# Supplementary material for: Profiling of Selected MicroRNAs in Proliferative Eutopic Endometrium of Women with Ovarian Endometriosis
Source: Biomed Res Int. 2015 Aug 20;2015:760698. doi: 10.1155/2015/760698 (PMC4558423; doi:10.1155/2015/760698)
Supplement: Supplementary file 1 — Table I: The names of miRNAs significantly differentially expressed between eutopic endometrium of patients with endometriosis vs eutopic endometrium of patients without endometriosis. Table II: The associations between miRNA and mRNA, which presents detailed results of the search of six major databases i.e targetscan, tarbase, miranda, mirbase, mirtarget2 and pictar. [file 760698.f1.zip › 760698.f1/Table II/hsa-miR-542-3p.tsv]

miR	targetscan	tarbase	miranda	mirbase	mirtarget2	pictar	GeneSymbol	GeneName
hsa-miR-542-3p	1	0	1	1	1	1	FBN1	fibrillin 1
hsa-miR-542-3p	1	0	1	1	1	1	TLN2	talin 2
hsa-miR-542-3p	1	0	1	1	1	1	FLRT3	fibronectin leucine rich transmembrane protein 3
hsa-miR-542-3p	1	0	1	1	1	1	SIDT1	SID1 transmembrane family, member 1
hsa-miR-542-3p	1	0	1	1	1	1	ZFP14	zinc finger protein 14 homolog (mouse)
hsa-miR-542-3p	1	0	1	1	1	1	IRX2	iroquois homeobox 2
hsa-miR-542-3p	1	0	1	1	1	1	ASXL2	additional sex combs like 2 (Drosophila)
hsa-miR-542-3p	1	0	1	1	1	1	ITGB8	integrin, beta 8
hsa-miR-542-3p	1	0	1	1	1	1	SUN2	Sad1 and UNC84 domain containing 2
hsa-miR-542-3p	1	0	1	1	0	0	TET3	tet methylcytosine dioxygenase 3
hsa-miR-542-3p	1	0	1	1	1	1	SLC22A3	solute carrier family 22 (extraneuronal monoamine transporter), member 3
hsa-miR-542-3p	1	0	1	1	1	1	GPD1	glycerol-3-phosphate dehydrogenase 1 (soluble)
hsa-miR-542-3p	1	0	1	0	0	0	YLPM1	YLP motif containing 1
hsa-miR-542-3p	1	0	1	0	1	1	SLC2A3	solute carrier family 2 (facilitated glucose transporter), member 3
hsa-miR-542-3p	1	0	1	1	1	1	NEBL	nebulette
hsa-miR-542-3p	1	0	1	0	1	1	BCL11B	B-cell CLL/lymphoma 11B (zinc finger protein)
hsa-miR-542-3p	1	0	1	0	1	1	PTEN	phosphatase and tensin homolog
hsa-miR-542-3p	1	0	1	1	1	1	CLOCK	clock homolog (mouse)
hsa-miR-542-3p	1	0	1	1	0	0	PCED1A	PC-esterase domain containing 1A
hsa-miR-542-3p	1	0	1	1	1	1	SPSB4	splA/ryanodine receptor domain and SOCS box containing 4
hsa-miR-542-3p	1	0	1	1	1	1	TMEM65	transmembrane protein 65
hsa-miR-542-3p	1	0	1	1	1	1	KCNA1	potassium voltage-gated channel, shaker-related subfamily, member 1 (episodic ataxia with myokymia)
hsa-miR-542-3p	1	0	1	1	1	1	PHF15	PHD finger protein 15
hsa-miR-542-3p	1	0	1	1	1	1	DPP10	dipeptidyl-peptidase 10 (non-functional)
hsa-miR-542-3p	1	0	1	1	1	1	CC2D1B	coiled-coil and C2 domain containing 1B
hsa-miR-542-3p	1	0	1	1	1	1	BLCAP	bladder cancer associated protein
hsa-miR-542-3p	1	0	1	1	1	1	MYLIP	myosin regulatory light chain interacting protein
hsa-miR-542-3p	1	0	1	1	1	1	ZNF618	zinc finger protein 618
hsa-miR-542-3p	1	0	1	1	1	1	KCNE4	potassium voltage-gated channel, Isk-related family, member 4
hsa-miR-542-3p	1	0	1	1	0	0	ATP2A1	ATPase, Ca++ transporting, cardiac muscle, fast twitch 1
hsa-miR-542-3p	1	0	1	1	1	1	CEP57L1	centrosomal protein 57kDa-like 1
hsa-miR-542-3p	1	0	1	1	1	1	SH2D4B	SH2 domain containing 4B
hsa-miR-542-3p	1	0	1	1	1	1	CBL	Cbl proto-oncogene, E3 ubiquitin protein ligase
hsa-miR-542-3p	1	0	1	1	1	1	PUM2	pumilio homolog 2 (Drosophila)
hsa-miR-542-3p	1	0	1	1	1	1	DNAJA2	DnaJ (Hsp40) homolog, subfamily A, member 2
hsa-miR-542-3p	1	0	1	1	1	1	CBX1	chromobox homolog 1
hsa-miR-542-3p	1	0	1	1	1	1	SRI	sorcin
hsa-miR-542-3p	1	0	1	1	1	1	CTCF	CCCTC-binding factor (zinc finger protein)
hsa-miR-542-3p	1	0	1	0	1	1	MTPN	myotrophin
hsa-miR-542-3p	1	0	1	1	1	1	U2SURP	U2 snRNP-associated SURP domain containing
hsa-miR-542-3p	1	0	1	1	1	1	MEIS1	Meis homeobox 1
hsa-miR-542-3p	1	0	1	0	1	1	KCMF1	potassium channel modulatory factor 1
hsa-miR-542-3p	1	0	1	1	1	1	SEC61A1	Sec61 alpha 1 subunit (S. cerevisiae)
hsa-miR-542-3p	1	0	1	1	1	1	ELAVL2	ELAV (embryonic lethal, abnormal vision, Drosophila)-like 2 (Hu antigen B)
hsa-miR-542-3p	1	0	1	0	0	0	ANKRD52	ankyrin repeat domain 52
hsa-miR-542-3p	1	0	1	1	1	1	ENAH	enabled homolog (Drosophila)
hsa-miR-542-3p	1	0	1	0	1	1	RCHY1	ring finger and CHY zinc finger domain containing 1, E3 ubiquitin protein ligase
hsa-miR-542-3p	1	0	1	1	1	1	SPRED1	sprouty-related, EVH1 domain containing 1
hsa-miR-542-3p	1	0	1	1	1	1	FHOD3	formin homology 2 domain containing 3
hsa-miR-542-3p	1	0	0	1	1	1	PARP12	poly (ADP-ribose) polymerase family, member 12
hsa-miR-542-3p	1	0	1	1	1	1	CUX2	cut-like homeobox 2
hsa-miR-542-3p	1	0	1	0	1	1	DCBLD2	discoidin, CUB and LCCL domain containing 2
hsa-miR-542-3p	1	0	1	0	1	1	SRGAP2	SLIT-ROBO Rho GTPase activating protein 2
hsa-miR-542-3p	1	0	1	1	1	1	LRRC59	leucine rich repeat containing 59
hsa-miR-542-3p	1	0	1	1	0	0	C16orf5	chromosome 16 open reading frame 5
hsa-miR-542-3p	1	0	1	1	1	1	ZADH2	zinc binding alcohol dehydrogenase domain containing 2
hsa-miR-542-3p	1	0	1	1	1	1	ITPR2	inositol 1,4,5-trisphosphate receptor, type 2
hsa-miR-542-3p	1	0	1	1	1	1	BNC2	basonuclin 2
hsa-miR-542-3p	1	0	1	1	1	1	SPTBN1	spectrin, beta, non-erythrocytic 1
hsa-miR-542-3p	1	0	1	1	1	1	TRIB2	tribbles homolog 2 (Drosophila)
hsa-miR-542-3p	1	0	1	1	1	1	SLC48A1	solute carrier family 48 (heme transporter), member 1
hsa-miR-542-3p	1	0	1	1	1	1	PPP1CB	protein phosphatase 1, catalytic subunit, beta isozyme
hsa-miR-542-3p	1	0	1	0	1	1	CAPRIN1	cell cycle associated protein 1
hsa-miR-542-3p	1	0	1	1	1	1	YPEL5	yippee-like 5 (Drosophila)
hsa-miR-542-3p	1	0	1	1	1	1	MLL5	myeloid/lymphoid or mixed-lineage leukemia 5 (trithorax homolog, Drosophila)
hsa-miR-542-3p	1	0	1	1	1	1	ALCAM	activated leukocyte cell adhesion molecule
hsa-miR-542-3p	1	0	1	1	1	1	PRKAB1	protein kinase, AMP-activated, beta 1 non-catalytic subunit
hsa-miR-542-3p	1	0	1	0	1	1	UNC5D	unc-5 homolog D (C. elegans)
hsa-miR-542-3p	1	0	1	1	1	1	RIC3	resistance to inhibitors of cholinesterase 3 homolog (C. elegans)
hsa-miR-542-3p	1	0	1	0	1	1	RAB1A	RAB1A, member RAS oncogene family
hsa-miR-542-3p	1	0	1	1	1	1	HNRNPU	heterogeneous nuclear ribonucleoprotein U (scaffold attachment factor A)
hsa-miR-542-3p	1	0	1	0	1	1	CCL22	chemokine (C-C motif) ligand 22
hsa-miR-542-3p	1	0	1	1	1	1	TPM1	tropomyosin 1 (alpha)
hsa-miR-542-3p	1	0	1	0	1	1	KCTD9	potassium channel tetramerisation domain containing 9
hsa-miR-542-3p	1	0	1	1	1	1	GPRIN1	G protein regulated inducer of neurite outgrowth 1
hsa-miR-542-3p	1	0	1	0	1	1	ACVR1C	activin A receptor, type IC
hsa-miR-542-3p	1	0	1	1	1	1	FYCO1	FYVE and coiled-coil domain containing 1
hsa-miR-542-3p	1	0	1	1	1	1	RBMS3	RNA binding motif, single stranded interacting protein 3
hsa-miR-542-3p	1	0	1	0	1	1	PDE4D	phosphodiesterase 4D, cAMP-specific
hsa-miR-542-3p	1	0	1	1	1	1	USP25	ubiquitin specific peptidase 25
hsa-miR-542-3p	1	0	1	1	0	0	NRL	neural retina leucine zipper
hsa-miR-542-3p	1	0	0	1	1	1	CDX2	caudal type homeobox 2
hsa-miR-542-3p	1	0	1	1	1	1	KLF12	Kruppel-like factor 12
hsa-miR-542-3p	1	0	1	1	1	1	MDM1	Mdm1 nuclear protein homolog (mouse)
hsa-miR-542-3p	1	0	1	1	1	1	R3HDM2	R3H domain containing 2
hsa-miR-542-3p	1	0	0	1	1	1	ANGPT2	angiopoietin 2
hsa-miR-542-3p	1	0	1	1	1	1	COPS2	COP9 constitutive photomorphogenic homolog subunit 2 (Arabidopsis)
hsa-miR-542-3p	1	0	1	1	1	1	SCARB2	scavenger receptor class B, member 2
hsa-miR-542-3p	1	0	1	1	1	1	GLIS3	GLIS family zinc finger 3
hsa-miR-542-3p	1	0	1	1	1	1	PPP1R12B	protein phosphatase 1, regulatory subunit 12B
hsa-miR-542-3p	1	0	1	1	1	1	MAP3K11	mitogen-activated protein kinase kinase kinase 11
hsa-miR-542-3p	1	0	1	1	0	0	POLDIP2	polymerase (DNA-directed), delta interacting protein 2
hsa-miR-542-3p	1	0	1	1	1	1	MAPK1IP1L	mitogen-activated protein kinase 1 interacting protein 1-like
hsa-miR-542-3p	1	0	1	0	1	1	RBM15B	RNA binding motif protein 15B
hsa-miR-542-3p	1	0	1	1	1	1	ZBTB43	zinc finger and BTB domain containing 43
hsa-miR-542-3p	1	0	1	0	1	1	ZFHX4	zinc finger homeobox 4
hsa-miR-542-3p	1	0	1	0	1	1	YOD1	YOD1 OTU deubiquinating enzyme 1 homolog (S. cerevisiae)
hsa-miR-542-3p	1	0	1	0	1	1	LPPR4	lipid phosphate phosphatase-related protein type 4
hsa-miR-542-3p	1	0	1	1	1	1	XKR6	XK, Kell blood group complex subunit-related family, member 6
hsa-miR-542-3p	1	0	1	0	1	1	CNNM1	cyclin M1
hsa-miR-542-3p	1	0	1	0	1	1	CREB5	cAMP responsive element binding protein 5
hsa-miR-542-3p	1	0	1	1	1	1	CNNM4	cyclin M4
hsa-miR-542-3p	1	0	1	1	1	1	RPS6KA4	ribosomal protein S6 kinase, 90kDa, polypeptide 4
hsa-miR-542-3p	1	0	1	1	1	1	DCTN5	dynactin 5 (p25)
hsa-miR-542-3p	1	0	1	0	1	1	BMP7	bone morphogenetic protein 7
hsa-miR-542-3p	1	0	1	0	1	1	ZC3H12B	zinc finger CCCH-type containing 12B
hsa-miR-542-3p	1	0	1	0	1	1	SPRY3	sprouty homolog 3 (Drosophila)
hsa-miR-542-3p	1	0	1	0	1	1	OTUB2	OTU domain, ubiquitin aldehyde binding 2
hsa-miR-542-3p	1	0	1	1	1	1	ONECUT2	one cut homeobox 2
hsa-miR-542-3p	1	0	1	1	1	1	ARHGAP36	Rho GTPase activating protein 36
hsa-miR-542-3p	1	0	1	0	1	1	SLC12A2	solute carrier family 12 (sodium/potassium/chloride transporters), member 2
hsa-miR-542-3p	1	0	1	1	1	1	HIF1AN	hypoxia inducible factor 1, alpha subunit inhibitor
hsa-miR-542-3p	1	0	1	1	1	1	OPN4	opsin 4
hsa-miR-542-3p	1	0	1	1	1	1	SAMD12	sterile alpha motif domain containing 12
hsa-miR-542-3p	1	0	0	1	1	1	SOX17	SRY (sex determining region Y)-box 17
hsa-miR-542-3p	1	0	1	1	1	1	ATP6V1C1	ATPase, H+ transporting, lysosomal 42kDa, V1 subunit C1
hsa-miR-542-3p	1	0	1	1	1	1	TCEANC2	transcription elongation factor A (SII) N-terminal and central domain containing 2
hsa-miR-542-3p	1	0	1	1	1	1	NAA15	N(alpha)-acetyltransferase 15, NatA auxiliary subunit
hsa-miR-542-3p	1	0	1	1	1	1	B3GNT5	UDP-GlcNAc:betaGal beta-1,3-N-acetylglucosaminyltransferase 5
hsa-miR-542-3p	1	0	1	1	1	1	EEF1A1	eukaryotic translation elongation factor 1 alpha 1
hsa-miR-542-3p	1	0	1	1	1	1	CILP	cartilage intermediate layer protein, nucleotide pyrophosphohydrolase
hsa-miR-542-3p	1	0	1	1	1	1	MYT1L	myelin transcription factor 1-like
hsa-miR-542-3p	1	0	1	1	1	1	SRSF1	serine/arginine-rich splicing factor 1
hsa-miR-542-3p	1	0	1	1	1	1	PELI2	pellino E3 ubiquitin protein ligase family member 2
hsa-miR-542-3p	1	0	1	1	1	1	PIGR	polymeric immunoglobulin receptor
hsa-miR-542-3p	1	0	1	1	0	0	PFKM	phosphofructokinase, muscle
hsa-miR-542-3p	1	0	1	1	1	1	STRN3	striatin, calmodulin binding protein 3
hsa-miR-542-3p	1	0	1	1	0	0	MRVI1	murine retrovirus integration site 1 homolog
hsa-miR-542-3p	1	0	1	1	1	1	FBXO9	F-box protein 9
hsa-miR-542-3p	1	0	1	1	1	1	VAPB	VAMP (vesicle-associated membrane protein)-associated protein B and C
hsa-miR-542-3p	1	0	1	0	1	1	UBE2G1	ubiquitin-conjugating enzyme E2G 1
hsa-miR-542-3p	1	0	1	1	1	1	SORCS3	sortilin-related VPS10 domain containing receptor 3
hsa-miR-542-3p	1	0	1	0	1	1	SLC6A6	solute carrier family 6 (neurotransmitter transporter, taurine), member 6
hsa-miR-542-3p	1	0	1	1	1	1	ILK	integrin-linked kinase
hsa-miR-542-3p	1	0	1	1	1	1	MYH9	myosin, heavy chain 9, non-muscle
hsa-miR-542-3p	1	0	1	1	1	1	LPP	LIM domain containing preferred translocation partner in lipoma
hsa-miR-542-3p	1	0	1	0	1	1	GRSF1	G-rich RNA sequence binding factor 1
hsa-miR-542-3p	1	0	0	1	1	1	PGP	phosphoglycolate phosphatase
hsa-miR-542-3p	1	0	1	0	1	1	TMEM237	transmembrane protein 237
hsa-miR-542-3p	1	0	1	1	1	1	GPR68	G protein-coupled receptor 68
hsa-miR-542-3p	1	0	1	0	1	1	CDK17	cyclin-dependent kinase 17
hsa-miR-542-3p	1	0	1	1	0	0	GXYLT1	glucoside xylosyltransferase 1
hsa-miR-542-3p	1	0	1	1	1	1	DBT	dihydrolipoamide branched chain transacylase E2
hsa-miR-542-3p	1	0	1	1	1	1	AP3D1	adaptor-related protein complex 3, delta 1 subunit
hsa-miR-542-3p	1	0	1	0	1	1	CDON	Cdon homolog (mouse)
hsa-miR-542-3p	1	0	1	1	1	1	BACH2	BTB and CNC homology 1, basic leucine zipper transcription factor 2
hsa-miR-542-3p	1	0	1	0	1	1	C1orf21	chromosome 1 open reading frame 21
hsa-miR-542-3p	1	0	1	1	1	1	EPB41L1	erythrocyte membrane protein band 4.1-like 1
hsa-miR-542-3p	1	0	1	1	1	1	KLHL14	kelch-like 14 (Drosophila)
hsa-miR-542-3p	1	0	1	0	1	1	PPP1R15B	protein phosphatase 1, regulatory subunit 15B
hsa-miR-542-3p	1	0	1	1	0	0	FIGF	c-fos induced growth factor (vascular endothelial growth factor D)
hsa-miR-542-3p	1	0	1	1	1	1	DCX	doublecortin
hsa-miR-542-3p	1	0	1	0	1	1	GALNT2	UDP-N-acetyl-alpha-D-galactosamine:polypeptide N-acetylgalactosaminyltransferase 2 (GalNAc-T2)
hsa-miR-542-3p	1	0	1	1	1	1	SLC39A10	solute carrier family 39 (zinc transporter), member 10
hsa-miR-542-3p	1	0	1	1	1	1	HS2ST1	heparan sulfate 2-O-sulfotransferase 1
hsa-miR-542-3p	1	0	1	1	1	1	ZNF148	zinc finger protein 148
hsa-miR-542-3p	1	0	1	1	1	1	PLAU	plasminogen activator, urokinase
hsa-miR-542-3p	1	0	1	1	0	0	SRCAP	Snf2-related CREBBP activator protein
hsa-miR-542-3p	1	0	1	0	1	1	KIAA0355	KIAA0355
hsa-miR-542-3p	1	0	1	1	1	1	ABCC5	ATP-binding cassette, sub-family C (CFTR/MRP), member 5
hsa-miR-542-3p	1	0	1	0	1	1	PTPRT	protein tyrosine phosphatase, receptor type, T
hsa-miR-542-3p	1	0	1	0	1	1	KIAA0408	KIAA0408
hsa-miR-542-3p	1	0	1	1	1	1	NUPL1	nucleoporin like 1
hsa-miR-542-3p	1	0	1	1	1	1	RNGTT	RNA guanylyltransferase and 5'-phosphatase
hsa-miR-542-3p	0	0	1	1	1	1	SPAG9	sperm associated antigen 9
hsa-miR-542-3p	1	0	1	1	1	1	HIPK1	homeodomain interacting protein kinase 1
hsa-miR-542-3p	0	0	1	1	1	1	PHLDB1	pleckstrin homology-like domain, family B, member 1
hsa-miR-542-3p	1	0	1	1	1	1	ATG13	autophagy related 13
hsa-miR-542-3p	1	0	1	1	1	1	ANKRD17	ankyrin repeat domain 17
hsa-miR-542-3p	1	0	1	0	1	1	MAGI2	membrane associated guanylate kinase, WW and PDZ domain containing 2
hsa-miR-542-3p	1	0	1	1	1	1	TP63	tumor protein p63
hsa-miR-542-3p	1	0	1	0	1	1	SNX13	sorting nexin 13
hsa-miR-542-3p	0	0	1	1	1	1	GPR116	G protein-coupled receptor 116
hsa-miR-542-3p	1	0	1	1	1	1	ARHGEF15	Rho guanine nucleotide exchange factor (GEF) 15
hsa-miR-542-3p	1	0	1	0	0	0	DTX4	deltex homolog 4 (Drosophila)
hsa-miR-542-3p	1	0	1	1	1	1	CPEB3	cytoplasmic polyadenylation element binding protein 3
hsa-miR-542-3p	1	0	1	1	1	1	NLGN4Y	neuroligin 4, Y-linked
hsa-miR-542-3p	0	0	1	1	1	1	FASTKD2	FAST kinase domains 2
hsa-miR-542-3p	1	0	1	1	0	0	KIAA1045	KIAA1045
hsa-miR-542-3p	1	0	1	0	1	1	ZNF507	zinc finger protein 507
hsa-miR-542-3p	1	0	1	1	1	1	PRRC2C	proline-rich coiled-coil 2C
hsa-miR-542-3p	1	0	1	1	1	1	PHF8	PHD finger protein 8
hsa-miR-542-3p	1	0	1	1	1	1	RALGAPB	Ral GTPase activating protein, beta subunit (non-catalytic)
hsa-miR-542-3p	1	0	1	1	1	1	MKL2	MKL/myocardin-like 2
hsa-miR-542-3p	1	0	1	1	1	1	ASAP1	ArfGAP with SH3 domain, ankyrin repeat and PH domain 1
hsa-miR-542-3p	0	0	1	1	1	1	FSTL5	follistatin-like 5
hsa-miR-542-3p	1	0	1	0	1	1	INTS2	integrator complex subunit 2
hsa-miR-542-3p	0	0	1	1	1	1	COPS7A	COP9 constitutive photomorphogenic homolog subunit 7A (Arabidopsis)
hsa-miR-542-3p	0	0	1	1	1	1	CA10	carbonic anhydrase X
hsa-miR-542-3p	1	0	1	1	1	1	PCDH19	protocadherin 19
hsa-miR-542-3p	0	0	1	1	1	1	SCAPER	S-phase cyclin A-associated protein in the ER
hsa-miR-542-3p	1	0	1	1	0	0	ZSWIM5	zinc finger, SWIM-type containing 5
hsa-miR-542-3p	1	0	1	0	1	1	LMO3	LIM domain only 3 (rhombotin-like 2)
hsa-miR-542-3p	1	0	1	1	1	1	PPP6R3	protein phosphatase 6, regulatory subunit 3
hsa-miR-542-3p	1	0	1	0	1	1	IGDCC4	immunoglobulin superfamily, DCC subclass, member 4
hsa-miR-542-3p	0	0	1	0	0	0	LOC440792	proline dehydrogenase (oxidase) 1 pseudogene
hsa-miR-542-3p	1	0	1	1	1	1	SH3TC2	SH3 domain and tetratricopeptide repeats 2
hsa-miR-542-3p	1	0	1	1	1	1	RFX4	regulatory factor X, 4 (influences HLA class II expression)
hsa-miR-542-3p	1	0	1	1	1	1	UBR3	ubiquitin protein ligase E3 component n-recognin 3 (putative)
hsa-miR-542-3p	0	0	1	1	0	0	KRTAP24-1	keratin associated protein 24-1
hsa-miR-542-3p	1	0	1	0	1	1	BEND4	BEN domain containing 4
hsa-miR-542-3p	0	0	1	1	1	1	DOCK8	dedicator of cytokinesis 8
hsa-miR-542-3p	1	0	1	1	1	1	TRIM36	tripartite motif containing 36
hsa-miR-542-3p	1	0	1	1	1	1	DAPK1	death-associated protein kinase 1
hsa-miR-542-3p	1	0	1	0	1	1	PCDHA13	protocadherin alpha 13
hsa-miR-542-3p	1	0	1	1	1	1	PCDHA4	protocadherin alpha 4
hsa-miR-542-3p	1	0	1	1	1	1	PCCB	propionyl CoA carboxylase, beta polypeptide
hsa-miR-542-3p	1	0	1	1	1	1	SLC8A1	solute carrier family 8 (sodium/calcium exchanger), member 1
hsa-miR-542-3p	1	0	1	0	1	1	MAML1	mastermind-like 1 (Drosophila)
hsa-miR-542-3p	1	0	1	1	1	1	PRKACB	protein kinase, cAMP-dependent, catalytic, beta
hsa-miR-542-3p	1	0	1	0	1	1	DPYSL2	dihydropyrimidinase-like 2
hsa-miR-542-3p	1	0	1	1	1	1	DMTF1	cyclin D binding myb-like transcription factor 1
hsa-miR-542-3p	1	0	1	1	1	1	REV3L	REV3-like, polymerase (DNA directed), zeta, catalytic subunit
hsa-miR-542-3p	1	0	1	1	1	1	EPHA7	EPH receptor A7
hsa-miR-542-3p	1	0	1	0	1	1	CHL1	cell adhesion molecule with homology to L1CAM (close homolog of L1)
hsa-miR-542-3p	0	0	1	1	1	1	DGKE	diacylglycerol kinase, epsilon 64kDa
hsa-miR-542-3p	1	0	1	1	1	1	SATB2	SATB homeobox 2
hsa-miR-542-3p	1	0	1	1	1	1	SPTB	spectrin, beta, erythrocytic
hsa-miR-542-3p	0	0	1	1	0	0	ASIC3	acid-sensing (proton-gated) ion channel 3
hsa-miR-542-3p	1	0	1	1	1	1	CTAGE5	CTAGE family, member 5
hsa-miR-542-3p	0	0	1	1	0	0	BMP1	bone morphogenetic protein 1
hsa-miR-542-3p	0	0	1	1	0	0	CFLAR	CASP8 and FADD-like apoptosis regulator
hsa-miR-542-3p	0	0	1	1	0	0	TRIM27	tripartite motif containing 27
hsa-miR-542-3p	1	0	1	0	1	1	CAV1	caveolin 1, caveolae protein, 22kDa
hsa-miR-542-3p	1	0	1	0	1	1	PDE7B	phosphodiesterase 7B
hsa-miR-542-3p	1	0	1	1	1	1	SYNJ1	synaptojanin 1
hsa-miR-542-3p	0	0	1	1	0	0	SPTBN2	spectrin, beta, non-erythrocytic 2
hsa-miR-542-3p	1	0	1	1	1	1	PCDH17	protocadherin 17
hsa-miR-542-3p	1	0	1	1	1	1	MID1	midline 1 (Opitz/BBB syndrome)
hsa-miR-542-3p	1	0	1	0	1	1	CELF2	CUGBP, Elav-like family member 2
hsa-miR-542-3p	1	0	1	1	1	1	ZFAND6	zinc finger, AN1-type domain 6
hsa-miR-542-3p	1	0	1	1	1	1	ERLIN1	ER lipid raft associated 1
hsa-miR-542-3p	1	0	1	1	1	1	CBFA2T2	core-binding factor, runt domain, alpha subunit 2; translocated to, 2
hsa-miR-542-3p	0	0	1	1	0	0	SLC38A6	solute carrier family 38, member 6
hsa-miR-542-3p	1	0	1	1	1	1	WHSC1	Wolf-Hirschhorn syndrome candidate 1
hsa-miR-542-3p	0	0	1	1	1	1	MINPP1	multiple inositol-polyphosphate phosphatase 1
hsa-miR-542-3p	1	0	1	1	1	1	ZNF236	zinc finger protein 236
hsa-miR-542-3p	0	0	1	1	1	1	PDE4DIP	phosphodiesterase 4D interacting protein
hsa-miR-542-3p	0	0	1	1	1	1	RGS7	regulator of G-protein signaling 7
hsa-miR-542-3p	0	0	1	1	1	1	PLEKHB1	pleckstrin homology domain containing, family B (evectins) member 1
hsa-miR-542-3p	0	0	1	1	1	1	FHL1	four and a half LIM domains 1
hsa-miR-542-3p	1	0	1	1	1	1	KAT6B	K(lysine) acetyltransferase 6B
hsa-miR-542-3p	1	0	1	1	1	1	EDNRB	endothelin receptor type B
hsa-miR-542-3p	1	0	1	0	1	1	CDK14	cyclin-dependent kinase 14
hsa-miR-542-3p	1	0	1	1	1	1	HNRNPH3	heterogeneous nuclear ribonucleoprotein H3 (2H9)
hsa-miR-542-3p	0	0	1	1	1	1	FAM178B	family with sequence similarity 178, member B
hsa-miR-542-3p	0	0	1	1	1	1	FAM114A2	family with sequence similarity 114, member A2
hsa-miR-542-3p	1	0	1	1	1	1	DNAJA4	DnaJ (Hsp40) homolog, subfamily A, member 4
hsa-miR-542-3p	0	0	1	1	0	0	CHEK2	checkpoint kinase 2
hsa-miR-542-3p	1	0	1	1	1	1	OGT	O-linked N-acetylglucosamine (GlcNAc) transferase
hsa-miR-542-3p	0	0	1	1	1	1	MFF	mitochondrial fission factor
hsa-miR-542-3p	1	0	1	1	1	1	DESI2	desumoylating isopeptidase 2
hsa-miR-542-3p	1	0	1	1	1	1	ELF2	E74-like factor 2 (ets domain transcription factor)
hsa-miR-542-3p	1	0	1	0	1	1	TRPS1	trichorhinophalangeal syndrome I
hsa-miR-542-3p	0	0	1	1	1	1	RANGRF	RAN guanine nucleotide release factor
hsa-miR-542-3p	1	0	1	1	1	1	ERGIC1	endoplasmic reticulum-golgi intermediate compartment (ERGIC) 1
hsa-miR-542-3p	0	0	1	1	0	0	FEZF2	FEZ family zinc finger 2
hsa-miR-542-3p	0	0	1	1	1	1	RERG	RAS-like, estrogen-regulated, growth inhibitor
hsa-miR-542-3p	1	0	1	0	1	1	WIPF2	WAS/WASL interacting protein family, member 2
hsa-miR-542-3p	1	0	1	1	1	1	LARP4	La ribonucleoprotein domain family, member 4
hsa-miR-542-3p	0	0	1	1	1	1	PARK2	parkinson protein 2, E3 ubiquitin protein ligase (parkin)
hsa-miR-542-3p	0	0	1	1	1	1	OLFM3	olfactomedin 3
hsa-miR-542-3p	0	0	1	1	0	0	CNKSR2	connector enhancer of kinase suppressor of Ras 2
hsa-miR-542-3p	1	0	1	1	1	1	RBFOX1	RNA binding protein, fox-1 homolog (C. elegans) 1
hsa-miR-542-3p	0	0	1	1	0	0	RASGEF1C	RasGEF domain family, member 1C
hsa-miR-542-3p	1	0	1	1	1	1	PTBP2	polypyrimidine tract binding protein 2
hsa-miR-542-3p	0	0	1	1	1	1	ZNF638	zinc finger protein 638
hsa-miR-542-3p	1	0	1	0	1	1	IL1RAP	interleukin 1 receptor accessory protein
hsa-miR-542-3p	1	0	1	1	1	1	AFF2	AF4/FMR2 family, member 2
hsa-miR-542-3p	1	0	1	1	1	1	SH2B3	SH2B adaptor protein 3
hsa-miR-542-3p	0	0	1	1	1	1	TCFL5	transcription factor-like 5 (basic helix-loop-helix)
hsa-miR-542-3p	1	0	1	1	1	1	VAMP7	vesicle-associated membrane protein 7
hsa-miR-542-3p	0	0	1	0	0	0	CD177	CD177 molecule
hsa-miR-542-3p	1	0	1	1	1	1	PALM2	paralemmin 2
hsa-miR-542-3p	1	0	1	1	1	1	NRXN3	neurexin 3
hsa-miR-542-3p	0	0	1	0	1	1	SRPK1	SRSF protein kinase 1
hsa-miR-542-3p	0	0	1	0	0	0	CASC2	cancer susceptibility candidate 2 (non-protein coding)
hsa-miR-542-3p	1	0	1	1	1	1	NAV3	neuron navigator 3
hsa-miR-542-3p	0	0	1	0	1	1	MUC15	mucin 15, cell surface associated
hsa-miR-542-3p	1	0	1	1	1	1	ARL4C	ADP-ribosylation factor-like 4C
hsa-miR-542-3p	1	0	1	1	1	1	SYT14	synaptotagmin XIV
hsa-miR-542-3p	0	0	1	1	1	1	ESRP1	epithelial splicing regulatory protein 1
hsa-miR-542-3p	1	0	1	1	1	1	AKAP2	A kinase (PRKA) anchor protein 2
hsa-miR-542-3p	0	0	1	1	1	1	UBE2Q2	ubiquitin-conjugating enzyme E2Q family member 2
hsa-miR-542-3p	0	0	1	0	0	0	TUG1	taurine upregulated 1 (non-protein coding)
hsa-miR-542-3p	0	0	1	0	0	0	RNF31	ring finger protein 31
hsa-miR-542-3p	1	0	1	1	1	1	ARHGAP17	Rho GTPase activating protein 17
hsa-miR-542-3p	0	0	1	1	1	1	STOX2	storkhead box 2
hsa-miR-542-3p	1	0	1	1	1	1	RIC8B	resistance to inhibitors of cholinesterase 8 homolog B (C. elegans)
hsa-miR-542-3p	1	0	1	1	1	1	EIF2C1	eukaryotic translation initiation factor 2C, 1
hsa-miR-542-3p	0	0	1	1	1	1	STAU2	staufen, RNA binding protein, homolog 2 (Drosophila)
hsa-miR-542-3p	1	0	1	1	1	1	INSIG2	insulin induced gene 2
hsa-miR-542-3p	0	0	1	1	1	1	SNCAIP	synuclein, alpha interacting protein
hsa-miR-542-3p	0	0	1	1	0	0	UBR4	ubiquitin protein ligase E3 component n-recognin 4
hsa-miR-542-3p	1	0	1	1	1	1	SUN1	Sad1 and UNC84 domain containing 1
hsa-miR-542-3p	1	0	1	1	1	1	MON2	MON2 homolog (S. cerevisiae)
hsa-miR-542-3p	0	0	1	0	0	0	TDRD12	tudor domain containing 12
hsa-miR-542-3p	1	0	1	0	1	1	UBP1	upstream binding protein 1 (LBP-1a)
hsa-miR-542-3p	0	0	1	1	0	0	BUB1	budding uninhibited by benzimidazoles 1 homolog (yeast)
hsa-miR-542-3p	1	0	1	1	1	1	USP33	ubiquitin specific peptidase 33
hsa-miR-542-3p	0	0	1	1	1	1	CLEC4M	C-type lectin domain family 4, member M
hsa-miR-542-3p	0	0	1	0	0	0	LOC284561	uncharacterized LOC284561
hsa-miR-542-3p	1	0	1	1	0	0	MEX3A	mex-3 homolog A (C. elegans)
hsa-miR-542-3p	0	0	1	0	1	1	FLJ14186	uncharacterized LOC401149
hsa-miR-542-3p	1	0	1	1	1	1	ABI3BP	ABI family, member 3 (NESH) binding protein
hsa-miR-542-3p	1	0	1	1	1	1	ARFGEF1	ADP-ribosylation factor guanine nucleotide-exchange factor 1 (brefeldin A-inhibited)
hsa-miR-542-3p	1	0	1	0	1	1	ZCCHC3	zinc finger, CCHC domain containing 3
hsa-miR-542-3p	0	0	1	0	1	1	HEMK1	HemK methyltransferase family member 1
hsa-miR-542-3p	1	0	1	1	1	1	RNF185	ring finger protein 185
hsa-miR-542-3p	1	0	1	1	1	1	FOXP1	forkhead box P1
hsa-miR-542-3p	1	0	1	1	1	1	SEC63	SEC63 homolog (S. cerevisiae)
hsa-miR-542-3p	1	0	1	1	1	1	FAM53C	family with sequence similarity 53, member C
hsa-miR-542-3p	1	0	1	1	1	1	MARK1	MAP/microtubule affinity-regulating kinase 1
hsa-miR-542-3p	0	0	1	0	0	0	JAKMIP2-AS1	JAKMIP2 antisense RNA 1
hsa-miR-542-3p	0	0	1	1	1	1	DTL	denticleless E3 ubiquitin protein ligase homolog (Drosophila)
hsa-miR-542-3p	0	0	1	1	0	0	TMEM107	transmembrane protein 107
hsa-miR-542-3p	0	0	1	1	1	1	GABRP	gamma-aminobutyric acid (GABA) A receptor, pi
hsa-miR-542-3p	0	0	1	0	0	0	FLJ30838	uncharacterized LOC400955
hsa-miR-542-3p	1	0	1	1	1	1	ZIC4	Zic family member 4
hsa-miR-542-3p	0	0	1	1	0	0	ZNF185	zinc finger protein 185 (LIM domain)
hsa-miR-542-3p	1	0	1	1	1	1	CLCN5	chloride channel, voltage-sensitive 5
hsa-miR-542-3p	0	0	1	1	0	0	PYGM	phosphorylase, glycogen, muscle
hsa-miR-542-3p	1	0	1	1	1	1	FOPNL	FGFR1OP N-terminal like
hsa-miR-542-3p	1	0	1	1	1	1	ZBTB10	zinc finger and BTB domain containing 10
hsa-miR-542-3p	1	0	1	1	1	1	PCMTD1	protein-L-isoaspartate (D-aspartate) O-methyltransferase domain containing 1
hsa-miR-542-3p	1	0	1	1	0	0	ZBTB37	zinc finger and BTB domain containing 37
hsa-miR-542-3p	0	0	1	1	0	0	LOC285033	uncharacterized LOC285033
hsa-miR-542-3p	0	0	1	1	0	0	UBAP2	ubiquitin associated protein 2
hsa-miR-542-3p	0	0	1	1	0	0	CD37	CD37 molecule
hsa-miR-542-3p	1	0	1	1	1	1	FAM73B	family with sequence similarity 73, member B
hsa-miR-542-3p	1	0	1	1	1	1	TBCK	TBC1 domain containing kinase
hsa-miR-542-3p	1	0	1	1	1	1	SIRT1	sirtuin 1
hsa-miR-542-3p	1	0	1	1	0	0	APBB3	amyloid beta (A4) precursor protein-binding, family B, member 3
hsa-miR-542-3p	0	0	1	1	0	0	NISCH	nischarin
hsa-miR-542-3p	1	0	1	1	1	1	NOTCH2NL	notch 2 N-terminal like
hsa-miR-542-3p	0	0	1	1	0	0	PPP2R1A	protein phosphatase 2, regulatory subunit A, alpha
hsa-miR-542-3p	1	0	1	1	1	1	GABRA6	gamma-aminobutyric acid (GABA) A receptor, alpha 6
hsa-miR-542-3p	0	0	1	1	1	1	STBD1	starch binding domain 1
hsa-miR-542-3p	0	0	1	0	1	1	TMSB15B	thymosin beta 15B
hsa-miR-542-3p	1	0	1	1	1	1	AMMECR1	Alport syndrome, mental retardation, midface hypoplasia and elliptocytosis chromosomal region gene 1
hsa-miR-542-3p	0	0	1	1	1	1	KBTBD4	kelch repeat and BTB (POZ) domain containing 4
hsa-miR-542-3p	1	0	1	1	1	1	SUPT16H	suppressor of Ty 16 homolog (S. cerevisiae)
hsa-miR-542-3p	0	0	1	0	0	0	LOC440910	uncharacterized LOC440910
hsa-miR-542-3p	1	0	1	1	1	1	FBXW2	F-box and WD repeat domain containing 2
hsa-miR-542-3p	0	0	1	0	0	0	KIAA1430	KIAA1430
hsa-miR-542-3p	1	0	1	1	1	1	LUC7L2	LUC7-like 2 (S. cerevisiae)
hsa-miR-542-3p	1	0	1	1	1	1	GNG2	guanine nucleotide binding protein (G protein), gamma 2
hsa-miR-542-3p	1	0	1	1	1	1	MAFK	v-maf musculoaponeurotic fibrosarcoma oncogene homolog K (avian)
hsa-miR-542-3p	1	0	1	1	1	1	GCFC1	GC-rich sequence DNA-binding factor 1
hsa-miR-542-3p	0	0	1	0	0	0	LOC283887	uncharacterized LOC283887
hsa-miR-542-3p	1	0	1	1	1	1	RRBP1	ribosome binding protein 1 homolog 180kDa (dog)
hsa-miR-542-3p	1	0	1	1	1	1	DZIP1	DAZ interacting protein 1
hsa-miR-542-3p	0	0	1	1	1	1	MARC1	mitochondrial amidoxime reducing component 1
hsa-miR-542-3p	1	0	1	0	1	1	KIAA1456	KIAA1456
hsa-miR-542-3p	0	0	1	0	0	0	ZNF806	zinc finger protein 806
hsa-miR-542-3p	0	0	1	1	0	0	CES4A	carboxylesterase 4A
hsa-miR-542-3p	0	0	1	0	0	0	FLJ37505	uncharacterized LOC400087
hsa-miR-542-3p	1	0	1	1	1	1	GLT25D2	glycosyltransferase 25 domain containing 2
hsa-miR-542-3p	1	0	1	1	1	1	ANKRD46	ankyrin repeat domain 46
hsa-miR-542-3p	1	0	1	1	1	1	EPHB1	EPH receptor B1
hsa-miR-542-3p	0	0	1	0	0	0	LOC730101	uncharacterized LOC730101
hsa-miR-542-3p	1	0	1	1	1	1	SPATS2	spermatogenesis associated, serine-rich 2
hsa-miR-542-3p	1	0	1	0	1	1	STC2	stanniocalcin 2
hsa-miR-542-3p	0	0	1	1	1	1	AIMP1	aminoacyl tRNA synthetase complex-interacting multifunctional protein 1
hsa-miR-542-3p	1	0	1	1	1	1	ACSL1	acyl-CoA synthetase long-chain family member 1
hsa-miR-542-3p	0	0	1	0	0	0	ZNF815P	zinc finger protein 815, pseudogene
hsa-miR-542-3p	0	0	1	0	0	0	OTUD1	OTU domain containing 1
hsa-miR-542-3p	1	0	1	0	1	1	KIAA1737	KIAA1737
hsa-miR-542-3p	1	0	1	0	1	1	THRB	thyroid hormone receptor, beta
hsa-miR-542-3p	1	0	1	0	1	1	KBTBD8	kelch repeat and BTB (POZ) domain containing 8
hsa-miR-542-3p	1	0	1	1	1	1	SYT6	synaptotagmin VI
hsa-miR-542-3p	1	0	1	1	1	1	CDV3	CDV3 homolog (mouse)
hsa-miR-542-3p	0	0	1	1	1	1	EXTL2	exostoses (multiple)-like 2
hsa-miR-542-3p	0	0	1	0	0	0	LOC400680	uncharacterized LOC400680
hsa-miR-542-3p	0	0	1	1	1	1	MED20	mediator complex subunit 20
hsa-miR-542-3p	0	0	1	0	0	0	LINC00293	long intergenic non-protein coding RNA 293
hsa-miR-542-3p	0	0	1	1	1	1	FAM9B	family with sequence similarity 9, member B
hsa-miR-542-3p	1	0	1	1	1	1	IGSF11	immunoglobulin superfamily, member 11
hsa-miR-542-3p	0	0	1	1	0	0	KLHDC3	kelch domain containing 3
hsa-miR-542-3p	1	0	1	1	1	1	LZTS2	leucine zipper, putative tumor suppressor 2
hsa-miR-542-3p	1	0	1	1	1	1	PIGA	phosphatidylinositol glycan anchor biosynthesis, class A
hsa-miR-542-3p	0	0	1	1	1	1	CPXCR1	CPX chromosome region, candidate 1
hsa-miR-542-3p	0	0	1	0	0	0	LOC338579	ankyrin repeat domain-containing protein 30B pseudogene
hsa-miR-542-3p	1	0	1	1	1	1	NAP1L1	nucleosome assembly protein 1-like 1
hsa-miR-542-3p	0	0	1	1	0	0	PRICKLE1	prickle homolog 1 (Drosophila)
hsa-miR-542-3p	0	0	1	1	1	1	ZDHHC15	zinc finger, DHHC-type containing 15
hsa-miR-542-3p	1	0	1	1	1	1	PPP1R21	protein phosphatase 1, regulatory subunit 21
hsa-miR-542-3p	0	0	1	1	0	0	MX2	myxovirus (influenza virus) resistance 2 (mouse)
hsa-miR-542-3p	1	0	1	1	1	1	PXN	paxillin
hsa-miR-542-3p	0	0	1	1	0	0	SLC26A10	solute carrier family 26, member 10
hsa-miR-542-3p	0	0	1	1	1	1	SLC13A3	solute carrier family 13 (sodium-dependent dicarboxylate transporter), member 3
hsa-miR-542-3p	0	0	1	1	1	1	CC2D2B	coiled-coil and C2 domain containing 2B
hsa-miR-542-3p	0	0	1	1	0	0	CENPM	centromere protein M
hsa-miR-542-3p	1	0	1	1	1	1	IPPK	inositol 1,3,4,5,6-pentakisphosphate 2-kinase
hsa-miR-542-3p	1	0	1	0	1	1	WDR82	WD repeat domain 82
hsa-miR-542-3p	0	0	1	0	0	0	DKFZP434H168	uncharacterized LOC26077
hsa-miR-542-3p	0	0	1	1	1	1	SLC9A1	solute carrier family 9, subfamily A (NHE1, cation proton antiporter 1), member 1
hsa-miR-542-3p	1	0	1	1	1	1	GJC1	gap junction protein, gamma 1, 45kDa
hsa-miR-542-3p	1	0	1	0	1	1	DCUN1D4	DCN1, defective in cullin neddylation 1, domain containing 4 (S. cerevisiae)
hsa-miR-542-3p	0	0	1	1	0	0	KCNAB2	potassium voltage-gated channel, shaker-related subfamily, beta member 2
hsa-miR-542-3p	1	0	1	1	1	1	CORO2B	coronin, actin binding protein, 2B
hsa-miR-542-3p	0	0	1	0	0	0	TMEM232	transmembrane protein 232
hsa-miR-542-3p	1	0	1	1	1	1	C11orf30	chromosome 11 open reading frame 30
hsa-miR-542-3p	1	0	1	1	1	1	SACS	spastic ataxia of Charlevoix-Saguenay (sacsin)
hsa-miR-542-3p	0	0	1	0	1	1	RASGRP3	RAS guanyl releasing protein 3 (calcium and DAG-regulated)
hsa-miR-542-3p	0	0	1	0	0	0	LOC613266	uncharacterized LOC613266
hsa-miR-542-3p	1	0	1	0	1	1	HECTD1	HECT domain containing E3 ubiquitin protein ligase 1
hsa-miR-542-3p	0	0	1	0	0	0	FAM75D4	family with sequence similarity 75, member D4
hsa-miR-542-3p	0	0	1	1	1	1	RBM46	RNA binding motif protein 46
hsa-miR-542-3p	1	0	1	1	1	1	TP53INP1	tumor protein p53 inducible nuclear protein 1
hsa-miR-542-3p	1	0	1	1	0	0	UBN2	ubinuclein 2
hsa-miR-542-3p	0	0	1	1	1	1	EPPIN	epididymal peptidase inhibitor
hsa-miR-542-3p	1	0	1	1	1	1	CSRNP3	cysteine-serine-rich nuclear protein 3
hsa-miR-542-3p	1	0	1	1	1	1	PIK3R1	phosphoinositide-3-kinase, regulatory subunit 1 (alpha)
hsa-miR-542-3p	1	0	1	1	1	1	SACM1L	SAC1 suppressor of actin mutations 1-like (yeast)
hsa-miR-542-3p	1	0	1	1	0	0	SPEG	SPEG complex locus
hsa-miR-542-3p	0	0	1	1	1	1	C18orf54	chromosome 18 open reading frame 54
hsa-miR-542-3p	0	0	1	1	1	1	SNX22	sorting nexin 22
hsa-miR-542-3p	1	0	1	1	1	1	LRIG1	leucine-rich repeats and immunoglobulin-like domains 1
hsa-miR-542-3p	1	0	1	1	1	1	DLG2	discs, large homolog 2 (Drosophila)
hsa-miR-542-3p	0	0	1	1	0	0	HS3ST5	heparan sulfate (glucosamine) 3-O-sulfotransferase 5
hsa-miR-542-3p	0	0	1	1	0	0	FAM54B	family with sequence similarity 54, member B
hsa-miR-542-3p	1	0	1	0	1	1	ADIPOR2	adiponectin receptor 2
hsa-miR-542-3p	0	0	1	1	1	1	DOCK9	dedicator of cytokinesis 9
hsa-miR-542-3p	0	0	1	1	1	1	RALGAPA2	Ral GTPase activating protein, alpha subunit 2 (catalytic)
hsa-miR-542-3p	1	0	1	1	1	1	UBE3C	ubiquitin protein ligase E3C
hsa-miR-542-3p	1	0	1	1	1	1	LSM14A	LSM14A, SCD6 homolog A (S. cerevisiae)
hsa-miR-542-3p	0	0	1	1	1	1	PDIA6	protein disulfide isomerase family A, member 6
hsa-miR-542-3p	0	0	1	0	0	0	LOC285812	uncharacterized LOC285812
hsa-miR-542-3p	1	0	1	1	0	0	PPP1CA	protein phosphatase 1, catalytic subunit, alpha isozyme
hsa-miR-542-3p	1	0	1	0	1	1	FNDC3B	fibronectin type III domain containing 3B
hsa-miR-542-3p	0	0	1	1	1	1	MCU	mitochondrial calcium uniporter
hsa-miR-542-3p	0	0	1	0	0	0	LRRC9	leucine rich repeat containing 9
hsa-miR-542-3p	0	0	1	1	0	0	LOC100128682	uncharacterized LOC100128682
hsa-miR-542-3p	0	0	1	0	0	0	LOC440993	uncharacterized LOC440993
hsa-miR-542-3p	1	0	1	1	1	1	KCTD12	potassium channel tetramerisation domain containing 12
hsa-miR-542-3p	1	0	1	0	1	1	USP37	ubiquitin specific peptidase 37
hsa-miR-542-3p	1	0	1	1	0	0	NBEAL1	neurobeachin-like 1
hsa-miR-542-3p	0	0	1	1	1	1	RAB13	RAB13, member RAS oncogene family
hsa-miR-542-3p	1	0	1	0	1	1	IRF4	interferon regulatory factor 4
hsa-miR-542-3p	0	0	1	0	0	0	FAM27A	family with sequence similarity 27, member A
hsa-miR-542-3p	0	0	1	1	1	1	TRIM28	tripartite motif containing 28
hsa-miR-542-3p	0	0	1	1	0	0	DNASE1L3	deoxyribonuclease I-like 3
hsa-miR-542-3p	0	0	1	1	0	0	ISOC2	isochorismatase domain containing 2
hsa-miR-542-3p	1	0	1	1	1	1	PPP2R5C	protein phosphatase 2, regulatory subunit B', gamma
hsa-miR-542-3p	1	0	1	1	1	1	WTAP	Wilms tumor 1 associated protein
hsa-miR-542-3p	1	0	1	1	1	1	MAP2K4	mitogen-activated protein kinase kinase 4
hsa-miR-542-3p	0	0	1	1	1	1	NR4A1	nuclear receptor subfamily 4, group A, member 1
hsa-miR-542-3p	0	0	1	0	0	0	AGAP9	ArfGAP with GTPase domain, ankyrin repeat and PH domain 9
hsa-miR-542-3p	0	0	1	1	1	1	CD48	CD48 molecule
hsa-miR-542-3p	1	0	1	0	1	1	MAP3K3	mitogen-activated protein kinase kinase kinase 3
hsa-miR-542-3p	0	0	1	1	1	1	SERPINE2	serpin peptidase inhibitor, clade E (nexin, plasminogen activator inhibitor type 1), member 2
hsa-miR-542-3p	1	0	1	1	1	1	COBLL1	COBL-like 1
hsa-miR-542-3p	1	0	1	1	1	1	SETX	senataxin
hsa-miR-542-3p	0	0	1	1	1	1	PRSS16	protease, serine, 16 (thymus)
hsa-miR-542-3p	0	0	1	1	1	1	ENPP3	ectonucleotide pyrophosphatase/phosphodiesterase 3
hsa-miR-542-3p	1	0	1	1	1	1	NOVA1	neuro-oncological ventral antigen 1
hsa-miR-542-3p	1	0	1	1	1	1	APBB2	amyloid beta (A4) precursor protein-binding, family B, member 2
hsa-miR-542-3p	0	0	1	1	1	1	PTPN20B	protein tyrosine phosphatase, non-receptor type 20B
hsa-miR-542-3p	0	0	1	1	1	1	PTPN20A	protein tyrosine phosphatase, non-receptor type 20A
hsa-miR-542-3p	0	0	1	0	0	0	PART1	prostate androgen-regulated transcript 1 (non-protein coding)
hsa-miR-542-3p	1	0	1	1	1	1	NECAP1	NECAP endocytosis associated 1
hsa-miR-542-3p	0	0	1	1	0	0	FAAH	fatty acid amide hydrolase
hsa-miR-542-3p	1	0	1	1	1	1	RIF1	RAP1 interacting factor homolog (yeast)
hsa-miR-542-3p	1	0	1	1	1	1	TAB2	TGF-beta activated kinase 1/MAP3K7 binding protein 2
hsa-miR-542-3p	0	0	1	1	1	1	ARIH1	ariadne homolog, ubiquitin-conjugating enzyme E2 binding protein, 1 (Drosophila)
hsa-miR-542-3p	0	0	1	1	1	1	AQP6	aquaporin 6, kidney specific
hsa-miR-542-3p	0	0	1	1	1	1	SYNJ2	synaptojanin 2
hsa-miR-542-3p	1	0	1	0	1	1	GPR85	G protein-coupled receptor 85
hsa-miR-542-3p	0	0	1	1	1	1	CD276	CD276 molecule
hsa-miR-542-3p	1	0	1	0	1	1	BRPF1	bromodomain and PHD finger containing, 1
hsa-miR-542-3p	1	0	1	1	1	1	SLC30A8	solute carrier family 30 (zinc transporter), member 8
hsa-miR-542-3p	1	0	1	1	1	1	YTHDF3	YTH domain family, member 3
hsa-miR-542-3p	0	0	1	1	0	0	KRBA1	KRAB-A domain containing 1
hsa-miR-542-3p	1	0	1	1	1	1	MIER1	mesoderm induction early response 1 homolog (Xenopus laevis)
hsa-miR-542-3p	0	0	1	1	0	0	RPL9	ribosomal protein L9
hsa-miR-542-3p	1	0	1	1	1	1	LYPD3	LY6/PLAUR domain containing 3
hsa-miR-542-3p	0	0	1	1	1	1	SRSF11	serine/arginine-rich splicing factor 11
hsa-miR-542-3p	0	0	1	1	1	1	ZMYM6	zinc finger, MYM-type 6
hsa-miR-542-3p	0	0	1	1	1	1	C12orf50	chromosome 12 open reading frame 50
hsa-miR-542-3p	1	0	1	1	1	1	MARCH7	membrane-associated ring finger (C3HC4) 7, E3 ubiquitin protein ligase
hsa-miR-542-3p	0	0	1	1	1	1	PCDH20	protocadherin 20
hsa-miR-542-3p	0	0	1	1	1	1	PNMAL1	paraneoplastic Ma antigen family-like 1
hsa-miR-542-3p	1	0	1	0	1	1	NR3C1	nuclear receptor subfamily 3, group C, member 1 (glucocorticoid receptor)
hsa-miR-542-3p	1	0	1	1	1	1	BOLL	bol, boule-like (Drosophila)
hsa-miR-542-3p	0	0	1	1	1	1	LMAN2L	lectin, mannose-binding 2-like
hsa-miR-542-3p	1	0	1	1	1	1	SET	SET nuclear oncogene
hsa-miR-542-3p	0	0	1	1	1	1	TMEM130	transmembrane protein 130
hsa-miR-542-3p	1	0	1	1	1	1	RNF38	ring finger protein 38
hsa-miR-542-3p	0	0	1	1	1	1	MOXD1	monooxygenase, DBH-like 1
hsa-miR-542-3p	0	0	1	0	0	0	PMCHL1	pro-melanin-concentrating hormone-like 1, pseudogene
hsa-miR-542-3p	0	0	1	0	0	0	PMCHL2	pro-melanin-concentrating hormone-like 2, pseudogene
hsa-miR-542-3p	0	0	1	1	1	1	KLHL7	kelch-like 7 (Drosophila)
hsa-miR-542-3p	1	0	1	1	1	1	MIPOL1	mirror-image polydactyly 1
hsa-miR-542-3p	0	0	1	1	0	0	TREM1	triggering receptor expressed on myeloid cells 1
hsa-miR-542-3p	1	0	1	1	1	1	KIAA0907	KIAA0907
hsa-miR-542-3p	1	0	1	1	1	1	MARK4	MAP/microtubule affinity-regulating kinase 4
hsa-miR-542-3p	0	0	1	1	0	0	CMTM1	CKLF-like MARVEL transmembrane domain containing 1
hsa-miR-542-3p	0	0	1	1	1	1	KLC1	kinesin light chain 1
hsa-miR-542-3p	1	0	1	1	1	1	TPP1	tripeptidyl peptidase I
hsa-miR-542-3p	1	0	1	1	1	1	PBRM1	polybromo 1
hsa-miR-542-3p	0	0	1	1	0	0	CCL4	chemokine (C-C motif) ligand 4
hsa-miR-542-3p	0	0	1	1	1	1	GCOM1	GRINL1A complex locus 1
hsa-miR-542-3p	1	0	1	1	1	1	TAB3	TGF-beta activated kinase 1/MAP3K7 binding protein 3
hsa-miR-542-3p	0	0	1	1	1	1	GON4L	gon-4-like (C. elegans)
hsa-miR-542-3p	1	0	1	0	1	1	ANKRD28	ankyrin repeat domain 28
hsa-miR-542-3p	1	0	1	1	1	1	ECT2	epithelial cell transforming sequence 2 oncogene
hsa-miR-542-3p	1	0	1	1	1	1	SP3	Sp3 transcription factor
hsa-miR-542-3p	1	0	1	1	1	1	MECP2	methyl CpG binding protein 2 (Rett syndrome)
hsa-miR-542-3p	1	0	1	1	0	0	ADAM15	ADAM metallopeptidase domain 15
hsa-miR-542-3p	0	0	1	0	1	1	RAB18	RAB18, member RAS oncogene family
hsa-miR-542-3p	0	0	1	1	1	1	RHD	Rh blood group, D antigen
hsa-miR-542-3p	1	0	1	1	1	1	QKI	QKI, KH domain containing, RNA binding
hsa-miR-542-3p	1	0	1	1	1	1	TBC1D22B	TBC1 domain family, member 22B
hsa-miR-542-3p	1	0	1	0	1	1	RASGRP1	RAS guanyl releasing protein 1 (calcium and DAG-regulated)
hsa-miR-542-3p	1	0	1	0	1	1	FAM46A	family with sequence similarity 46, member A
hsa-miR-542-3p	0	0	1	1	1	1	ZCCHC17	zinc finger, CCHC domain containing 17
hsa-miR-542-3p	0	0	1	1	1	1	WDR55	WD repeat domain 55
hsa-miR-542-3p	0	0	1	1	1	1	TTLL5	tubulin tyrosine ligase-like family, member 5
hsa-miR-542-3p	0	0	1	1	1	1	ATG3	autophagy related 3
hsa-miR-542-3p	0	0	1	1	1	1	REXO2	REX2, RNA exonuclease 2 homolog (S. cerevisiae)
hsa-miR-542-3p	0	0	1	1	1	1	FTO	fat mass and obesity associated
hsa-miR-542-3p	0	0	1	0	1	1	HAUS3	HAUS augmin-like complex, subunit 3
hsa-miR-542-3p	0	0	1	1	1	1	RABL5	RAB, member RAS oncogene family-like 5
hsa-miR-542-3p	1	0	1	0	1	1	CGGBP1	CGG triplet repeat binding protein 1
hsa-miR-542-3p	1	0	1	1	1	1	DTNA	dystrobrevin, alpha
hsa-miR-542-3p	1	0	1	1	1	1	POU2F2	POU class 2 homeobox 2
hsa-miR-542-3p	1	0	1	1	0	0	ASRGL1	asparaginase like 1
hsa-miR-542-3p	0	0	1	1	0	0	LOC100132167	uncharacterized LOC100132167
hsa-miR-542-3p	1	0	1	1	1	1	PCGF5	polycomb group ring finger 5
hsa-miR-542-3p	0	0	1	1	0	0	RBM14	RNA binding motif protein 14
hsa-miR-542-3p	1	0	1	1	1	1	CALM1	calmodulin 1 (phosphorylase kinase, delta)
hsa-miR-542-3p	0	0	1	1	1	1	ZNF85	zinc finger protein 85
hsa-miR-542-3p	0	0	1	0	0	0	ATXN7L3B	ataxin 7-like 3B
hsa-miR-542-3p	1	0	1	1	1	1	TNPO3	transportin 3
hsa-miR-542-3p	1	0	1	0	1	1	TMEM39A	transmembrane protein 39A
hsa-miR-542-3p	1	0	1	1	1	1	GRIA2	glutamate receptor, ionotropic, AMPA 2
hsa-miR-542-3p	0	0	1	1	1	1	ATG12	autophagy related 12
hsa-miR-542-3p	1	0	1	1	1	1	TRIM2	tripartite motif containing 2
hsa-miR-542-3p	1	0	1	1	1	1	IDH1	isocitrate dehydrogenase 1 (NADP+), soluble
hsa-miR-542-3p	1	0	1	1	1	1	GDAP2	ganglioside induced differentiation associated protein 2
hsa-miR-542-3p	1	0	1	1	1	1	RBM7	RNA binding motif protein 7
hsa-miR-542-3p	0	0	1	1	1	1	H2AFY	H2A histone family, member Y
hsa-miR-542-3p	0	0	1	1	1	1	DEDD2	death effector domain containing 2
hsa-miR-542-3p	1	0	1	1	1	1	CAP1	CAP, adenylate cyclase-associated protein 1 (yeast)
hsa-miR-542-3p	1	0	1	1	1	1	YY1	YY1 transcription factor
hsa-miR-542-3p	0	0	1	1	0	0	C8orf44	chromosome 8 open reading frame 44
hsa-miR-542-3p	0	0	1	0	0	0	KLHL15	kelch-like 15 (Drosophila)
hsa-miR-542-3p	1	0	1	1	1	1	ZDHHC3	zinc finger, DHHC-type containing 3
hsa-miR-542-3p	1	0	1	1	1	1	RIMKLB	ribosomal modification protein rimK-like family member B
hsa-miR-542-3p	1	0	1	0	1	1	NR1D2	nuclear receptor subfamily 1, group D, member 2
hsa-miR-542-3p	0	0	1	0	0	0	APOBEC3D	apolipoprotein B mRNA editing enzyme, catalytic polypeptide-like 3D
hsa-miR-542-3p	0	0	1	1	1	1	CSDE1	cold shock domain containing E1, RNA-binding
hsa-miR-542-3p	0	0	1	0	0	0	NBR2	neighbor of BRCA1 gene 2 (non-protein coding)
hsa-miR-542-3p	1	0	1	1	1	1	C16orf45	chromosome 16 open reading frame 45
hsa-miR-542-3p	0	0	1	0	0	0	SNX29P2	sorting nexin 29 pseudogene 2
hsa-miR-542-3p	0	0	1	0	0	0	JMJD7	jumonji domain containing 7
hsa-miR-542-3p	0	0	1	1	1	1	TLR4	toll-like receptor 4
hsa-miR-542-3p	0	0	1	1	1	1	SPAG16	sperm associated antigen 16
hsa-miR-542-3p	1	0	1	1	1	1	VASP	vasodilator-stimulated phosphoprotein
hsa-miR-542-3p	1	0	1	1	1	1	CNTN4	contactin 4
hsa-miR-542-3p	1	0	1	1	1	1	TMEM127	transmembrane protein 127
hsa-miR-542-3p	0	0	1	0	1	1	PAPOLG	poly(A) polymerase gamma
hsa-miR-542-3p	0	0	1	0	1	1	KIAA0895	KIAA0895
hsa-miR-542-3p	1	0	1	0	0	0	KCNU1	potassium channel, subfamily U, member 1
hsa-miR-542-3p	1	0	1	1	1	1	MRO	maestro
hsa-miR-542-3p	1	0	1	0	1	1	SV2B	synaptic vesicle glycoprotein 2B
hsa-miR-542-3p	1	0	1	1	1	1	WDR20	WD repeat domain 20
hsa-miR-542-3p	1	0	1	1	1	1	RCOR3	REST corepressor 3
hsa-miR-542-3p	1	0	1	1	1	1	ZNF282	zinc finger protein 282
hsa-miR-542-3p	1	0	1	1	1	1	PHF17	PHD finger protein 17
hsa-miR-542-3p	1	0	1	1	1	1	ZNF439	zinc finger protein 439
hsa-miR-542-3p	1	0	1	1	1	1	ZNF521	zinc finger protein 521
hsa-miR-542-3p	1	0	1	1	1	1	SORL1	sortilin-related receptor, L(DLR class) A repeats containing
hsa-miR-542-3p	1	0	1	1	1	1	PPP2R2C	protein phosphatase 2, regulatory subunit B, gamma
hsa-miR-542-3p	1	0	1	1	1	1	SIRPA	signal-regulatory protein alpha
hsa-miR-542-3p	1	0	1	1	0	0	PCNX	pecanex homolog (Drosophila)
hsa-miR-542-3p	1	0	1	1	1	1	PCDHA5	protocadherin alpha 5
hsa-miR-542-3p	1	0	1	1	1	1	PML	promyelocytic leukemia
hsa-miR-542-3p	0	0	1	1	1	1	ZNF337	zinc finger protein 337
hsa-miR-542-3p	1	0	1	0	1	1	RHOBTB2	Rho-related BTB domain containing 2
hsa-miR-542-3p	0	0	1	1	1	1	EDA2R	ectodysplasin A2 receptor
hsa-miR-542-3p	1	0	1	0	1	1	DDX3Y	DEAD (Asp-Glu-Ala-Asp) box polypeptide 3, Y-linked
hsa-miR-542-3p	1	0	1	1	1	1	ZZZ3	zinc finger, ZZ-type containing 3
hsa-miR-542-3p	0	0	1	1	0	0	TSNAXIP1	translin-associated factor X interacting protein 1
hsa-miR-542-3p	1	0	1	1	1	1	ZEB2	zinc finger E-box binding homeobox 2
hsa-miR-542-3p	0	0	1	1	0	0	C2orf80	chromosome 2 open reading frame 80
hsa-miR-542-3p	0	0	1	1	1	1	CLEC12B	C-type lectin domain family 12, member B
hsa-miR-542-3p	1	0	1	1	1	1	IMPACT	Impact homolog (mouse)
hsa-miR-542-3p	1	0	1	1	1	1	SMG7	smg-7 homolog, nonsense mediated mRNA decay factor (C. elegans)
hsa-miR-542-3p	1	0	1	1	1	1	SLC35G1	solute carrier family 35, member G1
hsa-miR-542-3p	0	0	1	1	1	1	FAM171B	family with sequence similarity 171, member B
hsa-miR-542-3p	1	0	1	1	0	0	RASGEF1B	RasGEF domain family, member 1B
hsa-miR-542-3p	0	0	1	0	0	0	CYP4F35P	cytochrome P450, family 4, subfamily F, polypeptide 35, pseudogene
hsa-miR-542-3p	1	0	1	0	0	0	RAVER1	ribonucleoprotein, PTB-binding 1
hsa-miR-542-3p	0	0	1	0	0	0	INHBA-AS1	INHBA antisense RNA 1
hsa-miR-542-3p	1	0	1	1	1	1	CMIP	c-Maf inducing protein
hsa-miR-542-3p	0	0	1	0	0	0	FLJ36000	uncharacterized FLJ36000
hsa-miR-542-3p	0	0	1	0	0	0	USP32P1	ubiquitin specific peptidase 32 pseudogene 1
hsa-miR-542-3p	1	0	1	0	0	0	CT62	cancer/testis antigen 62
hsa-miR-542-3p	1	0	1	1	1	1	MARCKS	myristoylated alanine-rich protein kinase C substrate
hsa-miR-542-3p	0	0	1	0	0	0	LOC401074	uncharacterized LOC401074
hsa-miR-542-3p	1	0	1	1	1	1	DYNC2LI1	dynein, cytoplasmic 2, light intermediate chain 1
hsa-miR-542-3p	1	0	1	1	0	0	ZNF292	zinc finger protein 292
hsa-miR-542-3p	1	0	1	1	1	1	UNC13C	unc-13 homolog C (C. elegans)
hsa-miR-542-3p	0	0	1	1	1	1	CARD8	caspase recruitment domain family, member 8
hsa-miR-542-3p	1	0	1	1	1	1	ARID3B	AT rich interactive domain 3B (BRIGHT-like)
hsa-miR-542-3p	0	0	1	0	0	0	OR7E47P	olfactory receptor, family 7, subfamily E, member 47 pseudogene
hsa-miR-542-3p	0	0	1	0	0	0	LOC643837	uncharacterized LOC643837
hsa-miR-542-3p	0	0	1	0	0	0	LOC339316	uncharacterized LOC339316
hsa-miR-542-3p	0	0	1	0	0	0	DKFZp686O1327	uncharacterized LOC401014
hsa-miR-542-3p	0	0	1	1	1	1	STRADA	STE20-related kinase adaptor alpha
hsa-miR-542-3p	1	0	1	0	1	1	PSD3	pleckstrin and Sec7 domain containing 3
hsa-miR-542-3p	0	0	1	1	1	1	MGC57346	uncharacterized LOC401884
hsa-miR-542-3p	0	0	1	1	1	1	EBP	emopamil binding protein (sterol isomerase)
hsa-miR-542-3p	0	0	1	0	1	1	IL33	interleukin 33
hsa-miR-542-3p	0	0	1	0	0	0	CRYBB2P1	crystallin, beta B2 pseudogene 1
hsa-miR-542-3p	0	0	1	0	0	0	LOC348120	uncharacterized LOC348120
hsa-miR-542-3p	0	0	1	0	0	0	DPY19L2P4	dpy-19-like 2 pseudogene 4 (C. elegans)
hsa-miR-542-3p	0	0	1	1	0	0	FAM170B	family with sequence similarity 170, member B
hsa-miR-542-3p	1	0	1	1	0	0	NCSTN	nicastrin
hsa-miR-542-3p	0	0	1	0	0	0	RPL37A	ribosomal protein L37a
hsa-miR-542-3p	0	0	1	1	1	1	SGOL2	shugoshin-like 2 (S. pombe)
hsa-miR-542-3p	1	0	1	1	1	1	PTPRG	protein tyrosine phosphatase, receptor type, G
hsa-miR-542-3p	1	0	1	1	1	1	PELI1	pellino E3 ubiquitin protein ligase 1
hsa-miR-542-3p	1	0	1	0	1	1	ARHGAP5	Rho GTPase activating protein 5
hsa-miR-542-3p	1	0	1	1	1	1	WASF3	WAS protein family, member 3
hsa-miR-542-3p	1	0	1	1	1	1	FNDC3A	fibronectin type III domain containing 3A
hsa-miR-542-3p	0	0	1	0	0	0	LINC00265	long intergenic non-protein coding RNA 265
hsa-miR-542-3p	1	0	1	1	1	1	RCC2	regulator of chromosome condensation 2
hsa-miR-542-3p	1	0	1	1	0	0	DALRD3	DALR anticodon binding domain containing 3
hsa-miR-542-3p	1	0	1	1	1	1	ATP8B4	ATPase, class I, type 8B, member 4
hsa-miR-542-3p	0	0	1	1	0	0	GRIN2C	glutamate receptor, ionotropic, N-methyl D-aspartate 2C
hsa-miR-542-3p	0	0	1	1	1	1	ZNF365	zinc finger protein 365
hsa-miR-542-3p	0	0	1	1	0	0	WDR90	WD repeat domain 90
hsa-miR-542-3p	1	0	1	1	1	1	ZSCAN29	zinc finger and SCAN domain containing 29
hsa-miR-542-3p	0	0	1	1	1	1	B4GALT4	UDP-Gal:betaGlcNAc beta 1,4- galactosyltransferase, polypeptide 4
hsa-miR-542-3p	0	0	1	1	0	0	C8orf31	chromosome 8 open reading frame 31
hsa-miR-542-3p	0	0	1	1	0	0	PDSS1	prenyl (decaprenyl) diphosphate synthase, subunit 1
hsa-miR-542-3p	0	0	1	1	1	1	ZNF333	zinc finger protein 333
hsa-miR-542-3p	0	0	1	1	1	1	GORAB	golgin, RAB6-interacting
hsa-miR-542-3p	0	0	1	1	1	1	TAGLN	transgelin
hsa-miR-542-3p	1	0	1	1	1	1	C18orf1	chromosome 18 open reading frame 1
hsa-miR-542-3p	0	0	1	0	0	0	ZNF66P	zinc finger protein 66, pseudogene
hsa-miR-542-3p	0	0	1	1	0	0	SRA1	steroid receptor RNA activator 1
hsa-miR-542-3p	1	0	1	1	1	1	MAPKAPK3	mitogen-activated protein kinase-activated protein kinase 3
hsa-miR-542-3p	1	0	1	1	1	1	PHACTR4	phosphatase and actin regulator 4
hsa-miR-542-3p	1	0	1	1	1	1	SULF1	sulfatase 1
hsa-miR-542-3p	0	0	1	0	0	0	PTGER4P2	prostaglandin E receptor 4 (subtype EP4) pseudogene 2
hsa-miR-542-3p	0	0	1	0	0	0	FOXN3-AS2	FOXN3 antisense RNA 2
hsa-miR-542-3p	1	0	1	1	1	1	ANLN	anillin, actin binding protein
hsa-miR-542-3p	1	0	1	1	1	1	DDR1	discoidin domain receptor tyrosine kinase 1
hsa-miR-542-3p	1	0	1	1	1	1	LRRC32	leucine rich repeat containing 32
hsa-miR-542-3p	1	0	1	1	1	1	FARP1	FERM, RhoGEF (ARHGEF) and pleckstrin domain protein 1 (chondrocyte-derived)
hsa-miR-542-3p	1	0	1	0	1	1	TMEM194A	transmembrane protein 194A
hsa-miR-542-3p	0	0	1	0	0	0	LOC440416	uncharacterized LOC440416
hsa-miR-542-3p	1	0	1	1	1	1	OPCML	opioid binding protein/cell adhesion molecule-like
hsa-miR-542-3p	1	0	1	0	1	1	DPYSL3	dihydropyrimidinase-like 3
hsa-miR-542-3p	1	0	1	0	1	1	MEST	mesoderm specific transcript homolog (mouse)
hsa-miR-542-3p	1	0	1	1	1	1	GIGYF2	GRB10 interacting GYF protein 2
hsa-miR-542-3p	0	0	1	1	1	1	TMBIM4	transmembrane BAX inhibitor motif containing 4
hsa-miR-542-3p	1	0	1	1	1	1	ST8SIA2	ST8 alpha-N-acetyl-neuraminide alpha-2,8-sialyltransferase 2
hsa-miR-542-3p	0	0	1	1	0	0	TMC1	transmembrane channel-like 1
hsa-miR-542-3p	0	0	1	1	1	1	CCDC126	coiled-coil domain containing 126
hsa-miR-542-3p	1	0	1	1	1	1	GABRB2	gamma-aminobutyric acid (GABA) A receptor, beta 2
hsa-miR-542-3p	1	0	1	1	1	1	PTPRD	protein tyrosine phosphatase, receptor type, D
hsa-miR-542-3p	1	0	1	1	1	1	PNISR	PNN-interacting serine/arginine-rich protein
hsa-miR-542-3p	0	0	1	0	0	0	TPTEP1	transmembrane phosphatase with tensin homology pseudogene 1
hsa-miR-542-3p	1	0	1	1	1	1	CERS6	ceramide synthase 6
hsa-miR-542-3p	1	0	1	1	1	1	TET2	tet methylcytosine dioxygenase 2
hsa-miR-542-3p	0	0	1	1	1	1	RBM25	RNA binding motif protein 25
hsa-miR-542-3p	0	0	1	1	1	1	LRCH1	leucine-rich repeats and calponin homology (CH) domain containing 1
hsa-miR-542-3p	1	0	1	1	1	1	TRIP12	thyroid hormone receptor interactor 12
hsa-miR-542-3p	1	0	1	1	1	1	TNS1	tensin 1
hsa-miR-542-3p	1	0	1	1	1	1	ST18	suppression of tumorigenicity 18 (breast carcinoma) (zinc finger protein)
hsa-miR-542-3p	1	0	1	1	1	1	KIAA1324L	KIAA1324-like
hsa-miR-542-3p	1	0	1	1	1	1	GRIA3	glutamate receptor, ionotropic, AMPA 3
hsa-miR-542-3p	1	0	1	1	1	1	FKBP1A	FK506 binding protein 1A, 12kDa
hsa-miR-542-3p	0	0	1	0	0	0	EEF1DP3	eukaryotic translation elongation factor 1 delta pseudogene 3
hsa-miR-542-3p	1	0	1	0	1	1	LRCH2	leucine-rich repeats and calponin homology (CH) domain containing 2
hsa-miR-542-3p	1	0	1	1	1	1	CHIC1	cysteine-rich hydrophobic domain 1
hsa-miR-542-3p	0	0	1	0	1	1	C20orf202	chromosome 20 open reading frame 202
hsa-miR-542-3p	0	0	1	0	0	0	FAM225B	family with sequence similarity 225, member B (non-protein coding)
hsa-miR-542-3p	0	0	1	0	0	0	LILRP2	leukocyte immunoglobulin-like receptor pseudogene 2
hsa-miR-542-3p	1	0	1	1	1	1	CADPS	Ca++-dependent secretion activator
hsa-miR-542-3p	1	0	1	1	1	1	PTPRZ1	protein tyrosine phosphatase, receptor-type, Z polypeptide 1
hsa-miR-542-3p	1	0	1	0	1	1	FAM196A	family with sequence similarity 196, member A
hsa-miR-542-3p	0	0	1	0	0	0	TMED8	transmembrane emp24 protein transport domain containing 8
hsa-miR-542-3p	0	0	1	0	0	0	FLJ39632	uncharacterized LOC642477
hsa-miR-542-3p	1	0	1	1	1	1	SASH1	SAM and SH3 domain containing 1
hsa-miR-542-3p	1	0	1	1	1	1	HECTD2	HECT domain containing E3 ubiquitin protein ligase 2
hsa-miR-542-3p	0	0	1	1	1	1	SLC12A8	solute carrier family 12 (potassium/chloride transporters), member 8
hsa-miR-542-3p	1	0	1	1	1	1	ETS1	v-ets erythroblastosis virus E26 oncogene homolog 1 (avian)
hsa-miR-542-3p	1	0	1	1	1	1	SLC35F1	solute carrier family 35, member F1
hsa-miR-542-3p	0	0	1	1	1	1	PSMA2	proteasome (prosome, macropain) subunit, alpha type, 2
hsa-miR-542-3p	0	0	1	1	1	1	MAP2K6	mitogen-activated protein kinase kinase 6
hsa-miR-542-3p	0	0	1	0	1	1	NHSL1	NHS-like 1
hsa-miR-542-3p	0	0	1	1	1	1	PRR14L	proline rich 14-like
hsa-miR-542-3p	1	0	1	1	0	0	RBM27	RNA binding motif protein 27
hsa-miR-542-3p	0	0	1	0	1	1	GTF2H2D	general transcription factor IIH, polypeptide 2D
hsa-miR-542-3p	1	0	1	1	0	0	CECR2	cat eye syndrome chromosome region, candidate 2
hsa-miR-542-3p	1	0	1	0	1	1	EML4	echinoderm microtubule associated protein like 4
hsa-miR-542-3p	0	0	1	0	1	1	MYO3B	myosin IIIB
hsa-miR-542-3p	0	0	1	1	0	0	TMEM41A	transmembrane protein 41A
hsa-miR-542-3p	0	0	1	0	0	0	OVOS	ovostatin
hsa-miR-542-3p	1	0	1	1	1	1	DCAF5	DDB1 and CUL4 associated factor 5
hsa-miR-542-3p	0	0	1	1	0	0	FBXO7	F-box protein 7
hsa-miR-542-3p	0	0	1	0	1	1	TYW5	tRNA-yW synthesizing protein 5
hsa-miR-542-3p	1	0	1	1	1	1	NAV1	neuron navigator 1
hsa-miR-542-3p	1	0	1	0	1	1	KLHL24	kelch-like 24 (Drosophila)
hsa-miR-542-3p	1	0	1	0	1	1	IGF2BP3	insulin-like growth factor 2 mRNA binding protein 3
hsa-miR-542-3p	1	0	1	1	1	1	C5orf24	chromosome 5 open reading frame 24
hsa-miR-542-3p	1	0	1	1	1	1	PTER	phosphotriesterase related
hsa-miR-542-3p	1	0	1	1	1	1	PGAP1	post-GPI attachment to proteins 1
hsa-miR-542-3p	0	0	1	0	0	0	ZNRD1-AS1	ZNRD1 antisense RNA 1
hsa-miR-542-3p	0	0	1	1	1	1	ZCCHC11	zinc finger, CCHC domain containing 11
hsa-miR-542-3p	0	0	1	1	1	1	IFRD1	interferon-related developmental regulator 1
hsa-miR-542-3p	0	0	1	1	1	1	KIAA1328	KIAA1328
hsa-miR-542-3p	0	0	1	1	1	1	SSFA2	sperm specific antigen 2
hsa-miR-542-3p	1	0	1	0	1	1	TBL1XR1	transducin (beta)-like 1 X-linked receptor 1
hsa-miR-542-3p	0	0	1	1	0	0	NEB	nebulin
hsa-miR-542-3p	1	0	1	1	1	1	LYST	lysosomal trafficking regulator
hsa-miR-542-3p	1	0	1	0	1	1	TTL	tubulin tyrosine ligase
hsa-miR-542-3p	0	0	1	1	0	0	EIF3L	eukaryotic translation initiation factor 3, subunit L
hsa-miR-542-3p	0	0	1	1	0	0	PYCR1	pyrroline-5-carboxylate reductase 1
hsa-miR-542-3p	0	0	1	1	0	0	SREBF2	sterol regulatory element binding transcription factor 2
hsa-miR-542-3p	0	0	1	1	1	1	DUSP26	dual specificity phosphatase 26 (putative)
hsa-miR-542-3p	1	0	1	0	0	0	IGLON5	IgLON family member 5
hsa-miR-542-3p	0	0	1	0	0	0	LOC401127	WD repeat domain 5 pseudogene
hsa-miR-542-3p	1	0	1	1	1	1	FUT9	fucosyltransferase 9 (alpha (1,3) fucosyltransferase)
hsa-miR-542-3p	0	0	1	0	0	0	RPS16P10	ribosomal protein S16 pseudogene 10
hsa-miR-542-3p	0	0	1	1	0	0	TCEAL4	transcription elongation factor A (SII)-like 4
hsa-miR-542-3p	0	0	1	1	0	0	F2	coagulation factor II (thrombin)
hsa-miR-542-3p	1	0	1	1	1	1	SETD8	SET domain containing (lysine methyltransferase) 8
hsa-miR-542-3p	0	0	1	1	1	1	SLC25A4	solute carrier family 25 (mitochondrial carrier; adenine nucleotide translocator), member 4
hsa-miR-542-3p	0	0	1	1	0	0	WDR18	WD repeat domain 18
hsa-miR-542-3p	0	0	1	1	1	1	TASP1	taspase, threonine aspartase, 1
hsa-miR-542-3p	0	0	1	1	0	0	NGDN	neuroguidin, EIF4E binding protein
hsa-miR-542-3p	0	0	1	1	1	1	INCENP	inner centromere protein antigens 135/155kDa
hsa-miR-542-3p	1	0	1	1	1	1	SSR1	signal sequence receptor, alpha
hsa-miR-542-3p	0	0	1	0	0	0	LOC387647	patched domain containing 3 pseudogene
hsa-miR-542-3p	0	0	1	0	0	0	TRIQK	triple QxxK/R motif containing
hsa-miR-542-3p	0	0	1	1	1	1	GRAP2	GRB2-related adaptor protein 2
hsa-miR-542-3p	1	0	1	1	1	1	TMEM248	transmembrane protein 248
hsa-miR-542-3p	0	0	1	1	0	0	B9D1	B9 protein domain 1
hsa-miR-542-3p	0	0	1	1	0	0	FGB	fibrinogen beta chain
hsa-miR-542-3p	1	0	1	1	1	1	BAMBI	BMP and activin membrane-bound inhibitor homolog (Xenopus laevis)
hsa-miR-542-3p	0	0	1	1	1	1	ATG4A	autophagy related 4A, cysteine peptidase
hsa-miR-542-3p	0	0	1	1	1	1	MAZ	MYC-associated zinc finger protein (purine-binding transcription factor)
hsa-miR-542-3p	0	0	1	1	1	1	GLRX3	glutaredoxin 3
hsa-miR-542-3p	0	0	1	1	1	1	BMPR1A	bone morphogenetic protein receptor, type IA
hsa-miR-542-3p	0	0	1	1	1	1	SEC11A	SEC11 homolog A (S. cerevisiae)
hsa-miR-542-3p	0	0	1	1	1	1	PEX19	peroxisomal biogenesis factor 19
hsa-miR-542-3p	1	0	1	1	1	1	TLE1	transducin-like enhancer of split 1 (E(sp1) homolog, Drosophila)
hsa-miR-542-3p	0	0	1	0	1	1	VSTM2A	V-set and transmembrane domain containing 2A
hsa-miR-542-3p	0	0	1	1	1	1	SLC9A3R1	solute carrier family 9, subfamily A (NHE3, cation proton antiporter 3), member 3 regulator 1
hsa-miR-542-3p	0	0	1	1	1	1	FKBP1B	FK506 binding protein 1B, 12.6 kDa
hsa-miR-542-3p	0	0	1	1	1	1	CD1C	CD1c molecule
hsa-miR-542-3p	0	0	1	1	1	1	TCTN3	tectonic family member 3
hsa-miR-542-3p	0	0	1	0	0	0	LOC100132352	FSHD region gene 1 pseudogene
hsa-miR-542-3p	1	0	1	1	1	1	RPUSD3	RNA pseudouridylate synthase domain containing 3
hsa-miR-542-3p	1	0	1	1	1	1	RNF2	ring finger protein 2
hsa-miR-542-3p	1	0	1	0	1	1	GIT2	G protein-coupled receptor kinase interacting ArfGAP 2
hsa-miR-542-3p	1	0	1	0	1	1	MAP1B	microtubule-associated protein 1B
hsa-miR-542-3p	1	0	1	1	1	1	RALY	RNA binding protein, autoantigenic (hnRNP-associated with lethal yellow homolog (mouse))
hsa-miR-542-3p	0	0	1	1	0	0	ACSS2	acyl-CoA synthetase short-chain family member 2
hsa-miR-542-3p	0	0	1	1	0	0	PCCA	propionyl CoA carboxylase, alpha polypeptide
hsa-miR-542-3p	0	0	1	1	1	1	WDR78	WD repeat domain 78
hsa-miR-542-3p	0	0	1	0	0	0	FAM92A1	family with sequence similarity 92, member A1
hsa-miR-542-3p	1	0	1	0	1	1	TSC1	tuberous sclerosis 1
hsa-miR-542-3p	0	0	1	0	0	0	NUDT18	nudix (nucleoside diphosphate linked moiety X)-type motif 18
hsa-miR-542-3p	1	0	1	1	1	1	ATP1B1	ATPase, Na+/K+ transporting, beta 1 polypeptide
hsa-miR-542-3p	0	0	1	0	0	0	CHEK2P2	checkpoint kinase 2 pseudogene 2
hsa-miR-542-3p	0	0	1	1	1	1	CDKAL1	CDK5 regulatory subunit associated protein 1-like 1
hsa-miR-542-3p	0	0	1	0	0	0	GNB2L1	guanine nucleotide binding protein (G protein), beta polypeptide 2-like 1
hsa-miR-542-3p	1	0	1	1	1	1	MAN1C1	mannosidase, alpha, class 1C, member 1
hsa-miR-542-3p	1	0	1	1	1	1	ANKS6	ankyrin repeat and sterile alpha motif domain containing 6
hsa-miR-542-3p	0	0	1	1	0	0	PI16	peptidase inhibitor 16
hsa-miR-542-3p	1	0	1	1	1	1	SLMAP	sarcolemma associated protein
hsa-miR-542-3p	1	0	1	0	1	1	KIAA0240	KIAA0240
hsa-miR-542-3p	0	0	1	0	0	0	LOC731789	uncharacterized LOC731789
hsa-miR-542-3p	0	0	1	1	1	1	UPRT	uracil phosphoribosyltransferase (FUR1) homolog (S. cerevisiae)
hsa-miR-542-3p	1	0	1	0	1	1	XRN1	5'-3' exoribonuclease 1
hsa-miR-542-3p	1	0	1	0	1	1	OSBPL8	oxysterol binding protein-like 8
hsa-miR-542-3p	0	0	1	1	1	1	SLC25A26	solute carrier family 25 (S-adenosylmethionine carrier), member 26
hsa-miR-542-3p	1	0	1	0	1	1	CNTNAP2	contactin associated protein-like 2
hsa-miR-542-3p	1	0	1	1	1	1	METAP1	methionyl aminopeptidase 1
hsa-miR-542-3p	0	0	1	1	1	1	STON1	stonin 1
hsa-miR-542-3p	0	0	1	1	0	0	GSTT2	glutathione S-transferase theta 2
hsa-miR-542-3p	1	0	1	1	1	1	PI15	peptidase inhibitor 15
hsa-miR-542-3p	1	0	1	0	1	1	CBX7	chromobox homolog 7
hsa-miR-542-3p	0	0	1	1	0	0	SPINK5	serine peptidase inhibitor, Kazal type 5
hsa-miR-542-3p	0	0	1	1	1	1	P2RX7	purinergic receptor P2X, ligand-gated ion channel, 7
hsa-miR-542-3p	1	0	1	1	1	1	CAPZA2	capping protein (actin filament) muscle Z-line, alpha 2
hsa-miR-542-3p	0	0	1	0	0	0	LOC728377	Rho guanine nucleotide exchange factor (GEF) 5 pseudogene
hsa-miR-542-3p	0	0	1	1	1	1	PROS1	protein S (alpha)
hsa-miR-542-3p	1	0	1	1	1	1	IRF1	interferon regulatory factor 1
hsa-miR-542-3p	1	0	1	0	1	1	EPDR1	ependymin related protein 1 (zebrafish)
hsa-miR-542-3p	0	0	1	0	0	0	GPR144	G protein-coupled receptor 144
hsa-miR-542-3p	1	0	1	1	1	1	MLL	myeloid/lymphoid or mixed-lineage leukemia (trithorax homolog, Drosophila)
hsa-miR-542-3p	0	0	1	1	1	1	RAD52	RAD52 homolog (S. cerevisiae)
hsa-miR-542-3p	0	0	1	1	0	0	HLA-DQB1	major histocompatibility complex, class II, DQ beta 1
hsa-miR-542-3p	0	0	1	0	0	0	PVT1	Pvt1 oncogene (non-protein coding)
hsa-miR-542-3p	0	0	1	1	1	1	GAD2	glutamate decarboxylase 2 (pancreatic islets and brain, 65kDa)
hsa-miR-542-3p	1	0	1	0	1	1	ACVR2A	activin A receptor, type IIA
hsa-miR-542-3p	0	0	1	0	0	0	AR	androgen receptor
hsa-miR-542-3p	1	0	1	1	1	1	COL4A3	collagen, type IV, alpha 3 (Goodpasture antigen)
hsa-miR-542-3p	1	0	1	1	1	1	COL4A4	collagen, type IV, alpha 4
hsa-miR-542-3p	1	0	1	1	1	1	DMD	dystrophin
hsa-miR-542-3p	0	0	1	0	1	1	GBE1	glucan (1,4-alpha-), branching enzyme 1
hsa-miR-542-3p	0	0	1	1	1	1	GLDC	glycine dehydrogenase (decarboxylating)
hsa-miR-542-3p	0	0	1	0	1	1	KAL1	Kallmann syndrome 1 sequence
hsa-miR-542-3p	1	0	1	0	1	1	SGCB	sarcoglycan, beta (43kDa dystrophin-associated glycoprotein)
hsa-miR-542-3p	1	0	1	1	1	1	MITF	microphthalmia-associated transcription factor
hsa-miR-542-3p	1	0	1	1	1	1	PTCH1	patched 1
hsa-miR-542-3p	0	0	1	1	1	1	NDP	Norrie disease (pseudoglioma)
hsa-miR-542-3p	1	0	1	1	1	1	OCRL	oculocerebrorenal syndrome of Lowe
hsa-miR-542-3p	0	0	1	1	1	1	PEX7	peroxisomal biogenesis factor 7
hsa-miR-542-3p	0	0	1	0	1	1	PGK1	phosphoglycerate kinase 1
hsa-miR-542-3p	1	0	1	1	1	1	ATXN1	ataxin 1
hsa-miR-542-3p	0	0	1	1	1	1	XDH	xanthine dehydrogenase
hsa-miR-542-3p	1	0	1	1	1	1	CHM	choroideremia (Rab escort protein 1)
hsa-miR-542-3p	0	0	1	1	0	0	HRG	histidine-rich glycoprotein
hsa-miR-542-3p	1	0	1	1	1	1	HNF1B	HNF1 homeobox B
hsa-miR-542-3p	0	0	1	1	1	1	WRN	Werner syndrome, RecQ helicase-like
hsa-miR-542-3p	0	0	1	1	1	1	IL5RA	interleukin 5 receptor, alpha
hsa-miR-542-3p	1	0	1	1	1	1	TNF	tumor necrosis factor
hsa-miR-542-3p	1	0	1	0	1	1	IGFBP5	insulin-like growth factor binding protein 5
hsa-miR-542-3p	1	0	1	1	1	1	DIO2	deiodinase, iodothyronine, type II
hsa-miR-542-3p	1	0	1	1	1	1	GABRG2	gamma-aminobutyric acid (GABA) A receptor, gamma 2
hsa-miR-542-3p	1	0	1	1	1	1	GRIA4	glutamate receptor, ionotropic, AMPA 4
hsa-miR-542-3p	1	0	1	1	0	0	GRIN2A	glutamate receptor, ionotropic, N-methyl D-aspartate 2A
hsa-miR-542-3p	1	0	1	1	1	1	GRM7	glutamate receptor, metabotropic 7
hsa-miR-542-3p	1	0	1	0	1	1	KITLG	KIT ligand
hsa-miR-542-3p	1	0	1	0	1	1	SMAD5	SMAD family member 5
hsa-miR-542-3p	1	0	1	0	1	1	SPOPL	speckle-type POZ protein-like
hsa-miR-542-3p	1	0	1	0	1	1	CLDN18	claudin 18
hsa-miR-542-3p	0	0	1	0	0	0	OR8G1	olfactory receptor, family 8, subfamily G, member 1
hsa-miR-542-3p	1	0	1	0	1	1	SMAD2	SMAD family member 2
hsa-miR-542-3p	0	0	1	1	0	0	ATP5J	ATP synthase, H+ transporting, mitochondrial Fo complex, subunit F6
hsa-miR-542-3p	1	0	1	1	1	1	BICD2	bicaudal D homolog 2 (Drosophila)
hsa-miR-542-3p	1	0	1	1	0	0	NOMO3	NODAL modulator 3
hsa-miR-542-3p	0	0	1	1	1	1	ZCCHC16	zinc finger, CCHC domain containing 16
hsa-miR-542-3p	0	0	1	1	1	1	HMGN2P46	high mobility group nucleosomal binding domain 2 pseudogene 46
hsa-miR-542-3p	1	0	1	1	1	1	ADAM9	ADAM metallopeptidase domain 9
hsa-miR-542-3p	0	0	1	1	1	1	MAPKAP1	mitogen-activated protein kinase associated protein 1
hsa-miR-542-3p	1	0	1	1	1	1	IGF2BP2	insulin-like growth factor 2 mRNA binding protein 2
hsa-miR-542-3p	1	0	1	1	1	1	EI24	etoposide induced 2.4 mRNA
hsa-miR-542-3p	1	0	1	0	1	1	C18orf25	chromosome 18 open reading frame 25
hsa-miR-542-3p	1	0	1	1	1	1	CTDSPL	CTD (carboxy-terminal domain, RNA polymerase II, polypeptide A) small phosphatase-like
hsa-miR-542-3p	1	0	1	1	1	1	LUZP2	leucine zipper protein 2
hsa-miR-542-3p	0	0	1	1	1	1	HRNR	hornerin
hsa-miR-542-3p	1	0	1	1	1	1	SHE	Src homology 2 domain containing E
hsa-miR-542-3p	0	0	1	0	1	1	LPPR5	lipid phosphate phosphatase-related protein type 5
hsa-miR-542-3p	0	0	1	1	1	1	HGF	hepatocyte growth factor (hepapoietin A; scatter factor)
hsa-miR-542-3p	1	0	1	1	1	1	GOSR2	golgi SNAP receptor complex member 2
hsa-miR-542-3p	0	0	1	0	1	1	ARGFX	arginine-fifty homeobox
hsa-miR-542-3p	1	0	1	1	1	1	SLC25A53	solute carrier family 25, member 53
hsa-miR-542-3p	1	0	1	1	1	1	DISC1	disrupted in schizophrenia 1
hsa-miR-542-3p	0	0	1	1	0	0	SATL1	spermidine/spermine N1-acetyl transferase-like 1
hsa-miR-542-3p	1	0	1	0	1	1	ZKSCAN2	zinc finger with KRAB and SCAN domains 2
hsa-miR-542-3p	0	0	1	1	1	1	C9orf152	chromosome 9 open reading frame 152
hsa-miR-542-3p	1	0	1	1	1	1	SORCS1	sortilin-related VPS10 domain containing receptor 1
hsa-miR-542-3p	1	0	1	1	1	1	C12orf68	chromosome 12 open reading frame 68
hsa-miR-542-3p	1	0	1	1	1	1	NTRK2	neurotrophic tyrosine kinase, receptor, type 2
hsa-miR-542-3p	0	0	1	1	1	1	POLR2M	polymerase (RNA) II (DNA directed) polypeptide M
hsa-miR-542-3p	0	0	1	1	1	1	HAX1	HCLS1 associated protein X-1
hsa-miR-542-3p	1	0	1	1	1	1	KALRN	kalirin, RhoGEF kinase
hsa-miR-542-3p	1	0	1	0	1	1	BCL7A	B-cell CLL/lymphoma 7A
hsa-miR-542-3p	1	0	1	1	1	1	SLC6A9	solute carrier family 6 (neurotransmitter transporter, glycine), member 9
hsa-miR-542-3p	0	0	1	1	0	0	ABCF1	ATP-binding cassette, sub-family F (GCN20), member 1
hsa-miR-542-3p	1	0	1	0	1	1	CLLU1	chronic lymphocytic leukemia up-regulated 1
hsa-miR-542-3p	1	0	1	0	1	1	ANO6	anoctamin 6
hsa-miR-542-3p	0	0	1	0	1	1	C6orf120	chromosome 6 open reading frame 120
hsa-miR-542-3p	1	0	1	1	1	1	RGS7BP	regulator of G-protein signaling 7 binding protein
hsa-miR-542-3p	1	0	1	0	1	1	MSRB3	methionine sulfoxide reductase B3
hsa-miR-542-3p	1	0	1	0	1	1	NPNT	nephronectin
hsa-miR-542-3p	1	0	1	0	1	1	SRGAP3	SLIT-ROBO Rho GTPase activating protein 3
hsa-miR-542-3p	1	0	1	1	1	1	ZNF704	zinc finger protein 704
hsa-miR-542-3p	0	0	1	1	1	1	KCNIP1	Kv channel interacting protein 1
hsa-miR-542-3p	0	0	1	1	1	1	C18orf62	chromosome 18 open reading frame 62
hsa-miR-542-3p	0	0	1	1	1	1	CTLA4	cytotoxic T-lymphocyte-associated protein 4
hsa-miR-542-3p	0	0	1	1	0	0	C17orf47	chromosome 17 open reading frame 47
hsa-miR-542-3p	1	0	1	1	1	1	ELMO1	engulfment and cell motility 1
hsa-miR-542-3p	1	0	1	1	1	1	ZNF384	zinc finger protein 384
hsa-miR-542-3p	1	0	1	1	1	1	MLLT4	myeloid/lymphoid or mixed-lineage leukemia (trithorax homolog, Drosophila); translocated to, 4
hsa-miR-542-3p	1	0	1	1	1	1	SCN2A	sodium channel, voltage-gated, type II, alpha subunit
hsa-miR-542-3p	0	0	1	0	1	1	SCN3B	sodium channel, voltage-gated, type III, beta subunit
hsa-miR-542-3p	1	0	1	1	1	1	SLC9A6	solute carrier family 9, subfamily A (NHE6, cation proton antiporter 6), member 6
hsa-miR-542-3p	1	0	1	1	1	1	ERBB4	v-erb-a erythroblastic leukemia viral oncogene homolog 4 (avian)
hsa-miR-542-3p	0	0	1	1	0	0	FAM127A	family with sequence similarity 127, member A
hsa-miR-542-3p	1	0	1	0	0	0	FAM127B	family with sequence similarity 127, member B
hsa-miR-542-3p	0	0	1	1	1	1	CAB39L	calcium binding protein 39-like
hsa-miR-542-3p	1	0	1	1	1	1	N4BP2L1	NEDD4 binding protein 2-like 1
hsa-miR-542-3p	1	0	1	1	1	1	VAV3	vav 3 guanine nucleotide exchange factor
hsa-miR-542-3p	1	0	1	0	1	1	FBXO41	F-box protein 41
hsa-miR-542-3p	1	0	1	0	1	1	MEGF9	multiple EGF-like-domains 9
hsa-miR-542-3p	0	0	1	0	1	1	ISCA1P1	iron-sulfur cluster assembly 1 homolog (S. cerevisiae) pseudogene 1
hsa-miR-542-3p	1	0	1	1	1	1	MGA	MAX gene associated
hsa-miR-542-3p	0	0	1	1	1	1	C15orf57	chromosome 15 open reading frame 57
hsa-miR-542-3p	0	0	1	1	0	0	GSTT2B	glutathione S-transferase theta 2B (gene/pseudogene)
hsa-miR-542-3p	1	0	1	1	1	1	REPS2	RALBP1 associated Eps domain containing 2
hsa-miR-542-3p	1	0	1	1	1	1	ADAM10	ADAM metallopeptidase domain 10
hsa-miR-542-3p	1	0	1	1	1	1	ADCY9	adenylate cyclase 9
hsa-miR-542-3p	1	0	1	1	1	1	AFM	afamin
hsa-miR-542-3p	0	0	1	1	0	0	AOX1	aldehyde oxidase 1
hsa-miR-542-3p	1	0	1	0	1	1	XIAP	X-linked inhibitor of apoptosis
hsa-miR-542-3p	0	0	1	1	0	0	ARG2	arginase, type II
hsa-miR-542-3p	1	0	1	1	1	1	CASP10	caspase 10, apoptosis-related cysteine peptidase
hsa-miR-542-3p	0	0	1	0	1	1	CASQ2	calsequestrin 2 (cardiac muscle)
hsa-miR-542-3p	0	0	1	1	1	1	CDC5L	CDC5 cell division cycle 5-like (S. pombe)
hsa-miR-542-3p	1	0	1	0	1	1	CDK6	cyclin-dependent kinase 6
hsa-miR-542-3p	1	0	1	1	1	1	CREBL2	cAMP responsive element binding protein-like 2
hsa-miR-542-3p	1	0	1	1	1	1	CTNND2	catenin (cadherin-associated protein), delta 2
hsa-miR-542-3p	1	0	1	1	1	1	DYRK1A	dual-specificity tyrosine-(Y)-phosphorylation regulated kinase 1A
hsa-miR-542-3p	1	0	1	0	1	1	ELAVL3	ELAV (embryonic lethal, abnormal vision, Drosophila)-like 3 (Hu antigen C)
hsa-miR-542-3p	0	0	1	0	1	1	ELF5	E74-like factor 5 (ets domain transcription factor)
hsa-miR-542-3p	0	0	1	1	1	1	FRZB	frizzled-related protein
hsa-miR-542-3p	1	0	1	0	1	1	MPPED2	metallophosphoesterase domain containing 2
hsa-miR-542-3p	0	0	1	1	0	0	ACP2	acid phosphatase 2, lysosomal
hsa-miR-542-3p	0	0	1	1	1	1	RHOA	ras homolog family member A
hsa-miR-542-3p	1	0	1	0	1	1	ATP1B2	ATPase, Na+/K+ transporting, beta 2 polypeptide
hsa-miR-542-3p	1	0	1	1	1	1	BNC1	basonuclin 1
hsa-miR-542-3p	0	0	1	1	1	1	BTC	betacellulin
hsa-miR-542-3p	1	0	1	1	1	1	CALM2	calmodulin 2 (phosphorylase kinase, delta)
hsa-miR-542-3p	1	0	1	1	1	1	CDC25A	cell division cycle 25 homolog A (S. pombe)
hsa-miR-542-3p	1	0	1	1	1	1	CDK2	cyclin-dependent kinase 2
hsa-miR-542-3p	1	0	1	0	1	1	CHML	choroideremia-like (Rab escort protein 2)
hsa-miR-542-3p	1	0	1	1	1	1	DR1	down-regulator of transcription 1, TBP-binding (negative cofactor 2)
hsa-miR-542-3p	1	0	1	1	1	1	HBEGF	heparin-binding EGF-like growth factor
hsa-miR-542-3p	1	0	1	1	1	1	FBN2	fibrillin 2
hsa-miR-542-3p	1	0	1	0	1	1	FUT4	fucosyltransferase 4 (alpha (1,3) fucosyltransferase, myeloid-specific)
hsa-miR-542-3p	0	0	1	0	1	1	GCLM	glutamate-cysteine ligase, modifier subunit
hsa-miR-542-3p	0	0	1	1	1	1	CXCL3	chemokine (C-X-C motif) ligand 3
hsa-miR-542-3p	0	0	1	1	1	1	GTF2E2	general transcription factor IIE, polypeptide 2, beta 34kDa
hsa-miR-542-3p	0	0	1	0	1	1	GYPA	glycophorin A (MNS blood group)
hsa-miR-542-3p	0	0	1	1	1	1	HOXA4	homeobox A4
hsa-miR-542-3p	1	0	1	1	1	1	HOXB3	homeobox B3
hsa-miR-542-3p	1	0	1	1	1	1	KPNA3	karyopherin alpha 3 (importin alpha 4)
hsa-miR-542-3p	0	0	1	1	0	0	LECT2	leukocyte cell-derived chemotaxin 2
hsa-miR-542-3p	1	0	1	1	1	1	ADAM11	ADAM metallopeptidase domain 11
hsa-miR-542-3p	1	0	1	1	1	1	MSN	moesin
hsa-miR-542-3p	1	0	1	1	1	1	NPTX1	neuronal pentraxin I
hsa-miR-542-3p	0	0	1	0	1	1	OAZ2	ornithine decarboxylase antizyme 2
hsa-miR-542-3p	1	0	1	1	1	1	OLR1	oxidized low density lipoprotein (lectin-like) receptor 1
hsa-miR-542-3p	1	0	1	1	1	1	TNFRSF11B	tumor necrosis factor receptor superfamily, member 11b
hsa-miR-542-3p	0	0	1	0	1	1	OPHN1	oligophrenin 1
hsa-miR-542-3p	1	0	1	0	1	1	PAPPA	pregnancy-associated plasma protein A, pappalysin 1
hsa-miR-542-3p	1	0	1	1	1	1	PBX2	pre-B-cell leukemia homeobox 2
hsa-miR-542-3p	0	0	1	1	1	1	PCNA	proliferating cell nuclear antigen
hsa-miR-542-3p	0	0	1	1	1	1	PDE6D	phosphodiesterase 6D, cGMP-specific, rod, delta
hsa-miR-542-3p	0	0	1	1	1	1	PIM1	pim-1 oncogene
hsa-miR-542-3p	1	0	1	0	1	1	PRKCA	protein kinase C, alpha
hsa-miR-542-3p	1	0	1	1	1	1	PRKD1	protein kinase D1
hsa-miR-542-3p	1	0	1	0	1	1	MAPK4	mitogen-activated protein kinase 4
hsa-miR-542-3p	0	0	1	0	0	0	PSMB10	proteasome (prosome, macropain) subunit, beta type, 10
hsa-miR-542-3p	1	0	1	1	1	1	PTPN2	protein tyrosine phosphatase, non-receptor type 2
hsa-miR-542-3p	0	0	1	1	1	1	PTPN12	protein tyrosine phosphatase, non-receptor type 12
hsa-miR-542-3p	1	0	1	1	1	1	PTPRK	protein tyrosine phosphatase, receptor type, K
hsa-miR-542-3p	0	0	1	1	0	0	CCL11	chemokine (C-C motif) ligand 11
hsa-miR-542-3p	1	0	1	1	1	1	SRSF3	serine/arginine-rich splicing factor 3
hsa-miR-542-3p	1	0	1	1	1	1	SLC9A2	solute carrier family 9, subfamily A (NHE2, cation proton antiporter 2), member 2
hsa-miR-542-3p	1	0	1	1	1	1	SMARCD2	SWI/SNF related, matrix associated, actin dependent regulator of chromatin, subfamily d, member 2
hsa-miR-542-3p	1	0	1	0	1	1	SOX11	SRY (sex determining region Y)-box 11
hsa-miR-542-3p	1	0	1	1	1	1	SRF	serum response factor (c-fos serum response element-binding transcription factor)
hsa-miR-542-3p	1	0	1	0	1	1	STC1	stanniocalcin 1
hsa-miR-542-3p	0	0	1	1	1	1	STIM1	stromal interaction molecule 1
hsa-miR-542-3p	1	0	1	0	1	1	TSPYL1	TSPY-like 1
hsa-miR-542-3p	0	0	1	1	0	0	UBA7	ubiquitin-like modifier activating enzyme 7
hsa-miR-542-3p	1	0	1	1	1	1	UBE2D3	ubiquitin-conjugating enzyme E2D 3
hsa-miR-542-3p	0	0	1	1	1	1	UBE2E1	ubiquitin-conjugating enzyme E2E 1
hsa-miR-542-3p	1	0	1	1	0	0	CLIP2	CAP-GLY domain containing linker protein 2
hsa-miR-542-3p	1	0	1	0	1	1	ZIC1	Zic family member 1
hsa-miR-542-3p	1	0	1	1	1	1	FZD5	frizzled family receptor 5
hsa-miR-542-3p	1	0	1	1	1	1	CUL5	cullin 5
hsa-miR-542-3p	1	0	1	1	1	1	FZD1	frizzled family receptor 1
hsa-miR-542-3p	1	0	1	1	1	1	FZD7	frizzled family receptor 7
hsa-miR-542-3p	0	0	1	1	1	1	STX7	syntaxin 7
hsa-miR-542-3p	0	0	1	1	1	1	PEX3	peroxisomal biogenesis factor 3
hsa-miR-542-3p	1	0	1	1	1	1	BARX2	BARX homeobox 2
hsa-miR-542-3p	0	0	1	1	1	1	AP3B1	adaptor-related protein complex 3, beta 1 subunit
hsa-miR-542-3p	1	0	1	0	1	1	TNKS	tankyrase, TRF1-interacting ankyrin-related ADP-ribose polymerase
hsa-miR-542-3p	0	0	1	1	1	1	SUCLA2	succinate-CoA ligase, ADP-forming, beta subunit
hsa-miR-542-3p	1	0	1	1	1	1	NRP2	neuropilin 2
hsa-miR-542-3p	1	0	1	0	1	1	ST13	suppression of tumorigenicity 13 (colon carcinoma) (Hsp70 interacting protein)
hsa-miR-542-3p	1	0	1	1	1	1	BTAF1	BTAF1 RNA polymerase II, B-TFIID transcription factor-associated, 170kDa (Mot1 homolog, S. cerevisiae)
hsa-miR-542-3p	1	0	1	1	1	1	MAP7	microtubule-associated protein 7
hsa-miR-542-3p	0	0	1	1	1	1	ATF3	activating transcription factor 3
hsa-miR-542-3p	1	0	1	1	1	1	EFNB2	ephrin-B2
hsa-miR-542-3p	0	0	1	0	1	1	EIF4EBP2	eukaryotic translation initiation factor 4E binding protein 2
hsa-miR-542-3p	1	0	1	1	1	1	FGF12	fibroblast growth factor 12
hsa-miR-542-3p	0	0	1	1	1	1	FLT3	fms-related tyrosine kinase 3
hsa-miR-542-3p	1	0	1	0	1	1	SLC1A2	solute carrier family 1 (glial high affinity glutamate transporter), member 2
hsa-miR-542-3p	1	0	1	1	1	1	SYT7	synaptotagmin VII
hsa-miR-542-3p	1	0	1	1	1	1	SOCS6	suppressor of cytokine signaling 6
hsa-miR-542-3p	1	0	1	0	1	1	AKAP6	A kinase (PRKA) anchor protein 6
hsa-miR-542-3p	1	0	1	1	1	1	BNIP2	BCL2/adenovirus E1B 19kDa interacting protein 2
hsa-miR-542-3p	0	0	1	1	0	0	COX6C	cytochrome c oxidase subunit VIc
hsa-miR-542-3p	1	0	1	1	1	1	DACH1	dachshund homolog 1 (Drosophila)
hsa-miR-542-3p	1	0	1	1	1	1	DUSP5	dual specificity phosphatase 5
hsa-miR-542-3p	1	0	1	1	1	1	EFNB1	ephrin-B1
hsa-miR-542-3p	1	0	1	1	1	1	EPHA4	EPH receptor A4
hsa-miR-542-3p	0	0	1	1	1	1	GP5	glycoprotein V (platelet)
hsa-miR-542-3p	1	0	1	1	1	1	MLLT3	myeloid/lymphoid or mixed-lineage leukemia (trithorax homolog, Drosophila); translocated to, 3
hsa-miR-542-3p	0	0	1	1	1	1	NAP1L3	nucleosome assembly protein 1-like 3
hsa-miR-542-3p	0	0	1	1	1	1	PNPLA4	patatin-like phospholipase domain containing 4
hsa-miR-542-3p	1	0	1	1	1	1	RAB11A	RAB11A, member RAS oncogene family
hsa-miR-542-3p	1	0	1	1	1	1	MTMR4	myotubularin related protein 4
hsa-miR-542-3p	1	0	1	1	1	1	XPR1	xenotropic and polytropic retrovirus receptor 1
hsa-miR-542-3p	1	0	1	1	1	1	STK17A	serine/threonine kinase 17a
hsa-miR-542-3p	1	0	1	0	1	1	VAMP3	vesicle-associated membrane protein 3 (cellubrevin)
hsa-miR-542-3p	1	0	1	1	1	1	KIF3B	kinesin family member 3B
hsa-miR-542-3p	1	0	1	0	1	1	ROCK2	Rho-associated, coiled-coil containing protein kinase 2
hsa-miR-542-3p	1	0	1	1	1	1	TBPL1	TBP-like 1
hsa-miR-542-3p	1	0	1	1	1	1	VPS4B	vacuolar protein sorting 4 homolog B (S. cerevisiae)
hsa-miR-542-3p	0	0	1	1	1	1	ATP6V1G1	ATPase, H+ transporting, lysosomal 13kDa, V1 subunit G1
hsa-miR-542-3p	0	0	1	1	1	1	PRDX6	peroxiredoxin 6
hsa-miR-542-3p	1	0	1	1	1	1	ZFP36L1	zinc finger protein 36, C3H type-like 1
hsa-miR-542-3p	1	0	1	1	1	1	GABRE	gamma-aminobutyric acid (GABA) A receptor, epsilon
hsa-miR-542-3p	1	0	1	0	1	1	KRAS	v-Ki-ras2 Kirsten rat sarcoma viral oncogene homolog
hsa-miR-542-3p	1	0	1	1	1	1	KDM5A	lysine (K)-specific demethylase 5A
hsa-miR-542-3p	1	0	1	0	1	1	SCD	stearoyl-CoA desaturase (delta-9-desaturase)
hsa-miR-542-3p	0	0	1	1	1	1	SIM1	single-minded homolog 1 (Drosophila)
hsa-miR-542-3p	1	0	1	1	0	0	ZMYM3	zinc finger, MYM-type 3
hsa-miR-542-3p	1	0	1	1	1	1	WDR1	WD repeat domain 1
hsa-miR-542-3p	1	0	1	1	1	1	MED13	mediator complex subunit 13
hsa-miR-542-3p	0	0	1	1	1	1	CLEC2B	C-type lectin domain family 2, member B
hsa-miR-542-3p	1	0	1	1	1	1	CRK	v-crk sarcoma virus CT10 oncogene homolog (avian)
hsa-miR-542-3p	1	0	1	1	1	1	DCC	deleted in colorectal carcinoma
hsa-miR-542-3p	1	0	1	1	1	1	GJA5	gap junction protein, alpha 5, 40kDa
hsa-miR-542-3p	0	0	1	1	1	1	LPAR4	lysophosphatidic acid receptor 4
hsa-miR-542-3p	0	0	1	1	1	1	PPP1R3C	protein phosphatase 1, regulatory subunit 3C
hsa-miR-542-3p	1	0	1	0	1	1	PRKAB2	protein kinase, AMP-activated, beta 2 non-catalytic subunit
hsa-miR-542-3p	1	0	1	0	1	1	SRC	v-src sarcoma (Schmidt-Ruppin A-2) viral oncogene homolog (avian)
hsa-miR-542-3p	1	0	1	1	1	1	GABBR2	gamma-aminobutyric acid (GABA) B receptor, 2
hsa-miR-542-3p	1	0	1	1	1	1	GTF2E1	general transcription factor IIE, polypeptide 1, alpha 56kDa
hsa-miR-542-3p	0	0	1	1	1	1	ITK	IL2-inducible T-cell kinase
hsa-miR-542-3p	1	0	1	1	1	1	LAMC2	laminin, gamma 2
hsa-miR-542-3p	0	0	1	1	1	1	LIMK2	LIM domain kinase 2
hsa-miR-542-3p	0	0	1	1	0	0	CD180	CD180 molecule
hsa-miR-542-3p	0	0	1	1	1	1	SOX3	SRY (sex determining region Y)-box 3
hsa-miR-542-3p	1	0	1	1	1	1	TMPRSS2	transmembrane protease, serine 2
hsa-miR-542-3p	1	0	1	1	1	1	EVI5	ecotropic viral integration site 5
hsa-miR-542-3p	1	0	1	1	1	1	ST8SIA4	ST8 alpha-N-acetyl-neuraminide alpha-2,8-sialyltransferase 4
hsa-miR-542-3p	1	0	1	1	1	1	ABCF2	ATP-binding cassette, sub-family F (GCN20), member 2
hsa-miR-542-3p	1	0	1	1	1	1	NAMPT	nicotinamide phosphoribosyltransferase
hsa-miR-542-3p	0	0	1	1	1	1	MPHOSPH6	M-phase phosphoprotein 6
hsa-miR-542-3p	0	0	1	1	1	1	KLRG1	killer cell lectin-like receptor subfamily G, member 1
hsa-miR-542-3p	0	0	1	0	1	1	CD96	CD96 molecule
hsa-miR-542-3p	1	0	1	1	1	1	MTF1	metal-regulatory transcription factor 1
hsa-miR-542-3p	1	0	1	0	1	1	NAB1	NGFI-A binding protein 1 (EGR1 binding protein 1)
hsa-miR-542-3p	1	0	1	1	1	1	SNAI1	snail homolog 1 (Drosophila)
hsa-miR-542-3p	0	0	1	1	0	0	SPRR1A	small proline-rich protein 1A
hsa-miR-542-3p	1	0	1	1	1	1	HS3ST4	heparan sulfate (glucosamine) 3-O-sulfotransferase 4
hsa-miR-542-3p	0	0	1	1	1	1	LANCL1	LanC lantibiotic synthetase component C-like 1 (bacterial)
hsa-miR-542-3p	0	0	1	1	1	1	TRDN	triadin
hsa-miR-542-3p	1	0	1	1	1	1	LUC7L3	LUC7-like 3 (S. cerevisiae)
hsa-miR-542-3p	1	0	1	1	1	1	TMEM50B	transmembrane protein 50B
hsa-miR-542-3p	1	0	1	1	1	1	NCK1	NCK adaptor protein 1
hsa-miR-542-3p	1	0	1	1	1	1	NFATC1	nuclear factor of activated T-cells, cytoplasmic, calcineurin-dependent 1
hsa-miR-542-3p	0	0	1	1	1	1	NKX3-1	NK3 homeobox 1
hsa-miR-542-3p	0	0	1	0	1	1	OAS3	2'-5'-oligoadenylate synthetase 3, 100kDa
hsa-miR-542-3p	1	0	1	0	1	1	PPP1R2	protein phosphatase 1, regulatory (inhibitor) subunit 2
hsa-miR-542-3p	0	0	1	0	0	0	PTPN13	protein tyrosine phosphatase, non-receptor type 13 (APO-1/CD95 (Fas)-associated phosphatase)
hsa-miR-542-3p	1	0	1	1	1	1	RANBP2	RAN binding protein 2
hsa-miR-542-3p	1	0	1	1	1	1	TUBGCP3	tubulin, gamma complex associated protein 3
hsa-miR-542-3p	1	0	1	1	1	1	FBLN5	fibulin 5
hsa-miR-542-3p	1	0	1	1	1	1	ZNF238	zinc finger protein 238
hsa-miR-542-3p	0	0	1	0	0	0	CREB3	cAMP responsive element binding protein 3
hsa-miR-542-3p	0	0	1	1	1	1	LRRC41	leucine rich repeat containing 41
hsa-miR-542-3p	1	0	1	1	1	1	SEMA3C	sema domain, immunoglobulin domain (Ig), short basic domain, secreted, (semaphorin) 3C
hsa-miR-542-3p	1	0	1	0	1	1	ARFGEF2	ADP-ribosylation factor guanine nucleotide-exchange factor 2 (brefeldin A-inhibited)
hsa-miR-542-3p	0	0	1	1	1	1	SLCO1B1	solute carrier organic anion transporter family, member 1B1
hsa-miR-542-3p	0	0	1	0	1	1	SLC16A2	solute carrier family 16, member 2 (thyroid hormone transporter)
hsa-miR-542-3p	1	0	1	1	1	1	MAP3K2	mitogen-activated protein kinase kinase kinase 2
hsa-miR-542-3p	0	0	1	1	1	1	PPP1R17	protein phosphatase 1, regulatory subunit 17
hsa-miR-542-3p	1	0	1	1	1	1	MMP24	matrix metallopeptidase 24 (membrane-inserted)
hsa-miR-542-3p	0	0	1	1	0	0	DNAJB2	DnaJ (Hsp40) homolog, subfamily B, member 2
hsa-miR-542-3p	1	0	1	1	1	1	SNTB2	syntrophin, beta 2 (dystrophin-associated protein A1, 59kDa, basic component 2)
hsa-miR-542-3p	1	0	1	1	1	1	SEC61B	Sec61 beta subunit
hsa-miR-542-3p	0	0	1	1	1	1	PKIA	protein kinase (cAMP-dependent, catalytic) inhibitor alpha
hsa-miR-542-3p	1	0	1	1	1	1	FERMT2	fermitin family member 2
hsa-miR-542-3p	1	0	1	1	1	1	RAC1	ras-related C3 botulinum toxin substrate 1 (rho family, small GTP binding protein Rac1)
hsa-miR-542-3p	0	0	1	1	1	1	RLN1	relaxin 1
hsa-miR-542-3p	1	0	1	1	1	1	RIT1	Ras-like without CAAX 1
hsa-miR-542-3p	1	0	1	1	1	1	SCN1A	sodium channel, voltage-gated, type I, alpha subunit
hsa-miR-542-3p	1	0	1	0	1	1	SOX12	SRY (sex determining region Y)-box 12
hsa-miR-542-3p	1	0	1	0	1	1	WASF2	WAS protein family, member 2
hsa-miR-542-3p	0	0	1	1	1	1	RTN4	reticulon 4
hsa-miR-542-3p	1	0	1	1	1	1	ADAMTS5	ADAM metallopeptidase with thrombospondin type 1 motif, 5
hsa-miR-542-3p	1	0	1	1	1	1	KAT7	K(lysine) acetyltransferase 7
hsa-miR-542-3p	1	0	1	1	1	1	UTRN	utrophin
hsa-miR-542-3p	0	0	1	0	1	1	ZXDB	zinc finger, X-linked, duplicated B
hsa-miR-542-3p	1	0	1	1	1	1	ERLIN2	ER lipid raft associated 2
hsa-miR-542-3p	0	0	1	1	1	1	AKAP10	A kinase (PRKA) anchor protein 10
hsa-miR-542-3p	1	0	1	1	1	1	PALM2-AKAP2	PALM2-AKAP2 readthrough
hsa-miR-542-3p	0	0	1	0	1	1	AP4E1	adaptor-related protein complex 4, epsilon 1 subunit
hsa-miR-542-3p	1	0	1	1	1	1	ELL2	elongation factor, RNA polymerase II, 2
hsa-miR-542-3p	1	0	1	1	1	1	APPL1	adaptor protein, phosphotyrosine interaction, PH domain and leucine zipper containing 1
hsa-miR-542-3p	1	0	1	0	1	1	CD2AP	CD2-associated protein
hsa-miR-542-3p	1	0	1	1	1	1	MGEA5	meningioma expressed antigen 5 (hyaluronidase)
hsa-miR-542-3p	1	0	1	1	1	1	RHOQ	ras homolog family member Q
hsa-miR-542-3p	1	0	1	1	1	1	KCND2	potassium voltage-gated channel, Shal-related subfamily, member 2
hsa-miR-542-3p	1	0	1	1	0	0	MYO1F	myosin IF
hsa-miR-542-3p	1	0	1	1	1	1	PITPNB	phosphatidylinositol transfer protein, beta
hsa-miR-542-3p	0	0	1	1	1	1	N6AMT1	N-6 adenine-specific DNA methyltransferase 1 (putative)
hsa-miR-542-3p	1	0	1	1	1	1	LRP12	low density lipoprotein receptor-related protein 12
hsa-miR-542-3p	1	0	1	1	1	1	NRG1	neuregulin 1
hsa-miR-542-3p	1	0	1	1	1	1	SOCS5	suppressor of cytokine signaling 5
hsa-miR-542-3p	1	0	1	0	1	1	OSTM1	osteopetrosis associated transmembrane protein 1
hsa-miR-542-3p	1	0	1	0	1	1	C16orf72	chromosome 16 open reading frame 72
hsa-miR-542-3p	1	0	1	1	1	1	YME1L1	YME1-like 1 (S. cerevisiae)
hsa-miR-542-3p	1	0	1	1	1	1	C11orf58	chromosome 11 open reading frame 58
hsa-miR-542-3p	1	0	1	1	1	1	MAPRE2	microtubule-associated protein, RP/EB family, member 2
hsa-miR-542-3p	0	0	1	1	0	0	NOMO1	NODAL modulator 1
hsa-miR-542-3p	0	0	1	1	1	1	TRAM1	translocation associated membrane protein 1
hsa-miR-542-3p	1	0	1	1	1	1	LEMD3	LEM domain containing 3
hsa-miR-542-3p	1	0	1	1	1	1	SLC7A11	solute carrier family 7 (anionic amino acid transporter light chain, xc- system), member 11
hsa-miR-542-3p	0	0	1	0	1	1	VPS41	vacuolar protein sorting 41 homolog (S. cerevisiae)
hsa-miR-542-3p	1	0	1	1	1	1	AFF4	AF4/FMR2 family, member 4
hsa-miR-542-3p	1	0	1	1	1	1	RND1	Rho family GTPase 1
hsa-miR-542-3p	0	0	1	1	1	1	ARFGAP3	ADP-ribosylation factor GTPase activating protein 3
hsa-miR-542-3p	1	0	1	1	1	1	EHD3	EH-domain containing 3
hsa-miR-542-3p	1	0	1	1	1	1	DBC1	deleted in bladder cancer 1
hsa-miR-542-3p	0	0	1	1	0	0	HOXD4	homeobox D4
hsa-miR-542-3p	1	0	1	1	1	1	RALGPS1	Ral GEF with PH domain and SH3 binding motif 1
hsa-miR-542-3p	1	0	1	1	0	0	TTLL4	tubulin tyrosine ligase-like family, member 4
hsa-miR-542-3p	1	0	1	1	1	1	ULK2	unc-51-like kinase 2 (C. elegans)
hsa-miR-542-3p	0	0	1	1	1	1	AQR	aquarius homolog (mouse)
hsa-miR-542-3p	1	0	1	1	1	1	SPCS2	signal peptidase complex subunit 2 homolog (S. cerevisiae)
hsa-miR-542-3p	0	0	1	1	1	1	TATDN2	TatD DNase domain containing 2
hsa-miR-542-3p	1	0	1	0	1	1	TOMM20	translocase of outer mitochondrial membrane 20 homolog (yeast)
hsa-miR-542-3p	0	0	1	0	1	1	ZBTB24	zinc finger and BTB domain containing 24
hsa-miR-542-3p	1	0	1	0	1	1	PJA2	praja ring finger 2, E3 ubiquitin protein ligase
hsa-miR-542-3p	1	0	1	1	1	1	NUAK1	NUAK family, SNF1-like kinase, 1
hsa-miR-542-3p	0	0	1	0	1	1	PPM1E	protein phosphatase, Mg2+/Mn2+ dependent, 1E
hsa-miR-542-3p	1	0	1	1	1	1	CHSY1	chondroitin sulfate synthase 1
hsa-miR-542-3p	1	0	1	1	1	1	DIP2C	DIP2 disco-interacting protein 2 homolog C (Drosophila)
hsa-miR-542-3p	1	0	1	1	1	1	PHLPP2	PH domain and leucine rich repeat protein phosphatase 2
hsa-miR-542-3p	1	0	1	0	1	1	PDS5B	PDS5, regulator of cohesion maintenance, homolog B (S. cerevisiae)
hsa-miR-542-3p	1	0	1	1	1	1	IQSEC2	IQ motif and Sec7 domain 2
hsa-miR-542-3p	1	0	1	1	1	1	SMG1	smg-1 homolog, phosphatidylinositol 3-kinase-related kinase (C. elegans)
hsa-miR-542-3p	1	0	1	1	1	1	TBC1D9	TBC1 domain family, member 9 (with GRAM domain)
hsa-miR-542-3p	1	0	1	1	1	1	RTF1	Rtf1, Paf1/RNA polymerase II complex component, homolog (S. cerevisiae)
hsa-miR-542-3p	1	0	1	1	0	0	RFTN1	raftlin, lipid raft linker 1
hsa-miR-542-3p	1	0	1	0	1	1	LARP4B	La ribonucleoprotein domain family, member 4B
hsa-miR-542-3p	1	0	1	1	1	1	PLCB1	phospholipase C, beta 1 (phosphoinositide-specific)
hsa-miR-542-3p	1	0	1	1	1	1	PDS5A	PDS5, regulator of cohesion maintenance, homolog A (S. cerevisiae)
hsa-miR-542-3p	0	0	1	0	1	1	ZDHHC17	zinc finger, DHHC-type containing 17
hsa-miR-542-3p	1	0	1	1	1	1	ASXL1	additional sex combs like 1 (Drosophila)
hsa-miR-542-3p	1	0	1	0	1	1	KCTD2	potassium channel tetramerisation domain containing 2
hsa-miR-542-3p	1	0	1	1	1	1	MORC3	MORC family CW-type zinc finger 3
hsa-miR-542-3p	1	0	1	1	1	1	CAMSAP1	calmodulin regulated spectrin-associated protein 1
hsa-miR-542-3p	1	0	1	1	1	1	NSL1	NSL1, MIND kinetochore complex component, homolog (S. cerevisiae)
hsa-miR-542-3p	1	0	1	1	1	1	CLIP3	CAP-GLY domain containing linker protein 3
hsa-miR-542-3p	1	0	1	0	1	1	OSBPL3	oxysterol binding protein-like 3
hsa-miR-542-3p	1	0	1	1	1	1	LRRTM2	leucine rich repeat transmembrane neuronal 2
hsa-miR-542-3p	0	0	1	1	0	0	KLK13	kallikrein-related peptidase 13
hsa-miR-542-3p	1	0	1	1	1	1	EPC2	enhancer of polycomb homolog 2 (Drosophila)
hsa-miR-542-3p	1	0	1	0	1	1	WWC3	WWC family member 3
hsa-miR-542-3p	1	0	1	1	1	1	ST8SIA3	ST8 alpha-N-acetyl-neuraminide alpha-2,8-sialyltransferase 3
hsa-miR-542-3p	1	0	1	1	1	1	TAF9B	TAF9B RNA polymerase II, TATA box binding protein (TBP)-associated factor, 31kDa
hsa-miR-542-3p	1	0	1	1	0	0	YBX2	Y box binding protein 2
hsa-miR-542-3p	1	0	1	1	1	1	UBE2J1	ubiquitin-conjugating enzyme E2, J1
hsa-miR-542-3p	0	0	1	0	1	1	OTUD6B	OTU domain containing 6B
hsa-miR-542-3p	0	0	1	1	1	1	MRPS23	mitochondrial ribosomal protein S23
hsa-miR-542-3p	0	0	1	1	1	1	ZFR	zinc finger RNA binding protein
hsa-miR-542-3p	1	0	1	1	1	1	VGLL3	vestigial like 3 (Drosophila)
hsa-miR-542-3p	1	0	1	1	1	1	AKAP11	A kinase (PRKA) anchor protein 11
hsa-miR-542-3p	1	0	1	0	1	1	HPCAL4	hippocalcin like 4
hsa-miR-542-3p	1	0	1	1	1	1	CMPK1	cytidine monophosphate (UMP-CMP) kinase 1, cytosolic
hsa-miR-542-3p	0	0	1	1	1	1	CD244	CD244 molecule, natural killer cell receptor 2B4
hsa-miR-542-3p	1	0	1	0	1	1	KLHL3	kelch-like 3 (Drosophila)
hsa-miR-542-3p	1	0	1	1	1	1	SIX4	SIX homeobox 4
hsa-miR-542-3p	0	0	1	1	1	1	SPA17	sperm autoantigenic protein 17
hsa-miR-542-3p	0	0	1	0	1	1	TRIM44	tripartite motif containing 44
hsa-miR-542-3p	0	0	1	0	1	1	VEZT	vezatin, adherens junctions transmembrane protein
hsa-miR-542-3p	1	0	1	0	1	1	EIF2C4	eukaryotic translation initiation factor 2C, 4
hsa-miR-542-3p	1	0	1	1	1	1	HAUS6	HAUS augmin-like complex, subunit 6
hsa-miR-542-3p	0	0	1	0	1	1	OTUB1	OTU domain, ubiquitin aldehyde binding 1
hsa-miR-542-3p	0	0	1	1	1	1	WHSC1L1	Wolf-Hirschhorn syndrome candidate 1-like 1
hsa-miR-542-3p	0	0	1	1	1	1	SOHLH2	spermatogenesis and oogenesis specific basic helix-loop-helix 2
hsa-miR-542-3p	1	0	1	1	1	1	RNF125	ring finger protein 125, E3 ubiquitin protein ligase
hsa-miR-542-3p	1	0	1	1	1	1	VPS13B	vacuolar protein sorting 13 homolog B (yeast)
hsa-miR-542-3p	1	0	1	1	0	0	LAMTOR1	late endosomal/lysosomal adaptor, MAPK and MTOR activator 1
hsa-miR-542-3p	1	0	1	1	1	1	ARGLU1	arginine and glutamate rich 1
hsa-miR-542-3p	0	0	1	0	1	1	WDR60	WD repeat domain 60
hsa-miR-542-3p	1	0	1	1	1	1	FIGN	fidgetin
hsa-miR-542-3p	1	0	1	1	1	1	FAM178A	family with sequence similarity 178, member A
hsa-miR-542-3p	1	0	1	0	1	1	ARL8B	ADP-ribosylation factor-like 8B
hsa-miR-542-3p	0	0	1	1	1	1	AP5M1	adaptor-related protein complex 5, mu 1 subunit
hsa-miR-542-3p	1	0	1	1	1	1	SPTLC3	serine palmitoyltransferase, long chain base subunit 3
hsa-miR-542-3p	1	0	1	0	1	1	LIN7C	lin-7 homolog C (C. elegans)
hsa-miR-542-3p	1	0	1	1	1	1	RSBN1	round spermatid basic protein 1
hsa-miR-542-3p	1	0	1	1	1	1	ACER3	alkaline ceramidase 3
hsa-miR-542-3p	0	0	1	1	1	1	SYNJ2BP	synaptojanin 2 binding protein
hsa-miR-542-3p	0	0	1	1	0	0	IL26	interleukin 26
hsa-miR-542-3p	1	0	1	0	1	1	FOXJ2	forkhead box J2
hsa-miR-542-3p	1	0	1	0	1	1	BRK1	BRICK1, SCAR/WAVE actin-nucleating complex subunit
hsa-miR-542-3p	0	0	1	1	1	1	BEX1	brain expressed, X-linked 1
hsa-miR-542-3p	1	0	1	1	1	1	ETNK1	ethanolamine kinase 1
hsa-miR-542-3p	1	0	1	0	1	1	SMPD3	sphingomyelin phosphodiesterase 3, neutral membrane (neutral sphingomyelinase II)
hsa-miR-542-3p	1	0	1	0	1	1	PCDHAC1	protocadherin alpha subfamily C, 1
hsa-miR-542-3p	1	0	1	0	1	1	PCDHAC2	protocadherin alpha subfamily C, 2
hsa-miR-542-3p	1	0	1	1	1	1	PCDHA1	protocadherin alpha 1
hsa-miR-542-3p	1	0	1	0	1	1	PCDHA10	protocadherin alpha 10
hsa-miR-542-3p	1	0	1	0	1	1	PCDHA11	protocadherin alpha 11
hsa-miR-542-3p	1	0	1	0	1	1	PCDHA12	protocadherin alpha 12
hsa-miR-542-3p	1	0	1	1	1	1	PCDHA2	protocadherin alpha 2
hsa-miR-542-3p	1	0	1	1	1	1	PCDHA3	protocadherin alpha 3
hsa-miR-542-3p	1	0	1	1	1	1	PCDHA6	protocadherin alpha 6
hsa-miR-542-3p	1	0	1	0	1	1	PCDHA7	protocadherin alpha 7
hsa-miR-542-3p	1	0	1	1	1	1	PCDHA8	protocadherin alpha 8
hsa-miR-542-3p	0	0	1	1	0	0	MIS18A	MIS18 kinetochore protein homolog A (S. pombe)
hsa-miR-542-3p	1	0	1	0	1	1	FAM190B	family with sequence similarity 190, member B
hsa-miR-542-3p	1	0	1	1	1	1	EPB41L4B	erythrocyte membrane protein band 4.1 like 4B
hsa-miR-542-3p	1	0	1	0	1	1	UBFD1	ubiquitin family domain containing 1
hsa-miR-542-3p	0	0	1	1	1	1	KLHL4	kelch-like 4 (Drosophila)
hsa-miR-542-3p	0	0	1	1	1	1	RNF20	ring finger protein 20, E3 ubiquitin protein ligase
hsa-miR-542-3p	1	0	1	1	1	1	SERTAD4	SERTA domain containing 4
hsa-miR-542-3p	1	0	1	1	1	1	WDR45L	WDR45-like
hsa-miR-542-3p	0	0	1	1	1	1	TMEM167B	transmembrane protein 167B
hsa-miR-542-3p	1	0	1	1	1	1	NMUR2	neuromedin U receptor 2
hsa-miR-542-3p	1	0	1	1	1	1	FEM1C	fem-1 homolog c (C. elegans)
hsa-miR-542-3p	1	0	1	1	1	1	PAK7	p21 protein (Cdc42/Rac)-activated kinase 7
hsa-miR-542-3p	1	0	1	1	1	1	PITHD1	PITH (C-terminal proteasome-interacting domain of thioredoxin-like) domain containing 1
hsa-miR-542-3p	0	0	1	1	1	1	PDSS2	prenyl (decaprenyl) diphosphate synthase, subunit 2
hsa-miR-542-3p	1	0	1	0	1	1	EIF5A2	eukaryotic translation initiation factor 5A2
hsa-miR-542-3p	1	0	1	1	1	1	PCDH9	protocadherin 9
hsa-miR-542-3p	1	0	1	1	1	1	PTGFRN	prostaglandin F2 receptor negative regulator
hsa-miR-542-3p	1	0	1	0	1	1	DCUN1D1	DCN1, defective in cullin neddylation 1, domain containing 1 (S. cerevisiae)
hsa-miR-542-3p	1	0	1	1	1	1	RAB22A	RAB22A, member RAS oncogene family
hsa-miR-542-3p	1	0	1	1	1	1	SLC12A5	solute carrier family 12 (potassium/chloride transporter), member 5
hsa-miR-542-3p	0	0	1	0	1	1	ZNF490	zinc finger protein 490
hsa-miR-542-3p	0	0	1	1	1	1	SHROOM4	shroom family member 4
hsa-miR-542-3p	1	0	1	1	1	1	RGAG1	retrotransposon gag domain containing 1
hsa-miR-542-3p	1	0	1	0	1	1	ALPK3	alpha-kinase 3
hsa-miR-542-3p	1	0	1	0	1	1	SYT4	synaptotagmin IV
hsa-miR-542-3p	0	0	1	1	1	1	MARCH4	membrane-associated ring finger (C3HC4) 4, E3 ubiquitin protein ligase
hsa-miR-542-3p	1	0	1	1	1	1	HOMEZ	homeobox and leucine zipper encoding
hsa-miR-542-3p	1	0	1	1	1	1	RANBP10	RAN binding protein 10
hsa-miR-542-3p	1	0	1	1	1	1	FAM160B1	family with sequence similarity 160, member B1
hsa-miR-542-3p	0	0	1	1	1	1	SLC7A14	solute carrier family 7 (orphan transporter), member 14
hsa-miR-542-3p	0	0	1	1	0	0	HOXD11	homeobox D11
hsa-miR-542-3p	1	0	1	1	1	1	CDH22	cadherin 22, type 2
hsa-miR-542-3p	1	0	1	1	1	1	SNX6	sorting nexin 6
hsa-miR-542-3p	1	0	1	1	1	1	SENP2	SUMO1/sentrin/SMT3 specific peptidase 2
hsa-miR-542-3p	0	0	1	0	1	1	CFL2	cofilin 2 (muscle)
hsa-miR-542-3p	0	0	1	0	1	1	SPCS3	signal peptidase complex subunit 3 homolog (S. cerevisiae)
hsa-miR-542-3p	1	0	1	1	1	1	ZFAND3	zinc finger, AN1-type domain 3
hsa-miR-542-3p	1	0	1	1	1	1	SNX16	sorting nexin 16
hsa-miR-542-3p	0	0	1	1	1	1	RAB38	RAB38, member RAS oncogene family
hsa-miR-542-3p	1	0	1	1	1	1	XPO4	exportin 4
hsa-miR-542-3p	0	0	1	1	1	1	HHIP	hedgehog interacting protein
hsa-miR-542-3p	1	0	1	1	1	1	GIGYF1	GRB10 interacting GYF protein 1
hsa-miR-542-3p	1	0	1	0	1	1	HOXC8	homeobox C8
hsa-miR-542-3p	1	0	1	1	1	1	PRRX1	paired related homeobox 1
hsa-miR-542-3p	0	0	1	1	1	1	ACBD3	acyl-CoA binding domain containing 3
hsa-miR-542-3p	1	0	1	0	1	1	USP46	ubiquitin specific peptidase 46
hsa-miR-542-3p	0	0	1	1	1	1	METTL4	methyltransferase like 4
hsa-miR-542-3p	1	0	1	1	1	1	C1orf116	chromosome 1 open reading frame 116
hsa-miR-542-3p	0	0	1	0	1	1	MRP63	mitochondrial ribosomal protein 63
hsa-miR-542-3p	1	0	1	1	1	1	HOXD1	homeobox D1
hsa-miR-542-3p	1	0	1	1	1	1	LRRC2	leucine rich repeat containing 2
hsa-miR-542-3p	1	0	1	1	1	1	USB1	U6 snRNA biogenesis 1
hsa-miR-542-3p	1	0	1	1	1	1	DHX40	DEAH (Asp-Glu-Ala-His) box polypeptide 40
hsa-miR-542-3p	1	0	1	0	1	1	LIN28A	lin-28 homolog A (C. elegans)
hsa-miR-542-3p	0	0	1	1	1	1	TEFM	transcription elongation factor, mitochondrial
hsa-miR-542-3p	0	0	1	1	1	1	SNIP1	Smad nuclear interacting protein 1
hsa-miR-542-3p	0	0	1	0	1	1	C1orf115	chromosome 1 open reading frame 115
hsa-miR-542-3p	0	0	1	1	1	1	PLBD1	phospholipase B domain containing 1
hsa-miR-542-3p	1	0	1	0	1	1	MAGIX	MAGI family member, X-linked
hsa-miR-542-3p	0	0	1	1	1	1	ZNF767	zinc finger family member 767
hsa-miR-542-3p	0	0	1	1	1	1	ESRP2	epithelial splicing regulatory protein 2
hsa-miR-542-3p	1	0	1	0	1	1	NAA25	N(alpha)-acetyltransferase 25, NatB auxiliary subunit
hsa-miR-542-3p	1	0	1	0	1	1	EDEM3	ER degradation enhancer, mannosidase alpha-like 3
hsa-miR-542-3p	1	0	1	0	1	1	C2orf44	chromosome 2 open reading frame 44
hsa-miR-542-3p	0	0	1	1	0	0	INTS5	integrator complex subunit 5
hsa-miR-542-3p	1	0	1	0	1	1	CSRNP2	cysteine-serine-rich nuclear protein 2
hsa-miR-542-3p	1	0	1	1	0	0	PVRL4	poliovirus receptor-related 4
hsa-miR-542-3p	0	0	1	1	1	1	TRMT1L	tRNA methyltransferase 1 homolog (S. cerevisiae)-like
hsa-miR-542-3p	0	0	1	1	1	1	ISCA1	iron-sulfur cluster assembly 1 homolog (S. cerevisiae)
hsa-miR-542-3p	0	0	1	1	1	1	SEH1L	SEH1-like (S. cerevisiae)
hsa-miR-542-3p	1	0	1	1	0	0	TCF7L1	transcription factor 7-like 1 (T-cell specific, HMG-box)
hsa-miR-542-3p	1	0	1	0	1	1	RAB33B	RAB33B, member RAS oncogene family
hsa-miR-542-3p	1	0	1	0	1	1	TMEM47	transmembrane protein 47
hsa-miR-542-3p	1	0	1	0	1	1	SH3BGRL2	SH3 domain binding glutamic acid-rich protein like 2
hsa-miR-542-3p	1	0	1	0	1	1	ITCH	itchy E3 ubiquitin protein ligase
hsa-miR-542-3p	1	0	1	1	1	1	PCDHA9	protocadherin alpha 9
hsa-miR-542-3p	0	0	1	1	1	1	KCNA7	potassium voltage-gated channel, shaker-related subfamily, member 7
hsa-miR-542-3p	0	0	1	1	1	1	MAGT1	magnesium transporter 1
hsa-miR-542-3p	0	0	1	1	1	1	ANKRD27	ankyrin repeat domain 27 (VPS9 domain)
hsa-miR-542-3p	1	0	1	1	1	1	DSEL	dermatan sulfate epimerase-like
hsa-miR-542-3p	1	0	1	1	1	1	LOXL4	lysyl oxidase-like 4
hsa-miR-542-3p	0	0	1	0	1	1	LDOC1L	leucine zipper, down-regulated in cancer 1-like
hsa-miR-542-3p	1	0	1	0	1	1	PSD2	pleckstrin and Sec7 domain containing 2
hsa-miR-542-3p	1	0	1	1	1	1	CAMKK1	calcium/calmodulin-dependent protein kinase kinase 1, alpha
hsa-miR-542-3p	1	0	1	1	1	1	PRADC1	protease-associated domain containing 1
hsa-miR-542-3p	1	0	1	1	0	0	ACRBP	acrosin binding protein
hsa-miR-542-3p	0	0	1	0	1	1	IMMP2L	IMP2 inner mitochondrial membrane peptidase-like (S. cerevisiae)
hsa-miR-542-3p	1	0	1	1	1	1	RSPO3	R-spondin 3
hsa-miR-542-3p	1	0	1	0	1	1	ADO	2-aminoethanethiol (cysteamine) dioxygenase
hsa-miR-542-3p	1	0	1	1	1	1	ARHGEF39	Rho guanine nucleotide exchange factor (GEF) 39
hsa-miR-542-3p	1	0	1	1	1	1	FAM104A	family with sequence similarity 104, member A
hsa-miR-542-3p	1	0	1	1	1	1	CGNL1	cingulin-like 1
hsa-miR-542-3p	0	0	1	1	1	1	FBXL20	F-box and leucine-rich repeat protein 20
hsa-miR-542-3p	1	0	1	1	1	1	AJUBA	ajuba LIM protein
hsa-miR-542-3p	1	0	1	1	1	1	TMEM60	transmembrane protein 60
hsa-miR-542-3p	0	0	1	1	1	1	POLR2J2	polymerase (RNA) II (DNA directed) polypeptide J2
hsa-miR-542-3p	1	0	1	1	1	1	HIAT1	hippocampus abundant transcript 1
hsa-miR-542-3p	0	0	1	1	1	1	ZIC5	Zic family member 5
hsa-miR-542-3p	1	0	1	1	1	1	SYS1	SYS1 Golgi-localized integral membrane protein homolog (S. cerevisiae)
hsa-miR-542-3p	1	0	1	1	1	1	RCSD1	RCSD domain containing 1
hsa-miR-542-3p	0	0	1	1	1	1	NACC1	nucleus accumbens associated 1, BEN and BTB (POZ) domain containing
hsa-miR-542-3p	1	0	1	1	1	1	MAL2	mal, T-cell differentiation protein 2 (gene/pseudogene)
hsa-miR-542-3p	1	0	1	1	1	1	TRIM9	tripartite motif containing 9
hsa-miR-542-3p	0	0	1	1	1	1	PRDM7	PR domain containing 7
hsa-miR-542-3p	1	0	1	1	1	1	MED12L	mediator complex subunit 12-like
hsa-miR-542-3p	0	0	1	1	1	1	PPP4R4	protein phosphatase 4, regulatory subunit 4
hsa-miR-542-3p	1	0	1	1	1	1	NRSN1	neurensin 1
hsa-miR-542-3p	1	0	1	0	1	1	EDARADD	EDAR-associated death domain
hsa-miR-542-3p	0	0	1	1	0	0	ZNF280A	zinc finger protein 280A
hsa-miR-542-3p	1	0	1	0	1	1	STK35	serine/threonine kinase 35
hsa-miR-542-3p	1	0	1	1	1	1	KLHL6	kelch-like 6 (Drosophila)
hsa-miR-542-3p	0	0	1	1	1	1	ATP6V1G2	ATPase, H+ transporting, lysosomal 13kDa, V1 subunit G2
hsa-miR-542-3p	0	0	1	1	0	0	RXFP2	relaxin/insulin-like family peptide receptor 2
hsa-miR-542-3p	1	0	1	1	1	1	BMPER	BMP binding endothelial regulator
hsa-miR-542-3p	1	0	1	1	1	1	SLC30A7	solute carrier family 30 (zinc transporter), member 7
hsa-miR-542-3p	1	0	1	1	1	1	ADAMTS19	ADAM metallopeptidase with thrombospondin type 1 motif, 19
hsa-miR-542-3p	1	0	1	1	1	1	NUP35	nucleoporin 35kDa
hsa-miR-542-3p	0	0	1	1	1	1	PATE1	prostate and testis expressed 1
hsa-miR-542-3p	0	0	1	1	1	1	PKD1L1	polycystic kidney disease 1 like 1
hsa-miR-542-3p	1	0	1	1	1	1	PCSK6	proprotein convertase subtilisin/kexin type 6
hsa-miR-542-3p	1	0	1	1	1	1	FAM122A	family with sequence similarity 122A
hsa-miR-542-3p	1	0	1	1	1	1	GLCCI1	glucocorticoid induced transcript 1
hsa-miR-542-3p	1	0	1	0	1	1	SP1	Sp1 transcription factor
hsa-miR-542-3p	1	0	1	1	1	1	PKHD1	polycystic kidney and hepatic disease 1 (autosomal recessive)
hsa-miR-542-3p	0	0	1	1	1	1	FAM122C	family with sequence similarity 122C
hsa-miR-542-3p	1	0	1	1	0	0	LIPH	lipase, member H
hsa-miR-542-3p	1	0	1	0	1	1	CNOT6L	CCR4-NOT transcription complex, subunit 6-like
hsa-miR-542-3p	1	0	1	1	1	1	FAM76B	family with sequence similarity 76, member B
hsa-miR-542-3p	1	0	1	1	1	1	ZMAT2	zinc finger, matrin-type 2
hsa-miR-542-3p	0	0	1	1	1	1	VWA3B	von Willebrand factor A domain containing 3B
hsa-miR-542-3p	0	0	1	0	1	1	DDIT4L	DNA-damage-inducible transcript 4-like
hsa-miR-542-3p	0	0	1	1	1	1	APOBEC3F	apolipoprotein B mRNA editing enzyme, catalytic polypeptide-like 3F
hsa-miR-542-3p	1	0	1	1	1	1	UBTD2	ubiquitin domain containing 2
hsa-miR-542-3p	0	0	1	1	1	1	CHMP4C	charged multivesicular body protein 4C
hsa-miR-542-3p	0	0	1	1	1	1	MUC7	mucin 7, secreted
hsa-miR-542-3p	1	0	1	1	1	1	POGLUT1	protein O-glucosyltransferase 1
hsa-miR-542-3p	0	0	1	0	1	1	AFAP1L1	actin filament associated protein 1-like 1
hsa-miR-542-3p	0	0	1	1	0	0	TMCO5A	transmembrane and coiled-coil domains 5A
hsa-miR-542-3p	0	0	1	0	1	1	HORMAD2	HORMA domain containing 2
hsa-miR-542-3p	1	0	1	1	1	1	ZCCHC5	zinc finger, CCHC domain containing 5
hsa-miR-542-3p	0	0	1	1	0	0	MS4A15	membrane-spanning 4-domains, subfamily A, member 15
hsa-miR-542-3p	1	0	1	1	1	1	BEND6	BEN domain containing 6
hsa-miR-542-3p	0	0	1	1	1	1	ASPRV1	aspartic peptidase, retroviral-like 1
hsa-miR-542-3p	0	0	1	0	1	1	KBTBD6	kelch repeat and BTB (POZ) domain containing 6
hsa-miR-542-3p	0	0	1	0	1	1	LIX1	Lix1 homolog (chicken)
hsa-miR-542-3p	1	0	1	1	1	1	TMEM161B	transmembrane protein 161B
hsa-miR-542-3p	1	0	1	0	1	1	TAPT1	transmembrane anterior posterior transformation 1
hsa-miR-542-3p	1	0	1	1	1	1	HS6ST3	heparan sulfate 6-O-sulfotransferase 3
hsa-miR-542-3p	1	0	1	1	0	0	FAM43A	family with sequence similarity 43, member A
hsa-miR-542-3p	1	0	1	1	1	1	CACUL1	CDK2-associated, cullin domain 1
hsa-miR-542-3p	1	0	1	0	1	1	PLEKHH2	pleckstrin homology domain containing, family H (with MyTH4 domain) member 2
hsa-miR-542-3p	1	0	1	1	1	1	IL16	interleukin 16
hsa-miR-542-3p	0	0	1	1	1	1	POFUT1	protein O-fucosyltransferase 1
hsa-miR-542-3p	0	0	1	0	1	1	CTAGE1	cutaneous T-cell lymphoma-associated antigen 1
hsa-miR-542-3p	1	0	1	1	1	1	CNTD1	cyclin N-terminal domain containing 1
hsa-miR-542-3p	1	0	1	0	1	1	C3orf58	chromosome 3 open reading frame 58
hsa-miR-542-3p	1	0	1	1	1	1	RFX6	regulatory factor X, 6
hsa-miR-542-3p	0	0	1	1	0	0	NOMO2	NODAL modulator 2
hsa-miR-542-3p	0	0	1	1	1	1	YIPF6	Yip1 domain family, member 6
hsa-miR-542-3p	1	0	1	1	1	1	LDLRAD3	low density lipoprotein receptor class A domain containing 3
hsa-miR-542-3p	1	0	1	0	1	1	TMEM167A	transmembrane protein 167A
hsa-miR-542-3p	1	0	1	1	1	1	UBR1	ubiquitin protein ligase E3 component n-recognin 1
hsa-miR-542-3p	0	0	1	1	1	1	FAM9A	family with sequence similarity 9, member A
hsa-miR-542-3p	1	0	1	1	0	0	EMC10	ER membrane protein complex subunit 10
hsa-miR-542-3p	0	0	1	1	1	1	XG	Xg blood group
hsa-miR-542-3p	1	0	1	0	1	1	CCDC71L	coiled-coil domain containing 71-like
hsa-miR-542-3p	1	0	1	1	0	0	JPH2	junctophilin 2
hsa-miR-542-3p	1	0	1	1	1	1	STX12	syntaxin 12
hsa-miR-542-3p	1	0	1	1	1	1	LRRTM3	leucine rich repeat transmembrane neuronal 3
hsa-miR-542-3p	1	0	1	1	1	1	GMCL1	germ cell-less, spermatogenesis associated 1
hsa-miR-542-3p	0	0	1	1	1	1	ZNF831	zinc finger protein 831
hsa-miR-542-3p	1	0	1	1	1	1	MTDH	metadherin
hsa-miR-542-3p	1	0	1	0	1	1	ARL5B	ADP-ribosylation factor-like 5B
hsa-miR-542-3p	0	0	1	1	0	0	KRT25	keratin 25
hsa-miR-542-3p	0	0	1	0	1	1	HCG27	HLA complex group 27 (non-protein coding)
hsa-miR-542-3p	1	0	1	1	1	1	BCL6B	B-cell CLL/lymphoma 6, member B
hsa-miR-542-3p	1	0	1	1	1	1	ZSCAN22	zinc finger and SCAN domain containing 22
hsa-miR-542-3p	1	0	1	1	1	1	ADAT2	adenosine deaminase, tRNA-specific 2
hsa-miR-542-3p	1	0	1	1	1	1	SP8	Sp8 transcription factor
hsa-miR-542-3p	1	0	1	0	1	1	HNRNPA3	heterogeneous nuclear ribonucleoprotein A3
hsa-miR-542-3p	1	0	1	1	1	1	SPTY2D1	SPT2, Suppressor of Ty, domain containing 1 (S. cerevisiae)
hsa-miR-542-3p	1	0	1	1	1	1	ZBTB41	zinc finger and BTB domain containing 41
hsa-miR-542-3p	1	0	1	1	1	1	PHLPP1	PH domain and leucine rich repeat protein phosphatase 1
hsa-miR-542-3p	1	0	1	1	1	1	ASB7	ankyrin repeat and SOCS box containing 7
hsa-miR-542-3p	0	0	1	0	1	1	CA13	carbonic anhydrase XIII
hsa-miR-542-3p	0	0	1	0	1	1	SIAH3	siah E3 ubiquitin protein ligase family member 3
hsa-miR-542-3p	1	0	1	0	1	1	PRICKLE2	prickle homolog 2 (Drosophila)
hsa-miR-542-3p	1	0	1	0	1	1	SS18L1	synovial sarcoma translocation gene on chromosome 18-like 1
hsa-miR-542-3p	1	0	1	1	1	1	NSUN4	NOP2/Sun domain family, member 4
hsa-miR-542-3p	1	0	1	1	1	1	BLOC1S5	biogenesis of lysosomal organelles complex-1, subunit 5, muted
hsa-miR-542-3p	1	0	1	1	0	0	KAZN	kazrin, periplakin interacting protein
hsa-miR-542-3p	1	0	1	1	1	1	FIBIN	fin bud initiation factor homolog (zebrafish)
hsa-miR-542-3p	1	0	1	1	1	1	E2F7	E2F transcription factor 7
hsa-miR-542-3p	1	0	1	0	1	1	LURAP1L	leucine rich adaptor protein 1-like
hsa-miR-542-3p	0	0	1	1	1	1	SERTM1	serine-rich and transmembrane domain containing 1
hsa-miR-542-3p	1	0	1	1	0	0	CLYBL	citrate lyase beta like
hsa-miR-542-3p	0	0	1	1	1	1	TMIGD1	transmembrane and immunoglobulin domain containing 1
hsa-miR-542-3p	1	0	1	1	1	1	ENSA	endosulfine alpha
hsa-miR-542-3p	0	0	1	0	1	1	FAM174B	family with sequence similarity 174, member B
hsa-miR-542-3p	1	0	1	1	1	1	CAPN3	calpain 3, (p94)
hsa-miR-542-3p	0	0	1	0	0	0	ESRRAP2	estrogen-related receptor alpha pseudogene 2
hsa-miR-542-3p	0	0	1	0	0	0	MIR155HG	MIR155 host gene (non-protein coding)
hsa-miR-542-3p	0	0	1	0	0	0	TTTY2	testis-specific transcript, Y-linked 2 (non-protein coding)
hsa-miR-542-3p	0	0	1	0	0	0	TTTY15	testis-specific transcript, Y-linked 15 (non-protein coding)
hsa-miR-542-3p	0	0	1	0	0	0	PPP1R2P3	protein phosphatase 1, regulatory (inhibitor) subunit 2 pseudogene 3
hsa-miR-542-3p	0	0	1	0	0	0	NACAP1	nascent-polypeptide-associated complex alpha polypeptide pseudogene 1
hsa-miR-542-3p	0	0	1	0	0	0	SUMO1P1	SUMO1 pseudogene 1
hsa-miR-542-3p	0	0	1	0	0	0	SNORD96A	small nucleolar RNA, C/D box 96A
hsa-miR-542-3p	0	0	1	0	0	0	HNRNPA3P1	heterogeneous nuclear ribonucleoprotein A3 pseudogene 1
hsa-miR-542-3p	0	0	1	0	0	0	HYALP1	hyaluronoglucosaminidase pseudogene 1
hsa-miR-542-3p	0	0	1	0	0	0	SEPHS1P1	selenophosphate synthetase 1 pseudogene 1
hsa-miR-542-3p	0	0	1	0	0	0	NEAT1	nuclear paraspeckle assembly transcript 1 (non-protein coding)
hsa-miR-542-3p	0	0	1	0	0	0	NPHP3-AS1	NPHP3 antisense RNA 1
hsa-miR-542-3p	0	0	1	0	0	0	MALAT1	metastasis associated lung adenocarcinoma transcript 1 (non-protein coding)
hsa-miR-542-3p	0	0	1	0	0	0	SNORA24	small nucleolar RNA, H/ACA box 24
hsa-miR-542-3p	0	0	1	0	0	0	SNORA30	small nucleolar RNA, H/ACA box 30
hsa-miR-542-3p	0	0	1	0	0	0	EIF3IP1	eukaryotic translation initiation factor 3, subunit I pseudogene 1
hsa-miR-542-3p	0	0	1	0	0	0	PYY2	peptide YY, 2 (pseudogene)
hsa-miR-542-3p	0	0	1	0	0	0	GMCL1P1	germ cell-less, spermatogenesis associated 1 pseudogene 1
hsa-miR-542-3p	0	0	1	0	0	0	SNORD116-28	small nucleolar RNA, C/D box 116-28
hsa-miR-542-3p	0	0	1	1	0	0	SNRPN	small nuclear ribonucleoprotein polypeptide N
hsa-miR-542-3p	1	0	1	1	0	0	KIAA1549L	KIAA1549-like
hsa-miR-542-3p	0	0	1	1	1	1	BBS9	Bardet-Biedl syndrome 9
hsa-miR-542-3p	1	0	1	1	0	0	GPRC5A	G protein-coupled receptor, family C, group 5, member A
hsa-miR-542-3p	0	0	1	1	0	0	DNAH2	dynein, axonemal, heavy chain 2
hsa-miR-542-3p	0	0	1	1	1	1	SPP2	secreted phosphoprotein 2, 24kDa
hsa-miR-542-3p	0	0	1	1	0	0	ZW10	ZW10, kinetochore associated, homolog (Drosophila)
hsa-miR-542-3p	0	0	0	1	0	0	TRIP6	thyroid hormone receptor interactor 6
hsa-miR-542-3p	0	0	0	1	0	0	OR1I1	olfactory receptor, family 1, subfamily I, member 1
hsa-miR-542-3p	0	0	1	1	1	1	LZTR1	leucine-zipper-like transcription regulator 1
hsa-miR-542-3p	0	0	1	1	1	1	SNRPD3	small nuclear ribonucleoprotein D3 polypeptide 18kDa
hsa-miR-542-3p	0	0	1	1	0	0	NHP2L1	NHP2 non-histone chromosome protein 2-like 1 (S. cerevisiae)
hsa-miR-542-3p	1	0	1	1	1	1	FAM118A	family with sequence similarity 118, member A
hsa-miR-542-3p	0	0	0	1	0	0	PMM1	phosphomannomutase 1
hsa-miR-542-3p	0	0	1	1	1	1	TIMM9	translocase of inner mitochondrial membrane 9 homolog (yeast)
hsa-miR-542-3p	0	0	1	1	0	0	GSTZ1	glutathione S-transferase zeta 1
hsa-miR-542-3p	0	0	0	1	0	0	BDKRB1	bradykinin receptor B1
hsa-miR-542-3p	0	0	1	1	1	1	TKTL1	transketolase-like 1
hsa-miR-542-3p	1	0	1	1	1	1	MXRA5	matrix-remodelling associated 5
hsa-miR-542-3p	0	0	0	1	0	0	ACP5	acid phosphatase 5, tartrate resistant
hsa-miR-542-3p	0	0	1	1	1	1	MTFMT	mitochondrial methionyl-tRNA formyltransferase
hsa-miR-542-3p	0	0	1	1	0	0	EMC2	ER membrane protein complex subunit 2
hsa-miR-542-3p	0	0	1	1	0	0	MAP4K1	mitogen-activated protein kinase kinase kinase kinase 1
hsa-miR-542-3p	0	0	1	1	0	0	LGALS13	lectin, galactoside-binding, soluble, 13
hsa-miR-542-3p	0	0	1	1	0	0	EBI3	Epstein-Barr virus induced 3
hsa-miR-542-3p	1	0	1	1	0	0	FSD1	fibronectin type III and SPRY domain containing 1
hsa-miR-542-3p	0	0	1	1	0	0	RABAC1	Rab acceptor 1 (prenylated)
hsa-miR-542-3p	0	0	0	1	0	0	INSL3	insulin-like 3 (Leydig cell)
hsa-miR-542-3p	0	0	0	1	1	1	JAK3	Janus kinase 3
hsa-miR-542-3p	0	0	1	1	0	0	UPK1A	uroplakin 1A
hsa-miR-542-3p	0	0	0	1	0	0	CCL24	chemokine (C-C motif) ligand 24
hsa-miR-542-3p	0	0	0	1	0	0	BUD31	BUD31 homolog (S. cerevisiae)
hsa-miR-542-3p	1	0	0	1	1	1	WNT3	wingless-type MMTV integration site family, member 3
hsa-miR-542-3p	0	0	1	1	1	1	CCL8	chemokine (C-C motif) ligand 8
hsa-miR-542-3p	1	0	1	1	1	1	WFS1	Wolfram syndrome 1 (wolframin)
hsa-miR-542-3p	1	0	1	1	0	0	PRPF19	PRP19/PSO4 pre-mRNA processing factor 19 homolog (S. cerevisiae)
hsa-miR-542-3p	0	0	1	1	1	1	ARHGDIB	Rho GDP dissociation inhibitor (GDI) beta
hsa-miR-542-3p	0	0	0	1	0	0	MRPL51	mitochondrial ribosomal protein L51
hsa-miR-542-3p	0	0	0	1	0	0	TPI1	triosephosphate isomerase 1
hsa-miR-542-3p	0	0	1	1	1	1	FANCE	Fanconi anemia, complementation group E
hsa-miR-542-3p	0	0	1	1	1	1	GPR63	G protein-coupled receptor 63
hsa-miR-542-3p	1	0	1	1	1	1	SOBP	sine oculis binding protein homolog (Drosophila)
hsa-miR-542-3p	0	0	0	1	1	1	FIG4	FIG4 homolog, SAC1 lipid phosphatase domain containing (S. cerevisiae)
hsa-miR-542-3p	0	0	0	1	1	1	MRPL2	mitochondrial ribosomal protein L2
hsa-miR-542-3p	0	0	1	1	1	1	TTK	TTK protein kinase
hsa-miR-542-3p	0	0	1	1	0	0	WISP3	WNT1 inducible signaling pathway protein 3
hsa-miR-542-3p	0	0	1	1	0	0	PKD2L2	polycystic kidney disease 2-like 2
hsa-miR-542-3p	0	0	1	1	1	1	MRPS30	mitochondrial ribosomal protein S30
hsa-miR-542-3p	1	0	1	1	1	1	PPP2CA	protein phosphatase 2, catalytic subunit, alpha isozyme
hsa-miR-542-3p	0	0	1	1	1	1	HEATR5B	HEAT repeat containing 5B
hsa-miR-542-3p	0	0	0	1	0	0	ZNF643	zinc finger protein 643
hsa-miR-542-3p	0	0	0	1	0	0	AKR7A2	aldo-keto reductase family 7, member A2 (aflatoxin aldehyde reductase)
hsa-miR-542-3p	1	0	0	1	1	1	PIGZ	phosphatidylinositol glycan anchor biosynthesis, class Z
hsa-miR-542-3p	0	0	1	1	1	1	CCDC77	coiled-coil domain containing 77
hsa-miR-542-3p	1	0	1	1	1	1	ACHE	acetylcholinesterase
hsa-miR-542-3p	1	0	1	1	1	1	AHR	aryl hydrocarbon receptor
hsa-miR-542-3p	0	0	0	1	1	1	FTSJ2	FtsJ RNA methyltransferase homolog 2 (E. coli)
hsa-miR-542-3p	1	0	1	1	1	1	LRRFIP1	leucine rich repeat (in FLII) interacting protein 1
hsa-miR-542-3p	0	0	0	1	0	0	KRT35	keratin 35
hsa-miR-542-3p	0	0	0	1	1	1	STATH	statherin
hsa-miR-542-3p	0	0	0	1	0	0	APOL5	apolipoprotein L, 5
hsa-miR-542-3p	0	0	1	1	0	0	NEDD8	neural precursor cell expressed, developmentally down-regulated 8
hsa-miR-542-3p	0	0	0	1	0	0	KRT75	keratin 75
hsa-miR-542-3p	1	0	0	1	1	1	ELOF1	elongation factor 1 homolog (S. cerevisiae)
hsa-miR-542-3p	0	0	0	1	0	0	GDF15	growth differentiation factor 15
hsa-miR-542-3p	0	0	0	1	0	0	CALY	calcyon neuron-specific vesicular protein
hsa-miR-542-3p	0	0	0	1	0	0	LAMA5	laminin, alpha 5
hsa-miR-542-3p	0	0	1	1	0	0	ATP6V1E1	ATPase, H+ transporting, lysosomal 31kDa, V1 subunit E1
hsa-miR-542-3p	0	0	1	1	0	0	COX4I1	cytochrome c oxidase subunit IV isoform 1
hsa-miR-542-3p	1	0	1	1	1	1	SH3BP5	SH3-domain binding protein 5 (BTK-associated)
hsa-miR-542-3p	1	0	1	1	1	1	INADL	InaD-like (Drosophila)
hsa-miR-542-3p	0	0	1	1	1	1	HBXIP	hepatitis B virus x interacting protein
hsa-miR-542-3p	0	0	1	1	1	1	GRP	gastrin-releasing peptide
hsa-miR-542-3p	1	0	1	1	0	0	TIMM10	translocase of inner mitochondrial membrane 10 homolog (yeast)
hsa-miR-542-3p	1	0	0	1	1	1	DBNL	drebrin-like
hsa-miR-542-3p	0	0	1	1	0	0	IMP4	IMP4, U3 small nucleolar ribonucleoprotein, homolog (yeast)
hsa-miR-542-3p	0	0	1	1	1	1	TUBB2B	tubulin, beta 2B class IIb
hsa-miR-542-3p	0	0	1	1	1	1	IER3	immediate early response 3
hsa-miR-542-3p	0	0	1	1	1	1	CCDC90B	coiled-coil domain containing 90B
hsa-miR-542-3p	0	0	1	1	0	0	GGH	gamma-glutamyl hydrolase (conjugase, folylpolygammaglutamyl hydrolase)
hsa-miR-542-3p	0	0	0	1	0	0	FXYD2	FXYD domain containing ion transport regulator 2
hsa-miR-542-3p	0	0	1	1	1	1	NUSAP1	nucleolar and spindle associated protein 1
hsa-miR-542-3p	0	0	0	1	1	1	CYP2C9	cytochrome P450, family 2, subfamily C, polypeptide 9
hsa-miR-542-3p	0	0	1	1	0	0	CDK15	cyclin-dependent kinase 15
hsa-miR-542-3p	0	0	1	1	1	1	GUCY2C	guanylate cyclase 2C (heat stable enterotoxin receptor)
hsa-miR-542-3p	0	0	0	1	1	1	JKAMP	JNK1/MAPK8-associated membrane protein
hsa-miR-542-3p	0	0	1	1	0	0	DNAH3	dynein, axonemal, heavy chain 3
hsa-miR-542-3p	1	0	1	1	1	1	NOL4	nucleolar protein 4
hsa-miR-542-3p	0	0	0	1	1	1	UTP20	UTP20, small subunit (SSU) processome component, homolog (yeast)
hsa-miR-542-3p	0	0	0	1	0	0	C14orf166	chromosome 14 open reading frame 166
hsa-miR-542-3p	0	0	1	1	1	1	RAB27B	RAB27B, member RAS oncogene family
hsa-miR-542-3p	0	0	1	1	1	1	RHBDF1	rhomboid 5 homolog 1 (Drosophila)
hsa-miR-542-3p	0	0	1	1	1	1	CDKN2C	cyclin-dependent kinase inhibitor 2C (p18, inhibits CDK4)
hsa-miR-542-3p	0	0	1	1	1	1	TEP1	telomerase-associated protein 1
hsa-miR-542-3p	0	0	1	1	1	1	ARPC1A	actin related protein 2/3 complex, subunit 1A, 41kDa
hsa-miR-542-3p	0	0	0	1	1	1	UQCR11	ubiquinol-cytochrome c reductase, complex III subunit XI
hsa-miR-542-3p	0	0	0	1	0	0	CCDC94	coiled-coil domain containing 94
hsa-miR-542-3p	1	0	1	1	1	1	ZMYND8	zinc finger, MYND-type containing 8
hsa-miR-542-3p	1	0	1	1	1	1	CSE1L	CSE1 chromosome segregation 1-like (yeast)
hsa-miR-542-3p	0	0	1	1	0	0	UFD1L	ubiquitin fusion degradation 1 like (yeast)
hsa-miR-542-3p	0	0	0	1	1	1	CLNS1A	chloride channel, nucleotide-sensitive, 1A
hsa-miR-542-3p	1	0	0	1	1	1	DDX25	DEAD (Asp-Glu-Ala-Asp) box helicase 25
hsa-miR-542-3p	0	0	0	1	1	1	GTF3C3	general transcription factor IIIC, polypeptide 3, 102kDa
hsa-miR-542-3p	0	0	1	1	1	1	KYNU	kynureninase
hsa-miR-542-3p	0	0	0	1	0	0	IL18RAP	interleukin 18 receptor accessory protein
hsa-miR-542-3p	0	0	1	1	1	1	TOP2B	topoisomerase (DNA) II beta 180kDa
hsa-miR-542-3p	0	0	1	1	1	1	F11	coagulation factor XI
hsa-miR-542-3p	0	0	1	1	1	1	ICAM1	intercellular adhesion molecule 1
hsa-miR-542-3p	0	0	0	1	1	1	OLFM2	olfactomedin 2
hsa-miR-542-3p	1	0	1	1	1	1	MGAT4A	mannosyl (alpha-1,3-)-glycoprotein beta-1,4-N-acetylglucosaminyltransferase, isozyme A
hsa-miR-542-3p	0	0	1	1	0	0	RPL26L1	ribosomal protein L26-like 1
hsa-miR-542-3p	0	0	0	1	0	0	NIT2	nitrilase family, member 2
hsa-miR-542-3p	0	0	1	1	1	1	SLC25A13	solute carrier family 25 (aspartate/glutamate carrier), member 13
hsa-miR-542-3p	0	0	1	1	0	0	FSCN3	fascin homolog 3, actin-bundling protein, testicular (Strongylocentrotus purpuratus)
hsa-miR-542-3p	0	0	1	1	1	1	HYAL1	hyaluronoglucosaminidase 1
hsa-miR-542-3p	0	0	1	1	1	1	INHBE	inhibin, beta E
hsa-miR-542-3p	1	0	1	1	1	1	TMBIM6	transmembrane BAX inhibitor motif containing 6
hsa-miR-542-3p	0	0	0	1	1	1	ZNF174	zinc finger protein 174
hsa-miR-542-3p	0	0	1	1	1	1	PHF12	PHD finger protein 12
hsa-miR-542-3p	0	0	0	1	1	1	MYO19	myosin XIX
hsa-miR-542-3p	0	0	1	1	0	0	EPN3	epsin 3
hsa-miR-542-3p	0	0	1	1	1	1	SLC39A6	solute carrier family 39 (zinc transporter), member 6
hsa-miR-542-3p	0	0	1	1	0	0	CCDC40	coiled-coil domain containing 40
hsa-miR-542-3p	0	0	1	1	1	1	BCAM	basal cell adhesion molecule (Lutheran blood group)
hsa-miR-542-3p	0	0	0	1	0	0	PSMB6	proteasome (prosome, macropain) subunit, beta type, 6
hsa-miR-542-3p	0	0	0	1	0	0	RCN3	reticulocalbin 3, EF-hand calcium binding domain
hsa-miR-542-3p	0	0	1	1	1	1	CREG1	cellular repressor of E1A-stimulated genes 1
hsa-miR-542-3p	0	0	0	1	0	0	SLC27A3	solute carrier family 27 (fatty acid transporter), member 3
hsa-miR-542-3p	1	0	1	1	1	1	LEFTY1	left-right determination factor 1
hsa-miR-542-3p	0	0	1	1	0	0	DUSP11	dual specificity phosphatase 11 (RNA/RNP complex 1-interacting)
hsa-miR-542-3p	0	0	1	1	1	1	CCBP2	chemokine binding protein 2
hsa-miR-542-3p	0	0	1	1	0	0	AHSG	alpha-2-HS-glycoprotein
hsa-miR-542-3p	0	0	0	1	1	1	FAM105A	family with sequence similarity 105, member A
hsa-miR-542-3p	1	0	1	1	1	1	TRIM23	tripartite motif containing 23
hsa-miR-542-3p	0	0	1	1	1	1	GIN1	gypsy retrotransposon integrase 1
hsa-miR-542-3p	0	0	1	1	1	1	CDKN2AIPNL	CDKN2A interacting protein N-terminal like
hsa-miR-542-3p	1	0	0	1	1	1	IGFBP1	insulin-like growth factor binding protein 1
hsa-miR-542-3p	0	0	0	1	0	0	DENND2A	DENN/MADD domain containing 2A
hsa-miR-542-3p	1	0	0	1	1	1	CHST7	carbohydrate (N-acetylglucosamine 6-O) sulfotransferase 7
hsa-miR-542-3p	1	0	1	1	1	1	ADAMTSL1	ADAMTS-like 1
hsa-miR-542-3p	0	0	1	1	0	0	PAOX	polyamine oxidase (exo-N4-amino)
hsa-miR-542-3p	0	0	0	1	0	0	OVOL2	ovo-like 2 (Drosophila)
hsa-miR-542-3p	0	0	1	1	1	1	MS4A3	membrane-spanning 4-domains, subfamily A, member 3 (hematopoietic cell-specific)
hsa-miR-542-3p	0	0	0	1	0	0	GPHA2	glycoprotein hormone alpha 2
hsa-miR-542-3p	0	0	0	1	0	0	FERMT3	fermitin family member 3
hsa-miR-542-3p	1	0	0	1	1	1	DHRS12	dehydrogenase/reductase (SDR family) member 12
hsa-miR-542-3p	0	0	1	1	0	0	TIMM8B	translocase of inner mitochondrial membrane 8 homolog B (yeast)
hsa-miR-542-3p	0	0	0	1	1	1	LDHAL6A	lactate dehydrogenase A-like 6A
hsa-miR-542-3p	0	0	0	1	1	1	SERPINB4	serpin peptidase inhibitor, clade B (ovalbumin), member 4
hsa-miR-542-3p	0	0	1	1	1	1	HGD	homogentisate 1,2-dioxygenase
hsa-miR-542-3p	1	0	1	1	1	1	TOMM70A	translocase of outer mitochondrial membrane 70 homolog A (S. cerevisiae)
hsa-miR-542-3p	0	0	0	1	0	0	LY96	lymphocyte antigen 96
hsa-miR-542-3p	0	0	1	1	1	1	ATP6V0D2	ATPase, H+ transporting, lysosomal 38kDa, V0 subunit d2
hsa-miR-542-3p	0	0	1	1	0	0	BATF	basic leucine zipper transcription factor, ATF-like
hsa-miR-542-3p	0	0	1	1	0	0	C14orf2	chromosome 14 open reading frame 2
hsa-miR-542-3p	0	0	1	1	0	0	SPATS1	spermatogenesis associated, serine-rich 1
hsa-miR-542-3p	0	0	1	1	1	1	DGKI	diacylglycerol kinase, iota
hsa-miR-542-3p	0	0	0	1	0	0	ANKRD36C	ankyrin repeat domain 36C
hsa-miR-542-3p	0	0	1	1	0	0	SPRR2G	small proline-rich protein 2G
hsa-miR-542-3p	0	0	0	1	0	0	PWP2	PWP2 periodic tryptophan protein homolog (yeast)
hsa-miR-542-3p	1	0	0	1	0	0	CPSF4	cleavage and polyadenylation specific factor 4, 30kDa
hsa-miR-542-3p	0	0	0	1	1	1	ALKBH4	alkB, alkylation repair homolog 4 (E. coli)
hsa-miR-542-3p	1	0	1	1	0	0	CELF5	CUGBP, Elav-like family member 5
hsa-miR-542-3p	0	0	0	1	0	0	SDR9C7	short chain dehydrogenase/reductase family 9C, member 7
hsa-miR-542-3p	0	0	1	1	1	1	VPS52	vacuolar protein sorting 52 homolog (S. cerevisiae)
hsa-miR-542-3p	1	0	0	1	1	1	KRT72	keratin 72
hsa-miR-542-3p	1	0	1	1	1	1	NXF1	nuclear RNA export factor 1
hsa-miR-542-3p	1	0	1	1	1	1	LAPTM5	lysosomal protein transmembrane 5
hsa-miR-542-3p	1	0	1	1	1	1	LHX8	LIM homeobox 8
hsa-miR-542-3p	0	0	1	1	0	0	LRRC52	leucine rich repeat containing 52
hsa-miR-542-3p	0	0	0	1	1	1	STPG2	sperm-tail PG-rich repeat containing 2
hsa-miR-542-3p	1	0	0	1	1	1	MRPS18C	mitochondrial ribosomal protein S18C
hsa-miR-542-3p	0	0	1	1	1	1	TTC14	tetratricopeptide repeat domain 14
hsa-miR-542-3p	0	0	0	1	1	1	PRSS12	protease, serine, 12 (neurotrypsin, motopsin)
hsa-miR-542-3p	1	0	1	1	1	1	OTUD4	OTU domain containing 4
hsa-miR-542-3p	0	0	0	1	1	1	CCDC127	coiled-coil domain containing 127
hsa-miR-542-3p	0	0	0	1	1	1	C6orf165	chromosome 6 open reading frame 165
hsa-miR-542-3p	0	0	0	1	0	0	GPER	G protein-coupled estrogen receptor 1
hsa-miR-542-3p	1	0	1	1	1	1	PHAX	phosphorylated adaptor for RNA export
hsa-miR-542-3p	0	0	1	1	1	1	MELK	maternal embryonic leucine zipper kinase
hsa-miR-542-3p	0	0	0	1	1	1	FOLR2	folate receptor 2 (fetal)
hsa-miR-542-3p	0	0	0	1	1	1	DNAAF2	dynein, axonemal, assembly factor 2
hsa-miR-542-3p	0	0	0	1	0	0	C16orf78	chromosome 16 open reading frame 78
hsa-miR-542-3p	0	0	0	1	1	1	NLRP14	NLR family, pyrin domain containing 14
hsa-miR-542-3p	1	0	0	1	1	1	HSBP1	heat shock factor binding protein 1
hsa-miR-542-3p	0	0	1	1	1	1	MMP3	matrix metallopeptidase 3 (stromelysin 1, progelatinase)
hsa-miR-542-3p	0	0	1	1	0	0	FAM18A	family with sequence similarity 18, member A
hsa-miR-542-3p	0	0	1	1	1	1	FANCI	Fanconi anemia, complementation group I
hsa-miR-542-3p	1	0	1	1	1	1	UEVLD	UEV and lactate/malate dehyrogenase domains
hsa-miR-542-3p	1	0	1	1	1	1	RBPMS2	RNA binding protein with multiple splicing 2
hsa-miR-542-3p	0	0	1	1	1	1	INTS10	integrator complex subunit 10
hsa-miR-542-3p	0	0	1	1	0	0	GNGT2	guanine nucleotide binding protein (G protein), gamma transducing activity polypeptide 2
hsa-miR-542-3p	0	0	0	1	0	0	COQ4	coenzyme Q4 homolog (S. cerevisiae)
hsa-miR-542-3p	0	0	0	1	0	0	LILRA5	leukocyte immunoglobulin-like receptor, subfamily A (with TM domain), member 5
hsa-miR-542-3p	0	0	1	1	0	0	IGFBP6	insulin-like growth factor binding protein 6
hsa-miR-542-3p	0	0	1	1	1	1	POLR2G	polymerase (RNA) II (DNA directed) polypeptide G
hsa-miR-542-3p	0	0	0	1	1	1	PDHB	pyruvate dehydrogenase (lipoamide) beta
hsa-miR-542-3p	1	0	1	1	1	1	HIPK3	homeodomain interacting protein kinase 3
hsa-miR-542-3p	0	0	1	1	1	1	CHST11	carbohydrate (chondroitin 4) sulfotransferase 11
hsa-miR-542-3p	0	0	1	1	1	1	APLF	aprataxin and PNKP like factor
hsa-miR-542-3p	0	0	0	1	0	0	RAB40A	RAB40A, member RAS oncogene family
hsa-miR-542-3p	1	0	1	1	1	1	RNASE6	ribonuclease, RNase A family, k6
hsa-miR-542-3p	0	0	0	1	1	1	CST5	cystatin D
hsa-miR-542-3p	0	0	1	1	1	1	TPD52L1	tumor protein D52-like 1
hsa-miR-542-3p	0	0	0	1	0	0	IL17D	interleukin 17D
hsa-miR-542-3p	0	0	1	1	0	0	REG3A	regenerating islet-derived 3 alpha
hsa-miR-542-3p	0	0	0	1	1	1	C22orf15	chromosome 22 open reading frame 15
hsa-miR-542-3p	0	0	1	1	1	1	HSPBAP1	HSPB (heat shock 27kDa) associated protein 1
hsa-miR-542-3p	0	0	0	1	0	0	FAM83B	family with sequence similarity 83, member B
hsa-miR-542-3p	0	0	1	1	1	1	PAH	phenylalanine hydroxylase
hsa-miR-542-3p	0	0	0	1	0	0	SPRR1B	small proline-rich protein 1B
hsa-miR-542-3p	0	0	1	1	0	0	AVPI1	arginine vasopressin-induced 1
hsa-miR-542-3p	0	0	1	1	1	1	PPID	peptidylprolyl isomerase D
hsa-miR-542-3p	0	0	0	1	0	0	WDR49	WD repeat domain 49
hsa-miR-542-3p	0	0	0	1	1	1	HFE	hemochromatosis
hsa-miR-542-3p	0	0	0	1	0	0	MZT2A	mitotic spindle organizing protein 2A
hsa-miR-542-3p	0	0	0	1	0	0	GSDMB	gasdermin B
hsa-miR-542-3p	0	0	1	1	0	0	KRT3	keratin 3
hsa-miR-542-3p	0	0	1	1	0	0	C3orf77	chromosome 3 open reading frame 77
hsa-miR-542-3p	0	0	0	1	0	0	OR10A6	olfactory receptor, family 10, subfamily A, member 6
hsa-miR-542-3p	0	0	0	1	0	0	TTC9B	tetratricopeptide repeat domain 9B
hsa-miR-542-3p	0	0	1	1	1	1	LSM1	LSM1 homolog, U6 small nuclear RNA associated (S. cerevisiae)
hsa-miR-542-3p	0	0	1	1	0	0	SSX5	synovial sarcoma, X breakpoint 5
hsa-miR-542-3p	0	0	0	1	0	0	CST6	cystatin E/M
hsa-miR-542-3p	1	0	0	1	1	1	TCHP	trichoplein, keratin filament binding
hsa-miR-542-3p	0	0	0	1	1	1	LINC00471	long intergenic non-protein coding RNA 471
hsa-miR-542-3p	1	0	1	1	1	1	TRIP10	thyroid hormone receptor interactor 10
hsa-miR-542-3p	0	0	1	1	0	0	AP4S1	adaptor-related protein complex 4, sigma 1 subunit
hsa-miR-542-3p	0	0	1	1	0	0	ACAD10	acyl-CoA dehydrogenase family, member 10
hsa-miR-542-3p	1	0	0	1	0	0	DPM2	dolichyl-phosphate mannosyltransferase polypeptide 2, regulatory subunit
hsa-miR-542-3p	0	0	0	1	1	1	DNAJC28	DnaJ (Hsp40) homolog, subfamily C, member 28
hsa-miR-542-3p	0	0	1	1	0	0	TMEM136	transmembrane protein 136
hsa-miR-542-3p	0	0	1	1	0	0	FAM21A	family with sequence similarity 21, member A
hsa-miR-542-3p	0	0	0	1	0	0	STX19	syntaxin 19
hsa-miR-542-3p	0	0	1	1	0	0	PRSS50	protease, serine, 50
hsa-miR-542-3p	1	0	1	1	1	1	RAI1	retinoic acid induced 1
hsa-miR-542-3p	1	0	0	1	1	1	RBAK	RB-associated KRAB zinc finger
hsa-miR-542-3p	1	0	1	1	1	1	ICA1L	islet cell autoantigen 1,69kDa-like
hsa-miR-542-3p	0	0	1	1	0	0	LSM10	LSM10, U7 small nuclear RNA associated
hsa-miR-542-3p	1	0	0	1	1	1	HNF4A	hepatocyte nuclear factor 4, alpha
hsa-miR-542-3p	0	0	1	1	0	0	LRRN4CL	LRRN4 C-terminal like
hsa-miR-542-3p	0	0	0	1	0	0	PXMP2	peroxisomal membrane protein 2, 22kDa
hsa-miR-542-3p	1	0	1	1	1	1	MAB21L2	mab-21-like 2 (C. elegans)
hsa-miR-542-3p	0	0	0	1	1	1	PROM2	prominin 2
hsa-miR-542-3p	0	0	0	1	1	1	GRHPR	glyoxylate reductase/hydroxypyruvate reductase
hsa-miR-542-3p	0	0	1	1	0	0	LRR1	leucine rich repeat protein 1
hsa-miR-542-3p	0	0	0	1	1	1	SRP9P1	signal recognition particle 9 pseudogene 1
hsa-miR-542-3p	0	0	0	1	0	0	NDUFV2	NADH dehydrogenase (ubiquinone) flavoprotein 2, 24kDa
hsa-miR-542-3p	0	0	0	1	0	0	KLK11	kallikrein-related peptidase 11
hsa-miR-542-3p	1	0	1	1	1	1	ITFG1	integrin alpha FG-GAP repeat containing 1
hsa-miR-542-3p	0	0	1	1	1	1	EFCAB5	EF-hand calcium binding domain 5
hsa-miR-542-3p	0	0	1	1	0	0	D2HGDH	D-2-hydroxyglutarate dehydrogenase
hsa-miR-542-3p	0	0	0	1	1	1	NUDC	nuclear distribution C homolog (A. nidulans)
hsa-miR-542-3p	0	0	1	1	1	1	PCED1B	PC-esterase domain containing 1B
hsa-miR-542-3p	0	0	0	1	0	0	OR51S1	olfactory receptor, family 51, subfamily S, member 1
hsa-miR-542-3p	0	0	0	1	1	1	ZNF713	zinc finger protein 713
hsa-miR-542-3p	0	0	1	1	1	1	ZCCHC7	zinc finger, CCHC domain containing 7
hsa-miR-542-3p	1	0	1	1	1	1	OPA3	optic atrophy 3 (autosomal recessive, with chorea and spastic paraplegia)
hsa-miR-542-3p	0	0	0	1	0	0	SPEM1	spermatid maturation 1
hsa-miR-542-3p	0	0	1	1	1	1	USP39	ubiquitin specific peptidase 39
hsa-miR-542-3p	1	0	1	1	1	1	AP1S3	adaptor-related protein complex 1, sigma 3 subunit
hsa-miR-542-3p	1	0	1	1	1	1	SSH2	slingshot homolog 2 (Drosophila)
hsa-miR-542-3p	1	0	1	1	0	0	RANBP3	RAN binding protein 3
hsa-miR-542-3p	0	0	1	1	1	1	MARVELD2	MARVEL domain containing 2
hsa-miR-542-3p	0	0	0	1	1	1	ASB4	ankyrin repeat and SOCS box containing 4
hsa-miR-542-3p	1	0	0	1	1	1	IQCE	IQ motif containing E
hsa-miR-542-3p	0	0	0	1	0	0	PTPRCAP	protein tyrosine phosphatase, receptor type, C-associated protein
hsa-miR-542-3p	1	0	1	1	1	1	CARM1	coactivator-associated arginine methyltransferase 1
hsa-miR-542-3p	0	0	0	1	1	1	CABYR	calcium binding tyrosine-(Y)-phosphorylation regulated
hsa-miR-542-3p	1	0	0	1	1	1	FANCF	Fanconi anemia, complementation group F
hsa-miR-542-3p	0	0	1	1	0	0	AFMID	arylformamidase
hsa-miR-542-3p	0	0	1	1	1	1	CHRM5	cholinergic receptor, muscarinic 5
hsa-miR-542-3p	0	0	0	1	0	0	OFCC1	orofacial cleft 1 candidate 1
hsa-miR-542-3p	0	0	0	1	0	0	OR51M1	olfactory receptor, family 51, subfamily M, member 1
hsa-miR-542-3p	0	0	1	1	0	0	PCP4	Purkinje cell protein 4
hsa-miR-542-3p	0	0	0	1	0	0	ARSI	arylsulfatase family, member I
hsa-miR-542-3p	0	0	0	1	1	1	CNOT10	CCR4-NOT transcription complex, subunit 10
hsa-miR-542-3p	0	0	0	1	0	0	NUPR1L	nuclear protein, transcriptional regulator, 1-like
hsa-miR-542-3p	0	0	0	1	0	0	GDPGP1	GDP-D-glucose phosphorylase 1
hsa-miR-542-3p	0	0	1	1	0	0	TSHZ2	teashirt zinc finger homeobox 2
hsa-miR-542-3p	0	0	0	1	1	1	TRIM49	tripartite motif containing 49
hsa-miR-542-3p	0	0	0	1	1	1	ZNF570	zinc finger protein 570
hsa-miR-542-3p	0	0	0	1	0	0	SAMD14	sterile alpha motif domain containing 14
hsa-miR-542-3p	0	0	0	1	1	1	SLC37A4	solute carrier family 37 (glucose-6-phosphate transporter), member 4
hsa-miR-542-3p	0	0	0	1	1	1	SNX20	sorting nexin 20
hsa-miR-542-3p	0	0	0	1	0	0	CCR4	chemokine (C-C motif) receptor 4
hsa-miR-542-3p	0	0	1	1	0	0	LOC100131138	uncharacterized LOC100131138
hsa-miR-542-3p	0	0	0	1	1	1	MAGEA2B	melanoma antigen family A, 2B
hsa-miR-542-3p	0	0	0	1	1	1	MAGEA6	melanoma antigen family A, 6
hsa-miR-542-3p	0	0	1	1	1	1	BMP8A	bone morphogenetic protein 8a
hsa-miR-542-3p	0	0	1	1	1	1	SPRR3	small proline-rich protein 3
hsa-miR-542-3p	0	0	0	1	0	0	OR4F15	olfactory receptor, family 4, subfamily F, member 15
hsa-miR-542-3p	0	0	0	1	1	1	MAGEA2	melanoma antigen family A, 2
hsa-miR-542-3p	0	0	1	1	0	0	MARCH11	membrane-associated ring finger (C3HC4) 11
hsa-miR-542-3p	0	0	1	1	1	1	GEMIN8	gem (nuclear organelle) associated protein 8
hsa-miR-542-3p	0	0	0	1	1	1	NR2C1	nuclear receptor subfamily 2, group C, member 1
hsa-miR-542-3p	0	0	0	1	0	0	ZNF804B	zinc finger protein 804B
hsa-miR-542-3p	0	0	1	1	0	0	PPT2	palmitoyl-protein thioesterase 2
hsa-miR-542-3p	0	0	1	1	0	0	EGFL8	EGF-like-domain, multiple 8
hsa-miR-542-3p	0	0	0	1	1	1	TTF1	transcription termination factor, RNA polymerase I
hsa-miR-542-3p	0	0	1	1	0	0	PRMT2	protein arginine methyltransferase 2
hsa-miR-542-3p	1	0	1	1	1	1	RSBN1L	round spermatid basic protein 1-like
hsa-miR-542-3p	0	0	0	1	1	1	H1FNT	H1 histone family, member N, testis-specific
hsa-miR-542-3p	0	0	1	1	0	0	PGS1	phosphatidylglycerophosphate synthase 1
hsa-miR-542-3p	1	0	1	1	1	1	SLITRK2	SLIT and NTRK-like family, member 2
hsa-miR-542-3p	0	0	1	1	1	1	SLC6A16	solute carrier family 6, member 16
hsa-miR-542-3p	0	0	0	1	0	0	RASSF3	Ras association (RalGDS/AF-6) domain family member 3
hsa-miR-542-3p	0	0	0	1	0	0	STARD3	StAR-related lipid transfer (START) domain containing 3
hsa-miR-542-3p	1	0	1	1	1	1	TMPRSS13	transmembrane protease, serine 13
hsa-miR-542-3p	0	0	0	1	0	0	SCAI	suppressor of cancer cell invasion
hsa-miR-542-3p	0	0	1	1	1	1	BRIX1	BRX1, biogenesis of ribosomes, homolog (S. cerevisiae)
hsa-miR-542-3p	0	0	1	1	0	0	SKAP1	src kinase associated phosphoprotein 1
hsa-miR-542-3p	1	0	1	1	1	1	BCL2L11	BCL2-like 11 (apoptosis facilitator)
hsa-miR-542-3p	0	0	1	1	1	1	FAM180A	family with sequence similarity 180, member A
hsa-miR-542-3p	0	0	1	1	0	0	DCBLD1	discoidin, CUB and LCCL domain containing 1
hsa-miR-542-3p	0	0	0	1	0	0	LRRC25	leucine rich repeat containing 25
hsa-miR-542-3p	0	0	1	1	1	1	TDRD9	tudor domain containing 9
hsa-miR-542-3p	0	0	1	1	1	1	ZNF621	zinc finger protein 621
hsa-miR-542-3p	1	0	1	1	1	1	PHKA1	phosphorylase kinase, alpha 1 (muscle)
hsa-miR-542-3p	0	0	0	1	1	1	NCCRP1	non-specific cytotoxic cell receptor protein 1 homolog (zebrafish)
hsa-miR-542-3p	0	0	0	1	1	1	SDCBP2	syndecan binding protein (syntenin) 2
hsa-miR-542-3p	1	0	1	1	1	1	DOCK7	dedicator of cytokinesis 7
hsa-miR-542-3p	1	0	1	1	1	1	CPED1	cadherin-like and PC-esterase domain containing 1
hsa-miR-542-3p	1	0	1	1	1	1	PVRL1	poliovirus receptor-related 1 (herpesvirus entry mediator C)
hsa-miR-542-3p	0	0	1	1	0	0	MCCC2	methylcrotonoyl-CoA carboxylase 2 (beta)
hsa-miR-542-3p	0	0	1	1	0	0	CASS4	Cas scaffolding protein family member 4
hsa-miR-542-3p	0	0	0	1	0	0	BLOC1S3	biogenesis of lysosomal organelles complex-1, subunit 3
hsa-miR-542-3p	0	0	0	1	1	1	SERPINB3	serpin peptidase inhibitor, clade B (ovalbumin), member 3
hsa-miR-542-3p	1	0	1	1	1	1	ATRX	alpha thalassemia/mental retardation syndrome X-linked
hsa-miR-542-3p	0	0	1	1	0	0	SPRR2B	small proline-rich protein 2B
hsa-miR-542-3p	0	0	1	1	1	1	MSANTD1	Myb/SANT-like DNA-binding domain containing 1
hsa-miR-542-3p	0	0	1	1	0	0	BMX	BMX non-receptor tyrosine kinase
hsa-miR-542-3p	0	0	1	1	1	1	PMS1	PMS1 postmeiotic segregation increased 1 (S. cerevisiae)
hsa-miR-542-3p	0	0	1	1	1	1	TMEM80	transmembrane protein 80
hsa-miR-542-3p	0	0	0	1	0	0	JMJD7-PLA2G4B	JMJD7-PLA2G4B readthrough
hsa-miR-542-3p	0	0	0	1	0	0	ATP13A5	ATPase type 13A5
hsa-miR-542-3p	0	0	1	1	1	1	RAD51B	RAD51 homolog B (S. cerevisiae)
hsa-miR-542-3p	0	0	0	1	1	1	PROZ	protein Z, vitamin K-dependent plasma glycoprotein
hsa-miR-542-3p	1	0	1	1	1	1	PAQR3	progestin and adipoQ receptor family member III
hsa-miR-542-3p	0	0	0	1	1	1	CIDEA	cell death-inducing DFFA-like effector a
hsa-miR-542-3p	0	0	0	1	0	0	NLRP13	NLR family, pyrin domain containing 13
hsa-miR-542-3p	0	0	0	1	1	1	DFNA5	deafness, autosomal dominant 5
hsa-miR-542-3p	0	0	1	1	0	0	CXorf67	chromosome X open reading frame 67
hsa-miR-542-3p	0	0	0	1	1	1	ZNF177	zinc finger protein 177
hsa-miR-542-3p	1	0	1	1	1	1	ASH2L	ash2 (absent, small, or homeotic)-like (Drosophila)
hsa-miR-542-3p	1	0	0	1	1	1	COL9A3	collagen, type IX, alpha 3
hsa-miR-542-3p	0	0	0	1	1	1	CYP1A2	cytochrome P450, family 1, subfamily A, polypeptide 2
hsa-miR-542-3p	0	0	1	1	0	0	PAEP	progestagen-associated endometrial protein
hsa-miR-542-3p	0	0	0	1	0	0	ZMAT5	zinc finger, matrin-type 5
hsa-miR-542-3p	1	0	1	1	0	0	FAM150B	family with sequence similarity 150, member B
hsa-miR-542-3p	0	0	1	1	0	0	FZD9	frizzled family receptor 9
hsa-miR-542-3p	0	0	1	1	1	1	C14orf79	chromosome 14 open reading frame 79
hsa-miR-542-3p	0	0	0	1	0	0	IZUMO4	IZUMO family member 4
hsa-miR-542-3p	0	0	0	1	0	0	ACTG2	actin, gamma 2, smooth muscle, enteric
hsa-miR-542-3p	0	0	1	1	1	1	SCEL	sciellin
hsa-miR-542-3p	0	0	1	1	1	1	NIPSNAP3A	nipsnap homolog 3A (C. elegans)
hsa-miR-542-3p	0	0	0	1	1	1	CBS	cystathionine-beta-synthase
hsa-miR-542-3p	0	0	1	1	1	1	CWF19L1	CWF19-like 1, cell cycle control (S. pombe)
hsa-miR-542-3p	0	0	1	1	1	1	CASC1	cancer susceptibility candidate 1
hsa-miR-542-3p	0	0	0	1	1	1	NDUFV3	NADH dehydrogenase (ubiquinone) flavoprotein 3, 10kDa
hsa-miR-542-3p	0	0	1	1	0	0	ANAPC7	anaphase promoting complex subunit 7
hsa-miR-542-3p	1	0	0	1	1	1	LIPA	lipase A, lysosomal acid, cholesterol esterase
hsa-miR-542-3p	1	0	1	1	1	1	WLS	wntless homolog (Drosophila)
hsa-miR-542-3p	0	0	0	1	1	1	ZNF565	zinc finger protein 565
hsa-miR-542-3p	0	0	1	1	1	1	GPM6B	glycoprotein M6B
hsa-miR-542-3p	0	0	0	1	0	0	PDE4C	phosphodiesterase 4C, cAMP-specific
hsa-miR-542-3p	0	0	1	1	1	1	UBE2I	ubiquitin-conjugating enzyme E2I
hsa-miR-542-3p	0	0	1	1	0	0	PORCN	porcupine homolog (Drosophila)
hsa-miR-542-3p	1	0	1	1	1	1	ASPH	aspartate beta-hydroxylase
hsa-miR-542-3p	1	0	0	1	1	1	ACBD7	acyl-CoA binding domain containing 7
hsa-miR-542-3p	0	0	1	1	1	1	ARHGEF26	Rho guanine nucleotide exchange factor (GEF) 26
hsa-miR-542-3p	0	0	1	1	1	1	DYNLRB1	dynein, light chain, roadblock-type 1
hsa-miR-542-3p	0	0	1	1	1	1	NUDT13	nudix (nucleoside diphosphate linked moiety X)-type motif 13
hsa-miR-542-3p	1	0	1	1	0	0	ECE2	endothelin converting enzyme 2
hsa-miR-542-3p	0	0	1	1	1	1	SERTAD1	SERTA domain containing 1
hsa-miR-542-3p	0	0	0	1	0	0	ANKLE2	ankyrin repeat and LEM domain containing 2
hsa-miR-542-3p	0	0	0	1	0	0	DDX47	DEAD (Asp-Glu-Ala-Asp) box polypeptide 47
hsa-miR-542-3p	1	0	1	1	1	1	NIPAL3	NIPA-like domain containing 3
hsa-miR-542-3p	0	0	1	1	1	1	MTPAP	mitochondrial poly(A) polymerase
hsa-miR-542-3p	0	0	1	1	1	1	ZNF100	zinc finger protein 100
hsa-miR-542-3p	0	0	0	1	1	1	RPS6KL1	ribosomal protein S6 kinase-like 1
hsa-miR-542-3p	0	0	0	1	0	0	ITIH2	inter-alpha-trypsin inhibitor heavy chain 2
hsa-miR-542-3p	0	0	0	1	0	0	LOC729458	methyl-CpG-binding domain protein 3-like 2-like
hsa-miR-542-3p	0	0	0	1	0	0	PADI6	peptidyl arginine deiminase, type VI
hsa-miR-542-3p	0	0	1	1	1	1	SPRR2A	small proline-rich protein 2A
hsa-miR-542-3p	0	0	1	1	1	1	SLC33A1	solute carrier family 33 (acetyl-CoA transporter), member 1
hsa-miR-542-3p	0	0	1	1	0	0	DNMT1	DNA (cytosine-5-)-methyltransferase 1
hsa-miR-542-3p	1	0	1	1	1	1	TP53	tumor protein p53
hsa-miR-542-3p	0	0	0	1	1	1	ZNF681	zinc finger protein 681
hsa-miR-542-3p	0	0	1	1	0	0	AARSD1	alanyl-tRNA synthetase domain containing 1
hsa-miR-542-3p	1	0	1	1	1	1	CEP85L	centrosomal protein 85kDa-like
hsa-miR-542-3p	0	0	0	1	1	1	CLEC4C	C-type lectin domain family 4, member C
hsa-miR-542-3p	0	0	0	1	0	0	OR2T8	olfactory receptor, family 2, subfamily T, member 8
hsa-miR-542-3p	0	0	0	1	1	1	SPRR2D	small proline-rich protein 2D
hsa-miR-542-3p	0	0	1	1	1	1	CDC16	cell division cycle 16 homolog (S. cerevisiae)
hsa-miR-542-3p	0	0	0	1	0	0	RPL39	ribosomal protein L39
hsa-miR-542-3p	0	0	0	1	1	1	MAGEB3	melanoma antigen family B, 3
hsa-miR-542-3p	0	0	0	1	0	0	CHIT1	chitinase 1 (chitotriosidase)
hsa-miR-542-3p	0	0	1	1	1	1	LGALS8	lectin, galactoside-binding, soluble, 8
hsa-miR-542-3p	0	0	1	1	1	1	COG2	component of oligomeric golgi complex 2
hsa-miR-542-3p	0	0	0	1	0	0	NUP133	nucleoporin 133kDa
hsa-miR-542-3p	0	0	0	1	0	0	MRPL18	mitochondrial ribosomal protein L18
hsa-miR-542-3p	0	0	1	1	1	1	SOD2	superoxide dismutase 2, mitochondrial
hsa-miR-542-3p	1	0	1	1	1	1	MDM4	Mdm4 p53 binding protein homolog (mouse)
hsa-miR-542-3p	1	0	1	1	1	1	RABIF	RAB interacting factor
hsa-miR-542-3p	1	0	0	1	1	1	SWT1	SWT1 RNA endoribonuclease homolog (S. cerevisiae)
hsa-miR-542-3p	1	0	1	1	1	1	ARPC5	actin related protein 2/3 complex, subunit 5, 16kDa
hsa-miR-542-3p	1	0	1	1	1	1	NPL	N-acetylneuraminate pyruvate lyase (dihydrodipicolinate synthase)
hsa-miR-542-3p	0	0	1	1	0	0	ABRACL	ABRA C-terminal like
hsa-miR-542-3p	0	0	1	1	0	0	TNR	tenascin R
hsa-miR-542-3p	0	0	1	1	0	0	NUF2	NUF2, NDC80 kinetochore complex component, homolog (S. cerevisiae)
hsa-miR-542-3p	0	0	1	1	1	1	NR1I3	nuclear receptor subfamily 1, group I, member 3
hsa-miR-542-3p	0	0	1	1	1	1	CKS1B	CDC28 protein kinase regulatory subunit 1B
hsa-miR-542-3p	0	0	1	1	1	1	SPRR2E	small proline-rich protein 2E
hsa-miR-542-3p	1	0	1	1	1	1	AMD1	adenosylmethionine decarboxylase 1
hsa-miR-542-3p	0	0	1	1	0	0	NSMCE4A	non-SMC element 4 homolog A (S. cerevisiae)
hsa-miR-542-3p	0	0	0	1	0	0	GJA10	gap junction protein, alpha 10, 62kDa
hsa-miR-542-3p	0	0	1	1	0	0	CD58	CD58 molecule
hsa-miR-542-3p	0	1	1	1	1	1	SYCP1	synaptonemal complex protein 1
hsa-miR-542-3p	0	0	0	1	0	0	AMPD1	adenosine monophosphate deaminase 1
hsa-miR-542-3p	1	0	1	1	1	1	CYB5R4	cytochrome b5 reductase 4
hsa-miR-542-3p	0	0	0	1	0	0	FLNA	filamin A, alpha
hsa-miR-542-3p	0	0	1	1	0	0	KIAA1324	KIAA1324
hsa-miR-542-3p	0	0	1	1	1	1	ELOVL3	ELOVL fatty acid elongase 3
hsa-miR-542-3p	0	0	1	1	1	1	RTCA	RNA 3'-terminal phosphate cyclase
hsa-miR-542-3p	0	0	1	1	1	1	MRPL43	mitochondrial ribosomal protein L43
hsa-miR-542-3p	0	0	1	1	0	0	MTMR1	myotubularin related protein 1
hsa-miR-542-3p	0	0	1	1	1	1	OGFRL1	opioid growth factor receptor-like 1
hsa-miR-542-3p	0	0	1	1	1	1	CUTC	cutC copper transporter homolog (E. coli)
hsa-miR-542-3p	0	0	1	1	0	0	HPSE2	heparanase 2
hsa-miR-542-3p	0	0	1	1	1	1	SEP15	15 kDa selenoprotein
hsa-miR-542-3p	0	0	1	1	1	1	HOGA1	4-hydroxy-2-oxoglutarate aldolase 1
hsa-miR-542-3p	0	0	0	1	0	0	RPF1	ribosome production factor 1 homolog (S. cerevisiae)
hsa-miR-542-3p	1	0	1	1	1	1	LPHN2	latrophilin 2
hsa-miR-542-3p	0	0	1	1	0	0	TINAG	tubulointerstitial nephritis antigen
hsa-miR-542-3p	0	0	0	1	1	1	EFCAB7	EF-hand calcium binding domain 7
hsa-miR-542-3p	0	0	1	1	1	1	DNTT	deoxynucleotidyltransferase, terminal
hsa-miR-542-3p	0	0	1	1	1	1	OMA1	OMA1 zinc metallopeptidase homolog (S. cerevisiae)
hsa-miR-542-3p	0	0	1	1	0	0	RAE1	RAE1 RNA export 1 homolog (S. pombe)
hsa-miR-542-3p	0	0	0	1	0	0	SPO11	SPO11 meiotic protein covalently bound to DSB homolog (S. cerevisiae)
hsa-miR-542-3p	0	0	1	1	1	1	LRRC42	leucine rich repeat containing 42
hsa-miR-542-3p	0	0	1	1	0	0	ORC1	origin recognition complex, subunit 1
hsa-miR-542-3p	0	0	1	1	1	1	SLC25A43	solute carrier family 25, member 43
hsa-miR-542-3p	0	0	1	1	1	1	IL13RA1	interleukin 13 receptor, alpha 1
hsa-miR-542-3p	0	0	0	1	0	0	C9orf116	chromosome 9 open reading frame 116
hsa-miR-542-3p	0	0	1	1	0	0	BEND5	BEN domain containing 5
hsa-miR-542-3p	1	0	1	1	1	1	TSPAN14	tetraspanin 14
hsa-miR-542-3p	0	0	1	1	1	1	TMEM53	transmembrane protein 53
hsa-miR-542-3p	1	0	1	1	1	1	AIF1L	allograft inflammatory factor 1-like
hsa-miR-542-3p	0	0	1	1	0	0	PLTP	phospholipid transfer protein
hsa-miR-542-3p	1	0	1	1	1	1	CTSA	cathepsin A
hsa-miR-542-3p	0	0	1	1	0	0	NUP62CL	nucleoporin 62kDa C-terminal like
hsa-miR-542-3p	0	0	0	1	1	1	MPL	myeloproliferative leukemia virus oncogene
hsa-miR-542-3p	1	0	0	1	0	0	C1orf50	chromosome 1 open reading frame 50
hsa-miR-542-3p	0	0	1	1	0	0	LEPRE1	leucine proline-enriched proteoglycan (leprecan) 1
hsa-miR-542-3p	0	0	1	1	0	0	TCEAL5	transcription elongation factor A (SII)-like 5
hsa-miR-542-3p	0	0	1	1	1	1	NXF3	nuclear RNA export factor 3
hsa-miR-542-3p	0	0	1	1	0	0	UBR2	ubiquitin protein ligase E3 component n-recognin 2
hsa-miR-542-3p	0	0	1	1	1	1	TAF8	TAF8 RNA polymerase II, TATA box binding protein (TBP)-associated factor, 43kDa
hsa-miR-542-3p	0	0	1	1	0	0	TREM2	triggering receptor expressed on myeloid cells 2
hsa-miR-542-3p	0	0	1	1	1	1	TOR2A	torsin family 2, member A
hsa-miR-542-3p	0	0	1	1	0	0	GARNL3	GTPase activating Rap/RanGAP domain-like 3
hsa-miR-542-3p	1	0	1	1	0	0	ANGPTL2	angiopoietin-like 2
hsa-miR-542-3p	0	0	1	1	1	1	RNF19B	ring finger protein 19B
hsa-miR-542-3p	1	0	1	1	1	1	GOLGA1	golgin A1
hsa-miR-542-3p	0	0	1	1	1	1	FABP3	fatty acid binding protein 3, muscle and heart (mammary-derived growth inhibitor)
hsa-miR-542-3p	0	0	1	1	1	1	MRRF	mitochondrial ribosome recycling factor
hsa-miR-542-3p	1	0	1	1	1	1	FKBP5	FK506 binding protein 5
hsa-miR-542-3p	0	0	0	1	0	0	SMPDL3B	sphingomyelin phosphodiesterase, acid-like 3B
hsa-miR-542-3p	0	0	0	1	1	1	KIAA1958	KIAA1958
hsa-miR-542-3p	1	0	1	1	1	1	KIF4A	kinesin family member 4A
hsa-miR-542-3p	0	0	1	1	0	0	ADAM23	ADAM metallopeptidase domain 23
hsa-miR-542-3p	0	0	1	1	0	0	PDZD11	PDZ domain containing 11
hsa-miR-542-3p	1	0	1	1	1	1	FUCA1	fucosidase, alpha-L- 1, tissue
hsa-miR-542-3p	1	0	1	1	1	1	PHF1	PHD finger protein 1
hsa-miR-542-3p	0	0	0	1	0	0	BMS1	BMS1 homolog, ribosome assembly protein (yeast)
hsa-miR-542-3p	0	0	1	1	0	0	PARD3	par-3 partitioning defective 3 homolog (C. elegans)
hsa-miR-542-3p	0	0	1	1	1	1	NOTCH4	notch 4
hsa-miR-542-3p	0	0	1	1	0	0	MAGED2	melanoma antigen family D, 2
hsa-miR-542-3p	0	0	0	1	0	0	PLA2G2E	phospholipase A2, group IIE
hsa-miR-542-3p	0	0	0	1	0	0	CD300LD	CD300 molecule-like family member d
hsa-miR-542-3p	1	0	1	1	0	0	EHMT2	euchromatic histone-lysine N-methyltransferase 2
hsa-miR-542-3p	0	0	1	1	1	1	C6orf48	chromosome 6 open reading frame 48
hsa-miR-542-3p	0	0	0	1	0	0	CLCNKB	chloride channel, voltage-sensitive Kb
hsa-miR-542-3p	0	0	0	1	0	0	ERCC5	excision repair cross-complementing rodent repair deficiency, complementation group 5
hsa-miR-542-3p	0	0	0	1	0	0	DUSP15	dual specificity phosphatase 15
hsa-miR-542-3p	0	0	0	1	0	0	PRAMEF1	PRAME family member 1
hsa-miR-542-3p	0	0	0	1	1	1	SLC15A1	solute carrier family 15 (oligopeptide transporter), member 1
hsa-miR-542-3p	1	0	1	1	1	1	TLE4	transducin-like enhancer of split 4 (E(sp1) homolog, Drosophila)
hsa-miR-542-3p	0	0	1	1	0	0	MAD2L2	MAD2 mitotic arrest deficient-like 2 (yeast)
hsa-miR-542-3p	0	0	0	1	0	0	FBXO6	F-box protein 6
hsa-miR-542-3p	1	0	1	1	0	0	C9orf41	chromosome 9 open reading frame 41
hsa-miR-542-3p	0	0	0	1	0	0	ZNF157	zinc finger protein 157
hsa-miR-542-3p	0	0	1	1	1	1	CBWD3	COBW domain containing 3
hsa-miR-542-3p	0	0	1	1	1	1	CBWD5	COBW domain containing 5
hsa-miR-542-3p	0	0	0	1	0	0	CBWD6	COBW domain containing 6
hsa-miR-542-3p	0	0	1	1	1	1	TNFRSF9	tumor necrosis factor receptor superfamily, member 9
hsa-miR-542-3p	0	0	0	1	1	1	PLEKHG5	pleckstrin homology domain containing, family G (with RhoGef domain) member 5
hsa-miR-542-3p	1	0	1	1	1	1	RSU1	Ras suppressor protein 1
hsa-miR-542-3p	1	0	1	1	1	1	DIAPH3	diaphanous homolog 3 (Drosophila)
hsa-miR-542-3p	1	0	1	1	1	1	RNF207	ring finger protein 207
hsa-miR-542-3p	0	0	1	1	0	0	BEST1	bestrophin 1
hsa-miR-542-3p	0	0	0	1	0	0	RPP38	ribonuclease P/MRP 38kDa subunit
hsa-miR-542-3p	1	0	1	1	1	1	NRXN1	neurexin 1
hsa-miR-542-3p	0	0	0	1	1	1	PHF11	PHD finger protein 11
hsa-miR-542-3p	0	0	0	1	0	0	LOC100129697	uncharacterized LOC100129697
hsa-miR-542-3p	1	0	1	1	1	1	MRS2	MRS2 magnesium homeostasis factor homolog (S. cerevisiae)
hsa-miR-542-3p	0	0	0	1	0	0	OXER1	oxoeicosanoid (OXE) receptor 1
hsa-miR-542-3p	0	0	0	1	0	0	CATSPERG	catsper channel auxiliary subunit gamma
hsa-miR-542-3p	0	0	1	1	0	0	TPT1	tumor protein, translationally-controlled 1
hsa-miR-542-3p	0	0	0	1	0	0	FABP9	fatty acid binding protein 9, testis
hsa-miR-542-3p	1	0	1	1	1	1	SLC30A6	solute carrier family 30 (zinc transporter), member 6
hsa-miR-542-3p	1	0	1	1	1	1	UFM1	ubiquitin-fold modifier 1
hsa-miR-542-3p	1	0	1	1	1	1	PFKFB3	6-phosphofructo-2-kinase/fructose-2,6-biphosphatase 3
hsa-miR-542-3p	0	0	1	1	0	0	PHKA2	phosphorylase kinase, alpha 2 (liver)
hsa-miR-542-3p	0	0	0	1	0	0	GPR150	G protein-coupled receptor 150
hsa-miR-542-3p	0	0	1	1	0	0	DDRGK1	DDRGK domain containing 1
hsa-miR-542-3p	0	0	0	1	0	0	OR52A1	olfactory receptor, family 52, subfamily A, member 1
hsa-miR-542-3p	1	0	1	1	1	1	EBF1	early B-cell factor 1
hsa-miR-542-3p	0	0	1	1	0	0	CCDC171	coiled-coil domain containing 171
hsa-miR-542-3p	0	0	1	1	0	0	GTF2H2C	general transcription factor IIH, polypeptide 2C
hsa-miR-542-3p	1	0	1	1	1	1	WRNIP1	Werner helicase interacting protein 1
hsa-miR-542-3p	0	0	0	1	0	0	AREGB	amphiregulin B
hsa-miR-542-3p	1	0	1	1	1	1	NFIB	nuclear factor I/B
hsa-miR-542-3p	0	0	1	1	0	0	CEP152	centrosomal protein 152kDa
hsa-miR-542-3p	0	0	0	1	0	0	ACOT6	acyl-CoA thioesterase 6
hsa-miR-542-3p	0	0	1	1	1	1	NPC1L1	NPC1 (Niemann-Pick disease, type C1, gene)-like 1
hsa-miR-542-3p	1	0	1	1	1	1	WDR37	WD repeat domain 37
hsa-miR-542-3p	0	0	0	1	1	1	SHOX	short stature homeobox
hsa-miR-542-3p	0	0	1	1	0	0	CATSPERD	catsper channel auxiliary subunit delta
hsa-miR-542-3p	0	0	1	1	0	0	ARRDC5	arrestin domain containing 5
hsa-miR-542-3p	0	0	1	1	1	1	PRB1	proline-rich protein BstNI subfamily 1
hsa-miR-542-3p	0	0	1	1	1	1	PRB4	proline-rich protein BstNI subfamily 4
hsa-miR-542-3p	0	0	1	1	0	0	PRB2	proline-rich protein BstNI subfamily 2
hsa-miR-542-3p	0	0	1	1	1	1	C1QTNF9	C1q and tumor necrosis factor related protein 9
hsa-miR-542-3p	0	0	1	1	0	0	C1QTNF9B	C1q and tumor necrosis factor related protein 9B
hsa-miR-542-3p	1	0	1	1	0	0	SMARCA2	SWI/SNF related, matrix associated, actin dependent regulator of chromatin, subfamily a, member 2
hsa-miR-542-3p	0	0	0	1	1	1	OLIG1	oligodendrocyte transcription factor 1
hsa-miR-542-3p	0	0	1	1	1	1	CBWD1	COBW domain containing 1
hsa-miR-542-3p	0	0	1	1	0	0	TCP10	t-complex 10 homolog (mouse)
hsa-miR-542-3p	0	0	0	1	1	1	N6AMT2	N-6 adenine-specific DNA methyltransferase 2 (putative)
hsa-miR-542-3p	0	0	0	1	0	0	SERPINB12	serpin peptidase inhibitor, clade B (ovalbumin), member 12
hsa-miR-542-3p	0	0	0	1	0	0	TSPY4	testis specific protein, Y-linked 4
hsa-miR-542-3p	1	0	1	1	1	1	EOGT	EGF domain-specific O-linked N-acetylglucosamine (GlcNAc) transferase
hsa-miR-542-3p	0	0	1	1	1	1	C11orf31	chromosome 11 open reading frame 31
hsa-miR-542-3p	0	0	0	1	1	1	VPS53	vacuolar protein sorting 53 homolog (S. cerevisiae)
hsa-miR-542-3p	0	0	1	1	1	1	PRIM2	primase, DNA, polypeptide 2 (58kDa)
hsa-miR-542-3p	0	0	1	1	1	1	F8	coagulation factor VIII, procoagulant component
hsa-miR-542-3p	1	0	1	1	1	1	SCN5A	sodium channel, voltage-gated, type V, alpha subunit
hsa-miR-542-3p	0	0	1	1	1	1	PLA2R1	phospholipase A2 receptor 1, 180kDa
hsa-miR-542-3p	0	0	1	0	1	1	GPX8	glutathione peroxidase 8 (putative)
hsa-miR-542-3p	0	0	1	0	1	1	TRAPPC2	trafficking protein particle complex 2
hsa-miR-542-3p	0	0	1	1	1	1	BIRC5	baculoviral IAP repeat containing 5
hsa-miR-542-3p	0	0	1	1	1	1	PAPSS2	3'-phosphoadenosine 5'-phosphosulfate synthase 2
hsa-miR-542-3p	1	0	1	0	1	1	TFEC	transcription factor EC
hsa-miR-542-3p	0	0	0	1	1	1	HIST2H2BF	histone cluster 2, H2bf
hsa-miR-542-3p	0	0	1	1	1	1	PRPS2	phosphoribosyl pyrophosphate synthetase 2
hsa-miR-542-3p	1	0	0	0	1	1	TMPPE	transmembrane protein with metallophosphoesterase domain
hsa-miR-542-3p	1	0	0	1	1	1	PRDM15	PR domain containing 15
hsa-miR-542-3p	1	0	1	1	1	1	TPM3	tropomyosin 3
hsa-miR-542-3p	0	0	0	1	1	1	DHODH	dihydroorotate dehydrogenase (quinone)
hsa-miR-542-3p	1	0	1	1	1	1	GNAZ	guanine nucleotide binding protein (G protein), alpha z polypeptide
hsa-miR-542-3p	0	0	1	1	1	1	SERPINB8	serpin peptidase inhibitor, clade B (ovalbumin), member 8
hsa-miR-542-3p	0	0	1	1	1	1	SRP9	signal recognition particle 9kDa
hsa-miR-542-3p	1	0	1	0	1	1	GAS7	growth arrest-specific 7
hsa-miR-542-3p	0	0	0	1	1	1	F2RL3	coagulation factor II (thrombin) receptor-like 3
[truncated: 35 more rows]
