# Supplementary material for: Profiling of Selected MicroRNAs in Proliferative Eutopic Endometrium of Women with Ovarian Endometriosis
Source: Biomed Res Int. 2015 Aug 20;2015:760698. doi: 10.1155/2015/760698 (PMC4558423; doi:10.1155/2015/760698)
Supplement: Supplementary file 1 — Table I: The names of miRNAs significantly differentially expressed between eutopic endometrium of patients with endometriosis vs eutopic endometrium of patients without endometriosis. Table II: The associations between miRNA and mRNA, which presents detailed results of the search of six major databases i.e targetscan, tarbase, miranda, mirbase, mirtarget2 and pictar. [file 760698.f1.zip › 760698.f1/Table II/hsa-miR-543.tsv]

miR	targetscan	tarbase	miranda	mirbase	mirtarget2	pictar	GeneSymbol	GeneName
hsa-miR-543	1	0	1	0	1	1	PDE5A	phosphodiesterase 5A, cGMP-specific
hsa-miR-543	1	0	1	1	1	1	SLAIN1	SLAIN motif family, member 1
hsa-miR-543	1	0	1	1	1	1	ELAVL1	ELAV (embryonic lethal, abnormal vision, Drosophila)-like 1 (Hu antigen R)
hsa-miR-543	1	0	1	1	1	1	PDIK1L	PDLIM1 interacting kinase 1 like
hsa-miR-543	1	0	1	1	1	1	RNF125	ring finger protein 125, E3 ubiquitin protein ligase
hsa-miR-543	1	0	1	1	1	1	ZDHHC3	zinc finger, DHHC-type containing 3
hsa-miR-543	1	0	1	1	0	0	ZSWIM1	zinc finger, SWIM-type containing 1
hsa-miR-543	1	0	1	0	1	1	GPCPD1	glycerophosphocholine phosphodiesterase GDE1 homolog (S. cerevisiae)
hsa-miR-543	1	0	1	1	1	1	PHOX2B	paired-like homeobox 2b
hsa-miR-543	1	0	1	1	1	1	FBXO34	F-box protein 34
hsa-miR-543	1	0	1	1	1	1	NRN1	neuritin 1
hsa-miR-543	1	0	1	1	1	1	MON2	MON2 homolog (S. cerevisiae)
hsa-miR-543	1	0	1	1	1	1	TTBK1	tau tubulin kinase 1
hsa-miR-543	1	0	1	0	1	1	PCDHAC2	protocadherin alpha subfamily C, 2
hsa-miR-543	1	0	1	1	1	1	DNAJB5	DnaJ (Hsp40) homolog, subfamily B, member 5
hsa-miR-543	1	0	1	1	1	1	RSPO2	R-spondin 2
hsa-miR-543	1	0	1	1	1	1	SIRT1	sirtuin 1
hsa-miR-543	1	0	1	1	1	1	PPARGC1A	peroxisome proliferator-activated receptor gamma, coactivator 1 alpha
hsa-miR-543	1	0	1	0	1	1	OSBPL3	oxysterol binding protein-like 3
hsa-miR-543	1	0	1	1	1	1	BAZ2B	bromodomain adjacent to zinc finger domain, 2B
hsa-miR-543	1	0	1	1	1	1	IL10	interleukin 10
hsa-miR-543	1	0	1	1	1	1	IPPK	inositol 1,3,4,5,6-pentakisphosphate 2-kinase
hsa-miR-543	1	0	1	1	1	1	TRIM39	tripartite motif containing 39
hsa-miR-543	1	0	1	1	0	0	INO80D	INO80 complex subunit D
hsa-miR-543	1	0	1	1	1	1	C12orf23	chromosome 12 open reading frame 23
hsa-miR-543	1	0	1	0	1	1	CDK14	cyclin-dependent kinase 14
hsa-miR-543	1	0	1	0	1	1	FIGNL2	fidgetin-like 2
hsa-miR-543	1	0	1	0	1	1	MFAP3L	microfibrillar-associated protein 3-like
hsa-miR-543	1	0	1	1	1	1	CYB5R4	cytochrome b5 reductase 4
hsa-miR-543	1	0	1	1	1	1	VEGFA	vascular endothelial growth factor A
hsa-miR-543	1	0	1	1	1	1	IPO5	importin 5
hsa-miR-543	1	0	1	1	1	1	PODXL	podocalyxin-like
hsa-miR-543	1	0	1	1	1	1	CNNM2	cyclin M2
hsa-miR-543	1	0	1	1	1	1	FRYL	FRY-like
hsa-miR-543	1	0	1	1	1	1	POF1B	premature ovarian failure, 1B
hsa-miR-543	1	0	1	1	1	1	ZADH2	zinc binding alcohol dehydrogenase domain containing 2
hsa-miR-543	1	0	1	1	1	1	EEA1	early endosome antigen 1
hsa-miR-543	1	0	1	1	1	1	ZNF704	zinc finger protein 704
hsa-miR-543	1	0	1	1	1	1	PROSER1	proline and serine rich 1
hsa-miR-543	1	0	0	1	0	0	POC5	POC5 centriolar protein homolog (Chlamydomonas)
hsa-miR-543	1	0	1	1	1	1	PPP2R2C	protein phosphatase 2, regulatory subunit B, gamma
hsa-miR-543	1	0	1	1	1	1	TBC1D1	TBC1 (tre-2/USP6, BUB2, cdc16) domain family, member 1
hsa-miR-543	1	0	1	1	1	1	ZCCHC14	zinc finger, CCHC domain containing 14
hsa-miR-543	1	0	1	1	1	1	FAM189B	family with sequence similarity 189, member B
hsa-miR-543	1	0	1	0	1	1	UBE2W	ubiquitin-conjugating enzyme E2W (putative)
hsa-miR-543	1	0	1	1	1	1	PAK7	p21 protein (Cdc42/Rac)-activated kinase 7
hsa-miR-543	1	0	1	0	0	0	PID1	phosphotyrosine interaction domain containing 1
hsa-miR-543	1	0	1	1	1	1	TWIST1	twist homolog 1 (Drosophila)
hsa-miR-543	1	0	1	1	1	1	PCDHA8	protocadherin alpha 8
hsa-miR-543	1	0	1	1	1	1	MYH10	myosin, heavy chain 10, non-muscle
hsa-miR-543	1	0	1	0	1	1	CPEB4	cytoplasmic polyadenylation element binding protein 4
hsa-miR-543	1	0	1	1	1	1	CASK	calcium/calmodulin-dependent serine protein kinase (MAGUK family)
hsa-miR-543	1	0	1	1	1	1	TPM3	tropomyosin 3
hsa-miR-543	1	0	1	1	1	1	SPOCK2	sparc/osteonectin, cwcv and kazal-like domains proteoglycan (testican) 2
hsa-miR-543	1	0	1	0	1	1	ARHGAP11A	Rho GTPase activating protein 11A
hsa-miR-543	1	0	1	1	1	1	FOXP1	forkhead box P1
hsa-miR-543	1	0	1	1	1	1	SLC26A9	solute carrier family 26, member 9
hsa-miR-543	1	0	1	1	1	1	SON	SON DNA binding protein
hsa-miR-543	1	0	1	1	1	1	BAI3	brain-specific angiogenesis inhibitor 3
hsa-miR-543	1	0	1	1	1	1	MLLT6	myeloid/lymphoid or mixed-lineage leukemia (trithorax homolog, Drosophila); translocated to, 6
hsa-miR-543	1	0	1	1	1	1	RAI1	retinoic acid induced 1
hsa-miR-543	1	0	1	1	1	1	MGA	MAX gene associated
hsa-miR-543	1	0	1	0	1	1	CERS3	ceramide synthase 3
hsa-miR-543	1	0	1	1	1	1	SFR1	SWI5-dependent recombination repair 1
hsa-miR-543	1	0	1	1	1	1	PCDHA2	protocadherin alpha 2
hsa-miR-543	1	0	1	1	0	0	CFL1	cofilin 1 (non-muscle)
hsa-miR-543	1	0	1	1	1	1	SMAD7	SMAD family member 7
hsa-miR-543	1	0	1	1	1	1	TMEM242	transmembrane protein 242
hsa-miR-543	1	0	1	0	1	1	JAZF1	JAZF zinc finger 1
hsa-miR-543	1	0	1	1	1	1	PTPRB	protein tyrosine phosphatase, receptor type, B
hsa-miR-543	1	0	1	1	0	0	DGAT2	diacylglycerol O-acyltransferase 2
hsa-miR-543	1	0	1	1	1	1	AHCTF1	AT hook containing transcription factor 1
hsa-miR-543	1	0	1	1	1	1	HNRNPA2B1	heterogeneous nuclear ribonucleoprotein A2/B1
hsa-miR-543	1	0	1	1	1	1	STRBP	spermatid perinuclear RNA binding protein
hsa-miR-543	1	0	1	1	0	0	FNIP2	folliculin interacting protein 2
hsa-miR-543	1	0	1	1	1	1	KIF4A	kinesin family member 4A
hsa-miR-543	1	0	1	0	1	1	FAM84B	family with sequence similarity 84, member B
hsa-miR-543	1	0	1	0	1	1	NAALADL2	N-acetylated alpha-linked acidic dipeptidase-like 2
hsa-miR-543	1	0	1	0	1	1	NFAT5	nuclear factor of activated T-cells 5, tonicity-responsive
hsa-miR-543	1	0	1	1	1	1	ELAVL2	ELAV (embryonic lethal, abnormal vision, Drosophila)-like 2 (Hu antigen B)
hsa-miR-543	1	0	1	0	1	1	ACVR2A	activin A receptor, type IIA
hsa-miR-543	1	0	1	0	1	1	KIAA1024	KIAA1024
hsa-miR-543	1	0	1	0	1	1	HUNK	hormonally up-regulated Neu-associated kinase
hsa-miR-543	1	0	1	1	1	1	PTPRD	protein tyrosine phosphatase, receptor type, D
hsa-miR-543	1	0	1	0	1	1	YOD1	YOD1 OTU deubiquinating enzyme 1 homolog (S. cerevisiae)
hsa-miR-543	1	0	0	1	1	1	AK3	adenylate kinase 3
hsa-miR-543	1	0	1	1	1	1	PTCH1	patched 1
hsa-miR-543	1	0	1	1	1	1	NF1	neurofibromin 1
hsa-miR-543	1	0	1	1	1	1	KCNH8	potassium voltage-gated channel, subfamily H (eag-related), member 8
hsa-miR-543	1	0	1	1	1	1	ATP6V1A	ATPase, H+ transporting, lysosomal 70kDa, V1 subunit A
hsa-miR-543	1	0	1	1	1	1	TRIB2	tribbles homolog 2 (Drosophila)
hsa-miR-543	1	0	0	1	0	0	SOS1	son of sevenless homolog 1 (Drosophila)
hsa-miR-543	1	0	1	1	1	1	SENP2	SUMO1/sentrin/SMT3 specific peptidase 2
hsa-miR-543	1	0	1	1	1	1	GNG2	guanine nucleotide binding protein (G protein), gamma 2
hsa-miR-543	1	0	1	1	1	1	GABRB2	gamma-aminobutyric acid (GABA) A receptor, beta 2
hsa-miR-543	1	0	1	0	1	1	RABGEF1	RAB guanine nucleotide exchange factor (GEF) 1
hsa-miR-543	1	0	1	1	1	1	MAB21L2	mab-21-like 2 (C. elegans)
hsa-miR-543	1	0	1	0	1	1	PLAG1	pleiomorphic adenoma gene 1
hsa-miR-543	1	0	1	1	1	1	CLCN5	chloride channel, voltage-sensitive 5
hsa-miR-543	1	0	1	0	1	1	ARID2	AT rich interactive domain 2 (ARID, RFX-like)
hsa-miR-543	1	0	1	1	1	1	ZNF654	zinc finger protein 654
hsa-miR-543	1	0	1	1	1	1	PCDHA1	protocadherin alpha 1
hsa-miR-543	1	0	1	1	0	0	HAND2	heart and neural crest derivatives expressed 2
hsa-miR-543	1	0	1	0	1	1	TTPAL	tocopherol (alpha) transfer protein-like
hsa-miR-543	1	0	1	1	1	1	ELL	elongation factor RNA polymerase II
hsa-miR-543	1	0	1	0	1	1	ZFHX4	zinc finger homeobox 4
hsa-miR-543	1	0	1	0	1	1	SELT	selenoprotein T
hsa-miR-543	1	0	1	1	1	1	RAPH1	Ras association (RalGDS/AF-6) and pleckstrin homology domains 1
hsa-miR-543	1	0	1	1	1	1	CDH17	cadherin 17, LI cadherin (liver-intestine)
hsa-miR-543	1	0	1	1	1	1	DLGAP2	discs, large (Drosophila) homolog-associated protein 2
hsa-miR-543	1	0	1	1	1	1	ZNF512	zinc finger protein 512
hsa-miR-543	1	0	1	0	1	1	ATP2B1	ATPase, Ca++ transporting, plasma membrane 1
hsa-miR-543	1	0	1	1	1	1	ARHGEF3	Rho guanine nucleotide exchange factor (GEF) 3
hsa-miR-543	1	0	0	1	0	0	DMRTA2	DMRT-like family A2
hsa-miR-543	1	0	1	0	1	1	HECA	headcase homolog (Drosophila)
hsa-miR-543	1	0	1	1	1	1	PLP1	proteolipid protein 1
hsa-miR-543	1	0	1	0	1	1	CELF2	CUGBP, Elav-like family member 2
hsa-miR-543	1	0	1	1	1	1	MDM4	Mdm4 p53 binding protein homolog (mouse)
hsa-miR-543	1	0	1	1	1	1	NPAS3	neuronal PAS domain protein 3
hsa-miR-543	1	0	1	1	1	1	SH3GLB1	SH3-domain GRB2-like endophilin B1
hsa-miR-543	1	0	1	1	1	1	RNF2	ring finger protein 2
hsa-miR-543	1	0	1	0	1	1	CPEB2	cytoplasmic polyadenylation element binding protein 2
hsa-miR-543	1	0	1	1	1	1	HS3ST3A1	heparan sulfate (glucosamine) 3-O-sulfotransferase 3A1
hsa-miR-543	1	0	1	1	0	0	FOXP2	forkhead box P2
hsa-miR-543	1	0	1	0	1	1	DDX46	DEAD (Asp-Glu-Ala-Asp) box polypeptide 46
hsa-miR-543	1	0	1	1	1	1	ADCY6	adenylate cyclase 6
hsa-miR-543	1	0	1	1	1	1	UBE2M	ubiquitin-conjugating enzyme E2M
hsa-miR-543	1	0	0	0	1	1	SLC9A8	solute carrier family 9, subfamily A (NHE8, cation proton antiporter 8), member 8
hsa-miR-543	1	0	0	1	1	1	MRPS18C	mitochondrial ribosomal protein S18C
hsa-miR-543	1	0	1	1	1	1	GRM8	glutamate receptor, metabotropic 8
hsa-miR-543	1	0	1	0	1	1	RCHY1	ring finger and CHY zinc finger domain containing 1, E3 ubiquitin protein ligase
hsa-miR-543	1	0	1	1	1	1	EN2	engrailed homeobox 2
hsa-miR-543	1	0	1	1	1	1	ZNF148	zinc finger protein 148
hsa-miR-543	1	0	1	0	1	1	TRPS1	trichorhinophalangeal syndrome I
hsa-miR-543	1	0	1	1	1	1	PPP3R1	protein phosphatase 3, regulatory subunit B, alpha
hsa-miR-543	1	0	1	1	1	1	PRKG1	protein kinase, cGMP-dependent, type I
hsa-miR-543	1	0	1	1	1	1	ONECUT2	one cut homeobox 2
hsa-miR-543	1	0	1	1	1	1	MAB21L1	mab-21-like 1 (C. elegans)
hsa-miR-543	1	0	1	1	1	1	FGF12	fibroblast growth factor 12
hsa-miR-543	1	0	1	1	1	1	ALS2	amyotrophic lateral sclerosis 2 (juvenile)
hsa-miR-543	1	0	1	1	1	1	PGAP1	post-GPI attachment to proteins 1
hsa-miR-543	1	0	1	1	1	1	NFIB	nuclear factor I/B
hsa-miR-543	1	0	1	0	1	1	PCDHA13	protocadherin alpha 13
hsa-miR-543	1	0	0	1	1	1	ANGPT2	angiopoietin 2
hsa-miR-543	1	0	1	1	1	1	SPIN1	spindlin 1
hsa-miR-543	1	0	1	0	1	1	PCDHA7	protocadherin alpha 7
hsa-miR-543	1	0	1	0	1	1	PTPRE	protein tyrosine phosphatase, receptor type, E
hsa-miR-543	1	0	1	1	0	0	ROR2	receptor tyrosine kinase-like orphan receptor 2
hsa-miR-543	1	0	1	1	1	1	FAM102A	family with sequence similarity 102, member A
hsa-miR-543	1	0	1	1	1	1	PCBP1	poly(rC) binding protein 1
hsa-miR-543	1	0	1	1	0	0	PHIP	pleckstrin homology domain interacting protein
hsa-miR-543	1	0	1	0	0	0	ANKRD40	ankyrin repeat domain 40
hsa-miR-543	1	0	1	0	1	1	TNRC6B	trinucleotide repeat containing 6B
hsa-miR-543	1	0	1	1	1	1	EGR1	early growth response 1
hsa-miR-543	1	0	1	1	1	1	RTN1	reticulon 1
hsa-miR-543	1	0	1	0	1	1	PDE4D	phosphodiesterase 4D, cAMP-specific
hsa-miR-543	1	0	1	1	1	1	HIPK3	homeodomain interacting protein kinase 3
hsa-miR-543	1	0	1	1	1	1	PER3	period homolog 3 (Drosophila)
hsa-miR-543	1	0	0	1	1	1	ATF1	activating transcription factor 1
hsa-miR-543	1	0	1	0	1	1	BTBD3	BTB (POZ) domain containing 3
hsa-miR-543	1	0	1	1	1	1	ERAS	ES cell expressed Ras
hsa-miR-543	1	0	1	1	1	1	RBM47	RNA binding motif protein 47
hsa-miR-543	1	0	1	1	1	1	EPB41	erythrocyte membrane protein band 4.1 (elliptocytosis 1, RH-linked)
hsa-miR-543	1	0	1	1	1	1	NMT2	N-myristoyltransferase 2
hsa-miR-543	1	0	1	0	1	1	LMO3	LIM domain only 3 (rhombotin-like 2)
hsa-miR-543	1	0	1	0	1	1	C14orf43	chromosome 14 open reading frame 43
hsa-miR-543	1	0	0	1	1	1	FAM86A	family with sequence similarity 86, member A
hsa-miR-543	1	0	1	1	1	1	DLX1	distal-less homeobox 1
hsa-miR-543	1	0	1	0	1	1	SEL1L	sel-1 suppressor of lin-12-like (C. elegans)
hsa-miR-543	1	0	1	1	1	1	EIF2AK4	eukaryotic translation initiation factor 2 alpha kinase 4
hsa-miR-543	1	0	1	1	1	1	FIGN	fidgetin
hsa-miR-543	1	0	1	1	1	1	CREBL2	cAMP responsive element binding protein-like 2
hsa-miR-543	1	0	1	1	1	1	ZNF644	zinc finger protein 644
hsa-miR-543	1	0	1	0	1	1	CCNL2	cyclin L2
hsa-miR-543	1	0	1	0	1	1	FNDC3B	fibronectin type III domain containing 3B
hsa-miR-543	1	0	1	1	1	1	NCL	nucleolin
hsa-miR-543	1	0	1	0	1	1	LPPR4	lipid phosphate phosphatase-related protein type 4
hsa-miR-543	1	0	1	1	1	1	ARID3B	AT rich interactive domain 3B (BRIGHT-like)
hsa-miR-543	1	0	1	1	1	1	GID4	GID complex subunit 4, VID24 homolog (S. cerevisiae)
hsa-miR-543	1	0	1	1	1	1	BRD1	bromodomain containing 1
hsa-miR-543	1	0	1	1	1	1	SACS	spastic ataxia of Charlevoix-Saguenay (sacsin)
hsa-miR-543	1	0	1	1	1	1	GPR3	G protein-coupled receptor 3
hsa-miR-543	1	0	1	1	1	1	BIRC6	baculoviral IAP repeat containing 6
hsa-miR-543	1	0	1	1	1	1	KLHL5	kelch-like 5 (Drosophila)
hsa-miR-543	1	0	1	1	1	1	ZMYND8	zinc finger, MYND-type containing 8
hsa-miR-543	1	0	1	0	1	1	ZNF507	zinc finger protein 507
hsa-miR-543	1	0	1	1	1	1	UBXN2A	UBX domain protein 2A
hsa-miR-543	1	0	1	1	1	1	PKNOX2	PBX/knotted 1 homeobox 2
hsa-miR-543	1	0	1	1	1	1	MEX3C	mex-3 homolog C (C. elegans)
hsa-miR-543	1	0	1	1	1	1	KREMEN1	kringle containing transmembrane protein 1
hsa-miR-543	1	0	1	0	1	1	GK5	glycerol kinase 5 (putative)
hsa-miR-543	1	0	1	1	1	1	PRDM16	PR domain containing 16
hsa-miR-543	1	0	1	1	1	1	ING5	inhibitor of growth family, member 5
hsa-miR-543	1	0	1	1	1	1	CDH13	cadherin 13, H-cadherin (heart)
hsa-miR-543	1	0	1	0	1	1	ZFPM2	zinc finger protein, multitype 2
hsa-miR-543	1	0	1	1	1	1	HEY2	hairy/enhancer-of-split related with YRPW motif 2
hsa-miR-543	1	0	1	1	1	1	MEX3B	mex-3 homolog B (C. elegans)
hsa-miR-543	1	0	1	1	1	1	TAF9B	TAF9B RNA polymerase II, TATA box binding protein (TBP)-associated factor, 31kDa
hsa-miR-543	1	0	1	1	1	1	DMRT1	doublesex and mab-3 related transcription factor 1
hsa-miR-543	1	0	1	0	1	1	PLEKHH2	pleckstrin homology domain containing, family H (with MyTH4 domain) member 2
hsa-miR-543	1	0	1	1	1	1	MGAT4A	mannosyl (alpha-1,3-)-glycoprotein beta-1,4-N-acetylglucosaminyltransferase, isozyme A
hsa-miR-543	1	0	1	1	1	1	GPR137B	G protein-coupled receptor 137B
hsa-miR-543	1	0	1	1	1	1	PCDHA4	protocadherin alpha 4
hsa-miR-543	1	0	1	1	1	1	RUFY2	RUN and FYVE domain containing 2
hsa-miR-543	1	0	1	1	1	1	LHX6	LIM homeobox 6
hsa-miR-543	1	0	1	1	1	1	YTHDC1	YTH domain containing 1
hsa-miR-543	1	0	1	1	1	1	TBC1D9	TBC1 domain family, member 9 (with GRAM domain)
hsa-miR-543	1	0	1	0	1	1	SOX11	SRY (sex determining region Y)-box 11
hsa-miR-543	1	0	1	1	1	1	MTCH2	mitochondrial carrier 2
hsa-miR-543	1	0	1	1	1	1	SLC31A1	solute carrier family 31 (copper transporters), member 1
hsa-miR-543	1	0	1	1	1	1	CYP26B1	cytochrome P450, family 26, subfamily B, polypeptide 1
hsa-miR-543	1	0	1	1	1	1	CBX3	chromobox homolog 3
hsa-miR-543	1	0	1	0	1	1	PAFAH1B1	platelet-activating factor acetylhydrolase 1b, regulatory subunit 1 (45kDa)
hsa-miR-543	1	0	1	1	1	1	ATXN7	ataxin 7
hsa-miR-543	1	0	0	1	0	0	FOXD3	forkhead box D3
hsa-miR-543	1	0	1	1	0	0	PEAK1	NKF3 kinase family member
hsa-miR-543	1	0	1	1	1	1	HOXA10	homeobox A10
hsa-miR-543	1	0	1	0	1	1	AKAP6	A kinase (PRKA) anchor protein 6
hsa-miR-543	1	0	1	1	1	1	PURA	purine-rich element binding protein A
hsa-miR-543	1	0	1	0	1	1	UNC5D	unc-5 homolog D (C. elegans)
hsa-miR-543	1	0	1	1	1	1	KIAA1522	KIAA1522
hsa-miR-543	1	0	1	1	1	1	ZNF396	zinc finger protein 396
hsa-miR-543	1	0	1	1	1	1	ITGB8	integrin, beta 8
hsa-miR-543	1	0	1	0	1	1	PTP4A1	protein tyrosine phosphatase type IVA, member 1
hsa-miR-543	1	0	1	1	1	1	PCDHA6	protocadherin alpha 6
hsa-miR-543	1	0	1	0	1	1	ARHGAP35	Rho GTPase activating protein 35
hsa-miR-543	1	0	1	1	1	1	CPSF6	cleavage and polyadenylation specific factor 6, 68kDa
hsa-miR-543	1	0	1	1	1	1	TXLNB	taxilin beta
hsa-miR-543	1	0	1	0	1	1	KRAS	v-Ki-ras2 Kirsten rat sarcoma viral oncogene homolog
hsa-miR-543	1	0	1	0	1	1	ARHGAP26	Rho GTPase activating protein 26
hsa-miR-543	1	0	1	0	1	1	VPS13D	vacuolar protein sorting 13 homolog D (S. cerevisiae)
hsa-miR-543	1	0	1	1	1	1	SAMD4B	sterile alpha motif domain containing 4B
hsa-miR-543	1	0	0	1	1	1	HSPA1B	heat shock 70kDa protein 1B
hsa-miR-543	1	0	1	1	1	1	ANKS1A	ankyrin repeat and sterile alpha motif domain containing 1A
hsa-miR-543	1	0	1	1	1	1	BHLHE40	basic helix-loop-helix family, member e40
hsa-miR-543	1	0	1	1	1	1	ALDH8A1	aldehyde dehydrogenase 8 family, member A1
hsa-miR-543	1	0	1	1	1	1	RCOR1	REST corepressor 1
hsa-miR-543	1	0	1	1	1	1	ERLIN1	ER lipid raft associated 1
hsa-miR-543	1	0	1	1	1	1	ANGPTL1	angiopoietin-like 1
hsa-miR-543	1	0	1	1	1	1	TLK2	tousled-like kinase 2
hsa-miR-543	1	0	1	1	1	1	ACVR2B	activin A receptor, type IIB
hsa-miR-543	1	0	1	1	1	1	SENP1	SUMO1/sentrin specific peptidase 1
hsa-miR-543	1	0	1	1	1	1	ANKRD50	ankyrin repeat domain 50
hsa-miR-543	1	0	1	0	1	1	PCDHA11	protocadherin alpha 11
hsa-miR-543	1	0	1	1	1	1	DCLK1	doublecortin-like kinase 1
hsa-miR-543	1	0	1	1	1	1	METAP1	methionyl aminopeptidase 1
hsa-miR-543	1	0	1	1	1	1	SEMA3C	sema domain, immunoglobulin domain (Ig), short basic domain, secreted, (semaphorin) 3C
hsa-miR-543	1	0	1	1	1	1	RP2	retinitis pigmentosa 2 (X-linked recessive)
hsa-miR-543	1	0	1	1	1	1	KLF6	Kruppel-like factor 6
hsa-miR-543	1	0	1	1	1	1	FKBP4	FK506 binding protein 4, 59kDa
hsa-miR-543	1	0	1	1	1	1	LMTK2	lemur tyrosine kinase 2
hsa-miR-543	1	0	1	1	1	1	SETX	senataxin
hsa-miR-543	1	0	1	0	1	1	SLC5A3	solute carrier family 5 (sodium/myo-inositol cotransporter), member 3
hsa-miR-543	1	0	1	1	1	1	SENP7	SUMO1/sentrin specific peptidase 7
hsa-miR-543	1	0	1	1	1	1	GJC1	gap junction protein, gamma 1, 45kDa
hsa-miR-543	1	0	1	1	1	1	EPS8	epidermal growth factor receptor pathway substrate 8
hsa-miR-543	1	0	1	0	1	1	ATP11A	ATPase, class VI, type 11A
hsa-miR-543	1	0	1	1	1	1	FAM179B	family with sequence similarity 179, member B
hsa-miR-543	1	0	1	1	1	1	ADAMTSL1	ADAMTS-like 1
hsa-miR-543	1	0	1	1	1	1	COX11	COX11 cytochrome c oxidase assembly homolog (yeast)
hsa-miR-543	1	0	1	1	1	1	PDE10A	phosphodiesterase 10A
hsa-miR-543	1	0	1	0	1	1	VAPA	VAMP (vesicle-associated membrane protein)-associated protein A, 33kDa
hsa-miR-543	1	0	0	1	1	1	CLCC1	chloride channel CLIC-like 1
hsa-miR-543	1	0	1	1	0	0	YTHDF2	YTH domain family, member 2
hsa-miR-543	1	0	1	0	1	1	FAM46C	family with sequence similarity 46, member C
hsa-miR-543	1	0	1	1	1	1	LPP	LIM domain containing preferred translocation partner in lipoma
hsa-miR-543	1	0	1	1	1	1	SBF2	SET binding factor 2
hsa-miR-543	1	0	1	1	1	1	FAM160A2	family with sequence similarity 160, member A2
hsa-miR-543	1	0	1	0	1	1	MEGF10	multiple EGF-like-domains 10
hsa-miR-543	1	0	1	1	1	1	DCX	doublecortin
hsa-miR-543	1	0	1	1	1	1	FZD10	frizzled family receptor 10
hsa-miR-543	1	0	0	1	1	1	ZNF419	zinc finger protein 419
hsa-miR-543	1	0	1	0	1	1	EIF5A2	eukaryotic translation initiation factor 5A2
hsa-miR-543	1	0	1	1	1	1	ABHD13	abhydrolase domain containing 13
hsa-miR-543	1	0	1	1	1	1	REPS2	RALBP1 associated Eps domain containing 2
hsa-miR-543	1	0	1	0	1	1	KIAA0232	KIAA0232
hsa-miR-543	1	0	1	1	1	1	LEPREL1	leprecan-like 1
hsa-miR-543	1	0	1	0	1	1	IREB2	iron-responsive element binding protein 2
hsa-miR-543	1	0	1	1	1	1	FAM155B	family with sequence similarity 155, member B
hsa-miR-543	1	0	1	1	1	1	PPP1CB	protein phosphatase 1, catalytic subunit, beta isozyme
hsa-miR-543	1	0	1	0	1	1	IRS2	insulin receptor substrate 2
hsa-miR-543	1	0	1	1	1	1	AASDHPPT	aminoadipate-semialdehyde dehydrogenase-phosphopantetheinyl transferase
hsa-miR-543	1	0	1	1	1	1	FAM117B	family with sequence similarity 117, member B
hsa-miR-543	1	0	1	1	1	1	MEIS2	Meis homeobox 2
hsa-miR-543	1	0	1	0	1	1	FLRT2	fibronectin leucine rich transmembrane protein 2
hsa-miR-543	1	0	1	1	1	1	ZFP106	zinc finger protein 106 homolog (mouse)
hsa-miR-543	1	0	1	1	1	1	MTA1	metastasis associated 1
hsa-miR-543	1	0	1	1	1	1	HNRNPU	heterogeneous nuclear ribonucleoprotein U (scaffold attachment factor A)
hsa-miR-543	1	0	1	1	1	1	COL16A1	collagen, type XVI, alpha 1
hsa-miR-543	1	0	1	1	1	1	MESDC1	mesoderm development candidate 1
hsa-miR-543	1	0	1	1	1	1	UNKL	unkempt homolog (Drosophila)-like
hsa-miR-543	1	0	1	0	1	1	PURB	purine-rich element binding protein B
hsa-miR-543	1	0	1	1	1	1	SLITRK3	SLIT and NTRK-like family, member 3
hsa-miR-543	1	0	1	1	1	1	BRWD1	bromodomain and WD repeat domain containing 1
hsa-miR-543	1	0	1	1	1	1	DOCK7	dedicator of cytokinesis 7
hsa-miR-543	1	0	1	1	1	1	EPC2	enhancer of polycomb homolog 2 (Drosophila)
hsa-miR-543	1	0	1	1	1	1	ACSL1	acyl-CoA synthetase long-chain family member 1
hsa-miR-543	1	0	1	1	1	1	SCHIP1	schwannomin interacting protein 1
hsa-miR-543	1	0	1	1	1	1	HIC2	hypermethylated in cancer 2
hsa-miR-543	1	0	1	1	1	1	C5orf30	chromosome 5 open reading frame 30
hsa-miR-543	1	0	1	0	1	1	PCDHA12	protocadherin alpha 12
hsa-miR-543	1	0	1	1	1	1	FBXO21	F-box protein 21
hsa-miR-543	1	0	1	1	1	1	NEO1	neogenin 1
hsa-miR-543	1	0	1	0	1	1	PCSK1	proprotein convertase subtilisin/kexin type 1
hsa-miR-543	1	0	1	1	0	0	HIPK2	homeodomain interacting protein kinase 2
hsa-miR-543	1	0	1	1	1	1	ARMC8	armadillo repeat containing 8
hsa-miR-543	1	0	1	1	1	1	RAD21	RAD21 homolog (S. pombe)
hsa-miR-543	1	0	1	1	1	1	DNAL1	dynein, axonemal, light chain 1
hsa-miR-543	1	0	1	1	1	1	UNC119B	unc-119 homolog B (C. elegans)
hsa-miR-543	1	0	1	1	0	0	LMO1	LIM domain only 1 (rhombotin 1)
hsa-miR-543	1	0	1	1	1	1	MTF1	metal-regulatory transcription factor 1
hsa-miR-543	1	0	1	1	1	1	GPR124	G protein-coupled receptor 124
hsa-miR-543	1	0	1	0	1	1	PJA2	praja ring finger 2, E3 ubiquitin protein ligase
hsa-miR-543	1	0	1	0	0	0	HEPHL1	hephaestin-like 1
hsa-miR-543	1	0	1	1	1	1	ADAM9	ADAM metallopeptidase domain 9
hsa-miR-543	1	0	1	1	1	1	KPNB1	karyopherin (importin) beta 1
hsa-miR-543	1	0	1	1	1	1	NPTXR	neuronal pentraxin receptor
hsa-miR-543	1	0	1	1	1	1	SPTBN1	spectrin, beta, non-erythrocytic 1
hsa-miR-543	1	0	1	0	1	1	FZD4	frizzled family receptor 4
hsa-miR-543	1	0	1	1	1	1	SYNE1	spectrin repeat containing, nuclear envelope 1
hsa-miR-543	1	0	1	1	1	1	TCERG1	transcription elongation regulator 1
hsa-miR-543	1	0	1	1	1	1	PCDHA3	protocadherin alpha 3
hsa-miR-543	1	0	1	1	1	1	RBM26	RNA binding motif protein 26
hsa-miR-543	1	0	1	1	1	1	VAV3	vav 3 guanine nucleotide exchange factor
hsa-miR-543	1	0	1	0	1	1	TMEM196	transmembrane protein 196
hsa-miR-543	1	0	0	0	0	0	FAM160A1	family with sequence similarity 160, member A1
hsa-miR-543	1	0	1	1	1	1	CNOT1	CCR4-NOT transcription complex, subunit 1
hsa-miR-543	1	0	1	0	1	1	ACVR1C	activin A receptor, type IC
hsa-miR-543	1	0	1	1	1	1	CAB39	calcium binding protein 39
hsa-miR-543	1	0	1	1	1	1	DBT	dihydrolipoamide branched chain transacylase E2
hsa-miR-543	1	0	1	0	1	1	DDX3Y	DEAD (Asp-Glu-Ala-Asp) box polypeptide 3, Y-linked
hsa-miR-543	1	0	1	1	1	1	ATP1B1	ATPase, Na+/K+ transporting, beta 1 polypeptide
hsa-miR-543	1	0	1	1	1	1	ASH1L	ash1 (absent, small, or homeotic)-like (Drosophila)
hsa-miR-543	1	0	1	0	1	1	ICK	intestinal cell (MAK-like) kinase
hsa-miR-543	1	0	1	1	1	1	SEPT3	septin 3
hsa-miR-543	1	0	1	1	1	1	DNAJC10	DnaJ (Hsp40) homolog, subfamily C, member 10
hsa-miR-543	1	0	1	0	1	1	ZIC1	Zic family member 1
hsa-miR-543	1	0	1	0	1	1	SS18L1	synovial sarcoma translocation gene on chromosome 18-like 1
hsa-miR-543	1	0	1	1	1	1	HNRNPH3	heterogeneous nuclear ribonucleoprotein H3 (2H9)
hsa-miR-543	1	0	1	1	1	1	GMFB	glia maturation factor, beta
hsa-miR-543	1	0	1	1	1	1	AGR2	anterior gradient 2 homolog (Xenopus laevis)
hsa-miR-543	1	0	1	1	1	1	LCA5	Leber congenital amaurosis 5
hsa-miR-543	1	0	1	0	1	1	CREB5	cAMP responsive element binding protein 5
hsa-miR-543	1	0	1	1	1	1	ANKRD13C	ankyrin repeat domain 13C
hsa-miR-543	1	0	1	1	1	1	TOB2	transducer of ERBB2, 2
hsa-miR-543	1	0	1	1	1	1	HELZ	helicase with zinc finger
hsa-miR-543	1	0	1	0	1	1	LIN54	lin-54 homolog (C. elegans)
hsa-miR-543	1	0	1	0	1	1	TMEM194A	transmembrane protein 194A
hsa-miR-543	1	0	1	1	1	1	PDXDC1	pyridoxal-dependent decarboxylase domain containing 1
hsa-miR-543	1	0	1	1	1	1	ARHGEF7	Rho guanine nucleotide exchange factor (GEF) 7
hsa-miR-543	1	0	1	1	1	1	UNC13C	unc-13 homolog C (C. elegans)
hsa-miR-543	1	0	1	0	1	1	BCL7A	B-cell CLL/lymphoma 7A
hsa-miR-543	1	0	1	0	1	1	PCDHAC1	protocadherin alpha subfamily C, 1
hsa-miR-543	1	0	1	0	1	1	SCN2B	sodium channel, voltage-gated, type II, beta subunit
hsa-miR-543	1	0	1	1	1	1	PCGF5	polycomb group ring finger 5
hsa-miR-543	1	0	1	1	1	1	ARNT2	aryl-hydrocarbon receptor nuclear translocator 2
hsa-miR-543	1	0	1	0	1	1	ARL5B	ADP-ribosylation factor-like 5B
hsa-miR-543	1	0	1	1	1	1	MAK	male germ cell-associated kinase
hsa-miR-543	1	0	1	1	1	1	CAMK2G	calcium/calmodulin-dependent protein kinase II gamma
hsa-miR-543	1	0	1	1	1	1	CTDSPL	CTD (carboxy-terminal domain, RNA polymerase II, polypeptide A) small phosphatase-like
hsa-miR-543	1	0	1	1	1	1	LRP6	low density lipoprotein receptor-related protein 6
hsa-miR-543	1	0	1	1	0	0	RBM27	RNA binding motif protein 27
hsa-miR-543	1	0	1	1	1	1	SYT1	synaptotagmin I
hsa-miR-543	1	0	1	1	1	1	SF3B3	splicing factor 3b, subunit 3, 130kDa
hsa-miR-543	1	0	1	1	1	1	INADL	InaD-like (Drosophila)
hsa-miR-543	1	0	1	0	1	1	CCNJ	cyclin J
hsa-miR-543	1	0	1	1	1	1	ERLIN2	ER lipid raft associated 2
hsa-miR-543	1	0	1	1	1	1	E2F7	E2F transcription factor 7
hsa-miR-543	1	0	1	1	1	1	MERTK	c-mer proto-oncogene tyrosine kinase
hsa-miR-543	1	0	1	1	0	0	SLAIN2	SLAIN motif family, member 2
hsa-miR-543	1	0	1	1	1	1	CLVS1	clavesin 1
hsa-miR-543	1	0	1	1	1	1	SLC30A8	solute carrier family 30 (zinc transporter), member 8
hsa-miR-543	1	0	1	1	1	1	VAX1	ventral anterior homeobox 1
hsa-miR-543	1	0	1	1	1	1	MBNL1	muscleblind-like splicing regulator 1
hsa-miR-543	1	0	1	1	1	1	FADS1	fatty acid desaturase 1
hsa-miR-543	1	0	1	1	1	1	EYA1	eyes absent homolog 1 (Drosophila)
hsa-miR-543	1	0	1	1	1	1	SMG7	smg-7 homolog, nonsense mediated mRNA decay factor (C. elegans)
hsa-miR-543	1	0	1	0	1	1	PDAP1	PDGFA associated protein 1
hsa-miR-543	1	0	1	1	1	1	RNF13	ring finger protein 13
hsa-miR-543	1	0	1	1	1	1	B3GNT5	UDP-GlcNAc:betaGal beta-1,3-N-acetylglucosaminyltransferase 5
hsa-miR-543	1	0	1	0	0	0	HEG1	HEG homolog 1 (zebrafish)
hsa-miR-543	1	0	1	1	1	1	DENND5B	DENN/MADD domain containing 5B
hsa-miR-543	1	0	1	1	1	1	EEF1A1	eukaryotic translation elongation factor 1 alpha 1
hsa-miR-543	1	0	1	1	1	1	SPCS2	signal peptidase complex subunit 2 homolog (S. cerevisiae)
hsa-miR-543	1	0	1	1	1	1	PER2	period homolog 2 (Drosophila)
hsa-miR-543	1	0	1	1	1	1	KCNMA1	potassium large conductance calcium-activated channel, subfamily M, alpha member 1
hsa-miR-543	1	0	1	1	1	1	FGFR2	fibroblast growth factor receptor 2
hsa-miR-543	1	0	1	1	1	1	SLC7A11	solute carrier family 7 (anionic amino acid transporter light chain, xc- system), member 11
hsa-miR-543	1	0	1	1	1	1	CREBBP	CREB binding protein
hsa-miR-543	1	0	1	1	1	1	CBL	Cbl proto-oncogene, E3 ubiquitin protein ligase
hsa-miR-543	1	0	1	1	1	1	BNC2	basonuclin 2
hsa-miR-543	1	0	1	1	1	1	RABL3	RAB, member of RAS oncogene family-like 3
hsa-miR-543	1	0	1	0	1	1	RAP2B	RAP2B, member of RAS oncogene family
hsa-miR-543	1	0	1	1	1	1	DNAJB1	DnaJ (Hsp40) homolog, subfamily B, member 1
hsa-miR-543	1	0	0	1	0	0	PCDHB6	protocadherin beta 6
hsa-miR-543	1	0	1	1	1	1	RRAGA	Ras-related GTP binding A
hsa-miR-543	1	0	1	0	1	1	GDF6	growth differentiation factor 6
hsa-miR-543	1	0	1	1	1	1	METAP2	methionyl aminopeptidase 2
hsa-miR-543	1	0	1	0	1	1	BEND4	BEN domain containing 4
hsa-miR-543	1	0	1	0	1	1	KLHDC10	kelch domain containing 10
hsa-miR-543	1	0	1	1	1	1	ADCY1	adenylate cyclase 1 (brain)
hsa-miR-543	1	0	1	1	1	1	CTTNBP2NL	CTTNBP2 N-terminal like
hsa-miR-543	1	0	1	1	1	1	PCDHA5	protocadherin alpha 5
hsa-miR-543	1	0	1	1	0	0	CASKIN2	CASK interacting protein 2
hsa-miR-543	1	0	1	1	1	1	ERBB4	v-erb-a erythroblastic leukemia viral oncogene homolog 4 (avian)
hsa-miR-543	1	0	1	1	1	1	GRAMD4	GRAM domain containing 4
hsa-miR-543	1	0	1	1	1	1	ZFAND3	zinc finger, AN1-type domain 3
hsa-miR-543	1	0	1	0	1	1	UBXN2B	UBX domain protein 2B
hsa-miR-543	1	0	1	1	1	1	CLOCK	clock homolog (mouse)
hsa-miR-543	1	0	1	1	1	1	TGIF2	TGFB-induced factor homeobox 2
hsa-miR-543	1	0	1	1	1	1	TRIM2	tripartite motif containing 2
hsa-miR-543	1	0	1	1	1	1	NCK2	NCK adaptor protein 2
hsa-miR-543	1	0	1	1	1	1	ZFAND5	zinc finger, AN1-type domain 5
hsa-miR-543	1	0	1	0	1	1	RNF141	ring finger protein 141
hsa-miR-543	1	0	1	1	1	1	ENOX2	ecto-NOX disulfide-thiol exchanger 2
hsa-miR-543	1	0	1	0	1	1	TNS3	tensin 3
hsa-miR-543	1	0	1	0	1	1	ARL5A	ADP-ribosylation factor-like 5A
hsa-miR-543	1	0	1	1	1	1	KCNA1	potassium voltage-gated channel, shaker-related subfamily, member 1 (episodic ataxia with myokymia)
hsa-miR-543	1	0	1	1	1	1	LRRC8D	leucine rich repeat containing 8 family, member D
hsa-miR-543	1	0	1	1	1	1	TEAD1	TEA domain family member 1 (SV40 transcriptional enhancer factor)
hsa-miR-543	1	0	1	1	1	1	COL5A1	collagen, type V, alpha 1
hsa-miR-543	1	0	1	1	1	1	FBXO33	F-box protein 33
hsa-miR-543	1	0	1	1	0	0	SEMA4C	sema domain, immunoglobulin domain (Ig), transmembrane domain (TM) and short cytoplasmic domain, (semaphorin) 4C
hsa-miR-543	1	0	1	1	1	1	ZBTB4	zinc finger and BTB domain containing 4
hsa-miR-543	1	0	1	1	0	0	SDF2L1	stromal cell-derived factor 2-like 1
hsa-miR-543	1	0	1	1	0	0	SNX30	sorting nexin family member 30
hsa-miR-543	1	0	1	1	1	1	ARL4A	ADP-ribosylation factor-like 4A
hsa-miR-543	1	0	1	1	1	1	TFDP1	transcription factor Dp-1
hsa-miR-543	1	0	1	0	1	1	TSC1	tuberous sclerosis 1
hsa-miR-543	1	0	1	1	1	1	MTF2	metal response element binding transcription factor 2
hsa-miR-543	1	0	1	1	0	0	WNK1	WNK lysine deficient protein kinase 1
hsa-miR-543	1	0	1	1	1	1	LRRK2	leucine-rich repeat kinase 2
hsa-miR-543	1	0	0	1	0	0	AKAP5	A kinase (PRKA) anchor protein 5
hsa-miR-543	1	0	1	1	1	1	AKAP2	A kinase (PRKA) anchor protein 2
hsa-miR-543	1	0	1	0	1	1	VCPIP1	valosin containing protein (p97)/p47 complex interacting protein 1
hsa-miR-543	1	0	1	1	1	1	EIF4A2	eukaryotic translation initiation factor 4A2
hsa-miR-543	1	0	1	0	0	0	PWWP2A	PWWP domain containing 2A
hsa-miR-543	1	0	1	1	1	1	GOLGA8A	golgin A8 family, member A
hsa-miR-543	1	0	1	1	1	1	UBE3A	ubiquitin protein ligase E3A
hsa-miR-543	1	0	1	1	1	1	ARHGAP29	Rho GTPase activating protein 29
hsa-miR-543	1	0	1	1	1	1	GOLT1B	golgi transport 1B
hsa-miR-543	1	0	1	1	1	1	CYLD	cylindromatosis (turban tumor syndrome)
hsa-miR-543	1	0	1	1	1	1	FAM222A	family with sequence similarity 222, member A
hsa-miR-543	1	0	1	0	1	1	TOX	thymocyte selection-associated high mobility group box
hsa-miR-543	1	0	1	0	1	1	DCAF17	DDB1 and CUL4 associated factor 17
hsa-miR-543	1	0	1	1	1	1	MAF	v-maf musculoaponeurotic fibrosarcoma oncogene homolog (avian)
hsa-miR-543	1	0	1	1	1	1	ZFX	zinc finger protein, X-linked
hsa-miR-543	1	0	1	1	1	1	ID4	inhibitor of DNA binding 4, dominant negative helix-loop-helix protein
hsa-miR-543	1	0	1	1	1	1	BACH2	BTB and CNC homology 1, basic leucine zipper transcription factor 2
hsa-miR-543	1	0	1	0	1	1	FMNL2	formin-like 2
hsa-miR-543	1	0	1	1	1	1	NOL4	nucleolar protein 4
hsa-miR-543	1	0	1	0	1	1	DDX3X	DEAD (Asp-Glu-Ala-Asp) box polypeptide 3, X-linked
hsa-miR-543	1	0	1	0	1	1	NR1D2	nuclear receptor subfamily 1, group D, member 2
hsa-miR-543	1	0	1	1	1	1	ZNF281	zinc finger protein 281
hsa-miR-543	1	0	1	0	1	1	AGFG1	ArfGAP with FG repeats 1
hsa-miR-543	1	0	1	1	1	1	FOS	FBJ murine osteosarcoma viral oncogene homolog
hsa-miR-543	1	0	1	1	1	1	SOWAHA	sosondowah ankyrin repeat domain family member A
hsa-miR-543	1	0	1	0	1	1	CGGBP1	CGG triplet repeat binding protein 1
hsa-miR-543	1	0	1	1	1	1	KDM5A	lysine (K)-specific demethylase 5A
hsa-miR-543	1	0	1	1	1	1	PIAS3	protein inhibitor of activated STAT, 3
hsa-miR-543	1	0	1	1	1	1	ATG2B	autophagy related 2B
hsa-miR-543	1	0	1	1	1	1	MYRIP	myosin VIIA and Rab interacting protein
hsa-miR-543	1	0	1	1	1	1	SLC12A5	solute carrier family 12 (potassium/chloride transporter), member 5
hsa-miR-543	1	0	1	1	1	1	NUMA1	nuclear mitotic apparatus protein 1
hsa-miR-543	1	0	1	1	1	1	RB1CC1	RB1-inducible coiled-coil 1
hsa-miR-543	1	0	1	1	1	1	CDC14B	CDC14 cell division cycle 14 homolog B (S. cerevisiae)
hsa-miR-543	1	0	1	1	1	1	NIPBL	Nipped-B homolog (Drosophila)
hsa-miR-543	1	0	1	1	1	1	TP63	tumor protein p63
hsa-miR-543	1	0	1	0	1	1	PCDHA10	protocadherin alpha 10
hsa-miR-543	1	0	1	0	1	1	BRK1	BRICK1, SCAR/WAVE actin-nucleating complex subunit
hsa-miR-543	1	0	1	1	1	1	SLC10A7	solute carrier family 10 (sodium/bile acid cotransporter family), member 7
hsa-miR-543	1	0	1	1	1	1	MAPK1	mitogen-activated protein kinase 1
hsa-miR-543	1	0	1	1	1	1	ABR	active BCR-related
hsa-miR-543	1	0	1	0	1	1	FOXJ2	forkhead box J2
hsa-miR-543	1	0	1	1	1	1	IL1A	interleukin 1, alpha
hsa-miR-543	1	0	1	1	1	1	NPTN	neuroplastin
hsa-miR-543	1	0	1	1	1	1	FAM117A	family with sequence similarity 117, member A
hsa-miR-543	1	0	1	1	1	1	PALM2-AKAP2	PALM2-AKAP2 readthrough
hsa-miR-543	1	0	1	1	0	0	HS6ST1	heparan sulfate 6-O-sulfotransferase 1
hsa-miR-543	1	0	1	1	1	1	LCP1	lymphocyte cytosolic protein 1 (L-plastin)
hsa-miR-543	1	0	1	1	1	1	PBX3	pre-B-cell leukemia homeobox 3
hsa-miR-543	1	0	1	0	1	1	HSPA12A	heat shock 70kDa protein 12A
hsa-miR-543	1	0	1	1	1	1	ZZZ3	zinc finger, ZZ-type containing 3
hsa-miR-543	1	0	1	1	0	0	DALRD3	DALR anticodon binding domain containing 3
hsa-miR-543	1	0	1	1	1	1	CDH2	cadherin 2, type 1, N-cadherin (neuronal)
hsa-miR-543	1	0	1	0	1	1	MINOS1	mitochondrial inner membrane organizing system 1
hsa-miR-543	1	0	1	1	1	1	DDX52	DEAD (Asp-Glu-Ala-Asp) box polypeptide 52
hsa-miR-543	1	0	1	0	1	1	TMEM237	transmembrane protein 237
hsa-miR-543	1	0	1	1	1	1	ZAK	sterile alpha motif and leucine zipper containing kinase AZK
hsa-miR-543	1	0	1	0	1	1	KLF3	Kruppel-like factor 3 (basic)
hsa-miR-543	1	0	1	0	0	0	TNPO1	transportin 1
hsa-miR-543	1	0	1	1	1	1	M6PR	mannose-6-phosphate receptor (cation dependent)
hsa-miR-543	1	0	1	1	1	1	HS2ST1	heparan sulfate 2-O-sulfotransferase 1
hsa-miR-543	1	0	1	1	1	1	GRIK2	glutamate receptor, ionotropic, kainate 2
hsa-miR-543	1	0	1	1	1	1	JDP2	Jun dimerization protein 2
hsa-miR-543	1	0	1	1	1	1	ENAH	enabled homolog (Drosophila)
hsa-miR-543	1	0	1	1	1	1	SIX2	SIX homeobox 2
hsa-miR-543	1	0	1	1	1	1	ZFYVE16	zinc finger, FYVE domain containing 16
hsa-miR-543	1	0	1	1	0	0	SRCAP	Snf2-related CREBBP activator protein
hsa-miR-543	1	0	1	0	0	0	TRANK1	tetratricopeptide repeat and ankyrin repeat containing 1
hsa-miR-543	1	0	1	0	1	1	PTPRT	protein tyrosine phosphatase, receptor type, T
hsa-miR-543	0	0	1	1	1	1	C2CD2L	C2CD2-like
hsa-miR-543	1	0	1	0	1	1	KIAA0408	KIAA0408
hsa-miR-543	0	0	1	1	1	1	PREPL	prolyl endopeptidase-like
hsa-miR-543	1	0	1	1	1	1	AUTS2	autism susceptibility candidate 2
hsa-miR-543	1	0	1	0	1	1	CEP350	centrosomal protein 350kDa
hsa-miR-543	1	0	1	1	1	1	RNGTT	RNA guanylyltransferase and 5'-phosphatase
hsa-miR-543	0	0	1	1	1	1	SPAG9	sperm associated antigen 9
hsa-miR-543	1	0	1	1	0	0	SUSD5	sushi domain containing 5
hsa-miR-543	0	0	1	1	0	0	HKR1	HKR1, GLI-Kruppel zinc finger family member
hsa-miR-543	0	0	1	1	0	0	ARHGEF2	Rho/Rac guanine nucleotide exchange factor (GEF) 2
hsa-miR-543	1	0	1	1	1	1	MATR3	matrin 3
hsa-miR-543	1	0	1	1	1	1	DMXL2	Dmx-like 2
hsa-miR-543	1	0	1	0	0	0	DTX4	deltex homolog 4 (Drosophila)
hsa-miR-543	1	0	1	1	1	1	CIT	citron (rho-interacting, serine/threonine kinase 21)
hsa-miR-543	1	0	1	1	1	1	RGL1	ral guanine nucleotide dissociation stimulator-like 1
hsa-miR-543	1	0	1	1	0	0	KIAA1045	KIAA1045
hsa-miR-543	1	0	1	1	1	1	KIAA1217	KIAA1217
hsa-miR-543	1	0	1	1	1	1	ATXN7L1	ataxin 7-like 1
hsa-miR-543	1	0	1	1	1	1	RIMKLB	ribosomal modification protein rimK-like family member B
hsa-miR-543	0	0	1	1	1	1	TCF7L2	transcription factor 7-like 2 (T-cell specific, HMG-box)
hsa-miR-543	1	0	1	0	0	0	ODZ4	odz, odd Oz/ten-m homolog 4 (Drosophila)
hsa-miR-543	0	0	1	1	1	1	KLHL13	kelch-like 13 (Drosophila)
hsa-miR-543	1	0	1	1	1	1	PCDH19	protocadherin 19
hsa-miR-543	1	0	1	1	1	1	FAM135A	family with sequence similarity 135, member A
hsa-miR-543	0	0	1	0	0	0	NYAP2	neuronal tyrosine-phosphorylated phosphoinositide-3-kinase adaptor 2
hsa-miR-543	0	0	1	1	1	1	ANKRD36B	ankyrin repeat domain 36B
hsa-miR-543	0	0	1	1	1	1	PBLD	phenazine biosynthesis-like protein domain containing
hsa-miR-543	0	0	1	1	1	1	KIAA1704	KIAA1704
hsa-miR-543	1	0	1	1	1	1	LCOR	ligand dependent nuclear receptor corepressor
hsa-miR-543	1	0	1	1	1	1	BCL2L11	BCL2-like 11 (apoptosis facilitator)
hsa-miR-543	1	0	1	1	1	1	AKNA	AT-hook transcription factor
hsa-miR-543	1	0	1	1	1	1	SH3TC2	SH3 domain and tetratricopeptide repeats 2
hsa-miR-543	1	0	1	0	0	0	ZBTB34	zinc finger and BTB domain containing 34
hsa-miR-543	1	0	1	1	1	1	PGR	progesterone receptor
hsa-miR-543	0	0	1	0	1	1	RASSF8	Ras association (RalGDS/AF-6) domain family (N-terminal) member 8
hsa-miR-543	0	0	1	1	0	0	FAM22D	family with sequence similarity 22, member D
hsa-miR-543	1	0	1	1	1	1	UBR3	ubiquitin protein ligase E3 component n-recognin 3 (putative)
hsa-miR-543	1	0	1	1	1	1	PAN3	PAN3 poly(A) specific ribonuclease subunit homolog (S. cerevisiae)
hsa-miR-543	0	0	1	0	1	1	DCAF11	DDB1 and CUL4 associated factor 11
hsa-miR-543	1	0	1	1	1	1	DTNA	dystrobrevin, alpha
hsa-miR-543	1	0	1	0	1	1	MPPED2	metallophosphoesterase domain containing 2
hsa-miR-543	0	0	1	1	1	1	DGKI	diacylglycerol kinase, iota
hsa-miR-543	1	0	1	0	1	1	SLC6A6	solute carrier family 6 (neurotransmitter transporter, taurine), member 6
hsa-miR-543	1	0	1	1	1	1	DMTF1	cyclin D binding myb-like transcription factor 1
hsa-miR-543	1	0	1	1	1	1	EPHA7	EPH receptor A7
hsa-miR-543	1	0	1	1	1	1	TWF1	twinfilin, actin-binding protein, homolog 1 (Drosophila)
hsa-miR-543	1	0	1	1	1	1	TBX2	T-box 2
hsa-miR-543	0	0	1	1	0	0	IFT27	intraflagellar transport 27 homolog (Chlamydomonas)
hsa-miR-543	0	0	1	1	1	1	ACO1	aconitase 1, soluble
hsa-miR-543	1	0	1	1	1	1	MYO5A	myosin VA (heavy chain 12, myoxin)
hsa-miR-543	1	0	1	1	1	1	HNRNPK	heterogeneous nuclear ribonucleoprotein K
hsa-miR-543	1	0	1	1	1	1	IPO8	importin 8
hsa-miR-543	0	0	1	1	1	1	CHN1	chimerin (chimaerin) 1
hsa-miR-543	0	0	1	1	1	1	PLD1	phospholipase D1, phosphatidylcholine-specific
hsa-miR-543	1	0	1	0	1	1	FYB	FYN binding protein
hsa-miR-543	1	0	1	1	1	1	CBFA2T2	core-binding factor, runt domain, alpha subunit 2; translocated to, 2
hsa-miR-543	0	0	1	1	1	1	CYP4F3	cytochrome P450, family 4, subfamily F, polypeptide 3
hsa-miR-543	1	0	1	1	1	1	ZFAND6	zinc finger, AN1-type domain 6
hsa-miR-543	0	0	1	1	0	0	SLC38A6	solute carrier family 38, member 6
hsa-miR-543	1	0	1	1	1	1	GLS	glutaminase
hsa-miR-543	1	0	1	1	1	1	SLMAP	sarcolemma associated protein
hsa-miR-543	1	0	1	1	0	0	RASSF1	Ras association (RalGDS/AF-6) domain family member 1
hsa-miR-543	1	0	1	1	1	1	EDNRB	endothelin receptor type B
hsa-miR-543	0	0	1	1	1	1	DCAF6	DDB1 and CUL4 associated factor 6
hsa-miR-543	0	0	1	1	1	1	HEPH	hephaestin
hsa-miR-543	1	0	1	1	1	1	ANKRD13A	ankyrin repeat domain 13A
hsa-miR-543	0	0	1	0	1	1	PDP1	pyruvate dehyrogenase phosphatase catalytic subunit 1
hsa-miR-543	0	0	1	1	1	1	FAM114A2	family with sequence similarity 114, member A2
hsa-miR-543	1	0	1	1	1	1	TACC2	transforming, acidic coiled-coil containing protein 2
hsa-miR-543	0	0	1	0	1	1	SLC38A4	solute carrier family 38, member 4
hsa-miR-543	0	0	1	1	1	1	LMBRD1	LMBR1 domain containing 1
hsa-miR-543	1	0	1	1	1	1	KCNMB2	potassium large conductance calcium-activated channel, subfamily M, beta member 2
hsa-miR-543	0	0	1	1	1	1	SPG21	spastic paraplegia 21 (autosomal recessive, Mast syndrome)
hsa-miR-543	0	0	1	1	1	1	HERPUD1	homocysteine-inducible, endoplasmic reticulum stress-inducible, ubiquitin-like domain member 1
hsa-miR-543	1	0	1	1	1	1	C21orf91	chromosome 21 open reading frame 91
hsa-miR-543	0	0	1	1	1	1	DOCK10	dedicator of cytokinesis 10
hsa-miR-543	0	0	1	1	1	1	CCR3	chemokine (C-C motif) receptor 3
hsa-miR-543	1	0	1	1	1	1	TAGLN3	transgelin 3
hsa-miR-543	1	0	1	1	1	1	KLHL12	kelch-like 12 (Drosophila)
hsa-miR-543	0	0	1	0	1	1	KANSL3	KAT8 regulatory NSL complex subunit 3
hsa-miR-543	0	0	1	1	1	1	FCRLA	Fc receptor-like A
hsa-miR-543	0	0	1	1	0	0	TTTY7	testis-specific transcript, Y-linked 7 (non-protein coding)
hsa-miR-543	1	0	1	1	1	1	LARP4	La ribonucleoprotein domain family, member 4
hsa-miR-543	0	0	1	1	1	1	PARK2	parkinson protein 2, E3 ubiquitin protein ligase (parkin)
hsa-miR-543	0	0	1	0	1	1	ZNF268	zinc finger protein 268
hsa-miR-543	0	0	1	1	0	0	SNRPN	small nuclear ribonucleoprotein polypeptide N
hsa-miR-543	1	0	1	1	1	1	MAGI1	membrane associated guanylate kinase, WW and PDZ domain containing 1
hsa-miR-543	0	0	1	1	1	1	SPSB1	splA/ryanodine receptor domain and SOCS box containing 1
hsa-miR-543	1	0	1	1	0	0	SEPT8	septin 8
hsa-miR-543	1	0	1	1	1	1	CACNB2	calcium channel, voltage-dependent, beta 2 subunit
hsa-miR-543	1	0	1	1	1	1	CPNE4	copine IV
hsa-miR-543	1	0	1	1	1	1	WAPAL	wings apart-like homolog (Drosophila)
hsa-miR-543	0	0	1	1	1	1	CARD8	caspase recruitment domain family, member 8
hsa-miR-543	0	0	1	1	1	1	BMP2K	BMP2 inducible kinase
hsa-miR-543	0	0	1	1	1	1	ZNF638	zinc finger protein 638
hsa-miR-543	1	0	1	0	1	1	IL1RAP	interleukin 1 receptor accessory protein
hsa-miR-543	1	0	1	1	1	1	GPR64	G protein-coupled receptor 64
hsa-miR-543	1	0	1	1	1	1	AFF2	AF4/FMR2 family, member 2
hsa-miR-543	1	0	1	0	1	1	GRB10	growth factor receptor-bound protein 10
hsa-miR-543	0	0	1	0	0	0	CACNA2D3	calcium channel, voltage-dependent, alpha 2/delta subunit 3
hsa-miR-543	1	0	1	1	1	1	PALM2	paralemmin 2
hsa-miR-543	0	0	1	1	1	1	TRDN	triadin
hsa-miR-543	1	0	1	1	1	1	NRXN3	neurexin 3
hsa-miR-543	1	0	1	1	1	1	PPP1R9A	protein phosphatase 1, regulatory subunit 9A
hsa-miR-543	0	0	1	1	1	1	ESRP1	epithelial splicing regulatory protein 1
hsa-miR-543	0	0	1	1	1	1	BANK1	B-cell scaffold protein with ankyrin repeats 1
hsa-miR-543	1	0	1	1	1	1	ARHGAP12	Rho GTPase activating protein 12
hsa-miR-543	1	0	1	1	0	0	SALL2	sal-like 2 (Drosophila)
hsa-miR-543	0	0	1	1	0	0	FAM64A	family with sequence similarity 64, member A
hsa-miR-543	1	0	1	1	1	1	RIC8B	resistance to inhibitors of cholinesterase 8 homolog B (C. elegans)
hsa-miR-543	0	0	1	1	1	1	ARAP3	ArfGAP with RhoGAP domain, ankyrin repeat and PH domain 3
hsa-miR-543	1	0	1	1	1	1	PTBP3	polypyrimidine tract binding protein 3
hsa-miR-543	1	0	1	1	1	1	SLC38A2	solute carrier family 38, member 2
hsa-miR-543	0	0	1	1	1	1	CXXC5	CXXC finger protein 5
hsa-miR-543	0	0	1	1	1	1	RSRC2	arginine/serine-rich coiled-coil 2
hsa-miR-543	1	0	1	1	1	1	PDCD6	programmed cell death 6
hsa-miR-543	0	0	1	1	0	0	PARP2	poly (ADP-ribose) polymerase 2
hsa-miR-543	1	0	1	1	1	1	ACER3	alkaline ceramidase 3
hsa-miR-543	0	0	1	1	1	1	STAU2	staufen, RNA binding protein, homolog 2 (Drosophila)
hsa-miR-543	1	0	1	1	1	1	MAEA	macrophage erythroblast attacher
hsa-miR-543	0	0	1	1	1	1	LRRN1	leucine rich repeat neuronal 1
hsa-miR-543	1	0	1	1	1	1	USP33	ubiquitin specific peptidase 33
hsa-miR-543	0	0	1	1	1	1	AMFR	autocrine motility factor receptor, E3 ubiquitin protein ligase
hsa-miR-543	1	0	1	1	1	1	FAM131A	family with sequence similarity 131, member A
hsa-miR-543	1	0	1	1	1	1	DYRK2	dual-specificity tyrosine-(Y)-phosphorylation regulated kinase 2
hsa-miR-543	0	0	1	1	1	1	GGNBP2	gametogenetin binding protein 2
hsa-miR-543	1	0	1	1	1	1	GBF1	golgi brefeldin A resistant guanine nucleotide exchange factor 1
hsa-miR-543	0	0	1	0	1	1	ATXN1L	ataxin 1-like
hsa-miR-543	1	0	1	1	1	1	PHACTR4	phosphatase and actin regulator 4
hsa-miR-543	1	0	1	1	1	1	DENND4C	DENN/MADD domain containing 4C
hsa-miR-543	0	0	1	0	1	1	FLJ22763	uncharacterized LOC401081
hsa-miR-543	0	0	1	1	1	1	GTF2H1	general transcription factor IIH, polypeptide 1, 62kDa
hsa-miR-543	1	0	1	1	1	1	LRP4	low density lipoprotein receptor-related protein 4
hsa-miR-543	0	0	1	1	1	1	RNF146	ring finger protein 146
hsa-miR-543	1	0	1	1	1	1	MARK1	MAP/microtubule affinity-regulating kinase 1
hsa-miR-543	0	0	1	1	0	0	ZNF252P	zinc finger protein 252, pseudogene
hsa-miR-543	1	0	1	1	1	1	SLC38A1	solute carrier family 38, member 1
hsa-miR-543	0	0	1	0	0	0	NBLA00301	Nbla00301
hsa-miR-543	0	0	1	1	1	1	SNAP47	synaptosomal-associated protein, 47kDa
hsa-miR-543	1	0	1	1	1	1	SGK1	serum/glucocorticoid regulated kinase 1
hsa-miR-543	1	0	1	0	1	1	AP1G1	adaptor-related protein complex 1, gamma 1 subunit
hsa-miR-543	0	0	1	1	1	1	FBXO5	F-box protein 5
hsa-miR-543	0	0	1	0	0	0	FLJ31104	uncharacterized LOC441072
hsa-miR-543	1	0	1	1	1	1	ZNF664	zinc finger protein 664
hsa-miR-543	1	0	1	1	0	0	SH2D3C	SH2 domain containing 3C
hsa-miR-543	1	0	1	1	1	1	LMNA	lamin A/C
hsa-miR-543	0	0	1	0	0	0	LOC255187	hCG1980447
hsa-miR-543	0	0	1	1	1	1	SCIMP	SLP adaptor and CSK interacting membrane protein
hsa-miR-543	1	0	1	0	1	1	PLEKHA1	pleckstrin homology domain containing, family A (phosphoinositide binding specific) member 1
hsa-miR-543	1	0	1	1	0	0	GBA2	glucosidase, beta (bile acid) 2
hsa-miR-543	0	0	1	1	1	1	ZNF385B	zinc finger protein 385B
hsa-miR-543	1	0	1	1	1	1	C6orf89	chromosome 6 open reading frame 89
hsa-miR-543	0	0	1	0	0	0	LINC00301	long intergenic non-protein coding RNA 301
hsa-miR-543	1	0	1	1	1	1	BLCAP	bladder cancer associated protein
hsa-miR-543	1	0	1	1	1	1	CNOT4	CCR4-NOT transcription complex, subunit 4
hsa-miR-543	1	0	1	1	1	1	WDR20	WD repeat domain 20
hsa-miR-543	0	0	1	0	0	0	LOC152225	uncharacterized LOC152225
hsa-miR-543	1	0	1	1	1	1	TLK1	tousled-like kinase 1
hsa-miR-543	1	0	1	1	1	1	ARIH2	ariadne homolog 2 (Drosophila)
hsa-miR-543	1	0	1	1	1	1	AMMECR1	Alport syndrome, mental retardation, midface hypoplasia and elliptocytosis chromosomal region gene 1
hsa-miR-543	1	0	1	1	1	1	FBXW2	F-box and WD repeat domain containing 2
hsa-miR-543	1	0	1	0	1	1	TEF	thyrotrophic embryonic factor
hsa-miR-543	0	0	1	1	1	1	HNRNPH1	heterogeneous nuclear ribonucleoprotein H1 (H)
hsa-miR-543	0	0	1	1	1	1	NRCAM	neuronal cell adhesion molecule
hsa-miR-543	0	0	1	1	0	0	C6orf163	chromosome 6 open reading frame 163
hsa-miR-543	1	0	1	1	1	1	GCFC1	GC-rich sequence DNA-binding factor 1
hsa-miR-543	1	0	1	1	0	0	PRMT8	protein arginine methyltransferase 8
hsa-miR-543	0	0	1	1	1	1	LZTFL1	leucine zipper transcription factor-like 1
hsa-miR-543	0	0	1	1	1	1	TGFBI	transforming growth factor, beta-induced, 68kDa
hsa-miR-543	0	0	1	1	1	1	SLC16A1	solute carrier family 16, member 1 (monocarboxylic acid transporter 1)
hsa-miR-543	1	0	1	1	1	1	DEM1	defects in morphology 1 homolog (S. cerevisiae)
hsa-miR-543	1	0	1	1	1	1	CTNNA1	catenin (cadherin-associated protein), alpha 1, 102kDa
hsa-miR-543	1	0	1	1	1	1	SNAP25	synaptosomal-associated protein, 25kDa
hsa-miR-543	1	0	1	0	1	1	GATAD2B	GATA zinc finger domain containing 2B
hsa-miR-543	0	0	1	1	1	1	RBM25	RNA binding motif protein 25
hsa-miR-543	0	0	1	1	1	1	GPT2	glutamic pyruvate transaminase (alanine aminotransferase) 2
hsa-miR-543	0	0	1	1	1	1	MOBP	myelin-associated oligodendrocyte basic protein
hsa-miR-543	1	0	1	1	1	1	EPHB1	EPH receptor B1
hsa-miR-543	1	0	1	1	1	1	ANKRD10	ankyrin repeat domain 10
hsa-miR-543	1	0	1	1	1	1	ZC3H11A	zinc finger CCCH-type containing 11A
hsa-miR-543	0	0	1	1	1	1	CDKN2AIP	CDKN2A interacting protein
hsa-miR-543	1	0	1	1	1	1	GAPVD1	GTPase activating protein and VPS9 domains 1
hsa-miR-543	0	0	1	0	0	0	OTUD1	OTU domain containing 1
hsa-miR-543	0	0	1	0	1	1	FLJ39080	uncharacterized LOC441355
hsa-miR-543	1	0	1	0	1	1	COL21A1	collagen, type XXI, alpha 1
hsa-miR-543	0	0	1	0	0	0	C1orf204	chromosome 1 open reading frame 204
hsa-miR-543	0	0	1	0	0	0	ZNF300P1	zinc finger protein 300 pseudogene 1
hsa-miR-543	1	0	1	0	1	1	KBTBD8	kelch repeat and BTB (POZ) domain containing 8
hsa-miR-543	1	0	1	1	1	1	CCDC141	coiled-coil domain containing 141
hsa-miR-543	1	0	1	1	1	1	KL	klotho
hsa-miR-543	0	0	1	0	0	0	LOC100128560	uncharacterized LOC100128560
hsa-miR-543	1	0	1	1	1	1	GOLGA8B	golgin A8 family, member B
hsa-miR-543	0	0	1	1	1	1	PLA2G5	phospholipase A2, group V
hsa-miR-543	0	0	1	1	0	0	PSAPL1	prosaposin-like 1 (gene/pseudogene)
hsa-miR-543	0	0	1	1	1	1	PRSS16	protease, serine, 16 (thymus)
hsa-miR-543	1	0	1	1	1	1	PIGA	phosphatidylinositol glycan anchor biosynthesis, class A
hsa-miR-543	1	0	1	1	1	1	GATM	glycine amidinotransferase (L-arginine:glycine amidinotransferase)
hsa-miR-543	0	0	1	1	0	0	ZNF283	zinc finger protein 283
hsa-miR-543	0	0	1	1	1	1	FAM76A	family with sequence similarity 76, member A
hsa-miR-543	0	0	1	0	0	0	GTF2IP1	general transcription factor IIi, pseudogene 1
hsa-miR-543	0	0	1	0	1	1	MYLK4	myosin light chain kinase family, member 4
hsa-miR-543	0	0	1	1	0	0	KIAA0146	KIAA0146
hsa-miR-543	1	0	1	1	1	1	WEE1	WEE1 homolog (S. pombe)
hsa-miR-543	1	0	1	1	1	1	SIK3	SIK family kinase 3
hsa-miR-543	0	0	1	1	1	1	ARHGEF26	Rho guanine nucleotide exchange factor (GEF) 26
hsa-miR-543	0	0	1	0	1	1	PATE4	prostate and testis expressed 4
hsa-miR-543	1	0	1	1	0	0	RASIP1	Ras interacting protein 1
hsa-miR-543	0	0	1	1	1	1	SLC13A3	solute carrier family 13 (sodium-dependent dicarboxylate transporter), member 3
hsa-miR-543	1	0	1	0	1	1	KCNK2	potassium channel, subfamily K, member 2
hsa-miR-543	1	0	1	1	1	1	ATG4B	autophagy related 4B, cysteine peptidase
hsa-miR-543	1	0	1	1	1	1	ADAMTS8	ADAM metallopeptidase with thrombospondin type 1 motif, 8
hsa-miR-543	0	0	1	1	0	0	KRT37	keratin 37
hsa-miR-543	1	0	1	1	1	1	SH2D4B	SH2 domain containing 4B
hsa-miR-543	1	0	1	1	1	1	SMAP1	small ArfGAP 1
hsa-miR-543	0	0	1	1	1	1	QDPR	quinoid dihydropteridine reductase
hsa-miR-543	0	0	1	0	0	0	EML6	echinoderm microtubule associated protein like 6
hsa-miR-543	0	0	1	0	0	0	FAM47E	family with sequence similarity 47, member E
hsa-miR-543	1	0	1	1	1	1	C11orf30	chromosome 11 open reading frame 30
hsa-miR-543	1	0	1	1	0	0	GXYLT1	glucoside xylosyltransferase 1
hsa-miR-543	0	0	1	1	1	1	RBM46	RNA binding motif protein 46
hsa-miR-543	0	0	1	1	0	0	FSIP2	fibrous sheath interacting protein 2
hsa-miR-543	1	0	1	0	1	1	ANO6	anoctamin 6
hsa-miR-543	0	0	1	1	1	1	C18orf54	chromosome 18 open reading frame 54
hsa-miR-543	0	0	1	1	0	0	TMEM151B	transmembrane protein 151B
hsa-miR-543	0	0	1	1	1	1	SPICE1	spindle and centriole associated protein 1
hsa-miR-543	0	0	1	1	1	1	SZT2	seizure threshold 2 homolog (mouse)
hsa-miR-543	1	0	1	1	1	1	EIF4E3	eukaryotic translation initiation factor 4E family member 3
hsa-miR-543	0	0	1	0	0	0	RPL23AP53	ribosomal protein L23a pseudogene 53
hsa-miR-543	0	0	1	1	0	0	FAM54B	family with sequence similarity 54, member B
hsa-miR-543	1	0	1	1	0	0	PTPN5	protein tyrosine phosphatase, non-receptor type 5 (striatum-enriched)
hsa-miR-543	0	0	1	1	1	1	PDIA6	protein disulfide isomerase family A, member 6
hsa-miR-543	0	0	1	1	0	0	AADACL3	arylacetamide deacetylase-like 3
hsa-miR-543	0	0	1	1	1	1	MCU	mitochondrial calcium uniporter
hsa-miR-543	1	0	1	1	1	1	DSE	dermatan sulfate epimerase
hsa-miR-543	0	0	1	0	0	0	IDO2	indoleamine 2,3-dioxygenase 2
hsa-miR-543	1	0	1	0	1	1	CYB561D1	cytochrome b-561 domain containing 1
hsa-miR-543	1	0	1	1	1	1	DPY19L3	dpy-19-like 3 (C. elegans)
hsa-miR-543	0	0	1	1	1	1	WBP2NL	WBP2 N-terminal like
hsa-miR-543	0	0	1	0	0	0	FLJ26245	uncharacterized LOC400533
hsa-miR-543	0	0	1	1	1	1	G3BP1	GTPase activating protein (SH3 domain) binding protein 1
hsa-miR-543	0	0	1	1	0	0	HEATR8	HEAT repeat containing 8
hsa-miR-543	0	0	1	0	1	1	KIF1A	kinesin family member 1A
hsa-miR-543	1	0	1	0	1	1	ESRRG	estrogen-related receptor gamma
hsa-miR-543	0	0	1	1	1	1	SLTM	SAFB-like, transcription modulator
hsa-miR-543	0	0	1	0	0	0	LOC100124692	maltase-glucoamylase (alpha-glucosidase) pseudogene
hsa-miR-543	1	0	1	1	1	1	WTAP	Wilms tumor 1 associated protein
hsa-miR-543	0	0	1	1	1	1	SYPL2	synaptophysin-like 2
hsa-miR-543	0	0	1	1	1	1	PDE2A	phosphodiesterase 2A, cGMP-stimulated
hsa-miR-543	0	0	1	0	0	0	AGAP9	ArfGAP with GTPase domain, ankyrin repeat and PH domain 9
hsa-miR-543	1	0	1	1	1	1	NME6	NME/NM23 nucleoside diphosphate kinase 6
hsa-miR-543	1	0	1	0	1	1	TMEM106B	transmembrane protein 106B
hsa-miR-543	1	0	1	1	1	1	ATL2	atlastin GTPase 2
hsa-miR-543	1	0	1	1	1	1	PHTF2	putative homeodomain transcription factor 2
hsa-miR-543	0	0	1	1	0	0	HSPB11	heat shock protein family B (small), member 11
hsa-miR-543	0	0	1	1	0	0	NEK7	NIMA (never in mitosis gene a)-related kinase 7
hsa-miR-543	0	0	1	0	0	0	POM121L9P	POM121 transmembrane nucleoporin-like 9, pseudogene
hsa-miR-543	1	0	1	1	1	1	ARF6	ADP-ribosylation factor 6
hsa-miR-543	0	0	1	1	1	1	ARIH1	ariadne homolog, ubiquitin-conjugating enzyme E2 binding protein, 1 (Drosophila)
hsa-miR-543	0	0	1	0	0	0	DNAJC5B	DnaJ (Hsp40) homolog, subfamily C, member 5 beta
hsa-miR-543	0	0	1	1	1	1	ZNF280D	zinc finger protein 280D
hsa-miR-543	1	0	1	0	1	1	DNAJC5	DnaJ (Hsp40) homolog, subfamily C, member 5
hsa-miR-543	0	0	1	1	0	0	LRCH3	leucine-rich repeats and calponin homology (CH) domain containing 3
hsa-miR-543	1	0	1	1	1	1	GPBP1	GC-rich promoter binding protein 1
hsa-miR-543	0	0	1	1	1	1	SLC30A10	solute carrier family 30, member 10
hsa-miR-543	1	0	1	1	1	1	TMEFF1	transmembrane protein with EGF-like and two follistatin-like domains 1
hsa-miR-543	0	0	1	1	1	1	EGFLAM	EGF-like, fibronectin type III and laminin G domains
hsa-miR-543	1	0	1	1	1	1	MLL3	myeloid/lymphoid or mixed-lineage leukemia 3
hsa-miR-543	1	0	1	0	1	1	STYX	serine/threonine/tyrosine interacting protein
hsa-miR-543	0	0	1	1	1	1	VWA3B	von Willebrand factor A domain containing 3B
hsa-miR-543	0	0	1	1	1	1	CCDC132	coiled-coil domain containing 132
hsa-miR-543	1	0	1	1	1	1	BPTF	bromodomain PHD finger transcription factor
hsa-miR-543	0	0	1	1	1	1	PCDH20	protocadherin 20
hsa-miR-543	1	0	1	1	1	1	ANKRD12	ankyrin repeat domain 12
hsa-miR-543	0	0	1	1	1	1	TEX2	testis expressed 2
hsa-miR-543	1	0	1	1	1	1	C1orf131	chromosome 1 open reading frame 131
hsa-miR-543	0	0	1	1	1	1	C8orf34	chromosome 8 open reading frame 34
hsa-miR-543	1	0	1	0	1	1	NR3C1	nuclear receptor subfamily 3, group C, member 1 (glucocorticoid receptor)
hsa-miR-543	1	0	1	1	1	1	FBXL5	F-box and leucine-rich repeat protein 5
hsa-miR-543	1	0	1	1	1	1	RNF38	ring finger protein 38
hsa-miR-543	1	0	1	1	1	1	IKZF2	IKAROS family zinc finger 2 (Helios)
hsa-miR-543	1	0	1	1	1	1	CLIC5	chloride intracellular channel 5
hsa-miR-543	0	0	1	1	1	1	CRB1	crumbs homolog 1 (Drosophila)
hsa-miR-543	0	0	1	1	1	1	LEAP2	liver expressed antimicrobial peptide 2
hsa-miR-543	1	0	1	1	1	1	TXNRD1	thioredoxin reductase 1
hsa-miR-543	0	0	1	1	1	1	NFXL1	nuclear transcription factor, X-box binding-like 1
hsa-miR-543	0	0	1	1	1	1	CEP41	centrosomal protein 41kDa
hsa-miR-543	1	0	1	1	1	1	NRG1	neuregulin 1
hsa-miR-543	0	0	1	1	0	0	FANK1	fibronectin type III and ankyrin repeat domains 1
hsa-miR-543	0	0	1	1	1	1	IYD	iodotyrosine deiodinase
hsa-miR-543	1	0	1	1	1	1	PBRM1	polybromo 1
hsa-miR-543	0	0	1	0	0	0	MEG3	maternally expressed 3 (non-protein coding)
hsa-miR-543	1	0	1	1	1	1	RAI14	retinoic acid induced 14
hsa-miR-543	1	0	1	1	1	1	LAMA3	laminin, alpha 3
hsa-miR-543	1	0	1	1	1	1	TAB3	TGF-beta activated kinase 1/MAP3K7 binding protein 3
hsa-miR-543	1	0	1	1	1	1	NPM1	nucleophosmin (nucleolar phosphoprotein B23, numatrin)
hsa-miR-543	1	0	1	1	1	1	CAMTA1	calmodulin binding transcription activator 1
hsa-miR-543	0	0	1	0	1	1	ANKS1B	ankyrin repeat and sterile alpha motif domain containing 1B
hsa-miR-543	0	0	1	1	0	0	PDZD11	PDZ domain containing 11
hsa-miR-543	1	0	1	0	1	1	ANKRD28	ankyrin repeat domain 28
hsa-miR-543	0	0	1	1	1	1	PTGR2	prostaglandin reductase 2
hsa-miR-543	0	0	1	1	1	1	TNFSF15	tumor necrosis factor (ligand) superfamily, member 15
hsa-miR-543	1	0	1	1	1	1	SP3	Sp3 transcription factor
hsa-miR-543	1	0	1	0	1	1	CHRM2	cholinergic receptor, muscarinic 2
hsa-miR-543	1	0	1	0	1	1	NHS	Nance-Horan syndrome (congenital cataracts and dental anomalies)
hsa-miR-543	1	0	1	1	0	0	ZNF594	zinc finger protein 594
hsa-miR-543	0	0	1	1	1	1	AICDA	activation-induced cytidine deaminase
hsa-miR-543	1	0	1	1	1	1	MECP2	methyl CpG binding protein 2 (Rett syndrome)
hsa-miR-543	0	0	1	1	1	1	ILDR1	immunoglobulin-like domain containing receptor 1
hsa-miR-543	1	0	1	1	1	1	NTNG1	netrin G1
hsa-miR-543	1	0	1	1	1	1	QKI	QKI, KH domain containing, RNA binding
hsa-miR-543	0	0	1	1	1	1	NOLC1	nucleolar and coiled-body phosphoprotein 1
hsa-miR-543	1	0	1	1	1	1	PCDH11X	protocadherin 11 X-linked
hsa-miR-543	0	0	1	1	1	1	IL23R	interleukin 23 receptor
hsa-miR-543	0	0	1	1	0	0	TMEM116	transmembrane protein 116
hsa-miR-543	0	0	1	1	1	1	C20orf24	chromosome 20 open reading frame 24
hsa-miR-543	0	0	1	1	1	1	WDR55	WD repeat domain 55
hsa-miR-543	1	0	1	1	1	1	MYCN	v-myc myelocytomatosis viral related oncogene, neuroblastoma derived (avian)
hsa-miR-543	1	0	1	1	1	1	TSPAN14	tetraspanin 14
hsa-miR-543	0	0	1	0	1	1	HAUS3	HAUS augmin-like complex, subunit 3
hsa-miR-543	1	0	1	1	0	0	SAP30BP	SAP30 binding protein
hsa-miR-543	0	0	1	1	0	0	STAC3	SH3 and cysteine rich domain 3
hsa-miR-543	0	0	1	1	1	1	TMEM30A	transmembrane protein 30A
hsa-miR-543	0	0	1	1	0	0	TALDO1	transaldolase 1
hsa-miR-543	1	0	1	1	0	0	JUP	junction plakoglobin
hsa-miR-543	0	0	1	1	0	0	KLHDC3	kelch domain containing 3
hsa-miR-543	1	0	1	1	1	1	CAP1	CAP, adenylate cyclase-associated protein 1 (yeast)
hsa-miR-543	1	0	1	1	1	1	ETF1	eukaryotic translation termination factor 1
hsa-miR-543	0	0	1	1	1	1	PLA2G4C	phospholipase A2, group IVC (cytosolic, calcium-independent)
hsa-miR-543	1	0	1	0	1	1	SLC19A2	solute carrier family 19 (thiamine transporter), member 2
hsa-miR-543	0	0	1	0	1	1	TMSB15B	thymosin beta 15B
hsa-miR-543	0	0	1	1	1	1	NELL2	NEL-like 2 (chicken)
hsa-miR-543	0	0	1	1	1	1	TMEM40	transmembrane protein 40
hsa-miR-543	0	0	1	1	0	0	C6orf130	chromosome 6 open reading frame 130
hsa-miR-543	1	0	1	1	1	1	TMEM71	transmembrane protein 71
hsa-miR-543	0	0	1	1	1	1	CDC42SE2	CDC42 small effector 2
hsa-miR-543	1	0	1	1	1	1	RACGAP1	Rac GTPase activating protein 1
hsa-miR-543	1	0	1	1	1	1	NIPA1	non imprinted in Prader-Willi/Angelman syndrome 1
hsa-miR-543	0	0	1	0	0	0	TRAV20	T cell receptor alpha variable 20
hsa-miR-543	0	0	1	1	1	1	SLAMF7	SLAM family member 7
hsa-miR-543	0	0	1	1	1	1	RNF32	ring finger protein 32
hsa-miR-543	0	0	1	1	0	0	SYT3	synaptotagmin III
hsa-miR-543	0	0	1	0	1	1	KIAA0895	KIAA0895
hsa-miR-543	1	0	1	1	1	1	HTR2C	5-hydroxytryptamine (serotonin) receptor 2C, G protein-coupled
hsa-miR-543	0	0	1	0	0	0	C3orf55	chromosome 3 open reading frame 55
hsa-miR-543	1	0	1	0	1	1	PSMF1	proteasome (prosome, macropain) inhibitor subunit 1 (PI31)
hsa-miR-543	1	0	1	1	1	1	TIAL1	TIA1 cytotoxic granule-associated RNA binding protein-like 1
hsa-miR-543	1	0	1	1	1	1	EYA4	eyes absent homolog 4 (Drosophila)
hsa-miR-543	1	0	1	1	1	1	GABRA1	gamma-aminobutyric acid (GABA) A receptor, alpha 1
hsa-miR-543	0	0	1	1	0	0	C7orf57	chromosome 7 open reading frame 57
hsa-miR-543	1	0	1	1	1	1	PITPNB	phosphatidylinositol transfer protein, beta
hsa-miR-543	0	0	1	0	0	0	CFL1P1	cofilin 1 (non-muscle) pseudogene 1
hsa-miR-543	0	0	1	1	1	1	FBXO24	F-box protein 24
hsa-miR-543	1	0	1	1	1	1	SF1	splicing factor 1
hsa-miR-543	1	0	1	1	1	1	RHOBTB1	Rho-related BTB domain containing 1
hsa-miR-543	1	0	1	1	1	1	SIRPA	signal-regulatory protein alpha
hsa-miR-543	1	0	1	1	0	0	TMEM181	transmembrane protein 181
hsa-miR-543	0	0	1	1	0	0	ADAP2	ArfGAP with dual PH domains 2
hsa-miR-543	0	0	1	1	1	1	SLC39A12	solute carrier family 39 (zinc transporter), member 12
hsa-miR-543	0	0	1	1	0	0	C2orf80	chromosome 2 open reading frame 80
hsa-miR-543	0	0	1	1	1	1	ARHGAP6	Rho GTPase activating protein 6
hsa-miR-543	1	0	1	1	1	1	LMO7	LIM domain 7
hsa-miR-543	0	0	1	1	1	1	TADA1	transcriptional adaptor 1
hsa-miR-543	0	0	1	1	0	0	FNTA	farnesyltransferase, CAAX box, alpha
hsa-miR-543	1	0	1	0	1	1	RAG1	recombination activating gene 1
hsa-miR-543	0	0	1	1	1	1	EFCAB13	EF-hand calcium binding domain 13
hsa-miR-543	1	0	1	1	1	1	GALNT1	UDP-N-acetyl-alpha-D-galactosamine:polypeptide N-acetylgalactosaminyltransferase 1 (GalNAc-T1)
hsa-miR-543	0	0	1	1	1	1	VBP1	von Hippel-Lindau binding protein 1
hsa-miR-543	0	0	1	1	1	1	SLC14A1	solute carrier family 14 (urea transporter), member 1 (Kidd blood group)
hsa-miR-543	0	0	1	0	0	0	LOC339622	uncharacterized LOC339622
hsa-miR-543	1	0	1	1	1	1	PDPK1	3-phosphoinositide dependent protein kinase-1
hsa-miR-543	1	0	1	1	1	1	SOGA2	SOGA family member 2
hsa-miR-543	0	0	1	1	1	1	SIAE	sialic acid acetylesterase
hsa-miR-543	0	0	1	0	0	0	SLC7A11-AS1	SLC7A11 antisense RNA 1
hsa-miR-543	0	0	1	0	0	0	FAM86JP	family with sequence similarity 86, member A pseudogene
hsa-miR-543	0	0	1	0	1	1	FAM13B	family with sequence similarity 13, member B
hsa-miR-543	1	0	1	1	1	1	FAM123A	family with sequence similarity 123A
hsa-miR-543	0	0	1	1	0	0	FAM159A	family with sequence similarity 159, member A
hsa-miR-543	1	0	1	1	1	1	TNFSF4	tumor necrosis factor (ligand) superfamily, member 4
hsa-miR-543	0	0	1	1	1	1	GOLGA6L9	golgin A6 family-like 9
hsa-miR-543	0	0	1	0	0	0	LRRC37BP1	leucine rich repeat containing 37B pseudogene 1
hsa-miR-543	0	0	1	1	1	1	DGKH	diacylglycerol kinase, eta
hsa-miR-543	1	0	1	1	1	1	PSIP1	PC4 and SFRS1 interacting protein 1
hsa-miR-543	0	0	1	0	0	0	LOC283914	uncharacterized LOC283914
hsa-miR-543	1	0	1	1	1	1	ZFAND4	zinc finger, AN1-type domain 4
hsa-miR-543	1	0	1	0	1	1	LYPD6	LY6/PLAUR domain containing 6
hsa-miR-543	1	0	1	1	1	1	RMND5A	required for meiotic nuclear division 5 homolog A (S. cerevisiae)
hsa-miR-543	1	0	1	1	1	1	RTKN2	rhotekin 2
hsa-miR-543	1	0	1	1	1	1	DIXDC1	DIX domain containing 1
hsa-miR-543	0	0	1	1	1	1	ZNF589	zinc finger protein 589
hsa-miR-543	0	0	1	1	1	1	INO80C	INO80 complex subunit C
hsa-miR-543	1	0	1	1	1	1	PELI1	pellino E3 ubiquitin protein ligase 1
hsa-miR-543	1	0	1	0	1	1	ARHGAP5	Rho GTPase activating protein 5
hsa-miR-543	1	0	1	0	1	1	SEMA4G	sema domain, immunoglobulin domain (Ig), transmembrane domain (TM) and short cytoplasmic domain, (semaphorin) 4G
hsa-miR-543	1	0	1	1	1	1	ZFP91	zinc finger protein 91 homolog (mouse)
hsa-miR-543	0	0	1	1	0	0	ADAM7	ADAM metallopeptidase domain 7
hsa-miR-543	1	0	1	1	1	1	SOX5	SRY (sex determining region Y)-box 5
hsa-miR-543	1	0	1	1	1	1	ZEB2	zinc finger E-box binding homeobox 2
hsa-miR-543	1	0	1	1	1	1	PRRG1	proline rich Gla (G-carboxyglutamic acid) 1
hsa-miR-543	1	0	1	0	1	1	C7orf41	chromosome 7 open reading frame 41
hsa-miR-543	1	0	1	1	1	1	SCOC	short coiled-coil protein
hsa-miR-543	0	0	1	1	1	1	ATF7IP	activating transcription factor 7 interacting protein
hsa-miR-543	0	0	1	1	1	1	SCLT1	sodium channel and clathrin linker 1
hsa-miR-543	0	0	1	1	1	1	STAG1	stromal antigen 1
hsa-miR-543	0	0	1	1	1	1	GORAB	golgin, RAB6-interacting
hsa-miR-543	1	0	1	1	0	0	ASRGL1	asparaginase like 1
hsa-miR-543	0	0	1	1	1	1	SGK2	serum/glucocorticoid regulated kinase 2
hsa-miR-543	1	0	1	1	1	1	AP3M1	adaptor-related protein complex 3, mu 1 subunit
hsa-miR-543	1	0	1	1	1	1	SLC26A7	solute carrier family 26, member 7
hsa-miR-543	0	0	1	0	0	0	PTGER4P2	prostaglandin E receptor 4 (subtype EP4) pseudogene 2
hsa-miR-543	0	0	1	0	0	0	FOXN3-AS2	FOXN3 antisense RNA 2
hsa-miR-543	0	0	1	1	0	0	CSF2RB	colony stimulating factor 2 receptor, beta, low-affinity (granulocyte-macrophage)
hsa-miR-543	0	0	1	1	1	1	C3orf67	chromosome 3 open reading frame 67
hsa-miR-543	1	0	1	0	1	1	AMMECR1L	AMME chromosomal region gene 1-like
hsa-miR-543	1	0	1	1	1	1	C18orf34	chromosome 18 open reading frame 34
hsa-miR-543	0	0	1	1	1	1	COBL	cordon-bleu homolog (mouse)
hsa-miR-543	1	0	1	0	1	1	PIK3R3	phosphoinositide-3-kinase, regulatory subunit 3 (gamma)
hsa-miR-543	1	0	1	1	1	1	ST8SIA2	ST8 alpha-N-acetyl-neuraminide alpha-2,8-sialyltransferase 2
hsa-miR-543	0	0	1	1	1	1	KLRF1	killer cell lectin-like receptor subfamily F, member 1
hsa-miR-543	0	0	1	1	1	1	TUBAL3	tubulin, alpha-like 3
hsa-miR-543	0	0	1	1	1	1	HMGB2	high mobility group box 2
hsa-miR-543	0	0	1	1	0	0	NUBP1	nucleotide binding protein 1
hsa-miR-543	1	0	1	0	1	1	MYBL1	v-myb myeloblastosis viral oncogene homolog (avian)-like 1
hsa-miR-543	1	0	1	1	1	1	ARFIP1	ADP-ribosylation factor interacting protein 1
hsa-miR-543	0	0	1	1	1	1	CCDC126	coiled-coil domain containing 126
hsa-miR-543	0	0	1	0	0	0	LOC283174	uncharacterized LOC283174
hsa-miR-543	0	0	1	0	0	0	FBXL19-AS1	FBXL19 antisense RNA 1 (head to head)
hsa-miR-543	0	0	1	1	1	1	POSTN	periostin, osteoblast specific factor
hsa-miR-543	0	0	1	1	0	0	FMN1	formin 1
hsa-miR-543	1	0	1	1	1	1	PNISR	PNN-interacting serine/arginine-rich protein
hsa-miR-543	0	0	1	0	0	0	TPTEP1	transmembrane phosphatase with tensin homology pseudogene 1
hsa-miR-543	1	0	1	1	1	1	CERS6	ceramide synthase 6
hsa-miR-543	1	0	1	1	1	1	KIAA0528	KIAA0528
hsa-miR-543	1	0	1	0	1	1	PRDM10	PR domain containing 10
hsa-miR-543	1	0	1	1	1	1	OTUD4	OTU domain containing 4
hsa-miR-543	0	0	1	1	0	0	ANKLE1	ankyrin repeat and LEM domain containing 1
hsa-miR-543	1	0	1	1	1	1	FKBP1A	FK506 binding protein 1A, 12kDa
hsa-miR-543	0	0	1	0	1	1	GOLGA8G	golgin A8 family, member G
hsa-miR-543	1	0	1	0	1	1	LRCH2	leucine-rich repeats and calponin homology (CH) domain containing 2
hsa-miR-543	0	0	1	0	1	1	RBM44	RNA binding motif protein 44
hsa-miR-543	0	0	1	0	0	0	LINC00314	long intergenic non-protein coding RNA 314
hsa-miR-543	1	0	1	1	1	1	MEGF11	multiple EGF-like-domains 11
hsa-miR-543	1	0	1	1	1	1	COLQ	collagen-like tail subunit (single strand of homotrimer) of asymmetric acetylcholinesterase
hsa-miR-543	0	0	1	1	1	1	HSF2	heat shock transcription factor 2
hsa-miR-543	0	0	1	0	0	0	FAM225B	family with sequence similarity 225, member B (non-protein coding)
hsa-miR-543	1	0	1	1	1	1	NIPAL2	NIPA-like domain containing 2
hsa-miR-543	0	0	1	1	0	0	EFCAB11	EF-hand calcium binding domain 11
hsa-miR-543	0	0	1	0	0	0	ADCY10P1	adenylate cyclase 10 (soluble) pseudogene 1
hsa-miR-543	1	0	1	1	1	1	SASH1	SAM and SH3 domain containing 1
hsa-miR-543	1	0	1	1	1	1	JPH1	junctophilin 1
hsa-miR-543	1	0	1	1	1	1	RBL2	retinoblastoma-like 2 (p130)
hsa-miR-543	0	0	1	0	1	1	GPX8	glutathione peroxidase 8 (putative)
hsa-miR-543	1	0	1	1	1	1	ETS1	v-ets erythroblastosis virus E26 oncogene homolog 1 (avian)
hsa-miR-543	1	0	1	1	1	1	SLC35F1	solute carrier family 35, member F1
hsa-miR-543	1	0	1	1	1	1	MLLT10	myeloid/lymphoid or mixed-lineage leukemia (trithorax homolog, Drosophila); translocated to, 10
hsa-miR-543	0	0	1	1	1	1	GLIPR1L2	GLI pathogenesis-related 1 like 2
hsa-miR-543	0	0	1	1	1	1	COL6A3	collagen, type VI, alpha 3
hsa-miR-543	0	0	1	1	1	1	GTF3C2	general transcription factor IIIC, polypeptide 2, beta 110kDa
hsa-miR-543	0	0	1	0	0	0	TRAF3IP2-AS1	TRAF3IP2 antisense RNA 1
hsa-miR-543	0	0	1	0	1	1	PRH2	proline-rich protein HaeIII subfamily 2
hsa-miR-543	1	0	1	1	1	1	MASP1	mannan-binding lectin serine peptidase 1 (C4/C2 activating component of Ra-reactive factor)
hsa-miR-543	0	0	1	1	1	1	IPCEF1	interaction protein for cytohesin exchange factors 1
hsa-miR-543	0	0	1	1	1	1	PRR14L	proline rich 14-like
hsa-miR-543	0	0	1	1	1	1	SCAPER	S-phase cyclin A-associated protein in the ER
hsa-miR-543	1	0	1	1	1	1	CGN	cingulin
hsa-miR-543	1	0	1	1	0	0	CECR2	cat eye syndrome chromosome region, candidate 2
hsa-miR-543	1	0	1	1	1	1	SLC39A13	solute carrier family 39 (zinc transporter), member 13
hsa-miR-543	1	0	1	1	1	1	STARD13	StAR-related lipid transfer (START) domain containing 13
hsa-miR-543	0	0	1	1	1	1	ARMCX3	armadillo repeat containing, X-linked 3
hsa-miR-543	0	0	1	1	0	0	TMEM41A	transmembrane protein 41A
hsa-miR-543	0	0	1	1	1	1	CCNT2	cyclin T2
hsa-miR-543	1	0	1	1	1	1	ATP7B	ATPase, Cu++ transporting, beta polypeptide
hsa-miR-543	0	0	1	1	1	1	DOCK5	dedicator of cytokinesis 5
hsa-miR-543	1	0	1	1	1	1	BCLAF1	BCL2-associated transcription factor 1
hsa-miR-543	1	0	1	1	1	1	NAV1	neuron navigator 1
hsa-miR-543	1	0	1	1	1	1	TMEM135	transmembrane protein 135
hsa-miR-543	0	0	1	0	0	0	ZNRD1-AS1	ZNRD1 antisense RNA 1
hsa-miR-543	1	0	1	1	1	1	CALD1	caldesmon 1
hsa-miR-543	1	0	1	1	1	1	SGK3	serum/glucocorticoid regulated kinase family, member 3
hsa-miR-543	0	0	1	1	0	0	APOBEC3H	apolipoprotein B mRNA editing enzyme, catalytic polypeptide-like 3H
hsa-miR-543	1	0	1	1	1	1	BSDC1	BSD domain containing 1
hsa-miR-543	0	0	1	1	1	1	HPGD	hydroxyprostaglandin dehydrogenase 15-(NAD)
hsa-miR-543	0	0	1	1	1	1	RWDD2B	RWD domain containing 2B
hsa-miR-543	0	0	1	1	0	0	HSD3B1	hydroxy-delta-5-steroid dehydrogenase, 3 beta- and steroid delta-isomerase 1
hsa-miR-543	1	0	1	1	1	1	FUT9	fucosyltransferase 9 (alpha (1,3) fucosyltransferase)
hsa-miR-543	1	0	1	1	1	1	VIM	vimentin
hsa-miR-543	0	0	1	0	0	0	FLJ30838	uncharacterized LOC400955
hsa-miR-543	0	0	1	0	0	0	LOC400768	uncharacterized LOC400768
hsa-miR-543	0	0	1	1	1	1	RABGGTB	Rab geranylgeranyltransferase, beta subunit
hsa-miR-543	0	0	1	1	0	0	HLA-C	major histocompatibility complex, class I, C
hsa-miR-543	1	0	1	1	1	1	C8orf58	chromosome 8 open reading frame 58
hsa-miR-543	1	0	1	1	1	1	ARL1	ADP-ribosylation factor-like 1
hsa-miR-543	1	0	1	1	1	1	SLC35D2	solute carrier family 35, member D2
hsa-miR-543	0	0	1	1	1	1	CIRBP	cold inducible RNA binding protein
hsa-miR-543	0	0	1	1	1	1	INCENP	inner centromere protein antigens 135/155kDa
hsa-miR-543	0	0	1	1	1	1	PROCR	protein C receptor, endothelial
hsa-miR-543	1	0	1	1	1	1	DCN	decorin
hsa-miR-543	0	0	1	1	1	1	SORD	sorbitol dehydrogenase
hsa-miR-543	0	0	1	1	0	0	TUSC3	tumor suppressor candidate 3
hsa-miR-543	0	0	1	1	1	1	GRAP2	GRB2-related adaptor protein 2
hsa-miR-543	0	0	1	1	1	1	C19orf12	chromosome 19 open reading frame 12
hsa-miR-543	0	0	1	1	1	1	ANKRD53	ankyrin repeat domain 53
hsa-miR-543	0	0	1	0	0	0	LOC729678	uncharacterized LOC729678
hsa-miR-543	1	0	1	1	1	1	CCDC25	coiled-coil domain containing 25
hsa-miR-543	1	0	1	1	1	1	PHTF1	putative homeodomain transcription factor 1
hsa-miR-543	0	0	1	1	1	1	BEX2	brain expressed X-linked 2
hsa-miR-543	1	0	1	1	1	1	DKK3	dickkopf 3 homolog (Xenopus laevis)
hsa-miR-543	0	0	1	0	1	1	TMEM155	transmembrane protein 155
hsa-miR-543	0	0	1	1	1	1	PDLIM1	PDZ and LIM domain 1
hsa-miR-543	0	0	1	0	0	0	LOC677759	uncharacterized LOC677759
hsa-miR-543	0	0	1	1	0	0	PTGDS	prostaglandin D2 synthase 21kDa (brain)
hsa-miR-543	0	0	1	1	1	1	DEDD	death effector domain containing
hsa-miR-543	0	0	1	0	1	1	VSTM2A	V-set and transmembrane domain containing 2A
hsa-miR-543	0	0	1	1	1	1	MAEL	maelstrom homolog (Drosophila)
hsa-miR-543	0	0	1	1	1	1	ZNF639	zinc finger protein 639
hsa-miR-543	1	0	1	1	1	1	RBBP7	retinoblastoma binding protein 7
hsa-miR-543	0	0	1	1	1	1	CD1C	CD1c molecule
hsa-miR-543	0	0	1	1	1	1	TCTN3	tectonic family member 3
hsa-miR-543	1	0	1	1	1	1	ANAPC16	anaphase promoting complex subunit 16
hsa-miR-543	0	0	1	1	1	1	ACSF3	acyl-CoA synthetase family member 3
hsa-miR-543	1	0	1	1	1	1	EIF1	eukaryotic translation initiation factor 1
hsa-miR-543	1	0	1	1	1	1	F11R	F11 receptor
hsa-miR-543	1	0	1	1	1	1	SNX1	sorting nexin 1
hsa-miR-543	0	0	1	1	1	1	DNAJC25	DnaJ (Hsp40) homolog, subfamily C , member 25
hsa-miR-543	1	0	1	0	1	1	MAP1B	microtubule-associated protein 1B
hsa-miR-543	0	0	1	0	0	0	RNF115	ring finger protein 115
hsa-miR-543	0	0	1	1	0	0	HEBP1	heme binding protein 1
hsa-miR-543	0	0	1	1	1	1	PLAC8	placenta-specific 8
hsa-miR-543	1	0	1	1	1	1	ATPAF1	ATP synthase mitochondrial F1 complex assembly factor 1
hsa-miR-543	1	0	1	1	1	1	LHX9	LIM homeobox 9
hsa-miR-543	0	0	1	1	1	1	FAM118B	family with sequence similarity 118, member B
hsa-miR-543	1	0	1	1	1	1	RND3	Rho family GTPase 3
hsa-miR-543	0	0	1	1	1	1	ARFRP1	ADP-ribosylation factor related protein 1
hsa-miR-543	0	0	1	0	0	0	MYSM1	Myb-like, SWIRM and MPN domains 1
hsa-miR-543	0	0	1	1	1	1	BDP1	B double prime 1, subunit of RNA polymerase III transcription initiation factor IIIB
hsa-miR-543	0	0	1	0	0	0	LOC731789	uncharacterized LOC731789
hsa-miR-543	0	0	1	1	1	1	CCP110	centriolar coiled coil protein 110kDa
hsa-miR-543	0	0	1	1	1	1	MRPL42	mitochondrial ribosomal protein L42
hsa-miR-543	1	0	1	1	1	1	PHACTR2	phosphatase and actin regulator 2
hsa-miR-543	0	0	1	1	1	1	ATG5	autophagy related 5
hsa-miR-543	1	0	1	1	1	1	KIAA2018	KIAA2018
hsa-miR-543	1	0	1	0	1	1	XRN1	5'-3' exoribonuclease 1
hsa-miR-543	1	0	1	0	1	1	OSBPL8	oxysterol binding protein-like 8
hsa-miR-543	1	0	1	1	1	1	SLC39A10	solute carrier family 39 (zinc transporter), member 10
hsa-miR-543	0	0	1	1	1	1	SLC39A14	solute carrier family 39 (zinc transporter), member 14
hsa-miR-543	0	0	1	0	0	0	61E3.4	nuclear pore complex interacting protein-like
hsa-miR-543	0	0	1	1	1	1	PTGS1	prostaglandin-endoperoxide synthase 1 (prostaglandin G/H synthase and cyclooxygenase)
hsa-miR-543	1	0	1	1	1	1	ATP2B3	ATPase, Ca++ transporting, plasma membrane 3
hsa-miR-543	1	0	1	0	1	1	DAPP1	dual adaptor of phosphotyrosine and 3-phosphoinositides
hsa-miR-543	0	0	1	1	1	1	AKAP17A	A kinase (PRKA) anchor protein 17A
hsa-miR-543	1	0	1	1	1	1	ATP2B2	ATPase, Ca++ transporting, plasma membrane 2
hsa-miR-543	0	0	1	0	1	1	OPRK1	opioid receptor, kappa 1
hsa-miR-543	1	0	1	1	1	1	GRM1	glutamate receptor, metabotropic 1
hsa-miR-543	0	0	1	1	0	0	CHRNE	cholinergic receptor, nicotinic, epsilon (muscle)
hsa-miR-543	1	0	1	1	1	1	COL1A2	collagen, type I, alpha 2
hsa-miR-543	1	0	1	1	1	1	CPOX	coproporphyrinogen oxidase
hsa-miR-543	1	0	1	1	1	1	GK	glycerol kinase
hsa-miR-543	1	0	1	0	1	1	ITGB3	integrin, beta 3 (platelet glycoprotein IIIa, antigen CD61)
hsa-miR-543	1	0	1	0	1	1	SGCB	sarcoglycan, beta (43kDa dystrophin-associated glycoprotein)
hsa-miR-543	1	0	1	1	1	1	NPC1	Niemann-Pick disease, type C1
hsa-miR-543	0	0	1	1	0	0	OCA2	oculocutaneous albinism II
hsa-miR-543	1	0	1	0	1	1	PKD2	polycystic kidney disease 2 (autosomal dominant)
hsa-miR-543	1	0	1	0	1	1	PTEN	phosphatase and tensin homolog
hsa-miR-543	1	0	1	1	1	1	RB1	retinoblastoma 1
hsa-miR-543	1	0	1	1	1	1	ATXN1	ataxin 1
hsa-miR-543	0	0	1	1	0	0	SERPINA7	serpin peptidase inhibitor, clade A (alpha-1 antiproteinase, antitrypsin), member 7
hsa-miR-543	1	0	1	0	1	1	CYBB	cytochrome b-245, beta polypeptide
hsa-miR-543	0	0	1	1	1	1	CYP11B2	cytochrome P450, family 11, subfamily B, polypeptide 2
hsa-miR-543	0	0	1	1	1	1	IL2	interleukin 2
hsa-miR-543	1	0	1	1	1	1	FASLG	Fas ligand (TNF superfamily, member 6)
hsa-miR-543	0	0	1	1	0	0	IL13RA2	interleukin 13 receptor, alpha 2
hsa-miR-543	0	0	1	1	0	0	ADORA3	adenosine A3 receptor
hsa-miR-543	1	0	1	1	1	1	CACNB4	calcium channel, voltage-dependent, beta 4 subunit
hsa-miR-543	0	0	1	1	1	1	CRH	corticotropin releasing hormone
hsa-miR-543	0	0	1	1	1	1	CYP7A1	cytochrome P450, family 7, subfamily A, polypeptide 1
hsa-miR-543	1	0	1	1	1	1	DIO2	deiodinase, iodothyronine, type II
hsa-miR-543	1	0	1	1	1	1	GRM5	glutamate receptor, metabotropic 5
hsa-miR-543	1	0	1	1	1	1	PDE3B	phosphodiesterase 3B, cGMP-inhibited
hsa-miR-543	0	0	1	1	1	1	PTGS2	prostaglandin-endoperoxide synthase 2 (prostaglandin G/H synthase and cyclooxygenase)
hsa-miR-543	0	0	1	0	1	1	DNAJB3	DnaJ (Hsp40) homolog, subfamily B, member 3
hsa-miR-543	1	0	1	0	1	1	SMAD5	SMAD family member 5
hsa-miR-543	1	0	1	0	1	1	SPOPL	speckle-type POZ protein-like
hsa-miR-543	0	0	1	0	1	1	C9orf170	chromosome 9 open reading frame 170
hsa-miR-543	0	0	1	1	1	1	CC2D2B	coiled-coil and C2 domain containing 2B
hsa-miR-543	1	0	1	1	1	1	HMGXB4	HMG box domain containing 4
hsa-miR-543	1	0	1	1	1	1	BICD2	bicaudal D homolog 2 (Drosophila)
hsa-miR-543	0	0	1	1	1	1	ALG11	asparagine-linked glycosylation 11, alpha-1,2-mannosyltransferase homolog (yeast)
hsa-miR-543	0	0	1	1	1	1	CCDC144NL	coiled-coil domain containing 144 family, N-terminal like
hsa-miR-543	0	0	1	1	1	1	DBX2	developing brain homeobox 2
hsa-miR-543	0	0	1	0	0	0	FLJ42842	uncharacterized FLJ42842
hsa-miR-543	1	0	1	1	1	1	AK4	adenylate kinase 4
hsa-miR-543	0	0	1	1	1	1	SCP2	sterol carrier protein 2
hsa-miR-543	1	0	1	1	1	1	L3MBTL3	l(3)mbt-like 3 (Drosophila)
hsa-miR-543	1	0	1	1	1	1	EI24	etoposide induced 2.4 mRNA
hsa-miR-543	0	0	1	1	1	1	TRIM13	tripartite motif containing 13
hsa-miR-543	1	0	1	0	1	1	C18orf25	chromosome 18 open reading frame 25
hsa-miR-543	1	0	1	1	1	1	BCAP29	B-cell receptor-associated protein 29
hsa-miR-543	0	0	1	1	1	1	FBXO47	F-box protein 47
hsa-miR-543	0	0	1	0	1	1	THEMIS	thymocyte selection associated
hsa-miR-543	1	0	1	0	1	1	FAM125B	family with sequence similarity 125, member B
hsa-miR-543	0	0	1	1	0	0	PNLIPRP3	pancreatic lipase-related protein 3
hsa-miR-543	0	0	1	1	0	0	SOHLH1	spermatogenesis and oogenesis specific basic helix-loop-helix 1
hsa-miR-543	0	0	1	0	1	1	GOLGA8E	golgin A8 family, member E
hsa-miR-543	1	0	1	1	1	1	TRNP1	TMF1-regulated nuclear protein 1
hsa-miR-543	1	0	1	0	1	1	ZNF793	zinc finger protein 793
hsa-miR-543	1	0	1	0	1	1	SYT14L	synaptotagmin XIV-like
hsa-miR-543	0	0	1	1	1	1	PURG	purine-rich element binding protein G
hsa-miR-543	1	0	1	1	1	1	PHF6	PHD finger protein 6
hsa-miR-543	1	0	1	0	1	1	GOPC	golgi-associated PDZ and coiled-coil motif containing
hsa-miR-543	1	0	1	1	1	1	VMA21	VMA21 vacuolar H+-ATPase homolog (S. cerevisiae)
hsa-miR-543	0	0	1	1	1	1	NARG2	NMDA receptor regulated 2
hsa-miR-543	0	0	1	1	1	1	POLR2M	polymerase (RNA) II (DNA directed) polypeptide M
hsa-miR-543	0	0	1	1	1	1	NPIPL1	nuclear pore complex interacting protein-like 1
hsa-miR-543	1	0	1	1	1	1	SBK1	SH3-binding domain kinase 1
hsa-miR-543	1	0	1	1	1	1	RAB3IP	RAB3A interacting protein (rabin3)
hsa-miR-543	0	0	1	1	1	1	WASF1	WAS protein family, member 1
hsa-miR-543	1	0	1	0	1	1	RAB12	RAB12, member RAS oncogene family
hsa-miR-543	0	0	1	1	0	0	CCT8L1P	chaperonin containing TCP1, subunit 8 (theta)-like 1, pseudogene
hsa-miR-543	0	0	1	1	1	1	FAM24A	family with sequence similarity 24, member A
hsa-miR-543	1	0	1	0	1	1	MSRB3	methionine sulfoxide reductase B3
hsa-miR-543	1	0	1	1	1	1	MYCL1	v-myc myelocytomatosis viral oncogene homolog 1, lung carcinoma derived (avian)
hsa-miR-543	1	0	1	1	1	1	CHTF8	CTF8, chromosome transmission fidelity factor 8 homolog (S. cerevisiae)
hsa-miR-543	0	0	1	0	1	1	C15orf56	chromosome 15 open reading frame 56
hsa-miR-543	1	0	1	1	1	1	CHN2	chimerin (chimaerin) 2
hsa-miR-543	1	0	1	1	1	1	MLLT4	myeloid/lymphoid or mixed-lineage leukemia (trithorax homolog, Drosophila); translocated to, 4
hsa-miR-543	1	0	1	0	1	1	FAM133B	family with sequence similarity 133, member B
hsa-miR-543	0	0	1	1	1	1	SPOCK3	sparc/osteonectin, cwcv and kazal-like domains proteoglycan (testican) 3
hsa-miR-543	1	0	1	0	1	1	CD83	CD83 molecule
hsa-miR-543	1	0	1	1	1	1	MTMR12	myotubularin related protein 12
hsa-miR-543	1	0	1	1	1	1	PRKAG2	protein kinase, AMP-activated, gamma 2 non-catalytic subunit
hsa-miR-543	1	0	1	1	1	1	GLIS3	GLIS family zinc finger 3
hsa-miR-543	0	0	1	1	1	1	PSPC1	paraspeckle component 1
hsa-miR-543	1	0	1	1	1	1	WHSC1	Wolf-Hirschhorn syndrome candidate 1
hsa-miR-543	0	0	1	1	1	1	SEC24B	SEC24 family, member B (S. cerevisiae)
hsa-miR-543	0	0	1	1	1	1	FAM22G	family with sequence similarity 22, member G
hsa-miR-543	1	0	1	1	1	1	MZT1	mitotic spindle organizing protein 1
hsa-miR-543	1	0	1	1	1	1	METTL9	methyltransferase like 9
hsa-miR-543	1	0	1	1	1	1	PDE11A	phosphodiesterase 11A
hsa-miR-543	0	0	1	1	0	0	VPS37D	vacuolar protein sorting 37 homolog D (S. cerevisiae)
hsa-miR-543	1	0	1	1	1	1	SRSF1	serine/arginine-rich splicing factor 1
hsa-miR-543	1	0	1	1	1	1	DACT1	dapper, antagonist of beta-catenin, homolog 1 (Xenopus laevis)
hsa-miR-543	1	0	1	1	1	1	CUL4B	cullin 4B
hsa-miR-543	1	0	1	1	1	1	LDB3	LIM domain binding 3
hsa-miR-543	1	0	1	1	1	1	KIAA0368	KIAA0368
hsa-miR-543	1	0	1	1	1	1	SHANK3	SH3 and multiple ankyrin repeat domains 3
hsa-miR-543	1	0	1	0	1	1	THSD7B	thrombospondin, type I, domain containing 7B
hsa-miR-543	1	0	1	1	1	1	BEND3	BEN domain containing 3
hsa-miR-543	0	0	1	1	1	1	TMEM202	transmembrane protein 202
hsa-miR-543	1	0	1	1	1	1	ZNF697	zinc finger protein 697
hsa-miR-543	1	0	1	1	1	1	MBOAT1	membrane bound O-acyltransferase domain containing 1
hsa-miR-543	1	0	1	0	1	1	MEGF9	multiple EGF-like-domains 9
hsa-miR-543	0	0	1	1	0	0	OVOS2	ovostatin 2
hsa-miR-543	0	0	1	1	1	1	TBX18	T-box 18
hsa-miR-543	0	0	1	1	1	1	SNTN	sentan, cilia apical structure protein
hsa-miR-543	0	0	1	1	0	0	PRKDC	protein kinase, DNA-activated, catalytic polypeptide
hsa-miR-543	0	0	1	1	1	1	ACPP	acid phosphatase, prostate
hsa-miR-543	0	0	1	1	1	1	ACYP1	acylphosphatase 1, erythrocyte (common) type
hsa-miR-543	1	0	1	1	1	1	ADAM10	ADAM metallopeptidase domain 10
hsa-miR-543	1	0	1	1	1	1	BMP2	bone morphogenetic protein 2
hsa-miR-543	1	0	1	0	1	1	CDK6	cyclin-dependent kinase 6
hsa-miR-543	1	0	1	0	1	1	CPD	carboxypeptidase D
hsa-miR-543	0	0	1	1	1	1	DAD1	defender against cell death 1
hsa-miR-543	1	0	1	1	1	1	S1PR1	sphingosine-1-phosphate receptor 1
hsa-miR-543	1	0	1	1	1	1	EREG	epiregulin
hsa-miR-543	1	0	1	1	0	0	GDI1	GDP dissociation inhibitor 1
hsa-miR-543	1	0	1	1	1	1	AHR	aryl hydrocarbon receptor
hsa-miR-543	1	0	1	1	1	1	AQP4	aquaporin 4
hsa-miR-543	1	0	1	1	1	1	ARL4D	ADP-ribosylation factor-like 4D
hsa-miR-543	1	0	1	1	1	1	BCL6	B-cell CLL/lymphoma 6
hsa-miR-543	0	0	1	1	0	0	C5	complement component 5
hsa-miR-543	1	0	1	1	1	1	CDC25A	cell division cycle 25 homolog A (S. pombe)
hsa-miR-543	1	0	1	0	1	1	CEBPG	CCAAT/enhancer binding protein (C/EBP), gamma
hsa-miR-543	1	0	1	0	1	1	COL19A1	collagen, type XIX, alpha 1
hsa-miR-543	0	0	1	1	0	0	CSNK2A2	casein kinase 2, alpha prime polypeptide
hsa-miR-543	0	0	1	1	1	1	CTH	cystathionase (cystathionine gamma-lyase)
hsa-miR-543	1	0	1	1	1	1	DR1	down-regulator of transcription 1, TBP-binding (negative cofactor 2)
hsa-miR-543	1	0	1	1	1	1	DSC3	desmocollin 3
hsa-miR-543	1	0	1	1	1	1	FBN2	fibrillin 2
hsa-miR-543	0	0	1	1	1	1	FPR3	formyl peptide receptor 3
hsa-miR-543	1	0	1	1	1	1	GBP1	guanylate binding protein 1, interferon-inducible
hsa-miR-543	1	0	1	1	1	1	GOT2	glutamic-oxaloacetic transaminase 2, mitochondrial (aspartate aminotransferase 2)
hsa-miR-543	0	0	1	1	1	1	HOXB5	homeobox B5
hsa-miR-543	0	0	1	1	1	1	IL12B	interleukin 12B (natural killer cell stimulatory factor 2, cytotoxic lymphocyte maturation factor 2, p40)
hsa-miR-543	1	0	1	1	1	1	ITPR2	inositol 1,4,5-trisphosphate receptor, type 2
hsa-miR-543	1	0	1	1	1	1	KCNA3	potassium voltage-gated channel, shaker-related subfamily, member 3
hsa-miR-543	1	0	1	1	1	1	KCNA4	potassium voltage-gated channel, shaker-related subfamily, member 4
hsa-miR-543	1	0	1	1	1	1	KPNA4	karyopherin alpha 4 (importin alpha 3)
hsa-miR-543	1	0	1	0	1	1	LAMC1	laminin, gamma 1 (formerly LAMB2)
hsa-miR-543	1	0	1	1	1	1	LIFR	leukemia inhibitory factor receptor alpha
hsa-miR-543	0	0	1	1	1	1	MMP13	matrix metallopeptidase 13 (collagenase 3)
hsa-miR-543	1	0	1	1	1	1	NPAT	nuclear protein, ataxia-telangiectasia locus
hsa-miR-543	0	0	1	1	1	1	PAFAH1B2	platelet-activating factor acetylhydrolase 1b, catalytic subunit 2 (30kDa)
hsa-miR-543	1	0	1	1	1	1	PAWR	PRKC, apoptosis, WT1, regulator
hsa-miR-543	1	0	1	1	1	1	PRKAR2B	protein kinase, cAMP-dependent, regulatory, type II, beta
hsa-miR-543	0	0	1	1	0	0	PRM1	protamine 1
hsa-miR-543	1	0	1	1	1	1	PROX1	prospero homeobox 1
hsa-miR-543	0	0	1	1	1	1	PTPRC	protein tyrosine phosphatase, receptor type, C
hsa-miR-543	1	0	1	0	1	1	CCL22	chemokine (C-C motif) ligand 22
hsa-miR-543	1	0	1	1	1	1	SRSF3	serine/arginine-rich splicing factor 3
hsa-miR-543	1	0	1	1	0	0	SLN	sarcolipin
hsa-miR-543	1	0	1	1	1	1	SNX2	sorting nexin 2
hsa-miR-543	0	0	1	1	1	1	SPAG1	sperm associated antigen 1
hsa-miR-543	1	0	1	1	1	1	SYN2	synapsin II
hsa-miR-543	0	0	1	1	0	0	TTC1	tetratricopeptide repeat domain 1
hsa-miR-543	0	0	1	1	1	1	UBE2D1	ubiquitin-conjugating enzyme E2D 1
hsa-miR-543	1	0	1	0	1	1	YWHAB	tyrosine 3-monooxygenase/tryptophan 5-monooxygenase activation protein, beta polypeptide
hsa-miR-543	0	0	1	0	1	1	ZFY	zinc finger protein, Y-linked
hsa-miR-543	0	0	1	1	1	1	ZNF124	zinc finger protein 124
hsa-miR-543	1	0	1	1	1	1	ZNF131	zinc finger protein 131
hsa-miR-543	1	0	1	1	1	1	ADAM12	ADAM metallopeptidase domain 12
hsa-miR-543	1	0	1	1	1	1	HMGA2	high mobility group AT-hook 2
hsa-miR-543	1	0	1	1	1	1	TAF15	TAF15 RNA polymerase II, TATA box binding protein (TBP)-associated factor, 68kDa
hsa-miR-543	1	0	1	1	1	1	NRIP1	nuclear receptor interacting protein 1
hsa-miR-543	0	0	1	1	1	1	DDO	D-aspartate oxidase
hsa-miR-543	1	0	1	1	1	1	CDC14A	CDC14 cell division cycle 14 homolog A (S. cerevisiae)
hsa-miR-543	1	0	1	1	1	1	TNFSF11	tumor necrosis factor (ligand) superfamily, member 11
hsa-miR-543	0	0	1	1	1	1	SLC25A12	solute carrier family 25 (aspartate/glutamate carrier), member 12
hsa-miR-543	1	0	1	0	1	1	TNKS	tankyrase, TRF1-interacting ankyrin-related ADP-ribose polymerase
hsa-miR-543	0	0	1	1	1	1	CRADD	CASP2 and RIPK1 domain containing adaptor with death domain
hsa-miR-543	1	0	1	1	1	1	KAT2B	K(lysine) acetyltransferase 2B
hsa-miR-543	1	0	1	0	1	1	WASL	Wiskott-Aldrich syndrome-like
hsa-miR-543	0	0	1	1	1	1	RNF8	ring finger protein 8, E3 ubiquitin protein ligase
hsa-miR-543	1	0	1	1	1	1	MAP7	microtubule-associated protein 7
hsa-miR-543	1	0	1	1	1	1	BCL2L2	BCL2-like 2
hsa-miR-543	0	0	1	1	1	1	CDKN1B	cyclin-dependent kinase inhibitor 1B (p27, Kip1)
hsa-miR-543	0	0	1	1	1	1	TIMM8A	translocase of inner mitochondrial membrane 8 homolog A (yeast)
hsa-miR-543	1	0	1	0	1	1	SLC1A2	solute carrier family 1 (glial high affinity glutamate transporter), member 2
hsa-miR-543	0	0	1	0	1	1	SLC1A3	solute carrier family 1 (glial high affinity glutamate transporter), member 3
hsa-miR-543	0	0	1	0	1	1	TMSB4Y	thymosin beta 4, Y-linked
hsa-miR-543	1	0	1	0	1	1	MED14	mediator complex subunit 14
hsa-miR-543	0	0	1	1	1	1	TRIP13	thyroid hormone receptor interactor 13
hsa-miR-543	0	0	1	1	1	1	LY86	lymphocyte antigen 86
hsa-miR-543	1	0	1	1	1	1	GDA	guanine deaminase
hsa-miR-543	0	0	1	1	1	1	ACTL6A	actin-like 6A
hsa-miR-543	1	0	1	0	1	1	ACVR1B	activin A receptor, type IB
hsa-miR-543	1	0	1	1	1	1	ARL3	ADP-ribosylation factor-like 3
hsa-miR-543	1	0	1	0	1	1	CEBPA	CCAAT/enhancer binding protein (C/EBP), alpha
hsa-miR-543	1	0	1	1	1	1	CREB1	cAMP responsive element binding protein 1
hsa-miR-543	1	0	1	1	1	1	DACH1	dachshund homolog 1 (Drosophila)
hsa-miR-543	1	0	1	0	1	1	ACSL4	acyl-CoA synthetase long-chain family member 4
hsa-miR-543	1	0	1	1	1	1	FLOT2	flotillin 2
hsa-miR-543	0	0	1	1	1	1	GP5	glycoprotein V (platelet)
hsa-miR-543	0	0	1	1	0	0	NDUFB1	NADH dehydrogenase (ubiquinone) 1 beta subcomplex, 1, 7kDa
hsa-miR-543	1	0	1	0	1	1	PKNOX1	PBX/knotted 1 homeobox 1
hsa-miR-543	1	0	1	1	1	1	WNT11	wingless-type MMTV integration site family, member 11
hsa-miR-543	1	0	1	1	1	1	RAB11A	RAB11A, member RAS oncogene family
hsa-miR-543	0	0	1	0	1	1	BPY2	basic charge, Y-linked, 2
hsa-miR-543	1	0	1	1	1	1	MTMR6	myotubularin related protein 6
hsa-miR-543	1	0	1	1	1	1	SCAF11	SR-related CTD-associated factor 11
hsa-miR-543	1	0	1	1	1	1	NREP	neuronal regeneration related protein homolog (rat)
hsa-miR-543	1	0	1	1	1	1	B4GALT6	UDP-Gal:betaGlcNAc beta 1,4- galactosyltransferase, polypeptide 6
hsa-miR-543	1	0	1	1	1	1	KIF3B	kinesin family member 3B
hsa-miR-543	1	0	1	1	1	1	AKAP7	A kinase (PRKA) anchor protein 7
hsa-miR-543	0	0	1	1	1	1	CALB1	calbindin 1, 28kDa
hsa-miR-543	0	0	1	1	1	1	DSC1	desmocollin 1
hsa-miR-543	1	0	1	0	1	1	KIF5A	kinesin family member 5A
hsa-miR-543	0	0	1	1	1	1	SERPINI1	serpin peptidase inhibitor, clade I (neuroserpin), member 1
hsa-miR-543	0	0	1	1	1	1	PRCP	prolylcarboxypeptidase (angiotensinase C)
hsa-miR-543	1	0	1	0	1	1	CALM3	calmodulin 3 (phosphorylase kinase, delta)
hsa-miR-543	1	0	1	1	1	1	GPM6A	glycoprotein M6A
hsa-miR-543	1	0	1	1	0	0	NNAT	neuronatin
hsa-miR-543	1	0	1	1	1	1	PHF2	PHD finger protein 2
hsa-miR-543	0	0	1	1	1	1	PPP1R3C	protein phosphatase 1, regulatory subunit 3C
hsa-miR-543	1	0	1	0	1	1	PRKCE	protein kinase C, epsilon
hsa-miR-543	1	0	1	1	1	1	ABCA1	ATP-binding cassette, sub-family A (ABC1), member 1
hsa-miR-543	1	0	1	1	1	1	GTF2E1	general transcription factor IIE, polypeptide 1, alpha 56kDa
hsa-miR-543	1	0	1	1	1	1	HOXA1	homeobox A1
hsa-miR-543	0	0	1	1	1	1	ING1	inhibitor of growth family, member 1
hsa-miR-543	0	0	1	1	1	1	LIMK2	LIM domain kinase 2
hsa-miR-543	1	0	1	0	1	1	SPRY3	sprouty homolog 3 (Drosophila)
hsa-miR-543	1	0	1	1	1	1	RNF6	ring finger protein (C3H2C3 type) 6
hsa-miR-543	1	0	1	1	1	1	ENDOU	endonuclease, polyU-specific
hsa-miR-543	0	0	1	1	1	1	HS3ST2	heparan sulfate (glucosamine) 3-O-sulfotransferase 2
hsa-miR-543	1	0	1	1	1	1	CAPZA2	capping protein (actin filament) muscle Z-line, alpha 2
hsa-miR-543	1	0	1	1	1	1	DYNC1LI2	dynein, cytoplasmic 1, light intermediate chain 2
hsa-miR-543	1	0	1	0	1	1	PPP1R2	protein phosphatase 1, regulatory (inhibitor) subunit 2
hsa-miR-543	1	0	1	1	1	1	TSG101	tumor susceptibility gene 101
hsa-miR-543	1	0	1	0	1	1	APPBP2	amyloid beta precursor protein (cytoplasmic tail) binding protein 2
hsa-miR-543	1	0	1	1	1	1	NEBL	nebulette
hsa-miR-543	1	0	1	1	1	1	SPTLC1	serine palmitoyltransferase, long chain base subunit 1
hsa-miR-543	1	0	1	0	1	1	ARFGEF2	ADP-ribosylation factor guanine nucleotide-exchange factor 2 (brefeldin A-inhibited)
hsa-miR-543	0	0	1	0	1	1	SLC16A2	solute carrier family 16, member 2 (thyroid hormone transporter)
hsa-miR-543	0	0	1	1	0	0	SCGB1D1	secretoglobin, family 1D, member 1
hsa-miR-543	1	0	1	1	1	1	CTCF	CCCTC-binding factor (zinc finger protein)
hsa-miR-543	1	0	1	0	1	1	MAP4K5	mitogen-activated protein kinase kinase kinase kinase 5
hsa-miR-543	1	0	1	0	1	1	API5	apoptosis inhibitor 5
hsa-miR-543	1	0	1	1	1	1	SRSF10	serine/arginine-rich splicing factor 10
hsa-miR-543	0	0	1	1	1	1	PPP1R17	protein phosphatase 1, regulatory subunit 17
hsa-miR-543	1	0	1	1	1	1	BTG2	BTG family, member 2
hsa-miR-543	1	0	1	1	1	1	KAT6A	K(lysine) acetyltransferase 6A
hsa-miR-543	1	0	1	1	1	1	ZBTB33	zinc finger and BTB domain containing 33
hsa-miR-543	0	0	1	1	1	1	RAB40B	RAB40B, member RAS oncogene family
hsa-miR-543	1	0	1	1	1	1	RIT1	Ras-like without CAAX 1
hsa-miR-543	1	0	1	0	1	1	SLC2A3	solute carrier family 2 (facilitated glucose transporter), member 3
hsa-miR-543	1	0	1	1	1	1	HSPA13	heat shock protein 70kDa family, member 13
hsa-miR-543	0	0	1	1	1	1	TAF5	TAF5 RNA polymerase II, TATA box binding protein (TBP)-associated factor, 100kDa
hsa-miR-543	1	0	1	1	1	1	NR4A3	nuclear receptor subfamily 4, group A, member 3
hsa-miR-543	1	0	1	0	1	1	PAPD7	PAP associated domain containing 7
hsa-miR-543	1	0	1	1	1	1	SSR3	signal sequence receptor, gamma (translocon-associated protein gamma)
hsa-miR-543	1	0	1	1	1	1	TMF1	TATA element modulatory factor 1
hsa-miR-543	0	0	1	1	0	0	USF1	upstream transcription factor 1
hsa-miR-543	1	0	1	1	1	1	UTRN	utrophin
hsa-miR-543	1	0	1	1	1	1	UTY	ubiquitously transcribed tetratricopeptide repeat gene, Y-linked
hsa-miR-543	1	0	1	1	1	1	ZIC2	Zic family member 2
hsa-miR-543	1	0	1	1	1	1	VEZF1	vascular endothelial zinc finger 1
hsa-miR-543	1	0	1	0	1	1	PRSS23	protease, serine, 23
hsa-miR-543	0	0	1	1	1	1	WIF1	WNT inhibitory factor 1
hsa-miR-543	1	0	1	1	1	1	CA5B	carbonic anhydrase VB, mitochondrial
hsa-miR-543	1	0	1	0	1	1	CHP1	calcineurin-like EF hand protein 1
hsa-miR-543	1	0	1	1	1	1	KLF12	Kruppel-like factor 12
hsa-miR-543	0	0	1	0	1	1	AP4E1	adaptor-related protein complex 4, epsilon 1 subunit
hsa-miR-543	1	0	1	1	1	1	TARDBP	TAR DNA binding protein
hsa-miR-543	0	0	1	1	0	0	PRDX5	peroxiredoxin 5
hsa-miR-543	1	0	1	1	0	0	CCRN4L	CCR4 carbon catabolite repression 4-like (S. cerevisiae)
hsa-miR-543	1	0	1	1	1	1	FBXL3	F-box and leucine-rich repeat protein 3
hsa-miR-543	1	0	1	1	1	1	RHOQ	ras homolog family member Q
hsa-miR-543	1	0	1	1	1	1	LAMP5	lysosomal-associated membrane protein family, member 5
hsa-miR-543	1	0	1	1	1	1	MAPRE1	microtubule-associated protein, RP/EB family, member 1
hsa-miR-543	1	0	1	1	1	1	NUFIP1	nuclear fragile X mental retardation protein interacting protein 1
hsa-miR-543	0	0	1	0	1	1	SEMA3E	sema domain, immunoglobulin domain (Ig), short basic domain, secreted, (semaphorin) 3E
hsa-miR-543	1	0	1	1	1	1	SF3B1	splicing factor 3b, subunit 1, 155kDa
hsa-miR-543	0	0	1	0	1	1	TLL1	tolloid-like 1
hsa-miR-543	1	0	1	1	1	1	LRP12	low density lipoprotein receptor-related protein 12
hsa-miR-543	0	0	1	0	1	1	EMR2	egf-like module containing, mucin-like, hormone receptor-like 2
hsa-miR-543	1	0	1	1	1	1	ZBTB43	zinc finger and BTB domain containing 43
hsa-miR-543	1	0	1	1	1	1	SOCS5	suppressor of cytokine signaling 5
hsa-miR-543	0	0	1	1	1	1	METTL7A	methyltransferase like 7A
hsa-miR-543	1	0	1	0	1	1	C16orf72	chromosome 16 open reading frame 72
hsa-miR-543	0	0	1	1	1	1	DYNLRB1	dynein, light chain, roadblock-type 1
hsa-miR-543	1	0	1	1	1	1	RNF7	ring finger protein 7
hsa-miR-543	1	0	1	0	1	1	ODZ1	odz, odd Oz/ten-m homolog 1 (Drosophila)
hsa-miR-543	0	0	1	1	1	1	C22orf28	chromosome 22 open reading frame 28
hsa-miR-543	1	0	1	1	1	1	CORO1C	coronin, actin binding protein, 1C
hsa-miR-543	0	0	1	1	0	0	CCT8L2	chaperonin containing TCP1, subunit 8 (theta)-like 2
hsa-miR-543	1	0	1	1	1	1	ZBTB11	zinc finger and BTB domain containing 11
hsa-miR-543	1	0	1	1	1	1	SERP1	stress-associated endoplasmic reticulum protein 1
hsa-miR-543	1	0	1	1	1	1	ERO1L	ERO1-like (S. cerevisiae)
hsa-miR-543	1	0	1	1	1	1	HERC3	HECT and RLD domain containing E3 ubiquitin protein ligase 3
hsa-miR-543	1	0	1	0	1	1	ATP11B	ATPase, class VI, type 11B
hsa-miR-543	1	0	1	1	1	1	RALGPS1	Ral GEF with PH domain and SH3 binding motif 1
hsa-miR-543	1	0	1	1	1	1	UBE3C	ubiquitin protein ligase E3C
hsa-miR-543	1	0	1	1	1	1	RASSF2	Ras association (RalGDS/AF-6) domain family member 2
hsa-miR-543	1	0	1	0	1	1	SERTAD2	SERTA domain containing 2
hsa-miR-543	1	0	1	1	1	1	MRPL19	mitochondrial ribosomal protein L19
hsa-miR-543	1	0	1	1	1	1	TBC1D4	TBC1 domain family, member 4
hsa-miR-543	0	0	1	1	1	1	ADNP2	ADNP homeobox 2
hsa-miR-543	1	0	1	0	1	1	WDFY3	WD repeat and FYVE domain containing 3
hsa-miR-543	1	0	1	1	1	1	RAB21	RAB21, member RAS oncogene family
hsa-miR-543	1	0	1	0	1	1	PDS5B	PDS5, regulator of cohesion maintenance, homolog B (S. cerevisiae)
hsa-miR-543	1	0	1	1	1	1	TRAK2	trafficking protein, kinesin binding 2
hsa-miR-543	0	0	1	1	0	0	AVL9	AVL9 homolog (S. cerevisiase)
hsa-miR-543	1	0	1	0	1	1	PEG10	paternally expressed 10
hsa-miR-543	1	0	1	1	1	1	RTF1	Rtf1, Paf1/RNA polymerase II complex component, homolog (S. cerevisiae)
hsa-miR-543	1	0	1	1	0	0	RFTN1	raftlin, lipid raft linker 1
hsa-miR-543	1	0	1	0	1	1	LARP4B	La ribonucleoprotein domain family, member 4B
hsa-miR-543	1	0	1	1	1	1	PRRC2C	proline-rich coiled-coil 2C
hsa-miR-543	1	0	1	1	1	1	CUX2	cut-like homeobox 2
hsa-miR-543	1	0	1	1	1	1	WDR7	WD repeat domain 7
hsa-miR-543	0	0	1	0	1	1	ZDHHC17	zinc finger, DHHC-type containing 17
hsa-miR-543	1	0	1	1	1	1	ASXL1	additional sex combs like 1 (Drosophila)
hsa-miR-543	1	0	1	1	1	1	ZFYVE26	zinc finger, FYVE domain containing 26
hsa-miR-543	0	0	1	1	1	1	HERC4	HECT and RLD domain containing E3 ubiquitin protein ligase 4
hsa-miR-543	1	0	1	1	1	1	FGFR1	fibroblast growth factor receptor 1
hsa-miR-543	1	0	1	1	1	1	AZIN1	antizyme inhibitor 1
hsa-miR-543	1	0	1	1	1	1	ST8SIA3	ST8 alpha-N-acetyl-neuraminide alpha-2,8-sialyltransferase 3
hsa-miR-543	0	0	1	1	1	1	PCF11	PCF11, cleavage and polyadenylation factor subunit, homolog (S. cerevisiae)
hsa-miR-543	1	0	1	1	1	1	HOOK1	hook homolog 1 (Drosophila)
hsa-miR-543	1	0	1	0	1	1	TRIM33	tripartite motif containing 33
hsa-miR-543	1	0	1	1	1	1	PHF20L1	PHD finger protein 20-like 1
hsa-miR-543	1	0	1	1	1	1	UBE2J1	ubiquitin-conjugating enzyme E2, J1
hsa-miR-543	0	0	1	1	1	1	MRPS23	mitochondrial ribosomal protein S23
hsa-miR-543	1	0	1	0	1	1	CNR1	cannabinoid receptor 1 (brain)
hsa-miR-543	1	0	1	0	1	1	WNT16	wingless-type MMTV integration site family, member 16
hsa-miR-543	0	0	1	1	1	1	ZFR	zinc finger RNA binding protein
hsa-miR-543	1	0	1	1	1	1	VGLL3	vestigial like 3 (Drosophila)
hsa-miR-543	1	0	1	1	1	1	PCYOX1	prenylcysteine oxidase 1
hsa-miR-543	1	0	1	1	1	1	CMPK1	cytidine monophosphate (UMP-CMP) kinase 1, cytosolic
hsa-miR-543	0	0	1	1	0	0	CPB2	carboxypeptidase B2 (plasma)
hsa-miR-543	1	0	1	1	1	1	PHF20	PHD finger protein 20
hsa-miR-543	0	0	1	0	1	1	ERGIC2	ERGIC and golgi 2
hsa-miR-543	1	0	1	0	1	1	SLC25A37	solute carrier family 25 (mitochondrial iron transporter), member 37
hsa-miR-543	1	0	1	1	1	1	SIX4	SIX homeobox 4
hsa-miR-543	1	0	1	1	1	1	RBM38	RNA binding motif protein 38
hsa-miR-543	1	0	1	1	1	1	PLXNA3	plexin A3
hsa-miR-543	0	0	1	1	1	1	NKRF	NFKB repressing factor
hsa-miR-543	1	0	1	0	1	1	ZRANB1	zinc finger, RAN-binding domain containing 1
hsa-miR-543	0	0	1	1	1	1	BHMT2	betaine--homocysteine S-methyltransferase 2
hsa-miR-543	1	0	1	1	0	0	C17orf59	chromosome 17 open reading frame 59
hsa-miR-543	0	0	1	1	0	0	NDE1	nudE nuclear distribution E homolog 1 (A. nidulans)
hsa-miR-543	1	0	1	1	1	1	GDAP2	ganglioside induced differentiation associated protein 2
hsa-miR-543	0	0	1	0	1	1	THUMPD1	THUMP domain containing 1
hsa-miR-543	1	0	1	0	1	1	DCAF16	DDB1 and CUL4 associated factor 16
hsa-miR-543	1	0	1	1	1	1	LPPR1	lipid phosphate phosphatase-related protein type 1
hsa-miR-543	1	0	1	1	1	1	ELOVL2	ELOVL fatty acid elongase 2
hsa-miR-543	1	0	1	1	1	1	UBE2R2	ubiquitin-conjugating enzyme E2R 2
hsa-miR-543	0	0	1	1	1	1	C2orf42	chromosome 2 open reading frame 42
hsa-miR-543	1	0	1	1	0	0	LAMTOR1	late endosomal/lysosomal adaptor, MAPK and MTOR activator 1
hsa-miR-543	0	0	1	1	1	1	AIM1L	absent in melanoma 1-like
hsa-miR-543	1	0	1	1	1	1	ARGLU1	arginine and glutamate rich 1
hsa-miR-543	1	0	1	1	1	1	SOBP	sine oculis binding protein homolog (Drosophila)
hsa-miR-543	0	0	1	1	1	1	OSBPL1A	oxysterol binding protein-like 1A
hsa-miR-543	0	0	1	1	1	1	RBM22	RNA binding motif protein 22
hsa-miR-543	1	0	1	1	1	1	FAM178A	family with sequence similarity 178, member A
hsa-miR-543	1	0	1	0	1	1	MSL2	male-specific lethal 2 homolog (Drosophila)
hsa-miR-543	0	0	1	1	1	1	NUDT11	nudix (nucleoside diphosphate linked moiety X)-type motif 11
hsa-miR-543	1	0	1	0	1	1	ARL8B	ADP-ribosylation factor-like 8B
hsa-miR-543	1	0	1	1	1	1	UBA6	ubiquitin-like modifier activating enzyme 6
hsa-miR-543	1	0	1	1	1	1	CCAR1	cell division cycle and apoptosis regulator 1
hsa-miR-543	1	0	1	1	1	1	SPTLC3	serine palmitoyltransferase, long chain base subunit 3
hsa-miR-543	1	0	1	1	1	1	AGPAT5	1-acylglycerol-3-phosphate O-acyltransferase 5 (lysophosphatidic acid acyltransferase, epsilon)
hsa-miR-543	1	0	1	0	1	1	LIN7C	lin-7 homolog C (C. elegans)
hsa-miR-543	1	0	1	1	1	1	RSBN1	round spermatid basic protein 1
hsa-miR-543	0	0	1	0	0	0	KDM3A	lysine (K)-specific demethylase 3A
hsa-miR-543	1	0	1	1	1	1	PAG1	phosphoprotein associated with glycosphingolipid microdomains 1
hsa-miR-543	1	0	1	1	1	1	CAMK2N1	calcium/calmodulin-dependent protein kinase II inhibitor 1
hsa-miR-543	0	0	1	1	1	1	SLC35E3	solute carrier family 35, member E3
hsa-miR-543	1	0	1	1	1	1	MLL5	myeloid/lymphoid or mixed-lineage leukemia 5 (trithorax homolog, Drosophila)
hsa-miR-543	1	0	1	1	1	1	KIAA1199	KIAA1199
hsa-miR-543	0	0	1	1	1	1	NPAP1	nuclear pore associated protein 1
hsa-miR-543	1	0	1	0	1	1	FAM190B	family with sequence similarity 190, member B
hsa-miR-543	1	0	1	1	1	1	PLEKHA3	pleckstrin homology domain containing, family A (phosphoinositide binding specific) member 3
hsa-miR-543	1	0	1	1	1	1	EPB41L4B	erythrocyte membrane protein band 4.1 like 4B
hsa-miR-543	0	0	1	1	1	1	RNF20	ring finger protein 20, E3 ubiquitin protein ligase
hsa-miR-543	1	0	1	1	1	1	LRRC8A	leucine rich repeat containing 8 family, member A
hsa-miR-543	1	0	1	1	1	1	WDR45L	WDR45-like
hsa-miR-543	1	0	1	0	1	1	TM9SF3	transmembrane 9 superfamily member 3
hsa-miR-543	1	0	1	1	1	1	MDM1	Mdm1 nuclear protein homolog (mouse)
hsa-miR-543	1	0	1	1	1	1	C8orf4	chromosome 8 open reading frame 4
hsa-miR-543	0	0	1	1	1	1	TMEM167B	transmembrane protein 167B
hsa-miR-543	1	0	1	1	0	0	C11orf75	chromosome 11 open reading frame 75
hsa-miR-543	0	0	1	1	0	0	PDXP	pyridoxal (pyridoxine, vitamin B6) phosphatase
hsa-miR-543	1	0	1	0	1	1	CNNM1	cyclin M1
hsa-miR-543	1	0	1	1	1	1	LYRM2	LYR motif containing 2
hsa-miR-543	1	0	1	0	1	1	DCUN1D1	DCN1, defective in cullin neddylation 1, domain containing 1 (S. cerevisiae)
hsa-miR-543	1	0	1	1	1	1	SLC24A3	solute carrier family 24 (sodium/potassium/calcium exchanger), member 3
hsa-miR-543	1	0	1	0	1	1	KCNS2	potassium voltage-gated channel, delayed-rectifier, subfamily S, member 2
hsa-miR-543	1	0	1	0	1	1	FAM40B	family with sequence similarity 40, member B
hsa-miR-543	0	0	1	0	1	1	SERINC1	serine incorporator 1
hsa-miR-543	1	0	1	0	1	1	ALPK3	alpha-kinase 3
hsa-miR-543	1	0	1	1	1	1	NCEH1	neutral cholesterol ester hydrolase 1
hsa-miR-543	1	0	1	1	1	1	KLHL14	kelch-like 14 (Drosophila)
hsa-miR-543	1	0	1	1	1	1	NIN	ninein (GSK3B interacting protein)
hsa-miR-543	0	0	1	1	1	1	AQP9	aquaporin 9
hsa-miR-543	0	0	1	1	1	1	B3GALT1	UDP-Gal:betaGlcNAc beta 1,3-galactosyltransferase, polypeptide 1
hsa-miR-543	1	0	1	0	1	1	RAP2A	RAP2A, member of RAS oncogene family
hsa-miR-543	0	0	1	1	1	1	RNASEL	ribonuclease L (2',5'-oligoisoadenylate synthetase-dependent)
hsa-miR-543	1	0	1	1	1	1	RHOU	ras homolog family member U
hsa-miR-543	1	0	1	1	1	1	DMRT3	doublesex and mab-3 related transcription factor 3
hsa-miR-543	1	0	1	1	1	1	SNX16	sorting nexin 16
hsa-miR-543	1	0	1	1	1	1	ABCG4	ATP-binding cassette, sub-family G (WHITE), member 4
hsa-miR-543	0	0	1	1	1	1	TCTA	T-cell leukemia translocation altered
hsa-miR-543	1	0	1	0	1	1	EDAR	ectodysplasin A receptor
hsa-miR-543	0	0	1	1	1	1	RAB38	RAB38, member RAS oncogene family
hsa-miR-543	0	0	1	1	1	1	HHIP	hedgehog interacting protein
hsa-miR-543	1	0	1	1	1	1	TMEM168	transmembrane protein 168
hsa-miR-543	1	0	1	1	1	1	GIGYF1	GRB10 interacting GYF protein 1
hsa-miR-543	1	0	1	0	1	1	HOXC8	homeobox C8
hsa-miR-543	0	0	1	1	1	1	ACBD3	acyl-CoA binding domain containing 3
hsa-miR-543	1	0	1	1	1	1	DEPTOR	DEP domain containing MTOR-interacting protein
hsa-miR-543	1	0	1	0	1	1	USP46	ubiquitin specific peptidase 46
hsa-miR-543	1	0	1	1	1	1	REEP1	receptor accessory protein 1
hsa-miR-543	1	0	1	1	1	1	C1orf116	chromosome 1 open reading frame 116
hsa-miR-543	1	0	1	1	1	1	GDAP1L1	ganglioside induced differentiation associated protein 1-like 1
hsa-miR-543	0	0	1	1	1	1	NUDT9	nudix (nucleoside diphosphate linked moiety X)-type motif 9
hsa-miR-543	0	0	1	0	1	1	TRPM8	transient receptor potential cation channel, subfamily M, member 8
hsa-miR-543	0	0	1	1	1	1	PLA2G4A	phospholipase A2, group IVA (cytosolic, calcium-dependent)
hsa-miR-543	1	0	1	1	1	1	IRF2BPL	interferon regulatory factor 2 binding protein-like
hsa-miR-543	1	0	1	1	1	1	MUL1	mitochondrial E3 ubiquitin protein ligase 1
hsa-miR-543	1	0	1	1	1	1	ARSJ	arylsulfatase family, member J
hsa-miR-543	1	0	1	1	1	1	PANK3	pantothenate kinase 3
hsa-miR-543	0	0	1	1	1	1	STEAP4	STEAP family member 4
hsa-miR-543	0	0	1	0	1	1	C14orf169	chromosome 14 open reading frame 169
hsa-miR-543	0	0	1	1	1	1	SH3D21	SH3 domain containing 21
hsa-miR-543	1	0	1	1	1	1	C15orf29	chromosome 15 open reading frame 29
hsa-miR-543	1	0	1	1	1	1	PIP4K2C	phosphatidylinositol-5-phosphate 4-kinase, type II, gamma
hsa-miR-543	0	0	1	1	1	1	ZBTB3	zinc finger and BTB domain containing 3
hsa-miR-543	0	0	1	1	1	1	RPAP2	RNA polymerase II associated protein 2
hsa-miR-543	0	0	1	1	1	1	ZNF767	zinc finger family member 767
hsa-miR-543	1	0	1	1	1	1	CPED1	cadherin-like and PC-esterase domain containing 1
hsa-miR-543	1	0	1	1	1	1	RNF34	ring finger protein 34, E3 ubiquitin protein ligase
hsa-miR-543	1	0	1	1	1	1	OR51E2	olfactory receptor, family 51, subfamily E, member 2
hsa-miR-543	1	0	1	1	1	1	SGPP1	sphingosine-1-phosphate phosphatase 1
hsa-miR-543	1	0	1	0	1	1	C1orf21	chromosome 1 open reading frame 21
hsa-miR-543	1	0	1	1	0	0	PVRL4	poliovirus receptor-related 4
hsa-miR-543	0	0	1	1	0	0	C11orf68	chromosome 11 open reading frame 68
hsa-miR-543	1	0	1	1	1	1	PCDHA9	protocadherin alpha 9
hsa-miR-543	0	0	1	1	1	1	FRMD8	FERM domain containing 8
hsa-miR-543	1	0	1	0	1	1	SRSF8	serine/arginine-rich splicing factor 8
hsa-miR-543	0	0	1	1	1	1	MAGT1	magnesium transporter 1
hsa-miR-543	0	0	1	1	0	0	ARL6	ADP-ribosylation factor-like 6
hsa-miR-543	1	0	1	1	1	1	DSEL	dermatan sulfate epimerase-like
hsa-miR-543	1	0	1	0	1	1	FAR1	fatty acyl CoA reductase 1
hsa-miR-543	1	0	1	1	1	1	BRMS1L	breast cancer metastasis-suppressor 1-like
hsa-miR-543	1	0	1	1	1	1	HOOK3	hook homolog 3 (Drosophila)
hsa-miR-543	1	0	1	1	1	1	PARD6B	par-6 partitioning defective 6 homolog beta (C. elegans)
hsa-miR-543	1	0	1	0	1	1	ADO	2-aminoethanethiol (cysteamine) dioxygenase
hsa-miR-543	1	0	1	1	1	1	ARHGEF39	Rho guanine nucleotide exchange factor (GEF) 39
hsa-miR-543	1	0	1	0	1	1	UBASH3B	ubiquitin associated and SH3 domain containing B
hsa-miR-543	0	0	1	0	1	1	PIGY	phosphatidylinositol glycan anchor biosynthesis, class Y
hsa-miR-543	1	0	1	1	1	1	PCDH11Y	protocadherin 11 Y-linked
hsa-miR-543	0	0	1	1	1	1	TRIM4	tripartite motif containing 4
hsa-miR-543	0	0	1	1	0	0	MUC13	mucin 13, cell surface associated
hsa-miR-543	1	0	1	1	1	1	FGF1	fibroblast growth factor 1 (acidic)
hsa-miR-543	1	0	1	1	1	1	ADAM19	ADAM metallopeptidase domain 19
hsa-miR-543	1	0	1	1	1	1	TP53INP1	tumor protein p53 inducible nuclear protein 1
hsa-miR-543	0	0	1	1	1	1	CASP8	caspase 8, apoptosis-related cysteine peptidase
hsa-miR-543	1	0	1	1	1	1	SSH2	slingshot homolog 2 (Drosophila)
hsa-miR-543	1	0	1	1	1	1	TANC1	tetratricopeptide repeat, ankyrin repeat and coiled-coil containing 1
hsa-miR-543	1	0	1	1	1	1	MAL2	mal, T-cell differentiation protein 2 (gene/pseudogene)
hsa-miR-543	1	0	1	0	0	0	SMYD4	SET and MYND domain containing 4
hsa-miR-543	0	0	1	1	1	1	UBE2F	ubiquitin-conjugating enzyme E2F (putative)
hsa-miR-543	0	0	1	1	1	1	PABPC5	poly(A) binding protein, cytoplasmic 5
hsa-miR-543	1	0	1	0	1	1	SOCS4	suppressor of cytokine signaling 4
hsa-miR-543	0	0	1	0	1	1	SYNPO2	synaptopodin 2
hsa-miR-543	1	0	1	1	0	0	PKDCC	protein kinase domain containing, cytoplasmic homolog (mouse)
hsa-miR-543	1	0	1	1	1	1	KCTD12	potassium channel tetramerisation domain containing 12
hsa-miR-543	1	0	1	1	1	1	ICA1L	islet cell autoantigen 1,69kDa-like
hsa-miR-543	1	0	1	1	1	1	CD200R1	CD200 receptor 1
hsa-miR-543	1	0	1	1	1	1	ATRN	attractin
hsa-miR-543	1	0	1	0	1	1	CNOT6L	CCR4-NOT transcription complex, subunit 6-like
hsa-miR-543	1	0	1	1	1	1	FAM91A1	family with sequence similarity 91, member A1
hsa-miR-543	0	0	1	1	1	1	SLFN5	schlafen family member 5
hsa-miR-543	1	0	1	1	1	1	UBQLNL	ubiquilin-like
hsa-miR-543	0	0	1	1	0	0	SFT2D1	SFT2 domain containing 1
hsa-miR-543	0	0	1	1	1	1	OMA1	OMA1 zinc metallopeptidase homolog (S. cerevisiae)
hsa-miR-543	0	0	1	0	1	1	SPATA18	spermatogenesis associated 18
hsa-miR-543	0	0	1	1	0	0	TMEM217	transmembrane protein 217
hsa-miR-543	0	0	1	1	1	1	IPMK	inositol polyphosphate multikinase
hsa-miR-543	1	0	1	1	1	1	POGLUT1	protein O-glucosyltransferase 1
hsa-miR-543	0	0	1	1	1	1	RMI2	RMI2, RecQ mediated genome instability 2, homolog (S. cerevisiae)
hsa-miR-543	0	0	1	0	1	1	MAB21L3	mab-21-like 3 (C. elegans)
hsa-miR-543	1	0	1	1	1	1	GRPEL2	GrpE-like 2, mitochondrial (E. coli)
hsa-miR-543	0	0	1	1	1	1	RDH12	retinol dehydrogenase 12 (all-trans/9-cis/11-cis)
hsa-miR-543	1	0	1	1	1	1	SLC16A14	solute carrier family 16, member 14 (monocarboxylic acid transporter 14)
hsa-miR-543	1	0	1	0	1	1	TMTC2	transmembrane and tetratricopeptide repeat containing 2
hsa-miR-543	1	0	1	0	1	1	DCP2	DCP2 decapping enzyme homolog (S. cerevisiae)
hsa-miR-543	0	0	1	1	1	1	SNX31	sorting nexin 31
hsa-miR-543	0	0	1	1	0	0	FAM47B	family with sequence similarity 47, member B
hsa-miR-543	0	0	1	1	1	1	CCER1	coiled-coil glutamate-rich protein 1
hsa-miR-543	0	0	1	1	1	1	GAPT	GRB2-binding adaptor protein, transmembrane
hsa-miR-543	1	0	1	1	1	1	NXPH1	neurexophilin 1
hsa-miR-543	0	0	1	1	0	0	IGLL1	immunoglobulin lambda-like polypeptide 1
hsa-miR-543	1	0	1	0	1	1	ST6GALNAC3	ST6 (alpha-N-acetyl-neuraminyl-2,3-beta-galactosyl-1,3)-N-acetylgalactosaminide alpha-2,6-sialyltransferase 3
hsa-miR-543	0	0	1	0	1	1	LIX1	Lix1 homolog (chicken)
hsa-miR-543	1	0	1	1	0	0	TMEM86A	transmembrane protein 86A
hsa-miR-543	0	0	1	0	1	1	LNX2	ligand of numb-protein X 2
hsa-miR-543	1	0	1	0	1	1	SEMA6D	sema domain, transmembrane domain (TM), and cytoplasmic domain, (semaphorin) 6D
hsa-miR-543	1	0	1	1	0	0	FAM43A	family with sequence similarity 43, member A
hsa-miR-543	1	0	1	1	1	1	ZNF367	zinc finger protein 367
hsa-miR-543	1	0	1	1	1	1	CACUL1	CDK2-associated, cullin domain 1
hsa-miR-543	1	0	1	1	1	1	RAB39B	RAB39B, member RAS oncogene family
hsa-miR-543	1	0	1	1	1	1	CCDC117	coiled-coil domain containing 117
hsa-miR-543	0	0	1	1	1	1	C15orf26	chromosome 15 open reading frame 26
hsa-miR-543	0	0	1	1	1	1	APLF	aprataxin and PNKP like factor
hsa-miR-543	1	0	1	0	1	1	PGM2L1	phosphoglucomutase 2-like 1
hsa-miR-543	1	0	1	1	1	1	PRTG	protogenin
hsa-miR-543	0	0	1	1	0	0	KRTCAP2	keratinocyte associated protein 2
hsa-miR-543	0	0	1	1	1	1	CHSY3	chondroitin sulfate synthase 3
hsa-miR-543	1	0	1	0	1	1	CCDC71L	coiled-coil domain containing 71-like
hsa-miR-543	0	0	1	1	1	1	NLRP9	NLR family, pyrin domain containing 9
hsa-miR-543	1	0	1	1	1	1	STX12	syntaxin 12
hsa-miR-543	1	0	1	1	1	1	GGT7	gamma-glutamyltransferase 7
hsa-miR-543	1	0	1	1	1	1	MARCH3	membrane-associated ring finger (C3HC4) 3, E3 ubiquitin protein ligase
hsa-miR-543	0	0	1	1	1	1	STXBP4	syntaxin binding protein 4
hsa-miR-543	1	0	1	1	1	1	PPP2R5C	protein phosphatase 2, regulatory subunit B', gamma
hsa-miR-543	0	0	1	0	1	1	SLCO4C1	solute carrier organic anion transporter family, member 4C1
hsa-miR-543	1	0	1	1	1	1	NF2	neurofibromin 2 (merlin)
hsa-miR-543	1	0	1	1	1	1	TMED7	transmembrane emp24 protein transport domain containing 7
hsa-miR-543	1	0	1	1	1	1	BCL6B	B-cell CLL/lymphoma 6, member B
hsa-miR-543	1	0	1	1	1	1	ZSCAN22	zinc finger and SCAN domain containing 22
hsa-miR-543	1	0	1	1	1	1	ADAT2	adenosine deaminase, tRNA-specific 2
hsa-miR-543	0	0	1	1	1	1	ZSWIM2	zinc finger, SWIM-type containing 2
hsa-miR-543	0	0	1	0	0	0	FER1L6-AS2	FER1L6 antisense RNA 2
hsa-miR-543	0	0	1	1	1	1	SKA2	spindle and kinetochore associated complex subunit 2
hsa-miR-543	1	0	1	1	1	1	CREM	cAMP responsive element modulator
hsa-miR-543	1	0	1	0	1	1	RNF144B	ring finger protein 144B
hsa-miR-543	1	0	1	0	1	1	RIMS4	regulating synaptic membrane exocytosis 4
hsa-miR-543	1	0	1	1	1	1	ARRDC4	arrestin domain containing 4
hsa-miR-543	1	0	1	0	1	1	HNRNPA3	heterogeneous nuclear ribonucleoprotein A3
hsa-miR-543	1	0	1	1	1	1	SPTY2D1	SPT2, Suppressor of Ty, domain containing 1 (S. cerevisiae)
hsa-miR-543	1	0	1	0	1	1	ZC3H6	zinc finger CCCH-type containing 6
hsa-miR-543	0	0	1	0	1	1	SIAH3	siah E3 ubiquitin protein ligase family member 3
hsa-miR-543	1	0	1	0	1	1	PRICKLE2	prickle homolog 2 (Drosophila)
hsa-miR-543	0	0	1	1	1	1	UBE3D	ubiquitin protein ligase E3D
hsa-miR-543	1	0	1	0	1	1	LHFPL3	lipoma HMGIC fusion partner-like 3
hsa-miR-543	0	0	1	1	1	1	MDFIC	MyoD family inhibitor domain containing
hsa-miR-543	1	0	1	1	1	1	GLYAT	glycine-N-acyltransferase
hsa-miR-543	1	0	1	0	1	1	CAPRIN1	cell cycle associated protein 1
hsa-miR-543	0	0	1	1	1	1	SERTM1	serine-rich and transmembrane domain containing 1
hsa-miR-543	1	0	1	1	1	1	MOG	myelin oligodendrocyte glycoprotein
hsa-miR-543	1	0	1	1	1	1	ATRNL1	attractin-like 1
hsa-miR-543	1	0	1	1	1	1	GADL1	glutamate decarboxylase-like 1
hsa-miR-543	0	0	1	0	0	0	SNORD21	small nucleolar RNA, C/D box 21
hsa-miR-543	0	0	1	0	0	0	SNORD4A	small nucleolar RNA, C/D box 4A
hsa-miR-543	0	0	1	0	0	0	SNORD56B	small nucleolar RNA, C/D box 56B
hsa-miR-543	0	0	1	0	0	0	MIR155HG	MIR155 host gene (non-protein coding)
hsa-miR-543	0	0	1	0	0	0	TTTY6	testis-specific transcript, Y-linked 6 (non-protein coding)
hsa-miR-543	0	0	1	0	0	0	TTTY2	testis-specific transcript, Y-linked 2 (non-protein coding)
hsa-miR-543	0	0	1	0	0	0	TTTY23	testis-specific transcript, Y-linked 23 (non-protein coding)
hsa-miR-543	0	0	1	0	0	0	NXF4	nuclear RNA export factor 4 pseudogene
hsa-miR-543	0	0	1	0	0	0	RPL23AP32	ribosomal protein L23a pseudogene 32
hsa-miR-543	0	0	1	0	0	0	SNORA4	small nucleolar RNA, H/ACA box 4
hsa-miR-543	0	0	1	0	0	0	HNRNPA3P1	heterogeneous nuclear ribonucleoprotein A3 pseudogene 1
hsa-miR-543	0	0	1	0	0	0	HYALP1	hyaluronoglucosaminidase pseudogene 1
hsa-miR-543	0	0	1	0	0	0	SNORD56	small nucleolar RNA, C/D box 56
hsa-miR-543	0	0	1	0	0	0	NEAT1	nuclear paraspeckle assembly transcript 1 (non-protein coding)
hsa-miR-543	0	0	1	0	0	0	MALAT1	metastasis associated lung adenocarcinoma transcript 1 (non-protein coding)
hsa-miR-543	0	0	1	0	0	0	PTPRVP	protein tyrosine phosphatase, receptor type, V, pseudogene
hsa-miR-543	0	0	1	0	0	0	SNX29P2	sorting nexin 29 pseudogene 2
hsa-miR-543	0	0	1	0	0	0	TCAM1P	testicular cell adhesion molecule 1 homolog (mouse), pseudogene
hsa-miR-543	0	0	1	0	0	0	HSP90B3P	heat shock protein 90kDa beta (Grp94), member 3, pseudogene
hsa-miR-543	0	0	1	0	0	0	SNORD115-26	small nucleolar RNA, C/D box 115-26
hsa-miR-543	1	0	1	1	0	0	KIAA1549L	KIAA1549-like
hsa-miR-543	1	0	1	1	0	0	TNXB	tenascin XB
hsa-miR-543	1	0	1	1	1	1	ATF6B	activating transcription factor 6 beta
hsa-miR-543	0	0	1	1	1	1	PEG3	paternally expressed 3
hsa-miR-543	0	0	0	1	1	1	PDK4	pyruvate dehydrogenase kinase, isozyme 4
hsa-miR-543	0	0	1	1	1	1	SS18L2	synovial sarcoma translocation gene on chromosome 18-like 2
hsa-miR-543	0	0	1	1	1	1	KLRAP1	killer cell lectin-like receptor subfamily A pseudogene 1
hsa-miR-543	1	0	1	1	1	1	QSER1	glutamine and serine rich 1
hsa-miR-543	0	0	0	1	1	1	TIMM21	translocase of inner mitochondrial membrane 21 homolog (yeast)
hsa-miR-543	0	0	0	1	1	1	PSG6	pregnancy specific beta-1-glycoprotein 6
hsa-miR-543	1	0	1	1	1	1	KDELR3	KDEL (Lys-Asp-Glu-Leu) endoplasmic reticulum protein retention receptor 3
hsa-miR-543	1	0	1	1	1	1	SMCR7L	Smith-Magenis syndrome chromosome region, candidate 7-like
hsa-miR-543	0	0	1	1	1	1	ATP6V1D	ATPase, H+ transporting, lysosomal 34kDa, V1 subunit D
hsa-miR-543	0	0	0	1	0	0	CTSZ	cathepsin Z
hsa-miR-543	0	0	1	1	0	0	TAF9	TAF9 RNA polymerase II, TATA box binding protein (TBP)-associated factor, 32kDa
hsa-miR-543	0	0	0	1	0	0	ACSM1	acyl-CoA synthetase medium-chain family member 1
hsa-miR-543	1	0	1	1	1	1	POLR2C	polymerase (RNA) II (DNA directed) polypeptide C, 33kDa
hsa-miR-543	0	0	0	1	1	1	FDFT1	farnesyl-diphosphate farnesyltransferase 1
hsa-miR-543	0	0	0	1	1	1	CYP4F2	cytochrome P450, family 4, subfamily F, polypeptide 2
hsa-miR-543	0	0	0	1	1	1	POP4	processing of precursor 4, ribonuclease P/MRP subunit (S. cerevisiae)
hsa-miR-543	0	0	0	1	0	0	ZNRF4	zinc and ring finger 4
hsa-miR-543	0	0	1	1	1	1	TNFSF8	tumor necrosis factor (ligand) superfamily, member 8
hsa-miR-543	1	0	0	1	0	0	ACTA2	actin, alpha 2, smooth muscle, aorta
hsa-miR-543	0	0	1	1	1	1	CCL2	chemokine (C-C motif) ligand 2
hsa-miR-543	0	0	1	1	1	1	CCL13	chemokine (C-C motif) ligand 13
hsa-miR-543	0	0	1	1	1	1	PF4V1	platelet factor 4 variant 1
hsa-miR-543	1	0	1	1	1	1	CSDA	cold shock domain protein A
hsa-miR-543	0	0	1	1	1	1	RAD51AP1	RAD51 associated protein 1
hsa-miR-543	1	0	1	1	1	1	SRSF9	serine/arginine-rich splicing factor 9
hsa-miR-543	0	0	0	1	1	1	EXOC2	exocyst complex component 2
hsa-miR-543	0	0	0	1	1	1	PCDHB3	protocadherin beta 3
hsa-miR-543	0	0	0	1	0	0	C3orf14	chromosome 3 open reading frame 14
hsa-miR-543	0	0	1	1	1	1	EIF1B	eukaryotic translation initiation factor 1B
hsa-miR-543	0	0	1	1	1	1	SLC11A1	solute carrier family 11 (proton-coupled divalent metal ion transporters), member 1
hsa-miR-543	0	0	1	1	1	1	TMEM48	transmembrane protein 48
hsa-miR-543	1	0	1	1	0	0	TNP1	transition protein 1 (during histone to protamine replacement)
hsa-miR-543	0	0	0	1	0	0	PCDHB8	protocadherin beta 8
hsa-miR-543	1	0	1	1	0	0	ST3GAL4	ST3 beta-galactoside alpha-2,3-sialyltransferase 4
hsa-miR-543	0	0	1	1	1	1	IFT81	intraflagellar transport 81 homolog (Chlamydomonas)
hsa-miR-543	0	0	0	1	0	0	ZNF442	zinc finger protein 442
hsa-miR-543	0	0	0	1	1	1	TNFAIP6	tumor necrosis factor, alpha-induced protein 6
hsa-miR-543	0	0	0	1	0	0	ZNF350	zinc finger protein 350
hsa-miR-543	0	0	0	1	0	0	ZNF391	zinc finger protein 391
hsa-miR-543	0	0	0	1	0	0	SCGB1D2	secretoglobin, family 1D, member 2
hsa-miR-543	0	0	1	1	1	1	BMP4	bone morphogenetic protein 4
hsa-miR-543	0	0	1	1	0	0	SUGP1	SURP and G patch domain containing 1
hsa-miR-543	0	0	1	1	1	1	RGS13	regulator of G-protein signaling 13
hsa-miR-543	0	0	1	1	1	1	ZNF598	zinc finger protein 598
hsa-miR-543	0	0	0	1	1	1	MTX2	metaxin 2
hsa-miR-543	0	0	0	1	0	0	ART1	ADP-ribosyltransferase 1
hsa-miR-543	0	0	1	1	0	0	PAM16	presequence translocase-associated motor 16 homolog (S. cerevisiae)
hsa-miR-543	0	0	1	1	1	1	CORO7	coronin 7
hsa-miR-543	0	0	1	1	1	1	RABGAP1L	RAB GTPase activating protein 1-like
hsa-miR-543	0	0	1	1	1	1	DHX29	DEAH (Asp-Glu-Ala-His) box polypeptide 29
hsa-miR-543	0	0	0	1	1	1	FKBP6	FK506 binding protein 6, 36kDa
hsa-miR-543	0	0	1	1	1	1	NDUFA10	NADH dehydrogenase (ubiquinone) 1 alpha subcomplex, 10, 42kDa
hsa-miR-543	1	0	1	1	1	1	ARPC1B	actin related protein 2/3 complex, subunit 1B, 41kDa
hsa-miR-543	1	0	1	1	0	0	MAP3K10	mitogen-activated protein kinase kinase kinase 10
hsa-miR-543	0	0	0	1	0	0	GINS2	GINS complex subunit 2 (Psf2 homolog)
hsa-miR-543	0	0	1	1	1	1	CHD1L	chromodomain helicase DNA binding protein 1-like
hsa-miR-543	0	0	0	1	0	0	ZSCAN5A	zinc finger and SCAN domain containing 5A
hsa-miR-543	1	0	1	1	1	1	ACTR10	actin-related protein 10 homolog (S. cerevisiae)
hsa-miR-543	0	0	0	1	1	1	UTP3	UTP3, small subunit (SSU) processome component, homolog (S. cerevisiae)
hsa-miR-543	0	0	0	1	1	1	DMGDH	dimethylglycine dehydrogenase
hsa-miR-543	0	0	1	1	1	1	MED10	mediator complex subunit 10
hsa-miR-543	0	0	1	1	1	1	NTS	neurotensin
hsa-miR-543	0	0	1	1	1	1	MPHOSPH6	M-phase phosphoprotein 6
hsa-miR-543	1	0	0	1	1	1	TGFBRAP1	transforming growth factor, beta receptor associated protein 1
hsa-miR-543	0	0	0	1	1	1	MRPS9	mitochondrial ribosomal protein S9
hsa-miR-543	0	0	1	1	0	0	TTC5	tetratricopeptide repeat domain 5
hsa-miR-543	0	0	0	1	1	1	PGBD1	piggyBac transposable element derived 1
hsa-miR-543	0	0	0	1	1	1	SLC3A1	solute carrier family 3 (cystine, dibasic and neutral amino acid transporters, activator of cystine, dibasic and neutral amino acid transport), member 1
hsa-miR-543	0	0	1	1	1	1	SSB	Sjogren syndrome antigen B (autoantigen La)
hsa-miR-543	0	0	0	1	0	0	FASTKD1	FAST kinase domains 1
hsa-miR-543	0	0	1	1	1	1	SNCAIP	synuclein, alpha interacting protein
hsa-miR-543	0	0	0	1	0	0	NUP133	nucleoporin 133kDa
hsa-miR-543	0	0	0	1	1	1	TMEM206	transmembrane protein 206
hsa-miR-543	1	0	1	1	1	1	RPS6KA5	ribosomal protein S6 kinase, 90kDa, polypeptide 5
hsa-miR-543	0	0	0	1	0	0	PSMB1	proteasome (prosome, macropain) subunit, beta type, 1
hsa-miR-543	0	0	1	1	1	1	ANXA13	annexin A13
hsa-miR-543	0	0	1	1	1	1	RHBDF1	rhomboid 5 homolog 1 (Drosophila)
hsa-miR-543	0	0	1	1	1	1	INVS	inversin
hsa-miR-543	0	0	0	1	0	0	GSDMD	gasdermin D
hsa-miR-543	0	0	0	1	0	0	UCP1	uncoupling protein 1 (mitochondrial, proton carrier)
hsa-miR-543	0	0	1	1	1	1	BBOX1	butyrobetaine (gamma), 2-oxoglutarate dioxygenase (gamma-butyrobetaine hydroxylase) 1
hsa-miR-543	0	0	1	1	0	0	UFD1L	ubiquitin fusion degradation 1 like (yeast)
hsa-miR-543	1	0	0	1	1	1	DDX25	DEAD (Asp-Glu-Ala-Asp) box helicase 25
hsa-miR-543	0	0	1	1	0	0	ASB3	ankyrin repeat and SOCS box containing 3
hsa-miR-543	0	0	1	1	0	0	ACCS	1-aminocyclopropane-1-carboxylate synthase homolog (Arabidopsis)(non-functional)
hsa-miR-543	1	0	1	1	1	1	STK17B	serine/threonine kinase 17b
hsa-miR-543	1	0	1	1	0	0	KIAA1211	KIAA1211
hsa-miR-543	0	0	1	1	1	1	SEC22C	SEC22 vesicle trafficking protein homolog C (S. cerevisiae)
hsa-miR-543	0	0	1	1	1	1	CP	ceruloplasmin (ferroxidase)
hsa-miR-543	0	0	0	1	0	0	GRK7	G protein-coupled receptor kinase 7
hsa-miR-543	1	0	1	1	1	1	SOX30	SRY (sex determining region Y)-box 30
hsa-miR-543	1	0	1	1	1	1	SEMA3A	sema domain, immunoglobulin domain (Ig), short basic domain, secreted, (semaphorin) 3A
hsa-miR-543	0	0	1	1	1	1	TJP2	tight junction protein 2
hsa-miR-543	0	0	1	1	1	1	UBXN8	UBX domain protein 8
hsa-miR-543	0	0	1	1	1	1	CPT1A	carnitine palmitoyltransferase 1A (liver)
hsa-miR-543	0	0	0	1	1	1	CSRP3	cysteine and glycine-rich protein 3 (cardiac LIM protein)
hsa-miR-543	0	0	0	1	0	0	DAXX	death-domain associated protein
hsa-miR-543	0	0	0	1	0	0	SFRP5	secreted frizzled-related protein 5
hsa-miR-543	0	0	0	1	0	0	SLC5A4	solute carrier family 5 (low affinity glucose cotransporter), member 4
hsa-miR-543	0	0	1	1	0	0	FBXO7	F-box protein 7
hsa-miR-543	0	0	1	1	0	0	EIF2B2	eukaryotic translation initiation factor 2B, subunit 2 beta, 39kDa
hsa-miR-543	0	0	0	1	0	0	DIABLO	diablo, IAP-binding mitochondrial protein
hsa-miR-543	0	0	0	1	1	1	FANCM	Fanconi anemia, complementation group M
hsa-miR-543	0	0	1	1	0	0	GPR65	G protein-coupled receptor 65
hsa-miR-543	1	0	1	1	1	1	CRTC3	CREB regulated transcription coactivator 3
hsa-miR-543	0	0	1	1	1	1	SEC11A	SEC11 homolog A (S. cerevisiae)
hsa-miR-543	0	0	1	1	1	1	ITGAD	integrin, alpha D
hsa-miR-543	0	0	0	1	1	1	ZNF750	zinc finger protein 750
hsa-miR-543	1	0	1	1	1	1	ZCCHC2	zinc finger, CCHC domain containing 2
hsa-miR-543	0	0	1	1	1	1	ZNF544	zinc finger protein 544
hsa-miR-543	1	0	0	1	1	1	PRDM15	PR domain containing 15
hsa-miR-543	0	0	0	1	0	0	ARMC6	armadillo repeat containing 6
hsa-miR-543	0	0	0	1	1	1	PSG9	pregnancy specific beta-1-glycoprotein 9
hsa-miR-543	0	0	1	1	0	0	WDPCP	WD repeat containing planar cell polarity effector
hsa-miR-543	0	0	0	1	1	1	SLC25A38	solute carrier family 25, member 38
hsa-miR-543	0	0	0	1	1	1	CRHBP	corticotropin releasing hormone binding protein
hsa-miR-543	0	0	1	1	1	1	NHP2	NHP2 ribonucleoprotein homolog (yeast)
hsa-miR-543	0	0	0	1	1	1	HIGD2A	HIG1 hypoxia inducible domain family, member 2A
hsa-miR-543	0	0	1	1	1	1	MUT	methylmalonyl CoA mutase
hsa-miR-543	0	0	0	1	0	0	ANO7	anoctamin 7
hsa-miR-543	0	0	1	1	0	0	PNLDC1	poly(A)-specific ribonuclease (PARN)-like domain containing 1
hsa-miR-543	0	0	1	1	1	1	ADHFE1	alcohol dehydrogenase, iron containing, 1
hsa-miR-543	0	0	1	1	0	0	PAOX	polyamine oxidase (exo-N4-amino)
hsa-miR-543	0	0	1	1	0	0	SAA4	serum amyloid A4, constitutive
hsa-miR-543	1	0	1	1	1	1	TMPRSS13	transmembrane protease, serine 13
hsa-miR-543	1	0	1	1	0	0	TMEM219	transmembrane protein 219
hsa-miR-543	0	0	0	1	0	0	MMP10	matrix metallopeptidase 10 (stromelysin 2)
hsa-miR-543	0	0	1	1	1	1	MIA2	melanoma inhibitory activity 2
hsa-miR-543	0	0	0	1	1	1	C11orf53	chromosome 11 open reading frame 53
hsa-miR-543	0	0	1	1	1	1	PTS	6-pyruvoyltetrahydropterin synthase
hsa-miR-543	0	0	1	1	1	1	SLC25A4	solute carrier family 25 (mitochondrial carrier; adenine nucleotide translocator), member 4
hsa-miR-543	1	0	0	1	0	0	ZNF385D	zinc finger protein 385D
hsa-miR-543	0	0	1	1	1	1	CCDC75	coiled-coil domain containing 75
hsa-miR-543	0	0	1	1	0	0	KCNK13	potassium channel, subfamily K, member 13
hsa-miR-543	0	0	1	1	1	1	CPB1	carboxypeptidase B1 (tissue)
hsa-miR-543	0	0	1	1	1	1	CETN3	centrin, EF-hand protein, 3
hsa-miR-543	0	0	1	1	0	0	FAM81B	family with sequence similarity 81, member B
hsa-miR-543	1	0	1	1	1	1	PLCL2	phospholipase C-like 2
hsa-miR-543	0	0	0	1	1	1	LRGUK	leucine-rich repeats and guanylate kinase domain containing
hsa-miR-543	0	0	1	1	0	0	TRIM42	tripartite motif containing 42
hsa-miR-543	1	0	0	1	1	1	WHAMM	WAS protein homolog associated with actin, golgi membranes and microtubules
hsa-miR-543	0	0	1	1	0	0	AIFM1	apoptosis-inducing factor, mitochondrion-associated, 1
hsa-miR-543	1	0	1	1	1	1	WDYHV1	WDYHV motif containing 1
hsa-miR-543	0	0	1	1	0	0	FRRS1	ferric-chelate reductase 1
hsa-miR-543	0	0	0	1	0	0	TIMP4	TIMP metallopeptidase inhibitor 4
hsa-miR-543	0	0	0	1	0	0	PSMG3	proteasome (prosome, macropain) assembly chaperone 3
hsa-miR-543	0	0	0	1	1	1	WDR66	WD repeat domain 66
hsa-miR-543	1	0	1	1	1	1	PTPDC1	protein tyrosine phosphatase domain containing 1
hsa-miR-543	0	0	1	1	1	1	C2orf29	chromosome 2 open reading frame 29
hsa-miR-543	0	0	1	1	1	1	SNF8	SNF8, ESCRT-II complex subunit, homolog (S. cerevisiae)
hsa-miR-543	0	0	0	1	0	0	PWP2	PWP2 periodic tryptophan protein homolog (yeast)
hsa-miR-543	0	0	1	1	0	0	C21orf33	chromosome 21 open reading frame 33
hsa-miR-543	0	0	0	1	0	0	SIGLEC12	sialic acid binding Ig-like lectin 12 (gene/pseudogene)
hsa-miR-543	0	0	0	1	0	0	TNNT1	troponin T type 1 (skeletal, slow)
hsa-miR-543	0	0	1	1	1	1	ZNF333	zinc finger protein 333
hsa-miR-543	1	0	0	1	1	1	KRT72	keratin 72
hsa-miR-543	0	0	1	1	0	0	CCDC42	coiled-coil domain containing 42
hsa-miR-543	0	0	1	1	0	0	NCKIPSD	NCK interacting protein with SH3 domain
hsa-miR-543	0	0	0	1	1	1	PDHA2	pyruvate dehydrogenase (lipoamide) alpha 2
hsa-miR-543	0	0	0	1	0	0	GLB1L	galactosidase, beta 1-like
hsa-miR-543	0	0	0	1	1	1	ZNF35	zinc finger protein 35
hsa-miR-543	0	0	0	1	0	0	RTP3	receptor (chemosensory) transporter protein 3
hsa-miR-543	0	0	1	1	0	0	CCDC51	coiled-coil domain containing 51
hsa-miR-543	0	0	1	1	0	0	SAP30	Sin3A-associated protein, 30kDa
hsa-miR-543	0	0	0	1	0	0	ANKRD33B	ankyrin repeat domain 33B
hsa-miR-543	1	0	1	1	1	1	PRKAA1	protein kinase, AMP-activated, alpha 1 catalytic subunit
hsa-miR-543	0	0	0	1	0	0	SLC6A18	solute carrier family 6, member 18
hsa-miR-543	0	0	0	1	0	0	NOS3	nitric oxide synthase 3 (endothelial cell)
hsa-miR-543	0	0	1	1	1	1	CPA6	carboxypeptidase A6
hsa-miR-543	0	0	0	1	0	0	STK32C	serine/threonine kinase 32C
hsa-miR-543	0	0	0	1	0	0	OR4K2	olfactory receptor, family 4, subfamily K, member 2
hsa-miR-543	0	0	1	1	1	1	HEATR3	HEAT repeat containing 3
hsa-miR-543	0	0	1	1	1	1	BRD7	bromodomain containing 7
hsa-miR-543	0	0	0	1	0	0	C16orf71	chromosome 16 open reading frame 71
hsa-miR-543	0	0	1	1	0	0	CYB5R2	cytochrome b5 reductase 2
hsa-miR-543	0	0	1	1	0	0	CENPV	centromere protein V
hsa-miR-543	0	0	0	1	0	0	ZNF560	zinc finger protein 560
hsa-miR-543	0	0	0	1	1	1	ZNF443	zinc finger protein 443
hsa-miR-543	0	0	0	1	0	0	ICT1	immature colon carcinoma transcript 1
hsa-miR-543	0	0	0	1	1	1	HSPB3	heat shock 27kDa protein 3
hsa-miR-543	1	0	1	1	0	0	CANT1	calcium activated nucleotidase 1
hsa-miR-543	1	0	1	1	1	1	TRIAP1	TP53 regulated inhibitor of apoptosis 1
hsa-miR-543	0	0	1	1	1	1	RNASE4	ribonuclease, RNase A family, 4
hsa-miR-543	0	0	0	1	1	1	GUSB	glucuronidase, beta
hsa-miR-543	0	0	0	1	1	1	ESCO2	establishment of cohesion 1 homolog 2 (S. cerevisiae)
hsa-miR-543	0	0	1	1	0	0	ARMC4	armadillo repeat containing 4
hsa-miR-543	0	0	1	1	1	1	TM4SF1	transmembrane 4 L six family member 1
hsa-miR-543	0	0	0	1	0	0	MGMT	O-6-methylguanine-DNA methyltransferase
hsa-miR-543	1	0	0	1	0	0	KISS1	KiSS-1 metastasis-suppressor
hsa-miR-543	0	0	0	1	1	1	MRPL13	mitochondrial ribosomal protein L13
hsa-miR-543	0	0	0	1	0	0	REEP4	receptor accessory protein 4
hsa-miR-543	1	0	1	1	1	1	CEP120	centrosomal protein 120kDa
hsa-miR-543	0	0	0	1	0	0	PCDHB1	protocadherin beta 1
hsa-miR-543	0	0	0	1	0	0	FOXB1	forkhead box B1
hsa-miR-543	1	0	1	1	1	1	RBM33	RNA binding motif protein 33
hsa-miR-543	0	0	0	1	0	0	AGXT	alanine-glyoxylate aminotransferase
hsa-miR-543	0	0	1	1	1	1	RAPGEF6	Rap guanine nucleotide exchange factor (GEF) 6
hsa-miR-543	1	0	1	1	1	1	FNIP1	folliculin interacting protein 1
hsa-miR-543	0	0	0	1	0	0	OR7D4	olfactory receptor, family 7, subfamily D, member 4
hsa-miR-543	0	0	1	1	1	1	BTK	Bruton agammaglobulinemia tyrosine kinase
hsa-miR-543	0	0	0	1	1	1	NPFFR2	neuropeptide FF receptor 2
hsa-miR-543	0	0	1	1	0	0	DENND4A	DENN/MADD domain containing 4A
hsa-miR-543	0	0	0	1	1	1	FAM86B2	family with sequence similarity 86, member B2
hsa-miR-543	0	0	1	1	1	1	TRMT10C	tRNA methyltransferase 10 homolog C (S. cerevisiae)
hsa-miR-543	0	0	1	1	1	1	RBM4B	RNA binding motif protein 4B
hsa-miR-543	0	0	0	1	0	0	LOC645529	acrosin pseudogene
hsa-miR-543	0	0	1	1	0	0	TTC18	tetratricopeptide repeat domain 18
hsa-miR-543	0	0	1	1	0	0	UGT8	UDP glycosyltransferase 8
hsa-miR-543	0	0	1	1	1	1	CARHSP1	calcium regulated heat stable protein 1, 24kDa
hsa-miR-543	0	0	1	1	1	1	MAP9	microtubule-associated protein 9
hsa-miR-543	0	0	1	1	0	0	FAM170B	family with sequence similarity 170, member B
hsa-miR-543	1	0	1	1	0	0	MMP14	matrix metallopeptidase 14 (membrane-inserted)
hsa-miR-543	0	0	0	1	0	0	OR10AG1	olfactory receptor, family 10, subfamily AG, member 1
hsa-miR-543	1	0	0	1	0	0	FBXL18	F-box and leucine-rich repeat protein 18
hsa-miR-543	0	0	1	1	0	0	MLF1	myeloid leukemia factor 1
hsa-miR-543	0	0	0	1	1	1	LINC00471	long intergenic non-protein coding RNA 471
hsa-miR-543	0	0	0	1	0	0	DEFB103A	defensin, beta 103A
hsa-miR-543	0	0	0	1	1	1	ZNF77	zinc finger protein 77
hsa-miR-543	1	0	0	1	1	1	RECQL	RecQ protein-like (DNA helicase Q1-like)
hsa-miR-543	0	0	1	1	0	0	C1QB	complement component 1, q subcomponent, B chain
hsa-miR-543	0	0	1	1	0	0	C12orf42	chromosome 12 open reading frame 42
hsa-miR-543	0	0	1	1	1	1	TMEM132C	transmembrane protein 132C
hsa-miR-543	0	0	1	1	1	1	HSPBAP1	HSPB (heat shock 27kDa) associated protein 1
hsa-miR-543	1	0	1	1	0	0	PDIA5	protein disulfide isomerase family A, member 5
hsa-miR-543	0	0	1	1	1	1	SIGLECL1	SIGLEC family like 1
hsa-miR-543	1	0	1	1	1	1	AHRR	aryl-hydrocarbon receptor repressor
hsa-miR-543	0	0	1	1	0	0	STK25	serine/threonine kinase 25
hsa-miR-543	0	0	1	1	0	0	DNAJC7	DnaJ (Hsp40) homolog, subfamily C, member 7
hsa-miR-543	0	0	0	1	0	0	DEF6	differentially expressed in FDCP 6 homolog (mouse)
hsa-miR-543	0	0	1	1	1	1	VRK3	vaccinia related kinase 3
hsa-miR-543	0	0	0	1	1	1	CES2	carboxylesterase 2
hsa-miR-543	0	0	0	1	0	0	RRH	retinal pigment epithelium-derived rhodopsin homolog
hsa-miR-543	0	0	0	1	0	0	DEFB103B	defensin, beta 103B
hsa-miR-543	0	0	0	1	1	1	LOC729420	uncharacterized LOC729420
hsa-miR-543	0	0	1	1	1	1	PEX7	peroxisomal biogenesis factor 7
hsa-miR-543	1	0	1	1	1	1	IGSF3	immunoglobulin superfamily, member 3
hsa-miR-543	0	0	0	1	1	1	DIS3L	DIS3 mitotic control homolog (S. cerevisiae)-like
hsa-miR-543	1	0	1	1	1	1	SCD5	stearoyl-CoA desaturase 5
hsa-miR-543	0	0	1	1	1	1	HSPH1	heat shock 105kDa/110kDa protein 1
hsa-miR-543	0	0	0	1	0	0	ZNF121	zinc finger protein 121
hsa-miR-543	0	0	0	1	1	1	CCDC65	coiled-coil domain containing 65
hsa-miR-543	1	0	1	1	1	1	ZNF236	zinc finger protein 236
hsa-miR-543	0	0	0	1	1	1	SPTBN5	spectrin, beta, non-erythrocytic 5
hsa-miR-543	0	0	0	1	1	1	ME2	malic enzyme 2, NAD(+)-dependent, mitochondrial
hsa-miR-543	0	0	0	1	0	0	STAB1	stabilin 1
hsa-miR-543	0	0	0	1	0	0	ACBD4	acyl-CoA binding domain containing 4
hsa-miR-543	0	0	0	1	0	0	SV2C	synaptic vesicle glycoprotein 2C
hsa-miR-543	0	0	0	1	0	0	TRIM75	tripartite motif containing 75
hsa-miR-543	0	0	1	1	1	1	FCAMR	Fc receptor, IgA, IgM, high affinity
hsa-miR-543	0	0	0	1	1	1	UPB1	ureidopropionase, beta
hsa-miR-543	0	0	0	1	0	0	GTPBP6	GTP binding protein 6 (putative)
hsa-miR-543	0	0	0	1	1	1	ITLN1	intelectin 1 (galactofuranose binding)
hsa-miR-543	1	0	1	1	0	0	EXOSC3	exosome component 3
hsa-miR-543	0	0	0	1	1	1	CCDC60	coiled-coil domain containing 60
hsa-miR-543	0	0	0	1	1	1	ZNF84	zinc finger protein 84
hsa-miR-543	1	0	1	1	1	1	CEP128	centrosomal protein 128kDa
hsa-miR-543	0	0	0	1	0	0	FAM65C	family with sequence similarity 65, member C
hsa-miR-543	0	0	1	1	1	1	ZNF181	zinc finger protein 181
hsa-miR-543	0	0	1	1	1	1	KCNN2	potassium intermediate/small conductance calcium-activated channel, subfamily N, member 2
hsa-miR-543	0	0	0	1	1	1	APOL4	apolipoprotein L, 4
hsa-miR-543	1	0	1	1	0	0	RIMS2	regulating synaptic membrane exocytosis 2
hsa-miR-543	0	0	0	1	0	0	PRSS57	protease, serine, 57
hsa-miR-543	0	0	0	1	1	1	TRIM61	tripartite motif containing 61
hsa-miR-543	0	0	0	1	0	0	OR52E8	olfactory receptor, family 52, subfamily E, member 8
hsa-miR-543	0	0	0	1	0	0	MAGEB17	melanoma antigen family B, 17
hsa-miR-543	0	0	1	1	0	0	IDH2	isocitrate dehydrogenase 2 (NADP+), mitochondrial
hsa-miR-543	1	0	1	1	1	1	MORF4L1	mortality factor 4 like 1
hsa-miR-543	0	0	0	1	0	0	MCTP2	multiple C2 domains, transmembrane 2
hsa-miR-543	0	0	0	1	0	0	PRAMEF1	PRAME family member 1
hsa-miR-543	0	0	1	1	1	1	MRPL12	mitochondrial ribosomal protein L12
hsa-miR-543	0	0	0	1	0	0	TAS2R60	taste receptor, type 2, member 60
hsa-miR-543	0	0	1	1	1	1	SUMO3	SMT3 suppressor of mif two 3 homolog 3 (S. cerevisiae)
hsa-miR-543	0	0	1	1	0	0	LYG2	lysozyme G-like 2
hsa-miR-543	0	0	1	1	1	1	TM2D3	TM2 domain containing 3
hsa-miR-543	0	0	0	1	0	0	C12orf56	chromosome 12 open reading frame 56
hsa-miR-543	0	0	0	1	0	0	CYP2R1	cytochrome P450, family 2, subfamily R, polypeptide 1
hsa-miR-543	0	0	1	1	1	1	TMPRSS11A	transmembrane protease, serine 11A
hsa-miR-543	0	0	1	1	1	1	NAA20	N(alpha)-acetyltransferase 20, NatB catalytic subunit
hsa-miR-543	0	0	1	1	0	0	SAMD7	sterile alpha motif domain containing 7
hsa-miR-543	1	0	1	1	1	1	SLITRK2	SLIT and NTRK-like family, member 2
hsa-miR-543	0	0	0	1	0	0	VWCE	von Willebrand factor C and EGF domains
hsa-miR-543	0	0	1	1	0	0	KATNA1	katanin p60 (ATPase containing) subunit A 1
hsa-miR-543	0	0	1	1	0	0	CDKN2D	cyclin-dependent kinase inhibitor 2D (p19, inhibits CDK4)
hsa-miR-543	0	0	1	1	1	1	KLK5	kallikrein-related peptidase 5
hsa-miR-543	0	0	0	1	1	1	ABHD12B	abhydrolase domain containing 12B
hsa-miR-543	1	0	1	1	1	1	MYH9	myosin, heavy chain 9, non-muscle
hsa-miR-543	1	0	1	1	1	1	RERE	arginine-glutamic acid dipeptide (RE) repeats
hsa-miR-543	1	0	0	1	0	0	LRFN2	leucine rich repeat and fibronectin type III domain containing 2
hsa-miR-543	0	0	1	1	0	0	MOCS2	molybdenum cofactor synthesis 2
hsa-miR-543	1	0	0	1	1	1	GYG2	glycogenin 2
hsa-miR-543	0	0	0	1	0	0	ZFP92	zinc finger protein 92 homolog (mouse)
hsa-miR-543	0	0	1	1	0	0	TMEM120A	transmembrane protein 120A
hsa-miR-543	0	0	1	1	1	1	GAL3ST1	galactose-3-O-sulfotransferase 1
hsa-miR-543	1	0	1	1	1	1	C5orf43	chromosome 5 open reading frame 43
hsa-miR-543	0	0	0	1	0	0	ZNF573	zinc finger protein 573
hsa-miR-543	1	0	1	1	1	1	SPAM1	sperm adhesion molecule 1 (PH-20 hyaluronidase, zona pellucida binding)
hsa-miR-543	0	0	0	1	0	0	ZBP1	Z-DNA binding protein 1
hsa-miR-543	0	0	0	1	0	0	FAM86B1	family with sequence similarity 86, member B1
hsa-miR-543	0	0	0	1	0	0	RASSF10	Ras association (RalGDS/AF-6) domain family (N-terminal) member 10
hsa-miR-543	1	0	1	1	1	1	GATA2	GATA binding protein 2
hsa-miR-543	0	0	1	1	0	0	MPST	mercaptopyruvate sulfurtransferase
hsa-miR-543	0	0	0	1	1	1	SLC25A40	solute carrier family 25, member 40
hsa-miR-543	1	0	1	1	1	1	KLHL6	kelch-like 6 (Drosophila)
hsa-miR-543	0	0	0	1	0	0	PRY2	PTPN13-like, Y-linked 2
hsa-miR-543	0	0	0	1	0	0	LOC729974	ret finger protein-like 4A-like
hsa-miR-543	0	0	1	1	0	0	IDH3B	isocitrate dehydrogenase 3 (NAD+) beta
hsa-miR-543	0	0	1	1	1	1	TSHR	thyroid stimulating hormone receptor
hsa-miR-543	0	0	0	1	1	1	CIDEA	cell death-inducing DFFA-like effector a
hsa-miR-543	0	0	1	1	0	0	CARD14	caspase recruitment domain family, member 14
hsa-miR-543	0	0	0	1	0	0	RFPL4A	ret finger protein-like 4A
hsa-miR-543	0	0	1	1	1	1	C15orf48	chromosome 15 open reading frame 48
hsa-miR-543	0	0	0	1	1	1	MCPH1	microcephalin 1
hsa-miR-543	0	0	1	1	1	1	FAM221A	family with sequence similarity 221, member A
hsa-miR-543	0	0	0	1	0	0	RSC1A1	regulatory solute carrier protein, family 1, member 1
hsa-miR-543	0	0	0	1	1	1	TRADD	TNFRSF1A-associated via death domain
hsa-miR-543	0	0	0	1	0	0	PPL	periplakin
hsa-miR-543	1	0	0	1	1	1	PCBP3	poly(rC) binding protein 3
hsa-miR-543	0	0	1	1	0	0	THBS4	thrombospondin 4
hsa-miR-543	0	0	0	1	1	1	CBS	cystathionine-beta-synthase
hsa-miR-543	0	0	0	1	0	0	PSMD13	proteasome (prosome, macropain) 26S subunit, non-ATPase, 13
hsa-miR-543	0	0	1	1	1	1	KCTD14	potassium channel tetramerisation domain containing 14
hsa-miR-543	0	0	0	1	0	0	CHIA	chitinase, acidic
hsa-miR-543	1	0	1	1	1	1	PTGER3	prostaglandin E receptor 3 (subtype EP3)
hsa-miR-543	0	0	1	1	1	1	DIDO1	death inducer-obliterator 1
hsa-miR-543	0	0	1	1	0	0	GLYCTK	glycerate kinase
hsa-miR-543	0	0	0	1	1	1	ALDH9A1	aldehyde dehydrogenase 9 family, member A1
hsa-miR-543	0	0	0	1	1	1	CLEC12A	C-type lectin domain family 12, member A
hsa-miR-543	0	0	1	1	1	1	CLEC12B	C-type lectin domain family 12, member B
hsa-miR-543	0	0	1	1	1	1	PRPF39	PRP39 pre-mRNA processing factor 39 homolog (S. cerevisiae)
hsa-miR-543	0	0	1	1	1	1	VPS13A	vacuolar protein sorting 13 homolog A (S. cerevisiae)
hsa-miR-543	0	0	0	1	1	1	OPRL1	opiate receptor-like 1
hsa-miR-543	0	0	0	1	0	0	RIMBP3B	RIMS binding protein 3B
hsa-miR-543	0	0	1	1	1	1	TOP3B	topoisomerase (DNA) III beta
hsa-miR-543	0	0	1	1	1	1	CCDC147	coiled-coil domain containing 147
hsa-miR-543	0	0	1	1	0	0	HIST1H2BB	histone cluster 1, H2bb
hsa-miR-543	0	0	0	1	0	0	ZNF799	zinc finger protein 799
hsa-miR-543	0	0	0	1	0	0	DDX47	DEAD (Asp-Glu-Ala-Asp) box polypeptide 47
hsa-miR-543	0	0	1	1	1	1	DCAF4	DDB1 and CUL4 associated factor 4
hsa-miR-543	0	0	1	1	1	1	STAT4	signal transducer and activator of transcription 4
hsa-miR-543	0	0	0	1	0	0	AKAP4	A kinase (PRKA) anchor protein 4
hsa-miR-543	1	0	1	1	1	1	SLC4A8	solute carrier family 4, sodium bicarbonate cotransporter, member 8
hsa-miR-543	1	0	1	1	0	0	ADC	arginine decarboxylase
hsa-miR-543	0	0	1	1	1	1	GGPS1	geranylgeranyl diphosphate synthase 1
hsa-miR-543	1	0	1	1	1	1	CD163	CD163 molecule
hsa-miR-543	0	0	1	1	0	0	CXorf40A	chromosome X open reading frame 40A
hsa-miR-543	0	0	1	1	1	1	MARC2	mitochondrial amidoxime reducing component 2
hsa-miR-543	0	0	0	1	1	1	CELA2A	chymotrypsin-like elastase family, member 2A
hsa-miR-543	1	0	0	1	1	1	CRB2	crumbs homolog 2 (Drosophila)
hsa-miR-543	0	0	0	1	0	0	ARL9	ADP-ribosylation factor-like 9
hsa-miR-543	0	0	1	1	0	0	AARSD1	alanyl-tRNA synthetase domain containing 1
hsa-miR-543	0	0	0	1	1	1	CLEC4C	C-type lectin domain family 4, member C
hsa-miR-543	0	0	0	1	0	0	CLPSL2	colipase-like 2
hsa-miR-543	1	0	1	1	1	1	P4HA2	prolyl 4-hydroxylase, alpha polypeptide II
hsa-miR-543	0	0	0	1	1	1	RGS22	regulator of G-protein signaling 22
hsa-miR-543	1	0	0	1	1	1	RBMS1	RNA binding motif, single stranded interacting protein 1
hsa-miR-543	1	0	1	1	1	1	ARHGEF10L	Rho guanine nucleotide exchange factor (GEF) 10-like
hsa-miR-543	1	0	1	1	1	1	ZFP2	zinc finger protein 2 homolog (mouse)
hsa-miR-543	0	0	1	1	0	0	PSMB5	proteasome (prosome, macropain) subunit, beta type, 5
hsa-miR-543	0	0	0	1	1	1	TIFA	TRAF-interacting protein with forkhead-associated domain
hsa-miR-543	0	0	1	1	1	1	ZNF277	zinc finger protein 277
hsa-miR-543	0	0	1	1	1	1	PCDH15	protocadherin-related 15
hsa-miR-543	0	0	0	1	1	1	COL6A1	collagen, type VI, alpha 1
hsa-miR-543	0	0	0	1	1	1	GTSE1	G-2 and S-phase expressed 1
hsa-miR-543	1	0	1	1	1	1	ENSA	endosulfine alpha
hsa-miR-543	0	0	0	1	1	1	ADCK3	aarF domain containing kinase 3
hsa-miR-543	1	0	1	1	0	0	DYNLT1	dynein, light chain, Tctex-type 1
hsa-miR-543	0	0	1	1	1	1	DYRK3	dual-specificity tyrosine-(Y)-phosphorylation regulated kinase 3
hsa-miR-543	0	0	0	1	1	1	VIP	vasoactive intestinal peptide
hsa-miR-543	0	0	0	1	1	1	LGR6	leucine-rich repeat containing G protein-coupled receptor 6
hsa-miR-543	0	0	1	1	1	1	MTHFD1L	methylenetetrahydrofolate dehydrogenase (NADP+ dependent) 1-like
hsa-miR-543	1	0	1	1	1	1	PLEKHG1	pleckstrin homology domain containing, family G (with RhoGef domain) member 1
hsa-miR-543	0	0	1	1	0	0	TMEM9	transmembrane protein 9
hsa-miR-543	0	0	0	1	1	1	NUP43	nucleoporin 43kDa
hsa-miR-543	0	0	1	1	1	1	CFHR3	complement factor H-related 3
hsa-miR-543	0	0	0	1	0	0	GLRX2	glutaredoxin 2
hsa-miR-543	0	0	1	1	1	1	RASAL2	RAS protein activator like 2
hsa-miR-543	0	0	1	1	0	0	ABRACL	ABRA C-terminal like
hsa-miR-543	0	0	0	1	1	1	MRPS14	mitochondrial ribosomal protein S14
hsa-miR-543	0	0	1	1	1	1	CD48	CD48 molecule
hsa-miR-543	0	0	0	1	1	1	EPB41L2	erythrocyte membrane protein band 4.1-like 2
hsa-miR-543	1	0	1	1	1	1	PTPRK	protein tyrosine phosphatase, receptor type, K
hsa-miR-543	0	0	0	1	1	1	CHRNB2	cholinergic receptor, nicotinic, beta 2 (neuronal)
hsa-miR-543	0	0	0	1	0	0	CALY	calcyon neuron-specific vesicular protein
[truncated: 287 more rows]
