# Supplementary material for: Profiling of Selected MicroRNAs in Proliferative Eutopic Endometrium of Women with Ovarian Endometriosis
Source: Biomed Res Int. 2015 Aug 20;2015:760698. doi: 10.1155/2015/760698 (PMC4558423; doi:10.1155/2015/760698)
Supplement: Supplementary file 1 — Table I: The names of miRNAs significantly differentially expressed between eutopic endometrium of patients with endometriosis vs eutopic endometrium of patients without endometriosis. Table II: The associations between miRNA and mRNA, which presents detailed results of the search of six major databases i.e targetscan, tarbase, miranda, mirbase, mirtarget2 and pictar. [file 760698.f1.zip › 760698.f1/Table II/hsa-miR-548a-5p.tsv]

miR	targetscan	tarbase	miranda	mirbase	mirtarget2	pictar	GeneSymbol	GeneName
hsa-miR-548a-5p	1	0	1	1	1	1	ZFYVE16	zinc finger, FYVE domain containing 16
hsa-miR-548a-5p	1	0	1	1	1	1	CHD9	chromodomain helicase DNA binding protein 9
hsa-miR-548a-5p	1	0	1	1	1	1	PRUNE2	prune homolog 2 (Drosophila)
hsa-miR-548a-5p	1	0	1	1	1	1	FAM65B	family with sequence similarity 65, member B
hsa-miR-548a-5p	1	0	1	0	1	1	PTPRT	protein tyrosine phosphatase, receptor type, T
hsa-miR-548a-5p	0	0	1	1	0	0	USH1C	Usher syndrome 1C (autosomal recessive, severe)
hsa-miR-548a-5p	1	0	1	0	1	1	KIAA0408	KIAA0408
hsa-miR-548a-5p	1	0	1	1	1	1	NUPL1	nucleoporin like 1
hsa-miR-548a-5p	1	0	1	1	1	1	PPIP5K2	diphosphoinositol pentakisphosphate kinase 2
hsa-miR-548a-5p	1	0	1	0	1	1	NEDD4L	neural precursor cell expressed, developmentally down-regulated 4-like, E3 ubiquitin protein ligase
hsa-miR-548a-5p	1	0	1	1	1	1	AUTS2	autism susceptibility candidate 2
hsa-miR-548a-5p	0	0	1	1	1	1	RABGAP1L	RAB GTPase activating protein 1-like
hsa-miR-548a-5p	0	0	1	1	1	1	SPAG9	sperm associated antigen 9
hsa-miR-548a-5p	1	0	1	1	1	1	BAI3	brain-specific angiogenesis inhibitor 3
hsa-miR-548a-5p	1	0	1	1	1	1	GPATCH8	G patch domain containing 8
hsa-miR-548a-5p	1	0	1	1	1	1	GREB1	growth regulation by estrogen in breast cancer 1
hsa-miR-548a-5p	1	0	1	1	1	1	NRXN1	neurexin 1
hsa-miR-548a-5p	1	0	1	1	1	1	SLC4A7	solute carrier family 4, sodium bicarbonate cotransporter, member 7
hsa-miR-548a-5p	1	0	1	1	1	1	HIPK1	homeodomain interacting protein kinase 1
hsa-miR-548a-5p	1	0	1	1	1	1	GIGYF2	GRB10 interacting GYF protein 2
hsa-miR-548a-5p	1	0	1	1	0	0	SMCHD1	structural maintenance of chromosomes flexible hinge domain containing 1
hsa-miR-548a-5p	1	0	1	1	1	1	ATG13	autophagy related 13
hsa-miR-548a-5p	1	0	1	1	1	1	ANKRD17	ankyrin repeat domain 17
hsa-miR-548a-5p	1	0	1	0	1	1	MAGI2	membrane associated guanylate kinase, WW and PDZ domain containing 2
hsa-miR-548a-5p	1	0	1	0	1	1	DOCK4	dedicator of cytokinesis 4
hsa-miR-548a-5p	1	0	1	1	1	1	MATR3	matrin 3
hsa-miR-548a-5p	1	0	1	1	0	0	RIMS2	regulating synaptic membrane exocytosis 2
hsa-miR-548a-5p	1	0	1	0	1	1	RBM12	RNA binding motif protein 12
hsa-miR-548a-5p	1	0	1	0	1	1	LPHN3	latrophilin 3
hsa-miR-548a-5p	0	0	1	1	1	1	SEC31A	SEC31 homolog A (S. cerevisiae)
hsa-miR-548a-5p	1	0	1	1	1	1	DNM3	dynamin 3
hsa-miR-548a-5p	1	0	1	1	1	1	DMXL2	Dmx-like 2
hsa-miR-548a-5p	0	0	1	1	0	0	FAM169A	family with sequence similarity 169, member A
hsa-miR-548a-5p	0	0	1	1	1	1	WDR47	WD repeat domain 47
hsa-miR-548a-5p	1	0	1	1	1	1	UBR5	ubiquitin protein ligase E3 component n-recognin 5
hsa-miR-548a-5p	1	0	1	1	1	1	CPEB3	cytoplasmic polyadenylation element binding protein 3
hsa-miR-548a-5p	1	0	1	1	1	1	CIT	citron (rho-interacting, serine/threonine kinase 21)
hsa-miR-548a-5p	1	0	1	1	1	1	RGL1	ral guanine nucleotide dissociation stimulator-like 1
hsa-miR-548a-5p	0	0	1	1	1	1	FASTKD2	FAST kinase domains 2
hsa-miR-548a-5p	1	0	1	1	1	1	PALLD	palladin, cytoskeletal associated protein
hsa-miR-548a-5p	1	0	1	1	1	1	RPGRIP1L	RPGRIP1-like
hsa-miR-548a-5p	1	0	1	1	1	1	CNOT1	CCR4-NOT transcription complex, subunit 1
hsa-miR-548a-5p	1	0	1	0	1	1	DIS3	DIS3 mitotic control homolog (S. cerevisiae)
hsa-miR-548a-5p	0	0	1	0	1	1	TP53TG3	TP53 target 3
hsa-miR-548a-5p	0	0	1	0	0	0	TP53TG3B	TP53 target 3B
hsa-miR-548a-5p	0	0	1	1	1	1	AGTPBP1	ATP/GTP binding protein 1
hsa-miR-548a-5p	1	0	1	1	1	1	FOXJ3	forkhead box J3
hsa-miR-548a-5p	1	0	1	1	0	0	KIAA1045	KIAA1045
hsa-miR-548a-5p	1	0	1	1	0	0	ZC3H4	zinc finger CCCH-type containing 4
hsa-miR-548a-5p	1	0	1	0	1	1	ZNF507	zinc finger protein 507
hsa-miR-548a-5p	0	0	1	0	0	0	KIAA1107	KIAA1107
hsa-miR-548a-5p	1	0	1	1	1	1	SPIRE1	spire homolog 1 (Drosophila)
hsa-miR-548a-5p	1	0	1	0	1	1	GPR158	G protein-coupled receptor 158
hsa-miR-548a-5p	0	0	1	1	0	0	ZC4H2	zinc finger, C4H2 domain containing
hsa-miR-548a-5p	1	0	1	1	1	1	KIAA1217	KIAA1217
hsa-miR-548a-5p	1	0	1	1	1	1	ATXN7L1	ataxin 7-like 1
hsa-miR-548a-5p	1	0	1	1	1	1	ZMIZ1	zinc finger, MIZ-type containing 1
hsa-miR-548a-5p	0	0	1	1	0	0	ODF2L	outer dense fiber of sperm tails 2-like
hsa-miR-548a-5p	1	0	1	0	0	0	HEG1	HEG homolog 1 (zebrafish)
hsa-miR-548a-5p	1	0	1	1	1	1	RIMKLB	ribosomal modification protein rimK-like family member B
hsa-miR-548a-5p	1	0	1	1	0	0	ATAD2B	ATPase family, AAA domain containing 2B
hsa-miR-548a-5p	1	0	1	1	1	1	ASAP1	ArfGAP with SH3 domain, ankyrin repeat and PH domain 1
hsa-miR-548a-5p	1	0	1	0	1	1	ANKFY1	ankyrin repeat and FYVE domain containing 1
hsa-miR-548a-5p	0	0	1	1	1	1	FSTL5	follistatin-like 5
hsa-miR-548a-5p	1	0	1	0	1	1	INTS2	integrator complex subunit 2
hsa-miR-548a-5p	1	0	1	1	1	1	PCDH19	protocadherin 19
hsa-miR-548a-5p	1	0	1	1	1	1	TAOK1	TAO kinase 1
hsa-miR-548a-5p	1	0	1	1	1	1	LRRC7	leucine rich repeat containing 7
hsa-miR-548a-5p	0	0	1	0	0	0	KIAA1383	KIAA1383
hsa-miR-548a-5p	1	0	1	1	1	1	UPF2	UPF2 regulator of nonsense transcripts homolog (yeast)
hsa-miR-548a-5p	1	0	1	1	1	1	FAM135A	family with sequence similarity 135, member A
hsa-miR-548a-5p	0	0	1	0	1	1	MUC3B	mucin 3B, cell surface associated
hsa-miR-548a-5p	1	0	1	0	0	0	PITPNM2	phosphatidylinositol transfer protein, membrane-associated 2
hsa-miR-548a-5p	1	0	1	1	0	0	KIAA1462	KIAA1462
hsa-miR-548a-5p	0	0	1	0	1	1	KIAA1468	KIAA1468
hsa-miR-548a-5p	1	0	1	1	1	1	BAZ2B	bromodomain adjacent to zinc finger domain, 2B
hsa-miR-548a-5p	0	0	1	0	0	0	NYAP2	neuronal tyrosine-phosphorylated phosphoinositide-3-kinase adaptor 2
hsa-miR-548a-5p	1	0	1	1	1	1	FRAS1	Fraser syndrome 1
hsa-miR-548a-5p	1	0	1	1	1	1	USP28	ubiquitin specific peptidase 28
hsa-miR-548a-5p	1	0	1	0	1	1	ZNF295	zinc finger protein 295
hsa-miR-548a-5p	1	0	1	0	1	1	LMO3	LIM domain only 3 (rhombotin-like 2)
hsa-miR-548a-5p	1	0	1	1	1	1	INADL	InaD-like (Drosophila)
hsa-miR-548a-5p	1	0	1	1	1	1	TOPORS	topoisomerase I binding, arginine/serine-rich, E3 ubiquitin protein ligase
hsa-miR-548a-5p	0	0	1	0	1	1	ZSWIM6	zinc finger, SWIM-type containing 6
hsa-miR-548a-5p	1	0	1	0	1	1	IGDCC4	immunoglobulin superfamily, DCC subclass, member 4
hsa-miR-548a-5p	1	0	1	0	0	0	TANC2	tetratricopeptide repeat, ankyrin repeat and coiled-coil containing 2
hsa-miR-548a-5p	1	0	1	1	1	1	PTBP2	polypyrimidine tract binding protein 2
hsa-miR-548a-5p	1	0	1	1	1	1	PHF21A	PHD finger protein 21A
hsa-miR-548a-5p	0	0	1	1	1	1	BHLHB9	basic helix-loop-helix domain containing, class B, 9
hsa-miR-548a-5p	0	0	1	1	1	1	KIAA1704	KIAA1704
hsa-miR-548a-5p	1	0	1	1	1	1	DDHD1	DDHD domain containing 1
hsa-miR-548a-5p	1	0	1	0	1	1	RIMS1	regulating synaptic membrane exocytosis 1
hsa-miR-548a-5p	1	0	1	1	1	1	LCOR	ligand dependent nuclear receptor corepressor
hsa-miR-548a-5p	1	0	1	1	1	1	AHCTF1	AT hook containing transcription factor 1
hsa-miR-548a-5p	1	0	1	1	1	1	NAV2	neuron navigator 2
hsa-miR-548a-5p	1	0	1	1	1	1	HNRPDL	heterogeneous nuclear ribonucleoprotein D-like
hsa-miR-548a-5p	1	0	1	1	1	1	CSMD3	CUB and Sushi multiple domains 3
hsa-miR-548a-5p	1	0	1	1	1	1	LSM14A	LSM14A, SCD6 homolog A (S. cerevisiae)
hsa-miR-548a-5p	1	0	1	1	1	1	MAT2B	methionine adenosyltransferase II, beta
hsa-miR-548a-5p	1	0	1	1	0	0	ZNF292	zinc finger protein 292
hsa-miR-548a-5p	1	0	1	1	1	1	SH3TC2	SH3 domain and tetratricopeptide repeats 2
hsa-miR-548a-5p	0	0	1	0	0	0	NUGGC	nuclear GTPase, germinal center associated
hsa-miR-548a-5p	1	0	1	1	1	1	CSGALNACT1	chondroitin sulfate N-acetylgalactosaminyltransferase 1
hsa-miR-548a-5p	1	0	1	0	0	0	RNF169	ring finger protein 169
hsa-miR-548a-5p	1	0	1	0	0	0	ZBTB34	zinc finger and BTB domain containing 34
hsa-miR-548a-5p	1	0	1	1	1	1	PGR	progesterone receptor
hsa-miR-548a-5p	0	0	1	0	1	1	RASSF8	Ras association (RalGDS/AF-6) domain family (N-terminal) member 8
hsa-miR-548a-5p	1	0	1	0	0	0	ZC3H12C	zinc finger CCCH-type containing 12C
hsa-miR-548a-5p	1	0	1	1	1	1	C11orf57	chromosome 11 open reading frame 57
hsa-miR-548a-5p	0	0	1	1	0	0	KRTAP24-1	keratin associated protein 24-1
hsa-miR-548a-5p	0	0	1	1	1	1	IL7	interleukin 7
hsa-miR-548a-5p	1	0	1	1	1	1	PAN3	PAN3 poly(A) specific ribonuclease subunit homolog (S. cerevisiae)
hsa-miR-548a-5p	1	0	1	0	1	1	LIN54	lin-54 homolog (C. elegans)
hsa-miR-548a-5p	1	0	1	1	1	1	KCNMA1	potassium large conductance calcium-activated channel, subfamily M, alpha member 1
hsa-miR-548a-5p	1	0	1	1	1	1	SLC43A2	solute carrier family 43, member 2
hsa-miR-548a-5p	0	0	1	0	0	0	TIFAB	TRAF-interacting protein with forkhead-associated domain, family member B
hsa-miR-548a-5p	1	1	1	1	1	1	BACE1	beta-site APP-cleaving enzyme 1
hsa-miR-548a-5p	1	0	1	1	1	1	ARHGEF7	Rho guanine nucleotide exchange factor (GEF) 7
hsa-miR-548a-5p	0	0	1	1	1	1	FN1	fibronectin 1
hsa-miR-548a-5p	1	0	1	1	1	1	UBE3A	ubiquitin protein ligase E3A
hsa-miR-548a-5p	1	0	1	1	1	1	TRIM36	tripartite motif containing 36
hsa-miR-548a-5p	1	0	1	0	1	1	CCDC88A	coiled-coil domain containing 88A
hsa-miR-548a-5p	1	0	1	1	1	1	LTBP1	latent transforming growth factor beta binding protein 1
hsa-miR-548a-5p	1	0	1	1	1	1	COL11A1	collagen, type XI, alpha 1
hsa-miR-548a-5p	1	0	1	1	1	1	SHC1	SHC (Src homology 2 domain containing) transforming protein 1
hsa-miR-548a-5p	0	0	1	1	1	1	SEPT10	septin 10
hsa-miR-548a-5p	1	0	1	1	1	1	OSBPL6	oxysterol binding protein-like 6
hsa-miR-548a-5p	1	0	1	1	1	1	RPS6KA3	ribosomal protein S6 kinase, 90kDa, polypeptide 3
hsa-miR-548a-5p	1	0	1	1	1	1	PCCB	propionyl CoA carboxylase, beta polypeptide
hsa-miR-548a-5p	0	0	1	1	1	1	PTK2	PTK2 protein tyrosine kinase 2
hsa-miR-548a-5p	1	0	1	1	1	1	SLC8A1	solute carrier family 8 (sodium/calcium exchanger), member 1
hsa-miR-548a-5p	1	0	1	1	1	1	SYNCRIP	synaptotagmin binding, cytoplasmic RNA interacting protein
hsa-miR-548a-5p	1	0	1	1	1	1	RLF	rearranged L-myc fusion
hsa-miR-548a-5p	1	0	1	1	1	1	DTNA	dystrobrevin, alpha
hsa-miR-548a-5p	1	0	1	1	1	1	EIF4G3	eukaryotic translation initiation factor 4 gamma, 3
hsa-miR-548a-5p	1	0	1	0	1	1	PLAG1	pleiomorphic adenoma gene 1
hsa-miR-548a-5p	1	0	1	1	1	1	FMR1	fragile X mental retardation 1
hsa-miR-548a-5p	1	0	1	0	1	1	ETV1	ets variant 1
hsa-miR-548a-5p	1	0	1	1	1	1	ZNF207	zinc finger protein 207
hsa-miR-548a-5p	1	0	1	1	1	1	REV3L	REV3-like, polymerase (DNA directed), zeta, catalytic subunit
hsa-miR-548a-5p	1	0	1	1	1	1	EPHA7	EPH receptor A7
hsa-miR-548a-5p	1	0	1	1	1	1	ERF	Ets2 repressor factor
hsa-miR-548a-5p	1	0	1	1	1	1	TWF1	twinfilin, actin-binding protein, homolog 1 (Drosophila)
hsa-miR-548a-5p	1	0	1	0	1	1	CHL1	cell adhesion molecule with homology to L1CAM (close homolog of L1)
hsa-miR-548a-5p	1	0	1	1	1	1	MTA1	metastasis associated 1
hsa-miR-548a-5p	1	0	1	1	1	1	EPHA5	EPH receptor A5
hsa-miR-548a-5p	1	0	1	1	1	1	SATB2	SATB homeobox 2
hsa-miR-548a-5p	1	0	1	1	1	1	AEBP2	AE binding protein 2
hsa-miR-548a-5p	1	0	1	1	1	1	MYO5A	myosin VA (heavy chain 12, myoxin)
hsa-miR-548a-5p	0	0	1	1	1	1	GPM6B	glycoprotein M6B
hsa-miR-548a-5p	1	0	1	1	1	1	CTAGE5	CTAGE family, member 5
hsa-miR-548a-5p	1	0	1	1	1	1	PDLIM5	PDZ and LIM domain 5
hsa-miR-548a-5p	0	0	1	1	0	0	ITGA2B	integrin, alpha 2b (platelet glycoprotein IIb of IIb/IIIa complex, antigen CD41)
hsa-miR-548a-5p	1	0	1	1	1	1	HNRNPK	heterogeneous nuclear ribonucleoprotein K
hsa-miR-548a-5p	0	0	1	1	0	0	HLA-DMB	major histocompatibility complex, class II, DM beta
hsa-miR-548a-5p	0	0	1	1	0	0	CFLAR	CASP8 and FADD-like apoptosis regulator
hsa-miR-548a-5p	0	0	1	1	1	1	HLA-DQA1	major histocompatibility complex, class II, DQ alpha 1
hsa-miR-548a-5p	1	0	1	1	1	1	ARHGEF3	Rho guanine nucleotide exchange factor (GEF) 3
hsa-miR-548a-5p	0	0	1	1	1	1	HNRNPM	heterogeneous nuclear ribonucleoprotein M
hsa-miR-548a-5p	1	0	1	1	1	1	SATB1	SATB homeobox 1
hsa-miR-548a-5p	0	0	1	1	1	1	KIF3A	kinesin family member 3A
hsa-miR-548a-5p	0	0	1	1	1	1	CHN1	chimerin (chimaerin) 1
hsa-miR-548a-5p	0	0	1	1	1	1	ELOVL5	ELOVL fatty acid elongase 5
hsa-miR-548a-5p	0	0	1	1	1	1	RNF130	ring finger protein 130
hsa-miR-548a-5p	1	0	1	1	1	1	TEAD1	TEA domain family member 1 (SV40 transcriptional enhancer factor)
hsa-miR-548a-5p	0	0	1	1	0	0	TRIM27	tripartite motif containing 27
hsa-miR-548a-5p	1	0	1	1	1	1	GULP1	GULP, engulfment adaptor PTB domain containing 1
hsa-miR-548a-5p	1	0	1	1	1	1	ZFX	zinc finger protein, X-linked
hsa-miR-548a-5p	1	0	1	1	1	1	PHLDB2	pleckstrin homology-like domain, family B, member 2
hsa-miR-548a-5p	1	0	1	0	1	1	CAV1	caveolin 1, caveolae protein, 22kDa
hsa-miR-548a-5p	1	0	1	0	1	1	PDE7B	phosphodiesterase 7B
hsa-miR-548a-5p	0	0	1	1	1	1	CENPE	centromere protein E, 312kDa
hsa-miR-548a-5p	0	0	1	1	1	1	ACLY	ATP citrate lyase
hsa-miR-548a-5p	1	0	1	1	1	1	ADARB1	adenosine deaminase, RNA-specific, B1
hsa-miR-548a-5p	1	0	1	1	1	1	DLGAP2	discs, large (Drosophila) homolog-associated protein 2
hsa-miR-548a-5p	1	0	1	1	1	1	SLC4A4	solute carrier family 4, sodium bicarbonate cotransporter, member 4
hsa-miR-548a-5p	1	0	1	0	1	1	PDE4D	phosphodiesterase 4D, cAMP-specific
hsa-miR-548a-5p	0	0	1	1	1	1	SESN1	sestrin 1
hsa-miR-548a-5p	1	0	1	1	1	1	MID1	midline 1 (Opitz/BBB syndrome)
hsa-miR-548a-5p	1	0	1	1	1	1	MYT1L	myelin transcription factor 1-like
hsa-miR-548a-5p	1	0	1	0	0	0	MAP3K1	mitogen-activated protein kinase kinase kinase 1, E3 ubiquitin protein ligase
hsa-miR-548a-5p	1	0	1	1	1	1	MRAS	muscle RAS oncogene homolog
hsa-miR-548a-5p	0	0	1	1	1	1	KHDRBS3	KH domain containing, RNA binding, signal transduction associated 3
hsa-miR-548a-5p	1	0	1	1	1	1	SHOC2	soc-2 suppressor of clear homolog (C. elegans)
hsa-miR-548a-5p	1	0	1	1	1	1	PFKFB3	6-phosphofructo-2-kinase/fructose-2,6-biphosphatase 3
hsa-miR-548a-5p	1	0	1	1	1	1	MBNL2	muscleblind-like splicing regulator 2
hsa-miR-548a-5p	1	0	1	1	1	1	ZFAND6	zinc finger, AN1-type domain 6
hsa-miR-548a-5p	1	0	1	1	1	1	CTNND1	catenin (cadherin-associated protein), delta 1
hsa-miR-548a-5p	0	0	1	1	1	1	ZNF33A	zinc finger protein 33A
hsa-miR-548a-5p	1	0	1	1	1	1	NUDT4	nudix (nucleoside diphosphate linked moiety X)-type motif 4
hsa-miR-548a-5p	1	0	1	1	1	1	CBFA2T2	core-binding factor, runt domain, alpha subunit 2; translocated to, 2
hsa-miR-548a-5p	0	0	1	1	0	0	SLC38A6	solute carrier family 38, member 6
hsa-miR-548a-5p	1	0	1	1	1	1	TP63	tumor protein p63
hsa-miR-548a-5p	1	0	1	1	1	1	WHSC1	Wolf-Hirschhorn syndrome candidate 1
hsa-miR-548a-5p	1	0	1	1	1	1	DMTF1	cyclin D binding myb-like transcription factor 1
hsa-miR-548a-5p	0	0	1	1	1	1	SNRNP200	small nuclear ribonucleoprotein 200kDa (U5)
hsa-miR-548a-5p	1	0	1	0	1	1	DDX3X	DEAD (Asp-Glu-Ala-Asp) box polypeptide 3, X-linked
hsa-miR-548a-5p	0	0	1	0	0	0	C3orf79	chromosome 3 open reading frame 79
hsa-miR-548a-5p	0	0	1	1	1	1	RGS7	regulator of G-protein signaling 7
hsa-miR-548a-5p	1	0	1	0	1	1	CELF2	CUGBP, Elav-like family member 2
hsa-miR-548a-5p	0	0	1	1	1	1	RER1	RER1 retention in endoplasmic reticulum 1 homolog (S. cerevisiae)
hsa-miR-548a-5p	1	0	1	1	1	1	PHF8	PHD finger protein 8
hsa-miR-548a-5p	0	0	1	1	1	1	C11orf54	chromosome 11 open reading frame 54
hsa-miR-548a-5p	0	0	1	1	0	0	FAM48A	family with sequence similarity 48, member A
hsa-miR-548a-5p	1	0	1	0	1	1	MAP4K4	mitogen-activated protein kinase kinase kinase kinase 4
hsa-miR-548a-5p	1	0	1	1	1	1	GLS	glutaminase
hsa-miR-548a-5p	0	0	1	1	1	1	FHL1	four and a half LIM domains 1
hsa-miR-548a-5p	0	0	1	1	1	1	SH2D1A	SH2 domain containing 1A
hsa-miR-548a-5p	1	0	1	1	1	1	SLMAP	sarcolemma associated protein
hsa-miR-548a-5p	1	0	1	0	1	1	CD164	CD164 molecule, sialomucin
hsa-miR-548a-5p	0	0	1	1	0	0	RBM5	RNA binding motif protein 5
hsa-miR-548a-5p	0	0	1	1	1	1	GUCA1C	guanylate cyclase activator 1C
hsa-miR-548a-5p	1	0	1	1	1	1	KAT6B	K(lysine) acetyltransferase 6B
hsa-miR-548a-5p	1	0	1	1	1	1	HP1BP3	heterochromatin protein 1, binding protein 3
hsa-miR-548a-5p	1	0	1	1	1	1	EDNRB	endothelin receptor type B
hsa-miR-548a-5p	0	0	1	1	0	0	ABRACL	ABRA C-terminal like
hsa-miR-548a-5p	0	0	1	1	1	1	COG6	component of oligomeric golgi complex 6
hsa-miR-548a-5p	1	0	1	1	1	1	PKN2	protein kinase N2
hsa-miR-548a-5p	0	0	1	1	1	1	TIAM2	T-cell lymphoma invasion and metastasis 2
hsa-miR-548a-5p	1	0	1	0	1	1	FAM19A5	family with sequence similarity 19 (chemokine (C-C motif)-like), member A5
hsa-miR-548a-5p	1	0	1	1	1	1	CAB39	calcium binding protein 39
hsa-miR-548a-5p	1	0	1	1	1	1	TAOK3	TAO kinase 3
hsa-miR-548a-5p	1	0	1	1	1	1	SORBS1	sorbin and SH3 domain containing 1
hsa-miR-548a-5p	1	0	1	1	1	1	AASDHPPT	aminoadipate-semialdehyde dehydrogenase-phosphopantetheinyl transferase
hsa-miR-548a-5p	1	0	1	1	1	1	ZBTB20	zinc finger and BTB domain containing 20
hsa-miR-548a-5p	1	0	1	1	1	1	SCHIP1	schwannomin interacting protein 1
hsa-miR-548a-5p	1	0	1	1	1	1	C14orf129	chromosome 14 open reading frame 129
hsa-miR-548a-5p	0	0	1	1	1	1	CNPPD1	cyclin Pas1/PHO80 domain containing 1
hsa-miR-548a-5p	1	0	1	0	0	0	PRPF40A	PRP40 pre-mRNA processing factor 40 homolog A (S. cerevisiae)
hsa-miR-548a-5p	1	0	1	1	1	1	ANKRD13A	ankyrin repeat domain 13A
hsa-miR-548a-5p	0	0	1	0	1	1	PDP1	pyruvate dehyrogenase phosphatase catalytic subunit 1
hsa-miR-548a-5p	1	0	1	1	1	1	AGPAT3	1-acylglycerol-3-phosphate O-acyltransferase 3
hsa-miR-548a-5p	0	0	1	1	1	1	SAP30L	SAP30-like
hsa-miR-548a-5p	0	0	1	1	1	1	FAM114A2	family with sequence similarity 114, member A2
hsa-miR-548a-5p	1	0	1	1	0	0	ZCCHC4	zinc finger, CCHC domain containing 4
hsa-miR-548a-5p	1	0	1	1	1	1	USP25	ubiquitin specific peptidase 25
hsa-miR-548a-5p	1	0	1	1	1	1	SEPT9	septin 9
hsa-miR-548a-5p	0	0	1	1	1	1	SLC39A8	solute carrier family 39 (zinc transporter), member 8
hsa-miR-548a-5p	0	0	1	1	0	0	PARD3	par-3 partitioning defective 3 homolog (C. elegans)
hsa-miR-548a-5p	0	0	1	0	0	0	BPESC1	blepharophimosis, epicanthus inversus and ptosis, candidate 1 (non-protein coding)
hsa-miR-548a-5p	1	0	1	1	1	1	CCNL1	cyclin L1
hsa-miR-548a-5p	1	0	1	1	1	1	FAM49B	family with sequence similarity 49, member B
hsa-miR-548a-5p	1	0	1	1	1	1	KCNMB2	potassium large conductance calcium-activated channel, subfamily M, beta member 2
hsa-miR-548a-5p	1	0	1	1	1	1	NXT2	nuclear transport factor 2-like export factor 2
hsa-miR-548a-5p	0	0	1	1	1	1	HERPUD1	homocysteine-inducible, endoplasmic reticulum stress-inducible, ubiquitin-like domain member 1
hsa-miR-548a-5p	0	0	1	1	1	1	SAMSN1	SAM domain, SH3 domain and nuclear localization signals 1
hsa-miR-548a-5p	0	0	1	1	1	1	CD28	CD28 molecule
hsa-miR-548a-5p	1	0	1	1	1	1	SUFU	suppressor of fused homolog (Drosophila)
hsa-miR-548a-5p	1	0	1	1	1	1	OGT	O-linked N-acetylglucosamine (GlcNAc) transferase
hsa-miR-548a-5p	0	0	1	1	1	1	MFF	mitochondrial fission factor
hsa-miR-548a-5p	1	0	1	1	1	1	C21orf91	chromosome 21 open reading frame 91
hsa-miR-548a-5p	0	0	1	1	0	0	KCNK9	potassium channel, subfamily K, member 9
hsa-miR-548a-5p	0	0	1	1	1	1	CELF1	CUGBP, Elav-like family member 1
hsa-miR-548a-5p	0	0	1	1	1	1	BAX	BCL2-associated X protein
hsa-miR-548a-5p	0	0	1	1	1	1	DOCK10	dedicator of cytokinesis 10
hsa-miR-548a-5p	0	0	1	0	0	0	TIGD7	tigger transposable element derived 7
hsa-miR-548a-5p	1	0	1	1	1	1	RBM47	RNA binding motif protein 47
hsa-miR-548a-5p	1	0	1	1	1	1	SH3GLB1	SH3-domain GRB2-like endophilin B1
hsa-miR-548a-5p	0	0	1	1	1	1	GOLGA6A	golgin A6 family, member A
hsa-miR-548a-5p	1	0	1	0	1	1	TRPS1	trichorhinophalangeal syndrome I
hsa-miR-548a-5p	1	0	1	1	1	1	PUM2	pumilio homolog 2 (Drosophila)
hsa-miR-548a-5p	1	0	1	1	1	1	PCDH11Y	protocadherin 11 Y-linked
hsa-miR-548a-5p	0	0	1	1	1	1	TEX12	testis expressed 12
hsa-miR-548a-5p	1	0	1	1	1	1	DCLRE1B	DNA cross-link repair 1B
hsa-miR-548a-5p	1	0	1	1	1	1	METTL10	methyltransferase like 10
hsa-miR-548a-5p	1	0	1	1	1	1	VEGFA	vascular endothelial growth factor A
hsa-miR-548a-5p	1	0	1	1	1	1	CHST9	carbohydrate (N-acetylgalactosamine 4-0) sulfotransferase 9
hsa-miR-548a-5p	0	0	1	1	1	1	FCRL5	Fc receptor-like 5
hsa-miR-548a-5p	1	0	1	0	1	1	USP32	ubiquitin specific peptidase 32
hsa-miR-548a-5p	1	0	1	1	1	1	PBX3	pre-B-cell leukemia homeobox 3
hsa-miR-548a-5p	1	0	1	0	1	1	WIPF2	WAS/WASL interacting protein family, member 2
hsa-miR-548a-5p	1	0	1	1	1	1	LARP4	La ribonucleoprotein domain family, member 4
hsa-miR-548a-5p	0	0	1	0	0	0	NBPF10	neuroblastoma breakpoint family, member 10
hsa-miR-548a-5p	1	0	1	1	1	1	SON	SON DNA binding protein
hsa-miR-548a-5p	1	0	1	1	1	1	PDE8A	phosphodiesterase 8A
hsa-miR-548a-5p	0	0	1	1	0	0	SNRPN	small nuclear ribonucleoprotein polypeptide N
hsa-miR-548a-5p	1	0	1	1	1	1	MAGI1	membrane associated guanylate kinase, WW and PDZ domain containing 1
hsa-miR-548a-5p	0	0	1	1	1	1	SPSB1	splA/ryanodine receptor domain and SOCS box containing 1
hsa-miR-548a-5p	1	0	1	1	1	1	NTRK2	neurotrophic tyrosine kinase, receptor, type 2
hsa-miR-548a-5p	0	0	1	1	0	0	CNKSR2	connector enhancer of kinase suppressor of Ras 2
hsa-miR-548a-5p	0	0	1	0	1	1	NBPF15	neuroblastoma breakpoint family, member 15
hsa-miR-548a-5p	1	0	1	1	0	0	YTHDF2	YTH domain family, member 2
hsa-miR-548a-5p	0	0	1	1	1	1	C10orf90	chromosome 10 open reading frame 90
hsa-miR-548a-5p	1	0	1	1	0	0	SEPT8	septin 8
hsa-miR-548a-5p	1	0	1	1	0	0	FOXP2	forkhead box P2
hsa-miR-548a-5p	1	0	1	1	1	1	ZC3H14	zinc finger CCCH-type containing 14
hsa-miR-548a-5p	0	0	1	1	1	1	SAMD9L	sterile alpha motif domain containing 9-like
hsa-miR-548a-5p	1	0	1	1	1	1	WAPAL	wings apart-like homolog (Drosophila)
hsa-miR-548a-5p	0	0	1	1	1	1	CHODL	chondrolectin
hsa-miR-548a-5p	0	0	1	1	0	0	SVIP	small VCP/p97-interacting protein
hsa-miR-548a-5p	0	0	1	1	1	1	ANKRD36B	ankyrin repeat domain 36B
hsa-miR-548a-5p	1	0	1	1	1	1	AFF2	AF4/FMR2 family, member 2
hsa-miR-548a-5p	0	0	1	1	1	1	CLDND1	claudin domain containing 1
hsa-miR-548a-5p	1	0	1	0	1	1	GRB10	growth factor receptor-bound protein 10
hsa-miR-548a-5p	1	0	1	1	1	1	ILF3	interleukin enhancer binding factor 3, 90kDa
hsa-miR-548a-5p	0	0	1	1	1	1	WWTR1	WW domain containing transcription regulator 1
hsa-miR-548a-5p	0	0	1	0	0	0	CASC2	cancer susceptibility candidate 2 (non-protein coding)
hsa-miR-548a-5p	1	0	1	1	1	1	PNISR	PNN-interacting serine/arginine-rich protein
hsa-miR-548a-5p	1	0	1	1	1	1	CASP10	caspase 10, apoptosis-related cysteine peptidase
hsa-miR-548a-5p	1	0	1	1	1	1	NAV3	neuron navigator 3
hsa-miR-548a-5p	1	0	1	1	1	1	PPP3CB	protein phosphatase 3, catalytic subunit, beta isozyme
hsa-miR-548a-5p	1	0	1	1	1	1	NRXN3	neurexin 3
hsa-miR-548a-5p	1	0	1	1	1	1	SYNM	synemin, intermediate filament protein
hsa-miR-548a-5p	0	0	1	1	1	1	PPARG	peroxisome proliferator-activated receptor gamma
hsa-miR-548a-5p	0	0	1	1	1	1	ABLIM2	actin binding LIM protein family, member 2
hsa-miR-548a-5p	1	0	1	1	1	1	PPP1R9A	protein phosphatase 1, regulatory subunit 9A
hsa-miR-548a-5p	0	0	1	1	1	1	ESRP1	epithelial splicing regulatory protein 1
hsa-miR-548a-5p	1	0	1	1	1	1	AKAP2	A kinase (PRKA) anchor protein 2
hsa-miR-548a-5p	1	0	1	0	1	1	NFAT5	nuclear factor of activated T-cells 5, tonicity-responsive
hsa-miR-548a-5p	0	0	1	0	0	0	FLJ20518	FSHD region gene 2 family, member C pseudogene
hsa-miR-548a-5p	1	0	1	0	1	1	CLSTN1	calsyntenin 1
hsa-miR-548a-5p	0	0	1	0	0	0	TUG1	taurine upregulated 1 (non-protein coding)
hsa-miR-548a-5p	0	0	1	1	1	1	PARPBP	PARP1 binding protein
hsa-miR-548a-5p	1	0	1	1	1	1	ARHGAP12	Rho GTPase activating protein 12
hsa-miR-548a-5p	0	0	1	1	0	0	AP4B1	adaptor-related protein complex 4, beta 1 subunit
hsa-miR-548a-5p	1	0	1	1	1	1	MEIS2	Meis homeobox 2
hsa-miR-548a-5p	1	0	1	1	1	1	HNRNPF	heterogeneous nuclear ribonucleoprotein F
hsa-miR-548a-5p	0	0	1	1	1	1	STOX2	storkhead box 2
hsa-miR-548a-5p	1	0	1	1	1	1	RIC8B	resistance to inhibitors of cholinesterase 8 homolog B (C. elegans)
hsa-miR-548a-5p	1	0	1	1	1	1	EIF2C1	eukaryotic translation initiation factor 2C, 1
hsa-miR-548a-5p	1	0	1	1	1	1	PTBP3	polypyrimidine tract binding protein 3
hsa-miR-548a-5p	1	0	1	1	1	1	SLC38A2	solute carrier family 38, member 2
hsa-miR-548a-5p	0	0	1	1	1	1	LRIF1	ligand dependent nuclear receptor interacting factor 1
hsa-miR-548a-5p	0	0	1	1	1	1	RSRC2	arginine/serine-rich coiled-coil 2
hsa-miR-548a-5p	1	0	1	1	1	1	PDCD6	programmed cell death 6
hsa-miR-548a-5p	0	0	1	1	1	1	PRPF39	PRP39 pre-mRNA processing factor 39 homolog (S. cerevisiae)
hsa-miR-548a-5p	1	0	1	1	1	1	LRRN3	leucine rich repeat neuronal 3
hsa-miR-548a-5p	1	0	1	1	1	1	ZNF395	zinc finger protein 395
hsa-miR-548a-5p	0	0	1	1	1	1	FAM175A	family with sequence similarity 175, member A
hsa-miR-548a-5p	1	0	1	1	1	1	INSIG2	insulin induced gene 2
hsa-miR-548a-5p	1	0	1	1	1	1	C12orf23	chromosome 12 open reading frame 23
hsa-miR-548a-5p	1	0	1	1	1	1	MAEA	macrophage erythroblast attacher
hsa-miR-548a-5p	1	0	1	0	1	1	LIN28A	lin-28 homolog A (C. elegans)
hsa-miR-548a-5p	1	0	1	1	1	1	VASH2	vasohibin 2
hsa-miR-548a-5p	1	0	1	1	1	1	SLCO5A1	solute carrier organic anion transporter family, member 5A1
hsa-miR-548a-5p	0	0	1	0	0	0	DUXAP10	double homeobox A pseudogene 10
hsa-miR-548a-5p	1	0	1	1	1	1	S100PBP	S100P binding protein
hsa-miR-548a-5p	1	0	1	1	1	1	SMEK2	SMEK homolog 2, suppressor of mek1 (Dictyostelium)
hsa-miR-548a-5p	1	0	1	0	1	1	UBP1	upstream binding protein 1 (LBP-1a)
hsa-miR-548a-5p	1	0	1	1	1	1	MACF1	microtubule-actin crosslinking factor 1
hsa-miR-548a-5p	0	0	1	1	1	1	C5orf42	chromosome 5 open reading frame 42
hsa-miR-548a-5p	0	0	1	1	1	1	C14orf118	chromosome 14 open reading frame 118
hsa-miR-548a-5p	1	0	1	1	1	1	BAIAP2	BAI1-associated protein 2
hsa-miR-548a-5p	1	0	1	1	1	1	PHF20L1	PHD finger protein 20-like 1
hsa-miR-548a-5p	1	0	1	1	1	1	BAZ2A	bromodomain adjacent to zinc finger domain, 2A
hsa-miR-548a-5p	1	0	1	1	1	1	DERL1	derlin 1
hsa-miR-548a-5p	1	0	1	1	1	1	PAX8	paired box 8
hsa-miR-548a-5p	1	0	1	0	1	1	C14orf101	chromosome 14 open reading frame 101
hsa-miR-548a-5p	0	0	1	1	1	1	NSUN7	NOP2/Sun domain family, member 7
hsa-miR-548a-5p	0	0	1	0	1	1	ZNF766	zinc finger protein 766
hsa-miR-548a-5p	0	0	1	1	1	1	CDKAL1	CDK5 regulatory subunit associated protein 1-like 1
hsa-miR-548a-5p	1	0	1	0	0	0	ZDBF2	zinc finger, DBF-type containing 2
hsa-miR-548a-5p	1	0	1	1	1	1	DYRK2	dual-specificity tyrosine-(Y)-phosphorylation regulated kinase 2
hsa-miR-548a-5p	0	0	1	1	1	1	EP400	E1A binding protein p400
hsa-miR-548a-5p	0	0	1	0	0	0	FLJ21408	uncharacterized LOC400512
hsa-miR-548a-5p	0	0	1	1	0	0	EIF4ENIF1	eukaryotic translation initiation factor 4E nuclear import factor 1
hsa-miR-548a-5p	1	0	1	0	1	1	MYO5B	myosin VB
hsa-miR-548a-5p	1	0	1	1	1	1	KANK1	KN motif and ankyrin repeat domains 1
hsa-miR-548a-5p	1	0	1	1	1	1	YPEL5	yippee-like 5 (Drosophila)
hsa-miR-548a-5p	1	0	1	1	1	1	NAA30	N(alpha)-acetyltransferase 30, NatC catalytic subunit
hsa-miR-548a-5p	1	0	1	1	0	0	PRRC2B	proline-rich coiled-coil 2B
hsa-miR-548a-5p	0	0	1	1	1	1	HSPBAP1	HSPB (heat shock 27kDa) associated protein 1
hsa-miR-548a-5p	0	0	1	0	1	1	FLJ22763	uncharacterized LOC401081
hsa-miR-548a-5p	1	0	1	1	0	0	MAGI3	membrane associated guanylate kinase, WW and PDZ domain containing 3
hsa-miR-548a-5p	0	0	1	1	0	0	EXOC6B	exocyst complex component 6B
hsa-miR-548a-5p	1	0	1	1	1	1	DCAF8	DDB1 and CUL4 associated factor 8
hsa-miR-548a-5p	0	0	1	1	1	1	TGIF1	TGFB-induced factor homeobox 1
hsa-miR-548a-5p	0	0	1	0	1	1	ZCCHC8	zinc finger, CCHC domain containing 8
hsa-miR-548a-5p	1	0	1	1	1	1	FBXL12	F-box and leucine-rich repeat protein 12
hsa-miR-548a-5p	0	0	1	0	0	0	LOC729852	uncharacterized LOC729852
hsa-miR-548a-5p	1	0	1	1	1	1	GORASP2	golgi reassembly stacking protein 2, 55kDa
hsa-miR-548a-5p	0	0	1	1	1	1	GPBP1L1	GC-rich promoter binding protein 1-like 1
hsa-miR-548a-5p	1	0	1	1	1	1	FOXP1	forkhead box P1
hsa-miR-548a-5p	0	0	1	1	1	1	MINA	MYC induced nuclear antigen
hsa-miR-548a-5p	0	0	1	1	1	1	SPRTN	SprT-like N-terminal domain
hsa-miR-548a-5p	1	0	1	1	1	1	SEC63	SEC63 homolog (S. cerevisiae)
hsa-miR-548a-5p	1	0	1	1	1	1	FAM53C	family with sequence similarity 53, member C
hsa-miR-548a-5p	0	0	1	1	1	1	RNF146	ring finger protein 146
hsa-miR-548a-5p	1	0	1	1	1	1	MARK1	MAP/microtubule affinity-regulating kinase 1
hsa-miR-548a-5p	0	0	1	0	0	0	JAKMIP2-AS1	JAKMIP2 antisense RNA 1
hsa-miR-548a-5p	0	0	1	0	1	1	TWSG1	twisted gastrulation homolog 1 (Drosophila)
hsa-miR-548a-5p	0	0	1	1	1	1	DTL	denticleless E3 ubiquitin protein ligase homolog (Drosophila)
hsa-miR-548a-5p	1	0	1	1	1	1	GPD2	glycerol-3-phosphate dehydrogenase 2 (mitochondrial)
hsa-miR-548a-5p	1	0	1	1	1	1	STRBP	spermatid perinuclear RNA binding protein
hsa-miR-548a-5p	1	0	1	1	1	1	SLAIN1	SLAIN motif family, member 1
hsa-miR-548a-5p	0	0	1	0	0	0	LOC283508	uncharacterized LOC283508
hsa-miR-548a-5p	0	0	1	0	0	0	CHST9-AS1	CHST9 antisense RNA 1
hsa-miR-548a-5p	1	0	1	0	1	1	AP1G1	adaptor-related protein complex 1, gamma 1 subunit
hsa-miR-548a-5p	1	0	1	1	1	1	TPM1	tropomyosin 1 (alpha)
hsa-miR-548a-5p	0	0	1	0	0	0	FLJ30838	uncharacterized LOC400955
hsa-miR-548a-5p	1	0	1	1	1	1	SULF1	sulfatase 1
hsa-miR-548a-5p	1	0	1	1	1	1	FRMD6	FERM domain containing 6
hsa-miR-548a-5p	0	0	1	0	1	1	C17orf108	chromosome 17 open reading frame 108
hsa-miR-548a-5p	0	0	1	0	0	0	LOC201617	uncharacterized LOC201617
hsa-miR-548a-5p	1	0	1	1	1	1	DIXDC1	DIX domain containing 1
hsa-miR-548a-5p	1	0	1	0	1	1	RAB1A	RAB1A, member RAS oncogene family
hsa-miR-548a-5p	1	0	1	1	1	1	TMTC1	transmembrane and tetratricopeptide repeat containing 1
hsa-miR-548a-5p	1	0	1	1	1	1	EXD2	exonuclease 3'-5' domain containing 2
hsa-miR-548a-5p	1	0	1	1	1	1	ZNF664	zinc finger protein 664
hsa-miR-548a-5p	0	0	1	0	0	0	LOC440894	uncharacterized LOC440894
hsa-miR-548a-5p	1	0	1	0	1	1	PTPRE	protein tyrosine phosphatase, receptor type, E
hsa-miR-548a-5p	1	0	1	1	1	1	PPP1R3F	protein phosphatase 1, regulatory subunit 3F
hsa-miR-548a-5p	0	0	1	0	1	1	FAM70A	family with sequence similarity 70, member A
hsa-miR-548a-5p	0	0	1	0	0	0	LOC441204	uncharacterized LOC441204
hsa-miR-548a-5p	1	0	1	1	1	1	CLCN5	chloride channel, voltage-sensitive 5
hsa-miR-548a-5p	1	0	1	1	1	1	SORBS2	sorbin and SH3 domain containing 2
hsa-miR-548a-5p	0	0	1	1	1	1	GNB2	guanine nucleotide binding protein (G protein), beta polypeptide 2
hsa-miR-548a-5p	0	0	1	1	1	1	DST	dystonin
hsa-miR-548a-5p	0	0	1	0	0	0	MAGI1-IT1	MAGI1 intronic transcript 1 (non-protein coding)
hsa-miR-548a-5p	1	0	1	1	1	1	TPM3	tropomyosin 3
hsa-miR-548a-5p	1	0	1	1	1	1	ZBTB10	zinc finger and BTB domain containing 10
hsa-miR-548a-5p	1	0	1	1	1	1	PCMTD1	protein-L-isoaspartate (D-aspartate) O-methyltransferase domain containing 1
hsa-miR-548a-5p	1	0	1	1	1	1	MGAT1	mannosyl (alpha-1,3-)-glycoprotein beta-1,2-N-acetylglucosaminyltransferase
hsa-miR-548a-5p	1	0	1	1	1	1	MPP7	membrane protein, palmitoylated 7 (MAGUK p55 subfamily member 7)
hsa-miR-548a-5p	0	0	1	0	1	1	ARHGAP42	Rho GTPase activating protein 42
hsa-miR-548a-5p	0	0	1	1	0	0	NXF2	nuclear RNA export factor 2
hsa-miR-548a-5p	0	0	1	1	1	1	ZBTB26	zinc finger and BTB domain containing 26
hsa-miR-548a-5p	1	0	1	0	1	1	PLEKHA1	pleckstrin homology domain containing, family A (phosphoinositide binding specific) member 1
hsa-miR-548a-5p	1	0	1	0	1	1	NCAM1	neural cell adhesion molecule 1
hsa-miR-548a-5p	1	0	1	1	1	1	SEC22A	SEC22 vesicle trafficking protein homolog A (S. cerevisiae)
hsa-miR-548a-5p	0	0	1	0	1	1	CHURC1	churchill domain containing 1
hsa-miR-548a-5p	0	0	1	1	0	0	BUD13	BUD13 homolog (S. cerevisiae)
hsa-miR-548a-5p	0	0	1	1	1	1	SPICE1	spindle and centriole associated protein 1
hsa-miR-548a-5p	0	0	1	1	1	1	FXC1	fracture callus 1 homolog (rat)
hsa-miR-548a-5p	0	0	1	1	0	0	ANKAR	ankyrin and armadillo repeat containing
hsa-miR-548a-5p	0	0	1	0	1	1	UHMK1	U2AF homology motif (UHM) kinase 1
hsa-miR-548a-5p	1	0	1	1	1	1	HLF	hepatic leukemia factor
hsa-miR-548a-5p	0	0	1	1	1	1	PKIB	protein kinase (cAMP-dependent, catalytic) inhibitor beta
hsa-miR-548a-5p	0	0	1	0	1	1	CDHR3	cadherin-related family member 3
hsa-miR-548a-5p	1	0	1	0	1	1	RNF165	ring finger protein 165
hsa-miR-548a-5p	0	0	1	1	1	1	PDZRN3	PDZ domain containing ring finger 3
hsa-miR-548a-5p	0	0	1	1	1	1	GALNT6	UDP-N-acetyl-alpha-D-galactosamine:polypeptide N-acetylgalactosaminyltransferase 6 (GalNAc-T6)
hsa-miR-548a-5p	1	0	1	0	1	1	TPBG	trophoblast glycoprotein
hsa-miR-548a-5p	1	0	1	1	1	1	SIRT1	sirtuin 1
hsa-miR-548a-5p	0	0	1	1	0	0	PVRL3	poliovirus receptor-related 3
hsa-miR-548a-5p	0	0	1	0	1	1	CADM1	cell adhesion molecule 1
hsa-miR-548a-5p	1	0	1	1	1	1	TTC13	tetratricopeptide repeat domain 13
hsa-miR-548a-5p	1	0	1	1	1	1	BOC	Boc homolog (mouse)
hsa-miR-548a-5p	0	0	1	1	1	1	TOLLIP	toll interacting protein
hsa-miR-548a-5p	0	0	1	0	1	1	TMSB15B	thymosin beta 15B
hsa-miR-548a-5p	0	0	1	0	0	0	LOC643837	uncharacterized LOC643837
hsa-miR-548a-5p	0	0	1	1	1	1	BBS9	Bardet-Biedl syndrome 9
hsa-miR-548a-5p	1	0	1	1	1	1	AMMECR1	Alport syndrome, mental retardation, midface hypoplasia and elliptocytosis chromosomal region gene 1
hsa-miR-548a-5p	1	0	1	1	1	1	RBMX	RNA binding motif protein, X-linked
hsa-miR-548a-5p	1	0	1	1	1	1	FBXW2	F-box and WD repeat domain containing 2
hsa-miR-548a-5p	1	0	1	1	1	1	TSN	translin
hsa-miR-548a-5p	1	0	1	0	1	1	TEF	thyrotrophic embryonic factor
hsa-miR-548a-5p	0	0	1	0	0	0	KIAA1430	KIAA1430
hsa-miR-548a-5p	0	0	1	1	0	0	GAS6	growth arrest-specific 6
hsa-miR-548a-5p	1	0	1	1	1	1	LUC7L2	LUC7-like 2 (S. cerevisiae)
hsa-miR-548a-5p	1	0	1	1	1	1	HDAC2	histone deacetylase 2
hsa-miR-548a-5p	0	0	1	1	1	1	HNRNPH1	heterogeneous nuclear ribonucleoprotein H1 (H)
hsa-miR-548a-5p	0	0	1	1	1	1	NRCAM	neuronal cell adhesion molecule
hsa-miR-548a-5p	1	0	1	1	1	1	GNG2	guanine nucleotide binding protein (G protein), gamma 2
hsa-miR-548a-5p	1	0	1	1	1	1	IVNS1ABP	influenza virus NS1A binding protein
hsa-miR-548a-5p	0	0	1	0	1	1	SSPN	sarcospan
hsa-miR-548a-5p	1	0	1	1	1	1	GCFC1	GC-rich sequence DNA-binding factor 1
hsa-miR-548a-5p	1	0	1	1	1	1	SLBP	stem-loop binding protein
hsa-miR-548a-5p	0	0	1	1	1	1	GNAS	GNAS complex locus
hsa-miR-548a-5p	0	0	1	1	1	1	XPNPEP1	X-prolyl aminopeptidase (aminopeptidase P) 1, soluble
hsa-miR-548a-5p	1	0	1	1	1	1	SPTBN1	spectrin, beta, non-erythrocytic 1
hsa-miR-548a-5p	0	0	1	1	1	1	SPOCK1	sparc/osteonectin, cwcv and kazal-like domains proteoglycan (testican) 1
hsa-miR-548a-5p	0	0	1	0	1	1	KANSL2	KAT8 regulatory NSL complex subunit 2
hsa-miR-548a-5p	1	0	1	1	1	1	SLC7A8	solute carrier family 7 (amino acid transporter light chain, L system), member 8
hsa-miR-548a-5p	1	0	1	0	1	1	GATAD2B	GATA zinc finger domain containing 2B
hsa-miR-548a-5p	1	0	1	0	1	1	ARL6IP6	ADP-ribosylation-like factor 6 interacting protein 6
hsa-miR-548a-5p	0	0	1	1	1	1	RBM25	RNA binding motif protein 25
hsa-miR-548a-5p	0	0	1	1	1	1	TMEM170A	transmembrane protein 170A
hsa-miR-548a-5p	1	0	1	1	1	1	GCLC	glutamate-cysteine ligase, catalytic subunit
hsa-miR-548a-5p	0	0	1	0	0	0	LOC285500	uncharacterized LOC285500
hsa-miR-548a-5p	0	0	1	1	1	1	GPT2	glutamic pyruvate transaminase (alanine aminotransferase) 2
hsa-miR-548a-5p	0	0	1	0	0	0	FLJ37798	uncharacterized LOC401264
hsa-miR-548a-5p	0	0	1	1	0	0	DPAGT1	dolichyl-phosphate (UDP-N-acetylglucosamine) N-acetylglucosaminephosphotransferase 1 (GlcNAc-1-P transferase)
hsa-miR-548a-5p	1	0	1	1	1	1	KLF4	Kruppel-like factor 4 (gut)
hsa-miR-548a-5p	1	0	1	0	1	1	SLC39A11	solute carrier family 39 (metal ion transporter), member 11
hsa-miR-548a-5p	0	0	1	1	0	0	ZNF185	zinc finger protein 185 (LIM domain)
hsa-miR-548a-5p	1	0	1	1	1	1	EPHB1	EPH receptor B1
hsa-miR-548a-5p	1	0	1	0	1	1	UVRAG	UV radiation resistance associated gene
hsa-miR-548a-5p	0	0	1	0	0	0	LOC730101	uncharacterized LOC730101
hsa-miR-548a-5p	0	0	1	1	1	1	AQP3	aquaporin 3 (Gill blood group)
hsa-miR-548a-5p	0	0	1	1	1	1	GPR115	G protein-coupled receptor 115
hsa-miR-548a-5p	0	0	1	1	1	1	SETD2	SET domain containing 2
hsa-miR-548a-5p	0	0	1	0	0	0	LOC100129858	uncharacterized LOC100129858
hsa-miR-548a-5p	0	0	1	1	1	1	CDK5RAP1	CDK5 regulatory subunit associated protein 1
hsa-miR-548a-5p	1	0	1	1	1	1	ANKRD10	ankyrin repeat domain 10
hsa-miR-548a-5p	0	0	1	0	1	1	HDAC9	histone deacetylase 9
hsa-miR-548a-5p	1	0	1	1	1	1	CS	citrate synthase
hsa-miR-548a-5p	1	0	1	1	1	1	ZC3H11A	zinc finger CCCH-type containing 11A
hsa-miR-548a-5p	1	0	1	0	1	1	STC2	stanniocalcin 2
hsa-miR-548a-5p	1	0	1	1	1	1	EPB41L4A	erythrocyte membrane protein band 4.1 like 4A
hsa-miR-548a-5p	1	0	1	1	1	1	AMT	aminomethyltransferase
hsa-miR-548a-5p	0	0	1	1	1	1	CDKN2AIP	CDKN2A interacting protein
hsa-miR-548a-5p	0	0	1	1	1	1	ZMYM1	zinc finger, MYM-type 1
hsa-miR-548a-5p	1	0	1	1	1	1	GAPVD1	GTPase activating protein and VPS9 domains 1
hsa-miR-548a-5p	0	0	1	1	0	0	RPN2	ribophorin II
hsa-miR-548a-5p	1	0	1	1	1	1	FADS1	fatty acid desaturase 1
hsa-miR-548a-5p	0	0	1	0	0	0	OTUD1	OTU domain containing 1
hsa-miR-548a-5p	0	0	1	1	1	1	XRCC5	X-ray repair complementing defective repair in Chinese hamster cells 5 (double-strand-break rejoining)
hsa-miR-548a-5p	1	0	1	0	1	1	COL21A1	collagen, type XXI, alpha 1
hsa-miR-548a-5p	1	0	1	0	1	1	KIAA1737	KIAA1737
hsa-miR-548a-5p	1	0	1	0	1	1	THRB	thyroid hormone receptor, beta
hsa-miR-548a-5p	1	0	1	1	1	1	SLC30A6	solute carrier family 30 (zinc transporter), member 6
hsa-miR-548a-5p	0	0	1	1	1	1	STAT1	signal transducer and activator of transcription 1, 91kDa
hsa-miR-548a-5p	1	0	1	1	1	1	C3orf62	chromosome 3 open reading frame 62
hsa-miR-548a-5p	1	0	1	1	1	1	ETS2	v-ets erythroblastosis virus E26 oncogene homolog 2 (avian)
hsa-miR-548a-5p	1	0	1	1	1	1	EPB41L1	erythrocyte membrane protein band 4.1-like 1
hsa-miR-548a-5p	0	0	1	0	1	1	SWAP70	SWAP switching B-cell complex 70kDa subunit
hsa-miR-548a-5p	0	0	1	1	1	1	EXTL2	exostoses (multiple)-like 2
hsa-miR-548a-5p	1	0	1	1	1	1	CAPN2	calpain 2, (m/II) large subunit
hsa-miR-548a-5p	1	0	1	1	1	1	LCP1	lymphocyte cytosolic protein 1 (L-plastin)
hsa-miR-548a-5p	0	0	1	0	1	1	TNFAIP8	tumor necrosis factor, alpha-induced protein 8
hsa-miR-548a-5p	1	0	1	1	1	1	EBF3	early B-cell factor 3
hsa-miR-548a-5p	0	0	1	0	0	0	LOC400680	uncharacterized LOC400680
hsa-miR-548a-5p	0	0	1	1	1	1	PPFIBP2	PTPRF interacting protein, binding protein 2 (liprin beta 2)
hsa-miR-548a-5p	1	0	1	0	1	1	AGFG1	ArfGAP with FG repeats 1
hsa-miR-548a-5p	0	0	1	0	0	0	LINC00293	long intergenic non-protein coding RNA 293
hsa-miR-548a-5p	1	0	1	1	1	1	GOLGA8B	golgin A8 family, member B
hsa-miR-548a-5p	0	0	1	1	1	1	CBWD5	COBW domain containing 5
hsa-miR-548a-5p	1	0	1	1	1	1	IGSF11	immunoglobulin superfamily, member 11
hsa-miR-548a-5p	1	0	1	1	1	1	ST7L	suppression of tumorigenicity 7 like
hsa-miR-548a-5p	1	0	1	1	1	1	UGDH	UDP-glucose 6-dehydrogenase
hsa-miR-548a-5p	0	0	1	1	1	1	POLR1D	polymerase (RNA) I polypeptide D, 16kDa
hsa-miR-548a-5p	1	0	1	1	1	1	PIGA	phosphatidylinositol glycan anchor biosynthesis, class A
hsa-miR-548a-5p	1	0	1	1	1	1	GATM	glycine amidinotransferase (L-arginine:glycine amidinotransferase)
hsa-miR-548a-5p	1	0	1	1	1	1	ZCCHC2	zinc finger, CCHC domain containing 2
hsa-miR-548a-5p	1	0	1	1	1	1	CHD6	chromodomain helicase DNA binding protein 6
hsa-miR-548a-5p	0	0	1	1	0	0	DCBLD1	discoidin, CUB and LCCL domain containing 1
hsa-miR-548a-5p	1	0	1	1	0	0	ENTPD1	ectonucleoside triphosphate diphosphohydrolase 1
hsa-miR-548a-5p	0	0	1	1	0	0	FBXO16	F-box protein 16
hsa-miR-548a-5p	1	0	1	1	0	0	TMEM131	transmembrane protein 131
hsa-miR-548a-5p	0	0	1	0	0	0	GTF2IP1	general transcription factor IIi, pseudogene 1
hsa-miR-548a-5p	0	0	1	1	1	1	ABCC12	ATP-binding cassette, sub-family C (CFTR/MRP), member 12
hsa-miR-548a-5p	1	0	1	1	1	1	NAP1L1	nucleosome assembly protein 1-like 1
hsa-miR-548a-5p	1	0	1	1	1	1	ACSL6	acyl-CoA synthetase long-chain family member 6
hsa-miR-548a-5p	1	0	1	1	1	1	UHRF2	ubiquitin-like with PHD and ring finger domains 2, E3 ubiquitin protein ligase
hsa-miR-548a-5p	0	0	1	1	1	1	SLFN13	schlafen family member 13
hsa-miR-548a-5p	1	0	1	1	1	1	ZMAT3	zinc finger, matrin-type 3
hsa-miR-548a-5p	1	0	1	1	1	1	LMX1A	LIM homeobox transcription factor 1, alpha
hsa-miR-548a-5p	1	0	1	1	1	1	WEE1	WEE1 homolog (S. pombe)
hsa-miR-548a-5p	1	0	1	1	1	1	SIK3	SIK family kinase 3
hsa-miR-548a-5p	0	0	1	1	1	1	NFKB1	nuclear factor of kappa light polypeptide gene enhancer in B-cells 1
hsa-miR-548a-5p	1	0	1	1	1	1	PPP1R21	protein phosphatase 1, regulatory subunit 21
hsa-miR-548a-5p	0	0	1	1	1	1	GFI1	growth factor independent 1 transcription repressor
hsa-miR-548a-5p	1	0	1	1	1	1	FGD5	FYVE, RhoGEF and PH domain containing 5
hsa-miR-548a-5p	0	0	1	0	1	1	FLJ41200	uncharacterized LOC401492
hsa-miR-548a-5p	1	0	1	1	1	1	TPRG1	tumor protein p63 regulated 1
hsa-miR-548a-5p	1	0	1	1	1	1	MDGA2	MAM domain containing glycosylphosphatidylinositol anchor 2
hsa-miR-548a-5p	1	0	1	1	1	1	PPFIA1	protein tyrosine phosphatase, receptor type, f polypeptide (PTPRF), interacting protein (liprin), alpha 1
hsa-miR-548a-5p	0	0	1	1	1	1	FAM5B	family with sequence similarity 5, member B
hsa-miR-548a-5p	1	0	1	1	1	1	EGLN3	egl nine homolog 3 (C. elegans)
hsa-miR-548a-5p	1	0	1	0	1	1	KCNK2	potassium channel, subfamily K, member 2
hsa-miR-548a-5p	0	0	1	1	0	0	SAAL1	serum amyloid A-like 1
hsa-miR-548a-5p	0	0	1	1	1	1	PCBP2	poly(rC) binding protein 2
hsa-miR-548a-5p	0	0	1	1	1	1	FAM19A2	family with sequence similarity 19 (chemokine (C-C motif)-like), member A2
hsa-miR-548a-5p	1	0	1	1	1	1	SBF2	SET binding factor 2
hsa-miR-548a-5p	0	0	1	0	1	1	CWC22	CWC22 spliceosome-associated protein homolog (S. cerevisiae)
hsa-miR-548a-5p	0	0	1	0	0	0	LOC650368	asparagine-linked glycosylation 1-like pseudogene
hsa-miR-548a-5p	1	0	1	1	1	1	IPPK	inositol 1,3,4,5,6-pentakisphosphate 2-kinase
hsa-miR-548a-5p	1	0	1	1	1	1	EPAS1	endothelial PAS domain protein 1
hsa-miR-548a-5p	1	0	1	0	1	1	WDR82	WD repeat domain 82
hsa-miR-548a-5p	1	0	1	0	1	1	XRN1	5'-3' exoribonuclease 1
hsa-miR-548a-5p	1	0	1	0	0	0	GPR137C	G protein-coupled receptor 137C
hsa-miR-548a-5p	1	0	1	1	1	1	SH2D4B	SH2 domain containing 4B
hsa-miR-548a-5p	0	0	1	0	0	0	LOC100133029	sirtuin 5 pseudogene
hsa-miR-548a-5p	1	0	1	1	1	1	GJC1	gap junction protein, gamma 1, 45kDa
hsa-miR-548a-5p	0	0	1	1	0	0	LOC100129995	uncharacterized LOC100129995
hsa-miR-548a-5p	0	0	1	0	1	1	NAIP	NLR family, apoptosis inhibitory protein
hsa-miR-548a-5p	1	0	1	1	1	1	KIF21A	kinesin family member 21A
hsa-miR-548a-5p	1	0	1	1	1	1	UBA2	ubiquitin-like modifier activating enzyme 2
hsa-miR-548a-5p	1	0	1	1	1	1	HARS	histidyl-tRNA synthetase
hsa-miR-548a-5p	0	0	1	1	0	0	PPP1R18	protein phosphatase 1, regulatory subunit 18
hsa-miR-548a-5p	0	0	1	1	1	1	C2orf91	chromosome 2 open reading frame 91
hsa-miR-548a-5p	0	0	1	1	1	1	KANSL1L	KAT8 regulatory NSL complex subunit 1-like
hsa-miR-548a-5p	0	0	1	1	1	1	ATPBD4	ATP binding domain 4
hsa-miR-548a-5p	1	0	1	1	1	1	SGIP1	SH3-domain GRB2-like (endophilin) interacting protein 1
hsa-miR-548a-5p	1	0	1	1	1	1	C17orf85	chromosome 17 open reading frame 85
hsa-miR-548a-5p	1	0	1	1	1	1	SEPHS1	selenophosphate synthetase 1
hsa-miR-548a-5p	0	0	1	0	0	0	TMEM232	transmembrane protein 232
hsa-miR-548a-5p	1	0	1	1	1	1	ATXN7	ataxin 7
hsa-miR-548a-5p	1	0	1	1	0	0	GXYLT1	glucoside xylosyltransferase 1
hsa-miR-548a-5p	1	0	1	1	1	1	PIAS3	protein inhibitor of activated STAT, 3
hsa-miR-548a-5p	0	0	1	1	1	1	FAM179A	family with sequence similarity 179, member A
hsa-miR-548a-5p	0	0	1	1	1	1	CCDC66	coiled-coil domain containing 66
hsa-miR-548a-5p	0	0	1	1	1	1	MKX	mohawk homeobox
hsa-miR-548a-5p	1	0	1	1	1	1	SACS	spastic ataxia of Charlevoix-Saguenay (sacsin)
hsa-miR-548a-5p	1	0	1	1	1	1	KPNA1	karyopherin alpha 1 (importin alpha 5)
hsa-miR-548a-5p	0	0	1	1	1	1	C11orf45	chromosome 11 open reading frame 45
hsa-miR-548a-5p	1	0	1	0	0	0	MSL1	male-specific lethal 1 homolog (Drosophila)
hsa-miR-548a-5p	0	0	1	1	1	1	PLOD2	procollagen-lysine, 2-oxoglutarate 5-dioxygenase 2
hsa-miR-548a-5p	1	0	1	0	1	1	HECTD1	HECT domain containing E3 ubiquitin protein ligase 1
hsa-miR-548a-5p	0	0	1	0	1	1	C17orf105	chromosome 17 open reading frame 105
hsa-miR-548a-5p	0	0	1	0	0	0	FAM95B1	family with sequence similarity 95, member B1
hsa-miR-548a-5p	0	0	1	1	1	1	RBM46	RNA binding motif protein 46
hsa-miR-548a-5p	1	0	1	1	0	0	DYDC1	DPY30 domain containing 1
hsa-miR-548a-5p	1	0	1	1	1	1	FAM122B	family with sequence similarity 122B
hsa-miR-548a-5p	1	0	1	1	0	0	PCLO	piccolo (presynaptic cytomatrix protein)
hsa-miR-548a-5p	1	0	1	1	1	1	CHD5	chromodomain helicase DNA binding protein 5
hsa-miR-548a-5p	0	0	1	1	0	0	FSIP2	fibrous sheath interacting protein 2
hsa-miR-548a-5p	1	0	1	1	0	0	ATXN7L3	ataxin 7-like 3
hsa-miR-548a-5p	1	0	1	1	1	1	LIN9	lin-9 homolog (C. elegans)
hsa-miR-548a-5p	1	0	1	1	1	1	PLEKHB2	pleckstrin homology domain containing, family B (evectins) member 2
hsa-miR-548a-5p	1	0	1	1	1	1	SIKE1	suppressor of IKBKE 1
hsa-miR-548a-5p	0	0	1	0	1	1	LOC388942	uncharacterized LOC388942
hsa-miR-548a-5p	1	0	1	1	1	1	SACM1L	SAC1 suppressor of actin mutations 1-like (yeast)
hsa-miR-548a-5p	0	0	1	1	1	1	C18orf54	chromosome 18 open reading frame 54
hsa-miR-548a-5p	1	0	1	1	1	1	DMXL1	Dmx-like 1
hsa-miR-548a-5p	1	0	1	1	1	1	LRIG1	leucine-rich repeats and immunoglobulin-like domains 1
hsa-miR-548a-5p	1	0	1	0	1	1	CLEC16A	C-type lectin domain family 16, member A
hsa-miR-548a-5p	1	0	1	0	1	1	GPR180	G protein-coupled receptor 180
hsa-miR-548a-5p	0	0	1	0	0	0	HNRNPKP3	heterogeneous nuclear ribonucleoprotein K pseudogene 3
hsa-miR-548a-5p	1	0	1	1	1	1	LRP2BP	LRP2 binding protein
hsa-miR-548a-5p	0	0	1	1	1	1	PCDH15	protocadherin-related 15
hsa-miR-548a-5p	1	0	1	1	1	1	CLIP1	CAP-GLY domain containing linker protein 1
hsa-miR-548a-5p	0	0	1	1	1	1	MOBP	myelin-associated oligodendrocyte basic protein
hsa-miR-548a-5p	0	0	1	1	1	1	USP4	ubiquitin specific peptidase 4 (proto-oncogene)
hsa-miR-548a-5p	1	0	1	1	1	1	MFSD6	major facilitator superfamily domain containing 6
hsa-miR-548a-5p	1	0	1	1	1	1	CTNNA2	catenin (cadherin-associated protein), alpha 2
hsa-miR-548a-5p	1	0	1	1	1	1	ZDHHC23	zinc finger, DHHC-type containing 23
hsa-miR-548a-5p	1	0	1	1	1	1	PHF17	PHD finger protein 17
hsa-miR-548a-5p	1	0	1	0	1	1	KIAA0182	KIAA0182
hsa-miR-548a-5p	0	0	1	1	0	0	SLC22A25	solute carrier family 22, member 25
hsa-miR-548a-5p	0	0	1	1	1	1	ZNF503	zinc finger protein 503
hsa-miR-548a-5p	1	0	1	0	1	1	SP6	Sp6 transcription factor
hsa-miR-548a-5p	1	0	1	1	1	1	CXorf23	chromosome X open reading frame 23
hsa-miR-548a-5p	1	0	1	1	1	1	R3HDM1	R3H domain containing 1
hsa-miR-548a-5p	1	0	1	1	1	1	EYA1	eyes absent homolog 1 (Drosophila)
hsa-miR-548a-5p	0	0	1	1	1	1	PITX2	paired-like homeodomain 2
hsa-miR-548a-5p	0	0	1	0	0	0	TRAV20	T cell receptor alpha variable 20
hsa-miR-548a-5p	1	0	1	0	1	1	CAPRIN1	cell cycle associated protein 1
hsa-miR-548a-5p	1	0	1	0	1	1	YOD1	YOD1 OTU deubiquinating enzyme 1 homolog (S. cerevisiae)
hsa-miR-548a-5p	0	0	1	1	1	1	MCU	mitochondrial calcium uniporter
hsa-miR-548a-5p	0	0	1	0	0	0	LRRC9	leucine rich repeat containing 9
hsa-miR-548a-5p	1	0	1	1	1	1	SLC12A6	solute carrier family 12 (potassium/chloride transporters), member 6
hsa-miR-548a-5p	1	0	1	0	1	1	KDM2A	lysine (K)-specific demethylase 2A
hsa-miR-548a-5p	1	0	1	1	1	1	FRYL	FRY-like
hsa-miR-548a-5p	1	0	1	1	1	1	SH3D19	SH3 domain containing 19
hsa-miR-548a-5p	1	0	1	0	1	1	NBR1	neighbor of BRCA1 gene 1
hsa-miR-548a-5p	1	0	1	1	1	1	TXNRD1	thioredoxin reductase 1
hsa-miR-548a-5p	1	0	1	0	1	1	KPNA6	karyopherin alpha 6 (importin alpha 7)
hsa-miR-548a-5p	0	0	1	1	1	1	ATXN2	ataxin 2
hsa-miR-548a-5p	1	0	1	1	0	0	NBEAL1	neurobeachin-like 1
hsa-miR-548a-5p	1	0	1	1	1	1	SDCBP	syndecan binding protein (syntenin)
hsa-miR-548a-5p	0	0	1	1	1	1	SHROOM3	shroom family member 3
hsa-miR-548a-5p	0	0	1	0	0	0	LOC100129940	uncharacterized LOC100129940
hsa-miR-548a-5p	0	0	1	0	0	0	EMBP1	embigin pseudogene 1
hsa-miR-548a-5p	1	0	1	1	1	1	DPY19L3	dpy-19-like 3 (C. elegans)
hsa-miR-548a-5p	1	0	1	1	1	1	RBM24	RNA binding motif protein 24
hsa-miR-548a-5p	1	0	1	1	1	1	CEP97	centrosomal protein 97kDa
hsa-miR-548a-5p	0	0	1	1	1	1	G3BP1	GTPase activating protein (SH3 domain) binding protein 1
hsa-miR-548a-5p	0	0	1	0	0	0	LOC654433	uncharacterized LOC654433
hsa-miR-548a-5p	0	0	1	0	0	0	LOC494141	mitochondrial carrier triple repeat 1 pseudogene
hsa-miR-548a-5p	0	0	1	0	1	1	GALNT13	UDP-N-acetyl-alpha-D-galactosamine:polypeptide N-acetylgalactosaminyltransferase 13 (GalNAc-T13)
hsa-miR-548a-5p	0	0	1	1	1	1	TMC5	transmembrane channel-like 5
hsa-miR-548a-5p	0	0	1	1	1	1	SLTM	SAFB-like, transcription modulator
hsa-miR-548a-5p	0	0	1	1	1	1	KIAA1841	KIAA1841
hsa-miR-548a-5p	1	0	1	1	1	1	MTERFD2	MTERF domain containing 2
hsa-miR-548a-5p	1	0	1	0	1	1	FMNL2	formin-like 2
hsa-miR-548a-5p	0	0	1	0	0	0	LOC100124692	maltase-glucoamylase (alpha-glucosidase) pseudogene
hsa-miR-548a-5p	1	0	1	1	1	1	WTAP	Wilms tumor 1 associated protein
hsa-miR-548a-5p	1	0	1	1	1	1	SMAD7	SMAD family member 7
hsa-miR-548a-5p	1	0	1	0	0	0	ASXL3	additional sex combs like 3 (Drosophila)
hsa-miR-548a-5p	0	0	1	1	0	0	ZNF730	zinc finger protein 730
hsa-miR-548a-5p	1	0	1	1	1	1	LRRK2	leucine-rich repeat kinase 2
hsa-miR-548a-5p	1	0	1	1	1	1	MAP2K4	mitogen-activated protein kinase kinase 4
hsa-miR-548a-5p	0	0	1	1	1	1	PHF12	PHD finger protein 12
hsa-miR-548a-5p	1	0	1	1	1	1	SYS1	SYS1 Golgi-localized integral membrane protein homolog (S. cerevisiae)
hsa-miR-548a-5p	1	0	1	1	1	1	RBBP4	retinoblastoma binding protein 4
hsa-miR-548a-5p	1	0	1	0	1	1	TMEM106B	transmembrane protein 106B
hsa-miR-548a-5p	0	0	1	1	1	1	ARID1A	AT rich interactive domain 1A (SWI-like)
hsa-miR-548a-5p	0	0	1	1	0	0	DDX50	DEAD (Asp-Glu-Ala-Asp) box polypeptide 50
hsa-miR-548a-5p	1	0	1	1	1	1	CYYR1	cysteine/tyrosine-rich 1
hsa-miR-548a-5p	1	0	1	1	1	1	ATL2	atlastin GTPase 2
hsa-miR-548a-5p	0	0	1	1	1	1	C5orf28	chromosome 5 open reading frame 28
hsa-miR-548a-5p	1	0	1	1	1	1	TBC1D15	TBC1 domain family, member 15
hsa-miR-548a-5p	1	0	1	1	1	1	MEAF6	MYST/Esa1-associated factor 6
hsa-miR-548a-5p	1	0	1	1	1	1	PTPN2	protein tyrosine phosphatase, non-receptor type 2
hsa-miR-548a-5p	1	0	1	1	0	0	ABLIM3	actin binding LIM protein family, member 3
hsa-miR-548a-5p	0	0	1	1	0	0	PCSK5	proprotein convertase subtilisin/kexin type 5
hsa-miR-548a-5p	0	0	1	1	1	1	SERPINE2	serpin peptidase inhibitor, clade E (nexin, plasminogen activator inhibitor type 1), member 2
hsa-miR-548a-5p	1	0	1	1	1	1	COBLL1	COBL-like 1
hsa-miR-548a-5p	1	0	1	1	1	1	WDR20	WD repeat domain 20
hsa-miR-548a-5p	1	0	1	1	1	1	PHTF2	putative homeodomain transcription factor 2
hsa-miR-548a-5p	0	0	1	1	1	1	PUS7L	pseudouridylate synthase 7 homolog (S. cerevisiae)-like
hsa-miR-548a-5p	0	0	1	1	0	0	HSPB11	heat shock protein family B (small), member 11
hsa-miR-548a-5p	1	0	1	1	1	1	NCOA1	nuclear receptor coactivator 1
hsa-miR-548a-5p	1	0	1	1	1	1	NOVA1	neuro-oncological ventral antigen 1
hsa-miR-548a-5p	0	0	1	1	0	0	TRIM69	tripartite motif containing 69
hsa-miR-548a-5p	1	0	1	1	1	1	APBB2	amyloid beta (A4) precursor protein-binding, family B, member 2
hsa-miR-548a-5p	0	0	1	1	1	1	PTPN20B	protein tyrosine phosphatase, non-receptor type 20B
hsa-miR-548a-5p	0	0	1	1	1	1	PTPN20A	protein tyrosine phosphatase, non-receptor type 20A
hsa-miR-548a-5p	0	0	1	0	0	0	PART1	prostate androgen-regulated transcript 1 (non-protein coding)
hsa-miR-548a-5p	1	0	1	1	1	1	NECAP1	NECAP endocytosis associated 1
hsa-miR-548a-5p	0	0	1	1	1	1	SRP9	signal recognition particle 9kDa
hsa-miR-548a-5p	0	0	1	0	1	1	NEK1	NIMA (never in mitosis gene a)-related kinase 1
hsa-miR-548a-5p	0	0	1	1	0	0	NEK7	NIMA (never in mitosis gene a)-related kinase 7
hsa-miR-548a-5p	1	0	1	1	1	1	RIF1	RAP1 interacting factor homolog (yeast)
hsa-miR-548a-5p	0	0	1	1	1	1	TFDP2	transcription factor Dp-2 (E2F dimerization partner 2)
hsa-miR-548a-5p	0	0	1	1	1	1	ENGASE	endo-beta-N-acetylglucosaminidase
hsa-miR-548a-5p	1	0	1	1	1	1	ARF6	ADP-ribosylation factor 6
hsa-miR-548a-5p	0	0	1	1	1	1	ARIH1	ariadne homolog, ubiquitin-conjugating enzyme E2 binding protein, 1 (Drosophila)
hsa-miR-548a-5p	0	0	1	0	0	0	TPTE2P6	transmembrane phosphoinositide 3-phosphatase and tensin homolog 2 pseudogene 6
hsa-miR-548a-5p	1	0	1	0	1	1	DCDC2	doublecortin domain containing 2
hsa-miR-548a-5p	1	0	1	1	1	1	SMAP2	small ArfGAP2
hsa-miR-548a-5p	1	0	1	1	1	1	FBXL17	F-box and leucine-rich repeat protein 17
hsa-miR-548a-5p	0	0	1	1	1	1	WDR52	WD repeat domain 52
hsa-miR-548a-5p	0	0	1	1	0	0	ODF3	outer dense fiber of sperm tails 3
hsa-miR-548a-5p	1	0	1	1	1	1	SMC6	structural maintenance of chromosomes 6
hsa-miR-548a-5p	1	0	1	1	1	1	PREX1	phosphatidylinositol-3,4,5-trisphosphate-dependent Rac exchange factor 1
hsa-miR-548a-5p	0	0	1	1	1	1	RHOT1	ras homolog family member T1
hsa-miR-548a-5p	1	0	1	1	1	1	GOLGA8A	golgin A8 family, member A
hsa-miR-548a-5p	1	0	1	1	1	1	NBEA	neurobeachin
hsa-miR-548a-5p	1	0	1	1	1	1	KIAA1033	KIAA1033
hsa-miR-548a-5p	1	0	1	0	1	1	GPR85	G protein-coupled receptor 85
hsa-miR-548a-5p	0	0	1	1	1	1	SLC30A10	solute carrier family 30, member 10
hsa-miR-548a-5p	0	0	1	0	0	0	PSMG4	proteasome (prosome, macropain) assembly chaperone 4
hsa-miR-548a-5p	1	0	1	1	0	0	FAM108C1	family with sequence similarity 108, member C1
hsa-miR-548a-5p	0	0	1	0	0	0	FAM66D	family with sequence similarity 66, member D
hsa-miR-548a-5p	0	0	1	1	1	1	HNRPLL	heterogeneous nuclear ribonucleoprotein L-like
hsa-miR-548a-5p	1	0	1	1	0	0	CHTOP	chromatin target of PRMT1
hsa-miR-548a-5p	1	0	1	0	1	1	FAM19A1	family with sequence similarity 19 (chemokine (C-C motif)-like), member A1
hsa-miR-548a-5p	1	0	1	1	1	1	USP45	ubiquitin specific peptidase 45
hsa-miR-548a-5p	0	0	1	1	1	1	COBL	cordon-bleu homolog (mouse)
hsa-miR-548a-5p	0	0	1	1	1	1	ARL13B	ADP-ribosylation factor-like 13B
hsa-miR-548a-5p	1	0	1	1	1	1	DENND1B	DENN/MADD domain containing 1B
hsa-miR-548a-5p	1	0	1	1	1	1	TMEFF1	transmembrane protein with EGF-like and two follistatin-like domains 1
hsa-miR-548a-5p	0	0	1	1	1	1	TMEM132C	transmembrane protein 132C
hsa-miR-548a-5p	1	0	1	1	1	1	MIER1	mesoderm induction early response 1 homolog (Xenopus laevis)
hsa-miR-548a-5p	1	0	1	1	1	1	KDM6A	lysine (K)-specific demethylase 6A
hsa-miR-548a-5p	0	0	1	1	1	1	FILIP1	filamin A interacting protein 1
hsa-miR-548a-5p	0	0	1	1	1	1	PDE4DIP	phosphodiesterase 4D interacting protein
hsa-miR-548a-5p	1	0	1	1	1	1	MTMR10	myotubularin related protein 10
hsa-miR-548a-5p	0	0	1	1	1	1	BEND7	BEN domain containing 7
hsa-miR-548a-5p	0	0	1	1	1	1	RAD51AP1	RAD51 associated protein 1
hsa-miR-548a-5p	1	0	1	0	1	1	HNRNPA3	heterogeneous nuclear ribonucleoprotein A3
hsa-miR-548a-5p	0	0	1	0	1	1	METTL20	methyltransferase like 20
hsa-miR-548a-5p	1	0	1	1	1	1	MLL3	myeloid/lymphoid or mixed-lineage leukemia 3
hsa-miR-548a-5p	1	0	1	0	1	1	STYX	serine/threonine/tyrosine interacting protein
hsa-miR-548a-5p	0	0	1	1	1	1	SYTL4	synaptotagmin-like 4
hsa-miR-548a-5p	0	0	1	1	1	1	YAP1	Yes-associated protein 1
hsa-miR-548a-5p	0	0	1	1	1	1	VWA3B	von Willebrand factor A domain containing 3B
hsa-miR-548a-5p	1	0	1	1	1	1	NABP1	nucleic acid binding protein 1
hsa-miR-548a-5p	1	0	1	1	0	0	PTAR1	protein prenyltransferase alpha subunit repeat containing 1
hsa-miR-548a-5p	1	0	1	0	1	1	GPCPD1	glycerophosphocholine phosphodiesterase GDE1 homolog (S. cerevisiae)
hsa-miR-548a-5p	0	0	1	0	1	1	PAPD4	PAP associated domain containing 4
hsa-miR-548a-5p	1	0	1	1	1	1	ABI3BP	ABI family, member 3 (NESH) binding protein
hsa-miR-548a-5p	0	0	1	0	1	1	FBXO42	F-box protein 42
hsa-miR-548a-5p	1	0	1	1	1	1	HMCN1	hemicentin 1
hsa-miR-548a-5p	1	0	1	0	1	1	MEF2C	myocyte enhancer factor 2C
hsa-miR-548a-5p	1	0	1	1	1	1	SOX6	SRY (sex determining region Y)-box 6
hsa-miR-548a-5p	0	0	1	1	1	1	NARG2	NMDA receptor regulated 2
hsa-miR-548a-5p	0	0	1	1	1	1	C12orf50	chromosome 12 open reading frame 50
hsa-miR-548a-5p	1	0	1	1	1	1	BPTF	bromodomain PHD finger transcription factor
hsa-miR-548a-5p	1	0	1	0	1	1	CLINT1	clathrin interactor 1
hsa-miR-548a-5p	0	0	1	1	1	1	SOAT1	sterol O-acyltransferase 1
hsa-miR-548a-5p	1	0	1	0	1	1	CNOT7	CCR4-NOT transcription complex, subunit 7
hsa-miR-548a-5p	0	0	1	1	1	1	SLC30A5	solute carrier family 30 (zinc transporter), member 5
hsa-miR-548a-5p	1	0	1	0	1	1	EXOC5	exocyst complex component 5
hsa-miR-548a-5p	0	0	1	1	1	1	PCDH20	protocadherin 20
hsa-miR-548a-5p	1	0	1	1	1	1	ATAT1	alpha tubulin acetyltransferase 1
hsa-miR-548a-5p	1	0	1	1	1	1	IL17RD	interleukin 17 receptor D
hsa-miR-548a-5p	1	0	1	1	1	1	HERC2	HECT and RLD domain containing E3 ubiquitin protein ligase 2
hsa-miR-548a-5p	1	0	1	1	1	1	ANKRD12	ankyrin repeat domain 12
hsa-miR-548a-5p	1	0	1	1	1	1	CAPRIN2	caprin family member 2
hsa-miR-548a-5p	1	0	1	0	1	1	JAZF1	JAZF zinc finger 1
hsa-miR-548a-5p	1	0	1	0	1	1	SMURF1	SMAD specific E3 ubiquitin protein ligase 1
hsa-miR-548a-5p	0	0	1	1	1	1	C8orf34	chromosome 8 open reading frame 34
hsa-miR-548a-5p	1	0	1	1	1	1	RICTOR	RPTOR independent companion of MTOR, complex 2
hsa-miR-548a-5p	1	0	1	1	1	1	MSANTD4	Myb/SANT-like DNA-binding domain containing 4 with coiled-coils
hsa-miR-548a-5p	1	0	1	0	1	1	NR3C1	nuclear receptor subfamily 3, group C, member 1 (glucocorticoid receptor)
hsa-miR-548a-5p	0	0	1	1	0	0	FIP1L1	FIP1 like 1 (S. cerevisiae)
hsa-miR-548a-5p	0	0	1	0	1	1	SYNPO2	synaptopodin 2
hsa-miR-548a-5p	1	0	1	1	1	1	FAM76B	family with sequence similarity 76, member B
hsa-miR-548a-5p	1	0	1	0	1	1	PATL1	protein associated with topoisomerase II homolog 1 (yeast)
hsa-miR-548a-5p	1	0	1	1	1	1	SET	SET nuclear oncogene
hsa-miR-548a-5p	1	0	1	1	1	1	AP1AR	adaptor-related protein complex 1 associated regulatory protein
hsa-miR-548a-5p	1	0	1	1	0	0	LRRC58	leucine rich repeat containing 58
hsa-miR-548a-5p	1	0	1	1	1	1	FBXL5	F-box and leucine-rich repeat protein 5
hsa-miR-548a-5p	0	0	1	0	1	1	USO1	USO1 vesicle docking protein homolog (yeast)
hsa-miR-548a-5p	1	0	1	1	1	1	TSHZ3	teashirt zinc finger homeobox 3
hsa-miR-548a-5p	0	0	1	1	1	1	AMOTL1	angiomotin like 1
hsa-miR-548a-5p	1	0	1	1	1	1	PPP3CA	protein phosphatase 3, catalytic subunit, alpha isozyme
hsa-miR-548a-5p	1	0	1	1	1	1	RNF38	ring finger protein 38
hsa-miR-548a-5p	1	0	1	1	1	1	IKZF2	IKAROS family zinc finger 2 (Helios)
hsa-miR-548a-5p	1	0	1	1	1	1	CLIC5	chloride intracellular channel 5
hsa-miR-548a-5p	1	0	1	1	1	1	RCAN2	regulator of calcineurin 2
hsa-miR-548a-5p	0	0	1	1	1	1	CRB1	crumbs homolog 1 (Drosophila)
hsa-miR-548a-5p	1	0	1	0	1	1	BDNF	brain-derived neurotrophic factor
hsa-miR-548a-5p	1	0	1	1	1	1	MIPOL1	mirror-image polydactyly 1
hsa-miR-548a-5p	1	0	1	1	1	1	CKAP2	cytoskeleton associated protein 2
hsa-miR-548a-5p	1	0	1	1	1	1	RFFL	ring finger and FYVE-like domain containing E3 ubiquitin protein ligase
hsa-miR-548a-5p	1	0	1	1	1	1	SORCS1	sortilin-related VPS10 domain containing receptor 1
hsa-miR-548a-5p	1	0	1	1	1	1	KIAA0907	KIAA0907
hsa-miR-548a-5p	1	0	1	1	1	1	ANGPT1	angiopoietin 1
hsa-miR-548a-5p	0	0	1	1	1	1	NFXL1	nuclear transcription factor, X-box binding-like 1
hsa-miR-548a-5p	0	0	1	1	1	1	SHPRH	SNF2 histone linker PHD RING helicase, E3 ubiquitin protein ligase
hsa-miR-548a-5p	0	0	1	1	1	1	CEP41	centrosomal protein 41kDa
hsa-miR-548a-5p	1	0	1	1	1	1	WDR26	WD repeat domain 26
hsa-miR-548a-5p	1	0	1	1	1	1	OPRM1	opioid receptor, mu 1
hsa-miR-548a-5p	0	0	1	1	1	1	BCOR	BCL6 corepressor
hsa-miR-548a-5p	1	0	1	1	1	1	RAI14	retinoic acid induced 14
hsa-miR-548a-5p	0	0	1	1	1	1	GCOM1	GRINL1A complex locus 1
hsa-miR-548a-5p	1	0	1	1	1	1	TAB3	TGF-beta activated kinase 1/MAP3K7 binding protein 3
hsa-miR-548a-5p	0	0	1	1	1	1	MFAP5	microfibrillar associated protein 5
hsa-miR-548a-5p	0	0	1	1	1	1	PROK2	prokineticin 2
hsa-miR-548a-5p	1	0	1	1	1	1	CAMTA1	calmodulin binding transcription activator 1
hsa-miR-548a-5p	0	0	1	0	1	1	ANKS1B	ankyrin repeat and sterile alpha motif domain containing 1B
hsa-miR-548a-5p	0	0	1	1	0	0	LRRC39	leucine rich repeat containing 39
hsa-miR-548a-5p	0	0	1	1	1	1	IL20	interleukin 20
hsa-miR-548a-5p	1	0	1	0	1	1	MEGF9	multiple EGF-like-domains 9
hsa-miR-548a-5p	0	0	1	1	1	1	KDELC2	KDEL (Lys-Asp-Glu-Leu) containing 2
hsa-miR-548a-5p	0	0	1	0	1	1	FAM198B	family with sequence similarity 198, member B
hsa-miR-548a-5p	0	0	1	1	1	1	TNFRSF19	tumor necrosis factor receptor superfamily, member 19
hsa-miR-548a-5p	1	0	1	0	1	1	ANKRD28	ankyrin repeat domain 28
hsa-miR-548a-5p	0	0	1	1	1	1	IKZF3	IKAROS family zinc finger 3 (Aiolos)
hsa-miR-548a-5p	1	0	1	1	1	1	SP3	Sp3 transcription factor
hsa-miR-548a-5p	1	0	1	0	1	1	CHRM2	cholinergic receptor, muscarinic 2
hsa-miR-548a-5p	1	0	1	0	1	1	NHS	Nance-Horan syndrome (congenital cataracts and dental anomalies)
hsa-miR-548a-5p	0	0	1	1	1	1	AICDA	activation-induced cytidine deaminase
hsa-miR-548a-5p	1	0	1	1	1	1	MECP2	methyl CpG binding protein 2 (Rett syndrome)
hsa-miR-548a-5p	0	0	1	1	1	1	PRPF4	PRP4 pre-mRNA processing factor 4 homolog (yeast)
hsa-miR-548a-5p	0	0	1	0	1	1	RAB18	RAB18, member RAS oncogene family
hsa-miR-548a-5p	0	0	1	1	1	1	HORMAD1	HORMA domain containing 1
hsa-miR-548a-5p	1	0	1	1	1	1	ALCAM	activated leukocyte cell adhesion molecule
hsa-miR-548a-5p	1	0	1	1	1	1	BHLHE41	basic helix-loop-helix family, member e41
hsa-miR-548a-5p	1	0	1	1	1	1	PLCH1	phospholipase C, eta 1
hsa-miR-548a-5p	1	0	1	1	1	1	CYFIP1	cytoplasmic FMR1 interacting protein 1
hsa-miR-548a-5p	1	0	1	1	1	1	NTNG1	netrin G1
hsa-miR-548a-5p	1	0	1	1	1	1	POLK	polymerase (DNA directed) kappa
hsa-miR-548a-5p	1	0	1	1	1	1	QKI	QKI, KH domain containing, RNA binding
hsa-miR-548a-5p	1	0	1	1	1	1	MYB	v-myb myeloblastosis viral oncogene homolog (avian)
hsa-miR-548a-5p	1	0	1	1	1	1	CD109	CD109 molecule
hsa-miR-548a-5p	0	0	1	1	1	1	NOLC1	nucleolar and coiled-body phosphoprotein 1
hsa-miR-548a-5p	1	0	1	1	1	1	PCDH11X	protocadherin 11 X-linked
hsa-miR-548a-5p	1	0	1	1	0	0	TAF4B	TAF4b RNA polymerase II, TATA box binding protein (TBP)-associated factor, 105kDa
hsa-miR-548a-5p	0	0	1	1	1	1	IL23R	interleukin 23 receptor
hsa-miR-548a-5p	1	0	1	0	1	1	FAM46A	family with sequence similarity 46, member A
hsa-miR-548a-5p	0	0	1	1	1	1	SNX11	sorting nexin 11
hsa-miR-548a-5p	1	0	1	1	1	1	ELOVL6	ELOVL fatty acid elongase 6
hsa-miR-548a-5p	0	0	1	1	1	1	TFG	TRK-fused gene
hsa-miR-548a-5p	0	0	1	1	1	1	PAFAH1B2	platelet-activating factor acetylhydrolase 1b, catalytic subunit 2 (30kDa)
hsa-miR-548a-5p	0	0	1	1	1	1	RLIM	ring finger protein, LIM domain interacting
hsa-miR-548a-5p	1	0	1	1	1	1	MYCN	v-myc myelocytomatosis viral related oncogene, neuroblastoma derived (avian)
hsa-miR-548a-5p	0	0	1	1	1	1	REXO2	REX2, RNA exonuclease 2 homolog (S. cerevisiae)
hsa-miR-548a-5p	1	0	1	0	1	1	DCAF10	DDB1 and CUL4 associated factor 10
hsa-miR-548a-5p	1	0	1	1	0	0	DHDDS	dehydrodolichyl diphosphate synthase
hsa-miR-548a-5p	1	0	1	1	1	1	SPRY2	sprouty homolog 2 (Drosophila)
hsa-miR-548a-5p	1	0	1	1	0	0	SLC10A3	solute carrier family 10 (sodium/bile acid cotransporter family), member 3
hsa-miR-548a-5p	0	0	1	1	1	1	ANAPC1	anaphase promoting complex subunit 1
hsa-miR-548a-5p	1	0	1	0	1	1	CGGBP1	CGG triplet repeat binding protein 1
hsa-miR-548a-5p	1	0	1	0	0	0	TGFA	transforming growth factor, alpha
hsa-miR-548a-5p	0	0	1	1	0	0	CD58	CD58 molecule
hsa-miR-548a-5p	1	0	1	1	1	1	KIAA1191	KIAA1191
hsa-miR-548a-5p	1	0	1	1	1	1	U2SURP	U2 snRNP-associated SURP domain containing
hsa-miR-548a-5p	0	0	1	1	1	1	KIRREL2	kin of IRRE like 2 (Drosophila)
hsa-miR-548a-5p	1	0	1	1	0	0	OSTF1	osteoclast stimulating factor 1
hsa-miR-548a-5p	1	0	1	1	1	1	RSU1	Ras suppressor protein 1
hsa-miR-548a-5p	1	0	1	1	1	1	HMGA1	high mobility group AT-hook 1
hsa-miR-548a-5p	0	0	1	1	1	1	TMEM30A	transmembrane protein 30A
hsa-miR-548a-5p	0	0	1	1	0	0	PANK2	pantothenate kinase 2
hsa-miR-548a-5p	0	0	1	1	1	1	ATXN2L	ataxin 2-like
hsa-miR-548a-5p	1	0	1	1	1	1	ZFAND5	zinc finger, AN1-type domain 5
hsa-miR-548a-5p	0	0	1	1	1	1	BBOX1	butyrobetaine (gamma), 2-oxoglutarate dioxygenase (gamma-butyrobetaine hydroxylase) 1
hsa-miR-548a-5p	1	0	1	1	1	1	TRIM2	tripartite motif containing 2
hsa-miR-548a-5p	1	0	1	1	1	1	OTUD5	OTU domain containing 5
hsa-miR-548a-5p	1	0	1	1	1	1	BTG3	BTG family, member 3
hsa-miR-548a-5p	0	0	1	1	1	1	TAF12	TAF12 RNA polymerase II, TATA box binding protein (TBP)-associated factor, 20kDa
hsa-miR-548a-5p	0	0	1	1	1	1	H2AFY	H2A histone family, member Y
hsa-miR-548a-5p	0	0	1	1	1	1	PCNP	PEST proteolytic signal containing nuclear protein
hsa-miR-548a-5p	0	0	1	1	1	1	KLHL29	kelch-like 29 (Drosophila)
hsa-miR-548a-5p	1	0	1	1	1	1	ETF1	eukaryotic translation termination factor 1
hsa-miR-548a-5p	1	0	1	1	1	1	PRDM2	PR domain containing 2, with ZNF domain
hsa-miR-548a-5p	0	0	1	0	1	1	AHI1	Abelson helper integration site 1
hsa-miR-548a-5p	1	0	1	1	1	1	PAPOLA	poly(A) polymerase alpha
hsa-miR-548a-5p	0	0	1	0	0	0	MGC21881	uncharacterized locus MGC21881
hsa-miR-548a-5p	0	0	1	0	0	0	KLHL15	kelch-like 15 (Drosophila)
hsa-miR-548a-5p	1	0	1	1	1	1	ZBTB38	zinc finger and BTB domain containing 38
hsa-miR-548a-5p	0	0	1	1	1	1	KRCC1	lysine-rich coiled-coil 1
hsa-miR-548a-5p	1	0	1	0	1	1	NR1D2	nuclear receptor subfamily 1, group D, member 2
hsa-miR-548a-5p	0	0	1	0	0	0	ABCC6P2	ATP-binding cassette, sub-family C, member 6 pseudogene 2
hsa-miR-548a-5p	1	0	1	0	1	1	NUP50	nucleoporin 50kDa
hsa-miR-548a-5p	0	0	1	0	0	0	GNN	Grp94 neighboring nucleotidase pseudogene
hsa-miR-548a-5p	1	0	1	1	1	1	SCAMP1	secretory carrier membrane protein 1
hsa-miR-548a-5p	0	0	1	1	1	1	CMAS	cytidine monophosphate N-acetylneuraminic acid synthetase
hsa-miR-548a-5p	1	0	1	1	1	1	FAM199X	family with sequence similarity 199, X-linked
hsa-miR-548a-5p	0	0	1	1	1	1	MBIP	MAP3K12 binding inhibitory protein 1
hsa-miR-548a-5p	1	0	1	0	1	1	CYBRD1	cytochrome b reductase 1
hsa-miR-548a-5p	1	0	1	1	0	0	C10orf137	chromosome 10 open reading frame 137
hsa-miR-548a-5p	1	0	1	1	1	1	SREK1	splicing regulatory glutamine/lysine-rich protein 1
hsa-miR-548a-5p	1	0	1	1	0	0	USP53	ubiquitin specific peptidase 53
hsa-miR-548a-5p	0	0	1	1	0	0	ZDHHC6	zinc finger, DHHC-type containing 6
hsa-miR-548a-5p	0	0	1	1	1	1	PARP9	poly (ADP-ribose) polymerase family, member 9
hsa-miR-548a-5p	0	0	1	1	0	0	RPP40	ribonuclease P/MRP 40kDa subunit
hsa-miR-548a-5p	0	0	1	1	1	1	PLA2G4C	phospholipase A2, group IVC (cytosolic, calcium-independent)
hsa-miR-548a-5p	1	0	1	1	1	1	WWC2	WW and C2 domain containing 2
hsa-miR-548a-5p	0	0	1	0	0	0	FAM200B	family with sequence similarity 200, member B
hsa-miR-548a-5p	1	0	1	1	1	1	ARHGEF9	Cdc42 guanine nucleotide exchange factor (GEF) 9
hsa-miR-548a-5p	0	0	1	0	0	0	ZNF720	zinc finger protein 720
hsa-miR-548a-5p	1	0	1	0	1	1	SLC19A2	solute carrier family 19 (thiamine transporter), member 2
hsa-miR-548a-5p	1	0	1	1	0	0	CSNK1G2	casein kinase 1, gamma 2
hsa-miR-548a-5p	0	0	1	0	0	0	WDFY3-AS2	WDFY3 antisense RNA 2
hsa-miR-548a-5p	0	0	1	1	1	1	HIBADH	3-hydroxyisobutyrate dehydrogenase
hsa-miR-548a-5p	1	0	1	0	1	1	BTF3L4	basic transcription factor 3-like 4
hsa-miR-548a-5p	1	0	1	0	1	1	ARHGAP26	Rho GTPase activating protein 26
hsa-miR-548a-5p	1	0	1	1	1	1	SCML4	sex comb on midleg-like 4 (Drosophila)
hsa-miR-548a-5p	0	0	1	1	1	1	C10orf88	chromosome 10 open reading frame 88
hsa-miR-548a-5p	0	0	1	0	0	0	LOC728196	uncharacterized LOC728196
hsa-miR-548a-5p	0	0	1	1	0	0	TPT1	tumor protein, translationally-controlled 1
hsa-miR-548a-5p	0	0	1	1	1	1	ZCCHC10	zinc finger, CCHC domain containing 10
hsa-miR-548a-5p	0	0	1	1	1	1	RNF103	ring finger protein 103
hsa-miR-548a-5p	1	0	1	1	1	1	SPRYD7	SPRY domain containing 7
hsa-miR-548a-5p	0	0	1	1	1	1	PDE1C	phosphodiesterase 1C, calmodulin-dependent 70kDa
hsa-miR-548a-5p	0	0	1	1	1	1	CDC42SE2	CDC42 small effector 2
hsa-miR-548a-5p	1	0	1	0	1	1	CDK19	cyclin-dependent kinase 19
hsa-miR-548a-5p	1	0	1	1	1	1	NIPA1	non imprinted in Prader-Willi/Angelman syndrome 1
hsa-miR-548a-5p	0	0	1	1	1	1	FAM221A	family with sequence similarity 221, member A
hsa-miR-548a-5p	1	0	1	1	1	1	CNTN4	contactin 4
hsa-miR-548a-5p	1	0	1	1	1	1	EPHA4	EPH receptor A4
hsa-miR-548a-5p	0	0	1	1	1	1	MAP2	microtubule-associated protein 2
hsa-miR-548a-5p	1	0	1	1	1	1	RSPO2	R-spondin 2
hsa-miR-548a-5p	0	0	1	1	1	1	HS1BP3	HCLS1 binding protein 3
hsa-miR-548a-5p	1	0	1	1	1	1	B3GNT5	UDP-GlcNAc:betaGal beta-1,3-N-acetylglucosaminyltransferase 5
hsa-miR-548a-5p	1	0	1	1	1	1	ZBTB11	zinc finger and BTB domain containing 11
hsa-miR-548a-5p	0	0	1	1	1	1	CLK1	CDC-like kinase 1
hsa-miR-548a-5p	1	0	1	1	1	1	SENP6	SUMO1/sentrin specific peptidase 6
hsa-miR-548a-5p	0	0	1	0	1	1	PAPOLG	poly(A) polymerase gamma
hsa-miR-548a-5p	0	0	1	0	1	1	KIAA0895	KIAA0895
hsa-miR-548a-5p	1	0	1	1	1	1	HTR2C	5-hydroxytryptamine (serotonin) receptor 2C, G protein-coupled
hsa-miR-548a-5p	0	0	1	1	1	1	LRMP	lymphoid-restricted membrane protein
hsa-miR-548a-5p	0	0	1	1	1	1	SEMA3D	sema domain, immunoglobulin domain (Ig), short basic domain, secreted, (semaphorin) 3D
hsa-miR-548a-5p	1	0	1	1	1	1	PPARGC1A	peroxisome proliferator-activated receptor gamma, coactivator 1 alpha
hsa-miR-548a-5p	1	0	1	0	1	1	SV2B	synaptic vesicle glycoprotein 2B
hsa-miR-548a-5p	1	0	1	1	1	1	TIAL1	TIA1 cytotoxic granule-associated RNA binding protein-like 1
hsa-miR-548a-5p	0	0	1	1	1	1	CCP110	centriolar coiled coil protein 110kDa
hsa-miR-548a-5p	1	0	1	1	1	1	MLLT3	myeloid/lymphoid or mixed-lineage leukemia (trithorax homolog, Drosophila); translocated to, 3
hsa-miR-548a-5p	0	0	1	1	1	1	C10orf118	chromosome 10 open reading frame 118
hsa-miR-548a-5p	0	0	1	1	1	1	RBBP8	retinoblastoma binding protein 8
hsa-miR-548a-5p	0	0	1	1	0	0	AGBL3	ATP/GTP binding protein-like 3
hsa-miR-548a-5p	1	0	1	1	1	1	ELAVL2	ELAV (embryonic lethal, abnormal vision, Drosophila)-like 2 (Hu antigen B)
hsa-miR-548a-5p	1	0	1	1	1	1	GABRA1	gamma-aminobutyric acid (GABA) A receptor, alpha 1
hsa-miR-548a-5p	1	0	1	1	1	1	ZNF518A	zinc finger protein 518A
hsa-miR-548a-5p	0	0	1	1	0	0	AHSA2	AHA1, activator of heat shock 90kDa protein ATPase homolog 2 (yeast)
hsa-miR-548a-5p	0	0	1	1	1	1	AADAT	aminoadipate aminotransferase
hsa-miR-548a-5p	1	0	1	1	1	1	PLS1	plastin 1
hsa-miR-548a-5p	1	0	1	1	1	1	MUM1L1	melanoma associated antigen (mutated) 1-like 1
hsa-miR-548a-5p	1	0	1	1	1	1	ZPLD1	zona pellucida-like domain containing 1
hsa-miR-548a-5p	1	0	1	1	1	1	PITPNB	phosphatidylinositol transfer protein, beta
hsa-miR-548a-5p	1	0	1	1	1	1	RCOR3	REST corepressor 3
hsa-miR-548a-5p	1	0	1	0	1	1	RNF4	ring finger protein 4
hsa-miR-548a-5p	1	0	1	1	1	1	GLUL	glutamate-ammonia ligase
hsa-miR-548a-5p	0	0	1	1	1	1	C7orf53	chromosome 7 open reading frame 53
hsa-miR-548a-5p	1	0	1	1	1	1	TBC1D1	TBC1 (tre-2/USP6, BUB2, cdc16) domain family, member 1
hsa-miR-548a-5p	0	0	1	1	0	0	POLI	polymerase (DNA directed) iota
hsa-miR-548a-5p	1	0	1	1	1	1	RHOBTB1	Rho-related BTB domain containing 1
hsa-miR-548a-5p	0	0	1	0	1	1	TTC23L	tetratricopeptide repeat domain 23-like
hsa-miR-548a-5p	1	0	1	1	1	1	PPP2R2C	protein phosphatase 2, regulatory subunit B, gamma
hsa-miR-548a-5p	1	0	1	1	1	1	SECISBP2L	SECIS binding protein 2-like
hsa-miR-548a-5p	1	0	1	1	1	1	CRKL	v-crk sarcoma virus CT10 oncogene homolog (avian)-like
hsa-miR-548a-5p	1	0	1	1	1	1	HMGCR	3-hydroxy-3-methylglutaryl-CoA reductase
hsa-miR-548a-5p	1	0	1	1	1	1	LPGAT1	lysophosphatidylglycerol acyltransferase 1
hsa-miR-548a-5p	1	0	1	1	1	1	CLK4	CDC-like kinase 4
hsa-miR-548a-5p	0	0	1	0	0	0	FAM66C	family with sequence similarity 66, member C
hsa-miR-548a-5p	0	0	1	1	1	1	EDA2R	ectodysplasin A2 receptor
hsa-miR-548a-5p	0	0	1	0	0	0	TMPRSS12	transmembrane (C-terminal) protease, serine 12
hsa-miR-548a-5p	1	0	1	1	1	1	RAP2C	RAP2C, member of RAS oncogene family
hsa-miR-548a-5p	0	0	1	1	1	1	PIK3CG	phosphatidylinositol-4,5-bisphosphate 3-kinase, catalytic subunit gamma
hsa-miR-548a-5p	1	0	1	1	1	1	CTDSPL2	CTD (carboxy-terminal domain, RNA polymerase II, polypeptide A) small phosphatase like 2
hsa-miR-548a-5p	0	0	1	1	1	1	SEC24D	SEC24 family, member D (S. cerevisiae)
hsa-miR-548a-5p	0	0	1	1	1	1	CBLN2	cerebellin 2 precursor
hsa-miR-548a-5p	0	0	1	0	0	0	LOC339862	uncharacterized LOC339862
hsa-miR-548a-5p	0	0	1	0	0	0	C12orf77	chromosome 12 open reading frame 77
hsa-miR-548a-5p	0	0	1	1	0	0	VPS8	vacuolar protein sorting 8 homolog (S. cerevisiae)
hsa-miR-548a-5p	0	0	1	1	1	1	SNAPC3	small nuclear RNA activating complex, polypeptide 3, 50kDa
hsa-miR-548a-5p	0	0	1	1	1	1	CLEC12B	C-type lectin domain family 12, member B
hsa-miR-548a-5p	1	0	1	1	1	1	ZNF618	zinc finger protein 618
hsa-miR-548a-5p	0	0	1	1	1	1	UBE3D	ubiquitin protein ligase E3D
hsa-miR-548a-5p	0	0	1	1	0	0	MCCC1	methylcrotonoyl-CoA carboxylase 1 (alpha)
hsa-miR-548a-5p	1	0	1	1	1	1	LHX8	LIM homeobox 8
hsa-miR-548a-5p	0	0	1	1	1	1	FAM171B	family with sequence similarity 171, member B
hsa-miR-548a-5p	1	0	1	1	1	1	HECTD2	HECT domain containing E3 ubiquitin protein ligase 2
hsa-miR-548a-5p	1	0	1	0	1	1	CLDN12	claudin 12
hsa-miR-548a-5p	1	0	1	0	1	1	NEGR1	neuronal growth regulator 1
hsa-miR-548a-5p	0	0	1	0	0	0	SRGAP2C	SLIT-ROBO Rho GTPase activating protein 2C
hsa-miR-548a-5p	1	0	1	0	1	1	CPEB4	cytoplasmic polyadenylation element binding protein 4
hsa-miR-548a-5p	1	0	1	1	1	1	BNC2	basonuclin 2
hsa-miR-548a-5p	0	0	1	0	0	0	CYP4F35P	cytochrome P450, family 4, subfamily F, polypeptide 35, pseudogene
hsa-miR-548a-5p	0	0	1	0	0	0	LOC286184	uncharacterized LOC286184
hsa-miR-548a-5p	0	0	1	1	0	0	ATXN7L2	ataxin 7-like 2
hsa-miR-548a-5p	0	0	1	1	1	1	EFCAB13	EF-hand calcium binding domain 13
hsa-miR-548a-5p	1	0	1	1	1	1	SLC35F3	solute carrier family 35, member F3
hsa-miR-548a-5p	1	0	1	1	1	1	UBXN2A	UBX domain protein 2A
hsa-miR-548a-5p	1	0	1	1	1	1	C4orf19	chromosome 4 open reading frame 19
hsa-miR-548a-5p	1	0	1	1	1	1	CMIP	c-Maf inducing protein
hsa-miR-548a-5p	1	0	1	1	1	1	GALNT1	UDP-N-acetyl-alpha-D-galactosamine:polypeptide N-acetylgalactosaminyltransferase 1 (GalNAc-T1)
hsa-miR-548a-5p	1	0	1	1	1	1	DPP10	dipeptidyl-peptidase 10 (non-functional)
hsa-miR-548a-5p	1	0	1	0	1	1	CEP44	centrosomal protein 44kDa
hsa-miR-548a-5p	1	0	1	0	1	1	ARID2	AT rich interactive domain 2 (ARID, RFX-like)
hsa-miR-548a-5p	0	0	1	0	0	0	USP32P1	ubiquitin specific peptidase 32 pseudogene 1
hsa-miR-548a-5p	0	0	1	0	0	0	LINC00326	long intergenic non-protein coding RNA 326
hsa-miR-548a-5p	1	0	1	1	1	1	MARCKS	myristoylated alanine-rich protein kinase C substrate
hsa-miR-548a-5p	1	0	1	1	1	1	TIMP2	TIMP metallopeptidase inhibitor 2
hsa-miR-548a-5p	0	0	1	1	1	1	FBXL4	F-box and leucine-rich repeat protein 4
hsa-miR-548a-5p	0	0	1	1	1	1	SLC14A1	solute carrier family 14 (urea transporter), member 1 (Kidd blood group)
hsa-miR-548a-5p	1	0	1	1	1	1	DACH2	dachshund homolog 2 (Drosophila)
hsa-miR-548a-5p	0	0	1	0	0	0	LOC339622	uncharacterized LOC339622
hsa-miR-548a-5p	1	0	1	1	1	1	FBXO8	F-box protein 8
hsa-miR-548a-5p	1	0	1	1	1	1	BVES	blood vessel epicardial substance
hsa-miR-548a-5p	1	0	1	0	1	1	PCSK2	proprotein convertase subtilisin/kexin type 2
hsa-miR-548a-5p	1	0	1	1	1	1	LEF1	lymphoid enhancer-binding factor 1
hsa-miR-548a-5p	1	0	1	1	1	1	INTS6	integrator complex subunit 6
hsa-miR-548a-5p	0	0	1	1	0	0	MTCH1	mitochondrial carrier 1
hsa-miR-548a-5p	0	0	1	1	1	1	SIAE	sialic acid acetylesterase
hsa-miR-548a-5p	0	0	1	0	1	1	FAM13B	family with sequence similarity 13, member B
hsa-miR-548a-5p	1	0	1	1	1	1	ARPP21	cAMP-regulated phosphoprotein, 21kDa
hsa-miR-548a-5p	1	0	1	1	1	1	FAM123A	family with sequence similarity 123A
hsa-miR-548a-5p	0	0	1	1	1	1	CARD8	caspase recruitment domain family, member 8
hsa-miR-548a-5p	1	0	1	0	1	1	DCUN1D4	DCN1, defective in cullin neddylation 1, domain containing 4 (S. cerevisiae)
hsa-miR-548a-5p	1	0	1	1	1	1	ARID3B	AT rich interactive domain 3B (BRIGHT-like)
hsa-miR-548a-5p	1	0	1	1	1	1	ROCK1	Rho-associated, coiled-coil containing protein kinase 1
hsa-miR-548a-5p	0	0	1	1	1	1	GOLGA6L9	golgin A6 family-like 9
hsa-miR-548a-5p	1	0	1	1	1	1	CLOCK	clock homolog (mouse)
hsa-miR-548a-5p	0	0	1	1	1	1	C4orf32	chromosome 4 open reading frame 32
hsa-miR-548a-5p	1	0	1	1	1	1	C12orf76	chromosome 12 open reading frame 76
hsa-miR-548a-5p	1	0	1	0	1	1	PRKCI	protein kinase C, iota
hsa-miR-548a-5p	0	0	1	0	0	0	LOC154822	uncharacterized LOC154822
hsa-miR-548a-5p	0	0	1	0	1	1	C11orf93	chromosome 11 open reading frame 93
hsa-miR-548a-5p	1	0	1	1	1	1	FKBP5	FK506 binding protein 5
hsa-miR-548a-5p	0	0	1	0	0	0	LOC338579	ankyrin repeat domain-containing protein 30B pseudogene
hsa-miR-548a-5p	0	0	1	1	1	1	DGKH	diacylglycerol kinase, eta
hsa-miR-548a-5p	0	0	1	0	0	0	LOC339260	uncharacterized LOC339260
hsa-miR-548a-5p	0	0	1	0	0	0	DKFZp686O1327	uncharacterized LOC401014
hsa-miR-548a-5p	0	0	1	1	1	1	TMEM200A	transmembrane protein 200A
hsa-miR-548a-5p	1	0	1	1	1	1	HLTF	helicase-like transcription factor
hsa-miR-548a-5p	1	0	1	0	1	1	PSD3	pleckstrin and Sec7 domain containing 3
hsa-miR-548a-5p	0	0	1	0	0	0	LOC728342	uncharacterized LOC728342
hsa-miR-548a-5p	0	0	1	0	0	0	LOC283914	uncharacterized LOC283914
hsa-miR-548a-5p	1	0	1	1	1	1	SUPT7L	suppressor of Ty 7 (S. cerevisiae)-like
hsa-miR-548a-5p	1	0	1	1	1	1	SENP1	SUMO1/sentrin specific peptidase 1
hsa-miR-548a-5p	1	0	1	1	1	1	SF3B1	splicing factor 3b, subunit 1, 155kDa
hsa-miR-548a-5p	0	0	1	1	0	0	NIT1	nitrilase 1
hsa-miR-548a-5p	1	0	1	0	1	1	LYPD6	LY6/PLAUR domain containing 6
hsa-miR-548a-5p	0	0	1	1	1	1	RABEPK	Rab9 effector protein with kelch motifs
hsa-miR-548a-5p	0	0	1	1	1	1	ANGEL2	angel homolog 2 (Drosophila)
hsa-miR-548a-5p	0	0	1	0	0	0	DPY19L2P4	dpy-19-like 2 pseudogene 4 (C. elegans)
hsa-miR-548a-5p	0	0	1	1	1	1	OLFML2B	olfactomedin-like 2B
hsa-miR-548a-5p	1	0	1	1	1	1	BRD1	bromodomain containing 1
hsa-miR-548a-5p	1	0	1	1	1	1	KIF2A	kinesin heavy chain member 2A
hsa-miR-548a-5p	1	0	1	0	1	1	ZNF800	zinc finger protein 800
hsa-miR-548a-5p	0	0	1	1	0	0	PLA1A	phospholipase A1 member A
hsa-miR-548a-5p	1	0	1	1	1	1	RTKN2	rhotekin 2
hsa-miR-548a-5p	0	0	1	0	0	0	LOC255025	uncharacterized LOC255025
hsa-miR-548a-5p	1	0	1	1	1	1	PTPRG	protein tyrosine phosphatase, receptor type, G
hsa-miR-548a-5p	1	0	1	1	1	1	CLVS1	clavesin 1
hsa-miR-548a-5p	1	0	1	1	1	1	PELI1	pellino E3 ubiquitin protein ligase 1
hsa-miR-548a-5p	1	0	1	1	1	1	RECK	reversion-inducing-cysteine-rich protein with kazal motifs
hsa-miR-548a-5p	1	0	1	0	1	1	CCNY	cyclin Y
hsa-miR-548a-5p	0	0	1	1	1	1	FBXO38	F-box protein 38
hsa-miR-548a-5p	1	0	1	1	1	1	MBNL1	muscleblind-like splicing regulator 1
hsa-miR-548a-5p	0	0	1	0	0	0	AURKAPS1	aurora kinase A pseudogene 1
hsa-miR-548a-5p	1	0	1	0	1	1	NUDT10	nudix (nucleoside diphosphate linked moiety X)-type motif 10
hsa-miR-548a-5p	1	0	1	0	1	1	SMURF2	SMAD specific E3 ubiquitin protein ligase 2
hsa-miR-548a-5p	0	0	1	0	0	0	BMS1P6	BMS1 pseudogene 6
hsa-miR-548a-5p	1	0	1	1	1	1	PTPDC1	protein tyrosine phosphatase domain containing 1
hsa-miR-548a-5p	1	0	1	1	1	1	ZFP91	zinc finger protein 91 homolog (mouse)
hsa-miR-548a-5p	1	0	1	1	1	1	PCGF5	polycomb group ring finger 5
hsa-miR-548a-5p	0	0	1	1	1	1	KDELC1	KDEL (Lys-Asp-Glu-Leu) containing 1
hsa-miR-548a-5p	0	0	1	1	1	1	SLC25A35	solute carrier family 25, member 35
hsa-miR-548a-5p	1	0	1	0	1	1	C14orf43	chromosome 14 open reading frame 43
hsa-miR-548a-5p	0	0	1	1	1	1	PLEKHA8	pleckstrin homology domain containing, family A (phosphoinositide binding specific) member 8
hsa-miR-548a-5p	0	0	1	1	0	0	TINAG	tubulointerstitial nephritis antigen
hsa-miR-548a-5p	0	0	1	1	0	0	CRYM-AS1	CRYM antisense RNA 1
hsa-miR-548a-5p	1	0	1	1	1	1	ATP8B4	ATPase, class I, type 8B, member 4
hsa-miR-548a-5p	1	0	1	1	1	1	ZFP161	zinc finger protein 161 homolog (mouse)
hsa-miR-548a-5p	1	0	1	1	1	1	KLHL28	kelch-like 28 (Drosophila)
hsa-miR-548a-5p	0	0	1	1	0	0	IFT88	intraflagellar transport 88 homolog (Chlamydomonas)
hsa-miR-548a-5p	1	0	1	1	1	1	SOX5	SRY (sex determining region Y)-box 5
hsa-miR-548a-5p	1	0	1	1	1	1	PRRG1	proline rich Gla (G-carboxyglutamic acid) 1
hsa-miR-548a-5p	0	0	1	0	1	1	GUCY1B3	guanylate cyclase 1, soluble, beta 3
hsa-miR-548a-5p	0	0	1	0	0	0	CCDC150	coiled-coil domain containing 150
hsa-miR-548a-5p	1	0	1	1	0	0	G6PC3	glucose 6 phosphatase, catalytic, 3
hsa-miR-548a-5p	0	0	1	1	0	0	LRRIQ3	leucine-rich repeats and IQ motif containing 3
hsa-miR-548a-5p	0	0	1	1	1	1	CLEC2D	C-type lectin domain family 2, member D
hsa-miR-548a-5p	0	0	1	0	1	1	ASAP2	ArfGAP with SH3 domain, ankyrin repeat and PH domain 2
hsa-miR-548a-5p	0	0	1	1	0	0	DHX30	DEAH (Asp-Glu-Ala-His) box polypeptide 30
hsa-miR-548a-5p	1	0	1	1	1	1	GRIK2	glutamate receptor, ionotropic, kainate 2
hsa-miR-548a-5p	0	0	1	1	1	1	C1orf109	chromosome 1 open reading frame 109
hsa-miR-548a-5p	1	0	1	1	1	1	UEVLD	UEV and lactate/malate dehyrogenase domains
hsa-miR-548a-5p	1	0	1	1	1	1	MYLK	myosin light chain kinase
hsa-miR-548a-5p	0	0	1	0	0	0	LOC158435	uncharacterized LOC158435
hsa-miR-548a-5p	0	0	1	1	0	0	SPNS2	spinster homolog 2 (Drosophila)
hsa-miR-548a-5p	1	0	1	1	1	1	RAVER2	ribonucleoprotein, PTB-binding 2
hsa-miR-548a-5p	0	0	1	1	1	1	TRIM6	tripartite motif containing 6
hsa-miR-548a-5p	1	0	1	1	1	1	STXBP5	syntaxin binding protein 5 (tomosyn)
hsa-miR-548a-5p	1	0	1	1	1	1	ZNF449	zinc finger protein 449
hsa-miR-548a-5p	1	0	1	1	1	1	C18orf1	chromosome 18 open reading frame 1
hsa-miR-548a-5p	0	0	1	0	0	0	DPY19L2P1	dpy-19-like 2 pseudogene 1 (C. elegans)
hsa-miR-548a-5p	0	0	1	1	1	1	KCTD18	potassium channel tetramerisation domain containing 18
hsa-miR-548a-5p	0	0	1	1	0	0	CELF3	CUGBP, Elav-like family member 3
hsa-miR-548a-5p	1	0	1	1	1	1	SLC26A7	solute carrier family 26, member 7
hsa-miR-548a-5p	1	0	1	1	1	1	SRPK2	SRSF protein kinase 2
hsa-miR-548a-5p	0	0	1	0	0	0	PTGER4P2	prostaglandin E receptor 4 (subtype EP4) pseudogene 2
hsa-miR-548a-5p	0	0	1	0	0	0	SPDYE8P	speedy homolog E8 (Xenopus laevis), pseudogene
hsa-miR-548a-5p	0	0	1	1	0	0	GP6	glycoprotein VI (platelet)
hsa-miR-548a-5p	1	0	1	1	1	1	SOCS2	suppressor of cytokine signaling 2
hsa-miR-548a-5p	1	0	1	1	1	1	SCAF8	SR-related CTD-associated factor 8
hsa-miR-548a-5p	1	0	1	1	1	1	AHR	aryl hydrocarbon receptor
hsa-miR-548a-5p	0	0	1	1	0	0	CSF2RB	colony stimulating factor 2 receptor, beta, low-affinity (granulocyte-macrophage)
hsa-miR-548a-5p	1	0	1	0	1	1	TGFBR1	transforming growth factor, beta receptor 1
hsa-miR-548a-5p	1	0	1	0	1	1	MAP4K3	mitogen-activated protein kinase kinase kinase kinase 3
hsa-miR-548a-5p	0	0	1	1	1	1	PCDH18	protocadherin 18
hsa-miR-548a-5p	1	0	1	0	1	1	TMEM194A	transmembrane protein 194A
hsa-miR-548a-5p	0	0	1	1	1	1	TNFSF12	tumor necrosis factor (ligand) superfamily, member 12
hsa-miR-548a-5p	1	0	1	1	1	1	AGGF1	angiogenic factor with G patch and FHA domains 1
hsa-miR-548a-5p	0	0	1	1	0	0	EBNA1BP2	EBNA1 binding protein 2
hsa-miR-548a-5p	1	0	1	1	1	1	OPCML	opioid binding protein/cell adhesion molecule-like
hsa-miR-548a-5p	0	0	1	1	1	1	IRX5	iroquois homeobox 5
hsa-miR-548a-5p	0	0	1	1	1	1	C3orf67	chromosome 3 open reading frame 67
hsa-miR-548a-5p	1	0	1	1	1	1	ZBTB7A	zinc finger and BTB domain containing 7A
hsa-miR-548a-5p	1	0	1	1	1	1	HNRNPC	heterogeneous nuclear ribonucleoprotein C (C1/C2)
hsa-miR-548a-5p	1	0	1	0	1	1	MEST	mesoderm specific transcript homolog (mouse)
hsa-miR-548a-5p	1	0	1	1	1	1	ZMYND11	zinc finger, MYND-type containing 11
hsa-miR-548a-5p	1	0	1	1	1	1	ESRRA	estrogen-related receptor alpha
hsa-miR-548a-5p	0	0	1	1	0	0	HERC2P3	hect domain and RLD 2 pseudogene 3
hsa-miR-548a-5p	1	0	1	1	1	1	ST8SIA2	ST8 alpha-N-acetyl-neuraminide alpha-2,8-sialyltransferase 2
hsa-miR-548a-5p	1	0	1	1	1	1	ACVR2B	activin A receptor, type IIB
hsa-miR-548a-5p	0	0	1	1	1	1	HMGB2	high mobility group box 2
hsa-miR-548a-5p	0	0	1	1	1	1	XG	Xg blood group
hsa-miR-548a-5p	1	0	1	0	1	1	MYBL1	v-myb myeloblastosis viral oncogene homolog (avian)-like 1
hsa-miR-548a-5p	1	0	1	0	1	1	CPEB2	cytoplasmic polyadenylation element binding protein 2
hsa-miR-548a-5p	0	0	1	0	0	0	LOC441493	uncharacterized LOC441493
hsa-miR-548a-5p	0	0	1	0	0	0	C5orf49	chromosome 5 open reading frame 49
hsa-miR-548a-5p	0	0	1	0	0	0	LOC283174	uncharacterized LOC283174
hsa-miR-548a-5p	0	0	1	1	1	1	SPHKAP	SPHK1 interactor, AKAP domain containing
hsa-miR-548a-5p	1	0	1	0	0	0	PWWP2A	PWWP domain containing 2A
hsa-miR-548a-5p	1	0	1	1	1	1	GABRB2	gamma-aminobutyric acid (GABA) A receptor, beta 2
hsa-miR-548a-5p	1	0	1	1	1	1	PTPRD	protein tyrosine phosphatase, receptor type, D
hsa-miR-548a-5p	0	0	1	1	1	1	TBRG1	transforming growth factor beta regulator 1
hsa-miR-548a-5p	1	0	1	0	1	1	DNAJC6	DnaJ (Hsp40) homolog, subfamily C, member 6
hsa-miR-548a-5p	1	0	1	1	1	1	CERS6	ceramide synthase 6
hsa-miR-548a-5p	1	0	1	1	1	1	SP4	Sp4 transcription factor
hsa-miR-548a-5p	1	0	1	0	1	1	BTBD3	BTB (POZ) domain containing 3
hsa-miR-548a-5p	0	0	1	1	1	1	STAU2	staufen, RNA binding protein, homolog 2 (Drosophila)
hsa-miR-548a-5p	1	0	1	1	1	1	UBE4A	ubiquitination factor E4A
hsa-miR-548a-5p	1	0	1	1	1	1	SLK	STE20-like kinase
hsa-miR-548a-5p	1	0	1	1	1	1	NR3C2	nuclear receptor subfamily 3, group C, member 2
hsa-miR-548a-5p	1	0	1	0	1	1	ROBO1	roundabout, axon guidance receptor, homolog 1 (Drosophila)
hsa-miR-548a-5p	0	0	1	1	1	1	LRCH1	leucine-rich repeats and calponin homology (CH) domain containing 1
hsa-miR-548a-5p	1	0	1	1	1	1	SHANK2	SH3 and multiple ankyrin repeat domains 2
hsa-miR-548a-5p	0	0	1	1	1	1	C14orf105	chromosome 14 open reading frame 105
hsa-miR-548a-5p	1	0	1	0	1	1	PRDM10	PR domain containing 10
hsa-miR-548a-5p	1	0	1	1	1	1	OTUD4	OTU domain containing 4
hsa-miR-548a-5p	0	0	1	1	0	0	RGSL1	regulator of G-protein signaling like 1
hsa-miR-548a-5p	0	0	1	1	0	0	PRDM5	PR domain containing 5
hsa-miR-548a-5p	0	0	1	0	0	0	LINC00486	long intergenic non-protein coding RNA 486
hsa-miR-548a-5p	0	0	1	0	0	0	LINC00266-1	long intergenic non-protein coding RNA 266-1
hsa-miR-548a-5p	1	0	1	0	1	1	LRCH2	leucine-rich repeats and calponin homology (CH) domain containing 2
hsa-miR-548a-5p	1	0	1	0	1	1	CAMSAP2	calmodulin regulated spectrin-associated protein family, member 2
hsa-miR-548a-5p	0	0	1	0	0	0	C3orf55	chromosome 3 open reading frame 55
hsa-miR-548a-5p	1	0	1	1	1	1	MEGF11	multiple EGF-like-domains 11
hsa-miR-548a-5p	1	0	1	1	1	1	JMJD1C	jumonji domain containing 1C
hsa-miR-548a-5p	1	0	1	1	1	1	ZEB2	zinc finger E-box binding homeobox 2
hsa-miR-548a-5p	0	0	1	1	1	1	HSF2	heat shock transcription factor 2
hsa-miR-548a-5p	0	0	1	1	1	1	SLC22A23	solute carrier family 22, member 23
hsa-miR-548a-5p	1	0	1	1	1	1	MLLT10	myeloid/lymphoid or mixed-lineage leukemia (trithorax homolog, Drosophila); translocated to, 10
hsa-miR-548a-5p	0	0	1	1	1	1	ABCA8	ATP-binding cassette, sub-family A (ABC1), member 8
hsa-miR-548a-5p	0	0	1	0	0	0	FAM225B	family with sequence similarity 225, member B (non-protein coding)
hsa-miR-548a-5p	1	0	1	1	1	1	CADPS	Ca++-dependent secretion activator
hsa-miR-548a-5p	1	0	1	1	1	1	PTPRZ1	protein tyrosine phosphatase, receptor-type, Z polypeptide 1
hsa-miR-548a-5p	1	0	1	0	1	1	FAM196A	family with sequence similarity 196, member A
hsa-miR-548a-5p	0	0	1	1	1	1	BMP4	bone morphogenetic protein 4
hsa-miR-548a-5p	0	0	1	1	0	0	EFCAB11	EF-hand calcium binding domain 11
hsa-miR-548a-5p	1	0	1	1	1	1	CCNK	cyclin K
hsa-miR-548a-5p	0	0	1	1	0	0	DHRS1	dehydrogenase/reductase (SDR family) member 1
hsa-miR-548a-5p	1	0	1	1	1	1	NUMB	numb homolog (Drosophila)
hsa-miR-548a-5p	0	0	1	1	1	1	DLGAP5	discs, large (Drosophila) homolog-associated protein 5
hsa-miR-548a-5p	0	0	1	1	1	1	CNIH	cornichon homolog (Drosophila)
hsa-miR-548a-5p	1	0	1	1	1	1	GOLGA5	golgin A5
hsa-miR-548a-5p	0	0	1	0	0	0	LINC00643	long intergenic non-protein coding RNA 643
hsa-miR-548a-5p	1	0	1	1	1	1	BTBD7	BTB (POZ) domain containing 7
hsa-miR-548a-5p	0	0	1	0	0	0	FLJ39632	uncharacterized LOC642477
hsa-miR-548a-5p	1	0	1	1	1	1	EIF5	eukaryotic translation initiation factor 5
hsa-miR-548a-5p	0	0	1	1	1	1	C10orf82	chromosome 10 open reading frame 82
hsa-miR-548a-5p	0	0	1	0	0	0	ADCY10P1	adenylate cyclase 10 (soluble) pseudogene 1
hsa-miR-548a-5p	1	0	1	1	1	1	SASH1	SAM and SH3 domain containing 1
hsa-miR-548a-5p	1	0	1	1	1	1	JPH1	junctophilin 1
hsa-miR-548a-5p	1	0	1	1	1	1	RAB7A	RAB7A, member RAS oncogene family
hsa-miR-548a-5p	0	0	1	0	1	1	AP1S2	adaptor-related protein complex 1, sigma 2 subunit
hsa-miR-548a-5p	0	0	1	0	1	1	FEZ2	fasciculation and elongation protein zeta 2 (zygin II)
hsa-miR-548a-5p	1	0	1	1	1	1	MIER3	mesoderm induction early response 1, family member 3
hsa-miR-548a-5p	0	0	1	0	0	0	RGPD4	RANBP2-like and GRIP domain containing 4
hsa-miR-548a-5p	1	0	1	1	1	1	SGCD	sarcoglycan, delta (35kDa dystrophin-associated glycoprotein)
hsa-miR-548a-5p	1	0	1	1	1	1	TRIM37	tripartite motif containing 37
hsa-miR-548a-5p	0	0	1	1	1	1	TRDMT1	tRNA aspartic acid methyltransferase 1
hsa-miR-548a-5p	0	0	1	1	1	1	NUP54	nucleoporin 54kDa
hsa-miR-548a-5p	1	0	1	0	1	1	MTX3	metaxin 3
hsa-miR-548a-5p	1	0	1	0	1	1	CLASP2	cytoplasmic linker associated protein 2
hsa-miR-548a-5p	0	0	1	1	1	1	PSMA2	proteasome (prosome, macropain) subunit, alpha type, 2
hsa-miR-548a-5p	1	0	1	1	1	1	C12orf4	chromosome 12 open reading frame 4
hsa-miR-548a-5p	1	0	1	1	1	1	PRKRIR	protein-kinase, interferon-inducible double stranded RNA dependent inhibitor, repressor of (P58 repressor)
hsa-miR-548a-5p	1	0	1	0	1	1	FAM73A	family with sequence similarity 73, member A
hsa-miR-548a-5p	1	0	1	1	1	1	RORB	RAR-related orphan receptor B
hsa-miR-548a-5p	0	0	1	1	1	1	GTF3C2	general transcription factor IIIC, polypeptide 2, beta 110kDa
hsa-miR-548a-5p	0	0	1	1	1	1	TSGA10	testis specific, 10
hsa-miR-548a-5p	1	0	1	1	1	1	MYCBP2	MYC binding protein 2, E3 ubiquitin protein ligase
hsa-miR-548a-5p	0	0	1	0	1	1	NHSL1	NHS-like 1
hsa-miR-548a-5p	0	0	1	1	1	1	IPCEF1	interaction protein for cytohesin exchange factors 1
hsa-miR-548a-5p	1	0	1	0	1	1	GALNT4	UDP-N-acetyl-alpha-D-galactosamine:polypeptide N-acetylgalactosaminyltransferase 4 (GalNAc-T4)
hsa-miR-548a-5p	0	0	1	1	1	1	PRR14L	proline rich 14-like
hsa-miR-548a-5p	1	0	1	1	0	0	RBM27	RNA binding motif protein 27
hsa-miR-548a-5p	1	0	1	1	0	0	CECR2	cat eye syndrome chromosome region, candidate 2
hsa-miR-548a-5p	0	0	1	1	1	1	MLIP	muscular LMNA-interacting protein
hsa-miR-548a-5p	0	0	1	0	1	1	THAP6	THAP domain containing 6
hsa-miR-548a-5p	0	0	1	1	1	1	FAM9C	family with sequence similarity 9, member C
hsa-miR-548a-5p	1	0	1	1	1	1	TLN2	talin 2
hsa-miR-548a-5p	1	0	1	1	1	1	EPS15	epidermal growth factor receptor pathway substrate 15
hsa-miR-548a-5p	1	0	1	1	1	1	USP6	ubiquitin specific peptidase 6 (Tre-2 oncogene)
hsa-miR-548a-5p	1	0	1	1	1	1	VPS26A	vacuolar protein sorting 26 homolog A (S. pombe)
hsa-miR-548a-5p	1	0	1	1	1	1	GABPA	GA binding protein transcription factor, alpha subunit 60kDa
hsa-miR-548a-5p	0	0	1	1	1	1	ARMCX3	armadillo repeat containing, X-linked 3
hsa-miR-548a-5p	0	0	1	1	1	1	DUSP19	dual specificity phosphatase 19
hsa-miR-548a-5p	1	0	1	1	1	1	TC2N	tandem C2 domains, nuclear
hsa-miR-548a-5p	0	0	1	1	1	1	ZNF365	zinc finger protein 365
hsa-miR-548a-5p	1	0	1	1	1	1	CYB5B	cytochrome b5 type B (outer mitochondrial membrane)
hsa-miR-548a-5p	0	0	1	0	1	1	B3GALTL	beta 1,3-galactosyltransferase-like
hsa-miR-548a-5p	0	0	1	0	0	0	OVOS	ovostatin
hsa-miR-548a-5p	1	0	1	1	1	1	CASP7	caspase 7, apoptosis-related cysteine peptidase
hsa-miR-548a-5p	1	0	1	1	1	1	DCAF5	DDB1 and CUL4 associated factor 5
hsa-miR-548a-5p	1	0	1	1	1	1	HBS1L	HBS1-like (S. cerevisiae)
hsa-miR-548a-5p	1	0	1	1	1	1	DDAH1	dimethylarginine dimethylaminohydrolase 1
hsa-miR-548a-5p	0	0	1	1	1	1	CCNT2	cyclin T2
hsa-miR-548a-5p	1	0	1	0	0	0	CTSB	cathepsin B
hsa-miR-548a-5p	0	0	1	0	1	1	TYW5	tRNA-yW synthesizing protein 5
hsa-miR-548a-5p	1	0	1	0	1	1	PCGF3	polycomb group ring finger 3
hsa-miR-548a-5p	1	0	1	1	1	1	BCLAF1	BCL2-associated transcription factor 1
hsa-miR-548a-5p	1	0	1	1	1	1	NAV1	neuron navigator 1
hsa-miR-548a-5p	1	0	1	0	1	1	KLHL24	kelch-like 24 (Drosophila)
hsa-miR-548a-5p	1	0	1	0	1	1	IGF2BP3	insulin-like growth factor 2 mRNA binding protein 3
hsa-miR-548a-5p	0	0	1	0	0	0	LOC286299	uncharacterized LOC286299
hsa-miR-548a-5p	1	0	1	1	1	1	POLA1	polymerase (DNA directed), alpha 1, catalytic subunit
hsa-miR-548a-5p	1	0	1	1	1	1	C5orf24	chromosome 5 open reading frame 24
hsa-miR-548a-5p	0	0	1	1	1	1	MPP4	membrane protein, palmitoylated 4 (MAGUK p55 subfamily member 4)
hsa-miR-548a-5p	1	0	1	1	1	1	PGAP1	post-GPI attachment to proteins 1
hsa-miR-548a-5p	1	0	1	1	1	1	TMEM135	transmembrane protein 135
hsa-miR-548a-5p	1	0	1	1	1	1	CACNB4	calcium channel, voltage-dependent, beta 4 subunit
hsa-miR-548a-5p	0	0	1	1	1	1	ABCD3	ATP-binding cassette, sub-family D (ALD), member 3
hsa-miR-548a-5p	0	0	1	1	1	1	THSD4	thrombospondin, type I, domain containing 4
hsa-miR-548a-5p	1	0	1	1	1	1	WLS	wntless homolog (Drosophila)
hsa-miR-548a-5p	1	0	1	1	1	1	HIF1A	hypoxia inducible factor 1, alpha subunit (basic helix-loop-helix transcription factor)
hsa-miR-548a-5p	0	0	1	1	1	1	IFRD1	interferon-related developmental regulator 1
hsa-miR-548a-5p	1	0	1	1	1	1	CALD1	caldesmon 1
hsa-miR-548a-5p	1	0	1	1	1	1	EOGT	EGF domain-specific O-linked N-acetylglucosamine (GlcNAc) transferase
hsa-miR-548a-5p	0	0	1	1	1	1	SSFA2	sperm specific antigen 2
hsa-miR-548a-5p	1	0	1	0	1	1	TBL1XR1	transducin (beta)-like 1 X-linked receptor 1
hsa-miR-548a-5p	1	0	1	1	1	1	FAM208A	family with sequence similarity 208, member A
hsa-miR-548a-5p	1	0	1	0	1	1	C1orf21	chromosome 1 open reading frame 21
hsa-miR-548a-5p	0	0	1	1	1	1	USP54	ubiquitin specific peptidase 54
hsa-miR-548a-5p	0	0	1	0	1	1	STT3A	STT3, subunit of the oligosaccharyltransferase complex, homolog A (S. cerevisiae)
hsa-miR-548a-5p	1	0	1	1	1	1	LYST	lysosomal trafficking regulator
hsa-miR-548a-5p	1	0	1	1	1	1	DLG5	discs, large homolog 5 (Drosophila)
hsa-miR-548a-5p	1	0	1	1	1	1	CREB3L2	cAMP responsive element binding protein 3-like 2
hsa-miR-548a-5p	1	0	1	0	1	1	TTL	tubulin tyrosine ligase
hsa-miR-548a-5p	0	0	1	1	1	1	IPO11	importin 11
hsa-miR-548a-5p	1	0	1	1	0	0	GSK3B	glycogen synthase kinase 3 beta
hsa-miR-548a-5p	0	0	1	1	1	1	LRRC42	leucine rich repeat containing 42
hsa-miR-548a-5p	0	0	1	0	1	1	CD59	CD59 molecule, complement regulatory protein
hsa-miR-548a-5p	0	0	1	1	1	1	POLR2H	polymerase (RNA) II (DNA directed) polypeptide H
hsa-miR-548a-5p	1	0	1	1	1	1	PCMT1	protein-L-isoaspartate (D-aspartate) O-methyltransferase
hsa-miR-548a-5p	1	0	1	0	0	0	PLSCR5	phospholipid scramblase family, member 5
hsa-miR-548a-5p	0	0	1	1	1	1	FGG	fibrinogen gamma chain
hsa-miR-548a-5p	1	0	1	1	0	0	SMARCA2	SWI/SNF related, matrix associated, actin dependent regulator of chromatin, subfamily a, member 2
hsa-miR-548a-5p	0	0	1	1	1	1	CHEK1	checkpoint kinase 1
hsa-miR-548a-5p	0	0	1	1	1	1	PSG2	pregnancy specific beta-1-glycoprotein 2
hsa-miR-548a-5p	0	0	1	1	0	0	SLC39A7	solute carrier family 39 (zinc transporter), member 7
hsa-miR-548a-5p	1	0	1	1	1	1	FUT9	fucosyltransferase 9 (alpha (1,3) fucosyltransferase)
hsa-miR-548a-5p	1	0	1	1	1	1	TOM1L1	target of myb1 (chicken)-like 1
hsa-miR-548a-5p	1	0	1	1	1	1	EIF4B	eukaryotic translation initiation factor 4B
hsa-miR-548a-5p	0	0	1	1	0	0	TCEAL4	transcription elongation factor A (SII)-like 4
hsa-miR-548a-5p	1	0	1	0	1	1	OLA1	Obg-like ATPase 1
hsa-miR-548a-5p	0	0	1	1	1	1	SLCO1C1	solute carrier organic anion transporter family, member 1C1
hsa-miR-548a-5p	0	0	1	0	0	0	ABCB5	ATP-binding cassette, sub-family B (MDR/TAP), member 5
hsa-miR-548a-5p	0	0	1	1	1	1	SEC22C	SEC22 vesicle trafficking protein homolog C (S. cerevisiae)
hsa-miR-548a-5p	0	0	1	1	1	1	MMADHC	methylmalonic aciduria (cobalamin deficiency) cblD type, with homocystinuria
hsa-miR-548a-5p	1	0	1	1	1	1	DOLPP1	dolichyl pyrophosphate phosphatase 1
hsa-miR-548a-5p	0	0	1	1	1	1	ADK	adenosine kinase
hsa-miR-548a-5p	0	0	1	1	1	1	HSPB8	heat shock 22kDa protein 8
hsa-miR-548a-5p	1	0	1	1	1	1	E2F3	E2F transcription factor 3
hsa-miR-548a-5p	0	0	1	1	1	1	SLC25A4	solute carrier family 25 (mitochondrial carrier; adenine nucleotide translocator), member 4
hsa-miR-548a-5p	1	0	1	0	1	1	BNIP3L	BCL2/adenovirus E1B 19kDa interacting protein 3-like
hsa-miR-548a-5p	0	0	1	1	1	1	BCL7B	B-cell CLL/lymphoma 7B
hsa-miR-548a-5p	0	0	1	1	1	1	FAT1	FAT tumor suppressor homolog 1 (Drosophila)
hsa-miR-548a-5p	1	0	1	1	1	1	CD9	CD9 molecule
hsa-miR-548a-5p	1	0	1	1	1	1	E2F5	E2F transcription factor 5, p130-binding
hsa-miR-548a-5p	1	0	1	1	1	1	ADM	adrenomedullin
hsa-miR-548a-5p	1	0	1	0	1	1	EIF4H	eukaryotic translation initiation factor 4H
hsa-miR-548a-5p	1	0	1	1	1	1	SMARCE1	SWI/SNF related, matrix associated, actin dependent regulator of chromatin, subfamily e, member 1
hsa-miR-548a-5p	1	0	1	1	1	1	CDK7	cyclin-dependent kinase 7
hsa-miR-548a-5p	0	0	1	1	1	1	HPGD	hydroxyprostaglandin dehydrogenase 15-(NAD)
hsa-miR-548a-5p	0	0	1	1	1	1	MTCP1	mature T-cell proliferation 1
hsa-miR-548a-5p	0	0	1	0	1	1	CD99P1	CD99 molecule pseudogene 1
hsa-miR-548a-5p	1	0	1	1	1	1	CCNE1	cyclin E1
hsa-miR-548a-5p	0	0	1	1	1	1	SORD	sorbitol dehydrogenase
hsa-miR-548a-5p	1	0	1	1	1	1	HMGN1	high mobility group nucleosome binding domain 1
hsa-miR-548a-5p	0	0	1	1	0	0	HAS1	hyaluronan synthase 1
hsa-miR-548a-5p	1	0	1	1	1	1	FBXO9	F-box protein 9
hsa-miR-548a-5p	1	0	1	1	1	1	TRA2B	transformer 2 beta homolog (Drosophila)
hsa-miR-548a-5p	0	0	1	0	0	0	HMGN1P37	high mobility group nucleosome binding domain 1 pseudogene 37
hsa-miR-548a-5p	1	0	1	1	1	1	NFKBIA	nuclear factor of kappa light polypeptide gene enhancer in B-cells inhibitor, alpha
hsa-miR-548a-5p	0	0	1	1	1	1	CCDC91	coiled-coil domain containing 91
hsa-miR-548a-5p	0	0	1	0	1	1	PDCD5	programmed cell death 5
hsa-miR-548a-5p	0	0	1	1	1	1	GRAP2	GRB2-related adaptor protein 2
hsa-miR-548a-5p	1	0	1	0	1	1	RPS6KB1	ribosomal protein S6 kinase, 70kDa, polypeptide 1
hsa-miR-548a-5p	0	0	1	1	1	1	CYP26A1	cytochrome P450, family 26, subfamily A, polypeptide 1
hsa-miR-548a-5p	0	0	1	1	1	1	MTMR8	myotubularin related protein 8
hsa-miR-548a-5p	0	0	1	0	1	1	MMAA	methylmalonic aciduria (cobalamin deficiency) cblA type
hsa-miR-548a-5p	0	0	1	0	1	1	PSG11	pregnancy specific beta-1-glycoprotein 11
hsa-miR-548a-5p	1	0	1	1	1	1	BAMBI	BMP and activin membrane-bound inhibitor homolog (Xenopus laevis)
hsa-miR-548a-5p	1	0	1	1	1	1	STK38L	serine/threonine kinase 38 like
hsa-miR-548a-5p	1	0	1	1	1	1	WIPF1	WAS/WASL interacting protein family, member 1
hsa-miR-548a-5p	1	0	1	1	1	1	PTBP1	polypyrimidine tract binding protein 1
hsa-miR-548a-5p	1	0	1	1	1	1	PIAS1	protein inhibitor of activated STAT, 1
hsa-miR-548a-5p	0	0	1	1	1	1	BMPR1A	bone morphogenetic protein receptor, type IA
hsa-miR-548a-5p	1	0	1	1	1	1	PEX2	peroxisomal biogenesis factor 2
hsa-miR-548a-5p	1	0	1	1	1	1	MMP2	matrix metallopeptidase 2 (gelatinase A, 72kDa gelatinase, 72kDa type IV collagenase)
hsa-miR-548a-5p	0	0	1	1	1	1	COG3	component of oligomeric golgi complex 3
hsa-miR-548a-5p	1	0	1	1	1	1	PPP5C	protein phosphatase 5, catalytic subunit
hsa-miR-548a-5p	1	0	1	1	1	1	KCNIP4	Kv channel interacting protein 4
hsa-miR-548a-5p	0	0	1	1	0	0	NOX5	NADPH oxidase, EF-hand calcium binding domain 5
hsa-miR-548a-5p	1	0	1	1	0	0	FAT4	FAT tumor suppressor homolog 4 (Drosophila)
hsa-miR-548a-5p	0	0	1	0	1	1	SRSF5	serine/arginine-rich splicing factor 5
hsa-miR-548a-5p	0	0	1	0	0	0	LOC100130353	hippocampus abundant transcript-like 1 pseudogene
hsa-miR-548a-5p	1	0	1	1	1	1	TLK2	tousled-like kinase 2
hsa-miR-548a-5p	1	0	1	1	1	1	ARNTL	aryl hydrocarbon receptor nuclear translocator-like
hsa-miR-548a-5p	1	0	1	1	1	1	EIF4A2	eukaryotic translation initiation factor 4A2
hsa-miR-548a-5p	1	0	1	0	1	1	C15orf41	chromosome 15 open reading frame 41
hsa-miR-548a-5p	1	0	1	1	1	1	NT5DC1	5'-nucleotidase domain containing 1
hsa-miR-548a-5p	1	0	1	1	1	1	MEIS1	Meis homeobox 1
hsa-miR-548a-5p	0	0	1	1	1	1	RDH11	retinol dehydrogenase 11 (all-trans/9-cis/11-cis)
hsa-miR-548a-5p	0	0	1	0	1	1	VSTM2A	V-set and transmembrane domain containing 2A
hsa-miR-548a-5p	1	0	1	1	1	1	YWHAQ	tyrosine 3-monooxygenase/tryptophan 5-monooxygenase activation protein, theta polypeptide
hsa-miR-548a-5p	0	0	1	1	1	1	UBE2A	ubiquitin-conjugating enzyme E2A
hsa-miR-548a-5p	1	0	1	1	1	1	ARL4A	ADP-ribosylation factor-like 4A
hsa-miR-548a-5p	0	0	1	1	1	1	CD1C	CD1c molecule
hsa-miR-548a-5p	0	0	1	1	1	1	UBE2F	ubiquitin-conjugating enzyme E2F (putative)
hsa-miR-548a-5p	1	0	1	1	1	1	ANAPC16	anaphase promoting complex subunit 16
hsa-miR-548a-5p	1	0	1	1	1	1	KCNS3	potassium voltage-gated channel, delayed-rectifier, subfamily S, member 3
hsa-miR-548a-5p	1	0	1	1	1	1	CNBP	CCHC-type zinc finger, nucleic acid binding protein
hsa-miR-548a-5p	0	0	1	1	1	1	PSG5	pregnancy specific beta-1-glycoprotein 5
hsa-miR-548a-5p	1	0	1	1	1	1	NFYB	nuclear transcription factor Y, beta
hsa-miR-548a-5p	0	0	1	1	1	1	DNAJC25	DnaJ (Hsp40) homolog, subfamily C , member 25
hsa-miR-548a-5p	1	0	1	1	1	1	RPUSD3	RNA pseudouridylate synthase domain containing 3
hsa-miR-548a-5p	1	0	1	1	1	1	TRPM6	transient receptor potential cation channel, subfamily M, member 6
hsa-miR-548a-5p	1	0	1	1	1	1	RNF2	ring finger protein 2
hsa-miR-548a-5p	1	0	1	0	1	1	MAP1B	microtubule-associated protein 1B
hsa-miR-548a-5p	1	0	1	1	1	1	HMGN2	high mobility group nucleosomal binding domain 2
hsa-miR-548a-5p	1	0	1	1	1	1	GDA	guanine deaminase
hsa-miR-548a-5p	1	0	1	1	1	1	VLDLR	very low density lipoprotein receptor
hsa-miR-548a-5p	0	0	1	1	0	0	DCAF13	DDB1 and CUL4 associated factor 13
hsa-miR-548a-5p	0	0	1	1	1	1	TSEN15	tRNA splicing endonuclease 15 homolog (S. cerevisiae)
hsa-miR-548a-5p	1	0	1	0	1	1	CD47	CD47 molecule
hsa-miR-548a-5p	0	0	1	1	1	1	PTMA	prothymosin, alpha
hsa-miR-548a-5p	0	0	1	1	1	1	BEX4	brain expressed, X-linked 4
hsa-miR-548a-5p	0	0	1	1	1	1	OTOR	otoraplin
hsa-miR-548a-5p	0	0	1	1	1	1	NUDT21	nudix (nucleoside diphosphate linked moiety X)-type motif 21
hsa-miR-548a-5p	0	0	1	1	1	1	COPS4	COP9 constitutive photomorphogenic homolog subunit 4 (Arabidopsis)
hsa-miR-548a-5p	1	0	1	0	1	1	ARHGAP11A	Rho GTPase activating protein 11A
hsa-miR-548a-5p	1	0	1	1	1	1	LGALSL	lectin, galactoside-binding-like
hsa-miR-548a-5p	1	0	1	1	1	1	GABPB2	GA binding protein transcription factor, beta subunit 2
hsa-miR-548a-5p	0	0	1	1	0	0	CD38	CD38 molecule
hsa-miR-548a-5p	1	0	1	0	1	1	KIAA0240	KIAA0240
hsa-miR-548a-5p	1	0	1	1	1	1	STAG2	stromal antigen 2
hsa-miR-548a-5p	1	0	1	1	1	1	DNAJC16	DnaJ (Hsp40) homolog, subfamily C, member 16
hsa-miR-548a-5p	0	0	1	1	1	1	BDP1	B double prime 1, subunit of RNA polymerase III transcription initiation factor IIIB
hsa-miR-548a-5p	1	0	1	1	1	1	FBXW7	F-box and WD repeat domain containing 7, E3 ubiquitin protein ligase
hsa-miR-548a-5p	0	0	1	0	0	0	C18orf63	chromosome 18 open reading frame 63
hsa-miR-548a-5p	0	0	1	1	1	1	ATG5	autophagy related 5
hsa-miR-548a-5p	1	0	1	1	1	1	NKTR	natural killer-tumor recognition sequence
hsa-miR-548a-5p	1	0	1	0	1	1	MEGF10	multiple EGF-like-domains 10
hsa-miR-548a-5p	1	0	1	1	1	1	KIAA2018	KIAA2018
hsa-miR-548a-5p	1	0	1	0	1	1	PTP4A1	protein tyrosine phosphatase type IVA, member 1
hsa-miR-548a-5p	0	0	1	0	1	1	USP10	ubiquitin specific peptidase 10
hsa-miR-548a-5p	0	0	1	0	0	0	MUC19	mucin 19, oligomeric
hsa-miR-548a-5p	1	0	1	0	1	1	OSBPL8	oxysterol binding protein-like 8
hsa-miR-548a-5p	1	0	1	0	1	1	TNS3	tensin 3
hsa-miR-548a-5p	1	0	1	1	1	1	METAP1	methionyl aminopeptidase 1
hsa-miR-548a-5p	1	0	1	1	1	1	NAPEPLD	N-acyl phosphatidylethanolamine phospholipase D
hsa-miR-548a-5p	1	0	1	1	1	1	SLC30A7	solute carrier family 30 (zinc transporter), member 7
hsa-miR-548a-5p	1	0	1	1	1	1	ZFHX3	zinc finger homeobox 3
hsa-miR-548a-5p	1	0	1	1	1	1	RBPJ	recombination signal binding protein for immunoglobulin kappa J region
hsa-miR-548a-5p	1	0	1	1	1	1	GRM5	glutamate receptor, metabotropic 5
hsa-miR-548a-5p	1	0	1	1	1	1	SP2	Sp2 transcription factor
hsa-miR-548a-5p	0	0	1	1	1	1	SLC39A14	solute carrier family 39 (zinc transporter), member 14
hsa-miR-548a-5p	1	0	1	1	1	1	MAN2A2	mannosidase, alpha, class 2A, member 2
hsa-miR-548a-5p	1	0	1	1	1	1	UBAP2L	ubiquitin associated protein 2-like
hsa-miR-548a-5p	0	0	1	1	0	0	RASA2	RAS p21 protein activator 2
hsa-miR-548a-5p	1	0	1	0	1	1	IRF4	interferon regulatory factor 4
hsa-miR-548a-5p	0	0	1	1	1	1	UBXN8	UBX domain protein 8
hsa-miR-548a-5p	1	0	1	0	1	1	KLHDC10	kelch domain containing 10
hsa-miR-548a-5p	0	0	1	1	1	1	MPV17L	MPV17 mitochondrial membrane protein-like
hsa-miR-548a-5p	1	0	1	0	1	1	CBX7	chromobox homolog 7
hsa-miR-548a-5p	0	0	1	1	0	0	SPINK5	serine peptidase inhibitor, Kazal type 5
hsa-miR-548a-5p	1	0	1	1	1	1	BTLA	B and T lymphocyte associated
hsa-miR-548a-5p	1	0	1	1	1	1	ATP2B3	ATPase, Ca++ transporting, plasma membrane 3
hsa-miR-548a-5p	1	0	1	1	0	0	DPY19L1	dpy-19-like 1 (C. elegans)
hsa-miR-548a-5p	1	0	1	1	1	1	MOSPD1	motile sperm domain containing 1
hsa-miR-548a-5p	1	0	1	1	1	1	ITSN1	intersectin 1 (SH3 domain protein)
hsa-miR-548a-5p	1	0	1	0	1	1	DCBLD2	discoidin, CUB and LCCL domain containing 2
hsa-miR-548a-5p	1	0	1	1	1	1	LGR4	leucine-rich repeat containing G protein-coupled receptor 4
hsa-miR-548a-5p	1	0	1	0	1	1	EPDR1	ependymin related protein 1 (zebrafish)
hsa-miR-548a-5p	1	0	1	1	1	1	SLC4A8	solute carrier family 4, sodium bicarbonate cotransporter, member 8
hsa-miR-548a-5p	0	0	1	0	0	0	LCE6A	late cornified envelope 6A
hsa-miR-548a-5p	1	0	1	1	1	1	MLL	myeloid/lymphoid or mixed-lineage leukemia (trithorax homolog, Drosophila)
hsa-miR-548a-5p	0	0	1	1	1	1	VDAC2	voltage-dependent anion channel 2
hsa-miR-548a-5p	1	0	1	1	1	1	CCNG2	cyclin G2
hsa-miR-548a-5p	1	0	1	0	1	1	YES1	v-yes-1 Yamaguchi sarcoma viral oncogene homolog 1
hsa-miR-548a-5p	1	0	1	1	1	1	IGF1	insulin-like growth factor 1 (somatomedin C)
hsa-miR-548a-5p	0	0	1	1	1	1	GAD2	glutamate decarboxylase 2 (pancreatic islets and brain, 65kDa)
hsa-miR-548a-5p	0	0	1	1	1	1	ELF1	E74-like factor 1 (ets domain transcription factor)
hsa-miR-548a-5p	1	0	1	0	1	1	ACVR2A	activin A receptor, type IIA
hsa-miR-548a-5p	1	0	1	0	1	1	ATM	ataxia telangiectasia mutated
hsa-miR-548a-5p	0	0	1	1	1	1	ATP7A	ATPase, Cu++ transporting, alpha polypeptide
hsa-miR-548a-5p	0	0	1	1	1	1	ERCC8	excision repair cross-complementing rodent repair deficiency, complementation group 8
hsa-miR-548a-5p	1	0	1	1	1	1	COL1A1	collagen, type I, alpha 1
hsa-miR-548a-5p	1	0	1	1	1	1	COL4A3	collagen, type IV, alpha 3 (Goodpasture antigen)
hsa-miR-548a-5p	1	0	1	1	1	1	COL4A4	collagen, type IV, alpha 4
hsa-miR-548a-5p	1	0	1	1	1	1	COL5A1	collagen, type V, alpha 1
hsa-miR-548a-5p	1	0	1	1	1	1	CPOX	coproporphyrinogen oxidase
hsa-miR-548a-5p	1	0	1	1	1	1	DMD	dystrophin
hsa-miR-548a-5p	0	0	1	1	1	1	EDN3	endothelin 3
hsa-miR-548a-5p	1	0	1	1	1	1	F13A1	coagulation factor XIII, A1 polypeptide
hsa-miR-548a-5p	0	0	1	1	1	1	F5	coagulation factor V (proaccelerin, labile factor)
hsa-miR-548a-5p	0	0	1	0	1	1	MS4A2	membrane-spanning 4-domains, subfamily A, member 2
hsa-miR-548a-5p	1	0	1	0	1	1	G6PC	glucose-6-phosphatase, catalytic subunit
hsa-miR-548a-5p	1	0	1	1	1	1	GK	glycerol kinase
hsa-miR-548a-5p	0	0	1	1	1	1	GLDC	glycine dehydrogenase (decarboxylating)
hsa-miR-548a-5p	1	0	1	1	1	1	JAG1	jagged 1
hsa-miR-548a-5p	0	0	1	0	1	1	KAL1	Kallmann syndrome 1 sequence
hsa-miR-548a-5p	1	0	1	1	1	1	KCNA1	potassium voltage-gated channel, shaker-related subfamily, member 1 (episodic ataxia with myokymia)
hsa-miR-548a-5p	1	0	1	1	1	1	LEP	leptin
hsa-miR-548a-5p	0	0	1	1	1	1	MAOA	monoamine oxidase A
hsa-miR-548a-5p	0	0	1	0	1	1	MBL2	mannose-binding lectin (protein C) 2, soluble
hsa-miR-548a-5p	1	0	1	1	1	1	MITF	microphthalmia-associated transcription factor
hsa-miR-548a-5p	0	0	1	1	1	1	MSH2	mutS homolog 2, colon cancer, nonpolyposis type 1 (E. coli)
hsa-miR-548a-5p	0	0	1	1	1	1	MTM1	myotubularin 1
hsa-miR-548a-5p	0	0	1	1	1	1	MUT	methylmalonyl CoA mutase
hsa-miR-548a-5p	0	0	1	1	1	1	NDP	Norrie disease (pseudoglioma)
hsa-miR-548a-5p	1	0	1	0	1	1	PKD2	polycystic kidney disease 2 (autosomal dominant)
hsa-miR-548a-5p	0	0	1	1	1	1	PRNP	prion protein
hsa-miR-548a-5p	1	0	1	0	1	1	PTEN	phosphatase and tensin homolog
hsa-miR-548a-5p	1	0	1	1	1	1	RB1	retinoblastoma 1
hsa-miR-548a-5p	0	0	1	1	1	1	RS1	retinoschisin 1
hsa-miR-548a-5p	1	0	1	1	1	1	ATXN1	ataxin 1
hsa-miR-548a-5p	1	0	1	1	1	1	SOX9	SRY (sex determining region Y)-box 9
hsa-miR-548a-5p	1	0	1	1	1	1	TAT	tyrosine aminotransferase
hsa-miR-548a-5p	1	0	1	0	1	1	TSC1	tuberous sclerosis 1
hsa-miR-548a-5p	0	0	1	1	1	1	XDH	xanthine dehydrogenase
hsa-miR-548a-5p	0	0	1	1	0	0	APOB	apolipoprotein B (including Ag(x) antigen)
hsa-miR-548a-5p	1	0	1	1	1	1	HLCS	holocarboxylase synthetase (biotin-(proprionyl-CoA-carboxylase (ATP-hydrolysing)) ligase)
hsa-miR-548a-5p	0	0	1	1	0	0	IL2RA	interleukin 2 receptor, alpha
hsa-miR-548a-5p	1	0	1	0	1	1	PAFAH1B1	platelet-activating factor acetylhydrolase 1b, regulatory subunit 1 (45kDa)
hsa-miR-548a-5p	0	0	1	1	1	1	UGT1A1	UDP glucuronosyltransferase 1 family, polypeptide A1
hsa-miR-548a-5p	1	0	1	1	1	1	ATRX	alpha thalassemia/mental retardation syndrome X-linked
hsa-miR-548a-5p	0	0	1	1	1	1	CYP11B2	cytochrome P450, family 11, subfamily B, polypeptide 2
hsa-miR-548a-5p	1	0	1	1	1	1	HOXA13	homeobox A13
hsa-miR-548a-5p	1	0	1	1	1	1	HOXD13	homeobox D13
hsa-miR-548a-5p	0	0	1	1	1	1	RFXAP	regulatory factor X-associated protein
hsa-miR-548a-5p	0	0	1	1	1	1	WRN	Werner syndrome, RecQ helicase-like
hsa-miR-548a-5p	1	0	1	1	1	1	DCX	doublecortin
hsa-miR-548a-5p	0	0	1	1	1	1	CRP	C-reactive protein, pentraxin-related
hsa-miR-548a-5p	1	0	1	1	1	1	CR1	complement component (3b/4b) receptor 1 (Knops blood group)
hsa-miR-548a-5p	1	0	1	1	1	1	IL1A	interleukin 1, alpha
hsa-miR-548a-5p	0	0	1	1	1	1	IL15	interleukin 15
hsa-miR-548a-5p	0	0	1	1	0	0	IL3	interleukin 3 (colony-stimulating factor, multiple)
hsa-miR-548a-5p	1	0	1	1	1	1	CXCL12	chemokine (C-X-C motif) ligand 12
hsa-miR-548a-5p	1	0	1	1	1	1	CD44	CD44 molecule (Indian blood group)
hsa-miR-548a-5p	0	0	1	1	1	1	IL11	interleukin 11
hsa-miR-548a-5p	0	0	1	1	1	1	AGTR1	angiotensin II receptor, type 1
hsa-miR-548a-5p	1	0	1	0	1	1	CACNA1E	calcium channel, voltage-dependent, R type, alpha 1E subunit
hsa-miR-548a-5p	1	0	1	0	1	1	GABRA4	gamma-aminobutyric acid (GABA) A receptor, alpha 4
hsa-miR-548a-5p	1	0	1	1	1	1	GABRB3	gamma-aminobutyric acid (GABA) A receptor, beta 3
hsa-miR-548a-5p	1	0	1	1	1	1	GABRG2	gamma-aminobutyric acid (GABA) A receptor, gamma 2
hsa-miR-548a-5p	1	0	1	1	1	1	GRIA4	glutamate receptor, ionotropic, AMPA 4
hsa-miR-548a-5p	1	0	1	1	1	1	GRM1	glutamate receptor, metabotropic 1
hsa-miR-548a-5p	1	0	1	1	1	1	GRM7	glutamate receptor, metabotropic 7
hsa-miR-548a-5p	1	0	1	1	1	1	HTR4	5-hydroxytryptamine (serotonin) receptor 4, G protein-coupled
hsa-miR-548a-5p	0	0	1	1	1	1	IL1R1	interleukin 1 receptor, type I
hsa-miR-548a-5p	1	0	1	0	1	1	KCNJ2	potassium inwardly-rectifying channel, subfamily J, member 2
hsa-miR-548a-5p	1	0	1	0	1	1	KITLG	KIT ligand
hsa-miR-548a-5p	1	0	1	1	1	1	MME	membrane metallo-endopeptidase
hsa-miR-548a-5p	0	0	1	1	1	1	NPY2R	neuropeptide Y receptor Y2
hsa-miR-548a-5p	1	0	1	1	1	1	PPP3R1	protein phosphatase 3, regulatory subunit B, alpha
hsa-miR-548a-5p	1	0	1	1	1	1	PTGER4	prostaglandin E receptor 4 (subtype EP4)
hsa-miR-548a-5p	1	0	1	1	1	1	PTGFR	prostaglandin F receptor (FP)
hsa-miR-548a-5p	1	0	1	1	1	1	RARB	retinoic acid receptor, beta
hsa-miR-548a-5p	1	0	1	1	1	1	REEP3	receptor accessory protein 3
hsa-miR-548a-5p	0	0	1	1	1	1	BLOC1S2	biogenesis of lysosomal organelles complex-1, subunit 2
hsa-miR-548a-5p	1	0	1	0	1	1	SMAD5	SMAD family member 5
hsa-miR-548a-5p	0	0	1	1	1	1	C16orf87	chromosome 16 open reading frame 87
hsa-miR-548a-5p	1	0	1	0	1	1	UBE2W	ubiquitin-conjugating enzyme E2W (putative)
hsa-miR-548a-5p	1	0	1	1	1	1	UGP2	UDP-glucose pyrophosphorylase 2
hsa-miR-548a-5p	1	0	1	0	1	1	GDF6	growth differentiation factor 6
hsa-miR-548a-5p	1	0	1	0	1	1	SPOPL	speckle-type POZ protein-like
hsa-miR-548a-5p	0	0	1	1	1	1	CYP27C1	cytochrome P450, family 27, subfamily C, polypeptide 1
hsa-miR-548a-5p	0	0	1	1	1	1	CC2D2B	coiled-coil and C2 domain containing 2B
hsa-miR-548a-5p	1	0	1	1	1	1	ATP1B1	ATPase, Na+/K+ transporting, beta 1 polypeptide
hsa-miR-548a-5p	1	0	1	1	1	1	FAM13C	family with sequence similarity 13, member C
hsa-miR-548a-5p	0	0	1	1	1	1	SUMO4	SMT3 suppressor of mif two 3 homolog 4 (S. cerevisiae)
hsa-miR-548a-5p	0	0	1	1	1	1	FCGR2B	Fc fragment of IgG, low affinity IIb, receptor (CD32)
hsa-miR-548a-5p	1	0	1	1	1	1	WNK3	WNK lysine deficient protein kinase 3
hsa-miR-548a-5p	1	0	1	1	1	1	C1orf173	chromosome 1 open reading frame 173
hsa-miR-548a-5p	0	0	1	1	0	0	C1orf95	chromosome 1 open reading frame 95
hsa-miR-548a-5p	1	0	1	1	1	1	HMGXB4	HMG box domain containing 4
hsa-miR-548a-5p	0	0	1	1	1	1	SMAD1	SMAD family member 1
hsa-miR-548a-5p	1	0	1	1	1	1	KLHL31	kelch-like 31 (Drosophila)
hsa-miR-548a-5p	0	0	1	1	1	1	TSPYL6	TSPY-like 6
hsa-miR-548a-5p	0	0	1	1	1	1	ANXA13	annexin A13
hsa-miR-548a-5p	1	0	1	1	0	0	NOMO3	NODAL modulator 3
hsa-miR-548a-5p	1	0	1	0	1	1	ZNF740	zinc finger protein 740
hsa-miR-548a-5p	0	0	1	1	1	1	CCDC144NL	coiled-coil domain containing 144 family, N-terminal like
hsa-miR-548a-5p	0	0	1	1	1	1	ZCCHC16	zinc finger, CCHC domain containing 16
hsa-miR-548a-5p	1	0	1	0	1	1	LIN28B	lin-28 homolog B (C. elegans)
hsa-miR-548a-5p	0	0	1	1	1	1	AGMO	alkylglycerol monooxygenase
hsa-miR-548a-5p	0	0	1	1	1	1	DBX2	developing brain homeobox 2
hsa-miR-548a-5p	0	0	1	0	1	1	FLJ16124	FLJ16124 protein
hsa-miR-548a-5p	0	0	1	1	1	1	FRG2	FSHD region gene 2
hsa-miR-548a-5p	1	0	1	1	1	1	PLCXD3	phosphatidylinositol-specific phospholipase C, X domain containing 3
hsa-miR-548a-5p	0	0	1	1	1	1	SUMO1	SMT3 suppressor of mif two 3 homolog 1 (S. cerevisiae)
hsa-miR-548a-5p	1	0	1	1	1	1	ADAM9	ADAM metallopeptidase domain 9
hsa-miR-548a-5p	0	0	1	1	1	1	RYK	receptor-like tyrosine kinase
hsa-miR-548a-5p	1	0	1	0	1	1	IP6K1	inositol hexakisphosphate kinase 1
hsa-miR-548a-5p	1	0	1	1	1	1	TCEAL8	transcription elongation factor A (SII)-like 8
hsa-miR-548a-5p	1	0	1	0	1	1	GOSR1	golgi SNAP receptor complex member 1
hsa-miR-548a-5p	1	0	1	1	1	1	L3MBTL3	l(3)mbt-like 3 (Drosophila)
hsa-miR-548a-5p	1	0	1	1	1	1	NTRK3	neurotrophic tyrosine kinase, receptor, type 3
hsa-miR-548a-5p	0	0	1	1	1	1	IGIP	IgA-inducing protein homolog (Bos taurus)
hsa-miR-548a-5p	0	0	1	0	1	1	GIMAP6	GTPase, IMAP family member 6
hsa-miR-548a-5p	1	0	1	1	1	1	IGSF3	immunoglobulin superfamily, member 3
hsa-miR-548a-5p	1	0	1	1	1	1	TULP4	tubby like protein 4
hsa-miR-548a-5p	0	0	1	0	1	1	C3orf56	chromosome 3 open reading frame 56
hsa-miR-548a-5p	0	0	1	1	1	1	SHISA2	shisa homolog 2 (Xenopus laevis)
hsa-miR-548a-5p	1	0	1	0	1	1	SS18	synovial sarcoma translocation, chromosome 18
hsa-miR-548a-5p	1	0	1	1	1	1	CNOT4	CCR4-NOT transcription complex, subunit 4
hsa-miR-548a-5p	0	0	1	1	1	1	FAM154B	family with sequence similarity 154, member B
hsa-miR-548a-5p	1	0	1	0	1	1	C18orf25	chromosome 18 open reading frame 25
hsa-miR-548a-5p	1	0	1	1	1	1	CTDSPL	CTD (carboxy-terminal domain, RNA polymerase II, polypeptide A) small phosphatase-like
hsa-miR-548a-5p	1	0	1	1	1	1	BCAP29	B-cell receptor-associated protein 29
hsa-miR-548a-5p	0	0	1	1	1	1	PIWIL3	piwi-like 3 (Drosophila)
hsa-miR-548a-5p	1	0	1	0	1	1	KIAA2022	KIAA2022
hsa-miR-548a-5p	0	0	1	1	1	1	MXI1	MAX interactor 1
hsa-miR-548a-5p	0	0	1	1	1	1	GCSAM	germinal center-associated, signaling and motility
hsa-miR-548a-5p	0	0	1	1	1	1	SLC35D3	solute carrier family 35, member D3
hsa-miR-548a-5p	1	0	1	1	1	1	CUL4A	cullin 4A
hsa-miR-548a-5p	1	0	1	1	1	1	LUZP2	leucine zipper protein 2
hsa-miR-548a-5p	1	0	1	0	1	1	RCHY1	ring finger and CHY zinc finger domain containing 1, E3 ubiquitin protein ligase
hsa-miR-548a-5p	1	0	1	0	1	1	ERMN	ermin, ERM-like protein
hsa-miR-548a-5p	1	0	1	1	1	1	FAM168B	family with sequence similarity 168, member B
hsa-miR-548a-5p	1	0	1	1	1	1	SHE	Src homology 2 domain containing E
hsa-miR-548a-5p	1	0	1	0	1	1	PM20D2	peptidase M20 domain containing 2
hsa-miR-548a-5p	0	0	1	0	1	1	LPPR5	lipid phosphate phosphatase-related protein type 5
hsa-miR-548a-5p	0	0	1	1	1	1	SPIN3	spindlin family, member 3
hsa-miR-548a-5p	1	0	1	0	1	1	ZC3H12B	zinc finger CCCH-type containing 12B
hsa-miR-548a-5p	0	0	1	1	1	1	SERP2	stress-associated endoplasmic reticulum protein family member 2
hsa-miR-548a-5p	1	0	1	1	1	1	BCL2L15	BCL2-like 15
hsa-miR-548a-5p	0	0	1	1	1	1	HGF	hepatocyte growth factor (hepapoietin A; scatter factor)
hsa-miR-548a-5p	0	0	1	1	1	1	SAMD13	sterile alpha motif domain containing 13
hsa-miR-548a-5p	1	0	1	1	1	1	ATP11C	ATPase, class VI, type 11C
hsa-miR-548a-5p	1	0	1	0	1	1	FYTTD1	forty-two-three domain containing 1
hsa-miR-548a-5p	1	0	1	1	0	0	RPL21P44	ribosomal protein L21 pseudogene 44
hsa-miR-548a-5p	0	0	1	1	1	1	DSTN	destrin (actin depolymerizing factor)
hsa-miR-548a-5p	0	0	1	1	1	1	ZMAT1	zinc finger, matrin-type 1
hsa-miR-548a-5p	1	0	1	0	1	1	CREB5	cAMP responsive element binding protein 5
hsa-miR-548a-5p	0	0	1	1	0	0	PNLIPRP3	pancreatic lipase-related protein 3
hsa-miR-548a-5p	0	0	1	0	1	1	U2AF2	U2 small nuclear RNA auxiliary factor 2
hsa-miR-548a-5p	1	0	1	1	1	1	SLC25A53	solute carrier family 25, member 53
hsa-miR-548a-5p	1	0	1	1	1	1	DISC1	disrupted in schizophrenia 1
hsa-miR-548a-5p	0	0	1	1	1	1	SPIN4	spindlin family, member 4
hsa-miR-548a-5p	0	0	1	0	1	1	C12orf69	chromosome 12 open reading frame 69
hsa-miR-548a-5p	0	0	1	1	1	1	PLIN5	perilipin 5
hsa-miR-548a-5p	0	0	1	0	1	1	LINC00268	long intergenic non-protein coding RNA 268
hsa-miR-548a-5p	0	0	1	1	1	1	FLG2	filaggrin family member 2
hsa-miR-548a-5p	1	0	1	0	1	1	SYT14L	synaptotagmin XIV-like
hsa-miR-548a-5p	1	0	1	1	1	1	KATNAL1	katanin p60 subunit A-like 1
hsa-miR-548a-5p	1	0	1	1	0	0	USP21	ubiquitin specific peptidase 21
hsa-miR-548a-5p	1	0	1	1	1	1	RUNX2	runt-related transcription factor 2
hsa-miR-548a-5p	1	0	1	1	1	1	PHF6	PHD finger protein 6
hsa-miR-548a-5p	1	0	1	1	1	1	TMCC1	transmembrane and coiled-coil domain family 1
hsa-miR-548a-5p	1	0	1	0	1	1	GOPC	golgi-associated PDZ and coiled-coil motif containing
hsa-miR-548a-5p	0	0	1	1	0	0	ALDH18A1	aldehyde dehydrogenase 18 family, member A1
hsa-miR-548a-5p	0	0	1	1	1	1	PGBD2	piggyBac transposable element derived 2
hsa-miR-548a-5p	1	0	1	1	1	1	VMA21	VMA21 vacuolar H+-ATPase homolog (S. cerevisiae)
hsa-miR-548a-5p	1	0	1	1	1	1	PFKFB2	6-phosphofructo-2-kinase/fructose-2,6-biphosphatase 2
hsa-miR-548a-5p	1	0	1	1	1	1	SERBP1	SERPINE1 mRNA binding protein 1
hsa-miR-548a-5p	0	0	1	1	1	1	POLR2M	polymerase (RNA) II (DNA directed) polypeptide M
hsa-miR-548a-5p	1	0	1	1	1	1	GPHN	gephyrin
hsa-miR-548a-5p	1	0	1	1	1	1	CANX	calnexin
hsa-miR-548a-5p	1	0	1	0	1	1	TNRC6B	trinucleotide repeat containing 6B
hsa-miR-548a-5p	1	0	1	1	1	1	SLC6A9	solute carrier family 6 (neurotransmitter transporter, glycine), member 9
hsa-miR-548a-5p	1	0	1	1	1	1	TGFBR2	transforming growth factor, beta receptor II (70/80kDa)
hsa-miR-548a-5p	1	0	1	1	1	1	YIPF5	Yip1 domain family, member 5
hsa-miR-548a-5p	1	0	1	1	1	1	AFF3	AF4/FMR2 family, member 3
hsa-miR-548a-5p	1	0	1	0	1	1	CLLU1	chronic lymphocytic leukemia up-regulated 1
hsa-miR-548a-5p	1	0	1	1	1	1	TPD52	tumor protein D52
hsa-miR-548a-5p	1	0	1	1	1	1	SLC35F1	solute carrier family 35, member F1
hsa-miR-548a-5p	0	0	1	0	1	1	C6orf120	chromosome 6 open reading frame 120
hsa-miR-548a-5p	1	0	1	1	1	1	RGS7BP	regulator of G-protein signaling 7 binding protein
hsa-miR-548a-5p	1	0	1	1	1	1	PLEKHG1	pleckstrin homology domain containing, family G (with RhoGef domain) member 1
hsa-miR-548a-5p	1	0	1	0	1	1	SAMD5	sterile alpha motif domain containing 5
hsa-miR-548a-5p	1	0	1	0	1	1	MSRB3	methionine sulfoxide reductase B3
hsa-miR-548a-5p	0	0	1	1	1	1	TRMT11	tRNA methyltransferase 11 homolog (S. cerevisiae)
hsa-miR-548a-5p	1	0	1	1	1	1	YTHDC1	YTH domain containing 1
hsa-miR-548a-5p	1	0	1	1	1	1	MAF	v-maf musculoaponeurotic fibrosarcoma oncogene homolog (avian)
hsa-miR-548a-5p	1	0	1	1	1	1	CSNK1G3	casein kinase 1, gamma 3
hsa-miR-548a-5p	1	0	1	1	1	1	TFAP2A	transcription factor AP-2 alpha (activating enhancer binding protein 2 alpha)
hsa-miR-548a-5p	1	0	1	1	1	1	KLF10	Kruppel-like factor 10
hsa-miR-548a-5p	1	0	1	1	1	1	UBE2V1	ubiquitin-conjugating enzyme E2 variant 1
hsa-miR-548a-5p	1	0	1	1	1	1	STK24	serine/threonine kinase 24
hsa-miR-548a-5p	0	0	1	1	1	1	PLGLB1	plasminogen-like B1
hsa-miR-548a-5p	0	0	1	1	1	1	HNRNPH2	heterogeneous nuclear ribonucleoprotein H2 (H')
hsa-miR-548a-5p	1	0	1	0	1	1	NPNT	nephronectin
hsa-miR-548a-5p	1	0	1	1	1	1	SAR1B	SAR1 homolog B (S. cerevisiae)
hsa-miR-548a-5p	0	0	1	1	1	1	SPECC1	sperm antigen with calponin homology and coiled-coil domains 1
hsa-miR-548a-5p	0	0	1	1	1	1	C6orf225	chromosome 6 open reading frame 225
hsa-miR-548a-5p	1	0	1	1	1	1	ZNF704	zinc finger protein 704
hsa-miR-548a-5p	1	0	1	1	1	1	GALNTL6	UDP-N-acetyl-alpha-D-galactosamine:polypeptide N-acetylgalactosaminyltransferase-like 6
hsa-miR-548a-5p	0	0	1	1	1	1	FAM134B	family with sequence similarity 134, member B
hsa-miR-548a-5p	1	0	1	0	1	1	RYR2	ryanodine receptor 2 (cardiac)
hsa-miR-548a-5p	1	0	1	0	1	1	RYR3	ryanodine receptor 3
hsa-miR-548a-5p	0	0	1	1	1	1	DYNLL1	dynein, light chain, LC8-type 1
hsa-miR-548a-5p	1	0	1	0	1	1	SCML1	sex comb on midleg-like 1 (Drosophila)
hsa-miR-548a-5p	1	0	1	1	1	1	SCD5	stearoyl-CoA desaturase 5
hsa-miR-548a-5p	1	0	1	1	1	1	NPM1	nucleophosmin (nucleolar phosphoprotein B23, numatrin)
hsa-miR-548a-5p	0	0	1	1	1	1	REV1	REV1, polymerase (DNA directed)
hsa-miR-548a-5p	1	0	1	1	1	1	DLX1	distal-less homeobox 1
hsa-miR-548a-5p	1	0	1	1	1	1	ATP6V1C2	ATPase, H+ transporting, lysosomal 42kDa, V1 subunit C2
hsa-miR-548a-5p	1	0	1	0	1	1	GK5	glycerol kinase 5 (putative)
hsa-miR-548a-5p	1	0	1	1	1	1	KREMEN1	kringle containing transmembrane protein 1
hsa-miR-548a-5p	0	0	1	1	1	1	MAP9	microtubule-associated protein 9
hsa-miR-548a-5p	1	0	1	0	1	1	USP9X	ubiquitin specific peptidase 9, X-linked
hsa-miR-548a-5p	1	0	1	0	1	1	CREBZF	CREB/ATF bZIP transcription factor
hsa-miR-548a-5p	1	0	1	1	1	1	CHTF8	CTF8, chromosome transmission fidelity factor 8 homolog (S. cerevisiae)
hsa-miR-548a-5p	0	0	1	1	1	1	MDH1B	malate dehydrogenase 1B, NAD (soluble)
hsa-miR-548a-5p	0	0	1	0	1	1	C15orf56	chromosome 15 open reading frame 56
hsa-miR-548a-5p	1	0	1	1	1	1	CHN2	chimerin (chimaerin) 2
hsa-miR-548a-5p	1	0	1	1	1	1	MLLT4	myeloid/lymphoid or mixed-lineage leukemia (trithorax homolog, Drosophila); translocated to, 4
hsa-miR-548a-5p	0	0	1	0	1	1	SCN3B	sodium channel, voltage-gated, type III, beta subunit
hsa-miR-548a-5p	0	0	1	1	1	1	SPOCK3	sparc/osteonectin, cwcv and kazal-like domains proteoglycan (testican) 3
hsa-miR-548a-5p	1	0	1	1	1	1	PAPD5	PAP associated domain containing 5
hsa-miR-548a-5p	0	0	1	1	1	1	MTHFD2	methylenetetrahydrofolate dehydrogenase (NADP+ dependent) 2, methenyltetrahydrofolate cyclohydrolase
hsa-miR-548a-5p	1	0	1	1	1	1	MTMR12	myotubularin related protein 12
hsa-miR-548a-5p	1	0	1	1	1	1	FAM63B	family with sequence similarity 63, member B
hsa-miR-548a-5p	1	0	1	1	1	1	NCALD	neurocalcin delta
hsa-miR-548a-5p	1	0	1	1	1	1	PRKAG2	protein kinase, AMP-activated, gamma 2 non-catalytic subunit
hsa-miR-548a-5p	1	0	1	1	1	1	CRCP	CGRP receptor component
hsa-miR-548a-5p	0	0	1	0	1	1	STEAP2	STEAP family member 2, metalloreductase
hsa-miR-548a-5p	1	0	1	1	1	1	HEY1	hairy/enhancer-of-split related with YRPW motif 1
hsa-miR-548a-5p	1	0	1	1	1	1	GDAP1	ganglioside induced differentiation associated protein 1
hsa-miR-548a-5p	0	0	1	0	1	1	ABCE1	ATP-binding cassette, sub-family E (OABP), member 1
hsa-miR-548a-5p	0	0	1	1	1	1	SI	sucrase-isomaltase (alpha-glucosidase)
hsa-miR-548a-5p	0	0	1	1	0	0	FAM110A	family with sequence similarity 110, member A
hsa-miR-548a-5p	1	0	1	1	1	1	CYLD	cylindromatosis (turban tumor syndrome)
hsa-miR-548a-5p	1	0	1	1	1	1	PPP4R1	protein phosphatase 4, regulatory subunit 1
hsa-miR-548a-5p	1	0	1	1	1	1	GLIS3	GLIS family zinc finger 3
hsa-miR-548a-5p	1	0	1	1	1	1	RUFY2	RUN and FYVE domain containing 2
hsa-miR-548a-5p	1	0	1	1	1	1	DIAPH3	diaphanous homolog 3 (Drosophila)
hsa-miR-548a-5p	1	0	1	1	1	1	SLC9A6	solute carrier family 9, subfamily A (NHE6, cation proton antiporter 6), member 6
hsa-miR-548a-5p	1	0	1	1	1	1	FRS2	fibroblast growth factor receptor substrate 2
hsa-miR-548a-5p	1	0	1	1	1	1	ERBB4	v-erb-a erythroblastic leukemia viral oncogene homolog 4 (avian)
hsa-miR-548a-5p	1	0	1	1	1	1	KDM5A	lysine (K)-specific demethylase 5A
hsa-miR-548a-5p	0	0	1	1	1	1	SEC24B	SEC24 family, member B (S. cerevisiae)
hsa-miR-548a-5p	0	0	1	1	1	1	SLC6A3	solute carrier family 6 (neurotransmitter transporter, dopamine), member 3
hsa-miR-548a-5p	1	0	1	0	1	1	SLC12A2	solute carrier family 12 (sodium/potassium/chloride transporters), member 2
hsa-miR-548a-5p	1	0	1	1	1	1	NET1	neuroepithelial cell transforming 1
hsa-miR-548a-5p	0	0	1	1	0	0	UBL5	ubiquitin-like 5
hsa-miR-548a-5p	0	0	1	1	1	1	SSTR2	somatostatin receptor 2
hsa-miR-548a-5p	0	0	1	0	1	1	TOP2A	topoisomerase (DNA) II alpha 170kDa
hsa-miR-548a-5p	1	0	1	1	1	1	MZT1	mitotic spindle organizing protein 1
hsa-miR-548a-5p	0	0	1	1	1	1	UGT1A6	UDP glucuronosyltransferase 1 family, polypeptide A6
hsa-miR-548a-5p	1	0	1	1	1	1	METTL9	methyltransferase like 9
hsa-miR-548a-5p	1	0	1	1	1	1	CDC14B	CDC14 cell division cycle 14 homolog B (S. cerevisiae)
hsa-miR-548a-5p	1	0	1	1	1	1	HS6ST2	heparan sulfate 6-O-sulfotransferase 2
hsa-miR-548a-5p	1	0	1	1	1	1	ZNF436	zinc finger protein 436
hsa-miR-548a-5p	1	0	1	1	1	1	PDE11A	phosphodiesterase 11A
hsa-miR-548a-5p	1	0	1	1	1	1	RNF214	ring finger protein 214
hsa-miR-548a-5p	1	0	1	1	1	1	IRF2BP2	interferon regulatory factor 2 binding protein 2
hsa-miR-548a-5p	1	0	1	0	1	1	UBXN2B	UBX domain protein 2B
hsa-miR-548a-5p	1	0	1	1	1	1	ALG9	asparagine-linked glycosylation 9, alpha-1,2-mannosyltransferase homolog (S. cerevisiae)
hsa-miR-548a-5p	0	0	1	1	1	1	VCAM1	vascular cell adhesion molecule 1
hsa-miR-548a-5p	1	0	1	1	1	1	SRSF1	serine/arginine-rich splicing factor 1
hsa-miR-548a-5p	1	0	1	0	1	1	FAM127C	family with sequence similarity 127, member C
hsa-miR-548a-5p	0	0	1	1	0	0	TMEM134	transmembrane protein 134
hsa-miR-548a-5p	1	0	1	1	1	1	N4BP2L1	NEDD4 binding protein 2-like 1
hsa-miR-548a-5p	0	0	1	1	1	1	TAX1BP1	Tax1 (human T-cell leukemia virus type I) binding protein 1
hsa-miR-548a-5p	1	0	1	1	1	1	VAV3	vav 3 guanine nucleotide exchange factor
hsa-miR-548a-5p	1	0	1	1	1	1	LDB3	LIM domain binding 3
hsa-miR-548a-5p	1	0	1	1	1	1	FAM155A	family with sequence similarity 155, member A
hsa-miR-548a-5p	1	0	1	1	1	1	KIAA0368	KIAA0368
hsa-miR-548a-5p	1	0	1	0	1	1	THSD7B	thrombospondin, type I, domain containing 7B
hsa-miR-548a-5p	0	0	1	1	1	1	LRRC4B	leucine rich repeat containing 4B
hsa-miR-548a-5p	0	0	1	0	0	0	LRRIQ4	leucine-rich repeats and IQ motif containing 4
hsa-miR-548a-5p	0	0	1	1	1	1	TMEM202	transmembrane protein 202
hsa-miR-548a-5p	1	0	1	1	1	1	ZNF697	zinc finger protein 697
hsa-miR-548a-5p	0	0	1	1	0	0	C2orf78	chromosome 2 open reading frame 78
hsa-miR-548a-5p	1	0	1	1	1	1	MGA	MAX gene associated
hsa-miR-548a-5p	0	0	1	1	1	1	PPP1R1C	protein phosphatase 1, regulatory (inhibitor) subunit 1C
hsa-miR-548a-5p	1	0	1	1	1	1	DGKG	diacylglycerol kinase, gamma 90kDa
hsa-miR-548a-5p	0	0	1	1	1	1	MAGEA9B	melanoma antigen family A, 9B
hsa-miR-548a-5p	1	0	1	1	1	1	REPS2	RALBP1 associated Eps domain containing 2
hsa-miR-548a-5p	1	0	1	1	1	1	THOC2	THO complex 2
hsa-miR-548a-5p	1	0	1	0	1	1	SCN3A	sodium channel, voltage-gated, type III, alpha subunit
hsa-miR-548a-5p	0	0	1	1	1	1	G6PC2	glucose-6-phosphatase, catalytic, 2
hsa-miR-548a-5p	1	0	1	0	1	1	PDE5A	phosphodiesterase 5A, cGMP-specific
hsa-miR-548a-5p	0	0	1	1	1	1	PLIN2	perilipin 2
hsa-miR-548a-5p	0	0	1	1	1	1	ADSS	adenylosuccinate synthase
hsa-miR-548a-5p	0	0	1	1	1	1	AMELY	amelogenin, Y-linked
hsa-miR-548a-5p	1	0	1	0	1	1	XIAP	X-linked inhibitor of apoptosis
hsa-miR-548a-5p	1	0	1	0	1	1	BACH1	BTB and CNC homology 1, basic leucine zipper transcription factor 1
hsa-miR-548a-5p	1	0	1	1	1	1	PRDM1	PR domain containing 1, with ZNF domain
hsa-miR-548a-5p	1	0	1	1	1	1	BMP2	bone morphogenetic protein 2
hsa-miR-548a-5p	1	0	1	0	1	1	BMPR2	bone morphogenetic protein receptor, type II (serine/threonine kinase)
hsa-miR-548a-5p	1	0	1	0	1	1	KLF9	Kruppel-like factor 9
hsa-miR-548a-5p	1	0	1	1	1	1	CAMK2D	calcium/calmodulin-dependent protein kinase II delta
hsa-miR-548a-5p	0	0	1	0	1	1	CASQ2	calsequestrin 2 (cardiac muscle)
hsa-miR-548a-5p	1	0	1	1	1	1	CCNA2	cyclin A2
hsa-miR-548a-5p	0	0	1	1	1	1	ENTPD3	ectonucleoside triphosphate diphosphohydrolase 3
hsa-miR-548a-5p	1	0	1	0	1	1	CDK6	cyclin-dependent kinase 6
hsa-miR-548a-5p	1	0	1	1	1	1	CDS1	CDP-diacylglycerol synthase (phosphatidate cytidylyltransferase) 1
hsa-miR-548a-5p	1	0	1	0	1	1	CPD	carboxypeptidase D
hsa-miR-548a-5p	1	0	1	1	1	1	CREBL2	cAMP responsive element binding protein-like 2
hsa-miR-548a-5p	1	0	1	1	1	1	MAPK14	mitogen-activated protein kinase 14
hsa-miR-548a-5p	1	0	1	1	1	1	CTNND2	catenin (cadherin-associated protein), delta 2
hsa-miR-548a-5p	0	0	1	1	1	1	DAD1	defender against cell death 1
hsa-miR-548a-5p	0	0	1	1	1	1	DARS	aspartyl-tRNA synthetase
hsa-miR-548a-5p	1	0	1	0	0	0	DLG4	discs, large homolog 4 (Drosophila)
hsa-miR-548a-5p	1	0	1	1	1	1	DYRK1A	dual-specificity tyrosine-(Y)-phosphorylation regulated kinase 1A
hsa-miR-548a-5p	1	0	1	1	1	1	S1PR1	sphingosine-1-phosphate receptor 1
hsa-miR-548a-5p	1	0	1	1	1	1	CELSR3	cadherin, EGF LAG seven-pass G-type receptor 3 (flamingo homolog, Drosophila)
hsa-miR-548a-5p	1	0	1	1	1	1	ELAVL1	ELAV (embryonic lethal, abnormal vision, Drosophila)-like 1 (Hu antigen R)
hsa-miR-548a-5p	0	0	1	0	1	1	EMP1	epithelial membrane protein 1
hsa-miR-548a-5p	1	0	1	1	1	1	EN1	engrailed homeobox 1
hsa-miR-548a-5p	1	0	1	1	1	1	EN2	engrailed homeobox 2
hsa-miR-548a-5p	1	0	1	1	1	1	EP300	E1A binding protein p300
hsa-miR-548a-5p	1	0	1	1	1	1	EREG	epiregulin
hsa-miR-548a-5p	1	0	1	1	1	1	GPC4	glypican 4
hsa-miR-548a-5p	1	0	1	1	1	1	FOXC1	forkhead box C1
hsa-miR-548a-5p	0	0	1	0	1	1	FMO2	flavin containing monooxygenase 2 (non-functional)
hsa-miR-548a-5p	0	0	1	1	1	1	FRZB	frizzled-related protein
hsa-miR-548a-5p	1	0	1	1	1	1	GCNT1	glucosaminyl (N-acetyl) transferase 1, core 2
hsa-miR-548a-5p	1	0	1	0	1	1	B4GALT1	UDP-Gal:betaGlcNAc beta 1,4- galactosyltransferase, polypeptide 1
hsa-miR-548a-5p	1	0	1	1	1	1	ING2	inhibitor of growth family, member 2
hsa-miR-548a-5p	1	0	1	0	1	1	MPPED2	metallophosphoesterase domain containing 2
hsa-miR-548a-5p	1	0	1	1	1	1	ADRBK1	adrenergic, beta, receptor kinase 1
hsa-miR-548a-5p	1	0	1	0	1	1	ARCN1	archain 1
hsa-miR-548a-5p	0	0	1	0	1	1	AREG	amphiregulin
hsa-miR-548a-5p	1	0	1	0	1	1	ARNT	aryl hydrocarbon receptor nuclear translocator
hsa-miR-548a-5p	1	0	1	1	1	1	ATP6V1A	ATPase, H+ transporting, lysosomal 70kDa, V1 subunit A
hsa-miR-548a-5p	0	0	1	1	0	0	C5	complement component 5
hsa-miR-548a-5p	1	0	1	1	1	1	CBFB	core-binding factor, beta subunit
hsa-miR-548a-5p	1	0	1	1	1	1	CDH2	cadherin 2, type 1, N-cadherin (neuronal)
hsa-miR-548a-5p	0	0	1	1	1	1	CDO1	cysteine dioxygenase, type I
hsa-miR-548a-5p	1	0	1	0	1	1	CHML	choroideremia-like (Rab escort protein 2)
hsa-miR-548a-5p	0	0	1	1	1	1	CKS2	CDC28 protein kinase regulatory subunit 2
hsa-miR-548a-5p	1	0	1	1	1	1	CLCN3	chloride channel, voltage-sensitive 3
hsa-miR-548a-5p	1	0	1	1	1	1	CLCN4	chloride channel, voltage-sensitive 4
hsa-miR-548a-5p	1	0	1	1	1	1	SLC31A1	solute carrier family 31 (copper transporters), member 1
hsa-miR-548a-5p	0	0	1	1	1	1	CPS1	carbamoyl-phosphate synthase 1, mitochondrial
hsa-miR-548a-5p	0	0	1	1	1	1	CSN2	casein beta
hsa-miR-548a-5p	0	0	1	1	0	0	DDB1	damage-specific DNA binding protein 1, 127kDa
hsa-miR-548a-5p	0	0	1	1	1	1	DLAT	dihydrolipoamide S-acetyltransferase
hsa-miR-548a-5p	1	0	1	1	1	1	DR1	down-regulator of transcription 1, TBP-binding (negative cofactor 2)
hsa-miR-548a-5p	1	0	1	1	1	1	DSC3	desmocollin 3
hsa-miR-548a-5p	0	0	1	1	1	1	DSG1	desmoglein 1
hsa-miR-548a-5p	1	0	1	1	1	1	HBEGF	heparin-binding EGF-like growth factor
hsa-miR-548a-5p	0	0	1	1	0	0	EDN2	endothelin 2
hsa-miR-548a-5p	1	0	1	1	1	1	EGR1	early growth response 1
hsa-miR-548a-5p	1	0	1	1	1	1	EIF4E	eukaryotic translation initiation factor 4E
hsa-miR-548a-5p	0	0	1	0	1	1	FGF2	fibroblast growth factor 2 (basic)
hsa-miR-548a-5p	0	0	1	1	0	0	FKBP3	FK506 binding protein 3, 25kDa
hsa-miR-548a-5p	1	0	1	0	1	1	FOXO1	forkhead box O1
hsa-miR-548a-5p	0	0	1	1	1	1	FLI1	Friend leukemia virus integration 1
hsa-miR-548a-5p	1	0	1	1	1	1	FRK	fyn-related kinase
hsa-miR-548a-5p	1	0	1	1	1	1	GBP1	guanylate binding protein 1, interferon-inducible
hsa-miR-548a-5p	0	0	1	0	1	1	GCLM	glutamate-cysteine ligase, modifier subunit
hsa-miR-548a-5p	1	0	1	0	1	1	GNAI1	guanine nucleotide binding protein (G protein), alpha inhibiting activity polypeptide 1
hsa-miR-548a-5p	0	0	1	1	1	1	GTF2E2	general transcription factor IIE, polypeptide 2, beta 34kDa
hsa-miR-548a-5p	0	0	1	0	1	1	GYPA	glycophorin A (MNS blood group)
hsa-miR-548a-5p	0	0	1	1	1	1	HMGCS1	3-hydroxy-3-methylglutaryl-CoA synthase 1 (soluble)
hsa-miR-548a-5p	1	0	1	1	1	1	HOXB3	homeobox B3
hsa-miR-548a-5p	0	0	1	1	1	1	FOXN2	forkhead box N2
hsa-miR-548a-5p	1	0	1	1	1	1	TNC	tenascin C
hsa-miR-548a-5p	0	0	1	1	1	1	IRF8	interferon regulatory factor 8
hsa-miR-548a-5p	0	0	1	1	1	1	IL17A	interleukin 17A
hsa-miR-548a-5p	1	0	1	1	0	0	INHBB	inhibin, beta B
hsa-miR-548a-5p	1	0	1	1	1	1	INSM1	insulinoma-associated 1
hsa-miR-548a-5p	1	0	1	1	1	1	ISL1	ISL LIM homeobox 1
hsa-miR-548a-5p	0	0	1	1	1	1	ITGAE	integrin, alpha E (antigen CD103, human mucosal lymphocyte antigen 1; alpha polypeptide)
hsa-miR-548a-5p	0	0	1	0	1	1	ITGAV	integrin, alpha V
hsa-miR-548a-5p	1	0	1	1	1	1	ITGB8	integrin, beta 8
hsa-miR-548a-5p	1	0	1	1	1	1	JAK1	Janus kinase 1
hsa-miR-548a-5p	1	0	1	1	1	1	KCNJ3	potassium inwardly-rectifying channel, subfamily J, member 3
hsa-miR-548a-5p	0	0	1	1	1	1	KCNJ6	potassium inwardly-rectifying channel, subfamily J, member 6
hsa-miR-548a-5p	1	0	1	1	1	1	KDR	kinase insert domain receptor (a type III receptor tyrosine kinase)
hsa-miR-548a-5p	0	0	1	1	1	1	KLRC1	killer cell lectin-like receptor subfamily C, member 1
hsa-miR-548a-5p	1	0	1	1	1	1	KPNB1	karyopherin (importin) beta 1
hsa-miR-548a-5p	1	0	1	1	1	1	KPNA3	karyopherin alpha 3 (importin alpha 4)
hsa-miR-548a-5p	1	0	1	1	1	1	IPO5	importin 5
hsa-miR-548a-5p	0	0	1	1	1	1	KRT8	keratin 8
hsa-miR-548a-5p	0	0	1	1	1	1	KRT32	keratin 32
hsa-miR-548a-5p	1	0	1	0	1	1	LAMC1	laminin, gamma 1 (formerly LAMB2)
hsa-miR-548a-5p	1	0	1	1	1	1	LIF	leukemia inhibitory factor
hsa-miR-548a-5p	1	0	1	1	1	1	LIFR	leukemia inhibitory factor receptor alpha
hsa-miR-548a-5p	1	0	1	1	1	1	LIMK1	LIM domain kinase 1
hsa-miR-548a-5p	1	0	1	1	1	1	LY75	lymphocyte antigen 75
hsa-miR-548a-5p	1	0	1	0	1	1	MXD1	MAX dimerization protein 1
hsa-miR-548a-5p	1	0	1	1	1	1	MAN2A1	mannosidase, alpha, class 2A, member 1
hsa-miR-548a-5p	1	0	1	1	1	1	ME1	malic enzyme 1, NADP(+)-dependent, cytosolic
hsa-miR-548a-5p	0	0	1	1	1	1	MMP3	matrix metallopeptidase 3 (stromelysin 1, progelatinase)
hsa-miR-548a-5p	1	0	1	1	1	1	MN1	meningioma (disrupted in balanced translocation) 1
hsa-miR-548a-5p	1	0	1	1	1	1	MSN	moesin
hsa-miR-548a-5p	0	0	1	1	1	1	MSX2	msh homeobox 2
hsa-miR-548a-5p	0	0	1	1	1	1	MTRR	5-methyltetrahydrofolate-homocysteine methyltransferase reductase
hsa-miR-548a-5p	1	0	1	1	1	1	NCBP1	nuclear cap binding protein subunit 1, 80kDa
hsa-miR-548a-5p	1	0	1	1	1	1	NEUROD1	neuronal differentiation 1
hsa-miR-548a-5p	1	0	1	1	1	1	NGF	nerve growth factor (beta polypeptide)
hsa-miR-548a-5p	0	0	1	1	1	1	NOV	nephroblastoma overexpressed
hsa-miR-548a-5p	1	0	1	1	1	1	NPTX1	neuronal pentraxin I
hsa-miR-548a-5p	1	0	1	1	1	1	NTF3	neurotrophin 3
hsa-miR-548a-5p	1	0	1	1	1	1	TNFRSF11B	tumor necrosis factor receptor superfamily, member 11b
hsa-miR-548a-5p	1	0	1	1	1	1	ORC5	origin recognition complex, subunit 5
hsa-miR-548a-5p	1	0	1	0	1	1	PAK2	p21 protein (Cdc42/Rac)-activated kinase 2
hsa-miR-548a-5p	1	0	1	1	1	1	PCDH8	protocadherin 8
hsa-miR-548a-5p	0	0	1	1	1	1	PCK1	phosphoenolpyruvate carboxykinase 1 (soluble)
hsa-miR-548a-5p	0	0	1	1	1	1	PDE6D	phosphodiesterase 6D, cGMP-specific, rod, delta
hsa-miR-548a-5p	1	0	1	0	1	1	PDK1	pyruvate dehydrogenase kinase, isozyme 1
hsa-miR-548a-5p	1	0	1	1	1	1	PFKP	phosphofructokinase, platelet
hsa-miR-548a-5p	1	0	1	1	1	1	PLAGL2	pleiomorphic adenoma gene-like 2
hsa-miR-548a-5p	0	0	1	1	1	1	PLGLB2	plasminogen-like B2
hsa-miR-548a-5p	0	0	1	0	1	1	PMP2	peripheral myelin protein 2
hsa-miR-548a-5p	1	0	1	0	1	1	POU3F1	POU class 3 homeobox 1
hsa-miR-548a-5p	1	0	1	1	1	1	PPP1CB	protein phosphatase 1, catalytic subunit, beta isozyme
hsa-miR-548a-5p	0	0	1	1	1	1	PPP1R3A	protein phosphatase 1, regulatory subunit 3A
hsa-miR-548a-5p	0	0	1	1	0	0	PPP1R8	protein phosphatase 1, regulatory subunit 8
hsa-miR-548a-5p	1	0	1	1	1	1	PPP2CA	protein phosphatase 2, catalytic subunit, alpha isozyme
hsa-miR-548a-5p	1	0	1	1	1	1	PRKAR2B	protein kinase, cAMP-dependent, regulatory, type II, beta
hsa-miR-548a-5p	1	0	1	0	1	1	PRKCA	protein kinase C, alpha
hsa-miR-548a-5p	1	0	1	1	1	1	PRKD1	protein kinase D1
hsa-miR-548a-5p	1	0	1	0	1	1	MAPK4	mitogen-activated protein kinase 4
hsa-miR-548a-5p	1	0	1	1	1	1	MAPK6	mitogen-activated protein kinase 6
hsa-miR-548a-5p	0	0	1	1	1	1	MAP2K1	mitogen-activated protein kinase kinase 1
hsa-miR-548a-5p	1	0	1	1	1	1	PTPN1	protein tyrosine phosphatase, non-receptor type 1
hsa-miR-548a-5p	0	0	1	1	1	1	PTPRC	protein tyrosine phosphatase, receptor type, C
hsa-miR-548a-5p	1	0	1	1	1	1	PTPRK	protein tyrosine phosphatase, receptor type, K
hsa-miR-548a-5p	1	0	1	1	1	1	PTPRO	protein tyrosine phosphatase, receptor type, O
hsa-miR-548a-5p	0	0	1	1	1	1	PTPRR	protein tyrosine phosphatase, receptor type, R
hsa-miR-548a-5p	1	0	1	1	1	1	PTX3	pentraxin 3, long
hsa-miR-548a-5p	1	0	1	1	1	1	RAB2A	RAB2A, member RAS oncogene family
hsa-miR-548a-5p	1	0	1	1	1	1	RAD23B	RAD23 homolog B (S. cerevisiae)
hsa-miR-548a-5p	1	0	1	0	1	1	RAP2B	RAP2B, member of RAS oncogene family
hsa-miR-548a-5p	1	0	1	1	1	1	RASA1	RAS p21 protein activator (GTPase activating protein) 1
hsa-miR-548a-5p	1	0	1	1	1	1	ARID4A	AT rich interactive domain 4A (RBP1-like)
hsa-miR-548a-5p	1	0	1	1	0	0	RORA	RAR-related orphan receptor A
hsa-miR-548a-5p	1	0	1	0	1	1	SORT1	sortilin 1
hsa-miR-548a-5p	1	0	1	1	0	0	CCL3	chemokine (C-C motif) ligand 3
hsa-miR-548a-5p	0	0	1	0	1	1	CXCL5	chemokine (C-X-C motif) ligand 5
hsa-miR-548a-5p	0	0	1	1	1	1	XCL1	chemokine (C motif) ligand 1
hsa-miR-548a-5p	0	0	1	1	1	1	SDC2	syndecan 2
hsa-miR-548a-5p	1	0	1	1	1	1	SFRP2	secreted frizzled-related protein 2
hsa-miR-548a-5p	1	0	1	1	1	1	SRSF3	serine/arginine-rich splicing factor 3
hsa-miR-548a-5p	0	0	1	1	1	1	SH3BGRL	SH3 domain binding glutamic acid-rich protein like
hsa-miR-548a-5p	1	0	1	1	1	1	ST8SIA1	ST8 alpha-N-acetyl-neuraminide alpha-2,8-sialyltransferase 1
hsa-miR-548a-5p	0	0	1	1	1	1	SLAMF1	signaling lymphocytic activation molecule family member 1
hsa-miR-548a-5p	1	0	1	0	1	1	SLC6A6	solute carrier family 6 (neurotransmitter transporter, taurine), member 6
hsa-miR-548a-5p	1	0	1	1	1	1	SLC7A1	solute carrier family 7 (cationic amino acid transporter, y+ system), member 1
hsa-miR-548a-5p	1	0	1	1	1	1	SLIT3	slit homolog 3 (Drosophila)
hsa-miR-548a-5p	1	0	1	1	1	1	SNAI2	snail homolog 2 (Drosophila)
hsa-miR-548a-5p	1	0	1	0	1	1	SOX4	SRY (sex determining region Y)-box 4
hsa-miR-548a-5p	1	0	1	0	1	1	SOX11	SRY (sex determining region Y)-box 11
hsa-miR-548a-5p	0	0	1	1	1	1	SPAG1	sperm associated antigen 1
hsa-miR-548a-5p	0	0	1	1	1	1	UAP1	UDP-N-acteylglucosamine pyrophosphorylase 1
hsa-miR-548a-5p	1	0	1	1	1	1	SRI	sorcin
hsa-miR-548a-5p	0	0	1	1	0	0	SSRP1	structure specific recognition protein 1
hsa-miR-548a-5p	1	0	1	0	1	1	STC1	stanniocalcin 1
hsa-miR-548a-5p	0	0	1	1	1	1	STIM1	stromal interaction molecule 1
hsa-miR-548a-5p	0	0	1	1	1	1	STRN	striatin, calmodulin binding protein
hsa-miR-548a-5p	0	0	1	1	1	1	XCL2	chemokine (C motif) ligand 2
hsa-miR-548a-5p	0	0	1	1	1	1	TAF2	TAF2 RNA polymerase II, TATA box binding protein (TBP)-associated factor, 150kDa
hsa-miR-548a-5p	1	0	1	1	1	1	TAF4	TAF4 RNA polymerase II, TATA box binding protein (TBP)-associated factor, 135kDa
hsa-miR-548a-5p	1	0	1	1	1	1	TDG	thymine-DNA glycosylase
hsa-miR-548a-5p	0	0	1	1	1	1	THBS2	thrombospondin 2
hsa-miR-548a-5p	1	0	1	0	1	1	SEC62	SEC62 homolog (S. cerevisiae)
hsa-miR-548a-5p	1	0	1	1	1	1	TOP1	topoisomerase (DNA) I
hsa-miR-548a-5p	0	0	1	1	0	0	TXN	thioredoxin
hsa-miR-548a-5p	1	0	1	1	1	1	UBE2B	ubiquitin-conjugating enzyme E2B
hsa-miR-548a-5p	0	0	1	1	1	1	UBE2D1	ubiquitin-conjugating enzyme E2D 1
hsa-miR-548a-5p	1	0	1	0	1	1	UBE2D2	ubiquitin-conjugating enzyme E2D 2
hsa-miR-548a-5p	0	0	1	1	1	1	UBE2I	ubiquitin-conjugating enzyme E2I
hsa-miR-548a-5p	1	0	1	1	1	1	VAV2	vav 2 guanine nucleotide exchange factor
hsa-miR-548a-5p	1	0	1	1	1	1	YWHAH	tyrosine 3-monooxygenase/tryptophan 5-monooxygenase activation protein, eta polypeptide
hsa-miR-548a-5p	0	0	1	0	1	1	ZFY	zinc finger protein, Y-linked
hsa-miR-548a-5p	1	0	1	0	1	1	ZIC1	Zic family member 1
hsa-miR-548a-5p	0	0	1	1	1	1	SCG2	secretogranin II
hsa-miR-548a-5p	1	0	1	1	1	1	CUL5	cullin 5
hsa-miR-548a-5p	1	0	1	1	1	1	HMGA2	high mobility group AT-hook 2
hsa-miR-548a-5p	1	0	1	1	1	1	NRIP1	nuclear receptor interacting protein 1
hsa-miR-548a-5p	1	0	1	1	1	1	FZD7	frizzled family receptor 7
hsa-miR-548a-5p	1	0	1	1	1	1	EEA1	early endosome antigen 1
hsa-miR-548a-5p	0	0	1	1	1	1	STX7	syntaxin 7
hsa-miR-548a-5p	1	0	1	0	1	1	VAPA	VAMP (vesicle-associated membrane protein)-associated protein A, 33kDa
hsa-miR-548a-5p	0	0	1	1	0	0	DUSP11	dual specificity phosphatase 11 (RNA/RNP complex 1-interacting)
hsa-miR-548a-5p	1	0	1	1	1	1	KLF11	Kruppel-like factor 11
hsa-miR-548a-5p	1	0	1	1	1	1	SUPT3H	suppressor of Ty 3 homolog (S. cerevisiae)
hsa-miR-548a-5p	1	0	1	1	1	1	CILP	cartilage intermediate layer protein, nucleotide pyrophosphohydrolase
hsa-miR-548a-5p	0	0	1	1	1	1	PEX3	peroxisomal biogenesis factor 3
hsa-miR-548a-5p	0	0	1	1	1	1	AGPS	alkylglycerone phosphate synthase
hsa-miR-548a-5p	1	0	1	1	1	1	CDC14A	CDC14 cell division cycle 14 homolog A (S. cerevisiae)
hsa-miR-548a-5p	1	0	1	1	0	0	KHSRP	KH-type splicing regulatory protein
hsa-miR-548a-5p	1	0	1	1	1	1	ALDH4A1	aldehyde dehydrogenase 4 family, member A1
hsa-miR-548a-5p	1	0	1	0	1	1	IRS2	insulin receptor substrate 2
hsa-miR-548a-5p	1	0	1	1	1	1	B3GALT2	UDP-Gal:betaGlcNAc beta 1,3-galactosyltransferase, polypeptide 2
hsa-miR-548a-5p	1	0	1	1	1	1	MBTPS1	membrane-bound transcription factor peptidase, site 1
hsa-miR-548a-5p	1	0	1	1	1	1	URI1	URI1, prefoldin-like chaperone
hsa-miR-548a-5p	0	0	1	1	1	1	CRADD	CASP2 and RIPK1 domain containing adaptor with death domain
hsa-miR-548a-5p	1	0	1	1	1	1	NR5A2	nuclear receptor subfamily 5, group A, member 2
hsa-miR-548a-5p	1	0	1	1	1	1	SNAP23	synaptosomal-associated protein, 23kDa
hsa-miR-548a-5p	1	0	1	1	1	1	PEX11B	peroxisomal biogenesis factor 11 beta
hsa-miR-548a-5p	1	0	1	1	1	1	KAT2B	K(lysine) acetyltransferase 2B
hsa-miR-548a-5p	0	0	1	1	1	1	PRPF4B	PRP4 pre-mRNA processing factor 4 homolog B (yeast)
hsa-miR-548a-5p	1	0	1	0	1	1	ST13	suppression of tumorigenicity 13 (colon carcinoma) (Hsp70 interacting protein)
hsa-miR-548a-5p	0	0	1	1	1	1	MPZL1	myelin protein zero-like 1
hsa-miR-548a-5p	0	0	1	1	1	1	CH25H	cholesterol 25-hydroxylase
hsa-miR-548a-5p	1	0	1	1	1	1	BCL2L2	BCL2-like 2
hsa-miR-548a-5p	1	0	1	1	1	1	CDH12	cadherin 12, type 2 (N-cadherin 2)
hsa-miR-548a-5p	1	0	1	1	1	1	CDH17	cadherin 17, LI cadherin (liver-intestine)
hsa-miR-548a-5p	1	0	1	1	1	1	CTSS	cathepsin S
hsa-miR-548a-5p	1	0	1	0	1	1	DGKB	diacylglycerol kinase, beta 90kDa
hsa-miR-548a-5p	1	0	1	1	1	1	EFNB2	ephrin-B2
hsa-miR-548a-5p	1	0	1	1	1	1	FGF12	fibroblast growth factor 12
hsa-miR-548a-5p	1	0	1	1	1	1	GMFB	glia maturation factor, beta
hsa-miR-548a-5p	1	0	1	1	1	1	HNF4G	hepatocyte nuclear factor 4, gamma
hsa-miR-548a-5p	0	0	1	0	1	1	OAZ1	ornithine decarboxylase antizyme 1
hsa-miR-548a-5p	1	0	1	1	1	1	RAB5A	RAB5A, member RAS oncogene family
hsa-miR-548a-5p	0	0	1	1	1	1	RAB27B	RAB27B, member RAS oncogene family
hsa-miR-548a-5p	0	0	1	1	1	1	SLC1A1	solute carrier family 1 (neuronal/epithelial high affinity glutamate transporter, system Xag), member 1
hsa-miR-548a-5p	1	0	1	0	1	1	SLC1A2	solute carrier family 1 (glial high affinity glutamate transporter), member 2
hsa-miR-548a-5p	0	0	1	0	1	1	SLC1A3	solute carrier family 1 (glial high affinity glutamate transporter), member 3
hsa-miR-548a-5p	0	0	1	1	0	0	ATP6V1F	ATPase, H+ transporting, lysosomal 14kDa, V1 subunit F
hsa-miR-548a-5p	1	0	1	1	1	1	SOCS6	suppressor of cytokine signaling 6
hsa-miR-548a-5p	1	0	1	1	1	1	MED21	mediator complex subunit 21
hsa-miR-548a-5p	0	0	1	1	1	1	HOMER1	homer homolog 1 (Drosophila)
hsa-miR-548a-5p	1	0	1	1	1	1	ARL3	ADP-ribosylation factor-like 3
hsa-miR-548a-5p	1	0	1	1	1	1	ASTN1	astrotactin 1
hsa-miR-548a-5p	1	0	1	1	1	1	BCL9	B-cell CLL/lymphoma 9
hsa-miR-548a-5p	0	0	1	1	1	1	BST1	bone marrow stromal cell antigen 1
hsa-miR-548a-5p	0	0	1	1	1	1	COL12A1	collagen, type XII, alpha 1
hsa-miR-548a-5p	1	0	1	1	1	1	COX11	COX11 cytochrome c oxidase assembly homolog (yeast)
hsa-miR-548a-5p	1	0	1	1	1	1	EFNB1	ephrin-B1
hsa-miR-548a-5p	1	0	1	1	1	1	EPS8	epidermal growth factor receptor pathway substrate 8
hsa-miR-548a-5p	1	0	1	1	1	1	ACSL3	acyl-CoA synthetase long-chain family member 3
hsa-miR-548a-5p	1	0	1	0	1	1	ACSL4	acyl-CoA synthetase long-chain family member 4
hsa-miR-548a-5p	1	0	1	0	1	1	FGF5	fibroblast growth factor 5
hsa-miR-548a-5p	0	0	1	1	1	1	GP5	glycoprotein V (platelet)
hsa-miR-548a-5p	0	0	1	1	1	1	FOXA1	forkhead box A1
hsa-miR-548a-5p	1	0	1	1	0	0	HOXC6	homeobox C6
hsa-miR-548a-5p	1	0	1	1	1	1	FOXK2	forkhead box K2
hsa-miR-548a-5p	1	0	1	1	1	1	LRP2	low density lipoprotein receptor-related protein 2
hsa-miR-548a-5p	1	0	1	1	1	1	NCAM2	neural cell adhesion molecule 2
hsa-miR-548a-5p	0	0	1	1	1	1	PIGH	phosphatidylinositol glycan anchor biosynthesis, class H
hsa-miR-548a-5p	0	0	1	0	1	1	POU4F2	POU class 4 homeobox 2
hsa-miR-548a-5p	0	0	1	1	1	1	RAB27A	RAB27A, member RAS oncogene family
hsa-miR-548a-5p	1	0	1	0	1	1	USP9Y	ubiquitin specific peptidase 9, Y-linked
hsa-miR-548a-5p	1	0	1	1	1	1	RAB11A	RAB11A, member RAS oncogene family
hsa-miR-548a-5p	0	0	1	1	1	1	VNN1	vanin 1
hsa-miR-548a-5p	0	0	1	1	1	1	CDY1	chromodomain protein, Y-linked, 1
hsa-miR-548a-5p	1	0	1	1	1	1	MTMR6	myotubularin related protein 6
hsa-miR-548a-5p	1	0	1	1	1	1	MTMR4	myotubularin related protein 4
hsa-miR-548a-5p	0	0	1	0	1	1	CXorf1	chromosome X open reading frame 1
hsa-miR-548a-5p	1	0	1	1	0	0	COX7A2L	cytochrome c oxidase subunit VIIa polypeptide 2 like
hsa-miR-548a-5p	1	0	1	1	1	1	MAP3K13	mitogen-activated protein kinase kinase kinase 13
hsa-miR-548a-5p	0	0	1	1	1	1	BUB3	budding uninhibited by benzimidazoles 3 homolog (yeast)
hsa-miR-548a-5p	1	0	1	1	1	1	DCLK1	doublecortin-like kinase 1
hsa-miR-548a-5p	1	0	1	1	1	1	XPR1	xenotropic and polytropic retrovirus receptor 1
hsa-miR-548a-5p	1	0	1	1	1	1	STK17A	serine/threonine kinase 17a
hsa-miR-548a-5p	1	0	1	1	1	1	NREP	neuronal regeneration related protein homolog (rat)
hsa-miR-548a-5p	0	0	1	1	1	1	LHX2	LIM homeobox 2
hsa-miR-548a-5p	1	0	1	0	1	1	ARHGEF6	Rac/Cdc42 guanine nucleotide exchange factor (GEF) 6
hsa-miR-548a-5p	1	0	1	1	1	1	AKAP7	A kinase (PRKA) anchor protein 7
hsa-miR-548a-5p	1	0	1	0	1	1	ROCK2	Rho-associated, coiled-coil containing protein kinase 2
hsa-miR-548a-5p	1	0	1	1	1	1	ONECUT2	one cut homeobox 2
hsa-miR-548a-5p	1	0	1	1	1	1	FXR2	fragile X mental retardation, autosomal homolog 2
hsa-miR-548a-5p	1	0	1	0	1	1	SEC22B	SEC22 vesicle trafficking protein homolog B (S. cerevisiae) (gene/pseudogene)
hsa-miR-548a-5p	0	0	1	1	1	1	CALB1	calbindin 1, 28kDa
hsa-miR-548a-5p	0	0	1	0	1	1	DSC2	desmocollin 2
hsa-miR-548a-5p	0	0	1	1	0	0	NR5A1	nuclear receptor subfamily 5, group A, member 1
hsa-miR-548a-5p	1	0	1	1	1	1	JARID2	jumonji, AT rich interactive domain 2
hsa-miR-548a-5p	0	0	1	1	1	1	SERPINI1	serpin peptidase inhibitor, clade I (neuroserpin), member 1
hsa-miR-548a-5p	0	0	1	1	1	1	PRCP	prolylcarboxypeptidase (angiotensinase C)
hsa-miR-548a-5p	1	0	1	1	1	1	RELN	reelin
hsa-miR-548a-5p	0	0	1	1	1	1	PTH2R	parathyroid hormone 2 receptor
hsa-miR-548a-5p	0	0	1	1	1	1	RGPD5	RANBP2-like and GRIP domain containing 5
hsa-miR-548a-5p	1	0	1	0	1	1	SEL1L	sel-1 suppressor of lin-12-like (C. elegans)
hsa-miR-548a-5p	0	0	1	1	1	1	XYLB	xylulokinase homolog (H. influenzae)
hsa-miR-548a-5p	1	0	1	1	1	1	GFPT2	glutamine-fructose-6-phosphate transaminase 2
[truncated: 1,706 more rows]
