# Supplementary material for: Profiling of Selected MicroRNAs in Proliferative Eutopic Endometrium of Women with Ovarian Endometriosis
Source: Biomed Res Int. 2015 Aug 20;2015:760698. doi: 10.1155/2015/760698 (PMC4558423; doi:10.1155/2015/760698)
Supplement: Supplementary file 1 — Table I: The names of miRNAs significantly differentially expressed between eutopic endometrium of patients with endometriosis vs eutopic endometrium of patients without endometriosis. Table II: The associations between miRNA and mRNA, which presents detailed results of the search of six major databases i.e targetscan, tarbase, miranda, mirbase, mirtarget2 and pictar. [file 760698.f1.zip › 760698.f1/Table II/hsa-miR-548b-3p.tsv]

miR	targetscan	tarbase	miranda	mirbase	mirtarget2	pictar	GeneSymbol	GeneName
hsa-miR-548b-3p	1	0	1	1	0	0	SRCAP	Snf2-related CREBBP activator protein
hsa-miR-548b-3p	1	0	1	1	0	0	RAPGEF2	Rap guanine nucleotide exchange factor (GEF) 2
hsa-miR-548b-3p	1	0	1	1	1	1	FAM65B	family with sequence similarity 65, member B
hsa-miR-548b-3p	1	0	1	0	1	1	PTPRT	protein tyrosine phosphatase, receptor type, T
hsa-miR-548b-3p	1	0	1	1	1	1	NUPL1	nucleoporin like 1
hsa-miR-548b-3p	1	0	1	1	0	0	DENND4B	DENN/MADD domain containing 4B
hsa-miR-548b-3p	1	0	1	1	1	1	GREB1	growth regulation by estrogen in breast cancer 1
hsa-miR-548b-3p	1	0	1	0	0	0	HECTD4	HECT domain containing E3 ubiquitin protein ligase 4
hsa-miR-548b-3p	1	0	1	1	1	1	HIPK1	homeodomain interacting protein kinase 1
hsa-miR-548b-3p	1	0	1	1	0	0	SMCHD1	structural maintenance of chromosomes flexible hinge domain containing 1
hsa-miR-548b-3p	0	0	1	1	0	0	ARHGEF2	Rho/Rac guanine nucleotide exchange factor (GEF) 2
hsa-miR-548b-3p	1	0	1	0	1	1	MAGI2	membrane associated guanylate kinase, WW and PDZ domain containing 2
hsa-miR-548b-3p	0	0	1	1	1	1	XYLB	xylulokinase homolog (H. influenzae)
hsa-miR-548b-3p	1	0	1	0	1	1	SNX13	sorting nexin 13
hsa-miR-548b-3p	1	0	1	1	1	1	MATR3	matrin 3
hsa-miR-548b-3p	1	0	1	1	1	1	LMO7	LIM domain 7
hsa-miR-548b-3p	1	0	1	1	1	1	UBR5	ubiquitin protein ligase E3 component n-recognin 5
hsa-miR-548b-3p	1	0	1	0	0	0	DTX4	deltex homolog 4 (Drosophila)
hsa-miR-548b-3p	1	0	1	1	1	1	CIT	citron (rho-interacting, serine/threonine kinase 21)
hsa-miR-548b-3p	0	0	1	1	1	1	TBC1D30	TBC1 domain family, member 30
hsa-miR-548b-3p	1	0	1	1	1	1	RPGRIP1L	RPGRIP1-like
hsa-miR-548b-3p	0	0	1	0	1	1	TP53TG3	TP53 target 3
hsa-miR-548b-3p	0	0	1	0	0	0	TP53TG3B	TP53 target 3B
hsa-miR-548b-3p	1	0	1	1	1	1	FOXJ3	forkhead box J3
hsa-miR-548b-3p	1	0	1	1	0	0	KIAA1045	KIAA1045
hsa-miR-548b-3p	1	0	1	1	1	1	NLGN1	neuroligin 1
hsa-miR-548b-3p	1	0	1	1	1	1	PHF8	PHD finger protein 8
hsa-miR-548b-3p	1	0	1	1	1	1	SMARCAD1	SWI/SNF-related, matrix-associated actin-dependent regulator of chromatin, subfamily a, containing DEAD/H box 1
hsa-miR-548b-3p	1	0	1	0	1	1	SRGAP3	SLIT-ROBO Rho GTPase activating protein 3
hsa-miR-548b-3p	0	0	1	1	0	0	ZC4H2	zinc finger, C4H2 domain containing
hsa-miR-548b-3p	1	0	1	1	1	1	NDRG4	NDRG family member 4
hsa-miR-548b-3p	1	0	1	1	1	1	RALGAPB	Ral GTPase activating protein, beta subunit (non-catalytic)
hsa-miR-548b-3p	1	0	1	1	0	0	ATAD2B	ATPase family, AAA domain containing 2B
hsa-miR-548b-3p	0	0	1	1	1	1	FILIP1	filamin A interacting protein 1
hsa-miR-548b-3p	1	0	1	1	1	1	PCDH19	protocadherin 19
hsa-miR-548b-3p	1	0	1	0	1	1	KCTD16	potassium channel tetramerisation domain containing 16
hsa-miR-548b-3p	1	0	1	1	1	1	UNC79	unc-79 homolog (C. elegans)
hsa-miR-548b-3p	1	0	1	1	0	0	EBF4	early B-cell factor 4
hsa-miR-548b-3p	0	0	1	0	1	1	MUC3B	mucin 3B, cell surface associated
hsa-miR-548b-3p	1	0	1	0	1	1	SEMA6D	sema domain, transmembrane domain (TM), and cytoplasmic domain, (semaphorin) 6D
hsa-miR-548b-3p	0	0	1	0	0	0	NYAP2	neuronal tyrosine-phosphorylated phosphoinositide-3-kinase adaptor 2
hsa-miR-548b-3p	1	0	1	1	1	1	FRAS1	Fraser syndrome 1
hsa-miR-548b-3p	1	0	1	0	1	1	ZNF295	zinc finger protein 295
hsa-miR-548b-3p	1	0	1	0	1	1	IGDCC4	immunoglobulin superfamily, DCC subclass, member 4
hsa-miR-548b-3p	1	0	1	1	1	1	PTBP2	polypyrimidine tract binding protein 2
hsa-miR-548b-3p	1	0	1	1	1	1	PHF21A	PHD finger protein 21A
hsa-miR-548b-3p	1	0	1	1	1	1	ITPRIP	inositol 1,4,5-trisphosphate receptor interacting protein
hsa-miR-548b-3p	1	0	1	1	1	1	NPAS3	neuronal PAS domain protein 3
hsa-miR-548b-3p	1	0	1	1	1	1	NAV2	neuron navigator 2
hsa-miR-548b-3p	1	0	1	1	1	1	CSRNP1	cysteine-serine-rich nuclear protein 1
hsa-miR-548b-3p	1	0	1	1	1	1	HNRPDL	heterogeneous nuclear ribonucleoprotein D-like
hsa-miR-548b-3p	1	0	1	1	1	1	MAT2B	methionine adenosyltransferase II, beta
hsa-miR-548b-3p	1	0	1	1	0	0	ADC	arginine decarboxylase
hsa-miR-548b-3p	0	0	1	1	1	1	KIAA1967	KIAA1967
hsa-miR-548b-3p	1	0	1	0	0	0	FAT3	FAT tumor suppressor homolog 3 (Drosophila)
hsa-miR-548b-3p	1	0	1	0	0	0	ZBTB34	zinc finger and BTB domain containing 34
hsa-miR-548b-3p	1	0	1	1	1	1	PGR	progesterone receptor
hsa-miR-548b-3p	0	0	1	0	1	1	RASSF8	Ras association (RalGDS/AF-6) domain family (N-terminal) member 8
hsa-miR-548b-3p	1	0	1	1	1	1	RFX4	regulatory factor X, 4 (influences HLA class II expression)
hsa-miR-548b-3p	1	0	1	1	1	1	C11orf57	chromosome 11 open reading frame 57
hsa-miR-548b-3p	0	0	1	1	1	1	PAK3	p21 protein (Cdc42/Rac)-activated kinase 3
hsa-miR-548b-3p	1	0	1	1	1	1	PAN3	PAN3 poly(A) specific ribonuclease subunit homolog (S. cerevisiae)
hsa-miR-548b-3p	1	0	1	1	1	1	FAT2	FAT tumor suppressor homolog 2 (Drosophila)
hsa-miR-548b-3p	1	1	1	1	1	1	BACE1	beta-site APP-cleaving enzyme 1
hsa-miR-548b-3p	1	0	1	1	1	1	UBE3A	ubiquitin protein ligase E3A
hsa-miR-548b-3p	1	0	1	0	1	1	LRBA	LPS-responsive vesicle trafficking, beach and anchor containing
hsa-miR-548b-3p	0	0	1	0	1	1	ATF6	activating transcription factor 6
hsa-miR-548b-3p	0	0	1	1	0	0	KCNC3	potassium voltage-gated channel, Shaw-related subfamily, member 3
hsa-miR-548b-3p	1	0	1	1	1	1	HMGB1	high mobility group box 1
hsa-miR-548b-3p	1	0	1	1	1	1	PCCB	propionyl CoA carboxylase, beta polypeptide
hsa-miR-548b-3p	0	0	1	1	1	1	DYNC1I2	dynein, cytoplasmic 1, intermediate chain 2
hsa-miR-548b-3p	1	0	1	1	1	1	CLIP4	CAP-GLY domain containing linker protein family, member 4
hsa-miR-548b-3p	1	0	1	1	1	1	PML	promyelocytic leukemia
hsa-miR-548b-3p	1	0	1	1	1	1	SYNCRIP	synaptotagmin binding, cytoplasmic RNA interacting protein
hsa-miR-548b-3p	1	0	1	1	1	1	DTNA	dystrobrevin, alpha
hsa-miR-548b-3p	1	0	1	0	1	1	PLAG1	pleiomorphic adenoma gene 1
hsa-miR-548b-3p	0	0	1	1	0	0	PPM1G	protein phosphatase, Mg2+/Mn2+ dependent, 1G
hsa-miR-548b-3p	1	0	1	1	1	1	DMTF1	cyclin D binding myb-like transcription factor 1
hsa-miR-548b-3p	0	0	1	1	1	1	TFRC	transferrin receptor (p90, CD71)
hsa-miR-548b-3p	1	0	1	1	1	1	ABI1	abl-interactor 1
hsa-miR-548b-3p	0	0	1	1	0	0	IFT27	intraflagellar transport 27 homolog (Chlamydomonas)
hsa-miR-548b-3p	1	0	1	1	1	1	MYO5A	myosin VA (heavy chain 12, myoxin)
hsa-miR-548b-3p	0	0	1	1	0	0	CFLAR	CASP8 and FADD-like apoptosis regulator
hsa-miR-548b-3p	1	0	1	1	1	1	IPO8	importin 8
hsa-miR-548b-3p	1	0	1	1	1	1	EPHB4	EPH receptor B4
hsa-miR-548b-3p	0	0	1	1	0	0	SLC22A8	solute carrier family 22 (organic anion transporter), member 8
hsa-miR-548b-3p	1	0	1	1	1	1	HMGA2	high mobility group AT-hook 2
hsa-miR-548b-3p	0	0	1	1	1	1	DDX10	DEAD (Asp-Glu-Ala-Asp) box polypeptide 10
hsa-miR-548b-3p	1	0	1	1	1	1	ZFX	zinc finger protein, X-linked
hsa-miR-548b-3p	1	0	1	1	1	1	MEF2D	myocyte enhancer factor 2D
hsa-miR-548b-3p	1	0	1	1	0	0	TNPO2	transportin 2
hsa-miR-548b-3p	1	0	1	1	1	1	INSC	inscuteable homolog (Drosophila)
hsa-miR-548b-3p	0	0	1	0	0	0	MIAT	myocardial infarction associated transcript (non-protein coding)
hsa-miR-548b-3p	0	0	1	1	1	1	PON2	paraoxonase 2
hsa-miR-548b-3p	0	0	1	0	1	1	PARG	poly (ADP-ribose) glycohydrolase
hsa-miR-548b-3p	1	0	1	1	1	1	STX16	syntaxin 16
hsa-miR-548b-3p	1	0	1	1	1	1	DLGAP2	discs, large (Drosophila) homolog-associated protein 2
hsa-miR-548b-3p	0	0	1	0	1	1	ZMYM2	zinc finger, MYM-type 2
hsa-miR-548b-3p	0	0	1	1	1	1	CD3EAP	CD3e molecule, epsilon associated protein
hsa-miR-548b-3p	0	0	1	1	0	0	SPTBN2	spectrin, beta, non-erythrocytic 2
hsa-miR-548b-3p	1	0	1	1	1	1	MYT1L	myelin transcription factor 1-like
hsa-miR-548b-3p	1	0	1	1	1	1	SOCS2	suppressor of cytokine signaling 2
hsa-miR-548b-3p	1	0	1	0	0	0	MAP3K1	mitogen-activated protein kinase kinase kinase 1, E3 ubiquitin protein ligase
hsa-miR-548b-3p	1	0	1	1	1	1	LDB2	LIM domain binding 2
hsa-miR-548b-3p	1	0	1	1	1	1	ZFAND6	zinc finger, AN1-type domain 6
hsa-miR-548b-3p	1	0	1	1	1	1	PDE4A	phosphodiesterase 4A, cAMP-specific
hsa-miR-548b-3p	1	0	1	1	1	1	AKAP9	A kinase (PRKA) anchor protein (yotiao) 9
hsa-miR-548b-3p	0	0	1	1	0	0	CARD10	caspase recruitment domain family, member 10
hsa-miR-548b-3p	1	0	1	1	1	1	FAM60A	family with sequence similarity 60, member A
hsa-miR-548b-3p	1	0	1	1	1	1	RABEP1	rabaptin, RAB GTPase binding effector protein 1
hsa-miR-548b-3p	0	0	1	1	0	0	RBM5	RNA binding motif protein 5
hsa-miR-548b-3p	0	0	1	1	0	0	EVL	Enah/Vasp-like
hsa-miR-548b-3p	0	0	1	1	1	1	MAP3K4	mitogen-activated protein kinase kinase kinase 4
hsa-miR-548b-3p	1	0	1	0	1	1	BECN1	beclin 1, autophagy related
hsa-miR-548b-3p	0	0	1	0	1	1	CLEC5A	C-type lectin domain family 5, member A
hsa-miR-548b-3p	1	0	1	1	1	1	HTRA2	HtrA serine peptidase 2
hsa-miR-548b-3p	0	0	1	1	1	1	CNPPD1	cyclin Pas1/PHO80 domain containing 1
hsa-miR-548b-3p	1	0	1	1	1	1	USP15	ubiquitin specific peptidase 15
hsa-miR-548b-3p	0	0	1	0	1	1	PDP1	pyruvate dehyrogenase phosphatase catalytic subunit 1
hsa-miR-548b-3p	0	0	1	1	1	1	FAM114A2	family with sequence similarity 114, member A2
hsa-miR-548b-3p	1	0	1	1	1	1	MYLIP	myosin regulatory light chain interacting protein
hsa-miR-548b-3p	0	0	1	1	1	1	HERPUD1	homocysteine-inducible, endoplasmic reticulum stress-inducible, ubiquitin-like domain member 1
hsa-miR-548b-3p	0	0	1	1	1	1	PGLYRP4	peptidoglycan recognition protein 4
hsa-miR-548b-3p	1	0	1	1	1	1	CALD1	caldesmon 1
hsa-miR-548b-3p	0	0	1	1	1	1	CELF1	CUGBP, Elav-like family member 1
hsa-miR-548b-3p	1	0	1	1	1	1	SH3GLB1	SH3-domain GRB2-like endophilin B1
hsa-miR-548b-3p	1	0	1	0	1	1	TRPS1	trichorhinophalangeal syndrome I
hsa-miR-548b-3p	1	0	1	1	1	1	PUM2	pumilio homolog 2 (Drosophila)
hsa-miR-548b-3p	0	0	1	0	1	1	PRDM6	PR domain containing 6
hsa-miR-548b-3p	0	0	1	0	1	1	ERBB2IP	erbb2 interacting protein
hsa-miR-548b-3p	0	0	1	1	1	1	CYP3A43	cytochrome P450, family 3, subfamily A, polypeptide 43
hsa-miR-548b-3p	1	0	1	1	1	1	NRP1	neuropilin 1
hsa-miR-548b-3p	0	0	1	1	1	1	SEPT10	septin 10
hsa-miR-548b-3p	0	0	1	1	1	1	FCRL1	Fc receptor-like 1
hsa-miR-548b-3p	0	0	1	1	0	0	MUC1	mucin 1, cell surface associated
hsa-miR-548b-3p	1	0	1	0	1	1	WIPF2	WAS/WASL interacting protein family, member 2
hsa-miR-548b-3p	1	0	1	1	1	1	LARP4	La ribonucleoprotein domain family, member 4
hsa-miR-548b-3p	1	0	1	1	1	1	PDE8A	phosphodiesterase 8A
hsa-miR-548b-3p	1	0	1	1	1	1	RCAN1	regulator of calcineurin 1
hsa-miR-548b-3p	1	0	1	1	1	1	NTRK2	neurotrophic tyrosine kinase, receptor, type 2
hsa-miR-548b-3p	1	0	1	1	1	1	ST3GAL3	ST3 beta-galactoside alpha-2,3-sialyltransferase 3
hsa-miR-548b-3p	1	0	1	1	1	1	TNKS1BP1	tankyrase 1 binding protein 1, 182kDa
hsa-miR-548b-3p	1	0	1	1	1	1	HNRNPU	heterogeneous nuclear ribonucleoprotein U (scaffold attachment factor A)
hsa-miR-548b-3p	0	0	1	1	0	0	HOPX	HOP homeobox
hsa-miR-548b-3p	0	0	1	1	1	1	CHODL	chondrolectin
hsa-miR-548b-3p	1	0	1	0	1	1	MED14	mediator complex subunit 14
hsa-miR-548b-3p	1	0	1	1	1	1	ILF3	interleukin enhancer binding factor 3, 90kDa
hsa-miR-548b-3p	0	0	1	1	1	1	RANBP17	RAN binding protein 17
hsa-miR-548b-3p	0	0	1	1	1	1	STK33	serine/threonine kinase 33
hsa-miR-548b-3p	0	0	1	1	1	1	FUT10	fucosyltransferase 10 (alpha (1,3) fucosyltransferase)
hsa-miR-548b-3p	1	0	1	1	1	1	PPP3CB	protein phosphatase 3, catalytic subunit, beta isozyme
hsa-miR-548b-3p	0	0	1	1	1	1	ZNF248	zinc finger protein 248
hsa-miR-548b-3p	0	0	1	1	1	1	TAF1	TAF1 RNA polymerase II, TATA box binding protein (TBP)-associated factor, 250kDa
hsa-miR-548b-3p	1	0	1	1	1	1	AKAP2	A kinase (PRKA) anchor protein 2
hsa-miR-548b-3p	1	0	1	0	1	1	NFAT5	nuclear factor of activated T-cells 5, tonicity-responsive
hsa-miR-548b-3p	0	0	1	0	0	0	TUG1	taurine upregulated 1 (non-protein coding)
hsa-miR-548b-3p	0	0	1	0	1	1	EBF2	early B-cell factor 2
hsa-miR-548b-3p	1	0	1	1	0	0	SALL2	sal-like 2 (Drosophila)
hsa-miR-548b-3p	1	0	1	1	1	1	SCAMP1	secretory carrier membrane protein 1
hsa-miR-548b-3p	1	0	1	1	1	1	PTBP3	polypyrimidine tract binding protein 3
hsa-miR-548b-3p	1	0	1	1	1	1	SLC38A2	solute carrier family 38, member 2
hsa-miR-548b-3p	0	0	1	1	1	1	STAU2	staufen, RNA binding protein, homolog 2 (Drosophila)
hsa-miR-548b-3p	1	0	1	1	1	1	MYO9B	myosin IXB
hsa-miR-548b-3p	0	0	1	1	0	0	UGGT2	UDP-glucose glycoprotein glucosyltransferase 2
hsa-miR-548b-3p	1	0	1	1	1	1	C12orf23	chromosome 12 open reading frame 23
hsa-miR-548b-3p	1	0	1	1	1	1	PGAP1	post-GPI attachment to proteins 1
hsa-miR-548b-3p	1	0	1	0	1	1	LIN28A	lin-28 homolog A (C. elegans)
hsa-miR-548b-3p	1	0	1	1	1	1	MON2	MON2 homolog (S. cerevisiae)
hsa-miR-548b-3p	1	0	1	1	1	1	SLCO5A1	solute carrier organic anion transporter family, member 5A1
hsa-miR-548b-3p	1	0	1	1	1	1	S100PBP	S100P binding protein
hsa-miR-548b-3p	0	0	1	1	1	1	TTC23	tetratricopeptide repeat domain 23
hsa-miR-548b-3p	0	0	1	0	0	0	LOC284561	uncharacterized LOC284561
hsa-miR-548b-3p	0	0	1	1	1	1	NSUN7	NOP2/Sun domain family, member 7
hsa-miR-548b-3p	0	0	1	0	1	1	FLJ14186	uncharacterized LOC401149
hsa-miR-548b-3p	1	0	1	1	1	1	COPS7B	COP9 constitutive photomorphogenic homolog subunit 7B (Arabidopsis)
hsa-miR-548b-3p	1	0	1	1	1	1	MAPK8IP3	mitogen-activated protein kinase 8 interacting protein 3
hsa-miR-548b-3p	1	0	1	1	1	1	DYRK2	dual-specificity tyrosine-(Y)-phosphorylation regulated kinase 2
hsa-miR-548b-3p	0	0	1	0	1	1	ATXN1L	ataxin 1-like
hsa-miR-548b-3p	0	0	1	0	0	0	KIAA1671	KIAA1671
hsa-miR-548b-3p	1	0	1	1	1	1	DLC1	deleted in liver cancer 1
hsa-miR-548b-3p	1	0	1	0	1	1	CADPS2	Ca++-dependent secretion activator 2
hsa-miR-548b-3p	1	0	1	1	1	1	NAA30	N(alpha)-acetyltransferase 30, NatC catalytic subunit
hsa-miR-548b-3p	0	0	1	0	1	1	HEMK1	HemK methyltransferase family member 1
hsa-miR-548b-3p	1	0	1	1	0	0	PRRC2B	proline-rich coiled-coil 2B
hsa-miR-548b-3p	0	0	1	1	1	1	FAM124B	family with sequence similarity 124B
hsa-miR-548b-3p	1	0	1	1	0	0	MAGI3	membrane associated guanylate kinase, WW and PDZ domain containing 3
hsa-miR-548b-3p	0	0	1	1	1	1	GTF2H1	general transcription factor IIH, polypeptide 1, 62kDa
hsa-miR-548b-3p	0	0	1	1	1	1	GPBP1L1	GC-rich promoter binding protein 1-like 1
hsa-miR-548b-3p	1	0	1	1	1	1	FAM53C	family with sequence similarity 53, member C
hsa-miR-548b-3p	0	0	1	1	1	1	RNF146	ring finger protein 146
hsa-miR-548b-3p	0	0	1	0	1	1	TWSG1	twisted gastrulation homolog 1 (Drosophila)
hsa-miR-548b-3p	1	0	1	1	1	1	SLC38A1	solute carrier family 38, member 1
hsa-miR-548b-3p	1	0	1	1	1	1	SLAIN1	SLAIN motif family, member 1
hsa-miR-548b-3p	0	0	1	1	1	1	C8orf46	chromosome 8 open reading frame 46
hsa-miR-548b-3p	0	0	1	0	0	0	CHST9-AS1	CHST9 antisense RNA 1
hsa-miR-548b-3p	1	0	1	0	1	1	AP1G1	adaptor-related protein complex 1, gamma 1 subunit
hsa-miR-548b-3p	0	0	1	1	1	1	TOX2	TOX high mobility group box family member 2
hsa-miR-548b-3p	0	0	1	1	1	1	FANCI	Fanconi anemia, complementation group I
hsa-miR-548b-3p	0	0	1	1	1	1	GABRP	gamma-aminobutyric acid (GABA) A receptor, pi
hsa-miR-548b-3p	1	0	1	1	0	0	SPEG	SPEG complex locus
hsa-miR-548b-3p	1	0	1	1	1	1	DIXDC1	DIX domain containing 1
hsa-miR-548b-3p	1	0	1	0	1	1	RAB1A	RAB1A, member RAS oncogene family
hsa-miR-548b-3p	0	0	1	1	1	1	ANKRD36B	ankyrin repeat domain 36B
hsa-miR-548b-3p	1	0	1	1	1	1	LMNA	lamin A/C
hsa-miR-548b-3p	1	0	1	0	1	1	FSTL4	follistatin-like 4
hsa-miR-548b-3p	1	0	1	1	1	1	ZIC4	Zic family member 4
hsa-miR-548b-3p	0	0	1	0	1	1	FAM70A	family with sequence similarity 70, member A
hsa-miR-548b-3p	0	0	1	0	0	0	LOC157381	uncharacterized LOC157381
hsa-miR-548b-3p	0	0	1	0	1	1	THAP6	THAP domain containing 6
hsa-miR-548b-3p	0	0	1	1	1	1	FAM213B	family with sequence similarity 213, member B
hsa-miR-548b-3p	1	0	1	1	0	0	SLC29A2	solute carrier family 29 (nucleoside transporters), member 2
hsa-miR-548b-3p	0	0	1	0	0	0	PLCD4	phospholipase C, delta 4
hsa-miR-548b-3p	1	0	1	1	1	1	TLE4	transducin-like enhancer of split 4 (E(sp1) homolog, Drosophila)
hsa-miR-548b-3p	0	0	1	1	0	0	NXF2	nuclear RNA export factor 2
hsa-miR-548b-3p	0	0	1	1	1	1	ELL3	elongation factor RNA polymerase II-like 3
hsa-miR-548b-3p	1	0	1	1	1	1	SEC22A	SEC22 vesicle trafficking protein homolog A (S. cerevisiae)
hsa-miR-548b-3p	0	0	1	1	1	1	A2ML1	alpha-2-macroglobulin-like 1
hsa-miR-548b-3p	0	0	1	1	1	1	SPICE1	spindle and centriole associated protein 1
hsa-miR-548b-3p	0	0	1	1	0	0	CERS5	ceramide synthase 5
hsa-miR-548b-3p	0	0	1	0	0	0	LINC00301	long intergenic non-protein coding RNA 301
hsa-miR-548b-3p	0	0	1	0	1	1	UHMK1	U2AF homology motif (UHM) kinase 1
hsa-miR-548b-3p	1	0	1	1	1	1	HLF	hepatic leukemia factor
hsa-miR-548b-3p	1	0	1	1	1	1	ARIH2	ariadne homolog 2 (Drosophila)
hsa-miR-548b-3p	1	0	1	1	1	1	SYN2	synapsin II
hsa-miR-548b-3p	0	0	1	0	1	1	PIANP	PILR alpha associated neural protein
hsa-miR-548b-3p	1	0	1	1	1	1	SUPT16H	suppressor of Ty 16 homolog (S. cerevisiae)
hsa-miR-548b-3p	0	0	1	1	0	0	CDK15	cyclin-dependent kinase 15
hsa-miR-548b-3p	1	0	1	1	1	1	FBXW2	F-box and WD repeat domain containing 2
hsa-miR-548b-3p	1	0	1	1	1	1	EPN2	epsin 2
hsa-miR-548b-3p	1	0	1	1	1	1	MAFK	v-maf musculoaponeurotic fibrosarcoma oncogene homolog K (avian)
hsa-miR-548b-3p	1	0	1	1	1	1	IVNS1ABP	influenza virus NS1A binding protein
hsa-miR-548b-3p	0	0	1	1	0	0	FNTB	farnesyltransferase, CAAX box, beta
hsa-miR-548b-3p	0	0	1	1	0	0	ARPC2	actin related protein 2/3 complex, subunit 2, 34kDa
hsa-miR-548b-3p	0	0	1	0	0	0	LOC550112	uncharacterized LOC550112
hsa-miR-548b-3p	0	0	1	1	1	1	SLC16A1	solute carrier family 16, member 1 (monocarboxylic acid transporter 1)
hsa-miR-548b-3p	1	0	1	1	1	1	DEM1	defects in morphology 1 homolog (S. cerevisiae)
hsa-miR-548b-3p	0	0	1	0	1	1	RALYL	RALY RNA binding protein-like
hsa-miR-548b-3p	1	0	1	1	1	1	SIAH1	siah E3 ubiquitin protein ligase 1
hsa-miR-548b-3p	1	0	1	0	1	1	GATAD2B	GATA zinc finger domain containing 2B
hsa-miR-548b-3p	1	0	1	0	1	1	NCOA7	nuclear receptor coactivator 7
hsa-miR-548b-3p	1	0	1	1	1	1	KANSL1	KAT8 regulatory NSL complex subunit 1
hsa-miR-548b-3p	1	0	1	0	1	1	IL1RAP	interleukin 1 receptor accessory protein
hsa-miR-548b-3p	0	0	1	1	0	0	DPAGT1	dolichyl-phosphate (UDP-N-acetylglucosamine) N-acetylglucosaminephosphotransferase 1 (GlcNAc-1-P transferase)
hsa-miR-548b-3p	1	0	1	1	1	1	RASGEF1A	RasGEF domain family, member 1A
hsa-miR-548b-3p	1	0	1	1	1	1	KCNIP3	Kv channel interacting protein 3, calsenilin
hsa-miR-548b-3p	1	0	1	1	1	1	FAM222B	family with sequence similarity 222, member B
hsa-miR-548b-3p	1	0	1	1	1	1	PEA15	phosphoprotein enriched in astrocytes 15
hsa-miR-548b-3p	1	0	1	1	1	1	AMT	aminomethyltransferase
hsa-miR-548b-3p	1	0	1	1	1	1	ACSL1	acyl-CoA synthetase long-chain family member 1
hsa-miR-548b-3p	1	0	1	1	1	1	GAPVD1	GTPase activating protein and VPS9 domains 1
hsa-miR-548b-3p	0	0	1	1	0	0	ERGIC3	ERGIC and golgi 3
hsa-miR-548b-3p	1	0	1	0	1	1	KIAA1737	KIAA1737
hsa-miR-548b-3p	1	0	1	0	1	1	THRB	thyroid hormone receptor, beta
hsa-miR-548b-3p	1	0	1	0	0	0	PID1	phosphotyrosine interaction domain containing 1
hsa-miR-548b-3p	0	0	1	1	1	1	PIGG	phosphatidylinositol glycan anchor biosynthesis, class G
hsa-miR-548b-3p	1	0	1	1	1	1	GOLGA8B	golgin A8 family, member B
hsa-miR-548b-3p	0	0	1	1	0	0	AHCY	adenosylhomocysteinase
hsa-miR-548b-3p	0	0	1	1	1	1	CBWD5	COBW domain containing 5
hsa-miR-548b-3p	1	0	1	1	1	1	IGSF11	immunoglobulin superfamily, member 11
hsa-miR-548b-3p	1	0	1	1	1	1	VAV3	vav 3 guanine nucleotide exchange factor
hsa-miR-548b-3p	0	0	1	1	1	1	LRRC49	leucine rich repeat containing 49
hsa-miR-548b-3p	1	0	1	1	1	1	ST7L	suppression of tumorigenicity 7 like
hsa-miR-548b-3p	1	0	1	1	1	1	ZCCHC2	zinc finger, CCHC domain containing 2
hsa-miR-548b-3p	1	0	1	1	1	1	CHD6	chromodomain helicase DNA binding protein 6
hsa-miR-548b-3p	0	0	1	1	0	0	ZNF283	zinc finger protein 283
hsa-miR-548b-3p	0	0	1	1	1	1	RP1	retinitis pigmentosa 1 (autosomal dominant)
hsa-miR-548b-3p	0	0	1	1	1	1	VIPAS39	VPS33B interacting protein, apical-basolateral polarity regulator, spe-39 homolog
hsa-miR-548b-3p	0	0	1	1	1	1	ARFGAP2	ADP-ribosylation factor GTPase activating protein 2
hsa-miR-548b-3p	1	0	1	1	1	1	NAP1L1	nucleosome assembly protein 1-like 1
hsa-miR-548b-3p	0	0	1	1	1	1	SLFN13	schlafen family member 13
hsa-miR-548b-3p	0	0	1	1	1	1	RNF217	ring finger protein 217
hsa-miR-548b-3p	1	0	1	1	1	1	BCL6B	B-cell CLL/lymphoma 6, member B
hsa-miR-548b-3p	0	0	1	1	0	0	CFP	complement factor properdin
hsa-miR-548b-3p	1	0	1	1	1	1	ZBTB4	zinc finger and BTB domain containing 4
hsa-miR-548b-3p	0	0	1	0	1	1	PATE4	prostate and testis expressed 4
hsa-miR-548b-3p	0	0	1	0	0	0	C1orf132	chromosome 1 open reading frame 132
hsa-miR-548b-3p	0	0	1	1	1	1	FAM5B	family with sequence similarity 5, member B
hsa-miR-548b-3p	0	0	1	1	1	1	PCBP2	poly(rC) binding protein 2
hsa-miR-548b-3p	0	0	1	0	0	0	LGALS17A	Charcot-Leyden crystal protein pseudogene
hsa-miR-548b-3p	0	0	1	0	0	0	LOC650368	asparagine-linked glycosylation 1-like pseudogene
hsa-miR-548b-3p	1	0	1	1	1	1	IPPK	inositol 1,3,4,5,6-pentakisphosphate 2-kinase
hsa-miR-548b-3p	1	0	1	1	1	1	SH2D4B	SH2 domain containing 4B
hsa-miR-548b-3p	0	0	1	1	0	0	NMI	N-myc (and STAT) interactor
hsa-miR-548b-3p	0	0	1	1	1	1	IDS	iduronate 2-sulfatase
hsa-miR-548b-3p	0	0	1	1	1	1	C3orf67	chromosome 3 open reading frame 67
hsa-miR-548b-3p	1	0	1	1	0	0	GXYLT1	glucoside xylosyltransferase 1
hsa-miR-548b-3p	0	0	1	1	0	0	LOC100128239	uncharacterized LOC100128239
hsa-miR-548b-3p	1	0	1	1	1	1	DENND5B	DENN/MADD domain containing 5B
hsa-miR-548b-3p	0	0	1	0	0	0	LOC613266	uncharacterized LOC613266
hsa-miR-548b-3p	1	0	1	0	1	1	KIAA1456	KIAA1456
hsa-miR-548b-3p	1	0	1	1	0	0	DYDC1	DPY30 domain containing 1
hsa-miR-548b-3p	1	0	1	1	1	1	FAM122B	family with sequence similarity 122B
hsa-miR-548b-3p	1	0	1	1	1	1	SACM1L	SAC1 suppressor of actin mutations 1-like (yeast)
hsa-miR-548b-3p	0	0	1	1	0	0	CLDN4	claudin 4
hsa-miR-548b-3p	0	0	1	1	1	1	CCDC132	coiled-coil domain containing 132
hsa-miR-548b-3p	0	0	1	1	1	1	C18orf54	chromosome 18 open reading frame 54
hsa-miR-548b-3p	0	0	1	1	0	0	CCDC88B	coiled-coil domain containing 88B
hsa-miR-548b-3p	0	0	1	0	0	0	PLEKHD1	pleckstrin homology domain containing, family D (with coiled-coil domains) member 1
hsa-miR-548b-3p	0	0	1	0	0	0	LOC100127955	uncharacterized LOC100127955
hsa-miR-548b-3p	1	0	1	0	1	1	ADIPOR2	adiponectin receptor 2
hsa-miR-548b-3p	1	0	1	1	0	0	MRVI1	murine retrovirus integration site 1 homolog
hsa-miR-548b-3p	1	0	1	1	1	1	PHF17	PHD finger protein 17
hsa-miR-548b-3p	1	0	1	1	1	1	LSM14A	LSM14A, SCD6 homolog A (S. cerevisiae)
hsa-miR-548b-3p	0	0	1	0	0	0	LOC100128262	uncharacterized LOC100128262
hsa-miR-548b-3p	0	0	1	1	1	1	WDR69	WD repeat domain 69
hsa-miR-548b-3p	0	0	1	1	0	0	BPIFB1	BPI fold containing family B, member 1
hsa-miR-548b-3p	0	0	1	0	0	0	LRRC9	leucine rich repeat containing 9
hsa-miR-548b-3p	1	0	1	1	1	1	SLC12A6	solute carrier family 12 (potassium/chloride transporters), member 6
hsa-miR-548b-3p	1	0	1	0	1	1	KDM2A	lysine (K)-specific demethylase 2A
hsa-miR-548b-3p	0	0	1	1	1	1	CD160	CD160 molecule
hsa-miR-548b-3p	1	0	1	1	1	1	SH3D19	SH3 domain containing 19
hsa-miR-548b-3p	1	0	1	1	1	1	BCAT1	branched chain amino-acid transaminase 1, cytosolic
hsa-miR-548b-3p	1	0	1	1	1	1	PUS7	pseudouridylate synthase 7 homolog (S. cerevisiae)
hsa-miR-548b-3p	0	0	1	0	1	1	KIF1A	kinesin family member 1A
hsa-miR-548b-3p	1	0	1	0	1	1	ESRRG	estrogen-related receptor gamma
hsa-miR-548b-3p	0	0	1	1	1	1	TMC5	transmembrane channel-like 5
hsa-miR-548b-3p	1	0	1	1	0	0	FOXP2	forkhead box P2
hsa-miR-548b-3p	0	0	1	0	0	0	AGAP9	ArfGAP with GTPase domain, ankyrin repeat and PH domain 9
hsa-miR-548b-3p	0	0	1	1	1	1	FANCC	Fanconi anemia, complementation group C
hsa-miR-548b-3p	1	0	1	1	1	1	B3GALNT1	beta-1,3-N-acetylgalactosaminyltransferase 1 (globoside blood group)
hsa-miR-548b-3p	0	0	1	0	1	1	PEX5	peroxisomal biogenesis factor 5
hsa-miR-548b-3p	0	0	1	1	0	0	FERMT1	fermitin family member 1
hsa-miR-548b-3p	1	0	1	1	1	1	TBC1D15	TBC1 domain family, member 15
hsa-miR-548b-3p	0	0	1	1	0	0	PCSK5	proprotein convertase subtilisin/kexin type 5
hsa-miR-548b-3p	1	0	1	1	1	1	LUC7L3	LUC7-like 3 (S. cerevisiae)
hsa-miR-548b-3p	0	0	1	1	1	1	CCKBR	cholecystokinin B receptor
hsa-miR-548b-3p	0	0	1	1	1	1	SRP9	signal recognition particle 9kDa
hsa-miR-548b-3p	1	0	1	1	1	1	RIF1	RAP1 interacting factor homolog (yeast)
hsa-miR-548b-3p	1	0	1	1	1	1	SMC6	structural maintenance of chromosomes 6
hsa-miR-548b-3p	0	0	1	1	0	0	PACSIN2	protein kinase C and casein kinase substrate in neurons 2
hsa-miR-548b-3p	0	0	1	1	1	1	RHOT1	ras homolog family member T1
hsa-miR-548b-3p	0	0	1	1	0	0	PCIF1	PDX1 C-terminal inhibiting factor 1
hsa-miR-548b-3p	1	0	1	1	1	1	NBEA	neurobeachin
hsa-miR-548b-3p	1	0	1	0	1	1	GPR85	G protein-coupled receptor 85
hsa-miR-548b-3p	0	0	1	1	0	0	DOPEY1	dopey family member 1
hsa-miR-548b-3p	1	0	1	1	0	0	FAM108C1	family with sequence similarity 108, member C1
hsa-miR-548b-3p	1	0	1	0	1	1	FAM19A1	family with sequence similarity 19 (chemokine (C-C motif)-like), member A1
hsa-miR-548b-3p	1	0	1	1	1	1	YTHDF3	YTH domain family, member 3
hsa-miR-548b-3p	1	0	1	1	1	1	LIMCH1	LIM and calponin homology domains 1
hsa-miR-548b-3p	1	0	1	1	1	1	MIER1	mesoderm induction early response 1 homolog (Xenopus laevis)
hsa-miR-548b-3p	0	0	1	0	1	1	GAB3	GRB2-associated binding protein 3
hsa-miR-548b-3p	1	0	1	1	1	1	DNAJC10	DnaJ (Hsp40) homolog, subfamily C, member 10
hsa-miR-548b-3p	1	0	1	1	1	1	EHMT1	euchromatic histone-lysine N-methyltransferase 1
hsa-miR-548b-3p	0	0	1	1	1	1	INPP5B	inositol polyphosphate-5-phosphatase, 75kDa
hsa-miR-548b-3p	0	0	1	0	1	1	FBXO42	F-box protein 42
hsa-miR-548b-3p	1	0	1	1	1	1	CEP164	centrosomal protein 164kDa
hsa-miR-548b-3p	0	0	1	1	0	0	FAM18A	family with sequence similarity 18, member A
hsa-miR-548b-3p	1	0	1	1	1	1	FAM63B	family with sequence similarity 63, member B
hsa-miR-548b-3p	0	0	1	1	0	0	TTLL6	tubulin tyrosine ligase-like family, member 6
hsa-miR-548b-3p	1	0	1	0	1	1	JAZF1	JAZF zinc finger 1
hsa-miR-548b-3p	0	0	1	1	1	1	TEX2	testis expressed 2
hsa-miR-548b-3p	1	0	1	1	1	1	RBM26	RNA binding motif protein 26
hsa-miR-548b-3p	1	0	1	1	1	1	RICTOR	RPTOR independent companion of MTOR, complex 2
hsa-miR-548b-3p	0	0	1	0	1	1	SYNPO2	synaptopodin 2
hsa-miR-548b-3p	1	0	1	1	1	1	FAM76B	family with sequence similarity 76, member B
hsa-miR-548b-3p	1	0	1	1	1	1	FBXL5	F-box and leucine-rich repeat protein 5
hsa-miR-548b-3p	1	0	1	1	1	1	RNF38	ring finger protein 38
hsa-miR-548b-3p	1	0	1	1	1	1	IKZF2	IKAROS family zinc finger 2 (Helios)
hsa-miR-548b-3p	0	0	1	1	1	1	CRB1	crumbs homolog 1 (Drosophila)
hsa-miR-548b-3p	0	0	1	0	0	0	GRIK1-AS1	GRIK1 antisense RNA 1
hsa-miR-548b-3p	1	0	1	1	1	1	SULF1	sulfatase 1
hsa-miR-548b-3p	1	0	1	1	1	1	ANGPT1	angiopoietin 1
hsa-miR-548b-3p	1	0	1	1	1	1	ITSN1	intersectin 1 (SH3 domain protein)
hsa-miR-548b-3p	1	0	1	1	1	1	WDR26	WD repeat domain 26
hsa-miR-548b-3p	1	0	1	1	1	1	BCL11A	B-cell CLL/lymphoma 11A (zinc finger protein)
hsa-miR-548b-3p	0	0	1	1	1	1	GCOM1	GRINL1A complex locus 1
hsa-miR-548b-3p	1	0	1	1	1	1	TAB3	TGF-beta activated kinase 1/MAP3K7 binding protein 3
hsa-miR-548b-3p	0	0	1	1	1	1	PROK2	prokineticin 2
hsa-miR-548b-3p	1	0	1	1	1	1	IQGAP2	IQ motif containing GTPase activating protein 2
hsa-miR-548b-3p	1	0	1	0	1	1	DLEU7	deleted in lymphocytic leukemia, 7
hsa-miR-548b-3p	1	0	1	1	1	1	SSX2IP	synovial sarcoma, X breakpoint 2 interacting protein
hsa-miR-548b-3p	1	0	1	0	1	1	ANKRD28	ankyrin repeat domain 28
hsa-miR-548b-3p	0	0	1	1	1	1	RPTN	repetin
hsa-miR-548b-3p	1	0	1	1	1	1	VPS45	vacuolar protein sorting 45 homolog (S. cerevisiae)
hsa-miR-548b-3p	1	0	1	0	1	1	NHS	Nance-Horan syndrome (congenital cataracts and dental anomalies)
hsa-miR-548b-3p	0	0	1	1	1	1	DIDO1	death inducer-obliterator 1
hsa-miR-548b-3p	1	0	1	1	1	1	ARHGAP20	Rho GTPase activating protein 20
hsa-miR-548b-3p	1	0	1	1	1	1	MECP2	methyl CpG binding protein 2 (Rett syndrome)
hsa-miR-548b-3p	1	0	1	0	1	1	LRAT	lecithin retinol acyltransferase (phosphatidylcholine--retinol O-acyltransferase)
hsa-miR-548b-3p	1	0	1	1	1	1	LAMP2	lysosomal-associated membrane protein 2
hsa-miR-548b-3p	0	0	1	0	1	1	RAB18	RAB18, member RAS oncogene family
hsa-miR-548b-3p	1	0	1	1	1	1	PLCH1	phospholipase C, eta 1
hsa-miR-548b-3p	0	0	1	1	1	1	RHD	Rh blood group, D antigen
hsa-miR-548b-3p	0	0	1	1	1	1	DLEC1	deleted in lung and esophageal cancer 1
hsa-miR-548b-3p	1	0	1	1	1	1	PCDH11X	protocadherin 11 X-linked
hsa-miR-548b-3p	1	0	1	1	1	1	PRKACB	protein kinase, cAMP-dependent, catalytic, beta
hsa-miR-548b-3p	1	0	1	1	1	1	AMOT	angiomotin
hsa-miR-548b-3p	1	0	1	0	1	1	FAM46A	family with sequence similarity 46, member A
hsa-miR-548b-3p	1	0	1	1	1	1	TSPAN14	tetraspanin 14
hsa-miR-548b-3p	1	0	1	0	1	1	DCAF10	DDB1 and CUL4 associated factor 10
hsa-miR-548b-3p	1	0	1	1	0	0	DHDDS	dehydrodolichyl diphosphate synthase
hsa-miR-548b-3p	0	0	1	1	1	1	CHEK1	checkpoint kinase 1
hsa-miR-548b-3p	0	0	1	1	1	1	PRMT5	protein arginine methyltransferase 5
hsa-miR-548b-3p	0	0	1	0	0	0	MGC13053	uncharacterized MGC13053
hsa-miR-548b-3p	0	0	1	1	1	1	FAM104B	family with sequence similarity 104, member B
hsa-miR-548b-3p	1	0	1	1	1	1	U2SURP	U2 snRNP-associated SURP domain containing
hsa-miR-548b-3p	1	0	1	1	1	1	TRIM39	tripartite motif containing 39
hsa-miR-548b-3p	0	0	1	0	0	0	ATXN7L3B	ataxin 7-like 3B
hsa-miR-548b-3p	0	0	1	0	0	0	LOC400043	uncharacterized LOC400043
hsa-miR-548b-3p	1	0	1	1	0	0	MARCH9	membrane-associated ring finger (C3HC4) 9
hsa-miR-548b-3p	0	0	1	1	1	1	WSCD1	WSC domain containing 1
hsa-miR-548b-3p	0	0	1	1	1	1	ATXN2L	ataxin 2-like
hsa-miR-548b-3p	0	0	1	1	1	1	RSRC1	arginine/serine-rich coiled-coil 1
hsa-miR-548b-3p	0	0	1	1	1	1	HDHD2	haloacid dehalogenase-like hydrolase domain containing 2
hsa-miR-548b-3p	0	0	1	0	0	0	TPTEP1	transmembrane phosphatase with tensin homology pseudogene 1
hsa-miR-548b-3p	1	0	1	0	1	1	RNF165	ring finger protein 165
hsa-miR-548b-3p	0	0	1	1	1	1	CPNE5	copine V
hsa-miR-548b-3p	1	0	1	1	0	0	ZMYM3	zinc finger, MYM-type 3
hsa-miR-548b-3p	1	0	1	1	1	1	CAP1	CAP, adenylate cyclase-associated protein 1 (yeast)
hsa-miR-548b-3p	1	0	1	1	1	1	ETF1	eukaryotic translation termination factor 1
hsa-miR-548b-3p	1	0	1	1	1	1	PRDM2	PR domain containing 2, with ZNF domain
hsa-miR-548b-3p	1	0	1	1	1	1	PAPOLA	poly(A) polymerase alpha
hsa-miR-548b-3p	0	0	1	1	1	1	GIN1	gypsy retrotransposon integrase 1
hsa-miR-548b-3p	0	0	1	0	0	0	KLHL15	kelch-like 15 (Drosophila)
hsa-miR-548b-3p	1	0	1	1	1	1	RIMKLB	ribosomal modification protein rimK-like family member B
hsa-miR-548b-3p	1	0	1	1	0	0	ARMCX2	armadillo repeat containing, X-linked 2
hsa-miR-548b-3p	0	0	1	1	1	1	KRCC1	lysine-rich coiled-coil 1
hsa-miR-548b-3p	1	0	1	1	1	1	FAM199X	family with sequence similarity 199, X-linked
hsa-miR-548b-3p	0	0	1	0	0	0	FAM86DP	family with sequence similarity 86, member D, pseudogene
hsa-miR-548b-3p	1	0	1	1	1	1	NRF1	nuclear respiratory factor 1
hsa-miR-548b-3p	0	0	1	0	0	0	LOC100144602	uncharacterized LOC100144602
hsa-miR-548b-3p	1	0	1	1	1	1	ZNF131	zinc finger protein 131
hsa-miR-548b-3p	0	0	1	0	1	1	LOC646736	uncharacterized LOC646736
hsa-miR-548b-3p	0	0	1	1	0	0	LRRC36	leucine rich repeat containing 36
hsa-miR-548b-3p	0	0	1	0	1	1	ZNF641	zinc finger protein 641
hsa-miR-548b-3p	1	0	1	1	1	1	SUZ12	suppressor of zeste 12 homolog (Drosophila)
hsa-miR-548b-3p	0	0	1	0	1	1	TMSB15B	thymosin beta 15B
hsa-miR-548b-3p	0	0	1	0	0	0	ENTPD5	ectonucleoside triphosphate diphosphohydrolase 5
hsa-miR-548b-3p	0	0	1	1	1	1	SRGN	serglycin
hsa-miR-548b-3p	1	0	1	1	1	1	NIPA1	non imprinted in Prader-Willi/Angelman syndrome 1
hsa-miR-548b-3p	0	0	1	1	1	1	ANKZF1	ankyrin repeat and zinc finger domain containing 1
hsa-miR-548b-3p	0	0	1	0	1	1	KIAA0895	KIAA0895
hsa-miR-548b-3p	0	0	1	0	0	0	C3orf55	chromosome 3 open reading frame 55
hsa-miR-548b-3p	1	0	1	1	1	1	GIGYF2	GRB10 interacting GYF protein 2
hsa-miR-548b-3p	0	0	1	1	1	1	SEMA3D	sema domain, immunoglobulin domain (Ig), short basic domain, secreted, (semaphorin) 3D
hsa-miR-548b-3p	1	0	1	1	1	1	PPARGC1A	peroxisome proliferator-activated receptor gamma, coactivator 1 alpha
hsa-miR-548b-3p	0	0	1	1	1	1	PIK3AP1	phosphoinositide-3-kinase adaptor protein 1
hsa-miR-548b-3p	0	0	1	1	1	1	CD48	CD48 molecule
hsa-miR-548b-3p	0	0	1	1	0	0	FOLR3	folate receptor 3 (gamma)
hsa-miR-548b-3p	1	0	1	1	1	1	ELAVL2	ELAV (embryonic lethal, abnormal vision, Drosophila)-like 2 (Hu antigen B)
hsa-miR-548b-3p	1	0	1	1	1	1	ZNF518A	zinc finger protein 518A
hsa-miR-548b-3p	0	0	1	1	0	0	C7orf57	chromosome 7 open reading frame 57
hsa-miR-548b-3p	1	0	1	1	1	1	PITPNB	phosphatidylinositol transfer protein, beta
hsa-miR-548b-3p	1	0	1	1	1	1	RCOR3	REST corepressor 3
hsa-miR-548b-3p	1	0	1	1	1	1	GLUL	glutamate-ammonia ligase
hsa-miR-548b-3p	0	0	1	1	1	1	C7orf53	chromosome 7 open reading frame 53
hsa-miR-548b-3p	1	0	1	1	1	1	C5orf25	chromosome 5 open reading frame 25
hsa-miR-548b-3p	0	0	1	0	0	0	LOC643648	uncharacterized LOC643648
hsa-miR-548b-3p	1	0	1	1	1	1	SF1	splicing factor 1
hsa-miR-548b-3p	1	0	1	1	1	1	RAB5B	RAB5B, member RAS oncogene family
hsa-miR-548b-3p	0	0	1	0	0	0	FAM86JP	family with sequence similarity 86, member A pseudogene
hsa-miR-548b-3p	0	0	1	0	1	1	TTC23L	tetratricopeptide repeat domain 23-like
hsa-miR-548b-3p	1	0	1	1	1	1	PPP2R2C	protein phosphatase 2, regulatory subunit B, gamma
hsa-miR-548b-3p	0	0	1	1	0	0	STK31	serine/threonine kinase 31
hsa-miR-548b-3p	1	0	1	1	1	1	PLEKHA7	pleckstrin homology domain containing, family A member 7
hsa-miR-548b-3p	1	0	1	1	1	1	CRKL	v-crk sarcoma virus CT10 oncogene homolog (avian)-like
hsa-miR-548b-3p	1	0	1	1	1	1	HMGCR	3-hydroxy-3-methylglutaryl-CoA reductase
hsa-miR-548b-3p	1	0	1	0	1	1	KIF5A	kinesin family member 5A
hsa-miR-548b-3p	1	0	1	1	1	1	LPGAT1	lysophosphatidylglycerol acyltransferase 1
hsa-miR-548b-3p	0	0	1	0	1	1	DKFZP434I0714	uncharacterized protein DKFZP434I0714
hsa-miR-548b-3p	0	0	1	1	1	1	EDA2R	ectodysplasin A2 receptor
hsa-miR-548b-3p	1	0	1	1	1	1	FAM120A	family with sequence similarity 120A
hsa-miR-548b-3p	0	0	1	0	1	1	GPR155	G protein-coupled receptor 155
hsa-miR-548b-3p	0	0	1	0	0	0	LOC643529	hCG2024094
hsa-miR-548b-3p	0	0	1	1	1	1	SEC24D	SEC24 family, member D (S. cerevisiae)
hsa-miR-548b-3p	0	0	1	1	1	1	SNAPC3	small nuclear RNA activating complex, polypeptide 3, 50kDa
hsa-miR-548b-3p	1	0	1	1	1	1	ZNF618	zinc finger protein 618
hsa-miR-548b-3p	1	0	1	1	1	1	MACROD2	MACRO domain containing 2
hsa-miR-548b-3p	0	0	1	1	1	1	FAM171B	family with sequence similarity 171, member B
hsa-miR-548b-3p	1	0	1	0	1	1	NEGR1	neuronal growth regulator 1
hsa-miR-548b-3p	1	0	1	0	1	1	CPEB4	cytoplasmic polyadenylation element binding protein 4
hsa-miR-548b-3p	1	0	1	0	1	1	YAF2	YY1 associated factor 2
hsa-miR-548b-3p	0	0	1	1	1	1	EFCAB13	EF-hand calcium binding domain 13
hsa-miR-548b-3p	1	0	1	1	1	1	GALNT1	UDP-N-acetyl-alpha-D-galactosamine:polypeptide N-acetylgalactosaminyltransferase 1 (GalNAc-T1)
hsa-miR-548b-3p	1	0	1	0	1	1	ARID2	AT rich interactive domain 2 (ARID, RFX-like)
hsa-miR-548b-3p	0	0	1	1	0	0	CCDC152	coiled-coil domain containing 152
hsa-miR-548b-3p	0	0	1	0	0	0	FLJ36000	uncharacterized FLJ36000
hsa-miR-548b-3p	0	0	1	1	1	1	CACHD1	cache domain containing 1
hsa-miR-548b-3p	1	0	1	0	0	0	CT62	cancer/testis antigen 62
hsa-miR-548b-3p	1	0	1	1	1	1	MARCKS	myristoylated alanine-rich protein kinase C substrate
hsa-miR-548b-3p	0	0	1	1	1	1	SLTM	SAFB-like, transcription modulator
hsa-miR-548b-3p	1	0	1	1	1	1	DOLPP1	dolichyl pyrophosphate phosphatase 1
hsa-miR-548b-3p	0	0	1	0	0	0	LOC339622	uncharacterized LOC339622
hsa-miR-548b-3p	0	0	1	1	0	0	AQP12B	aquaporin 12B
hsa-miR-548b-3p	1	0	1	1	1	1	ROCK1	Rho-associated, coiled-coil containing protein kinase 1
hsa-miR-548b-3p	0	0	1	0	1	1	OAZ1	ornithine decarboxylase antizyme 1
hsa-miR-548b-3p	0	0	1	1	1	1	SH3GL3	SH3-domain GRB2-like 3
hsa-miR-548b-3p	1	0	1	1	1	1	TXNRD1	thioredoxin reductase 1
hsa-miR-548b-3p	0	0	1	0	0	0	LOC340094	uncharacterized LOC340094
hsa-miR-548b-3p	1	0	1	1	1	1	ASXL2	additional sex combs like 2 (Drosophila)
hsa-miR-548b-3p	0	0	1	0	0	0	LOC339316	uncharacterized LOC339316
hsa-miR-548b-3p	0	0	1	0	0	0	LOC338739	uncharacterized LOC338739
hsa-miR-548b-3p	0	0	1	0	0	0	MORF4L2-AS1	MORF4L2 antisense RNA 1
hsa-miR-548b-3p	0	0	1	0	0	0	LOC339260	uncharacterized LOC339260
hsa-miR-548b-3p	0	0	1	0	0	0	LOC646168	uncharacterized LOC646168
hsa-miR-548b-3p	0	0	1	0	0	0	DKFZp686O1327	uncharacterized LOC401014
hsa-miR-548b-3p	1	0	1	0	1	1	PSD3	pleckstrin and Sec7 domain containing 3
hsa-miR-548b-3p	1	0	1	1	1	1	SENP1	SUMO1/sentrin specific peptidase 1
hsa-miR-548b-3p	1	0	1	1	1	1	SON	SON DNA binding protein
hsa-miR-548b-3p	1	0	1	0	1	1	LYPD6	LY6/PLAUR domain containing 6
hsa-miR-548b-3p	0	0	1	0	1	1	CADM1	cell adhesion molecule 1
hsa-miR-548b-3p	1	0	1	0	1	1	ZNF800	zinc finger protein 800
hsa-miR-548b-3p	1	0	1	1	1	1	WSB1	WD repeat and SOCS box containing 1
hsa-miR-548b-3p	0	0	1	1	0	0	POLG	polymerase (DNA directed), gamma
hsa-miR-548b-3p	1	0	1	1	1	1	CRCP	CGRP receptor component
hsa-miR-548b-3p	1	0	1	0	1	1	C14orf43	chromosome 14 open reading frame 43
hsa-miR-548b-3p	0	0	1	0	0	0	LINC00265	long intergenic non-protein coding RNA 265
hsa-miR-548b-3p	0	0	1	0	1	1	C17orf51	chromosome 17 open reading frame 51
hsa-miR-548b-3p	0	0	1	1	0	0	CRYM-AS1	CRYM antisense RNA 1
hsa-miR-548b-3p	1	0	1	1	0	0	G6PC3	glucose 6 phosphatase, catalytic, 3
hsa-miR-548b-3p	0	0	1	1	0	0	LRRIQ3	leucine-rich repeats and IQ motif containing 3
hsa-miR-548b-3p	0	0	1	1	0	0	C8orf31	chromosome 8 open reading frame 31
hsa-miR-548b-3p	0	0	1	1	1	1	PIM3	pim-3 oncogene
hsa-miR-548b-3p	1	0	1	1	1	1	UEVLD	UEV and lactate/malate dehyrogenase domains
hsa-miR-548b-3p	0	0	1	1	1	1	GORAB	golgin, RAB6-interacting
hsa-miR-548b-3p	1	0	1	1	1	1	RAVER2	ribonucleoprotein, PTB-binding 2
hsa-miR-548b-3p	0	0	1	0	0	0	KANSL1-AS1	KANSL1 antisense RNA 1
hsa-miR-548b-3p	1	0	1	1	1	1	RAB2B	RAB2B, member RAS oncogene family
hsa-miR-548b-3p	0	0	1	1	1	1	SH2D1B	SH2 domain containing 1B
hsa-miR-548b-3p	1	0	1	1	1	1	CKAP2	cytoskeleton associated protein 2
hsa-miR-548b-3p	0	0	1	1	1	1	GPR18	G protein-coupled receptor 18
hsa-miR-548b-3p	1	0	1	1	1	1	VIM	vimentin
hsa-miR-548b-3p	1	0	1	1	0	0	TMEM198	transmembrane protein 198
hsa-miR-548b-3p	0	0	1	0	1	1	LOC728228	uncharacterized LOC728228
hsa-miR-548b-3p	1	0	1	1	1	1	ANLN	anillin, actin binding protein
hsa-miR-548b-3p	0	0	1	0	0	0	AQP7P2	aquaporin 7 pseudogene 2
hsa-miR-548b-3p	1	0	1	0	1	1	TMEM194A	transmembrane protein 194A
hsa-miR-548b-3p	0	0	1	1	1	1	ABHD14B	abhydrolase domain containing 14B
hsa-miR-548b-3p	0	0	1	0	0	0	LOC440416	uncharacterized LOC440416
hsa-miR-548b-3p	1	0	1	1	1	1	OPCML	opioid binding protein/cell adhesion molecule-like
hsa-miR-548b-3p	1	0	1	1	1	1	WNT5A	wingless-type MMTV integration site family, member 5A
hsa-miR-548b-3p	1	0	1	0	1	1	DPYSL3	dihydropyrimidinase-like 3
hsa-miR-548b-3p	1	0	1	1	1	1	HNRNPC	heterogeneous nuclear ribonucleoprotein C (C1/C2)
hsa-miR-548b-3p	1	0	1	1	1	1	TRPM3	transient receptor potential cation channel, subfamily M, member 3
hsa-miR-548b-3p	1	0	1	0	1	1	PIK3R3	phosphoinositide-3-kinase, regulatory subunit 3 (gamma)
hsa-miR-548b-3p	1	0	1	1	1	1	PLXNA2	plexin A2
hsa-miR-548b-3p	1	0	1	1	1	1	STK38	serine/threonine kinase 38
hsa-miR-548b-3p	1	0	1	0	1	1	LRRTM4	leucine rich repeat transmembrane neuronal 4
hsa-miR-548b-3p	0	0	1	1	1	1	HMGB2	high mobility group box 2
hsa-miR-548b-3p	1	0	1	0	1	1	CPEB2	cytoplasmic polyadenylation element binding protein 2
hsa-miR-548b-3p	0	0	1	0	0	0	LOC441493	uncharacterized LOC441493
hsa-miR-548b-3p	1	0	1	1	1	1	GABRB2	gamma-aminobutyric acid (GABA) A receptor, beta 2
hsa-miR-548b-3p	1	0	1	1	1	1	NR2F2	nuclear receptor subfamily 2, group F, member 2
hsa-miR-548b-3p	0	0	1	0	0	0	HIST2H2BA	histone cluster 2, H2ba (pseudogene)
hsa-miR-548b-3p	1	0	1	1	1	1	USP34	ubiquitin specific peptidase 34
hsa-miR-548b-3p	1	0	1	1	1	1	SUV420H1	suppressor of variegation 4-20 homolog 1 (Drosophila)
hsa-miR-548b-3p	1	0	1	0	1	1	DNAJC6	DnaJ (Hsp40) homolog, subfamily C, member 6
hsa-miR-548b-3p	1	0	1	0	1	1	BTBD3	BTB (POZ) domain containing 3
hsa-miR-548b-3p	0	0	1	1	0	0	STK19	serine/threonine kinase 19
hsa-miR-548b-3p	0	0	1	0	0	0	FAM86C2P	family with sequence similarity 86, member A pseudogene
hsa-miR-548b-3p	0	0	1	1	1	1	UNC13B	unc-13 homolog B (C. elegans)
hsa-miR-548b-3p	1	0	1	0	1	1	ROBO1	roundabout, axon guidance receptor, homolog 1 (Drosophila)
hsa-miR-548b-3p	0	0	1	1	0	0	C9orf84	chromosome 9 open reading frame 84
hsa-miR-548b-3p	0	0	1	1	1	1	LRCH1	leucine-rich repeats and calponin homology (CH) domain containing 1
hsa-miR-548b-3p	1	0	1	1	1	1	TMEM64	transmembrane protein 64
hsa-miR-548b-3p	0	0	1	1	1	1	C14orf105	chromosome 14 open reading frame 105
hsa-miR-548b-3p	1	0	1	1	1	1	GRIA3	glutamate receptor, ionotropic, AMPA 3
hsa-miR-548b-3p	0	0	1	0	0	0	EEF1DP3	eukaryotic translation elongation factor 1 delta pseudogene 3
hsa-miR-548b-3p	1	0	1	1	1	1	ZMYM4	zinc finger, MYM-type 4
hsa-miR-548b-3p	1	0	1	1	1	1	PHC2	polyhomeotic homolog 2 (Drosophila)
hsa-miR-548b-3p	1	0	1	0	0	0	SDR39U1	short chain dehydrogenase/reductase family 39U, member 1
hsa-miR-548b-3p	0	0	1	1	1	1	RAD51B	RAD51 homolog B (S. cerevisiae)
hsa-miR-548b-3p	0	0	1	0	0	0	LINC00643	long intergenic non-protein coding RNA 643
hsa-miR-548b-3p	1	0	1	1	1	1	EIF5	eukaryotic translation initiation factor 5
hsa-miR-548b-3p	0	0	1	0	0	0	DKFZp686D0853	uncharacterized LOC401613
hsa-miR-548b-3p	1	0	1	1	1	1	ATP2B4	ATPase, Ca++ transporting, plasma membrane 4
hsa-miR-548b-3p	1	0	1	1	1	1	RBL2	retinoblastoma-like 2 (p130)
hsa-miR-548b-3p	1	0	1	1	1	1	HECTD2	HECT domain containing E3 ubiquitin protein ligase 2
hsa-miR-548b-3p	1	0	1	1	1	1	SGCD	sarcoglycan, delta (35kDa dystrophin-associated glycoprotein)
hsa-miR-548b-3p	1	0	1	1	1	1	SUN2	Sad1 and UNC84 domain containing 2
hsa-miR-548b-3p	1	0	1	0	1	1	MTX3	metaxin 3
hsa-miR-548b-3p	1	0	1	1	1	1	ETS1	v-ets erythroblastosis virus E26 oncogene homolog 1 (avian)
hsa-miR-548b-3p	1	0	1	1	1	1	SH3BP4	SH3-domain binding protein 4
hsa-miR-548b-3p	1	0	1	0	1	1	GALNT4	UDP-N-acetyl-alpha-D-galactosamine:polypeptide N-acetylgalactosaminyltransferase 4 (GalNAc-T4)
hsa-miR-548b-3p	1	0	1	1	0	0	RBM27	RNA binding motif protein 27
hsa-miR-548b-3p	1	0	1	0	1	1	C14orf101	chromosome 14 open reading frame 101
hsa-miR-548b-3p	0	0	1	1	1	1	MLIP	muscular LMNA-interacting protein
hsa-miR-548b-3p	1	0	1	1	1	1	EPS15	epidermal growth factor receptor pathway substrate 15
hsa-miR-548b-3p	1	0	1	1	1	1	KLHL2	kelch-like 2, Mayven (Drosophila)
hsa-miR-548b-3p	0	0	1	0	1	1	MYO3B	myosin IIIB
hsa-miR-548b-3p	0	0	1	1	1	1	ZNF365	zinc finger protein 365
hsa-miR-548b-3p	1	0	1	1	1	1	CYB5B	cytochrome b5 type B (outer mitochondrial membrane)
hsa-miR-548b-3p	0	0	1	1	0	0	TMEM41A	transmembrane protein 41A
hsa-miR-548b-3p	1	0	1	1	1	1	NEDD9	neural precursor cell expressed, developmentally down-regulated 9
hsa-miR-548b-3p	1	0	1	1	1	1	PDXDC1	pyridoxal-dependent decarboxylase domain containing 1
hsa-miR-548b-3p	0	0	1	1	1	1	EXT2	exostosin 2
hsa-miR-548b-3p	1	0	1	1	1	1	GSTCD	glutathione S-transferase, C-terminal domain containing
hsa-miR-548b-3p	1	0	1	1	1	1	NAV1	neuron navigator 1
hsa-miR-548b-3p	1	0	1	0	1	1	IGF2BP3	insulin-like growth factor 2 mRNA binding protein 3
hsa-miR-548b-3p	0	0	1	1	1	1	THSD4	thrombospondin, type I, domain containing 4
hsa-miR-548b-3p	0	0	1	1	1	1	KIAA1328	KIAA1328
hsa-miR-548b-3p	1	0	1	0	1	1	TBL1XR1	transducin (beta)-like 1 X-linked receptor 1
hsa-miR-548b-3p	1	0	1	0	1	1	C1orf21	chromosome 1 open reading frame 21
hsa-miR-548b-3p	1	0	1	1	1	1	CREB3L2	cAMP responsive element binding protein 3-like 2
hsa-miR-548b-3p	0	0	1	0	0	0	DCTN2	dynactin 2 (p50)
hsa-miR-548b-3p	1	0	1	1	1	1	PGGT1B	protein geranylgeranyltransferase type I, beta subunit
hsa-miR-548b-3p	1	0	1	1	0	0	SMARCA2	SWI/SNF related, matrix associated, actin dependent regulator of chromatin, subfamily a, member 2
hsa-miR-548b-3p	1	0	1	1	1	1	NAGA	N-acetylgalactosaminidase, alpha-
hsa-miR-548b-3p	1	0	1	0	1	1	STX6	syntaxin 6
hsa-miR-548b-3p	0	0	1	1	1	1	RIPK2	receptor-interacting serine-threonine kinase 2
hsa-miR-548b-3p	0	0	1	1	1	1	UPRT	uracil phosphoribosyltransferase (FUR1) homolog (S. cerevisiae)
hsa-miR-548b-3p	0	0	1	1	1	1	DGCR14	DiGeorge syndrome critical region gene 14
hsa-miR-548b-3p	0	0	1	0	0	0	LOC400768	uncharacterized LOC400768
hsa-miR-548b-3p	0	0	1	1	1	1	FANCL	Fanconi anemia, complementation group L
hsa-miR-548b-3p	0	0	1	1	1	1	CIRBP	cold inducible RNA binding protein
hsa-miR-548b-3p	0	0	1	1	1	1	HSPB8	heat shock 22kDa protein 8
hsa-miR-548b-3p	0	0	1	1	1	1	BCL7B	B-cell CLL/lymphoma 7B
hsa-miR-548b-3p	0	0	1	1	1	1	INCENP	inner centromere protein antigens 135/155kDa
hsa-miR-548b-3p	1	0	1	1	1	1	SSR1	signal sequence receptor, alpha
hsa-miR-548b-3p	0	0	1	1	1	1	BLZF1	basic leucine zipper nuclear factor 1
hsa-miR-548b-3p	1	0	1	1	1	1	CDK7	cyclin-dependent kinase 7
hsa-miR-548b-3p	1	0	1	1	1	1	CHTF8	CTF8, chromosome transmission fidelity factor 8 homolog (S. cerevisiae)
hsa-miR-548b-3p	0	0	1	0	1	1	CD99P1	CD99 molecule pseudogene 1
hsa-miR-548b-3p	1	0	1	1	1	1	DAZAP1	DAZ associated protein 1
hsa-miR-548b-3p	1	0	1	1	1	1	ADAM9	ADAM metallopeptidase domain 9
hsa-miR-548b-3p	0	0	1	1	0	0	CCDC112	coiled-coil domain containing 112
hsa-miR-548b-3p	1	0	1	0	1	1	RPS6KB1	ribosomal protein S6 kinase, 70kDa, polypeptide 1
hsa-miR-548b-3p	0	0	1	1	1	1	XBP1	X-box binding protein 1
hsa-miR-548b-3p	1	0	1	1	1	1	STK38L	serine/threonine kinase 38 like
hsa-miR-548b-3p	0	0	1	1	0	0	C11orf73	chromosome 11 open reading frame 73
hsa-miR-548b-3p	1	0	1	1	1	1	TMEM245	transmembrane protein 245
hsa-miR-548b-3p	0	0	1	1	1	1	ATG4A	autophagy related 4A, cysteine peptidase
hsa-miR-548b-3p	1	0	1	1	0	0	THY1	Thy-1 cell surface antigen
hsa-miR-548b-3p	0	0	1	1	1	1	CAPZB	capping protein (actin filament) muscle Z-line, beta
hsa-miR-548b-3p	1	0	1	1	1	1	BTBD10	BTB (POZ) domain containing 10
hsa-miR-548b-3p	1	0	1	1	1	1	GPR137B	G protein-coupled receptor 137B
hsa-miR-548b-3p	0	0	1	1	1	1	SAP130	Sin3A-associated protein, 130kDa
hsa-miR-548b-3p	1	0	1	1	1	1	ARNTL	aryl hydrocarbon receptor nuclear translocator-like
hsa-miR-548b-3p	0	0	1	1	1	1	PEX19	peroxisomal biogenesis factor 19
hsa-miR-548b-3p	1	0	1	1	1	1	NT5DC1	5'-nucleotidase domain containing 1
hsa-miR-548b-3p	0	0	1	1	1	1	TANK	TRAF family member-associated NFKB activator
hsa-miR-548b-3p	1	0	1	1	1	1	HN1	hematological and neurological expressed 1
hsa-miR-548b-3p	1	0	1	1	1	1	FUBP3	far upstream element (FUSE) binding protein 3
hsa-miR-548b-3p	0	0	1	1	1	1	ATP1A1	ATPase, Na+/K+ transporting, alpha 1 polypeptide
hsa-miR-548b-3p	1	0	1	1	1	1	ARL4A	ADP-ribosylation factor-like 4A
hsa-miR-548b-3p	0	0	1	1	0	0	FAM57B	family with sequence similarity 57, member B
hsa-miR-548b-3p	1	0	1	1	1	1	EIF1	eukaryotic translation initiation factor 1
hsa-miR-548b-3p	0	0	1	1	1	1	CSTF1	cleavage stimulation factor, 3' pre-RNA, subunit 1, 50kDa
hsa-miR-548b-3p	0	0	1	1	0	0	C9orf114	chromosome 9 open reading frame 114
hsa-miR-548b-3p	0	0	1	1	1	1	RPL14	ribosomal protein L14
hsa-miR-548b-3p	0	0	1	1	1	1	STRAP	serine/threonine kinase receptor associated protein
hsa-miR-548b-3p	1	0	1	1	1	1	TRPM6	transient receptor potential cation channel, subfamily M, member 6
hsa-miR-548b-3p	0	0	1	1	0	0	CHRNA5	cholinergic receptor, nicotinic, alpha 5 (neuronal)
hsa-miR-548b-3p	0	0	1	1	0	0	OXA1L	oxidase (cytochrome c) assembly 1-like
hsa-miR-548b-3p	1	0	1	0	1	1	MAP1B	microtubule-associated protein 1B
hsa-miR-548b-3p	0	0	1	1	1	1	TSEN15	tRNA splicing endonuclease 15 homolog (S. cerevisiae)
hsa-miR-548b-3p	1	0	1	1	1	1	UBE2K	ubiquitin-conjugating enzyme E2K
hsa-miR-548b-3p	1	0	1	1	1	1	YWHAE	tyrosine 3-monooxygenase/tryptophan 5-monooxygenase activation protein, epsilon polypeptide
hsa-miR-548b-3p	0	0	1	1	1	1	CDKAL1	CDK5 regulatory subunit associated protein 1-like 1
hsa-miR-548b-3p	0	0	1	0	1	1	UBA52	ubiquitin A-52 residue ribosomal protein fusion product 1
hsa-miR-548b-3p	1	0	1	1	1	1	MED1	mediator complex subunit 1
hsa-miR-548b-3p	0	0	1	1	1	1	FAM118B	family with sequence similarity 118, member B
hsa-miR-548b-3p	0	0	1	1	1	1	BDH1	3-hydroxybutyrate dehydrogenase, type 1
hsa-miR-548b-3p	1	0	1	1	1	1	SERF2	small EDRK-rich factor 2
hsa-miR-548b-3p	1	0	1	1	0	0	MMP11	matrix metallopeptidase 11 (stromelysin 3)
hsa-miR-548b-3p	0	0	1	1	0	0	CD38	CD38 molecule
hsa-miR-548b-3p	0	0	1	1	1	1	ISX	intestine-specific homeobox
hsa-miR-548b-3p	0	0	1	1	1	1	ATG5	autophagy related 5
hsa-miR-548b-3p	1	0	1	0	1	1	MEGF10	multiple EGF-like-domains 10
hsa-miR-548b-3p	1	0	1	0	1	1	SLC7A6	solute carrier family 7 (amino acid transporter light chain, y+L system), member 6
hsa-miR-548b-3p	1	0	1	0	1	1	OSBPL8	oxysterol binding protein-like 8
hsa-miR-548b-3p	0	0	1	0	1	1	HDAC9	histone deacetylase 9
hsa-miR-548b-3p	0	0	1	1	1	1	SDAD1	SDA1 domain containing 1
hsa-miR-548b-3p	1	0	1	1	1	1	SLC39A10	solute carrier family 39 (zinc transporter), member 10
hsa-miR-548b-3p	1	0	1	1	1	1	SLC30A7	solute carrier family 30 (zinc transporter), member 7
hsa-miR-548b-3p	0	0	1	0	0	0	LOC440518	golgin A2 pseudogene
hsa-miR-548b-3p	1	0	1	1	1	1	ZFHX3	zinc finger homeobox 3
hsa-miR-548b-3p	0	0	1	1	1	1	MOBP	myelin-associated oligodendrocyte basic protein
hsa-miR-548b-3p	0	0	1	1	1	1	SLC39A14	solute carrier family 39 (zinc transporter), member 14
hsa-miR-548b-3p	0	0	1	1	1	1	PTGS1	prostaglandin-endoperoxide synthase 1 (prostaglandin G/H synthase and cyclooxygenase)
hsa-miR-548b-3p	1	0	1	1	1	1	MOSPD1	motile sperm domain containing 1
hsa-miR-548b-3p	1	0	1	1	1	1	QKI	QKI, KH domain containing, RNA binding
hsa-miR-548b-3p	0	0	1	1	1	1	P2RX7	purinergic receptor P2X, ligand-gated ion channel, 7
hsa-miR-548b-3p	0	0	1	0	0	0	POM121L8P	POM121 transmembrane nucleoporin-like 8 pseudogene
hsa-miR-548b-3p	1	0	1	1	1	1	CDC27	cell division cycle 27 homolog (S. cerevisiae)
hsa-miR-548b-3p	1	0	1	1	1	1	IRF1	interferon regulatory factor 1
hsa-miR-548b-3p	1	0	1	1	1	1	SLC4A8	solute carrier family 4, sodium bicarbonate cotransporter, member 8
hsa-miR-548b-3p	1	0	1	1	1	1	MLL	myeloid/lymphoid or mixed-lineage leukemia (trithorax homolog, Drosophila)
hsa-miR-548b-3p	1	0	1	1	1	1	IGF1	insulin-like growth factor 1 (somatomedin C)
hsa-miR-548b-3p	0	0	1	1	1	1	PRKACA	protein kinase, cAMP-dependent, catalytic, alpha
hsa-miR-548b-3p	0	0	1	1	1	1	GAD2	glutamate decarboxylase 2 (pancreatic islets and brain, 65kDa)
hsa-miR-548b-3p	1	0	1	1	1	1	COL1A1	collagen, type I, alpha 1
hsa-miR-548b-3p	1	0	1	1	1	1	COL1A2	collagen, type I, alpha 2
hsa-miR-548b-3p	1	0	1	1	1	1	ESR1	estrogen receptor 1
hsa-miR-548b-3p	0	0	1	0	1	1	MS4A2	membrane-spanning 4-domains, subfamily A, member 2
hsa-miR-548b-3p	1	0	1	1	1	1	GK	glycerol kinase
hsa-miR-548b-3p	1	0	1	1	1	1	TBX5	T-box 5
hsa-miR-548b-3p	1	0	1	1	1	1	ITGA6	integrin, alpha 6
hsa-miR-548b-3p	1	0	1	1	1	1	JAG1	jagged 1
hsa-miR-548b-3p	1	0	1	1	1	1	LEP	leptin
hsa-miR-548b-3p	1	0	1	1	1	1	MITF	microphthalmia-associated transcription factor
hsa-miR-548b-3p	1	0	1	1	1	1	NPC1	Niemann-Pick disease, type C1
hsa-miR-548b-3p	1	0	1	0	1	1	PTEN	phosphatase and tensin homolog
hsa-miR-548b-3p	1	0	1	1	1	1	ATXN1	ataxin 1
hsa-miR-548b-3p	1	0	1	0	1	1	TSC1	tuberous sclerosis 1
hsa-miR-548b-3p	0	0	1	1	1	1	SLC25A20	solute carrier family 25 (carnitine/acylcarnitine translocase), member 20
hsa-miR-548b-3p	1	0	1	1	1	1	HLCS	holocarboxylase synthetase (biotin-(proprionyl-CoA-carboxylase (ATP-hydrolysing)) ligase)
hsa-miR-548b-3p	1	0	1	0	1	1	PAFAH1B1	platelet-activating factor acetylhydrolase 1b, regulatory subunit 1 (45kDa)
hsa-miR-548b-3p	0	0	1	1	1	1	PECAM1	platelet/endothelial cell adhesion molecule 1
hsa-miR-548b-3p	1	0	1	1	1	1	RFX5	regulatory factor X, 5 (influences HLA class II expression)
hsa-miR-548b-3p	0	0	1	1	1	1	CRX	cone-rod homeobox
hsa-miR-548b-3p	1	0	1	1	1	1	IL10	interleukin 10
hsa-miR-548b-3p	0	0	1	1	1	1	IL11	interleukin 11
hsa-miR-548b-3p	0	0	1	1	0	0	AVPR1B	arginine vasopressin receptor 1B
hsa-miR-548b-3p	0	0	1	1	0	0	BLVRA	biliverdin reductase A
hsa-miR-548b-3p	1	0	1	0	1	1	CACNA1E	calcium channel, voltage-dependent, R type, alpha 1E subunit
hsa-miR-548b-3p	1	0	1	1	1	1	GABRG2	gamma-aminobutyric acid (GABA) A receptor, gamma 2
hsa-miR-548b-3p	1	0	1	1	1	1	GRIA4	glutamate receptor, ionotropic, AMPA 4
hsa-miR-548b-3p	1	0	1	0	1	1	KCNJ2	potassium inwardly-rectifying channel, subfamily J, member 2
hsa-miR-548b-3p	0	0	1	1	0	0	OXT	oxytocin, prepropeptide
hsa-miR-548b-3p	1	0	1	1	0	0	PPIB	peptidylprolyl isomerase B (cyclophilin B)
hsa-miR-548b-3p	1	0	1	1	1	1	PTGFR	prostaglandin F receptor (FP)
hsa-miR-548b-3p	0	0	1	0	1	1	PTGIS	prostaglandin I2 (prostacyclin) synthase
hsa-miR-548b-3p	1	0	1	0	1	1	SMAD5	SMAD family member 5
hsa-miR-548b-3p	1	0	1	0	1	1	SPOPL	speckle-type POZ protein-like
hsa-miR-548b-3p	0	0	1	1	1	1	C4orf3	chromosome 4 open reading frame 3
hsa-miR-548b-3p	1	0	1	1	1	1	WNK3	WNK lysine deficient protein kinase 3
hsa-miR-548b-3p	1	0	1	1	1	1	KLHL31	kelch-like 31 (Drosophila)
hsa-miR-548b-3p	1	0	1	1	1	1	BICD2	bicaudal D homolog 2 (Drosophila)
hsa-miR-548b-3p	1	0	1	0	1	1	BMF	Bcl2 modifying factor
hsa-miR-548b-3p	0	0	1	1	1	1	ALG11	asparagine-linked glycosylation 11, alpha-1,2-mannosyltransferase homolog (yeast)
hsa-miR-548b-3p	0	0	1	1	1	1	CCDC144NL	coiled-coil domain containing 144 family, N-terminal like
hsa-miR-548b-3p	0	0	1	0	1	1	FLJ16124	FLJ16124 protein
hsa-miR-548b-3p	1	0	1	1	1	1	PLCXD3	phosphatidylinositol-specific phospholipase C, X domain containing 3
hsa-miR-548b-3p	1	0	1	0	1	1	IP6K1	inositol hexakisphosphate kinase 1
hsa-miR-548b-3p	0	0	1	1	1	1	WBP5	WW domain binding protein 5
hsa-miR-548b-3p	1	0	1	1	1	1	SPOP	speckle-type POZ protein
hsa-miR-548b-3p	1	0	1	1	1	1	BRWD1	bromodomain and WD repeat domain containing 1
hsa-miR-548b-3p	1	0	1	1	1	1	EI24	etoposide induced 2.4 mRNA
hsa-miR-548b-3p	1	0	1	1	1	1	ZDHHC9	zinc finger, DHHC-type containing 9
hsa-miR-548b-3p	1	0	1	0	1	1	C18orf25	chromosome 18 open reading frame 25
hsa-miR-548b-3p	0	0	1	1	1	1	HRNR	hornerin
hsa-miR-548b-3p	0	0	1	0	1	1	LPPR5	lipid phosphate phosphatase-related protein type 5
hsa-miR-548b-3p	0	0	1	1	1	1	SPIN3	spindlin family, member 3
hsa-miR-548b-3p	1	0	1	0	1	1	ZC3H12B	zinc finger CCCH-type containing 12B
hsa-miR-548b-3p	0	0	1	1	1	1	C1QL3	complement component 1, q subcomponent-like 3
hsa-miR-548b-3p	0	0	1	1	1	1	SAMD13	sterile alpha motif domain containing 13
hsa-miR-548b-3p	0	0	1	1	1	1	NCMAP	noncompact myelin associated protein
hsa-miR-548b-3p	1	0	1	0	1	1	CREB5	cAMP responsive element binding protein 5
hsa-miR-548b-3p	1	0	1	1	1	1	SLC25A53	solute carrier family 25, member 53
hsa-miR-548b-3p	1	0	1	0	1	1	RGMB	RGM domain family, member B
hsa-miR-548b-3p	1	0	1	1	1	1	DISC1	disrupted in schizophrenia 1
hsa-miR-548b-3p	1	0	1	1	1	1	UBE2NL	ubiquitin-conjugating enzyme E2N-like
hsa-miR-548b-3p	1	0	1	1	1	1	SORCS1	sortilin-related VPS10 domain containing receptor 1
hsa-miR-548b-3p	1	0	1	1	1	1	C12orf68	chromosome 12 open reading frame 68
hsa-miR-548b-3p	1	0	1	0	1	1	FIGNL2	fidgetin-like 2
hsa-miR-548b-3p	0	0	1	1	1	1	LDLRAD2	low density lipoprotein receptor class A domain containing 2
hsa-miR-548b-3p	0	0	1	0	1	1	LINC00268	long intergenic non-protein coding RNA 268
hsa-miR-548b-3p	1	0	1	1	1	1	PHF6	PHD finger protein 6
hsa-miR-548b-3p	0	0	1	1	1	1	USP1	ubiquitin specific peptidase 1
hsa-miR-548b-3p	1	0	1	1	1	1	PFKFB2	6-phosphofructo-2-kinase/fructose-2,6-biphosphatase 2
hsa-miR-548b-3p	0	0	1	1	1	1	NARG2	NMDA receptor regulated 2
hsa-miR-548b-3p	0	0	1	1	1	1	NPIPL1	nuclear pore complex interacting protein-like 1
hsa-miR-548b-3p	1	0	1	1	1	1	KALRN	kalirin, RhoGEF kinase
hsa-miR-548b-3p	1	0	1	0	1	1	BCL7A	B-cell CLL/lymphoma 7A
hsa-miR-548b-3p	1	0	1	0	1	1	TNRC6B	trinucleotide repeat containing 6B
hsa-miR-548b-3p	1	0	1	1	1	1	FNBP1L	formin binding protein 1-like
hsa-miR-548b-3p	1	0	1	1	1	1	PLEKHG1	pleckstrin homology domain containing, family G (with RhoGef domain) member 1
hsa-miR-548b-3p	1	0	1	0	1	1	MSRB3	methionine sulfoxide reductase B3
hsa-miR-548b-3p	1	0	1	1	1	1	RCE1	RCE1 homolog, prenyl protein protease (S. cerevisiae)
hsa-miR-548b-3p	1	0	1	0	1	1	NPNT	nephronectin
hsa-miR-548b-3p	1	0	1	1	1	1	SAR1B	SAR1 homolog B (S. cerevisiae)
hsa-miR-548b-3p	1	0	1	1	1	1	ZNF704	zinc finger protein 704
hsa-miR-548b-3p	1	0	1	0	1	1	CDC42SE1	CDC42 small effector 1
hsa-miR-548b-3p	0	0	1	1	1	1	ATAD3C	ATPase family, AAA domain containing 3C
hsa-miR-548b-3p	0	0	1	1	1	1	HEPACAM2	HEPACAM family member 2
hsa-miR-548b-3p	1	0	1	0	1	1	USP9X	ubiquitin specific peptidase 9, X-linked
hsa-miR-548b-3p	1	0	1	0	1	1	CREBZF	CREB/ATF bZIP transcription factor
hsa-miR-548b-3p	0	0	1	1	0	0	CD68	CD68 molecule
hsa-miR-548b-3p	0	0	1	1	1	1	MLH3	mutL homolog 3 (E. coli)
hsa-miR-548b-3p	1	0	1	1	1	1	HTR4	5-hydroxytryptamine (serotonin) receptor 4, G protein-coupled
hsa-miR-548b-3p	1	0	1	0	1	1	CD83	CD83 molecule
hsa-miR-548b-3p	0	0	1	1	0	0	GAGE1	G antigen 1
hsa-miR-548b-3p	0	0	1	0	1	1	STEAP2	STEAP family member 2, metalloreductase
hsa-miR-548b-3p	0	0	1	0	1	1	ABCE1	ATP-binding cassette, sub-family E (OABP), member 1
hsa-miR-548b-3p	0	0	1	1	1	1	SI	sucrase-isomaltase (alpha-glucosidase)
hsa-miR-548b-3p	0	0	1	1	1	1	PSPC1	paraspeckle component 1
hsa-miR-548b-3p	1	0	1	1	1	1	ZNF706	zinc finger protein 706
hsa-miR-548b-3p	1	0	1	1	1	1	ERBB4	v-erb-a erythroblastic leukemia viral oncogene homolog 4 (avian)
hsa-miR-548b-3p	0	0	1	1	1	1	TOP2B	topoisomerase (DNA) II beta 180kDa
hsa-miR-548b-3p	1	0	1	1	1	1	CDC14B	CDC14 cell division cycle 14 homolog B (S. cerevisiae)
hsa-miR-548b-3p	1	0	1	1	1	1	SREK1	splicing regulatory glutamine/lysine-rich protein 1
hsa-miR-548b-3p	1	0	1	1	1	1	PRR3	proline rich 3
hsa-miR-548b-3p	1	0	1	1	1	1	CREBBP	CREB binding protein
hsa-miR-548b-3p	1	0	1	1	1	1	CUL4B	cullin 4B
hsa-miR-548b-3p	1	0	1	0	1	1	ALDH5A1	aldehyde dehydrogenase 5 family, member A1
hsa-miR-548b-3p	1	0	1	1	1	1	LDB3	LIM domain binding 3
hsa-miR-548b-3p	1	0	1	1	1	1	SHANK3	SH3 and multiple ankyrin repeat domains 3
hsa-miR-548b-3p	0	0	1	1	1	1	TBX18	T-box 18
hsa-miR-548b-3p	1	0	1	1	1	1	MYO1C	myosin IC
hsa-miR-548b-3p	1	0	1	1	1	1	REPS2	RALBP1 associated Eps domain containing 2
hsa-miR-548b-3p	1	0	1	1	1	1	ADAM10	ADAM metallopeptidase domain 10
hsa-miR-548b-3p	1	0	1	0	1	1	XIAP	X-linked inhibitor of apoptosis
hsa-miR-548b-3p	0	0	1	1	1	1	CDC5L	CDC5 cell division cycle 5-like (S. pombe)
hsa-miR-548b-3p	1	0	1	0	1	1	CDK6	cyclin-dependent kinase 6
hsa-miR-548b-3p	0	0	1	1	1	1	CSTF3	cleavage stimulation factor, 3' pre-RNA, subunit 3, 77kDa
hsa-miR-548b-3p	1	0	1	1	1	1	DYRK1A	dual-specificity tyrosine-(Y)-phosphorylation regulated kinase 1A
hsa-miR-548b-3p	1	0	1	0	1	1	EFNB3	ephrin-B3
hsa-miR-548b-3p	1	0	1	1	1	1	CELSR2	cadherin, EGF LAG seven-pass G-type receptor 2 (flamingo homolog, Drosophila)
hsa-miR-548b-3p	1	0	1	1	1	1	ELAVL1	ELAV (embryonic lethal, abnormal vision, Drosophila)-like 1 (Hu antigen R)
hsa-miR-548b-3p	1	0	1	1	0	0	EMP2	epithelial membrane protein 2
hsa-miR-548b-3p	1	0	1	1	1	1	EN2	engrailed homeobox 2
hsa-miR-548b-3p	1	0	1	1	1	1	GCNT1	glucosaminyl (N-acetyl) transferase 1, core 2
hsa-miR-548b-3p	1	0	1	0	1	1	B4GALT1	UDP-Gal:betaGlcNAc beta 1,4- galactosyltransferase, polypeptide 1
hsa-miR-548b-3p	1	0	1	1	1	1	NDST1	N-deacetylase/N-sulfotransferase (heparan glucosaminyl) 1
hsa-miR-548b-3p	1	0	1	1	1	1	AQP4	aquaporin 4
hsa-miR-548b-3p	1	0	1	0	1	1	ARCN1	archain 1
hsa-miR-548b-3p	0	0	1	1	1	1	RHOA	ras homolog family member A
hsa-miR-548b-3p	0	0	1	1	1	1	ATP5F1	ATP synthase, H+ transporting, mitochondrial Fo complex, subunit B1
hsa-miR-548b-3p	1	0	1	1	1	1	CDH5	cadherin 5, type 2 (vascular endothelium)
hsa-miR-548b-3p	1	0	1	0	1	1	CEBPG	CCAAT/enhancer binding protein (C/EBP), gamma
hsa-miR-548b-3p	1	0	1	1	1	1	CLCN4	chloride channel, voltage-sensitive 4
hsa-miR-548b-3p	1	0	1	0	1	1	COL19A1	collagen, type XIX, alpha 1
hsa-miR-548b-3p	0	0	1	1	1	1	SLC31A2	solute carrier family 31 (copper transporters), member 2
hsa-miR-548b-3p	0	0	1	0	0	0	CPE	carboxypeptidase E
hsa-miR-548b-3p	1	0	1	1	1	1	CREM	cAMP responsive element modulator
hsa-miR-548b-3p	0	0	1	1	1	1	DLAT	dihydrolipoamide S-acetyltransferase
hsa-miR-548b-3p	0	0	1	1	1	1	DPT	dermatopontin
hsa-miR-548b-3p	1	0	1	1	1	1	E2F3	E2F transcription factor 3
hsa-miR-548b-3p	0	0	1	1	1	1	CELA1	chymotrypsin-like elastase family, member 1
hsa-miR-548b-3p	0	0	1	0	1	1	STX2	syntaxin 2
hsa-miR-548b-3p	1	0	1	1	1	1	FBN2	fibrillin 2
hsa-miR-548b-3p	1	0	1	1	1	1	FGF9	fibroblast growth factor 9 (glia-activating factor)
hsa-miR-548b-3p	0	0	1	1	1	1	GFAP	glial fibrillary acidic protein
hsa-miR-548b-3p	1	0	1	1	1	1	GNAZ	guanine nucleotide binding protein (G protein), alpha z polypeptide
hsa-miR-548b-3p	0	0	1	1	1	1	GYS1	glycogen synthase 1 (muscle)
hsa-miR-548b-3p	0	0	1	1	1	1	HMGCS1	3-hydroxy-3-methylglutaryl-CoA synthase 1 (soluble)
hsa-miR-548b-3p	1	0	1	1	1	1	ISL1	ISL LIM homeobox 1
hsa-miR-548b-3p	1	0	1	1	1	1	ITGA2	integrin, alpha 2 (CD49B, alpha 2 subunit of VLA-2 receptor)
hsa-miR-548b-3p	1	0	1	1	1	1	ITPR2	inositol 1,4,5-trisphosphate receptor, type 2
hsa-miR-548b-3p	1	0	1	1	1	1	JUNB	jun B proto-oncogene
hsa-miR-548b-3p	1	0	1	1	1	1	KCNJ10	potassium inwardly-rectifying channel, subfamily J, member 10
hsa-miR-548b-3p	1	0	1	1	1	1	IPO5	importin 5
hsa-miR-548b-3p	1	0	1	0	1	1	LAMC1	laminin, gamma 1 (formerly LAMB2)
hsa-miR-548b-3p	0	0	1	1	1	1	P2RY1	purinergic receptor P2Y, G-protein coupled, 1
hsa-miR-548b-3p	1	0	1	1	1	1	PBX2	pre-B-cell leukemia homeobox 2
hsa-miR-548b-3p	0	0	1	1	1	1	PREP	prolyl endopeptidase
hsa-miR-548b-3p	1	0	1	0	1	1	PRKCA	protein kinase C, alpha
hsa-miR-548b-3p	1	0	1	0	1	1	PRKY	protein kinase, Y-linked, pseudogene
hsa-miR-548b-3p	0	0	1	0	0	0	PSMB10	proteasome (prosome, macropain) subunit, beta type, 10
hsa-miR-548b-3p	1	0	1	1	0	0	PSMD7	proteasome (prosome, macropain) 26S subunit, non-ATPase, 7
hsa-miR-548b-3p	0	0	1	1	1	1	PTPRR	protein tyrosine phosphatase, receptor type, R
hsa-miR-548b-3p	0	0	1	0	1	1	RAB3B	RAB3B, member RAS oncogene family
hsa-miR-548b-3p	1	0	1	1	1	1	SALL1	sal-like 1 (Drosophila)
hsa-miR-548b-3p	0	0	1	1	1	1	XCL1	chemokine (C motif) ligand 1
hsa-miR-548b-3p	0	0	1	1	1	1	SDC4	syndecan 4
hsa-miR-548b-3p	1	0	1	1	1	1	SRSF3	serine/arginine-rich splicing factor 3
hsa-miR-548b-3p	1	0	1	1	1	1	SKI	v-ski sarcoma viral oncogene homolog (avian)
hsa-miR-548b-3p	1	0	1	0	1	1	SLC6A1	solute carrier family 6 (neurotransmitter transporter, GABA), member 1
hsa-miR-548b-3p	0	0	1	1	1	1	SP100	SP100 nuclear antigen
hsa-miR-548b-3p	1	0	1	0	1	1	STC1	stanniocalcin 1
hsa-miR-548b-3p	1	0	1	1	1	1	SUV39H1	suppressor of variegation 3-9 homolog 1 (Drosophila)
hsa-miR-548b-3p	1	0	1	1	1	1	TAF4	TAF4 RNA polymerase II, TATA box binding protein (TBP)-associated factor, 135kDa
hsa-miR-548b-3p	1	0	1	1	1	1	TDG	thymine-DNA glycosylase
hsa-miR-548b-3p	1	0	1	1	1	1	TFAP2B	transcription factor AP-2 beta (activating enhancer binding protein 2 beta)
hsa-miR-548b-3p	1	0	1	1	1	1	TGFB3	transforming growth factor, beta 3
hsa-miR-548b-3p	1	0	1	0	1	1	THBS1	thrombospondin 1
hsa-miR-548b-3p	1	0	1	1	1	1	TIAM1	T-cell lymphoma invasion and metastasis 1
hsa-miR-548b-3p	1	0	1	1	1	1	NR2E1	nuclear receptor subfamily 2, group E, member 1
hsa-miR-548b-3p	1	0	1	1	1	1	TOP1	topoisomerase (DNA) I
hsa-miR-548b-3p	1	0	1	0	1	1	TSPYL1	TSPY-like 1
hsa-miR-548b-3p	1	0	1	0	1	1	UBE2D2	ubiquitin-conjugating enzyme E2D 2
hsa-miR-548b-3p	1	0	1	1	1	1	UBE2N	ubiquitin-conjugating enzyme E2N
hsa-miR-548b-3p	1	0	1	0	1	1	VCL	vinculin
hsa-miR-548b-3p	1	0	1	1	1	1	ZIC3	Zic family member 3
hsa-miR-548b-3p	0	0	1	1	1	1	ZNF143	zinc finger protein 143
hsa-miR-548b-3p	1	0	1	1	1	1	DEK	DEK oncogene
hsa-miR-548b-3p	1	0	1	1	1	1	CUL5	cullin 5
hsa-miR-548b-3p	0	0	1	1	0	0	HIST1H2AK	histone cluster 1, H2ak
hsa-miR-548b-3p	0	0	1	1	1	1	SOAT2	sterol O-acyltransferase 2
hsa-miR-548b-3p	1	0	1	1	1	1	PPM1D	protein phosphatase, Mg2+/Mn2+ dependent, 1D
hsa-miR-548b-3p	1	0	1	0	1	1	ENC1	ectodermal-neural cortex 1 (with BTB-like domain)
hsa-miR-548b-3p	0	0	1	1	1	1	SLC25A12	solute carrier family 25 (aspartate/glutamate carrier), member 12
hsa-miR-548b-3p	0	0	1	1	1	1	EIF3A	eukaryotic translation initiation factor 3, subunit A
hsa-miR-548b-3p	0	0	1	1	1	1	CRADD	CASP2 and RIPK1 domain containing adaptor with death domain
hsa-miR-548b-3p	1	0	1	1	1	1	NR5A2	nuclear receptor subfamily 5, group A, member 2
hsa-miR-548b-3p	1	0	1	1	1	1	KAT2B	K(lysine) acetyltransferase 2B
hsa-miR-548b-3p	1	0	1	0	1	1	CDK5R1	cyclin-dependent kinase 5, regulatory subunit 1 (p35)
hsa-miR-548b-3p	1	0	1	0	1	1	ST13	suppression of tumorigenicity 13 (colon carcinoma) (Hsp70 interacting protein)
hsa-miR-548b-3p	1	0	1	1	1	1	CDKL2	cyclin-dependent kinase-like 2 (CDC2-related kinase)
hsa-miR-548b-3p	1	0	1	1	1	1	MAP7	microtubule-associated protein 7
hsa-miR-548b-3p	0	0	1	1	1	1	CRY1	cryptochrome 1 (photolyase-like)
hsa-miR-548b-3p	1	0	1	0	1	1	DGKB	diacylglycerol kinase, beta 90kDa
hsa-miR-548b-3p	1	0	1	1	1	1	EFNB2	ephrin-B2
hsa-miR-548b-3p	1	0	1	1	1	1	EYA4	eyes absent homolog 4 (Drosophila)
hsa-miR-548b-3p	1	0	1	1	1	1	FGF13	fibroblast growth factor 13
hsa-miR-548b-3p	1	0	1	1	1	1	PPP2CB	protein phosphatase 2, catalytic subunit, beta isozyme
hsa-miR-548b-3p	1	0	1	0	1	1	SLC1A2	solute carrier family 1 (glial high affinity glutamate transporter), member 2
hsa-miR-548b-3p	1	0	1	1	1	1	SOCS6	suppressor of cytokine signaling 6
hsa-miR-548b-3p	0	0	1	1	1	1	HOMER1	homer homolog 1 (Drosophila)
hsa-miR-548b-3p	1	0	1	1	1	1	ARL3	ADP-ribosylation factor-like 3
hsa-miR-548b-3p	1	0	1	1	1	1	CREB1	cAMP responsive element binding protein 1
hsa-miR-548b-3p	1	0	1	1	1	1	DACH1	dachshund homolog 1 (Drosophila)
hsa-miR-548b-3p	1	0	1	1	1	1	DAG1	dystroglycan 1 (dystrophin-associated glycoprotein 1)
hsa-miR-548b-3p	1	0	1	1	1	1	DDX5	DEAD (Asp-Glu-Ala-Asp) box helicase 5
hsa-miR-548b-3p	1	0	1	1	1	1	DUSP5	dual specificity phosphatase 5
hsa-miR-548b-3p	1	0	1	1	1	1	EPHA2	EPH receptor A2
hsa-miR-548b-3p	1	0	1	0	1	1	ACSL4	acyl-CoA synthetase long-chain family member 4
hsa-miR-548b-3p	1	0	1	0	1	1	FGF5	fibroblast growth factor 5
hsa-miR-548b-3p	1	0	1	0	1	1	ARHGAP35	Rho GTPase activating protein 35
hsa-miR-548b-3p	0	0	1	1	1	1	HOXB7	homeobox B7
hsa-miR-548b-3p	1	0	1	0	1	1	PKNOX1	PBX/knotted 1 homeobox 1
hsa-miR-548b-3p	0	0	1	0	1	1	POU4F2	POU class 4 homeobox 2
hsa-miR-548b-3p	1	0	1	0	1	1	SCN2B	sodium channel, voltage-gated, type II, beta subunit
hsa-miR-548b-3p	1	0	1	1	1	1	MTMR4	myotubularin related protein 4
hsa-miR-548b-3p	0	0	1	0	1	1	CXorf1	chromosome X open reading frame 1
hsa-miR-548b-3p	0	0	1	1	1	1	BUB3	budding uninhibited by benzimidazoles 3 homolog (yeast)
hsa-miR-548b-3p	1	0	1	1	1	1	XPR1	xenotropic and polytropic retrovirus receptor 1
hsa-miR-548b-3p	1	0	1	1	1	1	LARGE	like-glycosyltransferase
hsa-miR-548b-3p	0	0	1	1	1	1	MTA2	metastasis associated 1 family, member 2
hsa-miR-548b-3p	1	0	1	1	1	1	NREP	neuronal regeneration related protein homolog (rat)
hsa-miR-548b-3p	1	0	1	1	1	1	KIF3B	kinesin family member 3B
hsa-miR-548b-3p	1	0	1	1	1	1	ONECUT2	one cut homeobox 2
hsa-miR-548b-3p	1	0	1	1	1	1	CXCL14	chemokine (C-X-C motif) ligand 14
hsa-miR-548b-3p	1	0	1	1	1	1	ZFP36L1	zinc finger protein 36, C3H type-like 1
hsa-miR-548b-3p	0	0	1	1	1	1	DSC1	desmocollin 1
hsa-miR-548b-3p	0	0	1	0	1	1	DSC2	desmocollin 2
hsa-miR-548b-3p	1	0	1	1	1	1	KDM5A	lysine (K)-specific demethylase 5A
hsa-miR-548b-3p	0	0	1	1	1	1	SIM1	single-minded homolog 1 (Drosophila)
hsa-miR-548b-3p	1	0	1	1	1	1	OXSR1	oxidative-stress responsive 1
hsa-miR-548b-3p	1	0	1	1	1	1	MED13	mediator complex subunit 13
hsa-miR-548b-3p	1	0	1	0	1	1	NUP153	nucleoporin 153kDa
hsa-miR-548b-3p	1	0	1	1	1	1	FOXN3	forkhead box N3
hsa-miR-548b-3p	1	1	1	1	1	1	MAP3K8	mitogen-activated protein kinase kinase kinase 8
hsa-miR-548b-3p	1	0	1	1	1	1	ETV3	ets variant 3
hsa-miR-548b-3p	0	0	1	1	1	1	LPAR4	lysophosphatidic acid receptor 4
hsa-miR-548b-3p	1	0	1	1	0	0	JUND	jun D proto-oncogene
hsa-miR-548b-3p	1	0	1	1	1	1	NCL	nucleolin
hsa-miR-548b-3p	0	0	1	1	1	1	PPP1R3C	protein phosphatase 1, regulatory subunit 3C
hsa-miR-548b-3p	1	0	1	0	1	1	PRKAB2	protein kinase, AMP-activated, beta 2 non-catalytic subunit
hsa-miR-548b-3p	1	0	1	1	1	1	RALA	v-ral simian leukemia viral oncogene homolog A (ras related)
hsa-miR-548b-3p	0	0	1	1	1	1	SLC20A1	solute carrier family 20 (phosphate transporter), member 1
hsa-miR-548b-3p	1	0	1	0	1	1	SRC	v-src sarcoma (Schmidt-Ruppin A-2) viral oncogene homolog (avian)
hsa-miR-548b-3p	1	0	1	0	1	1	CCDC6	coiled-coil domain containing 6
hsa-miR-548b-3p	1	0	1	1	1	1	MAFB	v-maf musculoaponeurotic fibrosarcoma oncogene homolog B (avian)
hsa-miR-548b-3p	1	0	1	1	1	1	SCARB2	scavenger receptor class B, member 2
hsa-miR-548b-3p	1	0	1	1	1	1	INSIG1	insulin induced gene 1
hsa-miR-548b-3p	1	0	1	1	1	1	LAMC2	laminin, gamma 2
hsa-miR-548b-3p	1	0	1	1	1	1	LPP	LIM domain containing preferred translocation partner in lipoma
hsa-miR-548b-3p	1	0	1	1	1	1	NHLH2	nescient helix loop helix 2
hsa-miR-548b-3p	0	0	1	0	1	1	POU3F2	POU class 3 homeobox 2
hsa-miR-548b-3p	0	0	1	1	1	1	MKRN3	makorin ring finger protein 3
hsa-miR-548b-3p	0	0	1	1	1	1	PDCD7	programmed cell death 7
hsa-miR-548b-3p	1	0	1	1	1	1	NAMPT	nicotinamide phosphoribosyltransferase
hsa-miR-548b-3p	1	0	1	1	1	1	PRKD3	protein kinase D3
hsa-miR-548b-3p	0	0	1	1	1	1	DSCR4	Down syndrome critical region gene 4
hsa-miR-548b-3p	1	0	1	1	1	1	MAP3K5	mitogen-activated protein kinase kinase kinase 5
hsa-miR-548b-3p	1	0	1	1	1	1	MEOX2	mesenchyme homeobox 2
hsa-miR-548b-3p	0	0	1	1	1	1	MFAP3	microfibrillar-associated protein 3
hsa-miR-548b-3p	1	0	1	1	1	1	MMP16	matrix metallopeptidase 16 (membrane-inserted)
hsa-miR-548b-3p	1	0	1	1	1	1	MTF1	metal-regulatory transcription factor 1
hsa-miR-548b-3p	1	0	1	1	1	1	RNF6	ring finger protein (C3H2C3 type) 6
hsa-miR-548b-3p	0	0	1	1	1	1	STK10	serine/threonine kinase 10
hsa-miR-548b-3p	0	0	1	1	1	1	LAGE3	L antigen family, member 3
hsa-miR-548b-3p	1	0	1	1	0	0	ALKBH1	alkB, alkylation repair homolog 1 (E. coli)
hsa-miR-548b-3p	1	0	1	0	1	1	SPATA2	spermatogenesis associated 2
hsa-miR-548b-3p	0	0	1	1	1	1	HS3ST2	heparan sulfate (glucosamine) 3-O-sulfotransferase 2
hsa-miR-548b-3p	0	0	1	1	1	1	SMYD5	SMYD family member 5
hsa-miR-548b-3p	0	0	1	1	1	1	TRDN	triadin
hsa-miR-548b-3p	1	0	1	1	1	1	SPON1	spondin 1, extracellular matrix protein
hsa-miR-548b-3p	1	0	1	1	1	1	TMEM50B	transmembrane protein 50B
hsa-miR-548b-3p	1	0	1	1	1	1	DYNC1LI2	dynein, cytoplasmic 1, light intermediate chain 2
hsa-miR-548b-3p	1	0	1	1	1	1	NEUROD2	neuronal differentiation 2
hsa-miR-548b-3p	0	0	1	1	1	1	NKX3-1	NK3 homeobox 1
hsa-miR-548b-3p	0	0	1	1	1	1	PA2G4	proliferation-associated 2G4, 38kDa
hsa-miR-548b-3p	0	0	1	1	0	0	PDE6H	phosphodiesterase 6H, cGMP-specific, cone, gamma
hsa-miR-548b-3p	1	0	1	1	1	1	PDGFRA	platelet-derived growth factor receptor, alpha polypeptide
hsa-miR-548b-3p	1	0	1	0	1	1	PPP1R2	protein phosphatase 1, regulatory (inhibitor) subunit 2
hsa-miR-548b-3p	1	0	1	1	1	1	PRKAA1	protein kinase, AMP-activated, alpha 1 catalytic subunit
hsa-miR-548b-3p	1	0	1	1	1	1	NPEPPS	aminopeptidase puromycin sensitive
hsa-miR-548b-3p	1	0	1	1	1	1	SEC23A	Sec23 homolog A (S. cerevisiae)
hsa-miR-548b-3p	1	0	1	1	1	1	VAT1	vesicle amine transport protein 1 homolog (T. californica)
hsa-miR-548b-3p	1	0	1	0	1	1	APPBP2	amyloid beta precursor protein (cytoplasmic tail) binding protein 2
hsa-miR-548b-3p	1	0	1	1	1	1	NEBL	nebulette
hsa-miR-548b-3p	1	0	1	1	1	1	ANP32B	acidic (leucine-rich) nuclear phosphoprotein 32 family, member B
hsa-miR-548b-3p	1	0	1	1	1	1	TRIM3	tripartite motif containing 3
hsa-miR-548b-3p	1	0	1	1	1	1	HEXIM1	hexamethylene bis-acetamide inducible 1
hsa-miR-548b-3p	0	0	1	0	1	1	SLC16A2	solute carrier family 16, member 2 (thyroid hormone transporter)
hsa-miR-548b-3p	1	0	1	1	0	0	LBX1	ladybird homeobox 1
hsa-miR-548b-3p	1	0	1	0	1	1	MAP4K5	mitogen-activated protein kinase kinase kinase kinase 5
hsa-miR-548b-3p	1	0	1	0	1	1	API5	apoptosis inhibitor 5
hsa-miR-548b-3p	0	0	1	1	1	1	FGL2	fibrinogen-like 2
hsa-miR-548b-3p	0	0	1	1	1	1	JTB	jumping translocation breakpoint
hsa-miR-548b-3p	1	0	1	1	1	1	SPIN1	spindlin 1
hsa-miR-548b-3p	1	0	1	1	1	1	DIAPH2	diaphanous homolog 2 (Drosophila)
hsa-miR-548b-3p	1	0	1	1	1	1	KAT6A	K(lysine) acetyltransferase 6A
hsa-miR-548b-3p	0	0	1	1	1	1	TRIM10	tripartite motif containing 10
hsa-miR-548b-3p	0	0	1	1	0	0	HNRNPA0	heterogeneous nuclear ribonucleoprotein A0
hsa-miR-548b-3p	0	0	1	1	0	0	STIP1	stress-induced-phosphoprotein 1
hsa-miR-548b-3p	1	0	1	1	1	1	RAC1	ras-related C3 botulinum toxin substrate 1 (rho family, small GTP binding protein Rac1)
hsa-miR-548b-3p	1	0	1	1	1	1	SKP1	S-phase kinase-associated protein 1
hsa-miR-548b-3p	1	0	1	0	1	1	SLC2A3	solute carrier family 2 (facilitated glucose transporter), member 3
hsa-miR-548b-3p	0	0	1	1	1	1	RER1	RER1 retention in endoplasmic reticulum 1 homolog (S. cerevisiae)
hsa-miR-548b-3p	0	0	1	1	1	1	DMC1	DMC1 dosage suppressor of mck1 homolog, meiosis-specific homologous recombination (yeast)
hsa-miR-548b-3p	1	0	1	1	1	1	TRIO	trio Rho guanine nucleotide exchange factor
hsa-miR-548b-3p	0	0	1	1	0	0	USF1	upstream transcription factor 1
hsa-miR-548b-3p	1	0	1	1	1	1	ZNF81	zinc finger protein 81
hsa-miR-548b-3p	0	0	1	0	1	1	ZXDB	zinc finger, X-linked, duplicated B
hsa-miR-548b-3p	1	0	1	1	1	1	TESK2	testis-specific kinase 2
hsa-miR-548b-3p	1	0	1	1	1	1	PALM2-AKAP2	PALM2-AKAP2 readthrough
hsa-miR-548b-3p	1	0	1	1	1	1	CA5B	carbonic anhydrase VB, mitochondrial
hsa-miR-548b-3p	1	0	1	1	1	1	KLF12	Kruppel-like factor 12
hsa-miR-548b-3p	1	0	1	1	1	1	CBX3	chromobox homolog 3
hsa-miR-548b-3p	0	0	1	0	1	1	AP4E1	adaptor-related protein complex 4, epsilon 1 subunit
hsa-miR-548b-3p	1	0	1	1	1	1	CASC3	cancer susceptibility candidate 3
hsa-miR-548b-3p	1	0	1	1	1	1	TARDBP	TAR DNA binding protein
hsa-miR-548b-3p	1	0	1	1	1	1	CHORDC1	cysteine and histidine-rich domain (CHORD) containing 1
hsa-miR-548b-3p	0	0	1	1	0	0	GNG3	guanine nucleotide binding protein (G protein), gamma 3
hsa-miR-548b-3p	1	0	1	1	1	1	RHOQ	ras homolog family member Q
hsa-miR-548b-3p	0	0	1	1	1	1	RRAS2	related RAS viral (r-ras) oncogene homolog 2
hsa-miR-548b-3p	1	0	1	0	1	1	ACAP2	ArfGAP with coiled-coil, ankyrin repeat and PH domains 2
hsa-miR-548b-3p	1	0	1	0	1	1	FBXL7	F-box and leucine-rich repeat protein 7
hsa-miR-548b-3p	1	0	1	1	1	1	KIN	KIN, antigenic determinant of recA protein homolog (mouse)
hsa-miR-548b-3p	1	0	1	1	1	1	MMD	monocyte to macrophage differentiation-associated
hsa-miR-548b-3p	1	0	1	1	1	1	TLL2	tolloid-like 2
hsa-miR-548b-3p	1	0	1	1	1	1	YWHAG	tyrosine 3-monooxygenase/tryptophan 5-monooxygenase activation protein, gamma polypeptide
hsa-miR-548b-3p	1	0	1	0	1	1	FLRT2	fibronectin leucine rich transmembrane protein 2
hsa-miR-548b-3p	1	0	1	1	1	1	ZNF215	zinc finger protein 215
hsa-miR-548b-3p	1	0	1	1	1	1	TMEM2	transmembrane protein 2
hsa-miR-548b-3p	1	0	1	1	1	1	NCKAP1	NCK-associated protein 1
hsa-miR-548b-3p	1	0	1	1	1	1	BAZ1A	bromodomain adjacent to zinc finger domain, 1A
hsa-miR-548b-3p	1	0	1	1	1	1	SOCS5	suppressor of cytokine signaling 5
hsa-miR-548b-3p	1	0	1	0	1	1	C16orf72	chromosome 16 open reading frame 72
hsa-miR-548b-3p	1	0	1	1	1	1	CRIPT	cysteine-rich PDZ-binding protein
hsa-miR-548b-3p	1	0	1	1	1	1	CELSR1	cadherin, EGF LAG seven-pass G-type receptor 1 (flamingo homolog, Drosophila)
hsa-miR-548b-3p	1	0	1	0	1	1	ODZ1	odz, odd Oz/ten-m homolog 1 (Drosophila)
hsa-miR-548b-3p	0	0	1	1	0	0	QPRT	quinolinate phosphoribosyltransferase
hsa-miR-548b-3p	0	0	1	1	1	1	LAMP3	lysosomal-associated membrane protein 3
hsa-miR-548b-3p	0	0	1	1	1	1	PSME4	proteasome (prosome, macropain) activator subunit 4
hsa-miR-548b-3p	0	0	1	1	1	1	HOXC4	homeobox C4
hsa-miR-548b-3p	1	0	1	1	1	1	RALGPS1	Ral GEF with PH domain and SH3 binding motif 1
hsa-miR-548b-3p	1	0	1	0	1	1	BZW1	basic leucine zipper and W2 domains 1
hsa-miR-548b-3p	1	0	1	0	1	1	TOX	thymocyte selection-associated high mobility group box
hsa-miR-548b-3p	1	0	1	0	1	1	MLEC	malectin
hsa-miR-548b-3p	1	0	1	1	1	1	RASSF2	Ras association (RalGDS/AF-6) domain family member 2
hsa-miR-548b-3p	1	0	1	0	1	1	SERTAD2	SERTA domain containing 2
hsa-miR-548b-3p	1	0	1	0	1	1	KIAA0494	KIAA0494
hsa-miR-548b-3p	1	0	1	0	1	1	PJA2	praja ring finger 2, E3 ubiquitin protein ligase
hsa-miR-548b-3p	1	0	1	1	1	1	ZBTB39	zinc finger and BTB domain containing 39
hsa-miR-548b-3p	1	0	1	1	1	1	RNF44	ring finger protein 44
hsa-miR-548b-3p	1	0	1	1	1	1	DIP2C	DIP2 disco-interacting protein 2 homolog C (Drosophila)
hsa-miR-548b-3p	1	0	1	1	1	1	FBXO21	F-box protein 21
hsa-miR-548b-3p	0	0	1	1	1	1	MYO16	myosin XVI
hsa-miR-548b-3p	1	0	1	0	1	1	NMNAT2	nicotinamide nucleotide adenylyltransferase 2
hsa-miR-548b-3p	1	0	1	0	1	1	ZNF609	zinc finger protein 609
hsa-miR-548b-3p	1	0	1	1	1	1	TRAK2	trafficking protein, kinesin binding 2
hsa-miR-548b-3p	1	0	1	1	1	1	ERP44	endoplasmic reticulum protein 44
hsa-miR-548b-3p	1	0	1	0	1	1	PEG10	paternally expressed 10
hsa-miR-548b-3p	1	0	1	1	1	1	SIPA1L3	signal-induced proliferation-associated 1 like 3
hsa-miR-548b-3p	1	0	1	1	1	1	SMG1	smg-1 homolog, phosphatidylinositol 3-kinase-related kinase (C. elegans)
hsa-miR-548b-3p	1	0	1	1	1	1	GPD1L	glycerol-3-phosphate dehydrogenase 1-like
hsa-miR-548b-3p	1	0	1	0	1	1	LARP4B	La ribonucleoprotein domain family, member 4B
hsa-miR-548b-3p	1	0	1	1	1	1	PRRC2C	proline-rich coiled-coil 2C
hsa-miR-548b-3p	0	0	1	1	1	1	FBXO28	F-box protein 28
hsa-miR-548b-3p	1	0	1	1	1	1	PLCB1	phospholipase C, beta 1 (phosphoinositide-specific)
hsa-miR-548b-3p	1	0	1	1	1	1	MYO1D	myosin ID
hsa-miR-548b-3p	1	0	1	1	0	0	SMG5	smg-5 homolog, nonsense mediated mRNA decay factor (C. elegans)
hsa-miR-548b-3p	0	0	1	0	1	1	ZDHHC17	zinc finger, DHHC-type containing 17
hsa-miR-548b-3p	1	0	1	1	1	1	ZFYVE26	zinc finger, FYVE domain containing 26
hsa-miR-548b-3p	0	0	1	1	1	1	POFUT1	protein O-fucosyltransferase 1
hsa-miR-548b-3p	0	0	1	1	1	1	POLR1A	polymerase (RNA) I polypeptide A, 194kDa
hsa-miR-548b-3p	1	0	1	1	1	1	CNOT6	CCR4-NOT transcription complex, subunit 6
hsa-miR-548b-3p	1	0	1	0	1	1	OSBPL3	oxysterol binding protein-like 3
hsa-miR-548b-3p	1	0	1	0	1	1	PPP1R16B	protein phosphatase 1, regulatory subunit 16B
hsa-miR-548b-3p	0	0	1	1	0	0	CCZ1	CCZ1 vacuolar protein trafficking and biogenesis associated homolog (S. cerevisiae)
hsa-miR-548b-3p	1	0	1	1	1	1	EPC2	enhancer of polycomb homolog 2 (Drosophila)
hsa-miR-548b-3p	1	0	1	1	1	1	PHF19	PHD finger protein 19
hsa-miR-548b-3p	1	0	1	0	1	1	RRM2B	ribonucleotide reductase M2 B (TP53 inducible)
hsa-miR-548b-3p	0	0	1	1	1	1	ATP6V1D	ATPase, H+ transporting, lysosomal 34kDa, V1 subunit D
hsa-miR-548b-3p	1	0	1	1	1	1	UBE2J1	ubiquitin-conjugating enzyme E2, J1
hsa-miR-548b-3p	1	0	1	1	1	1	RRP15	ribosomal RNA processing 15 homolog (S. cerevisiae)
hsa-miR-548b-3p	1	0	1	1	1	1	GOLT1B	golgi transport 1B
hsa-miR-548b-3p	0	0	1	1	1	1	NAA20	N(alpha)-acetyltransferase 20, NatB catalytic subunit
hsa-miR-548b-3p	1	0	1	1	1	1	NSFL1C	NSFL1 (p97) cofactor (p47)
hsa-miR-548b-3p	0	0	1	1	1	1	COMMD10	COMM domain containing 10
hsa-miR-548b-3p	1	0	1	1	1	1	VGLL3	vestigial like 3 (Drosophila)
hsa-miR-548b-3p	0	0	1	1	1	1	IMPG2	interphotoreceptor matrix proteoglycan 2
hsa-miR-548b-3p	1	0	1	1	1	1	CMPK1	cytidine monophosphate (UMP-CMP) kinase 1, cytosolic
hsa-miR-548b-3p	0	0	1	1	0	0	SRRM2	serine/arginine repetitive matrix 2
hsa-miR-548b-3p	1	0	1	1	1	1	PHF20	PHD finger protein 20
hsa-miR-548b-3p	0	0	1	0	1	1	ERAP1	endoplasmic reticulum aminopeptidase 1
hsa-miR-548b-3p	0	0	1	1	0	0	CXorf26	chromosome X open reading frame 26
hsa-miR-548b-3p	1	0	1	1	1	1	IER5	immediate early response 5
hsa-miR-548b-3p	0	0	1	1	1	1	KDM3B	lysine (K)-specific demethylase 3B
hsa-miR-548b-3p	1	0	1	1	1	1	ZNF644	zinc finger protein 644
hsa-miR-548b-3p	1	0	1	1	1	1	ZAK	sterile alpha motif and leucine zipper containing kinase AZK
hsa-miR-548b-3p	1	0	1	1	1	1	SIX2	SIX homeobox 2
hsa-miR-548b-3p	1	0	1	1	1	1	SIX4	SIX homeobox 4
hsa-miR-548b-3p	1	0	1	0	1	1	CYTH1	cytohesin 1
hsa-miR-548b-3p	1	0	1	1	1	1	DIRAS2	DIRAS family, GTP-binding RAS-like 2
hsa-miR-548b-3p	0	0	1	1	0	0	MED18	mediator complex subunit 18
hsa-miR-548b-3p	0	0	1	0	1	1	OTUB1	OTU domain, ubiquitin aldehyde binding 1
hsa-miR-548b-3p	1	0	1	0	1	1	FAM46C	family with sequence similarity 46, member C
hsa-miR-548b-3p	1	0	1	0	1	1	CHD7	chromodomain helicase DNA binding protein 7
hsa-miR-548b-3p	1	0	1	1	1	1	FAM120C	family with sequence similarity 120C
hsa-miR-548b-3p	0	0	1	1	1	1	FKBP14	FK506 binding protein 14, 22 kDa
hsa-miR-548b-3p	0	0	1	1	0	0	VPS37C	vacuolar protein sorting 37 homolog C (S. cerevisiae)
hsa-miR-548b-3p	1	0	1	1	1	1	IFT57	intraflagellar transport 57 homolog (Chlamydomonas)
hsa-miR-548b-3p	0	0	1	1	1	1	KDM4D	lysine (K)-specific demethylase 4D
hsa-miR-548b-3p	1	0	1	1	1	1	MAGOHB	mago-nashi homolog B (Drosophila)
hsa-miR-548b-3p	1	0	1	1	1	1	LRRC8D	leucine rich repeat containing 8 family, member D
hsa-miR-548b-3p	1	0	1	1	1	1	FAM178A	family with sequence similarity 178, member A
hsa-miR-548b-3p	0	0	1	1	0	0	CEP55	centrosomal protein 55kDa
hsa-miR-548b-3p	1	0	1	0	1	1	MSL2	male-specific lethal 2 homolog (Drosophila)
hsa-miR-548b-3p	0	0	1	1	1	1	NUDT11	nudix (nucleoside diphosphate linked moiety X)-type motif 11
hsa-miR-548b-3p	1	0	1	1	1	1	RPRD1A	regulation of nuclear pre-mRNA domain containing 1A
hsa-miR-548b-3p	0	0	1	0	1	1	FAM86C1	family with sequence similarity 86, member C1
hsa-miR-548b-3p	0	0	1	1	1	1	TRIM62	tripartite motif containing 62
hsa-miR-548b-3p	1	0	1	1	1	1	SPTLC3	serine palmitoyltransferase, long chain base subunit 3
hsa-miR-548b-3p	1	0	1	1	1	1	KIAA1598	KIAA1598
hsa-miR-548b-3p	1	0	1	0	1	1	FOXJ2	forkhead box J2
hsa-miR-548b-3p	0	0	1	1	1	1	STYK1	serine/threonine/tyrosine kinase 1
hsa-miR-548b-3p	1	0	1	1	1	1	PAG1	phosphoprotein associated with glycosphingolipid microdomains 1
hsa-miR-548b-3p	0	0	1	0	0	0	FAM45B	family with sequence similarity 45, member A pseudogene
hsa-miR-548b-3p	1	0	1	1	1	1	ASH1L	ash1 (absent, small, or homeotic)-like (Drosophila)
hsa-miR-548b-3p	1	0	1	0	1	1	LRP1B	low density lipoprotein receptor-related protein 1B
hsa-miR-548b-3p	1	0	1	1	1	1	CAMK2N1	calcium/calmodulin-dependent protein kinase II inhibitor 1
hsa-miR-548b-3p	1	0	1	0	1	1	SMPD3	sphingomyelin phosphodiesterase 3, neutral membrane (neutral sphingomyelinase II)
hsa-miR-548b-3p	1	0	1	0	1	1	ELMOD1	ELMO/CED-12 domain containing 1
hsa-miR-548b-3p	1	0	1	1	1	1	GNG12	guanine nucleotide binding protein (G protein), gamma 12
hsa-miR-548b-3p	1	0	1	0	1	1	KLHL9	kelch-like 9 (Drosophila)
hsa-miR-548b-3p	1	0	1	0	1	1	TMX3	thioredoxin-related transmembrane protein 3
hsa-miR-548b-3p	1	0	1	1	1	1	EPB41L4B	erythrocyte membrane protein band 4.1 like 4B
hsa-miR-548b-3p	0	0	1	1	1	1	FMN2	formin 2
hsa-miR-548b-3p	1	0	1	0	1	1	KCMF1	potassium channel modulatory factor 1
hsa-miR-548b-3p	1	0	1	0	1	1	TM9SF3	transmembrane 9 superfamily member 3
hsa-miR-548b-3p	1	0	1	1	0	0	SEMA3G	sema domain, immunoglobulin domain (Ig), short basic domain, secreted, (semaphorin) 3G
hsa-miR-548b-3p	1	0	1	0	1	1	OTUD7B	OTU domain containing 7B
hsa-miR-548b-3p	1	0	1	1	1	1	SCYL3	SCY1-like 3 (S. cerevisiae)
hsa-miR-548b-3p	1	0	1	1	0	0	THAP11	THAP domain containing 11
hsa-miR-548b-3p	1	0	1	1	1	1	RET	ret proto-oncogene
hsa-miR-548b-3p	1	0	1	1	1	1	RAB22A	RAB22A, member RAS oncogene family
hsa-miR-548b-3p	1	0	1	1	1	1	SLC24A3	solute carrier family 24 (sodium/potassium/calcium exchanger), member 3
hsa-miR-548b-3p	1	0	1	1	1	1	SLC12A5	solute carrier family 12 (potassium/chloride transporter), member 5
hsa-miR-548b-3p	0	0	1	1	1	1	SHROOM4	shroom family member 4
hsa-miR-548b-3p	1	0	1	0	1	1	NUFIP2	nuclear fragile X mental retardation protein interacting protein 2
hsa-miR-548b-3p	1	0	1	1	1	1	NLGN2	neuroligin 2
hsa-miR-548b-3p	1	0	1	1	1	1	SEMA6A	sema domain, transmembrane domain (TM), and cytoplasmic domain, (semaphorin) 6A
hsa-miR-548b-3p	1	0	1	1	1	1	RANBP10	RAN binding protein 10
hsa-miR-548b-3p	1	0	1	1	1	1	VAT1L	vesicle amine transport protein 1 homolog (T. californica)-like
hsa-miR-548b-3p	0	0	1	1	1	1	EPG5	ectopic P-granules autophagy protein 5 homolog (C. elegans)
hsa-miR-548b-3p	1	0	1	0	1	1	RAP2A	RAP2A, member of RAS oncogene family
hsa-miR-548b-3p	0	0	1	1	1	1	RNASEL	ribonuclease L (2',5'-oligoisoadenylate synthetase-dependent)
hsa-miR-548b-3p	1	0	1	1	1	1	RPRD1B	regulation of nuclear pre-mRNA domain containing 1B
hsa-miR-548b-3p	0	0	1	1	1	1	KCNN2	potassium intermediate/small conductance calcium-activated channel, subfamily N, member 2
hsa-miR-548b-3p	1	0	1	1	1	1	SENP2	SUMO1/sentrin/SMT3 specific peptidase 2
hsa-miR-548b-3p	1	0	1	1	1	1	TRIB2	tribbles homolog 2 (Drosophila)
hsa-miR-548b-3p	1	0	1	1	1	1	OTX2	orthodenticle homeobox 2
hsa-miR-548b-3p	1	0	1	1	1	1	BACH2	BTB and CNC homology 1, basic leucine zipper transcription factor 2
hsa-miR-548b-3p	1	0	1	1	1	1	DHX35	DEAH (Asp-Glu-Ala-His) box polypeptide 35
hsa-miR-548b-3p	1	0	1	0	1	1	MCL1	myeloid cell leukemia sequence 1 (BCL2-related)
hsa-miR-548b-3p	0	0	1	1	1	1	ITM2B	integral membrane protein 2B
hsa-miR-548b-3p	1	0	1	0	1	1	CSNK1G1	casein kinase 1, gamma 1
hsa-miR-548b-3p	0	0	1	1	1	1	FAM204A	family with sequence similarity 204, member A
hsa-miR-548b-3p	1	0	1	1	1	1	NDRG3	NDRG family member 3
hsa-miR-548b-3p	1	0	1	1	1	1	SUDS3	suppressor of defective silencing 3 homolog (S. cerevisiae)
hsa-miR-548b-3p	1	0	1	1	1	1	C6orf106	chromosome 6 open reading frame 106
hsa-miR-548b-3p	0	0	1	1	1	1	OSBPL11	oxysterol binding protein-like 11
hsa-miR-548b-3p	1	0	1	1	1	1	FNDC4	fibronectin type III domain containing 4
hsa-miR-548b-3p	1	0	1	1	1	1	FBXL17	F-box and leucine-rich repeat protein 17
hsa-miR-548b-3p	1	0	1	1	1	1	REEP1	receptor accessory protein 1
hsa-miR-548b-3p	1	0	1	1	1	1	SOWAHC	sosondowah ankyrin repeat domain family member C
hsa-miR-548b-3p	1	0	1	1	1	1	GRAMD3	GRAM domain containing 3
hsa-miR-548b-3p	1	0	1	1	1	1	GID4	GID complex subunit 4, VID24 homolog (S. cerevisiae)
hsa-miR-548b-3p	0	0	1	1	1	1	WDR77	WD repeat domain 77
hsa-miR-548b-3p	1	0	1	1	1	1	PSTPIP2	proline-serine-threonine phosphatase interacting protein 2
hsa-miR-548b-3p	1	0	1	1	1	1	C10orf76	chromosome 10 open reading frame 76
hsa-miR-548b-3p	1	0	1	0	1	1	PLEKHF2	pleckstrin homology domain containing, family F (with FYVE domain) member 2
hsa-miR-548b-3p	0	0	1	0	1	1	ZYG11B	zyg-11 homolog B (C. elegans)
hsa-miR-548b-3p	1	0	1	1	1	1	C15orf29	chromosome 15 open reading frame 29
hsa-miR-548b-3p	1	0	1	0	1	1	ZFHX4	zinc finger homeobox 4
hsa-miR-548b-3p	1	0	1	1	1	1	PIP4K2C	phosphatidylinositol-5-phosphate 4-kinase, type II, gamma
hsa-miR-548b-3p	1	0	1	0	1	1	MAGIX	MAGI family member, X-linked
hsa-miR-548b-3p	1	0	1	0	1	1	VCPIP1	valosin containing protein (p97)/p47 complex interacting protein 1
hsa-miR-548b-3p	1	0	1	1	1	1	HKDC1	hexokinase domain containing 1
hsa-miR-548b-3p	1	0	1	1	1	1	TRIB1	tribbles homolog 1 (Drosophila)
hsa-miR-548b-3p	0	0	1	0	1	1	PDGFD	platelet derived growth factor D
hsa-miR-548b-3p	1	0	1	0	1	1	DNAJC5	DnaJ (Hsp40) homolog, subfamily C, member 5
hsa-miR-548b-3p	1	0	1	1	1	1	JHDM1D	jumonji C domain containing histone demethylase 1 homolog D (S. cerevisiae)
hsa-miR-548b-3p	1	0	1	0	1	1	SETD7	SET domain containing (lysine methyltransferase) 7
hsa-miR-548b-3p	1	0	1	1	1	1	HOXA3	homeobox A3
hsa-miR-548b-3p	1	0	1	0	1	1	CSRNP2	cysteine-serine-rich nuclear protein 2
hsa-miR-548b-3p	1	0	1	1	1	1	OR2H1	olfactory receptor, family 2, subfamily H, member 1
hsa-miR-548b-3p	1	0	1	1	1	1	C6orf62	chromosome 6 open reading frame 62
hsa-miR-548b-3p	1	0	1	0	1	1	SPRY4	sprouty homolog 4 (Drosophila)
hsa-miR-548b-3p	1	0	1	1	1	1	RAB1B	RAB1B, member RAS oncogene family
hsa-miR-548b-3p	1	0	1	1	1	1	GABARAPL1	GABA(A) receptor-associated protein like 1
hsa-miR-548b-3p	0	0	1	1	1	1	COG3	component of oligomeric golgi complex 3
hsa-miR-548b-3p	1	0	1	1	1	1	SOX7	SRY (sex determining region Y)-box 7
hsa-miR-548b-3p	1	0	1	0	1	1	SH3BGRL2	SH3 domain binding glutamic acid-rich protein like 2
hsa-miR-548b-3p	0	0	1	1	1	1	MAGT1	magnesium transporter 1
hsa-miR-548b-3p	1	0	1	1	1	1	FBXO30	F-box protein 30
hsa-miR-548b-3p	1	0	1	1	1	1	DSEL	dermatan sulfate epimerase-like
hsa-miR-548b-3p	1	0	1	1	1	1	ARID5B	AT rich interactive domain 5B (MRF1-like)
hsa-miR-548b-3p	1	0	1	0	1	1	FAR1	fatty acyl CoA reductase 1
hsa-miR-548b-3p	1	0	1	1	1	1	ZNRF1	zinc and ring finger 1, E3 ubiquitin protein ligase
hsa-miR-548b-3p	0	0	1	1	0	0	NICN1	nicolin 1
hsa-miR-548b-3p	0	0	1	1	1	1	CHAMP1	chromosome alignment maintaining phosphoprotein 1
hsa-miR-548b-3p	0	0	1	1	1	1	JAGN1	jagunal homolog 1 (Drosophila)
hsa-miR-548b-3p	1	0	1	1	1	1	USP38	ubiquitin specific peptidase 38
hsa-miR-548b-3p	1	0	1	1	1	1	PPP1R9B	protein phosphatase 1, regulatory subunit 9B
hsa-miR-548b-3p	1	0	1	0	1	1	INA	internexin neuronal intermediate filament protein, alpha
hsa-miR-548b-3p	0	0	1	1	1	1	USMG5	up-regulated during skeletal muscle growth 5 homolog (mouse)
hsa-miR-548b-3p	1	0	1	1	1	1	ARHGEF39	Rho guanine nucleotide exchange factor (GEF) 39
hsa-miR-548b-3p	1	0	1	0	1	1	LACTB	lactamase, beta
hsa-miR-548b-3p	0	0	1	1	1	1	MICALCL	MICAL C-terminal like
hsa-miR-548b-3p	0	0	1	1	1	1	FBXL20	F-box and leucine-rich repeat protein 20
hsa-miR-548b-3p	1	0	1	1	1	1	PCDH11Y	protocadherin 11 Y-linked
hsa-miR-548b-3p	1	0	1	1	1	1	FGD3	FYVE, RhoGEF and PH domain containing 3
hsa-miR-548b-3p	0	0	1	1	1	1	ZIC5	Zic family member 5
hsa-miR-548b-3p	1	0	1	0	1	1	PURB	purine-rich element binding protein B
hsa-miR-548b-3p	1	0	1	1	1	1	XRCC6BP1	XRCC6 binding protein 1
hsa-miR-548b-3p	0	0	1	0	1	1	C9orf123	chromosome 9 open reading frame 123
hsa-miR-548b-3p	1	0	1	1	1	1	SLC18B1	solute carrier family 18, subfamily B, member 1
hsa-miR-548b-3p	1	0	1	0	0	0	ANKRD40	ankyrin repeat domain 40
hsa-miR-548b-3p	1	0	1	1	1	1	SLC2A13	solute carrier family 2 (facilitated glucose transporter), member 13
hsa-miR-548b-3p	1	0	1	1	1	1	SLITRK1	SLIT and NTRK-like family, member 1
hsa-miR-548b-3p	1	0	1	1	1	1	PCMTD1	protein-L-isoaspartate (D-aspartate) O-methyltransferase domain containing 1
hsa-miR-548b-3p	1	0	1	1	1	1	TRIM9	tripartite motif containing 9
hsa-miR-548b-3p	1	0	1	1	1	1	NAA15	N(alpha)-acetyltransferase 15, NatA auxiliary subunit
hsa-miR-548b-3p	0	0	1	1	1	1	CCNE2	cyclin E2
hsa-miR-548b-3p	0	0	1	1	1	1	CBLN4	cerebellin 4 precursor
hsa-miR-548b-3p	1	0	1	1	1	1	COL11A2	collagen, type XI, alpha 2
hsa-miR-548b-3p	0	0	1	1	1	1	PABPC5	poly(A) binding protein, cytoplasmic 5
hsa-miR-548b-3p	1	0	1	1	1	1	KLHL6	kelch-like 6 (Drosophila)
hsa-miR-548b-3p	0	0	1	1	1	1	CHST14	carbohydrate (N-acetylgalactosamine 4-0) sulfotransferase 14
hsa-miR-548b-3p	0	0	1	1	1	1	RGS18	regulator of G-protein signaling 18
hsa-miR-548b-3p	0	0	1	0	1	1	PAQR8	progestin and adipoQ receptor family member VIII
hsa-miR-548b-3p	0	0	1	1	0	0	CITED4	Cbp/p300-interacting transactivator, with Glu/Asp-rich carboxy-terminal domain, 4
hsa-miR-548b-3p	0	0	1	1	1	1	PATE1	prostate and testis expressed 1
hsa-miR-548b-3p	1	0	1	0	1	1	NUS1	nuclear undecaprenyl pyrophosphate synthase 1 homolog (S. cerevisiae)
hsa-miR-548b-3p	1	0	1	1	1	1	ICA1L	islet cell autoantigen 1,69kDa-like
hsa-miR-548b-3p	1	0	1	0	1	1	SP1	Sp1 transcription factor
hsa-miR-548b-3p	1	0	1	0	1	1	FCHO2	FCH domain only 2
hsa-miR-548b-3p	1	0	1	1	1	1	CD200R1	CD200 receptor 1
hsa-miR-548b-3p	0	0	1	1	1	1	SDR16C5	short chain dehydrogenase/reductase family 16C, member 5
hsa-miR-548b-3p	1	0	1	1	0	0	LIPH	lipase, member H
hsa-miR-548b-3p	0	0	1	1	0	0	LINC00477	long intergenic non-protein coding RNA 477
hsa-miR-548b-3p	1	0	1	0	1	1	CENPBD1	CENPB DNA-binding domains containing 1
hsa-miR-548b-3p	1	0	1	1	1	1	FAM84A	family with sequence similarity 84, member A
hsa-miR-548b-3p	0	0	1	1	1	1	C7orf33	chromosome 7 open reading frame 33
hsa-miR-548b-3p	0	0	1	1	0	0	TCEB3C	transcription elongation factor B polypeptide 3C (elongin A3)
hsa-miR-548b-3p	1	0	1	1	1	1	ZNF396	zinc finger protein 396
hsa-miR-548b-3p	1	0	1	1	1	1	FAM110B	family with sequence similarity 110, member B
hsa-miR-548b-3p	1	0	1	1	1	1	BOD1L1	biorientation of chromosomes in cell division 1-like 1
hsa-miR-548b-3p	1	0	1	1	1	1	TPM3	tropomyosin 3
hsa-miR-548b-3p	1	0	1	1	1	1	UBTD2	ubiquitin domain containing 2
hsa-miR-548b-3p	1	0	1	1	1	1	POGLUT1	protein O-glucosyltransferase 1
hsa-miR-548b-3p	0	0	1	1	1	1	TRAM1L1	translocation associated membrane protein 1-like 1
hsa-miR-548b-3p	1	0	1	1	1	1	FAM123B	family with sequence similarity 123B
hsa-miR-548b-3p	1	0	1	1	1	1	C7orf60	chromosome 7 open reading frame 60
hsa-miR-548b-3p	1	0	1	1	1	1	SPRED1	sprouty-related, EVH1 domain containing 1
hsa-miR-548b-3p	1	0	1	1	1	1	TCTEX1D1	Tctex1 domain containing 1
hsa-miR-548b-3p	1	0	1	0	1	1	RWDD4	RWD domain containing 4
hsa-miR-548b-3p	1	0	1	1	1	1	ZCCHC5	zinc finger, CCHC domain containing 5
hsa-miR-548b-3p	1	0	1	1	1	1	ATXN7L1	ataxin 7-like 1
hsa-miR-548b-3p	1	0	1	0	1	1	C7orf41	chromosome 7 open reading frame 41
hsa-miR-548b-3p	1	0	1	1	1	1	FAS	Fas (TNF receptor superfamily, member 6)
hsa-miR-548b-3p	1	0	1	1	1	1	UHRF2	ubiquitin-like with PHD and ring finger domains 2, E3 ubiquitin protein ligase
hsa-miR-548b-3p	1	0	1	1	1	1	HS6ST3	heparan sulfate 6-O-sulfotransferase 3
hsa-miR-548b-3p	1	0	1	1	1	1	CREBRF	CREB3 regulatory factor
hsa-miR-548b-3p	1	0	1	1	0	0	FAM43A	family with sequence similarity 43, member A
hsa-miR-548b-3p	0	0	1	0	1	1	RTP1	receptor (chemosensory) transporter protein 1
hsa-miR-548b-3p	1	0	1	0	1	1	TTL	tubulin tyrosine ligase
hsa-miR-548b-3p	0	0	1	1	1	1	TEDDM1	transmembrane epididymal protein 1
hsa-miR-548b-3p	0	0	1	1	1	1	REXO1L1	REX1, RNA exonuclease 1 homolog (S. cerevisiae)-like 1
hsa-miR-548b-3p	1	0	1	1	1	1	MMGT1	membrane magnesium transporter 1
hsa-miR-548b-3p	1	0	1	1	1	1	DCUN1D3	DCN1, defective in cullin neddylation 1, domain containing 3 (S. cerevisiae)
hsa-miR-548b-3p	1	0	1	1	1	1	FAM117B	family with sequence similarity 117, member B
hsa-miR-548b-3p	0	0	1	1	1	1	C15orf26	chromosome 15 open reading frame 26
hsa-miR-548b-3p	1	0	1	1	1	1	ARL10	ADP-ribosylation factor-like 10
hsa-miR-548b-3p	1	0	1	0	1	1	DPY19L2	dpy-19-like 2 (C. elegans)
hsa-miR-548b-3p	1	0	1	0	1	1	FAM84B	family with sequence similarity 84, member B
hsa-miR-548b-3p	1	0	1	1	1	1	UBR1	ubiquitin protein ligase E3 component n-recognin 1
hsa-miR-548b-3p	0	0	1	1	1	1	GRIK1	glutamate receptor, ionotropic, kainate 1
hsa-miR-548b-3p	1	0	1	1	1	1	SYT9	synaptotagmin IX
hsa-miR-548b-3p	1	0	1	1	1	1	GRIK2	glutamate receptor, ionotropic, kainate 2
hsa-miR-548b-3p	1	0	1	1	1	1	PDLIM2	PDZ and LIM domain 2 (mystique)
hsa-miR-548b-3p	1	0	1	1	1	1	LRRTM3	leucine rich repeat transmembrane neuronal 3
hsa-miR-548b-3p	0	0	1	1	1	1	HSD17B13	hydroxysteroid (17-beta) dehydrogenase 13
hsa-miR-548b-3p	1	0	1	1	1	1	MB21D2	Mab-21 domain containing 2
hsa-miR-548b-3p	1	0	1	1	1	1	TMED7	transmembrane emp24 protein transport domain containing 7
hsa-miR-548b-3p	0	0	1	0	1	1	VSTM2A	V-set and transmembrane domain containing 2A
hsa-miR-548b-3p	0	0	1	0	1	1	TMED4	transmembrane emp24 protein transport domain containing 4
hsa-miR-548b-3p	0	0	1	1	1	1	C15orf38	chromosome 15 open reading frame 38
hsa-miR-548b-3p	1	0	1	1	1	1	SP8	Sp8 transcription factor
hsa-miR-548b-3p	1	0	1	0	1	1	VSX2	visual system homeobox 2
hsa-miR-548b-3p	1	0	1	0	1	1	RIMS4	regulating synaptic membrane exocytosis 4
hsa-miR-548b-3p	1	0	1	1	1	1	ARRDC4	arrestin domain containing 4
hsa-miR-548b-3p	0	0	1	1	1	1	ISCA2	iron-sulfur cluster assembly 2 homolog (S. cerevisiae)
hsa-miR-548b-3p	1	0	1	1	1	1	ZBTB41	zinc finger and BTB domain containing 41
hsa-miR-548b-3p	0	0	1	0	1	1	BTNL3	butyrophilin-like 3
hsa-miR-548b-3p	1	0	1	1	1	1	CCZ1B	CCZ1 vacuolar protein trafficking and biogenesis associated homolog B (S. cerevisiae)
hsa-miR-548b-3p	1	0	1	1	1	1	ASB7	ankyrin repeat and SOCS box containing 7
hsa-miR-548b-3p	1	0	1	1	1	1	E2F6	E2F transcription factor 6
hsa-miR-548b-3p	1	0	1	1	1	1	GPRIN3	GPRIN family member 3
hsa-miR-548b-3p	1	0	1	0	1	1	NRK	Nik related kinase
hsa-miR-548b-3p	1	0	1	1	1	1	RAB43	RAB43, member RAS oncogene family
hsa-miR-548b-3p	0	0	1	0	1	1	ANKRD45	ankyrin repeat domain 45
hsa-miR-548b-3p	1	0	1	1	1	1	PAQR9	progestin and adipoQ receptor family member IX
hsa-miR-548b-3p	1	0	1	0	1	1	LHFPL3	lipoma HMGIC fusion partner-like 3
hsa-miR-548b-3p	0	0	1	1	1	1	THAP1	THAP domain containing, apoptosis associated protein 1
hsa-miR-548b-3p	0	0	1	1	1	1	MDFIC	MyoD family inhibitor domain containing
hsa-miR-548b-3p	1	0	1	1	1	1	CXCL12	chemokine (C-X-C motif) ligand 12
hsa-miR-548b-3p	0	0	1	1	0	0	KRTAP26-1	keratin associated protein 26-1
hsa-miR-548b-3p	1	0	1	0	1	1	MBLAC2	metallo-beta-lactamase domain containing 2
hsa-miR-548b-3p	1	0	1	1	1	1	ATRNL1	attractin-like 1
hsa-miR-548b-3p	0	0	1	0	1	1	C11orf92	chromosome 11 open reading frame 92
hsa-miR-548b-3p	0	0	1	1	1	1	C15orf54	chromosome 15 open reading frame 54
hsa-miR-548b-3p	1	0	1	0	1	1	C17orf102	chromosome 17 open reading frame 102
hsa-miR-548b-3p	1	0	1	1	1	1	C11orf87	chromosome 11 open reading frame 87
hsa-miR-548b-3p	0	0	1	0	1	1	FSD1L	fibronectin type III and SPRY domain containing 1-like
hsa-miR-548b-3p	0	0	1	1	1	1	PATE2	prostate and testis expressed 2
hsa-miR-548b-3p	1	0	1	0	1	1	STAT3	signal transducer and activator of transcription 3 (acute-phase response factor)
hsa-miR-548b-3p	0	0	1	0	0	0	TFAMP1	transcription factor A, mitochondrial pseudogene 1
hsa-miR-548b-3p	0	0	1	0	0	0	SNORD107	small nucleolar RNA, C/D box 107
hsa-miR-548b-3p	0	0	1	1	0	0	SNRPN	small nuclear ribonucleoprotein polypeptide N
hsa-miR-548b-3p	0	0	1	0	0	0	HLA-H	major histocompatibility complex, class I, H (pseudogene)
hsa-miR-548b-3p	0	0	1	0	0	0	MIR155HG	MIR155 host gene (non-protein coding)
hsa-miR-548b-3p	0	0	1	0	0	0	TTTY22	testis-specific transcript, Y-linked 22 (non-protein coding)
hsa-miR-548b-3p	0	0	1	0	0	0	PPP1R2P3	protein phosphatase 1, regulatory (inhibitor) subunit 2 pseudogene 3
hsa-miR-548b-3p	0	0	1	0	0	0	ST13P4	suppression of tumorigenicity 13 (colon carcinoma) (Hsp70 interacting protein) pseudogene 4
hsa-miR-548b-3p	0	0	1	0	0	0	TPI1P2	triosephosphate isomerase 1 pseudogene 2
hsa-miR-548b-3p	0	0	1	0	0	0	ST13P6	suppression of tumorigenicity 13 (colon carcinoma) (Hsp70 interacting protein) pseudogene 6
hsa-miR-548b-3p	0	0	1	0	0	0	SNORA66	small nucleolar RNA, H/ACA box 66
hsa-miR-548b-3p	0	0	1	0	0	0	TOP1P1	topoisomerase (DNA) I pseudogene 1
hsa-miR-548b-3p	0	0	1	0	0	0	AOC4	amine oxidase, copper containing 3 (vascular adhesion protein 1) pseudogene
hsa-miR-548b-3p	0	0	1	0	0	0	HTR7P1	5-hydroxytryptamine (serotonin) receptor 7 pseudogene 1
hsa-miR-548b-3p	0	0	1	0	0	0	AQP7P1	aquaporin 7 pseudogene 1
hsa-miR-548b-3p	0	0	1	0	0	0	HAS2-AS1	HAS2 antisense RNA 1
hsa-miR-548b-3p	0	0	1	0	0	0	HSP90B3P	heat shock protein 90kDa beta (Grp94), member 3, pseudogene
hsa-miR-548b-3p	1	0	1	1	1	1	FGFR2	fibroblast growth factor receptor 2
hsa-miR-548b-3p	1	0	1	1	1	1	CASP2	caspase 2, apoptosis-related cysteine peptidase
hsa-miR-548b-3p	1	0	1	0	1	1	NFIX	nuclear factor I/X (CCAAT-binding transcription factor)
hsa-miR-548b-3p	1	0	1	1	1	1	CBLB	Cbl proto-oncogene, E3 ubiquitin protein ligase B
hsa-miR-548b-3p	0	0	1	0	0	0	MST1P9	macrophage stimulating 1 (hepatocyte growth factor-like) pseudogene 9
hsa-miR-548b-3p	1	0	1	1	0	0	DTNB	dystrobrevin, beta
hsa-miR-548b-3p	0	0	1	1	1	1	UPP2	uridine phosphorylase 2
hsa-miR-548b-3p	0	0	1	1	0	0	TSR3	TSR3, 20S rRNA accumulation, homolog (S. cerevisiae)
hsa-miR-548b-3p	0	0	1	1	0	0	RWDD2A	RWD domain containing 2A
hsa-miR-548b-3p	0	0	1	1	1	1	ST6GALNAC1	ST6 (alpha-N-acetyl-neuraminyl-2,3-beta-galactosyl-1,3)-N-acetylgalactosaminide alpha-2,6-sialyltransferase 1
hsa-miR-548b-3p	1	0	0	1	1	1	NEDD4	neural precursor cell expressed, developmentally down-regulated 4, E3 ubiquitin protein ligase
hsa-miR-548b-3p	0	0	0	1	1	1	KRT20	keratin 20
hsa-miR-548b-3p	0	0	1	1	0	0	NEB	nebulin
hsa-miR-548b-3p	0	0	1	1	0	0	ALPK1	alpha-kinase 1
hsa-miR-548b-3p	0	0	1	1	0	0	CPB2	carboxypeptidase B2 (plasma)
hsa-miR-548b-3p	0	0	1	1	0	0	ROPN1	rhophilin associated tail protein 1
hsa-miR-548b-3p	0	0	0	1	0	0	GAL3ST2	galactose-3-O-sulfotransferase 2
hsa-miR-548b-3p	0	0	0	1	0	0	TRIP6	thyroid hormone receptor interactor 6
hsa-miR-548b-3p	0	0	1	1	0	0	SIRT4	sirtuin 4
hsa-miR-548b-3p	0	0	0	1	0	0	NAT14	N-acetyltransferase 14 (GCN5-related, putative)
hsa-miR-548b-3p	0	0	1	1	1	1	TMEM101	transmembrane protein 101
hsa-miR-548b-3p	0	0	0	1	0	0	HMGB1P10	high mobility group box 1 pseudogene 10
hsa-miR-548b-3p	0	0	0	1	0	0	RTDR1	rhabdoid tumor deletion region gene 1
hsa-miR-548b-3p	0	0	0	1	1	1	BIK	BCL2-interacting killer (apoptosis-inducing)
hsa-miR-548b-3p	0	0	0	1	1	1	HMOX1	heme oxygenase (decycling) 1
hsa-miR-548b-3p	1	0	1	1	1	1	SYNGR1	synaptogyrin 1
hsa-miR-548b-3p	0	0	0	1	1	1	PNPLA3	patatin-like phospholipase domain containing 3
hsa-miR-548b-3p	0	0	1	1	1	1	ACO2	aconitase 2, mitochondrial
hsa-miR-548b-3p	0	0	0	1	0	0	PYGL	phosphorylase, glycogen, liver
hsa-miR-548b-3p	1	0	1	1	0	0	ERH	enhancer of rudimentary homolog (Drosophila)
hsa-miR-548b-3p	0	0	1	1	1	1	SRP54	signal recognition particle 54kDa
hsa-miR-548b-3p	1	0	1	1	1	1	NFKBIA	nuclear factor of kappa light polypeptide gene enhancer in B-cells inhibitor, alpha
hsa-miR-548b-3p	0	0	1	1	1	1	PNN	pinin, desmosome associated protein
hsa-miR-548b-3p	0	0	1	1	0	0	BIRC7	baculoviral IAP repeat containing 7
hsa-miR-548b-3p	0	0	1	1	0	0	XKR7	XK, Kell blood group complex subunit-related family, member 7
hsa-miR-548b-3p	0	0	1	1	0	0	TAF9	TAF9 RNA polymerase II, TATA box binding protein (TBP)-associated factor, 32kDa
hsa-miR-548b-3p	1	0	1	1	1	1	LYRM1	LYR motif containing 1
hsa-miR-548b-3p	0	0	1	1	0	0	PARD6A	par-6 partitioning defective 6 homolog alpha (C. elegans)
hsa-miR-548b-3p	0	0	1	1	1	1	AQP8	aquaporin 8
hsa-miR-548b-3p	1	0	1	1	1	1	DCTN6	dynactin 6
hsa-miR-548b-3p	0	0	0	1	0	0	ERCC2	excision repair cross-complementing rodent repair deficiency, complementation group 2
hsa-miR-548b-3p	0	0	1	1	1	1	ARHGAP33	Rho GTPase activating protein 33
hsa-miR-548b-3p	1	0	1	1	1	1	RAB3D	RAB3D, member RAS oncogene family
hsa-miR-548b-3p	0	0	1	1	0	0	DBP	D site of albumin promoter (albumin D-box) binding protein
hsa-miR-548b-3p	0	0	0	1	0	0	HAMP	hepcidin antimicrobial peptide
hsa-miR-548b-3p	0	0	1	1	1	1	PSMA2	proteasome (prosome, macropain) subunit, alpha type, 2
hsa-miR-548b-3p	0	0	1	1	1	1	PLGRKT	plasminogen receptor, C-terminal lysine transmembrane protein
hsa-miR-548b-3p	1	0	1	1	1	1	GOSR2	golgi SNAP receptor complex member 2
hsa-miR-548b-3p	0	0	1	1	0	0	PFN1	profilin 1
hsa-miR-548b-3p	0	0	1	1	1	1	MED31	mediator complex subunit 31
hsa-miR-548b-3p	0	0	1	1	1	1	LAP3	leucine aminopeptidase 3
hsa-miR-548b-3p	0	0	1	1	1	1	PANX1	pannexin 1
hsa-miR-548b-3p	1	0	1	1	0	0	RPS13	ribosomal protein S13
hsa-miR-548b-3p	1	0	1	1	1	1	SMARCD1	SWI/SNF related, matrix associated, actin dependent regulator of chromatin, subfamily d, member 1
hsa-miR-548b-3p	0	0	0	1	1	1	GPN3	GPN-loop GTPase 3
hsa-miR-548b-3p	1	0	1	1	1	1	SRSF9	serine/arginine-rich splicing factor 9
hsa-miR-548b-3p	0	0	1	1	1	1	FBXO5	F-box protein 5
hsa-miR-548b-3p	0	0	0	1	0	0	KIF6	kinesin family member 6
hsa-miR-548b-3p	1	0	1	1	1	1	TTC31	tetratricopeptide repeat domain 31
hsa-miR-548b-3p	1	0	1	1	1	1	POLE4	polymerase (DNA-directed), epsilon 4, accessory subunit
hsa-miR-548b-3p	0	0	1	1	1	1	IL18R1	interleukin 18 receptor 1
hsa-miR-548b-3p	0	0	1	1	1	1	PPP1R7	protein phosphatase 1, regulatory subunit 7
hsa-miR-548b-3p	1	0	1	1	1	1	TCEANC2	transcription elongation factor A (SII) N-terminal and central domain containing 2
hsa-miR-548b-3p	1	0	1	1	1	1	RPL22	ribosomal protein L22
hsa-miR-548b-3p	0	0	0	1	0	0	NT5C1A	5'-nucleotidase, cytosolic IA
hsa-miR-548b-3p	0	0	1	1	1	1	HMGCL	3-hydroxymethyl-3-methylglutaryl-CoA lyase
hsa-miR-548b-3p	1	0	1	1	1	1	SLC8A2	solute carrier family 8 (sodium/calcium exchanger), member 2
hsa-miR-548b-3p	0	0	1	1	1	1	DDX55	DEAD (Asp-Glu-Ala-Asp) box polypeptide 55
hsa-miR-548b-3p	0	0	1	1	1	1	ACYP1	acylphosphatase 1, erythrocyte (common) type
hsa-miR-548b-3p	0	0	1	1	0	0	TNFSF18	tumor necrosis factor (ligand) superfamily, member 18
hsa-miR-548b-3p	0	0	1	1	0	0	CHRNA2	cholinergic receptor, nicotinic, alpha 2 (neuronal)
hsa-miR-548b-3p	0	0	1	1	0	0	SLC35B1	solute carrier family 35, member B1
hsa-miR-548b-3p	1	0	1	1	1	1	AHR	aryl hydrocarbon receptor
hsa-miR-548b-3p	0	0	0	1	1	1	UNG	uracil-DNA glycosylase
hsa-miR-548b-3p	0	0	0	1	0	0	HMGB1P1	high mobility group box 1 pseudogene 1
hsa-miR-548b-3p	0	0	1	1	0	0	ABCC10	ATP-binding cassette, sub-family C (CFTR/MRP), member 10
hsa-miR-548b-3p	0	0	0	1	1	1	BBS2	Bardet-Biedl syndrome 2
hsa-miR-548b-3p	0	0	1	1	0	0	CD70	CD70 molecule
hsa-miR-548b-3p	0	0	1	1	1	1	CST8	cystatin 8 (cystatin-related epididymal specific)
hsa-miR-548b-3p	1	0	1	1	1	1	RALY	RNA binding protein, autoantigenic (hnRNP-associated with lethal yellow homolog (mouse))
hsa-miR-548b-3p	0	0	1	1	0	0	LRFN3	leucine rich repeat and fibronectin type III domain containing 3
hsa-miR-548b-3p	0	0	1	1	0	0	PDCD2L	programmed cell death 2-like
hsa-miR-548b-3p	0	0	0	1	0	0	TBPL2	TATA box binding protein like 2
hsa-miR-548b-3p	0	0	1	1	1	1	MTMR8	myotubularin related protein 8
hsa-miR-548b-3p	0	0	1	1	0	0	MAGEC2	melanoma antigen family C, 2
hsa-miR-548b-3p	0	0	0	1	0	0	TUBA4A	tubulin, alpha 4a
hsa-miR-548b-3p	1	0	1	1	0	0	ZFP36	zinc finger protein 36, C3H type, homolog (mouse)
hsa-miR-548b-3p	0	0	1	1	0	0	SPINK2	serine peptidase inhibitor, Kazal type 2 (acrosin-trypsin inhibitor)
hsa-miR-548b-3p	1	0	0	1	1	1	TST	thiosulfate sulfurtransferase (rhodanese)
hsa-miR-548b-3p	1	0	1	1	1	1	HOXD13	homeobox D13
hsa-miR-548b-3p	0	0	0	1	1	1	THAP10	THAP domain containing 10
hsa-miR-548b-3p	0	0	1	1	1	1	MYOD1	myogenic differentiation 1
hsa-miR-548b-3p	0	0	1	1	0	0	DHRS2	dehydrogenase/reductase (SDR family) member 2
hsa-miR-548b-3p	0	0	0	1	0	0	CDY2A	chromodomain protein, Y-linked, 2A
hsa-miR-548b-3p	0	0	0	1	0	0	PDGFRL	platelet-derived growth factor receptor-like
hsa-miR-548b-3p	0	0	0	1	1	1	FKBP6	FK506 binding protein 6, 36kDa
hsa-miR-548b-3p	0	0	0	1	0	0	NSUN5	NOP2/Sun domain family, member 5
hsa-miR-548b-3p	1	0	1	1	1	1	MNX1	motor neuron and pancreas homeobox 1
hsa-miR-548b-3p	1	0	1	1	1	1	SESN2	sestrin 2
hsa-miR-548b-3p	1	0	0	1	1	1	AKAP12	A kinase (PRKA) anchor protein 12
hsa-miR-548b-3p	0	0	0	1	1	1	PRDM9	PR domain containing 9
hsa-miR-548b-3p	0	0	1	1	0	0	RPL27	ribosomal protein L27
hsa-miR-548b-3p	0	0	0	1	1	1	ZCCHC9	zinc finger, CCHC domain containing 9
hsa-miR-548b-3p	0	0	1	1	1	1	RPA1	replication protein A1, 70kDa
hsa-miR-548b-3p	1	0	1	1	1	1	LANCL2	LanC lantibiotic synthetase component C-like 2 (bacterial)
hsa-miR-548b-3p	0	0	0	1	1	1	UTP3	UTP3, small subunit (SSU) processome component, homolog (S. cerevisiae)
hsa-miR-548b-3p	1	0	1	1	1	1	KDM6B	lysine (K)-specific demethylase 6B
hsa-miR-548b-3p	1	0	1	1	1	1	MATN2	matrilin 2
hsa-miR-548b-3p	1	0	0	1	0	0	HAPLN2	hyaluronan and proteoglycan link protein 2
hsa-miR-548b-3p	0	0	0	1	1	1	DMGDH	dimethylglycine dehydrogenase
hsa-miR-548b-3p	0	0	1	1	1	1	CCDC134	coiled-coil domain containing 134
hsa-miR-548b-3p	0	0	1	1	0	0	CCDC59	coiled-coil domain containing 59
hsa-miR-548b-3p	0	0	1	1	1	1	CCNB1	cyclin B1
hsa-miR-548b-3p	0	0	1	1	0	0	CD101	CD101 molecule
hsa-miR-548b-3p	0	0	0	1	1	1	TMEM106C	transmembrane protein 106C
hsa-miR-548b-3p	0	0	1	1	0	0	PLEKHA8P1	pleckstrin homology domain containing, family A member 8 pseudogene 1
hsa-miR-548b-3p	0	0	1	1	1	1	CMPK2	cytidine monophosphate (UMP-CMP) kinase 2, mitochondrial
hsa-miR-548b-3p	1	0	1	1	1	1	GOLM1	golgi membrane protein 1
hsa-miR-548b-3p	1	0	0	1	1	1	USP30	ubiquitin specific peptidase 30
hsa-miR-548b-3p	0	0	1	1	1	1	RINT1	RAD50 interactor 1
hsa-miR-548b-3p	0	0	1	1	1	1	CD63	CD63 molecule
hsa-miR-548b-3p	0	0	0	1	1	1	CCDC102A	coiled-coil domain containing 102A
hsa-miR-548b-3p	1	0	1	1	1	1	PAX3	paired box 3
hsa-miR-548b-3p	0	0	1	1	0	0	WNT10A	wingless-type MMTV integration site family, member 10A
hsa-miR-548b-3p	1	0	0	1	1	1	TGFBRAP1	transforming growth factor, beta receptor associated protein 1
hsa-miR-548b-3p	0	0	1	1	1	1	USP12	ubiquitin specific peptidase 12
hsa-miR-548b-3p	0	0	1	1	0	0	GPR45	G protein-coupled receptor 45
hsa-miR-548b-3p	1	0	0	1	1	1	USP44	ubiquitin specific peptidase 44
hsa-miR-548b-3p	1	0	1	1	1	1	CKAP4	cytoskeleton-associated protein 4
hsa-miR-548b-3p	0	0	1	1	1	1	CHST12	carbohydrate (chondroitin 4) sulfotransferase 12
hsa-miR-548b-3p	0	0	1	1	0	0	GALNT5	UDP-N-acetyl-alpha-D-galactosamine:polypeptide N-acetylgalactosaminyltransferase 5 (GalNAc-T5)
hsa-miR-548b-3p	0	0	1	1	1	1	CCDC115	coiled-coil domain containing 115
hsa-miR-548b-3p	0	0	0	1	0	0	CAPN11	calpain 11
hsa-miR-548b-3p	0	0	0	1	0	0	HTR3B	5-hydroxytryptamine (serotonin) receptor 3B, ionotropic
hsa-miR-548b-3p	0	0	1	1	1	1	MMP7	matrix metallopeptidase 7 (matrilysin, uterine)
hsa-miR-548b-3p	0	0	1	1	0	0	DCUN1D5	DCN1, defective in cullin neddylation 1, domain containing 5 (S. cerevisiae)
hsa-miR-548b-3p	0	0	1	1	1	1	MMP13	matrix metallopeptidase 13 (collagenase 3)
hsa-miR-548b-3p	0	0	1	1	0	0	CARD17	caspase recruitment domain family, member 17
hsa-miR-548b-3p	0	0	1	1	1	1	CASP1	caspase 1, apoptosis-related cysteine peptidase
hsa-miR-548b-3p	0	0	1	1	1	1	PAK6	p21 protein (Cdc42/Rac)-activated kinase 6
hsa-miR-548b-3p	0	0	1	1	1	1	AACS	acetoacetyl-CoA synthetase
hsa-miR-548b-3p	0	0	1	1	0	0	ARG2	arginase, type II
hsa-miR-548b-3p	0	0	1	1	1	1	MYO9A	myosin IXA
hsa-miR-548b-3p	1	0	1	1	1	1	HCN4	hyperpolarization activated cyclic nucleotide-gated potassium channel 4
hsa-miR-548b-3p	1	0	1	1	0	0	LOXL1	lysyl oxidase-like 1
hsa-miR-548b-3p	0	0	0	1	0	0	CDHR2	cadherin-related family member 2
hsa-miR-548b-3p	1	0	0	1	1	1	FAM86A	family with sequence similarity 86, member A
hsa-miR-548b-3p	0	0	0	1	0	0	GLP2R	glucagon-like peptide 2 receptor
hsa-miR-548b-3p	1	0	0	1	0	0	ISM1	isthmin 1 homolog (zebrafish)
hsa-miR-548b-3p	1	0	1	1	0	0	ZC3H3	zinc finger CCCH-type containing 3
hsa-miR-548b-3p	0	0	0	1	1	1	LGALS3BP	lectin, galactoside-binding, soluble, 3 binding protein
hsa-miR-548b-3p	0	0	1	1	0	0	CSF2RB	colony stimulating factor 2 receptor, beta, low-affinity (granulocyte-macrophage)
hsa-miR-548b-3p	0	0	0	1	1	1	UQCR11	ubiquinol-cytochrome c reductase, complex III subunit XI
hsa-miR-548b-3p	1	0	1	1	1	1	TBC1D9	TBC1 domain family, member 9 (with GRAM domain)
hsa-miR-548b-3p	0	0	0	1	0	0	CCDC61	coiled-coil domain containing 61
hsa-miR-548b-3p	0	0	1	1	0	0	IL1B	interleukin 1, beta
hsa-miR-548b-3p	0	0	1	1	0	0	ZNF541	zinc finger protein 541
hsa-miR-548b-3p	1	0	1	1	1	1	LIFR	leukemia inhibitory factor receptor alpha
hsa-miR-548b-3p	1	0	1	1	0	0	HIPK2	homeodomain interacting protein kinase 2
hsa-miR-548b-3p	0	0	1	1	0	0	TBXAS1	thromboxane A synthase 1 (platelet)
hsa-miR-548b-3p	0	0	0	1	1	1	NOL10	nucleolar protein 10
hsa-miR-548b-3p	0	0	1	1	1	1	DGKD	diacylglycerol kinase, delta 130kDa
hsa-miR-548b-3p	0	0	0	1	1	1	EFHD1	EF-hand domain family, member D1
hsa-miR-548b-3p	0	0	1	1	1	1	ATF2	activating transcription factor 2
hsa-miR-548b-3p	0	0	1	1	1	1	KYNU	kynureninase
hsa-miR-548b-3p	0	0	0	1	0	0	PDCL3	phosducin-like 3
hsa-miR-548b-3p	1	0	1	1	1	1	OCIAD1	OCIA domain containing 1
hsa-miR-548b-3p	0	0	0	1	1	1	TXK	TXK tyrosine kinase
hsa-miR-548b-3p	0	0	0	1	0	0	TMEM175	transmembrane protein 175
hsa-miR-548b-3p	0	0	1	1	1	1	CCDC99	coiled-coil domain containing 99
hsa-miR-548b-3p	0	0	1	1	1	1	CPVL	carboxypeptidase, vitellogenic-like
hsa-miR-548b-3p	1	0	0	1	1	1	WNT2	wingless-type MMTV integration site family member 2
hsa-miR-548b-3p	0	0	1	1	0	0	KIF9	kinesin family member 9
hsa-miR-548b-3p	1	0	1	1	1	1	SLC2A4RG	SLC2A4 regulator
hsa-miR-548b-3p	0	0	1	1	1	1	ALG10	asparagine-linked glycosylation 10, alpha-1,2-glucosyltransferase homolog (S. pombe)
hsa-miR-548b-3p	1	0	1	1	0	0	SCAMP2	secretory carrier membrane protein 2
hsa-miR-548b-3p	0	0	1	1	0	0	NUDT7	nudix (nucleoside diphosphate linked moiety X)-type motif 7
hsa-miR-548b-3p	0	0	1	1	1	1	ABCA10	ATP-binding cassette, sub-family A (ABC1), member 10
hsa-miR-548b-3p	0	0	0	1	1	1	NLRP1	NLR family, pyrin domain containing 1
hsa-miR-548b-3p	0	0	1	1	0	0	NT5C3L	5'-nucleotidase, cytosolic III-like
hsa-miR-548b-3p	0	0	0	1	0	0	SAMD1	sterile alpha motif domain containing 1
hsa-miR-548b-3p	0	0	0	1	0	0	PPAP2C	phosphatidic acid phosphatase type 2C
hsa-miR-548b-3p	0	0	0	1	0	0	SSBP4	single stranded DNA binding protein 4
hsa-miR-548b-3p	0	0	0	1	0	0	IL19	interleukin 19
hsa-miR-548b-3p	0	0	1	1	0	0	FXYD1	FXYD domain containing ion transport regulator 1
hsa-miR-548b-3p	0	0	1	1	0	0	FXYD7	FXYD domain containing ion transport regulator 7
hsa-miR-548b-3p	0	0	0	1	0	0	ECSIT	ECSIT homolog (Drosophila)
hsa-miR-548b-3p	0	0	1	1	0	0	WRAP73	WD repeat containing, antisense to TP73
hsa-miR-548b-3p	0	0	1	1	0	0	SETDB1	SET domain, bifurcated 1
hsa-miR-548b-3p	0	0	0	1	0	0	TUBB8	tubulin, beta 8 class VIII
hsa-miR-548b-3p	0	0	1	1	1	1	ARL6IP5	ADP-ribosylation-like factor 6 interacting protein 5
hsa-miR-548b-3p	1	0	1	1	1	1	TAGLN3	transgelin 3
hsa-miR-548b-3p	0	0	1	1	1	1	ENOPH1	enolase-phosphatase 1
hsa-miR-548b-3p	0	0	0	1	1	1	SPATA5	spermatogenesis associated 5
hsa-miR-548b-3p	0	0	0	1	1	1	RPL37	ribosomal protein L37
hsa-miR-548b-3p	0	0	1	1	1	1	LARS	leucyl-tRNA synthetase
hsa-miR-548b-3p	0	0	1	1	0	0	SPINK7	serine peptidase inhibitor, Kazal type 7 (putative)
hsa-miR-548b-3p	0	0	0	1	0	0	PLA2G7	phospholipase A2, group VII (platelet-activating factor acetylhydrolase, plasma)
hsa-miR-548b-3p	0	0	1	1	1	1	UIMC1	ubiquitin interaction motif containing 1
hsa-miR-548b-3p	0	0	1	1	0	0	SNX12	sorting nexin 12
hsa-miR-548b-3p	0	0	0	1	0	0	GPR119	G protein-coupled receptor 119
hsa-miR-548b-3p	0	0	1	1	0	0	PAOX	polyamine oxidase (exo-N4-amino)
hsa-miR-548b-3p	0	0	1	1	1	1	BCCIP	BRCA2 and CDKN1A interacting protein
hsa-miR-548b-3p	0	0	1	1	0	0	WDR74	WD repeat domain 74
hsa-miR-548b-3p	1	0	1	1	1	1	TMEM218	transmembrane protein 218
hsa-miR-548b-3p	0	0	0	1	0	0	DCP1B	DCP1 decapping enzyme homolog B (S. cerevisiae)
hsa-miR-548b-3p	0	0	0	1	0	0	C12orf45	chromosome 12 open reading frame 45
hsa-miR-548b-3p	0	0	0	1	1	1	GUF1	GUF1 GTPase homolog (S. cerevisiae)
hsa-miR-548b-3p	0	0	1	1	1	1	RBM46	RNA binding motif protein 46
hsa-miR-548b-3p	0	0	0	1	0	0	GRID2	glutamate receptor, ionotropic, delta 2
hsa-miR-548b-3p	1	0	1	1	1	1	RIT2	Ras-like without CAAX 2
hsa-miR-548b-3p	0	0	1	1	0	0	HAUS1	HAUS augmin-like complex, subunit 1
hsa-miR-548b-3p	0	0	1	1	1	1	CETN3	centrin, EF-hand protein, 3
hsa-miR-548b-3p	1	0	1	1	1	1	HOXA10	homeobox A10
hsa-miR-548b-3p	0	0	0	1	0	0	C16orf74	chromosome 16 open reading frame 74
hsa-miR-548b-3p	0	0	0	1	1	1	TMPRSS15	transmembrane protease, serine 15
hsa-miR-548b-3p	1	0	0	1	1	1	RHOC	ras homolog family member C
hsa-miR-548b-3p	0	0	1	1	1	1	CNOT8	CCR4-NOT transcription complex, subunit 8
hsa-miR-548b-3p	0	0	1	1	0	0	PDZD9	PDZ domain containing 9
hsa-miR-548b-3p	0	0	1	1	1	1	ATP1B3	ATPase, Na+/K+ transporting, beta 3 polypeptide
hsa-miR-548b-3p	0	0	0	1	0	0	MAGEA8	melanoma antigen family A, 8
hsa-miR-548b-3p	0	0	0	1	0	0	FAM161B	family with sequence similarity 161, member B
hsa-miR-548b-3p	0	0	1	1	1	1	PDE6D	phosphodiesterase 6D, cGMP-specific, rod, delta
hsa-miR-548b-3p	1	0	0	1	1	1	ATG16L1	autophagy related 16-like 1 (S. cerevisiae)
hsa-miR-548b-3p	0	0	0	1	1	1	ZNF19	zinc finger protein 19
hsa-miR-548b-3p	0	0	0	1	0	0	CCNB2	cyclin B2
hsa-miR-548b-3p	0	0	1	1	0	0	LCA5L	Leber congenital amaurosis 5-like
hsa-miR-548b-3p	0	0	0	1	0	0	FCER1G	Fc fragment of IgE, high affinity I, receptor for; gamma polypeptide
hsa-miR-548b-3p	0	0	0	1	0	0	CBR1	carbonyl reductase 1
hsa-miR-548b-3p	1	0	0	1	0	0	UROC1	urocanate hydratase 1
hsa-miR-548b-3p	0	0	0	1	0	0	PRKD2	protein kinase D2
hsa-miR-548b-3p	0	0	0	1	1	1	SSU72	SSU72 RNA polymerase II CTD phosphatase homolog (S. cerevisiae)
hsa-miR-548b-3p	0	0	0	1	0	0	RSPH1	radial spoke head 1 homolog (Chlamydomonas)
hsa-miR-548b-3p	0	0	0	1	0	0	AMICA1	adhesion molecule, interacts with CXADR antigen 1
hsa-miR-548b-3p	0	0	1	1	1	1	TMEM199	transmembrane protein 199
hsa-miR-548b-3p	0	0	1	1	1	1	ZNF382	zinc finger protein 382
hsa-miR-548b-3p	1	0	1	1	1	1	NXF1	nuclear RNA export factor 1
hsa-miR-548b-3p	1	0	1	1	1	1	FZD5	frizzled family receptor 5
hsa-miR-548b-3p	0	0	0	1	0	0	YY1AP1	YY1 associated protein 1
hsa-miR-548b-3p	1	0	1	1	1	1	FSTL1	follistatin-like 1
hsa-miR-548b-3p	0	0	0	1	0	0	RQCD1	RCD1 required for cell differentiation1 homolog (S. pombe)
hsa-miR-548b-3p	0	0	0	1	1	1	KIAA1524	KIAA1524
hsa-miR-548b-3p	1	0	1	1	1	1	FBLN2	fibulin 2
hsa-miR-548b-3p	0	0	1	1	1	1	WDR52	WD repeat domain 52
hsa-miR-548b-3p	1	0	1	1	1	1	FAM208A	family with sequence similarity 208, member A
hsa-miR-548b-3p	1	0	1	1	0	0	KIAA0226	KIAA0226
hsa-miR-548b-3p	0	0	1	1	1	1	MAD2L1	MAD2 mitotic arrest deficient-like 1 (yeast)
hsa-miR-548b-3p	0	0	0	1	1	1	F2RL1	coagulation factor II (thrombin) receptor-like 1
hsa-miR-548b-3p	0	0	0	1	1	1	CCDC127	coiled-coil domain containing 127
hsa-miR-548b-3p	0	0	0	1	1	1	C6orf195	chromosome 6 open reading frame 195
hsa-miR-548b-3p	1	0	1	1	1	1	NPM1	nucleophosmin (nucleolar phosphoprotein B23, numatrin)
hsa-miR-548b-3p	1	0	0	1	1	1	SOX17	SRY (sex determining region Y)-box 17
hsa-miR-548b-3p	0	0	0	1	1	1	SBSPON	somatomedin B and thrombospondin, type 1 domain containing
hsa-miR-548b-3p	1	0	0	1	1	1	GPR146	G protein-coupled receptor 146
hsa-miR-548b-3p	0	0	0	1	0	0	GBX1	gastrulation brain homeobox 1
hsa-miR-548b-3p	0	0	1	1	1	1	CXorf22	chromosome X open reading frame 22
hsa-miR-548b-3p	0	0	1	1	1	1	WRN	Werner syndrome, RecQ helicase-like
hsa-miR-548b-3p	0	0	1	1	1	1	MAGEC3	melanoma antigen family C, 3
hsa-miR-548b-3p	0	0	1	1	1	1	PIWIL4	piwi-like 4 (Drosophila)
hsa-miR-548b-3p	0	0	1	1	1	1	APBB1	amyloid beta (A4) precursor protein-binding, family B, member 1 (Fe65)
hsa-miR-548b-3p	0	0	0	1	0	0	SERINC4	serine incorporator 4
hsa-miR-548b-3p	0	0	1	1	0	0	SAAL1	serum amyloid A-like 1
hsa-miR-548b-3p	0	0	1	1	0	0	PLK1	polo-like kinase 1
hsa-miR-548b-3p	1	0	1	1	0	0	NAB2	NGFI-A binding protein 2 (EGR1 binding protein 2)
hsa-miR-548b-3p	0	0	1	1	0	0	SCG5	secretogranin V (7B2 protein)
hsa-miR-548b-3p	0	0	0	1	0	0	ZNF267	zinc finger protein 267
hsa-miR-548b-3p	0	0	0	1	0	0	IZUMO4	IZUMO family member 4
hsa-miR-548b-3p	1	0	1	1	1	1	ZNF701	zinc finger protein 701
hsa-miR-548b-3p	0	0	1	1	1	1	NTF4	neurotrophin 4
hsa-miR-548b-3p	0	0	0	1	0	0	EVPL	envoplakin
hsa-miR-548b-3p	0	0	1	1	1	1	POLR2G	polymerase (RNA) II (DNA directed) polypeptide G
hsa-miR-548b-3p	1	0	1	1	1	1	CTTN	cortactin
hsa-miR-548b-3p	0	0	1	1	0	0	SAC3D1	SAC3 domain containing 1
hsa-miR-548b-3p	0	0	1	1	1	1	STEAP4	STEAP family member 4
hsa-miR-548b-3p	0	0	1	1	1	1	TADA3	transcriptional adaptor 3
hsa-miR-548b-3p	0	0	1	1	0	0	ZNF467	zinc finger protein 467
hsa-miR-548b-3p	0	0	1	1	0	0	ZNF280A	zinc finger protein 280A
hsa-miR-548b-3p	0	0	1	1	0	0	IRF2BP1	interferon regulatory factor 2 binding protein 1
hsa-miR-548b-3p	1	0	1	1	1	1	MYRIP	myosin VIIA and Rab interacting protein
hsa-miR-548b-3p	0	0	1	1	1	1	CLP1	CLP1, cleavage and polyadenylation factor I subunit, homolog (S. cerevisiae)
hsa-miR-548b-3p	1	0	0	1	1	1	LETM1	leucine zipper-EF-hand containing transmembrane protein 1
hsa-miR-548b-3p	0	0	1	1	1	1	DONSON	downstream neighbor of SON
hsa-miR-548b-3p	0	0	1	1	1	1	SIRPG	signal-regulatory protein gamma
hsa-miR-548b-3p	0	0	0	1	1	1	ACYP2	acylphosphatase 2, muscle type
hsa-miR-548b-3p	0	0	1	1	1	1	CHCHD7	coiled-coil-helix-coiled-coil-helix domain containing 7
hsa-miR-548b-3p	0	0	1	1	1	1	FRMD3	FERM domain containing 3
hsa-miR-548b-3p	0	0	0	1	0	0	RNMTL1	RNA methyltransferase like 1
hsa-miR-548b-3p	0	0	0	1	1	1	VASN	vasorin
hsa-miR-548b-3p	0	0	1	1	0	0	TBCA	tubulin folding cofactor A
hsa-miR-548b-3p	1	0	1	1	1	1	CDCA7	cell division cycle associated 7
hsa-miR-548b-3p	0	0	0	1	1	1	CDY1B	chromodomain protein, Y-linked, 1B
hsa-miR-548b-3p	0	0	1	1	1	1	ANKMY2	ankyrin repeat and MYND domain containing 2
hsa-miR-548b-3p	1	0	1	1	1	1	INADL	InaD-like (Drosophila)
hsa-miR-548b-3p	0	0	1	1	1	1	PPID	peptidylprolyl isomerase D
hsa-miR-548b-3p	0	0	0	1	1	1	ZWILCH	Zwilch, kinetochore associated, homolog (Drosophila)
hsa-miR-548b-3p	1	0	0	1	1	1	FAM57A	family with sequence similarity 57, member A
hsa-miR-548b-3p	0	0	0	1	0	0	MS4A10	membrane-spanning 4-domains, subfamily A, member 10
hsa-miR-548b-3p	0	0	1	1	1	1	GEMIN2	gem (nuclear organelle) associated protein 2
hsa-miR-548b-3p	0	0	1	1	0	0	RFWD2	ring finger and WD repeat domain 2, E3 ubiquitin protein ligase
hsa-miR-548b-3p	0	0	0	1	0	0	PHYHD1	phytanoyl-CoA dioxygenase domain containing 1
hsa-miR-548b-3p	0	0	0	1	1	1	P2RY14	purinergic receptor P2Y, G-protein coupled, 14
hsa-miR-548b-3p	0	0	1	1	0	0	PPP1R14B	protein phosphatase 1, regulatory (inhibitor) subunit 14B
hsa-miR-548b-3p	0	0	1	1	1	1	KLF7	Kruppel-like factor 7 (ubiquitous)
hsa-miR-548b-3p	0	0	0	1	1	1	FAM86B2	family with sequence similarity 86, member B2
hsa-miR-548b-3p	0	0	1	1	1	1	C7orf10	chromosome 7 open reading frame 10
hsa-miR-548b-3p	0	0	0	1	0	0	OR8S1	olfactory receptor, family 8, subfamily S, member 1
hsa-miR-548b-3p	0	0	0	1	1	1	DCAKD	dephospho-CoA kinase domain containing
hsa-miR-548b-3p	1	0	1	1	1	1	HAP1	huntingtin-associated protein 1
hsa-miR-548b-3p	0	0	1	1	1	1	SNX31	sorting nexin 31
hsa-miR-548b-3p	0	0	1	1	0	0	CPT1B	carnitine palmitoyltransferase 1B (muscle)
hsa-miR-548b-3p	0	0	1	1	1	1	FAM174A	family with sequence similarity 174, member A
hsa-miR-548b-3p	0	0	1	1	1	1	RNF166	ring finger protein 166
hsa-miR-548b-3p	0	0	1	1	0	0	DOK3	docking protein 3
hsa-miR-548b-3p	0	0	0	1	1	1	HMHA1	histocompatibility (minor) HA-1
hsa-miR-548b-3p	1	0	1	1	1	1	SRSF7	serine/arginine-rich splicing factor 7
hsa-miR-548b-3p	1	0	1	1	1	1	DDN	dendrin
hsa-miR-548b-3p	1	0	1	1	1	1	MAK	male germ cell-associated kinase
hsa-miR-548b-3p	0	0	0	1	0	0	RPL27A	ribosomal protein L27a
hsa-miR-548b-3p	0	0	1	1	1	1	GALM	galactose mutarotase (aldose 1-epimerase)
hsa-miR-548b-3p	0	0	1	1	0	0	HIST1H2BC	histone cluster 1, H2bc
hsa-miR-548b-3p	0	0	1	1	0	0	HCLS1	hematopoietic cell-specific Lyn substrate 1
hsa-miR-548b-3p	0	0	0	1	1	1	C9orf64	chromosome 9 open reading frame 64
hsa-miR-548b-3p	0	0	1	1	1	1	IMP3	IMP3, U3 small nucleolar ribonucleoprotein, homolog (yeast)
hsa-miR-548b-3p	0	0	1	1	0	0	GARNL3	GTPase activating Rap/RanGAP domain-like 3
hsa-miR-548b-3p	0	0	1	1	1	1	PENK	proenkephalin
hsa-miR-548b-3p	0	0	1	1	1	1	RABL5	RAB, member RAS oncogene family-like 5
hsa-miR-548b-3p	0	0	0	1	0	0	OR4K17	olfactory receptor, family 4, subfamily K, member 17
hsa-miR-548b-3p	0	0	0	1	0	0	OR4K13	olfactory receptor, family 4, subfamily K, member 13
hsa-miR-548b-3p	0	0	0	1	0	0	LOC100132418	Uncharacterized PRO1102-like protein LOC100132418
hsa-miR-548b-3p	0	0	1	1	1	1	KCND3	potassium voltage-gated channel, Shal-related subfamily, member 3
hsa-miR-548b-3p	0	0	0	1	0	0	MAP7D3	MAP7 domain containing 3
hsa-miR-548b-3p	0	0	0	1	1	1	MCM9	minichromosome maintenance complex component 9
hsa-miR-548b-3p	1	0	0	1	0	0	APBA3	amyloid beta (A4) precursor protein-binding, family A, member 3
hsa-miR-548b-3p	0	0	0	1	0	0	OR52N2	olfactory receptor, family 52, subfamily N, member 2
hsa-miR-548b-3p	1	0	1	1	1	1	GBA3	glucosidase, beta, acid 3 (cytosolic)
hsa-miR-548b-3p	0	0	0	1	0	0	PXMP2	peroxisomal membrane protein 2, 22kDa
hsa-miR-548b-3p	0	0	1	1	0	0	PPAPDC1B	phosphatidic acid phosphatase type 2 domain containing 1B
hsa-miR-548b-3p	0	0	0	1	0	0	FXYD2	FXYD domain containing ion transport regulator 2
hsa-miR-548b-3p	0	0	1	1	1	1	PCNXL4	pecanex-like 4 (Drosophila)
hsa-miR-548b-3p	0	0	1	1	0	0	TMEM11	transmembrane protein 11
hsa-miR-548b-3p	1	0	0	1	1	1	TUBB6	tubulin, beta 6 class V
hsa-miR-548b-3p	0	0	1	1	1	1	SPAG11B	sperm associated antigen 11B
hsa-miR-548b-3p	0	0	1	1	1	1	ZFAT	zinc finger and AT hook domain containing
hsa-miR-548b-3p	0	0	1	1	0	0	PKD2L1	polycystic kidney disease 2-like 1
hsa-miR-548b-3p	0	0	1	1	1	1	MRPL43	mitochondrial ribosomal protein L43
hsa-miR-548b-3p	0	0	1	1	1	1	ZWINT	ZW10 interactor
hsa-miR-548b-3p	0	0	1	1	0	0	SLCO3A1	solute carrier organic anion transporter family, member 3A1
hsa-miR-548b-3p	1	0	1	1	1	1	HTR1F	5-hydroxytryptamine (serotonin) receptor 1F, G protein-coupled
hsa-miR-548b-3p	0	0	0	1	0	0	FGF8	fibroblast growth factor 8 (androgen-induced)
hsa-miR-548b-3p	0	0	1	1	1	1	ASPRV1	aspartic peptidase, retroviral-like 1
hsa-miR-548b-3p	0	0	1	1	1	1	C1orf172	chromosome 1 open reading frame 172
hsa-miR-548b-3p	1	0	1	1	1	1	ITFG1	integrin alpha FG-GAP repeat containing 1
hsa-miR-548b-3p	0	0	0	1	0	0	OR51V1	olfactory receptor, family 51, subfamily V, member 1
hsa-miR-548b-3p	1	0	1	1	1	1	YBX1	Y box binding protein 1
hsa-miR-548b-3p	0	0	1	1	0	0	TCP1	t-complex 1
hsa-miR-548b-3p	0	0	1	1	1	1	HYDIN	HYDIN, axonemal central pair apparatus protein
hsa-miR-548b-3p	0	0	0	1	0	0	SLC25A41	solute carrier family 25, member 41
hsa-miR-548b-3p	0	0	0	1	0	0	TPPP2	tubulin polymerization-promoting protein family member 2
hsa-miR-548b-3p	0	0	0	1	0	0	FCRL6	Fc receptor-like 6
hsa-miR-548b-3p	0	0	0	1	0	0	SSNA1	Sjogren syndrome nuclear autoantigen 1
hsa-miR-548b-3p	0	0	1	1	0	0	PNKP	polynucleotide kinase 3'-phosphatase
hsa-miR-548b-3p	1	0	1	1	1	1	EEA1	early endosome antigen 1
hsa-miR-548b-3p	0	0	1	1	0	0	RUVBL1	RuvB-like 1 (E. coli)
hsa-miR-548b-3p	0	0	1	1	1	1	KCNH5	potassium voltage-gated channel, subfamily H (eag-related), member 5
hsa-miR-548b-3p	0	0	0	1	0	0	CDH7	cadherin 7, type 2
hsa-miR-548b-3p	1	0	1	1	1	1	NAP1L5	nucleosome assembly protein 1-like 5
hsa-miR-548b-3p	0	0	1	1	0	0	STRA6	stimulated by retinoic acid gene 6 homolog (mouse)
hsa-miR-548b-3p	1	0	1	1	1	1	AP1S3	adaptor-related protein complex 1, sigma 3 subunit
hsa-miR-548b-3p	0	0	0	1	0	0	LARP7	La ribonucleoprotein domain family, member 7
hsa-miR-548b-3p	0	0	0	1	1	1	C8orf42	chromosome 8 open reading frame 42
hsa-miR-548b-3p	0	0	1	1	1	1	FANCB	Fanconi anemia, complementation group B
hsa-miR-548b-3p	0	0	0	1	0	0	B3GNT4	UDP-GlcNAc:betaGal beta-1,3-N-acetylglucosaminyltransferase 4
hsa-miR-548b-3p	0	0	1	1	1	1	CALCB	calcitonin-related polypeptide beta
hsa-miR-548b-3p	0	0	0	1	0	0	CYP4F12	cytochrome P450, family 4, subfamily F, polypeptide 12
hsa-miR-548b-3p	0	0	1	1	0	0	MSC	musculin
hsa-miR-548b-3p	0	0	1	1	1	1	LACC1	laccase (multicopper oxidoreductase) domain containing 1
hsa-miR-548b-3p	0	0	1	1	0	0	MMP12	matrix metallopeptidase 12 (macrophage elastase)
hsa-miR-548b-3p	0	0	0	1	0	0	SPAG11A	sperm associated antigen 11A
hsa-miR-548b-3p	0	0	1	1	0	0	TMEM150B	transmembrane protein 150B
hsa-miR-548b-3p	0	0	1	1	1	1	FHL5	four and a half LIM domains 5
hsa-miR-548b-3p	1	0	1	1	0	0	EXOSC3	exosome component 3
hsa-miR-548b-3p	0	0	1	1	0	0	NT5DC4	5'-nucleotidase domain containing 4
hsa-miR-548b-3p	0	0	1	1	1	1	MC2R	melanocortin 2 receptor (adrenocorticotropic hormone)
hsa-miR-548b-3p	0	0	0	1	0	0	SERHL2	serine hydrolase-like 2
hsa-miR-548b-3p	0	0	1	1	0	0	PLB1	phospholipase B1
hsa-miR-548b-3p	1	0	1	1	1	1	KREMEN1	kringle containing transmembrane protein 1
hsa-miR-548b-3p	0	0	1	1	0	0	SPRR4	small proline-rich protein 4
hsa-miR-548b-3p	0	0	1	1	0	0	NPIP	nuclear pore complex interacting protein
hsa-miR-548b-3p	0	0	0	1	1	1	APOL4	apolipoprotein L, 4
hsa-miR-548b-3p	0	0	0	1	0	0	DHX34	DEAH (Asp-Glu-Ala-His) box polypeptide 34
hsa-miR-548b-3p	0	0	0	1	0	0	TTTY8B	testis-specific transcript, Y-linked 8B (non-protein coding)
hsa-miR-548b-3p	0	0	1	1	1	1	PPP4R4	protein phosphatase 4, regulatory subunit 4
hsa-miR-548b-3p	0	0	0	1	1	1	FAM181B	family with sequence similarity 181, member B
hsa-miR-548b-3p	0	0	0	1	0	0	NUPR1L	nuclear protein, transcriptional regulator, 1-like
hsa-miR-548b-3p	0	0	0	1	0	0	MAPK8IP2	mitogen-activated protein kinase 8 interacting protein 2
hsa-miR-548b-3p	0	0	0	1	1	1	TRIM49	tripartite motif containing 49
hsa-miR-548b-3p	0	0	1	1	0	0	WBSCR16	Williams-Beuren syndrome chromosome region 16
hsa-miR-548b-3p	0	0	1	1	1	1	KRT79	keratin 79
hsa-miR-548b-3p	0	0	0	1	0	0	CDCA2	cell division cycle associated 2
hsa-miR-548b-3p	0	0	0	1	1	1	WDR5B	WD repeat domain 5B
hsa-miR-548b-3p	0	0	1	1	0	0	C12orf60	chromosome 12 open reading frame 60
hsa-miR-548b-3p	0	0	0	1	0	0	SLC25A10	solute carrier family 25 (mitochondrial carrier; dicarboxylate transporter), member 10
hsa-miR-548b-3p	0	0	1	1	0	0	ZNF703	zinc finger protein 703
hsa-miR-548b-3p	0	0	0	1	0	0	SYNDIG1L	synapse differentiation inducing 1-like
hsa-miR-548b-3p	0	0	1	1	1	1	MXRA7	matrix-remodelling associated 7
hsa-miR-548b-3p	0	0	1	1	1	1	METTL7A	methyltransferase like 7A
hsa-miR-548b-3p	0	0	1	1	1	1	LRRC16A	leucine rich repeat containing 16A
hsa-miR-548b-3p	0	0	1	1	1	1	ZNRD1	zinc ribbon domain containing 1
hsa-miR-548b-3p	0	0	0	1	0	0	TMEM186	transmembrane protein 186
hsa-miR-548b-3p	0	0	0	1	0	0	LCK	lymphocyte-specific protein tyrosine kinase
hsa-miR-548b-3p	1	0	1	1	1	1	SELE	selectin E
hsa-miR-548b-3p	0	0	0	1	0	0	OR1D5	olfactory receptor, family 1, subfamily D, member 5
hsa-miR-548b-3p	1	0	1	1	1	1	SCN5A	sodium channel, voltage-gated, type V, alpha subunit
hsa-miR-548b-3p	0	0	0	1	0	0	GABRG3	gamma-aminobutyric acid (GABA) A receptor, gamma 3
hsa-miR-548b-3p	0	0	1	1	1	1	WHSC2	Wolf-Hirschhorn syndrome candidate 2
hsa-miR-548b-3p	1	0	0	1	0	0	UBL4B	ubiquitin-like 4B
hsa-miR-548b-3p	0	0	0	1	1	1	USP16	ubiquitin specific peptidase 16
hsa-miR-548b-3p	0	0	0	1	0	0	QRFPR	pyroglutamylated RFamide peptide receptor
hsa-miR-548b-3p	0	0	0	1	0	0	GPR141	G protein-coupled receptor 141
hsa-miR-548b-3p	0	0	0	1	0	0	WDR86	WD repeat domain 86
hsa-miR-548b-3p	0	0	0	1	0	0	C20orf94	chromosome 20 open reading frame 94
hsa-miR-548b-3p	0	0	0	1	0	0	ZNF578	zinc finger protein 578
hsa-miR-548b-3p	0	0	0	1	1	1	ZNF528	zinc finger protein 528
hsa-miR-548b-3p	0	0	0	1	0	0	TAC4	tachykinin 4 (hemokinin)
hsa-miR-548b-3p	0	0	1	1	1	1	PGAM4	phosphoglycerate mutase family member 4
hsa-miR-548b-3p	1	0	1	1	1	1	PGAM1	phosphoglycerate mutase 1 (brain)
hsa-miR-548b-3p	0	0	0	1	0	0	WDR25	WD repeat domain 25
hsa-miR-548b-3p	1	0	1	1	1	1	LRRC7	leucine rich repeat containing 7
hsa-miR-548b-3p	0	0	0	1	0	0	OR5D14	olfactory receptor, family 5, subfamily D, member 14
hsa-miR-548b-3p	1	0	1	1	1	1	NPAS2	neuronal PAS domain protein 2
hsa-miR-548b-3p	1	0	1	1	1	1	PNRC1	proline-rich nuclear receptor coactivator 1
hsa-miR-548b-3p	1	0	1	1	1	1	BOLL	bol, boule-like (Drosophila)
hsa-miR-548b-3p	0	0	0	1	0	0	RASSF3	Ras association (RalGDS/AF-6) domain family member 3
hsa-miR-548b-3p	0	0	1	1	0	0	RNASEH2B	ribonuclease H2, subunit B
hsa-miR-548b-3p	0	0	1	1	1	1	TRIM34	tripartite motif containing 34
hsa-miR-548b-3p	0	0	1	1	1	1	TRIM6	tripartite motif containing 6
hsa-miR-548b-3p	0	0	1	1	1	1	TRIM6-TRIM34	TRIM6-TRIM34 readthrough
hsa-miR-548b-3p	1	0	1	1	1	1	SUPT7L	suppressor of Ty 7 (S. cerevisiae)-like
hsa-miR-548b-3p	0	0	0	1	0	0	ISYNA1	inositol-3-phosphate synthase 1
hsa-miR-548b-3p	0	0	1	1	1	1	ANKRD34B	ankyrin repeat domain 34B
hsa-miR-548b-3p	0	0	1	1	0	0	TRMT2B	tRNA methyltransferase 2 homolog B (S. cerevisiae)
hsa-miR-548b-3p	1	0	1	1	1	1	DNAJB12	DnaJ (Hsp40) homolog, subfamily B, member 12
hsa-miR-548b-3p	0	0	1	1	0	0	STAMBP	STAM binding protein
hsa-miR-548b-3p	1	0	1	1	1	1	C15orf63	chromosome 15 open reading frame 63
hsa-miR-548b-3p	0	0	0	1	0	0	INTS12	integrator complex subunit 12
hsa-miR-548b-3p	0	0	0	1	0	0	FAM86B1	family with sequence similarity 86, member B1
hsa-miR-548b-3p	0	0	1	1	1	1	C15orf43	chromosome 15 open reading frame 43
hsa-miR-548b-3p	1	0	1	1	1	1	NASP	nuclear autoantigenic sperm protein (histone-binding)
hsa-miR-548b-3p	0	0	1	1	1	1	TRAK1	trafficking protein, kinesin binding 1
hsa-miR-548b-3p	1	0	1	1	1	1	NEK10	NIMA (never in mitosis gene a)- related kinase 10
hsa-miR-548b-3p	0	0	1	1	1	1	LCTL	lactase-like
hsa-miR-548b-3p	1	0	1	1	1	1	TMEM248	transmembrane protein 248
hsa-miR-548b-3p	0	0	1	1	1	1	CNTNAP3B	contactin associated protein-like 3B
hsa-miR-548b-3p	0	0	1	1	1	1	SMPD1	sphingomyelin phosphodiesterase 1, acid lysosomal
hsa-miR-548b-3p	0	0	0	1	0	0	ASTL	astacin-like metallo-endopeptidase (M12 family)
hsa-miR-548b-3p	1	0	1	1	1	1	RUFY2	RUN and FYVE domain containing 2
hsa-miR-548b-3p	1	0	1	1	1	1	SPTB	spectrin, beta, erythrocytic
hsa-miR-548b-3p	0	0	1	1	0	0	DAP3	death associated protein 3
hsa-miR-548b-3p	0	0	0	1	0	0	ALKBH2	alkB, alkylation repair homolog 2 (E. coli)
hsa-miR-548b-3p	0	0	1	1	0	0	FSIP2	fibrous sheath interacting protein 2
hsa-miR-548b-3p	1	0	1	1	1	1	SEMA4D	sema domain, immunoglobulin domain (Ig), transmembrane domain (TM) and short cytoplasmic domain, (semaphorin) 4D
hsa-miR-548b-3p	1	0	1	1	1	1	NOVA1	neuro-oncological ventral antigen 1
hsa-miR-548b-3p	0	0	0	1	1	1	DTNBP1	dystrobrevin binding protein 1
hsa-miR-548b-3p	0	0	0	1	1	1	MCPH1	microcephalin 1
hsa-miR-548b-3p	0	0	1	1	1	1	BPGM	2,3-bisphosphoglycerate mutase
hsa-miR-548b-3p	1	0	1	1	1	1	GIPC1	GIPC PDZ domain containing family, member 1
hsa-miR-548b-3p	0	0	1	1	0	0	UBE2J2	ubiquitin-conjugating enzyme E2, J2
hsa-miR-548b-3p	0	0	1	1	1	1	CKB	creatine kinase, brain
hsa-miR-548b-3p	1	0	1	1	1	1	AKT1	v-akt murine thymoma viral oncogene homolog 1
hsa-miR-548b-3p	0	0	1	1	0	0	C20orf152	chromosome 20 open reading frame 152
hsa-miR-548b-3p	0	0	1	1	1	1	C16orf89	chromosome 16 open reading frame 89
hsa-miR-548b-3p	0	0	1	1	0	0	C7orf25	chromosome 7 open reading frame 25
hsa-miR-548b-3p	1	0	1	1	1	1	TRPC1	transient receptor potential cation channel, subfamily C, member 1
hsa-miR-548b-3p	0	0	1	1	0	0	DCDC1	doublecortin domain containing 1
hsa-miR-548b-3p	0	0	1	1	1	1	TAP1	transporter 1, ATP-binding cassette, sub-family B (MDR/TAP)
hsa-miR-548b-3p	0	0	0	1	0	0	KIF25	kinesin family member 25
hsa-miR-548b-3p	0	0	1	1	1	1	LRMP	lymphoid-restricted membrane protein
hsa-miR-548b-3p	1	0	1	1	1	1	LUC7L2	LUC7-like 2 (S. cerevisiae)
hsa-miR-548b-3p	0	0	1	1	1	1	ZNF160	zinc finger protein 160
hsa-miR-548b-3p	0	0	0	1	0	0	NPIPL2	nuclear pore complex interacting protein-like 2
hsa-miR-548b-3p	1	0	1	1	1	1	DRD2	dopamine receptor D2
hsa-miR-548b-3p	1	0	1	1	1	1	VANGL1	vang-like 1 (van gogh, Drosophila)
hsa-miR-548b-3p	0	0	1	1	0	0	KRT39	keratin 39
hsa-miR-548b-3p	1	0	1	1	1	1	UBE2H	ubiquitin-conjugating enzyme E2H
hsa-miR-548b-3p	0	0	1	1	1	1	TLR4	toll-like receptor 4
hsa-miR-548b-3p	0	0	0	1	0	0	SFXN4	sideroflexin 4
hsa-miR-548b-3p	1	0	1	1	1	1	KTN1	kinectin 1 (kinesin receptor)
hsa-miR-548b-3p	0	0	1	1	1	1	G3BP1	GTPase activating protein (SH3 domain) binding protein 1
hsa-miR-548b-3p	0	0	1	1	0	0	ACOX3	acyl-CoA oxidase 3, pristanoyl
hsa-miR-548b-3p	0	0	1	1	0	0	STOML2	stomatin (EPB72)-like 2
hsa-miR-548b-3p	1	0	1	1	1	1	HNRNPA2B1	heterogeneous nuclear ribonucleoprotein A2/B1
hsa-miR-548b-3p	1	0	1	1	1	1	PPP1R12B	protein phosphatase 1, regulatory subunit 12B
hsa-miR-548b-3p	0	0	1	1	1	1	PPP1R26	protein phosphatase 1, regulatory subunit 26
hsa-miR-548b-3p	1	0	1	1	1	1	PTBP1	polypyrimidine tract binding protein 1
hsa-miR-548b-3p	0	0	0	1	0	0	OR2L8	olfactory receptor, family 2, subfamily L, member 8
hsa-miR-548b-3p	0	0	0	1	0	0	LOC100132247	nuclear pore complex interacting protein related gene
hsa-miR-548b-3p	0	0	1	1	0	0	DTHD1	death domain containing 1
hsa-miR-548b-3p	1	0	0	1	1	1	FAM219B	family with sequence similarity 219, member B
hsa-miR-548b-3p	0	0	1	1	1	1	CARD8	caspase recruitment domain family, member 8
hsa-miR-548b-3p	0	0	1	1	1	1	CX3CR1	chemokine (C-X3-C motif) receptor 1
hsa-miR-548b-3p	0	0	1	1	1	1	CCDC102B	coiled-coil domain containing 102B
hsa-miR-548b-3p	0	0	1	1	0	0	FAM3D	family with sequence similarity 3, member D
hsa-miR-548b-3p	0	0	0	1	0	0	GK2	glycerol kinase 2
hsa-miR-548b-3p	0	0	1	1	0	0	TMC2	transmembrane channel-like 2
hsa-miR-548b-3p	1	0	1	1	1	1	FAM222A	family with sequence similarity 222, member A
hsa-miR-548b-3p	0	0	0	1	1	1	SEPSECS	Sep (O-phosphoserine) tRNA:Sec (selenocysteine) tRNA synthase
hsa-miR-548b-3p	0	0	0	1	1	1	ZSCAN5B	zinc finger and SCAN domain containing 5B
hsa-miR-548b-3p	0	0	0	1	1	1	FTHL17	ferritin, heavy polypeptide-like 17
hsa-miR-548b-3p	0	0	1	1	1	1	EHD1	EH-domain containing 1
hsa-miR-548b-3p	1	0	1	1	1	1	C1orf116	chromosome 1 open reading frame 116
hsa-miR-548b-3p	0	0	1	1	1	1	SLC33A1	solute carrier family 33 (acetyl-CoA transporter), member 1
hsa-miR-548b-3p	0	0	1	1	1	1	SERHL	serine hydrolase-like
hsa-miR-548b-3p	0	0	0	1	0	0	DCAF12L2	DDB1 and CUL4 associated factor 12-like 2
hsa-miR-548b-3p	0	0	1	1	1	1	TPK1	thiamin pyrophosphokinase 1
hsa-miR-548b-3p	0	0	1	1	0	0	CASS4	Cas scaffolding protein family member 4
hsa-miR-548b-3p	0	0	1	1	1	1	HLA-G	major histocompatibility complex, class I, G
hsa-miR-548b-3p	1	0	1	1	1	1	SIN3A	SIN3 transcription regulator homolog A (yeast)
hsa-miR-548b-3p	0	0	1	1	1	1	C15orf57	chromosome 15 open reading frame 57
hsa-miR-548b-3p	0	0	1	1	0	0	CES1	carboxylesterase 1
hsa-miR-548b-3p	1	0	0	1	1	1	RBMS1	RNA binding motif, single stranded interacting protein 1
hsa-miR-548b-3p	0	0	1	1	1	1	PACRGL	PARK2 co-regulated-like
hsa-miR-548b-3p	0	0	1	1	1	1	FAM107A	family with sequence similarity 107, member A
hsa-miR-548b-3p	0	0	0	1	1	1	SLC26A11	solute carrier family 26, member 11
hsa-miR-548b-3p	1	0	1	1	1	1	ZFP2	zinc finger protein 2 homolog (mouse)
hsa-miR-548b-3p	1	0	1	1	1	1	TLR10	toll-like receptor 10
hsa-miR-548b-3p	1	0	0	1	0	0	GPATCH3	G patch domain containing 3
hsa-miR-548b-3p	0	0	0	1	1	1	HHLA3	HERV-H LTR-associating 3
hsa-miR-548b-3p	0	0	1	1	1	1	IFT81	intraflagellar transport 81 homolog (Chlamydomonas)
hsa-miR-548b-3p	0	0	0	1	1	1	DARS2	aspartyl-tRNA synthetase 2, mitochondrial
hsa-miR-548b-3p	1	0	1	1	1	1	SMOC1	SPARC related modular calcium binding 1
hsa-miR-548b-3p	0	0	0	1	0	0	ZNF669	zinc finger protein 669
hsa-miR-548b-3p	1	0	1	1	1	1	EXO1	exonuclease 1
hsa-miR-548b-3p	0	0	1	1	0	0	FAM89A	family with sequence similarity 89, member A
hsa-miR-548b-3p	0	0	1	1	1	1	SUSD4	sushi domain containing 4
hsa-miR-548b-3p	0	0	0	1	1	1	NENF	neudesin neurotrophic factor
hsa-miR-548b-3p	0	0	1	1	1	1	INTS7	integrator complex subunit 7
hsa-miR-548b-3p	1	0	0	1	1	1	KLHDC8A	kelch domain containing 8A
hsa-miR-548b-3p	0	0	0	1	0	0	RAET1G	retinoic acid early transcript 1G
hsa-miR-548b-3p	0	0	1	1	1	1	TRMT1L	tRNA methyltransferase 1 homolog (S. cerevisiae)-like
hsa-miR-548b-3p	1	0	1	1	1	1	TOR3A	torsin family 3, member A
hsa-miR-548b-3p	0	0	1	1	1	1	C1orf129	chromosome 1 open reading frame 129
hsa-miR-548b-3p	1	0	1	1	1	1	HBS1L	HBS1-like (S. cerevisiae)
hsa-miR-548b-3p	0	0	1	1	1	1	FCRLB	Fc receptor-like B
hsa-miR-548b-3p	0	0	1	1	1	1	CD1E	CD1e molecule
hsa-miR-548b-3p	1	0	1	1	1	1	HCN3	hyperpolarization activated cyclic nucleotide-gated potassium channel 3
hsa-miR-548b-3p	0	0	1	1	1	1	PKIB	protein kinase (cAMP-dependent, catalytic) inhibitor beta
hsa-miR-548b-3p	1	0	1	1	1	1	UBAP2L	ubiquitin associated protein 2-like
hsa-miR-548b-3p	0	0	1	1	1	1	C1orf43	chromosome 1 open reading frame 43
hsa-miR-548b-3p	0	0	1	1	0	0	KNDC1	kinase non-catalytic C-lobe domain (KIND) containing 1
hsa-miR-548b-3p	0	0	0	1	0	0	S100A4	S100 calcium binding protein A4
hsa-miR-548b-3p	1	0	1	1	0	0	PI4KB	phosphatidylinositol 4-kinase, catalytic, beta
hsa-miR-548b-3p	0	0	1	1	0	0	VPS72	vacuolar protein sorting 72 homolog (S. cerevisiae)
hsa-miR-548b-3p	0	0	0	1	1	1	FIG4	FIG4 homolog, SAC1 lipid phosphatase domain containing (S. cerevisiae)
hsa-miR-548b-3p	1	0	1	1	1	1	AIM1	absent in melanoma 1
hsa-miR-548b-3p	0	0	0	1	0	0	NBPF24	neuroblastoma breakpoint family, member 24
hsa-miR-548b-3p	1	0	1	1	1	1	KLHL32	kelch-like 32 (Drosophila)
hsa-miR-548b-3p	0	0	1	1	1	1	POLR3GL	polymerase (RNA) III (DNA directed) polypeptide G (32kD)-like
hsa-miR-548b-3p	1	0	1	1	1	1	TXNIP	thioredoxin interacting protein
hsa-miR-548b-3p	1	0	1	1	1	1	SYT6	synaptotagmin VI
hsa-miR-548b-3p	1	0	1	1	1	1	CYB5R4	cytochrome b5 reductase 4
hsa-miR-548b-3p	0	0	1	1	1	1	PGM3	phosphoglucomutase 3
hsa-miR-548b-3p	1	0	1	1	1	1	KCNA3	potassium voltage-gated channel, shaker-related subfamily, member 3
hsa-miR-548b-3p	0	0	0	1	1	1	SLC16A4	solute carrier family 16, member 4 (monocarboxylic acid transporter 5)
hsa-miR-548b-3p	0	0	1	1	1	1	IMPG1	interphotoreceptor matrix proteoglycan 1
hsa-miR-548b-3p	1	0	0	1	1	1	CLCC1	chloride channel CLIC-like 1
hsa-miR-548b-3p	0	0	1	1	0	0	AKNAD1	AKNA domain containing 1
hsa-miR-548b-3p	0	0	1	1	0	0	RTEL1	regulator of telomere elongation helicase 1
hsa-miR-548b-3p	0	0	0	1	0	0	TNFRSF6B	tumor necrosis factor receptor superfamily, member 6b, decoy
hsa-miR-548b-3p	0	0	0	1	0	0	SPANXN1	SPANX family, member N1
hsa-miR-548b-3p	0	0	1	1	1	1	GOT1	glutamic-oxaloacetic transaminase 1, soluble (aspartate aminotransferase 1)
hsa-miR-548b-3p	0	0	1	1	0	0	ODF2L	outer dense fiber of sperm tails 2-like
hsa-miR-548b-3p	0	0	1	1	1	1	LMBRD1	LMBR1 domain containing 1
hsa-miR-548b-3p	1	0	1	1	1	1	ZNF449	zinc finger protein 449
hsa-miR-548b-3p	0	0	1	1	1	1	RABGGTB	Rab geranylgeranyltransferase, beta subunit
hsa-miR-548b-3p	0	0	1	1	0	0	LSM14B	LSM14B, SCD6 homolog B (S. cerevisiae)
hsa-miR-548b-3p	1	0	1	1	1	1	WLS	wntless homolog (Drosophila)
hsa-miR-548b-3p	1	0	1	1	0	0	EFHC1	EF-hand domain (C-terminal) containing 1
hsa-miR-548b-3p	0	0	1	1	1	1	DNTT	deoxynucleotidyltransferase, terminal
hsa-miR-548b-3p	0	0	1	1	0	0	RAE1	RAE1 RNA export 1 homolog (S. pombe)
hsa-miR-548b-3p	0	0	1	1	0	0	HSPB11	heat shock protein family B (small), member 11
hsa-miR-548b-3p	1	0	1	1	0	0	MAN1B1	mannosidase, alpha, class 1B, member 1
hsa-miR-548b-3p	0	0	1	1	1	1	SLC25A43	solute carrier family 25, member 43
hsa-miR-548b-3p	1	0	1	1	1	1	LONRF3	LON peptidase N-terminal domain and ring finger 3
hsa-miR-548b-3p	0	0	0	1	0	0	EDF1	endothelial differentiation-related factor 1
hsa-miR-548b-3p	1	0	1	1	0	0	RABL6	RAB, member RAS oncogene family-like 6
hsa-miR-548b-3p	0	0	1	1	1	1	C1orf185	chromosome 1 open reading frame 185
hsa-miR-548b-3p	1	0	1	1	1	1	COL5A1	collagen, type V, alpha 1
hsa-miR-548b-3p	0	0	1	1	1	1	IPP	intracisternal A particle-promoted polypeptide
hsa-miR-548b-3p	0	0	0	1	0	0	LCN1P2	lipocalin 1 pseudogene 2
hsa-miR-548b-3p	1	0	1	1	1	1	MED27	mediator complex subunit 27
hsa-miR-548b-3p	0	0	0	1	0	0	POLR1C	polymerase (RNA) I polypeptide C, 30kDa
hsa-miR-548b-3p	1	0	1	1	1	1	RIMKLA	ribosomal modification protein rimK-like family member A
hsa-miR-548b-3p	0	0	1	1	0	0	DNTTIP1	deoxynucleotidyltransferase, terminal, interacting protein 1
hsa-miR-548b-3p	0	0	1	1	1	1	NXF3	nuclear RNA export factor 3
hsa-miR-548b-3p	0	0	1	1	1	1	PKIG	protein kinase (cAMP-dependent, catalytic) inhibitor gamma
hsa-miR-548b-3p	0	0	1	1	1	1	MSS51	MSS51 mitochondrial translational activator homolog (S. cerevisiae)
hsa-miR-548b-3p	0	0	0	1	1	1	NOX1	NADPH oxidase 1
hsa-miR-548b-3p	0	0	1	1	0	0	TREML1	triggering receptor expressed on myeloid cells-like 1
hsa-miR-548b-3p	1	0	1	1	1	1	ZHX3	zinc fingers and homeoboxes 3
hsa-miR-548b-3p	0	0	0	1	1	1	MSL3P1	male-specific lethal 3 homolog (Drosophila) pseudogene 1
hsa-miR-548b-3p	0	0	1	1	1	1	RNF19B	ring finger protein 19B
hsa-miR-548b-3p	0	0	1	1	0	0	PI16	peptidase inhibitor 16
hsa-miR-548b-3p	0	0	1	1	0	0	NHSL2	NHS-like 2
hsa-miR-548b-3p	0	0	0	1	0	0	OR5C1	olfactory receptor, family 5, subfamily C, member 1
hsa-miR-548b-3p	0	0	1	1	1	1	TTLL11	tubulin tyrosine ligase-like family, member 11
hsa-miR-548b-3p	1	0	1	1	1	1	EPB41	erythrocyte membrane protein band 4.1 (elliptocytosis 1, RH-linked)
hsa-miR-548b-3p	1	0	0	1	1	1	CNTRL	centriolin
hsa-miR-548b-3p	0	0	1	1	0	0	TCP11	t-complex 11 homolog (mouse)
hsa-miR-548b-3p	0	0	1	1	1	1	ASTN2	astrotactin 2
hsa-miR-548b-3p	0	0	1	1	0	0	GJB1	gap junction protein, beta 1, 32kDa
hsa-miR-548b-3p	1	0	1	1	1	1	SLC31A1	solute carrier family 31 (copper transporters), member 1
hsa-miR-548b-3p	0	0	0	1	1	1	KIAA1958	KIAA1958
hsa-miR-548b-3p	0	0	1	1	0	0	EIF6	eukaryotic translation initiation factor 6
hsa-miR-548b-3p	0	0	0	1	1	1	RAB41	RAB41, member RAS oncogene family
hsa-miR-548b-3p	0	0	1	1	0	0	HSD17B8	hydroxysteroid (17-beta) dehydrogenase 8
hsa-miR-548b-3p	0	0	1	1	1	1	HEPH	hephaestin
hsa-miR-548b-3p	0	0	1	1	1	1	ZNF189	zinc finger protein 189
hsa-miR-548b-3p	0	0	1	1	0	0	DNAH17	dynein, axonemal, heavy chain 17
hsa-miR-548b-3p	0	0	1	1	0	0	UBR4	ubiquitin protein ligase E3 component n-recognin 4
hsa-miR-548b-3p	0	0	0	1	0	0	CD300LD	CD300 molecule-like family member d
hsa-miR-548b-3p	1	0	0	1	1	1	DCUN1D2	DCN1, defective in cullin neddylation 1, domain containing 2 (S. cerevisiae)
hsa-miR-548b-3p	0	0	1	1	1	1	ZBTB12	zinc finger and BTB domain containing 12
hsa-miR-548b-3p	1	0	1	1	0	0	EHMT2	euchromatic histone-lysine N-methyltransferase 2
hsa-miR-548b-3p	0	0	1	1	0	0	CSNK2B	casein kinase 2, beta polypeptide
hsa-miR-548b-3p	0	0	0	1	1	1	LY6G5B	lymphocyte antigen 6 complex, locus G5B
hsa-miR-548b-3p	1	0	1	1	1	1	FAM155A	family with sequence similarity 155, member A
hsa-miR-548b-3p	0	0	0	1	0	0	APOM	apolipoprotein M
hsa-miR-548b-3p	0	0	1	1	1	1	TEX30	testis expressed 30
hsa-miR-548b-3p	0	0	1	1	1	1	TCF19	transcription factor 19
hsa-miR-548b-3p	1	0	1	1	0	0	CLYBL	citrate lyase beta like
hsa-miR-548b-3p	1	0	1	1	0	0	WDR45	WD repeat domain 45
hsa-miR-548b-3p	0	0	0	1	1	1	C10orf67	chromosome 10 open reading frame 67
hsa-miR-548b-3p	0	0	1	1	0	0	MAD2L2	MAD2 mitotic arrest deficient-like 2 (yeast)
hsa-miR-548b-3p	0	0	0	1	0	0	LOC116437	uncharacterized LOC116437
hsa-miR-548b-3p	0	0	0	1	0	0	FOXB2	forkhead box B2
hsa-miR-548b-3p	0	0	0	1	0	0	TRIM31	tripartite motif containing 31
hsa-miR-548b-3p	1	0	1	1	1	1	C9orf40	chromosome 9 open reading frame 40
hsa-miR-548b-3p	1	0	0	1	1	1	ABCC4	ATP-binding cassette, sub-family C (CFTR/MRP), member 4
hsa-miR-548b-3p	0	0	0	1	1	1	DCT	dopachrome tautomerase (dopachrome delta-isomerase, tyrosine-related protein 2)
hsa-miR-548b-3p	0	0	1	1	0	0	ARAF	v-raf murine sarcoma 3611 viral oncogene homolog
hsa-miR-548b-3p	0	0	0	1	0	0	ZNF157	zinc finger protein 157
hsa-miR-548b-3p	0	0	0	1	0	0	OR5V1	olfactory receptor, family 5, subfamily V, member 1
hsa-miR-548b-3p	0	0	0	1	1	1	OR12D3	olfactory receptor, family 12, subfamily D, member 3
hsa-miR-548b-3p	0	0	1	1	1	1	XRN2	5'-3' exoribonuclease 2
hsa-miR-548b-3p	0	0	1	1	1	1	TJP2	tight junction protein 2
hsa-miR-548b-3p	0	0	0	1	0	0	TMEM236	transmembrane protein 236
hsa-miR-548b-3p	0	0	1	1	1	1	STAM	signal transducing adaptor molecule (SH3 domain and ITAM motif) 1
hsa-miR-548b-3p	0	0	0	1	0	0	LOC100132874	uncharacterized LOC100132874
hsa-miR-548b-3p	0	0	0	1	0	0	THAP3	THAP domain containing, apoptosis associated protein 3
hsa-miR-548b-3p	0	0	1	1	1	1	CNTNAP3	contactin associated protein-like 3
hsa-miR-548b-3p	1	0	1	1	1	1	HIF3A	hypoxia inducible factor 3, alpha subunit
hsa-miR-548b-3p	0	0	0	1	1	1	KRTAP9-3	keratin associated protein 9-3
hsa-miR-548b-3p	1	0	1	1	1	1	DIAPH3	diaphanous homolog 3 (Drosophila)
hsa-miR-548b-3p	0	0	1	1	0	0	GKN1	gastrokine 1
hsa-miR-548b-3p	1	0	1	1	1	1	AHNAK	AHNAK nucleoprotein
hsa-miR-548b-3p	0	0	1	1	1	1	MAOB	monoamine oxidase B
hsa-miR-548b-3p	0	0	1	1	0	0	C12orf42	chromosome 12 open reading frame 42
hsa-miR-548b-3p	0	0	0	1	1	1	LRRC47	leucine rich repeat containing 47
hsa-miR-548b-3p	0	0	1	1	1	1	ANKRD5	ankyrin repeat domain 5
hsa-miR-548b-3p	0	0	1	1	0	0	CLLU1OS	chronic lymphocytic leukemia up-regulated 1 opposite strand
hsa-miR-548b-3p	1	0	1	1	1	1	CCL7	chemokine (C-C motif) ligand 7
hsa-miR-548b-3p	0	0	1	1	0	0	GABRD	gamma-aminobutyric acid (GABA) A receptor, delta
hsa-miR-548b-3p	0	0	1	1	0	0	C17orf79	chromosome 17 open reading frame 79
hsa-miR-548b-3p	0	0	0	1	1	1	UQCRQ	ubiquinol-cytochrome c reductase, complex III subunit VII, 9.5kDa
hsa-miR-548b-3p	0	0	1	1	0	0	KIAA0226L	KIAA0226-like
hsa-miR-548b-3p	1	0	1	1	1	1	HAO1	hydroxyacid oxidase (glycolate oxidase) 1
hsa-miR-548b-3p	1	0	1	1	1	1	ARX	aristaless related homeobox
hsa-miR-548b-3p	0	0	1	1	0	0	TPT1	tumor protein, translationally-controlled 1
[truncated: 94 more rows]
