# Supplementary material for: Profiling of Selected MicroRNAs in Proliferative Eutopic Endometrium of Women with Ovarian Endometriosis
Source: Biomed Res Int. 2015 Aug 20;2015:760698. doi: 10.1155/2015/760698 (PMC4558423; doi:10.1155/2015/760698)
Supplement: Supplementary file 1 — Table I: The names of miRNAs significantly differentially expressed between eutopic endometrium of patients with endometriosis vs eutopic endometrium of patients without endometriosis. Table II: The associations between miRNA and mRNA, which presents detailed results of the search of six major databases i.e targetscan, tarbase, miranda, mirbase, mirtarget2 and pictar. [file 760698.f1.zip › 760698.f1/Table II/hsa-miR-548c-3p.tsv]

miR	targetscan	tarbase	miranda	mirbase	mirtarget2	pictar	GeneSymbol	GeneName
hsa-miR-548c-3p	1	0	1	1	1	1	PLAU	plasminogen activator, urokinase
hsa-miR-548c-3p	1	0	1	1	1	1	ZFYVE16	zinc finger, FYVE domain containing 16
hsa-miR-548c-3p	1	0	1	1	1	1	CHD9	chromodomain helicase DNA binding protein 9
hsa-miR-548c-3p	1	0	1	1	0	0	SRCAP	Snf2-related CREBBP activator protein
hsa-miR-548c-3p	1	0	1	1	0	0	RAPGEF2	Rap guanine nucleotide exchange factor (GEF) 2
hsa-miR-548c-3p	1	0	1	0	1	1	KIAA0355	KIAA0355
hsa-miR-548c-3p	1	0	1	1	1	1	MCF2L	MCF.2 cell line derived transforming sequence-like
hsa-miR-548c-3p	0	0	1	1	1	1	KIAA0391	KIAA0391
hsa-miR-548c-3p	1	0	1	1	1	1	ABCC5	ATP-binding cassette, sub-family C (CFTR/MRP), member 5
hsa-miR-548c-3p	1	0	1	0	1	1	PTPRT	protein tyrosine phosphatase, receptor type, T
hsa-miR-548c-3p	1	0	1	1	1	1	SGSM2	small G protein signaling modulator 2
hsa-miR-548c-3p	1	0	1	0	1	1	KIAA0408	KIAA0408
hsa-miR-548c-3p	1	0	1	1	1	1	NUPL1	nucleoporin like 1
hsa-miR-548c-3p	1	0	1	0	1	1	MTSS1	metastasis suppressor 1
hsa-miR-548c-3p	1	0	1	1	1	1	ATMIN	ATM interactor
hsa-miR-548c-3p	1	0	1	1	1	1	PPIP5K2	diphosphoinositol pentakisphosphate kinase 2
hsa-miR-548c-3p	0	0	1	1	1	1	PREPL	prolyl endopeptidase-like
hsa-miR-548c-3p	1	0	1	0	1	1	NEDD4L	neural precursor cell expressed, developmentally down-regulated 4-like, E3 ubiquitin protein ligase
hsa-miR-548c-3p	1	0	1	1	1	1	AUTS2	autism susceptibility candidate 2
hsa-miR-548c-3p	1	0	1	1	1	1	CDC42BPA	CDC42 binding protein kinase alpha (DMPK-like)
hsa-miR-548c-3p	1	0	1	1	1	1	GPATCH8	G patch domain containing 8
hsa-miR-548c-3p	1	0	1	1	0	0	PCLO	piccolo (presynaptic cytomatrix protein)
hsa-miR-548c-3p	1	0	1	1	1	1	GREB1	growth regulation by estrogen in breast cancer 1
hsa-miR-548c-3p	1	0	1	0	1	1	CHST15	carbohydrate (N-acetylgalactosamine 4-sulfate 6-O) sulfotransferase 15
hsa-miR-548c-3p	1	0	1	1	1	1	SLC4A7	solute carrier family 4, sodium bicarbonate cotransporter, member 7
hsa-miR-548c-3p	1	0	1	1	1	1	HIPK1	homeodomain interacting protein kinase 1
hsa-miR-548c-3p	1	0	1	1	1	1	GIGYF2	GRB10 interacting GYF protein 2
hsa-miR-548c-3p	0	0	1	1	0	0	ARHGEF2	Rho/Rac guanine nucleotide exchange factor (GEF) 2
hsa-miR-548c-3p	1	0	1	1	1	1	MATR3	matrin 3
hsa-miR-548c-3p	1	0	1	0	1	1	RBM12	RNA binding motif protein 12
hsa-miR-548c-3p	1	0	1	0	1	1	LPHN3	latrophilin 3
hsa-miR-548c-3p	1	0	1	1	1	1	CAMKK2	calcium/calmodulin-dependent protein kinase kinase 2, beta
hsa-miR-548c-3p	1	0	1	1	1	1	DNM3	dynamin 3
hsa-miR-548c-3p	1	0	1	1	1	1	DMXL2	Dmx-like 2
hsa-miR-548c-3p	1	0	1	1	1	1	LMO7	LIM domain 7
hsa-miR-548c-3p	1	0	1	1	1	1	WWC1	WW and C2 domain containing 1
hsa-miR-548c-3p	0	0	1	1	1	1	WDR47	WD repeat domain 47
hsa-miR-548c-3p	1	0	1	1	1	1	UBR5	ubiquitin protein ligase E3 component n-recognin 5
hsa-miR-548c-3p	1	0	1	1	1	1	CDK12	cyclin-dependent kinase 12
hsa-miR-548c-3p	1	0	1	1	1	1	CALCR	calcitonin receptor
hsa-miR-548c-3p	1	0	1	0	0	0	DTX4	deltex homolog 4 (Drosophila)
hsa-miR-548c-3p	1	0	1	1	1	1	CPEB3	cytoplasmic polyadenylation element binding protein 3
hsa-miR-548c-3p	1	0	1	1	1	1	BAHD1	bromo adjacent homology domain containing 1
hsa-miR-548c-3p	1	0	1	1	1	1	NLGN4Y	neuroligin 4, Y-linked
hsa-miR-548c-3p	0	0	1	0	0	0	THSD7A	thrombospondin, type I, domain containing 7A
hsa-miR-548c-3p	0	0	1	1	0	0	FAM149B1	family with sequence similarity 149, member B1
hsa-miR-548c-3p	1	0	1	1	1	1	PALLD	palladin, cytoskeletal associated protein
hsa-miR-548c-3p	1	0	1	1	1	1	RPGRIP1L	RPGRIP1-like
hsa-miR-548c-3p	0	0	1	0	1	1	TP53TG3	TP53 target 3
hsa-miR-548c-3p	0	0	1	0	0	0	TP53TG3B	TP53 target 3B
hsa-miR-548c-3p	0	0	1	1	1	1	DBF4	DBF4 homolog (S. cerevisiae)
hsa-miR-548c-3p	1	0	1	1	1	1	FOXJ3	forkhead box J3
hsa-miR-548c-3p	1	0	1	1	1	1	NLGN1	neuroligin 1
hsa-miR-548c-3p	1	0	1	1	1	1	PLCL2	phospholipase C-like 2
hsa-miR-548c-3p	1	0	1	1	1	1	PHF8	PHD finger protein 8
hsa-miR-548c-3p	1	0	1	1	1	1	SMARCAD1	SWI/SNF-related, matrix-associated actin-dependent regulator of chromatin, subfamily a, containing DEAD/H box 1
hsa-miR-548c-3p	1	0	1	1	1	1	SPIRE1	spire homolog 1 (Drosophila)
hsa-miR-548c-3p	1	0	1	0	1	1	GPR158	G protein-coupled receptor 158
hsa-miR-548c-3p	1	0	1	1	1	1	ATXN7L1	ataxin 7-like 1
hsa-miR-548c-3p	1	0	1	1	1	1	RALGAPB	Ral GTPase activating protein, beta subunit (non-catalytic)
hsa-miR-548c-3p	1	0	1	1	1	1	ZMIZ1	zinc finger, MIZ-type containing 1
hsa-miR-548c-3p	0	0	1	1	0	0	ODF2L	outer dense fiber of sperm tails 2-like
hsa-miR-548c-3p	1	0	1	1	1	1	RIMKLB	ribosomal modification protein rimK-like family member B
hsa-miR-548c-3p	1	0	1	1	0	0	ATAD2B	ATPase family, AAA domain containing 2B
hsa-miR-548c-3p	1	0	1	1	1	1	MKL2	MKL/myocardin-like 2
hsa-miR-548c-3p	0	0	1	0	0	0	MTA3	metastasis associated 1 family, member 3
hsa-miR-548c-3p	1	0	1	0	0	0	ODZ4	odz, odd Oz/ten-m homolog 4 (Drosophila)
hsa-miR-548c-3p	1	0	1	1	1	1	PCDH19	protocadherin 19
hsa-miR-548c-3p	1	0	1	0	1	1	KCTD16	potassium channel tetramerisation domain containing 16
hsa-miR-548c-3p	1	0	1	1	1	1	HACE1	HECT domain and ankyrin repeat containing E3 ubiquitin protein ligase 1
hsa-miR-548c-3p	1	0	1	1	1	1	TAOK1	TAO kinase 1
hsa-miR-548c-3p	1	0	1	1	1	1	UNC79	unc-79 homolog (C. elegans)
hsa-miR-548c-3p	1	0	1	1	1	1	FAM135A	family with sequence similarity 135, member A
hsa-miR-548c-3p	1	1	1	1	1	1	NFIA	nuclear factor I/A
hsa-miR-548c-3p	1	0	1	0	0	0	PITPNM2	phosphatidylinositol transfer protein, membrane-associated 2
hsa-miR-548c-3p	1	0	1	1	0	0	KIAA1462	KIAA1462
hsa-miR-548c-3p	0	0	1	0	1	1	KIAA1468	KIAA1468
hsa-miR-548c-3p	1	0	1	1	1	1	BAZ2B	bromodomain adjacent to zinc finger domain, 2B
hsa-miR-548c-3p	1	0	1	0	1	1	SEMA6D	sema domain, transmembrane domain (TM), and cytoplasmic domain, (semaphorin) 6D
hsa-miR-548c-3p	0	0	1	1	1	1	NLGN3	neuroligin 3
hsa-miR-548c-3p	1	0	1	1	1	1	FRAS1	Fraser syndrome 1
hsa-miR-548c-3p	1	0	1	1	1	1	KIAA1522	KIAA1522
hsa-miR-548c-3p	1	0	1	0	1	1	ZNF295	zinc finger protein 295
hsa-miR-548c-3p	0	0	1	0	1	1	CDC42EP4	CDC42 effector protein (Rho GTPase binding) 4
hsa-miR-548c-3p	1	0	1	0	1	1	LMO3	LIM domain only 3 (rhombotin-like 2)
hsa-miR-548c-3p	1	0	1	1	1	1	INADL	InaD-like (Drosophila)
hsa-miR-548c-3p	1	0	1	1	0	0	KIAA1549	KIAA1549
hsa-miR-548c-3p	1	0	1	1	1	1	PPP6R3	protein phosphatase 6, regulatory subunit 3
hsa-miR-548c-3p	0	0	1	1	1	1	CEP192	centrosomal protein 192kDa
hsa-miR-548c-3p	0	0	1	0	1	1	ZSWIM6	zinc finger, SWIM-type containing 6
hsa-miR-548c-3p	1	0	1	0	1	1	IGDCC4	immunoglobulin superfamily, DCC subclass, member 4
hsa-miR-548c-3p	1	0	1	0	0	0	TANC2	tetratricopeptide repeat, ankyrin repeat and coiled-coil containing 2
hsa-miR-548c-3p	0	0	1	1	1	1	PBLD	phenazine biosynthesis-like protein domain containing
hsa-miR-548c-3p	1	0	1	1	1	1	PTBP2	polypyrimidine tract binding protein 2
hsa-miR-548c-3p	1	0	1	1	1	1	PHF21A	PHD finger protein 21A
hsa-miR-548c-3p	0	0	1	1	1	1	BHLHB9	basic helix-loop-helix domain containing, class B, 9
hsa-miR-548c-3p	0	0	1	0	1	1	SETD5	SET domain containing 5
hsa-miR-548c-3p	1	0	1	0	1	1	RIMS1	regulating synaptic membrane exocytosis 1
hsa-miR-548c-3p	1	0	1	1	1	1	NPAS3	neuronal PAS domain protein 3
hsa-miR-548c-3p	0	0	1	1	0	0	PFDN5	prefoldin subunit 5
hsa-miR-548c-3p	0	0	1	1	1	1	SPOCK3	sparc/osteonectin, cwcv and kazal-like domains proteoglycan (testican) 3
hsa-miR-548c-3p	1	0	1	1	1	1	LCOR	ligand dependent nuclear receptor corepressor
hsa-miR-548c-3p	0	0	1	1	0	0	FOCAD	focadhesin
hsa-miR-548c-3p	1	0	1	1	1	1	AHCTF1	AT hook containing transcription factor 1
hsa-miR-548c-3p	0	0	1	1	1	1	SLC11A2	solute carrier family 11 (proton-coupled divalent metal ion transporters), member 2
hsa-miR-548c-3p	1	0	1	1	1	1	NAV2	neuron navigator 2
hsa-miR-548c-3p	1	0	1	1	1	1	HNRPDL	heterogeneous nuclear ribonucleoprotein D-like
hsa-miR-548c-3p	0	0	1	1	0	0	SEC16B	SEC16 homolog B (S. cerevisiae)
hsa-miR-548c-3p	0	0	1	1	1	1	LENG8	leukocyte receptor cluster (LRC) member 8
hsa-miR-548c-3p	1	0	1	1	1	1	LSM14A	LSM14A, SCD6 homolog A (S. cerevisiae)
hsa-miR-548c-3p	1	0	1	1	1	1	BCL2L11	BCL2-like 11 (apoptosis facilitator)
hsa-miR-548c-3p	1	0	1	1	1	1	MAT2B	methionine adenosyltransferase II, beta
hsa-miR-548c-3p	1	0	1	1	1	1	POGZ	pogo transposable element with ZNF domain
hsa-miR-548c-3p	1	0	1	1	1	1	OXR1	oxidation resistance 1
hsa-miR-548c-3p	1	0	1	1	0	0	ZNF292	zinc finger protein 292
hsa-miR-548c-3p	1	0	1	1	0	0	ADC	arginine decarboxylase
hsa-miR-548c-3p	0	0	1	1	1	1	KIAA1967	KIAA1967
hsa-miR-548c-3p	1	0	1	1	1	1	SH3TC2	SH3 domain and tetratricopeptide repeats 2
hsa-miR-548c-3p	1	0	1	0	0	0	FAT3	FAT tumor suppressor homolog 3 (Drosophila)
hsa-miR-548c-3p	1	0	1	1	1	1	PRDM16	PR domain containing 16
hsa-miR-548c-3p	1	0	1	0	0	0	ZBTB34	zinc finger and BTB domain containing 34
hsa-miR-548c-3p	1	0	1	1	1	1	ACBD5	acyl-CoA binding domain containing 5
hsa-miR-548c-3p	1	0	1	1	1	1	PGR	progesterone receptor
hsa-miR-548c-3p	0	0	1	0	1	1	RASSF8	Ras association (RalGDS/AF-6) domain family (N-terminal) member 8
hsa-miR-548c-3p	1	0	1	1	1	1	RFX4	regulatory factor X, 4 (influences HLA class II expression)
hsa-miR-548c-3p	1	0	1	1	1	1	SMEK1	SMEK homolog 1, suppressor of mek1 (Dictyostelium)
hsa-miR-548c-3p	1	0	1	1	1	1	UBR3	ubiquitin protein ligase E3 component n-recognin 3 (putative)
hsa-miR-548c-3p	1	0	1	0	0	0	ZC3H12C	zinc finger CCCH-type containing 12C
hsa-miR-548c-3p	0	0	1	1	0	0	HELLS	helicase, lymphoid-specific
hsa-miR-548c-3p	0	0	1	1	1	1	IL7	interleukin 7
hsa-miR-548c-3p	0	0	1	1	1	1	ACPP	acid phosphatase, prostate
hsa-miR-548c-3p	1	0	1	1	1	1	PAN3	PAN3 poly(A) specific ribonuclease subunit homolog (S. cerevisiae)
hsa-miR-548c-3p	1	0	1	0	1	1	LIN54	lin-54 homolog (C. elegans)
hsa-miR-548c-3p	1	0	1	1	1	1	KCNMA1	potassium large conductance calcium-activated channel, subfamily M, alpha member 1
hsa-miR-548c-3p	1	0	1	1	1	1	SLC43A2	solute carrier family 43, member 2
hsa-miR-548c-3p	1	0	1	0	1	1	BEND4	BEN domain containing 4
hsa-miR-548c-3p	1	0	1	1	1	1	SCN5A	sodium channel, voltage-gated, type V, alpha subunit
hsa-miR-548c-3p	1	0	1	1	1	1	FAT2	FAT tumor suppressor homolog 2 (Drosophila)
hsa-miR-548c-3p	0	0	1	1	0	0	PTPRF	protein tyrosine phosphatase, receptor type, F
hsa-miR-548c-3p	0	0	1	1	1	1	PCBP2	poly(rC) binding protein 2
hsa-miR-548c-3p	1	0	1	1	1	1	UBE3A	ubiquitin protein ligase E3A
hsa-miR-548c-3p	1	0	1	0	1	1	CCDC88A	coiled-coil domain containing 88A
hsa-miR-548c-3p	0	0	1	1	0	0	HFM1	HFM1, ATP-dependent DNA helicase homolog (S. cerevisiae)
hsa-miR-548c-3p	1	0	1	1	1	1	KLHL5	kelch-like 5 (Drosophila)
hsa-miR-548c-3p	0	0	1	0	1	1	ATR	ataxia telangiectasia and Rad3 related
hsa-miR-548c-3p	1	0	1	1	0	0	NDST2	N-deacetylase/N-sulfotransferase (heparan glucosaminyl) 2
hsa-miR-548c-3p	1	0	1	1	1	1	BACH2	BTB and CNC homology 1, basic leucine zipper transcription factor 2
hsa-miR-548c-3p	1	0	1	0	1	1	PCDHA13	protocadherin alpha 13
hsa-miR-548c-3p	1	0	1	1	1	1	PCDHA4	protocadherin alpha 4
hsa-miR-548c-3p	0	0	1	0	1	1	ATF6	activating transcription factor 6
hsa-miR-548c-3p	1	0	1	1	1	1	RPS6KA3	ribosomal protein S6 kinase, 90kDa, polypeptide 3
hsa-miR-548c-3p	1	0	1	1	1	1	PCCB	propionyl CoA carboxylase, beta polypeptide
hsa-miR-548c-3p	1	0	1	1	1	1	CLIP4	CAP-GLY domain containing linker protein family, member 4
hsa-miR-548c-3p	1	0	1	1	1	1	PHC1	polyhomeotic homolog 1 (Drosophila)
hsa-miR-548c-3p	1	0	1	1	1	1	SYNCRIP	synaptotagmin binding, cytoplasmic RNA interacting protein
hsa-miR-548c-3p	1	0	1	1	1	1	DTNA	dystrobrevin, alpha
hsa-miR-548c-3p	1	0	1	1	1	1	RPS6KA2	ribosomal protein S6 kinase, 90kDa, polypeptide 2
hsa-miR-548c-3p	1	0	1	1	1	1	EIF4G3	eukaryotic translation initiation factor 4 gamma, 3
hsa-miR-548c-3p	1	0	1	0	1	1	PLAG1	pleiomorphic adenoma gene 1
hsa-miR-548c-3p	1	0	1	0	1	1	SLC6A6	solute carrier family 6 (neurotransmitter transporter, taurine), member 6
hsa-miR-548c-3p	1	0	1	0	1	1	DPYSL2	dihydropyrimidinase-like 2
hsa-miR-548c-3p	1	0	1	0	1	1	ETV1	ets variant 1
hsa-miR-548c-3p	0	0	1	1	1	1	DDX39B	DEAD (Asp-Glu-Ala-Asp) box polypeptide 39B
hsa-miR-548c-3p	0	0	1	0	1	1	NPY1R	neuropeptide Y receptor Y1
hsa-miR-548c-3p	0	0	1	1	1	1	TFRC	transferrin receptor (p90, CD71)
hsa-miR-548c-3p	1	0	1	1	1	1	REV3L	REV3-like, polymerase (DNA directed), zeta, catalytic subunit
hsa-miR-548c-3p	1	0	1	1	1	1	EPHA7	EPH receptor A7
hsa-miR-548c-3p	1	0	1	1	1	1	SATB2	SATB homeobox 2
hsa-miR-548c-3p	1	0	1	1	1	1	AEBP2	AE binding protein 2
hsa-miR-548c-3p	0	0	1	1	1	1	GTF2IRD1	GTF2I repeat domain containing 1
hsa-miR-548c-3p	1	0	1	0	1	1	AKAP13	A kinase (PRKA) anchor protein 13
hsa-miR-548c-3p	1	0	1	1	1	1	ANK1	ankyrin 1, erythrocytic
hsa-miR-548c-3p	1	0	1	1	1	1	MINK1	misshapen-like kinase 1
hsa-miR-548c-3p	0	0	1	1	0	0	IGFBP2	insulin-like growth factor binding protein 2, 36kDa
hsa-miR-548c-3p	1	0	1	1	1	1	LIMA1	LIM domain and actin binding 1
hsa-miR-548c-3p	0	0	1	1	1	1	GPM6B	glycoprotein M6B
hsa-miR-548c-3p	1	0	1	1	1	1	PDLIM5	PDZ and LIM domain 5
hsa-miR-548c-3p	1	0	1	1	1	1	HNRNPK	heterogeneous nuclear ribonucleoprotein K
hsa-miR-548c-3p	1	0	1	1	1	1	IPO8	importin 8
hsa-miR-548c-3p	1	0	1	0	1	1	TBL1X	transducin (beta)-like 1X-linked
hsa-miR-548c-3p	1	0	1	1	1	1	EPHB4	EPH receptor B4
hsa-miR-548c-3p	1	0	1	1	1	1	EPB41	erythrocyte membrane protein band 4.1 (elliptocytosis 1, RH-linked)
hsa-miR-548c-3p	1	0	1	1	1	1	COL24A1	collagen, type XXIV, alpha 1
hsa-miR-548c-3p	1	0	1	1	1	1	GOLGA4	golgin A4
hsa-miR-548c-3p	1	0	1	1	1	1	CYP46A1	cytochrome P450, family 46, subfamily A, polypeptide 1
hsa-miR-548c-3p	1	0	1	1	1	1	SATB1	SATB homeobox 1
hsa-miR-548c-3p	1	0	1	0	1	1	ADD3	adducin 3 (gamma)
hsa-miR-548c-3p	1	0	1	1	1	1	CRTAM	cytotoxic and regulatory T cell molecule
hsa-miR-548c-3p	1	0	1	1	1	1	NCOA3	nuclear receptor coactivator 3
hsa-miR-548c-3p	0	0	1	1	1	1	DDX10	DEAD (Asp-Glu-Ala-Asp) box polypeptide 10
hsa-miR-548c-3p	1	0	1	1	1	1	ZFX	zinc finger protein, X-linked
hsa-miR-548c-3p	1	0	1	1	1	1	PHLDB2	pleckstrin homology-like domain, family B, member 2
hsa-miR-548c-3p	0	0	1	1	1	1	PLD1	phospholipase D1, phosphatidylcholine-specific
hsa-miR-548c-3p	1	0	1	0	1	1	CAV1	caveolin 1, caveolae protein, 22kDa
hsa-miR-548c-3p	1	0	1	0	1	1	PDE7B	phosphodiesterase 7B
hsa-miR-548c-3p	1	0	1	1	1	1	APC	adenomatous polyposis coli
hsa-miR-548c-3p	1	0	1	1	1	1	PICALM	phosphatidylinositol binding clathrin assembly protein
hsa-miR-548c-3p	1	0	1	1	1	1	MYH10	myosin, heavy chain 10, non-muscle
hsa-miR-548c-3p	0	0	1	1	1	1	ACLY	ATP citrate lyase
hsa-miR-548c-3p	1	0	1	1	1	1	SLC22A5	solute carrier family 22 (organic cation/carnitine transporter), member 5
hsa-miR-548c-3p	0	0	1	0	1	1	PARG	poly (ADP-ribose) glycohydrolase
hsa-miR-548c-3p	0	0	1	1	1	1	BRCA1	breast cancer 1, early onset
hsa-miR-548c-3p	0	0	1	1	0	0	MUC3A	mucin 3A, cell surface associated
hsa-miR-548c-3p	1	0	1	0	1	1	MLL2	myeloid/lymphoid or mixed-lineage leukemia 2
hsa-miR-548c-3p	1	0	1	0	1	1	PDE4D	phosphodiesterase 4D, cAMP-specific
hsa-miR-548c-3p	0	0	1	0	1	1	ZMYM2	zinc finger, MYM-type 2
hsa-miR-548c-3p	1	0	1	1	1	1	MYT1L	myelin transcription factor 1-like
hsa-miR-548c-3p	1	0	1	0	1	1	CELF2	CUGBP, Elav-like family member 2
hsa-miR-548c-3p	1	0	1	1	1	1	SOCS2	suppressor of cytokine signaling 2
hsa-miR-548c-3p	0	0	1	0	1	1	C9orf91	chromosome 9 open reading frame 91
hsa-miR-548c-3p	0	0	1	0	1	1	STAM2	signal transducing adaptor molecule (SH3 domain and ITAM motif) 2
hsa-miR-548c-3p	1	0	1	0	0	0	MAP3K1	mitogen-activated protein kinase kinase kinase 1, E3 ubiquitin protein ligase
hsa-miR-548c-3p	0	0	1	1	1	1	UBE4B	ubiquitination factor E4B
hsa-miR-548c-3p	1	0	1	1	1	1	MRAS	muscle RAS oncogene homolog
hsa-miR-548c-3p	1	0	1	1	1	1	LDB2	LIM domain binding 2
hsa-miR-548c-3p	0	0	1	1	1	1	CYP4F3	cytochrome P450, family 4, subfamily F, polypeptide 3
hsa-miR-548c-3p	1	0	1	1	1	1	SHOC2	soc-2 suppressor of clear homolog (C. elegans)
hsa-miR-548c-3p	1	0	1	1	1	1	MBNL2	muscleblind-like splicing regulator 2
hsa-miR-548c-3p	1	0	1	1	1	1	ZFAND6	zinc finger, AN1-type domain 6
hsa-miR-548c-3p	1	0	1	1	1	1	CTNND1	catenin (cadherin-associated protein), delta 1
hsa-miR-548c-3p	0	0	1	1	1	1	ZNF33A	zinc finger protein 33A
hsa-miR-548c-3p	0	0	1	1	1	1	SC5DL	sterol-C5-desaturase (ERG3 delta-5-desaturase homolog, S. cerevisiae)-like
hsa-miR-548c-3p	1	0	1	1	1	1	CBFA2T2	core-binding factor, runt domain, alpha subunit 2; translocated to, 2
hsa-miR-548c-3p	1	0	1	1	0	0	PAK1	p21 protein (Cdc42/Rac)-activated kinase 1
hsa-miR-548c-3p	1	0	1	1	1	1	PDE4A	phosphodiesterase 4A, cAMP-specific
hsa-miR-548c-3p	1	0	1	1	1	1	TP63	tumor protein p63
hsa-miR-548c-3p	0	0	1	1	1	1	LYPLA1	lysophospholipase I
hsa-miR-548c-3p	1	0	1	1	1	1	AKAP9	A kinase (PRKA) anchor protein (yotiao) 9
hsa-miR-548c-3p	1	0	1	1	1	1	DMTF1	cyclin D binding myb-like transcription factor 1
hsa-miR-548c-3p	1	0	1	0	1	1	DDX3X	DEAD (Asp-Glu-Ala-Asp) box polypeptide 3, X-linked
hsa-miR-548c-3p	0	0	1	1	1	1	PDE4DIP	phosphodiesterase 4D interacting protein
hsa-miR-548c-3p	0	0	1	1	1	1	RER1	RER1 retention in endoplasmic reticulum 1 homolog (S. cerevisiae)
hsa-miR-548c-3p	0	0	1	1	1	1	BBS9	Bardet-Biedl syndrome 9
hsa-miR-548c-3p	0	0	1	1	1	1	SH2D1A	SH2 domain containing 1A
hsa-miR-548c-3p	1	0	1	0	1	1	CD164	CD164 molecule, sialomucin
hsa-miR-548c-3p	1	0	1	1	1	1	KAT6B	K(lysine) acetyltransferase 6B
hsa-miR-548c-3p	0	0	1	1	1	1	SMC2	structural maintenance of chromosomes 2
hsa-miR-548c-3p	1	0	1	1	1	1	EDNRB	endothelin receptor type B
hsa-miR-548c-3p	1	0	1	1	1	1	LRRFIP1	leucine rich repeat (in FLII) interacting protein 1
hsa-miR-548c-3p	0	0	1	1	0	0	ABRACL	ABRA C-terminal like
hsa-miR-548c-3p	1	0	1	0	1	1	CDK14	cyclin-dependent kinase 14
hsa-miR-548c-3p	0	0	1	1	1	1	ACIN1	apoptotic chromatin condensation inducer 1
hsa-miR-548c-3p	0	0	1	1	1	1	DMRT2	doublesex and mab-3 related transcription factor 2
hsa-miR-548c-3p	1	0	1	0	1	1	WDR82	WD repeat domain 82
hsa-miR-548c-3p	1	0	1	1	1	1	CAB39	calcium binding protein 39
hsa-miR-548c-3p	1	0	1	1	1	1	TAOK3	TAO kinase 3
hsa-miR-548c-3p	1	0	1	1	1	1	SORBS1	sorbin and SH3 domain containing 1
hsa-miR-548c-3p	1	0	1	0	1	1	BECN1	beclin 1, autophagy related
hsa-miR-548c-3p	0	0	1	1	1	1	CNPPD1	cyclin Pas1/PHO80 domain containing 1
hsa-miR-548c-3p	0	0	1	1	1	1	AIG1	androgen-induced 1
hsa-miR-548c-3p	1	0	1	1	1	1	USP15	ubiquitin specific peptidase 15
hsa-miR-548c-3p	0	0	1	0	1	1	PDP1	pyruvate dehyrogenase phosphatase catalytic subunit 1
hsa-miR-548c-3p	0	0	1	1	1	1	SAP30L	SAP30-like
hsa-miR-548c-3p	0	0	1	1	1	1	FAM114A2	family with sequence similarity 114, member A2
hsa-miR-548c-3p	1	0	1	1	1	1	HBS1L	HBS1-like (S. cerevisiae)
hsa-miR-548c-3p	0	0	1	1	1	1	FGFR1OP2	FGFR1 oncogene partner 2
hsa-miR-548c-3p	1	0	1	1	1	1	STXBP6	syntaxin binding protein 6 (amisyn)
hsa-miR-548c-3p	1	0	1	1	1	1	USP25	ubiquitin specific peptidase 25
hsa-miR-548c-3p	1	0	1	1	1	1	CHFR	checkpoint with forkhead and ring finger domains, E3 ubiquitin protein ligase
hsa-miR-548c-3p	1	0	1	1	1	1	C16orf70	chromosome 16 open reading frame 70
hsa-miR-548c-3p	1	0	1	1	1	1	C3orf18	chromosome 3 open reading frame 18
hsa-miR-548c-3p	0	0	1	0	1	1	SLC38A4	solute carrier family 38, member 4
hsa-miR-548c-3p	1	0	1	1	1	1	CCNL1	cyclin L1
hsa-miR-548c-3p	1	0	1	1	1	1	FAM49B	family with sequence similarity 49, member B
hsa-miR-548c-3p	1	0	1	1	1	1	EIF4A2	eukaryotic translation initiation factor 4A2
hsa-miR-548c-3p	1	0	1	1	1	1	KCNMB2	potassium large conductance calcium-activated channel, subfamily M, beta member 2
hsa-miR-548c-3p	0	0	1	1	1	1	CHRD	chordin
hsa-miR-548c-3p	1	0	1	1	1	1	NXT2	nuclear transport factor 2-like export factor 2
hsa-miR-548c-3p	0	0	1	1	1	1	SLC30A5	solute carrier family 30 (zinc transporter), member 5
hsa-miR-548c-3p	0	0	1	1	1	1	ARHGAP15	Rho GTPase activating protein 15
hsa-miR-548c-3p	0	0	1	1	1	1	CSNK1A1	casein kinase 1, alpha 1
hsa-miR-548c-3p	0	0	1	1	1	1	CD28	CD28 molecule
hsa-miR-548c-3p	1	0	1	1	1	1	OGT	O-linked N-acetylglucosamine (GlcNAc) transferase
hsa-miR-548c-3p	1	0	1	1	0	0	TDRKH	tudor and KH domain containing
hsa-miR-548c-3p	1	0	1	1	1	1	SNTB2	syntrophin, beta 2 (dystrophin-associated protein A1, 59kDa, basic component 2)
hsa-miR-548c-3p	0	0	1	1	1	1	KIAA1704	KIAA1704
hsa-miR-548c-3p	1	0	1	1	1	1	CALD1	caldesmon 1
hsa-miR-548c-3p	0	0	1	1	1	1	NKX3-1	NK3 homeobox 1
hsa-miR-548c-3p	0	0	1	1	1	1	CTDSP1	CTD (carboxy-terminal domain, RNA polymerase II, polypeptide A) small phosphatase 1
hsa-miR-548c-3p	1	0	1	1	1	1	ABI2	abl-interactor 2
hsa-miR-548c-3p	1	0	1	1	1	1	RBM47	RNA binding motif protein 47
hsa-miR-548c-3p	1	0	1	1	1	1	SH3GLB1	SH3-domain GRB2-like endophilin B1
hsa-miR-548c-3p	1	0	1	0	1	1	TRPS1	trichorhinophalangeal syndrome I
hsa-miR-548c-3p	1	0	1	1	1	1	ERGIC1	endoplasmic reticulum-golgi intermediate compartment (ERGIC) 1
hsa-miR-548c-3p	0	0	1	1	0	0	BCAT2	branched chain amino-acid transaminase 2, mitochondrial
hsa-miR-548c-3p	0	0	1	1	1	1	C21orf7	chromosome 21 open reading frame 7
hsa-miR-548c-3p	1	0	1	1	1	1	PUM2	pumilio homolog 2 (Drosophila)
hsa-miR-548c-3p	0	0	1	1	1	1	ZNF638	zinc finger protein 638
hsa-miR-548c-3p	0	0	1	0	1	1	ERBB2IP	erbb2 interacting protein
hsa-miR-548c-3p	1	0	1	1	1	1	KLHL12	kelch-like 12 (Drosophila)
hsa-miR-548c-3p	0	0	1	1	1	1	PARP9	poly (ADP-ribose) polymerase family, member 9
hsa-miR-548c-3p	1	0	1	1	1	1	CHST9	carbohydrate (N-acetylgalactosamine 4-0) sulfotransferase 9
hsa-miR-548c-3p	1	0	1	1	1	1	BIVM	basic, immunoglobulin-like variable motif containing
hsa-miR-548c-3p	1	0	1	1	1	1	CALU	calumenin
hsa-miR-548c-3p	1	0	1	0	1	1	USP32	ubiquitin specific peptidase 32
hsa-miR-548c-3p	0	0	1	1	1	1	SLC6A15	solute carrier family 6 (neutral amino acid transporter), member 15
hsa-miR-548c-3p	1	0	1	1	1	1	BBC3	BCL2 binding component 3
hsa-miR-548c-3p	1	0	1	1	1	1	CASD1	CAS1 domain containing 1
hsa-miR-548c-3p	0	0	1	1	1	1	RGS20	regulator of G-protein signaling 20
hsa-miR-548c-3p	1	0	1	1	1	1	LARP4	La ribonucleoprotein domain family, member 4
hsa-miR-548c-3p	0	0	1	0	0	0	NBPF10	neuroblastoma breakpoint family, member 10
hsa-miR-548c-3p	1	0	1	1	1	1	SON	SON DNA binding protein
hsa-miR-548c-3p	1	0	1	1	1	1	PDE8A	phosphodiesterase 8A
hsa-miR-548c-3p	0	0	1	1	1	1	RAPGEF6	Rap guanine nucleotide exchange factor (GEF) 6
hsa-miR-548c-3p	1	0	1	1	1	1	NTRK2	neurotrophic tyrosine kinase, receptor, type 2
hsa-miR-548c-3p	0	0	1	0	0	0	ABCC13	ATP-binding cassette, sub-family C (CFTR/MRP), member 13, pseudogene
hsa-miR-548c-3p	1	0	1	1	1	1	ST3GAL3	ST3 beta-galactoside alpha-2,3-sialyltransferase 3
hsa-miR-548c-3p	1	0	1	1	0	0	YTHDF2	YTH domain family, member 2
hsa-miR-548c-3p	0	0	1	1	1	1	C10orf90	chromosome 10 open reading frame 90
hsa-miR-548c-3p	1	0	1	1	0	0	SEPT8	septin 8
hsa-miR-548c-3p	1	0	1	0	1	1	PPP1R12A	protein phosphatase 1, regulatory subunit 12A
hsa-miR-548c-3p	1	0	1	1	1	1	HNRNPU	heterogeneous nuclear ribonucleoprotein U (scaffold attachment factor A)
hsa-miR-548c-3p	0	0	1	1	0	0	MTO1	mitochondrial translation optimization 1 homolog (S. cerevisiae)
hsa-miR-548c-3p	1	0	1	1	1	1	WAPAL	wings apart-like homolog (Drosophila)
hsa-miR-548c-3p	0	0	1	1	0	0	HOPX	HOP homeobox
hsa-miR-548c-3p	0	0	1	1	0	0	MT1E	metallothionein 1E
hsa-miR-548c-3p	1	0	1	1	1	1	LRRC7	leucine rich repeat containing 7
hsa-miR-548c-3p	0	0	1	1	1	1	CARD8	caspase recruitment domain family, member 8
hsa-miR-548c-3p	0	0	1	1	1	1	RBM11	RNA binding motif protein 11
hsa-miR-548c-3p	1	0	1	1	1	1	IQCK	IQ motif containing K
hsa-miR-548c-3p	1	0	1	0	1	1	NUDCD1	NudC domain containing 1
hsa-miR-548c-3p	0	0	1	1	1	1	CHODL	chondrolectin
hsa-miR-548c-3p	1	0	1	0	1	1	IL1RAP	interleukin 1 receptor accessory protein
hsa-miR-548c-3p	1	0	1	1	1	1	VPS37A	vacuolar protein sorting 37 homolog A (S. cerevisiae)
hsa-miR-548c-3p	1	0	1	1	1	1	AFF2	AF4/FMR2 family, member 2
hsa-miR-548c-3p	1	0	1	1	1	1	PLAGL1	pleiomorphic adenoma gene-like 1
hsa-miR-548c-3p	1	0	1	0	1	1	DICER1	dicer 1, ribonuclease type III
hsa-miR-548c-3p	1	0	1	1	1	1	ZNF281	zinc finger protein 281
hsa-miR-548c-3p	1	0	1	1	1	1	UBAP2L	ubiquitin associated protein 2-like
hsa-miR-548c-3p	0	0	1	1	1	1	CLDND1	claudin domain containing 1
hsa-miR-548c-3p	0	0	1	1	1	1	TCFL5	transcription factor-like 5 (basic helix-loop-helix)
hsa-miR-548c-3p	1	0	1	1	1	1	ILF3	interleukin enhancer binding factor 3, 90kDa
hsa-miR-548c-3p	0	0	1	0	0	0	CACNA2D3	calcium channel, voltage-dependent, alpha 2/delta subunit 3
hsa-miR-548c-3p	0	0	1	1	1	1	CD1E	CD1e molecule
hsa-miR-548c-3p	0	0	1	1	1	1	CHST11	carbohydrate (chondroitin 4) sulfotransferase 11
hsa-miR-548c-3p	0	0	1	1	1	1	STK33	serine/threonine kinase 33
hsa-miR-548c-3p	0	0	1	0	1	1	SRPK1	SRSF protein kinase 1
hsa-miR-548c-3p	0	0	1	1	1	1	PDE1A	phosphodiesterase 1A, calmodulin-dependent
hsa-miR-548c-3p	1	0	1	1	1	1	NFYA	nuclear transcription factor Y, alpha
hsa-miR-548c-3p	0	0	1	0	0	0	TOMM6	translocase of outer mitochondrial membrane 6 homolog (yeast)
hsa-miR-548c-3p	1	0	1	1	1	1	PPP3CB	protein phosphatase 3, catalytic subunit, beta isozyme
hsa-miR-548c-3p	0	0	1	1	1	1	ZNF248	zinc finger protein 248
hsa-miR-548c-3p	1	0	1	1	1	1	NRXN3	neurexin 3
hsa-miR-548c-3p	1	0	1	1	1	1	PPP1R9A	protein phosphatase 1, regulatory subunit 9A
hsa-miR-548c-3p	0	0	1	1	1	1	DBR1	debranching enzyme homolog 1 (S. cerevisiae)
hsa-miR-548c-3p	1	0	1	0	1	1	NFAT5	nuclear factor of activated T-cells 5, tonicity-responsive
hsa-miR-548c-3p	1	0	1	1	1	1	ENOX2	ecto-NOX disulfide-thiol exchanger 2
hsa-miR-548c-3p	0	0	1	1	0	0	ENY2	enhancer of yellow 2 homolog (Drosophila)
hsa-miR-548c-3p	0	0	1	1	1	1	PARP16	poly (ADP-ribose) polymerase family, member 16
hsa-miR-548c-3p	0	0	1	0	0	0	BABAM1	BRISC and BRCA1 A complex member 1
hsa-miR-548c-3p	0	0	1	0	1	1	OAS3	2'-5'-oligoadenylate synthetase 3, 100kDa
hsa-miR-548c-3p	0	0	1	1	1	1	UBE2Q2	ubiquitin-conjugating enzyme E2Q family member 2
hsa-miR-548c-3p	0	0	1	0	0	0	TUG1	taurine upregulated 1 (non-protein coding)
hsa-miR-548c-3p	0	0	1	1	1	1	PARPBP	PARP1 binding protein
hsa-miR-548c-3p	0	0	1	1	1	1	OLFM4	olfactomedin 4
hsa-miR-548c-3p	1	0	1	1	1	1	ARHGAP12	Rho GTPase activating protein 12
hsa-miR-548c-3p	0	0	1	1	1	1	SMOX	spermine oxidase
hsa-miR-548c-3p	1	0	1	1	1	1	ZC3H7A	zinc finger CCCH-type containing 7A
hsa-miR-548c-3p	0	0	1	1	1	1	STOX2	storkhead box 2
hsa-miR-548c-3p	1	0	1	1	1	1	RIC8B	resistance to inhibitors of cholinesterase 8 homolog B (C. elegans)
hsa-miR-548c-3p	1	0	1	1	1	1	EIF2C1	eukaryotic translation initiation factor 2C, 1
hsa-miR-548c-3p	1	0	1	0	1	1	CLIC4	chloride intracellular channel 4
hsa-miR-548c-3p	1	0	1	1	1	1	PTBP3	polypyrimidine tract binding protein 3
hsa-miR-548c-3p	1	0	1	1	1	1	SLC38A2	solute carrier family 38, member 2
hsa-miR-548c-3p	1	0	1	1	1	1	ARMC8	armadillo repeat containing 8
hsa-miR-548c-3p	0	0	1	1	1	1	RSRC2	arginine/serine-rich coiled-coil 2
hsa-miR-548c-3p	1	0	1	1	1	1	MBD5	methyl-CpG binding domain protein 5
hsa-miR-548c-3p	0	0	1	1	1	1	PRPF39	PRP39 pre-mRNA processing factor 39 homolog (S. cerevisiae)
hsa-miR-548c-3p	1	0	1	1	1	1	ACER3	alkaline ceramidase 3
hsa-miR-548c-3p	1	0	1	0	1	1	TRIM33	tripartite motif containing 33
hsa-miR-548c-3p	0	0	1	1	1	1	FAM175A	family with sequence similarity 175, member A
hsa-miR-548c-3p	1	0	1	1	1	1	C15orf63	chromosome 15 open reading frame 63
hsa-miR-548c-3p	1	0	1	1	1	1	PGAP1	post-GPI attachment to proteins 1
hsa-miR-548c-3p	1	0	1	1	1	1	MON2	MON2 homolog (S. cerevisiae)
hsa-miR-548c-3p	1	0	1	1	1	1	UNKL	unkempt homolog (Drosophila)-like
hsa-miR-548c-3p	0	0	1	1	1	1	INPP5B	inositol polyphosphate-5-phosphatase, 75kDa
hsa-miR-548c-3p	0	0	1	0	0	0	DUXAP10	double homeobox A pseudogene 10
hsa-miR-548c-3p	1	0	1	1	1	1	S100PBP	S100P binding protein
hsa-miR-548c-3p	1	0	1	0	1	1	DCAF17	DDB1 and CUL4 associated factor 17
hsa-miR-548c-3p	0	0	1	1	1	1	VPRBP	Vpr (HIV-1) binding protein
hsa-miR-548c-3p	0	0	1	1	1	1	LRRN1	leucine rich repeat neuronal 1
hsa-miR-548c-3p	1	0	1	1	1	1	MACF1	microtubule-actin crosslinking factor 1
hsa-miR-548c-3p	0	0	1	0	1	1	GVINP1	GTPase, very large interferon inducible pseudogene 1
hsa-miR-548c-3p	0	0	1	1	1	1	NECAP2	NECAP endocytosis associated 2
hsa-miR-548c-3p	1	0	1	1	1	1	USP33	ubiquitin specific peptidase 33
hsa-miR-548c-3p	1	0	1	1	1	1	PHF20L1	PHD finger protein 20-like 1
hsa-miR-548c-3p	0	0	1	0	0	0	LOC284561	uncharacterized LOC284561
hsa-miR-548c-3p	1	0	1	1	1	1	BAZ2A	bromodomain adjacent to zinc finger domain, 2A
hsa-miR-548c-3p	0	0	1	1	1	1	AMFR	autocrine motility factor receptor, E3 ubiquitin protein ligase
hsa-miR-548c-3p	1	0	1	0	1	1	C14orf101	chromosome 14 open reading frame 101
hsa-miR-548c-3p	0	0	1	0	1	1	ZNF766	zinc finger protein 766
hsa-miR-548c-3p	0	0	1	1	1	1	CXorf57	chromosome X open reading frame 57
hsa-miR-548c-3p	0	0	1	0	0	0	LOC286059	tumor necrosis factor receptor superfamily, member 10d, decoy with truncated death domain pseudogene
hsa-miR-548c-3p	1	0	1	0	0	0	ZDBF2	zinc finger, DBF-type containing 2
hsa-miR-548c-3p	0	0	1	0	0	0	IFFO2	intermediate filament family orphan 2
hsa-miR-548c-3p	1	0	1	1	1	1	DYRK2	dual-specificity tyrosine-(Y)-phosphorylation regulated kinase 2
hsa-miR-548c-3p	1	0	1	0	1	1	ATP2B1	ATPase, Ca++ transporting, plasma membrane 1
hsa-miR-548c-3p	1	0	1	1	1	1	SLC35A3	solute carrier family 35 (UDP-N-acetylglucosamine (UDP-GlcNAc) transporter), member A3
hsa-miR-548c-3p	0	0	1	0	0	0	FLJ21408	uncharacterized LOC400512
hsa-miR-548c-3p	0	0	1	1	0	0	UBR4	ubiquitin protein ligase E3 component n-recognin 4
hsa-miR-548c-3p	0	0	1	1	0	0	EIF4ENIF1	eukaryotic translation initiation factor 4E nuclear import factor 1
hsa-miR-548c-3p	0	0	1	1	1	1	SYNRG	synergin, gamma
hsa-miR-548c-3p	1	0	1	0	1	1	MYO5B	myosin VB
hsa-miR-548c-3p	1	0	1	1	1	1	DLC1	deleted in liver cancer 1
hsa-miR-548c-3p	1	0	1	1	1	1	ARFGEF1	ADP-ribosylation factor guanine nucleotide-exchange factor 1 (brefeldin A-inhibited)
hsa-miR-548c-3p	0	0	1	1	1	1	WDR67	WD repeat domain 67
hsa-miR-548c-3p	1	0	1	1	1	1	TNRC6A	trinucleotide repeat containing 6A
hsa-miR-548c-3p	1	0	1	1	1	1	YPEL5	yippee-like 5 (Drosophila)
hsa-miR-548c-3p	1	0	1	1	1	1	NAA30	N(alpha)-acetyltransferase 30, NatC catalytic subunit
hsa-miR-548c-3p	1	0	1	1	0	0	PRRC2B	proline-rich coiled-coil 2B
hsa-miR-548c-3p	1	0	1	1	1	1	HPS3	Hermansky-Pudlak syndrome 3
hsa-miR-548c-3p	0	0	1	0	1	1	FLJ22763	uncharacterized LOC401081
hsa-miR-548c-3p	1	0	1	1	0	0	UBXN7	UBX domain protein 7
hsa-miR-548c-3p	1	0	1	1	1	1	DCAF8	DDB1 and CUL4 associated factor 8
hsa-miR-548c-3p	0	0	1	1	1	1	ZBBX	zinc finger, B-box domain containing
hsa-miR-548c-3p	0	0	1	0	0	0	NEURL1B	neuralized homolog 1B (Drosophila)
hsa-miR-548c-3p	0	0	1	1	1	1	TGIF1	TGFB-induced factor homeobox 1
hsa-miR-548c-3p	0	0	1	0	1	1	ZCCHC8	zinc finger, CCHC domain containing 8
hsa-miR-548c-3p	0	0	1	1	1	1	GTF2H1	general transcription factor IIH, polypeptide 1, 62kDa
hsa-miR-548c-3p	0	0	1	0	0	0	LOC729852	uncharacterized LOC729852
hsa-miR-548c-3p	1	0	1	1	1	1	GORASP2	golgi reassembly stacking protein 2, 55kDa
hsa-miR-548c-3p	1	0	1	1	1	1	FOXP1	forkhead box P1
hsa-miR-548c-3p	0	0	1	1	1	1	RNF146	ring finger protein 146
hsa-miR-548c-3p	1	0	1	1	1	1	MARK1	MAP/microtubule affinity-regulating kinase 1
hsa-miR-548c-3p	1	0	1	0	1	1	ATP10D	ATPase, class V, type 10D
hsa-miR-548c-3p	0	0	1	0	1	1	TWSG1	twisted gastrulation homolog 1 (Drosophila)
hsa-miR-548c-3p	0	0	1	1	1	1	NETO2	neuropilin (NRP) and tolloid (TLL)-like 2
hsa-miR-548c-3p	1	0	1	1	1	1	FAM40A	family with sequence similarity 40, member A
hsa-miR-548c-3p	0	0	1	1	1	1	DTL	denticleless E3 ubiquitin protein ligase homolog (Drosophila)
hsa-miR-548c-3p	1	0	1	0	1	1	CCNL2	cyclin L2
hsa-miR-548c-3p	1	0	1	1	1	1	EIF2C3	eukaryotic translation initiation factor 2C, 3
hsa-miR-548c-3p	1	0	1	1	1	1	TMEM2	transmembrane protein 2
hsa-miR-548c-3p	1	0	1	1	1	1	SLC38A1	solute carrier family 38, member 1
hsa-miR-548c-3p	1	0	1	1	1	1	GPD2	glycerol-3-phosphate dehydrogenase 2 (mitochondrial)
hsa-miR-548c-3p	1	0	1	1	1	1	ARHGAP36	Rho GTPase activating protein 36
hsa-miR-548c-3p	1	0	1	0	1	1	ZKSCAN1	zinc finger with KRAB and SCAN domains 1
hsa-miR-548c-3p	0	0	1	0	0	0	FAM185A	family with sequence similarity 185, member A
hsa-miR-548c-3p	0	0	1	1	1	1	C8orf46	chromosome 8 open reading frame 46
hsa-miR-548c-3p	1	0	1	1	1	1	FAM123A	family with sequence similarity 123A
hsa-miR-548c-3p	0	0	1	0	0	0	CHST9-AS1	CHST9 antisense RNA 1
hsa-miR-548c-3p	1	0	1	0	1	1	AP1G1	adaptor-related protein complex 1, gamma 1 subunit
hsa-miR-548c-3p	1	0	1	1	1	1	DLGAP4	discs, large (Drosophila) homolog-associated protein 4
hsa-miR-548c-3p	0	0	1	1	1	1	GABRP	gamma-aminobutyric acid (GABA) A receptor, pi
hsa-miR-548c-3p	0	0	1	1	1	1	FBXO5	F-box protein 5
hsa-miR-548c-3p	0	0	1	0	0	0	THOC1	THO complex 1
hsa-miR-548c-3p	1	0	1	1	0	0	SPEG	SPEG complex locus
hsa-miR-548c-3p	0	0	1	1	1	1	OPTN	optineurin
hsa-miR-548c-3p	1	0	1	1	1	1	ADPGK	ADP-dependent glucokinase
hsa-miR-548c-3p	0	0	1	1	1	1	GLYATL1	glycine-N-acyltransferase-like 1
hsa-miR-548c-3p	1	0	1	1	1	1	MAP3K7	mitogen-activated protein kinase kinase kinase 7
hsa-miR-548c-3p	1	0	1	0	0	0	PWWP2A	PWWP domain containing 2A
hsa-miR-548c-3p	1	0	1	0	1	1	RAB1A	RAB1A, member RAS oncogene family
hsa-miR-548c-3p	1	0	1	0	1	1	PTPRE	protein tyrosine phosphatase, receptor type, E
hsa-miR-548c-3p	0	0	1	1	1	1	PDE1C	phosphodiesterase 1C, calmodulin-dependent 70kDa
hsa-miR-548c-3p	1	0	1	0	1	1	FSTL4	follistatin-like 4
hsa-miR-548c-3p	0	0	1	1	0	0	ATP13A1	ATPase type 13A1
hsa-miR-548c-3p	0	0	1	0	0	0	FLG-AS1	FLG antisense RNA 1
hsa-miR-548c-3p	1	0	1	1	1	1	CLCN5	chloride channel, voltage-sensitive 5
hsa-miR-548c-3p	1	0	1	1	1	1	PUM1	pumilio homolog 1 (Drosophila)
hsa-miR-548c-3p	0	0	1	0	1	1	SNRNP48	small nuclear ribonucleoprotein 48kDa (U11/U12)
hsa-miR-548c-3p	0	0	1	1	1	1	LNX1	ligand of numb-protein X 1, E3 ubiquitin protein ligase
hsa-miR-548c-3p	0	0	1	1	1	1	XAF1	XIAP associated factor 1
hsa-miR-548c-3p	0	0	1	0	1	1	ZNF498	zinc finger protein 498
hsa-miR-548c-3p	1	0	1	1	1	1	GORASP1	golgi reassembly stacking protein 1, 65kDa
hsa-miR-548c-3p	1	0	1	1	1	1	HMGB1	high mobility group box 1
hsa-miR-548c-3p	1	0	1	1	1	1	MGAT1	mannosyl (alpha-1,3-)-glycoprotein beta-1,2-N-acetylglucosaminyltransferase
hsa-miR-548c-3p	1	0	1	1	1	1	TLE4	transducin-like enhancer of split 4 (E(sp1) homolog, Drosophila)
hsa-miR-548c-3p	0	0	1	1	1	1	CCDC102B	coiled-coil domain containing 102B
hsa-miR-548c-3p	1	0	1	1	1	1	MPP7	membrane protein, palmitoylated 7 (MAGUK p55 subfamily member 7)
hsa-miR-548c-3p	0	0	1	0	1	1	ARHGAP42	Rho GTPase activating protein 42
hsa-miR-548c-3p	1	0	1	0	1	1	NCAM1	neural cell adhesion molecule 1
hsa-miR-548c-3p	0	0	1	0	0	0	LOC285074	anaphase promoting complex subunit 1 pseudogene
hsa-miR-548c-3p	0	0	1	1	1	1	ZBTB26	zinc finger and BTB domain containing 26
hsa-miR-548c-3p	0	0	1	0	1	1	CCDC68	coiled-coil domain containing 68
hsa-miR-548c-3p	1	0	1	1	1	1	HLF	hepatic leukemia factor
hsa-miR-548c-3p	0	0	1	1	1	1	HDAC8	histone deacetylase 8
hsa-miR-548c-3p	1	0	1	0	1	1	CLASP1	cytoplasmic linker associated protein 1
hsa-miR-548c-3p	0	0	1	1	1	1	PKIB	protein kinase (cAMP-dependent, catalytic) inhibitor beta
hsa-miR-548c-3p	0	0	1	0	1	1	CDHR3	cadherin-related family member 3
hsa-miR-548c-3p	1	0	1	1	1	1	PNISR	PNN-interacting serine/arginine-rich protein
hsa-miR-548c-3p	1	0	1	0	1	1	TPBG	trophoblast glycoprotein
hsa-miR-548c-3p	1	0	1	1	1	1	PAX6	paired box 6
hsa-miR-548c-3p	1	0	1	1	1	1	UXS1	UDP-glucuronate decarboxylase 1
hsa-miR-548c-3p	0	0	1	1	1	1	KDELR1	KDEL (Lys-Asp-Glu-Leu) endoplasmic reticulum protein retention receptor 1
hsa-miR-548c-3p	0	0	1	1	0	0	LGR5	leucine-rich repeat containing G protein-coupled receptor 5
hsa-miR-548c-3p	0	0	1	1	1	1	TFPI2	tissue factor pathway inhibitor 2
hsa-miR-548c-3p	0	0	1	0	1	1	CADM1	cell adhesion molecule 1
hsa-miR-548c-3p	1	0	1	1	1	1	DPH1	DPH1 homolog (S. cerevisiae)
hsa-miR-548c-3p	1	0	1	1	1	1	TLK1	tousled-like kinase 1
hsa-miR-548c-3p	0	0	1	1	1	1	TOLLIP	toll interacting protein
hsa-miR-548c-3p	1	0	1	1	1	1	AMMECR1	Alport syndrome, mental retardation, midface hypoplasia and elliptocytosis chromosomal region gene 1
hsa-miR-548c-3p	1	0	1	1	1	1	RBMX	RNA binding motif protein, X-linked
hsa-miR-548c-3p	0	0	1	0	1	1	TBX5-AS1	TBX5 antisense RNA 1
hsa-miR-548c-3p	1	0	1	1	1	1	CTTN	cortactin
hsa-miR-548c-3p	0	0	1	0	0	0	LOC440910	uncharacterized LOC440910
hsa-miR-548c-3p	1	0	1	1	1	1	FBXW2	F-box and WD repeat domain containing 2
hsa-miR-548c-3p	0	0	1	1	1	1	CD34	CD34 molecule
hsa-miR-548c-3p	1	0	1	1	1	1	LUC7L2	LUC7-like 2 (S. cerevisiae)
hsa-miR-548c-3p	1	0	1	1	1	1	HDAC2	histone deacetylase 2
hsa-miR-548c-3p	0	0	1	1	1	1	NRCAM	neuronal cell adhesion molecule
hsa-miR-548c-3p	1	0	1	1	1	1	GNG2	guanine nucleotide binding protein (G protein), gamma 2
hsa-miR-548c-3p	1	0	1	1	1	1	MAFK	v-maf musculoaponeurotic fibrosarcoma oncogene homolog K (avian)
hsa-miR-548c-3p	0	0	1	1	0	0	HNRNPL	heterogeneous nuclear ribonucleoprotein L
hsa-miR-548c-3p	0	0	1	1	1	1	WT1	Wilms tumor 1
hsa-miR-548c-3p	1	0	1	1	1	1	GCFC1	GC-rich sequence DNA-binding factor 1
hsa-miR-548c-3p	0	0	1	1	1	1	XPNPEP1	X-prolyl aminopeptidase (aminopeptidase P) 1, soluble
hsa-miR-548c-3p	0	0	1	1	1	1	LZTFL1	leucine zipper transcription factor-like 1
hsa-miR-548c-3p	1	0	1	1	1	1	SPTBN1	spectrin, beta, non-erythrocytic 1
hsa-miR-548c-3p	0	0	1	1	0	0	HSD17B4	hydroxysteroid (17-beta) dehydrogenase 4
hsa-miR-548c-3p	0	0	1	1	1	1	SLC16A1	solute carrier family 16, member 1 (monocarboxylic acid transporter 1)
hsa-miR-548c-3p	1	0	1	1	1	1	DEM1	defects in morphology 1 homolog (S. cerevisiae)
hsa-miR-548c-3p	1	0	1	1	1	1	LRRC57	leucine rich repeat containing 57
hsa-miR-548c-3p	1	0	1	1	1	1	RCN1	reticulocalbin 1, EF-hand calcium binding domain
hsa-miR-548c-3p	0	0	1	1	1	1	SPOCK1	sparc/osteonectin, cwcv and kazal-like domains proteoglycan (testican) 1
hsa-miR-548c-3p	0	0	1	0	1	1	RALYL	RALY RNA binding protein-like
hsa-miR-548c-3p	1	0	1	1	1	1	SLC7A8	solute carrier family 7 (amino acid transporter light chain, L system), member 8
hsa-miR-548c-3p	1	0	1	1	1	1	SNAP25	synaptosomal-associated protein, 25kDa
hsa-miR-548c-3p	1	0	1	1	1	1	SIAH1	siah E3 ubiquitin protein ligase 1
hsa-miR-548c-3p	1	0	1	0	1	1	GATAD2B	GATA zinc finger domain containing 2B
hsa-miR-548c-3p	1	0	1	0	1	1	ARL6IP6	ADP-ribosylation-like factor 6 interacting protein 6
hsa-miR-548c-3p	0	0	1	1	1	1	RBM25	RNA binding motif protein 25
hsa-miR-548c-3p	1	0	1	0	1	1	NCOA7	nuclear receptor coactivator 7
hsa-miR-548c-3p	1	0	1	1	1	1	GALNTL2	UDP-N-acetyl-alpha-D-galactosamine:polypeptide N-acetylgalactosaminyltransferase-like 2
hsa-miR-548c-3p	0	0	1	1	1	1	C9orf47	chromosome 9 open reading frame 47
hsa-miR-548c-3p	0	0	1	1	1	1	TMEM170A	transmembrane protein 170A
hsa-miR-548c-3p	1	0	1	1	1	1	KANSL1	KAT8 regulatory NSL complex subunit 1
hsa-miR-548c-3p	1	0	1	1	1	1	CPNE8	copine VIII
hsa-miR-548c-3p	1	0	1	1	1	1	GLT25D2	glycosyltransferase 25 domain containing 2
hsa-miR-548c-3p	0	0	1	0	0	0	FLJ37798	uncharacterized LOC401264
hsa-miR-548c-3p	1	0	1	1	1	1	RASGEF1A	RasGEF domain family, member 1A
hsa-miR-548c-3p	1	0	1	1	1	1	TMEM100	transmembrane protein 100
hsa-miR-548c-3p	1	0	1	0	1	1	SLC39A11	solute carrier family 39 (metal ion transporter), member 11
hsa-miR-548c-3p	1	0	1	1	1	1	ANKRD46	ankyrin repeat domain 46
hsa-miR-548c-3p	0	0	1	1	1	1	MYO6	myosin VI
hsa-miR-548c-3p	1	0	1	1	1	1	ATXN10	ataxin 10
hsa-miR-548c-3p	1	0	1	0	1	1	UVRAG	UV radiation resistance associated gene
hsa-miR-548c-3p	0	0	1	0	0	0	LOC730101	uncharacterized LOC730101
hsa-miR-548c-3p	0	0	1	1	1	1	FUT11	fucosyltransferase 11 (alpha (1,3) fucosyltransferase)
hsa-miR-548c-3p	0	0	1	0	0	0	LOC100129858	uncharacterized LOC100129858
hsa-miR-548c-3p	1	0	1	1	1	1	FAM222B	family with sequence similarity 222, member B
hsa-miR-548c-3p	0	0	1	0	1	1	NBPF3	neuroblastoma breakpoint family, member 3
hsa-miR-548c-3p	1	0	1	1	1	1	ANKRD10	ankyrin repeat domain 10
hsa-miR-548c-3p	0	0	1	1	0	0	RPL5	ribosomal protein L5
hsa-miR-548c-3p	1	0	1	1	1	1	CS	citrate synthase
hsa-miR-548c-3p	1	0	1	1	1	1	ZC3H11A	zinc finger CCCH-type containing 11A
hsa-miR-548c-3p	1	0	1	1	1	1	B4GALT7	xylosylprotein beta 1,4-galactosyltransferase, polypeptide 7
hsa-miR-548c-3p	0	0	1	1	1	1	AIMP1	aminoacyl tRNA synthetase complex-interacting multifunctional protein 1
hsa-miR-548c-3p	1	0	1	1	1	1	ACSL1	acyl-CoA synthetase long-chain family member 1
hsa-miR-548c-3p	0	0	1	0	1	1	C1orf198	chromosome 1 open reading frame 198
hsa-miR-548c-3p	1	0	1	1	1	1	FAM98A	family with sequence similarity 98, member A
hsa-miR-548c-3p	0	0	1	1	1	1	RPE	ribulose-5-phosphate-3-epimerase
hsa-miR-548c-3p	1	0	1	1	1	1	GAPVD1	GTPase activating protein and VPS9 domains 1
hsa-miR-548c-3p	0	0	1	0	0	0	OTUD1	OTU domain containing 1
hsa-miR-548c-3p	0	0	1	0	1	1	FLJ39080	uncharacterized LOC441355
hsa-miR-548c-3p	1	0	1	1	1	1	LRP8	low density lipoprotein receptor-related protein 8, apolipoprotein e receptor
hsa-miR-548c-3p	0	0	1	1	1	1	ZNF667	zinc finger protein 667
hsa-miR-548c-3p	1	0	1	0	1	1	THRB	thyroid hormone receptor, beta
hsa-miR-548c-3p	1	0	1	1	1	1	SLC30A6	solute carrier family 30 (zinc transporter), member 6
hsa-miR-548c-3p	0	0	1	1	1	1	ARMCX5	armadillo repeat containing, X-linked 5
hsa-miR-548c-3p	1	0	1	1	1	1	SYT6	synaptotagmin VI
hsa-miR-548c-3p	1	0	1	1	1	1	CCDC141	coiled-coil domain containing 141
hsa-miR-548c-3p	1	0	1	1	1	1	STIM2	stromal interaction molecule 2
hsa-miR-548c-3p	1	0	1	1	1	1	EPB41L1	erythrocyte membrane protein band 4.1-like 1
hsa-miR-548c-3p	0	0	1	0	1	1	SWAP70	SWAP switching B-cell complex 70kDa subunit
hsa-miR-548c-3p	0	0	1	1	1	1	GBAS	glioblastoma amplified sequence
hsa-miR-548c-3p	0	0	1	1	0	0	NMRK1	nicotinamide riboside kinase 1
hsa-miR-548c-3p	0	0	1	0	0	0	LOC401463	uncharacterized LOC401463
hsa-miR-548c-3p	0	0	1	0	1	1	TNFAIP8	tumor necrosis factor, alpha-induced protein 8
hsa-miR-548c-3p	1	0	1	1	1	1	POU2F3	POU class 2 homeobox 3
hsa-miR-548c-3p	1	0	1	0	1	1	AGFG1	ArfGAP with FG repeats 1
hsa-miR-548c-3p	0	0	1	0	0	0	LOC285626	uncharacterized LOC285626
hsa-miR-548c-3p	1	0	1	1	1	1	HOOK1	hook homolog 1 (Drosophila)
hsa-miR-548c-3p	1	0	1	1	1	1	VAV3	vav 3 guanine nucleotide exchange factor
hsa-miR-548c-3p	0	0	1	1	1	1	HCCS	holocytochrome c synthase
hsa-miR-548c-3p	0	0	1	1	1	1	EHD1	EH-domain containing 1
hsa-miR-548c-3p	1	0	1	1	1	1	UGDH	UDP-glucose 6-dehydrogenase
hsa-miR-548c-3p	1	0	1	1	1	1	PIGA	phosphatidylinositol glycan anchor biosynthesis, class A
hsa-miR-548c-3p	1	0	1	1	1	1	ZCCHC2	zinc finger, CCHC domain containing 2
hsa-miR-548c-3p	0	0	1	1	0	0	ZNF283	zinc finger protein 283
hsa-miR-548c-3p	0	0	1	0	0	0	LOC728095	uncharacterized LOC728095
hsa-miR-548c-3p	0	0	1	0	0	0	GTF2IP1	general transcription factor IIi, pseudogene 1
hsa-miR-548c-3p	0	0	1	1	0	0	EFHB	EF-hand domain family, member B
hsa-miR-548c-3p	1	0	1	1	1	1	TRAFD1	TRAF-type zinc finger domain containing 1
hsa-miR-548c-3p	1	0	1	1	1	1	ACSL6	acyl-CoA synthetase long-chain family member 6
hsa-miR-548c-3p	1	0	1	1	1	1	DDX42	DEAD (Asp-Glu-Ala-Asp) box polypeptide 42
hsa-miR-548c-3p	1	0	1	1	1	1	CRMP1	collapsin response mediator protein 1
hsa-miR-548c-3p	1	0	1	1	1	1	LMX1A	LIM homeobox transcription factor 1, alpha
hsa-miR-548c-3p	0	0	1	1	1	1	HMGCL	3-hydroxymethyl-3-methylglutaryl-CoA lyase
hsa-miR-548c-3p	0	0	1	1	0	0	KIAA0146	KIAA0146
hsa-miR-548c-3p	0	0	1	1	0	0	CFP	complement factor properdin
hsa-miR-548c-3p	1	0	1	1	1	1	PXN	paxillin
hsa-miR-548c-3p	1	0	1	1	1	1	ZBTB4	zinc finger and BTB domain containing 4
hsa-miR-548c-3p	1	0	1	1	1	1	ZNF275	zinc finger protein 275
hsa-miR-548c-3p	0	0	1	1	1	1	FRMD5	FERM domain containing 5
hsa-miR-548c-3p	1	0	1	1	1	1	HNRNPA1L2	heterogeneous nuclear ribonucleoprotein A1-like 2
hsa-miR-548c-3p	0	0	1	0	0	0	C1orf132	chromosome 1 open reading frame 132
hsa-miR-548c-3p	1	0	1	1	1	1	PDZD4	PDZ domain containing 4
hsa-miR-548c-3p	1	0	1	1	1	1	TPRG1	tumor protein p63 regulated 1
hsa-miR-548c-3p	1	0	1	1	1	1	MDGA2	MAM domain containing glycosylphosphatidylinositol anchor 2
hsa-miR-548c-3p	0	0	1	0	0	0	LGALS17A	Charcot-Leyden crystal protein pseudogene
hsa-miR-548c-3p	0	0	1	1	1	1	FAM19A2	family with sequence similarity 19 (chemokine (C-C motif)-like), member A2
hsa-miR-548c-3p	0	0	1	1	1	1	LYPLAL1	lysophospholipase-like 1
hsa-miR-548c-3p	0	0	1	0	0	0	LOC650368	asparagine-linked glycosylation 1-like pseudogene
hsa-miR-548c-3p	0	0	1	1	0	0	LIX1L	Lix1 homolog (mouse)-like
hsa-miR-548c-3p	1	0	1	1	1	1	EPAS1	endothelial PAS domain protein 1
hsa-miR-548c-3p	1	0	1	0	0	0	GPR137C	G protein-coupled receptor 137C
hsa-miR-548c-3p	1	0	1	1	1	1	OSBPL9	oxysterol binding protein-like 9
hsa-miR-548c-3p	0	0	1	1	1	1	ANKRD44	ankyrin repeat domain 44
hsa-miR-548c-3p	0	0	1	1	1	1	TMEM17	transmembrane protein 17
hsa-miR-548c-3p	0	0	1	0	0	0	DKFZP434H168	uncharacterized LOC26077
hsa-miR-548c-3p	0	0	1	1	1	1	PKP4	plakophilin 4
hsa-miR-548c-3p	1	0	1	1	0	0	KCNC1	potassium voltage-gated channel, Shaw-related subfamily, member 1
hsa-miR-548c-3p	1	0	1	1	1	1	ADIPOR1	adiponectin receptor 1
hsa-miR-548c-3p	0	0	1	1	1	1	CPVL	carboxypeptidase, vitellogenic-like
hsa-miR-548c-3p	0	0	1	1	0	0	NUP85	nucleoporin 85kDa
hsa-miR-548c-3p	1	0	1	0	1	1	TTYH3	tweety homolog 3 (Drosophila)
hsa-miR-548c-3p	1	0	1	1	1	1	DAB2IP	DAB2 interacting protein
hsa-miR-548c-3p	0	0	1	1	1	1	IDS	iduronate 2-sulfatase
hsa-miR-548c-3p	0	0	1	1	1	1	LRTM2	leucine-rich repeats and transmembrane domains 2
hsa-miR-548c-3p	1	0	1	1	1	1	KIF21A	kinesin family member 21A
hsa-miR-548c-3p	0	0	1	0	0	0	LOC728716	uncharacterized LOC728716
hsa-miR-548c-3p	1	0	1	1	1	1	HARS	histidyl-tRNA synthetase
hsa-miR-548c-3p	0	0	1	1	1	1	KANSL1L	KAT8 regulatory NSL complex subunit 1-like
hsa-miR-548c-3p	0	0	1	1	1	1	ATPBD4	ATP binding domain 4
hsa-miR-548c-3p	1	0	1	1	1	1	SGIP1	SH3-domain GRB2-like (endophilin) interacting protein 1
hsa-miR-548c-3p	1	0	1	1	1	1	C17orf85	chromosome 17 open reading frame 85
hsa-miR-548c-3p	1	0	1	1	1	1	SEPHS1	selenophosphate synthetase 1
hsa-miR-548c-3p	0	0	1	0	0	0	TMEM232	transmembrane protein 232
hsa-miR-548c-3p	1	0	1	1	1	1	ATXN7	ataxin 7
hsa-miR-548c-3p	0	0	1	1	0	0	FAM21B	family with sequence similarity 21, member B
hsa-miR-548c-3p	1	0	1	1	1	1	RGMA	RGM domain family, member A
hsa-miR-548c-3p	1	0	1	1	1	1	CTGF	connective tissue growth factor
hsa-miR-548c-3p	1	0	1	1	1	1	METAP2	methionyl aminopeptidase 2
hsa-miR-548c-3p	0	0	1	1	1	1	MKX	mohawk homeobox
hsa-miR-548c-3p	0	0	1	1	1	1	DENND5A	DENN/MADD domain containing 5A
hsa-miR-548c-3p	1	0	1	1	1	1	KTN1	kinectin 1 (kinesin receptor)
hsa-miR-548c-3p	1	0	1	1	1	1	KPNA1	karyopherin alpha 1 (importin alpha 5)
hsa-miR-548c-3p	1	0	1	0	1	1	KIAA1456	KIAA1456
hsa-miR-548c-3p	1	0	1	0	0	0	MSL1	male-specific lethal 1 homolog (Drosophila)
hsa-miR-548c-3p	0	0	1	1	0	0	RPRD2	regulation of nuclear pre-mRNA domain containing 2
hsa-miR-548c-3p	0	0	1	1	1	1	RBM46	RNA binding motif protein 46
hsa-miR-548c-3p	1	0	1	1	1	1	MACROD2	MACRO domain containing 2
hsa-miR-548c-3p	1	0	1	1	0	0	DYDC1	DPY30 domain containing 1
hsa-miR-548c-3p	1	0	1	1	0	0	UBN2	ubinuclein 2
hsa-miR-548c-3p	1	0	1	1	1	1	DCTN4	dynactin 4 (p62)
hsa-miR-548c-3p	1	0	1	1	1	1	FAM122B	family with sequence similarity 122B
hsa-miR-548c-3p	1	0	1	1	1	1	CHD5	chromodomain helicase DNA binding protein 5
hsa-miR-548c-3p	0	0	1	1	0	0	FSIP2	fibrous sheath interacting protein 2
hsa-miR-548c-3p	1	0	1	1	0	0	ATXN7L3	ataxin 7-like 3
hsa-miR-548c-3p	0	0	1	0	0	0	LOC729177	uncharacterized LOC729177
hsa-miR-548c-3p	1	0	1	1	1	1	LIN9	lin-9 homolog (C. elegans)
hsa-miR-548c-3p	1	0	1	1	1	1	SIKE1	suppressor of IKBKE 1
hsa-miR-548c-3p	1	0	1	1	1	1	PIK3R1	phosphoinositide-3-kinase, regulatory subunit 1 (alpha)
hsa-miR-548c-3p	0	0	1	1	0	0	CLDN4	claudin 4
hsa-miR-548c-3p	0	0	1	1	0	0	HSPG2	heparan sulfate proteoglycan 2
hsa-miR-548c-3p	1	0	1	1	1	1	DMXL1	Dmx-like 1
hsa-miR-548c-3p	1	0	1	1	1	1	DLG2	discs, large homolog 2 (Drosophila)
hsa-miR-548c-3p	1	0	1	1	1	1	IBTK	inhibitor of Bruton agammaglobulinemia tyrosine kinase
hsa-miR-548c-3p	1	0	1	0	1	1	GPR180	G protein-coupled receptor 180
hsa-miR-548c-3p	1	0	1	1	1	1	NIPBL	Nipped-B homolog (Drosophila)
hsa-miR-548c-3p	0	0	1	0	0	0	HNRNPKP3	heterogeneous nuclear ribonucleoprotein K pseudogene 3
hsa-miR-548c-3p	1	0	1	1	1	1	ODF2	outer dense fiber of sperm tails 2
hsa-miR-548c-3p	1	0	1	1	1	1	C14orf28	chromosome 14 open reading frame 28
hsa-miR-548c-3p	1	0	1	1	1	1	CLIP1	CAP-GLY domain containing linker protein 1
hsa-miR-548c-3p	1	0	1	1	1	1	EIF4E3	eukaryotic translation initiation factor 4E family member 3
hsa-miR-548c-3p	0	0	1	0	0	0	RPL23AP53	ribosomal protein L23a pseudogene 53
hsa-miR-548c-3p	0	0	1	1	1	1	LARS	leucyl-tRNA synthetase
hsa-miR-548c-3p	1	0	1	1	1	1	MKRN1	makorin ring finger protein 1
hsa-miR-548c-3p	1	0	1	1	1	1	CLTC	clathrin, heavy chain (Hc)
hsa-miR-548c-3p	0	0	1	1	0	0	FAM54B	family with sequence similarity 54, member B
hsa-miR-548c-3p	1	0	1	0	1	1	ADIPOR2	adiponectin receptor 2
hsa-miR-548c-3p	0	0	1	1	1	1	DOCK9	dedicator of cytokinesis 9
hsa-miR-548c-3p	1	0	1	1	1	1	CTNNA2	catenin (cadherin-associated protein), alpha 2
hsa-miR-548c-3p	1	0	1	1	1	1	PHF17	PHD finger protein 17
hsa-miR-548c-3p	1	0	1	0	1	1	KIAA0182	KIAA0182
hsa-miR-548c-3p	1	0	1	1	1	1	ENAH	enabled homolog (Drosophila)
hsa-miR-548c-3p	0	0	1	1	1	1	PIN4	protein (peptidylprolyl cis/trans isomerase) NIMA-interacting, 4 (parvulin)
hsa-miR-548c-3p	0	0	1	1	1	1	NT5C2	5'-nucleotidase, cytosolic II
hsa-miR-548c-3p	1	0	1	0	1	1	SP6	Sp6 transcription factor
hsa-miR-548c-3p	1	0	1	1	1	1	CXorf23	chromosome X open reading frame 23
hsa-miR-548c-3p	1	0	1	1	1	1	R3HDM1	R3H domain containing 1
hsa-miR-548c-3p	1	0	1	1	1	1	EYA1	eyes absent homolog 1 (Drosophila)
hsa-miR-548c-3p	1	0	1	0	1	1	FNDC3B	fibronectin type III domain containing 3B
hsa-miR-548c-3p	0	0	1	1	1	1	PITX2	paired-like homeodomain 2
hsa-miR-548c-3p	0	0	1	0	0	0	ERVFRD-2	endogenous retrovirus group FRD, member 2
hsa-miR-548c-3p	1	0	1	1	1	1	AFAP1	actin filament associated protein 1
hsa-miR-548c-3p	1	0	1	0	1	1	YOD1	YOD1 OTU deubiquinating enzyme 1 homolog (S. cerevisiae)
hsa-miR-548c-3p	0	0	1	1	1	1	SLC35F2	solute carrier family 35, member F2
hsa-miR-548c-3p	0	0	1	1	0	0	RASA3	RAS p21 protein activator 3
hsa-miR-548c-3p	1	0	1	1	1	1	WDR37	WD repeat domain 37
hsa-miR-548c-3p	1	0	1	1	1	1	SLC4A8	solute carrier family 4, sodium bicarbonate cotransporter, member 8
hsa-miR-548c-3p	0	0	1	1	1	1	CD160	CD160 molecule
hsa-miR-548c-3p	0	0	1	1	0	0	C17orf107	chromosome 17 open reading frame 107
hsa-miR-548c-3p	1	0	1	1	1	1	SH3D19	SH3 domain containing 19
hsa-miR-548c-3p	1	0	1	1	1	1	BCAT1	branched chain amino-acid transaminase 1, cytosolic
hsa-miR-548c-3p	0	0	1	0	0	0	IGHD	immunoglobulin heavy constant delta
hsa-miR-548c-3p	1	0	1	1	1	1	PUS7	pseudouridylate synthase 7 homolog (S. cerevisiae)
hsa-miR-548c-3p	1	0	1	1	1	1	SDCBP	syndecan binding protein (syntenin)
hsa-miR-548c-3p	0	0	1	1	1	1	TPK1	thiamin pyrophosphokinase 1
hsa-miR-548c-3p	0	0	1	1	1	1	RAB13	RAB13, member RAS oncogene family
hsa-miR-548c-3p	0	0	1	1	1	1	ZNF662	zinc finger protein 662
hsa-miR-548c-3p	0	0	1	0	0	0	EMBP1	embigin pseudogene 1
hsa-miR-548c-3p	1	0	1	1	1	1	ADAMTS19	ADAM metallopeptidase with thrombospondin type 1 motif, 19
hsa-miR-548c-3p	1	0	1	1	1	1	DPY19L3	dpy-19-like 3 (C. elegans)
hsa-miR-548c-3p	1	0	1	1	1	1	RBM24	RNA binding motif protein 24
hsa-miR-548c-3p	0	0	1	1	1	1	G3BP1	GTPase activating protein (SH3 domain) binding protein 1
hsa-miR-548c-3p	1	0	1	1	1	1	WDR17	WD repeat domain 17
hsa-miR-548c-3p	0	0	1	0	0	0	LOC390660	FLJ00317 protein
hsa-miR-548c-3p	1	0	1	0	1	1	RXRA	retinoid X receptor, alpha
hsa-miR-548c-3p	1	0	1	0	1	1	ESRRG	estrogen-related receptor gamma
hsa-miR-548c-3p	0	0	1	0	1	1	GALNT13	UDP-N-acetyl-alpha-D-galactosamine:polypeptide N-acetylgalactosaminyltransferase 13 (GalNAc-T13)
hsa-miR-548c-3p	0	0	1	1	1	1	TMC5	transmembrane channel-like 5
hsa-miR-548c-3p	0	0	1	1	1	1	ZNF680	zinc finger protein 680
hsa-miR-548c-3p	1	0	1	1	0	0	FOXP2	forkhead box P2
hsa-miR-548c-3p	1	0	1	1	1	1	RNF111	ring finger protein 111
hsa-miR-548c-3p	0	0	1	1	0	0	CYP4X1	cytochrome P450, family 4, subfamily X, polypeptide 1
hsa-miR-548c-3p	1	0	1	0	1	1	STK3	serine/threonine kinase 3
hsa-miR-548c-3p	1	0	1	1	1	1	WTAP	Wilms tumor 1 associated protein
hsa-miR-548c-3p	1	0	1	1	1	1	SMAD7	SMAD family member 7
hsa-miR-548c-3p	1	0	1	1	1	1	LRRK2	leucine-rich repeat kinase 2
hsa-miR-548c-3p	1	0	1	1	1	1	MAP2K4	mitogen-activated protein kinase kinase 4
hsa-miR-548c-3p	0	0	1	0	0	0	AGAP9	ArfGAP with GTPase domain, ankyrin repeat and PH domain 9
hsa-miR-548c-3p	0	0	1	1	1	1	LRRN4	leucine rich repeat neuronal 4
hsa-miR-548c-3p	0	0	1	1	1	1	XRN2	5'-3' exoribonuclease 2
hsa-miR-548c-3p	1	0	1	1	1	1	TAP2	transporter 2, ATP-binding cassette, sub-family B (MDR/TAP)
hsa-miR-548c-3p	0	0	1	1	1	1	FANCC	Fanconi anemia, complementation group C
hsa-miR-548c-3p	0	0	1	1	1	1	ARID1A	AT rich interactive domain 1A (SWI-like)
hsa-miR-548c-3p	0	0	1	1	1	1	CRISP3	cysteine-rich secretory protein 3
hsa-miR-548c-3p	1	0	1	1	1	1	B3GALNT1	beta-1,3-N-acetylgalactosaminyltransferase 1 (globoside blood group)
hsa-miR-548c-3p	1	0	1	1	1	1	CYYR1	cysteine/tyrosine-rich 1
hsa-miR-548c-3p	1	0	1	1	1	1	CYFIP2	cytoplasmic FMR1 interacting protein 2
hsa-miR-548c-3p	1	0	1	1	0	0	ATP13A3	ATPase type 13A3
hsa-miR-548c-3p	0	0	1	0	1	1	PEX5	peroxisomal biogenesis factor 5
hsa-miR-548c-3p	0	0	1	1	0	0	FERMT1	fermitin family member 1
hsa-miR-548c-3p	1	0	1	1	1	1	TBC1D15	TBC1 domain family, member 15
hsa-miR-548c-3p	1	0	1	1	1	1	MEAF6	MYST/Esa1-associated factor 6
hsa-miR-548c-3p	1	0	1	0	1	1	MGAT4B	mannosyl (alpha-1,3-)-glycoprotein beta-1,4-N-acetylglucosaminyltransferase, isozyme B
hsa-miR-548c-3p	0	0	1	1	1	1	NMD3	NMD3 homolog (S. cerevisiae)
hsa-miR-548c-3p	0	0	1	0	0	0	RRN3P2	RNA polymerase I transcription factor homolog (S. cerevisiae) pseudogene 2
hsa-miR-548c-3p	1	0	1	1	1	1	ACTN1	actinin, alpha 1
hsa-miR-548c-3p	1	0	1	0	1	1	MAP3K3	mitogen-activated protein kinase kinase kinase 3
hsa-miR-548c-3p	1	0	1	1	1	1	COBLL1	COBL-like 1
hsa-miR-548c-3p	1	0	1	1	1	1	WDR20	WD repeat domain 20
hsa-miR-548c-3p	0	0	1	1	1	1	PUS7L	pseudouridylate synthase 7 homolog (S. cerevisiae)-like
hsa-miR-548c-3p	0	0	1	1	0	0	HSPB11	heat shock protein family B (small), member 11
hsa-miR-548c-3p	1	0	1	1	1	1	LUC7L3	LUC7-like 3 (S. cerevisiae)
hsa-miR-548c-3p	1	0	1	1	1	1	NCOA1	nuclear receptor coactivator 1
hsa-miR-548c-3p	0	0	1	1	1	1	ENPP3	ectonucleotide pyrophosphatase/phosphodiesterase 3
hsa-miR-548c-3p	0	0	1	1	0	0	MTMR1	myotubularin related protein 1
hsa-miR-548c-3p	0	0	1	1	0	0	TRIM69	tripartite motif containing 69
hsa-miR-548c-3p	1	0	1	1	1	1	AHCYL1	adenosylhomocysteinase-like 1
hsa-miR-548c-3p	0	0	1	1	1	1	PTPN20B	protein tyrosine phosphatase, non-receptor type 20B
hsa-miR-548c-3p	0	0	1	1	1	1	PTPN20A	protein tyrosine phosphatase, non-receptor type 20A
hsa-miR-548c-3p	0	0	1	0	1	1	NEK1	NIMA (never in mitosis gene a)-related kinase 1
hsa-miR-548c-3p	0	0	1	1	0	0	NEK7	NIMA (never in mitosis gene a)-related kinase 7
hsa-miR-548c-3p	0	0	1	1	1	1	TFDP2	transcription factor Dp-2 (E2F dimerization partner 2)
hsa-miR-548c-3p	1	0	1	1	1	1	ARF6	ADP-ribosylation factor 6
hsa-miR-548c-3p	0	0	1	1	1	1	MTPAP	mitochondrial poly(A) polymerase
hsa-miR-548c-3p	0	0	1	1	1	1	TTLL5	tubulin tyrosine ligase-like family, member 5
hsa-miR-548c-3p	0	0	1	1	1	1	KIDINS220	kinase D-interacting substrate, 220kDa
hsa-miR-548c-3p	0	0	1	1	0	0	H2AFJ	H2A histone family, member J
hsa-miR-548c-3p	0	0	1	0	0	0	DNAJC5B	DnaJ (Hsp40) homolog, subfamily C, member 5 beta
hsa-miR-548c-3p	1	0	1	1	1	1	PREX1	phosphatidylinositol-3,4,5-trisphosphate-dependent Rac exchange factor 1
hsa-miR-548c-3p	0	0	1	1	1	1	ZNF280D	zinc finger protein 280D
hsa-miR-548c-3p	1	0	1	1	1	1	SLC25A36	solute carrier family 25 (pyrimidine nucleotide carrier ), member 36
hsa-miR-548c-3p	0	0	1	1	0	0	PACSIN2	protein kinase C and casein kinase substrate in neurons 2
hsa-miR-548c-3p	0	0	1	1	1	1	RHOT1	ras homolog family member T1
hsa-miR-548c-3p	0	0	1	1	1	1	MYO9A	myosin IXA
hsa-miR-548c-3p	1	0	1	0	1	1	DNAJC5	DnaJ (Hsp40) homolog, subfamily C, member 5
hsa-miR-548c-3p	1	0	1	1	1	1	KIAA1033	KIAA1033
hsa-miR-548c-3p	1	0	1	0	1	1	GPR85	G protein-coupled receptor 85
hsa-miR-548c-3p	1	0	1	0	1	1	CEP170	centrosomal protein 170kDa
hsa-miR-548c-3p	1	0	1	1	1	1	TFE3	transcription factor binding to IGHM enhancer 3
hsa-miR-548c-3p	1	0	1	1	1	1	GPBP1	GC-rich promoter binding protein 1
hsa-miR-548c-3p	0	0	1	1	0	0	DOPEY1	dopey family member 1
hsa-miR-548c-3p	1	0	1	1	1	1	NEO1	neogenin 1
hsa-miR-548c-3p	1	0	1	0	1	1	GRIN3A	glutamate receptor, ionotropic, N-methyl-D-aspartate 3A
hsa-miR-548c-3p	0	0	1	1	1	1	MESP2	mesoderm posterior 2 homolog (mouse)
hsa-miR-548c-3p	1	0	1	1	0	0	FAM108C1	family with sequence similarity 108, member C1
hsa-miR-548c-3p	1	0	1	1	1	1	PKNOX2	PBX/knotted 1 homeobox 2
hsa-miR-548c-3p	1	0	1	1	1	1	MSANTD2	Myb/SANT-like DNA-binding domain containing 2
hsa-miR-548c-3p	1	0	1	0	0	0	BAHCC1	BAH domain and coiled-coil containing 1
hsa-miR-548c-3p	1	0	1	1	1	1	SLC30A8	solute carrier family 30 (zinc transporter), member 8
hsa-miR-548c-3p	1	0	1	1	0	0	FNIP2	folliculin interacting protein 2
hsa-miR-548c-3p	1	0	1	1	1	1	YTHDF3	YTH domain family, member 3
hsa-miR-548c-3p	1	0	1	1	1	1	DENND1B	DENN/MADD domain containing 1B
hsa-miR-548c-3p	1	0	1	1	1	1	TMEFF1	transmembrane protein with EGF-like and two follistatin-like domains 1
hsa-miR-548c-3p	1	0	1	1	1	1	MIER1	mesoderm induction early response 1 homolog (Xenopus laevis)
hsa-miR-548c-3p	1	0	1	1	1	1	KDM6A	lysine (K)-specific demethylase 6A
hsa-miR-548c-3p	0	0	1	1	1	1	FILIP1	filamin A interacting protein 1
hsa-miR-548c-3p	0	0	1	1	1	1	ZCCHC6	zinc finger, CCHC domain containing 6
hsa-miR-548c-3p	0	0	1	0	1	1	GAB3	GRB2-associated binding protein 3
hsa-miR-548c-3p	0	0	1	1	1	1	BEND7	BEN domain containing 7
hsa-miR-548c-3p	0	0	1	0	0	0	ZNF720	zinc finger protein 720
hsa-miR-548c-3p	1	0	1	1	1	1	FAM126B	family with sequence similarity 126, member B
hsa-miR-548c-3p	0	0	1	1	0	0	LETM2	leucine zipper-EF-hand containing transmembrane protein 2
hsa-miR-548c-3p	1	0	1	0	1	1	HNRNPA3	heterogeneous nuclear ribonucleoprotein A3
hsa-miR-548c-3p	0	0	1	1	0	0	NEDD1	neural precursor cell expressed, developmentally down-regulated 1
hsa-miR-548c-3p	1	0	1	0	1	1	MPP5	membrane protein, palmitoylated 5 (MAGUK p55 subfamily member 5)
hsa-miR-548c-3p	1	0	1	0	1	1	STYX	serine/threonine/tyrosine interacting protein
hsa-miR-548c-3p	0	0	1	1	1	1	YAP1	Yes-associated protein 1
hsa-miR-548c-3p	1	0	1	1	1	1	DNAJC10	DnaJ (Hsp40) homolog, subfamily C, member 10
hsa-miR-548c-3p	1	0	1	1	0	0	PTAR1	protein prenyltransferase alpha subunit repeat containing 1
hsa-miR-548c-3p	0	0	1	1	1	1	BRD2	bromodomain containing 2
hsa-miR-548c-3p	1	0	1	1	1	1	FBXO3	F-box protein 3
hsa-miR-548c-3p	1	0	1	1	1	1	EHMT1	euchromatic histone-lysine N-methyltransferase 1
hsa-miR-548c-3p	0	0	1	1	1	1	TMEM138	transmembrane protein 138
hsa-miR-548c-3p	1	0	1	1	1	1	TMEM68	transmembrane protein 68
hsa-miR-548c-3p	1	0	1	1	1	1	SBF2	SET binding factor 2
hsa-miR-548c-3p	0	0	1	1	1	1	CCDC132	coiled-coil domain containing 132
hsa-miR-548c-3p	1	0	1	1	1	1	ABI3BP	ABI family, member 3 (NESH) binding protein
hsa-miR-548c-3p	1	0	1	1	1	1	FAM126A	family with sequence similarity 126, member A
hsa-miR-548c-3p	0	0	1	1	1	1	NARG2	NMDA receptor regulated 2
hsa-miR-548c-3p	0	0	1	1	1	1	NFE2L1	nuclear factor (erythroid-derived 2)-like 1
hsa-miR-548c-3p	1	0	1	0	1	1	CLINT1	clathrin interactor 1
hsa-miR-548c-3p	1	0	1	1	1	1	ANO1	anoctamin 1, calcium activated chloride channel
hsa-miR-548c-3p	0	0	1	0	0	0	EPHA1-AS1	EPHA1 antisense RNA 1
hsa-miR-548c-3p	0	0	1	1	0	0	ATL1	atlastin GTPase 1
hsa-miR-548c-3p	0	0	1	1	1	1	KIAA1841	KIAA1841
hsa-miR-548c-3p	1	0	1	1	1	1	NRP1	neuropilin 1
hsa-miR-548c-3p	0	0	1	1	1	1	SOAT1	sterol O-acyltransferase 1
hsa-miR-548c-3p	0	0	1	1	1	1	DDX55	DEAD (Asp-Glu-Ala-Asp) box polypeptide 55
hsa-miR-548c-3p	0	0	1	1	1	1	CAND1	cullin-associated and neddylation-dissociated 1
hsa-miR-548c-3p	0	0	1	1	1	1	TDRD9	tudor domain containing 9
hsa-miR-548c-3p	1	0	1	0	1	1	LMBR1	limb region 1 homolog (mouse)
hsa-miR-548c-3p	1	0	1	1	1	1	HERC2	HECT and RLD domain containing E3 ubiquitin protein ligase 2
hsa-miR-548c-3p	1	0	1	1	1	1	ANKRD12	ankyrin repeat domain 12
hsa-miR-548c-3p	1	0	1	0	1	1	JAZF1	JAZF zinc finger 1
hsa-miR-548c-3p	0	0	1	1	1	1	TEX2	testis expressed 2
hsa-miR-548c-3p	0	0	1	0	1	1	SRR	serine racemase
hsa-miR-548c-3p	0	0	1	1	1	1	C8orf34	chromosome 8 open reading frame 34
hsa-miR-548c-3p	1	0	1	1	1	1	RICTOR	RPTOR independent companion of MTOR, complex 2
hsa-miR-548c-3p	1	0	1	0	1	1	NR3C1	nuclear receptor subfamily 3, group C, member 1 (glucocorticoid receptor)
hsa-miR-548c-3p	0	0	1	1	1	1	INTS7	integrator complex subunit 7
hsa-miR-548c-3p	0	0	1	1	1	1	LMAN2L	lectin, mannose-binding 2-like
hsa-miR-548c-3p	1	0	1	1	1	1	FAM76B	family with sequence similarity 76, member B
hsa-miR-548c-3p	1	0	1	0	1	1	PHYHIPL	phytanoyl-CoA 2-hydroxylase interacting protein-like
hsa-miR-548c-3p	1	0	1	1	1	1	FBXL5	F-box and leucine-rich repeat protein 5
hsa-miR-548c-3p	0	0	1	0	1	1	USO1	USO1 vesicle docking protein homolog (yeast)
hsa-miR-548c-3p	1	0	1	1	1	1	PPP3CA	protein phosphatase 3, catalytic subunit, alpha isozyme
hsa-miR-548c-3p	1	0	1	1	1	1	WDR44	WD repeat domain 44
hsa-miR-548c-3p	1	0	1	1	1	1	RNF38	ring finger protein 38
hsa-miR-548c-3p	0	0	1	1	1	1	MTMR14	myotubularin related protein 14
hsa-miR-548c-3p	1	0	1	1	1	1	IKZF2	IKAROS family zinc finger 2 (Helios)
hsa-miR-548c-3p	0	0	1	0	0	0	PMCHL2	pro-melanin-concentrating hormone-like 2, pseudogene
hsa-miR-548c-3p	0	0	1	0	1	1	STEAP2	STEAP family member 2, metalloreductase
hsa-miR-548c-3p	0	0	1	1	1	1	CCDC62	coiled-coil domain containing 62
hsa-miR-548c-3p	1	0	1	1	1	1	GAL3ST3	galactose-3-O-sulfotransferase 3
hsa-miR-548c-3p	0	0	1	1	1	1	ALS2CR8	amyotrophic lateral sclerosis 2 (juvenile) chromosome region, candidate 8
hsa-miR-548c-3p	0	0	1	1	1	1	RUNDC3B	RUN domain containing 3B
hsa-miR-548c-3p	1	0	1	1	1	1	RCAN2	regulator of calcineurin 2
hsa-miR-548c-3p	0	0	1	1	1	1	LGALS8	lectin, galactoside-binding, soluble, 8
hsa-miR-548c-3p	1	0	1	0	1	1	BDNF	brain-derived neurotrophic factor
hsa-miR-548c-3p	1	0	1	1	1	1	MIPOL1	mirror-image polydactyly 1
hsa-miR-548c-3p	1	0	1	1	1	1	RBBP6	retinoblastoma binding protein 6
hsa-miR-548c-3p	0	0	1	0	0	0	LOC374443	C-type lectin domain family 2, member D pseudogene
hsa-miR-548c-3p	1	0	1	1	1	1	USF2	upstream transcription factor 2, c-fos interacting
hsa-miR-548c-3p	0	0	1	1	1	1	SYNE2	spectrin repeat containing, nuclear envelope 2
hsa-miR-548c-3p	0	0	1	1	1	1	CEP41	centrosomal protein 41kDa
hsa-miR-548c-3p	0	0	1	1	1	1	DNAJB14	DnaJ (Hsp40) homolog, subfamily B, member 14
hsa-miR-548c-3p	1	0	1	1	1	1	GCNT1	glucosaminyl (N-acetyl) transferase 1, core 2
hsa-miR-548c-3p	1	0	1	1	1	1	WDR26	WD repeat domain 26
hsa-miR-548c-3p	1	0	1	1	0	0	DSG4	desmoglein 4
hsa-miR-548c-3p	1	0	1	1	1	1	BCL11A	B-cell CLL/lymphoma 11A (zinc finger protein)
hsa-miR-548c-3p	0	0	1	1	1	1	IYD	iodotyrosine deiodinase
hsa-miR-548c-3p	1	0	1	1	1	1	TPP1	tripeptidyl peptidase I
hsa-miR-548c-3p	0	0	1	1	1	1	SUGT1	SGT1, suppressor of G2 allele of SKP1 (S. cerevisiae)
hsa-miR-548c-3p	1	0	1	1	1	1	PBRM1	polybromo 1
hsa-miR-548c-3p	1	0	1	1	1	1	PNRC1	proline-rich nuclear receptor coactivator 1
hsa-miR-548c-3p	1	0	1	1	1	1	OPRM1	opioid receptor, mu 1
hsa-miR-548c-3p	0	0	1	1	1	1	GCOM1	GRINL1A complex locus 1
hsa-miR-548c-3p	1	0	1	1	1	1	NPL	N-acetylneuraminate pyruvate lyase (dihydrodipicolinate synthase)
hsa-miR-548c-3p	0	0	1	1	1	1	PROK2	prokineticin 2
hsa-miR-548c-3p	1	0	1	1	1	1	IQGAP2	IQ motif containing GTPase activating protein 2
hsa-miR-548c-3p	1	0	1	0	1	1	DLEU7	deleted in lymphocytic leukemia, 7
hsa-miR-548c-3p	0	0	1	1	0	0	LRRC28	leucine rich repeat containing 28
hsa-miR-548c-3p	0	0	1	1	1	1	IL20	interleukin 20
hsa-miR-548c-3p	0	0	1	1	1	1	PIGG	phosphatidylinositol glycan anchor biosynthesis, class G
hsa-miR-548c-3p	1	0	1	1	1	1	NLGN4X	neuroligin 4, X-linked
hsa-miR-548c-3p	0	0	1	1	1	1	KDELC2	KDEL (Lys-Asp-Glu-Leu) containing 2
hsa-miR-548c-3p	0	0	1	1	0	0	PDZD11	PDZ domain containing 11
hsa-miR-548c-3p	0	0	1	1	1	1	TNFRSF19	tumor necrosis factor receptor superfamily, member 19
hsa-miR-548c-3p	1	0	1	1	1	1	SSX2IP	synovial sarcoma, X breakpoint 2 interacting protein
hsa-miR-548c-3p	1	0	1	0	1	1	ANKRD28	ankyrin repeat domain 28
hsa-miR-548c-3p	1	0	1	1	1	1	ECT2	epithelial cell transforming sequence 2 oncogene
hsa-miR-548c-3p	1	0	1	1	1	1	SP3	Sp3 transcription factor
hsa-miR-548c-3p	1	0	1	0	1	1	NHS	Nance-Horan syndrome (congenital cataracts and dental anomalies)
hsa-miR-548c-3p	0	0	1	1	1	1	PLD5	phospholipase D family, member 5
hsa-miR-548c-3p	1	0	1	1	1	1	ARHGAP20	Rho GTPase activating protein 20
hsa-miR-548c-3p	0	0	1	0	1	1	BRWD3	bromodomain and WD repeat domain containing 3
hsa-miR-548c-3p	0	0	1	1	1	1	HMBOX1	homeobox containing 1
hsa-miR-548c-3p	0	0	1	1	1	1	EHBP1	EH domain binding protein 1
hsa-miR-548c-3p	0	0	1	1	1	1	AICDA	activation-induced cytidine deaminase
hsa-miR-548c-3p	1	0	1	0	1	1	LRAT	lecithin retinol acyltransferase (phosphatidylcholine--retinol O-acyltransferase)
hsa-miR-548c-3p	1	0	1	1	1	1	LAMP2	lysosomal-associated membrane protein 2
hsa-miR-548c-3p	0	0	1	0	1	1	RAB18	RAB18, member RAS oncogene family
hsa-miR-548c-3p	0	0	1	1	1	1	ANXA10	annexin A10
hsa-miR-548c-3p	0	0	1	1	1	1	C9orf78	chromosome 9 open reading frame 78
hsa-miR-548c-3p	1	0	1	1	1	1	RIF1	RAP1 interacting factor homolog (yeast)
hsa-miR-548c-3p	1	0	1	1	1	1	RTN3	reticulon 3
hsa-miR-548c-3p	1	0	1	1	1	1	CYFIP1	cytoplasmic FMR1 interacting protein 1
hsa-miR-548c-3p	1	0	1	1	1	1	NTNG1	netrin G1
hsa-miR-548c-3p	1	0	1	1	1	1	QKI	QKI, KH domain containing, RNA binding
hsa-miR-548c-3p	1	0	1	1	1	1	MYB	v-myb myeloblastosis viral oncogene homolog (avian)
hsa-miR-548c-3p	0	0	1	1	1	1	DLEC1	deleted in lung and esophageal cancer 1
hsa-miR-548c-3p	1	0	1	1	1	1	PCDH11X	protocadherin 11 X-linked
hsa-miR-548c-3p	0	0	1	1	0	0	NBPF8	neuroblastoma breakpoint family, member 8
hsa-miR-548c-3p	1	0	1	1	1	1	AMOT	angiomotin
hsa-miR-548c-3p	0	0	1	1	0	0	ISG20L2	interferon stimulated exonuclease gene 20kDa-like 2
hsa-miR-548c-3p	0	0	1	1	1	1	FAM115A	family with sequence similarity 115, member A
hsa-miR-548c-3p	1	0	1	0	1	1	FAM46A	family with sequence similarity 46, member A
hsa-miR-548c-3p	1	0	1	1	1	1	PDLIM3	PDZ and LIM domain 3
hsa-miR-548c-3p	0	0	1	1	0	0	DGUOK	deoxyguanosine kinase
hsa-miR-548c-3p	1	0	1	1	1	1	ELOVL6	ELOVL fatty acid elongase 6
hsa-miR-548c-3p	0	0	1	1	1	1	PAFAH1B2	platelet-activating factor acetylhydrolase 1b, catalytic subunit 2 (30kDa)
hsa-miR-548c-3p	0	0	1	1	1	1	RLIM	ring finger protein, LIM domain interacting
hsa-miR-548c-3p	1	0	1	1	1	1	MYCN	v-myc myelocytomatosis viral related oncogene, neuroblastoma derived (avian)
hsa-miR-548c-3p	0	0	1	1	1	1	ATG3	autophagy related 3
hsa-miR-548c-3p	1	0	1	1	1	1	TSPAN14	tetraspanin 14
hsa-miR-548c-3p	1	0	1	0	1	1	DCAF10	DDB1 and CUL4 associated factor 10
hsa-miR-548c-3p	1	0	1	1	1	1	NUMA1	nuclear mitotic apparatus protein 1
hsa-miR-548c-3p	0	0	1	1	1	1	CHEK1	checkpoint kinase 1
hsa-miR-548c-3p	1	0	1	1	1	1	SPRY2	sprouty homolog 2 (Drosophila)
hsa-miR-548c-3p	1	0	1	1	0	0	SLC10A3	solute carrier family 10 (sodium/bile acid cotransporter family), member 3
hsa-miR-548c-3p	0	0	1	0	0	0	LOC254896	uncharacterized LOC254896
hsa-miR-548c-3p	1	0	1	0	1	1	CGGBP1	CGG triplet repeat binding protein 1
hsa-miR-548c-3p	0	0	1	1	1	1	FAM104B	family with sequence similarity 104, member B
hsa-miR-548c-3p	1	0	1	1	1	1	U2SURP	U2 snRNP-associated SURP domain containing
hsa-miR-548c-3p	0	0	1	1	1	1	LZIC	leucine zipper and CTNNBIP1 domain containing
hsa-miR-548c-3p	0	0	1	1	1	1	C1orf94	chromosome 1 open reading frame 94
hsa-miR-548c-3p	0	0	1	1	0	0	BEND5	BEN domain containing 5
hsa-miR-548c-3p	1	0	1	1	1	1	CALM1	calmodulin 1 (phosphorylase kinase, delta)
hsa-miR-548c-3p	0	0	1	0	0	0	FBXO46	F-box protein 46
hsa-miR-548c-3p	0	0	1	1	1	1	DPYD	dihydropyrimidine dehydrogenase
hsa-miR-548c-3p	0	0	1	1	1	1	TMEM30A	transmembrane protein 30A
hsa-miR-548c-3p	1	0	1	1	0	0	WDR45	WD repeat domain 45
hsa-miR-548c-3p	0	0	1	0	0	0	ATXN7L3B	ataxin 7-like 3B
hsa-miR-548c-3p	1	0	1	1	1	1	SLC50A1	solute carrier family 50 (sugar transporter), member 1
hsa-miR-548c-3p	1	0	1	0	1	1	TMEM39A	transmembrane protein 39A
hsa-miR-548c-3p	0	0	1	1	1	1	RSRC1	arginine/serine-rich coiled-coil 1
hsa-miR-548c-3p	1	0	1	1	1	1	GRIA2	glutamate receptor, ionotropic, AMPA 2
hsa-miR-548c-3p	1	0	1	1	1	1	ZFAND5	zinc finger, AN1-type domain 5
hsa-miR-548c-3p	0	0	1	1	1	1	HDHD2	haloacid dehalogenase-like hydrolase domain containing 2
hsa-miR-548c-3p	0	0	1	1	1	1	TAF12	TAF12 RNA polymerase II, TATA box binding protein (TBP)-associated factor, 20kDa
hsa-miR-548c-3p	1	0	1	1	1	1	SUPT16H	suppressor of Ty 16 homolog (S. cerevisiae)
hsa-miR-548c-3p	0	0	1	1	1	1	NUP98	nucleoporin 98kDa
hsa-miR-548c-3p	1	0	1	1	1	1	SNCA	synuclein, alpha (non A4 component of amyloid precursor)
hsa-miR-548c-3p	0	0	1	1	1	1	PCNP	PEST proteolytic signal containing nuclear protein
hsa-miR-548c-3p	1	0	1	1	1	1	YY1	YY1 transcription factor
hsa-miR-548c-3p	1	0	1	1	1	1	ETF1	eukaryotic translation termination factor 1
hsa-miR-548c-3p	1	0	1	1	1	1	PRDM2	PR domain containing 2, with ZNF domain
hsa-miR-548c-3p	0	0	1	0	1	1	AHI1	Abelson helper integration site 1
hsa-miR-548c-3p	1	0	1	1	1	1	PAPOLA	poly(A) polymerase alpha
hsa-miR-548c-3p	0	0	1	0	0	0	KLHL15	kelch-like 15 (Drosophila)
hsa-miR-548c-3p	1	0	1	1	1	1	ZDHHC3	zinc finger, DHHC-type containing 3
hsa-miR-548c-3p	0	0	1	0	1	1	ZNF37A	zinc finger protein 37A
hsa-miR-548c-3p	1	0	1	0	1	1	NR1D2	nuclear receptor subfamily 1, group D, member 2
hsa-miR-548c-3p	1	0	1	1	1	1	FAM176A	family with sequence similarity 176, member A
hsa-miR-548c-3p	1	0	1	1	1	1	NUMBL	numb homolog (Drosophila)-like
hsa-miR-548c-3p	1	0	1	1	1	1	SCAMP1	secretory carrier membrane protein 1
hsa-miR-548c-3p	0	0	1	1	1	1	MYL12A	myosin, light chain 12A, regulatory, non-sarcomeric
hsa-miR-548c-3p	0	0	1	1	1	1	MFSD4	major facilitator superfamily domain containing 4
hsa-miR-548c-3p	0	0	1	1	1	1	CMAS	cytidine monophosphate N-acetylneuraminic acid synthetase
hsa-miR-548c-3p	0	0	1	1	1	1	MARC2	mitochondrial amidoxime reducing component 2
hsa-miR-548c-3p	1	0	1	0	1	1	CYBRD1	cytochrome b reductase 1
hsa-miR-548c-3p	1	0	1	1	1	1	ORMDL3	ORM1-like 3 (S. cerevisiae)
hsa-miR-548c-3p	1	0	1	1	1	1	ELF4	E74-like factor 4 (ets domain transcription factor)
hsa-miR-548c-3p	0	0	1	1	1	1	CSDE1	cold shock domain containing E1, RNA-binding
hsa-miR-548c-3p	0	0	1	0	0	0	LOC100144602	uncharacterized LOC100144602
hsa-miR-548c-3p	0	0	1	1	1	1	RDH11	retinol dehydrogenase 11 (all-trans/9-cis/11-cis)
hsa-miR-548c-3p	0	0	1	1	1	1	SLC17A3	solute carrier family 17 (sodium phosphate), member 3
hsa-miR-548c-3p	1	0	1	1	1	1	WWC2	WW and C2 domain containing 2
hsa-miR-548c-3p	0	0	1	0	0	0	FAM200B	family with sequence similarity 200, member B
hsa-miR-548c-3p	1	0	1	1	1	1	ARHGEF9	Cdc42 guanine nucleotide exchange factor (GEF) 9
hsa-miR-548c-3p	1	0	1	0	1	1	SLC19A2	solute carrier family 19 (thiamine transporter), member 2
hsa-miR-548c-3p	1	0	1	1	1	1	SUZ12	suppressor of zeste 12 homolog (Drosophila)
hsa-miR-548c-3p	1	0	1	1	1	1	ZMAT4	zinc finger, matrin-type 4
hsa-miR-548c-3p	0	0	1	1	1	1	HIBADH	3-hydroxyisobutyrate dehydrogenase
hsa-miR-548c-3p	1	0	1	0	1	1	BTF3L4	basic transcription factor 3-like 4
hsa-miR-548c-3p	1	0	1	1	1	1	TM9SF4	transmembrane 9 superfamily protein member 4
hsa-miR-548c-3p	1	0	1	1	1	1	SCML4	sex comb on midleg-like 4 (Drosophila)
hsa-miR-548c-3p	0	0	1	1	1	1	C10orf88	chromosome 10 open reading frame 88
hsa-miR-548c-3p	0	0	1	1	1	1	FHL5	four and a half LIM domains 5
hsa-miR-548c-3p	1	0	1	1	0	0	TET3	tet methylcytosine dioxygenase 3
hsa-miR-548c-3p	0	0	1	1	1	1	RNF103	ring finger protein 103
hsa-miR-548c-3p	1	0	1	1	1	1	RACGAP1	Rac GTPase activating protein 1
hsa-miR-548c-3p	1	0	1	1	1	1	FAM213A	family with sequence similarity 213, member A
hsa-miR-548c-3p	1	0	1	1	1	1	ASPH	aspartate beta-hydroxylase
hsa-miR-548c-3p	0	0	1	1	1	1	UCHL5	ubiquitin carboxyl-terminal hydrolase L5
hsa-miR-548c-3p	1	0	1	1	1	1	VASP	vasodilator-stimulated phosphoprotein
hsa-miR-548c-3p	0	0	1	1	1	1	MAP2	microtubule-associated protein 2
hsa-miR-548c-3p	1	0	1	0	1	1	CERS3	ceramide synthase 3
hsa-miR-548c-3p	0	0	1	1	1	1	RHBDD1	rhomboid domain containing 1
hsa-miR-548c-3p	1	0	1	1	1	1	RSPO2	R-spondin 2
hsa-miR-548c-3p	1	0	1	1	1	1	PHF2	PHD finger protein 2
hsa-miR-548c-3p	0	0	1	1	1	1	BIRC2	baculoviral IAP repeat containing 2
hsa-miR-548c-3p	0	0	1	0	1	1	KIAA0895	KIAA0895
hsa-miR-548c-3p	1	0	1	1	1	1	HTR2C	5-hydroxytryptamine (serotonin) receptor 2C, G protein-coupled
hsa-miR-548c-3p	0	0	1	1	1	1	SEMA3D	sema domain, immunoglobulin domain (Ig), short basic domain, secreted, (semaphorin) 3D
hsa-miR-548c-3p	1	0	1	0	1	1	SV2B	synaptic vesicle glycoprotein 2B
hsa-miR-548c-3p	1	0	1	1	1	1	TIAL1	TIA1 cytotoxic granule-associated RNA binding protein-like 1
hsa-miR-548c-3p	0	0	1	1	1	1	CD48	CD48 molecule
hsa-miR-548c-3p	1	0	1	1	1	1	ZBTB44	zinc finger and BTB domain containing 44
hsa-miR-548c-3p	0	0	1	1	1	1	PIP5K1B	phosphatidylinositol-4-phosphate 5-kinase, type I, beta
hsa-miR-548c-3p	0	0	1	1	1	1	RBBP8	retinoblastoma binding protein 8
hsa-miR-548c-3p	1	0	1	1	1	1	ADARB1	adenosine deaminase, RNA-specific, B1
hsa-miR-548c-3p	1	0	1	1	1	1	ELAVL2	ELAV (embryonic lethal, abnormal vision, Drosophila)-like 2 (Hu antigen B)
hsa-miR-548c-3p	1	0	1	1	1	1	ZNF518A	zinc finger protein 518A
hsa-miR-548c-3p	0	0	1	1	1	1	SLC22A2	solute carrier family 22 (organic cation transporter), member 2
hsa-miR-548c-3p	1	0	1	1	1	1	OSGIN2	oxidative stress induced growth inhibitor family member 2
hsa-miR-548c-3p	0	0	1	1	1	1	AADAT	aminoadipate aminotransferase
hsa-miR-548c-3p	1	0	1	1	1	1	PLS1	plastin 1
hsa-miR-548c-3p	1	0	1	1	1	1	ZPLD1	zona pellucida-like domain containing 1
hsa-miR-548c-3p	0	0	1	0	0	0	ATP8B5P	ATPase, class I, type 8B, member 5, pseudogene
hsa-miR-548c-3p	1	0	1	1	1	1	PITPNB	phosphatidylinositol transfer protein, beta
hsa-miR-548c-3p	1	0	1	1	1	1	RCOR3	REST corepressor 3
hsa-miR-548c-3p	1	0	1	1	1	1	GLUL	glutamate-ammonia ligase
hsa-miR-548c-3p	0	0	1	1	1	1	C7orf53	chromosome 7 open reading frame 53
hsa-miR-548c-3p	1	0	1	1	1	1	C5orf25	chromosome 5 open reading frame 25
hsa-miR-548c-3p	0	0	1	0	0	0	LOC643648	uncharacterized LOC643648
hsa-miR-548c-3p	1	0	1	1	1	1	SF1	splicing factor 1
hsa-miR-548c-3p	1	0	1	1	1	1	FGF1	fibroblast growth factor 1 (acidic)
hsa-miR-548c-3p	1	0	1	1	1	1	RAB5B	RAB5B, member RAS oncogene family
hsa-miR-548c-3p	1	0	1	1	0	0	MRC2	mannose receptor, C type 2
hsa-miR-548c-3p	0	0	1	0	1	1	TTC23L	tetratricopeptide repeat domain 23-like
hsa-miR-548c-3p	1	0	1	1	1	1	PPP2R2C	protein phosphatase 2, regulatory subunit B, gamma
hsa-miR-548c-3p	1	0	1	1	1	1	SECISBP2L	SECIS binding protein 2-like
hsa-miR-548c-3p	1	0	1	1	1	1	MAK	male germ cell-associated kinase
hsa-miR-548c-3p	1	0	1	1	1	1	FAM13A	family with sequence similarity 13, member A
hsa-miR-548c-3p	0	0	1	0	0	0	LOC96610	BMS1 homolog, ribosome assembly protein (yeast) pseudogene
hsa-miR-548c-3p	0	0	1	0	0	0	BCAS3	breast carcinoma amplified sequence 3
hsa-miR-548c-3p	1	0	1	1	1	1	CRKL	v-crk sarcoma virus CT10 oncogene homolog (avian)-like
hsa-miR-548c-3p	1	0	1	1	1	1	C11orf30	chromosome 11 open reading frame 30
hsa-miR-548c-3p	1	0	1	1	0	0	TMEM181	transmembrane protein 181
hsa-miR-548c-3p	0	0	1	1	1	1	SFI1	Sfi1 homolog, spindle assembly associated (yeast)
hsa-miR-548c-3p	1	0	1	1	1	1	HMGCR	3-hydroxy-3-methylglutaryl-CoA reductase
hsa-miR-548c-3p	1	0	1	1	1	1	PCDHA5	protocadherin alpha 5
hsa-miR-548c-3p	1	0	1	1	1	1	LPGAT1	lysophosphatidylglycerol acyltransferase 1
hsa-miR-548c-3p	0	0	1	0	1	1	DKFZP434I0714	uncharacterized protein DKFZP434I0714
hsa-miR-548c-3p	0	0	1	1	1	1	EDA2R	ectodysplasin A2 receptor
hsa-miR-548c-3p	1	0	1	1	1	1	FAM120A	family with sequence similarity 120A
hsa-miR-548c-3p	1	0	1	0	1	1	DDX3Y	DEAD (Asp-Glu-Ala-Asp) box polypeptide 3, Y-linked
hsa-miR-548c-3p	0	0	1	1	1	1	KIF16B	kinesin family member 16B
hsa-miR-548c-3p	1	0	1	1	1	1	NKAIN2	Na+/K+ transporting ATPase interacting 2
hsa-miR-548c-3p	0	0	1	1	1	1	SLC39A12	solute carrier family 39 (zinc transporter), member 12
hsa-miR-548c-3p	0	0	1	0	0	0	TMPRSS12	transmembrane (C-terminal) protease, serine 12
hsa-miR-548c-3p	1	0	1	1	1	1	RAP2C	RAP2C, member of RAS oncogene family
hsa-miR-548c-3p	0	0	1	0	1	1	FAM72A	family with sequence similarity 72, member A
hsa-miR-548c-3p	1	0	1	1	1	1	CTDSPL2	CTD (carboxy-terminal domain, RNA polymerase II, polypeptide A) small phosphatase like 2
hsa-miR-548c-3p	0	0	1	1	1	1	ARHGAP6	Rho GTPase activating protein 6
hsa-miR-548c-3p	0	0	1	1	1	1	CBLN2	cerebellin 2 precursor
hsa-miR-548c-3p	0	0	1	1	1	1	SNAPC3	small nuclear RNA activating complex, polypeptide 3, 50kDa
hsa-miR-548c-3p	1	0	1	1	1	1	ZNF618	zinc finger protein 618
hsa-miR-548c-3p	0	0	1	1	1	1	UBE3D	ubiquitin protein ligase E3D
hsa-miR-548c-3p	1	0	1	1	1	1	IMPACT	Impact homolog (mouse)
hsa-miR-548c-3p	1	0	1	1	1	1	PEX5L	peroxisomal biogenesis factor 5-like
hsa-miR-548c-3p	1	0	1	1	0	0	OLIG2	oligodendrocyte lineage transcription factor 2
hsa-miR-548c-3p	1	0	1	1	1	1	HECTD2	HECT domain containing E3 ubiquitin protein ligase 2
hsa-miR-548c-3p	1	0	1	1	1	1	MEIS1	Meis homeobox 1
hsa-miR-548c-3p	1	0	1	0	1	1	CLDN12	claudin 12
hsa-miR-548c-3p	1	0	1	0	1	1	NEGR1	neuronal growth regulator 1
hsa-miR-548c-3p	0	0	1	1	1	1	CELF1	CUGBP, Elav-like family member 1
hsa-miR-548c-3p	1	0	1	0	1	1	CPEB4	cytoplasmic polyadenylation element binding protein 4
hsa-miR-548c-3p	1	0	1	1	1	1	BNC2	basonuclin 2
hsa-miR-548c-3p	1	0	1	0	1	1	RAG1	recombination activating gene 1
hsa-miR-548c-3p	0	0	1	0	0	0	LOC286184	uncharacterized LOC286184
hsa-miR-548c-3p	1	0	1	0	1	1	YAF2	YY1 associated factor 2
hsa-miR-548c-3p	1	0	1	1	1	1	SOX6	SRY (sex determining region Y)-box 6
hsa-miR-548c-3p	1	0	1	1	1	1	CTBP2	C-terminal binding protein 2
hsa-miR-548c-3p	1	0	1	1	1	1	DAAM1	dishevelled associated activator of morphogenesis 1
hsa-miR-548c-3p	1	0	1	1	1	1	GALNT1	UDP-N-acetyl-alpha-D-galactosamine:polypeptide N-acetylgalactosaminyltransferase 1 (GalNAc-T1)
hsa-miR-548c-3p	1	0	1	0	1	1	ARID2	AT rich interactive domain 2 (ARID, RFX-like)
hsa-miR-548c-3p	0	0	1	1	0	0	H2AFZ	H2A histone family, member Z
hsa-miR-548c-3p	0	0	1	1	0	0	CCDC152	coiled-coil domain containing 152
hsa-miR-548c-3p	1	0	1	1	1	1	MARCKS	myristoylated alanine-rich protein kinase C substrate
hsa-miR-548c-3p	1	0	1	1	0	0	LMO1	LIM domain only 1 (rhombotin 1)
hsa-miR-548c-3p	0	0	1	1	1	1	SLC14A1	solute carrier family 14 (urea transporter), member 1 (Kidd blood group)
hsa-miR-548c-3p	1	0	1	1	0	0	KDM1A	lysine (K)-specific demethylase 1A
hsa-miR-548c-3p	1	0	1	1	1	1	FOSB	FBJ murine osteosarcoma viral oncogene homolog B
hsa-miR-548c-3p	1	0	1	1	1	1	DACH2	dachshund homolog 2 (Drosophila)
hsa-miR-548c-3p	1	0	1	1	1	1	IL16	interleukin 16
hsa-miR-548c-3p	0	0	1	1	1	1	TMEM45A	transmembrane protein 45A
hsa-miR-548c-3p	1	0	1	1	1	1	SLITRK3	SLIT and NTRK-like family, member 3
hsa-miR-548c-3p	1	0	1	1	1	1	BVES	blood vessel epicardial substance
hsa-miR-548c-3p	1	0	1	0	1	1	PCSK2	proprotein convertase subtilisin/kexin type 2
hsa-miR-548c-3p	1	0	1	1	1	1	DYNC2LI1	dynein, cytoplasmic 2, light intermediate chain 1
hsa-miR-548c-3p	1	0	1	1	1	1	LEF1	lymphoid enhancer-binding factor 1
hsa-miR-548c-3p	1	0	1	1	1	1	UNC13C	unc-13 homolog C (C. elegans)
hsa-miR-548c-3p	0	0	1	1	1	1	PCMTD2	protein-L-isoaspartate (D-aspartate) O-methyltransferase domain containing 2
hsa-miR-548c-3p	0	0	1	1	1	1	SIAE	sialic acid acetylesterase
hsa-miR-548c-3p	1	0	1	0	1	1	KIAA0430	KIAA0430
hsa-miR-548c-3p	1	0	1	1	1	1	EBF1	early B-cell factor 1
hsa-miR-548c-3p	0	0	1	1	1	1	USP2	ubiquitin specific peptidase 2
hsa-miR-548c-3p	0	0	1	1	1	1	VPS35	vacuolar protein sorting 35 homolog (S. cerevisiae)
hsa-miR-548c-3p	1	0	1	0	1	1	HSPA12A	heat shock 70kDa protein 12A
hsa-miR-548c-3p	0	0	1	1	0	0	NT5DC4	5'-nucleotidase domain containing 4
hsa-miR-548c-3p	1	0	1	1	1	1	TNFSF4	tumor necrosis factor (ligand) superfamily, member 4
hsa-miR-548c-3p	0	0	1	0	1	1	PDGFC	platelet derived growth factor C
hsa-miR-548c-3p	1	0	1	0	1	1	TNFAIP3	tumor necrosis factor, alpha-induced protein 3
hsa-miR-548c-3p	0	0	1	0	0	0	ALOX12P2	arachidonate 12-lipoxygenase pseudogene 2
hsa-miR-548c-3p	1	0	1	1	1	1	CLOCK	clock homolog (mouse)
hsa-miR-548c-3p	0	0	1	1	1	1	ZNF568	zinc finger protein 568
hsa-miR-548c-3p	0	0	1	1	1	1	MTHFD2L	methylenetetrahydrofolate dehydrogenase (NADP+ dependent) 2-like
hsa-miR-548c-3p	0	0	1	1	1	1	C4orf32	chromosome 4 open reading frame 32
hsa-miR-548c-3p	0	0	1	1	1	1	NSUN7	NOP2/Sun domain family, member 7
hsa-miR-548c-3p	1	0	1	0	1	1	USP6NL	USP6 N-terminal like
hsa-miR-548c-3p	0	0	1	1	1	1	STARD4	StAR-related lipid transfer (START) domain containing 4
hsa-miR-548c-3p	1	0	1	1	1	1	TXNRD1	thioredoxin reductase 1
hsa-miR-548c-3p	0	0	1	0	1	1	C12orf74	chromosome 12 open reading frame 74
hsa-miR-548c-3p	0	0	1	0	0	0	LOC339260	uncharacterized LOC339260
hsa-miR-548c-3p	0	0	1	0	0	0	LOC646168	uncharacterized LOC646168
hsa-miR-548c-3p	0	0	1	0	0	0	DKFZp686O1327	uncharacterized LOC401014
hsa-miR-548c-3p	1	0	1	1	1	1	RNF145	ring finger protein 145
hsa-miR-548c-3p	1	0	1	0	1	1	PSD3	pleckstrin and Sec7 domain containing 3
hsa-miR-548c-3p	0	0	1	0	0	0	LOC728342	uncharacterized LOC728342
hsa-miR-548c-3p	1	0	1	1	1	1	MAMDC2	MAM domain containing 2
hsa-miR-548c-3p	1	0	1	1	1	1	ZFAND4	zinc finger, AN1-type domain 4
hsa-miR-548c-3p	0	0	1	1	0	0	TF	transferrin
hsa-miR-548c-3p	1	0	1	1	1	1	SF3B1	splicing factor 3b, subunit 1, 155kDa
hsa-miR-548c-3p	0	0	1	1	0	0	FAM72B	family with sequence similarity 72, member B
hsa-miR-548c-3p	0	0	1	1	0	0	IFIH1	interferon induced with helicase C domain 1
hsa-miR-548c-3p	0	0	1	1	1	1	EBP	emopamil binding protein (sterol isomerase)
hsa-miR-548c-3p	1	0	1	0	1	1	LYPD6	LY6/PLAUR domain containing 6
hsa-miR-548c-3p	0	0	1	0	1	1	IL33	interleukin 33
hsa-miR-548c-3p	0	0	1	1	1	1	DDX4	DEAD (Asp-Glu-Ala-Asp) box polypeptide 4
hsa-miR-548c-3p	0	0	1	0	0	0	LOC348120	uncharacterized LOC348120
hsa-miR-548c-3p	0	0	1	0	0	0	DPY19L2P4	dpy-19-like 2 pseudogene 4 (C. elegans)
hsa-miR-548c-3p	1	0	1	1	1	1	BRD1	bromodomain containing 1
hsa-miR-548c-3p	0	0	1	0	1	1	LOC401021	uncharacterized LOC401021
hsa-miR-548c-3p	1	0	1	0	1	1	ZNF800	zinc finger protein 800
hsa-miR-548c-3p	1	0	1	1	1	1	PALD1	phosphatase domain containing, paladin 1
hsa-miR-548c-3p	1	0	1	1	1	1	PTPRG	protein tyrosine phosphatase, receptor type, G
hsa-miR-548c-3p	0	0	1	0	0	0	FAM66C	family with sequence similarity 66, member C
hsa-miR-548c-3p	1	0	1	1	1	1	PELI1	pellino E3 ubiquitin protein ligase 1
hsa-miR-548c-3p	1	0	1	0	1	1	ARHGAP5	Rho GTPase activating protein 5
hsa-miR-548c-3p	0	0	1	0	1	1	ITGA1	integrin, alpha 1
hsa-miR-548c-3p	1	0	1	1	1	1	KIF11	kinesin family member 11
hsa-miR-548c-3p	1	0	1	1	1	1	FNDC3A	fibronectin type III domain containing 3A
hsa-miR-548c-3p	1	0	1	1	1	1	ZFP91	zinc finger protein 91 homolog (mouse)
hsa-miR-548c-3p	1	0	1	1	1	1	YWHAZ	tyrosine 3-monooxygenase/tryptophan 5-monooxygenase activation protein, zeta polypeptide
hsa-miR-548c-3p	0	0	1	1	1	1	HLA-DQA1	major histocompatibility complex, class II, DQ alpha 1
hsa-miR-548c-3p	1	0	1	1	1	1	PCGF5	polycomb group ring finger 5
hsa-miR-548c-3p	1	0	1	1	1	1	HP1BP3	heterochromatin protein 1, binding protein 3
hsa-miR-548c-3p	1	0	1	1	1	1	OLFML2A	olfactomedin-like 2A
hsa-miR-548c-3p	0	0	1	0	1	1	SLC1A3	solute carrier family 1 (glial high affinity glutamate transporter), member 3
hsa-miR-548c-3p	0	0	1	1	1	1	ZNF254	zinc finger protein 254
hsa-miR-548c-3p	0	0	1	1	0	0	BCAS4	breast carcinoma amplified sequence 4
hsa-miR-548c-3p	1	0	1	1	1	1	ATP8B4	ATPase, class I, type 8B, member 4
hsa-miR-548c-3p	1	0	1	1	1	1	KLHL28	kelch-like 28 (Drosophila)
hsa-miR-548c-3p	0	0	1	1	0	0	RRAD	Ras-related associated with diabetes
hsa-miR-548c-3p	1	0	1	1	1	1	SOX5	SRY (sex determining region Y)-box 5
hsa-miR-548c-3p	1	0	1	1	1	1	ZEB2	zinc finger E-box binding homeobox 2
hsa-miR-548c-3p	1	0	1	1	1	1	PRRG1	proline rich Gla (G-carboxyglutamic acid) 1
hsa-miR-548c-3p	1	0	1	1	1	1	INPP5A	inositol polyphosphate-5-phosphatase, 40kDa
hsa-miR-548c-3p	0	0	1	1	0	0	AGAP4	ArfGAP with GTPase domain, ankyrin repeat and PH domain 4
hsa-miR-548c-3p	0	0	1	1	1	1	CDH26	cadherin 26
hsa-miR-548c-3p	1	0	1	1	1	1	SCOC	short coiled-coil protein
hsa-miR-548c-3p	0	0	1	0	0	0	TEX36	testis expressed 36
hsa-miR-548c-3p	0	0	1	1	0	0	LRRIQ3	leucine-rich repeats and IQ motif containing 3
hsa-miR-548c-3p	1	0	1	1	1	1	CLK4	CDC-like kinase 4
hsa-miR-548c-3p	1	0	1	1	1	1	PTPN3	protein tyrosine phosphatase, non-receptor type 3
hsa-miR-548c-3p	0	0	1	1	1	1	CAMLG	calcium modulating ligand
hsa-miR-548c-3p	1	0	1	1	1	1	GRIK2	glutamate receptor, ionotropic, kainate 2
hsa-miR-548c-3p	0	0	1	1	1	1	C1orf109	chromosome 1 open reading frame 109
hsa-miR-548c-3p	1	0	1	1	1	1	RANBP9	RAN binding protein 9
hsa-miR-548c-3p	0	0	1	1	0	0	ADORA3	adenosine A3 receptor
hsa-miR-548c-3p	0	0	1	1	1	1	SCLT1	sodium channel and clathrin linker 1
hsa-miR-548c-3p	0	0	1	1	0	0	CLIC1	chloride intracellular channel 1
hsa-miR-548c-3p	1	0	1	1	1	1	MYLK	myosin light chain kinase
hsa-miR-548c-3p	0	0	1	1	1	1	GORAB	golgin, RAB6-interacting
hsa-miR-548c-3p	0	0	1	1	1	1	ZNF33B	zinc finger protein 33B
hsa-miR-548c-3p	0	0	1	1	1	1	RWDD3	RWD domain containing 3
hsa-miR-548c-3p	1	0	1	1	1	1	ZNF449	zinc finger protein 449
hsa-miR-548c-3p	0	0	1	0	0	0	LINC00052	long intergenic non-protein coding RNA 52
hsa-miR-548c-3p	1	0	1	1	1	1	CUX1	cut-like homeobox 1
hsa-miR-548c-3p	0	0	1	1	1	1	METTL15	methyltransferase like 15
hsa-miR-548c-3p	1	0	1	1	1	1	CKAP2	cytoskeleton associated protein 2
hsa-miR-548c-3p	1	0	1	1	1	1	C18orf1	chromosome 18 open reading frame 1
hsa-miR-548c-3p	0	0	1	0	0	0	DPY19L2P1	dpy-19-like 2 pseudogene 1 (C. elegans)
hsa-miR-548c-3p	1	0	1	1	1	1	AP3M1	adaptor-related protein complex 3, mu 1 subunit
hsa-miR-548c-3p	0	0	1	1	1	1	KCTD18	potassium channel tetramerisation domain containing 18
hsa-miR-548c-3p	0	0	1	1	1	1	SLAMF1	signaling lymphocytic activation molecule family member 1
hsa-miR-548c-3p	0	0	1	1	0	0	CELF3	CUGBP, Elav-like family member 3
hsa-miR-548c-3p	1	0	1	1	1	1	PDCD6IP	programmed cell death 6 interacting protein
hsa-miR-548c-3p	1	0	1	1	1	1	SLC26A7	solute carrier family 26, member 7
hsa-miR-548c-3p	1	0	1	1	1	1	SRPK2	SRSF protein kinase 2
hsa-miR-548c-3p	1	0	1	1	1	1	LINGO1	leucine rich repeat and Ig domain containing 1
hsa-miR-548c-3p	0	0	1	0	0	0	SPDYE8P	speedy homolog E8 (Xenopus laevis), pseudogene
hsa-miR-548c-3p	1	0	1	1	1	1	DDR1	discoidin domain receptor tyrosine kinase 1
hsa-miR-548c-3p	0	0	1	0	0	0	AQP7P2	aquaporin 7 pseudogene 2
hsa-miR-548c-3p	1	0	1	0	1	1	TMEM194A	transmembrane protein 194A
hsa-miR-548c-3p	0	0	1	1	0	0	RPS16	ribosomal protein S16
hsa-miR-548c-3p	0	0	1	0	0	0	JPX	JPX transcript, XIST activator (non-protein coding)
hsa-miR-548c-3p	0	0	1	1	1	1	TNFSF12	tumor necrosis factor (ligand) superfamily, member 12
hsa-miR-548c-3p	1	0	1	1	1	1	KDELR2	KDEL (Lys-Asp-Glu-Leu) endoplasmic reticulum protein retention receptor 2
hsa-miR-548c-3p	0	0	1	1	0	0	PPIG	peptidylprolyl isomerase G (cyclophilin G)
hsa-miR-548c-3p	1	0	1	1	1	1	C1orf173	chromosome 1 open reading frame 173
hsa-miR-548c-3p	1	0	1	1	1	1	WNT5A	wingless-type MMTV integration site family, member 5A
hsa-miR-548c-3p	0	0	1	1	1	1	IRX5	iroquois homeobox 5
hsa-miR-548c-3p	1	0	1	1	1	1	PARP8	poly (ADP-ribose) polymerase family, member 8
hsa-miR-548c-3p	0	0	1	1	0	0	FAM21A	family with sequence similarity 21, member A
hsa-miR-548c-3p	0	0	1	1	1	1	C3orf67	chromosome 3 open reading frame 67
hsa-miR-548c-3p	1	0	1	0	1	1	AMMECR1L	AMME chromosomal region gene 1-like
hsa-miR-548c-3p	0	0	1	0	1	1	LOC389043	uncharacterized LOC389043
hsa-miR-548c-3p	1	0	1	1	1	1	HNRNPC	heterogeneous nuclear ribonucleoprotein C (C1/C2)
hsa-miR-548c-3p	0	0	1	1	1	1	HOXD8	homeobox D8
hsa-miR-548c-3p	1	0	1	1	1	1	ZMYND11	zinc finger, MYND-type containing 11
hsa-miR-548c-3p	0	0	1	1	1	1	ZCWPW2	zinc finger, CW type with PWWP domain 2
hsa-miR-548c-3p	0	0	1	1	0	0	HERC2P3	hect domain and RLD 2 pseudogene 3
hsa-miR-548c-3p	1	0	1	0	1	1	PIK3R3	phosphoinositide-3-kinase, regulatory subunit 3 (gamma)
hsa-miR-548c-3p	1	0	1	1	1	1	PLXNA2	plexin A2
hsa-miR-548c-3p	1	0	1	1	1	1	STK38	serine/threonine kinase 38
hsa-miR-548c-3p	1	0	1	0	1	1	LRRTM4	leucine rich repeat transmembrane neuronal 4
hsa-miR-548c-3p	1	0	1	1	1	1	SYNJ1	synaptojanin 1
hsa-miR-548c-3p	1	0	1	0	1	1	ARPP19	cAMP-regulated phosphoprotein, 19kDa
hsa-miR-548c-3p	0	0	1	1	1	1	HMGB2	high mobility group box 2
hsa-miR-548c-3p	0	0	1	0	1	1	TCAIM	T cell activation inhibitor, mitochondrial
hsa-miR-548c-3p	1	0	1	0	1	1	MYBL1	v-myb myeloblastosis viral oncogene homolog (avian)-like 1
hsa-miR-548c-3p	1	0	1	1	1	1	HNRNPA1	heterogeneous nuclear ribonucleoprotein A1
hsa-miR-548c-3p	1	0	1	0	1	1	VANGL2	vang-like 2 (van gogh, Drosophila)
hsa-miR-548c-3p	1	0	1	0	1	1	CPEB2	cytoplasmic polyadenylation element binding protein 2
hsa-miR-548c-3p	1	0	1	0	1	1	KCNT2	potassium channel, subfamily T, member 2
hsa-miR-548c-3p	0	0	1	0	0	0	LOC441493	uncharacterized LOC441493
hsa-miR-548c-3p	0	0	1	1	1	1	CCDC126	coiled-coil domain containing 126
hsa-miR-548c-3p	1	0	1	1	1	1	SLC35G1	solute carrier family 35, member G1
hsa-miR-548c-3p	0	0	1	0	0	0	LOC283174	uncharacterized LOC283174
hsa-miR-548c-3p	1	0	1	1	1	1	GABRB2	gamma-aminobutyric acid (GABA) A receptor, beta 2
hsa-miR-548c-3p	1	0	1	1	1	1	NR2F2	nuclear receptor subfamily 2, group F, member 2
hsa-miR-548c-3p	1	0	1	1	1	1	PTPRD	protein tyrosine phosphatase, receptor type, D
hsa-miR-548c-3p	0	0	1	0	0	0	HIST2H2BA	histone cluster 2, H2ba (pseudogene)
hsa-miR-548c-3p	0	0	1	1	0	0	BEAN1	brain expressed, associated with NEDD4, 1
hsa-miR-548c-3p	1	0	1	1	1	1	SUV420H1	suppressor of variegation 4-20 homolog 1 (Drosophila)
hsa-miR-548c-3p	0	0	1	1	0	0	C9orf153	chromosome 9 open reading frame 153
hsa-miR-548c-3p	0	0	1	1	0	0	BTBD16	BTB (POZ) domain containing 16
hsa-miR-548c-3p	0	0	1	1	1	1	TBRG1	transforming growth factor beta regulator 1
hsa-miR-548c-3p	1	0	1	0	1	1	DNAJC6	DnaJ (Hsp40) homolog, subfamily C, member 6
hsa-miR-548c-3p	1	0	1	1	1	1	CERS6	ceramide synthase 6
hsa-miR-548c-3p	1	0	1	1	1	1	SP4	Sp4 transcription factor
hsa-miR-548c-3p	1	0	1	0	1	1	BTBD3	BTB (POZ) domain containing 3
hsa-miR-548c-3p	1	0	1	0	1	1	ATP8A1	ATPase, aminophospholipid transporter (APLT), class I, type 8A, member 1
hsa-miR-548c-3p	0	0	1	1	1	1	STAU2	staufen, RNA binding protein, homolog 2 (Drosophila)
hsa-miR-548c-3p	1	0	1	1	1	1	TCF3	transcription factor 3 (E2A immunoglobulin enhancer binding factors E12/E47)
hsa-miR-548c-3p	0	0	1	1	0	0	ASB3	ankyrin repeat and SOCS box containing 3
hsa-miR-548c-3p	1	0	1	1	1	1	UBE4A	ubiquitination factor E4A
hsa-miR-548c-3p	1	0	1	1	1	1	MARCH6	membrane-associated ring finger (C3HC4) 6, E3 ubiquitin protein ligase
hsa-miR-548c-3p	1	0	1	1	1	1	SLK	STE20-like kinase
hsa-miR-548c-3p	1	0	1	1	1	1	NR3C2	nuclear receptor subfamily 3, group C, member 2
hsa-miR-548c-3p	1	0	1	0	1	1	ROBO1	roundabout, axon guidance receptor, homolog 1 (Drosophila)
hsa-miR-548c-3p	1	0	1	1	1	1	TMEM132B	transmembrane protein 132B
hsa-miR-548c-3p	1	0	1	1	1	1	TMEM64	transmembrane protein 64
hsa-miR-548c-3p	1	0	1	1	1	1	PAX3	paired box 3
hsa-miR-548c-3p	1	0	1	1	1	1	SLMAP	sarcolemma associated protein
hsa-miR-548c-3p	1	0	1	1	1	1	KIAA0528	KIAA0528
hsa-miR-548c-3p	1	0	1	1	1	1	ST18	suppression of tumorigenicity 18 (breast carcinoma) (zinc finger protein)
hsa-miR-548c-3p	0	0	1	1	1	1	ATP1B4	ATPase, Na+/K+ transporting, beta 4 polypeptide
hsa-miR-548c-3p	1	0	1	0	1	1	PRDM10	PR domain containing 10
hsa-miR-548c-3p	1	0	1	1	1	1	GRIA3	glutamate receptor, ionotropic, AMPA 3
hsa-miR-548c-3p	1	0	1	1	1	1	OTUD4	OTU domain containing 4
hsa-miR-548c-3p	0	0	1	1	0	0	PRDM5	PR domain containing 5
hsa-miR-548c-3p	0	0	1	0	0	0	LINC00266-1	long intergenic non-protein coding RNA 266-1
hsa-miR-548c-3p	0	0	1	0	1	1	GOLGA8G	golgin A8 family, member G
hsa-miR-548c-3p	1	0	1	0	1	1	CAMSAP2	calmodulin regulated spectrin-associated protein family, member 2
hsa-miR-548c-3p	1	0	1	1	1	1	ANK2	ankyrin 2, neuronal
hsa-miR-548c-3p	0	0	1	1	0	0	SAFB	scaffold attachment factor B
hsa-miR-548c-3p	1	0	1	1	1	1	MEGF11	multiple EGF-like-domains 11
hsa-miR-548c-3p	1	0	1	1	1	1	TRAPPC8	trafficking protein particle complex 8
hsa-miR-548c-3p	0	0	1	1	0	0	DZANK1	double zinc ribbon and ankyrin repeat domains 1
hsa-miR-548c-3p	0	0	1	0	0	0	FAM225B	family with sequence similarity 225, member B (non-protein coding)
hsa-miR-548c-3p	1	0	1	1	1	1	TDRD5	tudor domain containing 5
hsa-miR-548c-3p	0	0	1	1	1	1	MAPK8	mitogen-activated protein kinase 8
hsa-miR-548c-3p	1	0	1	1	1	1	KIAA0922	KIAA0922
hsa-miR-548c-3p	1	0	1	1	1	1	PTPRZ1	protein tyrosine phosphatase, receptor-type, Z polypeptide 1
hsa-miR-548c-3p	1	0	1	0	1	1	FAM196A	family with sequence similarity 196, member A
hsa-miR-548c-3p	0	0	1	1	0	0	TCHH	trichohyalin
hsa-miR-548c-3p	1	0	1	1	1	1	TMEM218	transmembrane protein 218
hsa-miR-548c-3p	0	0	1	1	0	0	CCDC144A	coiled-coil domain containing 144A
hsa-miR-548c-3p	0	0	1	1	1	1	ARG1	arginase, liver
hsa-miR-548c-3p	0	0	1	1	1	1	PRKAR2A	protein kinase, cAMP-dependent, regulatory, type II, alpha
hsa-miR-548c-3p	1	0	1	0	1	1	TTC7B	tetratricopeptide repeat domain 7B
hsa-miR-548c-3p	1	0	1	1	1	1	ACTR10	actin-related protein 10 homolog (S. cerevisiae)
hsa-miR-548c-3p	0	0	1	1	1	1	CNIH	cornichon homolog (Drosophila)
hsa-miR-548c-3p	0	0	1	0	0	0	LINC00643	long intergenic non-protein coding RNA 643
hsa-miR-548c-3p	1	0	1	1	1	1	BTBD7	BTB (POZ) domain containing 7
hsa-miR-548c-3p	0	0	1	0	0	0	FLJ39632	uncharacterized LOC642477
hsa-miR-548c-3p	1	0	1	1	1	1	EIF5	eukaryotic translation initiation factor 5
hsa-miR-548c-3p	1	0	1	1	1	1	ERMAP	erythroblast membrane-associated protein (Scianna blood group)
hsa-miR-548c-3p	1	0	1	1	1	1	LITAF	lipopolysaccharide-induced TNF factor
hsa-miR-548c-3p	1	0	1	1	0	0	KRT80	keratin 80
hsa-miR-548c-3p	0	0	1	0	0	0	DKFZp686D0853	uncharacterized LOC401613
hsa-miR-548c-3p	1	0	1	1	1	1	ATP2B4	ATPase, Ca++ transporting, plasma membrane 4
hsa-miR-548c-3p	1	0	1	1	1	1	JPH1	junctophilin 1
hsa-miR-548c-3p	1	0	1	1	1	1	RBL2	retinoblastoma-like 2 (p130)
hsa-miR-548c-3p	1	0	1	1	1	1	RAB7A	RAB7A, member RAS oncogene family
hsa-miR-548c-3p	1	0	1	1	1	1	MIER3	mesoderm induction early response 1, family member 3
hsa-miR-548c-3p	1	0	1	1	1	1	SGCD	sarcoglycan, delta (35kDa dystrophin-associated glycoprotein)
hsa-miR-548c-3p	1	0	1	0	1	1	MTX3	metaxin 3
hsa-miR-548c-3p	1	0	1	1	1	1	ETS1	v-ets erythroblastosis virus E26 oncogene homolog 1 (avian)
hsa-miR-548c-3p	1	0	1	0	1	1	CLASP2	cytoplasmic linker associated protein 2
hsa-miR-548c-3p	0	0	1	1	1	1	CRB1	crumbs homolog 1 (Drosophila)
hsa-miR-548c-3p	1	0	1	1	1	1	TGOLN2	trans-golgi network protein 2
hsa-miR-548c-3p	0	0	1	1	1	1	GLIPR1L2	GLI pathogenesis-related 1 like 2
hsa-miR-548c-3p	0	0	1	1	1	1	VCAN	versican
hsa-miR-548c-3p	0	0	1	1	1	1	THSD4	thrombospondin, type I, domain containing 4
hsa-miR-548c-3p	0	0	1	0	0	0	TRAF3IP2-AS1	TRAF3IP2 antisense RNA 1
hsa-miR-548c-3p	1	0	1	1	1	1	SMAD4	SMAD family member 4
hsa-miR-548c-3p	0	0	1	1	1	1	TSGA10	testis specific, 10
hsa-miR-548c-3p	1	0	1	1	1	1	SH3BP4	SH3-domain binding protein 4
hsa-miR-548c-3p	0	0	1	1	0	0	BAG6	BCL2-associated athanogene 6
hsa-miR-548c-3p	0	0	1	0	1	1	NHSL1	NHS-like 1
hsa-miR-548c-3p	1	0	1	0	1	1	GALNT4	UDP-N-acetyl-alpha-D-galactosamine:polypeptide N-acetylgalactosaminyltransferase 4 (GalNAc-T4)
hsa-miR-548c-3p	1	0	1	1	0	0	RBM27	RNA binding motif protein 27
hsa-miR-548c-3p	1	0	1	1	0	0	CECR2	cat eye syndrome chromosome region, candidate 2
hsa-miR-548c-3p	0	0	1	1	1	1	MLIP	muscular LMNA-interacting protein
hsa-miR-548c-3p	1	0	1	1	1	1	CASP3	caspase 3, apoptosis-related cysteine peptidase
hsa-miR-548c-3p	1	0	1	1	1	1	EPS15	epidermal growth factor receptor pathway substrate 15
hsa-miR-548c-3p	1	0	1	1	1	1	USP6	ubiquitin specific peptidase 6 (Tre-2 oncogene)
hsa-miR-548c-3p	1	0	1	1	1	1	DROSHA	drosha, ribonuclease type III
hsa-miR-548c-3p	1	0	1	0	1	1	EML4	echinoderm microtubule associated protein like 4
hsa-miR-548c-3p	1	0	1	1	1	1	GABPA	GA binding protein transcription factor, alpha subunit 60kDa
hsa-miR-548c-3p	1	0	1	1	1	1	KLHL2	kelch-like 2, Mayven (Drosophila)
hsa-miR-548c-3p	0	0	1	1	1	1	ARMCX3	armadillo repeat containing, X-linked 3
hsa-miR-548c-3p	0	0	1	1	1	1	DUSP19	dual specificity phosphatase 19
hsa-miR-548c-3p	1	0	1	1	1	1	TC2N	tandem C2 domains, nuclear
hsa-miR-548c-3p	1	0	1	0	1	1	VPS36	vacuolar protein sorting 36 homolog (S. cerevisiae)
hsa-miR-548c-3p	0	0	1	1	1	1	ZNF365	zinc finger protein 365
hsa-miR-548c-3p	0	0	1	0	0	0	OVOS	ovostatin
hsa-miR-548c-3p	1	0	1	1	1	1	CASP7	caspase 7, apoptosis-related cysteine peptidase
hsa-miR-548c-3p	1	0	1	1	1	1	ZNF711	zinc finger protein 711
hsa-miR-548c-3p	1	0	1	1	1	1	DDAH1	dimethylarginine dimethylaminohydrolase 1
hsa-miR-548c-3p	1	0	1	1	1	1	LCA5	Leber congenital amaurosis 5
hsa-miR-548c-3p	0	0	1	1	1	1	CCNT2	cyclin T2
hsa-miR-548c-3p	1	0	1	1	1	1	ATP7B	ATPase, Cu++ transporting, beta polypeptide
hsa-miR-548c-3p	0	0	1	0	1	1	TYW5	tRNA-yW synthesizing protein 5
hsa-miR-548c-3p	0	0	1	1	1	1	ATP2A2	ATPase, Ca++ transporting, cardiac muscle, slow twitch 2
hsa-miR-548c-3p	1	0	1	1	1	1	NFIB	nuclear factor I/B
hsa-miR-548c-3p	1	0	1	1	1	1	BCLAF1	BCL2-associated transcription factor 1
hsa-miR-548c-3p	0	0	1	1	0	0	DGKZ	diacylglycerol kinase, zeta
hsa-miR-548c-3p	1	0	1	0	1	1	KLHL24	kelch-like 24 (Drosophila)
hsa-miR-548c-3p	1	0	1	1	1	1	AZI2	5-azacytidine induced 2
hsa-miR-548c-3p	1	0	1	0	1	1	IGF2BP3	insulin-like growth factor 2 mRNA binding protein 3
hsa-miR-548c-3p	1	0	1	1	1	1	C5orf24	chromosome 5 open reading frame 24
hsa-miR-548c-3p	0	0	1	1	1	1	MPP4	membrane protein, palmitoylated 4 (MAGUK p55 subfamily member 4)
hsa-miR-548c-3p	1	0	1	1	1	1	RDX	radixin
hsa-miR-548c-3p	1	0	1	1	1	1	PTER	phosphotriesterase related
hsa-miR-548c-3p	0	0	1	1	1	1	RBM20	RNA binding motif protein 20
hsa-miR-548c-3p	0	0	1	1	1	1	DAZL	deleted in azoospermia-like
hsa-miR-548c-3p	1	0	1	1	1	1	RECK	reversion-inducing-cysteine-rich protein with kazal motifs
hsa-miR-548c-3p	0	0	1	1	1	1	SPEF2	sperm flagellar 2
hsa-miR-548c-3p	0	0	1	1	1	1	ABCD3	ATP-binding cassette, sub-family D (ALD), member 3
hsa-miR-548c-3p	0	0	1	1	1	1	IFRD1	interferon-related developmental regulator 1
hsa-miR-548c-3p	1	0	1	1	1	1	EOGT	EGF domain-specific O-linked N-acetylglucosamine (GlcNAc) transferase
hsa-miR-548c-3p	0	0	1	1	1	1	KIAA1328	KIAA1328
hsa-miR-548c-3p	0	0	1	1	1	1	SSFA2	sperm specific antigen 2
hsa-miR-548c-3p	1	0	1	0	1	1	TBL1XR1	transducin (beta)-like 1 X-linked receptor 1
hsa-miR-548c-3p	0	0	1	0	0	0	ANKRD62	ankyrin repeat domain 62
hsa-miR-548c-3p	0	0	1	1	1	1	SPATA6L	spermatogenesis associated 6-like
hsa-miR-548c-3p	1	0	1	1	1	1	SGK3	serum/glucocorticoid regulated kinase family, member 3
hsa-miR-548c-3p	0	0	1	0	1	1	STT3A	STT3, subunit of the oligosaccharyltransferase complex, homolog A (S. cerevisiae)
hsa-miR-548c-3p	0	0	1	1	0	0	HNRNPAB	heterogeneous nuclear ribonucleoprotein A/B
hsa-miR-548c-3p	0	0	1	1	1	1	POLR2H	polymerase (RNA) II (DNA directed) polypeptide H
hsa-miR-548c-3p	1	0	1	1	0	0	SMARCA2	SWI/SNF related, matrix associated, actin dependent regulator of chromatin, subfamily a, member 2
hsa-miR-548c-3p	0	0	1	1	1	1	HEXA	hexosaminidase A (alpha polypeptide)
hsa-miR-548c-3p	0	0	1	0	1	1	IDO1	indoleamine 2,3-dioxygenase 1
hsa-miR-548c-3p	1	0	1	0	1	1	STX6	syntaxin 6
hsa-miR-548c-3p	0	0	1	1	1	1	RAB3GAP2	RAB3 GTPase activating protein subunit 2 (non-catalytic)
hsa-miR-548c-3p	1	0	1	1	1	1	FUT9	fucosyltransferase 9 (alpha (1,3) fucosyltransferase)
hsa-miR-548c-3p	0	0	1	0	0	0	RPS16P10	ribosomal protein S16 pseudogene 10
hsa-miR-548c-3p	0	0	1	1	1	1	UPRT	uracil phosphoribosyltransferase (FUR1) homolog (S. cerevisiae)
hsa-miR-548c-3p	1	0	1	1	1	1	TARBP2	TAR (HIV-1) RNA binding protein 2
hsa-miR-548c-3p	0	0	1	1	1	1	DUT	deoxyuridine triphosphatase
hsa-miR-548c-3p	0	0	1	0	0	0	LOC400768	uncharacterized LOC400768
hsa-miR-548c-3p	0	0	1	1	1	1	FBXO36	F-box protein 36
hsa-miR-548c-3p	1	0	1	1	1	1	EIF4B	eukaryotic translation initiation factor 4B
hsa-miR-548c-3p	0	0	1	1	1	1	FANCL	Fanconi anemia, complementation group L
hsa-miR-548c-3p	0	0	1	1	0	0	TCEAL4	transcription elongation factor A (SII)-like 4
hsa-miR-548c-3p	1	0	1	0	1	1	OLA1	Obg-like ATPase 1
hsa-miR-548c-3p	0	0	1	1	1	1	APH1A	anterior pharynx defective 1 homolog A (C. elegans)
hsa-miR-548c-3p	0	0	1	1	1	1	COPS8	COP9 constitutive photomorphogenic homolog subunit 8 (Arabidopsis)
hsa-miR-548c-3p	1	0	1	1	1	1	ARL1	ADP-ribosylation factor-like 1
hsa-miR-548c-3p	1	0	1	1	1	1	PTN	pleiotrophin
hsa-miR-548c-3p	0	0	1	1	0	0	FXYD7	FXYD domain containing ion transport regulator 7
hsa-miR-548c-3p	1	0	1	1	1	1	AP3S1	adaptor-related protein complex 3, sigma 1 subunit
hsa-miR-548c-3p	0	0	1	1	0	0	NDUFAF5	NADH dehydrogenase (ubiquinone) complex I, assembly factor 5
hsa-miR-548c-3p	0	0	1	1	1	1	MMADHC	methylmalonic aciduria (cobalamin deficiency) cblD type, with homocystinuria
hsa-miR-548c-3p	0	0	1	1	1	1	ADK	adenosine kinase
hsa-miR-548c-3p	0	0	1	1	0	0	TBCB	tubulin folding cofactor B
hsa-miR-548c-3p	1	0	1	1	1	1	RAP1A	RAP1A, member of RAS oncogene family
hsa-miR-548c-3p	1	0	1	1	1	1	SETD8	SET domain containing (lysine methyltransferase) 8
hsa-miR-548c-3p	0	0	1	1	1	1	PTGES3	prostaglandin E synthase 3 (cytosolic)
hsa-miR-548c-3p	1	0	1	1	1	1	FGF11	fibroblast growth factor 11
hsa-miR-548c-3p	0	0	1	1	1	1	HSPB8	heat shock 22kDa protein 8
hsa-miR-548c-3p	0	0	1	1	1	1	TULP3	tubby like protein 3
hsa-miR-548c-3p	1	0	1	0	1	1	BNIP3L	BCL2/adenovirus E1B 19kDa interacting protein 3-like
hsa-miR-548c-3p	0	0	1	1	1	1	FAT1	FAT tumor suppressor homolog 1 (Drosophila)
hsa-miR-548c-3p	1	0	1	1	1	1	RASL12	RAS-like, family 12
hsa-miR-548c-3p	1	0	1	1	1	1	ACTG1	actin, gamma 1
hsa-miR-548c-3p	1	0	1	1	1	1	CD9	CD9 molecule
hsa-miR-548c-3p	1	0	1	1	1	1	E2F5	E2F transcription factor 5, p130-binding
hsa-miR-548c-3p	1	0	1	1	0	0	STX5	syntaxin 5
hsa-miR-548c-3p	1	0	1	1	1	1	SSR1	signal sequence receptor, alpha
hsa-miR-548c-3p	1	0	1	1	1	1	ADM	adrenomedullin
hsa-miR-548c-3p	1	0	1	1	1	1	HMGN3	high mobility group nucleosomal binding domain 3
hsa-miR-548c-3p	1	0	1	1	1	1	SMARCE1	SWI/SNF related, matrix associated, actin dependent regulator of chromatin, subfamily e, member 1
hsa-miR-548c-3p	1	0	1	1	1	1	CDK7	cyclin-dependent kinase 7
hsa-miR-548c-3p	0	0	1	0	1	1	CD99P1	CD99 molecule pseudogene 1
hsa-miR-548c-3p	1	0	1	1	1	1	COPS2	COP9 constitutive photomorphogenic homolog subunit 2 (Arabidopsis)
hsa-miR-548c-3p	1	0	1	1	1	1	DAZAP1	DAZ associated protein 1
hsa-miR-548c-3p	0	0	1	0	0	0	TRIQK	triple QxxK/R motif containing
hsa-miR-548c-3p	0	0	1	1	0	0	RAD54B	RAD54 homolog B (S. cerevisiae)
hsa-miR-548c-3p	0	0	1	0	1	1	EMX2	empty spiracles homeobox 2
hsa-miR-548c-3p	1	0	1	1	1	1	NTM	neurotrimin
hsa-miR-548c-3p	0	0	1	1	1	1	IFNGR2	interferon gamma receptor 2 (interferon gamma transducer 1)
hsa-miR-548c-3p	1	0	1	1	1	1	TRA2B	transformer 2 beta homolog (Drosophila)
hsa-miR-548c-3p	1	0	1	1	1	1	PLEKHB2	pleckstrin homology domain containing, family B (evectins) member 2
hsa-miR-548c-3p	1	0	1	1	1	1	NFKBIA	nuclear factor of kappa light polypeptide gene enhancer in B-cells inhibitor, alpha
hsa-miR-548c-3p	1	0	1	1	1	1	MBNL1	muscleblind-like splicing regulator 1
hsa-miR-548c-3p	0	0	1	1	0	0	CCDC112	coiled-coil domain containing 112
hsa-miR-548c-3p	0	0	1	1	0	0	TMEM183A	transmembrane protein 183A
hsa-miR-548c-3p	1	0	1	0	1	1	RPS6KB1	ribosomal protein S6 kinase, 70kDa, polypeptide 1
hsa-miR-548c-3p	0	0	1	1	1	1	PECR	peroxisomal trans-2-enoyl-CoA reductase
hsa-miR-548c-3p	0	0	1	1	1	1	STON1	stonin 1
hsa-miR-548c-3p	0	0	1	0	0	0	LOC643072	uncharacterized LOC643072
hsa-miR-548c-3p	0	0	1	1	1	1	CDS2	CDP-diacylglycerol synthase (phosphatidate cytidylyltransferase) 2
hsa-miR-548c-3p	1	0	1	1	1	1	STK38L	serine/threonine kinase 38 like
hsa-miR-548c-3p	1	0	1	1	1	1	MTCH2	mitochondrial carrier 2
hsa-miR-548c-3p	1	0	1	1	1	1	TMEM245	transmembrane protein 245
hsa-miR-548c-3p	0	0	1	1	1	1	ATG4A	autophagy related 4A, cysteine peptidase
hsa-miR-548c-3p	1	0	1	1	1	1	DKK3	dickkopf 3 homolog (Xenopus laevis)
hsa-miR-548c-3p	0	0	1	0	0	0	MEG3	maternally expressed 3 (non-protein coding)
hsa-miR-548c-3p	0	0	1	1	1	1	BMPR1A	bone morphogenetic protein receptor, type IA
hsa-miR-548c-3p	0	0	1	1	1	1	CAPZB	capping protein (actin filament) muscle Z-line, beta
hsa-miR-548c-3p	1	0	1	1	1	1	BTBD10	BTB (POZ) domain containing 10
hsa-miR-548c-3p	0	0	1	1	1	1	ZDHHC16	zinc finger, DHHC-type containing 16
hsa-miR-548c-3p	1	0	1	1	1	1	DOK4	docking protein 4
hsa-miR-548c-3p	1	0	1	1	0	0	FAT4	FAT tumor suppressor homolog 4 (Drosophila)
hsa-miR-548c-3p	1	0	1	1	1	1	GPR137B	G protein-coupled receptor 137B
hsa-miR-548c-3p	0	0	1	1	1	1	SAP130	Sin3A-associated protein, 130kDa
hsa-miR-548c-3p	0	0	1	1	0	0	RPS6	ribosomal protein S6
hsa-miR-548c-3p	1	0	1	1	1	1	ARNTL	aryl hydrocarbon receptor nuclear translocator-like
hsa-miR-548c-3p	0	0	1	1	1	1	PEX19	peroxisomal biogenesis factor 19
hsa-miR-548c-3p	1	0	1	1	1	1	IMPA2	inositol(myo)-1(or 4)-monophosphatase 2
hsa-miR-548c-3p	0	0	1	1	0	0	WDR43	WD repeat domain 43
hsa-miR-548c-3p	1	0	1	0	1	1	C15orf41	chromosome 15 open reading frame 41
hsa-miR-548c-3p	1	0	1	1	1	1	NT5DC1	5'-nucleotidase domain containing 1
hsa-miR-548c-3p	0	0	1	1	1	1	TANK	TRAF family member-associated NFKB activator
hsa-miR-548c-3p	1	0	1	1	1	1	HN1	hematological and neurological expressed 1
hsa-miR-548c-3p	0	0	1	1	1	1	ODC1	ornithine decarboxylase 1
hsa-miR-548c-3p	1	0	1	0	1	1	NLN	neurolysin (metallopeptidase M3 family)
hsa-miR-548c-3p	0	0	1	0	1	1	VSTM2A	V-set and transmembrane domain containing 2A
hsa-miR-548c-3p	1	0	1	1	1	1	FUBP3	far upstream element (FUSE) binding protein 3
hsa-miR-548c-3p	0	0	1	1	1	1	SLC9A3R1	solute carrier family 9, subfamily A (NHE3, cation proton antiporter 3), member 3 regulator 1
hsa-miR-548c-3p	0	0	1	1	1	1	TMCO1	transmembrane and coiled-coil domains 1
hsa-miR-548c-3p	0	0	1	1	1	1	ATP1A1	ATPase, Na+/K+ transporting, alpha 1 polypeptide
hsa-miR-548c-3p	1	0	1	1	1	1	ARL4A	ADP-ribosylation factor-like 4A
hsa-miR-548c-3p	1	0	1	1	1	1	BAALC	brain and acute leukemia, cytoplasmic
hsa-miR-548c-3p	1	0	1	1	1	1	PFN2	profilin 2
hsa-miR-548c-3p	1	0	1	1	1	1	NFYB	nuclear transcription factor Y, beta
hsa-miR-548c-3p	1	0	1	1	1	1	PSAP	prosaposin
hsa-miR-548c-3p	0	0	1	1	1	1	HOXC9	homeobox C9
hsa-miR-548c-3p	0	0	1	1	1	1	CXADR	coxsackie virus and adenovirus receptor
hsa-miR-548c-3p	0	0	1	1	1	1	STRAP	serine/threonine kinase receptor associated protein
hsa-miR-548c-3p	1	0	1	1	1	1	RNF2	ring finger protein 2
hsa-miR-548c-3p	1	0	1	1	1	1	RBFOX2	RNA binding protein, fox-1 homolog (C. elegans) 2
hsa-miR-548c-3p	1	0	1	0	1	1	MAP1B	microtubule-associated protein 1B
hsa-miR-548c-3p	1	0	1	1	1	1	HMGN2	high mobility group nucleosomal binding domain 2
hsa-miR-548c-3p	1	0	1	1	0	0	STAG3L4	stromal antigen 3-like 4
hsa-miR-548c-3p	0	0	1	1	1	1	TSEN15	tRNA splicing endonuclease 15 homolog (S. cerevisiae)
hsa-miR-548c-3p	1	0	1	1	1	1	DNAJA2	DnaJ (Hsp40) homolog, subfamily A, member 2
hsa-miR-548c-3p	1	0	1	1	1	1	SRSF2	serine/arginine-rich splicing factor 2
hsa-miR-548c-3p	1	0	1	1	1	1	ACTN4	actinin, alpha 4
hsa-miR-548c-3p	1	0	1	1	1	1	UBE2K	ubiquitin-conjugating enzyme E2K
hsa-miR-548c-3p	1	0	1	0	1	1	EIF2S2	eukaryotic translation initiation factor 2, subunit 2 beta, 38kDa
hsa-miR-548c-3p	1	0	1	0	1	1	CD47	CD47 molecule
hsa-miR-548c-3p	0	0	1	1	0	0	RPL24	ribosomal protein L24
hsa-miR-548c-3p	1	0	1	1	1	1	RUNX1	runt-related transcription factor 1
hsa-miR-548c-3p	1	0	1	1	1	1	ID2	inhibitor of DNA binding 2, dominant negative helix-loop-helix protein
hsa-miR-548c-3p	1	0	1	1	1	1	TMBIM6	transmembrane BAX inhibitor motif containing 6
hsa-miR-548c-3p	0	0	1	1	1	1	CDKAL1	CDK5 regulatory subunit associated protein 1-like 1
hsa-miR-548c-3p	0	0	1	0	1	1	SEPT7	septin 7
hsa-miR-548c-3p	1	0	1	1	1	1	ATPAF1	ATP synthase mitochondrial F1 complex assembly factor 1
hsa-miR-548c-3p	1	0	1	1	1	1	TIPRL	TIP41, TOR signaling pathway regulator-like (S. cerevisiae)
hsa-miR-548c-3p	0	0	1	1	1	1	ZNF75D	zinc finger protein 75D
hsa-miR-548c-3p	0	0	1	1	1	1	RNF126	ring finger protein 126
hsa-miR-548c-3p	0	0	1	1	1	1	ANXA7	annexin A7
hsa-miR-548c-3p	1	0	1	1	1	1	TMEM66	transmembrane protein 66
hsa-miR-548c-3p	1	0	1	1	1	1	MED1	mediator complex subunit 1
hsa-miR-548c-3p	0	0	1	1	1	1	LIMK2	LIM domain kinase 2
hsa-miR-548c-3p	0	0	1	1	1	1	COPS4	COP9 constitutive photomorphogenic homolog subunit 4 (Arabidopsis)
hsa-miR-548c-3p	1	0	1	1	1	1	RND3	Rho family GTPase 3
hsa-miR-548c-3p	1	0	1	1	1	1	GABPB2	GA binding protein transcription factor, beta subunit 2
hsa-miR-548c-3p	1	0	1	1	1	1	PRSS22	protease, serine, 22
hsa-miR-548c-3p	0	0	1	1	1	1	VPS16	vacuolar protein sorting 16 homolog (S. cerevisiae)
hsa-miR-548c-3p	1	0	1	1	1	1	STAG2	stromal antigen 2
hsa-miR-548c-3p	0	0	1	0	0	0	LOC731789	uncharacterized LOC731789
hsa-miR-548c-3p	0	0	1	1	1	1	CCP110	centriolar coiled coil protein 110kDa
hsa-miR-548c-3p	0	0	1	1	1	1	ATG5	autophagy related 5
hsa-miR-548c-3p	0	0	1	0	0	0	LINC00661	long intergenic non-protein coding RNA 661
hsa-miR-548c-3p	0	0	1	0	0	0	MUC19	mucin 19, oligomeric
hsa-miR-548c-3p	1	0	1	0	1	1	XRN1	5'-3' exoribonuclease 1
hsa-miR-548c-3p	0	0	1	0	1	1	HDAC9	histone deacetylase 9
hsa-miR-548c-3p	0	0	1	1	1	1	ARMCX1	armadillo repeat containing, X-linked 1
hsa-miR-548c-3p	1	0	1	1	1	1	SNRK	SNF related kinase
hsa-miR-548c-3p	1	0	1	1	1	1	TIPARP	TCDD-inducible poly(ADP-ribose) polymerase
hsa-miR-548c-3p	0	0	1	1	1	1	SLC25A26	solute carrier family 25 (S-adenosylmethionine carrier), member 26
hsa-miR-548c-3p	0	0	1	0	1	1	ZNF28	zinc finger protein 28
hsa-miR-548c-3p	1	0	1	0	1	1	CNTNAP2	contactin associated protein-like 2
hsa-miR-548c-3p	1	0	1	0	1	1	ZNF652	zinc finger protein 652
hsa-miR-548c-3p	0	0	1	1	1	1	APOBEC3B	apolipoprotein B mRNA editing enzyme, catalytic polypeptide-like 3B
hsa-miR-548c-3p	1	0	1	1	1	1	PHF21B	PHD finger protein 21B
hsa-miR-548c-3p	1	0	1	1	1	1	ZFHX3	zinc finger homeobox 3
hsa-miR-548c-3p	0	0	1	1	1	1	TMEM41B	transmembrane protein 41B
hsa-miR-548c-3p	0	0	1	1	1	1	SLC39A14	solute carrier family 39 (zinc transporter), member 14
hsa-miR-548c-3p	1	0	1	1	1	1	METAP1	methionyl aminopeptidase 1
hsa-miR-548c-3p	1	0	1	1	1	1	PI15	peptidase inhibitor 15
hsa-miR-548c-3p	1	0	1	1	1	1	NKX2-1	NK2 homeobox 1
hsa-miR-548c-3p	1	0	1	1	1	1	RB1CC1	RB1-inducible coiled-coil 1
hsa-miR-548c-3p	1	0	1	0	1	1	KLHDC10	kelch domain containing 10
hsa-miR-548c-3p	0	0	1	1	1	1	FCAR	Fc fragment of IgA, receptor for
hsa-miR-548c-3p	1	0	1	0	1	1	LONRF2	LON peptidase N-terminal domain and ring finger 2
hsa-miR-548c-3p	0	0	1	1	1	1	PARP14	poly (ADP-ribose) polymerase family, member 14
hsa-miR-548c-3p	1	0	1	1	1	1	TMEFF2	transmembrane protein with EGF-like and two follistatin-like domains 2
hsa-miR-548c-3p	1	0	1	1	1	1	KCNE3	potassium voltage-gated channel, Isk-related family, member 3
hsa-miR-548c-3p	1	0	1	1	1	1	MOSPD1	motile sperm domain containing 1
hsa-miR-548c-3p	0	0	1	0	0	0	CDKN2B-AS1	CDKN2B antisense RNA 1
hsa-miR-548c-3p	1	0	1	1	1	1	ANKRD42	ankyrin repeat domain 42
hsa-miR-548c-3p	1	0	1	1	1	1	ITSN1	intersectin 1 (SH3 domain protein)
hsa-miR-548c-3p	0	0	1	0	0	0	POM121L8P	POM121 transmembrane nucleoporin-like 8 pseudogene
hsa-miR-548c-3p	1	0	1	0	1	1	DCBLD2	discoidin, CUB and LCCL domain containing 2
hsa-miR-548c-3p	0	0	1	1	0	0	SLCO3A1	solute carrier organic anion transporter family, member 3A1
hsa-miR-548c-3p	0	0	1	1	1	1	PROS1	protein S (alpha)
hsa-miR-548c-3p	1	0	1	0	1	1	KCNB1	potassium voltage-gated channel, Shab-related subfamily, member 1
hsa-miR-548c-3p	1	0	1	1	1	1	MLL	myeloid/lymphoid or mixed-lineage leukemia (trithorax homolog, Drosophila)
hsa-miR-548c-3p	0	0	1	1	1	1	ADPRH	ADP-ribosylarginine hydrolase
hsa-miR-548c-3p	1	0	1	1	1	1	ATP2B2	ATPase, Ca++ transporting, plasma membrane 2
hsa-miR-548c-3p	0	0	1	1	1	1	RFC1	replication factor C (activator 1) 1, 145kDa
hsa-miR-548c-3p	1	0	1	1	1	1	AFF1	AF4/FMR2 family, member 1
hsa-miR-548c-3p	1	0	1	0	1	1	STAT3	signal transducer and activator of transcription 3 (acute-phase response factor)
hsa-miR-548c-3p	0	0	1	0	1	1	OPRK1	opioid receptor, kappa 1
hsa-miR-548c-3p	0	0	1	1	1	1	PLCB4	phospholipase C, beta 4
hsa-miR-548c-3p	1	0	1	1	1	1	RALBP1	ralA binding protein 1
hsa-miR-548c-3p	1	0	1	1	1	1	CCNG2	cyclin G2
hsa-miR-548c-3p	1	0	1	1	1	1	GRM1	glutamate receptor, metabotropic 1
hsa-miR-548c-3p	1	0	1	0	1	1	BCL2	B-cell CLL/lymphoma 2
hsa-miR-548c-3p	1	0	1	0	1	1	YES1	v-yes-1 Yamaguchi sarcoma viral oncogene homolog 1
hsa-miR-548c-3p	0	0	1	1	1	1	CD55	CD55 molecule, decay accelerating factor for complement (Cromer blood group)
hsa-miR-548c-3p	1	0	1	1	1	1	IGF1	insulin-like growth factor 1 (somatomedin C)
hsa-miR-548c-3p	0	0	1	1	1	1	GAD2	glutamate decarboxylase 2 (pancreatic islets and brain, 65kDa)
hsa-miR-548c-3p	0	0	1	1	1	1	ELF1	E74-like factor 1 (ets domain transcription factor)
hsa-miR-548c-3p	0	0	1	1	1	1	CNGA1	cyclic nucleotide gated channel alpha 1
hsa-miR-548c-3p	1	0	1	1	1	1	AGL	amylo-alpha-1, 6-glucosidase, 4-alpha-glucanotransferase
hsa-miR-548c-3p	1	0	1	1	1	1	FAS	Fas (TNF receptor superfamily, member 6)
hsa-miR-548c-3p	0	0	1	1	1	1	ATP7A	ATPase, Cu++ transporting, alpha polypeptide
hsa-miR-548c-3p	1	0	1	1	1	1	COL4A4	collagen, type IV, alpha 4
hsa-miR-548c-3p	1	0	1	1	1	1	CPOX	coproporphyrinogen oxidase
hsa-miR-548c-3p	1	0	1	1	1	1	CYP19A1	cytochrome P450, family 19, subfamily A, polypeptide 1
hsa-miR-548c-3p	1	0	1	1	1	1	DMD	dystrophin
hsa-miR-548c-3p	0	0	1	0	1	1	TOR1A	torsin family 1, member A (torsin A)
hsa-miR-548c-3p	0	0	1	1	1	1	EDN3	endothelin 3
hsa-miR-548c-3p	0	0	1	0	1	1	MS4A2	membrane-spanning 4-domains, subfamily A, member 2
hsa-miR-548c-3p	0	0	1	1	1	1	FXN	frataxin
hsa-miR-548c-3p	1	0	1	0	1	1	GCH1	GTP cyclohydrolase 1
hsa-miR-548c-3p	1	0	1	0	1	1	GHR	growth hormone receptor
hsa-miR-548c-3p	1	0	1	1	1	1	GJA1	gap junction protein, alpha 1, 43kDa
hsa-miR-548c-3p	1	0	1	1	1	1	GK	glycerol kinase
hsa-miR-548c-3p	1	0	1	0	1	1	GLI3	GLI family zinc finger 3
hsa-miR-548c-3p	0	0	1	1	1	1	GLDC	glycine dehydrogenase (decarboxylating)
hsa-miR-548c-3p	1	0	1	1	1	1	ITGA6	integrin, alpha 6
hsa-miR-548c-3p	1	0	1	1	1	1	JAG1	jagged 1
hsa-miR-548c-3p	0	0	1	0	1	1	KAL1	Kallmann syndrome 1 sequence
hsa-miR-548c-3p	1	0	1	1	1	1	KCNA1	potassium voltage-gated channel, shaker-related subfamily, member 1 (episodic ataxia with myokymia)
hsa-miR-548c-3p	1	0	1	0	1	1	SGCB	sarcoglycan, beta (43kDa dystrophin-associated glycoprotein)
hsa-miR-548c-3p	1	0	1	1	1	1	MITF	microphthalmia-associated transcription factor
hsa-miR-548c-3p	0	0	1	1	1	1	MSH2	mutS homolog 2, colon cancer, nonpolyposis type 1 (E. coli)
hsa-miR-548c-3p	0	0	1	0	1	1	MTTP	microsomal triglyceride transfer protein
hsa-miR-548c-3p	1	0	1	1	1	1	PTCH1	patched 1
hsa-miR-548c-3p	1	0	1	1	1	1	NF1	neurofibromin 1
hsa-miR-548c-3p	0	0	1	0	1	1	PGK1	phosphoglycerate kinase 1
hsa-miR-548c-3p	1	0	1	0	1	1	PKD2	polycystic kidney disease 2 (autosomal dominant)
hsa-miR-548c-3p	0	0	1	1	1	1	POU1F1	POU class 1 homeobox 1
hsa-miR-548c-3p	1	0	1	0	1	1	PTEN	phosphatase and tensin homolog
hsa-miR-548c-3p	1	0	1	1	1	1	RB1	retinoblastoma 1
hsa-miR-548c-3p	1	0	1	1	1	1	ATXN1	ataxin 1
hsa-miR-548c-3p	1	0	1	0	1	1	TSC1	tuberous sclerosis 1
hsa-miR-548c-3p	0	0	1	1	1	1	WAS	Wiskott-Aldrich syndrome
hsa-miR-548c-3p	0	0	1	1	1	1	SLC25A20	solute carrier family 25 (carnitine/acylcarnitine translocase), member 20
hsa-miR-548c-3p	1	1	1	1	1	1	CDKN1A	cyclin-dependent kinase inhibitor 1A (p21, Cip1)
hsa-miR-548c-3p	1	0	1	1	1	1	CHM	choroideremia (Rab escort protein 1)
hsa-miR-548c-3p	1	0	1	0	1	1	CYBB	cytochrome b-245, beta polypeptide
hsa-miR-548c-3p	1	0	1	1	1	1	HLCS	holocarboxylase synthetase (biotin-(proprionyl-CoA-carboxylase (ATP-hydrolysing)) ligase)
hsa-miR-548c-3p	0	0	1	1	1	1	LTBP2	latent transforming growth factor beta binding protein 2
hsa-miR-548c-3p	1	0	1	0	1	1	PAFAH1B1	platelet-activating factor acetylhydrolase 1b, regulatory subunit 1 (45kDa)
hsa-miR-548c-3p	1	0	1	0	1	1	PCSK1	proprotein convertase subtilisin/kexin type 1
hsa-miR-548c-3p	0	0	1	0	1	1	SLC10A2	solute carrier family 10 (sodium/bile acid cotransporter family), member 2
hsa-miR-548c-3p	1	0	1	1	1	1	APP	amyloid beta (A4) precursor protein
hsa-miR-548c-3p	1	0	1	1	1	1	AQP2	aquaporin 2 (collecting duct)
hsa-miR-548c-3p	0	0	1	1	1	1	COL10A1	collagen, type X, alpha 1
hsa-miR-548c-3p	1	0	1	1	1	1	MPZ	myelin protein zero
hsa-miR-548c-3p	1	0	1	1	1	1	PLP1	proteolipid protein 1
hsa-miR-548c-3p	0	0	1	1	1	1	CRX	cone-rod homeobox
hsa-miR-548c-3p	1	0	1	1	1	1	DCX	doublecortin
hsa-miR-548c-3p	1	0	1	1	1	1	ADRA1A	adrenoceptor alpha 1A
hsa-miR-548c-3p	0	0	1	0	1	1	ADRA2A	adrenoceptor alpha 2A
hsa-miR-548c-3p	1	0	1	0	1	1	ADRB1	adrenoceptor beta 1
hsa-miR-548c-3p	0	0	1	1	1	1	AGTR2	angiotensin II receptor, type 2
hsa-miR-548c-3p	1	0	1	1	1	1	DIO2	deiodinase, iodothyronine, type II
hsa-miR-548c-3p	1	0	1	1	1	1	GABRB3	gamma-aminobutyric acid (GABA) A receptor, beta 3
hsa-miR-548c-3p	1	0	1	1	1	1	GABRG2	gamma-aminobutyric acid (GABA) A receptor, gamma 2
hsa-miR-548c-3p	1	0	1	1	1	1	GAD1	glutamate decarboxylase 1 (brain, 67kDa)
hsa-miR-548c-3p	1	0	1	1	1	1	GRIA4	glutamate receptor, ionotropic, AMPA 4
hsa-miR-548c-3p	1	0	1	1	1	1	GRM7	glutamate receptor, metabotropic 7
hsa-miR-548c-3p	0	0	1	1	1	1	HTR7	5-hydroxytryptamine (serotonin) receptor 7, adenylate cyclase-coupled
hsa-miR-548c-3p	1	0	1	1	1	1	IGF1R	insulin-like growth factor 1 receptor
hsa-miR-548c-3p	1	0	1	1	1	1	IGF2R	insulin-like growth factor 2 receptor
hsa-miR-548c-3p	1	0	1	0	1	1	KCNJ2	potassium inwardly-rectifying channel, subfamily J, member 2
hsa-miR-548c-3p	0	0	1	1	0	0	OXT	oxytocin, prepropeptide
hsa-miR-548c-3p	0	0	1	1	1	1	P4HA1	prolyl 4-hydroxylase, alpha polypeptide I
hsa-miR-548c-3p	1	0	1	1	0	0	PDE3A	phosphodiesterase 3A, cGMP-inhibited
hsa-miR-548c-3p	1	0	1	1	0	0	PPIB	peptidylprolyl isomerase B (cyclophilin B)
hsa-miR-548c-3p	1	0	1	1	1	1	PPP3R1	protein phosphatase 3, regulatory subunit B, alpha
hsa-miR-548c-3p	1	0	1	1	1	1	PTGER2	prostaglandin E receptor 2 (subtype EP2), 53kDa
hsa-miR-548c-3p	1	0	1	1	1	1	PTGFR	prostaglandin F receptor (FP)
hsa-miR-548c-3p	0	0	1	1	1	1	PTGS2	prostaglandin-endoperoxide synthase 2 (prostaglandin G/H synthase and cyclooxygenase)
hsa-miR-548c-3p	1	0	1	1	1	1	RARA	retinoic acid receptor, alpha
hsa-miR-548c-3p	1	0	1	1	1	1	REEP3	receptor accessory protein 3
hsa-miR-548c-3p	1	0	1	0	1	1	SMAD5	SMAD family member 5
hsa-miR-548c-3p	0	0	1	1	1	1	C16orf87	chromosome 16 open reading frame 87
hsa-miR-548c-3p	1	0	1	0	1	1	UBE2W	ubiquitin-conjugating enzyme E2W (putative)
hsa-miR-548c-3p	1	0	1	1	1	1	UGP2	UDP-glucose pyrophosphorylase 2
hsa-miR-548c-3p	1	0	1	0	1	1	GDF6	growth differentiation factor 6
hsa-miR-548c-3p	1	0	1	0	1	1	SPOPL	speckle-type POZ protein-like
hsa-miR-548c-3p	0	0	1	1	1	1	CYP27C1	cytochrome P450, family 27, subfamily C, polypeptide 1
hsa-miR-548c-3p	1	0	1	0	1	1	FLJ33360	FLJ33360 protein
hsa-miR-548c-3p	0	0	1	1	1	1	CC2D2B	coiled-coil and C2 domain containing 2B
hsa-miR-548c-3p	1	0	1	1	1	1	C14orf37	chromosome 14 open reading frame 37
hsa-miR-548c-3p	1	0	1	1	1	1	FAM13C	family with sequence similarity 13, member C
hsa-miR-548c-3p	1	0	1	1	1	1	AFTPH	aftiphilin
hsa-miR-548c-3p	0	0	1	1	1	1	FCGR2B	Fc fragment of IgG, low affinity IIb, receptor (CD32)
hsa-miR-548c-3p	1	0	1	1	1	1	WNK3	WNK lysine deficient protein kinase 3
hsa-miR-548c-3p	1	0	1	1	1	1	ABLIM1	actin binding LIM protein 1
hsa-miR-548c-3p	1	0	1	0	1	1	SMAD2	SMAD family member 2
hsa-miR-548c-3p	1	0	1	1	1	1	LEPR	leptin receptor
hsa-miR-548c-3p	1	0	1	1	1	1	HMGXB4	HMG box domain containing 4
hsa-miR-548c-3p	0	0	1	1	1	1	SMAD1	SMAD family member 1
hsa-miR-548c-3p	1	0	1	1	1	1	RREB1	ras responsive element binding protein 1
hsa-miR-548c-3p	1	0	1	1	1	1	KLHL31	kelch-like 31 (Drosophila)
hsa-miR-548c-3p	1	0	1	1	1	1	RBMS3	RNA binding motif, single stranded interacting protein 3
hsa-miR-548c-3p	1	0	1	1	1	1	BICD2	bicaudal D homolog 2 (Drosophila)
hsa-miR-548c-3p	1	0	1	1	1	1	HNRNPD	heterogeneous nuclear ribonucleoprotein D (AU-rich element RNA binding protein 1, 37kDa)
hsa-miR-548c-3p	1	0	1	0	1	1	ZNF740	zinc finger protein 740
hsa-miR-548c-3p	0	0	1	1	1	1	ZCCHC16	zinc finger, CCHC domain containing 16
hsa-miR-548c-3p	1	0	1	0	1	1	LIN28B	lin-28 homolog B (C. elegans)
hsa-miR-548c-3p	0	0	1	0	1	1	ZNF705A	zinc finger protein 705A
hsa-miR-548c-3p	0	0	1	1	1	1	HMGN2P46	high mobility group nucleosomal binding domain 2 pseudogene 46
hsa-miR-548c-3p	0	0	1	1	1	1	PRR13	proline rich 13
hsa-miR-548c-3p	0	0	1	1	0	0	ZNF32	zinc finger protein 32
hsa-miR-548c-3p	1	0	1	1	1	1	PLCXD3	phosphatidylinositol-specific phospholipase C, X domain containing 3
hsa-miR-548c-3p	0	0	1	1	1	1	SUMO1	SMT3 suppressor of mif two 3 homolog 1 (S. cerevisiae)
hsa-miR-548c-3p	0	0	1	1	1	1	WBP5	WW domain binding protein 5
hsa-miR-548c-3p	1	0	1	1	1	1	TCEAL1	transcription elongation factor A (SII)-like 1
hsa-miR-548c-3p	1	0	1	1	0	0	RPS6KA1	ribosomal protein S6 kinase, 90kDa, polypeptide 1
hsa-miR-548c-3p	1	0	1	1	1	1	TCEAL8	transcription elongation factor A (SII)-like 8
hsa-miR-548c-3p	1	0	1	0	1	1	GOSR1	golgi SNAP receptor complex member 1
hsa-miR-548c-3p	1	0	1	1	1	1	L3MBTL3	l(3)mbt-like 3 (Drosophila)
hsa-miR-548c-3p	1	0	1	1	1	1	IGF2BP2	insulin-like growth factor 2 mRNA binding protein 2
hsa-miR-548c-3p	1	0	1	1	1	1	SPOP	speckle-type POZ protein
hsa-miR-548c-3p	1	0	1	1	1	1	EI24	etoposide induced 2.4 mRNA
hsa-miR-548c-3p	0	0	1	1	1	1	TRIM13	tripartite motif containing 13
hsa-miR-548c-3p	1	0	1	1	1	1	LMBRD2	LMBR1 domain containing 2
hsa-miR-548c-3p	1	0	1	0	1	1	SS18	synovial sarcoma translocation, chromosome 18
hsa-miR-548c-3p	0	0	1	1	1	1	UACA	uveal autoantigen with coiled-coil domains and ankyrin repeats
hsa-miR-548c-3p	1	0	1	1	1	1	CNOT4	CCR4-NOT transcription complex, subunit 4
hsa-miR-548c-3p	0	0	1	1	1	1	FAM154B	family with sequence similarity 154, member B
hsa-miR-548c-3p	1	0	1	1	1	1	UMOD	uromodulin
hsa-miR-548c-3p	1	0	1	1	1	1	CTDSPL	CTD (carboxy-terminal domain, RNA polymerase II, polypeptide A) small phosphatase-like
hsa-miR-548c-3p	1	0	1	1	1	1	RBM33	RNA binding motif protein 33
hsa-miR-548c-3p	0	0	1	1	1	1	PIWIL3	piwi-like 3 (Drosophila)
hsa-miR-548c-3p	0	0	1	1	1	1	TCHHL1	trichohyalin-like 1
hsa-miR-548c-3p	1	0	1	0	1	1	KIAA2022	KIAA2022
hsa-miR-548c-3p	0	0	1	1	1	1	CXCR4	chemokine (C-X-C motif) receptor 4
hsa-miR-548c-3p	1	0	1	1	1	1	LPHN1	latrophilin 1
hsa-miR-548c-3p	1	0	1	1	1	1	EML1	echinoderm microtubule associated protein like 1
hsa-miR-548c-3p	1	0	1	1	1	1	FNIP1	folliculin interacting protein 1
hsa-miR-548c-3p	1	0	1	1	1	1	CUL4A	cullin 4A
hsa-miR-548c-3p	0	0	1	1	1	1	ZCCHC11	zinc finger, CCHC domain containing 11
hsa-miR-548c-3p	1	0	1	1	1	1	LUZP2	leucine zipper protein 2
hsa-miR-548c-3p	1	0	1	0	1	1	ERMN	ermin, ERM-like protein
hsa-miR-548c-3p	1	0	1	1	1	1	SHE	Src homology 2 domain containing E
hsa-miR-548c-3p	0	0	1	0	1	1	LPPR5	lipid phosphate phosphatase-related protein type 5
hsa-miR-548c-3p	0	0	1	1	1	1	SPIN3	spindlin family, member 3
hsa-miR-548c-3p	1	0	1	0	1	1	ZC3H12B	zinc finger CCCH-type containing 12B
hsa-miR-548c-3p	0	0	1	1	1	1	C1QL3	complement component 1, q subcomponent-like 3
hsa-miR-548c-3p	0	0	1	1	1	1	HGF	hepatocyte growth factor (hepapoietin A; scatter factor)
hsa-miR-548c-3p	0	0	1	1	0	0	C9orf135	chromosome 9 open reading frame 135
hsa-miR-548c-3p	1	0	1	1	1	1	ATP11C	ATPase, class VI, type 11C
hsa-miR-548c-3p	1	0	1	1	0	0	RPL21P44	ribosomal protein L21 pseudogene 44
hsa-miR-548c-3p	0	0	1	1	1	1	DSTN	destrin (actin depolymerizing factor)
hsa-miR-548c-3p	0	0	1	1	1	1	SLC9A4	solute carrier family 9, subfamily A (NHE4, cation proton antiporter 4), member 4
hsa-miR-548c-3p	0	0	1	1	1	1	ZMAT1	zinc finger, matrin-type 1
hsa-miR-548c-3p	1	0	1	1	1	1	PCGF6	polycomb group ring finger 6
hsa-miR-548c-3p	1	0	1	0	1	1	CREB5	cAMP responsive element binding protein 5
hsa-miR-548c-3p	0	0	1	0	1	1	GOLGA8E	golgin A8 family, member E
hsa-miR-548c-3p	0	0	1	1	1	1	C1orf146	chromosome 1 open reading frame 146
hsa-miR-548c-3p	1	0	1	1	1	1	GRAMD2	GRAM domain containing 2
hsa-miR-548c-3p	1	0	1	1	1	1	SLC25A53	solute carrier family 25, member 53
hsa-miR-548c-3p	1	0	1	1	1	1	DISC1	disrupted in schizophrenia 1
hsa-miR-548c-3p	0	0	1	1	1	1	SPIN4	spindlin family, member 4
hsa-miR-548c-3p	1	0	1	0	1	1	ZKSCAN2	zinc finger with KRAB and SCAN domains 2
hsa-miR-548c-3p	0	0	1	1	1	1	CCNC	cyclin C
hsa-miR-548c-3p	0	0	1	0	1	1	LINC00268	long intergenic non-protein coding RNA 268
hsa-miR-548c-3p	1	0	1	0	1	1	SYT14L	synaptotagmin XIV-like
hsa-miR-548c-3p	1	0	1	1	1	1	RUNX2	runt-related transcription factor 2
hsa-miR-548c-3p	1	0	1	1	1	1	PHF6	PHD finger protein 6
hsa-miR-548c-3p	1	0	1	1	1	1	MSMO1	methylsterol monooxygenase 1
hsa-miR-548c-3p	0	0	1	1	1	1	SLC27A6	solute carrier family 27 (fatty acid transporter), member 6
hsa-miR-548c-3p	1	0	1	1	1	1	TMCC1	transmembrane and coiled-coil domain family 1
hsa-miR-548c-3p	1	0	1	0	1	1	GOPC	golgi-associated PDZ and coiled-coil motif containing
hsa-miR-548c-3p	0	0	1	1	1	1	BTBD11	BTB (POZ) domain containing 11
hsa-miR-548c-3p	0	0	1	1	1	1	DCAF8L1	DDB1 and CUL4 associated factor 8-like 1
hsa-miR-548c-3p	1	0	1	1	1	1	VMA21	VMA21 vacuolar H+-ATPase homolog (S. cerevisiae)
hsa-miR-548c-3p	1	0	1	1	1	1	PFKFB2	6-phosphofructo-2-kinase/fructose-2,6-biphosphatase 2
hsa-miR-548c-3p	0	0	1	1	1	1	ZNF187	zinc finger protein 187
hsa-miR-548c-3p	1	0	1	1	1	1	CANX	calnexin
hsa-miR-548c-3p	1	0	1	1	1	1	SH3KBP1	SH3-domain kinase binding protein 1
hsa-miR-548c-3p	1	0	1	0	1	1	TNRC6B	trinucleotide repeat containing 6B
hsa-miR-548c-3p	1	0	1	1	1	1	TGFBR2	transforming growth factor, beta receptor II (70/80kDa)
hsa-miR-548c-3p	1	0	1	1	1	1	YIPF5	Yip1 domain family, member 5
hsa-miR-548c-3p	1	0	1	1	1	1	FNBP1L	formin binding protein 1-like
hsa-miR-548c-3p	0	0	1	1	0	0	ARPC4	actin related protein 2/3 complex, subunit 4, 20kDa
hsa-miR-548c-3p	1	0	1	0	1	1	ADAR	adenosine deaminase, RNA-specific
hsa-miR-548c-3p	1	0	1	1	1	1	AFF3	AF4/FMR2 family, member 3
hsa-miR-548c-3p	1	0	1	0	1	1	CLLU1	chronic lymphocytic leukemia up-regulated 1
hsa-miR-548c-3p	1	0	1	0	1	1	C3orf70	chromosome 3 open reading frame 70
hsa-miR-548c-3p	1	0	1	0	1	1	ANO6	anoctamin 6
hsa-miR-548c-3p	1	0	1	1	1	1	FAM108B1	family with sequence similarity 108, member B1
hsa-miR-548c-3p	0	0	1	1	0	0	RPS24	ribosomal protein S24
hsa-miR-548c-3p	0	0	1	0	1	1	C6orf120	chromosome 6 open reading frame 120
hsa-miR-548c-3p	1	0	1	1	1	1	RGS7BP	regulator of G-protein signaling 7 binding protein
hsa-miR-548c-3p	1	0	1	0	1	1	C2orf71	chromosome 2 open reading frame 71
hsa-miR-548c-3p	1	0	1	1	1	1	KIAA0101	KIAA0101
hsa-miR-548c-3p	1	0	1	1	1	1	OPN5	opsin 5
hsa-miR-548c-3p	1	0	1	0	1	1	SAMD5	sterile alpha motif domain containing 5
hsa-miR-548c-3p	1	0	1	1	1	1	SRSF7	serine/arginine-rich splicing factor 7
hsa-miR-548c-3p	0	0	1	1	1	1	RNLS	renalase, FAD-dependent amine oxidase
hsa-miR-548c-3p	0	0	1	1	1	1	TRMT11	tRNA methyltransferase 11 homolog (S. cerevisiae)
hsa-miR-548c-3p	0	0	1	1	1	1	CALML4	calmodulin-like 4
hsa-miR-548c-3p	1	0	1	1	1	1	MAF	v-maf musculoaponeurotic fibrosarcoma oncogene homolog (avian)
hsa-miR-548c-3p	1	0	1	1	1	1	RCE1	RCE1 homolog, prenyl protein protease (S. cerevisiae)
hsa-miR-548c-3p	1	0	1	1	1	1	TFAP2A	transcription factor AP-2 alpha (activating enhancer binding protein 2 alpha)
hsa-miR-548c-3p	1	0	1	1	1	1	KLF10	Kruppel-like factor 10
hsa-miR-548c-3p	1	0	1	1	1	1	TMPO	thymopoietin
hsa-miR-548c-3p	1	0	1	1	1	1	UBE2V1	ubiquitin-conjugating enzyme E2 variant 1
hsa-miR-548c-3p	0	0	1	1	1	1	SLC35A2	solute carrier family 35 (UDP-galactose transporter), member A2
hsa-miR-548c-3p	0	0	1	1	1	1	PLGLB1	plasminogen-like B1
hsa-miR-548c-3p	0	0	1	1	1	1	HNRNPH2	heterogeneous nuclear ribonucleoprotein H2 (H')
hsa-miR-548c-3p	1	0	1	0	1	1	NPNT	nephronectin
hsa-miR-548c-3p	1	0	1	1	1	1	SAR1B	SAR1 homolog B (S. cerevisiae)
hsa-miR-548c-3p	0	0	1	1	1	1	PHF12	PHD finger protein 12
hsa-miR-548c-3p	0	0	1	1	1	1	C17orf104	chromosome 17 open reading frame 104
hsa-miR-548c-3p	1	0	1	1	1	1	ZNF704	zinc finger protein 704
hsa-miR-548c-3p	0	0	1	1	1	1	FAM134B	family with sequence similarity 134, member B
hsa-miR-548c-3p	1	0	1	0	1	1	RYR2	ryanodine receptor 2 (cardiac)
hsa-miR-548c-3p	1	0	1	1	1	1	AGAP1	ArfGAP with GTPase domain, ankyrin repeat and PH domain 1
hsa-miR-548c-3p	1	0	1	1	1	1	ACPL2	acid phosphatase-like 2
hsa-miR-548c-3p	1	0	1	0	1	1	ARL5A	ADP-ribosylation factor-like 5A
hsa-miR-548c-3p	0	0	1	1	1	1	REV1	REV1, polymerase (DNA directed)
hsa-miR-548c-3p	1	0	1	1	1	1	DLX1	distal-less homeobox 1
hsa-miR-548c-3p	0	0	1	1	1	1	HEPACAM2	HEPACAM family member 2
hsa-miR-548c-3p	1	0	1	0	1	1	GK5	glycerol kinase 5 (putative)
hsa-miR-548c-3p	1	0	1	1	1	1	SEC14L1	SEC14-like 1 (S. cerevisiae)
hsa-miR-548c-3p	1	0	1	0	1	1	USP9X	ubiquitin specific peptidase 9, X-linked
hsa-miR-548c-3p	0	0	1	0	1	1	ZNF705D	zinc finger protein 705D
hsa-miR-548c-3p	1	0	1	0	1	1	CREBZF	CREB/ATF bZIP transcription factor
hsa-miR-548c-3p	0	0	1	1	1	1	ZMYM5	zinc finger, MYM-type 5
hsa-miR-548c-3p	1	0	1	1	1	1	CDC42	cell division cycle 42 (GTP binding protein, 25kDa)
hsa-miR-548c-3p	1	0	1	1	1	1	CHN2	chimerin (chimaerin) 2
hsa-miR-548c-3p	1	0	1	1	1	1	MLLT4	myeloid/lymphoid or mixed-lineage leukemia (trithorax homolog, Drosophila); translocated to, 4
hsa-miR-548c-3p	0	0	1	1	0	0	MEOX1	mesenchyme homeobox 1
hsa-miR-548c-3p	1	0	1	1	1	1	TCERG1	transcription elongation regulator 1
hsa-miR-548c-3p	1	0	1	1	1	1	FAM3C	family with sequence similarity 3, member C
hsa-miR-548c-3p	0	0	1	1	1	1	MLH3	mutL homolog 3 (E. coli)
hsa-miR-548c-3p	1	0	1	1	1	1	SCN2A	sodium channel, voltage-gated, type II, alpha subunit
hsa-miR-548c-3p	1	0	1	1	1	1	PAPD5	PAP associated domain containing 5
hsa-miR-548c-3p	1	0	1	1	1	1	ZBTB8A	zinc finger and BTB domain containing 8A
hsa-miR-548c-3p	1	0	1	1	1	1	MTMR12	myotubularin related protein 12
hsa-miR-548c-3p	1	0	1	1	1	1	FAM63B	family with sequence similarity 63, member B
hsa-miR-548c-3p	0	0	1	1	0	0	SSX4B	synovial sarcoma, X breakpoint 4B
hsa-miR-548c-3p	1	0	1	1	1	1	NCALD	neurocalcin delta
hsa-miR-548c-3p	1	0	1	1	1	1	CRCP	CGRP receptor component
hsa-miR-548c-3p	0	0	1	1	1	1	METTL21D	methyltransferase like 21D
hsa-miR-548c-3p	0	0	1	1	0	0	GAGE1	G antigen 1
hsa-miR-548c-3p	1	0	1	1	1	1	GDAP1	ganglioside induced differentiation associated protein 1
hsa-miR-548c-3p	0	0	1	1	1	1	SI	sucrase-isomaltase (alpha-glucosidase)
hsa-miR-548c-3p	1	0	1	1	1	1	PPP4R1	protein phosphatase 4, regulatory subunit 1
hsa-miR-548c-3p	0	0	1	1	1	1	PSPC1	paraspeckle component 1
hsa-miR-548c-3p	1	0	1	1	1	1	ST3GAL5	ST3 beta-galactoside alpha-2,3-sialyltransferase 5
hsa-miR-548c-3p	1	0	1	1	1	1	CEP85L	centrosomal protein 85kDa-like
hsa-miR-548c-3p	1	0	1	1	1	1	ZNF706	zinc finger protein 706
hsa-miR-548c-3p	1	0	1	1	1	1	SLC9A6	solute carrier family 9, subfamily A (NHE6, cation proton antiporter 6), member 6
hsa-miR-548c-3p	1	0	1	1	1	1	NSL1	NSL1, MIND kinetochore complex component, homolog (S. cerevisiae)
hsa-miR-548c-3p	0	0	1	1	1	1	TATDN3	TatD DNase domain containing 3
hsa-miR-548c-3p	1	0	1	1	1	1	FRS2	fibroblast growth factor receptor substrate 2
hsa-miR-548c-3p	0	0	1	1	1	1	POT1	protection of telomeres 1 homolog (S. pombe)
hsa-miR-548c-3p	1	0	1	1	1	1	ERBB4	v-erb-a erythroblastic leukemia viral oncogene homolog 4 (avian)
hsa-miR-548c-3p	0	0	1	1	1	1	TTC14	tetratricopeptide repeat domain 14
hsa-miR-548c-3p	1	0	1	1	1	1	RERE	arginine-glutamic acid dipeptide (RE) repeats
hsa-miR-548c-3p	1	0	1	0	1	1	TMEM237	transmembrane protein 237
hsa-miR-548c-3p	1	0	1	0	1	1	SLC12A2	solute carrier family 12 (sodium/potassium/chloride transporters), member 2
hsa-miR-548c-3p	0	0	1	1	1	1	RCC1	regulator of chromosome condensation 1
hsa-miR-548c-3p	1	0	1	1	1	1	HIPK3	homeodomain interacting protein kinase 3
hsa-miR-548c-3p	0	0	1	0	1	1	TOP2A	topoisomerase (DNA) II alpha 170kDa
hsa-miR-548c-3p	0	0	1	1	1	1	TOP2B	topoisomerase (DNA) II beta 180kDa
hsa-miR-548c-3p	1	0	1	1	1	1	QSER1	glutamine and serine rich 1
hsa-miR-548c-3p	1	0	1	1	1	1	METTL9	methyltransferase like 9
hsa-miR-548c-3p	1	0	1	1	1	1	CDC14B	CDC14 cell division cycle 14 homolog B (S. cerevisiae)
hsa-miR-548c-3p	1	0	1	1	1	1	NCOR2	nuclear receptor corepressor 2
hsa-miR-548c-3p	1	0	1	1	1	1	IRF2BP2	interferon regulatory factor 2 binding protein 2
hsa-miR-548c-3p	1	0	1	1	1	1	PHF16	PHD finger protein 16
hsa-miR-548c-3p	1	0	1	1	1	1	PRR3	proline rich 3
hsa-miR-548c-3p	0	0	1	0	1	1	WTH3DI	RAB6C-like
hsa-miR-548c-3p	0	0	1	0	0	0	AGAP7	ArfGAP with GTPase domain, ankyrin repeat and PH domain 7
hsa-miR-548c-3p	0	0	1	1	1	1	VCAM1	vascular cell adhesion molecule 1
hsa-miR-548c-3p	1	0	1	1	1	1	SRSF1	serine/arginine-rich splicing factor 1
hsa-miR-548c-3p	1	0	1	1	1	1	DACT1	dapper, antagonist of beta-catenin, homolog 1 (Xenopus laevis)
hsa-miR-548c-3p	1	0	1	1	1	1	TMTC4	transmembrane and tetratricopeptide repeat containing 4
hsa-miR-548c-3p	0	0	1	0	0	0	TMEM183B	transmembrane protein 183B
hsa-miR-548c-3p	0	0	1	1	1	1	XIRP2	xin actin-binding repeat containing 2
hsa-miR-548c-3p	1	0	1	1	1	1	OCIAD1	OCIA domain containing 1
hsa-miR-548c-3p	1	0	1	1	1	1	CASZ1	castor zinc finger 1
hsa-miR-548c-3p	1	0	1	1	1	1	CREBBP	CREB binding protein
hsa-miR-548c-3p	1	0	1	1	1	1	DMP1	dentin matrix acidic phosphoprotein 1
hsa-miR-548c-3p	1	0	1	1	1	1	LDB3	LIM domain binding 3
hsa-miR-548c-3p	0	0	1	0	0	0	C12orf71	chromosome 12 open reading frame 71
hsa-miR-548c-3p	1	0	1	1	1	1	SHANK3	SH3 and multiple ankyrin repeat domains 3
hsa-miR-548c-3p	1	0	1	1	1	1	KDM6B	lysine (K)-specific demethylase 6B
hsa-miR-548c-3p	0	0	1	1	1	1	HSF5	heat shock transcription factor family member 5
hsa-miR-548c-3p	1	0	1	1	1	1	DNA2	DNA replication helicase 2 homolog (yeast)
hsa-miR-548c-3p	0	0	1	1	0	0	SLC35F4	solute carrier family 35, member F4
hsa-miR-548c-3p	1	0	1	0	1	1	ODZ3	odz, odd Oz/ten-m homolog 3 (Drosophila)
hsa-miR-548c-3p	0	0	1	1	1	1	TBX18	T-box 18
hsa-miR-548c-3p	1	0	1	1	1	1	MGA	MAX gene associated
hsa-miR-548c-3p	1	0	1	1	1	1	REPS2	RALBP1 associated Eps domain containing 2
hsa-miR-548c-3p	1	0	1	0	1	1	SCN3A	sodium channel, voltage-gated, type III, alpha subunit
hsa-miR-548c-3p	0	0	1	1	1	1	ACYP1	acylphosphatase 1, erythrocyte (common) type
hsa-miR-548c-3p	1	0	1	1	1	1	ADAM10	ADAM metallopeptidase domain 10
hsa-miR-548c-3p	1	0	1	1	1	1	ADCY9	adenylate cyclase 9
hsa-miR-548c-3p	1	0	1	1	1	1	AFM	afamin
hsa-miR-548c-3p	0	0	1	0	1	1	ALOX15	arachidonate 15-lipoxygenase
hsa-miR-548c-3p	0	0	1	1	1	1	AMELX	amelogenin, X-linked
hsa-miR-548c-3p	0	0	1	1	1	1	AMELY	amelogenin, Y-linked
hsa-miR-548c-3p	1	0	1	1	1	1	SLC25A5	solute carrier family 25 (mitochondrial carrier; adenine nucleotide translocator), member 5
hsa-miR-548c-3p	1	0	1	0	1	1	XIAP	X-linked inhibitor of apoptosis
hsa-miR-548c-3p	0	0	1	1	0	0	ARG2	arginase, type II
hsa-miR-548c-3p	1	0	1	0	1	1	BACH1	BTB and CNC homology 1, basic leucine zipper transcription factor 1
hsa-miR-548c-3p	1	0	1	0	1	1	KLF9	Kruppel-like factor 9
hsa-miR-548c-3p	1	0	1	1	1	1	CAMK2D	calcium/calmodulin-dependent protein kinase II delta
hsa-miR-548c-3p	0	0	1	0	1	1	CAV2	caveolin 2
hsa-miR-548c-3p	0	0	1	1	0	0	CD70	CD70 molecule
hsa-miR-548c-3p	1	0	1	1	1	1	CDH13	cadherin 13, H-cadherin (heart)
hsa-miR-548c-3p	1	0	1	0	1	1	CDK6	cyclin-dependent kinase 6
hsa-miR-548c-3p	0	0	1	1	1	1	CLIC2	chloride intracellular channel 2
hsa-miR-548c-3p	1	0	1	0	1	1	CPD	carboxypeptidase D
hsa-miR-548c-3p	1	0	1	1	1	1	CTNND2	catenin (cadherin-associated protein), delta 2
hsa-miR-548c-3p	0	0	1	1	1	1	DARS	aspartyl-tRNA synthetase
hsa-miR-548c-3p	0	0	1	0	1	1	DOCK1	dedicator of cytokinesis 1
hsa-miR-548c-3p	0	0	1	1	1	1	DSCAM	Down syndrome cell adhesion molecule
hsa-miR-548c-3p	1	0	1	1	1	1	DYRK1A	dual-specificity tyrosine-(Y)-phosphorylation regulated kinase 1A
hsa-miR-548c-3p	1	0	1	1	1	1	S1PR1	sphingosine-1-phosphate receptor 1
hsa-miR-548c-3p	1	0	1	0	1	1	EFNB3	ephrin-B3
hsa-miR-548c-3p	1	0	1	1	1	1	EIF1AX	eukaryotic translation initiation factor 1A, X-linked
hsa-miR-548c-3p	1	0	1	0	1	1	EIF2S3	eukaryotic translation initiation factor 2, subunit 3 gamma, 52kDa
hsa-miR-548c-3p	1	0	1	1	1	1	ELAVL1	ELAV (embryonic lethal, abnormal vision, Drosophila)-like 1 (Hu antigen R)
hsa-miR-548c-3p	0	0	1	0	1	1	EMP1	epithelial membrane protein 1
hsa-miR-548c-3p	1	0	1	1	0	0	EMP2	epithelial membrane protein 2
hsa-miR-548c-3p	1	0	1	1	1	1	EN2	engrailed homeobox 2
hsa-miR-548c-3p	1	0	1	1	1	1	EREG	epiregulin
hsa-miR-548c-3p	1	0	1	1	1	1	EXTL3	exostoses (multiple)-like 3
hsa-miR-548c-3p	0	0	1	1	1	1	FRZB	frizzled-related protein
hsa-miR-548c-3p	1	0	1	0	1	1	GCNT2	glucosaminyl (N-acetyl) transferase 2, I-branching enzyme (I blood group)
hsa-miR-548c-3p	1	0	1	0	1	1	B4GALT1	UDP-Gal:betaGlcNAc beta 1,4- galactosyltransferase, polypeptide 1
hsa-miR-548c-3p	1	0	1	1	1	1	IFIT2	interferon-induced protein with tetratricopeptide repeats 2
hsa-miR-548c-3p	0	0	1	1	1	1	IL13RA1	interleukin 13 receptor, alpha 1
hsa-miR-548c-3p	1	0	1	0	1	1	MPPED2	metallophosphoesterase domain containing 2
hsa-miR-548c-3p	0	0	1	1	0	0	ACRV1	acrosomal vesicle protein 1
hsa-miR-548c-3p	1	0	1	1	1	1	ADRBK1	adrenergic, beta, receptor kinase 1
hsa-miR-548c-3p	1	0	1	1	1	1	AHR	aryl hydrocarbon receptor
hsa-miR-548c-3p	1	0	1	1	1	1	AQP4	aquaporin 4
hsa-miR-548c-3p	1	0	1	0	1	1	ARCN1	archain 1
hsa-miR-548c-3p	0	0	1	1	1	1	ARF4	ADP-ribosylation factor 4
hsa-miR-548c-3p	0	0	1	1	1	1	RHOA	ras homolog family member A
hsa-miR-548c-3p	1	0	1	1	1	1	BNC1	basonuclin 1
hsa-miR-548c-3p	1	0	1	1	1	1	BTG1	B-cell translocation gene 1, anti-proliferative
hsa-miR-548c-3p	1	0	1	1	1	1	CBFB	core-binding factor, beta subunit
hsa-miR-548c-3p	1	0	1	0	1	1	CCND2	cyclin D2
hsa-miR-548c-3p	1	0	1	1	1	1	CDC25A	cell division cycle 25 homolog A (S. pombe)
hsa-miR-548c-3p	1	0	1	1	1	1	CDH2	cadherin 2, type 1, N-cadherin (neuronal)
hsa-miR-548c-3p	1	0	1	1	1	1	CDH5	cadherin 5, type 2 (vascular endothelium)
hsa-miR-548c-3p	1	0	1	1	1	1	CDH11	cadherin 11, type 2, OB-cadherin (osteoblast)
hsa-miR-548c-3p	0	0	1	1	1	1	CDO1	cysteine dioxygenase, type I
hsa-miR-548c-3p	1	0	1	0	1	1	CEBPG	CCAAT/enhancer binding protein (C/EBP), gamma
hsa-miR-548c-3p	0	0	1	1	1	1	CEACAM8	carcinoembryonic antigen-related cell adhesion molecule 8
hsa-miR-548c-3p	0	0	1	1	1	1	CNTN1	contactin 1
hsa-miR-548c-3p	1	0	1	0	1	1	COL19A1	collagen, type XIX, alpha 1
hsa-miR-548c-3p	1	0	1	1	1	1	SLC31A1	solute carrier family 31 (copper transporters), member 1
hsa-miR-548c-3p	0	0	1	1	1	1	CPS1	carbamoyl-phosphate synthase 1, mitochondrial
hsa-miR-548c-3p	0	0	1	1	1	1	CTH	cystathionase (cystathionine gamma-lyase)
hsa-miR-548c-3p	0	0	1	1	0	0	DDB1	damage-specific DNA binding protein 1, 127kDa
hsa-miR-548c-3p	0	0	1	1	1	1	DLAT	dihydrolipoamide S-acetyltransferase
hsa-miR-548c-3p	1	0	1	1	1	1	DR1	down-regulator of transcription 1, TBP-binding (negative cofactor 2)
hsa-miR-548c-3p	1	0	1	1	1	1	DUSP6	dual specificity phosphatase 6
hsa-miR-548c-3p	1	0	1	1	1	1	E2F3	E2F transcription factor 3
hsa-miR-548c-3p	0	0	1	1	0	0	EFNA5	ephrin-A5
hsa-miR-548c-3p	1	0	1	1	1	1	EGR1	early growth response 1
hsa-miR-548c-3p	1	0	1	1	1	1	ENPEP	glutamyl aminopeptidase (aminopeptidase A)
hsa-miR-548c-3p	1	0	1	1	1	1	FBN2	fibrillin 2
hsa-miR-548c-3p	1	0	1	0	1	1	FOXO1	forkhead box O1
hsa-miR-548c-3p	0	0	1	1	1	1	FLI1	Friend leukemia virus integration 1
hsa-miR-548c-3p	1	0	1	1	1	1	FRK	fyn-related kinase
hsa-miR-548c-3p	1	0	1	0	1	1	FUT4	fucosyltransferase 4 (alpha (1,3) fucosyltransferase, myeloid-specific)
hsa-miR-548c-3p	1	0	1	1	1	1	GBP1	guanylate binding protein 1, interferon-inducible
hsa-miR-548c-3p	1	0	1	1	1	1	GFPT1	glutamine--fructose-6-phosphate transaminase 1
hsa-miR-548c-3p	1	0	1	1	1	1	GLRA2	glycine receptor, alpha 2
hsa-miR-548c-3p	0	0	1	1	1	1	GTF2E2	general transcription factor IIE, polypeptide 2, beta 34kDa
hsa-miR-548c-3p	0	0	1	0	1	1	GYPA	glycophorin A (MNS blood group)
hsa-miR-548c-3p	0	0	1	1	1	1	HMGCS1	3-hydroxy-3-methylglutaryl-CoA synthase 1 (soluble)
hsa-miR-548c-3p	1	0	1	1	1	1	HNRNPA2B1	heterogeneous nuclear ribonucleoprotein A2/B1
hsa-miR-548c-3p	1	0	1	1	1	1	TNC	tenascin C
hsa-miR-548c-3p	0	0	1	1	1	1	IL6ST	interleukin 6 signal transducer (gp130, oncostatin M receptor)
hsa-miR-548c-3p	1	0	1	1	1	1	INSM1	insulinoma-associated 1
hsa-miR-548c-3p	1	0	1	1	1	1	ITGA9	integrin, alpha 9
hsa-miR-548c-3p	0	0	1	0	1	1	ITGAV	integrin, alpha V
hsa-miR-548c-3p	1	0	1	1	1	1	ITGB8	integrin, beta 8
hsa-miR-548c-3p	1	0	1	1	1	1	ITPR2	inositol 1,4,5-trisphosphate receptor, type 2
hsa-miR-548c-3p	1	0	1	1	1	1	KCNA3	potassium voltage-gated channel, shaker-related subfamily, member 3
hsa-miR-548c-3p	1	0	1	1	1	1	KCNA6	potassium voltage-gated channel, shaker-related subfamily, member 6
hsa-miR-548c-3p	1	0	1	1	1	1	KCNJ3	potassium inwardly-rectifying channel, subfamily J, member 3
hsa-miR-548c-3p	1	0	1	1	1	1	KDR	kinase insert domain receptor (a type III receptor tyrosine kinase)
hsa-miR-548c-3p	0	0	1	1	1	1	KLRC1	killer cell lectin-like receptor subfamily C, member 1
hsa-miR-548c-3p	0	0	1	1	1	1	KLRC2	killer cell lectin-like receptor subfamily C, member 2
hsa-miR-548c-3p	1	0	1	1	1	1	KPNB1	karyopherin (importin) beta 1
hsa-miR-548c-3p	1	0	1	1	1	1	KPNA3	karyopherin alpha 3 (importin alpha 4)
hsa-miR-548c-3p	1	0	1	1	1	1	KPNA4	karyopherin alpha 4 (importin alpha 3)
hsa-miR-548c-3p	0	0	1	1	1	1	KPNA5	karyopherin alpha 5 (importin alpha 6)
hsa-miR-548c-3p	1	0	1	1	1	1	LBR	lamin B receptor
hsa-miR-548c-3p	1	0	1	1	1	1	LIMK1	LIM domain kinase 1
hsa-miR-548c-3p	1	0	1	1	1	1	M6PR	mannose-6-phosphate receptor (cation dependent)
hsa-miR-548c-3p	1	0	1	0	1	1	MXD1	MAX dimerization protein 1
hsa-miR-548c-3p	1	0	1	1	1	1	MAN2A1	mannosidase, alpha, class 2A, member 1
hsa-miR-548c-3p	1	0	1	1	1	1	MATN2	matrilin 2
hsa-miR-548c-3p	0	0	1	1	0	0	MMP12	matrix metallopeptidase 12 (macrophage elastase)
hsa-miR-548c-3p	1	0	1	1	1	1	MSR1	macrophage scavenger receptor 1
hsa-miR-548c-3p	0	0	1	1	1	1	MYC	v-myc myelocytomatosis viral oncogene homolog (avian)
hsa-miR-548c-3p	1	0	1	1	1	1	NDN	necdin homolog (mouse)
hsa-miR-548c-3p	0	0	1	1	1	1	NID1	nidogen 1
hsa-miR-548c-3p	1	0	1	1	1	1	NPAS2	neuronal PAS domain protein 2
hsa-miR-548c-3p	1	0	1	1	1	1	NPAT	nuclear protein, ataxia-telangiectasia locus
hsa-miR-548c-3p	0	0	1	0	1	1	OAZ2	ornithine decarboxylase antizyme 2
hsa-miR-548c-3p	0	0	1	0	1	1	OPHN1	oligophrenin 1
hsa-miR-548c-3p	1	0	1	1	1	1	OSBP	oxysterol binding protein
hsa-miR-548c-3p	1	0	1	1	1	1	FURIN	furin (paired basic amino acid cleaving enzyme)
hsa-miR-548c-3p	1	0	1	0	1	1	PAK2	p21 protein (Cdc42/Rac)-activated kinase 2
hsa-miR-548c-3p	1	0	1	0	1	1	PAPPA	pregnancy-associated plasma protein A, pappalysin 1
hsa-miR-548c-3p	1	0	1	0	1	1	CDK17	cyclin-dependent kinase 17
hsa-miR-548c-3p	0	0	1	1	1	1	PDE6D	phosphodiesterase 6D, cGMP-specific, rod, delta
hsa-miR-548c-3p	1	0	1	0	1	1	PDK1	pyruvate dehydrogenase kinase, isozyme 1
hsa-miR-548c-3p	1	0	1	1	1	1	PLAGL2	pleiomorphic adenoma gene-like 2
hsa-miR-548c-3p	0	0	1	1	1	1	PLGLB2	plasminogen-like B2
hsa-miR-548c-3p	1	0	1	0	1	1	POU3F1	POU class 3 homeobox 1
hsa-miR-548c-3p	1	0	1	1	1	1	PPP1CB	protein phosphatase 1, catalytic subunit, beta isozyme
hsa-miR-548c-3p	1	0	1	1	1	1	PPP2R1B	protein phosphatase 2, regulatory subunit A, beta
hsa-miR-548c-3p	1	0	1	1	1	1	PRKAR2B	protein kinase, cAMP-dependent, regulatory, type II, beta
hsa-miR-548c-3p	1	0	1	0	1	1	PRKCA	protein kinase C, alpha
hsa-miR-548c-3p	0	0	1	1	0	0	PSMC6	proteasome (prosome, macropain) 26S subunit, ATPase, 6
hsa-miR-548c-3p	0	0	1	0	1	1	PSMD3	proteasome (prosome, macropain) 26S subunit, non-ATPase, 3
hsa-miR-548c-3p	1	0	1	1	0	0	PSMD7	proteasome (prosome, macropain) 26S subunit, non-ATPase, 7
hsa-miR-548c-3p	1	0	1	1	1	1	PTPN9	protein tyrosine phosphatase, non-receptor type 9
hsa-miR-548c-3p	1	0	1	1	1	1	PTPRK	protein tyrosine phosphatase, receptor type, K
hsa-miR-548c-3p	0	0	1	1	1	1	PTPRR	protein tyrosine phosphatase, receptor type, R
hsa-miR-548c-3p	1	0	1	1	1	1	RAD23B	RAD23 homolog B (S. cerevisiae)
hsa-miR-548c-3p	1	0	1	0	1	1	RAP2B	RAP2B, member of RAS oncogene family
hsa-miR-548c-3p	1	0	1	1	1	1	ARID4A	AT rich interactive domain 4A (RBP1-like)
hsa-miR-548c-3p	1	0	1	1	0	0	RFX1	regulatory factor X, 1 (influences HLA class II expression)
hsa-miR-548c-3p	1	0	1	0	1	1	SORT1	sortilin 1
hsa-miR-548c-3p	0	0	1	1	1	1	S100A10	S100 calcium binding protein A10
hsa-miR-548c-3p	0	0	1	1	1	1	SDC4	syndecan 4
hsa-miR-548c-3p	1	0	1	1	1	1	SRSF3	serine/arginine-rich splicing factor 3
hsa-miR-548c-3p	1	0	1	1	1	1	SH3GL2	SH3-domain GRB2-like 2
hsa-miR-548c-3p	1	0	1	1	1	1	SKI	v-ski sarcoma viral oncogene homolog (avian)
hsa-miR-548c-3p	1	0	1	0	1	1	SLC6A1	solute carrier family 6 (neurotransmitter transporter, GABA), member 1
hsa-miR-548c-3p	1	0	1	1	1	1	SLC7A1	solute carrier family 7 (cationic amino acid transporter, y+ system), member 1
hsa-miR-548c-3p	1	0	1	1	1	1	SLC9A2	solute carrier family 9, subfamily A (NHE2, cation proton antiporter 2), member 2
hsa-miR-548c-3p	1	0	1	1	1	1	SMARCC1	SWI/SNF related, matrix associated, actin dependent regulator of chromatin, subfamily c, member 1
hsa-miR-548c-3p	0	0	1	0	1	1	SNRPF	small nuclear ribonucleoprotein polypeptide F
hsa-miR-548c-3p	0	0	1	1	0	0	SNTA1	syntrophin, alpha 1
hsa-miR-548c-3p	1	0	1	1	1	1	SNX2	sorting nexin 2
hsa-miR-548c-3p	1	0	1	0	1	1	SOX11	SRY (sex determining region Y)-box 11
hsa-miR-548c-3p	1	0	1	1	1	1	SPAM1	sperm adhesion molecule 1 (PH-20 hyaluronidase, zona pellucida binding)
hsa-miR-548c-3p	0	0	1	1	1	1	SRP54	signal recognition particle 54kDa
hsa-miR-548c-3p	0	0	1	1	0	0	SSX2	synovial sarcoma, X breakpoint 2
hsa-miR-548c-3p	1	0	1	0	1	1	STC1	stanniocalcin 1
[truncated: 2,052 more rows]
