# Supplementary material for: Profiling of Selected MicroRNAs in Proliferative Eutopic Endometrium of Women with Ovarian Endometriosis
Source: Biomed Res Int. 2015 Aug 20;2015:760698. doi: 10.1155/2015/760698 (PMC4558423; doi:10.1155/2015/760698)
Supplement: Supplementary file 1 — Table I: The names of miRNAs significantly differentially expressed between eutopic endometrium of patients with endometriosis vs eutopic endometrium of patients without endometriosis. Table II: The associations between miRNA and mRNA, which presents detailed results of the search of six major databases i.e targetscan, tarbase, miranda, mirbase, mirtarget2 and pictar. [file 760698.f1.zip › 760698.f1/Table II/hsa-miR-548f.tsv]

miR	targetscan	tarbase	miranda	mirbase	mirtarget2	pictar	GeneSymbol	GeneName
hsa-miR-548f	0	0	1	0	0	0	NOP14-AS1	NOP14 antisense RNA 1
hsa-miR-548f	1	0	1	1	1	1	ZFYVE16	zinc finger, FYVE domain containing 16
hsa-miR-548f	1	0	1	1	1	1	CHD9	chromodomain helicase DNA binding protein 9
hsa-miR-548f	1	0	1	1	0	0	RAPGEF2	Rap guanine nucleotide exchange factor (GEF) 2
hsa-miR-548f	0	0	1	1	1	1	PPIP5K1	diphosphoinositol pentakisphosphate kinase 1
hsa-miR-548f	1	0	1	1	1	1	FAM65B	family with sequence similarity 65, member B
hsa-miR-548f	1	0	1	0	1	1	PTPRT	protein tyrosine phosphatase, receptor type, T
hsa-miR-548f	1	0	1	1	1	1	NUPL1	nucleoporin like 1
hsa-miR-548f	1	0	1	0	1	1	MTSS1	metastasis suppressor 1
hsa-miR-548f	1	0	1	0	1	1	NEDD4L	neural precursor cell expressed, developmentally down-regulated 4-like, E3 ubiquitin protein ligase
hsa-miR-548f	1	0	1	1	1	1	CDC42BPA	CDC42 binding protein kinase alpha (DMPK-like)
hsa-miR-548f	0	0	1	1	1	1	PDE4DIP	phosphodiesterase 4D interacting protein
hsa-miR-548f	1	0	1	0	1	1	CEP350	centrosomal protein 350kDa
hsa-miR-548f	1	0	1	1	1	1	BAI3	brain-specific angiogenesis inhibitor 3
hsa-miR-548f	1	0	1	1	0	0	PCLO	piccolo (presynaptic cytomatrix protein)
hsa-miR-548f	1	0	1	0	1	1	MFAP3L	microfibrillar-associated protein 3-like
hsa-miR-548f	1	0	1	1	1	1	HIPK1	homeodomain interacting protein kinase 1
hsa-miR-548f	1	0	1	1	1	1	GIGYF2	GRB10 interacting GYF protein 2
hsa-miR-548f	0	0	1	1	1	1	DZIP3	DAZ interacting protein 3, zinc finger
hsa-miR-548f	1	0	1	1	1	1	MATR3	matrin 3
hsa-miR-548f	1	0	1	1	0	0	ESYT1	extended synaptotagmin-like protein 1
hsa-miR-548f	1	0	1	0	1	1	RBM12	RNA binding motif protein 12
hsa-miR-548f	0	0	1	1	1	1	KDM4C	lysine (K)-specific demethylase 4C
hsa-miR-548f	1	0	1	1	1	1	DNM3	dynamin 3
hsa-miR-548f	1	0	1	1	1	1	WWC1	WW and C2 domain containing 1
hsa-miR-548f	0	0	1	1	0	0	FAM169A	family with sequence similarity 169, member A
hsa-miR-548f	0	0	1	1	1	1	WDR47	WD repeat domain 47
hsa-miR-548f	1	0	1	1	1	1	SEMA4F	sema domain, immunoglobulin domain (Ig), transmembrane domain (TM) and short cytoplasmic domain, (semaphorin) 4F
hsa-miR-548f	1	0	1	1	1	1	UBE2K	ubiquitin-conjugating enzyme E2K
hsa-miR-548f	1	0	1	1	1	1	RNMT	RNA (guanine-7-) methyltransferase
hsa-miR-548f	1	0	1	1	1	1	CPEB3	cytoplasmic polyadenylation element binding protein 3
hsa-miR-548f	1	0	1	1	1	1	RGL1	ral guanine nucleotide dissociation stimulator-like 1
hsa-miR-548f	0	0	1	1	1	1	FASTKD2	FAST kinase domains 2
hsa-miR-548f	0	0	1	1	0	0	FAM149B1	family with sequence similarity 149, member B1
hsa-miR-548f	1	0	1	1	1	1	PALLD	palladin, cytoskeletal associated protein
hsa-miR-548f	1	0	1	1	1	1	FOXJ3	forkhead box J3
hsa-miR-548f	1	0	1	1	0	0	KIAA1045	KIAA1045
hsa-miR-548f	1	0	1	1	1	1	NLGN1	neuroligin 1
hsa-miR-548f	1	0	1	0	1	1	ZNF507	zinc finger protein 507
hsa-miR-548f	0	0	1	0	0	0	KIAA1107	KIAA1107
hsa-miR-548f	0	0	1	0	0	0	ELTD1	EGF, latrophilin and seven transmembrane domain containing 1
hsa-miR-548f	1	0	1	1	1	1	SMARCAD1	SWI/SNF-related, matrix-associated actin-dependent regulator of chromatin, subfamily a, containing DEAD/H box 1
hsa-miR-548f	1	0	1	1	0	0	PPM1H	protein phosphatase, Mg2+/Mn2+ dependent, 1H
hsa-miR-548f	1	0	1	1	1	1	RALGAPB	Ral GTPase activating protein, beta subunit (non-catalytic)
hsa-miR-548f	0	0	1	1	0	0	ODF2L	outer dense fiber of sperm tails 2-like
hsa-miR-548f	1	0	1	1	1	1	RIMKLB	ribosomal modification protein rimK-like family member B
hsa-miR-548f	1	0	1	1	0	0	ATAD2B	ATPase family, AAA domain containing 2B
hsa-miR-548f	1	0	1	1	1	1	MKL2	MKL/myocardin-like 2
hsa-miR-548f	1	0	1	1	1	1	ASAP1	ArfGAP with SH3 domain, ankyrin repeat and PH domain 1
hsa-miR-548f	0	0	1	1	1	1	FSTL5	follistatin-like 5
hsa-miR-548f	1	0	1	0	1	1	INTS2	integrator complex subunit 2
hsa-miR-548f	0	0	1	1	1	1	GKAP1	G kinase anchoring protein 1
hsa-miR-548f	0	0	1	1	1	1	CA10	carbonic anhydrase X
hsa-miR-548f	1	0	1	0	0	0	NYNRIN	NYN domain and retroviral integrase containing
hsa-miR-548f	1	0	1	1	1	1	PCDH19	protocadherin 19
hsa-miR-548f	1	0	1	0	1	1	KCTD16	potassium channel tetramerisation domain containing 16
hsa-miR-548f	1	0	1	1	1	1	HACE1	HECT domain and ankyrin repeat containing E3 ubiquitin protein ligase 1
hsa-miR-548f	1	0	1	1	1	1	LRRC7	leucine rich repeat containing 7
hsa-miR-548f	0	0	1	1	1	1	IFT80	intraflagellar transport 80 homolog (Chlamydomonas)
hsa-miR-548f	1	0	1	1	0	0	EBF4	early B-cell factor 4
hsa-miR-548f	0	0	1	0	1	1	KIAA1468	KIAA1468
hsa-miR-548f	1	0	1	0	1	1	LMO3	LIM domain only 3 (rhombotin-like 2)
hsa-miR-548f	1	0	1	1	1	1	TOPORS	topoisomerase I binding, arginine/serine-rich, E3 ubiquitin protein ligase
hsa-miR-548f	1	0	1	1	1	1	PPP6R3	protein phosphatase 6, regulatory subunit 3
hsa-miR-548f	0	0	1	0	1	1	ZSWIM6	zinc finger, SWIM-type containing 6
hsa-miR-548f	1	0	1	0	0	0	TANC2	tetratricopeptide repeat, ankyrin repeat and coiled-coil containing 2
hsa-miR-548f	1	0	1	1	1	1	SNX3	sorting nexin 3
hsa-miR-548f	1	0	1	1	0	0	ARHGAP39	Rho GTPase activating protein 39
hsa-miR-548f	1	0	1	1	1	1	IKZF4	IKAROS family zinc finger 4 (Eos)
hsa-miR-548f	1	0	1	1	1	1	CDK13	cyclin-dependent kinase 13
hsa-miR-548f	0	0	1	1	0	0	FOCAD	focadhesin
hsa-miR-548f	0	0	1	1	1	1	UNC80	unc-80 homolog (C. elegans)
hsa-miR-548f	0	0	1	1	1	1	SLC11A2	solute carrier family 11 (proton-coupled divalent metal ion transporters), member 2
hsa-miR-548f	1	0	1	1	1	1	NAV2	neuron navigator 2
hsa-miR-548f	1	0	1	1	1	1	HNRPDL	heterogeneous nuclear ribonucleoprotein D-like
hsa-miR-548f	1	0	1	1	1	1	CSMD3	CUB and Sushi multiple domains 3
hsa-miR-548f	1	0	1	1	1	1	MAT2B	methionine adenosyltransferase II, beta
hsa-miR-548f	1	0	1	1	1	1	TET2	tet methylcytosine dioxygenase 2
hsa-miR-548f	1	0	1	1	1	1	OXR1	oxidation resistance 1
hsa-miR-548f	1	0	1	1	0	0	ZNF292	zinc finger protein 292
hsa-miR-548f	1	0	1	1	1	1	SH3TC2	SH3 domain and tetratricopeptide repeats 2
hsa-miR-548f	0	0	1	1	0	0	CIRH1A	cirrhosis, autosomal recessive 1A (cirhin)
hsa-miR-548f	1	0	1	0	0	0	ZBTB34	zinc finger and BTB domain containing 34
hsa-miR-548f	1	0	1	1	1	1	ACBD5	acyl-CoA binding domain containing 5
hsa-miR-548f	0	0	1	0	1	1	RASSF8	Ras association (RalGDS/AF-6) domain family (N-terminal) member 8
hsa-miR-548f	1	0	1	1	1	1	SMEK1	SMEK homolog 1, suppressor of mek1 (Dictyostelium)
hsa-miR-548f	0	0	1	1	0	0	ANKRD18A	ankyrin repeat domain 18A
hsa-miR-548f	1	0	1	1	1	1	UBR3	ubiquitin protein ligase E3 component n-recognin 3 (putative)
hsa-miR-548f	1	0	1	0	0	0	ZC3H12C	zinc finger CCCH-type containing 12C
hsa-miR-548f	0	0	1	1	1	1	IL7	interleukin 7
hsa-miR-548f	0	0	1	1	0	0	DDB2	damage-specific DNA binding protein 2, 48kDa
hsa-miR-548f	0	0	1	1	1	1	MICAL2	microtubule associated monoxygenase, calponin and LIM domain containing 2
hsa-miR-548f	1	0	1	1	1	1	SLC43A2	solute carrier family 43, member 2
hsa-miR-548f	1	1	1	1	1	1	BACE1	beta-site APP-cleaving enzyme 1
hsa-miR-548f	1	0	1	1	1	1	NRXN2	neurexin 2
hsa-miR-548f	0	0	1	0	1	1	FLNB	filamin B, beta
hsa-miR-548f	1	0	1	0	1	1	CCDC88A	coiled-coil domain containing 88A
hsa-miR-548f	1	0	1	1	1	1	LTBP1	latent transforming growth factor beta binding protein 1
hsa-miR-548f	0	0	1	0	1	1	ITPR1	inositol 1,4,5-trisphosphate receptor, type 1
hsa-miR-548f	1	0	1	1	1	1	DAPK1	death-associated protein kinase 1
hsa-miR-548f	0	0	1	0	1	1	ATF6	activating transcription factor 6
hsa-miR-548f	1	0	1	1	1	1	RPS6KA3	ribosomal protein S6 kinase, 90kDa, polypeptide 3
hsa-miR-548f	1	0	1	1	1	1	MEF2A	myocyte enhancer factor 2A
hsa-miR-548f	1	0	1	1	1	1	HMGB1	high mobility group box 1
hsa-miR-548f	0	0	1	1	1	1	PTK2	PTK2 protein tyrosine kinase 2
hsa-miR-548f	1	0	1	1	1	1	SLC8A1	solute carrier family 8 (sodium/calcium exchanger), member 1
hsa-miR-548f	1	0	1	0	1	1	PLAG1	pleiomorphic adenoma gene 1
hsa-miR-548f	1	0	1	1	0	0	TSPYL2	TSPY-like 2
hsa-miR-548f	1	0	1	1	1	1	FMR1	fragile X mental retardation 1
hsa-miR-548f	1	0	1	1	1	1	DMTF1	cyclin D binding myb-like transcription factor 1
hsa-miR-548f	1	0	1	1	1	1	TWF1	twinfilin, actin-binding protein, homolog 1 (Drosophila)
hsa-miR-548f	1	0	1	1	1	1	AEBP2	AE binding protein 2
hsa-miR-548f	1	0	1	0	1	1	AKAP13	A kinase (PRKA) anchor protein 13
hsa-miR-548f	0	0	1	1	1	1	RYR1	ryanodine receptor 1 (skeletal)
hsa-miR-548f	1	0	1	1	1	1	MYO5A	myosin VA (heavy chain 12, myoxin)
hsa-miR-548f	0	0	1	1	1	1	GPM6B	glycoprotein M6B
hsa-miR-548f	1	0	1	1	1	1	CTAGE5	CTAGE family, member 5
hsa-miR-548f	1	0	1	0	1	1	TBL1X	transducin (beta)-like 1X-linked
hsa-miR-548f	0	0	1	1	0	0	PXK	PX domain containing serine/threonine kinase
hsa-miR-548f	1	0	1	1	1	1	GOLGA4	golgin A4
hsa-miR-548f	0	0	1	1	1	1	KIF3A	kinesin family member 3A
hsa-miR-548f	0	0	1	1	1	1	ELOVL5	ELOVL fatty acid elongase 5
hsa-miR-548f	1	0	1	0	1	1	ADD3	adducin 3 (gamma)
hsa-miR-548f	1	0	1	1	1	1	TEAD1	TEA domain family member 1 (SV40 transcriptional enhancer factor)
hsa-miR-548f	1	0	1	1	1	1	ZFX	zinc finger protein, X-linked
hsa-miR-548f	0	0	1	1	1	1	PLD1	phospholipase D1, phosphatidylcholine-specific
hsa-miR-548f	1	0	1	0	1	1	CAV1	caveolin 1, caveolae protein, 22kDa
hsa-miR-548f	1	0	1	0	1	1	PDE7B	phosphodiesterase 7B
hsa-miR-548f	1	0	1	1	1	1	MEF2D	myocyte enhancer factor 2D
hsa-miR-548f	1	0	1	1	1	1	MYH10	myosin, heavy chain 10, non-muscle
hsa-miR-548f	1	0	1	0	1	1	FYB	FYN binding protein
hsa-miR-548f	0	0	1	0	1	1	PARG	poly (ADP-ribose) glycohydrolase
hsa-miR-548f	1	0	1	1	1	1	DLGAP2	discs, large (Drosophila) homolog-associated protein 2
hsa-miR-548f	1	0	1	0	1	1	MLL2	myeloid/lymphoid or mixed-lineage leukemia 2
hsa-miR-548f	1	0	1	1	1	1	SLC4A4	solute carrier family 4, sodium bicarbonate cotransporter, member 4
hsa-miR-548f	1	0	1	0	1	1	PDE4D	phosphodiesterase 4D, cAMP-specific
hsa-miR-548f	1	0	1	1	1	1	PCDH17	protocadherin 17
hsa-miR-548f	1	0	1	1	1	1	MYT1L	myelin transcription factor 1-like
hsa-miR-548f	1	0	1	0	1	1	CELF2	CUGBP, Elav-like family member 2
hsa-miR-548f	0	0	1	0	1	1	C9orf91	chromosome 9 open reading frame 91
hsa-miR-548f	0	0	1	1	1	1	UBE4B	ubiquitination factor E4B
hsa-miR-548f	0	0	1	1	1	1	SLC16A7	solute carrier family 16, member 7 (monocarboxylic acid transporter 2)
hsa-miR-548f	1	0	1	1	1	1	CTNND1	catenin (cadherin-associated protein), delta 1
hsa-miR-548f	1	0	1	1	1	1	NUDT4	nudix (nucleoside diphosphate linked moiety X)-type motif 4
hsa-miR-548f	1	0	1	1	1	1	TMEM159	transmembrane protein 159
hsa-miR-548f	1	0	1	1	1	1	USP3	ubiquitin specific peptidase 3
hsa-miR-548f	0	0	1	1	1	1	PCF11	PCF11, cleavage and polyadenylation factor subunit, homolog (S. cerevisiae)
hsa-miR-548f	0	0	1	1	1	1	PCBP4	poly(rC) binding protein 4
hsa-miR-548f	1	0	1	1	1	1	GLS	glutaminase
hsa-miR-548f	0	0	1	1	1	1	SH2D1A	SH2 domain containing 1A
hsa-miR-548f	1	0	1	0	1	1	CD164	CD164 molecule, sialomucin
hsa-miR-548f	1	0	1	1	1	1	EDNRB	endothelin receptor type B
hsa-miR-548f	0	0	1	1	1	1	CSAD	cysteine sulfinic acid decarboxylase
hsa-miR-548f	0	0	1	1	1	1	COG6	component of oligomeric golgi complex 6
hsa-miR-548f	0	0	1	1	1	1	TIAM2	T-cell lymphoma invasion and metastasis 2
hsa-miR-548f	1	0	1	0	1	1	FAM19A5	family with sequence similarity 19 (chemokine (C-C motif)-like), member A5
hsa-miR-548f	1	0	1	0	1	1	WDR82	WD repeat domain 82
hsa-miR-548f	1	0	1	1	1	1	CAB39	calcium binding protein 39
hsa-miR-548f	1	0	1	1	1	1	TAOK3	TAO kinase 3
hsa-miR-548f	1	0	1	1	1	1	SORBS1	sorbin and SH3 domain containing 1
hsa-miR-548f	1	0	1	0	1	1	BECN1	beclin 1, autophagy related
hsa-miR-548f	1	0	1	1	1	1	ZBTB20	zinc finger and BTB domain containing 20
hsa-miR-548f	0	0	1	0	1	1	CLEC5A	C-type lectin domain family 5, member A
hsa-miR-548f	1	0	1	1	1	1	SCHIP1	schwannomin interacting protein 1
hsa-miR-548f	1	0	1	1	1	1	HMG20A	high mobility group 20A
hsa-miR-548f	0	0	1	0	1	1	PDP1	pyruvate dehyrogenase phosphatase catalytic subunit 1
hsa-miR-548f	0	0	1	1	1	1	FAM114A2	family with sequence similarity 114, member A2
hsa-miR-548f	0	0	1	1	1	1	FGFR1OP2	FGFR1 oncogene partner 2
hsa-miR-548f	1	0	1	1	1	1	STXBP6	syntaxin binding protein 6 (amisyn)
hsa-miR-548f	1	0	1	1	1	1	CHFR	checkpoint with forkhead and ring finger domains, E3 ubiquitin protein ligase
hsa-miR-548f	1	0	1	0	1	1	AMOTL2	angiomotin like 2
hsa-miR-548f	0	0	1	0	1	1	CLDN2	claudin 2
hsa-miR-548f	1	0	1	1	1	1	FAM49B	family with sequence similarity 49, member B
hsa-miR-548f	0	0	1	1	0	0	DBNDD2	dysbindin (dystrobrevin binding protein 1) domain containing 2
hsa-miR-548f	1	0	1	1	1	1	OGT	O-linked N-acetylglucosamine (GlcNAc) transferase
hsa-miR-548f	0	0	1	1	1	1	MFF	mitochondrial fission factor
hsa-miR-548f	1	0	1	1	1	1	DESI2	desumoylating isopeptidase 2
hsa-miR-548f	0	0	1	1	1	1	CHST12	carbohydrate (chondroitin 4) sulfotransferase 12
hsa-miR-548f	1	0	1	1	1	1	STRN3	striatin, calmodulin binding protein 3
hsa-miR-548f	0	0	1	1	1	1	IFT81	intraflagellar transport 81 homolog (Chlamydomonas)
hsa-miR-548f	0	0	1	1	1	1	DOCK10	dedicator of cytokinesis 10
hsa-miR-548f	0	0	1	0	0	0	TIGD7	tigger transposable element derived 7
hsa-miR-548f	1	0	1	1	1	1	ELF2	E74-like factor 2 (ets domain transcription factor)
hsa-miR-548f	1	0	1	1	1	1	ABI2	abl-interactor 2
hsa-miR-548f	1	0	1	1	1	1	SH3GLB1	SH3-domain GRB2-like endophilin B1
hsa-miR-548f	0	0	1	0	1	1	PRDM6	PR domain containing 6
hsa-miR-548f	0	0	1	0	1	1	ERBB2IP	erbb2 interacting protein
hsa-miR-548f	1	0	1	1	1	1	CALN1	calneuron 1
hsa-miR-548f	1	0	1	1	1	1	DCLRE1B	DNA cross-link repair 1B
hsa-miR-548f	1	0	1	1	1	1	CPEB1	cytoplasmic polyadenylation element binding protein 1
hsa-miR-548f	0	0	1	1	0	0	FEZF2	FEZ family zinc finger 2
hsa-miR-548f	1	0	1	1	1	1	ATAD1	ATPase family, AAA domain containing 1
hsa-miR-548f	0	0	1	1	0	0	SPATA22	spermatogenesis associated 22
hsa-miR-548f	1	0	1	1	1	1	LARP4	La ribonucleoprotein domain family, member 4
hsa-miR-548f	1	0	1	1	1	1	SON	SON DNA binding protein
hsa-miR-548f	0	0	1	0	0	0	MIR155HG	MIR155 host gene (non-protein coding)
hsa-miR-548f	0	0	1	1	1	1	SPSB1	splA/ryanodine receptor domain and SOCS box containing 1
hsa-miR-548f	1	0	1	1	0	0	YTHDF2	YTH domain family, member 2
hsa-miR-548f	0	0	1	0	1	1	LYPD6B	LY6/PLAUR domain containing 6B
hsa-miR-548f	1	0	1	1	1	1	RBFOX1	RNA binding protein, fox-1 homolog (C. elegans) 1
hsa-miR-548f	1	0	1	0	1	1	PPP1R12A	protein phosphatase 1, regulatory subunit 12A
hsa-miR-548f	1	0	1	1	1	1	HNRNPU	heterogeneous nuclear ribonucleoprotein U (scaffold attachment factor A)
hsa-miR-548f	1	0	1	1	1	1	CPNE4	copine IV
hsa-miR-548f	1	0	1	1	1	1	WAPAL	wings apart-like homolog (Drosophila)
hsa-miR-548f	0	0	1	1	1	1	AMPH	amphiphysin
hsa-miR-548f	1	0	1	1	1	1	IQCK	IQ motif containing K
hsa-miR-548f	1	0	1	1	1	1	PTBP2	polypyrimidine tract binding protein 2
hsa-miR-548f	1	0	1	0	1	1	IL1RAP	interleukin 1 receptor accessory protein
hsa-miR-548f	1	0	1	1	1	1	AFF2	AF4/FMR2 family, member 2
hsa-miR-548f	1	0	1	0	1	1	DICER1	dicer 1, ribonuclease type III
hsa-miR-548f	0	0	1	0	0	0	SNHG4	small nucleolar RNA host gene 4 (non-protein coding)
hsa-miR-548f	1	0	1	1	1	1	SUCO	SUN domain containing ossification factor
hsa-miR-548f	0	0	1	1	1	1	TCFL5	transcription factor-like 5 (basic helix-loop-helix)
hsa-miR-548f	1	0	1	1	1	1	ILF3	interleukin enhancer binding factor 3, 90kDa
hsa-miR-548f	0	0	1	0	1	1	COL13A1	collagen, type XIII, alpha 1
hsa-miR-548f	1	0	1	1	1	1	VAMP7	vesicle-associated membrane protein 7
hsa-miR-548f	1	0	1	1	1	1	NAV3	neuron navigator 3
hsa-miR-548f	1	0	1	1	1	1	ARL4C	ADP-ribosylation factor-like 4C
hsa-miR-548f	1	0	1	1	1	1	PPP1R9A	protein phosphatase 1, regulatory subunit 9A
hsa-miR-548f	0	0	1	1	1	1	ESRP1	epithelial splicing regulatory protein 1
hsa-miR-548f	0	0	1	0	1	1	TRMT10A	tRNA methyltransferase 10 homolog A (S. cerevisiae)
hsa-miR-548f	1	0	1	1	1	1	ENOX2	ecto-NOX disulfide-thiol exchanger 2
hsa-miR-548f	0	0	1	1	0	0	ENY2	enhancer of yellow 2 homolog (Drosophila)
hsa-miR-548f	0	0	1	1	1	1	PARP16	poly (ADP-ribose) polymerase family, member 16
hsa-miR-548f	0	0	1	1	1	1	UBE2Q2	ubiquitin-conjugating enzyme E2Q family member 2
hsa-miR-548f	0	0	1	0	0	0	TUG1	taurine upregulated 1 (non-protein coding)
hsa-miR-548f	0	0	1	1	1	1	PARPBP	PARP1 binding protein
hsa-miR-548f	0	0	1	1	1	1	DONSON	downstream neighbor of SON
hsa-miR-548f	1	0	1	1	1	1	RIC8B	resistance to inhibitors of cholinesterase 8 homolog B (C. elegans)
hsa-miR-548f	1	0	1	1	1	1	EIF2C1	eukaryotic translation initiation factor 2C, 1
hsa-miR-548f	1	0	1	1	1	1	PTBP3	polypyrimidine tract binding protein 3
hsa-miR-548f	1	0	1	1	1	1	ARMC8	armadillo repeat containing 8
hsa-miR-548f	0	0	1	1	1	1	CXXC5	CXXC finger protein 5
hsa-miR-548f	1	0	1	0	1	1	SPATS2L	spermatogenesis associated, serine-rich 2-like
hsa-miR-548f	1	0	1	1	1	1	MYEF2	myelin expression factor 2
hsa-miR-548f	1	0	1	1	1	1	INSIG2	insulin induced gene 2
hsa-miR-548f	1	0	1	1	1	1	NINL	ninein-like
hsa-miR-548f	1	0	1	1	1	1	RABGAP1	RAB GTPase activating protein 1
hsa-miR-548f	1	0	1	1	1	1	SLCO5A1	solute carrier organic anion transporter family, member 5A1
hsa-miR-548f	0	0	1	0	0	0	LOC149134	uncharacterized LOC149134
hsa-miR-548f	1	0	1	1	1	1	S100PBP	S100P binding protein
hsa-miR-548f	1	0	1	1	1	1	WDTC1	WD and tetratricopeptide repeats 1
hsa-miR-548f	1	0	1	1	1	1	SMEK2	SMEK homolog 2, suppressor of mek1 (Dictyostelium)
hsa-miR-548f	1	0	1	0	1	1	DCAF17	DDB1 and CUL4 associated factor 17
hsa-miR-548f	0	0	1	1	1	1	TTC23	tetratricopeptide repeat domain 23
hsa-miR-548f	0	0	1	1	1	1	VPRBP	Vpr (HIV-1) binding protein
hsa-miR-548f	0	0	1	1	1	1	LRRN1	leucine rich repeat neuronal 1
hsa-miR-548f	1	0	1	1	1	1	PHF20L1	PHD finger protein 20-like 1
hsa-miR-548f	1	0	1	1	1	1	BAZ2A	bromodomain adjacent to zinc finger domain, 2A
hsa-miR-548f	0	0	1	1	1	1	CXorf57	chromosome X open reading frame 57
hsa-miR-548f	1	0	1	1	1	1	COPS7B	COP9 constitutive photomorphogenic homolog subunit 7B (Arabidopsis)
hsa-miR-548f	0	0	1	1	1	1	SIGLEC1	sialic acid binding Ig-like lectin 1, sialoadhesin
hsa-miR-548f	1	0	1	1	1	1	DYRK2	dual-specificity tyrosine-(Y)-phosphorylation regulated kinase 2
hsa-miR-548f	1	0	1	0	1	1	ATP2B1	ATPase, Ca++ transporting, plasma membrane 1
hsa-miR-548f	1	0	1	1	1	1	KANK1	KN motif and ankyrin repeat domains 1
hsa-miR-548f	1	0	1	1	1	1	ARFGEF1	ADP-ribosylation factor guanine nucleotide-exchange factor 1 (brefeldin A-inhibited)
hsa-miR-548f	1	0	1	1	1	1	TNRC6A	trinucleotide repeat containing 6A
hsa-miR-548f	1	0	1	1	0	0	FBXO45	F-box protein 45
hsa-miR-548f	1	0	1	1	1	1	YPEL5	yippee-like 5 (Drosophila)
hsa-miR-548f	1	0	1	1	1	1	NAA30	N(alpha)-acetyltransferase 30, NatC catalytic subunit
hsa-miR-548f	0	0	1	0	1	1	FLJ22763	uncharacterized LOC401081
hsa-miR-548f	1	0	1	1	0	0	UBXN7	UBX domain protein 7
hsa-miR-548f	1	0	1	1	1	1	FBXL12	F-box and leucine-rich repeat protein 12
hsa-miR-548f	0	0	1	0	0	0	LOC729852	uncharacterized LOC729852
hsa-miR-548f	1	0	1	1	1	1	GORASP2	golgi reassembly stacking protein 2, 55kDa
hsa-miR-548f	1	0	1	1	1	1	SEC63	SEC63 homolog (S. cerevisiae)
hsa-miR-548f	0	0	1	1	1	1	RNF146	ring finger protein 146
hsa-miR-548f	1	0	1	1	1	1	MARK1	MAP/microtubule affinity-regulating kinase 1
hsa-miR-548f	1	0	1	1	1	1	TMEM2	transmembrane protein 2
hsa-miR-548f	1	0	1	1	1	1	BZW2	basic leucine zipper and W2 domains 2
hsa-miR-548f	1	0	1	1	1	1	KCTD15	potassium channel tetramerisation domain containing 15
hsa-miR-548f	1	0	1	1	1	1	SLAIN1	SLAIN motif family, member 1
hsa-miR-548f	1	0	1	1	1	1	ARHGAP36	Rho GTPase activating protein 36
hsa-miR-548f	0	0	1	0	0	0	LOC283508	uncharacterized LOC283508
hsa-miR-548f	0	0	1	1	1	1	C8orf46	chromosome 8 open reading frame 46
hsa-miR-548f	0	0	1	0	0	0	NYAP2	neuronal tyrosine-phosphorylated phosphoinositide-3-kinase adaptor 2
hsa-miR-548f	0	0	1	0	0	0	FLJ30838	uncharacterized LOC400955
hsa-miR-548f	1	0	1	1	1	1	FRMD6	FERM domain containing 6
hsa-miR-548f	1	0	1	1	1	1	SFXN2	sideroflexin 2
hsa-miR-548f	1	0	1	1	1	1	DIXDC1	DIX domain containing 1
hsa-miR-548f	1	0	1	0	0	0	PWWP2A	PWWP domain containing 2A
hsa-miR-548f	1	0	1	1	1	1	TMTC1	transmembrane and tetratricopeptide repeat containing 1
hsa-miR-548f	1	0	1	1	1	1	ZNF664	zinc finger protein 664
hsa-miR-548f	0	0	1	0	0	0	LOC440894	uncharacterized LOC440894
hsa-miR-548f	1	0	1	0	1	1	PTPRE	protein tyrosine phosphatase, receptor type, E
hsa-miR-548f	1	0	1	1	1	1	AGPAT1	1-acylglycerol-3-phosphate O-acyltransferase 1 (lysophosphatidic acid acyltransferase, alpha)
hsa-miR-548f	0	0	1	0	0	0	FLJ30901	uncharacterized protein FLJ30901
hsa-miR-548f	1	0	1	1	1	1	SORBS2	sorbin and SH3 domain containing 2
hsa-miR-548f	0	0	1	0	0	0	LOC158376	uncharacterized LOC158376
hsa-miR-548f	0	0	1	1	1	1	GNB2	guanine nucleotide binding protein (G protein), beta polypeptide 2
hsa-miR-548f	0	0	1	0	0	0	LOC255187	hCG1980447
hsa-miR-548f	0	0	1	0	1	1	AGBL1	ATP/GTP binding protein-like 1
hsa-miR-548f	1	0	1	1	1	1	TBC1D14	TBC1 domain family, member 14
hsa-miR-548f	0	0	1	1	1	1	PSME3	proteasome (prosome, macropain) activator subunit 3 (PA28 gamma; Ki)
hsa-miR-548f	1	0	1	1	1	1	TLE4	transducin-like enhancer of split 4 (E(sp1) homolog, Drosophila)
hsa-miR-548f	1	0	1	1	1	1	MPP7	membrane protein, palmitoylated 7 (MAGUK p55 subfamily member 7)
hsa-miR-548f	0	0	1	1	1	1	SEC61A2	Sec61 alpha 2 subunit (S. cerevisiae)
hsa-miR-548f	0	0	1	0	1	1	UHMK1	U2AF homology motif (UHM) kinase 1
hsa-miR-548f	1	0	1	1	1	1	HLF	hepatic leukemia factor
hsa-miR-548f	1	0	1	1	1	1	BLCAP	bladder cancer associated protein
hsa-miR-548f	1	0	1	0	1	1	RNF165	ring finger protein 165
hsa-miR-548f	0	0	1	1	0	0	C6orf132	chromosome 6 open reading frame 132
hsa-miR-548f	1	0	1	0	1	1	TPBG	trophoblast glycoprotein
hsa-miR-548f	1	0	1	1	1	1	SIRT1	sirtuin 1
hsa-miR-548f	1	0	1	1	1	1	PAX6	paired box 6
hsa-miR-548f	1	0	1	1	1	1	SEC61A1	Sec61 alpha 1 subunit (S. cerevisiae)
hsa-miR-548f	1	0	1	1	1	1	NOTCH2NL	notch 2 N-terminal like
hsa-miR-548f	1	0	1	1	1	1	UXS1	UDP-glucuronate decarboxylase 1
hsa-miR-548f	0	0	1	1	1	1	TFPI2	tissue factor pathway inhibitor 2
hsa-miR-548f	1	0	1	1	1	1	PIP4K2C	phosphatidylinositol-5-phosphate 4-kinase, type II, gamma
hsa-miR-548f	1	0	1	1	1	1	TTC13	tetratricopeptide repeat domain 13
hsa-miR-548f	0	0	1	0	0	0	LOC643837	uncharacterized LOC643837
hsa-miR-548f	1	0	1	1	1	1	FBXW2	F-box and WD repeat domain containing 2
hsa-miR-548f	1	0	1	1	1	1	TSN	translin
hsa-miR-548f	0	0	1	0	0	0	KIAA1430	KIAA1430
hsa-miR-548f	1	0	1	1	1	1	LUC7L2	LUC7-like 2 (S. cerevisiae)
hsa-miR-548f	0	0	1	0	0	0	LOC644554	uncharacterized LOC644554
hsa-miR-548f	1	0	1	1	1	1	GNG2	guanine nucleotide binding protein (G protein), gamma 2
hsa-miR-548f	1	0	1	1	1	1	CLGN	calmegin
hsa-miR-548f	0	0	1	0	0	0	LOC550112	uncharacterized LOC550112
hsa-miR-548f	0	0	1	1	1	1	TGFBI	transforming growth factor, beta-induced, 68kDa
hsa-miR-548f	1	0	1	1	1	1	LRRC57	leucine rich repeat containing 57
hsa-miR-548f	1	0	1	1	1	1	SSH3	slingshot homolog 3 (Drosophila)
hsa-miR-548f	0	0	1	1	1	1	SPOCK1	sparc/osteonectin, cwcv and kazal-like domains proteoglycan (testican) 1
hsa-miR-548f	0	0	1	0	0	0	PART1	prostate androgen-regulated transcript 1 (non-protein coding)
hsa-miR-548f	0	0	1	0	1	1	RALYL	RALY RNA binding protein-like
hsa-miR-548f	1	0	1	1	1	1	SIAH1	siah E3 ubiquitin protein ligase 1
hsa-miR-548f	1	0	1	0	1	1	GATAD2B	GATA zinc finger domain containing 2B
hsa-miR-548f	1	0	1	0	1	1	NCOA7	nuclear receptor coactivator 7
hsa-miR-548f	0	0	1	1	1	1	TMEM170A	transmembrane protein 170A
hsa-miR-548f	1	0	1	1	1	1	GCLC	glutamate-cysteine ligase, catalytic subunit
hsa-miR-548f	1	0	1	1	1	1	KANSL1	KAT8 regulatory NSL complex subunit 1
hsa-miR-548f	0	0	1	1	1	1	GPT2	glutamic pyruvate transaminase (alanine aminotransferase) 2
hsa-miR-548f	1	0	1	1	1	1	CPNE8	copine VIII
hsa-miR-548f	1	0	1	1	1	1	RASGEF1A	RasGEF domain family, member 1A
hsa-miR-548f	0	0	1	1	1	1	MOBP	myelin-associated oligodendrocyte basic protein
hsa-miR-548f	1	0	1	1	1	1	ANKRD46	ankyrin repeat domain 46
hsa-miR-548f	0	0	1	1	0	0	ZNF185	zinc finger protein 185 (LIM domain)
hsa-miR-548f	0	0	1	1	1	1	MYO6	myosin VI
hsa-miR-548f	1	0	1	0	1	1	UVRAG	UV radiation resistance associated gene
hsa-miR-548f	1	0	1	1	1	1	CNEP1R1	CTD nuclear envelope phosphatase 1 regulatory subunit 1
hsa-miR-548f	0	0	1	1	1	1	EXOC4	exocyst complex component 4
hsa-miR-548f	1	0	1	1	1	1	KCNIP3	Kv channel interacting protein 3, calsenilin
hsa-miR-548f	1	0	1	1	1	1	FAM222B	family with sequence similarity 222, member B
hsa-miR-548f	1	0	1	1	1	1	SPATS2	spermatogenesis associated, serine-rich 2
hsa-miR-548f	1	0	1	1	1	1	ZC3H11A	zinc finger CCCH-type containing 11A
hsa-miR-548f	1	0	1	1	1	1	PEA15	phosphoprotein enriched in astrocytes 15
hsa-miR-548f	0	0	1	1	0	0	ARHGEF16	Rho guanine nucleotide exchange factor (GEF) 16
hsa-miR-548f	0	0	1	1	0	0	TRIM46	tripartite motif containing 46
hsa-miR-548f	0	0	1	1	1	1	CDKN2AIP	CDKN2A interacting protein
hsa-miR-548f	1	0	1	1	1	1	FAM98A	family with sequence similarity 98, member A
hsa-miR-548f	0	0	1	1	1	1	SUSD4	sushi domain containing 4
hsa-miR-548f	0	0	1	0	0	0	OTUD1	OTU domain containing 1
hsa-miR-548f	1	0	1	0	1	1	COL21A1	collagen, type XXI, alpha 1
hsa-miR-548f	0	0	1	1	1	1	MPHOSPH9	M-phase phosphoprotein 9
hsa-miR-548f	0	0	1	0	0	0	LOC643327	uncharacterized LOC643327
hsa-miR-548f	1	0	1	0	1	1	KIAA1737	KIAA1737
hsa-miR-548f	1	0	1	0	1	1	THRB	thyroid hormone receptor, beta
hsa-miR-548f	1	0	1	0	0	0	PID1	phosphotyrosine interaction domain containing 1
hsa-miR-548f	1	0	1	0	1	1	KBTBD8	kelch repeat and BTB (POZ) domain containing 8
hsa-miR-548f	0	0	1	1	1	1	ARMCX5	armadillo repeat containing, X-linked 5
hsa-miR-548f	0	0	1	1	0	0	PRMT10	protein arginine methyltransferase 10 (putative)
hsa-miR-548f	1	0	1	1	1	1	SYT6	synaptotagmin VI
hsa-miR-548f	1	0	1	1	1	1	C3orf62	chromosome 3 open reading frame 62
hsa-miR-548f	1	0	1	1	1	1	EPB41L1	erythrocyte membrane protein band 4.1-like 1
hsa-miR-548f	0	0	1	1	1	1	GBAS	glioblastoma amplified sequence
hsa-miR-548f	1	0	1	1	1	1	POU2F3	POU class 2 homeobox 3
hsa-miR-548f	1	0	1	0	1	1	AGFG1	ArfGAP with FG repeats 1
hsa-miR-548f	0	0	1	1	0	0	PSAPL1	prosaposin-like 1 (gene/pseudogene)
hsa-miR-548f	0	0	1	1	1	1	LRRC49	leucine rich repeat containing 49
hsa-miR-548f	0	0	1	1	1	1	CKAP2L	cytoskeleton associated protein 2-like
hsa-miR-548f	1	0	1	1	1	1	PIGA	phosphatidylinositol glycan anchor biosynthesis, class A
hsa-miR-548f	1	0	1	1	1	1	CHD6	chromodomain helicase DNA binding protein 6
hsa-miR-548f	1	0	1	1	1	1	LARP1B	La ribonucleoprotein domain family, member 1B
hsa-miR-548f	0	0	1	1	1	1	TRPM7	transient receptor potential cation channel, subfamily M, member 7
hsa-miR-548f	1	0	1	0	1	1	UNC5D	unc-5 homolog D (C. elegans)
hsa-miR-548f	1	0	1	1	1	1	CRMP1	collapsin response mediator protein 1
hsa-miR-548f	1	0	1	1	1	1	ZMAT3	zinc finger, matrin-type 3
hsa-miR-548f	0	0	1	1	0	0	KIAA0146	KIAA0146
hsa-miR-548f	0	0	1	1	1	1	ZDHHC15	zinc finger, DHHC-type containing 15
hsa-miR-548f	1	0	1	1	1	1	ZBTB4	zinc finger and BTB domain containing 4
hsa-miR-548f	1	0	1	1	1	1	ZNF275	zinc finger protein 275
hsa-miR-548f	0	0	1	1	0	0	GPR113	G protein-coupled receptor 113
hsa-miR-548f	0	0	1	1	1	1	GFI1	growth factor independent 1 transcription repressor
hsa-miR-548f	0	0	1	1	1	1	ARHGEF26	Rho guanine nucleotide exchange factor (GEF) 26
hsa-miR-548f	1	0	1	1	1	1	FGD5	FYVE, RhoGEF and PH domain containing 5
hsa-miR-548f	1	0	1	1	1	1	KALRN	kalirin, RhoGEF kinase
hsa-miR-548f	0	0	1	0	0	0	C1orf132	chromosome 1 open reading frame 132
hsa-miR-548f	0	0	1	0	1	1	FLJ41200	uncharacterized LOC401492
hsa-miR-548f	1	0	1	1	1	1	MDGA2	MAM domain containing glycosylphosphatidylinositol anchor 2
hsa-miR-548f	0	0	1	1	1	1	RGS3	regulator of G-protein signaling 3
hsa-miR-548f	0	0	1	0	0	0	LGALS17A	Charcot-Leyden crystal protein pseudogene
hsa-miR-548f	0	0	1	1	1	1	FAM19A2	family with sequence similarity 19 (chemokine (C-C motif)-like), member A2
hsa-miR-548f	0	0	1	0	0	0	LOC650368	asparagine-linked glycosylation 1-like pseudogene
hsa-miR-548f	1	0	1	1	1	1	PHKB	phosphorylase kinase, beta
hsa-miR-548f	1	0	1	1	1	1	EPAS1	endothelial PAS domain protein 1
hsa-miR-548f	0	0	1	0	0	0	LOC285043	uncharacterized LOC285043
hsa-miR-548f	1	0	1	0	0	0	GPR137C	G protein-coupled receptor 137C
hsa-miR-548f	1	0	1	1	1	1	OSBPL9	oxysterol binding protein-like 9
hsa-miR-548f	1	0	1	1	1	1	SMAP1	small ArfGAP 1
hsa-miR-548f	1	0	1	1	1	1	GJC1	gap junction protein, gamma 1, 45kDa
hsa-miR-548f	1	0	1	0	1	1	DCUN1D4	DCN1, defective in cullin neddylation 1, domain containing 4 (S. cerevisiae)
hsa-miR-548f	1	0	1	1	0	0	BCORL1	BCL6 corepressor-like 1
hsa-miR-548f	1	0	1	1	1	1	UBA2	ubiquitin-like modifier activating enzyme 2
hsa-miR-548f	0	0	1	1	1	1	ATPBD4	ATP binding domain 4
hsa-miR-548f	1	0	1	1	1	1	C17orf85	chromosome 17 open reading frame 85
hsa-miR-548f	0	0	1	1	0	0	VARS2	valyl-tRNA synthetase 2, mitochondrial (putative)
hsa-miR-548f	0	0	1	0	0	0	TMEM232	transmembrane protein 232
hsa-miR-548f	1	0	1	1	1	1	C11orf30	chromosome 11 open reading frame 30
hsa-miR-548f	1	0	1	1	1	1	ATXN7	ataxin 7
hsa-miR-548f	1	0	1	1	1	1	CTGF	connective tissue growth factor
hsa-miR-548f	0	0	1	0	0	0	C3orf72	chromosome 3 open reading frame 72
hsa-miR-548f	0	0	1	1	1	1	CTPS2	CTP synthase 2
hsa-miR-548f	0	0	1	0	1	1	ASB15	ankyrin repeat and SOCS box containing 15
hsa-miR-548f	1	0	1	0	0	0	ANKRD52	ankyrin repeat domain 52
hsa-miR-548f	0	0	1	0	0	0	LOC613266	uncharacterized LOC613266
hsa-miR-548f	1	0	1	0	0	0	MSL1	male-specific lethal 1 homolog (Drosophila)
hsa-miR-548f	0	0	1	1	1	1	SERAC1	serine active site containing 1
hsa-miR-548f	1	0	1	1	1	1	TP53INP1	tumor protein p53 inducible nuclear protein 1
hsa-miR-548f	1	0	1	1	1	1	MACROD2	MACRO domain containing 2
hsa-miR-548f	1	0	1	1	0	0	UBN2	ubinuclein 2
hsa-miR-548f	1	0	1	1	1	1	DCTN4	dynactin 4 (p62)
hsa-miR-548f	0	0	1	1	1	1	EPPIN	epididymal peptidase inhibitor
hsa-miR-548f	0	0	1	1	0	0	FSIP2	fibrous sheath interacting protein 2
hsa-miR-548f	1	0	1	1	1	1	CSRNP3	cysteine-serine-rich nuclear protein 3
hsa-miR-548f	1	0	1	1	1	1	DPY19L3	dpy-19-like 3 (C. elegans)
hsa-miR-548f	1	0	1	1	1	1	PLEKHB2	pleckstrin homology domain containing, family B (evectins) member 2
hsa-miR-548f	1	0	1	1	1	1	PIK3R1	phosphoinositide-3-kinase, regulatory subunit 1 (alpha)
hsa-miR-548f	1	0	1	1	1	1	SACM1L	SAC1 suppressor of actin mutations 1-like (yeast)
hsa-miR-548f	0	0	1	1	1	1	CCDC132	coiled-coil domain containing 132
hsa-miR-548f	0	0	1	1	0	0	LLGL2	lethal giant larvae homolog 2 (Drosophila)
hsa-miR-548f	0	0	1	1	1	1	ZFYVE28	zinc finger, FYVE domain containing 28
hsa-miR-548f	1	0	1	1	1	1	DLG2	discs, large homolog 2 (Drosophila)
hsa-miR-548f	0	0	1	0	0	0	HNRNPKP3	heterogeneous nuclear ribonucleoprotein K pseudogene 3
hsa-miR-548f	0	0	1	1	1	1	SPICE1	spindle and centriole associated protein 1
hsa-miR-548f	0	0	1	0	0	0	RPL23AP53	ribosomal protein L23a pseudogene 53
hsa-miR-548f	1	0	1	1	1	1	CLTC	clathrin, heavy chain (Hc)
hsa-miR-548f	1	0	1	1	1	1	MFSD6	major facilitator superfamily domain containing 6
hsa-miR-548f	1	0	1	0	1	1	ADIPOR2	adiponectin receptor 2
hsa-miR-548f	0	0	1	1	1	1	DOCK9	dedicator of cytokinesis 9
hsa-miR-548f	1	0	1	1	0	0	PTPN5	protein tyrosine phosphatase, non-receptor type 5 (striatum-enriched)
hsa-miR-548f	1	0	1	1	1	1	PHF17	PHD finger protein 17
hsa-miR-548f	1	0	1	1	1	1	ENAH	enabled homolog (Drosophila)
hsa-miR-548f	1	0	1	1	0	0	PEAK1	NKF3 kinase family member
hsa-miR-548f	1	0	1	1	1	1	CXorf23	chromosome X open reading frame 23
hsa-miR-548f	0	0	1	1	0	0	IQUB	IQ motif and ubiquitin domain containing
hsa-miR-548f	1	0	1	1	1	1	ZFP106	zinc finger protein 106 homolog (mouse)
hsa-miR-548f	1	0	1	1	1	1	R3HDM1	R3H domain containing 1
hsa-miR-548f	1	0	1	0	1	1	FNDC3B	fibronectin type III domain containing 3B
hsa-miR-548f	0	0	1	1	1	1	PITX2	paired-like homeodomain 2
hsa-miR-548f	1	0	1	1	1	1	AFAP1	actin filament associated protein 1
hsa-miR-548f	0	0	1	1	0	0	BPIFB1	BPI fold containing family B, member 1
hsa-miR-548f	1	0	1	0	1	1	YOD1	YOD1 OTU deubiquinating enzyme 1 homolog (S. cerevisiae)
hsa-miR-548f	0	0	1	1	0	0	RASA3	RAS p21 protein activator 3
hsa-miR-548f	1	0	1	1	1	1	SLC12A6	solute carrier family 12 (potassium/chloride transporters), member 6
hsa-miR-548f	1	0	1	0	1	1	KDM2A	lysine (K)-specific demethylase 2A
hsa-miR-548f	1	0	1	1	1	1	KCTD12	potassium channel tetramerisation domain containing 12
hsa-miR-548f	1	0	1	1	1	1	C2CD2	C2 calcium-dependent domain containing 2
hsa-miR-548f	1	0	1	0	1	1	USP37	ubiquitin specific peptidase 37
hsa-miR-548f	0	0	1	1	1	1	ATXN2	ataxin 2
hsa-miR-548f	0	0	1	0	0	0	FLJ26245	uncharacterized LOC400533
hsa-miR-548f	0	0	1	1	1	1	ENPP2	ectonucleotide pyrophosphatase/phosphodiesterase 2
hsa-miR-548f	1	0	1	0	1	1	ESRRG	estrogen-related receptor gamma
hsa-miR-548f	0	0	1	1	1	1	ZNF680	zinc finger protein 680
hsa-miR-548f	1	0	1	1	0	0	FOXP2	forkhead box P2
hsa-miR-548f	1	0	1	1	1	1	RNF111	ring finger protein 111
hsa-miR-548f	1	0	1	0	1	1	FMNL2	formin-like 2
hsa-miR-548f	1	0	1	1	1	1	WTAP	Wilms tumor 1 associated protein
hsa-miR-548f	1	0	1	1	1	1	LRRK2	leucine-rich repeat kinase 2
hsa-miR-548f	0	0	1	0	0	0	AGAP9	ArfGAP with GTPase domain, ankyrin repeat and PH domain 9
hsa-miR-548f	0	0	1	1	1	1	MCM8	minichromosome maintenance complex component 8
hsa-miR-548f	0	0	1	1	1	1	XRN2	5'-3' exoribonuclease 2
hsa-miR-548f	1	0	1	0	1	1	TMEM106B	transmembrane protein 106B
hsa-miR-548f	1	0	1	1	1	1	GATA6	GATA binding protein 6
hsa-miR-548f	0	0	1	1	0	0	FERMT1	fermitin family member 1
hsa-miR-548f	1	0	1	1	1	1	TGFBR3	transforming growth factor, beta receptor III
hsa-miR-548f	1	0	1	1	1	1	PHTF2	putative homeodomain transcription factor 2
hsa-miR-548f	1	0	1	1	1	1	SETX	senataxin
hsa-miR-548f	0	0	1	1	1	1	ENPP3	ectonucleotide pyrophosphatase/phosphodiesterase 3
hsa-miR-548f	0	0	1	1	0	0	MTMR1	myotubularin related protein 1
hsa-miR-548f	1	0	1	1	1	1	DUSP3	dual specificity phosphatase 3
hsa-miR-548f	0	0	1	0	1	1	NEK1	NIMA (never in mitosis gene a)-related kinase 1
hsa-miR-548f	1	0	1	1	1	1	RIF1	RAP1 interacting factor homolog (yeast)
hsa-miR-548f	1	0	1	1	1	1	TAB2	TGF-beta activated kinase 1/MAP3K7 binding protein 2
hsa-miR-548f	0	0	1	1	1	1	ARIH1	ariadne homolog, ubiquitin-conjugating enzyme E2 binding protein, 1 (Drosophila)
hsa-miR-548f	0	0	1	1	1	1	MTPAP	mitochondrial poly(A) polymerase
hsa-miR-548f	1	0	1	0	1	1	DCDC2	doublecortin domain containing 2
hsa-miR-548f	0	0	1	1	1	1	WDR52	WD repeat domain 52
hsa-miR-548f	0	0	1	1	1	1	GMEB2	glucocorticoid modulatory element binding protein 2
hsa-miR-548f	0	0	1	0	0	0	DNAJC5B	DnaJ (Hsp40) homolog, subfamily C, member 5 beta
hsa-miR-548f	1	0	1	1	1	1	SLC25A36	solute carrier family 25 (pyrimidine nucleotide carrier ), member 36
hsa-miR-548f	1	0	1	1	1	1	FAM107B	family with sequence similarity 107, member B
hsa-miR-548f	0	0	1	1	1	1	MIOS	missing oocyte, meiosis regulator, homolog (Drosophila)
hsa-miR-548f	0	0	1	1	1	1	DDX60	DEAD (Asp-Glu-Ala-Asp) box polypeptide 60
hsa-miR-548f	0	0	1	0	0	0	JAKMIP3	Janus kinase and microtubule interacting protein 3
hsa-miR-548f	1	0	1	1	1	1	ERI1	exoribonuclease 1
hsa-miR-548f	1	0	1	0	1	1	GPR85	G protein-coupled receptor 85
hsa-miR-548f	1	0	1	0	1	1	CEP170	centrosomal protein 170kDa
hsa-miR-548f	0	0	1	0	0	0	RPL23AP82	ribosomal protein L23a pseudogene 82
hsa-miR-548f	1	0	1	0	0	0	SYNPO	synaptopodin
hsa-miR-548f	1	0	1	1	1	1	DENND1B	DENN/MADD domain containing 1B
hsa-miR-548f	1	0	1	1	1	1	TMEFF1	transmembrane protein with EGF-like and two follistatin-like domains 1
hsa-miR-548f	1	0	1	1	1	1	ZEB1	zinc finger E-box binding homeobox 1
hsa-miR-548f	1	0	1	1	1	1	MIER1	mesoderm induction early response 1 homolog (Xenopus laevis)
hsa-miR-548f	1	0	1	1	1	1	KDM6A	lysine (K)-specific demethylase 6A
hsa-miR-548f	0	0	1	1	1	1	ZCCHC6	zinc finger, CCHC domain containing 6
hsa-miR-548f	0	0	1	0	1	1	GAB3	GRB2-associated binding protein 3
hsa-miR-548f	0	0	1	0	0	0	ZNF720	zinc finger protein 720
hsa-miR-548f	0	0	1	1	1	1	RAD51AP1	RAD51 associated protein 1
hsa-miR-548f	0	0	1	1	1	1	SRSF11	serine/arginine-rich splicing factor 11
hsa-miR-548f	1	0	1	1	0	0	USP24	ubiquitin specific peptidase 24
hsa-miR-548f	1	0	1	1	1	1	MLL3	myeloid/lymphoid or mixed-lineage leukemia 3
hsa-miR-548f	1	0	1	0	1	1	FAM214A	family with sequence similarity 214, member A
hsa-miR-548f	1	0	1	1	1	1	RNF180	ring finger protein 180
hsa-miR-548f	0	0	1	1	1	1	YAP1	Yes-associated protein 1
hsa-miR-548f	1	0	1	1	1	1	NABP1	nucleic acid binding protein 1
hsa-miR-548f	1	0	1	1	0	0	PTAR1	protein prenyltransferase alpha subunit repeat containing 1
hsa-miR-548f	0	0	1	1	1	1	USPL1	ubiquitin specific peptidase like 1
hsa-miR-548f	1	0	1	1	1	1	EHMT1	euchromatic histone-lysine N-methyltransferase 1
hsa-miR-548f	0	0	1	1	1	1	RANBP17	RAN binding protein 17
hsa-miR-548f	0	0	1	1	1	1	NEK11	NIMA (never in mitosis gene a)- related kinase 11
hsa-miR-548f	0	0	1	1	1	1	CEP192	centrosomal protein 192kDa
hsa-miR-548f	1	0	1	0	1	1	CLINT1	clathrin interactor 1
hsa-miR-548f	0	0	1	1	0	0	PPIE	peptidylprolyl isomerase E (cyclophilin E)
hsa-miR-548f	0	0	1	1	0	0	ATL1	atlastin GTPase 1
hsa-miR-548f	0	0	1	1	1	1	KIAA1841	KIAA1841
hsa-miR-548f	1	0	1	1	1	1	NRP1	neuropilin 1
hsa-miR-548f	1	0	1	0	1	1	CNOT7	CCR4-NOT transcription complex, subunit 7
hsa-miR-548f	1	0	1	1	1	1	ANP32E	acidic (leucine-rich) nuclear phosphoprotein 32 family, member E
hsa-miR-548f	1	0	1	1	1	1	IL17RD	interleukin 17 receptor D
hsa-miR-548f	1	0	1	0	1	1	LMBR1	limb region 1 homolog (mouse)
hsa-miR-548f	1	0	1	1	1	1	ANKRD12	ankyrin repeat domain 12
hsa-miR-548f	0	0	1	1	1	1	PNMAL1	paraneoplastic Ma antigen family-like 1
hsa-miR-548f	1	0	1	1	1	1	RICTOR	RPTOR independent companion of MTOR, complex 2
hsa-miR-548f	1	0	1	0	1	1	COX18	COX18 cytochrome c oxidase assembly homolog (S. cerevisiae)
hsa-miR-548f	1	0	1	0	1	1	NR3C1	nuclear receptor subfamily 3, group C, member 1 (glucocorticoid receptor)
hsa-miR-548f	1	0	1	1	1	1	BOLL	bol, boule-like (Drosophila)
hsa-miR-548f	0	0	1	1	1	1	LMAN2L	lectin, mannose-binding 2-like
hsa-miR-548f	1	0	1	1	1	1	FAM76B	family with sequence similarity 76, member B
hsa-miR-548f	1	0	1	1	1	1	SET	SET nuclear oncogene
hsa-miR-548f	1	0	1	1	0	0	LRRC58	leucine rich repeat containing 58
hsa-miR-548f	0	0	1	0	1	1	PSG1	pregnancy specific beta-1-glycoprotein 1
hsa-miR-548f	1	0	1	1	1	1	PPP3CA	protein phosphatase 3, catalytic subunit, alpha isozyme
hsa-miR-548f	1	0	1	1	1	1	WDR44	WD repeat domain 44
hsa-miR-548f	1	0	1	1	1	1	RNF38	ring finger protein 38
hsa-miR-548f	0	0	1	1	0	0	TMEM134	transmembrane protein 134
hsa-miR-548f	1	0	1	1	1	1	IKZF2	IKAROS family zinc finger 2 (Helios)
hsa-miR-548f	0	0	1	1	1	1	ALS2CR8	amyotrophic lateral sclerosis 2 (juvenile) chromosome region, candidate 8
hsa-miR-548f	1	0	1	1	1	1	TXNRD1	thioredoxin reductase 1
hsa-miR-548f	1	0	1	1	1	1	MIPOL1	mirror-image polydactyly 1
hsa-miR-548f	0	0	1	0	0	0	LINC00308	long intergenic non-protein coding RNA 308
hsa-miR-548f	0	0	1	1	1	1	SHPRH	SNF2 histone linker PHD RING helicase, E3 ubiquitin protein ligase
hsa-miR-548f	0	0	1	1	1	1	DNAJB14	DnaJ (Hsp40) homolog, subfamily B, member 14
hsa-miR-548f	1	0	1	1	1	1	WDR26	WD repeat domain 26
hsa-miR-548f	0	0	1	1	0	0	DNAH1	dynein, axonemal, heavy chain 1
hsa-miR-548f	1	0	1	1	1	1	BCL11A	B-cell CLL/lymphoma 11A (zinc finger protein)
hsa-miR-548f	1	0	1	1	1	1	PNRC1	proline-rich nuclear receptor coactivator 1
hsa-miR-548f	0	0	1	1	1	1	BCOR	BCL6 corepressor
hsa-miR-548f	1	0	1	1	1	1	TAB3	TGF-beta activated kinase 1/MAP3K7 binding protein 3
hsa-miR-548f	0	0	1	1	1	1	BRDT	bromodomain, testis-specific
hsa-miR-548f	1	0	1	1	1	1	CAMTA1	calmodulin binding transcription activator 1
hsa-miR-548f	1	0	1	1	1	1	IQGAP2	IQ motif containing GTPase activating protein 2
hsa-miR-548f	0	0	1	0	1	1	ANKS1B	ankyrin repeat and sterile alpha motif domain containing 1B
hsa-miR-548f	0	0	1	1	0	0	LRRC28	leucine rich repeat containing 28
hsa-miR-548f	0	0	1	1	0	0	EGFL8	EGF-like-domain, multiple 8
hsa-miR-548f	0	0	1	1	1	1	GPR114	G protein-coupled receptor 114
hsa-miR-548f	1	0	1	1	1	1	NLGN4X	neuroligin 4, X-linked
hsa-miR-548f	1	0	1	1	0	0	CLASRP	CLK4-associating serine/arginine rich protein
hsa-miR-548f	0	0	1	1	0	0	RAET1E	retinoic acid early transcript 1E
hsa-miR-548f	1	0	1	1	1	1	ECT2	epithelial cell transforming sequence 2 oncogene
hsa-miR-548f	0	0	1	1	1	1	PTGR2	prostaglandin reductase 2
hsa-miR-548f	1	0	1	1	1	1	SP3	Sp3 transcription factor
hsa-miR-548f	1	0	1	0	1	1	NHS	Nance-Horan syndrome (congenital cataracts and dental anomalies)
hsa-miR-548f	1	0	1	1	1	1	ANKRD11	ankyrin repeat domain 11
hsa-miR-548f	1	0	1	1	1	1	MECP2	methyl CpG binding protein 2 (Rett syndrome)
hsa-miR-548f	0	0	1	0	1	1	RAB18	RAB18, member RAS oncogene family
hsa-miR-548f	0	0	1	1	1	1	ILDR1	immunoglobulin-like domain containing receptor 1
hsa-miR-548f	1	0	1	1	1	1	PLCH1	phospholipase C, eta 1
hsa-miR-548f	1	0	1	1	1	1	NIPA2	non imprinted in Prader-Willi/Angelman syndrome 2
hsa-miR-548f	1	0	1	1	1	1	RTN3	reticulon 3
hsa-miR-548f	1	0	1	1	1	1	QKI	QKI, KH domain containing, RNA binding
hsa-miR-548f	1	0	1	1	1	1	AMOT	angiomotin
hsa-miR-548f	0	0	1	1	1	1	SLC6A2	solute carrier family 6 (neurotransmitter transporter, noradrenalin), member 2
hsa-miR-548f	1	0	1	0	1	1	FAM46A	family with sequence similarity 46, member A
hsa-miR-548f	0	0	1	1	1	1	SNX11	sorting nexin 11
hsa-miR-548f	1	0	1	0	1	1	BAG4	BCL2-associated athanogene 4
hsa-miR-548f	0	0	1	1	1	1	PAFAH1B2	platelet-activating factor acetylhydrolase 1b, catalytic subunit 2 (30kDa)
hsa-miR-548f	0	0	1	1	1	1	PTDSS1	phosphatidylserine synthase 1
hsa-miR-548f	0	0	1	1	1	1	RLIM	ring finger protein, LIM domain interacting
hsa-miR-548f	1	0	1	1	1	1	RIMS3	regulating synaptic membrane exocytosis 3
hsa-miR-548f	0	0	1	1	0	0	TRIM32	tripartite motif containing 32
hsa-miR-548f	0	0	1	1	1	1	REXO2	REX2, RNA exonuclease 2 homolog (S. cerevisiae)
hsa-miR-548f	0	0	1	1	1	1	PDXK	pyridoxal (pyridoxine, vitamin B6) kinase
hsa-miR-548f	1	0	1	1	1	1	U2SURP	U2 snRNP-associated SURP domain containing
hsa-miR-548f	1	0	1	0	1	1	DDX3X	DEAD (Asp-Glu-Ala-Asp) box polypeptide 3, X-linked
hsa-miR-548f	1	0	1	1	1	1	CALM1	calmodulin 1 (phosphorylase kinase, delta)
hsa-miR-548f	0	0	1	0	1	1	TMEM169	transmembrane protein 169
hsa-miR-548f	0	0	1	1	0	0	PRR11	proline rich 11
hsa-miR-548f	1	0	1	1	0	0	SIGMAR1	sigma non-opioid intracellular receptor 1
hsa-miR-548f	1	0	1	1	1	1	SZRD1	SUZ RNA binding domain containing 1
hsa-miR-548f	1	0	1	1	1	1	ZFAND5	zinc finger, AN1-type domain 5
hsa-miR-548f	1	0	1	1	1	1	TRIM2	tripartite motif containing 2
hsa-miR-548f	1	0	1	1	1	1	SUPT16H	suppressor of Ty 16 homolog (S. cerevisiae)
hsa-miR-548f	0	0	1	1	0	0	HAVCR1	hepatitis A virus cellular receptor 1
hsa-miR-548f	0	0	1	1	1	1	H2AFY	H2A histone family, member Y
hsa-miR-548f	0	0	1	1	1	1	KLHL29	kelch-like 29 (Drosophila)
hsa-miR-548f	1	0	1	1	1	1	ETF1	eukaryotic translation termination factor 1
hsa-miR-548f	1	0	1	1	1	1	PRDM2	PR domain containing 2, with ZNF domain
hsa-miR-548f	0	0	1	1	1	1	PTK7	PTK7 protein tyrosine kinase 7
hsa-miR-548f	0	0	1	1	1	1	TOMM40L	translocase of outer mitochondrial membrane 40 homolog (yeast)-like
hsa-miR-548f	1	0	1	1	1	1	PAPOLA	poly(A) polymerase alpha
hsa-miR-548f	0	0	1	0	0	0	KLHL15	kelch-like 15 (Drosophila)
hsa-miR-548f	0	0	1	0	1	1	ZNF37A	zinc finger protein 37A
hsa-miR-548f	0	0	1	1	1	1	KRCC1	lysine-rich coiled-coil 1
hsa-miR-548f	0	0	1	1	1	1	C1QTNF3	C1q and tumor necrosis factor related protein 3
hsa-miR-548f	1	0	1	0	1	1	NECAB1	N-terminal EF-hand calcium binding protein 1
hsa-miR-548f	1	0	1	1	1	1	NRF1	nuclear respiratory factor 1
hsa-miR-548f	0	0	1	1	1	1	CSDE1	cold shock domain containing E1, RNA-binding
hsa-miR-548f	0	0	1	1	1	1	RDH11	retinol dehydrogenase 11 (all-trans/9-cis/11-cis)
hsa-miR-548f	1	0	1	1	1	1	HMGA2	high mobility group AT-hook 2
hsa-miR-548f	1	0	1	0	1	1	SLC19A2	solute carrier family 19 (thiamine transporter), member 2
hsa-miR-548f	0	0	1	1	1	1	SRP19	signal recognition particle 19kDa
hsa-miR-548f	1	0	1	1	1	1	MID1IP1	MID1 interacting protein 1
hsa-miR-548f	1	0	1	1	1	1	NKTR	natural killer-tumor recognition sequence
hsa-miR-548f	1	0	1	0	1	1	BTF3L4	basic transcription factor 3-like 4
hsa-miR-548f	0	0	1	1	1	1	C10orf88	chromosome 10 open reading frame 88
hsa-miR-548f	0	0	1	0	0	0	LOC284260	uncharacterized LOC284260
hsa-miR-548f	1	0	1	1	1	1	TMEM71	transmembrane protein 71
hsa-miR-548f	0	0	1	1	0	0	LYSMD2	LysM, putative peptidoglycan-binding, domain containing 2
hsa-miR-548f	0	0	1	1	1	1	ZCCHC10	zinc finger, CCHC domain containing 10
hsa-miR-548f	0	0	1	1	1	1	RNF103	ring finger protein 103
hsa-miR-548f	1	0	1	1	1	1	BEND6	BEN domain containing 6
hsa-miR-548f	1	0	1	0	1	1	CDK19	cyclin-dependent kinase 19
hsa-miR-548f	0	0	1	1	1	1	TLR4	toll-like receptor 4
hsa-miR-548f	1	0	1	1	1	1	NIPA1	non imprinted in Prader-Willi/Angelman syndrome 1
hsa-miR-548f	0	0	1	1	1	1	FAM221A	family with sequence similarity 221, member A
hsa-miR-548f	1	0	1	1	1	1	VASP	vasodilator-stimulated phosphoprotein
hsa-miR-548f	1	0	1	1	1	1	CNTN4	contactin 4
hsa-miR-548f	1	0	1	1	1	1	RSPO2	R-spondin 2
hsa-miR-548f	1	0	1	1	1	1	B3GNT5	UDP-GlcNAc:betaGal beta-1,3-N-acetylglucosaminyltransferase 5
hsa-miR-548f	1	0	1	0	1	1	NCAM1	neural cell adhesion molecule 1
hsa-miR-548f	0	0	1	1	1	1	ASTN2	astrotactin 2
hsa-miR-548f	0	0	1	1	1	1	F11	coagulation factor XI
hsa-miR-548f	0	0	1	1	1	1	LRMP	lymphoid-restricted membrane protein
hsa-miR-548f	0	0	1	1	0	0	TOMM5	translocase of outer mitochondrial membrane 5 homolog (yeast)
hsa-miR-548f	0	0	1	1	1	1	SEMA3D	sema domain, immunoglobulin domain (Ig), short basic domain, secreted, (semaphorin) 3D
hsa-miR-548f	0	0	1	1	1	1	TFAM	transcription factor A, mitochondrial
hsa-miR-548f	1	0	1	0	1	1	PSMF1	proteasome (prosome, macropain) inhibitor subunit 1 (PI31)
hsa-miR-548f	1	0	1	0	1	1	TFEC	transcription factor EC
hsa-miR-548f	0	0	1	1	0	0	TSPAN16	tetraspanin 16
hsa-miR-548f	0	0	1	1	1	1	PIK3AP1	phosphoinositide-3-kinase adaptor protein 1
hsa-miR-548f	0	0	1	1	1	1	RBBP8	retinoblastoma binding protein 8
hsa-miR-548f	1	0	1	1	1	1	TAF15	TAF15 RNA polymerase II, TATA box binding protein (TBP)-associated factor, 68kDa
hsa-miR-548f	0	0	1	1	1	1	LPAR1	lysophosphatidic acid receptor 1
hsa-miR-548f	1	0	1	1	1	1	ELAVL2	ELAV (embryonic lethal, abnormal vision, Drosophila)-like 2 (Hu antigen B)
hsa-miR-548f	0	0	1	0	1	1	ERAP1	endoplasmic reticulum aminopeptidase 1
hsa-miR-548f	0	0	1	1	1	1	IQCH	IQ motif containing H
hsa-miR-548f	0	0	1	1	0	0	C7orf57	chromosome 7 open reading frame 57
hsa-miR-548f	0	0	1	0	0	0	LOC729307	uncharacterized LOC729307
hsa-miR-548f	1	0	1	1	1	1	ZPLD1	zona pellucida-like domain containing 1
hsa-miR-548f	1	0	1	1	1	1	PITPNB	phosphatidylinositol transfer protein, beta
hsa-miR-548f	1	0	1	1	1	1	TBC1D1	TBC1 (tre-2/USP6, BUB2, cdc16) domain family, member 1
hsa-miR-548f	0	0	1	1	1	1	CEPT1	choline/ethanolamine phosphotransferase 1
hsa-miR-548f	1	0	1	1	1	1	ZNF521	zinc finger protein 521
hsa-miR-548f	1	0	1	1	1	1	SECISBP2L	SECIS binding protein 2-like
hsa-miR-548f	0	0	1	1	1	1	SFI1	Sfi1 homolog, spindle assembly associated (yeast)
hsa-miR-548f	1	0	1	1	1	1	FAM189B	family with sequence similarity 189, member B
hsa-miR-548f	0	0	1	0	0	0	NBR2	neighbor of BRCA1 gene 2 (non-protein coding)
hsa-miR-548f	1	0	1	1	1	1	QTRTD1	queuine tRNA-ribosyltransferase domain containing 1
hsa-miR-548f	0	0	1	1	1	1	NUB1	negative regulator of ubiquitin-like proteins 1
hsa-miR-548f	0	0	1	1	1	1	EDA2R	ectodysplasin A2 receptor
hsa-miR-548f	1	0	1	1	1	1	FAM120A	family with sequence similarity 120A
hsa-miR-548f	1	0	1	0	1	1	DDX3Y	DEAD (Asp-Glu-Ala-Asp) box polypeptide 3, Y-linked
hsa-miR-548f	1	0	1	1	1	1	ZZZ3	zinc finger, ZZ-type containing 3
hsa-miR-548f	0	0	1	1	0	0	TMEM171	transmembrane protein 171
hsa-miR-548f	1	0	1	1	1	1	RAP2C	RAP2C, member of RAS oncogene family
hsa-miR-548f	0	0	1	1	1	1	PIK3CG	phosphatidylinositol-4,5-bisphosphate 3-kinase, catalytic subunit gamma
hsa-miR-548f	1	0	1	1	1	1	ZEB2	zinc finger E-box binding homeobox 2
hsa-miR-548f	0	0	1	1	1	1	ARHGAP6	Rho GTPase activating protein 6
hsa-miR-548f	0	0	1	1	1	1	TMEM139	transmembrane protein 139
hsa-miR-548f	0	0	1	1	1	1	SNAPC3	small nuclear RNA activating complex, polypeptide 3, 50kDa
hsa-miR-548f	0	0	1	1	1	1	CLEC12B	C-type lectin domain family 12, member B
hsa-miR-548f	1	0	1	1	1	1	PEX5L	peroxisomal biogenesis factor 5-like
hsa-miR-548f	0	0	1	0	0	0	FAM201A	family with sequence similarity 201, member A
hsa-miR-548f	1	0	1	1	1	1	SLC35G1	solute carrier family 35, member G1
hsa-miR-548f	0	0	1	1	1	1	FAM171B	family with sequence similarity 171, member B
hsa-miR-548f	1	0	1	1	1	1	HECTD2	HECT domain containing E3 ubiquitin protein ligase 2
hsa-miR-548f	1	0	1	0	1	1	CLDN12	claudin 12
hsa-miR-548f	1	0	1	0	1	1	NEGR1	neuronal growth regulator 1
hsa-miR-548f	0	0	1	1	1	1	PLGRKT	plasminogen receptor, C-terminal lysine transmembrane protein
hsa-miR-548f	0	0	1	0	0	0	SRGAP2C	SLIT-ROBO Rho GTPase activating protein 2C
hsa-miR-548f	1	0	1	0	1	1	CPEB4	cytoplasmic polyadenylation element binding protein 4
hsa-miR-548f	0	0	1	0	0	0	LOC286184	uncharacterized LOC286184
hsa-miR-548f	0	0	1	1	1	1	ZNF138	zinc finger protein 138
hsa-miR-548f	1	0	1	0	1	1	YAF2	YY1 associated factor 2
hsa-miR-548f	1	0	1	1	1	1	SLC35F3	solute carrier family 35, member F3
hsa-miR-548f	1	0	1	1	1	1	C4orf19	chromosome 4 open reading frame 19
hsa-miR-548f	1	0	1	1	1	1	GALNT1	UDP-N-acetyl-alpha-D-galactosamine:polypeptide N-acetylgalactosaminyltransferase 1 (GalNAc-T1)
hsa-miR-548f	1	0	1	1	1	1	DPP10	dipeptidyl-peptidase 10 (non-functional)
hsa-miR-548f	0	0	1	1	1	1	TTC39B	tetratricopeptide repeat domain 39B
hsa-miR-548f	1	0	1	0	1	1	ARID2	AT rich interactive domain 2 (ARID, RFX-like)
hsa-miR-548f	0	0	1	0	0	0	LOC100134868	uncharacterized LOC100134868
hsa-miR-548f	1	0	1	1	1	1	FGFR2	fibroblast growth factor receptor 2
hsa-miR-548f	1	0	1	1	1	1	PAIP2	poly(A) binding protein interacting protein 2
hsa-miR-548f	0	0	1	0	0	0	USP32P1	ubiquitin specific peptidase 32 pseudogene 1
hsa-miR-548f	1	0	1	1	1	1	DPP8	dipeptidyl-peptidase 8
hsa-miR-548f	1	0	1	1	1	1	DACH2	dachshund homolog 2 (Drosophila)
hsa-miR-548f	0	0	1	1	1	1	TMEM45A	transmembrane protein 45A
hsa-miR-548f	1	0	1	1	1	1	FBXO8	F-box protein 8
hsa-miR-548f	1	0	1	1	1	1	SLITRK3	SLIT and NTRK-like family, member 3
hsa-miR-548f	0	0	1	1	0	0	MTCH1	mitochondrial carrier 1
hsa-miR-548f	0	0	1	0	1	1	FAM13B	family with sequence similarity 13, member B
hsa-miR-548f	1	0	1	1	1	1	FAM123A	family with sequence similarity 123A
hsa-miR-548f	1	0	1	1	1	1	TNFSF4	tumor necrosis factor (ligand) superfamily, member 4
hsa-miR-548f	0	0	1	1	1	1	CARD8	caspase recruitment domain family, member 8
hsa-miR-548f	1	0	1	1	1	1	CLOCK	clock homolog (mouse)
hsa-miR-548f	0	0	1	1	1	1	RABGAP1L	RAB GTPase activating protein 1-like
hsa-miR-548f	1	0	1	1	1	1	NPL	N-acetylneuraminate pyruvate lyase (dihydrodipicolinate synthase)
hsa-miR-548f	0	0	1	0	0	0	LOC154822	uncharacterized LOC154822
hsa-miR-548f	0	0	1	0	0	0	LINC00347	long intergenic non-protein coding RNA 347
hsa-miR-548f	0	0	1	0	1	1	C12orf74	chromosome 12 open reading frame 74
hsa-miR-548f	1	0	1	1	0	0	WNK1	WNK lysine deficient protein kinase 1
hsa-miR-548f	1	0	1	0	1	1	PSD3	pleckstrin and Sec7 domain containing 3
hsa-miR-548f	1	0	1	1	1	1	ZFAND4	zinc finger, AN1-type domain 4
hsa-miR-548f	0	0	1	1	1	1	DOCK8	dedicator of cytokinesis 8
hsa-miR-548f	1	0	1	1	1	1	SUPT7L	suppressor of Ty 7 (S. cerevisiae)-like
hsa-miR-548f	1	0	1	1	1	1	SENP1	SUMO1/sentrin specific peptidase 1
hsa-miR-548f	1	0	1	1	1	1	SF3B1	splicing factor 3b, subunit 1, 155kDa
hsa-miR-548f	1	0	1	0	1	1	LYPD6	LY6/PLAUR domain containing 6
hsa-miR-548f	1	0	1	1	1	1	KIF2A	kinesin heavy chain member 2A
hsa-miR-548f	1	0	1	0	1	1	ZNF800	zinc finger protein 800
hsa-miR-548f	1	0	1	1	1	1	RTKN2	rhotekin 2
hsa-miR-548f	1	0	1	1	1	1	WSB1	WD repeat and SOCS box containing 1
hsa-miR-548f	0	0	1	0	0	0	LOC255025	uncharacterized LOC255025
hsa-miR-548f	1	0	1	1	1	1	CLVS1	clavesin 1
hsa-miR-548f	1	0	1	1	1	1	PELI1	pellino E3 ubiquitin protein ligase 1
hsa-miR-548f	1	0	1	0	1	1	ARHGAP5	Rho GTPase activating protein 5
hsa-miR-548f	0	0	1	0	1	1	ITGA1	integrin, alpha 1
hsa-miR-548f	0	0	1	1	0	0	TRABD2A	TraB domain containing 2A
hsa-miR-548f	1	0	1	1	1	1	PCGF5	polycomb group ring finger 5
hsa-miR-548f	1	0	1	1	1	1	KDM5C	lysine (K)-specific demethylase 5C
hsa-miR-548f	0	0	1	1	0	0	CRYM-AS1	CRYM antisense RNA 1
hsa-miR-548f	1	0	1	1	1	1	ZFP161	zinc finger protein 161 homolog (mouse)
hsa-miR-548f	1	0	1	1	1	1	KLHL28	kelch-like 28 (Drosophila)
hsa-miR-548f	0	0	1	1	1	1	CDC42SE2	CDC42 small effector 2
hsa-miR-548f	1	0	1	1	1	1	INPP5A	inositol polyphosphate-5-phosphatase, 40kDa
hsa-miR-548f	0	0	1	0	0	0	CCDC150	coiled-coil domain containing 150
hsa-miR-548f	1	0	1	1	1	1	ZSCAN29	zinc finger and SCAN domain containing 29
hsa-miR-548f	1	0	1	0	1	1	PLEKHH2	pleckstrin homology domain containing, family H (with MyTH4 domain) member 2
hsa-miR-548f	0	0	1	1	1	1	GPATCH2	G patch domain containing 2
hsa-miR-548f	0	0	1	1	0	0	TM6SF1	transmembrane 6 superfamily member 1
hsa-miR-548f	1	0	1	1	0	0	MANEAL	mannosidase, endo-alpha-like
hsa-miR-548f	1	0	1	1	1	1	ATP9A	ATPase, class II, type 9A
hsa-miR-548f	1	0	1	1	1	1	NIPBL	Nipped-B homolog (Drosophila)
hsa-miR-548f	1	0	1	1	1	1	MYLK	myosin light chain kinase
hsa-miR-548f	0	0	1	1	1	1	GORAB	golgin, RAB6-interacting
hsa-miR-548f	1	0	1	1	1	1	EIF4G2	eukaryotic translation initiation factor 4 gamma, 2
hsa-miR-548f	1	0	1	1	1	1	VTCN1	V-set domain containing T cell activation inhibitor 1
hsa-miR-548f	1	0	1	1	1	1	CKAP2	cytoskeleton associated protein 2
hsa-miR-548f	1	0	1	1	1	1	VIM	vimentin
hsa-miR-548f	1	0	1	1	1	1	GRHL1	grainyhead-like 1 (Drosophila)
hsa-miR-548f	1	0	1	1	1	1	PDCD6IP	programmed cell death 6 interacting protein
hsa-miR-548f	1	0	1	1	1	1	SRPK2	SRSF protein kinase 2
hsa-miR-548f	0	0	1	1	0	0	RPLP0	ribosomal protein, large, P0
hsa-miR-548f	0	0	1	0	0	0	AQP7P2	aquaporin 7 pseudogene 2
hsa-miR-548f	1	0	1	1	1	1	MED27	mediator complex subunit 27
hsa-miR-548f	1	0	1	0	1	1	TGFBR1	transforming growth factor, beta receptor 1
hsa-miR-548f	1	0	1	1	1	1	USP47	ubiquitin specific peptidase 47
hsa-miR-548f	1	0	1	0	1	1	TMEM194A	transmembrane protein 194A
hsa-miR-548f	0	0	1	1	0	0	RPS16	ribosomal protein S16
hsa-miR-548f	0	0	1	0	0	0	JPX	JPX transcript, XIST activator (non-protein coding)
hsa-miR-548f	1	0	1	1	1	1	CTBP1	C-terminal binding protein 1
hsa-miR-548f	1	0	1	1	1	1	C1orf173	chromosome 1 open reading frame 173
hsa-miR-548f	1	0	1	1	1	1	WNT5A	wingless-type MMTV integration site family, member 5A
hsa-miR-548f	0	0	1	1	1	1	C3orf67	chromosome 3 open reading frame 67
hsa-miR-548f	0	0	1	1	0	0	DNHD1	dynein heavy chain domain 1
hsa-miR-548f	0	0	1	0	1	1	LOC389043	uncharacterized LOC389043
hsa-miR-548f	1	0	1	1	0	0	SLC45A4	solute carrier family 45, member 4
hsa-miR-548f	1	0	1	1	1	1	SYNE1	spectrin repeat containing, nuclear envelope 1
hsa-miR-548f	0	0	1	1	1	1	SPDYA	speedy homolog A (Xenopus laevis)
hsa-miR-548f	1	0	1	1	1	1	ARHGAP44	Rho GTPase activating protein 44
hsa-miR-548f	0	0	1	1	0	0	HERC2P3	hect domain and RLD 2 pseudogene 3
hsa-miR-548f	1	0	1	0	1	1	PIK3R3	phosphoinositide-3-kinase, regulatory subunit 3 (gamma)
hsa-miR-548f	1	0	1	1	1	1	ELOVL7	ELOVL fatty acid elongase 7
hsa-miR-548f	1	0	1	1	1	1	ACVR2B	activin A receptor, type IIB
hsa-miR-548f	1	0	1	0	1	1	LRRTM4	leucine rich repeat transmembrane neuronal 4
hsa-miR-548f	1	0	1	1	1	1	KRIT1	KRIT1, ankyrin repeat containing
hsa-miR-548f	1	0	1	0	1	1	ARPP19	cAMP-regulated phosphoprotein, 19kDa
hsa-miR-548f	0	0	1	0	1	1	GALNT13	UDP-N-acetyl-alpha-D-galactosamine:polypeptide N-acetylgalactosaminyltransferase 13 (GalNAc-T13)
hsa-miR-548f	1	0	1	0	1	1	MYBL1	v-myb myeloblastosis viral oncogene homolog (avian)-like 1
hsa-miR-548f	1	0	1	0	1	1	CPEB2	cytoplasmic polyadenylation element binding protein 2
hsa-miR-548f	0	0	1	0	0	0	C5orf49	chromosome 5 open reading frame 49
hsa-miR-548f	0	0	1	1	1	1	SPHKAP	SPHK1 interactor, AKAP domain containing
hsa-miR-548f	1	0	1	1	1	1	GABRB2	gamma-aminobutyric acid (GABA) A receptor, beta 2
hsa-miR-548f	0	0	1	0	0	0	FBXL19-AS1	FBXL19 antisense RNA 1 (head to head)
hsa-miR-548f	0	0	1	1	1	1	SLC25A35	solute carrier family 25, member 35
hsa-miR-548f	1	0	1	1	1	1	NR2F2	nuclear receptor subfamily 2, group F, member 2
hsa-miR-548f	1	0	1	1	1	1	PTPRD	protein tyrosine phosphatase, receptor type, D
hsa-miR-548f	1	0	1	1	1	1	USP34	ubiquitin specific peptidase 34
hsa-miR-548f	1	0	1	1	1	1	SUV420H1	suppressor of variegation 4-20 homolog 1 (Drosophila)
hsa-miR-548f	1	0	1	1	1	1	TBP	TATA box binding protein
hsa-miR-548f	1	0	1	0	1	1	KIF5C	kinesin family member 5C
hsa-miR-548f	0	0	1	1	0	0	GKN2	gastrokine 2
hsa-miR-548f	0	0	1	0	0	0	LRRC37A11P	leucine rich repeat containing 37, member A11, pseudogene
hsa-miR-548f	1	0	1	1	1	1	NR3C2	nuclear receptor subfamily 3, group C, member 2
hsa-miR-548f	1	0	1	0	1	1	ROBO1	roundabout, axon guidance receptor, homolog 1 (Drosophila)
hsa-miR-548f	0	0	1	1	0	0	C9orf84	chromosome 9 open reading frame 84
hsa-miR-548f	1	0	1	1	1	1	TMEM132B	transmembrane protein 132B
hsa-miR-548f	1	0	1	1	1	1	TMEM64	transmembrane protein 64
hsa-miR-548f	1	0	1	1	1	1	ST18	suppression of tumorigenicity 18 (breast carcinoma) (zinc finger protein)
hsa-miR-548f	1	0	1	0	1	1	PRDM10	PR domain containing 10
hsa-miR-548f	1	0	1	1	1	1	OTUD4	OTU domain containing 4
hsa-miR-548f	1	0	1	1	1	1	FKBP1A	FK506 binding protein 1A, 12kDa
hsa-miR-548f	0	0	1	1	1	1	C5orf47	chromosome 5 open reading frame 47
hsa-miR-548f	1	0	1	0	1	1	CAMSAP2	calmodulin regulated spectrin-associated protein family, member 2
hsa-miR-548f	1	0	1	1	1	1	ANK2	ankyrin 2, neuronal
hsa-miR-548f	0	0	1	1	0	0	CCDC79	coiled-coil domain containing 79
hsa-miR-548f	1	0	1	1	1	1	TRAPPC8	trafficking protein particle complex 8
hsa-miR-548f	1	0	1	1	1	1	ZMYM4	zinc finger, MYM-type 4
hsa-miR-548f	1	0	1	1	1	1	MLLT10	myeloid/lymphoid or mixed-lineage leukemia (trithorax homolog, Drosophila); translocated to, 10
hsa-miR-548f	0	0	1	0	0	0	FAM225B	family with sequence similarity 225, member B (non-protein coding)
hsa-miR-548f	1	0	1	0	1	1	NFAT5	nuclear factor of activated T-cells 5, tonicity-responsive
hsa-miR-548f	1	0	1	1	1	1	PTPRZ1	protein tyrosine phosphatase, receptor-type, Z polypeptide 1
hsa-miR-548f	1	0	1	1	1	1	FNDC3A	fibronectin type III domain containing 3A
hsa-miR-548f	0	0	1	1	0	0	CCDC144A	coiled-coil domain containing 144A
hsa-miR-548f	0	0	1	1	1	1	PRKAR2A	protein kinase, cAMP-dependent, regulatory, type II, alpha
hsa-miR-548f	0	0	1	0	0	0	LOC100133207	uncharacterized LOC100133207
hsa-miR-548f	1	0	1	1	1	1	ERMAP	erythroblast membrane-associated protein (Scianna blood group)
hsa-miR-548f	1	0	1	1	0	0	KRT80	keratin 80
hsa-miR-548f	1	0	1	1	1	1	ATP2B4	ATPase, Ca++ transporting, plasma membrane 4
hsa-miR-548f	1	0	1	1	1	1	JPH1	junctophilin 1
hsa-miR-548f	1	0	1	1	1	1	RBL2	retinoblastoma-like 2 (p130)
hsa-miR-548f	1	0	1	1	1	1	MIER3	mesoderm induction early response 1, family member 3
hsa-miR-548f	0	0	1	1	1	1	NUP54	nucleoporin 54kDa
hsa-miR-548f	1	0	1	0	1	1	MTX3	metaxin 3
hsa-miR-548f	1	0	1	1	0	0	CCDC30	coiled-coil domain containing 30
hsa-miR-548f	1	0	1	0	1	1	CLASP2	cytoplasmic linker associated protein 2
hsa-miR-548f	0	0	1	0	0	0	EML6	echinoderm microtubule associated protein like 6
hsa-miR-548f	1	0	1	1	1	1	SMAD4	SMAD family member 4
hsa-miR-548f	0	0	1	0	1	1	PRH2	proline-rich protein HaeIII subfamily 2
hsa-miR-548f	0	0	1	0	1	1	NHSL1	NHS-like 1
hsa-miR-548f	0	0	1	1	1	1	IPCEF1	interaction protein for cytohesin exchange factors 1
hsa-miR-548f	0	0	1	1	1	1	PRR14L	proline rich 14-like
hsa-miR-548f	1	0	1	1	0	0	RBM27	RNA binding motif protein 27
hsa-miR-548f	1	0	1	1	0	0	CECR2	cat eye syndrome chromosome region, candidate 2
hsa-miR-548f	0	0	1	1	1	1	ADH1B	alcohol dehydrogenase 1B (class I), beta polypeptide
hsa-miR-548f	0	0	1	1	1	1	MLIP	muscular LMNA-interacting protein
hsa-miR-548f	1	0	1	1	1	1	KLHL2	kelch-like 2, Mayven (Drosophila)
hsa-miR-548f	0	0	1	1	1	1	ARMCX3	armadillo repeat containing, X-linked 3
hsa-miR-548f	1	0	1	1	1	1	TC2N	tandem C2 domains, nuclear
hsa-miR-548f	0	0	1	1	0	0	PPP2R2B	protein phosphatase 2, regulatory subunit B, beta
hsa-miR-548f	0	0	1	0	1	1	MYO3B	myosin IIIB
hsa-miR-548f	0	0	1	0	1	1	B3GALTL	beta 1,3-galactosyltransferase-like
hsa-miR-548f	1	0	1	1	1	1	DCAF5	DDB1 and CUL4 associated factor 5
hsa-miR-548f	0	0	1	1	0	0	LRR1	leucine rich repeat protein 1
hsa-miR-548f	1	0	1	1	1	1	PDXDC1	pyridoxal-dependent decarboxylase domain containing 1
hsa-miR-548f	1	0	1	1	1	1	ATP6V1C1	ATPase, H+ transporting, lysosomal 42kDa, V1 subunit C1
hsa-miR-548f	0	0	1	1	0	0	C3orf77	chromosome 3 open reading frame 77
hsa-miR-548f	1	0	1	1	1	1	ZNF711	zinc finger protein 711
hsa-miR-548f	0	0	1	0	1	1	TYW5	tRNA-yW synthesizing protein 5
hsa-miR-548f	1	0	1	1	1	1	PHF3	PHD finger protein 3
hsa-miR-548f	0	0	1	1	1	1	ATP2A2	ATPase, Ca++ transporting, cardiac muscle, slow twitch 2
hsa-miR-548f	1	0	1	0	1	1	PCGF3	polycomb group ring finger 3
hsa-miR-548f	1	0	1	1	1	1	NFIB	nuclear factor I/B
hsa-miR-548f	1	0	1	0	1	1	IGF2BP3	insulin-like growth factor 2 mRNA binding protein 3
hsa-miR-548f	0	0	1	1	0	0	SAMD7	sterile alpha motif domain containing 7
hsa-miR-548f	0	0	1	1	1	1	DAZL	deleted in azoospermia-like
hsa-miR-548f	1	0	1	1	1	1	PGAP1	post-GPI attachment to proteins 1
hsa-miR-548f	1	0	1	1	1	1	TMEM135	transmembrane protein 135
hsa-miR-548f	1	0	1	1	1	1	FAM179B	family with sequence similarity 179, member B
hsa-miR-548f	1	0	1	1	1	1	BZRAP1	benzodiazapine receptor (peripheral) associated protein 1
hsa-miR-548f	1	0	1	1	1	1	HIF1A	hypoxia inducible factor 1, alpha subunit (basic helix-loop-helix transcription factor)
hsa-miR-548f	0	0	1	1	1	1	SSFA2	sperm specific antigen 2
hsa-miR-548f	1	0	1	0	1	1	TBL1XR1	transducin (beta)-like 1 X-linked receptor 1
hsa-miR-548f	1	0	1	1	1	1	LYST	lysosomal trafficking regulator
hsa-miR-548f	1	0	1	1	1	1	CREB3L2	cAMP responsive element binding protein 3-like 2
hsa-miR-548f	1	0	1	1	1	1	HIC2	hypermethylated in cancer 2
hsa-miR-548f	0	0	1	0	1	1	CD59	CD59 molecule, complement regulatory protein
hsa-miR-548f	0	0	1	1	1	1	FGG	fibrinogen gamma chain
hsa-miR-548f	1	0	1	0	1	1	STX6	syntaxin 6
hsa-miR-548f	1	0	1	1	1	1	ARF1	ADP-ribosylation factor 1
hsa-miR-548f	0	0	1	0	0	0	LOC100128988	uncharacterized LOC100128988
hsa-miR-548f	1	0	1	1	1	1	FUT9	fucosyltransferase 9 (alpha (1,3) fucosyltransferase)
hsa-miR-548f	1	0	1	1	1	1	TOM1L1	target of myb1 (chicken)-like 1
hsa-miR-548f	0	0	1	0	0	0	RPS16P10	ribosomal protein S16 pseudogene 10
hsa-miR-548f	0	0	1	1	1	1	CETN2	centrin, EF-hand protein, 2
hsa-miR-548f	1	0	1	1	1	1	TARBP2	TAR (HIV-1) RNA binding protein 2
hsa-miR-548f	1	0	1	1	1	1	MMAB	methylmalonic aciduria (cobalamin deficiency) cblB type
hsa-miR-548f	0	0	1	0	0	0	LOC400768	uncharacterized LOC400768
hsa-miR-548f	0	0	1	1	0	0	RAD23A	RAD23 homolog A (S. cerevisiae)
hsa-miR-548f	0	0	1	1	1	1	SEC22C	SEC22 vesicle trafficking protein homolog C (S. cerevisiae)
hsa-miR-548f	0	0	1	1	0	0	PPOX	protoporphyrinogen oxidase
hsa-miR-548f	0	0	1	1	0	0	PSG8	pregnancy specific beta-1-glycoprotein 8
hsa-miR-548f	1	0	1	0	1	1	SLCO2A1	solute carrier organic anion transporter family, member 2A1
hsa-miR-548f	0	0	1	1	1	1	BTF3	basic transcription factor 3
hsa-miR-548f	0	0	1	1	1	1	MMADHC	methylmalonic aciduria (cobalamin deficiency) cblD type, with homocystinuria
hsa-miR-548f	1	0	1	1	1	1	SLC35D2	solute carrier family 35, member D2
hsa-miR-548f	0	0	1	1	1	1	CIRBP	cold inducible RNA binding protein
hsa-miR-548f	0	0	1	1	1	1	FAT1	FAT tumor suppressor homolog 1 (Drosophila)
hsa-miR-548f	1	0	1	1	1	1	CAAP1	caspase activity and apoptosis inhibitor 1
hsa-miR-548f	1	0	1	1	1	1	SSR1	signal sequence receptor, alpha
hsa-miR-548f	1	0	1	1	1	1	HMGN3	high mobility group nucleosomal binding domain 3
hsa-miR-548f	0	0	1	1	1	1	MTCP1	mature T-cell proliferation 1
hsa-miR-548f	0	0	1	1	1	1	PLAUR	plasminogen activator, urokinase receptor
hsa-miR-548f	0	0	1	1	0	0	TMEM183A	transmembrane protein 183A
hsa-miR-548f	1	0	1	0	1	1	RPS6KB1	ribosomal protein S6 kinase, 70kDa, polypeptide 1
hsa-miR-548f	0	0	1	1	1	1	TRIM68	tripartite motif containing 68
hsa-miR-548f	1	0	1	1	1	1	TMEM248	transmembrane protein 248
hsa-miR-548f	0	0	1	1	1	1	CDS2	CDP-diacylglycerol synthase (phosphatidate cytidylyltransferase) 2
hsa-miR-548f	0	0	1	1	1	1	XBP1	X-box binding protein 1
hsa-miR-548f	1	0	1	1	1	1	NAP1L1	nucleosome assembly protein 1-like 1
hsa-miR-548f	1	0	1	1	1	1	ARFIP2	ADP-ribosylation factor interacting protein 2
hsa-miR-548f	0	0	1	1	1	1	EIF3J	eukaryotic translation initiation factor 3, subunit J
hsa-miR-548f	1	0	1	1	1	1	WIPF1	WAS/WASL interacting protein family, member 1
hsa-miR-548f	0	0	1	1	1	1	TOX4	TOX high mobility group box family member 4
hsa-miR-548f	0	0	1	1	1	1	BEX2	brain expressed X-linked 2
hsa-miR-548f	1	0	1	1	1	1	PIAS1	protein inhibitor of activated STAT, 1
hsa-miR-548f	1	0	1	1	1	1	TMEM66	transmembrane protein 66
hsa-miR-548f	0	0	1	1	1	1	MRPS7	mitochondrial ribosomal protein S7
hsa-miR-548f	0	0	1	1	1	1	UIMC1	ubiquitin interaction motif containing 1
hsa-miR-548f	1	0	1	1	1	1	BTBD10	BTB (POZ) domain containing 10
hsa-miR-548f	0	0	1	1	0	0	NOX5	NADPH oxidase, EF-hand calcium binding domain 5
hsa-miR-548f	1	0	1	1	1	1	GPR137B	G protein-coupled receptor 137B
hsa-miR-548f	1	0	1	1	1	1	ARNTL	aryl hydrocarbon receptor nuclear translocator-like
hsa-miR-548f	0	0	1	1	1	1	PEX19	peroxisomal biogenesis factor 19
hsa-miR-548f	1	0	1	1	1	1	FOS	FBJ murine osteosarcoma viral oncogene homolog
hsa-miR-548f	0	0	1	1	1	1	SMNDC1	survival motor neuron domain containing 1
hsa-miR-548f	1	0	1	0	1	1	NLN	neurolysin (metallopeptidase M3 family)
hsa-miR-548f	1	0	1	1	1	1	FUBP3	far upstream element (FUSE) binding protein 3
hsa-miR-548f	1	0	1	1	1	1	ARL4A	ADP-ribosylation factor-like 4A
hsa-miR-548f	0	0	1	1	1	1	TCTN3	tectonic family member 3
hsa-miR-548f	1	0	1	1	1	1	BAALC	brain and acute leukemia, cytoplasmic
hsa-miR-548f	1	0	1	1	1	1	CNBP	CCHC-type zinc finger, nucleic acid binding protein
hsa-miR-548f	0	0	1	1	0	0	METTL5	methyltransferase like 5
hsa-miR-548f	0	0	1	1	1	1	FAM18B1	family with sequence similarity 18, member B1
hsa-miR-548f	1	0	1	1	1	1	RNF2	ring finger protein 2
hsa-miR-548f	1	0	1	1	1	1	HMGN2	high mobility group nucleosomal binding domain 2
hsa-miR-548f	0	0	1	1	0	0	TUBA8	tubulin, alpha 8
hsa-miR-548f	1	0	1	1	1	1	DNAJA2	DnaJ (Hsp40) homolog, subfamily A, member 2
hsa-miR-548f	0	0	1	1	1	1	UBE2A	ubiquitin-conjugating enzyme E2A
hsa-miR-548f	1	0	1	0	1	1	EIF2S2	eukaryotic translation initiation factor 2, subunit 2 beta, 38kDa
hsa-miR-548f	1	0	1	1	0	0	CCM2	cerebral cavernous malformation 2
hsa-miR-548f	1	0	1	0	1	1	CD47	CD47 molecule
hsa-miR-548f	1	0	1	1	1	1	YWHAE	tyrosine 3-monooxygenase/tryptophan 5-monooxygenase activation protein, epsilon polypeptide
hsa-miR-548f	0	0	1	1	1	1	ZNF346	zinc finger protein 346
hsa-miR-548f	0	0	1	0	1	1	SEPT7	septin 7
hsa-miR-548f	0	0	1	1	1	1	BEX4	brain expressed, X-linked 4
hsa-miR-548f	0	0	1	0	0	0	LOC100132984	uncharacterized LOC100132984
hsa-miR-548f	0	0	1	1	1	1	LIMK2	LIM domain kinase 2
hsa-miR-548f	0	0	1	1	1	1	FAM118B	family with sequence similarity 118, member B
hsa-miR-548f	0	0	1	1	1	1	C10orf2	chromosome 10 open reading frame 2
hsa-miR-548f	1	0	1	1	1	1	RND3	Rho family GTPase 3
hsa-miR-548f	0	0	1	0	1	1	SERF1A	small EDRK-rich factor 1A (telomeric)
hsa-miR-548f	1	0	1	1	1	1	SLMAP	sarcolemma associated protein
hsa-miR-548f	1	0	1	0	1	1	KIAA0240	KIAA0240
hsa-miR-548f	0	0	1	0	0	0	FAM47E	family with sequence similarity 47, member E
hsa-miR-548f	1	0	1	1	1	1	STAG2	stromal antigen 2
hsa-miR-548f	0	0	1	1	1	1	BDP1	B double prime 1, subunit of RNA polymerase III transcription initiation factor IIIB
hsa-miR-548f	0	0	1	0	0	0	LOC731789	uncharacterized LOC731789
hsa-miR-548f	1	0	1	1	1	1	PTPRG	protein tyrosine phosphatase, receptor type, G
hsa-miR-548f	1	0	1	1	1	1	FBXW7	F-box and WD repeat domain containing 7, E3 ubiquitin protein ligase
hsa-miR-548f	0	0	1	1	1	1	ATG5	autophagy related 5
hsa-miR-548f	1	0	1	1	1	1	HECW2	HECT, C2 and WW domain containing E3 ubiquitin protein ligase 2
hsa-miR-548f	1	0	1	1	1	1	KIAA2018	KIAA2018
hsa-miR-548f	1	0	1	0	1	1	PTP4A1	protein tyrosine phosphatase type IVA, member 1
hsa-miR-548f	1	0	1	0	1	1	XRN1	5'-3' exoribonuclease 1
hsa-miR-548f	1	0	1	0	1	1	OSBPL8	oxysterol binding protein-like 8
hsa-miR-548f	0	0	1	0	1	1	HDAC9	histone deacetylase 9
hsa-miR-548f	1	0	1	1	1	1	SLC39A10	solute carrier family 39 (zinc transporter), member 10
hsa-miR-548f	1	0	1	0	1	1	CNTNAP2	contactin associated protein-like 2
hsa-miR-548f	0	0	1	1	1	1	STON1	stonin 1
hsa-miR-548f	1	0	1	1	1	1	ZFHX3	zinc finger homeobox 3
hsa-miR-548f	0	0	1	1	1	1	SLC39A14	solute carrier family 39 (zinc transporter), member 14
hsa-miR-548f	1	0	1	1	1	1	PI15	peptidase inhibitor 15
hsa-miR-548f	1	0	1	1	1	1	SEC14L1	SEC14-like 1 (S. cerevisiae)
hsa-miR-548f	1	0	1	1	1	1	RBPMS	RNA binding protein with multiple splicing
hsa-miR-548f	0	0	1	1	1	1	ATF2	activating transcription factor 2
hsa-miR-548f	1	0	1	1	0	0	DPY19L1	dpy-19-like 1 (C. elegans)
hsa-miR-548f	1	0	1	1	1	1	MOSPD1	motile sperm domain containing 1
hsa-miR-548f	0	0	1	1	1	1	MARVELD2	MARVEL domain containing 2
hsa-miR-548f	0	0	1	1	1	1	EIF1AY	eukaryotic translation initiation factor 1A, Y-linked
hsa-miR-548f	0	0	1	1	1	1	TNFSF10	tumor necrosis factor (ligand) superfamily, member 10
hsa-miR-548f	0	0	1	1	1	1	PROS1	protein S (alpha)
hsa-miR-548f	1	0	1	1	1	1	SLC4A8	solute carrier family 4, sodium bicarbonate cotransporter, member 8
hsa-miR-548f	0	0	1	1	1	1	MORC4	MORC family CW-type zinc finger 4
hsa-miR-548f	0	0	1	1	1	1	ALDH3B1	aldehyde dehydrogenase 3 family, member B1
hsa-miR-548f	0	0	1	1	1	1	ADPRH	ADP-ribosylarginine hydrolase
hsa-miR-548f	1	0	1	1	1	1	AFF1	AF4/FMR2 family, member 1
hsa-miR-548f	1	0	1	1	1	1	RALBP1	ralA binding protein 1
hsa-miR-548f	1	0	1	0	1	1	BCL2	B-cell CLL/lymphoma 2
hsa-miR-548f	1	0	1	0	1	1	YES1	v-yes-1 Yamaguchi sarcoma viral oncogene homolog 1
hsa-miR-548f	1	0	1	1	1	1	ARSB	arylsulfatase B
hsa-miR-548f	0	0	1	1	0	0	CD40LG	CD40 ligand
hsa-miR-548f	1	0	1	1	1	1	COL1A1	collagen, type I, alpha 1
hsa-miR-548f	1	0	1	1	1	1	DMD	dystrophin
hsa-miR-548f	1	0	1	0	1	1	SLC26A2	solute carrier family 26 (sulfate transporter), member 2
hsa-miR-548f	1	0	1	0	1	1	EXT1	exostosin 1
hsa-miR-548f	1	0	1	1	1	1	GJA1	gap junction protein, alpha 1, 43kDa
hsa-miR-548f	1	0	1	0	1	1	GLI3	GLI family zinc finger 3
hsa-miR-548f	1	0	1	1	1	1	TBX5	T-box 5
hsa-miR-548f	0	0	1	1	1	1	LPL	lipoprotein lipase
hsa-miR-548f	1	0	1	1	1	1	MITF	microphthalmia-associated transcription factor
hsa-miR-548f	0	0	1	1	1	1	MTM1	myotubularin 1
hsa-miR-548f	0	0	1	1	1	1	PEX7	peroxisomal biogenesis factor 7
hsa-miR-548f	1	0	1	1	1	1	PPT1	palmitoyl-protein thioesterase 1
hsa-miR-548f	1	0	1	0	1	1	PTEN	phosphatase and tensin homolog
hsa-miR-548f	0	0	1	1	1	1	RPGR	retinitis pigmentosa GTPase regulator
hsa-miR-548f	1	0	1	1	1	1	ATXN1	ataxin 1
hsa-miR-548f	1	0	1	1	1	1	SOX9	SRY (sex determining region Y)-box 9
hsa-miR-548f	0	0	1	1	1	1	SRD5A2	steroid-5-alpha-reductase, alpha polypeptide 2 (3-oxo-5 alpha-steroid delta 4-dehydrogenase alpha 2)
hsa-miR-548f	1	0	1	1	1	1	TIMP3	TIMP metallopeptidase inhibitor 3
hsa-miR-548f	1	0	1	1	1	1	CHM	choroideremia (Rab escort protein 1)
hsa-miR-548f	1	0	1	0	1	1	CYBB	cytochrome b-245, beta polypeptide
hsa-miR-548f	1	0	1	1	1	1	HLCS	holocarboxylase synthetase (biotin-(proprionyl-CoA-carboxylase (ATP-hydrolysing)) ligase)
hsa-miR-548f	0	0	1	1	0	0	IFNGR1	interferon gamma receptor 1
hsa-miR-548f	1	0	1	0	1	1	PCSK1	proprotein convertase subtilisin/kexin type 1
hsa-miR-548f	1	0	1	1	1	1	SLC26A4	solute carrier family 26, member 4
hsa-miR-548f	1	0	1	0	1	1	RAG1	recombination activating gene 1
hsa-miR-548f	1	0	1	1	1	1	HNF1B	HNF1 homeobox B
hsa-miR-548f	1	0	1	1	1	1	ATRX	alpha thalassemia/mental retardation syndrome X-linked
hsa-miR-548f	0	0	1	1	1	1	CRX	cone-rod homeobox
hsa-miR-548f	1	0	1	1	1	1	DCX	doublecortin
hsa-miR-548f	1	0	1	1	1	1	IL10	interleukin 10
hsa-miR-548f	1	0	1	1	1	1	CR1	complement component (3b/4b) receptor 1 (Knops blood group)
hsa-miR-548f	1	0	1	1	1	1	IL1A	interleukin 1, alpha
hsa-miR-548f	0	0	1	1	1	1	SELL	selectin L
hsa-miR-548f	0	0	1	0	1	1	ADH1C	alcohol dehydrogenase 1C (class I), gamma polypeptide
hsa-miR-548f	1	0	1	1	1	1	DIO2	deiodinase, iodothyronine, type II
hsa-miR-548f	1	0	1	1	1	1	GABRB3	gamma-aminobutyric acid (GABA) A receptor, beta 3
hsa-miR-548f	1	0	1	1	1	1	GABRG2	gamma-aminobutyric acid (GABA) A receptor, gamma 2
hsa-miR-548f	0	0	1	1	1	1	NQO1	NAD(P)H dehydrogenase, quinone 1
hsa-miR-548f	1	0	1	1	1	1	PPP3R1	protein phosphatase 3, regulatory subunit B, alpha
hsa-miR-548f	1	0	1	1	1	1	PTGER2	prostaglandin E receptor 2 (subtype EP2), 53kDa
hsa-miR-548f	1	0	1	1	1	1	RARA	retinoic acid receptor, alpha
hsa-miR-548f	1	0	1	1	1	1	REEP3	receptor accessory protein 3
hsa-miR-548f	1	0	1	0	1	1	SMAD5	SMAD family member 5
hsa-miR-548f	1	0	1	0	1	1	UBE2W	ubiquitin-conjugating enzyme E2W (putative)
hsa-miR-548f	1	0	1	0	1	1	GDF6	growth differentiation factor 6
hsa-miR-548f	1	0	1	0	1	1	SPOPL	speckle-type POZ protein-like
hsa-miR-548f	0	0	1	1	1	1	CYP27C1	cytochrome P450, family 27, subfamily C, polypeptide 1
hsa-miR-548f	1	0	1	1	1	1	C14orf37	chromosome 14 open reading frame 37
hsa-miR-548f	1	0	1	0	1	1	PPARA	peroxisome proliferator-activated receptor alpha
hsa-miR-548f	1	0	1	0	1	1	CLDN18	claudin 18
hsa-miR-548f	1	0	1	1	1	1	GATA3	GATA binding protein 3
hsa-miR-548f	1	0	1	1	1	1	WNK3	WNK lysine deficient protein kinase 3
hsa-miR-548f	1	0	1	1	1	1	ABLIM1	actin binding LIM protein 1
hsa-miR-548f	1	0	1	0	1	1	SMAD2	SMAD family member 2
hsa-miR-548f	1	0	1	1	1	1	LEPR	leptin receptor
hsa-miR-548f	1	0	1	1	1	1	HMGXB4	HMG box domain containing 4
hsa-miR-548f	0	0	1	1	1	1	SMAD1	SMAD family member 1
hsa-miR-548f	1	0	1	1	1	1	HNRNPD	heterogeneous nuclear ribonucleoprotein D (AU-rich element RNA binding protein 1, 37kDa)
hsa-miR-548f	0	0	1	1	1	1	CCDC144NL	coiled-coil domain containing 144 family, N-terminal like
hsa-miR-548f	1	0	1	0	1	1	LIN28B	lin-28 homolog B (C. elegans)
hsa-miR-548f	0	0	1	1	1	1	AGMO	alkylglycerol monooxygenase
hsa-miR-548f	0	0	1	1	1	1	DBX2	developing brain homeobox 2
hsa-miR-548f	1	0	1	1	1	1	NCK2	NCK adaptor protein 2
hsa-miR-548f	0	0	1	1	1	1	HMGN2P46	high mobility group nucleosomal binding domain 2 pseudogene 46
hsa-miR-548f	1	0	1	0	1	1	YPEL2	yippee-like 2 (Drosophila)
hsa-miR-548f	1	0	1	1	1	1	PLCXD3	phosphatidylinositol-specific phospholipase C, X domain containing 3
hsa-miR-548f	0	0	1	1	1	1	RYK	receptor-like tyrosine kinase
hsa-miR-548f	0	0	1	1	1	1	MAPKAP1	mitogen-activated protein kinase associated protein 1
hsa-miR-548f	0	0	1	1	1	1	SCP2	sterol carrier protein 2
hsa-miR-548f	0	0	1	1	1	1	TRIM13	tripartite motif containing 13
hsa-miR-548f	1	0	1	1	1	1	LMBRD2	LMBR1 domain containing 2
hsa-miR-548f	1	0	1	0	1	1	SS18	synovial sarcoma translocation, chromosome 18
hsa-miR-548f	0	0	1	1	1	1	UACA	uveal autoantigen with coiled-coil domains and ankyrin repeats
hsa-miR-548f	1	0	1	0	1	1	C18orf25	chromosome 18 open reading frame 25
hsa-miR-548f	0	0	1	1	1	1	TCHHL1	trichohyalin-like 1
hsa-miR-548f	1	0	1	0	1	1	KIAA2022	KIAA2022
hsa-miR-548f	0	0	1	1	1	1	CXCR4	chemokine (C-X-C motif) receptor 4
hsa-miR-548f	0	0	1	1	1	1	FBXO47	F-box protein 47
hsa-miR-548f	0	0	1	1	1	1	SLC35D3	solute carrier family 35, member D3
hsa-miR-548f	0	0	1	1	0	0	CCT3	chaperonin containing TCP1, subunit 3 (gamma)
hsa-miR-548f	0	0	1	1	1	1	GEMIN2	gem (nuclear organelle) associated protein 2
hsa-miR-548f	0	0	1	1	1	1	ZCCHC11	zinc finger, CCHC domain containing 11
hsa-miR-548f	1	0	1	0	1	1	RCHY1	ring finger and CHY zinc finger domain containing 1, E3 ubiquitin protein ligase
hsa-miR-548f	1	0	1	0	1	1	FAM102B	family with sequence similarity 102, member B
hsa-miR-548f	1	0	1	0	1	1	ZC3H12B	zinc finger CCCH-type containing 12B
hsa-miR-548f	0	0	1	1	1	1	ERCC6L2	excision repair cross-complementing rodent repair deficiency, complementation group 6-like 2
hsa-miR-548f	1	0	1	0	1	1	C6orf222	chromosome 6 open reading frame 222
hsa-miR-548f	1	0	1	1	1	1	BCL2L15	BCL2-like 15
hsa-miR-548f	1	0	1	1	1	1	ATP11C	ATPase, class VI, type 11C
hsa-miR-548f	0	0	1	1	1	1	ZMAT1	zinc finger, matrin-type 1
hsa-miR-548f	1	0	1	1	1	1	PCGF6	polycomb group ring finger 6
hsa-miR-548f	1	0	1	0	1	1	CREB5	cAMP responsive element binding protein 5
hsa-miR-548f	0	0	1	1	1	1	CHCHD7	coiled-coil-helix-coiled-coil-helix domain containing 7
hsa-miR-548f	1	0	1	0	1	1	FAM125B	family with sequence similarity 125, member B
hsa-miR-548f	1	0	1	1	1	1	BTBD1	BTB (POZ) domain containing 1
hsa-miR-548f	0	0	1	1	0	0	SOGA3	SOGA family member 3
hsa-miR-548f	0	0	1	1	0	0	SOHLH1	spermatogenesis and oogenesis specific basic helix-loop-helix 1
hsa-miR-548f	1	0	1	1	1	1	DYNC2LI1	dynein, cytoplasmic 2, light intermediate chain 1
hsa-miR-548f	1	0	1	1	1	1	SLC25A53	solute carrier family 25, member 53
hsa-miR-548f	1	0	1	1	1	1	DISC1	disrupted in schizophrenia 1
hsa-miR-548f	0	0	1	1	1	1	SPIN4	spindlin family, member 4
hsa-miR-548f	1	0	1	0	1	1	ZKSCAN2	zinc finger with KRAB and SCAN domains 2
hsa-miR-548f	1	0	1	1	1	1	SORCS1	sortilin-related VPS10 domain containing receptor 1
hsa-miR-548f	0	0	1	1	1	1	PAGE5	P antigen family, member 5 (prostate associated)
hsa-miR-548f	0	0	1	1	1	1	FAM53A	family with sequence similarity 53, member A
hsa-miR-548f	1	0	1	1	1	1	H3F3C	H3 histone, family 3C
hsa-miR-548f	0	0	1	0	1	1	LINC00268	long intergenic non-protein coding RNA 268
hsa-miR-548f	1	0	1	1	1	1	KCNMA1	potassium large conductance calcium-activated channel, subfamily M, alpha member 1
hsa-miR-548f	0	0	1	1	1	1	PURG	purine-rich element binding protein G
hsa-miR-548f	1	0	1	1	1	1	PHF6	PHD finger protein 6
hsa-miR-548f	1	0	1	1	1	1	MSMO1	methylsterol monooxygenase 1
hsa-miR-548f	1	0	1	0	1	1	GOPC	golgi-associated PDZ and coiled-coil motif containing
hsa-miR-548f	0	0	1	1	1	1	USP1	ubiquitin specific peptidase 1
hsa-miR-548f	1	0	1	1	1	1	ZHX1	zinc fingers and homeoboxes 1
hsa-miR-548f	0	0	1	1	1	1	KIAA2026	KIAA2026
hsa-miR-548f	1	0	1	1	1	1	VMA21	VMA21 vacuolar H+-ATPase homolog (S. cerevisiae)
hsa-miR-548f	1	0	1	1	1	1	NTRK2	neurotrophic tyrosine kinase, receptor, type 2
hsa-miR-548f	1	0	1	1	1	1	SERBP1	SERPINE1 mRNA binding protein 1
hsa-miR-548f	0	0	1	1	1	1	NARG2	NMDA receptor regulated 2
hsa-miR-548f	0	0	1	1	1	1	NPIPL1	nuclear pore complex interacting protein-like 1
hsa-miR-548f	1	0	1	1	1	1	ABCC5	ATP-binding cassette, sub-family C (CFTR/MRP), member 5
hsa-miR-548f	1	0	1	0	1	1	RGAG4	retrotransposon gag domain containing 4
hsa-miR-548f	1	0	1	1	1	1	CANX	calnexin
hsa-miR-548f	1	0	1	0	1	1	BCL7A	B-cell CLL/lymphoma 7A
hsa-miR-548f	1	0	1	0	1	1	TNRC6B	trinucleotide repeat containing 6B
hsa-miR-548f	0	0	1	1	1	1	WASF1	WAS protein family, member 1
hsa-miR-548f	1	0	1	1	1	1	FNBP1L	formin binding protein 1-like
hsa-miR-548f	0	0	1	1	0	0	ABCF1	ATP-binding cassette, sub-family F (GCN20), member 1
hsa-miR-548f	1	0	1	0	1	1	ADAR	adenosine deaminase, RNA-specific
hsa-miR-548f	1	0	1	1	1	1	AFF3	AF4/FMR2 family, member 3
hsa-miR-548f	1	0	1	1	1	1	TPD52	tumor protein D52
hsa-miR-548f	1	0	1	0	1	1	C3orf70	chromosome 3 open reading frame 70
hsa-miR-548f	1	0	1	1	1	1	VEGFA	vascular endothelial growth factor A
hsa-miR-548f	1	0	1	1	1	1	UGGT1	UDP-glucose glycoprotein glucosyltransferase 1
hsa-miR-548f	0	0	1	0	1	1	C6orf120	chromosome 6 open reading frame 120
hsa-miR-548f	1	0	1	1	1	1	RGS7BP	regulator of G-protein signaling 7 binding protein
hsa-miR-548f	1	0	1	0	1	1	MSRB3	methionine sulfoxide reductase B3
hsa-miR-548f	0	0	1	1	1	1	TRMT11	tRNA methyltransferase 11 homolog (S. cerevisiae)
hsa-miR-548f	1	0	1	1	1	1	MAF	v-maf musculoaponeurotic fibrosarcoma oncogene homolog (avian)
hsa-miR-548f	1	0	1	1	1	1	CSNK1G3	casein kinase 1, gamma 3
hsa-miR-548f	0	0	1	1	1	1	HNRNPH2	heterogeneous nuclear ribonucleoprotein H2 (H')
hsa-miR-548f	1	0	1	1	1	1	RRM1	ribonucleotide reductase M1
hsa-miR-548f	1	0	1	1	1	1	SAR1B	SAR1 homolog B (S. cerevisiae)
hsa-miR-548f	0	0	1	1	1	1	PHF12	PHD finger protein 12
hsa-miR-548f	1	0	1	1	0	0	MTUS2	microtubule associated tumor suppressor candidate 2
hsa-miR-548f	1	0	1	0	1	1	RYR2	ryanodine receptor 2 (cardiac)
hsa-miR-548f	1	0	1	1	1	1	ACPL2	acid phosphatase-like 2
hsa-miR-548f	1	0	1	0	1	1	SCML1	sex comb on midleg-like 1 (Drosophila)
hsa-miR-548f	0	0	1	1	1	1	REV1	REV1, polymerase (DNA directed)
hsa-miR-548f	1	0	1	1	1	1	ELMO1	engulfment and cell motility 1
hsa-miR-548f	0	0	1	0	0	0	PRSS53	protease, serine, 53
hsa-miR-548f	0	0	1	1	1	1	SKA1	spindle and kinetochore associated complex subunit 1
hsa-miR-548f	1	0	1	0	1	1	GK5	glycerol kinase 5 (putative)
hsa-miR-548f	1	0	1	0	1	1	USP9X	ubiquitin specific peptidase 9, X-linked
hsa-miR-548f	1	0	1	0	1	1	CREBZF	CREB/ATF bZIP transcription factor
hsa-miR-548f	0	0	1	1	1	1	ANKRD55	ankyrin repeat domain 55
hsa-miR-548f	1	0	1	1	1	1	SPTSSB	serine palmitoyltransferase, small subunit B
hsa-miR-548f	0	0	1	0	1	1	OPALIN	oligodendrocytic myelin paranodal and inner loop protein
hsa-miR-548f	0	0	1	1	1	1	MYH11	myosin, heavy chain 11, smooth muscle
hsa-miR-548f	0	0	1	0	1	1	SCN3B	sodium channel, voltage-gated, type III, beta subunit
hsa-miR-548f	1	0	1	0	1	1	CEP44	centrosomal protein 44kDa
hsa-miR-548f	0	0	1	1	1	1	MCHR2	melanin-concentrating hormone receptor 2
hsa-miR-548f	1	0	1	1	1	1	PAPD5	PAP associated domain containing 5
hsa-miR-548f	1	0	1	1	1	1	CYLD	cylindromatosis (turban tumor syndrome)
hsa-miR-548f	1	0	1	1	1	1	GLIS3	GLIS family zinc finger 3
hsa-miR-548f	1	0	1	1	1	1	RUFY2	RUN and FYVE domain containing 2
hsa-miR-548f	0	0	1	1	1	1	MST4	serine/threonine protein kinase MST4
hsa-miR-548f	1	0	1	1	1	1	C2orf88	chromosome 2 open reading frame 88
hsa-miR-548f	1	0	1	1	1	1	GLRA3	glycine receptor, alpha 3
hsa-miR-548f	1	0	1	1	1	1	FRS2	fibroblast growth factor receptor substrate 2
hsa-miR-548f	1	0	1	1	1	1	ERBB4	v-erb-a erythroblastic leukemia viral oncogene homolog 4 (avian)
hsa-miR-548f	1	0	1	1	1	1	KDM5A	lysine (K)-specific demethylase 5A
hsa-miR-548f	1	0	1	1	1	1	SNX21	sorting nexin family member 21
hsa-miR-548f	1	0	1	0	1	1	SRGAP2	SLIT-ROBO Rho GTPase activating protein 2
hsa-miR-548f	0	0	1	1	1	1	SLC6A3	solute carrier family 6 (neurotransmitter transporter, dopamine), member 3
hsa-miR-548f	1	0	1	1	1	1	SLA	Src-like-adaptor
hsa-miR-548f	1	0	1	1	1	1	NET1	neuroepithelial cell transforming 1
hsa-miR-548f	0	0	1	1	1	1	RCC1	regulator of chromosome condensation 1
hsa-miR-548f	1	0	1	1	1	1	HIPK3	homeodomain interacting protein kinase 3
hsa-miR-548f	0	0	1	1	1	1	TOP2B	topoisomerase (DNA) II beta 180kDa
hsa-miR-548f	1	0	1	1	1	1	METTL9	methyltransferase like 9
hsa-miR-548f	1	0	1	1	1	1	CDC14B	CDC14 cell division cycle 14 homolog B (S. cerevisiae)
hsa-miR-548f	1	0	1	1	1	1	HS6ST2	heparan sulfate 6-O-sulfotransferase 2
hsa-miR-548f	1	0	1	1	1	1	ZNF436	zinc finger protein 436
hsa-miR-548f	1	0	1	1	1	1	PDE11A	phosphodiesterase 11A
hsa-miR-548f	1	0	1	1	1	1	SREK1	splicing regulatory glutamine/lysine-rich protein 1
hsa-miR-548f	1	0	1	1	1	1	PHF16	PHD finger protein 16
hsa-miR-548f	1	0	1	1	1	1	PRR3	proline rich 3
hsa-miR-548f	1	0	1	0	1	1	UBXN2B	UBX domain protein 2B
hsa-miR-548f	0	0	1	0	1	1	WTH3DI	RAB6C-like
hsa-miR-548f	1	0	1	1	1	1	ALG9	asparagine-linked glycosylation 9, alpha-1,2-mannosyltransferase homolog (S. cerevisiae)
hsa-miR-548f	1	0	1	1	1	1	SRSF1	serine/arginine-rich splicing factor 1
hsa-miR-548f	1	0	1	1	1	1	UBN1	ubinuclein 1
hsa-miR-548f	1	0	1	1	1	1	DACT1	dapper, antagonist of beta-catenin, homolog 1 (Xenopus laevis)
hsa-miR-548f	1	0	1	1	1	1	N4BP2L1	NEDD4 binding protein 2-like 1
hsa-miR-548f	0	0	1	1	1	1	FKTN	fukutin
hsa-miR-548f	0	0	1	0	0	0	TMEM183B	transmembrane protein 183B
hsa-miR-548f	1	0	1	1	1	1	ITGA6	integrin, alpha 6
hsa-miR-548f	1	0	1	1	1	1	LDB3	LIM domain binding 3
hsa-miR-548f	1	0	1	0	1	1	THSD7B	thrombospondin, type I, domain containing 7B
hsa-miR-548f	0	0	1	1	1	1	FTO	fat mass and obesity associated
hsa-miR-548f	1	0	1	0	1	1	CCDC85A	coiled-coil domain containing 85A
hsa-miR-548f	0	0	1	0	1	1	TMEM150C	transmembrane protein 150C
hsa-miR-548f	1	0	1	1	1	1	UNC119B	unc-119 homolog B (C. elegans)
hsa-miR-548f	0	0	1	1	1	1	SNTN	sentan, cilia apical structure protein
hsa-miR-548f	1	0	1	1	1	1	REPS2	RALBP1 associated Eps domain containing 2
hsa-miR-548f	1	0	1	1	1	1	THOC2	THO complex 2
hsa-miR-548f	1	0	1	0	1	1	PDE5A	phosphodiesterase 5A, cGMP-specific
hsa-miR-548f	1	0	1	1	1	1	ADAM10	ADAM metallopeptidase domain 10
hsa-miR-548f	0	0	1	1	1	1	PLIN2	perilipin 2
hsa-miR-548f	0	0	1	1	1	1	ADSS	adenylosuccinate synthase
hsa-miR-548f	0	0	1	1	1	1	CRISP1	cysteine-rich secretory protein 1
hsa-miR-548f	1	0	1	1	1	1	SLC25A5	solute carrier family 25 (mitochondrial carrier; adenine nucleotide translocator), member 5
hsa-miR-548f	1	0	1	0	1	1	XIAP	X-linked inhibitor of apoptosis
hsa-miR-548f	1	0	1	1	1	1	BMP2	bone morphogenetic protein 2
hsa-miR-548f	1	0	1	0	1	1	BMPR2	bone morphogenetic protein receptor, type II (serine/threonine kinase)
hsa-miR-548f	1	0	1	0	1	1	KLF9	Kruppel-like factor 9
hsa-miR-548f	1	0	1	1	1	1	CCNA2	cyclin A2
hsa-miR-548f	0	0	1	1	1	1	CDC5L	CDC5 cell division cycle 5-like (S. pombe)
hsa-miR-548f	1	0	1	0	1	1	CDK6	cyclin-dependent kinase 6
hsa-miR-548f	0	0	1	1	1	1	CHUK	conserved helix-loop-helix ubiquitous kinase
hsa-miR-548f	1	0	1	0	1	1	CPD	carboxypeptidase D
hsa-miR-548f	0	0	1	1	1	1	CSTF3	cleavage stimulation factor, 3' pre-RNA, subunit 3, 77kDa
hsa-miR-548f	1	0	1	1	1	1	CTNND2	catenin (cadherin-associated protein), delta 2
hsa-miR-548f	0	0	1	1	1	1	DSCAM	Down syndrome cell adhesion molecule
hsa-miR-548f	1	0	1	1	1	1	DYRK1A	dual-specificity tyrosine-(Y)-phosphorylation regulated kinase 1A
hsa-miR-548f	1	0	1	0	1	1	EFNB3	ephrin-B3
hsa-miR-548f	1	0	1	1	1	1	ELAVL1	ELAV (embryonic lethal, abnormal vision, Drosophila)-like 1 (Hu antigen R)
hsa-miR-548f	1	0	1	1	1	1	EP300	E1A binding protein p300
hsa-miR-548f	1	0	1	1	1	1	EREG	epiregulin
hsa-miR-548f	1	0	1	1	1	1	GPC4	glypican 4
hsa-miR-548f	1	0	1	1	1	1	FOXC1	forkhead box C1
hsa-miR-548f	1	0	1	1	1	1	GCNT1	glucosaminyl (N-acetyl) transferase 1, core 2
hsa-miR-548f	0	0	1	0	1	1	CXCL1	chemokine (C-X-C motif) ligand 1 (melanoma growth stimulating activity, alpha)
hsa-miR-548f	1	0	1	1	1	1	AHR	aryl hydrocarbon receptor
hsa-miR-548f	1	0	1	0	1	1	ARCN1	archain 1
hsa-miR-548f	0	0	1	1	1	1	RHOA	ras homolog family member A
hsa-miR-548f	1	0	1	1	1	1	KLF5	Kruppel-like factor 5 (intestinal)
hsa-miR-548f	1	0	1	1	1	1	BTG1	B-cell translocation gene 1, anti-proliferative
hsa-miR-548f	1	0	1	1	1	1	CDH2	cadherin 2, type 1, N-cadherin (neuronal)
hsa-miR-548f	0	0	1	1	1	1	CKS2	CDC28 protein kinase regulatory subunit 2
hsa-miR-548f	1	0	1	1	1	1	COL4A6	collagen, type IV, alpha 6
hsa-miR-548f	1	0	1	1	1	1	COL15A1	collagen, type XV, alpha 1
hsa-miR-548f	1	0	1	0	1	1	COL19A1	collagen, type XIX, alpha 1
hsa-miR-548f	0	0	1	1	1	1	CPS1	carbamoyl-phosphate synthase 1, mitochondrial
hsa-miR-548f	1	0	1	1	1	1	CREM	cAMP responsive element modulator
hsa-miR-548f	1	0	1	1	1	1	CSNK1D	casein kinase 1, delta
hsa-miR-548f	1	0	1	1	1	1	DBT	dihydrolipoamide branched chain transacylase E2
hsa-miR-548f	1	0	1	1	1	1	DPP4	dipeptidyl-peptidase 4
hsa-miR-548f	1	0	1	1	1	1	DR1	down-regulator of transcription 1, TBP-binding (negative cofactor 2)
hsa-miR-548f	1	0	1	1	1	1	EIF4E	eukaryotic translation initiation factor 4E
hsa-miR-548f	1	0	1	0	1	1	ETV6	ets variant 6
hsa-miR-548f	0	0	1	1	1	1	FLI1	Friend leukemia virus integration 1
hsa-miR-548f	0	0	1	1	1	1	FPR3	formyl peptide receptor 3
hsa-miR-548f	1	0	1	0	1	1	FUT4	fucosyltransferase 4 (alpha (1,3) fucosyltransferase, myeloid-specific)
hsa-miR-548f	1	0	1	0	1	1	GNAI1	guanine nucleotide binding protein (G protein), alpha inhibiting activity polypeptide 1
hsa-miR-548f	1	0	1	1	0	0	GRK6	G protein-coupled receptor kinase 6
hsa-miR-548f	0	0	1	1	1	1	HMGCS1	3-hydroxy-3-methylglutaryl-CoA synthase 1 (soluble)
hsa-miR-548f	1	0	1	1	1	1	HSPA4	heat shock 70kDa protein 4
hsa-miR-548f	0	0	1	1	1	1	FOXN2	forkhead box N2
hsa-miR-548f	0	0	1	1	1	1	IL12B	interleukin 12B (natural killer cell stimulatory factor 2, cytotoxic lymphocyte maturation factor 2, p40)
hsa-miR-548f	0	0	1	0	1	1	ITGAV	integrin, alpha V
hsa-miR-548f	0	0	1	1	1	1	ITGB1	integrin, beta 1 (fibronectin receptor, beta polypeptide, antigen CD29 includes MDF2, MSK12)
hsa-miR-548f	1	0	1	1	1	1	ITPR2	inositol 1,4,5-trisphosphate receptor, type 2
hsa-miR-548f	1	0	1	1	1	1	JAK1	Janus kinase 1
hsa-miR-548f	1	0	1	1	1	1	KCNA3	potassium voltage-gated channel, shaker-related subfamily, member 3
hsa-miR-548f	1	0	1	1	1	1	KCNJ10	potassium inwardly-rectifying channel, subfamily J, member 10
hsa-miR-548f	1	0	1	1	1	1	KPNB1	karyopherin (importin) beta 1
hsa-miR-548f	1	0	1	1	1	1	KPNA3	karyopherin alpha 3 (importin alpha 4)
hsa-miR-548f	1	0	1	1	1	1	KPNA4	karyopherin alpha 4 (importin alpha 3)
hsa-miR-548f	1	0	1	1	1	1	LY75	lymphocyte antigen 75
hsa-miR-548f	1	0	1	1	1	1	MAN2A1	mannosidase, alpha, class 2A, member 1
hsa-miR-548f	0	0	1	0	1	1	CXCL9	chemokine (C-X-C motif) ligand 9
hsa-miR-548f	0	0	1	1	1	1	MRC1	mannose receptor, C type 1
hsa-miR-548f	1	0	1	1	1	1	NGF	nerve growth factor (beta polypeptide)
hsa-miR-548f	1	0	1	1	1	1	NPAT	nuclear protein, ataxia-telangiectasia locus
hsa-miR-548f	0	0	1	1	0	0	NTSR1	neurotensin receptor 1 (high affinity)
hsa-miR-548f	0	0	1	0	1	1	OPHN1	oligophrenin 1
hsa-miR-548f	1	0	1	1	1	1	OSBP	oxysterol binding protein
hsa-miR-548f	1	0	1	0	1	1	PAK2	p21 protein (Cdc42/Rac)-activated kinase 2
hsa-miR-548f	1	0	1	0	1	1	PAPPA	pregnancy-associated plasma protein A, pappalysin 1
hsa-miR-548f	1	0	1	1	1	1	PBX2	pre-B-cell leukemia homeobox 2
hsa-miR-548f	1	0	1	1	1	1	PLAGL2	pleiomorphic adenoma gene-like 2
hsa-miR-548f	1	0	1	1	1	1	PPP1CB	protein phosphatase 1, catalytic subunit, beta isozyme
hsa-miR-548f	0	0	1	1	1	1	PPP1R3A	protein phosphatase 1, regulatory subunit 3A
hsa-miR-548f	0	0	1	1	0	0	PPP1R8	protein phosphatase 1, regulatory subunit 8
hsa-miR-548f	0	0	1	1	1	1	PREP	prolyl endopeptidase
hsa-miR-548f	1	0	1	1	1	1	PRKD1	protein kinase D1
hsa-miR-548f	0	0	1	1	1	1	MAPK9	mitogen-activated protein kinase 9
hsa-miR-548f	0	0	1	1	1	1	EIF2AK2	eukaryotic translation initiation factor 2-alpha kinase 2
hsa-miR-548f	0	0	1	1	0	0	PSMD11	proteasome (prosome, macropain) 26S subunit, non-ATPase, 11
hsa-miR-548f	1	0	1	1	1	1	PTPN2	protein tyrosine phosphatase, non-receptor type 2
hsa-miR-548f	1	0	1	1	1	1	PTPN9	protein tyrosine phosphatase, non-receptor type 9
hsa-miR-548f	0	0	1	1	1	1	PTPN12	protein tyrosine phosphatase, non-receptor type 12
hsa-miR-548f	1	0	1	1	1	1	PTPRJ	protein tyrosine phosphatase, receptor type, J
hsa-miR-548f	1	0	1	1	1	1	PTPRK	protein tyrosine phosphatase, receptor type, K
hsa-miR-548f	1	0	1	0	1	1	RAB6A	RAB6A, member RAS oncogene family
hsa-miR-548f	1	0	1	1	1	1	RAD23B	RAD23 homolog B (S. cerevisiae)
hsa-miR-548f	1	0	1	1	1	1	RASA1	RAS p21 protein activator (GTPase activating protein) 1
hsa-miR-548f	1	0	1	1	1	1	ARID4A	AT rich interactive domain 4A (RBP1-like)
hsa-miR-548f	1	0	1	1	0	0	RFX1	regulatory factor X, 1 (influences HLA class II expression)
hsa-miR-548f	1	0	1	1	1	1	RGS16	regulator of G-protein signaling 16
hsa-miR-548f	1	0	1	1	1	1	ROBO2	roundabout, axon guidance receptor, homolog 2 (Drosophila)
hsa-miR-548f	1	0	1	0	1	1	SORT1	sortilin 1
hsa-miR-548f	0	0	1	1	1	1	SDC2	syndecan 2
hsa-miR-548f	1	0	1	1	1	1	SFRP4	secreted frizzled-related protein 4
hsa-miR-548f	1	0	1	1	1	1	SNAI2	snail homolog 2 (Drosophila)
hsa-miR-548f	1	0	1	1	1	1	SMARCC1	SWI/SNF related, matrix associated, actin dependent regulator of chromatin, subfamily c, member 1
hsa-miR-548f	1	0	1	1	1	1	SMARCD1	SWI/SNF related, matrix associated, actin dependent regulator of chromatin, subfamily d, member 1
hsa-miR-548f	0	0	1	1	0	0	SNRPC	small nuclear ribonucleoprotein polypeptide C
hsa-miR-548f	1	0	1	0	1	1	SOX4	SRY (sex determining region Y)-box 4
hsa-miR-548f	1	0	1	0	1	1	SOX11	SRY (sex determining region Y)-box 11
hsa-miR-548f	0	0	1	1	1	1	SP100	SP100 nuclear antigen
hsa-miR-548f	0	0	1	1	1	1	SQLE	squalene epoxidase
hsa-miR-548f	1	0	1	0	1	1	STC1	stanniocalcin 1
hsa-miR-548f	0	0	1	1	1	1	STIM1	stromal interaction molecule 1
hsa-miR-548f	0	0	1	1	1	1	STRN	striatin, calmodulin binding protein
hsa-miR-548f	1	0	1	1	1	1	TAF4	TAF4 RNA polymerase II, TATA box binding protein (TBP)-associated factor, 135kDa
hsa-miR-548f	1	0	1	1	1	1	TDG	thymine-DNA glycosylase
hsa-miR-548f	0	0	1	0	1	1	TDGF1	teratocarcinoma-derived growth factor 1
hsa-miR-548f	1	0	1	1	1	1	TEC	tec protein tyrosine kinase
hsa-miR-548f	1	0	1	0	1	1	THBS1	thrombospondin 1
hsa-miR-548f	1	0	1	0	1	1	SEC62	SEC62 homolog (S. cerevisiae)
hsa-miR-548f	1	0	1	0	1	1	TUB	tubby homolog (mouse)
hsa-miR-548f	1	0	1	1	1	1	UBE2B	ubiquitin-conjugating enzyme E2B
hsa-miR-548f	0	0	1	1	1	1	UBE2D1	ubiquitin-conjugating enzyme E2D 1
hsa-miR-548f	1	0	1	1	1	1	UBE2D3	ubiquitin-conjugating enzyme E2D 3
hsa-miR-548f	1	0	1	0	1	1	UBE2L3	ubiquitin-conjugating enzyme E2L 3
hsa-miR-548f	0	0	1	1	1	1	ZNF143	zinc finger protein 143
hsa-miR-548f	0	0	1	1	1	1	SCG2	secretogranin II
hsa-miR-548f	1	0	1	1	1	1	KCNAB1	potassium voltage-gated channel, shaker-related subfamily, beta member 1
hsa-miR-548f	1	0	1	1	1	1	ADAM12	ADAM metallopeptidase domain 12
hsa-miR-548f	1	0	1	1	1	1	CUL5	cullin 5
hsa-miR-548f	1	0	1	1	1	1	AKAP1	A kinase (PRKA) anchor protein 1
hsa-miR-548f	1	0	1	1	1	1	NRIP1	nuclear receptor interacting protein 1
hsa-miR-548f	1	0	1	1	1	1	FZD7	frizzled family receptor 7
hsa-miR-548f	0	0	1	1	1	1	HIST2H2BE	histone cluster 2, H2be
hsa-miR-548f	0	0	1	1	1	1	PIP5K1A	phosphatidylinositol-4-phosphate 5-kinase, type I, alpha
hsa-miR-548f	0	0	1	1	1	1	PIP5K1B	phosphatidylinositol-4-phosphate 5-kinase, type I, beta
hsa-miR-548f	1	0	1	1	1	1	SUPT3H	suppressor of Ty 3 homolog (S. cerevisiae)
hsa-miR-548f	1	0	1	1	1	1	PPM1D	protein phosphatase, Mg2+/Mn2+ dependent, 1D
hsa-miR-548f	0	0	1	1	1	1	PEX3	peroxisomal biogenesis factor 3
hsa-miR-548f	1	0	1	1	1	1	CDC14A	CDC14 cell division cycle 14 homolog A (S. cerevisiae)
hsa-miR-548f	1	0	1	1	0	0	KHSRP	KH-type splicing regulatory protein
hsa-miR-548f	1	0	1	1	1	1	TNFSF11	tumor necrosis factor (ligand) superfamily, member 11
hsa-miR-548f	1	0	1	0	1	1	TNKS	tankyrase, TRF1-interacting ankyrin-related ADP-ribose polymerase
hsa-miR-548f	1	0	1	0	1	1	IRS2	insulin receptor substrate 2
hsa-miR-548f	1	0	1	1	1	1	B3GALT2	UDP-Gal:betaGlcNAc beta 1,3-galactosyltransferase, polypeptide 2
hsa-miR-548f	1	0	1	1	1	1	MBTPS1	membrane-bound transcription factor peptidase, site 1
hsa-miR-548f	1	0	1	1	1	1	URI1	URI1, prefoldin-like chaperone
hsa-miR-548f	0	0	1	1	1	1	CRADD	CASP2 and RIPK1 domain containing adaptor with death domain
hsa-miR-548f	1	0	1	1	1	1	SNAP23	synaptosomal-associated protein, 23kDa
hsa-miR-548f	1	0	1	1	1	1	IQGAP1	IQ motif containing GTPase activating protein 1
hsa-miR-548f	1	0	1	1	1	1	KAT2B	K(lysine) acetyltransferase 2B
hsa-miR-548f	1	0	1	1	1	1	ALDH1A2	aldehyde dehydrogenase 1 family, member A2
hsa-miR-548f	1	0	1	1	1	1	FUBP1	far upstream element (FUSE) binding protein 1
hsa-miR-548f	0	0	1	1	1	1	HERC1	HECT and RLD domain containing E3 ubiquitin protein ligase family member 1
hsa-miR-548f	1	0	1	1	1	1	PHOX2B	paired-like homeobox 2b
hsa-miR-548f	1	0	1	1	1	1	BTAF1	BTAF1 RNA polymerase II, B-TFIID transcription factor-associated, 170kDa (Mot1 homolog, S. cerevisiae)
hsa-miR-548f	1	0	1	1	1	1	MAP7	microtubule-associated protein 7
hsa-miR-548f	0	0	1	0	1	1	RHOB	ras homolog family member B
hsa-miR-548f	1	0	1	1	1	1	CDH12	cadherin 12, type 2 (N-cadherin 2)
hsa-miR-548f	1	0	1	0	1	1	DGKB	diacylglycerol kinase, beta 90kDa
hsa-miR-548f	1	0	1	0	1	1	E2F2	E2F transcription factor 2
hsa-miR-548f	0	0	1	0	1	1	EIF4EBP2	eukaryotic translation initiation factor 4E binding protein 2
hsa-miR-548f	1	0	1	1	1	1	EYA4	eyes absent homolog 4 (Drosophila)
hsa-miR-548f	1	0	1	1	1	1	FGF13	fibroblast growth factor 13
hsa-miR-548f	1	0	1	1	1	1	GMFB	glia maturation factor, beta
hsa-miR-548f	0	0	1	1	1	1	SLC1A1	solute carrier family 1 (neuronal/epithelial high affinity glutamate transporter, system Xag), member 1
hsa-miR-548f	1	0	1	0	1	1	SLC1A2	solute carrier family 1 (glial high affinity glutamate transporter), member 2
hsa-miR-548f	0	0	1	0	1	1	TMSB4Y	thymosin beta 4, Y-linked
hsa-miR-548f	0	0	1	1	0	0	SLC28A2	solute carrier family 28 (sodium-coupled nucleoside transporter), member 2
hsa-miR-548f	1	0	1	0	1	1	CYTH3	cytohesin 3
hsa-miR-548f	1	0	1	1	1	1	SOCS6	suppressor of cytokine signaling 6
hsa-miR-548f	0	0	1	1	1	1	SEP15	15 kDa selenoprotein
hsa-miR-548f	1	0	1	0	1	1	AKAP6	A kinase (PRKA) anchor protein 6
hsa-miR-548f	1	0	1	1	1	1	GDA	guanine deaminase
hsa-miR-548f	1	0	1	0	1	1	RUNX1T1	runt-related transcription factor 1; translocated to, 1 (cyclin D-related)
hsa-miR-548f	0	0	1	1	1	1	CDH1	cadherin 1, type 1, E-cadherin (epithelial)
hsa-miR-548f	0	0	1	1	1	1	COL12A1	collagen, type XII, alpha 1
hsa-miR-548f	1	0	1	1	1	1	EPHB2	EPH receptor B2
hsa-miR-548f	1	0	1	1	1	1	ERG	v-ets erythroblastosis virus E26 oncogene homolog (avian)
hsa-miR-548f	1	0	1	1	1	1	FGD1	FYVE, RhoGEF and PH domain containing 1
hsa-miR-548f	1	0	1	0	1	1	FGF5	fibroblast growth factor 5
hsa-miR-548f	0	0	1	1	1	1	HOXB7	homeobox B7
hsa-miR-548f	1	0	1	0	1	1	PKNOX1	PBX/knotted 1 homeobox 1
hsa-miR-548f	0	0	1	0	1	1	POU4F2	POU class 4 homeobox 2
hsa-miR-548f	0	0	1	1	1	1	TRAF6	TNF receptor-associated factor 6, E3 ubiquitin protein ligase
hsa-miR-548f	1	0	1	0	1	1	USP9Y	ubiquitin specific peptidase 9, Y-linked
hsa-miR-548f	0	0	1	0	0	0	XKRY	XK, Kell blood group complex subunit-related, Y-linked
hsa-miR-548f	1	0	1	1	1	1	MTMR4	myotubularin related protein 4
hsa-miR-548f	0	0	1	1	1	1	LATS1	LATS, large tumor suppressor, homolog 1 (Drosophila)
hsa-miR-548f	1	0	1	1	1	1	SCAF11	SR-related CTD-associated factor 11
hsa-miR-548f	0	0	1	1	1	1	BUB3	budding uninhibited by benzimidazoles 3 homolog (yeast)
hsa-miR-548f	0	0	1	1	1	1	SLC33A1	solute carrier family 33 (acetyl-CoA transporter), member 1
hsa-miR-548f	1	0	1	1	1	1	XPR1	xenotropic and polytropic retrovirus receptor 1
hsa-miR-548f	0	0	1	1	1	1	MTA2	metastasis associated 1 family, member 2
hsa-miR-548f	1	0	1	1	1	1	STK17A	serine/threonine kinase 17a
hsa-miR-548f	1	0	1	1	1	1	NREP	neuronal regeneration related protein homolog (rat)
hsa-miR-548f	1	0	1	1	1	1	MED1	mediator complex subunit 1
hsa-miR-548f	1	0	1	1	1	1	B4GALT6	UDP-Gal:betaGlcNAc beta 1,4- galactosyltransferase, polypeptide 6
hsa-miR-548f	0	0	1	1	1	1	LHX2	LIM homeobox 2
hsa-miR-548f	1	0	1	1	1	1	NRXN3	neurexin 3
hsa-miR-548f	0	0	1	0	1	1	ADIPOQ	adiponectin, C1Q and collagen domain containing
hsa-miR-548f	1	0	1	1	1	1	ARHGAP29	Rho GTPase activating protein 29
hsa-miR-548f	0	0	1	1	1	1	TJP2	tight junction protein 2
hsa-miR-548f	1	0	1	0	1	1	CDYL	chromodomain protein, Y-like
hsa-miR-548f	1	0	1	1	1	1	MED26	mediator complex subunit 26
hsa-miR-548f	1	0	1	0	1	1	ROCK2	Rho-associated, coiled-coil containing protein kinase 2
hsa-miR-548f	1	0	1	1	1	1	ONECUT2	one cut homeobox 2
hsa-miR-548f	1	0	1	1	1	1	CXCL14	chemokine (C-X-C motif) ligand 14
hsa-miR-548f	0	0	1	1	1	1	CLCA3P	chloride channel accessory 3, pseudogene
hsa-miR-548f	1	0	1	1	1	1	ZFP36L1	zinc finger protein 36, C3H type-like 1
hsa-miR-548f	0	0	1	1	1	1	CALB1	calbindin 1, 28kDa
hsa-miR-548f	0	0	1	1	1	1	CD8B	CD8b molecule
hsa-miR-548f	0	0	1	1	1	1	DSC1	desmocollin 1
hsa-miR-548f	0	0	1	0	1	1	DSC2	desmocollin 2
hsa-miR-548f	0	0	1	1	1	1	JAK2	Janus kinase 2
hsa-miR-548f	1	0	1	0	1	1	KRAS	v-Ki-ras2 Kirsten rat sarcoma viral oncogene homolog
hsa-miR-548f	0	0	1	1	1	1	NDUFS1	NADH dehydrogenase (ubiquinone) Fe-S protein 1, 75kDa (NADH-coenzyme Q reductase)
hsa-miR-548f	0	0	1	1	1	1	PPID	peptidylprolyl isomerase D
hsa-miR-548f	1	0	1	0	1	1	SCD	stearoyl-CoA desaturase (delta-9-desaturase)
hsa-miR-548f	1	0	1	1	1	1	HS3ST1	heparan sulfate (glucosamine) 3-O-sulfotransferase 1
hsa-miR-548f	1	0	1	1	1	1	SLC23A2	solute carrier family 23 (nucleobase transporters), member 2
hsa-miR-548f	1	0	1	0	1	1	NUP153	nucleoporin 153kDa
hsa-miR-548f	0	0	1	1	1	1	CLEC2B	C-type lectin domain family 2, member B
hsa-miR-548f	0	0	1	1	1	1	ABCD2	ATP-binding cassette, sub-family D (ALD), member 2
hsa-miR-548f	1	0	1	1	1	1	BMI1	BMI1 polycomb ring finger oncogene
hsa-miR-548f	1	0	1	1	1	1	FOXN3	forkhead box N3
hsa-miR-548f	1	1	1	1	1	1	MAP3K8	mitogen-activated protein kinase kinase kinase 8
hsa-miR-548f	1	0	1	1	1	1	CRK	v-crk sarcoma virus CT10 oncogene homolog (avian)
hsa-miR-548f	1	0	1	1	1	1	DLX3	distal-less homeobox 3
hsa-miR-548f	1	0	1	1	1	1	GABPB1	GA binding protein transcription factor, beta subunit 1
hsa-miR-548f	0	0	1	1	1	1	MSTN	myostatin
hsa-miR-548f	1	0	1	1	1	1	H3F3B	H3 histone, family 3B (H3.3B)
hsa-miR-548f	1	0	1	0	1	1	PRKAB2	protein kinase, AMP-activated, beta 2 non-catalytic subunit
hsa-miR-548f	1	0	1	1	1	1	RALA	v-ral simian leukemia viral oncogene homolog A (ras related)
hsa-miR-548f	0	0	1	1	1	1	SEPP1	selenoprotein P, plasma, 1
hsa-miR-548f	0	0	1	1	1	1	SLC20A1	solute carrier family 20 (phosphate transporter), member 1
hsa-miR-548f	0	0	1	1	1	1	ST5	suppression of tumorigenicity 5
hsa-miR-548f	1	0	1	0	1	1	CCDC6	coiled-coil domain containing 6
hsa-miR-548f	0	0	1	1	1	1	SMC3	structural maintenance of chromosomes 3
hsa-miR-548f	1	0	1	1	0	0	NOG	noggin
hsa-miR-548f	0	0	1	1	1	1	MAPK8IP1	mitogen-activated protein kinase 8 interacting protein 1
hsa-miR-548f	1	0	1	1	1	1	MAFB	v-maf musculoaponeurotic fibrosarcoma oncogene homolog B (avian)
hsa-miR-548f	1	0	1	1	1	1	AKT3	v-akt murine thymoma viral oncogene homolog 3 (protein kinase B, gamma)
hsa-miR-548f	1	0	1	1	1	1	INSIG1	insulin induced gene 1
hsa-miR-548f	1	0	1	1	1	1	LPP	LIM domain containing preferred translocation partner in lipoma
hsa-miR-548f	1	0	1	1	1	1	NHLH2	nescient helix loop helix 2
hsa-miR-548f	0	0	1	0	1	1	POU3F2	POU class 3 homeobox 2
hsa-miR-548f	1	0	1	1	1	1	RGS4	regulator of G-protein signaling 4
hsa-miR-548f	1	0	1	1	1	1	EVI5	ecotropic viral integration site 5
hsa-miR-548f	1	0	1	1	1	1	ST8SIA4	ST8 alpha-N-acetyl-neuraminide alpha-2,8-sialyltransferase 4
hsa-miR-548f	1	0	1	1	1	1	ARPC5	actin related protein 2/3 complex, subunit 5, 16kDa
hsa-miR-548f	1	0	1	0	1	1	TSPAN2	tetraspanin 2
hsa-miR-548f	1	0	1	1	1	1	NAMPT	nicotinamide phosphoribosyltransferase
hsa-miR-548f	0	0	1	1	0	0	LPCAT3	lysophosphatidylcholine acyltransferase 3
hsa-miR-548f	1	0	1	1	1	1	EIF1	eukaryotic translation initiation factor 1
hsa-miR-548f	0	0	1	0	1	1	CALCOCO2	calcium binding and coiled-coil domain 2
hsa-miR-548f	1	0	1	0	1	1	SPRY3	sprouty homolog 3 (Drosophila)
hsa-miR-548f	1	0	1	1	1	1	PURA	purine-rich element binding protein A
hsa-miR-548f	1	0	1	1	1	1	BET1	blocked early in transport 1 homolog (S. cerevisiae)
hsa-miR-548f	1	0	1	0	1	1	NBR1	neighbor of BRCA1 gene 1
hsa-miR-548f	1	0	1	1	1	1	MAN1A1	mannosidase, alpha, class 1A, member 1
hsa-miR-548f	1	0	1	0	1	1	MAP1B	microtubule-associated protein 1B
hsa-miR-548f	1	0	1	0	1	1	NAB1	NGFI-A binding protein 1 (EGR1 binding protein 1)
hsa-miR-548f	0	0	1	1	0	0	SKP2	S-phase kinase-associated protein 2, E3 ubiquitin protein ligase
hsa-miR-548f	1	0	1	1	1	1	CDC42BPB	CDC42 binding protein kinase beta (DMPK-like)
hsa-miR-548f	0	0	1	1	1	1	EMC8	ER membrane protein complex subunit 8
hsa-miR-548f	1	0	1	1	1	1	SEMA3A	sema domain, immunoglobulin domain (Ig), short basic domain, secreted, (semaphorin) 3A
hsa-miR-548f	1	0	1	0	1	1	SCML2	sex comb on midleg-like 2 (Drosophila)
hsa-miR-548f	1	0	1	1	1	1	SPON1	spondin 1, extracellular matrix protein
hsa-miR-548f	1	0	1	1	1	1	TMEM50B	transmembrane protein 50B
hsa-miR-548f	1	0	1	1	1	1	CAPZA1	capping protein (actin filament) muscle Z-line, alpha 1
hsa-miR-548f	1	0	1	1	1	1	DYNC1LI2	dynein, cytoplasmic 1, light intermediate chain 2
hsa-miR-548f	1	0	1	1	1	1	NCK1	NCK adaptor protein 1
hsa-miR-548f	1	0	1	1	1	1	PCBP1	poly(rC) binding protein 1
hsa-miR-548f	1	0	1	1	1	1	PDGFRA	platelet-derived growth factor receptor, alpha polypeptide
hsa-miR-548f	1	0	1	1	1	1	POU4F1	POU class 4 homeobox 1
hsa-miR-548f	1	0	1	0	1	1	PPP1R2	protein phosphatase 1, regulatory (inhibitor) subunit 2
hsa-miR-548f	1	0	1	1	1	1	PPP2R5E	protein phosphatase 2, regulatory subunit B', epsilon isoform
hsa-miR-548f	0	0	1	1	1	1	PRKG2	protein kinase, cGMP-dependent, type II
hsa-miR-548f	1	0	1	1	1	1	RAD21	RAD21 homolog (S. pombe)
hsa-miR-548f	1	0	1	1	1	1	STK4	serine/threonine kinase 4
hsa-miR-548f	1	0	1	1	1	1	TSG101	tumor susceptibility gene 101
hsa-miR-548f	1	0	1	1	1	1	NPEPPS	aminopeptidase puromycin sensitive
hsa-miR-548f	0	0	1	1	1	1	FST	follistatin
hsa-miR-548f	1	0	1	1	1	1	ZNF238	zinc finger protein 238
hsa-miR-548f	1	0	1	1	1	1	SEC23A	Sec23 homolog A (S. cerevisiae)
hsa-miR-548f	1	0	1	0	1	1	APPBP2	amyloid beta precursor protein (cytoplasmic tail) binding protein 2
hsa-miR-548f	1	0	1	1	1	1	NEBL	nebulette
hsa-miR-548f	1	0	1	1	1	1	PAIP1	poly(A) binding protein interacting protein 1
hsa-miR-548f	0	0	1	0	1	1	SLC16A2	solute carrier family 16, member 2 (thyroid hormone transporter)
hsa-miR-548f	1	0	1	1	1	1	DYNLT3	dynein, light chain, Tctex-type 3
hsa-miR-548f	0	0	1	1	0	0	YEATS4	YEATS domain containing 4
hsa-miR-548f	1	0	1	0	1	1	IGF2BP1	insulin-like growth factor 2 mRNA binding protein 1
hsa-miR-548f	0	0	1	1	1	1	FARS2	phenylalanyl-tRNA synthetase 2, mitochondrial
hsa-miR-548f	0	0	1	1	1	1	CCT6B	chaperonin containing TCP1, subunit 6B (zeta 2)
hsa-miR-548f	1	0	1	1	1	1	CORIN	corin, serine peptidase
hsa-miR-548f	1	0	1	0	1	1	API5	apoptosis inhibitor 5
hsa-miR-548f	1	0	1	1	1	1	MAP3K2	mitogen-activated protein kinase kinase kinase 2
hsa-miR-548f	1	0	1	1	1	1	PLK2	polo-like kinase 2
hsa-miR-548f	1	0	1	1	1	1	ZBTB6	zinc finger and BTB domain containing 6
hsa-miR-548f	0	0	1	1	1	1	CLPX	ClpX caseinolytic peptidase X homolog (E. coli)
hsa-miR-548f	0	0	1	0	1	1	SUB1	SUB1 homolog (S. cerevisiae)
hsa-miR-548f	1	0	1	1	1	1	CDH10	cadherin 10, type 2 (T2-cadherin)
hsa-miR-548f	1	0	1	1	1	1	DIAPH2	diaphanous homolog 2 (Drosophila)
hsa-miR-548f	1	0	1	1	1	1	CBX1	chromobox homolog 1
hsa-miR-548f	1	0	1	1	1	1	SEC61B	Sec61 beta subunit
hsa-miR-548f	0	0	1	1	1	1	RAB40B	RAB40B, member RAS oncogene family
hsa-miR-548f	1	0	1	1	1	1	FERMT2	fermitin family member 2
hsa-miR-548f	0	0	1	1	1	1	ATF7	activating transcription factor 7
hsa-miR-548f	1	0	1	1	1	1	CD86	CD86 molecule
hsa-miR-548f	1	0	1	1	1	1	RP2	retinitis pigmentosa 2 (X-linked recessive)
hsa-miR-548f	1	0	1	0	1	1	SLC5A3	solute carrier family 5 (sodium/myo-inositol cotransporter), member 3
hsa-miR-548f	0	0	1	1	1	1	SNRPD1	small nuclear ribonucleoprotein D1 polypeptide 16kDa
hsa-miR-548f	0	0	1	1	1	1	TAF5	TAF5 RNA polymerase II, TATA box binding protein (TBP)-associated factor, 100kDa
hsa-miR-548f	1	0	1	0	1	1	WASF2	WAS protein family, member 2
hsa-miR-548f	1	0	1	0	1	1	PAPD7	PAP associated domain containing 7
hsa-miR-548f	1	0	1	1	1	1	WWP1	WW domain containing E3 ubiquitin protein ligase 1
hsa-miR-548f	0	0	1	1	1	1	RER1	RER1 retention in endoplasmic reticulum 1 homolog (S. cerevisiae)
hsa-miR-548f	1	0	1	1	1	1	ADAMTS5	ADAM metallopeptidase with thrombospondin type 1 motif, 5
hsa-miR-548f	0	0	1	1	1	1	POLR3A	polymerase (RNA) III (DNA directed) polypeptide A, 155kDa
hsa-miR-548f	1	0	1	1	1	1	SOX21	SRY (sex determining region Y)-box 21
hsa-miR-548f	1	0	1	1	1	1	UTY	ubiquitously transcribed tetratricopeptide repeat gene, Y-linked
hsa-miR-548f	1	0	1	1	1	1	ZNF81	zinc finger protein 81
hsa-miR-548f	1	0	1	1	1	1	VEZF1	vascular endothelial zinc finger 1
hsa-miR-548f	0	0	1	0	1	1	ZXDB	zinc finger, X-linked, duplicated B
hsa-miR-548f	1	0	1	1	1	1	ERLIN2	ER lipid raft associated 2
hsa-miR-548f	1	0	1	1	1	1	ABCF2	ATP-binding cassette, sub-family F (GCN20), member 2
hsa-miR-548f	0	0	1	1	1	1	AKAP10	A kinase (PRKA) anchor protein 10
hsa-miR-548f	1	0	1	1	1	1	RNF139	ring finger protein 139
hsa-miR-548f	1	0	1	1	1	1	CA5B	carbonic anhydrase VB, mitochondrial
hsa-miR-548f	1	0	1	0	1	1	CHP1	calcineurin-like EF hand protein 1
hsa-miR-548f	0	0	1	1	1	1	STXBP3	syntaxin binding protein 3
hsa-miR-548f	0	0	1	0	0	0	PHB2	prohibitin 2
hsa-miR-548f	0	0	1	1	1	1	STAT1	signal transducer and activator of transcription 1, 91kDa
hsa-miR-548f	0	0	1	0	1	1	AP4E1	adaptor-related protein complex 4, epsilon 1 subunit
hsa-miR-548f	0	0	1	1	1	1	MMRN1	multimerin 1
hsa-miR-548f	0	0	1	1	1	1	PLA2R1	phospholipase A2 receptor 1, 180kDa
hsa-miR-548f	1	0	1	1	1	1	ELL2	elongation factor, RNA polymerase II, 2
hsa-miR-548f	1	0	1	0	1	1	ZFPM2	zinc finger protein, multitype 2
hsa-miR-548f	1	0	1	1	1	1	ICOS	inducible T-cell co-stimulator
hsa-miR-548f	0	0	1	1	1	1	AK5	adenylate kinase 5
hsa-miR-548f	0	0	1	1	1	1	EHF	ets homologous factor
hsa-miR-548f	1	0	1	1	1	1	FBXL3	F-box and leucine-rich repeat protein 3
hsa-miR-548f	0	0	1	1	1	1	FXC1	fracture callus 1 homolog (rat)
hsa-miR-548f	1	0	1	0	1	1	FZD4	frizzled family receptor 4
hsa-miR-548f	1	0	1	1	1	1	RYBP	RING1 and YY1 binding protein
hsa-miR-548f	1	0	1	1	1	1	RHOQ	ras homolog family member Q
hsa-miR-548f	0	0	1	1	1	1	RRAS2	related RAS viral (r-ras) oncogene homolog 2
hsa-miR-548f	1	0	1	1	1	1	KCND2	potassium voltage-gated channel, Shal-related subfamily, member 2
hsa-miR-548f	1	0	1	1	1	1	KCNE1L	KCNE1-like
hsa-miR-548f	1	0	1	0	1	1	RAPGEF5	Rap guanine nucleotide exchange factor (GEF) 5
hsa-miR-548f	1	0	1	0	1	1	G3BP2	GTPase activating protein (SH3 domain) binding protein 2
hsa-miR-548f	1	0	1	1	1	1	MAPRE1	microtubule-associated protein, RP/EB family, member 1
hsa-miR-548f	0	0	1	0	1	1	PIGN	phosphatidylinositol glycan anchor biosynthesis, class N
hsa-miR-548f	1	0	1	1	1	1	MMD	monocyte to macrophage differentiation-associated
hsa-miR-548f	1	0	1	1	1	1	NNT	nicotinamide nucleotide transhydrogenase
hsa-miR-548f	1	0	1	0	1	1	BLOC1S6	biogenesis of lysosomal organelles complex-1, subunit 6, pallidin
hsa-miR-548f	0	0	1	0	1	1	PLA2G2D	phospholipase A2, group IID
hsa-miR-548f	1	0	1	1	1	1	SF3B3	splicing factor 3b, subunit 3, 130kDa
hsa-miR-548f	0	0	1	0	1	1	TLL1	tolloid-like 1
hsa-miR-548f	1	0	1	1	1	1	TRPC5	transient receptor potential cation channel, subfamily C, member 5
hsa-miR-548f	0	0	1	1	0	0	LRRC6	leucine rich repeat containing 6
hsa-miR-548f	0	0	1	1	1	1	CD24	CD24 molecule
hsa-miR-548f	1	0	1	0	1	1	FLRT2	fibronectin leucine rich transmembrane protein 2
hsa-miR-548f	1	0	1	1	1	1	STK39	serine threonine kinase 39
hsa-miR-548f	1	0	1	1	1	1	SLC25A24	solute carrier family 25 (mitochondrial carrier; phosphate carrier), member 24
hsa-miR-548f	0	0	1	0	1	1	EMR2	egf-like module containing, mucin-like, hormone receptor-like 2
hsa-miR-548f	1	0	1	1	1	1	BAZ1A	bromodomain adjacent to zinc finger domain, 1A
hsa-miR-548f	1	0	1	1	1	1	LAMP2	lysosomal-associated membrane protein 2
hsa-miR-548f	1	0	1	1	1	1	SOCS5	suppressor of cytokine signaling 5
hsa-miR-548f	0	0	1	1	0	0	REM1	RAS (RAD and GEM)-like GTP-binding 1
hsa-miR-548f	1	0	1	1	1	1	WDR37	WD repeat domain 37
hsa-miR-548f	1	0	1	1	1	1	KLF15	Kruppel-like factor 15
hsa-miR-548f	1	0	1	0	1	1	C16orf72	chromosome 16 open reading frame 72
hsa-miR-548f	1	0	1	1	1	1	ZBTB44	zinc finger and BTB domain containing 44
hsa-miR-548f	0	0	1	0	1	1	AP2A1	adaptor-related protein complex 2, alpha 1 subunit
hsa-miR-548f	1	0	1	0	1	1	VAMP2	vesicle-associated membrane protein 2 (synaptobrevin 2)
hsa-miR-548f	1	0	1	1	1	1	RNF7	ring finger protein 7
hsa-miR-548f	1	0	1	1	1	1	MAPRE2	microtubule-associated protein, RP/EB family, member 2
hsa-miR-548f	1	0	1	1	1	1	LEMD3	LEM domain containing 3
hsa-miR-548f	1	0	1	1	1	1	MTCH2	mitochondrial carrier 2
hsa-miR-548f	1	0	1	0	1	1	FJX1	four jointed box 1 (Drosophila)
hsa-miR-548f	1	0	1	0	1	1	RNF11	ring finger protein 11
hsa-miR-548f	1	0	1	0	1	1	DIEXF	digestive organ expansion factor homolog (zebrafish)
hsa-miR-548f	1	0	1	1	1	1	AFF4	AF4/FMR2 family, member 4
hsa-miR-548f	1	0	1	1	1	1	SERP1	stress-associated endoplasmic reticulum protein 1
hsa-miR-548f	0	0	1	1	1	1	ARFGAP3	ADP-ribosylation factor GTPase activating protein 3
hsa-miR-548f	1	1	1	1	1	1	LATS2	LATS, large tumor suppressor, homolog 2 (Drosophila)
hsa-miR-548f	1	0	1	1	1	1	ERO1L	ERO1-like (S. cerevisiae)
hsa-miR-548f	1	0	1	1	1	1	RALGPS1	Ral GEF with PH domain and SH3 binding motif 1
hsa-miR-548f	0	0	1	1	1	1	FAM53B	family with sequence similarity 53, member B
hsa-miR-548f	1	0	1	0	1	1	BZW1	basic leucine zipper and W2 domains 1
hsa-miR-548f	0	0	1	0	1	1	KNTC1	kinetochore associated 1
hsa-miR-548f	1	0	1	0	1	1	MLEC	malectin
hsa-miR-548f	1	0	1	1	1	1	RASSF2	Ras association (RalGDS/AF-6) domain family member 2
hsa-miR-548f	1	0	1	1	1	1	SPCS2	signal peptidase complex subunit 2 homolog (S. cerevisiae)
hsa-miR-548f	1	0	1	0	1	1	TOMM20	translocase of outer mitochondrial membrane 20 homolog (yeast)
hsa-miR-548f	0	0	1	1	1	1	PPP1R26	protein phosphatase 1, regulatory subunit 26
hsa-miR-548f	1	0	1	0	1	1	LPPR4	lipid phosphate phosphatase-related protein type 4
hsa-miR-548f	1	0	1	1	1	1	NUAK1	NUAK family, SNF1-like kinase, 1
hsa-miR-548f	1	0	1	1	1	1	SV2A	synaptic vesicle glycoprotein 2A
hsa-miR-548f	1	0	1	1	1	1	ZBTB5	zinc finger and BTB domain containing 5
hsa-miR-548f	1	0	1	1	1	1	JOSD1	Josephin domain containing 1
hsa-miR-548f	0	0	1	1	1	1	N4BP2L2	NEDD4 binding protein 2-like 2
hsa-miR-548f	1	0	1	1	1	1	CHSY1	chondroitin sulfate synthase 1
hsa-miR-548f	1	0	1	0	1	1	ICK	intestinal cell (MAK-like) kinase
hsa-miR-548f	1	0	1	1	1	1	SPEN	spen homolog, transcriptional regulator (Drosophila)
hsa-miR-548f	0	0	1	1	1	1	TMEM41B	transmembrane protein 41B
hsa-miR-548f	1	0	1	1	1	1	USP33	ubiquitin specific peptidase 33
hsa-miR-548f	1	0	1	0	1	1	PDS5B	PDS5, regulator of cohesion maintenance, homolog B (S. cerevisiae)
hsa-miR-548f	1	0	1	1	1	1	PIKFYVE	phosphoinositide kinase, FYVE finger containing
hsa-miR-548f	1	0	1	1	1	1	TRAK2	trafficking protein, kinesin binding 2
hsa-miR-548f	1	0	1	1	1	1	RTF1	Rtf1, Paf1/RNA polymerase II complex component, homolog (S. cerevisiae)
hsa-miR-548f	1	0	1	1	1	1	GPD1L	glycerol-3-phosphate dehydrogenase 1-like
hsa-miR-548f	1	0	1	0	1	1	LARP4B	La ribonucleoprotein domain family, member 4B
hsa-miR-548f	0	0	1	1	1	1	ARL6IP1	ADP-ribosylation factor-like 6 interacting protein 1
hsa-miR-548f	0	0	1	1	1	1	FBXO28	F-box protein 28
hsa-miR-548f	1	0	1	1	1	1	SIK2	salt-inducible kinase 2
hsa-miR-548f	1	0	1	1	1	1	PLCB1	phospholipase C, beta 1 (phosphoinositide-specific)
hsa-miR-548f	1	0	1	1	1	1	PDS5A	PDS5, regulator of cohesion maintenance, homolog A (S. cerevisiae)
hsa-miR-548f	1	0	1	1	1	1	AHCYL2	adenosylhomocysteinase-like 2
hsa-miR-548f	0	0	1	0	1	1	ZDHHC17	zinc finger, DHHC-type containing 17
hsa-miR-548f	0	0	1	1	1	1	LEPROTL1	leptin receptor overlapping transcript-like 1
hsa-miR-548f	0	0	1	1	1	1	NUP188	nucleoporin 188kDa
hsa-miR-548f	1	0	1	1	1	1	MOB4	MOB family member 4, phocein
hsa-miR-548f	1	0	1	1	1	1	PARM1	prostate androgen-regulated mucin-like protein 1
hsa-miR-548f	1	0	1	1	1	1	RNF19A	ring finger protein 19A, E3 ubiquitin protein ligase
hsa-miR-548f	1	0	1	1	1	1	MYRIP	myosin VIIA and Rab interacting protein
hsa-miR-548f	1	0	1	1	1	1	NSL1	NSL1, MIND kinetochore complex component, homolog (S. cerevisiae)
hsa-miR-548f	0	0	1	1	1	1	KBTBD2	kelch repeat and BTB (POZ) domain containing 2
hsa-miR-548f	1	0	1	1	1	1	LTN1	listerin E3 ubiquitin protein ligase 1
hsa-miR-548f	1	0	1	0	1	1	ERC2	ELKS/RAB6-interacting/CAST family member 2
hsa-miR-548f	0	0	1	1	1	1	C10orf12	chromosome 10 open reading frame 12
hsa-miR-548f	0	0	1	1	1	1	GIMAP2	GTPase, IMAP family member 2
hsa-miR-548f	1	0	1	1	1	1	FAM155B	family with sequence similarity 155, member B
hsa-miR-548f	1	0	1	0	1	1	WWC3	WWC family member 3
hsa-miR-548f	0	0	1	1	1	1	BRPF3	bromodomain and PHD finger containing, 3
hsa-miR-548f	0	0	1	1	1	1	KRT76	keratin 76
hsa-miR-548f	1	0	1	1	1	1	AZIN1	antizyme inhibitor 1
hsa-miR-548f	1	0	1	0	1	1	TRIM33	tripartite motif containing 33
hsa-miR-548f	0	0	1	0	0	0	RPS27L	ribosomal protein S27-like
hsa-miR-548f	0	0	1	1	1	1	PELO	pelota homolog (Drosophila)
hsa-miR-548f	1	0	1	1	1	1	MEMO1	mediator of cell motility 1
hsa-miR-548f	1	0	1	1	1	1	TAF9B	TAF9B RNA polymerase II, TATA box binding protein (TBP)-associated factor, 31kDa
hsa-miR-548f	1	0	1	1	0	0	YBX2	Y box binding protein 2
hsa-miR-548f	1	0	1	1	1	1	UBE2J1	ubiquitin-conjugating enzyme E2, J1
hsa-miR-548f	0	0	1	0	1	1	OTUD6B	OTU domain containing 6B
hsa-miR-548f	0	0	1	1	1	1	CCDC53	coiled-coil domain containing 53
hsa-miR-548f	1	0	1	1	1	1	GOLT1B	golgi transport 1B
hsa-miR-548f	0	0	1	1	1	1	HDGFRP3	hepatoma-derived growth factor, related protein 3
hsa-miR-548f	1	0	1	0	1	1	WNT16	wingless-type MMTV integration site family, member 16
hsa-miR-548f	0	0	1	1	1	1	COMMD2	COMM domain containing 2
hsa-miR-548f	0	0	1	1	1	1	ZFR	zinc finger RNA binding protein
hsa-miR-548f	0	0	1	1	1	1	RAB10	RAB10, member RAS oncogene family
hsa-miR-548f	1	0	1	1	1	1	VGLL3	vestigial like 3 (Drosophila)
hsa-miR-548f	1	0	1	0	1	1	HPCAL4	hippocalcin like 4
hsa-miR-548f	1	0	1	1	1	1	RNF138	ring finger protein 138, E3 ubiquitin protein ligase
hsa-miR-548f	1	0	1	0	1	1	SELT	selenoprotein T
hsa-miR-548f	1	0	1	0	1	1	PTPLAD1	protein tyrosine phosphatase-like A domain containing 1
hsa-miR-548f	0	0	1	1	0	0	CWC15	CWC15 spliceosome-associated protein homolog (S. cerevisiae)
hsa-miR-548f	0	0	1	1	0	0	TRMT112	tRNA methyltransferase 11-2 homolog (S. cerevisiae)
hsa-miR-548f	0	0	1	1	1	1	DTL	denticleless E3 ubiquitin protein ligase homolog (Drosophila)
hsa-miR-548f	1	0	1	1	1	1	VTA1	Vps20-associated 1 homolog (S. cerevisiae)
hsa-miR-548f	1	0	1	0	1	1	RAB8B	RAB8B, member RAS oncogene family
hsa-miR-548f	1	0	1	1	1	1	DNAJC27	DnaJ (Hsp40) homolog, subfamily C, member 27
hsa-miR-548f	1	0	1	1	1	1	MEX3C	mex-3 homolog C (C. elegans)
hsa-miR-548f	1	0	1	1	1	1	SIX4	SIX homeobox 4
hsa-miR-548f	0	0	1	1	1	1	HYDIN	HYDIN, axonemal central pair apparatus protein
hsa-miR-548f	1	0	1	0	1	1	UBE2Q1	ubiquitin-conjugating enzyme E2Q family member 1
hsa-miR-548f	0	0	1	0	1	1	TRIM44	tripartite motif containing 44
hsa-miR-548f	1	0	1	1	1	1	DIRAS2	DIRAS family, GTP-binding RAS-like 2
hsa-miR-548f	1	0	1	1	0	0	C17orf59	chromosome 17 open reading frame 59
hsa-miR-548f	1	0	1	1	1	1	ZNF280C	zinc finger protein 280C
hsa-miR-548f	1	0	1	1	1	1	VPS13C	vacuolar protein sorting 13 homolog C (S. cerevisiae)
hsa-miR-548f	1	0	1	0	1	1	FAM46C	family with sequence similarity 46, member C
hsa-miR-548f	1	0	1	1	1	1	TBC1D8B	TBC1 domain family, member 8B (with GRAM domain)
hsa-miR-548f	1	0	1	1	1	1	LPPR1	lipid phosphate phosphatase-related protein type 1
hsa-miR-548f	1	0	1	1	1	1	ALKBH5	alkB, alkylation repair homolog 5 (E. coli)
hsa-miR-548f	0	0	1	1	1	1	WHSC1L1	Wolf-Hirschhorn syndrome candidate 1-like 1
hsa-miR-548f	1	0	1	0	1	1	CMTM6	CKLF-like MARVEL transmembrane domain containing 6
hsa-miR-548f	1	0	1	0	1	1	MARCH5	membrane-associated ring finger (C3HC4) 5
hsa-miR-548f	0	0	1	1	1	1	SOHLH2	spermatogenesis and oogenesis specific basic helix-loop-helix 2
hsa-miR-548f	1	0	1	1	1	1	GID8	GID complex subunit 8 homolog (S. cerevisiae)
hsa-miR-548f	0	0	1	1	0	0	CCDC109B	coiled-coil domain containing 109B
hsa-miR-548f	1	0	1	1	1	1	CDCA4	cell division cycle associated 4
hsa-miR-548f	0	0	1	1	0	0	TRMT12	tRNA methyltransferase 12 homolog (S. cerevisiae)
hsa-miR-548f	1	0	1	1	1	1	C9orf40	chromosome 9 open reading frame 40
hsa-miR-548f	0	0	1	0	1	1	MREG	melanoregulin
hsa-miR-548f	1	0	1	1	1	1	ARGLU1	arginine and glutamate rich 1
hsa-miR-548f	1	0	1	1	1	1	ATG2B	autophagy related 2B
hsa-miR-548f	0	0	1	1	1	1	KDM4D	lysine (K)-specific demethylase 4D
hsa-miR-548f	1	0	1	1	1	1	FIGN	fidgetin
hsa-miR-548f	1	0	1	0	1	1	ARMC1	armadillo repeat containing 1
hsa-miR-548f	1	0	1	1	1	1	FAM178A	family with sequence similarity 178, member A
hsa-miR-548f	1	0	1	1	1	1	TMEM33	transmembrane protein 33
hsa-miR-548f	1	0	1	0	1	1	MSL2	male-specific lethal 2 homolog (Drosophila)
hsa-miR-548f	0	0	1	1	1	1	MRPS10	mitochondrial ribosomal protein S10
hsa-miR-548f	0	0	1	1	1	1	NUDT11	nudix (nucleoside diphosphate linked moiety X)-type motif 11
hsa-miR-548f	1	0	1	0	1	1	ARL8B	ADP-ribosylation factor-like 8B
hsa-miR-548f	0	0	1	0	1	1	TMEM57	transmembrane protein 57
hsa-miR-548f	1	0	1	1	1	1	UBA6	ubiquitin-like modifier activating enzyme 6
hsa-miR-548f	1	0	1	1	1	1	CCAR1	cell division cycle and apoptosis regulator 1
hsa-miR-548f	1	0	1	1	1	1	C20orf20	chromosome 20 open reading frame 20
hsa-miR-548f	1	0	1	1	1	1	ZNF654	zinc finger protein 654
hsa-miR-548f	0	0	1	1	1	1	RBM41	RNA binding motif protein 41
hsa-miR-548f	1	0	1	1	1	1	PI4K2B	phosphatidylinositol 4-kinase type 2 beta
hsa-miR-548f	1	0	1	1	1	1	SPTLC3	serine palmitoyltransferase, long chain base subunit 3
hsa-miR-548f	1	0	1	1	1	1	KIAA1598	KIAA1598
hsa-miR-548f	0	0	1	0	1	1	TXLNG	taxilin gamma
hsa-miR-548f	1	0	1	0	1	1	LIN7C	lin-7 homolog C (C. elegans)
hsa-miR-548f	1	0	1	1	1	1	RSBN1	round spermatid basic protein 1
hsa-miR-548f	0	0	1	0	1	1	BLOC1S4	biogenesis of lysosomal organelles complex-1, subunit 4, cappuccino
hsa-miR-548f	0	0	1	1	1	1	LAPTM4B	lysosomal protein transmembrane 4 beta
hsa-miR-548f	1	0	1	0	1	1	FOXJ2	forkhead box J2
hsa-miR-548f	1	0	1	1	1	1	PAG1	phosphoprotein associated with glycosphingolipid microdomains 1
hsa-miR-548f	0	0	1	1	1	1	ALG13	asparagine-linked glycosylation 13 homolog (S. cerevisiae)
hsa-miR-548f	0	0	1	1	1	1	ZC3H15	zinc finger CCCH-type containing 15
hsa-miR-548f	1	0	1	1	1	1	ASH1L	ash1 (absent, small, or homeotic)-like (Drosophila)
hsa-miR-548f	1	0	1	1	1	1	CAMK2N1	calcium/calmodulin-dependent protein kinase II inhibitor 1
hsa-miR-548f	1	0	1	1	1	1	MLL5	myeloid/lymphoid or mixed-lineage leukemia 5 (trithorax homolog, Drosophila)
hsa-miR-548f	1	0	1	0	1	1	TMEM55A	transmembrane protein 55A
hsa-miR-548f	1	0	1	0	1	1	KLHL9	kelch-like 9 (Drosophila)
hsa-miR-548f	1	0	1	0	1	1	PCDHAC1	protocadherin alpha subfamily C, 1
hsa-miR-548f	1	0	1	0	1	1	PCDHAC2	protocadherin alpha subfamily C, 2
hsa-miR-548f	1	0	1	1	1	1	PCDHA1	protocadherin alpha 1
hsa-miR-548f	1	0	1	0	1	1	PCDHA10	protocadherin alpha 10
hsa-miR-548f	1	0	1	0	1	1	PCDHA11	protocadherin alpha 11
hsa-miR-548f	1	0	1	0	1	1	PCDHA12	protocadherin alpha 12
hsa-miR-548f	1	0	1	0	1	1	PCDHA13	protocadherin alpha 13
hsa-miR-548f	1	0	1	1	1	1	PCDHA2	protocadherin alpha 2
hsa-miR-548f	1	0	1	1	1	1	PCDHA3	protocadherin alpha 3
hsa-miR-548f	1	0	1	1	1	1	PCDHA4	protocadherin alpha 4
hsa-miR-548f	1	0	1	1	1	1	PCDHA5	protocadherin alpha 5
hsa-miR-548f	1	0	1	1	1	1	PCDHA6	protocadherin alpha 6
hsa-miR-548f	1	0	1	0	1	1	PCDHA7	protocadherin alpha 7
hsa-miR-548f	1	0	1	1	1	1	PCDHA8	protocadherin alpha 8
hsa-miR-548f	1	0	1	0	1	1	CYCS	cytochrome c, somatic
hsa-miR-548f	0	0	1	1	1	1	ERRFI1	ERBB receptor feedback inhibitor 1
hsa-miR-548f	1	0	1	1	1	1	HOXA10	homeobox A10
hsa-miR-548f	0	0	1	1	1	1	NPAP1	nuclear pore associated protein 1
hsa-miR-548f	0	0	1	1	1	1	TERF2IP	telomeric repeat binding factor 2, interacting protein
hsa-miR-548f	1	0	1	0	1	1	FAM190B	family with sequence similarity 190, member B
hsa-miR-548f	0	0	1	1	0	0	TOMM7	translocase of outer mitochondrial membrane 7 homolog (yeast)
hsa-miR-548f	0	0	1	1	1	1	GNL3L	guanine nucleotide binding protein-like 3 (nucleolar)-like
hsa-miR-548f	1	0	1	1	1	1	NDFIP2	Nedd4 family interacting protein 2
hsa-miR-548f	1	0	1	0	1	1	CCNJ	cyclin J
hsa-miR-548f	0	0	1	0	1	1	ARL15	ADP-ribosylation factor-like 15
hsa-miR-548f	1	0	1	1	1	1	SERTAD4	SERTA domain containing 4
hsa-miR-548f	0	0	1	1	1	1	RPRM	reprimo, TP53 dependent G2 arrest mediator candidate
hsa-miR-548f	1	0	1	1	1	1	POLE4	polymerase (DNA-directed), epsilon 4, accessory subunit
hsa-miR-548f	1	0	1	0	1	1	TM9SF3	transmembrane 9 superfamily member 3
hsa-miR-548f	0	0	1	1	1	1	TMEM167B	transmembrane protein 167B
hsa-miR-548f	1	0	1	1	1	1	C1GALT1	core 1 synthase, glycoprotein-N-acetylgalactosamine 3-beta-galactosyltransferase, 1
hsa-miR-548f	0	0	1	1	1	1	ACN9	ACN9 homolog (S. cerevisiae)
hsa-miR-548f	1	0	1	1	1	1	SMYD2	SET and MYND domain containing 2
hsa-miR-548f	0	0	1	1	1	1	STOX2	storkhead box 2
hsa-miR-548f	0	0	1	1	1	1	CXCR7	chemokine (C-X-C motif) receptor 7
hsa-miR-548f	1	0	1	1	1	1	PAK7	p21 protein (Cdc42/Rac)-activated kinase 7
hsa-miR-548f	0	0	1	1	1	1	PDSS2	prenyl (decaprenyl) diphosphate synthase, subunit 2
hsa-miR-548f	1	0	1	1	1	1	OSM	oncostatin M
hsa-miR-548f	1	0	1	0	1	1	ADCY2	adenylate cyclase 2 (brain)
hsa-miR-548f	1	0	1	0	1	1	DCUN1D1	DCN1, defective in cullin neddylation 1, domain containing 1 (S. cerevisiae)
hsa-miR-548f	1	0	1	1	1	1	NRIP3	nuclear receptor interacting protein 3
hsa-miR-548f	0	0	1	0	1	1	TWSG1	twisted gastrulation homolog 1 (Drosophila)
hsa-miR-548f	1	0	1	1	1	1	CBX8	chromobox homolog 8
hsa-miR-548f	1	0	1	1	1	1	RAB22A	RAB22A, member RAS oncogene family
hsa-miR-548f	1	0	1	0	1	1	KCNS2	potassium voltage-gated channel, delayed-rectifier, subfamily S, member 2
hsa-miR-548f	0	0	1	1	1	1	SHROOM4	shroom family member 4
hsa-miR-548f	1	0	1	1	1	1	USP31	ubiquitin specific peptidase 31
hsa-miR-548f	1	0	1	1	1	1	ZNF608	zinc finger protein 608
hsa-miR-548f	1	0	1	1	1	1	ARHGAP31	Rho GTPase activating protein 31
hsa-miR-548f	1	0	1	0	1	1	NUFIP2	nuclear fragile X mental retardation protein interacting protein 2
hsa-miR-548f	1	0	1	0	1	1	KLHDC5	kelch domain containing 5
hsa-miR-548f	1	0	1	0	1	1	SYT4	synaptotagmin IV
hsa-miR-548f	1	0	1	1	1	1	SEMA6A	sema domain, transmembrane domain (TM), and cytoplasmic domain, (semaphorin) 6A
hsa-miR-548f	0	0	1	0	1	1	TRMT5	tRNA methyltransferase 5 homolog (S. cerevisiae)
hsa-miR-548f	1	0	1	1	1	1	ARHGAP21	Rho GTPase activating protein 21
hsa-miR-548f	1	0	1	0	1	1	WDFY1	WD repeat and FYVE domain containing 1
hsa-miR-548f	1	0	1	1	1	1	CNTN3	contactin 3 (plasmacytoma associated)
hsa-miR-548f	1	0	1	1	1	1	EPB41L5	erythrocyte membrane protein band 4.1 like 5
hsa-miR-548f	1	0	1	0	1	1	GPAM	glycerol-3-phosphate acyltransferase, mitochondrial
hsa-miR-548f	0	0	1	1	1	1	KIAA1586	KIAA1586
hsa-miR-548f	0	0	1	1	1	1	B3GALT1	UDP-Gal:betaGlcNAc beta 1,3-galactosyltransferase, polypeptide 1
hsa-miR-548f	1	0	1	0	1	1	RAP2A	RAP2A, member of RAS oncogene family
hsa-miR-548f	1	0	1	1	1	1	HCN1	hyperpolarization activated cyclic nucleotide-gated potassium channel 1
hsa-miR-548f	1	0	1	1	1	1	RTN1	reticulon 1
hsa-miR-548f	1	0	1	1	1	1	C6orf47	chromosome 6 open reading frame 47
hsa-miR-548f	0	0	1	0	1	1	SLC30A1	solute carrier family 30 (zinc transporter), member 1
hsa-miR-548f	0	0	1	0	1	1	MS4A7	membrane-spanning 4-domains, subfamily A, member 7
hsa-miR-548f	1	0	1	1	1	1	NTN4	netrin 4
hsa-miR-548f	0	0	1	1	1	1	SELK	selenoprotein K
hsa-miR-548f	1	0	1	1	1	1	DMRT3	doublesex and mab-3 related transcription factor 3
hsa-miR-548f	1	0	1	1	1	1	PELI2	pellino E3 ubiquitin protein ligase family member 2
hsa-miR-548f	1	0	1	1	1	1	OTX2	orthodenticle homeobox 2
hsa-miR-548f	1	0	1	1	1	1	BACH2	BTB and CNC homology 1, basic leucine zipper transcription factor 2
hsa-miR-548f	1	0	1	1	1	1	ZFAND3	zinc finger, AN1-type domain 3
hsa-miR-548f	1	0	1	1	1	1	SEC24A	SEC24 family, member A (S. cerevisiae)
hsa-miR-548f	1	0	1	0	1	1	CSNK1G1	casein kinase 1, gamma 1
hsa-miR-548f	0	0	1	1	1	1	FAM204A	family with sequence similarity 204, member A
hsa-miR-548f	0	0	1	1	1	1	PERP	PERP, TP53 apoptosis effector
hsa-miR-548f	0	0	1	1	0	0	MCCC2	methylcrotonoyl-CoA carboxylase 2 (beta)
hsa-miR-548f	1	0	1	1	1	1	XYLT1	xylosyltransferase I
hsa-miR-548f	1	0	1	1	1	1	XPO4	exportin 4
hsa-miR-548f	1	0	1	1	1	1	MESDC1	mesoderm development candidate 1
hsa-miR-548f	1	0	1	0	1	1	HOXC8	homeobox C8
hsa-miR-548f	1	0	1	1	1	1	PER2	period homolog 2 (Drosophila)
hsa-miR-548f	1	0	1	1	1	1	MARCH7	membrane-associated ring finger (C3HC4) 7, E3 ubiquitin protein ligase
hsa-miR-548f	1	0	1	0	1	1	BCL11B	B-cell CLL/lymphoma 11B (zinc finger protein)
hsa-miR-548f	0	0	1	1	1	1	SERF1B	small EDRK-rich factor 1B (centromeric)
hsa-miR-548f	1	0	1	1	1	1	SOWAHC	sosondowah ankyrin repeat domain family member C
hsa-miR-548f	0	0	1	0	1	1	ANKRA2	ankyrin repeat, family A (RFXANK-like), 2
hsa-miR-548f	1	0	1	1	1	1	GID4	GID complex subunit 4, VID24 homolog (S. cerevisiae)
hsa-miR-548f	0	0	1	0	1	1	C2orf49	chromosome 2 open reading frame 49
hsa-miR-548f	0	0	1	1	1	1	WDR77	WD repeat domain 77
hsa-miR-548f	1	0	1	0	1	1	NOTCH2	notch 2
hsa-miR-548f	1	0	1	1	1	1	PSTPIP2	proline-serine-threonine phosphatase interacting protein 2
hsa-miR-548f	1	0	1	1	1	1	HOXD1	homeobox D1
hsa-miR-548f	1	0	1	1	1	1	LRRC2	leucine rich repeat containing 2
hsa-miR-548f	1	0	1	1	1	1	C10orf76	chromosome 10 open reading frame 76
hsa-miR-548f	1	0	1	1	1	1	USB1	U6 snRNA biogenesis 1
hsa-miR-548f	0	0	1	0	1	1	ZYG11B	zyg-11 homolog B (C. elegans)
hsa-miR-548f	0	0	1	1	1	1	SNIP1	Smad nuclear interacting protein 1
hsa-miR-548f	1	0	1	1	1	1	C15orf29	chromosome 15 open reading frame 29
hsa-miR-548f	1	0	1	0	1	1	ZFHX4	zinc finger homeobox 4
hsa-miR-548f	1	0	1	1	1	1	CLMP	CXADR-like membrane protein
hsa-miR-548f	0	0	1	1	1	1	PREX2	phosphatidylinositol-3,4,5-trisphosphate-dependent Rac exchange factor 2
hsa-miR-548f	1	0	1	1	1	1	L2HGDH	L-2-hydroxyglutarate dehydrogenase
hsa-miR-548f	1	0	1	1	1	1	CEP76	centrosomal protein 76kDa
hsa-miR-548f	1	0	1	1	1	1	KLHL18	kelch-like 18 (Drosophila)
hsa-miR-548f	0	0	1	1	1	1	ZNF606	zinc finger protein 606
hsa-miR-548f	1	0	1	0	1	1	VCPIP1	valosin containing protein (p97)/p47 complex interacting protein 1
hsa-miR-548f	1	0	1	1	1	1	FBXO11	F-box protein 11
hsa-miR-548f	1	0	1	1	1	1	PROSER1	proline and serine rich 1
hsa-miR-548f	1	0	1	1	1	1	NAA50	N(alpha)-acetyltransferase 50, NatE catalytic subunit
hsa-miR-548f	1	0	1	1	1	1	EFHC2	EF-hand domain (C-terminal) containing 2
hsa-miR-548f	1	0	1	0	1	1	EDEM3	ER degradation enhancer, mannosidase alpha-like 3
hsa-miR-548f	1	0	1	0	1	1	SRCIN1	SRC kinase signaling inhibitor 1
hsa-miR-548f	1	0	1	0	1	1	TET1	tet methylcytosine dioxygenase 1
hsa-miR-548f	1	0	1	1	1	1	JHDM1D	jumonji C domain containing histone demethylase 1 homolog D (S. cerevisiae)
hsa-miR-548f	1	0	1	0	1	1	SETD7	SET domain containing (lysine methyltransferase) 7
hsa-miR-548f	1	0	1	1	1	1	TMX1	thioredoxin-related transmembrane protein 1
hsa-miR-548f	1	0	1	1	1	1	NRBF2	nuclear receptor binding factor 2
hsa-miR-548f	0	0	1	1	1	1	HMGN5	high mobility group nucleosome binding domain 5
hsa-miR-548f	1	0	1	1	1	1	TUBB1	tubulin, beta 1 class VI
hsa-miR-548f	1	0	1	0	1	1	C1orf21	chromosome 1 open reading frame 21
hsa-miR-548f	1	0	1	0	1	1	CSRNP2	cysteine-serine-rich nuclear protein 2
hsa-miR-548f	1	0	1	1	1	1	SNX27	sorting nexin family member 27
hsa-miR-548f	1	0	1	1	1	1	C6orf62	chromosome 6 open reading frame 62
hsa-miR-548f	0	0	1	1	1	1	TEX15	testis expressed 15
hsa-miR-548f	1	0	1	1	1	1	ANO3	anoctamin 3
hsa-miR-548f	0	0	1	1	0	0	NUF2	NUF2, NDC80 kinetochore complex component, homolog (S. cerevisiae)
hsa-miR-548f	0	0	1	1	1	1	COG3	component of oligomeric golgi complex 3
hsa-miR-548f	1	0	1	0	1	1	NUDT12	nudix (nucleoside diphosphate linked moiety X)-type motif 12
hsa-miR-548f	1	0	1	1	1	1	PCDHA9	protocadherin alpha 9
hsa-miR-548f	0	0	1	0	1	1	ENAM	enamelin
hsa-miR-548f	0	0	1	1	1	1	MAGT1	magnesium transporter 1
hsa-miR-548f	0	0	1	0	1	1	RAB6C	RAB6C, member RAS oncogene family
hsa-miR-548f	1	0	1	1	1	1	FBXO30	F-box protein 30
hsa-miR-548f	1	0	1	1	1	1	FAM175B	family with sequence similarity 175, member B
hsa-miR-548f	1	0	1	0	1	1	FAR1	fatty acyl CoA reductase 1
hsa-miR-548f	1	0	1	1	1	1	SLITRK6	SLIT and NTRK-like family, member 6
hsa-miR-548f	1	0	1	1	1	1	MEX3B	mex-3 homolog B (C. elegans)
hsa-miR-548f	1	0	1	1	1	1	CAMKK1	calcium/calmodulin-dependent protein kinase kinase 1, alpha
hsa-miR-548f	0	0	1	1	1	1	YIPF4	Yip1 domain family, member 4
hsa-miR-548f	0	0	1	1	0	0	NICN1	nicolin 1
hsa-miR-548f	0	0	1	1	0	0	C3orf26	chromosome 3 open reading frame 26
hsa-miR-548f	0	0	1	1	1	1	ZNF333	zinc finger protein 333
hsa-miR-548f	1	0	1	1	0	0	SLX4	SLX4 structure-specific endonuclease subunit homolog (S. cerevisiae)
hsa-miR-548f	1	0	1	1	1	1	USP38	ubiquitin specific peptidase 38
hsa-miR-548f	0	0	1	1	1	1	RETNLB	resistin like beta
hsa-miR-548f	0	0	1	0	1	1	TRIM52	tripartite motif containing 52
hsa-miR-548f	1	0	1	1	1	1	AIFM2	apoptosis-inducing factor, mitochondrion-associated, 2
hsa-miR-548f	1	0	1	1	1	1	ARHGEF39	Rho guanine nucleotide exchange factor (GEF) 39
hsa-miR-548f	0	0	1	1	1	1	FBXL20	F-box and leucine-rich repeat protein 20
hsa-miR-548f	1	0	1	1	1	1	PCDH10	protocadherin 10
hsa-miR-548f	0	0	1	1	0	0	MUC13	mucin 13, cell surface associated
hsa-miR-548f	0	0	1	1	1	1	SUCNR1	succinate receptor 1
hsa-miR-548f	1	0	1	1	1	1	HIAT1	hippocampus abundant transcript 1
hsa-miR-548f	1	0	1	1	1	1	C5orf30	chromosome 5 open reading frame 30
hsa-miR-548f	1	0	1	0	1	1	PURB	purine-rich element binding protein B
hsa-miR-548f	1	0	1	1	1	1	RASL10B	RAS-like, family 10, member B
hsa-miR-548f	1	0	1	1	1	1	SSH2	slingshot homolog 2 (Drosophila)
hsa-miR-548f	1	0	1	1	1	1	TANC1	tetratricopeptide repeat, ankyrin repeat and coiled-coil containing 1
hsa-miR-548f	0	0	1	1	1	1	CTTNBP2	cortactin binding protein 2
hsa-miR-548f	1	0	1	1	1	1	EPT1	ethanolaminephosphotransferase 1 (CDP-ethanolamine-specific)
hsa-miR-548f	1	0	1	1	1	1	TPD52L3	tumor protein D52-like 3
hsa-miR-548f	1	0	1	1	1	1	CDC42	cell division cycle 42 (GTP binding protein, 25kDa)
hsa-miR-548f	1	0	1	1	1	1	SLC18B1	solute carrier family 18, subfamily B, member 1
hsa-miR-548f	1	0	1	1	1	1	RCSD1	RCSD domain containing 1
hsa-miR-548f	0	0	1	1	1	1	NALCN	sodium leak channel, non-selective
hsa-miR-548f	1	0	1	1	1	1	SLC2A13	solute carrier family 2 (facilitated glucose transporter), member 13
hsa-miR-548f	1	0	1	1	1	1	GPRIN1	G protein regulated inducer of neurite outgrowth 1
hsa-miR-548f	0	0	1	1	1	1	SCAND3	SCAN domain containing 3
hsa-miR-548f	1	0	1	0	0	0	SMYD4	SET and MYND domain containing 4
hsa-miR-548f	1	0	1	1	1	1	TRIM9	tripartite motif containing 9
hsa-miR-548f	1	0	1	1	1	1	MED12L	mediator complex subunit 12-like
hsa-miR-548f	1	0	1	0	1	1	CCND1	cyclin D1
hsa-miR-548f	1	0	1	1	1	1	SRSF10	serine/arginine-rich splicing factor 10
hsa-miR-548f	1	0	1	1	1	1	NAA15	N(alpha)-acetyltransferase 15, NatA auxiliary subunit
hsa-miR-548f	1	0	1	1	1	1	SLC44A1	solute carrier family 44, member 1
hsa-miR-548f	0	0	1	1	1	1	CCDC34	coiled-coil domain containing 34
hsa-miR-548f	1	0	1	1	1	1	KCNE4	potassium voltage-gated channel, Isk-related family, member 4
hsa-miR-548f	1	0	1	1	1	1	ZNF280B	zinc finger protein 280B
hsa-miR-548f	0	0	1	1	1	1	PABPC5	poly(A) binding protein, cytoplasmic 5
hsa-miR-548f	1	0	1	0	1	1	SOCS4	suppressor of cytokine signaling 4
hsa-miR-548f	1	0	1	1	1	1	KLHL6	kelch-like 6 (Drosophila)
hsa-miR-548f	0	0	1	1	1	1	CHST14	carbohydrate (N-acetylgalactosamine 4-0) sulfotransferase 14
hsa-miR-548f	0	0	1	1	0	0	XAGE5	X antigen family, member 5
hsa-miR-548f	1	0	1	1	1	1	PRRC1	proline-rich coiled-coil 1
hsa-miR-548f	0	0	1	1	1	1	WFDC8	WAP four-disulfide core domain 8
hsa-miR-548f	0	0	1	1	1	1	ATP6V1G3	ATPase, H+ transporting, lysosomal 13kDa, V1 subunit G3
hsa-miR-548f	1	0	1	1	1	1	WHSC1	Wolf-Hirschhorn syndrome candidate 1
hsa-miR-548f	0	0	1	0	1	1	PAQR8	progestin and adipoQ receptor family member VIII
hsa-miR-548f	1	0	1	1	1	1	BMPER	BMP binding endothelial regulator
hsa-miR-548f	1	0	1	1	1	1	ZAK	sterile alpha motif and leucine zipper containing kinase AZK
hsa-miR-548f	0	0	1	1	1	1	RFX3	regulatory factor X, 3 (influences HLA class II expression)
hsa-miR-548f	1	0	1	1	1	1	SPTSSA	serine palmitoyltransferase, small subunit A
hsa-miR-548f	1	0	1	1	1	1	GLCCI1	glucocorticoid induced transcript 1
hsa-miR-548f	1	0	1	0	1	1	NUS1	nuclear undecaprenyl pyrophosphate synthase 1 homolog (S. cerevisiae)
hsa-miR-548f	0	0	1	1	1	1	ZMYND19	zinc finger, MYND-type containing 19
hsa-miR-548f	0	0	1	1	0	0	PPP1R14B	protein phosphatase 1, regulatory (inhibitor) subunit 14B
hsa-miR-548f	1	0	1	1	1	1	HLTF	helicase-like transcription factor
hsa-miR-548f	0	0	1	1	1	1	PPIL4	peptidylprolyl isomerase (cyclophilin)-like 4
hsa-miR-548f	0	0	1	1	0	0	SGCZ	sarcoglycan, zeta
hsa-miR-548f	1	0	1	1	1	1	TSTD2	thiosulfate sulfurtransferase (rhodanese)-like domain containing 2
hsa-miR-548f	1	0	1	1	1	1	PPTC7	PTC7 protein phosphatase homolog (S. cerevisiae)
hsa-miR-548f	1	0	1	1	1	1	RPIA	ribose 5-phosphate isomerase A
hsa-miR-548f	1	0	1	0	1	1	CNOT6L	CCR4-NOT transcription complex, subunit 6-like
hsa-miR-548f	0	0	1	1	1	1	C15orf40	chromosome 15 open reading frame 40
hsa-miR-548f	1	0	1	1	1	1	KCNH8	potassium voltage-gated channel, subfamily H (eag-related), member 8
hsa-miR-548f	1	0	1	1	1	1	FAM91A1	family with sequence similarity 91, member A1
hsa-miR-548f	0	0	1	1	0	0	GLYATL2	glycine-N-acyltransferase-like 2
hsa-miR-548f	0	0	1	0	1	1	UBLCP1	ubiquitin-like domain containing CTD phosphatase 1
hsa-miR-548f	1	0	1	0	1	1	ZBTB47	zinc finger and BTB domain containing 47
hsa-miR-548f	0	0	1	0	1	1	PIGM	phosphatidylinositol glycan anchor biosynthesis, class M
hsa-miR-548f	1	0	1	1	1	1	FAM84A	family with sequence similarity 84, member A
hsa-miR-548f	0	0	1	1	0	0	CSNK1A1L	casein kinase 1, alpha 1-like
hsa-miR-548f	1	0	1	1	1	1	CCSAP	centriole, cilia and spindle-associated protein
hsa-miR-548f	0	0	1	0	1	1	SPATA18	spermatogenesis associated 18
hsa-miR-548f	0	0	1	1	1	1	APOBEC3F	apolipoprotein B mRNA editing enzyme, catalytic polypeptide-like 3F
hsa-miR-548f	1	0	1	0	1	1	MTPN	myotrophin
hsa-miR-548f	0	0	1	1	1	1	GLIS1	GLIS family zinc finger 1
hsa-miR-548f	1	0	1	1	1	1	BOD1L1	biorientation of chromosomes in cell division 1-like 1
hsa-miR-548f	0	0	1	1	1	1	LONRF1	LON peptidase N-terminal domain and ring finger 1
hsa-miR-548f	0	0	1	1	1	1	ZNF561	zinc finger protein 561
hsa-miR-548f	1	0	1	1	1	1	TBX15	T-box 15
hsa-miR-548f	1	0	1	1	1	1	BHLHE22	basic helix-loop-helix family, member e22
hsa-miR-548f	1	0	1	1	1	1	FAM123B	family with sequence similarity 123B
hsa-miR-548f	1	0	1	1	1	1	FAM81A	family with sequence similarity 81, member A
hsa-miR-548f	0	0	1	1	0	0	TMCO5A	transmembrane and coiled-coil domains 5A
hsa-miR-548f	1	0	1	1	1	1	PPM1K	protein phosphatase, Mg2+/Mn2+ dependent, 1K
hsa-miR-548f	1	0	1	1	1	1	SPRED1	sprouty-related, EVH1 domain containing 1
hsa-miR-548f	0	0	1	1	1	1	ZNF366	zinc finger protein 366
hsa-miR-548f	1	0	1	0	1	1	FAM116A	family with sequence similarity 116, member A
hsa-miR-548f	1	0	1	1	1	1	ABCA13	ATP-binding cassette, sub-family A (ABC1), member 13
hsa-miR-548f	1	0	1	1	1	1	PDIK1L	PDLIM1 interacting kinase 1 like
hsa-miR-548f	0	0	1	0	1	1	KBTBD6	kelch repeat and BTB (POZ) domain containing 6
hsa-miR-548f	1	0	1	1	1	1	EED	embryonic ectoderm development
hsa-miR-548f	1	0	1	0	1	1	KDM1B	lysine (K)-specific demethylase 1B
hsa-miR-548f	1	0	1	0	1	1	TAPT1	transmembrane anterior posterior transformation 1
hsa-miR-548f	1	0	1	0	1	1	ZCCHC24	zinc finger, CCHC domain containing 24
hsa-miR-548f	0	0	1	1	0	0	ESX1	ESX homeobox 1
hsa-miR-548f	1	0	1	1	1	1	CREBRF	CREB3 regulatory factor
hsa-miR-548f	1	0	1	0	1	1	SEMA6D	sema domain, transmembrane domain (TM), and cytoplasmic domain, (semaphorin) 6D
hsa-miR-548f	1	0	1	1	1	1	C2orf69	chromosome 2 open reading frame 69
hsa-miR-548f	0	0	1	1	1	1	ANKRD44	ankyrin repeat domain 44
hsa-miR-548f	0	0	1	0	1	1	RTP1	receptor (chemosensory) transporter protein 1
hsa-miR-548f	0	0	1	1	0	0	LIX1L	Lix1 homolog (mouse)-like
hsa-miR-548f	1	0	1	1	1	1	RDH10	retinol dehydrogenase 10 (all-trans)
hsa-miR-548f	1	0	1	1	1	1	RC3H1	ring finger and CCCH-type domains 1
hsa-miR-548f	1	0	1	0	1	1	KLHDC1	kelch domain containing 1
hsa-miR-548f	0	0	1	0	1	1	GTF2A1L	general transcription factor IIA, 1-like
hsa-miR-548f	0	0	1	0	1	1	CTAGE1	cutaneous T-cell lymphoma-associated antigen 1
hsa-miR-548f	1	0	1	1	1	1	NR4A3	nuclear receptor subfamily 4, group A, member 3
hsa-miR-548f	1	0	1	1	1	1	MMGT1	membrane magnesium transporter 1
hsa-miR-548f	1	0	1	1	1	1	DCUN1D3	DCN1, defective in cullin neddylation 1, domain containing 3 (S. cerevisiae)
hsa-miR-548f	1	0	1	1	1	1	CNTD1	cyclin N-terminal domain containing 1
hsa-miR-548f	1	0	1	1	1	1	CCDC117	coiled-coil domain containing 117
hsa-miR-548f	1	0	1	1	1	1	FAM117B	family with sequence similarity 117, member B
hsa-miR-548f	0	0	1	1	1	1	C8orf47	chromosome 8 open reading frame 47
hsa-miR-548f	1	0	1	0	1	1	PGM2L1	phosphoglucomutase 2-like 1
hsa-miR-548f	1	0	1	1	1	1	SLC9A9	solute carrier family 9, subfamily A (NHE9, cation proton antiporter 9), member 9
hsa-miR-548f	0	0	1	0	1	1	C5orf64	chromosome 5 open reading frame 64
hsa-miR-548f	0	0	1	1	1	1	AQPEP	laeverin
hsa-miR-548f	1	0	1	1	1	1	RABL3	RAB, member of RAS oncogene family-like 3
hsa-miR-548f	1	0	1	0	1	1	SREK1IP1	SREK1-interacting protein 1
hsa-miR-548f	0	0	1	1	1	1	YIPF6	Yip1 domain family, member 6
hsa-miR-548f	1	0	1	1	1	1	LDLRAD3	low density lipoprotein receptor class A domain containing 3
hsa-miR-548f	1	0	1	0	1	1	FAM84B	family with sequence similarity 84, member B
hsa-miR-548f	1	0	1	1	1	1	C4orf34	chromosome 4 open reading frame 34
hsa-miR-548f	0	0	1	1	1	1	CLEC14A	C-type lectin domain family 14, member A
hsa-miR-548f	1	0	1	1	1	1	OLIG3	oligodendrocyte transcription factor 3
hsa-miR-548f	1	0	1	0	1	1	CCDC71L	coiled-coil domain containing 71-like
hsa-miR-548f	0	0	1	1	0	0	CHMP4B	charged multivesicular body protein 4B
hsa-miR-548f	1	0	1	1	1	1	STX12	syntaxin 12
hsa-miR-548f	1	0	1	1	1	1	LRRTM3	leucine rich repeat transmembrane neuronal 3
hsa-miR-548f	1	0	1	1	1	1	MARCH3	membrane-associated ring finger (C3HC4) 3, E3 ubiquitin protein ligase
hsa-miR-548f	0	0	1	1	1	1	ZNF831	zinc finger protein 831
hsa-miR-548f	1	0	1	1	1	1	DCAF12L1	DDB1 and CUL4 associated factor 12-like 1
hsa-miR-548f	1	0	1	1	1	1	MB21D2	Mab-21 domain containing 2
hsa-miR-548f	1	0	1	1	1	1	MTDH	metadherin
hsa-miR-548f	0	0	1	1	1	1	CMTM4	CKLF-like MARVEL transmembrane domain containing 4
hsa-miR-548f	0	0	1	0	1	1	SLCO4C1	solute carrier organic anion transporter family, member 4C1
[truncated: 69 more rows]
