# Supplementary material for: Profiling of Selected MicroRNAs in Proliferative Eutopic Endometrium of Women with Ovarian Endometriosis
Source: Biomed Res Int. 2015 Aug 20;2015:760698. doi: 10.1155/2015/760698 (PMC4558423; doi:10.1155/2015/760698)
Supplement: Supplementary file 1 — Table I: The names of miRNAs significantly differentially expressed between eutopic endometrium of patients with endometriosis vs eutopic endometrium of patients without endometriosis. Table II: The associations between miRNA and mRNA, which presents detailed results of the search of six major databases i.e targetscan, tarbase, miranda, mirbase, mirtarget2 and pictar. [file 760698.f1.zip › 760698.f1/Table II/hsa-miR-548k.tsv]

miR	targetscan	tarbase	miranda	mirbase	mirtarget2	pictar	GeneSymbol	GeneName
hsa-miR-548k	1	0	1	1	1	1	ZFYVE16	zinc finger, FYVE domain containing 16
hsa-miR-548k	1	0	1	1	1	1	CHD9	chromodomain helicase DNA binding protein 9
hsa-miR-548k	1	0	1	1	0	0	RAPGEF2	Rap guanine nucleotide exchange factor (GEF) 2
hsa-miR-548k	1	0	1	1	1	1	MCF2L	MCF.2 cell line derived transforming sequence-like
hsa-miR-548k	1	0	1	1	1	1	PRUNE2	prune homolog 2 (Drosophila)
hsa-miR-548k	1	0	1	0	1	1	PTPRT	protein tyrosine phosphatase, receptor type, T
hsa-miR-548k	0	0	1	1	1	1	PEG3	paternally expressed 3
hsa-miR-548k	1	0	1	1	1	1	NUPL1	nucleoporin like 1
hsa-miR-548k	1	0	1	0	1	1	MTSS1	metastasis suppressor 1
hsa-miR-548k	1	0	1	0	1	1	NEDD4L	neural precursor cell expressed, developmentally down-regulated 4-like, E3 ubiquitin protein ligase
hsa-miR-548k	1	0	1	1	1	1	GPATCH8	G patch domain containing 8
hsa-miR-548k	1	0	1	0	1	1	CHST15	carbohydrate (N-acetylgalactosamine 4-sulfate 6-O) sulfotransferase 15
hsa-miR-548k	1	0	1	1	1	1	HIPK1	homeodomain interacting protein kinase 1
hsa-miR-548k	1	0	1	1	0	0	SMCHD1	structural maintenance of chromosomes flexible hinge domain containing 1
hsa-miR-548k	1	0	1	1	1	1	ATG13	autophagy related 13
hsa-miR-548k	1	0	1	1	1	1	SMOC2	SPARC related modular calcium binding 2
hsa-miR-548k	1	0	1	0	1	1	DOCK4	dedicator of cytokinesis 4
hsa-miR-548k	1	0	1	1	1	1	MATR3	matrin 3
hsa-miR-548k	1	0	1	1	0	0	ESYT1	extended synaptotagmin-like protein 1
hsa-miR-548k	1	0	1	1	1	1	LPHN2	latrophilin 2
hsa-miR-548k	0	0	1	1	1	1	SEC31A	SEC31 homolog A (S. cerevisiae)
hsa-miR-548k	1	0	1	0	1	1	ATG14	autophagy related 14
hsa-miR-548k	1	0	1	1	1	1	DMXL2	Dmx-like 2
hsa-miR-548k	1	0	1	1	1	1	LMO7	LIM domain 7
hsa-miR-548k	0	0	1	1	1	1	WDR47	WD repeat domain 47
hsa-miR-548k	1	0	1	1	1	1	RNMT	RNA (guanine-7-) methyltransferase
hsa-miR-548k	0	0	1	1	1	1	MAN2B2	mannosidase, alpha, class 2B, member 2
hsa-miR-548k	1	0	1	1	1	1	CPEB3	cytoplasmic polyadenylation element binding protein 3
hsa-miR-548k	1	0	1	1	1	1	BAHD1	bromo adjacent homology domain containing 1
hsa-miR-548k	0	0	1	1	0	0	FAM149B1	family with sequence similarity 149, member B1
hsa-miR-548k	1	0	1	1	1	1	NTNG1	netrin G1
hsa-miR-548k	0	0	1	1	1	1	TBC1D30	TBC1 domain family, member 30
hsa-miR-548k	1	0	1	1	1	1	PALLD	palladin, cytoskeletal associated protein
hsa-miR-548k	1	0	1	1	1	1	FNBP4	formin binding protein 4
hsa-miR-548k	0	0	1	0	1	1	TP53TG3	TP53 target 3
hsa-miR-548k	0	0	1	0	0	0	TP53TG3B	TP53 target 3B
hsa-miR-548k	0	0	1	1	1	1	TTC28	tetratricopeptide repeat domain 28
hsa-miR-548k	1	0	1	1	1	1	SMARCAD1	SWI/SNF-related, matrix-associated actin-dependent regulator of chromatin, subfamily a, containing DEAD/H box 1
hsa-miR-548k	0	0	1	1	0	0	ZC4H2	zinc finger, C4H2 domain containing
hsa-miR-548k	1	0	1	1	1	1	RALGAPB	Ral GTPase activating protein, beta subunit (non-catalytic)
hsa-miR-548k	1	0	1	1	1	1	MKL2	MKL/myocardin-like 2
hsa-miR-548k	0	0	1	1	1	1	FSTL5	follistatin-like 5
hsa-miR-548k	1	0	1	0	1	1	INTS2	integrator complex subunit 2
hsa-miR-548k	0	0	1	1	1	1	COPS7A	COP9 constitutive photomorphogenic homolog subunit 7A (Arabidopsis)
hsa-miR-548k	1	0	1	0	0	0	ODZ4	odz, odd Oz/ten-m homolog 4 (Drosophila)
hsa-miR-548k	0	0	1	1	1	1	KLHL13	kelch-like 13 (Drosophila)
hsa-miR-548k	1	0	1	1	1	1	PCDH19	protocadherin 19
hsa-miR-548k	1	0	1	1	1	1	TAOK1	TAO kinase 1
hsa-miR-548k	1	0	1	0	1	1	SEMA6D	sema domain, transmembrane domain (TM), and cytoplasmic domain, (semaphorin) 6D
hsa-miR-548k	0	0	1	0	0	0	NYAP2	neuronal tyrosine-phosphorylated phosphoinositide-3-kinase adaptor 2
hsa-miR-548k	1	0	1	1	0	0	ZSWIM5	zinc finger, SWIM-type containing 5
hsa-miR-548k	1	0	1	1	1	1	FAM214B	family with sequence similarity 214, member B
hsa-miR-548k	1	0	1	0	1	1	ZNF295	zinc finger protein 295
hsa-miR-548k	1	0	1	1	1	1	TOPORS	topoisomerase I binding, arginine/serine-rich, E3 ubiquitin protein ligase
hsa-miR-548k	1	0	1	1	1	1	PPP6R3	protein phosphatase 6, regulatory subunit 3
hsa-miR-548k	0	0	1	0	1	1	ZSWIM6	zinc finger, SWIM-type containing 6
hsa-miR-548k	1	0	1	0	0	0	TANC2	tetratricopeptide repeat, ankyrin repeat and coiled-coil containing 2
hsa-miR-548k	1	0	1	1	1	1	FUT8	fucosyltransferase 8 (alpha (1,6) fucosyltransferase)
hsa-miR-548k	1	0	1	1	1	1	PTBP2	polypyrimidine tract binding protein 2
hsa-miR-548k	0	0	1	0	1	1	SETD5	SET domain containing 5
hsa-miR-548k	1	0	1	0	1	1	RIMS1	regulating synaptic membrane exocytosis 1
hsa-miR-548k	1	0	1	1	1	1	CDK13	cyclin-dependent kinase 13
hsa-miR-548k	1	0	1	1	1	1	LCOR	ligand dependent nuclear receptor corepressor
hsa-miR-548k	1	0	1	1	1	1	AHCTF1	AT hook containing transcription factor 1
hsa-miR-548k	0	0	1	1	1	1	SLC11A2	solute carrier family 11 (proton-coupled divalent metal ion transporters), member 2
hsa-miR-548k	1	0	1	1	1	1	HNRPDL	heterogeneous nuclear ribonucleoprotein D-like
hsa-miR-548k	1	0	1	1	1	1	MAT2B	methionine adenosyltransferase II, beta
hsa-miR-548k	0	0	1	1	1	1	CREB3L3	cAMP responsive element binding protein 3-like 3
hsa-miR-548k	1	0	1	1	1	1	TET2	tet methylcytosine dioxygenase 2
hsa-miR-548k	0	0	1	1	0	0	CIRH1A	cirrhosis, autosomal recessive 1A (cirhin)
hsa-miR-548k	1	0	1	0	0	0	FAT3	FAT tumor suppressor homolog 3 (Drosophila)
hsa-miR-548k	1	0	1	1	1	1	PRDM16	PR domain containing 16
hsa-miR-548k	1	0	1	0	0	0	ZBTB34	zinc finger and BTB domain containing 34
hsa-miR-548k	0	0	1	0	0	0	ARHGEF28	Rho guanine nucleotide exchange factor (GEF) 28
hsa-miR-548k	0	0	1	0	1	1	RASSF8	Ras association (RalGDS/AF-6) domain family (N-terminal) member 8
hsa-miR-548k	1	0	1	1	1	1	PAM	peptidylglycine alpha-amidating monooxygenase
hsa-miR-548k	1	0	1	1	1	1	RFX4	regulatory factor X, 4 (influences HLA class II expression)
hsa-miR-548k	1	0	1	1	1	1	UBR3	ubiquitin protein ligase E3 component n-recognin 3 (putative)
hsa-miR-548k	1	0	1	1	1	1	PAN3	PAN3 poly(A) specific ribonuclease subunit homolog (S. cerevisiae)
hsa-miR-548k	1	0	1	1	1	1	KCNMA1	potassium large conductance calcium-activated channel, subfamily M, alpha member 1
hsa-miR-548k	1	0	1	1	1	1	FAT2	FAT tumor suppressor homolog 2 (Drosophila)
hsa-miR-548k	0	0	1	1	1	1	FN1	fibronectin 1
hsa-miR-548k	1	0	1	1	1	1	UBE3A	ubiquitin protein ligase E3A
hsa-miR-548k	1	0	1	0	1	1	CCDC88A	coiled-coil domain containing 88A
hsa-miR-548k	0	0	1	1	0	0	HFM1	HFM1, ATP-dependent DNA helicase homolog (S. cerevisiae)
hsa-miR-548k	1	0	1	0	1	1	NFE2L2	nuclear factor (erythroid-derived 2)-like 2
hsa-miR-548k	0	0	1	1	1	1	ATP7A	ATPase, Cu++ transporting, alpha polypeptide
hsa-miR-548k	1	0	1	0	1	1	PCDHA13	protocadherin alpha 13
hsa-miR-548k	1	0	1	1	1	1	PCDHA4	protocadherin alpha 4
hsa-miR-548k	1	0	1	1	1	1	RPS6KA3	ribosomal protein S6 kinase, 90kDa, polypeptide 3
hsa-miR-548k	1	0	1	1	1	1	MEF2A	myocyte enhancer factor 2A
hsa-miR-548k	1	0	1	1	1	1	HMGB1	high mobility group box 1
hsa-miR-548k	1	0	1	1	1	1	CLIP4	CAP-GLY domain containing linker protein family, member 4
hsa-miR-548k	1	0	1	1	1	1	PML	promyelocytic leukemia
hsa-miR-548k	1	0	1	0	1	1	MAML1	mastermind-like 1 (Drosophila)
hsa-miR-548k	1	0	1	1	1	1	FMR1	fragile X mental retardation 1
hsa-miR-548k	1	0	1	1	1	1	PRKACB	protein kinase, cAMP-dependent, catalytic, beta
hsa-miR-548k	1	0	1	0	1	1	DPYSL2	dihydropyrimidinase-like 2
hsa-miR-548k	0	0	1	0	1	1	NPY1R	neuropeptide Y receptor Y1
hsa-miR-548k	1	0	1	1	1	1	EPHA7	EPH receptor A7
hsa-miR-548k	1	0	1	1	1	1	TWF1	twinfilin, actin-binding protein, homolog 1 (Drosophila)
hsa-miR-548k	1	0	1	0	1	1	CHL1	cell adhesion molecule with homology to L1CAM (close homolog of L1)
hsa-miR-548k	1	0	1	1	1	1	SATB2	SATB homeobox 2
hsa-miR-548k	0	0	1	1	0	0	DNMT1	DNA (cytosine-5-)-methyltransferase 1
hsa-miR-548k	0	0	1	0	0	0	CACNA1B	calcium channel, voltage-dependent, N type, alpha 1B subunit
hsa-miR-548k	1	0	1	1	1	1	DDX17	DEAD (Asp-Glu-Ala-Asp) box helicase 17
hsa-miR-548k	1	0	1	0	1	1	TBL1X	transducin (beta)-like 1X-linked
hsa-miR-548k	0	0	1	1	1	1	HLA-DQA1	major histocompatibility complex, class II, DQ alpha 1
hsa-miR-548k	1	0	1	1	1	1	COL24A1	collagen, type XXIV, alpha 1
hsa-miR-548k	1	0	1	1	1	1	SLC6A8	solute carrier family 6 (neurotransmitter transporter, creatine), member 8
hsa-miR-548k	1	0	1	1	1	1	SATB1	SATB homeobox 1
hsa-miR-548k	0	0	1	1	1	1	CHN1	chimerin (chimaerin) 1
hsa-miR-548k	0	0	1	1	1	1	ELOVL5	ELOVL fatty acid elongase 5
hsa-miR-548k	1	0	1	1	1	1	TEAD1	TEA domain family member 1 (SV40 transcriptional enhancer factor)
hsa-miR-548k	1	0	1	1	1	1	PHLDB2	pleckstrin homology-like domain, family B, member 2
hsa-miR-548k	1	0	1	0	1	1	CAV1	caveolin 1, caveolae protein, 22kDa
hsa-miR-548k	1	0	1	0	1	1	PDE7B	phosphodiesterase 7B
hsa-miR-548k	1	0	1	1	1	1	MEF2D	myocyte enhancer factor 2D
hsa-miR-548k	1	0	1	0	1	1	FYB	FYN binding protein
hsa-miR-548k	0	0	1	0	1	1	PARG	poly (ADP-ribose) glycohydrolase
hsa-miR-548k	0	0	1	1	1	1	HDAC3	histone deacetylase 3
hsa-miR-548k	1	0	1	1	1	1	STX16	syntaxin 16
hsa-miR-548k	1	0	1	1	1	1	SLC4A4	solute carrier family 4, sodium bicarbonate cotransporter, member 4
hsa-miR-548k	0	0	1	1	1	1	CD3EAP	CD3e molecule, epsilon associated protein
hsa-miR-548k	1	0	1	1	1	1	TMBIM6	transmembrane BAX inhibitor motif containing 6
hsa-miR-548k	0	0	1	1	1	1	SESN1	sestrin 1
hsa-miR-548k	1	0	1	1	1	1	MYT1L	myelin transcription factor 1-like
hsa-miR-548k	1	0	1	0	1	1	CELF2	CUGBP, Elav-like family member 2
hsa-miR-548k	0	0	1	0	1	1	C9orf91	chromosome 9 open reading frame 91
hsa-miR-548k	0	0	1	1	1	1	SLC16A7	solute carrier family 16, member 7 (monocarboxylic acid transporter 2)
hsa-miR-548k	1	0	1	1	1	1	LDB2	LIM domain binding 2
hsa-miR-548k	1	0	1	1	1	1	SHOC2	soc-2 suppressor of clear homolog (C. elegans)
hsa-miR-548k	1	0	1	1	1	1	CTNND1	catenin (cadherin-associated protein), delta 1
hsa-miR-548k	1	0	1	1	1	1	TP63	tumor protein p63
hsa-miR-548k	1	0	1	1	1	1	WHSC1	Wolf-Hirschhorn syndrome candidate 1
hsa-miR-548k	0	0	1	1	1	1	SH2D1A	SH2 domain containing 1A
hsa-miR-548k	1	0	1	0	1	1	CD164	CD164 molecule, sialomucin
hsa-miR-548k	1	0	1	1	1	1	LRRFIP1	leucine rich repeat (in FLII) interacting protein 1
hsa-miR-548k	0	0	1	1	0	0	ABRACL	ABRA C-terminal like
hsa-miR-548k	1	0	1	0	1	1	CDK14	cyclin-dependent kinase 14
hsa-miR-548k	1	0	1	1	1	1	PRUNE	prune homolog (Drosophila)
hsa-miR-548k	1	0	1	1	1	1	SCHIP1	schwannomin interacting protein 1
hsa-miR-548k	1	0	1	1	1	1	HMG20A	high mobility group 20A
hsa-miR-548k	1	0	1	1	1	1	C14orf129	chromosome 14 open reading frame 129
hsa-miR-548k	1	0	1	1	1	1	ANKRD13A	ankyrin repeat domain 13A
hsa-miR-548k	0	0	1	0	1	1	PDP1	pyruvate dehyrogenase phosphatase catalytic subunit 1
hsa-miR-548k	1	0	1	1	1	1	AGPAT3	1-acylglycerol-3-phosphate O-acyltransferase 3
hsa-miR-548k	0	0	1	1	1	1	FAM114A2	family with sequence similarity 114, member A2
hsa-miR-548k	1	0	1	1	1	1	TLK2	tousled-like kinase 2
hsa-miR-548k	1	0	1	1	1	1	USP25	ubiquitin specific peptidase 25
hsa-miR-548k	1	0	1	1	1	1	SENP7	SUMO1/sentrin specific peptidase 7
hsa-miR-548k	1	0	1	1	1	1	TSC22D2	TSC22 domain family, member 2
hsa-miR-548k	1	0	1	1	1	1	CCNL1	cyclin L1
hsa-miR-548k	1	0	1	1	1	1	KCNMB2	potassium large conductance calcium-activated channel, subfamily M, beta member 2
hsa-miR-548k	0	0	1	1	1	1	HERPUD1	homocysteine-inducible, endoplasmic reticulum stress-inducible, ubiquitin-like domain member 1
hsa-miR-548k	0	0	1	1	1	1	CSNK1A1	casein kinase 1, alpha 1
hsa-miR-548k	1	0	1	1	1	1	C21orf91	chromosome 21 open reading frame 91
hsa-miR-548k	0	0	1	1	1	1	NKX3-1	NK3 homeobox 1
hsa-miR-548k	0	0	1	1	1	1	DOCK10	dedicator of cytokinesis 10
hsa-miR-548k	0	0	1	1	0	0	ZNF692	zinc finger protein 692
hsa-miR-548k	1	0	1	1	1	1	ABI2	abl-interactor 2
hsa-miR-548k	1	0	1	1	1	1	RBM47	RNA binding motif protein 47
hsa-miR-548k	1	0	1	1	1	1	SH3GLB1	SH3-domain GRB2-like endophilin B1
hsa-miR-548k	1	0	1	0	1	1	TRPS1	trichorhinophalangeal syndrome I
hsa-miR-548k	1	0	1	1	1	1	PUM2	pumilio homolog 2 (Drosophila)
hsa-miR-548k	0	0	1	1	1	1	ASUN	asunder, spermatogenesis regulator homolog (Drosphila)
hsa-miR-548k	0	0	1	0	1	1	ERBB2IP	erbb2 interacting protein
hsa-miR-548k	1	0	1	1	1	1	CALN1	calneuron 1
hsa-miR-548k	0	0	1	0	0	0	LOC645355	uncharacterized LOC645355
hsa-miR-548k	0	0	1	1	1	1	PARP9	poly (ADP-ribose) polymerase family, member 9
hsa-miR-548k	0	0	1	1	1	1	MED28	mediator complex subunit 28
hsa-miR-548k	1	0	1	1	0	0	ZBTB37	zinc finger and BTB domain containing 37
hsa-miR-548k	1	0	1	1	0	0	CANT1	calcium activated nucleotidase 1
hsa-miR-548k	1	0	1	1	1	1	LETMD1	LETM1 domain containing 1
hsa-miR-548k	0	0	1	1	1	1	FCRL1	Fc receptor-like 1
hsa-miR-548k	0	0	1	1	1	1	FCRLA	Fc receptor-like A
hsa-miR-548k	0	0	1	1	1	1	RERG	RAS-like, estrogen-regulated, growth inhibitor
hsa-miR-548k	1	0	1	1	1	1	ATAD1	ATPase family, AAA domain containing 1
hsa-miR-548k	1	0	1	1	1	1	LARP4	La ribonucleoprotein domain family, member 4
hsa-miR-548k	0	0	1	1	1	1	PARK2	parkinson protein 2, E3 ubiquitin protein ligase (parkin)
hsa-miR-548k	1	0	1	1	1	1	NTRK2	neurotrophic tyrosine kinase, receptor, type 2
hsa-miR-548k	1	0	1	1	1	1	RBFOX1	RNA binding protein, fox-1 homolog (C. elegans) 1
hsa-miR-548k	0	0	1	1	1	1	CSPG5	chondroitin sulfate proteoglycan 5 (neuroglycan C)
hsa-miR-548k	0	0	1	1	1	1	LGI1	leucine-rich, glioma inactivated 1
hsa-miR-548k	1	0	1	1	1	1	WAPAL	wings apart-like homolog (Drosophila)
hsa-miR-548k	0	0	1	1	1	1	CHODL	chondrolectin
hsa-miR-548k	1	0	1	1	1	1	VPS37A	vacuolar protein sorting 37 homolog A (S. cerevisiae)
hsa-miR-548k	1	0	1	1	1	1	AFF2	AF4/FMR2 family, member 2
hsa-miR-548k	1	0	1	0	1	1	DICER1	dicer 1, ribonuclease type III
hsa-miR-548k	1	0	1	1	0	0	ENTPD1	ectonucleoside triphosphate diphosphohydrolase 1
hsa-miR-548k	0	0	1	1	1	1	GNAS	GNAS complex locus
hsa-miR-548k	1	0	1	0	1	1	CACNA1C	calcium channel, voltage-dependent, L type, alpha 1C subunit
hsa-miR-548k	0	0	1	1	1	1	TCFL5	transcription factor-like 5 (basic helix-loop-helix)
hsa-miR-548k	1	0	1	0	1	1	GRB10	growth factor receptor-bound protein 10
hsa-miR-548k	0	0	1	0	0	0	CACNA2D3	calcium channel, voltage-dependent, alpha 2/delta subunit 3
hsa-miR-548k	1	0	1	1	1	1	PALM2	paralemmin 2
hsa-miR-548k	1	0	1	1	1	1	PDE1B	phosphodiesterase 1B, calmodulin-dependent
hsa-miR-548k	1	0	1	1	1	1	PNISR	PNN-interacting serine/arginine-rich protein
hsa-miR-548k	1	0	1	1	1	1	PPP3CB	protein phosphatase 3, catalytic subunit, beta isozyme
hsa-miR-548k	0	0	1	0	0	0	MIR135B	microRNA 135b
hsa-miR-548k	0	0	1	0	0	0	LINC00271	long intergenic non-protein coding RNA 271
hsa-miR-548k	1	0	1	1	1	1	PPP1R9A	protein phosphatase 1, regulatory subunit 9A
hsa-miR-548k	0	0	1	1	0	0	NHLRC2	NHL repeat containing 2
hsa-miR-548k	0	0	1	1	1	1	ESRP1	epithelial splicing regulatory protein 1
hsa-miR-548k	1	0	1	0	1	1	NFAT5	nuclear factor of activated T-cells 5, tonicity-responsive
hsa-miR-548k	1	0	1	1	1	1	SIK2	salt-inducible kinase 2
hsa-miR-548k	0	0	1	0	1	1	OAS3	2'-5'-oligoadenylate synthetase 3, 100kDa
hsa-miR-548k	0	0	1	0	0	0	TUG1	taurine upregulated 1 (non-protein coding)
hsa-miR-548k	1	0	1	1	1	1	ARHGAP12	Rho GTPase activating protein 12
hsa-miR-548k	1	0	1	1	1	1	HNRNPF	heterogeneous nuclear ribonucleoprotein F
hsa-miR-548k	1	0	1	1	1	1	RIC8B	resistance to inhibitors of cholinesterase 8 homolog B (C. elegans)
hsa-miR-548k	1	0	1	1	1	1	PTBP3	polypyrimidine tract binding protein 3
hsa-miR-548k	0	0	1	1	1	1	LRIF1	ligand dependent nuclear receptor interacting factor 1
hsa-miR-548k	0	0	1	1	1	1	MCOLN3	mucolipin 3
hsa-miR-548k	0	0	1	1	1	1	RSRC2	arginine/serine-rich coiled-coil 2
hsa-miR-548k	1	0	1	1	1	1	ACER3	alkaline ceramidase 3
hsa-miR-548k	0	0	1	1	1	1	FAM175A	family with sequence similarity 175, member A
hsa-miR-548k	1	0	1	1	1	1	C12orf23	chromosome 12 open reading frame 23
hsa-miR-548k	0	0	1	1	0	0	ANAPC7	anaphase promoting complex subunit 7
hsa-miR-548k	1	0	1	1	1	1	MON2	MON2 homolog (S. cerevisiae)
hsa-miR-548k	0	0	1	0	0	0	SOX2-OT	SOX2 overlapping transcript (non-protein coding)
hsa-miR-548k	0	0	1	1	0	0	POLR3E	polymerase (RNA) III (DNA directed) polypeptide E (80kD)
hsa-miR-548k	0	0	1	1	1	1	LRRN1	leucine rich repeat neuronal 1
hsa-miR-548k	1	0	1	1	1	1	SRP72	signal recognition particle 72kDa
hsa-miR-548k	1	0	1	1	1	1	BAZ2A	bromodomain adjacent to zinc finger domain, 2A
hsa-miR-548k	0	0	1	1	1	1	AMFR	autocrine motility factor receptor, E3 ubiquitin protein ligase
hsa-miR-548k	0	0	1	1	1	1	CXorf57	chromosome X open reading frame 57
hsa-miR-548k	1	0	1	0	0	0	ZDBF2	zinc finger, DBF-type containing 2
hsa-miR-548k	0	0	1	1	1	1	SIGLEC1	sialic acid binding Ig-like lectin 1, sialoadhesin
hsa-miR-548k	1	0	1	0	1	1	ATP2B1	ATPase, Ca++ transporting, plasma membrane 1
hsa-miR-548k	1	0	1	1	1	1	SLC35A3	solute carrier family 35 (UDP-N-acetylglucosamine (UDP-GlcNAc) transporter), member A3
hsa-miR-548k	1	0	1	1	1	1	ABHD3	abhydrolase domain containing 3
hsa-miR-548k	0	0	1	1	1	1	EP400	E1A binding protein p400
hsa-miR-548k	0	0	1	0	1	1	ATXN1L	ataxin 1-like
hsa-miR-548k	0	0	1	0	0	0	KIAA1671	KIAA1671
hsa-miR-548k	1	0	1	1	1	1	DLC1	deleted in liver cancer 1
hsa-miR-548k	1	0	1	0	1	1	CADPS2	Ca++-dependent secretion activator 2
hsa-miR-548k	1	0	1	1	1	1	YPEL5	yippee-like 5 (Drosophila)
hsa-miR-548k	1	0	1	0	1	1	ZCCHC3	zinc finger, CCHC domain containing 3
hsa-miR-548k	0	0	1	0	0	0	LINC00340	long intergenic non-protein coding RNA 340
hsa-miR-548k	0	0	1	1	0	0	EWSR1	Ewing sarcoma breakpoint region 1
hsa-miR-548k	1	0	1	1	1	1	DCAF8	DDB1 and CUL4 associated factor 8
hsa-miR-548k	1	0	1	1	1	1	ITGA9	integrin, alpha 9
hsa-miR-548k	0	0	1	1	1	1	GTF2H1	general transcription factor IIH, polypeptide 1, 62kDa
hsa-miR-548k	1	0	1	1	1	1	GORASP2	golgi reassembly stacking protein 2, 55kDa
hsa-miR-548k	1	0	1	1	1	1	FOXP1	forkhead box P1
hsa-miR-548k	1	0	1	1	1	1	MARK1	MAP/microtubule affinity-regulating kinase 1
hsa-miR-548k	1	0	1	0	1	1	ATP10D	ATPase, class V, type 10D
hsa-miR-548k	1	0	1	1	1	1	SLC38A1	solute carrier family 38, member 1
hsa-miR-548k	0	0	1	0	0	0	LOC283508	uncharacterized LOC283508
hsa-miR-548k	0	0	1	1	1	1	C8orf46	chromosome 8 open reading frame 46
hsa-miR-548k	1	0	1	0	1	1	AP1G1	adaptor-related protein complex 1, gamma 1 subunit
hsa-miR-548k	0	0	1	0	0	0	LOC154092	uncharacterized LOC154092
hsa-miR-548k	1	0	1	1	1	1	FRMD6	FERM domain containing 6
hsa-miR-548k	1	0	1	1	1	1	HERPUD2	HERPUD family member 2
hsa-miR-548k	1	0	1	1	1	1	GULP1	GULP, engulfment adaptor PTB domain containing 1
hsa-miR-548k	0	0	1	1	1	1	AGXT2	alanine--glyoxylate aminotransferase 2
hsa-miR-548k	0	0	1	0	0	0	FLJ12825	uncharacterized LOC440101
hsa-miR-548k	1	0	1	1	1	1	SORBS2	sorbin and SH3 domain containing 2
hsa-miR-548k	1	0	1	1	1	1	PUM1	pumilio homolog 1 (Drosophila)
hsa-miR-548k	0	0	1	0	0	0	LOC255187	hCG1980447
hsa-miR-548k	0	0	1	0	1	1	SNRNP48	small nuclear ribonucleoprotein 48kDa (U11/U12)
hsa-miR-548k	0	0	1	1	1	1	XAF1	XIAP associated factor 1
hsa-miR-548k	1	0	1	1	1	1	TBC1D14	TBC1 domain family, member 14
hsa-miR-548k	0	0	1	1	1	1	COPS5	COP9 constitutive photomorphogenic homolog subunit 5 (Arabidopsis)
hsa-miR-548k	0	0	1	1	1	1	PSME3	proteasome (prosome, macropain) activator subunit 3 (PA28 gamma; Ki)
hsa-miR-548k	0	0	1	0	0	0	LOC284014	uncharacterized LOC284014
hsa-miR-548k	0	0	1	1	1	1	ZNF385B	zinc finger protein 385B
hsa-miR-548k	0	0	1	1	1	1	ZBTB26	zinc finger and BTB domain containing 26
hsa-miR-548k	0	0	1	1	0	0	CD37	CD37 molecule
hsa-miR-548k	0	0	1	0	1	1	UHMK1	U2AF homology motif (UHM) kinase 1
hsa-miR-548k	1	0	1	1	1	1	ZNF449	zinc finger protein 449
hsa-miR-548k	1	0	1	1	1	1	HLF	hepatic leukemia factor
hsa-miR-548k	1	0	1	1	1	1	BLCAP	bladder cancer associated protein
hsa-miR-548k	0	0	1	1	1	1	ALG2	asparagine-linked glycosylation 2, alpha-1,3-mannosyltransferase homolog (S. cerevisiae)
hsa-miR-548k	1	0	1	1	1	1	NOTCH2NL	notch 2 N-terminal like
hsa-miR-548k	0	0	1	1	0	0	LGR5	leucine-rich repeat containing G protein-coupled receptor 5
hsa-miR-548k	0	0	1	1	1	1	TFPI2	tissue factor pathway inhibitor 2
hsa-miR-548k	0	0	1	1	1	1	MTR	5-methyltetrahydrofolate-homocysteine methyltransferase
hsa-miR-548k	0	0	1	1	1	1	DYNC1I1	dynein, cytoplasmic 1, intermediate chain 1
hsa-miR-548k	1	0	1	1	1	1	AMMECR1	Alport syndrome, mental retardation, midface hypoplasia and elliptocytosis chromosomal region gene 1
hsa-miR-548k	0	0	1	1	1	1	KBTBD4	kelch repeat and BTB (POZ) domain containing 4
hsa-miR-548k	1	0	1	1	1	1	FBXW2	F-box and WD repeat domain containing 2
hsa-miR-548k	1	0	1	1	1	1	TSN	translin
hsa-miR-548k	0	0	1	0	0	0	KIAA1430	KIAA1430
hsa-miR-548k	1	0	1	1	1	1	GNG2	guanine nucleotide binding protein (G protein), gamma 2
hsa-miR-548k	1	0	1	1	1	1	IVNS1ABP	influenza virus NS1A binding protein
hsa-miR-548k	0	0	1	1	0	0	FNTB	farnesyltransferase, CAAX box, beta
hsa-miR-548k	1	0	1	1	1	1	SLBP	stem-loop binding protein
hsa-miR-548k	0	0	1	0	0	0	LOC283887	uncharacterized LOC283887
hsa-miR-548k	1	0	1	0	0	0	SH3RF3	SH3 domain containing ring finger 3
hsa-miR-548k	0	0	1	1	1	1	SPOCK1	sparc/osteonectin, cwcv and kazal-like domains proteoglycan (testican) 1
hsa-miR-548k	0	0	1	1	0	0	CYHR1	cysteine/histidine-rich 1
hsa-miR-548k	1	0	1	1	1	1	SYT1	synaptotagmin I
hsa-miR-548k	0	0	1	1	0	0	RASGRF2	Ras protein-specific guanine nucleotide-releasing factor 2
hsa-miR-548k	1	0	1	1	1	1	NMT2	N-myristoyltransferase 2
hsa-miR-548k	0	0	1	1	1	1	TM2D3	TM2 domain containing 3
hsa-miR-548k	1	0	1	1	1	1	ARHGEF7	Rho guanine nucleotide exchange factor (GEF) 7
hsa-miR-548k	1	0	1	1	1	1	TMEM100	transmembrane protein 100
hsa-miR-548k	0	0	1	1	1	1	MOBP	myelin-associated oligodendrocyte basic protein
hsa-miR-548k	0	0	1	1	1	1	MYO6	myosin VI
hsa-miR-548k	0	0	1	1	1	1	GPR115	G protein-coupled receptor 115
hsa-miR-548k	1	0	1	1	1	1	CNEP1R1	CTD nuclear envelope phosphatase 1 regulatory subunit 1
hsa-miR-548k	0	0	1	0	0	0	LOC100129858	uncharacterized LOC100129858
hsa-miR-548k	1	0	1	1	1	1	FAM222B	family with sequence similarity 222, member B
hsa-miR-548k	0	0	1	0	0	0	LOC730101	uncharacterized LOC730101
hsa-miR-548k	1	0	1	0	1	1	CLIC4	chloride intracellular channel 4
hsa-miR-548k	0	0	1	1	1	1	RPE	ribulose-5-phosphate-3-epimerase
hsa-miR-548k	0	0	1	0	0	0	ZNF815P	zinc finger protein 815, pseudogene
hsa-miR-548k	0	0	1	0	0	0	OTUD1	OTU domain containing 1
hsa-miR-548k	0	0	1	1	0	0	DHX9	DEAH (Asp-Glu-Ala-His) box polypeptide 9
hsa-miR-548k	1	0	1	0	1	1	THRB	thyroid hormone receptor, beta
hsa-miR-548k	1	0	1	0	1	1	KBTBD8	kelch repeat and BTB (POZ) domain containing 8
hsa-miR-548k	1	0	1	1	1	1	SYT6	synaptotagmin VI
hsa-miR-548k	1	0	1	1	1	1	CDV3	CDV3 homolog (mouse)
hsa-miR-548k	0	0	1	1	1	1	EXTL2	exostoses (multiple)-like 2
hsa-miR-548k	0	0	1	1	0	0	CHCHD5	coiled-coil-helix-coiled-coil-helix domain containing 5
hsa-miR-548k	0	0	1	0	1	1	TNFAIP8	tumor necrosis factor, alpha-induced protein 8
hsa-miR-548k	0	0	1	1	0	0	PRKRIP1	PRKR interacting protein 1 (IL11 inducible)
hsa-miR-548k	1	0	1	1	1	1	TMEM185A	transmembrane protein 185A
hsa-miR-548k	1	0	1	0	1	1	PRKAR1A	protein kinase, cAMP-dependent, regulatory, type I, alpha
hsa-miR-548k	0	0	1	1	0	0	AHCY	adenosylhomocysteinase
hsa-miR-548k	1	0	1	1	1	1	IGSF11	immunoglobulin superfamily, member 11
hsa-miR-548k	1	0	1	1	1	1	VAV3	vav 3 guanine nucleotide exchange factor
hsa-miR-548k	0	0	1	1	0	0	CORO1A	coronin, actin binding protein, 1A
hsa-miR-548k	1	0	1	1	1	1	GATM	glycine amidinotransferase (L-arginine:glycine amidinotransferase)
hsa-miR-548k	1	0	1	1	1	1	ZCCHC2	zinc finger, CCHC domain containing 2
hsa-miR-548k	0	0	1	1	0	0	TMEM150A	transmembrane protein 150A
hsa-miR-548k	0	0	1	1	1	1	C1orf114	chromosome 1 open reading frame 114
hsa-miR-548k	0	0	1	1	1	1	CHCHD1	coiled-coil-helix-coiled-coil-helix domain containing 1
hsa-miR-548k	0	0	1	1	1	1	GPR128	G protein-coupled receptor 128
hsa-miR-548k	0	0	1	1	0	0	KIAA0146	KIAA0146
hsa-miR-548k	1	0	1	1	1	1	WEE1	WEE1 homolog (S. pombe)
hsa-miR-548k	0	0	1	0	1	1	FLJ41200	uncharacterized LOC401492
hsa-miR-548k	1	0	1	1	1	1	IKBKAP	inhibitor of kappa light polypeptide gene enhancer in B-cells, kinase complex-associated protein
hsa-miR-548k	1	0	1	1	1	1	MDGA2	MAM domain containing glycosylphosphatidylinositol anchor 2
hsa-miR-548k	0	0	1	1	1	1	FAM5B	family with sequence similarity 5, member B
hsa-miR-548k	0	0	1	1	1	1	CC2D2B	coiled-coil and C2 domain containing 2B
hsa-miR-548k	0	0	1	0	0	0	LGALS17A	Charcot-Leyden crystal protein pseudogene
hsa-miR-548k	0	0	1	1	1	1	FAM19A2	family with sequence similarity 19 (chemokine (C-C motif)-like), member A2
hsa-miR-548k	1	0	1	1	1	1	SBF2	SET binding factor 2
hsa-miR-548k	0	0	1	0	0	0	LOC650368	asparagine-linked glycosylation 1-like pseudogene
hsa-miR-548k	0	0	1	1	0	0	LIX1L	Lix1 homolog (mouse)-like
hsa-miR-548k	1	0	1	1	1	1	EPAS1	endothelial PAS domain protein 1
hsa-miR-548k	0	0	1	1	0	0	PRR19	proline rich 19
hsa-miR-548k	0	0	1	1	1	1	PKP4	plakophilin 4
hsa-miR-548k	1	0	1	1	1	1	SMAP1	small ArfGAP 1
hsa-miR-548k	1	0	1	1	0	0	KCNC1	potassium voltage-gated channel, Shaw-related subfamily, member 1
hsa-miR-548k	1	0	1	1	1	1	GJC1	gap junction protein, gamma 1, 45kDa
hsa-miR-548k	1	0	1	1	1	1	ADIPOR1	adiponectin receptor 1
hsa-miR-548k	1	0	1	0	1	1	RHBDL3	rhomboid, veinlet-like 3 (Drosophila)
hsa-miR-548k	0	0	1	1	0	0	DOCK11	dedicator of cytokinesis 11
hsa-miR-548k	1	0	1	1	1	1	HARS	histidyl-tRNA synthetase
hsa-miR-548k	1	0	1	1	1	1	SEPHS1	selenophosphate synthetase 1
hsa-miR-548k	1	0	1	1	1	1	C11orf30	chromosome 11 open reading frame 30
hsa-miR-548k	1	0	1	1	0	0	GXYLT1	glucoside xylosyltransferase 1
hsa-miR-548k	0	0	1	1	1	1	MKX	mohawk homeobox
hsa-miR-548k	0	0	1	1	1	1	DENND5A	DENN/MADD domain containing 5A
hsa-miR-548k	1	0	1	1	1	1	SACS	spastic ataxia of Charlevoix-Saguenay (sacsin)
hsa-miR-548k	0	0	1	0	0	0	LOC613266	uncharacterized LOC613266
hsa-miR-548k	1	0	1	1	1	1	KPNA1	karyopherin alpha 1 (importin alpha 5)
hsa-miR-548k	0	0	1	1	1	1	PLOD2	procollagen-lysine, 2-oxoglutarate 5-dioxygenase 2
hsa-miR-548k	1	0	1	1	0	0	UBN2	ubinuclein 2
hsa-miR-548k	1	0	1	1	1	1	CPNE2	copine II
hsa-miR-548k	1	0	1	1	1	1	SIKE1	suppressor of IKBKE 1
hsa-miR-548k	0	0	1	1	1	1	C18orf54	chromosome 18 open reading frame 54
hsa-miR-548k	1	0	1	1	1	1	DMXL1	Dmx-like 1
hsa-miR-548k	1	0	1	1	1	1	MTOR	mechanistic target of rapamycin (serine/threonine kinase)
hsa-miR-548k	1	0	1	1	1	1	EIF4E3	eukaryotic translation initiation factor 4E family member 3
hsa-miR-548k	0	0	1	1	1	1	RAB37	RAB37, member RAS oncogene family
hsa-miR-548k	0	0	1	1	1	1	DOCK9	dedicator of cytokinesis 9
hsa-miR-548k	1	0	1	1	1	1	HYOU1	hypoxia up-regulated 1
hsa-miR-548k	1	0	1	1	1	1	LSM14A	LSM14A, SCD6 homolog A (S. cerevisiae)
hsa-miR-548k	1	0	1	1	1	1	ENAH	enabled homolog (Drosophila)
hsa-miR-548k	1	0	1	1	0	0	PEAK1	NKF3 kinase family member
hsa-miR-548k	1	0	1	1	1	1	CXorf23	chromosome X open reading frame 23
hsa-miR-548k	1	0	1	1	1	1	ZFP106	zinc finger protein 106 homolog (mouse)
hsa-miR-548k	1	0	1	1	1	1	R3HDM1	R3H domain containing 1
hsa-miR-548k	1	0	1	1	1	1	EYA1	eyes absent homolog 1 (Drosophila)
hsa-miR-548k	1	0	1	0	1	1	FNDC3B	fibronectin type III domain containing 3B
hsa-miR-548k	0	0	1	1	1	1	WDR69	WD repeat domain 69
hsa-miR-548k	1	0	1	1	1	1	CROT	carnitine O-octanoyltransferase
hsa-miR-548k	1	0	1	0	1	1	CAPRIN1	cell cycle associated protein 1
hsa-miR-548k	0	0	1	0	1	1	LOC401321	uncharacterized LOC401321
hsa-miR-548k	1	0	1	0	1	1	YOD1	YOD1 OTU deubiquinating enzyme 1 homolog (S. cerevisiae)
hsa-miR-548k	0	0	1	1	1	1	MON1B	MON1 homolog B (yeast)
hsa-miR-548k	1	0	1	1	1	1	BCAT1	branched chain amino-acid transaminase 1, cytosolic
hsa-miR-548k	0	0	1	0	0	0	EMBP1	embigin pseudogene 1
hsa-miR-548k	1	0	1	1	1	1	ADAMTSL1	ADAMTS-like 1
hsa-miR-548k	1	0	1	1	1	1	PHC2	polyhomeotic homolog 2 (Drosophila)
hsa-miR-548k	0	0	1	0	0	0	FLJ26245	uncharacterized LOC400533
hsa-miR-548k	0	0	1	1	1	1	ENPP2	ectonucleotide pyrophosphatase/phosphodiesterase 2
hsa-miR-548k	0	0	1	1	1	1	ZNF680	zinc finger protein 680
hsa-miR-548k	1	0	1	1	1	1	RNF111	ring finger protein 111
hsa-miR-548k	1	0	1	0	1	1	FMNL2	formin-like 2
hsa-miR-548k	0	0	1	1	0	0	CYP4X1	cytochrome P450, family 4, subfamily X, polypeptide 1
hsa-miR-548k	0	0	1	1	1	1	SYTL2	synaptotagmin-like 2
hsa-miR-548k	1	0	1	1	1	1	PPP2R5C	protein phosphatase 2, regulatory subunit B', gamma
hsa-miR-548k	0	0	1	1	1	1	ZSCAN20	zinc finger and SCAN domain containing 20
hsa-miR-548k	1	0	1	0	0	0	ASXL3	additional sex combs like 3 (Drosophila)
hsa-miR-548k	0	0	1	1	1	1	SYPL2	synaptophysin-like 2
hsa-miR-548k	0	0	1	1	0	0	ZNF730	zinc finger protein 730
hsa-miR-548k	1	0	1	1	1	1	LRRK2	leucine-rich repeat kinase 2
hsa-miR-548k	0	0	1	0	0	0	AGAP9	ArfGAP with GTPase domain, ankyrin repeat and PH domain 9
hsa-miR-548k	0	0	1	1	1	1	XRN2	5'-3' exoribonuclease 2
hsa-miR-548k	0	0	1	1	1	1	AKTIP	AKT interacting protein
hsa-miR-548k	0	0	1	1	1	1	CRISP3	cysteine-rich secretory protein 3
hsa-miR-548k	1	0	1	1	1	1	RPS6KA4	ribosomal protein S6 kinase, 90kDa, polypeptide 4
hsa-miR-548k	1	0	1	1	1	1	CYYR1	cysteine/tyrosine-rich 1
hsa-miR-548k	1	0	1	1	1	1	TBC1D15	TBC1 domain family, member 15
hsa-miR-548k	0	0	1	1	1	1	IMMT	inner membrane protein, mitochondrial
hsa-miR-548k	0	0	1	1	0	0	HSPB11	heat shock protein family B (small), member 11
hsa-miR-548k	0	0	1	1	1	1	TBC1D3G	TBC1 domain family, member 3G
hsa-miR-548k	1	0	1	1	1	1	NOVA1	neuro-oncological ventral antigen 1
hsa-miR-548k	0	0	1	1	1	1	PTPN20B	protein tyrosine phosphatase, non-receptor type 20B
hsa-miR-548k	0	0	1	1	1	1	PTPN20A	protein tyrosine phosphatase, non-receptor type 20A
hsa-miR-548k	1	0	1	1	1	1	NECAP1	NECAP endocytosis associated 1
hsa-miR-548k	1	0	1	1	1	1	NPAS3	neuronal PAS domain protein 3
hsa-miR-548k	0	0	1	1	1	1	TFDP2	transcription factor Dp-2 (E2F dimerization partner 2)
hsa-miR-548k	0	0	1	1	0	0	FAM153B	family with sequence similarity 153, member B
hsa-miR-548k	0	0	1	1	1	1	ARIH1	ariadne homolog, ubiquitin-conjugating enzyme E2 binding protein, 1 (Drosophila)
hsa-miR-548k	1	0	1	0	1	1	DCDC2	doublecortin domain containing 2
hsa-miR-548k	1	0	1	1	1	1	ARPP21	cAMP-regulated phosphoprotein, 21kDa
hsa-miR-548k	0	0	1	1	1	1	GMEB2	glucocorticoid modulatory element binding protein 2
hsa-miR-548k	0	0	1	1	1	1	ZNF280D	zinc finger protein 280D
hsa-miR-548k	1	0	1	1	1	1	NBEA	neurobeachin
hsa-miR-548k	1	0	1	1	1	1	NEO1	neogenin 1
hsa-miR-548k	1	0	1	0	1	1	GRIN3A	glutamate receptor, ionotropic, N-methyl-D-aspartate 3A
hsa-miR-548k	0	0	1	0	0	0	FAM66D	family with sequence similarity 66, member D
hsa-miR-548k	1	0	1	1	1	1	ZEB1	zinc finger E-box binding homeobox 1
hsa-miR-548k	1	0	1	1	1	1	MIER1	mesoderm induction early response 1 homolog (Xenopus laevis)
hsa-miR-548k	0	0	1	0	1	1	GAB3	GRB2-associated binding protein 3
hsa-miR-548k	0	0	1	1	1	1	BEND7	BEN domain containing 7
hsa-miR-548k	0	0	1	0	0	0	ZNF720	zinc finger protein 720
hsa-miR-548k	0	0	1	1	1	1	EGFLAM	EGF-like, fibronectin type III and laminin G domains
hsa-miR-548k	1	0	1	0	1	1	FAM214A	family with sequence similarity 214, member A
hsa-miR-548k	0	0	1	1	1	1	SYTL4	synaptotagmin-like 4
hsa-miR-548k	0	0	1	1	1	1	YAP1	Yes-associated protein 1
hsa-miR-548k	1	0	1	1	0	0	PTAR1	protein prenyltransferase alpha subunit repeat containing 1
hsa-miR-548k	1	0	1	1	1	1	TMEM182	transmembrane protein 182
hsa-miR-548k	1	0	1	1	0	0	ZBTB49	zinc finger and BTB domain containing 49
hsa-miR-548k	1	0	1	1	1	1	EHMT1	euchromatic histone-lysine N-methyltransferase 1
hsa-miR-548k	0	0	1	1	1	1	INPP5B	inositol polyphosphate-5-phosphatase, 75kDa
hsa-miR-548k	1	0	1	0	1	1	GPCPD1	glycerophosphocholine phosphodiesterase GDE1 homolog (S. cerevisiae)
hsa-miR-548k	1	0	1	1	1	1	HMCN1	hemicentin 1
hsa-miR-548k	1	0	1	0	1	1	MEF2C	myocyte enhancer factor 2C
hsa-miR-548k	0	0	1	0	1	1	PLEKHM1P	pleckstrin homology domain containing, family M (with RUN domain) member 1 pseudogene
hsa-miR-548k	1	0	1	1	1	1	CAMK4	calcium/calmodulin-dependent protein kinase IV
hsa-miR-548k	0	0	1	1	1	1	NFE2L1	nuclear factor (erythroid-derived 2)-like 1
hsa-miR-548k	1	0	1	1	1	1	ANP32E	acidic (leucine-rich) nuclear phosphoprotein 32 family, member E
hsa-miR-548k	1	0	1	1	1	1	IL17RD	interleukin 17 receptor D
hsa-miR-548k	0	0	1	1	1	1	TDRD9	tudor domain containing 9
hsa-miR-548k	1	0	1	1	1	1	ANKRD12	ankyrin repeat domain 12
hsa-miR-548k	1	0	1	1	1	1	CADM2	cell adhesion molecule 2
hsa-miR-548k	1	0	1	1	1	1	C1orf131	chromosome 1 open reading frame 131
hsa-miR-548k	1	0	1	1	1	1	RBM26	RNA binding motif protein 26
hsa-miR-548k	1	0	1	1	1	1	MSANTD4	Myb/SANT-like DNA-binding domain containing 4 with coiled-coils
hsa-miR-548k	1	0	1	1	1	1	FAM76B	family with sequence similarity 76, member B
hsa-miR-548k	1	0	1	1	1	1	TSHZ3	teashirt zinc finger homeobox 3
hsa-miR-548k	1	0	1	1	1	1	PPP3CA	protein phosphatase 3, catalytic subunit, alpha isozyme
hsa-miR-548k	1	0	1	1	1	1	IKZF2	IKAROS family zinc finger 2 (Helios)
hsa-miR-548k	0	0	1	1	1	1	KLHL7	kelch-like 7 (Drosophila)
hsa-miR-548k	1	0	1	1	1	1	CLIC5	chloride intracellular channel 5
hsa-miR-548k	0	0	1	1	1	1	ALS2CR8	amyotrophic lateral sclerosis 2 (juvenile) chromosome region, candidate 8
hsa-miR-548k	1	0	1	1	1	1	RCAN2	regulator of calcineurin 2
hsa-miR-548k	1	0	1	1	1	1	TACC1	transforming, acidic coiled-coil containing protein 1
hsa-miR-548k	0	0	1	1	1	1	CD209	CD209 molecule
hsa-miR-548k	1	0	1	1	1	1	TXNRD1	thioredoxin reductase 1
hsa-miR-548k	1	0	1	1	1	1	KIAA0907	KIAA0907
hsa-miR-548k	0	0	1	0	0	0	CR1L	complement component (3b/4b) receptor 1-like
hsa-miR-548k	0	0	1	1	1	1	SHPRH	SNF2 histone linker PHD RING helicase, E3 ubiquitin protein ligase
hsa-miR-548k	0	0	1	1	1	1	DNAJB14	DnaJ (Hsp40) homolog, subfamily B, member 14
hsa-miR-548k	1	0	1	1	1	1	WDR26	WD repeat domain 26
hsa-miR-548k	1	0	1	1	1	1	BCL11A	B-cell CLL/lymphoma 11A (zinc finger protein)
hsa-miR-548k	1	0	1	1	1	1	PBRM1	polybromo 1
hsa-miR-548k	0	0	1	1	1	1	RAD9B	RAD9 homolog B (S. pombe)
hsa-miR-548k	1	0	1	1	1	1	RAI14	retinoic acid induced 14
hsa-miR-548k	0	0	1	1	1	1	GCOM1	GRINL1A complex locus 1
hsa-miR-548k	1	0	1	1	1	1	TAB3	TGF-beta activated kinase 1/MAP3K7 binding protein 3
hsa-miR-548k	1	0	1	1	1	1	CAMTA1	calmodulin binding transcription activator 1
hsa-miR-548k	0	0	1	1	0	0	FKBP7	FK506 binding protein 7
hsa-miR-548k	1	0	1	1	1	1	NLGN4X	neuroligin 4, X-linked
hsa-miR-548k	1	0	1	1	1	1	BCL2L11	BCL2-like 11 (apoptosis facilitator)
hsa-miR-548k	1	0	1	1	1	1	SP3	Sp3 transcription factor
hsa-miR-548k	1	0	1	1	1	1	ANKRD11	ankyrin repeat domain 11
hsa-miR-548k	0	0	1	1	1	1	AICDA	activation-induced cytidine deaminase
hsa-miR-548k	0	0	1	1	1	1	KLK7	kallikrein-related peptidase 7
hsa-miR-548k	1	0	1	1	1	1	PLCH1	phospholipase C, eta 1
hsa-miR-548k	1	0	1	1	1	1	RTN3	reticulon 3
hsa-miR-548k	1	0	1	1	1	1	QKI	QKI, KH domain containing, RNA binding
hsa-miR-548k	1	0	1	1	1	1	CD109	CD109 molecule
hsa-miR-548k	1	0	1	1	1	1	PCDH11X	protocadherin 11 X-linked
hsa-miR-548k	1	0	1	1	0	0	TAF4B	TAF4b RNA polymerase II, TATA box binding protein (TBP)-associated factor, 105kDa
hsa-miR-548k	0	0	1	1	1	1	CDK20	cyclin-dependent kinase 20
hsa-miR-548k	0	0	1	1	0	0	ARMC9	armadillo repeat containing 9
hsa-miR-548k	1	0	1	1	1	1	NEK6	NIMA (never in mitosis gene a)-related kinase 6
hsa-miR-548k	1	0	1	0	1	1	FAM46A	family with sequence similarity 46, member A
hsa-miR-548k	1	0	1	1	1	1	PAFAH2	platelet-activating factor acetylhydrolase 2, 40kDa
hsa-miR-548k	0	0	1	1	1	1	ASB9	ankyrin repeat and SOCS box containing 9
hsa-miR-548k	0	0	1	1	0	0	ANXA5	annexin A5
hsa-miR-548k	0	0	1	1	1	1	PAFAH1B2	platelet-activating factor acetylhydrolase 1b, catalytic subunit 2 (30kDa)
hsa-miR-548k	0	0	1	1	1	1	RLIM	ring finger protein, LIM domain interacting
hsa-miR-548k	1	0	1	0	0	0	VGLL4	vestigial like 4 (Drosophila)
hsa-miR-548k	0	0	1	0	1	1	HAUS3	HAUS augmin-like complex, subunit 3
hsa-miR-548k	0	0	1	1	1	1	METTL17	methyltransferase like 17
hsa-miR-548k	0	0	1	1	1	1	ANAPC1	anaphase promoting complex subunit 1
hsa-miR-548k	0	0	1	1	0	0	PNLIPRP1	pancreatic lipase-related protein 1
hsa-miR-548k	1	0	1	1	1	1	MBNL1	muscleblind-like splicing regulator 1
hsa-miR-548k	1	0	1	1	1	1	SEC23B	Sec23 homolog B (S. cerevisiae)
hsa-miR-548k	0	0	1	1	1	1	FAM104B	family with sequence similarity 104, member B
hsa-miR-548k	1	0	1	0	1	1	FAXC	failed axon connections homolog (Drosophila)
hsa-miR-548k	1	0	1	1	1	1	COL2A1	collagen, type II, alpha 1
hsa-miR-548k	0	0	1	1	1	1	DYDC2	DPY30 domain containing 2
hsa-miR-548k	0	0	1	1	0	0	SPAG7	sperm associated antigen 7
hsa-miR-548k	1	0	1	1	1	1	CALM1	calmodulin 1 (phosphorylase kinase, delta)
hsa-miR-548k	0	0	1	1	1	1	ZNF85	zinc finger protein 85
hsa-miR-548k	0	0	1	1	1	1	TMEM30A	transmembrane protein 30A
hsa-miR-548k	1	0	1	1	1	1	GRIA2	glutamate receptor, ionotropic, AMPA 2
hsa-miR-548k	0	0	1	1	1	1	DOCK5	dedicator of cytokinesis 5
hsa-miR-548k	0	0	1	1	1	1	HDHD2	haloacid dehalogenase-like hydrolase domain containing 2
hsa-miR-548k	0	0	1	0	0	0	GRAMD1B	GRAM domain containing 1B
hsa-miR-548k	0	0	1	1	1	1	TAF12	TAF12 RNA polymerase II, TATA box binding protein (TBP)-associated factor, 20kDa
hsa-miR-548k	0	0	1	0	0	0	TPTEP1	transmembrane phosphatase with tensin homology pseudogene 1
hsa-miR-548k	1	0	1	1	1	1	GDA	guanine deaminase
hsa-miR-548k	1	0	1	1	1	1	RBM7	RNA binding motif protein 7
hsa-miR-548k	0	0	1	1	1	1	PCNP	PEST proteolytic signal containing nuclear protein
hsa-miR-548k	1	0	1	1	1	1	ETF1	eukaryotic translation termination factor 1
hsa-miR-548k	1	0	1	1	1	1	SOX5	SRY (sex determining region Y)-box 5
hsa-miR-548k	1	0	1	1	1	1	PAPOLA	poly(A) polymerase alpha
hsa-miR-548k	0	0	1	0	1	1	ZNF37A	zinc finger protein 37A
hsa-miR-548k	0	0	1	1	1	1	KRCC1	lysine-rich coiled-coil 1
hsa-miR-548k	1	0	1	1	1	1	NUMBL	numb homolog (Drosophila)-like
hsa-miR-548k	0	0	1	1	1	1	ANKRD44	ankyrin repeat domain 44
hsa-miR-548k	0	0	1	1	1	1	CASP8	caspase 8, apoptosis-related cysteine peptidase
hsa-miR-548k	1	0	1	1	1	1	VTI1A	vesicle transport through interaction with t-SNAREs homolog 1A (yeast)
hsa-miR-548k	1	0	1	1	1	1	ELF4	E74-like factor 4 (ets domain transcription factor)
hsa-miR-548k	1	0	1	1	0	0	USP53	ubiquitin specific peptidase 53
hsa-miR-548k	1	0	1	1	1	1	ARHGEF9	Cdc42 guanine nucleotide exchange factor (GEF) 9
hsa-miR-548k	1	0	1	0	1	1	SLC19A2	solute carrier family 19 (thiamine transporter), member 2
hsa-miR-548k	1	0	1	1	1	1	SUZ12	suppressor of zeste 12 homolog (Drosophila)
hsa-miR-548k	1	0	1	1	1	1	ZMAT4	zinc finger, matrin-type 4
hsa-miR-548k	1	0	1	1	1	1	SPTLC3	serine palmitoyltransferase, long chain base subunit 3
hsa-miR-548k	1	0	1	0	1	1	BTF3L4	basic transcription factor 3-like 4
hsa-miR-548k	0	0	1	1	1	1	SNX17	sorting nexin 17
hsa-miR-548k	1	0	1	1	0	0	SAMD4A	sterile alpha motif domain containing 4A
hsa-miR-548k	1	0	1	1	1	1	LIMS1	LIM and senescent cell antigen-like domains 1
hsa-miR-548k	1	0	1	0	1	1	CDK19	cyclin-dependent kinase 19
hsa-miR-548k	1	0	1	1	1	1	ASPH	aspartate beta-hydroxylase
hsa-miR-548k	1	0	1	1	1	1	SPG20	spastic paraplegia 20 (Troyer syndrome)
hsa-miR-548k	1	0	1	1	1	1	EPHA4	EPH receptor A4
hsa-miR-548k	0	0	1	0	0	0	ZBED3-AS1	ZBED3 antisense RNA 1
hsa-miR-548k	0	0	1	1	1	1	MAP2	microtubule-associated protein 2
hsa-miR-548k	1	0	1	0	1	1	CERS3	ceramide synthase 3
hsa-miR-548k	1	0	1	1	1	1	ZBTB11	zinc finger and BTB domain containing 11
hsa-miR-548k	0	0	1	0	1	1	PAPOLG	poly(A) polymerase gamma
hsa-miR-548k	1	0	1	1	1	1	HTR2C	5-hydroxytryptamine (serotonin) receptor 2C, G protein-coupled
hsa-miR-548k	0	0	1	1	1	1	PDSS2	prenyl (decaprenyl) diphosphate synthase, subunit 2
hsa-miR-548k	0	0	1	1	1	1	SEMA3D	sema domain, immunoglobulin domain (Ig), short basic domain, secreted, (semaphorin) 3D
hsa-miR-548k	1	0	1	1	1	1	SYT9	synaptotagmin IX
hsa-miR-548k	0	0	1	1	0	0	SWI5	SWI5 recombination repair homolog (yeast)
hsa-miR-548k	1	0	1	1	1	1	TIAL1	TIA1 cytotoxic granule-associated RNA binding protein-like 1
hsa-miR-548k	0	0	1	1	1	1	CCP110	centriolar coiled coil protein 110kDa
hsa-miR-548k	0	0	1	1	1	1	CTNNA3	catenin (cadherin-associated protein), alpha 3
hsa-miR-548k	1	0	1	1	1	1	WDR20	WD repeat domain 20
hsa-miR-548k	1	0	1	1	1	1	ELAVL2	ELAV (embryonic lethal, abnormal vision, Drosophila)-like 2 (Hu antigen B)
hsa-miR-548k	1	0	1	1	1	1	ZNF518A	zinc finger protein 518A
hsa-miR-548k	0	0	1	1	1	1	AADAT	aminoadipate aminotransferase
hsa-miR-548k	1	0	1	1	1	1	MUM1L1	melanoma associated antigen (mutated) 1-like 1
hsa-miR-548k	1	0	1	1	1	1	RCOR3	REST corepressor 3
hsa-miR-548k	1	0	1	1	1	1	GLUL	glutamate-ammonia ligase
hsa-miR-548k	1	0	1	1	1	1	TTC39C	tetratricopeptide repeat domain 39C
hsa-miR-548k	0	0	1	0	0	0	FAM86JP	family with sequence similarity 86, member A pseudogene
hsa-miR-548k	0	0	1	0	1	1	TTC23L	tetratricopeptide repeat domain 23-like
hsa-miR-548k	1	0	1	1	1	1	MAK	male germ cell-associated kinase
hsa-miR-548k	0	0	1	0	0	0	WDFY3-AS2	WDFY3 antisense RNA 2
hsa-miR-548k	1	0	1	1	1	1	PCDHA5	protocadherin alpha 5
hsa-miR-548k	1	0	1	1	1	1	TTC26	tetratricopeptide repeat domain 26
hsa-miR-548k	0	0	1	0	0	0	NDUFB4	NADH dehydrogenase (ubiquinone) 1 beta subcomplex, 4, 15kDa
hsa-miR-548k	1	0	1	0	1	1	RHOBTB2	Rho-related BTB domain containing 2
hsa-miR-548k	1	0	1	1	1	1	FAM120A	family with sequence similarity 120A
hsa-miR-548k	0	0	1	1	1	1	KIF16B	kinesin family member 16B
hsa-miR-548k	1	0	1	1	1	1	NKAIN2	Na+/K+ transporting ATPase interacting 2
hsa-miR-548k	0	0	1	0	0	0	LOC144486	uncharacterized LOC144486
hsa-miR-548k	1	0	1	0	1	1	ATP11A	ATPase, class VI, type 11A
hsa-miR-548k	1	0	1	1	1	1	RAP2C	RAP2C, member of RAS oncogene family
hsa-miR-548k	0	0	1	1	1	1	ARHGAP6	Rho GTPase activating protein 6
hsa-miR-548k	0	0	1	1	1	1	CBLN2	cerebellin 2 precursor
hsa-miR-548k	0	0	1	0	0	0	LOC339862	uncharacterized LOC339862
hsa-miR-548k	0	0	1	1	0	0	VPS8	vacuolar protein sorting 8 homolog (S. cerevisiae)
hsa-miR-548k	0	0	1	1	1	1	CLEC12B	C-type lectin domain family 12, member B
hsa-miR-548k	1	0	1	1	1	1	ZNF618	zinc finger protein 618
hsa-miR-548k	0	0	1	1	1	1	UBE3D	ubiquitin protein ligase E3D
hsa-miR-548k	0	0	1	0	0	0	FAM201A	family with sequence similarity 201, member A
hsa-miR-548k	0	0	1	1	1	1	FAM171B	family with sequence similarity 171, member B
hsa-miR-548k	1	0	1	1	1	1	HECTD2	HECT domain containing E3 ubiquitin protein ligase 2
hsa-miR-548k	1	0	1	0	1	1	CLDN12	claudin 12
hsa-miR-548k	1	0	1	1	0	0	TMEM131	transmembrane protein 131
hsa-miR-548k	1	0	1	0	1	1	CPEB4	cytoplasmic polyadenylation element binding protein 4
hsa-miR-548k	1	0	1	1	1	1	BNC2	basonuclin 2
hsa-miR-548k	0	0	1	0	0	0	LOC286184	uncharacterized LOC286184
hsa-miR-548k	1	0	1	0	1	1	YAF2	YY1 associated factor 2
hsa-miR-548k	0	0	1	1	1	1	EFCAB13	EF-hand calcium binding domain 13
hsa-miR-548k	1	0	1	1	1	1	SLC35F3	solute carrier family 35, member F3
hsa-miR-548k	0	0	1	1	1	1	KIAA1328	KIAA1328
hsa-miR-548k	1	0	1	1	1	1	GALNT1	UDP-N-acetyl-alpha-D-galactosamine:polypeptide N-acetylgalactosaminyltransferase 1 (GalNAc-T1)
hsa-miR-548k	1	0	1	1	1	1	DPP10	dipeptidyl-peptidase 10 (non-functional)
hsa-miR-548k	1	0	1	1	0	0	CHD4	chromodomain helicase DNA binding protein 4
hsa-miR-548k	1	0	1	0	1	1	ARID2	AT rich interactive domain 2 (ARID, RFX-like)
hsa-miR-548k	0	0	1	0	0	0	LINC00326	long intergenic non-protein coding RNA 326
hsa-miR-548k	1	0	1	0	1	1	LPHN3	latrophilin 3
hsa-miR-548k	0	0	1	0	0	0	LOC100132735	uncharacterized LOC100132735
hsa-miR-548k	1	0	1	1	1	1	BVES	blood vessel epicardial substance
hsa-miR-548k	0	0	1	0	0	0	LOC339240	keratin 17 pseudogene
hsa-miR-548k	1	0	1	1	1	1	UNC13C	unc-13 homolog C (C. elegans)
hsa-miR-548k	0	0	1	1	0	0	SLC13A4	solute carrier family 13 (sodium/sulfate symporters), member 4
hsa-miR-548k	0	0	1	0	0	0	SLC7A11-AS1	SLC7A11 antisense RNA 1
hsa-miR-548k	0	0	1	0	0	0	PVT1	Pvt1 oncogene (non-protein coding)
hsa-miR-548k	0	0	1	1	1	1	C17orf104	chromosome 17 open reading frame 104
hsa-miR-548k	1	0	1	1	1	1	TNFSF4	tumor necrosis factor (ligand) superfamily, member 4
hsa-miR-548k	0	0	1	1	1	1	ZNF568	zinc finger protein 568
hsa-miR-548k	0	0	1	1	1	1	C8orf34	chromosome 8 open reading frame 34
hsa-miR-548k	1	0	1	1	1	1	FKBP5	FK506 binding protein 5
hsa-miR-548k	0	0	1	1	1	1	SH3GL3	SH3-domain GRB2-like 3
hsa-miR-548k	0	0	1	0	0	0	LOC339260	uncharacterized LOC339260
hsa-miR-548k	0	0	1	0	0	0	DKFZp686O1327	uncharacterized LOC401014
hsa-miR-548k	1	0	1	1	1	1	HLTF	helicase-like transcription factor
hsa-miR-548k	1	0	1	1	1	1	RNF145	ring finger protein 145
hsa-miR-548k	1	0	1	0	1	1	PSD3	pleckstrin and Sec7 domain containing 3
hsa-miR-548k	0	0	1	0	0	0	LOC283914	uncharacterized LOC283914
hsa-miR-548k	0	0	1	0	0	0	LOC348120	uncharacterized LOC348120
hsa-miR-548k	1	0	1	1	1	1	BRD1	bromodomain containing 1
hsa-miR-548k	1	0	1	0	1	1	ZNF800	zinc finger protein 800
hsa-miR-548k	1	0	1	1	1	1	WSB1	WD repeat and SOCS box containing 1
hsa-miR-548k	0	0	1	0	0	0	LOC255025	uncharacterized LOC255025
hsa-miR-548k	1	0	1	1	1	1	CLVS1	clavesin 1
hsa-miR-548k	1	0	1	0	1	1	ARHGAP5	Rho GTPase activating protein 5
hsa-miR-548k	0	0	1	0	1	1	ITGA1	integrin, alpha 1
hsa-miR-548k	1	0	1	1	1	1	FNDC3A	fibronectin type III domain containing 3A
hsa-miR-548k	1	0	1	1	1	1	GATA2	GATA binding protein 2
hsa-miR-548k	1	0	1	0	1	1	SMURF2	SMAD specific E3 ubiquitin protein ligase 2
hsa-miR-548k	0	0	1	1	0	0	AGAP8	ArfGAP with GTPase domain, ankyrin repeat and PH domain 8
hsa-miR-548k	1	0	1	1	1	1	ZFP91	zinc finger protein 91 homolog (mouse)
hsa-miR-548k	1	0	1	1	1	1	YWHAZ	tyrosine 3-monooxygenase/tryptophan 5-monooxygenase activation protein, zeta polypeptide
hsa-miR-548k	1	0	1	1	1	1	MKRN1	makorin ring finger protein 1
hsa-miR-548k	1	0	1	1	1	1	PCGF5	polycomb group ring finger 5
hsa-miR-548k	0	0	1	1	1	1	KDELC1	KDEL (Lys-Asp-Glu-Leu) containing 1
hsa-miR-548k	1	0	1	0	1	1	C14orf43	chromosome 14 open reading frame 43
hsa-miR-548k	1	0	1	1	1	1	HP1BP3	heterochromatin protein 1, binding protein 3
hsa-miR-548k	1	0	1	1	1	1	OLFML2A	olfactomedin-like 2A
hsa-miR-548k	1	0	1	1	1	1	ATP8B4	ATPase, class I, type 8B, member 4
hsa-miR-548k	1	0	1	1	1	1	KLHL28	kelch-like 28 (Drosophila)
hsa-miR-548k	0	0	1	1	1	1	IDI1	isopentenyl-diphosphate delta isomerase 1
hsa-miR-548k	1	0	1	1	1	1	ZEB2	zinc finger E-box binding homeobox 2
hsa-miR-548k	1	0	1	1	1	1	PRRG1	proline rich Gla (G-carboxyglutamic acid) 1
hsa-miR-548k	0	0	1	1	0	0	AGAP4	ArfGAP with GTPase domain, ankyrin repeat and PH domain 4
hsa-miR-548k	1	0	1	0	1	1	C7orf41	chromosome 7 open reading frame 41
hsa-miR-548k	0	0	1	0	0	0	LOC550643	uncharacterized LOC550643
hsa-miR-548k	0	0	1	0	0	0	TEX36	testis expressed 36
hsa-miR-548k	0	0	1	0	0	0	FLJ35390	uncharacterized LOC255031
hsa-miR-548k	1	0	1	1	1	1	MYLK	myosin light chain kinase
hsa-miR-548k	0	0	1	1	1	1	GORAB	golgin, RAB6-interacting
hsa-miR-548k	0	0	1	1	1	1	ZNF33B	zinc finger protein 33B
hsa-miR-548k	1	0	1	1	1	1	GANAB	glucosidase, alpha; neutral AB
hsa-miR-548k	0	0	1	1	1	1	AQP6	aquaporin 6, kidney specific
hsa-miR-548k	1	0	1	1	1	1	C18orf1	chromosome 18 open reading frame 1
hsa-miR-548k	0	0	1	0	0	0	WHAMMP2	WAS protein homolog associated with actin, golgi membranes and microtubules pseudogene 2
hsa-miR-548k	0	0	1	1	1	1	KCTD18	potassium channel tetramerisation domain containing 18
hsa-miR-548k	0	0	1	1	1	1	SLAMF1	signaling lymphocytic activation molecule family member 1
hsa-miR-548k	1	0	1	1	1	1	PDCD6IP	programmed cell death 6 interacting protein
hsa-miR-548k	0	0	1	0	0	0	RNF216P1	ring finger protein 216 pseudogene 1
hsa-miR-548k	1	0	1	1	1	1	SLC26A7	solute carrier family 26, member 7
hsa-miR-548k	1	0	1	1	1	1	PHACTR4	phosphatase and actin regulator 4
hsa-miR-548k	1	0	1	1	1	1	SRPK2	SRSF protein kinase 2
hsa-miR-548k	0	0	1	0	0	0	SPDYE8P	speedy homolog E8 (Xenopus laevis), pseudogene
hsa-miR-548k	1	0	1	0	1	1	SLC7A2	solute carrier family 7 (cationic amino acid transporter, y+ system), member 2
hsa-miR-548k	0	0	1	1	0	0	CYP4F30P	cytochrome P450, family 4, subfamily F, polypeptide 30, pseudogene
hsa-miR-548k	1	0	1	1	1	1	EEF1A1	eukaryotic translation elongation factor 1 alpha 1
hsa-miR-548k	0	0	1	1	1	1	CFHR3	complement factor H-related 3
hsa-miR-548k	1	0	1	0	1	1	HMGB3	high mobility group box 3
hsa-miR-548k	1	0	1	0	1	1	TGFBR1	transforming growth factor, beta receptor 1
hsa-miR-548k	1	0	1	0	1	1	MAP4K3	mitogen-activated protein kinase kinase kinase kinase 3
hsa-miR-548k	1	0	1	0	1	1	TMEM194A	transmembrane protein 194A
hsa-miR-548k	1	0	1	0	1	1	NCOA7	nuclear receptor coactivator 7
hsa-miR-548k	1	0	1	1	0	0	PLEKHG3	pleckstrin homology domain containing, family G (with RhoGef domain) member 3
hsa-miR-548k	1	0	1	1	1	1	C1orf173	chromosome 1 open reading frame 173
hsa-miR-548k	1	0	1	1	1	1	WNT5A	wingless-type MMTV integration site family, member 5A
hsa-miR-548k	0	0	1	1	0	0	UGT8	UDP glycosyltransferase 8
hsa-miR-548k	1	0	1	1	0	0	SLC45A4	solute carrier family 45, member 4
hsa-miR-548k	1	0	1	0	1	1	PIK3R3	phosphoinositide-3-kinase, regulatory subunit 3 (gamma)
hsa-miR-548k	1	0	1	1	1	1	ELOVL7	ELOVL fatty acid elongase 7
hsa-miR-548k	1	0	1	1	1	1	ACVR2B	activin A receptor, type IIB
hsa-miR-548k	1	0	1	1	1	1	SYNJ1	synaptojanin 1
hsa-miR-548k	1	0	1	0	1	1	MYBL1	v-myb myeloblastosis viral oncogene homolog (avian)-like 1
hsa-miR-548k	1	0	1	0	1	1	KCNT2	potassium channel, subfamily T, member 2
hsa-miR-548k	0	0	1	1	1	1	CCDC126	coiled-coil domain containing 126
hsa-miR-548k	1	0	1	1	1	1	SLC35G1	solute carrier family 35, member G1
hsa-miR-548k	0	0	1	0	0	0	LOC150577	uncharacterized LOC150577
hsa-miR-548k	1	0	1	1	1	1	NR2F2	nuclear receptor subfamily 2, group F, member 2
hsa-miR-548k	1	0	1	1	1	1	PTPRD	protein tyrosine phosphatase, receptor type, D
hsa-miR-548k	1	0	1	1	1	1	SUV420H1	suppressor of variegation 4-20 homolog 1 (Drosophila)
hsa-miR-548k	0	0	1	0	0	0	LOC389765	kinesin family member 27 pseudogene
hsa-miR-548k	0	0	1	1	1	1	DET1	de-etiolated homolog 1 (Arabidopsis)
hsa-miR-548k	0	0	1	1	0	0	NLRP7	NLR family, pyrin domain containing 7
hsa-miR-548k	1	0	1	0	1	1	DNAJC6	DnaJ (Hsp40) homolog, subfamily C, member 6
hsa-miR-548k	1	0	1	1	1	1	SP4	Sp4 transcription factor
hsa-miR-548k	1	0	1	1	1	1	LARP1B	La ribonucleoprotein domain family, member 1B
hsa-miR-548k	0	0	1	1	0	0	KCNAB2	potassium voltage-gated channel, shaker-related subfamily, beta member 2
hsa-miR-548k	1	0	1	1	1	1	HNRNPR	heterogeneous nuclear ribonucleoprotein R
hsa-miR-548k	1	0	1	1	1	1	PPP4R2	protein phosphatase 4, regulatory subunit 2
hsa-miR-548k	1	0	1	1	1	1	SLK	STE20-like kinase
hsa-miR-548k	1	0	1	1	1	1	NR3C2	nuclear receptor subfamily 3, group C, member 2
hsa-miR-548k	0	0	1	1	1	1	UNC13B	unc-13 homolog B (C. elegans)
hsa-miR-548k	1	0	1	0	1	1	ROBO1	roundabout, axon guidance receptor, homolog 1 (Drosophila)
hsa-miR-548k	1	0	1	1	1	1	PAX3	paired box 3
hsa-miR-548k	1	0	1	1	1	1	SLMAP	sarcolemma associated protein
hsa-miR-548k	1	0	1	1	1	1	KIAA0528	KIAA0528
hsa-miR-548k	1	0	1	1	1	1	ST18	suppression of tumorigenicity 18 (breast carcinoma) (zinc finger protein)
hsa-miR-548k	1	0	1	0	1	1	PRDM10	PR domain containing 10
hsa-miR-548k	1	0	1	1	1	1	OTUD4	OTU domain containing 4
hsa-miR-548k	0	0	1	0	0	0	EEF1DP3	eukaryotic translation elongation factor 1 delta pseudogene 3
hsa-miR-548k	1	0	1	0	1	1	LRCH2	leucine-rich repeats and calponin homology (CH) domain containing 2
hsa-miR-548k	1	0	1	0	1	1	CAMSAP2	calmodulin regulated spectrin-associated protein family, member 2
hsa-miR-548k	1	0	1	1	1	1	ANK2	ankyrin 2, neuronal
hsa-miR-548k	0	0	1	1	1	1	HSF2	heat shock transcription factor 2
hsa-miR-548k	0	0	1	1	0	0	TTC21A	tetratricopeptide repeat domain 21A
hsa-miR-548k	0	0	1	0	1	1	PIK3C2G	phosphatidylinositol-4-phosphate 3-kinase, catalytic subunit type 2 gamma
hsa-miR-548k	0	0	1	1	0	0	AGAP6	ArfGAP with GTPase domain, ankyrin repeat and PH domain 6
hsa-miR-548k	1	0	1	0	1	1	FAM196A	family with sequence similarity 196, member A
hsa-miR-548k	0	0	1	1	1	1	PRKAR2A	protein kinase, cAMP-dependent, regulatory, type II, alpha
hsa-miR-548k	0	0	1	0	0	0	FUT8-AS1	FUT8 antisense RNA 1
hsa-miR-548k	0	0	1	0	0	0	MEG3	maternally expressed 3 (non-protein coding)
hsa-miR-548k	0	0	1	0	0	0	LINC00643	long intergenic non-protein coding RNA 643
hsa-miR-548k	1	0	1	1	1	1	BTBD7	BTB (POZ) domain containing 7
hsa-miR-548k	0	0	1	0	0	0	ADCY10P1	adenylate cyclase 10 (soluble) pseudogene 1
hsa-miR-548k	0	0	1	0	0	0	DKFZp686D0853	uncharacterized LOC401613
hsa-miR-548k	1	0	1	1	1	1	JPH1	junctophilin 1
hsa-miR-548k	0	0	1	0	1	1	FEZ2	fasciculation and elongation protein zeta 2 (zygin II)
hsa-miR-548k	1	0	1	1	1	1	MIER3	mesoderm induction early response 1, family member 3
hsa-miR-548k	0	0	1	1	1	1	NUP54	nucleoporin 54kDa
hsa-miR-548k	0	0	1	1	1	1	DSG3	desmoglein 3
hsa-miR-548k	1	0	1	1	1	1	ETS1	v-ets erythroblastosis virus E26 oncogene homolog 1 (avian)
hsa-miR-548k	1	0	1	0	1	1	CLASP2	cytoplasmic linker associated protein 2
hsa-miR-548k	1	0	1	1	1	1	C7orf31	chromosome 7 open reading frame 31
hsa-miR-548k	1	0	1	0	1	1	FAM73A	family with sequence similarity 73, member A
hsa-miR-548k	1	0	1	1	1	1	RORB	RAR-related orphan receptor B
hsa-miR-548k	0	0	1	1	0	0	WDPCP	WD repeat containing planar cell polarity effector
hsa-miR-548k	0	0	1	0	1	1	THAP6	THAP domain containing 6
hsa-miR-548k	1	0	1	1	1	1	EPS15	epidermal growth factor receptor pathway substrate 15
hsa-miR-548k	1	0	1	1	1	1	STARD13	StAR-related lipid transfer (START) domain containing 13
hsa-miR-548k	1	0	1	1	1	1	GABPA	GA binding protein transcription factor, alpha subunit 60kDa
hsa-miR-548k	1	0	1	1	1	1	GTDC1	glycosyltransferase-like domain containing 1
hsa-miR-548k	1	0	1	1	1	1	KLHL2	kelch-like 2, Mayven (Drosophila)
hsa-miR-548k	0	0	1	1	1	1	ARMCX3	armadillo repeat containing, X-linked 3
hsa-miR-548k	0	0	1	1	1	1	DUSP19	dual specificity phosphatase 19
hsa-miR-548k	1	0	1	1	1	1	TC2N	tandem C2 domains, nuclear
hsa-miR-548k	1	0	1	1	1	1	DCAF5	DDB1 and CUL4 associated factor 5
hsa-miR-548k	1	0	1	1	1	1	NEDD9	neural precursor cell expressed, developmentally down-regulated 9
hsa-miR-548k	1	0	1	1	1	1	ATP6V1C1	ATPase, H+ transporting, lysosomal 42kDa, V1 subunit C1
hsa-miR-548k	1	0	1	1	1	1	ZNF711	zinc finger protein 711
hsa-miR-548k	1	0	1	1	1	1	DDAH1	dimethylarginine dimethylaminohydrolase 1
hsa-miR-548k	0	0	1	1	1	1	ATP2A2	ATPase, Ca++ transporting, cardiac muscle, slow twitch 2
hsa-miR-548k	1	0	1	1	1	1	GPR125	G protein-coupled receptor 125
hsa-miR-548k	1	0	1	1	1	1	NFIB	nuclear factor I/B
hsa-miR-548k	1	0	1	1	1	1	SOGA2	SOGA family member 2
hsa-miR-548k	1	0	1	1	1	1	C5orf24	chromosome 5 open reading frame 24
hsa-miR-548k	1	0	1	1	1	1	RDX	radixin
hsa-miR-548k	1	0	1	1	1	1	PGAP1	post-GPI attachment to proteins 1
hsa-miR-548k	0	0	1	1	1	1	IFRD1	interferon-related developmental regulator 1
hsa-miR-548k	1	0	1	1	1	1	CALD1	caldesmon 1
hsa-miR-548k	0	0	1	1	1	1	SSFA2	sperm specific antigen 2
hsa-miR-548k	1	0	1	1	1	1	SPATS2	spermatogenesis associated, serine-rich 2
hsa-miR-548k	1	0	1	0	1	1	TBL1XR1	transducin (beta)-like 1 X-linked receptor 1
hsa-miR-548k	0	0	1	1	0	0	NEB	nebulin
hsa-miR-548k	0	0	1	0	0	0	ANKRD62	ankyrin repeat domain 62
hsa-miR-548k	1	0	1	1	1	1	CREB3L2	cAMP responsive element binding protein 3-like 2
hsa-miR-548k	1	0	1	1	1	1	SIN3A	SIN3 transcription regulator homolog A (yeast)
hsa-miR-548k	1	0	1	1	1	1	BSDC1	BSD domain containing 1
hsa-miR-548k	0	0	1	1	0	0	HNRNPAB	heterogeneous nuclear ribonucleoprotein A/B
hsa-miR-548k	1	0	1	1	1	1	SEL1L3	sel-1 suppressor of lin-12-like 3 (C. elegans)
hsa-miR-548k	1	0	1	1	1	1	CLU	clusterin
hsa-miR-548k	0	0	1	1	1	1	DGCR14	DiGeorge syndrome critical region gene 14
hsa-miR-548k	0	0	1	1	0	0	RNPS1	RNA binding protein S1, serine-rich domain
hsa-miR-548k	0	0	1	1	1	1	TPRA1	transmembrane protein, adipocyte asscociated 1
hsa-miR-548k	0	0	1	0	0	0	LOC285141	uncharacterized protein LOC285141
hsa-miR-548k	1	0	1	1	1	1	DOLPP1	dolichyl pyrophosphate phosphatase 1
hsa-miR-548k	1	1	1	1	0	0	EFNA3	ephrin-A3
hsa-miR-548k	1	0	1	1	1	1	SETD8	SET domain containing (lysine methyltransferase) 8
hsa-miR-548k	0	0	1	1	1	1	ATP5F1	ATP synthase, H+ transporting, mitochondrial Fo complex, subunit B1
hsa-miR-548k	0	0	1	1	1	1	SLC25A4	solute carrier family 25 (mitochondrial carrier; adenine nucleotide translocator), member 4
hsa-miR-548k	0	0	1	1	1	1	CHCHD4	coiled-coil-helix-coiled-coil-helix domain containing 4
hsa-miR-548k	1	0	1	1	1	1	CD9	CD9 molecule
hsa-miR-548k	1	0	1	1	1	1	CAAP1	caspase activity and apoptosis inhibitor 1
hsa-miR-548k	0	0	1	1	1	1	XRCC4	X-ray repair complementing defective repair in Chinese hamster cells 4
hsa-miR-548k	0	0	1	1	1	1	CD99	CD99 molecule
hsa-miR-548k	1	0	1	1	1	1	HMGN3	high mobility group nucleosomal binding domain 3
hsa-miR-548k	1	0	1	1	1	1	CHTF8	CTF8, chromosome transmission fidelity factor 8 homolog (S. cerevisiae)
hsa-miR-548k	1	0	1	0	1	1	ARL6IP6	ADP-ribosylation-like factor 6 interacting protein 6
hsa-miR-548k	0	0	1	1	1	1	MTCP1	mature T-cell proliferation 1
hsa-miR-548k	0	0	1	0	1	1	CD99P1	CD99 molecule pseudogene 1
hsa-miR-548k	1	0	1	1	1	1	ADAM9	ADAM metallopeptidase domain 9
hsa-miR-548k	1	0	1	1	1	1	TRA2B	transformer 2 beta homolog (Drosophila)
hsa-miR-548k	1	0	1	1	1	1	PLEKHB2	pleckstrin homology domain containing, family B (evectins) member 2
hsa-miR-548k	1	0	1	1	1	1	NFKBIA	nuclear factor of kappa light polypeptide gene enhancer in B-cells inhibitor, alpha
hsa-miR-548k	1	0	1	1	1	1	TFDP1	transcription factor Dp-1
hsa-miR-548k	0	0	1	1	0	0	CCDC112	coiled-coil domain containing 112
hsa-miR-548k	1	0	1	0	1	1	RPS6KB1	ribosomal protein S6 kinase, 70kDa, polypeptide 1
hsa-miR-548k	0	0	1	1	1	1	PECR	peroxisomal trans-2-enoyl-CoA reductase
hsa-miR-548k	0	0	1	1	1	1	CYP26A1	cytochrome P450, family 26, subfamily A, polypeptide 1
hsa-miR-548k	1	0	1	1	1	1	TMEM248	transmembrane protein 248
hsa-miR-548k	0	0	1	1	1	1	XBP1	X-box binding protein 1
hsa-miR-548k	1	0	1	1	1	1	ARFIP2	ADP-ribosylation factor interacting protein 2
hsa-miR-548k	1	0	1	1	1	1	STK38L	serine/threonine kinase 38 like
hsa-miR-548k	0	0	1	1	1	1	CAPZB	capping protein (actin filament) muscle Z-line, beta
hsa-miR-548k	1	0	1	1	1	1	BTBD10	BTB (POZ) domain containing 10
hsa-miR-548k	0	0	1	1	0	0	GLMN	glomulin, FKBP associated protein
hsa-miR-548k	1	0	1	1	1	1	GPR137B	G protein-coupled receptor 137B
hsa-miR-548k	0	0	1	1	0	0	TUSC3	tumor suppressor candidate 3
hsa-miR-548k	0	0	1	1	1	1	JMJD8	jumonji domain containing 8
hsa-miR-548k	1	0	1	1	1	1	YWHAQ	tyrosine 3-monooxygenase/tryptophan 5-monooxygenase activation protein, theta polypeptide
hsa-miR-548k	0	0	1	1	1	1	RFT1	RFT1 homolog (S. cerevisiae)
hsa-miR-548k	0	0	1	1	1	1	TMCO1	transmembrane and coiled-coil domains 1
hsa-miR-548k	0	0	1	1	0	0	NEK7	NIMA (never in mitosis gene a)-related kinase 7
hsa-miR-548k	0	0	1	1	1	1	MAEL	maelstrom homolog (Drosophila)
hsa-miR-548k	1	0	1	1	1	1	BAALC	brain and acute leukemia, cytoplasmic
hsa-miR-548k	0	0	1	1	0	0	C9orf114	chromosome 9 open reading frame 114
hsa-miR-548k	1	0	1	1	1	1	ZNF207	zinc finger protein 207
hsa-miR-548k	0	0	1	1	0	0	GMNN	geminin, DNA replication inhibitor
hsa-miR-548k	1	0	1	1	1	1	ARMC8	armadillo repeat containing 8
hsa-miR-548k	0	0	1	1	1	1	DNAJC25	DnaJ (Hsp40) homolog, subfamily C , member 25
hsa-miR-548k	1	0	1	1	1	1	LAPTM4A	lysosomal protein transmembrane 4 alpha
hsa-miR-548k	1	0	1	1	1	1	RNF2	ring finger protein 2
hsa-miR-548k	1	0	1	0	1	1	GIT2	G protein-coupled receptor kinase interacting ArfGAP 2
hsa-miR-548k	0	0	1	1	1	1	HS3ST2	heparan sulfate (glucosamine) 3-O-sulfotransferase 2
hsa-miR-548k	0	0	1	1	1	1	TBRG1	transforming growth factor beta regulator 1
hsa-miR-548k	1	0	1	1	1	1	SRSF2	serine/arginine-rich splicing factor 2
hsa-miR-548k	1	0	1	1	1	1	UBE2K	ubiquitin-conjugating enzyme E2K
hsa-miR-548k	0	0	1	0	0	0	A2M	alpha-2-macroglobulin
hsa-miR-548k	1	0	1	0	1	1	CD47	CD47 molecule
hsa-miR-548k	0	0	1	1	1	1	SLC33A1	solute carrier family 33 (acetyl-CoA transporter), member 1
hsa-miR-548k	0	0	1	1	1	1	ZNF397	zinc finger protein 397
hsa-miR-548k	0	0	1	0	0	0	EEF1G	eukaryotic translation elongation factor 1 gamma
hsa-miR-548k	0	0	1	1	1	1	PTMA	prothymosin, alpha
hsa-miR-548k	0	0	1	0	0	0	LOC100132984	uncharacterized LOC100132984
hsa-miR-548k	0	0	1	1	0	0	TUBA1C	tubulin, alpha 1c
hsa-miR-548k	1	0	1	1	1	1	MED1	mediator complex subunit 1
hsa-miR-548k	0	0	1	1	0	0	KAT8	K(lysine) acetyltransferase 8
hsa-miR-548k	0	0	1	1	1	1	COPS4	COP9 constitutive photomorphogenic homolog subunit 4 (Arabidopsis)
hsa-miR-548k	1	0	1	1	1	1	JUNB	jun B proto-oncogene
hsa-miR-548k	1	0	1	1	1	1	LGALSL	lectin, galactoside-binding-like
hsa-miR-548k	1	0	1	1	1	1	RND3	Rho family GTPase 3
hsa-miR-548k	0	0	1	1	0	0	FAM3B	family with sequence similarity 3, member B
hsa-miR-548k	1	0	1	0	1	1	KIAA0240	KIAA0240
hsa-miR-548k	1	0	1	0	1	1	KDM1B	lysine (K)-specific demethylase 1B
hsa-miR-548k	1	0	1	1	1	1	STAG2	stromal antigen 2
hsa-miR-548k	0	0	1	0	0	0	LOC731789	uncharacterized LOC731789
hsa-miR-548k	1	0	1	1	1	1	PHACTR2	phosphatase and actin regulator 2
hsa-miR-548k	0	0	1	1	1	1	ATG5	autophagy related 5
hsa-miR-548k	0	0	1	0	0	0	LINC00661	long intergenic non-protein coding RNA 661
hsa-miR-548k	0	0	1	0	1	1	STARD8	StAR-related lipid transfer (START) domain containing 8
hsa-miR-548k	1	0	1	0	1	1	MEGF10	multiple EGF-like-domains 10
hsa-miR-548k	1	0	1	1	1	1	KIAA2018	KIAA2018
hsa-miR-548k	0	0	1	1	0	0	FMN1	formin 1
hsa-miR-548k	0	0	1	0	0	0	MUC19	mucin 19, oligomeric
hsa-miR-548k	1	0	1	0	1	1	XRN1	5'-3' exoribonuclease 1
hsa-miR-548k	1	0	1	0	1	1	OSBPL8	oxysterol binding protein-like 8
hsa-miR-548k	0	0	1	0	1	1	HDAC9	histone deacetylase 9
hsa-miR-548k	1	0	1	0	1	1	MCFD2	multiple coagulation factor deficiency 2
hsa-miR-548k	1	0	1	0	1	1	CNTNAP2	contactin associated protein-like 2
hsa-miR-548k	1	0	1	1	1	1	ZFHX3	zinc finger homeobox 3
hsa-miR-548k	0	0	1	1	1	1	TMEM41B	transmembrane protein 41B
hsa-miR-548k	1	0	1	1	1	1	GRM5	glutamate receptor, metabotropic 5
hsa-miR-548k	1	0	1	1	1	1	SP2	Sp2 transcription factor
hsa-miR-548k	1	0	1	1	1	1	SEC14L1	SEC14-like 1 (S. cerevisiae)
hsa-miR-548k	0	0	1	0	0	0	61E3.4	nuclear pore complex interacting protein-like
hsa-miR-548k	1	0	1	1	1	1	GLIS3	GLIS family zinc finger 3
hsa-miR-548k	1	0	1	1	0	0	LGSN	lengsin, lens protein with glutamine synthetase domain
hsa-miR-548k	1	0	1	1	1	1	MLL	myeloid/lymphoid or mixed-lineage leukemia (trithorax homolog, Drosophila)
hsa-miR-548k	0	0	1	0	1	1	OPRK1	opioid receptor, kappa 1
hsa-miR-548k	1	0	1	1	1	1	CCNG2	cyclin G2
hsa-miR-548k	1	0	1	0	1	1	BCL2	B-cell CLL/lymphoma 2
hsa-miR-548k	0	0	1	1	1	1	NPR3	natriuretic peptide receptor C/guanylate cyclase C (atrionatriuretic peptide receptor C)
hsa-miR-548k	1	0	1	0	1	1	ACVR2A	activin A receptor, type IIA
hsa-miR-548k	1	0	1	0	1	1	ATM	ataxia telangiectasia mutated
hsa-miR-548k	0	0	1	1	0	0	CHRNE	cholinergic receptor, nicotinic, epsilon (muscle)
hsa-miR-548k	1	0	1	1	1	1	CYP19A1	cytochrome P450, family 19, subfamily A, polypeptide 1
hsa-miR-548k	0	0	1	0	1	1	CYP1B1	cytochrome P450, family 1, subfamily B, polypeptide 1
hsa-miR-548k	1	0	1	1	1	1	FBN1	fibrillin 1
hsa-miR-548k	0	0	1	0	1	1	MS4A2	membrane-spanning 4-domains, subfamily A, member 2
hsa-miR-548k	1	0	1	0	1	1	G6PC	glucose-6-phosphatase, catalytic subunit
hsa-miR-548k	1	0	1	0	1	1	GHR	growth hormone receptor
hsa-miR-548k	1	0	1	1	1	1	GK	glycerol kinase
hsa-miR-548k	1	0	1	0	1	1	GLI3	GLI family zinc finger 3
hsa-miR-548k	0	0	1	1	1	1	HPRT1	hypoxanthine phosphoribosyltransferase 1
hsa-miR-548k	0	0	1	0	1	1	KAL1	Kallmann syndrome 1 sequence
hsa-miR-548k	1	0	1	0	1	1	SGCB	sarcoglycan, beta (43kDa dystrophin-associated glycoprotein)
hsa-miR-548k	1	0	1	1	1	1	MET	met proto-oncogene (hepatocyte growth factor receptor)
hsa-miR-548k	0	0	1	1	1	1	MUT	methylmalonyl CoA mutase
hsa-miR-548k	0	0	1	1	1	1	PRNP	prion protein
hsa-miR-548k	1	0	1	1	1	1	ATXN1	ataxin 1
hsa-miR-548k	0	0	1	1	1	1	CASR	calcium-sensing receptor
hsa-miR-548k	1	0	1	1	1	1	CHM	choroideremia (Rab escort protein 1)
hsa-miR-548k	1	0	1	1	1	1	HLCS	holocarboxylase synthetase (biotin-(proprionyl-CoA-carboxylase (ATP-hydrolysing)) ligase)
hsa-miR-548k	1	0	1	1	0	0	NOTCH3	notch 3
hsa-miR-548k	1	0	1	0	1	1	RAG1	recombination activating gene 1
hsa-miR-548k	1	0	1	1	1	1	ATRX	alpha thalassemia/mental retardation syndrome X-linked
hsa-miR-548k	1	0	1	1	1	1	DCX	doublecortin
hsa-miR-548k	1	0	1	1	1	1	IL1A	interleukin 1, alpha
hsa-miR-548k	1	0	1	1	1	1	CXCL12	chemokine (C-X-C motif) ligand 12
hsa-miR-548k	0	0	1	1	1	1	IFNG	interferon, gamma
hsa-miR-548k	0	0	1	1	1	1	ALDH1B1	aldehyde dehydrogenase 1 family, member B1
hsa-miR-548k	1	0	1	0	1	1	ALDH1A3	aldehyde dehydrogenase 1 family, member A3
hsa-miR-548k	1	0	1	1	1	1	DIO2	deiodinase, iodothyronine, type II
hsa-miR-548k	1	0	1	0	1	1	GABRA4	gamma-aminobutyric acid (GABA) A receptor, alpha 4
hsa-miR-548k	1	0	1	1	1	1	GABRG2	gamma-aminobutyric acid (GABA) A receptor, gamma 2
hsa-miR-548k	0	0	1	1	1	1	GAD2	glutamate decarboxylase 2 (pancreatic islets and brain, 65kDa)
hsa-miR-548k	0	0	1	1	1	1	GLRB	glycine receptor, beta
hsa-miR-548k	1	0	1	1	1	1	GRM7	glutamate receptor, metabotropic 7
hsa-miR-548k	0	0	1	1	1	1	HTR7	5-hydroxytryptamine (serotonin) receptor 7, adenylate cyclase-coupled
hsa-miR-548k	0	0	1	1	1	1	IL5	interleukin 5 (colony-stimulating factor, eosinophil)
hsa-miR-548k	0	0	1	1	1	1	IL12A	interleukin 12A (natural killer cell stimulatory factor 1, cytotoxic lymphocyte maturation factor 1, p35)
hsa-miR-548k	1	0	1	0	1	1	KCNJ2	potassium inwardly-rectifying channel, subfamily J, member 2
hsa-miR-548k	0	0	1	1	1	1	P4HA1	prolyl 4-hydroxylase, alpha polypeptide I
hsa-miR-548k	1	0	1	1	1	1	PPP3R1	protein phosphatase 3, regulatory subunit B, alpha
hsa-miR-548k	1	0	1	1	1	1	PTGDR	prostaglandin D2 receptor (DP)
hsa-miR-548k	1	0	1	1	1	1	PTGER2	prostaglandin E receptor 2 (subtype EP2), 53kDa
hsa-miR-548k	1	0	1	1	1	1	PTGER3	prostaglandin E receptor 3 (subtype EP3)
hsa-miR-548k	1	0	1	1	1	1	PTGFR	prostaglandin F receptor (FP)
hsa-miR-548k	1	0	1	1	1	1	RARB	retinoic acid receptor, beta
hsa-miR-548k	1	0	1	0	1	1	SMAD5	SMAD family member 5
hsa-miR-548k	1	0	1	1	1	1	UGP2	UDP-glucose pyrophosphorylase 2
hsa-miR-548k	0	0	1	1	1	1	FLJ45079	FLJ45079 protein
hsa-miR-548k	1	0	1	1	1	1	C14orf37	chromosome 14 open reading frame 37
hsa-miR-548k	1	0	1	1	1	1	FAM13C	family with sequence similarity 13, member C
hsa-miR-548k	1	0	1	0	1	1	CLDN18	claudin 18
hsa-miR-548k	1	0	1	1	1	1	WNK3	WNK lysine deficient protein kinase 3
hsa-miR-548k	1	0	1	1	1	1	ABLIM1	actin binding LIM protein 1
hsa-miR-548k	1	0	1	0	1	1	SMAD2	SMAD family member 2
hsa-miR-548k	1	0	1	1	1	1	HMGXB4	HMG box domain containing 4
hsa-miR-548k	0	0	1	1	1	1	SMAD1	SMAD family member 1
hsa-miR-548k	1	0	1	1	1	1	RBMS3	RNA binding motif, single stranded interacting protein 3
hsa-miR-548k	0	0	1	1	1	1	CCDC144NL	coiled-coil domain containing 144 family, N-terminal like
hsa-miR-548k	0	0	1	1	1	1	ZCCHC16	zinc finger, CCHC domain containing 16
hsa-miR-548k	0	0	1	0	1	1	ZNF705A	zinc finger protein 705A
hsa-miR-548k	1	0	1	1	1	1	NCK2	NCK adaptor protein 2
hsa-miR-548k	1	0	1	0	1	1	LRRC55	leucine rich repeat containing 55
hsa-miR-548k	1	0	1	1	1	1	EDA	ectodysplasin A
hsa-miR-548k	0	0	1	1	1	1	SUMO1	SMT3 suppressor of mif two 3 homolog 1 (S. cerevisiae)
hsa-miR-548k	1	0	1	1	1	1	TCEAL8	transcription elongation factor A (SII)-like 8
hsa-miR-548k	1	0	1	1	1	1	L3MBTL3	l(3)mbt-like 3 (Drosophila)
hsa-miR-548k	0	0	1	1	1	1	ERCC8	excision repair cross-complementing rodent repair deficiency, complementation group 8
hsa-miR-548k	1	0	1	1	1	1	IGSF3	immunoglobulin superfamily, member 3
hsa-miR-548k	0	0	1	1	1	1	TRIM13	tripartite motif containing 13
hsa-miR-548k	1	0	1	0	1	1	SS18	synovial sarcoma translocation, chromosome 18
hsa-miR-548k	1	0	1	0	1	1	C18orf25	chromosome 18 open reading frame 25
hsa-miR-548k	1	0	1	1	1	1	RBM33	RNA binding motif protein 33
hsa-miR-548k	0	0	1	1	1	1	CCDC147	coiled-coil domain containing 147
hsa-miR-548k	1	0	1	1	1	1	FNIP1	folliculin interacting protein 1
hsa-miR-548k	1	0	1	1	1	1	DSP	desmoplakin
hsa-miR-548k	1	0	1	1	1	1	CUL4A	cullin 4A
hsa-miR-548k	0	0	1	1	1	1	RXRG	retinoid X receptor, gamma
hsa-miR-548k	0	0	1	1	1	1	C12orf29	chromosome 12 open reading frame 29
hsa-miR-548k	0	0	1	1	1	1	HRNR	hornerin
hsa-miR-548k	1	0	1	1	1	1	SHE	Src homology 2 domain containing E
hsa-miR-548k	0	0	1	0	1	1	LPPR5	lipid phosphate phosphatase-related protein type 5
hsa-miR-548k	1	0	1	0	1	1	MTX3	metaxin 3
hsa-miR-548k	0	0	1	1	1	1	NCMAP	noncompact myelin associated protein
hsa-miR-548k	1	0	1	0	1	1	FYTTD1	forty-two-three domain containing 1
hsa-miR-548k	0	0	1	1	1	1	SLC9A4	solute carrier family 9, subfamily A (NHE4, cation proton antiporter 4), member 4
hsa-miR-548k	0	0	1	1	1	1	ZMAT1	zinc finger, matrin-type 1
hsa-miR-548k	1	0	1	0	1	1	CREB5	cAMP responsive element binding protein 5
hsa-miR-548k	1	0	1	0	1	1	DNAJC21	DnaJ (Hsp40) homolog, subfamily C, member 21
hsa-miR-548k	0	0	1	1	1	1	SPIN4	spindlin family, member 4
hsa-miR-548k	0	0	1	1	1	1	C9orf152	chromosome 9 open reading frame 152
hsa-miR-548k	1	0	1	1	1	1	SORCS1	sortilin-related VPS10 domain containing receptor 1
hsa-miR-548k	0	0	1	1	0	0	OCIAD2	OCIA domain containing 2
hsa-miR-548k	1	0	1	1	1	1	RUNX2	runt-related transcription factor 2
hsa-miR-548k	1	0	1	1	1	1	PHF6	PHD finger protein 6
hsa-miR-548k	1	0	1	1	1	1	TMCC1	transmembrane and coiled-coil domain family 1
hsa-miR-548k	1	0	1	0	1	1	KCNK2	potassium channel, subfamily K, member 2
hsa-miR-548k	0	0	1	1	1	1	KIAA2026	KIAA2026
hsa-miR-548k	1	0	1	0	1	1	TFEC	transcription factor EC
hsa-miR-548k	1	0	1	1	1	1	SERBP1	SERPINE1 mRNA binding protein 1
hsa-miR-548k	0	0	1	1	1	1	POLR2M	polymerase (RNA) II (DNA directed) polypeptide M
hsa-miR-548k	1	0	1	1	1	1	ABCC5	ATP-binding cassette, sub-family C (CFTR/MRP), member 5
hsa-miR-548k	0	0	1	1	1	1	C1orf53	chromosome 1 open reading frame 53
hsa-miR-548k	1	0	1	1	1	1	KALRN	kalirin, RhoGEF kinase
hsa-miR-548k	1	0	1	0	1	1	BCL7A	B-cell CLL/lymphoma 7A
hsa-miR-548k	1	0	1	0	1	1	TNRC6B	trinucleotide repeat containing 6B
hsa-miR-548k	0	0	1	1	1	1	WASF1	WAS protein family, member 1
hsa-miR-548k	0	0	1	1	1	1	SC5DL	sterol-C5-desaturase (ERG3 delta-5-desaturase homolog, S. cerevisiae)-like
hsa-miR-548k	1	0	1	1	1	1	AFF3	AF4/FMR2 family, member 3
hsa-miR-548k	1	0	1	1	1	1	TPD52	tumor protein D52
hsa-miR-548k	1	0	1	0	1	1	RAB12	RAB12, member RAS oncogene family
hsa-miR-548k	1	0	1	0	1	1	ANO6	anoctamin 6
hsa-miR-548k	1	0	1	1	1	1	FAM108B1	family with sequence similarity 108, member B1
hsa-miR-548k	1	0	1	1	1	1	PLEKHG1	pleckstrin homology domain containing, family G (with RhoGef domain) member 1
hsa-miR-548k	1	0	1	1	1	1	OPN5	opsin 5
hsa-miR-548k	1	0	1	0	1	1	SAMD5	sterile alpha motif domain containing 5
hsa-miR-548k	0	0	1	1	1	1	TRMT11	tRNA methyltransferase 11 homolog (S. cerevisiae)
hsa-miR-548k	0	0	1	1	1	1	CALML4	calmodulin-like 4
hsa-miR-548k	1	0	1	1	1	1	MAF	v-maf musculoaponeurotic fibrosarcoma oncogene homolog (avian)
hsa-miR-548k	1	0	1	1	1	1	CSNK1G3	casein kinase 1, gamma 3
hsa-miR-548k	1	0	1	1	1	1	RCE1	RCE1 homolog, prenyl protein protease (S. cerevisiae)
hsa-miR-548k	1	0	1	1	1	1	KLF10	Kruppel-like factor 10
hsa-miR-548k	1	0	1	1	1	1	TMPO	thymopoietin
hsa-miR-548k	1	0	1	0	1	1	SRGAP3	SLIT-ROBO Rho GTPase activating protein 3
hsa-miR-548k	1	0	1	1	1	1	SAR1B	SAR1 homolog B (S. cerevisiae)
hsa-miR-548k	0	0	1	1	1	1	DYX1C1	dyslexia susceptibility 1 candidate 1
hsa-miR-548k	0	0	1	1	1	1	C6orf225	chromosome 6 open reading frame 225
hsa-miR-548k	1	0	1	1	1	1	SMOC1	SPARC related modular calcium binding 1
hsa-miR-548k	1	0	1	1	1	1	SDHC	succinate dehydrogenase complex, subunit C, integral membrane protein, 15kDa
hsa-miR-548k	0	0	1	1	1	1	C18orf62	chromosome 18 open reading frame 62
hsa-miR-548k	1	0	1	0	1	1	SCML1	sex comb on midleg-like 1 (Drosophila)
hsa-miR-548k	1	0	1	1	1	1	SCD5	stearoyl-CoA desaturase 5
hsa-miR-548k	0	0	1	1	1	1	ATAD3C	ATPase family, AAA domain containing 3C
hsa-miR-548k	1	0	1	1	1	1	DPP6	dipeptidyl-peptidase 6
hsa-miR-548k	0	0	1	1	1	1	HEPACAM2	HEPACAM family member 2
hsa-miR-548k	1	0	1	0	1	1	GK5	glycerol kinase 5 (putative)
hsa-miR-548k	1	0	1	1	1	1	KREMEN1	kringle containing transmembrane protein 1
hsa-miR-548k	0	0	1	1	1	1	MAP9	microtubule-associated protein 9
hsa-miR-548k	1	0	1	0	1	1	USP9X	ubiquitin specific peptidase 9, X-linked
hsa-miR-548k	0	0	1	0	1	1	ZNF705D	zinc finger protein 705D
hsa-miR-548k	1	0	1	0	1	1	CREBZF	CREB/ATF bZIP transcription factor
hsa-miR-548k	1	0	1	1	1	1	CBLN3	cerebellin 3 precursor
hsa-miR-548k	0	0	1	0	1	1	C15orf56	chromosome 15 open reading frame 56
hsa-miR-548k	1	0	1	1	1	1	MLLT4	myeloid/lymphoid or mixed-lineage leukemia (trithorax homolog, Drosophila); translocated to, 4
hsa-miR-548k	1	0	1	0	1	1	FAM133B	family with sequence similarity 133, member B
hsa-miR-548k	1	0	1	1	1	1	SPTSSB	serine palmitoyltransferase, small subunit B
hsa-miR-548k	0	0	1	1	1	1	MLH3	mutL homolog 3 (E. coli)
hsa-miR-548k	1	0	1	1	1	1	PAPD5	PAP associated domain containing 5
hsa-miR-548k	0	0	1	1	0	0	RHBDD2	rhomboid domain containing 2
hsa-miR-548k	1	0	1	1	1	1	FILIP1L	filamin A interacting protein 1-like
hsa-miR-548k	1	0	1	1	1	1	SLC9A6	solute carrier family 9, subfamily A (NHE6, cation proton antiporter 6), member 6
hsa-miR-548k	0	0	1	1	1	1	SMC2	structural maintenance of chromosomes 2
hsa-miR-548k	1	0	1	1	1	1	FRS2	fibroblast growth factor receptor substrate 2
hsa-miR-548k	1	0	1	1	1	1	ERBB4	v-erb-a erythroblastic leukemia viral oncogene homolog 4 (avian)
hsa-miR-548k	0	0	1	1	1	1	TTC14	tetratricopeptide repeat domain 14
hsa-miR-548k	0	0	1	1	1	1	TRAK1	trafficking protein, kinesin binding 1
hsa-miR-548k	0	0	1	1	0	0	CCDC158	coiled-coil domain containing 158
hsa-miR-548k	1	0	1	1	1	1	TPM3	tropomyosin 3
hsa-miR-548k	0	0	1	1	1	1	FAM22G	family with sequence similarity 22, member G
hsa-miR-548k	1	0	1	1	1	1	MZT1	mitotic spindle organizing protein 1
hsa-miR-548k	1	0	1	1	1	1	QSER1	glutamine and serine rich 1
hsa-miR-548k	1	0	1	1	1	1	CDC14B	CDC14 cell division cycle 14 homolog B (S. cerevisiae)
hsa-miR-548k	1	0	1	1	1	1	PDE11A	phosphodiesterase 11A
hsa-miR-548k	1	0	1	1	1	1	TMPRSS13	transmembrane protease, serine 13
hsa-miR-548k	0	0	1	0	1	1	WTH3DI	RAB6C-like
hsa-miR-548k	0	0	1	0	0	0	AGAP7	ArfGAP with GTPase domain, ankyrin repeat and PH domain 7
hsa-miR-548k	1	0	1	1	1	1	ALG9	asparagine-linked glycosylation 9, alpha-1,2-mannosyltransferase homolog (S. cerevisiae)
hsa-miR-548k	1	0	1	0	1	1	FAM127C	family with sequence similarity 127, member C
hsa-miR-548k	1	0	1	1	1	1	TMTC4	transmembrane and tetratricopeptide repeat containing 4
hsa-miR-548k	1	0	1	1	1	1	ITGA6	integrin, alpha 6
hsa-miR-548k	1	0	1	1	1	1	CASZ1	castor zinc finger 1
hsa-miR-548k	1	0	1	1	1	1	CUL4B	cullin 4B
hsa-miR-548k	0	0	1	1	1	1	CNGA3	cyclic nucleotide gated channel alpha 3
hsa-miR-548k	1	0	1	1	1	1	ZNF697	zinc finger protein 697
hsa-miR-548k	1	0	1	0	1	1	ODZ3	odz, odd Oz/ten-m homolog 3 (Drosophila)
hsa-miR-548k	1	0	1	0	1	1	MEGF9	multiple EGF-like-domains 9
hsa-miR-548k	0	0	1	1	1	1	TBX18	T-box 18
hsa-miR-548k	1	0	1	1	1	1	BICC1	bicaudal C homolog 1 (Drosophila)
hsa-miR-548k	0	0	1	1	1	1	SNTN	sentan, cilia apical structure protein
hsa-miR-548k	1	0	1	1	1	1	MGA	MAX gene associated
hsa-miR-548k	0	0	1	1	1	1	C15orf57	chromosome 15 open reading frame 57
hsa-miR-548k	1	0	1	1	1	1	REPS2	RALBP1 associated Eps domain containing 2
hsa-miR-548k	1	0	1	0	1	1	SCN3A	sodium channel, voltage-gated, type III, alpha subunit
hsa-miR-548k	0	0	1	1	1	1	ACYP1	acylphosphatase 1, erythrocyte (common) type
hsa-miR-548k	0	0	1	1	0	0	NUDT2	nudix (nucleoside diphosphate linked moiety X)-type motif 2
hsa-miR-548k	1	0	1	0	1	1	XIAP	X-linked inhibitor of apoptosis
hsa-miR-548k	1	0	1	0	1	1	BMPR2	bone morphogenetic protein receptor, type II (serine/threonine kinase)
hsa-miR-548k	1	0	1	0	1	1	KLF9	Kruppel-like factor 9
hsa-miR-548k	0	0	1	1	1	1	BUB1B	budding uninhibited by benzimidazoles 1 homolog beta (yeast)
hsa-miR-548k	1	0	1	0	1	1	CDK6	cyclin-dependent kinase 6
hsa-miR-548k	1	0	1	1	1	1	CDS1	CDP-diacylglycerol synthase (phosphatidate cytidylyltransferase) 1
hsa-miR-548k	1	0	1	1	1	1	CHD1	chromodomain helicase DNA binding protein 1
hsa-miR-548k	1	0	1	1	1	1	CHD2	chromodomain helicase DNA binding protein 2
hsa-miR-548k	1	0	1	0	1	1	CPD	carboxypeptidase D
hsa-miR-548k	1	0	1	1	1	1	CREBL2	cAMP responsive element binding protein-like 2
hsa-miR-548k	1	0	1	1	1	1	MAPK14	mitogen-activated protein kinase 14
hsa-miR-548k	0	0	1	1	1	1	DARS	aspartyl-tRNA synthetase
hsa-miR-548k	0	0	1	1	0	0	DIO3	deiodinase, iodothyronine, type III
hsa-miR-548k	1	0	1	1	1	1	S1PR1	sphingosine-1-phosphate receptor 1
hsa-miR-548k	1	0	1	1	1	1	EIF1AX	eukaryotic translation initiation factor 1A, X-linked
hsa-miR-548k	1	0	1	0	1	1	ELAVL3	ELAV (embryonic lethal, abnormal vision, Drosophila)-like 3 (Hu antigen C)
hsa-miR-548k	0	0	1	0	1	1	EMP1	epithelial membrane protein 1
hsa-miR-548k	1	0	1	1	1	1	FOXF1	forkhead box F1
hsa-miR-548k	1	0	1	1	1	1	FOXF2	forkhead box F2
hsa-miR-548k	1	0	1	1	1	1	GCNT1	glucosaminyl (N-acetyl) transferase 1, core 2
hsa-miR-548k	1	0	1	0	1	1	B4GALT1	UDP-Gal:betaGlcNAc beta 1,4- galactosyltransferase, polypeptide 1
hsa-miR-548k	1	0	1	1	1	1	ING2	inhibitor of growth family, member 2
hsa-miR-548k	1	0	1	0	1	1	MPPED2	metallophosphoesterase domain containing 2
hsa-miR-548k	0	0	1	0	1	1	AREG	amphiregulin
hsa-miR-548k	1	0	1	0	1	1	ARNT	aryl hydrocarbon receptor nuclear translocator
hsa-miR-548k	1	0	1	1	1	1	ATP6V1A	ATPase, H+ transporting, lysosomal 70kDa, V1 subunit A
hsa-miR-548k	1	0	1	1	1	1	BAAT	bile acid CoA: amino acid N-acyltransferase (glycine N-choloyltransferase)
hsa-miR-548k	0	0	1	1	0	0	BICD1	bicaudal D homolog 1 (Drosophila)
hsa-miR-548k	1	0	1	1	1	1	CNN3	calponin 3, acidic
hsa-miR-548k	1	0	1	1	1	1	COL4A1	collagen, type IV, alpha 1
hsa-miR-548k	1	0	1	1	1	1	SLC31A1	solute carrier family 31 (copper transporters), member 1
hsa-miR-548k	1	0	1	1	1	1	DR1	down-regulator of transcription 1, TBP-binding (negative cofactor 2)
hsa-miR-548k	1	0	1	0	1	1	FUT4	fucosyltransferase 4 (alpha (1,3) fucosyltransferase, myeloid-specific)
hsa-miR-548k	0	0	1	1	1	1	FYN	FYN oncogene related to SRC, FGR, YES
hsa-miR-548k	1	0	1	1	1	1	GAS1	growth arrest-specific 1
hsa-miR-548k	0	0	1	1	1	1	HMGCS1	3-hydroxy-3-methylglutaryl-CoA synthase 1 (soluble)
hsa-miR-548k	1	0	1	1	1	1	HOXB3	homeobox B3
hsa-miR-548k	1	0	1	1	1	1	HOXD10	homeobox D10
hsa-miR-548k	0	0	1	1	1	1	FOXN2	forkhead box N2
hsa-miR-548k	1	0	1	1	1	1	TNC	tenascin C
hsa-miR-548k	0	0	1	0	1	1	ITGAV	integrin, alpha V
hsa-miR-548k	1	0	1	1	1	1	ITGB8	integrin, beta 8
hsa-miR-548k	1	0	1	1	1	1	ITPR2	inositol 1,4,5-trisphosphate receptor, type 2
hsa-miR-548k	1	0	1	1	1	1	KCNJ10	potassium inwardly-rectifying channel, subfamily J, member 10
hsa-miR-548k	1	0	1	0	1	1	LAMC1	laminin, gamma 1 (formerly LAMB2)
hsa-miR-548k	1	0	1	1	1	1	LBR	lamin B receptor
hsa-miR-548k	1	0	1	1	1	1	LIFR	leukemia inhibitory factor receptor alpha
hsa-miR-548k	0	0	1	1	1	1	LUM	lumican
hsa-miR-548k	1	0	1	1	1	1	LY75	lymphocyte antigen 75
hsa-miR-548k	1	0	1	0	1	1	MXD1	MAX dimerization protein 1
hsa-miR-548k	1	0	1	1	1	1	ME1	malic enzyme 1, NADP(+)-dependent, cytosolic
hsa-miR-548k	1	0	1	1	1	1	MSN	moesin
hsa-miR-548k	0	0	1	1	1	1	MTAP	methylthioadenosine phosphorylase
hsa-miR-548k	0	0	1	1	1	1	MTRR	5-methyltetrahydrofolate-homocysteine methyltransferase reductase
hsa-miR-548k	1	0	1	0	1	1	IRF4	interferon regulatory factor 4
hsa-miR-548k	1	0	1	1	1	1	MYH9	myosin, heavy chain 9, non-muscle
hsa-miR-548k	1	0	1	1	1	1	PPP1R12B	protein phosphatase 1, regulatory subunit 12B
hsa-miR-548k	1	0	1	1	1	1	NDN	necdin homolog (mouse)
hsa-miR-548k	1	0	1	1	1	1	NPAT	nuclear protein, ataxia-telangiectasia locus
hsa-miR-548k	1	0	1	1	1	1	NTF3	neurotrophin 3
hsa-miR-548k	0	0	1	1	1	1	P2RY1	purinergic receptor P2Y, G-protein coupled, 1
hsa-miR-548k	1	0	1	1	1	1	FURIN	furin (paired basic amino acid cleaving enzyme)
hsa-miR-548k	1	0	1	0	1	1	CDK17	cyclin-dependent kinase 17
hsa-miR-548k	0	0	1	1	0	0	PDGFRB	platelet-derived growth factor receptor, beta polypeptide
hsa-miR-548k	0	0	1	1	1	1	PEX13	peroxisomal biogenesis factor 13
hsa-miR-548k	0	0	1	1	1	1	SERPINB5	serpin peptidase inhibitor, clade B (ovalbumin), member 5
hsa-miR-548k	1	0	1	1	1	1	PLAGL2	pleiomorphic adenoma gene-like 2
hsa-miR-548k	0	0	1	0	1	1	PLN	phospholamban
hsa-miR-548k	0	0	1	1	1	1	PNN	pinin, desmosome associated protein
hsa-miR-548k	0	0	1	1	1	1	PRKCB	protein kinase C, beta
hsa-miR-548k	1	0	1	0	1	1	MAPK4	mitogen-activated protein kinase 4
hsa-miR-548k	0	0	1	1	1	1	MAP2K1	mitogen-activated protein kinase kinase 1
hsa-miR-548k	1	0	1	1	1	1	PTPN2	protein tyrosine phosphatase, non-receptor type 2
hsa-miR-548k	0	0	1	1	1	1	PTPN12	protein tyrosine phosphatase, non-receptor type 12
hsa-miR-548k	0	0	1	1	0	0	PTPRH	protein tyrosine phosphatase, receptor type, H
hsa-miR-548k	0	0	1	1	1	1	PTPRM	protein tyrosine phosphatase, receptor type, M
hsa-miR-548k	1	0	1	1	1	1	PVRL1	poliovirus receptor-related 1 (herpesvirus entry mediator C)
hsa-miR-548k	1	0	1	0	1	1	RAB6A	RAB6A, member RAS oncogene family
hsa-miR-548k	1	0	1	1	1	1	RAD23B	RAD23 homolog B (S. cerevisiae)
hsa-miR-548k	0	0	1	1	0	0	RBMS2	RNA binding motif, single stranded interacting protein 2
hsa-miR-548k	0	0	1	1	1	1	SDC2	syndecan 2
hsa-miR-548k	0	0	1	1	1	1	SDC4	syndecan 4
hsa-miR-548k	1	0	1	1	1	1	SFRP2	secreted frizzled-related protein 2
hsa-miR-548k	0	0	1	1	1	1	SH3BGRL	SH3 domain binding glutamic acid-rich protein like
hsa-miR-548k	1	0	1	1	1	1	SNAI2	snail homolog 2 (Drosophila)
hsa-miR-548k	1	0	1	1	1	1	SMARCC1	SWI/SNF related, matrix associated, actin dependent regulator of chromatin, subfamily c, member 1
hsa-miR-548k	1	0	1	0	1	1	SOX11	SRY (sex determining region Y)-box 11
hsa-miR-548k	0	0	1	1	1	1	SRP9	signal recognition particle 9kDa
hsa-miR-548k	1	0	1	1	1	1	SSR2	signal sequence receptor, beta (translocon-associated protein beta)
hsa-miR-548k	0	0	1	1	1	1	STAT5A	signal transducer and activator of transcription 5A
hsa-miR-548k	0	0	1	1	1	1	TAF2	TAF2 RNA polymerase II, TATA box binding protein (TBP)-associated factor, 150kDa
hsa-miR-548k	1	0	1	1	1	1	TAF4	TAF4 RNA polymerase II, TATA box binding protein (TBP)-associated factor, 135kDa
hsa-miR-548k	1	0	1	0	1	1	TAL1	T-cell acute lymphocytic leukemia 1
hsa-miR-548k	0	0	1	1	1	1	TERF1	telomeric repeat binding factor (NIMA-interacting) 1
hsa-miR-548k	1	0	1	1	1	1	TFAP4	transcription factor AP-4 (activating enhancer binding protein 4)
hsa-miR-548k	1	0	1	1	1	1	TIAM1	T-cell lymphoma invasion and metastasis 1
hsa-miR-548k	1	0	1	0	1	1	SEC62	SEC62 homolog (S. cerevisiae)
hsa-miR-548k	1	0	1	1	1	1	NR2E1	nuclear receptor subfamily 2, group E, member 1
hsa-miR-548k	1	0	1	0	1	1	TUB	tubby homolog (mouse)
hsa-miR-548k	1	0	1	1	1	1	UBE2B	ubiquitin-conjugating enzyme E2B
hsa-miR-548k	0	0	1	1	1	1	UBE2D1	ubiquitin-conjugating enzyme E2D 1
hsa-miR-548k	1	0	1	0	1	1	UBE2D2	ubiquitin-conjugating enzyme E2D 2
hsa-miR-548k	1	0	1	1	1	1	UBE2D3	ubiquitin-conjugating enzyme E2D 3
hsa-miR-548k	1	0	1	0	1	1	UBE2G2	ubiquitin-conjugating enzyme E2G 2
hsa-miR-548k	1	0	1	1	1	1	YY1	YY1 transcription factor
hsa-miR-548k	0	0	1	0	1	1	ZFY	zinc finger protein, Y-linked
hsa-miR-548k	1	0	1	0	1	1	ZIC1	Zic family member 1
hsa-miR-548k	0	0	1	1	1	1	ZNF143	zinc finger protein 143
hsa-miR-548k	1	0	1	1	1	1	FZD5	frizzled family receptor 5
hsa-miR-548k	0	0	1	1	1	1	STAM	signal transducing adaptor molecule (SH3 domain and ITAM motif) 1
hsa-miR-548k	1	0	1	1	1	1	HMGA2	high mobility group AT-hook 2
hsa-miR-548k	1	0	1	1	1	1	NRIP1	nuclear receptor interacting protein 1
hsa-miR-548k	1	0	1	1	1	1	FZD1	frizzled family receptor 1
hsa-miR-548k	1	0	1	1	1	1	FZD7	frizzled family receptor 7
hsa-miR-548k	1	0	1	1	1	1	EEA1	early endosome antigen 1
hsa-miR-548k	0	0	1	1	1	1	STX7	syntaxin 7
hsa-miR-548k	1	0	1	0	1	1	VAPA	VAMP (vesicle-associated membrane protein)-associated protein A, 33kDa
hsa-miR-548k	1	0	1	1	1	1	DYRK2	dual-specificity tyrosine-(Y)-phosphorylation regulated kinase 2
hsa-miR-548k	1	0	1	0	1	1	CUL3	cullin 3
hsa-miR-548k	0	0	1	0	1	1	GCM1	glial cells missing homolog 1 (Drosophila)
hsa-miR-548k	1	0	1	1	1	1	BHLHE40	basic helix-loop-helix family, member e40
hsa-miR-548k	1	0	1	0	1	1	TNKS	tankyrase, TRF1-interacting ankyrin-related ADP-ribose polymerase
hsa-miR-548k	1	0	1	1	1	1	B3GALT2	UDP-Gal:betaGlcNAc beta 1,3-galactosyltransferase, polypeptide 2
hsa-miR-548k	0	0	1	1	1	1	SUCLA2	succinate-CoA ligase, ADP-forming, beta subunit
hsa-miR-548k	1	0	1	1	1	1	FUBP1	far upstream element (FUSE) binding protein 1
hsa-miR-548k	0	0	1	0	1	1	AP1S2	adaptor-related protein complex 1, sigma 2 subunit
hsa-miR-548k	1	0	1	0	1	1	ST13	suppression of tumorigenicity 13 (colon carcinoma) (Hsp70 interacting protein)
hsa-miR-548k	0	0	1	1	1	1	MPZL1	myelin protein zero-like 1
hsa-miR-548k	1	0	1	1	1	1	BTAF1	BTAF1 RNA polymerase II, B-TFIID transcription factor-associated, 170kDa (Mot1 homolog, S. cerevisiae)
hsa-miR-548k	0	0	1	1	1	1	GJB2	gap junction protein, beta 2, 26kDa
hsa-miR-548k	0	0	1	1	1	1	CDKN1B	cyclin-dependent kinase inhibitor 1B (p27, Kip1)
hsa-miR-548k	1	0	1	0	1	1	DGKB	diacylglycerol kinase, beta 90kDa
hsa-miR-548k	1	0	1	1	1	1	EYA4	eyes absent homolog 4 (Drosophila)
hsa-miR-548k	1	0	1	1	1	1	FGF12	fibroblast growth factor 12
hsa-miR-548k	1	0	1	1	1	1	FGF13	fibroblast growth factor 13
hsa-miR-548k	1	0	1	0	1	1	SLC1A2	solute carrier family 1 (glial high affinity glutamate transporter), member 2
hsa-miR-548k	0	0	1	1	1	1	SNRPD3	small nuclear ribonucleoprotein D3 polypeptide 18kDa
hsa-miR-548k	1	0	1	0	1	1	MED14	mediator complex subunit 14
hsa-miR-548k	1	0	1	1	1	1	TRIP11	thyroid hormone receptor interactor 11
hsa-miR-548k	1	0	1	1	1	1	MED17	mediator complex subunit 17
hsa-miR-548k	1	0	1	1	1	1	SLC25A27	solute carrier family 25, member 27
hsa-miR-548k	1	0	1	1	1	1	BCL9	B-cell CLL/lymphoma 9
hsa-miR-548k	1	0	1	1	1	1	CREB1	cAMP responsive element binding protein 1
hsa-miR-548k	1	0	1	1	1	1	DAG1	dystroglycan 1 (dystrophin-associated glycoprotein 1)
hsa-miR-548k	1	0	1	1	1	1	EGR3	early growth response 3
hsa-miR-548k	1	0	1	1	1	1	EPHA2	EPH receptor A2
hsa-miR-548k	1	0	1	1	1	1	EPHB2	EPH receptor B2
hsa-miR-548k	1	0	1	1	1	1	EZH2	enhancer of zeste homolog 2 (Drosophila)
hsa-miR-548k	1	0	1	0	1	1	ACSL4	acyl-CoA synthetase long-chain family member 4
hsa-miR-548k	1	0	1	1	1	1	FGD1	FYVE, RhoGEF and PH domain containing 1
hsa-miR-548k	1	0	1	0	1	1	FOXD1	forkhead box D1
hsa-miR-548k	1	0	1	0	1	1	GALNT2	UDP-N-acetyl-alpha-D-galactosamine:polypeptide N-acetylgalactosaminyltransferase 2 (GalNAc-T2)
hsa-miR-548k	0	0	1	0	1	1	GALNT3	UDP-N-acetyl-alpha-D-galactosamine:polypeptide N-acetylgalactosaminyltransferase 3 (GalNAc-T3)
hsa-miR-548k	0	0	1	1	1	1	FOXA1	forkhead box A1
hsa-miR-548k	1	0	1	1	1	1	LRP2	low density lipoprotein receptor-related protein 2
hsa-miR-548k	1	0	1	1	1	1	MLLT3	myeloid/lymphoid or mixed-lineage leukemia (trithorax homolog, Drosophila); translocated to, 3
hsa-miR-548k	1	0	1	1	0	0	ROR2	receptor tyrosine kinase-like orphan receptor 2
hsa-miR-548k	0	0	1	0	1	1	POU4F2	POU class 4 homeobox 2
hsa-miR-548k	1	0	1	1	1	1	COIL	coilin
hsa-miR-548k	1	0	1	0	1	1	USP9Y	ubiquitin specific peptidase 9, Y-linked
hsa-miR-548k	0	0	1	0	0	0	XKRY	XK, Kell blood group complex subunit-related, Y-linked
hsa-miR-548k	0	0	1	1	1	1	LATS1	LATS, large tumor suppressor, homolog 1 (Drosophila)
hsa-miR-548k	0	0	1	0	1	1	CXorf1	chromosome X open reading frame 1
hsa-miR-548k	1	0	1	1	1	1	SCAF11	SR-related CTD-associated factor 11
hsa-miR-548k	0	0	1	1	1	1	BUB3	budding uninhibited by benzimidazoles 3 homolog (yeast)
hsa-miR-548k	1	0	1	1	1	1	XPR1	xenotropic and polytropic retrovirus receptor 1
hsa-miR-548k	1	0	1	1	1	1	RPS6KA5	ribosomal protein S6 kinase, 90kDa, polypeptide 5
hsa-miR-548k	1	0	1	1	1	1	STK17A	serine/threonine kinase 17a
hsa-miR-548k	1	0	1	1	1	1	NREP	neuronal regeneration related protein homolog (rat)
hsa-miR-548k	1	0	1	1	1	1	B4GALT6	UDP-Gal:betaGlcNAc beta 1,4- galactosyltransferase, polypeptide 6
hsa-miR-548k	1	0	1	1	1	1	B4GALT5	UDP-Gal:betaGlcNAc beta 1,4- galactosyltransferase, polypeptide 5
hsa-miR-548k	0	0	1	1	1	1	LHX2	LIM homeobox 2
hsa-miR-548k	0	0	1	1	1	1	TJP2	tight junction protein 2
hsa-miR-548k	1	0	1	0	1	1	CDYL	chromodomain protein, Y-like
hsa-miR-548k	0	0	1	1	1	1	EIF2AK3	eukaryotic translation initiation factor 2-alpha kinase 3
hsa-miR-548k	1	0	1	0	1	1	ARHGEF6	Rac/Cdc42 guanine nucleotide exchange factor (GEF) 6
hsa-miR-548k	1	0	1	1	1	1	ONECUT2	one cut homeobox 2
hsa-miR-548k	0	0	1	1	1	1	EPYC	epiphycan
hsa-miR-548k	1	0	1	1	1	1	JARID2	jumonji, AT rich interactive domain 2
hsa-miR-548k	1	0	1	0	1	1	KRAS	v-Ki-ras2 Kirsten rat sarcoma viral oncogene homolog
hsa-miR-548k	1	0	1	1	1	1	MYO1E	myosin IE
hsa-miR-548k	0	0	1	1	1	1	PTH2R	parathyroid hormone 2 receptor
hsa-miR-548k	0	0	1	1	0	0	RAPSN	receptor-associated protein of the synapse
hsa-miR-548k	1	0	1	0	1	1	SCD	stearoyl-CoA desaturase (delta-9-desaturase)
hsa-miR-548k	1	0	1	0	1	1	SEL1L	sel-1 suppressor of lin-12-like (C. elegans)
hsa-miR-548k	1	0	1	1	1	1	SIAH2	siah E3 ubiquitin protein ligase 2
hsa-miR-548k	1	0	1	1	1	1	GFPT2	glutamine-fructose-6-phosphate transaminase 2
hsa-miR-548k	1	0	1	1	1	1	HS3ST1	heparan sulfate (glucosamine) 3-O-sulfotransferase 1
hsa-miR-548k	1	0	1	1	1	1	SLC23A2	solute carrier family 23 (nucleobase transporters), member 2
hsa-miR-548k	1	0	1	1	1	1	MED13	mediator complex subunit 13
hsa-miR-548k	1	0	1	0	1	1	NUP153	nucleoporin 153kDa
hsa-miR-548k	0	0	1	1	1	1	CLEC2B	C-type lectin domain family 2, member B
hsa-miR-548k	0	0	1	1	1	1	DOPEY2	dopey family member 2
hsa-miR-548k	1	0	1	1	1	1	BMI1	BMI1 polycomb ring finger oncogene
hsa-miR-548k	1	0	1	1	1	1	CRK	v-crk sarcoma virus CT10 oncogene homolog (avian)
hsa-miR-548k	0	0	1	0	1	1	EPHA3	EPH receptor A3
hsa-miR-548k	1	0	1	1	1	1	FOXG1	forkhead box G1
hsa-miR-548k	1	0	1	1	1	1	GAS2	growth arrest-specific 2
hsa-miR-548k	1	0	1	1	1	1	GEM	GTP binding protein overexpressed in skeletal muscle
hsa-miR-548k	1	0	1	1	1	1	GPM6A	glycoprotein M6A
hsa-miR-548k	0	0	1	1	1	1	GRK5	G protein-coupled receptor kinase 5
hsa-miR-548k	0	0	1	1	1	1	GRPR	gastrin-releasing peptide receptor
hsa-miR-548k	1	0	1	1	1	1	HAS3	hyaluronan synthase 3
hsa-miR-548k	1	0	1	0	1	1	PRKAB2	protein kinase, AMP-activated, beta 2 non-catalytic subunit
hsa-miR-548k	1	0	1	1	1	1	RALA	v-ral simian leukemia viral oncogene homolog A (ras related)
hsa-miR-548k	0	0	1	1	1	1	CXCL11	chemokine (C-X-C motif) ligand 11
hsa-miR-548k	0	0	1	1	1	1	SKIL	SKI-like oncogene
hsa-miR-548k	1	0	1	0	1	1	CCDC6	coiled-coil domain containing 6
hsa-miR-548k	1	0	1	1	1	1	MAFB	v-maf musculoaponeurotic fibrosarcoma oncogene homolog B (avian)
hsa-miR-548k	1	0	1	1	1	1	MED6	mediator complex subunit 6
hsa-miR-548k	0	0	1	1	1	1	GNPDA1	glucosamine-6-phosphate deaminase 1
hsa-miR-548k	0	0	1	1	1	1	CST8	cystatin 8 (cystatin-related epididymal specific)
hsa-miR-548k	1	0	1	1	1	1	SCARB2	scavenger receptor class B, member 2
hsa-miR-548k	1	0	1	1	1	1	LPP	LIM domain containing preferred translocation partner in lipoma
hsa-miR-548k	1	0	1	1	1	1	MAB21L1	mab-21-like 1 (C. elegans)
hsa-miR-548k	1	0	1	1	1	1	MYF5	myogenic factor 5
hsa-miR-548k	1	0	1	1	1	1	DLL1	delta-like 1 (Drosophila)
hsa-miR-548k	1	0	1	1	1	1	ST8SIA4	ST8 alpha-N-acetyl-neuraminide alpha-2,8-sialyltransferase 4
hsa-miR-548k	1	0	1	0	1	1	REEP5	receptor accessory protein 5
hsa-miR-548k	1	0	1	1	1	1	UST	uronyl-2-sulfotransferase
hsa-miR-548k	0	0	1	1	1	1	ACTR3	ARP3 actin-related protein 3 homolog (yeast)
hsa-miR-548k	0	0	1	0	1	1	CD96	CD96 molecule
hsa-miR-548k	1	0	1	0	1	1	SPRY3	sprouty homolog 3 (Drosophila)
hsa-miR-548k	0	0	1	1	1	1	ZMPSTE24	zinc metallopeptidase STE24 homolog (S. cerevisiae)
hsa-miR-548k	1	0	1	0	1	1	NBR1	neighbor of BRCA1 gene 1
hsa-miR-548k	1	0	1	0	1	1	MAP1B	microtubule-associated protein 1B
hsa-miR-548k	1	0	1	1	1	1	MTF1	metal-regulatory transcription factor 1
hsa-miR-548k	1	0	1	0	1	1	NAB1	NGFI-A binding protein 1 (EGR1 binding protein 1)
hsa-miR-548k	1	0	1	0	1	1	HDAC4	histone deacetylase 4
hsa-miR-548k	0	0	1	1	1	1	LANCL1	LanC lantibiotic synthetase component C-like 1 (bacterial)
hsa-miR-548k	1	0	1	1	1	1	CITED2	Cbp/p300-interacting transactivator, with Glu/Asp-rich carboxy-terminal domain, 2
hsa-miR-548k	1	0	1	0	1	1	SCML2	sex comb on midleg-like 2 (Drosophila)
hsa-miR-548k	1	0	1	1	1	1	SPON1	spondin 1, extracellular matrix protein
hsa-miR-548k	1	0	1	1	1	1	TMEM50B	transmembrane protein 50B
hsa-miR-548k	0	0	1	1	1	1	CD28	CD28 molecule
hsa-miR-548k	1	0	1	1	1	1	NEUROG1	neurogenin 1
hsa-miR-548k	1	0	1	1	1	1	NR4A2	nuclear receptor subfamily 4, group A, member 2
hsa-miR-548k	0	0	1	1	0	0	PDE6H	phosphodiesterase 6H, cGMP-specific, cone, gamma
hsa-miR-548k	0	0	1	1	0	0	PNOC	prepronociceptin
hsa-miR-548k	1	0	1	0	1	1	PPP1R2	protein phosphatase 1, regulatory (inhibitor) subunit 2
hsa-miR-548k	1	0	1	1	1	1	PKN2	protein kinase N2
hsa-miR-548k	0	0	1	1	1	1	PRKG2	protein kinase, cGMP-dependent, type II
hsa-miR-548k	1	0	1	1	1	1	SMC1A	structural maintenance of chromosomes 1A
hsa-miR-548k	1	0	1	1	1	1	BASP1	brain abundant, membrane attached signal protein 1
hsa-miR-548k	1	0	1	1	1	1	FBLN5	fibulin 5
hsa-miR-548k	0	0	1	1	1	1	C1D	C1D nuclear receptor corepressor
hsa-miR-548k	1	0	1	1	1	1	ZER1	zer-1 homolog (C. elegans)
hsa-miR-548k	1	0	1	1	1	1	NXF1	nuclear RNA export factor 1
hsa-miR-548k	1	0	1	1	1	1	SEC23A	Sec23 homolog A (S. cerevisiae)
hsa-miR-548k	1	0	1	1	1	1	NEBL	nebulette
hsa-miR-548k	1	0	1	1	1	1	SPTLC1	serine palmitoyltransferase, long chain base subunit 1
hsa-miR-548k	1	0	1	1	1	1	SLC35A1	solute carrier family 35 (CMP-sialic acid transporter), member A1
hsa-miR-548k	1	0	1	0	1	1	IGF2BP1	insulin-like growth factor 2 mRNA binding protein 1
hsa-miR-548k	1	0	1	1	1	1	KHDRBS1	KH domain containing, RNA binding, signal transduction associated 1
hsa-miR-548k	1	0	1	0	1	1	GNA13	guanine nucleotide binding protein (G protein), alpha 13
hsa-miR-548k	1	0	1	0	1	1	MAP4K5	mitogen-activated protein kinase kinase kinase kinase 5
hsa-miR-548k	1	0	1	1	1	1	ZBTB6	zinc finger and BTB domain containing 6
hsa-miR-548k	1	0	1	1	1	1	MAN1A2	mannosidase, alpha, class 1A, member 2
hsa-miR-548k	0	0	1	1	1	1	NUDT3	nudix (nucleoside diphosphate linked moiety X)-type motif 3
hsa-miR-548k	1	0	1	1	1	1	SPIN1	spindlin 1
hsa-miR-548k	1	0	1	1	1	1	HIVEP2	human immunodeficiency virus type I enhancer binding protein 2
hsa-miR-548k	1	0	1	1	1	1	SLC20A2	solute carrier family 20 (phosphate transporter), member 2
hsa-miR-548k	1	0	1	1	1	1	KAT6A	K(lysine) acetyltransferase 6A
hsa-miR-548k	1	0	1	1	1	1	MORF4L1	mortality factor 4 like 1
hsa-miR-548k	0	0	1	1	1	1	MSL3	male-specific lethal 3 homolog (Drosophila)
hsa-miR-548k	0	0	1	1	0	0	HNRNPA0	heterogeneous nuclear ribonucleoprotein A0
hsa-miR-548k	1	0	1	1	1	1	CBX1	chromobox homolog 1
hsa-miR-548k	1	0	1	1	1	1	RAC1	ras-related C3 botulinum toxin substrate 1 (rho family, small GTP binding protein Rac1)
hsa-miR-548k	1	0	1	1	1	1	SCN1A	sodium channel, voltage-gated, type I, alpha subunit
hsa-miR-548k	1	0	1	0	1	1	SLC5A3	solute carrier family 5 (sodium/myo-inositol cotransporter), member 3
hsa-miR-548k	1	0	1	1	1	1	SYN1	synapsin I
hsa-miR-548k	1	0	1	1	1	1	ADAMTS1	ADAM metallopeptidase with thrombospondin type 1 motif, 1
hsa-miR-548k	1	0	1	1	1	1	WWP1	WW domain containing E3 ubiquitin protein ligase 1
hsa-miR-548k	1	0	1	1	1	1	SOX30	SRY (sex determining region Y)-box 30
hsa-miR-548k	0	0	1	1	1	1	TMEM115	transmembrane protein 115
hsa-miR-548k	0	0	1	1	1	1	DNAJB4	DnaJ (Hsp40) homolog, subfamily B, member 4
hsa-miR-548k	1	0	1	1	1	1	ESM1	endothelial cell-specific molecule 1
hsa-miR-548k	0	0	1	1	1	1	CD160	CD160 molecule
hsa-miR-548k	1	0	1	1	1	1	UTY	ubiquitously transcribed tetratricopeptide repeat gene, Y-linked
hsa-miR-548k	0	0	1	1	1	1	ZNF146	zinc finger protein 146
hsa-miR-548k	1	0	1	1	1	1	VEZF1	vascular endothelial zinc finger 1
hsa-miR-548k	1	0	1	0	1	1	PRSS23	protease, serine, 23
hsa-miR-548k	1	0	1	1	1	1	C14orf1	chromosome 14 open reading frame 1
hsa-miR-548k	1	0	1	1	1	1	FZD10	frizzled family receptor 10
hsa-miR-548k	0	0	1	1	1	1	XPOT	exportin, tRNA (nuclear export receptor for tRNAs)
hsa-miR-548k	1	0	1	0	1	1	CHP1	calcineurin-like EF hand protein 1
hsa-miR-548k	1	0	1	1	1	1	KLF12	Kruppel-like factor 12
hsa-miR-548k	0	0	1	1	1	1	STXBP3	syntaxin binding protein 3
hsa-miR-548k	0	0	1	0	1	1	AP4E1	adaptor-related protein complex 4, epsilon 1 subunit
hsa-miR-548k	0	0	1	0	1	1	PAXIP1	PAX interacting (with transcription-activation domain) protein 1
hsa-miR-548k	1	0	1	1	1	1	PHLDA1	pleckstrin homology-like domain, family A, member 1
hsa-miR-548k	1	0	1	1	1	1	TARDBP	TAR DNA binding protein
hsa-miR-548k	0	0	1	0	1	1	CD93	CD93 molecule
hsa-miR-548k	1	0	1	1	1	1	APPL1	adaptor protein, phosphotyrosine interaction, PH domain and leucine zipper containing 1
hsa-miR-548k	0	0	1	1	0	0	STAP1	signal transducing adaptor family member 1
hsa-miR-548k	1	0	1	0	1	1	CD2AP	CD2-associated protein
hsa-miR-548k	1	0	1	1	1	1	FBXL3	F-box and leucine-rich repeat protein 3
hsa-miR-548k	1	0	1	1	1	1	MGAT4A	mannosyl (alpha-1,3-)-glycoprotein beta-1,4-N-acetylglucosaminyltransferase, isozyme A
hsa-miR-548k	1	0	1	1	1	1	MGEA5	meningioma expressed antigen 5 (hyaluronidase)
hsa-miR-548k	1	0	1	1	1	1	RYBP	RING1 and YY1 binding protein
hsa-miR-548k	1	0	1	1	1	1	LAMP5	lysosomal-associated membrane protein family, member 5
hsa-miR-548k	1	0	1	1	1	1	HS2ST1	heparan sulfate 2-O-sulfotransferase 1
hsa-miR-548k	1	0	1	1	1	1	KCND2	potassium voltage-gated channel, Shal-related subfamily, member 2
hsa-miR-548k	1	0	1	0	1	1	G3BP2	GTPase activating protein (SH3 domain) binding protein 2
hsa-miR-548k	1	0	1	1	1	1	MAPRE1	microtubule-associated protein, RP/EB family, member 1
hsa-miR-548k	0	0	1	0	1	1	PIGN	phosphatidylinositol glycan anchor biosynthesis, class N
hsa-miR-548k	1	0	1	1	1	1	DNAJB9	DnaJ (Hsp40) homolog, subfamily B, member 9
hsa-miR-548k	1	0	1	0	1	1	BLOC1S6	biogenesis of lysosomal organelles complex-1, subunit 6, pallidin
hsa-miR-548k	0	0	1	0	1	1	TLL1	tolloid-like 1
hsa-miR-548k	0	0	1	1	1	1	UCK2	uridine-cytidine kinase 2
hsa-miR-548k	1	0	1	0	1	1	FLRT2	fibronectin leucine rich transmembrane protein 2
hsa-miR-548k	1	0	1	1	1	1	PPARGC1A	peroxisome proliferator-activated receptor gamma, coactivator 1 alpha
hsa-miR-548k	1	0	1	1	1	1	FLRT3	fibronectin leucine rich transmembrane protein 3
hsa-miR-548k	0	0	1	1	0	0	KCNJ14	potassium inwardly-rectifying channel, subfamily J, member 14
hsa-miR-548k	1	0	1	1	1	1	SLC25A24	solute carrier family 25 (mitochondrial carrier; phosphate carrier), member 24
hsa-miR-548k	1	0	1	1	1	1	TMEM2	transmembrane protein 2
hsa-miR-548k	1	0	1	1	1	1	LRP12	low density lipoprotein receptor-related protein 12
hsa-miR-548k	0	0	1	1	1	1	UBQLN2	ubiquilin 2
hsa-miR-548k	1	0	1	1	1	1	LAMP2	lysosomal-associated membrane protein 2
hsa-miR-548k	1	0	1	0	1	1	CHMP2B	charged multivesicular body protein 2B
hsa-miR-548k	0	0	1	1	1	1	MRPL42	mitochondrial ribosomal protein L42
hsa-miR-548k	1	0	1	0	1	1	C16orf72	chromosome 16 open reading frame 72
hsa-miR-548k	1	0	1	1	1	1	ZBTB44	zinc finger and BTB domain containing 44
hsa-miR-548k	0	0	1	1	1	1	TM4SF1	transmembrane 4 L six family member 1
hsa-miR-548k	0	0	1	1	1	1	ADAM28	ADAM metallopeptidase domain 28
hsa-miR-548k	1	0	1	1	1	1	C11orf58	chromosome 11 open reading frame 58
hsa-miR-548k	0	0	1	1	1	1	DNAJC8	DnaJ (Hsp40) homolog, subfamily C, member 8
hsa-miR-548k	1	0	1	1	1	1	LEMD3	LEM domain containing 3
hsa-miR-548k	0	0	1	1	1	1	OPN3	opsin 3
hsa-miR-548k	1	0	1	1	1	1	LHX6	LIM homeobox 6
hsa-miR-548k	1	0	1	0	1	1	RNF11	ring finger protein 11
hsa-miR-548k	1	0	1	0	1	1	DIEXF	digestive organ expansion factor homolog (zebrafish)
hsa-miR-548k	0	0	1	1	1	1	LAMP3	lysosomal-associated membrane protein 3
hsa-miR-548k	1	0	1	1	1	1	AFF4	AF4/FMR2 family, member 4
hsa-miR-548k	1	0	1	1	1	1	KLHL20	kelch-like 20 (Drosophila)
hsa-miR-548k	0	0	1	1	1	1	ARFGAP3	ADP-ribosylation factor GTPase activating protein 3
hsa-miR-548k	0	0	1	1	0	0	LMCD1	LIM and cysteine-rich domains 1
hsa-miR-548k	1	0	1	1	1	1	SLC40A1	solute carrier family 40 (iron-regulated transporter), member 1
hsa-miR-548k	1	0	1	0	1	1	HUNK	hormonally up-regulated Neu-associated kinase
hsa-miR-548k	0	0	1	1	1	1	SOX8	SRY (sex determining region Y)-box 8
hsa-miR-548k	1	0	1	0	1	1	ATP11B	ATPase, class VI, type 11B
hsa-miR-548k	1	0	1	1	0	0	TTLL4	tubulin tyrosine ligase-like family, member 4
hsa-miR-548k	1	0	1	0	1	1	MLEC	malectin
hsa-miR-548k	1	0	1	0	1	1	KIAA0232	KIAA0232
hsa-miR-548k	1	0	1	1	1	1	SPCS2	signal peptidase complex subunit 2 homolog (S. cerevisiae)
hsa-miR-548k	1	0	1	0	1	1	SERTAD2	SERTA domain containing 2
hsa-miR-548k	1	0	1	1	1	1	KIAA0753	KIAA0753
hsa-miR-548k	0	0	1	0	1	1	EPM2AIP1	EPM2A (laforin) interacting protein 1
hsa-miR-548k	1	0	1	0	1	1	PJA2	praja ring finger 2, E3 ubiquitin protein ligase
hsa-miR-548k	1	0	1	1	1	1	TBC1D4	TBC1 domain family, member 4
hsa-miR-548k	1	0	1	0	1	1	LPPR4	lipid phosphate phosphatase-related protein type 4
hsa-miR-548k	1	0	1	1	1	1	RHOBTB3	Rho-related BTB domain containing 3
hsa-miR-548k	1	0	1	1	1	1	RNF44	ring finger protein 44
hsa-miR-548k	0	0	1	0	1	1	PPM1E	protein phosphatase, Mg2+/Mn2+ dependent, 1E
hsa-miR-548k	1	0	1	1	1	1	CHSY1	chondroitin sulfate synthase 1
hsa-miR-548k	1	0	1	1	1	1	SPAST	spastin
hsa-miR-548k	1	0	1	0	1	1	ZBTB1	zinc finger and BTB domain containing 1
hsa-miR-548k	1	0	1	0	1	1	WDFY3	WD repeat and FYVE domain containing 3
hsa-miR-548k	1	0	1	1	1	1	RAB21	RAB21, member RAS oncogene family
hsa-miR-548k	1	0	1	1	1	1	PHLPP2	PH domain and leucine rich repeat protein phosphatase 2
hsa-miR-548k	1	0	1	0	1	1	PDS5B	PDS5, regulator of cohesion maintenance, homolog B (S. cerevisiae)
hsa-miR-548k	1	0	1	1	1	1	ERP44	endoplasmic reticulum protein 44
hsa-miR-548k	1	0	1	0	1	1	ARHGAP26	Rho GTPase activating protein 26
hsa-miR-548k	1	0	1	1	1	1	SMG1	smg-1 homolog, phosphatidylinositol 3-kinase-related kinase (C. elegans)
hsa-miR-548k	1	0	1	1	1	1	TAB2	TGF-beta activated kinase 1/MAP3K7 binding protein 2
hsa-miR-548k	1	0	1	1	0	0	CIC	capicua homolog (Drosophila)
hsa-miR-548k	1	0	1	1	1	1	ZCCHC14	zinc finger, CCHC domain containing 14
hsa-miR-548k	1	0	1	1	1	1	RCOR1	REST corepressor 1
hsa-miR-548k	1	0	1	0	1	1	KIAA1024	KIAA1024
hsa-miR-548k	1	0	1	1	1	1	NUP160	nucleoporin 160kDa
hsa-miR-548k	1	0	1	1	1	1	PPP1R13B	protein phosphatase 1, regulatory subunit 13B
hsa-miR-548k	1	0	1	1	1	1	MED13L	mediator complex subunit 13-like
hsa-miR-548k	0	0	1	0	1	1	ZDHHC17	zinc finger, DHHC-type containing 17
hsa-miR-548k	1	0	1	1	1	1	ASXL1	additional sex combs like 1 (Drosophila)
hsa-miR-548k	0	0	1	1	1	1	LEPROTL1	leptin receptor overlapping transcript-like 1
hsa-miR-548k	1	0	1	1	1	1	RIMBP2	RIMS binding protein 2
hsa-miR-548k	1	0	1	1	1	1	MORC3	MORC family CW-type zinc finger 3
hsa-miR-548k	1	0	1	1	1	1	MOB4	MOB family member 4, phocein
hsa-miR-548k	0	0	1	1	1	1	ANAPC13	anaphase promoting complex subunit 13
hsa-miR-548k	1	0	1	1	1	1	CNOT6	CCR4-NOT transcription complex, subunit 6
hsa-miR-548k	1	0	1	1	1	1	KIAA1429	KIAA1429
hsa-miR-548k	0	0	1	1	1	1	TMEM87A	transmembrane protein 87A
hsa-miR-548k	1	0	1	0	1	1	OSBPL3	oxysterol binding protein-like 3
hsa-miR-548k	1	0	1	1	1	1	LRRTM2	leucine rich repeat transmembrane neuronal 2
hsa-miR-548k	1	0	1	0	1	1	PPP1R16B	protein phosphatase 1, regulatory subunit 16B
hsa-miR-548k	1	0	1	0	1	1	ERC2	ELKS/RAB6-interacting/CAST family member 2
hsa-miR-548k	1	0	1	0	1	1	WWC3	WWC family member 3
hsa-miR-548k	1	0	1	1	1	1	GPX7	glutathione peroxidase 7
hsa-miR-548k	1	0	1	1	1	1	ST8SIA3	ST8 alpha-N-acetyl-neuraminide alpha-2,8-sialyltransferase 3
hsa-miR-548k	0	0	1	1	1	1	PCF11	PCF11, cleavage and polyadenylation factor subunit, homolog (S. cerevisiae)
hsa-miR-548k	1	0	1	0	1	1	TRIM33	tripartite motif containing 33
hsa-miR-548k	1	0	1	1	1	1	TXNDC12	thioredoxin domain containing 12 (endoplasmic reticulum)
hsa-miR-548k	0	0	1	1	1	1	HMP19	HMP19 protein
hsa-miR-548k	1	0	1	0	1	1	KLF13	Kruppel-like factor 13
hsa-miR-548k	1	0	1	1	1	1	UBE2J1	ubiquitin-conjugating enzyme E2, J1
hsa-miR-548k	1	0	1	1	1	1	DERL2	derlin 2
hsa-miR-548k	1	0	1	1	1	1	SLMO2	slowmo homolog 2 (Drosophila)
hsa-miR-548k	1	0	1	1	1	1	GOLT1B	golgi transport 1B
hsa-miR-548k	0	0	1	1	1	1	RAB10	RAB10, member RAS oncogene family
hsa-miR-548k	0	0	1	1	1	1	NAA38	N(alpha)-acetyltransferase 38, NatC auxiliary subunit
hsa-miR-548k	1	0	1	1	1	1	VGLL3	vestigial like 3 (Drosophila)
hsa-miR-548k	1	0	1	0	1	1	HECA	headcase homolog (Drosophila)
hsa-miR-548k	1	0	1	1	1	1	NLK	nemo-like kinase
hsa-miR-548k	1	0	1	1	1	1	AKAP11	A kinase (PRKA) anchor protein 11
hsa-miR-548k	0	0	1	0	1	1	FAM8A1	family with sequence similarity 8, member A1
hsa-miR-548k	0	0	1	1	0	0	VGLL1	vestigial like 1 (Drosophila)
hsa-miR-548k	1	0	1	1	1	1	RNF138	ring finger protein 138, E3 ubiquitin protein ligase
hsa-miR-548k	0	0	1	1	1	1	RAB23	RAB23, member RAS oncogene family
hsa-miR-548k	1	0	1	1	1	1	RAB14	RAB14, member RAS oncogene family
hsa-miR-548k	0	0	1	1	0	0	GP6	glycoprotein VI (platelet)
hsa-miR-548k	1	0	1	1	1	1	ARID4B	AT rich interactive domain 4B (RBP1-like)
hsa-miR-548k	0	0	1	1	1	1	DTL	denticleless E3 ubiquitin protein ligase homolog (Drosophila)
hsa-miR-548k	0	0	1	1	0	0	NCKIPSD	NCK interacting protein with SH3 domain
hsa-miR-548k	1	0	1	1	1	1	VTA1	Vps20-associated 1 homolog (S. cerevisiae)
hsa-miR-548k	1	0	1	0	1	1	TMEM216	transmembrane protein 216
hsa-miR-548k	1	0	1	1	1	1	IER5	immediate early response 5
hsa-miR-548k	1	0	1	1	1	1	RAB6B	RAB6B, member RAS oncogene family
hsa-miR-548k	0	0	1	1	0	0	IL23A	interleukin 23, alpha subunit p19
hsa-miR-548k	1	0	1	1	1	1	ZNF644	zinc finger protein 644
hsa-miR-548k	1	0	1	0	1	1	FZD3	frizzled family receptor 3
hsa-miR-548k	1	0	1	0	1	1	KLHL3	kelch-like 3 (Drosophila)
hsa-miR-548k	1	0	1	1	1	1	SIX4	SIX homeobox 4
hsa-miR-548k	1	0	1	1	1	1	GALNT7	UDP-N-acetyl-alpha-D-galactosamine:polypeptide N-acetylgalactosaminyltransferase 7 (GalNAc-T7)
hsa-miR-548k	1	0	1	1	1	1	MDM1	Mdm1 nuclear protein homolog (mouse)
hsa-miR-548k	0	0	1	1	1	1	NKRF	NFKB repressing factor
hsa-miR-548k	0	0	1	1	1	1	C2orf29	chromosome 2 open reading frame 29
hsa-miR-548k	1	0	1	0	1	1	UBE2Q1	ubiquitin-conjugating enzyme E2Q family member 1
hsa-miR-548k	0	0	1	0	1	1	VEZT	vezatin, adherens junctions transmembrane protein
hsa-miR-548k	1	0	1	1	1	1	NOTCH1	notch 1
hsa-miR-548k	1	0	1	0	1	1	EIF2C4	eukaryotic translation initiation factor 2C, 4
hsa-miR-548k	0	0	1	1	1	1	LRRC16A	leucine rich repeat containing 16A
hsa-miR-548k	1	0	1	1	1	1	HAUS6	HAUS augmin-like complex, subunit 6
hsa-miR-548k	1	0	1	1	1	1	ZNF280C	zinc finger protein 280C
hsa-miR-548k	1	0	1	1	1	1	VPS13C	vacuolar protein sorting 13 homolog C (S. cerevisiae)
hsa-miR-548k	1	0	1	0	1	1	FAM46C	family with sequence similarity 46, member C
hsa-miR-548k	0	0	1	1	1	1	TTC27	tetratricopeptide repeat domain 27
hsa-miR-548k	1	0	1	0	1	1	DCAF16	DDB1 and CUL4 associated factor 16
hsa-miR-548k	1	0	1	1	1	1	TBC1D8B	TBC1 domain family, member 8B (with GRAM domain)
hsa-miR-548k	0	0	1	1	1	1	NCAPG2	non-SMC condensin II complex, subunit G2
hsa-miR-548k	1	0	1	1	1	1	PNRC2	proline-rich nuclear receptor coactivator 2
hsa-miR-548k	1	0	1	1	1	1	YTHDF1	YTH domain family, member 1
hsa-miR-548k	1	0	1	1	1	1	IMPAD1	inositol monophosphatase domain containing 1
hsa-miR-548k	1	0	1	1	1	1	RNF125	ring finger protein 125, E3 ubiquitin protein ligase
hsa-miR-548k	0	0	1	1	1	1	C2orf42	chromosome 2 open reading frame 42
hsa-miR-548k	0	0	1	1	1	1	IWS1	IWS1 homolog (S. cerevisiae)
hsa-miR-548k	1	0	1	1	1	1	C9orf40	chromosome 9 open reading frame 40
hsa-miR-548k	1	0	1	1	1	1	ARGLU1	arginine and glutamate rich 1
hsa-miR-548k	1	0	1	0	1	1	IPO9	importin 9
hsa-miR-548k	1	0	1	1	0	0	GSPT2	G1 to S phase transition 2
hsa-miR-548k	0	0	1	1	0	0	WDR11	WD repeat domain 11
hsa-miR-548k	1	0	1	1	1	1	FAM178A	family with sequence similarity 178, member A
hsa-miR-548k	1	0	1	1	1	1	RFWD3	ring finger and WD repeat domain 3
hsa-miR-548k	0	0	1	0	1	1	SHQ1	SHQ1 homolog (S. cerevisiae)
hsa-miR-548k	1	0	1	0	1	1	MSL2	male-specific lethal 2 homolog (Drosophila)
hsa-miR-548k	1	0	1	1	1	1	RPRD1A	regulation of nuclear pre-mRNA domain containing 1A
hsa-miR-548k	1	0	1	1	1	1	LRRC20	leucine rich repeat containing 20
hsa-miR-548k	1	0	1	0	1	1	PARVA	parvin, alpha
hsa-miR-548k	1	0	1	1	1	1	UBA6	ubiquitin-like modifier activating enzyme 6
hsa-miR-548k	1	0	1	1	1	1	ZNF654	zinc finger protein 654
hsa-miR-548k	1	0	1	1	1	1	C9orf72	chromosome 9 open reading frame 72
hsa-miR-548k	0	0	1	1	1	1	TMEM144	transmembrane protein 144
hsa-miR-548k	1	0	1	0	1	1	LIN7C	lin-7 homolog C (C. elegans)
hsa-miR-548k	1	0	1	1	1	1	RSBN1	round spermatid basic protein 1
hsa-miR-548k	1	0	1	0	1	1	TMEM106B	transmembrane protein 106B
hsa-miR-548k	1	0	1	1	1	1	RRN3	RRN3 RNA polymerase I transcription factor homolog (S. cerevisiae)
hsa-miR-548k	1	0	1	1	1	1	ASH1L	ash1 (absent, small, or homeotic)-like (Drosophila)
hsa-miR-548k	1	0	1	1	1	1	ETNK1	ethanolamine kinase 1
hsa-miR-548k	1	0	1	1	1	1	MLL5	myeloid/lymphoid or mixed-lineage leukemia 5 (trithorax homolog, Drosophila)
hsa-miR-548k	1	0	1	1	1	1	CTTNBP2NL	CTTNBP2 N-terminal like
hsa-miR-548k	1	0	1	0	1	1	TMEM55A	transmembrane protein 55A
hsa-miR-548k	1	0	1	1	1	1	GNG12	guanine nucleotide binding protein (G protein), gamma 12
hsa-miR-548k	1	0	1	0	1	1	KLHL9	kelch-like 9 (Drosophila)
hsa-miR-548k	1	0	1	0	1	1	PCDHAC1	protocadherin alpha subfamily C, 1
hsa-miR-548k	1	0	1	0	1	1	PCDHAC2	protocadherin alpha subfamily C, 2
hsa-miR-548k	1	0	1	1	1	1	PCDHA1	protocadherin alpha 1
hsa-miR-548k	1	0	1	0	1	1	PCDHA10	protocadherin alpha 10
hsa-miR-548k	1	0	1	0	1	1	PCDHA11	protocadherin alpha 11
hsa-miR-548k	1	0	1	0	1	1	PCDHA12	protocadherin alpha 12
hsa-miR-548k	1	0	1	1	1	1	PCDHA2	protocadherin alpha 2
hsa-miR-548k	1	0	1	1	1	1	PCDHA3	protocadherin alpha 3
hsa-miR-548k	1	0	1	1	1	1	PCDHA6	protocadherin alpha 6
hsa-miR-548k	1	0	1	0	1	1	PCDHA7	protocadherin alpha 7
hsa-miR-548k	1	0	1	1	1	1	PCDHA8	protocadherin alpha 8
hsa-miR-548k	0	0	1	1	1	1	NPAP1	nuclear pore associated protein 1
hsa-miR-548k	0	0	1	1	1	1	RIN2	Ras and Rab interactor 2
hsa-miR-548k	1	0	1	0	1	1	FAM190B	family with sequence similarity 190, member B
hsa-miR-548k	0	0	1	1	0	0	TOMM7	translocase of outer mitochondrial membrane 7 homolog (yeast)
hsa-miR-548k	0	0	1	1	1	1	CRLS1	cardiolipin synthase 1
hsa-miR-548k	1	0	1	1	1	1	EPB41L4B	erythrocyte membrane protein band 4.1 like 4B
hsa-miR-548k	1	0	1	0	1	1	UBFD1	ubiquitin family domain containing 1
hsa-miR-548k	0	0	1	1	1	1	KLHL4	kelch-like 4 (Drosophila)
hsa-miR-548k	0	0	1	1	1	1	RNF20	ring finger protein 20, E3 ubiquitin protein ligase
hsa-miR-548k	1	0	1	1	0	0	KCNQ5	potassium voltage-gated channel, KQT-like subfamily, member 5
hsa-miR-548k	1	0	1	0	1	1	TM9SF3	transmembrane 9 superfamily member 3
hsa-miR-548k	0	0	1	1	1	1	RAD18	RAD18 homolog (S. cerevisiae)
hsa-miR-548k	1	0	1	1	1	1	FEM1C	fem-1 homolog c (C. elegans)
hsa-miR-548k	1	0	1	1	1	1	CCDC47	coiled-coil domain containing 47
hsa-miR-548k	1	0	1	1	1	1	C5orf15	chromosome 5 open reading frame 15
hsa-miR-548k	0	0	1	1	1	1	PRTFDC1	phosphoribosyl transferase domain containing 1
hsa-miR-548k	1	0	1	1	1	1	KIAA1244	KIAA1244
hsa-miR-548k	1	0	1	1	1	1	PAK7	p21 protein (Cdc42/Rac)-activated kinase 7
hsa-miR-548k	1	0	1	0	1	1	SLC17A6	solute carrier family 17 (sodium-dependent inorganic phosphate cotransporter), member 6
hsa-miR-548k	1	0	1	0	1	1	CNNM1	cyclin M1
hsa-miR-548k	1	0	1	0	1	1	EIF5A2	eukaryotic translation initiation factor 5A2
hsa-miR-548k	1	0	1	1	1	1	LYRM2	LYR motif containing 2
hsa-miR-548k	0	0	1	1	1	1	IL22	interleukin 22
hsa-miR-548k	1	0	1	0	1	1	ADCY2	adenylate cyclase 2 (brain)
hsa-miR-548k	1	0	1	1	1	1	RAB22A	RAB22A, member RAS oncogene family
hsa-miR-548k	1	0	1	1	1	1	SLC12A5	solute carrier family 12 (potassium/chloride transporter), member 5
hsa-miR-548k	0	0	1	0	1	1	ZNF490	zinc finger protein 490
hsa-miR-548k	0	0	1	1	1	1	SHROOM4	shroom family member 4
hsa-miR-548k	1	0	1	1	1	1	USP31	ubiquitin specific peptidase 31
hsa-miR-548k	1	0	1	1	1	1	ZNF608	zinc finger protein 608
hsa-miR-548k	1	0	1	0	1	1	NUFIP2	nuclear fragile X mental retardation protein interacting protein 2
hsa-miR-548k	1	0	1	0	1	1	KLHDC5	kelch domain containing 5
hsa-miR-548k	1	0	1	0	1	1	SYT4	synaptotagmin IV
hsa-miR-548k	0	0	1	1	1	1	MARCH4	membrane-associated ring finger (C3HC4) 4, E3 ubiquitin protein ligase
hsa-miR-548k	1	0	1	1	1	1	PCDH10	protocadherin 10
hsa-miR-548k	1	0	1	1	1	1	RANBP10	RAN binding protein 10
hsa-miR-548k	1	0	1	1	1	1	ZBTB2	zinc finger and BTB domain containing 2
hsa-miR-548k	1	0	1	1	1	1	CNTN3	contactin 3 (plasmacytoma associated)
hsa-miR-548k	0	0	1	1	1	1	GNAO1	guanine nucleotide binding protein (G protein), alpha activating activity polypeptide O
hsa-miR-548k	0	0	1	1	0	0	CTAG2	cancer/testis antigen 2
hsa-miR-548k	0	0	1	1	1	1	TLX3	T-cell leukemia homeobox 3
hsa-miR-548k	1	0	1	0	1	1	RAP2A	RAP2A, member of RAS oncogene family
hsa-miR-548k	1	0	1	0	1	1	XK	X-linked Kx blood group (McLeod syndrome)
hsa-miR-548k	1	0	1	1	1	1	RTN1	reticulon 1
hsa-miR-548k	0	0	1	1	0	0	HOXD11	homeobox D11
hsa-miR-548k	1	0	1	1	1	1	RPRD1B	regulation of nuclear pre-mRNA domain containing 1B
hsa-miR-548k	1	0	1	1	1	1	FAM60A	family with sequence similarity 60, member A
hsa-miR-548k	0	0	1	1	1	1	PRDM13	PR domain containing 13
hsa-miR-548k	1	0	1	0	1	1	TSPYL4	TSPY-like 4
hsa-miR-548k	1	0	1	1	1	1	BACH2	BTB and CNC homology 1, basic leucine zipper transcription factor 2
hsa-miR-548k	0	0	1	1	1	1	GABBR1	gamma-aminobutyric acid (GABA) B receptor, 1
hsa-miR-548k	0	0	1	0	1	1	SPCS3	signal peptidase complex subunit 3 homolog (S. cerevisiae)
hsa-miR-548k	1	0	1	1	1	1	DMRT1	doublesex and mab-3 related transcription factor 1
hsa-miR-548k	1	0	1	0	1	1	MCL1	myeloid cell leukemia sequence 1 (BCL2-related)
hsa-miR-548k	0	0	1	1	1	1	ITM2B	integral membrane protein 2B
hsa-miR-548k	1	0	1	0	1	1	CSNK1G1	casein kinase 1, gamma 1
hsa-miR-548k	1	0	1	1	1	1	GPR88	G protein-coupled receptor 88
hsa-miR-548k	0	0	1	1	1	1	FAM204A	family with sequence similarity 204, member A
hsa-miR-548k	1	0	1	1	1	1	GOLPH3	golgi phosphoprotein 3 (coat-protein)
hsa-miR-548k	1	0	1	1	1	1	EPB41L4A	erythrocyte membrane protein band 4.1 like 4A
hsa-miR-548k	0	0	1	1	1	1	GLIPR2	GLI pathogenesis-related 2
hsa-miR-548k	0	0	1	1	1	1	SUSD1	sushi domain containing 1
hsa-miR-548k	1	0	1	0	1	1	HOXC8	homeobox C8
hsa-miR-548k	1	0	1	1	1	1	S100PBP	S100P binding protein
hsa-miR-548k	1	0	1	1	1	1	DEPTOR	DEP domain containing MTOR-interacting protein
hsa-miR-548k	1	0	1	1	1	1	YTHDC2	YTH domain containing 2
hsa-miR-548k	1	0	1	1	1	1	RFX7	regulatory factor X, 7
hsa-miR-548k	1	0	1	0	1	1	BCL11B	B-cell CLL/lymphoma 11B (zinc finger protein)
hsa-miR-548k	1	0	1	1	1	1	REEP1	receptor accessory protein 1
hsa-miR-548k	0	0	1	1	1	1	MARCKSL1	MARCKS-like 1
hsa-miR-548k	1	0	1	1	1	1	KCTD15	potassium channel tetramerisation domain containing 15
hsa-miR-548k	1	0	1	1	1	1	GNPTAB	N-acetylglucosamine-1-phosphate transferase, alpha and beta subunits
hsa-miR-548k	1	0	1	1	1	1	PSTPIP2	proline-serine-threonine phosphatase interacting protein 2
hsa-miR-548k	1	0	1	1	1	1	HOXD1	homeobox D1
hsa-miR-548k	0	0	1	1	0	0	ZBED2	zinc finger, BED-type containing 2
hsa-miR-548k	1	0	1	1	1	1	NKAIN1	Na+/K+ transporting ATPase interacting 1
hsa-miR-548k	1	0	1	1	1	1	CDC73	cell division cycle 73, Paf1/RNA polymerase II complex component, homolog (S. cerevisiae)
hsa-miR-548k	1	0	1	1	1	1	RNF128	ring finger protein 128, E3 ubiquitin protein ligase
hsa-miR-548k	1	0	1	1	1	1	DHX40	DEAH (Asp-Glu-Ala-His) box polypeptide 40
hsa-miR-548k	0	0	1	1	1	1	SH3D21	SH3 domain containing 21
hsa-miR-548k	1	0	1	0	1	1	ZFHX4	zinc finger homeobox 4
hsa-miR-548k	1	0	1	0	1	1	MOB3B	MOB kinase activator 3B
hsa-miR-548k	1	0	1	0	1	1	VCPIP1	valosin containing protein (p97)/p47 complex interacting protein 1
hsa-miR-548k	1	0	1	1	1	1	FBXO11	F-box protein 11
hsa-miR-548k	1	0	1	1	1	1	PROSER1	proline and serine rich 1
hsa-miR-548k	1	0	1	1	1	1	NAA50	N(alpha)-acetyltransferase 50, NatE catalytic subunit
hsa-miR-548k	0	0	1	1	1	1	COQ10B	coenzyme Q10 homolog B (S. cerevisiae)
hsa-miR-548k	1	0	1	0	1	1	EDEM3	ER degradation enhancer, mannosidase alpha-like 3
hsa-miR-548k	1	0	1	1	1	1	TRIB1	tribbles homolog 1 (Drosophila)
hsa-miR-548k	0	0	1	0	1	1	PDGFD	platelet derived growth factor D
hsa-miR-548k	1	0	1	1	1	1	TNKS2	tankyrase, TRF1-interacting ankyrin-related ADP-ribose polymerase 2
hsa-miR-548k	1	0	1	1	1	1	JHDM1D	jumonji C domain containing histone demethylase 1 homolog D (S. cerevisiae)
hsa-miR-548k	1	0	1	0	1	1	SETD7	SET domain containing (lysine methyltransferase) 7
hsa-miR-548k	1	0	1	1	1	1	TMX1	thioredoxin-related transmembrane protein 1
hsa-miR-548k	1	0	1	1	1	1	SYNC	syncoilin, intermediate filament protein
hsa-miR-548k	1	0	1	1	1	1	SGPP1	sphingosine-1-phosphate phosphatase 1
hsa-miR-548k	1	0	1	0	1	1	C1orf21	chromosome 1 open reading frame 21
hsa-miR-548k	1	0	1	1	0	0	PVRL4	poliovirus receptor-related 4
hsa-miR-548k	0	0	1	1	1	1	ST6GALNAC5	ST6 (alpha-N-acetyl-neuraminyl-2,3-beta-galactosyl-1,3)-N-acetylgalactosaminide alpha-2,6-sialyltransferase 5
hsa-miR-548k	0	0	1	1	1	1	KIF18A	kinesin family member 18A
hsa-miR-548k	0	0	1	1	1	1	TEX15	testis expressed 15
hsa-miR-548k	1	0	1	0	1	1	THAP2	THAP domain containing, apoptosis associated protein 2
hsa-miR-548k	1	0	1	0	1	1	NUDT12	nudix (nucleoside diphosphate linked moiety X)-type motif 12
hsa-miR-548k	1	0	1	0	1	1	TMEM47	transmembrane protein 47
hsa-miR-548k	1	0	1	0	1	1	SH3BGRL2	SH3 domain binding glutamic acid-rich protein like 2
hsa-miR-548k	1	0	1	1	1	1	PCDHA9	protocadherin alpha 9
hsa-miR-548k	0	0	1	1	1	1	KCNA7	potassium voltage-gated channel, shaker-related subfamily, member 7
hsa-miR-548k	1	0	1	1	1	1	SNX25	sorting nexin 25
hsa-miR-548k	1	0	1	0	1	1	SRSF8	serine/arginine-rich splicing factor 8
hsa-miR-548k	0	0	1	1	1	1	MAGT1	magnesium transporter 1
hsa-miR-548k	0	0	1	1	1	1	ARMC2	armadillo repeat containing 2
hsa-miR-548k	0	0	1	1	1	1	KBTBD7	kelch repeat and BTB (POZ) domain containing 7
hsa-miR-548k	0	0	1	0	1	1	RAB6C	RAB6C, member RAS oncogene family
hsa-miR-548k	0	0	1	1	1	1	SLC41A2	solute carrier family 41, member 2
hsa-miR-548k	1	0	1	1	1	1	ARID5B	AT rich interactive domain 5B (MRF1-like)
hsa-miR-548k	1	0	1	1	1	1	SLITRK6	SLIT and NTRK-like family, member 6
hsa-miR-548k	1	0	1	1	1	1	MEX3B	mex-3 homolog B (C. elegans)
hsa-miR-548k	0	0	1	1	1	1	ATP13A4	ATPase type 13A4
hsa-miR-548k	1	0	1	0	1	1	PSD2	pleckstrin and Sec7 domain containing 2
hsa-miR-548k	0	0	1	1	0	0	DCUN1D5	DCN1, defective in cullin neddylation 1, domain containing 5 (S. cerevisiae)
hsa-miR-548k	1	0	1	1	1	1	BRMS1L	breast cancer metastasis-suppressor 1-like
hsa-miR-548k	0	0	1	0	1	1	ZC3H8	zinc finger CCCH-type containing 8
hsa-miR-548k	1	0	1	1	1	1	PARD6B	par-6 partitioning defective 6 homolog beta (C. elegans)
hsa-miR-548k	1	0	1	1	1	1	USP38	ubiquitin specific peptidase 38
hsa-miR-548k	1	0	1	1	1	1	HIATL1	hippocampus abundant transcript-like 1
hsa-miR-548k	1	0	1	1	1	1	GLIS2	GLIS family zinc finger 2
hsa-miR-548k	0	0	1	1	1	1	MGARP	mitochondria-localized glutamic acid-rich protein
hsa-miR-548k	1	0	1	0	1	1	ADO	2-aminoethanethiol (cysteamine) dioxygenase
hsa-miR-548k	1	0	1	0	1	1	PPP1R15B	protein phosphatase 1, regulatory subunit 15B
hsa-miR-548k	1	0	1	1	1	1	PCDH11Y	protocadherin 11 Y-linked
hsa-miR-548k	1	0	1	1	1	1	HIAT1	hippocampus abundant transcript 1
hsa-miR-548k	0	0	1	1	1	1	RBM18	RNA binding motif protein 18
hsa-miR-548k	0	0	1	1	1	1	ZIC5	Zic family member 5
hsa-miR-548k	1	0	1	1	1	1	C5orf30	chromosome 5 open reading frame 30
hsa-miR-548k	1	0	1	0	1	1	PURB	purine-rich element binding protein B
hsa-miR-548k	1	0	1	1	0	0	KCNH7	potassium voltage-gated channel, subfamily H (eag-related), member 7
hsa-miR-548k	1	0	1	1	1	1	TP53INP1	tumor protein p53 inducible nuclear protein 1
hsa-miR-548k	1	0	1	1	1	1	RASL10B	RAS-like, family 10, member B
hsa-miR-548k	1	0	1	1	1	1	SSH2	slingshot homolog 2 (Drosophila)
hsa-miR-548k	1	0	1	1	1	1	TANC1	tetratricopeptide repeat, ankyrin repeat and coiled-coil containing 1
hsa-miR-548k	0	0	1	1	1	1	CTTNBP2	cortactin binding protein 2
hsa-miR-548k	1	0	1	1	1	1	EPT1	ethanolaminephosphotransferase 1 (CDP-ethanolamine-specific)
hsa-miR-548k	0	0	1	1	1	1	ARHGAP18	Rho GTPase activating protein 18
hsa-miR-548k	1	0	1	1	1	1	BRWD1	bromodomain and WD repeat domain containing 1
hsa-miR-548k	1	0	1	1	1	1	XKR4	XK, Kell blood group complex subunit-related family, member 4
hsa-miR-548k	1	0	1	1	1	1	ANTXR1	anthrax toxin receptor 1
hsa-miR-548k	1	0	1	1	1	1	NAA15	N(alpha)-acetyltransferase 15, NatA auxiliary subunit
hsa-miR-548k	0	0	1	1	1	1	CCNE2	cyclin E2
hsa-miR-548k	1	0	1	1	1	1	GCFC1	GC-rich sequence DNA-binding factor 1
hsa-miR-548k	0	0	1	1	1	1	CLEC4D	C-type lectin domain family 4, member D
hsa-miR-548k	0	0	1	1	1	1	CTCFL	CCCTC-binding factor (zinc finger protein)-like
hsa-miR-548k	0	0	1	1	1	1	MED30	mediator complex subunit 30
hsa-miR-548k	0	0	1	1	1	1	PABPC5	poly(A) binding protein, cytoplasmic 5
hsa-miR-548k	1	0	1	0	1	1	SOCS4	suppressor of cytokine signaling 4
hsa-miR-548k	0	0	1	1	1	1	CHST14	carbohydrate (N-acetylgalactosamine 4-0) sulfotransferase 14
hsa-miR-548k	1	0	1	1	1	1	SPTSSA	serine palmitoyltransferase, small subunit A
hsa-miR-548k	1	0	1	1	1	1	FAM122A	family with sequence similarity 122A
hsa-miR-548k	1	0	1	1	1	1	MARS2	methionyl-tRNA synthetase 2, mitochondrial
hsa-miR-548k	1	0	1	1	1	1	KCTD12	potassium channel tetramerisation domain containing 12
hsa-miR-548k	1	0	1	0	1	1	SP1	Sp1 transcription factor
hsa-miR-548k	0	0	1	1	1	1	C1orf213	chromosome 1 open reading frame 213
hsa-miR-548k	0	0	1	0	1	1	PRELID2	PRELI domain containing 2
hsa-miR-548k	1	0	1	0	1	1	FCHO2	FCH domain only 2
hsa-miR-548k	1	0	1	1	1	1	MSI2	musashi homolog 2 (Drosophila)
hsa-miR-548k	0	0	1	1	1	1	SDR16C5	short chain dehydrogenase/reductase family 16C, member 5
hsa-miR-548k	0	0	1	0	1	1	MYO3B	myosin IIIB
hsa-miR-548k	1	0	1	1	1	1	ATRN	attractin
hsa-miR-548k	1	0	1	1	1	1	RPIA	ribose 5-phosphate isomerase A
hsa-miR-548k	1	0	1	0	1	1	CNOT6L	CCR4-NOT transcription complex, subunit 6-like
hsa-miR-548k	0	0	1	1	0	0	CMTM2	CKLF-like MARVEL transmembrane domain containing 2
hsa-miR-548k	0	0	1	1	0	0	DHRS13	dehydrogenase/reductase (SDR family) member 13
hsa-miR-548k	1	0	1	1	1	1	FAM91A1	family with sequence similarity 91, member A1
hsa-miR-548k	0	0	1	1	1	1	OMA1	OMA1 zinc metallopeptidase homolog (S. cerevisiae)
hsa-miR-548k	1	0	1	1	1	1	CCSAP	centriole, cilia and spindle-associated protein
hsa-miR-548k	0	0	1	0	1	1	OSTCP1	oligosaccharyltransferase complex subunit pseudogene 1
hsa-miR-548k	0	0	1	1	1	1	SLC25A43	solute carrier family 25, member 43
hsa-miR-548k	0	0	1	1	1	1	LRTOMT	leucine rich transmembrane and 0-methyltransferase domain containing
hsa-miR-548k	1	0	1	1	1	1	ZNF396	zinc finger protein 396
hsa-miR-548k	1	0	1	1	1	1	SEPT6	septin 6
hsa-miR-548k	1	0	1	1	1	1	UBTD2	ubiquitin domain containing 2
hsa-miR-548k	0	0	1	1	1	1	MUC7	mucin 7, secreted
hsa-miR-548k	0	0	1	1	1	1	TARSL2	threonyl-tRNA synthetase-like 2
hsa-miR-548k	0	0	1	0	1	1	BBS5	Bardet-Biedl syndrome 5
hsa-miR-548k	1	0	1	1	1	1	FAM123B	family with sequence similarity 123B
hsa-miR-548k	1	0	1	1	1	1	FGFBP3	fibroblast growth factor binding protein 3
hsa-miR-548k	1	0	1	1	1	1	CEP128	centrosomal protein 128kDa
hsa-miR-548k	1	0	1	1	1	1	LRFN5	leucine rich repeat and fibronectin type III domain containing 5
hsa-miR-548k	1	0	1	1	1	1	FAM81A	family with sequence similarity 81, member A
hsa-miR-548k	1	0	1	1	1	1	ZSCAN29	zinc finger and SCAN domain containing 29
hsa-miR-548k	1	0	1	1	1	1	C7orf60	chromosome 7 open reading frame 60
hsa-miR-548k	0	0	1	1	0	0	C11orf65	chromosome 11 open reading frame 65
hsa-miR-548k	1	0	1	0	1	1	TMTC2	transmembrane and tetratricopeptide repeat containing 2
hsa-miR-548k	1	0	1	1	1	1	CNST	consortin, connexin sorting protein
hsa-miR-548k	1	0	1	0	1	1	DCP2	DCP2 decapping enzyme homolog (S. cerevisiae)
hsa-miR-548k	0	0	1	1	1	1	CCER1	coiled-coil glutamate-rich protein 1
hsa-miR-548k	1	0	1	1	1	1	UBE2E2	ubiquitin-conjugating enzyme E2E 2
hsa-miR-548k	1	0	1	0	1	1	TMEM154	transmembrane protein 154
hsa-miR-548k	0	0	1	0	0	0	TCP11L2	t-complex 11 (mouse)-like 2
hsa-miR-548k	1	0	1	1	1	1	PDIK1L	PDLIM1 interacting kinase 1 like
hsa-miR-548k	0	0	1	1	1	1	MS4A6A	membrane-spanning 4-domains, subfamily A, member 6A
hsa-miR-548k	0	0	1	0	1	1	KBTBD6	kelch repeat and BTB (POZ) domain containing 6
hsa-miR-548k	1	0	1	0	1	1	ST6GALNAC3	ST6 (alpha-N-acetyl-neuraminyl-2,3-beta-galactosyl-1,3)-N-acetylgalactosaminide alpha-2,6-sialyltransferase 3
hsa-miR-548k	1	0	1	1	1	1	TXLNB	taxilin beta
hsa-miR-548k	1	0	1	1	0	0	TMEM86A	transmembrane protein 86A
hsa-miR-548k	1	0	1	0	1	1	TAPT1	transmembrane anterior posterior transformation 1
hsa-miR-548k	1	0	1	1	0	0	SVEP1	sushi, von Willebrand factor type A, EGF and pentraxin domain containing 1
hsa-miR-548k	1	0	1	0	1	1	ZCCHC24	zinc finger, CCHC domain containing 24
hsa-miR-548k	1	0	1	1	1	1	HS6ST3	heparan sulfate 6-O-sulfotransferase 3
hsa-miR-548k	1	0	1	1	1	1	CREBRF	CREB3 regulatory factor
hsa-miR-548k	1	0	1	1	1	1	C2orf69	chromosome 2 open reading frame 69
hsa-miR-548k	0	0	1	1	1	1	FAM154A	family with sequence similarity 154, member A
hsa-miR-548k	1	0	1	1	1	1	NAP1L5	nucleosome assembly protein 1-like 5
hsa-miR-548k	0	0	1	1	0	0	SCUBE1	signal peptide, CUB domain, EGF-like 1
hsa-miR-548k	0	0	1	1	1	1	TPH2	tryptophan hydroxylase 2
hsa-miR-548k	1	0	1	1	1	1	TTBK2	tau tubulin kinase 2
hsa-miR-548k	1	0	1	1	1	1	FAM117B	family with sequence similarity 117, member B
hsa-miR-548k	0	0	1	1	0	0	REM2	RAS (RAD and GEM)-like GTP binding 2
hsa-miR-548k	1	0	1	0	1	1	PGM2L1	phosphoglucomutase 2-like 1
hsa-miR-548k	1	0	1	1	1	1	DIP2B	DIP2 disco-interacting protein 2 homolog B (Drosophila)
hsa-miR-548k	0	0	1	0	1	1	C5orf64	chromosome 5 open reading frame 64
hsa-miR-548k	1	0	1	0	1	1	DPY19L2	dpy-19-like 2 (C. elegans)
hsa-miR-548k	1	0	1	0	1	1	SREK1IP1	SREK1-interacting protein 1
hsa-miR-548k	1	0	1	1	1	1	SLC41A1	solute carrier family 41, member 1
hsa-miR-548k	1	0	1	1	1	1	UBR1	ubiquitin protein ligase E3 component n-recognin 1
hsa-miR-548k	1	0	1	1	1	1	OLIG3	oligodendrocyte transcription factor 3
hsa-miR-548k	0	0	1	1	1	1	CHSY3	chondroitin sulfate synthase 3
hsa-miR-548k	1	0	1	0	1	1	CCDC71L	coiled-coil domain containing 71-like
hsa-miR-548k	1	0	1	1	1	1	ZADH2	zinc binding alcohol dehydrogenase domain containing 2
hsa-miR-548k	1	0	1	1	1	1	PPAP2B	phosphatidic acid phosphatase type 2B
hsa-miR-548k	0	0	1	1	0	0	TAS1R1	taste receptor, type 1, member 1
hsa-miR-548k	1	0	1	1	1	1	LRRTM3	leucine rich repeat transmembrane neuronal 3
hsa-miR-548k	1	0	1	1	1	1	FAM134C	family with sequence similarity 134, member C
hsa-miR-548k	0	0	1	1	0	0	CCDC36	coiled-coil domain containing 36
hsa-miR-548k	1	0	1	1	1	1	MARCH3	membrane-associated ring finger (C3HC4) 3, E3 ubiquitin protein ligase
hsa-miR-548k	1	0	1	1	1	1	TMEM26	transmembrane protein 26
hsa-miR-548k	1	0	1	1	1	1	MTDH	metadherin
hsa-miR-548k	1	0	1	0	1	1	ARL5B	ADP-ribosylation factor-like 5B
hsa-miR-548k	0	0	1	1	1	1	CMTM4	CKLF-like MARVEL transmembrane domain containing 4
hsa-miR-548k	0	0	1	0	1	1	SLCO4C1	solute carrier organic anion transporter family, member 4C1
hsa-miR-548k	0	0	1	0	1	1	ZNF445	zinc finger protein 445
hsa-miR-548k	0	0	1	1	1	1	CCDC67	coiled-coil domain containing 67
hsa-miR-548k	0	0	1	1	1	1	C17orf58	chromosome 17 open reading frame 58
hsa-miR-548k	1	0	1	1	1	1	QSOX2	quiescin Q6 sulfhydryl oxidase 2
hsa-miR-548k	1	0	1	0	1	1	EFHA2	EF-hand domain family, member A2
hsa-miR-548k	1	0	1	1	1	1	ADAT2	adenosine deaminase, tRNA-specific 2
hsa-miR-548k	0	0	1	1	1	1	ZNF714	zinc finger protein 714
hsa-miR-548k	0	0	1	0	1	1	TMED4	transmembrane emp24 protein transport domain containing 4
hsa-miR-548k	1	0	1	1	1	1	SP8	Sp8 transcription factor
hsa-miR-548k	1	0	1	0	1	1	RNF144B	ring finger protein 144B
hsa-miR-548k	0	0	1	1	1	1	ZNF326	zinc finger protein 326
hsa-miR-548k	1	0	1	1	1	1	RD3	retinal degeneration 3
hsa-miR-548k	1	0	1	1	1	1	ARRDC4	arrestin domain containing 4
hsa-miR-548k	1	0	1	1	1	1	TMEM65	transmembrane protein 65
hsa-miR-548k	1	0	1	0	1	1	SLC16A9	solute carrier family 16, member 9 (monocarboxylic acid transporter 9)
hsa-miR-548k	1	0	1	1	1	1	RALGAPA1	Ral GTPase activating protein, alpha subunit 1 (catalytic)
hsa-miR-548k	1	0	1	1	1	1	ZBTB41	zinc finger and BTB domain containing 41
hsa-miR-548k	0	0	1	0	1	1	B3GALTL	beta 1,3-galactosyltransferase-like
hsa-miR-548k	1	0	1	1	1	1	ADAMTS6	ADAM metallopeptidase with thrombospondin type 1 motif, 6
hsa-miR-548k	0	0	1	0	0	0	RNF148	ring finger protein 148
hsa-miR-548k	1	0	1	1	1	1	ASB7	ankyrin repeat and SOCS box containing 7
hsa-miR-548k	0	0	1	1	0	0	KCTD8	potassium channel tetramerisation domain containing 8
hsa-miR-548k	1	0	1	0	1	1	PTPLB	protein tyrosine phosphatase-like (proline instead of catalytic arginine), member b
hsa-miR-548k	1	0	1	1	1	1	PAQR9	progestin and adipoQ receptor family member IX
hsa-miR-548k	0	0	1	0	0	0	IGFL1	IGF-like family member 1
hsa-miR-548k	0	0	1	1	1	1	C5orf34	chromosome 5 open reading frame 34
hsa-miR-548k	0	0	1	1	1	1	GJB7	gap junction protein, beta 7, 25kDa
hsa-miR-548k	0	0	1	1	0	0	VWC2	von Willebrand factor C domain containing 2
hsa-miR-548k	1	0	1	0	1	1	ZC3H6	zinc finger CCCH-type containing 6
hsa-miR-548k	0	0	1	1	1	1	COL25A1	collagen, type XXV, alpha 1
hsa-miR-548k	1	0	1	0	1	1	PRICKLE2	prickle homolog 2 (Drosophila)
hsa-miR-548k	1	0	1	0	1	1	LHFPL3	lipoma HMGIC fusion partner-like 3
hsa-miR-548k	1	0	1	1	1	1	NSUN4	NOP2/Sun domain family, member 4
hsa-miR-548k	0	0	1	1	1	1	MDFIC	MyoD family inhibitor domain containing
hsa-miR-548k	1	0	1	1	1	1	MEX3D	mex-3 homolog D (C. elegans)
hsa-miR-548k	0	0	1	1	1	1	ZRANB2	zinc finger, RAN-binding domain containing 2
hsa-miR-548k	1	0	1	0	1	1	MBLAC2	metallo-beta-lactamase domain containing 2
hsa-miR-548k	1	0	1	1	1	1	IGSF1	immunoglobulin superfamily, member 1
hsa-miR-548k	1	0	1	1	1	1	ENSA	endosulfine alpha
hsa-miR-548k	1	0	1	1	1	1	ATRNL1	attractin-like 1
hsa-miR-548k	0	0	1	1	1	1	ZNF474	zinc finger protein 474
hsa-miR-548k	0	0	1	1	1	1	C10orf129	chromosome 10 open reading frame 129
hsa-miR-548k	1	0	1	1	1	1	SKIDA1	SKI/DACH domain containing 1
hsa-miR-548k	0	0	1	1	1	1	C4orf50	chromosome 4 open reading frame 50
hsa-miR-548k	0	0	1	0	1	1	FLJ44635	TPT1-like protein
hsa-miR-548k	1	0	1	1	1	1	ADAMTSL3	ADAMTS-like 3
hsa-miR-548k	0	0	1	0	1	1	TMEM215	transmembrane protein 215
hsa-miR-548k	0	0	1	0	0	0	ESRRAP2	estrogen-related receptor alpha pseudogene 2
hsa-miR-548k	0	0	1	0	0	0	TOP1P2	topoisomerase (DNA) I pseudogene 2
hsa-miR-548k	0	0	1	0	0	0	SNORD107	small nucleolar RNA, C/D box 107
hsa-miR-548k	0	0	1	1	0	0	SNRPN	small nuclear ribonucleoprotein polypeptide N
hsa-miR-548k	0	0	1	0	0	0	ANXA2P3	annexin A2 pseudogene 3
hsa-miR-548k	0	0	1	0	0	0	TTTY15	testis-specific transcript, Y-linked 15 (non-protein coding)
hsa-miR-548k	0	0	1	0	0	0	VENTXP1	VENT homeobox pseudogene 1
hsa-miR-548k	0	0	1	0	0	0	ANXA2P1	annexin A2 pseudogene 1
hsa-miR-548k	0	0	1	0	0	0	PPP1R2P3	protein phosphatase 1, regulatory (inhibitor) subunit 2 pseudogene 3
hsa-miR-548k	0	0	1	0	0	0	SUMO1P3	SUMO1 pseudogene 3
hsa-miR-548k	0	0	1	0	0	0	TPRXL	tetra-peptide repeat homeobox-like
hsa-miR-548k	0	0	1	0	0	0	SNORA4	small nucleolar RNA, H/ACA box 4
hsa-miR-548k	0	0	1	0	0	0	FMO6P	flavin containing monooxygenase 6 pseudogene
hsa-miR-548k	0	0	1	0	0	0	NPY6R	neuropeptide Y receptor Y6 (pseudogene)
hsa-miR-548k	0	0	1	0	0	0	GABPAP	GA binding protein transcription factor, alpha subunit pseudogene
hsa-miR-548k	0	0	1	0	0	0	HYALP1	hyaluronoglucosaminidase pseudogene 1
hsa-miR-548k	0	0	1	0	0	0	AKIRIN2-AS1	AKIRIN2 antisense RNA 1
hsa-miR-548k	0	0	1	0	0	0	SEPHS1P1	selenophosphate synthetase 1 pseudogene 1
hsa-miR-548k	0	0	1	0	0	0	LOC256880	uncharacterized LOC256880
hsa-miR-548k	0	0	1	0	0	0	SNX29P2	sorting nexin 29 pseudogene 2
hsa-miR-548k	0	0	1	0	0	0	TCAM1P	testicular cell adhesion molecule 1 homolog (mouse), pseudogene
hsa-miR-548k	0	0	1	0	0	0	SCARNA17	small Cajal body-specific RNA 17
hsa-miR-548k	0	0	1	0	0	0	SNORA77	small nucleolar RNA, H/ACA box 77
hsa-miR-548k	0	0	1	0	0	0	EIF3IP1	eukaryotic translation initiation factor 3, subunit I pseudogene 1
hsa-miR-548k	0	0	1	0	0	0	HSP90B3P	heat shock protein 90kDa beta (Grp94), member 3, pseudogene
hsa-miR-548k	0	0	1	0	0	0	HSP90AB2P	heat shock protein 90kDa alpha (cytosolic), class B member 2, pseudogene
hsa-miR-548k	0	0	1	0	0	0	GBP1P1	guanylate binding protein 1, interferon-inducible pseudogene 1
hsa-miR-548k	0	0	1	0	1	1	SRSF5	serine/arginine-rich splicing factor 5
