# Supplementary material for: Profiling of Selected MicroRNAs in Proliferative Eutopic Endometrium of Women with Ovarian Endometriosis
Source: Biomed Res Int. 2015 Aug 20;2015:760698. doi: 10.1155/2015/760698 (PMC4558423; doi:10.1155/2015/760698)
Supplement: Supplementary file 1 — Table I: The names of miRNAs significantly differentially expressed between eutopic endometrium of patients with endometriosis vs eutopic endometrium of patients without endometriosis. Table II: The associations between miRNA and mRNA, which presents detailed results of the search of six major databases i.e targetscan, tarbase, miranda, mirbase, mirtarget2 and pictar. [file 760698.f1.zip › 760698.f1/Table II/hsa-miR-548l.tsv]

miR	targetscan	tarbase	miranda	mirbase	mirtarget2	pictar	GeneSymbol	GeneName
hsa-miR-548l	1	0	1	1	1	1	ARNTL	aryl hydrocarbon receptor nuclear translocator-like
hsa-miR-548l	1	0	1	1	1	1	ZFYVE16	zinc finger, FYVE domain containing 16
hsa-miR-548l	1	0	1	1	1	1	CHD9	chromodomain helicase DNA binding protein 9
hsa-miR-548l	1	0	1	1	0	0	RAPGEF2	Rap guanine nucleotide exchange factor (GEF) 2
hsa-miR-548l	1	0	1	0	1	1	KIAA0355	KIAA0355
hsa-miR-548l	1	0	1	1	1	1	PRUNE2	prune homolog 2 (Drosophila)
hsa-miR-548l	1	0	1	1	1	1	ITM2C	integral membrane protein 2C
hsa-miR-548l	1	0	1	0	1	1	PTPRT	protein tyrosine phosphatase, receptor type, T
hsa-miR-548l	1	0	1	0	1	1	GAS7	growth arrest-specific 7
hsa-miR-548l	1	0	1	0	1	1	KIAA0408	KIAA0408
hsa-miR-548l	1	0	1	1	1	1	NUPL1	nucleoporin like 1
hsa-miR-548l	1	0	1	0	1	1	MTSS1	metastasis suppressor 1
hsa-miR-548l	0	0	1	1	1	1	PREPL	prolyl endopeptidase-like
hsa-miR-548l	1	0	1	0	1	1	NEDD4L	neural precursor cell expressed, developmentally down-regulated 4-like, E3 ubiquitin protein ligase
hsa-miR-548l	1	0	1	1	1	1	AUTS2	autism susceptibility candidate 2
hsa-miR-548l	1	0	1	1	1	1	CDC42BPA	CDC42 binding protein kinase alpha (DMPK-like)
hsa-miR-548l	1	0	1	1	0	0	OTUD3	OTU domain containing 3
hsa-miR-548l	0	0	1	1	1	1	RABGAP1L	RAB GTPase activating protein 1-like
hsa-miR-548l	1	0	1	0	1	1	CEP350	centrosomal protein 350kDa
hsa-miR-548l	1	0	1	1	1	1	RNGTT	RNA guanylyltransferase and 5'-phosphatase
hsa-miR-548l	0	0	1	1	0	0	ZNF862	zinc finger protein 862
hsa-miR-548l	1	0	1	1	1	1	GPATCH8	G patch domain containing 8
hsa-miR-548l	0	0	1	0	0	0	KIAA0586	KIAA0586
hsa-miR-548l	1	0	1	1	1	1	SLC4A7	solute carrier family 4, sodium bicarbonate cotransporter, member 7
hsa-miR-548l	1	0	1	1	1	1	HIPK1	homeodomain interacting protein kinase 1
hsa-miR-548l	0	0	1	1	1	1	PHLDB1	pleckstrin homology-like domain, family B, member 1
hsa-miR-548l	1	0	1	1	1	1	GIGYF2	GRB10 interacting GYF protein 2
hsa-miR-548l	1	0	1	1	1	1	ATG13	autophagy related 13
hsa-miR-548l	1	0	1	1	1	1	TP63	tumor protein p63
hsa-miR-548l	0	0	1	1	1	1	XRCC4	X-ray repair complementing defective repair in Chinese hamster cells 4
hsa-miR-548l	1	0	1	0	1	1	SNX13	sorting nexin 13
hsa-miR-548l	0	0	1	1	0	0	ATP10B	ATPase, class V, type 10B
hsa-miR-548l	1	0	1	0	1	1	DOCK4	dedicator of cytokinesis 4
hsa-miR-548l	1	0	1	1	1	1	MATR3	matrin 3
hsa-miR-548l	1	0	1	0	1	1	RBM12	RNA binding motif protein 12
hsa-miR-548l	1	0	1	1	1	1	LPHN2	latrophilin 2
hsa-miR-548l	0	0	1	1	1	1	SEC31A	SEC31 homolog A (S. cerevisiae)
hsa-miR-548l	1	0	1	1	1	1	DNM3	dynamin 3
hsa-miR-548l	1	0	1	0	1	1	ATG14	autophagy related 14
hsa-miR-548l	0	0	1	1	1	1	ZC3H13	zinc finger CCCH-type containing 13
hsa-miR-548l	1	0	1	1	1	1	DMXL2	Dmx-like 2
hsa-miR-548l	1	0	1	1	1	1	LMO7	LIM domain 7
hsa-miR-548l	1	0	1	1	1	1	UBR5	ubiquitin protein ligase E3 component n-recognin 5
hsa-miR-548l	1	0	1	1	1	1	CDK12	cyclin-dependent kinase 12
hsa-miR-548l	1	0	1	1	1	1	CALCR	calcitonin receptor
hsa-miR-548l	1	0	1	1	1	1	UBE2K	ubiquitin-conjugating enzyme E2K
hsa-miR-548l	1	0	1	1	1	1	BAHD1	bromo adjacent homology domain containing 1
hsa-miR-548l	1	0	1	1	1	1	RGL1	ral guanine nucleotide dissociation stimulator-like 1
hsa-miR-548l	0	0	1	1	1	1	FASTKD2	FAST kinase domains 2
hsa-miR-548l	0	0	1	1	0	0	FAM149B1	family with sequence similarity 149, member B1
hsa-miR-548l	0	0	1	1	1	1	TBC1D30	TBC1 domain family, member 30
hsa-miR-548l	1	0	1	1	1	1	PALLD	palladin, cytoskeletal associated protein
hsa-miR-548l	1	0	1	1	1	1	RPGRIP1L	RPGRIP1-like
hsa-miR-548l	1	0	1	1	0	0	FRMD4B	FERM domain containing 4B
hsa-miR-548l	0	0	1	1	1	1	DBF4	DBF4 homolog (S. cerevisiae)
hsa-miR-548l	1	0	1	1	1	1	NLGN1	neuroligin 1
hsa-miR-548l	1	0	1	0	1	1	ZNF507	zinc finger protein 507
hsa-miR-548l	0	0	1	1	0	0	CIZ1	CDKN1A interacting zinc finger protein 1
hsa-miR-548l	1	0	1	1	1	1	SMARCAD1	SWI/SNF-related, matrix-associated actin-dependent regulator of chromatin, subfamily a, containing DEAD/H box 1
hsa-miR-548l	1	0	1	0	1	1	ODZ2	odz, odd Oz/ten-m homolog 2 (Drosophila)
hsa-miR-548l	1	0	1	0	1	1	GPR158	G protein-coupled receptor 158
hsa-miR-548l	1	0	1	1	1	1	RALGAPB	Ral GTPase activating protein, beta subunit (non-catalytic)
hsa-miR-548l	1	0	1	1	1	1	ZMIZ1	zinc finger, MIZ-type containing 1
hsa-miR-548l	1	0	1	1	1	1	RIMKLB	ribosomal modification protein rimK-like family member B
hsa-miR-548l	1	0	1	1	0	0	ATAD2B	ATPase family, AAA domain containing 2B
hsa-miR-548l	1	0	1	1	1	1	ASAP1	ArfGAP with SH3 domain, ankyrin repeat and PH domain 1
hsa-miR-548l	1	0	1	0	1	1	ANKFY1	ankyrin repeat and FYVE domain containing 1
hsa-miR-548l	0	0	1	1	1	1	KIF20B	kinesin family member 20B
hsa-miR-548l	1	0	1	1	1	1	PCDH19	protocadherin 19
hsa-miR-548l	1	0	1	1	1	1	TAOK1	TAO kinase 1
hsa-miR-548l	1	0	1	1	1	1	LRRC7	leucine rich repeat containing 7
hsa-miR-548l	0	0	1	0	0	0	KIAA1383	KIAA1383
hsa-miR-548l	1	0	1	1	1	1	FAM135A	family with sequence similarity 135, member A
hsa-miR-548l	1	1	1	1	1	1	NFIA	nuclear factor I/A
hsa-miR-548l	1	0	1	0	1	1	SEMA6D	sema domain, transmembrane domain (TM), and cytoplasmic domain, (semaphorin) 6D
hsa-miR-548l	1	0	1	0	1	1	ZNF295	zinc finger protein 295
hsa-miR-548l	1	0	1	1	1	1	TOPORS	topoisomerase I binding, arginine/serine-rich, E3 ubiquitin protein ligase
hsa-miR-548l	0	0	1	1	1	1	CEP192	centrosomal protein 192kDa
hsa-miR-548l	1	0	1	1	1	1	ZNF532	zinc finger protein 532
hsa-miR-548l	1	0	1	0	0	0	TANC2	tetratricopeptide repeat, ankyrin repeat and coiled-coil containing 2
hsa-miR-548l	0	0	1	0	1	1	SETD5	SET domain containing 5
hsa-miR-548l	0	0	1	1	1	1	LRRCC1	leucine rich repeat and coiled-coil centrosomal protein 1
hsa-miR-548l	1	0	1	0	1	1	RIMS1	regulating synaptic membrane exocytosis 1
hsa-miR-548l	1	0	1	1	1	1	LCOR	ligand dependent nuclear receptor corepressor
hsa-miR-548l	0	0	1	1	1	1	SLC11A2	solute carrier family 11 (proton-coupled divalent metal ion transporters), member 2
hsa-miR-548l	1	0	1	1	1	1	NAV2	neuron navigator 2
hsa-miR-548l	0	0	1	1	1	1	C3orf15	chromosome 3 open reading frame 15
hsa-miR-548l	1	0	1	1	1	1	LSM14A	LSM14A, SCD6 homolog A (S. cerevisiae)
hsa-miR-548l	1	0	1	1	1	1	ANKRD12	ankyrin repeat domain 12
hsa-miR-548l	1	0	1	1	0	0	ZNF292	zinc finger protein 292
hsa-miR-548l	1	0	1	1	1	1	SH3TC2	SH3 domain and tetratricopeptide repeats 2
hsa-miR-548l	1	0	1	0	0	0	ZBTB34	zinc finger and BTB domain containing 34
hsa-miR-548l	0	0	1	1	1	1	MCF2	MCF.2 cell line derived transforming sequence
hsa-miR-548l	0	0	1	0	1	1	RASSF8	Ras association (RalGDS/AF-6) domain family (N-terminal) member 8
hsa-miR-548l	1	0	1	1	1	1	SMEK1	SMEK homolog 1, suppressor of mek1 (Dictyostelium)
hsa-miR-548l	0	0	1	1	0	0	ANKRD18A	ankyrin repeat domain 18A
hsa-miR-548l	1	0	1	1	1	1	UBR3	ubiquitin protein ligase E3 component n-recognin 3 (putative)
hsa-miR-548l	1	0	1	0	0	0	ZC3H12C	zinc finger CCCH-type containing 12C
hsa-miR-548l	1	0	1	1	1	1	C11orf57	chromosome 11 open reading frame 57
hsa-miR-548l	0	0	1	1	1	1	ACPP	acid phosphatase, prostate
hsa-miR-548l	1	0	1	1	1	1	PAN3	PAN3 poly(A) specific ribonuclease subunit homolog (S. cerevisiae)
hsa-miR-548l	1	0	1	1	1	1	KCNMA1	potassium large conductance calcium-activated channel, subfamily M, alpha member 1
hsa-miR-548l	1	0	1	0	1	1	BEND4	BEN domain containing 4
hsa-miR-548l	1	0	1	1	1	1	TRIM36	tripartite motif containing 36
hsa-miR-548l	1	0	1	0	1	1	CCDC88A	coiled-coil domain containing 88A
hsa-miR-548l	0	0	1	1	0	0	HFM1	HFM1, ATP-dependent DNA helicase homolog (S. cerevisiae)
hsa-miR-548l	1	0	1	0	1	1	NFE2L2	nuclear factor (erythroid-derived 2)-like 2
hsa-miR-548l	1	0	1	1	1	1	SEC14L1	SEC14-like 1 (S. cerevisiae)
hsa-miR-548l	0	0	1	1	1	1	ATP7A	ATPase, Cu++ transporting, alpha polypeptide
hsa-miR-548l	1	0	1	0	1	1	LRBA	LPS-responsive vesicle trafficking, beach and anchor containing
hsa-miR-548l	1	0	1	1	1	1	COL11A1	collagen, type XI, alpha 1
hsa-miR-548l	1	0	1	1	1	1	SHC1	SHC (Src homology 2 domain containing) transforming protein 1
hsa-miR-548l	0	0	1	0	1	1	ITPR1	inositol 1,4,5-trisphosphate receptor, type 1
hsa-miR-548l	1	0	1	1	1	1	BACH2	BTB and CNC homology 1, basic leucine zipper transcription factor 2
hsa-miR-548l	1	0	1	0	1	1	PCDHA13	protocadherin alpha 13
hsa-miR-548l	1	0	1	1	1	1	PCDHA4	protocadherin alpha 4
hsa-miR-548l	0	0	1	0	1	1	ATF6	activating transcription factor 6
hsa-miR-548l	1	0	1	1	1	1	RPS6KA3	ribosomal protein S6 kinase, 90kDa, polypeptide 3
hsa-miR-548l	1	0	1	1	0	0	ELN	elastin
hsa-miR-548l	1	0	1	1	1	1	NFYC	nuclear transcription factor Y, gamma
hsa-miR-548l	1	0	1	1	1	1	HMGB1	high mobility group box 1
hsa-miR-548l	1	0	1	1	1	1	PCCB	propionyl CoA carboxylase, beta polypeptide
hsa-miR-548l	0	0	1	1	1	1	NME7	NME/NM23 family member 7
hsa-miR-548l	1	0	1	1	1	1	PML	promyelocytic leukemia
hsa-miR-548l	1	0	1	1	1	1	PHC1	polyhomeotic homolog 1 (Drosophila)
hsa-miR-548l	0	0	1	1	1	1	PTK2	PTK2 protein tyrosine kinase 2
hsa-miR-548l	1	0	1	1	1	1	SLC8A1	solute carrier family 8 (sodium/calcium exchanger), member 1
hsa-miR-548l	1	0	1	0	1	1	PLAG1	pleiomorphic adenoma gene 1
hsa-miR-548l	1	0	1	0	1	1	SLC6A6	solute carrier family 6 (neurotransmitter transporter, taurine), member 6
hsa-miR-548l	1	0	1	1	1	1	FMR1	fragile X mental retardation 1
hsa-miR-548l	1	0	1	0	1	1	DPYSL2	dihydropyrimidinase-like 2
hsa-miR-548l	0	0	1	0	1	1	NPY1R	neuropeptide Y receptor Y1
hsa-miR-548l	1	0	1	1	1	1	REV3L	REV3-like, polymerase (DNA directed), zeta, catalytic subunit
hsa-miR-548l	1	0	1	1	1	1	ABI1	abl-interactor 1
hsa-miR-548l	1	0	1	1	1	1	EPHA7	EPH receptor A7
hsa-miR-548l	1	0	1	0	1	1	CHL1	cell adhesion molecule with homology to L1CAM (close homolog of L1)
hsa-miR-548l	1	0	1	1	1	1	AEBP2	AE binding protein 2
hsa-miR-548l	1	0	1	0	1	1	CDON	Cdon homolog (mouse)
hsa-miR-548l	0	0	1	1	0	0	DNMT1	DNA (cytosine-5-)-methyltransferase 1
hsa-miR-548l	0	0	1	1	0	0	IFT27	intraflagellar transport 27 homolog (Chlamydomonas)
hsa-miR-548l	1	0	1	1	1	1	MYO5A	myosin VA (heavy chain 12, myoxin)
hsa-miR-548l	1	0	1	1	1	1	LIMA1	LIM domain and actin binding 1
hsa-miR-548l	0	0	1	1	0	0	EIF4E2	eukaryotic translation initiation factor 4E family member 2
hsa-miR-548l	1	0	1	1	1	1	HNRNPK	heterogeneous nuclear ribonucleoprotein K
hsa-miR-548l	1	0	1	1	1	1	COL16A1	collagen, type XVI, alpha 1
hsa-miR-548l	1	0	1	1	1	1	IPO8	importin 8
hsa-miR-548l	0	0	1	1	1	1	HLA-DQA1	major histocompatibility complex, class II, DQ alpha 1
hsa-miR-548l	1	0	1	1	1	1	ARHGEF3	Rho guanine nucleotide exchange factor (GEF) 3
hsa-miR-548l	1	0	1	1	0	0	SYN3	synapsin III
hsa-miR-548l	0	0	1	1	0	0	SLC22A8	solute carrier family 22 (organic anion transporter), member 8
hsa-miR-548l	0	0	1	1	1	1	ELOVL5	ELOVL fatty acid elongase 5
hsa-miR-548l	1	0	1	0	1	1	ADD3	adducin 3 (gamma)
hsa-miR-548l	1	0	1	1	1	1	CRTAM	cytotoxic and regulatory T cell molecule
hsa-miR-548l	1	0	1	1	1	1	HMGA2	high mobility group AT-hook 2
hsa-miR-548l	1	0	1	1	1	1	TEAD1	TEA domain family member 1 (SV40 transcriptional enhancer factor)
hsa-miR-548l	0	0	1	1	0	0	TRIM27	tripartite motif containing 27
hsa-miR-548l	1	0	1	1	1	1	GULP1	GULP, engulfment adaptor PTB domain containing 1
hsa-miR-548l	1	0	1	1	1	1	ZFX	zinc finger protein, X-linked
hsa-miR-548l	0	0	1	1	1	1	PLD1	phospholipase D1, phosphatidylcholine-specific
hsa-miR-548l	1	0	1	0	1	1	CAV1	caveolin 1, caveolae protein, 22kDa
hsa-miR-548l	0	0	1	1	1	1	SPP1	secreted phosphoprotein 1
hsa-miR-548l	1	0	1	0	1	1	PDE7B	phosphodiesterase 7B
hsa-miR-548l	0	0	1	1	1	1	CENPE	centromere protein E, 312kDa
hsa-miR-548l	1	0	1	1	1	1	APC	adenomatous polyposis coli
hsa-miR-548l	1	0	1	1	1	1	MEF2D	myocyte enhancer factor 2D
hsa-miR-548l	1	0	1	1	1	1	PICALM	phosphatidylinositol binding clathrin assembly protein
hsa-miR-548l	1	0	1	1	1	1	DLGAP2	discs, large (Drosophila) homolog-associated protein 2
hsa-miR-548l	1	0	1	0	1	1	MLL2	myeloid/lymphoid or mixed-lineage leukemia 2
hsa-miR-548l	1	0	1	0	1	1	PDE4D	phosphodiesterase 4D, cAMP-specific
hsa-miR-548l	1	0	1	1	1	1	PCDH17	protocadherin 17
hsa-miR-548l	0	0	1	1	1	1	SESN1	sestrin 1
hsa-miR-548l	0	0	1	1	1	1	SH3GL3	SH3-domain GRB2-like 3
hsa-miR-548l	1	0	1	1	1	1	SOCS2	suppressor of cytokine signaling 2
hsa-miR-548l	1	0	1	0	0	0	MAP3K1	mitogen-activated protein kinase kinase kinase 1, E3 ubiquitin protein ligase
hsa-miR-548l	0	0	1	1	1	1	UBE4B	ubiquitination factor E4B
hsa-miR-548l	1	0	1	1	1	1	LDB2	LIM domain binding 2
hsa-miR-548l	0	0	1	1	1	1	CYP4F3	cytochrome P450, family 4, subfamily F, polypeptide 3
hsa-miR-548l	1	0	1	1	1	1	SHOC2	soc-2 suppressor of clear homolog (C. elegans)
hsa-miR-548l	0	0	1	1	1	1	CREB3L1	cAMP responsive element binding protein 3-like 1
hsa-miR-548l	1	0	1	1	1	1	MBNL2	muscleblind-like splicing regulator 2
hsa-miR-548l	1	0	1	1	1	1	NUDT4	nudix (nucleoside diphosphate linked moiety X)-type motif 4
hsa-miR-548l	1	0	1	1	1	1	USP3	ubiquitin specific peptidase 3
hsa-miR-548l	0	0	1	0	0	0	C3orf79	chromosome 3 open reading frame 79
hsa-miR-548l	1	0	1	1	1	1	GLS	glutaminase
hsa-miR-548l	0	0	1	1	1	1	FHL1	four and a half LIM domains 1
hsa-miR-548l	0	0	1	1	1	1	SH2D1A	SH2 domain containing 1A
hsa-miR-548l	1	0	1	1	1	1	SLMAP	sarcolemma associated protein
hsa-miR-548l	0	0	1	1	0	0	COPB1	coatomer protein complex, subunit beta 1
hsa-miR-548l	1	0	1	1	1	1	EDNRB	endothelin receptor type B
hsa-miR-548l	1	0	1	1	1	1	LRRFIP1	leucine rich repeat (in FLII) interacting protein 1
hsa-miR-548l	0	0	1	1	0	0	ABRACL	ABRA C-terminal like
hsa-miR-548l	0	0	1	1	1	1	DCAF6	DDB1 and CUL4 associated factor 6
hsa-miR-548l	1	0	1	0	1	1	CDK14	cyclin-dependent kinase 14
hsa-miR-548l	0	0	1	1	1	1	TIAM2	T-cell lymphoma invasion and metastasis 2
hsa-miR-548l	1	0	1	0	1	1	FAM19A5	family with sequence similarity 19 (chemokine (C-C motif)-like), member A5
hsa-miR-548l	1	0	1	1	1	1	HNRNPH3	heterogeneous nuclear ribonucleoprotein H3 (2H9)
hsa-miR-548l	0	0	1	1	0	0	ACOT9	acyl-CoA thioesterase 9
hsa-miR-548l	1	0	1	1	1	1	CAB39	calcium binding protein 39
hsa-miR-548l	1	0	1	0	1	1	BECN1	beclin 1, autophagy related
hsa-miR-548l	1	0	1	1	1	1	C14orf129	chromosome 14 open reading frame 129
hsa-miR-548l	0	0	1	0	1	1	PDP1	pyruvate dehyrogenase phosphatase catalytic subunit 1
hsa-miR-548l	1	0	1	1	1	1	USP25	ubiquitin specific peptidase 25
hsa-miR-548l	1	0	1	1	1	1	DNAJA4	DnaJ (Hsp40) homolog, subfamily A, member 4
hsa-miR-548l	0	0	1	1	1	1	FBXO25	F-box protein 25
hsa-miR-548l	1	0	1	0	1	1	AMOTL2	angiomotin like 2
hsa-miR-548l	1	0	1	1	1	1	BCL2L13	BCL2-like 13 (apoptosis facilitator)
hsa-miR-548l	0	0	1	0	1	1	SLC38A4	solute carrier family 38, member 4
hsa-miR-548l	1	0	1	1	1	1	CCNL1	cyclin L1
hsa-miR-548l	1	0	1	1	1	1	FAM49B	family with sequence similarity 49, member B
hsa-miR-548l	1	0	1	1	1	1	KCNMB2	potassium large conductance calcium-activated channel, subfamily M, beta member 2
hsa-miR-548l	1	0	1	1	1	1	MYLIP	myosin regulatory light chain interacting protein
hsa-miR-548l	1	0	1	1	1	1	NXT2	nuclear transport factor 2-like export factor 2
hsa-miR-548l	0	0	1	1	1	1	SLC30A5	solute carrier family 30 (zinc transporter), member 5
hsa-miR-548l	0	0	1	1	1	1	BRD7	bromodomain containing 7
hsa-miR-548l	0	0	1	1	1	1	ARHGAP15	Rho GTPase activating protein 15
hsa-miR-548l	0	0	1	1	1	1	SAMSN1	SAM domain, SH3 domain and nuclear localization signals 1
hsa-miR-548l	0	0	1	1	1	1	CD28	CD28 molecule
hsa-miR-548l	1	0	1	1	1	1	OGT	O-linked N-acetylglucosamine (GlcNAc) transferase
hsa-miR-548l	1	0	1	1	1	1	DESI2	desumoylating isopeptidase 2
hsa-miR-548l	1	0	1	1	1	1	STRN3	striatin, calmodulin binding protein 3
hsa-miR-548l	0	0	1	1	0	0	ELMOD3	ELMO/CED-12 domain containing 3
hsa-miR-548l	1	0	1	1	1	1	RBM47	RNA binding motif protein 47
hsa-miR-548l	1	0	1	1	1	1	SH3GLB1	SH3-domain GRB2-like endophilin B1
hsa-miR-548l	1	0	1	0	1	1	PARP11	poly (ADP-ribose) polymerase family, member 11
hsa-miR-548l	1	0	1	0	1	1	TRPS1	trichorhinophalangeal syndrome I
hsa-miR-548l	1	0	1	1	1	1	ERGIC1	endoplasmic reticulum-golgi intermediate compartment (ERGIC) 1
hsa-miR-548l	1	0	1	1	1	1	PUM2	pumilio homolog 2 (Drosophila)
hsa-miR-548l	0	0	1	1	1	1	ASUN	asunder, spermatogenesis regulator homolog (Drosphila)
hsa-miR-548l	1	0	1	1	1	1	TMUB2	transmembrane and ubiquitin-like domain containing 2
hsa-miR-548l	0	0	1	0	0	0	LOC645355	uncharacterized LOC645355
hsa-miR-548l	1	0	1	1	1	1	DCLRE1B	DNA cross-link repair 1B
hsa-miR-548l	0	0	1	1	1	1	FCRLA	Fc receptor-like A
hsa-miR-548l	1	0	1	1	1	1	CHST9	carbohydrate (N-acetylgalactosamine 4-0) sulfotransferase 9
hsa-miR-548l	0	0	1	1	0	0	FEZF2	FEZ family zinc finger 2
hsa-miR-548l	0	0	1	1	1	1	RERG	RAS-like, estrogen-regulated, growth inhibitor
hsa-miR-548l	1	0	1	1	1	1	BIVM	basic, immunoglobulin-like variable motif containing
hsa-miR-548l	0	0	1	1	1	1	SLC6A15	solute carrier family 6 (neutral amino acid transporter), member 15
hsa-miR-548l	1	0	1	1	1	1	PBX3	pre-B-cell leukemia homeobox 3
hsa-miR-548l	1	0	1	1	1	1	CALCOCO1	calcium binding and coiled-coil domain 1
hsa-miR-548l	1	0	1	1	1	1	LARP4	La ribonucleoprotein domain family, member 4
hsa-miR-548l	0	0	1	1	1	1	CASP8	caspase 8, apoptosis-related cysteine peptidase
hsa-miR-548l	1	0	1	1	1	1	PDE8A	phosphodiesterase 8A
hsa-miR-548l	0	0	1	0	1	1	MYO3B	myosin IIIB
hsa-miR-548l	0	0	1	1	0	0	CREB3L4	cAMP responsive element binding protein 3-like 4
hsa-miR-548l	1	0	1	1	0	0	SAMD4A	sterile alpha motif domain containing 4A
hsa-miR-548l	1	0	1	1	0	0	SEPT8	septin 8
hsa-miR-548l	1	0	1	1	1	1	RBFOX1	RNA binding protein, fox-1 homolog (C. elegans) 1
hsa-miR-548l	0	0	1	0	1	1	EPM2A	epilepsy, progressive myoclonus type 2A, Lafora disease (laforin)
hsa-miR-548l	1	0	1	0	1	1	PPP1R12A	protein phosphatase 1, regulatory subunit 12A
hsa-miR-548l	0	0	1	1	0	0	MTO1	mitochondrial translation optimization 1 homolog (S. cerevisiae)
hsa-miR-548l	1	0	1	1	1	1	ZC3H14	zinc finger CCCH-type containing 14
hsa-miR-548l	1	0	1	1	1	1	WAPAL	wings apart-like homolog (Drosophila)
hsa-miR-548l	1	0	1	1	1	1	F3	coagulation factor III (thromboplastin, tissue factor)
hsa-miR-548l	0	0	1	1	1	1	CARD8	caspase recruitment domain family, member 8
hsa-miR-548l	1	0	1	1	1	1	PTBP2	polypyrimidine tract binding protein 2
hsa-miR-548l	1	0	1	1	1	1	VPS37A	vacuolar protein sorting 37 homolog A (S. cerevisiae)
hsa-miR-548l	1	0	1	1	1	1	AFF2	AF4/FMR2 family, member 2
hsa-miR-548l	1	0	1	0	1	1	DICER1	dicer 1, ribonuclease type III
hsa-miR-548l	1	0	1	0	1	1	CACNA1C	calcium channel, voltage-dependent, L type, alpha 1C subunit
hsa-miR-548l	1	0	1	1	1	1	SUCO	SUN domain containing ossification factor
hsa-miR-548l	0	0	1	1	1	1	TCFL5	transcription factor-like 5 (basic helix-loop-helix)
hsa-miR-548l	1	0	1	0	1	1	GRB10	growth factor receptor-bound protein 10
hsa-miR-548l	0	0	1	1	1	1	CD1E	CD1e molecule
hsa-miR-548l	0	0	1	1	1	1	WWTR1	WW domain containing transcription regulator 1
hsa-miR-548l	1	0	1	1	1	1	PALM2	paralemmin 2
hsa-miR-548l	1	0	1	1	1	1	RAB3IP	RAB3A interacting protein (rabin3)
hsa-miR-548l	0	0	1	0	1	1	SRPK1	SRSF protein kinase 1
hsa-miR-548l	0	0	1	0	1	1	AHI1	Abelson helper integration site 1
hsa-miR-548l	1	0	1	1	1	1	NAV3	neuron navigator 3
hsa-miR-548l	0	0	1	1	1	1	TRDN	triadin
hsa-miR-548l	1	0	1	1	1	1	ARL4C	ADP-ribosylation factor-like 4C
hsa-miR-548l	0	0	1	1	1	1	PHACTR3	phosphatase and actin regulator 3
hsa-miR-548l	1	0	1	1	1	1	PPP1R9A	protein phosphatase 1, regulatory subunit 9A
hsa-miR-548l	1	0	1	1	1	1	AKAP2	A kinase (PRKA) anchor protein 2
hsa-miR-548l	1	0	1	1	1	1	ENOX2	ecto-NOX disulfide-thiol exchanger 2
hsa-miR-548l	0	0	1	0	0	0	TUG1	taurine upregulated 1 (non-protein coding)
hsa-miR-548l	0	0	1	1	1	1	OLFM4	olfactomedin 4
hsa-miR-548l	1	0	1	1	1	1	ARHGAP12	Rho GTPase activating protein 12
hsa-miR-548l	1	0	1	0	1	1	VPS13D	vacuolar protein sorting 13 homolog D (S. cerevisiae)
hsa-miR-548l	1	0	1	1	1	1	EIF2C1	eukaryotic translation initiation factor 2C, 1
hsa-miR-548l	1	0	1	1	1	1	PTBP3	polypyrimidine tract binding protein 3
hsa-miR-548l	1	0	1	1	1	1	SLC38A2	solute carrier family 38, member 2
hsa-miR-548l	1	0	1	1	1	1	MKLN1	muskelin 1, intracellular mediator containing kelch motifs
hsa-miR-548l	1	0	1	1	1	1	ZNF395	zinc finger protein 395
hsa-miR-548l	1	0	1	0	1	1	SPATS2L	spermatogenesis associated, serine-rich 2-like
hsa-miR-548l	1	0	1	1	1	1	MYEF2	myelin expression factor 2
hsa-miR-548l	1	0	1	1	1	1	ACER3	alkaline ceramidase 3
hsa-miR-548l	1	0	1	1	1	1	INSIG2	insulin induced gene 2
hsa-miR-548l	0	0	1	1	0	0	ANAPC7	anaphase promoting complex subunit 7
hsa-miR-548l	1	0	1	1	1	1	RABGAP1	RAB GTPase activating protein 1
hsa-miR-548l	0	0	1	0	0	0	SOX2-OT	SOX2 overlapping transcript (non-protein coding)
hsa-miR-548l	0	0	1	1	1	1	INPP5B	inositol polyphosphate-5-phosphatase, 75kDa
hsa-miR-548l	1	0	1	1	1	1	SMEK2	SMEK homolog 2, suppressor of mek1 (Dictyostelium)
hsa-miR-548l	0	0	1	1	1	1	TTC23	tetratricopeptide repeat domain 23
hsa-miR-548l	1	0	1	1	1	1	SRP72	signal recognition particle 72kDa
hsa-miR-548l	0	0	1	1	0	0	BUB1	budding uninhibited by benzimidazoles 1 homolog (yeast)
hsa-miR-548l	1	0	1	1	1	1	BAIAP2	BAI1-associated protein 2
hsa-miR-548l	1	0	1	1	1	1	PHF20L1	PHD finger protein 20-like 1
hsa-miR-548l	0	0	1	0	0	0	LOC284561	uncharacterized LOC284561
hsa-miR-548l	0	0	1	1	1	1	AMFR	autocrine motility factor receptor, E3 ubiquitin protein ligase
hsa-miR-548l	0	0	1	1	1	1	CDKAL1	CDK5 regulatory subunit associated protein 1-like 1
hsa-miR-548l	0	0	1	0	0	0	IFFO2	intermediate filament family orphan 2
hsa-miR-548l	1	0	1	1	1	1	CLIP4	CAP-GLY domain containing linker protein family, member 4
hsa-miR-548l	1	0	1	0	1	1	ATP2B1	ATPase, Ca++ transporting, plasma membrane 1
hsa-miR-548l	0	0	1	1	1	1	EP400	E1A binding protein p400
hsa-miR-548l	1	0	1	0	1	1	MYO5B	myosin VB
hsa-miR-548l	0	0	1	0	0	0	KIAA1671	KIAA1671
hsa-miR-548l	1	0	1	1	1	1	PHACTR4	phosphatase and actin regulator 4
hsa-miR-548l	1	0	1	1	1	1	ARFGEF1	ADP-ribosylation factor guanine nucleotide-exchange factor 1 (brefeldin A-inhibited)
hsa-miR-548l	0	0	1	1	1	1	WDR67	WD repeat domain 67
hsa-miR-548l	1	0	1	1	1	1	SUN1	Sad1 and UNC84 domain containing 1
hsa-miR-548l	1	0	1	1	1	1	NAA30	N(alpha)-acetyltransferase 30, NatC catalytic subunit
hsa-miR-548l	0	0	1	1	0	0	EWSR1	Ewing sarcoma breakpoint region 1
hsa-miR-548l	0	0	1	1	1	1	FAM124B	family with sequence similarity 124B
hsa-miR-548l	1	0	1	1	1	1	DCAF8	DDB1 and CUL4 associated factor 8
hsa-miR-548l	0	0	1	1	1	1	ZBBX	zinc finger, B-box domain containing
hsa-miR-548l	0	0	1	0	1	1	ZCCHC8	zinc finger, CCHC domain containing 8
hsa-miR-548l	1	0	1	1	1	1	FBXL12	F-box and leucine-rich repeat protein 12
hsa-miR-548l	1	0	1	0	1	1	TOX3	TOX high mobility group box family member 3
hsa-miR-548l	0	0	1	1	1	1	GPBP1L1	GC-rich promoter binding protein 1-like 1
hsa-miR-548l	0	0	1	1	1	1	RNF146	ring finger protein 146
hsa-miR-548l	1	0	1	1	1	1	MARK1	MAP/microtubule affinity-regulating kinase 1
hsa-miR-548l	0	0	1	1	0	0	FAM48A	family with sequence similarity 48, member A
hsa-miR-548l	1	0	1	0	1	1	ATP10D	ATPase, class V, type 10D
hsa-miR-548l	0	0	1	1	1	1	VWDE	von Willebrand factor D and EGF domains
hsa-miR-548l	0	0	1	1	1	1	DTL	denticleless E3 ubiquitin protein ligase homolog (Drosophila)
hsa-miR-548l	1	0	1	1	1	1	GPD2	glycerol-3-phosphate dehydrogenase 2 (mitochondrial)
hsa-miR-548l	0	0	1	1	1	1	STMN1	stathmin 1
hsa-miR-548l	1	0	1	1	1	1	SLAIN1	SLAIN motif family, member 1
hsa-miR-548l	1	0	1	1	1	1	ARHGAP36	Rho GTPase activating protein 36
hsa-miR-548l	0	0	1	1	1	1	FAM107A	family with sequence similarity 107, member A
hsa-miR-548l	1	0	1	1	1	1	MBD5	methyl-CpG binding domain protein 5
hsa-miR-548l	1	0	1	1	1	1	PPM1L	protein phosphatase, Mg2+/Mn2+ dependent, 1L
hsa-miR-548l	1	0	1	0	1	1	AP1G1	adaptor-related protein complex 1, gamma 1 subunit
hsa-miR-548l	0	0	1	1	1	1	FBXO5	F-box protein 5
hsa-miR-548l	0	0	1	0	0	0	FLJ30838	uncharacterized LOC400955
hsa-miR-548l	0	0	1	1	1	1	OPTN	optineurin
hsa-miR-548l	1	0	1	1	1	1	SULF1	sulfatase 1
hsa-miR-548l	0	0	1	0	0	0	LOC219688	uncharacterized LOC219688
hsa-miR-548l	0	0	1	1	1	1	GLYATL1	glycine-N-acyltransferase-like 1
hsa-miR-548l	1	0	1	0	0	0	PWWP2A	PWWP domain containing 2A
hsa-miR-548l	1	0	1	1	1	1	TMTC1	transmembrane and tetratricopeptide repeat containing 1
hsa-miR-548l	1	0	1	1	1	1	ZNF664	zinc finger protein 664
hsa-miR-548l	0	0	1	1	1	1	ANKRD36B	ankyrin repeat domain 36B
hsa-miR-548l	0	0	1	1	0	0	STRA6	stimulated by retinoic acid gene 6 homolog (mouse)
hsa-miR-548l	0	0	1	0	0	0	RMST	rhabdomyosarcoma 2 associated transcript (non-protein coding)
hsa-miR-548l	0	0	1	1	1	1	HEATR2	HEAT repeat containing 2
hsa-miR-548l	1	0	1	1	0	0	SLC26A6	solute carrier family 26, member 6
hsa-miR-548l	0	0	1	0	1	1	FAM70A	family with sequence similarity 70, member A
hsa-miR-548l	1	0	1	1	1	1	CLCN5	chloride channel, voltage-sensitive 5
hsa-miR-548l	1	0	1	1	1	1	SORBS2	sorbin and SH3 domain containing 2
hsa-miR-548l	1	0	1	1	1	1	PUM1	pumilio homolog 1 (Drosophila)
hsa-miR-548l	1	0	1	1	1	1	FOPNL	FGFR1OP N-terminal like
hsa-miR-548l	0	0	1	0	1	1	AGBL1	ATP/GTP binding protein-like 1
hsa-miR-548l	1	0	1	1	1	1	PCMTD1	protein-L-isoaspartate (D-aspartate) O-methyltransferase domain containing 1
hsa-miR-548l	1	0	1	1	1	1	GORASP1	golgi reassembly stacking protein 1, 65kDa
hsa-miR-548l	0	0	1	1	1	1	PSME3	proteasome (prosome, macropain) activator subunit 3 (PA28 gamma; Ki)
hsa-miR-548l	0	0	1	1	0	0	LOXHD1	lipoxygenase homology domains 1
hsa-miR-548l	1	0	1	1	1	1	TLE4	transducin-like enhancer of split 4 (E(sp1) homolog, Drosophila)
hsa-miR-548l	0	0	1	0	1	1	ARHGAP42	Rho GTPase activating protein 42
hsa-miR-548l	1	0	1	0	1	1	NCAM1	neural cell adhesion molecule 1
hsa-miR-548l	0	0	1	1	1	1	SEC61A2	Sec61 alpha 2 subunit (S. cerevisiae)
hsa-miR-548l	1	0	1	0	1	1	BLOC1S6	biogenesis of lysosomal organelles complex-1, subunit 6, pallidin
hsa-miR-548l	1	0	1	1	0	0	TCF7	transcription factor 7 (T-cell specific, HMG-box)
hsa-miR-548l	0	0	1	0	1	1	CHURC1	churchill domain containing 1
hsa-miR-548l	0	0	1	0	0	0	LOC285074	anaphase promoting complex subunit 1 pseudogene
hsa-miR-548l	1	0	1	1	1	1	IST1	increased sodium tolerance 1 homolog (yeast)
hsa-miR-548l	0	0	1	1	0	0	CERS5	ceramide synthase 5
hsa-miR-548l	0	0	1	1	1	1	ZBTB26	zinc finger and BTB domain containing 26
hsa-miR-548l	0	0	1	1	1	1	KIDINS220	kinase D-interacting substrate, 220kDa
hsa-miR-548l	1	0	1	1	1	1	HLF	hepatic leukemia factor
hsa-miR-548l	1	0	1	1	1	1	TBCK	TBC1 domain containing kinase
hsa-miR-548l	0	0	1	1	1	1	HDAC8	histone deacetylase 8
hsa-miR-548l	0	0	1	1	1	1	PDZRN3	PDZ domain containing ring finger 3
hsa-miR-548l	1	0	1	1	1	1	PNISR	PNN-interacting serine/arginine-rich protein
hsa-miR-548l	1	0	1	0	1	1	TPBG	trophoblast glycoprotein
hsa-miR-548l	1	0	1	1	1	1	SIRT1	sirtuin 1
hsa-miR-548l	0	0	1	1	1	1	PINK1	PTEN induced putative kinase 1
hsa-miR-548l	1	0	1	1	1	1	KCTD6	potassium channel tetramerisation domain containing 6
hsa-miR-548l	0	0	1	1	1	1	PIK3C3	phosphatidylinositol 3-kinase, catalytic subunit type 3
hsa-miR-548l	1	0	1	1	1	1	TLK1	tousled-like kinase 1
hsa-miR-548l	0	0	1	1	1	1	BBS9	Bardet-Biedl syndrome 9
hsa-miR-548l	1	0	1	1	1	1	EGR2	early growth response 2
hsa-miR-548l	1	0	1	1	1	1	AMMECR1	Alport syndrome, mental retardation, midface hypoplasia and elliptocytosis chromosomal region gene 1
hsa-miR-548l	0	0	1	1	1	1	KBTBD4	kelch repeat and BTB (POZ) domain containing 4
hsa-miR-548l	1	0	1	1	1	1	CTTN	cortactin
hsa-miR-548l	1	0	1	1	1	1	FBXW2	F-box and WD repeat domain containing 2
hsa-miR-548l	1	0	1	1	1	1	TSN	translin
hsa-miR-548l	1	0	1	0	1	1	TEF	thyrotrophic embryonic factor
hsa-miR-548l	0	0	1	1	0	0	LAMA1	laminin, alpha 1
hsa-miR-548l	1	0	1	1	1	1	LUC7L2	LUC7-like 2 (S. cerevisiae)
hsa-miR-548l	0	0	1	1	0	0	MSANTD3	Myb/SANT-like DNA-binding domain containing 3
hsa-miR-548l	0	0	1	1	1	1	NRCAM	neuronal cell adhesion molecule
hsa-miR-548l	1	0	1	1	1	1	GNG2	guanine nucleotide binding protein (G protein), gamma 2
hsa-miR-548l	1	0	1	1	1	1	IVNS1ABP	influenza virus NS1A binding protein
hsa-miR-548l	0	0	1	0	1	1	SSPN	sarcospan
hsa-miR-548l	0	0	1	1	1	1	STAMBPL1	STAM binding protein-like 1
hsa-miR-548l	1	0	1	1	1	1	GCFC1	GC-rich sequence DNA-binding factor 1
hsa-miR-548l	1	0	1	1	1	1	DZIP1	DAZ interacting protein 1
hsa-miR-548l	0	0	1	1	1	1	TMPRSS11D	transmembrane protease, serine 11D
hsa-miR-548l	0	0	1	1	1	1	SLC16A1	solute carrier family 16, member 1 (monocarboxylic acid transporter 1)
hsa-miR-548l	0	0	1	1	1	1	SPOCK1	sparc/osteonectin, cwcv and kazal-like domains proteoglycan (testican) 1
hsa-miR-548l	1	0	1	1	1	1	SNAP25	synaptosomal-associated protein, 25kDa
hsa-miR-548l	1	0	1	1	1	1	NSG1	neuron specific gene family member 1
hsa-miR-548l	0	0	1	0	0	0	LINC00340	long intergenic non-protein coding RNA 340
hsa-miR-548l	0	0	1	1	1	1	NMD3	NMD3 homolog (S. cerevisiae)
hsa-miR-548l	1	0	1	1	1	1	NMT2	N-myristoyltransferase 2
hsa-miR-548l	0	0	1	1	1	1	TMEM170A	transmembrane protein 170A
hsa-miR-548l	1	0	1	1	1	1	KANSL1	KAT8 regulatory NSL complex subunit 1
hsa-miR-548l	1	0	1	1	1	1	CPNE8	copine VIII
hsa-miR-548l	1	0	1	1	1	1	TBC1D20	TBC1 domain family, member 20
hsa-miR-548l	1	0	1	1	1	1	KLF4	Kruppel-like factor 4 (gut)
hsa-miR-548l	1	0	1	1	1	1	TMEM100	transmembrane protein 100
hsa-miR-548l	0	0	1	1	1	1	MOBP	myelin-associated oligodendrocyte basic protein
hsa-miR-548l	0	0	1	1	1	1	MYO6	myosin VI
hsa-miR-548l	1	0	1	1	1	1	CNEP1R1	CTD nuclear envelope phosphatase 1 regulatory subunit 1
hsa-miR-548l	0	0	1	0	0	0	LOC100129858	uncharacterized LOC100129858
hsa-miR-548l	1	0	1	1	1	1	SPATS2	spermatogenesis associated, serine-rich 2
hsa-miR-548l	0	0	1	0	0	0	LOC730101	uncharacterized LOC730101
hsa-miR-548l	1	0	1	1	1	1	CS	citrate synthase
hsa-miR-548l	0	0	1	0	1	1	C1orf198	chromosome 1 open reading frame 198
hsa-miR-548l	1	0	1	1	1	1	GAPVD1	GTPase activating protein and VPS9 domains 1
hsa-miR-548l	0	0	1	1	0	0	RPN2	ribophorin II
hsa-miR-548l	1	0	1	1	1	1	SLITRK2	SLIT and NTRK-like family, member 2
hsa-miR-548l	0	0	1	0	0	0	ZNF815P	zinc finger protein 815, pseudogene
hsa-miR-548l	1	0	1	1	0	0	FBRS	fibrosin
hsa-miR-548l	0	0	1	0	0	0	OTUD1	OTU domain containing 1
hsa-miR-548l	0	0	1	0	0	0	C1orf204	chromosome 1 open reading frame 204
hsa-miR-548l	1	0	1	0	1	1	KIAA1737	KIAA1737
hsa-miR-548l	1	0	1	0	1	1	THRB	thyroid hormone receptor, beta
hsa-miR-548l	1	0	1	0	1	1	KBTBD8	kelch repeat and BTB (POZ) domain containing 8
hsa-miR-548l	1	0	1	1	1	1	CCDC141	coiled-coil domain containing 141
hsa-miR-548l	0	0	1	1	1	1	SC5DL	sterol-C5-desaturase (ERG3 delta-5-desaturase homolog, S. cerevisiae)-like
hsa-miR-548l	0	0	1	0	0	0	CCDC150	coiled-coil domain containing 150
hsa-miR-548l	0	0	1	1	1	1	GBAS	glioblastoma amplified sequence
hsa-miR-548l	1	0	1	0	1	1	YPEL2	yippee-like 2 (Drosophila)
hsa-miR-548l	0	0	1	1	0	0	PRKRIP1	PRKR interacting protein 1 (IL11 inducible)
hsa-miR-548l	0	0	1	0	0	0	LOC400680	uncharacterized LOC400680
hsa-miR-548l	1	0	1	1	1	1	POU2F3	POU class 2 homeobox 3
hsa-miR-548l	1	0	1	0	1	1	AGFG1	ArfGAP with FG repeats 1
hsa-miR-548l	0	0	1	0	0	0	LOC100128560	uncharacterized LOC100128560
hsa-miR-548l	1	0	1	1	1	1	GOLGA8B	golgin A8 family, member B
hsa-miR-548l	1	0	1	0	1	1	PRKAR1A	protein kinase, cAMP-dependent, regulatory, type I, alpha
hsa-miR-548l	0	0	1	1	1	1	CBWD5	COBW domain containing 5
hsa-miR-548l	1	0	1	1	1	1	IGSF11	immunoglobulin superfamily, member 11
hsa-miR-548l	1	0	1	1	1	1	HOOK1	hook homolog 1 (Drosophila)
hsa-miR-548l	0	0	1	1	1	1	HCCS	holocytochrome c synthase
hsa-miR-548l	0	0	1	1	1	1	CKAP2L	cytoskeleton associated protein 2-like
hsa-miR-548l	1	0	1	1	1	1	ZCCHC2	zinc finger, CCHC domain containing 2
hsa-miR-548l	0	0	1	1	0	0	TMEM150A	transmembrane protein 150A
hsa-miR-548l	0	0	1	1	0	0	FBXO16	F-box protein 16
hsa-miR-548l	0	0	1	1	1	1	CPXCR1	CPX chromosome region, candidate 1
hsa-miR-548l	1	0	1	0	1	1	FAM190B	family with sequence similarity 190, member B
hsa-miR-548l	1	0	1	1	1	1	NDFIP2	Nedd4 family interacting protein 2
hsa-miR-548l	1	0	1	1	0	0	FBXL19	F-box and leucine-rich repeat protein 19
hsa-miR-548l	0	0	1	0	1	1	MYLK4	myosin light chain kinase family, member 4
hsa-miR-548l	1	0	1	0	1	1	UNC5D	unc-5 homolog D (C. elegans)
hsa-miR-548l	0	0	1	1	1	1	SLFN13	schlafen family member 13
hsa-miR-548l	1	0	1	1	1	1	SIK3	SIK family kinase 3
hsa-miR-548l	0	0	1	1	1	1	NFKB1	nuclear factor of kappa light polypeptide gene enhancer in B-cells 1
hsa-miR-548l	0	0	1	1	1	1	ZDHHC15	zinc finger, DHHC-type containing 15
hsa-miR-548l	1	0	1	1	1	1	PPP1R21	protein phosphatase 1, regulatory subunit 21
hsa-miR-548l	0	0	1	1	0	0	HDAC6	histone deacetylase 6
hsa-miR-548l	0	0	1	1	0	0	MARS	methionyl-tRNA synthetase
hsa-miR-548l	1	0	1	1	1	1	ABHD6	abhydrolase domain containing 6
hsa-miR-548l	0	0	1	1	0	0	DCLK3	doublecortin-like kinase 3
hsa-miR-548l	1	0	1	1	1	1	CBLB	Cbl proto-oncogene, E3 ubiquitin protein ligase B
hsa-miR-548l	0	0	1	0	1	1	FLJ41200	uncharacterized LOC401492
hsa-miR-548l	1	0	1	1	1	1	MDGA2	MAM domain containing glycosylphosphatidylinositol anchor 2
hsa-miR-548l	1	0	1	1	1	1	EGLN3	egl nine homolog 3 (C. elegans)
hsa-miR-548l	0	0	1	1	1	1	SLC13A3	solute carrier family 13 (sodium-dependent dicarboxylate transporter), member 3
hsa-miR-548l	0	0	1	0	0	0	MORN2	MORN repeat containing 2
hsa-miR-548l	1	0	1	0	1	1	KCNK2	potassium channel, subfamily K, member 2
hsa-miR-548l	0	0	1	1	1	1	EXD1	exonuclease 3'-5' domain containing 1
hsa-miR-548l	0	0	1	1	1	1	FAM19A2	family with sequence similarity 19 (chemokine (C-C motif)-like), member A2
hsa-miR-548l	0	0	1	0	1	1	CWC22	CWC22 spliceosome-associated protein homolog (S. cerevisiae)
hsa-miR-548l	0	0	1	0	0	0	LOC650368	asparagine-linked glycosylation 1-like pseudogene
hsa-miR-548l	1	0	1	1	1	1	PHKB	phosphorylase kinase, beta
hsa-miR-548l	0	0	1	1	0	0	KRT37	keratin 37
hsa-miR-548l	1	0	1	1	1	1	FAM219A	family with sequence similarity 219, member A
hsa-miR-548l	1	0	1	0	0	0	GPR137C	G protein-coupled receptor 137C
hsa-miR-548l	1	0	1	1	0	0	KCNC1	potassium voltage-gated channel, Shaw-related subfamily, member 1
hsa-miR-548l	1	0	1	1	1	1	GJC1	gap junction protein, gamma 1, 45kDa
hsa-miR-548l	1	0	1	0	1	1	DCUN1D4	DCN1, defective in cullin neddylation 1, domain containing 4 (S. cerevisiae)
hsa-miR-548l	1	0	1	1	1	1	VPS54	vacuolar protein sorting 54 homolog (S. cerevisiae)
hsa-miR-548l	0	0	1	1	0	0	LOC100129995	uncharacterized LOC100129995
hsa-miR-548l	0	0	1	0	1	1	NAIP	NLR family, apoptosis inhibitory protein
hsa-miR-548l	1	0	1	0	1	1	RHBDL3	rhomboid, veinlet-like 3 (Drosophila)
hsa-miR-548l	0	0	1	1	1	1	IDS	iduronate 2-sulfatase
hsa-miR-548l	1	0	1	1	1	1	CELF6	CUGBP, Elav-like family member 6
hsa-miR-548l	0	0	1	0	0	0	FAM47E	family with sequence similarity 47, member E
hsa-miR-548l	1	0	1	1	1	1	SEPHS1	selenophosphate synthetase 1
hsa-miR-548l	1	0	1	1	1	1	C11orf30	chromosome 11 open reading frame 30
hsa-miR-548l	1	0	1	1	1	1	ATXN7	ataxin 7
hsa-miR-548l	1	0	1	1	0	0	GXYLT1	glucoside xylosyltransferase 1
hsa-miR-548l	0	0	1	0	1	1	PRELID2	PRELI domain containing 2
hsa-miR-548l	0	0	1	1	1	1	CTPS2	CTP synthase 2
hsa-miR-548l	0	0	1	1	1	1	MKX	mohawk homeobox
hsa-miR-548l	1	0	1	1	1	1	SACS	spastic ataxia of Charlevoix-Saguenay (sacsin)
hsa-miR-548l	0	0	1	0	0	0	LOC613266	uncharacterized LOC613266
hsa-miR-548l	0	0	1	1	1	1	CYB5D1	cytochrome b5 domain containing 1
hsa-miR-548l	1	0	1	1	1	1	KPNA1	karyopherin alpha 1 (importin alpha 5)
hsa-miR-548l	1	0	1	0	0	0	MSL1	male-specific lethal 1 homolog (Drosophila)
hsa-miR-548l	1	0	1	1	1	1	DPY19L3	dpy-19-like 3 (C. elegans)
hsa-miR-548l	0	0	1	1	1	1	RBM46	RNA binding motif protein 46
hsa-miR-548l	1	0	1	1	1	1	MACROD2	MACRO domain containing 2
hsa-miR-548l	1	0	1	1	0	0	UBN2	ubinuclein 2
hsa-miR-548l	1	0	1	1	1	1	KALRN	kalirin, RhoGEF kinase
hsa-miR-548l	0	0	1	1	0	0	FSIP2	fibrous sheath interacting protein 2
hsa-miR-548l	1	0	1	1	1	1	LIN9	lin-9 homolog (C. elegans)
hsa-miR-548l	1	0	1	0	1	1	PLEKHH2	pleckstrin homology domain containing, family H (with MyTH4 domain) member 2
hsa-miR-548l	1	0	1	1	1	1	SIKE1	suppressor of IKBKE 1
hsa-miR-548l	1	0	1	1	1	1	PIK3R1	phosphoinositide-3-kinase, regulatory subunit 1 (alpha)
hsa-miR-548l	1	0	1	1	1	1	SACM1L	SAC1 suppressor of actin mutations 1-like (yeast)
hsa-miR-548l	1	0	1	1	1	1	ATP1A2	ATPase, Na+/K+ transporting, alpha 2 polypeptide
hsa-miR-548l	1	0	1	1	1	1	DMXL1	Dmx-like 1
hsa-miR-548l	1	0	1	0	1	1	CLEC16A	C-type lectin domain family 16, member A
hsa-miR-548l	1	0	1	1	1	1	DLG2	discs, large homolog 2 (Drosophila)
hsa-miR-548l	1	0	1	0	1	1	GPR180	G protein-coupled receptor 180
hsa-miR-548l	1	0	1	1	1	1	CLIP1	CAP-GLY domain containing linker protein 1
hsa-miR-548l	0	0	1	0	0	0	RPL23AP53	ribosomal protein L23a pseudogene 53
hsa-miR-548l	1	0	1	1	0	0	SNX30	sorting nexin family member 30
hsa-miR-548l	1	0	1	1	1	1	MFSD6	major facilitator superfamily domain containing 6
hsa-miR-548l	0	0	1	1	1	1	DOCK9	dedicator of cytokinesis 9
hsa-miR-548l	1	0	1	1	1	1	UBE3C	ubiquitin protein ligase E3C
hsa-miR-548l	0	0	1	1	1	1	ERI2	ERI1 exoribonuclease family member 2
hsa-miR-548l	1	0	1	1	1	1	KANK4	KN motif and ankyrin repeat domains 4
hsa-miR-548l	1	0	1	1	1	1	SLC26A9	solute carrier family 26, member 9
hsa-miR-548l	0	0	1	1	0	0	IQUB	IQ motif and ubiquitin domain containing
hsa-miR-548l	1	0	1	1	1	1	R3HDM1	R3H domain containing 1
hsa-miR-548l	1	0	1	0	1	1	FNDC3B	fibronectin type III domain containing 3B
hsa-miR-548l	1	0	1	1	1	1	AFAP1	actin filament associated protein 1
hsa-miR-548l	1	0	1	0	1	1	CAPRIN1	cell cycle associated protein 1
hsa-miR-548l	1	0	1	0	1	1	YOD1	YOD1 OTU deubiquinating enzyme 1 homolog (S. cerevisiae)
hsa-miR-548l	0	0	1	1	1	1	MCU	mitochondrial calcium uniporter
hsa-miR-548l	0	0	1	1	0	0	TMEM136	transmembrane protein 136
hsa-miR-548l	1	0	1	1	1	1	KCTD12	potassium channel tetramerisation domain containing 12
hsa-miR-548l	1	0	1	1	1	1	FRYL	FRY-like
hsa-miR-548l	1	0	1	1	1	1	SH3D19	SH3 domain containing 19
hsa-miR-548l	1	0	1	1	1	1	BCAT1	branched chain amino-acid transaminase 1, cytosolic
hsa-miR-548l	1	0	1	0	1	1	USP37	ubiquitin specific peptidase 37
hsa-miR-548l	1	0	1	1	1	1	DSE	dermatan sulfate epimerase
hsa-miR-548l	1	0	1	1	1	1	PUS7	pseudouridylate synthase 7 homolog (S. cerevisiae)
hsa-miR-548l	0	0	1	0	0	0	EMBP1	embigin pseudogene 1
hsa-miR-548l	1	0	1	1	1	1	RBM24	RNA binding motif protein 24
hsa-miR-548l	0	0	1	1	1	1	G3BP1	GTPase activating protein (SH3 domain) binding protein 1
hsa-miR-548l	0	0	1	1	1	1	LYPD1	LY6/PLAUR domain containing 1
hsa-miR-548l	0	0	1	1	1	1	SQRDL	sulfide quinone reductase-like (yeast)
hsa-miR-548l	1	0	1	0	1	1	ESRRG	estrogen-related receptor gamma
hsa-miR-548l	0	0	1	0	1	1	GALNT13	UDP-N-acetyl-alpha-D-galactosamine:polypeptide N-acetylgalactosaminyltransferase 13 (GalNAc-T13)
hsa-miR-548l	0	0	1	1	1	1	ZNF680	zinc finger protein 680
hsa-miR-548l	1	0	1	1	1	1	RNF111	ring finger protein 111
hsa-miR-548l	1	0	1	0	1	1	FMNL2	formin-like 2
hsa-miR-548l	0	0	1	1	0	0	CYP4X1	cytochrome P450, family 4, subfamily X, polypeptide 1
hsa-miR-548l	1	0	1	0	1	1	STK3	serine/threonine kinase 3
hsa-miR-548l	1	0	1	1	1	1	WTAP	Wilms tumor 1 associated protein
hsa-miR-548l	1	0	1	1	1	1	SMAD7	SMAD family member 7
hsa-miR-548l	1	0	1	1	0	0	BRSK2	BR serine/threonine kinase 2
hsa-miR-548l	1	0	1	1	1	1	LRRK2	leucine-rich repeat kinase 2
hsa-miR-548l	1	0	1	1	1	1	MAP2K4	mitogen-activated protein kinase kinase 4
hsa-miR-548l	0	0	1	0	0	0	AGAP9	ArfGAP with GTPase domain, ankyrin repeat and PH domain 9
hsa-miR-548l	0	0	1	1	1	1	XRN2	5'-3' exoribonuclease 2
hsa-miR-548l	0	0	1	1	1	1	AKTIP	AKT interacting protein
hsa-miR-548l	1	0	1	1	1	1	CYYR1	cysteine/tyrosine-rich 1
hsa-miR-548l	0	0	1	1	1	1	C5orf28	chromosome 5 open reading frame 28
hsa-miR-548l	1	0	1	1	1	1	MEAF6	MYST/Esa1-associated factor 6
hsa-miR-548l	1	0	1	0	1	1	MGAT4B	mannosyl (alpha-1,3-)-glycoprotein beta-1,4-N-acetylglucosaminyltransferase, isozyme B
hsa-miR-548l	0	0	1	1	1	1	PDSS2	prenyl (decaprenyl) diphosphate synthase, subunit 2
hsa-miR-548l	1	0	1	1	1	1	PTPN2	protein tyrosine phosphatase, non-receptor type 2
hsa-miR-548l	0	0	1	1	0	0	C6orf10	chromosome 6 open reading frame 10
hsa-miR-548l	1	0	1	1	1	1	ACTN1	actinin, alpha 1
hsa-miR-548l	0	0	1	1	1	1	SERPINE2	serpin peptidase inhibitor, clade E (nexin, plasminogen activator inhibitor type 1), member 2
hsa-miR-548l	1	0	1	1	1	1	COBLL1	COBL-like 1
hsa-miR-548l	1	0	1	1	1	1	PHTF2	putative homeodomain transcription factor 2
hsa-miR-548l	0	0	1	1	0	0	HSPB11	heat shock protein family B (small), member 11
hsa-miR-548l	1	0	1	1	1	1	LUC7L3	LUC7-like 3 (S. cerevisiae)
hsa-miR-548l	0	0	1	1	1	1	ENPP3	ectonucleotide pyrophosphatase/phosphodiesterase 3
hsa-miR-548l	1	0	1	1	1	1	NOVA1	neuro-oncological ventral antigen 1
hsa-miR-548l	0	0	1	0	1	1	NEK1	NIMA (never in mitosis gene a)-related kinase 1
hsa-miR-548l	0	0	1	1	0	0	NEK7	NIMA (never in mitosis gene a)-related kinase 7
hsa-miR-548l	0	0	1	1	1	1	TFDP2	transcription factor Dp-2 (E2F dimerization partner 2)
hsa-miR-548l	0	0	1	0	0	0	ANKRD34C	ankyrin repeat domain 34C
hsa-miR-548l	0	0	1	1	1	1	ENGASE	endo-beta-N-acetylglucosaminidase
hsa-miR-548l	1	0	1	1	1	1	ARF6	ADP-ribosylation factor 6
hsa-miR-548l	0	0	1	0	0	0	TPTE2P6	transmembrane phosphoinositide 3-phosphatase and tensin homolog 2 pseudogene 6
hsa-miR-548l	0	0	1	1	1	1	GMEB2	glucocorticoid modulatory element binding protein 2
hsa-miR-548l	0	0	1	0	0	0	DNAJC5B	DnaJ (Hsp40) homolog, subfamily C, member 5 beta
hsa-miR-548l	0	0	1	1	1	1	GRAMD1C	GRAM domain containing 1C
hsa-miR-548l	0	0	1	0	0	0	KIAA0913	KIAA0913
hsa-miR-548l	0	0	1	1	0	0	PACSIN2	protein kinase C and casein kinase substrate in neurons 2
hsa-miR-548l	0	0	1	1	1	1	RHOT1	ras homolog family member T1
hsa-miR-548l	0	0	1	0	0	0	JAKMIP3	Janus kinase and microtubule interacting protein 3
hsa-miR-548l	1	0	1	1	1	1	GOLGA8A	golgin A8 family, member A
hsa-miR-548l	0	0	1	1	0	0	WDR11	WD repeat domain 11
hsa-miR-548l	1	0	1	1	1	1	NBEA	neurobeachin
hsa-miR-548l	1	0	1	1	1	1	KIAA1033	KIAA1033
hsa-miR-548l	1	0	1	0	1	1	GPR85	G protein-coupled receptor 85
hsa-miR-548l	1	0	1	0	1	1	CEP170	centrosomal protein 170kDa
hsa-miR-548l	0	0	1	1	0	0	DOPEY1	dopey family member 1
hsa-miR-548l	0	0	1	1	1	1	MESP2	mesoderm posterior 2 homolog (mouse)
hsa-miR-548l	1	0	1	1	1	1	MSANTD2	Myb/SANT-like DNA-binding domain containing 2
hsa-miR-548l	0	0	1	1	0	0	HELQ	helicase, POLQ-like
hsa-miR-548l	1	0	1	0	1	1	FAM19A1	family with sequence similarity 19 (chemokine (C-C motif)-like), member A1
hsa-miR-548l	1	0	1	1	1	1	SLC30A8	solute carrier family 30 (zinc transporter), member 8
hsa-miR-548l	1	0	1	1	1	1	YTHDF3	YTH domain family, member 3
hsa-miR-548l	1	0	1	1	1	1	MIER1	mesoderm induction early response 1 homolog (Xenopus laevis)
hsa-miR-548l	0	0	1	1	1	1	FILIP1	filamin A interacting protein 1
hsa-miR-548l	0	0	1	1	1	1	BEND7	BEN domain containing 7
hsa-miR-548l	1	0	1	1	1	1	PHLDB2	pleckstrin homology-like domain, family B, member 2
hsa-miR-548l	1	0	1	1	1	1	QTRTD1	queuine tRNA-ribosyltransferase domain containing 1
hsa-miR-548l	0	0	1	1	1	1	RAD51AP1	RAD51 associated protein 1
hsa-miR-548l	0	0	1	1	1	1	EGFLAM	EGF-like, fibronectin type III and laminin G domains
hsa-miR-548l	0	0	1	1	1	1	SRSF11	serine/arginine-rich splicing factor 11
hsa-miR-548l	1	0	1	1	0	0	USP24	ubiquitin specific peptidase 24
hsa-miR-548l	1	0	1	1	1	1	MLL3	myeloid/lymphoid or mixed-lineage leukemia 3
hsa-miR-548l	1	0	1	1	1	1	RNF180	ring finger protein 180
hsa-miR-548l	0	0	1	1	1	1	YAP1	Yes-associated protein 1
hsa-miR-548l	1	0	1	1	0	0	PTAR1	protein prenyltransferase alpha subunit repeat containing 1
hsa-miR-548l	1	0	1	1	1	1	TMEM182	transmembrane protein 182
hsa-miR-548l	0	0	1	0	0	0	LOC387647	patched domain containing 3 pseudogene
hsa-miR-548l	1	0	1	1	1	1	EHMT1	euchromatic histone-lysine N-methyltransferase 1
hsa-miR-548l	0	0	1	1	1	1	TMEM138	transmembrane protein 138
hsa-miR-548l	0	0	1	1	1	1	RANBP17	RAN binding protein 17
hsa-miR-548l	0	0	1	1	1	1	CCDC132	coiled-coil domain containing 132
hsa-miR-548l	0	0	1	1	1	1	ZMYM6	zinc finger, MYM-type 6
hsa-miR-548l	1	0	1	0	1	1	MEF2C	myocyte enhancer factor 2C
hsa-miR-548l	1	0	1	1	1	1	FAM126A	family with sequence similarity 126, member A
hsa-miR-548l	1	0	1	1	1	1	SOX6	SRY (sex determining region Y)-box 6
hsa-miR-548l	0	0	1	1	0	0	FCRL3	Fc receptor-like 3
hsa-miR-548l	0	0	1	0	1	1	C3orf43	chromosome 3 open reading frame 43
hsa-miR-548l	1	0	1	0	1	1	CLINT1	clathrin interactor 1
hsa-miR-548l	0	0	1	0	0	0	EPHA1-AS1	EPHA1 antisense RNA 1
hsa-miR-548l	0	0	1	1	1	1	KIAA1841	KIAA1841
hsa-miR-548l	0	0	1	1	1	1	SOAT1	sterol O-acyltransferase 1
hsa-miR-548l	1	0	1	0	1	1	CNOT7	CCR4-NOT transcription complex, subunit 7
hsa-miR-548l	1	0	1	1	1	1	ANP32E	acidic (leucine-rich) nuclear phosphoprotein 32 family, member E
hsa-miR-548l	1	0	1	0	1	1	EXOC5	exocyst complex component 5
hsa-miR-548l	1	0	1	1	1	1	ATAT1	alpha tubulin acetyltransferase 1
hsa-miR-548l	0	0	1	1	1	1	CAND1	cullin-associated and neddylation-dissociated 1
hsa-miR-548l	1	0	1	1	1	1	IL17RD	interleukin 17 receptor D
hsa-miR-548l	1	0	1	1	1	1	MBD6	methyl-CpG binding domain protein 6
hsa-miR-548l	1	0	1	0	1	1	JAZF1	JAZF zinc finger 1
hsa-miR-548l	1	0	1	0	0	0	XPNPEP3	X-prolyl aminopeptidase (aminopeptidase P) 3, putative
hsa-miR-548l	1	0	1	1	1	1	RICTOR	RPTOR independent companion of MTOR, complex 2
hsa-miR-548l	1	0	1	0	1	1	NR3C1	nuclear receptor subfamily 3, group C, member 1 (glucocorticoid receptor)
hsa-miR-548l	1	0	1	1	1	1	BOLL	bol, boule-like (Drosophila)
hsa-miR-548l	1	0	1	0	1	1	PATL1	protein associated with topoisomerase II homolog 1 (yeast)
hsa-miR-548l	1	0	1	1	1	1	AP1AR	adaptor-related protein complex 1 associated regulatory protein
hsa-miR-548l	1	0	1	1	1	1	FBXL5	F-box and leucine-rich repeat protein 5
hsa-miR-548l	1	0	1	1	1	1	TSHZ3	teashirt zinc finger homeobox 3
hsa-miR-548l	0	0	1	1	1	1	C5orf45	chromosome 5 open reading frame 45
hsa-miR-548l	1	0	1	1	1	1	PPP3CA	protein phosphatase 3, catalytic subunit, alpha isozyme
hsa-miR-548l	1	0	1	1	1	1	WDR44	WD repeat domain 44
hsa-miR-548l	1	0	1	1	1	1	RNF38	ring finger protein 38
hsa-miR-548l	1	0	1	1	1	1	IKZF2	IKAROS family zinc finger 2 (Helios)
hsa-miR-548l	1	0	1	1	1	1	GAL3ST3	galactose-3-O-sulfotransferase 3
hsa-miR-548l	0	0	1	1	1	1	KLHL7	kelch-like 7 (Drosophila)
hsa-miR-548l	1	0	1	1	1	1	RCAN2	regulator of calcineurin 2
hsa-miR-548l	1	0	1	1	1	1	DUSP16	dual specificity phosphatase 16
hsa-miR-548l	0	0	1	1	1	1	CD209	CD209 molecule
hsa-miR-548l	1	0	1	1	1	1	MIPOL1	mirror-image polydactyly 1
hsa-miR-548l	0	0	1	1	0	0	DHRS4	dehydrogenase/reductase (SDR family) member 4
hsa-miR-548l	0	0	1	0	0	0	KGFLP1	fibroblast growth factor 7 pseudogene
hsa-miR-548l	1	0	1	1	1	1	KIAA0907	KIAA0907
hsa-miR-548l	1	0	1	1	1	1	ZBTB8A	zinc finger and BTB domain containing 8A
hsa-miR-548l	0	0	1	1	1	1	SHPRH	SNF2 histone linker PHD RING helicase, E3 ubiquitin protein ligase
hsa-miR-548l	0	0	1	1	1	1	CEP41	centrosomal protein 41kDa
hsa-miR-548l	0	0	1	1	1	1	DNAJB14	DnaJ (Hsp40) homolog, subfamily B, member 14
hsa-miR-548l	1	0	1	1	1	1	NRG1	neuregulin 1
hsa-miR-548l	1	0	1	1	1	1	WDR26	WD repeat domain 26
hsa-miR-548l	1	0	1	1	1	1	BCL11A	B-cell CLL/lymphoma 11A (zinc finger protein)
hsa-miR-548l	1	0	1	1	1	1	ILF3	interleukin enhancer binding factor 3, 90kDa
hsa-miR-548l	0	0	1	1	1	1	IYD	iodotyrosine deiodinase
hsa-miR-548l	1	0	1	1	1	1	PBRM1	polybromo 1
hsa-miR-548l	0	0	1	1	1	1	BCOR	BCL6 corepressor
hsa-miR-548l	1	0	1	1	1	1	RAI14	retinoic acid induced 14
hsa-miR-548l	1	0	1	1	1	1	TAB3	TGF-beta activated kinase 1/MAP3K7 binding protein 3
hsa-miR-548l	0	0	1	1	1	1	MFAP5	microfibrillar associated protein 5
hsa-miR-548l	1	0	1	0	1	1	AP2B1	adaptor-related protein complex 2, beta 1 subunit
hsa-miR-548l	1	0	1	1	1	1	CAMTA1	calmodulin binding transcription activator 1
hsa-miR-548l	0	0	1	1	1	1	GCOM1	GRINL1A complex locus 1
hsa-miR-548l	1	0	1	0	1	1	MEGF9	multiple EGF-like-domains 9
hsa-miR-548l	0	0	1	1	1	1	KDELC2	KDEL (Lys-Asp-Glu-Leu) containing 2
hsa-miR-548l	0	0	1	1	1	1	TNFRSF19	tumor necrosis factor receptor superfamily, member 19
hsa-miR-548l	1	0	1	1	1	1	SSX2IP	synovial sarcoma, X breakpoint 2 interacting protein
hsa-miR-548l	1	0	1	0	1	1	ANKRD28	ankyrin repeat domain 28
hsa-miR-548l	1	0	1	1	0	0	USP7	ubiquitin specific peptidase 7 (herpes virus-associated)
hsa-miR-548l	0	0	1	1	1	1	TNFSF15	tumor necrosis factor (ligand) superfamily, member 15
hsa-miR-548l	1	0	1	1	1	1	SP3	Sp3 transcription factor
hsa-miR-548l	1	0	1	0	1	1	NHS	Nance-Horan syndrome (congenital cataracts and dental anomalies)
hsa-miR-548l	0	0	1	1	1	1	POTEG	POTE ankyrin domain family, member G
hsa-miR-548l	1	0	1	1	1	1	MYNN	myoneurin
hsa-miR-548l	0	0	1	1	1	1	EHBP1	EH domain binding protein 1
hsa-miR-548l	1	0	1	0	1	1	LRAT	lecithin retinol acyltransferase (phosphatidylcholine--retinol O-acyltransferase)
hsa-miR-548l	0	0	1	1	0	0	ART3	ADP-ribosyltransferase 3
hsa-miR-548l	0	0	1	1	1	1	ANXA10	annexin A10
hsa-miR-548l	0	0	1	1	1	1	HORMAD1	HORMA domain containing 1
hsa-miR-548l	0	0	1	1	1	1	KANK2	KN motif and ankyrin repeat domains 2
hsa-miR-548l	1	0	1	1	1	1	BHLHE41	basic helix-loop-helix family, member e41
hsa-miR-548l	1	0	1	1	1	1	PLCH1	phospholipase C, eta 1
hsa-miR-548l	1	0	1	1	1	1	TRIT1	tRNA isopentenyltransferase 1
hsa-miR-548l	1	0	1	1	1	1	NIPA2	non imprinted in Prader-Willi/Angelman syndrome 2
hsa-miR-548l	1	0	1	1	1	1	PFKFB4	6-phosphofructo-2-kinase/fructose-2,6-biphosphatase 4
hsa-miR-548l	1	0	1	1	1	1	CYFIP1	cytoplasmic FMR1 interacting protein 1
hsa-miR-548l	0	0	1	1	1	1	CEACAM1	carcinoembryonic antigen-related cell adhesion molecule 1 (biliary glycoprotein)
hsa-miR-548l	1	0	1	1	1	1	QKI	QKI, KH domain containing, RNA binding
hsa-miR-548l	1	0	1	1	1	1	MYB	v-myb myeloblastosis viral oncogene homolog (avian)
hsa-miR-548l	1	0	1	1	1	1	CD109	CD109 molecule
hsa-miR-548l	1	0	1	1	1	1	PCDH11X	protocadherin 11 X-linked
hsa-miR-548l	1	0	1	1	0	0	TAF4B	TAF4b RNA polymerase II, TATA box binding protein (TBP)-associated factor, 105kDa
hsa-miR-548l	1	0	1	1	1	1	TBC1D22B	TBC1 domain family, member 22B
hsa-miR-548l	1	0	1	0	1	1	RASGRP1	RAS guanyl releasing protein 1 (calcium and DAG-regulated)
hsa-miR-548l	1	0	1	1	1	1	AMOT	angiomotin
hsa-miR-548l	1	0	1	0	1	1	FAM46A	family with sequence similarity 46, member A
hsa-miR-548l	0	0	1	1	1	1	ENOPH1	enolase-phosphatase 1
hsa-miR-548l	0	0	1	1	0	0	ANXA5	annexin A5
hsa-miR-548l	0	0	1	1	1	1	PAFAH1B2	platelet-activating factor acetylhydrolase 1b, catalytic subunit 2 (30kDa)
hsa-miR-548l	0	0	1	1	1	1	RLIM	ring finger protein, LIM domain interacting
hsa-miR-548l	1	0	1	1	1	1	MYCN	v-myc myelocytomatosis viral related oncogene, neuroblastoma derived (avian)
hsa-miR-548l	0	0	1	1	1	1	MRRF	mitochondrial ribosome recycling factor
hsa-miR-548l	1	0	1	1	1	1	TSPAN14	tetraspanin 14
hsa-miR-548l	0	0	1	1	0	0	ZNF576	zinc finger protein 576
hsa-miR-548l	1	0	1	0	0	0	VGLL4	vestigial like 4 (Drosophila)
hsa-miR-548l	1	0	1	0	1	1	DCAF10	DDB1 and CUL4 associated factor 10
hsa-miR-548l	0	0	1	0	1	1	HAUS3	HAUS augmin-like complex, subunit 3
hsa-miR-548l	1	0	1	1	1	1	DTNA	dystrobrevin, alpha
hsa-miR-548l	0	0	1	1	1	1	PDXK	pyridoxal (pyridoxine, vitamin B6) kinase
hsa-miR-548l	1	0	1	0	1	1	C15orf41	chromosome 15 open reading frame 41
hsa-miR-548l	1	0	1	1	1	1	U2SURP	U2 snRNP-associated SURP domain containing
hsa-miR-548l	1	0	1	0	1	1	VAMP4	vesicle-associated membrane protein 4
hsa-miR-548l	1	0	1	1	1	1	COL2A1	collagen, type II, alpha 1
hsa-miR-548l	1	0	1	1	1	1	TRIM39	tripartite motif containing 39
hsa-miR-548l	1	0	1	0	1	1	DDX3X	DEAD (Asp-Glu-Ala-Asp) box polypeptide 3, X-linked
hsa-miR-548l	0	0	1	1	1	1	TMEM30A	transmembrane protein 30A
hsa-miR-548l	1	0	1	0	1	1	TMEM39A	transmembrane protein 39A
hsa-miR-548l	1	0	1	1	1	1	ATP6AP2	ATPase, H+ transporting, lysosomal accessory protein 2
hsa-miR-548l	1	0	1	1	1	1	GRIA2	glutamate receptor, ionotropic, AMPA 2
hsa-miR-548l	0	0	1	0	0	0	TPTEP1	transmembrane phosphatase with tensin homology pseudogene 1
hsa-miR-548l	1	0	1	1	1	1	DNAJB5	DnaJ (Hsp40) homolog, subfamily B, member 5
hsa-miR-548l	0	0	1	1	0	0	C8orf76	chromosome 8 open reading frame 76
hsa-miR-548l	0	0	1	1	0	0	ELP4	elongator acetyltransferase complex subunit 4
hsa-miR-548l	0	0	1	1	1	1	HSD17B12	hydroxysteroid (17-beta) dehydrogenase 12
hsa-miR-548l	1	0	1	1	0	0	ZMYM3	zinc finger, MYM-type 3
hsa-miR-548l	1	0	1	1	1	1	RBM7	RNA binding motif protein 7
hsa-miR-548l	0	0	1	1	1	1	RNF170	ring finger protein 170
hsa-miR-548l	0	0	1	1	1	1	PCNP	PEST proteolytic signal containing nuclear protein
hsa-miR-548l	1	0	1	1	1	1	ETF1	eukaryotic translation termination factor 1
hsa-miR-548l	0	0	1	1	1	1	C2orf65	chromosome 2 open reading frame 65
hsa-miR-548l	1	0	1	1	1	1	PAPOLA	poly(A) polymerase alpha
hsa-miR-548l	0	0	1	1	1	1	GIN1	gypsy retrotransposon integrase 1
hsa-miR-548l	0	0	1	0	0	0	KLHL15	kelch-like 15 (Drosophila)
hsa-miR-548l	1	0	1	1	1	1	ZBTB38	zinc finger and BTB domain containing 38
hsa-miR-548l	0	0	1	0	0	0	NUDT16P1	nudix (nucleoside diphosphate linked moiety X)-type motif 16 pseudogene 1
hsa-miR-548l	1	0	1	1	1	1	ZNF512	zinc finger protein 512
hsa-miR-548l	0	0	1	0	1	1	ZNF37A	zinc finger protein 37A
hsa-miR-548l	0	0	1	1	1	1	C1QTNF3	C1q and tumor necrosis factor related protein 3
hsa-miR-548l	1	0	1	0	1	1	NUP50	nucleoporin 50kDa
hsa-miR-548l	1	0	1	0	1	1	NECAB1	N-terminal EF-hand calcium binding protein 1
hsa-miR-548l	1	0	1	1	1	1	SCAMP1	secretory carrier membrane protein 1
hsa-miR-548l	1	0	1	1	1	1	FAM199X	family with sequence similarity 199, X-linked
hsa-miR-548l	0	0	1	1	1	1	MBIP	MAP3K12 binding inhibitory protein 1
hsa-miR-548l	1	0	1	0	1	1	CYBRD1	cytochrome b reductase 1
hsa-miR-548l	1	0	1	1	1	1	NRF1	nuclear respiratory factor 1
hsa-miR-548l	0	0	1	1	0	0	SARNP	SAP domain containing ribonucleoprotein
hsa-miR-548l	1	0	1	1	1	1	DNAJC14	DnaJ (Hsp40) homolog, subfamily C, member 14
hsa-miR-548l	1	0	1	1	0	0	USP53	ubiquitin specific peptidase 53
hsa-miR-548l	0	0	1	1	1	1	CSDE1	cold shock domain containing E1, RNA-binding
hsa-miR-548l	1	0	1	1	1	1	SCAF11	SR-related CTD-associated factor 11
hsa-miR-548l	1	0	1	1	1	1	ZNF131	zinc finger protein 131
hsa-miR-548l	0	0	1	0	0	0	FAM200B	family with sequence similarity 200, member B
hsa-miR-548l	0	0	1	0	0	0	ZNF720	zinc finger protein 720
hsa-miR-548l	0	0	1	1	1	1	ZNF273	zinc finger protein 273
hsa-miR-548l	0	0	1	1	1	1	SNX22	sorting nexin 22
hsa-miR-548l	0	0	1	1	1	1	HIBADH	3-hydroxyisobutyrate dehydrogenase
hsa-miR-548l	0	0	1	0	1	1	ZNF718	zinc finger protein 718
hsa-miR-548l	0	0	1	1	1	1	C10orf88	chromosome 10 open reading frame 88
hsa-miR-548l	0	0	1	0	0	0	LOC728196	uncharacterized LOC728196
hsa-miR-548l	1	0	1	1	1	1	SPRYD7	SPRY domain containing 7
hsa-miR-548l	1	0	1	1	1	1	RACGAP1	Rac GTPase activating protein 1
hsa-miR-548l	1	0	1	0	1	1	CDK19	cyclin-dependent kinase 19
hsa-miR-548l	1	0	1	1	1	1	FAM213A	family with sequence similarity 213, member A
hsa-miR-548l	1	0	1	1	1	1	ASPH	aspartate beta-hydroxylase
hsa-miR-548l	1	0	1	1	1	1	NIPA1	non imprinted in Prader-Willi/Angelman syndrome 1
hsa-miR-548l	0	0	1	1	0	0	CCDC171	coiled-coil domain containing 171
hsa-miR-548l	0	0	1	0	0	0	ZBED3-AS1	ZBED3 antisense RNA 1
hsa-miR-548l	1	0	1	1	1	1	CASD1	CAS1 domain containing 1
hsa-miR-548l	0	0	1	1	1	1	SEMA3D	sema domain, immunoglobulin domain (Ig), short basic domain, secreted, (semaphorin) 3D
hsa-miR-548l	0	0	1	1	1	1	PIK3AP1	phosphoinositide-3-kinase adaptor protein 1
hsa-miR-548l	0	0	1	1	1	1	CCP110	centriolar coiled coil protein 110kDa
hsa-miR-548l	1	0	1	1	1	1	WDR20	WD repeat domain 20
hsa-miR-548l	1	0	1	1	1	1	ELAVL2	ELAV (embryonic lethal, abnormal vision, Drosophila)-like 2 (Hu antigen B)
hsa-miR-548l	1	0	1	1	1	1	ZNF518A	zinc finger protein 518A
hsa-miR-548l	0	0	1	1	0	0	C7orf57	chromosome 7 open reading frame 57
hsa-miR-548l	0	0	1	1	1	1	ZNF197	zinc finger protein 197
hsa-miR-548l	1	0	1	1	1	1	MUM1L1	melanoma associated antigen (mutated) 1-like 1
hsa-miR-548l	0	0	1	0	0	0	LOC729307	uncharacterized LOC729307
hsa-miR-548l	1	0	1	1	1	1	PITPNB	phosphatidylinositol transfer protein, beta
hsa-miR-548l	1	0	1	1	1	1	RCOR3	REST corepressor 3
hsa-miR-548l	1	0	1	1	1	1	TBC1D1	TBC1 (tre-2/USP6, BUB2, cdc16) domain family, member 1
hsa-miR-548l	1	0	1	1	1	1	C5orf25	chromosome 5 open reading frame 25
hsa-miR-548l	0	0	1	1	1	1	RMI1	RMI1, RecQ mediated genome instability 1, homolog (S. cerevisiae)
hsa-miR-548l	0	0	1	1	1	1	C5orf54	chromosome 5 open reading frame 54
hsa-miR-548l	1	0	1	1	1	1	PMAIP1	phorbol-12-myristate-13-acetate-induced protein 1
hsa-miR-548l	0	0	1	1	1	1	C5orf22	chromosome 5 open reading frame 22
hsa-miR-548l	1	0	1	1	1	1	RHOBTB1	Rho-related BTB domain containing 1
hsa-miR-548l	0	0	1	1	1	1	CDADC1	cytidine and dCMP deaminase domain containing 1
hsa-miR-548l	1	0	1	1	1	1	PPP2R2C	protein phosphatase 2, regulatory subunit B, gamma
hsa-miR-548l	1	0	1	1	1	1	SECISBP2L	SECIS binding protein 2-like
hsa-miR-548l	1	0	1	1	1	1	SIRPA	signal-regulatory protein alpha
hsa-miR-548l	1	0	1	1	0	0	PCNX	pecanex homolog (Drosophila)
hsa-miR-548l	0	0	1	0	0	0	WDFY3-AS2	WDFY3 antisense RNA 2
hsa-miR-548l	0	0	1	0	0	0	LOC96610	BMS1 homolog, ribosome assembly protein (yeast) pseudogene
hsa-miR-548l	0	0	1	0	0	0	LINC00238	long intergenic non-protein coding RNA 238
hsa-miR-548l	1	0	1	1	1	1	SEPT2	septin 2
hsa-miR-548l	1	0	1	1	1	1	HMGCR	3-hydroxy-3-methylglutaryl-CoA reductase
hsa-miR-548l	1	0	1	0	1	1	TBC1D2B	TBC1 domain family, member 2B
hsa-miR-548l	1	0	1	1	1	1	PCDHA5	protocadherin alpha 5
hsa-miR-548l	0	0	1	1	1	1	ZCCHC7	zinc finger, CCHC domain containing 7
hsa-miR-548l	1	0	1	1	1	1	TTC26	tetratricopeptide repeat domain 26
hsa-miR-548l	0	0	1	1	1	1	ZNF337	zinc finger protein 337
hsa-miR-548l	1	0	1	1	1	1	LPGAT1	lysophosphatidylglycerol acyltransferase 1
hsa-miR-548l	1	0	1	1	1	1	CLK4	CDC-like kinase 4
hsa-miR-548l	1	0	1	1	1	1	FAM120A	family with sequence similarity 120A
hsa-miR-548l	1	0	1	0	1	1	DDX3Y	DEAD (Asp-Glu-Ala-Asp) box polypeptide 3, Y-linked
hsa-miR-548l	0	0	1	1	1	1	SLC6A16	solute carrier family 6, member 16
hsa-miR-548l	0	0	1	0	0	0	LOC144486	uncharacterized LOC144486
hsa-miR-548l	1	0	1	1	1	1	RAP2C	RAP2C, member of RAS oncogene family
hsa-miR-548l	1	0	1	1	1	1	ZEB2	zinc finger E-box binding homeobox 2
hsa-miR-548l	1	0	1	1	1	1	CTDSPL2	CTD (carboxy-terminal domain, RNA polymerase II, polypeptide A) small phosphatase like 2
hsa-miR-548l	0	0	1	1	1	1	ARHGAP6	Rho GTPase activating protein 6
hsa-miR-548l	0	0	1	1	1	1	CBLN2	cerebellin 2 precursor
hsa-miR-548l	0	0	1	0	0	0	LOC339862	uncharacterized LOC339862
hsa-miR-548l	0	0	1	1	1	1	SNAPC3	small nuclear RNA activating complex, polypeptide 3, 50kDa
hsa-miR-548l	1	0	1	1	1	1	ZNF618	zinc finger protein 618
hsa-miR-548l	0	0	1	1	1	1	UBE3D	ubiquitin protein ligase E3D
hsa-miR-548l	1	0	1	1	1	1	PEX5L	peroxisomal biogenesis factor 5-like
hsa-miR-548l	0	0	1	0	0	0	FAM201A	family with sequence similarity 201, member A
hsa-miR-548l	1	0	1	1	1	1	SLC38A9	solute carrier family 38, member 9
hsa-miR-548l	0	0	1	0	1	1	C9orf57	chromosome 9 open reading frame 57
hsa-miR-548l	1	0	1	1	1	1	LHX8	LIM homeobox 8
hsa-miR-548l	0	0	1	1	1	1	FAM171B	family with sequence similarity 171, member B
hsa-miR-548l	1	0	1	1	1	1	HECTD2	HECT domain containing E3 ubiquitin protein ligase 2
hsa-miR-548l	1	0	1	0	1	1	NEGR1	neuronal growth regulator 1
hsa-miR-548l	0	0	1	1	1	1	ZNF141	zinc finger protein 141
hsa-miR-548l	0	0	1	0	0	0	SRGAP2C	SLIT-ROBO Rho GTPase activating protein 2C
hsa-miR-548l	1	0	1	0	1	1	CPEB4	cytoplasmic polyadenylation element binding protein 4
hsa-miR-548l	1	0	1	0	1	1	YAF2	YY1 associated factor 2
hsa-miR-548l	1	0	1	1	1	1	UBXN2A	UBX domain protein 2A
hsa-miR-548l	1	0	1	1	1	1	CMIP	c-Maf inducing protein
hsa-miR-548l	1	0	1	1	1	1	DAAM1	dishevelled associated activator of morphogenesis 1
hsa-miR-548l	1	0	1	1	1	1	FOXK1	forkhead box K1
hsa-miR-548l	1	0	1	1	1	1	GALNT1	UDP-N-acetyl-alpha-D-galactosamine:polypeptide N-acetylgalactosaminyltransferase 1 (GalNAc-T1)
hsa-miR-548l	0	0	1	1	1	1	TTC39B	tetratricopeptide repeat domain 39B
hsa-miR-548l	1	0	1	0	1	1	ARID2	AT rich interactive domain 2 (ARID, RFX-like)
hsa-miR-548l	1	0	1	1	1	1	PRR16	proline rich 16
hsa-miR-548l	1	0	1	1	1	1	PLS3	plastin 3
hsa-miR-548l	0	0	1	0	0	0	FLJ36000	uncharacterized FLJ36000
hsa-miR-548l	1	0	1	1	1	1	FGFR2	fibroblast growth factor receptor 2
hsa-miR-548l	0	0	1	0	0	0	LINC00326	long intergenic non-protein coding RNA 326
hsa-miR-548l	1	0	1	0	1	1	LPHN3	latrophilin 3
hsa-miR-548l	0	0	1	1	1	1	FBXL4	F-box and leucine-rich repeat protein 4
hsa-miR-548l	0	0	1	1	1	1	SLTM	SAFB-like, transcription modulator
hsa-miR-548l	1	0	1	1	1	1	FOSB	FBJ murine osteosarcoma viral oncogene homolog B
hsa-miR-548l	1	0	1	1	1	1	DPP8	dipeptidyl-peptidase 8
hsa-miR-548l	0	0	1	0	1	1	SRSF5	serine/arginine-rich splicing factor 5
hsa-miR-548l	1	0	1	1	1	1	DACH2	dachshund homolog 2 (Drosophila)
hsa-miR-548l	0	0	1	1	1	1	TMEM45A	transmembrane protein 45A
hsa-miR-548l	0	0	1	0	0	0	LOC339240	keratin 17 pseudogene
hsa-miR-548l	0	0	1	1	1	1	STAG1	stromal antigen 1
hsa-miR-548l	1	0	1	1	1	1	UNC13C	unc-13 homolog C (C. elegans)
hsa-miR-548l	0	0	1	1	1	1	PCMTD2	protein-L-isoaspartate (D-aspartate) O-methyltransferase domain containing 2
hsa-miR-548l	0	0	1	0	0	0	SLC7A11-AS1	SLC7A11 antisense RNA 1
hsa-miR-548l	0	0	1	1	1	1	VPS35	vacuolar protein sorting 35 homolog (S. cerevisiae)
hsa-miR-548l	1	0	1	1	1	1	FAM123A	family with sequence similarity 123A
hsa-miR-548l	1	0	1	0	1	1	HSPA12A	heat shock 70kDa protein 12A
hsa-miR-548l	0	0	1	0	1	1	PDGFC	platelet derived growth factor C
hsa-miR-548l	1	0	1	0	1	1	TNFAIP3	tumor necrosis factor, alpha-induced protein 3
hsa-miR-548l	1	0	1	1	1	1	CLOCK	clock homolog (mouse)
hsa-miR-548l	0	0	1	1	0	0	C1orf87	chromosome 1 open reading frame 87
hsa-miR-548l	1	0	1	1	1	1	FKBP5	FK506 binding protein 5
hsa-miR-548l	1	0	1	0	1	1	USP6NL	USP6 N-terminal like
hsa-miR-548l	0	0	1	1	1	1	STARD4	StAR-related lipid transfer (START) domain containing 4
hsa-miR-548l	0	0	1	0	0	0	LOC157381	uncharacterized LOC157381
hsa-miR-548l	0	0	1	1	1	1	DGKH	diacylglycerol kinase, eta
hsa-miR-548l	1	0	1	1	1	1	SOLH	small optic lobes homolog (Drosophila)
hsa-miR-548l	1	0	1	1	1	1	HLTF	helicase-like transcription factor
hsa-miR-548l	1	0	1	1	1	1	RNF145	ring finger protein 145
hsa-miR-548l	1	0	1	0	1	1	PSD3	pleckstrin and Sec7 domain containing 3
hsa-miR-548l	1	0	1	1	1	1	MAMDC2	MAM domain containing 2
hsa-miR-548l	0	0	1	1	1	1	MGC57346	uncharacterized LOC401884
hsa-miR-548l	0	0	1	0	0	0	LOC283914	uncharacterized LOC283914
hsa-miR-548l	1	0	1	1	1	1	SENP1	SUMO1/sentrin specific peptidase 1
hsa-miR-548l	1	0	1	1	1	1	SF3B1	splicing factor 3b, subunit 1, 155kDa
hsa-miR-548l	0	0	1	1	0	0	NIT1	nitrilase 1
hsa-miR-548l	1	0	1	1	0	0	SFXN5	sideroflexin 5
hsa-miR-548l	0	0	1	0	1	1	IL33	interleukin 33
hsa-miR-548l	1	0	1	1	1	1	SLC35G1	solute carrier family 35, member G1
hsa-miR-548l	0	0	1	0	0	0	LOC348120	uncharacterized LOC348120
hsa-miR-548l	0	0	1	0	0	0	DPY19L2P4	dpy-19-like 2 pseudogene 4 (C. elegans)
hsa-miR-548l	1	0	1	1	1	1	BRD1	bromodomain containing 1
hsa-miR-548l	1	0	1	0	1	1	ZNF800	zinc finger protein 800
hsa-miR-548l	1	0	1	1	1	1	RMND5A	required for meiotic nuclear division 5 homolog A (S. cerevisiae)
hsa-miR-548l	0	0	1	1	1	1	ZNF589	zinc finger protein 589
hsa-miR-548l	1	0	1	1	1	1	PTPRG	protein tyrosine phosphatase, receptor type, G
hsa-miR-548l	0	0	1	0	0	0	LOC283038	uncharacterized LOC283038
hsa-miR-548l	0	0	1	1	1	1	INO80C	INO80 complex subunit C
hsa-miR-548l	1	0	1	1	1	1	CLVS1	clavesin 1
hsa-miR-548l	1	0	1	1	1	1	PELI1	pellino E3 ubiquitin protein ligase 1
hsa-miR-548l	1	0	1	0	1	1	ARHGAP5	Rho GTPase activating protein 5
hsa-miR-548l	1	0	1	1	1	1	RECK	reversion-inducing-cysteine-rich protein with kazal motifs
hsa-miR-548l	0	0	1	1	1	1	FBXO38	F-box protein 38
hsa-miR-548l	1	0	1	1	1	1	GATA2	GATA binding protein 2
hsa-miR-548l	0	0	1	1	1	1	LINC00086	long intergenic non-protein coding RNA 86
hsa-miR-548l	1	0	1	1	1	1	ZFP91	zinc finger protein 91 homolog (mouse)
hsa-miR-548l	1	0	1	1	1	1	YWHAZ	tyrosine 3-monooxygenase/tryptophan 5-monooxygenase activation protein, zeta polypeptide
hsa-miR-548l	1	0	1	1	1	1	PCGF5	polycomb group ring finger 5
hsa-miR-548l	0	0	1	1	0	0	EDC4	enhancer of mRNA decapping 4
hsa-miR-548l	1	0	1	1	1	1	OLFML2A	olfactomedin-like 2A
hsa-miR-548l	0	0	1	1	1	1	IDI1	isopentenyl-diphosphate delta isomerase 1
hsa-miR-548l	0	0	1	1	1	1	ZBTB8OS	zinc finger and BTB domain containing 8 opposite strand
hsa-miR-548l	0	0	1	1	1	1	CDC42SE2	CDC42 small effector 2
hsa-miR-548l	1	0	1	1	1	1	GTDC1	glycosyltransferase-like domain containing 1
hsa-miR-548l	1	0	1	1	1	1	INPP5A	inositol polyphosphate-5-phosphatase, 40kDa
hsa-miR-548l	1	0	1	1	0	0	G6PC3	glucose 6 phosphatase, catalytic, 3
hsa-miR-548l	0	0	1	0	1	1	ASAP2	ArfGAP with SH3 domain, ankyrin repeat and PH domain 2
hsa-miR-548l	0	0	1	1	0	0	C8orf31	chromosome 8 open reading frame 31
hsa-miR-548l	1	0	1	1	1	1	ANXA4	annexin A4
hsa-miR-548l	0	0	1	1	1	1	C1orf109	chromosome 1 open reading frame 109
hsa-miR-548l	1	0	1	1	0	0	ANKIB1	ankyrin repeat and IBR domain containing 1
hsa-miR-548l	0	0	1	1	1	1	SCLT1	sodium channel and clathrin linker 1
hsa-miR-548l	1	0	1	1	1	1	UEVLD	UEV and lactate/malate dehyrogenase domains
hsa-miR-548l	0	0	1	1	1	1	VNN2	vanin 2
hsa-miR-548l	1	0	1	1	1	1	MYLK	myosin light chain kinase
hsa-miR-548l	1	0	1	1	1	1	ADCY6	adenylate cyclase 6
hsa-miR-548l	0	0	1	1	1	1	GORAB	golgin, RAB6-interacting
hsa-miR-548l	0	0	1	1	1	1	AQP6	aquaporin 6, kidney specific
hsa-miR-548l	1	0	1	1	1	1	EIF4G2	eukaryotic translation initiation factor 4 gamma, 2
hsa-miR-548l	1	0	1	1	1	1	RAVER2	ribonucleoprotein, PTB-binding 2
hsa-miR-548l	1	0	1	1	1	1	VTCN1	V-set domain containing T cell activation inhibitor 1
hsa-miR-548l	1	0	1	1	1	1	ZNF449	zinc finger protein 449
hsa-miR-548l	1	0	1	1	1	1	CUX1	cut-like homeobox 1
hsa-miR-548l	1	0	1	1	1	1	CKAP2	cytoskeleton associated protein 2
hsa-miR-548l	1	0	1	1	1	1	VIM	vimentin
hsa-miR-548l	1	0	1	1	1	1	C18orf1	chromosome 18 open reading frame 1
hsa-miR-548l	1	0	1	1	1	1	AP3M1	adaptor-related protein complex 3, mu 1 subunit
hsa-miR-548l	0	0	1	1	1	1	KCTD18	potassium channel tetramerisation domain containing 18
hsa-miR-548l	1	0	1	1	0	0	SNX18	sorting nexin 18
hsa-miR-548l	1	0	1	1	1	1	PDCD6IP	programmed cell death 6 interacting protein
hsa-miR-548l	1	0	1	1	1	1	SLC26A7	solute carrier family 26, member 7
hsa-miR-548l	1	0	1	1	1	1	MAPKAPK3	mitogen-activated protein kinase-activated protein kinase 3
hsa-miR-548l	1	0	1	1	1	1	SRPK2	SRSF protein kinase 2
hsa-miR-548l	0	0	1	0	0	0	PTGER4P2	prostaglandin E receptor 4 (subtype EP4) pseudogene 2
hsa-miR-548l	1	0	1	1	1	1	EED	embryonic ectoderm development
hsa-miR-548l	0	0	1	1	0	0	CYP4F30P	cytochrome P450, family 4, subfamily F, polypeptide 30, pseudogene
hsa-miR-548l	1	0	1	1	1	1	SCAF8	SR-related CTD-associated factor 8
hsa-miR-548l	0	0	1	1	0	0	CSF2RB	colony stimulating factor 2 receptor, beta, low-affinity (granulocyte-macrophage)
hsa-miR-548l	0	0	1	0	0	0	AQP7P2	aquaporin 7 pseudogene 2
hsa-miR-548l	1	0	1	0	1	1	TGFBR1	transforming growth factor, beta receptor 1
hsa-miR-548l	1	0	1	1	1	1	CTBP1	C-terminal binding protein 1
hsa-miR-548l	0	0	1	0	0	0	LOC440416	uncharacterized LOC440416
hsa-miR-548l	1	0	1	1	1	1	WBP1L	WW domain binding protein 1-like
hsa-miR-548l	0	0	1	0	1	1	SH3RF2	SH3 domain containing ring finger 2
hsa-miR-548l	1	0	1	1	1	1	OPCML	opioid binding protein/cell adhesion molecule-like
hsa-miR-548l	1	0	1	1	1	1	WNT5A	wingless-type MMTV integration site family, member 5A
hsa-miR-548l	1	0	1	1	1	1	NTRK2	neurotrophic tyrosine kinase, receptor, type 2
hsa-miR-548l	0	0	1	1	1	1	C3orf67	chromosome 3 open reading frame 67
hsa-miR-548l	1	0	1	0	1	1	AMMECR1L	AMME chromosomal region gene 1-like
hsa-miR-548l	1	0	1	1	1	1	GRAMD4	GRAM domain containing 4
hsa-miR-548l	0	0	1	0	0	0	TBC1D25	TBC1 domain family, member 25
hsa-miR-548l	1	0	1	0	1	1	NFAT5	nuclear factor of activated T-cells 5, tonicity-responsive
hsa-miR-548l	1	0	1	0	1	1	MEST	mesoderm specific transcript homolog (mouse)
hsa-miR-548l	0	0	1	1	1	1	HOXD8	homeobox D8
hsa-miR-548l	1	0	1	1	0	0	SLC45A4	solute carrier family 45, member 4
hsa-miR-548l	1	0	1	1	1	1	ZMYND11	zinc finger, MYND-type containing 11
hsa-miR-548l	0	0	1	1	1	1	COBL	cordon-bleu homolog (mouse)
hsa-miR-548l	1	0	1	1	1	1	ACVR2B	activin A receptor, type IIB
hsa-miR-548l	0	0	1	1	1	1	TUBAL3	tubulin, alpha-like 3
hsa-miR-548l	0	0	1	0	0	0	ABCA11P	ATP-binding cassette, sub-family A (ABC1), member 11, pseudogene
hsa-miR-548l	0	0	1	0	0	0	FAM106A	family with sequence similarity 106, member A
hsa-miR-548l	1	0	1	1	1	1	SYNJ1	synaptojanin 1
hsa-miR-548l	0	0	1	1	1	1	HMGB2	high mobility group box 2
hsa-miR-548l	0	0	1	1	1	1	XG	Xg blood group
hsa-miR-548l	1	0	1	0	1	1	MYBL1	v-myb myeloblastosis viral oncogene homolog (avian)-like 1
hsa-miR-548l	1	0	1	1	1	1	ARFIP1	ADP-ribosylation factor interacting protein 1
hsa-miR-548l	1	0	1	0	1	1	CPEB2	cytoplasmic polyadenylation element binding protein 2
hsa-miR-548l	0	0	1	0	0	0	LSAMP-AS3	LSAMP antisense RNA 3
hsa-miR-548l	0	0	1	0	0	0	C5orf49	chromosome 5 open reading frame 49
hsa-miR-548l	0	0	1	1	0	0	KIF9	kinesin family member 9
hsa-miR-548l	0	0	1	1	1	1	CCDC126	coiled-coil domain containing 126
hsa-miR-548l	0	0	1	1	1	1	SPHKAP	SPHK1 interactor, AKAP domain containing
hsa-miR-548l	1	0	1	1	1	1	GABRB2	gamma-aminobutyric acid (GABA) A receptor, beta 2
hsa-miR-548l	1	0	1	1	1	1	PTPRD	protein tyrosine phosphatase, receptor type, D
hsa-miR-548l	1	0	1	1	1	1	HS2ST1	heparan sulfate 2-O-sulfotransferase 1
hsa-miR-548l	1	0	1	1	1	1	TBP	TATA box binding protein
hsa-miR-548l	1	0	1	0	1	1	DNAJC6	DnaJ (Hsp40) homolog, subfamily C, member 6
hsa-miR-548l	1	0	1	1	1	1	CERS6	ceramide synthase 6
hsa-miR-548l	1	0	1	1	1	1	SP4	Sp4 transcription factor
hsa-miR-548l	1	0	1	0	1	1	BTBD3	BTB (POZ) domain containing 3
hsa-miR-548l	1	0	1	1	1	1	LARP1B	La ribonucleoprotein domain family, member 1B
hsa-miR-548l	1	0	1	1	1	1	UBE4A	ubiquitination factor E4A
hsa-miR-548l	1	0	1	1	1	1	SLK	STE20-like kinase
hsa-miR-548l	0	0	1	0	0	0	LINC00310	long intergenic non-protein coding RNA 310
hsa-miR-548l	0	0	1	1	0	0	PRAMEF10	PRAME family member 10
hsa-miR-548l	0	0	1	0	0	0	MAGEL2	MAGE-like 2
hsa-miR-548l	1	0	1	0	1	1	ROBO1	roundabout, axon guidance receptor, homolog 1 (Drosophila)
hsa-miR-548l	1	0	1	1	1	1	TMEM132B	transmembrane protein 132B
hsa-miR-548l	0	0	1	1	1	1	ZNF621	zinc finger protein 621
hsa-miR-548l	1	0	1	1	1	1	PAX3	paired box 3
hsa-miR-548l	1	0	1	1	1	1	SHANK2	SH3 and multiple ankyrin repeat domains 2
hsa-miR-548l	1	0	1	1	1	1	ST18	suppression of tumorigenicity 18 (breast carcinoma) (zinc finger protein)
hsa-miR-548l	0	0	1	1	1	1	NAA35	N(alpha)-acetyltransferase 35, NatC auxiliary subunit
hsa-miR-548l	1	0	1	1	1	1	GRIA3	glutamate receptor, ionotropic, AMPA 3
hsa-miR-548l	1	0	1	1	1	1	OTUD4	OTU domain containing 4
hsa-miR-548l	1	0	1	1	1	1	OSBP2	oxysterol binding protein 2
hsa-miR-548l	0	0	1	0	1	1	GOLGA8G	golgin A8 family, member G
hsa-miR-548l	1	0	1	0	1	1	LRCH2	leucine-rich repeats and calponin homology (CH) domain containing 2
hsa-miR-548l	1	0	1	0	1	1	CAMSAP2	calmodulin regulated spectrin-associated protein family, member 2
hsa-miR-548l	1	0	1	1	1	1	ANK2	ankyrin 2, neuronal
hsa-miR-548l	0	0	1	1	0	0	SAFB	scaffold attachment factor B
hsa-miR-548l	1	0	1	1	1	1	MEGF11	multiple EGF-like-domains 11
hsa-miR-548l	1	0	1	1	1	1	JMJD1C	jumonji domain containing 1C
hsa-miR-548l	1	0	1	1	1	1	TRAPPC8	trafficking protein particle complex 8
hsa-miR-548l	1	0	1	1	1	1	ZMYM4	zinc finger, MYM-type 4
hsa-miR-548l	1	0	1	1	1	1	CHIC1	cysteine-rich hydrophobic domain 1
hsa-miR-548l	1	0	1	1	1	1	MLLT10	myeloid/lymphoid or mixed-lineage leukemia (trithorax homolog, Drosophila); translocated to, 10
hsa-miR-548l	0	0	1	1	1	1	ABCA8	ATP-binding cassette, sub-family A (ABC1), member 8
hsa-miR-548l	0	0	1	0	0	0	FAM225B	family with sequence similarity 225, member B (non-protein coding)
hsa-miR-548l	1	0	1	1	1	1	TDRD5	tudor domain containing 5
hsa-miR-548l	1	0	1	1	1	1	KIAA0922	KIAA0922
hsa-miR-548l	1	0	1	0	1	1	FAM196A	family with sequence similarity 196, member A
hsa-miR-548l	0	0	1	1	0	0	TCHH	trichohyalin
hsa-miR-548l	0	0	1	1	1	1	UCHL5	ubiquitin carboxyl-terminal hydrolase L5
hsa-miR-548l	0	0	1	0	0	0	FUT8-AS1	FUT8 antisense RNA 1
hsa-miR-548l	0	0	1	0	0	0	MEG3	maternally expressed 3 (non-protein coding)
hsa-miR-548l	0	0	1	0	0	0	LINC00643	long intergenic non-protein coding RNA 643
hsa-miR-548l	1	0	1	1	1	1	BTBD7	BTB (POZ) domain containing 7
hsa-miR-548l	1	0	1	1	1	1	EIF5	eukaryotic translation initiation factor 5
hsa-miR-548l	1	0	1	1	1	1	ERMAP	erythroblast membrane-associated protein (Scianna blood group)
hsa-miR-548l	0	0	1	1	1	1	RAD17	RAD17 homolog (S. pombe)
hsa-miR-548l	0	0	1	0	0	0	ADCY10P1	adenylate cyclase 10 (soluble) pseudogene 1
hsa-miR-548l	1	0	1	1	1	1	SASH1	SAM and SH3 domain containing 1
hsa-miR-548l	0	0	1	0	0	0	DKFZp686D0853	uncharacterized LOC401613
hsa-miR-548l	1	0	1	1	1	1	ATP2B4	ATPase, Ca++ transporting, plasma membrane 4
hsa-miR-548l	1	0	1	1	1	1	JPH1	junctophilin 1
hsa-miR-548l	1	0	1	1	1	1	RBL2	retinoblastoma-like 2 (p130)
hsa-miR-548l	0	0	1	0	0	0	RGPD4	RANBP2-like and GRIP domain containing 4
hsa-miR-548l	0	0	1	1	1	1	NUP54	nucleoporin 54kDa
hsa-miR-548l	1	0	1	1	1	1	ETS1	v-ets erythroblastosis virus E26 oncogene homolog 1 (avian)
hsa-miR-548l	1	0	1	0	1	1	CLASP2	cytoplasmic linker associated protein 2
hsa-miR-548l	0	0	1	1	1	1	KLHL8	kelch-like 8 (Drosophila)
hsa-miR-548l	0	0	1	1	0	0	CDK5RAP2	CDK5 regulatory subunit associated protein 2
hsa-miR-548l	1	0	1	0	0	0	HEPHL1	hephaestin-like 1
hsa-miR-548l	0	0	1	1	1	1	COL6A3	collagen, type VI, alpha 3
hsa-miR-548l	1	0	1	1	1	1	RORB	RAR-related orphan receptor B
hsa-miR-548l	1	0	1	1	1	1	SMAD4	SMAD family member 4
hsa-miR-548l	0	0	1	1	0	0	WDPCP	WD repeat containing planar cell polarity effector
hsa-miR-548l	1	0	1	1	1	1	SH3BP4	SH3-domain binding protein 4
hsa-miR-548l	1	0	1	1	1	1	MYCBP2	MYC binding protein 2, E3 ubiquitin protein ligase
hsa-miR-548l	0	0	1	1	1	1	IPCEF1	interaction protein for cytohesin exchange factors 1
hsa-miR-548l	0	0	1	1	1	1	PRR14L	proline rich 14-like
hsa-miR-548l	0	0	1	1	1	1	SCAPER	S-phase cyclin A-associated protein in the ER
hsa-miR-548l	0	0	1	1	1	1	UHRF1BP1L	UHRF1 binding protein 1-like
hsa-miR-548l	1	0	1	1	0	0	RBM27	RNA binding motif protein 27
hsa-miR-548l	0	0	1	1	0	0	SNAPC2	small nuclear RNA activating complex, polypeptide 2, 45kDa
hsa-miR-548l	0	0	1	1	1	1	ADH1B	alcohol dehydrogenase 1B (class I), beta polypeptide
hsa-miR-548l	0	0	1	0	1	1	THAP6	THAP domain containing 6
hsa-miR-548l	0	0	1	1	1	1	FAM9C	family with sequence similarity 9, member C
hsa-miR-548l	0	0	1	1	1	1	PPP1R1C	protein phosphatase 1, regulatory (inhibitor) subunit 1C
hsa-miR-548l	0	0	1	0	0	0	LINC00240	long intergenic non-protein coding RNA 240
hsa-miR-548l	1	0	1	1	1	1	EPS15	epidermal growth factor receptor pathway substrate 15
hsa-miR-548l	1	0	1	1	1	1	VPS26A	vacuolar protein sorting 26 homolog A (S. pombe)
hsa-miR-548l	1	0	1	0	1	1	EML4	echinoderm microtubule associated protein like 4
hsa-miR-548l	1	0	1	1	1	1	GABPA	GA binding protein transcription factor, alpha subunit 60kDa
hsa-miR-548l	0	0	1	0	1	1	ANKRD36	ankyrin repeat domain 36
hsa-miR-548l	1	0	1	1	1	1	KLHL2	kelch-like 2, Mayven (Drosophila)
hsa-miR-548l	0	0	1	1	1	1	DUSP19	dual specificity phosphatase 19
hsa-miR-548l	1	0	1	1	1	1	TC2N	tandem C2 domains, nuclear
hsa-miR-548l	0	0	1	1	1	1	ZNF365	zinc finger protein 365
hsa-miR-548l	0	0	1	1	1	1	TMEM48	transmembrane protein 48
hsa-miR-548l	1	0	1	1	1	1	NEDD9	neural precursor cell expressed, developmentally down-regulated 9
hsa-miR-548l	1	0	1	1	1	1	LCA5	Leber congenital amaurosis 5
hsa-miR-548l	0	0	1	1	1	1	CCNT2	cyclin T2
hsa-miR-548l	0	0	1	0	1	1	TYW5	tRNA-yW synthesizing protein 5
hsa-miR-548l	1	0	1	1	1	1	PHF3	PHD finger protein 3
hsa-miR-548l	0	0	1	1	1	1	ATP2A2	ATPase, Ca++ transporting, cardiac muscle, slow twitch 2
hsa-miR-548l	1	0	1	1	1	1	PAQR3	progestin and adipoQ receptor family member III
hsa-miR-548l	1	0	1	1	1	1	NFIB	nuclear factor I/B
hsa-miR-548l	1	0	1	1	1	1	BCLAF1	BCL2-associated transcription factor 1
hsa-miR-548l	1	0	1	1	1	1	NAV1	neuron navigator 1
hsa-miR-548l	1	0	1	0	1	1	IGF2BP3	insulin-like growth factor 2 mRNA binding protein 3
hsa-miR-548l	1	0	1	1	1	1	C5orf24	chromosome 5 open reading frame 24
hsa-miR-548l	1	0	1	1	1	1	PGAP1	post-GPI attachment to proteins 1
hsa-miR-548l	1	0	1	1	1	1	TMEM135	transmembrane protein 135
hsa-miR-548l	0	0	1	1	1	1	THSD4	thrombospondin, type I, domain containing 4
hsa-miR-548l	1	0	1	1	1	1	HIF1A	hypoxia inducible factor 1, alpha subunit (basic helix-loop-helix transcription factor)
hsa-miR-548l	1	0	1	1	1	1	CALD1	caldesmon 1
hsa-miR-548l	1	0	1	1	1	1	EOGT	EGF domain-specific O-linked N-acetylglucosamine (GlcNAc) transferase
hsa-miR-548l	0	0	1	1	1	1	KIAA1328	KIAA1328
hsa-miR-548l	0	0	1	1	1	1	SSFA2	sperm specific antigen 2
hsa-miR-548l	1	0	1	0	1	1	TBL1XR1	transducin (beta)-like 1 X-linked receptor 1
hsa-miR-548l	1	0	1	0	1	1	TTL	tubulin tyrosine ligase
hsa-miR-548l	0	0	1	1	1	1	IPO11	importin 11
hsa-miR-548l	0	0	1	0	1	1	GINS3	GINS complex subunit 3 (Psf3 homolog)
hsa-miR-548l	0	0	1	1	1	1	HPGD	hydroxyprostaglandin dehydrogenase 15-(NAD)
hsa-miR-548l	1	0	1	1	1	1	PCMT1	protein-L-isoaspartate (D-aspartate) O-methyltransferase
hsa-miR-548l	0	0	1	1	0	0	PPAPDC1B	phosphatidic acid phosphatase type 2 domain containing 1B
hsa-miR-548l	0	0	1	1	1	1	SNRNP27	small nuclear ribonucleoprotein 27kDa (U4/U6.U5)
hsa-miR-548l	0	0	1	1	0	0	SPATA6	spermatogenesis associated 6
hsa-miR-548l	0	0	1	0	0	0	LOC100128988	uncharacterized LOC100128988
hsa-miR-548l	1	0	1	1	1	1	FUT9	fucosyltransferase 9 (alpha (1,3) fucosyltransferase)
hsa-miR-548l	0	0	1	1	1	1	UMPS	uridine monophosphate synthetase
hsa-miR-548l	0	0	1	1	1	1	UPRT	uracil phosphoribosyltransferase (FUR1) homolog (S. cerevisiae)
hsa-miR-548l	0	0	1	1	0	0	TTC8	tetratricopeptide repeat domain 8
hsa-miR-548l	0	0	1	1	0	0	URM1	ubiquitin related modifier 1
hsa-miR-548l	0	0	1	1	0	0	TCEAL4	transcription elongation factor A (SII)-like 4
hsa-miR-548l	1	0	1	0	1	1	OLA1	Obg-like ATPase 1
hsa-miR-548l	0	0	1	1	1	1	RNFT1	ring finger protein, transmembrane 1
hsa-miR-548l	1	0	1	1	1	1	CLDN11	claudin 11
hsa-miR-548l	0	0	1	1	1	1	ATP1B3	ATPase, Na+/K+ transporting, beta 3 polypeptide
hsa-miR-548l	0	0	1	1	0	0	STAMBP	STAM binding protein
hsa-miR-548l	1	0	1	0	1	1	NRAS	neuroblastoma RAS viral (v-ras) oncogene homolog
hsa-miR-548l	0	0	1	1	0	0	ITGB3BP	integrin beta 3 binding protein (beta3-endonexin)
hsa-miR-548l	0	0	1	1	1	1	BTF3	basic transcription factor 3
hsa-miR-548l	0	0	1	1	1	1	FAT1	FAT tumor suppressor homolog 1 (Drosophila)
hsa-miR-548l	1	0	1	1	1	1	CD9	CD9 molecule
hsa-miR-548l	1	0	1	1	1	1	CAAP1	caspase activity and apoptosis inhibitor 1
hsa-miR-548l	1	0	1	1	1	1	E2F5	E2F transcription factor 5, p130-binding
hsa-miR-548l	0	0	1	1	1	1	TUBA1A	tubulin, alpha 1a
hsa-miR-548l	1	0	1	1	1	1	SSR1	signal sequence receptor, alpha
hsa-miR-548l	0	0	1	1	1	1	BLZF1	basic leucine zipper nuclear factor 1
hsa-miR-548l	1	0	1	1	1	1	TPM4	tropomyosin 4
hsa-miR-548l	1	0	1	1	1	1	SMARCE1	SWI/SNF related, matrix associated, actin dependent regulator of chromatin, subfamily e, member 1
hsa-miR-548l	0	0	1	1	1	1	MTCP1	mature T-cell proliferation 1
hsa-miR-548l	0	0	1	0	1	1	CD99P1	CD99 molecule pseudogene 1
hsa-miR-548l	0	0	1	0	0	0	LOC643837	uncharacterized LOC643837
hsa-miR-548l	0	0	1	1	1	1	PROCR	protein C receptor, endothelial
hsa-miR-548l	0	0	1	1	1	1	PPHLN1	periphilin 1
hsa-miR-548l	0	0	1	0	0	0	TRIQK	triple QxxK/R motif containing
hsa-miR-548l	0	0	1	1	0	0	RAD54B	RAD54 homolog B (S. cerevisiae)
hsa-miR-548l	1	0	1	1	1	1	DRAM2	DNA-damage regulated autophagy modulator 2
hsa-miR-548l	0	0	1	0	1	1	EMX2	empty spiracles homeobox 2
hsa-miR-548l	1	0	1	1	1	1	NTM	neurotrimin
hsa-miR-548l	0	0	1	1	1	1	IFNGR2	interferon gamma receptor 2 (interferon gamma transducer 1)
hsa-miR-548l	0	0	1	1	1	1	GGPS1	geranylgeranyl diphosphate synthase 1
hsa-miR-548l	0	0	1	0	0	0	HMGN1P37	high mobility group nucleosome binding domain 1 pseudogene 37
hsa-miR-548l	0	0	1	1	1	1	CCDC91	coiled-coil domain containing 91
hsa-miR-548l	1	0	1	1	1	1	MBNL1	muscleblind-like splicing regulator 1
hsa-miR-548l	0	0	1	0	1	1	PDCD5	programmed cell death 5
hsa-miR-548l	0	0	1	1	1	1	DCTD	dCMP deaminase
hsa-miR-548l	0	0	1	1	0	0	CCDC112	coiled-coil domain containing 112
hsa-miR-548l	0	0	1	1	1	1	ACTR3B	ARP3 actin-related protein 3 homolog B (yeast)
hsa-miR-548l	0	0	1	1	0	0	TMEM183A	transmembrane protein 183A
hsa-miR-548l	0	0	1	1	1	1	PECR	peroxisomal trans-2-enoyl-CoA reductase
hsa-miR-548l	0	0	1	1	1	1	STON1	stonin 1
hsa-miR-548l	0	0	1	1	1	1	CYP26A1	cytochrome P450, family 26, subfamily A, polypeptide 1
hsa-miR-548l	1	0	1	1	1	1	PCTP	phosphatidylcholine transfer protein
hsa-miR-548l	0	0	1	1	0	0	RPS18	ribosomal protein S18
hsa-miR-548l	0	0	1	1	1	1	CHMP5	charged multivesicular body protein 5
hsa-miR-548l	1	0	1	1	1	1	NAP1L1	nucleosome assembly protein 1-like 1
hsa-miR-548l	0	0	1	0	0	0	C12orf75	chromosome 12 open reading frame 75
hsa-miR-548l	1	0	1	1	1	1	STK38L	serine/threonine kinase 38 like
hsa-miR-548l	0	0	1	1	0	0	DOK5	docking protein 5
hsa-miR-548l	1	0	1	1	1	1	TMEM245	transmembrane protein 245
hsa-miR-548l	1	0	1	1	1	1	PTBP1	polypyrimidine tract binding protein 1
hsa-miR-548l	0	0	1	1	1	1	PSMA1	proteasome (prosome, macropain) subunit, alpha type, 1
hsa-miR-548l	0	0	1	1	1	1	ATG4A	autophagy related 4A, cysteine peptidase
hsa-miR-548l	0	0	1	0	0	0	FLJ45248	FLJ45248 protein
hsa-miR-548l	0	0	1	1	1	1	BMPR1A	bone morphogenetic protein receptor, type IA
hsa-miR-548l	0	0	1	1	0	0	TUBE1	tubulin, epsilon 1
hsa-miR-548l	0	0	1	0	0	0	LOC677759	uncharacterized LOC677759
hsa-miR-548l	1	0	1	1	1	1	MMP2	matrix metallopeptidase 2 (gelatinase A, 72kDa gelatinase, 72kDa type IV collagenase)
hsa-miR-548l	1	0	1	1	1	1	KCNIP4	Kv channel interacting protein 4
hsa-miR-548l	1	0	1	1	1	1	DOK4	docking protein 4
hsa-miR-548l	0	0	1	1	0	0	NOX5	NADPH oxidase, EF-hand calcium binding domain 5
hsa-miR-548l	1	0	1	1	0	0	FAT4	FAT tumor suppressor homolog 4 (Drosophila)
hsa-miR-548l	1	0	1	1	1	1	LAMTOR3	late endosomal/lysosomal adaptor, MAPK and MTOR activator 3
hsa-miR-548l	0	0	1	1	1	1	RPA2	replication protein A2, 32kDa
hsa-miR-548l	1	0	1	1	1	1	MEIS1	Meis homeobox 1
hsa-miR-548l	1	0	1	0	1	1	NLN	neurolysin (metallopeptidase M3 family)
hsa-miR-548l	0	0	1	1	1	1	ACAD9	acyl-CoA dehydrogenase family, member 9
hsa-miR-548l	1	0	1	1	1	1	YWHAQ	tyrosine 3-monooxygenase/tryptophan 5-monooxygenase activation protein, theta polypeptide
hsa-miR-548l	0	0	1	0	1	1	SUMO2	SMT3 suppressor of mif two 3 homolog 2 (S. cerevisiae)
hsa-miR-548l	1	0	1	1	1	1	METAP2	methionyl aminopeptidase 2
hsa-miR-548l	0	0	1	1	1	1	LYSMD4	LysM, putative peptidoglycan-binding, domain containing 4
hsa-miR-548l	0	0	1	1	1	1	CD1C	CD1c molecule
hsa-miR-548l	1	0	1	1	1	1	ANAPC16	anaphase promoting complex subunit 16
hsa-miR-548l	1	0	1	1	1	1	GOLGA7	golgin A7
hsa-miR-548l	1	0	1	1	1	1	NFYB	nuclear transcription factor Y, beta
hsa-miR-548l	1	0	1	1	1	1	TRIM5	tripartite motif containing 5
hsa-miR-548l	0	0	1	1	1	1	GFM1	G elongation factor, mitochondrial 1
hsa-miR-548l	1	0	1	1	1	1	SNX1	sorting nexin 1
hsa-miR-548l	1	0	1	1	1	1	ARMC8	armadillo repeat containing 8
hsa-miR-548l	1	0	1	1	1	1	LAPTM4A	lysosomal protein transmembrane 4 alpha
hsa-miR-548l	0	0	1	1	1	1	JAM2	junctional adhesion molecule 2
hsa-miR-548l	0	0	1	0	0	0	ZNF674-AS1	ZNF674 antisense RNA 1
hsa-miR-548l	0	0	1	1	0	0	CCNDBP1	cyclin D-type binding-protein 1
hsa-miR-548l	1	0	1	1	1	1	RBFOX2	RNA binding protein, fox-1 homolog (C. elegans) 2
hsa-miR-548l	1	0	1	0	1	1	MAP1B	microtubule-associated protein 1B
hsa-miR-548l	0	0	1	1	0	0	STT3B	STT3, subunit of the oligosaccharyltransferase complex, homolog B (S. cerevisiae)
hsa-miR-548l	1	0	1	1	0	0	STAG3L4	stromal antigen 3-like 4
hsa-miR-548l	1	0	1	1	1	1	ACTN4	actinin, alpha 4
hsa-miR-548l	0	0	1	1	1	1	LGI1	leucine-rich, glioma inactivated 1
hsa-miR-548l	0	0	1	1	1	1	PLAC8	placenta-specific 8
hsa-miR-548l	0	0	1	0	0	0	EEF1G	eukaryotic translation elongation factor 1 gamma
hsa-miR-548l	0	0	1	1	1	1	OTOR	otoraplin
hsa-miR-548l	0	0	1	1	1	1	NUDT21	nudix (nucleoside diphosphate linked moiety X)-type motif 21
hsa-miR-548l	1	0	1	1	1	1	MED1	mediator complex subunit 1
hsa-miR-548l	0	0	1	1	1	1	EPCAM	epithelial cell adhesion molecule
hsa-miR-548l	1	0	1	1	1	1	TFPI	tissue factor pathway inhibitor (lipoprotein-associated coagulation inhibitor)
hsa-miR-548l	0	0	1	1	1	1	NUB1	negative regulator of ubiquitin-like proteins 1
hsa-miR-548l	1	0	1	1	0	0	MMP11	matrix metallopeptidase 11 (stromelysin 3)
hsa-miR-548l	1	0	1	1	1	1	RND3	Rho family GTPase 3
hsa-miR-548l	1	0	1	1	1	1	STAG2	stromal antigen 2
hsa-miR-548l	1	0	1	1	1	1	DNAJC16	DnaJ (Hsp40) homolog, subfamily C, member 16
hsa-miR-548l	1	0	1	1	1	1	FBXW7	F-box and WD repeat domain containing 7, E3 ubiquitin protein ligase
hsa-miR-548l	0	0	1	1	1	1	ATG5	autophagy related 5
hsa-miR-548l	0	0	1	0	1	1	STARD8	StAR-related lipid transfer (START) domain containing 8
hsa-miR-548l	1	0	1	1	1	1	NKTR	natural killer-tumor recognition sequence
hsa-miR-548l	1	0	1	1	1	1	HECW2	HECT, C2 and WW domain containing E3 ubiquitin protein ligase 2
hsa-miR-548l	1	0	1	0	1	1	PTP4A1	protein tyrosine phosphatase type IVA, member 1
hsa-miR-548l	0	0	1	0	0	0	MUC19	mucin 19, oligomeric
hsa-miR-548l	1	0	1	0	1	1	XRN1	5'-3' exoribonuclease 1
hsa-miR-548l	0	0	1	1	1	1	CCDC102B	coiled-coil domain containing 102B
hsa-miR-548l	1	0	1	0	1	1	MCFD2	multiple coagulation factor deficiency 2
hsa-miR-548l	1	0	1	1	1	1	SNRK	SNF related kinase
hsa-miR-548l	1	0	1	1	1	1	TIPARP	TCDD-inducible poly(ADP-ribose) polymerase
hsa-miR-548l	1	0	1	1	1	1	SLC39A10	solute carrier family 39 (zinc transporter), member 10
hsa-miR-548l	1	0	1	0	1	1	CNTNAP2	contactin associated protein-like 2
hsa-miR-548l	0	0	1	0	1	1	SYNPR	synaptoporin
hsa-miR-548l	1	0	1	1	1	1	SLC30A7	solute carrier family 30 (zinc transporter), member 7
hsa-miR-548l	0	0	1	1	1	1	TMEM41B	transmembrane protein 41B
hsa-miR-548l	1	0	1	1	1	1	PI15	peptidase inhibitor 15
hsa-miR-548l	1	0	1	1	1	1	PRKG1	protein kinase, cGMP-dependent, type I
hsa-miR-548l	1	0	1	1	1	1	TTC3	tetratricopeptide repeat domain 3
hsa-miR-548l	1	0	1	1	1	1	RB1CC1	RB1-inducible coiled-coil 1
hsa-miR-548l	1	0	1	1	1	1	TMEFF2	transmembrane protein with EGF-like and two follistatin-like domains 2
hsa-miR-548l	0	0	1	1	1	1	CD274	CD274 molecule
hsa-miR-548l	1	0	1	1	0	0	DPY19L1	dpy-19-like 1 (C. elegans)
hsa-miR-548l	0	0	1	1	0	0	GPR111	G protein-coupled receptor 111
hsa-miR-548l	0	0	1	1	1	1	C1orf27	chromosome 1 open reading frame 27
hsa-miR-548l	0	0	1	1	1	1	EIF1AY	eukaryotic translation initiation factor 1A, Y-linked
hsa-miR-548l	0	0	1	1	1	1	TNFSF10	tumor necrosis factor (ligand) superfamily, member 10
hsa-miR-548l	1	0	1	1	1	1	BNC2	basonuclin 2
hsa-miR-548l	1	0	1	0	1	1	DCBLD2	discoidin, CUB and LCCL domain containing 2
hsa-miR-548l	1	0	1	1	1	1	LGR4	leucine-rich repeat containing G protein-coupled receptor 4
hsa-miR-548l	0	0	1	1	1	1	ADPRH	ADP-ribosylarginine hydrolase
hsa-miR-548l	1	0	1	1	1	1	ATP2B2	ATPase, Ca++ transporting, plasma membrane 2
hsa-miR-548l	1	0	1	1	1	1	CCNG2	cyclin G2
hsa-miR-548l	1	0	1	0	1	1	BCL2	B-cell CLL/lymphoma 2
hsa-miR-548l	1	0	1	0	1	1	YES1	v-yes-1 Yamaguchi sarcoma viral oncogene homolog 1
hsa-miR-548l	1	0	1	0	1	1	ACVR2A	activin A receptor, type IIA
hsa-miR-548l	1	0	1	1	1	1	ARSB	arylsulfatase B
hsa-miR-548l	1	0	1	1	1	1	COL3A1	collagen, type III, alpha 1
hsa-miR-548l	1	0	1	1	1	1	COL4A3	collagen, type IV, alpha 3 (Goodpasture antigen)
hsa-miR-548l	1	0	1	1	1	1	COL4A4	collagen, type IV, alpha 4
hsa-miR-548l	0	0	1	0	1	1	CYP1B1	cytochrome P450, family 1, subfamily B, polypeptide 1
hsa-miR-548l	1	0	1	0	1	1	SLC26A2	solute carrier family 26 (sulfate transporter), member 2
hsa-miR-548l	1	0	1	1	1	1	ESR1	estrogen receptor 1
hsa-miR-548l	1	0	1	1	1	1	GALC	galactosylceramidase
hsa-miR-548l	1	0	1	0	1	1	GHR	growth hormone receptor
hsa-miR-548l	1	0	1	1	1	1	GK	glycerol kinase
hsa-miR-548l	1	0	1	0	1	1	ITGB3	integrin, beta 3 (platelet glycoprotein IIIa, antigen CD61)
hsa-miR-548l	1	0	1	1	1	1	JAG1	jagged 1
hsa-miR-548l	1	0	1	1	1	1	KCNA1	potassium voltage-gated channel, shaker-related subfamily, member 1 (episodic ataxia with myokymia)
hsa-miR-548l	1	0	1	0	1	1	KIT	v-kit Hardy-Zuckerman 4 feline sarcoma viral oncogene homolog
hsa-miR-548l	0	0	1	1	1	1	KRT12	keratin 12
hsa-miR-548l	1	0	1	0	1	1	SGCB	sarcoglycan, beta (43kDa dystrophin-associated glycoprotein)
hsa-miR-548l	0	0	1	0	1	1	MBL2	mannose-binding lectin (protein C) 2, soluble
hsa-miR-548l	1	0	1	1	1	1	MITF	microphthalmia-associated transcription factor
hsa-miR-548l	0	0	1	1	1	1	MUT	methylmalonyl CoA mutase
hsa-miR-548l	0	0	1	0	1	1	MYO7A	myosin VIIA
hsa-miR-548l	1	0	1	1	1	1	NF1	neurofibromin 1
hsa-miR-548l	0	0	1	0	1	1	PGK1	phosphoglycerate kinase 1
hsa-miR-548l	1	0	1	0	1	1	PKD2	polycystic kidney disease 2 (autosomal dominant)
hsa-miR-548l	0	0	1	1	1	1	PRNP	prion protein
hsa-miR-548l	1	0	1	0	1	1	PTEN	phosphatase and tensin homolog
hsa-miR-548l	1	0	1	1	1	1	ATXN1	ataxin 1
hsa-miR-548l	0	0	1	1	1	1	CASR	calcium-sensing receptor
hsa-miR-548l	1	0	1	0	1	1	COL5A2	collagen, type V, alpha 2
hsa-miR-548l	1	0	1	1	1	1	HLCS	holocarboxylase synthetase (biotin-(proprionyl-CoA-carboxylase (ATP-hydrolysing)) ligase)
hsa-miR-548l	0	0	1	1	1	1	LTBP2	latent transforming growth factor beta binding protein 2
hsa-miR-548l	0	0	1	1	0	0	MAT1A	methionine adenosyltransferase I, alpha
hsa-miR-548l	1	0	1	0	1	1	PCSK1	proprotein convertase subtilisin/kexin type 1
hsa-miR-548l	0	0	1	1	1	1	PECAM1	platelet/endothelial cell adhesion molecule 1
hsa-miR-548l	1	0	1	0	1	1	RAG1	recombination activating gene 1
hsa-miR-548l	1	0	1	1	1	1	APP	amyloid beta (A4) precursor protein
hsa-miR-548l	1	0	1	1	1	1	ATRX	alpha thalassemia/mental retardation syndrome X-linked
hsa-miR-548l	0	0	1	1	1	1	COL10A1	collagen, type X, alpha 1
hsa-miR-548l	0	0	1	1	1	1	RFXAP	regulatory factor X-associated protein
hsa-miR-548l	1	0	1	1	1	1	DCX	doublecortin
hsa-miR-548l	0	0	1	1	1	1	IL6	interleukin 6 (interferon, beta 2)
hsa-miR-548l	0	0	1	1	1	1	ADH4	alcohol dehydrogenase 4 (class II), pi polypeptide
hsa-miR-548l	1	0	1	1	1	1	ADORA2B	adenosine A2b receptor
hsa-miR-548l	0	0	1	1	0	0	CA4	carbonic anhydrase IV
hsa-miR-548l	1	0	1	0	1	1	GABRA4	gamma-aminobutyric acid (GABA) A receptor, alpha 4
hsa-miR-548l	0	0	1	1	1	1	GABRA5	gamma-aminobutyric acid (GABA) A receptor, alpha 5
hsa-miR-548l	1	0	1	1	1	1	GABRB3	gamma-aminobutyric acid (GABA) A receptor, beta 3
hsa-miR-548l	1	0	1	1	1	1	GRM7	glutamate receptor, metabotropic 7
hsa-miR-548l	0	0	1	1	1	1	HTR7	5-hydroxytryptamine (serotonin) receptor 7, adenylate cyclase-coupled
hsa-miR-548l	0	0	1	1	1	1	IL5	interleukin 5 (colony-stimulating factor, eosinophil)
hsa-miR-548l	1	0	1	0	1	1	KCNJ2	potassium inwardly-rectifying channel, subfamily J, member 2
hsa-miR-548l	0	0	1	1	0	0	MGP	matrix Gla protein
hsa-miR-548l	1	0	1	1	1	1	MME	membrane metallo-endopeptidase
hsa-miR-548l	0	0	1	1	1	1	NPY2R	neuropeptide Y receptor Y2
hsa-miR-548l	0	0	1	1	1	1	PON3	paraoxonase 3
hsa-miR-548l	1	0	1	1	1	1	PPP3R1	protein phosphatase 3, regulatory subunit B, alpha
hsa-miR-548l	0	0	1	1	1	1	PTGS2	prostaglandin-endoperoxide synthase 2 (prostaglandin G/H synthase and cyclooxygenase)
hsa-miR-548l	1	0	1	1	1	1	RARB	retinoic acid receptor, beta
hsa-miR-548l	1	0	1	1	1	1	REEP3	receptor accessory protein 3
hsa-miR-548l	1	0	1	0	1	1	SMAD5	SMAD family member 5
hsa-miR-548l	0	0	1	1	1	1	C16orf87	chromosome 16 open reading frame 87
hsa-miR-548l	1	0	1	0	1	1	UBE2W	ubiquitin-conjugating enzyme E2W (putative)
hsa-miR-548l	1	0	1	1	1	1	UGP2	UDP-glucose pyrophosphorylase 2
hsa-miR-548l	1	0	1	0	1	1	SPOPL	speckle-type POZ protein-like
hsa-miR-548l	0	0	1	1	1	1	FLJ45079	FLJ45079 protein
hsa-miR-548l	1	0	1	1	1	1	C14orf37	chromosome 14 open reading frame 37
hsa-miR-548l	1	0	1	1	1	1	TPD52L3	tumor protein D52-like 3
hsa-miR-548l	1	0	1	1	1	1	FAM13C	family with sequence similarity 13, member C
hsa-miR-548l	1	0	1	1	1	1	LCLAT1	lysocardiolipin acyltransferase 1
hsa-miR-548l	1	0	1	1	1	1	GATA3	GATA binding protein 3
hsa-miR-548l	1	0	1	1	1	1	WNK3	WNK lysine deficient protein kinase 3
hsa-miR-548l	1	0	1	0	1	1	SMAD2	SMAD family member 2
hsa-miR-548l	1	0	1	1	1	1	HMGXB4	HMG box domain containing 4
hsa-miR-548l	1	0	1	1	1	1	KLHL31	kelch-like 31 (Drosophila)
hsa-miR-548l	1	0	1	1	1	1	RBMS3	RNA binding motif, single stranded interacting protein 3
hsa-miR-548l	0	0	1	1	1	1	TRIM6-TRIM34	TRIM6-TRIM34 readthrough
hsa-miR-548l	0	0	1	1	1	1	TRIM34	tripartite motif containing 34
hsa-miR-548l	0	0	1	1	1	1	SP5	Sp5 transcription factor
hsa-miR-548l	0	0	1	1	1	1	CCDC144NL	coiled-coil domain containing 144 family, N-terminal like
hsa-miR-548l	0	0	1	1	1	1	ZCCHC16	zinc finger, CCHC domain containing 16
hsa-miR-548l	1	0	1	0	1	1	LIN28B	lin-28 homolog B (C. elegans)
hsa-miR-548l	0	0	1	0	0	0	FLJ42842	uncharacterized FLJ42842
hsa-miR-548l	0	0	1	1	1	1	MTHFD2L	methylenetetrahydrofolate dehydrogenase (NADP+ dependent) 2-like
hsa-miR-548l	1	0	1	0	1	1	LRRC55	leucine rich repeat containing 55
hsa-miR-548l	0	0	1	1	1	1	FRG2	FSHD region gene 2
hsa-miR-548l	1	0	1	1	1	1	ACTR2	ARP2 actin-related protein 2 homolog (yeast)
hsa-miR-548l	1	0	1	1	1	1	EBF3	early B-cell factor 3
hsa-miR-548l	1	0	1	1	1	1	PLCXD3	phosphatidylinositol-specific phospholipase C, X domain containing 3
hsa-miR-548l	1	0	1	1	1	1	NFKBIZ	nuclear factor of kappa light polypeptide gene enhancer in B-cells inhibitor, zeta
hsa-miR-548l	0	0	1	1	1	1	RYK	receptor-like tyrosine kinase
hsa-miR-548l	0	0	1	1	1	1	MAPKAP1	mitogen-activated protein kinase associated protein 1
hsa-miR-548l	0	0	1	1	0	0	TCEAL3	transcription elongation factor A (SII)-like 3
hsa-miR-548l	1	0	1	1	0	0	SDC1	syndecan 1
hsa-miR-548l	1	0	1	0	1	1	GOSR1	golgi SNAP receptor complex member 1
hsa-miR-548l	1	0	1	1	1	1	L3MBTL3	l(3)mbt-like 3 (Drosophila)
hsa-miR-548l	1	0	1	1	1	1	NTRK3	neurotrophic tyrosine kinase, receptor, type 3
hsa-miR-548l	0	0	1	1	1	1	IGIP	IgA-inducing protein homolog (Bos taurus)
hsa-miR-548l	1	0	1	1	1	1	IGSF3	immunoglobulin superfamily, member 3
hsa-miR-548l	1	0	1	0	1	1	SS18	synovial sarcoma translocation, chromosome 18
hsa-miR-548l	1	0	1	0	1	1	CPLX2	complexin 2
hsa-miR-548l	1	0	1	1	1	1	ZDHHC9	zinc finger, DHHC-type containing 9
hsa-miR-548l	0	0	1	1	1	1	FAM154B	family with sequence similarity 154, member B
hsa-miR-548l	1	0	1	0	1	1	C18orf25	chromosome 18 open reading frame 25
hsa-miR-548l	1	0	1	1	1	1	RBM33	RNA binding motif protein 33
hsa-miR-548l	1	0	1	0	1	1	KIAA2022	KIAA2022
hsa-miR-548l	0	0	1	1	1	1	MXI1	MAX interactor 1
hsa-miR-548l	1	0	1	1	1	1	LPHN1	latrophilin 1
hsa-miR-548l	1	0	1	1	1	1	FNIP1	folliculin interacting protein 1
hsa-miR-548l	0	0	1	1	1	1	GCSAM	germinal center-associated, signaling and motility
hsa-miR-548l	1	0	1	1	1	1	CUL4A	cullin 4A
hsa-miR-548l	0	0	1	1	1	1	RXRG	retinoid X receptor, gamma
hsa-miR-548l	0	0	1	1	1	1	ZCCHC11	zinc finger, CCHC domain containing 11
hsa-miR-548l	1	0	1	1	1	1	LUZP2	leucine zipper protein 2
hsa-miR-548l	1	0	1	0	1	1	RCHY1	ring finger and CHY zinc finger domain containing 1, E3 ubiquitin protein ligase
hsa-miR-548l	1	0	1	1	1	1	ARHGAP28	Rho GTPase activating protein 28
hsa-miR-548l	0	0	1	1	1	1	IRAK1BP1	interleukin-1 receptor-associated kinase 1 binding protein 1
hsa-miR-548l	1	0	1	1	1	1	SHE	Src homology 2 domain containing E
hsa-miR-548l	0	0	1	1	1	1	SPIN3	spindlin family, member 3
hsa-miR-548l	1	0	1	0	1	1	ZC3H12B	zinc finger CCCH-type containing 12B
hsa-miR-548l	0	0	1	1	1	1	C1QL3	complement component 1, q subcomponent-like 3
hsa-miR-548l	0	0	1	1	1	1	NCMAP	noncompact myelin associated protein
hsa-miR-548l	1	0	1	1	1	1	ATP11C	ATPase, class VI, type 11C
hsa-miR-548l	1	0	1	1	1	1	PDLIM5	PDZ and LIM domain 5
hsa-miR-548l	1	0	1	0	1	1	CREB5	cAMP responsive element binding protein 5
hsa-miR-548l	0	0	1	0	1	1	ERVMER61-1	endogenous retrovirus group MER61, member 1
hsa-miR-548l	1	0	1	0	1	1	DNAJC21	DnaJ (Hsp40) homolog, subfamily C, member 21
hsa-miR-548l	0	0	1	0	1	1	GOLGA8E	golgin A8 family, member E
hsa-miR-548l	0	0	1	0	1	1	U2AF2	U2 small nuclear RNA auxiliary factor 2
hsa-miR-548l	1	0	1	1	1	1	GRAMD2	GRAM domain containing 2
hsa-miR-548l	1	0	1	1	1	1	SLC25A53	solute carrier family 25, member 53
hsa-miR-548l	1	0	1	0	1	1	RGMB	RGM domain family, member B
hsa-miR-548l	1	0	1	1	1	1	PABPC1L2A	poly(A) binding protein, cytoplasmic 1-like 2A
hsa-miR-548l	0	0	1	1	0	0	TCEAL5	transcription elongation factor A (SII)-like 5
hsa-miR-548l	0	0	1	1	1	1	C9orf152	chromosome 9 open reading frame 152
hsa-miR-548l	1	0	1	1	1	1	SORCS1	sortilin-related VPS10 domain containing receptor 1
hsa-miR-548l	0	0	1	1	1	1	CCNC	cyclin C
hsa-miR-548l	1	0	1	1	1	1	FXR1	fragile X mental retardation, autosomal homolog 1
hsa-miR-548l	1	0	1	1	1	1	H3F3C	H3 histone, family 3C
hsa-miR-548l	0	0	1	0	1	1	LINC00268	long intergenic non-protein coding RNA 268
hsa-miR-548l	1	0	1	0	1	1	SYT14L	synaptotagmin XIV-like
hsa-miR-548l	1	0	1	1	1	1	KATNAL1	katanin p60 subunit A-like 1
hsa-miR-548l	0	0	1	1	0	0	OCIAD2	OCIA domain containing 2
hsa-miR-548l	1	0	1	1	1	1	RUNX2	runt-related transcription factor 2
hsa-miR-548l	0	0	1	1	1	1	PURG	purine-rich element binding protein G
hsa-miR-548l	1	0	1	1	1	1	PHF6	PHD finger protein 6
hsa-miR-548l	1	0	1	1	1	1	TMCC1	transmembrane and coiled-coil domain family 1
hsa-miR-548l	1	0	1	0	1	1	GOPC	golgi-associated PDZ and coiled-coil motif containing
hsa-miR-548l	0	0	1	1	0	0	ALDH18A1	aldehyde dehydrogenase 18 family, member A1
hsa-miR-548l	0	0	1	1	1	1	RAB28	RAB28, member RAS oncogene family
hsa-miR-548l	0	0	1	1	1	1	ACTBL2	actin, beta-like 2
hsa-miR-548l	1	0	1	1	1	1	SH3PXD2B	SH3 and PX domains 2B
hsa-miR-548l	0	0	1	1	1	1	VPS13A	vacuolar protein sorting 13 homolog A (S. cerevisiae)
hsa-miR-548l	1	0	1	1	1	1	PFKFB2	6-phosphofructo-2-kinase/fructose-2,6-biphosphatase 2
hsa-miR-548l	1	0	1	0	1	1	TFEC	transcription factor EC
hsa-miR-548l	1	0	1	1	1	1	SERBP1	SERPINE1 mRNA binding protein 1
hsa-miR-548l	0	0	1	1	1	1	POLR2M	polymerase (RNA) II (DNA directed) polypeptide M
hsa-miR-548l	1	0	1	1	1	1	CANX	calnexin
hsa-miR-548l	1	0	1	0	1	1	TNRC6B	trinucleotide repeat containing 6B
hsa-miR-548l	1	0	1	1	1	1	FNBP1L	formin binding protein 1-like
hsa-miR-548l	1	0	1	1	1	1	ARPP21	cAMP-regulated phosphoprotein, 21kDa
hsa-miR-548l	0	0	1	1	0	0	RPS14	ribosomal protein S14
hsa-miR-548l	0	0	1	1	0	0	KPRP	keratinocyte proline-rich protein
hsa-miR-548l	1	0	1	0	1	1	CLLU1	chronic lymphocytic leukemia up-regulated 1
hsa-miR-548l	1	0	1	0	1	1	C3orf70	chromosome 3 open reading frame 70
hsa-miR-548l	1	0	1	1	1	1	ARHGAP24	Rho GTPase activating protein 24
hsa-miR-548l	1	0	1	1	1	1	FAM108B1	family with sequence similarity 108, member B1
hsa-miR-548l	0	0	1	1	0	0	CCDC7	coiled-coil domain containing 7
hsa-miR-548l	1	0	1	1	1	1	SLC35F1	solute carrier family 35, member F1
hsa-miR-548l	1	0	1	1	1	1	PLEKHG1	pleckstrin homology domain containing, family G (with RhoGef domain) member 1
hsa-miR-548l	1	0	1	0	1	1	CYB5RL	cytochrome b5 reductase-like
hsa-miR-548l	1	0	1	1	1	1	NEK10	NIMA (never in mitosis gene a)- related kinase 10
hsa-miR-548l	1	0	1	1	1	1	MAF	v-maf musculoaponeurotic fibrosarcoma oncogene homolog (avian)
hsa-miR-548l	1	0	1	1	1	1	CSNK1G3	casein kinase 1, gamma 3
hsa-miR-548l	1	0	1	1	1	1	TMPO	thymopoietin
hsa-miR-548l	0	0	1	1	1	1	HNRNPH2	heterogeneous nuclear ribonucleoprotein H2 (H')
hsa-miR-548l	1	0	1	0	1	1	GPR126	G protein-coupled receptor 126
hsa-miR-548l	1	0	1	1	1	1	MAGI1	membrane associated guanylate kinase, WW and PDZ domain containing 1
hsa-miR-548l	1	0	1	1	1	1	AMD1	adenosylmethionine decarboxylase 1
hsa-miR-548l	1	0	1	1	1	1	SAR1B	SAR1 homolog B (S. cerevisiae)
hsa-miR-548l	0	0	1	1	1	1	PHF12	PHD finger protein 12
hsa-miR-548l	0	0	1	1	1	1	ERP29	endoplasmic reticulum protein 29
hsa-miR-548l	0	0	1	1	0	0	BOLA3	bolA homolog 3 (E. coli)
hsa-miR-548l	1	0	1	0	1	1	RYR3	ryanodine receptor 3
hsa-miR-548l	1	0	1	0	1	1	ARL5A	ADP-ribosylation factor-like 5A
hsa-miR-548l	0	0	1	1	1	1	C18orf62	chromosome 18 open reading frame 62
hsa-miR-548l	1	0	1	0	1	1	SCML1	sex comb on midleg-like 1 (Drosophila)
hsa-miR-548l	0	0	1	1	1	1	CTLA4	cytotoxic T-lymphocyte-associated protein 4
hsa-miR-548l	1	0	1	1	1	1	DLX1	distal-less homeobox 1
hsa-miR-548l	0	0	1	1	1	1	PRPS2	phosphoribosyl pyrophosphate synthetase 2
hsa-miR-548l	0	0	1	1	0	0	ATP6V1E1	ATPase, H+ transporting, lysosomal 31kDa, V1 subunit E1
hsa-miR-548l	1	0	1	1	1	1	KIAA0317	KIAA0317
hsa-miR-548l	1	0	1	0	1	1	GK5	glycerol kinase 5 (putative)
hsa-miR-548l	0	0	1	1	1	1	MAP9	microtubule-associated protein 9
hsa-miR-548l	1	0	1	0	1	1	USP9X	ubiquitin specific peptidase 9, X-linked
hsa-miR-548l	1	0	1	0	1	1	CREBZF	CREB/ATF bZIP transcription factor
hsa-miR-548l	1	0	1	1	1	1	CHN2	chimerin (chimaerin) 2
hsa-miR-548l	1	0	1	1	1	1	MLLT4	myeloid/lymphoid or mixed-lineage leukemia (trithorax homolog, Drosophila); translocated to, 4
hsa-miR-548l	1	0	1	1	1	1	TCERG1	transcription elongation regulator 1
hsa-miR-548l	1	0	1	1	1	1	FAM3C	family with sequence similarity 3, member C
hsa-miR-548l	1	0	1	0	1	1	FAM133B	family with sequence similarity 133, member B
hsa-miR-548l	1	0	1	1	1	1	SPTSSB	serine palmitoyltransferase, small subunit B
hsa-miR-548l	1	0	1	1	1	1	SCN2A	sodium channel, voltage-gated, type II, alpha subunit
hsa-miR-548l	0	0	1	1	1	1	SPOCK3	sparc/osteonectin, cwcv and kazal-like domains proteoglycan (testican) 3
hsa-miR-548l	0	0	1	1	1	1	MCHR2	melanin-concentrating hormone receptor 2
hsa-miR-548l	1	0	1	1	1	1	PAPD5	PAP associated domain containing 5
hsa-miR-548l	0	0	1	1	1	1	MTHFD2	methylenetetrahydrofolate dehydrogenase (NADP+ dependent) 2, methenyltetrahydrofolate cyclohydrolase
hsa-miR-548l	1	0	1	1	1	1	ASB1	ankyrin repeat and SOCS box containing 1
hsa-miR-548l	1	0	1	1	1	1	MTMR12	myotubularin related protein 12
hsa-miR-548l	1	0	1	1	1	1	FAM63B	family with sequence similarity 63, member B
hsa-miR-548l	0	0	1	1	1	1	ZXDC	ZXD family zinc finger C
hsa-miR-548l	1	0	1	1	1	1	CEP63	centrosomal protein 63kDa
hsa-miR-548l	0	0	1	1	1	1	CCDC41	coiled-coil domain containing 41
hsa-miR-548l	1	0	1	1	1	1	HMGCLL1	3-hydroxymethyl-3-methylglutaryl-CoA lyase-like 1
hsa-miR-548l	0	0	1	1	1	1	PSPC1	paraspeckle component 1
hsa-miR-548l	1	0	1	1	1	1	FILIP1L	filamin A interacting protein 1-like
hsa-miR-548l	0	0	1	1	1	1	TMEM80	transmembrane protein 80
hsa-miR-548l	1	0	1	1	1	1	C2orf88	chromosome 2 open reading frame 88
hsa-miR-548l	1	0	1	1	1	1	SLC9A6	solute carrier family 9, subfamily A (NHE6, cation proton antiporter 6), member 6
hsa-miR-548l	1	0	1	1	1	1	NSL1	NSL1, MIND kinetochore complex component, homolog (S. cerevisiae)
hsa-miR-548l	0	0	1	1	1	1	SMC2	structural maintenance of chromosomes 2
hsa-miR-548l	1	0	1	1	1	1	FRS2	fibroblast growth factor receptor substrate 2
hsa-miR-548l	1	0	1	1	1	1	ERBB4	v-erb-a erythroblastic leukemia viral oncogene homolog 4 (avian)
hsa-miR-548l	0	0	1	1	1	1	TTC14	tetratricopeptide repeat domain 14
hsa-miR-548l	1	0	1	1	1	1	KDM5A	lysine (K)-specific demethylase 5A
hsa-miR-548l	0	0	1	1	1	1	TRAK1	trafficking protein, kinesin binding 1
hsa-miR-548l	1	0	1	0	1	1	TMEM237	transmembrane protein 237
hsa-miR-548l	1	0	1	0	1	1	SLC12A2	solute carrier family 12 (sodium/potassium/chloride transporters), member 2
hsa-miR-548l	1	0	1	1	1	1	MZT1	mitotic spindle organizing protein 1
hsa-miR-548l	1	0	1	1	1	1	QSER1	glutamine and serine rich 1
hsa-miR-548l	1	0	1	1	1	1	HS6ST2	heparan sulfate 6-O-sulfotransferase 2
hsa-miR-548l	1	0	1	1	1	1	ZNF436	zinc finger protein 436
hsa-miR-548l	1	0	1	1	1	1	ATG9A	autophagy related 9A
hsa-miR-548l	1	0	1	1	1	1	SREK1	splicing regulatory glutamine/lysine-rich protein 1
hsa-miR-548l	1	0	1	1	1	1	IRF2BP2	interferon regulatory factor 2 binding protein 2
hsa-miR-548l	1	0	1	1	1	1	PHF16	PHD finger protein 16
hsa-miR-548l	1	0	1	1	1	1	SRSF1	serine/arginine-rich splicing factor 1
hsa-miR-548l	0	0	1	1	1	1	FKTN	fukutin
hsa-miR-548l	0	0	1	0	0	0	TMEM183B	transmembrane protein 183B
hsa-miR-548l	1	0	1	1	1	1	ITGA6	integrin, alpha 6
hsa-miR-548l	1	0	1	1	1	1	CASZ1	castor zinc finger 1
hsa-miR-548l	1	0	1	1	1	1	VAV3	vav 3 guanine nucleotide exchange factor
hsa-miR-548l	0	0	1	1	1	1	CNGA3	cyclic nucleotide gated channel alpha 3
hsa-miR-548l	1	0	1	1	1	1	DMP1	dentin matrix acidic phosphoprotein 1
hsa-miR-548l	1	0	1	1	1	1	FAM155A	family with sequence similarity 155, member A
hsa-miR-548l	1	0	1	0	1	1	CCDC85A	coiled-coil domain containing 85A
hsa-miR-548l	1	0	1	0	1	1	ODZ3	odz, odd Oz/ten-m homolog 3 (Drosophila)
hsa-miR-548l	0	0	1	0	0	0	VWC2L	von Willebrand factor C domain containing protein 2-like
hsa-miR-548l	0	0	1	1	1	1	TBX18	T-box 18
hsa-miR-548l	1	0	1	1	1	1	UNC119B	unc-119 homolog B (C. elegans)
hsa-miR-548l	1	0	1	1	1	1	MGA	MAX gene associated
hsa-miR-548l	1	0	1	1	1	1	MYO1C	myosin IC
hsa-miR-548l	1	0	1	1	1	1	REPS2	RALBP1 associated Eps domain containing 2
hsa-miR-548l	1	0	1	1	1	1	THOC2	THO complex 2
hsa-miR-548l	1	0	1	0	1	1	PDE5A	phosphodiesterase 5A, cGMP-specific
hsa-miR-548l	1	0	1	1	1	1	ASIC1	acid-sensing (proton-gated) ion channel 1
hsa-miR-548l	1	0	1	1	1	1	ADAM10	ADAM metallopeptidase domain 10
hsa-miR-548l	1	0	1	1	1	1	ADCYAP1	adenylate cyclase activating polypeptide 1 (pituitary)
hsa-miR-548l	0	0	1	1	1	1	ADSS	adenylosuccinate synthase
hsa-miR-548l	0	0	1	0	1	1	ALOX15	arachidonate 15-lipoxygenase
hsa-miR-548l	0	0	1	1	1	1	AMELX	amelogenin, X-linked
hsa-miR-548l	1	0	1	0	1	1	XIAP	X-linked inhibitor of apoptosis
hsa-miR-548l	1	0	1	0	1	1	BACH1	BTB and CNC homology 1, basic leucine zipper transcription factor 1
hsa-miR-548l	1	0	1	0	1	1	BMPR2	bone morphogenetic protein receptor, type II (serine/threonine kinase)
hsa-miR-548l	0	0	1	0	1	1	CASQ2	calsequestrin 2 (cardiac muscle)
hsa-miR-548l	1	0	1	0	1	1	CDK6	cyclin-dependent kinase 6
hsa-miR-548l	1	0	1	1	1	1	CHD1	chromodomain helicase DNA binding protein 1
hsa-miR-548l	1	0	1	1	1	1	CHD2	chromodomain helicase DNA binding protein 2
hsa-miR-548l	0	0	1	1	1	1	CHUK	conserved helix-loop-helix ubiquitous kinase
hsa-miR-548l	0	0	1	1	1	1	CLIC2	chloride intracellular channel 2
hsa-miR-548l	1	0	1	1	1	1	CREBL2	cAMP responsive element binding protein-like 2
hsa-miR-548l	1	0	1	1	1	1	MAPK14	mitogen-activated protein kinase 14
hsa-miR-548l	1	0	1	1	1	1	S1PR1	sphingosine-1-phosphate receptor 1
hsa-miR-548l	1	0	1	0	1	1	EFNB3	ephrin-B3
hsa-miR-548l	1	0	1	1	1	1	EIF1AX	eukaryotic translation initiation factor 1A, X-linked
hsa-miR-548l	1	0	1	1	1	1	ELAVL1	ELAV (embryonic lethal, abnormal vision, Drosophila)-like 1 (Hu antigen R)
hsa-miR-548l	0	0	1	0	1	1	EMP1	epithelial membrane protein 1
hsa-miR-548l	1	0	1	1	1	1	EREG	epiregulin
hsa-miR-548l	1	0	1	1	1	1	FOXF1	forkhead box F1
hsa-miR-548l	1	0	1	1	1	1	FOXF2	forkhead box F2
hsa-miR-548l	1	0	1	1	1	1	FOXC1	forkhead box C1
hsa-miR-548l	0	0	1	0	1	1	FMO2	flavin containing monooxygenase 2 (non-functional)
hsa-miR-548l	1	0	1	1	1	1	NR6A1	nuclear receptor subfamily 6, group A, member 1
hsa-miR-548l	1	0	1	0	1	1	GCNT2	glucosaminyl (N-acetyl) transferase 2, I-branching enzyme (I blood group)
hsa-miR-548l	0	0	1	1	0	0	PRMT2	protein arginine methyltransferase 2
hsa-miR-548l	1	0	1	1	1	1	NDST1	N-deacetylase/N-sulfotransferase (heparan glucosaminyl) 1
hsa-miR-548l	1	0	1	1	1	1	AHR	aryl hydrocarbon receptor
hsa-miR-548l	1	0	1	1	1	1	APLP2	amyloid beta (A4) precursor-like protein 2
hsa-miR-548l	1	0	1	0	1	1	ARCN1	archain 1
hsa-miR-548l	1	0	1	1	1	1	ARF3	ADP-ribosylation factor 3
hsa-miR-548l	1	0	1	1	1	1	BAAT	bile acid CoA: amino acid N-acyltransferase (glycine N-choloyltransferase)
hsa-miR-548l	1	0	1	1	1	1	BCL6	B-cell CLL/lymphoma 6
hsa-miR-548l	1	0	1	1	1	1	BNC1	basonuclin 1
hsa-miR-548l	1	0	1	1	1	1	KLF5	Kruppel-like factor 5 (intestinal)
hsa-miR-548l	1	0	1	1	1	1	CBFB	core-binding factor, beta subunit
hsa-miR-548l	1	0	1	1	1	1	CDH2	cadherin 2, type 1, N-cadherin (neuronal)
hsa-miR-548l	0	0	1	1	1	1	CDO1	cysteine dioxygenase, type I
hsa-miR-548l	1	0	1	1	1	1	CENPB	centromere protein B, 80kDa
hsa-miR-548l	1	0	1	0	1	1	CHML	choroideremia-like (Rab escort protein 2)
hsa-miR-548l	0	0	1	1	1	1	CNTN1	contactin 1
hsa-miR-548l	1	0	1	0	1	1	COL19A1	collagen, type XIX, alpha 1
hsa-miR-548l	0	0	1	1	1	1	CPS1	carbamoyl-phosphate synthase 1, mitochondrial
hsa-miR-548l	1	0	1	1	1	1	CSNK2A1	casein kinase 2, alpha 1 polypeptide
hsa-miR-548l	1	0	1	1	1	1	DR1	down-regulator of transcription 1, TBP-binding (negative cofactor 2)
hsa-miR-548l	1	0	1	1	1	1	HBEGF	heparin-binding EGF-like growth factor
hsa-miR-548l	1	0	1	1	1	1	DUSP6	dual specificity phosphatase 6
hsa-miR-548l	1	0	1	1	1	1	E2F3	E2F transcription factor 3
hsa-miR-548l	1	0	1	1	0	0	E2F4	E2F transcription factor 4, p107/p130-binding
hsa-miR-548l	1	0	1	1	1	1	EIF4E	eukaryotic translation initiation factor 4E
hsa-miR-548l	1	0	1	1	1	1	ENPEP	glutamyl aminopeptidase (aminopeptidase A)
hsa-miR-548l	0	0	1	0	1	1	FGF2	fibroblast growth factor 2 (basic)
hsa-miR-548l	1	0	1	1	1	1	FGF7	fibroblast growth factor 7
hsa-miR-548l	0	0	1	1	0	0	FKBP3	FK506 binding protein 3, 25kDa
hsa-miR-548l	0	0	1	0	1	1	GCLM	glutamate-cysteine ligase, modifier subunit
hsa-miR-548l	0	0	1	1	1	1	CXCL3	chemokine (C-X-C motif) ligand 3
hsa-miR-548l	0	0	1	0	1	1	GYPA	glycophorin A (MNS blood group)
hsa-miR-548l	0	0	1	1	1	1	HMGCS1	3-hydroxy-3-methylglutaryl-CoA synthase 1 (soluble)
hsa-miR-548l	0	0	1	1	1	1	HOXA4	homeobox A4
hsa-miR-548l	1	0	1	1	1	1	HOXB3	homeobox B3
hsa-miR-548l	0	0	1	1	1	1	FOXN2	forkhead box N2
hsa-miR-548l	1	0	1	1	1	1	TNC	tenascin C
hsa-miR-548l	1	0	1	1	0	0	INHBB	inhibin, beta B
hsa-miR-548l	1	0	1	1	1	1	ITGA2	integrin, alpha 2 (CD49B, alpha 2 subunit of VLA-2 receptor)
hsa-miR-548l	1	0	1	1	1	1	ITGB8	integrin, beta 8
hsa-miR-548l	1	0	1	1	1	1	ITPR2	inositol 1,4,5-trisphosphate receptor, type 2
hsa-miR-548l	1	0	1	1	1	1	KCNJ3	potassium inwardly-rectifying channel, subfamily J, member 3
hsa-miR-548l	0	0	1	1	1	1	KCNJ6	potassium inwardly-rectifying channel, subfamily J, member 6
hsa-miR-548l	1	0	1	1	1	1	KCNJ10	potassium inwardly-rectifying channel, subfamily J, member 10
hsa-miR-548l	0	0	1	1	1	1	KCNK1	potassium channel, subfamily K, member 1
hsa-miR-548l	1	0	1	1	1	1	KDR	kinase insert domain receptor (a type III receptor tyrosine kinase)
hsa-miR-548l	1	0	1	1	1	1	KPNA3	karyopherin alpha 3 (importin alpha 4)
hsa-miR-548l	1	0	1	1	1	1	LBR	lamin B receptor
hsa-miR-548l	1	0	1	1	1	1	LIF	leukemia inhibitory factor
hsa-miR-548l	1	0	1	1	1	1	LY75	lymphocyte antigen 75
hsa-miR-548l	1	0	1	1	1	1	MARCKS	myristoylated alanine-rich protein kinase C substrate
hsa-miR-548l	1	0	1	0	1	1	MXD1	MAX dimerization protein 1
hsa-miR-548l	0	0	1	0	1	1	CXCL9	chemokine (C-X-C motif) ligand 9
hsa-miR-548l	1	0	1	1	1	1	MSN	moesin
hsa-miR-548l	0	0	1	1	1	1	MTAP	methylthioadenosine phosphorylase
hsa-miR-548l	0	0	1	1	1	1	MYOD1	myogenic differentiation 1
hsa-miR-548l	1	0	1	1	1	1	NCBP1	nuclear cap binding protein subunit 1, 80kDa
hsa-miR-548l	0	0	1	1	1	1	NID1	nidogen 1
hsa-miR-548l	1	0	1	1	1	1	NPTX1	neuronal pentraxin I
hsa-miR-548l	1	0	1	1	1	1	OSBP	oxysterol binding protein
hsa-miR-548l	1	0	1	1	1	1	PCSK6	proprotein convertase subtilisin/kexin type 6
hsa-miR-548l	1	0	1	0	1	1	PAK2	p21 protein (Cdc42/Rac)-activated kinase 2
hsa-miR-548l	1	0	1	0	1	1	PAPPA	pregnancy-associated plasma protein A, pappalysin 1
hsa-miR-548l	1	0	1	1	1	1	PAWR	PRKC, apoptosis, WT1, regulator
hsa-miR-548l	1	0	1	1	0	0	PDGFB	platelet-derived growth factor beta polypeptide
hsa-miR-548l	0	0	1	1	0	0	PDGFRB	platelet-derived growth factor receptor, beta polypeptide
hsa-miR-548l	0	0	1	1	1	1	PEX13	peroxisomal biogenesis factor 13
hsa-miR-548l	0	0	1	1	1	1	PFDN4	prefoldin subunit 4
hsa-miR-548l	0	0	1	1	0	0	PGM1	phosphoglucomutase 1
hsa-miR-548l	0	0	1	0	1	1	PMP2	peripheral myelin protein 2
hsa-miR-548l	0	0	1	1	1	1	PNN	pinin, desmosome associated protein
hsa-miR-548l	1	0	1	0	1	1	POU3F1	POU class 3 homeobox 1
hsa-miR-548l	1	0	1	1	1	1	PPP1CB	protein phosphatase 1, catalytic subunit, beta isozyme
hsa-miR-548l	1	0	1	1	1	1	PPP2R1B	protein phosphatase 2, regulatory subunit A, beta
hsa-miR-548l	1	0	1	1	1	1	PPP6C	protein phosphatase 6, catalytic subunit
hsa-miR-548l	1	0	1	0	1	1	PRKCA	protein kinase C, alpha
hsa-miR-548l	1	0	1	0	1	1	MAPK4	mitogen-activated protein kinase 4
hsa-miR-548l	1	0	1	1	1	1	MAPK6	mitogen-activated protein kinase 6
hsa-miR-548l	0	0	1	1	1	1	MAPK13	mitogen-activated protein kinase 13
hsa-miR-548l	0	0	1	1	1	1	MAP2K1	mitogen-activated protein kinase kinase 1
hsa-miR-548l	0	0	1	1	1	1	PSMA2	proteasome (prosome, macropain) subunit, alpha type, 2
hsa-miR-548l	1	0	1	1	0	0	PSMD7	proteasome (prosome, macropain) 26S subunit, non-ATPase, 7
hsa-miR-548l	0	0	1	1	1	1	PTPN12	protein tyrosine phosphatase, non-receptor type 12
hsa-miR-548l	1	0	1	1	1	1	PTPRK	protein tyrosine phosphatase, receptor type, K
hsa-miR-548l	0	0	1	1	1	1	PTPRM	protein tyrosine phosphatase, receptor type, M
hsa-miR-548l	1	0	1	1	1	1	RAD23B	RAD23 homolog B (S. cerevisiae)
hsa-miR-548l	1	0	1	1	1	1	RASA1	RAS p21 protein activator (GTPase activating protein) 1
hsa-miR-548l	1	0	1	1	1	1	ARID4A	AT rich interactive domain 4A (RBP1-like)
hsa-miR-548l	0	0	1	1	0	0	RBMS2	RNA binding motif, single stranded interacting protein 2
hsa-miR-548l	0	0	1	1	1	1	RGS2	regulator of G-protein signaling 2, 24kDa
hsa-miR-548l	0	0	1	1	1	1	RNASE4	ribonuclease, RNase A family, 4
hsa-miR-548l	1	0	1	1	1	1	ROBO2	roundabout, axon guidance receptor, homolog 2 (Drosophila)
hsa-miR-548l	1	0	1	1	0	0	RPN1	ribophorin I
hsa-miR-548l	1	0	1	0	1	1	SORT1	sortilin 1
hsa-miR-548l	1	0	1	0	1	1	CCL22	chemokine (C-C motif) ligand 22
hsa-miR-548l	0	0	1	1	1	1	CXCL6	chemokine (C-X-C motif) ligand 6 (granulocyte chemotactic protein 2)
hsa-miR-548l	0	0	1	0	1	1	CXCL5	chemokine (C-X-C motif) ligand 5
hsa-miR-548l	0	0	1	1	1	1	SDC2	syndecan 2
hsa-miR-548l	0	0	1	1	1	1	SDC4	syndecan 4
hsa-miR-548l	0	0	1	1	1	1	SDHD	succinate dehydrogenase complex, subunit D, integral membrane protein
hsa-miR-548l	1	0	1	0	1	1	SFRP1	secreted frizzled-related protein 1
hsa-miR-548l	1	0	1	1	1	1	SFRP2	secreted frizzled-related protein 2
hsa-miR-548l	1	0	1	1	1	1	ST8SIA1	ST8 alpha-N-acetyl-neuraminide alpha-2,8-sialyltransferase 1
hsa-miR-548l	1	0	1	1	1	1	SLC7A1	solute carrier family 7 (cationic amino acid transporter, y+ system), member 1
hsa-miR-548l	0	0	1	1	1	1	SMARCA1	SWI/SNF related, matrix associated, actin dependent regulator of chromatin, subfamily a, member 1
hsa-miR-548l	1	0	1	1	1	1	SMARCC1	SWI/SNF related, matrix associated, actin dependent regulator of chromatin, subfamily c, member 1
hsa-miR-548l	1	0	1	1	1	1	SMARCD2	SWI/SNF related, matrix associated, actin dependent regulator of chromatin, subfamily d, member 2
hsa-miR-548l	1	0	1	1	1	1	SNX2	sorting nexin 2
hsa-miR-548l	1	0	1	1	1	1	SORL1	sortilin-related receptor, L(DLR class) A repeats containing
hsa-miR-548l	1	0	1	1	1	1	SOX2	SRY (sex determining region Y)-box 2
hsa-miR-548l	1	0	1	0	1	1	SOX11	SRY (sex determining region Y)-box 11
hsa-miR-548l	0	0	1	1	1	1	SPAG1	sperm associated antigen 1
hsa-miR-548l	1	0	1	1	1	1	SPTBN1	spectrin, beta, non-erythrocytic 1
hsa-miR-548l	1	0	1	1	1	1	SRI	sorcin
hsa-miR-548l	1	0	1	0	1	1	RPS6KB1	ribosomal protein S6 kinase, 70kDa, polypeptide 1
hsa-miR-548l	0	0	1	1	1	1	TAF2	TAF2 RNA polymerase II, TATA box binding protein (TBP)-associated factor, 150kDa
hsa-miR-548l	1	0	1	1	1	1	TAF4	TAF4 RNA polymerase II, TATA box binding protein (TBP)-associated factor, 135kDa
hsa-miR-548l	1	0	1	0	1	1	TAL1	T-cell acute lymphocytic leukemia 1
hsa-miR-548l	0	0	1	0	1	1	TCEB3	transcription elongation factor B (SIII), polypeptide 3 (110kDa, elongin A)
hsa-miR-548l	1	0	1	1	1	1	TIAM1	T-cell lymphoma invasion and metastasis 1
hsa-miR-548l	1	0	1	1	1	1	TSPAN6	tetraspanin 6
hsa-miR-548l	1	0	1	1	1	1	TRAPPC10	trafficking protein particle complex 10
hsa-miR-548l	0	0	1	1	0	0	TNR	tenascin R
hsa-miR-548l	1	0	1	0	1	1	TSPYL1	TSPY-like 1
hsa-miR-548l	1	0	1	1	1	1	UBE2D3	ubiquitin-conjugating enzyme E2D 3
hsa-miR-548l	0	0	1	1	1	1	UBE2E1	ubiquitin-conjugating enzyme E2E 1
hsa-miR-548l	1	0	1	0	1	1	VCL	vinculin
hsa-miR-548l	1	0	1	0	1	1	YWHAB	tyrosine 3-monooxygenase/tryptophan 5-monooxygenase activation protein, beta polypeptide
hsa-miR-548l	0	0	1	0	1	1	ZFY	zinc finger protein, Y-linked
hsa-miR-548l	1	0	1	0	1	1	ZIC1	Zic family member 1
hsa-miR-548l	0	0	1	1	1	1	ZNF143	zinc finger protein 143
hsa-miR-548l	1	0	1	0	1	1	BSN	bassoon (presynaptic cytomatrix protein)
hsa-miR-548l	1	0	1	1	1	1	FZD5	frizzled family receptor 5
hsa-miR-548l	1	0	1	1	1	1	KCNAB1	potassium voltage-gated channel, shaker-related subfamily, beta member 1
hsa-miR-548l	1	0	1	1	1	1	DEK	DEK oncogene
hsa-miR-548l	1	0	1	1	1	1	CUL5	cullin 5
hsa-miR-548l	0	0	1	1	1	1	PIP5K1A	phosphatidylinositol-4-phosphate 5-kinase, type I, alpha
hsa-miR-548l	0	0	1	1	1	1	PIP5K1B	phosphatidylinositol-4-phosphate 5-kinase, type I, beta
hsa-miR-548l	1	0	1	1	1	1	EEA1	early endosome antigen 1
hsa-miR-548l	0	0	1	1	1	1	STX7	syntaxin 7
hsa-miR-548l	1	0	1	1	1	1	DYRK2	dual-specificity tyrosine-(Y)-phosphorylation regulated kinase 2
hsa-miR-548l	0	0	1	1	0	0	DUSP11	dual specificity phosphatase 11 (RNA/RNP complex 1-interacting)
hsa-miR-548l	1	0	1	0	1	1	CUL3	cullin 3
hsa-miR-548l	1	0	1	1	1	1	SUPT3H	suppressor of Ty 3 homolog (S. cerevisiae)
hsa-miR-548l	1	0	1	1	1	1	CILP	cartilage intermediate layer protein, nucleotide pyrophosphohydrolase
hsa-miR-548l	0	0	1	1	1	1	RGS5	regulator of G-protein signaling 5
hsa-miR-548l	0	0	1	1	1	1	CHST1	carbohydrate (keratan sulfate Gal-6) sulfotransferase 1
hsa-miR-548l	1	0	1	1	1	1	CBX4	chromobox homolog 4
hsa-miR-548l	0	0	1	1	1	1	AP3B1	adaptor-related protein complex 3, beta 1 subunit
hsa-miR-548l	1	0	1	1	1	1	BHLHE40	basic helix-loop-helix family, member e40
hsa-miR-548l	1	0	1	1	1	1	CDC14A	CDC14 cell division cycle 14 homolog A (S. cerevisiae)
hsa-miR-548l	1	0	1	1	1	1	TNFSF11	tumor necrosis factor (ligand) superfamily, member 11
hsa-miR-548l	0	0	1	1	1	1	SLC25A12	solute carrier family 25 (aspartate/glutamate carrier), member 12
hsa-miR-548l	1	0	1	0	1	1	TNKS	tankyrase, TRF1-interacting ankyrin-related ADP-ribose polymerase
hsa-miR-548l	1	0	1	0	1	1	IRS2	insulin receptor substrate 2
hsa-miR-548l	0	0	1	1	1	1	EIF3A	eukaryotic translation initiation factor 3, subunit A
hsa-miR-548l	1	0	1	1	1	1	B3GALT2	UDP-Gal:betaGlcNAc beta 1,3-galactosyltransferase, polypeptide 2
hsa-miR-548l	1	0	1	1	1	1	URI1	URI1, prefoldin-like chaperone
hsa-miR-548l	1	0	1	1	1	1	ADAM9	ADAM metallopeptidase domain 9
hsa-miR-548l	1	0	1	1	1	1	NR5A2	nuclear receptor subfamily 5, group A, member 2
hsa-miR-548l	0	0	1	1	0	0	PEX11A	peroxisomal biogenesis factor 11 alpha
hsa-miR-548l	1	0	1	1	1	1	KAT2B	K(lysine) acetyltransferase 2B
hsa-miR-548l	1	0	1	1	1	1	FUBP1	far upstream element (FUSE) binding protein 1
hsa-miR-548l	1	0	1	0	1	1	SKAP2	src kinase associated phosphoprotein 2
hsa-miR-548l	1	0	1	0	1	1	WASL	Wiskott-Aldrich syndrome-like
hsa-miR-548l	0	0	1	1	1	1	ATP6V0E1	ATPase, H+ transporting, lysosomal 9kDa, V0 subunit e1
hsa-miR-548l	0	0	1	1	1	1	CH25H	cholesterol 25-hydroxylase
hsa-miR-548l	0	0	1	1	1	1	UBA3	ubiquitin-like modifier activating enzyme 3
hsa-miR-548l	1	0	1	1	1	1	BTAF1	BTAF1 RNA polymerase II, B-TFIID transcription factor-associated, 170kDa (Mot1 homolog, S. cerevisiae)
hsa-miR-548l	1	0	1	1	1	1	MAP7	microtubule-associated protein 7
hsa-miR-548l	0	0	1	1	0	0	NPR2	natriuretic peptide receptor B/guanylate cyclase B (atrionatriuretic peptide receptor B)
hsa-miR-548l	0	0	1	1	1	1	CRY1	cryptochrome 1 (photolyase-like)
hsa-miR-548l	1	0	1	1	1	1	EFNB2	ephrin-B2
hsa-miR-548l	1	0	1	0	1	1	EIF2S1	eukaryotic translation initiation factor 2, subunit 1 alpha, 35kDa
hsa-miR-548l	1	0	1	1	1	1	FGF13	fibroblast growth factor 13
hsa-miR-548l	1	0	1	1	1	1	GMFB	glia maturation factor, beta
hsa-miR-548l	1	0	1	1	1	1	HNF4G	hepatocyte nuclear factor 4, gamma
hsa-miR-548l	0	0	1	1	1	1	RAB27B	RAB27B, member RAS oncogene family
hsa-miR-548l	1	0	1	0	1	1	SLC1A2	solute carrier family 1 (glial high affinity glutamate transporter), member 2
hsa-miR-548l	0	0	1	1	1	1	SNRPD3	small nuclear ribonucleoprotein D3 polypeptide 18kDa
hsa-miR-548l	0	0	1	0	1	1	TMSB4Y	thymosin beta 4, Y-linked
hsa-miR-548l	1	0	1	1	1	1	MFHAS1	malignant fibrous histiocytoma amplified sequence 1
hsa-miR-548l	1	0	1	0	1	1	CYTH3	cytohesin 3
hsa-miR-548l	1	0	1	0	1	1	MED14	mediator complex subunit 14
hsa-miR-548l	1	0	1	1	1	1	SOCS6	suppressor of cytokine signaling 6
hsa-miR-548l	1	0	1	1	1	1	TRIP11	thyroid hormone receptor interactor 11
hsa-miR-548l	1	0	1	1	1	1	GDA	guanine deaminase
hsa-miR-548l	0	0	1	1	0	0	NUP155	nucleoporin 155kDa
hsa-miR-548l	0	0	1	0	1	1	ALK	anaplastic lymphoma receptor tyrosine kinase
hsa-miR-548l	1	0	1	1	1	1	ARL3	ADP-ribosylation factor-like 3
hsa-miR-548l	1	0	1	0	1	1	CEBPA	CCAAT/enhancer binding protein (C/EBP), alpha
hsa-miR-548l	1	0	1	1	1	1	DACH1	dachshund homolog 1 (Drosophila)
hsa-miR-548l	1	0	1	1	1	1	DBN1	drebrin 1
hsa-miR-548l	1	0	1	1	1	1	EGR3	early growth response 3
hsa-miR-548l	1	0	1	1	1	1	EPS8	epidermal growth factor receptor pathway substrate 8
hsa-miR-548l	1	0	1	0	1	1	ETV5	ets variant 5
hsa-miR-548l	1	0	1	1	1	1	ACSL3	acyl-CoA synthetase long-chain family member 3
hsa-miR-548l	1	0	1	0	1	1	ACSL4	acyl-CoA synthetase long-chain family member 4
hsa-miR-548l	1	0	1	0	1	1	FGF5	fibroblast growth factor 5
hsa-miR-548l	1	0	1	0	1	1	GALNT2	UDP-N-acetyl-alpha-D-galactosamine:polypeptide N-acetylgalactosaminyltransferase 2 (GalNAc-T2)
hsa-miR-548l	0	0	1	1	1	1	GCSH	glycine cleavage system protein H (aminomethyl carrier)
hsa-miR-548l	1	0	1	0	1	1	ARHGAP35	Rho GTPase activating protein 35
hsa-miR-548l	1	0	1	1	1	1	MLLT3	myeloid/lymphoid or mixed-lineage leukemia (trithorax homolog, Drosophila); translocated to, 3
hsa-miR-548l	0	0	1	1	1	1	NFATC3	nuclear factor of activated T-cells, cytoplasmic, calcineurin-dependent 3
hsa-miR-548l	0	0	1	1	1	1	PIGH	phosphatidylinositol glycan anchor biosynthesis, class H
hsa-miR-548l	0	0	1	1	0	0	TBCA	tubulin folding cofactor A
hsa-miR-548l	0	0	1	1	1	1	PNPLA4	patatin-like phospholipase domain containing 4
hsa-miR-548l	1	0	1	0	1	1	USP9Y	ubiquitin specific peptidase 9, Y-linked
hsa-miR-548l	0	0	1	0	0	0	XKRY	XK, Kell blood group complex subunit-related, Y-linked
hsa-miR-548l	0	0	1	1	0	0	NMI	N-myc (and STAT) interactor
hsa-miR-548l	0	0	1	0	1	1	CXorf1	chromosome X open reading frame 1
hsa-miR-548l	0	0	1	1	0	0	ZW10	ZW10, kinetochore associated, homolog (Drosophila)
hsa-miR-548l	1	0	1	1	1	1	RPS6KA5	ribosomal protein S6 kinase, 90kDa, polypeptide 5
hsa-miR-548l	1	0	1	1	1	1	STK17A	serine/threonine kinase 17a
hsa-miR-548l	0	0	1	1	1	1	LHX2	LIM homeobox 2
hsa-miR-548l	0	0	1	1	1	1	TJP2	tight junction protein 2
hsa-miR-548l	1	0	1	0	1	1	CDYL	chromodomain protein, Y-like
hsa-miR-548l	1	0	1	0	1	1	ARHGEF6	Rac/Cdc42 guanine nucleotide exchange factor (GEF) 6
hsa-miR-548l	1	0	1	1	1	1	AKAP7	A kinase (PRKA) anchor protein 7
hsa-miR-548l	1	0	1	1	1	1	ONECUT2	one cut homeobox 2
hsa-miR-548l	1	0	1	1	1	1	VPS4B	vacuolar protein sorting 4 homolog B (S. cerevisiae)
hsa-miR-548l	0	0	1	1	0	0	PDIA4	protein disulfide isomerase family A, member 4
hsa-miR-548l	0	0	1	1	1	1	CALB1	calbindin 1, 28kDa
hsa-miR-548l	0	0	1	1	1	1	CDH6	cadherin 6, type 2, K-cadherin (fetal kidney)
hsa-miR-548l	0	0	1	1	1	1	DSC1	desmocollin 1
hsa-miR-548l	0	0	1	0	1	1	DSC2	desmocollin 2
hsa-miR-548l	0	0	1	1	1	1	GDF10	growth differentiation factor 10
hsa-miR-548l	0	0	1	1	1	1	JAK2	Janus kinase 2
hsa-miR-548l	1	0	1	0	1	1	KRAS	v-Ki-ras2 Kirsten rat sarcoma viral oncogene homolog
hsa-miR-548l	1	0	1	1	1	1	ATXN3	ataxin 3
hsa-miR-548l	1	0	1	1	1	1	RELN	reelin
hsa-miR-548l	0	0	1	1	1	1	RGPD5	RANBP2-like and GRIP domain containing 5
hsa-miR-548l	1	0	1	0	1	1	SEL1L	sel-1 suppressor of lin-12-like (C. elegans)
hsa-miR-548l	1	0	1	1	0	0	ADAMTS4	ADAM metallopeptidase with thrombospondin type 1 motif, 4
hsa-miR-548l	1	0	1	1	1	1	SLC23A2	solute carrier family 23 (nucleobase transporters), member 2
hsa-miR-548l	1	0	1	1	1	1	MED13	mediator complex subunit 13
hsa-miR-548l	0	0	1	1	1	1	CLEC2B	C-type lectin domain family 2, member B
hsa-miR-548l	0	0	1	1	1	1	ABCD2	ATP-binding cassette, sub-family D (ALD), member 2
hsa-miR-548l	1	0	1	1	1	1	BMI1	BMI1 polycomb ring finger oncogene
hsa-miR-548l	1	0	1	1	1	1	FOXN3	forkhead box N3
hsa-miR-548l	1	1	1	1	1	1	MAP3K8	mitogen-activated protein kinase kinase kinase 8
hsa-miR-548l	1	0	1	1	1	1	CRK	v-crk sarcoma virus CT10 oncogene homolog (avian)
hsa-miR-548l	1	0	1	0	1	1	DLX6	distal-less homeobox 6
hsa-miR-548l	0	0	1	0	1	1	EPHA3	EPH receptor A3
hsa-miR-548l	1	0	1	1	1	1	GABPB1	GA binding protein transcription factor, beta subunit 1
hsa-miR-548l	1	0	1	1	1	1	GAS2	growth arrest-specific 2
hsa-miR-548l	1	0	1	1	1	1	GEM	GTP binding protein overexpressed in skeletal muscle
hsa-miR-548l	1	0	1	1	1	1	GPM6A	glycoprotein M6A
hsa-miR-548l	0	0	1	1	1	1	LPAR4	lysophosphatidic acid receptor 4
hsa-miR-548l	0	0	1	1	1	1	GRPR	gastrin-releasing peptide receptor
hsa-miR-548l	1	0	1	1	1	1	H3F3B	H3 histone, family 3B (H3.3B)
hsa-miR-548l	1	0	1	1	1	1	HAS2	hyaluronan synthase 2
hsa-miR-548l	1	0	1	1	1	1	PDCL	phosducin-like
hsa-miR-548l	0	0	1	1	1	1	PPP1R3C	protein phosphatase 1, regulatory subunit 3C
hsa-miR-548l	1	0	1	0	1	1	PRKAB2	protein kinase, AMP-activated, beta 2 non-catalytic subunit
hsa-miR-548l	1	0	1	0	1	1	SRC	v-src sarcoma (Schmidt-Ruppin A-2) viral oncogene homolog (avian)
hsa-miR-548l	1	0	1	0	1	1	CCDC6	coiled-coil domain containing 6
hsa-miR-548l	1	0	1	1	1	1	MED6	mediator complex subunit 6
hsa-miR-548l	0	0	1	1	1	1	INSL5	insulin-like 5
hsa-miR-548l	1	0	1	1	1	1	PIGK	phosphatidylinositol glycan anchor biosynthesis, class K
hsa-miR-548l	1	0	1	1	1	1	ABCA1	ATP-binding cassette, sub-family A (ABC1), member 1
hsa-miR-548l	1	0	1	1	1	1	HOXA1	homeobox A1
hsa-miR-548l	0	0	1	1	1	1	HES1	hairy and enhancer of split 1, (Drosophila)
hsa-miR-548l	1	0	1	1	1	1	INSIG1	insulin induced gene 1
hsa-miR-548l	1	0	1	1	1	1	LAMP1	lysosomal-associated membrane protein 1
hsa-miR-548l	0	0	1	1	0	0	LMNB1	lamin B1
hsa-miR-548l	1	0	1	1	1	1	LNPEP	leucyl/cystinyl aminopeptidase
hsa-miR-548l	1	0	1	1	0	0	LOXL1	lysyl oxidase-like 1
hsa-miR-548l	1	0	1	1	1	1	LPP	LIM domain containing preferred translocation partner in lipoma
hsa-miR-548l	1	0	1	1	1	1	MAB21L1	mab-21-like 1 (C. elegans)
hsa-miR-548l	1	0	1	1	1	1	MYF5	myogenic factor 5
hsa-miR-548l	1	0	1	1	1	1	NHLH2	nescient helix loop helix 2
hsa-miR-548l	0	0	1	0	1	1	POU3F2	POU class 3 homeobox 2
hsa-miR-548l	1	0	1	1	1	1	ST8SIA4	ST8 alpha-N-acetyl-neuraminide alpha-2,8-sialyltransferase 4
hsa-miR-548l	1	0	1	1	1	1	UST	uronyl-2-sulfotransferase
hsa-miR-548l	0	0	1	1	1	1	ACTR3	ARP3 actin-related protein 3 homolog (yeast)
hsa-miR-548l	1	0	1	0	1	1	TSPAN2	tetraspanin 2
hsa-miR-548l	0	0	1	1	1	1	TOB1	transducer of ERBB2, 1
hsa-miR-548l	1	0	1	1	1	1	LHFP	lipoma HMGIC fusion partner
hsa-miR-548l	0	0	1	1	1	1	TXNDC9	thioredoxin domain containing 9
hsa-miR-548l	0	0	1	1	1	1	RNF41	ring finger protein 41
hsa-miR-548l	1	0	1	1	1	1	PRKD3	protein kinase D3
hsa-miR-548l	1	0	1	0	1	1	DCAF7	DDB1 and CUL4 associated factor 7
hsa-miR-548l	1	0	1	0	1	1	SPRY3	sprouty homolog 3 (Drosophila)
hsa-miR-548l	1	0	1	1	1	1	PURA	purine-rich element binding protein A
hsa-miR-548l	0	0	1	1	1	1	CWC27	CWC27 spliceosome-associated protein homolog (S. cerevisiae)
hsa-miR-548l	1	0	1	1	1	1	GOLGA3	golgin A3
hsa-miR-548l	1	0	1	1	1	1	MAN1A1	mannosidase, alpha, class 1A, member 1
hsa-miR-548l	1	0	1	1	1	1	MMP16	matrix metallopeptidase 16 (membrane-inserted)
hsa-miR-548l	1	0	1	1	1	1	MTF1	metal-regulatory transcription factor 1
hsa-miR-548l	1	0	1	0	1	1	NAB1	NGFI-A binding protein 1 (EGR1 binding protein 1)
hsa-miR-548l	0	0	1	1	1	1	UQCRFS1	ubiquinol-cytochrome c reductase, Rieske iron-sulfur polypeptide 1
hsa-miR-548l	0	0	1	1	1	1	TSC22D1	TSC22 domain family, member 1
hsa-miR-548l	1	0	1	1	1	1	ENDOU	endonuclease, polyU-specific
hsa-miR-548l	0	0	1	1	1	1	EMC8	ER membrane protein complex subunit 8
hsa-miR-548l	1	0	1	0	1	1	SCML2	sex comb on midleg-like 2 (Drosophila)
hsa-miR-548l	1	0	1	1	1	1	CAPZA1	capping protein (actin filament) muscle Z-line, alpha 1
hsa-miR-548l	1	0	1	1	1	1	CAPZA2	capping protein (actin filament) muscle Z-line, alpha 2
hsa-miR-548l	1	0	1	1	1	1	NEUROG1	neurogenin 1
hsa-miR-548l	0	0	1	1	1	1	PA2G4	proliferation-associated 2G4, 38kDa
hsa-miR-548l	1	0	1	1	1	1	POU4F1	POU class 4 homeobox 1
hsa-miR-548l	1	0	1	1	1	1	PPP2R5E	protein phosphatase 2, regulatory subunit B', epsilon isoform
hsa-miR-548l	1	0	1	1	1	1	PKN2	protein kinase N2
hsa-miR-548l	0	0	1	1	1	1	PRKG2	protein kinase, cGMP-dependent, type II
hsa-miR-548l	0	0	1	0	0	0	PTPN13	protein tyrosine phosphatase, non-receptor type 13 (APO-1/CD95 (Fas)-associated phosphatase)
hsa-miR-548l	1	0	1	1	1	1	CCL7	chemokine (C-C motif) ligand 7
hsa-miR-548l	1	0	1	1	1	1	TACC1	transforming, acidic coiled-coil containing protein 1
hsa-miR-548l	1	0	1	1	1	1	SMC1A	structural maintenance of chromosomes 1A
hsa-miR-548l	0	0	1	1	1	1	C1D	C1D nuclear receptor corepressor
hsa-miR-548l	0	0	1	1	1	1	SLC30A9	solute carrier family 30 (zinc transporter), member 9
hsa-miR-548l	0	0	1	1	1	1	PIBF1	progesterone immunomodulatory binding factor 1
hsa-miR-548l	1	0	1	1	1	1	ZNF238	zinc finger protein 238
hsa-miR-548l	0	0	1	1	1	1	SLC25A17	solute carrier family 25 (mitochondrial carrier; peroxisomal membrane protein, 34kDa), member 17
hsa-miR-548l	1	0	1	1	1	1	SEC23A	Sec23 homolog A (S. cerevisiae)
hsa-miR-548l	1	0	1	0	1	1	APPBP2	amyloid beta precursor protein (cytoplasmic tail) binding protein 2
hsa-miR-548l	1	0	1	1	1	1	NEBL	nebulette
hsa-miR-548l	1	0	1	1	1	1	SPTLC1	serine palmitoyltransferase, long chain base subunit 1
hsa-miR-548l	1	0	1	1	1	1	CDC42EP3	CDC42 effector protein (Rho GTPase binding) 3
hsa-miR-548l	1	0	1	1	1	1	PAIP1	poly(A) binding protein interacting protein 1
hsa-miR-548l	1	0	1	0	1	1	POLR3G	polymerase (RNA) III (DNA directed) polypeptide G (32kD)
hsa-miR-548l	1	0	1	0	1	1	PTPRE	protein tyrosine phosphatase, receptor type, E
hsa-miR-548l	0	0	1	0	1	1	SLC16A2	solute carrier family 16, member 2 (thyroid hormone transporter)
hsa-miR-548l	1	0	1	1	1	1	DYNLT3	dynein, light chain, Tctex-type 3
hsa-miR-548l	1	0	1	0	1	1	NCOA2	nuclear receptor coactivator 2
hsa-miR-548l	1	0	1	0	1	1	IGF2BP1	insulin-like growth factor 2 mRNA binding protein 1
hsa-miR-548l	1	0	1	1	1	1	KHDRBS1	KH domain containing, RNA binding, signal transduction associated 1
hsa-miR-548l	1	0	1	0	1	1	GNA13	guanine nucleotide binding protein (G protein), alpha 13
hsa-miR-548l	1	0	1	0	1	1	MAP4K5	mitogen-activated protein kinase kinase kinase kinase 5
hsa-miR-548l	0	0	1	1	1	1	TBR1	T-box, brain, 1
hsa-miR-548l	1	0	1	0	1	1	API5	apoptosis inhibitor 5
hsa-miR-548l	1	0	1	1	1	1	PHTF1	putative homeodomain transcription factor 1
hsa-miR-548l	1	0	1	1	1	1	MAP3K2	mitogen-activated protein kinase kinase kinase 2
hsa-miR-548l	0	0	1	1	1	1	KLRAP1	killer cell lectin-like receptor subfamily A pseudogene 1
hsa-miR-548l	1	0	1	1	1	1	SRSF10	serine/arginine-rich splicing factor 10
hsa-miR-548l	1	0	1	1	1	1	ZBTB6	zinc finger and BTB domain containing 6
hsa-miR-548l	0	0	1	1	0	0	WNK2	WNK lysine deficient protein kinase 2
hsa-miR-548l	0	0	1	1	1	1	FGL2	fibrinogen-like 2
hsa-miR-548l	1	0	1	1	1	1	MMP24	matrix metallopeptidase 24 (membrane-inserted)
hsa-miR-548l	1	0	1	1	1	1	MAN1A2	mannosidase, alpha, class 1A, member 2
hsa-miR-548l	0	0	1	1	1	1	NUDT3	nudix (nucleoside diphosphate linked moiety X)-type motif 3
hsa-miR-548l	0	0	1	0	1	1	SUB1	SUB1 homolog (S. cerevisiae)
hsa-miR-548l	1	0	1	1	1	1	DIAPH2	diaphanous homolog 2 (Drosophila)
hsa-miR-548l	1	0	1	1	1	1	HIVEP2	human immunodeficiency virus type I enhancer binding protein 2
hsa-miR-548l	1	0	1	1	1	1	SLC20A2	solute carrier family 20 (phosphate transporter), member 2
hsa-miR-548l	0	0	1	1	1	1	MSL3	male-specific lethal 3 homolog (Drosophila)
hsa-miR-548l	0	0	1	1	1	1	SERINC3	serine incorporator 3
hsa-miR-548l	0	0	1	1	1	1	PKIA	protein kinase (cAMP-dependent, catalytic) inhibitor alpha
hsa-miR-548l	0	0	1	1	1	1	TMED10	transmembrane emp24-like trafficking protein 10 (yeast)
hsa-miR-548l	0	0	1	1	1	1	ASCC3	activating signal cointegrator 1 complex subunit 3
hsa-miR-548l	1	0	1	1	1	1	RP2	retinitis pigmentosa 2 (X-linked recessive)
hsa-miR-548l	1	0	1	1	1	1	SKP1	S-phase kinase-associated protein 1
hsa-miR-548l	1	0	1	0	1	1	SLC5A3	solute carrier family 5 (sodium/myo-inositol cotransporter), member 3
hsa-miR-548l	1	0	1	1	1	1	NR4A3	nuclear receptor subfamily 4, group A, member 3
hsa-miR-548l	1	0	1	1	1	1	ADAMTS1	ADAM metallopeptidase with thrombospondin type 1 motif, 1
hsa-miR-548l	1	0	1	0	1	1	PAPD7	PAP associated domain containing 7
hsa-miR-548l	0	0	1	1	1	1	RTN4	reticulon 4
hsa-miR-548l	1	0	1	1	1	1	WWP1	WW domain containing E3 ubiquitin protein ligase 1
hsa-miR-548l	1	0	1	1	1	1	RAPGEF4	Rap guanine nucleotide exchange factor (GEF) 4
hsa-miR-548l	1	0	1	1	1	1	ADAMTS5	ADAM metallopeptidase with thrombospondin type 1 motif, 5
hsa-miR-548l	1	0	1	1	1	1	FGFR1OP	FGFR1 oncogene partner
hsa-miR-548l	1	0	1	1	1	1	KAT7	K(lysine) acetyltransferase 7
hsa-miR-548l	1	0	1	1	1	1	TMF1	TATA element modulatory factor 1
hsa-miR-548l	0	0	1	1	1	1	USH2A	Usher syndrome 2A (autosomal recessive, mild)
hsa-miR-548l	1	0	1	1	1	1	UTY	ubiquitously transcribed tetratricopeptide repeat gene, Y-linked
hsa-miR-548l	0	0	1	0	1	1	ZXDB	zinc finger, X-linked, duplicated B
hsa-miR-548l	1	0	1	1	1	1	TESK2	testis-specific kinase 2
hsa-miR-548l	1	0	1	0	1	1	PRSS23	protease, serine, 23
hsa-miR-548l	0	0	1	1	1	1	WIF1	WNT inhibitory factor 1
hsa-miR-548l	1	0	1	1	1	1	PALM2-AKAP2	PALM2-AKAP2 readthrough
hsa-miR-548l	1	0	1	1	1	1	DUSP10	dual specificity phosphatase 10
hsa-miR-548l	1	0	1	1	1	1	RNF139	ring finger protein 139
hsa-miR-548l	0	0	1	1	1	1	GPR176	G protein-coupled receptor 176
hsa-miR-548l	0	0	1	1	1	1	SLC6A14	solute carrier family 6 (amino acid transporter), member 14
hsa-miR-548l	0	0	1	1	1	1	XPOT	exportin, tRNA (nuclear export receptor for tRNAs)
hsa-miR-548l	1	0	1	1	1	1	KLF12	Kruppel-like factor 12
hsa-miR-548l	0	0	1	1	1	1	STXBP3	syntaxin binding protein 3
hsa-miR-548l	0	0	1	0	1	1	AP4E1	adaptor-related protein complex 4, epsilon 1 subunit
hsa-miR-548l	1	0	1	1	1	1	PHLDA1	pleckstrin homology-like domain, family A, member 1
hsa-miR-548l	1	0	1	1	1	1	CASC3	cancer susceptibility candidate 3
hsa-miR-548l	1	0	1	0	1	1	ZFPM2	zinc finger protein, multitype 2
hsa-miR-548l	1	0	1	1	1	1	ICOS	inducible T-cell co-stimulator
hsa-miR-548l	1	0	1	1	1	1	APPL1	adaptor protein, phosphotyrosine interaction, PH domain and leucine zipper containing 1
hsa-miR-548l	0	0	1	1	0	0	STAP1	signal transducing adaptor family member 1
hsa-miR-548l	1	0	1	0	1	1	CD2AP	CD2-associated protein
hsa-miR-548l	0	0	1	1	1	1	EHF	ets homologous factor
hsa-miR-548l	1	0	1	1	1	1	FBXL3	F-box and leucine-rich repeat protein 3
hsa-miR-548l	0	0	1	1	1	1	HARS2	histidyl-tRNA synthetase 2, mitochondrial
hsa-miR-548l	1	0	1	1	1	1	MGAT4A	mannosyl (alpha-1,3-)-glycoprotein beta-1,4-N-acetylglucosaminyltransferase, isozyme A
hsa-miR-548l	1	0	1	1	1	1	RYBP	RING1 and YY1 binding protein
hsa-miR-548l	1	0	1	1	1	1	RHOQ	ras homolog family member Q
hsa-miR-548l	1	0	1	1	1	1	HEY2	hairy/enhancer-of-split related with YRPW motif 2
hsa-miR-548l	1	0	1	0	1	1	G3BP2	GTPase activating protein (SH3 domain) binding protein 2
hsa-miR-548l	0	0	1	1	1	1	SLC39A6	solute carrier family 39 (zinc transporter), member 6
hsa-miR-548l	1	0	1	1	1	1	MAPRE1	microtubule-associated protein, RP/EB family, member 1
hsa-miR-548l	0	0	1	0	1	1	PIGN	phosphatidylinositol glycan anchor biosynthesis, class N
hsa-miR-548l	1	0	1	0	1	1	MYO10	myosin X
hsa-miR-548l	0	0	1	1	1	1	TTC33	tetratricopeptide repeat domain 33
hsa-miR-548l	1	0	1	1	1	1	NPTN	neuroplastin
hsa-miR-548l	0	0	1	0	1	1	SEMA3E	sema domain, immunoglobulin domain (Ig), short basic domain, secreted, (semaphorin) 3E
hsa-miR-548l	1	0	1	1	1	1	SLC17A5	solute carrier family 17 (anion/sugar transporter), member 5
hsa-miR-548l	1	0	1	1	1	1	TLL2	tolloid-like 2
hsa-miR-548l	0	0	1	1	1	1	TCL6	T-cell leukemia/lymphoma 6 (non-protein coding)
hsa-miR-548l	1	0	1	1	1	1	TRPC5	transient receptor potential cation channel, subfamily C, member 5
hsa-miR-548l	0	0	1	1	1	1	CD24	CD24 molecule
hsa-miR-548l	1	0	1	0	1	1	FLRT2	fibronectin leucine rich transmembrane protein 2
hsa-miR-548l	1	0	1	1	1	1	STK39	serine threonine kinase 39
hsa-miR-548l	0	0	1	1	1	1	TBK1	TANK-binding kinase 1
hsa-miR-548l	1	0	1	1	1	1	SLC30A4	solute carrier family 30 (zinc transporter), member 4
hsa-miR-548l	0	0	1	1	1	1	SNX10	sorting nexin 10
hsa-miR-548l	1	0	1	0	1	1	TRHDE	thyrotropin-releasing hormone degrading enzyme
hsa-miR-548l	1	0	1	1	1	1	LRP12	low density lipoprotein receptor-related protein 12
hsa-miR-548l	1	0	1	1	1	1	BAZ1A	bromodomain adjacent to zinc finger domain, 1A
hsa-miR-548l	1	0	1	1	1	1	LAMP2	lysosomal-associated membrane protein 2
hsa-miR-548l	1	0	1	1	0	0	DEXI	Dexi homolog (mouse)
hsa-miR-548l	1	0	1	1	1	1	WDR37	WD repeat domain 37
hsa-miR-548l	1	0	1	1	1	1	ZNF770	zinc finger protein 770
hsa-miR-548l	1	0	1	0	1	1	C16orf72	chromosome 16 open reading frame 72
hsa-miR-548l	1	0	1	1	1	1	ZBTB44	zinc finger and BTB domain containing 44
hsa-miR-548l	1	0	1	1	1	1	CRIPT	cysteine-rich PDZ-binding protein
hsa-miR-548l	0	0	1	1	0	0	CNIH4	cornichon homolog 4 (Drosophila)
hsa-miR-548l	0	0	1	1	1	1	DSPP	dentin sialophosphoprotein
hsa-miR-548l	1	0	1	1	1	1	C11orf58	chromosome 11 open reading frame 58
hsa-miR-548l	0	0	1	1	1	1	HSPA4L	heat shock 70kDa protein 4-like
hsa-miR-548l	0	0	1	1	0	0	OLFM1	olfactomedin 1
hsa-miR-548l	0	0	1	1	1	1	DNAJC8	DnaJ (Hsp40) homolog, subfamily C, member 8
hsa-miR-548l	0	0	1	1	1	1	TRAM1	translocation associated membrane protein 1
hsa-miR-548l	1	0	1	1	1	1	SLC7A11	solute carrier family 7 (anionic amino acid transporter light chain, xc- system), member 11
hsa-miR-548l	1	0	1	0	1	1	RNF11	ring finger protein 11
hsa-miR-548l	1	0	1	0	1	1	DIEXF	digestive organ expansion factor homolog (zebrafish)
hsa-miR-548l	0	0	1	1	1	1	LAMP3	lysosomal-associated membrane protein 3
hsa-miR-548l	1	0	1	1	1	1	AFF4	AF4/FMR2 family, member 4
hsa-miR-548l	1	0	1	1	1	1	SERP1	stress-associated endoplasmic reticulum protein 1
hsa-miR-548l	1	0	1	1	1	1	ERO1L	ERO1-like (S. cerevisiae)
hsa-miR-548l	1	0	1	1	1	1	SLC40A1	solute carrier family 40 (iron-regulated transporter), member 1
hsa-miR-548l	1	0	1	1	1	1	CDR2L	cerebellar degeneration-related protein 2-like
hsa-miR-548l	1	0	1	0	1	1	SH3PXD2A	SH3 and PX domains 2A
hsa-miR-548l	1	0	1	1	1	1	RALGPS1	Ral GEF with PH domain and SH3 binding motif 1
hsa-miR-548l	1	0	1	0	1	1	EDEM1	ER degradation enhancer, mannosidase alpha-like 1
hsa-miR-548l	1	0	1	1	1	1	ULK2	unc-51-like kinase 2 (C. elegans)
hsa-miR-548l	1	0	1	0	1	1	RAB11FIP3	RAB11 family interacting protein 3 (class II)
hsa-miR-548l	0	0	1	1	0	0	SETD1A	SET domain containing 1A
hsa-miR-548l	1	0	1	0	1	1	TOX	thymocyte selection-associated high mobility group box
hsa-miR-548l	1	0	1	0	1	1	KIAA0232	KIAA0232
hsa-miR-548l	1	0	1	1	1	1	SPCS2	signal peptidase complex subunit 2 homolog (S. cerevisiae)
hsa-miR-548l	1	0	1	0	1	1	SERTAD2	SERTA domain containing 2
hsa-miR-548l	1	0	1	1	1	1	MRPL19	mitochondrial ribosomal protein L19
hsa-miR-548l	1	0	1	0	1	1	KIAA0494	KIAA0494
hsa-miR-548l	1	0	1	1	1	1	KIAA0753	KIAA0753
hsa-miR-548l	1	0	1	0	1	1	TRIL	TLR4 interactor with leucine-rich repeats
hsa-miR-548l	1	0	1	1	1	1	FCHSD2	FCH and double SH3 domains 2
hsa-miR-548l	0	0	1	1	1	1	TOX4	TOX high mobility group box family member 4
hsa-miR-548l	1	0	1	0	1	1	LPPR4	lipid phosphate phosphatase-related protein type 4
hsa-miR-548l	1	0	1	1	1	1	NUAK1	NUAK family, SNF1-like kinase, 1
hsa-miR-548l	1	0	1	1	1	1	ZBTB5	zinc finger and BTB domain containing 5
hsa-miR-548l	0	0	1	1	1	1	ADNP2	ADNP homeobox 2
hsa-miR-548l	1	0	1	1	1	1	LMTK2	lemur tyrosine kinase 2
hsa-miR-548l	1	0	1	1	1	1	CHSY1	chondroitin sulfate synthase 1
hsa-miR-548l	1	0	1	0	1	1	ICK	intestinal cell (MAK-like) kinase
hsa-miR-548l	0	0	1	1	0	0	CNKSR2	connector enhancer of kinase suppressor of Ras 2
hsa-miR-548l	0	0	1	1	1	1	ENPP4	ectonucleotide pyrophosphatase/phosphodiesterase 4 (putative)
hsa-miR-548l	1	0	1	0	1	1	WDFY3	WD repeat and FYVE domain containing 3
hsa-miR-548l	1	0	1	1	1	1	RAB21	RAB21, member RAS oncogene family
hsa-miR-548l	1	0	1	0	1	1	PDS5B	PDS5, regulator of cohesion maintenance, homolog B (S. cerevisiae)
hsa-miR-548l	1	0	1	1	1	1	PIKFYVE	phosphoinositide kinase, FYVE finger containing
hsa-miR-548l	1	0	1	1	1	1	TRAK2	trafficking protein, kinesin binding 2
hsa-miR-548l	1	0	1	1	1	1	ERP44	endoplasmic reticulum protein 44
[truncated: 584 more rows]
