# Supplementary material for: Profiling of Selected MicroRNAs in Proliferative Eutopic Endometrium of Women with Ovarian Endometriosis
Source: Biomed Res Int. 2015 Aug 20;2015:760698. doi: 10.1155/2015/760698 (PMC4558423; doi:10.1155/2015/760698)
Supplement: Supplementary file 1 — Table I: The names of miRNAs significantly differentially expressed between eutopic endometrium of patients with endometriosis vs eutopic endometrium of patients without endometriosis. Table II: The associations between miRNA and mRNA, which presents detailed results of the search of six major databases i.e targetscan, tarbase, miranda, mirbase, mirtarget2 and pictar. [file 760698.f1.zip › 760698.f1/Table II/hsa-miR-548m.tsv]

miR	targetscan	tarbase	miranda	mirbase	mirtarget2	pictar	GeneSymbol	GeneName
hsa-miR-548m	1	0	1	1	1	1	PRUNE2	prune homolog 2 (Drosophila)
hsa-miR-548m	0	0	1	1	1	1	KIAA0391	KIAA0391
hsa-miR-548m	0	0	1	1	1	1	PEG3	paternally expressed 3
hsa-miR-548m	1	0	1	0	1	1	KIAA0408	KIAA0408
hsa-miR-548m	1	0	1	1	1	1	NUPL1	nucleoporin like 1
hsa-miR-548m	1	0	1	0	1	1	MTSS1	metastasis suppressor 1
hsa-miR-548m	1	0	1	1	1	1	PPIP5K2	diphosphoinositol pentakisphosphate kinase 2
hsa-miR-548m	1	0	1	0	1	1	CEP350	centrosomal protein 350kDa
hsa-miR-548m	0	0	1	1	1	1	NEU3	sialidase 3 (membrane sialidase)
hsa-miR-548m	1	0	1	1	1	1	RNGTT	RNA guanylyltransferase and 5'-phosphatase
hsa-miR-548m	0	0	1	1	0	0	ZNF862	zinc finger protein 862
hsa-miR-548m	1	0	1	1	0	0	PCLO	piccolo (presynaptic cytomatrix protein)
hsa-miR-548m	1	0	1	1	1	1	NRXN1	neurexin 1
hsa-miR-548m	1	0	1	1	1	1	SLC4A7	solute carrier family 4, sodium bicarbonate cotransporter, member 7
hsa-miR-548m	1	0	1	1	1	1	HIPK1	homeodomain interacting protein kinase 1
hsa-miR-548m	1	0	1	1	1	1	GIGYF2	GRB10 interacting GYF protein 2
hsa-miR-548m	1	0	1	1	1	1	ANKRD17	ankyrin repeat domain 17
hsa-miR-548m	1	0	1	0	1	1	SNX13	sorting nexin 13
hsa-miR-548m	0	0	1	1	0	0	ATP10B	ATPase, class V, type 10B
hsa-miR-548m	1	0	1	0	1	1	DOCK4	dedicator of cytokinesis 4
hsa-miR-548m	1	0	1	0	1	1	RBM12	RNA binding motif protein 12
hsa-miR-548m	0	0	1	1	1	1	SEC31A	SEC31 homolog A (S. cerevisiae)
hsa-miR-548m	1	0	1	1	1	1	DNM3	dynamin 3
hsa-miR-548m	1	0	1	1	1	1	LMO7	LIM domain 7
hsa-miR-548m	1	0	1	1	1	1	UBR5	ubiquitin protein ligase E3 component n-recognin 5
hsa-miR-548m	1	0	1	1	1	1	CALCR	calcitonin receptor
hsa-miR-548m	1	0	1	1	1	1	UBE2K	ubiquitin-conjugating enzyme E2K
hsa-miR-548m	1	0	1	1	1	1	CPEB3	cytoplasmic polyadenylation element binding protein 3
hsa-miR-548m	1	0	1	1	1	1	CIT	citron (rho-interacting, serine/threonine kinase 21)
hsa-miR-548m	1	0	1	1	1	1	RGL1	ral guanine nucleotide dissociation stimulator-like 1
hsa-miR-548m	0	0	1	1	1	1	FASTKD2	FAST kinase domains 2
hsa-miR-548m	1	0	1	1	1	1	PALLD	palladin, cytoskeletal associated protein
hsa-miR-548m	1	0	1	1	1	1	RPGRIP1L	RPGRIP1-like
hsa-miR-548m	1	0	1	1	0	0	FRMD4B	FERM domain containing 4B
hsa-miR-548m	0	0	1	1	1	1	DBF4	DBF4 homolog (S. cerevisiae)
hsa-miR-548m	0	0	1	1	1	1	AGTPBP1	ATP/GTP binding protein 1
hsa-miR-548m	1	0	1	1	1	1	FOXJ3	forkhead box J3
hsa-miR-548m	0	0	1	1	1	1	NCOR1	nuclear receptor corepressor 1
hsa-miR-548m	1	0	1	1	0	0	ZC3H4	zinc finger CCCH-type containing 4
hsa-miR-548m	1	0	1	0	1	1	ZNF507	zinc finger protein 507
hsa-miR-548m	1	0	1	1	1	1	PHF8	PHD finger protein 8
hsa-miR-548m	1	0	1	1	1	1	SMARCAD1	SWI/SNF-related, matrix-associated actin-dependent regulator of chromatin, subfamily a, containing DEAD/H box 1
hsa-miR-548m	1	0	1	0	1	1	ODZ2	odz, odd Oz/ten-m homolog 2 (Drosophila)
hsa-miR-548m	1	0	1	0	1	1	GPR158	G protein-coupled receptor 158
hsa-miR-548m	1	0	1	1	0	0	PPM1H	protein phosphatase, Mg2+/Mn2+ dependent, 1H
hsa-miR-548m	1	0	1	1	1	1	ATXN7L1	ataxin 7-like 1
hsa-miR-548m	1	0	1	1	1	1	ZMIZ1	zinc finger, MIZ-type containing 1
hsa-miR-548m	1	0	1	1	1	1	RIMKLB	ribosomal modification protein rimK-like family member B
hsa-miR-548m	1	0	1	1	0	0	ATAD2B	ATPase family, AAA domain containing 2B
hsa-miR-548m	1	0	1	1	1	1	MKL2	MKL/myocardin-like 2
hsa-miR-548m	1	0	1	1	1	1	ASAP1	ArfGAP with SH3 domain, ankyrin repeat and PH domain 1
hsa-miR-548m	0	0	1	1	1	1	CA10	carbonic anhydrase X
hsa-miR-548m	1	0	1	1	1	1	PCDH19	protocadherin 19
hsa-miR-548m	1	0	1	0	1	1	KCTD16	potassium channel tetramerisation domain containing 16
hsa-miR-548m	1	0	1	1	1	1	TAOK1	TAO kinase 1
hsa-miR-548m	1	0	1	1	1	1	LRRC7	leucine rich repeat containing 7
hsa-miR-548m	0	0	1	1	1	1	IFT80	intraflagellar transport 80 homolog (Chlamydomonas)
hsa-miR-548m	1	0	1	1	1	1	FAM135A	family with sequence similarity 135, member A
hsa-miR-548m	1	1	1	1	1	1	NFIA	nuclear factor I/A
hsa-miR-548m	1	0	1	1	1	1	CASK	calcium/calmodulin-dependent serine protein kinase (MAGUK family)
hsa-miR-548m	0	0	1	0	1	1	KIAA1468	KIAA1468
hsa-miR-548m	1	0	1	1	1	1	BAZ2B	bromodomain adjacent to zinc finger domain, 2B
hsa-miR-548m	0	0	1	0	0	0	NYAP2	neuronal tyrosine-phosphorylated phosphoinositide-3-kinase adaptor 2
hsa-miR-548m	1	0	1	1	1	1	ZNF532	zinc finger protein 532
hsa-miR-548m	0	0	1	1	1	1	BHLHB9	basic helix-loop-helix domain containing, class B, 9
hsa-miR-548m	0	0	1	1	1	1	KIAA1704	KIAA1704
hsa-miR-548m	0	0	1	1	0	0	SLC22A16	solute carrier family 22 (organic cation/carnitine transporter), member 16
hsa-miR-548m	1	0	1	1	1	1	CDK13	cyclin-dependent kinase 13
hsa-miR-548m	1	0	1	1	1	1	LCOR	ligand dependent nuclear receptor corepressor
hsa-miR-548m	1	0	1	1	1	1	NAV2	neuron navigator 2
hsa-miR-548m	1	0	1	1	1	1	BCL2L11	BCL2-like 11 (apoptosis facilitator)
hsa-miR-548m	1	0	1	1	0	0	ZNF292	zinc finger protein 292
hsa-miR-548m	1	0	1	1	1	1	SH3TC2	SH3 domain and tetratricopeptide repeats 2
hsa-miR-548m	0	0	1	0	0	0	NUGGC	nuclear GTPase, germinal center associated
hsa-miR-548m	1	0	1	0	0	0	FAT3	FAT tumor suppressor homolog 3 (Drosophila)
hsa-miR-548m	1	0	1	0	0	0	ZBTB34	zinc finger and BTB domain containing 34
hsa-miR-548m	0	0	1	0	0	0	ARHGEF28	Rho guanine nucleotide exchange factor (GEF) 28
hsa-miR-548m	1	0	1	1	1	1	SMEK1	SMEK homolog 1, suppressor of mek1 (Dictyostelium)
hsa-miR-548m	1	0	1	0	0	0	ZC3H12C	zinc finger CCCH-type containing 12C
hsa-miR-548m	1	0	1	1	1	1	C11orf57	chromosome 11 open reading frame 57
hsa-miR-548m	0	0	1	1	0	0	KRTAP24-1	keratin associated protein 24-1
hsa-miR-548m	1	0	1	1	1	1	TRPM3	transient receptor potential cation channel, subfamily M, member 3
hsa-miR-548m	0	0	1	1	1	1	PAK3	p21 protein (Cdc42/Rac)-activated kinase 3
hsa-miR-548m	0	0	1	1	1	1	IL7	interleukin 7
hsa-miR-548m	1	0	1	1	1	1	PAN3	PAN3 poly(A) specific ribonuclease subunit homolog (S. cerevisiae)
hsa-miR-548m	1	0	1	0	1	1	LIN54	lin-54 homolog (C. elegans)
hsa-miR-548m	1	0	1	1	1	1	FAT2	FAT tumor suppressor homolog 2 (Drosophila)
hsa-miR-548m	0	0	1	0	0	0	TIFAB	TRAF-interacting protein with forkhead-associated domain, family member B
hsa-miR-548m	0	0	1	1	0	0	APH1B	anterior pharynx defective 1 homolog B (C. elegans)
hsa-miR-548m	0	0	1	1	1	1	FN1	fibronectin 1
hsa-miR-548m	1	0	1	1	1	1	TRIM36	tripartite motif containing 36
hsa-miR-548m	1	0	1	0	1	1	CCDC88A	coiled-coil domain containing 88A
hsa-miR-548m	0	0	1	1	0	0	HFM1	HFM1, ATP-dependent DNA helicase homolog (S. cerevisiae)
hsa-miR-548m	1	0	1	0	1	1	NFE2L2	nuclear factor (erythroid-derived 2)-like 2
hsa-miR-548m	1	0	1	1	1	1	COL11A1	collagen, type XI, alpha 1
hsa-miR-548m	0	0	1	0	1	1	ATR	ataxia telangiectasia and Rad3 related
hsa-miR-548m	0	0	1	0	1	1	ITPR1	inositol 1,4,5-trisphosphate receptor, type 1
hsa-miR-548m	1	0	1	1	0	0	NDST2	N-deacetylase/N-sulfotransferase (heparan glucosaminyl) 2
hsa-miR-548m	1	0	1	0	1	1	PCDHA13	protocadherin alpha 13
hsa-miR-548m	1	0	1	1	1	1	PCDHA4	protocadherin alpha 4
hsa-miR-548m	0	0	1	1	0	0	KCNC3	potassium voltage-gated channel, Shaw-related subfamily, member 3
hsa-miR-548m	1	0	1	1	1	1	RPS6KA3	ribosomal protein S6 kinase, 90kDa, polypeptide 3
hsa-miR-548m	1	0	1	1	1	1	MEF2A	myocyte enhancer factor 2A
hsa-miR-548m	1	0	1	1	1	1	CLIP4	CAP-GLY domain containing linker protein family, member 4
hsa-miR-548m	1	0	1	0	1	1	PLAG1	pleiomorphic adenoma gene 1
hsa-miR-548m	1	0	1	0	1	1	SLC6A6	solute carrier family 6 (neurotransmitter transporter, taurine), member 6
hsa-miR-548m	1	0	1	1	0	0	CACNB1	calcium channel, voltage-dependent, beta 1 subunit
hsa-miR-548m	1	0	1	1	1	1	FMR1	fragile X mental retardation 1
hsa-miR-548m	1	0	1	1	1	1	PRKACB	protein kinase, cAMP-dependent, catalytic, beta
hsa-miR-548m	1	0	1	0	1	1	DPYSL2	dihydropyrimidinase-like 2
hsa-miR-548m	0	0	1	1	1	1	TFRC	transferrin receptor (p90, CD71)
hsa-miR-548m	1	0	1	1	1	1	EPHA7	EPH receptor A7
hsa-miR-548m	1	0	1	1	1	1	PPFIA1	protein tyrosine phosphatase, receptor type, f polypeptide (PTPRF), interacting protein (liprin), alpha 1
hsa-miR-548m	1	0	1	1	1	1	ARFGEF1	ADP-ribosylation factor guanine nucleotide-exchange factor 1 (brefeldin A-inhibited)
hsa-miR-548m	1	0	1	0	1	1	CHL1	cell adhesion molecule with homology to L1CAM (close homolog of L1)
hsa-miR-548m	1	0	1	1	1	1	SATB2	SATB homeobox 2
hsa-miR-548m	1	0	1	1	1	1	AEBP2	AE binding protein 2
hsa-miR-548m	1	0	1	0	1	1	CDON	Cdon homolog (mouse)
hsa-miR-548m	1	0	1	1	0	0	FGFR3	fibroblast growth factor receptor 3
hsa-miR-548m	0	0	1	1	0	0	EIF4E2	eukaryotic translation initiation factor 4E family member 2
hsa-miR-548m	0	0	1	1	1	1	GPM6B	glycoprotein M6B
hsa-miR-548m	1	0	1	1	1	1	EPB41	erythrocyte membrane protein band 4.1 (elliptocytosis 1, RH-linked)
hsa-miR-548m	1	0	1	1	1	1	ARHGEF3	Rho guanine nucleotide exchange factor (GEF) 3
hsa-miR-548m	1	0	1	1	0	0	SYN3	synapsin III
hsa-miR-548m	1	0	1	1	1	1	GOLGA4	golgin A4
hsa-miR-548m	0	0	1	1	1	1	ELOVL5	ELOVL fatty acid elongase 5
hsa-miR-548m	1	0	1	1	1	1	HMGA2	high mobility group AT-hook 2
hsa-miR-548m	1	0	1	1	1	1	TEAD1	TEA domain family member 1 (SV40 transcriptional enhancer factor)
hsa-miR-548m	1	0	1	1	1	1	NCOA3	nuclear receptor coactivator 3
hsa-miR-548m	0	0	1	1	1	1	DDX10	DEAD (Asp-Glu-Ala-Asp) box polypeptide 10
hsa-miR-548m	0	0	1	1	0	0	TRIM27	tripartite motif containing 27
hsa-miR-548m	1	0	1	1	1	1	ZFX	zinc finger protein, X-linked
hsa-miR-548m	1	0	1	0	1	1	CAV1	caveolin 1, caveolae protein, 22kDa
hsa-miR-548m	0	0	1	1	1	1	SPP1	secreted phosphoprotein 1
hsa-miR-548m	1	0	1	0	1	1	PDE7B	phosphodiesterase 7B
hsa-miR-548m	1	0	1	1	1	1	PICALM	phosphatidylinositol binding clathrin assembly protein
hsa-miR-548m	1	0	1	1	1	1	MYH10	myosin, heavy chain 10, non-muscle
hsa-miR-548m	1	0	1	0	1	1	FYB	FYN binding protein
hsa-miR-548m	0	0	1	1	1	1	HDAC3	histone deacetylase 3
hsa-miR-548m	1	0	1	1	1	1	DLGAP2	discs, large (Drosophila) homolog-associated protein 2
hsa-miR-548m	1	0	1	1	1	1	SLC4A4	solute carrier family 4, sodium bicarbonate cotransporter, member 4
hsa-miR-548m	1	0	1	0	1	1	PDE4D	phosphodiesterase 4D, cAMP-specific
hsa-miR-548m	1	0	1	1	1	1	PCDH17	protocadherin 17
hsa-miR-548m	1	0	1	1	1	1	MYT1L	myelin transcription factor 1-like
hsa-miR-548m	1	0	1	0	1	1	CELF2	CUGBP, Elav-like family member 2
hsa-miR-548m	1	0	1	1	1	1	SOCS2	suppressor of cytokine signaling 2
hsa-miR-548m	1	0	1	0	0	0	MAP3K1	mitogen-activated protein kinase kinase kinase 1, E3 ubiquitin protein ligase
hsa-miR-548m	0	0	1	1	1	1	SLC16A7	solute carrier family 16, member 7 (monocarboxylic acid transporter 2)
hsa-miR-548m	0	0	1	1	1	1	CYP4F3	cytochrome P450, family 4, subfamily F, polypeptide 3
hsa-miR-548m	1	0	1	1	1	1	PFKFB3	6-phosphofructo-2-kinase/fructose-2,6-biphosphatase 3
hsa-miR-548m	1	0	1	1	1	1	MBNL2	muscleblind-like splicing regulator 2
hsa-miR-548m	1	0	1	1	1	1	CTNND1	catenin (cadherin-associated protein), delta 1
hsa-miR-548m	1	0	1	1	1	1	ERLIN1	ER lipid raft associated 1
hsa-miR-548m	1	0	1	1	0	0	PAK1	p21 protein (Cdc42/Rac)-activated kinase 1
hsa-miR-548m	1	0	1	1	1	1	TP63	tumor protein p63
hsa-miR-548m	0	0	1	1	1	1	MINPP1	multiple inositol-polyphosphate phosphatase 1
hsa-miR-548m	1	0	1	0	1	1	CD164	CD164 molecule, sialomucin
hsa-miR-548m	0	0	1	1	0	0	RBM5	RNA binding motif protein 5
hsa-miR-548m	1	0	1	1	1	1	KAT6B	K(lysine) acetyltransferase 6B
hsa-miR-548m	1	0	1	1	1	1	LRRFIP1	leucine rich repeat (in FLII) interacting protein 1
hsa-miR-548m	0	0	1	1	1	1	MAP3K4	mitogen-activated protein kinase kinase kinase 4
hsa-miR-548m	1	0	1	0	1	1	CDK14	cyclin-dependent kinase 14
hsa-miR-548m	0	0	1	1	0	0	ACOT9	acyl-CoA thioesterase 9
hsa-miR-548m	0	0	1	0	1	1	CLEC5A	C-type lectin domain family 5, member A
hsa-miR-548m	1	0	1	1	1	1	USP15	ubiquitin specific peptidase 15
hsa-miR-548m	1	0	1	0	0	0	PRPF40A	PRP40 pre-mRNA processing factor 40 homolog A (S. cerevisiae)
hsa-miR-548m	1	0	1	1	1	1	ANKRD13A	ankyrin repeat domain 13A
hsa-miR-548m	0	0	1	1	1	1	NBPF14	neuroblastoma breakpoint family, member 14
hsa-miR-548m	0	0	1	1	1	1	SLC39A8	solute carrier family 39 (zinc transporter), member 8
hsa-miR-548m	0	0	1	1	0	0	PARD3	par-3 partitioning defective 3 homolog (C. elegans)
hsa-miR-548m	1	0	1	1	1	1	TSC22D2	TSC22 domain family, member 2
hsa-miR-548m	0	0	1	1	1	1	SLCO2B1	solute carrier organic anion transporter family, member 2B1
hsa-miR-548m	1	0	1	1	1	1	FAM49B	family with sequence similarity 49, member B
hsa-miR-548m	1	0	1	1	1	1	EIF4A2	eukaryotic translation initiation factor 4A2
hsa-miR-548m	1	0	1	1	1	1	KCNMB2	potassium large conductance calcium-activated channel, subfamily M, beta member 2
hsa-miR-548m	1	0	1	1	1	1	NXT2	nuclear transport factor 2-like export factor 2
hsa-miR-548m	0	0	1	1	1	1	SLC30A5	solute carrier family 30 (zinc transporter), member 5
hsa-miR-548m	0	0	1	1	0	0	DBNDD2	dysbindin (dystrobrevin binding protein 1) domain containing 2
hsa-miR-548m	0	0	1	1	1	1	CD28	CD28 molecule
hsa-miR-548m	1	0	1	1	1	1	SUFU	suppressor of fused homolog (Drosophila)
hsa-miR-548m	1	0	1	0	1	1	CSNK1G1	casein kinase 1, gamma 1
hsa-miR-548m	1	0	1	1	1	1	OGT	O-linked N-acetylglucosamine (GlcNAc) transferase
hsa-miR-548m	1	0	1	1	1	1	DESI2	desumoylating isopeptidase 2
hsa-miR-548m	1	0	1	1	1	1	CALD1	caldesmon 1
hsa-miR-548m	0	0	1	0	0	0	TIGD7	tigger transposable element derived 7
hsa-miR-548m	1	0	1	1	1	1	RBM47	RNA binding motif protein 47
hsa-miR-548m	1	0	1	1	1	1	SH3GLB1	SH3-domain GRB2-like endophilin B1
hsa-miR-548m	1	0	1	0	1	1	PARP11	poly (ADP-ribose) polymerase family, member 11
hsa-miR-548m	1	0	1	0	1	1	TRPS1	trichorhinophalangeal syndrome I
hsa-miR-548m	0	0	1	1	1	1	ZNF331	zinc finger protein 331
hsa-miR-548m	1	0	1	1	1	1	PUM2	pumilio homolog 2 (Drosophila)
hsa-miR-548m	0	0	1	1	1	1	ZNF638	zinc finger protein 638
hsa-miR-548m	0	0	1	1	1	1	ASUN	asunder, spermatogenesis regulator homolog (Drosphila)
hsa-miR-548m	0	0	1	0	1	1	ERBB2IP	erbb2 interacting protein
hsa-miR-548m	1	0	1	1	1	1	CALN1	calneuron 1
hsa-miR-548m	1	0	1	1	1	1	DCLRE1B	DNA cross-link repair 1B
hsa-miR-548m	1	0	1	1	1	1	CPEB1	cytoplasmic polyadenylation element binding protein 1
hsa-miR-548m	0	0	1	1	1	1	FCRLA	Fc receptor-like A
hsa-miR-548m	0	0	1	1	0	0	TTTY7	testis-specific transcript, Y-linked 7 (non-protein coding)
hsa-miR-548m	0	0	1	1	1	1	RERG	RAS-like, estrogen-regulated, growth inhibitor
hsa-miR-548m	1	0	1	1	1	1	CALU	calumenin
hsa-miR-548m	0	0	1	1	1	1	SLC6A15	solute carrier family 6 (neutral amino acid transporter), member 15
hsa-miR-548m	1	0	1	1	1	1	CASD1	CAS1 domain containing 1
hsa-miR-548m	1	0	1	1	1	1	LARP4	La ribonucleoprotein domain family, member 4
hsa-miR-548m	0	0	1	0	0	0	NBPF10	neuroblastoma breakpoint family, member 10
hsa-miR-548m	0	0	1	1	1	1	WBP2NL	WBP2 N-terminal like
hsa-miR-548m	0	0	1	1	1	1	OLFM3	olfactomedin 3
hsa-miR-548m	1	0	1	1	1	1	MAGI1	membrane associated guanylate kinase, WW and PDZ domain containing 1
hsa-miR-548m	0	0	1	1	1	1	SPSB1	splA/ryanodine receptor domain and SOCS box containing 1
hsa-miR-548m	1	0	1	1	1	1	NTRK2	neurotrophic tyrosine kinase, receptor, type 2
hsa-miR-548m	0	0	1	0	0	0	RMST	rhabdomyosarcoma 2 associated transcript (non-protein coding)
hsa-miR-548m	1	0	1	1	0	0	XRRA1	X-ray radiation resistance associated 1
hsa-miR-548m	1	0	1	1	0	0	SEPT8	septin 8
hsa-miR-548m	1	0	1	0	1	1	PPP1R12A	protein phosphatase 1, regulatory subunit 12A
hsa-miR-548m	0	0	1	1	1	1	LGI1	leucine-rich, glioma inactivated 1
hsa-miR-548m	1	0	1	1	1	1	WAPAL	wings apart-like homolog (Drosophila)
hsa-miR-548m	0	0	1	1	1	1	CARD8	caspase recruitment domain family, member 8
hsa-miR-548m	0	0	1	1	1	1	CHODL	chondrolectin
hsa-miR-548m	0	0	1	1	0	0	LSMD1	LSM domain containing 1
hsa-miR-548m	1	0	1	1	1	1	PTBP2	polypyrimidine tract binding protein 2
hsa-miR-548m	1	0	1	0	1	1	IL1RAP	interleukin 1 receptor accessory protein
hsa-miR-548m	1	0	1	1	1	1	GPR64	G protein-coupled receptor 64
hsa-miR-548m	1	0	1	1	1	1	AFF2	AF4/FMR2 family, member 2
hsa-miR-548m	1	0	1	0	1	1	DICER1	dicer 1, ribonuclease type III
hsa-miR-548m	0	0	1	1	1	1	GNAS	GNAS complex locus
hsa-miR-548m	1	0	1	0	1	1	CACNA1C	calcium channel, voltage-dependent, L type, alpha 1C subunit
hsa-miR-548m	0	0	1	1	1	1	MTHFR	methylenetetrahydrofolate reductase (NAD(P)H)
hsa-miR-548m	0	0	1	1	0	0	SERGEF	secretion regulating guanine nucleotide exchange factor
hsa-miR-548m	1	0	1	1	1	1	SUCO	SUN domain containing ossification factor
hsa-miR-548m	0	0	1	1	1	1	TCFL5	transcription factor-like 5 (basic helix-loop-helix)
hsa-miR-548m	1	0	1	1	1	1	ILF3	interleukin enhancer binding factor 3, 90kDa
hsa-miR-548m	0	0	1	0	0	0	CACNA2D3	calcium channel, voltage-dependent, alpha 2/delta subunit 3
hsa-miR-548m	1	0	1	1	1	1	PALM2	paralemmin 2
hsa-miR-548m	0	0	1	0	1	1	SRPK1	SRSF protein kinase 1
hsa-miR-548m	1	0	1	1	1	1	PDE1B	phosphodiesterase 1B, calmodulin-dependent
hsa-miR-548m	1	0	1	1	1	1	NFYA	nuclear transcription factor Y, alpha
hsa-miR-548m	1	0	1	1	1	1	NRXN3	neurexin 3
hsa-miR-548m	0	0	1	1	1	1	CSPP1	centrosome and spindle pole associated protein 1
hsa-miR-548m	0	0	1	1	0	0	NHLRC2	NHL repeat containing 2
hsa-miR-548m	1	0	1	0	1	1	NFAT5	nuclear factor of activated T-cells 5, tonicity-responsive
hsa-miR-548m	0	0	1	0	0	0	TUG1	taurine upregulated 1 (non-protein coding)
hsa-miR-548m	0	0	1	1	1	1	BANK1	B-cell scaffold protein with ankyrin repeats 1
hsa-miR-548m	1	0	1	1	1	1	ZC3H7A	zinc finger CCCH-type containing 7A
hsa-miR-548m	1	0	1	1	1	1	MEIS2	Meis homeobox 2
hsa-miR-548m	0	0	1	1	1	1	STOX2	storkhead box 2
hsa-miR-548m	1	0	1	1	1	1	RIC8B	resistance to inhibitors of cholinesterase 8 homolog B (C. elegans)
hsa-miR-548m	1	0	1	1	1	1	EIF2C1	eukaryotic translation initiation factor 2C, 1
hsa-miR-548m	1	0	1	1	1	1	PTBP3	polypyrimidine tract binding protein 3
hsa-miR-548m	1	0	1	1	1	1	SLC38A2	solute carrier family 38, member 2
hsa-miR-548m	1	0	1	1	1	1	ARMC8	armadillo repeat containing 8
hsa-miR-548m	1	0	1	1	0	0	SMUG1	single-strand-selective monofunctional uracil-DNA glycosylase 1
hsa-miR-548m	0	0	1	1	1	1	LRIF1	ligand dependent nuclear receptor interacting factor 1
hsa-miR-548m	0	0	1	1	0	0	PARP2	poly (ADP-ribose) polymerase 2
hsa-miR-548m	1	0	1	1	1	1	MYEF2	myelin expression factor 2
hsa-miR-548m	1	0	1	1	1	1	ACER3	alkaline ceramidase 3
hsa-miR-548m	1	0	1	1	1	1	KLHDC8B	kelch domain containing 8B
hsa-miR-548m	0	0	1	1	1	1	FAM175A	family with sequence similarity 175, member A
hsa-miR-548m	1	0	1	1	1	1	RIC3	resistance to inhibitors of cholinesterase 3 homolog (C. elegans)
hsa-miR-548m	1	0	1	1	1	1	C12orf23	chromosome 12 open reading frame 23
hsa-miR-548m	0	0	1	1	1	1	SNCAIP	synuclein, alpha interacting protein
hsa-miR-548m	0	0	1	1	0	0	MTBP	Mdm2, transformed 3T3 cell double minute 2, p53 binding protein (mouse) binding protein, 104kDa
hsa-miR-548m	1	0	1	0	1	1	LIN28A	lin-28 homolog A (C. elegans)
hsa-miR-548m	0	0	1	1	1	1	DEPDC1	DEP domain containing 1
hsa-miR-548m	1	0	1	0	0	0	ZNRF3	zinc and ring finger 3
hsa-miR-548m	0	0	1	0	0	0	DUXAP10	double homeobox A pseudogene 10
hsa-miR-548m	1	0	1	1	1	1	S100PBP	S100P binding protein
hsa-miR-548m	1	0	1	0	1	1	DCAF17	DDB1 and CUL4 associated factor 17
hsa-miR-548m	0	0	1	1	1	1	TTC23	tetratricopeptide repeat domain 23
hsa-miR-548m	1	0	1	0	1	1	UBP1	upstream binding protein 1 (LBP-1a)
hsa-miR-548m	0	0	1	1	1	1	C5orf42	chromosome 5 open reading frame 42
hsa-miR-548m	1	0	1	1	1	1	SRP72	signal recognition particle 72kDa
hsa-miR-548m	1	0	1	1	1	1	MARCH8	membrane-associated ring finger (C3HC4) 8, E3 ubiquitin protein ligase
hsa-miR-548m	1	0	1	1	1	1	PHF20L1	PHD finger protein 20-like 1
hsa-miR-548m	0	0	1	0	0	0	LOC284561	uncharacterized LOC284561
hsa-miR-548m	1	0	1	1	1	1	RAB11FIP5	RAB11 family interacting protein 5 (class I)
hsa-miR-548m	0	0	1	0	1	1	FLJ14186	uncharacterized LOC401149
hsa-miR-548m	0	0	1	0	0	0	LOC286059	tumor necrosis factor receptor superfamily, member 10d, decoy with truncated death domain pseudogene
hsa-miR-548m	1	0	1	0	1	1	ATP2B1	ATPase, Ca++ transporting, plasma membrane 1
hsa-miR-548m	1	0	1	1	1	1	SLC35A3	solute carrier family 35 (UDP-N-acetylglucosamine (UDP-GlcNAc) transporter), member A3
hsa-miR-548m	0	0	1	1	1	1	EP400	E1A binding protein p400
hsa-miR-548m	1	0	1	0	1	1	MYO5B	myosin VB
hsa-miR-548m	0	0	1	0	1	1	ATXN1L	ataxin 1-like
hsa-miR-548m	1	0	1	1	1	1	TNRC6A	trinucleotide repeat containing 6A
hsa-miR-548m	1	0	1	1	1	1	NAA30	N(alpha)-acetyltransferase 30, NatC catalytic subunit
hsa-miR-548m	1	0	1	0	1	1	ZCCHC3	zinc finger, CCHC domain containing 3
hsa-miR-548m	1	0	1	1	0	0	MAGI3	membrane associated guanylate kinase, WW and PDZ domain containing 3
hsa-miR-548m	0	0	1	1	0	0	EXOC6B	exocyst complex component 6B
hsa-miR-548m	1	0	1	1	1	1	DCAF8	DDB1 and CUL4 associated factor 8
hsa-miR-548m	1	0	1	0	1	1	TOX3	TOX high mobility group box family member 3
hsa-miR-548m	0	0	1	0	0	0	LOC729852	uncharacterized LOC729852
hsa-miR-548m	1	0	1	1	1	1	LRP4	low density lipoprotein receptor-related protein 4
hsa-miR-548m	0	0	1	1	1	1	GPBP1L1	GC-rich promoter binding protein 1-like 1
hsa-miR-548m	1	0	1	1	1	1	FOXP1	forkhead box P1
hsa-miR-548m	0	0	1	1	1	1	KDM2B	lysine (K)-specific demethylase 2B
hsa-miR-548m	0	0	1	1	0	0	FAM48A	family with sequence similarity 48, member A
hsa-miR-548m	1	0	1	0	1	1	ATP10D	ATPase, class V, type 10D
hsa-miR-548m	0	0	1	0	1	1	TWSG1	twisted gastrulation homolog 1 (Drosophila)
hsa-miR-548m	0	0	1	1	1	1	NETO2	neuropilin (NRP) and tolloid (TLL)-like 2
hsa-miR-548m	1	0	1	1	1	1	SLC38A1	solute carrier family 38, member 1
hsa-miR-548m	1	0	1	1	1	1	GPD2	glycerol-3-phosphate dehydrogenase 2 (mitochondrial)
hsa-miR-548m	1	0	1	1	1	1	SLAIN1	SLAIN motif family, member 1
hsa-miR-548m	0	0	1	0	0	0	FAM185A	family with sequence similarity 185, member A
hsa-miR-548m	1	0	1	0	1	1	AP1G1	adaptor-related protein complex 1, gamma 1 subunit
hsa-miR-548m	1	0	1	1	1	1	DLGAP4	discs, large (Drosophila) homolog-associated protein 4
hsa-miR-548m	0	0	1	1	1	1	GABRP	gamma-aminobutyric acid (GABA) A receptor, pi
hsa-miR-548m	0	0	1	1	1	1	BCAR3	breast cancer anti-estrogen resistance 3
hsa-miR-548m	1	0	1	1	1	1	SULF1	sulfatase 1
hsa-miR-548m	1	0	1	1	1	1	FRMD6	FERM domain containing 6
hsa-miR-548m	0	0	1	0	0	0	LOC157273	uncharacterized LOC157273
hsa-miR-548m	1	0	1	1	1	1	DIXDC1	DIX domain containing 1
hsa-miR-548m	1	0	1	1	1	1	TMTC1	transmembrane and tetratricopeptide repeat containing 1
hsa-miR-548m	1	0	1	1	1	1	ZNF664	zinc finger protein 664
hsa-miR-548m	0	0	1	1	0	0	BEAN1	brain expressed, associated with NEDD4, 1
hsa-miR-548m	1	0	1	1	1	1	RAI2	retinoic acid induced 2
hsa-miR-548m	1	0	1	1	1	1	PUM1	pumilio homolog 1 (Drosophila)
hsa-miR-548m	0	0	1	1	1	1	PTCD2	pentatricopeptide repeat domain 2
hsa-miR-548m	1	0	1	0	1	1	RABGEF1	RAB guanine nucleotide exchange factor (GEF) 1
hsa-miR-548m	0	0	1	0	0	0	MAGI1-IT1	MAGI1 intronic transcript 1 (non-protein coding)
hsa-miR-548m	1	0	1	1	1	1	TPM3	tropomyosin 3
hsa-miR-548m	0	0	1	1	1	1	XAF1	XIAP associated factor 1
hsa-miR-548m	1	0	1	1	1	1	TLE4	transducin-like enhancer of split 4 (E(sp1) homolog, Drosophila)
hsa-miR-548m	0	0	1	0	0	0	FLJ32742	uncharacterized locus FLJ32742
hsa-miR-548m	0	0	1	1	0	0	NXF2	nuclear RNA export factor 2
hsa-miR-548m	1	0	1	0	1	1	PLEKHA1	pleckstrin homology domain containing, family A (phosphoinositide binding specific) member 1
hsa-miR-548m	0	0	1	1	1	1	ELL3	elongation factor RNA polymerase II-like 3
hsa-miR-548m	1	0	1	1	1	1	ARID4B	AT rich interactive domain 4B (RBP1-like)
hsa-miR-548m	1	0	1	1	0	0	TCF7	transcription factor 7 (T-cell specific, HMG-box)
hsa-miR-548m	0	0	1	0	0	0	LOC285074	anaphase promoting complex subunit 1 pseudogene
hsa-miR-548m	1	0	1	1	1	1	ANKRD49	ankyrin repeat domain 49
hsa-miR-548m	0	0	1	1	1	1	ZNF385B	zinc finger protein 385B
hsa-miR-548m	0	0	1	1	1	1	ZBTB26	zinc finger and BTB domain containing 26
hsa-miR-548m	0	0	1	0	1	1	UHMK1	U2AF homology motif (UHM) kinase 1
hsa-miR-548m	1	0	1	1	1	1	EIF2AK4	eukaryotic translation initiation factor 2 alpha kinase 4
hsa-miR-548m	1	0	1	1	1	1	CNOT4	CCR4-NOT transcription complex, subunit 4
hsa-miR-548m	1	0	1	0	1	1	TPBG	trophoblast glycoprotein
hsa-miR-548m	1	0	1	1	1	1	KCTD6	potassium channel tetramerisation domain containing 6
hsa-miR-548m	0	0	1	0	1	1	CADM1	cell adhesion molecule 1
hsa-miR-548m	0	0	1	1	1	1	MTR	5-methyltetrahydrofolate-homocysteine methyltransferase
hsa-miR-548m	1	0	1	1	1	1	STXBP5	syntaxin binding protein 5 (tomosyn)
hsa-miR-548m	0	0	1	0	1	1	TMSB15B	thymosin beta 15B
hsa-miR-548m	0	0	1	1	0	0	CTNNBL1	catenin, beta like 1
hsa-miR-548m	1	0	1	1	1	1	ARIH2	ariadne homolog 2 (Drosophila)
hsa-miR-548m	1	0	1	1	1	1	EGR2	early growth response 2
hsa-miR-548m	1	0	1	1	1	1	FRY	furry homolog (Drosophila)
hsa-miR-548m	1	0	1	1	1	1	AMMECR1	Alport syndrome, mental retardation, midface hypoplasia and elliptocytosis chromosomal region gene 1
hsa-miR-548m	0	0	1	0	0	0	FLJ34208	uncharacterized LOC401106
hsa-miR-548m	0	0	1	1	1	1	USP8	ubiquitin specific peptidase 8
hsa-miR-548m	1	0	1	1	1	1	FBXW2	F-box and WD repeat domain containing 2
hsa-miR-548m	1	0	1	1	1	1	TSN	translin
hsa-miR-548m	1	0	1	0	1	1	TEF	thyrotrophic embryonic factor
hsa-miR-548m	1	0	1	1	1	1	EPN2	epsin 2
hsa-miR-548m	1	0	1	1	1	1	IVNS1ABP	influenza virus NS1A binding protein
hsa-miR-548m	0	0	1	0	1	1	SSPN	sarcospan
hsa-miR-548m	0	0	1	1	1	1	NCBP2	nuclear cap binding protein subunit 2, 20kDa
hsa-miR-548m	1	0	1	1	1	1	GCFC1	GC-rich sequence DNA-binding factor 1
hsa-miR-548m	0	0	1	1	1	1	TMPRSS11D	transmembrane protease, serine 11D
hsa-miR-548m	0	0	1	1	1	1	SLC16A1	solute carrier family 16, member 1 (monocarboxylic acid transporter 1)
hsa-miR-548m	0	0	1	1	1	1	MARC1	mitochondrial amidoxime reducing component 1
hsa-miR-548m	1	0	1	1	1	1	SSH3	slingshot homolog 3 (Drosophila)
hsa-miR-548m	1	0	1	0	1	1	KIAA1456	KIAA1456
hsa-miR-548m	0	0	1	1	1	1	SPOCK1	sparc/osteonectin, cwcv and kazal-like domains proteoglycan (testican) 1
hsa-miR-548m	1	0	1	0	1	1	GATAD2B	GATA zinc finger domain containing 2B
hsa-miR-548m	0	0	1	0	0	0	LINC00340	long intergenic non-protein coding RNA 340
hsa-miR-548m	0	0	1	0	1	1	AGBL4	ATP/GTP binding protein-like 4
hsa-miR-548m	0	0	1	1	1	1	TMEM170A	transmembrane protein 170A
hsa-miR-548m	1	0	1	1	1	1	CPNE8	copine VIII
hsa-miR-548m	0	0	1	1	0	0	ZNF185	zinc finger protein 185 (LIM domain)
hsa-miR-548m	0	0	1	1	1	1	MYO6	myosin VI
hsa-miR-548m	0	0	1	1	1	1	GPR115	G protein-coupled receptor 115
hsa-miR-548m	1	0	1	1	1	1	CNEP1R1	CTD nuclear envelope phosphatase 1 regulatory subunit 1
hsa-miR-548m	1	0	1	0	1	1	FAM129A	family with sequence similarity 129, member A
hsa-miR-548m	0	0	1	0	0	0	LOC100129858	uncharacterized LOC100129858
hsa-miR-548m	1	0	1	1	1	1	FAM222B	family with sequence similarity 222, member B
hsa-miR-548m	1	0	1	1	1	1	SPATS2	spermatogenesis associated, serine-rich 2
hsa-miR-548m	0	0	1	0	0	0	LOC730101	uncharacterized LOC730101
hsa-miR-548m	1	0	1	1	1	1	CS	citrate synthase
hsa-miR-548m	0	0	1	1	0	0	KDM5D	lysine (K)-specific demethylase 5D
hsa-miR-548m	0	0	1	0	0	0	CCDC150	coiled-coil domain containing 150
hsa-miR-548m	0	0	1	0	0	0	OTUD1	OTU domain containing 1
hsa-miR-548m	0	0	1	0	0	0	METTL21CP1	methyltransferase like 21C pseudogene 1
hsa-miR-548m	0	0	1	0	0	0	C1orf204	chromosome 1 open reading frame 204
hsa-miR-548m	0	0	1	0	0	0	LOC643327	uncharacterized LOC643327
hsa-miR-548m	1	0	1	0	1	1	THRB	thyroid hormone receptor, beta
hsa-miR-548m	1	0	1	1	1	1	SLC30A6	solute carrier family 30 (zinc transporter), member 6
hsa-miR-548m	1	0	1	1	1	1	CA12	carbonic anhydrase XII
hsa-miR-548m	0	0	1	1	1	1	PPP1R27	protein phosphatase 1, regulatory subunit 27
hsa-miR-548m	0	0	1	1	1	1	EXTL2	exostoses (multiple)-like 2
hsa-miR-548m	0	0	1	1	1	1	GBAS	glioblastoma amplified sequence
hsa-miR-548m	1	0	1	1	1	1	KL	klotho
hsa-miR-548m	0	0	1	0	0	0	DNAJB8-AS1	DNAJB8 antisense RNA 1
hsa-miR-548m	0	0	1	0	0	0	LINC00293	long intergenic non-protein coding RNA 293
hsa-miR-548m	0	0	1	1	1	1	TEX35	testis expressed 35
hsa-miR-548m	1	0	1	0	1	1	PRKAR1A	protein kinase, cAMP-dependent, regulatory, type I, alpha
hsa-miR-548m	1	0	1	1	1	1	IGSF11	immunoglobulin superfamily, member 11
hsa-miR-548m	0	0	1	1	1	1	ATP9B	ATPase, class II, type 9B
hsa-miR-548m	0	0	1	0	1	1	TNFAIP8	tumor necrosis factor, alpha-induced protein 8
hsa-miR-548m	1	0	1	1	1	1	LARP1B	La ribonucleoprotein domain family, member 1B
hsa-miR-548m	0	0	1	1	1	1	ASB5	ankyrin repeat and SOCS box containing 5
hsa-miR-548m	0	0	1	0	0	0	GTF2IP1	general transcription factor IIi, pseudogene 1
hsa-miR-548m	0	0	1	1	1	1	SLFN13	schlafen family member 13
hsa-miR-548m	0	0	1	1	0	0	KIAA0146	KIAA0146
hsa-miR-548m	0	0	1	1	1	1	ZNF182	zinc finger protein 182
hsa-miR-548m	0	0	1	1	1	1	ZDHHC15	zinc finger, DHHC-type containing 15
hsa-miR-548m	0	0	1	1	0	0	HDAC6	histone deacetylase 6
hsa-miR-548m	0	0	1	1	1	1	FRMPD2	FERM and PDZ domain containing 2
hsa-miR-548m	1	0	1	1	1	1	PLEKHH1	pleckstrin homology domain containing, family H (with MyTH4 domain) member 1
hsa-miR-548m	1	0	1	1	1	1	MDGA2	MAM domain containing glycosylphosphatidylinositol anchor 2
hsa-miR-548m	0	0	1	1	1	1	PCBP2	poly(rC) binding protein 2
hsa-miR-548m	0	0	1	0	0	0	TMPRSS11BNL	TMPRSS11B N terminal-like
hsa-miR-548m	0	0	1	1	1	1	FAM19A2	family with sequence similarity 19 (chemokine (C-C motif)-like), member A2
hsa-miR-548m	0	0	1	0	0	0	LOC650368	asparagine-linked glycosylation 1-like pseudogene
hsa-miR-548m	0	0	1	1	1	1	NOSTRIN	nitric oxide synthase trafficker
hsa-miR-548m	1	0	1	1	1	1	SH2D4B	SH2 domain containing 4B
hsa-miR-548m	0	0	1	1	1	1	TMEM17	transmembrane protein 17
hsa-miR-548m	1	0	1	1	1	1	ESYT2	extended synaptotagmin-like protein 2
hsa-miR-548m	1	0	1	0	1	1	DCUN1D4	DCN1, defective in cullin neddylation 1, domain containing 4 (S. cerevisiae)
hsa-miR-548m	1	0	1	1	1	1	VPS54	vacuolar protein sorting 54 homolog (S. cerevisiae)
hsa-miR-548m	0	0	1	0	1	1	NAIP	NLR family, apoptosis inhibitory protein
hsa-miR-548m	0	0	1	0	0	0	EML6	echinoderm microtubule associated protein like 6
hsa-miR-548m	1	0	1	1	1	1	RRP1B	ribosomal RNA processing 1 homolog B (S. cerevisiae)
hsa-miR-548m	0	0	1	1	1	1	IDS	iduronate 2-sulfatase
hsa-miR-548m	0	0	1	1	1	1	C2orf91	chromosome 2 open reading frame 91
hsa-miR-548m	0	0	1	1	1	1	C3orf67	chromosome 3 open reading frame 67
hsa-miR-548m	0	0	1	1	1	1	ATPBD4	ATP binding domain 4
hsa-miR-548m	1	0	1	1	1	1	SGIP1	SH3-domain GRB2-like (endophilin) interacting protein 1
hsa-miR-548m	1	0	1	1	1	1	SEPHS1	selenophosphate synthetase 1
hsa-miR-548m	1	0	1	1	1	1	ATXN7	ataxin 7
hsa-miR-548m	1	0	1	1	0	0	GXYLT1	glucoside xylosyltransferase 1
hsa-miR-548m	0	0	1	1	0	0	GABRA2	gamma-aminobutyric acid (GABA) A receptor, alpha 2
hsa-miR-548m	1	0	1	1	1	1	KPNA1	karyopherin alpha 1 (importin alpha 5)
hsa-miR-548m	1	0	1	0	1	1	HECTD1	HECT domain containing E3 ubiquitin protein ligase 1
hsa-miR-548m	0	0	1	1	1	1	RBM46	RNA binding motif protein 46
hsa-miR-548m	1	0	1	1	1	1	LIN9	lin-9 homolog (C. elegans)
hsa-miR-548m	1	0	1	1	1	1	PLEKHB2	pleckstrin homology domain containing, family B (evectins) member 2
hsa-miR-548m	1	0	1	1	1	1	SACM1L	SAC1 suppressor of actin mutations 1-like (yeast)
hsa-miR-548m	1	0	1	1	1	1	ATP1A2	ATPase, Na+/K+ transporting, alpha 2 polypeptide
hsa-miR-548m	1	0	1	1	1	1	DMXL1	Dmx-like 1
hsa-miR-548m	1	0	1	1	1	1	LRIG1	leucine-rich repeats and immunoglobulin-like domains 1
hsa-miR-548m	1	0	1	1	1	1	DLG2	discs, large homolog 2 (Drosophila)
hsa-miR-548m	1	0	1	1	0	0	LRRC73	leucine rich repeat containing 73
hsa-miR-548m	0	0	1	1	1	1	SPICE1	spindle and centriole associated protein 1
hsa-miR-548m	1	0	1	1	1	1	C14orf28	chromosome 14 open reading frame 28
hsa-miR-548m	1	0	1	1	1	1	CLIP1	CAP-GLY domain containing linker protein 1
hsa-miR-548m	0	0	1	0	0	0	RPL23AP53	ribosomal protein L23a pseudogene 53
hsa-miR-548m	1	0	1	1	1	1	MKRN1	makorin ring finger protein 1
hsa-miR-548m	1	0	1	1	1	1	MFSD6	major facilitator superfamily domain containing 6
hsa-miR-548m	0	0	1	1	1	1	RALGAPA2	Ral GTPase activating protein, alpha subunit 2 (catalytic)
hsa-miR-548m	1	0	1	1	1	1	UBE3C	ubiquitin protein ligase E3C
hsa-miR-548m	1	0	1	1	1	1	PHF17	PHD finger protein 17
hsa-miR-548m	0	0	1	1	1	1	ERI2	ERI1 exoribonuclease family member 2
hsa-miR-548m	1	0	1	1	1	1	KANK4	KN motif and ankyrin repeat domains 4
hsa-miR-548m	0	0	1	1	0	0	SLC22A25	solute carrier family 22, member 25
hsa-miR-548m	1	0	1	1	1	1	CXorf23	chromosome X open reading frame 23
hsa-miR-548m	1	0	1	1	1	1	ZFP106	zinc finger protein 106 homolog (mouse)
hsa-miR-548m	0	0	1	1	0	0	BPIFB1	BPI fold containing family B, member 1
hsa-miR-548m	1	0	1	0	1	1	CAPRIN1	cell cycle associated protein 1
hsa-miR-548m	0	0	1	1	1	1	MCU	mitochondrial calcium uniporter
hsa-miR-548m	1	0	1	1	0	0	SRCAP	Snf2-related CREBBP activator protein
hsa-miR-548m	0	0	1	0	0	0	FAM205B	transmembrane protein C9orf144B pseudogene
hsa-miR-548m	1	0	1	1	1	1	KALRN	kalirin, RhoGEF kinase
hsa-miR-548m	1	0	1	1	1	1	FRYL	FRY-like
hsa-miR-548m	1	0	1	0	1	1	NBR1	neighbor of BRCA1 gene 1
hsa-miR-548m	1	0	1	1	1	1	TXNRD1	thioredoxin reductase 1
hsa-miR-548m	1	0	1	0	0	0	SP7	Sp7 transcription factor
hsa-miR-548m	1	0	1	1	1	1	BCAT1	branched chain amino-acid transaminase 1, cytosolic
hsa-miR-548m	1	0	1	1	1	1	PUS7	pseudouridylate synthase 7 homolog (S. cerevisiae)
hsa-miR-548m	1	0	1	1	1	1	SDCBP	syndecan binding protein (syntenin)
hsa-miR-548m	0	0	1	1	1	1	ZNF662	zinc finger protein 662
hsa-miR-548m	0	0	1	0	0	0	FLJ26245	uncharacterized LOC400533
hsa-miR-548m	1	0	1	1	1	1	CD200	CD200 molecule
hsa-miR-548m	0	0	1	1	1	1	G3BP1	GTPase activating protein (SH3 domain) binding protein 1
hsa-miR-548m	1	0	1	0	1	1	GPC6	glypican 6
hsa-miR-548m	0	0	1	1	1	1	SQRDL	sulfide quinone reductase-like (yeast)
hsa-miR-548m	1	0	1	0	1	1	ESRRG	estrogen-related receptor gamma
hsa-miR-548m	0	0	1	0	1	1	GALNT13	UDP-N-acetyl-alpha-D-galactosamine:polypeptide N-acetylgalactosaminyltransferase 13 (GalNAc-T13)
hsa-miR-548m	0	0	1	1	1	1	TMC5	transmembrane channel-like 5
hsa-miR-548m	1	0	1	1	0	0	FOXP2	forkhead box P2
hsa-miR-548m	1	0	1	1	1	1	WTAP	Wilms tumor 1 associated protein
hsa-miR-548m	1	0	1	1	1	1	MAP2K4	mitogen-activated protein kinase kinase 4
hsa-miR-548m	1	0	1	0	1	1	ZNF607	zinc finger protein 607
hsa-miR-548m	0	0	1	1	1	1	NR4A1	nuclear receptor subfamily 4, group A, member 1
hsa-miR-548m	1	0	1	1	1	1	TAP2	transporter 2, ATP-binding cassette, sub-family B (MDR/TAP)
hsa-miR-548m	1	0	1	1	1	1	CYYR1	cysteine/tyrosine-rich 1
hsa-miR-548m	1	0	1	0	1	1	SEZ6	seizure related 6 homolog (mouse)
hsa-miR-548m	0	0	1	1	1	1	C5orf28	chromosome 5 open reading frame 28
hsa-miR-548m	1	0	1	1	1	1	LUC7L3	LUC7-like 3 (S. cerevisiae)
hsa-miR-548m	0	0	1	1	1	1	RNF135	ring finger protein 135
hsa-miR-548m	1	0	1	1	1	1	NOVA1	neuro-oncological ventral antigen 1
hsa-miR-548m	0	0	1	1	1	1	PTPN20B	protein tyrosine phosphatase, non-receptor type 20B
hsa-miR-548m	0	0	1	1	1	1	PTPN20A	protein tyrosine phosphatase, non-receptor type 20A
hsa-miR-548m	0	0	1	1	0	0	NEK7	NIMA (never in mitosis gene a)-related kinase 7
hsa-miR-548m	1	0	1	1	1	1	TAB2	TGF-beta activated kinase 1/MAP3K7 binding protein 2
hsa-miR-548m	0	0	1	1	0	0	TBC1D10B	TBC1 domain family, member 10B
hsa-miR-548m	0	0	1	0	0	0	POM121L8P	POM121 transmembrane nucleoporin-like 8 pseudogene
hsa-miR-548m	1	0	1	1	1	1	ARF6	ADP-ribosylation factor 6
hsa-miR-548m	0	0	1	1	1	1	ARIH1	ariadne homolog, ubiquitin-conjugating enzyme E2 binding protein, 1 (Drosophila)
hsa-miR-548m	0	0	1	1	1	1	ZNF280D	zinc finger protein 280D
hsa-miR-548m	1	0	1	1	1	1	SLC25A36	solute carrier family 25 (pyrimidine nucleotide carrier ), member 36
hsa-miR-548m	0	0	1	1	1	1	MIOS	missing oocyte, meiosis regulator, homolog (Drosophila)
hsa-miR-548m	0	0	1	1	1	1	RHOT1	ras homolog family member T1
hsa-miR-548m	1	0	1	1	1	1	KIAA1033	KIAA1033
hsa-miR-548m	1	0	1	0	1	1	GPR85	G protein-coupled receptor 85
hsa-miR-548m	1	0	1	0	1	1	CEP170	centrosomal protein 170kDa
hsa-miR-548m	1	0	1	1	1	1	EZR	ezrin
hsa-miR-548m	1	0	1	1	1	1	NEO1	neogenin 1
hsa-miR-548m	0	0	1	1	1	1	SLC30A10	solute carrier family 30, member 10
hsa-miR-548m	1	0	1	0	1	1	GRIN3A	glutamate receptor, ionotropic, N-methyl-D-aspartate 3A
hsa-miR-548m	1	0	1	1	1	1	SLC30A8	solute carrier family 30 (zinc transporter), member 8
hsa-miR-548m	1	0	1	1	1	1	YTHDF3	YTH domain family, member 3
hsa-miR-548m	1	0	1	1	1	1	DENND1B	DENN/MADD domain containing 1B
hsa-miR-548m	1	0	1	1	1	1	LIMCH1	LIM and calponin homology domains 1
hsa-miR-548m	1	0	1	1	1	1	MIER1	mesoderm induction early response 1 homolog (Xenopus laevis)
hsa-miR-548m	1	0	1	1	1	1	MTMR10	myotubularin related protein 10
hsa-miR-548m	0	0	1	1	1	1	BEND7	BEN domain containing 7
hsa-miR-548m	0	0	1	0	0	0	ZNF720	zinc finger protein 720
hsa-miR-548m	1	0	1	1	1	1	FAM126B	family with sequence similarity 126, member B
hsa-miR-548m	1	0	1	0	1	1	HNRNPA3	heterogeneous nuclear ribonucleoprotein A3
hsa-miR-548m	0	0	1	1	1	1	EGFLAM	EGF-like, fibronectin type III and laminin G domains
hsa-miR-548m	0	0	1	1	1	1	SRSF11	serine/arginine-rich splicing factor 11
hsa-miR-548m	1	0	1	1	0	0	USP24	ubiquitin specific peptidase 24
hsa-miR-548m	0	0	1	1	1	1	C10orf57	chromosome 10 open reading frame 57
hsa-miR-548m	0	0	1	1	1	1	YAP1	Yes-associated protein 1
hsa-miR-548m	0	0	1	1	1	1	U2AF1	U2 small nuclear RNA auxiliary factor 1
hsa-miR-548m	0	0	1	1	1	1	VIT	vitrin
hsa-miR-548m	1	0	1	1	0	0	PTAR1	protein prenyltransferase alpha subunit repeat containing 1
hsa-miR-548m	1	0	1	1	1	1	TMEM182	transmembrane protein 182
hsa-miR-548m	0	0	1	1	1	1	USPL1	ubiquitin specific peptidase like 1
hsa-miR-548m	1	0	1	1	1	1	FBXO3	F-box protein 3
hsa-miR-548m	1	0	1	1	1	1	EHMT1	euchromatic histone-lysine N-methyltransferase 1
hsa-miR-548m	0	0	1	1	1	1	TMEM138	transmembrane protein 138
hsa-miR-548m	0	0	1	1	1	1	CCDC132	coiled-coil domain containing 132
hsa-miR-548m	1	0	1	1	1	1	LPP	LIM domain containing preferred translocation partner in lipoma
hsa-miR-548m	1	0	1	0	1	1	MEF2C	myocyte enhancer factor 2C
hsa-miR-548m	0	0	1	1	0	0	TMEM116	transmembrane protein 116
hsa-miR-548m	0	0	1	1	0	0	LRRN2	leucine rich repeat neuronal 2
hsa-miR-548m	1	0	1	1	1	1	NRP1	neuropilin 1
hsa-miR-548m	0	0	1	1	1	1	SOAT1	sterol O-acyltransferase 1
hsa-miR-548m	1	0	1	0	1	1	CNOT7	CCR4-NOT transcription complex, subunit 7
hsa-miR-548m	1	0	1	1	1	1	ANP32E	acidic (leucine-rich) nuclear phosphoprotein 32 family, member E
hsa-miR-548m	1	0	1	1	1	1	PRPF38B	PRP38 pre-mRNA processing factor 38 (yeast) domain containing B
hsa-miR-548m	1	0	1	1	1	1	ANKRD12	ankyrin repeat domain 12
hsa-miR-548m	1	0	1	0	1	1	JAZF1	JAZF zinc finger 1
hsa-miR-548m	0	0	1	1	1	1	TEX2	testis expressed 2
hsa-miR-548m	0	0	1	1	1	1	C8orf34	chromosome 8 open reading frame 34
hsa-miR-548m	1	0	1	1	1	1	RICTOR	RPTOR independent companion of MTOR, complex 2
hsa-miR-548m	1	0	1	1	1	1	BOLL	bol, boule-like (Drosophila)
hsa-miR-548m	1	0	1	1	1	1	FAM76B	family with sequence similarity 76, member B
hsa-miR-548m	1	0	1	0	1	1	PATL1	protein associated with topoisomerase II homolog 1 (yeast)
hsa-miR-548m	1	0	1	1	0	0	LRRC58	leucine rich repeat containing 58
hsa-miR-548m	1	0	1	1	1	1	PPP3CA	protein phosphatase 3, catalytic subunit, alpha isozyme
hsa-miR-548m	1	0	1	1	1	1	WDR44	WD repeat domain 44
hsa-miR-548m	0	0	1	1	1	1	TMEM130	transmembrane protein 130
hsa-miR-548m	1	0	1	1	1	1	RNF38	ring finger protein 38
hsa-miR-548m	1	0	1	1	1	1	IKZF2	IKAROS family zinc finger 2 (Helios)
hsa-miR-548m	1	0	1	1	1	1	CLIC5	chloride intracellular channel 5
hsa-miR-548m	1	0	1	1	1	1	RCAN2	regulator of calcineurin 2
hsa-miR-548m	0	0	1	1	1	1	CRB1	crumbs homolog 1 (Drosophila)
hsa-miR-548m	0	0	1	1	1	1	GPRASP1	G protein-coupled receptor associated sorting protein 1
hsa-miR-548m	1	0	1	1	1	1	MIPOL1	mirror-image polydactyly 1
hsa-miR-548m	0	0	1	1	0	0	DHRS4	dehydrogenase/reductase (SDR family) member 4
hsa-miR-548m	1	0	1	1	1	1	RFFL	ring finger and FYVE-like domain containing E3 ubiquitin protein ligase
hsa-miR-548m	1	0	1	1	1	1	CNRIP1	cannabinoid receptor interacting protein 1
hsa-miR-548m	0	0	1	1	1	1	SHPRH	SNF2 histone linker PHD RING helicase, E3 ubiquitin protein ligase
hsa-miR-548m	0	0	1	1	1	1	DNAJB14	DnaJ (Hsp40) homolog, subfamily B, member 14
hsa-miR-548m	1	0	1	1	1	1	WDR26	WD repeat domain 26
hsa-miR-548m	1	0	1	1	1	1	BCL11A	B-cell CLL/lymphoma 11A (zinc finger protein)
hsa-miR-548m	0	0	1	1	1	1	SUGT1	SGT1, suppressor of G2 allele of SKP1 (S. cerevisiae)
hsa-miR-548m	1	0	1	1	1	1	RAI14	retinoic acid induced 14
hsa-miR-548m	1	0	1	1	1	1	TAB3	TGF-beta activated kinase 1/MAP3K7 binding protein 3
hsa-miR-548m	0	0	1	1	1	1	GCOM1	GRINL1A complex locus 1
hsa-miR-548m	1	0	1	1	1	1	CAMTA1	calmodulin binding transcription activator 1
hsa-miR-548m	1	0	1	1	1	1	IQGAP2	IQ motif containing GTPase activating protein 2
hsa-miR-548m	1	0	1	0	1	1	DLEU7	deleted in lymphocytic leukemia, 7
hsa-miR-548m	0	0	1	1	0	0	LRRC28	leucine rich repeat containing 28
hsa-miR-548m	0	0	1	1	1	1	KDELC2	KDEL (Lys-Asp-Glu-Leu) containing 2
hsa-miR-548m	0	0	1	1	1	1	TNFRSF19	tumor necrosis factor receptor superfamily, member 19
hsa-miR-548m	1	0	1	1	1	1	SSX2IP	synovial sarcoma, X breakpoint 2 interacting protein
hsa-miR-548m	1	0	1	0	1	1	ANKRD28	ankyrin repeat domain 28
hsa-miR-548m	0	0	1	1	1	1	RPTN	repetin
hsa-miR-548m	0	0	1	1	1	1	TNFSF15	tumor necrosis factor (ligand) superfamily, member 15
hsa-miR-548m	1	0	1	1	1	1	SP3	Sp3 transcription factor
hsa-miR-548m	0	0	1	1	1	1	TIMM50	translocase of inner mitochondrial membrane 50 homolog (S. cerevisiae)
hsa-miR-548m	0	0	1	1	1	1	PTPLA	protein tyrosine phosphatase-like (proline instead of catalytic arginine), member A
hsa-miR-548m	1	0	1	0	1	1	NHS	Nance-Horan syndrome (congenital cataracts and dental anomalies)
hsa-miR-548m	0	0	1	1	1	1	POTEG	POTE ankyrin domain family, member G
hsa-miR-548m	0	0	1	1	1	1	HMBOX1	homeobox containing 1
hsa-miR-548m	1	0	1	1	1	1	ANKRD11	ankyrin repeat domain 11
hsa-miR-548m	1	0	1	1	1	1	MECP2	methyl CpG binding protein 2 (Rett syndrome)
hsa-miR-548m	1	0	1	1	1	1	RBM24	RNA binding motif protein 24
hsa-miR-548m	0	0	1	0	1	1	RAB18	RAB18, member RAS oncogene family
hsa-miR-548m	1	0	1	1	1	1	BHLHE41	basic helix-loop-helix family, member e41
hsa-miR-548m	1	0	1	1	1	1	EYA2	eyes absent homolog 2 (Drosophila)
hsa-miR-548m	1	0	1	1	1	1	RIF1	RAP1 interacting factor homolog (yeast)
hsa-miR-548m	1	0	1	1	1	1	PFKFB4	6-phosphofructo-2-kinase/fructose-2,6-biphosphatase 4
hsa-miR-548m	1	0	1	1	1	1	NTNG1	netrin G1
hsa-miR-548m	1	0	1	1	1	1	QKI	QKI, KH domain containing, RNA binding
hsa-miR-548m	1	0	1	1	1	1	CD109	CD109 molecule
hsa-miR-548m	0	0	1	0	0	0	MAST4	microtubule associated serine/threonine kinase family member 4
hsa-miR-548m	1	0	1	1	1	1	SAT1	spermidine/spermine N1-acetyltransferase 1
hsa-miR-548m	1	0	1	1	1	1	PCDH11X	protocadherin 11 X-linked
hsa-miR-548m	1	0	1	1	0	0	TRPC3	transient receptor potential cation channel, subfamily C, member 3
hsa-miR-548m	1	0	1	1	0	0	TAF4B	TAF4b RNA polymerase II, TATA box binding protein (TBP)-associated factor, 105kDa
hsa-miR-548m	1	0	1	1	1	1	AMOT	angiomotin
hsa-miR-548m	1	0	1	0	1	1	FAM46A	family with sequence similarity 46, member A
hsa-miR-548m	0	0	1	1	1	1	PAFAH1B2	platelet-activating factor acetylhydrolase 1b, catalytic subunit 2 (30kDa)
hsa-miR-548m	0	0	1	1	1	1	PTDSS1	phosphatidylserine synthase 1
hsa-miR-548m	0	0	1	1	1	1	MRRF	mitochondrial ribosome recycling factor
hsa-miR-548m	1	0	1	1	1	1	RIMS3	regulating synaptic membrane exocytosis 3
hsa-miR-548m	1	0	1	0	1	1	DCAF10	DDB1 and CUL4 associated factor 10
hsa-miR-548m	1	0	1	1	1	1	GABPB1	GA binding protein transcription factor, beta subunit 1
hsa-miR-548m	1	0	1	1	1	1	TSEN34	tRNA splicing endonuclease 34 homolog (S. cerevisiae)
hsa-miR-548m	1	0	1	0	1	1	CGGBP1	CGG triplet repeat binding protein 1
hsa-miR-548m	1	0	1	1	1	1	U2SURP	U2 snRNP-associated SURP domain containing
hsa-miR-548m	0	0	1	1	0	0	RBM14	RNA binding motif protein 14
hsa-miR-548m	1	0	1	1	1	1	TRIM39	tripartite motif containing 39
hsa-miR-548m	1	0	1	0	1	1	DDX3X	DEAD (Asp-Glu-Ala-Asp) box polypeptide 3, X-linked
hsa-miR-548m	1	0	1	1	1	1	CALM1	calmodulin 1 (phosphorylase kinase, delta)
hsa-miR-548m	1	0	1	1	1	1	CTSC	cathepsin C
hsa-miR-548m	1	0	1	1	1	1	SHOX2	short stature homeobox 2
hsa-miR-548m	1	0	1	0	1	1	TMEM39A	transmembrane protein 39A
hsa-miR-548m	1	0	1	1	1	1	GRIA2	glutamate receptor, ionotropic, AMPA 2
hsa-miR-548m	1	0	1	1	1	1	TRIM2	tripartite motif containing 2
hsa-miR-548m	0	0	1	1	1	1	GNL3L	guanine nucleotide binding protein-like 3 (nucleolar)-like
hsa-miR-548m	1	0	1	1	1	1	OTUD5	OTU domain containing 5
hsa-miR-548m	1	0	1	1	1	1	SUPT16H	suppressor of Ty 16 homolog (S. cerevisiae)
hsa-miR-548m	0	0	1	1	1	1	CPNE5	copine V
hsa-miR-548m	1	0	1	1	1	1	IDH1	isocitrate dehydrogenase 1 (NADP+), soluble
hsa-miR-548m	0	0	1	1	1	1	PLXDC2	plexin domain containing 2
hsa-miR-548m	1	0	1	1	0	0	ZMYM3	zinc finger, MYM-type 3
hsa-miR-548m	0	0	1	1	1	1	PCNP	PEST proteolytic signal containing nuclear protein
hsa-miR-548m	1	0	1	1	1	1	CAP1	CAP, adenylate cyclase-associated protein 1 (yeast)
hsa-miR-548m	0	0	1	1	0	0	C9orf11	chromosome 9 open reading frame 11
hsa-miR-548m	0	0	1	1	0	0	CIR1	corepressor interacting with RBPJ, 1
hsa-miR-548m	1	0	1	1	1	1	PAPOLA	poly(A) polymerase alpha
hsa-miR-548m	1	0	1	1	1	1	ZNF512	zinc finger protein 512
hsa-miR-548m	0	0	1	1	0	0	MAST2	microtubule associated serine/threonine kinase 2
hsa-miR-548m	1	0	1	1	1	1	TMEM9B	TMEM9 domain family, member B
hsa-miR-548m	1	0	1	0	1	1	NR1D2	nuclear receptor subfamily 1, group D, member 2
hsa-miR-548m	1	0	1	1	1	1	SCAMP1	secretory carrier membrane protein 1
hsa-miR-548m	0	0	1	1	1	1	MARC2	mitochondrial amidoxime reducing component 2
hsa-miR-548m	1	0	1	0	1	1	CYBRD1	cytochrome b reductase 1
hsa-miR-548m	1	0	1	1	0	0	USP53	ubiquitin specific peptidase 53
hsa-miR-548m	0	0	1	1	0	0	ZDHHC6	zinc finger, DHHC-type containing 6
hsa-miR-548m	0	0	1	1	0	0	ZBTB32	zinc finger and BTB domain containing 32
hsa-miR-548m	0	0	1	1	1	1	RDH11	retinol dehydrogenase 11 (all-trans/9-cis/11-cis)
hsa-miR-548m	0	0	1	1	1	1	GLIPR2	GLI pathogenesis-related 2
hsa-miR-548m	0	0	1	0	0	0	FAM200B	family with sequence similarity 200, member B
hsa-miR-548m	0	0	1	1	1	1	TMEM67	transmembrane protein 67
hsa-miR-548m	1	0	1	1	1	1	ARHGEF9	Cdc42 guanine nucleotide exchange factor (GEF) 9
hsa-miR-548m	1	0	1	1	1	1	SUZ12	suppressor of zeste 12 homolog (Drosophila)
hsa-miR-548m	0	0	1	1	1	1	ZNF273	zinc finger protein 273
hsa-miR-548m	0	0	1	1	1	1	PRMT3	protein arginine methyltransferase 3
hsa-miR-548m	0	0	1	0	1	1	CD99P1	CD99 molecule pseudogene 1
hsa-miR-548m	0	0	1	1	0	0	PTPMT1	protein tyrosine phosphatase, mitochondrial 1
hsa-miR-548m	1	0	1	0	1	1	BTF3L4	basic transcription factor 3-like 4
hsa-miR-548m	1	0	1	1	1	1	TM9SF4	transmembrane 9 superfamily protein member 4
hsa-miR-548m	0	0	1	1	1	1	SNX17	sorting nexin 17
hsa-miR-548m	1	0	1	1	1	1	C11orf30	chromosome 11 open reading frame 30
hsa-miR-548m	0	0	1	0	0	0	LOC728196	uncharacterized LOC728196
hsa-miR-548m	1	0	1	1	1	1	SPOCK2	sparc/osteonectin, cwcv and kazal-like domains proteoglycan (testican) 2
hsa-miR-548m	1	0	1	0	1	1	CDK19	cyclin-dependent kinase 19
hsa-miR-548m	0	0	1	0	0	0	SNX29P2	sorting nexin 29 pseudogene 2
hsa-miR-548m	0	0	1	1	0	0	MEI1	meiosis inhibitor 1
hsa-miR-548m	0	0	1	1	1	1	FAM221A	family with sequence similarity 221, member A
hsa-miR-548m	1	0	1	1	1	1	EPHA4	EPH receptor A4
hsa-miR-548m	0	0	1	1	1	1	MAP2	microtubule-associated protein 2
hsa-miR-548m	0	0	1	1	1	1	CCPG1	cell cycle progression 1
hsa-miR-548m	1	0	1	1	1	1	APPL2	adaptor protein, phosphotyrosine interaction, PH domain and leucine zipper containing 2
hsa-miR-548m	1	0	1	1	1	1	B3GNT5	UDP-GlcNAc:betaGal beta-1,3-N-acetylglucosaminyltransferase 5
hsa-miR-548m	1	0	1	1	1	1	SENP6	SUMO1/sentrin specific peptidase 6
hsa-miR-548m	1	0	1	1	1	1	ANGPT1	angiopoietin 1
hsa-miR-548m	0	0	1	1	0	0	TOMM5	translocase of outer mitochondrial membrane 5 homolog (yeast)
hsa-miR-548m	1	0	1	1	1	1	PPARGC1A	peroxisome proliferator-activated receptor gamma, coactivator 1 alpha
hsa-miR-548m	0	0	1	1	1	1	TFAM	transcription factor A, mitochondrial
hsa-miR-548m	0	0	1	1	1	1	CD48	CD48 molecule
hsa-miR-548m	0	0	1	1	1	1	C10orf118	chromosome 10 open reading frame 118
hsa-miR-548m	0	0	1	1	1	1	PIP5K1B	phosphatidylinositol-4-phosphate 5-kinase, type I, beta
hsa-miR-548m	0	0	1	1	0	0	AGBL3	ATP/GTP binding protein-like 3
hsa-miR-548m	1	0	1	1	1	1	ELAVL2	ELAV (embryonic lethal, abnormal vision, Drosophila)-like 2 (Hu antigen B)
hsa-miR-548m	1	0	1	1	1	1	ZNF518A	zinc finger protein 518A
hsa-miR-548m	0	0	1	1	0	0	FREM1	FRAS1 related extracellular matrix 1
hsa-miR-548m	0	0	1	1	0	0	C7orf57	chromosome 7 open reading frame 57
hsa-miR-548m	0	0	1	0	0	0	LOC729307	uncharacterized LOC729307
hsa-miR-548m	1	0	1	1	1	1	PITPNB	phosphatidylinositol transfer protein, beta
hsa-miR-548m	1	0	1	1	1	1	RCOR3	REST corepressor 3
hsa-miR-548m	0	0	1	0	0	0	LOC387647	patched domain containing 3 pseudogene
hsa-miR-548m	1	0	1	1	1	1	C5orf25	chromosome 5 open reading frame 25
hsa-miR-548m	0	0	1	0	0	0	LOC643648	uncharacterized LOC643648
hsa-miR-548m	1	0	1	1	1	1	PMAIP1	phorbol-12-myristate-13-acetate-induced protein 1
hsa-miR-548m	1	0	1	1	1	1	DFFB	DNA fragmentation factor, 40kDa, beta polypeptide (caspase-activated DNase)
hsa-miR-548m	0	0	1	1	1	1	C5orf22	chromosome 5 open reading frame 22
hsa-miR-548m	1	0	1	1	1	1	PPP2R2C	protein phosphatase 2, regulatory subunit B, gamma
hsa-miR-548m	1	0	1	1	1	1	SECISBP2L	SECIS binding protein 2-like
hsa-miR-548m	1	0	1	1	1	1	SIRPA	signal-regulatory protein alpha
hsa-miR-548m	0	0	1	0	0	0	WDFY3-AS2	WDFY3 antisense RNA 2
hsa-miR-548m	0	0	1	0	0	0	BCAS3	breast carcinoma amplified sequence 3
hsa-miR-548m	1	0	1	1	0	0	FAM150B	family with sequence similarity 150, member B
hsa-miR-548m	1	0	1	1	1	1	SEPT2	septin 2
hsa-miR-548m	1	0	1	1	1	1	HMGCR	3-hydroxy-3-methylglutaryl-CoA reductase
hsa-miR-548m	1	0	1	1	1	1	PCDHA5	protocadherin alpha 5
hsa-miR-548m	0	0	1	1	1	1	HEXA	hexosaminidase A (alpha polypeptide)
hsa-miR-548m	1	0	1	1	1	1	TTC26	tetratricopeptide repeat domain 26
hsa-miR-548m	0	0	1	0	0	0	FAM66C	family with sequence similarity 66, member C
hsa-miR-548m	1	0	1	0	1	1	DDX3Y	DEAD (Asp-Glu-Ala-Asp) box polypeptide 3, Y-linked
hsa-miR-548m	0	0	1	0	1	1	GPR155	G protein-coupled receptor 155
hsa-miR-548m	1	0	1	1	1	1	NKAIN2	Na+/K+ transporting ATPase interacting 2
hsa-miR-548m	1	0	1	0	1	1	ATP11A	ATPase, class VI, type 11A
hsa-miR-548m	1	0	1	1	1	1	RAP2C	RAP2C, member of RAS oncogene family
hsa-miR-548m	1	0	1	1	1	1	ZEB2	zinc finger E-box binding homeobox 2
hsa-miR-548m	1	0	1	1	1	1	CTDSPL2	CTD (carboxy-terminal domain, RNA polymerase II, polypeptide A) small phosphatase like 2
hsa-miR-548m	0	0	1	1	1	1	ARHGAP6	Rho GTPase activating protein 6
hsa-miR-548m	0	0	1	1	1	1	CBLN2	cerebellin 2 precursor
hsa-miR-548m	0	0	1	0	0	0	LOC339862	uncharacterized LOC339862
hsa-miR-548m	0	0	1	1	1	1	CLEC12B	C-type lectin domain family 12, member B
hsa-miR-548m	1	0	1	1	1	1	ZNF618	zinc finger protein 618
hsa-miR-548m	1	0	1	1	1	1	IMPACT	Impact homolog (mouse)
hsa-miR-548m	0	0	1	0	0	0	FAM201A	family with sequence similarity 201, member A
hsa-miR-548m	0	0	1	0	0	0	LINC00642	long intergenic non-protein coding RNA 642
hsa-miR-548m	1	0	1	1	1	1	SMG7	smg-7 homolog, nonsense mediated mRNA decay factor (C. elegans)
hsa-miR-548m	1	0	1	1	1	1	MACROD2	MACRO domain containing 2
hsa-miR-548m	0	0	1	1	1	1	FAM171B	family with sequence similarity 171, member B
hsa-miR-548m	1	0	1	1	1	1	ELMO2	engulfment and cell motility 2
hsa-miR-548m	1	0	1	1	1	1	HECTD2	HECT domain containing E3 ubiquitin protein ligase 2
hsa-miR-548m	1	0	1	0	1	1	CLDN12	claudin 12
hsa-miR-548m	1	0	1	0	1	1	NEGR1	neuronal growth regulator 1
hsa-miR-548m	1	0	1	1	1	1	RNMT	RNA (guanine-7-) methyltransferase
hsa-miR-548m	1	0	1	0	1	1	CPEB4	cytoplasmic polyadenylation element binding protein 4
hsa-miR-548m	0	0	1	0	0	0	LOC286184	uncharacterized LOC286184
hsa-miR-548m	1	0	1	0	1	1	YAF2	YY1 associated factor 2
hsa-miR-548m	1	0	1	1	1	1	SOX6	SRY (sex determining region Y)-box 6
hsa-miR-548m	1	0	1	1	1	1	DAAM1	dishevelled associated activator of morphogenesis 1
hsa-miR-548m	1	0	1	1	1	1	GALNT1	UDP-N-acetyl-alpha-D-galactosamine:polypeptide N-acetylgalactosaminyltransferase 1 (GalNAc-T1)
hsa-miR-548m	1	0	1	1	1	1	DPP10	dipeptidyl-peptidase 10 (non-functional)
hsa-miR-548m	1	0	1	0	1	1	CEP44	centrosomal protein 44kDa
hsa-miR-548m	1	0	1	0	1	1	ARID2	AT rich interactive domain 2 (ARID, RFX-like)
hsa-miR-548m	0	0	1	0	0	0	LOC100134868	uncharacterized LOC100134868
hsa-miR-548m	0	0	1	1	0	0	H2AFZ	H2A histone family, member Z
hsa-miR-548m	1	0	1	0	1	1	FBXO22	F-box protein 22
hsa-miR-548m	0	0	1	1	0	0	CCDC152	coiled-coil domain containing 152
hsa-miR-548m	0	0	1	0	0	0	FLJ36000	uncharacterized FLJ36000
hsa-miR-548m	1	0	1	1	1	1	FGFR2	fibroblast growth factor receptor 2
hsa-miR-548m	1	0	1	0	0	0	MSL1	male-specific lethal 1 homolog (Drosophila)
hsa-miR-548m	1	0	1	0	1	1	LPHN3	latrophilin 3
hsa-miR-548m	0	0	1	1	1	1	FAM21C	family with sequence similarity 21, member C
hsa-miR-548m	1	0	1	1	1	1	FOSB	FBJ murine osteosarcoma viral oncogene homolog B
hsa-miR-548m	0	0	1	1	1	1	SCLT1	sodium channel and clathrin linker 1
hsa-miR-548m	1	0	1	1	1	1	BVES	blood vessel epicardial substance
hsa-miR-548m	0	0	1	0	1	1	TSLP	thymic stromal lymphopoietin
hsa-miR-548m	0	0	1	1	1	1	PCMTD2	protein-L-isoaspartate (D-aspartate) O-methyltransferase domain containing 2
hsa-miR-548m	0	0	1	0	0	0	SLC7A11-AS1	SLC7A11 antisense RNA 1
hsa-miR-548m	1	0	1	1	1	1	ARPP21	cAMP-regulated phosphoprotein, 21kDa
hsa-miR-548m	0	0	1	1	0	0	NT5DC4	5'-nucleotidase domain containing 4
hsa-miR-548m	1	0	1	0	1	1	TNFAIP3	tumor necrosis factor, alpha-induced protein 3
hsa-miR-548m	1	0	1	1	1	1	ROCK1	Rho-associated, coiled-coil containing protein kinase 1
hsa-miR-548m	1	0	1	1	1	1	CLOCK	clock homolog (mouse)
hsa-miR-548m	1	0	1	0	1	1	PRKCI	protein kinase C, iota
hsa-miR-548m	1	0	1	1	1	1	FKBP5	FK506 binding protein 5
hsa-miR-548m	0	0	1	0	0	0	LINC00347	long intergenic non-protein coding RNA 347
hsa-miR-548m	0	0	1	0	0	0	DKFZp686O1327	uncharacterized LOC401014
hsa-miR-548m	1	0	1	1	0	0	WNK1	WNK lysine deficient protein kinase 1
hsa-miR-548m	1	0	1	1	1	1	HLTF	helicase-like transcription factor
hsa-miR-548m	0	0	1	0	0	0	LOC728342	uncharacterized LOC728342
hsa-miR-548m	0	0	1	1	1	1	NADKD1	NAD kinase domain containing 1
hsa-miR-548m	1	0	1	1	1	1	MAMDC2	MAM domain containing 2
hsa-miR-548m	0	0	1	1	1	1	MGC57346	uncharacterized LOC401884
hsa-miR-548m	0	0	1	0	0	0	LOC283914	uncharacterized LOC283914
hsa-miR-548m	1	0	1	1	1	1	ZFAND4	zinc finger, AN1-type domain 4
hsa-miR-548m	1	0	1	1	1	1	SENP1	SUMO1/sentrin specific peptidase 1
hsa-miR-548m	1	0	1	1	1	1	SF3B1	splicing factor 3b, subunit 1, 155kDa
hsa-miR-548m	0	0	1	1	0	0	LILRA1	leukocyte immunoglobulin-like receptor, subfamily A (with TM domain), member 1
hsa-miR-548m	0	0	1	0	1	1	IL33	interleukin 33
hsa-miR-548m	0	0	1	0	0	0	LOC348120	uncharacterized LOC348120
hsa-miR-548m	0	0	1	0	1	1	LOC338758	uncharacterized LOC338758
hsa-miR-548m	1	0	1	1	1	1	KIF2A	kinesin heavy chain member 2A
hsa-miR-548m	1	0	1	0	1	1	ZNF800	zinc finger protein 800
hsa-miR-548m	1	0	1	1	0	0	TTC9	tetratricopeptide repeat domain 9
hsa-miR-548m	1	0	1	1	1	1	RTKN2	rhotekin 2
hsa-miR-548m	1	0	1	1	1	1	PTPRG	protein tyrosine phosphatase, receptor type, G
hsa-miR-548m	1	0	1	1	1	1	PELI1	pellino E3 ubiquitin protein ligase 1
hsa-miR-548m	1	0	1	0	1	1	ARHGAP5	Rho GTPase activating protein 5
hsa-miR-548m	0	0	1	0	1	1	ITGA1	integrin, alpha 1
hsa-miR-548m	0	0	1	1	0	0	ENTPD8	ectonucleoside triphosphate diphosphohydrolase 8
hsa-miR-548m	1	0	1	1	1	1	RECK	reversion-inducing-cysteine-rich protein with kazal motifs
hsa-miR-548m	1	0	1	1	1	1	GATA2	GATA binding protein 2
hsa-miR-548m	1	0	1	0	1	1	SMURF2	SMAD specific E3 ubiquitin protein ligase 2
hsa-miR-548m	0	0	1	1	1	1	HLA-DQA1	major histocompatibility complex, class II, DQ alpha 1
hsa-miR-548m	1	0	1	1	1	1	PCGF5	polycomb group ring finger 5
hsa-miR-548m	1	0	1	0	1	1	C14orf43	chromosome 14 open reading frame 43
hsa-miR-548m	1	0	1	1	1	1	RCC2	regulator of chromosome condensation 2
hsa-miR-548m	1	0	1	1	1	1	OLFML2A	olfactomedin-like 2A
hsa-miR-548m	1	0	1	1	1	1	PPP2R5E	protein phosphatase 2, regulatory subunit B', epsilon isoform
hsa-miR-548m	1	0	1	1	1	1	ATP8B4	ATPase, class I, type 8B, member 4
hsa-miR-548m	1	0	1	1	1	1	KLHL28	kelch-like 28 (Drosophila)
hsa-miR-548m	1	0	1	1	1	1	PRRG1	proline rich Gla (G-carboxyglutamic acid) 1
hsa-miR-548m	0	0	1	1	1	1	CDH26	cadherin 26
hsa-miR-548m	1	0	1	1	1	1	SCOC	short coiled-coil protein
hsa-miR-548m	1	0	1	1	1	1	CLK4	CDC-like kinase 4
hsa-miR-548m	0	0	1	0	1	1	ASAP2	ArfGAP with SH3 domain, ankyrin repeat and PH domain 2
hsa-miR-548m	1	0	1	0	1	1	PLEKHH2	pleckstrin homology domain containing, family H (with MyTH4 domain) member 2
hsa-miR-548m	0	0	1	1	1	1	GPATCH2	G patch domain containing 2
hsa-miR-548m	0	0	1	1	1	1	CAMLG	calcium modulating ligand
hsa-miR-548m	1	0	1	1	1	1	ANXA4	annexin A4
hsa-miR-548m	1	0	1	1	1	1	MYLK	myosin light chain kinase
hsa-miR-548m	0	0	1	0	0	0	LOC158435	uncharacterized LOC158435
hsa-miR-548m	0	0	1	1	0	0	PLB1	phospholipase B1
hsa-miR-548m	0	0	1	0	1	1	DDX12P	DEAD/H (Asp-Glu-Ala-Asp/His) box polypeptide 12, pseudogene
hsa-miR-548m	1	0	1	1	1	1	VTCN1	V-set domain containing T cell activation inhibitor 1
hsa-miR-548m	1	0	1	1	1	1	ZNF449	zinc finger protein 449
hsa-miR-548m	1	0	1	1	1	1	VIM	vimentin
hsa-miR-548m	1	0	1	1	1	1	C18orf1	chromosome 18 open reading frame 1
hsa-miR-548m	0	0	1	0	0	0	DPY19L2P1	dpy-19-like 2 pseudogene 1 (C. elegans)
hsa-miR-548m	1	0	1	1	1	1	FAM129B	family with sequence similarity 129, member B
hsa-miR-548m	1	0	1	1	1	1	GRHL1	grainyhead-like 1 (Drosophila)
hsa-miR-548m	1	0	1	1	1	1	CCDC149	coiled-coil domain containing 149
hsa-miR-548m	0	0	1	1	1	1	KCTD18	potassium channel tetramerisation domain containing 18
hsa-miR-548m	1	0	1	1	0	0	SNX18	sorting nexin 18
hsa-miR-548m	0	0	1	0	0	0	PCP4L1	Purkinje cell protein 4 like 1
hsa-miR-548m	1	0	1	0	0	0	TNRC18	trinucleotide repeat containing 18
hsa-miR-548m	0	0	1	0	0	0	PABPC1P2	poly(A) binding protein, cytoplasmic 1 pseudogene 2
hsa-miR-548m	1	0	1	1	1	1	SLC26A7	solute carrier family 26, member 7
hsa-miR-548m	0	0	1	0	0	0	SPDYE8P	speedy homolog E8 (Xenopus laevis), pseudogene
hsa-miR-548m	1	0	1	1	0	0	CHTOP	chromatin target of PRMT1
hsa-miR-548m	1	0	1	1	1	1	SCAF8	SR-related CTD-associated factor 8
hsa-miR-548m	1	0	1	1	1	1	AHR	aryl hydrocarbon receptor
hsa-miR-548m	0	0	1	1	1	1	TSPAN8	tetraspanin 8
hsa-miR-548m	1	0	1	0	1	1	TGFBR1	transforming growth factor, beta receptor 1
hsa-miR-548m	1	0	1	0	1	1	MAP4K3	mitogen-activated protein kinase kinase kinase kinase 3
hsa-miR-548m	1	0	1	0	1	1	TMEM194A	transmembrane protein 194A
hsa-miR-548m	0	0	1	1	1	1	FRMPDP2	FERM and PDZ domain containing 2 pseudogene 2
hsa-miR-548m	0	0	1	1	1	1	FRMPD2P1	FERM and PDZ domain containing 2 pseudogene 1
hsa-miR-548m	0	0	1	0	0	0	LOC440416	uncharacterized LOC440416
hsa-miR-548m	0	0	1	1	0	0	EBNA1BP2	EBNA1 binding protein 2
hsa-miR-548m	1	0	1	1	1	1	WNT5A	wingless-type MMTV integration site family, member 5A
hsa-miR-548m	0	0	1	1	1	1	IRX5	iroquois homeobox 5
hsa-miR-548m	1	0	1	0	1	1	AMMECR1L	AMME chromosomal region gene 1-like
hsa-miR-548m	0	0	1	0	0	0	TBC1D25	TBC1 domain family, member 25
hsa-miR-548m	0	0	1	1	1	1	HOXD8	homeobox D8
hsa-miR-548m	1	0	1	1	1	1	ZMYND11	zinc finger, MYND-type containing 11
hsa-miR-548m	0	0	1	1	1	1	KCTD3	potassium channel tetramerisation domain containing 3
hsa-miR-548m	0	0	1	0	0	0	FRG1B	FSHD region gene 1 family, member B
hsa-miR-548m	0	0	1	1	0	0	DARC	Duffy blood group, chemokine receptor
hsa-miR-548m	1	0	1	1	1	1	ST8SIA2	ST8 alpha-N-acetyl-neuraminide alpha-2,8-sialyltransferase 2
hsa-miR-548m	1	0	1	1	1	1	ACVR2B	activin A receptor, type IIB
hsa-miR-548m	0	0	1	1	1	1	COL8A2	collagen, type VIII, alpha 2
hsa-miR-548m	1	0	1	1	1	1	GTF2I	general transcription factor IIi
hsa-miR-548m	1	0	1	0	1	1	ARPP19	cAMP-regulated phosphoprotein, 19kDa
hsa-miR-548m	0	0	1	1	1	1	ZNF365	zinc finger protein 365
hsa-miR-548m	1	0	1	0	1	1	MYBL1	v-myb myeloblastosis viral oncogene homolog (avian)-like 1
hsa-miR-548m	0	0	1	0	0	0	CCDC163P	coiled-coil domain containing 163, pseudogene
hsa-miR-548m	1	0	1	1	1	1	ARFIP1	ADP-ribosylation factor interacting protein 1
hsa-miR-548m	1	0	1	0	1	1	VANGL2	vang-like 2 (van gogh, Drosophila)
hsa-miR-548m	1	0	1	0	1	1	CPEB2	cytoplasmic polyadenylation element binding protein 2
hsa-miR-548m	0	0	1	0	0	0	C5orf49	chromosome 5 open reading frame 49
hsa-miR-548m	0	0	1	1	1	1	CCDC126	coiled-coil domain containing 126
hsa-miR-548m	1	0	1	1	1	1	GABRB2	gamma-aminobutyric acid (GABA) A receptor, beta 2
hsa-miR-548m	1	0	1	1	1	1	PTPRD	protein tyrosine phosphatase, receptor type, D
hsa-miR-548m	1	0	1	1	1	1	PNISR	PNN-interacting serine/arginine-rich protein
hsa-miR-548m	0	0	1	1	1	1	TTN	titin
hsa-miR-548m	0	0	1	1	1	1	DET1	de-etiolated homolog 1 (Arabidopsis)
hsa-miR-548m	1	0	1	0	1	1	DNAJC6	DnaJ (Hsp40) homolog, subfamily C, member 6
hsa-miR-548m	1	0	1	1	1	1	CERS6	ceramide synthase 6
hsa-miR-548m	1	0	1	0	1	1	BTBD3	BTB (POZ) domain containing 3
hsa-miR-548m	1	0	1	0	1	1	KIF5C	kinesin family member 5C
hsa-miR-548m	1	0	1	1	1	1	TET2	tet methylcytosine dioxygenase 2
hsa-miR-548m	0	0	1	1	1	1	RASAL2	RAS protein activator like 2
hsa-miR-548m	1	0	1	0	1	1	SETD7	SET domain containing (lysine methyltransferase) 7
hsa-miR-548m	1	0	1	1	1	1	UBE4A	ubiquitination factor E4A
hsa-miR-548m	1	0	1	1	1	1	SLK	STE20-like kinase
hsa-miR-548m	1	0	1	1	1	1	NR3C2	nuclear receptor subfamily 3, group C, member 2
hsa-miR-548m	0	0	1	1	0	0	PRAMEF10	PRAME family member 10
hsa-miR-548m	1	0	1	0	1	1	ROBO1	roundabout, axon guidance receptor, homolog 1 (Drosophila)
hsa-miR-548m	0	0	1	1	1	1	LRCH1	leucine-rich repeats and calponin homology (CH) domain containing 1
hsa-miR-548m	0	0	1	1	1	1	FSHB	follicle stimulating hormone, beta polypeptide
hsa-miR-548m	0	0	1	1	0	0	C14orf178	chromosome 14 open reading frame 178
hsa-miR-548m	1	0	1	1	1	1	SHANK2	SH3 and multiple ankyrin repeat domains 2
hsa-miR-548m	0	0	1	1	0	0	C20orf152	chromosome 20 open reading frame 152
hsa-miR-548m	1	0	1	1	1	1	ST18	suppression of tumorigenicity 18 (breast carcinoma) (zinc finger protein)
hsa-miR-548m	0	0	1	1	1	1	NAA35	N(alpha)-acetyltransferase 35, NatC auxiliary subunit
hsa-miR-548m	0	0	1	0	1	1	NWD1	NACHT and WD repeat domain containing 1
hsa-miR-548m	1	0	1	1	1	1	PIKFYVE	phosphoinositide kinase, FYVE finger containing
hsa-miR-548m	0	0	1	1	1	1	SLC7A13	solute carrier family 7 (anionic amino acid transporter), member 13
hsa-miR-548m	0	0	1	0	1	1	GOLGA8G	golgin A8 family, member G
hsa-miR-548m	1	0	1	0	1	1	LRCH2	leucine-rich repeats and calponin homology (CH) domain containing 2
hsa-miR-548m	1	0	1	0	1	1	CAMSAP2	calmodulin regulated spectrin-associated protein family, member 2
hsa-miR-548m	0	0	1	0	0	0	LINC00314	long intergenic non-protein coding RNA 314
hsa-miR-548m	1	0	1	1	1	1	MEGF11	multiple EGF-like-domains 11
hsa-miR-548m	1	0	1	1	1	1	JMJD1C	jumonji domain containing 1C
hsa-miR-548m	0	0	1	1	0	0	USP19	ubiquitin specific peptidase 19
hsa-miR-548m	0	0	1	1	1	1	SLC22A23	solute carrier family 22, member 23
hsa-miR-548m	0	0	1	1	1	1	ABCA8	ATP-binding cassette, sub-family A (ABC1), member 8
hsa-miR-548m	0	0	1	0	0	0	FAM225B	family with sequence similarity 225, member B (non-protein coding)
hsa-miR-548m	1	0	1	1	1	1	TDRD5	tudor domain containing 5
hsa-miR-548m	1	0	1	1	1	1	PTPRZ1	protein tyrosine phosphatase, receptor-type, Z polypeptide 1
hsa-miR-548m	1	0	1	0	1	1	FAM196A	family with sequence similarity 196, member A
hsa-miR-548m	0	0	1	1	0	0	TCHH	trichohyalin
hsa-miR-548m	0	0	1	1	1	1	PRKAR2A	protein kinase, cAMP-dependent, regulatory, type II, alpha
hsa-miR-548m	0	0	1	1	0	0	CHMP4A	charged multivesicular body protein 4A
hsa-miR-548m	0	0	1	1	0	0	SYNE3	spectrin repeat containing, nuclear envelope family member 3
hsa-miR-548m	0	0	1	0	0	0	TMED8	transmembrane emp24 protein transport domain containing 8
hsa-miR-548m	1	0	1	1	1	1	BTBD7	BTB (POZ) domain containing 7
hsa-miR-548m	0	0	1	1	1	1	RAD17	RAD17 homolog (S. pombe)
hsa-miR-548m	0	0	1	0	0	0	ADCY10P1	adenylate cyclase 10 (soluble) pseudogene 1
hsa-miR-548m	0	0	1	0	0	0	DKFZp686D0853	uncharacterized LOC401613
hsa-miR-548m	1	0	1	1	1	1	JPH1	junctophilin 1
hsa-miR-548m	1	0	1	1	1	1	RBL2	retinoblastoma-like 2 (p130)
hsa-miR-548m	1	0	1	1	1	1	RAB7A	RAB7A, member RAS oncogene family
hsa-miR-548m	0	0	1	0	1	1	AP1S2	adaptor-related protein complex 1, sigma 2 subunit
hsa-miR-548m	1	0	1	1	1	1	MIER3	mesoderm induction early response 1, family member 3
hsa-miR-548m	0	0	1	0	0	0	RGPD4	RANBP2-like and GRIP domain containing 4
hsa-miR-548m	0	0	1	1	0	0	CCDC171	coiled-coil domain containing 171
hsa-miR-548m	0	0	1	1	1	1	NUP54	nucleoporin 54kDa
hsa-miR-548m	1	0	1	1	1	1	SLC35F1	solute carrier family 35, member F1
hsa-miR-548m	1	0	1	1	1	1	TJP1	tight junction protein 1
hsa-miR-548m	0	0	1	1	1	1	COL6A3	collagen, type VI, alpha 3
hsa-miR-548m	1	0	1	0	1	1	FAM73A	family with sequence similarity 73, member A
hsa-miR-548m	1	0	1	1	1	1	RORB	RAR-related orphan receptor B
hsa-miR-548m	1	0	1	1	1	1	SH3BP4	SH3-domain binding protein 4
hsa-miR-548m	1	0	1	1	1	1	HMGB1	high mobility group box 1
hsa-miR-548m	0	0	1	0	1	1	THAP6	THAP domain containing 6
hsa-miR-548m	1	0	1	1	1	1	STARD13	StAR-related lipid transfer (START) domain containing 13
hsa-miR-548m	1	0	1	0	1	1	EML4	echinoderm microtubule associated protein like 4
hsa-miR-548m	1	0	1	1	1	1	GABPA	GA binding protein transcription factor, alpha subunit 60kDa
hsa-miR-548m	0	0	1	0	1	1	ANKRD36	ankyrin repeat domain 36
hsa-miR-548m	0	0	1	1	1	1	HTR2A	5-hydroxytryptamine (serotonin) receptor 2A, G protein-coupled
hsa-miR-548m	0	0	1	1	1	1	ARMCX3	armadillo repeat containing, X-linked 3
hsa-miR-548m	1	0	1	0	1	1	VPS36	vacuolar protein sorting 36 homolog (S. cerevisiae)
hsa-miR-548m	0	0	1	1	1	1	TMEM48	transmembrane protein 48
hsa-miR-548m	1	0	1	1	1	1	HBS1L	HBS1-like (S. cerevisiae)
hsa-miR-548m	1	0	1	1	1	1	DDAH1	dimethylarginine dimethylaminohydrolase 1
hsa-miR-548m	0	0	1	1	1	1	CCNT2	cyclin T2
hsa-miR-548m	1	0	1	0	0	0	CTSB	cathepsin B
hsa-miR-548m	0	0	1	0	1	1	TYW5	tRNA-yW synthesizing protein 5
hsa-miR-548m	1	0	1	1	1	1	NFIB	nuclear factor I/B
hsa-miR-548m	1	0	1	1	1	1	BCLAF1	BCL2-associated transcription factor 1
hsa-miR-548m	1	0	1	1	1	1	NAV1	neuron navigator 1
hsa-miR-548m	1	0	1	0	1	1	IGF2BP3	insulin-like growth factor 2 mRNA binding protein 3
hsa-miR-548m	0	0	1	0	0	0	LOC286299	uncharacterized LOC286299
hsa-miR-548m	1	0	1	1	1	1	C5orf24	chromosome 5 open reading frame 24
hsa-miR-548m	1	0	1	1	1	1	PTER	phosphotriesterase related
hsa-miR-548m	0	0	1	1	1	1	RBM20	RNA binding motif protein 20
hsa-miR-548m	1	0	1	1	1	1	TMEM135	transmembrane protein 135
hsa-miR-548m	1	0	1	1	1	1	FAM179B	family with sequence similarity 179, member B
hsa-miR-548m	0	0	1	1	1	1	SSFA2	sperm specific antigen 2
hsa-miR-548m	1	0	1	0	1	1	TBL1XR1	transducin (beta)-like 1 X-linked receptor 1
hsa-miR-548m	1	0	1	1	1	1	LYST	lysosomal trafficking regulator
hsa-miR-548m	1	0	1	1	1	1	CREB3L2	cAMP responsive element binding protein 3-like 2
hsa-miR-548m	1	0	1	1	1	1	SIN3A	SIN3 transcription regulator homolog A (yeast)
hsa-miR-548m	0	0	1	0	1	1	GINS3	GINS complex subunit 3 (Psf3 homolog)
hsa-miR-548m	0	0	1	1	0	0	HNRNPAB	heterogeneous nuclear ribonucleoprotein A/B
hsa-miR-548m	0	0	1	1	0	0	AHSG	alpha-2-HS-glycoprotein
hsa-miR-548m	0	0	1	1	0	0	PPT2	palmitoyl-protein thioesterase 2
hsa-miR-548m	1	0	1	0	1	1	RNF144A	ring finger protein 144A
hsa-miR-548m	1	0	1	1	1	1	CLU	clusterin
hsa-miR-548m	1	0	1	0	1	1	STX6	syntaxin 6
hsa-miR-548m	0	0	1	1	0	0	SPATA6	spermatogenesis associated 6
hsa-miR-548m	1	0	1	1	1	1	ARF1	ADP-ribosylation factor 1
hsa-miR-548m	0	0	1	1	1	1	KIAA0141	KIAA0141
hsa-miR-548m	1	0	1	1	1	1	RSBN1L	round spermatid basic protein 1-like
hsa-miR-548m	0	0	1	0	0	0	FLJ30838	uncharacterized LOC400955
hsa-miR-548m	0	0	1	1	0	0	RNPS1	RNA binding protein S1, serine-rich domain
hsa-miR-548m	1	0	1	1	1	1	EIF4B	eukaryotic translation initiation factor 4B
hsa-miR-548m	0	0	1	1	0	0	TMEM62	transmembrane protein 62
hsa-miR-548m	0	0	1	1	1	1	APH1A	anterior pharynx defective 1 homolog A (C. elegans)
hsa-miR-548m	1	0	1	1	1	1	DDX19B	DEAD (Asp-Glu-Ala-Asp) box polypeptide 19B
hsa-miR-548m	1	0	1	1	1	1	ATAT1	alpha tubulin acetyltransferase 1
hsa-miR-548m	1	0	1	1	1	1	CLDN11	claudin 11
hsa-miR-548m	0	0	1	1	1	1	METTL21C	methyltransferase like 21C
hsa-miR-548m	1	0	1	1	1	1	SLC35D2	solute carrier family 35, member D2
hsa-miR-548m	1	1	1	1	0	0	EFNA3	ephrin-A3
hsa-miR-548m	1	0	1	1	1	1	SETD8	SET domain containing (lysine methyltransferase) 8
hsa-miR-548m	0	0	1	1	1	1	HSPB8	heat shock 22kDa protein 8
hsa-miR-548m	0	0	1	1	1	1	TULP3	tubby like protein 3
hsa-miR-548m	0	0	1	1	1	1	TASP1	taspase, threonine aspartase, 1
hsa-miR-548m	1	0	1	1	1	1	CAAP1	caspase activity and apoptosis inhibitor 1
hsa-miR-548m	0	0	1	1	1	1	BLZF1	basic leucine zipper nuclear factor 1
hsa-miR-548m	0	0	1	0	0	0	NBLA00301	Nbla00301
hsa-miR-548m	0	0	1	1	1	1	PPP1R1C	protein phosphatase 1, regulatory (inhibitor) subunit 1C
hsa-miR-548m	1	0	1	1	1	1	SMARCE1	SWI/SNF related, matrix associated, actin dependent regulator of chromatin, subfamily e, member 1
hsa-miR-548m	0	0	1	1	0	0	MYL6	myosin, light chain 6, alkali, smooth muscle and non-muscle
hsa-miR-548m	1	0	1	1	1	1	CHTF8	CTF8, chromosome transmission fidelity factor 8 homolog (S. cerevisiae)
hsa-miR-548m	0	0	1	0	0	0	LOC643837	uncharacterized LOC643837
hsa-miR-548m	1	0	1	1	1	1	NTM	neurotrimin
hsa-miR-548m	0	0	1	1	1	1	IFNGR2	interferon gamma receptor 2 (interferon gamma transducer 1)
hsa-miR-548m	1	0	1	1	1	1	COPZ1	coatomer protein complex, subunit zeta 1
hsa-miR-548m	1	0	1	1	1	1	TRA2B	transformer 2 beta homolog (Drosophila)
hsa-miR-548m	0	0	1	1	1	1	GGPS1	geranylgeranyl diphosphate synthase 1
hsa-miR-548m	0	0	1	1	1	1	CCDC91	coiled-coil domain containing 91
hsa-miR-548m	0	0	1	1	0	0	ZFYVE19	zinc finger, FYVE domain containing 19
hsa-miR-548m	0	0	1	1	1	1	DCTD	dCMP deaminase
hsa-miR-548m	0	0	1	1	1	1	ACTR3B	ARP3 actin-related protein 3 homolog B (yeast)
hsa-miR-548m	1	0	1	0	1	1	RPS6KB1	ribosomal protein S6 kinase, 70kDa, polypeptide 1
hsa-miR-548m	0	0	1	1	1	1	CD36	CD36 molecule (thrombospondin receptor)
hsa-miR-548m	0	0	1	1	1	1	ANKRD53	ankyrin repeat domain 53
hsa-miR-548m	0	0	1	1	1	1	CYP26A1	cytochrome P450, family 26, subfamily A, polypeptide 1
hsa-miR-548m	0	0	1	0	0	0	LOC643072	uncharacterized LOC643072
hsa-miR-548m	1	0	1	1	1	1	CCDC25	coiled-coil domain containing 25
hsa-miR-548m	1	0	1	1	1	1	STK38L	serine/threonine kinase 38 like
hsa-miR-548m	0	0	1	1	0	0	CD38	CD38 molecule
hsa-miR-548m	0	0	1	1	1	1	EIF3J	eukaryotic translation initiation factor 3, subunit J
hsa-miR-548m	1	0	1	1	1	1	MGST3	microsomal glutathione S-transferase 3
hsa-miR-548m	0	0	1	1	1	1	BEX2	brain expressed X-linked 2
hsa-miR-548m	1	0	1	1	1	1	SSBP3	single stranded DNA binding protein 3
hsa-miR-548m	0	0	1	0	0	0	LOC729059	uncharacterized LOC729059
hsa-miR-548m	0	0	1	1	1	1	BMPR1A	bone morphogenetic protein receptor, type IA
hsa-miR-548m	0	0	1	0	0	0	LOC677759	uncharacterized LOC677759
hsa-miR-548m	1	0	1	1	0	0	FAT4	FAT tumor suppressor homolog 4 (Drosophila)
hsa-miR-548m	0	0	1	1	0	0	GLMN	glomulin, FKBP associated protein
hsa-miR-548m	0	0	1	0	0	0	LOC100130353	hippocampus abundant transcript-like 1 pseudogene
hsa-miR-548m	1	0	1	1	1	1	LAMTOR3	late endosomal/lysosomal adaptor, MAPK and MTOR activator 3
hsa-miR-548m	0	0	1	1	0	0	UROD	uroporphyrinogen decarboxylase
hsa-miR-548m	0	0	1	1	0	0	WDR43	WD repeat domain 43
hsa-miR-548m	0	0	1	1	1	1	SMNDC1	survival motor neuron domain containing 1
hsa-miR-548m	1	0	1	1	1	1	NT5DC1	5'-nucleotidase domain containing 1
hsa-miR-548m	1	0	1	1	1	1	MEIS1	Meis homeobox 1
hsa-miR-548m	0	0	1	1	1	1	DUT	deoxyuridine triphosphatase
hsa-miR-548m	0	0	1	1	1	1	WIBG	within bgcn homolog (Drosophila)
hsa-miR-548m	0	0	1	0	1	1	VSTM2A	V-set and transmembrane domain containing 2A
hsa-miR-548m	1	0	1	1	1	1	YWHAQ	tyrosine 3-monooxygenase/tryptophan 5-monooxygenase activation protein, theta polypeptide
hsa-miR-548m	0	0	1	0	1	1	SUMO2	SMT3 suppressor of mif two 3 homolog 2 (S. cerevisiae)
hsa-miR-548m	1	0	1	1	1	1	METAP2	methionyl aminopeptidase 2
hsa-miR-548m	1	0	1	1	1	1	ARL4A	ADP-ribosylation factor-like 4A
hsa-miR-548m	0	0	1	1	1	1	FKBP1B	FK506 binding protein 1B, 12.6 kDa
hsa-miR-548m	1	0	1	1	1	1	ANAPC16	anaphase promoting complex subunit 16
hsa-miR-548m	1	0	1	1	1	1	KCNS3	potassium voltage-gated channel, delayed-rectifier, subfamily S, member 3
hsa-miR-548m	1	0	1	1	1	1	NFYB	nuclear transcription factor Y, beta
hsa-miR-548m	1	0	1	1	0	0	ATP6V1B2	ATPase, H+ transporting, lysosomal 56/58kDa, V1 subunit B2
hsa-miR-548m	0	0	1	1	1	1	GFM1	G elongation factor, mitochondrial 1
hsa-miR-548m	1	0	1	1	1	1	SNX1	sorting nexin 1
hsa-miR-548m	0	0	1	1	1	1	STRAP	serine/threonine kinase receptor associated protein
hsa-miR-548m	1	0	1	1	1	1	AZI2	5-azacytidine induced 2
hsa-miR-548m	1	0	1	1	1	1	RNF2	ring finger protein 2
hsa-miR-548m	0	0	1	1	0	0	CLEC1A	C-type lectin domain family 1, member A
hsa-miR-548m	1	0	1	1	1	1	RBFOX2	RNA binding protein, fox-1 homolog (C. elegans) 2
hsa-miR-548m	1	0	1	1	1	1	HSPD1	heat shock 60kDa protein 1 (chaperonin)
hsa-miR-548m	1	0	1	0	1	1	GIT2	G protein-coupled receptor kinase interacting ArfGAP 2
hsa-miR-548m	1	0	1	0	1	1	MAP1B	microtubule-associated protein 1B
hsa-miR-548m	0	0	1	1	0	0	GPC3	glypican 3
hsa-miR-548m	1	0	1	1	1	1	VLDLR	very low density lipoprotein receptor
hsa-miR-548m	1	0	1	1	1	1	RBPJ	recombination signal binding protein for immunoglobulin kappa J region
hsa-miR-548m	1	0	1	1	1	1	ACTN4	actinin, alpha 4
hsa-miR-548m	1	0	1	0	1	1	CD47	CD47 molecule
hsa-miR-548m	0	0	1	1	0	0	CD81	CD81 molecule
hsa-miR-548m	0	0	1	0	0	0	NUDT18	nudix (nucleoside diphosphate linked moiety X)-type motif 18
hsa-miR-548m	1	0	1	1	1	1	RUNX1	runt-related transcription factor 1
hsa-miR-548m	1	0	1	1	1	1	TMBIM6	transmembrane BAX inhibitor motif containing 6
hsa-miR-548m	0	0	1	1	1	1	ZNF346	zinc finger protein 346
hsa-miR-548m	0	0	1	0	1	1	SEPT7	septin 7
hsa-miR-548m	1	0	1	1	1	1	MYT1	myelin transcription factor 1
hsa-miR-548m	0	0	1	1	1	1	EPCAM	epithelial cell adhesion molecule
hsa-miR-548m	1	0	1	1	1	1	GABPB2	GA binding protein transcription factor, beta subunit 2
hsa-miR-548m	1	0	1	0	1	1	KDM1B	lysine (K)-specific demethylase 1B
hsa-miR-548m	0	0	1	0	0	0	LOC731789	uncharacterized LOC731789
hsa-miR-548m	1	0	1	1	1	1	DNAJC16	DnaJ (Hsp40) homolog, subfamily C, member 16
hsa-miR-548m	0	0	1	1	1	1	ATG5	autophagy related 5
hsa-miR-548m	0	0	1	0	0	0	LINC00661	long intergenic non-protein coding RNA 661
hsa-miR-548m	1	0	1	1	1	1	NKTR	natural killer-tumor recognition sequence
hsa-miR-548m	1	0	1	1	1	1	HECW2	HECT, C2 and WW domain containing E3 ubiquitin protein ligase 2
hsa-miR-548m	1	0	1	1	1	1	KIAA2018	KIAA2018
hsa-miR-548m	1	0	1	0	1	1	PTP4A1	protein tyrosine phosphatase type IVA, member 1
hsa-miR-548m	0	0	1	1	0	0	FMN1	formin 1
hsa-miR-548m	1	0	1	0	1	1	XRN1	5'-3' exoribonuclease 1
hsa-miR-548m	1	0	1	0	1	1	OSBPL8	oxysterol binding protein-like 8
hsa-miR-548m	1	0	1	0	1	1	MCFD2	multiple coagulation factor deficiency 2
hsa-miR-548m	0	0	1	1	1	1	SDAD1	SDA1 domain containing 1
hsa-miR-548m	1	0	1	1	1	1	SNRK	SNF related kinase
hsa-miR-548m	1	0	1	0	1	1	TNS3	tensin 3
hsa-miR-548m	1	0	1	1	1	1	BCL2L1	BCL2-like 1
hsa-miR-548m	1	0	1	1	1	1	SLC30A7	solute carrier family 30 (zinc transporter), member 7
hsa-miR-548m	1	0	1	1	1	1	GRM5	glutamate receptor, metabotropic 5
hsa-miR-548m	1	0	1	1	1	1	PI15	peptidase inhibitor 15
hsa-miR-548m	1	0	1	1	1	1	PRKG1	protein kinase, cGMP-dependent, type I
hsa-miR-548m	1	0	1	1	1	1	MAN2A2	mannosidase, alpha, class 2A, member 2
hsa-miR-548m	1	0	1	0	1	1	KLHDC10	kelch domain containing 10
hsa-miR-548m	1	0	1	1	0	0	DPY19L1	dpy-19-like 1 (C. elegans)
hsa-miR-548m	0	0	1	1	0	0	GPR111	G protein-coupled receptor 111
hsa-miR-548m	1	0	1	1	1	1	MOSPD1	motile sperm domain containing 1
hsa-miR-548m	0	0	1	0	0	0	DYTN	dystrotelin
hsa-miR-548m	1	0	1	1	1	1	BNC2	basonuclin 2
hsa-miR-548m	0	0	1	1	1	1	PROS1	protein S (alpha)
hsa-miR-548m	1	0	1	1	1	1	MLL	myeloid/lymphoid or mixed-lineage leukemia (trithorax homolog, Drosophila)
hsa-miR-548m	0	0	1	1	1	1	VDAC2	voltage-dependent anion channel 2
hsa-miR-548m	1	0	1	1	1	1	ATP2B2	ATPase, Ca++ transporting, plasma membrane 2
hsa-miR-548m	0	0	1	1	1	1	RFC1	replication factor C (activator 1) 1, 145kDa
hsa-miR-548m	1	0	1	0	0	0	YLPM1	YLP motif containing 1
hsa-miR-548m	1	0	1	1	1	1	CCNG2	cyclin G2
hsa-miR-548m	1	0	1	0	1	1	BCL2	B-cell CLL/lymphoma 2
hsa-miR-548m	1	0	1	1	1	1	IGF1	insulin-like growth factor 1 (somatomedin C)
hsa-miR-548m	0	0	1	1	0	0	ASPA	aspartoacylase
hsa-miR-548m	1	0	1	0	1	1	ATM	ataxia telangiectasia mutated
hsa-miR-548m	0	0	1	1	1	1	ATP7A	ATPase, Cu++ transporting, alpha polypeptide
hsa-miR-548m	0	0	1	1	1	1	CA2	carbonic anhydrase II
hsa-miR-548m	0	0	1	1	1	1	ERCC8	excision repair cross-complementing rodent repair deficiency, complementation group 8
hsa-miR-548m	0	0	1	1	1	1	DPYD	dihydropyrimidine dehydrogenase
hsa-miR-548m	1	0	1	0	1	1	SLC26A2	solute carrier family 26 (sulfate transporter), member 2
hsa-miR-548m	0	0	1	1	1	1	F8	coagulation factor VIII, procoagulant component
hsa-miR-548m	1	0	1	1	1	1	FBN1	fibrillin 1
hsa-miR-548m	0	0	1	1	0	0	FSHR	follicle stimulating hormone receptor
hsa-miR-548m	1	0	1	0	1	1	GCH1	GTP cyclohydrolase 1
hsa-miR-548m	1	0	1	1	1	1	GJA1	gap junction protein, alpha 1, 43kDa
hsa-miR-548m	1	0	1	1	1	1	GK	glycerol kinase
hsa-miR-548m	1	0	1	0	1	1	GLI3	GLI family zinc finger 3
hsa-miR-548m	1	0	1	0	1	1	ITGB3	integrin, beta 3 (platelet glycoprotein IIIa, antigen CD61)
hsa-miR-548m	1	0	1	1	1	1	KCNA1	potassium voltage-gated channel, shaker-related subfamily, member 1 (episodic ataxia with myokymia)
hsa-miR-548m	0	0	1	1	1	1	KRT12	keratin 12
hsa-miR-548m	1	0	1	0	1	1	SGCB	sarcoglycan, beta (43kDa dystrophin-associated glycoprotein)
hsa-miR-548m	0	0	1	1	1	1	MTM1	myotubularin 1
hsa-miR-548m	1	0	1	1	1	1	PTCH1	patched 1
hsa-miR-548m	1	0	1	1	1	1	OCRL	oculocerebrorenal syndrome of Lowe
hsa-miR-548m	1	0	1	0	1	1	PTEN	phosphatase and tensin homolog
hsa-miR-548m	1	0	1	1	1	1	ATXN1	ataxin 1
hsa-miR-548m	1	0	1	1	1	1	SOX9	SRY (sex determining region Y)-box 9
hsa-miR-548m	0	0	1	1	1	1	SRD5A2	steroid-5-alpha-reductase, alpha polypeptide 2 (3-oxo-5 alpha-steroid delta 4-dehydrogenase alpha 2)
hsa-miR-548m	1	0	1	1	1	1	TAT	tyrosine aminotransferase
hsa-miR-548m	1	0	1	0	1	1	COL5A2	collagen, type V, alpha 2
hsa-miR-548m	0	0	1	0	1	1	GNRHR	gonadotropin-releasing hormone receptor
hsa-miR-548m	1	0	1	1	1	1	HLCS	holocarboxylase synthetase (biotin-(proprionyl-CoA-carboxylase (ATP-hydrolysing)) ligase)
hsa-miR-548m	1	0	1	0	1	1	PAFAH1B1	platelet-activating factor acetylhydrolase 1b, regulatory subunit 1 (45kDa)
hsa-miR-548m	1	0	1	1	1	1	SLC26A4	solute carrier family 26, member 4
hsa-miR-548m	0	0	1	1	0	0	PHEX	phosphate regulating endopeptidase homolog, X-linked
hsa-miR-548m	1	0	1	1	1	1	TEK	TEK tyrosine kinase, endothelial
hsa-miR-548m	1	0	1	1	1	1	TWIST1	twist homolog 1 (Drosophila)
hsa-miR-548m	1	0	1	1	1	1	ATRX	alpha thalassemia/mental retardation syndrome X-linked
hsa-miR-548m	0	0	1	1	1	1	RFXAP	regulatory factor X-associated protein
hsa-miR-548m	0	0	1	1	1	1	HGF	hepatocyte growth factor (hepapoietin A; scatter factor)
hsa-miR-548m	1	0	1	1	1	1	ADORA2B	adenosine A2b receptor
hsa-miR-548m	0	0	1	0	1	1	ADRA2A	adrenoceptor alpha 2A
hsa-miR-548m	1	0	1	0	1	1	ADRB1	adrenoceptor beta 1
hsa-miR-548m	0	0	1	1	1	1	ALDH1B1	aldehyde dehydrogenase 1 family, member B1
hsa-miR-548m	1	0	1	0	1	1	ALDH1A3	aldehyde dehydrogenase 1 family, member A3
hsa-miR-548m	1	0	1	0	1	1	GABRA4	gamma-aminobutyric acid (GABA) A receptor, alpha 4
hsa-miR-548m	1	0	1	1	1	1	GABRB3	gamma-aminobutyric acid (GABA) A receptor, beta 3
hsa-miR-548m	1	0	1	1	1	1	GRIA4	glutamate receptor, ionotropic, AMPA 4
hsa-miR-548m	1	0	1	1	1	1	GRM1	glutamate receptor, metabotropic 1
hsa-miR-548m	0	0	1	1	1	1	GRM3	glutamate receptor, metabotropic 3
hsa-miR-548m	1	0	1	1	1	1	GUCY1A2	guanylate cyclase 1, soluble, alpha 2
hsa-miR-548m	0	0	1	1	1	1	HRH1	histamine receptor H1
hsa-miR-548m	0	0	1	1	1	1	HTR7	5-hydroxytryptamine (serotonin) receptor 7, adenylate cyclase-coupled
hsa-miR-548m	1	0	1	1	1	1	IGF1R	insulin-like growth factor 1 receptor
hsa-miR-548m	0	0	1	1	1	1	IL5	interleukin 5 (colony-stimulating factor, eosinophil)
hsa-miR-548m	1	0	1	0	1	1	KITLG	KIT ligand
hsa-miR-548m	0	0	1	1	1	1	NPY2R	neuropeptide Y receptor Y2
hsa-miR-548m	0	0	1	1	0	0	POLR2A	polymerase (RNA) II (DNA directed) polypeptide A, 220kDa
hsa-miR-548m	1	0	1	1	1	1	PTGER2	prostaglandin E receptor 2 (subtype EP2), 53kDa
hsa-miR-548m	1	0	1	1	1	1	PTGFR	prostaglandin F receptor (FP)
hsa-miR-548m	1	0	1	1	1	1	RARB	retinoic acid receptor, beta
hsa-miR-548m	0	0	1	1	1	1	BLOC1S2	biogenesis of lysosomal organelles complex-1, subunit 2
hsa-miR-548m	1	0	1	0	1	1	SMAD5	SMAD family member 5
hsa-miR-548m	1	0	1	0	1	1	UBE2W	ubiquitin-conjugating enzyme E2W (putative)
hsa-miR-548m	1	0	1	0	1	1	SPOPL	speckle-type POZ protein-like
hsa-miR-548m	1	0	1	0	1	1	RAB11FIP1	RAB11 family interacting protein 1 (class I)
hsa-miR-548m	0	0	1	1	1	1	FCGR2B	Fc fragment of IgG, low affinity IIb, receptor (CD32)
hsa-miR-548m	1	0	1	1	1	1	WNK3	WNK lysine deficient protein kinase 3
hsa-miR-548m	1	0	1	0	1	1	SMAD2	SMAD family member 2
hsa-miR-548m	1	0	1	1	1	1	KLHL31	kelch-like 31 (Drosophila)
hsa-miR-548m	1	0	1	1	1	1	RBMS3	RNA binding motif, single stranded interacting protein 3
hsa-miR-548m	0	0	1	1	1	1	TUSC1	tumor suppressor candidate 1
hsa-miR-548m	1	0	1	0	1	1	ZNF740	zinc finger protein 740
hsa-miR-548m	0	0	1	1	1	1	CCDC144NL	coiled-coil domain containing 144 family, N-terminal like
hsa-miR-548m	0	0	1	1	1	1	ZCCHC16	zinc finger, CCHC domain containing 16
hsa-miR-548m	1	0	1	0	1	1	LIN28B	lin-28 homolog B (C. elegans)
hsa-miR-548m	0	0	1	1	1	1	AGMO	alkylglycerol monooxygenase
hsa-miR-548m	1	0	1	1	1	1	NRARP	NOTCH-regulated ankyrin repeat protein
hsa-miR-548m	0	0	1	1	1	1	CLEC2D	C-type lectin domain family 2, member D
hsa-miR-548m	1	0	1	1	1	1	NCK2	NCK adaptor protein 2
hsa-miR-548m	0	0	1	1	1	1	HMGN2P46	high mobility group nucleosomal binding domain 2 pseudogene 46
hsa-miR-548m	1	0	1	1	1	1	EBF3	early B-cell factor 3
hsa-miR-548m	1	0	1	1	1	1	NFKBIZ	nuclear factor of kappa light polypeptide gene enhancer in B-cells inhibitor, zeta
hsa-miR-548m	0	0	1	1	1	1	SUMO1	SMT3 suppressor of mif two 3 homolog 1 (S. cerevisiae)
hsa-miR-548m	0	0	1	1	1	1	RYK	receptor-like tyrosine kinase
hsa-miR-548m	1	0	1	0	1	1	PDPN	podoplanin
hsa-miR-548m	1	0	1	1	0	0	RPS6KA1	ribosomal protein S6 kinase, 90kDa, polypeptide 1
hsa-miR-548m	1	0	1	1	1	1	TCEAL8	transcription elongation factor A (SII)-like 8
hsa-miR-548m	0	0	1	1	1	1	TCEAL6	transcription elongation factor A (SII)-like 6
hsa-miR-548m	0	0	1	1	1	1	SCP2	sterol carrier protein 2
hsa-miR-548m	1	0	1	1	1	1	L3MBTL3	l(3)mbt-like 3 (Drosophila)
hsa-miR-548m	1	0	1	1	1	1	IGSF3	immunoglobulin superfamily, member 3
hsa-miR-548m	0	0	1	1	1	1	TRIM13	tripartite motif containing 13
hsa-miR-548m	1	0	1	1	1	1	CTDSPL	CTD (carboxy-terminal domain, RNA polymerase II, polypeptide A) small phosphatase-like
hsa-miR-548m	1	0	1	0	1	1	KIAA2022	KIAA2022
hsa-miR-548m	0	0	1	1	1	1	MXI1	MAX interactor 1
hsa-miR-548m	1	0	1	1	1	1	FNIP1	folliculin interacting protein 1
hsa-miR-548m	0	0	1	1	1	1	GCSAM	germinal center-associated, signaling and motility
hsa-miR-548m	1	0	1	1	1	1	CUL4A	cullin 4A
hsa-miR-548m	1	0	1	1	1	1	LUZP2	leucine zipper protein 2
hsa-miR-548m	1	0	1	0	1	1	RCHY1	ring finger and CHY zinc finger domain containing 1, E3 ubiquitin protein ligase
hsa-miR-548m	1	0	1	0	1	1	ERMN	ermin, ERM-like protein
hsa-miR-548m	1	0	1	1	1	1	ARHGAP28	Rho GTPase activating protein 28
hsa-miR-548m	0	0	1	0	1	1	LPPR5	lipid phosphate phosphatase-related protein type 5
hsa-miR-548m	1	0	1	0	1	1	ZC3H12B	zinc finger CCCH-type containing 12B
hsa-miR-548m	1	0	1	1	1	1	BCL2L15	BCL2-like 15
hsa-miR-548m	1	0	1	1	1	1	FAM171A1	family with sequence similarity 171, member A1
hsa-miR-548m	0	0	1	1	1	1	NCMAP	noncompact myelin associated protein
hsa-miR-548m	1	0	1	1	1	1	ATP11C	ATPase, class VI, type 11C
hsa-miR-548m	1	0	1	0	1	1	FYTTD1	forty-two-three domain containing 1
hsa-miR-548m	0	0	1	1	1	1	SLC9A4	solute carrier family 9, subfamily A (NHE4, cation proton antiporter 4), member 4
hsa-miR-548m	0	0	1	1	1	1	ZMAT1	zinc finger, matrin-type 1
hsa-miR-548m	1	0	1	1	1	1	PCGF6	polycomb group ring finger 6
hsa-miR-548m	1	0	1	0	1	1	CREB5	cAMP responsive element binding protein 5
hsa-miR-548m	0	0	1	0	1	1	GOLGA8E	golgin A8 family, member E
hsa-miR-548m	1	0	1	1	1	1	SLC25A53	solute carrier family 25, member 53
hsa-miR-548m	1	0	1	0	1	1	RGMB	RGM domain family, member B
hsa-miR-548m	0	0	1	1	1	1	SPIN4	spindlin family, member 4
hsa-miR-548m	1	0	1	1	1	1	PABPC1L2A	poly(A) binding protein, cytoplasmic 1-like 2A
hsa-miR-548m	0	0	1	1	1	1	BEX5	brain expressed, X-linked 5
hsa-miR-548m	1	0	1	0	1	1	ZKSCAN2	zinc finger with KRAB and SCAN domains 2
hsa-miR-548m	0	0	1	1	1	1	C9orf152	chromosome 9 open reading frame 152
hsa-miR-548m	1	0	1	1	1	1	FXR1	fragile X mental retardation, autosomal homolog 1
hsa-miR-548m	0	0	1	1	1	1	AADACL4	arylacetamide deacetylase-like 4
hsa-miR-548m	0	0	1	1	1	1	C2orf68	chromosome 2 open reading frame 68
hsa-miR-548m	0	0	1	1	0	0	PRR23B	proline rich 23B
hsa-miR-548m	1	0	1	0	1	1	ZNF793	zinc finger protein 793
hsa-miR-548m	1	0	1	1	1	1	KATNAL1	katanin p60 subunit A-like 1
hsa-miR-548m	0	0	1	1	0	0	C1QTNF9B-AS1	C1QTNF9B antisense RNA 1
hsa-miR-548m	1	0	1	1	1	1	NCDN	neurochondrin
hsa-miR-548m	0	0	1	1	1	1	PURG	purine-rich element binding protein G
hsa-miR-548m	1	0	1	1	1	1	PHF6	PHD finger protein 6
hsa-miR-548m	1	0	1	1	1	1	TMCC1	transmembrane and coiled-coil domain family 1
hsa-miR-548m	1	0	1	0	1	1	KCNK2	potassium channel, subfamily K, member 2
hsa-miR-548m	0	0	1	0	1	1	TMEM30B	transmembrane protein 30B
hsa-miR-548m	0	0	1	1	1	1	ACTBL2	actin, beta-like 2
hsa-miR-548m	1	0	1	1	1	1	SH3PXD2B	SH3 and PX domains 2B
hsa-miR-548m	0	0	1	1	1	1	VPS13A	vacuolar protein sorting 13 homolog A (S. cerevisiae)
hsa-miR-548m	1	0	1	1	1	1	SERBP1	SERPINE1 mRNA binding protein 1
hsa-miR-548m	0	0	1	1	1	1	NARG2	NMDA receptor regulated 2
hsa-miR-548m	1	0	1	1	1	1	GPHN	gephyrin
hsa-miR-548m	1	0	1	0	1	1	RGAG4	retrotransposon gag domain containing 4
hsa-miR-548m	1	0	1	1	1	1	CANX	calnexin
hsa-miR-548m	1	0	1	0	1	1	BCL7A	B-cell CLL/lymphoma 7A
hsa-miR-548m	1	0	1	0	1	1	TNRC6B	trinucleotide repeat containing 6B
hsa-miR-548m	1	0	1	1	1	1	YIPF5	Yip1 domain family, member 5
hsa-miR-548m	1	0	1	1	1	1	FNBP1L	formin binding protein 1-like
hsa-miR-548m	0	0	1	1	1	1	SC5DL	sterol-C5-desaturase (ERG3 delta-5-desaturase homolog, S. cerevisiae)-like
hsa-miR-548m	1	0	1	1	1	1	AFF3	AF4/FMR2 family, member 3
hsa-miR-548m	1	0	1	0	1	1	CLLU1	chronic lymphocytic leukemia up-regulated 1
hsa-miR-548m	1	0	1	1	1	1	TPD52	tumor protein D52
hsa-miR-548m	1	0	1	0	1	1	C3orf70	chromosome 3 open reading frame 70
hsa-miR-548m	1	0	1	0	1	1	RAB12	RAB12, member RAS oncogene family
hsa-miR-548m	1	0	1	0	1	1	ANO6	anoctamin 6
hsa-miR-548m	1	0	1	1	1	1	FAM108B1	family with sequence similarity 108, member B1
hsa-miR-548m	0	0	1	0	1	1	C6orf120	chromosome 6 open reading frame 120
hsa-miR-548m	1	0	1	1	1	1	RGS7BP	regulator of G-protein signaling 7 binding protein
hsa-miR-548m	1	0	1	1	1	1	OPN5	opsin 5
hsa-miR-548m	1	0	1	1	1	1	YTHDC1	YTH domain containing 1
hsa-miR-548m	1	0	1	1	1	1	MAF	v-maf musculoaponeurotic fibrosarcoma oncogene homolog (avian)
hsa-miR-548m	1	0	1	1	1	1	CSNK1G3	casein kinase 1, gamma 3
hsa-miR-548m	0	0	1	0	1	1	STXBP1	syntaxin binding protein 1
hsa-miR-548m	1	0	1	1	1	1	KLF10	Kruppel-like factor 10
hsa-miR-548m	1	0	1	1	1	1	AMD1	adenosylmethionine decarboxylase 1
hsa-miR-548m	0	0	1	1	1	1	CSTF3	cleavage stimulation factor, 3' pre-RNA, subunit 3, 77kDa
hsa-miR-548m	0	0	1	1	1	1	C6orf225	chromosome 6 open reading frame 225
hsa-miR-548m	1	0	1	1	1	1	ZNF704	zinc finger protein 704
hsa-miR-548m	1	0	1	1	1	1	FAM102A	family with sequence similarity 102, member A
hsa-miR-548m	1	0	1	1	1	1	USP14	ubiquitin specific peptidase 14 (tRNA-guanine transglycosylase)
hsa-miR-548m	1	0	1	0	1	1	SCML1	sex comb on midleg-like 1 (Drosophila)
hsa-miR-548m	1	0	1	0	1	1	CDC42SE1	CDC42 small effector 1
hsa-miR-548m	1	0	1	1	1	1	KIAA0317	KIAA0317
hsa-miR-548m	1	0	1	0	1	1	GK5	glycerol kinase 5 (putative)
hsa-miR-548m	0	0	1	1	0	0	DPH2	DPH2 homolog (S. cerevisiae)
hsa-miR-548m	1	0	1	0	1	1	CREBZF	CREB/ATF bZIP transcription factor
hsa-miR-548m	0	0	1	1	0	0	C7orf63	chromosome 7 open reading frame 63
hsa-miR-548m	0	0	1	0	1	1	C15orf56	chromosome 15 open reading frame 56
hsa-miR-548m	1	0	1	1	1	1	MLLT4	myeloid/lymphoid or mixed-lineage leukemia (trithorax homolog, Drosophila); translocated to, 4
hsa-miR-548m	1	0	1	1	1	1	TCERG1	transcription elongation regulator 1
hsa-miR-548m	1	0	1	0	1	1	FAM133B	family with sequence similarity 133, member B
hsa-miR-548m	0	0	1	1	1	1	MLH3	mutL homolog 3 (E. coli)
hsa-miR-548m	0	0	1	1	1	1	MCHR2	melanin-concentrating hormone receptor 2
hsa-miR-548m	1	0	1	1	1	1	PAPD5	PAP associated domain containing 5
hsa-miR-548m	0	0	1	1	0	0	SPINK9	serine peptidase inhibitor, Kazal type 9
hsa-miR-548m	1	0	1	1	1	1	FAM63B	family with sequence similarity 63, member B
hsa-miR-548m	0	0	1	0	1	1	STEAP2	STEAP family member 2, metalloreductase
hsa-miR-548m	1	0	1	1	1	1	GDAP1	ganglioside induced differentiation associated protein 1
hsa-miR-548m	1	0	1	1	1	1	CEP63	centrosomal protein 63kDa
hsa-miR-548m	1	0	1	1	1	1	HMGCLL1	3-hydroxymethyl-3-methylglutaryl-CoA lyase-like 1
hsa-miR-548m	0	0	1	1	1	1	PSPC1	paraspeckle component 1
hsa-miR-548m	0	0	1	1	1	1	MST4	serine/threonine protein kinase MST4
hsa-miR-548m	1	0	1	1	1	1	CEP85L	centrosomal protein 85kDa-like
hsa-miR-548m	0	0	1	1	1	1	GEMIN8	gem (nuclear organelle) associated protein 8
hsa-miR-548m	1	0	1	1	1	1	PABPC1L2B	poly(A) binding protein, cytoplasmic 1-like 2B
hsa-miR-548m	1	0	1	1	1	1	C2orf88	chromosome 2 open reading frame 88
hsa-miR-548m	1	0	1	1	1	1	SLC9A6	solute carrier family 9, subfamily A (NHE6, cation proton antiporter 6), member 6
hsa-miR-548m	1	0	1	1	1	1	FRS2	fibroblast growth factor receptor substrate 2
hsa-miR-548m	1	0	1	1	1	1	ERBB4	v-erb-a erythroblastic leukemia viral oncogene homolog 4 (avian)
hsa-miR-548m	0	0	1	1	1	1	TTC14	tetratricopeptide repeat domain 14
hsa-miR-548m	0	0	1	1	1	1	TRAK1	trafficking protein, kinesin binding 1
hsa-miR-548m	1	0	1	0	1	1	TMEM237	transmembrane protein 237
hsa-miR-548m	0	0	1	1	1	1	FAM22G	family with sequence similarity 22, member G
hsa-miR-548m	1	0	1	0	1	1	SLC12A2	solute carrier family 12 (sodium/potassium/chloride transporters), member 2
hsa-miR-548m	0	0	1	1	1	1	SULT1C2	sulfotransferase family, cytosolic, 1C, member 2
hsa-miR-548m	1	0	1	0	1	1	NCAM1	neural cell adhesion molecule 1
hsa-miR-548m	1	0	1	1	1	1	QSER1	glutamine and serine rich 1
hsa-miR-548m	1	0	1	1	1	1	PDE11A	phosphodiesterase 11A
hsa-miR-548m	1	0	1	1	1	1	SREK1	splicing regulatory glutamine/lysine-rich protein 1
hsa-miR-548m	1	0	1	1	1	1	IRF2BP2	interferon regulatory factor 2 binding protein 2
hsa-miR-548m	1	0	1	1	1	1	PHF16	PHD finger protein 16
hsa-miR-548m	0	0	1	1	0	0	VPS37D	vacuolar protein sorting 37 homolog D (S. cerevisiae)
hsa-miR-548m	1	0	1	1	1	1	SRSF1	serine/arginine-rich splicing factor 1
hsa-miR-548m	1	0	1	0	1	1	TRAPPC6B	trafficking protein particle complex 6B
hsa-miR-548m	1	0	1	1	1	1	TMTC4	transmembrane and tetratricopeptide repeat containing 4
hsa-miR-548m	0	0	1	1	1	1	FKTN	fukutin
hsa-miR-548m	1	0	1	1	1	1	CUL4B	cullin 4B
hsa-miR-548m	1	0	1	1	1	1	DMP1	dentin matrix acidic phosphoprotein 1
hsa-miR-548m	1	0	1	1	1	1	LDB3	LIM domain binding 3
hsa-miR-548m	1	0	1	1	1	1	KIAA0368	KIAA0368
hsa-miR-548m	0	0	1	1	1	1	HSF5	heat shock transcription factor family member 5
hsa-miR-548m	1	0	1	0	1	1	ODZ3	odz, odd Oz/ten-m homolog 3 (Drosophila)
hsa-miR-548m	1	0	1	1	1	1	MBOAT1	membrane bound O-acyltransferase domain containing 1
hsa-miR-548m	1	0	1	1	1	1	MGA	MAX gene associated
hsa-miR-548m	1	0	1	1	1	1	REPS2	RALBP1 associated Eps domain containing 2
hsa-miR-548m	1	0	1	0	1	1	SCN3A	sodium channel, voltage-gated, type III, alpha subunit
hsa-miR-548m	1	0	1	0	1	1	PDE5A	phosphodiesterase 5A, cGMP-specific
hsa-miR-548m	1	0	1	1	1	1	ASIC1	acid-sensing (proton-gated) ion channel 1
hsa-miR-548m	1	0	1	1	1	1	ADAM10	ADAM metallopeptidase domain 10
hsa-miR-548m	0	0	1	1	1	1	PLIN2	perilipin 2
hsa-miR-548m	0	0	1	1	1	1	ADSS	adenylosuccinate synthase
hsa-miR-548m	1	0	1	1	1	1	APAF1	apoptotic peptidase activating factor 1
hsa-miR-548m	1	0	1	0	1	1	XIAP	X-linked inhibitor of apoptosis
hsa-miR-548m	1	0	1	0	1	1	BACH1	BTB and CNC homology 1, basic leucine zipper transcription factor 1
hsa-miR-548m	1	0	1	1	1	1	BMP2	bone morphogenetic protein 2
hsa-miR-548m	1	0	1	0	1	1	BMPR2	bone morphogenetic protein receptor, type II (serine/threonine kinase)
hsa-miR-548m	1	0	1	0	1	1	KLF9	Kruppel-like factor 9
hsa-miR-548m	0	0	1	0	1	1	CASQ2	calsequestrin 2 (cardiac muscle)
hsa-miR-548m	1	0	1	1	1	1	CDH13	cadherin 13, H-cadherin (heart)
hsa-miR-548m	1	0	1	0	1	1	CDK6	cyclin-dependent kinase 6
hsa-miR-548m	1	0	1	1	1	1	CDS1	CDP-diacylglycerol synthase (phosphatidate cytidylyltransferase) 1
hsa-miR-548m	1	0	1	1	1	1	CHD1	chromodomain helicase DNA binding protein 1
hsa-miR-548m	1	0	1	1	1	1	CHD2	chromodomain helicase DNA binding protein 2
hsa-miR-548m	0	0	1	1	1	1	CHUK	conserved helix-loop-helix ubiquitous kinase
hsa-miR-548m	1	0	1	0	1	1	CPD	carboxypeptidase D
hsa-miR-548m	1	0	1	1	1	1	CREBL2	cAMP responsive element binding protein-like 2
hsa-miR-548m	0	0	1	1	1	1	DSCAM	Down syndrome cell adhesion molecule
hsa-miR-548m	1	0	1	1	1	1	DTNA	dystrobrevin, alpha
hsa-miR-548m	1	0	1	1	1	1	S1PR1	sphingosine-1-phosphate receptor 1
hsa-miR-548m	1	0	1	1	1	1	CELSR3	cadherin, EGF LAG seven-pass G-type receptor 3 (flamingo homolog, Drosophila)
hsa-miR-548m	1	0	1	1	1	1	ELAVL1	ELAV (embryonic lethal, abnormal vision, Drosophila)-like 1 (Hu antigen R)
hsa-miR-548m	0	0	1	0	1	1	EMP1	epithelial membrane protein 1
hsa-miR-548m	1	0	1	1	1	1	EN2	engrailed homeobox 2
hsa-miR-548m	1	0	1	1	1	1	EP300	E1A binding protein p300
hsa-miR-548m	1	0	1	1	1	1	FOXF1	forkhead box F1
hsa-miR-548m	0	0	1	0	1	1	FMO2	flavin containing monooxygenase 2 (non-functional)
hsa-miR-548m	1	0	1	1	1	1	IRAK2	interleukin-1 receptor-associated kinase 2
hsa-miR-548m	1	0	1	1	1	1	AQP4	aquaporin 4
hsa-miR-548m	1	0	1	0	1	1	ARCN1	archain 1
hsa-miR-548m	0	0	1	1	1	1	ARF4	ADP-ribosylation factor 4
hsa-miR-548m	0	0	1	1	0	0	RHOG	ras homolog family member G
hsa-miR-548m	1	0	1	0	1	1	ARNT	aryl hydrocarbon receptor nuclear translocator
hsa-miR-548m	1	0	1	1	1	1	ATP6V1A	ATPase, H+ transporting, lysosomal 70kDa, V1 subunit A
hsa-miR-548m	1	0	1	1	1	1	BNC1	basonuclin 1
hsa-miR-548m	1	0	1	1	1	1	BTG1	B-cell translocation gene 1, anti-proliferative
hsa-miR-548m	0	0	1	1	0	0	C9	complement component 9
hsa-miR-548m	1	0	1	1	1	1	CDH2	cadherin 2, type 1, N-cadherin (neuronal)
hsa-miR-548m	1	0	1	1	1	1	CDH11	cadherin 11, type 2, OB-cadherin (osteoblast)
hsa-miR-548m	1	0	1	0	1	1	CEBPG	CCAAT/enhancer binding protein (C/EBP), gamma
hsa-miR-548m	0	0	1	1	1	1	CEACAM8	carcinoembryonic antigen-related cell adhesion molecule 8
hsa-miR-548m	1	0	1	0	1	1	CHML	choroideremia-like (Rab escort protein 2)
hsa-miR-548m	1	0	1	1	1	1	CLCN3	chloride channel, voltage-sensitive 3
hsa-miR-548m	1	0	1	1	1	1	COL4A1	collagen, type IV, alpha 1
hsa-miR-548m	1	0	1	0	1	1	COL19A1	collagen, type XIX, alpha 1
hsa-miR-548m	0	0	1	1	1	1	SLC31A2	solute carrier family 31 (copper transporters), member 2
hsa-miR-548m	0	0	1	1	0	0	CPA3	carboxypeptidase A3 (mast cell)
hsa-miR-548m	1	0	1	1	1	1	CSNK2A1	casein kinase 2, alpha 1 polypeptide
hsa-miR-548m	0	0	1	1	0	0	CSNK2A2	casein kinase 2, alpha prime polypeptide
hsa-miR-548m	0	0	1	1	1	1	CTH	cystathionase (cystathionine gamma-lyase)
hsa-miR-548m	0	0	1	1	1	1	GADD45A	growth arrest and DNA-damage-inducible, alpha
hsa-miR-548m	1	0	1	1	1	1	DR1	down-regulator of transcription 1, TBP-binding (negative cofactor 2)
hsa-miR-548m	1	0	1	0	0	0	DRP2	dystrophin related protein 2
hsa-miR-548m	1	0	1	1	1	1	DSC3	desmocollin 3
hsa-miR-548m	1	0	1	1	1	1	HBEGF	heparin-binding EGF-like growth factor
hsa-miR-548m	1	0	1	1	1	1	DUSP6	dual specificity phosphatase 6
hsa-miR-548m	1	0	1	1	1	1	ENPEP	glutamyl aminopeptidase (aminopeptidase A)
hsa-miR-548m	1	0	1	0	1	1	ETV6	ets variant 6
hsa-miR-548m	1	0	1	1	1	1	FMOD	fibromodulin
hsa-miR-548m	0	0	1	1	0	0	FTH1	ferritin, heavy polypeptide 1
hsa-miR-548m	1	0	1	0	1	1	FUT4	fucosyltransferase 4 (alpha (1,3) fucosyltransferase, myeloid-specific)
hsa-miR-548m	1	0	1	0	1	1	GNAI1	guanine nucleotide binding protein (G protein), alpha inhibiting activity polypeptide 1
hsa-miR-548m	1	0	1	1	1	1	GOLGA1	golgin A1
hsa-miR-548m	0	0	1	0	1	1	GYPA	glycophorin A (MNS blood group)
hsa-miR-548m	1	0	1	1	0	0	GYPC	glycophorin C (Gerbich blood group)
hsa-miR-548m	0	0	1	1	1	1	HLA-DPB1	major histocompatibility complex, class II, DP beta 1
hsa-miR-548m	1	0	1	1	1	1	HNRNPA2B1	heterogeneous nuclear ribonucleoprotein A2/B1
hsa-miR-548m	0	0	1	1	1	1	HOXA4	homeobox A4
hsa-miR-548m	1	0	1	1	1	1	HOXD10	homeobox D10
hsa-miR-548m	1	0	1	1	1	1	TNC	tenascin C
hsa-miR-548m	0	0	1	1	1	1	IRF8	interferon regulatory factor 8
hsa-miR-548m	0	0	1	1	0	0	ID3	inhibitor of DNA binding 3, dominant negative helix-loop-helix protein
hsa-miR-548m	0	0	1	1	1	1	IL12B	interleukin 12B (natural killer cell stimulatory factor 2, cytotoxic lymphocyte maturation factor 2, p40)
hsa-miR-548m	1	0	1	1	1	1	INSM1	insulinoma-associated 1
hsa-miR-548m	0	0	1	0	1	1	ITGAV	integrin, alpha V
hsa-miR-548m	0	0	1	1	1	1	ITGB1	integrin, beta 1 (fibronectin receptor, beta polypeptide, antigen CD29 includes MDF2, MSK12)
hsa-miR-548m	1	0	1	1	1	1	ITGB8	integrin, beta 8
hsa-miR-548m	1	0	1	1	1	1	KCNJ10	potassium inwardly-rectifying channel, subfamily J, member 10
hsa-miR-548m	1	0	1	1	1	1	KPNB1	karyopherin (importin) beta 1
hsa-miR-548m	1	0	1	1	1	1	KPNA3	karyopherin alpha 3 (importin alpha 4)
hsa-miR-548m	0	0	1	1	0	0	KRT33B	keratin 33B
hsa-miR-548m	1	0	1	1	1	1	LAMP2	lysosomal-associated membrane protein 2
hsa-miR-548m	1	0	1	1	1	1	LIF	leukemia inhibitory factor
hsa-miR-548m	1	0	1	1	1	1	LIFR	leukemia inhibitory factor receptor alpha
hsa-miR-548m	1	0	1	1	1	1	LY75	lymphocyte antigen 75
hsa-miR-548m	1	0	1	0	1	1	MXD1	MAX dimerization protein 1
hsa-miR-548m	1	0	1	1	1	1	MAN2A1	mannosidase, alpha, class 2A, member 1
hsa-miR-548m	0	0	1	1	1	1	MSX2	msh homeobox 2
hsa-miR-548m	0	0	1	1	1	1	MTRR	5-methyltetrahydrofolate-homocysteine methyltransferase reductase
hsa-miR-548m	1	0	1	1	1	1	NDN	necdin homolog (mouse)
hsa-miR-548m	1	0	1	1	1	1	NEUROD1	neuronal differentiation 1
hsa-miR-548m	0	0	1	1	1	1	NOV	nephroblastoma overexpressed
hsa-miR-548m	0	0	1	1	0	0	NPPB	natriuretic peptide B
hsa-miR-548m	0	0	1	0	1	1	OPHN1	oligophrenin 1
hsa-miR-548m	1	0	1	0	1	1	PAK2	p21 protein (Cdc42/Rac)-activated kinase 2
hsa-miR-548m	1	0	1	0	1	1	PAPPA	pregnancy-associated plasma protein A, pappalysin 1
hsa-miR-548m	1	0	1	1	1	1	PAWR	PRKC, apoptosis, WT1, regulator
hsa-miR-548m	0	0	1	1	1	1	PCK1	phosphoenolpyruvate carboxykinase 1 (soluble)
hsa-miR-548m	0	0	1	1	1	1	PDE2A	phosphodiesterase 2A, cGMP-stimulated
hsa-miR-548m	0	0	1	1	1	1	PDE6D	phosphodiesterase 6D, cGMP-specific, rod, delta
hsa-miR-548m	0	0	1	1	1	1	PEX13	peroxisomal biogenesis factor 13
hsa-miR-548m	1	0	1	1	1	1	PLAGL2	pleiomorphic adenoma gene-like 2
hsa-miR-548m	0	0	1	1	1	1	PLGLB2	plasminogen-like B2
hsa-miR-548m	0	0	1	1	0	0	PLP2	proteolipid protein 2 (colonic epithelium-enriched)
hsa-miR-548m	0	0	1	0	1	1	PMP2	peripheral myelin protein 2
hsa-miR-548m	0	0	1	1	1	1	PNN	pinin, desmosome associated protein
hsa-miR-548m	1	0	1	1	1	1	PPP1CB	protein phosphatase 1, catalytic subunit, beta isozyme
hsa-miR-548m	0	0	1	1	1	1	PPP1R3A	protein phosphatase 1, regulatory subunit 3A
hsa-miR-548m	1	0	1	1	1	1	PPP6C	protein phosphatase 6, catalytic subunit
hsa-miR-548m	0	0	1	1	1	1	PREP	prolyl endopeptidase
hsa-miR-548m	0	0	1	1	1	1	SRGN	serglycin
hsa-miR-548m	0	0	1	1	1	1	EIF2AK2	eukaryotic translation initiation factor 2-alpha kinase 2
hsa-miR-548m	1	0	1	1	1	1	PTPN2	protein tyrosine phosphatase, non-receptor type 2
hsa-miR-548m	0	0	1	1	1	1	PTPN12	protein tyrosine phosphatase, non-receptor type 12
hsa-miR-548m	0	0	1	1	1	1	PTPRM	protein tyrosine phosphatase, receptor type, M
hsa-miR-548m	0	0	1	1	1	1	PTPRR	protein tyrosine phosphatase, receptor type, R
hsa-miR-548m	1	0	1	1	1	1	PVRL1	poliovirus receptor-related 1 (herpesvirus entry mediator C)
hsa-miR-548m	0	0	1	1	0	0	RBMS2	RNA binding motif, single stranded interacting protein 2
hsa-miR-548m	0	0	1	1	1	1	RFC3	replication factor C (activator 1) 3, 38kDa
hsa-miR-548m	1	0	1	1	0	0	RFX1	regulatory factor X, 1 (influences HLA class II expression)
hsa-miR-548m	1	0	1	0	1	1	SORT1	sortilin 1
hsa-miR-548m	1	0	1	0	1	1	CCL22	chemokine (C-C motif) ligand 22
hsa-miR-548m	0	0	1	1	1	1	SDC2	syndecan 2
hsa-miR-548m	0	0	1	1	1	1	SDC4	syndecan 4
hsa-miR-548m	1	0	1	1	1	1	SFRP2	secreted frizzled-related protein 2
hsa-miR-548m	1	0	1	1	1	1	SRSF2	serine/arginine-rich splicing factor 2
hsa-miR-548m	1	0	1	1	1	1	SRSF3	serine/arginine-rich splicing factor 3
hsa-miR-548m	0	0	1	1	1	1	SH3BGRL	SH3 domain binding glutamic acid-rich protein like
hsa-miR-548m	1	0	1	1	1	1	SH3GL2	SH3-domain GRB2-like 2
hsa-miR-548m	0	0	1	1	0	0	SLC5A2	solute carrier family 5 (sodium/glucose cotransporter), member 2
hsa-miR-548m	1	0	1	1	1	1	SLC9A2	solute carrier family 9, subfamily A (NHE2, cation proton antiporter 2), member 2
hsa-miR-548m	1	0	1	1	1	1	SNAI2	snail homolog 2 (Drosophila)
hsa-miR-548m	1	0	1	1	1	1	SMARCC1	SWI/SNF related, matrix associated, actin dependent regulator of chromatin, subfamily c, member 1
hsa-miR-548m	1	0	1	1	1	1	SMARCD2	SWI/SNF related, matrix associated, actin dependent regulator of chromatin, subfamily d, member 2
hsa-miR-548m	0	0	1	1	0	0	SNTA1	syntrophin, alpha 1
hsa-miR-548m	1	0	1	0	1	1	SOX11	SRY (sex determining region Y)-box 11
hsa-miR-548m	1	0	1	1	1	1	SPTBN1	spectrin, beta, non-erythrocytic 1
hsa-miR-548m	1	0	1	1	1	1	SSR2	signal sequence receptor, beta (translocon-associated protein beta)
hsa-miR-548m	1	0	1	1	1	1	STAC	SH3 and cysteine rich domain
hsa-miR-548m	1	0	1	0	1	1	STC1	stanniocalcin 1
hsa-miR-548m	0	0	1	1	1	1	STIM1	stromal interaction molecule 1
hsa-miR-548m	1	0	1	1	1	1	SVIL	supervillin
hsa-miR-548m	0	0	1	1	1	1	TAF2	TAF2 RNA polymerase II, TATA box binding protein (TBP)-associated factor, 150kDa
hsa-miR-548m	1	0	1	0	1	1	TAL1	T-cell acute lymphocytic leukemia 1
hsa-miR-548m	0	0	1	0	1	1	TCEB3	transcription elongation factor B (SIII), polypeptide 3 (110kDa, elongin A)
hsa-miR-548m	0	0	1	0	1	1	TCF21	transcription factor 21
hsa-miR-548m	1	0	1	1	1	1	TFAP4	transcription factor AP-4 (activating enhancer binding protein 4)
hsa-miR-548m	1	0	1	0	1	1	THBS1	thrombospondin 1
hsa-miR-548m	1	0	1	1	1	1	TIAM1	T-cell lymphoma invasion and metastasis 1
hsa-miR-548m	1	0	1	0	1	1	SEC62	SEC62 homolog (S. cerevisiae)
hsa-miR-548m	1	0	1	1	1	1	NR2E1	nuclear receptor subfamily 2, group E, member 1
hsa-miR-548m	1	0	1	1	1	1	TSPAN6	tetraspanin 6
hsa-miR-548m	0	0	1	1	1	1	TPR	translocated promoter region, nuclear basket protein
hsa-miR-548m	1	0	1	0	1	1	TSPYL1	TSPY-like 1
hsa-miR-548m	0	0	1	1	1	1	TTK	TTK protein kinase
hsa-miR-548m	1	0	1	0	1	1	TUB	tubby homolog (mouse)
hsa-miR-548m	1	0	1	1	1	1	UBE2B	ubiquitin-conjugating enzyme E2B
hsa-miR-548m	1	0	1	0	1	1	UBE2D2	ubiquitin-conjugating enzyme E2D 2
hsa-miR-548m	0	0	1	1	1	1	UBE2E1	ubiquitin-conjugating enzyme E2E 1
hsa-miR-548m	1	0	1	0	1	1	VCL	vinculin
hsa-miR-548m	1	0	1	1	1	1	YY1	YY1 transcription factor
hsa-miR-548m	1	0	1	0	1	1	YWHAB	tyrosine 3-monooxygenase/tryptophan 5-monooxygenase activation protein, beta polypeptide
hsa-miR-548m	0	0	1	0	1	1	ZFY	zinc finger protein, Y-linked
hsa-miR-548m	0	0	1	1	1	1	ZNF137P	zinc finger protein 137, pseudogene
hsa-miR-548m	1	0	1	0	1	1	BSN	bassoon (presynaptic cytomatrix protein)
hsa-miR-548m	1	0	1	1	1	1	FZD5	frizzled family receptor 5
hsa-miR-548m	0	0	1	1	1	1	SCG2	secretogranin II
hsa-miR-548m	1	0	1	1	1	1	DEK	DEK oncogene
hsa-miR-548m	0	0	1	1	1	1	STAM	signal transducing adaptor molecule (SH3 domain and ITAM motif) 1
hsa-miR-548m	1	0	1	1	1	1	CUL5	cullin 5
hsa-miR-548m	1	0	1	1	1	1	NRIP1	nuclear receptor interacting protein 1
hsa-miR-548m	1	0	1	1	1	1	TRRAP	transformation/transcription domain-associated protein
hsa-miR-548m	0	0	1	1	1	1	STX7	syntaxin 7
hsa-miR-548m	1	0	1	0	1	1	VAPA	VAMP (vesicle-associated membrane protein)-associated protein A, 33kDa
hsa-miR-548m	1	0	1	1	1	1	SUPT3H	suppressor of Ty 3 homolog (S. cerevisiae)
hsa-miR-548m	1	0	1	1	1	1	CILP	cartilage intermediate layer protein, nucleotide pyrophosphohydrolase
hsa-miR-548m	0	0	1	1	1	1	RGS5	regulator of G-protein signaling 5
hsa-miR-548m	0	0	1	1	0	0	COPS3	COP9 constitutive photomorphogenic homolog subunit 3 (Arabidopsis)
hsa-miR-548m	0	0	1	1	1	1	AGPS	alkylglycerone phosphate synthase
hsa-miR-548m	0	0	1	1	1	1	AP3B1	adaptor-related protein complex 3, beta 1 subunit
hsa-miR-548m	1	0	1	1	1	1	BHLHE40	basic helix-loop-helix family, member e40
hsa-miR-548m	1	0	1	1	1	1	TNFSF11	tumor necrosis factor (ligand) superfamily, member 11
hsa-miR-548m	1	0	1	0	1	1	TNKS	tankyrase, TRF1-interacting ankyrin-related ADP-ribose polymerase
hsa-miR-548m	1	0	1	0	1	1	IRS2	insulin receptor substrate 2
hsa-miR-548m	0	0	1	1	0	0	EIF3F	eukaryotic translation initiation factor 3, subunit F
hsa-miR-548m	0	0	1	1	1	1	JRKL	jerky homolog-like (mouse)
hsa-miR-548m	1	0	1	1	1	1	ADAM9	ADAM metallopeptidase domain 9
hsa-miR-548m	1	0	1	1	1	1	PEX11B	peroxisomal biogenesis factor 11 beta
hsa-miR-548m	1	0	1	1	1	1	ALDH1A2	aldehyde dehydrogenase 1 family, member A2
hsa-miR-548m	0	0	1	1	1	1	PRPF4B	PRP4 pre-mRNA processing factor 4 homolog B (yeast)
hsa-miR-548m	1	0	1	1	1	1	PHOX2B	paired-like homeobox 2b
hsa-miR-548m	1	0	1	1	1	1	CDKL2	cyclin-dependent kinase-like 2 (CDC2-related kinase)
hsa-miR-548m	0	0	1	1	1	1	CH25H	cholesterol 25-hydroxylase
hsa-miR-548m	1	0	1	1	1	1	MAP7	microtubule-associated protein 7
hsa-miR-548m	0	0	1	0	0	0	ARRB1	arrestin, beta 1
hsa-miR-548m	1	0	1	0	1	1	DGKB	diacylglycerol kinase, beta 90kDa
hsa-miR-548m	1	0	1	0	1	1	E2F2	E2F transcription factor 2
hsa-miR-548m	1	0	1	1	1	1	EFNB2	ephrin-B2
hsa-miR-548m	0	0	1	1	1	1	FABP3	fatty acid binding protein 3, muscle and heart (mammary-derived growth inhibitor)
hsa-miR-548m	1	0	1	1	1	1	HNF4G	hepatocyte nuclear factor 4, gamma
hsa-miR-548m	1	0	1	0	1	1	IREB2	iron-responsive element binding protein 2
hsa-miR-548m	1	0	1	0	1	1	SLC1A2	solute carrier family 1 (glial high affinity glutamate transporter), member 2
hsa-miR-548m	0	0	1	1	0	0	UXT	ubiquitously-expressed, prefoldin-like chaperone
hsa-miR-548m	1	0	1	1	1	1	SOCS6	suppressor of cytokine signaling 6
hsa-miR-548m	0	0	1	1	1	1	TRIP13	thyroid hormone receptor interactor 13
hsa-miR-548m	1	0	1	1	1	1	MED21	mediator complex subunit 21
hsa-miR-548m	1	0	1	0	1	1	CHST3	carbohydrate (chondroitin 6) sulfotransferase 3
hsa-miR-548m	0	0	1	1	1	1	CARTPT	CART prepropeptide
hsa-miR-548m	1	0	1	1	1	1	GDA	guanine deaminase
hsa-miR-548m	1	0	1	1	1	1	ARL3	ADP-ribosylation factor-like 3
hsa-miR-548m	1	0	1	0	1	1	RUNX1T1	runt-related transcription factor 1; translocated to, 1 (cyclin D-related)
hsa-miR-548m	1	0	1	1	1	1	DACH1	dachshund homolog 1 (Drosophila)
hsa-miR-548m	1	0	1	1	1	1	DAG1	dystroglycan 1 (dystrophin-associated glycoprotein 1)
hsa-miR-548m	1	0	1	1	1	1	DLX2	distal-less homeobox 2
hsa-miR-548m	1	0	1	1	1	1	ENSA	endosulfine alpha
hsa-miR-548m	1	0	1	1	1	1	EPHB2	EPH receptor B2
hsa-miR-548m	1	0	1	1	1	1	EPS8	epidermal growth factor receptor pathway substrate 8
hsa-miR-548m	1	0	1	0	1	1	ETV5	ets variant 5
hsa-miR-548m	1	0	1	0	1	1	ACSL4	acyl-CoA synthetase long-chain family member 4
hsa-miR-548m	1	0	1	1	1	1	MLLT3	myeloid/lymphoid or mixed-lineage leukemia (trithorax homolog, Drosophila); translocated to, 3
hsa-miR-548m	0	0	1	1	1	1	NFATC3	nuclear factor of activated T-cells, cytoplasmic, calcineurin-dependent 3
hsa-miR-548m	0	0	1	1	1	1	PIGH	phosphatidylinositol glycan anchor biosynthesis, class H
hsa-miR-548m	1	0	1	0	1	1	USP9Y	ubiquitin specific peptidase 9, Y-linked
hsa-miR-548m	1	0	1	1	1	1	RAB11A	RAB11A, member RAS oncogene family
hsa-miR-548m	1	0	1	1	1	1	RABEP1	rabaptin, RAB GTPase binding effector protein 1
hsa-miR-548m	1	0	1	1	1	1	XPR1	xenotropic and polytropic retrovirus receptor 1
hsa-miR-548m	1	0	1	1	1	1	STK17A	serine/threonine kinase 17a
hsa-miR-548m	1	0	1	1	1	1	MED1	mediator complex subunit 1
hsa-miR-548m	1	0	1	1	1	1	B4GALT6	UDP-Gal:betaGlcNAc beta 1,4- galactosyltransferase, polypeptide 6
hsa-miR-548m	1	0	1	1	1	1	B4GALT5	UDP-Gal:betaGlcNAc beta 1,4- galactosyltransferase, polypeptide 5
hsa-miR-548m	0	0	1	1	1	1	LHX2	LIM homeobox 2
hsa-miR-548m	1	0	1	1	1	1	KIF3B	kinesin family member 3B
hsa-miR-548m	1	0	1	1	1	1	SNRNP40	small nuclear ribonucleoprotein 40kDa (U5)
hsa-miR-548m	1	0	1	0	1	1	CDYL	chromodomain protein, Y-like
hsa-miR-548m	1	0	1	1	1	1	ONECUT2	one cut homeobox 2
hsa-miR-548m	1	0	1	1	1	1	FXR2	fragile X mental retardation, autosomal homolog 2
hsa-miR-548m	1	0	1	1	1	1	TBPL1	TBP-like 1
hsa-miR-548m	0	0	1	1	1	1	CALB1	calbindin 1, 28kDa
hsa-miR-548m	0	0	1	1	1	1	DSC1	desmocollin 1
hsa-miR-548m	1	0	1	1	1	1	GABRE	gamma-aminobutyric acid (GABA) A receptor, epsilon
hsa-miR-548m	0	0	1	1	1	1	JAK2	Janus kinase 2
hsa-miR-548m	1	0	1	0	1	1	KRAS	v-Ki-ras2 Kirsten rat sarcoma viral oncogene homolog
hsa-miR-548m	1	0	1	1	1	1	ATXN3	ataxin 3
hsa-miR-548m	0	0	1	1	0	0	ROR1	receptor tyrosine kinase-like orphan receptor 1
hsa-miR-548m	1	0	1	1	1	1	PIK3CD	phosphatidylinositol-4,5-bisphosphate 3-kinase, catalytic subunit delta
hsa-miR-548m	0	0	1	1	1	1	RGPD5	RANBP2-like and GRIP domain containing 5
hsa-miR-548m	1	0	1	0	1	1	SCD	stearoyl-CoA desaturase (delta-9-desaturase)
hsa-miR-548m	1	0	1	0	1	1	SEL1L	sel-1 suppressor of lin-12-like (C. elegans)
hsa-miR-548m	1	0	1	1	1	1	TLE1	transducin-like enhancer of split 1 (E(sp1) homolog, Drosophila)
hsa-miR-548m	1	0	1	1	1	1	WDR1	WD repeat domain 1
hsa-miR-548m	1	0	1	1	1	1	MED13	mediator complex subunit 13
hsa-miR-548m	0	0	1	1	1	1	CLEC2B	C-type lectin domain family 2, member B
hsa-miR-548m	0	0	1	1	1	1	ABCD2	ATP-binding cassette, sub-family D (ALD), member 2
hsa-miR-548m	1	0	1	1	1	1	CBL	Cbl proto-oncogene, E3 ubiquitin protein ligase
hsa-miR-548m	1	0	1	1	1	1	FOXN3	forkhead box N3
hsa-miR-548m	1	1	1	1	1	1	MAP3K8	mitogen-activated protein kinase kinase kinase 8
hsa-miR-548m	0	0	1	1	1	1	CSTA	cystatin A (stefin A)
hsa-miR-548m	0	0	1	0	1	1	EPHA3	EPH receptor A3
hsa-miR-548m	0	0	1	0	0	0	FER	fer (fps/fes related) tyrosine kinase
hsa-miR-548m	0	0	1	1	1	1	MSTN	myostatin
hsa-miR-548m	1	0	1	1	1	1	GPM6A	glycoprotein M6A
hsa-miR-548m	1	0	1	1	1	1	HAS2	hyaluronan synthase 2
hsa-miR-548m	1	0	1	1	0	0	JUND	jun D proto-oncogene
hsa-miR-548m	0	0	1	1	0	0	LIPE	lipase, hormone-sensitive
hsa-miR-548m	1	0	1	1	1	1	PDCL	phosducin-like
hsa-miR-548m	1	0	1	1	1	1	PHF2	PHD finger protein 2
hsa-miR-548m	1	0	1	0	1	1	PRKAB2	protein kinase, AMP-activated, beta 2 non-catalytic subunit
hsa-miR-548m	0	0	1	1	1	1	CXCL11	chemokine (C-X-C motif) ligand 11
hsa-miR-548m	1	0	1	0	1	1	CCDC6	coiled-coil domain containing 6
hsa-miR-548m	0	0	1	1	1	1	SMC3	structural maintenance of chromosomes 3
hsa-miR-548m	0	0	1	1	1	1	CER1	cerberus 1, cysteine knot superfamily, homolog (Xenopus laevis)
hsa-miR-548m	1	0	1	1	1	1	AKT3	v-akt murine thymoma viral oncogene homolog 3 (protein kinase B, gamma)
hsa-miR-548m	1	0	1	0	0	0	FRAT1	frequently rearranged in advanced T-cell lymphomas
hsa-miR-548m	1	0	1	1	1	1	PIGK	phosphatidylinositol glycan anchor biosynthesis, class K
hsa-miR-548m	1	0	1	1	1	1	INSIG1	insulin induced gene 1
hsa-miR-548m	0	0	1	1	1	1	ITK	IL2-inducible T-cell kinase
hsa-miR-548m	0	0	1	1	0	0	LMNB1	lamin B1
hsa-miR-548m	1	0	1	1	1	1	RGS4	regulator of G-protein signaling 4
hsa-miR-548m	1	0	1	1	1	1	DLL1	delta-like 1 (Drosophila)
hsa-miR-548m	1	0	1	1	1	1	ST8SIA4	ST8 alpha-N-acetyl-neuraminide alpha-2,8-sialyltransferase 4
hsa-miR-548m	0	0	1	1	1	1	UBXN8	UBX domain protein 8
hsa-miR-548m	0	0	1	1	0	0	SNURF	SNRPN upstream reading frame
hsa-miR-548m	1	0	1	1	1	1	UST	uronyl-2-sulfotransferase
hsa-miR-548m	1	0	1	1	1	1	NAMPT	nicotinamide phosphoribosyltransferase
hsa-miR-548m	0	0	1	1	1	1	PRG4	proteoglycan 4
hsa-miR-548m	0	0	1	1	1	1	KLRG1	killer cell lectin-like receptor subfamily G, member 1
hsa-miR-548m	1	0	1	1	1	1	PRKD3	protein kinase D3
hsa-miR-548m	1	0	1	0	1	1	SPRY3	sprouty homolog 3 (Drosophila)
hsa-miR-548m	1	0	1	1	1	1	MAT2A	methionine adenosyltransferase II, alpha
hsa-miR-548m	1	0	1	1	1	1	MEOX2	mesenchyme homeobox 2
hsa-miR-548m	1	0	1	1	0	0	MLLT1	myeloid/lymphoid or mixed-lineage leukemia (trithorax homolog, Drosophila); translocated to, 1
hsa-miR-548m	1	0	1	1	1	1	MMP16	matrix metallopeptidase 16 (membrane-inserted)
hsa-miR-548m	0	0	1	1	1	1	S100A2	S100 calcium binding protein A2
hsa-miR-548m	0	0	1	1	0	0	SIX1	SIX homeobox 1
hsa-miR-548m	1	0	1	1	1	1	LIPG	lipase, endothelial
hsa-miR-548m	1	0	1	0	1	1	HDAC4	histone deacetylase 4
hsa-miR-548m	0	0	1	1	1	1	LANCL1	LanC lantibiotic synthetase component C-like 1 (bacterial)
hsa-miR-548m	1	0	1	1	1	1	SEMA3A	sema domain, immunoglobulin domain (Ig), short basic domain, secreted, (semaphorin) 3A
hsa-miR-548m	1	0	1	1	1	1	SPON1	spondin 1, extracellular matrix protein
hsa-miR-548m	1	0	1	1	1	1	CAPZA2	capping protein (actin filament) muscle Z-line, alpha 2
hsa-miR-548m	1	0	1	1	1	1	NCK1	NCK adaptor protein 1
hsa-miR-548m	1	0	1	1	1	1	POU4F1	POU class 4 homeobox 1
hsa-miR-548m	1	0	1	0	1	1	PPP1R2	protein phosphatase 1, regulatory (inhibitor) subunit 2
hsa-miR-548m	0	0	1	0	0	0	PRB3	proline-rich protein BstNI subfamily 3
hsa-miR-548m	1	0	1	0	1	1	PRKAA2	protein kinase, AMP-activated, alpha 2 catalytic subunit
hsa-miR-548m	1	0	1	1	1	1	PKN2	protein kinase N2
hsa-miR-548m	0	0	1	1	1	1	PRKG2	protein kinase, cGMP-dependent, type II
hsa-miR-548m	1	0	1	1	1	1	RANBP2	RAN binding protein 2
hsa-miR-548m	1	0	1	1	1	1	NPEPPS	aminopeptidase puromycin sensitive
hsa-miR-548m	1	0	1	1	1	1	TUBGCP3	tubulin, gamma complex associated protein 3
hsa-miR-548m	0	0	1	1	1	1	HMGN4	high mobility group nucleosomal binding domain 4
hsa-miR-548m	0	0	1	1	1	1	UBE2E3	ubiquitin-conjugating enzyme E2E 3
hsa-miR-548m	0	0	1	1	1	1	SLC25A17	solute carrier family 25 (mitochondrial carrier; peroxisomal membrane protein, 34kDa), member 17
hsa-miR-548m	1	0	1	1	1	1	SEC23A	Sec23 homolog A (S. cerevisiae)
hsa-miR-548m	0	0	1	1	1	1	LRRC41	leucine rich repeat containing 41
hsa-miR-548m	1	0	1	1	1	1	VAT1	vesicle amine transport protein 1 homolog (T. californica)
hsa-miR-548m	1	0	1	0	1	1	APPBP2	amyloid beta precursor protein (cytoplasmic tail) binding protein 2
hsa-miR-548m	1	0	1	1	1	1	NEBL	nebulette
hsa-miR-548m	1	0	1	1	1	1	SPTLC1	serine palmitoyltransferase, long chain base subunit 1
hsa-miR-548m	1	0	1	0	1	1	PTPRE	protein tyrosine phosphatase, receptor type, E
hsa-miR-548m	0	0	1	1	1	1	CLCA2	chloride channel accessory 2
hsa-miR-548m	1	0	1	1	1	1	KHDRBS1	KH domain containing, RNA binding, signal transduction associated 1
hsa-miR-548m	1	0	1	0	1	1	GNA13	guanine nucleotide binding protein (G protein), alpha 13
hsa-miR-548m	1	0	1	0	1	1	API5	apoptosis inhibitor 5
hsa-miR-548m	1	0	1	1	1	1	PGRMC1	progesterone receptor membrane component 1
hsa-miR-548m	1	0	1	1	1	1	MAN1A2	mannosidase, alpha, class 1A, member 2
hsa-miR-548m	0	0	1	1	1	1	NUDT3	nudix (nucleoside diphosphate linked moiety X)-type motif 3
hsa-miR-548m	0	0	1	0	1	1	SUB1	SUB1 homolog (S. cerevisiae)
hsa-miR-548m	1	0	1	1	1	1	DIAPH2	diaphanous homolog 2 (Drosophila)
hsa-miR-548m	1	0	1	1	1	1	HIVEP2	human immunodeficiency virus type I enhancer binding protein 2
hsa-miR-548m	1	0	1	1	1	1	SNTB2	syntrophin, beta 2 (dystrophin-associated protein A1, 59kDa, basic component 2)
hsa-miR-548m	1	0	1	1	1	1	BTG2	BTG family, member 2
hsa-miR-548m	1	0	1	1	1	1	KAT6A	K(lysine) acetyltransferase 6A
hsa-miR-548m	0	0	1	1	0	0	HNRNPA0	heterogeneous nuclear ribonucleoprotein A0
hsa-miR-548m	1	0	1	1	1	1	CBX1	chromobox homolog 1
hsa-miR-548m	1	0	1	1	1	1	FERMT2	fermitin family member 2
hsa-miR-548m	1	0	1	1	1	1	GLIPR1	GLI pathogenesis-related 1
hsa-miR-548m	0	0	1	1	1	1	ATF7	activating transcription factor 7
hsa-miR-548m	1	0	1	1	1	1	RAC1	ras-related C3 botulinum toxin substrate 1 (rho family, small GTP binding protein Rac1)
hsa-miR-548m	1	0	1	1	1	1	RP2	retinitis pigmentosa 2 (X-linked recessive)
hsa-miR-548m	1	0	1	0	1	1	SLC2A3	solute carrier family 2 (facilitated glucose transporter), member 3
hsa-miR-548m	1	0	1	0	1	1	SLC5A3	solute carrier family 5 (sodium/myo-inositol cotransporter), member 3
hsa-miR-548m	1	0	1	1	1	1	SYN1	synapsin I
hsa-miR-548m	1	0	1	1	1	1	NR4A3	nuclear receptor subfamily 4, group A, member 3
hsa-miR-548m	1	0	1	0	1	1	PAPD7	PAP associated domain containing 7
hsa-miR-548m	0	0	1	1	1	1	RTN4	reticulon 4
hsa-miR-548m	1	0	1	1	1	1	ABHD2	abhydrolase domain containing 2
hsa-miR-548m	0	0	1	1	1	1	DNAJB4	DnaJ (Hsp40) homolog, subfamily B, member 4
hsa-miR-548m	1	0	1	1	1	1	FGFR1OP	FGFR1 oncogene partner
hsa-miR-548m	1	0	1	1	1	1	KAT7	K(lysine) acetyltransferase 7
hsa-miR-548m	1	0	1	1	1	1	TMF1	TATA element modulatory factor 1
hsa-miR-548m	1	0	1	1	1	1	UTRN	utrophin
hsa-miR-548m	1	0	1	1	1	1	ZNF81	zinc finger protein 81
hsa-miR-548m	1	0	1	1	1	1	VEZF1	vascular endothelial zinc finger 1
hsa-miR-548m	1	0	1	1	1	1	DUSP10	dual specificity phosphatase 10
hsa-miR-548m	0	0	1	1	1	1	SLC6A14	solute carrier family 6 (amino acid transporter), member 14
hsa-miR-548m	1	0	1	0	1	1	CHP1	calcineurin-like EF hand protein 1
hsa-miR-548m	0	0	1	0	1	1	PNMA2	paraneoplastic Ma antigen 2
hsa-miR-548m	1	0	1	1	1	1	ZNF236	zinc finger protein 236
hsa-miR-548m	0	0	1	0	1	1	AP4E1	adaptor-related protein complex 4, epsilon 1 subunit
hsa-miR-548m	1	0	1	1	1	1	PHLDA1	pleckstrin homology-like domain, family A, member 1
hsa-miR-548m	1	0	1	1	1	1	MTF2	metal response element binding transcription factor 2
hsa-miR-548m	1	0	1	1	1	1	PADI2	peptidyl arginine deiminase, type II
hsa-miR-548m	1	0	1	1	1	1	TARDBP	TAR DNA binding protein
hsa-miR-548m	0	0	1	0	1	1	CD93	CD93 molecule
hsa-miR-548m	1	0	1	1	1	1	ELL2	elongation factor, RNA polymerase II, 2
hsa-miR-548m	0	0	1	1	1	1	GLUD2	glutamate dehydrogenase 2
hsa-miR-548m	1	0	1	1	1	1	APPL1	adaptor protein, phosphotyrosine interaction, PH domain and leucine zipper containing 1
hsa-miR-548m	0	0	1	1	1	1	AHSA1	AHA1, activator of heat shock 90kDa protein ATPase homolog 1 (yeast)
hsa-miR-548m	1	0	1	0	1	1	FZD4	frizzled family receptor 4
hsa-miR-548m	1	0	1	1	1	1	RABGAP1	RAB GTPase activating protein 1
hsa-miR-548m	0	0	1	1	1	1	HARS2	histidyl-tRNA synthetase 2, mitochondrial
hsa-miR-548m	1	0	1	1	1	1	MGEA5	meningioma expressed antigen 5 (hyaluronidase)
hsa-miR-548m	0	0	1	1	0	0	SNW1	SNW domain containing 1
hsa-miR-548m	1	0	1	1	1	1	RHOQ	ras homolog family member Q
hsa-miR-548m	0	0	1	1	1	1	RRAS2	related RAS viral (r-ras) oncogene homolog 2
hsa-miR-548m	1	0	1	1	1	1	HS2ST1	heparan sulfate 2-O-sulfotransferase 1
hsa-miR-548m	1	0	1	0	1	1	ACAP2	ArfGAP with coiled-coil, ankyrin repeat and PH domains 2
hsa-miR-548m	1	0	1	0	1	1	PXDN	peroxidasin homolog (Drosophila)
hsa-miR-548m	1	0	1	0	1	1	G3BP2	GTPase activating protein (SH3 domain) binding protein 2
hsa-miR-548m	1	0	1	1	1	1	MAPRE1	microtubule-associated protein, RP/EB family, member 1
hsa-miR-548m	1	0	1	1	1	1	MMD	monocyte to macrophage differentiation-associated
hsa-miR-548m	1	0	1	0	1	1	BLOC1S6	biogenesis of lysosomal organelles complex-1, subunit 6, pallidin
hsa-miR-548m	0	0	1	1	1	1	H2AFV	H2A histone family, member V
hsa-miR-548m	1	0	1	1	1	1	NPTN	neuroplastin
hsa-miR-548m	0	0	1	0	1	1	TLL1	tolloid-like 1
hsa-miR-548m	0	0	1	1	1	1	CD24	CD24 molecule
hsa-miR-548m	1	0	1	0	1	1	FLRT2	fibronectin leucine rich transmembrane protein 2
hsa-miR-548m	0	0	1	1	1	1	N6AMT1	N-6 adenine-specific DNA methyltransferase 1 (putative)
hsa-miR-548m	0	0	1	1	1	1	C16orf80	chromosome 16 open reading frame 80
hsa-miR-548m	1	0	1	1	1	1	CLCF1	cardiotrophin-like cytokine factor 1
hsa-miR-548m	0	0	1	1	1	1	TBK1	TANK-binding kinase 1
hsa-miR-548m	1	0	1	1	1	1	SLC30A4	solute carrier family 30 (zinc transporter), member 4
hsa-miR-548m	1	0	1	1	1	1	PADI1	peptidyl arginine deiminase, type I
hsa-miR-548m	1	0	1	1	1	1	SLC25A24	solute carrier family 25 (mitochondrial carrier; phosphate carrier), member 24
hsa-miR-548m	1	0	1	1	1	1	TMEM2	transmembrane protein 2
hsa-miR-548m	1	0	1	1	1	1	LRP12	low density lipoprotein receptor-related protein 12
hsa-miR-548m	0	0	1	1	1	1	UBQLN1	ubiquilin 1
hsa-miR-548m	0	0	1	0	1	1	EMR2	egf-like module containing, mucin-like, hormone receptor-like 2
hsa-miR-548m	1	0	1	0	1	1	OSTM1	osteopetrosis associated transmembrane protein 1
hsa-miR-548m	0	0	1	1	1	1	MRPL42	mitochondrial ribosomal protein L42
hsa-miR-548m	1	0	1	1	1	1	KLF15	Kruppel-like factor 15
hsa-miR-548m	1	0	1	1	1	1	ZNF770	zinc finger protein 770
hsa-miR-548m	1	0	1	0	1	1	C16orf72	chromosome 16 open reading frame 72
hsa-miR-548m	0	0	1	1	0	0	EIF2B2	eukaryotic translation initiation factor 2B, subunit 2 beta, 39kDa
hsa-miR-548m	0	0	1	0	1	1	ADAMTS3	ADAM metallopeptidase with thrombospondin type 1 motif, 3
hsa-miR-548m	1	0	1	0	1	1	ODZ1	odz, odd Oz/ten-m homolog 1 (Drosophila)
hsa-miR-548m	0	0	1	1	0	0	CNPY2	canopy 2 homolog (zebrafish)
hsa-miR-548m	0	0	1	1	1	1	PLK4	polo-like kinase 4
hsa-miR-548m	0	0	1	1	1	1	ADAM28	ADAM metallopeptidase domain 28
hsa-miR-548m	1	0	1	1	1	1	C11orf58	chromosome 11 open reading frame 58
hsa-miR-548m	0	0	1	1	1	1	IL1RAPL1	interleukin 1 receptor accessory protein-like 1
hsa-miR-548m	0	0	1	1	1	1	DNAJC8	DnaJ (Hsp40) homolog, subfamily C, member 8
hsa-miR-548m	1	0	1	1	1	1	LEMD3	LEM domain containing 3
hsa-miR-548m	0	0	1	0	1	1	EID1	EP300 interacting inhibitor of differentiation 1
hsa-miR-548m	1	0	1	1	1	1	MTCH2	mitochondrial carrier 2
hsa-miR-548m	0	0	1	1	0	0	CLEC4E	C-type lectin domain family 4, member E
hsa-miR-548m	1	0	1	1	1	1	LHX6	LIM homeobox 6
hsa-miR-548m	1	0	1	0	1	1	DIEXF	digestive organ expansion factor homolog (zebrafish)
hsa-miR-548m	0	0	1	1	1	1	LAMP3	lysosomal-associated membrane protein 3
hsa-miR-548m	1	0	1	1	1	1	AFF4	AF4/FMR2 family, member 4
hsa-miR-548m	0	0	1	1	1	1	MORC1	MORC family CW-type zinc finger 1
hsa-miR-548m	1	0	1	1	1	1	SERP1	stress-associated endoplasmic reticulum protein 1
hsa-miR-548m	1	0	1	1	1	1	PDCD4	programmed cell death 4 (neoplastic transformation inhibitor)
hsa-miR-548m	1	0	1	1	1	1	KLHL20	kelch-like 20 (Drosophila)
hsa-miR-548m	1	0	1	1	0	0	RBMXL2	RNA binding motif protein, X-linked-like 2
hsa-miR-548m	0	0	1	1	1	1	GOLIM4	golgi integral membrane protein 4
hsa-miR-548m	0	0	1	1	1	1	TMOD2	tropomodulin 2 (neuronal)
hsa-miR-548m	0	0	1	1	0	0	A1CF	APOBEC1 complementation factor
hsa-miR-548m	1	0	1	1	1	1	SLC40A1	solute carrier family 40 (iron-regulated transporter), member 1
hsa-miR-548m	1	0	1	0	1	1	SH3PXD2A	SH3 and PX domains 2A
hsa-miR-548m	0	0	1	1	1	1	DZIP3	DAZ interacting protein 3, zinc finger
hsa-miR-548m	0	0	1	1	0	0	EMC2	ER membrane protein complex subunit 2
hsa-miR-548m	1	0	1	0	1	1	EDEM1	ER degradation enhancer, mannosidase alpha-like 1
hsa-miR-548m	1	0	1	1	1	1	TBKBP1	TBK1 binding protein 1
hsa-miR-548m	0	0	1	1	1	1	FRMPD4	FERM and PDZ domain containing 4
hsa-miR-548m	1	0	1	0	1	1	MLEC	malectin
hsa-miR-548m	1	0	1	1	1	1	RASSF2	Ras association (RalGDS/AF-6) domain family member 2
hsa-miR-548m	1	0	1	0	1	1	SERTAD2	SERTA domain containing 2
hsa-miR-548m	1	0	1	0	1	1	MAML1	mastermind-like 1 (Drosophila)
hsa-miR-548m	1	0	1	1	1	1	MRPL19	mitochondrial ribosomal protein L19
hsa-miR-548m	1	0	1	1	1	1	DAZAP2	DAZ associated protein 2
hsa-miR-548m	1	0	1	0	1	1	ARHGAP11A	Rho GTPase activating protein 11A
hsa-miR-548m	0	0	1	0	1	1	EPM2AIP1	EPM2A (laforin) interacting protein 1
hsa-miR-548m	1	0	1	0	1	1	TRIL	TLR4 interactor with leucine-rich repeats
hsa-miR-548m	0	0	1	1	1	1	TOX4	TOX high mobility group box family member 4
hsa-miR-548m	1	0	1	0	1	1	LPPR4	lipid phosphate phosphatase-related protein type 4
hsa-miR-548m	0	0	1	0	1	1	PPM1E	protein phosphatase, Mg2+/Mn2+ dependent, 1E
hsa-miR-548m	0	0	1	1	1	1	ADNP2	ADNP homeobox 2
hsa-miR-548m	1	0	1	1	1	1	CHSY1	chondroitin sulfate synthase 1
hsa-miR-548m	0	0	1	1	1	1	ENPP4	ectonucleotide pyrophosphatase/phosphodiesterase 4 (putative)
hsa-miR-548m	1	0	1	1	1	1	SPAST	spastin
hsa-miR-548m	1	0	1	1	1	1	DIP2C	DIP2 disco-interacting protein 2 homolog C (Drosophila)
hsa-miR-548m	1	0	1	1	1	1	SORCS3	sortilin-related VPS10 domain containing receptor 3
hsa-miR-548m	1	0	1	1	1	1	SPEN	spen homolog, transcriptional regulator (Drosophila)
hsa-miR-548m	1	0	1	1	1	1	FBXO21	F-box protein 21
hsa-miR-548m	1	0	1	0	1	1	PDS5B	PDS5, regulator of cohesion maintenance, homolog B (S. cerevisiae)
hsa-miR-548m	1	0	1	1	1	1	SMG1	smg-1 homolog, phosphatidylinositol 3-kinase-related kinase (C. elegans)
hsa-miR-548m	0	0	1	1	0	0	NUP205	nucleoporin 205kDa
hsa-miR-548m	1	0	1	1	1	1	RTF1	Rtf1, Paf1/RNA polymerase II complex component, homolog (S. cerevisiae)
hsa-miR-548m	1	0	1	1	1	1	PRRC2C	proline-rich coiled-coil 2C
hsa-miR-548m	1	0	1	1	1	1	PLCB1	phospholipase C, beta 1 (phosphoinositide-specific)
hsa-miR-548m	1	0	1	0	1	1	KIAA1024	KIAA1024
hsa-miR-548m	1	0	1	1	1	1	CSTF2T	cleavage stimulation factor, 3' pre-RNA, subunit 2, 64kDa, tau variant
hsa-miR-548m	1	0	1	1	1	1	DNAJC13	DnaJ (Hsp40) homolog, subfamily C, member 13
hsa-miR-548m	0	0	1	1	1	1	ANGEL1	angel homolog 1 (Drosophila)
hsa-miR-548m	1	0	1	0	1	1	ARHGEF12	Rho guanine nucleotide exchange factor (GEF) 12
hsa-miR-548m	1	0	1	0	1	1	SRGAP2	SLIT-ROBO Rho GTPase activating protein 2
hsa-miR-548m	1	0	1	1	1	1	MED13L	mediator complex subunit 13-like
hsa-miR-548m	1	0	1	0	1	1	KCTD2	potassium channel tetramerisation domain containing 2
hsa-miR-548m	1	0	1	1	1	1	MORC3	MORC family CW-type zinc finger 3
hsa-miR-548m	1	0	1	1	1	1	MOB4	MOB family member 4, phocein
hsa-miR-548m	1	0	1	1	1	1	PARM1	prostate androgen-regulated mucin-like protein 1
hsa-miR-548m	1	0	1	1	1	1	CNOT6	CCR4-NOT transcription complex, subunit 6
hsa-miR-548m	1	0	1	1	1	1	MYRIP	myosin VIIA and Rab interacting protein
hsa-miR-548m	0	0	1	1	1	1	TMEM87A	transmembrane protein 87A
hsa-miR-548m	1	0	1	0	1	1	OSBPL3	oxysterol binding protein-like 3
hsa-miR-548m	1	0	1	0	1	1	PPP1R16B	protein phosphatase 1, regulatory subunit 16B
hsa-miR-548m	1	0	1	0	1	1	ERC2	ELKS/RAB6-interacting/CAST family member 2
hsa-miR-548m	1	0	1	1	1	1	WSB1	WD repeat and SOCS box containing 1
hsa-miR-548m	1	0	1	1	0	0	LDLRAP1	low density lipoprotein receptor adaptor protein 1
hsa-miR-548m	1	0	1	1	1	1	PHF19	PHD finger protein 19
hsa-miR-548m	1	0	1	1	1	1	ABCA12	ATP-binding cassette, sub-family A (ABC1), member 12
hsa-miR-548m	0	0	1	1	0	0	ZNF777	zinc finger protein 777
hsa-miR-548m	1	0	1	1	1	1	AZIN1	antizyme inhibitor 1
hsa-miR-548m	1	0	1	0	1	1	TRIM33	tripartite motif containing 33
hsa-miR-548m	1	0	1	1	1	1	MEMO1	mediator of cell motility 1
hsa-miR-548m	0	0	1	0	1	1	OTUD6B	OTU domain containing 6B
hsa-miR-548m	0	0	1	1	1	1	SBDS	Shwachman-Bodian-Diamond syndrome
hsa-miR-548m	1	0	1	1	1	1	SLMO2	slowmo homolog 2 (Drosophila)
hsa-miR-548m	0	0	1	1	1	1	ISOC1	isochorismatase domain containing 1
hsa-miR-548m	0	0	1	1	1	1	MED31	mediator complex subunit 31
hsa-miR-548m	1	0	1	1	1	1	GOLT1B	golgi transport 1B
hsa-miR-548m	1	0	1	0	1	1	CNR1	cannabinoid receptor 1 (brain)
hsa-miR-548m	0	0	1	1	1	1	ZFR	zinc finger RNA binding protein
hsa-miR-548m	0	0	1	1	1	1	RAB10	RAB10, member RAS oncogene family
hsa-miR-548m	1	0	1	1	1	1	INSIG2	insulin induced gene 2
hsa-miR-548m	0	0	1	1	1	1	COMMD10	COMM domain containing 10
hsa-miR-548m	1	0	1	1	1	1	VGLL3	vestigial like 3 (Drosophila)
hsa-miR-548m	1	0	1	1	1	1	NLK	nemo-like kinase
hsa-miR-548m	1	0	1	1	1	1	AKAP11	A kinase (PRKA) anchor protein 11
hsa-miR-548m	0	0	1	1	0	0	MAGEC2	melanoma antigen family C, 2
hsa-miR-548m	1	0	1	0	1	1	HPCAL4	hippocalcin like 4
hsa-miR-548m	1	0	1	1	1	1	RNF138	ring finger protein 138, E3 ubiquitin protein ligase
hsa-miR-548m	0	0	1	1	0	0	HSPA14	heat shock 70kDa protein 14
hsa-miR-548m	1	0	1	1	1	1	RAB14	RAB14, member RAS oncogene family
hsa-miR-548m	1	0	1	1	1	1	RAPGEFL1	Rap guanine nucleotide exchange factor (GEF)-like 1
hsa-miR-548m	0	0	1	1	1	1	CD244	CD244 molecule, natural killer cell receptor 2B4
hsa-miR-548m	1	0	1	1	1	1	PHF20	PHD finger protein 20
hsa-miR-548m	0	0	1	1	1	1	AMBN	ameloblastin (enamel matrix protein)
hsa-miR-548m	1	0	1	0	1	1	RAB8B	RAB8B, member RAS oncogene family
hsa-miR-548m	1	0	1	1	1	1	GCNT4	glucosaminyl (N-acetyl) transferase 4, core 2
hsa-miR-548m	0	0	1	1	1	1	KDM3B	lysine (K)-specific demethylase 3B
hsa-miR-548m	1	0	1	1	1	1	UFM1	ubiquitin-fold modifier 1
hsa-miR-548m	0	0	1	0	1	1	PAX5	paired box 5
hsa-miR-548m	1	0	1	1	1	1	HOXC13	homeobox C13
hsa-miR-548m	1	0	1	1	1	1	SIX4	SIX homeobox 4
hsa-miR-548m	1	0	1	1	1	1	OTUD4	OTU domain containing 4
hsa-miR-548m	1	0	1	1	1	1	GALNT10	UDP-N-acetyl-alpha-D-galactosamine:polypeptide N-acetylgalactosaminyltransferase 10 (GalNAc-T10)
hsa-miR-548m	1	0	1	0	1	1	UBE2Q1	ubiquitin-conjugating enzyme E2Q family member 1
hsa-miR-548m	0	0	1	0	1	1	TRIM44	tripartite motif containing 44
hsa-miR-548m	1	0	1	1	1	1	DIRAS2	DIRAS family, GTP-binding RAS-like 2
hsa-miR-548m	1	0	1	0	1	1	EIF2C4	eukaryotic translation initiation factor 2C, 4
hsa-miR-548m	1	0	1	0	1	1	KCTD9	potassium channel tetramerisation domain containing 9
hsa-miR-548m	1	0	1	1	1	1	HAUS6	HAUS augmin-like complex, subunit 6
hsa-miR-548m	1	0	1	1	1	1	ZNF280C	zinc finger protein 280C
hsa-miR-548m	0	0	1	1	1	1	ERCC6L	excision repair cross-complementing rodent repair deficiency, complementation group 6-like
hsa-miR-548m	1	0	1	0	1	1	FAM46C	family with sequence similarity 46, member C
hsa-miR-548m	0	0	1	1	1	1	QRICH1	glutamine-rich 1
hsa-miR-548m	1	0	1	0	1	1	DCAF16	DDB1 and CUL4 associated factor 16
hsa-miR-548m	1	0	1	1	1	1	TBC1D8B	TBC1 domain family, member 8B (with GRAM domain)
hsa-miR-548m	1	0	1	0	1	1	CHD7	chromodomain helicase DNA binding protein 7
hsa-miR-548m	1	0	1	1	1	1	HIF1AN	hypoxia inducible factor 1, alpha subunit inhibitor
hsa-miR-548m	1	0	1	1	1	1	FBXO34	F-box protein 34
hsa-miR-548m	1	0	1	1	1	1	IFT57	intraflagellar transport 57 homolog (Chlamydomonas)
hsa-miR-548m	1	0	1	1	1	1	FIGN	fidgetin
hsa-miR-548m	0	0	1	0	0	0	C19orf73	chromosome 19 open reading frame 73
hsa-miR-548m	1	0	1	1	1	1	TMEM33	transmembrane protein 33
hsa-miR-548m	0	0	1	1	1	1	TSR1	TSR1, 20S rRNA accumulation, homolog (S. cerevisiae)
hsa-miR-548m	0	0	1	1	0	0	CEP55	centrosomal protein 55kDa
hsa-miR-548m	1	0	1	0	1	1	MSL2	male-specific lethal 2 homolog (Drosophila)
hsa-miR-548m	0	0	1	1	1	1	NUDT11	nudix (nucleoside diphosphate linked moiety X)-type motif 11
hsa-miR-548m	1	0	1	1	1	1	RPRD1A	regulation of nuclear pre-mRNA domain containing 1A
hsa-miR-548m	0	0	1	0	1	1	GOLPH3L	golgi phosphoprotein 3-like
hsa-miR-548m	1	0	1	0	1	1	ARL8B	ADP-ribosylation factor-like 8B
hsa-miR-548m	0	0	1	1	1	1	TMLHE	trimethyllysine hydroxylase, epsilon
hsa-miR-548m	1	0	1	1	1	1	LRRC1	leucine rich repeat containing 1
hsa-miR-548m	1	0	1	1	1	1	UBA6	ubiquitin-like modifier activating enzyme 6
hsa-miR-548m	0	0	1	1	1	1	SAYSD1	SAYSVFN motif domain containing 1
hsa-miR-548m	1	0	1	1	1	1	PI4K2B	phosphatidylinositol 4-kinase type 2 beta
hsa-miR-548m	1	0	1	1	1	1	C9orf72	chromosome 9 open reading frame 72
hsa-miR-548m	1	0	1	1	1	1	SPTLC3	serine palmitoyltransferase, long chain base subunit 3
hsa-miR-548m	0	0	1	1	1	1	TMEM144	transmembrane protein 144
hsa-miR-548m	1	0	1	0	1	1	LIN7C	lin-7 homolog C (C. elegans)
hsa-miR-548m	1	0	1	1	1	1	RSBN1	round spermatid basic protein 1
hsa-miR-548m	0	0	1	0	1	1	BLOC1S4	biogenesis of lysosomal organelles complex-1, subunit 4, cappuccino
hsa-miR-548m	1	0	1	1	1	1	DRAM1	DNA-damage regulated autophagy modulator 1
hsa-miR-548m	0	0	1	1	1	1	SYNJ2BP	synaptojanin 2 binding protein
hsa-miR-548m	1	0	1	0	1	1	FOXJ2	forkhead box J2
hsa-miR-548m	0	0	1	1	1	1	SLC22A15	solute carrier family 22, member 15
hsa-miR-548m	1	0	1	1	1	1	RRN3	RRN3 RNA polymerase I transcription factor homolog (S. cerevisiae)
hsa-miR-548m	1	0	1	1	1	1	PAG1	phosphoprotein associated with glycosphingolipid microdomains 1
hsa-miR-548m	1	0	1	0	1	1	BRK1	BRICK1, SCAR/WAVE actin-nucleating complex subunit
hsa-miR-548m	1	0	1	1	1	1	ASH1L	ash1 (absent, small, or homeotic)-like (Drosophila)
hsa-miR-548m	1	0	1	0	1	1	LRP1B	low density lipoprotein receptor-related protein 1B
hsa-miR-548m	1	0	1	1	1	1	CTTNBP2NL	CTTNBP2 N-terminal like
hsa-miR-548m	1	0	1	0	1	1	TMEM55A	transmembrane protein 55A
hsa-miR-548m	1	0	1	1	1	1	GNG12	guanine nucleotide binding protein (G protein), gamma 12
hsa-miR-548m	1	0	1	0	1	1	PCDHAC1	protocadherin alpha subfamily C, 1
hsa-miR-548m	1	0	1	0	1	1	PCDHAC2	protocadherin alpha subfamily C, 2
hsa-miR-548m	1	0	1	1	1	1	PCDHA1	protocadherin alpha 1
hsa-miR-548m	1	0	1	0	1	1	PCDHA10	protocadherin alpha 10
hsa-miR-548m	1	0	1	0	1	1	PCDHA11	protocadherin alpha 11
hsa-miR-548m	1	0	1	0	1	1	PCDHA12	protocadherin alpha 12
hsa-miR-548m	1	0	1	1	1	1	PCDHA2	protocadherin alpha 2
hsa-miR-548m	1	0	1	1	1	1	PCDHA3	protocadherin alpha 3
hsa-miR-548m	1	0	1	1	1	1	PCDHA6	protocadherin alpha 6
hsa-miR-548m	1	0	1	0	1	1	PCDHA7	protocadherin alpha 7
hsa-miR-548m	1	0	1	1	1	1	PCDHA8	protocadherin alpha 8
hsa-miR-548m	0	0	1	1	1	1	NPAP1	nuclear pore associated protein 1
hsa-miR-548m	1	0	1	1	1	1	SASH3	SAM and SH3 domain containing 3
hsa-miR-548m	0	0	1	1	1	1	RIN2	Ras and Rab interactor 2
hsa-miR-548m	1	0	1	0	1	1	CCDC93	coiled-coil domain containing 93
hsa-miR-548m	1	0	1	1	1	1	DLL4	delta-like 4 (Drosophila)
hsa-miR-548m	1	0	1	1	1	1	NDFIP2	Nedd4 family interacting protein 2
hsa-miR-548m	1	0	1	0	1	1	CCNJ	cyclin J
hsa-miR-548m	0	0	1	0	1	1	ARL15	ADP-ribosylation factor-like 15
hsa-miR-548m	1	0	1	1	1	1	PLEKHA3	pleckstrin homology domain containing, family A (phosphoinositide binding specific) member 3
hsa-miR-548m	1	0	1	1	1	1	EPB41L4B	erythrocyte membrane protein band 4.1 like 4B
hsa-miR-548m	0	0	1	1	1	1	RNF20	ring finger protein 20, E3 ubiquitin protein ligase
hsa-miR-548m	1	0	1	1	1	1	CCBL2	cysteine conjugate-beta lyase 2
hsa-miR-548m	1	0	1	1	0	0	KCNQ5	potassium voltage-gated channel, KQT-like subfamily, member 5
hsa-miR-548m	0	0	1	1	1	1	RPRM	reprimo, TP53 dependent G2 arrest mediator candidate
hsa-miR-548m	0	0	1	1	1	1	HLA-DQA2	major histocompatibility complex, class II, DQ alpha 2
hsa-miR-548m	1	0	1	0	1	1	TM9SF3	transmembrane 9 superfamily member 3
hsa-miR-548m	1	0	1	1	1	1	FEM1C	fem-1 homolog c (C. elegans)
hsa-miR-548m	1	0	1	1	0	0	C11orf75	chromosome 11 open reading frame 75
hsa-miR-548m	1	0	1	1	1	1	C5orf15	chromosome 5 open reading frame 15
hsa-miR-548m	0	0	1	1	1	1	PRTFDC1	phosphoribosyl transferase domain containing 1
hsa-miR-548m	0	0	1	1	1	1	MEPE	matrix extracellular phosphoglycoprotein
hsa-miR-548m	0	0	1	1	1	1	TOMM22	translocase of outer mitochondrial membrane 22 homolog (yeast)
hsa-miR-548m	1	0	1	0	1	1	MNT	MAX binding protein
hsa-miR-548m	0	0	1	1	1	1	ANKMY2	ankyrin repeat and MYND domain containing 2
hsa-miR-548m	1	0	1	1	1	1	KIAA1244	KIAA1244
hsa-miR-548m	1	0	1	1	1	1	PAK7	p21 protein (Cdc42/Rac)-activated kinase 7
hsa-miR-548m	1	0	1	0	1	1	SLC17A6	solute carrier family 17 (sodium-dependent inorganic phosphate cotransporter), member 6
hsa-miR-548m	0	0	1	1	1	1	PDSS2	prenyl (decaprenyl) diphosphate synthase, subunit 2
hsa-miR-548m	0	0	1	1	1	1	PLXDC1	plexin domain containing 1
hsa-miR-548m	1	0	1	1	1	1	ATP8B2	ATPase, aminophospholipid transporter, class I, type 8B, member 2
hsa-miR-548m	1	0	1	1	0	0	JPH3	junctophilin 3
hsa-miR-548m	1	0	1	1	1	1	DSCAML1	Down syndrome cell adhesion molecule like 1
hsa-miR-548m	1	0	1	0	1	1	KCNS2	potassium voltage-gated channel, delayed-rectifier, subfamily S, member 2
hsa-miR-548m	0	0	1	1	1	1	SHROOM4	shroom family member 4
hsa-miR-548m	1	0	1	1	1	1	MIB1	mindbomb E3 ubiquitin protein ligase 1
hsa-miR-548m	1	0	1	0	1	1	SYT4	synaptotagmin IV
hsa-miR-548m	0	0	1	1	1	1	TXNDC16	thioredoxin domain containing 16
hsa-miR-548m	1	0	1	1	1	1	NCEH1	neutral cholesterol ester hydrolase 1
hsa-miR-548m	1	0	1	1	1	1	SEMA6A	sema domain, transmembrane domain (TM), and cytoplasmic domain, (semaphorin) 6A
hsa-miR-548m	0	0	1	1	1	1	ARRDC3	arrestin domain containing 3
hsa-miR-548m	0	0	1	1	1	1	MARCH4	membrane-associated ring finger (C3HC4) 4, E3 ubiquitin protein ligase
hsa-miR-548m	1	0	1	1	1	1	ZBTB2	zinc finger and BTB domain containing 2
hsa-miR-548m	1	0	1	1	1	1	CNTN3	contactin 3 (plasmacytoma associated)
hsa-miR-548m	1	0	1	1	1	1	EPB41L5	erythrocyte membrane protein band 4.1 like 5
hsa-miR-548m	1	0	1	1	1	1	ZFP14	zinc finger protein 14 homolog (mouse)
hsa-miR-548m	1	0	1	1	1	1	ALS2	amyotrophic lateral sclerosis 2 (juvenile)
hsa-miR-548m	0	0	1	1	1	1	EPG5	ectopic P-granules autophagy protein 5 homolog (C. elegans)
hsa-miR-548m	0	0	1	1	1	1	AQP9	aquaporin 9
hsa-miR-548m	1	0	1	1	1	1	SNTB1	syntrophin, beta 1 (dystrophin-associated protein A1, 59kDa, basic component 1)
hsa-miR-548m	1	0	1	0	1	1	RAP2A	RAP2A, member of RAS oncogene family
hsa-miR-548m	1	0	1	0	1	1	NMT1	N-myristoyltransferase 1
hsa-miR-548m	1	0	1	1	1	1	CLDN1	claudin 1
hsa-miR-548m	1	0	1	1	1	1	TMSB4X	thymosin beta 4, X-linked
hsa-miR-548m	1	0	1	1	1	1	RTN1	reticulon 1
hsa-miR-548m	1	0	1	0	1	1	TMX4	thioredoxin-related transmembrane protein 4
hsa-miR-548m	0	0	1	1	0	0	TRIB3	tribbles homolog 3 (Drosophila)
hsa-miR-548m	1	0	1	0	1	1	TP53INP2	tumor protein p53 inducible nuclear protein 2
hsa-miR-548m	0	0	1	1	1	1	OSTC	oligosaccharyltransferase complex subunit
hsa-miR-548m	0	0	1	1	1	1	SELK	selenoprotein K
hsa-miR-548m	1	0	1	1	1	1	FAM60A	family with sequence similarity 60, member A
hsa-miR-548m	0	0	1	1	0	0	MYOZ1	myozenin 1
hsa-miR-548m	1	0	1	1	1	1	SNX6	sorting nexin 6
hsa-miR-548m	1	0	1	1	1	1	PELI2	pellino E3 ubiquitin protein ligase family member 2
hsa-miR-548m	1	0	1	1	1	1	PRDM12	PR domain containing 12
hsa-miR-548m	0	0	1	1	0	0	FCGR2A	Fc fragment of IgG, low affinity IIa, receptor (CD32)
hsa-miR-548m	1	0	1	0	1	1	TSPYL4	TSPY-like 4
hsa-miR-548m	1	0	1	1	1	1	OTX2	orthodenticle homeobox 2
hsa-miR-548m	1	0	1	1	1	1	TGIF2	TGFB-induced factor homeobox 2
hsa-miR-548m	1	0	1	1	1	1	BACH2	BTB and CNC homology 1, basic leucine zipper transcription factor 2
hsa-miR-548m	0	0	1	0	1	1	CFL2	cofilin 2 (muscle)
hsa-miR-548m	1	0	1	1	1	1	ZFAND3	zinc finger, AN1-type domain 3
hsa-miR-548m	0	0	1	1	1	1	MS4A1	membrane-spanning 4-domains, subfamily A, member 1
hsa-miR-548m	1	0	1	1	1	1	GRIK2	glutamate receptor, ionotropic, kainate 2
hsa-miR-548m	1	0	1	1	1	1	SEC24A	SEC24 family, member A (S. cerevisiae)
hsa-miR-548m	1	0	1	1	1	1	TIA1	TIA1 cytotoxic granule-associated RNA binding protein
hsa-miR-548m	1	0	1	0	1	1	GAN	gigaxonin
hsa-miR-548m	1	0	1	1	0	0	SDF2L1	stromal cell-derived factor 2-like 1
hsa-miR-548m	0	0	1	1	1	1	CHP2	calcineurin-like EF hand protein 2
hsa-miR-548m	1	0	1	1	1	1	SNX16	sorting nexin 16
hsa-miR-548m	1	0	1	1	1	1	EPB41L4A	erythrocyte membrane protein band 4.1 like 4A
hsa-miR-548m	1	0	1	1	1	1	XYLT1	xylosyltransferase I
hsa-miR-548m	1	0	1	0	1	1	EDAR	ectodysplasin A receptor
hsa-miR-548m	0	0	1	1	1	1	RAB38	RAB38, member RAS oncogene family
hsa-miR-548m	0	0	1	1	0	0	KIF9	kinesin family member 9
hsa-miR-548m	0	0	1	1	1	1	HHIP	hedgehog interacting protein
hsa-miR-548m	1	0	1	0	1	1	MRPS25	mitochondrial ribosomal protein S25
hsa-miR-548m	1	0	1	0	1	1	DNMT3A	DNA (cytosine-5-)-methyltransferase 3 alpha
hsa-miR-548m	1	0	1	1	1	1	MESDC1	mesoderm development candidate 1
hsa-miR-548m	1	0	1	1	1	1	ALDH8A1	aldehyde dehydrogenase 8 family, member A1
hsa-miR-548m	0	0	1	1	0	0	NDST4	N-deacetylase/N-sulfotransferase (heparan glucosaminyl) 4
hsa-miR-548m	1	0	1	0	1	1	HOXC8	homeobox C8
hsa-miR-548m	0	0	1	1	1	1	ACBD3	acyl-CoA binding domain containing 3
hsa-miR-548m	0	0	1	1	1	1	SFXN1	sideroflexin 1
hsa-miR-548m	1	0	1	1	1	1	MARCH7	membrane-associated ring finger (C3HC4) 7, E3 ubiquitin protein ligase
hsa-miR-548m	1	0	1	1	1	1	AIDA	axin interactor, dorsalization associated
hsa-miR-548m	1	0	1	0	1	1	USP46	ubiquitin specific peptidase 46
hsa-miR-548m	0	0	1	0	1	1	CDCP1	CUB domain containing protein 1
hsa-miR-548m	1	0	1	0	1	1	BCL11B	B-cell CLL/lymphoma 11B (zinc finger protein)
hsa-miR-548m	1	0	1	1	0	0	CCDC71	coiled-coil domain containing 71
hsa-miR-548m	1	0	1	1	1	1	REEP1	receptor accessory protein 1
hsa-miR-548m	0	0	1	1	1	1	MARCKSL1	MARCKS-like 1
hsa-miR-548m	1	0	1	1	1	1	SOWAHC	sosondowah ankyrin repeat domain family member C
hsa-miR-548m	1	0	1	1	0	0	UBE2Z	ubiquitin-conjugating enzyme E2Z
hsa-miR-548m	1	0	1	1	1	1	GDAP1L1	ganglioside induced differentiation associated protein 1-like 1
hsa-miR-548m	0	0	1	1	0	0	DDX50	DEAD (Asp-Glu-Ala-Asp) box polypeptide 50
hsa-miR-548m	0	0	1	1	0	0	DCTPP1	dCTP pyrophosphatase 1
hsa-miR-548m	1	0	1	0	1	1	NOTCH2	notch 2
hsa-miR-548m	1	0	1	1	1	1	LRRC2	leucine rich repeat containing 2
[truncated: 285 more rows]
