# Supplementary material for: Profiling of Selected MicroRNAs in Proliferative Eutopic Endometrium of Women with Ovarian Endometriosis
Source: Biomed Res Int. 2015 Aug 20;2015:760698. doi: 10.1155/2015/760698 (PMC4558423; doi:10.1155/2015/760698)
Supplement: Supplementary file 1 — Table I: The names of miRNAs significantly differentially expressed between eutopic endometrium of patients with endometriosis vs eutopic endometrium of patients without endometriosis. Table II: The associations between miRNA and mRNA, which presents detailed results of the search of six major databases i.e targetscan, tarbase, miranda, mirbase, mirtarget2 and pictar. [file 760698.f1.zip › 760698.f1/Table II/hsa-miR-548n.tsv]

miR	targetscan	tarbase	miranda	mirbase	mirtarget2	pictar	GeneSymbol	GeneName
hsa-miR-548n	1	0	1	1	1	1	ZFYVE16	zinc finger, FYVE domain containing 16
hsa-miR-548n	1	0	1	1	1	1	CHD9	chromodomain helicase DNA binding protein 9
hsa-miR-548n	1	0	1	1	0	0	RAPGEF2	Rap guanine nucleotide exchange factor (GEF) 2
hsa-miR-548n	1	0	1	0	1	1	KIAA0355	KIAA0355
hsa-miR-548n	1	0	1	1	1	1	DAAM2	dishevelled associated activator of morphogenesis 2
hsa-miR-548n	1	0	1	1	1	1	FAM65B	family with sequence similarity 65, member B
hsa-miR-548n	0	0	1	1	1	1	HSPH1	heat shock 105kDa/110kDa protein 1
hsa-miR-548n	1	0	1	0	1	1	KIAA0408	KIAA0408
hsa-miR-548n	1	0	1	1	1	1	NUPL1	nucleoporin like 1
hsa-miR-548n	1	0	1	1	1	1	PPIP5K2	diphosphoinositol pentakisphosphate kinase 2
hsa-miR-548n	1	0	1	0	1	1	NEDD4L	neural precursor cell expressed, developmentally down-regulated 4-like, E3 ubiquitin protein ligase
hsa-miR-548n	1	0	1	1	1	1	AUTS2	autism susceptibility candidate 2
hsa-miR-548n	0	0	1	1	1	1	RABGAP1L	RAB GTPase activating protein 1-like
hsa-miR-548n	0	0	1	1	1	1	SPAG9	sperm associated antigen 9
hsa-miR-548n	1	0	1	1	1	1	GPATCH8	G patch domain containing 8
hsa-miR-548n	1	0	1	1	1	1	NRXN1	neurexin 1
hsa-miR-548n	1	0	1	0	1	1	CHST15	carbohydrate (N-acetylgalactosamine 4-sulfate 6-O) sulfotransferase 15
hsa-miR-548n	1	0	1	1	1	1	SLC4A7	solute carrier family 4, sodium bicarbonate cotransporter, member 7
hsa-miR-548n	1	0	1	1	1	1	HIPK1	homeodomain interacting protein kinase 1
hsa-miR-548n	0	0	1	1	1	1	PHLDB1	pleckstrin homology-like domain, family B, member 1
hsa-miR-548n	1	0	1	1	1	1	GIGYF2	GRB10 interacting GYF protein 2
hsa-miR-548n	1	0	1	1	0	0	SMCHD1	structural maintenance of chromosomes flexible hinge domain containing 1
hsa-miR-548n	1	0	1	0	1	1	MAGI2	membrane associated guanylate kinase, WW and PDZ domain containing 2
hsa-miR-548n	1	0	1	0	1	1	SNX13	sorting nexin 13
hsa-miR-548n	0	0	1	1	0	0	ATP10B	ATPase, class V, type 10B
hsa-miR-548n	1	0	1	0	1	1	DOCK4	dedicator of cytokinesis 4
hsa-miR-548n	1	0	1	1	1	1	MATR3	matrin 3
hsa-miR-548n	1	0	1	0	1	1	RBM12	RNA binding motif protein 12
hsa-miR-548n	1	0	1	0	1	1	LPHN3	latrophilin 3
hsa-miR-548n	0	0	1	1	1	1	SEC31A	SEC31 homolog A (S. cerevisiae)
hsa-miR-548n	1	0	1	1	1	1	DNM3	dynamin 3
hsa-miR-548n	0	0	1	1	1	1	ZC3H13	zinc finger CCCH-type containing 13
hsa-miR-548n	1	0	1	1	1	1	DMXL2	Dmx-like 2
hsa-miR-548n	1	0	1	1	1	1	LMO7	LIM domain 7
hsa-miR-548n	0	0	1	1	0	0	FAM169A	family with sequence similarity 169, member A
hsa-miR-548n	0	0	1	1	1	1	WDR47	WD repeat domain 47
hsa-miR-548n	1	0	1	1	1	1	UBR5	ubiquitin protein ligase E3 component n-recognin 5
hsa-miR-548n	1	0	1	1	1	1	CDK12	cyclin-dependent kinase 12
hsa-miR-548n	1	0	1	1	1	1	CALCR	calcitonin receptor
hsa-miR-548n	1	0	1	1	1	1	CPEB3	cytoplasmic polyadenylation element binding protein 3
hsa-miR-548n	1	0	1	1	1	1	BAHD1	bromo adjacent homology domain containing 1
hsa-miR-548n	1	0	1	1	1	1	CIT	citron (rho-interacting, serine/threonine kinase 21)
hsa-miR-548n	1	0	1	1	1	1	RGL1	ral guanine nucleotide dissociation stimulator-like 1
hsa-miR-548n	0	0	1	1	1	1	FASTKD2	FAST kinase domains 2
hsa-miR-548n	0	0	1	1	0	0	FAM149B1	family with sequence similarity 149, member B1
hsa-miR-548n	1	0	1	1	1	1	PALLD	palladin, cytoskeletal associated protein
hsa-miR-548n	1	0	1	1	1	1	RPGRIP1L	RPGRIP1-like
hsa-miR-548n	1	0	1	1	1	1	CNOT1	CCR4-NOT transcription complex, subunit 1
hsa-miR-548n	1	0	1	0	1	1	DIS3	DIS3 mitotic control homolog (S. cerevisiae)
hsa-miR-548n	0	0	1	0	1	1	TP53TG3	TP53 target 3
hsa-miR-548n	0	0	1	0	0	0	TP53TG3B	TP53 target 3B
hsa-miR-548n	0	0	1	1	1	1	DBF4	DBF4 homolog (S. cerevisiae)
hsa-miR-548n	1	0	1	1	1	1	FOXJ3	forkhead box J3
hsa-miR-548n	0	0	1	1	1	1	TTC28	tetratricopeptide repeat domain 28
hsa-miR-548n	1	0	1	1	0	0	KIAA1045	KIAA1045
hsa-miR-548n	1	0	1	1	1	1	NLGN1	neuroligin 1
hsa-miR-548n	1	0	1	0	1	1	ZNF507	zinc finger protein 507
hsa-miR-548n	1	0	1	1	1	1	FAM208A	family with sequence similarity 208, member A
hsa-miR-548n	0	0	1	0	0	0	KIAA1107	KIAA1107
hsa-miR-548n	1	0	1	1	1	1	PHF8	PHD finger protein 8
hsa-miR-548n	0	0	1	1	0	0	CIZ1	CDKN1A interacting zinc finger protein 1
hsa-miR-548n	1	0	1	1	1	1	SMARCAD1	SWI/SNF-related, matrix-associated actin-dependent regulator of chromatin, subfamily a, containing DEAD/H box 1
hsa-miR-548n	1	0	1	0	1	1	ODZ2	odz, odd Oz/ten-m homolog 2 (Drosophila)
hsa-miR-548n	1	0	1	1	1	1	SPIRE1	spire homolog 1 (Drosophila)
hsa-miR-548n	1	0	1	0	1	1	GPR158	G protein-coupled receptor 158
hsa-miR-548n	1	0	1	0	1	1	SRGAP3	SLIT-ROBO Rho GTPase activating protein 3
hsa-miR-548n	0	0	1	1	0	0	ZC4H2	zinc finger, C4H2 domain containing
hsa-miR-548n	1	0	1	1	1	1	ATXN7L1	ataxin 7-like 1
hsa-miR-548n	1	0	1	1	1	1	RALGAPB	Ral GTPase activating protein, beta subunit (non-catalytic)
hsa-miR-548n	1	0	1	1	1	1	RIMKLB	ribosomal modification protein rimK-like family member B
hsa-miR-548n	1	0	1	1	0	0	ATAD2B	ATPase family, AAA domain containing 2B
hsa-miR-548n	1	0	1	1	1	1	MKL2	MKL/myocardin-like 2
hsa-miR-548n	1	0	1	1	1	1	ASAP1	ArfGAP with SH3 domain, ankyrin repeat and PH domain 1
hsa-miR-548n	0	0	1	1	1	1	FSTL5	follistatin-like 5
hsa-miR-548n	1	0	1	0	1	1	INTS2	integrator complex subunit 2
hsa-miR-548n	0	0	1	1	1	1	KIF20B	kinesin family member 20B
hsa-miR-548n	1	0	1	0	0	0	ODZ4	odz, odd Oz/ten-m homolog 4 (Drosophila)
hsa-miR-548n	0	0	1	1	1	1	KLHL13	kelch-like 13 (Drosophila)
hsa-miR-548n	1	0	1	1	1	1	PCDH19	protocadherin 19
hsa-miR-548n	1	0	1	1	1	1	HACE1	HECT domain and ankyrin repeat containing E3 ubiquitin protein ligase 1
hsa-miR-548n	1	0	1	1	1	1	TAOK1	TAO kinase 1
hsa-miR-548n	1	0	1	1	1	1	LRRC7	leucine rich repeat containing 7
hsa-miR-548n	0	0	1	0	0	0	KIAA1383	KIAA1383
hsa-miR-548n	1	0	1	1	1	1	UNC79	unc-79 homolog (C. elegans)
hsa-miR-548n	1	0	1	1	1	1	FAM135A	family with sequence similarity 135, member A
hsa-miR-548n	1	1	1	1	1	1	NFIA	nuclear factor I/A
hsa-miR-548n	1	0	1	0	0	0	PITPNM2	phosphatidylinositol transfer protein, membrane-associated 2
hsa-miR-548n	1	0	1	1	0	0	KIAA1462	KIAA1462
hsa-miR-548n	0	0	1	0	1	1	KIAA1468	KIAA1468
hsa-miR-548n	0	0	1	1	1	1	NLGN3	neuroligin 3
hsa-miR-548n	0	0	1	0	0	0	NYAP2	neuronal tyrosine-phosphorylated phosphoinositide-3-kinase adaptor 2
hsa-miR-548n	1	0	1	1	1	1	FRAS1	Fraser syndrome 1
hsa-miR-548n	1	0	1	1	0	0	ZSWIM5	zinc finger, SWIM-type containing 5
hsa-miR-548n	1	0	1	1	1	1	USP28	ubiquitin specific peptidase 28
hsa-miR-548n	1	0	1	1	1	1	FAM214B	family with sequence similarity 214, member B
hsa-miR-548n	1	0	1	0	1	1	ZNF295	zinc finger protein 295
hsa-miR-548n	1	0	1	0	1	1	LMO3	LIM domain only 3 (rhombotin-like 2)
hsa-miR-548n	1	0	1	1	1	1	TOPORS	topoisomerase I binding, arginine/serine-rich, E3 ubiquitin protein ligase
hsa-miR-548n	1	0	1	1	1	1	PPP6R3	protein phosphatase 6, regulatory subunit 3
hsa-miR-548n	0	0	1	1	1	1	CEP192	centrosomal protein 192kDa
hsa-miR-548n	0	0	1	0	1	1	ZSWIM6	zinc finger, SWIM-type containing 6
hsa-miR-548n	1	0	1	0	0	0	TANC2	tetratricopeptide repeat, ankyrin repeat and coiled-coil containing 2
hsa-miR-548n	0	0	1	1	1	1	ANKRD36B	ankyrin repeat domain 36B
hsa-miR-548n	1	0	1	1	1	1	FUT8	fucosyltransferase 8 (alpha (1,6) fucosyltransferase)
hsa-miR-548n	0	0	1	1	1	1	BHLHB9	basic helix-loop-helix domain containing, class B, 9
hsa-miR-548n	0	0	1	1	1	1	KIAA1704	KIAA1704
hsa-miR-548n	0	0	1	0	1	1	SETD5	SET domain containing 5
hsa-miR-548n	0	0	1	1	1	1	LRRCC1	leucine rich repeat and coiled-coil centrosomal protein 1
hsa-miR-548n	1	0	1	0	1	1	RIMS1	regulating synaptic membrane exocytosis 1
hsa-miR-548n	1	0	1	1	1	1	NPAS3	neuronal PAS domain protein 3
hsa-miR-548n	1	0	1	1	1	1	IKZF4	IKAROS family zinc finger 4 (Eos)
hsa-miR-548n	1	0	1	1	1	1	CDK13	cyclin-dependent kinase 13
hsa-miR-548n	1	0	1	1	1	1	LCOR	ligand dependent nuclear receptor corepressor
hsa-miR-548n	0	0	1	1	0	0	SH3GLB2	SH3-domain GRB2-like endophilin B2
hsa-miR-548n	1	0	1	1	1	1	AHCTF1	AT hook containing transcription factor 1
hsa-miR-548n	0	0	1	1	1	1	C3orf15	chromosome 3 open reading frame 15
hsa-miR-548n	1	0	1	1	1	1	HNRPDL	heterogeneous nuclear ribonucleoprotein D-like
hsa-miR-548n	1	0	1	1	1	1	CSMD3	CUB and Sushi multiple domains 3
hsa-miR-548n	1	0	1	0	1	1	SLC25A25	solute carrier family 25 (mitochondrial carrier; phosphate carrier), member 25
hsa-miR-548n	1	0	1	1	1	1	LSM14A	LSM14A, SCD6 homolog A (S. cerevisiae)
hsa-miR-548n	0	0	1	1	0	0	TPGS2	tubulin polyglutamylase complex subunit 2
hsa-miR-548n	1	0	1	1	1	1	MAT2B	methionine adenosyltransferase II, beta
hsa-miR-548n	1	0	1	1	1	1	ANKRD12	ankyrin repeat domain 12
hsa-miR-548n	1	0	1	1	1	1	POGZ	pogo transposable element with ZNF domain
hsa-miR-548n	1	0	1	1	0	0	ZNF292	zinc finger protein 292
hsa-miR-548n	1	0	1	1	1	1	SH3TC2	SH3 domain and tetratricopeptide repeats 2
hsa-miR-548n	0	0	1	0	0	0	NUGGC	nuclear GTPase, germinal center associated
hsa-miR-548n	1	0	1	0	0	0	FAT3	FAT tumor suppressor homolog 3 (Drosophila)
hsa-miR-548n	1	0	1	1	1	1	PRDM16	PR domain containing 16
hsa-miR-548n	1	0	1	1	1	1	CSGALNACT1	chondroitin sulfate N-acetylgalactosaminyltransferase 1
hsa-miR-548n	1	0	1	0	0	0	RNF169	ring finger protein 169
hsa-miR-548n	1	0	1	0	0	0	ZBTB34	zinc finger and BTB domain containing 34
hsa-miR-548n	1	0	1	1	1	1	ACBD5	acyl-CoA binding domain containing 5
hsa-miR-548n	0	0	1	0	0	0	ARHGEF28	Rho guanine nucleotide exchange factor (GEF) 28
hsa-miR-548n	0	0	1	1	1	1	MCF2	MCF.2 cell line derived transforming sequence
hsa-miR-548n	0	0	1	0	1	1	RASSF8	Ras association (RalGDS/AF-6) domain family (N-terminal) member 8
hsa-miR-548n	1	0	1	1	1	1	RFX4	regulatory factor X, 4 (influences HLA class II expression)
hsa-miR-548n	1	0	1	1	1	1	SMEK1	SMEK homolog 1, suppressor of mek1 (Dictyostelium)
hsa-miR-548n	1	0	1	1	1	1	UBR3	ubiquitin protein ligase E3 component n-recognin 3 (putative)
hsa-miR-548n	1	0	1	1	1	1	C11orf57	chromosome 11 open reading frame 57
hsa-miR-548n	0	0	1	1	1	1	PMS1	PMS1 postmeiotic segregation increased 1 (S. cerevisiae)
hsa-miR-548n	0	0	1	1	1	1	IL7	interleukin 7
hsa-miR-548n	1	0	1	1	1	1	PAN3	PAN3 poly(A) specific ribonuclease subunit homolog (S. cerevisiae)
hsa-miR-548n	1	0	1	0	1	1	LIN54	lin-54 homolog (C. elegans)
hsa-miR-548n	1	0	1	1	1	1	KCNMA1	potassium large conductance calcium-activated channel, subfamily M, alpha member 1
hsa-miR-548n	0	0	1	1	0	0	SGCE	sarcoglycan, epsilon
hsa-miR-548n	1	0	1	1	1	1	FAT2	FAT tumor suppressor homolog 2 (Drosophila)
hsa-miR-548n	1	1	1	1	1	1	BACE1	beta-site APP-cleaving enzyme 1
hsa-miR-548n	0	0	1	1	1	1	PCBP2	poly(rC) binding protein 2
hsa-miR-548n	0	0	1	1	1	1	DOCK8	dedicator of cytokinesis 8
hsa-miR-548n	0	0	1	1	1	1	FN1	fibronectin 1
hsa-miR-548n	1	0	1	1	1	1	UBE3A	ubiquitin protein ligase E3A
hsa-miR-548n	1	0	1	1	1	1	TRIM36	tripartite motif containing 36
hsa-miR-548n	1	0	1	0	1	1	CCDC88A	coiled-coil domain containing 88A
hsa-miR-548n	0	0	1	1	0	0	HFM1	HFM1, ATP-dependent DNA helicase homolog (S. cerevisiae)
hsa-miR-548n	1	0	1	0	1	1	NFE2L2	nuclear factor (erythroid-derived 2)-like 2
hsa-miR-548n	0	0	1	1	0	0	DBP	D site of albumin promoter (albumin D-box) binding protein
hsa-miR-548n	1	0	1	1	1	1	SEC14L1	SEC14-like 1 (S. cerevisiae)
hsa-miR-548n	1	0	1	0	1	1	LRBA	LPS-responsive vesicle trafficking, beach and anchor containing
hsa-miR-548n	1	0	1	1	1	1	COL11A1	collagen, type XI, alpha 1
hsa-miR-548n	1	0	1	1	1	1	SHC1	SHC (Src homology 2 domain containing) transforming protein 1
hsa-miR-548n	0	0	1	0	1	1	ITPR1	inositol 1,4,5-trisphosphate receptor, type 1
hsa-miR-548n	1	0	1	1	0	0	NDST2	N-deacetylase/N-sulfotransferase (heparan glucosaminyl) 2
hsa-miR-548n	0	0	1	1	1	1	SEPT10	septin 10
hsa-miR-548n	1	0	1	1	1	1	BACH2	BTB and CNC homology 1, basic leucine zipper transcription factor 2
hsa-miR-548n	1	0	1	1	1	1	OSBPL6	oxysterol binding protein-like 6
hsa-miR-548n	1	0	1	0	1	1	PCDHA13	protocadherin alpha 13
hsa-miR-548n	1	0	1	1	1	1	PCDHA4	protocadherin alpha 4
hsa-miR-548n	0	0	1	0	1	1	ATF6	activating transcription factor 6
hsa-miR-548n	0	0	1	1	0	0	KCNC3	potassium voltage-gated channel, Shaw-related subfamily, member 3
hsa-miR-548n	1	0	1	1	1	1	RPS6KA3	ribosomal protein S6 kinase, 90kDa, polypeptide 3
hsa-miR-548n	1	0	1	1	0	0	ELN	elastin
hsa-miR-548n	1	0	1	1	1	1	NFYC	nuclear transcription factor Y, gamma
hsa-miR-548n	1	0	1	1	1	1	MEF2A	myocyte enhancer factor 2A
hsa-miR-548n	1	0	1	1	1	1	HMGB1	high mobility group box 1
hsa-miR-548n	1	0	1	1	1	1	PCCB	propionyl CoA carboxylase, beta polypeptide
hsa-miR-548n	0	0	1	1	1	1	DYNC1I2	dynein, cytoplasmic 1, intermediate chain 2
hsa-miR-548n	0	0	1	1	1	1	NME7	NME/NM23 family member 7
hsa-miR-548n	1	0	1	1	1	1	PHC1	polyhomeotic homolog 1 (Drosophila)
hsa-miR-548n	0	0	1	1	1	1	PTK2	PTK2 protein tyrosine kinase 2
hsa-miR-548n	1	0	1	1	1	1	SLC8A1	solute carrier family 8 (sodium/calcium exchanger), member 1
hsa-miR-548n	1	0	1	1	1	1	SYNCRIP	synaptotagmin binding, cytoplasmic RNA interacting protein
hsa-miR-548n	1	0	1	1	1	1	DTNA	dystrobrevin, alpha
hsa-miR-548n	1	0	1	0	1	1	PLAG1	pleiomorphic adenoma gene 1
hsa-miR-548n	0	0	1	1	1	1	DGKI	diacylglycerol kinase, iota
hsa-miR-548n	1	0	1	0	1	1	SLC6A6	solute carrier family 6 (neurotransmitter transporter, taurine), member 6
hsa-miR-548n	1	0	1	1	0	0	TSPYL2	TSPY-like 2
hsa-miR-548n	1	0	1	1	1	1	FMR1	fragile X mental retardation 1
hsa-miR-548n	1	0	1	1	1	1	PRKACB	protein kinase, cAMP-dependent, catalytic, beta
hsa-miR-548n	1	0	1	0	1	1	DPYSL2	dihydropyrimidinase-like 2
hsa-miR-548n	1	0	1	0	1	1	ETV1	ets variant 1
hsa-miR-548n	0	0	1	0	1	1	NPY1R	neuropeptide Y receptor Y1
hsa-miR-548n	1	0	1	1	1	1	REV3L	REV3-like, polymerase (DNA directed), zeta, catalytic subunit
hsa-miR-548n	0	0	1	0	0	0	SUPT5H	suppressor of Ty 5 homolog (S. cerevisiae)
hsa-miR-548n	1	0	1	1	1	1	EPHA7	EPH receptor A7
hsa-miR-548n	1	0	1	1	1	1	TWF1	twinfilin, actin-binding protein, homolog 1 (Drosophila)
hsa-miR-548n	0	0	1	1	0	0	HTATSF1	HIV-1 Tat specific factor 1
hsa-miR-548n	1	0	1	0	1	1	CHL1	cell adhesion molecule with homology to L1CAM (close homolog of L1)
hsa-miR-548n	1	0	1	1	1	1	MTA1	metastasis associated 1
hsa-miR-548n	0	0	1	1	1	1	DGKE	diacylglycerol kinase, epsilon 64kDa
hsa-miR-548n	1	0	1	1	1	1	EPHA5	EPH receptor A5
hsa-miR-548n	1	0	1	1	1	1	SATB2	SATB homeobox 2
hsa-miR-548n	1	0	1	1	1	1	AEBP2	AE binding protein 2
hsa-miR-548n	1	0	1	0	1	1	CDON	Cdon homolog (mouse)
hsa-miR-548n	1	0	1	1	1	1	NEO1	neogenin 1
hsa-miR-548n	0	0	1	1	0	0	IFT27	intraflagellar transport 27 homolog (Chlamydomonas)
hsa-miR-548n	0	0	1	0	0	0	CACNA1B	calcium channel, voltage-dependent, N type, alpha 1B subunit
hsa-miR-548n	1	0	1	1	1	1	MYO5A	myosin VA (heavy chain 12, myoxin)
hsa-miR-548n	0	0	1	1	0	0	EIF4E2	eukaryotic translation initiation factor 4E family member 2
hsa-miR-548n	0	0	1	1	1	1	GPM6B	glycoprotein M6B
hsa-miR-548n	1	0	1	1	1	1	PDLIM5	PDZ and LIM domain 5
hsa-miR-548n	0	0	1	1	1	1	STAU1	staufen, RNA binding protein, homolog 1 (Drosophila)
hsa-miR-548n	1	0	1	1	1	1	HNRNPK	heterogeneous nuclear ribonucleoprotein K
hsa-miR-548n	0	0	1	1	0	0	CFLAR	CASP8 and FADD-like apoptosis regulator
hsa-miR-548n	1	0	1	1	1	1	IPO8	importin 8
hsa-miR-548n	1	0	1	0	1	1	TBL1X	transducin (beta)-like 1X-linked
hsa-miR-548n	0	0	1	1	1	1	HLA-DQA1	major histocompatibility complex, class II, DQ alpha 1
hsa-miR-548n	1	0	1	1	1	1	ARHGEF3	Rho guanine nucleotide exchange factor (GEF) 3
hsa-miR-548n	0	0	1	1	0	0	SLC22A8	solute carrier family 22 (organic anion transporter), member 8
hsa-miR-548n	1	0	1	1	1	1	GOLGA4	golgin A4
hsa-miR-548n	0	0	1	1	1	1	HNRNPM	heterogeneous nuclear ribonucleoprotein M
hsa-miR-548n	1	0	1	1	1	1	SATB1	SATB homeobox 1
hsa-miR-548n	0	0	1	1	1	1	KIF3A	kinesin family member 3A
hsa-miR-548n	0	0	1	1	1	1	ELOVL5	ELOVL fatty acid elongase 5
hsa-miR-548n	1	0	1	0	1	1	ADD3	adducin 3 (gamma)
hsa-miR-548n	1	0	1	1	1	1	HMGA2	high mobility group AT-hook 2
hsa-miR-548n	1	0	1	1	1	1	TEAD1	TEA domain family member 1 (SV40 transcriptional enhancer factor)
hsa-miR-548n	1	0	1	1	1	1	NCOA3	nuclear receptor coactivator 3
hsa-miR-548n	1	0	1	1	1	1	GULP1	GULP, engulfment adaptor PTB domain containing 1
hsa-miR-548n	1	0	1	1	1	1	ZFX	zinc finger protein, X-linked
hsa-miR-548n	1	0	1	1	1	1	FKBP5	FK506 binding protein 5
hsa-miR-548n	0	0	1	1	1	1	PLD1	phospholipase D1, phosphatidylcholine-specific
hsa-miR-548n	1	0	1	1	1	1	ANPEP	alanyl (membrane) aminopeptidase
hsa-miR-548n	1	0	1	0	1	1	CAV1	caveolin 1, caveolae protein, 22kDa
hsa-miR-548n	0	0	1	1	1	1	SPP1	secreted phosphoprotein 1
hsa-miR-548n	1	0	1	0	1	1	PDE7B	phosphodiesterase 7B
hsa-miR-548n	0	0	1	1	1	1	CENPE	centromere protein E, 312kDa
hsa-miR-548n	1	0	1	1	1	1	MEF2D	myocyte enhancer factor 2D
hsa-miR-548n	1	0	1	1	0	0	TNPO2	transportin 2
hsa-miR-548n	1	0	1	1	1	1	PICALM	phosphatidylinositol binding clathrin assembly protein
hsa-miR-548n	0	0	1	1	1	1	ACLY	ATP citrate lyase
hsa-miR-548n	1	0	1	1	1	1	ADARB1	adenosine deaminase, RNA-specific, B1
hsa-miR-548n	1	0	1	0	1	1	FYB	FYN binding protein
hsa-miR-548n	0	0	1	0	1	1	PARG	poly (ADP-ribose) glycohydrolase
hsa-miR-548n	1	0	1	1	1	1	STX16	syntaxin 16
hsa-miR-548n	1	0	1	1	1	1	DLGAP2	discs, large (Drosophila) homolog-associated protein 2
hsa-miR-548n	1	0	1	0	1	1	MLL2	myeloid/lymphoid or mixed-lineage leukemia 2
hsa-miR-548n	1	0	1	1	1	1	SLC4A4	solute carrier family 4, sodium bicarbonate cotransporter, member 4
hsa-miR-548n	1	0	1	0	1	1	PDE4D	phosphodiesterase 4D, cAMP-specific
hsa-miR-548n	1	0	1	1	1	1	TMBIM6	transmembrane BAX inhibitor motif containing 6
hsa-miR-548n	0	0	1	1	1	1	SESN1	sestrin 1
hsa-miR-548n	1	0	1	1	1	1	MYT1L	myelin transcription factor 1-like
hsa-miR-548n	1	0	1	0	1	1	CELF2	CUGBP, Elav-like family member 2
hsa-miR-548n	1	0	1	1	1	1	SOCS2	suppressor of cytokine signaling 2
hsa-miR-548n	0	0	1	0	1	1	C9orf91	chromosome 9 open reading frame 91
hsa-miR-548n	1	0	1	0	0	0	MAP3K1	mitogen-activated protein kinase kinase kinase 1, E3 ubiquitin protein ligase
hsa-miR-548n	0	0	1	1	1	1	UBE4B	ubiquitination factor E4B
hsa-miR-548n	0	0	1	1	1	1	SLC16A7	solute carrier family 16, member 7 (monocarboxylic acid transporter 2)
hsa-miR-548n	1	0	1	1	1	1	LDB2	LIM domain binding 2
hsa-miR-548n	0	0	1	1	1	1	CYP4F3	cytochrome P450, family 4, subfamily F, polypeptide 3
hsa-miR-548n	1	0	1	1	1	1	SHOC2	soc-2 suppressor of clear homolog (C. elegans)
hsa-miR-548n	0	0	1	1	1	1	SLIT2	slit homolog 2 (Drosophila)
hsa-miR-548n	1	0	1	1	1	1	PFKFB3	6-phosphofructo-2-kinase/fructose-2,6-biphosphatase 3
hsa-miR-548n	1	0	1	1	1	1	MBNL2	muscleblind-like splicing regulator 2
hsa-miR-548n	1	0	1	1	1	1	CTNND1	catenin (cadherin-associated protein), delta 1
hsa-miR-548n	0	0	1	1	1	1	ZNF33A	zinc finger protein 33A
hsa-miR-548n	1	0	1	1	1	1	CBFA2T2	core-binding factor, runt domain, alpha subunit 2; translocated to, 2
hsa-miR-548n	1	0	1	1	0	0	PAK1	p21 protein (Cdc42/Rac)-activated kinase 1
hsa-miR-548n	1	0	1	1	1	1	TP63	tumor protein p63
hsa-miR-548n	1	0	1	1	1	1	USP3	ubiquitin specific peptidase 3
hsa-miR-548n	0	0	1	1	1	1	LYPLA1	lysophospholipase I
hsa-miR-548n	1	0	1	1	1	1	WHSC1	Wolf-Hirschhorn syndrome candidate 1
hsa-miR-548n	1	0	1	1	1	1	DMTF1	cyclin D binding myb-like transcription factor 1
hsa-miR-548n	0	0	1	1	1	1	SNRNP200	small nuclear ribonucleoprotein 200kDa (U5)
hsa-miR-548n	0	0	1	1	1	1	PCF11	PCF11, cleavage and polyadenylation factor subunit, homolog (S. cerevisiae)
hsa-miR-548n	1	0	1	0	1	1	DDX3X	DEAD (Asp-Glu-Ala-Asp) box polypeptide 3, X-linked
hsa-miR-548n	0	0	1	1	1	1	PCGF1	polycomb group ring finger 1
hsa-miR-548n	0	0	1	1	1	1	RGS7	regulator of G-protein signaling 7
hsa-miR-548n	0	0	1	1	0	0	FAM48A	family with sequence similarity 48, member A
hsa-miR-548n	1	0	1	0	1	1	MAP4K4	mitogen-activated protein kinase kinase kinase kinase 4
hsa-miR-548n	1	0	1	1	1	1	GLS	glutaminase
hsa-miR-548n	1	0	1	1	1	1	SLMAP	sarcolemma associated protein
hsa-miR-548n	0	0	1	1	1	1	THOC7	THO complex 7 homolog (Drosophila)
hsa-miR-548n	1	0	1	0	1	1	CD164	CD164 molecule, sialomucin
hsa-miR-548n	0	0	1	1	0	0	RBM5	RNA binding motif protein 5
hsa-miR-548n	0	0	1	1	1	1	GUCA1C	guanylate cyclase activator 1C
hsa-miR-548n	0	0	1	1	0	0	COPB1	coatomer protein complex, subunit beta 1
hsa-miR-548n	1	0	1	1	1	1	KAT6B	K(lysine) acetyltransferase 6B
hsa-miR-548n	1	0	1	1	1	1	CEP63	centrosomal protein 63kDa
hsa-miR-548n	1	0	1	1	1	1	EDNRB	endothelin receptor type B
hsa-miR-548n	1	0	1	1	1	1	LRRFIP1	leucine rich repeat (in FLII) interacting protein 1
hsa-miR-548n	0	0	1	1	0	0	ABRACL	ABRA C-terminal like
hsa-miR-548n	0	0	1	1	1	1	COG6	component of oligomeric golgi complex 6
hsa-miR-548n	1	0	1	0	1	1	CDK14	cyclin-dependent kinase 14
hsa-miR-548n	0	0	1	1	1	1	DHX16	DEAH (Asp-Glu-Ala-His) box polypeptide 16
hsa-miR-548n	0	0	1	1	1	1	ACIN1	apoptotic chromatin condensation inducer 1
hsa-miR-548n	1	0	1	0	1	1	FAM19A5	family with sequence similarity 19 (chemokine (C-C motif)-like), member A5
hsa-miR-548n	1	0	1	1	1	1	HNRNPH3	heterogeneous nuclear ribonucleoprotein H3 (2H9)
hsa-miR-548n	0	0	1	1	0	0	ACOT9	acyl-CoA thioesterase 9
hsa-miR-548n	1	0	1	1	1	1	CAB39	calcium binding protein 39
hsa-miR-548n	1	0	1	1	1	1	TAOK3	TAO kinase 3
hsa-miR-548n	1	0	1	1	1	1	SORBS1	sorbin and SH3 domain containing 1
hsa-miR-548n	1	0	1	0	1	1	BECN1	beclin 1, autophagy related
hsa-miR-548n	1	0	1	1	1	1	SCHIP1	schwannomin interacting protein 1
hsa-miR-548n	1	0	1	1	1	1	HMG20A	high mobility group 20A
hsa-miR-548n	1	0	1	1	1	1	MYNN	myoneurin
hsa-miR-548n	1	0	1	1	1	1	C14orf129	chromosome 14 open reading frame 129
hsa-miR-548n	0	0	1	1	1	1	CNPPD1	cyclin Pas1/PHO80 domain containing 1
hsa-miR-548n	1	0	1	0	0	0	PRPF40A	PRP40 pre-mRNA processing factor 40 homolog A (S. cerevisiae)
hsa-miR-548n	1	0	1	1	1	1	ANKRD13A	ankyrin repeat domain 13A
hsa-miR-548n	0	0	1	0	1	1	PDP1	pyruvate dehyrogenase phosphatase catalytic subunit 1
hsa-miR-548n	1	0	1	1	1	1	AGPAT3	1-acylglycerol-3-phosphate O-acyltransferase 3
hsa-miR-548n	0	0	1	1	1	1	SAP30L	SAP30-like
hsa-miR-548n	0	0	1	1	1	1	FAM114A2	family with sequence similarity 114, member A2
hsa-miR-548n	1	0	1	1	1	1	STXBP6	syntaxin binding protein 6 (amisyn)
hsa-miR-548n	1	0	1	1	1	1	USP25	ubiquitin specific peptidase 25
hsa-miR-548n	1	0	1	1	1	1	DNAJA4	DnaJ (Hsp40) homolog, subfamily A, member 4
hsa-miR-548n	0	0	1	1	1	1	FBXO25	F-box protein 25
hsa-miR-548n	1	0	1	1	1	1	C16orf70	chromosome 16 open reading frame 70
hsa-miR-548n	1	0	1	1	1	1	BCL2L13	BCL2-like 13 (apoptosis facilitator)
hsa-miR-548n	0	0	1	1	1	1	SLC39A8	solute carrier family 39 (zinc transporter), member 8
hsa-miR-548n	0	0	1	0	1	1	SLC38A4	solute carrier family 38, member 4
hsa-miR-548n	0	0	1	1	0	0	PARD3	par-3 partitioning defective 3 homolog (C. elegans)
hsa-miR-548n	1	0	1	1	1	1	SENP7	SUMO1/sentrin specific peptidase 7
hsa-miR-548n	1	0	1	1	1	1	TSC22D2	TSC22 domain family, member 2
hsa-miR-548n	1	0	1	1	1	1	CCNL1	cyclin L1
hsa-miR-548n	1	0	1	1	1	1	FAM49B	family with sequence similarity 49, member B
hsa-miR-548n	1	0	1	1	1	1	KCNMB2	potassium large conductance calcium-activated channel, subfamily M, beta member 2
hsa-miR-548n	1	0	1	1	1	1	MYLIP	myosin regulatory light chain interacting protein
hsa-miR-548n	1	0	1	1	1	1	NXT2	nuclear transport factor 2-like export factor 2
hsa-miR-548n	0	0	1	1	1	1	SLC30A5	solute carrier family 30 (zinc transporter), member 5
hsa-miR-548n	0	0	1	1	1	1	BRD7	bromodomain containing 7
hsa-miR-548n	0	0	1	1	1	1	ARHGAP15	Rho GTPase activating protein 15
hsa-miR-548n	0	0	1	1	0	0	CHEK2	checkpoint kinase 2
hsa-miR-548n	0	0	1	1	1	1	HERPUD1	homocysteine-inducible, endoplasmic reticulum stress-inducible, ubiquitin-like domain member 1
hsa-miR-548n	0	0	1	1	1	1	CD28	CD28 molecule
hsa-miR-548n	1	0	1	1	1	1	SUFU	suppressor of fused homolog (Drosophila)
hsa-miR-548n	1	0	1	1	1	1	OGT	O-linked N-acetylglucosamine (GlcNAc) transferase
hsa-miR-548n	1	0	1	1	1	1	RSF1	remodeling and spacing factor 1
hsa-miR-548n	1	0	1	1	1	1	DESI2	desumoylating isopeptidase 2
hsa-miR-548n	1	0	1	1	1	1	C21orf91	chromosome 21 open reading frame 91
hsa-miR-548n	1	0	1	1	1	1	SNTB2	syntrophin, beta 2 (dystrophin-associated protein A1, 59kDa, basic component 2)
hsa-miR-548n	0	0	1	1	1	1	BAX	BCL2-associated X protein
hsa-miR-548n	0	0	1	1	1	1	DOCK10	dedicator of cytokinesis 10
hsa-miR-548n	0	0	1	0	0	0	TIGD7	tigger transposable element derived 7
hsa-miR-548n	1	0	1	1	1	1	ABI2	abl-interactor 2
hsa-miR-548n	1	0	1	1	1	1	RBM47	RNA binding motif protein 47
hsa-miR-548n	1	0	1	1	1	1	SH3GLB1	SH3-domain GRB2-like endophilin B1
hsa-miR-548n	1	0	1	0	1	1	PARP11	poly (ADP-ribose) polymerase family, member 11
hsa-miR-548n	1	0	1	0	1	1	TRPS1	trichorhinophalangeal syndrome I
hsa-miR-548n	1	0	1	1	1	1	ERGIC1	endoplasmic reticulum-golgi intermediate compartment (ERGIC) 1
hsa-miR-548n	1	0	1	1	1	1	PUM2	pumilio homolog 2 (Drosophila)
hsa-miR-548n	0	0	1	1	1	1	ASUN	asunder, spermatogenesis regulator homolog (Drosphila)
hsa-miR-548n	0	0	1	0	1	1	ERBB2IP	erbb2 interacting protein
hsa-miR-548n	1	0	1	1	1	1	CALN1	calneuron 1
hsa-miR-548n	0	0	1	1	0	0	KARS	lysyl-tRNA synthetase
hsa-miR-548n	1	0	1	1	1	1	DCLRE1B	DNA cross-link repair 1B
hsa-miR-548n	1	0	1	1	1	1	VEGFA	vascular endothelial growth factor A
hsa-miR-548n	0	0	1	1	1	1	FCRLA	Fc receptor-like A
hsa-miR-548n	1	0	1	1	1	1	CHST9	carbohydrate (N-acetylgalactosamine 4-0) sulfotransferase 9
hsa-miR-548n	1	0	1	1	1	1	BIVM	basic, immunoglobulin-like variable motif containing
hsa-miR-548n	1	0	1	0	1	1	USP32	ubiquitin specific peptidase 32
hsa-miR-548n	1	0	1	1	1	1	CASD1	CAS1 domain containing 1
hsa-miR-548n	1	0	1	0	1	1	WIPF2	WAS/WASL interacting protein family, member 2
hsa-miR-548n	1	0	1	1	1	1	LARP4	La ribonucleoprotein domain family, member 4
hsa-miR-548n	0	0	1	1	1	1	CASP8	caspase 8, apoptosis-related cysteine peptidase
hsa-miR-548n	0	0	1	1	1	1	PARK2	parkinson protein 2, E3 ubiquitin protein ligase (parkin)
hsa-miR-548n	0	0	1	1	1	1	WBP2NL	WBP2 N-terminal like
hsa-miR-548n	0	0	1	1	0	0	SNRPN	small nuclear ribonucleoprotein polypeptide N
hsa-miR-548n	1	0	1	1	1	1	MAGI1	membrane associated guanylate kinase, WW and PDZ domain containing 1
hsa-miR-548n	1	0	1	1	1	1	NTRK2	neurotrophic tyrosine kinase, receptor, type 2
hsa-miR-548n	0	0	1	0	1	1	NBPF15	neuroblastoma breakpoint family, member 15
hsa-miR-548n	1	0	1	1	1	1	PSIP1	PC4 and SFRS1 interacting protein 1
hsa-miR-548n	1	0	1	1	0	0	SEPT8	septin 8
hsa-miR-548n	1	0	1	1	1	1	RBFOX1	RNA binding protein, fox-1 homolog (C. elegans) 1
hsa-miR-548n	1	0	1	0	1	1	PPP1R12A	protein phosphatase 1, regulatory subunit 12A
hsa-miR-548n	1	0	1	1	1	1	ZAK	sterile alpha motif and leucine zipper containing kinase AZK
hsa-miR-548n	1	0	1	1	0	0	FOXP2	forkhead box P2
hsa-miR-548n	0	0	1	1	1	1	LGI1	leucine-rich, glioma inactivated 1
hsa-miR-548n	0	0	1	1	1	1	SAMD9L	sterile alpha motif domain containing 9-like
hsa-miR-548n	1	0	1	1	1	1	WAPAL	wings apart-like homolog (Drosophila)
hsa-miR-548n	0	0	1	1	1	1	SLC2A14	solute carrier family 2 (facilitated glucose transporter), member 14
hsa-miR-548n	0	0	1	1	0	0	HOPX	HOP homeobox
hsa-miR-548n	0	0	1	1	1	1	AMPH	amphiphysin
hsa-miR-548n	1	0	1	0	1	1	NUDCD1	NudC domain containing 1
hsa-miR-548n	0	0	1	1	1	1	CHODL	chondrolectin
hsa-miR-548n	0	0	1	1	0	0	SVIP	small VCP/p97-interacting protein
hsa-miR-548n	1	0	1	1	1	1	PTBP2	polypyrimidine tract binding protein 2
hsa-miR-548n	0	0	1	1	1	1	PTK7	PTK7 protein tyrosine kinase 7
hsa-miR-548n	0	0	1	1	1	1	ZNF638	zinc finger protein 638
hsa-miR-548n	1	0	1	0	1	1	IL1RAP	interleukin 1 receptor accessory protein
hsa-miR-548n	1	0	1	1	1	1	GPR64	G protein-coupled receptor 64
hsa-miR-548n	1	0	1	1	1	1	VPS37A	vacuolar protein sorting 37 homolog A (S. cerevisiae)
hsa-miR-548n	1	0	1	1	1	1	AFF2	AF4/FMR2 family, member 2
hsa-miR-548n	1	0	1	0	1	1	DICER1	dicer 1, ribonuclease type III
hsa-miR-548n	1	0	1	0	1	1	CACNA1C	calcium channel, voltage-dependent, L type, alpha 1C subunit
hsa-miR-548n	0	0	1	1	1	1	CLDND1	claudin domain containing 1
hsa-miR-548n	0	0	1	1	1	1	TCFL5	transcription factor-like 5 (basic helix-loop-helix)
hsa-miR-548n	1	0	1	0	1	1	GRB10	growth factor receptor-bound protein 10
hsa-miR-548n	1	0	1	1	1	1	ILF3	interleukin enhancer binding factor 3, 90kDa
hsa-miR-548n	0	0	1	1	1	1	CD1E	CD1e molecule
hsa-miR-548n	0	0	1	1	0	0	KIF13A	kinesin family member 13A
hsa-miR-548n	0	0	1	1	1	1	WWTR1	WW domain containing transcription regulator 1
hsa-miR-548n	1	0	1	1	1	1	PALM2	paralemmin 2
hsa-miR-548n	1	0	1	1	1	1	RAB3IP	RAB3A interacting protein (rabin3)
hsa-miR-548n	1	0	1	1	1	1	PNISR	PNN-interacting serine/arginine-rich protein
hsa-miR-548n	1	0	1	1	1	1	NAV3	neuron navigator 3
hsa-miR-548n	0	0	1	1	0	0	KIAA1324	KIAA1324
hsa-miR-548n	0	0	1	1	0	0	MBD1	methyl-CpG binding domain protein 1
hsa-miR-548n	1	0	1	1	1	1	ARL4C	ADP-ribosylation factor-like 4C
hsa-miR-548n	0	0	1	1	1	1	PHACTR3	phosphatase and actin regulator 3
hsa-miR-548n	0	0	1	1	1	1	PPARG	peroxisome proliferator-activated receptor gamma
hsa-miR-548n	1	0	1	1	1	1	PPP1R9A	protein phosphatase 1, regulatory subunit 9A
hsa-miR-548n	0	0	1	1	0	0	NHLRC2	NHL repeat containing 2
hsa-miR-548n	0	0	1	1	1	1	ESRP1	epithelial splicing regulatory protein 1
hsa-miR-548n	1	0	1	1	1	1	AKAP2	A kinase (PRKA) anchor protein 2
hsa-miR-548n	1	0	1	0	1	1	NFAT5	nuclear factor of activated T-cells 5, tonicity-responsive
hsa-miR-548n	0	0	1	0	0	0	FLJ20518	FSHD region gene 2 family, member C pseudogene
hsa-miR-548n	0	0	1	0	0	0	TUG1	taurine upregulated 1 (non-protein coding)
hsa-miR-548n	0	0	1	1	1	1	PARPBP	PARP1 binding protein
hsa-miR-548n	1	0	1	1	1	1	ARHGAP12	Rho GTPase activating protein 12
hsa-miR-548n	1	0	1	1	1	1	BCAP29	B-cell receptor-associated protein 29
hsa-miR-548n	1	0	1	1	1	1	MEIS2	Meis homeobox 2
hsa-miR-548n	0	0	1	1	1	1	STOX2	storkhead box 2
hsa-miR-548n	1	0	1	1	1	1	RIC8B	resistance to inhibitors of cholinesterase 8 homolog B (C. elegans)
hsa-miR-548n	1	0	1	1	1	1	EIF2C1	eukaryotic translation initiation factor 2C, 1
hsa-miR-548n	1	0	1	1	1	1	PTBP3	polypyrimidine tract binding protein 3
hsa-miR-548n	1	0	1	1	1	1	SLC38A2	solute carrier family 38, member 2
hsa-miR-548n	0	0	1	1	1	1	CXXC5	CXXC finger protein 5
hsa-miR-548n	0	0	1	1	1	1	GBP3	guanylate binding protein 3
hsa-miR-548n	0	0	1	1	1	1	LRIF1	ligand dependent nuclear receptor interacting factor 1
hsa-miR-548n	0	0	1	1	1	1	RSRC2	arginine/serine-rich coiled-coil 2
hsa-miR-548n	1	0	1	1	1	1	PDCD6	programmed cell death 6
hsa-miR-548n	1	0	1	1	1	1	MBD5	methyl-CpG binding domain protein 5
hsa-miR-548n	0	0	1	1	1	1	PRPF39	PRP39 pre-mRNA processing factor 39 homolog (S. cerevisiae)
hsa-miR-548n	1	0	1	1	1	1	ZNF395	zinc finger protein 395
hsa-miR-548n	1	0	1	1	1	1	MYEF2	myelin expression factor 2
hsa-miR-548n	1	0	1	1	1	1	ACER3	alkaline ceramidase 3
hsa-miR-548n	1	0	1	1	1	1	HNRNPUL1	heterogeneous nuclear ribonucleoprotein U-like 1
hsa-miR-548n	0	0	1	1	1	1	FAM175A	family with sequence similarity 175, member A
hsa-miR-548n	1	0	1	1	1	1	INSIG2	insulin induced gene 2
hsa-miR-548n	0	0	1	1	0	0	ANAPC7	anaphase promoting complex subunit 7
hsa-miR-548n	0	0	1	1	1	1	SNCAIP	synuclein, alpha interacting protein
hsa-miR-548n	0	0	1	1	1	1	SFXN1	sideroflexin 1
hsa-miR-548n	1	0	1	0	1	1	LIN28A	lin-28 homolog A (C. elegans)
hsa-miR-548n	1	0	1	1	1	1	MON2	MON2 homolog (S. cerevisiae)
hsa-miR-548n	1	0	1	1	1	1	SLCO5A1	solute carrier organic anion transporter family, member 5A1
hsa-miR-548n	0	0	1	0	0	0	SOX2-OT	SOX2 overlapping transcript (non-protein coding)
hsa-miR-548n	0	0	1	0	0	0	DUXAP10	double homeobox A pseudogene 10
hsa-miR-548n	1	0	1	1	1	1	S100PBP	S100P binding protein
hsa-miR-548n	0	0	1	1	1	1	TTC23	tetratricopeptide repeat domain 23
hsa-miR-548n	1	0	1	1	1	1	STARD7	StAR-related lipid transfer (START) domain containing 7
hsa-miR-548n	1	0	1	1	1	1	SRP72	signal recognition particle 72kDa
hsa-miR-548n	0	0	1	1	1	1	NECAP2	NECAP endocytosis associated 2
hsa-miR-548n	1	0	1	1	1	1	PHF20L1	PHD finger protein 20-like 1
hsa-miR-548n	0	0	1	0	0	0	LOC284561	uncharacterized LOC284561
hsa-miR-548n	1	0	1	1	1	1	BAZ2A	bromodomain adjacent to zinc finger domain, 2A
hsa-miR-548n	1	0	1	1	1	1	DERL1	derlin 1
hsa-miR-548n	1	0	1	1	1	1	PAX8	paired box 8
hsa-miR-548n	0	0	1	1	1	1	IPP	intracisternal A particle-promoted polypeptide
hsa-miR-548n	0	0	1	1	1	1	NSUN7	NOP2/Sun domain family, member 7
hsa-miR-548n	0	0	1	1	1	1	CDKAL1	CDK5 regulatory subunit associated protein 1-like 1
hsa-miR-548n	1	0	1	0	0	0	ZDBF2	zinc finger, DBF-type containing 2
hsa-miR-548n	0	0	1	0	0	0	IFFO2	intermediate filament family orphan 2
hsa-miR-548n	1	0	1	0	1	1	ATP2B1	ATPase, Ca++ transporting, plasma membrane 1
hsa-miR-548n	1	0	1	1	1	1	ABHD3	abhydrolase domain containing 3
hsa-miR-548n	0	0	1	1	1	1	EP400	E1A binding protein p400
hsa-miR-548n	1	0	1	0	1	1	MYO5B	myosin VB
hsa-miR-548n	0	0	1	0	1	1	ATXN1L	ataxin 1-like
hsa-miR-548n	0	0	1	1	1	1	CNOT8	CCR4-NOT transcription complex, subunit 8
hsa-miR-548n	0	0	1	0	0	0	KIAA1671	KIAA1671
hsa-miR-548n	1	0	1	1	1	1	KANK1	KN motif and ankyrin repeat domains 1
hsa-miR-548n	0	0	1	1	1	1	WDR67	WD repeat domain 67
hsa-miR-548n	1	0	1	1	1	1	SUN1	Sad1 and UNC84 domain containing 1
hsa-miR-548n	1	0	1	1	1	1	NAA30	N(alpha)-acetyltransferase 30, NatC catalytic subunit
hsa-miR-548n	1	0	1	0	1	1	ZCCHC3	zinc finger, CCHC domain containing 3
hsa-miR-548n	0	0	1	1	0	0	EWSR1	Ewing sarcoma breakpoint region 1
hsa-miR-548n	0	0	1	1	1	1	HSPBAP1	HSPB (heat shock 27kDa) associated protein 1
hsa-miR-548n	0	0	1	0	1	1	FLJ22763	uncharacterized LOC401081
hsa-miR-548n	0	0	1	1	0	0	EXOC6B	exocyst complex component 6B
hsa-miR-548n	1	0	1	1	1	1	DCAF8	DDB1 and CUL4 associated factor 8
hsa-miR-548n	0	0	1	1	1	1	USP48	ubiquitin specific peptidase 48
hsa-miR-548n	1	0	1	1	1	1	ITGA9	integrin, alpha 9
hsa-miR-548n	0	0	1	0	1	1	ZCCHC8	zinc finger, CCHC domain containing 8
hsa-miR-548n	1	0	1	0	1	1	TOX3	TOX high mobility group box family member 3
hsa-miR-548n	1	0	1	1	1	1	RNF185	ring finger protein 185
hsa-miR-548n	0	0	1	1	1	1	SUV39H2	suppressor of variegation 3-9 homolog 2 (Drosophila)
hsa-miR-548n	0	0	1	0	0	0	LOC729852	uncharacterized LOC729852
hsa-miR-548n	1	0	1	1	1	1	LRP4	low density lipoprotein receptor-related protein 4
hsa-miR-548n	1	0	1	1	1	1	GORASP2	golgi reassembly stacking protein 2, 55kDa
hsa-miR-548n	0	0	1	1	1	1	GPBP1L1	GC-rich promoter binding protein 1-like 1
hsa-miR-548n	1	0	1	1	1	1	FOXP1	forkhead box P1
hsa-miR-548n	0	0	1	1	1	1	SPRTN	SprT-like N-terminal domain
hsa-miR-548n	1	0	1	1	1	1	SEC63	SEC63 homolog (S. cerevisiae)
hsa-miR-548n	1	0	1	1	1	1	FAM53C	family with sequence similarity 53, member C
hsa-miR-548n	0	0	1	1	1	1	RNF146	ring finger protein 146
hsa-miR-548n	0	0	1	1	1	1	KDM2B	lysine (K)-specific demethylase 2B
hsa-miR-548n	1	0	1	1	1	1	MARK1	MAP/microtubule affinity-regulating kinase 1
hsa-miR-548n	0	0	1	0	0	0	JAKMIP2-AS1	JAKMIP2 antisense RNA 1
hsa-miR-548n	1	0	1	0	1	1	ATP10D	ATPase, class V, type 10D
hsa-miR-548n	0	0	1	0	1	1	TWSG1	twisted gastrulation homolog 1 (Drosophila)
hsa-miR-548n	0	0	1	1	1	1	CCDC77	coiled-coil domain containing 77
hsa-miR-548n	1	0	1	1	1	1	GPD2	glycerol-3-phosphate dehydrogenase 2 (mitochondrial)
hsa-miR-548n	1	0	1	1	1	1	STRBP	spermatid perinuclear RNA binding protein
hsa-miR-548n	1	0	1	1	1	1	SLAIN1	SLAIN motif family, member 1
hsa-miR-548n	1	0	1	1	1	1	TPPP	tubulin polymerization promoting protein
hsa-miR-548n	0	0	1	0	0	0	LOC283508	uncharacterized LOC283508
hsa-miR-548n	0	0	1	1	1	1	MTRF1	mitochondrial translational release factor 1
hsa-miR-548n	1	0	1	0	1	1	AP1G1	adaptor-related protein complex 1, gamma 1 subunit
hsa-miR-548n	1	0	1	1	1	1	TPM1	tropomyosin 1 (alpha)
hsa-miR-548n	0	0	1	1	1	1	GABRP	gamma-aminobutyric acid (GABA) A receptor, pi
hsa-miR-548n	1	0	1	1	1	1	SULF1	sulfatase 1
hsa-miR-548n	1	0	1	1	1	1	FRMD6	FERM domain containing 6
hsa-miR-548n	1	0	1	1	1	1	HERPUD2	HERPUD family member 2
hsa-miR-548n	0	0	1	1	1	1	AGXT2	alanine--glyoxylate aminotransferase 2
hsa-miR-548n	0	0	1	0	1	1	C17orf108	chromosome 17 open reading frame 108
hsa-miR-548n	1	0	1	1	1	1	DIXDC1	DIX domain containing 1
hsa-miR-548n	1	0	1	0	0	0	PWWP2A	PWWP domain containing 2A
hsa-miR-548n	1	0	1	0	1	1	RAB1A	RAB1A, member RAS oncogene family
hsa-miR-548n	1	0	1	1	1	1	TMTC1	transmembrane and tetratricopeptide repeat containing 1
hsa-miR-548n	1	0	1	1	1	1	EXD2	exonuclease 3'-5' domain containing 2
hsa-miR-548n	1	0	1	1	1	1	ZNF664	zinc finger protein 664
hsa-miR-548n	1	0	1	1	1	1	FNDC3A	fibronectin type III domain containing 3A
hsa-miR-548n	1	0	1	0	1	1	PTPRE	protein tyrosine phosphatase, receptor type, E
hsa-miR-548n	0	0	1	0	0	0	RMST	rhabdomyosarcoma 2 associated transcript (non-protein coding)
hsa-miR-548n	1	0	1	1	1	1	LMNA	lamin A/C
hsa-miR-548n	0	0	1	1	1	1	HEATR2	HEAT repeat containing 2
hsa-miR-548n	1	0	1	1	1	1	PPP1R3F	protein phosphatase 1, regulatory subunit 3F
hsa-miR-548n	1	0	1	1	1	1	ZIC4	Zic family member 4
hsa-miR-548n	0	0	1	0	1	1	FAM70A	family with sequence similarity 70, member A
hsa-miR-548n	0	0	1	0	0	0	LOC441204	uncharacterized LOC441204
hsa-miR-548n	1	0	1	1	1	1	CLCN5	chloride channel, voltage-sensitive 5
hsa-miR-548n	1	0	1	1	1	1	SORBS2	sorbin and SH3 domain containing 2
hsa-miR-548n	1	0	1	1	1	1	PUM1	pumilio homolog 1 (Drosophila)
hsa-miR-548n	1	0	1	0	1	1	RABGEF1	RAB guanine nucleotide exchange factor (GEF) 1
hsa-miR-548n	0	0	1	0	0	0	MAGI1-IT1	MAGI1 intronic transcript 1 (non-protein coding)
hsa-miR-548n	1	0	1	1	1	1	ZBTB10	zinc finger and BTB domain containing 10
hsa-miR-548n	1	0	1	1	1	1	PCMTD1	protein-L-isoaspartate (D-aspartate) O-methyltransferase domain containing 1
hsa-miR-548n	1	0	1	1	1	1	TBC1D14	TBC1 domain family, member 14
hsa-miR-548n	0	0	1	1	1	1	PSME3	proteasome (prosome, macropain) activator subunit 3 (PA28 gamma; Ki)
hsa-miR-548n	0	0	1	1	0	0	LOXHD1	lipoxygenase homology domains 1
hsa-miR-548n	1	0	1	1	1	1	MPP7	membrane protein, palmitoylated 7 (MAGUK p55 subfamily member 7)
hsa-miR-548n	0	0	1	1	0	0	NXF2	nuclear RNA export factor 2
hsa-miR-548n	0	0	1	1	1	1	ZBTB26	zinc finger and BTB domain containing 26
hsa-miR-548n	1	0	1	0	1	1	PLEKHA1	pleckstrin homology domain containing, family A (phosphoinositide binding specific) member 1
hsa-miR-548n	0	0	1	1	1	1	RANBP17	RAN binding protein 17
hsa-miR-548n	1	0	1	0	1	1	NCAM1	neural cell adhesion molecule 1
hsa-miR-548n	0	0	1	1	1	1	ELL3	elongation factor RNA polymerase II-like 3
hsa-miR-548n	1	0	1	1	0	0	TCF7	transcription factor 7 (T-cell specific, HMG-box)
hsa-miR-548n	1	0	1	1	1	1	SEC22A	SEC22 vesicle trafficking protein homolog A (S. cerevisiae)
hsa-miR-548n	0	0	1	0	1	1	CHURC1	churchill domain containing 1
hsa-miR-548n	1	0	1	1	1	1	ANKRD49	ankyrin repeat domain 49
hsa-miR-548n	0	0	1	1	0	0	BUD13	BUD13 homolog (S. cerevisiae)
hsa-miR-548n	0	0	1	1	1	1	ZNF385B	zinc finger protein 385B
hsa-miR-548n	0	0	1	1	0	0	ANKAR	ankyrin and armadillo repeat containing
hsa-miR-548n	0	0	1	1	1	1	KIDINS220	kinase D-interacting substrate, 220kDa
hsa-miR-548n	1	0	1	1	1	1	TBCK	TBC1 domain containing kinase
hsa-miR-548n	0	0	1	0	1	1	CDHR3	cadherin-related family member 3
hsa-miR-548n	1	0	1	0	1	1	TPBG	trophoblast glycoprotein
hsa-miR-548n	1	0	1	1	1	1	SIRT1	sirtuin 1
hsa-miR-548n	1	0	1	1	1	1	SEC61A1	Sec61 alpha 1 subunit (S. cerevisiae)
hsa-miR-548n	1	0	1	1	1	1	MYO1B	myosin IB
hsa-miR-548n	1	0	1	1	1	1	NOTCH2NL	notch 2 N-terminal like
hsa-miR-548n	1	0	1	1	1	1	UXS1	UDP-glucuronate decarboxylase 1
hsa-miR-548n	0	0	1	1	1	1	CAMKV	CaM kinase-like vesicle-associated
hsa-miR-548n	0	0	1	0	1	1	CADM1	cell adhesion molecule 1
hsa-miR-548n	1	0	1	1	1	1	TTC13	tetratricopeptide repeat domain 13
hsa-miR-548n	1	0	1	1	1	1	BOC	Boc homolog (mouse)
hsa-miR-548n	0	0	1	1	1	1	MTR	5-methyltetrahydrofolate-homocysteine methyltransferase
hsa-miR-548n	1	0	1	1	1	1	WDR20	WD repeat domain 20
hsa-miR-548n	0	0	1	1	1	1	TOLLIP	toll interacting protein
hsa-miR-548n	1	0	1	1	1	1	ARIH2	ariadne homolog 2 (Drosophila)
hsa-miR-548n	1	0	1	1	1	1	EGR2	early growth response 2
hsa-miR-548n	1	0	1	1	1	1	AMMECR1	Alport syndrome, mental retardation, midface hypoplasia and elliptocytosis chromosomal region gene 1
hsa-miR-548n	1	0	1	1	1	1	RBMX	RNA binding motif protein, X-linked
hsa-miR-548n	0	0	1	1	1	1	KBTBD4	kelch repeat and BTB (POZ) domain containing 4
hsa-miR-548n	0	0	1	0	1	1	TBX5-AS1	TBX5 antisense RNA 1
hsa-miR-548n	0	0	1	1	1	1	GPATCH1	G patch domain containing 1
hsa-miR-548n	1	0	1	1	1	1	FBXW2	F-box and WD repeat domain containing 2
hsa-miR-548n	1	0	1	1	1	1	TSN	translin
hsa-miR-548n	0	0	1	0	0	0	KIAA1430	KIAA1430
hsa-miR-548n	0	0	1	1	0	0	GAS6	growth arrest-specific 6
hsa-miR-548n	1	0	1	1	1	1	LUC7L2	LUC7-like 2 (S. cerevisiae)
hsa-miR-548n	0	0	1	1	1	1	HNRNPH1	heterogeneous nuclear ribonucleoprotein H1 (H)
hsa-miR-548n	0	0	1	1	1	1	NRCAM	neuronal cell adhesion molecule
hsa-miR-548n	1	0	1	1	1	1	NASP	nuclear autoantigenic sperm protein (histone-binding)
hsa-miR-548n	0	0	1	1	1	1	NRBP1	nuclear receptor binding protein 1
hsa-miR-548n	1	0	1	1	1	1	IVNS1ABP	influenza virus NS1A binding protein
hsa-miR-548n	0	0	1	1	1	1	WT1	Wilms tumor 1
hsa-miR-548n	1	0	1	1	1	1	SLBP	stem-loop binding protein
hsa-miR-548n	1	0	1	1	1	1	SPTBN1	spectrin, beta, non-erythrocytic 1
hsa-miR-548n	1	0	1	1	1	1	DZIP1	DAZ interacting protein 1
hsa-miR-548n	0	0	1	1	0	0	HSD17B4	hydroxysteroid (17-beta) dehydrogenase 4
hsa-miR-548n	0	0	1	1	1	1	TMPRSS11D	transmembrane protease, serine 11D
hsa-miR-548n	0	0	1	1	1	1	TGFBI	transforming growth factor, beta-induced, 68kDa
hsa-miR-548n	0	0	1	1	1	1	SLC16A1	solute carrier family 16, member 1 (monocarboxylic acid transporter 1)
hsa-miR-548n	0	0	1	1	1	1	MARC1	mitochondrial amidoxime reducing component 1
hsa-miR-548n	1	0	1	1	1	1	CTNNA1	catenin (cadherin-associated protein), alpha 1, 102kDa
hsa-miR-548n	1	0	1	1	1	1	BANP	BTG3 associated nuclear protein
hsa-miR-548n	0	0	1	1	1	1	SPOCK1	sparc/osteonectin, cwcv and kazal-like domains proteoglycan (testican) 1
hsa-miR-548n	1	0	1	1	1	1	SLC7A8	solute carrier family 7 (amino acid transporter light chain, L system), member 8
hsa-miR-548n	1	0	1	0	1	1	GATAD2B	GATA zinc finger domain containing 2B
hsa-miR-548n	1	0	1	0	1	1	ARL6IP6	ADP-ribosylation-like factor 6 interacting protein 6
hsa-miR-548n	0	0	1	0	0	0	LINC00340	long intergenic non-protein coding RNA 340
hsa-miR-548n	0	0	1	1	1	1	TMEM170A	transmembrane protein 170A
hsa-miR-548n	0	0	1	0	0	0	LOC285500	uncharacterized LOC285500
hsa-miR-548n	0	0	1	1	1	1	GPT2	glutamic pyruvate transaminase (alanine aminotransferase) 2
hsa-miR-548n	1	0	1	1	1	1	CPNE8	copine VIII
hsa-miR-548n	1	0	1	1	1	1	ARHGEF7	Rho guanine nucleotide exchange factor (GEF) 7
hsa-miR-548n	1	0	1	1	1	1	KLF4	Kruppel-like factor 4 (gut)
hsa-miR-548n	1	0	1	1	1	1	RASGEF1A	RasGEF domain family, member 1A
hsa-miR-548n	1	0	1	1	1	1	TMEM100	transmembrane protein 100
hsa-miR-548n	1	0	1	0	1	1	SLC39A11	solute carrier family 39 (metal ion transporter), member 11
hsa-miR-548n	1	0	1	1	1	1	ANKRD46	ankyrin repeat domain 46
hsa-miR-548n	0	0	1	1	0	0	ZNF185	zinc finger protein 185 (LIM domain)
hsa-miR-548n	0	0	1	1	1	1	MYO6	myosin VI
hsa-miR-548n	1	0	1	0	1	1	UVRAG	UV radiation resistance associated gene
hsa-miR-548n	0	0	1	0	0	0	LOC730101	uncharacterized LOC730101
hsa-miR-548n	0	0	1	1	1	1	AQP3	aquaporin 3 (Gill blood group)
hsa-miR-548n	1	0	1	0	1	1	UBXN4	UBX domain protein 4
hsa-miR-548n	1	0	1	1	1	1	CNEP1R1	CTD nuclear envelope phosphatase 1 regulatory subunit 1
hsa-miR-548n	0	0	1	1	1	1	SETD2	SET domain containing 2
hsa-miR-548n	0	0	1	0	0	0	LOC100129858	uncharacterized LOC100129858
hsa-miR-548n	1	0	1	1	1	1	SPATS2	spermatogenesis associated, serine-rich 2
hsa-miR-548n	1	0	1	1	1	1	ANKRD10	ankyrin repeat domain 10
hsa-miR-548n	0	0	1	0	1	1	HDAC9	histone deacetylase 9
hsa-miR-548n	1	0	1	1	1	1	CS	citrate synthase
hsa-miR-548n	1	0	1	1	1	1	ZC3H11A	zinc finger CCCH-type containing 11A
hsa-miR-548n	1	0	1	1	1	1	LITAF	lipopolysaccharide-induced TNF factor
hsa-miR-548n	1	0	1	0	1	1	CLIC4	chloride intracellular channel 4
hsa-miR-548n	0	0	1	0	0	0	EDEM2	ER degradation enhancer, mannosidase alpha-like 2
hsa-miR-548n	1	0	1	1	1	1	EPB41L4A	erythrocyte membrane protein band 4.1 like 4A
hsa-miR-548n	0	0	1	1	1	1	CDKN2AIP	CDKN2A interacting protein
hsa-miR-548n	0	0	1	1	1	1	ZMYM1	zinc finger, MYM-type 1
hsa-miR-548n	0	0	1	1	0	0	RPN2	ribophorin II
hsa-miR-548n	1	0	1	1	1	1	SLITRK2	SLIT and NTRK-like family, member 2
hsa-miR-548n	0	0	1	0	0	0	ZNF815P	zinc finger protein 815, pseudogene
hsa-miR-548n	0	0	1	1	1	1	C8orf46	chromosome 8 open reading frame 46
hsa-miR-548n	0	0	1	0	0	0	OTUD1	OTU domain containing 1
hsa-miR-548n	1	0	1	0	1	1	COL21A1	collagen, type XXI, alpha 1
hsa-miR-548n	0	0	1	1	0	0	DHX9	DEAH (Asp-Glu-Ala-His) box polypeptide 9
hsa-miR-548n	1	0	1	0	1	1	THRB	thyroid hormone receptor, beta
hsa-miR-548n	1	0	1	0	0	0	PID1	phosphotyrosine interaction domain containing 1
hsa-miR-548n	1	0	1	0	1	1	KBTBD8	kelch repeat and BTB (POZ) domain containing 8
hsa-miR-548n	1	0	1	1	1	1	SLC30A6	solute carrier family 30 (zinc transporter), member 6
hsa-miR-548n	0	0	1	1	1	1	STAT1	signal transducer and activator of transcription 1, 91kDa
hsa-miR-548n	1	0	1	1	1	1	ETS2	v-ets erythroblastosis virus E26 oncogene homolog 2 (avian)
hsa-miR-548n	1	0	1	1	1	1	EPB41L1	erythrocyte membrane protein band 4.1-like 1
hsa-miR-548n	0	0	1	0	1	1	SWAP70	SWAP switching B-cell complex 70kDa subunit
hsa-miR-548n	0	0	1	1	1	1	EXTL2	exostoses (multiple)-like 2
hsa-miR-548n	0	0	1	1	1	1	GBAS	glioblastoma amplified sequence
hsa-miR-548n	1	0	1	1	1	1	CAPN2	calpain 2, (m/II) large subunit
hsa-miR-548n	1	0	1	1	1	1	LCP1	lymphocyte cytosolic protein 1 (L-plastin)
hsa-miR-548n	0	0	1	0	1	1	TNFAIP8	tumor necrosis factor, alpha-induced protein 8
hsa-miR-548n	1	0	1	1	1	1	EBF3	early B-cell factor 3
hsa-miR-548n	0	0	1	0	0	0	LOC400680	uncharacterized LOC400680
hsa-miR-548n	0	0	1	0	0	0	LRRC69	leucine rich repeat containing 69
hsa-miR-548n	0	0	1	1	1	1	PPFIBP2	PTPRF interacting protein, binding protein 2 (liprin beta 2)
hsa-miR-548n	1	0	1	0	1	1	AGFG1	ArfGAP with FG repeats 1
hsa-miR-548n	0	0	1	0	0	0	LINC00293	long intergenic non-protein coding RNA 293
hsa-miR-548n	1	0	1	0	1	1	PRKAR1A	protein kinase, cAMP-dependent, regulatory, type I, alpha
hsa-miR-548n	0	0	1	1	0	0	AHCY	adenosylhomocysteinase
hsa-miR-548n	0	0	1	1	1	1	CBWD5	COBW domain containing 5
hsa-miR-548n	1	0	1	1	1	1	IGSF11	immunoglobulin superfamily, member 11
hsa-miR-548n	1	0	1	1	0	0	CFL1	cofilin 1 (non-muscle)
hsa-miR-548n	1	0	1	1	1	1	VAV3	vav 3 guanine nucleotide exchange factor
hsa-miR-548n	0	0	1	1	1	1	LRRC49	leucine rich repeat containing 49
hsa-miR-548n	0	0	1	1	1	1	HCCS	holocytochrome c synthase
hsa-miR-548n	1	0	1	1	1	1	ST7L	suppression of tumorigenicity 7 like
hsa-miR-548n	1	0	1	1	1	1	UGDH	UDP-glucose 6-dehydrogenase
hsa-miR-548n	0	0	1	1	1	1	POLR1D	polymerase (RNA) I polypeptide D, 16kDa
hsa-miR-548n	1	0	1	1	1	1	PIGA	phosphatidylinositol glycan anchor biosynthesis, class A
hsa-miR-548n	1	0	1	1	1	1	GATM	glycine amidinotransferase (L-arginine:glycine amidinotransferase)
hsa-miR-548n	1	0	1	1	1	1	ZCCHC2	zinc finger, CCHC domain containing 2
hsa-miR-548n	1	0	1	1	1	1	CHD6	chromodomain helicase DNA binding protein 6
hsa-miR-548n	0	0	1	1	0	0	TMEM150A	transmembrane protein 150A
hsa-miR-548n	0	0	1	1	0	0	FBXO16	F-box protein 16
hsa-miR-548n	0	0	1	1	1	1	FAM76A	family with sequence similarity 76, member A
hsa-miR-548n	1	0	1	1	1	1	LARP1B	La ribonucleoprotein domain family, member 1B
hsa-miR-548n	0	0	1	0	0	0	LOC338579	ankyrin repeat domain-containing protein 30B pseudogene
hsa-miR-548n	0	0	1	1	1	1	CHCHD1	coiled-coil-helix-coiled-coil-helix domain containing 1
hsa-miR-548n	1	0	1	1	0	0	TMEM131	transmembrane protein 131
hsa-miR-548n	0	0	1	0	0	0	GTF2IP1	general transcription factor IIi, pseudogene 1
hsa-miR-548n	1	0	1	0	1	1	UNC5D	unc-5 homolog D (C. elegans)
hsa-miR-548n	0	0	1	1	0	0	ZACN	zinc activated ligand-gated ion channel
hsa-miR-548n	1	0	1	1	1	1	GLUD1	glutamate dehydrogenase 1
hsa-miR-548n	1	0	1	1	1	1	ACSL6	acyl-CoA synthetase long-chain family member 6
hsa-miR-548n	1	0	1	1	1	1	UHRF2	ubiquitin-like with PHD and ring finger domains 2, E3 ubiquitin protein ligase
hsa-miR-548n	0	0	1	1	1	1	SLFN13	schlafen family member 13
hsa-miR-548n	1	0	1	1	1	1	LMX1A	LIM homeobox transcription factor 1, alpha
hsa-miR-548n	1	0	1	1	1	1	WEE1	WEE1 homolog (S. pombe)
hsa-miR-548n	1	0	1	1	1	1	SIK3	SIK family kinase 3
hsa-miR-548n	0	0	1	1	1	1	NFKB1	nuclear factor of kappa light polypeptide gene enhancer in B-cells 1
hsa-miR-548n	1	0	1	1	1	1	RC3H1	ring finger and CCCH-type domains 1
hsa-miR-548n	0	0	1	1	0	0	HDAC6	histone deacetylase 6
hsa-miR-548n	0	0	1	1	0	0	MARS	methionyl-tRNA synthetase
hsa-miR-548n	1	0	1	1	1	1	ABHD6	abhydrolase domain containing 6
hsa-miR-548n	0	0	1	1	0	0	DCLK3	doublecortin-like kinase 3
hsa-miR-548n	0	0	1	1	1	1	DNAJC24	DnaJ (Hsp40) homolog, subfamily C, member 24
hsa-miR-548n	0	0	1	0	1	1	FLJ41200	uncharacterized LOC401492
hsa-miR-548n	1	0	1	1	1	1	MDGA2	MAM domain containing glycosylphosphatidylinositol anchor 2
hsa-miR-548n	1	0	1	1	1	1	PPFIA1	protein tyrosine phosphatase, receptor type, f polypeptide (PTPRF), interacting protein (liprin), alpha 1
hsa-miR-548n	0	0	1	1	1	1	FAM5B	family with sequence similarity 5, member B
hsa-miR-548n	1	0	1	1	1	1	EGLN3	egl nine homolog 3 (C. elegans)
hsa-miR-548n	1	0	1	0	1	1	KCNK2	potassium channel, subfamily K, member 2
hsa-miR-548n	0	0	1	1	0	0	SAAL1	serum amyloid A-like 1
hsa-miR-548n	0	0	1	0	0	0	TMPRSS11BNL	TMPRSS11B N terminal-like
hsa-miR-548n	0	0	1	1	1	1	FAM19A2	family with sequence similarity 19 (chemokine (C-C motif)-like), member A2
hsa-miR-548n	0	0	1	0	1	1	CWC22	CWC22 spliceosome-associated protein homolog (S. cerevisiae)
hsa-miR-548n	0	0	1	0	0	0	LOC650368	asparagine-linked glycosylation 1-like pseudogene
hsa-miR-548n	1	0	1	0	1	1	WDR82	WD repeat domain 82
hsa-miR-548n	1	0	1	0	1	1	XRN1	5'-3' exoribonuclease 1
hsa-miR-548n	0	0	1	1	1	1	SLC27A2	solute carrier family 27 (fatty acid transporter), member 2
hsa-miR-548n	1	0	1	0	0	0	GPR137C	G protein-coupled receptor 137C
hsa-miR-548n	1	0	1	1	1	1	OSBPL9	oxysterol binding protein-like 9
hsa-miR-548n	0	0	1	1	0	0	PRR19	proline rich 19
hsa-miR-548n	1	0	1	1	1	1	GJC1	gap junction protein, gamma 1, 45kDa
hsa-miR-548n	1	0	1	1	1	1	VPS54	vacuolar protein sorting 54 homolog (S. cerevisiae)
hsa-miR-548n	0	0	1	1	0	0	LOC100129995	uncharacterized LOC100129995
hsa-miR-548n	1	0	1	1	1	1	ADIPOR1	adiponectin receptor 1
hsa-miR-548n	0	0	1	0	1	1	NAIP	NLR family, apoptosis inhibitory protein
hsa-miR-548n	1	0	1	0	1	1	RHBDL3	rhomboid, veinlet-like 3 (Drosophila)
hsa-miR-548n	1	0	1	1	0	0	BCORL1	BCL6 corepressor-like 1
hsa-miR-548n	1	0	1	1	1	1	UBA2	ubiquitin-like modifier activating enzyme 2
hsa-miR-548n	0	0	1	1	0	0	DOCK11	dedicator of cytokinesis 11
hsa-miR-548n	0	0	1	1	1	1	KANSL1L	KAT8 regulatory NSL complex subunit 1-like
hsa-miR-548n	0	0	1	1	1	1	ATPBD4	ATP binding domain 4
hsa-miR-548n	1	0	1	1	1	1	SGIP1	SH3-domain GRB2-like (endophilin) interacting protein 1
hsa-miR-548n	1	0	1	1	1	1	C17orf85	chromosome 17 open reading frame 85
hsa-miR-548n	1	0	1	1	1	1	SEPHS1	selenophosphate synthetase 1
hsa-miR-548n	0	0	1	0	0	0	TMEM232	transmembrane protein 232
hsa-miR-548n	1	0	1	1	1	1	C11orf30	chromosome 11 open reading frame 30
hsa-miR-548n	1	0	1	1	1	1	ATXN7	ataxin 7
hsa-miR-548n	1	0	1	1	0	0	GXYLT1	glucoside xylosyltransferase 1
hsa-miR-548n	1	0	1	1	1	1	PIAS3	protein inhibitor of activated STAT, 3
hsa-miR-548n	0	0	1	1	1	1	CCDC66	coiled-coil domain containing 66
hsa-miR-548n	0	0	1	1	1	1	MKX	mohawk homeobox
hsa-miR-548n	1	0	1	1	1	1	SACS	spastic ataxia of Charlevoix-Saguenay (sacsin)
hsa-miR-548n	0	0	1	1	1	1	SRPX	sushi-repeat containing protein, X-linked
hsa-miR-548n	0	0	1	0	0	0	LOC613266	uncharacterized LOC613266
hsa-miR-548n	1	0	1	1	1	1	KPNA1	karyopherin alpha 1 (importin alpha 5)
hsa-miR-548n	0	0	1	1	1	1	C11orf45	chromosome 11 open reading frame 45
hsa-miR-548n	1	0	1	0	0	0	MSL1	male-specific lethal 1 homolog (Drosophila)
hsa-miR-548n	0	0	1	1	1	1	PLOD2	procollagen-lysine, 2-oxoglutarate 5-dioxygenase 2
hsa-miR-548n	0	0	1	0	1	1	C17orf105	chromosome 17 open reading frame 105
hsa-miR-548n	1	0	1	1	1	1	DPY19L3	dpy-19-like 3 (C. elegans)
hsa-miR-548n	0	0	1	1	1	1	RBM46	RNA binding motif protein 46
hsa-miR-548n	1	0	1	1	0	0	DYDC1	DPY30 domain containing 1
hsa-miR-548n	1	0	1	1	0	0	UBN2	ubinuclein 2
hsa-miR-548n	1	0	1	1	1	1	FAM122B	family with sequence similarity 122B
hsa-miR-548n	1	0	1	1	1	1	CHD5	chromodomain helicase DNA binding protein 5
hsa-miR-548n	1	0	1	1	0	0	PFKM	phosphofructokinase, muscle
hsa-miR-548n	0	0	1	1	0	0	FSIP2	fibrous sheath interacting protein 2
hsa-miR-548n	1	0	1	1	0	0	ATXN7L3	ataxin 7-like 3
hsa-miR-548n	0	0	1	1	1	1	RBM39	RNA binding motif protein 39
hsa-miR-548n	1	0	1	1	1	1	LIN9	lin-9 homolog (C. elegans)
hsa-miR-548n	1	0	1	1	1	1	SIKE1	suppressor of IKBKE 1
hsa-miR-548n	1	0	1	1	1	1	PIK3R1	phosphoinositide-3-kinase, regulatory subunit 1 (alpha)
hsa-miR-548n	1	0	1	1	1	1	SACM1L	SAC1 suppressor of actin mutations 1-like (yeast)
hsa-miR-548n	1	0	1	1	1	1	ATP1A2	ATPase, Na+/K+ transporting, alpha 2 polypeptide
hsa-miR-548n	1	0	1	1	1	1	DMXL1	Dmx-like 1
hsa-miR-548n	1	0	1	1	1	1	LRIG1	leucine-rich repeats and immunoglobulin-like domains 1
hsa-miR-548n	1	0	1	0	1	1	CLEC16A	C-type lectin domain family 16, member A
hsa-miR-548n	1	0	1	1	1	1	DLG2	discs, large homolog 2 (Drosophila)
hsa-miR-548n	1	0	1	0	1	1	GPR180	G protein-coupled receptor 180
hsa-miR-548n	1	0	1	1	1	1	NIPBL	Nipped-B homolog (Drosophila)
hsa-miR-548n	0	0	1	1	0	0	TMEM151B	transmembrane protein 151B
hsa-miR-548n	0	0	1	1	1	1	SPICE1	spindle and centriole associated protein 1
hsa-miR-548n	0	0	1	1	1	1	PCDH15	protocadherin-related 15
hsa-miR-548n	1	0	1	1	1	1	C14orf28	chromosome 14 open reading frame 28
hsa-miR-548n	1	0	1	1	1	1	CLIP1	CAP-GLY domain containing linker protein 1
hsa-miR-548n	1	0	1	1	1	1	EIF4E3	eukaryotic translation initiation factor 4E family member 3
hsa-miR-548n	0	0	1	0	0	0	RPL23AP53	ribosomal protein L23a pseudogene 53
hsa-miR-548n	0	0	1	1	1	1	MOBP	myelin-associated oligodendrocyte basic protein
hsa-miR-548n	0	0	1	1	1	1	USP4	ubiquitin specific peptidase 4 (proto-oncogene)
hsa-miR-548n	1	0	1	1	1	1	MFSD6	major facilitator superfamily domain containing 6
hsa-miR-548n	0	0	1	1	1	1	DOCK9	dedicator of cytokinesis 9
hsa-miR-548n	1	0	1	1	1	1	UBE3C	ubiquitin protein ligase E3C
hsa-miR-548n	1	0	1	1	1	1	PHF17	PHD finger protein 17
hsa-miR-548n	0	0	1	1	1	1	ERI2	ERI1 exoribonuclease family member 2
hsa-miR-548n	1	0	1	1	1	1	KANK4	KN motif and ankyrin repeat domains 4
hsa-miR-548n	1	0	1	1	1	1	SLC26A9	solute carrier family 26, member 9
hsa-miR-548n	1	0	1	1	1	1	ENAH	enabled homolog (Drosophila)
hsa-miR-548n	1	0	1	0	1	1	SP6	Sp6 transcription factor
hsa-miR-548n	1	0	1	1	1	1	CXorf23	chromosome X open reading frame 23
hsa-miR-548n	1	0	1	1	1	1	ZFP106	zinc finger protein 106 homolog (mouse)
hsa-miR-548n	1	0	1	1	1	1	EYA1	eyes absent homolog 1 (Drosophila)
hsa-miR-548n	1	0	1	0	1	1	FNDC3B	fibronectin type III domain containing 3B
hsa-miR-548n	0	0	1	1	1	1	PITX2	paired-like homeodomain 2
hsa-miR-548n	1	0	1	1	1	1	CROT	carnitine O-octanoyltransferase
hsa-miR-548n	1	0	1	0	1	1	CAPRIN1	cell cycle associated protein 1
hsa-miR-548n	0	0	1	0	1	1	LOC401321	uncharacterized LOC401321
hsa-miR-548n	1	0	1	0	1	1	YOD1	YOD1 OTU deubiquinating enzyme 1 homolog (S. cerevisiae)
hsa-miR-548n	0	0	1	1	1	1	MCU	mitochondrial calcium uniporter
hsa-miR-548n	0	0	1	1	1	1	SLC35F2	solute carrier family 35, member F2
hsa-miR-548n	0	0	1	0	1	1	FAM46D	family with sequence similarity 46, member D
hsa-miR-548n	1	0	1	0	1	1	KDM2A	lysine (K)-specific demethylase 2A
hsa-miR-548n	1	0	1	1	1	1	KCTD12	potassium channel tetramerisation domain containing 12
hsa-miR-548n	0	0	1	1	1	1	CD160	CD160 molecule
hsa-miR-548n	0	0	1	1	1	1	MON1B	MON1 homolog B (yeast)
hsa-miR-548n	1	0	1	1	1	1	FRYL	FRY-like
hsa-miR-548n	1	0	1	1	1	1	SH3D19	SH3 domain containing 19
hsa-miR-548n	1	0	1	0	1	1	NBR1	neighbor of BRCA1 gene 1
hsa-miR-548n	1	0	1	1	1	1	TXNRD1	thioredoxin reductase 1
hsa-miR-548n	1	0	1	0	1	1	KPNA6	karyopherin alpha 6 (importin alpha 7)
hsa-miR-548n	1	0	1	1	1	1	PUS7	pseudouridylate synthase 7 homolog (S. cerevisiae)
hsa-miR-548n	0	0	1	1	1	1	SHROOM3	shroom family member 3
hsa-miR-548n	0	0	1	0	0	0	LOC100129940	uncharacterized LOC100129940
hsa-miR-548n	0	0	1	0	0	0	EMBP1	embigin pseudogene 1
hsa-miR-548n	1	0	1	1	1	1	CHMP3	charged multivesicular body protein 3
hsa-miR-548n	0	0	1	0	0	0	FLJ26245	uncharacterized LOC400533
hsa-miR-548n	1	0	1	1	1	1	CD200	CD200 molecule
hsa-miR-548n	0	0	1	1	1	1	TBX19	T-box 19
hsa-miR-548n	1	0	1	1	1	1	RBM24	RNA binding motif protein 24
hsa-miR-548n	0	0	1	1	1	1	G3BP1	GTPase activating protein (SH3 domain) binding protein 1
hsa-miR-548n	1	0	1	0	1	1	GPC6	glypican 6
hsa-miR-548n	0	0	1	1	1	1	SQRDL	sulfide quinone reductase-like (yeast)
hsa-miR-548n	0	0	1	0	0	0	LOC494141	mitochondrial carrier triple repeat 1 pseudogene
hsa-miR-548n	1	0	1	0	1	1	RXRA	retinoid X receptor, alpha
hsa-miR-548n	1	0	1	0	1	1	ESRRG	estrogen-related receptor gamma
hsa-miR-548n	0	0	1	0	1	1	GALNT13	UDP-N-acetyl-alpha-D-galactosamine:polypeptide N-acetylgalactosaminyltransferase 13 (GalNAc-T13)
hsa-miR-548n	0	0	1	1	1	1	SLTM	SAFB-like, transcription modulator
hsa-miR-548n	0	0	1	1	1	1	KIAA1841	KIAA1841
hsa-miR-548n	1	0	1	1	1	1	MTERFD2	MTERF domain containing 2
hsa-miR-548n	1	0	1	1	1	1	RNF111	ring finger protein 111
hsa-miR-548n	1	0	1	0	1	1	FMNL2	formin-like 2
hsa-miR-548n	0	0	1	0	0	0	LOC100124692	maltase-glucoamylase (alpha-glucosidase) pseudogene
hsa-miR-548n	1	0	1	0	1	1	STK3	serine/threonine kinase 3
hsa-miR-548n	1	0	1	1	1	1	WTAP	Wilms tumor 1 associated protein
hsa-miR-548n	0	0	1	1	0	0	ZNF730	zinc finger protein 730
hsa-miR-548n	1	0	1	1	0	0	BRSK2	BR serine/threonine kinase 2
hsa-miR-548n	1	0	1	1	1	1	LRRK2	leucine-rich repeat kinase 2
hsa-miR-548n	1	0	1	1	1	1	MAP2K4	mitogen-activated protein kinase kinase 4
hsa-miR-548n	0	0	1	1	1	1	PHF12	PHD finger protein 12
hsa-miR-548n	0	0	1	0	0	0	AGAP9	ArfGAP with GTPase domain, ankyrin repeat and PH domain 9
hsa-miR-548n	0	0	1	1	1	1	XRN2	5'-3' exoribonuclease 2
hsa-miR-548n	0	0	1	1	1	1	AKTIP	AKT interacting protein
hsa-miR-548n	1	0	1	1	1	1	RBBP4	retinoblastoma binding protein 4
hsa-miR-548n	1	0	1	0	1	1	TMEM106B	transmembrane protein 106B
hsa-miR-548n	0	0	1	1	1	1	ARID1A	AT rich interactive domain 1A (SWI-like)
hsa-miR-548n	0	0	1	1	0	0	DDX50	DEAD (Asp-Glu-Ala-Asp) box polypeptide 50
hsa-miR-548n	0	0	1	1	1	1	CRISP3	cysteine-rich secretory protein 3
hsa-miR-548n	1	0	1	1	1	1	RPS6KA4	ribosomal protein S6 kinase, 90kDa, polypeptide 4
hsa-miR-548n	1	0	1	1	1	1	CYYR1	cysteine/tyrosine-rich 1
hsa-miR-548n	0	0	1	0	1	1	PEX5	peroxisomal biogenesis factor 5
hsa-miR-548n	1	0	1	1	1	1	ATL2	atlastin GTPase 2
hsa-miR-548n	0	0	1	1	1	1	C5orf28	chromosome 5 open reading frame 28
hsa-miR-548n	1	0	1	1	1	1	TBC1D15	TBC1 domain family, member 15
hsa-miR-548n	1	0	1	1	1	1	TMEM25	transmembrane protein 25
hsa-miR-548n	1	0	1	1	1	1	MEAF6	MYST/Esa1-associated factor 6
hsa-miR-548n	1	0	1	0	1	1	MGAT4B	mannosyl (alpha-1,3-)-glycoprotein beta-1,4-N-acetylglucosaminyltransferase, isozyme B
hsa-miR-548n	0	0	1	0	1	1	BCAS1	breast carcinoma amplified sequence 1
hsa-miR-548n	1	0	1	1	1	1	PTPN2	protein tyrosine phosphatase, non-receptor type 2
hsa-miR-548n	0	0	1	1	0	0	PCSK5	proprotein convertase subtilisin/kexin type 5
hsa-miR-548n	0	0	1	1	1	1	SERPINE2	serpin peptidase inhibitor, clade E (nexin, plasminogen activator inhibitor type 1), member 2
hsa-miR-548n	1	0	1	1	1	1	PHTF2	putative homeodomain transcription factor 2
hsa-miR-548n	1	0	1	1	1	1	UPK1B	uroplakin 1B
hsa-miR-548n	0	0	1	1	0	0	HSPB11	heat shock protein family B (small), member 11
hsa-miR-548n	1	0	1	1	1	1	LUC7L3	LUC7-like 3 (S. cerevisiae)
hsa-miR-548n	0	0	1	1	1	1	TBC1D3G	TBC1 domain family, member 3G
hsa-miR-548n	1	0	1	1	1	1	SETX	senataxin
hsa-miR-548n	1	0	1	1	1	1	NCOA1	nuclear receptor coactivator 1
hsa-miR-548n	0	0	1	1	1	1	ENPP3	ectonucleotide pyrophosphatase/phosphodiesterase 3
hsa-miR-548n	1	0	1	1	1	1	NOVA1	neuro-oncological ventral antigen 1
hsa-miR-548n	0	0	1	1	1	1	PTPN20B	protein tyrosine phosphatase, non-receptor type 20B
hsa-miR-548n	0	0	1	1	1	1	PTPN20A	protein tyrosine phosphatase, non-receptor type 20A
hsa-miR-548n	0	0	1	0	0	0	NBPF10	neuroblastoma breakpoint family, member 10
hsa-miR-548n	0	0	1	0	1	1	NEK1	NIMA (never in mitosis gene a)-related kinase 1
hsa-miR-548n	0	0	1	1	0	0	NEK7	NIMA (never in mitosis gene a)-related kinase 7
hsa-miR-548n	1	0	1	1	1	1	RIF1	RAP1 interacting factor homolog (yeast)
hsa-miR-548n	0	0	1	1	1	1	TFDP2	transcription factor Dp-2 (E2F dimerization partner 2)
hsa-miR-548n	0	0	1	0	0	0	ANKRD34C	ankyrin repeat domain 34C
hsa-miR-548n	1	0	1	0	1	1	SLC2A3	solute carrier family 2 (facilitated glucose transporter), member 3
hsa-miR-548n	1	0	1	1	1	1	TAB2	TGF-beta activated kinase 1/MAP3K7 binding protein 2
hsa-miR-548n	1	0	1	1	1	1	ARF6	ADP-ribosylation factor 6
hsa-miR-548n	0	0	1	1	1	1	ARIH1	ariadne homolog, ubiquitin-conjugating enzyme E2 binding protein, 1 (Drosophila)
hsa-miR-548n	0	0	1	0	0	0	TPTE2P6	transmembrane phosphoinositide 3-phosphatase and tensin homolog 2 pseudogene 6
hsa-miR-548n	0	0	1	1	1	1	MTPAP	mitochondrial poly(A) polymerase
hsa-miR-548n	1	0	1	0	1	1	DCDC2	doublecortin domain containing 2
hsa-miR-548n	0	0	1	1	1	1	TTLL5	tubulin tyrosine ligase-like family, member 5
hsa-miR-548n	0	0	1	1	0	0	ODF3	outer dense fiber of sperm tails 3
hsa-miR-548n	1	0	1	1	1	1	SMC6	structural maintenance of chromosomes 6
hsa-miR-548n	0	0	1	1	1	1	ZNF280D	zinc finger protein 280D
hsa-miR-548n	1	0	1	1	1	1	SLC25A36	solute carrier family 25 (pyrimidine nucleotide carrier ), member 36
hsa-miR-548n	0	0	1	1	0	0	PACSIN2	protein kinase C and casein kinase substrate in neurons 2
hsa-miR-548n	0	0	1	0	1	1	TBC1D3F	TBC1 domain family, member 3F
hsa-miR-548n	0	0	1	1	1	1	RHOT1	ras homolog family member T1
hsa-miR-548n	0	0	1	1	1	1	UBE3D	ubiquitin protein ligase E3D
hsa-miR-548n	0	0	1	0	0	0	JAKMIP3	Janus kinase and microtubule interacting protein 3
hsa-miR-548n	1	0	1	1	1	1	NBEA	neurobeachin
hsa-miR-548n	1	0	1	1	1	1	KIAA1033	KIAA1033
hsa-miR-548n	1	0	1	0	1	1	GPR85	G protein-coupled receptor 85
hsa-miR-548n	1	0	1	0	1	1	CEP170	centrosomal protein 170kDa
hsa-miR-548n	0	0	1	1	1	1	SLC30A10	solute carrier family 30, member 10
hsa-miR-548n	1	0	1	0	1	1	GRIN3A	glutamate receptor, ionotropic, N-methyl-D-aspartate 3A
hsa-miR-548n	1	0	1	1	0	0	FAM108C1	family with sequence similarity 108, member C1
hsa-miR-548n	0	0	1	0	0	0	FAM66D	family with sequence similarity 66, member D
hsa-miR-548n	1	0	1	1	0	0	CHTOP	chromatin target of PRMT1
hsa-miR-548n	1	0	1	0	1	1	FAM19A1	family with sequence similarity 19 (chemokine (C-C motif)-like), member A1
hsa-miR-548n	1	0	1	1	1	1	USP45	ubiquitin specific peptidase 45
hsa-miR-548n	1	0	1	1	1	1	SLC30A8	solute carrier family 30 (zinc transporter), member 8
hsa-miR-548n	1	0	1	1	1	1	DENND1B	DENN/MADD domain containing 1B
hsa-miR-548n	1	0	1	1	1	1	TMEFF1	transmembrane protein with EGF-like and two follistatin-like domains 1
hsa-miR-548n	1	0	1	1	1	1	MIER1	mesoderm induction early response 1 homolog (Xenopus laevis)
hsa-miR-548n	1	0	1	1	1	1	KDM6A	lysine (K)-specific demethylase 6A
hsa-miR-548n	0	0	1	1	1	1	FILIP1	filamin A interacting protein 1
hsa-miR-548n	0	0	1	1	1	1	BEND7	BEN domain containing 7
hsa-miR-548n	1	0	1	1	1	1	FAM126B	family with sequence similarity 126, member B
hsa-miR-548n	1	0	1	0	1	1	HNRNPA3	heterogeneous nuclear ribonucleoprotein A3
hsa-miR-548n	0	0	1	1	1	1	EGFLAM	EGF-like, fibronectin type III and laminin G domains
hsa-miR-548n	0	0	1	1	1	1	SRSF11	serine/arginine-rich splicing factor 11
hsa-miR-548n	1	0	1	1	1	1	CHMP7	charged multivesicular body protein 7
hsa-miR-548n	0	0	1	1	0	0	EFCAB11	EF-hand calcium binding domain 11
hsa-miR-548n	0	0	1	0	1	1	METTL20	methyltransferase like 20
hsa-miR-548n	1	0	1	1	0	0	USP24	ubiquitin specific peptidase 24
hsa-miR-548n	0	0	1	1	0	0	NEDD1	neural precursor cell expressed, developmentally down-regulated 1
hsa-miR-548n	1	0	1	0	1	1	FAM214A	family with sequence similarity 214, member A
hsa-miR-548n	1	0	1	1	1	1	RNF180	ring finger protein 180
hsa-miR-548n	1	0	1	0	1	1	STYX	serine/threonine/tyrosine interacting protein
hsa-miR-548n	0	0	1	1	1	1	YAP1	Yes-associated protein 1
hsa-miR-548n	1	0	1	1	1	1	NABP1	nucleic acid binding protein 1
hsa-miR-548n	1	0	1	1	0	0	PTAR1	protein prenyltransferase alpha subunit repeat containing 1
hsa-miR-548n	1	0	1	1	1	1	TMEM182	transmembrane protein 182
hsa-miR-548n	1	0	1	1	0	0	ZBTB49	zinc finger and BTB domain containing 49
hsa-miR-548n	0	0	1	1	1	1	VWA3B	von Willebrand factor A domain containing 3B
hsa-miR-548n	1	0	1	1	1	1	EHMT1	euchromatic histone-lysine N-methyltransferase 1
hsa-miR-548n	0	0	1	1	1	1	TMEM138	transmembrane protein 138
hsa-miR-548n	1	0	1	1	1	1	TMEM68	transmembrane protein 68
hsa-miR-548n	0	0	1	1	1	1	INPP5B	inositol polyphosphate-5-phosphatase, 75kDa
hsa-miR-548n	0	0	1	0	1	1	PAPD4	PAP associated domain containing 4
hsa-miR-548n	1	0	1	1	1	1	ABI3BP	ABI family, member 3 (NESH) binding protein
hsa-miR-548n	1	0	1	1	1	1	HMCN1	hemicentin 1
hsa-miR-548n	1	0	1	0	1	1	MEF2C	myocyte enhancer factor 2C
hsa-miR-548n	1	0	1	1	1	1	SOX6	SRY (sex determining region Y)-box 6
hsa-miR-548n	0	0	1	1	1	1	NARG2	NMDA receptor regulated 2
hsa-miR-548n	1	0	1	1	1	1	BPTF	bromodomain PHD finger transcription factor
hsa-miR-548n	1	0	1	1	0	0	KIAA1109	KIAA1109
hsa-miR-548n	1	0	1	0	1	1	CLINT1	clathrin interactor 1
hsa-miR-548n	0	0	1	1	0	0	LRRN2	leucine rich repeat neuronal 2
hsa-miR-548n	0	0	1	1	1	1	SOAT1	sterol O-acyltransferase 1
hsa-miR-548n	0	0	1	0	0	0	ADCY10P1	adenylate cyclase 10 (soluble) pseudogene 1
hsa-miR-548n	1	0	1	1	1	1	MARCH7	membrane-associated ring finger (C3HC4) 7, E3 ubiquitin protein ligase
hsa-miR-548n	1	0	1	1	1	1	ANP32E	acidic (leucine-rich) nuclear phosphoprotein 32 family, member E
hsa-miR-548n	0	0	1	1	0	0	CD37	CD37 molecule
hsa-miR-548n	1	0	1	0	1	1	EXOC5	exocyst complex component 5
hsa-miR-548n	0	0	1	1	1	1	PCDH20	protocadherin 20
hsa-miR-548n	0	0	1	1	1	1	CAND1	cullin-associated and neddylation-dissociated 1
hsa-miR-548n	1	0	1	1	1	1	IL17RD	interleukin 17 receptor D
hsa-miR-548n	1	0	1	1	1	1	PRPF38B	PRP38 pre-mRNA processing factor 38 (yeast) domain containing B
hsa-miR-548n	1	0	1	1	1	1	CAPRIN2	caprin family member 2
hsa-miR-548n	1	0	1	1	1	1	SLC24A4	solute carrier family 24 (sodium/potassium/calcium exchanger), member 4
hsa-miR-548n	1	0	1	1	1	1	MBD6	methyl-CpG binding domain protein 6
hsa-miR-548n	1	0	1	0	1	1	JAZF1	JAZF zinc finger 1
hsa-miR-548n	1	0	1	0	1	1	SMURF1	SMAD specific E3 ubiquitin protein ligase 1
hsa-miR-548n	1	0	1	1	1	1	CADM2	cell adhesion molecule 2
hsa-miR-548n	1	0	1	0	0	0	XPNPEP3	X-prolyl aminopeptidase (aminopeptidase P) 3, putative
hsa-miR-548n	1	0	1	1	1	1	RBM26	RNA binding motif protein 26
hsa-miR-548n	0	0	1	1	1	1	PNMAL1	paraneoplastic Ma antigen family-like 1
hsa-miR-548n	1	0	1	1	1	1	RICTOR	RPTOR independent companion of MTOR, complex 2
hsa-miR-548n	1	0	1	0	1	1	NR3C1	nuclear receptor subfamily 3, group C, member 1 (glucocorticoid receptor)
hsa-miR-548n	1	0	1	1	1	1	BOLL	bol, boule-like (Drosophila)
hsa-miR-548n	0	0	1	1	0	0	FIP1L1	FIP1 like 1 (S. cerevisiae)
hsa-miR-548n	1	0	1	1	1	1	FAM76B	family with sequence similarity 76, member B
hsa-miR-548n	1	0	1	0	1	1	PATL1	protein associated with topoisomerase II homolog 1 (yeast)
hsa-miR-548n	1	0	1	0	1	1	PHYHIPL	phytanoyl-CoA 2-hydroxylase interacting protein-like
hsa-miR-548n	1	0	1	1	0	0	LRRC58	leucine rich repeat containing 58
hsa-miR-548n	1	0	1	1	1	1	FBXL5	F-box and leucine-rich repeat protein 5
hsa-miR-548n	0	0	1	1	1	1	AMOTL1	angiomotin like 1
hsa-miR-548n	1	0	1	1	1	1	PPP3CA	protein phosphatase 3, catalytic subunit, alpha isozyme
hsa-miR-548n	1	0	1	1	1	1	WDR44	WD repeat domain 44
hsa-miR-548n	1	0	1	1	1	1	RNF38	ring finger protein 38
hsa-miR-548n	0	0	1	1	1	1	MTMR14	myotubularin related protein 14
hsa-miR-548n	1	0	1	1	1	1	IKZF2	IKAROS family zinc finger 2 (Helios)
hsa-miR-548n	0	0	1	0	0	0	PMCHL1	pro-melanin-concentrating hormone-like 1, pseudogene
hsa-miR-548n	0	0	1	1	1	1	CCDC62	coiled-coil domain containing 62
hsa-miR-548n	1	0	1	1	1	1	GAL3ST3	galactose-3-O-sulfotransferase 3
hsa-miR-548n	1	0	1	1	1	1	CLIC5	chloride intracellular channel 5
hsa-miR-548n	1	0	1	1	1	1	RCAN2	regulator of calcineurin 2
hsa-miR-548n	1	0	1	1	1	1	DUSP16	dual specificity phosphatase 16
hsa-miR-548n	0	0	1	1	1	1	CD209	CD209 molecule
hsa-miR-548n	1	0	1	0	1	1	BDNF	brain-derived neurotrophic factor
hsa-miR-548n	1	0	1	1	1	1	MIPOL1	mirror-image polydactyly 1
hsa-miR-548n	0	0	1	1	0	0	DHRS4	dehydrogenase/reductase (SDR family) member 4
hsa-miR-548n	1	0	1	1	1	1	KIAA0907	KIAA0907
hsa-miR-548n	1	0	1	1	1	1	ANGPT1	angiopoietin 1
hsa-miR-548n	0	0	1	1	1	1	NFXL1	nuclear transcription factor, X-box binding-like 1
hsa-miR-548n	0	0	1	1	1	1	SHPRH	SNF2 histone linker PHD RING helicase, E3 ubiquitin protein ligase
hsa-miR-548n	0	0	1	1	1	1	CEP41	centrosomal protein 41kDa
hsa-miR-548n	0	0	1	1	1	1	DNAJB14	DnaJ (Hsp40) homolog, subfamily B, member 14
hsa-miR-548n	1	0	1	1	1	1	WDR26	WD repeat domain 26
hsa-miR-548n	1	0	1	1	1	1	BCL11A	B-cell CLL/lymphoma 11A (zinc finger protein)
hsa-miR-548n	0	0	1	1	1	1	CCDC83	coiled-coil domain containing 83
hsa-miR-548n	0	0	1	1	1	1	IYD	iodotyrosine deiodinase
hsa-miR-548n	1	0	1	1	1	1	OPRM1	opioid receptor, mu 1
hsa-miR-548n	0	0	1	1	1	1	BCOR	BCL6 corepressor
hsa-miR-548n	1	0	1	1	1	1	RAI14	retinoic acid induced 14
hsa-miR-548n	0	0	1	1	1	1	GCOM1	GRINL1A complex locus 1
hsa-miR-548n	1	0	1	1	1	1	TAB3	TGF-beta activated kinase 1/MAP3K7 binding protein 3
hsa-miR-548n	0	0	1	1	1	1	MFAP5	microfibrillar associated protein 5
hsa-miR-548n	1	0	1	0	1	1	AP2B1	adaptor-related protein complex 2, beta 1 subunit
hsa-miR-548n	0	0	1	1	1	1	PROK2	prokineticin 2
hsa-miR-548n	1	0	1	1	1	1	CAMTA1	calmodulin binding transcription activator 1
hsa-miR-548n	0	0	1	1	0	0	FKBP7	FK506 binding protein 7
hsa-miR-548n	0	0	1	1	1	1	IL20	interleukin 20
hsa-miR-548n	0	0	1	1	1	1	KDELC2	KDEL (Lys-Asp-Glu-Leu) containing 2
hsa-miR-548n	0	0	1	0	1	1	FAM198B	family with sequence similarity 198, member B
hsa-miR-548n	0	0	1	1	1	1	TNFRSF19	tumor necrosis factor receptor superfamily, member 19
hsa-miR-548n	1	0	1	1	1	1	SSX2IP	synovial sarcoma, X breakpoint 2 interacting protein
hsa-miR-548n	1	0	1	0	1	1	ANKRD28	ankyrin repeat domain 28
hsa-miR-548n	0	0	1	1	1	1	IKZF3	IKAROS family zinc finger 3 (Aiolos)
hsa-miR-548n	1	0	1	1	1	1	BCL2L11	BCL2-like 11 (apoptosis facilitator)
hsa-miR-548n	1	0	1	1	1	1	SP3	Sp3 transcription factor
hsa-miR-548n	1	0	1	1	1	1	FAM120A	family with sequence similarity 120A
hsa-miR-548n	1	0	1	0	1	1	CHRM2	cholinergic receptor, muscarinic 2
hsa-miR-548n	1	0	1	0	1	1	NHS	Nance-Horan syndrome (congenital cataracts and dental anomalies)
hsa-miR-548n	0	0	1	1	1	1	POTEG	POTE ankyrin domain family, member G
hsa-miR-548n	0	0	1	0	1	1	BRWD3	bromodomain and WD repeat domain containing 3
hsa-miR-548n	1	0	1	1	1	1	ANKRD11	ankyrin repeat domain 11
hsa-miR-548n	1	0	1	1	1	1	MECP2	methyl CpG binding protein 2 (Rett syndrome)
hsa-miR-548n	0	0	1	1	0	0	ART3	ADP-ribosyltransferase 3
hsa-miR-548n	1	0	1	1	1	1	LAMP2	lysosomal-associated membrane protein 2
hsa-miR-548n	0	0	1	0	1	1	RAB18	RAB18, member RAS oncogene family
hsa-miR-548n	1	0	1	1	0	0	ZCCHC4	zinc finger, CCHC domain containing 4
hsa-miR-548n	1	0	1	1	1	1	ALCAM	activated leukocyte cell adhesion molecule
hsa-miR-548n	0	0	1	1	1	1	KLK7	kallikrein-related peptidase 7
hsa-miR-548n	1	0	1	1	1	1	PLCH1	phospholipase C, eta 1
hsa-miR-548n	1	0	1	1	1	1	TRIT1	tRNA isopentenyltransferase 1
hsa-miR-548n	1	0	1	0	1	1	MYO18A	myosin XVIIIA
hsa-miR-548n	1	0	1	1	1	1	EYA2	eyes absent homolog 2 (Drosophila)
hsa-miR-548n	1	0	1	1	1	1	RTN3	reticulon 3
hsa-miR-548n	1	0	1	1	1	1	PFKFB4	6-phosphofructo-2-kinase/fructose-2,6-biphosphatase 4
hsa-miR-548n	1	0	1	1	1	1	CYFIP1	cytoplasmic FMR1 interacting protein 1
hsa-miR-548n	1	0	1	1	1	1	NTNG1	netrin G1
hsa-miR-548n	1	0	1	1	1	1	QKI	QKI, KH domain containing, RNA binding
hsa-miR-548n	1	0	1	1	1	1	MYB	v-myb myeloblastosis viral oncogene homolog (avian)
hsa-miR-548n	1	0	1	1	1	1	PCDH11X	protocadherin 11 X-linked
hsa-miR-548n	1	0	1	1	0	0	TAF4B	TAF4b RNA polymerase II, TATA box binding protein (TBP)-associated factor, 105kDa
hsa-miR-548n	0	0	1	1	1	1	CDK20	cyclin-dependent kinase 20
hsa-miR-548n	0	0	1	1	1	1	IL23R	interleukin 23 receptor
hsa-miR-548n	1	0	1	1	1	1	AMOT	angiomotin
hsa-miR-548n	1	0	1	1	1	1	NEK6	NIMA (never in mitosis gene a)-related kinase 6
hsa-miR-548n	1	0	1	1	1	1	NOL4	nucleolar protein 4
hsa-miR-548n	1	0	1	0	1	1	FAM46A	family with sequence similarity 46, member A
hsa-miR-548n	1	0	1	1	1	1	CPSF6	cleavage and polyadenylation specific factor 6, 68kDa
hsa-miR-548n	0	0	1	1	1	1	SNX11	sorting nexin 11
hsa-miR-548n	1	0	1	1	1	1	ELOVL6	ELOVL fatty acid elongase 6
hsa-miR-548n	0	0	1	1	0	0	ANXA5	annexin A5
hsa-miR-548n	0	0	1	1	1	1	TFG	TRK-fused gene
hsa-miR-548n	0	0	1	1	1	1	PAFAH1B2	platelet-activating factor acetylhydrolase 1b, catalytic subunit 2 (30kDa)
hsa-miR-548n	0	0	1	1	1	1	RLIM	ring finger protein, LIM domain interacting
hsa-miR-548n	0	0	1	1	1	1	TMOD1	tropomodulin 1
hsa-miR-548n	0	0	1	1	0	0	ZNF576	zinc finger protein 576
hsa-miR-548n	1	0	1	0	0	0	VGLL4	vestigial like 4 (Drosophila)
hsa-miR-548n	0	0	1	1	1	1	REXO2	REX2, RNA exonuclease 2 homolog (S. cerevisiae)
hsa-miR-548n	1	0	1	0	1	1	DCAF10	DDB1 and CUL4 associated factor 10
hsa-miR-548n	0	0	1	1	1	1	FTO	fat mass and obesity associated
hsa-miR-548n	1	0	1	1	1	1	SPRY2	sprouty homolog 2 (Drosophila)
hsa-miR-548n	1	0	1	1	0	0	SLC10A3	solute carrier family 10 (sodium/bile acid cotransporter family), member 3
hsa-miR-548n	0	0	1	1	1	1	ANAPC1	anaphase promoting complex subunit 1
hsa-miR-548n	1	0	1	0	1	1	CGGBP1	CGG triplet repeat binding protein 1
hsa-miR-548n	1	0	1	1	1	1	MBNL1	muscleblind-like splicing regulator 1
hsa-miR-548n	1	0	1	1	1	1	KIAA1191	KIAA1191
hsa-miR-548n	0	0	1	1	1	1	FAM104B	family with sequence similarity 104, member B
hsa-miR-548n	1	0	1	1	1	1	U2SURP	U2 snRNP-associated SURP domain containing
hsa-miR-548n	1	0	1	0	1	1	VAMP4	vesicle-associated membrane protein 4
hsa-miR-548n	0	0	1	1	0	0	OBSL1	obscurin-like 1
hsa-miR-548n	1	0	1	1	1	1	COL2A1	collagen, type II, alpha 1
hsa-miR-548n	0	0	1	1	1	1	DYDC2	DPY30 domain containing 2
hsa-miR-548n	1	0	1	1	0	0	OSTF1	osteoclast stimulating factor 1
hsa-miR-548n	1	0	1	1	1	1	RSU1	Ras suppressor protein 1
hsa-miR-548n	0	0	1	1	1	1	TMEM30A	transmembrane protein 30A
hsa-miR-548n	1	0	1	1	1	1	SLC50A1	solute carrier family 50 (sugar transporter), member 1
hsa-miR-548n	1	0	1	0	1	1	TMEM39A	transmembrane protein 39A
hsa-miR-548n	0	0	1	1	1	1	ATXN2L	ataxin 2-like
hsa-miR-548n	1	0	1	1	1	1	ATP6AP2	ATPase, H+ transporting, lysosomal accessory protein 2
hsa-miR-548n	1	0	1	1	1	1	GRIA2	glutamate receptor, ionotropic, AMPA 2
hsa-miR-548n	1	0	1	1	1	1	ZFAND5	zinc finger, AN1-type domain 5
hsa-miR-548n	0	0	1	1	1	1	BBOX1	butyrobetaine (gamma), 2-oxoglutarate dioxygenase (gamma-butyrobetaine hydroxylase) 1
hsa-miR-548n	1	0	1	1	1	1	TRIM2	tripartite motif containing 2
hsa-miR-548n	1	0	1	1	1	1	OTUD5	OTU domain containing 5
hsa-miR-548n	0	0	1	1	1	1	HDHD2	haloacid dehalogenase-like hydrolase domain containing 2
hsa-miR-548n	1	0	1	1	1	1	BTG3	BTG family, member 3
hsa-miR-548n	0	0	1	0	0	0	GRAMD1B	GRAM domain containing 1B
hsa-miR-548n	0	0	1	1	1	1	TAF12	TAF12 RNA polymerase II, TATA box binding protein (TBP)-associated factor, 20kDa
hsa-miR-548n	1	0	1	0	1	1	RNF165	ring finger protein 165
hsa-miR-548n	0	0	1	1	1	1	HSD17B12	hydroxysteroid (17-beta) dehydrogenase 12
hsa-miR-548n	1	0	1	1	1	1	SUPT16H	suppressor of Ty 16 homolog (S. cerevisiae)
hsa-miR-548n	0	0	1	1	1	1	PLXDC2	plexin domain containing 2
hsa-miR-548n	1	0	1	1	0	0	ZMYM3	zinc finger, MYM-type 3
hsa-miR-548n	1	0	1	1	1	1	SNCA	synuclein, alpha (non A4 component of amyloid precursor)
hsa-miR-548n	1	0	1	1	1	1	RBM7	RNA binding motif protein 7
hsa-miR-548n	0	0	1	1	1	1	H2AFY	H2A histone family, member Y
hsa-miR-548n	0	0	1	1	1	1	RNF170	ring finger protein 170
hsa-miR-548n	0	0	1	1	1	1	PCNP	PEST proteolytic signal containing nuclear protein
hsa-miR-548n	1	0	1	1	1	1	ETF1	eukaryotic translation termination factor 1
hsa-miR-548n	0	0	1	0	1	1	AHI1	Abelson helper integration site 1
hsa-miR-548n	1	0	1	1	1	1	PAPOLA	poly(A) polymerase alpha
hsa-miR-548n	0	0	1	0	0	0	MGC21881	uncharacterized locus MGC21881
hsa-miR-548n	0	0	1	0	0	0	KLHL15	kelch-like 15 (Drosophila)
hsa-miR-548n	1	0	1	1	1	1	ZBTB38	zinc finger and BTB domain containing 38
hsa-miR-548n	0	0	1	0	1	1	ZNF37A	zinc finger protein 37A
hsa-miR-548n	1	0	1	1	0	0	ARMCX2	armadillo repeat containing, X-linked 2
hsa-miR-548n	0	0	1	1	1	1	KRCC1	lysine-rich coiled-coil 1
hsa-miR-548n	1	0	1	0	1	1	NR1D2	nuclear receptor subfamily 1, group D, member 2
hsa-miR-548n	0	0	1	0	0	0	ABCC6P2	ATP-binding cassette, sub-family C, member 6 pseudogene 2
hsa-miR-548n	1	0	1	1	1	1	FAM176A	family with sequence similarity 176, member A
hsa-miR-548n	1	0	1	1	1	1	NUMBL	numb homolog (Drosophila)-like
hsa-miR-548n	1	0	1	1	1	1	SCAMP1	secretory carrier membrane protein 1
hsa-miR-548n	0	0	1	1	1	1	MYL12A	myosin, light chain 12A, regulatory, non-sarcomeric
hsa-miR-548n	0	0	1	1	1	1	CMAS	cytidine monophosphate N-acetylneuraminic acid synthetase
hsa-miR-548n	1	0	1	1	1	1	FAM199X	family with sequence similarity 199, X-linked
hsa-miR-548n	0	0	1	1	1	1	MBIP	MAP3K12 binding inhibitory protein 1
hsa-miR-548n	1	0	1	0	1	1	CYBRD1	cytochrome b reductase 1
hsa-miR-548n	1	0	1	1	1	1	NRF1	nuclear respiratory factor 1
hsa-miR-548n	0	0	1	1	0	0	SARNP	SAP domain containing ribonucleoprotein
hsa-miR-548n	1	0	1	1	1	1	DNAJC14	DnaJ (Hsp40) homolog, subfamily C, member 14
hsa-miR-548n	0	0	1	1	1	1	ANKRD44	ankyrin repeat domain 44
hsa-miR-548n	0	0	1	0	0	0	ASH1L-AS1	ASH1L antisense RNA 1
hsa-miR-548n	1	0	1	1	0	0	USP53	ubiquitin specific peptidase 53
hsa-miR-548n	0	0	1	1	1	1	CSDE1	cold shock domain containing E1, RNA-binding
hsa-miR-548n	0	0	1	1	1	1	RDH11	retinol dehydrogenase 11 (all-trans/9-cis/11-cis)
hsa-miR-548n	0	0	1	0	0	0	TCP11L2	t-complex 11 (mouse)-like 2
hsa-miR-548n	0	0	1	1	1	1	GLIPR2	GLI pathogenesis-related 2
hsa-miR-548n	0	0	1	0	0	0	FAM200B	family with sequence similarity 200, member B
hsa-miR-548n	1	0	1	1	1	1	ARHGEF9	Cdc42 guanine nucleotide exchange factor (GEF) 9
hsa-miR-548n	0	0	1	0	0	0	ZNF720	zinc finger protein 720
hsa-miR-548n	1	0	1	0	1	1	SLC19A2	solute carrier family 19 (thiamine transporter), member 2
hsa-miR-548n	1	0	1	1	1	1	SUZ12	suppressor of zeste 12 homolog (Drosophila)
hsa-miR-548n	0	0	1	1	1	1	ZNF273	zinc finger protein 273
hsa-miR-548n	0	0	1	0	0	0	WDFY3-AS2	WDFY3 antisense RNA 2
hsa-miR-548n	1	0	1	1	1	1	ZMAT4	zinc finger, matrin-type 4
hsa-miR-548n	0	0	1	1	1	1	SNX22	sorting nexin 22
hsa-miR-548n	0	0	1	0	1	1	CD99P1	CD99 molecule pseudogene 1
hsa-miR-548n	0	0	1	1	1	1	HIBADH	3-hydroxyisobutyrate dehydrogenase
hsa-miR-548n	0	0	1	1	0	0	PTPMT1	protein tyrosine phosphatase, mitochondrial 1
hsa-miR-548n	0	0	1	0	1	1	ZNF718	zinc finger protein 718
hsa-miR-548n	1	0	1	0	1	1	BTF3L4	basic transcription factor 3-like 4
hsa-miR-548n	1	0	1	0	1	1	ARHGAP26	Rho GTPase activating protein 26
hsa-miR-548n	1	0	1	1	1	1	TM9SF4	transmembrane 9 superfamily protein member 4
hsa-miR-548n	0	0	1	1	1	1	C10orf88	chromosome 10 open reading frame 88
hsa-miR-548n	0	0	1	1	1	1	FHL5	four and a half LIM domains 5
hsa-miR-548n	1	0	1	1	0	0	SAMD4A	sterile alpha motif domain containing 4A
hsa-miR-548n	0	0	1	0	0	0	LOC728196	uncharacterized LOC728196
hsa-miR-548n	0	0	1	1	1	1	ZCCHC10	zinc finger, CCHC domain containing 10
hsa-miR-548n	0	0	1	1	1	1	RNF103	ring finger protein 103
hsa-miR-548n	1	0	1	1	1	1	SPOCK2	sparc/osteonectin, cwcv and kazal-like domains proteoglycan (testican) 2
hsa-miR-548n	1	0	1	1	1	1	RACGAP1	Rac GTPase activating protein 1
hsa-miR-548n	1	0	1	0	1	1	CDK19	cyclin-dependent kinase 19
hsa-miR-548n	1	0	1	1	1	1	ASPH	aspartate beta-hydroxylase
hsa-miR-548n	1	0	1	1	1	1	ZNF200	zinc finger protein 200
hsa-miR-548n	0	0	1	1	1	1	TLR4	toll-like receptor 4
hsa-miR-548n	0	0	1	1	1	1	FAM221A	family with sequence similarity 221, member A
hsa-miR-548n	1	0	1	1	1	1	SPG20	spastic paraplegia 20 (Troyer syndrome)
hsa-miR-548n	1	0	1	1	1	1	EPHA4	EPH receptor A4
hsa-miR-548n	0	0	1	0	0	0	ZBED3-AS1	ZBED3 antisense RNA 1
hsa-miR-548n	1	0	1	1	1	1	ZDHHC5	zinc finger, DHHC-type containing 5
hsa-miR-548n	0	0	1	1	1	1	MAP2	microtubule-associated protein 2
hsa-miR-548n	0	0	1	1	1	1	SELP	selectin P (granule membrane protein 140kDa, antigen CD62)
hsa-miR-548n	1	0	1	1	1	1	SENP6	SUMO1/sentrin specific peptidase 6
hsa-miR-548n	0	0	1	0	1	1	PAPOLG	poly(A) polymerase gamma
hsa-miR-548n	1	0	1	1	1	1	HTR2C	5-hydroxytryptamine (serotonin) receptor 2C, G protein-coupled
hsa-miR-548n	1	0	1	1	1	1	PPARGC1A	peroxisome proliferator-activated receptor gamma, coactivator 1 alpha
hsa-miR-548n	1	0	1	0	1	1	SV2B	synaptic vesicle glycoprotein 2B
hsa-miR-548n	0	0	1	1	1	1	CCP110	centriolar coiled coil protein 110kDa
hsa-miR-548n	0	0	1	1	1	1	TMEM117	transmembrane protein 117
hsa-miR-548n	1	0	1	1	1	1	MLLT3	myeloid/lymphoid or mixed-lineage leukemia (trithorax homolog, Drosophila); translocated to, 3
hsa-miR-548n	0	0	1	1	1	1	PIP5K1B	phosphatidylinositol-4-phosphate 5-kinase, type I, beta
hsa-miR-548n	0	0	1	1	1	1	CTNNA3	catenin (cadherin-associated protein), alpha 3
hsa-miR-548n	1	0	1	1	1	1	SULT4A1	sulfotransferase family 4A, member 1
hsa-miR-548n	1	0	1	1	1	1	ELAVL2	ELAV (embryonic lethal, abnormal vision, Drosophila)-like 2 (Hu antigen B)
hsa-miR-548n	1	0	1	1	1	1	GABRA1	gamma-aminobutyric acid (GABA) A receptor, alpha 1
hsa-miR-548n	0	0	1	0	1	1	ERAP1	endoplasmic reticulum aminopeptidase 1
hsa-miR-548n	1	0	1	1	1	1	ZNF518A	zinc finger protein 518A
hsa-miR-548n	0	0	1	0	1	1	ZDHHC17	zinc finger, DHHC-type containing 17
hsa-miR-548n	0	0	1	1	0	0	AHSA2	AHA1, activator of heat shock 90kDa protein ATPase homolog 2 (yeast)
hsa-miR-548n	0	0	1	1	0	0	FREM1	FRAS1 related extracellular matrix 1
hsa-miR-548n	0	0	1	1	1	1	AADAT	aminoadipate aminotransferase
hsa-miR-548n	1	0	1	1	1	1	PLS1	plastin 1
hsa-miR-548n	0	0	1	1	0	0	C7orf57	chromosome 7 open reading frame 57
hsa-miR-548n	1	0	1	1	1	1	MUM1L1	melanoma associated antigen (mutated) 1-like 1
hsa-miR-548n	0	0	1	0	0	0	LOC729307	uncharacterized LOC729307
hsa-miR-548n	1	0	1	1	1	1	ZPLD1	zona pellucida-like domain containing 1
hsa-miR-548n	0	0	1	0	1	1	FLJ25328	uncharacterized LOC148231
hsa-miR-548n	1	0	1	1	1	1	PITPNB	phosphatidylinositol transfer protein, beta
hsa-miR-548n	1	0	1	1	1	1	RCOR3	REST corepressor 3
hsa-miR-548n	1	0	1	0	1	1	RNF4	ring finger protein 4
hsa-miR-548n	1	0	1	1	1	1	GLUL	glutamate-ammonia ligase
hsa-miR-548n	1	0	1	1	1	1	PDZD2	PDZ domain containing 2
hsa-miR-548n	1	0	1	1	1	1	TBC1D1	TBC1 (tre-2/USP6, BUB2, cdc16) domain family, member 1
hsa-miR-548n	1	0	1	1	1	1	C5orf25	chromosome 5 open reading frame 25
hsa-miR-548n	0	0	1	1	1	1	C5orf54	chromosome 5 open reading frame 54
hsa-miR-548n	0	0	1	1	1	1	CEPT1	choline/ethanolamine phosphotransferase 1
hsa-miR-548n	0	0	1	1	0	0	POLI	polymerase (DNA directed) iota
hsa-miR-548n	1	0	1	1	1	1	PMAIP1	phorbol-12-myristate-13-acetate-induced protein 1
hsa-miR-548n	0	0	1	0	0	0	FAM86JP	family with sequence similarity 86, member A pseudogene
hsa-miR-548n	0	0	1	1	1	1	C5orf22	chromosome 5 open reading frame 22
hsa-miR-548n	1	0	1	1	1	1	RHOBTB1	Rho-related BTB domain containing 1
hsa-miR-548n	1	0	1	1	1	1	ZNF521	zinc finger protein 521
hsa-miR-548n	0	0	1	0	1	1	TTC23L	tetratricopeptide repeat domain 23-like
hsa-miR-548n	0	0	1	1	1	1	CDADC1	cytidine and dCMP deaminase domain containing 1
hsa-miR-548n	1	0	1	1	1	1	PPP2R2C	protein phosphatase 2, regulatory subunit B, gamma
hsa-miR-548n	1	0	1	1	1	1	SECISBP2L	SECIS binding protein 2-like
hsa-miR-548n	1	0	1	1	1	1	MAK	male germ cell-associated kinase
hsa-miR-548n	1	0	1	1	0	0	PCNX	pecanex homolog (Drosophila)
hsa-miR-548n	1	0	1	1	1	1	CRKL	v-crk sarcoma virus CT10 oncogene homolog (avian)-like
hsa-miR-548n	1	0	1	1	1	1	SEPT2	septin 2
hsa-miR-548n	1	0	1	1	1	1	HMGCR	3-hydroxy-3-methylglutaryl-CoA reductase
hsa-miR-548n	1	0	1	0	1	1	TBC1D2B	TBC1 domain family, member 2B
hsa-miR-548n	1	0	1	1	1	1	PCDHA5	protocadherin alpha 5
hsa-miR-548n	0	0	1	1	0	0	TNMD	tenomodulin
hsa-miR-548n	0	0	1	1	1	1	HEXA	hexosaminidase A (alpha polypeptide)
hsa-miR-548n	1	0	1	1	1	1	TTC26	tetratricopeptide repeat domain 26
hsa-miR-548n	0	0	1	0	0	0	NDUFB4	NADH dehydrogenase (ubiquinone) 1 beta subcomplex, 4, 15kDa
hsa-miR-548n	1	0	1	1	1	1	LPGAT1	lysophosphatidylglycerol acyltransferase 1
hsa-miR-548n	1	0	1	1	1	1	CLK4	CDC-like kinase 4
hsa-miR-548n	0	0	1	0	0	0	FAM66C	family with sequence similarity 66, member C
hsa-miR-548n	0	0	1	1	1	1	EDA2R	ectodysplasin A2 receptor
hsa-miR-548n	1	0	1	0	1	1	DDX3Y	DEAD (Asp-Glu-Ala-Asp) box polypeptide 3, Y-linked
hsa-miR-548n	0	0	1	1	1	1	KIF16B	kinesin family member 16B
hsa-miR-548n	1	0	1	1	1	1	NKAIN2	Na+/K+ transporting ATPase interacting 2
hsa-miR-548n	1	0	1	1	1	1	ZZZ3	zinc finger, ZZ-type containing 3
hsa-miR-548n	0	0	1	0	0	0	LOC144486	uncharacterized LOC144486
hsa-miR-548n	0	0	1	1	1	1	SLC39A12	solute carrier family 39 (zinc transporter), member 12
hsa-miR-548n	1	0	1	0	1	1	ATP11A	ATPase, class VI, type 11A
hsa-miR-548n	1	0	1	1	1	1	RAP2C	RAP2C, member of RAS oncogene family
hsa-miR-548n	1	0	1	1	1	1	GRIA4	glutamate receptor, ionotropic, AMPA 4
hsa-miR-548n	0	0	1	0	1	1	TMSB15B	thymosin beta 15B
hsa-miR-548n	1	0	1	1	1	1	ZEB2	zinc finger E-box binding homeobox 2
hsa-miR-548n	1	0	1	1	1	1	CTDSPL2	CTD (carboxy-terminal domain, RNA polymerase II, polypeptide A) small phosphatase like 2
hsa-miR-548n	0	0	1	1	1	1	SEC24D	SEC24 family, member D (S. cerevisiae)
hsa-miR-548n	0	0	1	1	1	1	ARHGAP6	Rho GTPase activating protein 6
hsa-miR-548n	0	0	1	1	1	1	CBLN2	cerebellin 2 precursor
hsa-miR-548n	0	0	1	0	0	0	LOC339862	uncharacterized LOC339862
hsa-miR-548n	0	0	1	1	0	0	VPS8	vacuolar protein sorting 8 homolog (S. cerevisiae)
hsa-miR-548n	0	0	1	1	1	1	SNAPC3	small nuclear RNA activating complex, polypeptide 3, 50kDa
hsa-miR-548n	0	0	1	1	1	1	CLEC12B	C-type lectin domain family 12, member B
hsa-miR-548n	1	0	1	1	1	1	ZNF618	zinc finger protein 618
hsa-miR-548n	1	0	1	1	1	1	IMPACT	Impact homolog (mouse)
hsa-miR-548n	1	0	1	1	1	1	PEX5L	peroxisomal biogenesis factor 5-like
hsa-miR-548n	0	0	1	1	0	0	MCCC1	methylcrotonoyl-CoA carboxylase 1 (alpha)
hsa-miR-548n	1	0	1	1	1	1	MACROD2	MACRO domain containing 2
hsa-miR-548n	0	0	1	1	1	1	IPO11	importin 11
hsa-miR-548n	0	0	1	1	1	1	FAM171B	family with sequence similarity 171, member B
hsa-miR-548n	1	0	1	1	1	1	HECTD2	HECT domain containing E3 ubiquitin protein ligase 2
hsa-miR-548n	1	0	1	1	1	1	MEIS1	Meis homeobox 1
hsa-miR-548n	1	0	1	1	1	1	ACVR1	activin A receptor, type I
hsa-miR-548n	1	0	1	0	1	1	CLDN12	claudin 12
hsa-miR-548n	1	0	1	0	1	1	NEGR1	neuronal growth regulator 1
hsa-miR-548n	1	0	1	1	1	1	RNMT	RNA (guanine-7-) methyltransferase
hsa-miR-548n	0	0	1	0	0	0	SRGAP2C	SLIT-ROBO Rho GTPase activating protein 2C
hsa-miR-548n	1	0	1	0	1	1	CPEB4	cytoplasmic polyadenylation element binding protein 4
hsa-miR-548n	1	0	1	1	1	1	BNC2	basonuclin 2
hsa-miR-548n	1	0	1	1	1	1	FAM135B	family with sequence similarity 135, member B
hsa-miR-548n	0	0	1	1	0	0	ATXN7L2	ataxin 7-like 2
hsa-miR-548n	1	0	1	0	1	1	YAF2	YY1 associated factor 2
hsa-miR-548n	1	0	1	1	1	1	SLC35F3	solute carrier family 35, member F3
hsa-miR-548n	1	0	1	1	1	1	C4orf19	chromosome 4 open reading frame 19
hsa-miR-548n	1	0	1	1	1	1	CMIP	c-Maf inducing protein
hsa-miR-548n	1	0	1	1	1	1	DAAM1	dishevelled associated activator of morphogenesis 1
hsa-miR-548n	1	0	1	1	1	1	FOXK1	forkhead box K1
hsa-miR-548n	1	0	1	1	1	1	GALNT1	UDP-N-acetyl-alpha-D-galactosamine:polypeptide N-acetylgalactosaminyltransferase 1 (GalNAc-T1)
hsa-miR-548n	1	0	1	1	1	1	SF1	splicing factor 1
hsa-miR-548n	1	0	1	0	1	1	CEP44	centrosomal protein 44kDa
hsa-miR-548n	1	0	1	0	1	1	ARID2	AT rich interactive domain 2 (ARID, RFX-like)
hsa-miR-548n	0	0	1	1	0	0	HSPA14	heat shock 70kDa protein 14
hsa-miR-548n	0	0	1	0	0	0	LOC100134868	uncharacterized LOC100134868
hsa-miR-548n	1	0	1	1	1	1	PLS3	plastin 3
hsa-miR-548n	0	0	1	1	0	0	CCDC152	coiled-coil domain containing 152
hsa-miR-548n	0	0	1	0	0	0	FLJ36000	uncharacterized FLJ36000
hsa-miR-548n	1	0	1	1	1	1	FGFR2	fibroblast growth factor receptor 2
hsa-miR-548n	0	0	1	1	1	1	CACHD1	cache domain containing 1
hsa-miR-548n	0	0	1	0	0	0	LINC00326	long intergenic non-protein coding RNA 326
hsa-miR-548n	1	0	1	1	1	1	MARCKS	myristoylated alanine-rich protein kinase C substrate
hsa-miR-548n	0	0	1	0	0	0	LOC100132735	uncharacterized LOC100132735
hsa-miR-548n	0	0	1	1	1	1	SLC14A1	solute carrier family 14 (urea transporter), member 1 (Kidd blood group)
hsa-miR-548n	1	0	1	1	1	1	FOSB	FBJ murine osteosarcoma viral oncogene homolog B
hsa-miR-548n	1	0	1	1	1	1	DPP8	dipeptidyl-peptidase 8
hsa-miR-548n	1	0	1	1	1	1	DACH2	dachshund homolog 2 (Drosophila)
hsa-miR-548n	0	0	1	0	0	0	LOC339622	uncharacterized LOC339622
hsa-miR-548n	1	0	1	1	1	1	SLITRK3	SLIT and NTRK-like family, member 3
hsa-miR-548n	1	0	1	1	1	1	BVES	blood vessel epicardial substance
hsa-miR-548n	1	0	1	1	1	1	INTS6	integrator complex subunit 6
hsa-miR-548n	0	0	1	1	1	1	LRRC3B	leucine rich repeat containing 3B
hsa-miR-548n	0	0	1	1	0	0	MTCH1	mitochondrial carrier 1
hsa-miR-548n	0	0	1	1	1	1	STAG1	stromal antigen 1
hsa-miR-548n	0	0	1	1	1	1	PCMTD2	protein-L-isoaspartate (D-aspartate) O-methyltransferase domain containing 2
hsa-miR-548n	0	0	1	1	1	1	SIAE	sialic acid acetylesterase
hsa-miR-548n	1	0	1	1	1	1	EBF1	early B-cell factor 1
hsa-miR-548n	1	0	1	1	1	1	ARPP21	cAMP-regulated phosphoprotein, 21kDa
hsa-miR-548n	1	0	1	1	1	1	FAM123A	family with sequence similarity 123A
hsa-miR-548n	1	0	1	0	1	1	HSPA12A	heat shock 70kDa protein 12A
hsa-miR-548n	0	0	1	1	1	1	C17orf104	chromosome 17 open reading frame 104
hsa-miR-548n	1	0	1	1	1	1	TNFSF4	tumor necrosis factor (ligand) superfamily, member 4
hsa-miR-548n	0	0	1	1	1	1	CARD8	caspase recruitment domain family, member 8
hsa-miR-548n	1	0	1	0	1	1	DCUN1D4	DCN1, defective in cullin neddylation 1, domain containing 4 (S. cerevisiae)
hsa-miR-548n	0	0	1	0	1	1	PDGFC	platelet derived growth factor C
hsa-miR-548n	0	0	1	0	0	0	ALOX12P2	arachidonate 12-lipoxygenase pseudogene 2
hsa-miR-548n	0	0	1	1	1	1	GOLGA6L9	golgin A6 family-like 9
hsa-miR-548n	1	0	1	1	1	1	CLOCK	clock homolog (mouse)
hsa-miR-548n	0	0	1	1	1	1	MTHFD2L	methylenetetrahydrofolate dehydrogenase (NADP+ dependent) 2-like
hsa-miR-548n	0	0	1	1	1	1	C4orf32	chromosome 4 open reading frame 32
hsa-miR-548n	1	0	1	0	1	1	PRKCI	protein kinase C, iota
hsa-miR-548n	0	0	1	0	1	1	C11orf93	chromosome 11 open reading frame 93
hsa-miR-548n	0	0	1	0	0	0	LOC728853	WD repeat domain 87 pseudogene
hsa-miR-548n	0	0	1	1	0	0	PLB1	phospholipase B1
hsa-miR-548n	0	0	1	1	1	1	SH3GL3	SH3-domain GRB2-like 3
hsa-miR-548n	1	0	1	0	1	1	USP6NL	USP6 N-terminal like
hsa-miR-548n	0	0	1	0	0	0	DKFZp686O1327	uncharacterized LOC401014
hsa-miR-548n	0	0	1	1	1	1	TMEM200A	transmembrane protein 200A
hsa-miR-548n	1	0	1	1	0	0	WNK1	WNK lysine deficient protein kinase 1
hsa-miR-548n	1	0	1	1	1	1	HLTF	helicase-like transcription factor
hsa-miR-548n	1	0	1	1	1	1	RNF145	ring finger protein 145
hsa-miR-548n	0	0	1	0	0	0	KIF18B	kinesin family member 18B
hsa-miR-548n	1	0	1	0	1	1	PSD3	pleckstrin and Sec7 domain containing 3
hsa-miR-548n	0	0	1	0	0	0	LOC728342	uncharacterized LOC728342
hsa-miR-548n	1	0	1	0	1	1	C14orf101	chromosome 14 open reading frame 101
hsa-miR-548n	1	0	1	1	1	1	MAMDC2	MAM domain containing 2
hsa-miR-548n	0	0	1	0	0	0	LOC283914	uncharacterized LOC283914
hsa-miR-548n	1	0	1	1	1	1	ZFAND4	zinc finger, AN1-type domain 4
hsa-miR-548n	1	0	1	1	1	1	SUPT7L	suppressor of Ty 7 (S. cerevisiae)-like
hsa-miR-548n	1	0	1	1	1	1	SENP1	SUMO1/sentrin specific peptidase 1
hsa-miR-548n	1	0	1	1	1	1	SF3B1	splicing factor 3b, subunit 1, 155kDa
hsa-miR-548n	1	0	1	0	0	0	MICAL3	microtubule associated monoxygenase, calponin and LIM domain containing 3
hsa-miR-548n	1	0	1	1	0	0	SFXN5	sideroflexin 5
hsa-miR-548n	1	0	1	0	1	1	LYPD6	LY6/PLAUR domain containing 6
hsa-miR-548n	0	0	1	0	1	1	IL33	interleukin 33
hsa-miR-548n	0	0	1	1	1	1	ANGEL2	angel homolog 2 (Drosophila)
hsa-miR-548n	0	0	1	0	0	0	DPY19L2P4	dpy-19-like 2 pseudogene 4 (C. elegans)
hsa-miR-548n	1	0	1	1	1	1	BRD1	bromodomain containing 1
hsa-miR-548n	1	0	1	1	1	1	KIF2A	kinesin heavy chain member 2A
hsa-miR-548n	1	0	1	0	1	1	ZNF800	zinc finger protein 800
hsa-miR-548n	1	0	1	1	1	1	RTKN2	rhotekin 2
hsa-miR-548n	1	0	1	1	1	1	WSB1	WD repeat and SOCS box containing 1
hsa-miR-548n	0	0	1	0	0	0	LOC255025	uncharacterized LOC255025
hsa-miR-548n	1	0	1	1	1	1	PTPRG	protein tyrosine phosphatase, receptor type, G
hsa-miR-548n	0	0	1	1	1	1	INO80C	INO80 complex subunit C
hsa-miR-548n	1	0	1	1	1	1	CLVS1	clavesin 1
hsa-miR-548n	1	0	1	1	1	1	PELI1	pellino E3 ubiquitin protein ligase 1
hsa-miR-548n	1	0	1	0	1	1	ARHGAP5	Rho GTPase activating protein 5
hsa-miR-548n	1	0	1	1	1	1	RECK	reversion-inducing-cysteine-rich protein with kazal motifs
hsa-miR-548n	1	0	1	0	1	1	NUDT10	nudix (nucleoside diphosphate linked moiety X)-type motif 10
hsa-miR-548n	1	0	1	1	1	1	GATA2	GATA binding protein 2
hsa-miR-548n	1	0	1	0	1	1	SMURF2	SMAD specific E3 ubiquitin protein ligase 2
hsa-miR-548n	1	0	1	1	1	1	PTPDC1	protein tyrosine phosphatase domain containing 1
hsa-miR-548n	0	0	1	1	1	1	LINC00086	long intergenic non-protein coding RNA 86
hsa-miR-548n	0	0	1	1	0	0	AGAP8	ArfGAP with GTPase domain, ankyrin repeat and PH domain 8
hsa-miR-548n	1	0	1	1	1	1	ZFP91	zinc finger protein 91 homolog (mouse)
hsa-miR-548n	1	0	1	1	1	1	YWHAZ	tyrosine 3-monooxygenase/tryptophan 5-monooxygenase activation protein, zeta polypeptide
hsa-miR-548n	1	0	1	1	1	1	MKRN1	makorin ring finger protein 1
hsa-miR-548n	1	0	1	1	1	1	PCGF5	polycomb group ring finger 5
hsa-miR-548n	0	0	1	1	1	1	SLC25A35	solute carrier family 25, member 35
hsa-miR-548n	1	0	1	0	1	1	C14orf43	chromosome 14 open reading frame 43
hsa-miR-548n	1	0	1	1	1	1	HP1BP3	heterochromatin protein 1, binding protein 3
hsa-miR-548n	0	0	1	1	0	0	EDC4	enhancer of mRNA decapping 4
hsa-miR-548n	1	0	1	1	1	1	OLFML2A	olfactomedin-like 2A
hsa-miR-548n	0	0	1	1	0	0	TINAG	tubulointerstitial nephritis antigen
hsa-miR-548n	1	0	1	1	1	1	ZFP161	zinc finger protein 161 homolog (mouse)
hsa-miR-548n	1	0	1	1	1	1	KLHL28	kelch-like 28 (Drosophila)
hsa-miR-548n	0	0	1	1	1	1	IDI1	isopentenyl-diphosphate delta isomerase 1
hsa-miR-548n	0	0	1	1	1	1	CDC42SE2	CDC42 small effector 2
hsa-miR-548n	0	0	1	1	0	0	IFT88	intraflagellar transport 88 homolog (Chlamydomonas)
hsa-miR-548n	1	0	1	1	1	1	SOX5	SRY (sex determining region Y)-box 5
hsa-miR-548n	0	0	1	1	1	1	ZNF365	zinc finger protein 365
hsa-miR-548n	1	0	1	1	1	1	PRRG1	proline rich Gla (G-carboxyglutamic acid) 1
hsa-miR-548n	0	0	1	0	1	1	GUCY1B3	guanylate cyclase 1, soluble, beta 3
hsa-miR-548n	1	0	1	1	1	1	DUSP9	dual specificity phosphatase 9
hsa-miR-548n	1	0	1	1	1	1	GTDC1	glycosyltransferase-like domain containing 1
hsa-miR-548n	0	0	1	1	0	0	AGAP4	ArfGAP with GTPase domain, ankyrin repeat and PH domain 4
hsa-miR-548n	1	0	1	0	1	1	C7orf41	chromosome 7 open reading frame 41
hsa-miR-548n	0	0	1	0	0	0	CCDC150	coiled-coil domain containing 150
hsa-miR-548n	1	0	1	1	0	0	G6PC3	glucose 6 phosphatase, catalytic, 3
hsa-miR-548n	0	0	1	0	0	0	TEX36	testis expressed 36
hsa-miR-548n	0	0	1	1	0	0	LRRIQ3	leucine-rich repeats and IQ motif containing 3
hsa-miR-548n	0	0	1	1	1	1	CLEC2D	C-type lectin domain family 2, member D
hsa-miR-548n	0	0	1	0	1	1	ASAP2	ArfGAP with SH3 domain, ankyrin repeat and PH domain 2
hsa-miR-548n	0	0	1	1	0	0	DHX30	DEAH (Asp-Glu-Ala-His) box polypeptide 30
hsa-miR-548n	0	0	1	1	1	1	CAMLG	calcium modulating ligand
hsa-miR-548n	1	0	1	1	1	1	ANXA4	annexin A4
hsa-miR-548n	1	0	1	1	1	1	GRIK2	glutamate receptor, ionotropic, kainate 2
hsa-miR-548n	0	0	1	0	0	0	SCAND2	SCAN domain containing 2 pseudogene
hsa-miR-548n	0	0	1	1	1	1	C1orf109	chromosome 1 open reading frame 109
hsa-miR-548n	1	0	1	1	1	1	UEVLD	UEV and lactate/malate dehyrogenase domains
hsa-miR-548n	0	0	1	1	1	1	VNN2	vanin 2
hsa-miR-548n	1	0	1	1	1	1	MYLK	myosin light chain kinase
hsa-miR-548n	0	0	1	1	1	1	GORAB	golgin, RAB6-interacting
hsa-miR-548n	0	0	1	1	1	1	ZNF33B	zinc finger protein 33B
hsa-miR-548n	0	0	1	1	0	0	SPNS2	spinster homolog 2 (Drosophila)
hsa-miR-548n	1	0	1	1	1	1	GANAB	glucosidase, alpha; neutral AB
hsa-miR-548n	0	0	1	1	1	1	AQP6	aquaporin 6, kidney specific
hsa-miR-548n	1	0	1	1	1	1	RAVER2	ribonucleoprotein, PTB-binding 2
hsa-miR-548n	1	0	1	1	1	1	ZNF449	zinc finger protein 449
hsa-miR-548n	1	0	1	1	1	1	CKAP2	cytoskeleton associated protein 2
hsa-miR-548n	1	0	1	1	1	1	VIM	vimentin
hsa-miR-548n	1	0	1	1	1	1	C18orf1	chromosome 18 open reading frame 1
hsa-miR-548n	0	0	1	0	0	0	DPY19L2P1	dpy-19-like 2 pseudogene 1 (C. elegans)
hsa-miR-548n	0	0	1	1	1	1	CTSL2	cathepsin L2
hsa-miR-548n	0	0	1	1	1	1	KCTD18	potassium channel tetramerisation domain containing 18
hsa-miR-548n	0	0	1	1	0	0	TBCA	tubulin folding cofactor A
hsa-miR-548n	0	0	1	0	0	0	ZNF66P	zinc finger protein 66, pseudogene
hsa-miR-548n	0	0	1	1	1	1	SLAMF1	signaling lymphocytic activation molecule family member 1
hsa-miR-548n	0	0	1	0	0	0	LEF1-AS1	LEF1 antisense RNA 1
hsa-miR-548n	0	0	1	1	0	0	CELF3	CUGBP, Elav-like family member 3
hsa-miR-548n	1	0	1	1	1	1	PDCD6IP	programmed cell death 6 interacting protein
hsa-miR-548n	0	0	1	0	0	0	RNF216P1	ring finger protein 216 pseudogene 1
hsa-miR-548n	1	0	1	1	1	1	SLC26A7	solute carrier family 26, member 7
hsa-miR-548n	1	0	1	1	1	1	MAPKAPK3	mitogen-activated protein kinase-activated protein kinase 3
hsa-miR-548n	1	0	1	1	1	1	SRPK2	SRSF protein kinase 2
hsa-miR-548n	0	0	1	0	0	0	PTGER4P2	prostaglandin E receptor 4 (subtype EP4) pseudogene 2
hsa-miR-548n	0	0	1	0	0	0	SPDYE8P	speedy homolog E8 (Xenopus laevis), pseudogene
hsa-miR-548n	1	0	1	1	1	1	EED	embryonic ectoderm development
hsa-miR-548n	0	0	1	0	0	0	FOXN3-AS2	FOXN3 antisense RNA 2
hsa-miR-548n	0	0	1	1	0	0	CYP4F30P	cytochrome P450, family 4, subfamily F, polypeptide 30, pseudogene
hsa-miR-548n	1	0	1	1	1	1	ANLN	anillin, actin binding protein
hsa-miR-548n	1	0	1	1	1	1	SCAF8	SR-related CTD-associated factor 8
hsa-miR-548n	1	0	1	1	1	1	AHR	aryl hydrocarbon receptor
hsa-miR-548n	0	0	1	1	0	0	CSF2RB	colony stimulating factor 2 receptor, beta, low-affinity (granulocyte-macrophage)
hsa-miR-548n	1	0	1	1	1	1	EEF1A1	eukaryotic translation elongation factor 1 alpha 1
hsa-miR-548n	1	0	1	0	1	1	TGFBR1	transforming growth factor, beta receptor 1
hsa-miR-548n	1	0	1	0	1	1	MAP4K3	mitogen-activated protein kinase kinase kinase kinase 3
hsa-miR-548n	1	0	1	1	1	1	FARP1	FERM, RhoGEF (ARHGEF) and pleckstrin domain protein 1 (chondrocyte-derived)
hsa-miR-548n	1	0	1	0	1	1	TMEM194A	transmembrane protein 194A
hsa-miR-548n	0	0	1	0	0	0	JPX	JPX transcript, XIST activator (non-protein coding)
hsa-miR-548n	1	0	1	0	1	1	NCOA7	nuclear receptor coactivator 7
hsa-miR-548n	0	0	1	1	1	1	TNFSF12	tumor necrosis factor (ligand) superfamily, member 12
hsa-miR-548n	1	0	1	1	1	1	KDELR2	KDEL (Lys-Asp-Glu-Leu) endoplasmic reticulum protein retention receptor 2
hsa-miR-548n	0	0	1	0	0	0	LOC440416	uncharacterized LOC440416
hsa-miR-548n	1	0	1	1	1	1	AGGF1	angiogenic factor with G patch and FHA domains 1
hsa-miR-548n	1	0	1	1	0	0	PLEKHG3	pleckstrin homology domain containing, family G (with RhoGef domain) member 3
hsa-miR-548n	0	0	1	1	0	0	EBNA1BP2	EBNA1 binding protein 2
hsa-miR-548n	1	0	1	1	1	1	WNT5A	wingless-type MMTV integration site family, member 5A
hsa-miR-548n	0	0	1	1	1	1	IRX5	iroquois homeobox 5
hsa-miR-548n	0	0	1	1	1	1	C3orf67	chromosome 3 open reading frame 67
hsa-miR-548n	1	0	1	1	1	1	ZBTB7A	zinc finger and BTB domain containing 7A
hsa-miR-548n	1	0	1	1	1	1	HNRNPC	heterogeneous nuclear ribonucleoprotein C (C1/C2)
hsa-miR-548n	1	0	1	0	1	1	MEST	mesoderm specific transcript homolog (mouse)
hsa-miR-548n	1	0	1	1	0	0	SLC45A4	solute carrier family 45, member 4
hsa-miR-548n	1	0	1	1	1	1	ZMYND11	zinc finger, MYND-type containing 11
hsa-miR-548n	1	0	1	1	1	1	ESRRA	estrogen-related receptor alpha
hsa-miR-548n	1	0	1	1	1	1	STK38	serine/threonine kinase 38
hsa-miR-548n	1	0	1	1	1	1	ACVR2B	activin A receptor, type IIB
hsa-miR-548n	0	0	1	1	1	1	RAB3GAP2	RAB3 GTPase activating protein subunit 2 (non-catalytic)
hsa-miR-548n	1	0	1	1	1	1	SYNJ1	synaptojanin 1
hsa-miR-548n	1	0	1	1	1	1	KRIT1	KRIT1, ankyrin repeat containing
hsa-miR-548n	1	0	1	0	1	1	ARPP19	cAMP-regulated phosphoprotein, 19kDa
hsa-miR-548n	0	0	1	1	1	1	HMGB2	high mobility group box 2
hsa-miR-548n	0	0	1	1	1	1	XG	Xg blood group
hsa-miR-548n	0	0	1	0	1	1	TCAIM	T cell activation inhibitor, mitochondrial
hsa-miR-548n	1	0	1	0	1	1	MYBL1	v-myb myeloblastosis viral oncogene homolog (avian)-like 1
hsa-miR-548n	1	0	1	0	1	1	CPEB2	cytoplasmic polyadenylation element binding protein 2
hsa-miR-548n	1	0	1	0	1	1	KCNT2	potassium channel, subfamily T, member 2
hsa-miR-548n	0	0	1	0	0	0	LSAMP-AS3	LSAMP antisense RNA 3
hsa-miR-548n	0	0	1	1	1	1	CCDC126	coiled-coil domain containing 126
hsa-miR-548n	0	0	1	0	0	0	LOC283174	uncharacterized LOC283174
hsa-miR-548n	0	0	1	1	1	1	SPHKAP	SPHK1 interactor, AKAP domain containing
hsa-miR-548n	1	0	1	1	1	1	GABRB2	gamma-aminobutyric acid (GABA) A receptor, beta 2
hsa-miR-548n	0	0	1	0	0	0	FBXL19-AS1	FBXL19 antisense RNA 1 (head to head)
hsa-miR-548n	1	0	1	1	1	1	NR2F2	nuclear receptor subfamily 2, group F, member 2
hsa-miR-548n	1	0	1	1	1	1	PTPRD	protein tyrosine phosphatase, receptor type, D
hsa-miR-548n	1	0	1	1	1	1	USP34	ubiquitin specific peptidase 34
hsa-miR-548n	1	0	1	1	1	1	SUV420H1	suppressor of variegation 4-20 homolog 1 (Drosophila)
hsa-miR-548n	0	0	1	1	0	0	SLC17A4	solute carrier family 17 (sodium phosphate), member 4
hsa-miR-548n	1	0	1	0	1	1	DNAJC6	DnaJ (Hsp40) homolog, subfamily C, member 6
hsa-miR-548n	1	0	1	1	1	1	CERS6	ceramide synthase 6
hsa-miR-548n	1	0	1	1	1	1	SP4	Sp4 transcription factor
hsa-miR-548n	1	0	1	0	1	1	BTBD3	BTB (POZ) domain containing 3
hsa-miR-548n	1	0	1	1	1	1	HNRNPR	heterogeneous nuclear ribonucleoprotein R
hsa-miR-548n	0	0	1	1	1	1	STAU2	staufen, RNA binding protein, homolog 2 (Drosophila)
hsa-miR-548n	1	0	1	1	1	1	TET2	tet methylcytosine dioxygenase 2
hsa-miR-548n	0	0	1	1	1	1	RBM25	RNA binding motif protein 25
hsa-miR-548n	1	0	1	1	1	1	UBE4A	ubiquitination factor E4A
hsa-miR-548n	1	0	1	1	1	1	SLK	STE20-like kinase
hsa-miR-548n	1	0	1	1	1	1	NR3C2	nuclear receptor subfamily 3, group C, member 2
hsa-miR-548n	1	0	1	0	1	1	ROBO1	roundabout, axon guidance receptor, homolog 1 (Drosophila)
hsa-miR-548n	0	0	1	1	1	1	LRCH1	leucine-rich repeats and calponin homology (CH) domain containing 1
hsa-miR-548n	1	0	1	1	1	1	TRIP12	thyroid hormone receptor interactor 12
hsa-miR-548n	1	0	1	1	1	1	PAX3	paired box 3
hsa-miR-548n	1	0	1	1	1	1	SHANK2	SH3 and multiple ankyrin repeat domains 2
hsa-miR-548n	1	0	1	1	1	1	KIAA0528	KIAA0528
hsa-miR-548n	1	0	1	1	1	1	ST18	suppression of tumorigenicity 18 (breast carcinoma) (zinc finger protein)
hsa-miR-548n	0	0	1	1	1	1	C14orf105	chromosome 14 open reading frame 105
hsa-miR-548n	1	0	1	0	1	1	PRDM10	PR domain containing 10
hsa-miR-548n	0	0	1	1	1	1	NAA35	N(alpha)-acetyltransferase 35, NatC auxiliary subunit
hsa-miR-548n	0	0	1	1	0	0	CCDC173	coiled-coil domain containing 173
hsa-miR-548n	1	0	1	1	1	1	OTUD4	OTU domain containing 4
hsa-miR-548n	1	0	1	1	1	1	OSBP2	oxysterol binding protein 2
hsa-miR-548n	0	0	1	1	0	0	PRDM5	PR domain containing 5
hsa-miR-548n	0	0	1	0	0	0	LINC00266-1	long intergenic non-protein coding RNA 266-1
hsa-miR-548n	0	0	1	0	0	0	EEF1DP3	eukaryotic translation elongation factor 1 delta pseudogene 3
hsa-miR-548n	0	0	1	1	1	1	SLC7A13	solute carrier family 7 (anionic amino acid transporter), member 13
hsa-miR-548n	0	0	1	0	1	1	GOLGA8G	golgin A8 family, member G
hsa-miR-548n	1	0	1	0	1	1	LRCH2	leucine-rich repeats and calponin homology (CH) domain containing 2
hsa-miR-548n	1	0	1	0	1	1	CAMSAP2	calmodulin regulated spectrin-associated protein family, member 2
hsa-miR-548n	1	0	1	1	1	1	MEGF11	multiple EGF-like-domains 11
hsa-miR-548n	1	0	1	1	1	1	JMJD1C	jumonji domain containing 1C
hsa-miR-548n	1	0	1	1	1	1	ZMYM4	zinc finger, MYM-type 4
hsa-miR-548n	1	0	1	1	1	1	CHIC1	cysteine-rich hydrophobic domain 1
hsa-miR-548n	0	0	1	1	1	1	HSF2	heat shock transcription factor 2
hsa-miR-548n	1	0	1	0	1	1	SEMA4G	sema domain, immunoglobulin domain (Ig), transmembrane domain (TM) and short cytoplasmic domain, (semaphorin) 4G
hsa-miR-548n	1	0	1	1	1	1	MLLT10	myeloid/lymphoid or mixed-lineage leukemia (trithorax homolog, Drosophila); translocated to, 10
hsa-miR-548n	0	0	1	1	1	1	ABCA8	ATP-binding cassette, sub-family A (ABC1), member 8
hsa-miR-548n	0	0	1	0	0	0	FAM225B	family with sequence similarity 225, member B (non-protein coding)
hsa-miR-548n	1	0	1	1	1	1	TDRD5	tudor domain containing 5
hsa-miR-548n	0	0	1	1	0	0	AGAP6	ArfGAP with GTPase domain, ankyrin repeat and PH domain 6
hsa-miR-548n	1	0	1	1	1	1	CADPS	Ca++-dependent secretion activator
hsa-miR-548n	1	0	1	1	1	1	PHC3	polyhomeotic homolog 3 (Drosophila)
hsa-miR-548n	1	0	1	0	1	1	FAM196A	family with sequence similarity 196, member A
hsa-miR-548n	0	0	1	1	0	0	TCHH	trichohyalin
hsa-miR-548n	0	0	1	1	0	0	CCDC144A	coiled-coil domain containing 144A
hsa-miR-548n	0	0	1	0	0	0	FUT8-AS1	FUT8 antisense RNA 1
hsa-miR-548n	0	0	1	0	0	0	MEG3	maternally expressed 3 (non-protein coding)
hsa-miR-548n	1	0	1	0	1	1	TTC7B	tetratricopeptide repeat domain 7B
hsa-miR-548n	0	0	1	1	0	0	DHRS1	dehydrogenase/reductase (SDR family) member 1
hsa-miR-548n	1	0	1	1	1	1	NUMB	numb homolog (Drosophila)
hsa-miR-548n	0	0	1	1	1	1	DLGAP5	discs, large (Drosophila) homolog-associated protein 5
hsa-miR-548n	0	0	1	1	1	1	CNIH	cornichon homolog (Drosophila)
hsa-miR-548n	0	0	1	0	0	0	LINC00643	long intergenic non-protein coding RNA 643
hsa-miR-548n	1	0	1	1	1	1	BTBD7	BTB (POZ) domain containing 7
hsa-miR-548n	0	0	1	0	0	0	FLJ39632	uncharacterized LOC642477
hsa-miR-548n	1	0	1	1	1	1	EIF5	eukaryotic translation initiation factor 5
hsa-miR-548n	1	0	1	1	1	1	ERMAP	erythroblast membrane-associated protein (Scianna blood group)
hsa-miR-548n	0	0	1	1	1	1	RAD17	RAD17 homolog (S. pombe)
hsa-miR-548n	1	0	1	1	0	0	KRT80	keratin 80
hsa-miR-548n	1	0	1	1	1	1	SASH1	SAM and SH3 domain containing 1
hsa-miR-548n	0	0	1	0	0	0	DKFZp686D0853	uncharacterized LOC401613
hsa-miR-548n	1	0	1	1	1	1	ATP2B4	ATPase, Ca++ transporting, plasma membrane 4
hsa-miR-548n	1	0	1	1	1	1	JPH1	junctophilin 1
hsa-miR-548n	1	0	1	1	1	1	RBL2	retinoblastoma-like 2 (p130)
hsa-miR-548n	1	0	1	1	1	1	RAB7A	RAB7A, member RAS oncogene family
hsa-miR-548n	0	0	1	0	1	1	AP1S2	adaptor-related protein complex 1, sigma 2 subunit
hsa-miR-548n	0	0	1	0	1	1	FEZ2	fasciculation and elongation protein zeta 2 (zygin II)
hsa-miR-548n	1	0	1	1	1	1	MIER3	mesoderm induction early response 1, family member 3
hsa-miR-548n	0	0	1	0	0	0	RGPD4	RANBP2-like and GRIP domain containing 4
hsa-miR-548n	0	0	1	1	0	0	CCDC171	coiled-coil domain containing 171
hsa-miR-548n	1	0	1	1	1	1	SGCD	sarcoglycan, delta (35kDa dystrophin-associated glycoprotein)
hsa-miR-548n	1	0	1	1	1	1	TRIM37	tripartite motif containing 37
hsa-miR-548n	0	0	1	1	1	1	NUP54	nucleoporin 54kDa
hsa-miR-548n	0	0	1	1	1	1	SLC12A8	solute carrier family 12 (potassium/chloride transporters), member 8
hsa-miR-548n	1	0	1	0	1	1	MTX3	metaxin 3
hsa-miR-548n	0	0	1	1	1	1	DSG3	desmoglein 3
hsa-miR-548n	0	0	1	1	1	1	PDZRN4	PDZ domain containing ring finger 4
hsa-miR-548n	1	0	1	0	1	1	CLASP2	cytoplasmic linker associated protein 2
hsa-miR-548n	0	0	1	1	0	0	TTC5	tetratricopeptide repeat domain 5
hsa-miR-548n	0	0	1	1	1	1	SLC26A3	solute carrier family 26, member 3
hsa-miR-548n	0	0	1	1	0	0	CDK5RAP2	CDK5 regulatory subunit associated protein 2
hsa-miR-548n	1	0	1	1	1	1	NFASC	neurofascin
hsa-miR-548n	0	0	1	1	1	1	PSMA2	proteasome (prosome, macropain) subunit, alpha type, 2
hsa-miR-548n	1	0	1	1	1	1	C12orf4	chromosome 12 open reading frame 4
hsa-miR-548n	1	0	1	1	1	1	RAB30	RAB30, member RAS oncogene family
hsa-miR-548n	1	0	1	1	1	1	PRKRIR	protein-kinase, interferon-inducible double stranded RNA dependent inhibitor, repressor of (P58 repressor)
hsa-miR-548n	0	0	1	1	1	1	COL6A3	collagen, type VI, alpha 3
hsa-miR-548n	1	0	1	0	1	1	FAM73A	family with sequence similarity 73, member A
hsa-miR-548n	1	0	1	1	1	1	RORB	RAR-related orphan receptor B
hsa-miR-548n	1	0	1	1	1	1	SMAD4	SMAD family member 4
hsa-miR-548n	1	0	1	1	1	1	SH3BP4	SH3-domain binding protein 4
hsa-miR-548n	0	0	1	0	1	1	NHSL1	NHS-like 1
hsa-miR-548n	0	0	1	1	1	1	IPCEF1	interaction protein for cytohesin exchange factors 1
hsa-miR-548n	1	0	1	0	1	1	GALNT4	UDP-N-acetyl-alpha-D-galactosamine:polypeptide N-acetylgalactosaminyltransferase 4 (GalNAc-T4)
hsa-miR-548n	0	0	1	1	1	1	PRR14L	proline rich 14-like
hsa-miR-548n	0	0	1	0	0	0	SMG1P1	smg-1 homolog, phosphatidylinositol 3-kinase-related kinase pseudogene 1
hsa-miR-548n	0	0	1	1	1	1	UHRF1BP1L	UHRF1 binding protein 1-like
hsa-miR-548n	1	0	1	1	0	0	RBM27	RNA binding motif protein 27
hsa-miR-548n	1	0	1	1	0	0	CECR2	cat eye syndrome chromosome region, candidate 2
hsa-miR-548n	0	0	1	1	1	1	ADH1B	alcohol dehydrogenase 1B (class I), beta polypeptide
hsa-miR-548n	0	0	1	0	1	1	THAP6	THAP domain containing 6
hsa-miR-548n	0	0	1	1	1	1	PPP1R1C	protein phosphatase 1, regulatory (inhibitor) subunit 1C
hsa-miR-548n	1	0	1	1	1	1	CASP3	caspase 3, apoptosis-related cysteine peptidase
hsa-miR-548n	0	0	1	0	0	0	LINC00240	long intergenic non-protein coding RNA 240
hsa-miR-548n	1	0	1	1	1	1	EPS15	epidermal growth factor receptor pathway substrate 15
hsa-miR-548n	1	0	1	1	1	1	STARD13	StAR-related lipid transfer (START) domain containing 13
hsa-miR-548n	1	0	1	1	1	1	USP6	ubiquitin specific peptidase 6 (Tre-2 oncogene)
hsa-miR-548n	1	0	1	1	1	1	KLHL2	kelch-like 2, Mayven (Drosophila)
hsa-miR-548n	0	0	1	1	1	1	ARMCX3	armadillo repeat containing, X-linked 3
hsa-miR-548n	0	0	1	1	1	1	DUSP19	dual specificity phosphatase 19
hsa-miR-548n	1	0	1	1	1	1	TC2N	tandem C2 domains, nuclear
hsa-miR-548n	1	0	1	1	1	1	CYB5B	cytochrome b5 type B (outer mitochondrial membrane)
hsa-miR-548n	1	0	1	1	1	1	CASP7	caspase 7, apoptosis-related cysteine peptidase
hsa-miR-548n	1	0	1	1	1	1	DCAF5	DDB1 and CUL4 associated factor 5
hsa-miR-548n	0	0	1	1	1	1	TMEM48	transmembrane protein 48
hsa-miR-548n	1	0	1	1	1	1	ATP6V1C1	ATPase, H+ transporting, lysosomal 42kDa, V1 subunit C1
hsa-miR-548n	1	0	1	1	1	1	ZNF711	zinc finger protein 711
hsa-miR-548n	0	0	1	1	1	1	CCNT2	cyclin T2
hsa-miR-548n	1	0	1	1	1	1	AKT1	v-akt murine thymoma viral oncogene homolog 1
hsa-miR-548n	1	0	1	1	1	1	SEMA4D	sema domain, immunoglobulin domain (Ig), transmembrane domain (TM) and short cytoplasmic domain, (semaphorin) 4D
hsa-miR-548n	1	0	1	0	0	0	CTSB	cathepsin B
hsa-miR-548n	0	0	1	0	1	1	TYW5	tRNA-yW synthesizing protein 5
hsa-miR-548n	0	0	1	1	1	1	ATP2A2	ATPase, Ca++ transporting, cardiac muscle, slow twitch 2
hsa-miR-548n	1	0	1	1	1	1	PAQR3	progestin and adipoQ receptor family member III
hsa-miR-548n	0	0	1	1	1	1	TMEM201	transmembrane protein 201
hsa-miR-548n	1	0	1	1	1	1	NFIB	nuclear factor I/B
hsa-miR-548n	1	0	1	1	1	1	BCLAF1	BCL2-associated transcription factor 1
hsa-miR-548n	1	0	1	1	1	1	SOGA2	SOGA family member 2
hsa-miR-548n	1	0	1	1	1	1	NAV1	neuron navigator 1
hsa-miR-548n	1	0	1	0	1	1	KLHL24	kelch-like 24 (Drosophila)
hsa-miR-548n	1	0	1	1	1	1	AZI2	5-azacytidine induced 2
hsa-miR-548n	1	0	1	0	1	1	IGF2BP3	insulin-like growth factor 2 mRNA binding protein 3
hsa-miR-548n	0	0	1	0	0	0	LOC286299	uncharacterized LOC286299
hsa-miR-548n	1	0	1	1	1	1	C5orf24	chromosome 5 open reading frame 24
hsa-miR-548n	0	0	1	1	1	1	RBM20	RNA binding motif protein 20
hsa-miR-548n	1	0	1	1	1	1	PGAP1	post-GPI attachment to proteins 1
hsa-miR-548n	1	0	1	1	1	1	TMEM135	transmembrane protein 135
hsa-miR-548n	1	0	1	1	1	1	CACNB4	calcium channel, voltage-dependent, beta 4 subunit
hsa-miR-548n	0	0	1	1	1	1	THSD4	thrombospondin, type I, domain containing 4
hsa-miR-548n	1	0	1	1	1	1	FAM179B	family with sequence similarity 179, member B
hsa-miR-548n	1	0	1	1	1	1	HIF1A	hypoxia inducible factor 1, alpha subunit (basic helix-loop-helix transcription factor)
hsa-miR-548n	0	0	1	1	1	1	IFRD1	interferon-related developmental regulator 1
hsa-miR-548n	1	0	1	1	1	1	CALD1	caldesmon 1
hsa-miR-548n	1	0	1	1	1	1	EOGT	EGF domain-specific O-linked N-acetylglucosamine (GlcNAc) transferase
hsa-miR-548n	0	0	1	1	1	1	SSFA2	sperm specific antigen 2
hsa-miR-548n	1	0	1	0	1	1	TBL1XR1	transducin (beta)-like 1 X-linked receptor 1
hsa-miR-548n	1	0	1	0	1	1	C1orf21	chromosome 1 open reading frame 21
hsa-miR-548n	0	0	1	0	0	0	ANKRD62	ankyrin repeat domain 62
hsa-miR-548n	1	0	1	1	1	1	LYST	lysosomal trafficking regulator
hsa-miR-548n	1	0	1	1	1	1	CREB3L2	cAMP responsive element binding protein 3-like 2
hsa-miR-548n	1	0	1	0	1	1	TTL	tubulin tyrosine ligase
hsa-miR-548n	1	0	1	1	1	1	SIN3A	SIN3 transcription regulator homolog A (yeast)
hsa-miR-548n	1	0	1	1	1	1	HIC2	hypermethylated in cancer 2
hsa-miR-548n	0	0	1	0	1	1	GINS3	GINS complex subunit 3 (Psf3 homolog)
hsa-miR-548n	0	0	1	1	1	1	LRRC42	leucine rich repeat containing 42
hsa-miR-548n	0	0	1	1	0	0	HNRNPAB	heterogeneous nuclear ribonucleoprotein A/B
hsa-miR-548n	0	0	1	0	1	1	CD59	CD59 molecule, complement regulatory protein
hsa-miR-548n	0	0	1	1	1	1	HPGD	hydroxyprostaglandin dehydrogenase 15-(NAD)
hsa-miR-548n	0	0	1	1	1	1	POLR2H	polymerase (RNA) II (DNA directed) polypeptide H
hsa-miR-548n	1	0	1	1	1	1	PCMT1	protein-L-isoaspartate (D-aspartate) O-methyltransferase
hsa-miR-548n	1	0	1	0	0	0	PLSCR5	phospholipid scramblase family, member 5
hsa-miR-548n	1	0	1	1	1	1	SEL1L3	sel-1 suppressor of lin-12-like 3 (C. elegans)
hsa-miR-548n	0	0	1	1	1	1	SNRNP27	small nuclear ribonucleoprotein 27kDa (U4/U6.U5)
hsa-miR-548n	0	0	1	1	1	1	FGG	fibrinogen gamma chain
hsa-miR-548n	0	0	1	1	1	1	PSG2	pregnancy specific beta-1-glycoprotein 2
hsa-miR-548n	0	0	1	1	0	0	SPATA6	spermatogenesis associated 6
hsa-miR-548n	1	0	1	1	1	1	ARF1	ADP-ribosylation factor 1
hsa-miR-548n	0	0	1	0	0	0	LOC100128988	uncharacterized LOC100128988
hsa-miR-548n	1	0	1	1	1	1	FUT9	fucosyltransferase 9 (alpha (1,3) fucosyltransferase)
hsa-miR-548n	0	0	1	1	1	1	UPRT	uracil phosphoribosyltransferase (FUR1) homolog (S. cerevisiae)
hsa-miR-548n	0	0	1	1	0	0	TTC8	tetratricopeptide repeat domain 8
hsa-miR-548n	1	0	1	0	1	1	OLA1	Obg-like ATPase 1
hsa-miR-548n	1	0	1	1	1	1	CLDN11	claudin 11
hsa-miR-548n	0	0	1	1	1	1	SEC22C	SEC22 vesicle trafficking protein homolog C (S. cerevisiae)
hsa-miR-548n	1	0	1	0	1	1	NRAS	neuroblastoma RAS viral (v-ras) oncogene homolog
hsa-miR-548n	0	0	1	1	1	1	C1orf85	chromosome 1 open reading frame 85
hsa-miR-548n	0	0	1	1	1	1	BTF3	basic transcription factor 3
hsa-miR-548n	1	0	1	1	1	1	DOLPP1	dolichyl pyrophosphate phosphatase 1
hsa-miR-548n	0	0	1	1	1	1	ADK	adenosine kinase
hsa-miR-548n	1	0	1	1	1	1	RAP1A	RAP1A, member of RAS oncogene family
hsa-miR-548n	0	0	1	0	1	1	BLM	Bloom syndrome, RecQ helicase-like
hsa-miR-548n	1	0	1	1	1	1	SETD8	SET domain containing (lysine methyltransferase) 8
hsa-miR-548n	1	0	1	1	1	1	FGF11	fibroblast growth factor 11
hsa-miR-548n	0	0	1	1	1	1	HSPB8	heat shock 22kDa protein 8
hsa-miR-548n	1	0	1	1	1	1	E2F3	E2F transcription factor 3
hsa-miR-548n	1	0	1	0	1	1	BNIP3L	BCL2/adenovirus E1B 19kDa interacting protein 3-like
hsa-miR-548n	1	0	1	1	1	1	CD9	CD9 molecule
hsa-miR-548n	1	0	1	1	1	1	CAAP1	caspase activity and apoptosis inhibitor 1
hsa-miR-548n	0	0	1	0	0	0	MYCT1	myc target 1
hsa-miR-548n	1	0	1	1	1	1	ADM	adrenomedullin
hsa-miR-548n	0	0	1	1	1	1	BLZF1	basic leucine zipper nuclear factor 1
hsa-miR-548n	1	0	1	1	1	1	STARD3NL	STARD3 N-terminal like
hsa-miR-548n	1	0	1	1	1	1	SMARCE1	SWI/SNF related, matrix associated, actin dependent regulator of chromatin, subfamily e, member 1
hsa-miR-548n	1	0	1	1	1	1	CDK7	cyclin-dependent kinase 7
hsa-miR-548n	0	0	1	1	1	1	SMYD3	SET and MYND domain containing 3
hsa-miR-548n	0	0	1	0	0	0	LOC643837	uncharacterized LOC643837
hsa-miR-548n	0	0	1	0	0	0	TRIQK	triple QxxK/R motif containing
hsa-miR-548n	1	0	1	1	1	1	DRAM2	DNA-damage regulated autophagy modulator 2
hsa-miR-548n	0	0	1	0	1	1	EMX2	empty spiracles homeobox 2
hsa-miR-548n	1	0	1	1	1	1	NTM	neurotrimin
hsa-miR-548n	0	0	1	1	1	1	IFNGR2	interferon gamma receptor 2 (interferon gamma transducer 1)
hsa-miR-548n	1	0	1	1	1	1	FBXO9	F-box protein 9
hsa-miR-548n	1	0	1	1	1	1	TRA2B	transformer 2 beta homolog (Drosophila)
hsa-miR-548n	0	0	1	1	1	1	GGPS1	geranylgeranyl diphosphate synthase 1
hsa-miR-548n	1	0	1	1	1	1	PLEKHB2	pleckstrin homology domain containing, family B (evectins) member 2
hsa-miR-548n	0	0	1	0	0	0	HMGN1P37	high mobility group nucleosome binding domain 1 pseudogene 37
hsa-miR-548n	1	0	1	1	1	1	NFKBIA	nuclear factor of kappa light polypeptide gene enhancer in B-cells inhibitor, alpha
hsa-miR-548n	0	0	1	1	1	1	CCDC91	coiled-coil domain containing 91
hsa-miR-548n	1	0	1	1	1	1	BAI3	brain-specific angiogenesis inhibitor 3
hsa-miR-548n	0	0	1	0	1	1	PDCD5	programmed cell death 5
hsa-miR-548n	0	0	1	1	1	1	ALB	albumin
hsa-miR-548n	1	0	1	1	1	1	TFDP1	transcription factor Dp-1
hsa-miR-548n	0	0	1	1	0	0	CCDC112	coiled-coil domain containing 112
hsa-miR-548n	0	0	1	1	1	1	GRAP2	GRB2-related adaptor protein 2
hsa-miR-548n	1	0	1	0	1	1	RPS6KB1	ribosomal protein S6 kinase, 70kDa, polypeptide 1
hsa-miR-548n	0	0	1	1	1	1	PECR	peroxisomal trans-2-enoyl-CoA reductase
hsa-miR-548n	0	0	1	1	1	1	CYP26A1	cytochrome P450, family 26, subfamily A, polypeptide 1
hsa-miR-548n	0	0	1	1	1	1	XBP1	X-box binding protein 1
hsa-miR-548n	0	0	1	1	1	1	CHMP5	charged multivesicular body protein 5
hsa-miR-548n	0	0	1	0	1	1	PSG11	pregnancy specific beta-1-glycoprotein 11
hsa-miR-548n	1	0	1	1	1	1	BAMBI	BMP and activin membrane-bound inhibitor homolog (Xenopus laevis)
hsa-miR-548n	1	0	1	1	1	1	STK38L	serine/threonine kinase 38 like
hsa-miR-548n	1	0	1	1	1	1	TMEM245	transmembrane protein 245
hsa-miR-548n	1	0	1	1	1	1	WIPF1	WAS/WASL interacting protein family, member 1
hsa-miR-548n	1	0	1	1	1	1	PTBP1	polypyrimidine tract binding protein 1
hsa-miR-548n	0	0	1	1	1	1	ATG4A	autophagy related 4A, cysteine peptidase
hsa-miR-548n	1	0	1	1	1	1	DKK3	dickkopf 3 homolog (Xenopus laevis)
hsa-miR-548n	1	0	1	1	1	1	PIAS1	protein inhibitor of activated STAT, 1
hsa-miR-548n	0	0	1	0	0	0	FLJ45248	FLJ45248 protein
hsa-miR-548n	1	0	1	0	1	1	IP6K1	inositol hexakisphosphate kinase 1
hsa-miR-548n	1	0	1	1	1	1	BTBD10	BTB (POZ) domain containing 10
hsa-miR-548n	0	0	1	0	0	0	LOC677759	uncharacterized LOC677759
hsa-miR-548n	1	0	1	1	1	1	KCNIP4	Kv channel interacting protein 4
hsa-miR-548n	1	0	1	1	0	0	FAT4	FAT tumor suppressor homolog 4 (Drosophila)
hsa-miR-548n	0	0	1	0	0	0	LOC100130353	hippocampus abundant transcript-like 1 pseudogene
hsa-miR-548n	1	0	1	1	1	1	GPR137B	G protein-coupled receptor 137B
hsa-miR-548n	0	0	1	1	0	0	TUSC3	tumor suppressor candidate 3
hsa-miR-548n	1	0	1	1	1	1	LAMTOR3	late endosomal/lysosomal adaptor, MAPK and MTOR activator 3
hsa-miR-548n	0	0	1	1	0	0	WDR43	WD repeat domain 43
hsa-miR-548n	1	0	1	0	1	1	C15orf41	chromosome 15 open reading frame 41
hsa-miR-548n	0	0	1	0	0	0	EPB41L4A-AS1	EPB41L4A antisense RNA 1
hsa-miR-548n	0	0	1	1	0	0	FABP1	fatty acid binding protein 1, liver
hsa-miR-548n	0	0	1	1	1	1	WIBG	within bgcn homolog (Drosophila)
hsa-miR-548n	0	0	1	0	1	1	TMEM56	transmembrane protein 56
hsa-miR-548n	1	0	1	1	1	1	YWHAQ	tyrosine 3-monooxygenase/tryptophan 5-monooxygenase activation protein, theta polypeptide
hsa-miR-548n	0	0	1	1	1	1	RFT1	RFT1 homolog (S. cerevisiae)
hsa-miR-548n	1	0	1	1	1	1	FUBP3	far upstream element (FUSE) binding protein 3
hsa-miR-548n	0	0	1	0	1	1	SUMO2	SMT3 suppressor of mif two 3 homolog 2 (S. cerevisiae)
hsa-miR-548n	0	0	1	1	1	1	TMCO1	transmembrane and coiled-coil domains 1
hsa-miR-548n	0	0	1	1	1	1	MAEL	maelstrom homolog (Drosophila)
hsa-miR-548n	1	0	1	1	1	1	METAP2	methionyl aminopeptidase 2
hsa-miR-548n	1	0	1	1	1	1	ARL4A	ADP-ribosylation factor-like 4A
hsa-miR-548n	0	0	1	1	1	1	CD1C	CD1c molecule
hsa-miR-548n	0	0	1	1	1	1	UBE2F	ubiquitin-conjugating enzyme E2F (putative)
hsa-miR-548n	1	0	1	1	1	1	BAALC	brain and acute leukemia, cytoplasmic
hsa-miR-548n	1	0	1	1	1	1	ANAPC16	anaphase promoting complex subunit 16
hsa-miR-548n	1	0	1	1	1	1	CNBP	CCHC-type zinc finger, nucleic acid binding protein
hsa-miR-548n	0	0	1	1	1	1	PSG5	pregnancy specific beta-1-glycoprotein 5
hsa-miR-548n	1	0	1	1	1	1	NFYB	nuclear transcription factor Y, beta
hsa-miR-548n	1	0	1	1	1	1	SNX1	sorting nexin 1
hsa-miR-548n	1	0	1	1	1	1	ARMC8	armadillo repeat containing 8
hsa-miR-548n	1	0	1	1	1	1	RNF2	ring finger protein 2
hsa-miR-548n	1	0	1	1	1	1	RBFOX2	RNA binding protein, fox-1 homolog (C. elegans) 2
hsa-miR-548n	1	0	1	0	1	1	GIT2	G protein-coupled receptor kinase interacting ArfGAP 2
hsa-miR-548n	1	0	1	0	1	1	MAP1B	microtubule-associated protein 1B
hsa-miR-548n	1	0	1	1	1	1	HMGN2	high mobility group nucleosomal binding domain 2
hsa-miR-548n	0	0	1	1	0	0	STT3B	STT3, subunit of the oligosaccharyltransferase complex, homolog B (S. cerevisiae)
hsa-miR-548n	0	0	1	1	1	1	RNF166	ring finger protein 166
hsa-miR-548n	0	0	1	1	1	1	CD63	CD63 molecule
hsa-miR-548n	1	0	1	1	1	1	VLDLR	very low density lipoprotein receptor
hsa-miR-548n	0	0	1	1	0	0	DCAF13	DDB1 and CUL4 associated factor 13
hsa-miR-548n	0	0	1	1	1	1	TSEN15	tRNA splicing endonuclease 15 homolog (S. cerevisiae)
hsa-miR-548n	1	0	1	1	1	1	ACTN4	actinin, alpha 4
hsa-miR-548n	1	0	1	1	1	1	UBE2K	ubiquitin-conjugating enzyme E2K
hsa-miR-548n	1	0	1	0	1	1	CD47	CD47 molecule
hsa-miR-548n	0	0	1	0	0	0	CHEK2P2	checkpoint kinase 2 pseudogene 2
hsa-miR-548n	0	0	1	0	0	0	EEF1G	eukaryotic translation elongation factor 1 gamma
hsa-miR-548n	0	0	1	0	1	1	SEPT7	septin 7
hsa-miR-548n	0	0	1	1	1	1	PTMA	prothymosin, alpha
hsa-miR-548n	0	0	1	1	1	1	BEX4	brain expressed, X-linked 4
hsa-miR-548n	0	0	1	1	0	0	TUBA1C	tubulin, alpha 1c
hsa-miR-548n	0	0	1	1	1	1	OTOR	otoraplin
hsa-miR-548n	0	0	1	0	1	1	TSPAN7	tetraspanin 7
hsa-miR-548n	1	0	1	1	1	1	MYT1	myelin transcription factor 1
hsa-miR-548n	0	0	1	1	1	1	ANXA7	annexin A7
hsa-miR-548n	0	0	1	1	1	1	NUDT21	nudix (nucleoside diphosphate linked moiety X)-type motif 21
hsa-miR-548n	1	0	1	1	1	1	JUNB	jun B proto-oncogene
hsa-miR-548n	1	0	1	0	1	1	ARHGAP11A	Rho GTPase activating protein 11A
hsa-miR-548n	1	0	1	1	1	1	LGALSL	lectin, galactoside-binding-like
hsa-miR-548n	0	0	1	1	1	1	EPCAM	epithelial cell adhesion molecule
hsa-miR-548n	1	0	1	1	1	1	SLC37A3	solute carrier family 37 (glycerol-3-phosphate transporter), member 3
hsa-miR-548n	1	0	1	1	1	1	RND3	Rho family GTPase 3
hsa-miR-548n	0	0	1	1	1	1	VPS16	vacuolar protein sorting 16 homolog (S. cerevisiae)
hsa-miR-548n	1	0	1	0	1	1	KIAA0240	KIAA0240
hsa-miR-548n	1	0	1	1	1	1	STAG2	stromal antigen 2
hsa-miR-548n	0	0	1	0	0	0	LOC731789	uncharacterized LOC731789
hsa-miR-548n	0	0	1	1	1	1	BDP1	B double prime 1, subunit of RNA polymerase III transcription initiation factor IIIB
hsa-miR-548n	1	0	1	1	1	1	FBXW7	F-box and WD repeat domain containing 7, E3 ubiquitin protein ligase
hsa-miR-548n	0	0	1	0	0	0	C18orf63	chromosome 18 open reading frame 63
hsa-miR-548n	0	0	1	0	0	0	LINC00661	long intergenic non-protein coding RNA 661
hsa-miR-548n	1	0	1	1	1	1	NKTR	natural killer-tumor recognition sequence
hsa-miR-548n	1	0	1	1	1	1	HECW2	HECT, C2 and WW domain containing E3 ubiquitin protein ligase 2
hsa-miR-548n	1	0	1	1	1	1	KIAA2018	KIAA2018
hsa-miR-548n	1	0	1	0	1	1	PTP4A1	protein tyrosine phosphatase type IVA, member 1
hsa-miR-548n	0	0	1	0	0	0	MUC19	mucin 19, oligomeric
hsa-miR-548n	0	0	1	1	1	1	CCDC102B	coiled-coil domain containing 102B
hsa-miR-548n	1	0	1	0	1	1	OSBPL8	oxysterol binding protein-like 8
hsa-miR-548n	1	0	1	0	1	1	MCFD2	multiple coagulation factor deficiency 2
hsa-miR-548n	1	0	1	1	1	1	SNRK	SNF related kinase
hsa-miR-548n	1	0	1	0	1	1	TNS3	tensin 3
hsa-miR-548n	1	0	1	1	1	1	TIPARP	TCDD-inducible poly(ADP-ribose) polymerase
hsa-miR-548n	1	0	1	1	1	1	SLC39A10	solute carrier family 39 (zinc transporter), member 10
hsa-miR-548n	1	0	1	0	1	1	CNTNAP2	contactin associated protein-like 2
hsa-miR-548n	1	0	1	0	1	1	ZNF652	zinc finger protein 652
hsa-miR-548n	1	0	1	1	1	1	METAP1	methionyl aminopeptidase 1
hsa-miR-548n	0	0	1	0	1	1	SYNPR	synaptoporin
hsa-miR-548n	1	0	1	1	1	1	SLC30A7	solute carrier family 30 (zinc transporter), member 7
hsa-miR-548n	0	0	1	1	1	1	STON1	stonin 1
hsa-miR-548n	1	0	1	1	1	1	ZFHX3	zinc finger homeobox 3
hsa-miR-548n	1	0	1	1	1	1	RBPJ	recombination signal binding protein for immunoglobulin kappa J region
hsa-miR-548n	0	0	1	1	1	1	TMEM41B	transmembrane protein 41B
hsa-miR-548n	1	0	1	1	1	1	SP2	Sp2 transcription factor
hsa-miR-548n	0	0	1	1	1	1	SLC39A14	solute carrier family 39 (zinc transporter), member 14
hsa-miR-548n	1	0	1	1	1	1	PI15	peptidase inhibitor 15
hsa-miR-548n	1	0	1	0	1	1	EFR3A	EFR3 homolog A (S. cerevisiae)
hsa-miR-548n	1	0	1	1	1	1	UBAP2L	ubiquitin associated protein 2-like
hsa-miR-548n	1	0	1	0	1	1	IRF4	interferon regulatory factor 4
hsa-miR-548n	1	0	1	1	1	1	RB1CC1	RB1-inducible coiled-coil 1
hsa-miR-548n	1	0	1	0	1	1	KLHDC10	kelch domain containing 10
hsa-miR-548n	0	0	1	1	1	1	ATF2	activating transcription factor 2
hsa-miR-548n	0	0	1	1	1	1	MPV17L	MPV17 mitochondrial membrane protein-like
hsa-miR-548n	0	0	1	1	0	0	SPINK5	serine peptidase inhibitor, Kazal type 5
hsa-miR-548n	1	0	1	1	0	0	DPY19L1	dpy-19-like 1 (C. elegans)
hsa-miR-548n	0	0	1	1	0	0	GPR111	G protein-coupled receptor 111
hsa-miR-548n	1	0	1	0	1	1	CACNA1G	calcium channel, voltage-dependent, T type, alpha 1G subunit
hsa-miR-548n	1	0	1	1	1	1	ITSN1	intersectin 1 (SH3 domain protein)
hsa-miR-548n	1	0	1	0	1	1	RBBP5	retinoblastoma binding protein 5
hsa-miR-548n	1	0	1	0	1	1	DCBLD2	discoidin, CUB and LCCL domain containing 2
hsa-miR-548n	1	0	1	1	1	1	LGR4	leucine-rich repeat containing G protein-coupled receptor 4
hsa-miR-548n	1	0	1	1	1	1	CDC27	cell division cycle 27 homolog (S. cerevisiae)
hsa-miR-548n	0	0	1	1	1	1	CCL20	chemokine (C-C motif) ligand 20
hsa-miR-548n	1	0	1	0	1	1	EPDR1	ependymin related protein 1 (zebrafish)
hsa-miR-548n	1	0	1	1	1	1	SLC4A8	solute carrier family 4, sodium bicarbonate cotransporter, member 8
hsa-miR-548n	1	0	1	1	1	1	MLL	myeloid/lymphoid or mixed-lineage leukemia (trithorax homolog, Drosophila)
hsa-miR-548n	1	0	1	1	0	0	PPARD	peroxisome proliferator-activated receptor delta
hsa-miR-548n	0	0	1	1	1	1	VDAC2	voltage-dependent anion channel 2
hsa-miR-548n	1	0	1	1	1	1	ATP2B2	ATPase, Ca++ transporting, plasma membrane 2
hsa-miR-548n	1	0	1	1	1	1	AFF1	AF4/FMR2 family, member 1
hsa-miR-548n	0	0	1	1	1	1	PLCB4	phospholipase C, beta 4
hsa-miR-548n	1	0	1	1	1	1	RALBP1	ralA binding protein 1
hsa-miR-548n	1	0	1	1	1	1	CCNG2	cyclin G2
hsa-miR-548n	1	0	1	1	1	1	GRM1	glutamate receptor, metabotropic 1
hsa-miR-548n	1	0	1	0	1	1	BCL2	B-cell CLL/lymphoma 2
hsa-miR-548n	1	0	1	1	1	1	IGF1	insulin-like growth factor 1 (somatomedin C)
hsa-miR-548n	0	0	1	1	1	1	GAD2	glutamate decarboxylase 2 (pancreatic islets and brain, 65kDa)
hsa-miR-548n	0	0	1	1	1	1	ELF1	E74-like factor 1 (ets domain transcription factor)
hsa-miR-548n	1	0	1	0	1	1	ACVR2A	activin A receptor, type IIA
hsa-miR-548n	1	0	1	1	1	1	AGL	amylo-alpha-1, 6-glucosidase, 4-alpha-glucanotransferase
hsa-miR-548n	0	0	1	1	1	1	ATP7A	ATPase, Cu++ transporting, alpha polypeptide
hsa-miR-548n	1	0	1	1	1	1	COL3A1	collagen, type III, alpha 1
hsa-miR-548n	1	0	1	1	1	1	COL4A3	collagen, type IV, alpha 3 (Goodpasture antigen)
hsa-miR-548n	1	0	1	1	1	1	COL4A4	collagen, type IV, alpha 4
hsa-miR-548n	1	0	1	1	1	1	COL5A1	collagen, type V, alpha 1
hsa-miR-548n	1	0	1	1	1	1	CYP19A1	cytochrome P450, family 19, subfamily A, polypeptide 1
hsa-miR-548n	0	0	1	0	1	1	CYP1B1	cytochrome P450, family 1, subfamily B, polypeptide 1
hsa-miR-548n	1	0	1	1	1	1	DLD	dihydrolipoamide dehydrogenase
hsa-miR-548n	1	0	1	1	1	1	DMD	dystrophin
hsa-miR-548n	1	0	1	0	1	1	SLC26A2	solute carrier family 26 (sulfate transporter), member 2
hsa-miR-548n	1	0	1	1	1	1	ESR1	estrogen receptor 1
hsa-miR-548n	1	0	1	0	1	1	EXT1	exostosin 1
hsa-miR-548n	0	0	1	1	1	1	F5	coagulation factor V (proaccelerin, labile factor)
hsa-miR-548n	0	0	1	1	1	1	F8	coagulation factor VIII, procoagulant component
hsa-miR-548n	1	0	1	1	1	1	FBN1	fibrillin 1
hsa-miR-548n	1	0	1	0	1	1	G6PC	glucose-6-phosphatase, catalytic subunit
hsa-miR-548n	1	0	1	1	1	1	GALC	galactosylceramidase
hsa-miR-548n	1	0	1	1	1	1	GK	glycerol kinase
hsa-miR-548n	1	0	1	0	1	1	GLI3	GLI family zinc finger 3
hsa-miR-548n	1	0	1	1	1	1	HK2	hexokinase 2
hsa-miR-548n	1	0	1	1	1	1	TBX5	T-box 5
hsa-miR-548n	1	0	1	1	1	1	INSR	insulin receptor
hsa-miR-548n	0	0	1	0	1	1	KAL1	Kallmann syndrome 1 sequence
hsa-miR-548n	1	0	1	1	1	1	KCNA1	potassium voltage-gated channel, shaker-related subfamily, member 1 (episodic ataxia with myokymia)
hsa-miR-548n	0	0	1	1	1	1	KRT12	keratin 12
hsa-miR-548n	1	0	1	1	1	1	LEP	leptin
hsa-miR-548n	1	0	1	0	1	1	SGCB	sarcoglycan, beta (43kDa dystrophin-associated glycoprotein)
hsa-miR-548n	0	0	1	1	1	1	LPL	lipoprotein lipase
hsa-miR-548n	0	0	1	0	1	1	MBL2	mannose-binding lectin (protein C) 2, soluble
hsa-miR-548n	1	0	1	1	1	1	MET	met proto-oncogene (hepatocyte growth factor receptor)
hsa-miR-548n	1	0	1	1	1	1	MITF	microphthalmia-associated transcription factor
hsa-miR-548n	0	0	1	1	1	1	MTM1	myotubularin 1
hsa-miR-548n	1	0	1	1	1	1	NF1	neurofibromin 1
hsa-miR-548n	0	0	1	1	1	1	PEX7	peroxisomal biogenesis factor 7
hsa-miR-548n	1	0	1	0	1	1	PKD2	polycystic kidney disease 2 (autosomal dominant)
hsa-miR-548n	1	0	1	1	1	1	PMP22	peripheral myelin protein 22
hsa-miR-548n	0	0	1	1	1	1	PRNP	prion protein
hsa-miR-548n	1	0	1	0	1	1	PTEN	phosphatase and tensin homolog
hsa-miR-548n	1	0	1	1	1	1	RB1	retinoblastoma 1
hsa-miR-548n	0	0	1	1	1	1	RPGR	retinitis pigmentosa GTPase regulator
hsa-miR-548n	1	0	1	1	1	1	ATXN1	ataxin 1
hsa-miR-548n	1	0	1	1	1	1	SOX9	SRY (sex determining region Y)-box 9
hsa-miR-548n	1	0	1	1	1	1	TAT	tyrosine aminotransferase
hsa-miR-548n	1	0	1	0	1	1	TSC1	tuberous sclerosis 1
hsa-miR-548n	0	0	1	1	1	1	XDH	xanthine dehydrogenase
hsa-miR-548n	1	0	1	0	1	1	COL5A2	collagen, type V, alpha 2
hsa-miR-548n	1	0	1	1	1	1	HLCS	holocarboxylase synthetase (biotin-(proprionyl-CoA-carboxylase (ATP-hydrolysing)) ligase)
hsa-miR-548n	0	0	1	1	1	1	LTBP2	latent transforming growth factor beta binding protein 2
hsa-miR-548n	0	0	1	1	0	0	MAT1A	methionine adenosyltransferase I, alpha
hsa-miR-548n	1	0	1	0	1	1	PAFAH1B1	platelet-activating factor acetylhydrolase 1b, regulatory subunit 1 (45kDa)
hsa-miR-548n	1	0	1	1	0	0	NOTCH3	notch 3
hsa-miR-548n	1	0	1	0	1	1	PCSK1	proprotein convertase subtilisin/kexin type 1
hsa-miR-548n	1	0	1	1	1	1	SLC26A4	solute carrier family 26, member 4
hsa-miR-548n	0	0	1	1	0	0	PHEX	phosphate regulating endopeptidase homolog, X-linked
hsa-miR-548n	1	0	1	0	1	1	RAG1	recombination activating gene 1
hsa-miR-548n	1	0	1	1	1	1	TEK	TEK tyrosine kinase, endothelial
hsa-miR-548n	0	0	1	1	1	1	UGT1A1	UDP glucuronosyltransferase 1 family, polypeptide A1
hsa-miR-548n	1	0	1	1	1	1	TWIST1	twist homolog 1 (Drosophila)
hsa-miR-548n	0	0	1	1	1	1	ALPL	alkaline phosphatase, liver/bone/kidney
hsa-miR-548n	1	0	1	1	1	1	ATRX	alpha thalassemia/mental retardation syndrome X-linked
hsa-miR-548n	0	0	1	1	0	0	F2	coagulation factor II (thrombin)
hsa-miR-548n	1	0	1	1	1	1	HOXD13	homeobox D13
hsa-miR-548n	0	0	1	1	1	1	RFXAP	regulatory factor X-associated protein
hsa-miR-548n	0	0	1	1	1	1	WRN	Werner syndrome, RecQ helicase-like
hsa-miR-548n	0	0	1	1	1	1	CRX	cone-rod homeobox
hsa-miR-548n	1	0	1	1	1	1	DCX	doublecortin
hsa-miR-548n	1	0	1	1	1	1	CR1	complement component (3b/4b) receptor 1 (Knops blood group)
hsa-miR-548n	1	0	1	1	1	1	IL1A	interleukin 1, alpha
hsa-miR-548n	0	0	1	1	1	1	IL6	interleukin 6 (interferon, beta 2)
hsa-miR-548n	1	0	1	1	1	1	CXCL12	chemokine (C-X-C motif) ligand 12
hsa-miR-548n	1	0	1	1	1	1	CD44	CD44 molecule (Indian blood group)
hsa-miR-548n	0	0	1	1	1	1	GSR	glutathione reductase
hsa-miR-548n	0	0	1	1	1	1	IL11	interleukin 11
hsa-miR-548n	0	0	1	1	1	1	ADH4	alcohol dehydrogenase 4 (class II), pi polypeptide
hsa-miR-548n	1	0	1	1	1	1	ADORA2B	adenosine A2b receptor
hsa-miR-548n	0	0	1	1	1	1	AGTR1	angiotensin II receptor, type 1
hsa-miR-548n	0	0	1	1	1	1	ALDH1A1	aldehyde dehydrogenase 1 family, member A1
hsa-miR-548n	0	0	1	1	1	1	ALDH1B1	aldehyde dehydrogenase 1 family, member B1
hsa-miR-548n	1	0	1	0	1	1	CACNA1E	calcium channel, voltage-dependent, R type, alpha 1E subunit
hsa-miR-548n	0	0	1	1	1	1	CRH	corticotropin releasing hormone
hsa-miR-548n	1	0	1	0	1	1	GABRA4	gamma-aminobutyric acid (GABA) A receptor, alpha 4
hsa-miR-548n	0	0	1	1	1	1	GABRA5	gamma-aminobutyric acid (GABA) A receptor, alpha 5
hsa-miR-548n	1	0	1	1	1	1	GABRB3	gamma-aminobutyric acid (GABA) A receptor, beta 3
hsa-miR-548n	1	0	1	1	1	1	GABRG2	gamma-aminobutyric acid (GABA) A receptor, gamma 2
hsa-miR-548n	0	0	1	1	1	1	GRM3	glutamate receptor, metabotropic 3
hsa-miR-548n	1	0	1	1	1	1	GRM7	glutamate receptor, metabotropic 7
hsa-miR-548n	0	0	1	1	1	1	HTR7	5-hydroxytryptamine (serotonin) receptor 7, adenylate cyclase-coupled
hsa-miR-548n	0	0	1	1	1	1	IL5	interleukin 5 (colony-stimulating factor, eosinophil)
hsa-miR-548n	1	0	1	0	1	1	KITLG	KIT ligand
hsa-miR-548n	1	0	1	1	1	1	MME	membrane metallo-endopeptidase
hsa-miR-548n	0	0	1	1	1	1	NPY2R	neuropeptide Y receptor Y2
hsa-miR-548n	1	0	1	1	1	1	PPP3R1	protein phosphatase 3, regulatory subunit B, alpha
hsa-miR-548n	1	0	1	1	1	1	PTGDR	prostaglandin D2 receptor (DP)
hsa-miR-548n	1	0	1	1	1	1	PTGER3	prostaglandin E receptor 3 (subtype EP3)
hsa-miR-548n	1	0	1	1	1	1	PTGFR	prostaglandin F receptor (FP)
hsa-miR-548n	0	0	1	1	1	1	PTGS2	prostaglandin-endoperoxide synthase 2 (prostaglandin G/H synthase and cyclooxygenase)
hsa-miR-548n	1	0	1	1	1	1	RARB	retinoic acid receptor, beta
hsa-miR-548n	0	0	1	1	0	0	RPL7	ribosomal protein L7
hsa-miR-548n	1	0	1	1	1	1	REEP3	receptor accessory protein 3
hsa-miR-548n	0	0	1	1	1	1	BLOC1S2	biogenesis of lysosomal organelles complex-1, subunit 2
hsa-miR-548n	0	0	1	1	1	1	TBC1D3C	TBC1 domain family, member 3C
hsa-miR-548n	1	0	1	0	1	1	SMAD5	SMAD family member 5
hsa-miR-548n	0	0	1	1	1	1	C16orf87	chromosome 16 open reading frame 87
hsa-miR-548n	1	0	1	0	1	1	UBE2W	ubiquitin-conjugating enzyme E2W (putative)
hsa-miR-548n	1	0	1	1	1	1	UGP2	UDP-glucose pyrophosphorylase 2
hsa-miR-548n	1	0	1	0	1	1	GDF6	growth differentiation factor 6
hsa-miR-548n	1	0	1	0	1	1	SPOPL	speckle-type POZ protein-like
hsa-miR-548n	0	0	1	1	1	1	CYP27C1	cytochrome P450, family 27, subfamily C, polypeptide 1
hsa-miR-548n	0	0	1	0	1	1	C9orf170	chromosome 9 open reading frame 170
hsa-miR-548n	1	0	1	1	1	1	ATP1B1	ATPase, Na+/K+ transporting, beta 1 polypeptide
hsa-miR-548n	0	0	1	0	0	0	C10orf55	chromosome 10 open reading frame 55
hsa-miR-548n	1	0	1	1	1	1	TPD52L3	tumor protein D52-like 3
hsa-miR-548n	1	0	1	0	1	1	PPARA	peroxisome proliferator-activated receptor alpha
hsa-miR-548n	1	0	1	1	1	1	FAM13C	family with sequence similarity 13, member C
hsa-miR-548n	1	0	1	0	1	1	CLDN18	claudin 18
hsa-miR-548n	1	0	1	1	1	1	AFTPH	aftiphilin
hsa-miR-548n	0	0	1	1	1	1	FCGR2B	Fc fragment of IgG, low affinity IIb, receptor (CD32)
hsa-miR-548n	1	0	1	1	1	1	WNK3	WNK lysine deficient protein kinase 3
hsa-miR-548n	0	0	1	0	0	0	OR8G1	olfactory receptor, family 8, subfamily G, member 1
hsa-miR-548n	1	0	1	1	1	1	C1orf173	chromosome 1 open reading frame 173
hsa-miR-548n	0	0	1	1	1	1	PTRH1	peptidyl-tRNA hydrolase 1 homolog (S. cerevisiae)
hsa-miR-548n	1	0	1	1	1	1	KCTD11	potassium channel tetramerisation domain containing 11
hsa-miR-548n	1	0	1	0	1	1	CACNA1I	calcium channel, voltage-dependent, T type, alpha 1I subunit
hsa-miR-548n	1	0	1	0	1	1	SMAD2	SMAD family member 2
hsa-miR-548n	0	0	1	1	0	0	C1orf95	chromosome 1 open reading frame 95
hsa-miR-548n	1	0	1	1	1	1	HMGXB4	HMG box domain containing 4
hsa-miR-548n	0	0	1	1	1	1	SMAD1	SMAD family member 1
hsa-miR-548n	1	0	1	1	1	1	KLHL31	kelch-like 31 (Drosophila)
hsa-miR-548n	1	0	1	1	1	1	RBMS3	RNA binding motif, single stranded interacting protein 3
hsa-miR-548n	0	0	1	1	1	1	ANXA13	annexin A13
hsa-miR-548n	1	0	1	1	0	0	NOMO3	NODAL modulator 3
hsa-miR-548n	0	0	1	1	1	1	CCDC144NL	coiled-coil domain containing 144 family, N-terminal like
hsa-miR-548n	0	0	1	1	1	1	ZCCHC16	zinc finger, CCHC domain containing 16
hsa-miR-548n	1	0	1	0	1	1	LIN28B	lin-28 homolog B (C. elegans)
hsa-miR-548n	0	0	1	1	1	1	AGMO	alkylglycerol monooxygenase
hsa-miR-548n	0	0	1	0	1	1	ZNF705A	zinc finger protein 705A
hsa-miR-548n	1	0	1	1	1	1	NCK2	NCK adaptor protein 2
hsa-miR-548n	1	0	1	0	1	1	LRRC55	leucine rich repeat containing 55
hsa-miR-548n	0	0	1	1	1	1	OR9Q1	olfactory receptor, family 9, subfamily Q, member 1
hsa-miR-548n	0	0	1	1	1	1	FRG2	FSHD region gene 2
hsa-miR-548n	1	0	1	0	1	1	YPEL2	yippee-like 2 (Drosophila)
hsa-miR-548n	1	0	1	1	1	1	PLCXD3	phosphatidylinositol-specific phospholipase C, X domain containing 3
hsa-miR-548n	0	0	1	1	1	1	SUMO1	SMT3 suppressor of mif two 3 homolog 1 (S. cerevisiae)
hsa-miR-548n	0	0	1	1	1	1	RYK	receptor-like tyrosine kinase
hsa-miR-548n	0	0	1	1	1	1	WBP5	WW domain binding protein 5
hsa-miR-548n	1	0	1	1	1	1	TCEAL8	transcription elongation factor A (SII)-like 8
hsa-miR-548n	1	0	1	0	1	1	GOSR1	golgi SNAP receptor complex member 1
hsa-miR-548n	0	0	1	1	1	1	SCP2	sterol carrier protein 2
hsa-miR-548n	1	0	1	1	1	1	L3MBTL3	l(3)mbt-like 3 (Drosophila)
hsa-miR-548n	1	0	1	1	1	1	NTRK3	neurotrophic tyrosine kinase, receptor, type 3
hsa-miR-548n	0	0	1	0	1	1	GIMAP6	GTPase, IMAP family member 6
hsa-miR-548n	1	0	1	1	1	1	SPOP	speckle-type POZ protein
hsa-miR-548n	1	0	1	1	1	1	IGSF3	immunoglobulin superfamily, member 3
hsa-miR-548n	1	0	1	1	1	1	BRWD1	bromodomain and WD repeat domain containing 1
hsa-miR-548n	0	0	1	0	1	1	C3orf56	chromosome 3 open reading frame 56
hsa-miR-548n	1	0	1	0	1	1	SS18	synovial sarcoma translocation, chromosome 18
hsa-miR-548n	0	0	1	1	1	1	FAM154B	family with sequence similarity 154, member B
hsa-miR-548n	1	0	1	0	1	1	C18orf25	chromosome 18 open reading frame 25
hsa-miR-548n	1	0	1	1	1	1	CTDSPL	CTD (carboxy-terminal domain, RNA polymerase II, polypeptide A) small phosphatase-like
hsa-miR-548n	1	0	1	1	1	1	RBM33	RNA binding motif protein 33
hsa-miR-548n	0	0	1	1	1	1	PIWIL3	piwi-like 3 (Drosophila)
hsa-miR-548n	0	0	1	1	1	1	MXRA7	matrix-remodelling associated 7
hsa-miR-548n	1	0	1	0	1	1	KIAA2022	KIAA2022
hsa-miR-548n	0	0	1	1	1	1	MXI1	MAX interactor 1
hsa-miR-548n	0	0	1	1	1	1	CCDC147	coiled-coil domain containing 147
hsa-miR-548n	1	0	1	1	1	1	FNIP1	folliculin interacting protein 1
hsa-miR-548n	0	0	1	1	1	1	GCSAM	germinal center-associated, signaling and motility
hsa-miR-548n	0	0	1	1	1	1	FBXO47	F-box protein 47
hsa-miR-548n	0	0	1	1	1	1	SLC35D3	solute carrier family 35, member D3
hsa-miR-548n	1	0	1	1	1	1	CUL4A	cullin 4A
hsa-miR-548n	0	0	1	1	1	1	RXRG	retinoid X receptor, gamma
hsa-miR-548n	1	0	1	0	1	1	RCHY1	ring finger and CHY zinc finger domain containing 1, E3 ubiquitin protein ligase
hsa-miR-548n	1	0	1	0	1	1	ERMN	ermin, ERM-like protein
hsa-miR-548n	0	0	1	1	0	0	RIPPLY2	ripply2 homolog (zebrafish)
hsa-miR-548n	1	0	1	1	1	1	ARHGAP28	Rho GTPase activating protein 28
hsa-miR-548n	0	0	1	1	1	1	IRAK1BP1	interleukin-1 receptor-associated kinase 1 binding protein 1
hsa-miR-548n	0	0	1	0	1	1	LPPR5	lipid phosphate phosphatase-related protein type 5
hsa-miR-548n	0	0	1	1	1	1	SPIN3	spindlin family, member 3
[truncated: 1,808 more rows]
