# Supplementary material for: Profiling of Selected MicroRNAs in Proliferative Eutopic Endometrium of Women with Ovarian Endometriosis
Source: Biomed Res Int. 2015 Aug 20;2015:760698. doi: 10.1155/2015/760698 (PMC4558423; doi:10.1155/2015/760698)
Supplement: Supplementary file 1 — Table I: The names of miRNAs significantly differentially expressed between eutopic endometrium of patients with endometriosis vs eutopic endometrium of patients without endometriosis. Table II: The associations between miRNA and mRNA, which presents detailed results of the search of six major databases i.e targetscan, tarbase, miranda, mirbase, mirtarget2 and pictar. [file 760698.f1.zip › 760698.f1/Table II/hsa-miR-548p.tsv]

miR	targetscan	tarbase	miranda	mirbase	mirtarget2	pictar	GeneSymbol	GeneName
hsa-miR-548p	1	0	1	1	1	1	ZFYVE16	zinc finger, FYVE domain containing 16
hsa-miR-548p	1	0	1	1	1	1	CHD9	chromodomain helicase DNA binding protein 9
hsa-miR-548p	1	0	1	0	0	0	TRANK1	tetratricopeptide repeat and ankyrin repeat containing 1
hsa-miR-548p	0	0	1	1	1	1	HSPH1	heat shock 105kDa/110kDa protein 1
hsa-miR-548p	1	0	1	1	1	1	ABCC5	ATP-binding cassette, sub-family C (CFTR/MRP), member 5
hsa-miR-548p	1	0	1	0	1	1	PTPRT	protein tyrosine phosphatase, receptor type, T
hsa-miR-548p	1	0	1	0	1	1	GAS7	growth arrest-specific 7
hsa-miR-548p	1	0	1	0	1	1	MTSS1	metastasis suppressor 1
hsa-miR-548p	1	0	1	1	1	1	ATMIN	ATM interactor
hsa-miR-548p	0	0	1	1	1	1	PREPL	prolyl endopeptidase-like
hsa-miR-548p	1	0	1	0	1	1	NEDD4L	neural precursor cell expressed, developmentally down-regulated 4-like, E3 ubiquitin protein ligase
hsa-miR-548p	1	0	1	1	1	1	AUTS2	autism susceptibility candidate 2
hsa-miR-548p	1	0	1	1	0	0	OTUD3	OTU domain containing 3
hsa-miR-548p	1	0	1	1	0	0	DENND4B	DENN/MADD domain containing 4B
hsa-miR-548p	1	0	1	0	1	1	CEP350	centrosomal protein 350kDa
hsa-miR-548p	1	0	1	1	1	1	RNGTT	RNA guanylyltransferase and 5'-phosphatase
hsa-miR-548p	1	0	1	1	1	1	GPATCH8	G patch domain containing 8
hsa-miR-548p	1	0	1	1	1	1	KIF1B	kinesin family member 1B
hsa-miR-548p	1	0	1	1	1	1	SLC4A7	solute carrier family 4, sodium bicarbonate cotransporter, member 7
hsa-miR-548p	1	0	1	0	0	0	HECTD4	HECT domain containing E3 ubiquitin protein ligase 4
hsa-miR-548p	1	0	1	0	1	1	MFAP3L	microfibrillar-associated protein 3-like
hsa-miR-548p	1	0	1	1	1	1	HIPK1	homeodomain interacting protein kinase 1
hsa-miR-548p	1	0	1	1	1	1	GIGYF2	GRB10 interacting GYF protein 2
hsa-miR-548p	0	0	1	1	1	1	CLUAP1	clusterin associated protein 1
hsa-miR-548p	0	0	1	1	0	0	RAD51D	RAD51 homolog D (S. cerevisiae)
hsa-miR-548p	1	0	1	0	1	1	DOCK4	dedicator of cytokinesis 4
hsa-miR-548p	1	0	1	1	1	1	MATR3	matrin 3
hsa-miR-548p	1	0	1	0	1	1	RBM12	RNA binding motif protein 12
hsa-miR-548p	1	0	1	0	1	1	LPHN3	latrophilin 3
hsa-miR-548p	1	0	1	1	1	1	CAMKK2	calcium/calmodulin-dependent protein kinase kinase 2, beta
hsa-miR-548p	1	0	1	0	0	0	MICAL3	microtubule associated monoxygenase, calponin and LIM domain containing 3
hsa-miR-548p	1	0	1	1	1	1	DNM3	dynamin 3
hsa-miR-548p	1	0	1	0	1	1	ATG14	autophagy related 14
hsa-miR-548p	1	0	1	1	1	1	LMO7	LIM domain 7
hsa-miR-548p	0	0	1	1	0	0	FAM169A	family with sequence similarity 169, member A
hsa-miR-548p	0	0	1	1	1	1	MAU2	MAU2 chromatid cohesion factor homolog (C. elegans)
hsa-miR-548p	0	0	1	1	1	1	WDR47	WD repeat domain 47
hsa-miR-548p	1	0	1	1	1	1	UBR5	ubiquitin protein ligase E3 component n-recognin 5
hsa-miR-548p	1	0	1	1	1	1	CDK12	cyclin-dependent kinase 12
hsa-miR-548p	1	0	1	0	0	0	DTX4	deltex homolog 4 (Drosophila)
hsa-miR-548p	1	0	1	1	1	1	CPEB3	cytoplasmic polyadenylation element binding protein 3
hsa-miR-548p	1	0	1	0	0	0	KIAA0947	KIAA0947
hsa-miR-548p	1	0	1	1	1	1	C11orf9	chromosome 11 open reading frame 9
hsa-miR-548p	1	0	1	1	1	1	RGL1	ral guanine nucleotide dissociation stimulator-like 1
hsa-miR-548p	0	0	1	0	0	0	THSD7A	thrombospondin, type I, domain containing 7A
hsa-miR-548p	0	0	1	1	1	1	FASTKD2	FAST kinase domains 2
hsa-miR-548p	0	0	1	1	0	0	FAM149B1	family with sequence similarity 149, member B1
hsa-miR-548p	1	0	1	1	1	1	PALLD	palladin, cytoskeletal associated protein
hsa-miR-548p	1	0	1	1	0	0	FRMD4B	FERM domain containing 4B
hsa-miR-548p	0	0	1	1	1	1	CCDC125	coiled-coil domain containing 125
hsa-miR-548p	1	0	1	1	1	1	FOXJ3	forkhead box J3
hsa-miR-548p	1	0	1	1	1	1	NLGN1	neuroligin 1
hsa-miR-548p	0	0	1	1	1	1	SETD1B	SET domain containing 1B
hsa-miR-548p	1	0	1	0	1	1	ZNF507	zinc finger protein 507
hsa-miR-548p	1	0	1	1	1	1	FAM208A	family with sequence similarity 208, member A
hsa-miR-548p	0	0	1	0	0	0	KIAA1107	KIAA1107
hsa-miR-548p	1	0	1	1	1	1	SMARCAD1	SWI/SNF-related, matrix-associated actin-dependent regulator of chromatin, subfamily a, containing DEAD/H box 1
hsa-miR-548p	1	0	1	0	1	1	ODZ2	odz, odd Oz/ten-m homolog 2 (Drosophila)
hsa-miR-548p	1	0	1	0	1	1	SRGAP3	SLIT-ROBO Rho GTPase activating protein 3
hsa-miR-548p	1	0	1	1	0	0	PPM1H	protein phosphatase, Mg2+/Mn2+ dependent, 1H
hsa-miR-548p	1	0	1	1	1	1	NDRG4	NDRG family member 4
hsa-miR-548p	1	0	1	1	1	1	ATXN7L1	ataxin 7-like 1
hsa-miR-548p	1	0	1	1	1	1	RALGAPB	Ral GTPase activating protein, beta subunit (non-catalytic)
hsa-miR-548p	1	0	1	1	1	1	ZMIZ1	zinc finger, MIZ-type containing 1
hsa-miR-548p	1	0	1	1	1	1	RIMKLB	ribosomal modification protein rimK-like family member B
hsa-miR-548p	1	0	1	1	0	0	ATAD2B	ATPase family, AAA domain containing 2B
hsa-miR-548p	0	0	1	1	1	1	FSTL5	follistatin-like 5
hsa-miR-548p	0	0	1	1	1	1	COPS7A	COP9 constitutive photomorphogenic homolog subunit 7A (Arabidopsis)
hsa-miR-548p	1	0	1	1	1	1	DKK2	dickkopf 2 homolog (Xenopus laevis)
hsa-miR-548p	0	0	1	1	1	1	KLHL13	kelch-like 13 (Drosophila)
hsa-miR-548p	1	0	1	1	1	1	PCDH19	protocadherin 19
hsa-miR-548p	1	0	1	0	1	1	KCTD16	potassium channel tetramerisation domain containing 16
hsa-miR-548p	1	0	1	1	1	1	TAOK1	TAO kinase 1
hsa-miR-548p	1	0	1	1	1	1	LRRC7	leucine rich repeat containing 7
hsa-miR-548p	1	0	1	1	1	1	UPF2	UPF2 regulator of nonsense transcripts homolog (yeast)
hsa-miR-548p	1	0	1	1	1	1	FAM135A	family with sequence similarity 135, member A
hsa-miR-548p	1	1	1	1	1	1	NFIA	nuclear factor I/A
hsa-miR-548p	1	0	1	0	0	0	PITPNM2	phosphatidylinositol transfer protein, membrane-associated 2
hsa-miR-548p	1	0	1	1	0	0	KIAA1462	KIAA1462
hsa-miR-548p	0	0	1	0	1	1	KIAA1468	KIAA1468
hsa-miR-548p	0	0	1	0	0	0	NYAP2	neuronal tyrosine-phosphorylated phosphoinositide-3-kinase adaptor 2
hsa-miR-548p	1	0	1	0	1	1	ZNF295	zinc finger protein 295
hsa-miR-548p	1	0	1	0	1	1	LMO3	LIM domain only 3 (rhombotin-like 2)
hsa-miR-548p	1	0	1	1	1	1	PPP6R3	protein phosphatase 6, regulatory subunit 3
hsa-miR-548p	0	0	1	1	1	1	CEP192	centrosomal protein 192kDa
hsa-miR-548p	1	0	1	0	1	1	IGDCC4	immunoglobulin superfamily, DCC subclass, member 4
hsa-miR-548p	1	0	1	1	1	1	ZNF532	zinc finger protein 532
hsa-miR-548p	1	0	1	0	0	0	TANC2	tetratricopeptide repeat, ankyrin repeat and coiled-coil containing 2
hsa-miR-548p	1	0	1	1	1	1	SNX3	sorting nexin 3
hsa-miR-548p	0	0	1	1	1	1	PBLD	phenazine biosynthesis-like protein domain containing
hsa-miR-548p	1	0	1	1	1	1	PTBP2	polypyrimidine tract binding protein 2
hsa-miR-548p	1	0	1	1	1	1	PHF21A	PHD finger protein 21A
hsa-miR-548p	0	0	1	1	1	1	BHLHB9	basic helix-loop-helix domain containing, class B, 9
hsa-miR-548p	1	0	1	1	1	1	ITPRIP	inositol 1,4,5-trisphosphate receptor interacting protein
hsa-miR-548p	0	0	1	0	1	1	SETD5	SET domain containing 5
hsa-miR-548p	1	0	1	0	1	1	RIMS1	regulating synaptic membrane exocytosis 1
hsa-miR-548p	1	0	1	1	1	1	NPAS3	neuronal PAS domain protein 3
hsa-miR-548p	1	0	1	1	1	1	IKZF4	IKAROS family zinc finger 4 (Eos)
hsa-miR-548p	1	0	1	1	1	1	LCOR	ligand dependent nuclear receptor corepressor
hsa-miR-548p	1	0	1	1	1	1	KIAA1804	mixed lineage kinase 4
hsa-miR-548p	1	0	1	1	0	0	ZNF527	zinc finger protein 527
hsa-miR-548p	1	0	1	1	1	1	AHCTF1	AT hook containing transcription factor 1
hsa-miR-548p	1	0	1	1	1	1	HNRPDL	heterogeneous nuclear ribonucleoprotein D-like
hsa-miR-548p	0	0	1	1	0	0	SEC16B	SEC16 homolog B (S. cerevisiae)
hsa-miR-548p	1	0	1	1	1	1	MAT2B	methionine adenosyltransferase II, beta
hsa-miR-548p	1	0	1	1	1	1	POGZ	pogo transposable element with ZNF domain
hsa-miR-548p	1	0	1	1	1	1	SH3TC2	SH3 domain and tetratricopeptide repeats 2
hsa-miR-548p	0	0	1	1	0	0	CIRH1A	cirrhosis, autosomal recessive 1A (cirhin)
hsa-miR-548p	0	0	1	0	0	0	NUGGC	nuclear GTPase, germinal center associated
hsa-miR-548p	1	0	1	0	0	0	FAT3	FAT tumor suppressor homolog 3 (Drosophila)
hsa-miR-548p	1	0	1	1	1	1	CSGALNACT1	chondroitin sulfate N-acetylgalactosaminyltransferase 1
hsa-miR-548p	1	0	1	0	0	0	ZBTB34	zinc finger and BTB domain containing 34
hsa-miR-548p	1	0	1	1	1	1	ACBD5	acyl-CoA binding domain containing 5
hsa-miR-548p	1	0	1	1	1	1	SMEK1	SMEK homolog 1, suppressor of mek1 (Dictyostelium)
hsa-miR-548p	1	0	1	1	1	1	UBR3	ubiquitin protein ligase E3 component n-recognin 3 (putative)
hsa-miR-548p	1	0	1	0	0	0	ZC3H12C	zinc finger CCCH-type containing 12C
hsa-miR-548p	0	0	1	1	0	0	KRTAP24-1	keratin associated protein 24-1
hsa-miR-548p	0	0	1	1	1	1	ACPP	acid phosphatase, prostate
hsa-miR-548p	1	0	1	1	1	1	PAN3	PAN3 poly(A) specific ribonuclease subunit homolog (S. cerevisiae)
hsa-miR-548p	1	0	1	0	1	1	LIN54	lin-54 homolog (C. elegans)
hsa-miR-548p	1	1	1	1	1	1	BACE1	beta-site APP-cleaving enzyme 1
hsa-miR-548p	1	0	1	1	1	1	UBE3A	ubiquitin protein ligase E3A
hsa-miR-548p	0	0	1	1	1	1	SYBU	syntabulin (syntaxin-interacting)
hsa-miR-548p	0	0	1	1	1	1	CAST	calpastatin
hsa-miR-548p	1	0	1	1	1	1	COL11A1	collagen, type XI, alpha 1
hsa-miR-548p	0	0	1	0	1	1	ATR	ataxia telangiectasia and Rad3 related
hsa-miR-548p	1	0	1	1	1	1	BACH2	BTB and CNC homology 1, basic leucine zipper transcription factor 2
hsa-miR-548p	1	0	1	1	1	1	OSBPL6	oxysterol binding protein-like 6
hsa-miR-548p	0	0	1	0	1	1	ATF6	activating transcription factor 6
hsa-miR-548p	1	0	1	1	1	1	RPS6KA3	ribosomal protein S6 kinase, 90kDa, polypeptide 3
hsa-miR-548p	1	0	1	1	1	1	MEF2A	myocyte enhancer factor 2A
hsa-miR-548p	0	0	1	1	1	1	MAZ	MYC-associated zinc finger protein (purine-binding transcription factor)
hsa-miR-548p	0	0	1	1	1	1	PTK2	PTK2 protein tyrosine kinase 2
hsa-miR-548p	1	0	1	1	1	1	SLC8A1	solute carrier family 8 (sodium/calcium exchanger), member 1
hsa-miR-548p	1	0	1	1	0	0	GRIA1	glutamate receptor, ionotropic, AMPA 1
hsa-miR-548p	1	0	1	1	1	1	DTNA	dystrobrevin, alpha
hsa-miR-548p	0	0	1	1	1	1	DGKI	diacylglycerol kinase, iota
hsa-miR-548p	1	0	1	1	1	1	E2F5	E2F transcription factor 5, p130-binding
hsa-miR-548p	1	0	1	1	1	1	FMR1	fragile X mental retardation 1
hsa-miR-548p	1	0	1	1	1	1	PRKACB	protein kinase, cAMP-dependent, catalytic, beta
hsa-miR-548p	1	0	1	0	1	1	DPYSL2	dihydropyrimidinase-like 2
hsa-miR-548p	1	0	1	0	1	1	ETV1	ets variant 1
hsa-miR-548p	0	0	1	1	1	1	TFRC	transferrin receptor (p90, CD71)
hsa-miR-548p	1	0	1	1	1	1	REV3L	REV3-like, polymerase (DNA directed), zeta, catalytic subunit
hsa-miR-548p	1	0	1	0	1	1	CHL1	cell adhesion molecule with homology to L1CAM (close homolog of L1)
hsa-miR-548p	1	0	1	1	1	1	AEBP2	AE binding protein 2
hsa-miR-548p	1	0	1	1	1	1	MINK1	misshapen-like kinase 1
hsa-miR-548p	0	0	1	1	1	1	PPP1R12C	protein phosphatase 1, regulatory subunit 12C
hsa-miR-548p	0	0	1	1	1	1	GPM6B	glycoprotein M6B
hsa-miR-548p	1	0	1	1	1	1	CTAGE5	CTAGE family, member 5
hsa-miR-548p	1	0	1	1	1	1	HNRNPK	heterogeneous nuclear ribonucleoprotein K
hsa-miR-548p	1	0	1	1	1	1	COL16A1	collagen, type XVI, alpha 1
hsa-miR-548p	0	0	1	1	0	0	HLA-DMB	major histocompatibility complex, class II, DM beta
hsa-miR-548p	1	0	1	1	1	1	DDX17	DEAD (Asp-Glu-Ala-Asp) box helicase 17
hsa-miR-548p	1	0	1	1	1	1	IPO8	importin 8
hsa-miR-548p	1	0	1	0	1	1	TBL1X	transducin (beta)-like 1X-linked
hsa-miR-548p	0	0	1	1	1	1	KIF3A	kinesin family member 3A
hsa-miR-548p	0	0	1	1	1	1	ELOVL5	ELOVL fatty acid elongase 5
hsa-miR-548p	1	0	1	0	1	1	ADD3	adducin 3 (gamma)
hsa-miR-548p	0	0	1	1	1	1	MYO9A	myosin IXA
hsa-miR-548p	0	0	1	0	1	1	TGFB2	transforming growth factor, beta 2
hsa-miR-548p	1	0	1	1	1	1	HMGA2	high mobility group AT-hook 2
hsa-miR-548p	1	0	1	1	1	1	NCOA3	nuclear receptor coactivator 3
hsa-miR-548p	1	0	1	1	1	1	ZFX	zinc finger protein, X-linked
hsa-miR-548p	1	0	1	1	1	1	PHLDB2	pleckstrin homology-like domain, family B, member 2
hsa-miR-548p	0	0	1	1	1	1	PLD1	phospholipase D1, phosphatidylcholine-specific
hsa-miR-548p	1	0	1	0	1	1	CAV1	caveolin 1, caveolae protein, 22kDa
hsa-miR-548p	0	0	1	1	1	1	SPP1	secreted phosphoprotein 1
hsa-miR-548p	1	0	1	0	1	1	PDE7B	phosphodiesterase 7B
hsa-miR-548p	1	0	1	1	1	1	APC	adenomatous polyposis coli
hsa-miR-548p	1	0	1	1	1	1	MEF2D	myocyte enhancer factor 2D
hsa-miR-548p	0	0	1	0	0	0	LOC646813	DEAH (Asp-Glu-Ala-His) box polypeptide 9 pseudogene
hsa-miR-548p	0	0	1	0	0	0	MIAT	myocardial infarction associated transcript (non-protein coding)
hsa-miR-548p	1	0	1	0	1	1	FYB	FYN binding protein
hsa-miR-548p	0	0	1	0	1	1	PARG	poly (ADP-ribose) glycohydrolase
hsa-miR-548p	0	0	1	1	1	1	BRCA1	breast cancer 1, early onset
hsa-miR-548p	1	0	1	0	1	1	MLL2	myeloid/lymphoid or mixed-lineage leukemia 2
hsa-miR-548p	1	0	1	0	1	1	PDE4D	phosphodiesterase 4D, cAMP-specific
hsa-miR-548p	0	0	1	0	1	1	ZMYM2	zinc finger, MYM-type 2
hsa-miR-548p	1	0	1	1	1	1	CBFA2T2	core-binding factor, runt domain, alpha subunit 2; translocated to, 2
hsa-miR-548p	1	0	1	1	1	1	ENTPD4	ectonucleoside triphosphate diphosphohydrolase 4
hsa-miR-548p	1	0	1	1	1	1	TMBIM6	transmembrane BAX inhibitor motif containing 6
hsa-miR-548p	0	0	1	1	1	1	SESN1	sestrin 1
hsa-miR-548p	1	0	1	1	1	1	MID1	midline 1 (Opitz/BBB syndrome)
hsa-miR-548p	0	0	1	1	1	1	SLC9A3R2	solute carrier family 9, subfamily A (NHE3, cation proton antiporter 3), member 3 regulator 2
hsa-miR-548p	0	0	1	1	1	1	SH3GL3	SH3-domain GRB2-like 3
hsa-miR-548p	1	0	1	1	1	1	MYT1L	myelin transcription factor 1-like
hsa-miR-548p	1	0	1	0	1	1	CELF2	CUGBP, Elav-like family member 2
hsa-miR-548p	1	0	1	1	1	1	SOCS2	suppressor of cytokine signaling 2
hsa-miR-548p	1	0	1	0	0	0	MAP3K1	mitogen-activated protein kinase kinase kinase 1, E3 ubiquitin protein ligase
hsa-miR-548p	0	0	1	1	1	1	UBE4B	ubiquitination factor E4B
hsa-miR-548p	1	0	1	1	1	1	SHOC2	soc-2 suppressor of clear homolog (C. elegans)
hsa-miR-548p	0	0	1	1	1	1	CREB3L1	cAMP responsive element binding protein 3-like 1
hsa-miR-548p	1	0	1	1	1	1	MBNL2	muscleblind-like splicing regulator 2
hsa-miR-548p	1	0	1	1	1	1	CTNND1	catenin (cadherin-associated protein), delta 1
hsa-miR-548p	1	0	1	1	1	1	RBBP6	retinoblastoma binding protein 6
hsa-miR-548p	0	0	1	1	1	1	ZNF33A	zinc finger protein 33A
hsa-miR-548p	1	0	1	1	1	1	ERLIN1	ER lipid raft associated 1
hsa-miR-548p	1	0	1	1	1	1	TMEM159	transmembrane protein 159
hsa-miR-548p	1	0	1	1	0	0	SLC44A2	solute carrier family 44, member 2
hsa-miR-548p	0	0	1	1	1	1	CRYL1	crystallin, lambda 1
hsa-miR-548p	0	0	1	1	1	1	LYPLA1	lysophospholipase I
hsa-miR-548p	1	0	1	1	1	1	DMTF1	cyclin D binding myb-like transcription factor 1
hsa-miR-548p	1	0	1	0	1	1	DDX3X	DEAD (Asp-Glu-Ala-Asp) box polypeptide 3, X-linked
hsa-miR-548p	1	0	1	1	1	1	GLS	glutaminase
hsa-miR-548p	1	0	1	0	1	1	CD164	CD164 molecule, sialomucin
hsa-miR-548p	0	0	1	1	0	0	RBM5	RNA binding motif protein 5
hsa-miR-548p	1	0	1	0	0	0	PPME1	protein phosphatase methylesterase 1
hsa-miR-548p	1	0	1	1	1	1	KAT6B	K(lysine) acetyltransferase 6B
hsa-miR-548p	1	0	1	0	1	1	SLC25A37	solute carrier family 25 (mitochondrial iron transporter), member 37
hsa-miR-548p	0	0	1	1	0	0	ABRACL	ABRA C-terminal like
hsa-miR-548p	0	0	1	1	1	1	TIAM2	T-cell lymphoma invasion and metastasis 2
hsa-miR-548p	0	0	1	0	0	0	RPH3AL	rabphilin 3A-like (without C2 domains)
hsa-miR-548p	1	0	1	0	1	1	WDR82	WD repeat domain 82
hsa-miR-548p	1	0	1	1	1	1	CAB39	calcium binding protein 39
hsa-miR-548p	1	0	1	1	1	1	ZBTB20	zinc finger and BTB domain containing 20
hsa-miR-548p	1	0	1	1	1	1	SCHIP1	schwannomin interacting protein 1
hsa-miR-548p	1	0	1	1	1	1	HMG20A	high mobility group 20A
hsa-miR-548p	1	0	1	1	1	1	C14orf129	chromosome 14 open reading frame 129
hsa-miR-548p	1	0	1	1	1	1	USP15	ubiquitin specific peptidase 15
hsa-miR-548p	1	0	1	0	0	0	PRPF40A	PRP40 pre-mRNA processing factor 40 homolog A (S. cerevisiae)
hsa-miR-548p	1	0	1	1	1	1	AGPAT3	1-acylglycerol-3-phosphate O-acyltransferase 3
hsa-miR-548p	1	0	1	1	1	1	STXBP6	syntaxin binding protein 6 (amisyn)
hsa-miR-548p	1	0	1	1	1	1	CHFR	checkpoint with forkhead and ring finger domains, E3 ubiquitin protein ligase
hsa-miR-548p	1	0	1	1	1	1	SEPT9	septin 9
hsa-miR-548p	0	0	1	1	1	1	SLC39A8	solute carrier family 39 (zinc transporter), member 8
hsa-miR-548p	0	0	1	0	1	1	SLC38A4	solute carrier family 38, member 4
hsa-miR-548p	1	0	1	1	1	1	SENP7	SUMO1/sentrin specific peptidase 7
hsa-miR-548p	0	0	1	0	0	0	ARL17A	ADP-ribosylation factor-like 17A
hsa-miR-548p	1	0	1	1	1	1	KCNMB2	potassium large conductance calcium-activated channel, subfamily M, beta member 2
hsa-miR-548p	1	0	1	1	1	1	MYLIP	myosin regulatory light chain interacting protein
hsa-miR-548p	1	0	1	1	1	1	NXT2	nuclear transport factor 2-like export factor 2
hsa-miR-548p	0	0	1	1	1	1	SPG21	spastic paraplegia 21 (autosomal recessive, Mast syndrome)
hsa-miR-548p	0	0	1	1	1	1	SLC30A5	solute carrier family 30 (zinc transporter), member 5
hsa-miR-548p	0	0	1	1	1	1	SAMSN1	SAM domain, SH3 domain and nuclear localization signals 1
hsa-miR-548p	0	0	1	1	1	1	MFF	mitochondrial fission factor
hsa-miR-548p	1	0	1	1	0	0	TDRKH	tudor and KH domain containing
hsa-miR-548p	1	0	1	1	1	1	RSF1	remodeling and spacing factor 1
hsa-miR-548p	1	0	1	1	1	1	DESI2	desumoylating isopeptidase 2
hsa-miR-548p	0	0	1	0	0	0	URB1	URB1 ribosome biogenesis 1 homolog (S. cerevisiae)
hsa-miR-548p	1	0	1	1	1	1	C21orf91	chromosome 21 open reading frame 91
hsa-miR-548p	1	0	1	1	1	1	SNTB2	syntrophin, beta 2 (dystrophin-associated protein A1, 59kDa, basic component 2)
hsa-miR-548p	1	0	1	1	1	1	STRN3	striatin, calmodulin binding protein 3
hsa-miR-548p	1	0	1	1	1	1	CALD1	caldesmon 1
hsa-miR-548p	0	0	1	1	1	1	CELF1	CUGBP, Elav-like family member 1
hsa-miR-548p	0	0	1	1	1	1	NKX3-1	NK3 homeobox 1
hsa-miR-548p	0	0	1	1	1	1	DOCK10	dedicator of cytokinesis 10
hsa-miR-548p	1	0	1	1	1	1	ELF2	E74-like factor 2 (ets domain transcription factor)
hsa-miR-548p	1	0	1	1	1	1	RBM47	RNA binding motif protein 47
hsa-miR-548p	1	0	1	0	1	1	PARP11	poly (ADP-ribose) polymerase family, member 11
hsa-miR-548p	1	0	1	0	1	1	TRPS1	trichorhinophalangeal syndrome I
hsa-miR-548p	0	0	1	1	1	1	C21orf7	chromosome 21 open reading frame 7
hsa-miR-548p	1	0	1	1	1	1	PUM2	pumilio homolog 2 (Drosophila)
hsa-miR-548p	0	0	1	0	1	1	PRDM6	PR domain containing 6
hsa-miR-548p	0	0	1	0	1	1	ERBB2IP	erbb2 interacting protein
hsa-miR-548p	1	0	1	1	1	1	NRP1	neuropilin 1
hsa-miR-548p	0	0	1	0	1	1	KANSL3	KAT8 regulatory NSL complex subunit 3
hsa-miR-548p	1	0	1	1	1	1	METTL10	methyltransferase like 10
hsa-miR-548p	1	0	1	1	0	0	RAB34	RAB34, member RAS oncogene family
hsa-miR-548p	1	0	1	1	1	1	LETMD1	LETM1 domain containing 1
hsa-miR-548p	1	0	1	1	1	1	CPEB1	cytoplasmic polyadenylation element binding protein 1
hsa-miR-548p	0	0	1	1	1	1	FCRLA	Fc receptor-like A
hsa-miR-548p	0	0	1	1	1	1	RERG	RAS-like, estrogen-regulated, growth inhibitor
hsa-miR-548p	1	0	1	1	1	1	BIVM	basic, immunoglobulin-like variable motif containing
hsa-miR-548p	0	0	1	1	1	1	FCRL5	Fc receptor-like 5
hsa-miR-548p	0	0	1	1	1	1	SLC6A15	solute carrier family 6 (neutral amino acid transporter), member 15
hsa-miR-548p	1	0	1	1	1	1	PBX3	pre-B-cell leukemia homeobox 3
hsa-miR-548p	1	0	1	1	1	1	ATAD1	ATPase family, AAA domain containing 1
hsa-miR-548p	1	0	1	1	1	1	KCNIP2	Kv channel interacting protein 2
hsa-miR-548p	1	0	1	1	1	1	LARP4	La ribonucleoprotein domain family, member 4
hsa-miR-548p	0	0	1	1	1	1	PLEKHA8	pleckstrin homology domain containing, family A (phosphoinositide binding specific) member 8
hsa-miR-548p	0	0	1	1	1	1	CASP8	caspase 8, apoptosis-related cysteine peptidase
hsa-miR-548p	0	0	1	1	1	1	PARK2	parkinson protein 2, E3 ubiquitin protein ligase (parkin)
hsa-miR-548p	0	0	1	0	0	0	CLRN1-AS1	CLRN1 antisense RNA 1
hsa-miR-548p	0	0	1	1	1	1	RAPGEF6	Rap guanine nucleotide exchange factor (GEF) 6
hsa-miR-548p	0	0	1	1	1	1	OLFM3	olfactomedin 3
hsa-miR-548p	1	0	1	1	1	1	RCAN1	regulator of calcineurin 1
hsa-miR-548p	1	0	1	1	1	1	MAGI1	membrane associated guanylate kinase, WW and PDZ domain containing 1
hsa-miR-548p	0	0	1	1	0	0	ELP2	elongator acetyltransferase complex subunit 2
hsa-miR-548p	0	0	1	0	0	0	MYO15B	myosin XVB pseudogene
hsa-miR-548p	0	0	1	1	0	0	BRE	brain and reproductive organ-expressed (TNFRSF1A modulator)
hsa-miR-548p	0	0	1	0	0	0	RMST	rhabdomyosarcoma 2 associated transcript (non-protein coding)
hsa-miR-548p	1	0	1	1	0	0	SEPT8	septin 8
hsa-miR-548p	1	0	1	1	1	1	RBFOX1	RNA binding protein, fox-1 homolog (C. elegans) 1
hsa-miR-548p	1	0	1	0	1	1	PPP1R12A	protein phosphatase 1, regulatory subunit 12A
hsa-miR-548p	1	0	1	1	1	1	CACNB2	calcium channel, voltage-dependent, beta 2 subunit
hsa-miR-548p	1	0	1	1	1	1	CPNE4	copine IV
hsa-miR-548p	1	0	1	1	1	1	ZC3H14	zinc finger CCCH-type containing 14
hsa-miR-548p	1	0	1	1	1	1	WAPAL	wings apart-like homolog (Drosophila)
hsa-miR-548p	0	0	1	1	0	0	HOPX	HOP homeobox
hsa-miR-548p	0	0	1	1	1	1	AMPH	amphiphysin
hsa-miR-548p	0	0	1	1	1	1	CARD8	caspase recruitment domain family, member 8
hsa-miR-548p	0	0	1	1	1	1	RBM11	RNA binding motif protein 11
hsa-miR-548p	1	0	1	1	1	1	IQCK	IQ motif containing K
hsa-miR-548p	0	0	1	1	1	1	CHODL	chondrolectin
hsa-miR-548p	1	0	1	0	1	1	IL1RAP	interleukin 1 receptor accessory protein
hsa-miR-548p	1	0	1	1	1	1	AFF2	AF4/FMR2 family, member 2
hsa-miR-548p	1	0	1	1	1	1	PLAGL1	pleiomorphic adenoma gene-like 1
hsa-miR-548p	1	0	1	0	1	1	MED14	mediator complex subunit 14
hsa-miR-548p	1	0	1	1	1	1	SH2B3	SH2B adaptor protein 3
hsa-miR-548p	1	0	1	0	1	1	DICER1	dicer 1, ribonuclease type III
hsa-miR-548p	1	0	1	0	1	1	CACNA1C	calcium channel, voltage-dependent, L type, alpha 1C subunit
hsa-miR-548p	1	0	1	1	0	0	NAGK	N-acetylglucosamine kinase
hsa-miR-548p	1	0	1	1	1	1	SUCO	SUN domain containing ossification factor
hsa-miR-548p	1	0	1	1	1	1	ILF3	interleukin enhancer binding factor 3, 90kDa
hsa-miR-548p	1	0	1	1	1	1	VAMP7	vesicle-associated membrane protein 7
hsa-miR-548p	1	0	1	1	1	1	PALM2	paralemmin 2
hsa-miR-548p	1	0	1	1	1	1	RAB3IP	RAB3A interacting protein (rabin3)
hsa-miR-548p	0	0	1	0	1	1	SRPK1	SRSF protein kinase 1
hsa-miR-548p	1	0	1	1	1	1	PPP3CB	protein phosphatase 3, catalytic subunit, beta isozyme
hsa-miR-548p	1	0	1	1	1	1	NRXN3	neurexin 3
hsa-miR-548p	1	0	1	1	1	1	PPP1R9A	protein phosphatase 1, regulatory subunit 9A
hsa-miR-548p	0	0	1	1	0	0	ACSS2	acyl-CoA synthetase short-chain family member 2
hsa-miR-548p	1	0	1	1	0	0	TRPM4	transient receptor potential cation channel, subfamily M, member 4
hsa-miR-548p	1	0	1	1	1	1	AKAP2	A kinase (PRKA) anchor protein 2
hsa-miR-548p	1	0	1	0	1	1	NFAT5	nuclear factor of activated T-cells 5, tonicity-responsive
hsa-miR-548p	0	0	1	1	1	1	UBE2Q2	ubiquitin-conjugating enzyme E2Q family member 2
hsa-miR-548p	0	0	1	0	0	0	TUG1	taurine upregulated 1 (non-protein coding)
hsa-miR-548p	0	0	1	1	1	1	BANK1	B-cell scaffold protein with ankyrin repeats 1
hsa-miR-548p	1	0	1	1	1	1	ZC3H7A	zinc finger CCCH-type containing 7A
hsa-miR-548p	1	0	1	1	1	1	ARGLU1	arginine and glutamate rich 1
hsa-miR-548p	1	0	1	1	1	1	MEIS2	Meis homeobox 2
hsa-miR-548p	1	0	1	1	1	1	HNRNPF	heterogeneous nuclear ribonucleoprotein F
hsa-miR-548p	1	0	1	1	1	1	SCAMP1	secretory carrier membrane protein 1
hsa-miR-548p	1	0	1	1	1	1	EIF2C1	eukaryotic translation initiation factor 2C, 1
hsa-miR-548p	1	0	1	0	1	1	CLIC4	chloride intracellular channel 4
hsa-miR-548p	1	0	1	1	1	1	SLC38A2	solute carrier family 38, member 2
hsa-miR-548p	1	0	1	1	1	1	ARMC8	armadillo repeat containing 8
hsa-miR-548p	0	0	1	1	1	1	CXXC5	CXXC finger protein 5
hsa-miR-548p	0	0	1	1	1	1	MCOLN3	mucolipin 3
hsa-miR-548p	1	0	1	1	1	1	LRRN3	leucine rich repeat neuronal 3
hsa-miR-548p	1	0	1	1	1	1	MYEF2	myelin expression factor 2
hsa-miR-548p	1	0	1	1	1	1	KLHDC8B	kelch domain containing 8B
hsa-miR-548p	0	0	1	1	0	0	MTBP	Mdm2, transformed 3T3 cell double minute 2, p53 binding protein (mouse) binding protein, 104kDa
hsa-miR-548p	1	0	1	1	1	1	PGAP1	post-GPI attachment to proteins 1
hsa-miR-548p	1	0	1	0	1	1	LIN28A	lin-28 homolog A (C. elegans)
hsa-miR-548p	1	0	1	1	1	1	MON2	MON2 homolog (S. cerevisiae)
hsa-miR-548p	1	0	1	0	0	0	ZNRF3	zinc and ring finger 3
hsa-miR-548p	1	0	1	1	0	0	HAUS2	HAUS augmin-like complex, subunit 2
hsa-miR-548p	1	0	1	1	1	1	S100PBP	S100P binding protein
hsa-miR-548p	0	0	1	1	0	0	POLR3E	polymerase (RNA) III (DNA directed) polypeptide E (80kD)
hsa-miR-548p	1	0	1	1	1	1	STARD7	StAR-related lipid transfer (START) domain containing 7
hsa-miR-548p	0	0	1	1	1	1	LRRN1	leucine rich repeat neuronal 1
hsa-miR-548p	1	0	1	0	1	1	UBP1	upstream binding protein 1 (LBP-1a)
hsa-miR-548p	1	0	1	1	1	1	MACF1	microtubule-actin crosslinking factor 1
hsa-miR-548p	0	0	1	0	1	1	ARHGAP42	Rho GTPase activating protein 42
hsa-miR-548p	1	0	1	1	1	1	PHF20L1	PHD finger protein 20-like 1
hsa-miR-548p	1	0	1	1	1	1	BAZ2A	bromodomain adjacent to zinc finger domain, 2A
hsa-miR-548p	1	0	1	1	1	1	DERL1	derlin 1
hsa-miR-548p	0	0	1	1	0	0	OBSL1	obscurin-like 1
hsa-miR-548p	0	0	1	1	1	1	AMFR	autocrine motility factor receptor, E3 ubiquitin protein ligase
hsa-miR-548p	0	0	1	0	1	1	FLJ14186	uncharacterized LOC401149
hsa-miR-548p	0	0	1	1	1	1	CXorf57	chromosome X open reading frame 57
hsa-miR-548p	1	0	1	1	1	1	COPS7B	COP9 constitutive photomorphogenic homolog subunit 7B (Arabidopsis)
hsa-miR-548p	1	0	1	0	0	0	ZDBF2	zinc finger, DBF-type containing 2
hsa-miR-548p	0	0	1	0	0	0	IFFO2	intermediate filament family orphan 2
hsa-miR-548p	1	0	1	1	1	1	CLIP4	CAP-GLY domain containing linker protein family, member 4
hsa-miR-548p	1	0	1	0	1	1	ATP2B1	ATPase, Ca++ transporting, plasma membrane 1
hsa-miR-548p	1	0	1	1	1	1	ABI3BP	ABI family, member 3 (NESH) binding protein
hsa-miR-548p	0	0	1	0	1	1	ATXN1L	ataxin 1-like
hsa-miR-548p	1	0	1	0	1	1	ZCCHC3	zinc finger, CCHC domain containing 3
hsa-miR-548p	0	0	1	1	0	0	STPG1	sperm-tail PG-rich repeat containing 1
hsa-miR-548p	0	0	1	0	1	1	FLJ22763	uncharacterized LOC401081
hsa-miR-548p	1	0	1	1	0	0	UBXN7	UBX domain protein 7
hsa-miR-548p	1	0	1	1	1	1	DCAF8	DDB1 and CUL4 associated factor 8
hsa-miR-548p	0	0	1	0	1	1	ZCCHC8	zinc finger, CCHC domain containing 8
hsa-miR-548p	1	0	1	0	1	1	TOX3	TOX high mobility group box family member 3
hsa-miR-548p	0	0	1	1	1	1	SUV39H2	suppressor of variegation 3-9 homolog 2 (Drosophila)
hsa-miR-548p	1	0	1	1	1	1	GORASP2	golgi reassembly stacking protein 2, 55kDa
hsa-miR-548p	0	0	1	1	1	1	GPBP1L1	GC-rich promoter binding protein 1-like 1
hsa-miR-548p	1	0	1	1	1	1	FOXP1	forkhead box P1
hsa-miR-548p	1	0	1	1	1	1	SEC63	SEC63 homolog (S. cerevisiae)
hsa-miR-548p	1	0	1	1	1	1	FAM53C	family with sequence similarity 53, member C
hsa-miR-548p	0	0	1	1	1	1	KDM2B	lysine (K)-specific demethylase 2B
hsa-miR-548p	1	0	1	1	1	1	MARK1	MAP/microtubule affinity-regulating kinase 1
hsa-miR-548p	0	0	1	1	1	1	CHD1L	chromodomain helicase DNA binding protein 1-like
hsa-miR-548p	1	0	1	1	1	1	SLC38A1	solute carrier family 38, member 1
hsa-miR-548p	1	0	1	1	1	1	GPD2	glycerol-3-phosphate dehydrogenase 2 (mitochondrial)
hsa-miR-548p	1	0	1	1	1	1	SLAIN1	SLAIN motif family, member 1
hsa-miR-548p	1	0	1	1	1	1	ARHGAP36	Rho GTPase activating protein 36
hsa-miR-548p	0	0	1	1	1	1	FAM107A	family with sequence similarity 107, member A
hsa-miR-548p	1	0	1	1	1	1	RAP1GDS1	RAP1, GTP-GDP dissociation stimulator 1
hsa-miR-548p	0	0	1	1	1	1	PRR5L	proline rich 5 like
hsa-miR-548p	0	0	1	1	1	1	C8orf46	chromosome 8 open reading frame 46
hsa-miR-548p	0	0	1	0	0	0	CHST9-AS1	CHST9 antisense RNA 1
hsa-miR-548p	1	0	1	1	1	1	PPM1L	protein phosphatase, Mg2+/Mn2+ dependent, 1L
hsa-miR-548p	1	0	1	1	1	1	TPM1	tropomyosin 1 (alpha)
hsa-miR-548p	0	0	1	1	1	1	GABRP	gamma-aminobutyric acid (GABA) A receptor, pi
hsa-miR-548p	0	0	1	0	0	0	THOC1	THO complex 1
hsa-miR-548p	0	0	1	1	1	1	OPTN	optineurin
hsa-miR-548p	1	0	1	1	1	1	ADPGK	ADP-dependent glucokinase
hsa-miR-548p	1	0	1	1	1	1	FRMD6	FERM domain containing 6
hsa-miR-548p	0	0	1	1	1	1	TTC19	tetratricopeptide repeat domain 19
hsa-miR-548p	0	0	1	1	0	0	LRCH3	leucine-rich repeats and calponin homology (CH) domain containing 3
hsa-miR-548p	0	0	1	0	0	0	LOC157273	uncharacterized LOC157273
hsa-miR-548p	1	0	1	1	1	1	DIXDC1	DIX domain containing 1
hsa-miR-548p	1	0	1	1	1	1	TMTC1	transmembrane and tetratricopeptide repeat containing 1
hsa-miR-548p	0	0	1	1	1	1	SDK1	sidekick cell adhesion molecule 1
hsa-miR-548p	1	0	1	1	0	0	SH2D3C	SH2 domain containing 3C
hsa-miR-548p	1	0	1	1	1	1	FNDC3A	fibronectin type III domain containing 3A
hsa-miR-548p	1	0	1	0	1	1	PTPRE	protein tyrosine phosphatase, receptor type, E
hsa-miR-548p	1	0	1	1	1	1	TMEM25	transmembrane protein 25
hsa-miR-548p	0	0	1	0	1	1	FAM70A	family with sequence similarity 70, member A
hsa-miR-548p	1	0	1	1	1	1	SCAMP5	secretory carrier membrane protein 5
hsa-miR-548p	0	0	1	0	0	0	LOC441204	uncharacterized LOC441204
hsa-miR-548p	0	0	1	1	0	0	DNAH3	dynein, axonemal, heavy chain 3
hsa-miR-548p	1	0	1	1	1	1	CLCN5	chloride channel, voltage-sensitive 5
hsa-miR-548p	1	0	1	1	1	1	SORBS2	sorbin and SH3 domain containing 2
hsa-miR-548p	0	0	1	0	0	0	LOC255187	hCG1980447
hsa-miR-548p	0	0	1	1	1	1	DST	dystonin
hsa-miR-548p	1	0	1	1	1	1	FOPNL	FGFR1OP N-terminal like
hsa-miR-548p	1	0	1	0	1	1	RABGEF1	RAB guanine nucleotide exchange factor (GEF) 1
hsa-miR-548p	0	0	1	0	0	0	MAGI1-IT1	MAGI1 intronic transcript 1 (non-protein coding)
hsa-miR-548p	1	0	1	1	1	1	TPM3	tropomyosin 3
hsa-miR-548p	0	0	1	0	0	0	LOC157381	uncharacterized LOC157381
hsa-miR-548p	0	0	1	1	1	1	XAF1	XIAP associated factor 1
hsa-miR-548p	1	0	1	1	1	1	PCMTD1	protein-L-isoaspartate (D-aspartate) O-methyltransferase domain containing 1
hsa-miR-548p	1	0	1	1	1	1	TBC1D14	TBC1 domain family, member 14
hsa-miR-548p	0	0	1	1	0	0	RELT	RELT tumor necrosis factor receptor
hsa-miR-548p	1	0	1	1	0	0	SLC29A2	solute carrier family 29 (nucleoside transporters), member 2
hsa-miR-548p	1	0	1	1	1	1	HMGB1	high mobility group box 1
hsa-miR-548p	1	0	1	1	1	1	TLE4	transducin-like enhancer of split 4 (E(sp1) homolog, Drosophila)
hsa-miR-548p	0	0	1	0	0	0	LOC100125918	uncharacterized LOC100125918
hsa-miR-548p	1	0	1	1	1	1	C20orf26	chromosome 20 open reading frame 26
hsa-miR-548p	0	0	1	1	1	1	ZBTB26	zinc finger and BTB domain containing 26
hsa-miR-548p	1	0	1	0	1	1	NCAM1	neural cell adhesion molecule 1
hsa-miR-548p	1	0	1	1	0	0	TCF7	transcription factor 7 (T-cell specific, HMG-box)
hsa-miR-548p	1	0	1	1	1	1	SEC22A	SEC22 vesicle trafficking protein homolog A (S. cerevisiae)
hsa-miR-548p	0	0	1	0	1	1	CHURC1	churchill domain containing 1
hsa-miR-548p	0	0	1	0	0	0	LOC285074	anaphase promoting complex subunit 1 pseudogene
hsa-miR-548p	1	0	1	1	1	1	ANKRD29	ankyrin repeat domain 29
hsa-miR-548p	1	0	1	1	1	1	IST1	increased sodium tolerance 1 homolog (yeast)
hsa-miR-548p	0	0	1	1	1	1	ZNF385B	zinc finger protein 385B
hsa-miR-548p	0	0	1	1	0	0	TRIM41	tripartite motif containing 41
hsa-miR-548p	1	0	1	1	1	1	GANC	glucosidase, alpha; neutral C
hsa-miR-548p	0	0	1	1	1	1	PKIB	protein kinase (cAMP-dependent, catalytic) inhibitor beta
hsa-miR-548p	0	0	1	1	1	1	LRRC42	leucine rich repeat containing 42
hsa-miR-548p	0	0	1	1	1	1	PDZRN3	PDZ domain containing ring finger 3
hsa-miR-548p	1	0	1	1	1	1	CNOT4	CCR4-NOT transcription complex, subunit 4
hsa-miR-548p	1	0	1	1	1	1	SEC61A1	Sec61 alpha 1 subunit (S. cerevisiae)
hsa-miR-548p	0	0	1	1	0	0	NISCH	nischarin
hsa-miR-548p	1	0	1	1	1	1	UXS1	UDP-glucuronate decarboxylase 1
hsa-miR-548p	0	0	1	1	1	1	KDELR1	KDEL (Lys-Asp-Glu-Leu) endoplasmic reticulum protein retention receptor 1
hsa-miR-548p	0	0	1	1	1	1	CAMKV	CaM kinase-like vesicle-associated
hsa-miR-548p	0	0	1	0	1	1	CADM1	cell adhesion molecule 1
hsa-miR-548p	1	0	1	1	1	1	PIP4K2C	phosphatidylinositol-5-phosphate 4-kinase, type II, gamma
hsa-miR-548p	1	0	1	1	1	1	STXBP5	syntaxin binding protein 5 (tomosyn)
hsa-miR-548p	1	0	1	1	1	1	WDR20	WD repeat domain 20
hsa-miR-548p	0	0	1	1	1	1	STBD1	starch binding domain 1
hsa-miR-548p	1	0	1	1	1	1	ARIH2	ariadne homolog 2 (Drosophila)
hsa-miR-548p	0	0	1	1	1	1	BBS9	Bardet-Biedl syndrome 9
hsa-miR-548p	1	0	1	1	1	1	EGR2	early growth response 2
hsa-miR-548p	1	0	1	1	1	1	AMMECR1	Alport syndrome, mental retardation, midface hypoplasia and elliptocytosis chromosomal region gene 1
hsa-miR-548p	0	0	1	0	1	1	PIANP	PILR alpha associated neural protein
hsa-miR-548p	1	0	1	1	1	1	SUPT16H	suppressor of Ty 16 homolog (S. cerevisiae)
hsa-miR-548p	1	0	1	1	1	1	CTTN	cortactin
hsa-miR-548p	1	0	1	1	1	1	FBXW2	F-box and WD repeat domain containing 2
hsa-miR-548p	0	0	1	1	1	1	SP100	SP100 nuclear antigen
hsa-miR-548p	1	0	1	1	1	1	TSN	translin
hsa-miR-548p	1	0	1	1	1	1	LUC7L2	LUC7-like 2 (S. cerevisiae)
hsa-miR-548p	1	0	1	1	1	1	GNG2	guanine nucleotide binding protein (G protein), gamma 2
hsa-miR-548p	0	0	1	1	1	1	NRBP1	nuclear receptor binding protein 1
hsa-miR-548p	1	0	1	1	1	1	ST7	suppression of tumorigenicity 7
hsa-miR-548p	1	0	1	1	1	1	TIAM1	T-cell lymphoma invasion and metastasis 1
hsa-miR-548p	0	0	1	0	0	0	LOC550112	uncharacterized LOC550112
hsa-miR-548p	1	0	1	1	1	1	SPTBN1	spectrin, beta, non-erythrocytic 1
hsa-miR-548p	0	0	1	1	1	1	SLC16A1	solute carrier family 16, member 1 (monocarboxylic acid transporter 1)
hsa-miR-548p	0	0	1	0	0	0	CXXC1P1	CXXC finger protein 1 pseudogene 1
hsa-miR-548p	1	0	1	1	1	1	LRRC57	leucine rich repeat containing 57
hsa-miR-548p	0	0	1	1	1	1	SPOCK1	sparc/osteonectin, cwcv and kazal-like domains proteoglycan (testican) 1
hsa-miR-548p	1	0	1	0	1	1	GATAD2B	GATA zinc finger domain containing 2B
hsa-miR-548p	1	0	1	0	1	1	ARL6IP6	ADP-ribosylation-like factor 6 interacting protein 6
hsa-miR-548p	0	0	1	0	1	1	AGBL4	ATP/GTP binding protein-like 4
hsa-miR-548p	0	0	1	1	1	1	C9orf47	chromosome 9 open reading frame 47
hsa-miR-548p	0	0	1	1	0	0	PPOX	protoporphyrinogen oxidase
hsa-miR-548p	1	0	1	1	1	1	GCLC	glutamate-cysteine ligase, catalytic subunit
hsa-miR-548p	0	0	1	0	0	0	LOC285500	uncharacterized LOC285500
hsa-miR-548p	1	0	1	1	1	1	CPNE8	copine VIII
hsa-miR-548p	1	0	1	1	1	1	GLT25D2	glycosyltransferase 25 domain containing 2
hsa-miR-548p	0	0	1	1	1	1	LRRC34	leucine rich repeat containing 34
hsa-miR-548p	0	0	1	1	1	1	RBM4B	RNA binding motif protein 4B
hsa-miR-548p	1	0	1	1	1	1	ANKRD46	ankyrin repeat domain 46
hsa-miR-548p	1	0	1	1	1	1	CTNNB1	catenin (cadherin-associated protein), beta 1, 88kDa
hsa-miR-548p	0	0	1	1	0	0	ZNF185	zinc finger protein 185 (LIM domain)
hsa-miR-548p	1	0	1	0	1	1	UVRAG	UV radiation resistance associated gene
hsa-miR-548p	1	0	1	0	1	1	UBXN4	UBX domain protein 4
hsa-miR-548p	0	0	1	1	1	1	SETD2	SET domain containing 2
hsa-miR-548p	1	0	1	1	1	1	SPATS2	spermatogenesis associated, serine-rich 2
hsa-miR-548p	0	0	1	0	1	1	NBPF3	neuroblastoma breakpoint family, member 3
hsa-miR-548p	1	0	1	1	1	1	ZC3H11A	zinc finger CCCH-type containing 11A
hsa-miR-548p	1	0	1	1	1	1	PEA15	phosphoprotein enriched in astrocytes 15
hsa-miR-548p	0	0	1	1	0	0	KDM5D	lysine (K)-specific demethylase 5D
hsa-miR-548p	1	0	1	1	1	1	GREM1	gremlin 1
hsa-miR-548p	1	0	1	1	1	1	EPB41L4A	erythrocyte membrane protein band 4.1 like 4A
hsa-miR-548p	1	0	1	1	1	1	FAM98A	family with sequence similarity 98, member A
hsa-miR-548p	0	0	1	1	0	0	RPN2	ribophorin II
hsa-miR-548p	1	0	1	1	1	1	SLITRK2	SLIT and NTRK-like family, member 2
hsa-miR-548p	0	0	1	0	0	0	FAM66C	family with sequence similarity 66, member C
hsa-miR-548p	1	0	1	0	1	1	KIAA1737	KIAA1737
hsa-miR-548p	1	0	1	0	1	1	THRB	thyroid hormone receptor, beta
hsa-miR-548p	1	0	1	0	1	1	KBTBD8	kelch repeat and BTB (POZ) domain containing 8
hsa-miR-548p	1	0	1	1	1	1	CCDC141	coiled-coil domain containing 141
hsa-miR-548p	1	0	1	1	1	1	STIM2	stromal interaction molecule 2
hsa-miR-548p	0	0	1	0	1	1	SWAP70	SWAP switching B-cell complex 70kDa subunit
hsa-miR-548p	1	0	1	1	1	1	CDV3	CDV3 homolog (mouse)
hsa-miR-548p	1	0	1	1	1	1	LCP1	lymphocyte cytosolic protein 1 (L-plastin)
hsa-miR-548p	0	0	1	0	1	1	TNFAIP8	tumor necrosis factor, alpha-induced protein 8
hsa-miR-548p	0	0	1	0	0	0	LOC400680	uncharacterized LOC400680
hsa-miR-548p	0	0	1	1	0	0	LAS1L	LAS1-like (S. cerevisiae)
hsa-miR-548p	1	0	1	1	1	1	TMEM185A	transmembrane protein 185A
hsa-miR-548p	1	0	1	0	1	1	AGFG1	ArfGAP with FG repeats 1
hsa-miR-548p	1	0	1	1	1	1	GOLGA8B	golgin A8 family, member B
hsa-miR-548p	1	0	1	1	1	1	IGSF11	immunoglobulin superfamily, member 11
hsa-miR-548p	0	0	1	1	1	1	ATP9B	ATPase, class II, type 9B
hsa-miR-548p	1	0	1	1	1	1	ST7L	suppression of tumorigenicity 7 like
hsa-miR-548p	1	0	1	1	1	1	LZTS2	leucine zipper, putative tumor suppressor 2
hsa-miR-548p	0	0	1	0	0	0	CECR7	cat eye syndrome chromosome region, candidate 7 (non-protein coding)
hsa-miR-548p	1	0	1	1	1	1	PIGA	phosphatidylinositol glycan anchor biosynthesis, class A
hsa-miR-548p	1	0	1	1	1	1	GATM	glycine amidinotransferase (L-arginine:glycine amidinotransferase)
hsa-miR-548p	0	0	1	1	1	1	C10orf32	chromosome 10 open reading frame 32
hsa-miR-548p	1	0	1	1	1	1	ZCCHC2	zinc finger, CCHC domain containing 2
hsa-miR-548p	1	0	1	1	1	1	CHD6	chromodomain helicase DNA binding protein 6
hsa-miR-548p	0	0	1	1	1	1	RGS14	regulator of G-protein signaling 14
hsa-miR-548p	0	0	1	1	1	1	FAM76A	family with sequence similarity 76, member A
hsa-miR-548p	0	0	1	1	1	1	ARFGAP2	ADP-ribosylation factor GTPase activating protein 2
hsa-miR-548p	1	0	1	1	1	1	LARP1B	La ribonucleoprotein domain family, member 1B
hsa-miR-548p	0	0	1	1	1	1	ASB5	ankyrin repeat and SOCS box containing 5
hsa-miR-548p	1	0	1	1	1	1	NDFIP2	Nedd4 family interacting protein 2
hsa-miR-548p	1	0	1	0	1	1	UNC5D	unc-5 homolog D (C. elegans)
hsa-miR-548p	0	0	1	1	1	1	ABCC12	ATP-binding cassette, sub-family C (CFTR/MRP), member 12
hsa-miR-548p	1	0	1	1	1	1	NAP1L1	nucleosome assembly protein 1-like 1
hsa-miR-548p	1	0	1	1	1	1	UHRF2	ubiquitin-like with PHD and ring finger domains 2, E3 ubiquitin protein ligase
hsa-miR-548p	1	0	1	1	1	1	DDX42	DEAD (Asp-Glu-Ala-Asp) box polypeptide 42
hsa-miR-548p	0	0	1	1	1	1	SLFN13	schlafen family member 13
hsa-miR-548p	1	0	1	1	1	1	HBP1	HMG-box transcription factor 1
hsa-miR-548p	0	0	1	1	1	1	GPR128	G protein-coupled receptor 128
hsa-miR-548p	0	0	1	1	1	1	NFKB1	nuclear factor of kappa light polypeptide gene enhancer in B-cells 1
hsa-miR-548p	1	0	1	1	1	1	BCL6B	B-cell CLL/lymphoma 6, member B
hsa-miR-548p	1	0	1	1	1	1	ZNF275	zinc finger protein 275
hsa-miR-548p	0	0	1	1	0	0	SLC26A10	solute carrier family 26, member 10
hsa-miR-548p	0	0	1	1	0	0	DCLK3	doublecortin-like kinase 3
hsa-miR-548p	0	0	1	1	1	1	FRMD5	FERM domain containing 5
hsa-miR-548p	1	0	1	1	1	1	KALRN	kalirin, RhoGEF kinase
hsa-miR-548p	1	0	1	1	1	1	CBLB	Cbl proto-oncogene, E3 ubiquitin protein ligase B
hsa-miR-548p	1	0	1	1	1	1	IKBKAP	inhibitor of kappa light polypeptide gene enhancer in B-cells, kinase complex-associated protein
hsa-miR-548p	1	0	1	1	1	1	MDGA2	MAM domain containing glycosylphosphatidylinositol anchor 2
hsa-miR-548p	1	0	1	1	1	1	EGLN3	egl nine homolog 3 (C. elegans)
hsa-miR-548p	0	0	1	1	1	1	FAM19A2	family with sequence similarity 19 (chemokine (C-C motif)-like), member A2
hsa-miR-548p	0	0	1	0	0	0	LOC650368	asparagine-linked glycosylation 1-like pseudogene
hsa-miR-548p	1	0	1	1	1	1	IPPK	inositol 1,3,4,5,6-pentakisphosphate 2-kinase
hsa-miR-548p	1	0	1	1	0	0	XPO6	exportin 6
hsa-miR-548p	0	0	1	0	0	0	LOC285043	uncharacterized LOC285043
hsa-miR-548p	1	0	1	1	1	1	PRDM2	PR domain containing 2, with ZNF domain
hsa-miR-548p	0	0	1	1	0	0	NMI	N-myc (and STAT) interactor
hsa-miR-548p	1	0	1	1	1	1	GJC1	gap junction protein, gamma 1, 45kDa
hsa-miR-548p	1	0	1	1	1	1	VPS54	vacuolar protein sorting 54 homolog (S. cerevisiae)
hsa-miR-548p	1	0	1	1	1	1	ABR	active BCR-related
hsa-miR-548p	0	0	1	0	0	0	EML6	echinoderm microtubule associated protein like 6
hsa-miR-548p	1	0	1	0	1	1	TTYH3	tweety homolog 3 (Drosophila)
hsa-miR-548p	1	0	1	1	1	1	FAM122B	family with sequence similarity 122B
hsa-miR-548p	0	0	1	1	1	1	IDS	iduronate 2-sulfatase
hsa-miR-548p	1	0	1	1	0	0	BCORL1	BCL6 corepressor-like 1
hsa-miR-548p	1	0	1	1	1	1	UBA2	ubiquitin-like modifier activating enzyme 2
hsa-miR-548p	1	0	1	1	1	1	XPO1	exportin 1 (CRM1 homolog, yeast)
hsa-miR-548p	0	0	1	1	1	1	TPD52L1	tumor protein D52-like 1
hsa-miR-548p	0	0	1	1	0	0	PPP1R18	protein phosphatase 1, regulatory subunit 18
hsa-miR-548p	0	0	1	1	1	1	C3orf67	chromosome 3 open reading frame 67
hsa-miR-548p	0	0	1	1	1	1	KANSL1L	KAT8 regulatory NSL complex subunit 1-like
hsa-miR-548p	1	0	1	1	1	1	SGIP1	SH3-domain GRB2-like (endophilin) interacting protein 1
hsa-miR-548p	1	0	1	1	1	1	SEPHS1	selenophosphate synthetase 1
hsa-miR-548p	1	0	1	1	1	1	C11orf30	chromosome 11 open reading frame 30
hsa-miR-548p	1	0	1	1	1	1	ATXN7	ataxin 7
hsa-miR-548p	0	0	1	1	0	0	GABRA2	gamma-aminobutyric acid (GABA) A receptor, alpha 2
hsa-miR-548p	0	0	1	1	1	1	MKX	mohawk homeobox
hsa-miR-548p	1	0	1	1	1	1	KTN1	kinectin 1 (kinesin receptor)
hsa-miR-548p	0	0	1	0	0	0	LOC613266	uncharacterized LOC613266
hsa-miR-548p	1	0	1	1	1	1	KPNA1	karyopherin alpha 1 (importin alpha 5)
hsa-miR-548p	0	0	1	1	1	1	C11orf45	chromosome 11 open reading frame 45
hsa-miR-548p	1	0	1	0	1	1	KIAA1456	KIAA1456
hsa-miR-548p	0	0	1	1	1	1	FAM54A	family with sequence similarity 54, member A
hsa-miR-548p	1	0	1	0	1	1	HECTD1	HECT domain containing E3 ubiquitin protein ligase 1
hsa-miR-548p	1	0	1	1	1	1	DPY19L3	dpy-19-like 3 (C. elegans)
hsa-miR-548p	0	0	1	0	0	0	FAM95B1	family with sequence similarity 95, member B1
hsa-miR-548p	0	0	1	1	0	0	RPRD2	regulation of nuclear pre-mRNA domain containing 2
hsa-miR-548p	0	0	1	1	1	1	RBM46	RNA binding motif protein 46
hsa-miR-548p	1	0	1	1	1	1	TP53INP1	tumor protein p53 inducible nuclear protein 1
hsa-miR-548p	1	0	1	1	1	1	MACROD2	MACRO domain containing 2
hsa-miR-548p	1	0	1	1	0	0	DYDC1	DPY30 domain containing 1
hsa-miR-548p	1	0	1	1	0	0	UBN2	ubinuclein 2
hsa-miR-548p	0	0	1	1	1	1	EPPIN	epididymal peptidase inhibitor
hsa-miR-548p	0	0	1	1	0	0	FSIP2	fibrous sheath interacting protein 2
hsa-miR-548p	1	0	1	0	1	1	PLXNA1	plexin A1
hsa-miR-548p	1	0	1	1	1	1	CSRNP3	cysteine-serine-rich nuclear protein 3
hsa-miR-548p	1	0	1	1	1	1	PLEKHB2	pleckstrin homology domain containing, family B (evectins) member 2
hsa-miR-548p	1	0	1	1	1	1	PIK3R1	phosphoinositide-3-kinase, regulatory subunit 1 (alpha)
hsa-miR-548p	1	0	1	0	1	1	ANO6	anoctamin 6
hsa-miR-548p	0	0	1	0	1	1	LOC388942	uncharacterized LOC388942
hsa-miR-548p	1	0	1	1	1	1	ATP1A2	ATPase, Na+/K+ transporting, alpha 2 polypeptide
hsa-miR-548p	1	0	1	1	1	1	NCAN	neurocan
hsa-miR-548p	0	0	1	1	1	1	BDH1	3-hydroxybutyrate dehydrogenase, type 1
hsa-miR-548p	1	0	1	1	1	1	DLG2	discs, large homolog 2 (Drosophila)
hsa-miR-548p	1	0	1	0	1	1	GPR180	G protein-coupled receptor 180
hsa-miR-548p	0	0	1	1	1	1	SPICE1	spindle and centriole associated protein 1
hsa-miR-548p	0	0	1	0	0	0	NAPG	N-ethylmaleimide-sensitive factor attachment protein, gamma
hsa-miR-548p	1	0	1	1	1	1	CLIP1	CAP-GLY domain containing linker protein 1
hsa-miR-548p	0	0	1	0	0	0	RPL23AP53	ribosomal protein L23a pseudogene 53
hsa-miR-548p	1	0	1	1	0	0	SNX30	sorting nexin family member 30
hsa-miR-548p	1	0	1	1	1	1	CLTC	clathrin, heavy chain (Hc)
hsa-miR-548p	1	0	1	1	1	1	CTNNA2	catenin (cadherin-associated protein), alpha 2
hsa-miR-548p	1	0	1	1	1	1	PHF17	PHD finger protein 17
hsa-miR-548p	1	0	1	1	1	1	LSM14A	LSM14A, SCD6 homolog A (S. cerevisiae)
hsa-miR-548p	1	0	1	1	1	1	KANK4	KN motif and ankyrin repeat domains 4
hsa-miR-548p	0	0	1	1	1	1	PIN4	protein (peptidylprolyl cis/trans isomerase) NIMA-interacting, 4 (parvulin)
hsa-miR-548p	1	0	1	1	1	1	CXorf23	chromosome X open reading frame 23
hsa-miR-548p	1	0	1	0	1	1	FNDC3B	fibronectin type III domain containing 3B
hsa-miR-548p	0	0	1	1	0	0	AADACL3	arylacetamide deacetylase-like 3
hsa-miR-548p	1	0	1	0	1	1	CAPRIN1	cell cycle associated protein 1
hsa-miR-548p	1	0	1	1	1	1	SLC12A6	solute carrier family 12 (potassium/chloride transporters), member 6
hsa-miR-548p	0	0	1	1	0	0	TRIM46	tripartite motif containing 46
hsa-miR-548p	1	0	1	1	1	1	KCTD12	potassium channel tetramerisation domain containing 12
hsa-miR-548p	0	0	1	1	1	1	CD160	CD160 molecule
hsa-miR-548p	1	0	1	1	1	1	FBXO3	F-box protein 3
hsa-miR-548p	1	0	1	1	0	0	ATP2A1	ATPase, Ca++ transporting, cardiac muscle, fast twitch 1
hsa-miR-548p	1	0	1	1	1	1	BCAT1	branched chain amino-acid transaminase 1, cytosolic
hsa-miR-548p	1	0	1	1	1	1	PUS7	pseudouridylate synthase 7 homolog (S. cerevisiae)
hsa-miR-548p	0	0	1	1	1	1	TPK1	thiamin pyrophosphokinase 1
hsa-miR-548p	0	0	1	0	0	0	EMBP1	embigin pseudogene 1
hsa-miR-548p	1	0	1	1	1	1	CHMP3	charged multivesicular body protein 3
hsa-miR-548p	0	0	1	0	0	0	FLJ26245	uncharacterized LOC400533
hsa-miR-548p	0	0	1	0	0	0	LOC654433	uncharacterized LOC654433
hsa-miR-548p	1	0	1	0	1	1	ESRRG	estrogen-related receptor gamma
hsa-miR-548p	0	0	1	0	1	1	GALNT13	UDP-N-acetyl-alpha-D-galactosamine:polypeptide N-acetylgalactosaminyltransferase 13 (GalNAc-T13)
hsa-miR-548p	1	0	1	1	0	0	FOXP2	forkhead box P2
hsa-miR-548p	1	0	1	1	1	1	RNF111	ring finger protein 111
hsa-miR-548p	1	0	1	0	1	1	FMNL2	formin-like 2
hsa-miR-548p	1	0	1	0	1	1	STK3	serine/threonine kinase 3
hsa-miR-548p	1	0	1	1	1	1	PPP2R5C	protein phosphatase 2, regulatory subunit B', gamma
hsa-miR-548p	1	0	1	1	1	1	WTAP	Wilms tumor 1 associated protein
hsa-miR-548p	0	0	1	1	0	0	MAMSTR	MEF2 activating motif and SAP domain containing transcriptional regulator
hsa-miR-548p	0	0	1	1	0	0	ZNF730	zinc finger protein 730
hsa-miR-548p	0	0	1	1	0	0	DTHD1	death domain containing 1
hsa-miR-548p	1	0	1	1	1	1	MAP2K4	mitogen-activated protein kinase kinase 4
hsa-miR-548p	0	0	1	1	1	1	FANCC	Fanconi anemia, complementation group C
hsa-miR-548p	0	0	1	1	1	1	ARID1A	AT rich interactive domain 1A (SWI-like)
hsa-miR-548p	1	0	1	1	1	1	B3GALNT1	beta-1,3-N-acetylgalactosaminyltransferase 1 (globoside blood group)
hsa-miR-548p	1	0	1	1	1	1	CYYR1	cysteine/tyrosine-rich 1
hsa-miR-548p	1	0	1	0	1	1	CHD7	chromodomain helicase DNA binding protein 7
hsa-miR-548p	0	0	1	0	0	0	RRN3P2	RNA polymerase I transcription factor homolog (S. cerevisiae) pseudogene 2
hsa-miR-548p	1	0	1	1	1	1	CAMK2G	calcium/calmodulin-dependent protein kinase II gamma
hsa-miR-548p	0	0	1	1	1	1	IMMT	inner membrane protein, mitochondrial
hsa-miR-548p	1	0	1	1	1	1	PHTF2	putative homeodomain transcription factor 2
hsa-miR-548p	0	0	1	1	1	1	PUS7L	pseudouridylate synthase 7 homolog (S. cerevisiae)-like
hsa-miR-548p	0	0	1	1	0	0	HSPB11	heat shock protein family B (small), member 11
hsa-miR-548p	1	0	1	1	1	1	LUC7L3	LUC7-like 3 (S. cerevisiae)
hsa-miR-548p	1	0	1	1	1	1	SETX	senataxin
hsa-miR-548p	1	0	1	1	1	1	NCOA1	nuclear receptor coactivator 1
hsa-miR-548p	0	0	1	1	1	1	PRSS16	protease, serine, 16 (thymus)
hsa-miR-548p	0	0	1	1	0	0	MTMR1	myotubularin related protein 1
hsa-miR-548p	1	0	1	1	1	1	APBB2	amyloid beta (A4) precursor protein-binding, family B, member 2
hsa-miR-548p	0	0	1	1	1	1	PTPN20B	protein tyrosine phosphatase, non-receptor type 20B
hsa-miR-548p	0	0	1	1	1	1	PTPN20A	protein tyrosine phosphatase, non-receptor type 20A
hsa-miR-548p	1	0	1	1	0	0	PRRC2B	proline-rich coiled-coil 2B
hsa-miR-548p	0	0	1	1	0	0	NEK7	NIMA (never in mitosis gene a)-related kinase 7
hsa-miR-548p	0	0	1	1	1	1	ARIH1	ariadne homolog, ubiquitin-conjugating enzyme E2 binding protein, 1 (Drosophila)
hsa-miR-548p	0	0	1	1	1	1	GFAP	glial fibrillary acidic protein
hsa-miR-548p	1	0	1	1	1	1	SMAP2	small ArfGAP2
hsa-miR-548p	0	0	1	1	1	1	TTLL5	tubulin tyrosine ligase-like family, member 5
hsa-miR-548p	0	0	1	1	1	1	GMEB2	glucocorticoid modulatory element binding protein 2
hsa-miR-548p	1	0	1	1	1	1	SMC6	structural maintenance of chromosomes 6
hsa-miR-548p	1	0	1	1	1	1	GOLGA8A	golgin A8 family, member A
hsa-miR-548p	0	0	1	1	0	0	WDR11	WD repeat domain 11
hsa-miR-548p	1	0	1	1	1	1	KIAA1033	KIAA1033
hsa-miR-548p	1	0	1	0	1	1	GPR85	G protein-coupled receptor 85
hsa-miR-548p	1	0	1	0	1	1	GRIN3A	glutamate receptor, ionotropic, N-methyl-D-aspartate 3A
hsa-miR-548p	1	0	1	1	0	0	FAM108C1	family with sequence similarity 108, member C1
hsa-miR-548p	1	0	1	1	1	1	MSANTD2	Myb/SANT-like DNA-binding domain containing 2
hsa-miR-548p	1	0	1	0	1	1	FAM19A1	family with sequence similarity 19 (chemokine (C-C motif)-like), member A1
hsa-miR-548p	1	0	1	1	1	1	DENND1B	DENN/MADD domain containing 1B
hsa-miR-548p	1	0	1	1	1	1	TMEFF1	transmembrane protein with EGF-like and two follistatin-like domains 1
hsa-miR-548p	1	0	1	1	1	1	MIER1	mesoderm induction early response 1 homolog (Xenopus laevis)
hsa-miR-548p	1	0	1	1	1	1	KDM6A	lysine (K)-specific demethylase 6A
hsa-miR-548p	0	0	1	1	1	1	FILIP1	filamin A interacting protein 1
hsa-miR-548p	0	0	1	1	1	1	ZCCHC6	zinc finger, CCHC domain containing 6
hsa-miR-548p	0	0	1	1	0	0	RPL9	ribosomal protein L9
hsa-miR-548p	0	0	1	0	1	1	GAB3	GRB2-associated binding protein 3
hsa-miR-548p	0	0	1	0	0	0	SLC25A30	solute carrier family 25, member 30
hsa-miR-548p	0	0	1	1	1	1	SRSF11	serine/arginine-rich splicing factor 11
hsa-miR-548p	1	0	1	1	0	0	USP24	ubiquitin specific peptidase 24
hsa-miR-548p	1	0	1	1	1	1	MLL3	myeloid/lymphoid or mixed-lineage leukemia 3
hsa-miR-548p	1	0	1	0	1	1	STYX	serine/threonine/tyrosine interacting protein
hsa-miR-548p	0	0	1	1	1	1	YAP1	Yes-associated protein 1
hsa-miR-548p	0	0	1	1	1	1	VIT	vitrin
hsa-miR-548p	1	0	1	1	0	0	PTAR1	protein prenyltransferase alpha subunit repeat containing 1
hsa-miR-548p	0	0	1	1	1	1	WHSC1L1	Wolf-Hirschhorn syndrome candidate 1-like 1
hsa-miR-548p	1	0	1	1	1	1	TMEM68	transmembrane protein 68
hsa-miR-548p	0	0	1	1	0	0	TMEM44	transmembrane protein 44
hsa-miR-548p	1	0	1	0	1	1	GPCPD1	glycerophosphocholine phosphodiesterase GDE1 homolog (S. cerevisiae)
hsa-miR-548p	0	0	1	0	1	1	FBXO42	F-box protein 42
hsa-miR-548p	1	0	1	0	1	1	MEF2C	myocyte enhancer factor 2C
hsa-miR-548p	1	0	1	1	1	1	SOX6	SRY (sex determining region Y)-box 6
hsa-miR-548p	1	0	1	1	1	1	CAMK4	calcium/calmodulin-dependent protein kinase IV
hsa-miR-548p	1	0	1	1	1	1	BPTF	bromodomain PHD finger transcription factor
hsa-miR-548p	0	0	1	1	1	1	TAF8	TAF8 RNA polymerase II, TATA box binding protein (TBP)-associated factor, 43kDa
hsa-miR-548p	1	0	1	1	0	0	KIAA1109	KIAA1109
hsa-miR-548p	1	0	1	0	1	1	CLINT1	clathrin interactor 1
hsa-miR-548p	1	0	1	1	1	1	FAM63B	family with sequence similarity 63, member B
hsa-miR-548p	0	0	1	1	1	1	NUSAP1	nucleolar and spindle associated protein 1
hsa-miR-548p	0	0	1	1	1	1	SOAT1	sterol O-acyltransferase 1
hsa-miR-548p	1	0	1	0	1	1	EXOC5	exocyst complex component 5
hsa-miR-548p	1	0	1	1	1	1	IL17RD	interleukin 17 receptor D
hsa-miR-548p	0	0	1	1	1	1	TDRD9	tudor domain containing 9
hsa-miR-548p	1	0	1	0	0	0	XPNPEP3	X-prolyl aminopeptidase (aminopeptidase P) 3, putative
hsa-miR-548p	0	0	1	1	1	1	C8orf34	chromosome 8 open reading frame 34
hsa-miR-548p	1	0	1	1	1	1	RICTOR	RPTOR independent companion of MTOR, complex 2
hsa-miR-548p	1	0	1	0	1	1	KIF21B	kinesin family member 21B
hsa-miR-548p	1	0	1	1	1	1	BOLL	bol, boule-like (Drosophila)
hsa-miR-548p	1	0	1	1	1	1	FAM76B	family with sequence similarity 76, member B
hsa-miR-548p	1	0	1	1	1	1	AP1AR	adaptor-related protein complex 1 associated regulatory protein
hsa-miR-548p	0	0	1	0	1	1	USO1	USO1 vesicle docking protein homolog (yeast)
hsa-miR-548p	1	0	1	1	1	1	PPP3CA	protein phosphatase 3, catalytic subunit, alpha isozyme
hsa-miR-548p	1	0	1	1	1	1	IKZF2	IKAROS family zinc finger 2 (Helios)
hsa-miR-548p	1	0	1	1	1	1	RCAN2	regulator of calcineurin 2
hsa-miR-548p	0	0	1	1	1	1	CD209	CD209 molecule
hsa-miR-548p	1	0	1	1	1	1	TXNRD1	thioredoxin reductase 1
hsa-miR-548p	1	0	1	1	1	1	MIPOL1	mirror-image polydactyly 1
hsa-miR-548p	1	0	1	1	1	1	RFFL	ring finger and FYVE-like domain containing E3 ubiquitin protein ligase
hsa-miR-548p	1	0	1	1	1	1	SORCS1	sortilin-related VPS10 domain containing receptor 1
hsa-miR-548p	1	0	1	1	1	1	KIAA0907	KIAA0907
hsa-miR-548p	1	0	1	1	1	1	ANGPT1	angiopoietin 1
hsa-miR-548p	0	0	1	1	1	1	NFXL1	nuclear transcription factor, X-box binding-like 1
hsa-miR-548p	0	0	1	1	1	1	DNAJB14	DnaJ (Hsp40) homolog, subfamily B, member 14
hsa-miR-548p	1	0	1	1	1	1	RIC8B	resistance to inhibitors of cholinesterase 8 homolog B (C. elegans)
hsa-miR-548p	1	0	1	1	1	1	WDR26	WD repeat domain 26
hsa-miR-548p	1	0	1	1	1	1	TPP1	tripeptidyl peptidase I
hsa-miR-548p	1	0	1	1	1	1	PBRM1	polybromo 1
hsa-miR-548p	1	0	1	1	1	1	PNRC1	proline-rich nuclear receptor coactivator 1
hsa-miR-548p	0	0	1	1	1	1	GCOM1	GRINL1A complex locus 1
hsa-miR-548p	1	0	1	1	1	1	TAB3	TGF-beta activated kinase 1/MAP3K7 binding protein 3
hsa-miR-548p	0	0	1	1	1	1	MFAP5	microfibrillar associated protein 5
hsa-miR-548p	0	0	1	1	0	0	PIGU	phosphatidylinositol glycan anchor biosynthesis, class U
hsa-miR-548p	0	0	1	1	0	0	HTR3E	5-hydroxytryptamine (serotonin) receptor 3E, ionotropic
hsa-miR-548p	1	0	1	1	1	1	CAMTA1	calmodulin binding transcription activator 1
hsa-miR-548p	1	0	1	1	1	1	IQGAP2	IQ motif containing GTPase activating protein 2
hsa-miR-548p	0	0	1	1	0	0	EGFL8	EGF-like-domain, multiple 8
hsa-miR-548p	0	0	1	1	1	1	IL20	interleukin 20
hsa-miR-548p	0	0	1	1	1	1	GPR114	G protein-coupled receptor 114
hsa-miR-548p	0	0	1	0	0	0	RSPRY1	ring finger and SPRY domain containing 1
hsa-miR-548p	1	0	1	1	1	1	NLGN4X	neuroligin 4, X-linked
hsa-miR-548p	0	0	1	1	1	1	KDELC2	KDEL (Lys-Asp-Glu-Leu) containing 2
hsa-miR-548p	1	0	1	1	1	1	FGD4	FYVE, RhoGEF and PH domain containing 4
hsa-miR-548p	1	0	1	0	1	1	ANKRD28	ankyrin repeat domain 28
hsa-miR-548p	1	0	1	1	1	1	SP3	Sp3 transcription factor
hsa-miR-548p	1	0	1	1	1	1	VPS45	vacuolar protein sorting 45 homolog (S. cerevisiae)
hsa-miR-548p	1	0	1	0	1	1	CHRM2	cholinergic receptor, muscarinic 2
hsa-miR-548p	1	0	1	0	1	1	NHS	Nance-Horan syndrome (congenital cataracts and dental anomalies)
hsa-miR-548p	0	0	1	0	1	1	BRWD3	bromodomain and WD repeat domain containing 3
hsa-miR-548p	1	0	1	1	1	1	ANKRD11	ankyrin repeat domain 11
hsa-miR-548p	1	0	1	1	1	1	MECP2	methyl CpG binding protein 2 (Rett syndrome)
hsa-miR-548p	1	0	1	1	1	1	RBM24	RNA binding motif protein 24
hsa-miR-548p	0	0	1	0	1	1	RAB18	RAB18, member RAS oncogene family
hsa-miR-548p	1	0	1	1	1	1	CHRDL1	chordin-like 1
hsa-miR-548p	0	0	1	1	1	1	SMPD1	sphingomyelin phosphodiesterase 1, acid lysosomal
hsa-miR-548p	1	0	1	1	1	1	PLCH1	phospholipase C, eta 1
hsa-miR-548p	1	0	1	1	1	1	MCHR1	melanin-concentrating hormone receptor 1
hsa-miR-548p	1	0	1	1	1	1	PFKFB4	6-phosphofructo-2-kinase/fructose-2,6-biphosphatase 4
hsa-miR-548p	1	0	1	1	0	0	DGAT2	diacylglycerol O-acyltransferase 2
hsa-miR-548p	1	0	1	1	1	1	QKI	QKI, KH domain containing, RNA binding
hsa-miR-548p	1	0	1	1	1	1	MYB	v-myb myeloblastosis viral oncogene homolog (avian)
hsa-miR-548p	1	0	1	1	1	1	CD109	CD109 molecule
hsa-miR-548p	1	0	1	1	1	1	PCDH11X	protocadherin 11 X-linked
hsa-miR-548p	0	0	1	1	1	1	LY86	lymphocyte antigen 86
hsa-miR-548p	1	0	1	1	1	1	AMOT	angiomotin
hsa-miR-548p	0	0	1	1	1	1	CDH6	cadherin 6, type 2, K-cadherin (fetal kidney)
hsa-miR-548p	0	0	1	1	1	1	SLC6A2	solute carrier family 6 (neurotransmitter transporter, noradrenalin), member 2
hsa-miR-548p	1	0	1	0	1	1	FAM46A	family with sequence similarity 46, member A
hsa-miR-548p	0	0	1	1	1	1	SNX11	sorting nexin 11
hsa-miR-548p	1	0	1	1	1	1	PAFAH2	platelet-activating factor acetylhydrolase 2, 40kDa
hsa-miR-548p	0	0	1	1	0	0	AAR2	AAR2 splicing factor homolog (S. cerevisiae)
hsa-miR-548p	0	0	1	1	1	1	PAFAH1B2	platelet-activating factor acetylhydrolase 1b, catalytic subunit 2 (30kDa)
hsa-miR-548p	0	0	1	1	1	1	RLIM	ring finger protein, LIM domain interacting
hsa-miR-548p	0	0	1	1	1	1	EMC4	ER membrane protein complex subunit 4
hsa-miR-548p	0	0	1	1	1	1	MRRF	mitochondrial ribosome recycling factor
hsa-miR-548p	1	0	1	1	1	1	NRGN	neurogranin (protein kinase C substrate, RC3)
hsa-miR-548p	1	0	1	1	1	1	TSPAN14	tetraspanin 14
hsa-miR-548p	0	0	1	1	1	1	TUFT1	tuftelin 1
hsa-miR-548p	1	0	1	0	0	0	VGLL4	vestigial like 4 (Drosophila)
hsa-miR-548p	1	0	1	1	1	1	RIMS3	regulating synaptic membrane exocytosis 3
hsa-miR-548p	1	0	1	0	1	1	DCAF10	DDB1 and CUL4 associated factor 10
hsa-miR-548p	0	0	1	1	1	1	FTO	fat mass and obesity associated
hsa-miR-548p	1	0	1	1	0	0	POLR3D	polymerase (RNA) III (DNA directed) polypeptide D, 44kDa
hsa-miR-548p	1	0	1	0	1	1	CGGBP1	CGG triplet repeat binding protein 1
hsa-miR-548p	1	0	1	1	1	1	MBNL1	muscleblind-like splicing regulator 1
hsa-miR-548p	0	0	1	1	1	1	PRMT5	protein arginine methyltransferase 5
hsa-miR-548p	0	0	1	0	0	0	LOC93622	Morf4 family associated protein 1-like 1 pseudogene
hsa-miR-548p	0	0	1	0	0	0	MGC13053	uncharacterized MGC13053
hsa-miR-548p	1	0	1	1	1	1	KIAA1191	KIAA1191
hsa-miR-548p	1	0	1	1	1	1	U2SURP	U2 snRNP-associated SURP domain containing
hsa-miR-548p	0	0	1	1	1	1	DYDC2	DPY30 domain containing 2
hsa-miR-548p	0	0	1	1	1	1	C1orf94	chromosome 1 open reading frame 94
hsa-miR-548p	1	0	1	1	1	1	TRIM39	tripartite motif containing 39
hsa-miR-548p	1	0	1	1	1	1	RSU1	Ras suppressor protein 1
hsa-miR-548p	1	0	1	1	1	1	SHOX2	short stature homeobox 2
hsa-miR-548p	0	0	1	1	1	1	TMEM30A	transmembrane protein 30A
hsa-miR-548p	0	0	1	1	1	1	MLIP	muscular LMNA-interacting protein
hsa-miR-548p	1	0	1	0	1	1	TMEM39A	transmembrane protein 39A
hsa-miR-548p	0	0	1	1	1	1	GTPBP8	GTP-binding protein 8 (putative)
hsa-miR-548p	0	0	1	1	1	1	RSRC1	arginine/serine-rich coiled-coil 1
hsa-miR-548p	1	0	1	1	1	1	GRIA2	glutamate receptor, ionotropic, AMPA 2
hsa-miR-548p	1	0	1	1	1	1	ZFAND5	zinc finger, AN1-type domain 5
hsa-miR-548p	1	0	1	1	1	1	TRIM2	tripartite motif containing 2
hsa-miR-548p	1	0	1	1	1	1	OTUD5	OTU domain containing 5
hsa-miR-548p	0	0	1	0	0	0	GRAMD1B	GRAM domain containing 1B
hsa-miR-548p	1	0	1	0	1	1	RNF165	ring finger protein 165
hsa-miR-548p	0	0	1	1	1	1	H2AFY	H2A histone family, member Y
hsa-miR-548p	1	0	1	1	1	1	ZNF3	zinc finger protein 3
hsa-miR-548p	1	0	1	1	1	1	CAP1	CAP, adenylate cyclase-associated protein 1 (yeast)
hsa-miR-548p	0	0	1	1	1	1	KLHL29	kelch-like 29 (Drosophila)
hsa-miR-548p	1	0	1	1	1	1	YY1	YY1 transcription factor
hsa-miR-548p	1	0	1	1	1	1	ETF1	eukaryotic translation termination factor 1
hsa-miR-548p	0	0	1	0	0	0	LOC729013	uncharacterized LOC729013
hsa-miR-548p	0	0	1	1	0	0	C8orf44	chromosome 8 open reading frame 44
hsa-miR-548p	0	0	1	0	1	1	AHI1	Abelson helper integration site 1
hsa-miR-548p	0	0	1	1	0	0	ACAD10	acyl-CoA dehydrogenase family, member 10
hsa-miR-548p	1	0	1	1	1	1	PAPOLA	poly(A) polymerase alpha
hsa-miR-548p	0	0	1	0	0	0	KLHL15	kelch-like 15 (Drosophila)
hsa-miR-548p	1	0	1	1	1	1	ZBTB38	zinc finger and BTB domain containing 38
hsa-miR-548p	1	0	1	1	1	1	ZNF512	zinc finger protein 512
hsa-miR-548p	0	0	1	0	1	1	ZNF37A	zinc finger protein 37A
hsa-miR-548p	1	0	1	1	0	0	ARMCX2	armadillo repeat containing, X-linked 2
hsa-miR-548p	1	0	1	0	1	1	NR1D2	nuclear receptor subfamily 1, group D, member 2
hsa-miR-548p	0	0	1	1	1	1	CEP70	centrosomal protein 70kDa
hsa-miR-548p	1	0	1	0	1	1	NECAB1	N-terminal EF-hand calcium binding protein 1
hsa-miR-548p	0	0	1	1	1	1	FAM122C	family with sequence similarity 122C
hsa-miR-548p	1	0	1	1	1	1	NRF1	nuclear respiratory factor 1
hsa-miR-548p	0	0	1	1	0	0	SARNP	SAP domain containing ribonucleoprotein
hsa-miR-548p	1	0	1	1	1	1	DNAJC14	DnaJ (Hsp40) homolog, subfamily C, member 14
hsa-miR-548p	1	0	1	1	1	1	ORMDL3	ORM1-like 3 (S. cerevisiae)
hsa-miR-548p	1	0	1	1	0	0	USP53	ubiquitin specific peptidase 53
hsa-miR-548p	0	0	1	1	0	0	ZDHHC6	zinc finger, DHHC-type containing 6
hsa-miR-548p	0	0	1	1	1	1	CSDE1	cold shock domain containing E1, RNA-binding
hsa-miR-548p	0	0	1	1	1	1	RDH11	retinol dehydrogenase 11 (all-trans/9-cis/11-cis)
hsa-miR-548p	1	0	1	1	0	0	ATP6V0A1	ATPase, H+ transporting, lysosomal V0 subunit a1
hsa-miR-548p	1	0	1	1	1	1	SCAF11	SR-related CTD-associated factor 11
hsa-miR-548p	0	0	1	0	0	0	TCP11L2	t-complex 11 (mouse)-like 2
hsa-miR-548p	0	0	1	1	1	1	PLSCR1	phospholipid scramblase 1
hsa-miR-548p	1	0	1	1	1	1	WWC2	WW and C2 domain containing 2
hsa-miR-548p	1	0	1	1	1	1	ARHGEF9	Cdc42 guanine nucleotide exchange factor (GEF) 9
hsa-miR-548p	0	0	1	0	0	0	ZNF720	zinc finger protein 720
hsa-miR-548p	1	0	1	1	1	1	SUZ12	suppressor of zeste 12 homolog (Drosophila)
hsa-miR-548p	0	0	1	1	1	1	SRP19	signal recognition particle 19kDa
hsa-miR-548p	1	0	1	1	0	0	CSNK1G2	casein kinase 1, gamma 2
hsa-miR-548p	0	0	1	1	1	1	PTCD2	pentatricopeptide repeat domain 2
hsa-miR-548p	0	0	1	1	0	0	ANG	angiogenin, ribonuclease, RNase A family, 5
hsa-miR-548p	1	0	1	0	1	1	BTF3L4	basic transcription factor 3-like 4
hsa-miR-548p	1	0	1	0	1	1	ARHGAP26	Rho GTPase activating protein 26
hsa-miR-548p	1	0	1	1	1	1	TM9SF4	transmembrane 9 superfamily protein member 4
hsa-miR-548p	0	0	1	1	1	1	C10orf88	chromosome 10 open reading frame 88
hsa-miR-548p	0	0	1	0	0	0	LOC284260	uncharacterized LOC284260
hsa-miR-548p	1	0	1	1	0	0	TMEM63B	transmembrane protein 63B
hsa-miR-548p	1	0	1	1	1	1	SPRYD7	SPRY domain containing 7
hsa-miR-548p	1	0	1	0	1	1	CDK19	cyclin-dependent kinase 19
hsa-miR-548p	1	0	1	1	1	1	ASPH	aspartate beta-hydroxylase
hsa-miR-548p	1	0	1	1	1	1	NIPA1	non imprinted in Prader-Willi/Angelman syndrome 1
hsa-miR-548p	1	0	1	1	1	1	RTKN2	rhotekin 2
hsa-miR-548p	0	0	1	0	0	0	LOC494141	mitochondrial carrier triple repeat 1 pseudogene
hsa-miR-548p	1	0	1	1	1	1	CNTN4	contactin 4
hsa-miR-548p	0	0	1	1	1	1	WDR67	WD repeat domain 67
hsa-miR-548p	0	0	1	1	1	1	MAP2	microtubule-associated protein 2
hsa-miR-548p	0	0	1	1	1	1	RHBDD1	rhomboid domain containing 1
hsa-miR-548p	1	0	1	1	1	1	PTPRD	protein tyrosine phosphatase, receptor type, D
hsa-miR-548p	1	0	1	1	1	1	B3GNT5	UDP-GlcNAc:betaGal beta-1,3-N-acetylglucosaminyltransferase 5
hsa-miR-548p	0	0	1	1	1	1	PGPEP1	pyroglutamyl-peptidase I
hsa-miR-548p	0	0	1	1	1	1	CASC1	cancer susceptibility candidate 1
hsa-miR-548p	0	0	1	0	1	1	VEZT	vezatin, adherens junctions transmembrane protein
hsa-miR-548p	0	0	1	0	1	1	KIAA0895	KIAA0895
hsa-miR-548p	1	0	1	1	1	1	HTR2C	5-hydroxytryptamine (serotonin) receptor 2C, G protein-coupled
hsa-miR-548p	0	0	1	1	1	1	PDSS2	prenyl (decaprenyl) diphosphate synthase, subunit 2
hsa-miR-548p	0	0	1	1	1	1	SEMA3D	sema domain, immunoglobulin domain (Ig), short basic domain, secreted, (semaphorin) 3D
hsa-miR-548p	1	0	1	1	1	1	ATRNL1	attractin-like 1
hsa-miR-548p	1	0	1	1	1	1	SYT9	synaptotagmin IX
hsa-miR-548p	1	0	1	1	1	1	TIAL1	TIA1 cytotoxic granule-associated RNA binding protein-like 1
hsa-miR-548p	0	0	1	1	1	1	CCP110	centriolar coiled coil protein 110kDa
hsa-miR-548p	0	0	1	1	1	1	CD48	CD48 molecule
hsa-miR-548p	0	0	1	1	1	1	TMEM117	transmembrane protein 117
hsa-miR-548p	1	0	1	1	1	1	GCFC1	GC-rich sequence DNA-binding factor 1
hsa-miR-548p	0	0	1	1	1	1	RBBP8	retinoblastoma binding protein 8
hsa-miR-548p	0	0	1	1	0	0	AGBL3	ATP/GTP binding protein-like 3
hsa-miR-548p	0	0	1	0	1	1	ERAP1	endoplasmic reticulum aminopeptidase 1
hsa-miR-548p	1	0	1	1	1	1	ZNF518A	zinc finger protein 518A
hsa-miR-548p	0	0	1	1	0	0	C7orf57	chromosome 7 open reading frame 57
hsa-miR-548p	0	0	1	1	1	1	TMEM67	transmembrane protein 67
hsa-miR-548p	1	0	1	1	1	1	ZPLD1	zona pellucida-like domain containing 1
hsa-miR-548p	0	0	1	1	0	0	TRIM69	tripartite motif containing 69
hsa-miR-548p	1	0	1	1	1	1	BZRAP1	benzodiazapine receptor (peripheral) associated protein 1
hsa-miR-548p	0	0	1	0	0	0	CFL1P1	cofilin 1 (non-muscle) pseudogene 1
hsa-miR-548p	1	0	1	1	1	1	ZNF282	zinc finger protein 282
hsa-miR-548p	1	0	1	0	1	1	RNF4	ring finger protein 4
hsa-miR-548p	1	0	1	1	1	1	GLUL	glutamate-ammonia ligase
hsa-miR-548p	1	0	1	1	1	1	TBC1D1	TBC1 (tre-2/USP6, BUB2, cdc16) domain family, member 1
hsa-miR-548p	1	0	1	1	1	1	FGF1	fibroblast growth factor 1 (acidic)
hsa-miR-548p	1	0	1	1	1	1	RAB5B	RAB5B, member RAS oncogene family
hsa-miR-548p	1	0	1	1	1	1	DFFB	DNA fragmentation factor, 40kDa, beta polypeptide (caspase-activated DNase)
hsa-miR-548p	1	0	1	1	1	1	RHOBTB1	Rho-related BTB domain containing 1
hsa-miR-548p	0	0	1	1	0	0	WASIR2	WASH and IL9R antisense RNA 2
hsa-miR-548p	1	0	1	1	1	1	SECISBP2L	SECIS binding protein 2-like
hsa-miR-548p	1	0	1	1	1	1	MAK	male germ cell-associated kinase
hsa-miR-548p	1	0	1	1	1	1	SIRPA	signal-regulatory protein alpha
hsa-miR-548p	1	0	1	1	1	1	CUL1	cullin 1
hsa-miR-548p	1	0	1	1	1	1	LPGAT1	lysophosphatidylglycerol acyltransferase 1
hsa-miR-548p	1	0	1	1	1	1	CLK4	CDC-like kinase 4
hsa-miR-548p	0	0	1	0	1	1	DKFZP434I0714	uncharacterized protein DKFZP434I0714
hsa-miR-548p	0	0	1	1	1	1	EDA2R	ectodysplasin A2 receptor
hsa-miR-548p	1	0	1	0	1	1	DDX3Y	DEAD (Asp-Glu-Ala-Asp) box polypeptide 3, Y-linked
hsa-miR-548p	0	0	1	1	1	1	KIF16B	kinesin family member 16B
hsa-miR-548p	1	0	1	1	1	1	ZZZ3	zinc finger, ZZ-type containing 3
hsa-miR-548p	0	0	1	0	0	0	TMPRSS12	transmembrane (C-terminal) protease, serine 12
hsa-miR-548p	1	0	1	1	1	1	THRA	thyroid hormone receptor, alpha
hsa-miR-548p	0	0	1	1	0	0	SNRPN	small nuclear ribonucleoprotein polypeptide N
hsa-miR-548p	0	0	1	1	1	1	NR1H4	nuclear receptor subfamily 1, group H, member 4
hsa-miR-548p	0	0	1	0	1	1	FAM72A	family with sequence similarity 72, member A
hsa-miR-548p	1	0	1	1	1	1	ZEB2	zinc finger E-box binding homeobox 2
hsa-miR-548p	1	0	1	1	1	1	CTDSPL2	CTD (carboxy-terminal domain, RNA polymerase II, polypeptide A) small phosphatase like 2
hsa-miR-548p	0	0	1	1	1	1	CBLN2	cerebellin 2 precursor
hsa-miR-548p	0	0	1	0	0	0	FLJ10661	family with sequence similarity 86, member A pseudogene
hsa-miR-548p	0	0	1	1	1	1	TMEM144	transmembrane protein 144
hsa-miR-548p	0	0	1	0	0	0	HOXA-AS2	HOXA cluster antisense RNA 2
hsa-miR-548p	0	0	1	1	1	1	SNAPC3	small nuclear RNA activating complex, polypeptide 3, 50kDa
hsa-miR-548p	1	0	1	1	1	1	ZNF618	zinc finger protein 618
hsa-miR-548p	0	0	1	1	1	1	UBE3D	ubiquitin protein ligase E3D
hsa-miR-548p	1	0	1	1	1	1	IMPACT	Impact homolog (mouse)
hsa-miR-548p	1	0	1	1	1	1	PEX5L	peroxisomal biogenesis factor 5-like
hsa-miR-548p	0	0	1	1	1	1	DUSP28	dual specificity phosphatase 28
hsa-miR-548p	0	0	1	0	0	0	FAM201A	family with sequence similarity 201, member A
hsa-miR-548p	1	0	1	1	1	1	SLC38A9	solute carrier family 38, member 9
hsa-miR-548p	1	0	1	1	1	1	LHX8	LIM homeobox 8
hsa-miR-548p	1	0	1	1	1	1	ELMO2	engulfment and cell motility 2
hsa-miR-548p	1	0	1	1	1	1	HECTD2	HECT domain containing E3 ubiquitin protein ligase 2
hsa-miR-548p	1	0	1	0	1	1	CLDN12	claudin 12
hsa-miR-548p	1	0	1	0	1	1	NEGR1	neuronal growth regulator 1
hsa-miR-548p	1	0	1	0	1	1	CPEB4	cytoplasmic polyadenylation element binding protein 4
hsa-miR-548p	1	0	1	1	1	1	BNC2	basonuclin 2
hsa-miR-548p	0	0	1	0	0	0	CYP4F35P	cytochrome P450, family 4, subfamily F, polypeptide 35, pseudogene
hsa-miR-548p	1	0	1	1	1	1	FAM135B	family with sequence similarity 135, member B
hsa-miR-548p	0	0	1	0	1	1	KSR1	kinase suppressor of ras 1
hsa-miR-548p	1	0	1	0	1	1	YAF2	YY1 associated factor 2
hsa-miR-548p	1	0	1	1	1	1	CTBP2	C-terminal binding protein 2
hsa-miR-548p	1	0	1	1	1	1	WSCD2	WSC domain containing 2
hsa-miR-548p	1	0	1	1	1	1	FOXK1	forkhead box K1
hsa-miR-548p	1	0	1	1	1	1	GALNT1	UDP-N-acetyl-alpha-D-galactosamine:polypeptide N-acetylgalactosaminyltransferase 1 (GalNAc-T1)
hsa-miR-548p	1	0	1	1	1	1	DPP10	dipeptidyl-peptidase 10 (non-functional)
hsa-miR-548p	1	0	1	0	1	1	ARID2	AT rich interactive domain 2 (ARID, RFX-like)
hsa-miR-548p	1	0	1	1	1	1	PRR16	proline rich 16
hsa-miR-548p	1	0	1	1	1	1	PLS3	plastin 3
hsa-miR-548p	0	0	1	0	0	0	FLJ36000	uncharacterized FLJ36000
hsa-miR-548p	1	0	1	1	1	1	FGFR2	fibroblast growth factor receptor 2
hsa-miR-548p	1	0	1	1	1	1	PAIP2	poly(A) binding protein interacting protein 2
hsa-miR-548p	0	0	1	0	0	0	LINC00326	long intergenic non-protein coding RNA 326
hsa-miR-548p	0	0	1	0	0	0	LOC401074	uncharacterized LOC401074
hsa-miR-548p	0	0	1	1	1	1	FBXL4	F-box and leucine-rich repeat protein 4
hsa-miR-548p	0	0	1	1	1	1	SLTM	SAFB-like, transcription modulator
hsa-miR-548p	1	0	1	1	0	0	KDM1A	lysine (K)-specific demethylase 1A
hsa-miR-548p	1	0	1	1	1	1	DACH2	dachshund homolog 2 (Drosophila)
hsa-miR-548p	1	0	1	1	1	1	FBXO8	F-box protein 8
hsa-miR-548p	0	0	1	1	1	1	PRRT3	proline-rich transmembrane protein 3
hsa-miR-548p	1	0	1	0	1	1	PCSK2	proprotein convertase subtilisin/kexin type 2
hsa-miR-548p	1	0	1	1	1	1	LEF1	lymphoid enhancer-binding factor 1
hsa-miR-548p	1	0	1	1	1	1	UNC13C	unc-13 homolog C (C. elegans)
hsa-miR-548p	0	0	1	1	1	1	SIAE	sialic acid acetylesterase
hsa-miR-548p	0	0	1	0	1	1	FAM13B	family with sequence similarity 13, member B
hsa-miR-548p	0	0	1	1	0	0	TTLL6	tubulin tyrosine ligase-like family, member 6
hsa-miR-548p	1	0	1	1	1	1	ARPP21	cAMP-regulated phosphoprotein, 21kDa
hsa-miR-548p	1	0	1	1	1	1	FAM123A	family with sequence similarity 123A
hsa-miR-548p	1	0	1	1	1	1	TNFSF4	tumor necrosis factor (ligand) superfamily, member 4
hsa-miR-548p	1	0	1	0	1	1	DCUN1D4	DCN1, defective in cullin neddylation 1, domain containing 4 (S. cerevisiae)
hsa-miR-548p	0	0	1	0	1	1	PDGFC	platelet derived growth factor C
hsa-miR-548p	1	0	1	0	1	1	TNFAIP3	tumor necrosis factor, alpha-induced protein 3
hsa-miR-548p	1	0	1	1	1	1	ARID3B	AT rich interactive domain 3B (BRIGHT-like)
hsa-miR-548p	1	0	1	1	1	1	ROCK1	Rho-associated, coiled-coil containing protein kinase 1
hsa-miR-548p	1	0	1	1	1	1	CLOCK	clock homolog (mouse)
hsa-miR-548p	0	0	1	1	1	1	RABGAP1L	RAB GTPase activating protein 1-like
hsa-miR-548p	0	0	1	1	1	1	C4orf32	chromosome 4 open reading frame 32
hsa-miR-548p	1	0	1	1	1	1	NPL	N-acetylneuraminate pyruvate lyase (dihydrodipicolinate synthase)
hsa-miR-548p	1	0	1	1	1	1	FKBP5	FK506 binding protein 5
hsa-miR-548p	0	0	1	1	1	1	DGKH	diacylglycerol kinase, eta
hsa-miR-548p	1	0	1	0	1	1	PSD3	pleckstrin and Sec7 domain containing 3
hsa-miR-548p	0	0	1	1	1	1	MGC57346	uncharacterized LOC401884
hsa-miR-548p	1	0	1	1	1	1	PCYT1B	phosphate cytidylyltransferase 1, choline, beta
hsa-miR-548p	1	0	1	1	1	1	SENP1	SUMO1/sentrin specific peptidase 1
hsa-miR-548p	1	0	1	1	1	1	SF3B1	splicing factor 3b, subunit 1, 155kDa
hsa-miR-548p	0	0	1	1	0	0	FAM72B	family with sequence similarity 72, member B
hsa-miR-548p	0	0	1	0	1	1	IL33	interleukin 33
hsa-miR-548p	0	0	1	0	0	0	LOC348120	uncharacterized LOC348120
hsa-miR-548p	1	0	1	0	1	1	KDM2A	lysine (K)-specific demethylase 2A
hsa-miR-548p	1	0	1	1	1	1	BRD1	bromodomain containing 1
hsa-miR-548p	0	0	1	1	0	0	FAM170B	family with sequence similarity 170, member B
hsa-miR-548p	1	0	1	0	1	1	ZNF800	zinc finger protein 800
hsa-miR-548p	1	0	1	1	1	1	SMARCE1	SWI/SNF related, matrix associated, actin dependent regulator of chromatin, subfamily e, member 1
hsa-miR-548p	1	0	1	1	1	1	PTPRG	protein tyrosine phosphatase, receptor type, G
hsa-miR-548p	1	0	1	1	1	1	PELI1	pellino E3 ubiquitin protein ligase 1
hsa-miR-548p	1	0	1	0	1	1	RNF182	ring finger protein 182
hsa-miR-548p	1	0	1	0	1	1	ARHGAP5	Rho GTPase activating protein 5
hsa-miR-548p	1	0	1	1	1	1	WASF3	WAS protein family, member 3
hsa-miR-548p	1	0	1	1	1	1	GATA2	GATA binding protein 2
hsa-miR-548p	1	0	1	0	1	1	SMURF2	SMAD specific E3 ubiquitin protein ligase 2
hsa-miR-548p	1	0	1	1	1	1	PTPDC1	protein tyrosine phosphatase domain containing 1
hsa-miR-548p	1	0	1	1	1	1	ZFP91	zinc finger protein 91 homolog (mouse)
hsa-miR-548p	1	0	1	1	1	1	YWHAZ	tyrosine 3-monooxygenase/tryptophan 5-monooxygenase activation protein, zeta polypeptide
hsa-miR-548p	1	0	1	1	1	1	PCGF5	polycomb group ring finger 5
hsa-miR-548p	1	0	1	0	1	1	C14orf43	chromosome 14 open reading frame 43
hsa-miR-548p	0	0	1	1	1	1	LRRFIP2	leucine rich repeat (in FLII) interacting protein 2
hsa-miR-548p	1	0	1	1	1	1	RCC2	regulator of chromosome condensation 2
hsa-miR-548p	0	0	1	1	1	1	PEX14	peroxisomal biogenesis factor 14
hsa-miR-548p	0	0	1	1	1	1	RPAP3	RNA polymerase II associated protein 3
hsa-miR-548p	1	0	1	1	1	1	ZFP161	zinc finger protein 161 homolog (mouse)
hsa-miR-548p	1	0	1	1	1	1	SOX5	SRY (sex determining region Y)-box 5
hsa-miR-548p	1	0	1	1	1	1	PRRG1	proline rich Gla (G-carboxyglutamic acid) 1
hsa-miR-548p	1	0	1	1	1	1	PTCHD1	patched domain containing 1
hsa-miR-548p	1	0	1	0	1	1	C7orf41	chromosome 7 open reading frame 41
hsa-miR-548p	0	0	1	0	0	0	FRG1B	FSHD region gene 1 family, member B
hsa-miR-548p	0	0	1	1	1	1	GPATCH2	G patch domain containing 2
hsa-miR-548p	1	0	1	1	0	0	MANEAL	mannosidase, endo-alpha-like
hsa-miR-548p	1	0	1	1	1	1	RANBP9	RAN binding protein 9
hsa-miR-548p	1	0	1	1	1	1	NIPBL	Nipped-B homolog (Drosophila)
hsa-miR-548p	1	0	1	1	0	0	ANKIB1	ankyrin repeat and IBR domain containing 1
hsa-miR-548p	1	0	1	1	1	1	MYLK	myosin light chain kinase
hsa-miR-548p	1	0	1	1	1	1	ADCY6	adenylate cyclase 6
hsa-miR-548p	0	0	1	1	1	1	ZNF33B	zinc finger protein 33B
hsa-miR-548p	0	0	1	1	1	1	RWDD3	RWD domain containing 3
hsa-miR-548p	1	0	1	1	1	1	ZNF449	zinc finger protein 449
hsa-miR-548p	0	0	1	0	0	0	LINC00052	long intergenic non-protein coding RNA 52
hsa-miR-548p	0	0	1	1	1	1	METTL15	methyltransferase like 15
hsa-miR-548p	1	0	1	0	1	1	MAGIX	MAGI family member, X-linked
hsa-miR-548p	0	0	1	0	0	0	ZNF66P	zinc finger protein 66, pseudogene
hsa-miR-548p	0	0	1	0	0	0	LINC00442	long intergenic non-protein coding RNA 442
hsa-miR-548p	1	0	1	1	1	1	SLC26A7	solute carrier family 26, member 7
hsa-miR-548p	1	0	1	1	1	1	SRPK2	SRSF protein kinase 2
hsa-miR-548p	0	0	1	0	0	0	PTGER4P2	prostaglandin E receptor 4 (subtype EP4) pseudogene 2
hsa-miR-548p	0	0	1	1	0	0	CYP4F30P	cytochrome P450, family 4, subfamily F, polypeptide 30, pseudogene
hsa-miR-548p	1	0	1	1	1	1	ANLN	anillin, actin binding protein
hsa-miR-548p	0	0	1	1	0	0	CSF2RB	colony stimulating factor 2 receptor, beta, low-affinity (granulocyte-macrophage)
hsa-miR-548p	1	0	1	0	1	1	TGFBR1	transforming growth factor, beta receptor 1
hsa-miR-548p	1	0	1	1	1	1	USP47	ubiquitin specific peptidase 47
hsa-miR-548p	0	0	1	1	1	1	PCDH18	protocadherin 18
hsa-miR-548p	1	0	1	1	1	1	FARP1	FERM, RhoGEF (ARHGEF) and pleckstrin domain protein 1 (chondrocyte-derived)
hsa-miR-548p	1	0	1	0	1	1	TMEM194A	transmembrane protein 194A
hsa-miR-548p	0	0	1	0	0	0	LOC440416	uncharacterized LOC440416
hsa-miR-548p	0	0	1	1	0	0	ASIC4	acid-sensing (proton-gated) ion channel family member 4
hsa-miR-548p	1	0	1	1	1	1	C1orf173	chromosome 1 open reading frame 173
hsa-miR-548p	1	0	1	1	1	1	NTRK2	neurotrophic tyrosine kinase, receptor, type 2
hsa-miR-548p	1	0	1	0	1	1	AMMECR1L	AMME chromosomal region gene 1-like
hsa-miR-548p	0	0	1	0	0	0	LINC00537	long intergenic non-protein coding RNA 537
hsa-miR-548p	0	0	1	0	0	0	TBC1D25	TBC1 domain family, member 25
hsa-miR-548p	0	0	1	0	1	1	LOC389043	uncharacterized LOC389043
hsa-miR-548p	1	0	1	1	1	1	HNRNPC	heterogeneous nuclear ribonucleoprotein C (C1/C2)
hsa-miR-548p	1	0	1	1	0	0	SLC45A4	solute carrier family 45, member 4
hsa-miR-548p	1	0	1	1	1	1	ZMYND11	zinc finger, MYND-type containing 11
hsa-miR-548p	1	0	1	1	1	1	ESRRA	estrogen-related receptor alpha
hsa-miR-548p	0	0	1	1	1	1	SPDYA	speedy homolog A (Xenopus laevis)
hsa-miR-548p	0	0	1	1	1	1	NDUFB5	NADH dehydrogenase (ubiquinone) 1 beta subcomplex, 5, 16kDa
hsa-miR-548p	1	0	1	1	1	1	TRPM3	transient receptor potential cation channel, subfamily M, member 3
hsa-miR-548p	1	0	1	0	1	1	PIK3R3	phosphoinositide-3-kinase, regulatory subunit 3 (gamma)
hsa-miR-548p	1	0	1	1	1	1	ELOVL7	ELOVL fatty acid elongase 7
hsa-miR-548p	1	0	1	1	1	1	PLXNA2	plexin A2
hsa-miR-548p	1	0	1	1	1	1	ACVR2B	activin A receptor, type IIB
hsa-miR-548p	0	0	1	1	1	1	KLRF1	killer cell lectin-like receptor subfamily F, member 1
hsa-miR-548p	1	0	1	0	1	1	LRRTM4	leucine rich repeat transmembrane neuronal 4
hsa-miR-548p	1	0	1	1	1	1	SYNJ1	synaptojanin 1
hsa-miR-548p	1	0	1	0	1	1	ARPP19	cAMP-regulated phosphoprotein, 19kDa
hsa-miR-548p	0	0	1	1	1	1	HMGB2	high mobility group box 2
hsa-miR-548p	0	0	1	1	1	1	C10orf118	chromosome 10 open reading frame 118
hsa-miR-548p	0	0	1	1	1	1	XG	Xg blood group
hsa-miR-548p	1	0	1	0	1	1	MYBL1	v-myb myeloblastosis viral oncogene homolog (avian)-like 1
hsa-miR-548p	1	0	1	1	1	1	ARFIP1	ADP-ribosylation factor interacting protein 1
hsa-miR-548p	0	0	1	1	0	0	PLA2G16	phospholipase A2, group XVI
hsa-miR-548p	1	0	1	0	1	1	VANGL2	vang-like 2 (van gogh, Drosophila)
hsa-miR-548p	1	0	1	0	1	1	CPEB2	cytoplasmic polyadenylation element binding protein 2
hsa-miR-548p	1	0	1	0	1	1	KCNT2	potassium channel, subfamily T, member 2
hsa-miR-548p	0	0	1	1	0	0	TMC1	transmembrane channel-like 1
hsa-miR-548p	1	0	1	1	0	0	KIAA1644	KIAA1644
hsa-miR-548p	0	0	1	0	1	1	FLJ25328	uncharacterized LOC148231
hsa-miR-548p	0	0	1	1	1	1	CCDC126	coiled-coil domain containing 126
hsa-miR-548p	0	0	1	1	0	0	SFTPC	surfactant protein C
hsa-miR-548p	1	0	1	1	1	1	GABRB2	gamma-aminobutyric acid (GABA) A receptor, beta 2
hsa-miR-548p	0	0	1	1	0	0	FMN1	formin 1
hsa-miR-548p	1	0	1	1	1	1	PNISR	PNN-interacting serine/arginine-rich protein
hsa-miR-548p	1	0	1	1	1	1	USP34	ubiquitin specific peptidase 34
hsa-miR-548p	0	0	1	1	0	0	TMEM126B	transmembrane protein 126B
hsa-miR-548p	0	0	1	1	0	0	C9orf153	chromosome 9 open reading frame 153
hsa-miR-548p	0	0	1	1	1	1	TBRG1	transforming growth factor beta regulator 1
hsa-miR-548p	1	0	1	0	1	1	DNAJC6	DnaJ (Hsp40) homolog, subfamily C, member 6
hsa-miR-548p	1	0	1	1	1	1	SP4	Sp4 transcription factor
hsa-miR-548p	0	0	1	1	0	0	TRAF3IP3	TRAF3 interacting protein 3
hsa-miR-548p	1	0	1	0	1	1	KIAA1715	KIAA1715
hsa-miR-548p	1	0	1	1	1	1	HNRNPR	heterogeneous nuclear ribonucleoprotein R
hsa-miR-548p	0	0	1	1	1	1	STAU2	staufen, RNA binding protein, homolog 2 (Drosophila)
hsa-miR-548p	1	0	1	1	1	1	TET2	tet methylcytosine dioxygenase 2
hsa-miR-548p	0	0	1	1	0	0	EPN3	epsin 3
hsa-miR-548p	0	0	1	1	1	1	RASAL2	RAS protein activator like 2
hsa-miR-548p	0	0	1	1	0	0	ASB3	ankyrin repeat and SOCS box containing 3
hsa-miR-548p	1	0	1	1	1	1	SLK	STE20-like kinase
hsa-miR-548p	1	0	1	1	1	1	NR3C2	nuclear receptor subfamily 3, group C, member 2
hsa-miR-548p	1	0	1	0	1	1	ROBO1	roundabout, axon guidance receptor, homolog 1 (Drosophila)
hsa-miR-548p	1	0	1	1	1	1	TMEM64	transmembrane protein 64
hsa-miR-548p	1	0	1	1	1	1	ST18	suppression of tumorigenicity 18 (breast carcinoma) (zinc finger protein)
hsa-miR-548p	1	0	1	0	1	1	PRDM10	PR domain containing 10
hsa-miR-548p	1	0	1	1	1	1	GRIA3	glutamate receptor, ionotropic, AMPA 3
hsa-miR-548p	1	0	1	1	1	1	OTUD4	OTU domain containing 4
hsa-miR-548p	1	0	1	1	1	1	OSBP2	oxysterol binding protein 2
hsa-miR-548p	1	0	1	1	0	0	ITGB4	integrin, beta 4
hsa-miR-548p	0	0	1	1	0	0	RGSL1	regulator of G-protein signaling like 1
hsa-miR-548p	1	0	1	1	1	1	FAM59A	family with sequence similarity 59, member A
hsa-miR-548p	0	0	1	1	1	1	C5orf47	chromosome 5 open reading frame 47
hsa-miR-548p	1	0	1	1	1	1	PIKFYVE	phosphoinositide kinase, FYVE finger containing
hsa-miR-548p	0	0	1	0	1	1	GOLGA8G	golgin A8 family, member G
hsa-miR-548p	1	0	1	1	1	1	ANK2	ankyrin 2, neuronal
hsa-miR-548p	0	0	1	1	1	1	ZNF189	zinc finger protein 189
hsa-miR-548p	1	0	1	1	1	1	JMJD1C	jumonji domain containing 1C
hsa-miR-548p	1	0	1	1	1	1	TRAPPC8	trafficking protein particle complex 8
hsa-miR-548p	1	0	1	1	1	1	CHIC1	cysteine-rich hydrophobic domain 1
hsa-miR-548p	0	0	1	1	1	1	HSF2	heat shock transcription factor 2
hsa-miR-548p	1	0	1	1	1	1	CADPS	Ca++-dependent secretion activator
hsa-miR-548p	0	0	1	1	0	0	TCHH	trichohyalin
hsa-miR-548p	0	0	1	1	0	0	EFCAB11	EF-hand calcium binding domain 11
hsa-miR-548p	0	0	1	1	1	1	CNIH	cornichon homolog (Drosophila)
hsa-miR-548p	1	0	1	1	1	1	ERMAP	erythroblast membrane-associated protein (Scianna blood group)
hsa-miR-548p	0	0	1	1	1	1	RAD17	RAD17 homolog (S. pombe)
hsa-miR-548p	0	0	1	1	1	1	IP6K2	inositol hexakisphosphate kinase 2
hsa-miR-548p	0	0	1	1	1	1	C10orf82	chromosome 10 open reading frame 82
hsa-miR-548p	1	0	1	1	1	1	ATP2B4	ATPase, Ca++ transporting, plasma membrane 4
hsa-miR-548p	1	0	1	1	1	1	JPH1	junctophilin 1
hsa-miR-548p	1	0	1	1	1	1	RBL2	retinoblastoma-like 2 (p130)
hsa-miR-548p	0	0	1	0	1	1	AP1S2	adaptor-related protein complex 1, sigma 2 subunit
hsa-miR-548p	0	0	1	0	1	1	FEZ2	fasciculation and elongation protein zeta 2 (zygin II)
hsa-miR-548p	1	0	1	0	1	1	NFIX	nuclear factor I/X (CCAAT-binding transcription factor)
hsa-miR-548p	1	0	1	1	1	1	MIER3	mesoderm induction early response 1, family member 3
hsa-miR-548p	0	0	1	1	0	0	CCDC171	coiled-coil domain containing 171
hsa-miR-548p	1	0	1	1	1	1	TRIM37	tripartite motif containing 37
hsa-miR-548p	0	0	1	1	1	1	NUP54	nucleoporin 54kDa
hsa-miR-548p	1	0	1	0	1	1	MTX3	metaxin 3
hsa-miR-548p	1	0	1	1	1	1	NIPAL3	NIPA-like domain containing 3
hsa-miR-548p	0	0	1	1	1	1	DSG3	desmoglein 3
hsa-miR-548p	1	0	1	1	1	1	ETS1	v-ets erythroblastosis virus E26 oncogene homolog 1 (avian)
hsa-miR-548p	0	0	1	1	1	1	AIG1	androgen-induced 1
hsa-miR-548p	1	0	1	0	1	1	CLASP2	cytoplasmic linker associated protein 2
hsa-miR-548p	0	0	1	1	1	1	CRB1	crumbs homolog 1 (Drosophila)
hsa-miR-548p	0	0	1	0	1	1	CPPED1	calcineurin-like phosphoesterase domain containing 1
hsa-miR-548p	1	0	1	1	1	1	TJP1	tight junction protein 1
hsa-miR-548p	0	0	1	1	1	1	PSMA2	proteasome (prosome, macropain) subunit, alpha type, 2
hsa-miR-548p	0	0	1	1	1	1	COL6A3	collagen, type VI, alpha 3
hsa-miR-548p	0	0	1	1	1	1	TSGA10	testis specific, 10
hsa-miR-548p	0	0	1	1	1	1	IPCEF1	interaction protein for cytohesin exchange factors 1
hsa-miR-548p	0	0	1	1	1	1	PRR14L	proline rich 14-like
hsa-miR-548p	1	0	1	1	0	0	RBM27	RNA binding motif protein 27
hsa-miR-548p	1	0	1	1	1	1	ABCA13	ATP-binding cassette, sub-family A (ABC1), member 13
hsa-miR-548p	0	0	1	0	1	1	THAP6	THAP domain containing 6
hsa-miR-548p	0	0	1	1	1	1	FAM9C	family with sequence similarity 9, member C
hsa-miR-548p	1	0	1	1	1	1	TLN2	talin 2
hsa-miR-548p	1	0	1	1	1	1	EPS15	epidermal growth factor receptor pathway substrate 15
hsa-miR-548p	1	0	1	1	1	1	STARD13	StAR-related lipid transfer (START) domain containing 13
hsa-miR-548p	1	0	1	1	1	1	VPS26A	vacuolar protein sorting 26 homolog A (S. pombe)
hsa-miR-548p	1	0	1	1	1	1	KLHL2	kelch-like 2, Mayven (Drosophila)
hsa-miR-548p	0	0	1	1	1	1	ARMCX3	armadillo repeat containing, X-linked 3
hsa-miR-548p	1	0	1	1	1	1	TC2N	tandem C2 domains, nuclear
hsa-miR-548p	0	0	1	1	0	0	PPP2R2B	protein phosphatase 2, regulatory subunit B, beta
hsa-miR-548p	0	0	1	0	1	1	B3GALTL	beta 1,3-galactosyltransferase-like
hsa-miR-548p	1	0	1	1	1	1	DCAF5	DDB1 and CUL4 associated factor 5
hsa-miR-548p	1	0	1	1	1	1	NEDD9	neural precursor cell expressed, developmentally down-regulated 9
hsa-miR-548p	1	0	1	1	1	1	PDXDC1	pyridoxal-dependent decarboxylase domain containing 1
hsa-miR-548p	1	0	1	1	1	1	LCA5	Leber congenital amaurosis 5
hsa-miR-548p	0	0	1	1	1	1	CCNT2	cyclin T2
hsa-miR-548p	1	0	1	1	1	1	SEMA4D	sema domain, immunoglobulin domain (Ig), transmembrane domain (TM) and short cytoplasmic domain, (semaphorin) 4D
hsa-miR-548p	1	0	1	1	1	1	PHF3	PHD finger protein 3
hsa-miR-548p	0	0	1	1	1	1	ATP2A2	ATPase, Ca++ transporting, cardiac muscle, slow twitch 2
hsa-miR-548p	1	0	1	1	1	1	CORIN	corin, serine peptidase
hsa-miR-548p	1	0	1	1	1	1	PAQR3	progestin and adipoQ receptor family member III
hsa-miR-548p	1	0	1	0	1	1	PCGF3	polycomb group ring finger 3
hsa-miR-548p	1	0	1	1	1	1	NFIB	nuclear factor I/B
hsa-miR-548p	1	0	1	1	1	1	NAV1	neuron navigator 1
hsa-miR-548p	1	0	1	0	1	1	KLHL24	kelch-like 24 (Drosophila)
hsa-miR-548p	1	0	1	0	1	1	IGF2BP3	insulin-like growth factor 2 mRNA binding protein 3
hsa-miR-548p	1	0	1	1	1	1	RDX	radixin
hsa-miR-548p	1	0	1	1	1	1	PTER	phosphotriesterase related
hsa-miR-548p	1	0	1	1	1	1	TMEM135	transmembrane protein 135
hsa-miR-548p	0	0	1	1	1	1	ABCD3	ATP-binding cassette, sub-family D (ALD), member 3
hsa-miR-548p	1	0	1	1	1	1	FAM179B	family with sequence similarity 179, member B
hsa-miR-548p	1	0	1	1	1	1	HIF1A	hypoxia inducible factor 1, alpha subunit (basic helix-loop-helix transcription factor)
hsa-miR-548p	0	0	1	1	1	1	KIAA1328	KIAA1328
hsa-miR-548p	0	0	1	1	1	1	SSFA2	sperm specific antigen 2
hsa-miR-548p	1	0	1	0	1	1	TBL1XR1	transducin (beta)-like 1 X-linked receptor 1
hsa-miR-548p	1	0	1	1	1	1	SGK3	serum/glucocorticoid regulated kinase family, member 3
hsa-miR-548p	1	0	1	1	1	1	LYST	lysosomal trafficking regulator
hsa-miR-548p	1	0	1	1	1	1	CREB3L2	cAMP responsive element binding protein 3-like 2
hsa-miR-548p	0	0	1	1	1	1	IPO11	importin 11
hsa-miR-548p	0	0	1	0	0	0	LINC00341	long intergenic non-protein coding RNA 341
hsa-miR-548p	0	0	1	1	0	0	EIF3L	eukaryotic translation initiation factor 3, subunit L
hsa-miR-548p	0	0	1	0	1	1	CD59	CD59 molecule, complement regulatory protein
hsa-miR-548p	0	0	1	1	0	0	PPT2	palmitoyl-protein thioesterase 2
hsa-miR-548p	1	0	1	1	1	1	SEL1L3	sel-1 suppressor of lin-12-like 3 (C. elegans)
hsa-miR-548p	1	0	1	1	0	0	SMARCA2	SWI/SNF related, matrix associated, actin dependent regulator of chromatin, subfamily a, member 2
hsa-miR-548p	0	0	1	1	1	1	RIPK2	receptor-interacting serine-threonine kinase 2
hsa-miR-548p	0	0	1	0	0	0	LOC401127	WD repeat domain 5 pseudogene
hsa-miR-548p	1	0	1	1	1	1	ARF1	ADP-ribosylation factor 1
hsa-miR-548p	0	0	1	1	0	0	ABCA6	ATP-binding cassette, sub-family A (ABC1), member 6
hsa-miR-548p	0	0	1	1	1	1	CRISPLD2	cysteine-rich secretory protein LCCL domain containing 2
hsa-miR-548p	0	0	1	1	0	0	ACTB	actin, beta
hsa-miR-548p	0	0	1	1	0	0	TAPBPL	TAP binding protein-like
hsa-miR-548p	1	0	1	0	1	1	OLA1	Obg-like ATPase 1
hsa-miR-548p	1	0	1	0	1	1	SLCO2A1	solute carrier organic anion transporter family, member 2A1
hsa-miR-548p	0	0	1	1	0	0	CYGB	cytoglobin
hsa-miR-548p	0	0	1	1	1	1	BTF3	basic transcription factor 3
hsa-miR-548p	1	0	1	1	1	1	AP3S1	adaptor-related protein complex 3, sigma 1 subunit
hsa-miR-548p	0	0	1	1	1	1	HSPB8	heat shock 22kDa protein 8
hsa-miR-548p	0	0	1	1	1	1	BCL7B	B-cell CLL/lymphoma 7B
hsa-miR-548p	1	0	1	1	1	1	RASL12	RAS-like, family 12
hsa-miR-548p	0	0	1	1	1	1	TASP1	taspase, threonine aspartase, 1
hsa-miR-548p	1	0	1	1	1	1	CD9	CD9 molecule
hsa-miR-548p	1	0	1	1	1	1	CAAP1	caspase activity and apoptosis inhibitor 1
hsa-miR-548p	1	0	1	1	1	1	HSPA9	heat shock 70kDa protein 9 (mortalin)
hsa-miR-548p	1	0	1	1	1	1	SSR1	signal sequence receptor, alpha
hsa-miR-548p	0	0	1	0	0	0	SBDSP1	Shwachman-Bodian-Diamond syndrome pseudogene 1
hsa-miR-548p	0	0	1	1	1	1	PPP1R1C	protein phosphatase 1, regulatory (inhibitor) subunit 1C
hsa-miR-548p	1	0	1	1	1	1	CHTF8	CTF8, chromosome transmission fidelity factor 8 homolog (S. cerevisiae)
hsa-miR-548p	0	0	1	1	1	1	MTCP1	mature T-cell proliferation 1
hsa-miR-548p	0	0	1	0	1	1	CD99P1	CD99 molecule pseudogene 1
hsa-miR-548p	1	0	1	1	1	1	COPS2	COP9 constitutive photomorphogenic homolog subunit 2 (Arabidopsis)
hsa-miR-548p	0	0	1	1	1	1	TDP2	tyrosyl-DNA phosphodiesterase 2
hsa-miR-548p	0	0	1	0	0	0	TRIQK	triple QxxK/R motif containing
hsa-miR-548p	0	0	1	1	1	1	IFNGR2	interferon gamma receptor 2 (interferon gamma transducer 1)
hsa-miR-548p	0	0	1	1	1	1	GGPS1	geranylgeranyl diphosphate synthase 1
hsa-miR-548p	0	0	1	1	0	0	CCDC112	coiled-coil domain containing 112
hsa-miR-548p	0	0	1	1	0	0	TRMT44	tRNA methyltransferase 44 homolog (S. cerevisiae)
hsa-miR-548p	0	0	1	0	0	0	LOC643072	uncharacterized LOC643072
hsa-miR-548p	0	0	1	1	0	0	RPS18	ribosomal protein S18
hsa-miR-548p	1	0	1	1	1	1	CCDC25	coiled-coil domain containing 25
hsa-miR-548p	1	0	1	1	1	1	STK38L	serine/threonine kinase 38 like
hsa-miR-548p	1	0	1	1	1	1	MTCH2	mitochondrial carrier 2
hsa-miR-548p	1	0	1	1	1	1	TMEM245	transmembrane protein 245
hsa-miR-548p	0	0	1	1	0	0	CDK2AP2	cyclin-dependent kinase 2 associated protein 2
hsa-miR-548p	1	0	1	1	1	1	WIPF1	WAS/WASL interacting protein family, member 1
hsa-miR-548p	0	0	1	1	1	1	ATG4A	autophagy related 4A, cysteine peptidase
hsa-miR-548p	1	0	1	1	1	1	TMEM66	transmembrane protein 66
hsa-miR-548p	0	0	1	1	1	1	BMPR1A	bone morphogenetic protein receptor, type IA
hsa-miR-548p	0	0	1	1	1	1	CAPZB	capping protein (actin filament) muscle Z-line, beta
hsa-miR-548p	1	0	1	1	1	1	BTBD10	BTB (POZ) domain containing 10
hsa-miR-548p	0	0	1	0	0	0	LOC677759	uncharacterized LOC677759
hsa-miR-548p	1	0	1	1	1	1	KCNIP4	Kv channel interacting protein 4
hsa-miR-548p	0	0	1	1	0	0	NOX5	NADPH oxidase, EF-hand calcium binding domain 5
hsa-miR-548p	1	0	1	1	1	1	ARNTL	aryl hydrocarbon receptor nuclear translocator-like
hsa-miR-548p	0	0	1	1	1	1	SMNDC1	survival motor neuron domain containing 1
hsa-miR-548p	0	0	1	0	0	0	EPB41L4A-AS1	EPB41L4A antisense RNA 1
hsa-miR-548p	1	0	1	1	1	1	MEIS1	Meis homeobox 1
hsa-miR-548p	0	0	1	1	1	1	ODC1	ornithine decarboxylase 1
hsa-miR-548p	0	0	1	1	1	1	DUT	deoxyuridine triphosphatase
hsa-miR-548p	1	0	1	1	1	1	FUBP3	far upstream element (FUSE) binding protein 3
hsa-miR-548p	0	0	1	0	1	1	SUMO2	SMT3 suppressor of mif two 3 homolog 2 (S. cerevisiae)
hsa-miR-548p	1	0	1	1	1	1	ARL4A	ADP-ribosylation factor-like 4A
hsa-miR-548p	0	0	1	1	0	0	TAMM41	TAM41, mitochondrial translocator assembly and maintenance protein, homolog (S. cerevisiae)
hsa-miR-548p	1	0	1	1	1	1	PFN2	profilin 2
hsa-miR-548p	0	0	1	1	1	1	RCN2	reticulocalbin 2, EF-hand calcium binding domain
hsa-miR-548p	0	0	1	1	1	1	NGLY1	N-glycanase 1
hsa-miR-548p	1	0	1	1	1	1	SNX1	sorting nexin 1
hsa-miR-548p	0	0	1	1	1	1	DNAJC25	DnaJ (Hsp40) homolog, subfamily C , member 25
hsa-miR-548p	0	0	1	1	1	1	TMEM14C	transmembrane protein 14C
hsa-miR-548p	0	0	1	1	1	1	STRAP	serine/threonine kinase receptor associated protein
hsa-miR-548p	1	0	1	1	0	0	LMAN2	lectin, mannose-binding 2
hsa-miR-548p	0	0	1	1	1	1	FAM18B1	family with sequence similarity 18, member B1
hsa-miR-548p	1	0	1	1	1	1	RNF2	ring finger protein 2
hsa-miR-548p	0	0	1	1	0	0	NUF2	NUF2, NDC80 kinetochore complex component, homolog (S. cerevisiae)
hsa-miR-548p	1	0	1	0	1	1	MAP1B	microtubule-associated protein 1B
hsa-miR-548p	1	0	1	1	1	1	HMGN2	high mobility group nucleosomal binding domain 2
hsa-miR-548p	0	0	1	1	1	1	HUS1	HUS1 checkpoint homolog (S. pombe)
hsa-miR-548p	0	0	1	1	1	1	TSEN15	tRNA splicing endonuclease 15 homolog (S. cerevisiae)
hsa-miR-548p	1	0	1	1	1	1	RBPJ	recombination signal binding protein for immunoglobulin kappa J region
hsa-miR-548p	1	0	1	1	1	1	SRSF2	serine/arginine-rich splicing factor 2
hsa-miR-548p	1	0	1	1	1	1	ACTN4	actinin, alpha 4
hsa-miR-548p	1	0	1	1	1	1	UBE2K	ubiquitin-conjugating enzyme E2K
hsa-miR-548p	0	0	1	1	1	1	LGI1	leucine-rich, glioma inactivated 1
hsa-miR-548p	1	0	1	0	1	1	CD47	CD47 molecule
hsa-miR-548p	1	0	1	1	1	1	YWHAE	tyrosine 3-monooxygenase/tryptophan 5-monooxygenase activation protein, epsilon polypeptide
hsa-miR-548p	0	0	1	1	1	1	INPP5K	inositol polyphosphate-5-phosphatase K
hsa-miR-548p	0	0	1	1	1	1	CDKAL1	CDK5 regulatory subunit associated protein 1-like 1
hsa-miR-548p	1	0	1	1	1	1	WIPI2	WD repeat domain, phosphoinositide interacting 2
hsa-miR-548p	0	0	1	1	1	1	SPECC1	sperm antigen with calponin homology and coiled-coil domains 1
hsa-miR-548p	0	0	1	0	1	1	SEPT7	septin 7
hsa-miR-548p	0	0	1	1	1	1	PTMA	prothymosin, alpha
hsa-miR-548p	1	0	1	1	1	1	TIPRL	TIP41, TOR signaling pathway regulator-like (S. cerevisiae)
hsa-miR-548p	0	0	1	1	0	0	POLB	polymerase (DNA directed), beta
hsa-miR-548p	0	0	1	1	1	1	ARHGEF25	Rho guanine nucleotide exchange factor (GEF) 25
hsa-miR-548p	1	0	1	1	1	1	MYT1	myelin transcription factor 1
hsa-miR-548p	1	0	1	1	1	1	MAN1C1	mannosidase, alpha, class 1C, member 1
hsa-miR-548p	1	0	1	1	1	1	LGALSL	lectin, galactoside-binding-like
hsa-miR-548p	0	0	1	1	0	0	C18orf8	chromosome 18 open reading frame 8
hsa-miR-548p	0	0	1	1	1	1	NUB1	negative regulator of ubiquitin-like proteins 1
hsa-miR-548p	0	0	1	1	0	0	CD38	CD38 molecule
hsa-miR-548p	1	0	1	1	1	1	DENND4C	DENN/MADD domain containing 4C
hsa-miR-548p	1	0	1	0	1	1	KIAA0240	KIAA0240
hsa-miR-548p	0	0	1	0	0	0	FAM92A1	family with sequence similarity 92, member A1
hsa-miR-548p	1	0	1	1	1	1	DNAJC16	DnaJ (Hsp40) homolog, subfamily C, member 16
hsa-miR-548p	1	0	1	1	1	1	PHACTR2	phosphatase and actin regulator 2
hsa-miR-548p	0	0	1	0	0	0	C18orf63	chromosome 18 open reading frame 63
hsa-miR-548p	0	0	1	1	1	1	ATG5	autophagy related 5
hsa-miR-548p	0	0	1	0	1	1	STARD8	StAR-related lipid transfer (START) domain containing 8
hsa-miR-548p	1	0	1	0	1	1	MEGF10	multiple EGF-like-domains 10
hsa-miR-548p	0	0	1	0	0	0	MUC19	mucin 19, oligomeric
hsa-miR-548p	1	0	1	0	1	1	XRN1	5'-3' exoribonuclease 1
hsa-miR-548p	1	0	1	0	1	1	OSBPL8	oxysterol binding protein-like 8
hsa-miR-548p	0	0	1	0	1	1	HDAC9	histone deacetylase 9
hsa-miR-548p	0	0	1	1	1	1	SLC25A26	solute carrier family 25 (S-adenosylmethionine carrier), member 26
hsa-miR-548p	1	0	1	0	1	1	CNTNAP2	contactin associated protein-like 2
hsa-miR-548p	0	0	1	1	1	1	ZMYM1	zinc finger, MYM-type 1
hsa-miR-548p	1	0	1	1	1	1	ZFHX3	zinc finger homeobox 3
hsa-miR-548p	1	0	1	1	1	1	NKX2-1	NK2 homeobox 1
hsa-miR-548p	1	0	1	0	1	1	EFR3A	EFR3 homolog A (S. cerevisiae)
hsa-miR-548p	1	0	1	0	1	1	IRF4	interferon regulatory factor 4
hsa-miR-548p	0	0	1	1	1	1	UBXN8	UBX domain protein 8
hsa-miR-548p	0	0	1	1	1	1	ATF2	activating transcription factor 2
hsa-miR-548p	1	0	1	0	1	1	CBX7	chromobox homolog 7
hsa-miR-548p	0	0	1	1	1	1	PTGS1	prostaglandin-endoperoxide synthase 1 (prostaglandin G/H synthase and cyclooxygenase)
hsa-miR-548p	1	0	1	1	1	1	ATP2B3	ATPase, Ca++ transporting, plasma membrane 3
hsa-miR-548p	1	0	1	1	0	0	DPY19L1	dpy-19-like 1 (C. elegans)
hsa-miR-548p	0	0	1	1	0	0	GPR111	G protein-coupled receptor 111
hsa-miR-548p	1	0	1	1	1	1	ITSN1	intersectin 1 (SH3 domain protein)
hsa-miR-548p	0	0	1	0	0	0	POM121L8P	POM121 transmembrane nucleoporin-like 8 pseudogene
hsa-miR-548p	0	0	1	0	0	0	LOC728377	Rho guanine nucleotide exchange factor (GEF) 5 pseudogene
hsa-miR-548p	0	0	1	1	1	1	TNFSF10	tumor necrosis factor (ligand) superfamily, member 10
hsa-miR-548p	1	0	1	0	1	1	RBBP5	retinoblastoma binding protein 5
hsa-miR-548p	1	0	1	0	1	1	DCBLD2	discoidin, CUB and LCCL domain containing 2
hsa-miR-548p	0	0	1	1	0	0	SLCO3A1	solute carrier organic anion transporter family, member 3A1
hsa-miR-548p	0	0	1	1	1	1	PROS1	protein S (alpha)
hsa-miR-548p	1	0	1	1	1	1	LGR4	leucine-rich repeat containing G protein-coupled receptor 4
hsa-miR-548p	1	0	1	0	1	1	EPDR1	ependymin related protein 1 (zebrafish)
hsa-miR-548p	1	0	1	1	1	1	TMEM220	transmembrane protein 220
hsa-miR-548p	1	0	1	1	1	1	MLL	myeloid/lymphoid or mixed-lineage leukemia (trithorax homolog, Drosophila)
hsa-miR-548p	1	0	1	1	0	0	PPARD	peroxisome proliferator-activated receptor delta
hsa-miR-548p	1	0	1	1	1	1	AFF1	AF4/FMR2 family, member 1
hsa-miR-548p	1	0	1	0	1	1	STAT3	signal transducer and activator of transcription 3 (acute-phase response factor)
hsa-miR-548p	0	0	1	1	0	0	SUOX	sulfite oxidase
hsa-miR-548p	0	0	1	0	1	1	OPRK1	opioid receptor, kappa 1
hsa-miR-548p	1	0	1	0	0	0	YLPM1	YLP motif containing 1
hsa-miR-548p	1	0	1	0	1	1	BCL2	B-cell CLL/lymphoma 2
hsa-miR-548p	1	0	1	0	1	1	YES1	v-yes-1 Yamaguchi sarcoma viral oncogene homolog 1
hsa-miR-548p	1	0	1	1	1	1	IGF1	insulin-like growth factor 1 (somatomedin C)
hsa-miR-548p	1	0	1	1	1	1	COL3A1	collagen, type III, alpha 1
hsa-miR-548p	1	0	1	1	1	1	COL4A4	collagen, type IV, alpha 4
hsa-miR-548p	1	0	1	1	1	1	DLD	dihydrolipoamide dehydrogenase
hsa-miR-548p	1	0	1	0	1	1	SLC26A2	solute carrier family 26 (sulfate transporter), member 2
hsa-miR-548p	0	0	1	1	0	0	EMD	emerin
hsa-miR-548p	1	0	1	1	1	1	ESR1	estrogen receptor 1
hsa-miR-548p	1	0	1	1	1	1	F13A1	coagulation factor XIII, A1 polypeptide
hsa-miR-548p	1	0	1	1	1	1	FBN1	fibrillin 1
hsa-miR-548p	0	0	1	0	1	1	MS4A2	membrane-spanning 4-domains, subfamily A, member 2
hsa-miR-548p	1	0	1	0	1	1	G6PC	glucose-6-phosphatase, catalytic subunit
hsa-miR-548p	0	0	1	0	1	1	GBE1	glucan (1,4-alpha-), branching enzyme 1
hsa-miR-548p	1	0	1	0	1	1	GLI3	GLI family zinc finger 3
hsa-miR-548p	1	0	1	1	1	1	INSR	insulin receptor
hsa-miR-548p	1	0	1	1	1	1	JAG1	jagged 1
hsa-miR-548p	1	0	1	1	1	1	KCNA1	potassium voltage-gated channel, shaker-related subfamily, member 1 (episodic ataxia with myokymia)
hsa-miR-548p	1	0	1	1	1	1	LEP	leptin
hsa-miR-548p	1	0	1	1	1	1	MITF	microphthalmia-associated transcription factor
hsa-miR-548p	1	0	1	1	1	1	NF1	neurofibromin 1
hsa-miR-548p	1	0	1	1	1	1	PMP22	peripheral myelin protein 22
hsa-miR-548p	1	0	1	0	1	1	PTEN	phosphatase and tensin homolog
hsa-miR-548p	1	0	1	1	1	1	RB1	retinoblastoma 1
hsa-miR-548p	1	0	1	1	1	1	ATXN1	ataxin 1
hsa-miR-548p	1	0	1	1	1	1	SOX9	SRY (sex determining region Y)-box 9
hsa-miR-548p	1	0	1	1	1	1	TAT	tyrosine aminotransferase
hsa-miR-548p	1	0	1	1	1	1	TIMP3	TIMP metallopeptidase inhibitor 3
hsa-miR-548p	1	0	1	0	1	1	TSC1	tuberous sclerosis 1
hsa-miR-548p	0	0	1	1	0	0	APOB	apolipoprotein B (including Ag(x) antigen)
hsa-miR-548p	1	0	1	1	1	1	CHM	choroideremia (Rab escort protein 1)
hsa-miR-548p	1	0	1	0	1	1	COL5A2	collagen, type V, alpha 2
hsa-miR-548p	0	0	1	1	1	1	LTBP2	latent transforming growth factor beta binding protein 2
hsa-miR-548p	1	0	1	0	1	1	PCSK1	proprotein convertase subtilisin/kexin type 1
hsa-miR-548p	1	0	1	1	1	1	AQP2	aquaporin 2 (collecting duct)
hsa-miR-548p	1	0	1	1	1	1	ATRX	alpha thalassemia/mental retardation syndrome X-linked
hsa-miR-548p	1	0	1	1	1	1	PLP1	proteolipid protein 1
hsa-miR-548p	0	0	1	1	1	1	VHL	von Hippel-Lindau tumor suppressor, E3 ubiquitin protein ligase
hsa-miR-548p	1	0	1	1	1	1	CR1	complement component (3b/4b) receptor 1 (Knops blood group)
hsa-miR-548p	0	0	1	0	1	1	CCR5	chemokine (C-C motif) receptor 5 (gene/pseudogene)
hsa-miR-548p	1	0	1	1	1	1	CD44	CD44 molecule (Indian blood group)
hsa-miR-548p	1	0	1	0	1	1	ADRB1	adrenoceptor beta 1
hsa-miR-548p	0	0	1	1	1	1	AGTR2	angiotensin II receptor, type 2
hsa-miR-548p	0	0	1	1	1	1	ALDH1B1	aldehyde dehydrogenase 1 family, member B1
hsa-miR-548p	1	0	1	1	1	1	CACNB4	calcium channel, voltage-dependent, beta 4 subunit
hsa-miR-548p	0	0	1	1	1	1	CRH	corticotropin releasing hormone
hsa-miR-548p	1	0	1	1	1	1	GABRB3	gamma-aminobutyric acid (GABA) A receptor, beta 3
hsa-miR-548p	1	0	1	1	1	1	GRIA4	glutamate receptor, ionotropic, AMPA 4
hsa-miR-548p	1	0	1	1	1	1	IGF1R	insulin-like growth factor 1 receptor
hsa-miR-548p	1	0	1	0	1	1	KCNJ2	potassium inwardly-rectifying channel, subfamily J, member 2
hsa-miR-548p	1	0	1	1	1	1	MME	membrane metallo-endopeptidase
hsa-miR-548p	1	0	1	1	0	0	PDE3A	phosphodiesterase 3A, cGMP-inhibited
hsa-miR-548p	1	0	1	1	1	1	PPP3R1	protein phosphatase 3, regulatory subunit B, alpha
hsa-miR-548p	1	0	1	1	1	1	PTGER2	prostaglandin E receptor 2 (subtype EP2), 53kDa
hsa-miR-548p	1	0	1	1	1	1	PTGFR	prostaglandin F receptor (FP)
hsa-miR-548p	1	0	1	1	1	1	RARB	retinoic acid receptor, beta
hsa-miR-548p	1	0	1	0	1	1	SMAD5	SMAD family member 5
hsa-miR-548p	1	0	1	0	1	1	UBE2W	ubiquitin-conjugating enzyme E2W (putative)
hsa-miR-548p	0	0	1	0	1	1	ZDHHC13	zinc finger, DHHC-type containing 13
hsa-miR-548p	1	0	1	0	1	1	GDF6	growth differentiation factor 6
hsa-miR-548p	1	0	1	0	1	1	SPOPL	speckle-type POZ protein-like
hsa-miR-548p	0	0	1	1	0	0	RNASE9	ribonuclease, RNase A family, 9 (non-active)
hsa-miR-548p	1	0	1	0	1	1	FLJ33360	FLJ33360 protein
hsa-miR-548p	0	0	1	1	1	1	CC2D2B	coiled-coil and C2 domain containing 2B
hsa-miR-548p	1	0	1	1	1	1	MIR22HG	MIR22 host gene (non-protein coding)
hsa-miR-548p	1	0	1	1	1	1	TPD52L3	tumor protein D52-like 3
hsa-miR-548p	1	0	1	1	1	1	AFTPH	aftiphilin
hsa-miR-548p	0	0	1	1	1	1	SUMO4	SMT3 suppressor of mif two 3 homolog 4 (S. cerevisiae)
hsa-miR-548p	1	0	1	1	1	1	LCLAT1	lysocardiolipin acyltransferase 1
hsa-miR-548p	1	0	1	1	1	1	GATA3	GATA binding protein 3
hsa-miR-548p	0	0	1	0	0	0	OR8G1	olfactory receptor, family 8, subfamily G, member 1
hsa-miR-548p	1	0	1	1	1	1	LEPR	leptin receptor
hsa-miR-548p	1	0	1	1	1	1	HMGXB4	HMG box domain containing 4
hsa-miR-548p	0	0	1	1	1	1	SMAD1	SMAD family member 1
hsa-miR-548p	1	0	1	1	1	1	KLHL31	kelch-like 31 (Drosophila)
hsa-miR-548p	1	0	1	1	1	1	RBMS3	RNA binding motif, single stranded interacting protein 3
hsa-miR-548p	1	0	1	1	1	1	HNRNPD	heterogeneous nuclear ribonucleoprotein D (AU-rich element RNA binding protein 1, 37kDa)
hsa-miR-548p	1	0	1	0	1	1	BMF	Bcl2 modifying factor
hsa-miR-548p	1	0	1	1	1	1	FBLN2	fibulin 2
hsa-miR-548p	0	0	1	1	1	1	ALG11	asparagine-linked glycosylation 11, alpha-1,2-mannosyltransferase homolog (yeast)
hsa-miR-548p	0	0	1	0	1	1	FLJ16124	FLJ16124 protein
hsa-miR-548p	1	0	1	0	1	1	LRRC55	leucine rich repeat containing 55
hsa-miR-548p	0	0	1	1	1	1	HMGN2P46	high mobility group nucleosomal binding domain 2 pseudogene 46
hsa-miR-548p	1	0	1	1	0	0	NEURL4	neuralized homolog 4 (Drosophila)
hsa-miR-548p	1	0	1	1	1	1	EBF3	early B-cell factor 3
hsa-miR-548p	1	0	1	1	1	1	PLCXD3	phosphatidylinositol-specific phospholipase C, X domain containing 3
hsa-miR-548p	1	0	1	1	1	1	NFKBIZ	nuclear factor of kappa light polypeptide gene enhancer in B-cells inhibitor, zeta
hsa-miR-548p	1	0	1	1	1	1	EDA	ectodysplasin A
hsa-miR-548p	0	0	1	1	1	1	RYK	receptor-like tyrosine kinase
hsa-miR-548p	1	0	1	0	1	1	IP6K1	inositol hexakisphosphate kinase 1
hsa-miR-548p	0	0	1	1	1	1	WBP5	WW domain binding protein 5
hsa-miR-548p	0	0	1	1	0	0	SPIN2B	spindlin family, member 2B
hsa-miR-548p	1	0	1	1	1	1	TCEAL8	transcription elongation factor A (SII)-like 8
hsa-miR-548p	0	0	1	1	1	1	TCEAL6	transcription elongation factor A (SII)-like 6
hsa-miR-548p	1	0	1	1	0	0	SDC1	syndecan 1
hsa-miR-548p	1	0	1	0	1	1	GOSR1	golgi SNAP receptor complex member 1
hsa-miR-548p	0	0	1	1	1	1	SCP2	sterol carrier protein 2
hsa-miR-548p	1	0	1	1	1	1	L3MBTL3	l(3)mbt-like 3 (Drosophila)
hsa-miR-548p	1	0	1	1	1	1	SPOP	speckle-type POZ protein
hsa-miR-548p	1	0	1	1	1	1	IGSF3	immunoglobulin superfamily, member 3
hsa-miR-548p	0	0	1	1	1	1	KLHDC9	kelch domain containing 9
hsa-miR-548p	0	0	1	1	1	1	TRIM13	tripartite motif containing 13
hsa-miR-548p	1	0	1	1	1	1	TULP4	tubby like protein 4
hsa-miR-548p	0	0	1	1	0	0	F8A3	coagulation factor VIII-associated 3
hsa-miR-548p	1	0	1	1	1	1	LMBRD2	LMBR1 domain containing 2
hsa-miR-548p	0	0	1	1	1	1	FAM154B	family with sequence similarity 154, member B
hsa-miR-548p	1	0	1	0	1	1	C18orf25	chromosome 18 open reading frame 25
hsa-miR-548p	1	0	1	1	1	1	CTDSPL	CTD (carboxy-terminal domain, RNA polymerase II, polypeptide A) small phosphatase-like
hsa-miR-548p	1	0	1	1	1	1	BCAP29	B-cell receptor-associated protein 29
hsa-miR-548p	1	0	1	1	1	1	STEAP3	STEAP family member 3, metalloreductase
hsa-miR-548p	1	0	1	0	1	1	KIAA2022	KIAA2022
hsa-miR-548p	0	0	1	1	1	1	MXI1	MAX interactor 1
hsa-miR-548p	1	0	1	1	1	1	NUPL1	nucleoporin like 1
hsa-miR-548p	1	0	1	1	1	1	LPHN1	latrophilin 1
hsa-miR-548p	1	0	1	1	1	1	FNIP1	folliculin interacting protein 1
hsa-miR-548p	0	0	1	0	0	0	CD200R1L	CD200 receptor 1-like
hsa-miR-548p	1	0	1	1	1	1	DSP	desmoplakin
hsa-miR-548p	0	0	1	1	0	0	CDKL4	cyclin-dependent kinase-like 4
hsa-miR-548p	0	0	1	1	1	1	ZCCHC11	zinc finger, CCHC domain containing 11
hsa-miR-548p	1	0	1	1	1	1	SHE	Src homology 2 domain containing E
hsa-miR-548p	0	0	1	1	1	1	SPIN3	spindlin family, member 3
hsa-miR-548p	0	0	1	1	1	1	SERP2	stress-associated endoplasmic reticulum protein family member 2
hsa-miR-548p	1	0	1	1	1	1	BCL2L15	BCL2-like 15
hsa-miR-548p	1	0	1	1	1	1	FAM171A1	family with sequence similarity 171, member A1
hsa-miR-548p	0	0	1	1	1	1	NCMAP	noncompact myelin associated protein
hsa-miR-548p	1	0	1	1	1	1	ATP11C	ATPase, class VI, type 11C
hsa-miR-548p	0	0	1	1	1	1	DSTN	destrin (actin depolymerizing factor)
hsa-miR-548p	1	0	1	1	1	1	PCGF6	polycomb group ring finger 6
hsa-miR-548p	0	0	1	0	1	1	ERVMER61-1	endogenous retrovirus group MER61, member 1
hsa-miR-548p	0	0	1	1	1	1	MS4A13	membrane-spanning 4-domains, subfamily A, member 13
hsa-miR-548p	0	0	1	0	1	1	GOLGA8E	golgin A8 family, member E
hsa-miR-548p	1	0	1	1	1	1	GOSR2	golgi SNAP receptor complex member 2
hsa-miR-548p	1	0	1	1	1	1	GRAMD2	GRAM domain containing 2
hsa-miR-548p	0	0	1	0	1	1	C9orf106	chromosome 9 open reading frame 106
hsa-miR-548p	1	0	1	1	1	1	SLC25A53	solute carrier family 25, member 53
hsa-miR-548p	1	0	1	0	1	1	RGMB	RGM domain family, member B
hsa-miR-548p	1	0	1	1	1	1	DISC1	disrupted in schizophrenia 1
hsa-miR-548p	0	0	1	1	1	1	SPIN4	spindlin family, member 4
hsa-miR-548p	1	0	1	1	1	1	PABPC1L2A	poly(A) binding protein, cytoplasmic 1-like 2A
hsa-miR-548p	1	0	1	1	1	1	UBE2NL	ubiquitin-conjugating enzyme E2N-like
hsa-miR-548p	0	0	1	1	1	1	CCNC	cyclin C
hsa-miR-548p	1	0	1	1	1	1	FXR1	fragile X mental retardation, autosomal homolog 1
hsa-miR-548p	1	0	1	1	1	1	C12orf68	chromosome 12 open reading frame 68
hsa-miR-548p	0	0	1	1	1	1	C2orf68	chromosome 2 open reading frame 68
hsa-miR-548p	1	0	1	0	1	1	FIGNL2	fidgetin-like 2
hsa-miR-548p	0	0	1	1	1	1	PLIN5	perilipin 5
hsa-miR-548p	0	0	1	0	1	1	LINC00268	long intergenic non-protein coding RNA 268
hsa-miR-548p	0	0	1	1	0	0	SPRR2G	small proline-rich protein 2G
hsa-miR-548p	1	0	1	0	1	1	SYT14L	synaptotagmin XIV-like
hsa-miR-548p	0	0	1	1	0	0	C1QTNF9B-AS1	C1QTNF9B antisense RNA 1
hsa-miR-548p	1	0	1	1	1	1	KCNMA1	potassium large conductance calcium-activated channel, subfamily M, alpha member 1
hsa-miR-548p	0	0	1	0	1	1	BAG5	BCL2-associated athanogene 5
hsa-miR-548p	1	0	1	1	1	1	RUNX2	runt-related transcription factor 2
hsa-miR-548p	1	0	1	1	1	1	PHF6	PHD finger protein 6
hsa-miR-548p	1	0	1	1	1	1	TMCC1	transmembrane and coiled-coil domain family 1
hsa-miR-548p	1	0	1	0	1	1	GOPC	golgi-associated PDZ and coiled-coil motif containing
hsa-miR-548p	0	0	1	0	1	1	TMEM30B	transmembrane protein 30B
hsa-miR-548p	0	0	1	1	1	1	ACTBL2	actin, beta-like 2
hsa-miR-548p	1	0	1	1	1	1	SH3PXD2B	SH3 and PX domains 2B
hsa-miR-548p	0	0	1	1	1	1	VPS13A	vacuolar protein sorting 13 homolog A (S. cerevisiae)
hsa-miR-548p	1	0	1	1	1	1	GPHN	gephyrin
hsa-miR-548p	0	0	1	1	1	1	RGPD1	RANBP2-like and GRIP domain containing 1
hsa-miR-548p	1	0	1	1	1	1	SH3KBP1	SH3-domain kinase binding protein 1
hsa-miR-548p	1	0	1	0	1	1	TNRC6B	trinucleotide repeat containing 6B
hsa-miR-548p	1	0	1	1	1	1	TGFBR2	transforming growth factor, beta receptor II (70/80kDa)
hsa-miR-548p	0	0	1	1	1	1	WASF1	WAS protein family, member 1
hsa-miR-548p	1	0	1	1	1	1	YIPF5	Yip1 domain family, member 5
hsa-miR-548p	1	0	1	1	1	1	FNBP1L	formin binding protein 1-like
hsa-miR-548p	0	0	1	1	0	0	CES1	carboxylesterase 1
hsa-miR-548p	1	0	1	1	1	1	TPD52	tumor protein D52
hsa-miR-548p	1	0	1	0	1	1	RAB12	RAB12, member RAS oncogene family
hsa-miR-548p	1	0	1	1	1	1	VEGFA	vascular endothelial growth factor A
hsa-miR-548p	1	0	1	1	1	1	ARHGAP24	Rho GTPase activating protein 24
hsa-miR-548p	1	0	1	1	1	1	UGGT1	UDP-glucose glycoprotein glucosyltransferase 1
hsa-miR-548p	1	0	1	1	1	1	FAM108B1	family with sequence similarity 108, member B1
hsa-miR-548p	0	0	1	1	0	0	CCDC7	coiled-coil domain containing 7
hsa-miR-548p	1	0	1	1	1	1	RGS7BP	regulator of G-protein signaling 7 binding protein
hsa-miR-548p	0	0	1	1	0	0	AHDC1	AT hook, DNA binding motif, containing 1
hsa-miR-548p	1	0	1	1	1	1	PLEKHG1	pleckstrin homology domain containing, family G (with RhoGef domain) member 1
hsa-miR-548p	1	0	1	1	1	1	SLC10A7	solute carrier family 10 (sodium/bile acid cotransporter family), member 7
hsa-miR-548p	1	0	1	1	1	1	OPN5	opsin 5
hsa-miR-548p	1	0	1	0	1	1	SAMD5	sterile alpha motif domain containing 5
hsa-miR-548p	1	0	1	0	1	1	MSRB3	methionine sulfoxide reductase B3
hsa-miR-548p	0	0	1	1	1	1	TP53BP2	tumor protein p53 binding protein, 2
hsa-miR-548p	0	0	1	1	1	1	RNLS	renalase, FAD-dependent amine oxidase
hsa-miR-548p	1	0	1	1	1	1	YTHDC1	YTH domain containing 1
hsa-miR-548p	1	0	1	1	1	1	MAF	v-maf musculoaponeurotic fibrosarcoma oncogene homolog (avian)
hsa-miR-548p	1	0	1	1	1	1	CSNK1G3	casein kinase 1, gamma 3
hsa-miR-548p	1	0	1	1	1	1	KLF10	Kruppel-like factor 10
hsa-miR-548p	1	0	1	1	1	1	UBE2V1	ubiquitin-conjugating enzyme E2 variant 1
hsa-miR-548p	0	0	1	1	1	1	PLGLB1	plasminogen-like B1
hsa-miR-548p	1	0	1	0	1	1	NPNT	nephronectin
hsa-miR-548p	1	0	1	1	1	1	AMD1	adenosylmethionine decarboxylase 1
hsa-miR-548p	1	0	1	1	1	1	SAR1B	SAR1 homolog B (S. cerevisiae)
hsa-miR-548p	0	0	1	1	1	1	C17orf104	chromosome 17 open reading frame 104
hsa-miR-548p	1	0	1	1	1	1	ZNF704	zinc finger protein 704
hsa-miR-548p	1	0	1	1	1	1	GALNTL6	UDP-N-acetyl-alpha-D-galactosamine:polypeptide N-acetylgalactosaminyltransferase-like 6
hsa-miR-548p	1	0	1	1	1	1	SMOC1	SPARC related modular calcium binding 1
hsa-miR-548p	1	0	1	0	1	1	RYR2	ryanodine receptor 2 (cardiac)
hsa-miR-548p	0	0	1	1	0	0	BOLA3	bolA homolog 3 (E. coli)
hsa-miR-548p	1	0	1	0	1	1	ARL5A	ADP-ribosylation factor-like 5A
hsa-miR-548p	0	0	1	1	1	1	CTLA4	cytotoxic T-lymphocyte-associated protein 4
hsa-miR-548p	1	0	1	0	1	1	CDC42SE1	CDC42 small effector 1
hsa-miR-548p	1	0	1	1	1	1	DPP6	dipeptidyl-peptidase 6
hsa-miR-548p	0	0	1	1	1	1	HEPACAM2	HEPACAM family member 2
hsa-miR-548p	1	0	1	1	1	1	ELMO1	engulfment and cell motility 1
hsa-miR-548p	1	0	1	0	1	1	GK5	glycerol kinase 5 (putative)
hsa-miR-548p	1	0	1	0	1	1	USP9X	ubiquitin specific peptidase 9, X-linked
hsa-miR-548p	1	0	1	0	1	1	CREBZF	CREB/ATF bZIP transcription factor
hsa-miR-548p	1	0	1	1	1	1	CHN2	chimerin (chimaerin) 2
hsa-miR-548p	1	0	1	1	1	1	SPTSSB	serine palmitoyltransferase, small subunit B
hsa-miR-548p	1	0	1	0	1	1	CEP44	centrosomal protein 44kDa
hsa-miR-548p	1	0	1	1	1	1	LFNG	LFNG O-fucosylpeptide 3-beta-N-acetylglucosaminyltransferase
hsa-miR-548p	0	0	1	1	1	1	MCHR2	melanin-concentrating hormone receptor 2
hsa-miR-548p	1	0	1	0	1	1	CD83	CD83 molecule
hsa-miR-548p	0	0	1	1	1	1	MTHFD2	methylenetetrahydrofolate dehydrogenase (NADP+ dependent) 2, methenyltetrahydrofolate cyclohydrolase
hsa-miR-548p	1	0	1	1	1	1	HEY1	hairy/enhancer-of-split related with YRPW motif 1
hsa-miR-548p	1	0	1	1	1	1	HMGCLL1	3-hydroxymethyl-3-methylglutaryl-CoA lyase-like 1
hsa-miR-548p	0	0	1	1	1	1	MST4	serine/threonine protein kinase MST4
hsa-miR-548p	0	0	1	1	1	1	C6orf162	chromosome 6 open reading frame 162
hsa-miR-548p	1	0	1	1	1	1	SLC9A6	solute carrier family 9, subfamily A (NHE6, cation proton antiporter 6), member 6
hsa-miR-548p	1	0	1	1	1	1	GLRA3	glycine receptor, alpha 3
hsa-miR-548p	1	0	1	1	1	1	NSL1	NSL1, MIND kinetochore complex component, homolog (S. cerevisiae)
hsa-miR-548p	0	0	1	1	1	1	SMC2	structural maintenance of chromosomes 2
hsa-miR-548p	1	0	1	1	1	1	FRS2	fibroblast growth factor receptor substrate 2
hsa-miR-548p	1	0	1	1	1	1	KDM5A	lysine (K)-specific demethylase 5A
hsa-miR-548p	0	0	1	1	0	0	NGDN	neuroguidin, EIF4E binding protein
hsa-miR-548p	0	0	1	1	1	1	SLC6A3	solute carrier family 6 (neurotransmitter transporter, dopamine), member 3
hsa-miR-548p	1	0	1	0	1	1	TMEM237	transmembrane protein 237
hsa-miR-548p	1	0	1	0	1	1	SLC12A2	solute carrier family 12 (sodium/potassium/chloride transporters), member 2
hsa-miR-548p	1	0	1	1	1	1	HIPK3	homeodomain interacting protein kinase 3
hsa-miR-548p	0	0	1	0	1	1	SSTR1	somatostatin receptor 1
hsa-miR-548p	1	0	1	1	1	1	MZT1	mitotic spindle organizing protein 1
hsa-miR-548p	1	0	1	1	1	1	UBTF	upstream binding transcription factor, RNA polymerase I
hsa-miR-548p	1	0	1	1	1	1	QSER1	glutamine and serine rich 1
hsa-miR-548p	1	0	1	1	1	1	METTL9	methyltransferase like 9
hsa-miR-548p	1	0	1	1	1	1	HS6ST2	heparan sulfate 6-O-sulfotransferase 2
hsa-miR-548p	1	0	1	1	1	1	PDE11A	phosphodiesterase 11A
hsa-miR-548p	1	0	1	1	1	1	ATG9A	autophagy related 9A
hsa-miR-548p	1	0	1	1	1	1	SREK1	splicing regulatory glutamine/lysine-rich protein 1
hsa-miR-548p	1	0	1	1	1	1	IRF2BP2	interferon regulatory factor 2 binding protein 2
hsa-miR-548p	1	0	1	1	1	1	PHF16	PHD finger protein 16
hsa-miR-548p	1	0	1	0	1	1	UBXN2B	UBX domain protein 2B
hsa-miR-548p	0	0	1	1	0	0	VPS37D	vacuolar protein sorting 37 homolog D (S. cerevisiae)
hsa-miR-548p	0	0	1	0	1	1	WTH3DI	RAB6C-like
hsa-miR-548p	1	0	1	1	1	1	SRSF1	serine/arginine-rich splicing factor 1
hsa-miR-548p	0	0	1	1	1	1	RGPD2	RANBP2-like and GRIP domain containing 2
hsa-miR-548p	1	0	1	0	1	1	FAM127C	family with sequence similarity 127, member C
hsa-miR-548p	1	0	1	1	1	1	DACT1	dapper, antagonist of beta-catenin, homolog 1 (Xenopus laevis)
hsa-miR-548p	1	0	1	1	1	1	TMTC4	transmembrane and tetratricopeptide repeat containing 4
hsa-miR-548p	0	0	1	1	1	1	DIAPH1	diaphanous homolog 1 (Drosophila)
hsa-miR-548p	1	0	1	1	1	1	CASZ1	castor zinc finger 1
hsa-miR-548p	1	0	1	1	1	1	CUL4B	cullin 4B
hsa-miR-548p	1	0	1	1	1	1	VAV3	vav 3 guanine nucleotide exchange factor
hsa-miR-548p	1	0	1	1	1	1	LDB3	LIM domain binding 3
hsa-miR-548p	1	0	1	0	1	1	KIAA1147	KIAA1147
hsa-miR-548p	1	0	1	1	1	1	FAM155A	family with sequence similarity 155, member A
hsa-miR-548p	1	0	1	1	1	1	KDM6B	lysine (K)-specific demethylase 6B
hsa-miR-548p	1	0	1	0	1	1	CCDC85A	coiled-coil domain containing 85A
hsa-miR-548p	0	0	1	1	1	1	HSF5	heat shock transcription factor family member 5
hsa-miR-548p	1	0	1	1	1	1	DNA2	DNA replication helicase 2 homolog (yeast)
hsa-miR-548p	1	0	1	0	1	1	ODZ3	odz, odd Oz/ten-m homolog 3 (Drosophila)
hsa-miR-548p	0	0	1	1	1	1	SHISA3	shisa homolog 3 (Xenopus laevis)
hsa-miR-548p	0	0	1	1	1	1	TBX18	T-box 18
hsa-miR-548p	0	0	1	1	1	1	SNTN	sentan, cilia apical structure protein
hsa-miR-548p	1	0	1	1	1	1	MGA	MAX gene associated
hsa-miR-548p	1	0	1	1	1	1	MYO1C	myosin IC
hsa-miR-548p	1	0	1	1	1	1	REPS2	RALBP1 associated Eps domain containing 2
hsa-miR-548p	1	0	1	0	1	1	SCN3A	sodium channel, voltage-gated, type III, alpha subunit
hsa-miR-548p	0	0	1	1	1	1	G6PC2	glucose-6-phosphatase, catalytic, 2
hsa-miR-548p	1	0	1	1	0	0	ASIC2	acid-sensing (proton-gated) ion channel 2
hsa-miR-548p	1	0	1	1	1	1	ADAM10	ADAM metallopeptidase domain 10
hsa-miR-548p	0	0	1	1	1	1	ADSS	adenylosuccinate synthase
hsa-miR-548p	0	0	1	1	1	1	CRISP1	cysteine-rich secretory protein 1
hsa-miR-548p	0	0	1	1	1	1	AMELX	amelogenin, X-linked
hsa-miR-548p	0	0	1	1	1	1	AMELY	amelogenin, Y-linked
hsa-miR-548p	1	0	1	0	1	1	XIAP	X-linked inhibitor of apoptosis
hsa-miR-548p	1	0	1	0	1	1	BACH1	BTB and CNC homology 1, basic leucine zipper transcription factor 1
hsa-miR-548p	1	0	1	0	1	1	BMPR2	bone morphogenetic protein receptor, type II (serine/threonine kinase)
hsa-miR-548p	1	0	1	0	1	1	KLF9	Kruppel-like factor 9
hsa-miR-548p	1	0	1	1	1	1	CAMK2D	calcium/calmodulin-dependent protein kinase II delta
hsa-miR-548p	0	0	1	1	1	1	ENTPD3	ectonucleoside triphosphate diphosphohydrolase 3
hsa-miR-548p	1	0	1	0	1	1	CDK6	cyclin-dependent kinase 6
hsa-miR-548p	0	0	1	1	1	1	CDSN	corneodesmosin
hsa-miR-548p	0	0	1	1	1	1	CHUK	conserved helix-loop-helix ubiquitous kinase
hsa-miR-548p	1	0	1	1	1	1	CREBL2	cAMP responsive element binding protein-like 2
hsa-miR-548p	1	0	1	1	1	1	MAPK14	mitogen-activated protein kinase 14
hsa-miR-548p	1	0	1	1	1	1	DYRK1A	dual-specificity tyrosine-(Y)-phosphorylation regulated kinase 1A
hsa-miR-548p	1	0	1	1	1	1	CELSR3	cadherin, EGF LAG seven-pass G-type receptor 3 (flamingo homolog, Drosophila)
hsa-miR-548p	1	0	1	0	1	1	EIF2S3	eukaryotic translation initiation factor 2, subunit 3 gamma, 52kDa
hsa-miR-548p	1	0	1	1	1	1	ELAVL1	ELAV (embryonic lethal, abnormal vision, Drosophila)-like 1 (Hu antigen R)
hsa-miR-548p	1	0	1	0	1	1	ELAVL3	ELAV (embryonic lethal, abnormal vision, Drosophila)-like 3 (Hu antigen C)
hsa-miR-548p	1	0	1	1	1	1	NR6A1	nuclear receptor subfamily 6, group A, member 1
hsa-miR-548p	1	0	1	0	1	1	B4GALT1	UDP-Gal:betaGlcNAc beta 1,4- galactosyltransferase, polypeptide 1
hsa-miR-548p	0	0	1	1	0	0	DNAJA1	DnaJ (Hsp40) homolog, subfamily A, member 1
hsa-miR-548p	1	0	1	1	1	1	ID4	inhibitor of DNA binding 4, dominant negative helix-loop-helix protein
hsa-miR-548p	1	0	1	1	1	1	AHR	aryl hydrocarbon receptor
hsa-miR-548p	1	0	1	1	1	1	AQP4	aquaporin 4
hsa-miR-548p	1	0	1	0	1	1	ARCN1	archain 1
hsa-miR-548p	0	0	1	1	1	1	ARF4	ADP-ribosylation factor 4
hsa-miR-548p	1	0	1	0	1	1	ARNT	aryl hydrocarbon receptor nuclear translocator
hsa-miR-548p	1	0	1	1	1	1	BAAT	bile acid CoA: amino acid N-acyltransferase (glycine N-choloyltransferase)
hsa-miR-548p	1	0	1	1	1	1	BCL6	B-cell CLL/lymphoma 6
hsa-miR-548p	0	0	1	1	0	0	BMP6	bone morphogenetic protein 6
hsa-miR-548p	1	0	1	1	1	1	KLF5	Kruppel-like factor 5 (intestinal)
hsa-miR-548p	1	0	1	1	1	1	BTG1	B-cell translocation gene 1, anti-proliferative
hsa-miR-548p	0	0	1	1	0	0	C9	complement component 9
hsa-miR-548p	1	0	1	0	1	1	CCND2	cyclin D2
hsa-miR-548p	1	0	1	1	1	1	CDH11	cadherin 11, type 2, OB-cadherin (osteoblast)
hsa-miR-548p	0	0	1	1	1	1	CKS1B	CDC28 protein kinase regulatory subunit 1B
hsa-miR-548p	1	0	1	1	1	1	CLCN4	chloride channel, voltage-sensitive 4
hsa-miR-548p	1	0	1	1	1	1	CNN3	calponin 3, acidic
hsa-miR-548p	1	0	1	1	1	1	COL4A6	collagen, type IV, alpha 6
hsa-miR-548p	1	0	1	0	1	1	COL19A1	collagen, type XIX, alpha 1
hsa-miR-548p	1	0	1	1	1	1	CSNK1D	casein kinase 1, delta
hsa-miR-548p	0	0	1	1	1	1	CTH	cystathionase (cystathionine gamma-lyase)
hsa-miR-548p	1	0	1	1	1	1	DR1	down-regulator of transcription 1, TBP-binding (negative cofactor 2)
hsa-miR-548p	0	0	1	1	1	1	DSG1	desmoglein 1
hsa-miR-548p	1	0	1	1	1	1	HBEGF	heparin-binding EGF-like growth factor
hsa-miR-548p	1	0	1	1	1	1	DUSP6	dual specificity phosphatase 6
hsa-miR-548p	1	0	1	1	1	1	E2F3	E2F transcription factor 3
hsa-miR-548p	0	0	1	1	0	0	EFNA5	ephrin-A5
hsa-miR-548p	0	0	1	1	1	1	EGR4	early growth response 4
hsa-miR-548p	1	0	1	1	1	1	EIF4E	eukaryotic translation initiation factor 4E
hsa-miR-548p	1	0	1	1	1	1	EPB49	erythrocyte membrane protein band 4.9 (dematin)
hsa-miR-548p	1	0	1	0	1	1	ETV6	ets variant 6
hsa-miR-548p	1	0	1	1	1	1	FBN2	fibrillin 2
hsa-miR-548p	0	0	1	0	1	1	FGF2	fibroblast growth factor 2 (basic)
hsa-miR-548p	1	0	1	1	1	1	FGF7	fibroblast growth factor 7
hsa-miR-548p	1	0	1	1	1	1	FGF9	fibroblast growth factor 9 (glia-activating factor)
hsa-miR-548p	1	0	1	1	1	1	FKBP4	FK506 binding protein 4, 59kDa
hsa-miR-548p	1	0	1	1	1	1	FMOD	fibromodulin
hsa-miR-548p	1	0	1	1	1	1	FRK	fyn-related kinase
hsa-miR-548p	1	0	1	0	1	1	FUT4	fucosyltransferase 4 (alpha (1,3) fucosyltransferase, myeloid-specific)
hsa-miR-548p	1	0	1	1	1	1	GLRA2	glycine receptor, alpha 2
hsa-miR-548p	1	0	1	0	1	1	GNAI1	guanine nucleotide binding protein (G protein), alpha inhibiting activity polypeptide 1
hsa-miR-548p	1	0	1	1	1	1	GOLGA1	golgin A1
hsa-miR-548p	0	0	1	0	1	1	GYPA	glycophorin A (MNS blood group)
hsa-miR-548p	0	0	1	1	1	1	HLA-DOA	major histocompatibility complex, class II, DO alpha
hsa-miR-548p	0	0	1	1	1	1	HMGCS1	3-hydroxy-3-methylglutaryl-CoA synthase 1 (soluble)
hsa-miR-548p	0	0	1	1	1	1	FOXN2	forkhead box N2
hsa-miR-548p	1	0	1	1	1	1	TNC	tenascin C
hsa-miR-548p	1	0	1	1	1	1	ISL1	ISL LIM homeobox 1
hsa-miR-548p	0	0	1	0	1	1	ITGAV	integrin, alpha V
hsa-miR-548p	1	0	1	1	1	1	ITPR2	inositol 1,4,5-trisphosphate receptor, type 2
hsa-miR-548p	1	0	1	1	1	1	KCNJ3	potassium inwardly-rectifying channel, subfamily J, member 3
hsa-miR-548p	1	0	1	1	1	1	KDR	kinase insert domain receptor (a type III receptor tyrosine kinase)
hsa-miR-548p	0	0	1	1	1	1	KLRC1	killer cell lectin-like receptor subfamily C, member 1
hsa-miR-548p	0	0	1	1	1	1	KLRC2	killer cell lectin-like receptor subfamily C, member 2
hsa-miR-548p	1	0	1	1	1	1	KPNB1	karyopherin (importin) beta 1
hsa-miR-548p	1	0	1	1	1	1	LBR	lamin B receptor
hsa-miR-548p	1	0	1	1	1	1	LIFR	leukemia inhibitory factor receptor alpha
hsa-miR-548p	1	0	1	1	1	1	LRP1	low density lipoprotein receptor-related protein 1
hsa-miR-548p	1	0	1	1	1	1	MAFG	v-maf musculoaponeurotic fibrosarcoma oncogene homolog G (avian)
hsa-miR-548p	1	0	1	1	1	1	ME1	malic enzyme 1, NADP(+)-dependent, cytosolic
hsa-miR-548p	0	0	1	0	1	1	MFNG	MFNG O-fucosylpeptide 3-beta-N-acetylglucosaminyltransferase
hsa-miR-548p	0	0	1	1	0	0	MMP12	matrix metallopeptidase 12 (macrophage elastase)
hsa-miR-548p	1	0	1	1	1	1	MN1	meningioma (disrupted in balanced translocation) 1
hsa-miR-548p	0	0	1	1	1	1	MTAP	methylthioadenosine phosphorylase
hsa-miR-548p	0	0	1	1	1	1	MYC	v-myc myelocytomatosis viral oncogene homolog (avian)
hsa-miR-548p	0	0	1	1	0	0	MYOG	myogenin (myogenic factor 4)
hsa-miR-548p	1	0	1	1	1	1	NPAS2	neuronal PAS domain protein 2
hsa-miR-548p	0	0	1	0	1	1	OPHN1	oligophrenin 1
hsa-miR-548p	1	0	1	1	1	1	ORC5	origin recognition complex, subunit 5
hsa-miR-548p	1	0	1	1	1	1	OSBP	oxysterol binding protein
hsa-miR-548p	0	0	1	1	1	1	PEBP1	phosphatidylethanolamine binding protein 1
hsa-miR-548p	1	0	1	0	1	1	PAPPA	pregnancy-associated plasma protein A, pappalysin 1
hsa-miR-548p	1	0	1	1	1	1	PBX2	pre-B-cell leukemia homeobox 2
hsa-miR-548p	1	0	1	0	1	1	PCDHGC3	protocadherin gamma subfamily C, 3
hsa-miR-548p	1	0	1	0	1	1	CDK17	cyclin-dependent kinase 17
hsa-miR-548p	0	0	1	1	1	1	PEX13	peroxisomal biogenesis factor 13
hsa-miR-548p	0	0	1	1	1	1	PIM1	pim-1 oncogene
hsa-miR-548p	1	0	1	1	1	1	PLAGL2	pleiomorphic adenoma gene-like 2
hsa-miR-548p	0	0	1	1	1	1	PLGLB2	plasminogen-like B2
hsa-miR-548p	0	0	1	0	1	1	PMP2	peripheral myelin protein 2
hsa-miR-548p	1	0	1	1	1	1	PPP1CB	protein phosphatase 1, catalytic subunit, beta isozyme
hsa-miR-548p	1	0	1	1	1	1	PPP2CA	protein phosphatase 2, catalytic subunit, alpha isozyme
hsa-miR-548p	1	0	1	1	1	1	PPP2R1B	protein phosphatase 2, regulatory subunit A, beta
hsa-miR-548p	0	0	1	1	1	1	SRGN	serglycin
hsa-miR-548p	0	0	1	1	1	1	HHEX	hematopoietically expressed homeobox
hsa-miR-548p	1	0	1	0	1	1	PRKCA	protein kinase C, alpha
hsa-miR-548p	0	0	1	1	1	1	HTRA1	HtrA serine peptidase 1
hsa-miR-548p	1	0	1	1	1	1	PTPN9	protein tyrosine phosphatase, non-receptor type 9
hsa-miR-548p	0	0	1	1	1	1	PTPN12	protein tyrosine phosphatase, non-receptor type 12
hsa-miR-548p	1	0	1	1	1	1	PTPRK	protein tyrosine phosphatase, receptor type, K
hsa-miR-548p	0	0	1	1	1	1	PTPRM	protein tyrosine phosphatase, receptor type, M
hsa-miR-548p	0	0	1	1	1	1	PTPRR	protein tyrosine phosphatase, receptor type, R
hsa-miR-548p	1	0	1	0	1	1	RAB6A	RAB6A, member RAS oncogene family
hsa-miR-548p	1	0	1	1	1	1	RAD23B	RAD23 homolog B (S. cerevisiae)
hsa-miR-548p	1	0	1	1	1	1	RASA1	RAS p21 protein activator (GTPase activating protein) 1
hsa-miR-548p	1	0	1	1	1	1	RGS16	regulator of G-protein signaling 16
hsa-miR-548p	1	0	1	0	1	1	SORT1	sortilin 1
hsa-miR-548p	0	0	1	0	1	1	CXCL5	chemokine (C-X-C motif) ligand 5
hsa-miR-548p	0	0	1	1	1	1	SDC2	syndecan 2
hsa-miR-548p	1	0	1	1	1	1	SRSF3	serine/arginine-rich splicing factor 3
hsa-miR-548p	1	0	1	1	1	1	SH3GL2	SH3-domain GRB2-like 2
hsa-miR-548p	1	0	1	1	1	1	SHB	Src homology 2 domain containing adaptor protein B
hsa-miR-548p	1	0	1	0	1	1	SLC6A6	solute carrier family 6 (neurotransmitter transporter, taurine), member 6
hsa-miR-548p	1	0	1	1	1	1	SLC7A1	solute carrier family 7 (cationic amino acid transporter, y+ system), member 1
hsa-miR-548p	1	0	1	1	1	1	SNAI2	snail homolog 2 (Drosophila)
hsa-miR-548p	1	0	1	1	1	1	SMARCC1	SWI/SNF related, matrix associated, actin dependent regulator of chromatin, subfamily c, member 1
hsa-miR-548p	1	0	1	1	1	1	SPAM1	sperm adhesion molecule 1 (PH-20 hyaluronidase, zona pellucida binding)
hsa-miR-548p	1	0	1	1	1	1	SRI	sorcin
hsa-miR-548p	1	0	1	0	1	1	STC1	stanniocalcin 1
hsa-miR-548p	0	0	1	1	1	1	STIM1	stromal interaction molecule 1
hsa-miR-548p	0	0	1	1	1	1	TAF2	TAF2 RNA polymerase II, TATA box binding protein (TBP)-associated factor, 150kDa
hsa-miR-548p	1	0	1	1	1	1	TAF4	TAF4 RNA polymerase II, TATA box binding protein (TBP)-associated factor, 135kDa
hsa-miR-548p	1	0	1	0	1	1	TAL1	T-cell acute lymphocytic leukemia 1
hsa-miR-548p	0	0	1	0	1	1	TCF21	transcription factor 21
hsa-miR-548p	0	0	1	1	1	1	TERF1	telomeric repeat binding factor (NIMA-interacting) 1
hsa-miR-548p	1	0	1	1	1	1	TFAP2B	transcription factor AP-2 beta (activating enhancer binding protein 2 beta)
hsa-miR-548p	1	0	1	0	1	1	THBS1	thrombospondin 1
hsa-miR-548p	1	0	1	0	1	1	SEC62	SEC62 homolog (S. cerevisiae)
hsa-miR-548p	0	0	1	1	0	0	TNR	tenascin R
hsa-miR-548p	1	0	1	1	1	1	TOP1	topoisomerase (DNA) I
hsa-miR-548p	1	0	1	1	1	1	UBE2B	ubiquitin-conjugating enzyme E2B
hsa-miR-548p	0	0	1	1	1	1	UBE2D1	ubiquitin-conjugating enzyme E2D 1
hsa-miR-548p	1	0	1	1	1	1	UBE2D3	ubiquitin-conjugating enzyme E2D 3
hsa-miR-548p	1	0	1	1	1	1	UBE2N	ubiquitin-conjugating enzyme E2N
hsa-miR-548p	0	0	1	1	0	0	VGF	VGF nerve growth factor inducible
hsa-miR-548p	1	0	1	1	1	1	VSNL1	visinin-like 1
hsa-miR-548p	1	0	1	1	1	1	YWHAH	tyrosine 3-monooxygenase/tryptophan 5-monooxygenase activation protein, eta polypeptide
hsa-miR-548p	0	0	1	0	1	1	ZFY	zinc finger protein, Y-linked
hsa-miR-548p	0	0	1	1	1	1	ZNF143	zinc finger protein 143
hsa-miR-548p	1	0	1	0	1	1	BSN	bassoon (presynaptic cytomatrix protein)
hsa-miR-548p	1	0	1	1	1	1	FZD5	frizzled family receptor 5
hsa-miR-548p	1	0	1	1	1	1	DEK	DEK oncogene
hsa-miR-548p	1	0	1	1	1	1	CUL5	cullin 5
hsa-miR-548p	1	0	1	1	1	1	AKAP1	A kinase (PRKA) anchor protein 1
hsa-miR-548p	1	0	1	1	1	1	NRIP1	nuclear receptor interacting protein 1
hsa-miR-548p	1	0	1	1	1	1	FZD7	frizzled family receptor 7
hsa-miR-548p	0	0	1	1	1	1	PIP5K1A	phosphatidylinositol-4-phosphate 5-kinase, type I, alpha
hsa-miR-548p	0	0	1	1	1	1	STX7	syntaxin 7
hsa-miR-548p	1	0	1	0	1	1	VAPA	VAMP (vesicle-associated membrane protein)-associated protein A, 33kDa
hsa-miR-548p	1	0	1	0	1	1	CUL3	cullin 3
hsa-miR-548p	0	0	1	1	1	1	ITGA10	integrin, alpha 10
hsa-miR-548p	0	0	1	1	1	1	CHST1	carbohydrate (keratan sulfate Gal-6) sulfotransferase 1
hsa-miR-548p	0	0	1	1	1	1	AP3B1	adaptor-related protein complex 3, beta 1 subunit
hsa-miR-548p	1	0	1	1	1	1	CDC14A	CDC14 cell division cycle 14 homolog A (S. cerevisiae)
hsa-miR-548p	0	0	1	1	1	1	PRPF18	PRP18 pre-mRNA processing factor 18 homolog (S. cerevisiae)
hsa-miR-548p	1	0	1	1	1	1	TNFSF11	tumor necrosis factor (ligand) superfamily, member 11
hsa-miR-548p	0	0	1	1	1	1	UNC5C	unc-5 homolog C (C. elegans)
hsa-miR-548p	1	0	1	0	1	1	PCDHGA12	protocadherin gamma subfamily A, 12
hsa-miR-548p	1	0	1	0	1	1	PCDHGB4	protocadherin gamma subfamily B, 4
hsa-miR-548p	1	0	1	0	1	1	TNKS	tankyrase, TRF1-interacting ankyrin-related ADP-ribose polymerase
hsa-miR-548p	1	0	1	0	1	1	IRS2	insulin receptor substrate 2
hsa-miR-548p	0	0	1	1	1	1	JRKL	jerky homolog-like (mouse)
hsa-miR-548p	0	0	1	1	1	1	SNX4	sorting nexin 4
hsa-miR-548p	1	0	1	1	1	1	SNAP23	synaptosomal-associated protein, 23kDa
hsa-miR-548p	0	0	1	1	1	1	SUCLA2	succinate-CoA ligase, ADP-forming, beta subunit
hsa-miR-548p	1	0	1	1	1	1	IQGAP1	IQ motif containing GTPase activating protein 1
hsa-miR-548p	1	0	1	1	1	1	NRP2	neuropilin 2
hsa-miR-548p	1	0	1	1	1	1	KAT2B	K(lysine) acetyltransferase 2B
hsa-miR-548p	0	0	1	1	1	1	PRPF4B	PRP4 pre-mRNA processing factor 4 homolog B (yeast)
hsa-miR-548p	1	0	1	0	1	1	SKAP2	src kinase associated phosphoprotein 2
hsa-miR-548p	1	0	1	0	1	1	WASL	Wiskott-Aldrich syndrome-like
hsa-miR-548p	1	0	1	1	1	1	MAP7	microtubule-associated protein 7
hsa-miR-548p	1	0	1	1	1	1	CDH12	cadherin 12, type 2 (N-cadherin 2)
hsa-miR-548p	1	0	1	0	1	1	DGKB	diacylglycerol kinase, beta 90kDa
hsa-miR-548p	1	0	1	1	1	1	EFNB2	ephrin-B2
hsa-miR-548p	0	0	1	0	1	1	EIF4EBP2	eukaryotic translation initiation factor 4E binding protein 2
hsa-miR-548p	1	0	1	1	1	1	EYA4	eyes absent homolog 4 (Drosophila)
hsa-miR-548p	0	0	1	1	1	1	FEN1	flap structure-specific endonuclease 1
hsa-miR-548p	0	0	1	1	1	1	FLT3	fms-related tyrosine kinase 3
hsa-miR-548p	1	0	1	1	1	1	GMFB	glia maturation factor, beta
hsa-miR-548p	0	0	1	0	1	1	OAZ1	ornithine decarboxylase antizyme 1
hsa-miR-548p	1	0	1	0	1	1	SLC1A2	solute carrier family 1 (glial high affinity glutamate transporter), member 2
hsa-miR-548p	0	0	1	0	1	1	TMSB4Y	thymosin beta 4, Y-linked
hsa-miR-548p	1	0	1	1	1	1	SOCS6	suppressor of cytokine signaling 6
hsa-miR-548p	0	0	1	1	1	1	TRIP13	thyroid hormone receptor interactor 13
hsa-miR-548p	0	0	1	0	1	1	CYTIP	cytohesin 1 interacting protein
hsa-miR-548p	1	0	1	1	1	1	GDA	guanine deaminase
hsa-miR-548p	0	0	1	1	1	1	ACTL6A	actin-like 6A
hsa-miR-548p	1	0	1	1	1	1	BCL9	B-cell CLL/lymphoma 9
hsa-miR-548p	1	0	1	1	1	1	BNIP2	BCL2/adenovirus E1B 19kDa interacting protein 2
hsa-miR-548p	0	0	1	1	1	1	BST1	bone marrow stromal cell antigen 1
hsa-miR-548p	1	0	1	0	1	1	RUNX1T1	runt-related transcription factor 1; translocated to, 1 (cyclin D-related)
hsa-miR-548p	0	0	1	1	1	1	CEACAM5	carcinoembryonic antigen-related cell adhesion molecule 5
hsa-miR-548p	1	0	1	0	1	1	CEBPA	CCAAT/enhancer binding protein (C/EBP), alpha
hsa-miR-548p	0	0	1	1	1	1	COL12A1	collagen, type XII, alpha 1
hsa-miR-548p	0	0	1	1	0	0	CPT1B	carnitine palmitoyltransferase 1B (muscle)
hsa-miR-548p	1	0	1	1	1	1	DACH1	dachshund homolog 1 (Drosophila)
hsa-miR-548p	1	0	1	1	1	1	DAG1	dystroglycan 1 (dystrophin-associated glycoprotein 1)
hsa-miR-548p	1	0	1	1	1	1	DUSP1	dual specificity phosphatase 1
hsa-miR-548p	1	0	1	1	1	1	DUSP5	dual specificity phosphatase 5
hsa-miR-548p	1	0	1	1	1	1	EGR3	early growth response 3
hsa-miR-548p	1	0	1	1	1	1	EPS8	epidermal growth factor receptor pathway substrate 8
hsa-miR-548p	1	0	1	0	1	1	ETV5	ets variant 5
hsa-miR-548p	1	0	1	0	1	1	ACSL4	acyl-CoA synthetase long-chain family member 4
hsa-miR-548p	1	0	1	1	1	1	FOXD2	forkhead box D2
hsa-miR-548p	1	0	1	0	1	1	ARHGAP35	Rho GTPase activating protein 35
hsa-miR-548p	1	0	1	1	1	1	MLLT3	myeloid/lymphoid or mixed-lineage leukemia (trithorax homolog, Drosophila); translocated to, 3
hsa-miR-548p	1	0	1	1	0	0	ROR2	receptor tyrosine kinase-like orphan receptor 2
hsa-miR-548p	1	0	1	0	1	1	PKNOX1	PBX/knotted 1 homeobox 1
hsa-miR-548p	0	0	1	0	1	1	POU4F2	POU class 4 homeobox 2
hsa-miR-548p	0	0	1	1	1	1	RAB27A	RAB27A, member RAS oncogene family
hsa-miR-548p	0	0	1	1	1	1	SMS	spermine synthase
hsa-miR-548p	1	0	1	1	1	1	WNT11	wingless-type MMTV integration site family, member 11
hsa-miR-548p	1	0	1	0	1	1	USP9Y	ubiquitin specific peptidase 9, Y-linked
hsa-miR-548p	1	0	1	1	1	1	RAB11A	RAB11A, member RAS oncogene family
hsa-miR-548p	1	0	1	1	0	0	PIAS2	protein inhibitor of activated STAT, 2
hsa-miR-548p	1	0	1	1	1	1	RABEP1	rabaptin, RAB GTPase binding effector protein 1
hsa-miR-548p	0	0	1	0	1	1	CXorf1	chromosome X open reading frame 1
hsa-miR-548p	0	0	1	1	1	1	BUB3	budding uninhibited by benzimidazoles 3 homolog (yeast)
hsa-miR-548p	1	0	1	1	1	1	LARGE	like-glycosyltransferase
hsa-miR-548p	1	0	1	1	1	1	RPS6KA5	ribosomal protein S6 kinase, 90kDa, polypeptide 5
hsa-miR-548p	1	0	1	1	1	1	B4GALT6	UDP-Gal:betaGlcNAc beta 1,4- galactosyltransferase, polypeptide 6
hsa-miR-548p	1	0	1	1	1	1	B4GALT5	UDP-Gal:betaGlcNAc beta 1,4- galactosyltransferase, polypeptide 5
hsa-miR-548p	1	0	1	0	1	1	VAMP3	vesicle-associated membrane protein 3 (cellubrevin)
hsa-miR-548p	1	0	1	1	1	1	SNAP29	synaptosomal-associated protein, 29kDa
hsa-miR-548p	1	0	1	1	0	0	RAB33A	RAB33A, member RAS oncogene family
hsa-miR-548p	0	0	1	1	0	0	LPXN	leupaxin
hsa-miR-548p	0	0	1	1	1	1	TJP2	tight junction protein 2
hsa-miR-548p	1	0	1	0	1	1	CDYL	chromodomain protein, Y-like
hsa-miR-548p	1	0	1	1	1	1	ONECUT2	one cut homeobox 2
hsa-miR-548p	1	0	1	0	1	1	SEC22B	SEC22 vesicle trafficking protein homolog B (S. cerevisiae) (gene/pseudogene)
hsa-miR-548p	0	0	1	1	0	0	PDIA4	protein disulfide isomerase family A, member 4
hsa-miR-548p	1	0	1	1	1	1	ZFP36L1	zinc finger protein 36, C3H type-like 1
hsa-miR-548p	0	0	1	1	1	1	DSC1	desmocollin 1
hsa-miR-548p	0	0	1	0	1	1	DSC2	desmocollin 2
hsa-miR-548p	1	0	1	1	1	1	GABRE	gamma-aminobutyric acid (GABA) A receptor, epsilon
hsa-miR-548p	0	0	1	1	1	1	GUCY2C	guanylate cyclase 2C (heat stable enterotoxin receptor)
hsa-miR-548p	1	0	1	1	1	1	JARID2	jumonji, AT rich interactive domain 2
hsa-miR-548p	1	0	1	1	1	1	KCNC4	potassium voltage-gated channel, Shaw-related subfamily, member 4
hsa-miR-548p	0	0	1	1	1	1	PPID	peptidylprolyl isomerase D
hsa-miR-548p	0	0	1	1	1	1	PRCP	prolylcarboxypeptidase (angiotensinase C)
hsa-miR-548p	1	0	1	1	1	1	RELN	reelin
hsa-miR-548p	0	0	1	1	1	1	PSMD5	proteasome (prosome, macropain) 26S subunit, non-ATPase, 5
hsa-miR-548p	0	0	1	1	1	1	PTH2R	parathyroid hormone 2 receptor
hsa-miR-548p	1	0	1	0	1	1	SCD	stearoyl-CoA desaturase (delta-9-desaturase)
hsa-miR-548p	1	0	1	0	1	1	SEL1L	sel-1 suppressor of lin-12-like (C. elegans)
hsa-miR-548p	1	0	1	1	1	1	SIAH2	siah E3 ubiquitin protein ligase 2
hsa-miR-548p	0	0	1	1	1	1	SIM1	single-minded homolog 1 (Drosophila)
hsa-miR-548p	0	0	1	1	1	1	AKAP17A	A kinase (PRKA) anchor protein 17A
hsa-miR-548p	1	0	1	1	1	1	OXSR1	oxidative-stress responsive 1
hsa-miR-548p	1	0	1	1	1	1	GFPT2	glutamine-fructose-6-phosphate transaminase 2
hsa-miR-548p	1	0	1	1	1	1	SLC23A2	solute carrier family 23 (nucleobase transporters), member 2
hsa-miR-548p	1	0	1	0	1	1	NUP153	nucleoporin 153kDa
hsa-miR-548p	0	0	1	1	1	1	FGFBP1	fibroblast growth factor binding protein 1
hsa-miR-548p	0	0	1	1	0	0	CNGA2	cyclic nucleotide gated channel alpha 2
hsa-miR-548p	1	0	1	1	1	1	APLNR	apelin receptor
hsa-miR-548p	1	0	1	1	1	1	BMI1	BMI1 polycomb ring finger oncogene
hsa-miR-548p	1	0	1	1	1	1	CBL	Cbl proto-oncogene, E3 ubiquitin protein ligase
hsa-miR-548p	1	0	1	1	1	1	FOXN3	forkhead box N3
hsa-miR-548p	1	0	1	1	1	1	CRK	v-crk sarcoma virus CT10 oncogene homolog (avian)
hsa-miR-548p	1	0	1	1	1	1	ARID3A	AT rich interactive domain 3A (BRIGHT-like)
hsa-miR-548p	1	0	1	0	1	1	E2F1	E2F transcription factor 1
hsa-miR-548p	1	0	1	1	1	1	ELK3	ELK3, ETS-domain protein (SRF accessory protein 2)
hsa-miR-548p	1	0	1	1	1	1	GAS2	growth arrest-specific 2
hsa-miR-548p	0	0	1	1	1	1	MSTN	myostatin
hsa-miR-548p	1	0	1	1	1	1	GPM6A	glycoprotein M6A
hsa-miR-548p	1	0	1	1	1	1	GPR3	G protein-coupled receptor 3
hsa-miR-548p	1	0	1	1	1	1	GPR6	G protein-coupled receptor 6
hsa-miR-548p	0	0	1	1	1	1	LPAR4	lysophosphatidic acid receptor 4
hsa-miR-548p	0	0	1	1	1	1	H1F0	H1 histone family, member 0
hsa-miR-548p	1	0	1	1	1	1	HAS2	hyaluronan synthase 2
hsa-miR-548p	1	0	1	1	0	0	JUND	jun D proto-oncogene
hsa-miR-548p	0	0	1	1	0	0	LIPE	lipase, hormone-sensitive
hsa-miR-548p	1	0	1	1	1	1	MYCL1	v-myc myelocytomatosis viral oncogene homolog 1, lung carcinoma derived (avian)
hsa-miR-548p	1	0	1	1	1	1	NCL	nucleolin
hsa-miR-548p	1	0	1	1	1	1	PHF2	PHD finger protein 2
hsa-miR-548p	1	0	1	0	1	1	PRKAB2	protein kinase, AMP-activated, beta 2 non-catalytic subunit
hsa-miR-548p	1	0	1	0	1	1	PRKCE	protein kinase C, epsilon
hsa-miR-548p	1	0	1	1	0	0	SALL2	sal-like 2 (Drosophila)
hsa-miR-548p	0	0	1	1	1	1	CXCL11	chemokine (C-X-C motif) ligand 11
hsa-miR-548p	0	0	1	1	1	1	SEPP1	selenoprotein P, plasma, 1
hsa-miR-548p	0	0	1	1	1	1	ST5	suppression of tumorigenicity 5
hsa-miR-548p	1	0	1	0	1	1	CCDC6	coiled-coil domain containing 6
hsa-miR-548p	1	0	1	1	1	1	RND2	Rho family GTPase 2
hsa-miR-548p	0	0	1	1	1	1	ZRANB2	zinc finger, RAN-binding domain containing 2
hsa-miR-548p	1	0	1	1	1	1	MAFB	v-maf musculoaponeurotic fibrosarcoma oncogene homolog B (avian)
hsa-miR-548p	1	0	1	1	1	1	AKT3	v-akt murine thymoma viral oncogene homolog 3 (protein kinase B, gamma)
hsa-miR-548p	1	0	1	1	1	1	PIGK	phosphatidylinositol glycan anchor biosynthesis, class K
hsa-miR-548p	1	0	1	1	1	1	GTF2E1	general transcription factor IIE, polypeptide 1, alpha 56kDa
hsa-miR-548p	1	0	1	1	1	1	HOXA11	homeobox A11
hsa-miR-548p	0	0	1	1	1	1	ING1	inhibitor of growth family, member 1
hsa-miR-548p	1	0	1	1	1	1	INSIG1	insulin induced gene 1
hsa-miR-548p	1	0	1	1	1	1	LAMP1	lysosomal-associated membrane protein 1
hsa-miR-548p	0	0	1	0	1	1	LCP2	lymphocyte cytosolic protein 2 (SH2 domain containing leukocyte protein of 76kDa)
hsa-miR-548p	0	0	1	1	1	1	LMAN1	lectin, mannose-binding, 1
hsa-miR-548p	1	0	1	1	1	1	LPP	LIM domain containing preferred translocation partner in lipoma
hsa-miR-548p	0	0	1	0	1	1	POU3F2	POU class 3 homeobox 2
hsa-miR-548p	1	0	1	1	1	1	RNASE6	ribonuclease, RNase A family, k6
hsa-miR-548p	0	0	1	1	1	1	CCL8	chemokine (C-C motif) ligand 8
hsa-miR-548p	0	0	1	1	1	1	SRSF4	serine/arginine-rich splicing factor 4
hsa-miR-548p	0	0	1	1	1	1	SOX3	SRY (sex determining region Y)-box 3
hsa-miR-548p	1	0	1	1	1	1	TMPRSS2	transmembrane protease, serine 2
hsa-miR-548p	0	0	1	1	1	1	SLC35A2	solute carrier family 35 (UDP-galactose transporter), member A2
hsa-miR-548p	1	0	1	1	1	1	EVI5	ecotropic viral integration site 5
hsa-miR-548p	1	0	1	1	1	1	ST8SIA4	ST8 alpha-N-acetyl-neuraminide alpha-2,8-sialyltransferase 4
hsa-miR-548p	0	0	1	1	0	0	SNURF	SNRPN upstream reading frame
hsa-miR-548p	0	0	1	1	1	1	PDCD7	programmed cell death 7
hsa-miR-548p	1	0	1	0	1	1	GPC6	glypican 6
hsa-miR-548p	1	0	1	1	1	1	ARPC5	actin related protein 2/3 complex, subunit 5, 16kDa
hsa-miR-548p	0	0	1	1	1	1	TOB1	transducer of ERBB2, 1
hsa-miR-548p	1	0	1	0	1	1	CLEC3A	C-type lectin domain family 3, member A
hsa-miR-548p	0	0	1	1	1	1	CEBPZ	CCAAT/enhancer binding protein (C/EBP), zeta
hsa-miR-548p	1	0	1	1	1	1	LHFPL2	lipoma HMGIC fusion partner-like 2
hsa-miR-548p	1	0	1	1	1	1	PRKD3	protein kinase D3
hsa-miR-548p	0	0	1	1	1	1	LRRC17	leucine rich repeat containing 17
hsa-miR-548p	1	0	1	1	1	1	SRRM1	serine/arginine repetitive matrix 1
hsa-miR-548p	1	0	1	0	1	1	SPRY3	sprouty homolog 3 (Drosophila)
hsa-miR-548p	0	0	1	1	1	1	ZMPSTE24	zinc metallopeptidase STE24 homolog (S. cerevisiae)
hsa-miR-548p	1	0	1	1	1	1	PURA	purine-rich element binding protein A
hsa-miR-548p	1	0	1	1	1	1	BET1	blocked early in transport 1 homolog (S. cerevisiae)
hsa-miR-548p	1	0	1	0	1	1	NBR1	neighbor of BRCA1 gene 1
hsa-miR-548p	1	0	1	1	1	1	MAN1A1	mannosidase, alpha, class 1A, member 1
hsa-miR-548p	1	0	1	1	1	1	MEOX2	mesenchyme homeobox 2
hsa-miR-548p	1	0	1	1	0	0	MLLT1	myeloid/lymphoid or mixed-lineage leukemia (trithorax homolog, Drosophila); translocated to, 1
hsa-miR-548p	1	0	1	1	1	1	MMP16	matrix metallopeptidase 16 (membrane-inserted)
hsa-miR-548p	0	0	1	1	0	0	MT1G	metallothionein 1G
hsa-miR-548p	1	0	1	1	1	1	MTF1	metal-regulatory transcription factor 1
hsa-miR-548p	1	0	1	0	1	1	NAB1	NGFI-A binding protein 1 (EGR1 binding protein 1)
hsa-miR-548p	0	0	1	1	0	0	PPYR1	pancreatic polypeptide receptor 1
hsa-miR-548p	1	0	1	1	1	1	PRCC	papillary renal cell carcinoma (translocation-associated)
hsa-miR-548p	0	0	1	1	1	1	TSC22D1	TSC22 domain family, member 1
hsa-miR-548p	1	0	1	0	1	1	HDAC4	histone deacetylase 4
hsa-miR-548p	1	0	1	0	1	1	HS3ST3B1	heparan sulfate (glucosamine) 3-O-sulfotransferase 3B1
hsa-miR-548p	0	0	1	1	1	1	TRDN	triadin
hsa-miR-548p	1	0	1	1	1	1	SEMA3A	sema domain, immunoglobulin domain (Ig), short basic domain, secreted, (semaphorin) 3A
hsa-miR-548p	1	0	1	1	1	1	SPON1	spondin 1, extracellular matrix protein
hsa-miR-548p	0	0	1	1	1	1	KRT1	keratin 1
hsa-miR-548p	1	0	1	1	1	1	TMEM50B	transmembrane protein 50B
hsa-miR-548p	1	0	1	1	1	1	CAPZA1	capping protein (actin filament) muscle Z-line, alpha 1
hsa-miR-548p	1	0	1	1	1	1	DYNC1LI2	dynein, cytoplasmic 1, light intermediate chain 2
hsa-miR-548p	0	0	1	1	1	1	IRF6	interferon regulatory factor 6
hsa-miR-548p	1	0	1	1	1	1	NEFL	neurofilament, light polypeptide
hsa-miR-548p	1	0	1	1	1	1	NR4A2	nuclear receptor subfamily 4, group A, member 2
hsa-miR-548p	1	0	1	1	1	1	CDK16	cyclin-dependent kinase 16
hsa-miR-548p	0	0	1	1	0	0	PDE6H	phosphodiesterase 6H, cGMP-specific, cone, gamma
hsa-miR-548p	1	0	1	1	1	1	PDGFRA	platelet-derived growth factor receptor, alpha polypeptide
hsa-miR-548p	1	0	1	0	1	1	PITPNA	phosphatidylinositol transfer protein, alpha
hsa-miR-548p	1	0	1	0	1	1	PPP1R2	protein phosphatase 1, regulatory (inhibitor) subunit 2
hsa-miR-548p	1	0	1	1	1	1	PRKAA1	protein kinase, AMP-activated, alpha 1 catalytic subunit
hsa-miR-548p	1	0	1	1	1	1	PKN2	protein kinase N2
hsa-miR-548p	1	0	1	1	1	1	RAD21	RAD21 homolog (S. pombe)
hsa-miR-548p	1	0	1	1	1	1	ITSN2	intersectin 2
hsa-miR-548p	1	0	1	1	1	1	STK4	serine/threonine kinase 4
hsa-miR-548p	1	0	1	1	1	1	SMC1A	structural maintenance of chromosomes 1A
hsa-miR-548p	1	0	1	1	1	1	TUBGCP3	tubulin, gamma complex associated protein 3
hsa-miR-548p	0	0	1	1	1	1	FST	follistatin
hsa-miR-548p	1	0	1	1	1	1	ZNF238	zinc finger protein 238
hsa-miR-548p	0	0	1	1	1	1	SLC25A17	solute carrier family 25 (mitochondrial carrier; peroxisomal membrane protein, 34kDa), member 17
hsa-miR-548p	1	0	1	1	1	1	SEC23A	Sec23 homolog A (S. cerevisiae)
hsa-miR-548p	0	0	1	1	1	1	CAP2	CAP, adenylate cyclase-associated protein, 2 (yeast)
hsa-miR-548p	1	0	1	0	1	1	APPBP2	amyloid beta precursor protein (cytoplasmic tail) binding protein 2
hsa-miR-548p	1	0	1	1	1	1	NEBL	nebulette
hsa-miR-548p	1	0	1	1	1	1	ANP32B	acidic (leucine-rich) nuclear phosphoprotein 32 family, member B
hsa-miR-548p	0	0	1	1	1	1	HBXIP	hepatitis B virus x interacting protein
hsa-miR-548p	1	0	1	1	1	1	SPTLC1	serine palmitoyltransferase, long chain base subunit 1
hsa-miR-548p	1	0	1	1	1	1	PAIP1	poly(A) binding protein interacting protein 1
hsa-miR-548p	1	0	1	1	1	1	HEXIM1	hexamethylene bis-acetamide inducible 1
hsa-miR-548p	1	0	1	0	1	1	GNAI3	guanine nucleotide binding protein (G protein), alpha inhibiting activity polypeptide 3
hsa-miR-548p	1	0	1	0	1	1	IGF2BP1	insulin-like growth factor 2 mRNA binding protein 1
hsa-miR-548p	1	0	1	1	1	1	CTCF	CCCTC-binding factor (zinc finger protein)
hsa-miR-548p	1	0	1	0	1	1	MAP4K5	mitogen-activated protein kinase kinase kinase kinase 5
hsa-miR-548p	1	0	1	0	1	1	API5	apoptosis inhibitor 5
hsa-miR-548p	1	0	1	1	1	1	MAP3K2	mitogen-activated protein kinase kinase kinase 2
hsa-miR-548p	0	0	1	1	1	1	KLRAP1	killer cell lectin-like receptor subfamily A pseudogene 1
hsa-miR-548p	1	0	1	1	1	1	ZBTB6	zinc finger and BTB domain containing 6
[truncated: 728 more rows]
