# Supplementary material for: Profiling of Selected MicroRNAs in Proliferative Eutopic Endometrium of Women with Ovarian Endometriosis
Source: Biomed Res Int. 2015 Aug 20;2015:760698. doi: 10.1155/2015/760698 (PMC4558423; doi:10.1155/2015/760698)
Supplement: Supplementary file 1 — Table I: The names of miRNAs significantly differentially expressed between eutopic endometrium of patients with endometriosis vs eutopic endometrium of patients without endometriosis. Table II: The associations between miRNA and mRNA, which presents detailed results of the search of six major databases i.e targetscan, tarbase, miranda, mirbase, mirtarget2 and pictar. [file 760698.f1.zip › 760698.f1/Table II/hsa-miR-551a.tsv]

miR	targetscan	tarbase	miranda	mirbase	mirtarget2	pictar	GeneSymbol	GeneName
hsa-miR-551a	1	0	1	0	1	1	MEF2C	myocyte enhancer factor 2C
hsa-miR-551a	1	0	1	1	1	1	ERBB4	v-erb-a erythroblastic leukemia viral oncogene homolog 4 (avian)
hsa-miR-551a	1	0	1	1	1	1	LPHN1	latrophilin 1
hsa-miR-551a	1	0	1	1	1	1	GALNTL6	UDP-N-acetyl-alpha-D-galactosamine:polypeptide N-acetylgalactosaminyltransferase-like 6
hsa-miR-551a	1	0	1	1	0	0	ZFP36	zinc finger protein 36, C3H type, homolog (mouse)
hsa-miR-551a	1	0	1	1	1	1	PLAU	plasminogen activator, urokinase
hsa-miR-551a	0	0	1	1	0	0	ARHGEF2	Rho/Rac guanine nucleotide exchange factor (GEF) 2
hsa-miR-551a	0	0	1	1	0	0	FKBP15	FK506 binding protein 15, 133kDa
hsa-miR-551a	1	0	1	1	1	1	LMO7	LIM domain 7
hsa-miR-551a	1	0	1	1	1	1	RIMKLB	ribosomal modification protein rimK-like family member B
hsa-miR-551a	1	0	1	0	0	0	PITPNM2	phosphatidylinositol transfer protein, membrane-associated 2
hsa-miR-551a	1	0	1	1	1	1	USP28	ubiquitin specific peptidase 28
hsa-miR-551a	1	0	1	1	1	1	IKZF4	IKAROS family zinc finger 4 (Eos)
hsa-miR-551a	1	0	1	0	0	0	RNF169	ring finger protein 169
hsa-miR-551a	0	0	1	1	0	0	FAM22D	family with sequence similarity 22, member D
hsa-miR-551a	0	0	1	1	1	1	PTK2	PTK2 protein tyrosine kinase 2
hsa-miR-551a	1	0	1	0	1	1	MAML1	mastermind-like 1 (Drosophila)
hsa-miR-551a	1	0	1	1	1	1	TWF1	twinfilin, actin-binding protein, homolog 1 (Drosophila)
hsa-miR-551a	1	0	1	1	1	1	NEO1	neogenin 1
hsa-miR-551a	1	0	1	1	1	1	TEAD1	TEA domain family member 1 (SV40 transcriptional enhancer factor)
hsa-miR-551a	1	0	1	1	0	0	PPP2R5D	protein phosphatase 2, regulatory subunit B', delta
hsa-miR-551a	0	0	1	0	0	0	MIAT	myocardial infarction associated transcript (non-protein coding)
hsa-miR-551a	0	0	1	0	0	0	ALOX12P2	arachidonate 12-lipoxygenase pseudogene 2
hsa-miR-551a	1	0	1	1	0	0	PRRC2A	proline-rich coiled-coil 2A
hsa-miR-551a	0	0	1	1	1	1	ACIN1	apoptotic chromatin condensation inducer 1
hsa-miR-551a	0	0	1	1	1	1	CTNNAL1	catenin (cadherin-associated protein), alpha-like 1
hsa-miR-551a	0	0	1	0	0	0	BPESC1	blepharophimosis, epicanthus inversus and ptosis, candidate 1 (non-protein coding)
hsa-miR-551a	0	0	1	1	1	1	PJA1	praja ring finger 1, E3 ubiquitin protein ligase
hsa-miR-551a	0	0	1	0	1	1	ERBB2IP	erbb2 interacting protein
hsa-miR-551a	1	0	1	1	1	1	NRP1	neuropilin 1
hsa-miR-551a	1	0	1	1	1	1	SPTBN4	spectrin, beta, non-erythrocytic 4
hsa-miR-551a	0	0	1	1	1	1	FCRL1	Fc receptor-like 1
hsa-miR-551a	0	0	1	1	1	1	CHST11	carbohydrate (chondroitin 4) sulfotransferase 11
hsa-miR-551a	0	0	1	1	1	1	CD28	CD28 molecule
hsa-miR-551a	1	0	1	0	1	1	NAALADL2	N-acetylated alpha-linked acidic dipeptidase-like 2
hsa-miR-551a	1	0	1	1	1	1	ACER3	alkaline ceramidase 3
hsa-miR-551a	0	0	1	0	0	0	C17orf72	chromosome 17 open reading frame 72
hsa-miR-551a	0	0	1	0	0	0	C14orf93	chromosome 14 open reading frame 93
hsa-miR-551a	1	0	1	1	1	1	WDTC1	WD and tetratricopeptide repeats 1
hsa-miR-551a	1	0	1	0	1	1	DCAF17	DDB1 and CUL4 associated factor 17
hsa-miR-551a	1	0	1	1	1	1	COPS7B	COP9 constitutive photomorphogenic homolog subunit 7B (Arabidopsis)
hsa-miR-551a	0	0	1	1	1	1	SIGLEC1	sialic acid binding Ig-like lectin 1, sialoadhesin
hsa-miR-551a	0	0	1	0	0	0	IFFO2	intermediate filament family orphan 2
hsa-miR-551a	1	0	1	0	1	1	ATP2B1	ATPase, Ca++ transporting, plasma membrane 1
hsa-miR-551a	0	0	1	0	1	1	HEMK1	HemK methyltransferase family member 1
hsa-miR-551a	0	0	1	0	0	0	NEURL1B	neuralized homolog 1B (Drosophila)
hsa-miR-551a	0	0	1	1	0	0	NRSN2	neurensin 2
hsa-miR-551a	1	0	1	1	1	1	GORASP2	golgi reassembly stacking protein 2, 55kDa
hsa-miR-551a	1	0	1	1	1	1	FOXP1	forkhead box P1
hsa-miR-551a	1	0	1	1	1	1	TMEM2	transmembrane protein 2
hsa-miR-551a	1	0	1	0	1	1	AP1G1	adaptor-related protein complex 1, gamma 1 subunit
hsa-miR-551a	0	0	1	0	0	0	FLJ30838	uncharacterized LOC400955
hsa-miR-551a	0	0	1	0	0	0	FLJ31104	uncharacterized LOC441072
hsa-miR-551a	0	0	1	0	1	1	FAM70A	family with sequence similarity 70, member A
hsa-miR-551a	0	0	1	1	1	1	IFT43	intraflagellar transport 43 homolog (Chlamydomonas)
hsa-miR-551a	1	0	1	1	1	1	MAP3K11	mitogen-activated protein kinase kinase kinase 11
hsa-miR-551a	0	0	1	0	0	0	LOC147004	uncharacterized LOC147004
hsa-miR-551a	0	0	1	0	1	1	UHMK1	U2AF homology motif (UHM) kinase 1
hsa-miR-551a	0	0	1	1	0	0	MRPL46	mitochondrial ribosomal protein L46
hsa-miR-551a	0	0	1	1	1	1	TRPC4AP	transient receptor potential cation channel, subfamily C, member 4 associated protein
hsa-miR-551a	0	0	1	1	0	0	SYTL1	synaptotagmin-like 1
hsa-miR-551a	1	0	1	1	1	1	PIP4K2C	phosphatidylinositol-5-phosphate 4-kinase, type II, gamma
hsa-miR-551a	0	0	1	1	0	0	ATP6AP1	ATPase, H+ transporting, lysosomal accessory protein 1
hsa-miR-551a	0	0	1	1	0	0	APOBEC3G	apolipoprotein B mRNA editing enzyme, catalytic polypeptide-like 3G
hsa-miR-551a	0	0	1	1	1	1	CYP11B1	cytochrome P450, family 11, subfamily B, polypeptide 1
hsa-miR-551a	1	0	1	1	1	1	MAP3K12	mitogen-activated protein kinase kinase kinase 12
hsa-miR-551a	1	0	1	1	1	1	RCN1	reticulocalbin 1, EF-hand calcium binding domain
hsa-miR-551a	1	0	1	1	1	1	NDEL1	nudE nuclear distribution E homolog (A. nidulans)-like 1
hsa-miR-551a	0	0	1	1	1	1	MOBP	myelin-associated oligodendrocyte basic protein
hsa-miR-551a	1	0	1	0	1	1	STC2	stanniocalcin 2
hsa-miR-551a	1	0	1	1	1	1	EPB41L1	erythrocyte membrane protein band 4.1-like 1
hsa-miR-551a	0	0	1	0	0	0	KIRREL3-AS3	KIRREL3 antisense RNA 3
hsa-miR-551a	1	0	1	1	1	1	GOLGA8B	golgin A8 family, member B
hsa-miR-551a	0	0	1	0	0	0	CECR7	cat eye syndrome chromosome region, candidate 7 (non-protein coding)
hsa-miR-551a	1	0	1	0	1	1	SQSTM1	sequestosome 1
hsa-miR-551a	1	0	1	1	1	1	LMX1A	LIM homeobox transcription factor 1, alpha
hsa-miR-551a	1	0	1	1	1	1	AGAP2	ArfGAP with GTPase domain, ankyrin repeat and PH domain 2
hsa-miR-551a	1	0	1	1	1	1	FAM219A	family with sequence similarity 219, member A
hsa-miR-551a	0	0	1	1	0	0	C20orf27	chromosome 20 open reading frame 27
hsa-miR-551a	0	0	1	1	0	0	SSPO	SCO-spondin homolog (Bos taurus)
hsa-miR-551a	1	0	1	1	1	1	FAM122B	family with sequence similarity 122B
hsa-miR-551a	0	0	1	1	0	0	RPRD2	regulation of nuclear pre-mRNA domain containing 2
hsa-miR-551a	1	0	1	1	1	1	DCTN4	dynactin 4 (p62)
hsa-miR-551a	1	0	1	0	1	1	DDX46	DEAD (Asp-Glu-Ala-Asp) box polypeptide 46
hsa-miR-551a	0	0	1	1	1	1	PLEKHS1	pleckstrin homology domain containing, family S member 1
hsa-miR-551a	0	0	1	0	0	0	MIR143HG	MIR143 host gene (non-protein coding)
hsa-miR-551a	1	0	1	1	1	1	MFSD6	major facilitator superfamily domain containing 6
hsa-miR-551a	1	0	1	1	1	1	PHF17	PHD finger protein 17
hsa-miR-551a	1	0	1	1	0	0	PPP1CA	protein phosphatase 1, catalytic subunit, alpha isozyme
hsa-miR-551a	0	0	1	1	0	0	NCF1	neutrophil cytosolic factor 1
hsa-miR-551a	0	0	1	1	0	0	C1orf86	chromosome 1 open reading frame 86
hsa-miR-551a	0	0	1	1	0	0	DENND3	DENN/MADD domain containing 3
hsa-miR-551a	0	0	1	1	1	1	RGS3	regulator of G-protein signaling 3
hsa-miR-551a	1	0	1	1	0	0	ATP13A3	ATPase type 13A3
hsa-miR-551a	0	0	1	1	0	0	OPLAH	5-oxoprolinase (ATP-hydrolysing)
hsa-miR-551a	1	0	1	1	1	1	GOLGA8A	golgin A8 family, member A
hsa-miR-551a	1	0	1	1	1	1	GPBP1	GC-rich promoter binding protein 1
hsa-miR-551a	0	0	1	1	1	1	CCDC132	coiled-coil domain containing 132
hsa-miR-551a	0	0	1	0	1	1	USO1	USO1 vesicle docking protein homolog (yeast)
hsa-miR-551a	1	0	1	1	1	1	GAL3ST3	galactose-3-O-sulfotransferase 3
hsa-miR-551a	0	0	1	0	0	0	MEG3	maternally expressed 3 (non-protein coding)
hsa-miR-551a	0	0	1	1	1	1	GCOM1	GRINL1A complex locus 1
hsa-miR-551a	0	0	1	1	1	1	IL20	interleukin 20
hsa-miR-551a	0	0	1	1	1	1	PTGR2	prostaglandin reductase 2
hsa-miR-551a	0	0	1	1	1	1	AICDA	activation-induced cytidine deaminase
hsa-miR-551a	0	0	1	0	0	0	GBAP1	glucosidase, beta, acid pseudogene 1
hsa-miR-551a	1	0	1	1	1	1	NUMA1	nuclear mitotic apparatus protein 1
hsa-miR-551a	1	0	1	0	1	1	EIF1AD	eukaryotic translation initiation factor 1A domain containing
hsa-miR-551a	1	0	1	0	1	1	FAXC	failed axon connections homolog (Drosophila)
hsa-miR-551a	1	0	1	1	1	1	SZRD1	SUZ RNA binding domain containing 1
hsa-miR-551a	0	0	1	1	1	1	GNL3L	guanine nucleotide binding protein-like 3 (nucleolar)-like
hsa-miR-551a	0	0	1	0	1	1	ZNF37A	zinc finger protein 37A
hsa-miR-551a	1	0	1	1	1	1	ARHGEF9	Cdc42 guanine nucleotide exchange factor (GEF) 9
hsa-miR-551a	0	0	1	1	0	0	GPT	glutamic-pyruvate transaminase (alanine aminotransferase)
hsa-miR-551a	0	0	1	1	1	1	EXOC7	exocyst complex component 7
hsa-miR-551a	0	0	1	1	1	1	PRMT3	protein arginine methyltransferase 3
hsa-miR-551a	1	0	1	1	1	1	CASD1	CAS1 domain containing 1
hsa-miR-551a	1	0	1	0	1	1	PSMF1	proteasome (prosome, macropain) inhibitor subunit 1 (PI31)
hsa-miR-551a	1	0	1	0	1	1	GPR107	G protein-coupled receptor 107
hsa-miR-551a	0	0	1	1	1	1	TMEM117	transmembrane protein 117
hsa-miR-551a	0	0	1	1	0	0	ASIC4	acid-sensing (proton-gated) ion channel family member 4
hsa-miR-551a	1	0	1	1	1	1	SPATS2	spermatogenesis associated, serine-rich 2
hsa-miR-551a	1	0	1	1	1	1	SORL1	sortilin-related receptor, L(DLR class) A repeats containing
hsa-miR-551a	1	0	1	1	1	1	SIRPA	signal-regulatory protein alpha
hsa-miR-551a	0	0	1	1	0	0	TNMD	tenomodulin
hsa-miR-551a	1	0	1	1	1	1	CTDSPL2	CTD (carboxy-terminal domain, RNA polymerase II, polypeptide A) small phosphatase like 2
hsa-miR-551a	1	0	1	1	1	1	MEIS1	Meis homeobox 1
hsa-miR-551a	1	0	1	1	1	1	BNC2	basonuclin 2
hsa-miR-551a	0	0	1	1	0	0	COX4I1	cytochrome c oxidase subunit IV isoform 1
hsa-miR-551a	0	0	1	1	1	1	SLC14A1	solute carrier family 14 (urea transporter), member 1 (Kidd blood group)
hsa-miR-551a	0	0	1	1	1	1	GOLGA6L9	golgin A6 family-like 9
hsa-miR-551a	1	0	1	1	1	1	CTIF	CBP80/20-dependent translation initiation factor
hsa-miR-551a	0	0	1	1	0	0	PLB1	phospholipase B1
hsa-miR-551a	1	0	1	1	1	1	ARHGAP30	Rho GTPase activating protein 30
hsa-miR-551a	0	0	1	0	0	0	LOC646168	uncharacterized LOC646168
hsa-miR-551a	0	0	1	0	1	1	IL33	interleukin 33
hsa-miR-551a	0	0	1	1	0	0	NLRC5	NLR family, CARD domain containing 5
hsa-miR-551a	1	0	1	0	1	1	SEMA4G	sema domain, immunoglobulin domain (Ig), transmembrane domain (TM) and short cytoplasmic domain, (semaphorin) 4G
hsa-miR-551a	1	0	1	1	1	1	GATA2	GATA binding protein 2
hsa-miR-551a	1	0	1	1	1	1	SCUBE3	signal peptide, CUB domain, EGF-like 3
hsa-miR-551a	0	0	1	0	0	0	SCAND2	SCAN domain containing 2 pseudogene
hsa-miR-551a	0	0	1	1	1	1	SH2D1B	SH2 domain containing 1B
hsa-miR-551a	1	0	1	0	1	1	MAGIX	MAGI family member, X-linked
hsa-miR-551a	1	0	1	1	1	1	LRRC32	leucine rich repeat containing 32
hsa-miR-551a	1	0	1	1	1	1	PARP8	poly (ADP-ribose) polymerase family, member 8
hsa-miR-551a	1	0	1	1	1	1	LRRC15	leucine rich repeat containing 15
hsa-miR-551a	0	0	1	0	0	0	FAM71F2	family with sequence similarity 71, member F2
hsa-miR-551a	0	0	1	1	0	0	ZNF276	zinc finger protein 276
hsa-miR-551a	0	0	1	1	0	0	SOCS7	suppressor of cytokine signaling 7
hsa-miR-551a	0	0	1	0	1	1	GOLGA8G	golgin A8 family, member G
hsa-miR-551a	1	0	1	1	1	1	ANK2	ankyrin 2, neuronal
hsa-miR-551a	0	0	1	1	1	1	GLB1L3	galactosidase, beta 1-like 3
hsa-miR-551a	0	0	1	1	0	0	TCHH	trichohyalin
hsa-miR-551a	0	0	1	1	1	1	DAZL	deleted in azoospermia-like
hsa-miR-551a	1	0	1	1	1	1	TMEM135	transmembrane protein 135
hsa-miR-551a	0	0	1	0	0	0	ANKRD62	ankyrin repeat domain 62
hsa-miR-551a	1	0	1	0	0	0	IGLON5	IgLON family member 5
hsa-miR-551a	0	0	1	0	0	0	LOC400768	uncharacterized LOC400768
hsa-miR-551a	1	0	1	1	1	1	PTBP1	polypyrimidine tract binding protein 1
hsa-miR-551a	1	0	1	1	1	1	LETMD1	LETM1 domain containing 1
hsa-miR-551a	0	0	1	1	1	1	APBB1	amyloid beta (A4) precursor protein-binding, family B, member 1 (Fe65)
hsa-miR-551a	1	0	1	1	1	1	SLC35D2	solute carrier family 35, member D2
hsa-miR-551a	1	0	1	1	1	1	CLTA	clathrin, light chain A
hsa-miR-551a	0	0	1	1	1	1	SNRNP27	small nuclear ribonucleoprotein 27kDa (U4/U6.U5)
hsa-miR-551a	0	0	1	1	1	1	HPGD	hydroxyprostaglandin dehydrogenase 15-(NAD)
hsa-miR-551a	0	0	1	1	1	1	MTCP1	mature T-cell proliferation 1
hsa-miR-551a	1	0	1	1	1	1	RALB	v-ral simian leukemia viral oncogene homolog B (ras related; GTP binding protein)
hsa-miR-551a	1	0	1	1	1	1	FOS	FBJ murine osteosarcoma viral oncogene homolog
hsa-miR-551a	0	0	1	1	1	1	DEDD	death effector domain containing
hsa-miR-551a	0	0	1	1	1	1	ODC1	ornithine decarboxylase 1
hsa-miR-551a	0	0	1	1	1	1	HS3ST2	heparan sulfate (glucosamine) 3-O-sulfotransferase 2
hsa-miR-551a	1	0	1	1	0	0	RAD9A	RAD9 homolog A (S. pombe)
hsa-miR-551a	1	0	1	0	1	1	DNMT3A	DNA (cytosine-5-)-methyltransferase 3 alpha
hsa-miR-551a	0	0	1	1	0	0	TENC1	tensin like C1 domain containing phosphatase (tensin 2)
hsa-miR-551a	0	0	1	0	0	0	LOC440518	golgin A2 pseudogene
hsa-miR-551a	0	0	1	1	1	1	APOBEC3B	apolipoprotein B mRNA editing enzyme, catalytic polypeptide-like 3B
hsa-miR-551a	1	0	1	1	1	1	ZFHX3	zinc finger homeobox 3
hsa-miR-551a	1	0	1	0	1	1	CBX7	chromobox homolog 7
hsa-miR-551a	0	0	1	1	0	0	GBA	glucosidase, beta, acid
hsa-miR-551a	1	0	1	1	1	1	PMP22	peripheral myelin protein 22
hsa-miR-551a	1	0	1	0	1	1	CYBB	cytochrome b-245, beta polypeptide
hsa-miR-551a	0	0	1	1	1	1	FCGR1A	Fc fragment of IgG, high affinity Ia, receptor (CD64)
hsa-miR-551a	1	0	1	1	1	1	DRD1	dopamine receptor D1
hsa-miR-551a	0	0	1	1	1	1	GRIN2B	glutamate receptor, ionotropic, N-methyl D-aspartate 2B
hsa-miR-551a	0	0	1	1	1	1	HTR1D	5-hydroxytryptamine (serotonin) receptor 1D, G protein-coupled
hsa-miR-551a	1	0	1	0	1	1	UBE2W	ubiquitin-conjugating enzyme E2W (putative)
hsa-miR-551a	0	0	1	0	1	1	SPDYE3	speedy homolog E3 (Xenopus laevis)
hsa-miR-551a	1	0	1	1	1	1	PLCXD3	phosphatidylinositol-specific phospholipase C, X domain containing 3
hsa-miR-551a	1	0	1	0	1	1	KIAA2022	KIAA2022
hsa-miR-551a	0	0	1	1	1	1	CXCR4	chemokine (C-X-C motif) receptor 4
hsa-miR-551a	0	0	1	1	1	1	MS4A13	membrane-spanning 4-domains, subfamily A, member 13
hsa-miR-551a	0	0	1	0	1	1	GOLGA8E	golgin A8 family, member E
hsa-miR-551a	1	0	1	1	1	1	PHF6	PHD finger protein 6
hsa-miR-551a	1	0	1	1	1	1	NTRK2	neurotrophic tyrosine kinase, receptor, type 2
hsa-miR-551a	1	0	1	0	1	1	TNRC6B	trinucleotide repeat containing 6B
hsa-miR-551a	0	0	1	1	1	1	ATF3	activating transcription factor 3
hsa-miR-551a	1	0	1	1	1	1	CSNK1G3	casein kinase 1, gamma 3
hsa-miR-551a	1	0	1	1	1	1	UBE2V1	ubiquitin-conjugating enzyme E2 variant 1
hsa-miR-551a	1	0	1	0	1	1	NPNT	nephronectin
hsa-miR-551a	0	0	1	1	0	0	ANGPTL4	angiopoietin-like 4
hsa-miR-551a	1	0	1	0	1	1	DCUN1D4	DCN1, defective in cullin neddylation 1, domain containing 4 (S. cerevisiae)
hsa-miR-551a	1	0	1	1	1	1	TPM3	tropomyosin 3
hsa-miR-551a	1	0	1	1	1	1	PDE11A	phosphodiesterase 11A
hsa-miR-551a	1	0	1	1	1	1	ALG9	asparagine-linked glycosylation 9, alpha-1,2-mannosyltransferase homolog (S. cerevisiae)
hsa-miR-551a	1	0	1	1	1	1	REPS2	RALBP1 associated Eps domain containing 2
hsa-miR-551a	1	0	1	1	1	1	ADCY9	adenylate cyclase 9
hsa-miR-551a	1	0	1	1	1	1	KLF6	Kruppel-like factor 6
hsa-miR-551a	1	0	1	1	1	1	BAAT	bile acid CoA: amino acid N-acyltransferase (glycine N-choloyltransferase)
hsa-miR-551a	0	0	1	1	1	1	BTN1A1	butyrophilin, subfamily 1, member A1
hsa-miR-551a	0	0	1	1	0	0	CEACAM3	carcinoembryonic antigen-related cell adhesion molecule 3
hsa-miR-551a	1	0	1	1	1	1	COL4A6	collagen, type IV, alpha 6
hsa-miR-551a	1	0	1	1	1	1	GLRA2	glycine receptor, alpha 2
hsa-miR-551a	0	0	1	1	1	1	PIK3C2B	phosphatidylinositol-4-phosphate 3-kinase, catalytic subunit type 2 beta
hsa-miR-551a	1	0	1	1	1	1	PLAGL2	pleiomorphic adenoma gene-like 2
hsa-miR-551a	1	0	1	1	1	1	PVRL1	poliovirus receptor-related 1 (herpesvirus entry mediator C)
hsa-miR-551a	0	0	1	1	1	1	RAD51B	RAD51 homolog B (S. cerevisiae)
hsa-miR-551a	0	0	1	1	0	0	RNASE1	ribonuclease, RNase A family, 1 (pancreatic)
hsa-miR-551a	1	0	1	0	1	1	SLC6A6	solute carrier family 6 (neurotransmitter transporter, taurine), member 6
hsa-miR-551a	0	0	1	1	1	1	ZNF143	zinc finger protein 143
hsa-miR-551a	1	0	1	1	1	1	FZD1	frizzled family receptor 1
hsa-miR-551a	0	0	1	1	0	0	SEMA7A	semaphorin 7A, GPI membrane anchor (John Milton Hagen blood group)
hsa-miR-551a	1	0	1	1	1	1	IQGAP1	IQ motif containing GTPase activating protein 1
hsa-miR-551a	0	0	1	1	1	1	GYG1	glycogenin 1
hsa-miR-551a	0	0	1	1	0	0	NEURL	neuralized homolog (Drosophila)
hsa-miR-551a	1	0	1	1	1	1	WNT11	wingless-type MMTV integration site family, member 11
hsa-miR-551a	0	0	1	1	1	1	TAOK2	TAO kinase 2
hsa-miR-551a	0	0	1	1	1	1	GDF10	growth differentiation factor 10
hsa-miR-551a	1	0	1	1	1	1	KCNC4	potassium voltage-gated channel, Shaw-related subfamily, member 4
hsa-miR-551a	0	0	1	1	0	0	NDUFA9	NADH dehydrogenase (ubiquinone) 1 alpha subcomplex, 9, 39kDa
hsa-miR-551a	1	0	1	1	1	1	DLX3	distal-less homeobox 3
hsa-miR-551a	1	0	1	1	1	1	HAS3	hyaluronan synthase 3
hsa-miR-551a	1	0	1	1	1	1	PHF2	PHD finger protein 2
hsa-miR-551a	0	0	1	1	0	0	WDR46	WD repeat domain 46
hsa-miR-551a	1	0	1	1	1	1	SPON1	spondin 1, extracellular matrix protein
hsa-miR-551a	1	0	1	0	1	1	PITPNA	phosphatidylinositol transfer protein, alpha
hsa-miR-551a	1	0	1	1	1	1	RAD21	RAD21 homolog (S. pombe)
hsa-miR-551a	1	0	1	1	1	1	STK4	serine/threonine kinase 4
hsa-miR-551a	1	0	1	1	1	1	TXNIP	thioredoxin interacting protein
hsa-miR-551a	0	0	1	1	1	1	FGL2	fibrinogen-like 2
hsa-miR-551a	0	0	1	1	1	1	LYVE1	lymphatic vessel endothelial hyaluronan receptor 1
hsa-miR-551a	1	0	1	1	1	1	TARDBP	TAR DNA binding protein
hsa-miR-551a	0	0	1	1	1	1	LMOD1	leiomodin 1 (smooth muscle)
hsa-miR-551a	1	0	1	0	1	1	FZD4	frizzled family receptor 4
hsa-miR-551a	1	0	1	1	1	1	MGEA5	meningioma expressed antigen 5 (hyaluronidase)
hsa-miR-551a	0	0	1	1	0	0	SNW1	SNW domain containing 1
hsa-miR-551a	0	0	1	1	0	0	KCNJ14	potassium inwardly-rectifying channel, subfamily J, member 14
hsa-miR-551a	0	0	1	0	1	1	EMR2	egf-like module containing, mucin-like, hormone receptor-like 2
hsa-miR-551a	0	0	1	1	0	0	APOBEC3C	apolipoprotein B mRNA editing enzyme, catalytic polypeptide-like 3C
hsa-miR-551a	1	0	1	0	1	1	HEYL	hairy/enhancer-of-split related with YRPW motif-like
hsa-miR-551a	1	0	1	1	1	1	HERC3	HECT and RLD domain containing E3 ubiquitin protein ligase 3
hsa-miR-551a	1	0	1	1	1	1	JAKMIP2	janus kinase and microtubule interacting protein 2
hsa-miR-551a	0	0	1	1	0	0	KIFAP3	kinesin-associated protein 3
hsa-miR-551a	1	0	1	1	1	1	SIK2	salt-inducible kinase 2
hsa-miR-551a	1	0	1	1	1	1	PNKD	paroxysmal nonkinesigenic dyskinesia
hsa-miR-551a	1	0	1	1	1	1	FAM155B	family with sequence similarity 155, member B
hsa-miR-551a	0	0	1	0	1	1	OTUD6B	OTU domain containing 6B
hsa-miR-551a	1	0	1	1	1	1	VGLL3	vestigial like 3 (Drosophila)
hsa-miR-551a	1	0	1	1	1	1	GPRC5B	G protein-coupled receptor, family C, group 5, member B
hsa-miR-551a	1	0	1	1	1	1	CMPK1	cytidine monophosphate (UMP-CMP) kinase 1, cytosolic
hsa-miR-551a	1	0	1	1	1	1	RAPGEFL1	Rap guanine nucleotide exchange factor (GEF)-like 1
hsa-miR-551a	1	0	1	1	1	1	ARID4B	AT rich interactive domain 4B (RBP1-like)
hsa-miR-551a	0	0	1	0	1	1	ERAP1	endoplasmic reticulum aminopeptidase 1
hsa-miR-551a	1	0	1	1	1	1	RAB6B	RAB6B, member RAS oncogene family
hsa-miR-551a	0	0	1	1	1	1	PRKAG3	protein kinase, AMP-activated, gamma 3 non-catalytic subunit
hsa-miR-551a	0	0	1	1	0	0	FNDC8	fibronectin type III domain containing 8
hsa-miR-551a	1	0	1	1	0	0	C17orf59	chromosome 17 open reading frame 59
hsa-miR-551a	1	0	1	1	1	1	HAUS6	HAUS augmin-like complex, subunit 6
hsa-miR-551a	1	0	1	1	1	1	ZNF280C	zinc finger protein 280C
hsa-miR-551a	0	0	1	1	1	1	WHSC1L1	Wolf-Hirschhorn syndrome candidate 1-like 1
hsa-miR-551a	1	0	1	1	1	1	IMPAD1	inositol monophosphatase domain containing 1
hsa-miR-551a	0	0	1	1	1	1	TMEM167B	transmembrane protein 167B
hsa-miR-551a	1	0	1	1	1	1	ATP8B2	ATPase, aminophospholipid transporter, class I, type 8B, member 2
hsa-miR-551a	1	0	1	1	1	1	ZNF304	zinc finger protein 304
hsa-miR-551a	1	0	1	1	1	1	KIAA1467	KIAA1467
hsa-miR-551a	1	0	1	1	1	1	ZFYVE1	zinc finger, FYVE domain containing 1
hsa-miR-551a	0	0	1	1	1	1	POPDC3	popeye domain containing 3
hsa-miR-551a	1	0	1	1	0	0	CCDC71	coiled-coil domain containing 71
hsa-miR-551a	1	0	1	1	1	1	SOWAHC	sosondowah ankyrin repeat domain family member C
hsa-miR-551a	0	0	1	1	0	0	C7orf25	chromosome 7 open reading frame 25
hsa-miR-551a	1	0	1	1	1	1	FAM134A	family with sequence similarity 134, member A
hsa-miR-551a	1	0	1	1	1	1	C10orf76	chromosome 10 open reading frame 76
hsa-miR-551a	1	0	1	1	1	1	SNX27	sorting nexin family member 27
hsa-miR-551a	0	0	1	1	0	0	C11orf68	chromosome 11 open reading frame 68
hsa-miR-551a	1	0	1	1	1	1	SESN2	sestrin 2
hsa-miR-551a	0	0	1	1	0	0	PCDH1	protocadherin 1
hsa-miR-551a	1	0	1	1	1	1	C5orf30	chromosome 5 open reading frame 30
hsa-miR-551a	1	0	1	1	1	1	SSH2	slingshot homolog 2 (Drosophila)
hsa-miR-551a	1	0	1	1	1	1	EPT1	ethanolaminephosphotransferase 1 (CDP-ethanolamine-specific)
hsa-miR-551a	0	0	1	1	1	1	PLEKHG4B	pleckstrin homology domain containing, family G (with RhoGef domain) member 4B
hsa-miR-551a	0	0	1	1	0	0	FAM46B	family with sequence similarity 46, member B
hsa-miR-551a	0	0	1	1	1	1	PRDM7	PR domain containing 7
hsa-miR-551a	0	0	1	0	1	1	PAQR8	progestin and adipoQ receptor family member VIII
hsa-miR-551a	0	0	1	1	0	0	CITED4	Cbp/p300-interacting transactivator, with Glu/Asp-rich carboxy-terminal domain, 4
hsa-miR-551a	1	0	1	1	1	1	BMPER	BMP binding endothelial regulator
hsa-miR-551a	0	0	1	1	1	1	KLF14	Kruppel-like factor 14
hsa-miR-551a	1	0	1	1	1	1	TEX261	testis expressed 261
hsa-miR-551a	1	0	1	1	1	1	KCNH8	potassium voltage-gated channel, subfamily H (eag-related), member 8
hsa-miR-551a	0	0	1	0	1	1	DDIT4L	DNA-damage-inducible transcript 4-like
hsa-miR-551a	0	0	1	1	0	0	C10orf35	chromosome 10 open reading frame 35
hsa-miR-551a	0	0	1	1	1	1	APOBEC3A	apolipoprotein B mRNA editing enzyme, catalytic polypeptide-like 3A
hsa-miR-551a	0	0	1	0	0	0	ZNF285	zinc finger protein 285
hsa-miR-551a	0	0	1	1	1	1	ZNF572	zinc finger protein 572
hsa-miR-551a	0	0	1	1	1	1	SLC35G3	solute carrier family 35, member G3
hsa-miR-551a	1	0	1	0	1	1	TMTC2	transmembrane and tetratricopeptide repeat containing 2
hsa-miR-551a	0	0	1	1	0	0	DOK6	docking protein 6
hsa-miR-551a	1	0	1	0	1	1	C7orf41	chromosome 7 open reading frame 41
hsa-miR-551a	0	0	1	1	0	0	REM2	RAS (RAD and GEM)-like GTP binding 2
hsa-miR-551a	1	0	1	0	1	1	KCTD20	potassium channel tetramerisation domain containing 20
hsa-miR-551a	0	0	1	1	1	1	MRPL43	mitochondrial ribosomal protein L43
hsa-miR-551a	0	0	1	0	1	1	CDCP1	CUB domain containing protein 1
hsa-miR-551a	1	0	1	1	0	0	KCTD13	potassium channel tetramerisation domain containing 13
hsa-miR-551a	1	0	1	1	1	1	BCL9L	B-cell CLL/lymphoma 9-like
hsa-miR-551a	1	0	1	1	0	0	FAM100B	family with sequence similarity 100, member B
hsa-miR-551a	0	0	1	1	0	0	GPX6	glutathione peroxidase 6 (olfactory)
hsa-miR-551a	1	0	1	1	1	1	TMEM189-UBE2V1	TMEM189-UBE2V1 readthrough
hsa-miR-551a	1	0	1	1	0	0	KAZN	kazrin, periplakin interacting protein
hsa-miR-551a	1	0	1	1	0	0	CD164L2	CD164 sialomucin-like 2
hsa-miR-551a	1	0	1	1	1	1	ADAMTSL3	ADAMTS-like 3
hsa-miR-551a	0	0	1	0	0	0	CELP	carboxyl ester lipase pseudogene
hsa-miR-551a	0	0	1	0	0	0	TFAMP1	transcription factor A, mitochondrial pseudogene 1
hsa-miR-551a	0	0	1	0	0	0	SNORA33	small nucleolar RNA, H/ACA box 33
hsa-miR-551a	0	0	1	0	0	0	HYALP1	hyaluronoglucosaminidase pseudogene 1
hsa-miR-551a	0	0	1	0	0	0	SNX29P2	sorting nexin 29 pseudogene 2
hsa-miR-551a	0	0	1	0	0	0	SCARNA23	small Cajal body-specific RNA 23
hsa-miR-551a	1	0	1	1	0	0	KIAA1549L	KIAA1549-like
hsa-miR-551a	1	0	1	1	1	1	TRIO	trio Rho guanine nucleotide exchange factor
hsa-miR-551a	0	0	1	1	0	0	PSMA4	proteasome (prosome, macropain) subunit, alpha type, 4
hsa-miR-551a	0	0	0	1	0	0	RFC2	replication factor C (activator 1) 2, 40kDa
hsa-miR-551a	1	0	1	1	1	1	PPP1R3F	protein phosphatase 1, regulatory subunit 3F
hsa-miR-551a	1	0	1	1	1	1	OTUD5	OTU domain containing 5
hsa-miR-551a	0	0	0	1	0	0	ACTL6B	actin-like 6B
hsa-miR-551a	0	0	1	1	1	1	BCAR1	breast cancer anti-estrogen resistance 1
hsa-miR-551a	1	0	1	1	0	0	BCL3	B-cell CLL/lymphoma 3
hsa-miR-551a	1	0	1	1	0	0	REXO1	REX1, RNA exonuclease 1 homolog (S. cerevisiae)
hsa-miR-551a	0	0	1	1	1	1	IL4R	interleukin 4 receptor
hsa-miR-551a	0	0	0	1	0	0	RAPGEF3	Rap guanine nucleotide exchange factor (GEF) 3
hsa-miR-551a	0	0	1	1	1	1	KEAP1	kelch-like ECH-associated protein 1
hsa-miR-551a	0	0	1	1	0	0	ALPK1	alpha-kinase 1
hsa-miR-551a	0	0	0	1	1	1	ZNF324	zinc finger protein 324
hsa-miR-551a	0	0	0	1	0	0	IGSF9	immunoglobulin superfamily, member 9
hsa-miR-551a	0	0	0	1	0	0	HBQ1	hemoglobin, theta 1
hsa-miR-551a	0	0	0	1	0	0	HSD17B2	hydroxysteroid (17-beta) dehydrogenase 2
hsa-miR-551a	0	0	0	1	0	0	NAT14	N-acetyltransferase 14 (GCN5-related, putative)
hsa-miR-551a	0	0	0	1	0	0	MYL6B	myosin, light chain 6B, alkali, smooth muscle and non-muscle
hsa-miR-551a	0	0	0	1	0	0	TEKT2	tektin 2 (testicular)
hsa-miR-551a	0	0	0	1	0	0	MZF1	myeloid zinc finger 1
hsa-miR-551a	0	0	1	1	0	0	MORC2	MORC family CW-type zinc finger 2
hsa-miR-551a	0	0	0	1	0	0	HSCB	HscB iron-sulfur cluster co-chaperone homolog (E. coli)
hsa-miR-551a	1	0	1	1	1	1	CBX6	chromobox homolog 6
hsa-miR-551a	1	0	1	1	1	1	NPTXR	neuronal pentraxin receptor
hsa-miR-551a	0	0	0	1	1	1	RHBDD3	rhomboid domain containing 3
hsa-miR-551a	1	0	1	1	1	1	ZFYVE21	zinc finger, FYVE domain containing 21
hsa-miR-551a	0	0	1	1	0	0	CPNE6	copine VI (neuronal)
hsa-miR-551a	0	0	1	1	0	0	BIRC7	baculoviral IAP repeat containing 7
hsa-miR-551a	1	0	1	1	1	1	PXMP4	peroxisomal membrane protein 4, 24kDa
hsa-miR-551a	0	0	1	1	1	1	ORC6	origin recognition complex, subunit 6
hsa-miR-551a	0	0	0	1	1	1	PLLP	plasmolipin
hsa-miR-551a	1	0	1	1	1	1	POLR2C	polymerase (RNA) II (DNA directed) polypeptide C, 33kDa
hsa-miR-551a	1	0	1	1	0	0	FA2H	fatty acid 2-hydroxylase
hsa-miR-551a	0	0	1	1	1	1	CMC2	COX assembly mitochondrial protein 2 homolog (S. cerevisiae)
hsa-miR-551a	1	0	1	1	1	1	FBXO31	F-box protein 31
hsa-miR-551a	1	0	1	1	1	1	DCTN6	dynactin 6
hsa-miR-551a	0	0	1	1	1	1	CYP4F3	cytochrome P450, family 4, subfamily F, polypeptide 3
hsa-miR-551a	0	0	1	1	0	0	CEACAM4	carcinoembryonic antigen-related cell adhesion molecule 4
hsa-miR-551a	0	0	1	1	0	0	HAS1	hyaluronan synthase 1
hsa-miR-551a	1	0	1	1	0	0	RASIP1	Ras interacting protein 1
hsa-miR-551a	0	0	0	1	0	0	FKBP8	FK506 binding protein 8, 38kDa
hsa-miR-551a	1	0	1	1	1	1	CADM4	cell adhesion molecule 4
hsa-miR-551a	0	0	0	1	0	0	CPA2	carboxypeptidase A2 (pancreatic)
hsa-miR-551a	0	0	1	1	0	0	RBM28	RNA binding motif protein 28
hsa-miR-551a	0	0	1	1	0	0	PLOD3	procollagen-lysine, 2-oxoglutarate 5-dioxygenase 3
hsa-miR-551a	0	0	1	1	0	0	TADA2A	transcriptional adaptor 2A
hsa-miR-551a	0	0	0	1	1	1	SUPT4H1	suppressor of Ty 4 homolog 1 (S. cerevisiae)
hsa-miR-551a	0	0	0	1	0	0	HSD17B1	hydroxysteroid (17-beta) dehydrogenase 1
hsa-miR-551a	0	0	1	1	1	1	TIMELESS	timeless homolog (Drosophila)
hsa-miR-551a	1	0	1	1	0	0	ACRBP	acrosin binding protein
hsa-miR-551a	1	0	1	1	1	1	SRSF9	serine/arginine-rich splicing factor 9
hsa-miR-551a	1	0	0	1	1	1	KIF20A	kinesin family member 20A
hsa-miR-551a	0	0	1	1	1	1	SLC7A14	solute carrier family 7 (orphan transporter), member 14
hsa-miR-551a	0	0	0	1	0	0	TNNC1	troponin C type 1 (slow)
hsa-miR-551a	0	0	1	1	0	0	WBP1	WW domain binding protein 1
hsa-miR-551a	0	0	1	1	0	0	INO80B	INO80 complex subunit B
hsa-miR-551a	0	0	1	1	1	1	SPACA1	sperm acrosome associated 1
hsa-miR-551a	0	0	1	1	0	0	ADH6	alcohol dehydrogenase 6 (class V)
hsa-miR-551a	0	0	1	1	0	0	GSC	goosecoid homeobox
hsa-miR-551a	0	0	0	1	1	1	LRP11	low density lipoprotein receptor-related protein 11
hsa-miR-551a	0	0	1	1	1	1	TNFSF10	tumor necrosis factor (ligand) superfamily, member 10
hsa-miR-551a	0	0	1	1	1	1	HOXA7	homeobox A7
hsa-miR-551a	1	0	1	1	1	1	TWIST1	twist homolog 1 (Drosophila)
hsa-miR-551a	0	0	1	1	0	0	WDR83	WD repeat domain 83
hsa-miR-551a	1	0	1	1	1	1	HOXC13	homeobox C13
hsa-miR-551a	0	0	1	1	1	1	OTOR	otoraplin
hsa-miR-551a	1	0	0	1	0	0	PRR12	proline rich 12
hsa-miR-551a	0	0	1	1	0	0	FLRT1	fibronectin leucine rich transmembrane protein 1
hsa-miR-551a	0	0	1	1	0	0	IDUA	iduronidase, alpha-L-
hsa-miR-551a	0	0	0	1	1	1	F2RL3	coagulation factor II (thrombin) receptor-like 3
hsa-miR-551a	0	0	0	1	0	0	GSTT1	glutathione S-transferase theta 1
hsa-miR-551a	1	0	1	1	1	1	ALDH1A2	aldehyde dehydrogenase 1 family, member A2
hsa-miR-551a	0	0	0	1	1	1	CCRL1	chemokine (C-C motif) receptor-like 1
hsa-miR-551a	0	0	1	1	0	0	DHRS2	dehydrogenase/reductase (SDR family) member 2
hsa-miR-551a	1	0	0	1	0	0	PSMB11	proteasome (prosome, macropain) subunit, beta type, 11
hsa-miR-551a	1	0	1	1	1	1	KLF16	Kruppel-like factor 16
hsa-miR-551a	0	0	0	1	1	1	DOHH	deoxyhypusine hydroxylase/monooxygenase
hsa-miR-551a	0	0	1	1	1	1	CLSPN	claspin
hsa-miR-551a	0	0	0	1	0	0	PBX4	pre-B-cell leukemia homeobox 4
hsa-miR-551a	0	0	1	1	1	1	DHX29	DEAH (Asp-Glu-Ala-His) box polypeptide 29
hsa-miR-551a	0	0	0	1	1	1	USP40	ubiquitin specific peptidase 40
hsa-miR-551a	0	0	1	1	0	0	TMCO6	transmembrane and coiled-coil domains 6
hsa-miR-551a	0	0	0	1	0	0	GALNT8	UDP-N-acetyl-alpha-D-galactosamine:polypeptide N-acetylgalactosaminyltransferase 8 (GalNAc-T8)
hsa-miR-551a	1	0	0	1	1	1	ELOF1	elongation factor 1 homolog (S. cerevisiae)
hsa-miR-551a	0	0	0	1	0	0	APOC4	apolipoprotein C-IV
hsa-miR-551a	0	0	1	1	0	0	CACNG6	calcium channel, voltage-dependent, gamma subunit 6
hsa-miR-551a	0	0	1	1	0	0	ADRM1	adhesion regulating molecule 1
hsa-miR-551a	0	0	1	1	0	0	POLN	polymerase (DNA directed) nu
hsa-miR-551a	0	0	1	1	0	0	BPIFB1	BPI fold containing family B, member 1
hsa-miR-551a	0	0	1	1	1	1	VPS25	vacuolar protein sorting 25 homolog (S. cerevisiae)
hsa-miR-551a	0	0	0	1	0	0	PODNL1	podocan-like 1
hsa-miR-551a	0	0	0	1	1	1	GAS2L2	growth arrest-specific 2 like 2
hsa-miR-551a	1	0	1	1	0	0	EEFSEC	eukaryotic elongation factor, selenocysteine-tRNA-specific
hsa-miR-551a	0	0	1	1	0	0	FKBP11	FK506 binding protein 11, 19 kDa
hsa-miR-551a	0	0	1	1	1	1	MRAP2	melanocortin 2 receptor accessory protein 2
hsa-miR-551a	0	0	1	1	1	1	AKIRIN2	akirin 2
hsa-miR-551a	0	0	1	1	1	1	RSAD1	radical S-adenosyl methionine domain containing 1
hsa-miR-551a	0	0	1	1	0	0	BLK	B lymphoid tyrosine kinase
hsa-miR-551a	0	0	1	1	0	0	YIPF3	Yip1 domain family, member 3
hsa-miR-551a	0	0	1	1	1	1	IER3	immediate early response 3
hsa-miR-551a	0	0	0	1	0	0	HTR3B	5-hydroxytryptamine (serotonin) receptor 3B, ionotropic
hsa-miR-551a	0	0	1	1	1	1	MMP7	matrix metallopeptidase 7 (matrilysin, uterine)
hsa-miR-551a	1	0	1	1	0	0	FXYD6	FXYD domain containing ion transport regulator 6
hsa-miR-551a	1	0	1	1	1	1	MRPS27	mitochondrial ribosomal protein S27
hsa-miR-551a	1	0	1	1	1	1	TBC1D1	TBC1 (tre-2/USP6, BUB2, cdc16) domain family, member 1
hsa-miR-551a	1	0	1	1	1	1	RSBN1	round spermatid basic protein 1
hsa-miR-551a	0	0	1	1	1	1	SPECC1	sperm antigen with calponin homology and coiled-coil domains 1
hsa-miR-551a	0	0	0	1	1	1	COX10	COX10 homolog, cytochrome c oxidase assembly protein, heme A: farnesyltransferase (yeast)
hsa-miR-551a	0	0	1	1	1	1	ALDH2	aldehyde dehydrogenase 2 family (mitochondrial)
hsa-miR-551a	0	0	0	1	0	0	MYOM2	myomesin (M-protein) 2, 165kDa
hsa-miR-551a	0	0	1	1	0	0	ZNF839	zinc finger protein 839
hsa-miR-551a	0	0	0	1	0	0	LPO	lactoperoxidase
hsa-miR-551a	0	0	0	1	0	0	NUBP2	nucleotide binding protein 2
hsa-miR-551a	0	0	1	1	0	0	ITGA2B	integrin, alpha 2b (platelet glycoprotein IIb of IIb/IIIa complex, antigen CD41)
hsa-miR-551a	0	0	0	1	1	1	MLYCD	malonyl-CoA decarboxylase
hsa-miR-551a	0	0	1	1	1	1	INVS	inversin
hsa-miR-551a	0	0	1	1	0	0	RNF167	ring finger protein 167
hsa-miR-551a	0	0	1	1	0	0	HPN	hepsin
hsa-miR-551a	0	0	1	1	0	0	KCNN4	potassium intermediate/small conductance calcium-activated channel, subfamily N, member 4
hsa-miR-551a	0	0	1	1	1	1	MTPAP	mitochondrial poly(A) polymerase
hsa-miR-551a	0	0	1	1	1	1	APOBEC3F	apolipoprotein B mRNA editing enzyme, catalytic polypeptide-like 3F
hsa-miR-551a	1	0	1	1	0	0	GRIN2D	glutamate receptor, ionotropic, N-methyl D-aspartate 2D
hsa-miR-551a	0	0	1	1	0	0	AP2S1	adaptor-related protein complex 2, sigma 1 subunit
hsa-miR-551a	0	0	1	1	0	0	TCF25	transcription factor 25 (basic helix-loop-helix)
hsa-miR-551a	1	0	1	1	1	1	VAMP8	vesicle-associated membrane protein 8 (endobrevin)
hsa-miR-551a	0	0	1	1	1	1	LNX1	ligand of numb-protein X 1, E3 ubiquitin protein ligase
hsa-miR-551a	0	0	1	1	0	0	TMEM9	transmembrane protein 9
hsa-miR-551a	0	0	1	1	0	0	HSF4	heat shock transcription factor 4
hsa-miR-551a	0	0	1	1	1	1	ZNF638	zinc finger protein 638
hsa-miR-551a	0	0	1	1	0	0	NUCKS1	nuclear casein kinase and cyclin-dependent kinase substrate 1
hsa-miR-551a	0	0	1	1	1	1	IL11	interleukin 11
hsa-miR-551a	0	0	1	1	1	1	AGA	aspartylglucosaminidase
hsa-miR-551a	0	0	0	1	1	1	RAB17	RAB17, member RAS oncogene family
hsa-miR-551a	0	0	1	1	1	1	FGFRL1	fibroblast growth factor receptor-like 1
hsa-miR-551a	0	0	1	1	0	0	MCCC1	methylcrotonoyl-CoA carboxylase 1 (alpha)
hsa-miR-551a	0	0	1	1	0	0	GET4	golgi to ER traffic protein 4 homolog (S. cerevisiae)
hsa-miR-551a	0	0	0	1	0	0	PRPF6	PRP6 pre-mRNA processing factor 6 homolog (S. cerevisiae)
hsa-miR-551a	1	0	1	1	1	1	PHLDA1	pleckstrin homology-like domain, family A, member 1
hsa-miR-551a	0	0	0	1	0	0	ITGB7	integrin, beta 7
hsa-miR-551a	1	0	1	1	1	1	LMBR1L	limb region 1 homolog (mouse)-like
hsa-miR-551a	0	0	0	1	1	1	FANCM	Fanconi anemia, complementation group M
hsa-miR-551a	0	0	1	1	0	0	DHX38	DEAH (Asp-Glu-Ala-His) box polypeptide 38
hsa-miR-551a	0	0	1	1	1	1	NOL3	nucleolar protein 3 (apoptosis repressor with CARD domain)
hsa-miR-551a	0	0	0	1	0	0	ADAD2	adenosine deaminase domain containing 2
hsa-miR-551a	0	0	0	1	1	1	CPNE7	copine VII
hsa-miR-551a	0	0	1	1	0	0	AFG3L2	AFG3 ATPase family gene 3-like 2 (S. cerevisiae)
hsa-miR-551a	0	0	1	1	0	0	NT5C3L	5'-nucleotidase, cytosolic III-like
hsa-miR-551a	1	0	1	1	0	0	ADAMTS10	ADAM metallopeptidase with thrombospondin type 1 motif, 10
hsa-miR-551a	0	0	0	1	0	0	ZNF581	zinc finger protein 581
hsa-miR-551a	0	0	0	1	1	1	C19orf52	chromosome 19 open reading frame 52
hsa-miR-551a	0	0	1	1	1	1	TIMM44	translocase of inner mitochondrial membrane 44 homolog (yeast)
hsa-miR-551a	0	0	1	1	0	0	KLHDC4	kelch domain containing 4
hsa-miR-551a	0	0	0	1	0	0	RCN3	reticulocalbin 3, EF-hand calcium binding domain
hsa-miR-551a	1	0	1	1	1	1	GJA5	gap junction protein, alpha 5, 40kDa
hsa-miR-551a	1	0	1	1	1	1	LEFTY1	left-right determination factor 1
hsa-miR-551a	0	0	0	1	1	1	OTOF	otoferlin
hsa-miR-551a	1	0	1	1	1	1	UBR3	ubiquitin protein ligase E3 component n-recognin 3 (putative)
hsa-miR-551a	0	0	1	1	0	0	SLC22A14	solute carrier family 22, member 14
hsa-miR-551a	0	0	1	1	1	1	TM4SF19	transmembrane 4 L six family member 19
hsa-miR-551a	1	0	1	1	1	1	GABRB2	gamma-aminobutyric acid (GABA) A receptor, beta 2
hsa-miR-551a	0	0	0	1	0	0	STRA8	stimulated by retinoic acid gene 8 homolog (mouse)
hsa-miR-551a	0	0	0	1	0	0	DENND2A	DENN/MADD domain containing 2A
hsa-miR-551a	0	0	1	1	0	0	PRDM14	PR domain containing 14
hsa-miR-551a	1	0	0	1	1	1	HMBS	hydroxymethylbilane synthase
hsa-miR-551a	1	0	1	1	1	1	CEP164	centrosomal protein 164kDa
hsa-miR-551a	1	0	1	1	1	1	SIDT2	SID1 transmembrane family, member 2
hsa-miR-551a	0	0	1	1	0	0	LSM14B	LSM14B, SCD6 homolog B (S. cerevisiae)
hsa-miR-551a	0	0	0	1	0	0	GPHA2	glycoprotein hormone alpha 2
hsa-miR-551a	0	0	0	1	0	0	PLBD2	phospholipase B domain containing 2
hsa-miR-551a	1	0	1	1	1	1	GUCY1A2	guanylate cyclase 1, soluble, alpha 2
hsa-miR-551a	0	0	0	1	1	1	JMY	junction mediating and regulatory protein, p53 cofactor
hsa-miR-551a	0	0	1	1	1	1	ANKRD44	ankyrin repeat domain 44
hsa-miR-551a	1	0	1	1	1	1	MARS2	methionyl-tRNA synthetase 2, mitochondrial
hsa-miR-551a	0	0	1	1	1	1	STK32B	serine/threonine kinase 32B
hsa-miR-551a	0	0	1	1	0	0	NUBP1	nucleotide binding protein 1
hsa-miR-551a	0	0	1	1	0	0	BATF	basic leucine zipper transcription factor, ATF-like
hsa-miR-551a	0	0	1	1	1	1	PPEF2	protein phosphatase, EF-hand calcium binding domain 2
hsa-miR-551a	0	0	0	1	0	0	IL34	interleukin 34
hsa-miR-551a	1	0	1	1	1	1	MYO1E	myosin IE
hsa-miR-551a	1	0	1	1	1	1	PTPDC1	protein tyrosine phosphatase domain containing 1
hsa-miR-551a	0	0	1	1	1	1	C2orf62	chromosome 2 open reading frame 62
hsa-miR-551a	0	0	1	1	0	0	EXOC6B	exocyst complex component 6B
hsa-miR-551a	0	0	1	1	1	1	SNF8	SNF8, ESCRT-II complex subunit, homolog (S. cerevisiae)
hsa-miR-551a	1	0	1	1	1	1	ALDH4A1	aldehyde dehydrogenase 4 family, member A1
hsa-miR-551a	0	0	0	1	0	0	ACE	angiotensin I converting enzyme (peptidyl-dipeptidase A) 1
hsa-miR-551a	0	0	1	1	1	1	TPPP3	tubulin polymerization-promoting protein family member 3
hsa-miR-551a	0	0	1	1	0	0	ATP6V0D1	ATPase, H+ transporting, lysosomal 38kDa, V0 subunit d1
hsa-miR-551a	0	0	1	1	0	0	CCDC58	coiled-coil domain containing 58
hsa-miR-551a	0	0	1	1	0	0	CRYAA	crystallin, alpha A
hsa-miR-551a	0	0	0	1	0	0	LILRA4	leukocyte immunoglobulin-like receptor, subfamily A (with TM domain), member 4
hsa-miR-551a	0	0	0	1	1	1	PHLDB3	pleckstrin homology-like domain, family B, member 3
hsa-miR-551a	0	0	1	1	0	0	AZGP1	alpha-2-glycoprotein 1, zinc-binding
hsa-miR-551a	1	0	1	1	0	0	CELF5	CUGBP, Elav-like family member 5
hsa-miR-551a	0	0	0	1	0	0	CCDC116	coiled-coil domain containing 116
hsa-miR-551a	0	0	0	1	1	1	FDXR	ferredoxin reductase
hsa-miR-551a	0	0	0	1	0	0	RDM1	RAD52 motif 1
hsa-miR-551a	0	0	1	1	1	1	TNFSF12	tumor necrosis factor (ligand) superfamily, member 12
hsa-miR-551a	0	0	1	1	1	1	TNFSF12-TNFSF13	TNFSF12-TNFSF13 readthrough
hsa-miR-551a	0	0	1	1	1	1	TNFSF13	tumor necrosis factor (ligand) superfamily, member 13
hsa-miR-551a	0	0	0	1	1	1	NHLRC4	NHL repeat containing 4
hsa-miR-551a	1	0	1	1	0	0	SLX4	SLX4 structure-specific endonuclease subunit homolog (S. cerevisiae)
hsa-miR-551a	0	0	0	1	0	0	TAF6L	TAF6-like RNA polymerase II, p300/CBP-associated factor (PCAF)-associated factor, 65kDa
hsa-miR-551a	0	0	1	1	0	0	ZFPL1	zinc finger protein-like 1
hsa-miR-551a	1	0	1	1	1	1	KCNIP3	Kv channel interacting protein 3, calsenilin
hsa-miR-551a	1	0	1	1	0	0	IHH	Indian hedgehog
hsa-miR-551a	0	0	1	1	1	1	SLC23A3	solute carrier family 23 (nucleobase transporters), member 3
hsa-miR-551a	1	0	1	1	1	1	ATXN7	ataxin 7
hsa-miR-551a	0	0	1	1	1	1	PRRT3	proline-rich transmembrane protein 3
hsa-miR-551a	0	0	0	1	1	1	CAND2	cullin-associated and neddylation-dissociated 2 (putative)
hsa-miR-551a	0	0	0	1	1	1	ZNF35	zinc finger protein 35
hsa-miR-551a	1	0	1	1	1	1	LRRC2	leucine rich repeat containing 2
hsa-miR-551a	0	0	1	1	1	1	UVSSA	UV-stimulated scaffold protein A
hsa-miR-551a	0	0	1	1	0	0	MON1A	MON1 homolog A (yeast)
hsa-miR-551a	0	0	1	1	0	0	FAM170A	family with sequence similarity 170, member A
hsa-miR-551a	0	0	1	1	0	0	IL3	interleukin 3 (colony-stimulating factor, multiple)
hsa-miR-551a	1	0	1	1	1	1	RELL2	RELT-like 2
hsa-miR-551a	0	0	0	1	0	0	MICALL2	MICAL-like 2
hsa-miR-551a	1	0	1	1	0	0	CCDC136	coiled-coil domain containing 136
hsa-miR-551a	0	0	0	1	0	0	STK32C	serine/threonine kinase 32C
hsa-miR-551a	0	0	0	1	1	1	C14orf159	chromosome 14 open reading frame 159
hsa-miR-551a	0	0	1	1	1	1	GPR176	G protein-coupled receptor 176
hsa-miR-551a	0	0	0	1	0	0	TRMT61A	tRNA methyltransferase 61 homolog A (S. cerevisiae)
hsa-miR-551a	0	0	1	1	1	1	TMED3	transmembrane emp24 protein transport domain containing 3
hsa-miR-551a	0	0	0	1	0	0	SLC9A5	solute carrier family 9, subfamily A (NHE5, cation proton antiporter 5), member 5
hsa-miR-551a	1	0	1	1	1	1	MAP1A	microtubule-associated protein 1A
hsa-miR-551a	0	0	0	1	0	0	B4GALNT2	beta-1,4-N-acetyl-galactosaminyl transferase 2
hsa-miR-551a	0	0	1	1	0	0	GNGT2	guanine nucleotide binding protein (G protein), gamma transducing activity polypeptide 2
hsa-miR-551a	0	0	1	1	1	1	ENGASE	endo-beta-N-acetylglucosaminidase
hsa-miR-551a	0	0	1	1	1	1	ATP5L	ATP synthase, H+ transporting, mitochondrial Fo complex, subunit G
hsa-miR-551a	0	0	1	1	1	1	VPS11	vacuolar protein sorting 11 homolog (S. cerevisiae)
hsa-miR-551a	0	0	0	1	1	1	PLIN4	perilipin 4
hsa-miR-551a	0	0	1	1	0	0	TRPV3	transient receptor potential cation channel, subfamily V, member 3
hsa-miR-551a	0	0	0	1	1	1	CYB5D2	cytochrome b5 domain containing 2
hsa-miR-551a	0	0	0	1	0	0	EVPL	envoplakin
hsa-miR-551a	0	0	1	1	0	0	TTC21A	tetratricopeptide repeat domain 21A
hsa-miR-551a	0	0	1	1	0	0	SPATA24	spermatogenesis associated 24
hsa-miR-551a	0	0	1	1	1	1	ZNF561	zinc finger protein 561
hsa-miR-551a	0	0	0	1	0	0	AMDHD2	amidohydrolase domain containing 2
hsa-miR-551a	0	0	1	1	0	0	PRELID1	PRELI domain containing 1
hsa-miR-551a	0	0	1	1	1	1	MMADHC	methylmalonic aciduria (cobalamin deficiency) cblD type, with homocystinuria
hsa-miR-551a	1	0	1	1	0	0	MRC2	mannose receptor, C type 2
hsa-miR-551a	0	0	1	1	0	0	LAMB2	laminin, beta 2 (laminin S)
hsa-miR-551a	0	0	1	1	0	0	DYNLRB2	dynein, light chain, roadblock-type 2
hsa-miR-551a	1	0	1	1	1	1	PTGDR	prostaglandin D2 receptor (DP)
hsa-miR-551a	1	0	0	1	0	0	KISS1	KiSS-1 metastasis-suppressor
hsa-miR-551a	0	0	0	1	0	0	OR8B12	olfactory receptor, family 8, subfamily B, member 12
hsa-miR-551a	0	0	1	1	1	1	RAC3	ras-related C3 botulinum toxin substrate 3 (rho family, small GTP binding protein Rac3)
hsa-miR-551a	1	0	1	1	0	0	NKIRAS2	NFKB inhibitor interacting Ras-like 2
hsa-miR-551a	0	0	1	1	0	0	NUP93	nucleoporin 93kDa
hsa-miR-551a	0	0	1	1	1	1	GEMIN2	gem (nuclear organelle) associated protein 2
hsa-miR-551a	0	0	0	1	0	0	PHYHD1	phytanoyl-CoA dioxygenase domain containing 1
hsa-miR-551a	0	0	1	1	1	1	ZNF483	zinc finger protein 483
hsa-miR-551a	0	0	1	1	1	1	CARHSP1	calcium regulated heat stable protein 1, 24kDa
hsa-miR-551a	0	0	1	1	0	0	HOXB9	homeobox B9
hsa-miR-551a	0	0	0	1	0	0	DAK	dihydroxyacetone kinase 2 homolog (S. cerevisiae)
hsa-miR-551a	1	0	1	1	1	1	COQ2	coenzyme Q2 homolog, prenyltransferase (yeast)
hsa-miR-551a	0	0	0	1	1	1	LSP1	lymphocyte-specific protein 1
hsa-miR-551a	0	0	1	1	0	0	FAM170B	family with sequence similarity 170, member B
hsa-miR-551a	0	0	0	1	0	0	PRG2	proteoglycan 2, bone marrow (natural killer cell activator, eosinophil granule major basic protein)
hsa-miR-551a	0	0	0	1	1	1	HSPB7	heat shock 27kDa protein family, member 7 (cardiovascular)
hsa-miR-551a	0	0	1	1	1	1	C10orf2	chromosome 10 open reading frame 2
hsa-miR-551a	1	0	1	1	0	0	SPEG	SPEG complex locus
hsa-miR-551a	0	0	1	1	0	0	SLC29A1	solute carrier family 29 (nucleoside transporters), member 1
hsa-miR-551a	0	0	1	1	0	0	GMPPA	GDP-mannose pyrophosphorylase A
hsa-miR-551a	0	0	1	1	1	1	MRPS23	mitochondrial ribosomal protein S23
hsa-miR-551a	0	0	0	1	0	0	FARSA	phenylalanyl-tRNA synthetase, alpha subunit
hsa-miR-551a	1	0	1	1	1	1	RHOT2	ras homolog family member T2
hsa-miR-551a	0	0	1	1	1	1	KCND3	potassium voltage-gated channel, Shal-related subfamily, member 3
hsa-miR-551a	1	0	0	1	0	0	ARHGEF1	Rho guanine nucleotide exchange factor (GEF) 1
hsa-miR-551a	1	0	1	1	1	1	C3orf45	chromosome 3 open reading frame 45
hsa-miR-551a	1	0	1	1	0	0	SMCR8	Smith-Magenis syndrome chromosome region, candidate 8
hsa-miR-551a	0	0	0	1	0	0	PXMP2	peroxisomal membrane protein 2, 22kDa
hsa-miR-551a	0	0	0	1	0	0	PGAM5	phosphoglycerate mutase family member 5
hsa-miR-551a	0	0	0	1	1	1	PROM2	prominin 2
hsa-miR-551a	1	0	1	1	0	0	HES7	hairy and enhancer of split 7 (Drosophila)
hsa-miR-551a	0	0	1	1	0	0	IL11RA	interleukin 11 receptor, alpha
hsa-miR-551a	0	0	1	1	0	0	DGKZ	diacylglycerol kinase, zeta
hsa-miR-551a	0	0	0	1	0	0	C3orf22	chromosome 3 open reading frame 22
hsa-miR-551a	1	0	0	1	0	0	TMEM184A	transmembrane protein 184A
hsa-miR-551a	0	0	1	1	0	0	NADSYN1	NAD synthetase 1
hsa-miR-551a	1	0	0	1	1	1	TTC7A	tetratricopeptide repeat domain 7A
hsa-miR-551a	0	0	0	1	1	1	DIS3L	DIS3 mitotic control homolog (S. cerevisiae)-like
hsa-miR-551a	1	0	1	1	1	1	UBE2O	ubiquitin-conjugating enzyme E2O
hsa-miR-551a	0	0	1	1	0	0	KARS	lysyl-tRNA synthetase
hsa-miR-551a	0	0	0	1	1	1	SPPL2B	signal peptide peptidase like 2B
hsa-miR-551a	0	0	0	1	0	0	WBSCR28	Williams-Beuren syndrome chromosome region 28
hsa-miR-551a	0	0	1	1	0	0	RPLP2	ribosomal protein, large, P2
hsa-miR-551a	0	0	1	1	0	0	D2HGDH	D-2-hydroxyglutarate dehydrogenase
hsa-miR-551a	0	0	1	1	1	1	ATG16L2	autophagy related 16-like 2 (S. cerevisiae)
hsa-miR-551a	0	0	0	1	0	0	RNF151	ring finger protein 151
hsa-miR-551a	0	0	0	1	0	0	SLC25A41	solute carrier family 25, member 41
hsa-miR-551a	0	0	0	1	0	0	ACBD4	acyl-CoA binding domain containing 4
hsa-miR-551a	0	0	1	1	0	0	EFCAB4A	EF-hand calcium binding domain 4A
hsa-miR-551a	0	0	0	1	0	0	TRIM72	tripartite motif containing 72
hsa-miR-551a	1	0	1	1	1	1	GCNT4	glucosaminyl (N-acetyl) transferase 4, core 2
hsa-miR-551a	1	0	1	1	0	0	WDR45	WD repeat domain 45
hsa-miR-551a	0	0	0	1	0	0	LRRC23	leucine rich repeat containing 23
hsa-miR-551a	0	0	0	1	0	0	B3GNT4	UDP-GlcNAc:betaGal beta-1,3-N-acetylglucosaminyltransferase 4
hsa-miR-551a	0	0	1	1	1	1	SLC34A1	solute carrier family 34 (sodium phosphate), member 1
hsa-miR-551a	1	0	1	1	0	0	ECE2	endothelin converting enzyme 2
hsa-miR-551a	1	0	1	1	1	1	SLITRK5	SLIT and NTRK-like family, member 5
hsa-miR-551a	0	0	0	1	1	1	CABP4	calcium binding protein 4
hsa-miR-551a	0	0	0	1	0	0	OR52K2	olfactory receptor, family 52, subfamily K, member 2
hsa-miR-551a	0	0	1	1	0	0	CEP152	centrosomal protein 152kDa
hsa-miR-551a	0	0	0	1	1	1	UPB1	ureidopropionase, beta
hsa-miR-551a	0	0	1	1	0	0	PORCN	porcupine homolog (Drosophila)
hsa-miR-551a	1	0	0	1	1	1	SSH1	slingshot homolog 1 (Drosophila)
hsa-miR-551a	0	0	0	1	1	1	ELP6	elongator acetyltransferase complex subunit 6
hsa-miR-551a	0	0	0	1	1	1	CCDC60	coiled-coil domain containing 60
hsa-miR-551a	0	0	0	1	0	0	SERHL2	serine hydrolase-like 2
hsa-miR-551a	0	0	0	1	0	0	HSF1	heat shock transcription factor 1
hsa-miR-551a	1	0	0	1	1	1	SIRT7	sirtuin 7
hsa-miR-551a	0	0	0	1	1	1	RAX2	retina and anterior neural fold homeobox 2
hsa-miR-551a	1	0	1	1	1	1	SHMT2	serine hydroxymethyltransferase 2 (mitochondrial)
hsa-miR-551a	0	0	1	1	0	0	GP1BA	glycoprotein Ib (platelet), alpha polypeptide
hsa-miR-551a	1	0	1	1	0	0	PTP4A3	protein tyrosine phosphatase type IVA, member 3
hsa-miR-551a	0	0	1	1	1	1	KRTAP8-1	keratin associated protein 8-1
hsa-miR-551a	0	0	0	1	0	0	ZNF775	zinc finger protein 775
hsa-miR-551a	0	0	1	1	0	0	MFSD6L	major facilitator superfamily domain containing 6-like
hsa-miR-551a	0	0	0	1	0	0	ACTL10	actin-like 10
hsa-miR-551a	0	0	1	1	0	0	CLK3	CDC-like kinase 3
hsa-miR-551a	1	0	1	1	1	1	SOCS3	suppressor of cytokine signaling 3
hsa-miR-551a	1	0	1	1	1	1	KCNJ12	potassium inwardly-rectifying channel, subfamily J, member 12
hsa-miR-551a	1	0	1	1	1	1	FTL	ferritin, light polypeptide
hsa-miR-551a	1	0	1	1	1	1	NDN	necdin homolog (mouse)
hsa-miR-551a	0	0	1	1	0	0	SOCS1	suppressor of cytokine signaling 1
hsa-miR-551a	1	0	1	1	1	1	TMED9	transmembrane emp24 protein transport domain containing 9
hsa-miR-551a	0	0	0	1	1	1	MACC1	metastasis associated in colon cancer 1
hsa-miR-551a	0	0	1	1	1	1	TPRN	taperin
hsa-miR-551a	0	0	0	1	0	0	TMEM186	transmembrane protein 186
hsa-miR-551a	0	0	0	1	0	0	ACAA1	acetyl-CoA acyltransferase 1
hsa-miR-551a	0	0	1	1	0	0	TAS1R1	taste receptor, type 1, member 1
hsa-miR-551a	1	0	1	1	1	1	STAC2	SH3 and cysteine rich domain 2
hsa-miR-551a	0	0	0	1	0	0	PRODH	proline dehydrogenase (oxidase) 1
hsa-miR-551a	0	0	0	1	0	0	FGF3	fibroblast growth factor 3
hsa-miR-551a	1	0	1	1	1	1	RGS9BP	regulator of G protein signaling 9 binding protein
hsa-miR-551a	1	0	1	1	0	0	PPIL2	peptidylprolyl isomerase (cyclophilin)-like 2
hsa-miR-551a	0	0	0	1	0	0	RTN4RL2	reticulon 4 receptor-like 2
hsa-miR-551a	0	0	1	1	0	0	LSMD1	LSM domain containing 1
hsa-miR-551a	0	0	0	1	0	0	WDR25	WD repeat domain 25
hsa-miR-551a	0	0	0	1	0	0	UGT2B28	UDP glucuronosyltransferase 2 family, polypeptide B28
hsa-miR-551a	0	0	1	1	1	1	IFRD2	interferon-related developmental regulator 2
hsa-miR-551a	1	0	0	1	0	0	CIDEC	cell death-inducing DFFA-like effector c
hsa-miR-551a	0	0	1	1	1	1	CNPY3	canopy 3 homolog (zebrafish)
hsa-miR-551a	0	0	1	1	0	0	C12orf44	chromosome 12 open reading frame 44
hsa-miR-551a	0	0	1	1	0	0	GDPD5	glycerophosphodiester phosphodiesterase domain containing 5
hsa-miR-551a	1	0	1	1	0	0	NRL	neural retina leucine zipper
hsa-miR-551a	1	0	1	1	1	1	ERAS	ES cell expressed Ras
hsa-miR-551a	0	0	0	1	0	0	SCNN1D	sodium channel, non-voltage-gated 1, delta subunit
hsa-miR-551a	1	0	1	1	1	1	ATP9A	ATPase, class II, type 9A
hsa-miR-551a	0	0	0	1	0	0	TPSAB1	tryptase alpha/beta 1
hsa-miR-551a	0	0	0	1	0	0	INF2	inverted formin, FH2 and WH2 domain containing
hsa-miR-551a	0	0	1	1	1	1	LRRC17	leucine rich repeat containing 17
hsa-miR-551a	0	0	0	1	0	0	GFI1B	growth factor independent 1B transcription repressor
hsa-miR-551a	0	0	1	1	1	1	ICA1	islet cell autoantigen 1, 69kDa
hsa-miR-551a	0	0	0	1	1	1	C21orf2	chromosome 21 open reading frame 2
hsa-miR-551a	0	0	1	1	0	0	ENY2	enhancer of yellow 2 homolog (Drosophila)
hsa-miR-551a	0	0	1	1	0	0	NCR3	natural cytotoxicity triggering receptor 3
hsa-miR-551a	1	0	1	1	1	1	RNF207	ring finger protein 207
hsa-miR-551a	1	0	1	1	0	0	XRRA1	X-ray radiation resistance associated 1
hsa-miR-551a	1	0	1	1	1	1	NRP2	neuropilin 2
hsa-miR-551a	0	0	0	1	0	0	EXD3	exonuclease 3'-5' domain containing 3
hsa-miR-551a	0	0	1	1	0	0	SCARF2	scavenger receptor class F, member 2
hsa-miR-551a	0	0	1	1	0	0	IDH3B	isocitrate dehydrogenase 3 (NAD+) beta
hsa-miR-551a	0	0	1	1	0	0	C7orf59	chromosome 7 open reading frame 59
hsa-miR-551a	1	0	1	1	0	0	CECR2	cat eye syndrome chromosome region, candidate 2
hsa-miR-551a	1	0	1	1	1	1	ATP2B2	ATPase, Ca++ transporting, plasma membrane 2
hsa-miR-551a	0	0	0	1	0	0	KIR3DL3	killer cell immunoglobulin-like receptor, three domains, long cytoplasmic tail, 3
hsa-miR-551a	0	0	1	1	0	0	KIR2DS4	killer cell immunoglobulin-like receptor, two domains, short cytoplasmic tail, 4
hsa-miR-551a	0	0	1	1	0	0	KIR2DL3	killer cell immunoglobulin-like receptor, two domains, long cytoplasmic tail, 3
hsa-miR-551a	0	0	0	1	1	1	KIR2DL1	killer cell immunoglobulin-like receptor, two domains, long cytoplasmic tail, 1
hsa-miR-551a	0	0	0	1	0	0	TMEM120B	transmembrane protein 120B
hsa-miR-551a	0	0	0	1	0	0	FAM90A14P	putative protein FAM90A14
hsa-miR-551a	0	0	1	1	0	0	MATN4	matrilin 4
hsa-miR-551a	1	0	1	1	1	1	SDHC	succinate dehydrogenase complex, subunit C, integral membrane protein, 15kDa
hsa-miR-551a	1	0	1	1	1	1	DMPK	dystrophia myotonica-protein kinase
hsa-miR-551a	0	0	1	1	0	0	ESPNL	espin-like
hsa-miR-551a	0	0	1	1	1	1	MED22	mediator complex subunit 22
hsa-miR-551a	0	0	1	1	0	0	CARD14	caspase recruitment domain family, member 14
hsa-miR-551a	0	0	1	1	1	1	APTX	aprataxin
hsa-miR-551a	1	0	0	1	0	0	ZNF385C	zinc finger protein 385C
hsa-miR-551a	0	0	0	1	1	1	DMBT1	deleted in malignant brain tumors 1
hsa-miR-551a	1	0	1	1	0	0	USP7	ubiquitin specific peptidase 7 (herpes virus-associated)
hsa-miR-551a	1	0	0	1	1	1	SMARCB1	SWI/SNF related, matrix associated, actin dependent regulator of chromatin, subfamily b, member 1
hsa-miR-551a	0	0	1	1	0	0	SLC2A11	solute carrier family 2 (facilitated glucose transporter), member 11
hsa-miR-551a	0	0	1	1	1	1	LYNX1	Ly6/neurotoxin 1
hsa-miR-551a	0	0	0	1	1	1	F7	coagulation factor VII (serum prothrombin conversion accelerator)
hsa-miR-551a	1	0	0	1	1	1	PCBP3	poly(rC) binding protein 3
hsa-miR-551a	0	0	1	1	0	0	RBM5	RNA binding motif protein 5
hsa-miR-551a	1	0	1	1	1	1	CAMK2A	calcium/calmodulin-dependent protein kinase II alpha
hsa-miR-551a	1	0	0	1	0	0	SMPD4	sphingomyelin phosphodiesterase 4, neutral membrane (neutral sphingomyelinase-3)
hsa-miR-551a	0	0	1	1	0	0	TRIM41	tripartite motif containing 41
hsa-miR-551a	0	0	1	1	1	1	ACLY	ATP citrate lyase
hsa-miR-551a	0	0	1	1	0	0	RGN	regucalcin (senescence marker protein-30)
hsa-miR-551a	0	0	0	1	0	0	CCDC37	coiled-coil domain containing 37
hsa-miR-551a	0	0	1	1	1	1	PKP1	plakophilin 1 (ectodermal dysplasia/skin fragility syndrome)
hsa-miR-551a	0	0	0	1	0	0	HRCT1	histidine rich carboxyl terminus 1
hsa-miR-551a	0	0	1	1	1	1	CD209	CD209 molecule
hsa-miR-551a	1	0	1	1	0	0	SND1	staphylococcal nuclease and tudor domain containing 1
hsa-miR-551a	0	0	1	1	0	0	MUSTN1	musculoskeletal, embryonic nuclear protein 1
hsa-miR-551a	1	0	1	1	1	1	TMEM110	transmembrane protein 110
hsa-miR-551a	0	0	0	1	0	0	ENTPD2	ectonucleoside triphosphate diphosphohydrolase 2
hsa-miR-551a	0	0	1	1	0	0	MORN3	MORN repeat containing 3
hsa-miR-551a	0	0	0	1	0	0	LEPREL4	leprecan-like 4
hsa-miR-551a	0	0	1	1	0	0	MED25	mediator complex subunit 25
hsa-miR-551a	0	0	1	1	0	0	PC	pyruvate carboxylase
hsa-miR-551a	0	0	1	1	0	0	PRMT2	protein arginine methyltransferase 2
hsa-miR-551a	0	0	0	1	0	0	TNFRSF14	tumor necrosis factor receptor superfamily, member 14
hsa-miR-551a	0	0	1	1	1	1	NSD1	nuclear receptor binding SET domain protein 1
hsa-miR-551a	1	0	1	1	1	1	LAMB3	laminin, beta 3
hsa-miR-551a	1	0	1	1	1	1	ADRA1A	adrenoceptor alpha 1A
hsa-miR-551a	1	0	1	1	0	0	PLD3	phospholipase D family, member 3
hsa-miR-551a	0	0	1	1	0	0	SH3BP1	SH3-domain binding protein 1
hsa-miR-551a	0	0	1	1	0	0	PDXP	pyridoxal (pyridoxine, vitamin B6) phosphatase
hsa-miR-551a	0	0	0	1	1	1	FAM180B	family with sequence similarity 180, member B
hsa-miR-551a	1	0	1	1	0	0	APBB3	amyloid beta (A4) precursor protein-binding, family B, member 3
hsa-miR-551a	0	0	0	1	0	0	POTEE	POTE ankyrin domain family, member E
hsa-miR-551a	1	0	1	1	0	0	ATP2A1	ATPase, Ca++ transporting, cardiac muscle, fast twitch 1
hsa-miR-551a	0	0	1	1	0	0	DOK3	docking protein 3
hsa-miR-551a	0	0	0	1	0	0	ZNF628	zinc finger protein 628
hsa-miR-551a	0	0	0	1	0	0	POTEF	POTE ankyrin domain family, member F
hsa-miR-551a	1	0	1	1	1	1	KLHL14	kelch-like 14 (Drosophila)
hsa-miR-551a	0	0	0	1	1	1	ARSD	arylsulfatase D
hsa-miR-551a	1	0	1	1	1	1	RUNX1	runt-related transcription factor 1
hsa-miR-551a	0	0	0	1	0	0	KIAA1683	KIAA1683
hsa-miR-551a	0	0	0	1	0	0	DUX4L3	double homeobox 4 like 3
hsa-miR-551a	0	0	0	1	1	1	ZNF707	zinc finger protein 707
hsa-miR-551a	1	0	1	1	1	1	PPP6R2	protein phosphatase 6, regulatory subunit 2
hsa-miR-551a	1	0	1	1	1	1	DDX42	DEAD (Asp-Glu-Ala-Asp) box polypeptide 42
hsa-miR-551a	0	0	1	1	1	1	SLC33A1	solute carrier family 33 (acetyl-CoA transporter), member 1
hsa-miR-551a	0	0	0	1	1	1	OBSCN	obscurin, cytoskeletal calmodulin and titin-interacting RhoGEF
hsa-miR-551a	0	0	0	1	0	0	CFH	complement factor H
hsa-miR-551a	0	0	1	1	0	0	NPSR1	neuropeptide S receptor 1
hsa-miR-551a	0	0	1	1	0	0	HKR1	HKR1, GLI-Kruppel zinc finger family member
hsa-miR-551a	0	0	0	1	0	0	FAM90A20P	putative protein FAM90A20
hsa-miR-551a	0	0	0	1	1	1	RDH14	retinol dehydrogenase 14 (all-trans/9-cis/11-cis)
hsa-miR-551a	1	0	0	1	1	1	NT5C1B	5'-nucleotidase, cytosolic IB
hsa-miR-551a	0	0	0	1	1	1	CLEC4C	C-type lectin domain family 4, member C
hsa-miR-551a	1	0	1	1	1	1	NMB	neuromedin B
hsa-miR-551a	1	0	1	1	1	1	SCAF1	SR-related CTD-associated factor 1
hsa-miR-551a	0	0	1	1	1	1	HLA-DPB1	major histocompatibility complex, class II, DP beta 1
hsa-miR-551a	0	0	0	1	0	0	TSSK6	testis-specific serine kinase 6
hsa-miR-551a	1	0	1	1	1	1	PIK3CD	phosphatidylinositol-4,5-bisphosphate 3-kinase, catalytic subunit delta
hsa-miR-551a	0	0	0	1	0	0	ITPRIPL1	inositol 1,4,5-trisphosphate receptor interacting protein-like 1
hsa-miR-551a	1	0	1	1	1	1	CDC42BPB	CDC42 binding protein kinase beta (DMPK-like)
hsa-miR-551a	1	0	0	1	1	1	DCLRE1A	DNA cross-link repair 1A
hsa-miR-551a	0	0	1	1	0	0	RPL12	ribosomal protein L12
hsa-miR-551a	1	0	1	1	1	1	FAM110B	family with sequence similarity 110, member B
hsa-miR-551a	0	0	0	1	0	0	PPEF1	protein phosphatase, EF-hand calcium binding domain 1
hsa-miR-551a	0	0	0	1	0	0	DNASE2B	deoxyribonuclease II beta
hsa-miR-551a	0	0	0	1	0	0	SHISA4	shisa homolog 4 (Xenopus laevis)
hsa-miR-551a	1	0	1	1	0	0	DFNB31	deafness, autosomal recessive 31
hsa-miR-551a	1	0	1	1	1	1	HNRNPU	heterogeneous nuclear ribonucleoprotein U (scaffold attachment factor A)
hsa-miR-551a	1	0	0	1	1	1	TRIM67	tripartite motif containing 67
hsa-miR-551a	0	0	0	1	1	1	TAF1A	TATA box binding protein (TBP)-associated factor, RNA polymerase I, A, 48kDa
hsa-miR-551a	0	0	1	1	0	0	AVPR1B	arginine vasopressin receptor 1B
hsa-miR-551a	1	0	1	1	1	1	TOR3A	torsin family 3, member A
hsa-miR-551a	0	0	1	1	1	1	PIGC	phosphatidylinositol glycan anchor biosynthesis, class C
hsa-miR-551a	0	0	1	1	1	1	NR1I3	nuclear receptor subfamily 1, group I, member 3
hsa-miR-551a	0	0	1	1	1	1	CRP	C-reactive protein, pentraxin-related
hsa-miR-551a	0	0	1	1	1	1	C1orf85	chromosome 1 open reading frame 85
hsa-miR-551a	0	0	0	1	1	1	ZNF684	zinc finger protein 684
hsa-miR-551a	1	0	1	1	1	1	SLC50A1	solute carrier family 50 (sugar transporter), member 1
hsa-miR-551a	0	0	1	1	1	1	S100A2	S100 calcium binding protein A2
hsa-miR-551a	0	0	1	1	0	0	S100A6	S100 calcium binding protein A6
hsa-miR-551a	1	0	1	1	1	1	SOBP	sine oculis binding protein homolog (Drosophila)
hsa-miR-551a	0	0	1	1	0	0	HIST2H2AA3	histone cluster 2, H2aa3
hsa-miR-551a	0	0	0	1	0	0	NBPF24	neuroblastoma breakpoint family, member 24
hsa-miR-551a	0	0	0	1	1	1	WDR3	WD repeat domain 3
hsa-miR-551a	0	0	1	1	0	0	AMIGO1	adhesion molecule with Ig-like domain 1
hsa-miR-551a	0	0	0	1	0	0	TNFRSF6B	tumor necrosis factor receptor superfamily, member 6b, decoy
hsa-miR-551a	0	0	1	1	0	0	RTEL1	regulator of telomere elongation helicase 1
hsa-miR-551a	0	0	1	1	1	1	ELOVL3	ELOVL fatty acid elongase 3
hsa-miR-551a	0	0	0	1	1	1	PNCK	pregnancy up-regulated non-ubiquitously expressed CaM kinase
hsa-miR-551a	0	0	1	1	0	0	PDZD7	PDZ domain containing 7
hsa-miR-551a	1	0	1	1	1	1	DR1	down-regulator of transcription 1, TBP-binding (negative cofactor 2)
hsa-miR-551a	0	0	1	1	0	0	NDUFB8	NADH dehydrogenase (ubiquinone) 1 beta subcomplex, 8, 19kDa
hsa-miR-551a	0	0	1	1	1	1	KIAA1586	KIAA1586
hsa-miR-551a	1	0	1	1	1	1	LRRC1	leucine rich repeat containing 1
hsa-miR-551a	0	0	1	1	1	1	GSTA4	glutathione S-transferase alpha 4
hsa-miR-551a	0	0	1	1	1	1	GPR115	G protein-coupled receptor 115
hsa-miR-551a	0	0	1	1	0	0	MCTS1	malignant T cell amplified sequence 1
hsa-miR-551a	0	0	1	1	0	0	HSPB11	heat shock protein family B (small), member 11
hsa-miR-551a	0	0	0	1	0	0	MAGOH	mago-nashi homolog, proliferation-associated (Drosophila)
hsa-miR-551a	1	0	1	1	0	0	GRIN1	glutamate receptor, ionotropic, N-methyl D-aspartate 1
hsa-miR-551a	0	0	1	1	1	1	KCNG1	potassium voltage-gated channel, subfamily G, member 1
hsa-miR-551a	0	0	1	1	0	0	MRPS2	mitochondrial ribosomal protein S2
hsa-miR-551a	0	0	1	1	0	0	C10orf116	chromosome 10 open reading frame 116
hsa-miR-551a	0	0	1	1	0	0	MAD2L1BP	MAD2L1 binding protein
hsa-miR-551a	0	0	0	1	0	0	PTCH2	patched 2
hsa-miR-551a	0	0	1	1	0	0	PPAPDC3	phosphatidic acid phosphatase type 2 domain containing 3
hsa-miR-551a	1	0	1	1	1	1	KCNMA1	potassium large conductance calcium-activated channel, subfamily M, alpha member 1
hsa-miR-551a	0	0	1	1	1	1	RBM41	RNA binding motif protein 41
hsa-miR-551a	0	0	0	1	0	0	NTMT1	N-terminal Xaa-Pro-Lys N-methyltransferase 1
hsa-miR-551a	0	0	1	1	0	0	SERPINA7	serpin peptidase inhibitor, clade A (alpha-1 antiproteinase, antitrypsin), member 7
hsa-miR-551a	0	0	1	1	0	0	GUCA2B	guanylate cyclase activator 2B (uroguanylin)
hsa-miR-551a	0	0	0	1	0	0	GLRA4	glycine receptor, alpha 4
hsa-miR-551a	0	0	0	1	1	1	CTPS1	CTP synthase 1
hsa-miR-551a	0	0	1	1	1	1	FUT11	fucosyltransferase 11 (alpha (1,3) fucosyltransferase)
hsa-miR-551a	0	0	1	1	0	0	C9orf16	chromosome 9 open reading frame 16
hsa-miR-551a	0	0	1	1	1	1	SRPX2	sushi-repeat containing protein, X-linked 2
hsa-miR-551a	1	0	0	1	1	1	EPHA10	EPH receptor A10
hsa-miR-551a	1	0	1	1	0	0	MDFI	MyoD family inhibitor
hsa-miR-551a	0	0	1	1	0	0	MAP7D1	MAP7 domain containing 1
hsa-miR-551a	0	0	1	1	1	1	ZMYM6	zinc finger, MYM-type 6
hsa-miR-551a	0	0	1	1	1	1	TRIM62	tripartite motif containing 62
hsa-miR-551a	1	0	0	1	1	1	VSTM2L	V-set and transmembrane domain containing 2 like
hsa-miR-551a	0	0	1	1	1	1	HPCA	hippocalcin
hsa-miR-551a	1	0	1	1	1	1	NEK6	NIMA (never in mitosis gene a)-related kinase 6
hsa-miR-551a	0	0	0	1	0	0	ATOH7	atonal homolog 7 (Drosophila)
hsa-miR-551a	0	0	1	1	1	1	MRRF	mitochondrial ribosome recycling factor
hsa-miR-551a	1	0	1	1	1	1	MATN1	matrilin 1, cartilage matrix protein
hsa-miR-551a	1	0	1	1	1	1	PHACTR4	phosphatase and actin regulator 4
hsa-miR-551a	0	0	1	1	1	1	NCOA4	nuclear receptor coactivator 4
hsa-miR-551a	0	0	1	1	1	1	LRRC18	leucine rich repeat containing 18
hsa-miR-551a	0	0	1	1	1	1	SYT15	synaptotagmin XV
hsa-miR-551a	0	0	1	1	0	0	GDPD2	glycerophosphodiester phosphodiesterase domain containing 2
hsa-miR-551a	0	0	1	1	0	0	ALOX5	arachidonate 5-lipoxygenase
hsa-miR-551a	1	0	1	1	1	1	PHF1	PHD finger protein 1
hsa-miR-551a	1	0	1	1	0	0	RGL2	ral guanine nucleotide dissociation stimulator-like 2
hsa-miR-551a	0	0	1	1	0	0	CDK15	cyclin-dependent kinase 15
hsa-miR-551a	0	0	1	1	0	0	RAP1GAP	RAP1 GTPase activating protein
hsa-miR-551a	0	0	1	1	0	0	CCDC40	coiled-coil domain containing 40
hsa-miR-551a	0	0	1	1	0	0	TMEM136	transmembrane protein 136
hsa-miR-551a	1	0	1	1	1	1	TSTD2	thiosulfate sulfurtransferase (rhodanese)-like domain containing 2
hsa-miR-551a	0	0	1	1	0	0	GALK1	galactokinase 1
hsa-miR-551a	0	0	0	1	1	1	EMC1	ER membrane protein complex subunit 1
hsa-miR-551a	0	0	1	1	0	0	STK19	serine/threonine kinase 19
hsa-miR-551a	0	0	0	1	0	0	FAM70B	family with sequence similarity 70, member B
hsa-miR-551a	0	0	0	1	1	1	ADPRHL1	ADP-ribosylhydrolase like 1
hsa-miR-551a	0	0	1	1	0	0	CLIC1	chloride intracellular channel 1
hsa-miR-551a	0	0	1	1	0	0	DDAH2	dimethylarginine dimethylaminohydrolase 2
hsa-miR-551a	0	0	0	1	0	0	DUSP15	dual specificity phosphatase 15
hsa-miR-551a	1	0	1	1	1	1	UGGT1	UDP-glucose glycoprotein glucosyltransferase 1
hsa-miR-551a	0	0	1	1	1	1	ITGBL1	integrin, beta-like 1 (with EGF-like repeat domains)
hsa-miR-551a	0	0	1	1	0	0	CCDC22	coiled-coil domain containing 22
hsa-miR-551a	0	0	1	1	0	0	PCCA	propionyl CoA carboxylase, alpha polypeptide
hsa-miR-551a	0	0	1	1	0	0	PTPRH	protein tyrosine phosphatase, receptor type, H
hsa-miR-551a	0	0	0	1	1	1	RABL2A	RAB, member of RAS oncogene family-like 2A
hsa-miR-551a	1	0	1	1	0	0	TIMM17B	translocase of inner mitochondrial membrane 17 homolog B (yeast)
hsa-miR-551a	0	0	1	1	0	0	MAD2L2	MAD2 mitotic arrest deficient-like 2 (yeast)
hsa-miR-551a	0	0	0	1	0	0	TRIM31	tripartite motif containing 31
hsa-miR-551a	1	0	1	1	0	0	DNAJC1	DnaJ (Hsp40) homolog, subfamily C, member 1
hsa-miR-551a	0	0	0	1	0	0	C1orf127	chromosome 1 open reading frame 127
hsa-miR-551a	1	0	1	1	1	1	CASZ1	castor zinc finger 1
hsa-miR-551a	1	0	1	1	1	1	FOXA2	forkhead box A2
hsa-miR-551a	0	0	1	1	1	1	FXN	frataxin
hsa-miR-551a	0	0	0	1	1	1	MEN1	multiple endocrine neoplasia I
hsa-miR-551a	0	0	0	1	0	0	CBWD6	COBW domain containing 6
hsa-miR-551a	0	0	1	1	1	1	POLR3F	polymerase (RNA) III (DNA directed) polypeptide F, 39 kDa
hsa-miR-551a	0	0	1	1	0	0	ZNF467	zinc finger protein 467
hsa-miR-551a	0	0	0	1	0	0	LRRC10B	leucine rich repeat containing 10B
hsa-miR-551a	1	0	1	1	1	1	AFF4	AF4/FMR2 family, member 4
hsa-miR-551a	1	0	1	1	1	1	VCP	valosin containing protein
hsa-miR-551a	0	0	1	1	0	0	FANCG	Fanconi anemia, complementation group G
hsa-miR-551a	0	0	0	1	0	0	ATAD3B	ATPase family, AAA domain containing 3B
hsa-miR-551a	0	0	1	1	1	1	LRRN4	leucine rich repeat neuronal 4
hsa-miR-551a	0	0	0	1	0	0	ARID3C	AT rich interactive domain 3C (BRIGHT-like)
hsa-miR-551a	0	0	0	1	0	0	PLEKHN1	pleckstrin homology domain containing, family N member 1
hsa-miR-551a	0	0	1	1	0	0	AQP7	aquaporin 7
hsa-miR-551a	0	0	0	1	0	0	KIFC3	kinesin family member C3
hsa-miR-551a	0	0	1	1	0	0	MPV17	MpV17 mitochondrial inner membrane protein
hsa-miR-551a	0	0	1	1	0	0	SLC4A11	solute carrier family 4, sodium borate transporter, member 11
hsa-miR-551a	0	0	1	1	1	1	PXDC1	PX domain containing 1
hsa-miR-551a	0	0	1	1	0	0	CA5BP1	carbonic anhydrase VB pseudogene 1
hsa-miR-551a	0	0	1	1	1	1	ZNF768	zinc finger protein 768
hsa-miR-551a	0	0	1	1	1	1	ARHGAP6	Rho GTPase activating protein 6
hsa-miR-551a	0	0	0	1	1	1	GMDS	GDP-mannose 4,6-dehydratase
hsa-miR-551a	0	0	0	1	1	1	ZBED1	zinc finger, BED-type containing 1
hsa-miR-551a	1	0	1	1	1	1	C4orf19	chromosome 4 open reading frame 19
hsa-miR-551a	0	0	0	1	0	0	C22orf42	chromosome 22 open reading frame 42
hsa-miR-551a	1	0	1	1	0	0	SMARCA2	SWI/SNF related, matrix associated, actin dependent regulator of chromatin, subfamily a, member 2
hsa-miR-551a	0	0	1	1	1	1	DAZ4	deleted in azoospermia 4
hsa-miR-551a	0	0	0	1	0	0	LEPREL2	leprecan-like 2
hsa-miR-551a	0	0	1	1	0	0	GPR162	G protein-coupled receptor 162
hsa-miR-551a	0	0	1	1	1	1	RNF215	ring finger protein 215
hsa-miR-551a	0	0	0	1	0	0	IFITM5	interferon induced transmembrane protein 5
hsa-miR-551a	0	0	1	1	0	0	SNRNP25	small nuclear ribonucleoprotein 25kDa (U11/U12)
hsa-miR-551a	0	0	1	1	1	1	SRY	sex determining region Y
hsa-miR-551a	1	0	0	1	1	1	NPHP3	nephronophthisis 3 (adolescent)
hsa-miR-551a	0	0	1	1	1	1	ACAD11	acyl-CoA dehydrogenase family, member 11
hsa-miR-551a	0	0	1	1	1	1	CSPG5	chondroitin sulfate proteoglycan 5 (neuroglycan C)
hsa-miR-551a	0	0	0	1	0	0	CIITA	class II, major histocompatibility complex, transactivator
hsa-miR-551a	1	0	1	1	0	0	DPY19L1	dpy-19-like 1 (C. elegans)
hsa-miR-551a	0	0	1	1	1	1	SMYD5	SMYD family member 5
hsa-miR-551a	1	0	1	1	1	1	FAM168B	family with sequence similarity 168, member B
hsa-miR-551a	0	0	0	1	0	0	ZC3H12D	zinc finger CCCH-type containing 12D
hsa-miR-551a	0	0	1	1	1	1	TSSK1B	testis-specific serine kinase 1B
hsa-miR-551a	1	0	1	0	1	1	CDK17	cyclin-dependent kinase 17
hsa-miR-551a	1	0	1	1	1	1	MRS2	MRS2 magnesium homeostasis factor homolog (S. cerevisiae)
hsa-miR-551a	1	0	1	1	1	1	KIAA1804	mixed lineage kinase 4
hsa-miR-551a	1	0	0	1	1	1	PARD6G	par-6 partitioning defective 6 homolog gamma (C. elegans)
hsa-miR-551a	1	0	0	1	1	1	CRB2	crumbs homolog 2 (Drosophila)
