# Supplementary material for: Profiling of Selected MicroRNAs in Proliferative Eutopic Endometrium of Women with Ovarian Endometriosis
Source: Biomed Res Int. 2015 Aug 20;2015:760698. doi: 10.1155/2015/760698 (PMC4558423; doi:10.1155/2015/760698)
Supplement: Supplementary file 1 — Table I: The names of miRNAs significantly differentially expressed between eutopic endometrium of patients with endometriosis vs eutopic endometrium of patients without endometriosis. Table II: The associations between miRNA and mRNA, which presents detailed results of the search of six major databases i.e targetscan, tarbase, miranda, mirbase, mirtarget2 and pictar. [file 760698.f1.zip › 760698.f1/Table II/hsa-miR-554.tsv]

miR	targetscan	tarbase	miranda	mirbase	mirtarget2	pictar	GeneSymbol	GeneName
hsa-miR-554	1	0	1	1	1	1	GIGYF2	GRB10 interacting GYF protein 2
hsa-miR-554	1	0	1	0	1	1	MAGI2	membrane associated guanylate kinase, WW and PDZ domain containing 2
hsa-miR-554	0	0	1	1	1	1	SEC31A	SEC31 homolog A (S. cerevisiae)
hsa-miR-554	1	0	1	1	1	1	DNM3	dynamin 3
hsa-miR-554	0	0	1	1	1	1	FASTKD2	FAST kinase domains 2
hsa-miR-554	1	0	1	0	1	1	ZNF507	zinc finger protein 507
hsa-miR-554	1	0	1	1	1	1	SMARCAD1	SWI/SNF-related, matrix-associated actin-dependent regulator of chromatin, subfamily a, containing DEAD/H box 1
hsa-miR-554	0	0	1	1	1	1	KLHL13	kelch-like 13 (Drosophila)
hsa-miR-554	1	0	1	1	0	0	ZSWIM5	zinc finger, SWIM-type containing 5
hsa-miR-554	1	0	1	1	1	1	IKZF4	IKAROS family zinc finger 4 (Eos)
hsa-miR-554	1	0	1	1	1	1	CSRNP1	cysteine-serine-rich nuclear protein 1
hsa-miR-554	1	0	1	1	1	1	SH3TC2	SH3 domain and tetratricopeptide repeats 2
hsa-miR-554	1	0	1	1	1	1	C11orf57	chromosome 11 open reading frame 57
hsa-miR-554	0	0	1	1	1	1	ACPP	acid phosphatase, prostate
hsa-miR-554	1	0	1	1	1	1	KCNMA1	potassium large conductance calcium-activated channel, subfamily M, alpha member 1
hsa-miR-554	1	1	1	1	1	1	BACE1	beta-site APP-cleaving enzyme 1
hsa-miR-554	0	0	1	1	1	1	ING4	inhibitor of growth family, member 4
hsa-miR-554	0	0	1	0	0	0	PIDD	p53-induced death domain protein
hsa-miR-554	1	0	1	1	1	1	PML	promyelocytic leukemia
hsa-miR-554	1	0	1	0	1	1	PLAG1	pleiomorphic adenoma gene 1
hsa-miR-554	1	0	1	0	1	1	SLC6A6	solute carrier family 6 (neurotransmitter transporter, taurine), member 6
hsa-miR-554	0	0	1	1	1	1	DVL1	dishevelled, dsh homolog 1 (Drosophila)
hsa-miR-554	1	0	1	1	1	1	ABI1	abl-interactor 1
hsa-miR-554	1	0	1	1	1	1	ERF	Ets2 repressor factor
hsa-miR-554	1	0	1	1	1	1	SATB2	SATB homeobox 2
hsa-miR-554	1	0	1	1	1	1	AEBP2	AE binding protein 2
hsa-miR-554	1	0	1	1	1	1	ANK1	ankyrin 1, erythrocytic
hsa-miR-554	1	0	1	1	1	1	IPO8	importin 8
hsa-miR-554	0	0	1	1	0	0	SLC22A8	solute carrier family 22 (organic anion transporter), member 8
hsa-miR-554	1	0	1	0	1	1	ADD3	adducin 3 (gamma)
hsa-miR-554	0	0	1	1	1	1	DDX10	DEAD (Asp-Glu-Ala-Asp) box polypeptide 10
hsa-miR-554	0	0	1	1	1	1	PLD1	phospholipase D1, phosphatidylcholine-specific
hsa-miR-554	1	0	1	1	1	1	PICALM	phosphatidylinositol binding clathrin assembly protein
hsa-miR-554	0	0	1	1	1	1	BRCA1	breast cancer 1, early onset
hsa-miR-554	1	0	1	1	1	1	CTNND1	catenin (cadherin-associated protein), delta 1
hsa-miR-554	0	0	1	1	1	1	SC5DL	sterol-C5-desaturase (ERG3 delta-5-desaturase homolog, S. cerevisiae)-like
hsa-miR-554	0	0	1	1	1	1	ERAL1	Era G-protein-like 1 (E. coli)
hsa-miR-554	1	0	1	0	1	1	CD164	CD164 molecule, sialomucin
hsa-miR-554	0	0	1	1	1	1	MSTO1	misato homolog 1 (Drosophila)
hsa-miR-554	0	0	1	1	1	1	ACIN1	apoptotic chromatin condensation inducer 1
hsa-miR-554	1	0	1	1	1	1	TAOK3	TAO kinase 3
hsa-miR-554	0	0	1	1	1	1	HEPH	hephaestin
hsa-miR-554	1	0	1	1	1	1	DNAJA4	DnaJ (Hsp40) homolog, subfamily A, member 4
hsa-miR-554	1	0	1	1	1	1	SNPH	syntaphilin
hsa-miR-554	1	0	1	1	1	1	SYDE1	synapse defective 1, Rho GTPase, homolog 1 (C. elegans)
hsa-miR-554	1	0	1	1	1	1	NXT2	nuclear transport factor 2-like export factor 2
hsa-miR-554	1	0	1	1	1	1	SH3GLB1	SH3-domain GRB2-like endophilin B1
hsa-miR-554	0	0	1	1	0	0	KCNK6	potassium channel, subfamily K, member 6
hsa-miR-554	0	0	1	1	1	1	PARP9	poly (ADP-ribose) polymerase family, member 9
hsa-miR-554	0	0	1	1	1	1	MED28	mediator complex subunit 28
hsa-miR-554	0	0	1	0	0	0	NBPF10	neuroblastoma breakpoint family, member 10
hsa-miR-554	0	0	1	0	0	0	CLRN1-AS1	CLRN1 antisense RNA 1
hsa-miR-554	0	0	1	1	0	0	CNKSR2	connector enhancer of kinase suppressor of Ras 2
hsa-miR-554	1	0	1	1	0	0	SEPT8	septin 8
hsa-miR-554	1	0	1	1	1	1	CACNB2	calcium channel, voltage-dependent, beta 2 subunit
hsa-miR-554	1	0	1	0	1	1	IL1RAP	interleukin 1 receptor accessory protein
hsa-miR-554	0	0	1	1	1	1	KCNJ13	potassium inwardly-rectifying channel, subfamily J, member 13
hsa-miR-554	1	0	1	1	1	1	CACNA2D2	calcium channel, voltage-dependent, alpha 2/delta subunit 2
hsa-miR-554	0	0	1	1	1	1	CLDND1	claudin domain containing 1
hsa-miR-554	1	0	1	1	1	1	PCDH11X	protocadherin 11 X-linked
hsa-miR-554	0	0	1	1	1	1	STOX2	storkhead box 2
hsa-miR-554	1	0	1	1	1	1	EIF2C1	eukaryotic translation initiation factor 2C, 1
hsa-miR-554	0	0	1	1	0	0	PARP2	poly (ADP-ribose) polymerase 2
hsa-miR-554	1	0	1	1	1	1	ACER3	alkaline ceramidase 3
hsa-miR-554	1	0	1	1	1	1	C12orf23	chromosome 12 open reading frame 23
hsa-miR-554	1	0	1	1	1	1	GALNT14	UDP-N-acetyl-alpha-D-galactosamine:polypeptide N-acetylgalactosaminyltransferase 14 (GalNAc-T14)
hsa-miR-554	1	0	1	1	1	1	SLCO5A1	solute carrier organic anion transporter family, member 5A1
hsa-miR-554	1	0	1	1	1	1	PPFIA4	protein tyrosine phosphatase, receptor type, f polypeptide (PTPRF), interacting protein (liprin), alpha 4
hsa-miR-554	0	0	1	0	0	0	LOC284561	uncharacterized LOC284561
hsa-miR-554	0	0	1	0	1	1	FLJ14186	uncharacterized LOC401149
hsa-miR-554	0	0	1	0	0	0	IFFO2	intermediate filament family orphan 2
hsa-miR-554	0	0	1	1	0	0	STPG1	sperm-tail PG-rich repeat containing 1
hsa-miR-554	1	0	1	1	0	0	PCED1A	PC-esterase domain containing 1A
hsa-miR-554	0	0	1	1	1	1	KDM2B	lysine (K)-specific demethylase 2B
hsa-miR-554	1	0	1	1	1	1	FAM40A	family with sequence similarity 40, member A
hsa-miR-554	1	0	1	1	1	1	KCTD15	potassium channel tetramerisation domain containing 15
hsa-miR-554	0	0	1	0	0	0	NBLA00301	Nbla00301
hsa-miR-554	0	0	1	0	0	0	FAM185A	family with sequence similarity 185, member A
hsa-miR-554	0	0	1	0	0	0	CHST9-AS1	CHST9 antisense RNA 1
hsa-miR-554	1	0	1	0	1	1	AP1G1	adaptor-related protein complex 1, gamma 1 subunit
hsa-miR-554	1	0	1	1	1	1	DLGAP4	discs, large (Drosophila) homolog-associated protein 4
hsa-miR-554	0	0	1	0	0	0	LOC201617	uncharacterized LOC201617
hsa-miR-554	0	0	1	1	0	0	BEAN1	brain expressed, associated with NEDD4, 1
hsa-miR-554	1	0	1	1	1	1	SCAMP5	secretory carrier membrane protein 5
hsa-miR-554	1	0	1	1	1	1	SORBS2	sorbin and SH3 domain containing 2
hsa-miR-554	0	0	1	1	0	0	RELT	RELT tumor necrosis factor receptor
hsa-miR-554	0	0	1	0	0	0	TUBA3FP	tubulin, alpha 3f, pseudogene
hsa-miR-554	0	0	1	1	0	0	NXF2	nuclear RNA export factor 2
hsa-miR-554	0	0	1	0	0	0	LOC285074	anaphase promoting complex subunit 1 pseudogene
hsa-miR-554	0	0	1	1	0	0	KRT86	keratin 86
hsa-miR-554	0	0	1	1	1	1	TFPI2	tissue factor pathway inhibitor 2
hsa-miR-554	1	0	1	1	1	1	GNG2	guanine nucleotide binding protein (G protein), gamma 2
hsa-miR-554	1	0	1	1	1	1	KCND1	potassium voltage-gated channel, Shal-related subfamily, member 1
hsa-miR-554	1	0	1	1	1	1	RNF121	ring finger protein 121
hsa-miR-554	0	0	1	0	1	1	RALYL	RALY RNA binding protein-like
hsa-miR-554	1	0	1	1	1	1	GLT25D2	glycosyltransferase 25 domain containing 2
hsa-miR-554	1	0	1	0	1	1	UVRAG	UV radiation resistance associated gene
hsa-miR-554	0	0	1	0	1	1	NBPF3	neuroblastoma breakpoint family, member 3
hsa-miR-554	1	0	1	1	1	1	CS	citrate synthase
hsa-miR-554	1	0	1	1	1	1	PEA15	phosphoprotein enriched in astrocytes 15
hsa-miR-554	1	0	1	1	1	1	RNF185	ring finger protein 185
hsa-miR-554	0	0	1	1	1	1	BAG1	BCL2-associated athanogene
hsa-miR-554	1	0	1	1	1	1	GAPVD1	GTPase activating protein and VPS9 domains 1
hsa-miR-554	1	0	1	1	1	1	SLITRK2	SLIT and NTRK-like family, member 2
hsa-miR-554	0	0	1	0	0	0	FAM66C	family with sequence similarity 66, member C
hsa-miR-554	1	0	1	1	1	1	KL	klotho
hsa-miR-554	0	0	1	1	0	0	PRSS37	protease, serine, 37
hsa-miR-554	0	0	1	0	0	0	LOC284385	uncharacterized LOC284385
hsa-miR-554	0	0	1	1	0	0	KLHDC3	kelch domain containing 3
hsa-miR-554	0	0	1	0	0	0	GTF2IP1	general transcription factor IIi, pseudogene 1
hsa-miR-554	0	0	1	1	0	0	GDPD5	glycerophosphodiester phosphodiesterase domain containing 5
hsa-miR-554	0	0	1	1	1	1	SCLT1	sodium channel and clathrin linker 1
hsa-miR-554	1	0	1	1	1	1	RPS6KC1	ribosomal protein S6 kinase, 52kDa, polypeptide 1
hsa-miR-554	1	0	1	1	1	1	ZBTB4	zinc finger and BTB domain containing 4
hsa-miR-554	0	0	1	0	0	0	MORN2	MORN repeat containing 2
hsa-miR-554	0	0	1	0	0	0	LGALS17A	Charcot-Leyden crystal protein pseudogene
hsa-miR-554	1	0	1	1	1	1	ADAMTS8	ADAM metallopeptidase with thrombospondin type 1 motif, 8
hsa-miR-554	0	0	1	1	0	0	PRR19	proline rich 19
hsa-miR-554	1	0	1	1	1	1	KIF21A	kinesin family member 21A
hsa-miR-554	1	0	1	1	1	1	CORO2B	coronin, actin binding protein, 2B
hsa-miR-554	0	0	1	1	1	1	ATPBD4	ATP binding domain 4
hsa-miR-554	1	0	1	0	1	1	RBM23	RNA binding motif protein 23
hsa-miR-554	1	0	1	1	1	1	PIK3R1	phosphoinositide-3-kinase, regulatory subunit 1 (alpha)
hsa-miR-554	1	0	1	1	1	1	RALGDS	ral guanine nucleotide dissociation stimulator
hsa-miR-554	0	0	1	1	1	1	PIN4	protein (peptidylprolyl cis/trans isomerase) NIMA-interacting, 4 (parvulin)
hsa-miR-554	1	0	1	1	1	1	PLA2G15	phospholipase A2, group XV
hsa-miR-554	0	0	1	1	1	1	MON1B	MON1 homolog B (yeast)
hsa-miR-554	0	0	1	0	0	0	LOC100129940	uncharacterized LOC100129940
hsa-miR-554	1	0	1	1	1	1	UPF1	UPF1 regulator of nonsense transcripts homolog (yeast)
hsa-miR-554	0	0	1	1	0	0	WFIKKN1	WAP, follistatin/kazal, immunoglobulin, kunitz and netrin domain containing 1
hsa-miR-554	1	0	1	1	1	1	MRFAP1	Morf4 family associated protein 1
hsa-miR-554	1	0	1	0	1	1	GPC6	glypican 6
hsa-miR-554	0	0	1	1	1	1	ZNF346	zinc finger protein 346
hsa-miR-554	1	0	1	1	1	1	LRRK2	leucine-rich repeat kinase 2
hsa-miR-554	0	0	1	0	0	0	AGAP9	ArfGAP with GTPase domain, ankyrin repeat and PH domain 9
hsa-miR-554	1	0	1	1	1	1	TAP2	transporter 2, ATP-binding cassette, sub-family B (MDR/TAP)
hsa-miR-554	0	0	1	1	1	1	FANCC	Fanconi anemia, complementation group C
hsa-miR-554	1	0	1	1	1	1	CYYR1	cysteine/tyrosine-rich 1
hsa-miR-554	0	0	1	0	1	1	PEX5	peroxisomal biogenesis factor 5
hsa-miR-554	0	0	1	0	0	0	RRN3P2	RNA polymerase I transcription factor homolog (S. cerevisiae) pseudogene 2
hsa-miR-554	0	0	1	1	1	1	RNF135	ring finger protein 135
hsa-miR-554	1	0	1	1	1	1	NECAP1	NECAP endocytosis associated 1
hsa-miR-554	1	0	1	1	1	1	RIF1	RAP1 interacting factor homolog (yeast)
hsa-miR-554	0	0	1	0	0	0	POM121L9P	POM121 transmembrane nucleoporin-like 9, pseudogene
hsa-miR-554	0	0	1	0	0	0	POM121L8P	POM121 transmembrane nucleoporin-like 8 pseudogene
hsa-miR-554	0	0	1	0	0	0	FAM66D	family with sequence similarity 66, member D
hsa-miR-554	1	0	1	1	1	1	PKNOX2	PBX/knotted 1 homeobox 2
hsa-miR-554	0	0	1	1	0	0	KRT15	keratin 15
hsa-miR-554	0	0	1	1	1	1	INPP5B	inositol polyphosphate-5-phosphatase, 75kDa
hsa-miR-554	0	0	1	1	1	1	TAF8	TAF8 RNA polymerase II, TATA box binding protein (TBP)-associated factor, 43kDa
hsa-miR-554	1	0	1	1	1	1	IL17RD	interleukin 17 receptor D
hsa-miR-554	1	0	1	1	0	0	LRRC16B	leucine rich repeat containing 16B
hsa-miR-554	0	0	1	1	1	1	TEX2	testis expressed 2
hsa-miR-554	1	0	1	0	1	1	NR3C1	nuclear receptor subfamily 3, group C, member 1 (glucocorticoid receptor)
hsa-miR-554	1	0	1	1	1	1	FBXL5	F-box and leucine-rich repeat protein 5
hsa-miR-554	0	0	1	1	1	1	CD209	CD209 molecule
hsa-miR-554	0	0	1	0	0	0	KGFLP1	fibroblast growth factor 7 pseudogene
hsa-miR-554	1	0	1	1	1	1	WDR26	WD repeat domain 26
hsa-miR-554	0	0	1	1	1	1	IYD	iodotyrosine deiodinase
hsa-miR-554	1	0	1	1	1	1	TPP1	tripeptidyl peptidase I
hsa-miR-554	0	0	1	1	1	1	PTGR2	prostaglandin reductase 2
hsa-miR-554	1	0	1	0	1	1	NHS	Nance-Horan syndrome (congenital cataracts and dental anomalies)
hsa-miR-554	0	0	1	0	1	1	XKR5	XK, Kell blood group complex subunit-related family, member 5
hsa-miR-554	1	0	1	1	1	1	QKI	QKI, KH domain containing, RNA binding
hsa-miR-554	0	0	1	1	0	0	NBPF8	neuroblastoma breakpoint family, member 8
hsa-miR-554	0	0	1	1	1	1	SNX11	sorting nexin 11
hsa-miR-554	1	0	1	1	1	1	NONO	non-POU domain containing, octamer-binding
hsa-miR-554	1	0	1	0	1	1	DCAF10	DDB1 and CUL4 associated factor 10
hsa-miR-554	1	0	1	1	0	0	DHDDS	dehydrodolichyl diphosphate synthase
hsa-miR-554	1	0	1	1	1	1	NUMA1	nuclear mitotic apparatus protein 1
hsa-miR-554	1	0	1	0	1	1	CGGBP1	CGG triplet repeat binding protein 1
hsa-miR-554	1	0	1	1	1	1	DYNC2LI1	dynein, cytoplasmic 2, light intermediate chain 1
hsa-miR-554	1	0	1	1	0	0	SAP30BP	SAP30 binding protein
hsa-miR-554	0	0	1	1	1	1	C1orf94	chromosome 1 open reading frame 94
hsa-miR-554	1	0	1	0	1	1	DDX3X	DEAD (Asp-Glu-Ala-Asp) box polypeptide 3, X-linked
hsa-miR-554	1	0	1	1	1	1	LMBR1L	limb region 1 homolog (mouse)-like
hsa-miR-554	0	0	1	0	0	0	ATXN7L3B	ataxin 7-like 3B
hsa-miR-554	1	0	1	1	1	1	SZRD1	SUZ RNA binding domain containing 1
hsa-miR-554	1	0	1	0	1	1	CNP	2',3'-cyclic nucleotide 3' phosphodiesterase
hsa-miR-554	0	0	1	0	0	0	GRAMD1B	GRAM domain containing 1B
hsa-miR-554	1	0	1	1	0	0	LRFN1	leucine rich repeat and fibronectin type III domain containing 1
hsa-miR-554	0	0	1	1	0	0	USP19	ubiquitin specific peptidase 19
hsa-miR-554	0	0	1	1	1	1	TOMM40L	translocase of outer mitochondrial membrane 40 homolog (yeast)-like
hsa-miR-554	0	0	1	0	0	0	MGC21881	uncharacterized locus MGC21881
hsa-miR-554	0	0	1	0	0	0	KLHL15	kelch-like 15 (Drosophila)
hsa-miR-554	1	0	1	1	1	1	ZBTB38	zinc finger and BTB domain containing 38
hsa-miR-554	0	0	1	1	1	1	CMAS	cytidine monophosphate N-acetylneuraminic acid synthetase
hsa-miR-554	1	0	1	1	0	0	USP53	ubiquitin specific peptidase 53
hsa-miR-554	0	0	1	0	0	0	FAM200B	family with sequence similarity 200, member B
hsa-miR-554	1	0	1	1	1	1	ARHGEF9	Cdc42 guanine nucleotide exchange factor (GEF) 9
hsa-miR-554	0	0	1	0	1	1	ZNF718	zinc finger protein 718
hsa-miR-554	1	0	1	0	1	1	BTF3L4	basic transcription factor 3-like 4
hsa-miR-554	0	0	1	1	1	1	ZNF589	zinc finger protein 589
hsa-miR-554	0	0	1	1	1	1	ANKZF1	ankyrin repeat and zinc finger domain containing 1
hsa-miR-554	1	0	1	1	1	1	ACACB	acetyl-CoA carboxylase beta
hsa-miR-554	0	0	1	0	1	1	PAPOLG	poly(A) polymerase gamma
hsa-miR-554	1	0	1	1	1	1	HTR2C	5-hydroxytryptamine (serotonin) receptor 2C, G protein-coupled
hsa-miR-554	1	0	1	1	1	1	PPARGC1A	peroxisome proliferator-activated receptor gamma, coactivator 1 alpha
hsa-miR-554	1	0	1	1	1	1	FAM160A2	family with sequence similarity 160, member A2
hsa-miR-554	1	0	1	1	1	1	RCOR3	REST corepressor 3
hsa-miR-554	0	0	1	0	0	0	CFL1P1	cofilin 1 (non-muscle) pseudogene 1
hsa-miR-554	0	0	1	1	1	1	PRPF40B	PRP40 pre-mRNA processing factor 40 homolog B (S. cerevisiae)
hsa-miR-554	1	0	1	1	1	1	GLUL	glutamate-ammonia ligase
hsa-miR-554	0	0	1	1	0	0	STK31	serine/threonine kinase 31
hsa-miR-554	0	0	1	0	0	0	LOC339862	uncharacterized LOC339862
hsa-miR-554	0	0	1	1	1	1	SNAPC3	small nuclear RNA activating complex, polypeptide 3, 50kDa
hsa-miR-554	0	0	1	1	1	1	DUSP28	dual specificity phosphatase 28
hsa-miR-554	0	0	1	0	0	0	SPATA3	spermatogenesis associated 3
hsa-miR-554	1	0	1	0	1	1	YAF2	YY1 associated factor 2
hsa-miR-554	1	0	1	1	1	1	SOX6	SRY (sex determining region Y)-box 6
hsa-miR-554	0	0	1	1	0	0	BLK	B lymphoid tyrosine kinase
hsa-miR-554	1	0	1	1	1	1	PLS3	plastin 3
hsa-miR-554	1	0	1	1	1	1	KCNJ11	potassium inwardly-rectifying channel, subfamily J, member 11
hsa-miR-554	1	0	1	0	1	1	HSPA12A	heat shock 70kDa protein 12A
hsa-miR-554	0	0	1	1	1	1	BCO2	beta-carotene oxygenase 2
hsa-miR-554	0	0	1	1	1	1	MTHFD2L	methylenetetrahydrofolate dehydrogenase (NADP+ dependent) 2-like
hsa-miR-554	0	0	1	1	1	1	C4orf32	chromosome 4 open reading frame 32
hsa-miR-554	0	0	1	0	0	0	LOC643837	uncharacterized LOC643837
hsa-miR-554	0	0	1	1	1	1	CBWD5	COBW domain containing 5
hsa-miR-554	0	0	1	1	1	1	MGC57346	uncharacterized LOC401884
hsa-miR-554	0	0	1	0	0	0	LOC348120	uncharacterized LOC348120
hsa-miR-554	0	0	1	0	0	0	LOC255025	uncharacterized LOC255025
hsa-miR-554	0	0	1	1	0	0	NLRC5	NLR family, CARD domain containing 5
hsa-miR-554	1	0	1	1	1	1	PCGF5	polycomb group ring finger 5
hsa-miR-554	1	0	1	1	1	1	SCUBE3	signal peptide, CUB domain, EGF-like 3
hsa-miR-554	0	0	1	0	0	0	AQP7P1	aquaporin 7 pseudogene 1
hsa-miR-554	1	0	1	1	1	1	RCC2	regulator of chromosome condensation 2
hsa-miR-554	0	0	1	0	1	1	C17orf51	chromosome 17 open reading frame 51
hsa-miR-554	0	0	1	1	1	1	ADAM33	ADAM metallopeptidase domain 33
hsa-miR-554	1	0	1	1	0	0	MANEAL	mannosidase, endo-alpha-like
hsa-miR-554	0	0	1	1	1	1	C1orf109	chromosome 1 open reading frame 109
hsa-miR-554	1	0	1	1	1	1	GANAB	glucosidase, alpha; neutral AB
hsa-miR-554	0	0	1	0	0	0	PTGER4P2	prostaglandin E receptor 4 (subtype EP4) pseudogene 2
hsa-miR-554	0	0	1	0	0	0	FOXN3-AS2	FOXN3 antisense RNA 2
hsa-miR-554	0	0	1	1	0	0	TRIM41	tripartite motif containing 41
hsa-miR-554	0	0	1	0	1	1	TNFRSF8	tumor necrosis factor receptor superfamily, member 8
hsa-miR-554	1	0	1	1	1	1	WBP1L	WW domain binding protein 1-like
hsa-miR-554	0	0	1	1	1	1	C3orf67	chromosome 3 open reading frame 67
hsa-miR-554	0	0	1	0	0	0	LOC554249	uncharacterized LOC554249
hsa-miR-554	0	0	1	1	1	1	SYNRG	synergin, gamma
hsa-miR-554	1	0	1	1	1	1	ZMYND11	zinc finger, MYND-type containing 11
hsa-miR-554	0	0	1	1	1	1	COL8A2	collagen, type VIII, alpha 2
hsa-miR-554	1	0	1	1	1	1	GTF2I	general transcription factor IIi
hsa-miR-554	0	0	1	1	1	1	TTLL9	tubulin tyrosine ligase-like family, member 9
hsa-miR-554	1	0	1	1	1	1	GABRB2	gamma-aminobutyric acid (GABA) A receptor, beta 2
hsa-miR-554	0	0	1	0	0	0	LOC727924	uncharacterized LOC727924
hsa-miR-554	0	0	1	1	1	1	IL4R	interleukin 4 receptor
hsa-miR-554	0	0	1	1	1	1	LOC100499484-C9ORF174	LOC100499484-C9orf174 readthrough
hsa-miR-554	1	0	1	1	1	1	TMEM132B	transmembrane protein 132B
hsa-miR-554	1	0	1	1	1	1	GRIA3	glutamate receptor, ionotropic, AMPA 3
hsa-miR-554	1	0	1	1	1	1	OTUD4	OTU domain containing 4
hsa-miR-554	0	0	1	1	0	0	SOCS7	suppressor of cytokine signaling 7
hsa-miR-554	0	0	1	1	1	1	HSF2	heat shock transcription factor 2
hsa-miR-554	0	0	1	1	1	1	TINF2	TERF1 (TRF1)-interacting nuclear factor 2
hsa-miR-554	1	0	1	0	1	1	HMGB3	high mobility group box 3
hsa-miR-554	1	0	1	1	0	0	RGS6	regulator of G-protein signaling 6
hsa-miR-554	1	0	1	1	1	1	HECTD2	HECT domain containing E3 ubiquitin protein ligase 2
hsa-miR-554	1	0	1	1	1	1	MASP1	mannan-binding lectin serine peptidase 1 (C4/C2 activating component of Ra-reactive factor)
hsa-miR-554	0	0	1	0	0	0	SMG1P1	smg-1 homolog, phosphatidylinositol 3-kinase-related kinase pseudogene 1
hsa-miR-554	0	0	1	1	1	1	CCNT2	cyclin T2
hsa-miR-554	1	0	1	0	1	1	TBL1XR1	transducin (beta)-like 1 X-linked receptor 1
hsa-miR-554	0	0	1	1	1	1	USP54	ubiquitin specific peptidase 54
hsa-miR-554	1	0	1	1	1	1	CREB3L2	cAMP responsive element binding protein 3-like 2
hsa-miR-554	1	0	1	0	1	1	TTL	tubulin tyrosine ligase
hsa-miR-554	0	0	1	1	1	1	HPGD	hydroxyprostaglandin dehydrogenase 15-(NAD)
hsa-miR-554	0	0	1	1	0	0	URM1	ubiquitin related modifier 1
hsa-miR-554	0	0	1	1	0	0	RAD23A	RAD23 homolog A (S. cerevisiae)
hsa-miR-554	1	1	1	1	0	0	EFNA3	ephrin-A3
hsa-miR-554	1	0	1	1	1	1	CTDNEP1	CTD nuclear envelope phosphatase 1
hsa-miR-554	1	0	1	1	0	0	CCM2	cerebral cavernous malformation 2
hsa-miR-554	0	0	1	1	0	0	PSME2	proteasome (prosome, macropain) activator subunit 2 (PA28 beta)
hsa-miR-554	0	0	1	1	0	0	HAS1	hyaluronan synthase 1
hsa-miR-554	0	0	1	1	1	1	DCTD	dCMP deaminase
hsa-miR-554	0	0	1	1	0	0	C12orf52	chromosome 12 open reading frame 52
hsa-miR-554	1	0	1	1	1	1	TMEM245	transmembrane protein 245
hsa-miR-554	1	0	1	1	1	1	PPP5C	protein phosphatase 5, catalytic subunit
hsa-miR-554	1	0	1	1	0	0	FAT4	FAT tumor suppressor homolog 4 (Drosophila)
hsa-miR-554	0	0	1	0	0	0	LOC100130353	hippocampus abundant transcript-like 1 pseudogene
hsa-miR-554	1	0	1	1	1	1	TAGLN2	transgelin 2
hsa-miR-554	0	0	1	1	0	0	STUB1	STIP1 homology and U-box containing protein 1, E3 ubiquitin protein ligase
hsa-miR-554	1	0	1	1	1	1	EIF1	eukaryotic translation initiation factor 1
hsa-miR-554	0	0	1	1	1	1	JAM2	junctional adhesion molecule 2
hsa-miR-554	1	0	1	1	0	0	INO80E	INO80 complex subunit E
hsa-miR-554	0	0	1	1	0	0	DCAF13	DDB1 and CUL4 associated factor 13
hsa-miR-554	1	0	1	1	1	1	TRAPPC3	trafficking protein particle complex 3
hsa-miR-554	0	0	1	0	0	0	LOC650368	asparagine-linked glycosylation 1-like pseudogene
hsa-miR-554	0	0	1	1	1	1	CCDC53	coiled-coil domain containing 53
hsa-miR-554	1	0	1	1	1	1	MAN1C1	mannosidase, alpha, class 1C, member 1
hsa-miR-554	0	0	1	1	1	1	PSMC3IP	PSMC3 interacting protein
hsa-miR-554	1	0	1	0	1	1	BTRC	beta-transducin repeat containing E3 ubiquitin protein ligase
hsa-miR-554	1	0	1	1	1	1	PHACTR2	phosphatase and actin regulator 2
hsa-miR-554	1	0	1	1	1	1	TIPARP	TCDD-inducible poly(ADP-ribose) polymerase
hsa-miR-554	0	0	1	1	1	1	GLIPR2	GLI pathogenesis-related 2
hsa-miR-554	1	0	1	1	1	1	SLC39A10	solute carrier family 39 (zinc transporter), member 10
hsa-miR-554	1	0	1	1	1	1	MAN2A2	mannosidase, alpha, class 2A, member 2
hsa-miR-554	0	0	1	1	0	0	FAM58A	family with sequence similarity 58, member A
hsa-miR-554	0	0	1	0	0	0	CDKN2B-AS1	CDKN2B antisense RNA 1
hsa-miR-554	1	0	1	0	1	1	EPDR1	ependymin related protein 1 (zebrafish)
hsa-miR-554	1	0	1	1	1	1	MLL	myeloid/lymphoid or mixed-lineage leukemia (trithorax homolog, Drosophila)
hsa-miR-554	0	0	1	1	0	0	INHBA	inhibin, beta A
hsa-miR-554	1	0	1	1	1	1	ESR1	estrogen receptor 1
hsa-miR-554	1	0	1	1	1	1	F13A1	coagulation factor XIII, A1 polypeptide
hsa-miR-554	1	0	1	1	1	1	JAG1	jagged 1
hsa-miR-554	1	0	1	1	1	1	KCNA1	potassium voltage-gated channel, shaker-related subfamily, member 1 (episodic ataxia with myokymia)
hsa-miR-554	1	0	1	1	1	1	MITF	microphthalmia-associated transcription factor
hsa-miR-554	1	0	1	1	1	1	OCRL	oculocerebrorenal syndrome of Lowe
hsa-miR-554	1	0	1	1	1	1	PEX12	peroxisomal biogenesis factor 12
hsa-miR-554	1	0	1	0	1	1	PTEN	phosphatase and tensin homolog
hsa-miR-554	1	0	1	1	1	1	TAT	tyrosine aminotransferase
hsa-miR-554	1	0	1	0	1	1	CYBB	cytochrome b-245, beta polypeptide
hsa-miR-554	1	0	1	1	1	1	DCX	doublecortin
hsa-miR-554	1	0	1	1	1	1	CR1	complement component (3b/4b) receptor 1 (Knops blood group)
hsa-miR-554	0	0	1	1	0	0	AVPR1B	arginine vasopressin receptor 1B
hsa-miR-554	1	0	1	1	1	1	HTR4	5-hydroxytryptamine (serotonin) receptor 4, G protein-coupled
hsa-miR-554	0	0	1	1	1	1	MAOB	monoamine oxidase B
hsa-miR-554	1	0	1	1	1	1	RORC	RAR-related orphan receptor C
hsa-miR-554	1	0	1	1	1	1	TPD52L3	tumor protein D52-like 3
hsa-miR-554	0	0	1	0	0	0	KLK2	kallikrein-related peptidase 2
hsa-miR-554	1	0	1	1	1	1	C1orf173	chromosome 1 open reading frame 173
hsa-miR-554	1	0	1	0	1	1	BMF	Bcl2 modifying factor
hsa-miR-554	1	0	1	1	1	1	PLCXD3	phosphatidylinositol-specific phospholipase C, X domain containing 3
hsa-miR-554	1	0	1	1	1	1	NFKBIZ	nuclear factor of kappa light polypeptide gene enhancer in B-cells inhibitor, zeta
hsa-miR-554	0	0	1	1	1	1	RYK	receptor-like tyrosine kinase
hsa-miR-554	0	0	1	1	1	1	MAPKAP1	mitogen-activated protein kinase associated protein 1
hsa-miR-554	1	0	1	1	1	1	IGSF3	immunoglobulin superfamily, member 3
hsa-miR-554	0	0	1	1	1	1	MXI1	MAX interactor 1
hsa-miR-554	0	0	1	1	1	1	GCSAM	germinal center-associated, signaling and motility
hsa-miR-554	0	0	1	1	1	1	SPIN3	spindlin family, member 3
hsa-miR-554	1	0	1	1	1	1	DISC1	disrupted in schizophrenia 1
hsa-miR-554	1	0	1	1	1	1	SORCS1	sortilin-related VPS10 domain containing receptor 1
hsa-miR-554	0	0	1	1	1	1	ME3	malic enzyme 3, NADP(+)-dependent, mitochondrial
hsa-miR-554	1	0	1	0	1	1	BCL7A	B-cell CLL/lymphoma 7A
hsa-miR-554	1	0	1	0	1	1	CELF2	CUGBP, Elav-like family member 2
hsa-miR-554	1	0	1	1	1	1	TMPO	thymopoietin
hsa-miR-554	0	0	1	1	1	1	SLC35A2	solute carrier family 35 (UDP-galactose transporter), member A2
hsa-miR-554	0	0	1	1	1	1	MAP9	microtubule-associated protein 9
hsa-miR-554	1	0	1	0	1	1	CREBZF	CREB/ATF bZIP transcription factor
hsa-miR-554	0	0	1	1	0	0	TNFRSF25	tumor necrosis factor receptor superfamily, member 25
hsa-miR-554	1	0	1	1	1	1	SCN2A	sodium channel, voltage-gated, type II, alpha subunit
hsa-miR-554	1	0	1	1	1	1	RERE	arginine-glutamic acid dipeptide (RE) repeats
hsa-miR-554	1	0	1	0	1	1	TMEM237	transmembrane protein 237
hsa-miR-554	0	0	1	1	1	1	SLC6A4	solute carrier family 6 (neurotransmitter transporter, serotonin), member 4
hsa-miR-554	1	0	1	1	1	1	ALG9	asparagine-linked glycosylation 9, alpha-1,2-mannosyltransferase homolog (S. cerevisiae)
hsa-miR-554	1	0	1	0	1	1	FBXO41	F-box protein 41
hsa-miR-554	1	0	1	1	1	1	SHANK3	SH3 and multiple ankyrin repeat domains 3
hsa-miR-554	1	0	1	0	1	1	THSD7B	thrombospondin, type I, domain containing 7B
hsa-miR-554	0	0	1	0	0	0	C16orf90	chromosome 16 open reading frame 90
hsa-miR-554	1	0	1	1	1	1	REPS2	RALBP1 associated Eps domain containing 2
hsa-miR-554	1	0	1	1	1	1	THOC2	THO complex 2
hsa-miR-554	1	0	1	0	1	1	KLF9	Kruppel-like factor 9
hsa-miR-554	0	0	1	1	1	1	CDSN	corneodesmosin
hsa-miR-554	1	0	1	1	1	1	CELSR3	cadherin, EGF LAG seven-pass G-type receptor 3 (flamingo homolog, Drosophila)
hsa-miR-554	0	0	1	1	1	1	FRZB	frizzled-related protein
hsa-miR-554	1	0	1	0	1	1	ARNT	aryl hydrocarbon receptor nuclear translocator
hsa-miR-554	1	0	1	0	1	1	ATP1B2	ATPase, Na+/K+ transporting, beta 2 polypeptide
hsa-miR-554	0	0	1	1	1	1	CD1D	CD1d molecule
hsa-miR-554	1	0	1	1	1	1	CCR7	chemokine (C-C motif) receptor 7
hsa-miR-554	1	0	1	1	1	1	FGF7	fibroblast growth factor 7
hsa-miR-554	0	0	1	1	1	1	IL6ST	interleukin 6 signal transducer (gp130, oncostatin M receptor)
hsa-miR-554	1	0	1	1	1	1	INSM1	insulinoma-associated 1
hsa-miR-554	1	0	1	1	1	1	ITGA5	integrin, alpha 5 (fibronectin receptor, alpha polypeptide)
hsa-miR-554	1	0	1	1	1	1	LBR	lamin B receptor
hsa-miR-554	1	0	1	1	1	1	MYH9	myosin, heavy chain 9, non-muscle
hsa-miR-554	1	0	1	1	1	1	NGFR	nerve growth factor receptor
hsa-miR-554	0	0	1	0	1	1	OAZ2	ornithine decarboxylase antizyme 2
hsa-miR-554	1	0	1	0	1	1	PAK2	p21 protein (Cdc42/Rac)-activated kinase 2
hsa-miR-554	0	0	1	1	1	1	PIM1	pim-1 oncogene
hsa-miR-554	1	0	1	1	1	1	PLAGL2	pleiomorphic adenoma gene-like 2
hsa-miR-554	0	0	1	1	1	1	PPP1R3A	protein phosphatase 1, regulatory subunit 3A
hsa-miR-554	1	0	1	0	1	1	PPP2R2A	protein phosphatase 2, regulatory subunit B, alpha
hsa-miR-554	1	0	1	1	1	1	MAPK1	mitogen-activated protein kinase 1
hsa-miR-554	0	0	1	0	1	1	PSMD3	proteasome (prosome, macropain) 26S subunit, non-ATPase, 3
hsa-miR-554	1	0	1	1	1	1	PTPN9	protein tyrosine phosphatase, non-receptor type 9
hsa-miR-554	1	0	1	0	1	1	SORT1	sortilin 1
hsa-miR-554	1	0	1	1	1	1	SMARCD2	SWI/SNF related, matrix associated, actin dependent regulator of chromatin, subfamily d, member 2
hsa-miR-554	1	0	1	1	1	1	TEC	tec protein tyrosine kinase
hsa-miR-554	1	0	1	1	1	1	TGFB3	transforming growth factor, beta 3
hsa-miR-554	0	0	1	1	1	1	UBE2E1	ubiquitin-conjugating enzyme E2E 1
hsa-miR-554	1	0	1	1	1	1	HMGA2	high mobility group AT-hook 2
hsa-miR-554	1	0	1	0	1	1	IRS2	insulin receptor substrate 2
hsa-miR-554	1	0	1	1	1	1	B3GALT2	UDP-Gal:betaGlcNAc beta 1,3-galactosyltransferase, polypeptide 2
hsa-miR-554	0	0	1	1	0	0	FBP2	fructose-1,6-bisphosphatase 2
hsa-miR-554	1	0	1	1	1	1	NRP2	neuropilin 2
hsa-miR-554	0	0	1	1	0	0	CCRL2	chemokine (C-C motif) receptor-like 2
hsa-miR-554	1	0	1	1	1	1	BCL2L2	BCL2-like 2
hsa-miR-554	0	0	1	1	0	0	GIP	gastric inhibitory polypeptide
hsa-miR-554	1	0	1	1	1	1	GMFB	glia maturation factor, beta
hsa-miR-554	1	0	1	0	1	1	SLC1A2	solute carrier family 1 (glial high affinity glutamate transporter), member 2
hsa-miR-554	0	0	1	0	1	1	SLC1A3	solute carrier family 1 (glial high affinity glutamate transporter), member 3
hsa-miR-554	1	0	1	1	1	1	SEMA3F	sema domain, immunoglobulin domain (Ig), short basic domain, secreted, (semaphorin) 3F
hsa-miR-554	0	0	1	0	1	1	TMSB4Y	thymosin beta 4, Y-linked
hsa-miR-554	0	0	1	1	1	1	SLC28A1	solute carrier family 28 (sodium-coupled nucleoside transporter), member 1
hsa-miR-554	1	0	1	1	1	1	MED21	mediator complex subunit 21
hsa-miR-554	1	0	1	1	1	1	COX11	COX11 cytochrome c oxidase assembly homolog (yeast)
hsa-miR-554	1	0	1	1	1	1	ACSL3	acyl-CoA synthetase long-chain family member 3
hsa-miR-554	1	0	1	1	1	1	FOXD2	forkhead box D2
hsa-miR-554	0	0	1	1	1	1	HOXB7	homeobox B7
hsa-miR-554	0	0	1	0	1	1	POU4F2	POU class 4 homeobox 2
hsa-miR-554	1	0	1	1	0	0	COX7A2L	cytochrome c oxidase subunit VIIa polypeptide 2 like
hsa-miR-554	1	0	1	1	1	1	BZRAP1	benzodiazapine receptor (peripheral) associated protein 1
hsa-miR-554	1	0	1	1	1	1	KIF3B	kinesin family member 3B
hsa-miR-554	1	0	1	0	1	1	CDYL	chromodomain protein, Y-like
hsa-miR-554	1	0	1	1	1	1	ZFP36L1	zinc finger protein 36, C3H type-like 1
hsa-miR-554	1	0	1	1	1	1	CTNS	cystinosin, lysosomal cystine transporter
hsa-miR-554	0	0	1	1	0	0	NR5A1	nuclear receptor subfamily 5, group A, member 1
hsa-miR-554	1	0	1	1	1	1	KCNJ8	potassium inwardly-rectifying channel, subfamily J, member 8
hsa-miR-554	0	0	1	1	0	0	PITX3	paired-like homeodomain 3
hsa-miR-554	1	0	1	1	0	0	ADAMTS4	ADAM metallopeptidase with thrombospondin type 1 motif, 4
hsa-miR-554	1	0	1	0	1	1	CALM3	calmodulin 3 (phosphorylase kinase, delta)
hsa-miR-554	1	1	1	1	1	1	MAP3K8	mitogen-activated protein kinase kinase kinase 8
hsa-miR-554	0	0	1	1	1	1	CSTA	cystatin A (stefin A)
hsa-miR-554	0	0	1	1	1	1	PDIA3	protein disulfide isomerase family A, member 3
hsa-miR-554	1	0	1	1	0	0	NNAT	neuronatin
hsa-miR-554	1	0	1	1	1	1	ACTR1A	ARP1 actin-related protein 1 homolog A, centractin alpha (yeast)
hsa-miR-554	1	0	1	1	1	1	IRF9	interferon regulatory factor 9
hsa-miR-554	1	0	1	1	1	1	TMEM50B	transmembrane protein 50B
hsa-miR-554	0	0	1	1	1	1	RRAS	related RAS viral (r-ras) oncogene homolog
hsa-miR-554	1	0	1	1	1	1	ZNF238	zinc finger protein 238
hsa-miR-554	1	0	1	1	1	1	VAT1	vesicle amine transport protein 1 homolog (T. californica)
hsa-miR-554	0	0	1	1	1	1	GLRX3	glutaredoxin 3
hsa-miR-554	0	0	1	1	0	0	DNAJB2	DnaJ (Hsp40) homolog, subfamily B, member 2
hsa-miR-554	1	0	1	1	1	1	HSPA13	heat shock protein 70kDa family, member 13
hsa-miR-554	1	0	1	0	1	1	WASF2	WAS protein family, member 2
hsa-miR-554	1	0	1	1	1	1	KAT7	K(lysine) acetyltransferase 7
hsa-miR-554	1	0	1	1	1	1	CA5B	carbonic anhydrase VB, mitochondrial
hsa-miR-554	0	0	1	1	0	0	TWF2	twinfilin, actin-binding protein, homolog 2 (Drosophila)
hsa-miR-554	1	0	1	0	1	1	G3BP2	GTPase activating protein (SH3 domain) binding protein 2
hsa-miR-554	1	0	1	1	1	1	SF3B3	splicing factor 3b, subunit 3, 130kDa
hsa-miR-554	1	0	1	1	1	1	TLL2	tolloid-like 2
hsa-miR-554	1	0	1	0	1	1	FLRT2	fibronectin leucine rich transmembrane protein 2
hsa-miR-554	0	0	1	0	1	1	EMR2	egf-like module containing, mucin-like, hormone receptor-like 2
hsa-miR-554	1	0	1	1	1	1	NRG1	neuregulin 1
hsa-miR-554	0	0	1	1	1	1	CCDC113	coiled-coil domain containing 113
hsa-miR-554	1	0	1	0	1	1	ODZ1	odz, odd Oz/ten-m homolog 1 (Drosophila)
hsa-miR-554	0	0	1	0	0	0	SND1-IT1	SND1 intronic transcript 1 (non-protein coding)
hsa-miR-554	0	0	1	1	1	1	GOLIM4	golgi integral membrane protein 4
hsa-miR-554	1	0	1	1	1	1	OTX1	orthodenticle homeobox 1
hsa-miR-554	1	0	1	1	1	1	TMEM97	transmembrane protein 97
hsa-miR-554	1	0	1	0	1	1	HUNK	hormonally up-regulated Neu-associated kinase
hsa-miR-554	0	0	1	1	0	0	HOXD4	homeobox D4
hsa-miR-554	1	0	1	1	1	1	KDM4A	lysine (K)-specific demethylase 4A
hsa-miR-554	0	0	1	1	1	1	VPRBP	Vpr (HIV-1) binding protein
hsa-miR-554	1	0	1	0	1	1	MLEC	malectin
hsa-miR-554	1	0	1	1	1	1	JAKMIP2	janus kinase and microtubule interacting protein 2
hsa-miR-554	1	0	1	1	1	1	SV2A	synaptic vesicle glycoprotein 2A
hsa-miR-554	1	0	1	1	1	1	CSTF2T	cleavage stimulation factor, 3' pre-RNA, subunit 2, 64kDa, tau variant
hsa-miR-554	0	0	1	1	1	1	ANGEL1	angel homolog 1 (Drosophila)
hsa-miR-554	1	0	1	0	1	1	ARHGEF12	Rho guanine nucleotide exchange factor (GEF) 12
hsa-miR-554	1	0	1	0	1	1	LARP1	La ribonucleoprotein domain family, member 1
hsa-miR-554	1	0	1	0	1	1	SRGAP2	SLIT-ROBO Rho GTPase activating protein 2
hsa-miR-554	1	0	1	1	1	1	DCAF12	DDB1 and CUL4 associated factor 12
hsa-miR-554	0	0	1	1	1	1	KBTBD2	kelch repeat and BTB (POZ) domain containing 2
hsa-miR-554	0	0	1	1	0	0	ZNF593	zinc finger protein 593
hsa-miR-554	1	0	1	1	1	1	ST8SIA3	ST8 alpha-N-acetyl-neuraminide alpha-2,8-sialyltransferase 3
hsa-miR-554	1	0	1	0	1	1	TRIM33	tripartite motif containing 33
hsa-miR-554	1	0	1	1	1	1	TXNDC12	thioredoxin domain containing 12 (endoplasmic reticulum)
hsa-miR-554	1	0	1	1	1	1	UBE2J1	ubiquitin-conjugating enzyme E2, J1
hsa-miR-554	1	0	1	1	1	1	PALLD	palladin, cytoskeletal associated protein
hsa-miR-554	1	0	1	0	1	1	HPCAL4	hippocalcin like 4
hsa-miR-554	0	0	1	1	0	0	SRRM2	serine/arginine repetitive matrix 2
hsa-miR-554	1	0	1	0	1	1	RAB8B	RAB8B, member RAS oncogene family
hsa-miR-554	1	0	1	1	1	1	MEX3C	mex-3 homolog C (C. elegans)
hsa-miR-554	1	0	1	0	1	1	FZD3	frizzled family receptor 3
hsa-miR-554	1	0	1	0	1	1	EIF2C4	eukaryotic translation initiation factor 2C, 4
hsa-miR-554	1	0	1	1	1	1	HIF1AN	hypoxia inducible factor 1, alpha subunit inhibitor
hsa-miR-554	0	0	1	0	1	1	MREG	melanoregulin
hsa-miR-554	1	0	1	1	1	1	ARGLU1	arginine and glutamate rich 1
hsa-miR-554	0	0	1	1	1	1	THAP1	THAP domain containing, apoptosis associated protein 1
hsa-miR-554	1	0	1	0	1	1	FOXJ2	forkhead box J2
hsa-miR-554	1	0	1	1	1	1	ASH1L	ash1 (absent, small, or homeotic)-like (Drosophila)
hsa-miR-554	1	0	1	1	1	1	LRRC59	leucine rich repeat containing 59
hsa-miR-554	1	0	1	1	1	1	SEPT3	septin 3
hsa-miR-554	0	0	1	1	1	1	KLHL4	kelch-like 4 (Drosophila)
hsa-miR-554	0	0	1	1	1	1	RNF20	ring finger protein 20, E3 ubiquitin protein ligase
hsa-miR-554	1	0	1	0	1	1	PAPOLB	poly(A) polymerase beta (testis specific)
hsa-miR-554	0	0	1	1	0	0	ENTPD7	ectonucleoside triphosphate diphosphohydrolase 7
hsa-miR-554	0	0	1	1	1	1	TCL6	T-cell leukemia/lymphoma 6 (non-protein coding)
hsa-miR-554	1	0	1	0	1	1	FAM40B	family with sequence similarity 40, member B
hsa-miR-554	1	0	1	1	1	1	RGAG1	retrotransposon gag domain containing 1
hsa-miR-554	1	0	1	1	1	1	RANBP10	RAN binding protein 10
hsa-miR-554	1	0	1	1	1	1	ZFP14	zinc finger protein 14 homolog (mouse)
hsa-miR-554	0	0	1	1	1	1	SLC15A2	solute carrier family 15 (H+/peptide transporter), member 2
hsa-miR-554	1	0	1	1	1	1	MTMR3	myotubularin related protein 3
hsa-miR-554	0	0	1	1	0	0	POLD4	polymerase (DNA-directed), delta 4, accessory subunit
hsa-miR-554	0	0	1	1	1	1	OSTC	oligosaccharyltransferase complex subunit
hsa-miR-554	0	0	1	1	1	1	RAB38	RAB38, member RAS oncogene family
hsa-miR-554	1	0	1	1	1	1	HIF3A	hypoxia inducible factor 3, alpha subunit
hsa-miR-554	0	0	1	1	1	1	SUSD1	sushi domain containing 1
hsa-miR-554	1	0	1	1	1	1	SUDS3	suppressor of defective silencing 3 homolog (S. cerevisiae)
hsa-miR-554	1	0	1	1	1	1	FBXL17	F-box and leucine-rich repeat protein 17
hsa-miR-554	1	0	1	0	1	1	USP46	ubiquitin specific peptidase 46
hsa-miR-554	1	0	1	1	1	1	GDAP1L1	ganglioside induced differentiation associated protein 1-like 1
hsa-miR-554	1	0	1	1	1	1	AHNAK	AHNAK nucleoprotein
hsa-miR-554	1	0	1	1	1	1	FAM134A	family with sequence similarity 134, member A
hsa-miR-554	1	0	1	1	0	0	PHF23	PHD finger protein 23
hsa-miR-554	0	0	1	1	1	1	AKIRIN1	akirin 1
hsa-miR-554	1	0	1	0	1	1	LIN28A	lin-28 homolog A (C. elegans)
hsa-miR-554	0	0	1	1	1	1	SH3D21	SH3 domain containing 21
hsa-miR-554	1	0	1	1	1	1	CLMP	CXADR-like membrane protein
hsa-miR-554	0	0	1	1	0	0	RNF122	ring finger protein 122
hsa-miR-554	0	0	1	1	1	1	PLBD1	phospholipase B domain containing 1
hsa-miR-554	0	0	1	1	1	1	PREX2	phosphatidylinositol-3,4,5-trisphosphate-dependent Rac exchange factor 2
hsa-miR-554	1	0	1	1	1	1	NAA50	N(alpha)-acetyltransferase 50, NatE catalytic subunit
hsa-miR-554	1	0	1	1	1	1	TRIM56	tripartite motif containing 56
hsa-miR-554	1	0	1	0	1	1	TMEM47	transmembrane protein 47
hsa-miR-554	0	0	1	1	1	1	INHBE	inhibin, beta E
hsa-miR-554	1	0	1	1	1	1	PPP1R12B	protein phosphatase 1, regulatory subunit 12B
hsa-miR-554	1	0	1	1	1	1	OTP	orthopedia homeobox
hsa-miR-554	0	0	1	1	0	0	STK19	serine/threonine kinase 19
hsa-miR-554	1	0	1	1	1	1	TRIM63	tripartite motif containing 63, E3 ubiquitin protein ligase
hsa-miR-554	1	0	1	0	1	1	PPP1R15B	protein phosphatase 1, regulatory subunit 15B
hsa-miR-554	1	0	1	1	1	1	EPT1	ethanolaminephosphotransferase 1 (CDP-ethanolamine-specific)
hsa-miR-554	1	0	1	1	1	1	ESCO1	establishment of cohesion 1 homolog 1 (S. cerevisiae)
hsa-miR-554	0	0	1	1	0	0	COL6A2	collagen, type VI, alpha 2
hsa-miR-554	0	0	1	1	1	1	CHST14	carbohydrate (N-acetylgalactosamine 4-0) sulfotransferase 14
hsa-miR-554	0	0	1	0	1	1	PAQR8	progestin and adipoQ receptor family member VIII
hsa-miR-554	1	0	1	1	1	1	SPTSSA	serine palmitoyltransferase, small subunit A
hsa-miR-554	0	0	1	1	1	1	MRAP2	melanocortin 2 receptor accessory protein 2
hsa-miR-554	0	0	1	1	0	0	KIF12	kinesin family member 12
hsa-miR-554	1	0	1	1	1	1	KCTD12	potassium channel tetramerisation domain containing 12
hsa-miR-554	0	0	1	1	1	1	TMEM106A	transmembrane protein 106A
hsa-miR-554	0	0	1	1	0	0	RNASE11	ribonuclease, RNase A family, 11 (non-active)
hsa-miR-554	0	0	1	0	1	1	OSTCP1	oligosaccharyltransferase complex subunit pseudogene 1
hsa-miR-554	0	0	1	1	0	0	RPUSD2	RNA pseudouridylate synthase domain containing 2
hsa-miR-554	1	0	1	1	1	1	ZSCAN29	zinc finger and SCAN domain containing 29
hsa-miR-554	0	0	1	1	1	1	PM20D1	peptidase M20 domain containing 1
hsa-miR-554	0	0	1	0	1	1	LIX1	Lix1 homolog (chicken)
hsa-miR-554	0	0	1	1	1	1	SLC22A7	solute carrier family 22 (organic anion transporter), member 7
hsa-miR-554	1	0	1	1	1	1	C2orf69	chromosome 2 open reading frame 69
hsa-miR-554	1	0	1	1	1	1	PKHD1	polycystic kidney and hepatic disease 1 (autosomal recessive)
hsa-miR-554	1	0	1	1	1	1	POM121	POM121 transmembrane nucleoporin
hsa-miR-554	0	0	1	1	1	1	REXO1L1	REX1, RNA exonuclease 1 homolog (S. cerevisiae)-like 1
hsa-miR-554	1	0	1	1	1	1	SMG7	smg-7 homolog, nonsense mediated mRNA decay factor (C. elegans)
hsa-miR-554	1	0	1	1	1	1	SIK1	salt-inducible kinase 1
hsa-miR-554	0	0	1	0	1	1	NBPF15	neuroblastoma breakpoint family, member 15
hsa-miR-554	1	0	1	0	1	1	TMEM167A	transmembrane protein 167A
hsa-miR-554	1	0	1	1	1	1	UBR1	ubiquitin protein ligase E3 component n-recognin 1
hsa-miR-554	1	0	1	1	1	1	ZADH2	zinc binding alcohol dehydrogenase domain containing 2
hsa-miR-554	0	0	1	1	1	1	IFNE	interferon, epsilon
hsa-miR-554	1	0	1	1	1	1	FAM134C	family with sequence similarity 134, member C
hsa-miR-554	1	0	1	1	1	1	DCAF12L1	DDB1 and CUL4 associated factor 12-like 1
hsa-miR-554	1	0	1	0	1	1	ARL5B	ADP-ribosylation factor-like 5B
hsa-miR-554	1	0	1	1	1	1	BCL6B	B-cell CLL/lymphoma 6, member B
hsa-miR-554	1	0	1	0	1	1	RIMS4	regulating synaptic membrane exocytosis 4
hsa-miR-554	0	0	1	0	1	1	NBPF11	neuroblastoma breakpoint family, member 11
hsa-miR-554	0	0	1	1	1	1	COL18A1-AS1	COL18A1 antisense RNA 1
hsa-miR-554	0	0	1	1	1	1	ZRANB2	zinc finger, RAN-binding domain containing 2
hsa-miR-554	0	0	1	0	0	0	CELP	carboxyl ester lipase pseudogene
hsa-miR-554	0	0	1	0	0	0	TOP1P2	topoisomerase (DNA) I pseudogene 2
hsa-miR-554	0	0	1	0	0	0	NXF4	nuclear RNA export factor 4 pseudogene
hsa-miR-554	0	0	1	0	0	0	PDIA3P	protein disulfide isomerase family A, member 3 pseudogene
hsa-miR-554	0	0	1	0	0	0	TPTE2P6	transmembrane phosphoinositide 3-phosphatase and tensin homolog 2 pseudogene 6
hsa-miR-554	0	0	1	0	0	0	SIGLEC16	sialic acid binding Ig-like lectin 16 (gene/pseudogene)
hsa-miR-554	0	0	1	0	0	0	HAS2-AS1	HAS2 antisense RNA 1
hsa-miR-554	0	0	1	0	0	0	SNX29P2	sorting nexin 29 pseudogene 2
hsa-miR-554	0	0	1	1	1	1	CD84	CD84 molecule
hsa-miR-554	0	0	1	1	0	0	KIAA0100	KIAA0100
hsa-miR-554	0	0	0	1	0	0	TRAPPC6A	trafficking protein particle complex 6A
hsa-miR-554	0	0	1	1	1	1	ARHGAP33	Rho GTPase activating protein 33
hsa-miR-554	1	0	1	1	1	1	NDUFAB1	NADH dehydrogenase (ubiquinone) 1, alpha/beta subcomplex, 1, 8kDa
hsa-miR-554	0	0	0	1	0	0	RPS20	ribosomal protein S20
hsa-miR-554	0	0	0	1	0	0	SCTR	secretin receptor
hsa-miR-554	1	0	1	1	1	1	PSD	pleckstrin and Sec7 domain containing
hsa-miR-554	0	0	1	1	1	1	NSMAF	neutral sphingomyelinase (N-SMase) activation associated factor
hsa-miR-554	0	0	0	1	0	0	PSMC4	proteasome (prosome, macropain) 26S subunit, ATPase, 4
hsa-miR-554	1	0	1	1	1	1	CAMKK1	calcium/calmodulin-dependent protein kinase kinase 1, alpha
hsa-miR-554	0	0	0	1	0	0	RAPGEF3	Rap guanine nucleotide exchange factor (GEF) 3
hsa-miR-554	0	0	0	1	1	1	C4orf6	chromosome 4 open reading frame 6
hsa-miR-554	0	0	0	1	0	0	IGSF9	immunoglobulin superfamily, member 9
hsa-miR-554	1	0	1	1	0	0	ITGB4	integrin, beta 4
hsa-miR-554	0	0	1	1	0	0	SLC22A4	solute carrier family 22 (organic cation/ergothioneine transporter), member 4
hsa-miR-554	0	0	1	1	0	0	TGM1	transglutaminase 1 (K polypeptide epidermal type I, protein-glutamine-gamma-glutamyltransferase)
hsa-miR-554	0	0	1	1	1	1	UNC13D	unc-13 homolog D (C. elegans)
hsa-miR-554	0	0	1	1	1	1	VNN3	vanin 3
hsa-miR-554	0	0	1	1	0	0	C22orf31	chromosome 22 open reading frame 31
hsa-miR-554	0	0	0	1	1	1	RHBDD3	rhomboid domain containing 3
hsa-miR-554	0	0	0	1	1	1	BIK	BCL2-interacting killer (apoptosis-inducing)
hsa-miR-554	0	0	0	1	0	0	RIN3	Ras and Rab interactor 3
hsa-miR-554	1	0	1	1	1	1	CHGA	chromogranin A (parathyroid secretory protein 1)
hsa-miR-554	1	0	1	1	1	1	EFS	embryonal Fyn-associated substrate
hsa-miR-554	0	0	1	1	0	0	PIGU	phosphatidylinositol glycan anchor biosynthesis, class U
hsa-miR-554	0	0	1	1	0	0	POLI	polymerase (DNA directed) iota
hsa-miR-554	0	0	0	1	0	0	CCL17	chemokine (C-C motif) ligand 17
hsa-miR-554	0	0	0	1	0	0	METRN	meteorin, glial cell differentiation regulator
hsa-miR-554	0	0	1	1	1	1	RHOV	ras homolog family member V
hsa-miR-554	0	0	1	1	1	1	RP1	retinitis pigmentosa 1 (autosomal dominant)
hsa-miR-554	0	0	1	1	1	1	IL12RB1	interleukin 12 receptor, beta 1
hsa-miR-554	0	0	1	1	0	0	SNAPC2	small nuclear RNA activating complex, polypeptide 2, 45kDa
hsa-miR-554	0	0	0	1	0	0	CACTIN	cactin, spliceosome C complex subunit
hsa-miR-554	0	0	0	1	0	0	CAPS	calcyphosine
hsa-miR-554	0	0	0	1	0	0	SLC5A5	solute carrier family 5 (sodium iodide symporter), member 5
hsa-miR-554	0	0	1	1	0	0	DLX5	distal-less homeobox 5
hsa-miR-554	0	0	1	1	0	0	ZNHIT3	zinc finger, HIT-type containing 3
hsa-miR-554	0	0	1	1	0	0	PFN1	profilin 1
hsa-miR-554	0	0	0	1	0	0	ICAM2	intercellular adhesion molecule 2
hsa-miR-554	0	0	0	1	0	0	RCVRN	recoverin
hsa-miR-554	0	0	1	1	1	1	IL10RA	interleukin 10 receptor, alpha
hsa-miR-554	1	0	1	1	0	0	DGAT2	diacylglycerol O-acyltransferase 2
hsa-miR-554	1	0	1	1	1	1	ASIC1	acid-sensing (proton-gated) ion channel 1
hsa-miR-554	0	0	1	1	1	1	FANCE	Fanconi anemia, complementation group E
hsa-miR-554	0	0	1	1	1	1	MCM3	minichromosome maintenance complex component 3
hsa-miR-554	0	0	1	1	1	1	PTK7	PTK7 protein tyrosine kinase 7
hsa-miR-554	1	0	1	1	1	1	DAZAP1	DAZ associated protein 1
hsa-miR-554	0	0	1	1	0	0	INO80B	INO80 complex subunit B
hsa-miR-554	0	0	1	1	0	0	WBP1	WW domain binding protein 1
hsa-miR-554	0	0	0	1	0	0	A4GNT	alpha-1,4-N-acetylglucosaminyltransferase
hsa-miR-554	1	0	1	1	1	1	ACHE	acetylcholinesterase
hsa-miR-554	0	0	0	1	0	0	RAMP3	receptor (G protein-coupled) activity modifying protein 3
hsa-miR-554	1	0	1	1	0	0	HOXC11	homeobox C11
hsa-miR-554	0	0	0	1	0	0	HOXC12	homeobox C12
hsa-miR-554	0	0	1	1	1	1	CHPF	chondroitin polymerizing factor
hsa-miR-554	0	0	0	1	1	1	SLC35C2	solute carrier family 35, member C2
hsa-miR-554	0	0	1	1	0	0	LIPE	lipase, hormone-sensitive
hsa-miR-554	0	0	0	1	1	1	PSG9	pregnancy specific beta-1-glycoprotein 9
hsa-miR-554	0	0	0	1	1	1	AARS2	alanyl-tRNA synthetase 2, mitochondrial (putative)
hsa-miR-554	0	0	0	1	0	0	EMC3	ER membrane protein complex subunit 3
hsa-miR-554	1	0	1	1	1	1	NECAB3	N-terminal EF-hand calcium binding protein 3
hsa-miR-554	0	0	0	1	1	1	KRT9	keratin 9
hsa-miR-554	0	0	0	1	1	1	SDF2	stromal cell-derived factor 2
hsa-miR-554	0	0	1	1	0	0	SIX1	SIX homeobox 1
hsa-miR-554	1	0	0	1	1	1	SLC35E1	solute carrier family 35, member E1
hsa-miR-554	0	0	0	1	0	0	DGCR6L	DiGeorge syndrome critical region gene 6-like
hsa-miR-554	0	0	1	1	1	1	CYTH4	cytohesin 4
hsa-miR-554	0	0	1	1	0	0	CLN6	ceroid-lipofuscinosis, neuronal 6, late infantile, variant
hsa-miR-554	0	0	0	1	0	0	ISLR	immunoglobulin superfamily containing leucine-rich repeat
hsa-miR-554	0	0	0	1	0	0	ZNF232	zinc finger protein 232
hsa-miR-554	1	0	0	1	1	1	SBNO2	strawberry notch homolog 2 (Drosophila)
hsa-miR-554	0	0	0	1	0	0	PBX4	pre-B-cell leukemia homeobox 4
hsa-miR-554	0	0	1	1	0	0	CERS4	ceramide synthase 4
hsa-miR-554	0	0	0	1	0	0	NARFL	nuclear prelamin A recognition factor-like
hsa-miR-554	0	0	0	1	1	1	TRMT2A	tRNA methyltransferase 2 homolog A (S. cerevisiae)
hsa-miR-554	0	0	0	1	0	0	PRKCSH	protein kinase C substrate 80K-H
hsa-miR-554	1	0	1	1	1	1	XPO7	exportin 7
hsa-miR-554	0	0	0	1	0	0	RSPH3	radial spoke 3 homolog (Chlamydomonas)
hsa-miR-554	0	0	0	1	0	0	GDF15	growth differentiation factor 15
hsa-miR-554	0	0	0	1	0	0	TUBGCP2	tubulin, gamma complex associated protein 2
hsa-miR-554	1	0	0	1	1	1	YIPF2	Yip1 domain family, member 2
hsa-miR-554	0	0	0	1	0	0	TMEM160	transmembrane protein 160
hsa-miR-554	0	0	0	1	0	0	NPAS1	neuronal PAS domain protein 1
hsa-miR-554	1	0	1	1	1	1	SLC7A10	solute carrier family 7 (neutral amino acid transporter light chain, asc system), member 10
hsa-miR-554	0	0	1	1	1	1	FUS	fused in sarcoma
hsa-miR-554	0	0	0	1	1	1	GAS2L2	growth arrest-specific 2 like 2
hsa-miR-554	0	0	1	1	0	0	ZSWIM3	zinc finger, SWIM-type containing 3
hsa-miR-554	0	0	1	1	1	1	CHI3L1	chitinase 3-like 1 (cartilage glycoprotein-39)
hsa-miR-554	0	0	0	1	1	1	BTBD2	BTB (POZ) domain containing 2
hsa-miR-554	0	0	1	1	1	1	MED10	mediator complex subunit 10
hsa-miR-554	1	0	1	1	1	1	ARNTL	aryl hydrocarbon receptor nuclear translocator-like
hsa-miR-554	0	0	0	1	1	1	TMEM106C	transmembrane protein 106C
hsa-miR-554	0	0	1	1	0	0	DDB2	damage-specific DNA binding protein 2, 48kDa
hsa-miR-554	0	0	1	1	1	1	HRK	harakiri, BCL2 interacting protein (contains only BH3 domain)
hsa-miR-554	1	0	1	1	1	1	DTX1	deltex homolog 1 (Drosophila)
hsa-miR-554	1	0	1	1	1	1	TMEM60	transmembrane protein 60
hsa-miR-554	0	0	1	1	0	0	TROAP	trophinin associated protein (tastin)
hsa-miR-554	0	0	0	1	1	1	DYSF	dysferlin, limb girdle muscular dystrophy 2B (autosomal recessive)
hsa-miR-554	0	0	0	1	1	1	TMBIM1	transmembrane BAX inhibitor motif containing 1
hsa-miR-554	0	0	1	1	0	0	PSORS1C2	psoriasis susceptibility 1 candidate 2
hsa-miR-554	0	0	1	1	1	1	MRPS18B	mitochondrial ribosomal protein S18B
hsa-miR-554	0	0	1	1	0	0	GTF2H4	general transcription factor IIH, polypeptide 4, 52kDa
hsa-miR-554	1	0	1	1	1	1	LRRC32	leucine rich repeat containing 32
hsa-miR-554	0	0	1	1	0	0	PREB	prolactin regulatory element binding
hsa-miR-554	0	0	1	1	0	0	PLCE1	phospholipase C, epsilon 1
hsa-miR-554	0	0	1	1	1	1	ASUN	asunder, spermatogenesis regulator homolog (Drosphila)
hsa-miR-554	0	0	0	1	0	0	NUP133	nucleoporin 133kDa
hsa-miR-554	0	0	1	1	0	0	LPCAT3	lysophosphatidylcholine acyltransferase 3
hsa-miR-554	0	0	0	1	1	1	C4orf27	chromosome 4 open reading frame 27
hsa-miR-554	1	0	1	1	1	1	CDRT1	CMT1A duplicated region transcript 1
hsa-miR-554	0	0	0	1	1	1	TRIM16	tripartite motif containing 16
hsa-miR-554	0	0	0	1	1	1	VAC14	Vac14 homolog (S. cerevisiae)
hsa-miR-554	0	0	0	1	0	0	POLD1	polymerase (DNA directed), delta 1, catalytic subunit
hsa-miR-554	0	0	1	1	0	0	HAGH	hydroxyacylglutathione hydrolase
hsa-miR-554	1	0	0	1	1	1	PKD1	polycystic kidney disease 1 (autosomal dominant)
hsa-miR-554	0	0	1	1	1	1	RHBDF1	rhomboid 5 homolog 1 (Drosophila)
hsa-miR-554	0	0	1	1	0	0	RNF167	ring finger protein 167
hsa-miR-554	1	0	1	1	0	0	ZC3H3	zinc finger CCCH-type containing 3
hsa-miR-554	0	0	0	1	0	0	HCK	hemopoietic cell kinase
hsa-miR-554	0	0	1	1	0	0	KCNN4	potassium intermediate/small conductance calcium-activated channel, subfamily N, member 4
hsa-miR-554	0	0	0	1	0	0	GNA15	guanine nucleotide binding protein (G protein), alpha 15 (Gq class)
hsa-miR-554	1	0	1	1	1	1	MAPK3	mitogen-activated protein kinase 3
hsa-miR-554	1	0	0	1	1	1	SMARCB1	SWI/SNF related, matrix associated, actin dependent regulator of chromatin, subfamily b, member 1
hsa-miR-554	0	0	1	1	0	0	ARVCF	armadillo repeat gene deleted in velocardiofacial syndrome
hsa-miR-554	0	0	1	1	0	0	NOVA2	neuro-oncological ventral antigen 2
hsa-miR-554	0	0	0	1	0	0	PLEKHA4	pleckstrin homology domain containing, family A (phosphoinositide binding specific) member 4
hsa-miR-554	1	0	0	1	1	1	ITPKC	inositol-trisphosphate 3-kinase C
hsa-miR-554	0	0	0	1	1	1	FOXRED1	FAD-dependent oxidoreductase domain containing 1
hsa-miR-554	0	0	0	1	1	1	DCPS	decapping enzyme, scavenger
hsa-miR-554	0	0	1	1	0	0	LTK	leukocyte receptor tyrosine kinase
hsa-miR-554	0	0	1	1	1	1	SLC9A1	solute carrier family 9, subfamily A (NHE1, cation proton antiporter 1), member 1
hsa-miR-554	0	0	0	1	1	1	ORC4	origin recognition complex, subunit 4
hsa-miR-554	0	0	1	1	1	1	CAPZB	capping protein (actin filament) muscle Z-line, beta
hsa-miR-554	0	0	0	1	0	0	IL1RL2	interleukin 1 receptor-like 2
hsa-miR-554	0	0	0	1	0	0	FGF10	fibroblast growth factor 10
hsa-miR-554	1	0	1	1	1	1	MECOM	MDS1 and EVI1 complex locus
hsa-miR-554	0	0	1	1	0	0	CAD	carbamoyl-phosphate synthetase 2, aspartate transcarbamylase, and dihydroorotase
hsa-miR-554	0	0	0	1	0	0	TYK2	tyrosine kinase 2
hsa-miR-554	0	0	0	1	0	0	SIL1	SIL1 homolog, endoplasmic reticulum chaperone (S. cerevisiae)
hsa-miR-554	0	0	1	1	0	0	FAM188B	family with sequence similarity 188, member B
hsa-miR-554	1	0	1	1	0	0	B3GAT3	beta-1,3-glucuronyltransferase 3 (glucuronosyltransferase I)
hsa-miR-554	0	0	1	1	1	1	ICA1	islet cell autoantigen 1, 69kDa
hsa-miR-554	0	0	0	1	0	0	HPX	hemopexin
hsa-miR-554	0	0	1	1	0	0	B4GALNT3	beta-1,4-N-acetyl-galactosaminyl transferase 3
hsa-miR-554	0	0	0	1	1	1	RHOF	ras homolog family member F (in filopodia)
hsa-miR-554	0	0	1	1	1	1	RDH12	retinol dehydrogenase 12 (all-trans/9-cis/11-cis)
hsa-miR-554	0	0	1	1	1	1	NOL3	nucleolar protein 3 (apoptosis repressor with CARD domain)
hsa-miR-554	0	0	0	1	0	0	ADAD2	adenosine deaminase domain containing 2
hsa-miR-554	0	0	1	1	1	1	PHF12	PHD finger protein 12
hsa-miR-554	0	0	1	1	0	0	GFOD2	glucose-fructose oxidoreductase domain containing 2
hsa-miR-554	0	0	0	1	1	1	MYO19	myosin XIX
hsa-miR-554	1	0	1	1	1	1	GATA6	GATA binding protein 6
hsa-miR-554	0	0	0	1	0	0	SAMD1	sterile alpha motif domain containing 1
hsa-miR-554	0	0	1	1	0	0	TMEM91	transmembrane protein 91
hsa-miR-554	0	0	0	1	0	0	BCKDHA	branched chain keto acid dehydrogenase E1, alpha polypeptide
hsa-miR-554	1	0	1	1	1	1	PRUNE	prune homolog (Drosophila)
hsa-miR-554	0	0	1	1	0	0	SETDB1	SET domain, bifurcated 1
hsa-miR-554	0	0	1	1	1	1	NXPE3	neurexophilin and PC-esterase domain family, member 3
hsa-miR-554	1	0	1	1	1	1	MARCH6	membrane-associated ring finger (C3HC4) 6, E3 ubiquitin protein ligase
hsa-miR-554	0	0	0	1	0	0	PLA2G7	phospholipase A2, group VII (platelet-activating factor acetylhydrolase, plasma)
hsa-miR-554	0	0	0	1	1	1	ZC3HAV1L	zinc finger CCCH-type, antiviral 1-like
hsa-miR-554	0	0	0	1	1	1	IDI2	isopentenyl-diphosphate delta isomerase 2
hsa-miR-554	0	0	0	1	0	0	WDR85	WD repeat domain 85
hsa-miR-554	1	0	1	1	1	1	TMEM26	transmembrane protein 26
hsa-miR-554	0	0	0	1	0	0	ROM1	retinal outer segment membrane protein 1
hsa-miR-554	0	0	1	1	1	1	TAGLN	transgelin
hsa-miR-554	0	0	1	1	0	0	TM7SF2	transmembrane 7 superfamily member 2
hsa-miR-554	0	0	0	1	1	1	C11orf53	chromosome 11 open reading frame 53
hsa-miR-554	1	0	1	1	0	0	TMEM86A	transmembrane protein 86A
hsa-miR-554	1	0	0	1	1	1	THRSP	thyroid hormone responsive
hsa-miR-554	0	0	0	1	0	0	TAKR	aldo-keto reductase, truncated
hsa-miR-554	1	0	1	1	1	1	KCNE4	potassium voltage-gated channel, Isk-related family, member 4
hsa-miR-554	0	0	0	1	0	0	FRMD1	FERM domain containing 1
hsa-miR-554	0	0	1	1	0	0	ATP5J	ATP synthase, H+ transporting, mitochondrial Fo complex, subunit F6
hsa-miR-554	0	0	1	1	1	1	TSEN2	tRNA splicing endonuclease 2 homolog (S. cerevisiae)
hsa-miR-554	0	0	1	1	1	1	NSMCE2	non-SMC element 2, MMS21 homolog (S. cerevisiae)
hsa-miR-554	0	0	0	1	0	0	TIMP4	TIMP metallopeptidase inhibitor 4
hsa-miR-554	1	0	1	1	1	1	DUSP2	dual specificity phosphatase 2
hsa-miR-554	0	0	0	1	0	0	HTR6	5-hydroxytryptamine (serotonin) receptor 6, G protein-coupled
hsa-miR-554	0	0	1	1	1	1	DERL3	derlin 3
hsa-miR-554	0	0	1	1	0	0	TEPP	testis, prostate and placenta expressed
hsa-miR-554	1	0	0	1	0	0	AGRP	agouti related protein homolog (mouse)
hsa-miR-554	0	0	0	1	0	0	RRP1	ribosomal RNA processing 1 homolog (S. cerevisiae)
hsa-miR-554	0	0	0	1	0	0	RDH13	retinol dehydrogenase 13 (all-trans/9-cis)
hsa-miR-554	1	0	0	1	0	0	NBEAL2	neurobeachin-like 2
hsa-miR-554	0	0	1	1	0	0	CCDC12	coiled-coil domain containing 12
hsa-miR-554	0	0	1	1	0	0	FOXH1	forkhead box H1
hsa-miR-554	0	0	1	1	1	1	C5orf45	chromosome 5 open reading frame 45
hsa-miR-554	0	0	1	1	0	0	YDJC	YdjC homolog (bacterial)
hsa-miR-554	0	0	1	1	0	0	ABCF3	ATP-binding cassette, sub-family F (GCN20), member 3
hsa-miR-554	0	0	1	1	1	1	PCYT1A	phosphate cytidylyltransferase 1, choline, alpha
hsa-miR-554	0	0	0	1	1	1	FDXR	ferredoxin reductase
hsa-miR-554	0	0	0	1	0	0	CDK3	cyclin-dependent kinase 3
hsa-miR-554	1	0	1	1	1	1	PLEKHH3	pleckstrin homology domain containing, family H (with MyTH4 domain) member 3
hsa-miR-554	1	0	1	1	1	1	NAGS	N-acetylglutamate synthase
hsa-miR-554	0	0	1	1	1	1	C1orf123	chromosome 1 open reading frame 123
hsa-miR-554	1	0	0	1	1	1	SLC25A34	solute carrier family 25, member 34
hsa-miR-554	1	0	1	1	1	1	CDC42EP3	CDC42 effector protein (Rho GTPase binding) 3
hsa-miR-554	0	0	1	1	1	1	ATP13A4	ATPase type 13A4
hsa-miR-554	0	0	1	1	0	0	IGFN1	immunoglobulin-like and fibronectin type III domain containing 1
hsa-miR-554	1	0	1	1	1	1	FBLN2	fibulin 2
hsa-miR-554	0	0	1	1	1	1	POLR2H	polymerase (RNA) II (DNA directed) polypeptide H
hsa-miR-554	0	0	1	1	0	0	HIST1H2AA	histone cluster 1, H2aa
hsa-miR-554	0	0	1	1	1	1	SAP30L	SAP30-like
hsa-miR-554	0	0	0	1	1	1	RP9	retinitis pigmentosa 9 (autosomal dominant)
hsa-miR-554	1	0	1	1	1	1	ORC5	origin recognition complex, subunit 5
hsa-miR-554	0	0	0	1	0	0	GBX1	gastrulation brain homeobox 1
hsa-miR-554	0	0	1	1	0	0	C9orf24	chromosome 9 open reading frame 24
hsa-miR-554	0	0	1	1	1	1	SLC39A2	solute carrier family 39 (zinc transporter), member 2
hsa-miR-554	0	0	1	1	0	0	PACSIN3	protein kinase C and casein kinase substrate in neurons 3
hsa-miR-554	0	0	0	1	0	0	SERPINA4	serpin peptidase inhibitor, clade A (alpha-1 antiproteinase, antitrypsin), member 4
hsa-miR-554	0	0	0	1	0	0	AMN	amnionless homolog (mouse)
hsa-miR-554	0	0	0	1	0	0	ADAMTS15	ADAM metallopeptidase with thrombospondin type 1 motif, 15
hsa-miR-554	0	0	0	1	0	0	HPS6	Hermansky-Pudlak syndrome 6
hsa-miR-554	0	0	1	1	0	0	CHRNA5	cholinergic receptor, nicotinic, alpha 5 (neuronal)
hsa-miR-554	1	0	1	1	1	1	NDEL1	nudE nuclear distribution E homolog (A. nidulans)-like 1
hsa-miR-554	0	0	1	1	0	0	FAM18A	family with sequence similarity 18, member A
hsa-miR-554	0	0	0	1	0	0	NNMT	nicotinamide N-methyltransferase
hsa-miR-554	0	0	1	1	0	0	PLK1	polo-like kinase 1
hsa-miR-554	0	0	1	1	1	1	NYAP1	neuronal tyrosine-phosphorylated phosphoinositide-3-kinase adaptor 1
hsa-miR-554	1	0	1	1	0	0	CACNB3	calcium channel, voltage-dependent, beta 3 subunit
hsa-miR-554	0	0	0	1	0	0	DNAAF3	dynein, axonemal, assembly factor 3
hsa-miR-554	1	0	1	1	0	0	KIFC2	kinesin family member C2
hsa-miR-554	1	0	0	1	1	1	RCOR2	REST corepressor 2
hsa-miR-554	0	0	1	1	0	0	PRDX2	peroxiredoxin 2
hsa-miR-554	0	0	1	1	0	0	MLST8	MTOR associated protein, LST8 homolog (S. cerevisiae)
hsa-miR-554	1	0	1	1	1	1	HNRNPUL2	heterogeneous nuclear ribonucleoprotein U-like 2
hsa-miR-554	0	0	1	1	0	0	SAC3D1	SAC3 domain containing 1
hsa-miR-554	0	0	1	1	1	1	CLP1	CLP1, cleavage and polyadenylation factor I subunit, homolog (S. cerevisiae)
hsa-miR-554	0	0	1	1	1	1	DONSON	downstream neighbor of SON
hsa-miR-554	0	0	1	1	0	0	VAV1	vav 1 guanine nucleotide exchange factor
hsa-miR-554	0	0	0	1	0	0	ANKS3	ankyrin repeat and sterile alpha motif domain containing 3
hsa-miR-554	0	0	0	1	1	1	C8orf74	chromosome 8 open reading frame 74
hsa-miR-554	0	0	0	1	0	0	NFRKB	nuclear factor related to kappaB binding protein
hsa-miR-554	0	0	0	1	1	1	CXCR6	chemokine (C-X-C motif) receptor 6
hsa-miR-554	0	0	1	1	0	0	PEX6	peroxisomal biogenesis factor 6
hsa-miR-554	0	0	0	1	0	0	ASL	argininosuccinate lyase
hsa-miR-554	0	0	1	1	1	1	PPIH	peptidylprolyl isomerase H (cyclophilin H)
hsa-miR-554	0	0	0	1	1	1	C22orf15	chromosome 22 open reading frame 15
hsa-miR-554	0	0	0	1	0	0	TLR9	toll-like receptor 9
hsa-miR-554	0	0	1	1	0	0	CYHR1	cysteine/histidine-rich 1
hsa-miR-554	1	0	1	1	0	0	RBMXL2	RNA binding motif protein, X-linked-like 2
hsa-miR-554	1	0	1	1	0	0	ACOT12	acyl-CoA thioesterase 12
hsa-miR-554	1	0	1	1	1	1	HARS	histidyl-tRNA synthetase
hsa-miR-554	0	0	0	1	0	0	THOP1	thimet oligopeptidase 1
hsa-miR-554	0	0	0	1	0	0	METTL7B	methyltransferase like 7B
hsa-miR-554	0	0	1	1	1	1	RAPGEF6	Rap guanine nucleotide exchange factor (GEF) 6
hsa-miR-554	1	0	1	1	1	1	FNIP1	folliculin interacting protein 1
hsa-miR-554	0	0	1	1	0	0	GOLT1A	golgi transport 1A
hsa-miR-554	1	0	1	1	1	1	PDLIM2	PDZ and LIM domain 2 (mystique)
hsa-miR-554	0	0	1	1	0	0	GMPPB	GDP-mannose pyrophosphorylase B
hsa-miR-554	0	0	0	1	0	0	ATAD3B	ATPase family, AAA domain containing 3B
hsa-miR-554	0	0	1	1	1	1	NLRP11	NLR family, pyrin domain containing 11
hsa-miR-554	0	0	0	1	0	0	ADCK5	aarF domain containing kinase 5
hsa-miR-554	0	0	1	1	0	0	C19orf70	chromosome 19 open reading frame 70
hsa-miR-554	1	0	1	1	1	1	RCE1	RCE1 homolog, prenyl protein protease (S. cerevisiae)
hsa-miR-554	1	0	1	1	0	0	TCAP	titin-cap (telethonin)
hsa-miR-554	0	0	0	1	1	1	EPS8L1	EPS8-like 1
hsa-miR-554	0	0	1	1	1	1	KLK6	kallikrein-related peptidase 6
hsa-miR-554	0	0	1	1	0	0	RFNG	RFNG O-fucosylpeptide 3-beta-N-acetylglucosaminyltransferase
hsa-miR-554	1	0	1	1	1	1	NEFH	neurofilament, heavy polypeptide
hsa-miR-554	0	0	1	1	1	1	P2RY2	purinergic receptor P2Y, G-protein coupled, 2
hsa-miR-554	0	0	1	1	1	1	TNK1	tyrosine kinase, non-receptor, 1
hsa-miR-554	0	0	0	1	0	0	ZNF408	zinc finger protein 408
hsa-miR-554	0	0	1	1	1	1	MRPL52	mitochondrial ribosomal protein L52
hsa-miR-554	0	0	0	1	0	0	NFE2	nuclear factor (erythroid-derived 2), 45kDa
hsa-miR-554	1	0	1	1	0	0	TBC1D10C	TBC1 domain family, member 10C
hsa-miR-554	0	0	1	1	0	0	MRPL46	mitochondrial ribosomal protein L46
hsa-miR-554	1	0	1	1	0	0	CCDC85B	coiled-coil domain containing 85B
hsa-miR-554	1	0	1	1	0	0	PPP1CA	protein phosphatase 1, catalytic subunit, alpha isozyme
hsa-miR-554	0	0	0	1	0	0	PARP10	poly (ADP-ribose) polymerase family, member 10
hsa-miR-554	0	0	1	1	0	0	SLC6A13	solute carrier family 6 (neurotransmitter transporter, GABA), member 13
hsa-miR-554	0	0	1	1	0	0	ZNF821	zinc finger protein 821
hsa-miR-554	0	0	1	1	1	1	BBS12	Bardet-Biedl syndrome 12
hsa-miR-554	0	0	0	1	0	0	NOP14	NOP14 nucleolar protein homolog (yeast)
hsa-miR-554	0	0	0	1	0	0	OR4C13	olfactory receptor, family 4, subfamily C, member 13
hsa-miR-554	1	0	1	1	1	1	PFAS	phosphoribosylformylglycinamidine synthase
hsa-miR-554	1	0	0	1	0	0	TNIP1	TNFAIP3 interacting protein 1
hsa-miR-554	0	0	0	1	1	1	ODF3L2	outer dense fiber of sperm tails 3-like 2
hsa-miR-554	1	0	1	1	1	1	CNOT4	CCR4-NOT transcription complex, subunit 4
hsa-miR-554	0	0	1	1	1	1	KCND3	potassium voltage-gated channel, Shal-related subfamily, member 3
hsa-miR-554	1	0	0	1	0	0	ARHGEF1	Rho guanine nucleotide exchange factor (GEF) 1
hsa-miR-554	0	0	0	1	0	0	ZFAND2A	zinc finger, AN1-type domain 2A
hsa-miR-554	1	0	0	1	1	1	HNF4A	hepatocyte nuclear factor 4, alpha
hsa-miR-554	1	0	1	1	1	1	CCZ1B	CCZ1 vacuolar protein trafficking and biogenesis associated homolog B (S. cerevisiae)
hsa-miR-554	1	0	1	1	1	1	C7orf43	chromosome 7 open reading frame 43
hsa-miR-554	0	0	0	1	0	0	FAM125A	family with sequence similarity 125, member A
hsa-miR-554	0	0	0	1	0	0	OR2T35	olfactory receptor, family 2, subfamily T, member 35
hsa-miR-554	0	0	1	1	1	1	COX14	COX14 cytochrome c oxidase assembly homolog (S. cerevisiae)
hsa-miR-554	0	0	1	1	1	1	FAM83A	family with sequence similarity 83, member A
hsa-miR-554	0	0	0	1	1	1	DIS3L	DIS3 mitotic control homolog (S. cerevisiae)-like
hsa-miR-554	0	0	0	1	0	0	OTOS	otospiralin
hsa-miR-554	0	0	0	1	0	0	OR4S1	olfactory receptor, family 4, subfamily S, member 1
hsa-miR-554	0	0	1	1	1	1	RASGRP2	RAS guanyl releasing protein 2 (calcium and DAG-regulated)
hsa-miR-554	0	0	1	1	0	0	KLK8	kallikrein-related peptidase 8
hsa-miR-554	0	0	1	1	0	0	PRPF31	PRP31 pre-mRNA processing factor 31 homolog (S. cerevisiae)
hsa-miR-554	0	0	0	1	1	1	NUDC	nuclear distribution C homolog (A. nidulans)
hsa-miR-554	0	0	1	1	1	1	CCDC33	coiled-coil domain containing 33
hsa-miR-554	0	0	1	1	1	1	ATG16L2	autophagy related 16-like 2 (S. cerevisiae)
hsa-miR-554	1	0	0	1	0	0	FAM123C	family with sequence similarity 123C
hsa-miR-554	1	0	1	1	0	0	DUOX1	dual oxidase 1
hsa-miR-554	1	0	1	1	0	0	CASKIN2	CASK interacting protein 2
hsa-miR-554	0	0	0	1	0	0	P2RY11	purinergic receptor P2Y, G-protein coupled, 11
hsa-miR-554	0	0	0	1	0	0	PPAN	peter pan homolog (Drosophila)
hsa-miR-554	0	0	0	1	0	0	PPAN-P2RY11	PPAN-P2RY11 readthrough
hsa-miR-554	0	0	0	1	0	0	OR51F2	olfactory receptor, family 51, subfamily F, member 2
hsa-miR-554	0	0	0	1	0	0	TRIM72	tripartite motif containing 72
hsa-miR-554	0	0	1	1	0	0	ZNF335	zinc finger protein 335
hsa-miR-554	0	0	1	1	0	0	CPT1C	carnitine palmitoyltransferase 1C
hsa-miR-554	0	0	1	1	1	1	SNRNP200	small nuclear ribonucleoprotein 200kDa (U5)
hsa-miR-554	0	0	1	1	1	1	PRX	periaxin
hsa-miR-554	0	0	1	1	0	0	PPIE	peptidylprolyl isomerase E (cyclophilin E)
hsa-miR-554	1	0	1	1	0	0	ECE2	endothelin converting enzyme 2
hsa-miR-554	0	0	1	1	1	1	YARS2	tyrosyl-tRNA synthetase 2, mitochondrial
hsa-miR-554	0	0	0	1	0	0	MED16	mediator complex subunit 16
hsa-miR-554	0	0	0	1	0	0	GYLTL1B	glycosyltransferase-like 1B
hsa-miR-554	0	0	1	1	1	1	LACC1	laccase (multicopper oxidoreductase) domain containing 1
hsa-miR-554	0	0	1	1	0	0	CCZ1	CCZ1 vacuolar protein trafficking and biogenesis associated homolog (S. cerevisiae)
hsa-miR-554	0	0	0	1	0	0	KLHL38	kelch-like 38 (Drosophila)
hsa-miR-554	0	0	0	1	1	1	UPB1	ureidopropionase, beta
hsa-miR-554	1	0	1	1	0	0	CRELD1	cysteine-rich with EGF-like domains 1
hsa-miR-554	0	0	0	1	0	0	SPAG11A	sperm associated antigen 11A
hsa-miR-554	1	0	0	1	1	1	PLEKHJ1	pleckstrin homology domain containing, family J member 1
hsa-miR-554	0	0	0	1	1	1	ZNF274	zinc finger protein 274
hsa-miR-554	0	0	0	1	0	0	NOC2L	nucleolar complex associated 2 homolog (S. cerevisiae)
hsa-miR-554	0	0	1	1	1	1	CETN1	centrin, EF-hand protein, 1
hsa-miR-554	0	0	1	1	0	0	GBA	glucosidase, beta, acid
hsa-miR-554	0	0	1	1	0	0	CCDC107	coiled-coil domain containing 107
hsa-miR-554	0	0	1	1	0	0	CCDC158	coiled-coil domain containing 158
hsa-miR-554	1	0	1	1	1	1	EYA2	eyes absent homolog 2 (Drosophila)
hsa-miR-554	0	0	0	1	0	0	FAM110C	family with sequence similarity 110, member C
hsa-miR-554	0	0	0	1	0	0	TSPAN10	tetraspanin 10
hsa-miR-554	0	0	0	1	0	0	DHX34	DEAH (Asp-Glu-Ala-His) box polypeptide 34
hsa-miR-554	0	0	0	1	0	0	CLEC4G	C-type lectin domain family 4, member G
hsa-miR-554	0	0	1	1	1	1	TMIGD1	transmembrane and immunoglobulin domain containing 1
hsa-miR-554	0	0	0	1	0	0	POTEKP	POTE ankyrin domain family, member K, pseudogene
hsa-miR-554	0	0	0	1	0	0	NUPR1L	nuclear protein, transcriptional regulator, 1-like
hsa-miR-554	0	0	0	1	0	0	MAPK8IP2	mitogen-activated protein kinase 8 interacting protein 2
hsa-miR-554	0	0	0	1	0	0	C19orf71	chromosome 19 open reading frame 71
hsa-miR-554	0	0	0	1	0	0	ZNF775	zinc finger protein 775
hsa-miR-554	0	0	1	1	0	0	RXFP3	relaxin/insulin-like family peptide receptor 3
hsa-miR-554	0	0	0	1	0	0	SAMD14	sterile alpha motif domain containing 14
hsa-miR-554	0	0	0	1	0	0	CYP2A13	cytochrome P450, family 2, subfamily A, polypeptide 13
hsa-miR-554	0	0	1	1	0	0	CLK3	CDC-like kinase 3
hsa-miR-554	0	0	0	1	0	0	ADSSL1	adenylosuccinate synthase like 1
hsa-miR-554	0	0	0	1	0	0	PCYT2	phosphate cytidylyltransferase 2, ethanolamine
hsa-miR-554	0	0	1	1	0	0	PKP3	plakophilin 3
hsa-miR-554	0	0	1	1	1	1	P4HA3	prolyl 4-hydroxylase, alpha polypeptide III
hsa-miR-554	1	0	1	1	0	0	YTHDF2	YTH domain family, member 2
hsa-miR-554	0	0	0	1	1	1	SNAI3	snail homolog 3 (Drosophila)
hsa-miR-554	0	0	0	1	1	1	EMILIN3	elastin microfibril interfacer 3
hsa-miR-554	1	0	1	1	0	0	GPR173	G protein-coupled receptor 173
hsa-miR-554	0	0	1	1	0	0	STAC3	SH3 and cysteine rich domain 3
hsa-miR-554	0	0	1	1	0	0	DGAT2L6	diacylglycerol O-acyltransferase 2-like 6
hsa-miR-554	0	0	1	1	1	1	AIFM3	apoptosis-inducing factor, mitochondrion-associated, 3
hsa-miR-554	0	0	1	1	1	1	COL25A1	collagen, type XXV, alpha 1
hsa-miR-554	0	0	1	1	0	0	MED12	mediator complex subunit 12
hsa-miR-554	1	0	1	1	1	1	CREM	cAMP responsive element modulator
hsa-miR-554	0	0	1	1	0	0	CASP9	caspase 9, apoptosis-related cysteine peptidase
hsa-miR-554	0	0	1	1	1	1	ACAD9	acyl-CoA dehydrogenase family, member 9
hsa-miR-554	0	0	1	1	0	0	LCE5A	late cornified envelope 5A
hsa-miR-554	0	0	1	1	1	1	PDE2A	phosphodiesterase 2A, cGMP-stimulated
hsa-miR-554	0	0	1	1	0	0	RLTPR	RGD motif, leucine rich repeats, tropomodulin domain and proline-rich containing
hsa-miR-554	0	0	1	1	1	1	PLCD1	phospholipase C, delta 1
hsa-miR-554	0	0	1	1	0	0	RPS19BP1	ribosomal protein S19 binding protein 1
hsa-miR-554	0	0	1	1	1	1	RNF220	ring finger protein 220
hsa-miR-554	0	0	1	1	1	1	APOBEC3B	apolipoprotein B mRNA editing enzyme, catalytic polypeptide-like 3B
hsa-miR-554	0	0	0	1	0	0	STARD3	StAR-related lipid transfer (START) domain containing 3
hsa-miR-554	0	0	1	1	1	1	SPAG17	sperm associated antigen 17
hsa-miR-554	0	0	0	1	0	0	FTSJ3	FtsJ homolog 3 (E. coli)
hsa-miR-554	0	0	1	1	0	0	DCBLD1	discoidin, CUB and LCCL domain containing 1
hsa-miR-554	0	0	0	1	1	1	CLEC12A	C-type lectin domain family 12, member A
hsa-miR-554	0	0	1	1	1	1	CLEC12B	C-type lectin domain family 12, member B
hsa-miR-554	0	0	1	1	0	0	KRTDAP	keratinocyte differentiation-associated protein
hsa-miR-554	0	0	0	1	0	0	ATAD3A	ATPase family, AAA domain containing 3A
hsa-miR-554	0	0	0	1	0	0	SFN	stratifin
hsa-miR-554	0	0	0	1	0	0	C1QA	complement component 1, q subcomponent, A chain
hsa-miR-554	0	0	1	1	0	0	ENY2	enhancer of yellow 2 homolog (Drosophila)
hsa-miR-554	0	0	1	1	1	1	BTNL8	butyrophilin-like 8
hsa-miR-554	1	0	1	1	1	1	RNF207	ring finger protein 207
hsa-miR-554	1	0	1	1	1	1	C20orf26	chromosome 20 open reading frame 26
hsa-miR-554	0	0	1	1	1	1	BRAT1	BRCA1-associated ATM activator 1
hsa-miR-554	0	0	1	1	0	0	GOLGB1	golgin B1
hsa-miR-554	0	0	1	1	0	0	CLDN4	claudin 4
hsa-miR-554	1	0	1	1	0	0	KAT5	K(lysine) acetyltransferase 5
hsa-miR-554	1	0	1	1	1	1	ATP2B4	ATPase, Ca++ transporting, plasma membrane 4
hsa-miR-554	0	0	1	1	1	1	TMEM202	transmembrane protein 202
hsa-miR-554	0	0	0	1	0	0	SAMD11	sterile alpha motif domain containing 11
hsa-miR-554	0	0	1	1	1	1	TMEM230	transmembrane protein 230
hsa-miR-554	1	0	1	1	1	1	TMTC4	transmembrane and tetratricopeptide repeat containing 4
hsa-miR-554	0	0	1	1	0	0	LY6H	lymphocyte antigen 6 complex, locus H
hsa-miR-554	0	0	0	1	0	0	OR2T2	olfactory receptor, family 2, subfamily T, member 2
hsa-miR-554	1	0	1	1	1	1	CCDC141	coiled-coil domain containing 141
hsa-miR-554	1	0	1	1	1	1	MLLT4	myeloid/lymphoid or mixed-lineage leukemia (trithorax homolog, Drosophila); translocated to, 4
hsa-miR-554	1	0	1	1	1	1	TRIM3	tripartite motif containing 3
hsa-miR-554	0	0	1	1	1	1	NFATC3	nuclear factor of activated T-cells, cytoplasmic, calcineurin-dependent 3
hsa-miR-554	0	0	0	1	0	0	DHRS7B	dehydrogenase/reductase (SDR family) member 7B
hsa-miR-554	0	0	1	1	0	0	GRIN2C	glutamate receptor, ionotropic, N-methyl D-aspartate 2C
hsa-miR-554	0	0	1	1	1	1	GPR114	G protein-coupled receptor 114
hsa-miR-554	0	0	0	1	0	0	SAMM50	sorting and assembly machinery component 50 homolog (S. cerevisiae)
hsa-miR-554	0	0	0	1	0	0	CCDC37	coiled-coil domain containing 37
hsa-miR-554	0	0	1	1	0	0	DPAGT1	dolichyl-phosphate (UDP-N-acetylglucosamine) N-acetylglucosaminephosphotransferase 1 (GlcNAc-1-P transferase)
hsa-miR-554	0	0	1	1	0	0	FBXO2	F-box protein 2
hsa-miR-554	0	0	1	1	1	1	TP53I11	tumor protein p53 inducible protein 11
hsa-miR-554	0	0	0	1	0	0	ZBTB45	zinc finger and BTB domain containing 45
hsa-miR-554	0	0	1	1	0	0	CCDC81	coiled-coil domain containing 81
hsa-miR-554	0	0	1	1	0	0	SH2D6	SH2 domain containing 6
hsa-miR-554	0	0	0	1	1	1	ZNF565	zinc finger protein 565
hsa-miR-554	0	0	0	1	0	0	ERVW-1	endogenous retrovirus group W, member 1
hsa-miR-554	0	0	0	1	1	1	TXNL4A	thioredoxin-like 4A
hsa-miR-554	1	0	0	1	0	0	CARD11	caspase recruitment domain family, member 11
hsa-miR-554	0	0	1	1	1	1	TPRA1	transmembrane protein, adipocyte asscociated 1
hsa-miR-554	1	0	1	1	1	1	DIAPH2	diaphanous homolog 2 (Drosophila)
hsa-miR-554	0	0	0	1	0	0	MMP23B	matrix metallopeptidase 23B
hsa-miR-554	0	0	1	1	0	0	COL27A1	collagen, type XXVII, alpha 1
hsa-miR-554	1	0	1	1	1	1	NCDN	neurochondrin
hsa-miR-554	0	0	0	1	0	0	MYOCD	myocardin
hsa-miR-554	0	0	1	1	1	1	RANGAP1	Ran GTPase activating protein 1
hsa-miR-554	0	0	1	1	1	1	MED24	mediator complex subunit 24
hsa-miR-554	1	0	1	1	1	1	SH3BP2	SH3-domain binding protein 2
hsa-miR-554	0	0	1	1	0	0	ACOX3	acyl-CoA oxidase 3, pristanoyl
hsa-miR-554	0	0	1	1	1	1	ARHGEF26	Rho guanine nucleotide exchange factor (GEF) 26
hsa-miR-554	0	0	1	1	1	1	TMEM67	transmembrane protein 67
hsa-miR-554	1	0	1	1	0	0	TNPO2	transportin 2
hsa-miR-554	0	0	1	1	0	0	IL27	interleukin 27
hsa-miR-554	1	0	1	1	0	0	ADAM15	ADAM metallopeptidase domain 15
hsa-miR-554	0	0	1	1	1	1	DYNLRB1	dynein, light chain, roadblock-type 1
hsa-miR-554	0	0	1	1	1	1	GALP	galanin-like peptide
hsa-miR-554	0	0	0	1	1	1	PRAMEF8	PRAME family member 8
hsa-miR-554	0	0	1	1	0	0	ANAPC11	anaphase promoting complex subunit 11
hsa-miR-554	0	0	1	1	0	0	CEACAM3	carcinoembryonic antigen-related cell adhesion molecule 3
hsa-miR-554	0	0	0	1	0	0	C1QTNF5	C1q and tumor necrosis factor related protein 5
hsa-miR-554	0	0	1	1	0	0	MAP3K6	mitogen-activated protein kinase kinase kinase 6
hsa-miR-554	0	0	0	1	0	0	DDX47	DEAD (Asp-Glu-Ala-Asp) box polypeptide 47
hsa-miR-554	1	0	1	1	1	1	NIPAL3	NIPA-like domain containing 3
hsa-miR-554	0	0	1	1	0	0	ZNF646	zinc finger protein 646
hsa-miR-554	0	0	1	1	0	0	NIF3L1	NIF3 NGG1 interacting factor 3-like 1 (S. cerevisiae)
hsa-miR-554	0	0	0	1	0	0	HIST1H2AI	histone cluster 1, H2ai
hsa-miR-554	1	0	1	1	0	0	SYN3	synapsin III
hsa-miR-554	0	0	1	1	0	0	LPAR2	lysophosphatidic acid receptor 2
hsa-miR-554	0	0	0	1	0	0	ABCB8	ATP-binding cassette, sub-family B (MDR/TAP), member 8
hsa-miR-554	1	0	1	1	1	1	TRPM6	transient receptor potential cation channel, subfamily M, member 6
hsa-miR-554	1	0	1	1	1	1	DDX42	DEAD (Asp-Glu-Ala-Asp) box polypeptide 42
hsa-miR-554	0	0	1	1	1	1	SPAG11B	sperm associated antigen 11B
hsa-miR-554	0	0	0	1	0	0	DDA1	DET1 and DDB1 associated 1
hsa-miR-554	0	0	1	1	0	0	PDLIM7	PDZ and LIM domain 7 (enigma)
hsa-miR-554	0	0	0	1	0	0	CHCHD2	coiled-coil-helix-coiled-coil-helix domain containing 2
hsa-miR-554	0	0	1	1	1	1	STIL	SCL/TAL1 interrupting locus
hsa-miR-554	1	0	1	1	1	1	PHLPP2	PH domain and leucine rich repeat protein phosphatase 2
hsa-miR-554	0	0	0	1	0	0	TMEM119	transmembrane protein 119
hsa-miR-554	0	0	0	1	1	1	RDH16	retinol dehydrogenase 16 (all-trans)
hsa-miR-554	0	0	0	1	0	0	MPEG1	macrophage expressed 1
hsa-miR-554	0	0	0	1	0	0	PRAMEF7	PRAME family member 7
hsa-miR-554	1	0	1	1	1	1	GPX7	glutathione peroxidase 7
hsa-miR-554	0	0	0	1	0	0	C19orf45	chromosome 19 open reading frame 45
hsa-miR-554	0	0	1	1	1	1	CD3E	CD3e molecule, epsilon (CD3-TCR complex)
hsa-miR-554	0	0	0	1	1	1	C16orf59	chromosome 16 open reading frame 59
hsa-miR-554	1	0	1	1	1	1	NFASC	neurofascin
hsa-miR-554	0	0	0	1	0	0	KIAA1614	KIAA1614
hsa-miR-554	1	0	1	1	1	1	TOR3A	torsin family 3, member A
hsa-miR-554	0	0	1	1	0	0	NIT1	nitrilase 1
hsa-miR-554	0	0	1	1	0	0	APOA1BP	apolipoprotein A-I binding protein
hsa-miR-554	0	0	1	1	0	0	PMF1	polyamine-modulated factor 1
hsa-miR-554	0	0	0	1	0	0	BGLAP	bone gamma-carboxyglutamate (gla) protein
hsa-miR-554	0	0	1	1	0	0	TRIM46	tripartite motif containing 46
hsa-miR-554	0	0	1	1	0	0	MUC1	mucin 1, cell surface associated
hsa-miR-554	1	0	1	1	0	0	PBXIP1	pre-B-cell leukemia homeobox interacting protein 1
hsa-miR-554	0	0	0	1	0	0	PRAP1	proline-rich acidic protein 1
hsa-miR-554	0	0	0	1	0	0	TTC40	tetratricopeptide repeat domain 40
hsa-miR-554	0	0	1	1	1	1	NPR1	natriuretic peptide receptor A/guanylate cyclase A (atrionatriuretic peptide receptor A)
hsa-miR-554	0	0	0	1	1	1	SNAPIN	SNAP-associated protein
hsa-miR-554	0	0	1	1	1	1	S100A14	S100 calcium binding protein A14
hsa-miR-554	0	0	0	1	0	0	S100A9	S100 calcium binding protein A9
hsa-miR-554	0	0	0	1	0	0	LCE1C	late cornified envelope 1C
hsa-miR-554	0	0	0	1	0	0	UROS	uroporphyrinogen III synthase
hsa-miR-554	0	0	0	1	0	0	FLG	filaggrin
hsa-miR-554	1	0	1	1	1	1	RGS10	regulator of G-protein signaling 10
hsa-miR-554	0	0	0	1	1	1	HIST2H2BF	histone cluster 2, H2bf
hsa-miR-554	0	0	1	1	1	1	RBM8A	RNA binding motif protein 8A
hsa-miR-554	0	0	1	1	1	1	PLEKHS1	pleckstrin homology domain containing, family S member 1
hsa-miR-554	1	0	1	1	0	0	POLL	polymerase (DNA directed), lambda
hsa-miR-554	0	0	1	1	1	1	KAZALD1	Kazal-type serine peptidase inhibitor domain 1
hsa-miR-554	0	0	1	1	1	1	MRPL43	mitochondrial ribosomal protein L43
hsa-miR-554	0	0	0	1	1	1	CHRNA4	cholinergic receptor, nicotinic, alpha 4 (neuronal)
hsa-miR-554	0	0	1	1	1	1	SLC17A9	solute carrier family 17, member 9
hsa-miR-554	1	0	1	1	1	1	LDOC1	leucine zipper, down-regulated in cancer 1
hsa-miR-554	0	0	1	1	0	0	RPS21	ribosomal protein S21
hsa-miR-554	1	0	1	1	1	1	HS6ST2	heparan sulfate 6-O-sulfotransferase 2
hsa-miR-554	0	0	1	1	0	0	LSM14B	LSM14B, SCD6 homolog B (S. cerevisiae)
hsa-miR-554	0	0	0	1	0	0	RRP12	ribosomal RNA processing 12 homolog (S. cerevisiae)
hsa-miR-554	1	0	1	1	1	1	EHMT1	euchromatic histone-lysine N-methyltransferase 1
hsa-miR-554	0	0	0	1	1	1	CPT2	carnitine palmitoyltransferase 2
hsa-miR-554	0	0	0	1	0	0	DPP7	dipeptidyl-peptidase 7
hsa-miR-554	0	0	0	1	0	0	C9orf142	chromosome 9 open reading frame 142
hsa-miR-554	0	0	0	1	0	0	INPP5E	inositol polyphosphate-5-phosphatase, 72 kDa
hsa-miR-554	0	0	0	1	0	0	SURF2	surfeit 2
hsa-miR-554	1	0	1	1	0	0	POMGNT1	protein O-linked mannose beta1,2-N-acetylglucosaminyltransferase
hsa-miR-554	1	0	1	1	1	1	NCOA3	nuclear receptor coactivator 3
hsa-miR-554	0	0	0	1	1	1	TSPAN1	tetraspanin 1
hsa-miR-554	1	0	0	1	0	0	CCDC17	coiled-coil domain containing 17
hsa-miR-554	0	0	0	1	1	1	BEST4	bestrophin 4
hsa-miR-554	0	0	1	1	1	1	KIF2C	kinesin family member 2C
hsa-miR-554	0	0	0	1	0	0	DMAP1	DNA methyltransferase 1 associated protein 1
hsa-miR-554	0	0	0	1	1	1	ABL1	c-abl oncogene 1, non-receptor tyrosine kinase
hsa-miR-554	1	0	1	1	0	0	ELOVL1	ELOVL fatty acid elongase 1
hsa-miR-554	0	0	0	1	1	1	ZNF684	zinc finger protein 684
hsa-miR-554	0	0	1	1	1	1	CNPY3	canopy 3 homolog (zebrafish)
hsa-miR-554	0	0	1	1	1	1	CHCHD1	coiled-coil-helix-coiled-coil-helix domain containing 1
hsa-miR-554	0	0	1	1	0	0	WISP2	WNT1 inducible signaling pathway protein 2
hsa-miR-554	1	0	1	1	0	0	MDFI	MyoD family inhibitor
hsa-miR-554	1	0	1	1	1	1	RSPO1	R-spondin 1
hsa-miR-554	0	0	1	1	1	1	SGK2	serum/glucocorticoid regulated kinase 2
hsa-miR-554	0	0	1	1	0	0	TREM2	triggering receptor expressed on myeloid cells 2
hsa-miR-554	1	0	1	1	1	1	CDK9	cyclin-dependent kinase 9
hsa-miR-554	0	0	0	1	0	0	TACR2	tachykinin receptor 2
hsa-miR-554	1	0	1	1	0	0	CCDC28B	coiled-coil domain containing 28B
hsa-miR-554	0	0	0	1	0	0	OR5C1	olfactory receptor, family 5, subfamily C, member 1
hsa-miR-554	0	0	1	1	1	1	TTLL11	tubulin tyrosine ligase-like family, member 11
hsa-miR-554	0	0	1	1	1	1	ZNF365	zinc finger protein 365
hsa-miR-554	0	0	0	1	0	0	TULP1	tubby like protein 1
hsa-miR-554	0	0	1	1	1	1	ZWINT	ZW10 interactor
hsa-miR-554	1	0	1	1	0	0	DES	desmin
hsa-miR-554	1	0	1	1	0	0	ZMYM3	zinc finger, MYM-type 3
hsa-miR-554	0	0	1	1	0	0	SCAND1	SCAN domain containing 1
hsa-miR-554	1	0	1	1	0	0	CD164L2	CD164 sialomucin-like 2
hsa-miR-554	0	0	0	1	0	0	FXYD4	FXYD domain containing ion transport regulator 4
hsa-miR-554	0	0	0	1	0	0	BMS1	BMS1 homolog, ribosome assembly protein (yeast)
hsa-miR-554	0	0	1	1	0	0	SLC39A7	solute carrier family 39 (zinc transporter), member 7
hsa-miR-554	1	0	1	1	1	1	NRP1	neuropilin 1
hsa-miR-554	1	0	1	1	1	1	ANKS6	ankyrin repeat and sterile alpha motif domain containing 6
hsa-miR-554	0	0	1	1	0	0	TSR2	TSR2, 20S rRNA accumulation, homolog (S. cerevisiae)
hsa-miR-554	0	0	0	1	0	0	HSD17B3	hydroxysteroid (17-beta) dehydrogenase 3
hsa-miR-554	0	0	0	1	0	0	BTBD17	BTB (POZ) domain containing 17
hsa-miR-554	1	0	1	1	1	1	PADI2	peptidyl arginine deiminase, type II
hsa-miR-554	1	0	1	1	0	0	EHMT2	euchromatic histone-lysine N-methyltransferase 2
hsa-miR-554	1	0	1	1	1	1	NEU1	sialidase 1 (lysosomal sialidase)
hsa-miR-554	1	0	1	1	1	1	IARS	isoleucyl-tRNA synthetase
hsa-miR-554	0	0	0	1	0	0	VWA7	von Willebrand factor A domain containing 7
hsa-miR-554	0	0	1	1	1	1	SHC3	SHC (Src homology 2 domain containing) transforming protein 3
hsa-miR-554	0	0	0	1	0	0	DUSP15	dual specificity phosphatase 15
hsa-miR-554	0	0	1	1	1	1	IER3	immediate early response 3
hsa-miR-554	0	0	0	1	1	1	RABL2A	RAB, member of RAS oncogene family-like 2A
hsa-miR-554	0	0	1	1	0	0	NPPA	natriuretic peptide A
hsa-miR-554	0	0	0	1	1	1	SLC15A1	solute carrier family 15 (oligopeptide transporter), member 1
hsa-miR-554	0	0	0	1	0	0	NMS	neuromedin S
hsa-miR-554	0	0	0	1	0	0	CBY3	chibby homolog 3 (Drosophila)
hsa-miR-554	0	0	0	1	0	0	IRF3	interferon regulatory factor 3
hsa-miR-554	0	0	1	1	0	0	GHDC	GH3 domain containing
hsa-miR-554	0	0	1	1	0	0	SLC45A1	solute carrier family 45, member 1
hsa-miR-554	0	0	0	1	0	0	SLC25A51	solute carrier family 25, member 51
hsa-miR-554	0	0	0	1	1	1	BFSP1	beaded filament structural protein 1, filensin
hsa-miR-554	0	0	0	1	0	0	OR13J1	olfactory receptor, family 13, subfamily J, member 1
hsa-miR-554	0	0	1	1	1	1	TMEM8B	transmembrane protein 8B
hsa-miR-554	1	0	1	1	1	1	EFHC2	EF-hand domain (C-terminal) containing 2
hsa-miR-554	0	0	0	1	0	0	LRRC10B	leucine rich repeat containing 10B
hsa-miR-554	1	0	0	1	0	0	CTU2	cytosolic thiouridylase subunit 2 homolog (S. pombe)
hsa-miR-554	1	0	1	1	1	1	MID1IP1	MID1 interacting protein 1
hsa-miR-554	0	0	0	1	0	0	SPI1	spleen focus forming virus (SFFV) proviral integration oncogene spi1
hsa-miR-554	0	0	1	1	1	1	C11orf49	chromosome 11 open reading frame 49
hsa-miR-554	1	0	1	1	1	1	PLCB1	phospholipase C, beta 1 (phosphoinositide-specific)
hsa-miR-554	0	0	1	1	1	1	FUK	fucokinase
hsa-miR-554	0	0	1	1	1	1	SERP2	stress-associated endoplasmic reticulum protein family member 2
hsa-miR-554	1	0	0	1	1	1	C10orf47	chromosome 10 open reading frame 47
hsa-miR-554	0	0	1	1	0	0	ISG20	interferon stimulated exonuclease gene 20kDa
hsa-miR-554	0	0	1	1	0	0	FAM65A	family with sequence similarity 65, member A
hsa-miR-554	0	0	1	1	0	0	CYP1A1	cytochrome P450, family 1, subfamily A, polypeptide 1
hsa-miR-554	0	0	0	1	0	0	TECPR1	tectonin beta-propeller repeat containing 1
hsa-miR-554	0	0	1	1	1	1	NRBP1	nuclear receptor binding protein 1
hsa-miR-554	0	0	1	1	0	0	MPV17	MpV17 mitochondrial inner membrane protein
hsa-miR-554	0	0	1	1	0	0	SLC4A11	solute carrier family 4, sodium borate transporter, member 11
hsa-miR-554	0	0	0	1	0	0	LOC100131796	LP2570
hsa-miR-554	0	0	1	1	1	1	ITPA	inosine triphosphatase (nucleoside triphosphate pyrophosphatase)
hsa-miR-554	0	0	1	1	0	0	IFNB1	interferon, beta 1, fibroblast
hsa-miR-554	0	0	1	1	0	0	UMODL1	uromodulin-like 1
hsa-miR-554	0	0	1	1	1	1	PLIN2	perilipin 2
hsa-miR-554	0	0	1	1	0	0	CARS	cysteinyl-tRNA synthetase
hsa-miR-554	1	0	1	1	1	1	ADAMTSL1	ADAMTS-like 1
hsa-miR-554	0	0	1	1	1	1	MSL3	male-specific lethal 3 homolog (Drosophila)
hsa-miR-554	1	0	0	1	1	1	CDX2	caudal type homeobox 2
hsa-miR-554	0	0	1	1	1	1	SIRPB1	signal-regulatory protein beta 1
hsa-miR-554	1	0	1	1	1	1	RCL1	RNA terminal phosphate cyclase-like 1
hsa-miR-554	0	0	1	1	0	0	RNF17	ring finger protein 17
hsa-miR-554	0	0	1	1	1	1	SLIT2	slit homolog 2 (Drosophila)
hsa-miR-554	1	0	1	1	1	1	WDR1	WD repeat domain 1
hsa-miR-554	1	0	1	1	1	1	CASKIN1	CASK interacting protein 1
hsa-miR-554	0	0	1	1	0	0	SNRNP25	small nuclear ribonucleoprotein 25kDa (U11/U12)
hsa-miR-554	1	0	1	1	1	1	SPIRE1	spire homolog 1 (Drosophila)
hsa-miR-554	0	0	1	1	0	0	SDK2	sidekick cell adhesion molecule 2
hsa-miR-554	0	0	0	1	1	1	VPS53	vacuolar protein sorting 53 homolog (S. cerevisiae)
hsa-miR-554	1	0	1	1	1	1	AMPD3	adenosine monophosphate deaminase 3
hsa-miR-554	0	0	0	0	1	1	FLJ45831	uncharacterized FLJ45831
hsa-miR-554	1	0	1	1	1	1	PDLIM5	PDZ and LIM domain 5
hsa-miR-554	1	0	1	0	1	1	ALDH5A1	aldehyde dehydrogenase 5 family, member A1
hsa-miR-554	1	0	1	1	1	1	SHC1	SHC (Src homology 2 domain containing) transforming protein 1
hsa-miR-554	0	0	1	1	1	1	CLCA3P	chloride channel accessory 3, pseudogene
hsa-miR-554	0	0	1	1	1	1	DSC1	desmocollin 1
hsa-miR-554	1	0	1	1	1	1	GOLGA3	golgin A3
hsa-miR-554	0	0	1	1	1	1	LANCL1	LanC lantibiotic synthetase component C-like 1 (bacterial)
hsa-miR-554	0	0	1	1	1	1	AP3M2	adaptor-related protein complex 3, mu 2 subunit
hsa-miR-554	0	0	1	1	1	1	TOX4	TOX high mobility group box family member 4
hsa-miR-554	1	0	0	1	1	1	ZFP30	zinc finger protein 30 homolog (mouse)
hsa-miR-554	0	0	0	1	1	1	CRNKL1	crooked neck pre-mRNA splicing factor-like 1 (Drosophila)
hsa-miR-554	1	0	1	1	1	1	KIAA1199	KIAA1199
hsa-miR-554	1	0	1	1	1	1	TMEM159	transmembrane protein 159
hsa-miR-554	0	0	1	1	1	1	KIDINS220	kinase D-interacting substrate, 220kDa
hsa-miR-554	1	0	1	1	1	1	NCEH1	neutral cholesterol ester hydrolase 1
hsa-miR-554	1	0	1	0	1	1	EDAR	ectodysplasin A receptor
hsa-miR-554	1	0	1	1	1	1	ATP10A	ATPase, class V, type 10A
hsa-miR-554	1	0	1	1	1	1	AJUBA	ajuba LIM protein
hsa-miR-554	0	0	1	0	1	1	TSLP	thymic stromal lymphopoietin
hsa-miR-554	0	0	1	1	1	1	KCNG3	potassium voltage-gated channel, subfamily G, member 3
hsa-miR-554	1	0	1	0	1	1	TMEM196	transmembrane protein 196
hsa-miR-554	1	0	1	0	1	1	KSR2	kinase suppressor of ras 2
hsa-miR-554	0	0	0	1	1	1	ABHD15	abhydrolase domain containing 15
hsa-miR-554	0	0	1	1	1	1	SERTM1	serine-rich and transmembrane domain containing 1
