# Supplementary material for: Profiling of Selected MicroRNAs in Proliferative Eutopic Endometrium of Women with Ovarian Endometriosis
Source: Biomed Res Int. 2015 Aug 20;2015:760698. doi: 10.1155/2015/760698 (PMC4558423; doi:10.1155/2015/760698)
Supplement: Supplementary file 1 — Table I: The names of miRNAs significantly differentially expressed between eutopic endometrium of patients with endometriosis vs eutopic endometrium of patients without endometriosis. Table II: The associations between miRNA and mRNA, which presents detailed results of the search of six major databases i.e targetscan, tarbase, miranda, mirbase, mirtarget2 and pictar. [file 760698.f1.zip › 760698.f1/Table II/hsa-miR-555.tsv]

miR	targetscan	tarbase	miranda	mirbase	mirtarget2	pictar	GeneSymbol	GeneName
hsa-miR-555	1	0	1	1	1	1	PLAU	plasminogen activator, urokinase
hsa-miR-555	1	0	1	1	0	0	SRCAP	Snf2-related CREBBP activator protein
hsa-miR-555	1	0	1	0	0	0	TRANK1	tetratricopeptide repeat and ankyrin repeat containing 1
hsa-miR-555	0	0	1	1	1	1	RABGAP1L	RAB GTPase activating protein 1-like
hsa-miR-555	0	0	1	1	1	1	NEU3	sialidase 3 (membrane sialidase)
hsa-miR-555	1	0	1	1	0	0	SMCHD1	structural maintenance of chromosomes flexible hinge domain containing 1
hsa-miR-555	0	0	1	1	0	0	ATP10B	ATPase, class V, type 10B
hsa-miR-555	1	0	1	1	1	1	AHCYL2	adenosylhomocysteinase-like 2
hsa-miR-555	1	0	1	1	1	1	CDK12	cyclin-dependent kinase 12
hsa-miR-555	1	0	1	0	1	1	ZNF507	zinc finger protein 507
hsa-miR-555	0	0	1	1	0	0	RTEL1	regulator of telomere elongation helicase 1
hsa-miR-555	1	0	1	1	1	1	NDRG4	NDRG family member 4
hsa-miR-555	1	0	1	1	1	1	MKL2	MKL/myocardin-like 2
hsa-miR-555	1	0	1	1	0	0	KIAA1462	KIAA1462
hsa-miR-555	1	0	1	0	1	1	SEMA6D	sema domain, transmembrane domain (TM), and cytoplasmic domain, (semaphorin) 6D
hsa-miR-555	1	0	1	0	1	1	JPH4	junctophilin 4
hsa-miR-555	1	0	1	1	1	1	SH3TC2	SH3 domain and tetratricopeptide repeats 2
hsa-miR-555	1	0	1	0	0	0	ZBTB34	zinc finger and BTB domain containing 34
hsa-miR-555	1	0	1	1	1	1	PGR	progesterone receptor
hsa-miR-555	0	0	1	1	1	1	PAK3	p21 protein (Cdc42/Rac)-activated kinase 3
hsa-miR-555	1	0	1	1	1	1	PAN3	PAN3 poly(A) specific ribonuclease subunit homolog (S. cerevisiae)
hsa-miR-555	0	0	1	0	1	1	ATF6	activating transcription factor 6
hsa-miR-555	1	0	1	1	1	1	RPS6KA3	ribosomal protein S6 kinase, 90kDa, polypeptide 3
hsa-miR-555	1	0	1	1	1	1	SLC8A1	solute carrier family 8 (sodium/calcium exchanger), member 1
hsa-miR-555	1	0	1	1	1	1	PPFIA1	protein tyrosine phosphatase, receptor type, f polypeptide (PTPRF), interacting protein (liprin), alpha 1
hsa-miR-555	1	0	1	1	1	1	SATB2	SATB homeobox 2
hsa-miR-555	1	0	1	1	1	1	NEO1	neogenin 1
hsa-miR-555	1	0	1	1	1	1	MINK1	misshapen-like kinase 1
hsa-miR-555	0	0	1	1	0	0	CFLAR	CASP8 and FADD-like apoptosis regulator
hsa-miR-555	1	0	1	1	1	1	ARHGEF3	Rho guanine nucleotide exchange factor (GEF) 3
hsa-miR-555	0	0	1	1	0	0	SLC22A8	solute carrier family 22 (organic anion transporter), member 8
hsa-miR-555	1	0	1	1	0	0	KAT5	K(lysine) acetyltransferase 5
hsa-miR-555	1	0	1	1	0	0	PPP2R5D	protein phosphatase 2, regulatory subunit B', delta
hsa-miR-555	0	0	1	0	0	0	LOC646813	DEAH (Asp-Glu-Ala-His) box polypeptide 9 pseudogene
hsa-miR-555	1	0	1	0	1	1	DDX3X	DEAD (Asp-Glu-Ala-Asp) box polypeptide 3, X-linked
hsa-miR-555	0	0	1	1	0	0	PLA1A	phospholipase A1 member A
hsa-miR-555	0	0	1	1	1	1	SH3GL3	SH3-domain GRB2-like 3
hsa-miR-555	1	0	1	1	1	1	MRAS	muscle RAS oncogene homolog
hsa-miR-555	0	0	1	0	0	0	FP588	uncharacterized LOC92973
hsa-miR-555	0	0	1	1	1	1	CREB3L1	cAMP responsive element binding protein 3-like 1
hsa-miR-555	1	0	1	1	1	1	MBNL2	muscleblind-like splicing regulator 2
hsa-miR-555	0	0	1	1	1	1	SC5DL	sterol-C5-desaturase (ERG3 delta-5-desaturase homolog, S. cerevisiae)-like
hsa-miR-555	1	0	1	1	1	1	TP63	tumor protein p63
hsa-miR-555	0	0	1	1	1	1	MINPP1	multiple inositol-polyphosphate phosphatase 1
hsa-miR-555	1	0	1	0	1	1	MAP4K4	mitogen-activated protein kinase kinase kinase kinase 4
hsa-miR-555	1	0	1	1	1	1	CAB39	calcium binding protein 39
hsa-miR-555	0	0	1	0	1	1	CLEC5A	C-type lectin domain family 5, member A
hsa-miR-555	1	0	1	0	1	1	TAPT1	transmembrane anterior posterior transformation 1
hsa-miR-555	1	0	1	1	1	1	SENP7	SUMO1/sentrin specific peptidase 7
hsa-miR-555	1	0	1	1	1	1	AXIN2	axin 2
hsa-miR-555	0	0	1	1	0	0	DBNDD2	dysbindin (dystrobrevin binding protein 1) domain containing 2
hsa-miR-555	0	0	1	1	1	1	CELF1	CUGBP, Elav-like family member 1
hsa-miR-555	1	0	1	1	1	1	CPEB1	cytoplasmic polyadenylation element binding protein 1
hsa-miR-555	0	0	1	1	0	0	IL17F	interleukin 17F
hsa-miR-555	1	0	1	1	1	1	CALU	calumenin
hsa-miR-555	1	0	1	1	1	1	KCNIP2	Kv channel interacting protein 2
hsa-miR-555	0	0	1	1	1	1	CASP8	caspase 8, apoptosis-related cysteine peptidase
hsa-miR-555	0	0	1	1	1	1	OLFM3	olfactomedin 3
hsa-miR-555	0	0	1	1	0	0	SNRPN	small nuclear ribonucleoprotein polypeptide N
hsa-miR-555	1	0	1	1	1	1	ST3GAL3	ST3 beta-galactoside alpha-2,3-sialyltransferase 3
hsa-miR-555	0	0	1	1	0	0	CLEC18A	C-type lectin domain family 18, member A
hsa-miR-555	0	0	1	1	0	0	CLEC18C	C-type lectin domain family 18, member C
hsa-miR-555	1	0	1	1	1	1	LRRC7	leucine rich repeat containing 7
hsa-miR-555	1	0	1	1	1	1	NRXN3	neurexin 3
hsa-miR-555	0	0	1	0	0	0	CASC2	cancer susceptibility candidate 2 (non-protein coding)
hsa-miR-555	1	0	1	1	1	1	ARL4C	ADP-ribosylation factor-like 4C
hsa-miR-555	0	0	1	1	0	0	GPRC5C	G protein-coupled receptor, family C, group 5, member C
hsa-miR-555	1	0	1	0	1	1	NFAT5	nuclear factor of activated T-cells 5, tonicity-responsive
hsa-miR-555	1	0	1	1	1	1	CADM3	cell adhesion molecule 3
hsa-miR-555	1	0	1	1	1	1	EIF2C1	eukaryotic translation initiation factor 2C, 1
hsa-miR-555	1	0	1	1	1	1	ARMC8	armadillo repeat containing 8
hsa-miR-555	0	0	1	1	1	1	FAM175A	family with sequence similarity 175, member A
hsa-miR-555	1	0	1	1	1	1	C12orf23	chromosome 12 open reading frame 23
hsa-miR-555	1	0	1	1	1	1	SLCO5A1	solute carrier organic anion transporter family, member 5A1
hsa-miR-555	0	0	1	0	0	0	DUXAP10	double homeobox A pseudogene 10
hsa-miR-555	0	0	1	1	0	0	OBSL1	obscurin-like 1
hsa-miR-555	0	0	1	0	0	0	LOC286059	tumor necrosis factor receptor superfamily, member 10d, decoy with truncated death domain pseudogene
hsa-miR-555	0	0	1	0	1	1	ATXN1L	ataxin 1-like
hsa-miR-555	1	0	1	1	1	1	PHACTR4	phosphatase and actin regulator 4
hsa-miR-555	1	0	1	0	1	1	ZCCHC3	zinc finger, CCHC domain containing 3
hsa-miR-555	1	0	1	1	0	0	UBXN7	UBX domain protein 7
hsa-miR-555	1	0	1	1	1	1	DCAF8	DDB1 and CUL4 associated factor 8
hsa-miR-555	0	0	1	1	0	0	ZNF276	zinc finger protein 276
hsa-miR-555	1	0	1	1	1	1	RNF185	ring finger protein 185
hsa-miR-555	0	0	1	1	0	0	CCDC142	coiled-coil domain containing 142
hsa-miR-555	1	0	1	1	1	1	FAM53C	family with sequence similarity 53, member C
hsa-miR-555	0	0	1	1	0	0	ZNF252P	zinc finger protein 252, pseudogene
hsa-miR-555	1	0	1	1	1	1	SLC38A1	solute carrier family 38, member 1
hsa-miR-555	0	0	1	1	1	1	TOX2	TOX high mobility group box family member 2
hsa-miR-555	1	0	1	1	1	1	TPM1	tropomyosin 1 (alpha)
hsa-miR-555	0	0	1	1	1	1	GLYATL1	glycine-N-acyltransferase-like 1
hsa-miR-555	1	0	1	0	1	1	PTPRE	protein tyrosine phosphatase, receptor type, E
hsa-miR-555	1	0	1	1	1	1	SCAMP5	secretory carrier membrane protein 5
hsa-miR-555	0	0	1	1	1	1	BRD2	bromodomain containing 2
hsa-miR-555	1	0	1	1	1	1	CLCN5	chloride channel, voltage-sensitive 5
hsa-miR-555	0	0	1	0	0	0	LOC157381	uncharacterized LOC157381
hsa-miR-555	0	0	1	1	1	1	SEC61A2	Sec61 alpha 2 subunit (S. cerevisiae)
hsa-miR-555	0	0	1	1	0	0	UBAP2	ubiquitin associated protein 2
hsa-miR-555	0	0	1	1	0	0	CD37	CD37 molecule
hsa-miR-555	1	0	1	1	1	1	HLF	hepatic leukemia factor
hsa-miR-555	0	0	1	0	1	1	CDHR3	cadherin-related family member 3
hsa-miR-555	0	0	1	1	1	1	CAMKV	CaM kinase-like vesicle-associated
hsa-miR-555	0	0	1	1	1	1	MTR	5-methyltetrahydrofolate-homocysteine methyltransferase
hsa-miR-555	1	0	1	1	1	1	AMMECR1	Alport syndrome, mental retardation, midface hypoplasia and elliptocytosis chromosomal region gene 1
hsa-miR-555	1	0	1	1	1	1	FBXW2	F-box and WD repeat domain containing 2
hsa-miR-555	1	0	1	1	1	1	RRBP1	ribosome binding protein 1 homolog 180kDa (dog)
hsa-miR-555	1	0	1	1	1	1	DTX3	deltex homolog 3 (Drosophila)
hsa-miR-555	1	0	1	0	1	1	GATAD2B	GATA zinc finger domain containing 2B
hsa-miR-555	0	0	1	1	1	1	RBM25	RNA binding motif protein 25
hsa-miR-555	1	0	1	0	1	1	UBXN4	UBX domain protein 4
hsa-miR-555	1	0	1	1	1	1	ZC3H11A	zinc finger CCCH-type containing 11A
hsa-miR-555	1	0	1	1	1	1	AMT	aminomethyltransferase
hsa-miR-555	0	0	1	1	0	0	RPN2	ribophorin II
hsa-miR-555	1	0	1	1	1	1	FADS1	fatty acid desaturase 1
hsa-miR-555	0	0	1	0	0	0	C1orf204	chromosome 1 open reading frame 204
hsa-miR-555	0	0	1	0	0	0	LOC643327	uncharacterized LOC643327
hsa-miR-555	1	0	1	1	1	1	SYT6	synaptotagmin VI
hsa-miR-555	0	0	1	1	1	1	EXTL2	exostoses (multiple)-like 2
hsa-miR-555	0	0	1	1	1	1	FAM9B	family with sequence similarity 9, member B
hsa-miR-555	0	0	1	1	1	1	CBWD5	COBW domain containing 5
hsa-miR-555	0	0	1	1	0	0	PSAPL1	prosaposin-like 1 (gene/pseudogene)
hsa-miR-555	0	0	1	1	1	1	WDR64	WD repeat domain 64
hsa-miR-555	0	0	1	1	1	1	FRMPD2	FERM and PDZ domain containing 2
hsa-miR-555	1	0	1	1	1	1	FGD5	FYVE, RhoGEF and PH domain containing 5
hsa-miR-555	0	0	1	0	1	1	FLJ41200	uncharacterized LOC401492
hsa-miR-555	1	0	1	1	1	1	FAM219A	family with sequence similarity 219, member A
hsa-miR-555	0	0	1	0	0	0	LOC285043	uncharacterized LOC285043
hsa-miR-555	0	0	1	1	1	1	SLC9A1	solute carrier family 9, subfamily A (NHE1, cation proton antiporter 1), member 1
hsa-miR-555	1	0	1	1	1	1	ADIPOR1	adiponectin receptor 1
hsa-miR-555	1	0	1	0	1	1	CNTN2	contactin 2 (axonal)
hsa-miR-555	1	0	1	1	1	1	CELF6	CUGBP, Elav-like family member 6
hsa-miR-555	0	0	1	0	0	0	LOC613266	uncharacterized LOC613266
hsa-miR-555	0	0	1	1	1	1	RBM46	RNA binding motif protein 46
hsa-miR-555	1	0	1	1	1	1	MACROD2	MACRO domain containing 2
hsa-miR-555	0	0	1	1	0	0	FSIP2	fibrous sheath interacting protein 2
hsa-miR-555	1	0	1	1	1	1	PIK3R1	phosphoinositide-3-kinase, regulatory subunit 1 (alpha)
hsa-miR-555	0	0	1	0	1	1	LOC388942	uncharacterized LOC388942
hsa-miR-555	1	0	1	1	1	1	SLC1A4	solute carrier family 1 (glutamate/neutral amino acid transporter), member 4
hsa-miR-555	1	0	1	1	1	1	MFSD6	major facilitator superfamily domain containing 6
hsa-miR-555	0	0	1	0	0	0	ERVFRD-2	endogenous retrovirus group FRD, member 2
hsa-miR-555	1	0	1	1	1	1	FRYL	FRY-like
hsa-miR-555	0	0	1	1	1	1	RAB13	RAB13, member RAS oncogene family
hsa-miR-555	0	0	1	0	0	0	LOC654433	uncharacterized LOC654433
hsa-miR-555	0	0	1	1	1	1	SLC36A3	solute carrier family 36 (proton/amino acid symporter), member 3
hsa-miR-555	0	0	1	1	1	1	PDE2A	phosphodiesterase 2A, cGMP-stimulated
hsa-miR-555	1	0	1	1	1	1	MAP2K4	mitogen-activated protein kinase kinase 4
hsa-miR-555	1	0	1	1	1	1	TAP2	transporter 2, ATP-binding cassette, sub-family B (MDR/TAP)
hsa-miR-555	0	0	1	1	1	1	ARID1A	AT rich interactive domain 1A (SWI-like)
hsa-miR-555	0	0	1	0	1	1	BCAS1	breast carcinoma amplified sequence 1
hsa-miR-555	1	0	1	1	0	0	ZNF219	zinc finger protein 219
hsa-miR-555	0	0	1	1	1	1	CCKBR	cholecystokinin B receptor
hsa-miR-555	0	0	1	1	0	0	TRIM69	tripartite motif containing 69
hsa-miR-555	0	0	1	1	0	0	NEK7	NIMA (never in mitosis gene a)-related kinase 7
hsa-miR-555	0	0	1	1	1	1	ZNF280D	zinc finger protein 280D
hsa-miR-555	0	0	1	1	1	1	AQP6	aquaporin 6, kidney specific
hsa-miR-555	1	0	1	0	1	1	GPR85	G protein-coupled receptor 85
hsa-miR-555	0	0	1	0	0	0	FAM66D	family with sequence similarity 66, member D
hsa-miR-555	1	0	1	1	1	1	SLC30A8	solute carrier family 30 (zinc transporter), member 8
hsa-miR-555	0	0	1	1	0	0	KRBA1	KRAB-A domain containing 1
hsa-miR-555	1	0	1	1	1	1	MIER1	mesoderm induction early response 1 homolog (Xenopus laevis)
hsa-miR-555	1	0	1	1	1	1	FAM126B	family with sequence similarity 126, member B
hsa-miR-555	1	0	1	1	0	0	USP24	ubiquitin specific peptidase 24
hsa-miR-555	1	0	1	1	1	1	MLL3	myeloid/lymphoid or mixed-lineage leukemia 3
hsa-miR-555	0	0	1	1	1	1	C10orf57	chromosome 10 open reading frame 57
hsa-miR-555	1	0	1	0	1	1	STYX	serine/threonine/tyrosine interacting protein
hsa-miR-555	1	0	1	1	1	1	TMEM68	transmembrane protein 68
hsa-miR-555	0	0	1	1	1	1	C12orf50	chromosome 12 open reading frame 50
hsa-miR-555	0	0	1	1	0	0	FCRL3	Fc receptor-like 3
hsa-miR-555	0	0	1	0	0	0	EPHA1-AS1	EPHA1 antisense RNA 1
hsa-miR-555	1	0	1	1	1	1	ANKRD49	ankyrin repeat domain 49
hsa-miR-555	1	0	1	1	1	1	DIS3L2	DIS3 mitotic control homolog (S. cerevisiae)-like 2
hsa-miR-555	1	0	1	1	1	1	PPP3CA	protein phosphatase 3, catalytic subunit, alpha isozyme
hsa-miR-555	1	0	1	1	1	1	CLIC5	chloride intracellular channel 5
hsa-miR-555	1	0	1	0	1	1	BDNF	brain-derived neurotrophic factor
hsa-miR-555	0	0	1	1	1	1	SHPRH	SNF2 histone linker PHD RING helicase, E3 ubiquitin protein ligase
hsa-miR-555	1	0	1	1	1	1	WDR26	WD repeat domain 26
hsa-miR-555	0	0	1	1	1	1	GPR114	G protein-coupled receptor 114
hsa-miR-555	0	0	1	1	1	1	TNFSF15	tumor necrosis factor (ligand) superfamily, member 15
hsa-miR-555	0	0	1	1	1	1	POTEG	POTE ankyrin domain family, member G
hsa-miR-555	0	0	1	1	1	1	RHD	Rh blood group, D antigen
hsa-miR-555	1	0	1	1	0	0	DGAT2	diacylglycerol O-acyltransferase 2
hsa-miR-555	0	0	1	0	1	1	MIS12	MIS12, MIND kinetochore complex component, homolog (S. pombe)
hsa-miR-555	1	0	1	0	1	1	FAM46A	family with sequence similarity 46, member A
hsa-miR-555	1	0	1	1	1	1	RIMS3	regulating synaptic membrane exocytosis 3
hsa-miR-555	0	0	1	1	0	0	HEXIM2	hexamethylene bis-acetamide inducible 2
hsa-miR-555	0	0	1	1	1	1	FTO	fat mass and obesity associated
hsa-miR-555	1	0	1	0	1	1	CGGBP1	CGG triplet repeat binding protein 1
hsa-miR-555	0	0	1	1	0	0	KCNH6	potassium voltage-gated channel, subfamily H (eag-related), member 6
hsa-miR-555	1	0	1	1	1	1	U2SURP	U2 snRNP-associated SURP domain containing
hsa-miR-555	0	0	1	1	0	0	RBM14	RNA binding motif protein 14
hsa-miR-555	1	0	1	1	1	1	CALM1	calmodulin 1 (phosphorylase kinase, delta)
hsa-miR-555	0	0	1	1	1	1	TMEM30A	transmembrane protein 30A
hsa-miR-555	1	0	1	1	1	1	NXN	nucleoredoxin
hsa-miR-555	1	0	1	0	1	1	TMEM39A	transmembrane protein 39A
hsa-miR-555	0	0	1	0	0	0	LOC154761	family with sequence similarity 115, member C pseudogene
hsa-miR-555	1	0	1	1	0	0	FA2H	fatty acid 2-hydroxylase
hsa-miR-555	1	0	1	1	1	1	DNAJB5	DnaJ (Hsp40) homolog, subfamily B, member 5
hsa-miR-555	0	0	1	1	1	1	KLHL29	kelch-like 29 (Drosophila)
hsa-miR-555	1	0	1	1	1	1	PAPOLA	poly(A) polymerase alpha
hsa-miR-555	0	0	1	1	1	1	C8orf33	chromosome 8 open reading frame 33
hsa-miR-555	1	0	1	1	1	1	PDGFRA	platelet-derived growth factor receptor, alpha polypeptide
hsa-miR-555	1	0	1	1	1	1	ZNF512	zinc finger protein 512
hsa-miR-555	1	0	1	1	1	1	RIMKLB	ribosomal modification protein rimK-like family member B
hsa-miR-555	1	0	1	0	1	1	CYBRD1	cytochrome b reductase 1
hsa-miR-555	0	0	1	1	0	0	PREB	prolactin regulatory element binding
hsa-miR-555	0	0	1	1	1	1	GLIPR2	GLI pathogenesis-related 2
hsa-miR-555	1	0	1	1	1	1	ARHGEF9	Cdc42 guanine nucleotide exchange factor (GEF) 9
hsa-miR-555	0	0	1	1	0	0	PTPMT1	protein tyrosine phosphatase, mitochondrial 1
hsa-miR-555	1	0	1	1	0	0	TET3	tet methylcytosine dioxygenase 3
hsa-miR-555	1	0	1	1	1	1	SPOCK2	sparc/osteonectin, cwcv and kazal-like domains proteoglycan (testican) 2
hsa-miR-555	1	0	1	1	1	1	ZDHHC5	zinc finger, DHHC-type containing 5
hsa-miR-555	0	0	1	1	1	1	MAP2	microtubule-associated protein 2
hsa-miR-555	1	0	1	1	1	1	HTR2C	5-hydroxytryptamine (serotonin) receptor 2C, G protein-coupled
hsa-miR-555	1	0	1	0	1	1	SV2B	synaptic vesicle glycoprotein 2B
hsa-miR-555	0	0	1	0	1	1	B3GALTL	beta 1,3-galactosyltransferase-like
hsa-miR-555	1	0	1	0	1	1	RNF4	ring finger protein 4
hsa-miR-555	1	0	1	1	1	1	PPP2R2C	protein phosphatase 2, regulatory subunit B, gamma
hsa-miR-555	0	0	1	1	1	1	IL20RB	interleukin 20 receptor beta
hsa-miR-555	0	0	1	0	0	0	FAM66C	family with sequence similarity 66, member C
hsa-miR-555	0	0	1	0	1	1	DKFZP434I0714	uncharacterized protein DKFZP434I0714
hsa-miR-555	1	0	1	1	1	1	ZEB2	zinc finger E-box binding homeobox 2
hsa-miR-555	0	0	1	0	0	0	HOXA-AS2	HOXA cluster antisense RNA 2
hsa-miR-555	1	0	1	1	1	1	SLC35G1	solute carrier family 35, member G1
hsa-miR-555	1	0	1	1	1	1	MEIS1	Meis homeobox 1
hsa-miR-555	1	0	1	0	1	1	CPEB4	cytoplasmic polyadenylation element binding protein 4
hsa-miR-555	0	0	1	1	1	1	EFCAB13	EF-hand calcium binding domain 13
hsa-miR-555	1	0	1	1	1	1	MARCKS	myristoylated alanine-rich protein kinase C substrate
hsa-miR-555	0	0	1	1	1	1	ZFP90	zinc finger protein 90 homolog (mouse)
hsa-miR-555	1	0	1	1	1	1	BVES	blood vessel epicardial substance
hsa-miR-555	0	0	1	0	1	1	METTL12	methyltransferase like 12
hsa-miR-555	1	0	1	0	1	1	HSPA12A	heat shock 70kDa protein 12A
hsa-miR-555	0	0	1	1	1	1	BCO2	beta-carotene oxygenase 2
hsa-miR-555	1	0	1	1	1	1	CLOCK	clock homolog (mouse)
hsa-miR-555	1	0	1	1	0	0	PRRC2A	proline-rich coiled-coil 2A
hsa-miR-555	0	0	1	1	1	1	DOCK8	dedicator of cytokinesis 8
hsa-miR-555	1	0	1	0	0	0	MICAL3	microtubule associated monoxygenase, calponin and LIM domain containing 3
hsa-miR-555	1	0	1	1	1	1	ZFP91	zinc finger protein 91 homolog (mouse)
hsa-miR-555	0	0	1	1	1	1	RHOT1	ras homolog family member T1
hsa-miR-555	1	0	1	1	1	1	SOX5	SRY (sex determining region Y)-box 5
hsa-miR-555	0	0	1	1	1	1	ELL3	elongation factor RNA polymerase II-like 3
hsa-miR-555	1	0	1	1	1	1	GANAB	glucosidase, alpha; neutral AB
hsa-miR-555	1	0	1	1	1	1	RAB2B	RAB2B, member RAS oncogene family
hsa-miR-555	1	0	1	1	1	1	AP3M1	adaptor-related protein complex 3, mu 1 subunit
hsa-miR-555	1	0	1	1	1	1	SULF1	sulfatase 1
hsa-miR-555	0	0	1	1	1	1	TTLL9	tubulin tyrosine ligase-like family, member 9
hsa-miR-555	1	0	1	1	1	1	SCAF8	SR-related CTD-associated factor 8
hsa-miR-555	0	0	1	1	1	1	FRMPDP2	FERM and PDZ domain containing 2 pseudogene 2
hsa-miR-555	0	0	1	1	1	1	FRMPD2P1	FERM and PDZ domain containing 2 pseudogene 1
hsa-miR-555	1	0	1	1	1	1	AGGF1	angiogenic factor with G patch and FHA domains 1
hsa-miR-555	0	0	1	0	0	0	TBC1D25	TBC1 domain family, member 25
hsa-miR-555	1	0	1	1	1	1	HNRNPC	heterogeneous nuclear ribonucleoprotein C (C1/C2)
hsa-miR-555	1	0	1	1	1	1	WNT10B	wingless-type MMTV integration site family, member 10B
hsa-miR-555	0	0	1	1	0	0	RGL4	ral guanine nucleotide dissociation stimulator-like 4
hsa-miR-555	0	0	1	0	0	0	C5orf49	chromosome 5 open reading frame 49
hsa-miR-555	0	0	1	1	0	0	C10orf128	chromosome 10 open reading frame 128
hsa-miR-555	0	0	1	1	0	0	YDJC	YdjC homolog (bacterial)
hsa-miR-555	0	0	1	0	0	0	FAM86C2P	family with sequence similarity 86, member A pseudogene
hsa-miR-555	1	0	1	1	1	1	TET2	tet methylcytosine dioxygenase 2
hsa-miR-555	1	0	1	1	1	1	NR3C2	nuclear receptor subfamily 3, group C, member 2
hsa-miR-555	0	0	1	1	0	0	SPOCD1	SPOC domain containing 1
hsa-miR-555	1	0	1	1	1	1	OTUD4	OTU domain containing 4
hsa-miR-555	0	0	1	1	0	0	RGSL1	regulator of G-protein signaling like 1
hsa-miR-555	1	0	1	1	1	1	MEGF11	multiple EGF-like-domains 11
hsa-miR-555	1	0	1	1	1	1	MLLT10	myeloid/lymphoid or mixed-lineage leukemia (trithorax homolog, Drosophila); translocated to, 10
hsa-miR-555	0	0	1	0	0	0	FAM225B	family with sequence similarity 225, member B (non-protein coding)
hsa-miR-555	1	0	1	1	1	1	NIPAL2	NIPA-like domain containing 2
hsa-miR-555	0	0	1	1	0	0	CHMP4A	charged multivesicular body protein 4A
hsa-miR-555	1	0	1	1	1	1	NUMB	numb homolog (Drosophila)
hsa-miR-555	0	0	1	1	1	1	IP6K2	inositol hexakisphosphate kinase 2
hsa-miR-555	0	0	1	0	1	1	GPX8	glutathione peroxidase 8 (putative)
hsa-miR-555	1	0	1	1	1	1	C7orf31	chromosome 7 open reading frame 31
hsa-miR-555	1	0	1	1	1	1	TJP1	tight junction protein 1
hsa-miR-555	1	0	1	0	1	1	GALNT4	UDP-N-acetyl-alpha-D-galactosamine:polypeptide N-acetylgalactosaminyltransferase 4 (GalNAc-T4)
hsa-miR-555	0	0	1	1	1	1	PRR14L	proline rich 14-like
hsa-miR-555	1	0	1	1	1	1	PRDM2	PR domain containing 2, with ZNF domain
hsa-miR-555	1	0	1	1	1	1	CASP3	caspase 3, apoptosis-related cysteine peptidase
hsa-miR-555	1	0	1	1	1	1	TLN2	talin 2
hsa-miR-555	1	0	1	1	1	1	DDAH1	dimethylarginine dimethylaminohydrolase 1
hsa-miR-555	0	0	1	1	1	1	ATP2A2	ATPase, Ca++ transporting, cardiac muscle, slow twitch 2
hsa-miR-555	1	0	1	1	1	1	NFIB	nuclear factor I/B
hsa-miR-555	0	0	1	1	1	1	RBM20	RNA binding motif protein 20
hsa-miR-555	1	0	1	1	1	1	FAM208A	family with sequence similarity 208, member A
hsa-miR-555	0	0	1	1	1	1	IPO11	importin 11
hsa-miR-555	0	0	1	1	1	1	SLC25A11	solute carrier family 25 (mitochondrial carrier; oxoglutarate carrier), member 11
hsa-miR-555	1	0	1	1	0	0	TOE1	target of EGR1, member 1 (nuclear)
hsa-miR-555	0	0	1	0	0	0	LOC400768	uncharacterized LOC400768
hsa-miR-555	0	0	1	1	0	0	FCGRT	Fc fragment of IgG, receptor, transporter, alpha
hsa-miR-555	1	0	1	1	0	0	ELOVL1	ELOVL fatty acid elongase 1
hsa-miR-555	1	0	1	1	0	0	STX5	syntaxin 5
hsa-miR-555	1	0	1	1	1	1	CLTA	clathrin, light chain A
hsa-miR-555	1	0	1	1	1	1	SMARCE1	SWI/SNF related, matrix associated, actin dependent regulator of chromatin, subfamily e, member 1
hsa-miR-555	0	0	1	1	0	0	MYL6	myosin, light chain 6, alkali, smooth muscle and non-muscle
hsa-miR-555	0	0	1	1	0	0	DHPS	deoxyhypusine synthase
hsa-miR-555	0	0	1	1	1	1	ELP5	elongator acetyltransferase complex subunit 5
hsa-miR-555	1	0	1	1	1	1	POU2F2	POU class 2 homeobox 2
hsa-miR-555	1	0	1	1	0	0	YPEL3	yippee-like 3 (Drosophila)
hsa-miR-555	1	0	1	1	1	1	TMEM248	transmembrane protein 248
hsa-miR-555	1	0	1	1	1	1	RAB3IP	RAB3A interacting protein (rabin3)
hsa-miR-555	1	0	1	1	0	0	MYO1F	myosin IF
hsa-miR-555	1	0	1	1	1	1	DKK3	dickkopf 3 homolog (Xenopus laevis)
hsa-miR-555	0	0	1	1	1	1	NFATC4	nuclear factor of activated T-cells, cytoplasmic, calcineurin-dependent 4
hsa-miR-555	1	0	1	1	1	1	BTBD10	BTB (POZ) domain containing 10
hsa-miR-555	1	0	1	1	1	1	ARNTL	aryl hydrocarbon receptor nuclear translocator-like
hsa-miR-555	0	0	1	1	0	0	WDR43	WD repeat domain 43
hsa-miR-555	1	0	1	1	1	1	GDA	guanine deaminase
hsa-miR-555	1	0	1	1	1	1	TMEM55B	transmembrane protein 55B
hsa-miR-555	0	0	1	1	1	1	ZNF346	zinc finger protein 346
hsa-miR-555	1	0	1	1	0	0	FOXO3	forkhead box O3
hsa-miR-555	0	0	1	1	1	1	BEX4	brain expressed, X-linked 4
hsa-miR-555	0	0	1	1	1	1	SLC2A8	solute carrier family 2 (facilitated glucose transporter), member 8
hsa-miR-555	0	0	1	1	1	1	ZFAND2B	zinc finger, AN1-type domain 2B
hsa-miR-555	1	0	1	1	1	1	TFPI	tissue factor pathway inhibitor (lipoprotein-associated coagulation inhibitor)
hsa-miR-555	0	0	1	1	1	1	BDP1	B double prime 1, subunit of RNA polymerase III transcription initiation factor IIIB
hsa-miR-555	1	0	1	1	1	1	PHACTR2	phosphatase and actin regulator 2
hsa-miR-555	0	0	1	0	0	0	LINC00661	long intergenic non-protein coding RNA 661
hsa-miR-555	1	0	1	1	1	1	HECW2	HECT, C2 and WW domain containing E3 ubiquitin protein ligase 2
hsa-miR-555	1	0	1	1	1	1	CBFA2T2	core-binding factor, runt domain, alpha subunit 2; translocated to, 2
hsa-miR-555	1	0	1	0	1	1	OSBPL8	oxysterol binding protein-like 8
hsa-miR-555	1	0	1	1	1	1	BCL2L1	BCL2-like 1
hsa-miR-555	1	0	1	1	1	1	UBAP2L	ubiquitin associated protein 2-like
hsa-miR-555	0	0	1	1	1	1	LTA	lymphotoxin alpha (TNF superfamily, member 1)
hsa-miR-555	1	0	1	1	1	1	MOSPD1	motile sperm domain containing 1
hsa-miR-555	1	0	1	1	1	1	TNFAIP1	tumor necrosis factor, alpha-induced protein 1 (endothelial)
hsa-miR-555	0	0	1	1	1	1	ADPRH	ADP-ribosylarginine hydrolase
hsa-miR-555	1	0	1	1	1	1	AFF1	AF4/FMR2 family, member 1
hsa-miR-555	1	0	1	0	1	1	STAT3	signal transducer and activator of transcription 3 (acute-phase response factor)
hsa-miR-555	1	0	1	0	0	0	YLPM1	YLP motif containing 1
hsa-miR-555	1	0	1	0	1	1	BCL2	B-cell CLL/lymphoma 2
hsa-miR-555	1	0	1	1	1	1	PML	promyelocytic leukemia
hsa-miR-555	1	0	1	1	1	1	FBN1	fibrillin 1
hsa-miR-555	1	0	1	1	1	1	TBX5	T-box 5
hsa-miR-555	0	0	1	0	1	1	KAL1	Kallmann syndrome 1 sequence
hsa-miR-555	1	0	1	1	1	1	KCNA1	potassium voltage-gated channel, shaker-related subfamily, member 1 (episodic ataxia with myokymia)
hsa-miR-555	0	0	1	1	1	1	LPL	lipoprotein lipase
hsa-miR-555	0	0	1	1	0	0	OCA2	oculocutaneous albinism II
hsa-miR-555	1	0	1	1	1	1	HLCS	holocarboxylase synthetase (biotin-(proprionyl-CoA-carboxylase (ATP-hydrolysing)) ligase)
hsa-miR-555	0	0	1	1	0	0	IL2RA	interleukin 2 receptor, alpha
hsa-miR-555	1	0	1	0	1	1	PCSK1	proprotein convertase subtilisin/kexin type 1
hsa-miR-555	1	0	1	1	1	1	HNF1B	HNF1 homeobox B
hsa-miR-555	0	0	1	1	0	0	AK1	adenylate kinase 1
hsa-miR-555	1	0	1	1	1	1	MPZ	myelin protein zero
hsa-miR-555	1	0	1	1	1	1	IL1A	interleukin 1, alpha
hsa-miR-555	1	0	1	0	1	1	ADRA2B	adrenoceptor alpha 2B
hsa-miR-555	1	0	1	1	1	1	GRIA4	glutamate receptor, ionotropic, AMPA 4
hsa-miR-555	0	0	1	1	1	1	ITGAX	integrin, alpha X (complement component 3 receptor 4 subunit)
hsa-miR-555	0	0	1	1	1	1	BLOC1S2	biogenesis of lysosomal organelles complex-1, subunit 2
hsa-miR-555	0	0	1	1	1	1	DDI1	DNA-damage inducible 1 homolog 1 (S. cerevisiae)
hsa-miR-555	0	0	1	1	1	1	FAM109B	family with sequence similarity 109, member B
hsa-miR-555	0	0	1	1	1	1	MTHFD2L	methylenetetrahydrofolate dehydrogenase (NADP+ dependent) 2-like
hsa-miR-555	1	0	1	0	1	1	LRRC55	leucine rich repeat containing 55
hsa-miR-555	0	0	1	0	1	1	FLJ46347	uncharacterized LOC389064
hsa-miR-555	0	0	1	1	1	1	LINC00478	long intergenic non-protein coding RNA 478
hsa-miR-555	0	0	1	1	1	1	SCP2	sterol carrier protein 2
hsa-miR-555	1	0	1	1	1	1	IGSF3	immunoglobulin superfamily, member 3
hsa-miR-555	0	0	1	1	1	1	MXI1	MAX interactor 1
hsa-miR-555	1	0	1	1	1	1	SHE	Src homology 2 domain containing E
hsa-miR-555	0	0	1	1	1	1	ZMAT1	zinc finger, matrin-type 1
hsa-miR-555	0	0	1	1	0	0	CLEC18B	C-type lectin domain family 18, member B
hsa-miR-555	0	0	1	1	1	1	SPIN4	spindlin family, member 4
hsa-miR-555	0	0	1	0	1	1	LINC00268	long intergenic non-protein coding RNA 268
hsa-miR-555	0	0	1	1	0	0	SPRR2G	small proline-rich protein 2G
hsa-miR-555	1	0	1	1	1	1	RUNX2	runt-related transcription factor 2
hsa-miR-555	1	0	1	1	1	1	PHF6	PHD finger protein 6
hsa-miR-555	0	0	1	0	1	1	TMEM30B	transmembrane protein 30B
hsa-miR-555	0	0	1	1	1	1	ACTBL2	actin, beta-like 2
hsa-miR-555	1	0	1	1	1	1	PFKFB2	6-phosphofructo-2-kinase/fructose-2,6-biphosphatase 2
hsa-miR-555	1	0	1	1	1	1	NTRK2	neurotrophic tyrosine kinase, receptor, type 2
hsa-miR-555	0	0	1	1	1	1	GCOM1	GRINL1A complex locus 1
hsa-miR-555	0	0	1	0	1	1	C6orf120	chromosome 6 open reading frame 120
hsa-miR-555	1	0	1	0	1	1	C2orf71	chromosome 2 open reading frame 71
hsa-miR-555	0	0	1	1	1	1	TP53BP2	tumor protein p53 binding protein, 2
hsa-miR-555	0	0	1	1	1	1	C12orf40	chromosome 12 open reading frame 40
hsa-miR-555	1	0	1	1	1	1	SAR1B	SAR1 homolog B (S. cerevisiae)
hsa-miR-555	0	0	1	1	1	1	SKA1	spindle and kinetochore associated complex subunit 1
hsa-miR-555	1	0	1	1	1	1	AP1S3	adaptor-related protein complex 1, sigma 3 subunit
hsa-miR-555	0	0	1	0	0	0	C19orf55	chromosome 19 open reading frame 55
hsa-miR-555	1	0	1	1	1	1	ZNF384	zinc finger protein 384
hsa-miR-555	1	0	1	1	1	1	CHN2	chimerin (chimaerin) 2
hsa-miR-555	1	0	1	0	1	1	DCUN1D4	DCN1, defective in cullin neddylation 1, domain containing 4 (S. cerevisiae)
hsa-miR-555	0	0	1	1	0	0	U2AF1L4	U2 small nuclear RNA auxiliary factor 1-like 4
hsa-miR-555	0	0	1	1	1	1	YARS2	tyrosyl-tRNA synthetase 2, mitochondrial
hsa-miR-555	0	0	1	1	1	1	METTL21D	methyltransferase like 21D
hsa-miR-555	0	0	1	0	1	1	STEAP2	STEAP family member 2, metalloreductase
hsa-miR-555	0	0	1	0	1	1	ABCE1	ATP-binding cassette, sub-family E (OABP), member 1
hsa-miR-555	0	0	1	1	0	0	FAM110A	family with sequence similarity 110, member A
hsa-miR-555	1	0	1	1	1	1	ZNF706	zinc finger protein 706
hsa-miR-555	1	0	1	1	1	1	SLC9A6	solute carrier family 9, subfamily A (NHE6, cation proton antiporter 6), member 6
hsa-miR-555	1	0	1	1	1	1	FRS2	fibroblast growth factor receptor substrate 2
hsa-miR-555	1	0	1	1	1	1	SNX21	sorting nexin family member 21
hsa-miR-555	1	0	1	1	1	1	PVRL2	poliovirus receptor-related 2 (herpesvirus entry mediator B)
hsa-miR-555	1	0	1	0	1	1	SLC12A2	solute carrier family 12 (sodium/potassium/chloride transporters), member 2
hsa-miR-555	1	0	1	1	1	1	NCOR2	nuclear receptor corepressor 2
hsa-miR-555	1	0	1	1	1	1	PHF16	PHD finger protein 16
hsa-miR-555	1	0	1	1	1	1	CUL4B	cullin 4B
hsa-miR-555	1	0	1	1	1	1	LDB3	LIM domain binding 3
hsa-miR-555	1	0	1	1	1	1	MGA	MAX gene associated
hsa-miR-555	1	0	1	0	1	1	BACH1	BTB and CNC homology 1, basic leucine zipper transcription factor 1
hsa-miR-555	0	0	1	1	0	0	DIO3	deiodinase, iodothyronine, type III
hsa-miR-555	1	0	1	1	1	1	EP300	E1A binding protein p300
hsa-miR-555	1	0	1	1	0	0	GDI1	GDP dissociation inhibitor 1
hsa-miR-555	0	0	1	1	1	1	CDO1	cysteine dioxygenase, type I
hsa-miR-555	1	0	1	1	1	1	DPP4	dipeptidyl-peptidase 4
hsa-miR-555	1	0	1	1	1	1	FBN2	fibrillin 2
hsa-miR-555	1	0	1	1	1	1	KDSR	3-ketodihydrosphingosine reductase
hsa-miR-555	0	0	1	1	1	1	HOXB5	homeobox B5
hsa-miR-555	0	0	1	0	1	1	ITGAV	integrin, alpha V
hsa-miR-555	1	0	1	1	1	1	KCNA3	potassium voltage-gated channel, shaker-related subfamily, member 3
hsa-miR-555	1	0	1	1	1	1	KCNJ10	potassium inwardly-rectifying channel, subfamily J, member 10
hsa-miR-555	1	0	1	1	1	1	IPO5	importin 5
hsa-miR-555	1	0	1	0	1	1	LAMC1	laminin, gamma 1 (formerly LAMB2)
hsa-miR-555	0	0	1	1	1	1	TACSTD2	tumor-associated calcium signal transducer 2
hsa-miR-555	1	0	1	1	1	1	MSN	moesin
hsa-miR-555	0	0	1	0	1	1	OAZ2	ornithine decarboxylase antizyme 2
hsa-miR-555	1	0	1	1	1	1	PBX2	pre-B-cell leukemia homeobox 2
hsa-miR-555	1	0	1	0	1	1	PCDHGC3	protocadherin gamma subfamily C, 3
hsa-miR-555	1	0	1	0	1	1	PDK1	pyruvate dehydrogenase kinase, isozyme 1
hsa-miR-555	0	0	1	1	1	1	PIM1	pim-1 oncogene
hsa-miR-555	1	0	1	0	1	1	PPP2R2A	protein phosphatase 2, regulatory subunit B, alpha
hsa-miR-555	1	0	1	1	1	1	PPP2R3A	protein phosphatase 2, regulatory subunit B'', alpha
hsa-miR-555	1	0	1	1	1	1	PPP6C	protein phosphatase 6, catalytic subunit
hsa-miR-555	1	0	1	1	1	1	MAPK6	mitogen-activated protein kinase 6
hsa-miR-555	1	0	1	0	1	1	RAB6A	RAB6A, member RAS oncogene family
hsa-miR-555	1	0	1	1	1	1	ARID4A	AT rich interactive domain 4A (RBP1-like)
hsa-miR-555	1	0	1	0	1	1	ST6GAL1	ST6 beta-galactosamide alpha-2,6-sialyltranferase 1
hsa-miR-555	1	0	1	1	1	1	SRF	serum response factor (c-fos serum response element-binding transcription factor)
hsa-miR-555	1	0	1	1	1	1	STAC	SH3 and cysteine rich domain
hsa-miR-555	0	0	1	1	1	1	STIM1	stromal interaction molecule 1
hsa-miR-555	1	0	1	1	1	1	TOP1	topoisomerase (DNA) I
hsa-miR-555	1	0	1	0	1	1	TSPYL1	TSPY-like 1
hsa-miR-555	1	0	1	0	1	1	BSN	bassoon (presynaptic cytomatrix protein)
hsa-miR-555	0	0	1	1	1	1	RGS5	regulator of G-protein signaling 5
hsa-miR-555	0	0	1	1	1	1	DGKD	diacylglycerol kinase, delta 130kDa
hsa-miR-555	1	0	1	0	1	1	PCDHGA12	protocadherin gamma subfamily A, 12
hsa-miR-555	1	0	1	0	1	1	PCDHGB4	protocadherin gamma subfamily B, 4
hsa-miR-555	1	0	1	1	1	1	URI1	URI1, prefoldin-like chaperone
hsa-miR-555	1	0	1	1	1	1	NR5A2	nuclear receptor subfamily 5, group A, member 2
hsa-miR-555	1	0	1	1	1	1	SNAP23	synaptosomal-associated protein, 23kDa
hsa-miR-555	1	0	1	1	1	1	NRP2	neuropilin 2
hsa-miR-555	0	0	1	1	1	1	RNF8	ring finger protein 8, E3 ubiquitin protein ligase
hsa-miR-555	0	0	1	1	1	1	TIMM8A	translocase of inner mitochondrial membrane 8 homolog A (yeast)
hsa-miR-555	1	0	1	1	1	1	EFNB2	ephrin-B2
hsa-miR-555	1	0	1	1	1	1	EYA4	eyes absent homolog 4 (Drosophila)
hsa-miR-555	0	0	1	0	1	1	SLC1A3	solute carrier family 1 (glial high affinity glutamate transporter), member 3
hsa-miR-555	0	0	1	1	1	1	CHST2	carbohydrate (N-acetylglucosamine-6-O) sulfotransferase 2
hsa-miR-555	1	0	1	0	1	1	ACVR1B	activin A receptor, type IB
hsa-miR-555	1	0	1	0	1	1	ETV5	ets variant 5
hsa-miR-555	0	0	1	0	1	1	KCNQ3	potassium voltage-gated channel, KQT-like subfamily, member 3
hsa-miR-555	0	0	1	0	1	1	POU4F2	POU class 4 homeobox 2
hsa-miR-555	0	0	1	1	1	1	CDY1	chromodomain protein, Y-linked, 1
hsa-miR-555	0	0	1	1	0	0	ZW10	ZW10, kinetochore associated, homolog (Drosophila)
hsa-miR-555	1	0	1	0	1	1	CDYL	chromodomain protein, Y-like
hsa-miR-555	0	0	1	1	1	1	CLCA3P	chloride channel accessory 3, pseudogene
hsa-miR-555	0	0	1	1	1	1	CDKN2B	cyclin-dependent kinase inhibitor 2B (p15, inhibits CDK4)
hsa-miR-555	1	0	1	0	1	1	SEL1L	sel-1 suppressor of lin-12-like (C. elegans)
hsa-miR-555	1	0	1	1	1	1	TLE1	transducin-like enhancer of split 1 (E(sp1) homolog, Drosophila)
hsa-miR-555	1	0	1	1	1	1	CRK	v-crk sarcoma virus CT10 oncogene homolog (avian)
hsa-miR-555	1	0	1	0	1	1	DLX6	distal-less homeobox 6
hsa-miR-555	0	0	1	0	1	1	EPHA3	EPH receptor A3
hsa-miR-555	0	0	1	1	1	1	FOSL1	FOS-like antigen 1
hsa-miR-555	1	0	1	1	1	1	RND2	Rho family GTPase 2
hsa-miR-555	1	0	1	1	1	1	HOXA1	homeobox A1
hsa-miR-555	0	0	1	1	1	1	IMPA1	inositol(myo)-1(or 4)-monophosphatase 1
hsa-miR-555	1	0	1	1	1	1	INSIG1	insulin induced gene 1
hsa-miR-555	0	0	1	1	1	1	ITK	IL2-inducible T-cell kinase
hsa-miR-555	1	0	1	1	0	0	DPP3	dipeptidyl-peptidase 3
hsa-miR-555	0	0	1	1	1	1	RNF41	ring finger protein 41
hsa-miR-555	0	0	1	1	1	1	PRG4	proteoglycan 4
hsa-miR-555	1	0	1	0	1	1	DCAF7	DDB1 and CUL4 associated factor 7
hsa-miR-555	1	0	1	0	1	1	SPRY3	sprouty homolog 3 (Drosophila)
hsa-miR-555	1	0	1	1	1	1	MEOX2	mesenchyme homeobox 2
hsa-miR-555	1	0	1	1	1	1	FOXO4	forkhead box O4
hsa-miR-555	1	0	1	1	1	1	MTF1	metal-regulatory transcription factor 1
hsa-miR-555	0	0	1	1	0	0	SPRR1A	small proline-rich protein 1A
hsa-miR-555	1	0	1	0	1	1	SPATA2	spermatogenesis associated 2
hsa-miR-555	1	0	1	1	1	1	HS3ST4	heparan sulfate (glucosamine) 3-O-sulfotransferase 4
hsa-miR-555	0	0	1	1	1	1	SMYD5	SMYD family member 5
hsa-miR-555	1	0	1	0	1	1	SCML2	sex comb on midleg-like 2 (Drosophila)
hsa-miR-555	0	0	1	1	1	1	PPP2R5A	protein phosphatase 2, regulatory subunit B', alpha
hsa-miR-555	1	0	1	1	1	1	ZER1	zer-1 homolog (C. elegans)
hsa-miR-555	1	0	1	1	1	1	ZNF238	zinc finger protein 238
hsa-miR-555	0	0	1	1	1	1	UBE2E3	ubiquitin-conjugating enzyme E2E 3
hsa-miR-555	0	0	1	1	1	1	ARL6IP5	ADP-ribosylation-like factor 6 interacting protein 5
hsa-miR-555	1	0	1	1	1	1	TRIM3	tripartite motif containing 3
hsa-miR-555	0	0	1	1	0	0	SPAG5	sperm associated antigen 5
hsa-miR-555	1	0	1	1	1	1	RRAGA	Ras-related GTP binding A
hsa-miR-555	1	0	1	1	1	1	MMP24	matrix metallopeptidase 24 (membrane-inserted)
hsa-miR-555	0	0	1	1	1	1	LYVE1	lymphatic vessel endothelial hyaluronan receptor 1
hsa-miR-555	1	0	1	1	1	1	MAN1A2	mannosidase, alpha, class 1A, member 2
hsa-miR-555	0	0	1	0	1	1	SUB1	SUB1 homolog (S. cerevisiae)
hsa-miR-555	1	0	1	1	1	1	HIVEP2	human immunodeficiency virus type I enhancer binding protein 2
hsa-miR-555	1	0	1	1	0	0	PSKH1	protein serine kinase H1
hsa-miR-555	0	0	1	1	1	1	SSFA2	sperm specific antigen 2
hsa-miR-555	0	0	1	1	0	0	HNRNPA0	heterogeneous nuclear ribonucleoprotein A0
hsa-miR-555	0	0	1	1	1	1	ATF7	activating transcription factor 7
hsa-miR-555	0	0	1	1	0	0	USF1	upstream transcription factor 1
hsa-miR-555	1	0	1	0	1	1	CHP1	calcineurin-like EF hand protein 1
hsa-miR-555	1	0	1	1	1	1	TARDBP	TAR DNA binding protein
hsa-miR-555	1	0	1	1	1	1	KCND2	potassium voltage-gated channel, Shal-related subfamily, member 2
hsa-miR-555	1	0	1	1	1	1	KCNE1L	KCNE1-like
hsa-miR-555	0	0	1	1	0	0	TBX21	T-box 21
hsa-miR-555	0	0	1	1	1	1	PURG	purine-rich element binding protein G
hsa-miR-555	1	0	1	1	1	1	SOCS5	suppressor of cytokine signaling 5
hsa-miR-555	1	0	1	0	1	1	VAMP2	vesicle-associated membrane protein 2 (synaptobrevin 2)
hsa-miR-555	1	0	1	1	1	1	RNF7	ring finger protein 7
hsa-miR-555	1	0	1	0	1	1	ODZ1	odz, odd Oz/ten-m homolog 1 (Drosophila)
hsa-miR-555	1	0	1	1	0	0	BRD4	bromodomain containing 4
hsa-miR-555	1	0	1	1	1	1	SLC7A11	solute carrier family 7 (anionic amino acid transporter light chain, xc- system), member 11
hsa-miR-555	1	0	1	0	1	1	DIEXF	digestive organ expansion factor homolog (zebrafish)
hsa-miR-555	0	0	1	1	1	1	LAMP3	lysosomal-associated membrane protein 3
hsa-miR-555	1	0	1	1	1	1	ERO1L	ERO1-like (S. cerevisiae)
hsa-miR-555	1	0	1	1	1	1	CDR2L	cerebellar degeneration-related protein 2-like
hsa-miR-555	1	0	1	0	1	1	KIAA0232	KIAA0232
hsa-miR-555	1	0	1	0	1	1	KIAA0494	KIAA0494
hsa-miR-555	0	0	1	1	0	0	PCNXL2	pecanex-like 2 (Drosophila)
hsa-miR-555	0	0	1	1	1	1	ZBED4	zinc finger, BED-type containing 4
hsa-miR-555	1	0	1	0	1	1	KBTBD11	kelch repeat and BTB (POZ) domain containing 11
hsa-miR-555	1	0	1	1	1	1	SMG1	smg-1 homolog, phosphatidylinositol 3-kinase-related kinase (C. elegans)
hsa-miR-555	0	0	1	1	1	1	ARL6IP1	ADP-ribosylation factor-like 6 interacting protein 1
hsa-miR-555	0	0	1	1	1	1	FBXO28	F-box protein 28
hsa-miR-555	1	0	1	0	1	1	KIAA1024	KIAA1024
hsa-miR-555	1	0	1	0	1	1	LARP1	La ribonucleoprotein domain family, member 1
hsa-miR-555	1	0	1	1	1	1	NIPBL	Nipped-B homolog (Drosophila)
hsa-miR-555	1	0	1	1	1	1	MOB4	MOB family member 4, phocein
hsa-miR-555	1	0	1	1	1	1	CNOT6	CCR4-NOT transcription complex, subunit 6
hsa-miR-555	1	0	1	0	1	1	OSBPL3	oxysterol binding protein-like 3
hsa-miR-555	1	0	1	0	1	1	ERC2	ELKS/RAB6-interacting/CAST family member 2
hsa-miR-555	1	0	1	1	0	0	POLDIP2	polymerase (DNA-directed), delta interacting protein 2
hsa-miR-555	1	0	1	1	1	1	WSB1	WD repeat and SOCS box containing 1
hsa-miR-555	1	0	1	1	1	1	ABCA12	ATP-binding cassette, sub-family A (ABC1), member 12
hsa-miR-555	1	0	1	1	1	1	FAM155B	family with sequence similarity 155, member B
hsa-miR-555	1	0	1	0	1	1	RRM2B	ribonucleotide reductase M2 B (TP53 inducible)
hsa-miR-555	1	0	1	1	1	1	TAF9B	TAF9B RNA polymerase II, TATA box binding protein (TBP)-associated factor, 31kDa
hsa-miR-555	0	0	1	1	1	1	SCCPDH	saccharopine dehydrogenase (putative)
hsa-miR-555	0	0	1	1	1	1	ISOC1	isochorismatase domain containing 1
hsa-miR-555	0	0	1	1	0	0	CRNN	cornulin
hsa-miR-555	1	0	1	1	1	1	SNX9	sorting nexin 9
hsa-miR-555	1	0	1	1	1	1	NLK	nemo-like kinase
hsa-miR-555	0	0	1	1	1	1	ACSL5	acyl-CoA synthetase long-chain family member 5
hsa-miR-555	1	0	1	1	1	1	AKAP11	A kinase (PRKA) anchor protein 11
hsa-miR-555	1	0	1	1	1	1	RAPGEFL1	Rap guanine nucleotide exchange factor (GEF)-like 1
hsa-miR-555	0	0	1	0	1	1	ERAP1	endoplasmic reticulum aminopeptidase 1
hsa-miR-555	1	0	1	1	1	1	C20orf111	chromosome 20 open reading frame 111
hsa-miR-555	1	0	1	1	1	1	CPSF2	cleavage and polyadenylation specific factor 2, 100kDa
hsa-miR-555	0	0	1	1	1	1	POLE3	polymerase (DNA directed), epsilon 3, accessory subunit
hsa-miR-555	1	0	1	1	1	1	DNAJB12	DnaJ (Hsp40) homolog, subfamily B, member 12
hsa-miR-555	1	0	1	0	1	1	FAM46C	family with sequence similarity 46, member C
hsa-miR-555	1	0	1	1	1	1	LPPR1	lipid phosphate phosphatase-related protein type 1
hsa-miR-555	1	0	1	1	1	1	YTHDF1	YTH domain family, member 1
hsa-miR-555	1	0	1	1	1	1	UBE2R2	ubiquitin-conjugating enzyme E2R 2
hsa-miR-555	1	0	1	1	1	1	FAM120C	family with sequence similarity 120C
hsa-miR-555	0	0	1	1	0	0	THG1L	tRNA-histidine guanylyltransferase 1-like (S. cerevisiae)
hsa-miR-555	1	0	1	1	1	1	SAMD4B	sterile alpha motif domain containing 4B
hsa-miR-555	0	0	1	1	1	1	RBM22	RNA binding motif protein 22
hsa-miR-555	0	0	1	1	1	1	TSR1	TSR1, 20S rRNA accumulation, homolog (S. cerevisiae)
hsa-miR-555	0	0	1	0	1	1	FAM86C1	family with sequence similarity 86, member C1
hsa-miR-555	0	0	1	1	1	1	TRIM62	tripartite motif containing 62
hsa-miR-555	1	0	1	0	1	1	PARVA	parvin, alpha
hsa-miR-555	1	0	1	1	1	1	SPTLC3	serine palmitoyltransferase, long chain base subunit 3
hsa-miR-555	1	0	1	0	1	1	LIN7C	lin-7 homolog C (C. elegans)
hsa-miR-555	1	0	1	1	1	1	RSBN1	round spermatid basic protein 1
hsa-miR-555	0	0	1	1	1	1	LENEP	lens epithelial protein
hsa-miR-555	1	0	1	1	1	1	PCDHGA1	protocadherin gamma subfamily A, 1
hsa-miR-555	1	0	1	0	1	1	PCDHGA10	protocadherin gamma subfamily A, 10
hsa-miR-555	1	0	1	0	1	1	PCDHGA11	protocadherin gamma subfamily A, 11
hsa-miR-555	1	0	1	1	1	1	PCDHGA2	protocadherin gamma subfamily A, 2
hsa-miR-555	1	0	1	0	1	1	PCDHGA3	protocadherin gamma subfamily A, 3
hsa-miR-555	1	0	1	0	1	1	PCDHGA4	protocadherin gamma subfamily A, 4
hsa-miR-555	1	0	1	0	1	1	PCDHGA5	protocadherin gamma subfamily A, 5
hsa-miR-555	1	0	1	0	1	1	PCDHGA6	protocadherin gamma subfamily A, 6
hsa-miR-555	1	0	1	0	1	1	PCDHGA7	protocadherin gamma subfamily A, 7
hsa-miR-555	1	0	1	0	1	1	PCDHGA9	protocadherin gamma subfamily A, 9
hsa-miR-555	1	0	1	0	1	1	PCDHGB1	protocadherin gamma subfamily B, 1
hsa-miR-555	1	0	1	0	1	1	PCDHGB2	protocadherin gamma subfamily B, 2
hsa-miR-555	1	0	1	0	1	1	PCDHGB3	protocadherin gamma subfamily B, 3
hsa-miR-555	1	0	1	0	1	1	PCDHGB5	protocadherin gamma subfamily B, 5
hsa-miR-555	1	0	1	0	1	1	PCDHGB6	protocadherin gamma subfamily B, 6
hsa-miR-555	1	0	1	0	1	1	PCDHGB7	protocadherin gamma subfamily B, 7
hsa-miR-555	1	0	1	0	1	1	PCDHGC4	protocadherin gamma subfamily C, 4
hsa-miR-555	1	0	1	0	1	1	PCDHGC5	protocadherin gamma subfamily C, 5
hsa-miR-555	1	0	1	0	1	1	FAM190B	family with sequence similarity 190, member B
hsa-miR-555	1	0	1	1	1	1	C1GALT1	core 1 synthase, glycoprotein-N-acetylgalactosamine 3-beta-galactosyltransferase, 1
hsa-miR-555	0	0	1	1	0	0	CD248	CD248 molecule, endosialin
hsa-miR-555	1	0	1	1	0	0	JPH2	junctophilin 2
hsa-miR-555	1	0	1	1	0	0	THAP11	THAP domain containing 11
hsa-miR-555	1	0	1	1	1	1	EPHA8	EPH receptor A8
hsa-miR-555	1	0	1	1	1	1	RET	ret proto-oncogene
hsa-miR-555	0	0	1	1	1	1	FGF23	fibroblast growth factor 23
hsa-miR-555	1	0	1	0	1	1	DCUN1D1	DCN1, defective in cullin neddylation 1, domain containing 1 (S. cerevisiae)
hsa-miR-555	1	0	1	0	1	1	KCNS2	potassium voltage-gated channel, delayed-rectifier, subfamily S, member 2
hsa-miR-555	1	0	1	1	1	1	SLC12A5	solute carrier family 12 (potassium/chloride transporter), member 5
hsa-miR-555	0	0	1	1	1	1	SHROOM4	shroom family member 4
hsa-miR-555	1	0	1	1	1	1	ARHGAP31	Rho GTPase activating protein 31
hsa-miR-555	1	0	1	1	1	1	KLHL14	kelch-like 14 (Drosophila)
hsa-miR-555	1	0	1	1	1	1	SIPA1L2	signal-induced proliferation-associated 1 like 2
hsa-miR-555	1	0	1	1	1	1	ZFP14	zinc finger protein 14 homolog (mouse)
hsa-miR-555	0	0	1	1	1	1	PRX	periaxin
hsa-miR-555	0	0	1	1	1	1	ADAM30	ADAM metallopeptidase domain 30
hsa-miR-555	0	0	1	1	1	1	DNAJC12	DnaJ (Hsp40) homolog, subfamily C, member 12
hsa-miR-555	0	0	1	1	1	1	MS4A1	membrane-spanning 4-domains, subfamily A, member 1
hsa-miR-555	1	0	1	1	1	1	FOXM1	forkhead box M1
hsa-miR-555	0	0	1	1	0	0	ABHD4	abhydrolase domain containing 4
hsa-miR-555	1	0	1	0	1	1	CERS2	ceramide synthase 2
hsa-miR-555	1	0	1	0	1	1	EDAR	ectodysplasin A receptor
hsa-miR-555	0	0	1	1	1	1	RAB38	RAB38, member RAS oncogene family
hsa-miR-555	1	0	1	1	1	1	HIF3A	hypoxia inducible factor 3, alpha subunit
hsa-miR-555	1	0	1	1	1	1	GIGYF1	GRB10 interacting GYF protein 1
hsa-miR-555	1	0	1	1	1	1	PRRX1	paired related homeobox 1
hsa-miR-555	0	0	1	1	1	1	ACBD3	acyl-CoA binding domain containing 3
hsa-miR-555	1	0	1	1	1	1	FAM59A	family with sequence similarity 59, member A
hsa-miR-555	0	0	1	1	1	1	SFXN1	sideroflexin 1
hsa-miR-555	1	0	1	1	1	1	FNDC4	fibronectin type III domain containing 4
hsa-miR-555	1	0	1	1	1	1	YTHDC2	YTH domain containing 2
hsa-miR-555	0	0	1	1	1	1	MARCKSL1	MARCKS-like 1
hsa-miR-555	1	0	1	1	1	1	GRAMD3	GRAM domain containing 3
hsa-miR-555	1	0	1	1	1	1	C10orf76	chromosome 10 open reading frame 76
hsa-miR-555	0	0	1	0	1	1	ZYG11B	zyg-11 homolog B (C. elegans)
hsa-miR-555	1	0	1	1	1	1	TMC7	transmembrane channel-like 7
hsa-miR-555	1	0	1	1	0	0	CNTD2	cyclin N-terminal domain containing 2
hsa-miR-555	1	0	1	1	1	1	KLHL18	kelch-like 18 (Drosophila)
hsa-miR-555	1	0	1	1	1	1	NAA50	N(alpha)-acetyltransferase 50, NatE catalytic subunit
hsa-miR-555	1	0	1	1	1	1	JHDM1D	jumonji C domain containing histone demethylase 1 homolog D (S. cerevisiae)
hsa-miR-555	1	0	1	0	1	1	SETD7	SET domain containing (lysine methyltransferase) 7
hsa-miR-555	1	0	1	0	1	1	CSRNP2	cysteine-serine-rich nuclear protein 2
hsa-miR-555	1	0	1	1	1	1	SNX27	sorting nexin family member 27
hsa-miR-555	0	0	1	1	1	1	KIF18A	kinesin family member 18A
hsa-miR-555	0	0	1	1	1	1	CRISPLD2	cysteine-rich secretory protein LCCL domain containing 2
hsa-miR-555	1	0	1	0	1	1	ITCH	itchy E3 ubiquitin protein ligase
hsa-miR-555	1	0	1	1	0	0	FZD8	frizzled family receptor 8
hsa-miR-555	0	0	1	1	0	0	ROPN1L	rhophilin associated tail protein 1-like
hsa-miR-555	1	0	1	0	1	1	PCDHGA8	protocadherin gamma subfamily A, 8
hsa-miR-555	1	0	1	1	1	1	DSEL	dermatan sulfate epimerase-like
hsa-miR-555	1	0	1	1	1	1	ARID5B	AT rich interactive domain 5B (MRF1-like)
hsa-miR-555	0	0	1	1	1	1	ATP13A4	ATPase type 13A4
hsa-miR-555	1	0	1	1	1	1	SYVN1	synovial apoptosis inhibitor 1, synoviolin
hsa-miR-555	0	0	1	1	1	1	CHAMP1	chromosome alignment maintaining phosphoprotein 1
hsa-miR-555	0	0	1	1	1	1	FNDC1	fibronectin type III domain containing 1
hsa-miR-555	1	0	1	0	1	1	INA	internexin neuronal intermediate filament protein, alpha
hsa-miR-555	0	0	1	1	1	1	FBXL20	F-box and leucine-rich repeat protein 20
hsa-miR-555	1	0	1	1	1	1	PDGFA	platelet-derived growth factor alpha polypeptide
hsa-miR-555	1	0	1	1	1	1	TRIM5	tripartite motif containing 5
hsa-miR-555	1	0	1	1	1	1	FGD3	FYVE, RhoGEF and PH domain containing 3
hsa-miR-555	1	0	1	1	1	1	ADAM19	ADAM metallopeptidase domain 19
hsa-miR-555	1	0	1	1	1	1	SYS1	SYS1 Golgi-localized integral membrane protein homolog (S. cerevisiae)
hsa-miR-555	0	0	1	1	1	1	NACC1	nucleus accumbens associated 1, BEN and BTB (POZ) domain containing
hsa-miR-555	1	0	1	1	1	1	MBD6	methyl-CpG binding domain protein 6
hsa-miR-555	0	0	1	1	1	1	PANX3	pannexin 3
hsa-miR-555	1	0	1	1	1	1	TRIM9	tripartite motif containing 9
hsa-miR-555	1	0	1	1	1	1	SLC44A1	solute carrier family 44, member 1
hsa-miR-555	0	0	1	1	1	1	CBLN4	cerebellin 4 precursor
hsa-miR-555	0	0	1	1	1	1	UBE2F	ubiquitin-conjugating enzyme E2F (putative)
hsa-miR-555	1	0	1	1	1	1	ZNF280B	zinc finger protein 280B
hsa-miR-555	1	0	1	1	1	1	KLHL6	kelch-like 6 (Drosophila)
hsa-miR-555	1	0	1	0	1	1	SP1	Sp1 transcription factor
hsa-miR-555	1	0	1	1	1	1	MAPK14	mitogen-activated protein kinase 14
hsa-miR-555	1	0	1	1	1	1	PPTC7	PTC7 protein phosphatase homolog (S. cerevisiae)
hsa-miR-555	1	0	1	1	1	1	MAPK1IP1L	mitogen-activated protein kinase 1 interacting protein 1-like
hsa-miR-555	0	0	1	1	1	1	C15orf40	chromosome 15 open reading frame 40
hsa-miR-555	0	0	1	0	1	1	SPATA18	spermatogenesis associated 18
hsa-miR-555	0	0	1	1	1	1	C7orf45	chromosome 7 open reading frame 45
hsa-miR-555	1	0	1	1	1	1	SGMS1	sphingomyelin synthase 1
hsa-miR-555	1	0	1	1	1	1	FAM123B	family with sequence similarity 123B
hsa-miR-555	0	0	1	1	1	1	PM20D1	peptidase M20 domain containing 1
hsa-miR-555	1	0	1	1	1	1	ELMOD2	ELMO/CED-12 domain containing 2
hsa-miR-555	1	0	1	1	1	1	PKHD1	polycystic kidney and hepatic disease 1 (autosomal recessive)
hsa-miR-555	0	0	1	1	1	1	ZFP91-CNTF	ZFP91-CNTF readthrough (non-protein coding)
hsa-miR-555	1	0	1	1	1	1	FAM117B	family with sequence similarity 117, member B
hsa-miR-555	1	0	1	0	1	1	PGM2L1	phosphoglucomutase 2-like 1
hsa-miR-555	1	0	1	1	1	1	ATP11C	ATPase, class VI, type 11C
hsa-miR-555	1	0	1	1	1	1	RABL3	RAB, member of RAS oncogene family-like 3
hsa-miR-555	0	0	1	1	1	1	FRMD3	FERM domain containing 3
hsa-miR-555	0	0	1	1	0	0	CHMP4B	charged multivesicular body protein 4B
hsa-miR-555	1	0	1	1	1	1	LRRTM3	leucine rich repeat transmembrane neuronal 3
hsa-miR-555	0	0	1	1	1	1	GPIHBP1	glycosylphosphatidylinositol anchored high density lipoprotein binding protein 1
hsa-miR-555	0	0	1	1	0	0	PAQR7	progestin and adipoQ receptor family member VII
hsa-miR-555	1	0	1	1	1	1	GMCL1	germ cell-less, spermatogenesis associated 1
hsa-miR-555	0	0	1	1	1	1	ZNF326	zinc finger protein 326
hsa-miR-555	1	0	1	0	1	1	SRRM4	serine/arginine repetitive matrix 4
hsa-miR-555	1	0	1	1	1	1	GPRIN3	GPRIN family member 3
hsa-miR-555	0	0	1	1	1	1	FOXR2	forkhead box R2
hsa-miR-555	0	0	1	1	1	1	CXCL17	chemokine (C-X-C motif) ligand 17
hsa-miR-555	1	0	1	0	1	1	ZC3H6	zinc finger CCCH-type containing 6
hsa-miR-555	0	0	1	0	1	1	GYPE	glycophorin E (MNS blood group)
hsa-miR-555	1	0	1	0	1	1	SS18L1	synovial sarcoma translocation gene on chromosome 18-like 1
hsa-miR-555	1	0	1	0	1	1	LHFPL3	lipoma HMGIC fusion partner-like 3
hsa-miR-555	1	0	1	1	1	1	VAX1	ventral anterior homeobox 1
hsa-miR-555	1	0	1	1	1	1	CXCL12	chemokine (C-X-C motif) ligand 12
hsa-miR-555	1	0	1	1	1	1	BLOC1S5	biogenesis of lysosomal organelles complex-1, subunit 5, muted
hsa-miR-555	1	0	1	1	0	0	TCF7	transcription factor 7 (T-cell specific, HMG-box)
hsa-miR-555	1	0	1	1	1	1	FAM43B	family with sequence similarity 43, member B
hsa-miR-555	0	0	1	0	1	1	C1orf229	chromosome 1 open reading frame 229
hsa-miR-555	1	0	1	1	1	1	XKRX	XK, Kell blood group complex subunit-related, X-linked
hsa-miR-555	0	0	1	0	0	0	TOP1P2	topoisomerase (DNA) I pseudogene 2
hsa-miR-555	0	0	1	0	0	0	TTTY21	testis-specific transcript, Y-linked 21 (non-protein coding)
hsa-miR-555	0	0	1	0	0	0	TTTY15	testis-specific transcript, Y-linked 15 (non-protein coding)
hsa-miR-555	0	0	1	0	0	0	TOP1P1	topoisomerase (DNA) I pseudogene 1
hsa-miR-555	0	0	1	0	0	0	HOXA11-AS	HOXA11 antisense RNA
hsa-miR-555	0	0	1	0	0	0	LOC285359	phosducin-like 3 pseudogene
hsa-miR-555	0	0	1	0	0	0	TCAM1P	testicular cell adhesion molecule 1 homolog (mouse), pseudogene
hsa-miR-555	0	0	1	0	0	0	HSP90B3P	heat shock protein 90kDa beta (Grp94), member 3, pseudogene
hsa-miR-555	0	0	1	0	0	0	SYS1-DBNDD2	SYS1-DBNDD2 readthrough (non-protein coding)
hsa-miR-555	0	0	1	0	0	0	USP32P1	ubiquitin specific peptidase 32 pseudogene 1
hsa-miR-555	0	0	1	0	0	0	HAR1A	highly accelerated region 1A (non-protein coding)
hsa-miR-555	0	0	1	1	1	1	RXRB	retinoid X receptor, beta
hsa-miR-555	0	0	0	1	0	0	PRR5-ARHGAP8	PRR5-ARHGAP8 readthrough
hsa-miR-555	0	0	1	1	0	0	PRR5	proline rich 5 (renal)
hsa-miR-555	0	0	1	1	0	0	ARHGAP8	Rho GTPase activating protein 8
hsa-miR-555	0	0	1	1	1	1	ARHGAP33	Rho GTPase activating protein 33
hsa-miR-555	0	0	0	1	1	1	MYOC	myocilin, trabecular meshwork inducible glucocorticoid response
hsa-miR-555	0	0	0	1	0	0	PSMC4	proteasome (prosome, macropain) 26S subunit, ATPase, 4
hsa-miR-555	0	0	0	1	0	0	MRPL28	mitochondrial ribosomal protein L28
hsa-miR-555	0	0	1	1	0	0	SLC22A4	solute carrier family 22 (organic cation/ergothioneine transporter), member 4
hsa-miR-555	0	0	1	1	0	0	REM1	RAS (RAD and GEM)-like GTP-binding 1
hsa-miR-555	0	0	0	1	1	1	LAMB4	laminin, beta 4
hsa-miR-555	0	0	1	1	1	1	APOH	apolipoprotein H (beta-2-glycoprotein I)
hsa-miR-555	0	0	0	1	0	0	EIF3D	eukaryotic translation initiation factor 3, subunit D
hsa-miR-555	1	0	1	1	1	1	ZFYVE21	zinc finger, FYVE domain containing 21
hsa-miR-555	1	0	1	1	1	1	NFKBIA	nuclear factor of kappa light polypeptide gene enhancer in B-cells inhibitor, alpha
hsa-miR-555	0	0	1	1	0	0	PCSK1N	proprotein convertase subtilisin/kexin type 1 inhibitor
hsa-miR-555	0	0	1	1	0	0	MT4	metallothionein 4
hsa-miR-555	0	0	1	1	0	0	COG4	component of oligomeric golgi complex 4
hsa-miR-555	0	0	1	1	1	1	OIP5	Opa interacting protein 5
hsa-miR-555	0	0	1	1	1	1	RP1	retinitis pigmentosa 1 (autosomal dominant)
hsa-miR-555	0	0	1	1	1	1	PLAUR	plasminogen activator, urokinase receptor
hsa-miR-555	0	0	1	1	0	0	ECH1	enoyl CoA hydratase 1, peroxisomal
hsa-miR-555	0	0	1	1	0	0	PPP1R37	protein phosphatase 1, regulatory subunit 37
hsa-miR-555	1	0	1	1	0	0	RASIP1	Ras interacting protein 1
hsa-miR-555	0	0	1	1	0	0	WDR83OS	WD repeat domain 83 opposite strand
hsa-miR-555	0	0	0	1	1	1	CACNG7	calcium channel, voltage-dependent, gamma subunit 7
hsa-miR-555	0	0	1	1	1	1	GCDH	glutaryl-CoA dehydrogenase
hsa-miR-555	0	0	1	1	0	0	PSENEN	presenilin enhancer 2 homolog (C. elegans)
hsa-miR-555	0	0	1	1	1	1	UBE2D4	ubiquitin-conjugating enzyme E2D 4 (putative)
hsa-miR-555	0	0	0	1	0	0	HOXA6	homeobox A6
hsa-miR-555	0	0	1	1	0	0	PCOLCE	procollagen C-endopeptidase enhancer
hsa-miR-555	0	0	1	1	1	1	COA1	cytochrome C oxidase assembly factor 1 homolog (S. cerevisiae)
hsa-miR-555	0	0	1	1	1	1	YKT6	YKT6 v-SNARE homolog (S. cerevisiae)
hsa-miR-555	0	0	1	1	0	0	PITRM1	pitrilysin metallopeptidase 1
hsa-miR-555	1	0	1	1	0	0	SLC25A39	solute carrier family 25, member 39
hsa-miR-555	1	0	0	1	1	1	WNT3	wingless-type MMTV integration site family, member 3
hsa-miR-555	0	0	1	1	0	0	KRT37	keratin 37
hsa-miR-555	0	0	0	1	1	1	KAT2A	K(lysine) acetyltransferase 2A
hsa-miR-555	0	0	1	1	0	0	CACNG1	calcium channel, voltage-dependent, gamma subunit 1
hsa-miR-555	0	0	0	1	1	1	MANBA	mannosidase, beta A, lysosomal
hsa-miR-555	0	0	1	1	1	1	PUS3	pseudouridylate synthase 3
hsa-miR-555	0	0	1	1	0	0	IL23A	interleukin 23, alpha subunit p19
hsa-miR-555	0	0	1	1	0	0	H2AFJ	H2A histone family, member J
hsa-miR-555	0	0	1	1	0	0	MGP	matrix Gla protein
hsa-miR-555	0	0	1	1	1	1	ARHGDIB	Rho GDP dissociation inhibitor (GDI) beta
hsa-miR-555	0	0	0	1	1	1	RERGL	RERG/RAS-like
hsa-miR-555	0	0	1	1	1	1	FBXO5	F-box protein 5
hsa-miR-555	0	0	0	1	1	1	GPLD1	glycosylphosphatidylinositol specific phospholipase D1
hsa-miR-555	0	0	1	1	0	0	PKD2L2	polycystic kidney disease 2-like 2
hsa-miR-555	0	0	1	1	0	0	SLC4A9	solute carrier family 4, sodium bicarbonate cotransporter, member 9
hsa-miR-555	0	0	1	1	0	0	INO80B	INO80 complex subunit B
hsa-miR-555	0	0	1	1	0	0	WBP1	WW domain binding protein 1
hsa-miR-555	0	0	1	1	1	1	ATP6V1B1	ATPase, H+ transporting, lysosomal 56/58kDa, V1 subunit B1
hsa-miR-555	0	0	1	1	0	0	MASP2	mannan-binding lectin serine peptidase 2
hsa-miR-555	0	0	1	1	0	0	KIAA1324	KIAA1324
hsa-miR-555	0	0	1	1	1	1	RNF103	ring finger protein 103
hsa-miR-555	0	0	1	1	1	1	MYL12B	myosin, light chain 12B, regulatory
hsa-miR-555	0	0	1	1	0	0	NDUFB3	NADH dehydrogenase (ubiquinone) 1 beta subcomplex, 3, 12kDa
hsa-miR-555	1	0	0	1	0	0	TMEM180	transmembrane protein 180
hsa-miR-555	0	0	1	1	1	1	NCAPH	non-SMC condensin I complex, subunit H
hsa-miR-555	0	0	0	1	0	0	DNAI1	dynein, axonemal, intermediate chain 1
hsa-miR-555	0	0	0	1	0	0	KATNAL2	katanin p60 subunit A-like 2
hsa-miR-555	0	0	1	1	0	0	MIF4GD	MIF4G domain containing
hsa-miR-555	1	0	1	1	1	1	MAX	MYC associated factor X
hsa-miR-555	0	0	1	1	0	0	UROD	uroporphyrinogen decarboxylase
hsa-miR-555	0	0	0	1	1	1	PCID2	PCI domain containing 2
hsa-miR-555	0	0	1	1	0	0	GGT1	gamma-glutamyltransferase 1
hsa-miR-555	0	0	0	1	1	1	ARHGAP22	Rho GTPase activating protein 22
hsa-miR-555	1	0	1	1	1	1	PIAS1	protein inhibitor of activated STAT, 1
hsa-miR-555	0	0	0	1	0	0	ISLR	immunoglobulin superfamily containing leucine-rich repeat
hsa-miR-555	0	0	0	1	0	0	ART1	ADP-ribosyltransferase 1
hsa-miR-555	1	0	1	1	1	1	CAPRIN2	caprin family member 2
hsa-miR-555	0	0	0	1	0	0	SLX1A	SLX1 structure-specific endonuclease subunit homolog A (S. cerevisiae)
hsa-miR-555	0	0	0	1	1	1	USP40	ubiquitin specific peptidase 40
hsa-miR-555	0	0	1	1	0	0	TMCO6	transmembrane and coiled-coil domains 6
hsa-miR-555	0	0	1	1	0	0	NDUFA2	NADH dehydrogenase (ubiquinone) 1 alpha subcomplex, 2, 8kDa
hsa-miR-555	0	0	0	1	1	1	ZNF193	zinc finger protein 193
hsa-miR-555	0	0	0	1	0	0	PRKCSH	protein kinase C substrate 80K-H
hsa-miR-555	0	0	0	1	0	0	USHBP1	Usher syndrome 1C binding protein 1
hsa-miR-555	1	0	1	1	1	1	ARPC1B	actin related protein 2/3 complex, subunit 1B, 41kDa
hsa-miR-555	1	0	1	1	1	1	PRDM12	PR domain containing 12
hsa-miR-555	0	0	1	1	0	0	MRPL4	mitochondrial ribosomal protein L4
hsa-miR-555	0	0	1	1	0	0	BPIFA2	BPI fold containing family A, member 2
hsa-miR-555	0	0	1	1	0	0	COX4I1	cytochrome c oxidase subunit IV isoform 1
hsa-miR-555	0	0	0	1	0	0	F12	coagulation factor XII (Hageman factor)
hsa-miR-555	0	0	1	1	1	1	FUS	fused in sarcoma
hsa-miR-555	0	0	1	1	0	0	RAMP1	receptor (G protein-coupled) activity modifying protein 1
hsa-miR-555	1	0	0	1	1	1	COQ3	coenzyme Q3 homolog, methyltransferase (S. cerevisiae)
hsa-miR-555	0	0	1	1	0	0	NXT1	NTF2-like export factor 1
hsa-miR-555	0	0	1	1	1	1	GIMAP4	GTPase, IMAP family member 4
hsa-miR-555	0	0	1	1	1	1	LRRIQ1	leucine-rich repeats and IQ motif containing 1
hsa-miR-555	0	0	1	1	1	1	ADAM20	ADAM metallopeptidase domain 20
hsa-miR-555	0	0	1	1	1	1	HRH4	histamine receptor H4
hsa-miR-555	1	0	1	1	0	0	ZC3H10	zinc finger CCCH-type containing 10
hsa-miR-555	0	0	0	1	0	0	CCT7	chaperonin containing TCP1, subunit 7 (eta)
hsa-miR-555	0	0	1	1	1	1	PIGC	phosphatidylinositol glycan anchor biosynthesis, class C
hsa-miR-555	0	0	1	1	1	1	PWP1	PWP1 homolog (S. cerevisiae)
hsa-miR-555	0	0	1	1	1	1	IL6	interleukin 6 (interferon, beta 2)
hsa-miR-555	0	0	0	1	0	0	CIDEB	cell death-inducing DFFA-like effector b
hsa-miR-555	0	0	1	1	0	0	KIF13A	kinesin family member 13A
hsa-miR-555	0	0	0	1	0	0	CAPN11	calpain 11
hsa-miR-555	0	0	1	1	0	0	CDK15	cyclin-dependent kinase 15
hsa-miR-555	0	0	0	1	1	1	GYS2	glycogen synthase 2 (liver)
hsa-miR-555	0	0	1	1	0	0	VWF	von Willebrand factor
hsa-miR-555	0	0	0	1	0	0	PSMA6	proteasome (prosome, macropain) subunit, alpha type, 6
hsa-miR-555	0	0	0	1	0	0	DPEP1	dipeptidase 1 (renal)
hsa-miR-555	0	0	0	1	1	1	VAC14	Vac14 homolog (S. cerevisiae)
hsa-miR-555	0	0	1	1	1	1	PFDN1	prefoldin subunit 1
hsa-miR-555	1	0	0	1	0	0	SERPINA3	serpin peptidase inhibitor, clade A (alpha-1 antiproteinase, antitrypsin), member 3
hsa-miR-555	0	0	1	1	0	0	ATP5B	ATP synthase, H+ transporting, mitochondrial F1 complex, beta polypeptide
hsa-miR-555	1	0	1	1	1	1	ARFGEF1	ADP-ribosylation factor guanine nucleotide-exchange factor 1 (brefeldin A-inhibited)
hsa-miR-555	1	0	0	1	1	1	FAM86A	family with sequence similarity 86, member A
hsa-miR-555	0	0	1	1	0	0	RNF167	ring finger protein 167
hsa-miR-555	1	0	1	1	1	1	CDH20	cadherin 20, type 2
hsa-miR-555	0	0	1	1	0	0	TMEM59L	transmembrane protein 59-like
hsa-miR-555	0	0	0	1	0	0	TJP3	tight junction protein 3
hsa-miR-555	0	0	1	1	0	0	ASPA	aspartoacylase
hsa-miR-555	0	0	0	1	0	0	LIG1	ligase I, DNA, ATP-dependent
hsa-miR-555	0	0	0	1	1	1	CLNS1A	chloride channel, nucleotide-sensitive, 1A
hsa-miR-555	0	0	0	1	0	0	BLVRB	biliverdin reductase B (flavin reductase (NADPH))
hsa-miR-555	0	0	0	1	0	0	ILVBL	ilvB (bacterial acetolactate synthase)-like
hsa-miR-555	0	0	0	1	1	1	FOXRED1	FAD-dependent oxidoreductase domain containing 1
hsa-miR-555	0	0	1	1	0	0	IFIH1	interferon induced with helicase C domain 1
hsa-miR-555	0	0	0	1	1	1	PET112	PET112 homolog (yeast)
hsa-miR-555	0	0	0	1	0	0	GPR108	G protein-coupled receptor 108
hsa-miR-555	0	0	0	1	0	0	RPL31	ribosomal protein L31
hsa-miR-555	1	0	1	1	1	1	MGAT4A	mannosyl (alpha-1,3-)-glycoprotein beta-1,4-N-acetylglucosaminyltransferase, isozyme A
hsa-miR-555	0	0	1	1	0	0	TF	transferrin
hsa-miR-555	0	0	0	1	0	0	IQCG	IQ motif containing G
hsa-miR-555	0	0	1	1	1	1	TAX1BP1	Tax1 (human T-cell leukemia virus type I) binding protein 1
hsa-miR-555	0	0	1	1	1	1	SLC17A2	solute carrier family 17 (sodium phosphate), member 2
hsa-miR-555	0	0	0	1	0	0	SCAP	SREBF chaperone
hsa-miR-555	1	0	1	1	0	0	KIAA1549L	KIAA1549-like
hsa-miR-555	1	0	1	1	0	0	KCNC1	potassium voltage-gated channel, Shaw-related subfamily, member 1
hsa-miR-555	0	0	0	1	0	0	ITGB7	integrin, beta 7
hsa-miR-555	0	0	0	1	0	0	DIABLO	diablo, IAP-binding mitochondrial protein
hsa-miR-555	0	0	1	1	1	1	WDR61	WD repeat domain 61
hsa-miR-555	0	0	0	1	1	1	RPL3L	ribosomal protein L3-like
hsa-miR-555	0	0	1	1	0	0	COPS3	COP9 constitutive photomorphogenic homolog subunit 3 (Arabidopsis)
hsa-miR-555	0	0	0	1	0	0	ZNF287	zinc finger protein 287
hsa-miR-555	0	0	1	1	1	1	PHF12	PHD finger protein 12
hsa-miR-555	0	0	0	1	0	0	OR4D1	olfactory receptor, family 4, subfamily D, member 1
hsa-miR-555	0	0	0	1	1	1	C17orf64	chromosome 17 open reading frame 64
hsa-miR-555	0	0	0	1	1	1	ZNF750	zinc finger protein 750
hsa-miR-555	1	0	1	1	1	1	PIP4K2B	phosphatidylinositol-5-phosphate 4-kinase, type II, beta
hsa-miR-555	0	0	0	1	1	1	TXNL4A	thioredoxin-like 4A
hsa-miR-555	0	0	1	1	1	1	CYP4F22	cytochrome P450, family 4, subfamily F, polypeptide 22
hsa-miR-555	0	0	0	1	1	1	ZNF223	zinc finger protein 223
hsa-miR-555	0	0	1	1	0	0	SLC44A3	solute carrier family 44, member 3
hsa-miR-555	0	0	0	1	0	0	CAPN9	calpain 9
hsa-miR-555	0	0	1	1	0	0	FTH1	ferritin, heavy polypeptide 1
hsa-miR-555	0	0	1	1	1	1	MANF	mesencephalic astrocyte-derived neurotrophic factor
hsa-miR-555	1	0	1	1	0	0	EIF2B5	eukaryotic translation initiation factor 2B, subunit 5 epsilon, 82kDa
hsa-miR-555	1	0	1	1	0	0	OSMR	oncostatin M receptor
hsa-miR-555	0	0	0	1	0	0	NDUFB9	NADH dehydrogenase (ubiquinone) 1 beta subcomplex, 9, 22kDa
hsa-miR-555	0	0	1	1	0	0	FUOM	fucose mutarotase
hsa-miR-555	0	0	1	1	0	0	SSRP1	structure specific recognition protein 1
hsa-miR-555	1	0	1	1	1	1	PTPRJ	protein tyrosine phosphatase, receptor type, J
hsa-miR-555	0	0	1	1	1	1	TMEM138	transmembrane protein 138
hsa-miR-555	0	0	1	1	1	1	TAGLN	transgelin
hsa-miR-555	0	0	0	1	0	0	GPHA2	glycoprotein hormone alpha 2
hsa-miR-555	0	0	1	1	1	1	HIRIP3	HIRA interacting protein 3
hsa-miR-555	1	0	0	1	1	1	NCAPD3	non-SMC condensin II complex, subunit D3
hsa-miR-555	1	0	1	1	1	1	WWC2	WW and C2 domain containing 2
hsa-miR-555	0	0	0	1	1	1	TDO2	tryptophan 2,3-dioxygenase
hsa-miR-555	0	0	1	1	0	0	FEZF2	FEZ family zinc finger 2
hsa-miR-555	1	0	1	1	1	1	ATP8B1	ATPase, aminophospholipid transporter, class I, type 8B, member 1
hsa-miR-555	1	0	1	1	1	1	GTF2E1	general transcription factor IIE, polypeptide 1, alpha 56kDa
hsa-miR-555	1	0	1	1	1	1	TOMM70A	translocase of outer mitochondrial membrane 70 homolog A (S. cerevisiae)
hsa-miR-555	1	0	1	1	1	1	CC2D1B	coiled-coil and C2 domain containing 1B
hsa-miR-555	0	0	1	1	1	1	CCDC146	coiled-coil domain containing 146
hsa-miR-555	0	0	1	1	1	1	C15orf26	chromosome 15 open reading frame 26
hsa-miR-555	0	0	1	1	0	0	VPS8	vacuolar protein sorting 8 homolog (S. cerevisiae)
hsa-miR-555	0	0	1	1	0	0	DHRS1	dehydrogenase/reductase (SDR family) member 1
hsa-miR-555	0	0	0	1	0	0	TMEM141	transmembrane protein 141
hsa-miR-555	0	0	0	1	0	0	KIAA1984	KIAA1984
hsa-miR-555	0	0	1	1	0	0	GFRA4	GDNF family receptor alpha 4
hsa-miR-555	0	0	1	1	0	0	CPAMD8	C3 and PZP-like, alpha-2-macroglobulin domain containing 8
hsa-miR-555	0	0	0	1	0	0	MCM3AP	minichromosome maintenance complex component 3 associated protein
hsa-miR-555	0	0	0	1	1	1	PHLDB3	pleckstrin homology-like domain, family B, member 3
hsa-miR-555	0	0	1	1	0	0	CCDC12	coiled-coil domain containing 12
hsa-miR-555	0	0	0	1	0	0	MYL3	myosin, light chain 3, alkali; ventricular, skeletal, slow
hsa-miR-555	0	0	0	1	1	1	FDXR	ferredoxin reductase
hsa-miR-555	0	0	1	1	0	0	LYZL6	lysozyme-like 6
hsa-miR-555	1	0	1	1	1	1	NAGS	N-acetylglutamate synthase
hsa-miR-555	1	0	0	1	1	1	KRT72	keratin 72
hsa-miR-555	0	0	1	1	0	0	LRRC52	leucine rich repeat containing 52
hsa-miR-555	1	0	1	1	1	1	WDR92	WD repeat domain 92
hsa-miR-555	1	0	1	1	1	1	PPP3R1	protein phosphatase 3, regulatory subunit B, alpha
hsa-miR-555	0	0	0	1	0	0	CCDC74A	coiled-coil domain containing 74A
hsa-miR-555	0	0	1	1	1	1	WDR52	WD repeat domain 52
hsa-miR-555	0	0	1	1	1	1	TTC14	tetratricopeptide repeat domain 14
hsa-miR-555	1	0	0	1	0	0	NBEAL2	neurobeachin-like 2
hsa-miR-555	1	0	1	1	1	1	SHISA5	shisa homolog 5 (Xenopus laevis)
hsa-miR-555	0	0	1	1	0	0	GRM2	glutamate receptor, metabotropic 2
hsa-miR-555	1	0	1	1	1	1	HSPA9	heat shock 70kDa protein 9 (mortalin)
hsa-miR-555	0	0	1	1	1	1	SUN3	Sad1 and UNC84 domain containing 3
hsa-miR-555	0	0	0	1	0	0	NOS3	nitric oxide synthase 3 (endothelial cell)
hsa-miR-555	0	0	1	1	0	0	TMC1	transmembrane channel-like 1
hsa-miR-555	0	0	1	1	1	1	SLC39A2	solute carrier family 39 (zinc transporter), member 2
hsa-miR-555	0	0	1	1	1	1	FAM35A	family with sequence similarity 35, member A
hsa-miR-555	0	0	1	1	0	0	RAPSN	receptor-associated protein of the synapse
hsa-miR-555	0	0	0	1	0	0	AMN	amnionless homolog (mouse)
hsa-miR-555	0	0	0	1	1	1	PCBD1	pterin-4 alpha-carbinolamine dehydratase/dimerization cofactor of hepatocyte nuclear factor 1 alpha
hsa-miR-555	0	0	0	1	0	0	ANKRD20A20P	ankyrin repeat domain 20 family, member A20, pseudogene
hsa-miR-555	0	0	0	1	0	0	ANKRD20A8P	ankyrin repeat domain 20 family, member A8, pseudogene
hsa-miR-555	0	0	0	1	0	0	ANKRD20A4	ankyrin repeat domain 20 family, member A4
hsa-miR-555	1	0	1	1	1	1	ZNF3	zinc finger protein 3
hsa-miR-555	1	0	1	1	0	0	AGFG2	ArfGAP with FG repeats 2
hsa-miR-555	0	0	0	1	0	0	FER1L4	fer-1-like 4 (C. elegans) pseudogene
hsa-miR-555	0	0	0	1	0	0	GNG8	guanine nucleotide binding protein (G protein), gamma 8
hsa-miR-555	0	0	0	1	0	0	PCSK4	proprotein convertase subtilisin/kexin type 4
hsa-miR-555	0	0	1	1	0	0	TMEM145	transmembrane protein 145
hsa-miR-555	0	0	0	1	1	1	ZNF582	zinc finger protein 582
hsa-miR-555	1	0	1	1	1	1	SPRYD3	SPRY domain containing 3
hsa-miR-555	0	0	0	1	1	1	ZNF443	zinc finger protein 443
hsa-miR-555	1	0	0	1	1	1	RNF157	ring finger protein 157
hsa-miR-555	1	0	1	1	0	0	SNX15	sorting nexin 15
hsa-miR-555	0	0	0	1	0	0	SLC22A11	solute carrier family 22 (organic anion/urate transporter), member 11
hsa-miR-555	0	0	1	1	1	1	CLP1	CLP1, cleavage and polyadenylation factor I subunit, homolog (S. cerevisiae)
hsa-miR-555	0	0	1	1	1	1	POLR1D	polymerase (RNA) I polypeptide D, 16kDa
hsa-miR-555	0	0	1	1	0	0	POP7	processing of precursor 7, ribonuclease P/MRP subunit (S. cerevisiae)
hsa-miR-555	0	0	1	1	0	0	PRELID1	PRELI domain containing 1
hsa-miR-555	1	0	1	1	0	0	DTNB	dystrobrevin, beta
hsa-miR-555	0	0	0	1	0	0	NFU1	NFU1 iron-sulfur cluster scaffold homolog (S. cerevisiae)
hsa-miR-555	0	0	1	1	0	0	C2orf27B	chromosome 2 open reading frame 27B
hsa-miR-555	1	0	1	1	1	1	ORMDL3	ORM1-like 3 (S. cerevisiae)
hsa-miR-555	0	0	0	1	0	0	RPAP1	RNA polymerase II associated protein 1
hsa-miR-555	0	0	1	1	0	0	FSHR	follicle stimulating hormone receptor
hsa-miR-555	0	0	0	1	0	0	NFRKB	nuclear factor related to kappaB binding protein
hsa-miR-555	1	0	1	1	1	1	ZFX	zinc finger protein, X-linked
hsa-miR-555	0	0	0	1	0	0	DEGS2	delta(4)-desaturase, sphingolipid 2
hsa-miR-555	0	0	0	1	1	1	KRT73	keratin 73
hsa-miR-555	0	0	1	1	0	0	CCL11	chemokine (C-C motif) ligand 11
hsa-miR-555	0	0	1	1	0	0	RNF181	ring finger protein 181
hsa-miR-555	0	0	0	1	0	0	PCDHB1	protocadherin beta 1
hsa-miR-555	0	0	1	1	0	0	TSNARE1	t-SNARE domain containing 1
hsa-miR-555	0	0	1	1	1	1	ATP9B	ATPase, class II, type 9B
hsa-miR-555	0	0	0	1	0	0	THAP3	THAP domain containing, apoptosis associated protein 3
hsa-miR-555	0	0	1	1	1	1	RAPGEF6	Rap guanine nucleotide exchange factor (GEF) 6
hsa-miR-555	1	0	1	1	1	1	FNIP1	folliculin interacting protein 1
hsa-miR-555	0	0	1	1	0	0	TMEM134	transmembrane protein 134
hsa-miR-555	0	0	1	1	1	1	TAOK2	TAO kinase 2
hsa-miR-555	0	0	0	1	0	0	MRGPRD	MAS-related GPR, member D
hsa-miR-555	0	0	0	1	0	0	ANAPC10	anaphase promoting complex subunit 10
hsa-miR-555	0	0	0	1	0	0	PSMC5	proteasome (prosome, macropain) 26S subunit, ATPase, 5
hsa-miR-555	0	0	1	1	1	1	KLK6	kallikrein-related peptidase 6
hsa-miR-555	0	0	1	1	1	1	TTLL3	tubulin tyrosine ligase-like family, member 3
hsa-miR-555	0	0	1	1	0	0	ARPC4	actin related protein 2/3 complex, subunit 4, 20kDa
hsa-miR-555	1	0	1	1	1	1	ARHGAP32	Rho GTPase activating protein 32
hsa-miR-555	0	0	1	1	0	0	ZDHHC24	zinc finger, DHHC-type containing 24
hsa-miR-555	0	0	0	1	0	0	CCDC74B	coiled-coil domain containing 74B
hsa-miR-555	0	0	0	1	0	0	IQCF1	IQ motif containing F1
hsa-miR-555	0	0	1	1	1	1	KLF14	Kruppel-like factor 14
hsa-miR-555	0	0	0	1	0	0	GPR151	G protein-coupled receptor 151
hsa-miR-555	0	0	0	1	0	0	SLC19A1	solute carrier family 19 (folate transporter), member 1
hsa-miR-555	1	0	0	1	0	0	RNF26	ring finger protein 26
hsa-miR-555	0	0	1	1	0	0	REC8	REC8 homolog (yeast)
hsa-miR-555	0	0	1	1	0	0	DHRS4	dehydrogenase/reductase (SDR family) member 4
hsa-miR-555	0	0	0	1	0	0	FAM20C	family with sequence similarity 20, member C
hsa-miR-555	1	0	1	1	0	0	RELL1	RELT-like 1
hsa-miR-555	1	0	0	1	0	0	DPM2	dolichyl-phosphate mannosyltransferase polypeptide 2, regulatory subunit
hsa-miR-555	0	0	0	1	0	0	OR4P4	olfactory receptor, family 4, subfamily P, member 4
hsa-miR-555	0	0	1	1	0	0	COPG1	coatomer protein complex, subunit gamma 1
hsa-miR-555	0	0	0	1	0	0	OSCP1	organic solute carrier partner 1
hsa-miR-555	0	0	0	1	0	0	METAP1D	methionyl aminopeptidase type 1D (mitochondrial)
hsa-miR-555	0	0	0	1	0	0	MAP7D3	MAP7 domain containing 3
hsa-miR-555	1	0	1	1	1	1	PRKAG1	protein kinase, AMP-activated, gamma 1 non-catalytic subunit
hsa-miR-555	0	0	1	1	0	0	SNAPC5	small nuclear RNA activating complex, polypeptide 5, 19kDa
hsa-miR-555	0	0	0	1	0	0	ZNF671	zinc finger protein 671
hsa-miR-555	0	0	0	1	1	1	UGT2B17	UDP glucuronosyltransferase 2 family, polypeptide B17
hsa-miR-555	0	0	1	1	0	0	RAP1GAP	RAP1 GTPase activating protein
hsa-miR-555	0	0	1	1	1	1	PEX7	peroxisomal biogenesis factor 7
hsa-miR-555	0	0	0	1	0	0	FOXC2	forkhead box C2 (MFH-1, mesenchyme forkhead 1)
hsa-miR-555	0	0	1	1	1	1	ALS2CR8	amyotrophic lateral sclerosis 2 (juvenile) chromosome region, candidate 8
hsa-miR-555	0	0	1	1	1	1	DYX1C1	dyslexia susceptibility 1 candidate 1
hsa-miR-555	0	0	0	1	1	1	ME2	malic enzyme 2, NAD(+)-dependent, mitochondrial
hsa-miR-555	0	0	0	1	1	1	FKBP10	FK506 binding protein 10, 65 kDa
hsa-miR-555	0	0	0	1	0	0	HECW1-IT1	HECW1 intronic transcript 1 (non-protein coding)
hsa-miR-555	0	0	0	1	0	0	MAPK15	mitogen-activated protein kinase 15
hsa-miR-555	0	0	1	1	1	1	XPNPEP1	X-prolyl aminopeptidase (aminopeptidase P) 1, soluble
hsa-miR-555	1	0	1	1	1	1	GCNT4	glucosaminyl (N-acetyl) transferase 4, core 2
hsa-miR-555	0	0	1	1	0	0	RUVBL1	RuvB-like 1 (E. coli)
hsa-miR-555	0	0	1	1	0	0	POLR2A	polymerase (RNA) II (DNA directed) polypeptide A, 220kDa
hsa-miR-555	0	0	1	1	1	1	C18orf56	chromosome 18 open reading frame 56
hsa-miR-555	0	0	1	1	1	1	PRMT5	protein arginine methyltransferase 5
hsa-miR-555	0	0	1	1	0	0	ZNF283	zinc finger protein 283
hsa-miR-555	1	0	1	1	1	1	VPS37A	vacuolar protein sorting 37 homolog A (S. cerevisiae)
hsa-miR-555	1	0	1	1	1	1	PCM1	pericentriolar material 1
hsa-miR-555	1	0	1	1	1	1	ZNF580	zinc finger protein 580
hsa-miR-555	0	0	1	1	1	1	KLHDC7A	kelch domain containing 7A
hsa-miR-555	0	0	1	1	1	1	CAST	calpastatin
hsa-miR-555	0	0	1	1	1	1	LACC1	laccase (multicopper oxidoreductase) domain containing 1
hsa-miR-555	0	0	0	1	1	1	ITLN1	intelectin 1 (galactofuranose binding)
hsa-miR-555	0	0	1	1	1	1	C22orf25	chromosome 22 open reading frame 25
hsa-miR-555	0	0	0	1	1	1	IL36B	interleukin 36, beta
hsa-miR-555	0	0	1	1	0	0	RNF123	ring finger protein 123
hsa-miR-555	0	0	0	1	1	1	CRELD2	cysteine-rich with EGF-like domains 2
hsa-miR-555	0	0	0	1	1	1	ENPP7	ectonucleotide pyrophosphatase/phosphodiesterase 7
hsa-miR-555	0	0	0	1	0	0	OR5P3	olfactory receptor, family 5, subfamily P, member 3
hsa-miR-555	0	0	1	1	0	0	PTRHD1	peptidyl-tRNA hydrolase domain containing 1
hsa-miR-555	0	0	0	1	1	1	APOL4	apolipoprotein L, 4
hsa-miR-555	0	0	0	1	0	0	COA3	cytochrome C oxidase assembly factor 3
hsa-miR-555	0	0	0	1	0	0	RNASE10	ribonuclease, RNase A family, 10 (non-active)
hsa-miR-555	0	0	0	1	0	0	ZNF840	zinc finger protein 840
hsa-miR-555	1	0	1	1	0	0	CAPN12	calpain 12
hsa-miR-555	0	0	1	1	1	1	HNRNPH1	heterogeneous nuclear ribonucleoprotein H1 (H)
hsa-miR-555	0	0	1	1	0	0	ACSM2B	acyl-CoA synthetase medium-chain family member 2B
hsa-miR-555	0	0	1	1	0	0	MRPL11	mitochondrial ribosomal protein L11
hsa-miR-555	1	0	1	1	1	1	USP45	ubiquitin specific peptidase 45
hsa-miR-555	0	0	0	1	0	0	SAMD14	sterile alpha motif domain containing 14
hsa-miR-555	0	0	1	1	0	0	SLX1B	SLX1 structure-specific endonuclease subunit homolog B (S. cerevisiae)
hsa-miR-555	0	0	1	1	1	1	MINA	MYC induced nuclear antigen
hsa-miR-555	0	0	0	1	0	0	DDX41	DEAD (Asp-Glu-Ala-Asp) box polypeptide 41
hsa-miR-555	0	0	1	1	0	0	SLC22A16	solute carrier family 22 (organic cation/carnitine transporter), member 16
hsa-miR-555	0	0	0	1	0	0	NPBWR1	neuropeptides B/W receptor 1
hsa-miR-555	1	0	1	1	1	1	CECR6	cat eye syndrome chromosome region, candidate 6
hsa-miR-555	0	0	1	1	0	0	DRG1	developmentally regulated GTP binding protein 1
hsa-miR-555	0	0	0	1	0	0	FBXL6	F-box and leucine-rich repeat protein 6
hsa-miR-555	0	0	0	1	0	0	IZUMO1	izumo sperm-egg fusion 1
hsa-miR-555	1	0	1	1	1	1	NPTXR	neuronal pentraxin receptor
hsa-miR-555	1	0	1	1	1	1	CBX6	chromobox homolog 6
hsa-miR-555	0	0	0	1	0	0	SCN10A	sodium channel, voltage-gated, type X, alpha subunit
hsa-miR-555	0	0	0	1	1	1	MAGEA11	melanoma antigen family A, 11
hsa-miR-555	1	0	1	1	0	0	TSEN54	tRNA splicing endonuclease 54 homolog (S. cerevisiae)
hsa-miR-555	0	0	0	1	0	0	POLR2F	polymerase (RNA) II (DNA directed) polypeptide F
hsa-miR-555	0	0	0	1	1	1	NME9	NME/NM23 family member 9
hsa-miR-555	0	0	0	1	1	1	USP16	ubiquitin specific peptidase 16
hsa-miR-555	1	0	1	1	1	1	TACC2	transforming, acidic coiled-coil containing protein 2
hsa-miR-555	0	0	0	1	0	0	CYP2R1	cytochrome P450, family 2, subfamily R, polypeptide 1
hsa-miR-555	0	0	1	1	0	0	KIF9	kinesin family member 9
hsa-miR-555	0	0	0	1	0	0	RTN4RL2	reticulon 4 receptor-like 2
hsa-miR-555	0	0	1	1	1	1	DEFB106A	defensin, beta 106A
hsa-miR-555	0	0	0	1	1	1	ATP4B	ATPase, H+/K+ exchanging, beta polypeptide
hsa-miR-555	0	0	0	1	0	0	DEFB106B	defensin, beta 106B
hsa-miR-555	1	0	1	1	1	1	SPTB	spectrin, beta, erythrocytic
hsa-miR-555	0	0	0	1	0	0	RASSF3	Ras association (RalGDS/AF-6) domain family member 3
hsa-miR-555	0	0	1	1	0	0	ZNF142	zinc finger protein 142
hsa-miR-555	0	0	1	1	0	0	RNASEH2B	ribonuclease H2, subunit B
hsa-miR-555	1	0	0	1	1	1	P2RX4	purinergic receptor P2X, ligand-gated ion channel, 4
hsa-miR-555	1	0	1	1	1	1	NIPA2	non imprinted in Prader-Willi/Angelman syndrome 2
hsa-miR-555	1	0	1	1	1	1	CAPN3	calpain 3, (p94)
hsa-miR-555	0	0	1	1	0	0	ALDOA	aldolase A, fructose-bisphosphate
hsa-miR-555	1	0	1	1	1	1	CSMD2	CUB and Sushi multiple domains 2
hsa-miR-555	0	0	0	1	1	1	C11orf95	chromosome 11 open reading frame 95
hsa-miR-555	1	0	1	1	1	1	PHF8	PHD finger protein 8
hsa-miR-555	0	0	0	1	1	1	UGT2B15	UDP glucuronosyltransferase 2 family, polypeptide B15
hsa-miR-555	1	0	1	1	0	0	ACOXL	acyl-CoA oxidase-like
hsa-miR-555	1	0	1	1	1	1	CPED1	cadherin-like and PC-esterase domain containing 1
hsa-miR-555	0	0	1	1	0	0	CASS4	Cas scaffolding protein family member 4
hsa-miR-555	0	0	1	1	1	1	ANAPC1	anaphase promoting complex subunit 1
hsa-miR-555	0	0	0	1	0	0	THYN1	thymocyte nuclear protein 1
hsa-miR-555	0	0	1	1	0	0	GJA4	gap junction protein, alpha 4, 37kDa
hsa-miR-555	0	0	1	1	0	0	LY6H	lymphocyte antigen 6 complex, locus H
hsa-miR-555	0	0	1	1	0	0	CXorf67	chromosome X open reading frame 67
hsa-miR-555	0	0	1	1	1	1	RNFT1	ring finger protein, transmembrane 1
hsa-miR-555	1	0	1	1	1	1	TTC26	tetratricopeptide repeat domain 26
hsa-miR-555	0	0	1	1	1	1	P4HTM	prolyl 4-hydroxylase, transmembrane (endoplasmic reticulum)
hsa-miR-555	0	0	1	1	0	0	RBPJL	recombination signal binding protein for immunoglobulin kappa J region-like
hsa-miR-555	0	0	0	1	0	0	ZNF93	zinc finger protein 93
hsa-miR-555	0	0	0	1	0	0	CPSF4L	cleavage and polyadenylation specific factor 4-like
hsa-miR-555	0	0	1	1	0	0	PRICKLE1	prickle homolog 1 (Drosophila)
hsa-miR-555	0	0	0	1	0	0	DHRS7B	dehydrogenase/reductase (SDR family) member 7B
hsa-miR-555	0	0	1	1	1	1	TRAF6	TNF receptor-associated factor 6, E3 ubiquitin protein ligase
hsa-miR-555	0	0	1	1	1	1	B2M	beta-2-microglobulin
hsa-miR-555	1	0	1	1	1	1	FGFR1OP	FGFR1 oncogene partner
hsa-miR-555	0	0	1	1	0	0	DPAGT1	dolichyl-phosphate (UDP-N-acetylglucosamine) N-acetylglucosaminephosphotransferase 1 (GlcNAc-1-P transferase)
hsa-miR-555	0	0	1	1	1	1	ZNF568	zinc finger protein 568
hsa-miR-555	0	0	0	1	0	0	FGF16	fibroblast growth factor 16
hsa-miR-555	0	0	0	1	0	0	OR51B6	olfactory receptor, family 51, subfamily B, member 6
hsa-miR-555	0	0	0	1	0	0	ZBTB45	zinc finger and BTB domain containing 45
hsa-miR-555	0	0	1	1	1	1	PREX2	phosphatidylinositol-3,4,5-trisphosphate-dependent Rac exchange factor 2
hsa-miR-555	0	0	1	1	0	0	INTS4	integrator complex subunit 4
hsa-miR-555	0	0	1	1	1	1	SUV39H2	suppressor of variegation 3-9 homolog 2 (Drosophila)
hsa-miR-555	0	0	0	1	1	1	NEIL1	nei endonuclease VIII-like 1 (E. coli)
hsa-miR-555	0	0	1	1	0	0	MUSTN1	musculoskeletal, embryonic nuclear protein 1
hsa-miR-555	1	0	1	1	1	1	TMEM110	transmembrane protein 110
hsa-miR-555	0	0	0	1	1	1	ARSG	arylsulfatase G
hsa-miR-555	0	0	1	1	1	1	CCDC69	coiled-coil domain containing 69
hsa-miR-555	0	0	0	1	1	1	SULT1A3	sulfotransferase family, cytosolic, 1A, phenol-preferring, member 3
hsa-miR-555	0	0	0	1	1	1	RPL23A	ribosomal protein L23a
hsa-miR-555	0	0	1	1	1	1	GABBR1	gamma-aminobutyric acid (GABA) B receptor, 1
hsa-miR-555	0	0	1	1	0	0	CEP250	centrosomal protein 250kDa
hsa-miR-555	0	0	1	1	1	1	UBA5	ubiquitin-like modifier activating enzyme 5
hsa-miR-555	0	0	1	1	1	1	MED24	mediator complex subunit 24
hsa-miR-555	0	0	1	1	1	1	MPP3	membrane protein, palmitoylated 3 (MAGUK p55 subfamily member 3)
hsa-miR-555	0	0	1	1	1	1	LRRC27	leucine rich repeat containing 27
hsa-miR-555	0	0	0	1	1	1	FAM180B	family with sequence similarity 180, member B
hsa-miR-555	0	0	1	1	0	0	GUCA2A	guanylate cyclase activator 2A (guanylin)
hsa-miR-555	0	0	1	1	1	1	ENPP3	ectonucleotide pyrophosphatase/phosphodiesterase 3
hsa-miR-555	0	0	0	1	0	0	ZNF799	zinc finger protein 799
hsa-miR-555	1	0	1	1	1	1	SFMBT1	Scm-like with four mbt domains 1
hsa-miR-555	1	0	1	1	1	1	EPB49	erythrocyte membrane protein band 4.9 (dematin)
hsa-miR-555	0	0	1	1	1	1	NUDT3	nudix (nucleoside diphosphate linked moiety X)-type motif 3
hsa-miR-555	0	0	1	1	0	0	TMEM126B	transmembrane protein 126B
hsa-miR-555	0	0	1	1	1	1	GTF2F2	general transcription factor IIF, polypeptide 2, 30kDa
hsa-miR-555	0	0	1	1	0	0	DNMT1	DNA (cytosine-5-)-methyltransferase 1
hsa-miR-555	1	0	1	1	0	0	EFNA4	ephrin-A4
hsa-miR-555	0	0	1	1	1	1	PRKAR1B	protein kinase, cAMP-dependent, regulatory, type I, beta
hsa-miR-555	1	0	1	1	1	1	CEP85L	centrosomal protein 85kDa-like
hsa-miR-555	0	0	1	1	0	0	CLDN7	claudin 7
hsa-miR-555	0	0	1	1	1	1	PARP9	poly (ADP-ribose) polymerase family, member 9
hsa-miR-555	0	0	0	1	0	0	OR2T8	olfactory receptor, family 2, subfamily T, member 8
hsa-miR-555	0	0	1	1	1	1	BBS1	Bardet-Biedl syndrome 1
hsa-miR-555	0	0	1	1	0	0	CES1	carboxylesterase 1
hsa-miR-555	1	0	1	1	1	1	FUT8	fucosyltransferase 8 (alpha (1,6) fucosyltransferase)
hsa-miR-555	0	0	1	1	0	0	ISLR2	immunoglobulin superfamily containing leucine-rich repeat 2
hsa-miR-555	0	0	0	1	1	1	RAB25	RAB25, member RAS oncogene family
hsa-miR-555	1	0	1	1	1	1	ARHGEF11	Rho guanine nucleotide exchange factor (GEF) 11
hsa-miR-555	0	0	0	1	0	0	KRT19	keratin 19
hsa-miR-555	1	0	0	1	0	0	GPATCH3	G patch domain containing 3
hsa-miR-555	0	0	1	1	1	1	METTL13	methyltransferase like 13
hsa-miR-555	0	0	1	1	1	1	PCDH15	protocadherin-related 15
hsa-miR-555	0	0	0	1	1	1	TBCE	tubulin folding cofactor E
hsa-miR-555	1	0	1	1	1	1	ARID4B	AT rich interactive domain 4B (RBP1-like)
hsa-miR-555	0	0	1	1	0	0	GNPAT	glyceronephosphate O-acyltransferase
hsa-miR-555	0	0	0	1	1	1	OBSCN	obscurin, cytoskeletal calmodulin and titin-interacting RhoGEF
hsa-miR-555	1	0	1	1	1	1	CDC42BPA	CDC42 binding protein kinase alpha (DMPK-like)
hsa-miR-555	0	0	1	1	1	1	PARP1	poly (ADP-ribose) polymerase 1
hsa-miR-555	0	0	0	1	1	1	NENF	neudesin neurotrophic factor
hsa-miR-555	0	0	1	1	1	1	F13B	coagulation factor XIII, B polypeptide
hsa-miR-555	0	0	0	1	0	0	SF3B5	splicing factor 3b, subunit 5, 10kDa
hsa-miR-555	0	0	1	1	1	1	GORAB	golgin, RAB6-interacting
hsa-miR-555	0	0	1	1	1	1	VNN3	vanin 3
hsa-miR-555	0	0	0	1	0	0	CRABP2	cellular retinoic acid binding protein 2
hsa-miR-555	0	0	1	1	1	1	C1orf85	chromosome 1 open reading frame 85
hsa-miR-555	0	0	0	1	0	0	BGLAP	bone gamma-carboxyglutamate (gla) protein
hsa-miR-555	0	0	1	1	0	0	PMF1	polyamine-modulated factor 1
hsa-miR-555	0	0	0	1	1	1	SNAPIN	SNAP-associated protein
hsa-miR-555	0	0	1	1	0	0	S100A12	S100 calcium binding protein A12
hsa-miR-555	0	0	0	1	0	0	LCE1C	late cornified envelope 1C
hsa-miR-555	0	0	1	1	0	0	LCE2A	late cornified envelope 2A
hsa-miR-555	0	0	1	1	0	0	LCE3D	late cornified envelope 3D
hsa-miR-555	0	0	1	1	1	1	S100A10	S100 calcium binding protein A10
hsa-miR-555	1	0	1	1	0	0	TDRKH	tudor and KH domain containing
hsa-miR-555	0	0	0	1	1	1	FIG4	FIG4 homolog, SAC1 lipid phosphatase domain containing (S. cerevisiae)
hsa-miR-555	0	0	1	1	0	0	SETDB1	SET domain, bifurcated 1
hsa-miR-555	1	0	1	1	1	1	PRDM1	PR domain containing 1, with ZNF domain
hsa-miR-555	0	0	0	1	0	0	NBPF24	neuroblastoma breakpoint family, member 24
hsa-miR-555	0	0	1	1	1	1	PLEKHS1	pleckstrin homology domain containing, family S member 1
hsa-miR-555	0	0	1	1	0	0	NBPF8	neuroblastoma breakpoint family, member 8
hsa-miR-555	0	0	0	1	0	0	MDN1	MDN1, midasin homolog (yeast)
hsa-miR-555	0	0	1	1	1	1	CGA	glycoprotein hormones, alpha polypeptide
hsa-miR-555	0	0	1	1	1	1	SMNDC1	survival motor neuron domain containing 1
hsa-miR-555	0	0	1	1	1	1	ATP5F1	ATP synthase, H+ transporting, mitochondrial Fo complex, subunit B1
hsa-miR-555	0	0	0	1	0	0	NPBWR2	neuropeptides B/W receptor 2
hsa-miR-555	0	0	0	1	0	0	GSTM2	glutathione S-transferase mu 2 (muscle)
hsa-miR-555	0	0	1	1	0	0	MYBPHL	myosin binding protein H-like
hsa-miR-555	0	0	1	1	1	1	PSRC1	proline/serine-rich coiled-coil 1
hsa-miR-555	0	0	1	1	1	1	TKTL1	transketolase-like 1
hsa-miR-555	0	0	0	1	0	0	ABHD16B	abhydrolase domain containing 16B
hsa-miR-555	0	0	1	1	1	1	ELOVL3	ELOVL fatty acid elongase 3
hsa-miR-555	0	0	1	1	0	0	AVPR2	arginine vasopressin receptor 2
hsa-miR-555	0	0	1	1	1	1	ABCD1	ATP-binding cassette, sub-family D (ALD), member 1
hsa-miR-555	0	0	1	1	0	0	KHDC3L	KH domain containing 3-like, subcortical maternal complex member
hsa-miR-555	0	0	1	1	1	1	MTM1	myotubularin 1
hsa-miR-555	0	0	0	1	0	0	SPANXN1	SPANX family, member N1
hsa-miR-555	0	0	1	1	0	0	ODF2L	outer dense fiber of sperm tails 2-like
hsa-miR-555	0	0	1	1	0	0	VGLL1	vestigial like 1 (Drosophila)
hsa-miR-555	1	0	0	1	0	0	GNG5	guanine nucleotide binding protein (G protein), gamma 5
hsa-miR-555	0	0	0	1	1	1	CRYZ	crystallin, zeta (quinone reductase)
hsa-miR-555	0	0	0	1	0	0	UBE2U	ubiquitin-conjugating enzyme E2U (putative)
hsa-miR-555	1	0	1	1	1	1	STAG2	stromal antigen 2
hsa-miR-555	0	0	1	1	0	0	C1orf87	chromosome 1 open reading frame 87
hsa-miR-555	0	0	0	1	0	0	C8B	complement component 8, beta polypeptide
hsa-miR-555	0	0	1	1	0	0	HEATR8	HEAT repeat containing 8
hsa-miR-555	0	0	1	1	1	1	TTC4	tetratricopeptide repeat domain 4
hsa-miR-555	0	0	1	1	0	0	HSPB11	heat shock protein family B (small), member 11
hsa-miR-555	0	0	0	1	1	1	RBP4	retinol binding protein 4, plasma
hsa-miR-555	0	0	1	1	0	0	PHPT1	phosphohistidine phosphatase 1
hsa-miR-555	0	0	1	1	0	0	MRPS2	mitochondrial ribosomal protein S2
hsa-miR-555	0	0	1	1	0	0	OLFM1	olfactomedin 1
hsa-miR-555	0	0	1	1	1	1	MRPL14	mitochondrial ribosomal protein L14
hsa-miR-555	1	0	0	1	1	1	LRIT1	leucine-rich repeat, immunoglobulin-like and transmembrane domains 1
hsa-miR-555	0	0	1	1	0	0	MRPS18A	mitochondrial ribosomal protein S18A
hsa-miR-555	0	0	0	1	1	1	BEST4	bestrophin 4
hsa-miR-555	1	0	1	1	1	1	PRPS1	phosphoribosyl pyrophosphate synthetase 1
hsa-miR-555	0	0	1	1	1	1	C9orf78	chromosome 9 open reading frame 78
hsa-miR-555	0	0	1	1	0	0	RIPPLY1	ripply1 homolog (zebrafish)
hsa-miR-555	0	0	1	1	0	0	SPTAN1	spectrin, alpha, non-erythrocytic 1
hsa-miR-555	0	0	1	1	1	1	CNPY3	canopy 3 homolog (zebrafish)
hsa-miR-555	0	0	0	1	1	1	PABPC4	poly(A) binding protein, cytoplasmic 4 (inducible form)
hsa-miR-555	0	0	1	1	1	1	ANXA7	annexin A7
hsa-miR-555	0	0	1	1	0	0	CYLC1	cylicin, basic protein of sperm head cytoskeleton 1
hsa-miR-555	0	0	0	1	0	0	KCNK16	potassium channel, subfamily K, member 16
hsa-miR-555	0	0	0	1	1	1	FARP2	FERM, RhoGEF and pleckstrin domain protein 2
hsa-miR-555	0	0	0	1	1	1	YARS	tyrosyl-tRNA synthetase
hsa-miR-555	1	0	1	1	1	1	CHIC1	cysteine-rich hydrophobic domain 1
hsa-miR-555	0	0	1	1	0	0	DDX50	DEAD (Asp-Glu-Ala-Asp) box polypeptide 50
hsa-miR-555	1	0	1	1	1	1	COL16A1	collagen, type XVI, alpha 1
hsa-miR-555	0	0	1	1	1	1	FABP3	fatty acid binding protein 3, muscle and heart (mammary-derived growth inhibitor)
hsa-miR-555	0	0	1	1	1	1	FAM76A	family with sequence similarity 76, member A
hsa-miR-555	0	0	1	1	1	1	RBM39	RNA binding motif protein 39
hsa-miR-555	0	0	0	1	0	0	ZNF683	zinc finger protein 683
hsa-miR-555	0	0	1	1	1	1	AIM1L	absent in melanoma 1-like
hsa-miR-555	1	0	1	1	0	0	SNX30	sorting nexin family member 30
hsa-miR-555	1	0	1	1	1	1	SH3BGRL3	SH3 domain binding glutamic acid-rich protein like 3
hsa-miR-555	0	0	0	1	1	1	ITPR3	inositol 1,4,5-trisphosphate receptor, type 3
hsa-miR-555	1	0	1	1	1	1	ZFAND4	zinc finger, AN1-type domain 4
hsa-miR-555	0	0	0	1	0	0	FXYD4	FXYD domain containing ion transport regulator 4
hsa-miR-555	0	0	0	1	1	1	RAB41	RAB41, member RAS oncogene family
hsa-miR-555	0	0	0	1	0	0	BMS1	BMS1 homolog, ribosome assembly protein (yeast)
hsa-miR-555	0	0	1	1	0	0	ACSS2	acyl-CoA synthetase short-chain family member 2
hsa-miR-555	0	0	1	1	0	0	CCDC7	coiled-coil domain containing 7
hsa-miR-555	0	0	1	1	0	0	C10orf68	chromosome 10 open reading frame 68
hsa-miR-555	0	0	1	1	1	1	TBC1D2	TBC1 domain family, member 2
hsa-miR-555	0	0	0	1	1	1	C9orf156	chromosome 9 open reading frame 156
hsa-miR-555	0	0	1	1	0	0	RNF186	ring finger protein 186
hsa-miR-555	0	0	0	1	0	0	SKIV2L	superkiller viralicidic activity 2-like (S. cerevisiae)
hsa-miR-555	0	0	1	1	0	0	F10	coagulation factor X
hsa-miR-555	0	0	1	1	1	1	ING1	inhibitor of growth family, member 1
hsa-miR-555	1	0	1	1	1	1	FAM155A	family with sequence similarity 155, member A
hsa-miR-555	0	0	1	1	1	1	AGTPBP1	ATP/GTP binding protein 1
hsa-miR-555	0	0	1	1	0	0	FGF14	fibroblast growth factor 14
hsa-miR-555	1	0	1	1	0	0	WDR45	WD repeat domain 45
hsa-miR-555	0	0	0	1	1	1	MDC1	mediator of DNA-damage checkpoint 1
hsa-miR-555	0	0	1	1	0	0	NPPB	natriuretic peptide B
hsa-miR-555	1	0	1	1	1	1	VSX1	visual system homeobox 1
hsa-miR-555	1	0	1	1	1	1	RILPL1	Rab interacting lysosomal protein-like 1
hsa-miR-555	0	0	1	1	0	0	UXT	ubiquitously-expressed, prefoldin-like chaperone
hsa-miR-555	0	0	0	1	1	1	MYH14	myosin, heavy chain 14, non-muscle
hsa-miR-555	0	0	1	1	0	0	USP11	ubiquitin specific peptidase 11
hsa-miR-555	0	0	1	1	0	0	PRKACG	protein kinase, cAMP-dependent, catalytic, gamma
hsa-miR-555	0	0	1	1	0	0	TOMM5	translocase of outer mitochondrial membrane 5 homolog (yeast)
hsa-miR-555	1	0	1	1	1	1	PCDH9	protocadherin 9
hsa-miR-555	0	0	1	1	0	0	SLC17A1	solute carrier family 17 (sodium phosphate), member 1
hsa-miR-555	0	0	0	1	0	0	GRXCR2	glutaredoxin, cysteine rich 2
hsa-miR-555	0	0	0	1	1	1	ARHGEF35	Rho guanine nucleotide exchange factor (GEF) 35
hsa-miR-555	0	0	1	1	0	0	MEIG1	meiosis expressed gene 1 homolog (mouse)
hsa-miR-555	1	0	1	1	1	1	PPM1B	protein phosphatase, Mg2+/Mn2+ dependent, 1B
hsa-miR-555	1	0	1	1	1	1	GK	glycerol kinase
hsa-miR-555	0	0	0	1	1	1	C5orf56	chromosome 5 open reading frame 56
hsa-miR-555	0	0	1	1	0	0	C20orf196	chromosome 20 open reading frame 196
hsa-miR-555	0	0	1	1	1	1	MAGEB4	melanoma antigen family B, 4
hsa-miR-555	0	0	1	1	0	0	TPT1	tumor protein, translationally-controlled 1
hsa-miR-555	1	0	1	1	1	1	ZSCAN2	zinc finger and SCAN domain containing 2
hsa-miR-555	1	0	1	1	0	0	E2F4	E2F transcription factor 4, p107/p130-binding
hsa-miR-555	1	0	1	1	1	1	SNX2	sorting nexin 2
hsa-miR-555	0	0	1	1	0	0	ALOXE3	arachidonate lipoxygenase 3
hsa-miR-555	0	0	0	1	0	0	S100G	S100 calcium binding protein G
hsa-miR-555	0	0	0	1	0	0	MRPS26	mitochondrial ribosomal protein S26
hsa-miR-555	0	0	1	1	1	1	ALOX5AP	arachidonate 5-lipoxygenase-activating protein
hsa-miR-555	1	0	1	1	1	1	ADRA1A	adrenoceptor alpha 1A
hsa-miR-555	0	0	1	1	1	1	SERF1B	small EDRK-rich factor 1B (centromeric)
hsa-miR-555	0	0	1	1	1	1	SNAPC3	small nuclear RNA activating complex, polypeptide 3, 50kDa
hsa-miR-555	0	0	1	1	0	0	ESRRB	estrogen-related receptor beta
hsa-miR-555	0	0	1	1	0	0	LCMT1	leucine carboxyl methyltransferase 1
hsa-miR-555	0	0	0	1	0	0	LOC389906	zinc finger protein 839 pseudogene
hsa-miR-555	0	0	1	1	0	0	C17orf107	chromosome 17 open reading frame 107
hsa-miR-555	1	0	0	1	1	1	PDCD1LG2	programmed cell death 1 ligand 2
hsa-miR-555	1	0	1	1	1	1	CTNS	cystinosin, lysosomal cystine transporter
hsa-miR-555	1	0	0	1	0	0	CENPJ	centromere protein J
hsa-miR-555	0	0	1	1	0	0	RNF17	ring finger protein 17
hsa-miR-555	0	0	0	1	0	0	ATP8B3	ATPase, aminophospholipid transporter, class I, type 8B, member 3
hsa-miR-555	1	0	1	1	1	1	CD9	CD9 molecule
hsa-miR-555	0	0	1	1	1	1	SH3TC1	SH3 domain and tetratricopeptide repeats 1
hsa-miR-555	0	0	0	1	1	1	RBMY1E	RNA binding motif protein, Y-linked, family 1, member E
hsa-miR-555	0	0	0	1	1	1	RBMY1D	RNA binding motif protein, Y-linked, family 1, member D
hsa-miR-555	0	0	1	1	0	0	DHRS4L2	dehydrogenase/reductase (SDR family) member 4 like 2
hsa-miR-555	0	0	0	1	1	1	N6AMT2	N-6 adenine-specific DNA methyltransferase 2 (putative)
hsa-miR-555	0	0	1	1	1	1	GJB2	gap junction protein, beta 2, 26kDa
hsa-miR-555	0	0	0	1	1	1	C3orf37	chromosome 3 open reading frame 37
hsa-miR-555	0	0	1	1	1	1	C3orf15	chromosome 3 open reading frame 15
hsa-miR-555	1	0	1	1	1	1	RBMS3	RNA binding motif, single stranded interacting protein 3
hsa-miR-555	0	0	1	1	1	1	SLC2A2	solute carrier family 2 (facilitated glucose transporter), member 2
hsa-miR-555	0	0	1	0	1	1	C9orf170	chromosome 9 open reading frame 170
hsa-miR-555	1	0	1	1	1	1	MTUS1	microtubule associated tumor suppressor 1
hsa-miR-555	0	0	1	1	1	1	WDR33	WD repeat domain 33
hsa-miR-555	1	0	1	1	1	1	C14orf28	chromosome 14 open reading frame 28
hsa-miR-555	1	0	1	0	1	1	NPNT	nephronectin
hsa-miR-555	1	0	1	1	1	1	CASP10	caspase 10, apoptosis-related cysteine peptidase
hsa-miR-555	1	0	1	0	1	1	CDK6	cyclin-dependent kinase 6
hsa-miR-555	0	0	1	1	1	1	GNAQ	guanine nucleotide binding protein (G protein), q polypeptide
hsa-miR-555	0	0	0	1	1	1	PDK4	pyruvate dehydrogenase kinase, isozyme 4
hsa-miR-555	1	0	1	1	1	1	EEA1	early endosome antigen 1
hsa-miR-555	0	0	1	0	1	1	HABP2	hyaluronan binding protein 2
hsa-miR-555	0	0	1	1	1	1	SLC16A7	solute carrier family 16, member 7 (monocarboxylic acid transporter 2)
hsa-miR-555	0	0	1	1	1	1	CCPG1	cell cycle progression 1
hsa-miR-555	1	0	1	1	1	1	RND3	Rho family GTPase 3
hsa-miR-555	0	0	1	1	1	1	TRIM22	tripartite motif containing 22
hsa-miR-555	0	0	1	1	1	1	PEG3	paternally expressed 3
hsa-miR-555	0	0	1	0	1	1	VPS41	vacuolar protein sorting 41 homolog (S. cerevisiae)
hsa-miR-555	0	0	0	1	1	1	GLRX5	glutaredoxin 5
hsa-miR-555	0	0	1	0	1	1	GDE1	glycerophosphodiester phosphodiesterase 1
hsa-miR-555	0	0	0	1	1	1	RETSAT	retinol saturase (all-trans-retinol 13,14-reductase)
hsa-miR-555	0	0	0	1	1	1	FAM206A	family with sequence similarity 206, member A
hsa-miR-555	1	0	1	1	1	1	ZNHIT6	zinc finger, HIT-type containing 6
hsa-miR-555	0	0	1	1	1	1	YEATS2	YEATS domain containing 2
hsa-miR-555	0	0	1	1	1	1	OGFOD1	2-oxoglutarate and iron-dependent oxygenase domain containing 1
hsa-miR-555	0	0	0	1	1	1	ZNF167	zinc finger protein 167
hsa-miR-555	1	0	1	0	1	1	WDFY1	WD repeat and FYVE domain containing 1
hsa-miR-555	0	0	1	1	1	1	OXGR1	oxoglutarate (alpha-ketoglutarate) receptor 1
hsa-miR-555	0	0	0	1	1	1	S100Z	S100 calcium binding protein Z
hsa-miR-555	1	0	1	1	1	1	POGLUT1	protein O-glucosyltransferase 1
hsa-miR-555	0	0	1	1	1	1	XIRP2	xin actin-binding repeat containing 2
hsa-miR-555	0	0	1	0	1	1	BBS5	Bardet-Biedl syndrome 5
hsa-miR-555	1	0	1	0	1	1	FAM116A	family with sequence similarity 116, member A
hsa-miR-555	0	0	1	1	1	1	ZFP3	zinc finger protein 3 homolog (mouse)
hsa-miR-555	1	0	1	1	1	1	OLFML2A	olfactomedin-like 2A
hsa-miR-555	1	0	1	1	1	1	RNF207	ring finger protein 207
