# Supplementary material for: Profiling of Selected MicroRNAs in Proliferative Eutopic Endometrium of Women with Ovarian Endometriosis
Source: Biomed Res Int. 2015 Aug 20;2015:760698. doi: 10.1155/2015/760698 (PMC4558423; doi:10.1155/2015/760698)
Supplement: Supplementary file 1 — Table I: The names of miRNAs significantly differentially expressed between eutopic endometrium of patients with endometriosis vs eutopic endometrium of patients without endometriosis. Table II: The associations between miRNA and mRNA, which presents detailed results of the search of six major databases i.e targetscan, tarbase, miranda, mirbase, mirtarget2 and pictar. [file 760698.f1.zip › 760698.f1/Table II/hsa-miR-556-5p.tsv]

miR	targetscan	tarbase	miranda	mirbase	mirtarget2	pictar	GeneSymbol	GeneName
hsa-miR-556-5p	1	0	1	1	0	0	SRCAP	Snf2-related CREBBP activator protein
hsa-miR-556-5p	1	0	1	1	1	1	PRUNE2	prune homolog 2 (Drosophila)
hsa-miR-556-5p	1	0	1	0	1	1	PTPRT	protein tyrosine phosphatase, receptor type, T
hsa-miR-556-5p	1	0	1	1	0	0	SEC14L5	SEC14-like 5 (S. cerevisiae)
hsa-miR-556-5p	1	0	1	1	1	1	PPIP5K2	diphosphoinositol pentakisphosphate kinase 2
hsa-miR-556-5p	0	0	1	1	1	1	PREPL	prolyl endopeptidase-like
hsa-miR-556-5p	1	0	1	1	0	0	OTUD3	OTU domain containing 3
hsa-miR-556-5p	0	0	1	1	0	0	ZNF862	zinc finger protein 862
hsa-miR-556-5p	1	0	1	1	1	1	GPATCH8	G patch domain containing 8
hsa-miR-556-5p	1	0	1	1	1	1	GREB1	growth regulation by estrogen in breast cancer 1
hsa-miR-556-5p	1	0	1	1	1	1	SLC4A7	solute carrier family 4, sodium bicarbonate cotransporter, member 7
hsa-miR-556-5p	1	0	1	0	1	1	MFAP3L	microfibrillar-associated protein 3-like
hsa-miR-556-5p	1	0	1	0	1	1	MAGI2	membrane associated guanylate kinase, WW and PDZ domain containing 2
hsa-miR-556-5p	1	0	1	0	1	1	SNX13	sorting nexin 13
hsa-miR-556-5p	1	0	1	0	1	1	DOCK4	dedicator of cytokinesis 4
hsa-miR-556-5p	1	0	1	0	1	1	LPHN3	latrophilin 3
hsa-miR-556-5p	1	0	1	1	1	1	LPHN2	latrophilin 2
hsa-miR-556-5p	1	0	1	1	1	1	DNM3	dynamin 3
hsa-miR-556-5p	0	0	1	1	1	1	WDR47	WD repeat domain 47
hsa-miR-556-5p	1	0	1	1	1	1	CDK12	cyclin-dependent kinase 12
hsa-miR-556-5p	1	0	1	1	1	1	CALCR	calcitonin receptor
hsa-miR-556-5p	1	0	1	0	0	0	DTX4	deltex homolog 4 (Drosophila)
hsa-miR-556-5p	1	0	1	1	1	1	CPEB3	cytoplasmic polyadenylation element binding protein 3
hsa-miR-556-5p	1	0	1	1	1	1	CIT	citron (rho-interacting, serine/threonine kinase 21)
hsa-miR-556-5p	1	0	1	1	1	1	NLGN4Y	neuroligin 4, Y-linked
hsa-miR-556-5p	0	0	1	1	0	0	FAM149B1	family with sequence similarity 149, member B1
hsa-miR-556-5p	1	0	1	1	1	1	RPGRIP1L	RPGRIP1-like
hsa-miR-556-5p	1	0	1	1	1	1	CNOT1	CCR4-NOT transcription complex, subunit 1
hsa-miR-556-5p	1	0	1	1	0	0	KIAA1210	KIAA1210
hsa-miR-556-5p	1	0	1	1	1	1	RIMKLB	ribosomal modification protein rimK-like family member B
hsa-miR-556-5p	0	0	1	1	1	1	TCF7L2	transcription factor 7-like 2 (T-cell specific, HMG-box)
hsa-miR-556-5p	1	0	1	0	0	0	ODZ4	odz, odd Oz/ten-m homolog 4 (Drosophila)
hsa-miR-556-5p	1	0	1	1	1	1	HACE1	HECT domain and ankyrin repeat containing E3 ubiquitin protein ligase 1
hsa-miR-556-5p	1	0	1	1	1	1	ATP2C1	ATPase, Ca++ transporting, type 2C, member 1
hsa-miR-556-5p	0	0	1	1	0	0	PQBP1	polyglutamine binding protein 1
hsa-miR-556-5p	1	0	1	1	1	1	TOPORS	topoisomerase I binding, arginine/serine-rich, E3 ubiquitin protein ligase
hsa-miR-556-5p	0	0	1	0	1	1	ZSWIM6	zinc finger, SWIM-type containing 6
hsa-miR-556-5p	0	0	1	1	0	0	TMEM132A	transmembrane protein 132A
hsa-miR-556-5p	0	0	1	0	1	1	SETD5	SET domain containing 5
hsa-miR-556-5p	0	0	1	1	0	0	SPIRE2	spire homolog 2 (Drosophila)
hsa-miR-556-5p	0	0	1	1	1	1	SLC11A2	solute carrier family 11 (proton-coupled divalent metal ion transporters), member 2
hsa-miR-556-5p	1	0	1	1	1	1	BCL2L11	BCL2-like 11 (apoptosis facilitator)
hsa-miR-556-5p	0	0	1	1	1	1	KIAA1967	KIAA1967
hsa-miR-556-5p	1	0	1	1	1	1	SH3TC2	SH3 domain and tetratricopeptide repeats 2
hsa-miR-556-5p	0	0	1	1	0	0	CIRH1A	cirrhosis, autosomal recessive 1A (cirhin)
hsa-miR-556-5p	0	0	1	0	1	1	RASSF8	Ras association (RalGDS/AF-6) domain family (N-terminal) member 8
hsa-miR-556-5p	0	0	1	1	0	0	HELLS	helicase, lymphoid-specific
hsa-miR-556-5p	1	0	1	1	1	1	PAN3	PAN3 poly(A) specific ribonuclease subunit homolog (S. cerevisiae)
hsa-miR-556-5p	0	0	1	1	1	1	MICAL2	microtubule associated monoxygenase, calponin and LIM domain containing 2
hsa-miR-556-5p	1	0	1	0	1	1	BEND4	BEN domain containing 4
hsa-miR-556-5p	1	0	1	1	1	1	TRIM36	tripartite motif containing 36
hsa-miR-556-5p	0	0	1	1	0	0	HFM1	HFM1, ATP-dependent DNA helicase homolog (S. cerevisiae)
hsa-miR-556-5p	0	0	1	1	1	1	NLRP3	NLR family, pyrin domain containing 3
hsa-miR-556-5p	1	0	1	0	1	1	PCDHA13	protocadherin alpha 13
hsa-miR-556-5p	1	0	1	1	1	1	PCDHA4	protocadherin alpha 4
hsa-miR-556-5p	1	0	1	1	1	1	RPS6KA3	ribosomal protein S6 kinase, 90kDa, polypeptide 3
hsa-miR-556-5p	1	0	1	1	1	1	MEF2A	myocyte enhancer factor 2A
hsa-miR-556-5p	1	0	1	1	1	1	CLIP4	CAP-GLY domain containing linker protein family, member 4
hsa-miR-556-5p	0	0	1	1	1	1	MAZ	MYC-associated zinc finger protein (purine-binding transcription factor)
hsa-miR-556-5p	1	0	1	1	1	1	SLC8A1	solute carrier family 8 (sodium/calcium exchanger), member 1
hsa-miR-556-5p	1	0	1	1	1	1	DTNA	dystrobrevin, alpha
hsa-miR-556-5p	1	0	1	1	1	1	FMR1	fragile X mental retardation 1
hsa-miR-556-5p	1	0	1	1	1	1	PRKACB	protein kinase, cAMP-dependent, catalytic, beta
hsa-miR-556-5p	1	0	1	0	1	1	DPYSL2	dihydropyrimidinase-like 2
hsa-miR-556-5p	1	0	1	1	1	1	MYO5A	myosin VA (heavy chain 12, myoxin)
hsa-miR-556-5p	1	0	1	1	1	1	DDX17	DEAD (Asp-Glu-Ala-Asp) box helicase 17
hsa-miR-556-5p	0	0	1	1	0	0	CFLAR	CASP8 and FADD-like apoptosis regulator
hsa-miR-556-5p	1	0	1	0	1	1	TBL1X	transducin (beta)-like 1X-linked
hsa-miR-556-5p	0	0	1	1	0	0	MCM5	minichromosome maintenance complex component 5
hsa-miR-556-5p	0	0	1	1	0	0	CDK10	cyclin-dependent kinase 10
hsa-miR-556-5p	1	0	1	1	1	1	HMGA2	high mobility group AT-hook 2
hsa-miR-556-5p	1	0	1	1	1	1	TEAD1	TEA domain family member 1 (SV40 transcriptional enhancer factor)
hsa-miR-556-5p	0	0	1	1	1	1	PLD1	phospholipase D1, phosphatidylcholine-specific
hsa-miR-556-5p	0	0	1	0	0	0	TRPC2	transient receptor potential cation channel, subfamily C, member 2, pseudogene
hsa-miR-556-5p	0	0	1	0	0	0	MIAT	myocardial infarction associated transcript (non-protein coding)
hsa-miR-556-5p	1	0	1	0	1	1	MLL2	myeloid/lymphoid or mixed-lineage leukemia 2
hsa-miR-556-5p	1	0	1	1	1	1	CBFA2T2	core-binding factor, runt domain, alpha subunit 2; translocated to, 2
hsa-miR-556-5p	0	0	1	1	0	0	SPTBN2	spectrin, beta, non-erythrocytic 2
hsa-miR-556-5p	1	0	1	0	0	0	MAP3K1	mitogen-activated protein kinase kinase kinase 1, E3 ubiquitin protein ligase
hsa-miR-556-5p	0	0	1	1	1	1	CYP4F3	cytochrome P450, family 4, subfamily F, polypeptide 3
hsa-miR-556-5p	1	0	1	1	1	1	CTNND1	catenin (cadherin-associated protein), delta 1
hsa-miR-556-5p	0	0	1	1	1	1	SC5DL	sterol-C5-desaturase (ERG3 delta-5-desaturase homolog, S. cerevisiae)-like
hsa-miR-556-5p	0	0	1	1	1	1	PLEKHB1	pleckstrin homology domain containing, family B (evectins) member 1
hsa-miR-556-5p	0	0	1	1	1	1	BBS9	Bardet-Biedl syndrome 9
hsa-miR-556-5p	0	0	1	1	1	1	SH2D1A	SH2 domain containing 1A
hsa-miR-556-5p	0	0	1	1	0	0	COPB1	coatomer protein complex, subunit beta 1
hsa-miR-556-5p	0	0	1	0	1	1	CLEC5A	C-type lectin domain family 5, member A
hsa-miR-556-5p	0	0	1	1	1	1	FGFR1OP2	FGFR1 oncogene partner 2
hsa-miR-556-5p	0	0	1	0	1	1	CLDN2	claudin 2
hsa-miR-556-5p	1	0	1	1	1	1	FBN2	fibrillin 2
hsa-miR-556-5p	1	0	1	1	1	1	SENP7	SUMO1/sentrin specific peptidase 7
hsa-miR-556-5p	1	0	1	1	1	1	TSC22D2	TSC22 domain family, member 2
hsa-miR-556-5p	1	0	1	1	1	1	AXIN2	axin 2
hsa-miR-556-5p	0	0	1	1	0	0	NCOA6	nuclear receptor coactivator 6
hsa-miR-556-5p	1	0	1	1	1	1	NXT2	nuclear transport factor 2-like export factor 2
hsa-miR-556-5p	1	0	1	1	1	1	STRN3	striatin, calmodulin binding protein 3
hsa-miR-556-5p	1	0	1	0	1	1	TRPS1	trichorhinophalangeal syndrome I
hsa-miR-556-5p	1	0	1	1	1	1	ERGIC1	endoplasmic reticulum-golgi intermediate compartment (ERGIC) 1
hsa-miR-556-5p	0	0	1	1	1	1	C21orf7	chromosome 21 open reading frame 7
hsa-miR-556-5p	1	0	1	1	1	1	PUM2	pumilio homolog 2 (Drosophila)
hsa-miR-556-5p	0	0	1	0	1	1	PRDM6	PR domain containing 6
hsa-miR-556-5p	1	0	1	1	1	1	NRP1	neuropilin 1
hsa-miR-556-5p	0	0	1	0	0	0	LOC645355	uncharacterized LOC645355
hsa-miR-556-5p	0	0	1	1	0	0	TTTY7	testis-specific transcript, Y-linked 7 (non-protein coding)
hsa-miR-556-5p	1	0	1	1	1	1	ATAD1	ATPase family, AAA domain containing 1
hsa-miR-556-5p	1	0	1	0	1	1	WIPF2	WAS/WASL interacting protein family, member 2
hsa-miR-556-5p	0	0	1	0	0	0	NBPF10	neuroblastoma breakpoint family, member 10
hsa-miR-556-5p	1	0	1	1	1	1	PDE8A	phosphodiesterase 8A
hsa-miR-556-5p	0	0	1	1	1	1	RAPGEF6	Rap guanine nucleotide exchange factor (GEF) 6
hsa-miR-556-5p	0	0	1	1	1	1	ORMDL1	ORM1-like 1 (S. cerevisiae)
hsa-miR-556-5p	1	0	1	1	1	1	RCAN1	regulator of calcineurin 1
hsa-miR-556-5p	0	0	1	1	0	0	SNRPN	small nuclear ribonucleoprotein polypeptide N
hsa-miR-556-5p	1	0	1	1	1	1	NTRK2	neurotrophic tyrosine kinase, receptor, type 2
hsa-miR-556-5p	1	0	1	1	1	1	ST3GAL3	ST3 beta-galactoside alpha-2,3-sialyltransferase 3
hsa-miR-556-5p	1	0	1	1	0	0	SEPT8	septin 8
hsa-miR-556-5p	1	0	1	0	1	1	PPP1R12A	protein phosphatase 1, regulatory subunit 12A
hsa-miR-556-5p	1	0	1	1	0	0	FOXP2	forkhead box P2
hsa-miR-556-5p	0	0	1	1	1	1	SAMD9L	sterile alpha motif domain containing 9-like
hsa-miR-556-5p	0	0	1	1	1	1	CARD8	caspase recruitment domain family, member 8
hsa-miR-556-5p	0	0	1	1	1	1	RBM11	RNA binding motif protein 11
hsa-miR-556-5p	0	0	1	1	1	1	R3HCC1L	R3H domain and coiled-coil containing 1-like
hsa-miR-556-5p	0	0	1	1	1	1	MBD4	methyl-CpG binding domain protein 4
hsa-miR-556-5p	1	0	1	0	1	1	IL1RAP	interleukin 1 receptor accessory protein
hsa-miR-556-5p	1	0	1	1	1	1	GPR64	G protein-coupled receptor 64
hsa-miR-556-5p	1	0	1	1	0	0	BRSK2	BR serine/threonine kinase 2
hsa-miR-556-5p	0	0	1	1	1	1	GNAS	GNAS complex locus
hsa-miR-556-5p	0	0	1	0	1	1	COL13A1	collagen, type XIII, alpha 1
hsa-miR-556-5p	1	0	1	1	1	1	NRXN3	neurexin 3
hsa-miR-556-5p	0	0	1	0	0	0	LINC00271	long intergenic non-protein coding RNA 271
hsa-miR-556-5p	0	0	1	1	0	0	IL4I1	interleukin 4 induced 1
hsa-miR-556-5p	1	0	1	1	1	1	PPP1R9A	protein phosphatase 1, regulatory subunit 9A
hsa-miR-556-5p	0	0	1	0	0	0	FLJ20518	FSHD region gene 2 family, member C pseudogene
hsa-miR-556-5p	0	0	1	0	0	0	TUG1	taurine upregulated 1 (non-protein coding)
hsa-miR-556-5p	0	0	1	0	1	1	EBF2	early B-cell factor 2
hsa-miR-556-5p	1	0	1	1	1	1	ARHGAP17	Rho GTPase activating protein 17
hsa-miR-556-5p	0	0	1	1	1	1	RNF220	ring finger protein 220
hsa-miR-556-5p	1	0	1	0	1	1	VPS13D	vacuolar protein sorting 13 homolog D (S. cerevisiae)
hsa-miR-556-5p	1	0	1	1	1	1	KLHDC8B	kelch domain containing 8B
hsa-miR-556-5p	0	0	1	1	1	1	MBNL3	muscleblind-like splicing regulator 3
hsa-miR-556-5p	1	0	1	1	1	1	C12orf23	chromosome 12 open reading frame 23
hsa-miR-556-5p	0	0	1	1	0	0	ANAPC7	anaphase promoting complex subunit 7
hsa-miR-556-5p	0	0	1	1	0	0	UBR4	ubiquitin protein ligase E3 component n-recognin 4
hsa-miR-556-5p	0	0	1	1	1	1	CCPG1	cell cycle progression 1
hsa-miR-556-5p	1	0	1	1	1	1	MON2	MON2 homolog (S. cerevisiae)
hsa-miR-556-5p	1	0	1	1	0	0	DFNB31	deafness, autosomal recessive 31
hsa-miR-556-5p	1	0	1	1	1	1	S100PBP	S100P binding protein
hsa-miR-556-5p	1	0	1	1	1	1	MACF1	microtubule-actin crosslinking factor 1
hsa-miR-556-5p	0	0	1	1	1	1	C14orf118	chromosome 14 open reading frame 118
hsa-miR-556-5p	1	0	1	1	1	1	USP33	ubiquitin specific peptidase 33
hsa-miR-556-5p	1	0	1	0	1	1	C14orf101	chromosome 14 open reading frame 101
hsa-miR-556-5p	0	0	1	0	1	1	FLJ14186	uncharacterized LOC401149
hsa-miR-556-5p	0	0	1	1	1	1	CXorf57	chromosome X open reading frame 57
hsa-miR-556-5p	0	0	1	0	0	0	LOC286059	tumor necrosis factor receptor superfamily, member 10d, decoy with truncated death domain pseudogene
hsa-miR-556-5p	0	0	1	1	1	1	SIGLEC1	sialic acid binding Ig-like lectin 1, sialoadhesin
hsa-miR-556-5p	1	0	1	1	1	1	DYRK2	dual-specificity tyrosine-(Y)-phosphorylation regulated kinase 2
hsa-miR-556-5p	0	0	1	0	0	0	ARHGEF28	Rho guanine nucleotide exchange factor (GEF) 28
hsa-miR-556-5p	1	0	1	0	1	1	ZCCHC3	zinc finger, CCHC domain containing 3
hsa-miR-556-5p	0	0	1	0	1	1	FLJ22447	uncharacterized LOC400221
hsa-miR-556-5p	1	0	1	1	1	1	POLK	polymerase (DNA directed) kappa
hsa-miR-556-5p	0	0	1	1	1	1	FAM124B	family with sequence similarity 124B
hsa-miR-556-5p	0	0	1	1	1	1	CCDC14	coiled-coil domain containing 14
hsa-miR-556-5p	0	0	1	1	1	1	NETO2	neuropilin (NRP) and tolloid (TLL)-like 2
hsa-miR-556-5p	1	0	1	1	1	1	TMEM2	transmembrane protein 2
hsa-miR-556-5p	1	0	1	1	1	1	GPD2	glycerol-3-phosphate dehydrogenase 2 (mitochondrial)
hsa-miR-556-5p	1	0	1	1	1	1	SLAIN1	SLAIN motif family, member 1
hsa-miR-556-5p	0	0	1	1	1	1	C8orf46	chromosome 8 open reading frame 46
hsa-miR-556-5p	1	0	1	1	1	1	SGK1	serum/glucocorticoid regulated kinase 1
hsa-miR-556-5p	0	0	1	0	0	0	CASC2	cancer susceptibility candidate 2 (non-protein coding)
hsa-miR-556-5p	1	0	1	1	1	1	TPM1	tropomyosin 1 (alpha)
hsa-miR-556-5p	0	0	1	1	1	1	OPTN	optineurin
hsa-miR-556-5p	1	0	1	1	1	1	DHX15	DEAH (Asp-Glu-Ala-His) box polypeptide 15
hsa-miR-556-5p	1	0	1	1	1	1	DIXDC1	DIX domain containing 1
hsa-miR-556-5p	1	0	1	0	1	1	RNF165	ring finger protein 165
hsa-miR-556-5p	1	0	1	1	1	1	FNDC3A	fibronectin type III domain containing 3A
hsa-miR-556-5p	0	0	1	0	0	0	JPX	JPX transcript, XIST activator (non-protein coding)
hsa-miR-556-5p	0	0	1	0	0	0	AFG3L1P	AFG3 ATPase family gene 3-like 1 (S. cerevisiae), pseudogene
hsa-miR-556-5p	1	0	1	1	1	1	SORBS2	sorbin and SH3 domain containing 2
hsa-miR-556-5p	0	0	1	1	1	1	ZNF606	zinc finger protein 606
hsa-miR-556-5p	0	0	1	1	0	0	SLC25A28	solute carrier family 25 (mitochondrial iron transporter), member 28
hsa-miR-556-5p	0	0	1	1	0	0	LOXHD1	lipoxygenase homology domains 1
hsa-miR-556-5p	0	0	1	0	0	0	FLJ32742	uncharacterized locus FLJ32742
hsa-miR-556-5p	1	0	1	1	1	1	SEC22A	SEC22 vesicle trafficking protein homolog A (S. cerevisiae)
hsa-miR-556-5p	0	0	1	0	1	1	CHURC1	churchill domain containing 1
hsa-miR-556-5p	1	0	1	1	1	1	ANKRD49	ankyrin repeat domain 49
hsa-miR-556-5p	0	0	1	1	0	0	PTOV1	prostate tumor overexpressed 1
hsa-miR-556-5p	0	0	1	1	1	1	A2ML1	alpha-2-macroglobulin-like 1
hsa-miR-556-5p	0	0	1	1	1	1	ZBTB26	zinc finger and BTB domain containing 26
hsa-miR-556-5p	0	0	1	0	1	1	CCDC68	coiled-coil domain containing 68
hsa-miR-556-5p	0	0	1	0	1	1	UHMK1	U2AF homology motif (UHM) kinase 1
hsa-miR-556-5p	1	0	1	1	1	1	CNOT4	CCR4-NOT transcription complex, subunit 4
hsa-miR-556-5p	1	0	1	1	1	1	SIRT1	sirtuin 1
hsa-miR-556-5p	1	0	1	1	0	0	RELL1	RELT-like 1
hsa-miR-556-5p	1	0	1	1	1	1	TTC13	tetratricopeptide repeat domain 13
hsa-miR-556-5p	0	0	1	1	0	0	PIGO	phosphatidylinositol glycan anchor biosynthesis, class O
hsa-miR-556-5p	1	0	1	1	1	1	STXBP5	syntaxin binding protein 5 (tomosyn)
hsa-miR-556-5p	0	0	1	1	1	1	MAPK10	mitogen-activated protein kinase 10
hsa-miR-556-5p	1	0	1	1	1	1	AMMECR1	Alport syndrome, mental retardation, midface hypoplasia and elliptocytosis chromosomal region gene 1
hsa-miR-556-5p	1	0	1	1	1	1	FBXW2	F-box and WD repeat domain containing 2
hsa-miR-556-5p	0	0	1	1	0	0	RPS7	ribosomal protein S7
hsa-miR-556-5p	0	0	1	1	1	1	NRCAM	neuronal cell adhesion molecule
hsa-miR-556-5p	1	0	1	1	1	1	GNG2	guanine nucleotide binding protein (G protein), gamma 2
hsa-miR-556-5p	0	0	1	0	1	1	SSPN	sarcospan
hsa-miR-556-5p	0	0	1	1	1	1	WT1	Wilms tumor 1
hsa-miR-556-5p	1	0	1	1	1	1	SLBP	stem-loop binding protein
hsa-miR-556-5p	0	0	1	1	1	1	TGFBI	transforming growth factor, beta-induced, 68kDa
hsa-miR-556-5p	0	0	1	0	0	0	ZNF806	zinc finger protein 806
hsa-miR-556-5p	1	0	1	0	1	1	GATAD2B	GATA zinc finger domain containing 2B
hsa-miR-556-5p	1	0	1	1	1	1	CUL2	cullin 2
hsa-miR-556-5p	1	0	1	1	1	1	ANKRD46	ankyrin repeat domain 46
hsa-miR-556-5p	1	0	1	1	0	0	SAP30BP	SAP30 binding protein
hsa-miR-556-5p	0	0	1	0	0	0	LOC730101	uncharacterized LOC730101
hsa-miR-556-5p	1	0	1	1	1	1	ZC3H11A	zinc finger CCCH-type containing 11A
hsa-miR-556-5p	1	0	1	1	1	1	PEA15	phosphoprotein enriched in astrocytes 15
hsa-miR-556-5p	0	0	1	1	1	1	AIMP1	aminoacyl tRNA synthetase complex-interacting multifunctional protein 1
hsa-miR-556-5p	1	0	1	1	1	1	EPB41L4A	erythrocyte membrane protein band 4.1 like 4A
hsa-miR-556-5p	0	0	1	0	1	1	C19orf66	chromosome 19 open reading frame 66
hsa-miR-556-5p	1	0	1	1	1	1	FAM98A	family with sequence similarity 98, member A
hsa-miR-556-5p	1	0	1	1	1	1	GAPVD1	GTPase activating protein and VPS9 domains 1
hsa-miR-556-5p	1	0	1	1	1	1	FADS1	fatty acid desaturase 1
hsa-miR-556-5p	1	0	1	0	1	1	COL21A1	collagen, type XXI, alpha 1
hsa-miR-556-5p	0	0	1	0	0	0	C1orf204	chromosome 1 open reading frame 204
hsa-miR-556-5p	0	0	1	0	0	0	ZNF300P1	zinc finger protein 300 pseudogene 1
hsa-miR-556-5p	1	0	1	0	1	1	KIAA1737	KIAA1737
hsa-miR-556-5p	1	0	1	0	1	1	THRB	thyroid hormone receptor, beta
hsa-miR-556-5p	0	0	1	1	1	1	GBAS	glioblastoma amplified sequence
hsa-miR-556-5p	0	0	1	1	0	0	NMRK1	nicotinamide riboside kinase 1
hsa-miR-556-5p	1	0	1	1	1	1	GOLGA8B	golgin A8 family, member B
hsa-miR-556-5p	0	0	1	1	0	0	AHCY	adenosylhomocysteinase
hsa-miR-556-5p	1	0	1	1	1	1	IGSF11	immunoglobulin superfamily, member 11
hsa-miR-556-5p	0	0	1	0	0	0	LOC284385	uncharacterized LOC284385
hsa-miR-556-5p	1	0	1	1	1	1	HOOK1	hook homolog 1 (Drosophila)
hsa-miR-556-5p	1	0	1	1	1	1	UGDH	UDP-glucose 6-dehydrogenase
hsa-miR-556-5p	1	0	1	1	1	1	LZTS2	leucine zipper, putative tumor suppressor 2
hsa-miR-556-5p	0	0	1	0	0	0	HLA-DQB2	major histocompatibility complex, class II, DQ beta 2
hsa-miR-556-5p	1	0	1	1	1	1	ZCCHC2	zinc finger, CCHC domain containing 2
hsa-miR-556-5p	1	0	1	1	0	0	ENTPD1	ectonucleoside triphosphate diphosphohydrolase 1
hsa-miR-556-5p	0	0	1	0	0	0	LOC100130954	uncharacterized LOC100130954
hsa-miR-556-5p	1	0	1	1	1	1	LARP1B	La ribonucleoprotein domain family, member 1B
hsa-miR-556-5p	1	0	1	1	0	0	DGCR6	DiGeorge syndrome critical region gene 6
hsa-miR-556-5p	1	0	1	0	1	1	LRRTM4	leucine rich repeat transmembrane neuronal 4
hsa-miR-556-5p	0	0	1	1	0	0	ZACN	zinc activated ligand-gated ion channel
hsa-miR-556-5p	1	0	1	1	1	1	DDX42	DEAD (Asp-Glu-Ala-Asp) box polypeptide 42
hsa-miR-556-5p	1	0	1	1	1	1	LMX1A	LIM homeobox transcription factor 1, alpha
hsa-miR-556-5p	0	0	1	1	0	0	KIAA0146	KIAA0146
hsa-miR-556-5p	0	0	1	1	0	0	PROKR1	prokineticin receptor 1
hsa-miR-556-5p	0	0	1	1	0	0	HDAC6	histone deacetylase 6
hsa-miR-556-5p	0	0	1	1	0	0	MARS	methionyl-tRNA synthetase
hsa-miR-556-5p	0	0	1	0	1	1	FLJ41200	uncharacterized LOC401492
hsa-miR-556-5p	1	0	1	1	1	1	EGLN3	egl nine homolog 3 (C. elegans)
hsa-miR-556-5p	0	0	1	0	0	0	LOC650368	asparagine-linked glycosylation 1-like pseudogene
hsa-miR-556-5p	1	0	1	1	1	1	PHKB	phosphorylase kinase, beta
hsa-miR-556-5p	1	0	1	1	1	1	SH2D4B	SH2 domain containing 4B
hsa-miR-556-5p	0	0	1	0	0	0	LOC100133029	sirtuin 5 pseudogene
hsa-miR-556-5p	0	0	1	0	0	0	LOC728716	uncharacterized LOC728716
hsa-miR-556-5p	0	0	1	1	1	1	C2orf91	chromosome 2 open reading frame 91
hsa-miR-556-5p	0	0	1	0	0	0	TMEM232	transmembrane protein 232
hsa-miR-556-5p	1	0	1	1	1	1	C11orf30	chromosome 11 open reading frame 30
hsa-miR-556-5p	0	0	1	1	0	0	FAM21B	family with sequence similarity 21, member B
hsa-miR-556-5p	0	0	1	1	0	0	GABRA2	gamma-aminobutyric acid (GABA) A receptor, alpha 2
hsa-miR-556-5p	0	0	1	1	0	0	LOC100128239	uncharacterized LOC100128239
hsa-miR-556-5p	1	0	1	1	1	1	DENND5B	DENN/MADD domain containing 5B
hsa-miR-556-5p	1	0	1	0	0	0	MSL1	male-specific lethal 1 homolog (Drosophila)
hsa-miR-556-5p	1	0	1	1	0	0	UBN2	ubinuclein 2
hsa-miR-556-5p	0	0	1	1	0	0	FSIP2	fibrous sheath interacting protein 2
hsa-miR-556-5p	1	0	1	1	1	1	SIKE1	suppressor of IKBKE 1
hsa-miR-556-5p	0	0	1	1	1	1	C2orf65	chromosome 2 open reading frame 65
hsa-miR-556-5p	0	0	1	0	1	1	LOC388942	uncharacterized LOC388942
hsa-miR-556-5p	1	0	1	1	1	1	SACM1L	SAC1 suppressor of actin mutations 1-like (yeast)
hsa-miR-556-5p	1	0	1	1	1	1	DLG2	discs, large homolog 2 (Drosophila)
hsa-miR-556-5p	0	0	1	1	0	0	NPIP	nuclear pore complex interacting protein
hsa-miR-556-5p	1	0	1	1	1	1	FMNL3	formin-like 3
hsa-miR-556-5p	1	0	1	0	1	1	N4BP3	NEDD4 binding protein 3
hsa-miR-556-5p	1	0	1	1	1	1	LSM14A	LSM14A, SCD6 homolog A (S. cerevisiae)
hsa-miR-556-5p	1	0	1	1	1	1	NFYC	nuclear transcription factor Y, gamma
hsa-miR-556-5p	1	0	1	0	1	1	FNDC3B	fibronectin type III domain containing 3B
hsa-miR-556-5p	0	0	1	0	0	0	ERVFRD-2	endogenous retrovirus group FRD, member 2
hsa-miR-556-5p	0	0	1	0	0	0	FAM71E2	family with sequence similarity 71, member E2
hsa-miR-556-5p	1	0	1	1	1	1	ZNF655	zinc finger protein 655
hsa-miR-556-5p	0	0	1	0	0	0	EP400NL	EP400 N-terminal like
hsa-miR-556-5p	1	0	1	1	1	1	KALRN	kalirin, RhoGEF kinase
hsa-miR-556-5p	1	0	1	1	0	0	MAN1B1	mannosidase, alpha, class 1B, member 1
hsa-miR-556-5p	1	0	1	0	1	1	KDM2A	lysine (K)-specific demethylase 2A
hsa-miR-556-5p	0	0	1	0	0	0	IGHG1	immunoglobulin heavy constant gamma 1 (G1m marker)
hsa-miR-556-5p	0	0	1	1	1	1	CD160	CD160 molecule
hsa-miR-556-5p	1	0	1	1	1	1	FRYL	FRY-like
hsa-miR-556-5p	0	0	1	1	1	1	SHROOM3	shroom family member 3
hsa-miR-556-5p	0	0	1	0	0	0	IDO2	indoleamine 2,3-dioxygenase 2
hsa-miR-556-5p	0	0	1	0	0	0	EMBP1	embigin pseudogene 1
hsa-miR-556-5p	1	0	1	1	1	1	ADAMTS19	ADAM metallopeptidase with thrombospondin type 1 motif, 19
hsa-miR-556-5p	1	0	1	1	1	1	DPY19L3	dpy-19-like 3 (C. elegans)
hsa-miR-556-5p	0	0	1	0	0	0	FLJ26245	uncharacterized LOC400533
hsa-miR-556-5p	0	0	1	1	1	1	TBX19	T-box 19
hsa-miR-556-5p	0	0	1	0	0	0	LOC494141	mitochondrial carrier triple repeat 1 pseudogene
hsa-miR-556-5p	1	0	1	0	1	1	RXRA	retinoid X receptor, alpha
hsa-miR-556-5p	1	0	1	0	1	1	KIF21B	kinesin family member 21B
hsa-miR-556-5p	1	0	1	0	1	1	STK3	serine/threonine kinase 3
hsa-miR-556-5p	1	0	1	1	1	1	PPP2R5C	protein phosphatase 2, regulatory subunit B', gamma
hsa-miR-556-5p	1	0	1	1	1	1	MAP3K14	mitogen-activated protein kinase kinase kinase 14
hsa-miR-556-5p	1	0	1	1	1	1	LRRK2	leucine-rich repeat kinase 2
hsa-miR-556-5p	0	0	1	1	1	1	NR4A1	nuclear receptor subfamily 4, group A, member 1
hsa-miR-556-5p	0	0	1	0	0	0	AGAP9	ArfGAP with GTPase domain, ankyrin repeat and PH domain 9
hsa-miR-556-5p	1	0	1	1	1	1	MEAF6	MYST/Esa1-associated factor 6
hsa-miR-556-5p	0	0	1	1	1	1	PDSS2	prenyl (decaprenyl) diphosphate synthase, subunit 2
hsa-miR-556-5p	1	0	1	1	1	1	LEF1	lymphoid enhancer-binding factor 1
hsa-miR-556-5p	1	0	1	1	1	1	COBLL1	COBL-like 1
hsa-miR-556-5p	1	0	1	1	1	1	NCOA1	nuclear receptor coactivator 1
hsa-miR-556-5p	1	0	1	1	1	1	NOVA1	neuro-oncological ventral antigen 1
hsa-miR-556-5p	1	0	1	1	1	1	AHCYL1	adenosylhomocysteinase-like 1
hsa-miR-556-5p	1	0	1	1	1	1	MARCH7	membrane-associated ring finger (C3HC4) 7, E3 ubiquitin protein ligase
hsa-miR-556-5p	0	0	1	0	0	0	PART1	prostate androgen-regulated transcript 1 (non-protein coding)
hsa-miR-556-5p	0	0	1	1	1	1	ARIH1	ariadne homolog, ubiquitin-conjugating enzyme E2 binding protein, 1 (Drosophila)
hsa-miR-556-5p	0	0	1	0	0	0	KIAA0913	KIAA0913
hsa-miR-556-5p	0	0	1	1	1	1	ZNF280D	zinc finger protein 280D
hsa-miR-556-5p	1	0	1	1	1	1	SLC25A36	solute carrier family 25 (pyrimidine nucleotide carrier ), member 36
hsa-miR-556-5p	1	0	1	1	1	1	GOLGA8A	golgin A8 family, member A
hsa-miR-556-5p	1	0	1	1	1	1	KIAA1033	KIAA1033
hsa-miR-556-5p	1	0	1	1	1	1	CTTNBP2NL	CTTNBP2 N-terminal like
hsa-miR-556-5p	1	0	1	0	1	1	GRIN3A	glutamate receptor, ionotropic, N-methyl-D-aspartate 3A
hsa-miR-556-5p	1	0	1	1	1	1	PKNOX2	PBX/knotted 1 homeobox 2
hsa-miR-556-5p	0	0	1	1	1	1	ING3	inhibitor of growth family, member 3
hsa-miR-556-5p	1	0	1	1	1	1	SLC30A8	solute carrier family 30 (zinc transporter), member 8
hsa-miR-556-5p	1	0	1	1	1	1	YTHDF3	YTH domain family, member 3
hsa-miR-556-5p	1	0	1	0	0	0	SYNPO	synaptopodin
hsa-miR-556-5p	0	0	1	1	1	1	ZFP41	zinc finger protein 41 homolog (mouse)
hsa-miR-556-5p	0	0	1	1	1	1	BEND7	BEN domain containing 7
hsa-miR-556-5p	1	0	1	1	1	1	FAM126B	family with sequence similarity 126, member B
hsa-miR-556-5p	0	0	1	1	1	1	YAP1	Yes-associated protein 1
hsa-miR-556-5p	0	0	1	1	1	1	VWA3B	von Willebrand factor A domain containing 3B
hsa-miR-556-5p	1	0	1	1	0	0	FXYD6	FXYD domain containing ion transport regulator 6
hsa-miR-556-5p	0	0	1	1	1	1	TMEM138	transmembrane protein 138
hsa-miR-556-5p	0	0	1	1	0	0	TMEM44	transmembrane protein 44
hsa-miR-556-5p	1	0	1	0	1	1	GPCPD1	glycerophosphocholine phosphodiesterase GDE1 homolog (S. cerevisiae)
hsa-miR-556-5p	1	0	1	1	1	1	LPP	LIM domain containing preferred translocation partner in lipoma
hsa-miR-556-5p	0	0	1	1	1	1	NARG2	NMDA receptor regulated 2
hsa-miR-556-5p	0	0	1	1	0	0	LRRC39	leucine rich repeat containing 39
hsa-miR-556-5p	0	0	1	1	1	1	CAND1	cullin-associated and neddylation-dissociated 1
hsa-miR-556-5p	1	0	1	1	1	1	IL17RD	interleukin 17 receptor D
hsa-miR-556-5p	0	0	1	1	0	0	BLNK	B-cell linker
hsa-miR-556-5p	1	0	1	0	1	1	NR3C1	nuclear receptor subfamily 3, group C, member 1 (glucocorticoid receptor)
hsa-miR-556-5p	0	0	1	1	1	1	INTS7	integrator complex subunit 7
hsa-miR-556-5p	1	0	1	0	1	1	PHYHIPL	phytanoyl-CoA 2-hydroxylase interacting protein-like
hsa-miR-556-5p	1	0	1	1	1	1	PPP3CA	protein phosphatase 3, catalytic subunit, alpha isozyme
hsa-miR-556-5p	1	0	1	1	1	1	RNF38	ring finger protein 38
hsa-miR-556-5p	1	0	1	1	1	1	IKZF2	IKAROS family zinc finger 2 (Helios)
hsa-miR-556-5p	0	0	1	1	1	1	CCDC62	coiled-coil domain containing 62
hsa-miR-556-5p	0	0	1	1	0	0	IL1F10	interleukin 1 family, member 10 (theta)
hsa-miR-556-5p	0	0	1	1	1	1	OSR2	odd-skipped related 2 (Drosophila)
hsa-miR-556-5p	0	0	1	0	0	0	GRIK1-AS1	GRIK1 antisense RNA 1
hsa-miR-556-5p	1	0	1	1	1	1	SORCS1	sortilin-related VPS10 domain containing receptor 1
hsa-miR-556-5p	0	0	1	1	1	1	MED19	mediator complex subunit 19
hsa-miR-556-5p	0	0	1	1	1	1	CYP4B1	cytochrome P450, family 4, subfamily B, polypeptide 1
hsa-miR-556-5p	0	0	1	1	0	0	DNAH1	dynein, axonemal, heavy chain 1
hsa-miR-556-5p	1	0	1	1	1	1	BCL11A	B-cell CLL/lymphoma 11A (zinc finger protein)
hsa-miR-556-5p	0	0	1	1	1	1	CCDC83	coiled-coil domain containing 83
hsa-miR-556-5p	0	0	1	1	1	1	IYD	iodotyrosine deiodinase
hsa-miR-556-5p	1	0	1	0	1	1	RAB11FIP1	RAB11 family interacting protein 1 (class I)
hsa-miR-556-5p	1	0	1	1	1	1	RAI14	retinoic acid induced 14
hsa-miR-556-5p	0	0	1	1	1	1	GCOM1	GRINL1A complex locus 1
hsa-miR-556-5p	1	0	1	0	1	1	AP2B1	adaptor-related protein complex 2, beta 1 subunit
hsa-miR-556-5p	0	0	1	1	1	1	TNFRSF19	tumor necrosis factor receptor superfamily, member 19
hsa-miR-556-5p	0	0	1	1	1	1	PTPLA	protein tyrosine phosphatase-like (proline instead of catalytic arginine), member A
hsa-miR-556-5p	1	0	1	0	1	1	NHS	Nance-Horan syndrome (congenital cataracts and dental anomalies)
hsa-miR-556-5p	0	0	1	1	0	0	PAOX	polyamine oxidase (exo-N4-amino)
hsa-miR-556-5p	0	0	1	0	1	1	RAB18	RAB18, member RAS oncogene family
hsa-miR-556-5p	0	0	1	1	0	0	DHRS4	dehydrogenase/reductase (SDR family) member 4
hsa-miR-556-5p	0	0	1	0	0	0	MEP1B	meprin A, beta
hsa-miR-556-5p	0	0	1	1	1	1	RHD	Rh blood group, D antigen
hsa-miR-556-5p	1	0	1	1	1	1	QKI	QKI, KH domain containing, RNA binding
hsa-miR-556-5p	1	0	1	1	1	1	MYB	v-myb myeloblastosis viral oncogene homolog (avian)
hsa-miR-556-5p	0	0	1	1	0	0	NBPF8	neuroblastoma breakpoint family, member 8
hsa-miR-556-5p	1	0	1	1	1	1	TBC1D22B	TBC1 domain family, member 22B
hsa-miR-556-5p	1	0	1	1	0	0	PLXNB3	plexin B3
hsa-miR-556-5p	1	0	1	0	1	1	RASGRP1	RAS guanyl releasing protein 1 (calcium and DAG-regulated)
hsa-miR-556-5p	0	0	1	1	1	1	PAFAH1B2	platelet-activating factor acetylhydrolase 1b, catalytic subunit 2 (30kDa)
hsa-miR-556-5p	0	0	1	1	1	1	RLIM	ring finger protein, LIM domain interacting
hsa-miR-556-5p	0	0	1	1	1	1	WDR55	WD repeat domain 55
hsa-miR-556-5p	1	0	1	1	1	1	MYCN	v-myc myelocytomatosis viral related oncogene, neuroblastoma derived (avian)
hsa-miR-556-5p	1	0	1	1	1	1	RIMS3	regulating synaptic membrane exocytosis 3
hsa-miR-556-5p	0	0	1	1	0	0	SCG5	secretogranin V (7B2 protein)
hsa-miR-556-5p	0	0	1	1	1	1	ZNF589	zinc finger protein 589
hsa-miR-556-5p	0	0	1	1	1	1	KIRREL2	kin of IRRE like 2 (Drosophila)
hsa-miR-556-5p	0	0	1	1	0	0	RBM14	RNA binding motif protein 14
hsa-miR-556-5p	0	0	1	1	1	1	DPYD	dihydropyrimidine dehydrogenase
hsa-miR-556-5p	1	0	1	1	1	1	AGK	acylglycerol kinase
hsa-miR-556-5p	1	0	1	0	1	1	MINOS1	mitochondrial inner membrane organizing system 1
hsa-miR-556-5p	1	0	1	1	1	1	ATP6AP2	ATPase, H+ transporting, lysosomal accessory protein 2
hsa-miR-556-5p	1	0	1	1	0	0	FA2H	fatty acid 2-hydroxylase
hsa-miR-556-5p	1	0	1	1	1	1	ZFAND5	zinc finger, AN1-type domain 5
hsa-miR-556-5p	0	0	1	1	0	0	ELP4	elongator acetyltransferase complex subunit 4
hsa-miR-556-5p	0	0	1	1	1	1	PLXDC2	plexin domain containing 2
hsa-miR-556-5p	1	0	1	1	1	1	GDAP2	ganglioside induced differentiation associated protein 2
hsa-miR-556-5p	1	0	1	1	1	1	SOX5	SRY (sex determining region Y)-box 5
hsa-miR-556-5p	0	0	1	1	1	1	UCHL5	ubiquitin carboxyl-terminal hydrolase L5
hsa-miR-556-5p	1	0	1	1	1	1	ZBTB38	zinc finger and BTB domain containing 38
hsa-miR-556-5p	1	0	1	0	1	1	NR1D2	nuclear receptor subfamily 1, group D, member 2
hsa-miR-556-5p	0	0	1	0	0	0	LOC441528	uncharacterized LOC441528
hsa-miR-556-5p	0	0	1	1	1	1	SLC17A3	solute carrier family 17 (sodium phosphate), member 3
hsa-miR-556-5p	1	0	1	0	1	1	SLC19A2	solute carrier family 19 (thiamine transporter), member 2
hsa-miR-556-5p	0	0	1	1	1	1	EIF2B3	eukaryotic translation initiation factor 2B, subunit 3 gamma, 58kDa
hsa-miR-556-5p	1	0	1	1	1	1	TMEM71	transmembrane protein 71
hsa-miR-556-5p	0	0	1	1	0	0	LYSMD2	LysM, putative peptidoglycan-binding, domain containing 2
hsa-miR-556-5p	0	0	1	1	1	1	C18orf32	chromosome 18 open reading frame 32
hsa-miR-556-5p	1	0	1	1	1	1	LIMS1	LIM and senescent cell antigen-like domains 1
hsa-miR-556-5p	0	0	1	0	0	0	AZGP1P1	alpha-2-glycoprotein 1, zinc-binding pseudogene 1
hsa-miR-556-5p	0	0	1	1	1	1	RNF103	ring finger protein 103
hsa-miR-556-5p	0	0	1	1	1	1	CDC42SE2	CDC42 small effector 2
hsa-miR-556-5p	0	0	1	1	0	0	ENOX1	ecto-NOX disulfide-thiol exchanger 1
hsa-miR-556-5p	1	0	1	0	1	1	CDK19	cyclin-dependent kinase 19
hsa-miR-556-5p	1	0	1	1	1	1	CNTN4	contactin 4
hsa-miR-556-5p	1	0	1	1	1	1	FAM131A	family with sequence similarity 131, member A
hsa-miR-556-5p	0	0	1	1	0	0	TRO	trophinin
hsa-miR-556-5p	0	0	1	1	1	1	MAP2	microtubule-associated protein 2
hsa-miR-556-5p	0	0	1	1	1	1	RHBDD1	rhomboid domain containing 1
hsa-miR-556-5p	1	0	1	1	1	1	APPL2	adaptor protein, phosphotyrosine interaction, PH domain and leucine zipper containing 2
hsa-miR-556-5p	1	0	1	1	1	1	ZBTB11	zinc finger and BTB domain containing 11
hsa-miR-556-5p	0	0	1	1	1	1	C1orf101	chromosome 1 open reading frame 101
hsa-miR-556-5p	1	0	1	1	1	1	HTR2C	5-hydroxytryptamine (serotonin) receptor 2C, G protein-coupled
hsa-miR-556-5p	0	0	1	0	0	0	LOC100130950	uncharacterized LOC100130950
hsa-miR-556-5p	0	0	1	1	1	1	TFAM	transcription factor A, mitochondrial
hsa-miR-556-5p	0	0	1	0	0	0	BCAS3	breast carcinoma amplified sequence 3
hsa-miR-556-5p	1	0	1	1	1	1	TIAL1	TIA1 cytotoxic granule-associated RNA binding protein-like 1
hsa-miR-556-5p	0	0	1	1	1	1	CCP110	centriolar coiled coil protein 110kDa
hsa-miR-556-5p	0	0	1	1	1	1	CD48	CD48 molecule
hsa-miR-556-5p	0	0	1	1	1	1	LPAR1	lysophosphatidic acid receptor 1
hsa-miR-556-5p	1	0	1	1	1	1	ELAVL2	ELAV (embryonic lethal, abnormal vision, Drosophila)-like 2 (Hu antigen B)
hsa-miR-556-5p	0	0	1	1	1	1	AADAT	aminoadipate aminotransferase
hsa-miR-556-5p	0	0	1	1	1	1	C7orf53	chromosome 7 open reading frame 53
hsa-miR-556-5p	1	0	1	1	1	1	RAB5B	RAB5B, member RAS oncogene family
hsa-miR-556-5p	1	0	1	1	1	1	SORL1	sortilin-related receptor, L(DLR class) A repeats containing
hsa-miR-556-5p	1	0	1	1	1	1	MAK	male germ cell-associated kinase
hsa-miR-556-5p	1	0	1	1	1	1	PCDHA5	protocadherin alpha 5
hsa-miR-556-5p	1	0	1	1	0	0	GPR137	G protein-coupled receptor 137
hsa-miR-556-5p	1	0	1	0	1	1	KIF5A	kinesin family member 5A
hsa-miR-556-5p	0	0	1	1	0	0	PLA2G6	phospholipase A2, group VI (cytosolic, calcium-independent)
hsa-miR-556-5p	0	0	1	1	1	1	EDA2R	ectodysplasin A2 receptor
hsa-miR-556-5p	1	0	1	0	1	1	DDX3Y	DEAD (Asp-Glu-Ala-Asp) box polypeptide 3, Y-linked
hsa-miR-556-5p	1	0	1	1	1	1	ZZZ3	zinc finger, ZZ-type containing 3
hsa-miR-556-5p	0	0	1	0	0	0	LOC144486	uncharacterized LOC144486
hsa-miR-556-5p	1	0	1	1	1	1	RAP2C	RAP2C, member of RAS oncogene family
hsa-miR-556-5p	0	0	1	1	1	1	C6	complement component 6
hsa-miR-556-5p	0	0	1	1	1	1	CLEC12B	C-type lectin domain family 12, member B
hsa-miR-556-5p	1	0	1	1	1	1	IMPACT	Impact homolog (mouse)
hsa-miR-556-5p	0	0	1	0	0	0	FAM201A	family with sequence similarity 201, member A
hsa-miR-556-5p	0	0	1	1	0	0	FAM3B	family with sequence similarity 3, member B
hsa-miR-556-5p	0	0	1	1	1	1	FAM171B	family with sequence similarity 171, member B
hsa-miR-556-5p	1	0	1	1	1	1	MEIS1	Meis homeobox 1
hsa-miR-556-5p	1	0	1	1	1	1	ACVR1	activin A receptor, type I
hsa-miR-556-5p	1	0	1	1	1	1	RNMT	RNA (guanine-7-) methyltransferase
hsa-miR-556-5p	0	0	1	1	1	1	ZNF141	zinc finger protein 141
hsa-miR-556-5p	1	0	1	0	1	1	CPEB4	cytoplasmic polyadenylation element binding protein 4
hsa-miR-556-5p	1	0	1	1	1	1	BNC2	basonuclin 2
hsa-miR-556-5p	0	0	1	0	0	0	CYP4F35P	cytochrome P450, family 4, subfamily F, polypeptide 35, pseudogene
hsa-miR-556-5p	0	0	1	1	1	1	EFCAB13	EF-hand calcium binding domain 13
hsa-miR-556-5p	0	0	1	0	0	0	INHBA-AS1	INHBA antisense RNA 1
hsa-miR-556-5p	1	0	1	1	1	1	DAAM1	dishevelled associated activator of morphogenesis 1
hsa-miR-556-5p	1	0	1	0	1	1	CEP44	centrosomal protein 44kDa
hsa-miR-556-5p	0	0	1	1	0	0	CCDC152	coiled-coil domain containing 152
hsa-miR-556-5p	0	0	1	1	1	1	SLC14A1	solute carrier family 14 (urea transporter), member 1 (Kidd blood group)
hsa-miR-556-5p	1	0	1	1	1	1	DACH2	dachshund homolog 2 (Drosophila)
hsa-miR-556-5p	1	0	1	1	1	1	BVES	blood vessel epicardial substance
hsa-miR-556-5p	0	0	1	1	0	0	SLC13A4	solute carrier family 13 (sodium/sulfate symporters), member 4
hsa-miR-556-5p	0	0	1	0	0	0	A1BG-AS1	A1BG antisense RNA 1
hsa-miR-556-5p	0	0	1	0	0	0	SLC7A11-AS1	SLC7A11 antisense RNA 1
hsa-miR-556-5p	1	0	1	1	1	1	FAM123A	family with sequence similarity 123A
hsa-miR-556-5p	1	0	1	1	1	1	ROCK1	Rho-associated, coiled-coil containing protein kinase 1
hsa-miR-556-5p	0	0	1	1	1	1	GOLGA6L9	golgin A6 family-like 9
hsa-miR-556-5p	1	0	1	1	1	1	CLOCK	clock homolog (mouse)
hsa-miR-556-5p	0	0	1	0	0	0	SUZ12P1	suppressor of zeste 12 homolog pseudogene 1
hsa-miR-556-5p	0	0	1	1	0	0	C1orf87	chromosome 1 open reading frame 87
hsa-miR-556-5p	0	0	1	0	0	0	LRRC37BP1	leucine rich repeat containing 37B pseudogene 1
hsa-miR-556-5p	1	0	1	1	1	1	FKBP5	FK506 binding protein 5
hsa-miR-556-5p	0	0	1	0	0	0	LOC100130015	5-hydroxyisourate hydrolase pseudogene
hsa-miR-556-5p	0	0	1	1	0	0	LILRA1	leukocyte immunoglobulin-like receptor, subfamily A (with TM domain), member 1
hsa-miR-556-5p	1	0	1	0	1	1	LYPD6	LY6/PLAUR domain containing 6
hsa-miR-556-5p	0	0	1	0	0	0	LOC348120	uncharacterized LOC348120
hsa-miR-556-5p	1	0	1	0	1	1	NUDT10	nudix (nucleoside diphosphate linked moiety X)-type motif 10
hsa-miR-556-5p	0	0	1	1	0	0	AGAP8	ArfGAP with GTPase domain, ankyrin repeat and PH domain 8
hsa-miR-556-5p	1	0	1	1	1	1	PCGF5	polycomb group ring finger 5
hsa-miR-556-5p	1	0	1	0	1	1	C14orf43	chromosome 14 open reading frame 43
hsa-miR-556-5p	0	0	1	0	0	0	LINC00265	long intergenic non-protein coding RNA 265
hsa-miR-556-5p	0	0	1	1	1	1	PEX14	peroxisomal biogenesis factor 14
hsa-miR-556-5p	1	0	1	1	1	1	DHX57	DEAH (Asp-Glu-Ala-Asp/His) box polypeptide 57
hsa-miR-556-5p	0	0	1	1	0	0	AGAP4	ArfGAP with GTPase domain, ankyrin repeat and PH domain 4
hsa-miR-556-5p	0	0	1	1	1	1	B4GALT4	UDP-Gal:betaGlcNAc beta 1,4- galactosyltransferase, polypeptide 4
hsa-miR-556-5p	0	0	1	0	0	0	LMOD2	leiomodin 2 (cardiac)
hsa-miR-556-5p	0	0	1	0	1	1	ASAP2	ArfGAP with SH3 domain, ankyrin repeat and PH domain 2
hsa-miR-556-5p	0	0	1	1	1	1	GPATCH2	G patch domain containing 2
hsa-miR-556-5p	0	0	1	1	0	0	C8orf31	chromosome 8 open reading frame 31
hsa-miR-556-5p	0	0	1	1	0	0	DHX30	DEAH (Asp-Glu-Ala-His) box polypeptide 30
hsa-miR-556-5p	1	0	1	1	1	1	RANBP9	RAN binding protein 9
hsa-miR-556-5p	1	0	1	1	1	1	ROBO2	roundabout, axon guidance receptor, homolog 2 (Drosophila)
hsa-miR-556-5p	0	0	1	1	1	1	STAG1	stromal antigen 1
hsa-miR-556-5p	0	0	1	1	1	1	ZNF33B	zinc finger protein 33B
hsa-miR-556-5p	0	0	1	1	1	1	SGK2	serum/glucocorticoid regulated kinase 2
hsa-miR-556-5p	1	0	1	1	1	1	NRSN1	neurensin 1
hsa-miR-556-5p	0	0	1	1	1	1	KCTD18	potassium channel tetramerisation domain containing 18
hsa-miR-556-5p	0	0	1	1	0	0	TBCA	tubulin folding cofactor A
hsa-miR-556-5p	1	0	1	0	0	0	TNRC18	trinucleotide repeat containing 18
hsa-miR-556-5p	1	0	1	1	1	1	PDCD6IP	programmed cell death 6 interacting protein
hsa-miR-556-5p	0	0	1	1	1	1	TTLL9	tubulin tyrosine ligase-like family, member 9
hsa-miR-556-5p	0	0	1	0	0	0	PTGER4P2	prostaglandin E receptor 4 (subtype EP4) pseudogene 2
hsa-miR-556-5p	1	0	1	1	0	0	DCAF15	DDB1 and CUL4 associated factor 15
hsa-miR-556-5p	1	0	1	0	1	1	TGFBR1	transforming growth factor, beta receptor 1
hsa-miR-556-5p	1	0	1	0	1	1	TMEM194A	transmembrane protein 194A
hsa-miR-556-5p	1	0	1	1	1	1	LOXL3	lysyl oxidase-like 3
hsa-miR-556-5p	0	0	1	0	0	0	LOC440416	uncharacterized LOC440416
hsa-miR-556-5p	0	0	1	1	0	0	FAM21A	family with sequence similarity 21, member A
hsa-miR-556-5p	1	0	1	0	1	1	AMMECR1L	AMME chromosomal region gene 1-like
hsa-miR-556-5p	0	0	1	0	0	0	LINC00537	long intergenic non-protein coding RNA 537
hsa-miR-556-5p	1	0	1	0	1	1	MEST	mesoderm specific transcript homolog (mouse)
hsa-miR-556-5p	0	0	1	1	1	1	HOXD8	homeobox D8
hsa-miR-556-5p	1	0	1	1	1	1	SYNE1	spectrin repeat containing, nuclear envelope 1
hsa-miR-556-5p	0	0	1	1	1	1	COBL	cordon-bleu homolog (mouse)
hsa-miR-556-5p	1	0	1	1	1	1	TRPM3	transient receptor potential cation channel, subfamily M, member 3
hsa-miR-556-5p	0	0	1	1	0	0	DNASE1	deoxyribonuclease I
hsa-miR-556-5p	0	0	1	1	0	0	HEATR8	HEAT repeat containing 8
hsa-miR-556-5p	0	0	1	1	1	1	NELL1	NEL-like 1 (chicken)
hsa-miR-556-5p	1	0	1	1	1	1	ACVR2B	activin A receptor, type IIB
hsa-miR-556-5p	0	0	1	1	0	0	EDDM3A	epididymal protein 3A
hsa-miR-556-5p	0	0	1	1	0	0	MTMR11	myotubularin related protein 11
hsa-miR-556-5p	1	0	1	1	1	1	LRRC15	leucine rich repeat containing 15
hsa-miR-556-5p	0	0	1	1	0	0	FBXO16	F-box protein 16
hsa-miR-556-5p	1	0	1	0	1	1	KCNT2	potassium channel, subfamily T, member 2
hsa-miR-556-5p	0	0	1	1	1	1	SPHKAP	SPHK1 interactor, AKAP domain containing
hsa-miR-556-5p	0	0	1	1	0	0	RIPPLY1	ripply1 homolog (zebrafish)
hsa-miR-556-5p	0	0	1	1	1	1	CCDC148	coiled-coil domain containing 148
hsa-miR-556-5p	1	0	1	1	1	1	PNISR	PNN-interacting serine/arginine-rich protein
hsa-miR-556-5p	0	0	1	1	1	1	DET1	de-etiolated homolog 1 (Arabidopsis)
hsa-miR-556-5p	1	0	1	1	1	1	CERS6	ceramide synthase 6
hsa-miR-556-5p	1	0	1	0	1	1	BTBD3	BTB (POZ) domain containing 3
hsa-miR-556-5p	1	0	1	0	1	1	ATP8A1	ATPase, aminophospholipid transporter (APLT), class I, type 8A, member 1
hsa-miR-556-5p	1	0	1	1	1	1	TET2	tet methylcytosine dioxygenase 2
hsa-miR-556-5p	0	0	1	1	0	0	ASB3	ankyrin repeat and SOCS box containing 3
hsa-miR-556-5p	0	0	1	0	0	0	INTS4L1	integrator complex subunit 4-like 1
hsa-miR-556-5p	1	0	1	1	1	1	NR3C2	nuclear receptor subfamily 3, group C, member 2
hsa-miR-556-5p	1	0	1	1	1	1	PAX3	paired box 3
hsa-miR-556-5p	1	0	1	1	1	1	ST18	suppression of tumorigenicity 18 (breast carcinoma) (zinc finger protein)
hsa-miR-556-5p	0	0	1	1	1	1	C14orf105	chromosome 14 open reading frame 105
hsa-miR-556-5p	1	0	1	1	1	1	ZNF827	zinc finger protein 827
hsa-miR-556-5p	1	0	1	1	1	1	OTUD4	OTU domain containing 4
hsa-miR-556-5p	1	0	1	1	0	0	RASGEF1B	RasGEF domain family, member 1B
hsa-miR-556-5p	0	0	1	0	0	0	LINC00486	long intergenic non-protein coding RNA 486
hsa-miR-556-5p	0	0	1	1	1	1	C9orf171	chromosome 9 open reading frame 171
hsa-miR-556-5p	0	0	1	0	0	0	EEF1DP3	eukaryotic translation elongation factor 1 delta pseudogene 3
hsa-miR-556-5p	0	0	1	0	1	1	GOLGA8G	golgin A8 family, member G
hsa-miR-556-5p	1	0	1	0	1	1	CAMSAP2	calmodulin regulated spectrin-associated protein family, member 2
hsa-miR-556-5p	1	0	1	1	1	1	MEGF11	multiple EGF-like-domains 11
hsa-miR-556-5p	1	0	1	1	1	1	ZEB2	zinc finger E-box binding homeobox 2
hsa-miR-556-5p	1	0	1	0	1	1	LHFPL3	lipoma HMGIC fusion partner-like 3
hsa-miR-556-5p	0	0	1	1	0	0	AGAP6	ArfGAP with GTPase domain, ankyrin repeat and PH domain 6
hsa-miR-556-5p	1	0	1	1	1	1	NUMB	numb homolog (Drosophila)
hsa-miR-556-5p	1	0	1	1	1	1	BTBD7	BTB (POZ) domain containing 7
hsa-miR-556-5p	0	0	1	0	0	0	DKFZp686D0853	uncharacterized LOC401613
hsa-miR-556-5p	0	0	1	0	1	1	AP1S2	adaptor-related protein complex 1, sigma 2 subunit
hsa-miR-556-5p	1	0	1	0	1	1	CLASP2	cytoplasmic linker associated protein 2
hsa-miR-556-5p	0	0	1	1	1	1	SLC26A3	solute carrier family 26, member 3
hsa-miR-556-5p	1	0	1	1	1	1	SPPL3	signal peptide peptidase like 3
hsa-miR-556-5p	1	0	1	1	1	1	NFASC	neurofascin
hsa-miR-556-5p	0	0	1	1	1	1	MAP2K6	mitogen-activated protein kinase kinase 6
hsa-miR-556-5p	0	0	1	0	1	1	PRH2	proline-rich protein HaeIII subfamily 2
hsa-miR-556-5p	1	0	1	1	0	0	RBM27	RNA binding motif protein 27
hsa-miR-556-5p	0	0	1	1	1	1	MLIP	muscular LMNA-interacting protein
hsa-miR-556-5p	1	0	1	1	1	1	EPS15	epidermal growth factor receptor pathway substrate 15
hsa-miR-556-5p	1	0	1	1	1	1	GABPA	GA binding protein transcription factor, alpha subunit 60kDa
hsa-miR-556-5p	0	0	1	0	1	1	B3GALTL	beta 1,3-galactosyltransferase-like
hsa-miR-556-5p	1	0	1	1	1	1	C5orf24	chromosome 5 open reading frame 24
hsa-miR-556-5p	1	0	1	1	1	1	RDX	radixin
hsa-miR-556-5p	1	0	1	1	1	1	PGAP1	post-GPI attachment to proteins 1
hsa-miR-556-5p	1	0	1	1	1	1	WLS	wntless homolog (Drosophila)
hsa-miR-556-5p	1	0	1	1	1	1	HIF1A	hypoxia inducible factor 1, alpha subunit (basic helix-loop-helix transcription factor)
hsa-miR-556-5p	0	0	1	1	1	1	KIAA1328	KIAA1328
hsa-miR-556-5p	0	0	1	1	1	1	SSFA2	sperm specific antigen 2
hsa-miR-556-5p	0	0	1	1	1	1	USP54	ubiquitin specific peptidase 54
hsa-miR-556-5p	1	0	1	1	1	1	CREB3L2	cAMP responsive element binding protein 3-like 2
hsa-miR-556-5p	0	0	1	1	1	1	IPO11	importin 11
hsa-miR-556-5p	1	0	1	1	1	1	HIC2	hypermethylated in cancer 2
hsa-miR-556-5p	1	0	1	1	0	0	SMARCA2	SWI/SNF related, matrix associated, actin dependent regulator of chromatin, subfamily a, member 2
hsa-miR-556-5p	1	0	1	0	1	1	RNF144A	ring finger protein 144A
hsa-miR-556-5p	1	0	1	1	1	1	RNF10	ring finger protein 10
hsa-miR-556-5p	0	0	1	1	0	0	H2AFY2	H2A histone family, member Y2
hsa-miR-556-5p	1	0	1	1	1	1	RSBN1L	round spermatid basic protein 1-like
hsa-miR-556-5p	0	0	1	0	0	0	LOC100128988	uncharacterized LOC100128988
hsa-miR-556-5p	0	0	1	0	0	0	FLJ30838	uncharacterized LOC400955
hsa-miR-556-5p	0	0	1	1	1	1	DUT	deoxyuridine triphosphatase
hsa-miR-556-5p	0	0	1	1	0	0	URM1	ubiquitin related modifier 1
hsa-miR-556-5p	1	0	1	0	1	1	SLCO2A1	solute carrier organic anion transporter family, member 2A1
hsa-miR-556-5p	0	0	1	1	1	1	CYTH2	cytohesin 2
hsa-miR-556-5p	0	0	1	1	0	0	FCGRT	Fc fragment of IgG, receptor, transporter, alpha
hsa-miR-556-5p	1	0	1	1	1	1	POLR2D	polymerase (RNA) II (DNA directed) polypeptide D
hsa-miR-556-5p	1	0	1	1	1	1	RBM3	RNA binding motif (RNP1, RRM) protein 3
hsa-miR-556-5p	0	0	1	1	1	1	SMAGP	small cell adhesion glycoprotein
hsa-miR-556-5p	0	0	1	1	1	1	CIRBP	cold inducible RNA binding protein
hsa-miR-556-5p	0	0	1	1	0	0	CCNDBP1	cyclin D-type binding-protein 1
hsa-miR-556-5p	1	0	1	1	1	1	FGF11	fibroblast growth factor 11
hsa-miR-556-5p	0	0	1	1	1	1	CCDC132	coiled-coil domain containing 132
hsa-miR-556-5p	1	0	1	0	1	1	BNIP3L	BCL2/adenovirus E1B 19kDa interacting protein 3-like
hsa-miR-556-5p	0	0	1	1	1	1	TUBA1A	tubulin, alpha 1a
hsa-miR-556-5p	0	0	1	1	0	0	MYL6	myosin, light chain 6, alkali, smooth muscle and non-muscle
hsa-miR-556-5p	1	0	1	1	1	1	CHTF8	CTF8, chromosome transmission fidelity factor 8 homolog (S. cerevisiae)
hsa-miR-556-5p	0	0	1	0	1	1	CD99P1	CD99 molecule pseudogene 1
hsa-miR-556-5p	1	0	1	1	1	1	COPS2	COP9 constitutive photomorphogenic homolog subunit 2 (Arabidopsis)
hsa-miR-556-5p	0	0	1	1	1	1	PKP4	plakophilin 4
hsa-miR-556-5p	1	0	1	1	1	1	UPF3A	UPF3 regulator of nonsense transcripts homolog A (yeast)
hsa-miR-556-5p	0	0	1	1	0	0	PRMT7	protein arginine methyltransferase 7
hsa-miR-556-5p	1	0	1	0	1	1	MGRN1	mahogunin ring finger 1, E3 ubiquitin protein ligase
hsa-miR-556-5p	0	0	1	1	1	1	ATG4A	autophagy related 4A, cysteine peptidase
hsa-miR-556-5p	1	0	1	1	1	1	DKK3	dickkopf 3 homolog (Xenopus laevis)
hsa-miR-556-5p	0	0	1	1	1	1	BMPR1A	bone morphogenetic protein receptor, type IA
hsa-miR-556-5p	1	0	1	1	1	1	KCNIP4	Kv channel interacting protein 4
hsa-miR-556-5p	0	0	1	0	0	0	ZNF720	zinc finger protein 720
hsa-miR-556-5p	1	0	1	1	1	1	PPP3CB	protein phosphatase 3, catalytic subunit, beta isozyme
hsa-miR-556-5p	1	0	1	1	1	1	DPF2	D4, zinc and double PHD fingers family 2
hsa-miR-556-5p	1	0	1	1	1	1	ARL4A	ADP-ribosylation factor-like 4A
hsa-miR-556-5p	0	0	1	1	0	0	STUB1	STIP1 homology and U-box containing protein 1, E3 ubiquitin protein ligase
hsa-miR-556-5p	1	0	1	1	1	1	PFN2	profilin 2
hsa-miR-556-5p	1	0	1	1	1	1	NFYB	nuclear transcription factor Y, beta
hsa-miR-556-5p	1	0	1	1	1	1	F11R	F11 receptor
hsa-miR-556-5p	1	0	1	1	0	0	ANGPTL6	angiopoietin-like 6
hsa-miR-556-5p	0	0	1	1	0	0	CHRNA5	cholinergic receptor, nicotinic, alpha 5 (neuronal)
hsa-miR-556-5p	1	0	1	0	1	1	MAP1B	microtubule-associated protein 1B
hsa-miR-556-5p	1	0	1	1	1	1	RALY	RNA binding protein, autoantigenic (hnRNP-associated with lethal yellow homolog (mouse))
hsa-miR-556-5p	1	0	1	1	0	0	STAG3L4	stromal antigen 3-like 4
hsa-miR-556-5p	0	0	1	1	1	1	TSEN15	tRNA splicing endonuclease 15 homolog (S. cerevisiae)
hsa-miR-556-5p	1	0	1	1	1	1	TRAPPC3	trafficking protein particle complex 3
hsa-miR-556-5p	1	0	1	1	0	0	PPP4C	protein phosphatase 4, catalytic subunit
hsa-miR-556-5p	0	0	1	1	0	0	TUBG2	tubulin, gamma 2
hsa-miR-556-5p	0	0	1	0	0	0	LOC100132984	uncharacterized LOC100132984
hsa-miR-556-5p	1	0	1	1	1	1	MYT1	myelin transcription factor 1
hsa-miR-556-5p	0	0	1	1	0	0	FES	feline sarcoma oncogene
hsa-miR-556-5p	0	0	1	1	1	1	SUGT1	SGT1, suppressor of G2 allele of SKP1 (S. cerevisiae)
hsa-miR-556-5p	0	0	1	1	1	1	COMMD3	COMM domain containing 3
hsa-miR-556-5p	1	0	1	1	1	1	LGALSL	lectin, galactoside-binding-like
hsa-miR-556-5p	1	0	1	1	1	1	RND3	Rho family GTPase 3
hsa-miR-556-5p	1	0	1	1	1	1	GABPB2	GA binding protein transcription factor, beta subunit 2
hsa-miR-556-5p	0	0	1	0	0	0	FAM47E	family with sequence similarity 47, member E
hsa-miR-556-5p	0	0	1	0	0	0	LOC731789	uncharacterized LOC731789
hsa-miR-556-5p	1	0	1	0	1	1	BTRC	beta-transducin repeat containing E3 ubiquitin protein ligase
hsa-miR-556-5p	0	0	1	0	1	1	C3orf17	chromosome 3 open reading frame 17
hsa-miR-556-5p	0	0	1	1	1	1	ATG5	autophagy related 5
hsa-miR-556-5p	1	0	1	1	1	1	HECW2	HECT, C2 and WW domain containing E3 ubiquitin protein ligase 2
hsa-miR-556-5p	1	0	1	0	1	1	MEGF10	multiple EGF-like-domains 10
hsa-miR-556-5p	1	0	1	0	1	1	MCFD2	multiple coagulation factor deficiency 2
hsa-miR-556-5p	0	0	1	1	1	1	SDAD1	SDA1 domain containing 1
hsa-miR-556-5p	1	0	1	1	1	1	MAPK8IP3	mitogen-activated protein kinase 8 interacting protein 3
hsa-miR-556-5p	1	0	1	1	0	0	POMGNT1	protein O-linked mannose beta1,2-N-acetylglucosaminyltransferase
hsa-miR-556-5p	0	0	1	0	0	0	DNAJC27-AS1	DNAJC27 antisense RNA 1
hsa-miR-556-5p	1	0	1	0	1	1	CNTNAP2	contactin associated protein-like 2
hsa-miR-556-5p	1	0	1	0	1	1	ZNF652	zinc finger protein 652
hsa-miR-556-5p	0	0	1	1	0	0	TENC1	tensin like C1 domain containing phosphatase (tensin 2)
hsa-miR-556-5p	0	0	1	1	0	0	STK25	serine/threonine kinase 25
hsa-miR-556-5p	1	0	1	1	1	1	SEC14L1	SEC14-like 1 (S. cerevisiae)
hsa-miR-556-5p	1	0	1	0	1	1	KLHDC10	kelch domain containing 10
hsa-miR-556-5p	1	0	1	1	1	1	TRIOBP	TRIO and F-actin binding protein
hsa-miR-556-5p	0	0	1	1	0	0	MLH1	mutL homolog 1, colon cancer, nonpolyposis type 2 (E. coli)
hsa-miR-556-5p	1	0	1	1	1	1	ITSN1	intersectin 1 (SH3 domain protein)
hsa-miR-556-5p	0	0	1	0	0	0	FAM226A	family with sequence similarity 226, member A (non-protein coding)
hsa-miR-556-5p	1	0	1	0	1	1	EPDR1	ependymin related protein 1 (zebrafish)
hsa-miR-556-5p	1	0	1	1	1	1	ATP2B2	ATPase, Ca++ transporting, plasma membrane 2
hsa-miR-556-5p	1	0	1	0	1	1	STAT3	signal transducer and activator of transcription 3 (acute-phase response factor)
hsa-miR-556-5p	1	0	1	1	1	1	CCNG2	cyclin G2
hsa-miR-556-5p	0	0	1	1	1	1	ELF1	E74-like factor 1 (ets domain transcription factor)
hsa-miR-556-5p	1	0	1	1	0	0	ADRB3	adrenoceptor beta 3
hsa-miR-556-5p	1	0	1	1	1	1	FAS	Fas (TNF receptor superfamily, member 6)
hsa-miR-556-5p	0	0	1	1	0	0	ASPA	aspartoacylase
hsa-miR-556-5p	1	0	1	1	1	1	COL4A3	collagen, type IV, alpha 3 (Goodpasture antigen)
hsa-miR-556-5p	1	0	1	1	1	1	COL4A4	collagen, type IV, alpha 4
hsa-miR-556-5p	1	0	1	1	1	1	F13A1	coagulation factor XIII, A1 polypeptide
hsa-miR-556-5p	1	0	1	1	1	1	FBN1	fibrillin 1
hsa-miR-556-5p	0	0	1	0	1	1	GBE1	glucan (1,4-alpha-), branching enzyme 1
hsa-miR-556-5p	1	0	1	1	1	1	GK	glycerol kinase
hsa-miR-556-5p	1	0	1	0	1	1	ITGB3	integrin, beta 3 (platelet glycoprotein IIIa, antigen CD61)
hsa-miR-556-5p	1	0	1	1	1	1	KCNA1	potassium voltage-gated channel, shaker-related subfamily, member 1 (episodic ataxia with myokymia)
hsa-miR-556-5p	0	0	1	1	1	1	KCNJ1	potassium inwardly-rectifying channel, subfamily J, member 1
hsa-miR-556-5p	1	0	1	1	1	1	MET	met proto-oncogene (hepatocyte growth factor receptor)
hsa-miR-556-5p	1	0	1	1	1	1	OCRL	oculocerebrorenal syndrome of Lowe
hsa-miR-556-5p	0	0	1	0	1	1	PGK1	phosphoglycerate kinase 1
hsa-miR-556-5p	1	0	1	1	1	1	ATXN1	ataxin 1
hsa-miR-556-5p	1	0	1	0	1	1	SCN4A	sodium channel, voltage-gated, type IV, alpha subunit
hsa-miR-556-5p	1	0	1	1	1	1	CHM	choroideremia (Rab escort protein 1)
hsa-miR-556-5p	1	0	1	0	1	1	PAFAH1B1	platelet-activating factor acetylhydrolase 1b, regulatory subunit 1 (45kDa)
hsa-miR-556-5p	0	0	1	1	1	1	OXCT1	3-oxoacid CoA transferase 1
hsa-miR-556-5p	1	0	1	1	1	1	RFX5	regulatory factor X, 5 (influences HLA class II expression)
hsa-miR-556-5p	1	0	1	1	1	1	SELE	selectin E
hsa-miR-556-5p	1	0	1	1	1	1	ATRX	alpha thalassemia/mental retardation syndrome X-linked
hsa-miR-556-5p	1	0	1	1	1	1	DCX	doublecortin
hsa-miR-556-5p	1	0	1	0	1	1	ABAT	4-aminobutyrate aminotransferase
hsa-miR-556-5p	1	0	1	0	1	1	ADRB1	adrenoceptor beta 1
hsa-miR-556-5p	1	0	1	1	1	1	CACNB4	calcium channel, voltage-dependent, beta 4 subunit
hsa-miR-556-5p	1	0	1	1	1	1	GRIA4	glutamate receptor, ionotropic, AMPA 4
hsa-miR-556-5p	0	0	1	1	1	1	HTR7	5-hydroxytryptamine (serotonin) receptor 7, adenylate cyclase-coupled
hsa-miR-556-5p	1	0	1	0	1	1	KCNJ2	potassium inwardly-rectifying channel, subfamily J, member 2
hsa-miR-556-5p	0	0	1	0	1	1	PTGIS	prostaglandin I2 (prostacyclin) synthase
hsa-miR-556-5p	0	0	1	1	1	1	RPL32	ribosomal protein L32
hsa-miR-556-5p	1	0	1	0	1	1	SMAD5	SMAD family member 5
hsa-miR-556-5p	0	0	1	1	1	1	GALK2	galactokinase 2
hsa-miR-556-5p	0	0	1	1	1	1	DDI1	DNA-damage inducible 1 homolog 1 (S. cerevisiae)
hsa-miR-556-5p	1	0	1	1	1	1	GATA3	GATA binding protein 3
hsa-miR-556-5p	1	0	1	1	1	1	WNK3	WNK lysine deficient protein kinase 3
hsa-miR-556-5p	0	0	1	0	0	0	OR8G1	olfactory receptor, family 8, subfamily G, member 1
hsa-miR-556-5p	0	0	1	1	1	1	POTEA	POTE ankyrin domain family, member A
hsa-miR-556-5p	1	0	1	0	1	1	CACNA1I	calcium channel, voltage-dependent, T type, alpha 1I subunit
hsa-miR-556-5p	1	0	1	1	1	1	LEPR	leptin receptor
hsa-miR-556-5p	1	0	1	1	1	1	RREB1	ras responsive element binding protein 1
hsa-miR-556-5p	0	0	1	1	1	1	ALG11	asparagine-linked glycosylation 11, alpha-1,2-mannosyltransferase homolog (yeast)
hsa-miR-556-5p	0	0	1	0	1	1	ZNF705A	zinc finger protein 705A
hsa-miR-556-5p	1	0	1	1	1	1	SFMBT1	Scm-like with four mbt domains 1
hsa-miR-556-5p	0	0	1	1	1	1	FRG2	FSHD region gene 2
hsa-miR-556-5p	1	0	1	1	1	1	PLCXD3	phosphatidylinositol-specific phospholipase C, X domain containing 3
hsa-miR-556-5p	1	0	1	1	1	1	TCEAL1	transcription elongation factor A (SII)-like 1
hsa-miR-556-5p	0	0	1	1	1	1	APOBEC3F	apolipoprotein B mRNA editing enzyme, catalytic polypeptide-like 3F
hsa-miR-556-5p	1	0	1	1	1	1	TCEAL8	transcription elongation factor A (SII)-like 8
hsa-miR-556-5p	1	0	1	1	1	1	L3MBTL3	l(3)mbt-like 3 (Drosophila)
hsa-miR-556-5p	1	0	1	1	1	1	IGF2BP2	insulin-like growth factor 2 mRNA binding protein 2
hsa-miR-556-5p	1	0	1	1	1	1	TULP4	tubby like protein 4
hsa-miR-556-5p	0	0	1	0	1	1	C3orf56	chromosome 3 open reading frame 56
hsa-miR-556-5p	1	0	1	0	1	1	CPLX2	complexin 2
hsa-miR-556-5p	0	0	1	1	1	1	FAM154B	family with sequence similarity 154, member B
hsa-miR-556-5p	0	0	1	1	0	0	REG3G	regenerating islet-derived 3 gamma
hsa-miR-556-5p	1	0	1	0	1	1	KIAA2022	KIAA2022
hsa-miR-556-5p	0	0	1	1	1	1	MXI1	MAX interactor 1
hsa-miR-556-5p	1	0	1	1	1	1	FNIP1	folliculin interacting protein 1
hsa-miR-556-5p	1	0	1	0	1	1	RCHY1	ring finger and CHY zinc finger domain containing 1, E3 ubiquitin protein ligase
hsa-miR-556-5p	0	0	1	1	1	1	HRNR	hornerin
hsa-miR-556-5p	1	0	1	1	1	1	FAM168B	family with sequence similarity 168, member B
hsa-miR-556-5p	0	0	1	0	1	1	THEMIS	thymocyte selection associated
hsa-miR-556-5p	1	0	1	1	1	1	FAM171A1	family with sequence similarity 171, member A1
hsa-miR-556-5p	1	0	1	0	1	1	FYTTD1	forty-two-three domain containing 1
hsa-miR-556-5p	1	0	1	0	1	1	BACH1	BTB and CNC homology 1, basic leucine zipper transcription factor 1
hsa-miR-556-5p	1	0	1	0	1	1	CREB5	cAMP responsive element binding protein 5
hsa-miR-556-5p	0	0	1	0	1	1	GOLGA8E	golgin A8 family, member E
hsa-miR-556-5p	0	0	1	1	1	1	SPIN4	spindlin family, member 4
hsa-miR-556-5p	1	0	1	0	1	1	KCNK2	potassium channel, subfamily K, member 2
hsa-miR-556-5p	0	0	1	1	1	1	DNTT	deoxynucleotidyltransferase, terminal
hsa-miR-556-5p	0	0	1	1	1	1	BTBD11	BTB (POZ) domain containing 11
hsa-miR-556-5p	0	0	1	1	1	1	ACTBL2	actin, beta-like 2
hsa-miR-556-5p	1	0	1	0	1	1	BRCC3	BRCA1/BRCA2-containing complex, subunit 3
hsa-miR-556-5p	1	0	1	0	1	1	CELF2	CUGBP, Elav-like family member 2
hsa-miR-556-5p	1	0	1	0	1	1	RAB12	RAB12, member RAS oncogene family
hsa-miR-556-5p	0	0	1	0	1	1	C6orf120	chromosome 6 open reading frame 120
hsa-miR-556-5p	1	0	1	1	1	1	RGS7BP	regulator of G-protein signaling 7 binding protein
hsa-miR-556-5p	1	0	1	1	1	1	SAR1B	SAR1 homolog B (S. cerevisiae)
hsa-miR-556-5p	1	0	1	1	0	0	MTUS2	microtubule associated tumor suppressor candidate 2
hsa-miR-556-5p	1	0	1	1	1	1	ZNF704	zinc finger protein 704
hsa-miR-556-5p	1	0	1	1	1	1	RRM2	ribonucleotide reductase M2
hsa-miR-556-5p	0	0	1	0	1	1	ZNF705D	zinc finger protein 705D
hsa-miR-556-5p	0	0	1	1	0	0	C7orf63	chromosome 7 open reading frame 63
hsa-miR-556-5p	1	0	1	1	1	1	C3orf65	chromosome 3 open reading frame 65
hsa-miR-556-5p	1	0	1	1	1	1	MAPK3	mitogen-activated protein kinase 3
hsa-miR-556-5p	1	0	1	1	1	1	SPTSSB	serine palmitoyltransferase, small subunit B
hsa-miR-556-5p	1	0	1	1	1	1	SCN2A	sodium channel, voltage-gated, type II, alpha subunit
hsa-miR-556-5p	1	0	1	1	1	1	HTR4	5-hydroxytryptamine (serotonin) receptor 4, G protein-coupled
hsa-miR-556-5p	0	0	1	1	1	1	MCHR2	melanin-concentrating hormone receptor 2
hsa-miR-556-5p	1	0	1	1	1	1	GDAP1	ganglioside induced differentiation associated protein 1
hsa-miR-556-5p	1	0	1	1	1	1	ZNF706	zinc finger protein 706
hsa-miR-556-5p	1	0	1	1	1	1	GLRA3	glycine receptor, alpha 3
hsa-miR-556-5p	1	0	1	1	1	1	SLA	Src-like-adaptor
hsa-miR-556-5p	0	0	1	0	0	0	AGAP7	ArfGAP with GTPase domain, ankyrin repeat and PH domain 7
hsa-miR-556-5p	1	0	1	1	1	1	SRSF1	serine/arginine-rich splicing factor 1
hsa-miR-556-5p	1	0	1	1	1	1	UBN1	ubinuclein 1
hsa-miR-556-5p	1	0	1	1	1	1	CASZ1	castor zinc finger 1
hsa-miR-556-5p	1	0	1	1	1	1	FAM155A	family with sequence similarity 155, member A
hsa-miR-556-5p	1	0	1	0	1	1	ODZ3	odz, odd Oz/ten-m homolog 3 (Drosophila)
hsa-miR-556-5p	1	0	1	1	1	1	MGA	MAX gene associated
hsa-miR-556-5p	1	0	1	1	1	1	REPS2	RALBP1 associated Eps domain containing 2
hsa-miR-556-5p	1	0	1	1	1	1	ADAM10	ADAM metallopeptidase domain 10
hsa-miR-556-5p	0	0	1	1	1	1	ARHGDIB	Rho GDP dissociation inhibitor (GDI) beta
hsa-miR-556-5p	1	0	1	0	1	1	BMPR2	bone morphogenetic protein receptor, type II (serine/threonine kinase)
hsa-miR-556-5p	1	0	1	0	1	1	KLF9	Kruppel-like factor 9
hsa-miR-556-5p	0	0	1	1	0	0	CDC6	cell division cycle 6 homolog (S. cerevisiae)
hsa-miR-556-5p	1	0	1	1	1	1	CREBL2	cAMP responsive element binding protein-like 2
hsa-miR-556-5p	1	0	1	1	1	1	GPC4	glypican 4
hsa-miR-556-5p	1	0	1	1	1	1	GCNT1	glucosaminyl (N-acetyl) transferase 1, core 2
hsa-miR-556-5p	0	0	1	1	1	1	IL13RA1	interleukin 13 receptor, alpha 1
hsa-miR-556-5p	0	0	1	0	1	1	AREG	amphiregulin
hsa-miR-556-5p	0	0	1	1	0	0	RHOG	ras homolog family member G
hsa-miR-556-5p	0	0	1	1	1	1	BTN1A1	butyrophilin, subfamily 1, member A1
hsa-miR-556-5p	1	0	1	1	1	1	CDH2	cadherin 2, type 1, N-cadherin (neuronal)
hsa-miR-556-5p	1	0	1	1	1	1	CDK2	cyclin-dependent kinase 2
hsa-miR-556-5p	1	0	1	1	1	1	CLCN4	chloride channel, voltage-sensitive 4
hsa-miR-556-5p	1	0	1	1	1	1	COL4A1	collagen, type IV, alpha 1
hsa-miR-556-5p	1	0	1	0	1	1	COL19A1	collagen, type XIX, alpha 1
hsa-miR-556-5p	0	0	1	1	1	1	COX7B	cytochrome c oxidase subunit VIIb
hsa-miR-556-5p	0	0	1	1	1	1	CSN2	casein beta
hsa-miR-556-5p	0	0	1	1	1	1	DSG1	desmoglein 1
hsa-miR-556-5p	1	0	1	1	1	1	EGR1	early growth response 1
hsa-miR-556-5p	1	0	1	1	1	1	FMOD	fibromodulin
hsa-miR-556-5p	1	0	1	1	1	1	GAB1	GRB2-associated binding protein 1
hsa-miR-556-5p	0	0	1	1	1	1	HOXA4	homeobox A4
hsa-miR-556-5p	1	0	1	1	1	1	HSPA4	heat shock 70kDa protein 4
hsa-miR-556-5p	0	0	1	1	1	1	FOXN2	forkhead box N2
hsa-miR-556-5p	1	0	1	0	1	1	IRF2	interferon regulatory factor 2
hsa-miR-556-5p	0	0	1	1	1	1	ITGB1	integrin, beta 1 (fibronectin receptor, beta polypeptide, antigen CD29 includes MDF2, MSK12)
hsa-miR-556-5p	1	0	1	0	1	1	KIF3C	kinesin family member 3C
hsa-miR-556-5p	0	0	1	1	1	1	KLRC1	killer cell lectin-like receptor subfamily C, member 1
hsa-miR-556-5p	0	0	1	1	1	1	KLRC2	killer cell lectin-like receptor subfamily C, member 2
hsa-miR-556-5p	1	0	1	1	1	1	KPNA3	karyopherin alpha 3 (importin alpha 4)
hsa-miR-556-5p	1	0	1	1	1	1	KPNA4	karyopherin alpha 4 (importin alpha 3)
hsa-miR-556-5p	1	0	1	1	1	1	IPO5	importin 5
hsa-miR-556-5p	1	0	1	1	1	1	MARCKS	myristoylated alanine-rich protein kinase C substrate
hsa-miR-556-5p	1	0	1	0	1	1	MXD1	MAX dimerization protein 1
hsa-miR-556-5p	1	0	1	1	1	1	MN1	meningioma (disrupted in balanced translocation) 1
hsa-miR-556-5p	0	0	1	1	1	1	NID1	nidogen 1
hsa-miR-556-5p	1	0	1	1	1	1	OSBP	oxysterol binding protein
hsa-miR-556-5p	1	0	1	1	1	1	PBX2	pre-B-cell leukemia homeobox 2
hsa-miR-556-5p	0	0	1	1	1	1	PIK3C2B	phosphatidylinositol-4-phosphate 3-kinase, catalytic subunit type 2 beta
hsa-miR-556-5p	1	0	1	1	1	1	PPP1CB	protein phosphatase 1, catalytic subunit, beta isozyme
hsa-miR-556-5p	1	0	1	0	1	1	PPP2R2A	protein phosphatase 2, regulatory subunit B, alpha
hsa-miR-556-5p	1	0	1	0	1	1	MAPK4	mitogen-activated protein kinase 4
hsa-miR-556-5p	1	0	1	1	1	1	MAPK6	mitogen-activated protein kinase 6
hsa-miR-556-5p	0	0	1	0	1	1	PSMD3	proteasome (prosome, macropain) 26S subunit, non-ATPase, 3
hsa-miR-556-5p	1	0	1	1	0	0	PSMD7	proteasome (prosome, macropain) 26S subunit, non-ATPase, 7
hsa-miR-556-5p	1	0	1	1	1	1	PTPN9	protein tyrosine phosphatase, non-receptor type 9
hsa-miR-556-5p	1	0	1	1	1	1	PTPRK	protein tyrosine phosphatase, receptor type, K
hsa-miR-556-5p	0	0	1	0	1	1	RAB3B	RAB3B, member RAS oncogene family
hsa-miR-556-5p	1	0	1	1	1	1	ARID4A	AT rich interactive domain 4A (RBP1-like)
hsa-miR-556-5p	0	0	1	1	1	1	RNASE4	ribonuclease, RNase A family, 4
hsa-miR-556-5p	0	0	1	1	1	1	XCL1	chemokine (C motif) ligand 1
hsa-miR-556-5p	0	0	1	1	1	1	SDHD	succinate dehydrogenase complex, subunit D, integral membrane protein
hsa-miR-556-5p	1	0	1	1	1	1	SH3GL2	SH3-domain GRB2-like 2
hsa-miR-556-5p	1	0	1	1	1	1	SMARCC1	SWI/SNF related, matrix associated, actin dependent regulator of chromatin, subfamily c, member 1
hsa-miR-556-5p	1	0	1	0	1	1	SOX11	SRY (sex determining region Y)-box 11
hsa-miR-556-5p	1	0	1	1	1	1	SRI	sorcin
hsa-miR-556-5p	1	0	1	1	1	1	SRPR	signal recognition particle receptor (docking protein)
hsa-miR-556-5p	1	0	1	0	1	1	STC1	stanniocalcin 1
hsa-miR-556-5p	1	0	1	0	1	1	RPS6KB1	ribosomal protein S6 kinase, 70kDa, polypeptide 1
hsa-miR-556-5p	0	0	1	1	1	1	XCL2	chemokine (C motif) ligand 2
hsa-miR-556-5p	0	0	1	1	1	1	TAF2	TAF2 RNA polymerase II, TATA box binding protein (TBP)-associated factor, 150kDa
hsa-miR-556-5p	1	0	1	1	1	1	TIAM1	T-cell lymphoma invasion and metastasis 1
hsa-miR-556-5p	1	0	1	0	1	1	TUB	tubby homolog (mouse)
hsa-miR-556-5p	0	0	1	1	1	1	UBE2D1	ubiquitin-conjugating enzyme E2D 1
hsa-miR-556-5p	1	0	1	1	1	1	FZD1	frizzled family receptor 1
hsa-miR-556-5p	1	0	1	0	1	1	CUL3	cullin 3
hsa-miR-556-5p	1	0	1	1	1	1	CBX4	chromobox homolog 4
hsa-miR-556-5p	1	0	1	1	1	1	CDC14A	CDC14 cell division cycle 14 homolog A (S. cerevisiae)
hsa-miR-556-5p	1	0	1	0	1	1	TNKS	tankyrase, TRF1-interacting ankyrin-related ADP-ribose polymerase
hsa-miR-556-5p	1	0	1	1	1	1	NRP2	neuropilin 2
hsa-miR-556-5p	0	0	1	1	0	0	TMEM11	transmembrane protein 11
hsa-miR-556-5p	1	0	1	1	1	1	ALDH1A2	aldehyde dehydrogenase 1 family, member A2
hsa-miR-556-5p	1	0	1	0	1	1	WASL	Wiskott-Aldrich syndrome-like
hsa-miR-556-5p	0	0	1	1	1	1	MPZL1	myelin protein zero-like 1
hsa-miR-556-5p	0	0	1	1	1	1	RNF8	ring finger protein 8, E3 ubiquitin protein ligase
hsa-miR-556-5p	1	0	1	1	1	1	MAP7	microtubule-associated protein 7
hsa-miR-556-5p	0	0	1	0	1	1	RHOB	ras homolog family member B
hsa-miR-556-5p	1	0	1	1	1	1	SLC25A27	solute carrier family 25, member 27
hsa-miR-556-5p	0	0	1	0	1	1	CYTIP	cytohesin 1 interacting protein
hsa-miR-556-5p	1	0	1	0	1	1	RUNX1T1	runt-related transcription factor 1; translocated to, 1 (cyclin D-related)
hsa-miR-556-5p	1	0	1	1	1	1	DACH1	dachshund homolog 1 (Drosophila)
hsa-miR-556-5p	1	0	1	0	1	1	ETV5	ets variant 5
hsa-miR-556-5p	1	0	1	1	1	1	ACSL3	acyl-CoA synthetase long-chain family member 3
hsa-miR-556-5p	1	0	1	0	1	1	FGF5	fibroblast growth factor 5
hsa-miR-556-5p	1	0	1	1	0	0	FIGF	c-fos induced growth factor (vascular endothelial growth factor D)
hsa-miR-556-5p	1	0	1	1	1	1	FUT8	fucosyltransferase 8 (alpha (1,6) fucosyltransferase)
hsa-miR-556-5p	1	0	1	1	1	1	MLLT3	myeloid/lymphoid or mixed-lineage leukemia (trithorax homolog, Drosophila); translocated to, 3
hsa-miR-556-5p	0	0	1	1	1	1	NDUFC2	NADH dehydrogenase (ubiquinone) 1, subcomplex unknown, 2, 14.5kDa
hsa-miR-556-5p	0	0	1	1	1	1	SMS	spermine synthase
hsa-miR-556-5p	0	0	1	1	1	1	CDK2AP1	cyclin-dependent kinase 2 associated protein 1
hsa-miR-556-5p	0	0	1	1	1	1	PABPN1	poly(A) binding protein, nuclear 1
hsa-miR-556-5p	0	0	1	0	0	0	XKRY	XK, Kell blood group complex subunit-related, Y-linked
hsa-miR-556-5p	1	0	1	1	1	1	MTMR4	myotubularin related protein 4
hsa-miR-556-5p	1	0	1	1	1	1	RABEP1	rabaptin, RAB GTPase binding effector protein 1
hsa-miR-556-5p	1	0	1	1	0	0	COX7A2L	cytochrome c oxidase subunit VIIa polypeptide 2 like
hsa-miR-556-5p	1	0	1	1	1	1	KIF3B	kinesin family member 3B
hsa-miR-556-5p	1	0	1	1	1	1	AKAP7	A kinase (PRKA) anchor protein 7
hsa-miR-556-5p	1	0	1	1	1	1	VPS4B	vacuolar protein sorting 4 homolog B (S. cerevisiae)
hsa-miR-556-5p	1	0	1	1	1	1	ZFP36L1	zinc finger protein 36, C3H type-like 1
hsa-miR-556-5p	0	0	1	1	1	1	CALB1	calbindin 1, 28kDa
hsa-miR-556-5p	1	0	1	0	1	1	DOCK3	dedicator of cytokinesis 3
hsa-miR-556-5p	0	0	1	1	1	1	DSC1	desmocollin 1
hsa-miR-556-5p	0	0	1	0	1	1	DSC2	desmocollin 2
hsa-miR-556-5p	0	0	1	1	1	1	EPYC	epiphycan
hsa-miR-556-5p	0	0	1	1	1	1	PSMD5	proteasome (prosome, macropain) 26S subunit, non-ATPase, 5
hsa-miR-556-5p	0	0	1	1	1	1	SIM1	single-minded homolog 1 (Drosophila)
hsa-miR-556-5p	0	0	1	1	0	0	SLC4A3	solute carrier family 4, anion exchanger, member 3
hsa-miR-556-5p	1	0	1	1	1	1	OXSR1	oxidative-stress responsive 1
hsa-miR-556-5p	1	0	1	1	1	1	FOXN3	forkhead box N3
hsa-miR-556-5p	0	0	1	1	0	0	NCKAP1L	NCK-associated protein 1-like
hsa-miR-556-5p	1	0	1	1	1	1	RAB8A	RAB8A, member RAS oncogene family
hsa-miR-556-5p	1	0	1	0	1	1	PRKAB2	protein kinase, AMP-activated, beta 2 non-catalytic subunit
hsa-miR-556-5p	1	0	1	1	1	1	RND2	Rho family GTPase 2
hsa-miR-556-5p	0	0	1	1	1	1	GNPDA1	glucosamine-6-phosphate deaminase 1
hsa-miR-556-5p	0	0	1	1	1	1	DNAJB6	DnaJ (Hsp40) homolog, subfamily B, member 6
hsa-miR-556-5p	1	0	1	1	1	1	HOXA1	homeobox A1
hsa-miR-556-5p	0	0	1	1	1	1	HES1	hairy and enhancer of split 1, (Drosophila)
hsa-miR-556-5p	0	0	1	1	1	1	HSD11B1	hydroxysteroid (11-beta) dehydrogenase 1
hsa-miR-556-5p	0	0	1	1	1	1	ITK	IL2-inducible T-cell kinase
hsa-miR-556-5p	0	0	1	0	1	1	POU3F2	POU class 3 homeobox 2
hsa-miR-556-5p	0	0	1	1	1	1	CCL8	chemokine (C-C motif) ligand 8
hsa-miR-556-5p	0	0	1	1	1	1	SRSF4	serine/arginine-rich splicing factor 4
hsa-miR-556-5p	0	0	1	1	1	1	MKRN3	makorin ring finger protein 3
hsa-miR-556-5p	0	0	1	1	1	1	UBXN8	UBX domain protein 8
hsa-miR-556-5p	0	0	1	1	1	1	GPR52	G protein-coupled receptor 52
hsa-miR-556-5p	1	0	1	1	1	1	ARPC5	actin related protein 2/3 complex, subunit 5, 16kDa
hsa-miR-556-5p	1	0	1	0	1	1	TSPAN2	tetraspanin 2
hsa-miR-556-5p	0	0	1	1	1	1	MPHOSPH10	M-phase phosphoprotein 10 (U3 small nucleolar ribonucleoprotein)
hsa-miR-556-5p	0	0	1	1	1	1	MPHOSPH6	M-phase phosphoprotein 6
hsa-miR-556-5p	1	0	1	1	1	1	PRKD3	protein kinase D3
hsa-miR-556-5p	1	0	1	1	1	1	GLYAT	glycine-N-acyltransferase
hsa-miR-556-5p	1	0	1	0	1	1	SPRY3	sprouty homolog 3 (Drosophila)
hsa-miR-556-5p	1	0	1	1	1	1	MAN1A1	mannosidase, alpha, class 1A, member 1
hsa-miR-556-5p	1	0	1	1	1	1	MMP16	matrix metallopeptidase 16 (membrane-inserted)
hsa-miR-556-5p	0	0	1	1	1	1	LANCL1	LanC lantibiotic synthetase component C-like 1 (bacterial)
hsa-miR-556-5p	1	0	1	1	0	0	AGFG2	ArfGAP with FG repeats 2
hsa-miR-556-5p	0	0	1	1	1	1	MICU1	mitochondrial calcium uptake 1
hsa-miR-556-5p	1	0	1	1	1	1	SEMA3A	sema domain, immunoglobulin domain (Ig), short basic domain, secreted, (semaphorin) 3A
hsa-miR-556-5p	0	0	1	1	1	1	KRT1	keratin 1
hsa-miR-556-5p	1	0	1	1	1	1	DAGLA	diacylglycerol lipase, alpha
hsa-miR-556-5p	1	0	1	1	1	1	LASP1	LIM and SH3 protein 1
hsa-miR-556-5p	1	0	1	1	1	1	NEFL	neurofilament, light polypeptide
hsa-miR-556-5p	1	0	1	1	1	1	PKN2	protein kinase N2
hsa-miR-556-5p	1	0	1	1	1	1	RANBP2	RAN binding protein 2
hsa-miR-556-5p	1	0	1	0	1	1	SRSF6	serine/arginine-rich splicing factor 6
hsa-miR-556-5p	1	0	1	1	1	1	SMC1A	structural maintenance of chromosomes 1A
hsa-miR-556-5p	1	0	1	1	1	1	NEBL	nebulette
hsa-miR-556-5p	0	0	1	1	0	0	STAMBP	STAM binding protein
hsa-miR-556-5p	1	0	1	1	1	1	DYNLT3	dynein, light chain, Tctex-type 3
hsa-miR-556-5p	0	0	1	1	1	1	GLRX3	glutaredoxin 3
hsa-miR-556-5p	1	0	1	1	1	1	KHDRBS1	KH domain containing, RNA binding, signal transduction associated 1
hsa-miR-556-5p	0	0	1	1	1	1	POLD3	polymerase (DNA-directed), delta 3, accessory subunit
hsa-miR-556-5p	0	0	1	1	1	1	TBR1	T-box, brain, 1
hsa-miR-556-5p	1	0	1	1	1	1	ZBTB6	zinc finger and BTB domain containing 6
hsa-miR-556-5p	1	0	1	0	1	1	TCEA1	transcription elongation factor A (SII), 1
hsa-miR-556-5p	1	0	1	1	1	1	KAT6A	K(lysine) acetyltransferase 6A
hsa-miR-556-5p	1	0	1	1	1	1	ZBTB33	zinc finger and BTB domain containing 33
hsa-miR-556-5p	0	0	1	1	1	1	TRIM10	tripartite motif containing 10
hsa-miR-556-5p	1	0	1	1	1	1	PRRX1	paired related homeobox 1
hsa-miR-556-5p	1	0	1	1	1	1	RP2	retinitis pigmentosa 2 (X-linked recessive)
hsa-miR-556-5p	0	0	1	1	1	1	RTN4	reticulon 4
hsa-miR-556-5p	1	0	1	1	1	1	ABHD2	abhydrolase domain containing 2
hsa-miR-556-5p	1	0	1	1	1	1	RAPGEF4	Rap guanine nucleotide exchange factor (GEF) 4
hsa-miR-556-5p	0	0	1	1	1	1	ZNF80	zinc finger protein 80
hsa-miR-556-5p	0	0	1	1	1	1	WIF1	WNT inhibitory factor 1
hsa-miR-556-5p	0	0	1	1	1	1	SLC6A14	solute carrier family 6 (amino acid transporter), member 14
hsa-miR-556-5p	0	0	1	1	1	1	HRH3	histamine receptor H3
hsa-miR-556-5p	0	0	1	1	1	1	XPOT	exportin, tRNA (nuclear export receptor for tRNAs)
hsa-miR-556-5p	1	0	1	1	1	1	KLF12	Kruppel-like factor 12
hsa-miR-556-5p	0	0	1	0	1	1	PNMA2	paraneoplastic Ma antigen 2
hsa-miR-556-5p	1	0	1	1	1	1	CBX3	chromobox homolog 3
hsa-miR-556-5p	0	0	1	1	1	1	GABARAPL2	GABA(A) receptor-associated protein-like 2
hsa-miR-556-5p	1	0	1	1	1	1	ZNF236	zinc finger protein 236
hsa-miR-556-5p	1	0	1	1	1	1	TARDBP	TAR DNA binding protein
hsa-miR-556-5p	0	0	1	1	1	1	LMOD1	leiomodin 1 (smooth muscle)
hsa-miR-556-5p	1	0	1	1	1	1	RHOQ	ras homolog family member Q
hsa-miR-556-5p	1	0	1	0	1	1	PXDN	peroxidasin homolog (Drosophila)
hsa-miR-556-5p	1	0	1	0	1	1	G3BP2	GTPase activating protein (SH3 domain) binding protein 2
hsa-miR-556-5p	1	0	1	1	1	1	RANBP6	RAN binding protein 6
hsa-miR-556-5p	0	0	1	1	1	1	N6AMT1	N-6 adenine-specific DNA methyltransferase 1 (putative)
hsa-miR-556-5p	0	0	1	1	0	0	KCNJ14	potassium inwardly-rectifying channel, subfamily J, member 14
hsa-miR-556-5p	0	0	1	1	1	1	KLRC4	killer cell lectin-like receptor subfamily C, member 4
hsa-miR-556-5p	0	0	1	0	1	1	EMR2	egf-like module containing, mucin-like, hormone receptor-like 2
hsa-miR-556-5p	1	0	1	1	1	1	NRG1	neuregulin 1
hsa-miR-556-5p	1	0	1	1	1	1	SOCS5	suppressor of cytokine signaling 5
hsa-miR-556-5p	0	0	1	1	1	1	UBL4A	ubiquitin-like 4A
hsa-miR-556-5p	0	0	1	0	1	1	ADAMTS3	ADAM metallopeptidase with thrombospondin type 1 motif, 3
hsa-miR-556-5p	1	0	1	0	1	1	ODZ1	odz, odd Oz/ten-m homolog 1 (Drosophila)
hsa-miR-556-5p	0	0	1	1	1	1	CAPN6	calpain 6
hsa-miR-556-5p	0	0	1	1	1	1	TRAM1	translocation associated membrane protein 1
hsa-miR-556-5p	1	0	1	1	1	1	LEMD3	LEM domain containing 3
hsa-miR-556-5p	1	0	1	1	1	1	SLC7A11	solute carrier family 7 (anionic amino acid transporter light chain, xc- system), member 11
hsa-miR-556-5p	1	0	1	1	1	1	MTCH2	mitochondrial carrier 2
hsa-miR-556-5p	1	0	1	0	1	1	DIEXF	digestive organ expansion factor homolog (zebrafish)
hsa-miR-556-5p	0	0	1	1	1	1	GOLIM4	golgi integral membrane protein 4
hsa-miR-556-5p	0	0	1	1	1	1	TMOD3	tropomodulin 3 (ubiquitous)
hsa-miR-556-5p	0	0	1	1	1	1	ARFGAP3	ADP-ribosylation factor GTPase activating protein 3
hsa-miR-556-5p	1	0	1	1	1	1	ZNF592	zinc finger protein 592
hsa-miR-556-5p	1	0	1	1	1	1	GCC2	GRIP and coiled-coil domain containing 2
hsa-miR-556-5p	0	0	1	1	1	1	PHF14	PHD finger protein 14
hsa-miR-556-5p	1	0	1	1	1	1	ULK2	unc-51-like kinase 2 (C. elegans)
hsa-miR-556-5p	1	0	1	0	1	1	TOX	thymocyte selection-associated high mobility group box
hsa-miR-556-5p	0	0	1	0	1	1	DHCR24	24-dehydrocholesterol reductase
hsa-miR-556-5p	1	0	1	1	1	1	DAZAP2	DAZ associated protein 2
hsa-miR-556-5p	1	0	1	0	1	1	KIAA0494	KIAA0494
hsa-miR-556-5p	1	0	1	1	1	1	LRIG2	leucine-rich repeats and immunoglobulin-like domains 2
hsa-miR-556-5p	1	0	1	1	0	0	IQSEC1	IQ motif and Sec7 domain 1
hsa-miR-556-5p	0	0	1	1	1	1	N4BP2L2	NEDD4 binding protein 2-like 2
hsa-miR-556-5p	1	0	1	1	1	1	RNF44	ring finger protein 44
hsa-miR-556-5p	1	0	1	0	1	1	RAB11FIP2	RAB11 family interacting protein 2 (class I)
hsa-miR-556-5p	0	0	1	1	1	1	ADNP2	ADNP homeobox 2
hsa-miR-556-5p	1	0	1	0	1	1	ICK	intestinal cell (MAK-like) kinase
hsa-miR-556-5p	1	0	1	1	1	1	SORCS3	sortilin-related VPS10 domain containing receptor 3
hsa-miR-556-5p	1	0	1	0	1	1	WDFY3	WD repeat and FYVE domain containing 3
hsa-miR-556-5p	1	0	1	1	1	1	PHLPP2	PH domain and leucine rich repeat protein phosphatase 2
hsa-miR-556-5p	1	0	1	0	1	1	PDS5B	PDS5, regulator of cohesion maintenance, homolog B (S. cerevisiae)
hsa-miR-556-5p	1	0	1	0	1	1	NMNAT2	nicotinamide nucleotide adenylyltransferase 2
hsa-miR-556-5p	1	0	1	0	1	1	ZNF609	zinc finger protein 609
hsa-miR-556-5p	1	0	1	1	1	1	PDS5A	PDS5, regulator of cohesion maintenance, homolog A (S. cerevisiae)
hsa-miR-556-5p	1	0	1	1	1	1	WDR7	WD repeat domain 7
hsa-miR-556-5p	1	0	1	0	1	1	ARHGEF12	Rho guanine nucleotide exchange factor (GEF) 12
hsa-miR-556-5p	1	0	1	0	1	1	LARP1	La ribonucleoprotein domain family, member 1
hsa-miR-556-5p	1	0	1	1	1	1	DSTYK	dual serine/threonine and tyrosine protein kinase
hsa-miR-556-5p	0	0	1	1	1	1	NBPF14	neuroblastoma breakpoint family, member 14
hsa-miR-556-5p	0	0	1	1	1	1	ZNF10	zinc finger protein 10
hsa-miR-556-5p	1	0	1	1	1	1	RNF19A	ring finger protein 19A, E3 ubiquitin protein ligase
hsa-miR-556-5p	1	0	1	1	1	1	CNOT6	CCR4-NOT transcription complex, subunit 6
hsa-miR-556-5p	0	0	1	1	1	1	KBTBD2	kelch repeat and BTB (POZ) domain containing 2
hsa-miR-556-5p	1	0	1	0	1	1	RRM2B	ribonucleotide reductase M2 B (TP53 inducible)
hsa-miR-556-5p	1	0	1	1	1	1	PLA2G3	phospholipase A2, group III
hsa-miR-556-5p	1	0	1	1	1	1	TXNDC12	thioredoxin domain containing 12 (endoplasmic reticulum)
hsa-miR-556-5p	0	0	1	0	0	0	TMA7	translational machinery associated 7 homolog (S. cerevisiae)
hsa-miR-556-5p	0	0	1	1	1	1	SCCPDH	saccharopine dehydrogenase (putative)
hsa-miR-556-5p	1	0	1	1	1	1	PHF20L1	PHD finger protein 20-like 1
hsa-miR-556-5p	0	0	1	1	1	1	HDGFRP3	hepatoma-derived growth factor, related protein 3
hsa-miR-556-5p	1	0	1	0	1	1	WNT16	wingless-type MMTV integration site family, member 16
hsa-miR-556-5p	0	0	1	1	1	1	RAB10	RAB10, member RAS oncogene family
hsa-miR-556-5p	1	0	1	0	1	1	HECA	headcase homolog (Drosophila)
hsa-miR-556-5p	0	0	1	0	1	1	FAM8A1	family with sequence similarity 8, member A1
hsa-miR-556-5p	1	0	1	0	1	1	HPCAL4	hippocalcin like 4
hsa-miR-556-5p	0	0	1	1	0	0	VGLL1	vestigial like 1 (Drosophila)
hsa-miR-556-5p	1	0	1	1	1	1	PHF20	PHD finger protein 20
hsa-miR-556-5p	0	0	1	1	0	0	FAM203A	family with sequence similarity 203, member A
hsa-miR-556-5p	1	0	1	0	1	1	TMEM216	transmembrane protein 216
hsa-miR-556-5p	1	0	1	1	1	1	GALNT7	UDP-N-acetyl-alpha-D-galactosamine:polypeptide N-acetylgalactosaminyltransferase 7 (GalNAc-T7)
hsa-miR-556-5p	0	0	1	0	1	1	TRIM44	tripartite motif containing 44
hsa-miR-556-5p	1	0	1	1	1	1	ZNF280C	zinc finger protein 280C
hsa-miR-556-5p	1	0	1	1	1	1	VPS13C	vacuolar protein sorting 13 homolog C (S. cerevisiae)
hsa-miR-556-5p	1	0	1	0	1	1	FAM46C	family with sequence similarity 46, member C
hsa-miR-556-5p	1	0	1	1	1	1	HIF1AN	hypoxia inducible factor 1, alpha subunit inhibitor
hsa-miR-556-5p	0	0	1	1	0	0	TRMT12	tRNA methyltransferase 12 homolog (S. cerevisiae)
hsa-miR-556-5p	0	0	1	1	1	1	SCYL2	SCY1-like 2 (S. cerevisiae)
hsa-miR-556-5p	1	0	1	1	1	1	IFT57	intraflagellar transport 57 homolog (Chlamydomonas)
hsa-miR-556-5p	1	0	1	1	1	1	WDYHV1	WDYHV motif containing 1
hsa-miR-556-5p	1	0	1	1	1	1	FAM178A	family with sequence similarity 178, member A
hsa-miR-556-5p	1	0	1	1	1	1	RFWD3	ring finger and WD repeat domain 3
hsa-miR-556-5p	1	0	1	1	1	1	RIC8B	resistance to inhibitors of cholinesterase 8 homolog B (C. elegans)
hsa-miR-556-5p	0	0	1	1	1	1	NUDT11	nudix (nucleoside diphosphate linked moiety X)-type motif 11
hsa-miR-556-5p	1	0	1	1	1	1	RPRD1A	regulation of nuclear pre-mRNA domain containing 1A
hsa-miR-556-5p	0	0	1	0	1	1	GOLPH3L	golgi phosphoprotein 3-like
hsa-miR-556-5p	0	0	1	1	1	1	RCBTB1	regulator of chromosome condensation (RCC1) and BTB (POZ) domain containing protein 1
hsa-miR-556-5p	0	0	1	1	0	0	CCDC87	coiled-coil domain containing 87
hsa-miR-556-5p	1	0	1	1	1	1	ZNF654	zinc finger protein 654
hsa-miR-556-5p	0	0	1	1	1	1	TMEM144	transmembrane protein 144
hsa-miR-556-5p	1	0	1	1	1	1	RSBN1	round spermatid basic protein 1
hsa-miR-556-5p	1	0	1	1	1	1	ACER3	alkaline ceramidase 3
hsa-miR-556-5p	1	0	1	0	1	1	FOXJ2	forkhead box J2
hsa-miR-556-5p	1	0	1	0	1	1	BRK1	BRICK1, SCAR/WAVE actin-nucleating complex subunit
hsa-miR-556-5p	0	0	1	1	1	1	ZC3H15	zinc finger CCCH-type containing 15
hsa-miR-556-5p	1	0	1	1	1	1	ETNK1	ethanolamine kinase 1
hsa-miR-556-5p	1	0	1	1	1	1	KIAA1199	KIAA1199
hsa-miR-556-5p	0	0	1	1	1	1	ELAC1	elaC homolog 1 (E. coli)
hsa-miR-556-5p	1	0	1	0	1	1	TMEM55A	transmembrane protein 55A
hsa-miR-556-5p	1	0	1	1	1	1	TAP2	transporter 2, ATP-binding cassette, sub-family B (MDR/TAP)
hsa-miR-556-5p	1	0	1	1	1	1	GNG12	guanine nucleotide binding protein (G protein), gamma 12
hsa-miR-556-5p	1	0	1	0	1	1	PCDHAC1	protocadherin alpha subfamily C, 1
hsa-miR-556-5p	1	0	1	0	1	1	PCDHAC2	protocadherin alpha subfamily C, 2
hsa-miR-556-5p	1	0	1	1	1	1	PCDHA1	protocadherin alpha 1
hsa-miR-556-5p	1	0	1	0	1	1	PCDHA10	protocadherin alpha 10
hsa-miR-556-5p	1	0	1	0	1	1	PCDHA11	protocadherin alpha 11
hsa-miR-556-5p	1	0	1	0	1	1	PCDHA12	protocadherin alpha 12
hsa-miR-556-5p	1	0	1	1	1	1	PCDHA2	protocadherin alpha 2
hsa-miR-556-5p	1	0	1	1	1	1	PCDHA3	protocadherin alpha 3
hsa-miR-556-5p	1	0	1	1	1	1	PCDHA6	protocadherin alpha 6
hsa-miR-556-5p	1	0	1	0	1	1	PCDHA7	protocadherin alpha 7
hsa-miR-556-5p	1	0	1	1	1	1	PCDHA8	protocadherin alpha 8
hsa-miR-556-5p	0	0	1	0	1	1	ARL15	ADP-ribosylation factor-like 15
hsa-miR-556-5p	1	0	1	1	1	1	SEPT3	septin 3
hsa-miR-556-5p	1	0	1	0	1	1	TM9SF3	transmembrane 9 superfamily member 3
hsa-miR-556-5p	0	0	1	1	1	1	RAD18	RAD18 homolog (S. cerevisiae)
hsa-miR-556-5p	1	0	1	1	1	1	CCDC47	coiled-coil domain containing 47
hsa-miR-556-5p	1	0	1	0	1	1	EIF5A2	eukaryotic translation initiation factor 5A2
hsa-miR-556-5p	0	0	1	1	0	0	LYRM4	LYR motif containing 4
hsa-miR-556-5p	0	0	1	0	1	1	TWSG1	twisted gastrulation homolog 1 (Drosophila)
hsa-miR-556-5p	1	0	1	0	1	1	KCNS2	potassium voltage-gated channel, delayed-rectifier, subfamily S, member 2
hsa-miR-556-5p	1	0	1	1	1	1	SLC12A5	solute carrier family 12 (potassium/chloride transporter), member 5
hsa-miR-556-5p	1	0	1	1	1	1	USP31	ubiquitin specific peptidase 31
hsa-miR-556-5p	1	0	1	0	1	1	NUFIP2	nuclear fragile X mental retardation protein interacting protein 2
hsa-miR-556-5p	1	0	1	0	1	1	ALPK3	alpha-kinase 3
hsa-miR-556-5p	1	0	1	0	1	1	KLHDC5	kelch domain containing 5
hsa-miR-556-5p	0	0	1	1	1	1	ARRDC3	arrestin domain containing 3
hsa-miR-556-5p	1	0	1	1	1	1	KLHL14	kelch-like 14 (Drosophila)
hsa-miR-556-5p	1	0	1	1	1	1	ZNFX1	zinc finger, NFX1-type containing 1
hsa-miR-556-5p	1	0	1	1	1	1	NEFH	neurofilament, heavy polypeptide
hsa-miR-556-5p	1	0	1	0	1	1	XK	X-linked Kx blood group (McLeod syndrome)
hsa-miR-556-5p	1	0	1	1	1	1	NTN4	netrin 4
hsa-miR-556-5p	1	0	1	1	1	1	SNX6	sorting nexin 6
hsa-miR-556-5p	0	0	1	1	1	1	IL22RA1	interleukin 22 receptor, alpha 1
hsa-miR-556-5p	0	0	1	1	1	1	CHST6	carbohydrate (N-acetylglucosamine 6-O) sulfotransferase 6
hsa-miR-556-5p	1	0	1	1	1	1	OTX2	orthodenticle homeobox 2
hsa-miR-556-5p	0	0	1	1	1	1	GABBR1	gamma-aminobutyric acid (GABA) B receptor, 1
hsa-miR-556-5p	0	0	1	0	1	1	CFL2	cofilin 2 (muscle)
hsa-miR-556-5p	1	0	1	1	1	1	FOXM1	forkhead box M1
hsa-miR-556-5p	1	0	1	0	1	1	MCL1	myeloid cell leukemia sequence 1 (BCL2-related)
hsa-miR-556-5p	1	0	1	1	1	1	SEC24A	SEC24 family, member A (S. cerevisiae)
hsa-miR-556-5p	1	0	1	0	1	1	CSNK1G1	casein kinase 1, gamma 1
hsa-miR-556-5p	1	0	1	1	1	1	GPR88	G protein-coupled receptor 88
hsa-miR-556-5p	1	0	1	1	1	1	EGLN1	egl nine homolog 1 (C. elegans)
hsa-miR-556-5p	0	0	1	1	0	0	EDDM3B	epididymal protein 3B
hsa-miR-556-5p	1	0	1	1	1	1	HIF3A	hypoxia inducible factor 3, alpha subunit
hsa-miR-556-5p	0	0	1	1	1	1	PCNXL4	pecanex-like 4 (Drosophila)
hsa-miR-556-5p	0	0	1	1	1	1	ACBD3	acyl-CoA binding domain containing 3
hsa-miR-556-5p	0	0	1	1	1	1	SFXN1	sideroflexin 1
hsa-miR-556-5p	1	0	1	1	0	0	AEN	apoptosis enhancing nuclease
hsa-miR-556-5p	1	0	1	0	1	1	BCL11B	B-cell CLL/lymphoma 11B (zinc finger protein)
hsa-miR-556-5p	1	0	1	1	1	1	EBF1	early B-cell factor 1
hsa-miR-556-5p	0	0	1	1	1	1	C2orf47	chromosome 2 open reading frame 47
hsa-miR-556-5p	0	0	1	1	1	1	NAA16	N(alpha)-acetyltransferase 16, NatA auxiliary subunit
hsa-miR-556-5p	1	0	1	1	1	1	DHX40	DEAH (Asp-Glu-Ala-His) box polypeptide 40
hsa-miR-556-5p	0	0	1	1	1	1	LRRC31	leucine rich repeat containing 31
hsa-miR-556-5p	1	0	1	1	1	1	EIF2C3	eukaryotic translation initiation factor 2C, 3
hsa-miR-556-5p	1	0	1	1	1	1	L2HGDH	L-2-hydroxyglutarate dehydrogenase
hsa-miR-556-5p	1	0	1	1	1	1	NUP210	nucleoporin 210kDa
hsa-miR-556-5p	0	0	1	1	1	1	BCL2L14	BCL2-like 14 (apoptosis facilitator)
hsa-miR-556-5p	1	0	1	1	1	1	SGPP1	sphingosine-1-phosphate phosphatase 1
hsa-miR-556-5p	1	0	1	0	1	1	C1orf21	chromosome 1 open reading frame 21
hsa-miR-556-5p	1	0	1	0	1	1	CSRNP2	cysteine-serine-rich nuclear protein 2
hsa-miR-556-5p	1	0	1	1	1	1	OR2H1	olfactory receptor, family 2, subfamily H, member 1
hsa-miR-556-5p	1	0	1	1	0	0	PVRL4	poliovirus receptor-related 4
hsa-miR-556-5p	0	0	1	1	1	1	SLC25A31	solute carrier family 25 (mitochondrial carrier; adenine nucleotide translocator), member 31
hsa-miR-556-5p	1	0	1	0	1	1	THAP2	THAP domain containing, apoptosis associated protein 2
hsa-miR-556-5p	1	0	1	0	1	1	SH3BGRL2	SH3 domain binding glutamic acid-rich protein like 2
hsa-miR-556-5p	1	0	1	0	1	1	ITCH	itchy E3 ubiquitin protein ligase
hsa-miR-556-5p	1	0	1	1	1	1	PCDHA9	protocadherin alpha 9
hsa-miR-556-5p	0	0	1	1	1	1	KCNA7	potassium voltage-gated channel, shaker-related subfamily, member 7
hsa-miR-556-5p	1	0	1	1	0	0	SPATA16	spermatogenesis associated 16
hsa-miR-556-5p	0	0	1	0	1	1	KRTAP1-5	keratin associated protein 1-5
hsa-miR-556-5p	1	0	1	1	1	1	PPP1R12B	protein phosphatase 1, regulatory subunit 12B
hsa-miR-556-5p	0	0	1	1	1	1	MAGT1	magnesium transporter 1
hsa-miR-556-5p	1	0	1	1	1	1	FAM175B	family with sequence similarity 175, member B
hsa-miR-556-5p	1	0	1	1	1	1	ARID5B	AT rich interactive domain 5B (MRF1-like)
hsa-miR-556-5p	1	0	1	1	0	0	TRAF7	TNF receptor-associated factor 7, E3 ubiquitin protein ligase
hsa-miR-556-5p	1	0	1	1	1	1	BRMS1L	breast cancer metastasis-suppressor 1-like
hsa-miR-556-5p	1	0	1	1	1	1	TTBK1	tau tubulin kinase 1
hsa-miR-556-5p	1	0	1	1	1	1	RBBP6	retinoblastoma binding protein 6
hsa-miR-556-5p	1	0	1	0	1	1	INA	internexin neuronal intermediate filament protein, alpha
hsa-miR-556-5p	1	0	1	1	1	1	ARHGEF39	Rho guanine nucleotide exchange factor (GEF) 39
hsa-miR-556-5p	0	0	1	1	1	1	POLR2J2	polymerase (RNA) II (DNA directed) polypeptide J2
hsa-miR-556-5p	1	0	1	0	1	1	EAF1	ELL associated factor 1
hsa-miR-556-5p	1	0	1	0	1	1	PURB	purine-rich element binding protein B
hsa-miR-556-5p	1	0	1	1	1	1	CDC42	cell division cycle 42 (GTP binding protein, 25kDa)
hsa-miR-556-5p	1	0	1	1	1	1	RCSD1	RCSD domain containing 1
hsa-miR-556-5p	1	0	1	1	1	1	SLC44A1	solute carrier family 44, member 1
hsa-miR-556-5p	0	0	1	1	1	1	CDKN2AIPNL	CDKN2A interacting protein N-terminal like
hsa-miR-556-5p	0	0	1	1	1	1	C14orf126	chromosome 14 open reading frame 126
hsa-miR-556-5p	1	0	1	1	1	1	KLHL6	kelch-like 6 (Drosophila)
hsa-miR-556-5p	1	0	1	1	1	1	PANK1	pantothenate kinase 1
hsa-miR-556-5p	0	0	1	1	1	1	NAF1	nuclear assembly factor 1 homolog (S. cerevisiae)
hsa-miR-556-5p	0	0	1	0	1	1	SP140L	SP140 nuclear body protein-like
hsa-miR-556-5p	0	0	1	1	1	1	C1orf105	chromosome 1 open reading frame 105
hsa-miR-556-5p	1	0	1	1	1	1	PPTC7	PTC7 protein phosphatase homolog (S. cerevisiae)
hsa-miR-556-5p	0	0	1	1	1	1	CASC5	cancer susceptibility candidate 5
hsa-miR-556-5p	1	0	1	1	1	1	RPIA	ribose 5-phosphate isomerase A
hsa-miR-556-5p	0	0	1	0	0	0	CAPN13	calpain 13
hsa-miR-556-5p	1	0	1	1	1	1	TMEM182	transmembrane protein 182
hsa-miR-556-5p	0	0	1	1	1	1	SLFN5	schlafen family member 5
hsa-miR-556-5p	0	0	1	1	1	1	RANBP3L	RAN binding protein 3-like
hsa-miR-556-5p	0	0	1	1	0	0	GLYATL2	glycine-N-acyltransferase-like 2
hsa-miR-556-5p	0	0	1	0	1	1	DDIT4L	DNA-damage-inducible transcript 4-like
hsa-miR-556-5p	1	0	1	1	1	1	CCSAP	centriole, cilia and spindle-associated protein
hsa-miR-556-5p	0	0	1	0	1	1	SPATA18	spermatogenesis associated 18
hsa-miR-556-5p	0	0	1	1	0	0	TMEM217	transmembrane protein 217
hsa-miR-556-5p	1	0	1	1	1	1	ZNF396	zinc finger protein 396
hsa-miR-556-5p	1	0	1	0	1	1	MTPN	myotrophin
hsa-miR-556-5p	0	0	1	0	1	1	HORMAD2	HORMA domain containing 2
hsa-miR-556-5p	0	0	1	1	1	1	ENTHD1	ENTH domain containing 1
hsa-miR-556-5p	1	0	1	1	1	1	C7orf60	chromosome 7 open reading frame 60
hsa-miR-556-5p	1	0	1	1	1	1	SPRED1	sprouty-related, EVH1 domain containing 1
hsa-miR-556-5p	1	0	1	0	1	1	ARID2	AT rich interactive domain 2 (ARID, RFX-like)
hsa-miR-556-5p	1	0	1	1	1	1	PDIK1L	PDLIM1 interacting kinase 1 like
hsa-miR-556-5p	0	0	1	1	0	0	FAM71A	family with sequence similarity 71, member A
hsa-miR-556-5p	1	0	1	1	1	1	CREBRF	CREB3 regulatory factor
hsa-miR-556-5p	1	0	1	1	1	1	CACUL1	CDK2-associated, cullin domain 1
hsa-miR-556-5p	1	0	1	1	1	1	MSI2	musashi homolog 2 (Drosophila)
hsa-miR-556-5p	1	0	1	0	1	1	PLEKHH2	pleckstrin homology domain containing, family H (with MyTH4 domain) member 2
hsa-miR-556-5p	1	0	1	1	1	1	DCUN1D3	DCN1, defective in cullin neddylation 1, domain containing 3 (S. cerevisiae)
hsa-miR-556-5p	0	0	1	1	1	1	CYP4F22	cytochrome P450, family 4, subfamily F, polypeptide 22
hsa-miR-556-5p	1	0	1	1	1	1	PIP5KL1	phosphatidylinositol-4-phosphate 5-kinase-like 1
hsa-miR-556-5p	0	0	1	1	0	0	EFCAB3	EF-hand calcium binding domain 3
hsa-miR-556-5p	1	0	1	1	1	1	RFX6	regulatory factor X, 6
hsa-miR-556-5p	1	0	1	0	1	1	PGM2L1	phosphoglucomutase 2-like 1
hsa-miR-556-5p	0	0	1	0	1	1	C5orf64	chromosome 5 open reading frame 64
hsa-miR-556-5p	1	0	1	1	1	1	RABL3	RAB, member of RAS oncogene family-like 3
hsa-miR-556-5p	1	0	1	1	1	1	SYT9	synaptotagmin IX
hsa-miR-556-5p	0	0	1	1	1	1	RASSF6	Ras association (RalGDS/AF-6) domain family member 6
hsa-miR-556-5p	0	0	1	1	0	0	TAS1R1	taste receptor, type 1, member 1
hsa-miR-556-5p	1	0	1	0	1	1	PDE12	phosphodiesterase 12
hsa-miR-556-5p	1	0	1	1	1	1	LRRTM3	leucine rich repeat transmembrane neuronal 3
hsa-miR-556-5p	0	0	1	1	1	1	STXBP4	syntaxin binding protein 4
hsa-miR-556-5p	0	0	1	0	1	1	KRTAP13-2	keratin associated protein 13-2
hsa-miR-556-5p	0	0	1	0	1	1	HCG27	HLA complex group 27 (non-protein coding)
hsa-miR-556-5p	1	0	1	0	1	1	EFHA2	EF-hand domain family, member A2
hsa-miR-556-5p	0	0	1	1	0	0	DCDC1	doublecortin domain containing 1
hsa-miR-556-5p	1	0	1	1	1	1	TMED7	transmembrane emp24 protein transport domain containing 7
hsa-miR-556-5p	1	0	1	1	1	1	RPS6KA5	ribosomal protein S6 kinase, 90kDa, polypeptide 5
hsa-miR-556-5p	0	0	1	0	1	1	VSTM2A	V-set and transmembrane domain containing 2A
hsa-miR-556-5p	1	0	1	0	1	1	RNF144B	ring finger protein 144B
hsa-miR-556-5p	0	0	1	0	1	1	NBPF11	neuroblastoma breakpoint family, member 11
hsa-miR-556-5p	1	0	1	1	1	1	KIF1B	kinesin family member 1B
hsa-miR-556-5p	1	0	1	1	1	1	SPTY2D1	SPT2, Suppressor of Ty, domain containing 1 (S. cerevisiae)
hsa-miR-556-5p	1	0	1	1	1	1	ZBTB41	zinc finger and BTB domain containing 41
hsa-miR-556-5p	1	0	1	1	1	1	PHLPP1	PH domain and leucine rich repeat protein phosphatase 1
hsa-miR-556-5p	1	0	1	1	1	1	ADAMTS6	ADAM metallopeptidase with thrombospondin type 1 motif, 6
hsa-miR-556-5p	1	0	1	0	1	1	LYSMD3	LysM, putative peptidoglycan-binding, domain containing 3
hsa-miR-556-5p	1	0	1	0	1	1	PTPLB	protein tyrosine phosphatase-like (proline instead of catalytic arginine), member b
hsa-miR-556-5p	1	0	1	0	1	1	NRK	Nik related kinase
hsa-miR-556-5p	1	0	1	1	1	1	MIA3	melanoma inhibitory activity family, member 3
hsa-miR-556-5p	1	0	1	0	1	1	ZC3H6	zinc finger CCCH-type containing 6
hsa-miR-556-5p	1	0	1	1	1	1	PTGER3	prostaglandin E receptor 3 (subtype EP3)
hsa-miR-556-5p	0	0	1	1	1	1	COL25A1	collagen, type XXV, alpha 1
hsa-miR-556-5p	1	0	1	0	1	1	PRICKLE2	prickle homolog 2 (Drosophila)
hsa-miR-556-5p	1	0	1	1	1	1	CXCL12	chemokine (C-X-C motif) ligand 12
hsa-miR-556-5p	0	0	1	1	0	0	BRE	brain and reproductive organ-expressed (TNFRSF1A modulator)
hsa-miR-556-5p	0	0	1	1	0	0	FOXD4L4	forkhead box D4-like 4
hsa-miR-556-5p	0	0	1	1	1	1	GPX1	glutathione peroxidase 1
hsa-miR-556-5p	0	0	1	1	1	1	SERTM1	serine-rich and transmembrane domain containing 1
hsa-miR-556-5p	0	0	1	1	1	1	APOBEC4	apolipoprotein B mRNA editing enzyme, catalytic polypeptide-like 4 (putative)
hsa-miR-556-5p	1	0	1	1	1	1	IGSF1	immunoglobulin superfamily, member 1
hsa-miR-556-5p	0	0	1	1	1	1	CCDC18	coiled-coil domain containing 18
hsa-miR-556-5p	0	0	1	1	1	1	ERICH1	glutamate-rich 1
hsa-miR-556-5p	0	0	1	1	1	1	FAM177B	family with sequence similarity 177, member B
hsa-miR-556-5p	0	0	1	0	1	1	TMEM215	transmembrane protein 215
hsa-miR-556-5p	1	0	1	1	1	1	RAPH1	Ras association (RalGDS/AF-6) and pleckstrin homology domains 1
hsa-miR-556-5p	0	0	1	1	1	1	CLEC4M	C-type lectin domain family 4, member M
hsa-miR-556-5p	0	0	1	0	0	0	ESRRAP2	estrogen-related receptor alpha pseudogene 2
hsa-miR-556-5p	0	0	1	0	0	0	RAB9BP1	RAB9B, member RAS oncogene family pseudogene 1
hsa-miR-556-5p	0	0	1	0	0	0	LYPLA2P1	lysophospholipase II pseudogene 1
hsa-miR-556-5p	0	0	1	0	0	0	ST13P4	suppression of tumorigenicity 13 (colon carcinoma) (Hsp70 interacting protein) pseudogene 4
hsa-miR-556-5p	0	0	1	0	0	0	DKFZP586I1420	uncharacterized protein DKFZp586I1420
hsa-miR-556-5p	0	0	1	0	0	0	TPI1P2	triosephosphate isomerase 1 pseudogene 2
hsa-miR-556-5p	0	0	1	0	0	0	DPRXP4	divergent-paired related homeobox pseudogene 4
hsa-miR-556-5p	0	0	1	0	0	0	GABPAP	GA binding protein transcription factor, alpha subunit pseudogene
hsa-miR-556-5p	0	0	1	0	0	0	LOC256880	uncharacterized LOC256880
hsa-miR-556-5p	0	0	1	0	0	0	NEAT1	nuclear paraspeckle assembly transcript 1 (non-protein coding)
hsa-miR-556-5p	0	0	1	0	0	0	SNX29P2	sorting nexin 29 pseudogene 2
hsa-miR-556-5p	0	0	1	1	1	1	MOBP	myelin-associated oligodendrocyte basic protein
hsa-miR-556-5p	0	0	1	0	0	0	SNORD115-26	small nucleolar RNA, C/D box 115-26
hsa-miR-556-5p	0	0	1	0	1	1	SRSF5	serine/arginine-rich splicing factor 5
hsa-miR-556-5p	1	0	1	1	1	1	TRIO	trio Rho guanine nucleotide exchange factor
hsa-miR-556-5p	0	0	1	1	0	0	USH1C	Usher syndrome 1C (autosomal recessive, severe)
hsa-miR-556-5p	0	0	0	1	1	1	MRI1	methylthioribose-1-phosphate isomerase homolog (S. cerevisiae)
hsa-miR-556-5p	1	0	1	1	1	1	DCN	decorin
hsa-miR-556-5p	0	0	0	1	1	1	UTS2	urotensin 2
hsa-miR-556-5p	0	0	1	1	1	1	HEBP2	heme binding protein 2
hsa-miR-556-5p	0	0	1	1	1	1	STYK1	serine/threonine/tyrosine kinase 1
hsa-miR-556-5p	0	0	1	1	0	0	KLK13	kallikrein-related peptidase 13
hsa-miR-556-5p	0	0	1	1	0	0	NOX3	NADPH oxidase 3
hsa-miR-556-5p	1	0	1	1	1	1	PRSS22	protease, serine, 22
hsa-miR-556-5p	0	0	0	1	0	0	ZNF8	zinc finger protein 8
hsa-miR-556-5p	0	0	0	1	1	1	ADH7	alcohol dehydrogenase 7 (class IV), mu or sigma polypeptide
hsa-miR-556-5p	0	0	0	1	1	1	SERPIND1	serpin peptidase inhibitor, clade D (heparin cofactor), member 1
hsa-miR-556-5p	0	0	1	1	0	0	SEC14L3	SEC14-like 3 (S. cerevisiae)
hsa-miR-556-5p	0	0	1	1	1	1	SNRPD3	small nuclear ribonucleoprotein D3 polypeptide 18kDa
hsa-miR-556-5p	1	0	1	1	1	1	PIK3IP1	phosphoinositide-3-kinase interacting protein 1
hsa-miR-556-5p	1	0	1	1	1	1	SMCR7L	Smith-Magenis syndrome chromosome region, candidate 7-like
hsa-miR-556-5p	0	0	0	1	1	1	ADSL	adenylosuccinate lyase
hsa-miR-556-5p	1	0	0	1	1	1	SALL4	sal-like 4 (Drosophila)
hsa-miR-556-5p	0	0	0	1	0	0	ACD	adrenocortical dysplasia homolog (mouse)
hsa-miR-556-5p	0	0	1	1	0	0	WFDC1	WAP four-disulfide core domain 1
hsa-miR-556-5p	0	0	1	1	1	1	AQP8	aquaporin 8
hsa-miR-556-5p	1	0	1	1	1	1	HMOX2	heme oxygenase (decycling) 2
hsa-miR-556-5p	0	0	1	1	0	0	QPRT	quinolinate phosphoribosyltransferase
hsa-miR-556-5p	0	0	1	1	0	0	CTSH	cathepsin H
hsa-miR-556-5p	0	0	0	1	0	0	EXOSC5	exosome component 5
hsa-miR-556-5p	0	0	1	1	1	1	AES	amino-terminal enhancer of split
hsa-miR-556-5p	0	0	0	1	0	0	NKG7	natural killer cell group 7 sequence
hsa-miR-556-5p	0	0	0	1	0	0	SLC5A5	solute carrier family 5 (sodium iodide symporter), member 5
hsa-miR-556-5p	0	0	1	1	0	0	PLOD3	procollagen-lysine, 2-oxoglutarate 5-dioxygenase 3
hsa-miR-556-5p	0	0	0	1	1	1	AEBP1	AE binding protein 1
hsa-miR-556-5p	0	0	0	1	0	0	OBFC1	oligonucleotide/oligosaccharide-binding fold containing 1
hsa-miR-556-5p	0	0	0	1	1	1	ST6GALNAC2	ST6 (alpha-N-acetyl-neuraminyl-2,3-beta-galactosyl-1,3)-N-acetylgalactosaminide alpha-2,6-sialyltransferase 2
hsa-miR-556-5p	0	0	1	1	0	0	PIGL	phosphatidylinositol glycan anchor biosynthesis, class L
hsa-miR-556-5p	0	0	1	1	1	1	PF4V1	platelet factor 4 variant 1
hsa-miR-556-5p	0	0	1	1	0	0	CRYAB	crystallin, alpha B
hsa-miR-556-5p	0	0	1	1	0	0	GALNTL4	UDP-N-acetyl-alpha-D-galactosamine:polypeptide N-acetylgalactosaminyltransferase-like 4
hsa-miR-556-5p	0	0	0	1	0	0	MYF6	myogenic factor 6 (herculin)
hsa-miR-556-5p	0	0	1	1	0	0	GPX5	glutathione peroxidase 5 (epididymal androgen-related protein)
hsa-miR-556-5p	0	0	0	1	0	0	UNC93A	unc-93 homolog A (C. elegans)
hsa-miR-556-5p	0	0	0	1	1	1	PCDHB3	protocadherin beta 3
hsa-miR-556-5p	0	0	0	1	1	1	PCDHB15	protocadherin beta 15
hsa-miR-556-5p	0	0	0	1	1	1	PRLR	prolactin receptor
hsa-miR-556-5p	0	0	0	1	0	0	CYB561D2	cytochrome b-561 domain containing 2
hsa-miR-556-5p	0	0	1	1	1	1	UMPS	uridine monophosphate synthetase
hsa-miR-556-5p	0	0	1	1	1	1	FANCL	Fanconi anemia, complementation group L
hsa-miR-556-5p	0	0	1	1	1	1	IL1R1	interleukin 1 receptor, type I
hsa-miR-556-5p	1	0	1	1	1	1	ANGPTL1	angiopoietin-like 1
hsa-miR-556-5p	0	0	1	1	1	1	MED28	mediator complex subunit 28
hsa-miR-556-5p	0	0	1	1	1	1	IFT43	intraflagellar transport 43 homolog (Chlamydomonas)
hsa-miR-556-5p	0	0	1	1	1	1	TMEM214	transmembrane protein 214
hsa-miR-556-5p	0	0	1	1	1	1	MAGEA9B	melanoma antigen family A, 9B
hsa-miR-556-5p	0	0	0	1	0	0	GCNT7	glucosaminyl (N-acetyl) transferase family member 7
hsa-miR-556-5p	0	0	1	1	1	1	SH3TC1	SH3 domain and tetratricopeptide repeats 1
hsa-miR-556-5p	0	0	0	1	1	1	BBS2	Bardet-Biedl syndrome 2
hsa-miR-556-5p	0	0	1	1	1	1	ATP5S	ATP synthase, H+ transporting, mitochondrial Fo complex, subunit s (factor B)
hsa-miR-556-5p	0	0	1	1	0	0	MBOAT7	membrane bound O-acyltransferase domain containing 7
hsa-miR-556-5p	0	0	1	1	1	1	SLC35A2	solute carrier family 35 (UDP-galactose transporter), member A2
hsa-miR-556-5p	0	0	1	1	0	0	YEATS4	YEATS domain containing 4
hsa-miR-556-5p	0	0	1	1	0	0	CDC42EP1	CDC42 effector protein (Rho GTPase binding) 1
hsa-miR-556-5p	0	0	1	1	1	1	NAA38	N(alpha)-acetyltransferase 38, NatC auxiliary subunit
hsa-miR-556-5p	0	0	1	1	0	0	CHAC1	ChaC, cation transport regulator homolog 1 (E. coli)
hsa-miR-556-5p	0	0	1	1	0	0	ZNF221	zinc finger protein 221
hsa-miR-556-5p	0	0	0	1	0	0	PDGFRL	platelet-derived growth factor receptor-like
hsa-miR-556-5p	1	0	1	1	1	1	PCCB	propionyl CoA carboxylase, beta polypeptide
hsa-miR-556-5p	0	0	1	1	1	1	MRPL34	mitochondrial ribosomal protein L34
hsa-miR-556-5p	1	0	1	1	0	0	TRPM4	transient receptor potential cation channel, subfamily M, member 4
hsa-miR-556-5p	0	0	0	1	1	1	ZNF233	zinc finger protein 233
hsa-miR-556-5p	0	0	1	1	0	0	KRT15	keratin 15
hsa-miR-556-5p	0	0	0	1	1	1	ANKRD20A3	ankyrin repeat domain 20 family, member A3
hsa-miR-556-5p	0	0	1	1	0	0	SLC2A11	solute carrier family 2 (facilitated glucose transporter), member 11
hsa-miR-556-5p	0	0	1	1	1	1	NTS	neurotensin
hsa-miR-556-5p	1	0	1	1	0	0	ATP13A3	ATPase type 13A3
hsa-miR-556-5p	0	0	1	1	0	0	FKBP11	FK506 binding protein 11, 19 kDa
hsa-miR-556-5p	1	0	1	1	1	1	APC	adenomatous polyposis coli
hsa-miR-556-5p	0	0	0	1	0	0	MDM2	Mdm2, p53 E3 ubiquitin protein ligase homolog (mouse)
hsa-miR-556-5p	1	0	1	1	1	1	NPL	N-acetylneuraminate pyruvate lyase (dihydrodipicolinate synthase)
hsa-miR-556-5p	1	0	1	1	1	1	NEK3	NIMA (never in mitosis gene a)-related kinase 3
hsa-miR-556-5p	0	0	1	1	0	0	SETDB2	SET domain, bifurcated 2
hsa-miR-556-5p	0	0	0	1	1	1	TLR2	toll-like receptor 2
hsa-miR-556-5p	1	0	1	1	1	1	SLCO5A1	solute carrier organic anion transporter family, member 5A1
hsa-miR-556-5p	0	0	1	1	0	0	CALHM2	calcium homeostasis modulator 2
hsa-miR-556-5p	0	0	0	1	0	0	CRYGB	crystallin, gamma B
hsa-miR-556-5p	0	0	0	1	1	1	GYS2	glycogen synthase 2 (liver)
hsa-miR-556-5p	0	0	1	1	1	1	DAPK2	death-associated protein kinase 2
hsa-miR-556-5p	0	0	1	1	0	0	RBMS2	RNA binding motif, single stranded interacting protein 2
hsa-miR-556-5p	0	0	0	1	1	1	VIPR2	vasoactive intestinal peptide receptor 2
hsa-miR-556-5p	0	0	0	1	0	0	PSMB1	proteasome (prosome, macropain) subunit, beta type, 1
hsa-miR-556-5p	0	0	1	1	1	1	DHX8	DEAH (Asp-Glu-Ala-His) box polypeptide 8
hsa-miR-556-5p	0	0	0	1	1	1	MLYCD	malonyl-CoA decarboxylase
hsa-miR-556-5p	0	0	0	1	0	0	ATP4A	ATPase, H+/K+ exchanging, alpha polypeptide
hsa-miR-556-5p	0	0	1	1	1	1	CDKN2C	cyclin-dependent kinase inhibitor 2C (p18, inhibits CDK4)
hsa-miR-556-5p	1	0	1	1	0	0	NOMO3	NODAL modulator 3
hsa-miR-556-5p	0	0	1	1	1	1	MSH4	mutS homolog 4 (E. coli)
hsa-miR-556-5p	0	0	1	1	1	1	NLRP2	NLR family, pyrin domain containing 2
hsa-miR-556-5p	0	0	1	1	1	1	PNO1	partner of NOB1 homolog (S. cerevisiae)
hsa-miR-556-5p	1	0	1	1	1	1	PEX5L	peroxisomal biogenesis factor 5-like
hsa-miR-556-5p	1	0	1	1	1	1	MCAM	melanoma cell adhesion molecule
hsa-miR-556-5p	0	0	0	1	0	0	LXN	latexin
hsa-miR-556-5p	1	0	1	1	1	1	GRIA2	glutamate receptor, ionotropic, AMPA 2
hsa-miR-556-5p	0	0	1	1	1	1	GLRB	glycine receptor, beta
hsa-miR-556-5p	0	0	1	1	0	0	ALMS1	Alstrom syndrome 1
hsa-miR-556-5p	0	0	1	1	1	1	SEC22C	SEC22 vesicle trafficking protein homolog C (S. cerevisiae)
hsa-miR-556-5p	1	0	1	1	1	1	WNT5A	wingless-type MMTV integration site family, member 5A
hsa-miR-556-5p	1	0	1	1	1	1	NNT	nicotinamide nucleotide transhydrogenase
hsa-miR-556-5p	0	0	1	1	0	0	GPN1	GPN-loop GTPase 1
hsa-miR-556-5p	0	0	1	1	1	1	MMRN1	multimerin 1
hsa-miR-556-5p	0	0	0	1	0	0	TYK2	tyrosine kinase 2
hsa-miR-556-5p	0	0	0	1	1	1	ANXA3	annexin A3
hsa-miR-556-5p	1	0	1	1	1	1	ARSB	arylsulfatase B
hsa-miR-556-5p	1	0	1	1	1	1	PDE8B	phosphodiesterase 8B
hsa-miR-556-5p	0	0	1	1	1	1	CENPE	centromere protein E, 312kDa
hsa-miR-556-5p	0	0	0	1	0	0	SIL1	SIL1 homolog, endoplasmic reticulum chaperone (S. cerevisiae)
hsa-miR-556-5p	0	0	1	1	1	1	TJP2	tight junction protein 2
hsa-miR-556-5p	1	0	1	1	1	1	NPTX2	neuronal pentraxin II
hsa-miR-556-5p	0	0	1	1	1	1	EXPH5	exophilin 5
hsa-miR-556-5p	1	0	1	1	1	1	RUFY2	RUN and FYVE domain containing 2
hsa-miR-556-5p	1	0	1	1	1	1	TARBP2	TAR (HIV-1) RNA binding protein 2
hsa-miR-556-5p	0	0	1	1	0	0	SMARCC2	SWI/SNF related, matrix associated, actin dependent regulator of chromatin, subfamily c, member 2
hsa-miR-556-5p	1	0	1	1	1	1	MAP3K12	mitogen-activated protein kinase kinase kinase 12
hsa-miR-556-5p	0	0	0	1	1	1	FANCM	Fanconi anemia, complementation group M
hsa-miR-556-5p	0	0	1	1	1	1	AK7	adenylate kinase 7
hsa-miR-556-5p	0	0	1	1	1	1	SLC27A2	solute carrier family 27 (fatty acid transporter), member 2
hsa-miR-556-5p	0	0	1	1	1	1	HDC	histidine decarboxylase
hsa-miR-556-5p	0	0	1	1	0	0	ANP32A	acidic (leucine-rich) nuclear phosphoprotein 32 family, member A
hsa-miR-556-5p	0	0	1	1	1	1	NCOR1	nuclear receptor corepressor 1
hsa-miR-556-5p	0	0	0	1	0	0	LRRC46	leucine rich repeat containing 46
hsa-miR-556-5p	0	0	1	1	1	1	SLC39A6	solute carrier family 39 (zinc transporter), member 6
hsa-miR-556-5p	0	0	0	1	0	0	FAM176B	family with sequence similarity 176, member B
hsa-miR-556-5p	0	0	0	1	0	0	NAT8	N-acetyltransferase 8 (GCN5-related, putative)
hsa-miR-556-5p	0	0	1	1	1	1	DQX1	DEAQ box RNA-dependent ATPase 1
hsa-miR-556-5p	0	0	1	1	1	1	RGPD5	RANBP2-like and GRIP domain containing 5
hsa-miR-556-5p	0	0	1	1	1	1	TMEM177	transmembrane protein 177
hsa-miR-556-5p	0	0	0	1	0	0	FAM198A	family with sequence similarity 198, member A
hsa-miR-556-5p	0	0	1	1	0	0	PLA1A	phospholipase A1 member A
hsa-miR-556-5p	1	0	1	1	1	1	ATP6V1A	ATPase, H+ transporting, lysosomal 70kDa, V1 subunit A
hsa-miR-556-5p	0	0	0	1	1	1	SLC25A48	solute carrier family 25, member 48
hsa-miR-556-5p	0	0	1	1	1	1	ZNF300	zinc finger protein 300
hsa-miR-556-5p	0	0	0	1	1	1	TMEM140	transmembrane protein 140
hsa-miR-556-5p	0	0	1	1	1	1	TAF1	TAF1 RNA polymerase II, TATA box binding protein (TBP)-associated factor, 250kDa
hsa-miR-556-5p	0	0	1	1	1	1	LACTB2	lactamase, beta 2
hsa-miR-556-5p	0	0	0	1	0	0	FERMT3	fermitin family member 3
hsa-miR-556-5p	0	0	0	1	0	0	TMCO3	transmembrane and coiled-coil domains 3
hsa-miR-556-5p	1	0	1	1	1	1	VEGFC	vascular endothelial growth factor C
hsa-miR-556-5p	0	0	1	1	1	1	MLF1IP	MLF1 interacting protein
hsa-miR-556-5p	0	0	1	1	1	1	RNF219	ring finger protein 219
hsa-miR-556-5p	0	0	0	1	1	1	JMY	junction mediating and regulatory protein, p53 cofactor
hsa-miR-556-5p	0	0	0	1	0	0	CCNO	cyclin O
hsa-miR-556-5p	1	0	1	1	0	0	ACOXL	acyl-CoA oxidase-like
hsa-miR-556-5p	0	0	0	1	1	1	TMPRSS15	transmembrane protease, serine 15
hsa-miR-556-5p	0	0	1	1	0	0	TRIM74	tripartite motif containing 74
hsa-miR-556-5p	0	0	1	1	1	1	SETD9	SET domain containing 9
hsa-miR-556-5p	0	0	0	1	0	0	MED7	mediator complex subunit 7
hsa-miR-556-5p	0	0	1	1	1	1	HIST1H2BD	histone cluster 1, H2bd
hsa-miR-556-5p	1	0	1	1	1	1	SLC12A6	solute carrier family 12 (potassium/chloride transporters), member 6
hsa-miR-556-5p	1	0	0	1	1	1	G6PD	glucose-6-phosphate dehydrogenase
hsa-miR-556-5p	1	0	1	1	1	1	AGPAT3	1-acylglycerol-3-phosphate O-acyltransferase 3
hsa-miR-556-5p	0	0	0	1	1	1	ALKBH4	alkB, alkylation repair homolog 4 (E. coli)
hsa-miR-556-5p	0	0	1	1	1	1	BAX	BCL2-associated X protein
hsa-miR-556-5p	0	0	0	1	0	0	ZNF613	zinc finger protein 613
hsa-miR-556-5p	0	0	1	1	0	0	KRT83	keratin 83
hsa-miR-556-5p	0	0	1	1	1	1	IP6K3	inositol hexakisphosphate kinase 3
hsa-miR-556-5p	1	0	1	1	1	1	BCL6B	B-cell CLL/lymphoma 6, member B
hsa-miR-556-5p	0	0	0	1	0	0	LRRC53	leucine rich repeat containing 53
hsa-miR-556-5p	0	0	0	1	0	0	WDR63	WD repeat domain 63
hsa-miR-556-5p	0	0	0	1	1	1	GBP7	guanylate binding protein 7
hsa-miR-556-5p	0	0	1	1	0	0	ODF2L	outer dense fiber of sperm tails 2-like
hsa-miR-556-5p	1	0	0	1	1	1	MRPS18C	mitochondrial ribosomal protein S18C
hsa-miR-556-5p	0	0	1	1	0	0	STT3B	STT3, subunit of the oligosaccharyltransferase complex, homolog B (S. cerevisiae)
hsa-miR-556-5p	0	0	0	1	0	0	OTOP1	otopetrin 1
hsa-miR-556-5p	0	0	1	1	0	0	APEH	N-acylaminoacyl-peptide hydrolase
hsa-miR-556-5p	0	0	0	1	0	0	ADAD1	adenosine deaminase domain containing 1 (testis-specific)
hsa-miR-556-5p	0	0	1	1	1	1	ZNF474	zinc finger protein 474
hsa-miR-556-5p	0	0	0	1	1	1	CCDC127	coiled-coil domain containing 127
hsa-miR-556-5p	0	0	0	1	1	1	RP9	retinitis pigmentosa 9 (autosomal dominant)
hsa-miR-556-5p	1	0	1	1	1	1	KIAA1324L	KIAA1324-like
hsa-miR-556-5p	0	0	0	1	1	1	DEFA4	defensin, alpha 4, corticostatin
hsa-miR-556-5p	0	0	0	1	0	0	GBX1	gastrulation brain homeobox 1
hsa-miR-556-5p	1	0	0	1	1	1	CTHRC1	collagen triple helix repeat containing 1
hsa-miR-556-5p	1	0	1	1	1	1	KIAA1429	KIAA1429
hsa-miR-556-5p	0	0	1	1	0	0	WBSCR27	Williams Beuren syndrome chromosome region 27
hsa-miR-556-5p	0	0	0	1	0	0	SYTL5	synaptotagmin-like 5
hsa-miR-556-5p	0	0	0	1	0	0	OR1Q1	olfactory receptor, family 1, subfamily Q, member 1
hsa-miR-556-5p	0	0	1	1	1	1	MELK	maternal embryonic leucine zipper kinase
hsa-miR-556-5p	0	0	1	1	1	1	STOX1	storkhead box 1
hsa-miR-556-5p	0	0	1	1	1	1	FAM35A	family with sequence similarity 35, member A
hsa-miR-556-5p	0	0	0	1	1	1	MAGEA9	melanoma antigen family A, 9
hsa-miR-556-5p	0	0	1	1	1	1	GLB1L3	galactosidase, beta 1-like 3
hsa-miR-556-5p	0	0	0	1	1	1	AVPR1A	arginine vasopressin receptor 1A
hsa-miR-556-5p	0	0	1	1	0	0	CCT2	chaperonin containing TCP1, subunit 2 (beta)
hsa-miR-556-5p	1	0	1	1	1	1	ILK	integrin-linked kinase
hsa-miR-556-5p	0	0	0	1	0	0	OR2D2	olfactory receptor, family 2, subfamily D, member 2
hsa-miR-556-5p	0	0	1	1	0	0	MAPK7	mitogen-activated protein kinase 7
hsa-miR-556-5p	0	0	0	1	1	1	ALG8	asparagine-linked glycosylation 8, alpha-1,3-glucosyltransferase homolog (S. cerevisiae)
hsa-miR-556-5p	0	0	0	1	0	0	MC4R	melanocortin 4 receptor
hsa-miR-556-5p	0	0	1	1	1	1	MS4A8B	membrane-spanning 4-domains, subfamily A, member 8B
hsa-miR-556-5p	0	0	0	1	0	0	KLHL26	kelch-like 26 (Drosophila)
hsa-miR-556-5p	0	0	0	1	1	1	ZNF528	zinc finger protein 528
hsa-miR-556-5p	0	0	0	1	0	0	ZNF578	zinc finger protein 578
hsa-miR-556-5p	0	0	0	1	0	0	RILP	Rab interacting lysosomal protein
hsa-miR-556-5p	0	0	0	1	1	1	ZNF577	zinc finger protein 577
hsa-miR-556-5p	0	0	1	1	1	1	NTF4	neurotrophin 4
hsa-miR-556-5p	0	0	1	1	0	0	IRX1	iroquois homeobox 1
hsa-miR-556-5p	0	0	1	1	1	1	OGG1	8-oxoguanine DNA glycosylase
hsa-miR-556-5p	0	0	1	1	1	1	CKAP2L	cytoskeleton associated protein 2-like
hsa-miR-556-5p	1	0	1	1	1	1	UMOD	uromodulin
hsa-miR-556-5p	1	0	1	1	1	1	ZNF25	zinc finger protein 25
hsa-miR-556-5p	0	0	0	1	0	0	IARS2	isoleucyl-tRNA synthetase 2, mitochondrial
hsa-miR-556-5p	0	0	1	1	1	1	MMADHC	methylmalonic aciduria (cobalamin deficiency) cblD type, with homocystinuria
hsa-miR-556-5p	1	0	1	1	1	1	RNF139	ring finger protein 139
hsa-miR-556-5p	0	0	0	1	1	1	MRAP	melanocortin 2 receptor accessory protein
hsa-miR-556-5p	1	0	1	1	1	1	GPRIN1	G protein regulated inducer of neurite outgrowth 1
hsa-miR-556-5p	0	0	0	1	0	0	OR1A1	olfactory receptor, family 1, subfamily A, member 1
hsa-miR-556-5p	0	0	1	1	1	1	C15orf40	chromosome 15 open reading frame 40
hsa-miR-556-5p	1	0	1	1	1	1	FAM103A1	family with sequence similarity 103, member A1
hsa-miR-556-5p	0	0	0	1	0	0	NUDT16L1	nudix (nucleoside diphosphate linked moiety X)-type motif 16-like 1
hsa-miR-556-5p	0	0	0	1	1	1	C8orf74	chromosome 8 open reading frame 74
hsa-miR-556-5p	0	0	0	1	0	0	TUBB3	tubulin, beta 3 class III
hsa-miR-556-5p	0	0	1	1	1	1	UGT2B4	UDP glucuronosyltransferase 2 family, polypeptide B4
hsa-miR-556-5p	0	0	0	1	0	0	UGT2B11	UDP glucuronosyltransferase 2 family, polypeptide B11
hsa-miR-556-5p	0	0	1	1	1	1	SPATA5L1	spermatogenesis associated 5-like 1
hsa-miR-556-5p	0	0	1	1	1	1	PITX2	paired-like homeodomain 2
hsa-miR-556-5p	1	0	1	1	0	0	KIAA1109	KIAA1109
hsa-miR-556-5p	0	0	1	1	1	1	CMTM8	CKLF-like MARVEL transmembrane domain containing 8
hsa-miR-556-5p	0	0	0	1	0	0	THOP1	thimet oligopeptidase 1
hsa-miR-556-5p	0	0	0	1	0	0	THAP3	THAP domain containing, apoptosis associated protein 3
hsa-miR-556-5p	0	0	1	1	0	0	MUS81	MUS81 endonuclease homolog (S. cerevisiae)
hsa-miR-556-5p	0	0	1	1	0	0	DUSP13	dual specificity phosphatase 13
hsa-miR-556-5p	0	0	0	1	0	0	SNUPN	snurportin 1
hsa-miR-556-5p	0	0	1	1	0	0	SNTG2	syntrophin, gamma 2
hsa-miR-556-5p	0	0	1	1	1	1	APITD1	apoptosis-inducing, TAF9-like domain 1
hsa-miR-556-5p	0	0	1	1	1	1	CORT	cortistatin
hsa-miR-556-5p	0	0	0	1	0	0	ANAPC10	anaphase promoting complex subunit 10
hsa-miR-556-5p	1	0	1	1	1	1	SLC26A7	solute carrier family 26, member 7
hsa-miR-556-5p	0	0	1	1	1	1	TRIM59	tripartite motif containing 59
hsa-miR-556-5p	0	0	1	1	1	1	CD36	CD36 molecule (thrombospondin receptor)
hsa-miR-556-5p	0	0	1	1	1	1	CYP7B1	cytochrome P450, family 7, subfamily B, polypeptide 1
hsa-miR-556-5p	0	0	1	1	0	0	MRPL48	mitochondrial ribosomal protein L48
hsa-miR-556-5p	0	0	0	1	1	1	FAM21D	family with sequence similarity 21, member D
hsa-miR-556-5p	0	0	1	1	0	0	UQCRH	ubiquinol-cytochrome c reductase hinge protein
hsa-miR-556-5p	0	0	0	1	1	1	SLC22A13	solute carrier family 22 (organic anion transporter), member 13
hsa-miR-556-5p	1	0	1	1	1	1	GALE	UDP-galactose-4-epimerase
hsa-miR-556-5p	1	0	1	1	1	1	LUZP1	leucine zipper protein 1
hsa-miR-556-5p	0	0	0	1	0	0	ZNF575	zinc finger protein 575
hsa-miR-556-5p	0	0	0	1	0	0	IQCF1	IQ motif containing F1
hsa-miR-556-5p	0	0	1	1	0	0	HCLS1	hematopoietic cell-specific Lyn substrate 1
hsa-miR-556-5p	1	0	0	1	1	1	RECQL	RecQ protein-like (DNA helicase Q1-like)
hsa-miR-556-5p	0	0	1	1	0	0	TTC12	tetratricopeptide repeat domain 12
hsa-miR-556-5p	0	0	0	1	0	0	OR11H6	olfactory receptor, family 11, subfamily H, member 6
hsa-miR-556-5p	0	0	1	1	0	0	ACRV1	acrosomal vesicle protein 1
hsa-miR-556-5p	0	0	1	1	1	1	DOCK5	dedicator of cytokinesis 5
hsa-miR-556-5p	0	0	0	1	0	0	KCNG2	potassium voltage-gated channel, subfamily G, member 2
hsa-miR-556-5p	0	0	1	1	0	0	RAD23A	RAD23 homolog A (S. cerevisiae)
hsa-miR-556-5p	1	0	1	1	1	1	RFX7	regulatory factor X, 7
hsa-miR-556-5p	0	0	0	1	0	0	C3orf32	chromosome 3 open reading frame 32
hsa-miR-556-5p	1	0	1	1	1	1	ARHGAP24	Rho GTPase activating protein 24
hsa-miR-556-5p	0	0	0	1	1	1	SRP9P1	signal recognition particle 9 pseudogene 1
hsa-miR-556-5p	0	0	1	1	1	1	ZWINT	ZW10 interactor
hsa-miR-556-5p	1	0	1	1	1	1	YBX1	Y box binding protein 1
hsa-miR-556-5p	0	0	1	1	1	1	GRM6	glutamate receptor, metabotropic 6
hsa-miR-556-5p	1	0	0	1	0	0	ST3GAL1	ST3 beta-galactoside alpha-2,3-sialyltransferase 1
hsa-miR-556-5p	0	0	0	1	0	0	OR4S1	olfactory receptor, family 4, subfamily S, member 1
hsa-miR-556-5p	0	0	0	1	0	0	OR4X1	olfactory receptor, family 4, subfamily X, member 1
hsa-miR-556-5p	0	0	0	1	0	0	FGF8	fibroblast growth factor 8 (androgen-induced)
hsa-miR-556-5p	1	0	1	1	1	1	FOXL1	forkhead box L1
hsa-miR-556-5p	0	0	1	1	1	1	C1orf172	chromosome 1 open reading frame 172
hsa-miR-556-5p	1	0	1	1	0	0	IGSF9B	immunoglobulin superfamily, member 9B
hsa-miR-556-5p	0	0	1	1	1	1	PRKCB	protein kinase C, beta
hsa-miR-556-5p	1	0	1	1	0	0	ATAD5	ATPase family, AAA domain containing 5
hsa-miR-556-5p	0	0	0	1	0	0	DNPEP	aspartyl aminopeptidase
hsa-miR-556-5p	0	0	0	1	1	1	ZNF713	zinc finger protein 713
hsa-miR-556-5p	1	0	1	1	1	1	GREM1	gremlin 1
hsa-miR-556-5p	1	0	1	1	0	0	WDR45	WD repeat domain 45
hsa-miR-556-5p	0	0	1	1	0	0	PLA2G16	phospholipase A2, group XVI
hsa-miR-556-5p	0	0	1	1	0	0	TRIM73	tripartite motif containing 73
hsa-miR-556-5p	0	0	1	1	1	1	CNTNAP3	contactin associated protein-like 3
hsa-miR-556-5p	0	0	1	1	0	0	CD19	CD19 molecule
hsa-miR-556-5p	0	0	1	1	1	1	SCAPER	S-phase cyclin A-associated protein in the ER
hsa-miR-556-5p	0	0	1	1	1	1	CREG2	cellular repressor of E1A-stimulated genes 2
hsa-miR-556-5p	0	0	1	1	1	1	MRPS33	mitochondrial ribosomal protein S33
hsa-miR-556-5p	1	0	1	1	1	1	PCM1	pericentriolar material 1
hsa-miR-556-5p	0	0	0	1	0	0	ZNF7	zinc finger protein 7
hsa-miR-556-5p	0	0	0	1	0	0	GSG2	germ cell associated 2 (haspin)
hsa-miR-556-5p	0	0	0	1	0	0	TMIE	transmembrane inner ear
hsa-miR-556-5p	1	0	1	1	0	0	FAM100B	family with sequence similarity 100, member B
hsa-miR-556-5p	0	0	0	1	0	0	DEFA3	defensin, alpha 3, neutrophil-specific
hsa-miR-556-5p	0	0	1	1	1	1	SDHA	succinate dehydrogenase complex, subunit A, flavoprotein (Fp)
hsa-miR-556-5p	0	0	1	1	0	0	AFMID	arylformamidase
hsa-miR-556-5p	0	0	0	1	0	0	HEXDC	hexosaminidase (glycosyl hydrolase family 20, catalytic domain) containing
hsa-miR-556-5p	0	0	1	1	0	0	FAM208B	family with sequence similarity 208, member B
hsa-miR-556-5p	0	0	1	1	0	0	MUC1	mucin 1, cell surface associated
hsa-miR-556-5p	0	0	0	1	0	0	OTOP3	otopetrin 3
hsa-miR-556-5p	0	0	0	1	0	0	OR6B2	olfactory receptor, family 6, subfamily B, member 2
hsa-miR-556-5p	0	0	1	1	1	1	S100A7A	S100 calcium binding protein A7A
hsa-miR-556-5p	1	0	1	1	1	1	SETD3	SET domain containing 3
hsa-miR-556-5p	0	0	0	1	1	1	C6orf58	chromosome 6 open reading frame 58
hsa-miR-556-5p	0	0	0	1	0	0	WDR4	WD repeat domain 4
hsa-miR-556-5p	0	0	0	1	0	0	AMY1B	amylase, alpha 1B (salivary)
hsa-miR-556-5p	0	0	0	1	1	1	RGPD6	RANBP2-like and GRIP domain containing 6
hsa-miR-556-5p	1	0	1	1	0	0	HDDC3	HD domain containing 3
hsa-miR-556-5p	1	0	1	1	1	1	OPRM1	opioid receptor, mu 1
hsa-miR-556-5p	1	0	1	1	1	1	ZNF12	zinc finger protein 12
hsa-miR-556-5p	1	0	1	1	1	1	KPNA2	karyopherin alpha 2 (RAG cohort 1, importin alpha 1)
hsa-miR-556-5p	0	0	1	1	1	1	ADAMTSL5	ADAMTS-like 5
hsa-miR-556-5p	1	0	1	1	1	1	GJC1	gap junction protein, gamma 1, 45kDa
hsa-miR-556-5p	1	0	1	1	1	1	EPB41L5	erythrocyte membrane protein band 4.1 like 5
hsa-miR-556-5p	0	0	1	1	1	1	TAB1	TGF-beta activated kinase 1/MAP3K7 binding protein 1
hsa-miR-556-5p	0	0	1	1	0	0	DRG1	developmentally regulated GTP binding protein 1
hsa-miR-556-5p	0	0	1	1	1	1	P4HB	prolyl 4-hydroxylase, beta polypeptide
hsa-miR-556-5p	0	0	1	1	1	1	LRRC16A	leucine rich repeat containing 16A
hsa-miR-556-5p	0	0	0	1	0	0	ALG12	asparagine-linked glycosylation 12, alpha-1,6-mannosyltransferase homolog (S. cerevisiae)
hsa-miR-556-5p	0	0	1	1	1	1	CMTM3	CKLF-like MARVEL transmembrane domain containing 3
hsa-miR-556-5p	0	0	0	1	1	1	COPB2	coatomer protein complex, subunit beta 2 (beta prime)
hsa-miR-556-5p	0	0	1	1	0	0	KRTAP15-1	keratin associated protein 15-1
hsa-miR-556-5p	0	0	0	1	0	0	GPR141	G protein-coupled receptor 141
hsa-miR-556-5p	0	0	1	1	1	1	C9orf85	chromosome 9 open reading frame 85
hsa-miR-556-5p	0	0	1	1	1	1	NEXN	nexilin (F actin binding protein)
hsa-miR-556-5p	0	0	1	1	1	1	LGMN	legumain
hsa-miR-556-5p	0	0	1	1	0	0	EIF6	eukaryotic translation initiation factor 6
hsa-miR-556-5p	0	0	1	1	0	0	CDKN2D	cyclin-dependent kinase inhibitor 2D (p19, inhibits CDK4)
hsa-miR-556-5p	1	0	0	1	1	1	CENPQ	centromere protein Q
hsa-miR-556-5p	1	0	0	1	1	1	ZNF354A	zinc finger protein 354A
hsa-miR-556-5p	0	0	1	1	1	1	FAM21C	family with sequence similarity 21, member C
hsa-miR-556-5p	1	0	1	1	1	1	SEC23B	Sec23 homolog B (S. cerevisiae)
hsa-miR-556-5p	0	0	1	1	1	1	RAB27A	RAB27A, member RAS oncogene family
hsa-miR-556-5p	0	0	1	1	0	0	SKAP1	src kinase associated phosphoprotein 1
hsa-miR-556-5p	1	0	1	1	1	1	UGP2	UDP-glucose pyrophosphorylase 2
hsa-miR-556-5p	0	0	0	1	1	1	ABHD12B	abhydrolase domain containing 12B
hsa-miR-556-5p	1	0	1	1	1	1	NIPA2	non imprinted in Prader-Willi/Angelman syndrome 2
hsa-miR-556-5p	0	0	1	1	0	0	AVPR2	arginine vasopressin receptor 2
hsa-miR-556-5p	0	0	1	1	0	0	NUDT2	nudix (nucleoside diphosphate linked moiety X)-type motif 2
hsa-miR-556-5p	0	0	1	1	1	1	PSMD10	proteasome (prosome, macropain) 26S subunit, non-ATPase, 10
hsa-miR-556-5p	0	0	0	1	1	1	NPY5R	neuropeptide Y receptor Y5
hsa-miR-556-5p	0	0	0	1	1	1	CLEC12A	C-type lectin domain family 12, member A
hsa-miR-556-5p	0	0	1	1	1	1	TDRD9	tudor domain containing 9
hsa-miR-556-5p	0	0	0	1	1	1	CERKL	ceramide kinase-like
hsa-miR-556-5p	1	0	1	1	1	1	ITGA4	integrin, alpha 4 (antigen CD49D, alpha 4 subunit of VLA-4 receptor)
hsa-miR-556-5p	0	0	0	1	0	0	C1QA	complement component 1, q subcomponent, A chain
hsa-miR-556-5p	0	0	0	1	1	1	ZNF595	zinc finger protein 595
hsa-miR-556-5p	0	0	1	1	0	0	CNTNAP4	contactin associated protein-like 4
hsa-miR-556-5p	0	0	1	1	1	1	DNAJC12	DnaJ (Hsp40) homolog, subfamily C, member 12
hsa-miR-556-5p	1	0	1	1	1	1	CPED1	cadherin-like and PC-esterase domain containing 1
hsa-miR-556-5p	0	0	1	1	0	0	VWC2	von Willebrand factor C domain containing 2
hsa-miR-556-5p	1	0	1	1	0	0	PFKM	phosphofructokinase, muscle
hsa-miR-556-5p	0	0	1	1	0	0	MCCC2	methylcrotonoyl-CoA carboxylase 2 (beta)
hsa-miR-556-5p	0	0	0	1	0	0	ZNF780A	zinc finger protein 780A
hsa-miR-556-5p	0	0	0	1	0	0	ANKRD20A4	ankyrin repeat domain 20 family, member A4
hsa-miR-556-5p	0	0	0	1	0	0	ANKRD20A20P	ankyrin repeat domain 20 family, member A20, pseudogene
hsa-miR-556-5p	0	0	0	1	0	0	ANKRD20A8P	ankyrin repeat domain 20 family, member A8, pseudogene
hsa-miR-556-5p	0	0	1	1	0	0	TAF1C	TATA box binding protein (TBP)-associated factor, RNA polymerase I, C, 110kDa
hsa-miR-556-5p	0	0	0	1	1	1	FHIT	fragile histidine triad
hsa-miR-556-5p	0	0	1	1	1	1	TMEM230	transmembrane protein 230
hsa-miR-556-5p	1	0	1	1	1	1	GPR135	G protein-coupled receptor 135
hsa-miR-556-5p	0	0	1	1	1	1	C1orf162	chromosome 1 open reading frame 162
hsa-miR-556-5p	0	0	0	1	0	0	NKAPL	NFKB activating protein-like
hsa-miR-556-5p	0	0	1	1	0	0	TEX11	testis expressed 11
hsa-miR-556-5p	0	0	1	1	1	1	S100A14	S100 calcium binding protein A14
hsa-miR-556-5p	0	0	1	1	0	0	EFHB	EF-hand domain family, member B
hsa-miR-556-5p	0	0	0	1	1	1	EXOC1	exocyst complex component 1
hsa-miR-556-5p	0	0	1	1	1	1	PTPRC	protein tyrosine phosphatase, receptor type, C
hsa-miR-556-5p	0	0	1	1	1	1	GMPR2	guanosine monophosphate reductase 2
hsa-miR-556-5p	0	0	1	1	0	0	DOPEY1	dopey family member 1
hsa-miR-556-5p	0	0	1	1	0	0	C9orf9	chromosome 9 open reading frame 9
hsa-miR-556-5p	0	0	1	1	1	1	PDE1A	phosphodiesterase 1A, calmodulin-dependent
hsa-miR-556-5p	0	0	1	1	0	0	TUSC3	tumor suppressor candidate 3
hsa-miR-556-5p	0	0	1	1	0	0	TRIM41	tripartite motif containing 41
hsa-miR-556-5p	0	0	1	1	0	0	PPOX	protoporphyrinogen oxidase
hsa-miR-556-5p	0	0	0	1	1	1	TAF1A	TATA box binding protein (TBP)-associated factor, RNA polymerase I, A, 48kDa
hsa-miR-556-5p	0	0	1	1	0	0	RBCK1	RanBP-type and C3HC4-type zinc finger containing 1
hsa-miR-556-5p	0	0	0	1	1	1	MADCAM1	mucosal vascular addressin cell adhesion molecule 1
hsa-miR-556-5p	0	0	1	1	1	1	RFPL1	ret finger protein-like 1
hsa-miR-556-5p	1	0	1	1	1	1	ANXA4	annexin A4
hsa-miR-556-5p	0	0	0	1	1	1	NEIL1	nei endonuclease VIII-like 1 (E. coli)
hsa-miR-556-5p	0	0	1	1	1	1	ZNF160	zinc finger protein 160
hsa-miR-556-5p	1	0	1	1	1	1	SPG20	spastic paraplegia 20 (Troyer syndrome)
hsa-miR-556-5p	0	0	1	1	0	0	MORN3	MORN repeat containing 3
hsa-miR-556-5p	0	0	1	1	1	1	GTF2E2	general transcription factor IIE, polypeptide 2, beta 34kDa
hsa-miR-556-5p	0	0	1	1	0	0	LEKR1	leucine, glutamate and lysine rich 1
hsa-miR-556-5p	1	0	1	1	1	1	LMO7	LIM domain 7
hsa-miR-556-5p	0	0	1	1	0	0	DOK3	docking protein 3
hsa-miR-556-5p	0	0	0	1	0	0	DCHS2	dachsous 2 (Drosophila)
hsa-miR-556-5p	1	0	1	1	1	1	PAPD5	PAP associated domain containing 5
hsa-miR-556-5p	0	0	0	1	1	1	PHF11	PHD finger protein 11
hsa-miR-556-5p	0	0	0	1	1	1	WDSUB1	WD repeat, sterile alpha motif and U-box domain containing 1
hsa-miR-556-5p	1	0	1	1	1	1	WDR37	WD repeat domain 37
hsa-miR-556-5p	1	0	1	1	1	1	COL4A6	collagen, type IV, alpha 6
hsa-miR-556-5p	0	0	0	1	0	0	GK2	glycerol kinase 2
hsa-miR-556-5p	1	0	1	1	1	1	SGMS2	sphingomyelin synthase 2
hsa-miR-556-5p	0	0	1	1	1	1	SYTL2	synaptotagmin-like 2
hsa-miR-556-5p	1	0	1	1	1	1	FGFR2	fibroblast growth factor receptor 2
hsa-miR-556-5p	0	0	1	1	0	0	PLCG2	phospholipase C, gamma 2 (phosphatidylinositol-specific)
hsa-miR-556-5p	1	0	1	1	1	1	TP53	tumor protein p53
hsa-miR-556-5p	0	0	1	1	1	1	TRDN	triadin
hsa-miR-556-5p	0	0	1	1	0	0	AMZ2	archaelysin family metallopeptidase 2
hsa-miR-556-5p	0	0	0	1	0	0	OR2L3	olfactory receptor, family 2, subfamily L, member 3
hsa-miR-556-5p	0	0	1	1	1	1	GTPBP4	GTP binding protein 4
hsa-miR-556-5p	0	0	0	1	0	0	OR52M1	olfactory receptor, family 52, subfamily M, member 1
hsa-miR-556-5p	0	0	0	1	1	1	SPRR2D	small proline-rich protein 2D
hsa-miR-556-5p	0	0	1	1	0	0	CALCA	calcitonin-related polypeptide alpha
hsa-miR-556-5p	0	0	1	1	1	1	KIAA1704	KIAA1704
hsa-miR-556-5p	0	0	0	1	1	1	LRRC10	leucine rich repeat containing 10
hsa-miR-556-5p	0	0	1	1	1	1	DIO1	deiodinase, iodothyronine, type I
hsa-miR-556-5p	0	0	0	1	1	1	TRIM58	tripartite motif containing 58
hsa-miR-556-5p	1	0	1	1	1	1	AKT3	v-akt murine thymoma viral oncogene homolog 3 (protein kinase B, gamma)
hsa-miR-556-5p	1	0	1	1	1	1	KIAA1804	mixed lineage kinase 4
hsa-miR-556-5p	0	0	1	1	0	0	GNPAT	glyceronephosphate O-acyltransferase
hsa-miR-556-5p	0	0	0	1	0	0	SPHAR	S-phase response (cyclin related)
hsa-miR-556-5p	0	0	1	1	0	0	HIST3H2A	histone cluster 3, H2a
hsa-miR-556-5p	0	0	1	1	0	0	CNIH4	cornichon homolog 4 (Drosophila)
hsa-miR-556-5p	0	0	1	1	1	1	ATF3	activating transcription factor 3
hsa-miR-556-5p	0	0	0	1	0	0	C4BPA	complement component 4 binding protein, alpha
hsa-miR-556-5p	1	0	1	1	0	0	DYNLT1	dynein, light chain, Tctex-type 1
hsa-miR-556-5p	0	0	0	1	0	0	RAET1L	retinoic acid early transcript 1L
hsa-miR-556-5p	0	0	0	1	1	1	ULBP2	UL16 binding protein 2
hsa-miR-556-5p	0	0	0	1	0	0	RAET1G	retinoic acid early transcript 1G
hsa-miR-556-5p	0	0	1	1	1	1	SHPRH	SNF2 histone linker PHD RING helicase, E3 ubiquitin protein ligase
hsa-miR-556-5p	1	0	1	1	1	1	SCYL3	SCY1-like 3 (S. cerevisiae)
hsa-miR-556-5p	0	0	1	1	1	1	DCAF6	DDB1 and CUL4 associated factor 6
hsa-miR-556-5p	0	0	1	1	0	0	APOA1BP	apolipoprotein A-I binding protein
hsa-miR-556-5p	0	0	0	1	1	1	SMPDL3A	sphingomyelin phosphodiesterase, acid-like 3A
hsa-miR-556-5p	0	0	0	1	0	0	BET3L	BET3 like (S. cerevisiae)
hsa-miR-556-5p	0	0	0	1	0	0	LAMA4	laminin, alpha 4
hsa-miR-556-5p	0	0	1	1	0	0	SPRR2B	small proline-rich protein 2B
hsa-miR-556-5p	0	0	1	1	1	1	BCCIP	BRCA2 and CDKN1A interacting protein
hsa-miR-556-5p	0	0	1	1	0	0	LCE2A	late cornified envelope 2A
hsa-miR-556-5p	0	0	0	1	0	0	LCE2B	late cornified envelope 2B
hsa-miR-556-5p	0	0	0	1	0	0	LCE2C	late cornified envelope 2C
hsa-miR-556-5p	0	0	0	1	1	1	LCE2D	late cornified envelope 2D
hsa-miR-556-5p	0	0	1	1	0	0	SETDB1	SET domain, bifurcated 1
hsa-miR-556-5p	0	0	1	1	1	1	QRSL1	glutaminyl-tRNA synthase (glutamine-hydrolyzing)-like 1
hsa-miR-556-5p	0	0	0	1	1	1	MANEA	mannosidase, endo-alpha
hsa-miR-556-5p	0	0	1	1	1	1	POLR3GL	polymerase (RNA) III (DNA directed) polypeptide G (32kD)-like
hsa-miR-556-5p	1	0	1	1	1	1	MPP1	membrane protein, palmitoylated 1, 55kDa
hsa-miR-556-5p	1	0	1	1	1	1	SYT6	synaptotagmin VI
hsa-miR-556-5p	1	0	1	1	1	1	HIPK1	homeodomain interacting protein kinase 1
hsa-miR-556-5p	0	0	1	1	1	1	CGA	glycoprotein hormones, alpha polypeptide
hsa-miR-556-5p	0	0	1	1	1	1	IRAK1BP1	interleukin-1 receptor-associated kinase 1 binding protein 1
hsa-miR-556-5p	1	0	1	1	1	1	SENP6	SUMO1/sentrin specific peptidase 6
hsa-miR-556-5p	0	0	1	1	1	1	NSDHL	NAD(P) dependent steroid dehydrogenase-like
hsa-miR-556-5p	0	0	1	1	1	1	MCF2	MCF.2 cell line derived transforming sequence
hsa-miR-556-5p	1	0	0	1	0	0	GNG5	guanine nucleotide binding protein (G protein), gamma 5
hsa-miR-556-5p	0	0	1	1	1	1	PRIM2	primase, DNA, polypeptide 2 (58kDa)
hsa-miR-556-5p	0	0	1	1	1	1	GSTA4	glutathione S-transferase alpha 4
hsa-miR-556-5p	1	0	1	1	1	1	STAG2	stromal antigen 2
hsa-miR-556-5p	0	0	1	1	1	1	RHAG	Rh-associated glycoprotein
hsa-miR-556-5p	0	0	0	1	0	0	LDLRAD1	low density lipoprotein receptor class A domain containing 1
hsa-miR-556-5p	0	0	0	1	0	0	RHOXF2	Rhox homeobox family, member 2
hsa-miR-556-5p	0	0	0	1	0	0	RHOXF2B	Rhox homeobox family, member 2B
hsa-miR-556-5p	0	0	0	1	0	0	IFIT3	interferon-induced protein with tetratricopeptide repeats 3
hsa-miR-556-5p	0	0	1	1	0	0	SPATA6	spermatogenesis associated 6
hsa-miR-556-5p	0	0	0	1	1	1	SURF1	surfeit 1
hsa-miR-556-5p	1	0	1	1	1	1	PRPS1	phosphoribosyl pyrophosphate synthetase 1
hsa-miR-556-5p	0	0	1	1	1	1	PPCS	phosphopantothenoylcysteine synthetase
hsa-miR-556-5p	0	0	1	1	0	0	TCEAL2	transcription elongation factor A (SII)-like 2
hsa-miR-556-5p	0	0	1	1	0	0	PPIE	peptidylprolyl isomerase E (cyclophilin E)
hsa-miR-556-5p	1	0	1	1	1	1	FAM102A	family with sequence similarity 102, member A
hsa-miR-556-5p	0	0	1	1	0	0	TREML1	triggering receptor expressed on myeloid cells-like 1
hsa-miR-556-5p	0	0	0	1	0	0	KCNK16	potassium channel, subfamily K, member 16
hsa-miR-556-5p	0	0	1	1	0	0	TTC16	tetratricopeptide repeat domain 16
hsa-miR-556-5p	0	0	0	1	0	0	SMPDL3B	sphingomyelin phosphodiesterase, acid-like 3B
hsa-miR-556-5p	0	0	1	1	0	0	GPN2	GPN-loop GTPase 2
hsa-miR-556-5p	1	0	1	1	0	0	DHDDS	dehydrodolichyl diphosphate synthase
hsa-miR-556-5p	0	0	1	1	0	0	ALOX5	arachidonate 5-lipoxygenase
hsa-miR-556-5p	0	0	1	1	0	0	P2RY4	pyrimidinergic receptor P2Y, G-protein coupled, 4
hsa-miR-556-5p	0	0	1	1	1	1	ZNF189	zinc finger protein 189
hsa-miR-556-5p	0	0	1	1	0	0	MSANTD3	Myb/SANT-like DNA-binding domain containing 3
hsa-miR-556-5p	1	0	1	1	1	1	TMEFF1	transmembrane protein with EGF-like and two follistatin-like domains 1
hsa-miR-556-5p	0	0	1	1	0	0	SPIN2A	spindlin family, member 2A
hsa-miR-556-5p	0	0	1	1	0	0	SPIN2B	spindlin family, member 2B
hsa-miR-556-5p	0	0	1	1	1	1	GALNT12	UDP-N-acetyl-alpha-D-galactosamine:polypeptide N-acetylgalactosaminyltransferase 12 (GalNAc-T12)
hsa-miR-556-5p	0	0	0	1	0	0	SDHB	succinate dehydrogenase complex, subunit B, iron sulfur (Ip)
hsa-miR-556-5p	0	0	1	1	0	0	MSH5	mutS homolog 5 (E. coli)
hsa-miR-556-5p	0	0	1	1	0	0	DGKK	diacylglycerol kinase, kappa
hsa-miR-556-5p	1	0	0	1	0	0	NRM	nurim (nuclear envelope membrane protein)
hsa-miR-556-5p	0	0	0	1	1	1	MSRB2	methionine sulfoxide reductase B2
hsa-miR-556-5p	1	0	1	1	1	1	TLE4	transducin-like enhancer of split 4 (E(sp1) homolog, Drosophila)
hsa-miR-556-5p	0	0	0	1	0	0	TRIM40	tripartite motif containing 40
hsa-miR-556-5p	0	0	1	1	1	1	SSX3	synovial sarcoma, X breakpoint 3
hsa-miR-556-5p	0	0	1	1	1	1	ALDH1A1	aldehyde dehydrogenase 1 family, member A1
hsa-miR-556-5p	0	0	1	1	1	1	ANKRD36B	ankyrin repeat domain 36B
hsa-miR-556-5p	0	0	0	1	0	0	ZNF311	zinc finger protein 311
hsa-miR-556-5p	0	0	1	1	1	1	CBWD3	COBW domain containing 3
hsa-miR-556-5p	0	0	1	1	1	1	ANKRD20A1	ankyrin repeat domain 20 family, member A1
hsa-miR-556-5p	1	0	1	1	1	1	PER3	period homolog 3 (Drosophila)
hsa-miR-556-5p	0	0	0	1	1	1	ANKRD20A2	ankyrin repeat domain 20 family, member A2
hsa-miR-556-5p	0	0	0	1	1	1	ZNF658B	zinc finger protein 658B, pseudogene
hsa-miR-556-5p	0	0	0	1	1	1	ZNF658	zinc finger protein 658
hsa-miR-556-5p	1	0	1	1	1	1	TBC1D4	TBC1 domain family, member 4
hsa-miR-556-5p	0	0	0	1	1	1	KRTAP4-8	keratin associated protein 4-8
hsa-miR-556-5p	1	0	1	1	1	1	YIPF5	Yip1 domain family, member 5
hsa-miR-556-5p	1	0	1	1	1	1	DFFB	DNA fragmentation factor, 40kDa, beta polypeptide (caspase-activated DNase)
hsa-miR-556-5p	0	0	1	1	1	1	EBPL	emopamil binding protein-like
hsa-miR-556-5p	0	0	1	1	0	0	CDNF	cerebral dopamine neurotrophic factor
hsa-miR-556-5p	1	0	1	1	1	1	AFF4	AF4/FMR2 family, member 4
hsa-miR-556-5p	0	0	1	1	1	1	HYDIN	HYDIN, axonemal central pair apparatus protein
hsa-miR-556-5p	0	0	1	1	1	1	NUDT5	nudix (nucleoside diphosphate linked moiety X)-type motif 5
hsa-miR-556-5p	1	0	1	1	1	1	KCTD4	potassium channel tetramerisation domain containing 4
hsa-miR-556-5p	0	0	1	1	1	1	METTL15	methyltransferase like 15
hsa-miR-556-5p	0	0	1	1	1	1	MUC17	mucin 17, cell surface associated
hsa-miR-556-5p	0	0	1	1	1	1	TMEM14B	transmembrane protein 14B
hsa-miR-556-5p	1	0	1	1	1	1	EIF1AX	eukaryotic translation initiation factor 1A, X-linked
hsa-miR-556-5p	0	0	1	1	1	1	STOML3	stomatin (EPB72)-like 3
hsa-miR-556-5p	0	0	1	1	0	0	IPO7	importin 7
hsa-miR-556-5p	1	0	1	1	1	1	DSP	desmoplakin
hsa-miR-556-5p	0	0	1	1	1	1	RFC3	replication factor C (activator 1) 3, 38kDa
hsa-miR-556-5p	0	0	1	1	0	0	HBG1	hemoglobin, gamma A
hsa-miR-556-5p	0	0	0	1	0	0	HBG2	hemoglobin, gamma G
hsa-miR-556-5p	0	0	1	1	1	1	HSPH1	heat shock 105kDa/110kDa protein 1
hsa-miR-556-5p	0	0	0	1	0	0	OR52A1	olfactory receptor, family 52, subfamily A, member 1
hsa-miR-556-5p	0	0	0	1	0	0	OR52A4	olfactory receptor, family 52, subfamily A, member 4
hsa-miR-556-5p	0	0	0	1	0	0	OR51T1	olfactory receptor, family 51, subfamily T, member 1
hsa-miR-556-5p	0	0	1	1	0	0	PIR	pirin (iron-binding nuclear protein)
hsa-miR-556-5p	0	0	1	1	0	0	UMODL1	uromodulin-like 1
hsa-miR-556-5p	0	0	0	1	0	0	ASB11	ankyrin repeat and SOCS box containing 11
hsa-miR-556-5p	0	0	1	1	1	1	POLR2M	polymerase (RNA) II (DNA directed) polypeptide M
hsa-miR-556-5p	0	0	1	1	0	0	PLSCR3	phospholipid scramblase 3
hsa-miR-556-5p	1	0	0	1	1	1	SLC46A3	solute carrier family 46, member 3
hsa-miR-556-5p	0	0	0	1	0	0	AREGB	amphiregulin B
hsa-miR-556-5p	0	0	1	1	0	0	MUC16	mucin 16, cell surface associated
hsa-miR-556-5p	0	0	1	1	1	1	CD99	CD99 molecule
hsa-miR-556-5p	0	0	1	1	1	1	RDH11	retinol dehydrogenase 11 (all-trans/9-cis/11-cis)
hsa-miR-556-5p	0	0	1	1	0	0	NOMO2	NODAL modulator 2
hsa-miR-556-5p	1	0	0	1	1	1	MLANA	melan-A
hsa-miR-556-5p	0	0	1	1	0	0	APOBEC3G	apolipoprotein B mRNA editing enzyme, catalytic polypeptide-like 3G
hsa-miR-556-5p	0	0	1	1	1	1	SIRPB2	signal-regulatory protein beta 2
hsa-miR-556-5p	0	0	1	1	1	1	SPATA6L	spermatogenesis associated 6-like
hsa-miR-556-5p	0	0	1	1	0	0	TMEM74B	transmembrane protein 74B
hsa-miR-556-5p	0	0	1	1	1	1	KLRC3	killer cell lectin-like receptor subfamily C, member 3
hsa-miR-556-5p	1	0	1	1	1	1	MTMR12	myotubularin related protein 12
hsa-miR-556-5p	0	0	1	1	1	1	DAZ1	deleted in azoospermia 1
hsa-miR-556-5p	0	0	0	1	0	0	DEFA1	defensin, alpha 1
hsa-miR-556-5p	0	0	0	1	0	0	DEFA1B	defensin, alpha 1B
hsa-miR-556-5p	0	0	1	1	1	1	FBXO25	F-box protein 25
hsa-miR-556-5p	0	0	0	1	0	0	LRRC30	leucine rich repeat containing 30
hsa-miR-556-5p	1	0	1	1	1	1	ASPH	aspartate beta-hydroxylase
hsa-miR-556-5p	1	0	1	1	1	1	CC2D1A	coiled-coil and C2 domain containing 1A
hsa-miR-556-5p	0	0	1	1	0	0	ABCC8	ATP-binding cassette, sub-family C (CFTR/MRP), member 8
hsa-miR-556-5p	1	0	1	1	0	0	CCDC30	coiled-coil domain containing 30
hsa-miR-556-5p	1	0	1	1	1	1	FUT1	fucosyltransferase 1 (galactoside 2-alpha-L-fucosyltransferase, H blood group)
hsa-miR-556-5p	1	0	1	1	1	1	ARHGAP28	Rho GTPase activating protein 28
hsa-miR-556-5p	0	0	0	1	1	1	SGOL1	shugoshin-like 1 (S. pombe)
hsa-miR-556-5p	0	0	1	0	1	1	STXBP1	syntaxin binding protein 1
hsa-miR-556-5p	0	0	1	1	1	1	C6orf225	chromosome 6 open reading frame 225
hsa-miR-556-5p	1	0	1	1	1	1	GALNTL6	UDP-N-acetyl-alpha-D-galactosamine:polypeptide N-acetylgalactosaminyltransferase-like 6
hsa-miR-556-5p	0	0	0	0	1	1	FLJ44838	uncharacterized LOC644767
hsa-miR-556-5p	0	0	1	0	1	1	SCN3B	sodium channel, voltage-gated, type III, beta subunit
hsa-miR-556-5p	1	0	1	1	1	1	ST3GAL5	ST3 beta-galactoside alpha-2,3-sialyltransferase 5
hsa-miR-556-5p	1	0	1	0	1	1	MEGF9	multiple EGF-like-domains 9
hsa-miR-556-5p	0	0	1	0	1	1	CAV2	caveolin 2
hsa-miR-556-5p	0	0	1	1	1	1	KCNJ15	potassium inwardly-rectifying channel, subfamily J, member 15
hsa-miR-556-5p	0	0	1	1	1	1	IL18R1	interleukin 18 receptor 1
hsa-miR-556-5p	0	0	1	1	1	1	SDPR	serum deprivation response
hsa-miR-556-5p	1	0	1	0	1	1	LRAT	lecithin retinol acyltransferase (phosphatidylcholine--retinol O-acyltransferase)
hsa-miR-556-5p	0	0	1	1	1	1	CLCA3P	chloride channel accessory 3, pseudogene
hsa-miR-556-5p	1	0	1	0	1	1	PTPRE	protein tyrosine phosphatase, receptor type, E
hsa-miR-556-5p	0	0	1	1	1	1	CCT5	chaperonin containing TCP1, subunit 5 (epsilon)
hsa-miR-556-5p	0	0	1	0	1	1	OGN	osteoglycin
hsa-miR-556-5p	1	0	1	0	1	1	KIAA0182	KIAA0182
hsa-miR-556-5p	0	0	1	1	1	1	TOX4	TOX high mobility group box family member 4
hsa-miR-556-5p	1	0	1	1	1	1	FAM20B	family with sequence similarity 20, member B
hsa-miR-556-5p	1	0	1	1	1	1	WARS2	tryptophanyl tRNA synthetase 2, mitochondrial
hsa-miR-556-5p	1	0	1	1	1	1	LRP2BP	LRP2 binding protein
hsa-miR-556-5p	1	0	1	1	1	1	PAG1	phosphoprotein associated with glycosphingolipid microdomains 1
hsa-miR-556-5p	0	0	1	1	1	1	KIDINS220	kinase D-interacting substrate, 220kDa
hsa-miR-556-5p	0	0	1	1	1	1	PYROXD1	pyridine nucleotide-disulphide oxidoreductase domain 1
hsa-miR-556-5p	1	0	1	1	1	1	WWC2	WW and C2 domain containing 2
hsa-miR-556-5p	1	0	1	1	1	1	FOXP1	forkhead box P1
hsa-miR-556-5p	0	0	1	1	1	1	CLIC6	chloride intracellular channel 6
hsa-miR-556-5p	0	0	1	1	1	1	ATPBD4	ATP binding domain 4
hsa-miR-556-5p	1	0	1	1	1	1	WHSC1	Wolf-Hirschhorn syndrome candidate 1
hsa-miR-556-5p	1	0	1	1	1	1	BMPER	BMP binding endothelial regulator
hsa-miR-556-5p	1	0	0	1	1	1	ARL8A	ADP-ribosylation factor-like 8A
hsa-miR-556-5p	1	0	1	1	1	1	TBC1D20	TBC1 domain family, member 20
hsa-miR-556-5p	0	0	0	1	1	1	WFIKKN2	WAP, follistatin/kazal, immunoglobulin, kunitz and netrin domain containing 2
hsa-miR-556-5p	0	0	1	1	1	1	CCDC125	coiled-coil domain containing 125
hsa-miR-556-5p	1	0	1	0	1	1	RIMS4	regulating synaptic membrane exocytosis 4
hsa-miR-556-5p	1	0	1	1	1	1	TPRG1	tumor protein p63 regulated 1
hsa-miR-556-5p	0	0	1	1	1	1	ZPBP2	zona pellucida binding protein 2
hsa-miR-556-5p	0	0	0	0	1	1	ROCK1P1	Rho-associated, coiled-coil containing protein kinase 1 pseudogene 1
hsa-miR-556-5p	0	0	0	1	1	1	TMEM191B	transmembrane protein 191B
hsa-miR-556-5p	0	0	0	0	1	1	KIAA1239	KIAA1239
hsa-miR-556-5p	0	0	1	1	1	1	TMEM191C	transmembrane protein 191C
