# Supplementary material for: Profiling of Selected MicroRNAs in Proliferative Eutopic Endometrium of Women with Ovarian Endometriosis
Source: Biomed Res Int. 2015 Aug 20;2015:760698. doi: 10.1155/2015/760698 (PMC4558423; doi:10.1155/2015/760698)
Supplement: Supplementary file 1 — Table I: The names of miRNAs significantly differentially expressed between eutopic endometrium of patients with endometriosis vs eutopic endometrium of patients without endometriosis. Table II: The associations between miRNA and mRNA, which presents detailed results of the search of six major databases i.e targetscan, tarbase, miranda, mirbase, mirtarget2 and pictar. [file 760698.f1.zip › 760698.f1/Table II/hsa-miR-557.tsv]

miR	targetscan	tarbase	miranda	mirbase	mirtarget2	pictar	GeneSymbol	GeneName
hsa-miR-557	1	0	1	1	1	1	PLAU	plasminogen activator, urokinase
hsa-miR-557	1	0	1	1	1	1	CHD9	chromodomain helicase DNA binding protein 9
hsa-miR-557	0	0	1	1	1	1	PPIP5K1	diphosphoinositol pentakisphosphate kinase 1
hsa-miR-557	1	0	1	1	1	1	FAM65B	family with sequence similarity 65, member B
hsa-miR-557	1	0	1	0	1	1	PTPRT	protein tyrosine phosphatase, receptor type, T
hsa-miR-557	1	0	1	0	1	1	VPS13D	vacuolar protein sorting 13 homolog D (S. cerevisiae)
hsa-miR-557	1	0	1	1	0	0	DENND4B	DENN/MADD domain containing 4B
hsa-miR-557	1	0	1	0	1	1	CEP350	centrosomal protein 350kDa
hsa-miR-557	0	0	1	0	0	0	FAM91A2	family with sequence similarity 91, member A2
hsa-miR-557	1	0	1	1	1	1	SLC4A7	solute carrier family 4, sodium bicarbonate cotransporter, member 7
hsa-miR-557	1	0	1	1	1	1	HIPK1	homeodomain interacting protein kinase 1
hsa-miR-557	1	0	1	1	1	1	GIGYF2	GRB10 interacting GYF protein 2
hsa-miR-557	0	0	1	1	0	0	FKBP15	FK506 binding protein 15, 133kDa
hsa-miR-557	0	0	1	1	1	1	XRCC4	X-ray repair complementing defective repair in Chinese hamster cells 4
hsa-miR-557	1	0	1	0	1	1	DOCK4	dedicator of cytokinesis 4
hsa-miR-557	1	0	1	1	1	1	LPHN2	latrophilin 2
hsa-miR-557	1	0	1	1	1	1	DMXL2	Dmx-like 2
hsa-miR-557	1	0	1	1	1	1	ARHGEF15	Rho guanine nucleotide exchange factor (GEF) 15
hsa-miR-557	1	0	1	0	0	0	DTX4	deltex homolog 4 (Drosophila)
hsa-miR-557	1	0	1	1	1	1	C11orf9	chromosome 11 open reading frame 9
hsa-miR-557	1	0	1	1	1	1	RGL1	ral guanine nucleotide dissociation stimulator-like 1
hsa-miR-557	0	0	1	1	1	1	FASTKD2	FAST kinase domains 2
hsa-miR-557	1	0	1	1	1	1	FOXJ3	forkhead box J3
hsa-miR-557	1	0	1	1	0	0	ZC3H4	zinc finger CCCH-type containing 4
hsa-miR-557	1	0	1	1	1	1	SPIRE1	spire homolog 1 (Drosophila)
hsa-miR-557	1	0	1	0	1	1	SRGAP3	SLIT-ROBO Rho GTPase activating protein 3
hsa-miR-557	1	0	1	1	0	0	PPM1H	protein phosphatase, Mg2+/Mn2+ dependent, 1H
hsa-miR-557	1	0	1	1	1	1	PCDH19	protocadherin 19
hsa-miR-557	1	0	1	1	1	1	UNC79	unc-79 homolog (C. elegans)
hsa-miR-557	1	0	1	0	1	1	SEMA6D	sema domain, transmembrane domain (TM), and cytoplasmic domain, (semaphorin) 6D
hsa-miR-557	0	0	1	0	0	0	KRT19P2	keratin 19 pseudogene 2
hsa-miR-557	0	0	1	0	1	1	ZSWIM6	zinc finger, SWIM-type containing 6
hsa-miR-557	1	0	1	1	0	0	ARHGAP39	Rho GTPase activating protein 39
hsa-miR-557	0	0	1	0	1	1	SETD5	SET domain containing 5
hsa-miR-557	0	0	1	1	1	1	FANCI	Fanconi anemia, complementation group I
hsa-miR-557	1	0	1	1	1	1	LCOR	ligand dependent nuclear receptor corepressor
hsa-miR-557	0	0	1	1	1	1	UNC80	unc-80 homolog (C. elegans)
hsa-miR-557	0	0	1	0	0	0	NBLA00301	Nbla00301
hsa-miR-557	1	0	1	1	1	1	SH3TC2	SH3 domain and tetratricopeptide repeats 2
hsa-miR-557	1	0	1	1	1	1	PAN3	PAN3 poly(A) specific ribonuclease subunit homolog (S. cerevisiae)
hsa-miR-557	1	0	1	0	1	1	BEND4	BEN domain containing 4
hsa-miR-557	1	1	1	1	1	1	BACE1	beta-site APP-cleaving enzyme 1
hsa-miR-557	1	0	1	1	1	1	UBE3A	ubiquitin protein ligase E3A
hsa-miR-557	1	0	1	1	1	1	MEF2A	myocyte enhancer factor 2A
hsa-miR-557	1	0	1	1	1	1	HMGB1	high mobility group box 1
hsa-miR-557	0	0	1	1	1	1	DNM1L	dynamin 1-like
hsa-miR-557	1	0	1	1	1	1	SLC8A1	solute carrier family 8 (sodium/calcium exchanger), member 1
hsa-miR-557	1	0	1	0	1	1	PLAG1	pleiomorphic adenoma gene 1
hsa-miR-557	1	0	1	1	1	1	RASSF5	Ras association (RalGDS/AF-6) domain family member 5
hsa-miR-557	0	0	1	1	1	1	DGKI	diacylglycerol kinase, iota
hsa-miR-557	0	0	1	1	1	1	DVL1	dishevelled, dsh homolog 1 (Drosophila)
hsa-miR-557	1	0	1	1	1	1	REV3L	REV3-like, polymerase (DNA directed), zeta, catalytic subunit
hsa-miR-557	1	0	1	1	1	1	PPFIA1	protein tyrosine phosphatase, receptor type, f polypeptide (PTPRF), interacting protein (liprin), alpha 1
hsa-miR-557	1	0	1	1	1	1	SATB2	SATB homeobox 2
hsa-miR-557	1	0	1	1	1	1	AEBP2	AE binding protein 2
hsa-miR-557	0	0	1	1	0	0	IFT27	intraflagellar transport 27 homolog (Chlamydomonas)
hsa-miR-557	0	0	1	1	1	1	PPP1R12C	protein phosphatase 1, regulatory subunit 12C
hsa-miR-557	0	0	1	1	0	0	PSMB2	proteasome (prosome, macropain) subunit, beta type, 2
hsa-miR-557	0	0	1	1	0	0	IGFBP2	insulin-like growth factor binding protein 2, 36kDa
hsa-miR-557	0	0	1	1	0	0	EIF2B4	eukaryotic translation initiation factor 2B, subunit 4 delta, 67kDa
hsa-miR-557	1	0	1	1	1	1	HNRNPK	heterogeneous nuclear ribonucleoprotein K
hsa-miR-557	0	0	1	1	0	0	HLA-DMB	major histocompatibility complex, class II, DM beta
hsa-miR-557	0	0	1	1	0	0	CFLAR	CASP8 and FADD-like apoptosis regulator
hsa-miR-557	0	0	1	1	1	1	HLA-DQA1	major histocompatibility complex, class II, DQ alpha 1
hsa-miR-557	1	0	1	1	1	1	ARHGEF3	Rho guanine nucleotide exchange factor (GEF) 3
hsa-miR-557	1	0	1	1	1	1	CRTAM	cytotoxic and regulatory T cell molecule
hsa-miR-557	1	0	1	1	1	1	TEAD1	TEA domain family member 1 (SV40 transcriptional enhancer factor)
hsa-miR-557	0	0	1	1	0	0	TRIM27	tripartite motif containing 27
hsa-miR-557	1	0	1	1	1	1	ZFX	zinc finger protein, X-linked
hsa-miR-557	0	0	1	1	1	1	BRCA1	breast cancer 1, early onset
hsa-miR-557	1	0	1	1	1	1	TTC39A	tetratricopeptide repeat domain 39A
hsa-miR-557	1	0	1	0	1	1	PDE4D	phosphodiesterase 4D, cAMP-specific
hsa-miR-557	1	0	1	1	1	1	YME1L1	YME1-like 1 (S. cerevisiae)
hsa-miR-557	0	0	1	0	0	0	ALOX12P2	arachidonate 12-lipoxygenase pseudogene 2
hsa-miR-557	1	0	1	1	1	1	PCDH17	protocadherin 17
hsa-miR-557	1	0	1	1	1	1	SOCS2	suppressor of cytokine signaling 2
hsa-miR-557	1	0	1	0	0	0	MAP3K1	mitogen-activated protein kinase kinase kinase 1, E3 ubiquitin protein ligase
hsa-miR-557	0	0	1	1	1	1	KHDRBS3	KH domain containing, RNA binding, signal transduction associated 3
hsa-miR-557	1	0	1	1	1	1	RUNX2	runt-related transcription factor 2
hsa-miR-557	1	0	1	1	1	1	SHOC2	soc-2 suppressor of clear homolog (C. elegans)
hsa-miR-557	0	0	1	1	0	0	IKBKG	inhibitor of kappa light polypeptide gene enhancer in B-cells, kinase gamma
hsa-miR-557	1	0	1	1	1	1	TP63	tumor protein p63
hsa-miR-557	1	0	1	1	1	1	USP3	ubiquitin specific peptidase 3
hsa-miR-557	0	0	1	1	0	0	CARD10	caspase recruitment domain family, member 10
hsa-miR-557	0	0	1	1	1	1	BBS9	Bardet-Biedl syndrome 9
hsa-miR-557	1	0	1	0	1	1	CD164	CD164 molecule, sialomucin
hsa-miR-557	0	0	1	1	1	1	EIF2A	eukaryotic translation initiation factor 2A, 65kDa
hsa-miR-557	0	0	1	1	1	1	IL18BP	interleukin 18 binding protein
hsa-miR-557	0	0	1	1	1	1	TIAM2	T-cell lymphoma invasion and metastasis 2
hsa-miR-557	0	0	1	1	1	1	DMRT2	doublesex and mab-3 related transcription factor 2
hsa-miR-557	1	0	1	1	1	1	AASDHPPT	aminoadipate-semialdehyde dehydrogenase-phosphopantetheinyl transferase
hsa-miR-557	1	0	1	1	1	1	AGPAT3	1-acylglycerol-3-phosphate O-acyltransferase 3
hsa-miR-557	1	0	1	1	1	1	MARK3	MAP/microtubule affinity-regulating kinase 3
hsa-miR-557	1	0	1	1	1	1	CCNL1	cyclin L1
hsa-miR-557	0	0	1	1	1	1	LMBRD1	LMBR1 domain containing 1
hsa-miR-557	1	0	1	1	1	1	NXT2	nuclear transport factor 2-like export factor 2
hsa-miR-557	0	0	1	1	1	1	CSNK1A1	casein kinase 1, alpha 1
hsa-miR-557	0	0	1	0	0	0	TIGD7	tigger transposable element derived 7
hsa-miR-557	1	0	1	1	1	1	ELF2	E74-like factor 2 (ets domain transcription factor)
hsa-miR-557	0	0	1	0	1	1	ERBB2IP	erbb2 interacting protein
hsa-miR-557	0	0	1	1	0	0	EXOSC8	exosome component 8
hsa-miR-557	0	0	1	0	1	1	KANSL3	KAT8 regulatory NSL complex subunit 3
hsa-miR-557	1	0	1	1	1	1	METTL10	methyltransferase like 10
hsa-miR-557	0	0	1	1	0	0	ZAN	zonadhesin
hsa-miR-557	1	0	1	0	1	1	USP32	ubiquitin specific peptidase 32
hsa-miR-557	0	0	1	0	0	0	NBPF10	neuroblastoma breakpoint family, member 10
hsa-miR-557	1	0	1	1	1	1	RCAN1	regulator of calcineurin 1
hsa-miR-557	1	0	1	1	1	1	MAGI1	membrane associated guanylate kinase, WW and PDZ domain containing 1
hsa-miR-557	1	0	1	1	1	1	NTRK2	neurotrophic tyrosine kinase, receptor, type 2
hsa-miR-557	0	0	1	0	0	0	ANKRD30BP2	ankyrin repeat domain 30B pseudogene 2
hsa-miR-557	1	0	1	1	1	1	ZNF148	zinc finger protein 148
hsa-miR-557	1	0	1	1	0	0	SEPT8	septin 8
hsa-miR-557	1	0	1	1	1	1	RBFOX1	RNA binding protein, fox-1 homolog (C. elegans) 1
hsa-miR-557	1	0	1	1	1	1	WAPAL	wings apart-like homolog (Drosophila)
hsa-miR-557	0	0	1	1	1	1	AMPH	amphiphysin
hsa-miR-557	0	0	1	1	1	1	CHODL	chondrolectin
hsa-miR-557	0	0	1	1	1	1	GNAS	GNAS complex locus
hsa-miR-557	0	0	1	0	0	0	CACNA2D3	calcium channel, voltage-dependent, alpha 2/delta subunit 3
hsa-miR-557	1	0	1	1	1	1	VAMP7	vesicle-associated membrane protein 7
hsa-miR-557	0	0	1	0	0	0	LY6G6E	lymphocyte antigen 6 complex, locus G6E (pseudogene)
hsa-miR-557	1	0	1	1	1	1	NRXN3	neurexin 3
hsa-miR-557	1	0	1	1	1	1	ARL4C	ADP-ribosylation factor-like 4C
hsa-miR-557	0	0	1	0	0	0	COL28A1	collagen, type XXVIII, alpha 1
hsa-miR-557	1	0	1	1	1	1	AKAP2	A kinase (PRKA) anchor protein 2
hsa-miR-557	1	0	1	1	1	1	ENOX2	ecto-NOX disulfide-thiol exchanger 2
hsa-miR-557	0	0	1	1	1	1	PARP16	poly (ADP-ribose) polymerase family, member 16
hsa-miR-557	0	0	1	0	0	0	TUG1	taurine upregulated 1 (non-protein coding)
hsa-miR-557	0	0	1	1	1	1	PARPBP	PARP1 binding protein
hsa-miR-557	0	0	1	1	1	1	RBM10	RNA binding motif protein 10
hsa-miR-557	0	0	1	1	1	1	RNF220	ring finger protein 220
hsa-miR-557	1	0	1	1	1	1	SLC38A2	solute carrier family 38, member 2
hsa-miR-557	1	0	1	1	1	1	ARMC8	armadillo repeat containing 8
hsa-miR-557	0	0	1	1	1	1	CXXC5	CXXC finger protein 5
hsa-miR-557	0	0	1	0	0	0	C17orf72	chromosome 17 open reading frame 72
hsa-miR-557	1	0	1	0	1	1	LIN28A	lin-28 homolog A (C. elegans)
hsa-miR-557	1	0	1	0	0	0	ZNRF3	zinc and ring finger 3
hsa-miR-557	1	0	1	1	1	1	S100PBP	S100P binding protein
hsa-miR-557	1	0	1	1	1	1	PPFIA4	protein tyrosine phosphatase, receptor type, f polypeptide (PTPRF), interacting protein (liprin), alpha 4
hsa-miR-557	0	0	1	1	1	1	CLEC4M	C-type lectin domain family 4, member M
hsa-miR-557	1	0	1	1	1	1	DERL1	derlin 1
hsa-miR-557	0	0	1	0	0	0	LOC286059	tumor necrosis factor receptor superfamily, member 10d, decoy with truncated death domain pseudogene
hsa-miR-557	0	0	1	1	1	1	CC2D2A	coiled-coil and C2 domain containing 2A
hsa-miR-557	0	0	1	1	0	0	MPRIP	myosin phosphatase Rho interacting protein
hsa-miR-557	1	0	1	1	1	1	YPEL5	yippee-like 5 (Drosophila)
hsa-miR-557	1	0	1	1	1	1	NAA30	N(alpha)-acetyltransferase 30, NatC catalytic subunit
hsa-miR-557	1	0	1	0	1	1	ZCCHC3	zinc finger, CCHC domain containing 3
hsa-miR-557	0	0	1	0	1	1	HEMK1	HemK methyltransferase family member 1
hsa-miR-557	1	0	1	1	0	0	SLAIN2	SLAIN motif family, member 2
hsa-miR-557	1	0	1	1	1	1	ITGA9	integrin, alpha 9
hsa-miR-557	0	0	1	1	1	1	GTF2H1	general transcription factor IIH, polypeptide 1, 62kDa
hsa-miR-557	0	0	1	1	1	1	DUSP14	dual specificity phosphatase 14
hsa-miR-557	0	0	1	0	1	1	TWSG1	twisted gastrulation homolog 1 (Drosophila)
hsa-miR-557	0	0	1	1	1	1	DTL	denticleless E3 ubiquitin protein ligase homolog (Drosophila)
hsa-miR-557	1	0	1	1	1	1	SLC38A1	solute carrier family 38, member 1
hsa-miR-557	0	0	1	0	0	0	FAM185A	family with sequence similarity 185, member A
hsa-miR-557	1	0	1	1	1	1	FAM123A	family with sequence similarity 123A
hsa-miR-557	1	0	1	1	1	1	MBD5	methyl-CpG binding domain protein 5
hsa-miR-557	1	0	1	0	1	1	AP1G1	adaptor-related protein complex 1, gamma 1 subunit
hsa-miR-557	0	0	1	0	0	0	SNHG11	small nucleolar RNA host gene 11 (non-protein coding)
hsa-miR-557	0	0	1	1	1	1	BCAR3	breast cancer anti-estrogen resistance 3
hsa-miR-557	0	0	1	0	1	1	LOC152742	uncharacterized LOC152742
hsa-miR-557	0	0	1	1	1	1	ANKRD36B	ankyrin repeat domain 36B
hsa-miR-557	0	0	1	0	0	0	JPX	JPX transcript, XIST activator (non-protein coding)
hsa-miR-557	1	0	1	1	1	1	PPP1R3F	protein phosphatase 1, regulatory subunit 3F
hsa-miR-557	0	0	1	1	1	1	TP53I11	tumor protein p53 inducible protein 11
hsa-miR-557	1	0	1	1	1	1	SORBS2	sorbin and SH3 domain containing 2
hsa-miR-557	1	0	1	0	1	1	RABGEF1	RAB guanine nucleotide exchange factor (GEF) 1
hsa-miR-557	0	0	1	0	0	0	LOC157381	uncharacterized LOC157381
hsa-miR-557	1	0	1	1	1	1	TLE4	transducin-like enhancer of split 4 (E(sp1) homolog, Drosophila)
hsa-miR-557	1	0	1	0	1	1	NCAM1	neural cell adhesion molecule 1
hsa-miR-557	0	0	1	1	1	1	ELL3	elongation factor RNA polymerase II-like 3
hsa-miR-557	0	0	1	0	0	0	LINC00637	long intergenic non-protein coding RNA 637
hsa-miR-557	1	0	1	1	1	1	C6orf89	chromosome 6 open reading frame 89
hsa-miR-557	0	0	1	1	0	0	ANKAR	ankyrin and armadillo repeat containing
hsa-miR-557	0	0	1	0	0	0	C6orf228	chromosome 6 open reading frame 228
hsa-miR-557	1	0	1	1	1	1	PHF15	PHD finger protein 15
hsa-miR-557	1	0	1	1	1	1	PAX6	paired box 6
hsa-miR-557	1	0	1	1	0	0	APBB3	amyloid beta (A4) precursor protein-binding, family B, member 3
hsa-miR-557	1	0	1	1	1	1	UBAP1	ubiquitin associated protein 1
hsa-miR-557	0	0	1	1	0	0	NISCH	nischarin
hsa-miR-557	1	0	1	1	1	1	SUPT16H	suppressor of Ty 16 homolog (S. cerevisiae)
hsa-miR-557	1	0	1	1	1	1	FBXW2	F-box and WD repeat domain containing 2
hsa-miR-557	0	0	1	1	0	0	LAMA1	laminin, alpha 1
hsa-miR-557	0	0	1	0	0	0	KIAA1430	KIAA1430
hsa-miR-557	1	0	1	1	1	1	LUC7L2	LUC7-like 2 (S. cerevisiae)
hsa-miR-557	1	0	1	1	1	1	SLC25A3	solute carrier family 25 (mitochondrial carrier; phosphate carrier), member 3
hsa-miR-557	1	0	1	0	1	1	CRTAP	cartilage associated protein
hsa-miR-557	0	0	1	1	1	1	TMPRSS11D	transmembrane protease, serine 11D
hsa-miR-557	0	0	1	1	1	1	MARC1	mitochondrial amidoxime reducing component 1
hsa-miR-557	1	0	1	1	1	1	SSH3	slingshot homolog 3 (Drosophila)
hsa-miR-557	0	0	1	0	0	0	PART1	prostate androgen-regulated transcript 1 (non-protein coding)
hsa-miR-557	0	0	1	0	0	0	ZNF806	zinc finger protein 806
hsa-miR-557	1	0	1	0	1	1	ARL6IP6	ADP-ribosylation-like factor 6 interacting protein 6
hsa-miR-557	0	0	1	0	0	0	LINC00340	long intergenic non-protein coding RNA 340
hsa-miR-557	1	0	1	1	1	1	LPPR2	lipid phosphate phosphatase-related protein type 2
hsa-miR-557	0	0	1	1	1	1	SPAG16	sperm associated antigen 16
hsa-miR-557	1	0	1	1	1	1	TCF4	transcription factor 4
hsa-miR-557	1	0	1	1	1	1	EPHB1	EPH receptor B1
hsa-miR-557	0	0	1	0	0	0	LOC730101	uncharacterized LOC730101
hsa-miR-557	1	0	1	0	1	1	UBXN4	UBX domain protein 4
hsa-miR-557	1	0	1	0	1	1	FAM129A	family with sequence similarity 129, member A
hsa-miR-557	0	0	1	1	0	0	CXorf38	chromosome X open reading frame 38
hsa-miR-557	1	0	1	0	1	1	STC2	stanniocalcin 2
hsa-miR-557	1	0	1	1	1	1	ACSL1	acyl-CoA synthetase long-chain family member 1
hsa-miR-557	0	0	1	1	1	1	ZNF673	zinc finger family member 673
hsa-miR-557	0	0	1	0	0	0	METTL21CP1	methyltransferase like 21C pseudogene 1
hsa-miR-557	0	0	1	1	1	1	POLR3F	polymerase (RNA) III (DNA directed) polypeptide F, 39 kDa
hsa-miR-557	1	0	1	1	1	1	SYT6	synaptotagmin VI
hsa-miR-557	1	0	1	1	1	1	EPB41L1	erythrocyte membrane protein band 4.1-like 1
hsa-miR-557	1	0	1	1	1	1	CDV3	CDV3 homolog (mouse)
hsa-miR-557	0	0	1	1	1	1	TMEM177	transmembrane protein 177
hsa-miR-557	0	0	1	1	0	0	KRI1	KRI1 homolog (S. cerevisiae)
hsa-miR-557	1	0	1	1	1	1	KL	klotho
hsa-miR-557	0	0	1	1	0	0	LAS1L	LAS1-like (S. cerevisiae)
hsa-miR-557	1	0	1	0	0	0	CTSB	cathepsin B
hsa-miR-557	1	0	1	1	1	1	RAB11FIP4	RAB11 family interacting protein 4 (class II)
hsa-miR-557	1	0	1	0	1	1	AGFG1	ArfGAP with FG repeats 1
hsa-miR-557	0	0	1	0	0	0	KIRREL3-AS3	KIRREL3 antisense RNA 3
hsa-miR-557	1	0	1	1	1	1	GOLGA8B	golgin A8 family, member B
hsa-miR-557	1	0	1	0	1	1	PRKAR1A	protein kinase, cAMP-dependent, regulatory, type I, alpha
hsa-miR-557	0	0	1	1	1	1	RBM4	RNA binding motif protein 4
hsa-miR-557	0	0	1	1	0	0	PSAPL1	prosaposin-like 1 (gene/pseudogene)
hsa-miR-557	1	0	1	1	0	0	DNM2	dynamin 2
hsa-miR-557	1	0	1	1	1	1	LZTS2	leucine zipper, putative tumor suppressor 2
hsa-miR-557	0	0	1	0	0	0	CECR7	cat eye syndrome chromosome region, candidate 7 (non-protein coding)
hsa-miR-557	1	0	1	1	1	1	PIGA	phosphatidylinositol glycan anchor biosynthesis, class A
hsa-miR-557	1	0	1	1	1	1	GATM	glycine amidinotransferase (L-arginine:glycine amidinotransferase)
hsa-miR-557	0	0	1	1	0	0	ZNF283	zinc finger protein 283
hsa-miR-557	0	0	1	0	0	0	LOC100130954	uncharacterized LOC100130954
hsa-miR-557	0	0	1	1	1	1	VWA3B	von Willebrand factor A domain containing 3B
hsa-miR-557	0	0	1	1	0	0	ZACN	zinc activated ligand-gated ion channel
hsa-miR-557	0	0	1	1	0	0	KIAA0146	KIAA0146
hsa-miR-557	0	0	1	1	1	1	NFKB1	nuclear factor of kappa light polypeptide gene enhancer in B-cells 1
hsa-miR-557	1	0	1	1	1	1	ABHD6	abhydrolase domain containing 6
hsa-miR-557	0	0	1	0	0	0	C1orf132	chromosome 1 open reading frame 132
hsa-miR-557	1	0	1	1	1	1	MDGA2	MAM domain containing glycosylphosphatidylinositol anchor 2
hsa-miR-557	0	0	1	1	1	1	PCBP2	poly(rC) binding protein 2
hsa-miR-557	0	0	1	0	0	0	LGALS17A	Charcot-Leyden crystal protein pseudogene
hsa-miR-557	1	0	1	1	1	1	IPPK	inositol 1,3,4,5,6-pentakisphosphate 2-kinase
hsa-miR-557	0	0	1	1	0	0	KRT37	keratin 37
hsa-miR-557	1	0	1	1	1	1	EPAS1	endothelial PAS domain protein 1
hsa-miR-557	1	0	1	0	1	1	WDR82	WD repeat domain 82
hsa-miR-557	0	0	1	0	0	0	DKFZP434H168	uncharacterized LOC26077
hsa-miR-557	0	0	1	1	1	1	QDPR	quinoid dihydropteridine reductase
hsa-miR-557	1	0	1	1	1	1	ABR	active BCR-related
hsa-miR-557	1	0	1	1	1	1	DAB2IP	DAB2 interacting protein
hsa-miR-557	0	0	1	1	0	0	DOCK11	dedicator of cytokinesis 11
hsa-miR-557	0	0	1	1	1	1	KANSL1L	KAT8 regulatory NSL complex subunit 1-like
hsa-miR-557	0	0	1	1	0	0	CUL9	cullin 9
hsa-miR-557	0	0	1	1	1	1	MKX	mohawk homeobox
hsa-miR-557	1	0	1	0	0	0	MSL1	male-specific lethal 1 homolog (Drosophila)
hsa-miR-557	0	0	1	0	0	0	FAM75D4	family with sequence similarity 75, member D4
hsa-miR-557	0	0	1	1	0	0	LOC399829	uncharacterized LOC399829
hsa-miR-557	0	0	1	0	0	0	FAM95B1	family with sequence similarity 95, member B1
hsa-miR-557	1	0	1	1	0	0	UBN2	ubinuclein 2
hsa-miR-557	1	0	1	1	1	1	DCTN4	dynactin 4 (p62)
hsa-miR-557	0	0	1	1	1	1	EPPIN	epididymal peptidase inhibitor
hsa-miR-557	1	0	1	1	0	0	ATXN7L3	ataxin 7-like 3
hsa-miR-557	1	0	1	1	1	1	LIN9	lin-9 homolog (C. elegans)
hsa-miR-557	1	0	1	1	1	1	IL16	interleukin 16
hsa-miR-557	1	0	1	1	1	1	SACM1L	SAC1 suppressor of actin mutations 1-like (yeast)
hsa-miR-557	0	0	1	1	1	1	STRC	stereocilin
hsa-miR-557	1	0	1	1	1	1	DMXL1	Dmx-like 1
hsa-miR-557	1	0	1	1	1	1	DLG2	discs, large homolog 2 (Drosophila)
hsa-miR-557	1	0	1	1	1	1	C14orf28	chromosome 14 open reading frame 28
hsa-miR-557	1	0	1	1	0	0	SNX30	sorting nexin family member 30
hsa-miR-557	1	0	1	1	1	1	CTNNA2	catenin (cadherin-associated protein), alpha 2
hsa-miR-557	1	0	1	1	1	1	PHF17	PHD finger protein 17
hsa-miR-557	1	0	1	1	1	1	KANK4	KN motif and ankyrin repeat domains 4
hsa-miR-557	1	0	1	0	1	1	FNDC3B	fibronectin type III domain containing 3B
hsa-miR-557	0	0	1	0	0	0	ERVFRD-2	endogenous retrovirus group FRD, member 2
hsa-miR-557	1	0	1	1	1	1	SLC12A6	solute carrier family 12 (potassium/chloride transporters), member 6
hsa-miR-557	0	0	1	1	0	0	TRIM46	tripartite motif containing 46
hsa-miR-557	0	0	1	0	0	0	EP400NL	EP400 N-terminal like
hsa-miR-557	1	0	1	0	0	0	SP7	Sp7 transcription factor
hsa-miR-557	0	0	1	1	1	1	PDDC1	Parkinson disease 7 domain containing 1
hsa-miR-557	0	0	1	0	0	0	LOC100129940	uncharacterized LOC100129940
hsa-miR-557	1	0	1	0	1	1	CYB561D1	cytochrome b-561 domain containing 1
hsa-miR-557	0	0	1	1	1	1	TBX19	T-box 19
hsa-miR-557	1	0	1	1	1	1	RBM24	RNA binding motif protein 24
hsa-miR-557	0	0	1	1	0	0	HEATR8	HEAT repeat containing 8
hsa-miR-557	1	0	1	0	1	1	ESRRG	estrogen-related receptor gamma
hsa-miR-557	0	0	1	0	1	1	RUFY4	RUN and FYVE domain containing 4
hsa-miR-557	1	0	1	1	0	0	FOXP2	forkhead box P2
hsa-miR-557	0	0	1	1	1	1	ZNF346	zinc finger protein 346
hsa-miR-557	0	0	1	1	0	0	ZNF730	zinc finger protein 730
hsa-miR-557	1	0	1	1	1	1	LRRK2	leucine-rich repeat kinase 2
hsa-miR-557	1	0	1	0	1	1	ZNF607	zinc finger protein 607
hsa-miR-557	1	0	1	1	1	1	RPS6KA4	ribosomal protein S6 kinase, 90kDa, polypeptide 4
hsa-miR-557	0	0	1	1	0	0	FERMT1	fermitin family member 1
hsa-miR-557	1	0	1	1	1	1	MEAF6	MYST/Esa1-associated factor 6
hsa-miR-557	1	0	1	1	1	1	PTPN2	protein tyrosine phosphatase, non-receptor type 2
hsa-miR-557	1	0	1	1	1	1	LEF1	lymphoid enhancer-binding factor 1
hsa-miR-557	1	0	1	0	1	1	MAP3K3	mitogen-activated protein kinase kinase kinase 3
hsa-miR-557	1	0	1	1	1	1	PHTF2	putative homeodomain transcription factor 2
hsa-miR-557	1	0	1	1	1	1	NCOA1	nuclear receptor coactivator 1
hsa-miR-557	0	0	1	1	1	1	MECR	mitochondrial trans-2-enoyl-CoA reductase
hsa-miR-557	0	0	1	1	0	0	TRIM69	tripartite motif containing 69
hsa-miR-557	1	0	1	1	1	1	DUSP3	dual specificity phosphatase 3
hsa-miR-557	1	0	1	1	1	1	MARCH7	membrane-associated ring finger (C3HC4) 7, E3 ubiquitin protein ligase
hsa-miR-557	0	0	1	1	1	1	TTLL3	tubulin tyrosine ligase-like family, member 3
hsa-miR-557	0	0	1	1	0	0	OPLAH	5-oxoprolinase (ATP-hydrolysing)
hsa-miR-557	0	0	1	0	0	0	POM121L8P	POM121 transmembrane nucleoporin-like 8 pseudogene
hsa-miR-557	0	0	1	1	1	1	ARIH1	ariadne homolog, ubiquitin-conjugating enzyme E2 binding protein, 1 (Drosophila)
hsa-miR-557	0	0	1	1	0	0	MSH5	mutS homolog 5 (E. coli)
hsa-miR-557	0	0	1	1	0	0	SAPCD1	suppressor APC domain containing 1
hsa-miR-557	0	0	1	1	0	0	DOPEY1	dopey family member 1
hsa-miR-557	0	0	1	1	1	1	IDH3A	isocitrate dehydrogenase 3 (NAD+) alpha
hsa-miR-557	1	0	1	1	1	1	YTHDF3	YTH domain family, member 3
hsa-miR-557	0	0	1	1	1	1	BEND7	BEN domain containing 7
hsa-miR-557	0	0	1	1	1	1	RABEPK	Rab9 effector protein with kelch motifs
hsa-miR-557	1	0	1	1	0	0	PTAR1	protein prenyltransferase alpha subunit repeat containing 1
hsa-miR-557	0	0	1	0	0	0	FAM225A	family with sequence similarity 225, member A (non-protein coding)
hsa-miR-557	0	0	1	1	1	1	CCDC132	coiled-coil domain containing 132
hsa-miR-557	0	0	1	1	1	1	ZMYM6	zinc finger, MYM-type 6
hsa-miR-557	1	0	1	1	1	1	CAMK4	calcium/calmodulin-dependent protein kinase IV
hsa-miR-557	1	0	1	0	1	1	CLINT1	clathrin interactor 1
hsa-miR-557	1	0	1	1	1	1	FAM63B	family with sequence similarity 63, member B
hsa-miR-557	1	0	1	0	1	1	CNOT7	CCR4-NOT transcription complex, subunit 7
hsa-miR-557	1	0	1	1	1	1	ANKRD12	ankyrin repeat domain 12
hsa-miR-557	1	0	1	0	1	1	JAZF1	JAZF zinc finger 1
hsa-miR-557	0	0	1	1	1	1	TEX2	testis expressed 2
hsa-miR-557	1	0	1	0	1	1	NR3C1	nuclear receptor subfamily 3, group C, member 1 (glucocorticoid receptor)
hsa-miR-557	0	0	1	0	0	0	OIP5-AS1	OIP5 antisense RNA 1
hsa-miR-557	0	0	1	1	0	0	TMEM134	transmembrane protein 134
hsa-miR-557	1	0	1	1	1	1	IKZF2	IKAROS family zinc finger 2 (Helios)
hsa-miR-557	1	0	1	1	1	1	CLIC5	chloride intracellular channel 5
hsa-miR-557	1	0	1	1	1	1	DUSP16	dual specificity phosphatase 16
hsa-miR-557	0	0	1	1	0	0	DHRS4	dehydrogenase/reductase (SDR family) member 4
hsa-miR-557	0	0	1	0	0	0	CR1L	complement component (3b/4b) receptor 1-like
hsa-miR-557	1	0	1	1	1	1	WDR26	WD repeat domain 26
hsa-miR-557	1	0	1	1	1	1	BCL11A	B-cell CLL/lymphoma 11A (zinc finger protein)
hsa-miR-557	1	0	1	1	1	1	TPP1	tripeptidyl peptidase I
hsa-miR-557	0	0	1	1	1	1	ATF7IP	activating transcription factor 7 interacting protein
hsa-miR-557	1	0	1	0	1	1	AP2B1	adaptor-related protein complex 2, beta 1 subunit
hsa-miR-557	0	0	1	0	0	0	FAM138C	family with sequence similarity 138, member C
hsa-miR-557	1	0	1	1	1	1	CAMTA1	calmodulin binding transcription activator 1
hsa-miR-557	1	0	1	1	1	1	NLGN4X	neuroligin 4, X-linked
hsa-miR-557	1	0	1	1	1	1	OPRM1	opioid receptor, mu 1
hsa-miR-557	1	0	1	1	1	1	BCL2L11	BCL2-like 11 (apoptosis facilitator)
hsa-miR-557	1	0	1	1	1	1	SP3	Sp3 transcription factor
hsa-miR-557	0	0	1	0	0	0	ZNFX1-AS1	ZNFX1 antisense RNA 1
hsa-miR-557	1	0	1	1	1	1	MECP2	methyl CpG binding protein 2 (Rett syndrome)
hsa-miR-557	1	0	1	1	1	1	HMGA2	high mobility group AT-hook 2
hsa-miR-557	0	0	1	1	1	1	TMUB1	transmembrane and ubiquitin-like domain containing 1
hsa-miR-557	1	0	1	1	1	1	ITSN1	intersectin 1 (SH3 domain protein)
hsa-miR-557	0	0	1	1	1	1	KANK2	KN motif and ankyrin repeat domains 2
hsa-miR-557	1	0	1	1	1	1	ALCAM	activated leukocyte cell adhesion molecule
hsa-miR-557	1	0	1	1	1	1	QKI	QKI, KH domain containing, RNA binding
hsa-miR-557	1	0	1	1	0	0	TAF4B	TAF4b RNA polymerase II, TATA box binding protein (TBP)-associated factor, 105kDa
hsa-miR-557	0	0	1	1	0	0	NBPF8	neuroblastoma breakpoint family, member 8
hsa-miR-557	1	0	1	1	1	1	AMOT	angiomotin
hsa-miR-557	0	0	1	1	0	0	DDX49	DEAD (Asp-Glu-Ala-Asp) box polypeptide 49
hsa-miR-557	1	0	1	1	1	1	TMUB2	transmembrane and ubiquitin-like domain containing 2
hsa-miR-557	0	0	1	1	1	1	RLIM	ring finger protein, LIM domain interacting
hsa-miR-557	0	0	1	1	1	1	ATG3	autophagy related 3
hsa-miR-557	1	0	1	1	1	1	RIMS3	regulating synaptic membrane exocytosis 3
hsa-miR-557	1	0	1	1	0	0	DHDDS	dehydrodolichyl diphosphate synthase
hsa-miR-557	0	0	1	1	1	1	NUPL2	nucleoporin like 2
hsa-miR-557	1	0	1	0	1	1	C15orf41	chromosome 15 open reading frame 41
hsa-miR-557	1	0	1	1	1	1	U2SURP	U2 snRNP-associated SURP domain containing
hsa-miR-557	0	0	1	0	0	0	GLIS3-AS1	GLIS3 antisense RNA 1
hsa-miR-557	0	0	1	1	0	0	RBM14	RNA binding motif protein 14
hsa-miR-557	0	0	1	0	0	0	ATXN7L3B	ataxin 7-like 3B
hsa-miR-557	1	0	1	0	1	1	TMEM39A	transmembrane protein 39A
hsa-miR-557	1	0	1	1	0	0	FA2H	fatty acid 2-hydroxylase
hsa-miR-557	0	0	1	1	0	0	ARHGAP8	Rho GTPase activating protein 8
hsa-miR-557	1	0	1	1	1	1	TRIM2	tripartite motif containing 2
hsa-miR-557	0	0	1	1	1	1	PSEN1	presenilin 1
hsa-miR-557	1	0	1	1	1	1	OTUD5	OTU domain containing 5
hsa-miR-557	1	0	1	0	1	1	GUCY1A3	guanylate cyclase 1, soluble, alpha 3
hsa-miR-557	0	0	1	1	0	0	KLHDC3	kelch domain containing 3
hsa-miR-557	0	0	1	1	0	0	HAVCR1	hepatitis A virus cellular receptor 1
hsa-miR-557	0	0	1	1	0	0	LCMT1	leucine carboxyl methyltransferase 1
hsa-miR-557	1	0	1	1	1	1	PRDM2	PR domain containing 2, with ZNF domain
hsa-miR-557	1	0	1	1	1	1	ZNF512	zinc finger protein 512
hsa-miR-557	1	0	1	0	1	1	NECAB1	N-terminal EF-hand calcium binding protein 1
hsa-miR-557	1	0	1	1	1	1	ELF4	E74-like factor 4 (ets domain transcription factor)
hsa-miR-557	0	0	1	0	0	0	LOC100144602	uncharacterized LOC100144602
hsa-miR-557	0	0	1	1	1	1	PRMT3	protein arginine methyltransferase 3
hsa-miR-557	0	0	1	1	1	1	NELL2	NEL-like 2 (chicken)
hsa-miR-557	1	0	1	0	1	1	BTF3L4	basic transcription factor 3-like 4
hsa-miR-557	0	0	1	1	0	0	DPF1	D4, zinc and double PHD fingers family 1
hsa-miR-557	0	0	1	1	1	1	TLR4	toll-like receptor 4
hsa-miR-557	0	0	1	1	0	0	MEI1	meiosis inhibitor 1
hsa-miR-557	1	0	1	1	1	1	NIPA1	non imprinted in Prader-Willi/Angelman syndrome 1
hsa-miR-557	0	0	1	1	0	0	PRRG2	proline rich Gla (G-carboxyglutamic acid) 2
hsa-miR-557	0	0	1	1	1	1	C1orf114	chromosome 1 open reading frame 114
hsa-miR-557	1	0	1	1	1	1	CNTN4	contactin 4
hsa-miR-557	1	0	1	1	1	1	ZDHHC5	zinc finger, DHHC-type containing 5
hsa-miR-557	0	0	1	0	0	0	EVPLL	envoplakin-like
hsa-miR-557	0	0	1	1	1	1	RHBDD1	rhomboid domain containing 1
hsa-miR-557	1	0	1	0	0	0	KCNU1	potassium channel, subfamily U, member 1
hsa-miR-557	0	0	1	0	0	0	ANKRD19P	ankyrin repeat domain 19, pseudogene
hsa-miR-557	0	0	1	1	0	0	FCRL3	Fc receptor-like 3
hsa-miR-557	0	0	1	0	0	0	LOC145837	uncharacterized LOC145837
hsa-miR-557	1	0	1	1	1	1	CASD1	CAS1 domain containing 1
hsa-miR-557	0	0	1	1	1	1	SEMA3D	sema domain, immunoglobulin domain (Ig), short basic domain, secreted, (semaphorin) 3D
hsa-miR-557	1	0	1	1	1	1	TIAL1	TIA1 cytotoxic granule-associated RNA binding protein-like 1
hsa-miR-557	0	0	1	0	1	1	MYO7A	myosin VIIA
hsa-miR-557	0	0	1	1	1	1	AADAT	aminoadipate aminotransferase
hsa-miR-557	1	0	1	1	1	1	ZPLD1	zona pellucida-like domain containing 1
hsa-miR-557	1	0	1	1	1	1	RCOR3	REST corepressor 3
hsa-miR-557	1	0	1	1	1	1	ZNF282	zinc finger protein 282
hsa-miR-557	0	0	1	0	0	0	LOC402779	uncharacterized LOC402779
hsa-miR-557	1	0	1	0	1	1	RNF4	ring finger protein 4
hsa-miR-557	0	0	1	0	0	0	FAM86JP	family with sequence similarity 86, member A pseudogene
hsa-miR-557	1	0	1	0	1	1	LYPD6	LY6/PLAUR domain containing 6
hsa-miR-557	1	0	1	1	1	1	RHOBTB1	Rho-related BTB domain containing 1
hsa-miR-557	1	0	1	1	1	1	SECISBP2L	SECIS binding protein 2-like
hsa-miR-557	0	0	1	0	0	0	BCAS3	breast carcinoma amplified sequence 3
hsa-miR-557	0	0	1	1	1	1	IL20RB	interleukin 20 receptor beta
hsa-miR-557	0	0	1	0	0	0	LINC00238	long intergenic non-protein coding RNA 238
hsa-miR-557	0	0	1	1	1	1	ZNF337	zinc finger protein 337
hsa-miR-557	1	0	1	1	1	1	LPGAT1	lysophosphatidylglycerol acyltransferase 1
hsa-miR-557	1	0	1	1	1	1	NKAIN2	Na+/K+ transporting ATPase interacting 2
hsa-miR-557	0	0	1	1	0	0	CCDC158	coiled-coil domain containing 158
hsa-miR-557	0	0	1	1	1	1	PAK6	p21 protein (Cdc42/Rac)-activated kinase 6
hsa-miR-557	0	0	1	0	0	0	HOXA-AS2	HOXA cluster antisense RNA 2
hsa-miR-557	1	0	1	1	1	1	IMPACT	Impact homolog (mouse)
hsa-miR-557	1	0	1	1	1	1	LHX8	LIM homeobox 8
hsa-miR-557	1	0	1	1	1	1	LMO7	LIM domain 7
hsa-miR-557	1	0	1	1	1	1	MEIS1	Meis homeobox 1
hsa-miR-557	0	0	1	0	0	0	SRGAP2C	SLIT-ROBO Rho GTPase activating protein 2C
hsa-miR-557	1	0	1	0	1	1	CPEB4	cytoplasmic polyadenylation element binding protein 4
hsa-miR-557	0	0	1	0	0	0	LOC286184	uncharacterized LOC286184
hsa-miR-557	1	0	1	0	0	0	RAVER1	ribonucleoprotein, PTB-binding 1
hsa-miR-557	1	0	1	1	0	0	EBF4	early B-cell factor 4
hsa-miR-557	0	0	1	0	0	0	CRYBB2P1	crystallin, beta B2 pseudogene 1
hsa-miR-557	0	0	1	0	0	0	TOB1-AS1	TOB1 antisense RNA 1
hsa-miR-557	0	0	1	0	1	1	HSBP1L1	heat shock factor binding protein 1-like 1
hsa-miR-557	1	0	1	1	1	1	DACH2	dachshund homolog 2 (Drosophila)
hsa-miR-557	0	0	1	0	0	0	LOC339622	uncharacterized LOC339622
hsa-miR-557	0	0	1	1	0	0	MTCH1	mitochondrial carrier 1
hsa-miR-557	1	0	1	1	1	1	UNC13C	unc-13 homolog C (C. elegans)
hsa-miR-557	0	0	1	1	1	1	PCMTD2	protein-L-isoaspartate (D-aspartate) O-methyltransferase domain containing 2
hsa-miR-557	0	0	1	1	0	0	KIAA1432	KIAA1432
hsa-miR-557	1	0	1	1	1	1	PRRG1	proline rich Gla (G-carboxyglutamic acid) 1
hsa-miR-557	0	0	1	1	1	1	BCO2	beta-carotene oxygenase 2
hsa-miR-557	1	0	1	0	1	1	DCUN1D4	DCN1, defective in cullin neddylation 1, domain containing 4 (S. cerevisiae)
hsa-miR-557	1	0	1	1	1	1	CLOCK	clock homolog (mouse)
hsa-miR-557	0	0	1	1	1	1	FAM90A1	family with sequence similarity 90, member A1
hsa-miR-557	0	0	1	1	1	1	DGKH	diacylglycerol kinase, eta
hsa-miR-557	0	0	1	1	1	1	MGC57346	uncharacterized LOC401884
hsa-miR-557	0	0	1	1	1	1	OLFML2B	olfactomedin-like 2B
hsa-miR-557	0	0	1	1	0	0	MT3	metallothionein 3
hsa-miR-557	1	0	1	1	1	1	WSB1	WD repeat and SOCS box containing 1
hsa-miR-557	0	0	1	1	1	1	ZNF589	zinc finger protein 589
hsa-miR-557	1	0	1	1	1	1	PTPRG	protein tyrosine phosphatase, receptor type, G
hsa-miR-557	1	0	1	0	1	1	ARHGAP5	Rho GTPase activating protein 5
hsa-miR-557	1	0	1	1	1	1	FNDC3A	fibronectin type III domain containing 3A
hsa-miR-557	1	0	1	0	1	1	SEMA4G	sema domain, immunoglobulin domain (Ig), transmembrane domain (TM) and short cytoplasmic domain, (semaphorin) 4G
hsa-miR-557	0	0	1	1	0	0	AGAP8	ArfGAP with GTPase domain, ankyrin repeat and PH domain 8
hsa-miR-557	1	0	1	1	1	1	YWHAZ	tyrosine 3-monooxygenase/tryptophan 5-monooxygenase activation protein, zeta polypeptide
hsa-miR-557	1	0	1	1	1	1	PCGF5	polycomb group ring finger 5
hsa-miR-557	1	0	1	1	1	1	BZW2	basic leucine zipper and W2 domains 2
hsa-miR-557	1	0	1	0	1	1	C14orf43	chromosome 14 open reading frame 43
hsa-miR-557	0	0	1	1	1	1	IDI1	isopentenyl-diphosphate delta isomerase 1
hsa-miR-557	0	0	1	1	1	1	ZNF365	zinc finger protein 365
hsa-miR-557	0	0	1	1	0	0	WDR90	WD repeat domain 90
hsa-miR-557	0	0	1	1	0	0	AGAP4	ArfGAP with GTPase domain, ankyrin repeat and PH domain 4
hsa-miR-557	1	0	1	1	1	1	SCOC	short coiled-coil protein
hsa-miR-557	0	0	1	1	1	1	KIAA1009	KIAA1009
hsa-miR-557	1	0	1	1	1	1	EIF4G2	eukaryotic translation initiation factor 4 gamma, 2
hsa-miR-557	1	0	1	1	1	1	RAVER2	ribonucleoprotein, PTB-binding 2
hsa-miR-557	1	0	1	1	1	1	GRHL1	grainyhead-like 1 (Drosophila)
hsa-miR-557	1	0	1	0	1	1	MAGIX	MAGI family member, X-linked
hsa-miR-557	1	0	1	1	1	1	CDKN1C	cyclin-dependent kinase inhibitor 1C (p57, Kip2)
hsa-miR-557	0	0	1	1	0	0	CELF3	CUGBP, Elav-like family member 3
hsa-miR-557	1	0	1	1	1	1	SRPK2	SRSF protein kinase 2
hsa-miR-557	0	0	1	1	1	1	TTLL9	tubulin tyrosine ligase-like family, member 9
hsa-miR-557	1	0	1	1	1	1	ANLN	anillin, actin binding protein
hsa-miR-557	1	0	1	0	1	1	TGFBR1	transforming growth factor, beta receptor 1
hsa-miR-557	1	0	1	1	1	1	USP47	ubiquitin specific peptidase 47
hsa-miR-557	1	0	1	1	1	1	FARP1	FERM, RhoGEF (ARHGEF) and pleckstrin domain protein 1 (chondrocyte-derived)
hsa-miR-557	1	0	1	0	1	1	TMEM194A	transmembrane protein 194A
hsa-miR-557	0	0	1	1	0	0	TRIM41	tripartite motif containing 41
hsa-miR-557	1	0	1	1	1	1	KDELR2	KDEL (Lys-Asp-Glu-Leu) endoplasmic reticulum protein retention receptor 2
hsa-miR-557	0	0	1	0	0	0	LINC00152	long intergenic non-protein coding RNA 152
hsa-miR-557	1	0	1	0	1	1	AMMECR1L	AMME chromosomal region gene 1-like
hsa-miR-557	0	0	1	1	0	0	DNHD1	dynein heavy chain domain 1
hsa-miR-557	1	0	1	0	1	1	LRRTM4	leucine rich repeat transmembrane neuronal 4
hsa-miR-557	1	0	1	1	1	1	SYNJ1	synaptojanin 1
hsa-miR-557	1	0	1	0	1	1	ARPP19	cAMP-regulated phosphoprotein, 19kDa
hsa-miR-557	0	0	1	1	1	1	XG	Xg blood group
hsa-miR-557	1	0	1	0	1	1	MYBL1	v-myb myeloblastosis viral oncogene homolog (avian)-like 1
hsa-miR-557	0	0	1	0	0	0	MT1JP	metallothionein 1J, pseudogene
hsa-miR-557	1	0	1	1	1	1	PTPRD	protein tyrosine phosphatase, receptor type, D
hsa-miR-557	0	0	1	1	0	0	FMN1	formin 1
hsa-miR-557	1	0	1	1	1	1	SUV420H1	suppressor of variegation 4-20 homolog 1 (Drosophila)
hsa-miR-557	1	0	1	1	1	1	CERS6	ceramide synthase 6
hsa-miR-557	1	0	1	1	1	1	SP4	Sp4 transcription factor
hsa-miR-557	1	0	1	0	1	1	BTBD3	BTB (POZ) domain containing 3
hsa-miR-557	1	0	1	0	1	1	KIF5C	kinesin family member 5C
hsa-miR-557	0	0	1	1	0	0	STK19	serine/threonine kinase 19
hsa-miR-557	0	0	1	1	0	0	GKN2	gastrokine 2
hsa-miR-557	1	0	1	1	1	1	TMEM132B	transmembrane protein 132B
hsa-miR-557	1	0	1	1	0	0	MAPKBP1	mitogen-activated protein kinase binding protein 1
hsa-miR-557	1	0	1	1	1	1	ST18	suppression of tumorigenicity 18 (breast carcinoma) (zinc finger protein)
hsa-miR-557	0	0	1	1	0	0	RGSL1	regulator of G-protein signaling like 1
hsa-miR-557	0	0	1	0	0	0	LINC00486	long intergenic non-protein coding RNA 486
hsa-miR-557	1	0	1	1	1	1	PIKFYVE	phosphoinositide kinase, FYVE finger containing
hsa-miR-557	0	0	1	1	1	1	SLC7A13	solute carrier family 7 (anionic amino acid transporter), member 13
hsa-miR-557	0	0	1	0	1	1	GOLGA8G	golgin A8 family, member G
hsa-miR-557	1	0	1	0	1	1	CAMSAP2	calmodulin regulated spectrin-associated protein family, member 2
hsa-miR-557	1	0	1	1	1	1	ANK2	ankyrin 2, neuronal
hsa-miR-557	0	0	1	0	0	0	LINC00314	long intergenic non-protein coding RNA 314
hsa-miR-557	1	0	1	1	1	1	MEGF11	multiple EGF-like-domains 11
hsa-miR-557	1	0	1	1	1	1	ZMYM4	zinc finger, MYM-type 4
hsa-miR-557	0	0	1	0	0	0	LOC399753	uncharacterized LOC399753
hsa-miR-557	0	0	1	0	0	0	FAM225B	family with sequence similarity 225, member B (non-protein coding)
hsa-miR-557	0	0	1	1	0	0	AGAP6	ArfGAP with GTPase domain, ankyrin repeat and PH domain 6
hsa-miR-557	0	0	1	1	1	1	CNTNAP3	contactin associated protein-like 3
hsa-miR-557	0	0	1	1	1	1	BMP4	bone morphogenetic protein 4
hsa-miR-557	0	0	1	0	0	0	LOC100133207	uncharacterized LOC100133207
hsa-miR-557	1	0	1	1	1	1	GOLGA5	golgin A5
hsa-miR-557	1	0	1	1	1	1	EIF5	eukaryotic translation initiation factor 5
hsa-miR-557	1	0	1	0	1	1	HMGB3	high mobility group box 3
hsa-miR-557	1	0	1	1	1	1	SASH1	SAM and SH3 domain containing 1
hsa-miR-557	1	0	1	1	1	1	MIER3	mesoderm induction early response 1, family member 3
hsa-miR-557	0	0	1	1	1	1	CNTNAP3B	contactin associated protein-like 3B
hsa-miR-557	1	0	1	1	0	0	MAPK12	mitogen-activated protein kinase 12
hsa-miR-557	0	0	1	1	1	1	PPP1R1C	protein phosphatase 1, regulatory (inhibitor) subunit 1C
hsa-miR-557	1	0	1	1	1	1	EPS15	epidermal growth factor receptor pathway substrate 15
hsa-miR-557	1	0	1	1	1	1	FOXP1	forkhead box P1
hsa-miR-557	1	0	1	1	1	1	USP6	ubiquitin specific peptidase 6 (Tre-2 oncogene)
hsa-miR-557	1	0	1	0	1	1	VPS36	vacuolar protein sorting 36 homolog (S. cerevisiae)
hsa-miR-557	1	0	1	1	1	1	DCAF5	DDB1 and CUL4 associated factor 5
hsa-miR-557	1	0	1	1	1	1	ATP6V1C1	ATPase, H+ transporting, lysosomal 42kDa, V1 subunit C1
hsa-miR-557	0	0	1	1	1	1	CCNT2	cyclin T2
hsa-miR-557	0	0	1	1	1	1	ATP2A2	ATPase, Ca++ transporting, cardiac muscle, slow twitch 2
hsa-miR-557	1	0	1	1	1	1	NFIB	nuclear factor I/B
hsa-miR-557	1	0	1	1	1	1	NAV1	neuron navigator 1
hsa-miR-557	1	0	1	1	1	1	C5orf24	chromosome 5 open reading frame 24
hsa-miR-557	0	0	1	1	1	1	DAZL	deleted in azoospermia-like
hsa-miR-557	1	0	1	1	1	1	PGAP1	post-GPI attachment to proteins 1
hsa-miR-557	1	0	1	1	1	1	TMEM135	transmembrane protein 135
hsa-miR-557	1	0	1	1	1	1	FAM179B	family with sequence similarity 179, member B
hsa-miR-557	0	0	1	0	0	0	ZNRD1-AS1	ZNRD1 antisense RNA 1
hsa-miR-557	1	0	1	1	1	1	EOGT	EGF domain-specific O-linked N-acetylglucosamine (GlcNAc) transferase
hsa-miR-557	1	0	1	0	1	1	TBL1XR1	transducin (beta)-like 1 X-linked receptor 1
hsa-miR-557	1	0	1	1	1	1	FAM208A	family with sequence similarity 208, member A
hsa-miR-557	1	0	1	0	1	1	C1orf21	chromosome 1 open reading frame 21
hsa-miR-557	0	0	1	0	0	0	DKFZp686K1684	uncharacterized LOC440034
hsa-miR-557	1	0	1	1	1	1	DLG5	discs, large homolog 5 (Drosophila)
hsa-miR-557	1	0	1	1	1	1	HIC2	hypermethylated in cancer 2
hsa-miR-557	0	0	1	1	1	1	DUSP26	dual specificity phosphatase 26 (putative)
hsa-miR-557	0	0	1	1	1	1	CAT	catalase
hsa-miR-557	0	0	1	1	1	1	KIAA0141	KIAA0141
hsa-miR-557	0	0	1	0	0	0	LOC100128988	uncharacterized LOC100128988
hsa-miR-557	0	0	1	1	1	1	FBXO36	F-box protein 36
hsa-miR-557	1	0	1	1	1	1	ERI3	ERI1 exoribonuclease family member 3
hsa-miR-557	0	0	1	1	0	0	ITGB3BP	integrin beta 3 binding protein (beta3-endonexin)
hsa-miR-557	1	0	1	0	1	1	SLCO2A1	solute carrier organic anion transporter family, member 2A1
hsa-miR-557	0	0	1	1	1	1	ADK	adenosine kinase
hsa-miR-557	0	0	1	1	0	0	CCNDBP1	cyclin D-type binding-protein 1
hsa-miR-557	1	0	1	0	1	1	BNIP3L	BCL2/adenovirus E1B 19kDa interacting protein 3-like
hsa-miR-557	0	0	1	1	1	1	INCENP	inner centromere protein antigens 135/155kDa
hsa-miR-557	0	0	1	1	1	1	MRPS36	mitochondrial ribosomal protein S36
hsa-miR-557	1	0	1	1	1	1	CDK7	cyclin-dependent kinase 7
hsa-miR-557	0	0	1	0	1	1	CD99P1	CD99 molecule pseudogene 1
hsa-miR-557	1	0	1	1	1	1	COPS2	COP9 constitutive photomorphogenic homolog subunit 2 (Arabidopsis)
hsa-miR-557	1	0	1	1	1	1	NTM	neurotrimin
hsa-miR-557	1	0	1	1	1	1	COPZ1	coatomer protein complex, subunit zeta 1
hsa-miR-557	1	0	1	1	1	1	TRA2B	transformer 2 beta homolog (Drosophila)
hsa-miR-557	1	0	1	1	1	1	PLEKHB2	pleckstrin homology domain containing, family B (evectins) member 2
hsa-miR-557	0	0	1	1	0	0	ANAPC5	anaphase promoting complex subunit 5
hsa-miR-557	1	0	1	1	1	1	MBNL1	muscleblind-like splicing regulator 1
hsa-miR-557	0	0	1	1	1	1	GRAP2	GRB2-related adaptor protein 2
hsa-miR-557	1	0	1	0	1	1	RPS6KB1	ribosomal protein S6 kinase, 70kDa, polypeptide 1
hsa-miR-557	0	0	1	1	1	1	EIF3J	eukaryotic translation initiation factor 3, subunit J
hsa-miR-557	1	0	1	1	1	1	TMEM245	transmembrane protein 245
hsa-miR-557	0	0	1	0	0	0	LOC150568	uncharacterized LOC150568
hsa-miR-557	1	0	1	1	0	0	THY1	Thy-1 cell surface antigen
hsa-miR-557	0	0	1	1	1	1	CAPZB	capping protein (actin filament) muscle Z-line, beta
hsa-miR-557	1	0	1	1	1	1	NABP1	nucleic acid binding protein 1
hsa-miR-557	0	0	1	0	0	0	LOC100130353	hippocampus abundant transcript-like 1 pseudogene
hsa-miR-557	0	0	1	0	0	0	ZNF720	zinc finger protein 720
hsa-miR-557	0	0	1	1	0	0	WDR43	WD repeat domain 43
hsa-miR-557	0	0	1	1	1	1	CHEK1	checkpoint kinase 1
hsa-miR-557	0	0	1	1	0	0	TMEM120A	transmembrane protein 120A
hsa-miR-557	1	0	1	1	1	1	CNBP	CCHC-type zinc finger, nucleic acid binding protein
hsa-miR-557	0	0	1	1	1	1	HOXC9	homeobox C9
hsa-miR-557	0	0	1	1	1	1	FAM18B1	family with sequence similarity 18, member B1
hsa-miR-557	0	0	1	1	0	0	OXA1L	oxidase (cytochrome c) assembly 1-like
hsa-miR-557	1	0	1	1	1	1	HMGN2	high mobility group nucleosomal binding domain 2
hsa-miR-557	0	0	1	1	0	0	HEBP1	heme binding protein 1
hsa-miR-557	1	0	1	1	1	1	SRSF2	serine/arginine-rich splicing factor 2
hsa-miR-557	0	0	1	0	0	0	PRMT1	protein arginine methyltransferase 1
hsa-miR-557	1	0	1	1	1	1	RUNX1	runt-related transcription factor 1
hsa-miR-557	1	0	1	1	1	1	TIPRL	TIP41, TOR signaling pathway regulator-like (S. cerevisiae)
hsa-miR-557	0	0	1	1	1	1	PSMD9	proteasome (prosome, macropain) 26S subunit, non-ATPase, 9
hsa-miR-557	1	0	1	1	1	1	MYT1	myelin transcription factor 1
hsa-miR-557	1	0	1	1	1	1	MPP1	membrane protein, palmitoylated 1, 55kDa
hsa-miR-557	0	0	1	1	1	1	SUGT1	SGT1, suppressor of G2 allele of SKP1 (S. cerevisiae)
hsa-miR-557	1	0	1	1	1	1	STAG2	stromal antigen 2
hsa-miR-557	0	0	1	0	0	0	LOC731789	uncharacterized LOC731789
hsa-miR-557	0	0	1	1	1	1	CCP110	centriolar coiled coil protein 110kDa
hsa-miR-557	1	0	1	1	1	1	FBXW7	F-box and WD repeat domain containing 7, E3 ubiquitin protein ligase
hsa-miR-557	0	0	1	0	1	1	STARD8	StAR-related lipid transfer (START) domain containing 8
hsa-miR-557	1	0	1	0	1	1	PTP4A1	protein tyrosine phosphatase type IVA, member 1
hsa-miR-557	1	0	1	0	1	1	XRN1	5'-3' exoribonuclease 1
hsa-miR-557	1	0	1	1	0	0	GSK3A	glycogen synthase kinase 3 alpha
hsa-miR-557	0	0	1	1	1	1	SLC25A26	solute carrier family 25 (S-adenosylmethionine carrier), member 26
hsa-miR-557	0	0	1	0	1	1	NWD1	NACHT and WD repeat domain containing 1
hsa-miR-557	1	0	1	1	1	1	BNC2	basonuclin 2
hsa-miR-557	1	0	1	1	1	1	ZFHX3	zinc finger homeobox 3
hsa-miR-557	1	0	1	1	1	1	PI15	peptidase inhibitor 15
hsa-miR-557	1	0	1	1	1	1	SEC14L1	SEC14-like 1 (S. cerevisiae)
hsa-miR-557	0	0	1	1	1	1	CEACAM1	carcinoembryonic antigen-related cell adhesion molecule 1 (biliary glycoprotein)
hsa-miR-557	1	0	1	1	1	1	TRIOBP	TRIO and F-actin binding protein
hsa-miR-557	0	0	1	1	1	1	ESR2	estrogen receptor 2 (ER beta)
hsa-miR-557	1	0	1	0	1	1	RBBP5	retinoblastoma binding protein 5
hsa-miR-557	0	0	1	1	0	0	SLCO3A1	solute carrier organic anion transporter family, member 3A1
hsa-miR-557	1	0	1	1	1	1	IRF1	interferon regulatory factor 1
hsa-miR-557	0	0	1	1	1	1	CCL20	chemokine (C-C motif) ligand 20
hsa-miR-557	0	0	1	1	1	1	AKAP17A	A kinase (PRKA) anchor protein 17A
hsa-miR-557	1	0	1	1	1	1	ATP2B2	ATPase, Ca++ transporting, plasma membrane 2
hsa-miR-557	1	0	1	1	1	1	RALBP1	ralA binding protein 1
hsa-miR-557	1	0	1	1	1	1	GRM1	glutamate receptor, metabotropic 1
hsa-miR-557	1	0	1	1	1	1	IGF1	insulin-like growth factor 1 (somatomedin C)
hsa-miR-557	0	0	1	1	1	1	GAD2	glutamate decarboxylase 2 (pancreatic islets and brain, 65kDa)
hsa-miR-557	0	0	1	1	1	1	CNGA1	cyclic nucleotide gated channel alpha 1
hsa-miR-557	0	0	1	1	1	1	CA2	carbonic anhydrase II
hsa-miR-557	1	0	1	1	1	1	COL3A1	collagen, type III, alpha 1
hsa-miR-557	1	0	1	1	1	1	F13A1	coagulation factor XIII, A1 polypeptide
hsa-miR-557	0	0	1	1	0	0	FANCA	Fanconi anemia, complementation group A
hsa-miR-557	1	0	1	1	1	1	FBN1	fibrillin 1
hsa-miR-557	0	0	1	0	1	1	MS4A2	membrane-spanning 4-domains, subfamily A, member 2
hsa-miR-557	1	0	1	1	1	1	KCNA1	potassium voltage-gated channel, shaker-related subfamily, member 1 (episodic ataxia with myokymia)
hsa-miR-557	1	0	1	1	1	1	RB1	retinoblastoma 1
hsa-miR-557	1	0	1	0	1	1	CYBB	cytochrome b-245, beta polypeptide
hsa-miR-557	0	0	1	1	0	0	IL2RA	interleukin 2 receptor, alpha
hsa-miR-557	1	0	1	1	1	1	SLC26A4	solute carrier family 26, member 4
hsa-miR-557	0	0	1	1	1	1	CYP11B2	cytochrome P450, family 11, subfamily B, polypeptide 2
hsa-miR-557	1	0	1	1	1	1	DCX	doublecortin
hsa-miR-557	0	0	1	1	1	1	IL1RN	interleukin 1 receptor antagonist
hsa-miR-557	0	0	1	1	1	1	SELL	selectin L
hsa-miR-557	1	0	1	1	1	1	DIO2	deiodinase, iodothyronine, type II
hsa-miR-557	1	0	1	0	1	1	GABRA4	gamma-aminobutyric acid (GABA) A receptor, alpha 4
hsa-miR-557	1	0	1	1	1	1	GABRB3	gamma-aminobutyric acid (GABA) A receptor, beta 3
hsa-miR-557	1	0	1	1	1	1	IGF1R	insulin-like growth factor 1 receptor
hsa-miR-557	1	0	1	1	1	1	PTGFR	prostaglandin F receptor (FP)
hsa-miR-557	1	0	1	0	1	1	GDF6	growth differentiation factor 6
hsa-miR-557	0	0	1	0	1	1	C9orf170	chromosome 9 open reading frame 170
hsa-miR-557	1	0	1	1	1	1	ATP1B1	ATPase, Na+/K+ transporting, beta 1 polypeptide
hsa-miR-557	1	0	1	1	1	1	LCLAT1	lysocardiolipin acyltransferase 1
hsa-miR-557	1	0	1	0	1	1	CACNA1I	calcium channel, voltage-dependent, T type, alpha 1I subunit
hsa-miR-557	1	0	1	1	1	1	KLHL31	kelch-like 31 (Drosophila)
hsa-miR-557	1	0	1	1	1	1	RBMS3	RNA binding motif, single stranded interacting protein 3
hsa-miR-557	1	0	1	1	1	1	BICD2	bicaudal D homolog 2 (Drosophila)
hsa-miR-557	1	0	1	1	0	0	DLGAP1	discs, large (Drosophila) homolog-associated protein 1
hsa-miR-557	1	0	1	1	1	1	HNRNPD	heterogeneous nuclear ribonucleoprotein D (AU-rich element RNA binding protein 1, 37kDa)
hsa-miR-557	0	0	1	1	1	1	ANXA13	annexin A13
hsa-miR-557	1	0	1	1	0	0	NOMO3	NODAL modulator 3
hsa-miR-557	0	0	1	1	1	1	DBX2	developing brain homeobox 2
hsa-miR-557	0	0	1	1	1	1	CLEC2D	C-type lectin domain family 2, member D
hsa-miR-557	1	0	1	0	1	1	YPEL2	yippee-like 2 (Drosophila)
hsa-miR-557	1	0	1	1	0	0	SDC1	syndecan 1
hsa-miR-557	1	0	1	1	1	1	CTDSPL	CTD (carboxy-terminal domain, RNA polymerase II, polypeptide A) small phosphatase-like
hsa-miR-557	0	0	1	1	0	0	AKAP14	A kinase (PRKA) anchor protein 14
hsa-miR-557	1	0	1	0	1	1	KIAA2022	KIAA2022
hsa-miR-557	1	0	1	1	1	1	FNIP1	folliculin interacting protein 1
hsa-miR-557	1	0	1	1	1	1	ZNF655	zinc finger protein 655
hsa-miR-557	1	0	1	0	1	1	ERMN	ermin, ERM-like protein
hsa-miR-557	1	0	1	1	1	1	ARHGAP28	Rho GTPase activating protein 28
hsa-miR-557	1	0	1	0	1	1	FAM102B	family with sequence similarity 102, member B
hsa-miR-557	0	0	1	1	1	1	NCMAP	noncompact myelin associated protein
hsa-miR-557	0	0	1	1	1	1	MS4A13	membrane-spanning 4-domains, subfamily A, member 13
hsa-miR-557	0	0	1	0	1	1	GOLGA8E	golgin A8 family, member E
hsa-miR-557	0	0	1	1	1	1	GRP	gastrin-releasing peptide
hsa-miR-557	1	0	1	0	1	1	RGMB	RGM domain family, member B
hsa-miR-557	1	0	1	0	1	1	ZKSCAN2	zinc finger with KRAB and SCAN domains 2
hsa-miR-557	1	0	1	1	1	1	SORCS1	sortilin-related VPS10 domain containing receptor 1
hsa-miR-557	0	0	1	1	1	1	PAPSS2	3'-phosphoadenosine 5'-phosphosulfate synthase 2
hsa-miR-557	1	0	1	1	1	1	TMCC1	transmembrane and coiled-coil domain family 1
hsa-miR-557	0	0	1	1	0	0	SPRR2B	small proline-rich protein 2B
hsa-miR-557	0	0	1	1	1	1	BTBD11	BTB (POZ) domain containing 11
hsa-miR-557	0	0	1	1	1	1	RAB28	RAB28, member RAS oncogene family
hsa-miR-557	1	0	1	1	1	1	PFKFB2	6-phosphofructo-2-kinase/fructose-2,6-biphosphatase 2
hsa-miR-557	1	0	1	0	1	1	RGAG4	retrotransposon gag domain containing 4
hsa-miR-557	0	0	1	1	1	1	VNN3	vanin 3
hsa-miR-557	1	0	1	1	1	1	CANX	calnexin
hsa-miR-557	1	0	1	0	1	1	BCL7A	B-cell CLL/lymphoma 7A
hsa-miR-557	1	0	1	1	1	1	FNBP1L	formin binding protein 1-like
hsa-miR-557	1	0	1	0	1	1	CELF2	CUGBP, Elav-like family member 2
hsa-miR-557	1	0	1	0	1	1	CLLU1	chronic lymphocytic leukemia up-regulated 1
hsa-miR-557	1	0	1	0	1	1	RAB12	RAB12, member RAS oncogene family
hsa-miR-557	0	0	1	1	1	1	ARRDC2	arrestin domain containing 2
hsa-miR-557	0	0	1	0	0	0	NPS	neuropeptide S
hsa-miR-557	1	0	1	0	1	1	MSRB3	methionine sulfoxide reductase B3
hsa-miR-557	1	0	1	1	1	1	MAF	v-maf musculoaponeurotic fibrosarcoma oncogene homolog (avian)
hsa-miR-557	1	0	1	0	1	1	GPR126	G protein-coupled receptor 126
hsa-miR-557	1	0	1	1	0	0	MTUS2	microtubule associated tumor suppressor candidate 2
hsa-miR-557	1	0	1	1	1	1	ZNF704	zinc finger protein 704
hsa-miR-557	0	0	1	1	1	1	C18orf62	chromosome 18 open reading frame 62
hsa-miR-557	0	0	1	1	1	1	SPATA6L	spermatogenesis associated 6-like
hsa-miR-557	1	0	1	0	1	1	GK5	glycerol kinase 5 (putative)
hsa-miR-557	1	0	1	0	1	1	USP9X	ubiquitin specific peptidase 9, X-linked
hsa-miR-557	1	0	1	0	1	1	CREBZF	CREB/ATF bZIP transcription factor
hsa-miR-557	0	0	1	0	1	1	OPALIN	oligodendrocytic myelin paranodal and inner loop protein
hsa-miR-557	1	0	1	1	1	1	PAPD5	PAP associated domain containing 5
hsa-miR-557	1	0	1	1	1	1	MTMR12	myotubularin related protein 12
hsa-miR-557	1	0	1	1	1	1	PRKAG2	protein kinase, AMP-activated, gamma 2 non-catalytic subunit
hsa-miR-557	1	0	1	1	1	1	PPP4R1	protein phosphatase 4, regulatory subunit 1
hsa-miR-557	0	0	1	1	1	1	TMEM8B	transmembrane protein 8B
hsa-miR-557	1	0	1	1	1	1	ERBB4	v-erb-a erythroblastic leukemia viral oncogene homolog 4 (avian)
hsa-miR-557	0	0	1	1	1	1	TRAK1	trafficking protein, kinesin binding 1
hsa-miR-557	0	0	1	1	1	1	SLC6A3	solute carrier family 6 (neurotransmitter transporter, dopamine), member 3
hsa-miR-557	1	0	1	0	1	1	SLC7A6	solute carrier family 7 (amino acid transporter light chain, y+L system), member 6
hsa-miR-557	1	0	1	1	1	1	SREK1	splicing regulatory glutamine/lysine-rich protein 1
hsa-miR-557	1	0	1	1	1	1	NCOR2	nuclear receptor corepressor 2
hsa-miR-557	0	0	1	1	0	0	EXOC3L4	exocyst complex component 3-like 4
hsa-miR-557	0	0	1	0	0	0	AGAP7	ArfGAP with GTPase domain, ankyrin repeat and PH domain 7
hsa-miR-557	1	0	1	1	1	1	ECT2L	epithelial cell transforming sequence 2 oncogene-like
hsa-miR-557	0	0	1	1	1	1	VCAM1	vascular cell adhesion molecule 1
hsa-miR-557	0	0	1	1	1	1	XIRP2	xin actin-binding repeat containing 2
hsa-miR-557	1	0	1	1	1	1	FAM155A	family with sequence similarity 155, member A
hsa-miR-557	1	0	1	0	1	1	THSD7B	thrombospondin, type I, domain containing 7B
hsa-miR-557	1	0	1	0	1	1	CCDC85A	coiled-coil domain containing 85A
hsa-miR-557	0	0	1	1	1	1	HSF5	heat shock transcription factor family member 5
hsa-miR-557	1	0	1	0	1	1	MEGF9	multiple EGF-like-domains 9
hsa-miR-557	0	0	1	1	1	1	TBX18	T-box 18
hsa-miR-557	1	0	1	1	1	1	MGA	MAX gene associated
hsa-miR-557	1	0	1	0	1	1	SCN3A	sodium channel, voltage-gated, type III, alpha subunit
hsa-miR-557	1	0	1	1	1	1	ADAM10	ADAM metallopeptidase domain 10
hsa-miR-557	1	0	1	0	1	1	XIAP	X-linked inhibitor of apoptosis
hsa-miR-557	1	0	1	0	1	1	BACH1	BTB and CNC homology 1, basic leucine zipper transcription factor 1
hsa-miR-557	1	0	1	1	1	1	PRDM1	PR domain containing 1, with ZNF domain
hsa-miR-557	1	0	1	0	1	1	BMPR2	bone morphogenetic protein receptor, type II (serine/threonine kinase)
hsa-miR-557	1	0	1	0	1	1	KLF9	Kruppel-like factor 9
hsa-miR-557	1	0	1	1	1	1	CAMK2D	calcium/calmodulin-dependent protein kinase II delta
hsa-miR-557	0	0	1	0	1	1	CASQ2	calsequestrin 2 (cardiac muscle)
hsa-miR-557	1	0	1	0	1	1	CDK6	cyclin-dependent kinase 6
hsa-miR-557	0	0	1	1	0	0	DIO3	deiodinase, iodothyronine, type III
hsa-miR-557	0	0	1	1	1	1	DSCAM	Down syndrome cell adhesion molecule
hsa-miR-557	1	0	1	1	1	1	DYRK1A	dual-specificity tyrosine-(Y)-phosphorylation regulated kinase 1A
hsa-miR-557	1	0	1	1	1	1	CELSR3	cadherin, EGF LAG seven-pass G-type receptor 3 (flamingo homolog, Drosophila)
hsa-miR-557	0	0	1	0	1	1	EMP1	epithelial membrane protein 1
hsa-miR-557	1	0	1	1	1	1	EP300	E1A binding protein p300
hsa-miR-557	1	0	1	1	1	1	FOXF1	forkhead box F1
hsa-miR-557	0	0	1	1	1	1	IL13RA1	interleukin 13 receptor, alpha 1
hsa-miR-557	1	0	1	1	1	1	AHNAK	AHNAK nucleoprotein
hsa-miR-557	1	0	1	1	1	1	AHR	aryl hydrocarbon receptor
hsa-miR-557	1	0	1	1	1	1	AQP4	aquaporin 4
hsa-miR-557	1	0	1	1	1	1	BCL6	B-cell CLL/lymphoma 6
hsa-miR-557	1	0	1	1	1	1	CBFB	core-binding factor, beta subunit
hsa-miR-557	1	0	1	0	1	1	CCND2	cyclin D2
hsa-miR-557	1	0	1	1	1	1	CSNK1D	casein kinase 1, delta
hsa-miR-557	1	0	1	1	1	1	E2F3	E2F transcription factor 3
hsa-miR-557	0	0	1	1	1	1	EDNRA	endothelin receptor type A
hsa-miR-557	1	0	1	1	1	1	FBN2	fibrillin 2
hsa-miR-557	0	0	1	0	1	1	FGF2	fibroblast growth factor 2 (basic)
hsa-miR-557	0	0	1	1	0	0	FUT5	fucosyltransferase 5 (alpha (1,3) fucosyltransferase)
hsa-miR-557	0	0	1	1	1	1	GFAP	glial fibrillary acidic protein
hsa-miR-557	0	0	1	0	1	1	GYPA	glycophorin A (MNS blood group)
hsa-miR-557	1	0	1	0	1	1	HTT	huntingtin
hsa-miR-557	0	0	1	1	1	1	HOXB5	homeobox B5
hsa-miR-557	0	0	1	1	1	1	IL17A	interleukin 17A
hsa-miR-557	1	0	1	1	1	1	KCNJ3	potassium inwardly-rectifying channel, subfamily J, member 3
hsa-miR-557	0	0	1	1	1	1	KCNJ6	potassium inwardly-rectifying channel, subfamily J, member 6
hsa-miR-557	1	0	1	1	1	1	KPNA3	karyopherin alpha 3 (importin alpha 4)
hsa-miR-557	0	0	1	1	0	0	LGALS3	lectin, galactoside-binding, soluble, 3
hsa-miR-557	0	0	1	1	1	1	LOX	lysyl oxidase
hsa-miR-557	1	0	1	1	1	1	MATN2	matrilin 2
hsa-miR-557	1	0	1	1	1	1	MSN	moesin
hsa-miR-557	1	0	1	1	1	1	NEUROD1	neuronal differentiation 1
hsa-miR-557	1	0	1	1	1	1	NPTX2	neuronal pentraxin II
hsa-miR-557	0	0	1	0	1	1	OPHN1	oligophrenin 1
hsa-miR-557	0	0	1	1	1	1	P2RY1	purinergic receptor P2Y, G-protein coupled, 1
hsa-miR-557	1	0	1	0	1	1	PAPPA	pregnancy-associated plasma protein A, pappalysin 1
hsa-miR-557	1	0	1	1	1	1	PPP1CB	protein phosphatase 1, catalytic subunit, beta isozyme
hsa-miR-557	1	0	1	1	1	1	PRKD1	protein kinase D1
hsa-miR-557	1	0	1	1	1	1	PROX1	prospero homeobox 1
hsa-miR-557	1	0	1	1	1	1	PTPRK	protein tyrosine phosphatase, receptor type, K
hsa-miR-557	0	0	1	1	1	1	PTPRM	protein tyrosine phosphatase, receptor type, M
hsa-miR-557	0	0	1	0	1	1	RAB3B	RAB3B, member RAS oncogene family
hsa-miR-557	1	0	1	1	0	0	RFX1	regulatory factor X, 1 (influences HLA class II expression)
hsa-miR-557	0	0	1	1	1	1	SDC2	syndecan 2
hsa-miR-557	1	0	1	1	1	1	SRSF3	serine/arginine-rich splicing factor 3
hsa-miR-557	1	0	1	1	1	1	SNAI2	snail homolog 2 (Drosophila)
hsa-miR-557	1	0	1	1	1	1	SPAM1	sperm adhesion molecule 1 (PH-20 hyaluronidase, zona pellucida binding)
hsa-miR-557	0	0	1	1	1	1	STAT5A	signal transducer and activator of transcription 5A
hsa-miR-557	1	0	1	1	1	1	TDG	thymine-DNA glycosylase
hsa-miR-557	1	0	1	1	1	1	NR2C2	nuclear receptor subfamily 2, group C, member 2
hsa-miR-557	1	0	1	0	1	1	ZIC1	Zic family member 1
hsa-miR-557	0	0	1	1	1	1	ZNF137P	zinc finger protein 137, pseudogene
hsa-miR-557	1	0	1	1	1	1	AKAP1	A kinase (PRKA) anchor protein 1
hsa-miR-557	0	0	1	1	1	1	PEX3	peroxisomal biogenesis factor 3
hsa-miR-557	1	0	1	1	1	1	CBX4	chromobox homolog 4
hsa-miR-557	1	0	1	1	1	1	TNFSF11	tumor necrosis factor (ligand) superfamily, member 11
hsa-miR-557	1	0	1	1	1	1	NR5A2	nuclear receptor subfamily 5, group A, member 2
hsa-miR-557	0	0	1	1	1	1	TRIM24	tripartite motif containing 24
hsa-miR-557	1	0	1	1	1	1	GMFB	glia maturation factor, beta
hsa-miR-557	0	0	1	0	1	1	OAZ1	ornithine decarboxylase antizyme 1
hsa-miR-557	1	0	1	1	1	1	SHMT1	serine hydroxymethyltransferase 1 (soluble)
hsa-miR-557	1	0	1	0	1	1	SLC1A2	solute carrier family 1 (glial high affinity glutamate transporter), member 2
hsa-miR-557	1	0	1	1	1	1	SEMA3F	sema domain, immunoglobulin domain (Ig), short basic domain, secreted, (semaphorin) 3F
hsa-miR-557	0	0	1	1	1	1	HOMER1	homer homolog 1 (Drosophila)
hsa-miR-557	1	0	1	1	1	1	ARL3	ADP-ribosylation factor-like 3
hsa-miR-557	1	0	1	1	1	1	COX11	COX11 cytochrome c oxidase assembly homolog (yeast)
hsa-miR-557	1	0	1	1	1	1	DLX2	distal-less homeobox 2
hsa-miR-557	1	0	1	1	1	1	DUSP5	dual specificity phosphatase 5
hsa-miR-557	1	0	1	1	1	1	DUSP8	dual specificity phosphatase 8
hsa-miR-557	1	0	1	1	1	1	EFNB1	ephrin-B1
hsa-miR-557	1	0	1	0	1	1	ETV5	ets variant 5
hsa-miR-557	0	0	1	1	1	1	FOXA1	forkhead box A1
hsa-miR-557	1	0	1	1	0	0	HOXC6	homeobox C6
hsa-miR-557	1	0	1	1	1	1	FOXK2	forkhead box K2
hsa-miR-557	0	0	1	1	1	1	PIGH	phosphatidylinositol glycan anchor biosynthesis, class H
hsa-miR-557	1	0	1	1	1	1	MTMR4	myotubularin related protein 4
hsa-miR-557	0	0	1	0	1	1	CXorf1	chromosome X open reading frame 1
hsa-miR-557	1	0	1	1	1	1	B4GALT6	UDP-Gal:betaGlcNAc beta 1,4- galactosyltransferase, polypeptide 6
hsa-miR-557	1	0	1	0	1	1	ARHGEF6	Rac/Cdc42 guanine nucleotide exchange factor (GEF) 6
hsa-miR-557	1	0	1	1	1	1	VPS4B	vacuolar protein sorting 4 homolog B (S. cerevisiae)
hsa-miR-557	1	0	1	1	1	1	CXCL14	chemokine (C-X-C motif) ligand 14
hsa-miR-557	0	0	1	0	1	1	DSC2	desmocollin 2
hsa-miR-557	1	0	1	0	1	1	KRAS	v-Ki-ras2 Kirsten rat sarcoma viral oncogene homolog
hsa-miR-557	1	0	1	1	1	1	KDM5A	lysine (K)-specific demethylase 5A
hsa-miR-557	0	0	1	1	1	1	SIM1	single-minded homolog 1 (Drosophila)
hsa-miR-557	1	0	1	1	1	1	OXSR1	oxidative-stress responsive 1
hsa-miR-557	1	0	1	1	1	1	CRK	v-crk sarcoma virus CT10 oncogene homolog (avian)
hsa-miR-557	1	0	1	1	1	1	DCC	deleted in colorectal carcinoma
hsa-miR-557	1	0	1	1	1	1	GEM	GTP binding protein overexpressed in skeletal muscle
hsa-miR-557	1	0	1	1	1	1	HAS3	hyaluronan synthase 3
hsa-miR-557	1	0	1	0	1	1	PRKCE	protein kinase C, epsilon
hsa-miR-557	0	0	1	1	1	1	SEPP1	selenoprotein P, plasma, 1
hsa-miR-557	1	0	1	0	1	1	CCDC6	coiled-coil domain containing 6
hsa-miR-557	0	0	1	1	1	1	ING1	inhibitor of growth family, member 1
hsa-miR-557	1	0	1	1	1	1	DLL1	delta-like 1 (Drosophila)
hsa-miR-557	1	0	1	1	1	1	EVI5	ecotropic viral integration site 5
hsa-miR-557	1	0	1	1	1	1	UST	uronyl-2-sulfotransferase
hsa-miR-557	1	0	1	1	1	1	ARPC5	actin related protein 2/3 complex, subunit 5, 16kDa
hsa-miR-557	1	0	1	1	1	1	ACTR1A	ARP1 actin-related protein 1 homolog A, centractin alpha (yeast)
hsa-miR-557	1	0	1	1	1	1	EFS	embryonal Fyn-associated substrate
hsa-miR-557	1	0	1	1	1	1	MEOX2	mesenchyme homeobox 2
hsa-miR-557	1	0	1	1	1	1	MMP16	matrix metallopeptidase 16 (membrane-inserted)
hsa-miR-557	1	0	1	1	1	1	MTF1	metal-regulatory transcription factor 1
hsa-miR-557	1	0	1	1	1	1	RNF6	ring finger protein (C3H2C3 type) 6
hsa-miR-557	1	0	1	1	1	1	BPNT1	3'(2'), 5'-bisphosphate nucleotidase 1
hsa-miR-557	1	0	1	1	1	1	NEFL	neurofilament, light polypeptide
hsa-miR-557	0	0	1	1	0	0	TESK1	testis-specific kinase 1
hsa-miR-557	1	0	1	1	1	1	ZER1	zer-1 homolog (C. elegans)
hsa-miR-557	1	0	1	1	1	1	VAT1	vesicle amine transport protein 1 homolog (T. californica)
hsa-miR-557	0	0	1	1	0	0	STAMBP	STAM binding protein
hsa-miR-557	1	0	1	1	1	1	DYNLT3	dynein, light chain, Tctex-type 3
hsa-miR-557	0	0	1	1	0	0	MIA	melanoma inhibitory activity
hsa-miR-557	0	0	1	1	1	1	CLCA2	chloride channel accessory 2
hsa-miR-557	1	0	1	0	1	1	NCOA2	nuclear receptor coactivator 2
hsa-miR-557	1	0	1	0	1	1	IGF2BP1	insulin-like growth factor 2 mRNA binding protein 1
hsa-miR-557	1	0	1	1	0	0	LBX1	ladybird homeobox 1
hsa-miR-557	0	0	1	1	0	0	KIF1C	kinesin family member 1C
hsa-miR-557	1	0	1	1	1	1	MAN1A2	mannosidase, alpha, class 1A, member 2
hsa-miR-557	0	0	1	1	1	1	NUDT3	nudix (nucleoside diphosphate linked moiety X)-type motif 3
hsa-miR-557	0	0	1	0	1	1	SUB1	SUB1 homolog (S. cerevisiae)
hsa-miR-557	1	0	1	1	1	1	CDH10	cadherin 10, type 2 (T2-cadherin)
hsa-miR-557	1	0	1	1	1	1	KAT6A	K(lysine) acetyltransferase 6A
hsa-miR-557	1	0	1	1	1	1	RAB35	RAB35, member RAS oncogene family
hsa-miR-557	1	0	1	1	1	1	RP2	retinitis pigmentosa 2 (X-linked recessive)
hsa-miR-557	1	0	1	1	1	1	SCN1A	sodium channel, voltage-gated, type I, alpha subunit
hsa-miR-557	1	0	1	0	1	1	SLC5A3	solute carrier family 5 (sodium/myo-inositol cotransporter), member 3
hsa-miR-557	1	0	1	1	1	1	NR4A3	nuclear receptor subfamily 4, group A, member 3
hsa-miR-557	1	0	1	1	1	1	WWP1	WW domain containing E3 ubiquitin protein ligase 1
hsa-miR-557	0	0	1	1	0	0	USF1	upstream transcription factor 1
hsa-miR-557	0	0	1	0	1	1	ZNF208	zinc finger protein 208
hsa-miR-557	0	0	1	1	0	0	SLC14A2	solute carrier family 14 (urea transporter), member 2
hsa-miR-557	1	0	1	1	1	1	PALM2-AKAP2	PALM2-AKAP2 readthrough
hsa-miR-557	1	0	1	1	1	1	DUSP10	dual specificity phosphatase 10
hsa-miR-557	1	0	1	1	1	1	KLF12	Kruppel-like factor 12
hsa-miR-557	0	0	1	0	1	1	PNMA2	paraneoplastic Ma antigen 2
hsa-miR-557	1	0	1	1	1	1	PADI2	peptidyl arginine deiminase, type II
hsa-miR-557	1	0	1	1	1	1	TARDBP	TAR DNA binding protein
hsa-miR-557	0	0	1	1	1	1	MIP	major intrinsic protein of lens fiber
hsa-miR-557	0	0	1	1	1	1	FRAT2	frequently rearranged in advanced T-cell lymphomas 2
hsa-miR-557	0	0	1	1	1	1	RAB3GAP1	RAB3 GTPase activating protein subunit 1 (catalytic)
hsa-miR-557	1	0	1	1	1	1	RYBP	RING1 and YY1 binding protein
hsa-miR-557	1	0	1	1	1	1	HS2ST1	heparan sulfate 2-O-sulfotransferase 1
hsa-miR-557	1	0	1	1	1	1	KCND2	potassium voltage-gated channel, Shal-related subfamily, member 2
hsa-miR-557	1	0	1	0	1	1	FBXL7	F-box and leucine-rich repeat protein 7
hsa-miR-557	1	0	1	1	1	1	RGS17	regulator of G-protein signaling 17
hsa-miR-557	1	0	1	1	1	1	TLL2	tolloid-like 2
hsa-miR-557	0	0	1	1	1	1	N6AMT1	N-6 adenine-specific DNA methyltransferase 1 (putative)
hsa-miR-557	1	0	1	1	1	1	SERTAD3	SERTA domain containing 3
hsa-miR-557	0	0	1	0	0	0	PILRB	paired immunoglobin-like type 2 receptor beta
hsa-miR-557	1	0	1	0	1	1	OSTM1	osteopetrosis associated transmembrane protein 1
hsa-miR-557	1	0	1	1	0	0	HOXC11	homeobox C11
hsa-miR-557	1	0	1	1	0	0	HOXD9	homeobox D9
hsa-miR-557	0	0	1	1	1	1	HSPA4L	heat shock 70kDa protein 4-like
hsa-miR-557	0	0	1	1	0	0	NOMO1	NODAL modulator 1
hsa-miR-557	0	0	1	1	0	0	CLEC4E	C-type lectin domain family 4, member E
hsa-miR-557	0	0	1	1	1	1	ANKRD1	ankyrin repeat domain 1 (cardiac muscle)
hsa-miR-557	0	0	1	1	1	1	TSPAN13	tetraspanin 13
hsa-miR-557	1	0	1	1	1	1	KLHL20	kelch-like 20 (Drosophila)
hsa-miR-557	1	0	1	1	1	1	OTX1	orthodenticle homeobox 1
hsa-miR-557	1	0	1	1	1	1	VSX1	visual system homeobox 1
hsa-miR-557	0	0	1	0	1	1	CTR9	Ctr9, Paf1/RNA polymerase II complex component, homolog (S. cerevisiae)
hsa-miR-557	1	0	1	1	1	1	DAZAP2	DAZ associated protein 2
hsa-miR-557	1	0	1	1	1	1	KIAA0753	KIAA0753
hsa-miR-557	0	0	1	0	1	1	EPM2AIP1	EPM2A (laforin) interacting protein 1
hsa-miR-557	1	0	1	0	1	1	PJA2	praja ring finger 2, E3 ubiquitin protein ligase
hsa-miR-557	1	0	1	1	1	1	FCHSD2	FCH and double SH3 domains 2
hsa-miR-557	0	0	1	1	1	1	KIAA0196	KIAA0196
hsa-miR-557	1	0	1	1	1	1	ZBTB5	zinc finger and BTB domain containing 5
hsa-miR-557	1	0	1	1	1	1	JOSD1	Josephin domain containing 1
hsa-miR-557	1	0	1	0	1	1	ICK	intestinal cell (MAK-like) kinase
hsa-miR-557	0	0	1	1	0	0	DHX30	DEAH (Asp-Glu-Ala-His) box polypeptide 30
hsa-miR-557	1	0	1	1	1	1	RAB21	RAB21, member RAS oncogene family
hsa-miR-557	1	0	1	0	1	1	PEG10	paternally expressed 10
hsa-miR-557	1	0	1	1	1	1	IQSEC2	IQ motif and Sec7 domain 2
hsa-miR-557	1	0	1	1	1	1	RTF1	Rtf1, Paf1/RNA polymerase II complex component, homolog (S. cerevisiae)
hsa-miR-557	1	0	1	1	1	1	RCOR1	REST corepressor 1
hsa-miR-557	0	0	1	1	1	1	DNAJC9	DnaJ (Hsp40) homolog, subfamily C, member 9
hsa-miR-557	1	0	1	1	1	1	MYO1D	myosin ID
hsa-miR-557	1	0	1	0	1	1	KIAA1024	KIAA1024
hsa-miR-557	1	0	1	1	1	1	CSTF2T	cleavage stimulation factor, 3' pre-RNA, subunit 2, 64kDa, tau variant
hsa-miR-557	1	0	1	0	1	1	LPHN3	latrophilin 3
hsa-miR-557	1	0	1	1	1	1	ANKS1A	ankyrin repeat and sterile alpha motif domain containing 1A
hsa-miR-557	1	0	1	1	1	1	DNAJC13	DnaJ (Hsp40) homolog, subfamily C, member 13
hsa-miR-557	1	0	1	1	1	1	SYNM	synemin, intermediate filament protein
hsa-miR-557	1	0	1	0	1	1	ARHGEF12	Rho guanine nucleotide exchange factor (GEF) 12
hsa-miR-557	1	0	1	0	1	1	SRGAP2	SLIT-ROBO Rho GTPase activating protein 2
hsa-miR-557	1	0	1	1	1	1	MED13L	mediator complex subunit 13-like
hsa-miR-557	0	0	1	0	1	1	ZDHHC17	zinc finger, DHHC-type containing 17
hsa-miR-557	0	0	1	1	1	1	LEPROTL1	leptin receptor overlapping transcript-like 1
hsa-miR-557	1	0	1	1	1	1	DSTYK	dual serine/threonine and tyrosine protein kinase
hsa-miR-557	0	0	1	1	0	0	SPEF1	sperm flagellar 1
hsa-miR-557	1	0	1	1	1	1	MYRIP	myosin VIIA and Rab interacting protein
hsa-miR-557	1	0	1	0	1	1	OSBPL3	oxysterol binding protein-like 3
hsa-miR-557	1	0	1	0	1	1	GLCE	glucuronic acid epimerase
hsa-miR-557	1	0	1	0	1	1	ERC2	ELKS/RAB6-interacting/CAST family member 2
hsa-miR-557	0	0	1	1	1	1	HERC4	HECT and RLD domain containing E3 ubiquitin protein ligase 4
hsa-miR-557	1	0	1	1	1	1	TOR1AIP1	torsin A interacting protein 1
hsa-miR-557	1	0	1	1	1	1	EPC2	enhancer of polycomb homolog 2 (Drosophila)
hsa-miR-557	0	0	1	1	1	1	C10orf12	chromosome 10 open reading frame 12
hsa-miR-557	1	0	1	0	1	1	WWC3	WWC family member 3
hsa-miR-557	1	0	1	1	1	1	ST8SIA3	ST8 alpha-N-acetyl-neuraminide alpha-2,8-sialyltransferase 3
hsa-miR-557	0	0	1	1	1	1	PCF11	PCF11, cleavage and polyadenylation factor subunit, homolog (S. cerevisiae)
hsa-miR-557	1	0	1	0	1	1	TRIM33	tripartite motif containing 33
hsa-miR-557	1	0	1	1	1	1	PHF20L1	PHD finger protein 20-like 1
hsa-miR-557	1	0	1	1	1	1	DERL2	derlin 2
hsa-miR-557	0	0	1	1	1	1	MRPS33	mitochondrial ribosomal protein S33
hsa-miR-557	0	0	1	1	1	1	DYNC1LI1	dynein, cytoplasmic 1, light intermediate chain 1
hsa-miR-557	1	0	1	1	1	1	CERCAM	cerebral endothelial cell adhesion molecule
hsa-miR-557	1	0	1	1	1	1	VGLL3	vestigial like 3 (Drosophila)
hsa-miR-557	1	0	1	1	1	1	GPRC5B	G protein-coupled receptor, family C, group 5, member B
hsa-miR-557	0	0	1	1	1	1	CYB5R1	cytochrome b5 reductase 1
hsa-miR-557	0	0	1	1	0	0	GP6	glycoprotein VI (platelet)
hsa-miR-557	0	0	1	1	1	1	CD244	CD244 molecule, natural killer cell receptor 2B4
hsa-miR-557	0	0	1	1	0	0	ATP8A2	ATPase, aminophospholipid transporter, class I, type 8A, member 2
hsa-miR-557	1	0	1	1	1	1	DNAJC27	DnaJ (Hsp40) homolog, subfamily C, member 27
hsa-miR-557	0	0	1	0	1	1	ERGIC2	ERGIC and golgi 2
hsa-miR-557	1	0	1	1	1	1	RAB6B	RAB6B, member RAS oncogene family
hsa-miR-557	1	0	1	0	1	1	EIF2C4	eukaryotic translation initiation factor 2C, 4
hsa-miR-557	1	0	1	0	1	1	FAM46C	family with sequence similarity 46, member C
hsa-miR-557	0	0	1	1	0	0	CNTLN	centlein, centrosomal protein
hsa-miR-557	1	0	1	1	1	1	ZDHHC7	zinc finger, DHHC-type containing 7
hsa-miR-557	1	0	1	0	1	1	CMTM6	CKLF-like MARVEL transmembrane domain containing 6
hsa-miR-557	1	0	1	0	1	1	MARCH5	membrane-associated ring finger (C3HC4) 5
hsa-miR-557	0	0	1	1	0	0	THG1L	tRNA-histidine guanylyltransferase 1-like (S. cerevisiae)
hsa-miR-557	0	0	1	1	0	0	TRMT12	tRNA methyltransferase 12 homolog (S. cerevisiae)
hsa-miR-557	0	0	1	1	1	1	SCYL2	SCY1-like 2 (S. cerevisiae)
hsa-miR-557	1	0	1	1	1	1	ARGLU1	arginine and glutamate rich 1
hsa-miR-557	1	0	1	0	1	1	KIF26B	kinesin family member 26B
hsa-miR-557	0	0	1	0	1	1	GOLPH3L	golgi phosphoprotein 3-like
hsa-miR-557	1	0	1	1	1	1	LRRC20	leucine rich repeat containing 20
hsa-miR-557	1	0	1	0	1	1	PARVA	parvin, alpha
hsa-miR-557	1	0	1	1	1	1	UBA6	ubiquitin-like modifier activating enzyme 6
hsa-miR-557	0	0	1	1	1	1	RBM41	RNA binding motif protein 41
hsa-miR-557	1	0	1	1	1	1	DDX19A	DEAD (Asp-Glu-Ala-Asp) box polypeptide 19A
hsa-miR-557	1	0	1	1	1	1	RSBN1	round spermatid basic protein 1
hsa-miR-557	0	0	1	1	1	1	STK32B	serine/threonine kinase 32B
hsa-miR-557	1	0	1	0	1	1	FOXJ2	forkhead box J2
hsa-miR-557	1	0	1	1	1	1	RRN3	RRN3 RNA polymerase I transcription factor homolog (S. cerevisiae)
hsa-miR-557	0	0	1	0	0	0	KDM3A	lysine (K)-specific demethylase 3A
hsa-miR-557	1	0	1	1	1	1	ASH1L	ash1 (absent, small, or homeotic)-like (Drosophila)
hsa-miR-557	0	0	1	1	0	0	SAGE1	sarcoma antigen 1
hsa-miR-557	1	0	1	1	1	1	LANCL2	LanC lantibiotic synthetase component C-like 2 (bacterial)
hsa-miR-557	1	0	1	1	1	1	HOXA10	homeobox A10
hsa-miR-557	1	0	1	0	1	1	CCDC93	coiled-coil domain containing 93
hsa-miR-557	0	0	1	1	1	1	BARHL1	BarH-like homeobox 1
hsa-miR-557	0	0	1	1	1	1	FMN2	formin 2
hsa-miR-557	1	0	1	1	1	1	C5orf15	chromosome 5 open reading frame 15
hsa-miR-557	1	0	1	0	1	1	CNNM1	cyclin M1
hsa-miR-557	1	0	1	1	1	1	PCDH9	protocadherin 9
hsa-miR-557	0	0	1	1	1	1	PLXDC1	plexin domain containing 1
hsa-miR-557	1	0	1	1	1	1	OSM	oncostatin M
hsa-miR-557	0	0	1	1	1	1	TMEM27	transmembrane protein 27
hsa-miR-557	1	0	1	1	1	1	RAB22A	RAB22A, member RAS oncogene family
hsa-miR-557	1	0	1	1	1	1	USP31	ubiquitin specific peptidase 31
hsa-miR-557	1	0	1	1	1	1	DLG3	discs, large homolog 3 (Drosophila)
hsa-miR-557	1	0	1	1	1	1	ZNF608	zinc finger protein 608
hsa-miR-557	1	0	1	0	1	1	SYT4	synaptotagmin IV
hsa-miR-557	1	0	1	1	1	1	NLGN2	neuroligin 2
hsa-miR-557	0	0	1	1	1	1	ARRDC3	arrestin domain containing 3
hsa-miR-557	1	0	1	1	1	1	RANBP10	RAN binding protein 10
hsa-miR-557	0	0	1	1	1	1	PRX	periaxin
hsa-miR-557	0	0	1	1	1	1	PPM1A	protein phosphatase, Mg2+/Mn2+ dependent, 1A
hsa-miR-557	0	0	1	1	1	1	TLX3	T-cell leukemia homeobox 3
hsa-miR-557	1	0	1	0	1	1	RAP2A	RAP2A, member of RAS oncogene family
hsa-miR-557	1	0	1	1	1	1	HCN1	hyperpolarization activated cyclic nucleotide-gated potassium channel 1
hsa-miR-557	1	0	1	1	1	1	FAM60A	family with sequence similarity 60, member A
hsa-miR-557	1	0	1	1	1	1	TMEM35	transmembrane protein 35
hsa-miR-557	1	0	1	1	1	1	BACH2	BTB and CNC homology 1, basic leucine zipper transcription factor 2
hsa-miR-557	1	0	1	1	1	1	FOXM1	forkhead box M1
hsa-miR-557	1	0	1	1	1	1	GRIK2	glutamate receptor, ionotropic, kainate 2
hsa-miR-557	1	0	1	0	1	1	MCL1	myeloid cell leukemia sequence 1 (BCL2-related)
hsa-miR-557	0	0	1	1	1	1	ITM2B	integral membrane protein 2B
hsa-miR-557	1	0	1	1	1	1	TIA1	TIA1 cytotoxic granule-associated RNA binding protein
hsa-miR-557	1	0	1	0	1	1	CSNK1G1	casein kinase 1, gamma 1
hsa-miR-557	1	0	1	1	1	1	TXNDC5	thioredoxin domain containing 5 (endoplasmic reticulum)
hsa-miR-557	1	0	1	1	1	1	ABCG4	ATP-binding cassette, sub-family G (WHITE), member 4
hsa-miR-557	1	0	1	1	1	1	XPO4	exportin 4
hsa-miR-557	0	0	1	1	1	1	SUSD1	sushi domain containing 1
hsa-miR-557	1	0	1	1	1	1	C6orf106	chromosome 6 open reading frame 106
hsa-miR-557	1	0	1	1	1	1	PER2	period homolog 2 (Drosophila)
hsa-miR-557	1	0	1	1	1	1	RFX7	regulatory factor X, 7
hsa-miR-557	1	0	1	1	0	0	UBE2Z	ubiquitin-conjugating enzyme E2Z
hsa-miR-557	1	0	1	1	1	1	HOXB8	homeobox B8
hsa-miR-557	1	0	1	0	1	1	NOTCH2	notch 2
hsa-miR-557	1	0	1	1	1	1	PSTPIP2	proline-serine-threonine phosphatase interacting protein 2
hsa-miR-557	1	0	1	1	1	1	CCNJL	cyclin J-like
hsa-miR-557	0	0	1	1	1	1	AKIRIN1	akirin 1
hsa-miR-557	0	0	1	1	1	1	LRRK1	leucine-rich repeat kinase 1
hsa-miR-557	1	0	1	1	0	0	VPS37B	vacuolar protein sorting 37 homolog B (S. cerevisiae)
hsa-miR-557	1	0	1	0	1	1	ZFHX4	zinc finger homeobox 4
hsa-miR-557	0	0	1	1	1	1	AGBL2	ATP/GTP binding protein-like 2
hsa-miR-557	0	0	1	1	0	0	RNF122	ring finger protein 122
hsa-miR-557	1	0	1	1	1	1	CBLL1	Cbl proto-oncogene, E3 ubiquitin protein ligase-like 1
hsa-miR-557	0	0	1	1	1	1	GGNBP2	gametogenetin binding protein 2
hsa-miR-557	1	0	1	1	1	1	EIF2C3	eukaryotic translation initiation factor 2C, 3
hsa-miR-557	1	0	1	0	1	1	VCPIP1	valosin containing protein (p97)/p47 complex interacting protein 1
hsa-miR-557	1	0	1	0	1	1	TET1	tet methylcytosine dioxygenase 1
hsa-miR-557	1	0	1	1	1	1	JHDM1D	jumonji C domain containing histone demethylase 1 homolog D (S. cerevisiae)
hsa-miR-557	1	0	1	0	1	1	SETD7	SET domain containing (lysine methyltransferase) 7
hsa-miR-557	1	0	1	1	1	1	HOXA3	homeobox A3
hsa-miR-557	0	0	1	1	1	1	FCRL2	Fc receptor-like 2
hsa-miR-557	1	0	1	0	1	1	VOPP1	vesicular, overexpressed in cancer, prosurvival protein 1
hsa-miR-557	1	0	1	1	1	1	OR2H1	olfactory receptor, family 2, subfamily H, member 1
hsa-miR-557	1	0	1	1	1	1	MAP4	microtubule-associated protein 4
hsa-miR-557	0	0	1	1	0	0	TEX13B	testis expressed 13B
hsa-miR-557	0	0	1	1	1	1	COG3	component of oligomeric golgi complex 3
hsa-miR-557	0	0	1	1	1	1	KCNA7	potassium voltage-gated channel, shaker-related subfamily, member 7
hsa-miR-557	0	0	1	1	1	1	FRMD8	FERM domain containing 8
hsa-miR-557	1	0	1	1	1	1	GPR61	G protein-coupled receptor 61
hsa-miR-557	1	0	1	0	1	1	FAM172A	family with sequence similarity 172, member A
hsa-miR-557	1	0	1	1	1	1	ARID5B	AT rich interactive domain 5B (MRF1-like)
hsa-miR-557	1	0	1	1	1	1	ZNRF1	zinc and ring finger 1, E3 ubiquitin protein ligase
hsa-miR-557	1	0	1	1	1	1	BRMS1L	breast cancer metastasis-suppressor 1-like
hsa-miR-557	1	0	1	1	1	1	TRIM63	tripartite motif containing 63, E3 ubiquitin protein ligase
hsa-miR-557	1	0	1	1	0	0	ATOH8	atonal homolog 8 (Drosophila)
hsa-miR-557	1	0	1	1	1	1	FAM104A	family with sequence similarity 104, member A
hsa-miR-557	1	0	1	0	1	1	LACTB	lactamase, beta
hsa-miR-557	1	0	1	0	1	1	UBASH3B	ubiquitin associated and SH3 domain containing B
hsa-miR-557	0	0	1	1	1	1	SUCNR1	succinate receptor 1
hsa-miR-557	0	0	1	1	1	1	ZIC5	Zic family member 5
hsa-miR-557	1	0	1	1	1	1	TP53INP1	tumor protein p53 inducible nuclear protein 1
hsa-miR-557	0	0	1	1	0	0	RWDD2A	RWD domain containing 2A
hsa-miR-557	0	0	1	1	1	1	ITGB1	integrin, beta 1 (fibronectin receptor, beta polypeptide, antigen CD29 includes MDF2, MSK12)
hsa-miR-557	0	0	1	1	0	0	SIGLEC11	sialic acid binding Ig-like lectin 11
hsa-miR-557	1	0	1	1	1	1	MAL2	mal, T-cell differentiation protein 2 (gene/pseudogene)
hsa-miR-557	0	0	1	1	1	1	IL22RA2	interleukin 22 receptor, alpha 2
hsa-miR-557	1	0	1	1	1	1	TRIM9	tripartite motif containing 9
hsa-miR-557	1	0	1	1	1	1	MED12L	mediator complex subunit 12-like
hsa-miR-557	0	0	1	0	0	0	TSSK2	testis-specific serine kinase 2
hsa-miR-557	1	0	1	1	0	0	BRD4	bromodomain containing 4
hsa-miR-557	1	0	1	1	1	1	PTP4A2	protein tyrosine phosphatase type IVA, member 2
hsa-miR-557	1	0	1	0	1	1	EDARADD	EDAR-associated death domain
hsa-miR-557	0	0	1	0	1	1	PAQR8	progestin and adipoQ receptor family member VIII
hsa-miR-557	1	0	1	1	1	1	PCSK6	proprotein convertase subtilisin/kexin type 6
hsa-miR-557	0	0	1	1	1	1	ADAMTS17	ADAM metallopeptidase with thrombospondin type 1 motif, 17
hsa-miR-557	1	0	1	0	1	1	GIT2	G protein-coupled receptor kinase interacting ArfGAP 2
hsa-miR-557	1	0	1	1	1	1	ATRN	attractin
hsa-miR-557	1	0	1	0	1	1	CNOT6L	CCR4-NOT transcription complex, subunit 6-like
hsa-miR-557	1	0	1	1	1	1	MAPK1IP1L	mitogen-activated protein kinase 1 interacting protein 1-like
hsa-miR-557	1	0	1	1	1	1	RFTN2	raftlin family member 2
hsa-miR-557	0	0	1	1	0	0	AXDND1	axonemal dynein light chain domain containing 1
hsa-miR-557	0	0	1	1	1	1	SLFN5	schlafen family member 5
hsa-miR-557	0	0	1	1	1	1	DACT3	dapper, antagonist of beta-catenin, homolog 3 (Xenopus laevis)
hsa-miR-557	1	0	1	1	1	1	SGMS1	sphingomyelin synthase 1
hsa-miR-557	0	0	1	1	1	1	LONRF1	LON peptidase N-terminal domain and ring finger 1
hsa-miR-557	1	0	1	1	1	1	BHLHE22	basic helix-loop-helix family, member e22
hsa-miR-557	1	0	1	1	1	1	FGFBP3	fibroblast growth factor binding protein 3
hsa-miR-557	1	0	1	1	1	1	ZSCAN29	zinc finger and SCAN domain containing 29
hsa-miR-557	1	0	1	0	1	1	MOSPD2	motile sperm domain containing 2
hsa-miR-557	1	0	1	0	1	1	RWDD4	RWD domain containing 4
hsa-miR-557	1	0	1	1	1	1	BEND6	BEN domain containing 6
hsa-miR-557	1	0	1	0	1	1	TMEM196	transmembrane protein 196
hsa-miR-557	1	0	1	0	1	1	C7orf41	chromosome 7 open reading frame 41
hsa-miR-557	1	0	1	1	1	1	CEP120	centrosomal protein 120kDa
hsa-miR-557	1	0	1	0	1	1	MDGA1	MAM domain containing glycosylphosphatidylinositol anchor 1
hsa-miR-557	1	0	1	1	0	0	FAM43A	family with sequence similarity 43, member A
hsa-miR-557	1	0	1	1	1	1	ELMOD2	ELMO/CED-12 domain containing 2
hsa-miR-557	1	0	1	1	1	1	DAZAP1	DAZ associated protein 1
hsa-miR-557	1	0	1	1	1	1	POM121	POM121 transmembrane nucleoporin
hsa-miR-557	0	0	1	1	1	1	REXO1L1	REX1, RNA exonuclease 1 homolog (S. cerevisiae)-like 1
hsa-miR-557	1	0	1	1	1	1	L3MBTL4	l(3)mbt-like 4 (Drosophila)
hsa-miR-557	1	0	1	1	1	1	MOB1B	MOB kinase activator 1B
hsa-miR-557	1	0	1	1	1	1	LSM11	LSM11, U7 small nuclear RNA associated
hsa-miR-557	1	0	1	0	1	1	RNF152	ring finger protein 152
hsa-miR-557	0	0	1	1	0	0	NOMO2	NODAL modulator 2
hsa-miR-557	0	0	1	1	1	1	FAM133A	family with sequence similarity 133, member A
hsa-miR-557	1	0	1	1	1	1	OLIG3	oligodendrocyte transcription factor 3
hsa-miR-557	0	0	1	1	0	0	AGR3	anterior gradient 3 homolog (Xenopus laevis)
hsa-miR-557	1	0	1	1	1	1	LRRTM3	leucine rich repeat transmembrane neuronal 3
hsa-miR-557	0	0	1	1	1	1	ZNF831	zinc finger protein 831
hsa-miR-557	1	0	1	1	1	1	MB21D2	Mab-21 domain containing 2
hsa-miR-557	0	0	1	1	1	1	OAF	OAF homolog (Drosophila)
hsa-miR-557	1	0	1	1	1	1	MTDH	metadherin
hsa-miR-557	0	0	1	0	1	1	ZNF445	zinc finger protein 445
hsa-miR-557	1	0	1	1	1	1	ERAS	ES cell expressed Ras
hsa-miR-557	0	0	1	1	0	0	POLN	polymerase (DNA directed) nu
hsa-miR-557	1	0	1	0	1	1	BAGE2	B melanoma antigen family, member 2
hsa-miR-557	1	0	1	1	1	1	ISM2	isthmin 2 homolog (zebrafish)
hsa-miR-557	0	0	1	0	1	1	VSTM2A	V-set and transmembrane domain containing 2A
hsa-miR-557	0	0	1	0	1	1	NBPF11	neuroblastoma breakpoint family, member 11
hsa-miR-557	1	0	1	0	1	1	SLC16A9	solute carrier family 16, member 9 (monocarboxylic acid transporter 9)
hsa-miR-557	1	0	1	1	1	1	NHLRC1	NHL repeat containing 1
hsa-miR-557	1	0	1	0	1	1	DLEU7	deleted in lymphocytic leukemia, 7
hsa-miR-557	1	0	1	1	1	1	NSUN4	NOP2/Sun domain family, member 4
hsa-miR-557	1	0	1	1	1	1	THRA	thyroid hormone receptor, alpha
hsa-miR-557	1	0	1	1	1	1	BLOC1S5	biogenesis of lysosomal organelles complex-1, subunit 5, muted
hsa-miR-557	1	0	1	1	0	0	KAZN	kazrin, periplakin interacting protein
hsa-miR-557	1	0	1	1	1	1	E2F7	E2F transcription factor 7
hsa-miR-557	0	0	1	1	1	1	SERTM1	serine-rich and transmembrane domain containing 1
hsa-miR-557	0	0	1	1	1	1	TMIGD1	transmembrane and immunoglobulin domain containing 1
hsa-miR-557	0	0	1	0	1	1	NPSR1-AS1	NPSR1 antisense RNA 1
hsa-miR-557	1	0	1	1	1	1	SPRYD4	SPRY domain containing 4
hsa-miR-557	1	0	1	1	1	1	FREM2	FRAS1 related extracellular matrix protein 2
hsa-miR-557	0	0	1	0	1	1	CLEC17A	C-type lectin domain family 17, member A
hsa-miR-557	1	0	1	1	1	1	RAPH1	Ras association (RalGDS/AF-6) and pleckstrin homology domains 1
hsa-miR-557	1	0	1	1	1	1	CHCHD10	coiled-coil-helix-coiled-coil-helix domain containing 10
hsa-miR-557	0	0	1	0	0	0	SNORA68	small nucleolar RNA, H/ACA box 68
hsa-miR-557	0	0	1	0	0	0	RAB9BP1	RAB9B, member RAS oncogene family pseudogene 1
hsa-miR-557	0	0	1	0	0	0	MT1L	metallothionein 1L (gene/pseudogene)
hsa-miR-557	0	0	1	0	0	0	MIR155HG	MIR155 host gene (non-protein coding)
hsa-miR-557	0	0	1	0	0	0	TTTY2	testis-specific transcript, Y-linked 2 (non-protein coding)
hsa-miR-557	0	0	1	0	0	0	AOX2P	aldehyde oxidase 2 pseudogene
hsa-miR-557	0	0	1	0	0	0	FTH1P2	ferritin, heavy polypeptide 1 pseudogene 2
hsa-miR-557	0	0	1	0	0	0	FTH1P12	ferritin, heavy polypeptide 1 pseudogene 12
hsa-miR-557	0	0	1	0	0	0	SNORD96A	small nucleolar RNA, C/D box 96A
hsa-miR-557	0	0	1	0	0	0	HTR7P1	5-hydroxytryptamine (serotonin) receptor 7 pseudogene 1
hsa-miR-557	0	0	1	0	0	0	TRIM78P	tripartite motif containing 78, pseudogene
hsa-miR-557	0	0	1	0	0	0	TREML5P	triggering receptor expressed on myeloid cells-like 5, pseudogene
hsa-miR-557	0	0	1	0	0	0	RNF126P1	ring finger protein 126 pseudogene 1
hsa-miR-557	0	0	1	0	0	0	DUSP5P	dual specificity phosphatase 5 pseudogene
hsa-miR-557	0	0	1	0	0	0	SNORA74A	small nucleolar RNA, H/ACA box 74A
hsa-miR-557	0	0	1	0	0	0	SNX29P2	sorting nexin 29 pseudogene 2
hsa-miR-557	0	0	1	0	0	0	SNORA39	small nucleolar RNA, H/ACA box 39
hsa-miR-557	0	0	1	0	0	0	SNORA40	small nucleolar RNA, H/ACA box 40
hsa-miR-557	0	0	1	0	0	0	SNORA35	small nucleolar RNA, H/ACA box 35
hsa-miR-557	0	0	1	0	0	0	SCARNA1	small Cajal body-specific RNA 1
hsa-miR-557	0	0	1	0	0	0	GBP1P1	guanylate binding protein 1, interferon-inducible pseudogene 1
hsa-miR-557	0	0	1	0	0	0	USP32P1	ubiquitin specific peptidase 32 pseudogene 1
hsa-miR-557	0	0	1	0	0	0	GMCL1P1	germ cell-less, spermatogenesis associated 1 pseudogene 1
hsa-miR-557	0	0	1	0	0	0	SNORD116-28	small nucleolar RNA, C/D box 116-28
hsa-miR-557	0	0	1	1	0	0	SNRPN	small nuclear ribonucleoprotein polypeptide N
hsa-miR-557	1	0	1	1	1	1	PAM	peptidylglycine alpha-amidating monooxygenase
hsa-miR-557	0	0	1	0	0	0	GTF3A	general transcription factor IIIA
hsa-miR-557	1	0	1	1	1	1	ZNF238	zinc finger protein 238
hsa-miR-557	0	0	1	1	0	0	EPX	eosinophil peroxidase
hsa-miR-557	0	0	1	1	0	0	GPR17	G protein-coupled receptor 17
hsa-miR-557	0	0	1	1	1	1	FUCA2	fucosidase, alpha-L- 2, plasma
hsa-miR-557	1	0	1	1	1	1	CFTR	cystic fibrosis transmembrane conductance regulator (ATP-binding cassette sub-family C, member 7)
hsa-miR-557	0	0	1	1	0	0	C20orf43	chromosome 20 open reading frame 43
hsa-miR-557	0	0	1	1	1	1	PIGQ	phosphatidylinositol glycan anchor biosynthesis, class Q
hsa-miR-557	1	0	1	1	1	1	B4GALT7	xylosylprotein beta 1,4-galactosyltransferase, polypeptide 7
hsa-miR-557	0	0	1	1	0	0	RTN4R	reticulon 4 receptor
hsa-miR-557	0	0	1	1	0	0	PSMA4	proteasome (prosome, macropain) subunit, alpha type, 4
hsa-miR-557	0	0	1	1	0	0	RELT	RELT tumor necrosis factor receptor
hsa-miR-557	0	0	1	1	1	1	STYK1	serine/threonine/tyrosine kinase 1
hsa-miR-557	0	0	1	1	0	0	KIF22	kinesin family member 22
hsa-miR-557	0	0	0	1	0	0	KRT14	keratin 14
hsa-miR-557	0	0	1	1	0	0	ADAM7	ADAM metallopeptidase domain 7
hsa-miR-557	1	0	1	1	1	1	OSBPL6	oxysterol binding protein-like 6
hsa-miR-557	1	0	1	1	1	1	C20orf112	chromosome 20 open reading frame 112
hsa-miR-557	0	0	1	1	0	0	OAS1	2'-5'-oligoadenylate synthetase 1, 40/46kDa
hsa-miR-557	1	0	1	1	1	1	MYO15A	myosin XVA
hsa-miR-557	0	0	0	1	0	0	EFNA2	ephrin-A2
hsa-miR-557	0	0	1	1	1	1	TBC1D10A	TBC1 domain family, member 10A
hsa-miR-557	0	0	1	1	1	1	RNF215	ring finger protein 215
hsa-miR-557	0	0	1	1	1	1	L3MBTL2	l(3)mbt-like 2 (Drosophila)
hsa-miR-557	0	0	1	1	0	0	FKBP3	FK506 binding protein 3, 25kDa
hsa-miR-557	0	0	0	1	0	0	SRMS	src-related kinase lacking C-terminal regulatory tyrosine and N-terminal myristylation sites
hsa-miR-557	0	0	1	1	1	1	ATP12A	ATPase, H+/K+ transporting, nongastric, alpha polypeptide
hsa-miR-557	0	0	1	1	0	0	MT4	metallothionein 4
hsa-miR-557	0	0	1	1	1	1	AQP8	aquaporin 8
hsa-miR-557	1	0	0	1	1	1	C16orf88	chromosome 16 open reading frame 88
hsa-miR-557	0	0	1	1	1	1	CRX	cone-rod homeobox
hsa-miR-557	1	0	1	1	0	0	RASIP1	Ras interacting protein 1
hsa-miR-557	0	0	1	1	0	0	DLX5	distal-less homeobox 5
hsa-miR-557	0	0	0	1	1	1	AEBP1	AE binding protein 1
hsa-miR-557	1	0	0	1	0	0	P2RX1	purinergic receptor P2X, ligand-gated ion channel, 1
hsa-miR-557	0	0	1	1	0	0	CACNG1	calcium channel, voltage-dependent, gamma subunit 1
hsa-miR-557	1	0	1	1	1	1	WFS1	Wolfram syndrome 1 (wolframin)
hsa-miR-557	0	0	0	1	0	0	TPI1	triosephosphate isomerase 1
hsa-miR-557	0	0	0	1	1	1	SKIV2L2	superkiller viralicidic activity 2-like 2 (S. cerevisiae)
hsa-miR-557	0	0	0	1	0	0	SLC6A7	solute carrier family 6 (neurotransmitter transporter, L-proline), member 7
hsa-miR-557	1	0	1	1	1	1	HAND1	heart and neural crest derivatives expressed 1
hsa-miR-557	0	0	0	1	0	0	SPCS1	signal peptidase complex subunit 1 homolog (S. cerevisiae)
hsa-miR-557	0	0	0	1	0	0	FAHD2A	fumarylacetoacetate hydrolase domain containing 2A
hsa-miR-557	0	0	0	1	1	1	IL1RL1	interleukin 1 receptor-like 1
hsa-miR-557	0	0	0	1	0	0	NT5C1A	5'-nucleotidase, cytosolic IA
hsa-miR-557	0	0	1	1	1	1	CD160	CD160 molecule
hsa-miR-557	0	0	1	1	0	0	CCNI	cyclin I
hsa-miR-557	1	0	0	1	1	1	GLRX	glutaredoxin (thioltransferase)
hsa-miR-557	1	0	1	1	0	0	ST3GAL4	ST3 beta-galactoside alpha-2,3-sialyltransferase 4
hsa-miR-557	0	0	1	1	0	0	PRAMEF2	PRAME family member 2
hsa-miR-557	0	0	1	1	1	1	PRB1	proline-rich protein BstNI subfamily 1
hsa-miR-557	0	0	1	1	1	1	PRB4	proline-rich protein BstNI subfamily 4
hsa-miR-557	0	0	1	1	0	0	PRB2	proline-rich protein BstNI subfamily 2
hsa-miR-557	0	0	1	1	0	0	NPY	neuropeptide Y
hsa-miR-557	1	0	1	1	1	1	CLTA	clathrin, light chain A
hsa-miR-557	0	0	0	1	0	0	BATF3	basic leucine zipper transcription factor, ATF-like 3
hsa-miR-557	1	0	1	1	1	1	SLC22A5	solute carrier family 22 (organic cation/carnitine transporter), member 5
hsa-miR-557	0	0	1	1	0	0	MBOAT7	membrane bound O-acyltransferase domain containing 7
hsa-miR-557	1	0	1	1	1	1	SLC35F5	solute carrier family 35, member F5
hsa-miR-557	1	0	1	1	1	1	C20orf26	chromosome 20 open reading frame 26
hsa-miR-557	0	0	1	1	1	1	OTOR	otoraplin
hsa-miR-557	0	0	1	1	0	0	AHDC1	AT hook, DNA binding motif, containing 1
hsa-miR-557	0	0	0	1	0	0	TBPL2	TATA box binding protein like 2
hsa-miR-557	1	0	1	1	1	1	RAB40C	RAB40C, member RAS oncogene family
hsa-miR-557	1	0	1	1	0	0	ZFP36	zinc finger protein 36, C3H type, homolog (mouse)
hsa-miR-557	0	0	0	1	0	0	SELO	selenoprotein O
hsa-miR-557	0	0	1	1	0	0	CDC42EP1	CDC42 effector protein (Rho GTPase binding) 1
hsa-miR-557	0	0	0	1	1	1	RAC2	ras-related C3 botulinum toxin substrate 2 (rho family, small GTP binding protein Rac2)
hsa-miR-557	0	0	1	1	1	1	VWA8	von Willebrand factor A domain containing 8
hsa-miR-557	1	0	1	1	0	0	HCN2	hyperpolarization activated cyclic nucleotide-gated potassium channel 2
hsa-miR-557	0	0	0	1	0	0	PDGFRL	platelet-derived growth factor receptor-like
hsa-miR-557	0	0	0	1	0	0	ECSIT	ECSIT homolog (Drosophila)
hsa-miR-557	0	0	0	1	0	0	TUBGCP2	tubulin, gamma complex associated protein 2
hsa-miR-557	0	0	0	1	0	0	FAM22F	family with sequence similarity 22, member F
hsa-miR-557	0	0	0	1	1	1	TMEM204	transmembrane protein 204
hsa-miR-557	0	0	1	1	0	0	KRT15	keratin 15
hsa-miR-557	1	0	0	1	1	1	EMILIN2	elastin microfibril interfacer 2
hsa-miR-557	0	0	1	1	0	0	LGALS12	lectin, galactoside-binding, soluble, 12
hsa-miR-557	0	0	1	1	0	0	SLC2A11	solute carrier family 2 (facilitated glucose transporter), member 11
hsa-miR-557	0	0	0	1	1	1	TMEM106C	transmembrane protein 106C
hsa-miR-557	0	0	1	1	0	0	GPR77	G protein-coupled receptor 77
hsa-miR-557	1	0	0	1	1	1	USP30	ubiquitin specific peptidase 30
hsa-miR-557	0	0	1	1	0	0	UPK3B	uroplakin 3B
hsa-miR-557	1	0	0	1	0	0	POM121C	POM121 transmembrane nucleoporin C
hsa-miR-557	1	0	0	1	1	1	TGFBRAP1	transforming growth factor, beta receptor associated protein 1
hsa-miR-557	0	0	1	1	0	0	GPR45	G protein-coupled receptor 45
hsa-miR-557	0	0	1	1	1	1	SPDYE1	speedy homolog E1 (Xenopus laevis)
hsa-miR-557	1	0	1	1	0	0	CCM2	cerebral cavernous malformation 2
hsa-miR-557	0	0	1	1	1	1	IFNA14	interferon, alpha 14
hsa-miR-557	0	0	0	1	1	1	FGFBP2	fibroblast growth factor binding protein 2
hsa-miR-557	1	0	1	1	1	1	SORL1	sortilin-related receptor, L(DLR class) A repeats containing
hsa-miR-557	0	0	0	1	0	0	RPLP1	ribosomal protein, large, P1
hsa-miR-557	0	0	0	1	1	1	CYP2C9	cytochrome P450, family 2, subfamily C, polypeptide 9
hsa-miR-557	0	0	1	1	1	1	SSB	Sjogren syndrome antigen B (autoantigen La)
hsa-miR-557	0	0	1	1	1	1	LIN7A	lin-7 homolog A (C. elegans)
hsa-miR-557	0	0	0	1	1	1	HAL	histidine ammonia-lyase
hsa-miR-557	1	0	1	1	1	1	LRP6	low density lipoprotein receptor-related protein 6
hsa-miR-557	0	0	0	1	0	0	TNFRSF13B	tumor necrosis factor receptor superfamily, member 13B
hsa-miR-557	0	0	0	1	0	0	AP3B2	adaptor-related protein complex 3, beta 2 subunit
hsa-miR-557	0	0	1	1	0	0	AARS	alanyl-tRNA synthetase
hsa-miR-557	0	0	1	1	1	1	CYSTM1	cysteine-rich transmembrane module containing 1
hsa-miR-557	0	0	0	1	0	0	MCM4	minichromosome maintenance complex component 4
hsa-miR-557	0	0	1	1	1	1	WDR59	WD repeat domain 59
hsa-miR-557	0	0	1	1	0	0	NPRL3	nitrogen permease regulator-like 3 (S. cerevisiae)
hsa-miR-557	0	0	1	1	1	1	INVS	inversin
hsa-miR-557	0	0	1	1	1	1	ITGAE	integrin, alpha E (antigen CD103, human mucosal lymphocyte antigen 1; alpha polypeptide)
hsa-miR-557	0	0	0	1	0	0	TTC40	tetratricopeptide repeat domain 40
hsa-miR-557	0	0	1	1	1	1	FAM32A	family with sequence similarity 32, member A
hsa-miR-557	1	0	1	1	1	1	ARID3A	AT rich interactive domain 3A (BRIGHT-like)
hsa-miR-557	0	0	0	1	0	0	NDUFS3	NADH dehydrogenase (ubiquinone) Fe-S protein 3, 30kDa (NADH-coenzyme Q reductase)
hsa-miR-557	0	0	1	1	0	0	POPDC2	popeye domain containing 2
hsa-miR-557	0	0	0	1	1	1	HERC6	HECT and RLD domain containing E3 ubiquitin protein ligase family member 6
hsa-miR-557	0	0	1	1	1	1	COPS4	COP9 constitutive photomorphogenic homolog subunit 4 (Arabidopsis)
hsa-miR-557	0	0	0	1	1	1	MLPH	melanophilin
hsa-miR-557	0	0	1	1	1	1	FGFRL1	fibroblast growth factor receptor-like 1
hsa-miR-557	1	0	0	1	0	0	KLF1	Kruppel-like factor 1 (erythroid)
hsa-miR-557	1	0	1	1	1	1	AHRR	aryl-hydrocarbon receptor repressor
hsa-miR-557	1	0	1	1	1	1	PDCD6	programmed cell death 6
hsa-miR-557	0	0	0	1	0	0	SIL1	SIL1 homolog, endoplasmic reticulum chaperone (S. cerevisiae)
hsa-miR-557	0	0	1	1	0	0	ADAM18	ADAM metallopeptidase domain 18
hsa-miR-557	0	0	0	1	1	1	DUS4L	dihydrouridine synthase 4-like (S. cerevisiae)
hsa-miR-557	0	0	0	1	0	0	SLC5A4	solute carrier family 5 (low affinity glucose cotransporter), member 4
hsa-miR-557	0	0	0	1	1	1	RNF113B	ring finger protein 113B
hsa-miR-557	0	0	1	1	0	0	DUOXA1	dual oxidase maturation factor 1
hsa-miR-557	0	0	1	1	0	0	DHX38	DEAH (Asp-Glu-Ala-His) box polypeptide 38
hsa-miR-557	0	0	0	1	1	1	ZNF174	zinc finger protein 174
hsa-miR-557	0	0	1	1	0	0	AFG3L2	AFG3 ATPase family gene 3-like 2 (S. cerevisiae)
hsa-miR-557	0	0	1	1	1	1	SLC39A6	solute carrier family 39 (zinc transporter), member 6
hsa-miR-557	0	0	0	1	0	0	ZNF581	zinc finger protein 581
hsa-miR-557	0	0	0	1	0	0	CACNG8	calcium channel, voltage-dependent, gamma subunit 8
hsa-miR-557	0	0	0	1	1	1	C19orf52	chromosome 19 open reading frame 52
hsa-miR-557	0	0	1	1	0	0	CRNN	cornulin
hsa-miR-557	0	0	1	1	0	0	RPS27A	ribosomal protein S27a
hsa-miR-557	0	0	1	1	0	0	WDPCP	WD repeat containing planar cell polarity effector
hsa-miR-557	0	0	1	1	1	1	C1QL2	complement component 1, q subcomponent-like 2
hsa-miR-557	0	0	0	1	0	0	FAHD2B	fumarylacetoacetate hydrolase domain containing 2B
hsa-miR-557	1	0	1	1	1	1	GLRA3	glycine receptor, alpha 3
hsa-miR-557	0	0	0	1	0	0	NKD2	naked cuticle homolog 2 (Drosophila)
hsa-miR-557	0	0	0	1	1	1	HIGD2A	HIG1 hypoxia inducible domain family, member 2A
hsa-miR-557	0	0	1	1	0	0	PNLDC1	poly(A)-specific ribonuclease (PARN)-like domain containing 1
hsa-miR-557	0	0	1	1	1	1	IFNK	interferon, kappa
hsa-miR-557	0	0	1	1	1	1	SESN3	sestrin 3
hsa-miR-557	0	0	0	1	1	1	ST14	suppression of tumorigenicity 14 (colon carcinoma)
hsa-miR-557	0	0	1	1	1	1	COMMD7	COMM domain containing 7
hsa-miR-557	0	0	0	1	0	0	FXYD4	FXYD domain containing ion transport regulator 4
hsa-miR-557	1	0	0	1	1	1	DHRS12	dehydrogenase/reductase (SDR family) member 12
hsa-miR-557	0	0	0	1	1	1	RILPL2	Rab interacting lysosomal protein-like 2
hsa-miR-557	0	0	1	1	0	0	AGAP11	ankyrin repeat and GTPase domain Arf GTPase activating protein 11
hsa-miR-557	1	0	0	1	1	1	NCAPD3	non-SMC condensin II complex, subunit D3
hsa-miR-557	1	0	1	1	1	1	ANO4	anoctamin 4
hsa-miR-557	1	0	1	1	1	1	CGNL1	cingulin-like 1
hsa-miR-557	0	0	1	1	1	1	PIGF	phosphatidylinositol glycan anchor biosynthesis, class F
hsa-miR-557	0	0	1	1	0	0	GEMIN6	gem (nuclear organelle) associated protein 6
hsa-miR-557	1	0	0	1	0	0	POC5	POC5 centriolar protein homolog (Chlamydomonas)
hsa-miR-557	0	0	0	1	0	0	SPACA7	sperm acrosome associated 7
hsa-miR-557	1	0	1	1	1	1	GTF2E1	general transcription factor IIE, polypeptide 1, alpha 56kDa
hsa-miR-557	0	0	0	1	0	0	C16orf74	chromosome 16 open reading frame 74
hsa-miR-557	1	0	1	1	1	1	FAM105B	family with sequence similarity 105, member B
hsa-miR-557	0	0	1	1	0	0	OTOA	otoancorin
hsa-miR-557	0	0	1	1	1	1	GNAQ	guanine nucleotide binding protein (G protein), q polypeptide
hsa-miR-557	0	0	0	1	0	0	PSMG3	proteasome (prosome, macropain) assembly chaperone 3
hsa-miR-557	0	0	1	1	0	0	MMEL1	membrane metallo-endopeptidase-like 1
hsa-miR-557	0	0	1	1	1	1	CRYZL1	crystallin, zeta (quinone reductase)-like 1
hsa-miR-557	1	0	1	1	1	1	ACTC1	actin, alpha, cardiac muscle 1
hsa-miR-557	0	0	1	1	0	0	SAFB	scaffold attachment factor B
hsa-miR-557	0	0	1	1	0	0	FGFR4	fibroblast growth factor receptor 4
hsa-miR-557	0	0	1	1	0	0	NCKAP1L	NCK-associated protein 1-like
hsa-miR-557	0	0	1	1	0	0	DCST2	DC-STAMP domain containing 2
hsa-miR-557	0	0	1	1	1	1	SLC23A3	solute carrier family 23 (nucleobase transporters), member 3
hsa-miR-557	0	0	1	1	1	1	KIAA1143	KIAA1143
hsa-miR-557	0	0	1	1	0	0	TKT	transketolase
hsa-miR-557	0	0	1	1	1	1	UVSSA	UV-stimulated scaffold protein A
hsa-miR-557	1	0	1	1	1	1	PGGT1B	protein geranylgeranyltransferase type I, beta subunit
hsa-miR-557	1	0	1	1	1	1	PRKAA1	protein kinase, AMP-activated, alpha 1 catalytic subunit
hsa-miR-557	0	0	1	1	1	1	ANKHD1	ankyrin repeat and KH domain containing 1
hsa-miR-557	0	0	1	1	0	0	EIF4EBP3	eukaryotic translation initiation factor 4E binding protein 3
hsa-miR-557	0	0	1	1	0	0	ANKHD1-EIF4EBP3	ANKHD1-EIF4EBP3 readthrough
hsa-miR-557	1	0	1	1	1	1	LMTK2	lemur tyrosine kinase 2
hsa-miR-557	0	0	1	1	1	1	ITIH5	inter-alpha-trypsin inhibitor heavy chain family, member 5
hsa-miR-557	0	0	1	1	1	1	PIWIL4	piwi-like 4 (Drosophila)
hsa-miR-557	1	0	1	1	1	1	LARP6	La ribonucleoprotein domain family, member 6
hsa-miR-557	0	0	1	1	1	1	TMEM41B	transmembrane protein 41B
hsa-miR-557	0	0	0	1	0	0	WDR16	WD repeat domain 16
hsa-miR-557	0	0	1	1	1	1	MMP3	matrix metallopeptidase 3 (stromelysin 1, progelatinase)
hsa-miR-557	1	0	1	1	0	0	PPIB	peptidylprolyl isomerase B (cyclophilin B)
hsa-miR-557	0	0	1	1	0	0	SCG5	secretogranin V (7B2 protein)
hsa-miR-557	0	0	1	1	1	1	INTS10	integrator complex subunit 10
hsa-miR-557	0	0	0	1	0	0	RILP	Rab interacting lysosomal protein
hsa-miR-557	0	0	0	1	1	1	PBK	PDZ binding kinase
hsa-miR-557	0	0	1	1	1	1	SCARA5	scavenger receptor class A, member 5 (putative)
hsa-miR-557	0	0	1	1	1	1	TADA3	transcriptional adaptor 3
hsa-miR-557	0	0	0	1	0	0	SPDYE5	speedy homolog E5 (Xenopus laevis)
hsa-miR-557	0	0	1	1	0	0	IRX1	iroquois homeobox 1
hsa-miR-557	1	0	1	1	1	1	NHLH1	nescient helix loop helix 1
hsa-miR-557	0	0	0	1	0	0	OR8I2	olfactory receptor, family 8, subfamily I, member 2
hsa-miR-557	0	0	0	1	1	1	TRH	thyrotropin-releasing hormone
hsa-miR-557	0	0	1	1	1	1	POLR1D	polymerase (RNA) I polypeptide D, 16kDa
hsa-miR-557	1	0	1	1	1	1	RFXANK	regulatory factor X-associated ankyrin-containing protein
hsa-miR-557	0	0	0	1	1	1	MRAP	melanocortin 2 receptor accessory protein
hsa-miR-557	0	0	1	1	0	0	PROKR1	prokineticin receptor 1
hsa-miR-557	1	0	1	1	0	0	ENHO	energy homeostasis associated
hsa-miR-557	0	0	1	1	0	0	SLC6A19	solute carrier family 6 (neutral amino acid transporter), member 19
hsa-miR-557	0	0	1	1	0	0	PEX6	peroxisomal biogenesis factor 6
hsa-miR-557	0	0	1	1	1	1	MUC7	mucin 7, secreted
hsa-miR-557	0	0	0	1	1	1	NECAB2	N-terminal EF-hand calcium binding protein 2
hsa-miR-557	1	0	1	1	0	0	HTR1E	5-hydroxytryptamine (serotonin) receptor 1E, G protein-coupled
hsa-miR-557	0	0	0	1	1	1	PTAFR	platelet-activating factor receptor
hsa-miR-557	1	0	1	1	1	1	GRM5	glutamate receptor, metabotropic 5
hsa-miR-557	0	0	0	1	0	0	MBD3L1	methyl-CpG binding domain protein 3-like 1
hsa-miR-557	0	0	1	1	0	0	STRA13	stimulated by retinoic acid 13 homolog (mouse)
hsa-miR-557	1	0	1	1	1	1	DUS1L	dihydrouridine synthase 1-like (S. cerevisiae)
hsa-miR-557	1	0	1	1	1	1	GTPBP2	GTP binding protein 2
hsa-miR-557	0	0	1	1	0	0	HEXIM2	hexamethylene bis-acetamide inducible 2
hsa-miR-557	0	0	0	1	0	0	ZNF556	zinc finger protein 556
hsa-miR-557	0	0	0	1	0	0	CALML6	calmodulin-like 6
hsa-miR-557	0	0	1	1	1	1	MRPS12	mitochondrial ribosomal protein S12
hsa-miR-557	1	0	1	1	1	1	ANTXR1	anthrax toxin receptor 1
hsa-miR-557	1	0	1	1	0	0	SEZ6L2	seizure related 6 homolog (mouse)-like 2
hsa-miR-557	1	0	1	1	0	0	TNXB	tenascin XB
hsa-miR-557	0	0	0	1	0	0	MRGPRD	MAS-related GPR, member D
hsa-miR-557	0	0	0	1	0	0	XCR1	chemokine (C motif) receptor 1
hsa-miR-557	0	0	0	1	0	0	ZNF519	zinc finger protein 519
hsa-miR-557	0	0	1	1	0	0	VEGFB	vascular endothelial growth factor B
hsa-miR-557	0	0	1	1	0	0	CARD14	caspase recruitment domain family, member 14
hsa-miR-557	0	0	1	1	0	0	CCDC13	coiled-coil domain containing 13
hsa-miR-557	0	0	1	1	0	0	ZDHHC24	zinc finger, DHHC-type containing 24
hsa-miR-557	0	0	0	1	1	1	LSP1	lymphocyte-specific protein 1
hsa-miR-557	0	0	1	1	1	1	FAM71D	family with sequence similarity 71, member D
hsa-miR-557	0	0	1	1	0	0	RPS14	ribosomal protein S14
hsa-miR-557	0	0	0	1	0	0	MCTP1	multiple C2 domains, transmembrane 1
hsa-miR-557	0	0	1	1	1	1	C7orf53	chromosome 7 open reading frame 53
hsa-miR-557	0	0	1	1	1	1	MRPS23	mitochondrial ribosomal protein S23
hsa-miR-557	0	0	1	1	0	0	MKS1	Meckel syndrome, type 1
hsa-miR-557	1	0	1	1	1	1	UPF2	UPF2 regulator of nonsense transcripts homolog (yeast)
hsa-miR-557	1	0	1	1	0	0	RELL1	RELT-like 1
hsa-miR-557	1	0	1	1	1	1	SENP7	SUMO1/sentrin specific peptidase 7
hsa-miR-557	0	0	0	1	0	0	EXOC3L1	exocyst complex component 3-like 1
hsa-miR-557	0	0	1	1	0	0	TTC12	tetratricopeptide repeat domain 12
hsa-miR-557	0	0	0	1	0	0	EXOC3	exocyst complex component 3
hsa-miR-557	0	0	0	1	0	0	OR4K13	olfactory receptor, family 4, subfamily K, member 13
hsa-miR-557	0	0	0	1	0	0	OR4N2	olfactory receptor, family 4, subfamily N, member 2
hsa-miR-557	0	0	1	1	0	0	TUBA8	tubulin, alpha 8
hsa-miR-557	1	0	1	1	1	1	KCNA2	potassium voltage-gated channel, shaker-related subfamily, member 2
hsa-miR-557	0	0	1	1	1	1	LRRC34	leucine rich repeat containing 34
hsa-miR-557	1	0	1	1	1	1	DLC1	deleted in liver cancer 1
hsa-miR-557	0	0	1	1	1	1	BIN1	bridging integrator 1
hsa-miR-557	0	0	1	1	1	1	PNMA1	paraneoplastic Ma antigen 1
hsa-miR-557	0	0	1	1	1	1	MSRA	methionine sulfoxide reductase A
hsa-miR-557	0	0	1	1	1	1	RECQL5	RecQ protein-like 5
hsa-miR-557	0	0	1	1	0	0	KDM5D	lysine (K)-specific demethylase 5D
hsa-miR-557	1	0	1	1	1	1	EBF3	early B-cell factor 3
hsa-miR-557	0	0	1	1	1	1	FAM83A	family with sequence similarity 83, member A
hsa-miR-557	0	0	1	1	1	1	ZFP3	zinc finger protein 3 homolog (mouse)
hsa-miR-557	1	0	0	1	0	0	MPDZ	multiple PDZ domain protein
hsa-miR-557	1	0	1	1	1	1	SLC4A8	solute carrier family 4, sodium bicarbonate cotransporter, member 8
hsa-miR-557	0	0	0	1	1	1	FAM82B	family with sequence similarity 82, member B
hsa-miR-557	0	0	0	1	0	0	SLC25A19	solute carrier family 25 (mitochondrial thiamine pyrophosphate carrier), member 19
hsa-miR-557	0	0	1	1	0	0	CLPTM1L	CLPTM1-like
hsa-miR-557	0	0	0	1	1	1	SPTBN5	spectrin, beta, non-erythrocytic 5
hsa-miR-557	1	0	1	1	1	1	DSCAML1	Down syndrome cell adhesion molecule like 1
hsa-miR-557	1	0	1	1	0	0	TCF7	transcription factor 7 (T-cell specific, HMG-box)
hsa-miR-557	0	0	1	1	0	0	VARS2	valyl-tRNA synthetase 2, mitochondrial (putative)
hsa-miR-557	0	0	0	1	1	1	RPP25	ribonuclease P/MRP 25kDa subunit
hsa-miR-557	0	0	0	1	0	0	HECW1-IT1	HECW1 intronic transcript 1 (non-protein coding)
hsa-miR-557	0	0	1	1	0	0	PRMT10	protein arginine methyltransferase 10 (putative)
hsa-miR-557	0	0	0	1	0	0	TMEM102	transmembrane protein 102
hsa-miR-557	0	0	0	1	0	0	HTR1A	5-hydroxytryptamine (serotonin) receptor 1A, G protein-coupled
hsa-miR-557	0	0	0	1	0	0	ANAPC2	anaphase promoting complex subunit 2
hsa-miR-557	0	0	1	1	0	0	PPIE	peptidylprolyl isomerase E (cyclophilin E)
hsa-miR-557	1	0	1	1	1	1	CAMKK2	calcium/calmodulin-dependent protein kinase kinase 2, beta
hsa-miR-557	0	0	1	1	0	0	MRVI1-AS1	MRVI1 antisense RNA 1
hsa-miR-557	0	0	0	1	1	1	C21orf2	chromosome 21 open reading frame 2
hsa-miR-557	0	0	0	1	1	1	FBXW5	F-box and WD repeat domain containing 5
hsa-miR-557	1	0	1	1	1	1	ZNF580	zinc finger protein 580
hsa-miR-557	0	0	1	1	1	1	UBE2I	ubiquitin-conjugating enzyme E2I
hsa-miR-557	0	0	0	1	1	1	CABP4	calcium binding protein 4
hsa-miR-557	0	0	1	1	1	1	CEP192	centrosomal protein 192kDa
hsa-miR-557	1	0	1	1	1	1	ZNF562	zinc finger protein 562
hsa-miR-557	1	0	1	1	0	0	CRELD1	cysteine-rich with EGF-like domains 1
hsa-miR-557	0	0	0	1	0	0	TRIML2	tripartite motif family-like 2
hsa-miR-557	1	0	1	1	1	1	CHRNA3	cholinergic receptor, nicotinic, alpha 3 (neuronal)
hsa-miR-557	1	0	0	1	1	1	TAGAP	T-cell activation RhoGTPase activating protein
hsa-miR-557	0	0	0	1	1	1	BTBD6	BTB (POZ) domain containing 6
hsa-miR-557	0	0	0	1	1	1	RFPL4B	ret finger protein-like 4B
hsa-miR-557	0	0	1	1	1	1	ZNF85	zinc finger protein 85
hsa-miR-557	0	0	0	1	1	1	C3orf35	chromosome 3 open reading frame 35
hsa-miR-557	0	0	0	1	0	0	SPDYE4	speedy homolog E4 (Xenopus laevis)
hsa-miR-557	0	0	0	1	0	0	ADAT3	adenosine deaminase, tRNA-specific 3
hsa-miR-557	0	0	1	1	0	0	IRX3	iroquois homeobox 3
hsa-miR-557	0	0	0	1	0	0	LPAR5	lysophosphatidic acid receptor 5
hsa-miR-557	1	0	1	1	0	0	RIMS2	regulating synaptic membrane exocytosis 2
hsa-miR-557	0	0	1	1	1	1	MAGEC3	melanoma antigen family C, 3
hsa-miR-557	0	0	1	1	1	1	MOB2	MOB kinase activator 2
hsa-miR-557	0	0	1	1	1	1	ADAMTSL5	ADAMTS-like 5
hsa-miR-557	1	0	1	1	1	1	DYNC2LI1	dynein, cytoplasmic 2, light intermediate chain 1
hsa-miR-557	0	0	0	1	0	0	ADSSL1	adenylosuccinate synthase like 1
hsa-miR-557	0	0	1	1	0	0	SOCS7	suppressor of cytokine signaling 7
hsa-miR-557	0	0	1	1	1	1	FBLN7	fibulin 7
hsa-miR-557	0	0	1	1	0	0	ACTB	actin, beta
hsa-miR-557	0	0	0	1	0	0	ALG12	asparagine-linked glycosylation 12, alpha-1,6-mannosyltransferase homolog (S. cerevisiae)
hsa-miR-557	0	0	1	1	1	1	UQCR10	ubiquinol-cytochrome c reductase, complex III subunit X
hsa-miR-557	0	0	0	1	0	0	TMEM186	transmembrane protein 186
hsa-miR-557	0	0	0	1	0	0	ACAA1	acetyl-CoA acyltransferase 1
hsa-miR-557	0	0	1	1	0	0	TAS1R1	taste receptor, type 1, member 1
hsa-miR-557	0	0	0	1	0	0	C19orf59	chromosome 19 open reading frame 59
hsa-miR-557	0	0	1	1	1	1	COL25A1	collagen, type XXV, alpha 1
hsa-miR-557	0	0	1	1	0	0	DMRTC1B	DMRT-like family C1B
hsa-miR-557	0	0	0	1	1	1	ZNF20	zinc finger protein 20
hsa-miR-557	0	0	1	1	1	1	TCP11L1	t-complex 11 (mouse)-like 1
hsa-miR-557	0	0	0	1	0	0	QRFPR	pyroglutamylated RFamide peptide receptor
hsa-miR-557	0	0	0	1	0	0	PRAMEF14	PRAME family member 14
hsa-miR-557	0	0	1	1	1	1	CCK	cholecystokinin
hsa-miR-557	1	0	1	1	1	1	ANKRD13A	ankyrin repeat domain 13A
hsa-miR-557	1	0	1	1	0	0	EMC10	ER membrane protein complex subunit 10
hsa-miR-557	0	0	0	1	1	1	CDKN3	cyclin-dependent kinase inhibitor 3
hsa-miR-557	0	0	1	1	1	1	ATPIF1	ATPase inhibitory factor 1
hsa-miR-557	1	0	1	1	0	0	LMO1	LIM domain only 1 (rhombotin 1)
hsa-miR-557	0	0	0	1	0	0	ZNF446	zinc finger protein 446
hsa-miR-557	0	0	1	1	1	1	NLRP3	NLR family, pyrin domain containing 3
hsa-miR-557	0	0	1	1	0	0	ZNF142	zinc finger protein 142
hsa-miR-557	0	0	1	1	1	1	PISD	phosphatidylserine decarboxylase
hsa-miR-557	0	0	0	1	1	1	NEIL1	nei endonuclease VIII-like 1 (E. coli)
hsa-miR-557	0	0	0	1	0	0	CECR5	cat eye syndrome chromosome region, candidate 5
hsa-miR-557	0	0	0	1	1	1	GJD3	gap junction protein, delta 3, 31.9kDa
hsa-miR-557	0	0	0	1	0	0	DOM3Z	dom-3 homolog Z (C. elegans)
hsa-miR-557	1	0	1	1	1	1	SERF2	small EDRK-rich factor 2
hsa-miR-557	1	0	1	1	1	1	C15orf63	chromosome 15 open reading frame 63
hsa-miR-557	0	0	1	1	1	1	SPDYE2	speedy homolog E2 (Xenopus laevis)
hsa-miR-557	0	0	1	1	0	0	HTATIP2	HIV-1 Tat interactive protein 2, 30kDa
hsa-miR-557	1	0	1	1	1	1	ATP9A	ATPase, class II, type 9A
hsa-miR-557	0	0	0	1	0	0	NOSIP	nitric oxide synthase interacting protein
hsa-miR-557	0	0	0	1	0	0	SFN	stratifin
hsa-miR-557	0	0	1	1	0	0	TCTEX1D4	Tctex1 domain containing 4
hsa-miR-557	0	0	0	1	0	0	C11orf96	chromosome 11 open reading frame 96
hsa-miR-557	1	0	1	1	1	1	NELF	nasal embryonic LHRH factor
hsa-miR-557	0	0	0	1	0	0	LOC100132581	putative speedy protein E8-like
hsa-miR-557	0	0	1	1	1	1	ICAM4	intercellular adhesion molecule 4 (Landsteiner-Wiener blood group)
hsa-miR-557	0	0	0	1	1	1	POMT1	protein-O-mannosyltransferase 1
hsa-miR-557	0	0	0	1	0	0	DPM3	dolichyl-phosphate mannosyltransferase polypeptide 3
hsa-miR-557	1	0	1	1	1	1	INSR	insulin receptor
hsa-miR-557	0	0	1	1	0	0	BMX	BMX non-receptor tyrosine kinase
hsa-miR-557	1	0	1	1	1	1	RBPMS	RNA binding protein with multiple splicing
hsa-miR-557	0	0	0	1	0	0	SAMD11	sterile alpha motif domain containing 11
hsa-miR-557	0	0	0	1	0	0	JMJD7-PLA2G4B	JMJD7-PLA2G4B readthrough
hsa-miR-557	0	0	1	1	0	0	DPY30	dpy-30 homolog (C. elegans)
hsa-miR-557	0	0	0	1	0	0	FAM22B	family with sequence similarity 22, member B
hsa-miR-557	0	0	1	1	1	1	C1orf162	chromosome 1 open reading frame 162
hsa-miR-557	0	0	1	1	1	1	MED22	mediator complex subunit 22
hsa-miR-557	1	0	1	1	1	1	ZNF763	zinc finger protein 763
hsa-miR-557	0	0	1	1	1	1	AQP3	aquaporin 3 (Gill blood group)
hsa-miR-557	0	0	1	1	1	1	C15orf48	chromosome 15 open reading frame 48
hsa-miR-557	0	0	0	1	0	0	ZMAT5	zinc finger, matrin-type 5
hsa-miR-557	0	0	1	1	1	1	KRTAP1-1	keratin associated protein 1-1
hsa-miR-557	0	0	1	1	0	0	KRTAP1-3	keratin associated protein 1-3
hsa-miR-557	0	0	0	1	1	1	DMBT1	deleted in malignant brain tumors 1
hsa-miR-557	1	0	0	1	0	0	C7orf26	chromosome 7 open reading frame 26
hsa-miR-557	0	0	0	1	0	0	MRPL20	mitochondrial ribosomal protein L20
hsa-miR-557	0	0	0	1	1	1	BRF1	BRF1 homolog, subunit of RNA polymerase III transcription initiation factor IIIB (S. cerevisiae)
hsa-miR-557	0	0	0	1	0	0	SDSL	serine dehydratase-like
hsa-miR-557	0	0	0	1	0	0	DHRS7B	dehydrogenase/reductase (SDR family) member 7B
hsa-miR-557	0	0	1	1	1	1	TJP2	tight junction protein 2
hsa-miR-557	0	0	0	1	0	0	IRF7	interferon regulatory factor 7
hsa-miR-557	1	0	1	1	1	1	KDM5C	lysine (K)-specific demethylase 5C
hsa-miR-557	0	0	0	1	0	0	ARHGAP4	Rho GTPase activating protein 4
hsa-miR-557	1	0	0	1	0	0	NKX2-4	NK2 homeobox 4
hsa-miR-557	0	0	0	1	0	0	P2RX2	purinergic receptor P2X, ligand-gated ion channel, 2
hsa-miR-557	0	0	1	1	1	1	RIPK4	receptor-interacting serine-threonine kinase 4
hsa-miR-557	1	0	0	1	1	1	PARD6G	par-6 partitioning defective 6 homolog gamma (C. elegans)
hsa-miR-557	0	0	0	1	0	0	B3GNT6	UDP-GlcNAc:betaGal beta-1,3-N-acetylglucosaminyltransferase 6 (core 3 synthase)
hsa-miR-557	0	0	0	1	1	1	GNL3	guanine nucleotide binding protein-like 3 (nucleolar)
hsa-miR-557	1	0	1	1	1	1	SYNE1	spectrin repeat containing, nuclear envelope 1
hsa-miR-557	0	0	0	1	0	0	CRYBA4	crystallin, beta A4
hsa-miR-557	0	0	0	1	1	1	ITGB2	integrin, beta 2 (complement component 3 receptor 3 and 4 subunit)
hsa-miR-557	0	0	0	1	0	0	SHROOM1	shroom family member 1
hsa-miR-557	0	0	0	1	0	0	MFSD12	major facilitator superfamily domain containing 12
hsa-miR-557	0	0	1	1	1	1	NSD1	nuclear receptor binding SET domain protein 1
hsa-miR-557	0	0	0	1	0	0	ZGPAT	zinc finger, CCCH-type with G patch domain
hsa-miR-557	0	0	1	1	1	1	MED24	mediator complex subunit 24
hsa-miR-557	0	0	0	1	1	1	FABP7	fatty acid binding protein 7, brain
hsa-miR-557	1	0	1	1	1	1	ATN1	atrophin 1
hsa-miR-557	1	0	1	1	1	1	TBC1D9B	TBC1 domain family, member 9B (with GRAM domain)
hsa-miR-557	0	0	1	1	1	1	ARG1	arginase, liver
hsa-miR-557	1	0	1	1	0	0	ATP2A1	ATPase, Ca++ transporting, cardiac muscle, fast twitch 1
hsa-miR-557	0	0	1	1	0	0	ATRIP	ATR interacting protein
hsa-miR-557	0	0	0	1	0	0	TPSB2	tryptase beta 2 (gene/pseudogene)
hsa-miR-557	0	0	1	1	0	0	MPV17	MpV17 mitochondrial inner membrane protein
hsa-miR-557	0	0	0	1	0	0	IFNA10	interferon, alpha 10
hsa-miR-557	0	0	0	1	0	0	C7orf50	chromosome 7 open reading frame 50
hsa-miR-557	1	0	0	1	1	1	C14orf102	chromosome 14 open reading frame 102
hsa-miR-557	0	0	1	1	1	1	SYNE2	spectrin repeat containing, nuclear envelope 2
hsa-miR-557	1	0	1	1	1	1	ZNF329	zinc finger protein 329
hsa-miR-557	1	0	0	1	1	1	STMN3	stathmin-like 3
hsa-miR-557	0	0	1	1	1	1	ZNF100	zinc finger protein 100
hsa-miR-557	0	0	0	1	1	1	SUSD2	sushi domain containing 2
hsa-miR-557	0	0	1	1	1	1	RAD52	RAD52 homolog (S. cerevisiae)
hsa-miR-557	1	0	1	1	1	1	HELZ	helicase with zinc finger
hsa-miR-557	0	0	0	1	1	1	UCKL1	uridine-cytidine kinase 1-like 1
hsa-miR-557	0	0	1	1	1	1	GGPS1	geranylgeranyl diphosphate synthase 1
hsa-miR-557	1	0	1	1	1	1	SGMS2	sphingomyelin synthase 2
hsa-miR-557	1	0	1	1	1	1	FGFR2	fibroblast growth factor receptor 2
hsa-miR-557	0	0	0	1	0	0	OR6K2	olfactory receptor, family 6, subfamily K, member 2
hsa-miR-557	0	0	1	1	0	0	CCT8L2	chaperonin containing TCP1, subunit 8 (theta)-like 2
hsa-miR-557	0	0	1	1	0	0	FAM48A	family with sequence similarity 48, member A
hsa-miR-557	0	0	0	1	0	0	DISP1	dispatched homolog 1 (Drosophila)
hsa-miR-557	0	0	1	1	0	0	STYXL1	serine/threonine/tyrosine interacting-like 1
hsa-miR-557	0	0	1	1	1	1	SLC12A8	solute carrier family 12 (potassium/chloride transporters), member 8
hsa-miR-557	0	0	1	1	1	1	POTEG	POTE ankyrin domain family, member G
hsa-miR-557	0	0	1	1	0	0	RNF208	ring finger protein 208
hsa-miR-557	0	0	1	1	0	0	SLC34A3	solute carrier family 34 (sodium phosphate), member 3
hsa-miR-557	0	0	1	1	1	1	PTPLA	protein tyrosine phosphatase-like (proline instead of catalytic arginine), member A
hsa-miR-557	1	0	1	1	1	1	GPX7	glutathione peroxidase 7
hsa-miR-557	1	0	1	1	1	1	KIAA0922	KIAA0922
hsa-miR-557	0	0	0	1	0	0	PPP2R3B	protein phosphatase 2, regulatory subunit B'', beta
hsa-miR-557	0	0	0	1	0	0	MUC2	mucin 2, oligomeric mucus/gel-forming
hsa-miR-557	0	0	0	1	0	0	WDR88	WD repeat domain 88
hsa-miR-557	0	0	0	1	1	1	GPR161	G protein-coupled receptor 161
hsa-miR-557	0	0	1	1	0	0	TGFB1I1	transforming growth factor beta 1 induced transcript 1
hsa-miR-557	1	0	1	1	0	0	PLXNB3	plexin B3
hsa-miR-557	0	0	0	1	0	0	C6orf70	chromosome 6 open reading frame 70
hsa-miR-557	0	0	0	1	1	1	ADCK3	aarF domain containing kinase 3
hsa-miR-557	0	0	0	1	0	0	G0S2	G0/G1switch 2
hsa-miR-557	0	0	0	1	1	1	LAX1	lymphocyte transmembrane adaptor 1
hsa-miR-557	1	0	1	1	1	1	B3GALT2	UDP-Gal:betaGlcNAc beta 1,3-galactosyltransferase, polypeptide 2
hsa-miR-557	1	0	1	1	1	1	ADAT2	adenosine deaminase, tRNA-specific 2
hsa-miR-557	0	0	1	1	1	1	MPZL1	myelin protein zero-like 1
hsa-miR-557	1	0	1	1	1	1	MGST3	microsomal glutathione S-transferase 3
hsa-miR-557	0	0	1	1	1	1	CD1D	CD1d molecule
hsa-miR-557	1	0	1	1	1	1	ARHGEF11	Rho guanine nucleotide exchange factor (GEF) 11
hsa-miR-557	1	0	1	1	0	0	SH2D2A	SH2 domain containing 2A
hsa-miR-557	0	0	0	1	0	0	TSACC	TSSK6 activating co-chaperone
hsa-miR-557	1	0	1	1	1	1	RFX6	regulatory factor X, 6
hsa-miR-557	0	0	1	1	0	0	KNDC1	kinase non-catalytic C-lobe domain (KIND) containing 1
hsa-miR-557	0	0	1	1	1	1	FYN	FYN oncogene related to SRC, FGR, YES
hsa-miR-557	0	0	1	1	0	0	LELP1	late cornified envelope-like proline-rich 1
hsa-miR-557	0	0	1	1	0	0	MRPS21	mitochondrial ribosomal protein S21
hsa-miR-557	0	0	1	1	0	0	C1orf51	chromosome 1 open reading frame 51
hsa-miR-557	0	0	1	1	1	1	GRK5	G protein-coupled receptor kinase 5
hsa-miR-557	0	0	1	1	1	1	TCF7L2	transcription factor 7-like 2 (T-cell specific, HMG-box)
hsa-miR-557	1	0	1	1	1	1	VTI1A	vesicle transport through interaction with t-SNAREs homolog 1A (yeast)
hsa-miR-557	0	0	0	1	1	1	NT5E	5'-nucleotidase, ecto (CD73)
hsa-miR-557	0	0	1	1	0	0	AKNAD1	AKNA domain containing 1
hsa-miR-557	0	0	1	1	1	1	MRPL43	mitochondrial ribosomal protein L43
hsa-miR-557	0	0	0	1	0	0	PNMA6B	paraneoplastic Ma antigen family member 6B
hsa-miR-557	1	0	1	1	1	1	TMED5	transmembrane emp24 protein transport domain containing 5
hsa-miR-557	1	0	1	1	1	1	MTF2	metal response element binding transcription factor 2
hsa-miR-557	0	0	1	1	0	0	FMR1NB	fragile X mental retardation 1 neighbor
hsa-miR-557	0	0	1	1	0	0	PYROXD2	pyridine nucleotide-disulphide oxidoreductase domain 2
hsa-miR-557	0	0	1	1	1	1	GPR110	G protein-coupled receptor 110
hsa-miR-557	0	0	0	1	0	0	CYP2C19	cytochrome P450, family 2, subfamily C, polypeptide 19
hsa-miR-557	0	0	1	1	1	1	LGI1	leucine-rich, glioma inactivated 1
hsa-miR-557	0	0	0	1	1	1	PDE6C	phosphodiesterase 6C, cGMP-specific, cone, alpha prime
hsa-miR-557	0	0	1	1	0	0	PTGDS	prostaglandin D2 synthase 21kDa (brain)
hsa-miR-557	0	0	1	1	0	0	PMPCA	peptidase (mitochondrial processing) alpha
hsa-miR-557	0	0	1	1	0	0	MRPS2	mitochondrial ribosomal protein S2
hsa-miR-557	0	0	0	1	0	0	SARDH	sarcosine dehydrogenase
hsa-miR-557	0	0	0	1	0	0	SURF2	surfeit 2
hsa-miR-557	0	0	0	1	0	0	C10orf99	chromosome 10 open reading frame 99
hsa-miR-557	0	0	0	1	1	1	DDX31	DEAD (Asp-Glu-Ala-Asp) box polypeptide 31
hsa-miR-557	1	0	1	1	1	1	MED27	mediator complex subunit 27
hsa-miR-557	0	0	1	1	1	1	TMEM53	transmembrane protein 53
hsa-miR-557	0	0	0	1	1	1	ZNF684	zinc finger protein 684
hsa-miR-557	0	0	0	1	0	0	ZNF642	zinc finger protein 642
hsa-miR-557	0	0	0	1	0	0	WDR34	WD repeat domain 34
hsa-miR-557	1	0	1	1	1	1	MYCL1	v-myc myelocytomatosis viral oncogene homolog 1, lung carcinoma derived (avian)
hsa-miR-557	0	0	1	1	1	1	CNPY3	canopy 3 homolog (zebrafish)
hsa-miR-557	0	0	0	1	0	0	CENPI	centromere protein I
hsa-miR-557	0	0	1	1	1	1	MRPS16	mitochondrial ribosomal protein S16
hsa-miR-557	0	0	0	1	1	1	NOX1	NADPH oxidase 1
hsa-miR-557	0	0	1	1	1	1	TAF8	TAF8 RNA polymerase II, TATA box binding protein (TBP)-associated factor, 43kDa
hsa-miR-557	0	0	0	1	1	1	USP49	ubiquitin specific peptidase 49
hsa-miR-557	0	0	1	1	0	0	NCR2	natural cytotoxicity triggering receptor 2
hsa-miR-557	0	0	1	1	0	0	TREML1	triggering receptor expressed on myeloid cells-like 1
hsa-miR-557	0	0	1	1	1	1	L3MBTL1	l(3)mbt-like 1 (Drosophila)
hsa-miR-557	0	0	0	1	0	0	LOC100127947	uncharacterized LOC100127947
hsa-miR-557	0	0	1	1	1	1	SLC29A3	solute carrier family 29 (nucleoside transporters), member 3
hsa-miR-557	0	0	1	1	1	1	SCLY	selenocysteine lyase
hsa-miR-557	0	0	1	1	1	1	DMRTC1	DMRT-like family C1
hsa-miR-557	0	0	0	1	0	0	WDR38	WD repeat domain 38
hsa-miR-557	1	0	0	1	0	0	FAM167B	family with sequence similarity 167, member B
hsa-miR-557	1	0	0	1	1	1	CNTRL	centriolin
hsa-miR-557	0	0	1	1	0	0	SCAND1	SCAN domain containing 1
hsa-miR-557	0	0	0	1	0	0	SLC18A3	solute carrier family 18 (vesicular acetylcholine), member 3
hsa-miR-557	0	0	1	1	1	1	MNF1	mitochondrial nucleoid factor 1
hsa-miR-557	0	0	1	1	0	0	GPRIN2	G protein regulated inducer of neurite outgrowth 2
hsa-miR-557	0	0	1	1	1	1	ZNF483	zinc finger protein 483
hsa-miR-557	0	0	0	1	0	0	OR2K2	olfactory receptor, family 2, subfamily K, member 2
hsa-miR-557	1	0	1	1	1	1	EDA	ectodysplasin A
hsa-miR-557	0	0	1	1	0	0	ASAP3	ArfGAP with SH3 domain, ankyrin repeat and PH domain 3
hsa-miR-557	0	0	1	1	1	1	BRD2	bromodomain containing 2
hsa-miR-557	0	0	1	1	1	1	FAM22G	family with sequence similarity 22, member G
hsa-miR-557	0	0	1	1	0	0	FBP2	fructose-1,6-bisphosphatase 2
hsa-miR-557	1	0	1	1	1	1	SCN2A	sodium channel, voltage-gated, type II, alpha subunit
hsa-miR-557	0	0	0	1	0	0	ZBTB17	zinc finger and BTB domain containing 17
hsa-miR-557	1	0	1	1	1	1	DNAJC16	DnaJ (Hsp40) homolog, subfamily C, member 16
hsa-miR-557	0	0	0	1	1	1	LY6G5B	lymphocyte antigen 6 complex, locus G5B
hsa-miR-557	0	0	1	1	0	0	CSNK2B	casein kinase 2, beta polypeptide
hsa-miR-557	0	0	1	1	0	0	PDSS1	prenyl (decaprenyl) diphosphate synthase, subunit 1
hsa-miR-557	0	0	1	1	1	1	AADACL4	arylacetamide deacetylase-like 4
hsa-miR-557	0	0	1	1	1	1	C6orf136	chromosome 6 open reading frame 136
hsa-miR-557	0	0	0	1	1	1	ABHD12	abhydrolase domain containing 12
hsa-miR-557	0	0	1	1	1	1	COMMD3	COMM domain containing 3
hsa-miR-557	0	0	1	1	1	1	HLA-G	major histocompatibility complex, class I, G
hsa-miR-557	0	0	1	1	1	1	CNGA3	cyclic nucleotide gated channel alpha 3
hsa-miR-557	0	0	0	1	0	0	GPR157	G protein-coupled receptor 157
hsa-miR-557	0	0	0	1	1	1	PYCRL	pyrroline-5-carboxylate reductase-like
hsa-miR-557	0	0	0	1	0	0	IGFL4	IGF-like family member 4
hsa-miR-557	0	0	0	1	0	0	ASB10	ankyrin repeat and SOCS box containing 10
hsa-miR-557	1	0	1	1	1	1	HTR4	5-hydroxytryptamine (serotonin) receptor 4, G protein-coupled
hsa-miR-557	0	0	1	1	0	0	BEST1	bestrophin 1
hsa-miR-557	0	0	1	1	0	0	KCNAB2	potassium voltage-gated channel, shaker-related subfamily, beta member 2
hsa-miR-557	0	0	1	1	0	0	MORN1	MORN repeat containing 1
hsa-miR-557	1	0	1	1	1	1	CCL7	chemokine (C-C motif) ligand 7
hsa-miR-557	0	0	1	1	1	1	C2orf91	chromosome 2 open reading frame 91
hsa-miR-557	1	0	1	1	1	1	HAO1	hydroxyacid oxidase (glycolate oxidase) 1
hsa-miR-557	0	0	0	1	0	0	GALT	galactose-1-phosphate uridylyltransferase
hsa-miR-557	0	0	0	1	0	0	ARID3C	AT rich interactive domain 3C (BRIGHT-like)
hsa-miR-557	0	0	1	1	1	1	NUDT5	nudix (nucleoside diphosphate linked moiety X)-type motif 5
hsa-miR-557	1	0	1	1	1	1	ATXN1	ataxin 1
hsa-miR-557	0	0	0	1	0	0	TNFRSF4	tumor necrosis factor receptor superfamily, member 4
hsa-miR-557	0	0	0	1	0	0	DNAJC2	DnaJ (Hsp40) homolog, subfamily C, member 2
hsa-miR-557	0	0	0	1	0	0	ADRA1D	adrenoceptor alpha 1D
hsa-miR-557	0	0	1	1	1	1	GCM2	glial cells missing homolog 2 (Drosophila)
hsa-miR-557	0	0	1	1	1	1	APTX	aprataxin
hsa-miR-557	1	0	1	1	1	1	MAB21L1	mab-21-like 1 (C. elegans)
hsa-miR-557	0	0	1	1	0	0	NABP2	nucleic acid binding protein 2
hsa-miR-557	0	0	0	1	1	1	IFNA8	interferon, alpha 8
hsa-miR-557	0	0	0	1	0	0	IFNA17	interferon, alpha 17
hsa-miR-557	0	0	0	1	0	0	IFNA16	interferon, alpha 16
hsa-miR-557	0	0	0	1	0	0	OR51B6	olfactory receptor, family 51, subfamily B, member 6
hsa-miR-557	0	0	0	1	0	0	IFNA4	interferon, alpha 4
hsa-miR-557	0	0	1	1	1	1	IFNA21	interferon, alpha 21
hsa-miR-557	0	0	0	1	0	0	FBXW9	F-box and WD repeat domain containing 9
hsa-miR-557	0	0	1	1	1	1	BPHL	biphenyl hydrolase-like (serine hydrolase)
hsa-miR-557	0	0	0	1	1	1	TMPRSS3	transmembrane protease, serine 3
hsa-miR-557	0	0	1	1	1	1	ZNF768	zinc finger protein 768
hsa-miR-557	0	0	1	1	1	1	TUBAL3	tubulin, alpha-like 3
hsa-miR-557	0	0	0	1	0	0	HADHA	hydroxyacyl-CoA dehydrogenase/3-ketoacyl-CoA thiolase/enoyl-CoA hydratase (trifunctional protein), alpha subunit
hsa-miR-557	0	0	0	1	1	1	GMDS	GDP-mannose 4,6-dehydratase
hsa-miR-557	0	0	1	1	1	1	ALB	albumin
hsa-miR-557	0	0	1	1	0	0	MUC16	mucin 16, cell surface associated
hsa-miR-557	0	0	1	1	1	1	C2orf43	chromosome 2 open reading frame 43
hsa-miR-557	0	0	1	1	0	0	SLC25A6	solute carrier family 25 (mitochondrial carrier; adenine nucleotide translocator), member 6
hsa-miR-557	0	0	1	1	0	0	FAM22D	family with sequence similarity 22, member D
hsa-miR-557	0	0	0	1	0	0	FAM22A	family with sequence similarity 22, member A
hsa-miR-557	0	0	0	1	1	1	GART	phosphoribosylglycinamide formyltransferase, phosphoribosylglycinamide synthetase, phosphoribosylaminoimidazole synthetase
hsa-miR-557	0	0	0	1	0	0	CDH18	cadherin 18, type 2
hsa-miR-557	0	0	0	1	0	0	MRPL36	mitochondrial ribosomal protein L36
hsa-miR-557	0	0	0	1	1	1	RBMY1E	RNA binding motif protein, Y-linked, family 1, member E
hsa-miR-557	0	0	0	1	1	1	RBMY1D	RNA binding motif protein, Y-linked, family 1, member D
hsa-miR-557	0	0	1	1	1	1	RBMY1B	RNA binding motif protein, Y-linked, family 1, member B
hsa-miR-557	0	0	1	1	1	1	RBMY1A1	RNA binding motif protein, Y-linked, family 1, member A1
hsa-miR-557	0	0	0	1	0	0	ZDHHC11B	zinc finger, DHHC-type containing 11B
hsa-miR-557	1	0	1	1	1	1	ZIC4	Zic family member 4
hsa-miR-557	1	0	0	1	0	0	UROC1	urocanate hydratase 1
hsa-miR-557	0	0	0	1	1	1	LOC401052	uncharacterized LOC401052
hsa-miR-557	1	0	1	1	1	1	ADAMTSL1	ADAMTS-like 1
hsa-miR-557	0	0	1	1	1	1	PRNP	prion protein
hsa-miR-557	0	0	1	1	1	1	IL1R1	interleukin 1 receptor, type I
hsa-miR-557	0	0	1	0	1	1	OXTR	oxytocin receptor
hsa-miR-557	0	0	0	1	1	1	NDUFV3	NADH dehydrogenase (ubiquinone) flavoprotein 3, 10kDa
hsa-miR-557	0	0	0	0	1	1	LCN10	lipocalin 10
hsa-miR-557	1	0	1	1	1	1	MOG	myelin oligodendrocyte glycoprotein
hsa-miR-557	1	0	1	1	1	1	STEAP3	STEAP family member 3, metalloreductase
hsa-miR-557	0	0	1	1	1	1	ISX	intestine-specific homeobox
hsa-miR-557	1	0	1	0	1	1	PM20D2	peptidase M20 domain containing 2
hsa-miR-557	1	0	1	1	1	1	ABI1	abl-interactor 1
hsa-miR-557	1	0	1	0	1	1	NHLRC3	NHL repeat containing 3
hsa-miR-557	0	0	1	1	1	1	CPLX3	complexin 3
hsa-miR-557	1	0	1	1	1	1	AGAP1	ArfGAP with GTPase domain, ankyrin repeat and PH domain 1
hsa-miR-557	1	0	1	1	1	1	NSG1	neuron specific gene family member 1
hsa-miR-557	1	0	1	0	1	1	CEP44	centrosomal protein 44kDa
hsa-miR-557	1	0	1	1	1	1	C2orf88	chromosome 2 open reading frame 88
hsa-miR-557	1	0	1	1	1	1	NSL1	NSL1, MIND kinetochore complex component, homolog (S. cerevisiae)
hsa-miR-557	0	0	1	1	1	1	SULT1C2	sulfotransferase family, cytosolic, 1C, member 2
hsa-miR-557	1	0	1	0	1	1	UNC13A	unc-13 homolog A (C. elegans)
hsa-miR-557	1	0	1	1	1	1	DMPK	dystrophia myotonica-protein kinase
hsa-miR-557	1	0	1	1	1	1	CASP7	caspase 7, apoptosis-related cysteine peptidase
hsa-miR-557	1	0	1	1	1	1	IFIT2	interferon-induced protein with tetratricopeptide repeats 2
hsa-miR-557	0	0	0	0	1	1	C1R	complement component 1, r subcomponent
hsa-miR-557	1	0	1	1	1	1	FGF7	fibroblast growth factor 7
hsa-miR-557	0	0	1	1	1	1	HPCA	hippocalcin
hsa-miR-557	0	0	1	1	1	1	LUM	lumican
hsa-miR-557	1	0	0	0	1	1	MATN3	matrilin 3
hsa-miR-557	1	0	1	1	1	1	NKX2-2	NK2 homeobox 2
hsa-miR-557	0	0	1	1	1	1	PSMD12	proteasome (prosome, macropain) 26S subunit, non-ATPase, 12
hsa-miR-557	1	0	0	1	1	1	ADAM17	ADAM metallopeptidase domain 17
hsa-miR-557	0	0	0	1	1	1	TXK	TXK tyrosine kinase
hsa-miR-557	0	0	1	1	1	1	ZNF141	zinc finger protein 141
hsa-miR-557	1	0	1	1	1	1	ZNF200	zinc finger protein 200
hsa-miR-557	0	0	1	1	1	1	FPGT	fucose-1-phosphate guanylyltransferase
hsa-miR-557	0	0	1	1	1	1	PRC1	protein regulator of cytokinesis 1
hsa-miR-557	1	0	1	1	1	1	EFNB2	ephrin-B2
hsa-miR-557	1	0	1	1	1	1	MYO9B	myosin IXB
hsa-miR-557	0	0	1	1	1	1	TRIP13	thyroid hormone receptor interactor 13
hsa-miR-557	1	0	1	1	1	1	DFFB	DNA fragmentation factor, 40kDa, beta polypeptide (caspase-activated DNase)
hsa-miR-557	1	0	1	1	1	1	LRP2	low density lipoprotein receptor-related protein 2
hsa-miR-557	1	0	1	1	1	1	EDIL3	EGF-like repeats and discoidin I-like domains 3
hsa-miR-557	1	0	1	1	1	1	NFATC1	nuclear factor of activated T-cells, cytoplasmic, calcineurin-dependent 1
hsa-miR-557	0	0	1	1	1	1	PENK	proenkephalin
hsa-miR-557	0	0	1	1	1	1	FST	follistatin
hsa-miR-557	0	0	0	1	1	1	CXCR6	chemokine (C-X-C motif) receptor 6
hsa-miR-557	1	0	1	1	1	1	PDE10A	phosphodiesterase 10A
hsa-miR-557	1	0	1	1	1	1	SNTB2	syntrophin, beta 2 (dystrophin-associated protein A1, 59kDa, basic component 2)
hsa-miR-557	0	0	1	1	1	1	AP3M2	adaptor-related protein complex 3, mu 2 subunit
hsa-miR-557	0	0	1	1	1	1	MLLT11	myeloid/lymphoid or mixed-lineage leukemia (trithorax homolog, Drosophila); translocated to, 11
hsa-miR-557	0	0	0	1	1	1	SDS	serine dehydratase
hsa-miR-557	1	0	1	0	1	1	CLDN12	claudin 12
hsa-miR-557	0	0	0	1	1	1	HACL1	2-hydroxyacyl-CoA lyase 1
hsa-miR-557	1	0	1	1	1	1	PRDM4	PR domain containing 4
hsa-miR-557	1	0	1	1	1	1	STAT5B	signal transducer and activator of transcription 5B
hsa-miR-557	1	0	1	1	1	1	LAMP2	lysosomal-associated membrane protein 2
hsa-miR-557	0	0	1	1	1	1	C11orf54	chromosome 11 open reading frame 54
hsa-miR-557	0	0	1	0	1	1	KSR1	kinase suppressor of ras 1
hsa-miR-557	1	0	1	1	1	1	PTPN18	protein tyrosine phosphatase, non-receptor type 18 (brain-derived)
hsa-miR-557	1	0	1	0	1	1	KIAA0232	KIAA0232
hsa-miR-557	0	0	1	1	1	1	LCMT2	leucine carboxyl methyltransferase 2
hsa-miR-557	1	0	1	1	1	1	RUFY3	RUN and FYVE domain containing 3
hsa-miR-557	1	0	1	1	1	1	KIF1B	kinesin family member 1B
hsa-miR-557	0	0	1	1	1	1	SOSTDC1	sclerostin domain containing 1
hsa-miR-557	0	0	1	1	1	1	NMD3	NMD3 homolog (S. cerevisiae)
hsa-miR-557	1	0	1	1	1	1	ZDHHC3	zinc finger, DHHC-type containing 3
hsa-miR-557	0	0	1	0	1	1	GDE1	glycerophosphodiester phosphodiesterase 1
hsa-miR-557	0	0	1	1	1	1	MRPS10	mitochondrial ribosomal protein S10
hsa-miR-557	0	0	0	0	1	1	SMU1	smu-1 suppressor of mec-8 and unc-52 homolog (C. elegans)
hsa-miR-557	0	0	1	0	1	1	SLC6A20	solute carrier family 6 (proline IMINO transporter), member 20
hsa-miR-557	1	0	1	1	1	1	NCEH1	neutral cholesterol ester hydrolase 1
hsa-miR-557	1	0	1	1	1	1	ALS2	amyotrophic lateral sclerosis 2 (juvenile)
hsa-miR-557	1	0	1	1	1	1	RHOU	ras homolog family member U
hsa-miR-557	1	0	1	0	1	1	TSPYL4	TSPY-like 4
hsa-miR-557	1	0	0	0	1	1	GZF1	GDNF-inducible zinc finger protein 1
hsa-miR-557	1	0	1	0	1	1	USP46	ubiquitin specific peptidase 46
hsa-miR-557	1	0	1	1	1	1	UNKL	unkempt homolog (Drosophila)-like
hsa-miR-557	0	0	1	1	1	1	KIAA0319L	KIAA0319-like
hsa-miR-557	0	0	1	1	1	1	DSN1	DSN1, MIND kinetochore complex component, homolog (S. cerevisiae)
hsa-miR-557	1	0	1	1	1	1	NDFIP1	Nedd4 family interacting protein 1
hsa-miR-557	1	0	1	1	1	1	BHLHE41	basic helix-loop-helix family, member e41
hsa-miR-557	0	0	1	1	1	1	RNF135	ring finger protein 135
hsa-miR-557	1	0	1	1	1	1	TTYH2	tweety homolog 2 (Drosophila)
hsa-miR-557	0	0	1	0	1	1	CBR4	carbonyl reductase 4
hsa-miR-557	0	0	1	0	1	1	PNPT1	polyribonucleotide nucleotidyltransferase 1
hsa-miR-557	0	0	0	1	1	1	OBSCN	obscurin, cytoskeletal calmodulin and titin-interacting RhoGEF
hsa-miR-557	0	0	1	1	1	1	OLFM3	olfactomedin 3
hsa-miR-557	0	0	1	1	1	1	DNAJB6	DnaJ (Hsp40) homolog, subfamily B, member 6
hsa-miR-557	0	0	1	0	1	1	SLC36A1	solute carrier family 36 (proton/amino acid symporter), member 1
hsa-miR-557	0	0	1	0	1	1	MYOZ3	myozenin 3
hsa-miR-557	0	0	1	1	1	1	ZNF431	zinc finger protein 431
hsa-miR-557	1	0	1	0	1	1	NUS1	nuclear undecaprenyl pyrophosphate synthase 1 homolog (S. cerevisiae)
hsa-miR-557	0	0	1	0	1	1	THAP6	THAP domain containing 6
hsa-miR-557	0	0	1	1	1	1	SPEF2	sperm flagellar 2
hsa-miR-557	0	0	0	1	1	1	MPZL2	myelin protein zero-like 2
hsa-miR-557	0	0	1	1	1	1	ZNF572	zinc finger protein 572
hsa-miR-557	0	0	1	1	1	1	MS4A6A	membrane-spanning 4-domains, subfamily A, member 6A
hsa-miR-557	0	0	1	0	1	1	KCTD7	potassium channel tetramerisation domain containing 7
hsa-miR-557	1	0	1	1	1	1	IQCK	IQ motif containing K
hsa-miR-557	1	0	1	0	1	1	ZNF776	zinc finger protein 776
hsa-miR-557	1	0	0	1	1	1	PRR18	proline rich 18
hsa-miR-557	0	0	1	1	1	1	C1orf88	chromosome 1 open reading frame 88
hsa-miR-557	0	0	0	0	1	1	BAGE4	B melanoma antigen family, member 4
hsa-miR-557	0	0	1	0	1	1	BAGE5	B melanoma antigen family, member 5
hsa-miR-557	1	0	1	0	1	1	LONRF2	LON peptidase N-terminal domain and ring finger 2
hsa-miR-557	0	0	0	1	1	1	NUP43	nucleoporin 43kDa
hsa-miR-557	0	0	1	0	1	1	XKR5	XK, Kell blood group complex subunit-related family, member 5
hsa-miR-557	0	0	1	0	1	1	C1orf220	chromosome 1 open reading frame 220
hsa-miR-557	0	0	1	1	1	1	LYSMD1	LysM, putative peptidoglycan-binding, domain containing 1
hsa-miR-557	0	0	0	0	1	1	LOC727909	Golgin subfamily A member 8-like protein 2-like
hsa-miR-557	0	0	0	0	1	1	LOC728047	golgin subfamily A member 8-like protein 2-like
hsa-miR-557	0	0	0	0	1	1	LOC283688	uncharacterized LOC283688
hsa-miR-557	0	0	0	0	1	1	LOC729086	vesicular, overexpressed in cancer, prosurvival protein 1 pseudogene
hsa-miR-557	0	0	0	0	1	1	LOC400756	uncharacterized LOC400756
hsa-miR-557	0	0	0	0	1	1	KIAA1239	KIAA1239
hsa-miR-557	0	0	0	0	1	1	C2orf74	chromosome 2 open reading frame 74
hsa-miR-557	0	0	1	0	1	1	C14orf23	chromosome 14 open reading frame 23
hsa-miR-557	0	0	1	0	1	1	FLJ22447	uncharacterized LOC400221
hsa-miR-557	0	0	0	0	1	1	LOC643037	uncharacterized LOC643037
hsa-miR-557	0	0	0	0	1	1	LOC643699	golgin subfamily A member 8-like
hsa-miR-557	0	0	0	0	1	1	POTEJ	POTE ankyrin domain family, member J
hsa-miR-557	0	0	0	0	1	1	RPS26P8	ribosomal protein S26 pseudogene 8
hsa-miR-557	0	0	0	1	1	1	C11orf95	chromosome 11 open reading frame 95
