# Supplementary material for: Profiling of Selected MicroRNAs in Proliferative Eutopic Endometrium of Women with Ovarian Endometriosis
Source: Biomed Res Int. 2015 Aug 20;2015:760698. doi: 10.1155/2015/760698 (PMC4558423; doi:10.1155/2015/760698)
Supplement: Supplementary file 1 — Table I: The names of miRNAs significantly differentially expressed between eutopic endometrium of patients with endometriosis vs eutopic endometrium of patients without endometriosis. Table II: The associations between miRNA and mRNA, which presents detailed results of the search of six major databases i.e targetscan, tarbase, miranda, mirbase, mirtarget2 and pictar. [file 760698.f1.zip › 760698.f1/Table II/hsa-miR-558.tsv]

miR	targetscan	tarbase	miranda	mirbase	mirtarget2	pictar	GeneSymbol	GeneName
hsa-miR-558	1	0	1	1	0	0	SRCAP	Snf2-related CREBBP activator protein
hsa-miR-558	1	0	1	0	1	1	KIAA0355	KIAA0355
hsa-miR-558	1	0	1	1	1	1	MCF2L	MCF.2 cell line derived transforming sequence-like
hsa-miR-558	1	0	1	1	1	1	PRUNE2	prune homolog 2 (Drosophila)
hsa-miR-558	1	0	1	1	1	1	ABCC5	ATP-binding cassette, sub-family C (CFTR/MRP), member 5
hsa-miR-558	1	0	1	0	1	1	PTPRT	protein tyrosine phosphatase, receptor type, T
hsa-miR-558	0	0	1	1	1	1	C2CD2L	C2CD2-like
hsa-miR-558	0	0	1	0	1	1	KLHL21	kelch-like 21 (Drosophila)
hsa-miR-558	0	0	1	1	0	0	ZNF862	zinc finger protein 862
hsa-miR-558	1	0	1	1	1	1	GREB1	growth regulation by estrogen in breast cancer 1
hsa-miR-558	1	0	1	1	1	1	HIPK1	homeodomain interacting protein kinase 1
hsa-miR-558	0	0	1	1	1	1	PHLDB1	pleckstrin homology-like domain, family B, member 1
hsa-miR-558	1	0	1	0	1	1	LPHN3	latrophilin 3
hsa-miR-558	1	0	1	1	1	1	LPHN2	latrophilin 2
hsa-miR-558	1	0	1	1	1	1	SEMA4F	sema domain, immunoglobulin domain (Ig), transmembrane domain (TM) and short cytoplasmic domain, (semaphorin) 4F
hsa-miR-558	1	0	1	1	1	1	CIT	citron (rho-interacting, serine/threonine kinase 21)
hsa-miR-558	1	0	1	1	1	1	C11orf9	chromosome 11 open reading frame 9
hsa-miR-558	1	0	1	1	1	1	RPGRIP1L	RPGRIP1-like
hsa-miR-558	1	0	1	0	1	1	SRGAP3	SLIT-ROBO Rho GTPase activating protein 3
hsa-miR-558	0	0	1	1	1	1	KLHL13	kelch-like 13 (Drosophila)
hsa-miR-558	1	0	1	1	1	1	PCDH19	protocadherin 19
hsa-miR-558	1	0	1	1	1	1	ATP2C1	ATPase, Ca++ transporting, type 2C, member 1
hsa-miR-558	1	0	1	1	0	0	CARNS1	carnosine synthase 1
hsa-miR-558	0	0	1	0	0	0	NYAP2	neuronal tyrosine-phosphorylated phosphoinositide-3-kinase adaptor 2
hsa-miR-558	1	0	1	1	1	1	FRAS1	Fraser syndrome 1
hsa-miR-558	0	0	1	0	0	0	KRT19P2	keratin 19 pseudogene 2
hsa-miR-558	1	0	1	0	0	0	TANC2	tetratricopeptide repeat, ankyrin repeat and coiled-coil containing 2
hsa-miR-558	0	0	1	1	0	0	PFDN5	prefoldin subunit 5
hsa-miR-558	1	0	1	0	0	0	ZBTB34	zinc finger and BTB domain containing 34
hsa-miR-558	0	0	1	0	1	1	RASSF8	Ras association (RalGDS/AF-6) domain family (N-terminal) member 8
hsa-miR-558	0	0	1	1	0	0	FAM22D	family with sequence similarity 22, member D
hsa-miR-558	0	0	1	1	0	0	ERAP2	endoplasmic reticulum aminopeptidase 2
hsa-miR-558	1	0	1	1	1	1	LTBP1	latent transforming growth factor beta binding protein 1
hsa-miR-558	0	0	1	0	1	1	ATF6	activating transcription factor 6
hsa-miR-558	1	0	1	1	1	1	PLEKHH3	pleckstrin homology domain containing, family H (with MyTH4 domain) member 3
hsa-miR-558	1	0	1	1	1	1	PML	promyelocytic leukemia
hsa-miR-558	1	0	1	1	1	1	SLC8A1	solute carrier family 8 (sodium/calcium exchanger), member 1
hsa-miR-558	1	0	1	1	1	1	DTNA	dystrobrevin, alpha
hsa-miR-558	1	0	1	0	1	1	PLAG1	pleiomorphic adenoma gene 1
hsa-miR-558	1	0	1	0	1	1	MAML1	mastermind-like 1 (Drosophila)
hsa-miR-558	0	0	1	1	1	1	DGKI	diacylglycerol kinase, iota
hsa-miR-558	1	0	1	0	1	1	DPYSL2	dihydropyrimidinase-like 2
hsa-miR-558	1	0	1	0	1	1	ETV1	ets variant 1
hsa-miR-558	1	0	1	1	1	1	DMTF1	cyclin D binding myb-like transcription factor 1
hsa-miR-558	0	0	1	0	1	1	NPY1R	neuropeptide Y receptor Y1
hsa-miR-558	0	0	1	1	1	1	DGKE	diacylglycerol kinase, epsilon 64kDa
hsa-miR-558	1	0	1	1	1	1	EPHA5	EPH receptor A5
hsa-miR-558	1	0	1	1	1	1	SATB2	SATB homeobox 2
hsa-miR-558	0	0	1	1	1	1	GTF2IRD1	GTF2I repeat domain containing 1
hsa-miR-558	1	0	1	1	1	1	ANK1	ankyrin 1, erythrocytic
hsa-miR-558	0	0	1	1	0	0	IFT27	intraflagellar transport 27 homolog (Chlamydomonas)
hsa-miR-558	0	0	1	1	0	0	EIF2B4	eukaryotic translation initiation factor 2B, subunit 4 delta, 67kDa
hsa-miR-558	1	0	1	1	1	1	GIT1	G protein-coupled receptor kinase interacting ArfGAP 1
hsa-miR-558	1	0	1	0	1	1	TBL1X	transducin (beta)-like 1X-linked
hsa-miR-558	0	0	1	1	0	0	MCM5	minichromosome maintenance complex component 5
hsa-miR-558	1	0	1	1	1	1	MLLT10	myeloid/lymphoid or mixed-lineage leukemia (trithorax homolog, Drosophila); translocated to, 10
hsa-miR-558	1	0	1	1	0	0	ARRB2	arrestin, beta 2
hsa-miR-558	1	0	1	1	1	1	HMGA2	high mobility group AT-hook 2
hsa-miR-558	0	0	1	1	0	0	TRIM27	tripartite motif containing 27
hsa-miR-558	0	0	1	1	1	1	PLD1	phospholipase D1, phosphatidylcholine-specific
hsa-miR-558	1	0	1	0	1	1	PDE7B	phosphodiesterase 7B
hsa-miR-558	0	0	1	1	1	1	CD55	CD55 molecule, decay accelerating factor for complement (Cromer blood group)
hsa-miR-558	0	0	1	0	0	0	MIAT	myocardial infarction associated transcript (non-protein coding)
hsa-miR-558	1	0	1	1	1	1	TTC39A	tetratricopeptide repeat domain 39A
hsa-miR-558	0	0	1	1	1	1	MFSD11	major facilitator superfamily domain containing 11
hsa-miR-558	0	0	1	1	1	1	SESN1	sestrin 1
hsa-miR-558	0	0	1	1	1	1	SLIT2	slit homolog 2 (Drosophila)
hsa-miR-558	1	0	1	1	1	1	CBFA2T2	core-binding factor, runt domain, alpha subunit 2; translocated to, 2
hsa-miR-558	1	0	1	1	0	0	ASPHD1	aspartate beta-hydroxylase domain containing 1
hsa-miR-558	1	0	1	1	1	1	TP63	tumor protein p63
hsa-miR-558	1	0	1	1	1	1	ZNF236	zinc finger protein 236
hsa-miR-558	0	0	1	1	1	1	DMRT2	doublesex and mab-3 related transcription factor 2
hsa-miR-558	0	0	1	1	0	0	ANGPTL4	angiopoietin-like 4
hsa-miR-558	1	0	1	1	1	1	TLK2	tousled-like kinase 2
hsa-miR-558	1	0	1	1	1	1	C3orf18	chromosome 3 open reading frame 18
hsa-miR-558	0	0	1	1	1	1	CHPT1	choline phosphotransferase 1
hsa-miR-558	1	0	1	1	1	1	SENP7	SUMO1/sentrin specific peptidase 7
hsa-miR-558	1	0	1	1	1	1	TSC22D2	TSC22 domain family, member 2
hsa-miR-558	1	0	1	1	1	1	NXT2	nuclear transport factor 2-like export factor 2
hsa-miR-558	0	0	1	0	0	0	TIGD7	tigger transposable element derived 7
hsa-miR-558	1	0	1	1	1	1	ELF2	E74-like factor 2 (ets domain transcription factor)
hsa-miR-558	0	0	1	0	1	1	PRDM6	PR domain containing 6
hsa-miR-558	0	0	1	1	0	0	KARS	lysyl-tRNA synthetase
hsa-miR-558	1	0	1	1	1	1	DCLRE1B	DNA cross-link repair 1B
hsa-miR-558	0	0	1	1	1	1	MED28	mediator complex subunit 28
hsa-miR-558	0	0	1	1	1	1	WBP2NL	WBP2 N-terminal like
hsa-miR-558	1	0	1	1	1	1	MAGI1	membrane associated guanylate kinase, WW and PDZ domain containing 1
hsa-miR-558	0	0	1	0	0	0	MYO15B	myosin XVB pseudogene
hsa-miR-558	0	0	1	0	0	0	ABCC13	ATP-binding cassette, sub-family C (CFTR/MRP), member 13, pseudogene
hsa-miR-558	0	0	1	1	0	0	BRE	brain and reproductive organ-expressed (TNFRSF1A modulator)
hsa-miR-558	1	0	1	1	0	0	SEPT8	septin 8
hsa-miR-558	1	0	1	1	1	1	SGMS2	sphingomyelin synthase 2
hsa-miR-558	1	0	1	1	0	0	FOXP2	forkhead box P2
hsa-miR-558	1	0	1	1	0	0	POLR2J3	polymerase (RNA) II (DNA directed) polypeptide J3
hsa-miR-558	0	0	1	1	1	1	CARD8	caspase recruitment domain family, member 8
hsa-miR-558	0	0	1	1	1	1	CHODL	chondrolectin
hsa-miR-558	0	0	1	1	1	1	BMP2K	BMP2 inducible kinase
hsa-miR-558	1	0	1	1	1	1	AFF2	AF4/FMR2 family, member 2
hsa-miR-558	1	0	1	1	1	1	FLNC	filamin C, gamma
hsa-miR-558	0	0	1	1	1	1	HIRIP3	HIRA interacting protein 3
hsa-miR-558	0	0	1	0	0	0	CACNA2D3	calcium channel, voltage-dependent, alpha 2/delta subunit 3
hsa-miR-558	0	0	1	0	0	0	LY6G6E	lymphocyte antigen 6 complex, locus G6E (pseudogene)
hsa-miR-558	0	0	1	1	1	1	PDE1A	phosphodiesterase 1A, calmodulin-dependent
hsa-miR-558	1	0	1	1	1	1	EMID2	EMI domain containing 2
hsa-miR-558	0	0	1	0	0	0	TOMM6	translocase of outer mitochondrial membrane 6 homolog (yeast)
hsa-miR-558	1	0	1	1	1	1	SYNM	synemin, intermediate filament protein
hsa-miR-558	0	0	1	1	0	0	IL4I1	interleukin 4 induced 1
hsa-miR-558	0	0	1	1	0	0	OTOP2	otopetrin 2
hsa-miR-558	0	0	1	0	0	0	TUG1	taurine upregulated 1 (non-protein coding)
hsa-miR-558	0	0	1	0	0	0	RNF31	ring finger protein 31
hsa-miR-558	0	0	1	1	1	1	STOX2	storkhead box 2
hsa-miR-558	1	0	1	1	1	1	RIC8B	resistance to inhibitors of cholinesterase 8 homolog B (C. elegans)
hsa-miR-558	0	0	1	1	1	1	ARAP3	ArfGAP with RhoGAP domain, ankyrin repeat and PH domain 3
hsa-miR-558	1	0	1	1	1	1	EIF2C1	eukaryotic translation initiation factor 2C, 1
hsa-miR-558	1	0	1	1	1	1	PTBP3	polypyrimidine tract binding protein 3
hsa-miR-558	1	0	1	1	1	1	KLHDC8B	kelch domain containing 8B
hsa-miR-558	0	0	1	1	0	0	C17orf53	chromosome 17 open reading frame 53
hsa-miR-558	0	0	1	1	1	1	CCPG1	cell cycle progression 1
hsa-miR-558	1	0	1	0	1	1	LIN28A	lin-28 homolog A (C. elegans)
hsa-miR-558	1	0	1	0	0	0	ZNRF3	zinc and ring finger 3
hsa-miR-558	0	0	1	0	0	0	LOC149134	uncharacterized LOC149134
hsa-miR-558	1	0	1	1	0	0	FASTK	Fas-activated serine/threonine kinase
hsa-miR-558	0	0	1	1	1	1	PCBP2	poly(rC) binding protein 2
hsa-miR-558	1	0	1	1	1	1	MARCH8	membrane-associated ring finger (C3HC4) 8, E3 ubiquitin protein ligase
hsa-miR-558	1	0	1	1	1	1	COPS7B	COP9 constitutive photomorphogenic homolog subunit 7B (Arabidopsis)
hsa-miR-558	0	0	1	1	1	1	PDE4DIP	phosphodiesterase 4D interacting protein
hsa-miR-558	1	0	1	1	1	1	ABHD3	abhydrolase domain containing 3
hsa-miR-558	1	0	1	1	1	1	GBF1	golgi brefeldin A resistant guanine nucleotide exchange factor 1
hsa-miR-558	0	0	1	0	1	1	ATXN1L	ataxin 1-like
hsa-miR-558	1	0	1	1	1	1	NAA30	N(alpha)-acetyltransferase 30, NatC catalytic subunit
hsa-miR-558	1	0	1	0	1	1	ZCCHC3	zinc finger, CCHC domain containing 3
hsa-miR-558	0	0	1	0	1	1	HEMK1	HemK methyltransferase family member 1
hsa-miR-558	1	0	1	1	1	1	DCAF8	DDB1 and CUL4 associated factor 8
hsa-miR-558	1	0	1	1	1	1	FOXP1	forkhead box P1
hsa-miR-558	0	0	1	1	0	0	C15orf23	chromosome 15 open reading frame 23
hsa-miR-558	1	0	1	1	1	1	FAM53C	family with sequence similarity 53, member C
hsa-miR-558	0	0	1	1	0	0	RIC8A	resistance to inhibitors of cholinesterase 8 homolog A (C. elegans)
hsa-miR-558	0	0	1	0	0	0	JAKMIP2-AS1	JAKMIP2 antisense RNA 1
hsa-miR-558	1	0	1	0	1	1	CCNL2	cyclin L2
hsa-miR-558	1	0	1	1	1	1	SLC38A1	solute carrier family 38, member 1
hsa-miR-558	0	0	1	0	0	0	KIAA0664L3	KIAA0664-like 3
hsa-miR-558	1	0	1	0	1	1	ELMOD1	ELMO/CED-12 domain containing 1
hsa-miR-558	1	0	1	1	1	1	TPM1	tropomyosin 1 (alpha)
hsa-miR-558	1	0	1	1	1	1	FRMD6	FERM domain containing 6
hsa-miR-558	0	0	1	0	0	0	LOC219688	uncharacterized LOC219688
hsa-miR-558	1	0	1	1	1	1	HERPUD2	HERPUD family member 2
hsa-miR-558	1	0	1	1	1	1	DHX15	DEAH (Asp-Glu-Ala-His) box polypeptide 15
hsa-miR-558	1	0	1	1	1	1	DIXDC1	DIX domain containing 1
hsa-miR-558	1	0	1	1	1	1	LMNA	lamin A/C
hsa-miR-558	0	0	1	0	0	0	RMST	rhabdomyosarcoma 2 associated transcript (non-protein coding)
hsa-miR-558	0	0	1	1	1	1	SEPT5	septin 5
hsa-miR-558	1	0	1	1	1	1	SHISA5	shisa homolog 5 (Xenopus laevis)
hsa-miR-558	0	0	1	0	0	0	LOC284600	uncharacterized LOC284600
hsa-miR-558	0	0	1	1	1	1	TNFRSF1A	tumor necrosis factor receptor superfamily, member 1A
hsa-miR-558	0	0	1	1	0	0	SLC25A28	solute carrier family 25 (mitochondrial iron transporter), member 28
hsa-miR-558	0	0	1	0	0	0	MAGI1-IT1	MAGI1 intronic transcript 1 (non-protein coding)
hsa-miR-558	0	0	1	0	0	0	FLJ32742	uncharacterized locus FLJ32742
hsa-miR-558	1	0	1	0	1	1	NCAM1	neural cell adhesion molecule 1
hsa-miR-558	0	0	1	1	0	0	PTOV1	prostate tumor overexpressed 1
hsa-miR-558	0	0	1	0	0	0	LOC284014	uncharacterized LOC284014
hsa-miR-558	0	0	1	1	0	0	CERS5	ceramide synthase 5
hsa-miR-558	1	0	1	1	1	1	C6orf89	chromosome 6 open reading frame 89
hsa-miR-558	1	0	1	1	1	1	HLF	hepatic leukemia factor
hsa-miR-558	0	0	1	1	1	1	ZFAND2B	zinc finger, AN1-type domain 2B
hsa-miR-558	0	0	1	1	0	0	CPAMD8	C3 and PZP-like, alpha-2-macroglobulin domain containing 8
hsa-miR-558	0	0	1	0	1	1	CADM1	cell adhesion molecule 1
hsa-miR-558	0	0	1	1	1	1	TOR2A	torsin family 2, member A
hsa-miR-558	0	0	1	1	0	0	PIGO	phosphatidylinositol glycan anchor biosynthesis, class O
hsa-miR-558	0	0	1	1	1	1	STBD1	starch binding domain 1
hsa-miR-558	0	0	1	1	0	0	ACOT11	acyl-CoA thioesterase 11
hsa-miR-558	1	0	1	1	1	1	ARIH2	ariadne homolog 2 (Drosophila)
hsa-miR-558	0	0	1	0	0	0	LOC440910	uncharacterized LOC440910
hsa-miR-558	1	0	1	0	1	1	TEF	thyrotrophic embryonic factor
hsa-miR-558	0	0	1	1	0	0	MSANTD3	Myb/SANT-like DNA-binding domain containing 3
hsa-miR-558	1	0	1	1	1	1	GNG2	guanine nucleotide binding protein (G protein), gamma 2
hsa-miR-558	0	0	1	1	0	0	FNTB	farnesyltransferase, CAAX box, beta
hsa-miR-558	1	0	1	1	0	0	TOE1	target of EGR1, member 1 (nuclear)
hsa-miR-558	0	0	1	1	1	1	AP5S1	adaptor-related protein complex 5, sigma 1 subunit
hsa-miR-558	0	0	1	0	0	0	LOC283887	uncharacterized LOC283887
hsa-miR-558	0	0	1	1	1	1	TGFBI	transforming growth factor, beta-induced, 68kDa
hsa-miR-558	1	0	1	1	0	0	TSEN54	tRNA splicing endonuclease 54 homolog (S. cerevisiae)
hsa-miR-558	0	0	1	0	0	0	PART1	prostate androgen-regulated transcript 1 (non-protein coding)
hsa-miR-558	0	0	1	1	1	1	HOGA1	4-hydroxy-2-oxoglutarate aldolase 1
hsa-miR-558	0	0	1	1	1	1	MYBBP1A	MYB binding protein (P160) 1a
hsa-miR-558	1	0	1	1	0	0	SAP30BP	SAP30 binding protein
hsa-miR-558	0	0	1	0	0	0	LOC100129858	uncharacterized LOC100129858
hsa-miR-558	0	0	1	0	1	1	HDAC9	histone deacetylase 9
hsa-miR-558	1	0	1	1	1	1	ZC3H11A	zinc finger CCCH-type containing 11A
hsa-miR-558	0	0	1	1	0	0	C11orf74	chromosome 11 open reading frame 74
hsa-miR-558	0	0	1	0	0	0	CCDC150	coiled-coil domain containing 150
hsa-miR-558	0	0	1	0	0	0	ZNF815P	zinc finger protein 815, pseudogene
hsa-miR-558	1	0	1	1	0	0	CHD3	chromodomain helicase DNA binding protein 3
hsa-miR-558	1	0	1	0	1	1	KIAA1737	KIAA1737
hsa-miR-558	0	0	1	1	0	0	PRKRIP1	PRKR interacting protein 1 (IL11 inducible)
hsa-miR-558	1	0	1	1	1	1	RAB11FIP4	RAB11 family interacting protein 4 (class II)
hsa-miR-558	0	0	1	1	0	0	PSAPL1	prosaposin-like 1 (gene/pseudogene)
hsa-miR-558	1	0	1	1	1	1	VAV3	vav 3 guanine nucleotide exchange factor
hsa-miR-558	1	0	1	1	0	0	ENTPD1	ectonucleoside triphosphate diphosphohydrolase 1
hsa-miR-558	1	0	1	1	0	0	DGCR6	DiGeorge syndrome critical region gene 6
hsa-miR-558	1	0	1	1	1	1	AGAP2	ArfGAP with GTPase domain, ankyrin repeat and PH domain 2
hsa-miR-558	1	0	1	1	1	1	BCL6B	B-cell CLL/lymphoma 6, member B
hsa-miR-558	0	0	1	1	0	0	HDAC6	histone deacetylase 6
hsa-miR-558	0	0	1	1	0	0	MARS	methionyl-tRNA synthetase
hsa-miR-558	1	0	1	1	1	1	PXN	paxillin
hsa-miR-558	1	0	1	1	1	1	ZNF275	zinc finger protein 275
hsa-miR-558	1	0	1	1	1	1	CBLB	Cbl proto-oncogene, E3 ubiquitin protein ligase B
hsa-miR-558	1	0	1	1	0	0	KCNC1	potassium voltage-gated channel, Shaw-related subfamily, member 1
hsa-miR-558	0	0	1	1	0	0	SSPO	SCO-spondin homolog (Bos taurus)
hsa-miR-558	1	0	1	1	1	1	PDZD4	PDZ domain containing 4
hsa-miR-558	1	0	1	1	1	1	PPFIA1	protein tyrosine phosphatase, receptor type, f polypeptide (PTPRF), interacting protein (liprin), alpha 1
hsa-miR-558	0	0	1	1	1	1	RGS3	regulator of G-protein signaling 3
hsa-miR-558	0	0	1	0	0	0	LOC650368	asparagine-linked glycosylation 1-like pseudogene
hsa-miR-558	1	0	1	0	1	1	WDR82	WD repeat domain 82
hsa-miR-558	1	0	1	1	1	1	PRDM2	PR domain containing 2, with ZNF domain
hsa-miR-558	1	0	1	1	1	1	GJC1	gap junction protein, gamma 1, 45kDa
hsa-miR-558	0	0	1	1	0	0	C20orf27	chromosome 20 open reading frame 27
hsa-miR-558	1	0	1	1	1	1	KIF21A	kinesin family member 21A
hsa-miR-558	0	0	1	0	0	0	LOC728716	uncharacterized LOC728716
hsa-miR-558	1	0	1	0	1	1	CNTN2	contactin 2 (axonal)
hsa-miR-558	1	0	1	1	1	1	SEPHS1	selenophosphate synthetase 1
hsa-miR-558	0	0	1	0	0	0	TMEM232	transmembrane protein 232
hsa-miR-558	0	0	1	1	0	0	CUL9	cullin 9
hsa-miR-558	0	0	1	1	0	0	LOC100128239	uncharacterized LOC100128239
hsa-miR-558	1	0	1	1	1	1	KPNA1	karyopherin alpha 1 (importin alpha 5)
hsa-miR-558	1	0	1	0	1	1	HECTD1	HECT domain containing E3 ubiquitin protein ligase 1
hsa-miR-558	0	0	1	1	1	1	RBM46	RNA binding motif protein 46
hsa-miR-558	0	0	1	0	0	0	ADCY10P1	adenylate cyclase 10 (soluble) pseudogene 1
hsa-miR-558	1	0	1	1	0	0	ATXN7L3	ataxin 7-like 3
hsa-miR-558	1	0	1	0	1	1	ANO6	anoctamin 6
hsa-miR-558	0	0	1	1	0	0	CCDC88B	coiled-coil domain containing 88B
hsa-miR-558	1	0	1	1	0	0	LRRC73	leucine rich repeat containing 73
hsa-miR-558	0	0	1	1	0	0	NPIP	nuclear pore complex interacting protein
hsa-miR-558	1	0	1	1	0	0	MAN1B1	mannosidase, alpha, class 1B, member 1
hsa-miR-558	0	0	1	1	1	1	MOBP	myelin-associated oligodendrocyte basic protein
hsa-miR-558	1	0	1	0	1	1	ADIPOR2	adiponectin receptor 2
hsa-miR-558	1	0	1	1	1	1	FMNL3	formin-like 3
hsa-miR-558	1	0	1	0	1	1	N4BP3	NEDD4 binding protein 3
hsa-miR-558	0	0	1	0	0	0	LOC619207	scavenger receptor protein family member
hsa-miR-558	1	0	1	1	0	0	SLC30A3	solute carrier family 30 (zinc transporter), member 3
hsa-miR-558	1	0	1	1	1	1	PHF17	PHD finger protein 17
hsa-miR-558	0	0	1	1	1	1	ERI2	ERI1 exoribonuclease family member 2
hsa-miR-558	0	0	1	0	0	0	GRAMD1B	GRAM domain containing 1B
hsa-miR-558	1	0	1	1	0	0	PPP1CA	protein phosphatase 1, catalytic subunit, alpha isozyme
hsa-miR-558	1	0	1	1	1	1	ZFP106	zinc finger protein 106 homolog (mouse)
hsa-miR-558	0	0	1	1	1	1	WDR69	WD repeat domain 69
hsa-miR-558	0	0	1	0	0	0	TRAV20	T cell receptor alpha variable 20
hsa-miR-558	1	0	1	1	1	1	NSUN4	NOP2/Sun domain family, member 4
hsa-miR-558	0	0	1	0	0	0	EP400NL	EP400 N-terminal like
hsa-miR-558	0	0	1	1	1	1	CD160	CD160 molecule
hsa-miR-558	1	0	1	1	1	1	ADAMTS19	ADAM metallopeptidase with thrombospondin type 1 motif, 19
hsa-miR-558	1	0	1	0	1	1	CYB561D1	cytochrome b-561 domain containing 1
hsa-miR-558	1	0	1	1	1	1	PHC2	polyhomeotic homolog 2 (Drosophila)
hsa-miR-558	0	0	1	1	1	1	MRPL49	mitochondrial ribosomal protein L49
hsa-miR-558	0	0	1	1	0	0	HEATR8	HEAT repeat containing 8
hsa-miR-558	0	0	1	0	1	1	RUFY4	RUN and FYVE domain containing 4
hsa-miR-558	0	0	1	0	0	0	LOC100124692	maltase-glucoamylase (alpha-glucosidase) pseudogene
hsa-miR-558	1	0	1	1	1	1	PPP2R5C	protein phosphatase 2, regulatory subunit B', gamma
hsa-miR-558	0	0	1	1	1	1	SYPL2	synaptophysin-like 2
hsa-miR-558	0	0	1	0	0	0	AGAP9	ArfGAP with GTPase domain, ankyrin repeat and PH domain 9
hsa-miR-558	1	0	1	1	1	1	TAP2	transporter 2, ATP-binding cassette, sub-family B (MDR/TAP)
hsa-miR-558	1	0	1	1	1	1	TRPM6	transient receptor potential cation channel, subfamily M, member 6
hsa-miR-558	1	0	1	0	1	1	MAP3K3	mitogen-activated protein kinase kinase kinase 3
hsa-miR-558	0	0	1	1	1	1	TBC1D3G	TBC1 domain family, member 3G
hsa-miR-558	1	0	1	1	1	1	NECAP1	NECAP endocytosis associated 1
hsa-miR-558	0	0	1	1	1	1	TTLL3	tubulin tyrosine ligase-like family, member 3
hsa-miR-558	0	0	1	0	0	0	POM121L9P	POM121 transmembrane nucleoporin-like 9, pseudogene
hsa-miR-558	0	0	1	1	1	1	ARIH1	ariadne homolog, ubiquitin-conjugating enzyme E2 binding protein, 1 (Drosophila)
hsa-miR-558	0	0	1	1	0	0	MSH5	mutS homolog 5 (E. coli)
hsa-miR-558	0	0	1	1	0	0	SAPCD1	suppressor APC domain containing 1
hsa-miR-558	0	0	1	1	0	0	H2AFJ	H2A histone family, member J
hsa-miR-558	0	0	1	0	0	0	KIAA0913	KIAA0913
hsa-miR-558	0	0	1	0	1	1	TBC1D3F	TBC1 domain family, member 3F
hsa-miR-558	1	0	1	1	1	1	CTTNBP2NL	CTTNBP2 N-terminal like
hsa-miR-558	1	0	1	0	1	1	GRIN3A	glutamate receptor, ionotropic, N-methyl-D-aspartate 3A
hsa-miR-558	1	0	1	0	1	1	ZNF507	zinc finger protein 507
hsa-miR-558	0	0	1	1	1	1	COBL	cordon-bleu homolog (mouse)
hsa-miR-558	1	0	1	1	1	1	MLL3	myeloid/lymphoid or mixed-lineage leukemia 3
hsa-miR-558	0	0	1	1	1	1	NEK9	NIMA (never in mitosis gene a)- related kinase 9
hsa-miR-558	0	0	1	0	0	0	FAM225A	family with sequence similarity 225, member A (non-protein coding)
hsa-miR-558	1	0	1	1	1	1	POU6F1	POU class 6 homeobox 1
hsa-miR-558	0	0	1	1	1	1	CCDC132	coiled-coil domain containing 132
hsa-miR-558	0	0	1	1	0	0	PPIE	peptidylprolyl isomerase E (cyclophilin E)
hsa-miR-558	1	0	1	1	1	1	FAM63B	family with sequence similarity 63, member B
hsa-miR-558	1	0	1	1	1	1	MBD6	methyl-CpG binding domain protein 6
hsa-miR-558	1	0	1	0	0	0	XPNPEP3	X-prolyl aminopeptidase (aminopeptidase P) 3, putative
hsa-miR-558	1	0	1	1	1	1	BOLL	bol, boule-like (Drosophila)
hsa-miR-558	0	0	1	0	1	1	SYNPO2	synaptopodin 2
hsa-miR-558	1	0	1	1	0	0	LRRC58	leucine rich repeat containing 58
hsa-miR-558	1	0	1	1	1	1	RNF38	ring finger protein 38
hsa-miR-558	0	0	1	1	1	1	OSR2	odd-skipped related 2 (Drosophila)
hsa-miR-558	0	0	1	1	0	0	FAM176C	family with sequence similarity 176, member C
hsa-miR-558	1	0	1	1	1	1	WDR26	WD repeat domain 26
hsa-miR-558	0	0	1	1	0	0	DNAH1	dynein, axonemal, heavy chain 1
hsa-miR-558	0	0	1	1	1	1	PINX1	PIN2/TERF1 interacting, telomerase inhibitor 1
hsa-miR-558	0	0	1	1	1	1	GCOM1	GRINL1A complex locus 1
hsa-miR-558	0	0	1	1	1	1	GON4L	gon-4-like (C. elegans)
hsa-miR-558	0	0	1	0	0	0	FAM138C	family with sequence similarity 138, member C
hsa-miR-558	1	0	1	1	1	1	CAMTA1	calmodulin binding transcription activator 1
hsa-miR-558	0	0	1	1	1	1	ITGA10	integrin, alpha 10
hsa-miR-558	1	0	1	0	1	1	ANKRD28	ankyrin repeat domain 28
hsa-miR-558	1	0	1	1	1	1	ECT2	epithelial cell transforming sequence 2 oncogene
hsa-miR-558	1	0	1	1	1	1	SP3	Sp3 transcription factor
hsa-miR-558	0	0	1	1	1	1	TIMM50	translocase of inner mitochondrial membrane 50 homolog (S. cerevisiae)
hsa-miR-558	1	0	1	1	1	1	VPS45	vacuolar protein sorting 45 homolog (S. cerevisiae)
hsa-miR-558	1	0	1	1	1	1	MECP2	methyl CpG binding protein 2 (Rett syndrome)
hsa-miR-558	1	0	1	1	0	0	ADAM15	ADAM metallopeptidase domain 15
hsa-miR-558	1	0	1	1	1	1	PLCH1	phospholipase C, eta 1
hsa-miR-558	1	0	1	1	0	0	CDK8	cyclin-dependent kinase 8
hsa-miR-558	1	0	1	1	1	1	MCHR1	melanin-concentrating hormone receptor 1
hsa-miR-558	0	0	1	1	0	0	CLSTN3	calsyntenin 3
hsa-miR-558	1	0	1	1	1	1	QKI	QKI, KH domain containing, RNA binding
hsa-miR-558	1	0	1	1	1	1	MYB	v-myb myeloblastosis viral oncogene homolog (avian)
hsa-miR-558	0	0	1	0	0	0	PTPRVP	protein tyrosine phosphatase, receptor type, V, pseudogene
hsa-miR-558	1	0	1	1	1	1	AMOT	angiomotin
hsa-miR-558	1	0	1	0	1	1	FAM46A	family with sequence similarity 46, member A
hsa-miR-558	0	0	1	1	1	1	ZCCHC17	zinc finger, CCHC domain containing 17
hsa-miR-558	1	0	1	1	1	1	CPSF6	cleavage and polyadenylation specific factor 6, 68kDa
hsa-miR-558	0	0	1	1	0	0	DDX49	DEAD (Asp-Glu-Ala-Asp) box polypeptide 49
hsa-miR-558	1	0	1	1	1	1	TMUB2	transmembrane and ubiquitin-like domain containing 2
hsa-miR-558	0	0	1	1	1	1	PTDSS1	phosphatidylserine synthase 1
hsa-miR-558	1	0	1	1	1	1	RIMS3	regulating synaptic membrane exocytosis 3
hsa-miR-558	0	0	1	1	1	1	REXO2	REX2, RNA exonuclease 2 homolog (S. cerevisiae)
hsa-miR-558	1	0	1	0	1	1	DCAF10	DDB1 and CUL4 associated factor 10
hsa-miR-558	1	0	1	1	0	0	DHDDS	dehydrodolichyl diphosphate synthase
hsa-miR-558	1	0	1	1	1	1	NUMA1	nuclear mitotic apparatus protein 1
hsa-miR-558	0	0	1	1	0	0	ZNF821	zinc finger protein 821
hsa-miR-558	1	0	1	1	1	1	MBNL1	muscleblind-like splicing regulator 1
hsa-miR-558	1	0	1	1	0	0	SERPINE1	serpin peptidase inhibitor, clade E (nexin, plasminogen activator inhibitor type 1), member 1
hsa-miR-558	1	0	1	1	1	1	CALM1	calmodulin 1 (phosphorylase kinase, delta)
hsa-miR-558	0	0	1	1	1	1	ICA1	islet cell autoantigen 1, 69kDa
hsa-miR-558	0	0	1	0	0	0	LOC400043	uncharacterized LOC400043
hsa-miR-558	1	0	1	1	0	0	MARCH9	membrane-associated ring finger (C3HC4) 9
hsa-miR-558	1	0	1	1	1	1	KDM6B	lysine (K)-specific demethylase 6B
hsa-miR-558	0	0	1	1	1	1	ATXN2L	ataxin 2-like
hsa-miR-558	1	0	1	1	1	1	ZFAND5	zinc finger, AN1-type domain 5
hsa-miR-558	0	0	1	0	0	0	LRRC14	leucine rich repeat containing 14
hsa-miR-558	1	0	1	0	1	1	FNDC3B	fibronectin type III domain containing 3B
hsa-miR-558	0	0	1	1	0	0	KLHDC3	kelch domain containing 3
hsa-miR-558	1	0	1	1	1	1	TMEM185A	transmembrane protein 185A
hsa-miR-558	1	0	1	1	1	1	ETF1	eukaryotic translation termination factor 1
hsa-miR-558	0	0	1	1	0	0	PARP6	poly (ADP-ribose) polymerase family, member 6
hsa-miR-558	0	0	1	0	0	0	NUDT16P1	nudix (nucleoside diphosphate linked moiety X)-type motif 16 pseudogene 1
hsa-miR-558	1	0	1	1	1	1	ZNF512	zinc finger protein 512
hsa-miR-558	0	0	1	0	0	0	DTX2P1-UPK3BP1-PMS2P11	DTX2P1-UPK3BP1-PMS2P11 readthrough (non-protein coding)
hsa-miR-558	0	0	1	0	1	1	ZNF37A	zinc finger protein 37A
hsa-miR-558	1	0	1	0	1	1	NR1D2	nuclear receptor subfamily 1, group D, member 2
hsa-miR-558	0	0	1	1	1	1	RAB37	RAB37, member RAS oncogene family
hsa-miR-558	0	0	1	1	1	1	NDUFB5	NADH dehydrogenase (ubiquinone) 1 beta subcomplex, 5, 16kDa
hsa-miR-558	0	0	1	1	1	1	GLIPR2	GLI pathogenesis-related 2
hsa-miR-558	0	0	1	1	1	1	PTCD2	pentatricopeptide repeat domain 2
hsa-miR-558	1	0	1	1	1	1	KIAA1217	KIAA1217
hsa-miR-558	0	0	1	0	0	0	LOC283693	actin, alpha 2, smooth muscle, aorta pseudogene
hsa-miR-558	0	0	1	0	0	0	ENTPD5	ectonucleoside triphosphate diphosphohydrolase 5
hsa-miR-558	0	0	1	1	1	1	AP3M2	adaptor-related protein complex 3, mu 2 subunit
hsa-miR-558	0	0	1	1	0	0	SLC22A9	solute carrier family 22 (organic anion transporter), member 9
hsa-miR-558	0	0	1	1	1	1	CDC42SE2	CDC42 small effector 2
hsa-miR-558	1	0	1	1	1	1	SPOCK2	sparc/osteonectin, cwcv and kazal-like domains proteoglycan (testican) 2
hsa-miR-558	0	0	1	1	1	1	SEC61A2	Sec61 alpha 2 subunit (S. cerevisiae)
hsa-miR-558	0	0	1	0	0	0	EVPLL	envoplakin-like
hsa-miR-558	1	0	1	1	1	1	APPL2	adaptor protein, phosphotyrosine interaction, PH domain and leucine zipper containing 2
hsa-miR-558	0	0	1	1	0	0	ALPK1	alpha-kinase 1
hsa-miR-558	1	0	1	1	1	1	TMEM127	transmembrane protein 127
hsa-miR-558	1	0	1	1	1	1	SENP6	SUMO1/sentrin specific peptidase 6
hsa-miR-558	0	0	1	0	1	1	KIAA0895	KIAA0895
hsa-miR-558	1	0	1	0	0	0	KCNU1	potassium channel, subfamily U, member 1
hsa-miR-558	1	0	1	1	1	1	SYT9	synaptotagmin IX
hsa-miR-558	1	0	1	0	1	1	PSMF1	proteasome (prosome, macropain) inhibitor subunit 1 (PI31)
hsa-miR-558	1	0	1	0	1	1	RNF4	ring finger protein 4
hsa-miR-558	0	0	1	0	0	0	LOC643648	uncharacterized LOC643648
hsa-miR-558	1	0	1	1	1	1	DCLK2	doublecortin-like kinase 2
hsa-miR-558	1	0	1	1	1	1	DFFB	DNA fragmentation factor, 40kDa, beta polypeptide (caspase-activated DNase)
hsa-miR-558	0	0	1	1	0	0	LINC00176	long intergenic non-protein coding RNA 176
hsa-miR-558	0	0	1	0	0	0	LINC00452	long intergenic non-protein coding RNA 452
hsa-miR-558	1	0	1	1	1	1	NKAIN2	Na+/K+ transporting ATPase interacting 2
hsa-miR-558	1	0	1	1	1	1	RAP2C	RAP2C, member of RAS oncogene family
hsa-miR-558	0	0	1	0	0	0	TRAJ17	T cell receptor alpha joining 17
hsa-miR-558	0	0	1	1	0	0	SLC2A5	solute carrier family 2 (facilitated glucose/fructose transporter), member 5
hsa-miR-558	0	0	1	1	1	1	DUSP28	dual specificity phosphatase 28
hsa-miR-558	0	0	1	0	0	0	FAM201A	family with sequence similarity 201, member A
hsa-miR-558	0	0	1	0	0	0	SPATA3	spermatogenesis associated 3
hsa-miR-558	1	0	1	1	1	1	MEIS1	Meis homeobox 1
hsa-miR-558	1	0	1	0	1	1	NEGR1	neuronal growth regulator 1
hsa-miR-558	0	0	1	1	1	1	CTF1	cardiotrophin 1
hsa-miR-558	1	0	1	1	0	0	TMEM131	transmembrane protein 131
hsa-miR-558	0	0	1	0	0	0	LOC284889	uncharacterized LOC284889
hsa-miR-558	1	0	1	1	1	1	ITPK1	inositol-tetrakisphosphate 1-kinase
hsa-miR-558	0	0	1	0	0	0	CRYBB2P1	crystallin, beta B2 pseudogene 1
hsa-miR-558	0	0	1	0	0	0	INHBA-AS1	INHBA antisense RNA 1
hsa-miR-558	0	0	1	1	0	0	LAG3	lymphocyte-activation gene 3
hsa-miR-558	0	0	1	0	0	0	FLJ36000	uncharacterized FLJ36000
hsa-miR-558	0	0	1	1	0	0	ADAMTS13	ADAM metallopeptidase with thrombospondin type 1 motif, 13
hsa-miR-558	0	0	1	0	0	0	TOB1-AS1	TOB1 antisense RNA 1
hsa-miR-558	0	0	1	0	0	0	TRDV2	T cell receptor delta variable 2
hsa-miR-558	0	0	1	0	1	1	LINC00634	long intergenic non-protein coding RNA 634
hsa-miR-558	0	0	1	0	0	0	LRRC48	leucine rich repeat containing 48
hsa-miR-558	0	0	1	1	0	0	MTCH1	mitochondrial carrier 1
hsa-miR-558	0	0	1	1	1	1	MDFIC	MyoD family inhibitor domain containing
hsa-miR-558	0	0	1	0	0	0	A1BG-AS1	A1BG antisense RNA 1
hsa-miR-558	0	0	1	1	0	0	KIAA1432	KIAA1432
hsa-miR-558	1	0	1	0	1	1	HSPA12A	heat shock 70kDa protein 12A
hsa-miR-558	0	0	1	1	0	0	AQP12B	aquaporin 12B
hsa-miR-558	0	0	1	0	0	0	MDS2	myelodysplastic syndrome 2 translocation associated
hsa-miR-558	1	0	1	1	1	1	ARID3B	AT rich interactive domain 3B (BRIGHT-like)
hsa-miR-558	0	0	1	0	0	0	LOC339260	uncharacterized LOC339260
hsa-miR-558	1	0	1	1	1	1	AGAP3	ArfGAP with GTPase domain, ankyrin repeat and PH domain 3
hsa-miR-558	1	0	1	1	1	1	MAMDC2	MAM domain containing 2
hsa-miR-558	0	0	1	1	1	1	MGC57346	uncharacterized LOC401884
hsa-miR-558	1	0	1	1	0	0	TBC1D10C	TBC1 domain family, member 10C
hsa-miR-558	0	0	1	0	0	0	DPY19L2P4	dpy-19-like 2 pseudogene 4 (C. elegans)
hsa-miR-558	1	0	1	0	1	1	KDM2A	lysine (K)-specific demethylase 2A
hsa-miR-558	0	0	1	1	1	1	ZNF589	zinc finger protein 589
hsa-miR-558	1	0	1	1	1	1	CLVS1	clavesin 1
hsa-miR-558	0	0	1	0	1	1	ITGA1	integrin, alpha 1
hsa-miR-558	1	0	1	0	1	1	SEMA4G	sema domain, immunoglobulin domain (Ig), transmembrane domain (TM) and short cytoplasmic domain, (semaphorin) 4G
hsa-miR-558	1	0	1	1	1	1	ZFP91	zinc finger protein 91 homolog (mouse)
hsa-miR-558	0	0	1	1	1	1	RHOT1	ras homolog family member T1
hsa-miR-558	0	0	1	0	1	1	C17orf51	chromosome 17 open reading frame 51
hsa-miR-558	1	0	1	1	1	1	NCOA5	nuclear receptor coactivator 5
hsa-miR-558	0	0	1	1	0	0	CUEDC1	CUE domain containing 1
hsa-miR-558	1	0	1	1	1	1	ATP8B4	ATPase, class I, type 8B, member 4
hsa-miR-558	0	0	1	1	0	0	GRIN2C	glutamate receptor, ionotropic, N-methyl D-aspartate 2C
hsa-miR-558	0	0	1	0	0	0	TRA@	T cell receptor alpha locus
hsa-miR-558	0	0	1	1	0	0	DHX30	DEAH (Asp-Glu-Ala-His) box polypeptide 30
hsa-miR-558	0	0	1	0	0	0	FLJ35390	uncharacterized LOC255031
hsa-miR-558	0	0	1	1	1	1	STAG1	stromal antigen 1
hsa-miR-558	0	0	1	1	0	0	TSNARE1	t-SNARE domain containing 1
hsa-miR-558	0	0	1	1	1	1	TAGLN	transgelin
hsa-miR-558	1	0	1	1	1	1	C5orf25	chromosome 5 open reading frame 25
hsa-miR-558	1	0	1	1	1	1	PDCD6IP	programmed cell death 6 interacting protein
hsa-miR-558	1	0	1	1	1	1	BAZ2B	bromodomain adjacent to zinc finger domain, 2B
hsa-miR-558	1	0	1	1	0	0	DCAF15	DDB1 and CUL4 associated factor 15
hsa-miR-558	0	0	1	1	0	0	RELA	v-rel reticuloendotheliosis viral oncogene homolog A (avian)
hsa-miR-558	1	0	1	1	0	0	CHTOP	chromatin target of PRMT1
hsa-miR-558	1	0	1	0	1	1	TGFBR1	transforming growth factor, beta receptor 1
hsa-miR-558	1	0	1	1	1	1	USP47	ubiquitin specific peptidase 47
hsa-miR-558	1	0	1	1	1	1	LOXL3	lysyl oxidase-like 3
hsa-miR-558	1	0	1	1	1	1	TNS1	tensin 1
hsa-miR-558	1	0	1	1	1	1	CTBP1	C-terminal binding protein 1
hsa-miR-558	0	0	1	1	1	1	GNG10	guanine nucleotide binding protein (G protein), gamma 10
hsa-miR-558	0	0	1	1	0	0	C8orf31	chromosome 8 open reading frame 31
hsa-miR-558	1	0	1	1	1	1	WNT5A	wingless-type MMTV integration site family, member 5A
hsa-miR-558	0	0	1	0	0	0	LOC642846	DEAD/H (Asp-Glu-Ala-Asp/His) box polypeptide 11-like
hsa-miR-558	0	0	1	1	0	0	DNHD1	dynein heavy chain domain 1
hsa-miR-558	1	0	1	1	1	1	HNRNPC	heterogeneous nuclear ribonucleoprotein C (C1/C2)
hsa-miR-558	1	0	1	1	1	1	SYNE1	spectrin repeat containing, nuclear envelope 1
hsa-miR-558	0	0	1	0	0	0	GUSBP1	glucuronidase, beta pseudogene 1
hsa-miR-558	0	0	1	1	0	0	DNASE1	deoxyribonuclease I
hsa-miR-558	0	0	1	1	1	1	SLC39A2	solute carrier family 39 (zinc transporter), member 2
hsa-miR-558	0	0	1	1	0	0	IDUA	iduronidase, alpha-L-
hsa-miR-558	0	0	1	1	1	1	HMGB2	high mobility group box 2
hsa-miR-558	0	0	1	1	0	0	RGL4	ral guanine nucleotide dissociation stimulator-like 4
hsa-miR-558	1	0	1	0	1	1	VANGL2	vang-like 2 (van gogh, Drosophila)
hsa-miR-558	0	0	1	1	1	1	TTLL9	tubulin tyrosine ligase-like family, member 9
hsa-miR-558	0	0	1	0	0	0	LOC441493	uncharacterized LOC441493
hsa-miR-558	1	0	1	1	1	1	KLHL17	kelch-like 17 (Drosophila)
hsa-miR-558	0	0	1	1	1	1	PCNP	PEST proteolytic signal containing nuclear protein
hsa-miR-558	0	0	1	1	0	0	C1orf122	chromosome 1 open reading frame 122
hsa-miR-558	0	0	1	1	1	1	DET1	de-etiolated homolog 1 (Arabidopsis)
hsa-miR-558	1	0	1	1	1	1	SLK	STE20-like kinase
hsa-miR-558	0	0	1	0	0	0	LRRC37A11P	leucine rich repeat containing 37, member A11, pseudogene
hsa-miR-558	1	0	1	1	1	1	NR3C2	nuclear receptor subfamily 3, group C, member 2
hsa-miR-558	0	0	1	1	0	0	RNF123	ring finger protein 123
hsa-miR-558	1	0	1	1	1	1	TMEM64	transmembrane protein 64
hsa-miR-558	0	0	1	0	0	0	EEF1DP3	eukaryotic translation elongation factor 1 delta pseudogene 3
hsa-miR-558	0	0	1	0	1	1	GOLGA8G	golgin A8 family, member G
hsa-miR-558	1	0	1	1	1	1	ANK2	ankyrin 2, neuronal
hsa-miR-558	1	0	1	1	1	1	MEGF11	multiple EGF-like-domains 11
hsa-miR-558	0	0	1	0	0	0	H2BFS	H2B histone family, member S (pseudogene)
hsa-miR-558	0	0	1	0	0	0	FAM225B	family with sequence similarity 225, member B (non-protein coding)
hsa-miR-558	1	0	1	1	1	1	NIPAL2	NIPA-like domain containing 2
hsa-miR-558	0	0	1	0	0	0	FUT8-AS1	FUT8 antisense RNA 1
hsa-miR-558	0	0	1	1	1	1	TINF2	TERF1 (TRF1)-interacting nuclear factor 2
hsa-miR-558	0	0	1	1	1	1	C10orf82	chromosome 10 open reading frame 82
hsa-miR-558	1	0	1	1	1	1	ATP2B4	ATPase, Ca++ transporting, plasma membrane 4
hsa-miR-558	1	0	1	1	1	1	MIER3	mesoderm induction early response 1, family member 3
hsa-miR-558	0	0	1	1	1	1	DSG3	desmoglein 3
hsa-miR-558	1	0	1	1	1	1	SH3BP4	SH3-domain binding protein 4
hsa-miR-558	0	0	1	0	1	1	THAP6	THAP domain containing 6
hsa-miR-558	1	0	1	1	0	0	KIAA0226	KIAA0226
hsa-miR-558	0	0	1	0	0	0	LINC00240	long intergenic non-protein coding RNA 240
hsa-miR-558	0	0	1	0	1	1	GPX8	glutathione peroxidase 8 (putative)
hsa-miR-558	0	0	1	0	1	1	TYW5	tRNA-yW synthesizing protein 5
hsa-miR-558	1	0	1	0	1	1	TMEM184B	transmembrane protein 184B
hsa-miR-558	1	0	1	1	1	1	NFIB	nuclear factor I/B
hsa-miR-558	1	0	1	1	1	1	NAV1	neuron navigator 1
hsa-miR-558	1	0	1	1	1	1	C5orf24	chromosome 5 open reading frame 24
hsa-miR-558	1	0	1	1	1	1	PTER	phosphotriesterase related
hsa-miR-558	1	0	1	1	1	1	BZRAP1	benzodiazapine receptor (peripheral) associated protein 1
hsa-miR-558	0	0	1	1	1	1	SSFA2	sperm specific antigen 2
hsa-miR-558	0	0	1	1	0	0	PITRM1	pitrilysin metallopeptidase 1
hsa-miR-558	0	0	1	1	0	0	CNIH4	cornichon homolog 4 (Drosophila)
hsa-miR-558	1	0	1	1	1	1	CREB3L2	cAMP responsive element binding protein 3-like 2
hsa-miR-558	1	0	1	1	1	1	BSDC1	BSD domain containing 1
hsa-miR-558	0	0	1	1	0	0	SNRNP25	small nuclear ribonucleoprotein 25kDa (U11/U12)
hsa-miR-558	0	0	1	1	0	0	STMN4	stathmin-like 4
hsa-miR-558	1	0	1	1	1	1	VIM	vimentin
hsa-miR-558	1	0	1	1	0	0	CGREF1	cell growth regulator with EF-hand domain 1
hsa-miR-558	1	0	1	1	1	1	TARBP2	TAR (HIV-1) RNA binding protein 2
hsa-miR-558	0	0	1	0	0	0	LOC400768	uncharacterized LOC400768
hsa-miR-558	0	0	1	1	1	1	FBXO36	F-box protein 36
hsa-miR-558	1	0	1	1	1	1	C8orf58	chromosome 8 open reading frame 58
hsa-miR-558	0	0	1	1	1	1	CYTH2	cytohesin 2
hsa-miR-558	0	0	1	1	1	1	BTF3	basic transcription factor 3
hsa-miR-558	1	0	1	1	1	1	RAP1A	RAP1A, member of RAS oncogene family
hsa-miR-558	0	0	1	1	0	0	CCNDBP1	cyclin D-type binding-protein 1
hsa-miR-558	0	0	1	1	1	1	SLC25A4	solute carrier family 25 (mitochondrial carrier; adenine nucleotide translocator), member 4
hsa-miR-558	0	0	1	1	1	1	C2orf43	chromosome 2 open reading frame 43
hsa-miR-558	1	0	1	1	0	0	ELOVL1	ELOVL fatty acid elongase 1
hsa-miR-558	1	0	1	1	1	1	DIS3L2	DIS3 mitotic control homolog (S. cerevisiae)-like 2
hsa-miR-558	0	0	1	1	0	0	NGDN	neuroguidin, EIF4E binding protein
hsa-miR-558	1	0	1	1	0	0	STX5	syntaxin 5
hsa-miR-558	1	0	1	0	1	1	EIF4H	eukaryotic translation initiation factor 4H
hsa-miR-558	1	0	1	1	1	1	CHTF8	CTF8, chromosome transmission fidelity factor 8 homolog (S. cerevisiae)
hsa-miR-558	1	0	1	1	0	0	CCM2	cerebral cavernous malformation 2
hsa-miR-558	0	0	1	1	1	1	MTCP1	mature T-cell proliferation 1
hsa-miR-558	1	0	1	1	1	1	COPS2	COP9 constitutive photomorphogenic homolog subunit 2 (Arabidopsis)
hsa-miR-558	0	0	1	1	0	0	F10	coagulation factor X
hsa-miR-558	1	0	1	1	1	1	TFDP1	transcription factor Dp-1
hsa-miR-558	0	0	1	1	1	1	GRAP2	GRB2-related adaptor protein 2
hsa-miR-558	1	0	1	1	1	1	ARFIP2	ADP-ribosylation factor interacting protein 2
hsa-miR-558	0	0	1	0	0	0	ARRDC1	arrestin domain containing 1
hsa-miR-558	0	0	1	0	0	0	LOC100130353	hippocampus abundant transcript-like 1 pseudogene
hsa-miR-558	0	0	1	1	0	0	CCDC22	coiled-coil domain containing 22
hsa-miR-558	0	0	1	1	1	1	SEC11A	SEC11 homolog A (S. cerevisiae)
hsa-miR-558	0	0	1	1	0	0	FAM64A	family with sequence similarity 64, member A
hsa-miR-558	0	0	1	1	1	1	CPZ	carboxypeptidase Z
hsa-miR-558	1	0	1	1	1	1	ARNTL	aryl hydrocarbon receptor nuclear translocator-like
hsa-miR-558	0	0	1	1	0	0	RPSA	ribosomal protein SA
hsa-miR-558	0	0	1	0	0	0	LOC100128988	uncharacterized LOC100128988
hsa-miR-558	1	0	1	1	1	1	PPP3CB	protein phosphatase 3, catalytic subunit, beta isozyme
hsa-miR-558	1	0	1	1	1	1	DPF2	D4, zinc and double PHD fingers family 2
hsa-miR-558	0	0	1	1	1	1	TCTN3	tectonic family member 3
hsa-miR-558	1	0	1	1	0	0	TH1L	TH1-like (Drosophila)
hsa-miR-558	0	0	1	1	1	1	ACSF3	acyl-CoA synthetase family member 3
hsa-miR-558	0	0	1	1	0	0	AATF	apoptosis antagonizing transcription factor
hsa-miR-558	1	0	1	1	1	1	ARHGEF40	Rho guanine nucleotide exchange factor (GEF) 40
hsa-miR-558	0	0	1	1	1	1	TBRG1	transforming growth factor beta regulator 1
hsa-miR-558	0	0	1	1	1	1	TSEN15	tRNA splicing endonuclease 15 homolog (S. cerevisiae)
hsa-miR-558	0	0	1	1	1	1	LGI1	leucine-rich, glioma inactivated 1
hsa-miR-558	1	0	1	0	1	1	SLC2A3	solute carrier family 2 (facilitated glucose transporter), member 3
hsa-miR-558	1	0	1	0	1	1	CD47	CD47 molecule
hsa-miR-558	1	0	1	1	1	1	RUNX1	runt-related transcription factor 1
hsa-miR-558	1	0	1	1	0	0	FSD1	fibronectin type III and SPRY domain containing 1
hsa-miR-558	1	0	1	1	1	1	RALY	RNA binding protein, autoantigenic (hnRNP-associated with lethal yellow homolog (mouse))
hsa-miR-558	0	0	1	1	0	0	TESK1	testis-specific kinase 1
hsa-miR-558	0	0	1	0	0	0	LOC100132984	uncharacterized LOC100132984
hsa-miR-558	1	0	1	1	1	1	MYT1	myelin transcription factor 1
hsa-miR-558	0	0	1	1	1	1	RNF126	ring finger protein 126
hsa-miR-558	0	0	1	1	0	0	FES	feline sarcoma oncogene
hsa-miR-558	0	0	1	1	1	1	SUGT1	SGT1, suppressor of G2 allele of SKP1 (S. cerevisiae)
hsa-miR-558	0	0	1	1	0	0	PCOLCE	procollagen C-endopeptidase enhancer
hsa-miR-558	0	0	1	1	1	1	FAM118B	family with sequence similarity 118, member B
hsa-miR-558	1	0	1	0	1	1	DNMT3A	DNA (cytosine-5-)-methyltransferase 3 alpha
hsa-miR-558	1	0	1	1	1	1	SLC37A3	solute carrier family 37 (glycerol-3-phosphate transporter), member 3
hsa-miR-558	1	0	1	1	1	1	SERF2	small EDRK-rich factor 2
hsa-miR-558	1	0	1	1	1	1	STAG2	stromal antigen 2
hsa-miR-558	0	0	1	0	0	0	LOC731789	uncharacterized LOC731789
hsa-miR-558	0	0	1	1	1	1	MRPL42	mitochondrial ribosomal protein L42
hsa-miR-558	1	0	1	1	0	0	POMGNT1	protein O-linked mannose beta1,2-N-acetylglucosaminyltransferase
hsa-miR-558	1	0	1	1	1	1	BNC2	basonuclin 2
hsa-miR-558	0	0	1	0	0	0	DNAJC27-AS1	DNAJC27 antisense RNA 1
hsa-miR-558	0	0	1	1	0	0	TENC1	tensin like C1 domain containing phosphatase (tensin 2)
hsa-miR-558	1	0	1	1	1	1	SEC14L1	SEC14-like 1 (S. cerevisiae)
hsa-miR-558	0	0	1	1	0	0	PXK	PX domain containing serine/threonine kinase
hsa-miR-558	1	0	1	1	1	1	TRIOBP	TRIO and F-actin binding protein
hsa-miR-558	0	0	1	1	0	0	SPATA20	spermatogenesis associated 20
hsa-miR-558	0	0	1	1	1	1	MARVELD2	MARVEL domain containing 2
hsa-miR-558	0	0	1	1	1	1	ITGAX	integrin, alpha X (complement component 3 receptor 4 subunit)
hsa-miR-558	0	0	1	1	0	0	CEACAM3	carcinoembryonic antigen-related cell adhesion molecule 3
hsa-miR-558	0	0	1	1	1	1	ALDH3B1	aldehyde dehydrogenase 3 family, member B1
hsa-miR-558	1	0	1	1	1	1	GRM1	glutamate receptor, metabotropic 1
hsa-miR-558	1	0	1	0	1	1	BCL2	B-cell CLL/lymphoma 2
hsa-miR-558	1	0	1	1	1	1	IGF1	insulin-like growth factor 1 (somatomedin C)
hsa-miR-558	0	0	1	1	1	1	ATP7A	ATPase, Cu++ transporting, alpha polypeptide
hsa-miR-558	1	0	1	1	1	1	COL4A4	collagen, type IV, alpha 4
hsa-miR-558	0	0	1	1	0	0	GBA	glucosidase, beta, acid
hsa-miR-558	1	0	1	1	1	1	GK	glycerol kinase
hsa-miR-558	0	0	1	1	0	0	GP9	glycoprotein IX (platelet)
hsa-miR-558	0	0	1	1	1	1	HPRT1	hypoxanthine phosphoribosyltransferase 1
hsa-miR-558	1	0	1	0	1	1	ITGB3	integrin, beta 3 (platelet glycoprotein IIIa, antigen CD61)
hsa-miR-558	1	0	1	1	1	1	JAG1	jagged 1
hsa-miR-558	1	0	1	1	1	1	LEP	leptin
hsa-miR-558	1	0	1	0	1	1	PTEN	phosphatase and tensin homolog
hsa-miR-558	1	0	1	1	1	1	ATXN1	ataxin 1
hsa-miR-558	0	0	1	1	0	0	TGM1	transglutaminase 1 (K polypeptide epidermal type I, protein-glutamine-gamma-glutamyltransferase)
hsa-miR-558	0	0	1	1	1	1	CYP11B2	cytochrome P450, family 11, subfamily B, polypeptide 2
hsa-miR-558	1	0	1	1	1	1	DCX	doublecortin
hsa-miR-558	0	0	1	1	0	0	IL3	interleukin 3 (colony-stimulating factor, multiple)
hsa-miR-558	0	0	1	1	1	1	IGF2	insulin-like growth factor 2 (somatomedin A)
hsa-miR-558	0	0	1	1	1	1	GRIN2B	glutamate receptor, ionotropic, N-methyl D-aspartate 2B
hsa-miR-558	0	0	1	1	1	1	GRM3	glutamate receptor, metabotropic 3
hsa-miR-558	1	0	1	1	1	1	HTR4	5-hydroxytryptamine (serotonin) receptor 4, G protein-coupled
hsa-miR-558	1	0	1	1	1	1	IGF1R	insulin-like growth factor 1 receptor
hsa-miR-558	0	0	1	1	1	1	RPL32	ribosomal protein L32
hsa-miR-558	0	0	1	0	1	1	DNAJB3	DnaJ (Hsp40) homolog, subfamily B, member 3
hsa-miR-558	0	0	1	1	1	1	TBC1D3C	TBC1 domain family, member 3C
hsa-miR-558	0	0	1	0	0	0	OR8G1	olfactory receptor, family 8, subfamily G, member 1
hsa-miR-558	1	0	1	0	1	1	BMF	Bcl2 modifying factor
hsa-miR-558	0	0	1	1	1	1	ALG11	asparagine-linked glycosylation 11, alpha-1,2-mannosyltransferase homolog (yeast)
hsa-miR-558	1	0	1	0	1	1	ZNF740	zinc finger protein 740
hsa-miR-558	1	0	1	0	1	1	LIN28B	lin-28 homolog B (C. elegans)
hsa-miR-558	0	0	1	1	0	0	PAPL	iron/zinc purple acid phosphatase-like protein
hsa-miR-558	1	0	1	1	1	1	NCK2	NCK adaptor protein 2
hsa-miR-558	1	0	1	0	1	1	LRRC55	leucine rich repeat containing 55
hsa-miR-558	1	0	1	1	1	1	EDA	ectodysplasin A
hsa-miR-558	0	0	1	1	1	1	LINC00478	long intergenic non-protein coding RNA 478
hsa-miR-558	0	0	1	0	1	1	TXLNG2P	taxilin gamma 2, pseudogene
hsa-miR-558	1	0	1	1	1	1	BRWD1	bromodomain and WD repeat domain containing 1
hsa-miR-558	1	0	1	1	1	1	EI24	etoposide induced 2.4 mRNA
hsa-miR-558	0	0	1	1	0	0	REG3G	regenerating islet-derived 3 gamma
hsa-miR-558	1	0	1	1	1	1	BCAP29	B-cell receptor-associated protein 29
hsa-miR-558	0	0	1	1	1	1	MXI1	MAX interactor 1
hsa-miR-558	0	0	1	1	1	1	ANKRD16	ankyrin repeat domain 16
hsa-miR-558	1	0	1	1	1	1	ZNF655	zinc finger protein 655
hsa-miR-558	1	0	1	1	1	1	ARHGAP28	Rho GTPase activating protein 28
hsa-miR-558	1	0	1	1	1	1	BCL2L15	BCL2-like 15
hsa-miR-558	0	0	1	0	1	1	GOLGA8E	golgin A8 family, member E
hsa-miR-558	1	0	1	1	1	1	FOXP4	forkhead box P4
hsa-miR-558	1	0	1	0	1	1	RGMB	RGM domain family, member B
hsa-miR-558	0	0	1	1	1	1	LDLRAD2	low density lipoprotein receptor class A domain containing 2
hsa-miR-558	1	0	1	0	1	1	SYT14L	synaptotagmin XIV-like
hsa-miR-558	1	0	1	1	1	1	NCDN	neurochondrin
hsa-miR-558	0	0	1	1	1	1	RAB28	RAB28, member RAS oncogene family
hsa-miR-558	0	0	1	1	1	1	NPIPL1	nuclear pore complex interacting protein-like 1
hsa-miR-558	0	0	1	1	1	1	ZNF187	zinc finger protein 187
hsa-miR-558	1	0	1	1	1	1	KALRN	kalirin, RhoGEF kinase
hsa-miR-558	1	0	1	1	1	1	RGS7BP	regulator of G-protein signaling 7 binding protein
hsa-miR-558	0	0	1	0	1	1	STXBP1	syntaxin binding protein 1
hsa-miR-558	0	0	1	1	1	1	SLC35A2	solute carrier family 35 (UDP-galactose transporter), member A2
hsa-miR-558	1	0	1	1	1	1	PDE4B	phosphodiesterase 4B, cAMP-specific
hsa-miR-558	1	0	1	1	1	1	KREMEN1	kringle containing transmembrane protein 1
hsa-miR-558	0	0	1	1	1	1	MAP9	microtubule-associated protein 9
hsa-miR-558	0	0	1	1	1	1	ZDHHC19	zinc finger, DHHC-type containing 19
hsa-miR-558	1	0	1	1	1	1	CDC42	cell division cycle 42 (GTP binding protein, 25kDa)
hsa-miR-558	1	0	1	1	1	1	SPTSSB	serine palmitoyltransferase, small subunit B
hsa-miR-558	0	0	1	0	1	1	OPALIN	oligodendrocytic myelin paranodal and inner loop protein
hsa-miR-558	1	0	1	1	0	0	KIAA0895L	KIAA0895-like
hsa-miR-558	1	0	1	1	1	1	GDAP1	ganglioside induced differentiation associated protein 1
hsa-miR-558	0	0	1	1	1	1	FAM22G	family with sequence similarity 22, member G
hsa-miR-558	1	0	1	0	1	1	SLC7A6	solute carrier family 7 (amino acid transporter light chain, y+L system), member 6
hsa-miR-558	1	0	1	1	1	1	PDE11A	phosphodiesterase 11A
hsa-miR-558	0	0	1	1	1	1	KLK5	kallikrein-related peptidase 5
hsa-miR-558	1	0	1	0	1	1	UBXN2B	UBX domain protein 2B
hsa-miR-558	1	0	1	1	1	1	ALG9	asparagine-linked glycosylation 9, alpha-1,2-mannosyltransferase homolog (S. cerevisiae)
hsa-miR-558	1	0	1	0	0	0	FAM127B	family with sequence similarity 127, member B
hsa-miR-558	1	0	1	1	1	1	N4BP2L1	NEDD4 binding protein 2-like 1
hsa-miR-558	0	0	1	1	1	1	DIAPH1	diaphanous homolog 1 (Drosophila)
hsa-miR-558	1	0	1	0	1	1	FBXO41	F-box protein 41
hsa-miR-558	1	0	1	1	1	1	SHANK3	SH3 and multiple ankyrin repeat domains 3
hsa-miR-558	0	0	1	1	1	1	FTO	fat mass and obesity associated
hsa-miR-558	1	0	1	0	1	1	CCDC85A	coiled-coil domain containing 85A
hsa-miR-558	1	0	1	0	1	1	ODZ3	odz, odd Oz/ten-m homolog 3 (Drosophila)
hsa-miR-558	1	0	1	1	1	1	REPS2	RALBP1 associated Eps domain containing 2
hsa-miR-558	0	0	1	1	1	1	G6PC2	glucose-6-phosphatase, catalytic, 2
hsa-miR-558	0	0	1	1	0	0	NUDT2	nudix (nucleoside diphosphate linked moiety X)-type motif 2
hsa-miR-558	1	0	1	0	1	1	BMPR2	bone morphogenetic protein receptor, type II (serine/threonine kinase)
hsa-miR-558	0	0	1	1	1	1	ENTPD3	ectonucleoside triphosphate diphosphohydrolase 3
hsa-miR-558	1	0	1	1	1	1	CELSR3	cadherin, EGF LAG seven-pass G-type receptor 3 (flamingo homolog, Drosophila)
hsa-miR-558	0	0	1	0	1	1	EMP1	epithelial membrane protein 1
hsa-miR-558	0	0	1	1	0	0	GPR39	G protein-coupled receptor 39
hsa-miR-558	0	0	1	1	1	1	IL13RA1	interleukin 13 receptor, alpha 1
hsa-miR-558	1	0	1	1	1	1	ARF3	ADP-ribosylation factor 3
hsa-miR-558	0	0	1	1	1	1	BTN1A1	butyrophilin, subfamily 1, member A1
hsa-miR-558	1	0	1	1	1	1	FBN2	fibrillin 2
hsa-miR-558	0	0	1	1	0	0	IFI6	interferon, alpha-inducible protein 6
hsa-miR-558	0	0	1	1	1	1	HOXA4	homeobox A4
hsa-miR-558	1	0	1	1	1	1	ITGA5	integrin, alpha 5 (fibronectin receptor, alpha polypeptide)
hsa-miR-558	1	0	1	1	1	1	KDR	kinase insert domain receptor (a type III receptor tyrosine kinase)
hsa-miR-558	0	0	1	1	0	0	KRT4	keratin 4
hsa-miR-558	1	0	1	1	1	1	LIF	leukemia inhibitory factor
hsa-miR-558	1	0	1	1	1	1	LIFR	leukemia inhibitory factor receptor alpha
hsa-miR-558	1	0	1	1	1	1	LIMK1	LIM domain kinase 1
hsa-miR-558	1	0	1	1	1	1	NEUROD1	neuronal differentiation 1
hsa-miR-558	0	0	1	1	1	1	NOV	nephroblastoma overexpressed
hsa-miR-558	0	0	1	0	1	1	OPHN1	oligophrenin 1
hsa-miR-558	1	0	1	1	1	1	PBX2	pre-B-cell leukemia homeobox 2
hsa-miR-558	0	0	1	1	1	1	PIM1	pim-1 oncogene
hsa-miR-558	1	0	1	1	1	1	PROX1	prospero homeobox 1
hsa-miR-558	0	0	1	0	0	0	PSMB10	proteasome (prosome, macropain) subunit, beta type, 10
hsa-miR-558	1	0	1	1	1	1	PTPN11	protein tyrosine phosphatase, non-receptor type 11
hsa-miR-558	1	0	1	1	1	1	PTPRK	protein tyrosine phosphatase, receptor type, K
hsa-miR-558	1	0	1	1	1	1	SALL1	sal-like 1 (Drosophila)
hsa-miR-558	0	0	1	1	1	1	SDC2	syndecan 2
hsa-miR-558	1	0	1	1	1	1	SOX2	SRY (sex determining region Y)-box 2
hsa-miR-558	0	0	1	1	1	1	SPTA1	spectrin, alpha, erythrocytic 1 (elliptocytosis 2)
hsa-miR-558	1	0	1	1	1	1	SPTBN1	spectrin, beta, non-erythrocytic 1
hsa-miR-558	1	0	1	1	1	1	SVIL	supervillin
hsa-miR-558	1	0	1	1	1	1	LEFTY2	left-right determination factor 2
hsa-miR-558	1	0	1	0	1	1	SEC62	SEC62 homolog (S. cerevisiae)
hsa-miR-558	0	0	1	1	1	1	TSSC1	tumor suppressing subtransferable candidate 1
hsa-miR-558	1	0	1	1	1	1	UBE2H	ubiquitin-conjugating enzyme E2H
hsa-miR-558	1	0	1	1	1	1	ZIC3	Zic family member 3
hsa-miR-558	0	0	1	1	0	0	SEMA7A	semaphorin 7A, GPI membrane anchor (John Milton Hagen blood group)
hsa-miR-558	0	0	1	1	1	1	RGS5	regulator of G-protein signaling 5
hsa-miR-558	1	0	1	1	1	1	CBX4	chromobox homolog 4
hsa-miR-558	1	0	1	0	1	1	IRS2	insulin receptor substrate 2
hsa-miR-558	0	0	1	1	1	1	PRPF4B	PRP4 pre-mRNA processing factor 4 homolog B (yeast)
hsa-miR-558	0	0	1	1	1	1	RNF8	ring finger protein 8, E3 ubiquitin protein ligase
hsa-miR-558	0	0	1	1	0	0	NPR2	natriuretic peptide receptor B/guanylate cyclase B (atrionatriuretic peptide receptor B)
hsa-miR-558	0	0	1	0	1	1	SLC1A3	solute carrier family 1 (glial high affinity glutamate transporter), member 3
hsa-miR-558	1	0	1	0	1	1	CYTH3	cytohesin 3
hsa-miR-558	1	0	1	0	1	1	ACVR1B	activin A receptor, type IB
hsa-miR-558	1	0	1	1	1	1	ARL3	ADP-ribosylation factor-like 3
hsa-miR-558	1	0	1	1	1	1	DBN1	drebrin 1
hsa-miR-558	1	0	1	1	1	1	FLOT2	flotillin 2
hsa-miR-558	1	0	1	1	1	1	BAP1	BRCA1 associated protein-1 (ubiquitin carboxy-terminal hydrolase)
hsa-miR-558	1	0	1	1	1	1	RAB11A	RAB11A, member RAS oncogene family
hsa-miR-558	0	0	1	0	1	1	BPY2	basic charge, Y-linked, 2
hsa-miR-558	1	0	1	1	1	1	MTMR4	myotubularin related protein 4
hsa-miR-558	1	0	1	1	0	0	COX7A2L	cytochrome c oxidase subunit VIIa polypeptide 2 like
hsa-miR-558	1	0	1	1	1	1	NREP	neuronal regeneration related protein homolog (rat)
hsa-miR-558	1	0	1	1	1	1	ARHGAP29	Rho GTPase activating protein 29
hsa-miR-558	1	0	1	1	1	1	FXR2	fragile X mental retardation, autosomal homolog 2
hsa-miR-558	1	0	1	1	1	1	KCNC4	potassium voltage-gated channel, Shaw-related subfamily, member 4
hsa-miR-558	0	0	1	1	0	0	NDUFA9	NADH dehydrogenase (ubiquinone) 1 alpha subcomplex, 9, 39kDa
hsa-miR-558	1	0	1	1	1	1	CBL	Cbl proto-oncogene, E3 ubiquitin protein ligase
hsa-miR-558	1	0	1	1	1	1	CRK	v-crk sarcoma virus CT10 oncogene homolog (avian)
hsa-miR-558	1	0	1	1	1	1	GJA5	gap junction protein, alpha 5, 40kDa
hsa-miR-558	1	0	1	0	1	1	RAPGEF1	Rap guanine nucleotide exchange factor (GEF) 1
hsa-miR-558	1	0	1	1	1	1	HAS3	hyaluronan synthase 3
hsa-miR-558	1	0	1	1	1	1	PHF2	PHD finger protein 2
hsa-miR-558	1	0	1	0	1	1	PRKAB2	protein kinase, AMP-activated, beta 2 non-catalytic subunit
hsa-miR-558	1	0	1	1	1	1	GABBR2	gamma-aminobutyric acid (GABA) B receptor, 2
hsa-miR-558	1	0	1	1	1	1	AKT3	v-akt murine thymoma viral oncogene homolog 3 (protein kinase B, gamma)
hsa-miR-558	1	0	1	0	0	0	FRAT1	frequently rearranged in advanced T-cell lymphomas
hsa-miR-558	1	0	1	1	1	1	SCARB2	scavenger receptor class B, member 2
hsa-miR-558	1	0	1	1	1	1	LPP	LIM domain containing preferred translocation partner in lipoma
hsa-miR-558	1	0	1	1	1	1	NHLH1	nescient helix loop helix 1
hsa-miR-558	0	0	1	1	0	0	SNURF	SNRPN upstream reading frame
hsa-miR-558	1	0	1	1	1	1	SRRM1	serine/arginine repetitive matrix 1
hsa-miR-558	1	0	1	1	1	1	MAP3K5	mitogen-activated protein kinase kinase kinase 5
hsa-miR-558	1	0	1	1	1	1	DAGLA	diacylglycerol lipase, alpha
hsa-miR-558	1	0	1	1	1	1	TMEM50B	transmembrane protein 50B
hsa-miR-558	1	0	1	1	1	1	NR4A2	nuclear receptor subfamily 4, group A, member 2
hsa-miR-558	1	0	1	0	1	1	PITPNA	phosphatidylinositol transfer protein, alpha
hsa-miR-558	1	0	1	1	1	1	RAD21	RAD21 homolog (S. pombe)
hsa-miR-558	1	0	1	1	1	1	STK4	serine/threonine kinase 4
hsa-miR-558	0	0	1	1	1	1	TM9SF1	transmembrane 9 superfamily member 1
hsa-miR-558	1	0	1	1	1	1	HEXIM1	hexamethylene bis-acetamide inducible 1
hsa-miR-558	1	0	1	0	1	1	IGF2BP1	insulin-like growth factor 2 mRNA binding protein 1
hsa-miR-558	1	0	1	1	1	1	MMP24	matrix metallopeptidase 24 (membrane-inserted)
hsa-miR-558	0	0	1	1	1	1	LYVE1	lymphatic vessel endothelial hyaluronan receptor 1
hsa-miR-558	1	0	1	1	1	1	MAN1A2	mannosidase, alpha, class 1A, member 2
hsa-miR-558	1	0	1	1	1	1	DIAPH2	diaphanous homolog 2 (Drosophila)
hsa-miR-558	0	0	1	1	0	0	DNAJB2	DnaJ (Hsp40) homolog, subfamily B, member 2
hsa-miR-558	0	0	1	1	0	0	UPK2	uroplakin 2
hsa-miR-558	1	0	1	1	1	1	KAT6A	K(lysine) acetyltransferase 6A
hsa-miR-558	0	0	1	1	1	1	TMED10	transmembrane emp24-like trafficking protein 10 (yeast)
hsa-miR-558	1	0	1	1	1	1	NR4A3	nuclear receptor subfamily 4, group A, member 3
hsa-miR-558	1	0	1	1	1	1	ABHD2	abhydrolase domain containing 2
hsa-miR-558	0	0	1	1	1	1	POLR3A	polymerase (RNA) III (DNA directed) polypeptide A, 155kDa
hsa-miR-558	1	0	1	1	1	1	KAT7	K(lysine) acetyltransferase 7
hsa-miR-558	0	0	1	1	1	1	ZNF80	zinc finger protein 80
hsa-miR-558	1	0	1	1	1	1	ZNF81	zinc finger protein 81
hsa-miR-558	0	0	1	0	1	1	ZNF208	zinc finger protein 208
hsa-miR-558	0	0	1	1	1	1	AKAP10	A kinase (PRKA) anchor protein 10
hsa-miR-558	0	0	1	1	0	0	GPR45	G protein-coupled receptor 45
hsa-miR-558	1	0	1	1	1	1	PHLDA1	pleckstrin homology-like domain, family A, member 1
hsa-miR-558	0	0	1	1	0	0	LTB	lymphotoxin beta (TNF superfamily, member 3)
hsa-miR-558	1	0	1	0	1	1	ZFPM2	zinc finger protein, multitype 2
hsa-miR-558	1	0	1	1	1	1	FBXL2	F-box and leucine-rich repeat protein 2
hsa-miR-558	0	0	1	1	1	1	MID2	midline 2
hsa-miR-558	1	0	1	1	1	1	KCNE1L	KCNE1-like
hsa-miR-558	0	0	1	0	1	1	PIGN	phosphatidylinositol glycan anchor biosynthesis, class N
hsa-miR-558	1	0	1	1	1	1	RANBP6	RAN binding protein 6
hsa-miR-558	0	0	1	1	1	1	TIMM9	translocase of inner mitochondrial membrane 9 homolog (yeast)
hsa-miR-558	1	0	1	1	1	1	STK39	serine threonine kinase 39
hsa-miR-558	1	0	1	1	1	1	CLCF1	cardiotrophin-like cytokine factor 1
hsa-miR-558	1	0	1	1	1	1	NRG1	neuregulin 1
hsa-miR-558	1	0	1	1	1	1	ZBTB43	zinc finger and BTB domain containing 43
hsa-miR-558	1	0	1	1	1	1	SCN11A	sodium channel, voltage-gated, type XI, alpha subunit
hsa-miR-558	0	0	1	1	1	1	CCDC113	coiled-coil domain containing 113
hsa-miR-558	0	0	1	1	0	0	NOMO1	NODAL modulator 1
hsa-miR-558	1	0	1	1	1	1	LHX6	LIM homeobox 6
hsa-miR-558	1	0	1	1	1	1	GHITM	growth hormone inducible transmembrane protein
hsa-miR-558	1	0	1	1	1	1	ZBTB11	zinc finger and BTB domain containing 11
hsa-miR-558	1	0	1	1	1	1	RND1	Rho family GTPase 1
hsa-miR-558	1	0	1	1	1	1	CDR2L	cerebellar degeneration-related protein 2-like
hsa-miR-558	1	0	1	1	1	1	RALGPS1	Ral GEF with PH domain and SH3 binding motif 1
hsa-miR-558	1	0	1	0	1	1	TOX	thymocyte selection-associated high mobility group box
hsa-miR-558	1	0	1	0	1	1	MLEC	malectin
hsa-miR-558	1	0	1	0	1	1	TOMM20	translocase of outer mitochondrial membrane 20 homolog (yeast)
hsa-miR-558	1	0	1	1	1	1	NUAK1	NUAK family, SNF1-like kinase, 1
hsa-miR-558	1	0	1	1	1	1	SV2A	synaptic vesicle glycoprotein 2A
hsa-miR-558	1	0	1	1	1	1	ARHGAP44	Rho GTPase activating protein 44
hsa-miR-558	0	0	1	1	1	1	ADNP2	ADNP homeobox 2
hsa-miR-558	0	0	1	1	0	0	MORC2	MORC family CW-type zinc finger 2
hsa-miR-558	1	0	1	1	1	1	DIP2C	DIP2 disco-interacting protein 2 homolog C (Drosophila)
hsa-miR-558	1	0	1	0	1	1	PDS5B	PDS5, regulator of cohesion maintenance, homolog B (S. cerevisiae)
hsa-miR-558	1	0	1	0	1	1	GGA2	golgi-associated, gamma adaptin ear containing, ARF binding protein 2
hsa-miR-558	1	0	1	1	1	1	RTF1	Rtf1, Paf1/RNA polymerase II complex component, homolog (S. cerevisiae)
hsa-miR-558	1	0	1	1	1	1	RCOR1	REST corepressor 1
hsa-miR-558	1	0	1	1	1	1	PRRC2C	proline-rich coiled-coil 2C
hsa-miR-558	1	0	1	1	1	1	ANKS1A	ankyrin repeat and sterile alpha motif domain containing 1A
hsa-miR-558	1	0	1	0	1	1	KHNYN	KH and NYN domain containing
hsa-miR-558	1	0	1	0	1	1	ARHGEF12	Rho guanine nucleotide exchange factor (GEF) 12
hsa-miR-558	1	0	1	1	1	1	NUDCD3	NudC domain containing 3
hsa-miR-558	0	0	1	1	1	1	LEPROTL1	leptin receptor overlapping transcript-like 1
hsa-miR-558	1	0	1	1	1	1	RIMBP2	RIMS binding protein 2
hsa-miR-558	1	0	1	0	1	1	KCTD2	potassium channel tetramerisation domain containing 2
hsa-miR-558	1	0	1	1	1	1	DSTYK	dual serine/threonine and tyrosine protein kinase
hsa-miR-558	1	0	1	1	1	1	RNF19A	ring finger protein 19A, E3 ubiquitin protein ligase
hsa-miR-558	1	0	1	1	1	1	PNKD	paroxysmal nonkinesigenic dyskinesia
hsa-miR-558	1	0	1	0	1	1	PPP1R16B	protein phosphatase 1, regulatory subunit 16B
hsa-miR-558	1	0	1	0	1	1	ERC2	ELKS/RAB6-interacting/CAST family member 2
hsa-miR-558	1	0	1	1	1	1	FAM155B	family with sequence similarity 155, member B
hsa-miR-558	1	0	1	1	1	1	ST8SIA3	ST8 alpha-N-acetyl-neuraminide alpha-2,8-sialyltransferase 3
hsa-miR-558	1	0	1	1	1	1	CDC40	cell division cycle 40 homolog (S. cerevisiae)
hsa-miR-558	0	0	1	1	1	1	PPIL1	peptidylprolyl isomerase (cyclophilin)-like 1
hsa-miR-558	0	0	1	1	1	1	RAB10	RAB10, member RAS oncogene family
hsa-miR-558	0	0	1	1	0	0	IL23A	interleukin 23, alpha subunit p19
hsa-miR-558	0	0	1	1	1	1	HYDIN	HYDIN, axonemal central pair apparatus protein
hsa-miR-558	1	0	1	0	1	1	EIF2C4	eukaryotic translation initiation factor 2C, 4
hsa-miR-558	0	0	1	1	0	0	NDE1	nudE nuclear distribution E homolog 1 (A. nidulans)
hsa-miR-558	0	0	1	1	1	1	MTMR8	myotubularin related protein 8
hsa-miR-558	1	0	1	1	1	1	UBE2R2	ubiquitin-conjugating enzyme E2R 2
hsa-miR-558	1	0	1	1	1	1	HIF1AN	hypoxia inducible factor 1, alpha subunit inhibitor
hsa-miR-558	1	0	1	1	1	1	SLC35A5	solute carrier family 35, member A5
hsa-miR-558	1	0	1	1	1	1	ZNHIT6	zinc finger, HIT-type containing 6
hsa-miR-558	1	0	1	1	1	1	SOBP	sine oculis binding protein homolog (Drosophila)
hsa-miR-558	0	0	1	1	1	1	GPATCH2	G patch domain containing 2
hsa-miR-558	0	0	1	1	1	1	TMLHE	trimethyllysine hydroxylase, epsilon
hsa-miR-558	0	0	1	1	0	0	CCDC87	coiled-coil domain containing 87
hsa-miR-558	1	0	1	1	1	1	C9orf72	chromosome 9 open reading frame 72
hsa-miR-558	1	0	1	0	1	1	LIN7C	lin-7 homolog C (C. elegans)
hsa-miR-558	0	0	1	1	1	1	STK32B	serine/threonine kinase 32B
hsa-miR-558	1	0	1	1	1	1	AJAP1	adherens junctions associated protein 1
hsa-miR-558	1	0	1	1	1	1	GNG12	guanine nucleotide binding protein (G protein), gamma 12
hsa-miR-558	1	0	1	1	1	1	PLEKHA3	pleckstrin homology domain containing, family A (phosphoinositide binding specific) member 3
hsa-miR-558	1	0	1	1	1	1	EPB41L4B	erythrocyte membrane protein band 4.1 like 4B
hsa-miR-558	1	0	1	1	0	0	KCNQ5	potassium voltage-gated channel, KQT-like subfamily, member 5
hsa-miR-558	1	0	1	0	1	1	SLAMF8	SLAM family member 8
hsa-miR-558	1	0	1	0	1	1	EIF5A2	eukaryotic translation initiation factor 5A2
hsa-miR-558	1	0	1	1	1	1	PCDH9	protocadherin 9
hsa-miR-558	1	0	1	1	0	0	JPH2	junctophilin 2
hsa-miR-558	0	0	1	1	1	1	SHROOM4	shroom family member 4
hsa-miR-558	1	0	1	1	1	1	DLG3	discs, large homolog 3 (Drosophila)
hsa-miR-558	1	0	1	1	1	1	RANBP10	RAN binding protein 10
hsa-miR-558	1	0	1	0	1	1	SH3RF1	SH3 domain containing ring finger 1
hsa-miR-558	0	0	1	1	0	0	CTAG2	cancer/testis antigen 2
hsa-miR-558	0	0	1	1	1	1	PPM1A	protein phosphatase, Mg2+/Mn2+ dependent, 1A
hsa-miR-558	1	0	1	1	1	1	ZNFX1	zinc finger, NFX1-type containing 1
hsa-miR-558	0	0	1	1	1	1	HIST1H2AG	histone cluster 1, H2ag
hsa-miR-558	1	0	1	1	1	1	MTMR3	myotubularin related protein 3
hsa-miR-558	1	0	1	0	1	1	TMX4	thioredoxin-related transmembrane protein 4
hsa-miR-558	0	0	1	1	1	1	SRPRB	signal recognition particle receptor, B subunit
hsa-miR-558	0	0	1	1	1	1	IL22RA1	interleukin 22 receptor, alpha 1
hsa-miR-558	1	0	1	1	1	1	CLCN6	chloride channel, voltage-sensitive 6
hsa-miR-558	0	0	1	1	1	1	GABBR1	gamma-aminobutyric acid (GABA) B receptor, 1
hsa-miR-558	0	0	1	1	0	0	MIIP	migration and invasion inhibitory protein
hsa-miR-558	1	0	1	0	1	1	CSNK1G1	casein kinase 1, gamma 1
hsa-miR-558	0	0	1	1	0	0	TFB2M	transcription factor B2, mitochondrial
hsa-miR-558	1	0	1	1	1	1	GIGYF1	GRB10 interacting GYF protein 1
hsa-miR-558	1	0	1	0	1	1	HOXC8	homeobox C8
hsa-miR-558	1	0	1	1	1	1	PRRX1	paired related homeobox 1
hsa-miR-558	0	0	1	1	1	1	SFXN1	sideroflexin 1
hsa-miR-558	1	0	1	1	1	1	HOXB4	homeobox B4
hsa-miR-558	0	0	1	1	1	1	WDR77	WD repeat domain 77
hsa-miR-558	1	0	1	1	1	1	FAM134A	family with sequence similarity 134, member A
hsa-miR-558	1	0	1	1	0	0	PHF23	PHD finger protein 23
hsa-miR-558	0	0	1	1	0	0	ODF1	outer dense fiber of sperm tails 1
hsa-miR-558	0	0	1	1	1	1	MRPL24	mitochondrial ribosomal protein L24
hsa-miR-558	1	0	1	1	1	1	C10orf76	chromosome 10 open reading frame 76
hsa-miR-558	0	0	1	1	1	1	ZBTB3	zinc finger and BTB domain containing 3
hsa-miR-558	0	0	1	1	1	1	CCDC134	coiled-coil domain containing 134
hsa-miR-558	0	0	1	1	0	0	BAIAP2L2	BAI1-associated protein 2-like 2
hsa-miR-558	0	0	1	1	1	1	COQ10B	coenzyme Q10 homolog B (S. cerevisiae)
hsa-miR-558	1	0	1	1	1	1	FAM117A	family with sequence similarity 117, member A
hsa-miR-558	1	0	1	0	1	1	C1orf21	chromosome 1 open reading frame 21
hsa-miR-558	1	0	1	1	1	1	SNX27	sorting nexin family member 27
hsa-miR-558	1	0	1	1	1	1	TIGD6	tigger transposable element derived 6
hsa-miR-558	1	0	1	1	1	1	MARK4	MAP/microtubule affinity-regulating kinase 4
hsa-miR-558	1	0	1	1	1	1	ANO3	anoctamin 3
hsa-miR-558	1	0	1	0	1	1	ITCH	itchy E3 ubiquitin protein ligase
hsa-miR-558	0	0	1	1	1	1	KCNA7	potassium voltage-gated channel, shaker-related subfamily, member 7
hsa-miR-558	1	0	1	1	1	1	UTP15	UTP15, U3 small nucleolar ribonucleoprotein, homolog (S. cerevisiae)
hsa-miR-558	1	0	1	1	1	1	SETD3	SET domain containing 3
hsa-miR-558	1	0	1	1	1	1	ZNRF1	zinc and ring finger 1, E3 ubiquitin protein ligase
hsa-miR-558	1	0	1	1	0	0	MAF1	MAF1 homolog (S. cerevisiae)
hsa-miR-558	1	0	1	1	1	1	DDI2	DNA-damage inducible 1 homolog 2 (S. cerevisiae)
hsa-miR-558	0	0	1	1	1	1	MAP1LC3A	microtubule-associated protein 1 light chain 3 alpha
hsa-miR-558	1	0	1	1	1	1	ARHGEF39	Rho guanine nucleotide exchange factor (GEF) 39
hsa-miR-558	1	0	1	1	1	1	TRIM55	tripartite motif containing 55
hsa-miR-558	0	0	1	1	0	0	TBL1Y	transducin (beta)-like 1, Y-linked
hsa-miR-558	1	0	1	1	1	1	LUZP1	leucine zipper protein 1
hsa-miR-558	0	0	1	1	0	0	CTDP1	CTD (carboxy-terminal domain, RNA polymerase II, polypeptide A) phosphatase, subunit 1
hsa-miR-558	1	0	1	1	1	1	ELFN2	extracellular leucine-rich repeat and fibronectin type III domain containing 2
hsa-miR-558	1	0	1	0	1	1	ANTXR2	anthrax toxin receptor 2
hsa-miR-558	0	0	1	1	1	1	SLC32A1	solute carrier family 32 (GABA vesicular transporter), member 1
hsa-miR-558	1	0	1	1	1	1	C20orf112	chromosome 20 open reading frame 112
hsa-miR-558	0	0	1	1	1	1	CDKN2AIPNL	CDKN2A interacting protein N-terminal like
hsa-miR-558	1	0	1	0	1	1	EDARADD	EDAR-associated death domain
hsa-miR-558	0	0	1	1	1	1	RAB3C	RAB3C, member RAS oncogene family
hsa-miR-558	0	0	1	1	1	1	C1orf213	chromosome 1 open reading frame 213
hsa-miR-558	1	0	1	0	1	1	CNOT6L	CCR4-NOT transcription complex, subunit 6-like
hsa-miR-558	0	0	1	0	0	0	CAPN13	calpain 13
hsa-miR-558	0	0	1	1	1	1	CYB5D1	cytochrome b5 domain containing 1
hsa-miR-558	1	0	1	1	1	1	KCNH8	potassium voltage-gated channel, subfamily H (eag-related), member 8
hsa-miR-558	0	0	1	1	0	0	NKX2-3	NK2 homeobox 3
hsa-miR-558	1	0	1	1	0	0	GAS2L1	growth arrest-specific 2 like 1
hsa-miR-558	0	0	1	1	0	0	C1orf158	chromosome 1 open reading frame 158
hsa-miR-558	1	0	1	1	1	1	POGLUT1	protein O-glucosyltransferase 1
hsa-miR-558	1	0	1	1	1	1	ZNF362	zinc finger protein 362
hsa-miR-558	0	0	1	1	1	1	MED19	mediator complex subunit 19
hsa-miR-558	1	0	1	1	1	1	HS6ST3	heparan sulfate 6-O-sulfotransferase 3
hsa-miR-558	1	0	1	1	1	1	RDH10	retinol dehydrogenase 10 (all-trans)
hsa-miR-558	1	0	1	1	1	1	CAMK2D	calcium/calmodulin-dependent protein kinase II delta
hsa-miR-558	0	0	1	1	1	1	REXO1L1	REX1, RNA exonuclease 1 homolog (S. cerevisiae)-like 1
hsa-miR-558	0	0	1	0	1	1	TUSC5	tumor suppressor candidate 5
hsa-miR-558	0	0	1	1	0	0	PRSS36	protease, serine, 36
hsa-miR-558	0	0	1	0	1	1	KRT18P55	keratin 18 pseudogene 55
hsa-miR-558	0	0	1	1	1	1	YIPF6	Yip1 domain family, member 6
hsa-miR-558	0	0	1	0	1	1	C15orf37	chromosome 15 open reading frame 37
hsa-miR-558	1	0	1	0	1	1	PDE12	phosphodiesterase 12
hsa-miR-558	1	0	1	1	1	1	PPM1B	protein phosphatase, Mg2+/Mn2+ dependent, 1B
hsa-miR-558	1	0	1	0	1	1	ARNT	aryl hydrocarbon receptor nuclear translocator
hsa-miR-558	0	0	1	1	1	1	STXBP4	syntaxin binding protein 4
hsa-miR-558	0	0	1	0	1	1	NAT8L	N-acetyltransferase 8-like (GCN5-related, putative)
hsa-miR-558	1	0	1	1	1	1	CREM	cAMP responsive element modulator
hsa-miR-558	0	0	1	1	1	1	CCDC67	coiled-coil domain containing 67
hsa-miR-558	0	0	1	1	0	0	CENPV	centromere protein V
hsa-miR-558	1	0	1	1	1	1	TMEM229B	transmembrane protein 229B
hsa-miR-558	0	0	1	1	1	1	CABP7	calcium binding protein 7
hsa-miR-558	1	0	1	0	1	1	C12orf36	chromosome 12 open reading frame 36
hsa-miR-558	1	0	1	1	1	1	SP8	Sp8 transcription factor
hsa-miR-558	1	0	1	0	1	1	SRRM4	serine/arginine repetitive matrix 4
hsa-miR-558	1	0	1	1	1	1	ZBTB41	zinc finger and BTB domain containing 41
hsa-miR-558	1	0	1	1	1	1	E2F6	E2F transcription factor 6
hsa-miR-558	1	0	1	1	1	1	RAB43	RAB43, member RAS oncogene family
hsa-miR-558	1	0	1	0	1	1	ZC3H6	zinc finger CCCH-type containing 6
hsa-miR-558	1	0	1	0	1	1	DLEU7	deleted in lymphocytic leukemia, 7
hsa-miR-558	1	0	1	1	1	1	CXCL12	chemokine (C-X-C motif) ligand 12
hsa-miR-558	0	0	1	1	1	1	COL18A1-AS1	COL18A1 antisense RNA 1
hsa-miR-558	0	0	1	1	1	1	SLC25A35	solute carrier family 25, member 35
hsa-miR-558	1	0	1	1	1	1	PPAPDC2	phosphatidic acid phosphatase type 2 domain containing 2
hsa-miR-558	0	0	1	1	1	1	APOBEC4	apolipoprotein B mRNA editing enzyme, catalytic polypeptide-like 4 (putative)
hsa-miR-558	0	0	1	1	0	0	C19orf70	chromosome 19 open reading frame 70
hsa-miR-558	1	0	1	1	1	1	TMEM132E	transmembrane protein 132E
hsa-miR-558	0	0	1	1	1	1	DEFB132	defensin, beta 132
hsa-miR-558	0	0	1	0	1	1	LINC00336	long intergenic non-protein coding RNA 336
hsa-miR-558	0	0	1	0	0	0	CELP	carboxyl ester lipase pseudogene
hsa-miR-558	0	0	1	0	0	0	PCDHB19P	protocadherin beta 19 pseudogene
hsa-miR-558	0	0	1	0	0	0	LOC339240	keratin 17 pseudogene
hsa-miR-558	0	0	1	0	0	0	TTTY15	testis-specific transcript, Y-linked 15 (non-protein coding)
hsa-miR-558	0	0	1	0	0	0	RBMXP3	RNA binding motif protein, X-linked pseudogene 3
hsa-miR-558	0	0	1	0	0	0	NXF4	nuclear RNA export factor 4 pseudogene
hsa-miR-558	0	0	1	0	0	0	ATXN8OS	ATXN8 opposite strand (non-protein coding)
hsa-miR-558	0	0	1	0	0	0	SNORD56	small nucleolar RNA, C/D box 56
hsa-miR-558	0	0	1	0	0	0	RPL29P2	ribosomal protein L29 pseudogene 2
hsa-miR-558	0	0	1	0	0	0	MALAT1	metastasis associated lung adenocarcinoma transcript 1 (non-protein coding)
hsa-miR-558	0	0	1	0	0	0	DUSP5P	dual specificity phosphatase 5 pseudogene
hsa-miR-558	0	0	1	0	0	0	SNX29P2	sorting nexin 29 pseudogene 2
hsa-miR-558	0	0	1	0	0	0	NBR2	neighbor of BRCA1 gene 2 (non-protein coding)
hsa-miR-558	0	0	1	0	0	0	HSP90B3P	heat shock protein 90kDa beta (Grp94), member 3, pseudogene
hsa-miR-558	0	0	1	0	1	1	DDX12P	DEAD/H (Asp-Glu-Ala-Asp/His) box polypeptide 12, pseudogene
hsa-miR-558	1	0	1	1	1	1	HOXA1	homeobox A1
hsa-miR-558	1	0	1	1	1	1	TRIO	trio Rho guanine nucleotide exchange factor
hsa-miR-558	0	0	1	0	0	0	TRAC	T cell receptor alpha constant
hsa-miR-558	1	0	1	1	1	1	HNRNPA1	heterogeneous nuclear ribonucleoprotein A1
hsa-miR-558	0	0	0	1	0	0	IL32	interleukin 32
hsa-miR-558	1	0	1	1	0	0	GPRC5A	G protein-coupled receptor, family C, group 5, member A
hsa-miR-558	0	0	1	1	0	0	RNASET2	ribonuclease T2
hsa-miR-558	0	0	1	1	0	0	EDC4	enhancer of mRNA decapping 4
hsa-miR-558	0	0	0	1	0	0	RFC2	replication factor C (activator 1) 2, 40kDa
hsa-miR-558	0	0	0	1	0	0	ADCK2	aarF domain containing kinase 2
hsa-miR-558	0	0	0	1	0	0	METTL22	methyltransferase like 22
hsa-miR-558	0	0	0	1	0	0	TMEM38A	transmembrane protein 38A
hsa-miR-558	0	0	0	1	0	0	SULT2B1	sulfotransferase family, cytosolic, 2B, member 1
hsa-miR-558	0	0	1	1	1	1	RALGAPA2	Ral GTPase activating protein, alpha subunit 2 (catalytic)
hsa-miR-558	0	0	0	1	0	0	GMIP	GEM interacting protein
hsa-miR-558	0	0	0	1	0	0	THPO	thrombopoietin
hsa-miR-558	0	0	1	1	0	0	OCEL1	occludin/ELL domain containing 1
hsa-miR-558	0	0	0	1	0	0	CATSPERG	catsper channel auxiliary subunit gamma
hsa-miR-558	0	0	1	1	0	0	MARCH2	membrane-associated ring finger (C3HC4) 2, E3 ubiquitin protein ligase
hsa-miR-558	0	0	1	1	1	1	SNRPD3	small nuclear ribonucleoprotein D3 polypeptide 18kDa
hsa-miR-558	0	0	1	1	0	0	TCN2	transcobalamin II
hsa-miR-558	0	0	0	1	0	0	SRRD	SRR1 domain containing
hsa-miR-558	0	0	0	1	0	0	HSCB	HscB iron-sulfur cluster co-chaperone homolog (E. coli)
hsa-miR-558	0	0	1	1	0	0	CBY1	chibby homolog 1 (Drosophila)
hsa-miR-558	1	0	1	1	1	1	PHF5A	PHD finger protein 5A
hsa-miR-558	0	0	1	1	1	1	ACO2	aconitase 2, mitochondrial
hsa-miR-558	0	0	0	1	0	0	WDR13	WD repeat domain 13
hsa-miR-558	1	0	0	1	1	1	DHRS12	dehydrogenase/reductase (SDR family) member 12
hsa-miR-558	0	0	0	1	0	0	ZP2	zona pellucida glycoprotein 2 (sperm receptor)
hsa-miR-558	0	0	1	1	1	1	AQP8	aquaporin 8
hsa-miR-558	1	0	0	1	1	1	C16orf88	chromosome 16 open reading frame 88
hsa-miR-558	0	0	0	1	0	0	TNFRSF10A	tumor necrosis factor receptor superfamily, member 10a
hsa-miR-558	0	0	0	1	0	0	EXOSC5	exosome component 5
hsa-miR-558	0	0	1	1	0	0	DHDH	dihydrodiol dehydrogenase (dimeric)
hsa-miR-558	0	0	0	1	1	1	DNASE2	deoxyribonuclease II, lysosomal
hsa-miR-558	0	0	1	1	1	1	BAG1	BCL2-associated athanogene
hsa-miR-558	0	0	0	1	1	1	KAT2A	K(lysine) acetyltransferase 2A
hsa-miR-558	1	0	1	1	0	0	PRPF19	PRP19/PSO4 pre-mRNA processing factor 19 homolog (S. cerevisiae)
hsa-miR-558	0	0	1	1	0	0	MVK	mevalonate kinase
hsa-miR-558	0	0	1	1	1	1	TIMELESS	timeless homolog (Drosophila)
hsa-miR-558	0	0	0	1	0	0	GABRR2	gamma-aminobutyric acid (GABA) A receptor, rho 2
hsa-miR-558	0	0	1	1	0	0	PCDH12	protocadherin 12
hsa-miR-558	1	0	1	1	1	1	BCL6	B-cell CLL/lymphoma 6
hsa-miR-558	0	0	0	1	0	0	CYB561D2	cytochrome b-561 domain containing 2
hsa-miR-558	1	0	0	1	0	0	ABTB1	ankyrin repeat and BTB (POZ) domain containing 1
hsa-miR-558	0	0	1	1	1	1	COMMD2	COMM domain containing 2
hsa-miR-558	0	0	1	1	1	1	EIF1B	eukaryotic translation initiation factor 1B
hsa-miR-558	0	0	1	1	1	1	PCGF1	polycomb group ring finger 1
hsa-miR-558	0	0	0	1	0	0	PRTN3	proteinase 3
hsa-miR-558	0	0	0	1	0	0	VAX2	ventral anterior homeobox 2
hsa-miR-558	0	0	0	1	0	0	ENO1	enolase 1, (alpha)
hsa-miR-558	0	0	1	1	1	1	IFT43	intraflagellar transport 43 homolog (Chlamydomonas)
hsa-miR-558	1	0	1	1	1	1	TEX14	testis expressed 14
hsa-miR-558	1	0	0	1	0	0	CD97	CD97 molecule
hsa-miR-558	0	0	0	1	1	1	PSG9	pregnancy specific beta-1-glycoprotein 9
hsa-miR-558	0	0	0	1	0	0	SH2D3A	SH2 domain containing 3A
hsa-miR-558	0	0	1	1	1	1	SBDS	Shwachman-Bodian-Diamond syndrome
hsa-miR-558	1	0	0	1	1	1	WNK4	WNK lysine deficient protein kinase 4
hsa-miR-558	0	0	1	1	0	0	GCAT	glycine C-acetyltransferase
hsa-miR-558	0	0	0	1	0	0	SERINC4	serine incorporator 4
hsa-miR-558	0	0	1	1	1	1	DAD1	defender against cell death 1
hsa-miR-558	0	0	1	1	1	1	CNGB1	cyclic nucleotide gated channel beta 1
hsa-miR-558	0	0	1	1	0	0	CERS4	ceramide synthase 4
hsa-miR-558	0	0	0	1	1	1	TDRD1	tudor domain containing 1
hsa-miR-558	0	0	1	1	0	0	TMCO6	transmembrane and coiled-coil domains 6
hsa-miR-558	1	0	1	1	1	1	KCNA5	potassium voltage-gated channel, shaker-related subfamily, member 5
hsa-miR-558	0	0	0	1	1	1	EFCAB4B	EF-hand calcium binding domain 4B
hsa-miR-558	1	0	0	1	0	0	SAFB2	scaffold attachment factor B2
hsa-miR-558	0	0	1	1	1	1	NDUFA10	NADH dehydrogenase (ubiquinone) 1 alpha subcomplex, 10, 42kDa
hsa-miR-558	0	0	1	1	0	0	CACNG6	calcium channel, voltage-dependent, gamma subunit 6
hsa-miR-558	0	0	0	1	0	0	EIF3G	eukaryotic translation initiation factor 3, subunit G
hsa-miR-558	1	0	1	1	1	1	ACTR10	actin-related protein 10 homolog (S. cerevisiae)
hsa-miR-558	0	0	0	1	0	0	PODNL1	podocan-like 1
hsa-miR-558	0	0	1	1	0	0	RAMP1	receptor (G protein-coupled) activity modifying protein 1
hsa-miR-558	0	0	0	1	1	1	APCS	amyloid P component, serum
hsa-miR-558	0	0	1	1	1	1	RTTN	rotatin
hsa-miR-558	0	0	0	1	1	1	HRASLS2	HRAS-like suppressor 2
hsa-miR-558	0	0	1	1	1	1	MED10	mediator complex subunit 10
hsa-miR-558	0	0	1	1	0	0	SLC2A11	solute carrier family 2 (facilitated glucose transporter), member 11
hsa-miR-558	1	0	1	1	0	0	ATP13A3	ATPase type 13A3
hsa-miR-558	0	0	1	1	1	1	SYNJ2BP	synaptojanin 2 binding protein
hsa-miR-558	0	0	0	1	1	1	TRPM1	transient receptor potential cation channel, subfamily M, member 1
hsa-miR-558	0	0	1	1	1	1	HBXIP	hepatitis B virus x interacting protein
hsa-miR-558	0	0	0	1	0	0	ERN2	endoplasmic reticulum to nucleus signaling 2
hsa-miR-558	0	0	0	1	0	0	FBXL8	F-box and leucine-rich repeat protein 8
hsa-miR-558	0	0	1	1	0	0	KIF12	kinesin family member 12
hsa-miR-558	0	0	1	1	1	1	ENPP2	ectonucleotide pyrophosphatase/phosphodiesterase 2
hsa-miR-558	0	0	1	1	1	1	TTPA	tocopherol (alpha) transfer protein
hsa-miR-558	0	0	0	1	0	0	HTR3B	5-hydroxytryptamine (serotonin) receptor 3B, ionotropic
hsa-miR-558	0	0	1	1	0	0	ITPKA	inositol-trisphosphate 3-kinase A
hsa-miR-558	0	0	1	1	1	1	SPECC1	sperm antigen with calponin homology and coiled-coil domains 1
hsa-miR-558	0	0	1	1	0	0	PRR11	proline rich 11
hsa-miR-558	0	0	0	1	0	0	NUBP2	nucleotide binding protein 2
hsa-miR-558	0	0	0	1	0	0	TELO2	TEL2, telomere maintenance 2, homolog (S. cerevisiae)
hsa-miR-558	1	0	1	1	1	1	WSB1	WD repeat and SOCS box containing 1
hsa-miR-558	0	0	1	1	1	1	DHX8	DEAH (Asp-Glu-Ala-His) box polypeptide 8
hsa-miR-558	0	0	0	1	0	0	GSDMD	gasdermin D
hsa-miR-558	0	0	0	1	0	0	TJP3	tight junction protein 3
hsa-miR-558	1	0	1	1	0	0	EPC1	enhancer of polycomb homolog 1 (Drosophila)
hsa-miR-558	0	0	1	1	0	0	ASPA	aspartoacylase
hsa-miR-558	0	0	1	1	0	0	FAM83E	family with sequence similarity 83, member E
hsa-miR-558	0	0	0	1	0	0	C11orf67	chromosome 11 open reading frame 67
hsa-miR-558	0	0	1	1	0	0	ASB3	ankyrin repeat and SOCS box containing 3
hsa-miR-558	0	0	1	1	0	0	PRDM11	PR domain containing 11
hsa-miR-558	1	0	1	1	1	1	EIF2AK4	eukaryotic translation initiation factor 2 alpha kinase 4
hsa-miR-558	0	0	1	1	1	1	ATF2	activating transcription factor 2
hsa-miR-558	0	0	0	1	1	1	ANXA3	annexin A3
hsa-miR-558	0	0	1	1	1	1	RAD18	RAD18 homolog (S. cerevisiae)
hsa-miR-558	0	0	1	1	0	0	FAM184B	family with sequence similarity 184, member B
hsa-miR-558	0	0	1	1	1	1	CENPE	centromere protein E, 312kDa
hsa-miR-558	0	0	0	1	0	0	TRPC7	transient receptor potential cation channel, subfamily C, member 7
hsa-miR-558	0	0	0	1	0	0	SIL1	SIL1 homolog, endoplasmic reticulum chaperone (S. cerevisiae)
hsa-miR-558	0	0	0	1	1	1	WBSCR22	Williams Beuren syndrome chromosome region 22
hsa-miR-558	0	0	1	1	0	0	MAD1L1	MAD1 mitotic arrest deficient-like 1 (yeast)
hsa-miR-558	0	0	1	1	0	0	GET4	golgi to ER traffic protein 4 homolog (S. cerevisiae)
hsa-miR-558	1	0	1	1	0	0	ESYT1	extended synaptotagmin-like protein 1
hsa-miR-558	0	0	1	1	0	0	COMMD4	COMM domain containing 4
hsa-miR-558	0	0	0	1	0	0	SEPT12	septin 12
hsa-miR-558	0	0	1	1	1	1	SLC39A6	solute carrier family 39 (zinc transporter), member 6
hsa-miR-558	0	0	1	1	1	1	DOPEY2	dopey family member 2
hsa-miR-558	1	0	0	1	0	0	PGD	phosphogluconate dehydrogenase
hsa-miR-558	1	0	0	1	0	0	SF3B4	splicing factor 3b, subunit 4, 49kDa
hsa-miR-558	1	0	1	1	1	1	OSR1	odd-skipped related 1 (Drosophila)
hsa-miR-558	0	0	1	1	0	0	PLA1A	phospholipase A1 member A
hsa-miR-558	0	0	1	1	1	1	ILDR1	immunoglobulin-like domain containing receptor 1
hsa-miR-558	1	0	1	1	1	1	GABRA6	gamma-aminobutyric acid (GABA) A receptor, alpha 6
hsa-miR-558	0	0	1	1	1	1	NHP2	NHP2 ribonucleoprotein homolog (yeast)
hsa-miR-558	0	0	0	1	0	0	KCNMB1	potassium large conductance calcium-activated channel, subfamily M, beta member 1
hsa-miR-558	0	0	1	1	1	1	UIMC1	ubiquitin interaction motif containing 1
hsa-miR-558	0	0	0	1	0	0	FRMPD3	FERM and PDZ domain containing 3
hsa-miR-558	0	0	1	1	1	1	MAGEA4	melanoma antigen family A, 4
hsa-miR-558	0	0	1	1	0	0	FUOM	fucose mutarotase
hsa-miR-558	1	0	1	1	0	0	BSCL2	Berardinelli-Seip congenital lipodystrophy 2 (seipin)
hsa-miR-558	0	0	0	1	0	0	PLCB3	phospholipase C, beta 3 (phosphatidylinositol-specific)
hsa-miR-558	1	0	1	1	1	1	ZNF827	zinc finger protein 827
hsa-miR-558	0	0	0	1	1	1	CCR6	chemokine (C-C motif) receptor 6
hsa-miR-558	0	0	1	1	0	0	CFDP1	craniofacial development protein 1
hsa-miR-558	0	0	0	1	0	0	SLC5A10	solute carrier family 5 (sodium/glucose cotransporter), member 10
hsa-miR-558	1	0	1	1	1	1	TOMM70A	translocase of outer mitochondrial membrane 70 homolog A (S. cerevisiae)
hsa-miR-558	0	0	0	1	0	0	MED7	mediator complex subunit 7
hsa-miR-558	0	0	0	1	0	0	FAM161B	family with sequence similarity 161, member B
hsa-miR-558	0	0	1	1	1	1	GNAQ	guanine nucleotide binding protein (G protein), q polypeptide
hsa-miR-558	0	0	0	1	0	0	PRG3	proteoglycan 3
hsa-miR-558	0	0	0	1	0	0	COX6A2	cytochrome c oxidase subunit VIa polypeptide 2
hsa-miR-558	0	0	1	1	1	1	KBTBD5	kelch repeat and BTB (POZ) domain containing 5
hsa-miR-558	0	0	0	1	1	1	ZNF19	zinc finger protein 19
hsa-miR-558	0	0	1	1	0	0	ACTR1B	ARP1 actin-related protein 1 homolog B, centractin beta (yeast)
hsa-miR-558	1	0	1	1	0	0	SHF	Src homology 2 domain containing F
hsa-miR-558	0	0	1	1	0	0	LRRC36	leucine rich repeat containing 36
hsa-miR-558	0	0	0	1	0	0	AIRE	autoimmune regulator
hsa-miR-558	1	0	1	1	1	1	ZNF583	zinc finger protein 583
hsa-miR-558	0	0	0	1	0	0	FTCD	formiminotransferase cyclodeaminase
hsa-miR-558	0	0	0	1	0	0	C21orf58	chromosome 21 open reading frame 58
hsa-miR-558	0	0	1	1	0	0	SAFB	scaffold attachment factor B
hsa-miR-558	0	0	0	1	1	1	PHLDB3	pleckstrin homology-like domain, family B, member 3
hsa-miR-558	0	0	0	1	0	0	MYL3	myosin, light chain 3, alkali; ventricular, skeletal, slow
hsa-miR-558	0	0	1	1	1	1	C1orf123	chromosome 1 open reading frame 123
hsa-miR-558	0	0	1	1	0	0	RBP7	retinol binding protein 7, cellular
hsa-miR-558	0	0	0	1	1	1	TMCO4	transmembrane and coiled-coil domains 4
hsa-miR-558	0	0	1	1	1	1	RBM15	RNA binding motif protein 15
hsa-miR-558	0	0	0	1	0	0	HAAO	3-hydroxyanthranilate 3,4-dioxygenase
hsa-miR-558	0	0	1	1	1	1	C3orf67	chromosome 3 open reading frame 67
hsa-miR-558	0	0	0	1	1	1	ZNF35	zinc finger protein 35
hsa-miR-558	0	0	1	1	1	1	UVSSA	UV-stimulated scaffold protein A
hsa-miR-558	1	0	1	1	1	1	RNF180	ring finger protein 180
hsa-miR-558	0	0	1	1	1	1	AKR1D1	aldo-keto reductase family 1, member D1 (delta 4-3-ketosteroid-5-beta-reductase)
hsa-miR-558	1	0	0	1	1	1	GPR146	G protein-coupled receptor 146
hsa-miR-558	0	0	0	1	0	0	ALDH7A1	aldehyde dehydrogenase 7 family, member A1
hsa-miR-558	0	0	0	1	0	0	VWA2	von Willebrand factor A domain containing 2
hsa-miR-558	0	0	0	1	0	0	PLEKHF1	pleckstrin homology domain containing, family F (with FYVE domain) member 1
hsa-miR-558	0	0	1	1	1	1	TMED3	transmembrane emp24 protein transport domain containing 3
hsa-miR-558	0	0	0	1	0	0	CDH16	cadherin 16, KSP-cadherin
hsa-miR-558	0	0	0	1	0	0	NNMT	nicotinamide N-methyltransferase
hsa-miR-558	0	0	1	1	1	1	STAT6	signal transducer and activator of transcription 6, interleukin-4 induced
hsa-miR-558	0	0	1	1	0	0	SCG5	secretogranin V (7B2 protein)
hsa-miR-558	0	0	1	1	0	0	SMG8	smg-8 homolog, nonsense mediated mRNA decay factor (C. elegans)
hsa-miR-558	0	0	0	1	0	0	CYP2A6	cytochrome P450, family 2, subfamily A, polypeptide 6
hsa-miR-558	0	0	0	1	0	0	CYP2A7	cytochrome P450, family 2, subfamily A, polypeptide 7
hsa-miR-558	1	0	0	1	1	1	CHAF1A	chromatin assembly factor 1, subunit A (p150)
hsa-miR-558	0	0	1	1	0	0	CD320	CD320 molecule
hsa-miR-558	0	0	1	1	0	0	TMEM88	transmembrane protein 88
hsa-miR-558	0	0	1	1	1	1	BIRC5	baculoviral IAP repeat containing 5
hsa-miR-558	1	0	1	1	0	0	SNX15	sorting nexin 15
hsa-miR-558	0	0	1	1	1	1	OGG1	8-oxoguanine DNA glycosylase
hsa-miR-558	0	0	1	1	0	0	ZNF280A	zinc finger protein 280A
hsa-miR-558	0	0	0	1	1	1	FAM71B	family with sequence similarity 71, member B
hsa-miR-558	0	0	0	1	0	0	CTRB2	chymotrypsinogen B2
hsa-miR-558	1	0	1	1	1	1	ATRNL1	attractin-like 1
hsa-miR-558	0	0	1	1	1	1	HS1BP3	HCLS1 binding protein 3
hsa-miR-558	0	0	1	1	1	1	C15orf40	chromosome 15 open reading frame 40
hsa-miR-558	0	0	0	1	0	0	ANKS3	ankyrin repeat and sterile alpha motif domain containing 3
hsa-miR-558	0	0	0	1	1	1	DRD5	dopamine receptor D5
hsa-miR-558	0	0	1	1	1	1	GPR22	G protein-coupled receptor 22
hsa-miR-558	1	0	1	1	1	1	IL13	interleukin 13
hsa-miR-558	0	0	0	1	0	0	SLFN12	schlafen family member 12
hsa-miR-558	0	0	0	1	1	1	SLC9C1	solute carrier family 9, subfamily C (Na+-transporting carboxylic acid decarboxylase), member 1
hsa-miR-558	1	0	0	1	0	0	KISS1	KiSS-1 metastasis-suppressor
hsa-miR-558	1	0	1	1	1	1	CSDC2	cold shock domain containing C2, RNA binding
hsa-miR-558	0	0	0	1	1	1	COG7	component of oligomeric golgi complex 7
hsa-miR-558	0	0	0	1	0	0	BOP1	block of proliferation 1
hsa-miR-558	0	0	0	1	0	0	ZNF556	zinc finger protein 556
hsa-miR-558	0	0	0	1	1	1	ADAT1	adenosine deaminase, tRNA-specific 1
hsa-miR-558	0	0	1	1	1	1	DLEC1	deleted in lung and esophageal cancer 1
hsa-miR-558	0	0	1	1	0	0	MUS81	MUS81 endonuclease homolog (S. cerevisiae)
hsa-miR-558	0	0	0	1	1	1	KCNG4	potassium voltage-gated channel, subfamily G, member 4
hsa-miR-558	0	0	0	1	0	0	PIGS	phosphatidylinositol glycan anchor biosynthesis, class S
hsa-miR-558	0	0	0	1	0	0	SNUPN	snurportin 1
hsa-miR-558	0	0	0	1	0	0	ADCK5	aarF domain containing kinase 5
hsa-miR-558	0	0	0	1	1	1	TLR1	toll-like receptor 1
hsa-miR-558	0	0	1	1	0	0	GRB7	growth factor receptor-bound protein 7
hsa-miR-558	1	0	1	1	1	1	EEF1A1	eukaryotic translation elongation factor 1 alpha 1
hsa-miR-558	1	0	0	1	1	1	TMEM234	transmembrane protein 234
hsa-miR-558	0	0	0	1	0	0	MAL	mal, T-cell differentiation protein
hsa-miR-558	0	0	1	1	0	0	SPESP1	sperm equatorial segment protein 1
hsa-miR-558	0	0	1	1	0	0	SPNS1	spinster homolog 1 (Drosophila)
hsa-miR-558	1	0	0	1	0	0	TRPV6	transient receptor potential cation channel, subfamily V, member 6
hsa-miR-558	0	0	0	1	1	1	METTL2A	methyltransferase like 2A
hsa-miR-558	0	0	0	1	0	0	CMKLR1	chemokine-like receptor 1
hsa-miR-558	0	0	0	1	1	1	PSG4	pregnancy specific beta-1-glycoprotein 4
hsa-miR-558	0	0	1	1	1	1	PSG5	pregnancy specific beta-1-glycoprotein 5
hsa-miR-558	0	0	0	1	0	0	GUK1	guanylate kinase 1
hsa-miR-558	0	0	0	1	0	0	UTS2R	urotensin 2 receptor
hsa-miR-558	0	0	1	1	0	0	FUZ	fuzzy homolog (Drosophila)
hsa-miR-558	1	0	1	1	1	1	MTMR10	myotubularin related protein 10
hsa-miR-558	0	0	1	1	0	0	KCNH6	potassium voltage-gated channel, subfamily H (eag-related), member 6
hsa-miR-558	1	0	1	1	1	1	TLN1	talin 1
hsa-miR-558	0	0	1	1	1	1	MMP1	matrix metallopeptidase 1 (interstitial collagenase)
hsa-miR-558	0	0	0	1	1	1	WSB2	WD repeat and SOCS box containing 2
hsa-miR-558	0	0	1	1	0	0	RPUSD2	RNA pseudouridylate synthase domain containing 2
hsa-miR-558	1	0	1	1	1	1	SHMT1	serine hydroxymethyltransferase 1 (soluble)
hsa-miR-558	0	0	1	1	0	0	SDK2	sidekick cell adhesion molecule 2
hsa-miR-558	0	0	1	1	0	0	STOML1	stomatin (EPB72)-like 1
hsa-miR-558	0	0	0	1	0	0	ZNF271	zinc finger protein 271
hsa-miR-558	0	0	0	1	0	0	TNFRSF6B	tumor necrosis factor receptor superfamily, member 6b, decoy
hsa-miR-558	0	0	1	1	0	0	RTEL1	regulator of telomere elongation helicase 1
hsa-miR-558	0	0	0	1	0	0	ZNF101	zinc finger protein 101
hsa-miR-558	1	0	0	1	0	0	RUFY1	RUN and FYVE domain containing 1
hsa-miR-558	0	0	1	1	1	1	DCAF4L2	DDB1 and CUL4 associated factor 4-like 2
hsa-miR-558	0	0	1	1	1	1	USP54	ubiquitin specific peptidase 54
hsa-miR-558	0	0	0	1	0	0	GJD4	gap junction protein, delta 4, 40.1kDa
hsa-miR-558	1	0	1	1	1	1	NCL	nucleolin
hsa-miR-558	1	0	0	1	0	0	HIC1	hypermethylated in cancer 1
hsa-miR-558	0	0	1	1	1	1	SAMD3	sterile alpha motif domain containing 3
hsa-miR-558	0	0	1	1	1	1	CALCB	calcitonin-related polypeptide beta
hsa-miR-558	0	0	1	1	1	1	FAM193A	family with sequence similarity 193, member A
hsa-miR-558	1	0	0	1	0	0	KLHL36	kelch-like 36 (Drosophila)
hsa-miR-558	0	0	1	1	0	0	BBX	bobby sox homolog (Drosophila)
hsa-miR-558	0	0	0	1	1	1	ASB4	ankyrin repeat and SOCS box containing 4
hsa-miR-558	0	0	1	1	1	1	ARHGEF4	Rho guanine nucleotide exchange factor (GEF) 4
hsa-miR-558	0	0	0	1	0	0	SPAG11A	sperm associated antigen 11A
hsa-miR-558	0	0	1	1	1	1	HARBI1	harbinger transposase derived 1
hsa-miR-558	0	0	0	1	1	1	TBC1D3	TBC1 domain family, member 3
hsa-miR-558	1	0	1	1	1	1	ATP11C	ATPase, class VI, type 11C
hsa-miR-558	0	0	0	1	0	0	RAB11B	RAB11B, member RAS oncogene family
hsa-miR-558	0	0	0	1	0	0	IFITM1	interferon induced transmembrane protein 1
hsa-miR-558	0	0	0	1	0	0	COA3	cytochrome C oxidase assembly factor 3
hsa-miR-558	1	0	1	1	1	1	CALN1	calneuron 1
hsa-miR-558	0	0	1	1	0	0	CRIP2	cysteine-rich protein 2
hsa-miR-558	0	0	1	1	1	1	SLC22A23	solute carrier family 22, member 23
hsa-miR-558	0	0	1	1	1	1	HNMT	histamine N-methyltransferase
hsa-miR-558	0	0	1	1	1	1	PDLIM1	PDZ and LIM domain 1
hsa-miR-558	0	0	1	1	0	0	MFSD10	major facilitator superfamily domain containing 10
hsa-miR-558	0	0	1	1	1	1	MOB2	MOB kinase activator 2
hsa-miR-558	0	0	1	1	0	0	HIST1H2AK	histone cluster 1, H2ak
hsa-miR-558	0	0	0	1	0	0	ACTL10	actin-like 10
hsa-miR-558	0	0	0	1	0	0	WDR4	WD repeat domain 4
hsa-miR-558	0	0	0	1	0	0	CYP2A13	cytochrome P450, family 2, subfamily A, polypeptide 13
hsa-miR-558	0	0	0	1	0	0	DDX24	DEAD (Asp-Glu-Ala-Asp) box polypeptide 24
hsa-miR-558	0	0	0	1	1	1	SNX20	sorting nexin 20
hsa-miR-558	0	0	1	1	0	0	DRG1	developmentally regulated GTP binding protein 1
hsa-miR-558	0	0	1	1	1	1	SPAG16	sperm associated antigen 16
hsa-miR-558	1	0	1	1	1	1	KCNJ12	potassium inwardly-rectifying channel, subfamily J, member 12
hsa-miR-558	0	0	1	1	0	0	SOCS1	suppressor of cytokine signaling 1
hsa-miR-558	1	0	1	1	1	1	CEP63	centrosomal protein 63kDa
hsa-miR-558	0	0	1	1	1	1	DCAF4L1	DDB1 and CUL4 associated factor 4-like 1
hsa-miR-558	0	0	1	1	1	1	WBSCR17	Williams-Beuren syndrome chromosome region 17
hsa-miR-558	0	0	1	1	1	1	MRPL12	mitochondrial ribosomal protein L12
hsa-miR-558	0	0	0	1	0	0	TAS2R38	taste receptor, type 2, member 38
hsa-miR-558	1	0	0	1	0	0	UBL4B	ubiquitin-like 4B
hsa-miR-558	0	0	0	1	0	0	ZNF347	zinc finger protein 347
hsa-miR-558	0	0	1	1	1	1	CCDC18	coiled-coil domain containing 18
hsa-miR-558	0	0	0	1	0	0	HPDL	4-hydroxyphenylpyruvate dioxygenase-like
hsa-miR-558	0	0	0	1	1	1	H1FNT	H1 histone family, member N, testis-specific
hsa-miR-558	0	0	0	1	1	1	VSTM2B	V-set and transmembrane domain containing 2B
hsa-miR-558	0	0	0	1	0	0	VWCE	von Willebrand factor C and EGF domains
hsa-miR-558	0	0	1	1	0	0	SARNP	SAP domain containing ribonucleoprotein
hsa-miR-558	0	0	0	1	0	0	DNPEP	aspartyl aminopeptidase
hsa-miR-558	0	0	0	1	0	0	ZNF444	zinc finger protein 444
hsa-miR-558	1	0	0	1	1	1	P2RX4	purinergic receptor P2X, ligand-gated ion channel, 4
hsa-miR-558	0	0	0	1	0	0	TSPO	translocator protein (18kDa)
hsa-miR-558	0	0	0	1	1	1	ELAC2	elaC homolog 2 (E. coli)
hsa-miR-558	0	0	1	1	1	1	FIBP	fibroblast growth factor (acidic) intracellular binding protein
hsa-miR-558	0	0	0	1	0	0	GJB5	gap junction protein, beta 5, 31.1kDa
hsa-miR-558	0	0	1	1	1	1	ANKRD34B	ankyrin repeat domain 34B
hsa-miR-558	1	0	1	1	1	1	EVI5	ecotropic viral integration site 5
hsa-miR-558	0	0	1	1	1	1	PLAUR	plasminogen activator, urokinase receptor
hsa-miR-558	0	0	1	1	1	1	LIMK2	LIM domain kinase 2
hsa-miR-558	0	0	0	1	0	0	HNF1A	HNF1 homeobox A
hsa-miR-558	1	0	1	1	1	1	PPP1CC	protein phosphatase 1, catalytic subunit, gamma isozyme
hsa-miR-558	0	0	1	1	0	0	HM13	histocompatibility (minor) 13
hsa-miR-558	0	0	1	1	0	0	PGLYRP2	peptidoglycan recognition protein 2
hsa-miR-558	0	0	0	1	0	0	SAMD11	sterile alpha motif domain containing 11
hsa-miR-558	0	0	1	1	0	0	MPST	mercaptopyruvate sulfurtransferase
hsa-miR-558	0	0	0	1	0	0	LCN6	lipocalin 6
hsa-miR-558	0	0	1	1	0	0	GSN	gelsolin
hsa-miR-558	1	0	1	1	0	0	KAT5	K(lysine) acetyltransferase 5
hsa-miR-558	0	0	0	1	0	0	NOXA1	NADPH oxidase activator 1
hsa-miR-558	0	0	1	1	0	0	SPRR2B	small proline-rich protein 2B
hsa-miR-558	0	0	0	1	0	0	C19orf35	chromosome 19 open reading frame 35
hsa-miR-558	1	0	1	1	1	1	OLFML2A	olfactomedin-like 2A
hsa-miR-558	0	0	1	1	1	1	BID	BH3 interacting domain death agonist
hsa-miR-558	0	0	0	1	0	0	OTOG	otogelin
hsa-miR-558	0	0	0	1	1	1	TBC1D3B	TBC1 domain family, member 3B
hsa-miR-558	0	0	0	1	0	0	CXXC11	CXXC finger protein 11
hsa-miR-558	0	0	0	1	0	0	NKAPL	NFKB activating protein-like
hsa-miR-558	0	0	1	1	0	0	PPM1G	protein phosphatase, Mg2+/Mn2+ dependent, 1G
hsa-miR-558	1	0	1	1	1	1	STARD13	StAR-related lipid transfer (START) domain containing 13
hsa-miR-558	0	0	0	1	0	0	ZMAT5	zinc finger, matrin-type 5
hsa-miR-558	0	0	1	1	0	0	LAMA1	laminin, alpha 1
hsa-miR-558	0	0	0	1	1	1	SULT1A4	sulfotransferase family, cytosolic, 1A, phenol-preferring, member 4
hsa-miR-558	0	0	0	1	0	0	GTDC2	glycosyltransferase-like domain containing 2
hsa-miR-558	1	0	1	1	1	1	MAP7	microtubule-associated protein 7
hsa-miR-558	0	0	1	1	1	1	IL36RN	interleukin 36 receptor antagonist
hsa-miR-558	0	0	1	1	0	0	HELLS	helicase, lymphoid-specific
hsa-miR-558	0	0	1	1	1	1	GMPR2	guanosine monophosphate reductase 2
hsa-miR-558	0	0	1	1	0	0	APOBEC3H	apolipoprotein B mRNA editing enzyme, catalytic polypeptide-like 3H
hsa-miR-558	0	0	0	1	1	1	ALDH3B2	aldehyde dehydrogenase 3 family, member B2
hsa-miR-558	0	0	0	1	0	0	GNAT2	guanine nucleotide binding protein (G protein), alpha transducing activity polypeptide 2
hsa-miR-558	0	0	1	1	1	1	HADH	hydroxyacyl-CoA dehydrogenase
hsa-miR-558	0	0	1	1	0	0	DPAGT1	dolichyl-phosphate (UDP-N-acetylglucosamine) N-acetylglucosaminephosphotransferase 1 (GlcNAc-1-P transferase)
hsa-miR-558	1	0	1	1	1	1	DENND5B	DENN/MADD domain containing 5B
hsa-miR-558	1	0	0	1	1	1	SYT5	synaptotagmin V
hsa-miR-558	0	0	1	1	0	0	ANAPC7	anaphase promoting complex subunit 7
hsa-miR-558	0	0	0	1	1	1	TBC1D3H	TBC1 domain family, member 3H
hsa-miR-558	0	0	1	1	0	0	SLC38A6	solute carrier family 38, member 6
hsa-miR-558	0	0	0	1	1	1	LIMS2	LIM and senescent cell antigen-like domains 2
hsa-miR-558	0	0	1	1	1	1	MRPL52	mitochondrial ribosomal protein L52
hsa-miR-558	0	0	1	1	0	0	MORN3	MORN repeat containing 3
hsa-miR-558	0	0	0	1	1	1	HTR3A	5-hydroxytryptamine (serotonin) receptor 3A, ionotropic
hsa-miR-558	0	0	0	1	0	0	ZNF625	zinc finger protein 625
hsa-miR-558	0	0	1	1	1	1	GTF2E2	general transcription factor IIE, polypeptide 2, beta 34kDa
hsa-miR-558	0	0	1	1	1	1	GALNT6	UDP-N-acetyl-alpha-D-galactosamine:polypeptide N-acetylgalactosaminyltransferase 6 (GalNAc-T6)
hsa-miR-558	0	0	1	1	0	0	GUCA2A	guanylate cyclase activator 2A (guanylin)
hsa-miR-558	0	0	1	1	1	1	DYNLRB1	dynein, light chain, roadblock-type 1
hsa-miR-558	0	0	1	1	0	0	DOK3	docking protein 3
hsa-miR-558	1	0	1	1	0	0	ECE2	endothelin converting enzyme 2
hsa-miR-558	0	0	0	1	0	0	ARID5A	AT rich interactive domain 5A (MRF1-like)
hsa-miR-558	0	0	0	1	1	1	PHF11	PHD finger protein 11
hsa-miR-558	0	0	0	1	1	1	DCLRE1C	DNA cross-link repair 1C
hsa-miR-558	1	0	0	1	0	0	RABEP2	rabaptin, RAB GTPase binding effector protein 2
hsa-miR-558	0	0	1	1	1	1	DCAF4	DDB1 and CUL4 associated factor 4
hsa-miR-558	0	0	0	1	0	0	LONP1	lon peptidase 1, mitochondrial
hsa-miR-558	0	0	1	1	0	0	THNSL2	threonine synthase-like 2 (S. cerevisiae)
hsa-miR-558	1	0	1	1	1	1	FZD6	frizzled family receptor 6
hsa-miR-558	0	0	1	1	1	1	SNX11	sorting nexin 11
hsa-miR-558	0	0	1	1	1	1	SPRR2A	small proline-rich protein 2A
hsa-miR-558	1	0	1	1	1	1	LFNG	LFNG O-fucosylpeptide 3-beta-N-acetylglucosaminyltransferase
hsa-miR-558	0	0	1	1	0	0	SLC6A12	solute carrier family 6 (neurotransmitter transporter, betaine/GABA), member 12
hsa-miR-558	0	0	1	1	1	1	SPAG11B	sperm associated antigen 11B
hsa-miR-558	0	0	1	1	0	0	CTAG1B	cancer/testis antigen 1B
hsa-miR-558	0	0	0	1	1	1	SPRR2D	small proline-rich protein 2D
hsa-miR-558	0	0	0	1	0	0	CTAG1A	cancer/testis antigen 1A
hsa-miR-558	0	0	1	1	0	0	CPT1B	carnitine palmitoyltransferase 1B (muscle)
hsa-miR-558	0	0	0	1	1	1	GJA9	gap junction protein, alpha 9, 59kDa
hsa-miR-558	1	0	1	1	0	0	PAX9	paired box 9
hsa-miR-558	1	0	1	1	1	1	ULK2	unc-51-like kinase 2 (C. elegans)
hsa-miR-558	0	0	1	1	0	0	SFT2D1	SFT2 domain containing 1
hsa-miR-558	1	0	1	1	1	1	TRPM3	transient receptor potential cation channel, subfamily M, member 3
hsa-miR-558	0	0	0	1	1	1	MSRB1	methionine sulfoxide reductase B1
hsa-miR-558	1	0	1	1	1	1	PTGER3	prostaglandin E receptor 3 (subtype EP3)
hsa-miR-558	0	0	1	1	1	1	SLC9B2	solute carrier family 9, subfamily B (NHA2, cation proton antiporter 2), member 2
hsa-miR-558	0	0	0	1	0	0	PYCR2	pyrroline-5-carboxylate reductase family, member 2
hsa-miR-558	0	0	1	1	1	1	ATF3	activating transcription factor 3
hsa-miR-558	1	0	1	1	1	1	CNKSR3	CNKSR family member 3
hsa-miR-558	0	0	0	1	0	0	TNNT2	troponin T type 2 (cardiac)
hsa-miR-558	0	0	1	1	1	1	AIG1	androgen-induced 1
hsa-miR-558	1	0	1	1	1	1	MGST3	microsomal glutathione S-transferase 3
hsa-miR-558	0	0	1	1	1	1	ECHS1	enoyl CoA hydratase, short chain, 1, mitochondrial
hsa-miR-558	0	0	1	1	0	0	RPS27	ribosomal protein S27
hsa-miR-558	0	0	1	1	1	1	SPRR2E	small proline-rich protein 2E
hsa-miR-558	0	0	1	1	0	0	KPRP	keratinocyte proline-rich protein
hsa-miR-558	0	0	1	1	1	1	S100A10	S100 calcium binding protein A10
hsa-miR-558	0	0	1	1	1	1	PDSS2	prenyl (decaprenyl) diphosphate synthase, subunit 2
hsa-miR-558	1	0	1	1	1	1	RGS10	regulator of G-protein signaling 10
hsa-miR-558	0	0	0	1	0	0	FCGR1B	Fc fragment of IgG, high affinity Ib, receptor (CD64)
hsa-miR-558	0	0	1	1	1	1	CGA	glycoprotein hormones, alpha polypeptide
hsa-miR-558	1	0	1	1	1	1	SUFU	suppressor of fused homolog (Drosophila)
hsa-miR-558	0	0	1	1	0	0	NAA10	N(alpha)-acetyltransferase 10, NatA catalytic subunit
hsa-miR-558	0	0	1	1	0	0	CPN1	carboxypeptidase N, polypeptide 1
hsa-miR-558	0	0	1	1	1	1	ABCA9	ATP-binding cassette, sub-family A (ABC1), member 9
hsa-miR-558	0	0	1	1	0	0	TINAG	tubulointerstitial nephritis antigen
hsa-miR-558	0	0	1	1	1	1	RBMX2	RNA binding motif protein, X-linked 2
hsa-miR-558	0	0	1	1	1	1	C1orf141	chromosome 1 open reading frame 141
hsa-miR-558	0	0	1	1	1	1	DNTT	deoxynucleotidyltransferase, terminal
hsa-miR-558	0	0	1	1	0	0	C1orf87	chromosome 1 open reading frame 87
hsa-miR-558	0	0	0	1	0	0	CYP2C19	cytochrome P450, family 2, subfamily C, polypeptide 19
hsa-miR-558	0	0	0	1	0	0	LCN12	lipocalin 12
hsa-miR-558	0	0	0	1	0	0	SARDH	sarcosine dehydrogenase
hsa-miR-558	0	0	1	1	0	0	C9orf96	chromosome 9 open reading frame 96
hsa-miR-558	1	0	1	1	1	1	SURF4	surfeit 4
hsa-miR-558	0	0	1	1	1	1	MINPP1	multiple inositol-polyphosphate phosphatase 1
hsa-miR-558	0	0	1	1	1	1	MMACHC	methylmalonic aciduria (cobalamin deficiency) cblC type, with homocystinuria
hsa-miR-558	0	0	0	1	0	0	LRIT2	leucine-rich repeat, immunoglobulin-like and transmembrane domains 2
hsa-miR-558	1	0	1	1	1	1	TSPAN14	tetraspanin 14
hsa-miR-558	0	0	0	1	0	0	ZNF840	zinc finger protein 840
hsa-miR-558	0	0	0	1	0	0	POLR1C	polymerase (RNA) I polypeptide C, 30kDa
hsa-miR-558	0	0	1	1	0	0	TJAP1	tight junction associated protein 1 (peripheral)
hsa-miR-558	1	0	1	1	1	1	CTSA	cathepsin A
hsa-miR-558	0	0	0	1	1	1	ZDHHC12	zinc finger, DHHC-type containing 12
hsa-miR-558	0	0	1	1	0	0	TCEAL2	transcription elongation factor A (SII)-like 2
hsa-miR-558	0	0	1	1	1	1	MRPS16	mitochondrial ribosomal protein S16
hsa-miR-558	0	0	0	1	1	1	TSPAN15	tetraspanin 15
hsa-miR-558	0	0	1	1	1	1	HDAC8	histone deacetylase 8
hsa-miR-558	0	0	1	1	1	1	MYPN	myopalladin
hsa-miR-558	0	0	1	1	0	0	AHDC1	AT hook, DNA binding motif, containing 1
hsa-miR-558	0	0	0	1	0	0	SPAG4	sperm associated antigen 4
hsa-miR-558	0	0	0	1	0	0	PFDN6	prefoldin subunit 6
hsa-miR-558	0	0	0	1	0	0	HLA-DMA	major histocompatibility complex, class II, DM alpha
hsa-miR-558	1	0	0	1	0	0	PSMB8	proteasome (prosome, macropain) subunit, beta type, 8 (large multifunctional peptidase 7)
hsa-miR-558	1	0	1	1	1	1	EIF4G3	eukaryotic translation initiation factor 4 gamma, 3
hsa-miR-558	0	0	1	1	1	1	NOTCH4	notch 4
hsa-miR-558	0	0	1	1	0	0	CYP21A2	cytochrome P450, family 21, subfamily A, polypeptide 2
hsa-miR-558	0	0	0	1	0	0	C20orf144	chromosome 20 open reading frame 144
hsa-miR-558	1	0	1	1	1	1	CDC14B	CDC14 cell division cycle 14 homolog B (S. cerevisiae)
hsa-miR-558	0	0	0	1	0	0	GRTP1	growth hormone regulated TBC protein 1
hsa-miR-558	0	0	1	1	1	1	NXPE4	neurexophilin and PC-esterase domain family, member 4
hsa-miR-558	1	0	1	1	1	1	ARGLU1	arginine and glutamate rich 1
hsa-miR-558	0	0	1	1	1	1	LRRC38	leucine rich repeat containing 38
hsa-miR-558	0	0	0	1	0	0	FAM75B	family with sequence similarity 75, member B
hsa-miR-558	0	0	1	1	0	0	HLA-E	major histocompatibility complex, class I, E
hsa-miR-558	0	0	1	1	1	1	VPS13A	vacuolar protein sorting 13 homolog A (S. cerevisiae)
hsa-miR-558	0	0	0	1	0	0	PUS1	pseudouridylate synthase 1
hsa-miR-558	0	0	1	1	0	0	MAD2L2	MAD2 mitotic arrest deficient-like 2 (yeast)
hsa-miR-558	0	0	0	1	1	1	TRIM15	tripartite motif containing 15
hsa-miR-558	0	0	0	1	0	0	POLD1	polymerase (DNA directed), delta 1, catalytic subunit
hsa-miR-558	0	0	0	1	0	0	CST9L	cystatin 9-like
hsa-miR-558	0	0	1	1	1	1	GFAP	glial fibrillary acidic protein
hsa-miR-558	0	0	1	1	0	0	TIMP1	TIMP metallopeptidase inhibitor 1
hsa-miR-558	0	0	1	1	0	0	LOC285033	uncharacterized LOC285033
hsa-miR-558	0	0	1	1	0	0	GPAT2	glycerol-3-phosphate acyltransferase 2, mitochondrial
hsa-miR-558	1	0	1	1	1	1	ST3GAL5	ST3 beta-galactoside alpha-2,3-sialyltransferase 5
hsa-miR-558	0	0	1	1	1	1	HES2	hairy and enhancer of split 2 (Drosophila)
hsa-miR-558	0	0	0	1	0	0	ZNF425	zinc finger protein 425
hsa-miR-558	1	0	1	1	1	1	TXNRD1	thioredoxin reductase 1
hsa-miR-558	0	0	1	1	0	0	C12orf42	chromosome 12 open reading frame 42
hsa-miR-558	0	0	0	1	1	1	GPLD1	glycosylphosphatidylinositol specific phospholipase D1
hsa-miR-558	0	0	0	1	0	0	AARD	alanine and arginine rich domain containing protein
hsa-miR-558	0	0	0	1	0	0	CD72	CD72 molecule
hsa-miR-558	0	0	0	1	0	0	LIG3	ligase III, DNA, ATP-dependent
hsa-miR-558	1	0	1	1	1	1	AFF4	AF4/FMR2 family, member 4
hsa-miR-558	0	0	0	1	0	0	UCMA	upper zone of growth plate and cartilage matrix associated
hsa-miR-558	0	0	1	1	1	1	CAMK1D	calcium/calmodulin-dependent protein kinase ID
hsa-miR-558	0	0	1	1	1	1	CRLS1	cardiolipin synthase 1
hsa-miR-558	0	0	1	1	1	1	MCM8	minichromosome maintenance complex component 8
hsa-miR-558	0	0	1	1	0	0	DCTN3	dynactin 3 (p22)
hsa-miR-558	0	0	1	1	1	1	NUDT5	nudix (nucleoside diphosphate linked moiety X)-type motif 5
hsa-miR-558	0	0	0	1	1	1	C5orf56	chromosome 5 open reading frame 56
hsa-miR-558	0	0	0	1	0	0	NR0B1	nuclear receptor subfamily 0, group B, member 1
hsa-miR-558	0	0	1	1	0	0	ZNF584	zinc finger protein 584
hsa-miR-558	0	0	0	1	0	0	ZNF324B	zinc finger protein 324B
hsa-miR-558	0	0	0	1	0	0	SCGB2B2	secretoglobin, family 2B, member 2
hsa-miR-558	0	0	1	1	0	0	FBXL13	F-box and leucine-rich repeat protein 13
hsa-miR-558	0	0	0	1	0	0	PLEKHN1	pleckstrin homology domain containing, family N member 1
hsa-miR-558	1	0	1	1	1	1	PFKFB3	6-phosphofructo-2-kinase/fructose-2,6-biphosphatase 3
hsa-miR-558	0	0	1	1	1	1	ITPA	inosine triphosphatase (nucleoside triphosphate pyrophosphatase)
hsa-miR-558	0	0	0	1	1	1	IFNA8	interferon, alpha 8
hsa-miR-558	0	0	1	1	0	0	CD81	CD81 molecule
hsa-miR-558	0	0	1	1	1	1	CSF2RA	colony stimulating factor 2 receptor, alpha, low-affinity (granulocyte-macrophage)
hsa-miR-558	0	0	0	1	1	1	GGT6	gamma-glutamyltransferase 6
hsa-miR-558	0	0	0	1	0	0	C16orf96	chromosome 16 open reading frame 96
hsa-miR-558	0	0	0	1	1	1	RBMY1E	RNA binding motif protein, Y-linked, family 1, member E
hsa-miR-558	0	0	0	1	1	1	RBMY1D	RNA binding motif protein, Y-linked, family 1, member D
hsa-miR-558	0	0	0	1	0	0	NKD2	naked cuticle homolog 2 (Drosophila)
hsa-miR-558	1	0	1	1	1	1	TMEM128	transmembrane protein 128
hsa-miR-558	0	0	1	1	1	1	CRYL1	crystallin, lambda 1
hsa-miR-558	0	0	1	1	1	1	SRY	sex determining region Y
hsa-miR-558	1	0	1	1	1	1	C18orf34	chromosome 18 open reading frame 34
hsa-miR-558	1	0	0	1	0	0	PLEKHA2	pleckstrin homology domain containing, family A (phosphoinositide binding specific) member 2
hsa-miR-558	1	0	1	1	1	1	MKLN1	muskelin 1, intracellular mediator containing kelch motifs
hsa-miR-558	0	0	0	1	1	1	C16orf7	chromosome 16 open reading frame 7
hsa-miR-558	0	0	1	1	0	0	INTS1	integrator complex subunit 1
hsa-miR-558	0	0	1	1	1	1	ZFP91-CNTF	ZFP91-CNTF readthrough (non-protein coding)
hsa-miR-558	0	0	1	1	1	1	CNTF	ciliary neurotrophic factor
hsa-miR-558	1	0	1	1	1	1	KCNA1	potassium voltage-gated channel, shaker-related subfamily, member 1 (episodic ataxia with myokymia)
hsa-miR-558	0	0	1	1	1	1	PKP1	plakophilin 1 (ectodermal dysplasia/skin fragility syndrome)
hsa-miR-558	0	0	1	1	1	1	RS1	retinoschisin 1
hsa-miR-558	0	0	1	1	1	1	SF3A1	splicing factor 3a, subunit 1, 120kDa
hsa-miR-558	0	0	1	1	1	1	WDR31	WD repeat domain 31
hsa-miR-558	0	0	0	0	1	1	TDP1	tyrosyl-DNA phosphodiesterase 1
hsa-miR-558	1	0	0	1	1	1	C3P1	complement component 3 precursor pseudogene
hsa-miR-558	0	0	1	1	1	1	MST4	serine/threonine protein kinase MST4
hsa-miR-558	0	0	0	1	1	1	PLIN4	perilipin 4
hsa-miR-558	0	0	1	0	1	1	BAGE	B melanoma antigen
hsa-miR-558	1	0	1	1	1	1	DSC3	desmocollin 3
hsa-miR-558	1	0	1	1	1	1	ADAM12	ADAM metallopeptidase domain 12
hsa-miR-558	1	0	1	1	1	1	ULK1	unc-51-like kinase 1 (C. elegans)
hsa-miR-558	1	0	1	0	1	1	CUL3	cullin 3
hsa-miR-558	1	0	1	0	1	1	EIF2S2	eukaryotic translation initiation factor 2, subunit 2 beta, 38kDa
hsa-miR-558	0	0	0	1	1	1	SLC24A1	solute carrier family 24 (sodium/potassium/calcium exchanger), member 1
hsa-miR-558	0	0	1	1	1	1	LAGE3	L antigen family, member 3
hsa-miR-558	1	0	1	0	1	1	PCGF3	polycomb group ring finger 3
hsa-miR-558	0	0	1	0	1	1	PVR	poliovirus receptor
hsa-miR-558	1	0	1	1	1	1	ZNF217	zinc finger protein 217
hsa-miR-558	0	0	0	1	1	1	WDR3	WD repeat domain 3
hsa-miR-558	1	0	1	1	1	1	GPD1L	glycerol-3-phosphate dehydrogenase 1-like
hsa-miR-558	1	0	1	0	1	1	WWC3	WWC family member 3
hsa-miR-558	0	0	1	1	1	1	NUB1	negative regulator of ubiquitin-like proteins 1
hsa-miR-558	0	0	1	1	1	1	ZNF771	zinc finger protein 771
hsa-miR-558	0	0	1	0	1	1	CHRAC1	chromatin accessibility complex 1
hsa-miR-558	0	0	1	1	1	1	TRNAU1AP	tRNA selenocysteine 1 associated protein 1
hsa-miR-558	0	0	1	1	1	1	C14orf105	chromosome 14 open reading frame 105
hsa-miR-558	0	0	0	1	1	1	CARKD	carbohydrate kinase domain containing
hsa-miR-558	0	0	0	0	1	1	TMEM19	transmembrane protein 19
hsa-miR-558	0	0	0	1	1	1	TMEM140	transmembrane protein 140
hsa-miR-558	1	0	1	1	1	1	SAR1A	SAR1 homolog A (S. cerevisiae)
hsa-miR-558	0	0	1	1	1	1	C16orf62	chromosome 16 open reading frame 62
hsa-miR-558	1	0	1	1	1	1	C12orf4	chromosome 12 open reading frame 4
hsa-miR-558	1	0	1	1	1	1	TBC1D14	TBC1 domain family, member 14
hsa-miR-558	1	0	1	0	1	1	EDAR	ectodysplasin A receptor
hsa-miR-558	1	0	0	1	1	1	ZFYVE20	zinc finger, FYVE domain containing 20
hsa-miR-558	1	0	0	0	1	1	TMEM209	transmembrane protein 209
hsa-miR-558	0	0	0	0	1	1	GBP4	guanylate binding protein 4
hsa-miR-558	0	0	1	1	1	1	DIDO1	death inducer-obliterator 1
hsa-miR-558	1	0	1	1	1	1	NIPA1	non imprinted in Prader-Willi/Angelman syndrome 1
hsa-miR-558	0	0	1	1	1	1	ALS2CL	ALS2 C-terminal like
hsa-miR-558	0	0	1	1	1	1	MLKL	mixed lineage kinase domain-like
hsa-miR-558	0	0	1	1	1	1	TMEM130	transmembrane protein 130
hsa-miR-558	0	0	0	0	1	1	BAGE4	B melanoma antigen family, member 4
hsa-miR-558	1	0	1	1	1	1	NF2	neurofibromin 2 (merlin)
hsa-miR-558	0	0	1	0	1	1	BAGE5	B melanoma antigen family, member 5
hsa-miR-558	1	0	1	1	1	1	RBM12B	RNA binding motif protein 12B
hsa-miR-558	0	0	0	0	1	1	C7orf73	chromosome 7 open reading frame 73
