# Supplementary material for: Profiling of Selected MicroRNAs in Proliferative Eutopic Endometrium of Women with Ovarian Endometriosis
Source: Biomed Res Int. 2015 Aug 20;2015:760698. doi: 10.1155/2015/760698 (PMC4558423; doi:10.1155/2015/760698)
Supplement: Supplementary file 1 — Table I: The names of miRNAs significantly differentially expressed between eutopic endometrium of patients with endometriosis vs eutopic endometrium of patients without endometriosis. Table II: The associations between miRNA and mRNA, which presents detailed results of the search of six major databases i.e targetscan, tarbase, miranda, mirbase, mirtarget2 and pictar. [file 760698.f1.zip › 760698.f1/Table II/hsa-miR-562.tsv]

miR	targetscan	tarbase	miranda	mirbase	mirtarget2	pictar	GeneSymbol	GeneName
hsa-miR-562	1	0	1	1	1	1	ZFYVE16	zinc finger, FYVE domain containing 16
hsa-miR-562	1	0	1	0	0	0	TRANK1	tetratricopeptide repeat and ankyrin repeat containing 1
hsa-miR-562	1	0	1	1	1	1	MCF2L	MCF.2 cell line derived transforming sequence-like
hsa-miR-562	1	0	1	0	1	1	PTPRT	protein tyrosine phosphatase, receptor type, T
hsa-miR-562	1	0	1	1	1	1	ATMIN	ATM interactor
hsa-miR-562	1	0	1	1	0	0	DENND4B	DENN/MADD domain containing 4B
hsa-miR-562	1	0	1	1	1	1	RNGTT	RNA guanylyltransferase and 5'-phosphatase
hsa-miR-562	0	0	1	1	0	0	ZNF862	zinc finger protein 862
hsa-miR-562	1	0	1	1	0	0	PCLO	piccolo (presynaptic cytomatrix protein)
hsa-miR-562	1	0	1	1	1	1	NRXN1	neurexin 1
hsa-miR-562	1	0	1	1	0	0	TBC1D12	TBC1 domain family, member 12
hsa-miR-562	1	0	1	0	0	0	HECTD4	HECT domain containing E3 ubiquitin protein ligase 4
hsa-miR-562	1	0	1	1	1	1	MATR3	matrin 3
hsa-miR-562	1	0	1	0	1	1	RBM12	RNA binding motif protein 12
hsa-miR-562	1	0	1	1	1	1	SEMA4F	sema domain, immunoglobulin domain (Ig), transmembrane domain (TM) and short cytoplasmic domain, (semaphorin) 4F
hsa-miR-562	1	0	1	1	1	1	UBE2K	ubiquitin-conjugating enzyme E2K
hsa-miR-562	1	0	1	0	0	0	DTX4	deltex homolog 4 (Drosophila)
hsa-miR-562	1	0	1	1	1	1	CIT	citron (rho-interacting, serine/threonine kinase 21)
hsa-miR-562	0	0	1	1	1	1	TBC1D30	TBC1 domain family, member 30
hsa-miR-562	1	0	1	1	0	0	FRMD4B	FERM domain containing 4B
hsa-miR-562	1	0	1	1	1	1	PHF8	PHD finger protein 8
hsa-miR-562	1	0	1	1	1	1	SPIRE1	spire homolog 1 (Drosophila)
hsa-miR-562	1	0	1	1	1	1	RALGAPB	Ral GTPase activating protein, beta subunit (non-catalytic)
hsa-miR-562	0	0	1	0	0	0	MTA3	metastasis associated 1 family, member 3
hsa-miR-562	1	0	1	0	1	1	INTS2	integrator complex subunit 2
hsa-miR-562	1	0	1	1	1	1	PCDH19	protocadherin 19
hsa-miR-562	1	1	1	1	1	1	NFIA	nuclear factor I/A
hsa-miR-562	1	0	1	1	0	0	KIAA1462	KIAA1462
hsa-miR-562	0	0	1	0	1	1	KIAA1468	KIAA1468
hsa-miR-562	0	0	1	0	0	0	NYAP2	neuronal tyrosine-phosphorylated phosphoinositide-3-kinase adaptor 2
hsa-miR-562	1	0	1	1	1	1	USP28	ubiquitin specific peptidase 28
hsa-miR-562	1	0	1	0	1	1	LMO3	LIM domain only 3 (rhombotin-like 2)
hsa-miR-562	1	0	1	1	1	1	INADL	InaD-like (Drosophila)
hsa-miR-562	1	0	1	0	0	0	TANC2	tetratricopeptide repeat, ankyrin repeat and coiled-coil containing 2
hsa-miR-562	0	0	1	0	1	1	SETD5	SET domain containing 5
hsa-miR-562	1	0	1	0	1	1	JPH4	junctophilin 4
hsa-miR-562	0	0	1	1	1	1	C3orf15	chromosome 3 open reading frame 15
hsa-miR-562	1	0	1	1	1	1	TET2	tet methylcytosine dioxygenase 2
hsa-miR-562	1	0	1	1	0	0	ADC	arginine decarboxylase
hsa-miR-562	1	0	1	1	1	1	SH3TC2	SH3 domain and tetratricopeptide repeats 2
hsa-miR-562	0	0	1	1	0	0	CIRH1A	cirrhosis, autosomal recessive 1A (cirhin)
hsa-miR-562	0	0	1	1	0	0	SLC22A10	solute carrier family 22, member 10
hsa-miR-562	1	0	1	1	1	1	UBR3	ubiquitin protein ligase E3 component n-recognin 3 (putative)
hsa-miR-562	1	0	1	1	1	1	PAN3	PAN3 poly(A) specific ribonuclease subunit homolog (S. cerevisiae)
hsa-miR-562	1	0	1	1	1	1	KCNMA1	potassium large conductance calcium-activated channel, subfamily M, alpha member 1
hsa-miR-562	1	0	1	0	1	1	BEND4	BEN domain containing 4
hsa-miR-562	1	1	1	1	1	1	BACE1	beta-site APP-cleaving enzyme 1
hsa-miR-562	1	0	1	1	1	1	UBE3A	ubiquitin protein ligase E3A
hsa-miR-562	1	0	1	1	1	1	VLDLR	very low density lipoprotein receptor
hsa-miR-562	0	0	1	0	1	1	ATR	ataxia telangiectasia and Rad3 related
hsa-miR-562	1	0	1	1	1	1	MEF2A	myocyte enhancer factor 2A
hsa-miR-562	1	0	1	1	1	1	PCCB	propionyl CoA carboxylase, beta polypeptide
hsa-miR-562	0	0	1	1	1	1	PTK2	PTK2 protein tyrosine kinase 2
hsa-miR-562	1	0	1	0	1	1	MAML1	mastermind-like 1 (Drosophila)
hsa-miR-562	1	0	1	0	1	1	MPPED2	metallophosphoesterase domain containing 2
hsa-miR-562	1	0	1	1	1	1	FMR1	fragile X mental retardation 1
hsa-miR-562	1	0	1	1	1	1	ZNF207	zinc finger protein 207
hsa-miR-562	0	0	1	1	1	1	TFRC	transferrin receptor (p90, CD71)
hsa-miR-562	1	0	1	1	1	1	AEBP2	AE binding protein 2
hsa-miR-562	1	0	1	0	1	1	CDON	Cdon homolog (mouse)
hsa-miR-562	0	0	1	1	0	0	ASIC3	acid-sensing (proton-gated) ion channel 3
hsa-miR-562	1	0	1	1	0	0	FGFR3	fibroblast growth factor receptor 3
hsa-miR-562	0	0	1	1	1	1	PPP1R12C	protein phosphatase 1, regulatory subunit 12C
hsa-miR-562	0	0	1	1	0	0	SREBF1	sterol regulatory element binding transcription factor 1
hsa-miR-562	1	0	1	1	1	1	EPB41	erythrocyte membrane protein band 4.1 (elliptocytosis 1, RH-linked)
hsa-miR-562	0	0	1	1	1	1	MYO9A	myosin IXA
hsa-miR-562	1	0	1	1	1	1	TEAD1	TEA domain family member 1 (SV40 transcriptional enhancer factor)
hsa-miR-562	0	0	1	1	1	1	PLD1	phospholipase D1, phosphatidylcholine-specific
hsa-miR-562	1	0	1	1	1	1	SDHC	succinate dehydrogenase complex, subunit C, integral membrane protein, 15kDa
hsa-miR-562	1	0	1	1	1	1	DLGAP2	discs, large (Drosophila) homolog-associated protein 2
hsa-miR-562	1	0	1	1	1	1	CBFA2T2	core-binding factor, runt domain, alpha subunit 2; translocated to, 2
hsa-miR-562	0	0	1	1	0	0	PLA1A	phospholipase A1 member A
hsa-miR-562	1	0	1	1	1	1	PCYT1B	phosphate cytidylyltransferase 1, choline, beta
hsa-miR-562	0	0	1	1	1	1	CD84	CD84 molecule
hsa-miR-562	0	0	1	1	1	1	LYPLA1	lysophospholipase I
hsa-miR-562	1	0	1	0	1	1	CELF2	CUGBP, Elav-like family member 2
hsa-miR-562	0	0	1	1	1	1	SH2D1A	SH2 domain containing 1A
hsa-miR-562	1	0	1	0	1	1	CD164	CD164 molecule, sialomucin
hsa-miR-562	0	0	1	1	0	0	RBM5	RNA binding motif protein 5
hsa-miR-562	1	0	1	1	1	1	PKN2	protein kinase N2
hsa-miR-562	0	0	1	1	1	1	TIAM2	T-cell lymphoma invasion and metastasis 2
hsa-miR-562	1	0	1	1	1	1	KCNMB2	potassium large conductance calcium-activated channel, subfamily M, beta member 2
hsa-miR-562	1	0	1	1	0	0	TDRKH	tudor and KH domain containing
hsa-miR-562	1	0	1	1	1	1	CALD1	caldesmon 1
hsa-miR-562	0	0	1	1	1	1	DOCK10	dedicator of cytokinesis 10
hsa-miR-562	0	0	1	1	1	1	PJA1	praja ring finger 1, E3 ubiquitin protein ligase
hsa-miR-562	1	0	1	0	1	1	TRPS1	trichorhinophalangeal syndrome I
hsa-miR-562	0	0	1	1	1	1	FCRL1	Fc receptor-like 1
hsa-miR-562	0	0	1	1	1	1	RERG	RAS-like, estrogen-regulated, growth inhibitor
hsa-miR-562	1	0	1	1	1	1	PBX3	pre-B-cell leukemia homeobox 3
hsa-miR-562	0	0	1	1	0	0	SPATA22	spermatogenesis associated 22
hsa-miR-562	0	0	1	1	1	1	WBP2NL	WBP2 N-terminal like
hsa-miR-562	0	0	1	1	1	1	ORMDL1	ORM1-like 1 (S. cerevisiae)
hsa-miR-562	1	0	1	1	1	1	PSIP1	PC4 and SFRS1 interacting protein 1
hsa-miR-562	1	0	1	1	1	1	WAPAL	wings apart-like homolog (Drosophila)
hsa-miR-562	0	0	1	1	1	1	SLC2A14	solute carrier family 2 (facilitated glucose transporter), member 14
hsa-miR-562	1	0	1	1	1	1	AFF2	AF4/FMR2 family, member 2
hsa-miR-562	0	0	1	1	1	1	TCFL5	transcription factor-like 5 (basic helix-loop-helix)
hsa-miR-562	0	0	1	1	1	1	STK33	serine/threonine kinase 33
hsa-miR-562	1	0	1	1	1	1	PALM2	paralemmin 2
hsa-miR-562	1	0	1	1	1	1	NFYA	nuclear transcription factor Y, alpha
hsa-miR-562	0	0	1	1	0	0	KIAA1324	KIAA1324
hsa-miR-562	0	0	1	1	0	0	MBD1	methyl-CpG binding domain protein 1
hsa-miR-562	0	0	1	1	1	1	PPARG	peroxisome proliferator-activated receptor gamma
hsa-miR-562	1	0	1	0	1	1	NFAT5	nuclear factor of activated T-cells 5, tonicity-responsive
hsa-miR-562	0	0	1	0	1	1	TRMT10A	tRNA methyltransferase 10 homolog A (S. cerevisiae)
hsa-miR-562	0	0	1	0	0	0	TUG1	taurine upregulated 1 (non-protein coding)
hsa-miR-562	0	0	1	1	0	0	LOC100128398	uncharacterized LOC100128398
hsa-miR-562	1	0	1	1	1	1	ZC3H7A	zinc finger CCCH-type containing 7A
hsa-miR-562	0	0	1	0	0	0	RNF31	ring finger protein 31
hsa-miR-562	1	0	1	1	1	1	ARHGAP17	Rho GTPase activating protein 17
hsa-miR-562	0	0	1	1	1	1	STOX2	storkhead box 2
hsa-miR-562	1	0	1	1	1	1	RIC8B	resistance to inhibitors of cholinesterase 8 homolog B (C. elegans)
hsa-miR-562	1	0	1	1	1	1	PTBP3	polypyrimidine tract binding protein 3
hsa-miR-562	0	0	1	1	1	1	CXXC5	CXXC finger protein 5
hsa-miR-562	1	0	1	1	1	1	MBD5	methyl-CpG binding domain protein 5
hsa-miR-562	1	0	1	1	1	1	ZNF395	zinc finger protein 395
hsa-miR-562	0	0	1	1	1	1	INPP5B	inositol polyphosphate-5-phosphatase, 75kDa
hsa-miR-562	0	0	1	0	0	0	DUXAP10	double homeobox A pseudogene 10
hsa-miR-562	1	0	1	1	1	1	SMEK2	SMEK homolog 2, suppressor of mek1 (Dictyostelium)
hsa-miR-562	1	0	1	1	1	1	BAIAP2	BAI1-associated protein 2
hsa-miR-562	1	0	1	1	1	1	DERL1	derlin 1
hsa-miR-562	0	0	1	1	1	1	METTL7A	methyltransferase like 7A
hsa-miR-562	1	0	1	1	1	1	DYRK2	dual-specificity tyrosine-(Y)-phosphorylation regulated kinase 2
hsa-miR-562	1	0	1	0	1	1	MYO5B	myosin VB
hsa-miR-562	1	0	1	1	1	1	PHACTR4	phosphatase and actin regulator 4
hsa-miR-562	0	0	1	1	1	1	FAM124B	family with sequence similarity 124B
hsa-miR-562	0	0	1	1	0	0	EXOC6B	exocyst complex component 6B
hsa-miR-562	0	0	1	1	1	1	MINA	MYC induced nuclear antigen
hsa-miR-562	0	0	1	1	0	0	C15orf23	chromosome 15 open reading frame 23
hsa-miR-562	1	0	1	1	1	1	FAM53C	family with sequence similarity 53, member C
hsa-miR-562	1	0	1	0	1	1	ZKSCAN1	zinc finger with KRAB and SCAN domains 1
hsa-miR-562	1	0	1	1	1	1	RAP1GDS1	RAP1, GTP-GDP dissociation stimulator 1
hsa-miR-562	0	0	1	1	1	1	C8orf46	chromosome 8 open reading frame 46
hsa-miR-562	0	0	1	0	0	0	CHST9-AS1	CHST9 antisense RNA 1
hsa-miR-562	1	0	1	0	1	1	AP1G1	adaptor-related protein complex 1, gamma 1 subunit
hsa-miR-562	0	0	1	0	0	0	LOC154092	uncharacterized LOC154092
hsa-miR-562	1	0	1	1	1	1	TPM1	tropomyosin 1 (alpha)
hsa-miR-562	0	0	1	0	0	0	FLJ30838	uncharacterized LOC400955
hsa-miR-562	0	0	1	0	0	0	SNHG11	small nucleolar RNA host gene 11 (non-protein coding)
hsa-miR-562	0	0	1	0	0	0	LOC157273	uncharacterized LOC157273
hsa-miR-562	1	0	1	0	1	1	RNF165	ring finger protein 165
hsa-miR-562	0	0	1	0	0	0	RMST	rhabdomyosarcoma 2 associated transcript (non-protein coding)
hsa-miR-562	1	0	1	1	1	1	CLCN5	chloride channel, voltage-sensitive 5
hsa-miR-562	1	0	1	1	1	1	SORBS2	sorbin and SH3 domain containing 2
hsa-miR-562	0	0	1	1	0	0	HECTD3	HECT domain containing E3 ubiquitin protein ligase 3
hsa-miR-562	1	0	1	1	1	1	TPM3	tropomyosin 3
hsa-miR-562	1	0	1	1	1	1	ZBTB10	zinc finger and BTB domain containing 10
hsa-miR-562	1	0	1	1	1	1	PCMTD1	protein-L-isoaspartate (D-aspartate) O-methyltransferase domain containing 1
hsa-miR-562	1	0	1	1	1	1	ANKRD29	ankyrin repeat domain 29
hsa-miR-562	0	0	1	1	0	0	CERS5	ceramide synthase 5
hsa-miR-562	0	0	1	0	0	0	LINC00301	long intergenic non-protein coding RNA 301
hsa-miR-562	0	0	1	1	1	1	PKIB	protein kinase (cAMP-dependent, catalytic) inhibitor beta
hsa-miR-562	0	0	1	0	1	1	CDHR3	cadherin-related family member 3
hsa-miR-562	1	0	1	1	1	1	SIRT1	sirtuin 1
hsa-miR-562	1	0	1	1	0	0	B3GAT3	beta-1,3-glucuronyltransferase 3 (glucuronosyltransferase I)
hsa-miR-562	1	0	1	1	1	1	TTC13	tetratricopeptide repeat domain 13
hsa-miR-562	0	0	1	1	1	1	MTR	5-methyltetrahydrofolate-homocysteine methyltransferase
hsa-miR-562	0	0	1	1	1	1	SAE1	SUMO1 activating enzyme subunit 1
hsa-miR-562	0	0	1	0	1	1	TMSB15B	thymosin beta 15B
hsa-miR-562	1	0	1	1	1	1	EGR2	early growth response 2
hsa-miR-562	1	0	1	1	1	1	FBXW2	F-box and WD repeat domain containing 2
hsa-miR-562	0	0	1	1	1	1	PTGR1	prostaglandin reductase 1
hsa-miR-562	1	0	1	0	1	1	CRTAP	cartilage associated protein
hsa-miR-562	0	0	1	1	1	1	MARC1	mitochondrial amidoxime reducing component 1
hsa-miR-562	0	0	1	1	1	1	ACTR8	ARP8 actin-related protein 8 homolog (yeast)
hsa-miR-562	0	0	1	0	0	0	PART1	prostate androgen-regulated transcript 1 (non-protein coding)
hsa-miR-562	1	0	1	1	1	1	KLC2	kinesin light chain 2
hsa-miR-562	1	0	1	0	1	1	ARL6IP6	ADP-ribosylation-like factor 6 interacting protein 6
hsa-miR-562	1	0	1	0	1	1	NCOA7	nuclear receptor coactivator 7
hsa-miR-562	0	0	1	1	1	1	C9orf47	chromosome 9 open reading frame 47
hsa-miR-562	0	0	1	0	0	0	FLJ37798	uncharacterized LOC401264
hsa-miR-562	0	0	1	1	0	0	DPAGT1	dolichyl-phosphate (UDP-N-acetylglucosamine) N-acetylglucosaminephosphotransferase 1 (GlcNAc-1-P transferase)
hsa-miR-562	1	0	1	1	1	1	RASGEF1A	RasGEF domain family, member 1A
hsa-miR-562	1	0	1	1	1	1	TMEM100	transmembrane protein 100
hsa-miR-562	1	0	1	1	1	1	CUL2	cullin 2
hsa-miR-562	0	0	1	1	1	1	MYO6	myosin VI
hsa-miR-562	1	0	1	0	1	1	UBXN4	UBX domain protein 4
hsa-miR-562	1	0	1	1	1	1	ACSL1	acyl-CoA synthetase long-chain family member 1
hsa-miR-562	0	0	1	0	1	1	C19orf66	chromosome 19 open reading frame 66
hsa-miR-562	1	0	1	1	1	1	GAPVD1	GTPase activating protein and VPS9 domains 1
hsa-miR-562	0	0	1	0	0	0	ZNF815P	zinc finger protein 815, pseudogene
hsa-miR-562	0	0	1	0	0	0	FAM66C	family with sequence similarity 66, member C
hsa-miR-562	0	0	1	0	0	0	OTUD1	OTU domain containing 1
hsa-miR-562	1	0	1	1	1	1	LRP8	low density lipoprotein receptor-related protein 8, apolipoprotein e receptor
hsa-miR-562	1	0	1	1	1	1	SNRNP70	small nuclear ribonucleoprotein 70kDa (U1)
hsa-miR-562	1	0	1	1	1	1	ETS2	v-ets erythroblastosis virus E26 oncogene homolog 2 (avian)
hsa-miR-562	1	0	1	1	1	1	SPARC	secreted protein, acidic, cysteine-rich (osteonectin)
hsa-miR-562	0	0	1	1	1	1	PIGG	phosphatidylinositol glycan anchor biosynthesis, class G
hsa-miR-562	0	0	1	0	0	0	LOC400680	uncharacterized LOC400680
hsa-miR-562	1	0	1	1	1	1	GOLGA8B	golgin A8 family, member B
hsa-miR-562	1	0	1	1	0	0	CFL1	cofilin 1 (non-muscle)
hsa-miR-562	1	0	1	1	1	1	PIGA	phosphatidylinositol glycan anchor biosynthesis, class A
hsa-miR-562	0	0	1	0	0	0	LOC100130954	uncharacterized LOC100130954
hsa-miR-562	0	0	1	1	0	0	FBXO16	F-box protein 16
hsa-miR-562	0	0	1	1	0	0	PPAPDC1A	phosphatidic acid phosphatase type 2 domain containing 1A
hsa-miR-562	0	0	1	1	0	0	ALDOA	aldolase A, fructose-bisphosphate
hsa-miR-562	1	0	1	1	0	0	DGCR6	DiGeorge syndrome critical region gene 6
hsa-miR-562	1	0	1	1	1	1	GLUD1	glutamate dehydrogenase 1
hsa-miR-562	1	0	1	1	1	1	HBP1	HMG-box transcription factor 1
hsa-miR-562	1	0	1	1	1	1	WEE1	WEE1 homolog (S. pombe)
hsa-miR-562	0	0	1	1	1	1	NFKB1	nuclear factor of kappa light polypeptide gene enhancer in B-cells 1
hsa-miR-562	0	0	1	1	0	0	MARS	methionyl-tRNA synthetase
hsa-miR-562	1	0	1	1	1	1	ZNF25	zinc finger protein 25
hsa-miR-562	0	0	1	1	1	1	GFI1	growth factor independent 1 transcription repressor
hsa-miR-562	0	0	1	1	1	1	FRMPD2	FERM and PDZ domain containing 2
hsa-miR-562	0	0	1	1	1	1	DNAJC24	DnaJ (Hsp40) homolog, subfamily C, member 24
hsa-miR-562	1	0	1	1	1	1	EGLN3	egl nine homolog 3 (C. elegans)
hsa-miR-562	1	0	1	0	0	0	GPR137C	G protein-coupled receptor 137C
hsa-miR-562	0	0	1	1	0	0	LOC100129995	uncharacterized LOC100129995
hsa-miR-562	1	0	1	1	1	1	C17orf85	chromosome 17 open reading frame 85
hsa-miR-562	1	0	1	0	1	1	HECTD1	HECT domain containing E3 ubiquitin protein ligase 1
hsa-miR-562	1	0	1	1	1	1	DPY19L3	dpy-19-like 3 (C. elegans)
hsa-miR-562	0	0	1	0	0	0	FAM75D4	family with sequence similarity 75, member D4
hsa-miR-562	1	0	1	1	1	1	MACROD2	MACRO domain containing 2
hsa-miR-562	0	0	1	1	1	1	MYOM3	myomesin family, member 3
hsa-miR-562	0	0	1	1	0	0	FSIP2	fibrous sheath interacting protein 2
hsa-miR-562	0	0	1	0	0	0	ADCY10P1	adenylate cyclase 10 (soluble) pseudogene 1
hsa-miR-562	1	0	1	0	1	1	PLXNA1	plexin A1
hsa-miR-562	1	0	1	1	1	1	PLEKHB2	pleckstrin homology domain containing, family B (evectins) member 2
hsa-miR-562	1	0	1	1	1	1	SIKE1	suppressor of IKBKE 1
hsa-miR-562	1	0	1	1	1	1	SACM1L	SAC1 suppressor of actin mutations 1-like (yeast)
hsa-miR-562	0	0	1	1	1	1	C18orf54	chromosome 18 open reading frame 54
hsa-miR-562	0	0	1	1	0	0	HS3ST5	heparan sulfate (glucosamine) 3-O-sulfotransferase 5
hsa-miR-562	1	0	1	1	1	1	CLIP1	CAP-GLY domain containing linker protein 1
hsa-miR-562	1	0	1	1	1	1	EIF4E3	eukaryotic translation initiation factor 4E family member 3
hsa-miR-562	0	0	1	1	1	1	KLC4	kinesin light chain 4
hsa-miR-562	1	0	1	1	1	1	TSHZ1	teashirt zinc finger homeobox 1
hsa-miR-562	1	0	1	1	1	1	PHF17	PHD finger protein 17
hsa-miR-562	1	0	1	1	1	1	ZFP106	zinc finger protein 106 homolog (mouse)
hsa-miR-562	1	0	1	0	1	1	FNDC3B	fibronectin type III domain containing 3B
hsa-miR-562	1	0	1	0	1	1	CAPRIN1	cell cycle associated protein 1
hsa-miR-562	1	0	1	0	1	1	USP37	ubiquitin specific peptidase 37
hsa-miR-562	1	0	1	1	1	1	SDCBP	syndecan binding protein (syntenin)
hsa-miR-562	1	0	1	0	1	1	ESRRG	estrogen-related receptor gamma
hsa-miR-562	1	0	1	1	1	1	PPP2R5C	protein phosphatase 2, regulatory subunit B', gamma
hsa-miR-562	1	0	1	1	1	1	RPS6KA4	ribosomal protein S6 kinase, 90kDa, polypeptide 4
hsa-miR-562	1	0	1	1	0	0	ATP13A3	ATPase type 13A3
hsa-miR-562	0	0	1	0	0	0	RRN3P2	RNA polymerase I transcription factor homolog (S. cerevisiae) pseudogene 2
hsa-miR-562	0	0	1	1	0	0	PCSK5	proprotein convertase subtilisin/kexin type 5
hsa-miR-562	0	0	1	1	0	0	HSPB11	heat shock protein family B (small), member 11
hsa-miR-562	1	0	1	1	1	1	NCOA1	nuclear receptor coactivator 1
hsa-miR-562	0	0	1	1	0	0	FAAH	fatty acid amide hydrolase
hsa-miR-562	0	0	1	1	1	1	TFDP2	transcription factor Dp-2 (E2F dimerization partner 2)
hsa-miR-562	1	0	1	0	1	1	SLC2A3	solute carrier family 2 (facilitated glucose transporter), member 3
hsa-miR-562	0	0	1	1	0	0	ODF3	outer dense fiber of sperm tails 3
hsa-miR-562	0	0	1	1	1	1	STAG3L1	stromal antigen 3-like 1
hsa-miR-562	1	0	1	1	1	1	GOLGA8A	golgin A8 family, member A
hsa-miR-562	0	0	1	0	0	0	FAM66D	family with sequence similarity 66, member D
hsa-miR-562	1	0	1	1	1	1	MSANTD2	Myb/SANT-like DNA-binding domain containing 2
hsa-miR-562	1	0	1	0	1	1	FAM19A1	family with sequence similarity 19 (chemokine (C-C motif)-like), member A1
hsa-miR-562	0	0	1	0	0	0	ZNF720	zinc finger protein 720
hsa-miR-562	1	0	1	1	1	1	MLL3	myeloid/lymphoid or mixed-lineage leukemia 3
hsa-miR-562	1	0	1	1	1	1	NABP1	nucleic acid binding protein 1
hsa-miR-562	0	0	1	1	1	1	TMEM138	transmembrane protein 138
hsa-miR-562	0	0	1	0	1	1	PAPD4	PAP associated domain containing 4
hsa-miR-562	1	0	1	1	1	1	ABI3BP	ABI family, member 3 (NESH) binding protein
hsa-miR-562	1	0	1	1	1	1	HMCN1	hemicentin 1
hsa-miR-562	1	0	1	1	1	1	SOX6	SRY (sex determining region Y)-box 6
hsa-miR-562	1	0	1	1	1	1	NRP1	neuropilin 1
hsa-miR-562	1	0	1	1	1	1	RICTOR	RPTOR independent companion of MTOR, complex 2
hsa-miR-562	1	0	1	0	1	1	NR3C1	nuclear receptor subfamily 3, group C, member 1 (glucocorticoid receptor)
hsa-miR-562	0	0	1	0	1	1	USO1	USO1 vesicle docking protein homolog (yeast)
hsa-miR-562	1	0	1	1	1	1	IKZF2	IKAROS family zinc finger 2 (Helios)
hsa-miR-562	0	0	1	1	1	1	KLHL7	kelch-like 7 (Drosophila)
hsa-miR-562	1	0	1	1	1	1	CLIC5	chloride intracellular channel 5
hsa-miR-562	1	0	1	1	1	1	SYNCRIP	synaptotagmin binding, cytoplasmic RNA interacting protein
hsa-miR-562	1	0	1	0	1	1	BDNF	brain-derived neurotrophic factor
hsa-miR-562	0	0	1	1	1	1	NFXL1	nuclear transcription factor, X-box binding-like 1
hsa-miR-562	0	0	1	1	0	0	DNAH1	dynein, axonemal, heavy chain 1
hsa-miR-562	1	0	1	1	1	1	BCL11A	B-cell CLL/lymphoma 11A (zinc finger protein)
hsa-miR-562	0	0	1	1	0	0	PIGU	phosphatidylinositol glycan anchor biosynthesis, class U
hsa-miR-562	0	0	1	1	0	0	FKBP7	FK506 binding protein 7
hsa-miR-562	1	0	1	1	1	1	ARHGAP20	Rho GTPase activating protein 20
hsa-miR-562	0	0	1	1	1	1	AICDA	activation-induced cytidine deaminase
hsa-miR-562	1	0	1	1	1	1	MECP2	methyl CpG binding protein 2 (Rett syndrome)
hsa-miR-562	1	0	1	1	1	1	RBM24	RNA binding motif protein 24
hsa-miR-562	1	0	1	1	0	0	ADAM15	ADAM metallopeptidase domain 15
hsa-miR-562	0	0	1	1	1	1	SMPD1	sphingomyelin phosphodiesterase 1, acid lysosomal
hsa-miR-562	0	0	1	1	1	1	ILDR1	immunoglobulin-like domain containing receptor 1
hsa-miR-562	1	0	1	1	0	0	CDK8	cyclin-dependent kinase 8
hsa-miR-562	1	0	1	1	1	1	NTNG1	netrin G1
hsa-miR-562	1	0	1	1	0	0	TAF4B	TAF4b RNA polymerase II, TATA box binding protein (TBP)-associated factor, 105kDa
hsa-miR-562	1	0	1	1	1	1	AMOT	angiomotin
hsa-miR-562	1	0	1	1	1	1	RPRD1A	regulation of nuclear pre-mRNA domain containing 1A
hsa-miR-562	1	0	1	1	1	1	NOL4	nucleolar protein 4
hsa-miR-562	0	0	1	1	1	1	FAM115A	family with sequence similarity 115, member A
hsa-miR-562	1	0	1	0	1	1	FAM46A	family with sequence similarity 46, member A
hsa-miR-562	0	0	1	1	1	1	SLC43A1	solute carrier family 43, member 1
hsa-miR-562	0	0	1	1	1	1	PAFAH1B2	platelet-activating factor acetylhydrolase 1b, catalytic subunit 2 (30kDa)
hsa-miR-562	1	0	1	1	1	1	AZI2	5-azacytidine induced 2
hsa-miR-562	0	0	1	1	1	1	RLIM	ring finger protein, LIM domain interacting
hsa-miR-562	1	0	1	1	1	1	TSPAN14	tetraspanin 14
hsa-miR-562	1	0	1	0	0	0	VGLL4	vestigial like 4 (Drosophila)
hsa-miR-562	1	0	1	1	1	1	RIMS3	regulating synaptic membrane exocytosis 3
hsa-miR-562	1	0	1	0	1	1	CGGBP1	CGG triplet repeat binding protein 1
hsa-miR-562	1	0	1	1	1	1	U2SURP	U2 snRNP-associated SURP domain containing
hsa-miR-562	1	0	1	0	1	1	ATM	ataxia telangiectasia mutated
hsa-miR-562	0	0	1	1	1	1	ACPP	acid phosphatase, prostate
hsa-miR-562	0	0	1	1	1	1	C1orf94	chromosome 1 open reading frame 94
hsa-miR-562	1	0	1	1	1	1	LMBR1L	limb region 1 homolog (mouse)-like
hsa-miR-562	1	0	1	1	1	1	SHOX2	short stature homeobox 2
hsa-miR-562	1	0	1	1	1	1	HMGA1	high mobility group AT-hook 1
hsa-miR-562	0	0	1	1	0	0	SEC16B	SEC16 homolog B (S. cerevisiae)
hsa-miR-562	0	0	1	1	1	1	ATXN2L	ataxin 2-like
hsa-miR-562	1	0	1	1	1	1	TRIM2	tripartite motif containing 2
hsa-miR-562	1	0	1	1	1	1	DNAJB5	DnaJ (Hsp40) homolog, subfamily B, member 5
hsa-miR-562	0	0	1	1	1	1	NUP98	nucleoporin 98kDa
hsa-miR-562	0	0	1	1	1	1	PCNP	PEST proteolytic signal containing nuclear protein
hsa-miR-562	0	0	1	0	0	0	LOC729013	uncharacterized LOC729013
hsa-miR-562	0	0	1	1	0	0	TMEM44	transmembrane protein 44
hsa-miR-562	1	0	1	1	1	1	ZBTB38	zinc finger and BTB domain containing 38
hsa-miR-562	1	0	1	0	1	1	NECAB1	N-terminal EF-hand calcium binding protein 1
hsa-miR-562	0	0	1	1	1	1	PARP9	poly (ADP-ribose) polymerase family, member 9
hsa-miR-562	0	0	1	1	0	0	TMEM126B	transmembrane protein 126B
hsa-miR-562	1	0	1	1	1	1	ARHGEF9	Cdc42 guanine nucleotide exchange factor (GEF) 9
hsa-miR-562	0	0	1	1	0	0	TEAD2	TEA domain family member 2
hsa-miR-562	1	0	1	1	1	1	SLC25A22	solute carrier family 25 (mitochondrial carrier: glutamate), member 22
hsa-miR-562	1	0	1	0	1	1	CDK19	cyclin-dependent kinase 19
hsa-miR-562	1	0	1	1	1	1	ASPH	aspartate beta-hydroxylase
hsa-miR-562	0	0	1	1	0	0	GLS2	glutaminase 2 (liver, mitochondrial)
hsa-miR-562	1	0	1	1	1	1	VASP	vasodilator-stimulated phosphoprotein
hsa-miR-562	1	0	1	1	1	1	CNTN4	contactin 4
hsa-miR-562	1	0	1	1	1	1	SPG20	spastic paraplegia 20 (Troyer syndrome)
hsa-miR-562	1	0	1	1	1	1	RSPO2	R-spondin 2
hsa-miR-562	1	0	1	1	1	1	B3GNT5	UDP-GlcNAc:betaGal beta-1,3-N-acetylglucosaminyltransferase 5
hsa-miR-562	0	0	1	1	0	0	ALPK1	alpha-kinase 1
hsa-miR-562	1	0	1	1	1	1	VASH2	vasohibin 2
hsa-miR-562	0	0	1	1	1	1	CASC1	cancer susceptibility candidate 1
hsa-miR-562	1	0	1	0	0	0	KCNU1	potassium channel, subfamily U, member 1
hsa-miR-562	1	0	1	0	1	1	SV2B	synaptic vesicle glycoprotein 2B
hsa-miR-562	0	0	1	1	1	1	TMEM117	transmembrane protein 117
hsa-miR-562	1	0	1	1	1	1	BZRAP1	benzodiazapine receptor (peripheral) associated protein 1
hsa-miR-562	0	0	1	1	1	1	SNX17	sorting nexin 17
hsa-miR-562	1	0	1	1	1	1	DCLK2	doublecortin-like kinase 2
hsa-miR-562	1	0	1	1	1	1	PLEKHA7	pleckstrin homology domain containing, family A member 7
hsa-miR-562	0	0	1	1	1	1	HEXA	hexosaminidase A (alpha polypeptide)
hsa-miR-562	1	0	1	1	1	1	ABCA1	ATP-binding cassette, sub-family A (ABC1), member 1
hsa-miR-562	0	0	1	1	1	1	EDA2R	ectodysplasin A2 receptor
hsa-miR-562	0	0	1	1	1	1	SLC6A16	solute carrier family 6, member 16
hsa-miR-562	1	0	1	1	1	1	NKAIN2	Na+/K+ transporting ATPase interacting 2
hsa-miR-562	0	0	1	0	0	0	TMPRSS12	transmembrane (C-terminal) protease, serine 12
hsa-miR-562	0	0	1	1	1	1	NR1H4	nuclear receptor subfamily 1, group H, member 4
hsa-miR-562	0	0	1	1	0	0	C2orf80	chromosome 2 open reading frame 80
hsa-miR-562	0	0	1	1	1	1	CLEC12B	C-type lectin domain family 12, member B
hsa-miR-562	0	0	1	1	1	1	UBE3D	ubiquitin protein ligase E3D
hsa-miR-562	1	0	1	1	1	1	HECTD2	HECT domain containing E3 ubiquitin protein ligase 2
hsa-miR-562	1	0	1	0	1	1	CPEB4	cytoplasmic polyadenylation element binding protein 4
hsa-miR-562	1	0	1	1	1	1	FAM135B	family with sequence similarity 135, member B
hsa-miR-562	0	0	1	0	0	0	CRYBB2P1	crystallin, beta B2 pseudogene 1
hsa-miR-562	0	0	1	0	0	0	INHBA-AS1	INHBA antisense RNA 1
hsa-miR-562	0	0	1	1	1	1	NAALAD2	N-acetylated alpha-linked acidic dipeptidase 2
hsa-miR-562	0	0	1	0	0	0	LOC100134868	uncharacterized LOC100134868
hsa-miR-562	1	0	1	1	1	1	PLS3	plastin 3
hsa-miR-562	0	0	1	1	1	1	FBXL4	F-box and leucine-rich repeat protein 4
hsa-miR-562	0	0	1	1	1	1	SLC14A1	solute carrier family 14 (urea transporter), member 1 (Kidd blood group)
hsa-miR-562	1	0	1	0	1	1	PCSK2	proprotein convertase subtilisin/kexin type 2
hsa-miR-562	0	0	1	0	1	1	FAM13B	family with sequence similarity 13, member B
hsa-miR-562	1	0	1	0	1	1	HSPA12A	heat shock 70kDa protein 12A
hsa-miR-562	1	0	1	1	1	1	PRRG1	proline rich Gla (G-carboxyglutamic acid) 1
hsa-miR-562	0	0	1	0	0	0	SLC8A1-AS1	SLC8A1 antisense RNA 1
hsa-miR-562	0	0	1	0	0	0	LOC339260	uncharacterized LOC339260
hsa-miR-562	1	0	1	1	1	1	PLXND1	plexin D1
hsa-miR-562	0	0	1	1	1	1	MST1	macrophage stimulating 1 (hepatocyte growth factor-like)
hsa-miR-562	0	0	1	1	1	1	MGC57346	uncharacterized LOC401884
hsa-miR-562	1	0	1	1	1	1	ZFAND4	zinc finger, AN1-type domain 4
hsa-miR-562	0	0	1	0	1	1	IL33	interleukin 33
hsa-miR-562	0	0	1	1	0	0	SETDB2	SET domain, bifurcated 2
hsa-miR-562	1	0	1	1	0	0	TTC9	tetratricopeptide repeat domain 9
hsa-miR-562	1	0	1	0	1	1	ARHGAP5	Rho GTPase activating protein 5
hsa-miR-562	1	0	1	1	1	1	RECK	reversion-inducing-cysteine-rich protein with kazal motifs
hsa-miR-562	0	0	1	0	0	0	AURKAPS1	aurora kinase A pseudogene 1
hsa-miR-562	1	0	1	0	1	1	ZBTB1	zinc finger and BTB domain containing 1
hsa-miR-562	0	0	1	1	0	0	CCDC107	coiled-coil domain containing 107
hsa-miR-562	0	0	1	0	0	0	BMS1P6	BMS1 pseudogene 6
hsa-miR-562	1	0	1	1	1	1	ZFP91	zinc finger protein 91 homolog (mouse)
hsa-miR-562	1	0	1	1	1	1	PCGF5	polycomb group ring finger 5
hsa-miR-562	1	0	1	0	1	1	C14orf43	chromosome 14 open reading frame 43
hsa-miR-562	0	0	1	1	0	0	TINAG	tubulointerstitial nephritis antigen
hsa-miR-562	0	0	1	1	0	0	ABHD1	abhydrolase domain containing 1
hsa-miR-562	0	0	1	1	0	0	RRAD	Ras-related associated with diabetes
hsa-miR-562	0	0	1	1	0	0	ADAM7	ADAM metallopeptidase domain 7
hsa-miR-562	1	0	1	1	1	1	SOX5	SRY (sex determining region Y)-box 5
hsa-miR-562	0	0	1	1	1	1	SNX5	sorting nexin 5
hsa-miR-562	1	0	1	1	1	1	MTMR10	myotubularin related protein 10
hsa-miR-562	1	0	1	1	1	1	PDGFRA	platelet-derived growth factor receptor, alpha polypeptide
hsa-miR-562	0	0	1	1	1	1	GPATCH2	G patch domain containing 2
hsa-miR-562	0	0	1	1	0	0	C8orf31	chromosome 8 open reading frame 31
hsa-miR-562	1	0	1	1	1	1	RANBP9	RAN binding protein 9
hsa-miR-562	1	0	1	1	1	1	UEVLD	UEV and lactate/malate dehyrogenase domains
hsa-miR-562	1	0	1	1	0	0	KIF17	kinesin family member 17
hsa-miR-562	0	0	1	1	1	1	CTSL2	cathepsin L2
hsa-miR-562	1	0	1	1	1	1	PDCD6IP	programmed cell death 6 interacting protein
hsa-miR-562	0	0	1	0	0	0	FOXN3-AS2	FOXN3 antisense RNA 2
hsa-miR-562	1	0	1	0	1	1	TGFBR1	transforming growth factor, beta receptor 1
hsa-miR-562	0	0	1	0	0	0	JPX	JPX transcript, XIST activator (non-protein coding)
hsa-miR-562	1	0	1	1	0	0	PLEKHG3	pleckstrin homology domain containing, family G (with RhoGef domain) member 3
hsa-miR-562	0	0	1	1	0	0	EBNA1BP2	EBNA1 binding protein 2
hsa-miR-562	1	0	1	1	1	1	OPCML	opioid binding protein/cell adhesion molecule-like
hsa-miR-562	1	0	1	1	1	1	NTRK2	neurotrophic tyrosine kinase, receptor, type 2
hsa-miR-562	1	0	1	0	1	1	AMMECR1L	AMME chromosomal region gene 1-like
hsa-miR-562	0	0	1	0	0	0	TBC1D25	TBC1 domain family, member 25
hsa-miR-562	1	0	1	1	0	0	TIMM17B	translocase of inner mitochondrial membrane 17 homolog B (yeast)
hsa-miR-562	1	0	1	0	1	1	PIK3R3	phosphoinositide-3-kinase, regulatory subunit 3 (gamma)
hsa-miR-562	1	0	1	1	1	1	ACVR2B	activin A receptor, type IIB
hsa-miR-562	0	0	1	1	1	1	ZNF365	zinc finger protein 365
hsa-miR-562	1	0	1	0	1	1	MYBL1	v-myb myeloblastosis viral oncogene homolog (avian)-like 1
hsa-miR-562	0	0	1	1	0	0	TMC1	transmembrane channel-like 1
hsa-miR-562	0	0	1	1	1	1	CCDC126	coiled-coil domain containing 126
hsa-miR-562	1	0	1	1	1	1	NR2F2	nuclear receptor subfamily 2, group F, member 2
hsa-miR-562	0	0	1	1	1	1	TBRG1	transforming growth factor beta regulator 1
hsa-miR-562	1	0	1	1	1	1	SLK	STE20-like kinase
hsa-miR-562	1	0	1	1	1	1	SHANK2	SH3 and multiple ankyrin repeat domains 2
hsa-miR-562	1	0	1	1	1	1	KIAA0528	KIAA0528
hsa-miR-562	1	0	1	1	0	0	ITGB4	integrin, beta 4
hsa-miR-562	1	0	1	1	1	1	FAM59A	family with sequence similarity 59, member A
hsa-miR-562	0	0	1	0	1	1	GOLGA8G	golgin A8 family, member G
hsa-miR-562	1	0	1	0	1	1	CAMSAP2	calmodulin regulated spectrin-associated protein family, member 2
hsa-miR-562	1	0	1	1	1	1	ZMYM4	zinc finger, MYM-type 4
hsa-miR-562	1	0	1	1	1	1	CHIC1	cysteine-rich hydrophobic domain 1
hsa-miR-562	0	0	1	1	0	0	USP19	ubiquitin specific peptidase 19
hsa-miR-562	0	0	1	0	0	0	FAM225B	family with sequence similarity 225, member B (non-protein coding)
hsa-miR-562	0	0	1	1	0	0	CNKSR1	connector enhancer of kinase suppressor of Ras 1
hsa-miR-562	0	0	1	0	0	0	FLJ39632	uncharacterized LOC642477
hsa-miR-562	1	0	1	1	1	1	ERMAP	erythroblast membrane-associated protein (Scianna blood group)
hsa-miR-562	0	0	1	1	1	1	RAD17	RAD17 homolog (S. pombe)
hsa-miR-562	0	0	1	1	1	1	IP6K2	inositol hexakisphosphate kinase 2
hsa-miR-562	0	0	1	0	0	0	DKFZp686D0853	uncharacterized LOC401613
hsa-miR-562	0	0	1	0	1	1	FEZ2	fasciculation and elongation protein zeta 2 (zygin II)
hsa-miR-562	0	0	1	1	0	0	CCDC171	coiled-coil domain containing 171
hsa-miR-562	1	0	1	1	1	1	SGCD	sarcoglycan, delta (35kDa dystrophin-associated glycoprotein)
hsa-miR-562	1	0	1	0	1	1	CLASP2	cytoplasmic linker associated protein 2
hsa-miR-562	0	0	1	1	1	1	VCAN	versican
hsa-miR-562	0	0	1	1	1	1	PSMA2	proteasome (prosome, macropain) subunit, alpha type, 2
hsa-miR-562	1	0	1	1	1	1	RAB30	RAB30, member RAS oncogene family
hsa-miR-562	0	0	1	1	1	1	COL6A3	collagen, type VI, alpha 3
hsa-miR-562	0	0	1	1	1	1	GTF3C2	general transcription factor IIIC, polypeptide 2, beta 110kDa
hsa-miR-562	0	0	1	0	1	1	NHSL1	NHS-like 1
hsa-miR-562	1	0	1	1	1	1	ABCA13	ATP-binding cassette, sub-family A (ABC1), member 13
hsa-miR-562	1	0	1	1	1	1	CASP3	caspase 3, apoptosis-related cysteine peptidase
hsa-miR-562	1	0	1	1	1	1	USP6	ubiquitin specific peptidase 6 (Tre-2 oncogene)
hsa-miR-562	1	0	1	0	1	1	EML4	echinoderm microtubule associated protein like 4
hsa-miR-562	1	0	1	1	1	1	TC2N	tandem C2 domains, nuclear
hsa-miR-562	0	0	1	1	1	1	CCNT2	cyclin T2
hsa-miR-562	1	0	1	1	1	1	PTPRB	protein tyrosine phosphatase, receptor type, B
hsa-miR-562	0	0	1	1	1	1	ATP2A2	ATPase, Ca++ transporting, cardiac muscle, slow twitch 2
hsa-miR-562	1	0	1	1	1	1	NFIB	nuclear factor I/B
hsa-miR-562	1	0	1	1	1	1	NAV1	neuron navigator 1
hsa-miR-562	1	0	1	1	1	1	RDX	radixin
hsa-miR-562	0	0	1	1	1	1	DAZL	deleted in azoospermia-like
hsa-miR-562	1	0	1	1	1	1	PGAP1	post-GPI attachment to proteins 1
hsa-miR-562	0	0	1	1	1	1	THSD4	thrombospondin, type I, domain containing 4
hsa-miR-562	0	0	1	1	1	1	SSFA2	sperm specific antigen 2
hsa-miR-562	1	0	1	1	1	1	CREB3L2	cAMP responsive element binding protein 3-like 2
hsa-miR-562	1	0	1	1	1	1	BSDC1	BSD domain containing 1
hsa-miR-562	0	0	1	0	1	1	CD59	CD59 molecule, complement regulatory protein
hsa-miR-562	0	0	1	1	1	1	HPGD	hydroxyprostaglandin dehydrogenase 15-(NAD)
hsa-miR-562	0	0	1	1	1	1	CDC123	cell division cycle 123 homolog (S. cerevisiae)
hsa-miR-562	0	0	1	1	1	1	HSPB8	heat shock 22kDa protein 8
hsa-miR-562	0	0	1	1	1	1	SLC25A4	solute carrier family 25 (mitochondrial carrier; adenine nucleotide translocator), member 4
hsa-miR-562	1	0	1	1	1	1	CD9	CD9 molecule
hsa-miR-562	1	0	1	1	1	1	CAAP1	caspase activity and apoptosis inhibitor 1
hsa-miR-562	0	0	1	0	0	0	MYCT1	myc target 1
hsa-miR-562	1	0	1	1	1	1	CCNE1	cyclin E1
hsa-miR-562	0	0	1	0	0	0	TMEM208	transmembrane protein 208
hsa-miR-562	0	0	1	1	0	0	CD38	CD38 molecule
hsa-miR-562	0	0	1	1	0	0	C11orf68	chromosome 11 open reading frame 68
hsa-miR-562	0	0	1	1	1	1	CHEK1	checkpoint kinase 1
hsa-miR-562	0	0	1	0	1	1	SRSF5	serine/arginine-rich splicing factor 5
hsa-miR-562	0	0	1	1	1	1	CPZ	carboxypeptidase Z
hsa-miR-562	1	0	1	1	1	1	ARNTL	aryl hydrocarbon receptor nuclear translocator-like
hsa-miR-562	0	0	1	1	0	0	WDR43	WD repeat domain 43
hsa-miR-562	0	0	1	1	1	1	TANK	TRAF family member-associated NFKB activator
hsa-miR-562	0	0	1	1	1	1	CD1C	CD1c molecule
hsa-miR-562	1	0	1	1	1	1	BAALC	brain and acute leukemia, cytoplasmic
hsa-miR-562	0	0	1	1	1	1	SLCO4A1	solute carrier organic anion transporter family, member 4A1
hsa-miR-562	0	0	1	1	1	1	IL15	interleukin 15
hsa-miR-562	0	0	1	1	0	0	YIPF3	Yip1 domain family, member 3
hsa-miR-562	1	0	1	1	1	1	RPUSD3	RNA pseudouridylate synthase domain containing 3
hsa-miR-562	0	0	1	1	0	0	PC	pyruvate carboxylase
hsa-miR-562	1	0	1	1	1	1	RUNX1	runt-related transcription factor 1
hsa-miR-562	0	0	1	1	0	0	KAT8	K(lysine) acetyltransferase 8
hsa-miR-562	1	0	1	1	1	1	JUNB	jun B proto-oncogene
hsa-miR-562	0	0	1	1	1	1	SLC2A8	solute carrier family 2 (facilitated glucose transporter), member 8
hsa-miR-562	0	0	1	1	0	0	INO80B	INO80 complex subunit B
hsa-miR-562	0	0	1	1	0	0	IL11RA	interleukin 11 receptor, alpha
hsa-miR-562	1	0	1	0	1	1	KIAA0240	KIAA0240
hsa-miR-562	1	0	1	1	1	1	STAG2	stromal antigen 2
hsa-miR-562	0	0	1	0	0	0	LOC731789	uncharacterized LOC731789
hsa-miR-562	1	0	1	1	1	1	PTPRG	protein tyrosine phosphatase, receptor type, G
hsa-miR-562	1	0	1	1	1	1	PHACTR2	phosphatase and actin regulator 2
hsa-miR-562	0	0	1	0	0	0	C18orf63	chromosome 18 open reading frame 63
hsa-miR-562	0	0	1	0	0	0	MIR143HG	MIR143 host gene (non-protein coding)
hsa-miR-562	1	0	1	0	1	1	CNTNAP2	contactin associated protein-like 2
hsa-miR-562	1	0	1	1	1	1	ZFHX3	zinc finger homeobox 3
hsa-miR-562	1	0	1	1	1	1	PI15	peptidase inhibitor 15
hsa-miR-562	0	0	1	1	1	1	FCAR	Fc fragment of IgA, receptor for
hsa-miR-562	0	0	1	1	0	0	SPATA20	spermatogenesis associated 20
hsa-miR-562	0	0	1	1	1	1	MARVELD2	MARVEL domain containing 2
hsa-miR-562	0	0	1	0	0	0	POM121L8P	POM121 transmembrane nucleoporin-like 8 pseudogene
hsa-miR-562	0	0	1	0	0	0	PILRB	paired immunoglobin-like type 2 receptor beta
hsa-miR-562	1	0	1	1	1	1	BNC2	basonuclin 2
hsa-miR-562	1	0	1	0	1	1	RBBP5	retinoblastoma binding protein 5
hsa-miR-562	1	0	1	1	1	1	SLC4A8	solute carrier family 4, sodium bicarbonate cotransporter, member 8
hsa-miR-562	1	0	1	1	1	1	CCNG2	cyclin G2
hsa-miR-562	1	0	1	1	1	1	IGF1	insulin-like growth factor 1 (somatomedin C)
hsa-miR-562	1	0	1	0	1	1	ACVR2A	activin A receptor, type IIA
hsa-miR-562	0	0	1	1	1	1	AGA	aspartylglucosaminidase
hsa-miR-562	1	0	1	1	1	1	COL3A1	collagen, type III, alpha 1
hsa-miR-562	1	0	1	1	1	1	DLD	dihydrolipoamide dehydrogenase
hsa-miR-562	1	0	1	0	1	1	SLC26A2	solute carrier family 26 (sulfate transporter), member 2
hsa-miR-562	0	0	1	1	1	1	F8	coagulation factor VIII, procoagulant component
hsa-miR-562	0	0	1	1	0	0	FANCA	Fanconi anemia, complementation group A
hsa-miR-562	1	0	1	1	1	1	FBN1	fibrillin 1
hsa-miR-562	1	0	1	0	1	1	GHR	growth hormone receptor
hsa-miR-562	1	0	1	0	1	1	GLI3	GLI family zinc finger 3
hsa-miR-562	0	0	1	1	1	1	KCNJ1	potassium inwardly-rectifying channel, subfamily J, member 1
hsa-miR-562	1	0	1	1	1	1	MITF	microphthalmia-associated transcription factor
hsa-miR-562	0	0	1	1	1	1	SRD5A2	steroid-5-alpha-reductase, alpha polypeptide 2 (3-oxo-5 alpha-steroid delta 4-dehydrogenase alpha 2)
hsa-miR-562	0	0	1	1	1	1	STS	steroid sulfatase (microsomal), isozyme S
hsa-miR-562	0	0	1	1	1	1	LTBP2	latent transforming growth factor beta binding protein 2
hsa-miR-562	1	0	1	0	1	1	PAFAH1B1	platelet-activating factor acetylhydrolase 1b, regulatory subunit 1 (45kDa)
hsa-miR-562	0	0	1	1	0	0	PHEX	phosphate regulating endopeptidase homolog, X-linked
hsa-miR-562	1	0	1	1	1	1	AMPD3	adenosine monophosphate deaminase 3
hsa-miR-562	1	0	1	1	1	1	APP	amyloid beta (A4) precursor protein
hsa-miR-562	1	0	1	1	1	1	AQP2	aquaporin 2 (collecting duct)
hsa-miR-562	0	0	1	1	1	1	RFXAP	regulatory factor X-associated protein
hsa-miR-562	1	0	1	1	1	1	CD44	CD44 molecule (Indian blood group)
hsa-miR-562	0	0	1	1	1	1	GSR	glutathione reductase
hsa-miR-562	1	0	1	1	0	0	ADRA1B	adrenoceptor alpha 1B
hsa-miR-562	0	0	1	1	1	1	ALDH1A1	aldehyde dehydrogenase 1 family, member A1
hsa-miR-562	0	0	1	1	1	1	DCK	deoxycytidine kinase
hsa-miR-562	1	0	1	1	1	1	DRD1	dopamine receptor D1
hsa-miR-562	1	0	1	1	1	1	GRM1	glutamate receptor, metabotropic 1
hsa-miR-562	1	0	1	0	1	1	KCNJ2	potassium inwardly-rectifying channel, subfamily J, member 2
hsa-miR-562	1	0	1	1	1	1	PPP3R1	protein phosphatase 3, regulatory subunit B, alpha
hsa-miR-562	1	0	1	1	1	1	PTGFR	prostaglandin F receptor (FP)
hsa-miR-562	1	0	1	1	1	1	RARB	retinoic acid receptor, beta
hsa-miR-562	1	0	1	0	1	1	SMAD5	SMAD family member 5
hsa-miR-562	1	0	1	1	1	1	FAM13C	family with sequence similarity 13, member C
hsa-miR-562	1	0	1	1	1	1	LCLAT1	lysocardiolipin acyltransferase 1
hsa-miR-562	1	0	1	0	1	1	BMF	Bcl2 modifying factor
hsa-miR-562	0	0	1	1	1	1	SUMO1	SMT3 suppressor of mif two 3 homolog 1 (S. cerevisiae)
hsa-miR-562	1	0	1	1	1	1	ADAM9	ADAM metallopeptidase domain 9
hsa-miR-562	0	0	1	1	1	1	SCP2	sterol carrier protein 2
hsa-miR-562	0	0	1	0	1	1	C8orf22	chromosome 8 open reading frame 22
hsa-miR-562	1	0	1	1	1	1	EI24	etoposide induced 2.4 mRNA
hsa-miR-562	0	0	1	1	0	0	F8A3	coagulation factor VIII-associated 3
hsa-miR-562	0	0	1	1	1	1	SHISA2	shisa homolog 2 (Xenopus laevis)
hsa-miR-562	1	0	1	1	1	1	BCAP29	B-cell receptor-associated protein 29
hsa-miR-562	1	0	1	1	1	1	RBM33	RNA binding motif protein 33
hsa-miR-562	1	0	1	1	1	1	STEAP3	STEAP family member 3, metalloreductase
hsa-miR-562	0	0	1	1	1	1	TCHHL1	trichohyalin-like 1
hsa-miR-562	1	0	1	0	1	1	KIAA2022	KIAA2022
hsa-miR-562	0	0	1	1	1	1	MXI1	MAX interactor 1
hsa-miR-562	1	0	1	1	1	1	RBPMS	RNA binding protein with multiple splicing
hsa-miR-562	1	0	1	1	1	1	FNIP1	folliculin interacting protein 1
hsa-miR-562	0	0	1	1	1	1	GCSAM	germinal center-associated, signaling and motility
hsa-miR-562	0	0	1	1	1	1	FBXO47	F-box protein 47
hsa-miR-562	0	0	1	1	0	0	CCT3	chaperonin containing TCP1, subunit 3 (gamma)
hsa-miR-562	0	0	1	1	1	1	HRNR	hornerin
hsa-miR-562	1	0	1	1	1	1	FAM168B	family with sequence similarity 168, member B
hsa-miR-562	0	0	1	1	0	0	RIPPLY2	ripply2 homolog (zebrafish)
hsa-miR-562	1	0	1	0	1	1	ZC3H12B	zinc finger CCCH-type containing 12B
hsa-miR-562	1	0	1	0	1	1	MTX3	metaxin 3
hsa-miR-562	0	0	1	1	1	1	ZMAT1	zinc finger, matrin-type 1
hsa-miR-562	1	0	1	0	1	1	CREB5	cAMP responsive element binding protein 5
hsa-miR-562	0	0	1	0	1	1	GOLGA8E	golgin A8 family, member E
hsa-miR-562	1	0	1	1	1	1	SLC25A53	solute carrier family 25, member 53
hsa-miR-562	0	0	1	1	1	1	SPIN4	spindlin family, member 4
hsa-miR-562	0	0	1	1	1	1	C2orf68	chromosome 2 open reading frame 68
hsa-miR-562	0	0	1	0	1	1	LINC00268	long intergenic non-protein coding RNA 268
hsa-miR-562	1	0	1	1	1	1	KATNAL1	katanin p60 subunit A-like 1
hsa-miR-562	0	0	1	1	0	0	TAF9	TAF9 RNA polymerase II, TATA box binding protein (TBP)-associated factor, 32kDa
hsa-miR-562	1	0	1	0	1	1	GOPC	golgi-associated PDZ and coiled-coil motif containing
hsa-miR-562	1	0	1	1	1	1	VMA21	VMA21 vacuolar H+-ATPase homolog (S. cerevisiae)
hsa-miR-562	1	0	1	1	1	1	FNBP1L	formin binding protein 1-like
hsa-miR-562	1	0	1	0	1	1	CLLU1	chronic lymphocytic leukemia up-regulated 1
hsa-miR-562	0	0	1	0	1	1	C6orf120	chromosome 6 open reading frame 120
hsa-miR-562	1	0	1	1	1	1	MAF	v-maf musculoaponeurotic fibrosarcoma oncogene homolog (avian)
hsa-miR-562	1	0	1	1	1	1	UBE2V1	ubiquitin-conjugating enzyme E2 variant 1
hsa-miR-562	1	0	1	1	1	1	MYCL1	v-myc myelocytomatosis viral oncogene homolog 1, lung carcinoma derived (avian)
hsa-miR-562	1	0	1	1	1	1	PPM1B	protein phosphatase, Mg2+/Mn2+ dependent, 1B
hsa-miR-562	1	0	1	0	1	1	ARL5A	ADP-ribosylation factor-like 5A
hsa-miR-562	1	0	1	1	1	1	SCD5	stearoyl-CoA desaturase 5
hsa-miR-562	1	0	1	1	1	1	DPP6	dipeptidyl-peptidase 6
hsa-miR-562	1	0	1	1	1	1	ELMO1	engulfment and cell motility 1
hsa-miR-562	1	0	1	1	1	1	KIAA0317	KIAA0317
hsa-miR-562	1	0	1	1	1	1	CHTF8	CTF8, chromosome transmission fidelity factor 8 homolog (S. cerevisiae)
hsa-miR-562	1	0	1	0	1	1	FAM133B	family with sequence similarity 133, member B
hsa-miR-562	0	0	1	0	1	1	OPALIN	oligodendrocytic myelin paranodal and inner loop protein
hsa-miR-562	1	0	1	1	1	1	SCN2A	sodium channel, voltage-gated, type II, alpha subunit
hsa-miR-562	1	0	1	1	1	1	MTMR12	myotubularin related protein 12
hsa-miR-562	1	0	1	1	1	1	NCALD	neurocalcin delta
hsa-miR-562	0	0	1	0	1	1	STEAP2	STEAP family member 2, metalloreductase
hsa-miR-562	1	0	1	1	1	1	HMGCLL1	3-hydroxymethyl-3-methylglutaryl-CoA lyase-like 1
hsa-miR-562	1	0	1	1	1	1	RUFY2	RUN and FYVE domain containing 2
hsa-miR-562	1	0	1	1	1	1	NSL1	NSL1, MIND kinetochore complex component, homolog (S. cerevisiae)
hsa-miR-562	1	0	1	1	1	1	FRS2	fibroblast growth factor receptor substrate 2
hsa-miR-562	1	0	1	1	1	1	SNX21	sorting nexin family member 21
hsa-miR-562	1	0	1	0	1	1	SLC12A2	solute carrier family 12 (sodium/potassium/chloride transporters), member 2
hsa-miR-562	0	0	1	1	1	1	SLC7A3	solute carrier family 7 (cationic amino acid transporter, y+ system), member 3
hsa-miR-562	1	0	1	0	1	1	NCAM1	neural cell adhesion molecule 1
hsa-miR-562	1	0	1	1	1	1	ZNF436	zinc finger protein 436
hsa-miR-562	1	0	1	1	1	1	ATG9A	autophagy related 9A
hsa-miR-562	1	0	1	1	1	1	IRF2BP2	interferon regulatory factor 2 binding protein 2
hsa-miR-562	1	0	1	1	1	1	PRR3	proline rich 3
hsa-miR-562	0	0	1	1	1	1	FKTN	fukutin
hsa-miR-562	1	0	1	1	1	1	CREBBP	CREB binding protein
hsa-miR-562	1	0	1	1	1	1	CUL4B	cullin 4B
hsa-miR-562	1	0	1	0	1	1	ALDH5A1	aldehyde dehydrogenase 5 family, member A1
hsa-miR-562	1	0	1	0	1	1	THSD7B	thrombospondin, type I, domain containing 7B
hsa-miR-562	0	0	1	1	1	1	FTO	fat mass and obesity associated
hsa-miR-562	0	0	1	1	1	1	TBX18	T-box 18
hsa-miR-562	1	0	1	1	1	1	REPS2	RALBP1 associated Eps domain containing 2
hsa-miR-562	1	0	1	1	1	1	BMP2	bone morphogenetic protein 2
hsa-miR-562	1	0	1	1	1	1	CHD1	chromodomain helicase DNA binding protein 1
hsa-miR-562	1	0	1	1	1	1	CHD2	chromodomain helicase DNA binding protein 2
hsa-miR-562	0	0	1	1	1	1	CHUK	conserved helix-loop-helix ubiquitous kinase
hsa-miR-562	1	0	1	0	1	1	CPD	carboxypeptidase D
hsa-miR-562	1	0	1	1	1	1	MAPK14	mitogen-activated protein kinase 14
hsa-miR-562	1	0	1	1	1	1	CTNND2	catenin (cadherin-associated protein), delta 2
hsa-miR-562	1	0	1	1	1	1	DYRK1A	dual-specificity tyrosine-(Y)-phosphorylation regulated kinase 1A
hsa-miR-562	1	0	1	1	1	1	CELSR2	cadherin, EGF LAG seven-pass G-type receptor 2 (flamingo homolog, Drosophila)
hsa-miR-562	0	0	1	0	1	1	EMP1	epithelial membrane protein 1
hsa-miR-562	0	0	1	1	0	0	FABP5	fatty acid binding protein 5 (psoriasis-associated)
hsa-miR-562	0	0	1	0	1	1	FMO2	flavin containing monooxygenase 2 (non-functional)
hsa-miR-562	0	0	1	1	1	1	ARF4	ADP-ribosylation factor 4
hsa-miR-562	1	0	1	0	1	1	ARNT	aryl hydrocarbon receptor nuclear translocator
hsa-miR-562	1	0	1	0	1	1	CCND2	cyclin D2
hsa-miR-562	0	0	1	1	1	1	CD34	CD34 molecule
hsa-miR-562	0	0	1	1	1	1	CKS1B	CDC28 protein kinase regulatory subunit 1B
hsa-miR-562	1	0	1	1	1	1	COL4A1	collagen, type IV, alpha 1
hsa-miR-562	0	0	1	1	1	1	CTH	cystathionase (cystathionine gamma-lyase)
hsa-miR-562	0	0	1	1	1	1	DLAT	dihydrolipoamide S-acetyltransferase
hsa-miR-562	1	0	1	0	1	1	FOXO1	forkhead box O1
hsa-miR-562	0	0	1	1	1	1	FLI1	Friend leukemia virus integration 1
hsa-miR-562	1	0	1	1	1	1	GAB1	GRB2-associated binding protein 1
hsa-miR-562	0	0	1	1	1	1	FOXN2	forkhead box N2
hsa-miR-562	0	0	1	1	1	1	IL12B	interleukin 12B (natural killer cell stimulatory factor 2, cytotoxic lymphocyte maturation factor 2, p40)
hsa-miR-562	1	0	1	1	1	1	INSM1	insulinoma-associated 1
hsa-miR-562	1	0	1	1	1	1	ITGB8	integrin, beta 8
hsa-miR-562	1	0	1	1	1	1	KCNA6	potassium voltage-gated channel, shaker-related subfamily, member 6
hsa-miR-562	1	0	1	1	1	1	KCNJ10	potassium inwardly-rectifying channel, subfamily J, member 10
hsa-miR-562	0	0	1	1	0	0	KCNN4	potassium intermediate/small conductance calcium-activated channel, subfamily N, member 4
hsa-miR-562	0	0	1	1	0	0	KRT4	keratin 4
hsa-miR-562	0	0	1	1	0	0	KRT33B	keratin 33B
hsa-miR-562	1	0	1	0	1	1	LAMC1	laminin, gamma 1 (formerly LAMB2)
hsa-miR-562	1	0	1	0	1	1	MXD1	MAX dimerization protein 1
hsa-miR-562	0	0	1	1	1	1	MAG	myelin associated glycoprotein
hsa-miR-562	1	0	1	1	1	1	MAX	MYC associated factor X
hsa-miR-562	1	0	1	1	1	1	ME1	malic enzyme 1, NADP(+)-dependent, cytosolic
hsa-miR-562	1	0	1	1	1	1	PPP1R12B	protein phosphatase 1, regulatory subunit 12B
hsa-miR-562	1	0	1	1	1	1	NEUROD1	neuronal differentiation 1
hsa-miR-562	1	0	1	1	1	1	ORC5	origin recognition complex, subunit 5
hsa-miR-562	1	0	1	1	1	1	PCSK6	proprotein convertase subtilisin/kexin type 6
hsa-miR-562	1	0	1	0	1	1	PAPPA	pregnancy-associated plasma protein A, pappalysin 1
hsa-miR-562	1	0	1	1	1	1	PBX2	pre-B-cell leukemia homeobox 2
hsa-miR-562	0	0	1	1	1	1	PPP1R3A	protein phosphatase 1, regulatory subunit 3A
hsa-miR-562	0	0	1	1	1	1	PTPN12	protein tyrosine phosphatase, non-receptor type 12
hsa-miR-562	0	0	1	1	1	1	PTPRC	protein tyrosine phosphatase, receptor type, C
hsa-miR-562	0	0	1	1	0	0	PTPRH	protein tyrosine phosphatase, receptor type, H
hsa-miR-562	1	0	1	1	1	1	RAD23B	RAD23 homolog B (S. cerevisiae)
hsa-miR-562	1	0	1	1	1	1	SH3GL2	SH3-domain GRB2-like 2
hsa-miR-562	0	0	1	1	1	1	SMARCA1	SWI/SNF related, matrix associated, actin dependent regulator of chromatin, subfamily a, member 1
hsa-miR-562	0	0	1	1	1	1	TAC1	tachykinin, precursor 1
hsa-miR-562	1	0	1	1	1	1	TAF4	TAF4 RNA polymerase II, TATA box binding protein (TBP)-associated factor, 135kDa
hsa-miR-562	0	0	1	0	1	1	TCF21	transcription factor 21
hsa-miR-562	0	0	1	1	0	0	TTC1	tetratricopeptide repeat domain 1
hsa-miR-562	1	0	1	1	1	1	ZIC3	Zic family member 3
hsa-miR-562	0	0	1	1	1	1	ZNF137P	zinc finger protein 137, pseudogene
hsa-miR-562	0	0	1	1	1	1	STAM	signal transducing adaptor molecule (SH3 domain and ITAM motif) 1
hsa-miR-562	1	0	1	1	1	1	NRIP1	nuclear receptor interacting protein 1
hsa-miR-562	1	0	1	1	1	1	FZD7	frizzled family receptor 7
hsa-miR-562	1	0	1	0	1	1	VAPA	VAMP (vesicle-associated membrane protein)-associated protein A, 33kDa
hsa-miR-562	0	0	1	1	0	0	SEMA7A	semaphorin 7A, GPI membrane anchor (John Milton Hagen blood group)
hsa-miR-562	1	0	1	1	1	1	PPM1D	protein phosphatase, Mg2+/Mn2+ dependent, 1D
hsa-miR-562	0	0	1	1	1	1	ITGA10	integrin, alpha 10
hsa-miR-562	1	0	1	1	1	1	BHLHE40	basic helix-loop-helix family, member e40
hsa-miR-562	0	0	1	1	1	1	FAM193A	family with sequence similarity 193, member A
hsa-miR-562	1	0	1	0	1	1	TNKS	tankyrase, TRF1-interacting ankyrin-related ADP-ribose polymerase
hsa-miR-562	1	0	1	0	1	1	IRS2	insulin receptor substrate 2
hsa-miR-562	0	0	1	1	0	0	TNFRSF25	tumor necrosis factor receptor superfamily, member 25
hsa-miR-562	0	0	1	1	1	1	SNX4	sorting nexin 4
hsa-miR-562	0	0	1	1	1	1	IL18R1	interleukin 18 receptor 1
hsa-miR-562	1	0	1	0	1	1	SGPL1	sphingosine-1-phosphate lyase 1
hsa-miR-562	0	0	1	1	1	1	PRPF4B	PRP4 pre-mRNA processing factor 4 homolog B (yeast)
hsa-miR-562	1	0	1	1	1	1	CDH17	cadherin 17, LI cadherin (liver-intestine)
hsa-miR-562	1	0	1	1	1	1	EFNB2	ephrin-B2
hsa-miR-562	0	0	1	1	1	1	FLT3	fms-related tyrosine kinase 3
hsa-miR-562	1	0	1	1	1	1	GMFB	glia maturation factor, beta
hsa-miR-562	1	0	1	1	1	1	MFHAS1	malignant fibrous histiocytoma amplified sequence 1
hsa-miR-562	0	0	1	1	1	1	HOMER1	homer homolog 1 (Drosophila)
hsa-miR-562	1	0	1	1	1	1	DAG1	dystroglycan 1 (dystrophin-associated glycoprotein 1)
hsa-miR-562	1	0	1	0	1	1	ACSL4	acyl-CoA synthetase long-chain family member 4
hsa-miR-562	1	0	1	0	1	1	FGF5	fibroblast growth factor 5
hsa-miR-562	1	0	1	0	1	1	GALNT2	UDP-N-acetyl-alpha-D-galactosamine:polypeptide N-acetylgalactosaminyltransferase 2 (GalNAc-T2)
hsa-miR-562	0	0	1	1	1	1	PIGH	phosphatidylinositol glycan anchor biosynthesis, class H
hsa-miR-562	1	0	1	0	1	1	PKNOX1	PBX/knotted 1 homeobox 1
hsa-miR-562	1	0	1	1	1	1	RAB11A	RAB11A, member RAS oncogene family
hsa-miR-562	0	0	1	1	1	1	LIN7A	lin-7 homolog A (C. elegans)
hsa-miR-562	1	0	1	1	1	1	SPARCL1	SPARC-like 1 (hevin)
hsa-miR-562	1	0	1	1	1	1	MTMR4	myotubularin related protein 4
hsa-miR-562	1	0	1	1	1	1	SCAF11	SR-related CTD-associated factor 11
hsa-miR-562	0	0	1	1	1	1	BUB3	budding uninhibited by benzimidazoles 3 homolog (yeast)
hsa-miR-562	1	0	1	1	1	1	XPR1	xenotropic and polytropic retrovirus receptor 1
hsa-miR-562	1	0	1	1	1	1	STK17A	serine/threonine kinase 17a
hsa-miR-562	1	0	1	1	1	1	NRXN3	neurexin 3
hsa-miR-562	1	0	1	1	1	1	ONECUT2	one cut homeobox 2
hsa-miR-562	1	0	1	1	1	1	TBPL1	TBP-like 1
hsa-miR-562	1	0	1	1	1	1	JARID2	jumonji, AT rich interactive domain 2
hsa-miR-562	0	0	1	1	1	1	PRCP	prolylcarboxypeptidase (angiotensinase C)
hsa-miR-562	1	0	1	0	1	1	PRKX	protein kinase, X-linked
hsa-miR-562	1	0	1	1	1	1	RELN	reelin
hsa-miR-562	0	0	1	1	1	1	PTH2R	parathyroid hormone 2 receptor
hsa-miR-562	1	0	1	0	1	1	SEL1L	sel-1 suppressor of lin-12-like (C. elegans)
hsa-miR-562	1	0	1	1	1	1	SLC23A2	solute carrier family 23 (nucleobase transporters), member 2
hsa-miR-562	1	0	1	1	1	1	HIP1	huntingtin interacting protein 1
hsa-miR-562	1	0	1	0	1	1	PRKAB2	protein kinase, AMP-activated, beta 2 non-catalytic subunit
hsa-miR-562	1	0	1	1	1	1	RALA	v-ral simian leukemia viral oncogene homolog A (ras related)
hsa-miR-562	1	0	1	1	1	1	GABBR2	gamma-aminobutyric acid (GABA) B receptor, 2
hsa-miR-562	1	0	1	1	1	1	AKT3	v-akt murine thymoma viral oncogene homolog 3 (protein kinase B, gamma)
hsa-miR-562	1	0	1	0	0	0	FRAT1	frequently rearranged in advanced T-cell lymphomas
hsa-miR-562	0	0	1	1	1	1	LMAN1	lectin, mannose-binding, 1
hsa-miR-562	0	0	1	0	1	1	POU3F2	POU class 3 homeobox 2
hsa-miR-562	1	0	1	1	1	1	RHEB	Ras homolog enriched in brain
hsa-miR-562	0	0	1	1	1	1	SOX3	SRY (sex determining region Y)-box 3
hsa-miR-562	1	0	1	1	1	1	UST	uronyl-2-sulfotransferase
hsa-miR-562	1	0	1	1	1	1	ARPC5	actin related protein 2/3 complex, subunit 5, 16kDa
hsa-miR-562	1	0	1	0	1	1	TSPAN2	tetraspanin 2
hsa-miR-562	1	0	1	1	1	1	NAMPT	nicotinamide phosphoribosyltransferase
hsa-miR-562	0	0	1	1	0	0	PLXNC1	plexin C1
hsa-miR-562	1	0	1	0	1	1	DCAF7	DDB1 and CUL4 associated factor 7
hsa-miR-562	1	0	1	0	1	1	SPRY3	sprouty homolog 3 (Drosophila)
hsa-miR-562	1	0	1	0	1	1	NBR1	neighbor of BRCA1 gene 1
hsa-miR-562	1	0	1	1	1	1	MMP16	matrix metallopeptidase 16 (membrane-inserted)
hsa-miR-562	0	0	1	1	1	1	SOX1	SRY (sex determining region Y)-box 1
hsa-miR-562	1	0	1	0	1	1	SPATA2	spermatogenesis associated 2
hsa-miR-562	0	0	1	1	1	1	LANCL1	LanC lantibiotic synthetase component C-like 1 (bacterial)
hsa-miR-562	1	0	1	1	1	1	SEMA3A	sema domain, immunoglobulin domain (Ig), short basic domain, secreted, (semaphorin) 3A
hsa-miR-562	1	0	1	1	1	1	DAGLA	diacylglycerol lipase, alpha
hsa-miR-562	1	0	1	1	1	1	TMEM50B	transmembrane protein 50B
hsa-miR-562	0	0	1	1	1	1	CSF2RA	colony stimulating factor 2 receptor, alpha, low-affinity (granulocyte-macrophage)
hsa-miR-562	1	0	1	1	1	1	NR4A2	nuclear receptor subfamily 4, group A, member 2
hsa-miR-562	0	0	1	0	0	0	PTPN13	protein tyrosine phosphatase, non-receptor type 13 (APO-1/CD95 (Fas)-associated phosphatase)
hsa-miR-562	1	0	1	1	1	1	SMC1A	structural maintenance of chromosomes 1A
hsa-miR-562	1	0	1	1	1	1	HEXIM1	hexamethylene bis-acetamide inducible 1
hsa-miR-562	1	0	1	1	1	1	DYNLT3	dynein, light chain, Tctex-type 3
hsa-miR-562	0	0	1	1	1	1	CLCA2	chloride channel accessory 2
hsa-miR-562	1	0	1	1	1	1	ZBTB6	zinc finger and BTB domain containing 6
hsa-miR-562	0	0	1	1	1	1	CD300C	CD300c molecule
hsa-miR-562	1	0	1	1	1	1	SPIN1	spindlin 1
hsa-miR-562	1	0	1	1	1	1	DIAPH2	diaphanous homolog 2 (Drosophila)
hsa-miR-562	1	0	1	1	1	1	SLC20A2	solute carrier family 20 (phosphate transporter), member 2
hsa-miR-562	1	0	1	1	1	1	BTG2	BTG family, member 2
hsa-miR-562	0	0	1	1	1	1	TMED10	transmembrane emp24-like trafficking protein 10 (yeast)
hsa-miR-562	0	0	1	1	1	1	ASCC3	activating signal cointegrator 1 complex subunit 3
hsa-miR-562	0	0	1	1	0	0	IDH3B	isocitrate dehydrogenase 3 (NAD+) beta
hsa-miR-562	1	0	1	1	1	1	PRRX1	paired related homeobox 1
hsa-miR-562	0	0	1	0	1	1	PSG1	pregnancy specific beta-1-glycoprotein 1
hsa-miR-562	1	0	1	1	1	1	RP2	retinitis pigmentosa 2 (X-linked recessive)
hsa-miR-562	1	0	1	0	1	1	SOX12	SRY (sex determining region Y)-box 12
hsa-miR-562	1	0	1	0	1	1	WASF2	WAS protein family, member 2
hsa-miR-562	1	0	1	1	1	1	DDX52	DEAD (Asp-Glu-Ala-Asp) box polypeptide 52
hsa-miR-562	0	0	1	1	1	1	DNAJB4	DnaJ (Hsp40) homolog, subfamily B, member 4
hsa-miR-562	1	0	1	1	1	1	ADAMTS5	ADAM metallopeptidase with thrombospondin type 1 motif, 5
hsa-miR-562	0	0	1	1	1	1	FAF1	Fas (TNFRSF6) associated factor 1
hsa-miR-562	1	0	1	1	1	1	UBL3	ubiquitin-like 3
hsa-miR-562	1	0	1	0	1	1	PRSS23	protease, serine, 23
hsa-miR-562	1	0	1	1	1	1	HPS5	Hermansky-Pudlak syndrome 5
hsa-miR-562	1	0	1	1	1	1	KLF12	Kruppel-like factor 12
hsa-miR-562	0	0	1	1	1	1	STXBP3	syntaxin binding protein 3
hsa-miR-562	1	0	1	1	1	1	PHLDA1	pleckstrin homology-like domain, family A, member 1
hsa-miR-562	1	0	1	1	1	1	ELL2	elongation factor, RNA polymerase II, 2
hsa-miR-562	1	0	1	1	1	1	ICOS	inducible T-cell co-stimulator
hsa-miR-562	0	0	1	1	1	1	COPG2	coatomer protein complex, subunit gamma 2
hsa-miR-562	1	0	1	0	1	1	FZD4	frizzled family receptor 4
hsa-miR-562	1	0	1	1	1	1	MGEA5	meningioma expressed antigen 5 (hyaluronidase)
hsa-miR-562	1	0	1	1	1	1	RHOQ	ras homolog family member Q
hsa-miR-562	1	0	1	0	1	1	ACAP2	ArfGAP with coiled-coil, ankyrin repeat and PH domains 2
hsa-miR-562	1	0	1	0	1	1	GAB2	GRB2-associated binding protein 2
hsa-miR-562	1	0	1	1	1	1	DNAJB9	DnaJ (Hsp40) homolog, subfamily B, member 9
hsa-miR-562	0	0	1	1	0	0	NTSR2	neurotensin receptor 2
hsa-miR-562	1	0	1	1	1	1	SF3B1	splicing factor 3b, subunit 1, 155kDa
hsa-miR-562	1	0	1	1	1	1	PPARGC1A	peroxisome proliferator-activated receptor gamma, coactivator 1 alpha
hsa-miR-562	0	0	1	1	0	0	TBX21	T-box 21
hsa-miR-562	0	0	1	1	1	1	PURG	purine-rich element binding protein G
hsa-miR-562	1	0	1	1	1	1	LAMP2	lysosomal-associated membrane protein 2
hsa-miR-562	1	0	1	1	1	1	ZBTB43	zinc finger and BTB domain containing 43
hsa-miR-562	1	0	1	1	1	1	SOCS5	suppressor of cytokine signaling 5
hsa-miR-562	1	0	1	0	1	1	C16orf72	chromosome 16 open reading frame 72
hsa-miR-562	0	0	1	1	1	1	GTPBP8	GTP-binding protein 8 (putative)
hsa-miR-562	1	0	1	1	1	1	CORO1C	coronin, actin binding protein, 1C
hsa-miR-562	1	0	1	1	1	1	SLC7A11	solute carrier family 7 (anionic amino acid transporter light chain, xc- system), member 11
hsa-miR-562	0	0	1	1	1	1	ZNF318	zinc finger protein 318
hsa-miR-562	0	0	1	1	1	1	KCNMB4	potassium large conductance calcium-activated channel, subfamily M, beta member 4
hsa-miR-562	1	0	1	1	1	1	PCDH11X	protocadherin 11 X-linked
hsa-miR-562	0	0	1	1	1	1	ARFGAP3	ADP-ribosylation factor GTPase activating protein 3
hsa-miR-562	1	0	1	1	1	1	FAF2	Fas associated factor family member 2
hsa-miR-562	1	0	1	0	1	1	ATP11B	ATPase, class VI, type 11B
hsa-miR-562	0	0	1	1	0	0	EMC2	ER membrane protein complex subunit 2
hsa-miR-562	1	0	1	0	1	1	EDEM1	ER degradation enhancer, mannosidase alpha-like 1
hsa-miR-562	0	0	1	0	1	1	KNTC1	kinetochore associated 1
hsa-miR-562	1	0	1	0	1	1	MLEC	malectin
hsa-miR-562	1	0	1	0	1	1	SERTAD2	SERTA domain containing 2
hsa-miR-562	0	0	1	0	1	1	EPM2AIP1	EPM2A (laforin) interacting protein 1
hsa-miR-562	1	0	1	0	1	1	TRIL	TLR4 interactor with leucine-rich repeats
hsa-miR-562	1	0	1	0	1	1	LPPR4	lipid phosphate phosphatase-related protein type 4
hsa-miR-562	1	0	1	0	1	1	WDFY3	WD repeat and FYVE domain containing 3
hsa-miR-562	1	0	1	1	1	1	STK38L	serine/threonine kinase 38 like
hsa-miR-562	0	0	1	1	1	1	MYO16	myosin XVI
hsa-miR-562	1	0	1	1	1	1	PIKFYVE	phosphoinositide kinase, FYVE finger containing
hsa-miR-562	1	0	1	0	1	1	SNX13	sorting nexin 13
hsa-miR-562	1	0	1	1	1	1	PRRC2C	proline-rich coiled-coil 2C
hsa-miR-562	0	0	1	1	1	1	FBXO28	F-box protein 28
hsa-miR-562	1	0	1	1	1	1	CSTF2T	cleavage stimulation factor, 3' pre-RNA, subunit 2, 64kDa, tau variant
hsa-miR-562	1	0	1	0	1	1	SRGAP2	SLIT-ROBO Rho GTPase activating protein 2
hsa-miR-562	1	0	1	1	1	1	MED13L	mediator complex subunit 13-like
hsa-miR-562	0	0	1	0	1	1	ZDHHC17	zinc finger, DHHC-type containing 17
hsa-miR-562	1	0	1	1	1	1	ASXL1	additional sex combs like 1 (Drosophila)
hsa-miR-562	1	0	1	1	1	1	CNOT6	CCR4-NOT transcription complex, subunit 6
hsa-miR-562	1	0	1	0	1	1	OSBPL3	oxysterol binding protein-like 3
hsa-miR-562	1	0	1	0	1	1	GLCE	glucuronic acid epimerase
hsa-miR-562	1	0	1	1	0	0	POLDIP2	polymerase (DNA-directed), delta interacting protein 2
hsa-miR-562	1	0	1	1	0	0	LDLRAP1	low density lipoprotein receptor adaptor protein 1
hsa-miR-562	1	0	1	1	1	1	FGFR1	fibroblast growth factor receptor 1
hsa-miR-562	1	0	1	1	1	1	AZIN1	antizyme inhibitor 1
hsa-miR-562	1	0	1	1	1	1	TAF9B	TAF9B RNA polymerase II, TATA box binding protein (TBP)-associated factor, 31kDa
hsa-miR-562	1	0	1	1	1	1	UBE2J1	ubiquitin-conjugating enzyme E2, J1
hsa-miR-562	0	0	1	0	1	1	OTUD6B	OTU domain containing 6B
hsa-miR-562	0	0	1	1	1	1	LACTB2	lactamase, beta 2
hsa-miR-562	0	0	1	1	1	1	ISOC1	isochorismatase domain containing 1
hsa-miR-562	0	0	1	1	1	1	MRPS23	mitochondrial ribosomal protein S23
hsa-miR-562	0	0	1	1	1	1	COMMD2	COMM domain containing 2
hsa-miR-562	0	0	1	1	1	1	ZFR	zinc finger RNA binding protein
hsa-miR-562	1	0	1	1	1	1	VGLL3	vestigial like 3 (Drosophila)
hsa-miR-562	0	0	1	1	1	1	ACSL5	acyl-CoA synthetase long-chain family member 5
hsa-miR-562	0	0	1	1	1	1	EMCN	endomucin
hsa-miR-562	0	0	1	1	1	1	CYB5R1	cytochrome b5 reductase 1
hsa-miR-562	1	0	1	1	1	1	AKAP11	A kinase (PRKA) anchor protein 11
hsa-miR-562	1	0	1	0	1	1	HPCAL4	hippocalcin like 4
hsa-miR-562	0	0	1	1	1	1	RSL24D1	ribosomal L24 domain containing 1
hsa-miR-562	1	0	1	1	1	1	CMPK1	cytidine monophosphate (UMP-CMP) kinase 1, cytosolic
hsa-miR-562	0	0	1	1	1	1	WBP11	WW domain binding protein 11
hsa-miR-562	0	0	1	1	1	1	AMBN	ameloblastin (enamel matrix protein)
hsa-miR-562	1	0	1	0	1	1	RAB8B	RAB8B, member RAS oncogene family
hsa-miR-562	0	0	1	1	1	1	KDM3B	lysine (K)-specific demethylase 3B
hsa-miR-562	1	0	1	1	1	1	UFM1	ubiquitin-fold modifier 1
hsa-miR-562	1	0	1	0	1	1	KLHL3	kelch-like 3 (Drosophila)
hsa-miR-562	1	0	1	0	1	1	EIF2C4	eukaryotic translation initiation factor 2C, 4
hsa-miR-562	1	0	1	1	1	1	HAUS6	HAUS augmin-like complex, subunit 6
hsa-miR-562	1	0	1	1	1	1	ZNF280C	zinc finger protein 280C
hsa-miR-562	0	0	1	1	1	1	ERCC6L	excision repair cross-complementing rodent repair deficiency, complementation group 6-like
hsa-miR-562	1	0	1	0	1	1	FAM46C	family with sequence similarity 46, member C
hsa-miR-562	0	0	1	1	0	0	PALMD	palmdelphin
hsa-miR-562	0	0	1	0	1	1	THUMPD1	THUMP domain containing 1
hsa-miR-562	1	0	1	1	1	1	UBE2R2	ubiquitin-conjugating enzyme E2R 2
hsa-miR-562	1	0	1	0	1	1	MARCH5	membrane-associated ring finger (C3HC4) 5
hsa-miR-562	1	0	1	1	1	1	CDC37L1	cell division cycle 37 homolog (S. cerevisiae)-like 1
hsa-miR-562	1	0	1	1	1	1	SOBP	sine oculis binding protein homolog (Drosophila)
hsa-miR-562	1	0	1	1	1	1	FIGN	fidgetin
hsa-miR-562	1	0	1	1	1	1	LRRC8D	leucine rich repeat containing 8 family, member D
hsa-miR-562	1	0	1	1	1	1	UBA6	ubiquitin-like modifier activating enzyme 6
hsa-miR-562	0	0	1	1	0	0	INTS9	integrator complex subunit 9
hsa-miR-562	1	0	1	1	1	1	C9orf72	chromosome 9 open reading frame 72
hsa-miR-562	1	0	1	1	1	1	KIAA1598	KIAA1598
hsa-miR-562	0	0	1	0	1	1	TXLNG	taxilin gamma
hsa-miR-562	1	0	1	1	1	1	RSBN1	round spermatid basic protein 1
hsa-miR-562	1	0	1	1	1	1	ACER3	alkaline ceramidase 3
hsa-miR-562	0	0	1	1	1	1	LAPTM4B	lysosomal protein transmembrane 4 beta
hsa-miR-562	1	0	1	1	1	1	EPB41L4B	erythrocyte membrane protein band 4.1 like 4B
hsa-miR-562	1	0	1	1	1	1	PAG1	phosphoprotein associated with glycosphingolipid microdomains 1
hsa-miR-562	1	0	1	1	1	1	CAMK2N1	calcium/calmodulin-dependent protein kinase II inhibitor 1
hsa-miR-562	1	0	1	1	1	1	ETNK1	ethanolamine kinase 1
hsa-miR-562	1	0	1	0	1	1	TMEM55A	transmembrane protein 55A
hsa-miR-562	1	0	1	1	1	1	GNG12	guanine nucleotide binding protein (G protein), gamma 12
hsa-miR-562	0	0	1	1	1	1	NPAP1	nuclear pore associated protein 1
hsa-miR-562	1	0	1	0	1	1	FAM190B	family with sequence similarity 190, member B
hsa-miR-562	0	0	1	1	1	1	GNL3L	guanine nucleotide binding protein-like 3 (nucleolar)-like
hsa-miR-562	1	0	1	1	1	1	SEPT3	septin 3
hsa-miR-562	0	0	1	1	1	1	RNF20	ring finger protein 20, E3 ubiquitin protein ligase
hsa-miR-562	1	0	1	1	1	1	CCBL2	cysteine conjugate-beta lyase 2
hsa-miR-562	0	0	1	1	1	1	RPRM	reprimo, TP53 dependent G2 arrest mediator candidate
hsa-miR-562	1	0	1	1	1	1	CYP26B1	cytochrome P450, family 26, subfamily B, polypeptide 1
hsa-miR-562	0	0	1	1	1	1	UBQLN4	ubiquilin 4
hsa-miR-562	1	0	1	1	1	1	C5orf15	chromosome 5 open reading frame 15
hsa-miR-562	1	0	1	1	1	1	ANKRD50	ankyrin repeat domain 50
hsa-miR-562	1	0	1	0	1	1	SLC17A6	solute carrier family 17 (sodium-dependent inorganic phosphate cotransporter), member 6
hsa-miR-562	1	0	1	0	1	1	EIF5A2	eukaryotic translation initiation factor 5A2
hsa-miR-562	1	0	1	1	1	1	PTGFRN	prostaglandin F2 receptor negative regulator
hsa-miR-562	0	0	1	1	1	1	IL22	interleukin 22
hsa-miR-562	1	0	1	1	1	1	DLG3	discs, large homolog 3 (Drosophila)
hsa-miR-562	1	0	1	1	1	1	ZNF608	zinc finger protein 608
hsa-miR-562	1	0	1	1	1	1	MIB1	mindbomb E3 ubiquitin protein ligase 1
hsa-miR-562	1	0	1	0	1	1	ALPK3	alpha-kinase 3
hsa-miR-562	1	0	1	0	1	1	SYT4	synaptotagmin IV
hsa-miR-562	1	0	1	1	1	1	NCEH1	neutral cholesterol ester hydrolase 1
hsa-miR-562	1	0	1	1	1	1	KLHL14	kelch-like 14 (Drosophila)
hsa-miR-562	1	0	1	1	1	1	KIAA1467	KIAA1467
hsa-miR-562	0	0	1	1	1	1	SLC7A14	solute carrier family 7 (orphan transporter), member 14
hsa-miR-562	0	0	1	1	1	1	B3GALT1	UDP-Gal:betaGlcNAc beta 1,3-galactosyltransferase, polypeptide 1
hsa-miR-562	0	0	1	1	1	1	TLX3	T-cell leukemia homeobox 3
hsa-miR-562	1	0	1	0	1	1	NMT1	N-myristoyltransferase 1
hsa-miR-562	1	0	1	1	1	1	CLDN1	claudin 1
hsa-miR-562	0	0	1	1	1	1	INIP	INTS3 and NABP interacting protein
hsa-miR-562	1	0	1	1	1	1	NTN4	netrin 4
hsa-miR-562	0	0	1	1	1	1	IL22RA1	interleukin 22 receptor, alpha 1
hsa-miR-562	1	0	1	1	1	1	TMEM35	transmembrane protein 35
hsa-miR-562	1	0	1	1	1	1	TRIB2	tribbles homolog 2 (Drosophila)
hsa-miR-562	1	0	1	0	1	1	TSPYL4	TSPY-like 4
hsa-miR-562	1	0	1	1	1	1	CLCN6	chloride channel, voltage-sensitive 6
hsa-miR-562	1	0	1	1	1	1	PPP1R11	protein phosphatase 1, regulatory (inhibitor) subunit 11
hsa-miR-562	1	0	1	0	1	1	MCL1	myeloid cell leukemia sequence 1 (BCL2-related)
hsa-miR-562	1	0	1	0	1	1	CSNK1G1	casein kinase 1, gamma 1
hsa-miR-562	1	0	1	0	1	1	CERS2	ceramide synthase 2
hsa-miR-562	0	0	1	1	0	0	RRAGC	Ras-related GTP binding C
hsa-miR-562	0	0	1	1	1	1	POPDC3	popeye domain containing 3
hsa-miR-562	1	0	1	1	1	1	TMEM168	transmembrane protein 168
hsa-miR-562	1	0	1	1	1	1	SUDS3	suppressor of defective silencing 3 homolog (S. cerevisiae)
hsa-miR-562	1	0	1	0	1	1	MRPS25	mitochondrial ribosomal protein S25
hsa-miR-562	1	0	1	1	1	1	S100PBP	S100P binding protein
hsa-miR-562	0	0	1	1	1	1	SFXN1	sideroflexin 1
hsa-miR-562	0	0	1	1	1	1	OSBPL11	oxysterol binding protein-like 11
hsa-miR-562	1	0	1	1	1	1	DEPTOR	DEP domain containing MTOR-interacting protein
hsa-miR-562	1	0	1	0	1	1	USP46	ubiquitin specific peptidase 46
hsa-miR-562	0	0	1	0	1	1	CDCP1	CUB domain containing protein 1
hsa-miR-562	0	0	1	0	1	1	LRRC19	leucine rich repeat containing 19
hsa-miR-562	1	0	1	1	1	1	SOWAHC	sosondowah ankyrin repeat domain family member C
hsa-miR-562	1	0	1	1	1	1	EFHD2	EF-hand domain family, member D2
hsa-miR-562	0	0	1	1	0	0	DCTN3	dynactin 3 (p22)
hsa-miR-562	1	0	1	0	1	1	NOTCH2	notch 2
hsa-miR-562	0	0	1	1	1	1	AKIRIN1	akirin 1
hsa-miR-562	0	0	1	1	1	1	ZDHHC14	zinc finger, DHHC-type containing 14
hsa-miR-562	0	0	1	1	1	1	CXorf36	chromosome X open reading frame 36
hsa-miR-562	0	0	1	1	1	1	SNIP1	Smad nuclear interacting protein 1
hsa-miR-562	1	0	1	1	1	1	C15orf29	chromosome 15 open reading frame 29
hsa-miR-562	0	0	1	1	1	1	RPAP2	RNA polymerase II associated protein 2
hsa-miR-562	1	0	1	1	0	0	SYNDIG1	synapse differentiation inducing 1
hsa-miR-562	1	0	1	1	1	1	CEP76	centrosomal protein 76kDa
hsa-miR-562	0	0	1	1	1	1	DOCK5	dedicator of cytokinesis 5
hsa-miR-562	0	0	1	1	1	1	COQ10B	coenzyme Q10 homolog B (S. cerevisiae)
hsa-miR-562	1	0	1	1	1	1	JHDM1D	jumonji C domain containing histone demethylase 1 homolog D (S. cerevisiae)
hsa-miR-562	1	0	1	0	1	1	SETD7	SET domain containing (lysine methyltransferase) 7
hsa-miR-562	1	0	1	1	1	1	PTPRO	protein tyrosine phosphatase, receptor type, O
hsa-miR-562	1	0	1	1	1	1	MAP4	microtubule-associated protein 4
hsa-miR-562	1	0	1	1	1	1	PPP1R14C	protein phosphatase 1, regulatory (inhibitor) subunit 14C
hsa-miR-562	1	0	1	1	1	1	RAB1B	RAB1B, member RAS oncogene family
hsa-miR-562	0	0	1	1	1	1	KIF18A	kinesin family member 18A
hsa-miR-562	1	0	1	1	1	1	GABARAPL1	GABA(A) receptor-associated protein like 1
hsa-miR-562	1	0	1	1	1	1	ANO3	anoctamin 3
hsa-miR-562	0	0	1	1	1	1	CRISPLD2	cysteine-rich secretory protein LCCL domain containing 2
hsa-miR-562	0	0	1	0	1	1	ENAM	enamelin
hsa-miR-562	0	0	1	1	1	1	KRTAP3-2	keratin associated protein 3-2
hsa-miR-562	1	0	1	0	1	1	FAM172A	family with sequence similarity 172, member A
hsa-miR-562	1	0	1	0	1	1	SRSF8	serine/arginine-rich splicing factor 8
hsa-miR-562	1	0	1	1	1	1	DSEL	dermatan sulfate epimerase-like
hsa-miR-562	1	0	1	1	1	1	MEX3B	mex-3 homolog B (C. elegans)
hsa-miR-562	0	0	1	0	1	1	LDOC1L	leucine zipper, down-regulated in cancer 1-like
hsa-miR-562	0	0	1	1	0	0	C9orf89	chromosome 9 open reading frame 89
hsa-miR-562	1	0	1	1	1	1	PRADC1	protease-associated domain containing 1
hsa-miR-562	1	0	1	1	1	1	HIATL1	hippocampus abundant transcript-like 1
hsa-miR-562	0	0	1	0	1	1	TRIM52	tripartite motif containing 52
hsa-miR-562	0	0	1	1	1	1	MICALCL	MICAL C-terminal like
hsa-miR-562	1	0	1	0	1	1	UBASH3B	ubiquitin associated and SH3 domain containing B
hsa-miR-562	1	0	1	1	1	1	TRIM5	tripartite motif containing 5
hsa-miR-562	0	0	1	0	1	1	TSLP	thymic stromal lymphopoietin
hsa-miR-562	1	0	1	1	1	1	HIAT1	hippocampus abundant transcript 1
hsa-miR-562	1	0	1	1	0	0	DMRTB1	DMRT-like family B with proline-rich C-terminal, 1
hsa-miR-562	1	0	1	0	1	1	EAF1	ELL associated factor 1
hsa-miR-562	0	0	1	1	1	1	KRTAP3-3	keratin associated protein 3-3
hsa-miR-562	1	0	1	1	1	1	C5orf30	chromosome 5 open reading frame 30
hsa-miR-562	1	0	1	0	1	1	PURB	purine-rich element binding protein B
hsa-miR-562	1	0	1	1	1	1	TP53INP1	tumor protein p53 inducible nuclear protein 1
hsa-miR-562	1	0	1	1	1	1	TANC1	tetratricopeptide repeat, ankyrin repeat and coiled-coil containing 1
hsa-miR-562	0	0	1	1	0	0	ZNF622	zinc finger protein 622
hsa-miR-562	1	0	1	1	0	0	FCHSD1	FCH and double SH3 domains 1
hsa-miR-562	1	0	1	1	1	1	EPT1	ethanolaminephosphotransferase 1 (CDP-ethanolamine-specific)
hsa-miR-562	1	0	1	1	1	1	BRWD1	bromodomain and WD repeat domain containing 1
hsa-miR-562	1	0	1	1	1	1	MAL2	mal, T-cell differentiation protein 2 (gene/pseudogene)
hsa-miR-562	0	0	1	1	1	1	LENG8	leukocyte receptor cluster (LRC) member 8
hsa-miR-562	1	0	1	0	1	1	TMEM123	transmembrane protein 123
hsa-miR-562	1	0	1	1	0	0	AP1S1	adaptor-related protein complex 1, sigma 1 subunit
hsa-miR-562	1	0	1	1	1	1	GCFC1	GC-rich sequence DNA-binding factor 1
hsa-miR-562	0	0	1	1	1	1	ATP6V1G2	ATPase, H+ transporting, lysosomal 13kDa, V1 subunit G2
hsa-miR-562	0	0	1	1	0	0	ASZ1	ankyrin repeat, SAM and basic leucine zipper domain containing 1
hsa-miR-562	0	0	1	0	1	1	SYNPO2	synaptopodin 2
hsa-miR-562	1	0	1	1	1	1	FAM122A	family with sequence similarity 122A
hsa-miR-562	1	0	1	0	1	1	NUS1	nuclear undecaprenyl pyrophosphate synthase 1 homolog (S. cerevisiae)
hsa-miR-562	1	0	1	0	1	1	SP1	Sp1 transcription factor
hsa-miR-562	0	0	1	0	1	1	PRELID2	PRELI domain containing 2
hsa-miR-562	1	0	1	0	1	1	CNOT6L	CCR4-NOT transcription complex, subunit 6-like
hsa-miR-562	1	0	1	1	1	1	NACC2	NACC family member 2, BEN and BTB (POZ) domain containing
hsa-miR-562	0	0	1	1	1	1	SLFN5	schlafen family member 5
hsa-miR-562	0	0	1	0	1	1	SPATA18	spermatogenesis associated 18
hsa-miR-562	0	0	1	1	1	1	APOBEC3F	apolipoprotein B mRNA editing enzyme, catalytic polypeptide-like 3F
hsa-miR-562	0	0	1	1	0	0	C10orf35	chromosome 10 open reading frame 35
hsa-miR-562	0	0	1	1	1	1	MUC7	mucin 7, secreted
hsa-miR-562	0	0	1	1	1	1	MRFAP1L1	Morf4 family associated protein 1-like 1
hsa-miR-562	0	0	1	1	1	1	DEPDC4	DEP domain containing 4
hsa-miR-562	0	0	1	0	1	1	AFAP1L1	actin filament associated protein 1-like 1
hsa-miR-562	1	0	1	1	1	1	BHLHE22	basic helix-loop-helix family, member e22
hsa-miR-562	1	0	1	1	1	1	FAM123B	family with sequence similarity 123B
hsa-miR-562	0	0	1	0	1	1	HORMAD2	HORMA domain containing 2
hsa-miR-562	1	0	1	0	1	1	MOSPD2	motile sperm domain containing 2
hsa-miR-562	1	0	1	0	1	1	DCP2	DCP2 decapping enzyme homolog (S. cerevisiae)
hsa-miR-562	1	0	1	0	1	1	TMEM154	transmembrane protein 154
hsa-miR-562	0	0	1	1	1	1	DNAJC18	DnaJ (Hsp40) homolog, subfamily C, member 18
hsa-miR-562	1	0	1	1	1	1	SENP5	SUMO1/sentrin specific peptidase 5
hsa-miR-562	0	0	1	1	0	0	DOK6	docking protein 6
hsa-miR-562	0	0	1	1	1	1	C6orf170	chromosome 6 open reading frame 170
hsa-miR-562	1	0	1	0	1	1	ZBTB9	zinc finger and BTB domain containing 9
hsa-miR-562	1	0	1	1	1	1	NXPH1	neurexophilin 1
hsa-miR-562	1	0	1	1	1	1	PDIK1L	PDLIM1 interacting kinase 1 like
hsa-miR-562	1	0	1	0	1	1	ST6GALNAC3	ST6 (alpha-N-acetyl-neuraminyl-2,3-beta-galactosyl-1,3)-N-acetylgalactosaminide alpha-2,6-sialyltransferase 3
hsa-miR-562	0	0	1	1	0	0	SCARF2	scavenger receptor class F, member 2
hsa-miR-562	0	0	1	0	1	1	LNX2	ligand of numb-protein X 2
hsa-miR-562	1	0	1	1	1	1	PHF13	PHD finger protein 13
hsa-miR-562	1	0	1	1	1	1	NR4A3	nuclear receptor subfamily 4, group A, member 3
hsa-miR-562	1	0	1	1	1	1	MMGT1	membrane magnesium transporter 1
hsa-miR-562	0	0	1	1	1	1	C8orf47	chromosome 8 open reading frame 47
hsa-miR-562	1	0	1	0	1	1	C3orf58	chromosome 3 open reading frame 58
hsa-miR-562	1	0	1	1	1	1	XKR6	XK, Kell blood group complex subunit-related family, member 6
hsa-miR-562	0	0	1	1	1	1	C1orf101	chromosome 1 open reading frame 101
hsa-miR-562	1	0	1	0	1	1	SREK1IP1	SREK1-interacting protein 1
hsa-miR-562	0	0	1	1	0	0	GSC	goosecoid homeobox
hsa-miR-562	0	0	1	1	1	1	KRTAP8-1	keratin associated protein 8-1
hsa-miR-562	1	0	1	0	1	1	CCDC71L	coiled-coil domain containing 71-like
hsa-miR-562	1	0	1	1	1	1	PKHD1L1	polycystic kidney and hepatic disease 1 (autosomal recessive)-like 1
hsa-miR-562	0	0	1	1	0	0	TAS1R1	taste receptor, type 1, member 1
hsa-miR-562	0	0	1	1	1	1	SIRPD	signal-regulatory protein delta
hsa-miR-562	1	0	1	1	1	1	MB21D2	Mab-21 domain containing 2
hsa-miR-562	1	0	1	1	1	1	TMEM26	transmembrane protein 26
hsa-miR-562	1	0	1	0	1	1	ARL5B	ADP-ribosylation factor-like 5B
hsa-miR-562	0	0	1	1	1	1	RFC3	replication factor C (activator 1) 3, 38kDa
hsa-miR-562	0	0	1	0	1	1	HCG27	HLA complex group 27 (non-protein coding)
hsa-miR-562	1	0	1	1	1	1	ZSCAN22	zinc finger and SCAN domain containing 22
hsa-miR-562	1	0	1	1	1	1	ADAT2	adenosine deaminase, tRNA-specific 2
hsa-miR-562	1	0	1	0	1	1	HNRNPA3	heterogeneous nuclear ribonucleoprotein A3
hsa-miR-562	1	0	1	1	1	1	SPTY2D1	SPT2, Suppressor of Ty, domain containing 1 (S. cerevisiae)
hsa-miR-562	1	0	1	0	1	1	SRRM4	serine/arginine repetitive matrix 4
hsa-miR-562	1	0	1	1	1	1	ZBTB41	zinc finger and BTB domain containing 41
hsa-miR-562	0	0	1	1	1	1	FOXR2	forkhead box R2
hsa-miR-562	1	0	1	0	1	1	FAM73A	family with sequence similarity 73, member A
hsa-miR-562	1	0	1	1	1	1	NHLRC1	NHL repeat containing 1
hsa-miR-562	1	0	1	1	1	1	PTGER3	prostaglandin E receptor 3 (subtype EP3)
hsa-miR-562	0	0	1	1	1	1	COL25A1	collagen, type XXV, alpha 1
hsa-miR-562	1	0	1	0	1	1	PRICKLE2	prickle homolog 2 (Drosophila)
hsa-miR-562	1	0	1	1	1	1	TMEM189-UBE2V1	TMEM189-UBE2V1 readthrough
hsa-miR-562	0	0	1	1	1	1	PRC1	protein regulator of cytokinesis 1
hsa-miR-562	1	0	1	1	1	1	GLYAT	glycine-N-acyltransferase
hsa-miR-562	0	0	1	1	1	1	SHC4	SHC (Src homology 2 domain containing) family, member 4
hsa-miR-562	1	0	1	1	1	1	E2F7	E2F transcription factor 7
hsa-miR-562	0	0	1	0	1	1	NPSR1-AS1	NPSR1 antisense RNA 1
hsa-miR-562	1	0	1	1	1	1	ATRNL1	attractin-like 1
hsa-miR-562	1	0	1	1	1	1	GADL1	glutamate decarboxylase-like 1
hsa-miR-562	1	0	1	0	1	1	NCKAP5	NCK-associated protein 5
hsa-miR-562	0	0	1	0	0	0	C16orf47	chromosome 16 open reading frame 47
hsa-miR-562	0	0	1	0	1	1	TMEM215	transmembrane protein 215
hsa-miR-562	1	0	1	1	1	1	RAPH1	Ras association (RalGDS/AF-6) and pleckstrin homology domains 1
hsa-miR-562	0	0	1	0	0	0	SNORD21	small nucleolar RNA, C/D box 21
hsa-miR-562	0	0	1	0	0	0	RBMXP3	RNA binding motif protein, X-linked pseudogene 3
hsa-miR-562	0	0	1	0	0	0	HNRNPA3P1	heterogeneous nuclear ribonucleoprotein A3 pseudogene 1
hsa-miR-562	0	0	1	0	0	0	SEPHS1P1	selenophosphate synthetase 1 pseudogene 1
hsa-miR-562	0	0	1	0	0	0	PER4	period homolog 3 (Drosophila) pseudogene
hsa-miR-562	0	0	1	0	0	0	TREML5P	triggering receptor expressed on myeloid cells-like 5, pseudogene
hsa-miR-562	0	0	1	0	0	0	SIGLEC17P	sialic acid binding Ig-like lectin 17, pseudogene
hsa-miR-562	0	0	1	0	0	0	SNORA39	small nucleolar RNA, H/ACA box 39
hsa-miR-562	0	0	1	1	0	0	TCP10	t-complex 10 homolog (mouse)
hsa-miR-562	0	0	1	1	1	1	PSEN1	presenilin 1
hsa-miR-562	0	0	1	1	0	0	MUC1	mucin 1, cell surface associated
hsa-miR-562	0	0	1	1	0	0	CCL26	chemokine (C-C motif) ligand 26
hsa-miR-562	1	0	1	1	1	1	PPP5C	protein phosphatase 5, catalytic subunit
hsa-miR-562	0	0	1	1	1	1	SLC7A9	solute carrier family 7 (glycoprotein-associated amino acid transporter light chain, bo,+ system), member 9
hsa-miR-562	1	0	1	1	0	0	SLC45A4	solute carrier family 45, member 4
hsa-miR-562	0	0	1	1	1	1	NSMAF	neutral sphingomyelinase (N-SMase) activation associated factor
hsa-miR-562	0	0	0	1	1	1	NFE2L3	nuclear factor (erythroid-derived 2)-like 3
hsa-miR-562	1	0	1	1	1	1	QSER1	glutamine and serine rich 1
hsa-miR-562	0	0	1	1	1	1	SPP2	secreted phosphoprotein 2, 24kDa
hsa-miR-562	0	0	1	1	1	1	KEAP1	kelch-like ECH-associated protein 1
hsa-miR-562	0	0	1	1	0	0	CPB2	carboxypeptidase B2 (plasma)
hsa-miR-562	1	0	1	1	1	1	LYRM2	LYR motif containing 2
hsa-miR-562	0	0	0	1	0	0	GMIP	GEM interacting protein
hsa-miR-562	1	0	1	1	1	1	PDPR	pyruvate dehydrogenase phosphatase regulatory subunit
hsa-miR-562	0	0	1	1	0	0	SPAG7	sperm associated antigen 7
hsa-miR-562	0	0	0	1	0	0	CATSPERG	catsper channel auxiliary subunit gamma
hsa-miR-562	1	0	1	1	1	1	ASPHD2	aspartate beta-hydroxylase domain containing 2
hsa-miR-562	0	0	0	1	0	0	HSCB	HscB iron-sulfur cluster co-chaperone homolog (E. coli)
hsa-miR-562	0	0	1	1	0	0	CBY1	chibby homolog 1 (Drosophila)
hsa-miR-562	0	0	1	1	1	1	TIMM9	translocase of inner mitochondrial membrane 9 homolog (yeast)
hsa-miR-562	1	0	1	1	1	1	CHGA	chromogranin A (parathyroid secretory protein 1)
hsa-miR-562	0	0	0	1	0	0	MTHFD1	methylenetetrahydrofolate dehydrogenase (NADP+ dependent) 1, methenyltetrahydrofolate cyclohydrolase, formyltetrahydrofolate synthetase
hsa-miR-562	0	0	1	1	1	1	PABPC1L	poly(A) binding protein, cytoplasmic 1-like
hsa-miR-562	1	0	0	1	1	1	SALL4	sal-like 4 (Drosophila)
hsa-miR-562	0	0	1	1	0	0	CTSH	cathepsin H
hsa-miR-562	0	0	1	1	1	1	OIP5	Opa interacting protein 5
hsa-miR-562	0	0	1	1	0	0	FCGRT	Fc fragment of IgG, receptor, transporter, alpha
hsa-miR-562	0	0	1	1	0	0	RNASEH2A	ribonuclease H2, subunit A
hsa-miR-562	0	0	0	1	1	1	EPHX3	epoxide hydrolase 3
hsa-miR-562	0	0	1	1	1	1	PON2	paraoxonase 2
hsa-miR-562	0	0	1	1	1	1	PLGRKT	plasminogen receptor, C-terminal lysine transmembrane protein
hsa-miR-562	0	0	1	1	0	0	AATF	apoptosis antagonizing transcription factor
hsa-miR-562	1	0	1	1	0	0	RPS13	ribosomal protein S13
hsa-miR-562	0	0	1	1	0	0	LTA4H	leukotriene A4 hydrolase
hsa-miR-562	0	0	0	1	1	1	GPN3	GPN-loop GTPase 3
hsa-miR-562	0	0	0	1	1	1	CDCA3	cell division cycle associated 3
hsa-miR-562	1	0	1	1	1	1	SRSF9	serine/arginine-rich splicing factor 9
hsa-miR-562	0	0	0	1	0	0	GABRR2	gamma-aminobutyric acid (GABA) A receptor, rho 2
hsa-miR-562	0	0	1	1	1	1	GPR63	G protein-coupled receptor 63
hsa-miR-562	0	0	1	1	1	1	LY86	lymphocyte antigen 86
hsa-miR-562	1	0	0	1	1	1	KIF20A	kinesin family member 20A
hsa-miR-562	0	0	1	1	1	1	HES1	hairy and enhancer of split 1, (Drosophila)
hsa-miR-562	0	0	1	1	0	0	WBP1	WW domain binding protein 1
hsa-miR-562	0	0	1	1	1	1	KCNJ13	potassium inwardly-rectifying channel, subfamily J, member 13
hsa-miR-562	0	0	0	1	0	0	OSCP1	organic solute carrier partner 1
hsa-miR-562	1	0	1	1	1	1	GDA	guanine deaminase
hsa-miR-562	0	0	1	1	1	1	MLH3	mutL homolog 3 (E. coli)
hsa-miR-562	0	0	1	1	0	0	DYNLL2	dynein, light chain, LC8-type 2
hsa-miR-562	0	0	0	1	1	1	RAB9A	RAB9A, member RAS oncogene family
hsa-miR-562	1	0	1	1	1	1	SNAI1	snail homolog 1 (Drosophila)
hsa-miR-562	0	0	1	1	0	0	ABCC10	ATP-binding cassette, sub-family C (CFTR/MRP), member 10
hsa-miR-562	0	0	1	1	0	0	HIST1H1D	histone cluster 1, H1d
hsa-miR-562	0	0	0	1	1	1	BBS2	Bardet-Biedl syndrome 2
hsa-miR-562	0	0	1	1	0	0	CITED1	Cbp/p300-interacting transactivator, with Glu/Asp-rich carboxy-terminal domain, 1
hsa-miR-562	1	0	1	1	1	1	NECAB3	N-terminal EF-hand calcium binding protein 3
hsa-miR-562	0	0	0	1	1	1	HTN1	histatin 1
hsa-miR-562	0	0	1	1	1	1	L3HYPDH	L-3-hydroxyproline dehydratase (trans-)
hsa-miR-562	0	0	0	1	0	0	TBPL2	TATA box binding protein like 2
hsa-miR-562	0	0	1	1	1	1	OMG	oligodendrocyte myelin glycoprotein
hsa-miR-562	0	0	1	1	0	0	EMC6	ER membrane protein complex subunit 6
hsa-miR-562	0	0	0	1	1	1	MTX2	metaxin 2
hsa-miR-562	0	0	1	1	0	0	CD68	CD68 molecule
hsa-miR-562	0	0	0	1	1	1	EAPP	E2F-associated phosphoprotein
hsa-miR-562	0	0	1	1	1	1	NUP37	nucleoporin 37kDa
hsa-miR-562	0	0	0	1	1	1	FKBP6	FK506 binding protein 6, 36kDa
hsa-miR-562	0	0	0	1	0	0	MYH8	myosin, heavy chain 8, skeletal muscle, perinatal
hsa-miR-562	1	0	1	1	1	1	XPO7	exportin 7
hsa-miR-562	1	0	0	1	1	1	YIPF2	Yip1 domain family, member 2
hsa-miR-562	0	0	0	1	1	1	ZNF426	zinc finger protein 426
hsa-miR-562	0	0	1	1	1	1	C12orf65	chromosome 12 open reading frame 65
hsa-miR-562	1	0	0	1	1	1	HAUS8	HAUS augmin-like complex, subunit 8
hsa-miR-562	0	0	1	1	0	0	HSH2D	hematopoietic SH2 domain containing
hsa-miR-562	0	0	1	1	1	1	PSMC3IP	PSMC3 interacting protein
hsa-miR-562	1	0	1	1	1	1	NUP210	nucleoporin 210kDa
hsa-miR-562	1	0	0	1	1	1	COQ3	coenzyme Q3 homolog, methyltransferase (S. cerevisiae)
hsa-miR-562	0	0	1	1	1	1	HRSP12	heat-responsive protein 12
hsa-miR-562	0	0	0	1	1	1	C14orf159	chromosome 14 open reading frame 159
hsa-miR-562	0	0	1	1	1	1	SYNJ2BP	synaptojanin 2 binding protein
hsa-miR-562	0	0	1	1	1	1	GSTM3	glutathione S-transferase mu 3 (brain)
hsa-miR-562	0	0	0	1	1	1	AVIL	advillin
hsa-miR-562	0	0	0	1	0	0	CCT7	chaperonin containing TCP1, subunit 7 (eta)
hsa-miR-562	0	0	0	1	1	1	MRPS9	mitochondrial ribosomal protein S9
hsa-miR-562	1	0	1	1	1	1	KDELR2	KDEL (Lys-Asp-Glu-Leu) endoplasmic reticulum protein retention receptor 2
hsa-miR-562	0	0	1	1	0	0	KIF12	kinesin family member 12
hsa-miR-562	0	0	0	1	1	1	MRPL15	mitochondrial ribosomal protein L15
hsa-miR-562	0	0	0	1	0	0	HTR3B	5-hydroxytryptamine (serotonin) receptor 3B, ionotropic
hsa-miR-562	1	0	0	1	1	1	ABCC9	ATP-binding cassette, sub-family C (CFTR/MRP), member 9
hsa-miR-562	0	0	0	1	0	0	AP3B2	adaptor-related protein complex 3, beta 2 subunit
hsa-miR-562	0	0	1	1	1	1	RPS6KA6	ribosomal protein S6 kinase, 90kDa, polypeptide 6
hsa-miR-562	0	0	1	1	0	0	TMEM59L	transmembrane protein 59-like
hsa-miR-562	0	0	1	1	0	0	FAM83E	family with sequence similarity 83, member E
hsa-miR-562	0	0	1	1	0	0	ASB3	ankyrin repeat and SOCS box containing 3
hsa-miR-562	1	0	1	1	1	1	LRP2	low density lipoprotein receptor-related protein 2
hsa-miR-562	0	0	1	1	0	0	ZC2HC1A	zinc finger, C2HC-type containing 1A
hsa-miR-562	0	0	1	1	0	0	IFT46	intraflagellar transport 46 homolog (Chlamydomonas)
hsa-miR-562	0	0	0	1	0	0	IL18RAP	interleukin 18 receptor accessory protein
hsa-miR-562	0	0	1	1	1	1	CP	ceruloplasmin (ferroxidase)
hsa-miR-562	1	0	1	1	1	1	MAP3K13	mitogen-activated protein kinase kinase kinase 13
hsa-miR-562	0	0	0	1	1	1	CASP6	caspase 6, apoptosis-related cysteine peptidase
hsa-miR-562	0	0	1	1	1	1	TAX1BP1	Tax1 (human T-cell leukemia virus type I) binding protein 1
hsa-miR-562	0	0	0	1	1	1	PMS2	PMS2 postmeiotic segregation increased 2 (S. cerevisiae)
hsa-miR-562	0	0	1	1	0	0	GET4	golgi to ER traffic protein 4 homolog (S. cerevisiae)
hsa-miR-562	0	0	1	1	1	1	DNM1L	dynamin 1-like
hsa-miR-562	1	0	1	1	1	1	RFX4	regulatory factor X, 4 (influences HLA class II expression)
hsa-miR-562	0	0	1	1	0	0	LYSMD2	LysM, putative peptidoglycan-binding, domain containing 2
hsa-miR-562	0	0	1	1	1	1	SLC27A2	solute carrier family 27 (fatty acid transporter), member 2
hsa-miR-562	0	0	1	1	0	0	POLG	polymerase (DNA directed), gamma
hsa-miR-562	0	0	1	1	0	0	PRSS36	protease, serine, 36
hsa-miR-562	1	0	0	1	0	0	MYLK3	myosin light chain kinase 3
hsa-miR-562	0	0	0	1	1	1	MARVELD3	MARVEL domain containing 3
hsa-miR-562	0	0	0	1	0	0	CDRT15	CMT1A duplicated region transcript 15
hsa-miR-562	0	0	1	1	1	1	ABCA10	ATP-binding cassette, sub-family A (ABC1), member 10
hsa-miR-562	1	0	1	1	1	1	GNAL	guanine nucleotide binding protein (G protein), alpha activating activity polypeptide, olfactory type
hsa-miR-562	0	0	0	1	1	1	ZNF750	zinc finger protein 750
hsa-miR-562	0	0	1	1	1	1	DYM	dymeclin
hsa-miR-562	0	0	0	1	0	0	SLC39A3	solute carrier family 39 (zinc transporter), member 3
hsa-miR-562	0	0	0	1	0	0	CALR3	calreticulin 3
hsa-miR-562	0	0	1	1	1	1	DOPEY2	dopey family member 2
hsa-miR-562	0	0	1	1	1	1	BCAM	basal cell adhesion molecule (Lutheran blood group)
hsa-miR-562	0	0	1	1	1	1	CAPN10	calpain 10
hsa-miR-562	0	0	1	1	1	1	CREG1	cellular repressor of E1A-stimulated genes 1
hsa-miR-562	0	0	1	1	0	0	NUF2	NUF2, NDC80 kinetochore complex component, homolog (S. cerevisiae)
hsa-miR-562	1	0	0	1	0	0	SF3B4	splicing factor 3b, subunit 4, 49kDa
hsa-miR-562	0	0	1	1	1	1	JTB	jumping translocation breakpoint
hsa-miR-562	1	0	1	1	1	1	RALB	v-ral simian leukemia viral oncogene homolog B (ras related; GTP binding protein)
hsa-miR-562	0	0	0	1	0	0	RPS3A	ribosomal protein S3A
hsa-miR-562	0	0	0	1	1	1	SRD5A1	steroid-5-alpha-reductase, alpha polypeptide 1 (3-oxo-5 alpha-steroid delta 4-dehydrogenase alpha 1)
hsa-miR-562	1	0	1	1	1	1	ZNF711	zinc finger protein 711
hsa-miR-562	0	0	1	1	0	0	DOK2	docking protein 2, 56kDa
hsa-miR-562	1	0	1	1	1	1	ADAMTSL1	ADAMTS-like 1
hsa-miR-562	1	0	1	1	1	1	ZNF462	zinc finger protein 462
hsa-miR-562	0	0	0	1	1	1	APIP	APAF1 interacting protein
hsa-miR-562	0	0	1	1	1	1	SESN3	sestrin 3
hsa-miR-562	0	0	0	1	0	0	GPHA2	glycoprotein hormone alpha 2
hsa-miR-562	0	0	1	1	0	0	SLC22A9	solute carrier family 22 (organic anion transporter), member 9
hsa-miR-562	0	0	1	1	1	1	HIRIP3	HIRA interacting protein 3
hsa-miR-562	0	0	0	1	1	1	ZNF773	zinc finger protein 773
hsa-miR-562	0	0	1	1	1	1	IFLTD1	intermediate filament tail domain containing 1
hsa-miR-562	0	0	1	1	1	1	PGM3	phosphoglucomutase 3
hsa-miR-562	0	0	0	1	0	0	C16orf74	chromosome 16 open reading frame 74
hsa-miR-562	0	0	0	1	1	1	UCHL1	ubiquitin carboxyl-terminal esterase L1 (ubiquitin thiolesterase)
hsa-miR-562	1	0	1	1	1	1	PLCL2	phospholipase C-like 2
hsa-miR-562	0	0	0	1	1	1	LRGUK	leucine-rich repeats and guanylate kinase domain containing
hsa-miR-562	0	0	1	1	1	1	SETD9	SET domain containing 9
hsa-miR-562	0	0	1	1	0	0	NUP205	nucleoporin 205kDa
hsa-miR-562	0	0	1	1	0	0	BATF	basic leucine zipper transcription factor, ATF-like
hsa-miR-562	1	0	1	1	1	1	TIAM1	T-cell lymphoma invasion and metastasis 1
hsa-miR-562	0	0	1	1	1	1	UQCRB	ubiquinol-cytochrome c reductase binding protein
hsa-miR-562	0	0	1	1	1	1	KBTBD5	kelch repeat and BTB (POZ) domain containing 5
hsa-miR-562	1	0	1	1	1	1	PTPDC1	protein tyrosine phosphatase domain containing 1
hsa-miR-562	0	0	0	1	1	1	ELK4	ELK4, ETS-domain protein (SRF accessory protein 1)
hsa-miR-562	0	0	0	1	0	0	CHRNB3	cholinergic receptor, nicotinic, beta 3 (neuronal)
hsa-miR-562	0	0	0	1	0	0	OGFR	opioid growth factor receptor
hsa-miR-562	0	0	1	1	1	1	CES5A	carboxylesterase 5A
hsa-miR-562	0	0	0	1	0	0	PRKD2	protein kinase D2
hsa-miR-562	0	0	1	1	0	0	CCDC58	coiled-coil domain containing 58
hsa-miR-562	0	0	0	1	0	0	RSPH1	radial spoke head 1 homolog (Chlamydomonas)
hsa-miR-562	0	0	1	1	1	1	ZNF714	zinc finger protein 714
hsa-miR-562	0	0	1	1	0	0	SHKBP1	SH3KBP1 binding protein 1
hsa-miR-562	0	0	0	1	0	0	FLYWCH2	FLYWCH family member 2
hsa-miR-562	0	0	1	1	1	1	RBM15	RNA binding motif protein 15
hsa-miR-562	0	0	0	1	0	0	CCDC74A	coiled-coil domain containing 74A
hsa-miR-562	0	0	1	1	0	0	KRTCAP2	keratinocyte associated protein 2
hsa-miR-562	0	0	0	1	0	0	GLB1L	galactosidase, beta 1-like
hsa-miR-562	1	0	1	1	1	1	PPP1CB	protein phosphatase 1, catalytic subunit, beta isozyme
hsa-miR-562	0	0	0	1	1	1	GFM2	G elongation factor, mitochondrial 2
hsa-miR-562	0	0	1	1	1	1	SCIN	scinderin
hsa-miR-562	0	0	1	1	1	1	CAMLG	calcium modulating ligand
hsa-miR-562	0	0	0	1	1	1	C7orf62	chromosome 7 open reading frame 62
hsa-miR-562	0	0	0	1	1	1	USP49	ubiquitin specific peptidase 49
hsa-miR-562	0	0	1	1	1	1	CPA6	carboxypeptidase A6
hsa-miR-562	0	0	1	1	1	1	COL14A1	collagen, type XIV, alpha 1
hsa-miR-562	1	0	1	1	1	1	WDFY2	WD repeat and FYVE domain containing 2
hsa-miR-562	0	0	0	1	0	0	HPS6	Hermansky-Pudlak syndrome 6
hsa-miR-562	1	0	1	1	0	0	CDH8	cadherin 8, type 2
hsa-miR-562	0	0	0	1	1	1	ALG8	asparagine-linked glycosylation 8, alpha-1,3-glucosyltransferase homolog (S. cerevisiae)
hsa-miR-562	0	0	0	1	0	0	MC4R	melanocortin 4 receptor
hsa-miR-562	0	0	1	1	1	1	MMP3	matrix metallopeptidase 3 (stromelysin 1, progelatinase)
hsa-miR-562	0	0	1	1	1	1	FAM96A	family with sequence similarity 96, member A
hsa-miR-562	0	0	0	1	0	0	B4GALNT2	beta-1,4-N-acetyl-galactosaminyl transferase 2
hsa-miR-562	0	0	1	1	1	1	VPS11	vacuolar protein sorting 11 homolog (S. cerevisiae)
hsa-miR-562	0	0	0	1	1	1	SLC27A1	solute carrier family 27 (fatty acid transporter), member 1
hsa-miR-562	0	0	0	1	1	1	SPINT2	serine peptidase inhibitor, Kunitz type, 2
hsa-miR-562	0	0	0	1	0	0	NLRP4	NLR family, pyrin domain containing 4
hsa-miR-562	1	0	1	1	1	1	FUT9	fucosyltransferase 9 (alpha (1,3) fucosyltransferase)
hsa-miR-562	0	0	0	1	0	0	VPREB1	pre-B lymphocyte 1
hsa-miR-562	0	0	1	1	0	0	FNTA	farnesyltransferase, CAAX box, alpha
hsa-miR-562	1	0	1	1	1	1	SCN11A	sodium channel, voltage-gated, type XI, alpha subunit
hsa-miR-562	0	0	1	1	1	1	DMRT2	doublesex and mab-3 related transcription factor 2
hsa-miR-562	0	0	1	1	1	1	DONSON	downstream neighbor of SON
hsa-miR-562	0	0	1	1	0	0	IL7R	interleukin 7 receptor
hsa-miR-562	0	0	0	1	1	1	ACYP2	acylphosphatase 2, muscle type
hsa-miR-562	1	0	1	1	1	1	ADORA2B	adenosine A2b receptor
hsa-miR-562	0	0	0	1	0	0	RPAP1	RNA polymerase II associated protein 1
hsa-miR-562	0	0	0	1	0	0	EXOSC10	exosome component 10
hsa-miR-562	1	0	1	1	0	0	INO80E	INO80 complex subunit E
hsa-miR-562	1	0	1	1	1	1	ZFX	zinc finger protein, X-linked
hsa-miR-562	0	0	0	1	0	0	ASL	argininosuccinate lyase
hsa-miR-562	0	0	1	1	1	1	IL12A	interleukin 12A (natural killer cell stimulatory factor 1, cytotoxic lymphocyte maturation factor 1, p35)
hsa-miR-562	0	0	1	1	0	0	MTBP	Mdm2, transformed 3T3 cell double minute 2, p53 binding protein (mouse) binding protein, 104kDa
hsa-miR-562	0	0	0	1	1	1	PPIC	peptidylprolyl isomerase C (cyclophilin C)
hsa-miR-562	0	0	0	1	0	0	RBFA	ribosome binding factor A (putative)
hsa-miR-562	1	0	1	1	1	1	DUS1L	dihydrouridine synthase 1-like (S. cerevisiae)
hsa-miR-562	0	0	0	1	1	1	C3AR1	complement component 3a receptor 1
hsa-miR-562	0	0	1	1	0	0	WFDC5	WAP four-disulfide core domain 5
hsa-miR-562	0	0	0	1	1	1	LGR6	leucine-rich repeat containing G protein-coupled receptor 6
hsa-miR-562	0	0	0	1	1	1	TLR1	toll-like receptor 1
hsa-miR-562	1	0	1	1	1	1	SLC26A7	solute carrier family 26, member 7
hsa-miR-562	1	0	1	1	1	1	RCE1	RCE1 homolog, prenyl protein protease (S. cerevisiae)
hsa-miR-562	1	0	1	1	0	0	TCAP	titin-cap (telethonin)
hsa-miR-562	0	0	1	1	1	1	WDR69	WD repeat domain 69
hsa-miR-562	1	0	1	1	1	1	CLTB	clathrin, light chain B
hsa-miR-562	0	0	0	1	0	0	CCDC74B	coiled-coil domain containing 74B
hsa-miR-562	0	0	1	1	0	0	C6orf203	chromosome 6 open reading frame 203
hsa-miR-562	0	0	1	1	0	0	REC8	REC8 homolog (yeast)
hsa-miR-562	0	0	1	1	1	1	A2ML1	alpha-2-macroglobulin-like 1
hsa-miR-562	0	0	1	1	1	1	CEP19	centrosomal protein 19kDa
hsa-miR-562	1	0	1	1	0	0	FBXO45	F-box protein 45
hsa-miR-562	1	0	1	1	1	1	TAF15	TAF15 RNA polymerase II, TATA box binding protein (TBP)-associated factor, 68kDa
hsa-miR-562	0	0	0	1	0	0	CST6	cystatin E/M
hsa-miR-562	0	0	1	1	1	1	TMEM70	transmembrane protein 70
hsa-miR-562	0	0	1	1	1	1	FOSL1	FOS-like antigen 1
hsa-miR-562	1	0	0	1	1	1	TCHP	trichoplein, keratin filament binding
hsa-miR-562	0	0	1	1	0	0	TUBA3E	tubulin, alpha 3e
hsa-miR-562	0	0	0	1	1	1	ZNF135	zinc finger protein 135
hsa-miR-562	0	0	1	1	1	1	RNASEH1	ribonuclease H1
hsa-miR-562	0	0	1	1	1	1	GCSH	glycine cleavage system protein H (aminomethyl carrier)
hsa-miR-562	1	0	1	1	0	0	NEURL4	neuralized homolog 4 (Drosophila)
hsa-miR-562	1	0	1	1	1	1	PHF20L1	PHD finger protein 20-like 1
hsa-miR-562	1	0	0	1	0	0	ARHGEF1	Rho guanine nucleotide exchange factor (GEF) 1
hsa-miR-562	1	0	1	1	1	1	APBB2	amyloid beta (A4) precursor protein-binding, family B, member 2
hsa-miR-562	0	0	1	1	1	1	CCDC89	coiled-coil domain containing 89
hsa-miR-562	0	0	1	1	1	1	LRRC34	leucine rich repeat containing 34
hsa-miR-562	0	0	1	1	0	0	SNAPC5	small nuclear RNA activating complex, polypeptide 5, 19kDa
hsa-miR-562	0	0	1	1	1	1	PNMA1	paraneoplastic Ma antigen 1
hsa-miR-562	0	0	0	1	1	1	S100Z	S100 calcium binding protein Z
hsa-miR-562	0	0	0	1	0	0	OR2M7	olfactory receptor, family 2, subfamily M, member 7
hsa-miR-562	1	0	1	1	1	1	SLBP	stem-loop binding protein
hsa-miR-562	1	0	1	1	1	1	MET	met proto-oncogene (hepatocyte growth factor receptor)
hsa-miR-562	0	0	1	1	0	0	SFTPC	surfactant protein C
hsa-miR-562	0	0	1	1	1	1	PAQR4	progestin and adipoQ receptor family member IV
hsa-miR-562	0	0	0	1	1	1	DIS3L	DIS3 mitotic control homolog (S. cerevisiae)-like
hsa-miR-562	0	0	1	1	0	0	KARS	lysyl-tRNA synthetase
hsa-miR-562	1	0	0	1	1	1	ZFP82	zinc finger protein 82 homolog (mouse)
hsa-miR-562	0	0	0	1	0	0	SLC25A19	solute carrier family 25 (mitochondrial thiamine pyrophosphate carrier), member 19
hsa-miR-562	1	0	0	1	0	0	AKAP5	A kinase (PRKA) anchor protein 5
hsa-miR-562	0	0	1	1	1	1	EFCAB5	EF-hand calcium binding domain 5
hsa-miR-562	0	0	1	1	0	0	TUBA3D	tubulin, alpha 3d
hsa-miR-562	0	0	1	1	1	1	CLK1	CDC-like kinase 1
hsa-miR-562	0	0	0	1	0	0	GJD4	gap junction protein, delta 4, 40.1kDa
hsa-miR-562	0	0	0	1	0	0	P2RY11	purinergic receptor P2Y, G-protein coupled, 11
hsa-miR-562	0	0	0	1	0	0	PPAN	peter pan homolog (Drosophila)
hsa-miR-562	0	0	0	1	0	0	PPAN-P2RY11	PPAN-P2RY11 readthrough
hsa-miR-562	0	0	1	1	1	1	COX5A	cytochrome c oxidase subunit Va
hsa-miR-562	0	0	0	1	1	1	ZYX	zyxin
hsa-miR-562	0	0	1	1	0	0	TYMS	thymidylate synthetase
hsa-miR-562	0	0	0	1	0	0	PLEKHM3	pleckstrin homology domain containing, family M, member 3
hsa-miR-562	0	0	0	1	0	0	WFDC11	WAP four-disulfide core domain 11
hsa-miR-562	0	0	0	1	0	0	USHBP1	Usher syndrome 1C binding protein 1
hsa-miR-562	0	0	1	1	1	1	C12orf40	chromosome 12 open reading frame 40
hsa-miR-562	0	0	1	1	0	0	PRPSAP1	phosphoribosyl pyrophosphate synthetase-associated protein 1
hsa-miR-562	0	0	1	1	0	0	PRPF3	PRP3 pre-mRNA processing factor 3 homolog (S. cerevisiae)
hsa-miR-562	0	0	1	1	1	1	HNRNPM	heterogeneous nuclear ribonucleoprotein M
hsa-miR-562	1	0	1	1	1	1	RAB3IP	RAB3A interacting protein (rabin3)
hsa-miR-562	0	0	0	1	0	0	NIM1	serine/threonine-protein kinase NIM1
hsa-miR-562	0	0	1	1	0	0	BOLA3	bolA homolog 3 (E. coli)
hsa-miR-562	0	0	1	1	0	0	BRAP	BRCA1 associated protein
hsa-miR-562	0	0	1	1	0	0	GPR97	G protein-coupled receptor 97
hsa-miR-562	1	0	0	1	0	0	KRT81	keratin 81
hsa-miR-562	1	0	1	1	1	1	COL4A3	collagen, type IV, alpha 3 (Goodpasture antigen)
hsa-miR-562	0	0	0	1	0	0	HCAR2	hydroxycarboxylic acid receptor 2
hsa-miR-562	0	0	0	1	0	0	OR4F6	olfactory receptor, family 4, subfamily F, member 6
hsa-miR-562	0	0	1	1	1	1	TPO	thyroid peroxidase
hsa-miR-562	0	0	1	1	0	0	CCDC137	coiled-coil domain containing 137
hsa-miR-562	0	0	1	1	1	1	BLZF1	basic leucine zipper nuclear factor 1
hsa-miR-562	0	0	1	1	1	1	NFATC3	nuclear factor of activated T-cells, cytoplasmic, calcineurin-dependent 3
hsa-miR-562	0	0	0	1	0	0	SLC16A5	solute carrier family 16, member 5 (monocarboxylic acid transporter 6)
hsa-miR-562	0	0	1	1	0	0	KIAA2013	KIAA2013
hsa-miR-562	0	0	1	1	0	0	LMLN	leishmanolysin-like (metallopeptidase M8 family)
hsa-miR-562	0	0	1	1	1	1	CTNNA3	catenin (cadherin-associated protein), alpha 3
hsa-miR-562	0	0	1	1	1	1	BEST3	bestrophin 3
hsa-miR-562	1	0	1	1	1	1	MORF4L1	mortality factor 4 like 1
hsa-miR-562	1	0	1	1	1	1	RAI2	retinoic acid induced 2
hsa-miR-562	0	0	1	1	1	1	SLC35D3	solute carrier family 35, member D3
hsa-miR-562	0	0	1	1	1	1	MGAT4C	mannosyl (alpha-1,3-)-glycoprotein beta-1,4-N-acetylglucosaminyltransferase, isozyme C (putative)
hsa-miR-562	1	0	1	1	1	1	ROBO2	roundabout, axon guidance receptor, homolog 2 (Drosophila)
hsa-miR-562	0	0	0	1	1	1	MACC1	metastasis associated in colon cancer 1
hsa-miR-562	0	0	1	1	1	1	TPRN	taperin
hsa-miR-562	0	0	1	1	0	0	PPFIA2	protein tyrosine phosphatase, receptor type, f polypeptide (PTPRF), interacting protein (liprin), alpha 2
hsa-miR-562	0	0	1	1	0	0	TMEM179B	transmembrane protein 179B
hsa-miR-562	0	0	0	1	1	1	CCBE1	collagen and calcium binding EGF domains 1
hsa-miR-562	0	0	0	1	1	1	TTC32	tetratricopeptide repeat domain 32
hsa-miR-562	0	0	0	1	0	0	OR4N5	olfactory receptor, family 4, subfamily N, member 5
hsa-miR-562	0	0	1	1	1	1	NELL2	NEL-like 2 (chicken)
hsa-miR-562	1	0	1	1	0	0	RFTN1	raftlin, lipid raft linker 1
hsa-miR-562	0	0	0	1	0	0	FGF3	fibroblast growth factor 3
hsa-miR-562	0	0	1	1	0	0	LCE5A	late cornified envelope 5A
hsa-miR-562	1	0	1	1	1	1	GPR125	G protein-coupled receptor 125
hsa-miR-562	0	0	1	1	0	0	PSMB5	proteasome (prosome, macropain) subunit, beta type, 5
hsa-miR-562	0	0	0	1	1	1	INTU	inturned planar cell polarity effector homolog (Drosophila)
hsa-miR-562	0	0	1	1	0	0	ZNF584	zinc finger protein 584
hsa-miR-562	0	0	0	1	0	0	ZNF324B	zinc finger protein 324B
hsa-miR-562	0	0	1	1	1	1	BRIX1	BRX1, biogenesis of ribosomes, homolog (S. cerevisiae)
hsa-miR-562	1	0	1	1	1	1	LHX9	LIM homeobox 9
hsa-miR-562	0	0	1	1	0	0	TTC8	tetratricopeptide repeat domain 8
hsa-miR-562	0	0	0	1	0	0	PPP1R32	protein phosphatase 1, regulatory subunit 32
hsa-miR-562	0	0	1	1	0	0	DCBLD1	discoidin, CUB and LCCL domain containing 1
hsa-miR-562	0	0	1	1	1	1	TBCCD1	TBCC domain containing 1
hsa-miR-562	1	0	1	1	1	1	SPTBN4	spectrin, beta, non-erythrocytic 4
hsa-miR-562	0	0	0	1	1	1	SULT1A3	sulfotransferase family, cytosolic, 1A, phenol-preferring, member 3
hsa-miR-562	0	0	1	1	1	1	SLC25A14	solute carrier family 25 (mitochondrial carrier, brain), member 14
hsa-miR-562	1	0	1	1	1	1	ANP32B	acidic (leucine-rich) nuclear phosphoprotein 32 family, member B
hsa-miR-562	0	0	0	1	1	1	PDZK1	PDZ domain containing 1
hsa-miR-562	1	0	1	1	1	1	SENP1	SUMO1/sentrin specific peptidase 1
hsa-miR-562	0	0	0	1	1	1	CTSL1	cathepsin L1
hsa-miR-562	1	0	1	1	0	0	PTAR1	protein prenyltransferase alpha subunit repeat containing 1
hsa-miR-562	0	0	0	1	0	0	HNF1A	HNF1 homeobox A
hsa-miR-562	1	0	1	1	0	0	RANBP3	RAN binding protein 3
hsa-miR-562	0	0	0	1	1	1	PLEKHG5	pleckstrin homology domain containing, family G (with RhoGef domain) member 5
hsa-miR-562	0	0	1	1	1	1	UPP1	uridine phosphorylase 1
hsa-miR-562	0	0	0	1	0	0	ANKRD20A4	ankyrin repeat domain 20 family, member A4
hsa-miR-562	0	0	0	1	0	0	ANKRD20A20P	ankyrin repeat domain 20 family, member A20, pseudogene
hsa-miR-562	0	0	0	1	0	0	ANKRD20A8P	ankyrin repeat domain 20 family, member A8, pseudogene
hsa-miR-562	0	0	1	1	1	1	LBX2	ladybird homeobox 2
hsa-miR-562	0	0	1	1	1	1	BID	BH3 interacting domain death agonist
hsa-miR-562	0	0	1	1	1	1	CLEC14A	C-type lectin domain family 14, member A
hsa-miR-562	0	0	0	1	0	0	C2orf66	chromosome 2 open reading frame 66
hsa-miR-562	1	0	1	1	1	1	N4BP2L1	NEDD4 binding protein 2-like 1
hsa-miR-562	0	0	0	1	1	1	ZNF791	zinc finger protein 791
hsa-miR-562	1	0	1	1	1	1	ABCB9	ATP-binding cassette, sub-family B (MDR/TAP), member 9
hsa-miR-562	0	0	1	1	1	1	C15orf48	chromosome 15 open reading frame 48
hsa-miR-562	0	0	1	1	1	1	TRPC6	transient receptor potential cation channel, subfamily C, member 6
hsa-miR-562	1	0	1	1	1	1	SH3BP4	SH3-domain binding protein 4
hsa-miR-562	0	0	0	1	1	1	SULT1A4	sulfotransferase family, cytosolic, 1A, phenol-preferring, member 4
hsa-miR-562	1	0	1	1	1	1	UNC79	unc-79 homolog (C. elegans)
hsa-miR-562	0	0	0	1	1	1	SERPINB13	serpin peptidase inhibitor, clade B (ovalbumin), member 13
hsa-miR-562	0	0	1	1	0	0	MTMR11	myotubularin related protein 11
hsa-miR-562	0	0	1	1	0	0	PRICKLE1	prickle homolog 1 (Drosophila)
hsa-miR-562	0	0	1	1	1	1	TRAF6	TNF receptor-associated factor 6, E3 ubiquitin protein ligase
hsa-miR-562	0	0	1	1	1	1	AGTR1	angiotensin II receptor, type 1
hsa-miR-562	0	0	0	1	1	1	TAF1A	TATA box binding protein (TBP)-associated factor, RNA polymerase I, A, 48kDa
hsa-miR-562	0	0	0	1	0	0	GNAT2	guanine nucleotide binding protein (G protein), alpha transducing activity polypeptide 2
hsa-miR-562	0	0	1	1	1	1	KCTD14	potassium channel tetramerisation domain containing 14
hsa-miR-562	0	0	1	1	1	1	TAP1	transporter 1, ATP-binding cassette, sub-family B (MDR/TAP)
hsa-miR-562	1	0	1	1	1	1	WDR6	WD repeat domain 6
hsa-miR-562	1	0	1	1	1	1	IGSF11	immunoglobulin superfamily, member 11
hsa-miR-562	1	0	1	1	1	1	RNF34	ring finger protein 34, E3 ubiquitin protein ligase
hsa-miR-562	0	0	1	1	1	1	DBI	diazepam binding inhibitor (GABA receptor modulator, acyl-CoA binding protein)
hsa-miR-562	1	0	1	1	1	1	PUS7	pseudouridylate synthase 7 homolog (S. cerevisiae)
hsa-miR-562	0	0	1	1	0	0	ACOX3	acyl-CoA oxidase 3, pristanoyl
hsa-miR-562	0	0	1	1	1	1	ARHGEF26	Rho guanine nucleotide exchange factor (GEF) 26
hsa-miR-562	0	0	1	1	1	1	SPAG9	sperm associated antigen 9
hsa-miR-562	0	0	1	1	0	0	PPIE	peptidylprolyl isomerase E (cyclophilin E)
hsa-miR-562	0	0	0	1	1	1	ABCC11	ATP-binding cassette, sub-family C (CFTR/MRP), member 11
hsa-miR-562	0	0	0	1	0	0	HVCN1	hydrogen voltage-gated channel 1
hsa-miR-562	1	0	1	1	1	1	DDX26B	DEAD/H (Asp-Glu-Ala-Asp/His) box polypeptide 26B
hsa-miR-562	1	0	0	1	1	1	PTRF	polymerase I and transcript release factor
hsa-miR-562	1	0	1	1	0	0	ATP2A1	ATPase, Ca++ transporting, cardiac muscle, fast twitch 1
hsa-miR-562	0	0	1	1	1	1	LAGE3	L antigen family, member 3
hsa-miR-562	0	0	0	1	1	1	TMEM79	transmembrane protein 79
hsa-miR-562	0	0	1	1	1	1	N4BP2L2	NEDD4 binding protein 2-like 2
hsa-miR-562	0	0	0	1	1	1	PHF11	PHD finger protein 11
hsa-miR-562	0	0	1	1	1	1	POT1	protection of telomeres 1 homolog (S. pombe)
hsa-miR-562	0	0	1	1	1	1	CDK5RAP1	CDK5 regulatory subunit associated protein 1
hsa-miR-562	0	0	0	1	1	1	UCKL1	uridine-cytidine kinase 1-like 1
hsa-miR-562	0	0	1	1	1	1	CCL20	chemokine (C-C motif) ligand 20
hsa-miR-562	0	0	1	1	1	1	CNDP1	carnosine dipeptidase 1 (metallopeptidase M20 family)
hsa-miR-562	0	0	0	1	0	0	CCNB1IP1	cyclin B1 interacting protein 1, E3 ubiquitin protein ligase
hsa-miR-562	0	0	1	1	0	0	AXDND1	axonemal dynein light chain domain containing 1
hsa-miR-562	0	0	0	1	0	0	OR2M2	olfactory receptor, family 2, subfamily M, member 2
hsa-miR-562	0	0	1	1	1	1	RNF217	ring finger protein 217
hsa-miR-562	0	0	0	1	1	1	TBXA2R	thromboxane A2 receptor
hsa-miR-562	0	0	1	1	0	0	TRAF3IP2	TRAF3 interacting protein 2
hsa-miR-562	0	0	0	1	0	0	ZMYND10	zinc finger, MYND-type containing 10
hsa-miR-562	0	0	0	1	0	0	FLNA	filamin A, alpha
hsa-miR-562	0	0	0	1	1	1	TTI2	TELO2 interacting protein 2
hsa-miR-562	0	0	1	1	1	1	KIAA1704	KIAA1704
hsa-miR-562	0	0	1	1	0	0	UBL7	ubiquitin-like 7 (bone marrow stromal cell-derived)
hsa-miR-562	1	0	0	1	1	1	DCLRE1A	DNA cross-link repair 1A
hsa-miR-562	0	0	1	1	1	1	MYBPC1	myosin binding protein C, slow type
hsa-miR-562	0	0	1	1	1	1	CDY1	chromodomain protein, Y-linked, 1
hsa-miR-562	0	0	1	1	1	1	ZNF695	zinc finger protein 695
hsa-miR-562	0	0	1	1	1	1	KMO	kynurenine 3-monooxygenase (kynurenine 3-hydroxylase)
hsa-miR-562	0	0	1	1	1	1	HEATR1	HEAT repeat containing 1
hsa-miR-562	1	0	1	1	1	1	ARID4B	AT rich interactive domain 4B (RBP1-like)
hsa-miR-562	1	0	1	1	1	1	ITPKB	inositol-trisphosphate 3-kinase B
hsa-miR-562	0	0	1	1	1	1	INTS7	integrator complex subunit 7
hsa-miR-562	1	0	1	1	1	1	PCMT1	protein-L-isoaspartate (D-aspartate) O-methyltransferase
hsa-miR-562	0	0	1	1	1	1	GINM1	glycoprotein integral membrane 1
hsa-miR-562	1	0	1	1	1	1	TROVE2	TROVE domain family, member 2
hsa-miR-562	0	0	1	1	1	1	PLA2G4A	phospholipase A2, group IVA (cytosolic, calcium-dependent)
hsa-miR-562	0	0	1	1	1	1	FUCA2	fucosidase, alpha-L- 2, plasma
hsa-miR-562	0	0	0	1	0	0	KIAA1614	KIAA1614
hsa-miR-562	0	0	1	1	1	1	RASAL2	RAS protein activator like 2
hsa-miR-562	0	0	1	1	1	1	UFC1	ubiquitin-fold modifier conjugating enzyme 1
hsa-miR-562	0	0	1	1	1	1	CASQ1	calsequestrin 1 (fast-twitch, skeletal muscle)
hsa-miR-562	1	0	1	1	1	1	PTPRK	protein tyrosine phosphatase, receptor type, K
hsa-miR-562	0	0	1	1	1	1	C1orf85	chromosome 1 open reading frame 85
hsa-miR-562	1	0	1	1	1	1	FAM184A	family with sequence similarity 184, member A
hsa-miR-562	0	0	1	1	0	0	ZUFSP	zinc finger with UFM1-specific peptidase domain
hsa-miR-562	0	0	0	1	1	1	FAM26D	family with sequence similarity 26, member D
hsa-miR-562	1	0	1	1	1	1	TIAL1	TIA1 cytotoxic granule-associated RNA binding protein-like 1
hsa-miR-562	0	0	0	1	1	1	TDRD1	tudor domain containing 1
hsa-miR-562	0	0	1	1	1	1	PLEKHS1	pleckstrin homology domain containing, family S member 1
hsa-miR-562	0	0	1	1	0	0	NBPF8	neuroblastoma breakpoint family, member 8
hsa-miR-562	0	0	1	1	0	0	CD58	CD58 molecule
hsa-miR-562	0	1	1	1	1	1	SYCP1	synaptonemal complex protein 1
hsa-miR-562	1	0	1	1	1	1	MPP1	membrane protein, palmitoylated 1, 55kDa
hsa-miR-562	0	0	1	1	1	1	DKC1	dyskeratosis congenita 1, dyskerin
hsa-miR-562	1	0	1	1	1	1	KCNC4	potassium voltage-gated channel, Shaw-related subfamily, member 4
hsa-miR-562	0	0	1	1	1	1	IRAK1BP1	interleukin-1 receptor-associated kinase 1 binding protein 1
hsa-miR-562	0	0	1	1	1	1	ELOVL3	ELOVL fatty acid elongase 3
hsa-miR-562	1	0	1	1	1	1	PRPF38B	PRP38 pre-mRNA processing factor 38 (yeast) domain containing B
hsa-miR-562	0	0	1	1	0	0	LRRC39	leucine rich repeat containing 39
hsa-miR-562	0	0	0	1	0	0	OOEP	oocyte expressed protein
hsa-miR-562	0	0	1	1	1	1	IDS	iduronate 2-sulfatase
hsa-miR-562	1	0	1	1	1	1	HS2ST1	heparan sulfate 2-O-sulfotransferase 1
hsa-miR-562	1	0	1	1	0	0	LGSN	lengsin, lens protein with glutamine synthetase domain
hsa-miR-562	0	0	1	1	1	1	FAM122C	family with sequence similarity 122C
hsa-miR-562	0	0	1	1	0	0	TNNI3K	TNNI3 interacting kinase
hsa-miR-562	0	0	1	1	1	1	FPGT	fucose-1-phosphate guanylyltransferase
hsa-miR-562	1	0	1	1	1	1	SERBP1	SERPINE1 mRNA binding protein 1
hsa-miR-562	1	0	1	1	1	1	MIER1	mesoderm induction early response 1 homolog (Xenopus laevis)
hsa-miR-562	0	0	1	1	0	0	C1orf87	chromosome 1 open reading frame 87
hsa-miR-562	0	0	1	1	0	0	DAB1	disabled homolog 1 (Drosophila)
hsa-miR-562	0	0	1	1	0	0	RAE1	RAE1 RNA export 1 homolog (S. pombe)
hsa-miR-562	0	0	0	1	0	0	CYP2C19	cytochrome P450, family 2, subfamily C, polypeptide 19
hsa-miR-562	1	0	1	1	1	1	NOC3L	nucleolar complex associated 3 homolog (S. cerevisiae)
hsa-miR-562	0	0	1	1	1	1	NKAP	NFKB activating protein
hsa-miR-562	0	0	0	1	1	1	CPT2	carnitine palmitoyltransferase 2
hsa-miR-562	0	0	0	1	0	0	UBAC1	UBA domain containing 1
hsa-miR-562	0	0	1	1	1	1	DDX27	DEAD (Asp-Glu-Ala-Asp) box polypeptide 27
hsa-miR-562	0	0	0	1	0	0	SARDH	sarcosine dehydrogenase
hsa-miR-562	1	0	0	1	0	0	ANKRD22	ankyrin repeat domain 22
hsa-miR-562	0	0	1	1	1	1	ALG13	asparagine-linked glycosylation 13 homolog (S. cerevisiae)
hsa-miR-562	0	0	1	1	1	1	IPP	intracisternal A particle-promoted polypeptide
hsa-miR-562	1	0	1	1	1	1	MED27	mediator complex subunit 27
hsa-miR-562	0	0	1	1	0	0	DOLK	dolichol kinase
hsa-miR-562	1	0	1	1	1	1	NFYC	nuclear transcription factor Y, gamma
hsa-miR-562	0	0	1	1	1	1	RHBDL2	rhomboid, veinlet-like 2 (Drosophila)
hsa-miR-562	0	0	1	1	0	0	CXorf26	chromosome X open reading frame 26
hsa-miR-562	0	0	1	1	1	1	RABEPK	Rab9 effector protein with kelch motifs
hsa-miR-562	0	0	0	1	0	0	ATOH7	atonal homolog 7 (Drosophila)
hsa-miR-562	0	0	1	1	1	1	TTLL11	tubulin tyrosine ligase-like family, member 11
hsa-miR-562	1	0	1	1	0	0	CD164L2	CD164 sialomucin-like 2
hsa-miR-562	0	0	1	1	1	1	STMN1	stathmin 1
hsa-miR-562	1	0	1	1	0	0	SVEP1	sushi, von Willebrand factor type A, EGF and pentraxin domain containing 1
hsa-miR-562	1	0	1	1	1	1	LYPLA2	lysophospholipase II
hsa-miR-562	0	0	0	1	0	0	BMS1	BMS1 homolog, ribosome assembly protein (yeast)
hsa-miR-562	0	0	1	1	1	1	PMS1	PMS1 postmeiotic segregation increased 1 (S. cerevisiae)
hsa-miR-562	0	0	1	1	1	1	NOTCH4	notch 4
hsa-miR-562	0	0	1	1	1	1	TBC1D2	TBC1 domain family, member 2
hsa-miR-562	0	0	1	1	0	0	TMEM136	transmembrane protein 136
hsa-miR-562	0	0	0	1	0	0	DFNB59	deafness, autosomal recessive 59
hsa-miR-562	1	0	1	1	1	1	PTCH1	patched 1
hsa-miR-562	0	0	0	1	0	0	SDHB	succinate dehydrogenase complex, subunit B, iron sulfur (Ip)
hsa-miR-562	0	0	1	1	0	0	CARD17	caspase recruitment domain family, member 17
hsa-miR-562	0	0	1	1	1	1	CASP1	caspase 1, apoptosis-related cysteine peptidase
hsa-miR-562	0	0	1	1	0	0	CCDC22	coiled-coil domain containing 22
hsa-miR-562	0	0	0	1	0	0	PRICKLE3	prickle homolog 3 (Drosophila)
hsa-miR-562	0	0	1	1	1	1	FRMD3	FERM domain containing 3
hsa-miR-562	0	0	1	1	1	1	WAS	Wiskott-Aldrich syndrome
hsa-miR-562	0	0	1	1	1	1	CD300LG	CD300 molecule-like family member g
hsa-miR-562	1	0	1	1	1	1	C20orf26	chromosome 20 open reading frame 26
hsa-miR-562	0	0	0	1	1	1	CRNKL1	crooked neck pre-mRNA splicing factor-like 1 (Drosophila)
hsa-miR-562	0	0	1	1	0	0	TCTN1	tectonic family member 1
hsa-miR-562	0	0	1	1	0	0	FAM216A	family with sequence similarity 216, member A
hsa-miR-562	0	0	0	1	0	0	FRMPD1	FERM and PDZ domain containing 1
hsa-miR-562	0	0	1	1	1	1	SCGN	secretagogin, EF-hand calcium binding protein
hsa-miR-562	0	0	1	1	1	1	LECT1	leukocyte cell derived chemotaxin 1
hsa-miR-562	1	0	1	1	1	1	WDR92	WD repeat domain 92
hsa-miR-562	1	0	1	1	1	1	EFHC2	EF-hand domain (C-terminal) containing 2
hsa-miR-562	0	0	0	1	0	0	ZNF425	zinc finger protein 425
hsa-miR-562	0	0	0	1	0	0	LRRC10B	leucine rich repeat containing 10B
hsa-miR-562	1	0	1	1	1	1	PCDHA5	protocadherin alpha 5
hsa-miR-562	0	0	1	1	1	1	KIF3A	kinesin family member 3A
hsa-miR-562	0	0	1	1	1	1	CAMK1D	calcium/calmodulin-dependent protein kinase ID
hsa-miR-562	0	0	1	1	1	1	MCM8	minichromosome maintenance complex component 8
hsa-miR-562	0	0	1	1	0	0	PRODH2	proline dehydrogenase (oxidase) 2
hsa-miR-562	0	0	1	1	0	0	NPHS1	nephrosis 1, congenital, Finnish type (nephrin)
hsa-miR-562	0	0	0	1	0	0	CKS1BP6	CDC28 protein kinase regulatory subunit 1B pseudogene 6
hsa-miR-562	0	0	0	1	0	0	PUSL1	pseudouridylate synthase-like 1
hsa-miR-562	0	0	1	1	1	1	KIAA1161	KIAA1161
hsa-miR-562	0	0	1	1	1	1	ARHGEF25	Rho guanine nucleotide exchange factor (GEF) 25
hsa-miR-562	0	0	1	1	0	0	SLC26A10	solute carrier family 26, member 10
hsa-miR-562	0	0	1	1	0	0	UBAP2	ubiquitin associated protein 2
hsa-miR-562	1	0	1	1	1	1	SAT1	spermidine/spermine N1-acetyltransferase 1
hsa-miR-562	1	0	1	1	1	1	SMPX	small muscle protein, X-linked
hsa-miR-562	1	0	1	1	1	1	NFX1	nuclear transcription factor, X-box binding 1
hsa-miR-562	1	0	1	1	1	1	EIF4G2	eukaryotic translation initiation factor 4 gamma, 2
hsa-miR-562	0	0	1	1	1	1	RFESD	Rieske (Fe-S) domain containing
hsa-miR-562	0	0	1	1	0	0	CA5BP1	carbonic anhydrase VB pseudogene 1
hsa-miR-562	0	0	1	1	1	1	BTF3	basic transcription factor 3
hsa-miR-562	0	0	0	1	0	0	WRB	tryptophan rich basic protein
hsa-miR-562	1	0	1	1	1	1	TRIM23	tripartite motif containing 23
hsa-miR-562	0	0	1	1	0	0	HTN3	histatin 3
hsa-miR-562	0	0	0	1	1	1	ZNF343	zinc finger protein 343
hsa-miR-562	0	0	0	1	0	0	MRPL23	mitochondrial ribosomal protein L23
hsa-miR-562	1	0	1	1	1	1	FKBP1A	FK506 binding protein 1A, 12kDa
hsa-miR-562	1	0	1	1	1	1	RCL1	RNA terminal phosphate cyclase-like 1
hsa-miR-562	0	0	0	1	0	0	TPTE2P1	transmembrane phosphoinositide 3-phosphatase and tensin homolog 2 pseudogene 1
hsa-miR-562	0	0	1	1	0	0	TMEM74B	transmembrane protein 74B
hsa-miR-562	0	0	1	1	1	1	PARP4	poly (ADP-ribose) polymerase family, member 4
hsa-miR-562	0	0	1	1	1	1	SAP18	Sin3A-associated protein, 18kDa
hsa-miR-562	0	0	0	1	1	1	RBMY1E	RNA binding motif protein, Y-linked, family 1, member E
hsa-miR-562	0	0	0	1	1	1	RBMY1D	RNA binding motif protein, Y-linked, family 1, member D
hsa-miR-562	0	0	1	1	0	0	GAK	cyclin G associated kinase
hsa-miR-562	1	0	1	1	1	1	RNMT	RNA (guanine-7-) methyltransferase
hsa-miR-562	1	0	0	1	1	1	NKIRAS1	NFKB inhibitor interacting Ras-like 1
hsa-miR-562	0	0	1	1	0	0	C7orf63	chromosome 7 open reading frame 63
hsa-miR-562	1	0	1	1	1	1	MBTD1	mbt domain containing 1
hsa-miR-562	1	0	1	1	1	1	ESR1	estrogen receptor 1
hsa-miR-562	0	0	0	1	1	1	NPHP1	nephronophthisis 1 (juvenile)
hsa-miR-562	1	0	1	1	1	1	TPP1	tripeptidyl peptidase I
hsa-miR-562	0	0	0	1	1	1	SH3BGR	SH3 domain binding glutamic acid-rich protein
hsa-miR-562	1	0	1	1	1	1	RBMS3	RNA binding motif, single stranded interacting protein 3
hsa-miR-562	1	0	1	1	1	1	ACTR2	ARP2 actin-related protein 2 homolog (yeast)
hsa-miR-562	1	0	1	1	1	1	OPA3	optic atrophy 3 (autosomal recessive, with chorea and spastic paraplegia)
hsa-miR-562	0	0	1	1	1	1	NARG2	NMDA receptor regulated 2
hsa-miR-562	1	0	1	1	1	1	TGFBR2	transforming growth factor, beta receptor II (70/80kDa)
hsa-miR-562	1	0	1	1	1	1	NSG1	neuron specific gene family member 1
hsa-miR-562	1	0	1	1	1	1	PTPRD	protein tyrosine phosphatase, receptor type, D
hsa-miR-562	1	0	1	1	1	1	CYLD	cylindromatosis (turban tumor syndrome)
hsa-miR-562	1	0	1	1	1	1	DIAPH3	diaphanous homolog 3 (Drosophila)
hsa-miR-562	1	0	1	1	1	1	GLRA3	glycine receptor, alpha 3
hsa-miR-562	1	0	0	1	1	1	FAM177A1	family with sequence similarity 177, member A1
hsa-miR-562	1	0	1	1	1	1	GJC1	gap junction protein, gamma 1, 45kDa
hsa-miR-562	0	0	1	1	1	1	SHISA3	shisa homolog 3 (Xenopus laevis)
hsa-miR-562	1	0	1	0	1	1	COL19A1	collagen, type XIX, alpha 1
hsa-miR-562	0	0	0	1	1	1	SLC10A1	solute carrier family 10 (sodium/bile acid cotransporter family), member 1
hsa-miR-562	0	0	1	1	1	1	SPAG1	sperm associated antigen 1
hsa-miR-562	1	0	1	0	1	1	SNN	stannin
hsa-miR-562	1	0	0	1	1	1	AURKA	aurora kinase A
hsa-miR-562	0	0	0	1	1	1	IL1RL1	interleukin 1 receptor-like 1
hsa-miR-562	1	0	1	0	1	1	EIF2S1	eukaryotic translation initiation factor 2, subunit 1 alpha, 35kDa
hsa-miR-562	0	0	1	1	1	1	SERPINB9	serpin peptidase inhibitor, clade B (ovalbumin), member 9
hsa-miR-562	1	0	1	1	1	1	KIF11	kinesin family member 11
hsa-miR-562	1	0	1	0	1	1	NAB1	NGFI-A binding protein 1 (EGR1 binding protein 1)
hsa-miR-562	1	0	1	1	1	1	TGOLN2	trans-golgi network protein 2
hsa-miR-562	0	0	1	1	1	1	RAD51AP1	RAD51 associated protein 1
hsa-miR-562	0	0	1	0	1	1	ZXDB	zinc finger, X-linked, duplicated B
hsa-miR-562	1	0	1	1	1	1	ATP6V0A2	ATPase, H+ transporting, lysosomal V0 subunit a2
hsa-miR-562	0	0	0	1	1	1	NAAA	N-acylethanolamine acid amidase
hsa-miR-562	1	0	1	1	1	1	SETX	senataxin
hsa-miR-562	1	0	1	1	1	1	PPIP5K2	diphosphoinositol pentakisphosphate kinase 2
hsa-miR-562	1	0	1	1	1	1	MYEF2	myelin expression factor 2
hsa-miR-562	1	0	1	1	1	1	POLA1	polymerase (DNA directed), alpha 1, catalytic subunit
hsa-miR-562	0	0	0	0	1	1	PTCD3	pentatricopeptide repeat domain 3
hsa-miR-562	0	0	0	1	1	1	TMA16	translation machinery associated 16 homolog (S. cerevisiae)
hsa-miR-562	0	0	0	1	1	1	PCDHB10	protocadherin beta 10
hsa-miR-562	1	0	1	1	1	1	SGTB	small glutamine-rich tetratricopeptide repeat (TPR)-containing, beta
hsa-miR-562	0	0	1	0	1	1	SPCS3	signal peptidase complex subunit 3 homolog (S. cerevisiae)
hsa-miR-562	0	0	0	1	1	1	P2RY13	purinergic receptor P2Y, G-protein coupled, 13
hsa-miR-562	1	0	0	1	1	1	CPSF7	cleavage and polyadenylation specific factor 7, 59kDa
hsa-miR-562	0	0	0	1	1	1	SIRT5	sirtuin 5
hsa-miR-562	0	0	1	1	1	1	INSM2	insulinoma-associated 2
hsa-miR-562	0	0	1	1	1	1	FAM136A	family with sequence similarity 136, member A
hsa-miR-562	1	0	1	1	1	1	SLC35B4	solute carrier family 35, member B4
hsa-miR-562	1	0	1	1	1	1	FAM104A	family with sequence similarity 104, member A
hsa-miR-562	1	0	1	1	1	1	CASP2	caspase 2, apoptosis-related cysteine peptidase
hsa-miR-562	0	0	0	1	1	1	SDR42E1	short chain dehydrogenase/reductase family 42E, member 1
hsa-miR-562	0	0	1	1	1	1	GORAB	golgin, RAB6-interacting
hsa-miR-562	1	0	1	1	1	1	FGFBP3	fibroblast growth factor binding protein 3
hsa-miR-562	0	0	1	1	1	1	RAD9B	RAD9 homolog B (S. pombe)
hsa-miR-562	0	0	0	1	1	1	MCM9	minichromosome maintenance complex component 9
hsa-miR-562	1	0	1	1	1	1	CACUL1	CDK2-associated, cullin domain 1
hsa-miR-562	0	0	1	1	1	1	TAPBP	TAP binding protein (tapasin)
hsa-miR-562	0	0	0	1	1	1	PNPLA1	patatin-like phospholipase domain containing 1
hsa-miR-562	1	0	1	1	1	1	CEP57L1	centrosomal protein 57kDa-like 1
hsa-miR-562	0	0	1	1	1	1	FAM171B	family with sequence similarity 171, member B
hsa-miR-562	1	0	1	1	1	1	LRRK2	leucine-rich repeat kinase 2
hsa-miR-562	0	0	1	0	1	1	CA13	carbonic anhydrase XIII
hsa-miR-562	1	0	1	1	1	1	FREM2	FRAS1 related extracellular matrix protein 2
hsa-miR-562	0	0	0	1	1	1	TMEM191B	transmembrane protein 191B
hsa-miR-562	0	0	1	1	1	1	C5orf47	chromosome 5 open reading frame 47
hsa-miR-562	0	0	1	1	1	1	TMEM191C	transmembrane protein 191C
