# Supplementary material for: Profiling of Selected MicroRNAs in Proliferative Eutopic Endometrium of Women with Ovarian Endometriosis
Source: Biomed Res Int. 2015 Aug 20;2015:760698. doi: 10.1155/2015/760698 (PMC4558423; doi:10.1155/2015/760698)
Supplement: Supplementary file 1 — Table I: The names of miRNAs significantly differentially expressed between eutopic endometrium of patients with endometriosis vs eutopic endometrium of patients without endometriosis. Table II: The associations between miRNA and mRNA, which presents detailed results of the search of six major databases i.e targetscan, tarbase, miranda, mirbase, mirtarget2 and pictar. [file 760698.f1.zip › 760698.f1/Table II/hsa-miR-563.tsv]

miR	targetscan	tarbase	miranda	mirbase	mirtarget2	pictar	GeneSymbol	GeneName
hsa-miR-563	1	0	1	0	1	1	PTPRT	protein tyrosine phosphatase, receptor type, T
hsa-miR-563	1	0	1	1	1	1	GREB1	growth regulation by estrogen in breast cancer 1
hsa-miR-563	0	0	1	1	1	1	PHLDB1	pleckstrin homology-like domain, family B, member 1
hsa-miR-563	0	0	1	1	1	1	MICAL2	microtubule associated monoxygenase, calponin and LIM domain containing 2
hsa-miR-563	1	0	1	1	1	1	SEMA4F	sema domain, immunoglobulin domain (Ig), transmembrane domain (TM) and short cytoplasmic domain, (semaphorin) 4F
hsa-miR-563	1	0	1	1	1	1	C11orf9	chromosome 11 open reading frame 9
hsa-miR-563	1	0	1	0	1	1	ZNF507	zinc finger protein 507
hsa-miR-563	1	0	1	1	1	1	ATXN7L1	ataxin 7-like 1
hsa-miR-563	0	0	1	1	1	1	KLHL13	kelch-like 13 (Drosophila)
hsa-miR-563	1	0	1	1	1	1	PCDH19	protocadherin 19
hsa-miR-563	1	0	1	1	1	1	FRAS1	Fraser syndrome 1
hsa-miR-563	0	0	1	1	1	1	BHLHB9	basic helix-loop-helix domain containing, class B, 9
hsa-miR-563	0	0	1	1	1	1	UNC80	unc-80 homolog (C. elegans)
hsa-miR-563	0	0	1	1	1	1	SLC11A2	solute carrier family 11 (proton-coupled divalent metal ion transporters), member 2
hsa-miR-563	0	0	1	0	1	1	GSDMA	gasdermin A
hsa-miR-563	1	1	1	1	1	1	BACE1	beta-site APP-cleaving enzyme 1
hsa-miR-563	1	0	1	1	1	1	UBE3A	ubiquitin protein ligase E3A
hsa-miR-563	1	0	1	1	1	1	PCCB	propionyl CoA carboxylase, beta polypeptide
hsa-miR-563	1	0	1	1	1	1	DTNA	dystrobrevin, alpha
hsa-miR-563	1	0	1	0	1	1	PLAG1	pleiomorphic adenoma gene 1
hsa-miR-563	0	0	1	1	1	1	DGKI	diacylglycerol kinase, iota
hsa-miR-563	1	0	1	1	1	1	PRKACB	protein kinase, cAMP-dependent, catalytic, beta
hsa-miR-563	0	0	1	0	1	1	NPY1R	neuropeptide Y receptor Y1
hsa-miR-563	0	0	1	1	0	0	SLC22A8	solute carrier family 22 (organic anion transporter), member 8
hsa-miR-563	0	0	1	1	1	1	DDX10	DEAD (Asp-Glu-Ala-Asp) box polypeptide 10
hsa-miR-563	1	0	1	1	1	1	PHLDB2	pleckstrin homology-like domain, family B, member 2
hsa-miR-563	0	0	1	1	0	0	SPTBN2	spectrin, beta, non-erythrocytic 2
hsa-miR-563	1	0	1	1	1	1	TMBIM6	transmembrane BAX inhibitor motif containing 6
hsa-miR-563	1	0	1	1	1	1	NUDT4	nudix (nucleoside diphosphate linked moiety X)-type motif 4
hsa-miR-563	1	0	1	1	1	1	ZNF202	zinc finger protein 202
hsa-miR-563	1	0	1	1	1	1	ANKRD13A	ankyrin repeat domain 13A
hsa-miR-563	0	0	1	1	1	1	CD28	CD28 molecule
hsa-miR-563	0	0	1	1	1	1	MFF	mitochondrial fission factor
hsa-miR-563	1	0	1	1	1	1	KLHL32	kelch-like 32 (Drosophila)
hsa-miR-563	0	0	1	1	0	0	SNRPN	small nuclear ribonucleoprotein polypeptide N
hsa-miR-563	1	0	1	0	1	1	IL1RAP	interleukin 1 receptor accessory protein
hsa-miR-563	0	0	1	1	1	1	CLDND1	claudin domain containing 1
hsa-miR-563	1	0	1	1	1	1	NRXN3	neurexin 3
hsa-miR-563	1	0	1	1	1	1	AKAP2	A kinase (PRKA) anchor protein 2
hsa-miR-563	1	0	1	0	1	1	NFAT5	nuclear factor of activated T-cells 5, tonicity-responsive
hsa-miR-563	0	0	1	0	1	1	TRMT10A	tRNA methyltransferase 10 homolog A (S. cerevisiae)
hsa-miR-563	1	0	1	1	1	1	ARGLU1	arginine and glutamate rich 1
hsa-miR-563	1	0	1	1	1	1	RIC8B	resistance to inhibitors of cholinesterase 8 homolog B (C. elegans)
hsa-miR-563	1	0	1	1	1	1	SLC38A2	solute carrier family 38, member 2
hsa-miR-563	1	0	1	0	1	1	SPATS2L	spermatogenesis associated, serine-rich 2-like
hsa-miR-563	0	0	1	0	0	0	LOC284561	uncharacterized LOC284561
hsa-miR-563	1	0	1	1	1	1	BAZ2A	bromodomain adjacent to zinc finger domain, 2A
hsa-miR-563	1	0	1	1	0	0	MEX3A	mex-3 homolog A (C. elegans)
hsa-miR-563	1	0	1	1	1	1	ZNF385A	zinc finger protein 385A
hsa-miR-563	0	0	1	0	0	0	RASAL3	RAS protein activator like 3
hsa-miR-563	0	0	1	1	0	0	EIF4ENIF1	eukaryotic translation initiation factor 4E nuclear import factor 1
hsa-miR-563	1	0	1	1	1	1	POLK	polymerase (DNA directed) kappa
hsa-miR-563	0	0	1	1	1	1	ZBBX	zinc finger, B-box domain containing
hsa-miR-563	1	0	1	0	1	1	CCNL2	cyclin L2
hsa-miR-563	1	0	1	1	1	1	GPD2	glycerol-3-phosphate dehydrogenase 2 (mitochondrial)
hsa-miR-563	1	0	1	1	1	1	ARHGAP36	Rho GTPase activating protein 36
hsa-miR-563	0	0	1	0	0	0	FLJ30838	uncharacterized LOC400955
hsa-miR-563	1	0	1	0	1	1	PTPRE	protein tyrosine phosphatase, receptor type, E
hsa-miR-563	0	0	1	1	0	0	STRA6	stimulated by retinoic acid gene 6 homolog (mouse)
hsa-miR-563	0	0	1	0	1	1	FAM70A	family with sequence similarity 70, member A
hsa-miR-563	1	0	1	1	1	1	SORBS2	sorbin and SH3 domain containing 2
hsa-miR-563	0	0	1	1	0	0	UBAP2	ubiquitin associated protein 2
hsa-miR-563	1	0	1	1	1	1	ANKRD49	ankyrin repeat domain 49
hsa-miR-563	0	0	1	1	1	1	ZBTB26	zinc finger and BTB domain containing 26
hsa-miR-563	0	0	1	0	0	0	C6orf228	chromosome 6 open reading frame 228
hsa-miR-563	1	0	1	0	1	1	SLC25A37	solute carrier family 25 (mitochondrial iron transporter), member 37
hsa-miR-563	0	0	1	1	0	0	PPP2R1A	protein phosphatase 2, regulatory subunit A, alpha
hsa-miR-563	0	0	1	1	0	0	MSANTD3	Myb/SANT-like DNA-binding domain containing 3
hsa-miR-563	0	0	1	0	1	1	SSPN	sarcospan
hsa-miR-563	1	0	1	1	1	1	DZIP1	DAZ interacting protein 1
hsa-miR-563	0	0	1	1	1	1	SLC16A1	solute carrier family 16, member 1 (monocarboxylic acid transporter 1)
hsa-miR-563	1	0	1	0	1	1	KIAA1456	KIAA1456
hsa-miR-563	0	0	1	1	1	1	AQP3	aquaporin 3 (Gill blood group)
hsa-miR-563	0	0	1	1	1	1	FBLN1	fibulin 1
hsa-miR-563	0	0	1	1	1	1	ZNF673	zinc finger family member 673
hsa-miR-563	1	0	1	0	1	1	THRB	thyroid hormone receptor, beta
hsa-miR-563	1	0	1	1	1	1	EPB41L1	erythrocyte membrane protein band 4.1-like 1
hsa-miR-563	0	0	1	0	1	1	TNFAIP8	tumor necrosis factor, alpha-induced protein 8
hsa-miR-563	0	0	1	0	0	0	LOC100128560	uncharacterized LOC100128560
hsa-miR-563	0	0	1	1	0	0	CORO1A	coronin, actin binding protein, 1A
hsa-miR-563	0	0	1	1	1	1	RP1	retinitis pigmentosa 1 (autosomal dominant)
hsa-miR-563	0	0	1	1	0	0	YSK4	YSK4 Sps1/Ste20-related kinase homolog (S. cerevisiae)
hsa-miR-563	1	0	1	1	1	1	MDGA2	MAM domain containing glycosylphosphatidylinositol anchor 2
hsa-miR-563	1	0	1	1	1	1	SBF2	SET binding factor 2
hsa-miR-563	0	0	1	1	0	0	C16orf86	chromosome 16 open reading frame 86
hsa-miR-563	1	0	1	1	1	1	VPS54	vacuolar protein sorting 54 homolog (S. cerevisiae)
hsa-miR-563	1	0	1	1	1	1	PIAS3	protein inhibitor of activated STAT, 3
hsa-miR-563	0	0	1	1	1	1	CTPS2	CTP synthase 2
hsa-miR-563	0	0	1	0	0	0	FAM95B1	family with sequence similarity 95, member B1
hsa-miR-563	0	0	1	1	0	0	FSIP2	fibrous sheath interacting protein 2
hsa-miR-563	0	0	1	1	0	0	HS3ST5	heparan sulfate (glucosamine) 3-O-sulfotransferase 5
hsa-miR-563	0	0	1	0	0	0	RPL23AP53	ribosomal protein L23a pseudogene 53
hsa-miR-563	1	0	1	0	1	1	N4BP3	NEDD4 binding protein 3
hsa-miR-563	0	0	1	1	1	1	SHROOM3	shroom family member 3
hsa-miR-563	0	0	1	1	1	1	NLRP11	NLR family, pyrin domain containing 11
hsa-miR-563	1	0	1	1	1	1	RNF111	ring finger protein 111
hsa-miR-563	0	0	1	1	1	1	PHF12	PHD finger protein 12
hsa-miR-563	0	0	1	1	0	0	ZSCAN18	zinc finger and SCAN domain containing 18
hsa-miR-563	1	0	1	1	1	1	KDM6A	lysine (K)-specific demethylase 6A
hsa-miR-563	0	0	1	0	1	1	CEP95	centrosomal protein 95kDa
hsa-miR-563	1	0	1	0	1	1	EXOC5	exocyst complex component 5
hsa-miR-563	1	0	1	1	1	1	CAPRIN2	caprin family member 2
hsa-miR-563	0	0	1	1	1	1	PNMAL1	paraneoplastic Ma antigen family-like 1
hsa-miR-563	0	0	1	1	1	1	LMAN2L	lectin, mannose-binding 2-like
hsa-miR-563	1	0	1	1	1	1	IKZF2	IKAROS family zinc finger 2 (Helios)
hsa-miR-563	0	0	1	1	1	1	CRB1	crumbs homolog 1 (Drosophila)
hsa-miR-563	1	0	1	0	1	1	BDNF	brain-derived neurotrophic factor
hsa-miR-563	0	0	1	0	0	0	CR1L	complement component (3b/4b) receptor 1-like
hsa-miR-563	1	0	1	1	1	1	PBRM1	polybromo 1
hsa-miR-563	1	0	1	1	1	1	GFRA2	GDNF family receptor alpha 2
hsa-miR-563	1	0	1	1	1	1	TAB3	TGF-beta activated kinase 1/MAP3K7 binding protein 3
hsa-miR-563	1	0	1	1	1	1	CHRDL1	chordin-like 1
hsa-miR-563	0	0	1	1	0	0	DHRS4	dehydrogenase/reductase (SDR family) member 4
hsa-miR-563	0	0	1	1	0	0	C15orf61	chromosome 15 open reading frame 61
hsa-miR-563	1	0	1	1	1	1	NTNG1	netrin G1
hsa-miR-563	0	0	1	1	1	1	DLEC1	deleted in lung and esophageal cancer 1
hsa-miR-563	0	0	1	1	1	1	STOX1	storkhead box 1
hsa-miR-563	1	0	1	1	0	0	TAF4B	TAF4b RNA polymerase II, TATA box binding protein (TBP)-associated factor, 105kDa
hsa-miR-563	0	0	1	1	1	1	MTFP1	mitochondrial fission process 1
hsa-miR-563	0	0	1	1	1	1	B4GALT2	UDP-Gal:betaGlcNAc beta 1,4- galactosyltransferase, polypeptide 2
hsa-miR-563	0	0	1	1	0	0	SCG5	secretogranin V (7B2 protein)
hsa-miR-563	0	0	1	1	1	1	ZNF589	zinc finger protein 589
hsa-miR-563	0	0	1	0	0	0	FBXO46	F-box protein 46
hsa-miR-563	0	0	1	1	1	1	DPYD	dihydropyrimidine dehydrogenase
hsa-miR-563	0	0	1	1	1	1	HMBOX1	homeobox containing 1
hsa-miR-563	1	0	1	1	1	1	TRIM2	tripartite motif containing 2
hsa-miR-563	1	0	1	1	1	1	SUPT16H	suppressor of Ty 16 homolog (S. cerevisiae)
hsa-miR-563	0	0	1	1	0	0	HAVCR1	hepatitis A virus cellular receptor 1
hsa-miR-563	0	0	1	0	0	0	MGC21881	uncharacterized locus MGC21881
hsa-miR-563	0	0	1	1	1	1	MBIP	MAP3K12 binding inhibitory protein 1
hsa-miR-563	1	0	1	1	1	1	NRF1	nuclear respiratory factor 1
hsa-miR-563	1	0	1	1	0	0	USP53	ubiquitin specific peptidase 53
hsa-miR-563	1	0	1	1	1	1	WWC2	WW and C2 domain containing 2
hsa-miR-563	1	0	1	1	1	1	SUZ12	suppressor of zeste 12 homolog (Drosophila)
hsa-miR-563	0	0	1	0	1	1	CD99P1	CD99 molecule pseudogene 1
hsa-miR-563	1	0	1	1	1	1	C11orf30	chromosome 11 open reading frame 30
hsa-miR-563	0	0	1	0	0	0	SNX29P2	sorting nexin 29 pseudogene 2
hsa-miR-563	1	0	1	1	1	1	ZNF200	zinc finger protein 200
hsa-miR-563	1	0	1	1	1	1	CNTN4	contactin 4
hsa-miR-563	0	0	1	1	0	0	TRO	trophinin
hsa-miR-563	0	0	1	0	1	1	FHAD1	forkhead-associated (FHA) phosphopeptide binding domain 1
hsa-miR-563	0	0	1	0	0	0	LOC400891	chromosome 14 open reading frame 166B pseudogene
hsa-miR-563	1	0	1	0	0	0	KCNU1	potassium channel, subfamily U, member 1
hsa-miR-563	1	0	1	1	1	1	CASD1	CAS1 domain containing 1
hsa-miR-563	0	0	1	1	1	1	TMEM117	transmembrane protein 117
hsa-miR-563	1	0	1	1	1	1	ZNF518A	zinc finger protein 518A
hsa-miR-563	0	0	1	0	1	1	PLEKHM1P	pleckstrin homology domain containing, family M (with RUN domain) member 1 pseudogene
hsa-miR-563	1	0	1	1	1	1	SPATS2	spermatogenesis associated, serine-rich 2
hsa-miR-563	1	0	1	1	1	1	RAB5B	RAB5B, member RAS oncogene family
hsa-miR-563	0	0	1	1	1	1	CDADC1	cytidine and dCMP deaminase domain containing 1
hsa-miR-563	1	0	1	1	1	1	SECISBP2L	SECIS binding protein 2-like
hsa-miR-563	1	0	1	1	1	1	ANO1	anoctamin 1, calcium activated chloride channel
hsa-miR-563	0	0	1	0	0	0	FAM66C	family with sequence similarity 66, member C
hsa-miR-563	1	0	1	1	1	1	NKAIN2	Na+/K+ transporting ATPase interacting 2
hsa-miR-563	1	0	1	1	1	1	ZEB2	zinc finger E-box binding homeobox 2
hsa-miR-563	0	0	1	1	1	1	SEC24D	SEC24 family, member D (S. cerevisiae)
hsa-miR-563	0	0	1	1	1	1	SNAPC3	small nuclear RNA activating complex, polypeptide 3, 50kDa
hsa-miR-563	0	0	1	1	1	1	CLEC12B	C-type lectin domain family 12, member B
hsa-miR-563	1	0	1	1	0	0	TMEM131	transmembrane protein 131
hsa-miR-563	1	0	1	1	1	1	BNC2	basonuclin 2
hsa-miR-563	1	0	1	1	1	1	SOX6	SRY (sex determining region Y)-box 6
hsa-miR-563	1	0	1	1	1	1	FOSB	FBJ murine osteosarcoma viral oncogene homolog B
hsa-miR-563	1	0	1	1	1	1	DACH2	dachshund homolog 2 (Drosophila)
hsa-miR-563	0	0	1	0	0	0	LOC339622	uncharacterized LOC339622
hsa-miR-563	1	0	1	1	1	1	GNG2	guanine nucleotide binding protein (G protein), gamma 2
hsa-miR-563	1	0	1	1	1	1	PRRG1	proline rich Gla (G-carboxyglutamic acid) 1
hsa-miR-563	0	0	1	0	1	1	C12orf74	chromosome 12 open reading frame 74
hsa-miR-563	1	0	1	1	1	1	CARM1	coactivator-associated arginine methyltransferase 1
hsa-miR-563	0	0	1	0	0	0	LOC348120	uncharacterized LOC348120
hsa-miR-563	1	0	1	0	1	1	KDM2A	lysine (K)-specific demethylase 2A
hsa-miR-563	1	0	1	1	1	1	CLVS1	clavesin 1
hsa-miR-563	1	0	1	1	1	1	RECK	reversion-inducing-cysteine-rich protein with kazal motifs
hsa-miR-563	0	0	1	0	0	0	LOC387647	patched domain containing 3 pseudogene
hsa-miR-563	0	0	1	1	1	1	HSPBAP1	HSPB (heat shock 27kDa) associated protein 1
hsa-miR-563	1	0	1	1	1	1	ASPH	aspartate beta-hydroxylase
hsa-miR-563	0	0	1	1	0	0	CYP4F30P	cytochrome P450, family 4, subfamily F, polypeptide 30, pseudogene
hsa-miR-563	1	0	1	0	1	1	TGFBR1	transforming growth factor, beta receptor 1
hsa-miR-563	1	0	1	0	1	1	AMMECR1L	AMME chromosomal region gene 1-like
hsa-miR-563	0	0	1	1	0	0	DNHD1	dynein heavy chain domain 1
hsa-miR-563	0	0	1	0	1	1	PPIA	peptidylprolyl isomerase A (cyclophilin A)
hsa-miR-563	0	0	1	1	0	0	DARC	Duffy blood group, chemokine receptor
hsa-miR-563	0	0	1	1	0	0	ZNHIT3	zinc finger, HIT-type containing 3
hsa-miR-563	1	0	1	1	1	1	SLMAP	sarcolemma associated protein
hsa-miR-563	1	0	1	1	1	1	GRIA3	glutamate receptor, ionotropic, AMPA 3
hsa-miR-563	0	0	1	0	0	0	LRRC37BP1	leucine rich repeat containing 37B pseudogene 1
hsa-miR-563	0	0	1	1	0	0	RGSL1	regulator of G-protein signaling like 1
hsa-miR-563	0	0	1	0	1	1	GOLGA8G	golgin A8 family, member G
hsa-miR-563	1	0	1	0	1	1	CAMSAP2	calmodulin regulated spectrin-associated protein family, member 2
hsa-miR-563	0	0	1	0	0	0	LINC00314	long intergenic non-protein coding RNA 314
hsa-miR-563	0	0	1	1	0	0	KIF13A	kinesin family member 13A
hsa-miR-563	1	0	1	1	1	1	CADPS	Ca++-dependent secretion activator
hsa-miR-563	0	0	1	1	0	0	PSMB5	proteasome (prosome, macropain) subunit, beta type, 5
hsa-miR-563	0	0	1	1	1	1	KBTBD12	kelch repeat and BTB (POZ) domain containing 12
hsa-miR-563	1	0	1	1	1	1	RREB1	ras responsive element binding protein 1
hsa-miR-563	0	0	1	0	1	1	MYO3B	myosin IIIB
hsa-miR-563	1	0	1	1	1	1	NAV1	neuron navigator 1
hsa-miR-563	0	0	1	1	1	1	RBM20	RNA binding motif protein 20
hsa-miR-563	1	0	1	0	0	0	ZNRF3	zinc and ring finger 3
hsa-miR-563	1	0	1	1	1	1	SEL1L3	sel-1 suppressor of lin-12-like 3 (C. elegans)
hsa-miR-563	0	0	1	1	1	1	SNRNP27	small nuclear ribonucleoprotein 27kDa (U4/U6.U5)
hsa-miR-563	1	0	1	0	0	0	IGLON5	IgLON family member 5
hsa-miR-563	1	0	1	1	1	1	FUT9	fucosyltransferase 9 (alpha (1,3) fucosyltransferase)
hsa-miR-563	0	0	1	1	1	1	UPRT	uracil phosphoribosyltransferase (FUR1) homolog (S. cerevisiae)
hsa-miR-563	1	0	1	0	1	1	PLEKHA1	pleckstrin homology domain containing, family A (phosphoinositide binding specific) member 1
hsa-miR-563	0	0	1	1	1	1	COPS8	COP9 constitutive photomorphogenic homolog subunit 8 (Arabidopsis)
hsa-miR-563	0	0	1	1	1	1	C2orf43	chromosome 2 open reading frame 43
hsa-miR-563	0	0	1	1	1	1	CD99	CD99 molecule
hsa-miR-563	1	0	1	0	1	1	PTPLAD1	protein tyrosine phosphatase-like A domain containing 1
hsa-miR-563	0	0	1	1	1	1	PCK2	phosphoenolpyruvate carboxykinase 2 (mitochondrial)
hsa-miR-563	0	0	1	1	0	0	KIAA0100	KIAA0100
hsa-miR-563	0	0	1	1	1	1	STON1	stonin 1
hsa-miR-563	0	0	1	0	0	0	LOC643072	uncharacterized LOC643072
hsa-miR-563	0	0	1	0	0	0	LOC645513	uncharacterized LOC645513
hsa-miR-563	0	0	1	1	0	0	NOX5	NADPH oxidase, EF-hand calcium binding domain 5
hsa-miR-563	1	0	1	0	1	1	NLN	neurolysin (metallopeptidase M3 family)
hsa-miR-563	0	0	1	1	0	0	FAM57B	family with sequence similarity 57, member B
hsa-miR-563	1	0	1	1	1	1	PFN2	profilin 2
hsa-miR-563	0	0	1	1	1	1	DNAJC25	DnaJ (Hsp40) homolog, subfamily C , member 25
hsa-miR-563	1	0	1	1	1	1	HMGN2	high mobility group nucleosomal binding domain 2
hsa-miR-563	1	0	1	1	1	1	GDA	guanine deaminase
hsa-miR-563	0	0	1	1	0	0	TMEM41A	transmembrane protein 41A
hsa-miR-563	1	0	1	1	1	1	JUNB	jun B proto-oncogene
hsa-miR-563	1	0	1	1	1	1	SLC35A1	solute carrier family 35 (CMP-sialic acid transporter), member A1
hsa-miR-563	1	0	1	0	1	1	PTP4A1	protein tyrosine phosphatase type IVA, member 1
hsa-miR-563	1	0	1	0	1	1	MCFD2	multiple coagulation factor deficiency 2
hsa-miR-563	1	0	1	0	1	1	CNTNAP2	contactin associated protein-like 2
hsa-miR-563	0	0	1	0	0	0	POM121L8P	POM121 transmembrane nucleoporin-like 8 pseudogene
hsa-miR-563	1	0	1	1	1	1	LGR4	leucine-rich repeat containing G protein-coupled receptor 4
hsa-miR-563	1	0	1	1	1	1	MLL	myeloid/lymphoid or mixed-lineage leukemia (trithorax homolog, Drosophila)
hsa-miR-563	1	0	1	1	1	1	ATP2B2	ATPase, Ca++ transporting, plasma membrane 2
hsa-miR-563	1	0	1	0	0	0	YLPM1	YLP motif containing 1
hsa-miR-563	1	0	1	1	1	1	COL1A2	collagen, type I, alpha 2
hsa-miR-563	1	0	1	1	1	1	COL3A1	collagen, type III, alpha 1
hsa-miR-563	0	0	1	1	1	1	MTR	5-methyltetrahydrofolate-homocysteine methyltransferase
hsa-miR-563	1	0	1	0	1	1	TSC1	tuberous sclerosis 1
hsa-miR-563	1	0	1	1	1	1	HOXA13	homeobox A13
hsa-miR-563	0	0	1	1	1	1	C7	complement component 7
hsa-miR-563	0	0	1	1	1	1	ALDH1B1	aldehyde dehydrogenase 1 family, member B1
hsa-miR-563	1	0	1	1	1	1	GABRG2	gamma-aminobutyric acid (GABA) A receptor, gamma 2
hsa-miR-563	1	0	1	1	1	1	GRM1	glutamate receptor, metabotropic 1
hsa-miR-563	1	0	1	0	1	1	SMAD5	SMAD family member 5
hsa-miR-563	0	0	1	0	0	0	KLK2	kallikrein-related peptidase 2
hsa-miR-563	1	0	1	1	1	1	WNK3	WNK lysine deficient protein kinase 3
hsa-miR-563	0	0	1	1	1	1	DBX2	developing brain homeobox 2
hsa-miR-563	0	0	1	1	0	0	LINGO4	leucine rich repeat and Ig domain containing 4
hsa-miR-563	1	0	1	0	1	1	LRRC55	leucine rich repeat containing 55
hsa-miR-563	0	0	1	1	1	1	HMGN2P46	high mobility group nucleosomal binding domain 2 pseudogene 46
hsa-miR-563	0	0	1	1	1	1	TCEAL6	transcription elongation factor A (SII)-like 6
hsa-miR-563	1	0	1	1	1	1	IGF2BP2	insulin-like growth factor 2 mRNA binding protein 2
hsa-miR-563	1	0	1	1	1	1	FNIP1	folliculin interacting protein 1
hsa-miR-563	0	0	1	1	1	1	FBXO47	F-box protein 47
hsa-miR-563	0	0	1	0	1	1	LPPR5	lipid phosphate phosphatase-related protein type 5
hsa-miR-563	0	0	1	0	1	1	GOLGA8E	golgin A8 family, member E
hsa-miR-563	1	0	1	1	1	1	KCNMA1	potassium large conductance calcium-activated channel, subfamily M, alpha member 1
hsa-miR-563	1	0	1	1	1	1	TMCC1	transmembrane and coiled-coil domain family 1
hsa-miR-563	0	0	1	1	1	1	BTBD11	BTB (POZ) domain containing 11
hsa-miR-563	1	0	1	1	1	1	NTRK2	neurotrophic tyrosine kinase, receptor, type 2
hsa-miR-563	1	0	1	1	1	1	BAALC	brain and acute leukemia, cytoplasmic
hsa-miR-563	1	0	1	0	1	1	TNRC6B	trinucleotide repeat containing 6B
hsa-miR-563	1	0	1	0	1	1	MSRB3	methionine sulfoxide reductase B3
hsa-miR-563	0	0	1	1	1	1	CALML4	calmodulin-like 4
hsa-miR-563	1	0	1	1	1	1	CSNK1G3	casein kinase 1, gamma 3
hsa-miR-563	1	0	1	0	1	1	SRGAP3	SLIT-ROBO Rho GTPase activating protein 3
hsa-miR-563	1	0	1	1	1	1	PPM1B	protein phosphatase, Mg2+/Mn2+ dependent, 1B
hsa-miR-563	1	0	1	1	1	1	RRM2	ribonucleotide reductase M2
hsa-miR-563	0	0	1	1	1	1	EFEMP1	EGF containing fibulin-like extracellular matrix protein 1
hsa-miR-563	1	0	1	1	1	1	DPP6	dipeptidyl-peptidase 6
hsa-miR-563	1	0	1	0	1	1	USP9X	ubiquitin specific peptidase 9, X-linked
hsa-miR-563	1	0	1	1	1	1	MLLT4	myeloid/lymphoid or mixed-lineage leukemia (trithorax homolog, Drosophila); translocated to, 4
hsa-miR-563	1	0	1	1	1	1	TCERG1	transcription elongation regulator 1
hsa-miR-563	1	0	1	0	1	1	CD83	CD83 molecule
hsa-miR-563	1	0	1	1	1	1	SLC9A6	solute carrier family 9, subfamily A (NHE6, cation proton antiporter 6), member 6
hsa-miR-563	0	0	1	1	1	1	SMC2	structural maintenance of chromosomes 2
hsa-miR-563	1	0	1	1	1	1	PDE11A	phosphodiesterase 11A
hsa-miR-563	1	0	1	1	1	1	IRF2BP2	interferon regulatory factor 2 binding protein 2
hsa-miR-563	0	0	1	1	1	1	IGSF5	immunoglobulin superfamily, member 5
hsa-miR-563	1	0	1	1	1	1	REPS2	RALBP1 associated Eps domain containing 2
hsa-miR-563	1	0	1	0	1	1	BACH1	BTB and CNC homology 1, basic leucine zipper transcription factor 1
hsa-miR-563	1	0	1	1	1	1	PRDM1	PR domain containing 1, with ZNF domain
hsa-miR-563	1	0	1	0	1	1	CHML	choroideremia-like (Rab escort protein 2)
hsa-miR-563	1	0	1	0	1	1	FOXO1	forkhead box O1
hsa-miR-563	1	0	1	1	1	1	ITGA9	integrin, alpha 9
hsa-miR-563	0	0	1	0	1	1	ITGAV	integrin, alpha V
hsa-miR-563	1	0	1	0	0	0	PPP1R10	protein phosphatase 1, regulatory subunit 10
hsa-miR-563	1	0	1	0	1	1	CCL22	chemokine (C-C motif) ligand 22
hsa-miR-563	1	0	1	1	0	0	SLN	sarcolipin
hsa-miR-563	1	0	1	1	1	1	SMARCC1	SWI/SNF related, matrix associated, actin dependent regulator of chromatin, subfamily c, member 1
hsa-miR-563	1	0	1	1	1	1	STAC	SH3 and cysteine rich domain
hsa-miR-563	0	0	1	1	1	1	SUPT6H	suppressor of Ty 6 homolog (S. cerevisiae)
hsa-miR-563	0	0	1	1	1	1	UBE2D1	ubiquitin-conjugating enzyme E2D 1
hsa-miR-563	1	0	1	1	1	1	YWHAH	tyrosine 3-monooxygenase/tryptophan 5-monooxygenase activation protein, eta polypeptide
hsa-miR-563	1	0	1	1	1	1	KCNAB1	potassium voltage-gated channel, shaker-related subfamily, beta member 1
hsa-miR-563	1	0	1	1	1	1	NRIP1	nuclear receptor interacting protein 1
hsa-miR-563	1	0	1	0	1	1	IRS2	insulin receptor substrate 2
hsa-miR-563	1	0	1	1	1	1	FGF18	fibroblast growth factor 18
hsa-miR-563	0	0	1	1	1	1	RNF8	ring finger protein 8, E3 ubiquitin protein ligase
hsa-miR-563	0	0	1	1	1	1	PRC1	protein regulator of cytokinesis 1
hsa-miR-563	1	0	1	1	1	1	FGF13	fibroblast growth factor 13
hsa-miR-563	1	0	1	1	1	1	SEMA3F	sema domain, immunoglobulin domain (Ig), short basic domain, secreted, (semaphorin) 3F
hsa-miR-563	1	0	1	1	1	1	DACH1	dachshund homolog 1 (Drosophila)
hsa-miR-563	0	0	1	1	1	1	PIGH	phosphatidylinositol glycan anchor biosynthesis, class H
hsa-miR-563	1	0	1	1	1	1	RAB11A	RAB11A, member RAS oncogene family
hsa-miR-563	0	0	1	0	1	1	CXorf1	chromosome X open reading frame 1
hsa-miR-563	1	0	1	1	1	1	B4GALT6	UDP-Gal:betaGlcNAc beta 1,4- galactosyltransferase, polypeptide 6
hsa-miR-563	1	0	1	0	1	1	SEC22B	SEC22 vesicle trafficking protein homolog B (S. cerevisiae) (gene/pseudogene)
hsa-miR-563	1	0	1	0	1	1	SEL1L	sel-1 suppressor of lin-12-like (C. elegans)
hsa-miR-563	1	0	1	1	1	1	MED13	mediator complex subunit 13
hsa-miR-563	0	0	1	1	0	0	HR	hairless homolog (mouse)
hsa-miR-563	1	0	1	1	0	0	BCL3	B-cell CLL/lymphoma 3
hsa-miR-563	0	0	1	1	0	0	HLA-E	major histocompatibility complex, class I, E
hsa-miR-563	0	0	1	0	1	1	LCP2	lymphocyte cytosolic protein 2 (SH2 domain containing leukocyte protein of 76kDa)
hsa-miR-563	1	0	1	0	1	1	CALCRL	calcitonin receptor-like
hsa-miR-563	0	0	1	0	1	1	CD96	CD96 molecule
hsa-miR-563	0	0	1	1	1	1	MFAP3	microfibrillar-associated protein 3
hsa-miR-563	1	0	1	0	1	1	NAB1	NGFI-A binding protein 1 (EGR1 binding protein 1)
hsa-miR-563	1	0	1	1	1	1	NEFL	neurofilament, light polypeptide
hsa-miR-563	1	0	1	1	1	1	CDK16	cyclin-dependent kinase 16
hsa-miR-563	1	0	1	1	1	1	RANBP2	RAN binding protein 2
hsa-miR-563	1	0	1	1	1	1	ANP32B	acidic (leucine-rich) nuclear phosphoprotein 32 family, member B
hsa-miR-563	0	0	1	1	1	1	PPP1R17	protein phosphatase 1, regulatory subunit 17
hsa-miR-563	0	0	1	0	1	1	SUB1	SUB1 homolog (S. cerevisiae)
hsa-miR-563	0	0	1	1	1	1	TRIM10	tripartite motif containing 10
hsa-miR-563	1	0	1	0	1	1	SLC2A3	solute carrier family 2 (facilitated glucose transporter), member 3
hsa-miR-563	1	0	1	1	1	1	NR4A3	nuclear receptor subfamily 4, group A, member 3
hsa-miR-563	1	0	1	1	1	1	PALM2-AKAP2	PALM2-AKAP2 readthrough
hsa-miR-563	0	0	1	1	1	1	MRPL3	mitochondrial ribosomal protein L3
hsa-miR-563	1	0	1	0	1	1	FZD4	frizzled family receptor 4
hsa-miR-563	1	0	1	1	1	1	HS2ST1	heparan sulfate 2-O-sulfotransferase 1
hsa-miR-563	1	0	1	0	1	1	RAPGEF5	Rap guanine nucleotide exchange factor (GEF) 5
hsa-miR-563	1	0	1	1	1	1	MAPRE1	microtubule-associated protein, RP/EB family, member 1
hsa-miR-563	1	0	1	0	1	1	FLRT2	fibronectin leucine rich transmembrane protein 2
hsa-miR-563	0	0	1	0	1	1	EMR2	egf-like module containing, mucin-like, hormone receptor-like 2
hsa-miR-563	1	0	1	1	1	1	NRG1	neuregulin 1
hsa-miR-563	1	0	1	0	1	1	C16orf72	chromosome 16 open reading frame 72
hsa-miR-563	1	0	1	1	1	1	YME1L1	YME1-like 1 (S. cerevisiae)
hsa-miR-563	1	0	1	0	1	1	TOMM20	translocase of outer mitochondrial membrane 20 homolog (yeast)
hsa-miR-563	0	0	1	0	1	1	PPM1E	protein phosphatase, Mg2+/Mn2+ dependent, 1E
hsa-miR-563	1	0	1	0	1	1	ICK	intestinal cell (MAK-like) kinase
hsa-miR-563	1	0	1	1	1	1	PLEKHA6	pleckstrin homology domain containing, family A member 6
hsa-miR-563	1	0	1	1	1	1	SORCS3	sortilin-related VPS10 domain containing receptor 3
hsa-miR-563	0	0	1	1	1	1	ZC3H13	zinc finger CCCH-type containing 13
hsa-miR-563	1	0	1	0	1	1	LARP4B	La ribonucleoprotein domain family, member 4B
hsa-miR-563	1	0	1	1	1	1	PDS5A	PDS5, regulator of cohesion maintenance, homolog A (S. cerevisiae)
hsa-miR-563	1	0	1	0	1	1	LARP1	La ribonucleoprotein domain family, member 1
hsa-miR-563	1	0	1	1	1	1	RNF19A	ring finger protein 19A, E3 ubiquitin protein ligase
hsa-miR-563	1	0	1	1	1	1	SETBP1	SET binding protein 1
hsa-miR-563	1	0	1	0	1	1	PPP1R16B	protein phosphatase 1, regulatory subunit 16B
hsa-miR-563	0	0	1	1	1	1	KRT76	keratin 76
hsa-miR-563	1	0	1	0	1	1	TRIM33	tripartite motif containing 33
hsa-miR-563	0	0	1	1	1	1	SCCPDH	saccharopine dehydrogenase (putative)
hsa-miR-563	0	0	1	1	1	1	PPIL1	peptidylprolyl isomerase (cyclophilin)-like 1
hsa-miR-563	1	0	1	1	1	1	VGLL3	vestigial like 3 (Drosophila)
hsa-miR-563	1	0	1	1	1	1	RAB6B	RAB6B, member RAS oncogene family
hsa-miR-563	0	0	1	1	1	1	MRPS30	mitochondrial ribosomal protein S30
hsa-miR-563	0	0	1	1	0	0	UBQLN3	ubiquilin 3
hsa-miR-563	1	0	1	1	1	1	TBC1D8B	TBC1 domain family, member 8B (with GRAM domain)
hsa-miR-563	1	0	1	1	1	1	VPS13B	vacuolar protein sorting 13 homolog B (yeast)
hsa-miR-563	1	0	1	1	1	1	ZNHIT6	zinc finger, HIT-type containing 6
hsa-miR-563	0	0	1	0	1	1	MREG	melanoregulin
hsa-miR-563	1	0	1	1	1	1	FAM178A	family with sequence similarity 178, member A
hsa-miR-563	1	0	1	1	1	1	ZNF654	zinc finger protein 654
hsa-miR-563	0	0	1	1	1	1	NPAP1	nuclear pore associated protein 1
hsa-miR-563	0	0	1	1	1	1	DHX29	DEAH (Asp-Glu-Ala-His) box polypeptide 29
hsa-miR-563	0	0	1	1	1	1	KLHL4	kelch-like 4 (Drosophila)
hsa-miR-563	1	0	1	0	1	1	PAPOLB	poly(A) polymerase beta (testis specific)
hsa-miR-563	1	0	1	1	1	1	PCDH9	protocadherin 9
hsa-miR-563	0	0	1	1	0	0	CD248	CD248 molecule, endosialin
hsa-miR-563	1	0	1	1	1	1	RAB22A	RAB22A, member RAS oncogene family
hsa-miR-563	1	0	1	1	1	1	NCEH1	neutral cholesterol ester hydrolase 1
hsa-miR-563	0	0	1	0	1	1	TRMT5	tRNA methyltransferase 5 homolog (S. cerevisiae)
hsa-miR-563	1	0	1	1	1	1	RTN1	reticulon 1
hsa-miR-563	0	0	1	1	1	1	MS4A1	membrane-spanning 4-domains, subfamily A, member 1
hsa-miR-563	1	0	1	1	1	1	LRRC4	leucine rich repeat containing 4
hsa-miR-563	1	0	1	1	1	1	REEP1	receptor accessory protein 1
hsa-miR-563	1	0	1	1	1	1	GID4	GID complex subunit 4, VID24 homolog (S. cerevisiae)
hsa-miR-563	1	0	1	1	1	1	CDC73	cell division cycle 73, Paf1/RNA polymerase II complex component, homolog (S. cerevisiae)
hsa-miR-563	1	0	1	1	1	1	RNF128	ring finger protein 128, E3 ubiquitin protein ligase
hsa-miR-563	1	0	1	0	1	1	PLEKHF2	pleckstrin homology domain containing, family F (with FYVE domain) member 2
hsa-miR-563	0	0	1	1	1	1	GALNT12	UDP-N-acetyl-alpha-D-galactosamine:polypeptide N-acetylgalactosaminyltransferase 12 (GalNAc-T12)
hsa-miR-563	0	0	1	0	1	1	ZYG11B	zyg-11 homolog B (C. elegans)
hsa-miR-563	1	0	1	1	1	1	TMC7	transmembrane channel-like 7
hsa-miR-563	1	0	1	0	1	1	C1orf21	chromosome 1 open reading frame 21
hsa-miR-563	0	0	1	1	1	1	MS4A8B	membrane-spanning 4-domains, subfamily A, member 8B
hsa-miR-563	0	0	1	1	1	1	RIOK1	RIO kinase 1 (yeast)
hsa-miR-563	1	0	1	0	1	1	SRSF8	serine/arginine-rich splicing factor 8
hsa-miR-563	1	0	1	1	1	1	ANTXR1	anthrax toxin receptor 1
hsa-miR-563	0	0	1	1	1	1	CHAMP1	chromosome alignment maintaining phosphoprotein 1
hsa-miR-563	1	0	1	0	1	1	UBASH3B	ubiquitin associated and SH3 domain containing B
hsa-miR-563	0	0	1	1	1	1	FBXL20	F-box and leucine-rich repeat protein 20
hsa-miR-563	1	0	1	1	1	1	TMEM60	transmembrane protein 60
hsa-miR-563	1	0	1	1	1	1	TRIM55	tripartite motif containing 55
hsa-miR-563	1	0	1	1	1	1	EPT1	ethanolaminephosphotransferase 1 (CDP-ethanolamine-specific)
hsa-miR-563	1	0	1	1	1	1	MAL2	mal, T-cell differentiation protein 2 (gene/pseudogene)
hsa-miR-563	0	0	1	1	1	1	MRGPRX2	MAS-related GPR, member X2
hsa-miR-563	0	0	1	1	1	1	PPP4R4	protein phosphatase 4, regulatory subunit 4
hsa-miR-563	1	0	1	1	1	1	SLC44A1	solute carrier family 44, member 1
hsa-miR-563	0	0	1	1	0	0	CST11	cystatin 11
hsa-miR-563	1	0	1	0	1	1	SOCS4	suppressor of cytokine signaling 4
hsa-miR-563	1	0	1	1	1	1	KLHL6	kelch-like 6 (Drosophila)
hsa-miR-563	1	0	1	1	1	1	KCNH8	potassium voltage-gated channel, subfamily H (eag-related), member 8
hsa-miR-563	1	0	1	1	1	1	FAM84A	family with sequence similarity 84, member A
hsa-miR-563	1	0	1	1	1	1	MRPL30	mitochondrial ribosomal protein L30
hsa-miR-563	1	0	1	1	1	1	UBTD2	ubiquitin domain containing 2
hsa-miR-563	0	0	1	1	1	1	MUC7	mucin 7, secreted
hsa-miR-563	1	0	1	0	1	1	ARID2	AT rich interactive domain 2 (ARID, RFX-like)
hsa-miR-563	1	0	1	0	1	1	TMEM154	transmembrane protein 154
hsa-miR-563	0	0	1	0	1	1	KBTBD6	kelch repeat and BTB (POZ) domain containing 6
hsa-miR-563	1	0	1	1	1	1	AEBP2	AE binding protein 2
hsa-miR-563	0	0	1	1	0	0	DEFB119	defensin, beta 119
hsa-miR-563	1	0	1	1	1	1	C2orf69	chromosome 2 open reading frame 69
hsa-miR-563	0	0	1	1	1	1	TRIM59	tripartite motif containing 59
hsa-miR-563	1	0	1	1	1	1	FAM117B	family with sequence similarity 117, member B
hsa-miR-563	1	0	1	0	1	1	KSR2	kinase suppressor of ras 2
hsa-miR-563	1	0	1	1	1	1	DIP2B	DIP2 disco-interacting protein 2 homolog B (Drosophila)
hsa-miR-563	0	0	1	1	1	1	ZCCHC12	zinc finger, CCHC domain containing 12
hsa-miR-563	1	0	1	1	1	1	LRRTM3	leucine rich repeat transmembrane neuronal 3
hsa-miR-563	0	0	1	1	1	1	ZNF831	zinc finger protein 831
hsa-miR-563	1	0	1	1	1	1	TMEM26	transmembrane protein 26
hsa-miR-563	0	0	1	1	1	1	HTR3D	5-hydroxytryptamine (serotonin) receptor 3D, ionotropic
hsa-miR-563	1	0	1	0	1	1	WDR72	WD repeat domain 72
hsa-miR-563	1	0	1	0	1	1	HNRNPA3	heterogeneous nuclear ribonucleoprotein A3
hsa-miR-563	1	0	1	1	1	1	GPRIN3	GPRIN family member 3
hsa-miR-563	1	0	1	1	1	1	KCTD4	potassium channel tetramerisation domain containing 4
hsa-miR-563	1	0	1	0	1	1	NRK	Nik related kinase
hsa-miR-563	0	0	1	1	0	0	VWC2	von Willebrand factor C domain containing 2
hsa-miR-563	1	0	1	1	1	1	ASTN1	astrotactin 1
hsa-miR-563	1	0	1	1	1	1	FAM43B	family with sequence similarity 43, member B
hsa-miR-563	1	0	1	1	1	1	FREM2	FRAS1 related extracellular matrix protein 2
hsa-miR-563	1	0	1	1	1	1	SAMD12	sterile alpha motif domain containing 12
hsa-miR-563	0	0	1	1	1	1	CLEC4M	C-type lectin domain family 4, member M
hsa-miR-563	0	0	1	0	0	0	TTTY2	testis-specific transcript, Y-linked 2 (non-protein coding)
hsa-miR-563	0	0	1	0	0	0	TPI1P2	triosephosphate isomerase 1 pseudogene 2
hsa-miR-563	0	0	1	0	0	0	NUDT4P1	nudix (nucleoside diphosphate linked moiety X)-type motif 4 pseudogene 1
hsa-miR-563	0	0	1	0	0	0	TRIM78P	tripartite motif containing 78, pseudogene
hsa-miR-563	0	0	1	0	0	0	PTPRVP	protein tyrosine phosphatase, receptor type, V, pseudogene
hsa-miR-563	0	0	1	0	0	0	HSP90B3P	heat shock protein 90kDa beta (Grp94), member 3, pseudogene
hsa-miR-563	0	0	1	0	0	0	GMCL1P1	germ cell-less, spermatogenesis associated 1 pseudogene 1
hsa-miR-563	1	0	1	1	1	1	HOXA1	homeobox A1
hsa-miR-563	0	0	1	1	1	1	PEG3	paternally expressed 3
hsa-miR-563	0	0	1	1	1	1	COL14A1	collagen, type XIV, alpha 1
hsa-miR-563	0	0	1	1	0	0	GPR17	G protein-coupled receptor 17
hsa-miR-563	1	0	1	1	1	1	FKBP4	FK506 binding protein 4, 59kDa
hsa-miR-563	0	0	0	1	0	0	PRR5-ARHGAP8	PRR5-ARHGAP8 readthrough
hsa-miR-563	0	0	1	1	0	0	PRR5	proline rich 5 (renal)
hsa-miR-563	0	0	1	1	0	0	ARHGAP8	Rho GTPase activating protein 8
hsa-miR-563	0	0	0	1	0	0	KRT33A	keratin 33A
hsa-miR-563	1	0	1	1	1	1	LRRC7	leucine rich repeat containing 7
hsa-miR-563	0	0	1	1	1	1	P2RY10	purinergic receptor P2Y, G-protein coupled, 10
hsa-miR-563	0	0	0	1	0	0	ASNS	asparagine synthetase (glutamine-hydrolyzing)
hsa-miR-563	0	0	1	1	0	0	TBX21	T-box 21
hsa-miR-563	0	0	0	1	0	0	TSPAN32	tetraspanin 32
hsa-miR-563	1	0	1	1	1	1	RRP15	ribosomal RNA processing 15 homolog (S. cerevisiae)
hsa-miR-563	1	0	1	1	1	1	DMRT3	doublesex and mab-3 related transcription factor 3
hsa-miR-563	0	0	1	1	1	1	TDRD3	tudor domain containing 3
hsa-miR-563	0	0	1	1	0	0	TGM6	transglutaminase 6
hsa-miR-563	0	0	1	1	1	1	GNPTG	N-acetylglucosamine-1-phosphate transferase, gamma subunit
hsa-miR-563	1	0	1	1	1	1	DLD	dihydrolipoamide dehydrogenase
hsa-miR-563	0	0	1	1	0	0	TGM1	transglutaminase 1 (K polypeptide epidermal type I, protein-glutamine-gamma-glutamyltransferase)
hsa-miR-563	0	0	1	1	0	0	TPSD1	tryptase delta 1
hsa-miR-563	1	0	1	1	1	1	TGFBR3	transforming growth factor, beta receptor III
hsa-miR-563	0	0	1	1	0	0	PSMD8	proteasome (prosome, macropain) 26S subunit, non-ATPase, 8
hsa-miR-563	0	0	1	1	0	0	PDXP	pyridoxal (pyridoxine, vitamin B6) phosphatase
hsa-miR-563	0	0	1	1	0	0	SH3BP1	SH3-domain binding protein 1
hsa-miR-563	1	0	1	1	1	1	PATZ1	POZ (BTB) and AT hook containing zinc finger 1
hsa-miR-563	1	0	1	1	1	1	KDELR3	KDEL (Lys-Asp-Glu-Leu) endoplasmic reticulum protein retention receptor 3
hsa-miR-563	0	0	1	1	0	0	FKBP3	FK506 binding protein 3, 25kDa
hsa-miR-563	0	0	0	1	0	0	MTHFD1	methylenetetrahydrofolate dehydrogenase (NADP+ dependent) 1, methenyltetrahydrofolate cyclohydrolase, formyltetrahydrofolate synthetase
hsa-miR-563	0	0	1	1	1	1	GSS	glutathione synthetase
hsa-miR-563	0	0	1	1	1	1	CSTF1	cleavage stimulation factor, 3' pre-RNA, subunit 1, 50kDa
hsa-miR-563	0	0	1	1	0	0	TRIB3	tribbles homolog 3 (Drosophila)
hsa-miR-563	0	0	0	1	1	1	ARSD	arylsulfatase D
hsa-miR-563	0	0	1	1	1	1	PIN4	protein (peptidylprolyl cis/trans isomerase) NIMA-interacting, 4 (parvulin)
hsa-miR-563	1	0	1	1	1	1	GSPT1	G1 to S phase transition 1
hsa-miR-563	0	0	1	1	1	1	CDIPT	CDP-diacylglycerol--inositol 3-phosphatidyltransferase
hsa-miR-563	0	0	0	1	0	0	PAF1	Paf1, RNA polymerase II associated factor, homolog (S. cerevisiae)
hsa-miR-563	0	0	0	1	1	1	EPHX3	epoxide hydrolase 3
hsa-miR-563	1	0	1	1	1	1	CBLL1	Cbl proto-oncogene, E3 ubiquitin protein ligase-like 1
hsa-miR-563	0	0	1	1	0	0	BLNK	B-cell linker
hsa-miR-563	0	0	0	1	1	1	ABI3	ABI family, member 3
hsa-miR-563	1	0	1	1	1	1	COL1A1	collagen, type I, alpha 1
hsa-miR-563	0	0	1	1	1	1	PF4V1	platelet factor 4 variant 1
hsa-miR-563	0	0	1	1	1	1	PANX1	pannexin 1
hsa-miR-563	0	0	1	1	1	1	SART3	squamous cell carcinoma antigen recognized by T cells 3
hsa-miR-563	0	0	1	1	0	0	CLEC4A	C-type lectin domain family 4, member A
hsa-miR-563	0	0	1	1	1	1	FANCE	Fanconi anemia, complementation group E
hsa-miR-563	0	0	1	1	0	0	GMNN	geminin, DNA replication inhibitor
hsa-miR-563	0	0	1	1	0	0	WISP3	WNT1 inducible signaling pathway protein 3
hsa-miR-563	1	0	0	1	1	1	KIF20A	kinesin family member 20A
hsa-miR-563	0	0	0	1	1	1	PCDHB15	protocadherin beta 15
hsa-miR-563	0	0	1	1	1	1	IL5	interleukin 5 (colony-stimulating factor, eosinophil)
hsa-miR-563	0	0	1	1	1	1	RARS	arginyl-tRNA synthetase
hsa-miR-563	1	0	0	1	0	0	CDX1	caudal type homeobox 1
hsa-miR-563	0	0	0	1	0	0	SPCS1	signal peptidase complex subunit 1 homolog (S. cerevisiae)
hsa-miR-563	1	0	1	1	1	1	GCA	grancalcin, EF-hand calcium binding protein
hsa-miR-563	0	0	0	1	0	0	KISS1R	KISS1 receptor
hsa-miR-563	0	0	0	1	0	0	PRAMEF4	PRAME family member 4
hsa-miR-563	0	0	1	1	1	1	CD160	CD160 molecule
hsa-miR-563	0	0	1	1	1	1	UBE3D	ubiquitin protein ligase E3D
hsa-miR-563	0	0	1	1	1	1	RAB3GAP2	RAB3 GTPase activating protein subunit 2 (non-catalytic)
hsa-miR-563	0	0	1	1	1	1	IFT43	intraflagellar transport 43 homolog (Chlamydomonas)
hsa-miR-563	1	0	1	1	1	1	CRIPT	cysteine-rich PDZ-binding protein
hsa-miR-563	0	0	1	1	1	1	MRC1	mannose receptor, C type 1
hsa-miR-563	1	0	1	1	1	1	RIF1	RAP1 interacting factor homolog (yeast)
hsa-miR-563	0	0	0	1	0	0	ZNF350	zinc finger protein 350
hsa-miR-563	0	0	1	1	0	0	SNRPC	small nuclear ribonucleoprotein polypeptide C
hsa-miR-563	0	0	0	1	1	1	LILRB3	leukocyte immunoglobulin-like receptor, subfamily B (with TM and ITIM domains), member 3
hsa-miR-563	0	0	1	1	0	0	ARL2	ADP-ribosylation factor-like 2
hsa-miR-563	1	0	0	1	1	1	WNK4	WNK lysine deficient protein kinase 4
hsa-miR-563	0	0	0	1	0	0	COX7C	cytochrome c oxidase subunit VIIc
hsa-miR-563	0	0	1	1	0	0	IGLL1	immunoglobulin lambda-like polypeptide 1
hsa-miR-563	0	0	1	1	1	1	SOX15	SRY (sex determining region Y)-box 15
hsa-miR-563	0	0	0	1	1	1	EAPP	E2F-associated phosphoprotein
hsa-miR-563	0	0	0	1	0	0	ART1	ADP-ribosyltransferase 1
hsa-miR-563	0	0	0	1	0	0	PDGFRL	platelet-derived growth factor receptor-like
hsa-miR-563	1	0	0	1	1	1	ELOF1	elongation factor 1 homolog (S. cerevisiae)
hsa-miR-563	1	0	1	1	1	1	PVRL2	poliovirus receptor-related 2 (herpesvirus entry mediator B)
hsa-miR-563	1	0	1	1	1	1	XPO7	exportin 7
hsa-miR-563	0	0	0	1	0	0	GATA5	GATA binding protein 5
hsa-miR-563	0	0	1	1	1	1	VIMP	VCP-interacting membrane protein
hsa-miR-563	0	0	1	1	0	0	SNRPA1	small nuclear ribonucleoprotein polypeptide A'
hsa-miR-563	1	0	0	1	1	1	ADCY7	adenylate cyclase 7
hsa-miR-563	1	0	1	1	1	1	DNAJB1	DnaJ (Hsp40) homolog, subfamily B, member 1
hsa-miR-563	1	0	1	1	0	0	DCAF15	DDB1 and CUL4 associated factor 15
hsa-miR-563	0	0	0	1	0	0	ASGR2	asialoglycoprotein receptor 2
hsa-miR-563	0	0	1	1	1	1	USPL1	ubiquitin specific peptidase like 1
hsa-miR-563	0	0	1	1	0	0	LGALS12	lectin, galactoside-binding, soluble, 12
hsa-miR-563	1	0	1	1	1	1	ARNTL	aryl hydrocarbon receptor nuclear translocator-like
hsa-miR-563	0	0	1	1	1	1	MICALCL	MICAL C-terminal like
hsa-miR-563	0	0	1	1	1	1	RRAS2	related RAS viral (r-ras) oncogene homolog 2
hsa-miR-563	0	0	1	1	1	1	ATPBD4	ATP binding domain 4
hsa-miR-563	0	0	1	1	0	0	EMC7	ER membrane protein complex subunit 7
hsa-miR-563	0	0	1	1	0	0	SPOCD1	SPOC domain containing 1
hsa-miR-563	0	0	1	1	1	1	OASL	2'-5'-oligoadenylate synthetase-like
hsa-miR-563	0	0	0	1	1	1	PNPLA8	patatin-like phospholipase domain containing 8
hsa-miR-563	0	0	0	1	1	1	AVIL	advillin
hsa-miR-563	1	0	1	1	0	0	REPS1	RALBP1 associated Eps domain containing 1
hsa-miR-563	0	0	0	1	1	1	MRPL44	mitochondrial ribosomal protein L44
hsa-miR-563	1	0	0	1	1	1	TGFBRAP1	transforming growth factor, beta receptor associated protein 1
hsa-miR-563	1	0	1	1	0	0	CCM2	cerebral cavernous malformation 2
hsa-miR-563	0	0	1	1	1	1	GAD2	glutamate decarboxylase 2 (pancreatic islets and brain, 65kDa)
hsa-miR-563	0	0	1	1	0	0	DCTN3	dynactin 3 (p22)
hsa-miR-563	0	0	0	1	0	0	PSORS1C1	psoriasis susceptibility 1 candidate 1
hsa-miR-563	1	0	0	1	0	0	NRM	nurim (nuclear envelope membrane protein)
hsa-miR-563	0	0	0	1	1	1	HAL	histidine ammonia-lyase
hsa-miR-563	0	0	1	1	1	1	SNX24	sorting nexin 24
hsa-miR-563	0	0	0	1	0	0	NUP133	nucleoporin 133kDa
hsa-miR-563	0	0	1	1	0	0	B9D1	B9 protein domain 1
hsa-miR-563	0	0	0	1	0	0	DSG2	desmoglein 2
hsa-miR-563	0	0	1	1	1	1	ERP29	endoplasmic reticulum protein 29
hsa-miR-563	1	0	1	1	1	1	CYP46A1	cytochrome P450, family 46, subfamily A, polypeptide 1
hsa-miR-563	0	0	0	1	1	1	RPE65	retinal pigment epithelium-specific protein 65kDa
hsa-miR-563	0	0	1	1	0	0	RGS9	regulator of G-protein signaling 9
hsa-miR-563	0	0	1	1	1	1	INVS	inversin
hsa-miR-563	0	0	1	1	0	0	DOK5	docking protein 5
hsa-miR-563	0	0	1	1	0	0	ZBTB32	zinc finger and BTB domain containing 32
hsa-miR-563	1	0	1	1	1	1	RAB2A	RAB2A, member RAS oncogene family
hsa-miR-563	0	0	1	1	0	0	PGS1	phosphatidylglycerophosphate synthase 1
hsa-miR-563	0	0	0	1	1	1	BPI	bactericidal/permeability-increasing protein
hsa-miR-563	1	0	0	1	0	0	INPP4B	inositol polyphosphate-4-phosphatase, type II, 105kDa
hsa-miR-563	0	0	1	1	1	1	BBOX1	butyrobetaine (gamma), 2-oxoglutarate dioxygenase (gamma-butyrobetaine hydroxylase) 1
hsa-miR-563	0	0	1	1	1	1	BIRC3	baculoviral IAP repeat containing 3
hsa-miR-563	0	0	1	1	1	1	MECR	mitochondrial trans-2-enoyl-CoA reductase
hsa-miR-563	1	0	1	1	1	1	EIF2AK4	eukaryotic translation initiation factor 2 alpha kinase 4
hsa-miR-563	0	0	1	1	1	1	CHIC2	cysteine-rich hydrophobic domain 2
hsa-miR-563	0	0	1	1	1	1	CCNT2	cyclin T2
hsa-miR-563	1	0	1	1	1	1	ERO1LB	ERO1-like beta (S. cerevisiae)
hsa-miR-563	0	0	0	1	0	0	IL18RAP	interleukin 18 receptor accessory protein
hsa-miR-563	0	0	1	1	1	1	NOP58	NOP58 ribonucleoprotein homolog (yeast)
hsa-miR-563	1	0	1	1	0	0	KIAA1109	KIAA1109
hsa-miR-563	0	0	1	1	1	1	CLDN16	claudin 16
hsa-miR-563	0	0	1	1	1	1	KCNN2	potassium intermediate/small conductance calcium-activated channel, subfamily N, member 2
hsa-miR-563	0	0	0	1	0	0	TYK2	tyrosine kinase 2
hsa-miR-563	0	0	0	1	1	1	TARS	threonyl-tRNA synthetase
hsa-miR-563	0	0	1	1	1	1	TAX1BP1	Tax1 (human T-cell leukemia virus type I) binding protein 1
hsa-miR-563	0	0	1	1	0	0	ADAM18	ADAM metallopeptidase domain 18
hsa-miR-563	0	0	0	1	0	0	ACAT1	acetyl-CoA acetyltransferase 1
hsa-miR-563	0	0	1	1	0	0	GLT8D1	glycosyltransferase 8 domain containing 1
hsa-miR-563	0	0	1	1	1	1	TTC28	tetratricopeptide repeat domain 28
hsa-miR-563	0	0	1	1	0	0	FBXO7	F-box protein 7
hsa-miR-563	1	0	0	1	1	1	RAB20	RAB20, member RAS oncogene family
hsa-miR-563	0	0	1	1	1	1	HDC	histidine decarboxylase
hsa-miR-563	1	0	1	1	1	1	IQGAP1	IQ motif containing GTPase activating protein 1
hsa-miR-563	0	0	0	1	0	0	LRRC46	leucine rich repeat containing 46
hsa-miR-563	0	0	1	1	0	0	MBD1	methyl-CpG binding domain protein 1
hsa-miR-563	0	0	1	1	0	0	SIRT6	sirtuin 6
hsa-miR-563	0	0	1	1	0	0	TMEM91	transmembrane protein 91
hsa-miR-563	0	0	0	1	0	0	BCKDHA	branched chain keto acid dehydrogenase E1, alpha polypeptide
hsa-miR-563	0	0	1	1	0	0	FCN3	ficolin (collagen/fibrinogen domain containing) 3 (Hakata antigen)
hsa-miR-563	1	0	1	1	1	1	TPM3	tropomyosin 3
hsa-miR-563	0	0	1	1	0	0	EXOC6B	exocyst complex component 6B
hsa-miR-563	0	0	1	1	1	1	TMEM177	transmembrane protein 177
hsa-miR-563	0	0	1	1	1	1	EIF2A	eukaryotic translation initiation factor 2A, 65kDa
hsa-miR-563	0	0	1	1	1	1	EAF2	ELL associated factor 2
hsa-miR-563	1	0	1	1	1	1	GABRA6	gamma-aminobutyric acid (GABA) A receptor, alpha 6
hsa-miR-563	0	0	1	1	0	0	PNLDC1	poly(A)-specific ribonuclease (PARN)-like domain containing 1
hsa-miR-563	0	0	0	1	0	0	RPL32P18	ribosomal protein L32 pseudogene 18
hsa-miR-563	0	0	0	1	0	0	STRA8	stimulated by retinoic acid gene 8 homolog (mouse)
hsa-miR-563	0	0	1	1	1	1	TAF1	TAF1 RNA polymerase II, TATA box binding protein (TBP)-associated factor, 250kDa
hsa-miR-563	1	0	1	1	1	1	BIN3	bridging integrator 3
hsa-miR-563	0	0	1	1	1	1	SYBU	syntabulin (syntaxin-interacting)
hsa-miR-563	0	0	0	1	1	1	IDI2	isopentenyl-diphosphate delta isomerase 2
hsa-miR-563	1	0	1	1	1	1	FAM188A	family with sequence similarity 188, member A
hsa-miR-563	1	0	1	1	0	0	BSCL2	Berardinelli-Seip congenital lipodystrophy 2 (seipin)
hsa-miR-563	0	0	0	1	1	1	C11orf53	chromosome 11 open reading frame 53
hsa-miR-563	0	0	1	1	0	0	TIMM8B	translocase of inner mitochondrial membrane 8 homolog B (yeast)
hsa-miR-563	0	0	0	1	1	1	RILPL2	Rab interacting lysosomal protein-like 2
hsa-miR-563	1	0	0	1	1	1	NCAPD3	non-SMC condensin II complex, subunit D3
hsa-miR-563	0	0	1	1	1	1	TXNDC16	thioredoxin domain containing 16
hsa-miR-563	0	0	1	1	1	1	G6PC2	glucose-6-phosphatase, catalytic, 2
hsa-miR-563	0	0	0	1	0	0	ZNF837	zinc finger protein 837
hsa-miR-563	1	0	1	1	1	1	TIA1	TIA1 cytotoxic granule-associated RNA binding protein
hsa-miR-563	1	0	1	1	1	1	ZNF286A	zinc finger protein 286A
hsa-miR-563	0	0	1	1	1	1	WIF1	WNT inhibitory factor 1
hsa-miR-563	0	0	1	1	0	0	NODAL	nodal homolog (mouse)
hsa-miR-563	0	0	1	1	0	0	LCA5L	Leber congenital amaurosis 5-like
hsa-miR-563	0	0	1	1	1	1	SVOPL	SVOP-like
hsa-miR-563	0	0	1	1	1	1	RAB28	RAB28, member RAS oncogene family
hsa-miR-563	0	0	0	1	1	1	ACSM3	acyl-CoA synthetase medium-chain family member 3
hsa-miR-563	0	0	1	1	0	0	HMHB1	histocompatibility (minor) HB-1
hsa-miR-563	1	0	1	1	1	1	C8orf58	chromosome 8 open reading frame 58
hsa-miR-563	1	0	1	1	1	1	CPNE2	copine II
hsa-miR-563	0	0	0	1	1	1	ZNF235	zinc finger protein 235
hsa-miR-563	0	0	1	1	0	0	SHKBP1	SH3KBP1 binding protein 1
hsa-miR-563	0	0	0	1	1	1	CCR2	chemokine (C-C motif) receptor 2
hsa-miR-563	0	0	1	1	1	1	C5orf45	chromosome 5 open reading frame 45
hsa-miR-563	0	0	0	1	0	0	CCDC116	coiled-coil domain containing 116
hsa-miR-563	0	0	0	1	0	0	HCRT	hypocretin (orexin) neuropeptide precursor
hsa-miR-563	0	0	1	1	0	0	KRT4	keratin 4
hsa-miR-563	0	0	1	1	0	0	GNG3	guanine nucleotide binding protein (G protein), gamma 3
hsa-miR-563	1	0	1	1	1	1	FGF19	fibroblast growth factor 19
hsa-miR-563	0	0	0	1	0	0	CYP4A22	cytochrome P450, family 4, subfamily A, polypeptide 22
hsa-miR-563	0	0	0	1	0	0	LRRC53	leucine rich repeat containing 53
hsa-miR-563	1	0	1	1	1	1	TDRD5	tudor domain containing 5
hsa-miR-563	0	0	0	1	1	1	TMEM79	transmembrane protein 79
hsa-miR-563	0	0	0	1	0	0	FEV	FEV (ETS oncogene family)
hsa-miR-563	0	0	1	1	0	0	CPA3	carboxypeptidase A3 (mast cell)
hsa-miR-563	1	0	1	1	1	1	WDR17	WD repeat domain 17
hsa-miR-563	0	0	0	1	0	0	PGAM2	phosphoglycerate mutase 2 (muscle)
hsa-miR-563	1	0	1	1	1	1	SLC30A8	solute carrier family 30 (zinc transporter), member 8
hsa-miR-563	0	0	1	1	0	0	KIAA0146	KIAA0146
hsa-miR-563	0	0	1	1	1	1	SLC25A32	solute carrier family 25 (mitochondrial folate carrier) , member 32
hsa-miR-563	0	0	1	1	1	1	CPA6	carboxypeptidase A6
hsa-miR-563	0	0	0	1	0	0	FAM194B	family with sequence similarity 194, member B
hsa-miR-563	0	0	1	1	1	1	TRUB1	TruB pseudouridine (psi) synthase homolog 1 (E. coli)
hsa-miR-563	0	0	0	1	0	0	AMN	amnionless homolog (mouse)
hsa-miR-563	0	0	1	1	1	1	DEPDC4	DEP domain containing 4
hsa-miR-563	0	0	1	1	0	0	CCT2	chaperonin containing TCP1, subunit 2 (beta)
hsa-miR-563	0	0	1	1	1	1	TMED3	transmembrane emp24 protein transport domain containing 3
hsa-miR-563	0	0	1	1	0	0	MEI1	meiosis inhibitor 1
hsa-miR-563	0	0	0	1	0	0	TMIGD2	transmembrane and immunoglobulin domain containing 2
hsa-miR-563	0	0	0	1	1	1	ZNF443	zinc finger protein 443
hsa-miR-563	0	0	1	1	1	1	ITGB1	integrin, beta 1 (fibronectin receptor, beta polypeptide, antigen CD29 includes MDF2, MSK12)
hsa-miR-563	1	0	1	1	1	1	TRIAP1	TP53 regulated inhibitor of apoptosis 1
hsa-miR-563	1	0	0	1	0	0	ATPAF2	ATP synthase mitochondrial F1 complex assembly factor 2
hsa-miR-563	0	0	0	1	0	0	STARD5	StAR-related lipid transfer (START) domain containing 5
hsa-miR-563	0	0	1	1	1	1	HYDIN	HYDIN, axonemal central pair apparatus protein
hsa-miR-563	1	0	1	1	1	1	RFXANK	regulatory factor X-associated ankyrin-containing protein
hsa-miR-563	0	0	0	1	0	0	GLOD5	glyoxalase domain containing 5
hsa-miR-563	0	0	0	1	0	0	OR10G3	olfactory receptor, family 10, subfamily G, member 3
hsa-miR-563	0	0	1	1	0	0	COPS6	COP9 constitutive photomorphogenic homolog subunit 6 (Arabidopsis)
hsa-miR-563	1	0	1	1	0	0	EGLN2	egl nine homolog 2 (C. elegans)
hsa-miR-563	0	0	1	1	1	1	GPR22	G protein-coupled receptor 22
hsa-miR-563	1	0	1	1	1	1	HSPA4	heat shock 70kDa protein 4
hsa-miR-563	0	0	1	1	1	1	TGFBI	transforming growth factor, beta-induced, 68kDa
hsa-miR-563	0	0	1	1	0	0	USP19	ubiquitin specific peptidase 19
hsa-miR-563	0	0	1	1	0	0	ATP6V1E2	ATPase, H+ transporting, lysosomal 31kDa, V1 subunit E2
hsa-miR-563	1	0	0	1	1	1	SLC1A5	solute carrier family 1 (neutral amino acid transporter), member 5
hsa-miR-563	0	0	1	1	0	0	NTSR2	neurotensin receptor 2
hsa-miR-563	0	0	1	1	0	0	GP9	glycoprotein IX (platelet)
hsa-miR-563	0	0	1	1	1	1	MRPS12	mitochondrial ribosomal protein S12
hsa-miR-563	0	0	1	1	1	1	ZNF586	zinc finger protein 586
hsa-miR-563	0	0	1	1	0	0	RLN2	relaxin 2
hsa-miR-563	1	0	1	1	1	1	MAP3K11	mitogen-activated protein kinase kinase kinase 11
hsa-miR-563	0	0	1	1	0	0	MXRA8	matrix-remodelling associated 8
hsa-miR-563	0	0	1	1	0	0	SCUBE2	signal peptide, CUB domain, EGF-like 2
hsa-miR-563	1	0	1	1	1	1	AKIP1	A kinase (PRKA) interacting protein 1
hsa-miR-563	0	0	0	1	1	1	ATP6V0A4	ATPase, H+ transporting, lysosomal V0 subunit a4
hsa-miR-563	0	0	0	1	1	1	EPS8L1	EPS8-like 1
hsa-miR-563	0	0	1	1	0	0	CCDC13	coiled-coil domain containing 13
hsa-miR-563	0	0	1	1	1	1	TTLL9	tubulin tyrosine ligase-like family, member 9
hsa-miR-563	0	0	1	1	0	0	DNAI2	dynein, axonemal, intermediate chain 2
hsa-miR-563	1	0	1	1	1	1	DNAL1	dynein, axonemal, light chain 1
hsa-miR-563	0	0	1	1	1	1	P2RY2	purinergic receptor P2Y, G-protein coupled, 2
hsa-miR-563	0	0	0	1	0	0	RPL21	ribosomal protein L21
hsa-miR-563	0	0	1	1	1	1	ZC3HC1	zinc finger, C3HC-type containing 1
hsa-miR-563	0	0	1	1	0	0	KRT25	keratin 25
hsa-miR-563	0	0	1	1	1	1	KCNRG	potassium channel regulator
hsa-miR-563	0	0	0	1	0	0	PARP10	poly (ADP-ribose) polymerase family, member 10
hsa-miR-563	0	0	0	1	0	0	OR4D11	olfactory receptor, family 4, subfamily D, member 11
hsa-miR-563	0	0	1	1	1	1	RMND5B	required for meiotic nuclear division 5 homolog B (S. cerevisiae)
hsa-miR-563	0	0	1	1	0	0	NDUFS7	NADH dehydrogenase (ubiquinone) Fe-S protein 7, 20kDa (NADH-coenzyme Q reductase)
hsa-miR-563	0	0	1	1	0	0	AP4S1	adaptor-related protein complex 4, sigma 1 subunit
hsa-miR-563	1	0	1	1	0	0	DALRD3	DALR anticodon binding domain containing 3
hsa-miR-563	1	0	1	1	0	0	RELL1	RELT-like 1
hsa-miR-563	0	0	0	1	0	0	NOP14	NOP14 nucleolar protein homolog (yeast)
hsa-miR-563	0	0	1	1	0	0	HIST1H2BC	histone cluster 1, H2bc
hsa-miR-563	0	0	0	1	1	1	LILRB2	leukocyte immunoglobulin-like receptor, subfamily B (with TM and ITIM domains), member 2
hsa-miR-563	0	0	1	1	0	0	TMEM136	transmembrane protein 136
hsa-miR-563	0	0	0	1	0	0	LINC00521	long intergenic non-protein coding RNA 521
hsa-miR-563	0	0	1	1	1	1	MMP1	matrix metallopeptidase 1 (interstitial collagenase)
hsa-miR-563	0	0	0	1	0	0	LOC100132418	Uncharacterized PRO1102-like protein LOC100132418
hsa-miR-563	1	0	1	1	1	1	PHF20L1	PHD finger protein 20-like 1
hsa-miR-563	0	0	0	1	0	0	MAP7D3	MAP7 domain containing 3
hsa-miR-563	1	0	1	1	1	1	PRIMA1	proline rich membrane anchor 1
hsa-miR-563	0	0	1	1	1	1	CCDC89	coiled-coil domain containing 89
hsa-miR-563	0	0	1	1	1	1	PUS10	pseudouridylate synthase 10
hsa-miR-563	0	0	1	1	0	0	SDK2	sidekick cell adhesion molecule 2
hsa-miR-563	0	0	1	1	1	1	TIGD2	tigger transposable element derived 2
hsa-miR-563	0	0	0	1	0	0	OR52N1	olfactory receptor, family 52, subfamily N, member 1
hsa-miR-563	0	0	1	1	1	1	CD300LG	CD300 molecule-like family member g
hsa-miR-563	0	0	1	1	1	1	HADHB	hydroxyacyl-CoA dehydrogenase/3-ketoacyl-CoA thiolase/enoyl-CoA hydratase (trifunctional protein), beta subunit
hsa-miR-563	1	0	1	1	1	1	CC2D1A	coiled-coil and C2 domain containing 1A
hsa-miR-563	0	0	0	1	0	0	OR4F17	olfactory receptor, family 4, subfamily F, member 17
hsa-miR-563	0	0	1	1	0	0	AVL9	AVL9 homolog (S. cerevisiase)
hsa-miR-563	0	0	0	1	0	0	CTXN1	cortexin 1
hsa-miR-563	0	0	1	1	1	1	KLHL11	kelch-like 11 (Drosophila)
hsa-miR-563	0	0	0	1	1	1	CCDC129	coiled-coil domain containing 129
hsa-miR-563	0	0	0	1	0	0	OR2T8	olfactory receptor, family 2, subfamily T, member 8
hsa-miR-563	0	0	0	1	0	0	OR2G2	olfactory receptor, family 2, subfamily G, member 2
hsa-miR-563	0	0	1	1	1	1	SDK1	sidekick cell adhesion molecule 1
hsa-miR-563	0	0	1	1	1	1	ASPRV1	aspartic peptidase, retroviral-like 1
hsa-miR-563	0	0	0	1	0	0	OR6C4	olfactory receptor, family 6, subfamily C, member 4
hsa-miR-563	0	0	1	1	1	1	PDZD3	PDZ domain containing 3
hsa-miR-563	0	0	0	1	1	1	ZNF18	zinc finger protein 18
hsa-miR-563	0	0	0	1	0	0	OR3A4P	olfactory receptor, family 3, subfamily A, member 4 pseudogene
hsa-miR-563	0	0	1	1	0	0	TYMS	thymidylate synthetase
hsa-miR-563	1	0	1	1	1	1	NR2C2	nuclear receptor subfamily 2, group C, member 2
hsa-miR-563	1	0	1	1	1	1	SUV420H1	suppressor of variegation 4-20 homolog 1 (Drosophila)
hsa-miR-563	0	0	1	1	1	1	SNRNP200	small nuclear ribonucleoprotein 200kDa (U5)
hsa-miR-563	0	0	1	1	0	0	CD37	CD37 molecule
hsa-miR-563	0	0	1	1	0	0	CD19	CD19 molecule
hsa-miR-563	0	0	0	1	0	0	PPP1R42	protein phosphatase 1, regulatory subunit 42
hsa-miR-563	0	0	1	1	0	0	PRPF3	PRP3 pre-mRNA processing factor 3 homolog (S. cerevisiae)
hsa-miR-563	1	0	1	1	1	1	GRHL1	grainyhead-like 1 (Drosophila)
hsa-miR-563	1	0	1	1	1	1	VAV2	vav 2 guanine nucleotide exchange factor
hsa-miR-563	0	0	1	1	1	1	HNRNPM	heterogeneous nuclear ribonucleoprotein M
hsa-miR-563	0	0	1	1	0	0	MSC	musculin
hsa-miR-563	1	0	1	1	1	1	CEP57	centrosomal protein 57kDa
hsa-miR-563	1	0	1	1	1	1	FAM91A1	family with sequence similarity 91, member A1
hsa-miR-563	0	0	1	1	0	0	GHRHR	growth hormone releasing hormone receptor
hsa-miR-563	0	0	0	1	0	0	OR4F5	olfactory receptor, family 4, subfamily F, member 5
hsa-miR-563	1	0	1	1	1	1	RIT2	Ras-like without CAAX 2
hsa-miR-563	0	0	1	1	1	1	CETN1	centrin, EF-hand protein, 1
hsa-miR-563	1	0	0	1	1	1	MMS19	MMS19 nucleotide excision repair homolog (S. cerevisiae)
hsa-miR-563	0	0	0	1	1	1	IL36B	interleukin 36, beta
hsa-miR-563	0	0	0	1	0	0	OR6X1	olfactory receptor, family 6, subfamily X, member 1
hsa-miR-563	0	0	0	1	0	0	OR6M1	olfactory receptor, family 6, subfamily M, member 1
hsa-miR-563	0	0	1	1	0	0	PTRHD1	peptidyl-tRNA hydrolase domain containing 1
hsa-miR-563	0	0	0	1	1	1	PIGW	phosphatidylinositol glycan anchor biosynthesis, class W
hsa-miR-563	0	0	1	1	1	1	HAX1	HCLS1 associated protein X-1
hsa-miR-563	0	0	1	1	1	1	TMIGD1	transmembrane and immunoglobulin domain containing 1
hsa-miR-563	0	0	0	1	0	0	PRAMEF15	PRAME family member 15
hsa-miR-563	0	0	0	1	0	0	NXF2B	nuclear RNA export factor 2B
hsa-miR-563	1	0	1	1	1	1	PRKCD	protein kinase C, delta
hsa-miR-563	0	0	0	1	0	0	LCN12	lipocalin 12
hsa-miR-563	0	0	1	1	0	0	TMEM95	transmembrane protein 95
hsa-miR-563	0	0	1	1	1	1	EVI2B	ecotropic viral integration site 2B
hsa-miR-563	1	0	1	1	1	1	NTF3	neurotrophin 3
hsa-miR-563	0	0	0	1	0	0	PP13439	uncharacterized LOC100128046
hsa-miR-563	0	0	1	1	1	1	UPP1	uridine phosphorylase 1
hsa-miR-563	1	0	1	1	1	1	NDN	necdin homolog (mouse)
hsa-miR-563	0	0	0	1	0	0	ALG12	asparagine-linked glycosylation 12, alpha-1,6-mannosyltransferase homolog (S. cerevisiae)
hsa-miR-563	0	0	0	1	1	1	NDNL2	necdin-like 2
hsa-miR-563	1	0	1	1	1	1	LIMS1	LIM and senescent cell antigen-like domains 1
hsa-miR-563	0	0	0	1	0	0	OR5K1	olfactory receptor, family 5, subfamily K, member 1
hsa-miR-563	0	0	0	1	0	0	ZNF804B	zinc finger protein 804B
hsa-miR-563	0	0	1	1	1	1	C18orf21	chromosome 18 open reading frame 21
hsa-miR-563	0	0	1	1	1	1	CCDC172	coiled-coil domain containing 172
hsa-miR-563	0	0	0	1	0	0	C12orf56	chromosome 12 open reading frame 56
hsa-miR-563	0	0	0	1	0	0	KRTAP4-3	keratin associated protein 4-3
hsa-miR-563	0	0	1	1	0	0	ARAP1	ArfGAP with RhoGAP domain, ankyrin repeat and PH domain 1
hsa-miR-563	0	0	1	1	0	0	LCE5A	late cornified envelope 5A
hsa-miR-563	0	0	1	1	1	1	INO80C	INO80 complex subunit C
hsa-miR-563	0	0	0	1	0	0	KRTAP6-2	keratin associated protein 6-2
hsa-miR-563	1	0	1	1	1	1	NF2	neurofibromin 2 (merlin)
hsa-miR-563	0	0	0	1	0	0	OR4F4	olfactory receptor, family 4, subfamily F, member 4
hsa-miR-563	0	0	0	1	1	1	INTU	inturned planar cell polarity effector homolog (Drosophila)
hsa-miR-563	0	0	1	1	1	1	LPAL2	lipoprotein, Lp(a)-like 2, pseudogene
hsa-miR-563	0	0	1	1	0	0	SAMD7	sterile alpha motif domain containing 7
hsa-miR-563	0	0	1	1	0	0	HYAL3	hyaluronoglucosaminidase 3
hsa-miR-563	0	0	1	1	1	1	MFSD11	major facilitator superfamily domain containing 11
hsa-miR-563	0	0	0	1	0	0	FTSJ3	FtsJ homolog 3 (E. coli)
hsa-miR-563	1	0	1	1	1	1	OPRM1	opioid receptor, mu 1
hsa-miR-563	0	0	1	1	0	0	MKS1	Meckel syndrome, type 1
hsa-miR-563	0	0	0	1	0	0	SERPINA9	serpin peptidase inhibitor, clade A (alpha-1 antiproteinase, antitrypsin), member 9
hsa-miR-563	1	0	1	1	0	0	ZBTB49	zinc finger and BTB domain containing 49
hsa-miR-563	0	0	1	1	1	1	CLUL1	clusterin-like 1 (retinal)
hsa-miR-563	0	0	0	1	0	0	GJB5	gap junction protein, beta 5, 31.1kDa
hsa-miR-563	0	0	0	1	1	1	NPY5R	neuropeptide Y receptor Y5
hsa-miR-563	0	0	0	1	0	0	PPP1R32	protein phosphatase 1, regulatory subunit 32
hsa-miR-563	0	0	1	1	0	0	HTATIP2	HIV-1 Tat interactive protein 2, 30kDa
hsa-miR-563	0	0	1	1	0	0	SLC35B3	solute carrier family 35, member B3
hsa-miR-563	1	0	1	1	1	1	ITGA4	integrin, alpha 4 (antigen CD49D, alpha 4 subunit of VLA-4 receptor)
hsa-miR-563	1	0	1	1	1	1	RNF6	ring finger protein (C3H2C3 type) 6
hsa-miR-563	0	0	0	1	1	1	SDCBP2	syndecan binding protein (syntenin) 2
hsa-miR-563	1	0	1	1	1	1	KCTD21	potassium channel tetramerisation domain containing 21
hsa-miR-563	0	0	0	1	0	0	NAALADL1	N-acetylated alpha-linked acidic dipeptidase-like 1
hsa-miR-563	0	0	1	1	1	1	ZRANB2	zinc finger, RAN-binding domain containing 2
hsa-miR-563	0	0	1	1	0	0	RNASE1	ribonuclease, RNase A family, 1 (pancreatic)
hsa-miR-563	0	0	1	1	1	1	CPLX3	complexin 3
hsa-miR-563	1	0	1	1	1	1	SUN1	Sad1 and UNC84 domain containing 1
hsa-miR-563	0	0	1	1	0	0	SCARF2	scavenger receptor class F, member 2
hsa-miR-563	0	0	1	1	1	1	AKR7L	aldo-keto reductase family 7-like
hsa-miR-563	1	0	1	1	1	1	PLCL1	phospholipase C-like 1
hsa-miR-563	0	0	1	1	1	1	ABLIM2	actin binding LIM protein family, member 2
hsa-miR-563	0	0	1	1	0	0	GJA4	gap junction protein, alpha 4, 37kDa
hsa-miR-563	0	0	1	1	1	1	IFI44L	interferon-induced protein 44-like
hsa-miR-563	0	0	1	1	1	1	METTL15	methyltransferase like 15
hsa-miR-563	0	0	1	1	1	1	CHRD	chordin
hsa-miR-563	1	0	1	1	1	1	KLF12	Kruppel-like factor 12
hsa-miR-563	0	0	1	1	1	1	ACAD11	acyl-CoA dehydrogenase family, member 11
hsa-miR-563	1	0	0	1	1	1	NPHP3	nephronophthisis 3 (adolescent)
hsa-miR-563	0	0	1	1	1	1	TRIM24	tripartite motif containing 24
hsa-miR-563	0	0	1	1	1	1	C1orf162	chromosome 1 open reading frame 162
hsa-miR-563	0	0	1	1	1	1	C20orf132	chromosome 20 open reading frame 132
hsa-miR-563	0	0	0	1	0	0	SOWAHD	sosondowah ankyrin repeat domain family member D
hsa-miR-563	0	0	1	1	0	0	OSGIN1	oxidative stress induced growth inhibitor 1
hsa-miR-563	1	0	1	1	1	1	MAPT	microtubule-associated protein tau
hsa-miR-563	0	0	0	1	0	0	TAF3	TAF3 RNA polymerase II, TATA box binding protein (TBP)-associated factor, 140kDa
hsa-miR-563	0	0	1	1	1	1	ECM2	extracellular matrix protein 2, female organ and adipocyte specific
hsa-miR-563	0	0	1	1	0	0	TMEM156	transmembrane protein 156
hsa-miR-563	0	0	1	1	0	0	RPS10	ribosomal protein S10
hsa-miR-563	0	0	0	1	0	0	GTF2A1	general transcription factor IIA, 1, 19/37kDa
hsa-miR-563	0	0	1	1	1	1	ZNF833P	zinc finger protein 833, pseudogene
hsa-miR-563	1	0	1	1	1	1	MAP7	microtubule-associated protein 7
hsa-miR-563	0	0	1	1	0	0	NISCH	nischarin
hsa-miR-563	0	0	0	1	1	1	ZNF334	zinc finger protein 334
hsa-miR-563	0	0	1	1	1	1	HAUS4	HAUS augmin-like complex, subunit 4
hsa-miR-563	1	0	1	1	1	1	FGFR1OP	FGFR1 oncogene partner
hsa-miR-563	0	0	1	1	0	0	P2RY6	pyrimidinergic receptor P2Y, G-protein coupled, 6
hsa-miR-563	0	0	1	1	1	1	DPYS	dihydropyrimidinase
hsa-miR-563	0	0	0	1	1	1	SLC43A3	solute carrier family 43, member 3
hsa-miR-563	0	0	0	1	1	1	MYL1	myosin, light chain 1, alkali; skeletal, fast
hsa-miR-563	0	0	1	1	1	1	ZDHHC16	zinc finger, DHHC-type containing 16
hsa-miR-563	0	0	1	1	1	1	ARHGAP6	Rho GTPase activating protein 6
hsa-miR-563	0	0	1	1	1	1	CASC1	cancer susceptibility candidate 1
hsa-miR-563	0	0	1	1	1	1	DUSP19	dual specificity phosphatase 19
hsa-miR-563	0	0	1	1	1	1	ELP5	elongator acetyltransferase complex subunit 5
hsa-miR-563	0	0	0	1	0	0	CRYBA4	crystallin, beta A4
hsa-miR-563	1	0	1	1	1	1	WLS	wntless homolog (Drosophila)
hsa-miR-563	0	0	1	1	1	1	DDX4	DEAD (Asp-Glu-Ala-Asp) box polypeptide 4
hsa-miR-563	0	0	1	1	0	0	MORN3	MORN repeat containing 3
hsa-miR-563	0	0	0	1	0	0	SHROOM1	shroom family member 1
hsa-miR-563	0	0	0	1	0	0	OR11L1	olfactory receptor, family 11, subfamily L, member 1
hsa-miR-563	0	0	1	1	1	1	GTF2E2	general transcription factor IIE, polypeptide 2, beta 34kDa
hsa-miR-563	0	0	1	1	0	0	PORCN	porcupine homolog (Drosophila)
hsa-miR-563	1	0	1	1	0	0	FBRS	fibrosin
hsa-miR-563	1	0	1	1	1	1	CACNA2D1	calcium channel, voltage-dependent, alpha 2/delta subunit 1
hsa-miR-563	0	0	1	1	1	1	TMEM67	transmembrane protein 67
hsa-miR-563	0	0	0	1	1	1	CIAPIN1	cytokine induced apoptosis inhibitor 1
hsa-miR-563	0	0	1	1	0	0	PARVG	parvin, gamma
hsa-miR-563	0	0	1	1	1	1	DYNLRB1	dynein, light chain, roadblock-type 1
hsa-miR-563	1	0	1	1	0	0	PRRC2B	proline-rich coiled-coil 2B
hsa-miR-563	1	0	1	1	0	0	SAMD4A	sterile alpha motif domain containing 4A
hsa-miR-563	0	0	1	1	1	1	PRAMEF12	PRAME family member 12
hsa-miR-563	1	0	1	1	1	1	UNC50	unc-50 homolog (C. elegans)
hsa-miR-563	0	0	0	1	0	0	OR8D1	olfactory receptor, family 8, subfamily D, member 1
hsa-miR-563	0	0	0	1	0	0	ZNF799	zinc finger protein 799
hsa-miR-563	0	0	1	1	1	1	LAMA2	laminin, alpha 2
hsa-miR-563	1	0	1	1	1	1	HMGCLL1	3-hydroxymethyl-3-methylglutaryl-CoA lyase-like 1
hsa-miR-563	0	0	0	1	0	0	AKAP4	A kinase (PRKA) anchor protein 4
hsa-miR-563	0	0	1	1	1	1	EXT2	exostosin 2
hsa-miR-563	0	0	1	1	0	0	TMC2	transmembrane channel-like 2
hsa-miR-563	0	0	0	1	0	0	ADAM29	ADAM metallopeptidase domain 29
hsa-miR-563	0	0	1	1	0	0	SH2B1	SH2B adaptor protein 1
hsa-miR-563	0	0	0	1	0	0	C1orf112	chromosome 1 open reading frame 112
hsa-miR-563	0	0	0	1	0	0	OR51A7	olfactory receptor, family 51, subfamily A, member 7
hsa-miR-563	0	0	0	1	0	0	TMC3	transmembrane channel-like 3
hsa-miR-563	0	0	1	1	0	0	DNMT1	DNA (cytosine-5-)-methyltransferase 1
hsa-miR-563	0	0	1	1	1	1	ATP6V1H	ATPase, H+ transporting, lysosomal 50/57kDa, V1 subunit H
hsa-miR-563	0	0	1	1	1	1	LRP10	low density lipoprotein receptor-related protein 10
hsa-miR-563	0	0	1	1	1	1	HIBCH	3-hydroxyisobutyryl-CoA hydrolase
hsa-miR-563	0	0	1	1	0	0	NIF3L1	NIF3 NGG1 interacting factor 3-like 1 (S. cerevisiae)
hsa-miR-563	1	0	1	1	1	1	OSBPL6	oxysterol binding protein-like 6
hsa-miR-563	1	0	1	1	1	1	ATP11C	ATPase, class VI, type 11C
hsa-miR-563	1	0	0	1	1	1	AK3	adenylate kinase 3
hsa-miR-563	0	0	1	1	1	1	GTPBP4	GTP binding protein 4
hsa-miR-563	1	0	0	1	0	0	TSTA3	tissue specific transplantation antigen P35B
hsa-miR-563	0	0	0	1	0	0	FAM90A20P	putative protein FAM90A20
hsa-miR-563	1	0	1	1	1	1	SCN2A	sodium channel, voltage-gated, type II, alpha subunit
hsa-miR-563	0	0	0	1	1	1	PIGP	phosphatidylinositol glycan anchor biosynthesis, class P
hsa-miR-563	1	0	1	1	1	1	CLIP3	CAP-GLY domain containing linker protein 3
hsa-miR-563	0	0	1	1	1	1	ITGB1BP1	integrin beta 1 binding protein 1
hsa-miR-563	0	0	1	1	1	1	FAM177B	family with sequence similarity 177, member B
hsa-miR-563	0	0	1	1	1	1	TTN	titin
hsa-miR-563	0	0	1	1	1	1	MICU1	mitochondrial calcium uptake 1
hsa-miR-563	1	0	1	1	0	0	KAZN	kazrin, periplakin interacting protein
hsa-miR-563	1	0	1	1	1	1	FAM110B	family with sequence similarity 110, member B
hsa-miR-563	1	0	1	1	0	0	DCTN1	dynactin 1
hsa-miR-563	0	0	1	1	1	1	IFT81	intraflagellar transport 81 homolog (Chlamydomonas)
hsa-miR-563	0	0	0	1	0	0	ZNF669	zinc finger protein 669
hsa-miR-563	0	0	1	1	1	1	LGALS8	lectin, galactoside-binding, soluble, 8
hsa-miR-563	1	0	1	1	1	1	C1orf131	chromosome 1 open reading frame 131
hsa-miR-563	1	0	0	1	1	1	TRIM67	tripartite motif containing 67
hsa-miR-563	0	0	0	1	0	0	MIXL1	Mix paired-like homeobox
hsa-miR-563	0	0	0	1	0	0	MRPL18	mitochondrial ribosomal protein L18
hsa-miR-563	0	0	1	1	1	1	SOD2	superoxide dismutase 2, mitochondrial
hsa-miR-563	0	0	0	1	0	0	C4BPA	complement component 4 binding protein, alpha
hsa-miR-563	0	0	0	1	0	0	C6orf99	chromosome 6 open reading frame 99
hsa-miR-563	0	0	1	1	1	1	SYNJ2	synaptojanin 2
hsa-miR-563	0	0	0	1	0	0	LEMD1	LEM domain containing 1
hsa-miR-563	0	0	0	1	0	0	ULBP3	UL16 binding protein 3
hsa-miR-563	0	0	0	1	1	1	ULBP1	UL16 binding protein 1
hsa-miR-563	0	0	0	1	0	0	RAET1G	retinoic acid early transcript 1G
hsa-miR-563	1	0	1	1	1	1	SMG7	smg-7 homolog, nonsense mediated mRNA decay factor (C. elegans)
hsa-miR-563	0	0	1	1	0	0	MR1	major histocompatibility complex, class I-related
hsa-miR-563	0	0	1	1	1	1	PEX7	peroxisomal biogenesis factor 7
hsa-miR-563	1	0	1	1	1	1	CD247	CD247 molecule
hsa-miR-563	0	0	1	1	1	1	PBX1	pre-B-cell leukemia homeobox 1
hsa-miR-563	0	0	1	1	1	1	CD244	CD244 molecule, natural killer cell receptor 2B4
hsa-miR-563	0	0	0	1	0	0	OR10X1	olfactory receptor, family 10, subfamily X, member 1
hsa-miR-563	0	0	1	1	1	1	CD1B	CD1b molecule
hsa-miR-563	0	0	1	1	0	0	GPR123	G protein-coupled receptor 123
hsa-miR-563	0	0	0	1	0	0	S100A9	S100 calcium binding protein A9
hsa-miR-563	0	0	0	1	0	0	RPF2	ribosome production factor 2 homolog (S. cerevisiae)
hsa-miR-563	0	0	1	1	0	0	SETDB1	SET domain, bifurcated 1
hsa-miR-563	0	0	1	1	1	1	PDSS2	prenyl (decaprenyl) diphosphate synthase, subunit 2
hsa-miR-563	0	0	0	1	0	0	LOC100129852	uncharacterized LOC100129852
hsa-miR-563	1	0	1	1	1	1	VAX1	ventral anterior homeobox 1
hsa-miR-563	0	0	1	1	0	0	FAM19A3	family with sequence similarity 19 (chemokine (C-C motif)-like), member A3
hsa-miR-563	0	0	0	1	0	0	ABHD16B	abhydrolase domain containing 16B
hsa-miR-563	0	0	1	1	0	0	CUEDC2	CUE domain containing 2
hsa-miR-563	0	0	0	1	0	0	NBPF6	neuroblastoma breakpoint family, member 6
hsa-miR-563	0	0	1	1	0	0	COX7A2	cytochrome c oxidase subunit VIIa polypeptide 2 (liver)
hsa-miR-563	0	0	0	1	0	0	PPDPF	pancreatic progenitor cell differentiation and proliferation factor homolog (zebrafish)
hsa-miR-563	1	0	1	1	1	1	TLX1	T-cell leukemia homeobox 1
hsa-miR-563	0	0	1	1	1	1	OGFRL1	opioid growth factor receptor-like 1
hsa-miR-563	0	0	1	1	1	1	IDS	iduronate 2-sulfatase
hsa-miR-563	1	0	1	1	1	1	AFF2	AF4/FMR2 family, member 2
hsa-miR-563	1	0	1	1	1	1	LMO4	LIM domain only 4
hsa-miR-563	0	0	1	1	0	0	PYROXD2	pyridine nucleotide-disulphide oxidoreductase domain 2
hsa-miR-563	1	0	1	1	0	0	LGSN	lengsin, lens protein with glutamine synthetase domain
hsa-miR-563	0	0	0	1	0	0	PSMA7	proteasome (prosome, macropain) subunit, alpha type, 7
hsa-miR-563	1	0	1	1	1	1	IGSF1	immunoglobulin superfamily, member 1
hsa-miR-563	0	0	1	1	1	1	GSTA4	glutathione S-transferase alpha 4
hsa-miR-563	0	0	0	1	0	0	GSTA5	glutathione S-transferase alpha 5
hsa-miR-563	0	0	1	1	1	1	DNTT	deoxynucleotidyltransferase, terminal
hsa-miR-563	0	0	1	1	1	1	GPR110	G protein-coupled receptor 110
hsa-miR-563	0	0	1	1	1	1	LRRC42	leucine rich repeat containing 42
hsa-miR-563	0	0	1	1	0	0	SELRC1	Sel1 repeat containing 1
hsa-miR-563	0	0	0	1	0	0	FAM69B	family with sequence similarity 69, member B
hsa-miR-563	0	0	1	1	1	1	DDX27	DEAD (Asp-Glu-Ala-Asp) box polypeptide 27
hsa-miR-563	0	0	0	1	1	1	IFIT1	interferon-induced protein with tetratricopeptide repeats 1
hsa-miR-563	1	0	1	1	1	1	CMPK1	cytidine monophosphate (UMP-CMP) kinase 1, cytosolic
hsa-miR-563	0	0	0	1	0	0	DBH	dopamine beta-hydroxylase (dopamine beta-monooxygenase)
hsa-miR-563	0	0	0	1	1	1	CYP4A11	cytochrome P450, family 4, subfamily A, polypeptide 11
hsa-miR-563	0	0	1	1	0	0	C10orf116	chromosome 10 open reading frame 116
hsa-miR-563	0	0	1	1	0	0	NTNG2	netrin G2
hsa-miR-563	0	0	1	1	1	1	SZT2	seizure threshold 2 homolog (mouse)
hsa-miR-563	1	0	0	1	0	0	C1orf50	chromosome 1 open reading frame 50
hsa-miR-563	0	0	1	1	1	1	PPIH	peptidylprolyl isomerase H (cyclophilin H)
hsa-miR-563	0	0	1	1	1	1	PPCS	phosphopantothenoylcysteine synthetase
hsa-miR-563	0	0	1	1	0	0	C9orf114	chromosome 9 open reading frame 114
hsa-miR-563	0	0	1	1	0	0	NGFRAP1	nerve growth factor receptor (TNFRSF16) associated protein 1
hsa-miR-563	0	0	1	1	1	1	SDC4	syndecan 4
hsa-miR-563	0	0	1	1	0	0	NXF2	nuclear RNA export factor 2
hsa-miR-563	0	0	1	1	1	1	SEMG1	semenogelin I
hsa-miR-563	0	0	1	1	0	0	WISP2	WNT1 inducible signaling pathway protein 2
hsa-miR-563	0	0	1	1	1	1	ANXA7	annexin A7
hsa-miR-563	1	0	1	1	0	0	FRS3	fibroblast growth factor receptor substrate 3
hsa-miR-563	0	0	1	1	1	1	PLA2G12B	phospholipase A2, group XIIB
hsa-miR-563	0	0	0	1	1	1	RPA4	replication protein A4, 30kDa
hsa-miR-563	1	0	0	1	0	0	DPM2	dolichyl-phosphate mannosyltransferase polypeptide 2, regulatory subunit
hsa-miR-563	1	0	1	1	1	1	PSAP	prosaposin
hsa-miR-563	0	0	1	1	1	1	L3MBTL1	l(3)mbt-like 1 (Drosophila)
hsa-miR-563	0	0	0	1	0	0	TDRG1	testis development related 1 (non-protein coding)
hsa-miR-563	0	0	1	1	1	1	TRIM62	tripartite motif containing 62
hsa-miR-563	1	0	1	1	0	0	ADC	arginine decarboxylase
hsa-miR-563	0	0	1	1	0	0	HCRTR1	hypocretin (orexin) receptor 1
hsa-miR-563	0	0	1	1	1	1	RBM18	RNA binding motif protein 18
hsa-miR-563	0	0	0	1	1	1	LHFPL5	lipoma HMGIC fusion partner-like 5
hsa-miR-563	0	0	1	1	0	0	TCP11	t-complex 11 homolog (mouse)
hsa-miR-563	0	0	1	1	1	1	MDH1B	malate dehydrogenase 1B, NAD (soluble)
hsa-miR-563	1	0	1	1	1	1	CXCL12	chemokine (C-X-C motif) ligand 12
hsa-miR-563	0	0	0	1	1	1	B3GALT4	UDP-Gal:betaGlcNAc beta 1,3-galactosyltransferase, polypeptide 4
hsa-miR-563	0	0	1	1	1	1	ANKRD30A	ankyrin repeat domain 30A
hsa-miR-563	0	0	1	1	0	0	ACSS2	acyl-CoA synthetase short-chain family member 2
hsa-miR-563	0	0	1	1	0	0	CCDC40	coiled-coil domain containing 40
hsa-miR-563	1	0	1	1	1	1	EIF4G3	eukaryotic translation initiation factor 4 gamma, 3
hsa-miR-563	0	0	1	1	0	0	BPIFB4	BPI fold containing family B, member 4
hsa-miR-563	0	0	1	1	0	0	HSPA1L	heat shock 70kDa protein 1-like
hsa-miR-563	1	0	1	1	1	1	ASXL1	additional sex combs like 1 (Drosophila)
hsa-miR-563	0	0	1	1	1	1	DYNC2H1	dynein, cytoplasmic 2, heavy chain 1
hsa-miR-563	0	0	0	1	0	0	C1orf195	chromosome 1 open reading frame 195
hsa-miR-563	0	0	1	1	0	0	PRAMEF9	PRAME family member 9
hsa-miR-563	0	0	1	1	1	1	NALCN	sodium leak channel, non-selective
hsa-miR-563	0	0	1	1	1	1	APBB1IP	amyloid beta (A4) precursor protein-binding, family B, member 1 interacting protein
hsa-miR-563	0	0	0	1	1	1	FLOT1	flotillin 1
hsa-miR-563	0	0	1	1	0	0	NPPB	natriuretic peptide B
hsa-miR-563	0	0	1	1	0	0	UGGT2	UDP-glucose glycoprotein glucosyltransferase 2
hsa-miR-563	1	0	1	1	0	0	C9orf41	chromosome 9 open reading frame 41
hsa-miR-563	0	0	1	1	1	1	FLT4	fms-related tyrosine kinase 4
hsa-miR-563	1	0	1	1	0	0	DNAJC1	DnaJ (Hsp40) homolog, subfamily C, member 1
hsa-miR-563	0	0	0	1	1	1	NMNAT1	nicotinamide nucleotide adenylyltransferase 1
hsa-miR-563	0	0	1	1	0	0	FOXH1	forkhead box H1
hsa-miR-563	0	0	0	1	0	0	CA6	carbonic anhydrase VI
hsa-miR-563	0	0	0	1	1	1	KRTAP4-2	keratin associated protein 4-2
hsa-miR-563	0	0	0	1	1	1	GRHPR	glyoxylate reductase/hydroxypyruvate reductase
hsa-miR-563	1	0	1	1	0	0	STX5	syntaxin 5
hsa-miR-563	0	0	1	1	0	0	NDUFAF5	NADH dehydrogenase (ubiquinone) complex I, assembly factor 5
hsa-miR-563	1	0	1	1	1	1	CCL21	chemokine (C-C motif) ligand 21
hsa-miR-563	0	0	1	1	1	1	MAGEB2	melanoma antigen family B, 2
hsa-miR-563	0	0	1	1	1	1	KIAA1704	KIAA1704
hsa-miR-563	0	0	1	1	1	1	PCNA	proliferating cell nuclear antigen
hsa-miR-563	0	0	1	1	1	1	SERP2	stress-associated endoplasmic reticulum protein family member 2
hsa-miR-563	0	0	1	1	0	0	ZNF584	zinc finger protein 584
hsa-miR-563	0	0	0	1	0	0	ZNF324B	zinc finger protein 324B
hsa-miR-563	0	0	1	1	0	0	AQP7	aquaporin 7
hsa-miR-563	0	0	0	1	0	0	C6orf52	chromosome 6 open reading frame 52
hsa-miR-563	0	0	1	1	0	0	LOC100129995	uncharacterized LOC100129995
hsa-miR-563	0	0	1	1	1	1	SMAD9	SMAD family member 9
hsa-miR-563	0	0	1	1	1	1	SOAT2	sterol O-acyltransferase 2
hsa-miR-563	0	0	1	1	0	0	EXOC3L4	exocyst complex component 3-like 4
hsa-miR-563	0	0	1	1	1	1	SSBP2	single-stranded DNA binding protein 2
hsa-miR-563	1	0	1	1	1	1	FRY	furry homolog (Drosophila)
hsa-miR-563	0	0	1	1	0	0	FOCAD	focadhesin
hsa-miR-563	0	0	1	1	1	1	PXDC1	PX domain containing 1
hsa-miR-563	0	0	0	1	0	0	ZRSR2	zinc finger (CCCH type), RNA-binding motif and serine/arginine rich 2
hsa-miR-563	0	0	0	1	0	0	FBXW9	F-box and WD repeat domain containing 9
hsa-miR-563	0	0	1	1	1	1	ALOX5AP	arachidonate 5-lipoxygenase-activating protein
hsa-miR-563	0	0	0	1	0	0	AKR1C3	aldo-keto reductase family 1, member C3 (3-alpha hydroxysteroid dehydrogenase, type II)
hsa-miR-563	0	0	1	1	1	1	BTF3	basic transcription factor 3
hsa-miR-563	0	0	0	1	1	1	POMC	proopiomelanocortin
hsa-miR-563	0	0	1	1	1	1	AKR1C1	aldo-keto reductase family 1, member C1 (dihydrodiol dehydrogenase 1; 20-alpha (3-alpha)-hydroxysteroid dehydrogenase)
hsa-miR-563	0	0	1	1	0	0	MUC16	mucin 16, cell surface associated
hsa-miR-563	0	0	1	1	0	0	CEP152	centrosomal protein 152kDa
hsa-miR-563	0	0	1	1	1	1	CWC27	CWC27 spliceosome-associated protein homolog (S. cerevisiae)
hsa-miR-563	0	0	1	1	1	1	IDI1	isopentenyl-diphosphate delta isomerase 1
hsa-miR-563	1	0	1	1	1	1	ESM1	endothelial cell-specific molecule 1
hsa-miR-563	1	0	1	1	1	1	DIP2C	DIP2 disco-interacting protein 2 homolog C (Drosophila)
hsa-miR-563	0	0	1	1	0	0	EIF3L	eukaryotic translation initiation factor 3, subunit L
hsa-miR-563	1	0	1	1	1	1	PPAPDC2	phosphatidic acid phosphatase type 2 domain containing 2
hsa-miR-563	0	0	0	1	0	0	TLR6	toll-like receptor 6
hsa-miR-563	1	0	1	1	1	1	GLIS3	GLIS family zinc finger 3
hsa-miR-563	1	0	1	1	1	1	VLDLR	very low density lipoprotein receptor
hsa-miR-563	0	0	0	1	1	1	RBMY1J	RNA binding motif protein, Y-linked, family 1, member J
hsa-miR-563	0	0	0	1	0	0	IGLL3P	immunoglobulin lambda-like polypeptide 3, pseudogene
hsa-miR-563	0	0	0	1	0	0	LRRC30	leucine rich repeat containing 30
hsa-miR-563	0	0	1	1	0	0	TIGIT	T cell immunoreceptor with Ig and ITIM domains
hsa-miR-563	0	0	0	1	0	0	OR10J5	olfactory receptor, family 10, subfamily J, member 5
hsa-miR-563	0	0	1	1	0	0	FCHO1	FCH domain only 1
hsa-miR-563	0	0	1	1	1	1	LRRC4B	leucine rich repeat containing 4B
hsa-miR-563	1	0	1	1	1	1	PDPK1	3-phosphoinositide dependent protein kinase-1
hsa-miR-563	0	0	0	1	1	1	RPH3A	rabphilin 3A homolog (mouse)
hsa-miR-563	0	0	0	1	1	1	ASB14	ankyrin repeat and SOCS box containing 14
hsa-miR-563	0	0	1	1	1	1	C10orf107	chromosome 10 open reading frame 107
hsa-miR-563	0	0	0	1	0	0	CYP2D6	cytochrome P450, family 2, subfamily D, polypeptide 6
hsa-miR-563	1	0	1	1	1	1	ARSB	arylsulfatase B
hsa-miR-563	1	0	1	0	1	1	GABRA4	gamma-aminobutyric acid (GABA) A receptor, alpha 4
hsa-miR-563	0	0	1	0	1	1	LOC155060	AI894139 pseudogene
hsa-miR-563	0	0	0	1	1	1	GPR179	G protein-coupled receptor 179
hsa-miR-563	1	0	1	1	1	1	MAEA	macrophage erythroblast attacher
hsa-miR-563	1	0	0	1	1	1	UHRF1	ubiquitin-like with PHD and ring finger domains 1
hsa-miR-563	0	0	0	1	1	1	CRHR2	corticotropin releasing hormone receptor 2
hsa-miR-563	1	0	1	1	1	1	KPNA1	karyopherin alpha 1 (importin alpha 5)
hsa-miR-563	0	0	1	1	1	1	ASCL1	achaete-scute complex homolog 1 (Drosophila)
hsa-miR-563	1	0	1	1	1	1	ST8SIA3	ST8 alpha-N-acetyl-neuraminide alpha-2,8-sialyltransferase 3
hsa-miR-563	1	0	1	1	1	1	USP47	ubiquitin specific peptidase 47
hsa-miR-563	1	0	1	1	1	1	SOX7	SRY (sex determining region Y)-box 7
hsa-miR-563	0	0	1	0	1	1	PIGM	phosphatidylinositol glycan anchor biosynthesis, class M
hsa-miR-563	0	0	1	1	1	1	ZNF572	zinc finger protein 572
hsa-miR-563	1	0	1	1	1	1	CCDC149	coiled-coil domain containing 149
hsa-miR-563	0	0	1	1	1	1	C18orf26	chromosome 18 open reading frame 26
hsa-miR-563	0	0	0	1	1	1	TMCO4	transmembrane and coiled-coil domains 4
hsa-miR-563	0	0	0	0	1	1	PTPRQ	protein tyrosine phosphatase, receptor type, Q
