# Supplementary material for: Profiling of Selected MicroRNAs in Proliferative Eutopic Endometrium of Women with Ovarian Endometriosis
Source: Biomed Res Int. 2015 Aug 20;2015:760698. doi: 10.1155/2015/760698 (PMC4558423; doi:10.1155/2015/760698)
Supplement: Supplementary file 1 — Table I: The names of miRNAs significantly differentially expressed between eutopic endometrium of patients with endometriosis vs eutopic endometrium of patients without endometriosis. Table II: The associations between miRNA and mRNA, which presents detailed results of the search of six major databases i.e targetscan, tarbase, miranda, mirbase, mirtarget2 and pictar. [file 760698.f1.zip › 760698.f1/Table II/hsa-miR-564.tsv]

miR	targetscan	tarbase	miranda	mirbase	mirtarget2	pictar	GeneSymbol	GeneName
hsa-miR-564	0	0	1	1	0	0	ARHGEF2	Rho/Rac guanine nucleotide exchange factor (GEF) 2
hsa-miR-564	1	0	1	0	0	0	DTX4	deltex homolog 4 (Drosophila)
hsa-miR-564	1	0	1	1	1	1	C11orf9	chromosome 11 open reading frame 9
hsa-miR-564	0	0	1	1	0	0	RTEL1	regulator of telomere elongation helicase 1
hsa-miR-564	1	0	1	1	0	0	KIAA1210	KIAA1210
hsa-miR-564	1	0	1	1	1	1	RALGAPB	Ral GTPase activating protein, beta subunit (non-catalytic)
hsa-miR-564	0	0	1	0	0	0	MTA3	metastasis associated 1 family, member 3
hsa-miR-564	1	0	1	1	0	0	PLXNA4	plexin A4
hsa-miR-564	1	0	1	1	0	0	NCKAP5L	NCK-associated protein 5-like
hsa-miR-564	1	0	1	1	0	0	TMCO7	transmembrane and coiled-coil domains 7
hsa-miR-564	0	0	1	1	1	1	LENG8	leukocyte receptor cluster (LRC) member 8
hsa-miR-564	1	0	1	1	1	1	SSH3	slingshot homolog 3 (Drosophila)
hsa-miR-564	1	0	1	1	1	1	UBR3	ubiquitin protein ligase E3 component n-recognin 3 (putative)
hsa-miR-564	0	0	1	1	0	0	SSPO	SCO-spondin homolog (Bos taurus)
hsa-miR-564	1	0	1	1	1	1	VLDLR	very low density lipoprotein receptor
hsa-miR-564	1	0	1	1	1	1	MTA1	metastasis associated 1
hsa-miR-564	1	0	1	0	1	1	CDON	Cdon homolog (mouse)
hsa-miR-564	1	0	1	1	1	1	SPTB	spectrin, beta, erythrocytic
hsa-miR-564	0	0	1	1	0	0	BMP1	bone morphogenetic protein 1
hsa-miR-564	1	0	1	1	0	0	PPP2R5D	protein phosphatase 2, regulatory subunit B', delta
hsa-miR-564	1	0	1	0	1	1	PDE7B	phosphodiesterase 7B
hsa-miR-564	1	0	1	1	1	1	MYO9B	myosin IXB
hsa-miR-564	1	0	1	1	1	1	CBFA2T2	core-binding factor, runt domain, alpha subunit 2; translocated to, 2
hsa-miR-564	0	0	1	1	0	0	STARD10	StAR-related lipid transfer (START) domain containing 10
hsa-miR-564	0	0	1	1	0	0	CARD10	caspase recruitment domain family, member 10
hsa-miR-564	1	0	1	1	1	1	LRRFIP1	leucine rich repeat (in FLII) interacting protein 1
hsa-miR-564	0	0	1	1	0	0	SERPINI2	serpin peptidase inhibitor, clade I (pancpin), member 2
hsa-miR-564	1	0	1	0	1	1	FAM19A5	family with sequence similarity 19 (chemokine (C-C motif)-like), member A5
hsa-miR-564	1	0	1	1	1	1	TAOK3	TAO kinase 3
hsa-miR-564	1	0	1	1	1	1	ANKRD13A	ankyrin repeat domain 13A
hsa-miR-564	1	0	1	1	0	0	TH1L	TH1-like (Drosophila)
hsa-miR-564	0	0	1	1	0	0	FXYD5	FXYD domain containing ion transport regulator 5
hsa-miR-564	1	0	1	1	0	0	RAB34	RAB34, member RAS oncogene family
hsa-miR-564	1	0	1	1	1	1	RGS10	regulator of G-protein signaling 10
hsa-miR-564	0	0	1	1	0	0	SNRPN	small nuclear ribonucleoprotein polypeptide N
hsa-miR-564	1	0	1	1	1	1	MAGI1	membrane associated guanylate kinase, WW and PDZ domain containing 1
hsa-miR-564	0	0	1	1	0	0	ELP2	elongator acetyltransferase complex subunit 2
hsa-miR-564	1	0	1	1	1	1	BRSK1	BR serine/threonine kinase 1
hsa-miR-564	0	0	1	1	0	0	MT1E	metallothionein 1E
hsa-miR-564	0	0	1	1	0	0	MPI	mannose phosphate isomerase
hsa-miR-564	0	0	1	1	1	1	CARD8	caspase recruitment domain family, member 8
hsa-miR-564	1	0	1	1	1	1	NRXN3	neurexin 3
hsa-miR-564	0	0	1	1	1	1	TFEB	transcription factor EB
hsa-miR-564	1	0	1	1	1	1	XIRP1	xin actin-binding repeat containing 1
hsa-miR-564	0	0	1	1	1	1	SLC8A3	solute carrier family 8 (sodium/calcium exchanger), member 3
hsa-miR-564	1	0	1	0	1	1	CLSTN1	calsyntenin 1
hsa-miR-564	0	0	1	0	0	0	TUG1	taurine upregulated 1 (non-protein coding)
hsa-miR-564	1	0	1	1	1	1	RIC8B	resistance to inhibitors of cholinesterase 8 homolog B (C. elegans)
hsa-miR-564	1	0	1	1	1	1	HMGN3	high mobility group nucleosomal binding domain 3
hsa-miR-564	0	0	1	1	0	0	UBR4	ubiquitin protein ligase E3 component n-recognin 4
hsa-miR-564	0	0	1	1	1	1	ARMC5	armadillo repeat containing 5
hsa-miR-564	1	0	1	1	0	0	FASTK	Fas-activated serine/threonine kinase
hsa-miR-564	0	0	1	1	1	1	NECAP2	NECAP endocytosis associated 2
hsa-miR-564	1	0	1	1	1	1	PPFIA3	protein tyrosine phosphatase, receptor type, f polypeptide (PTPRF), interacting protein (liprin), alpha 3
hsa-miR-564	1	0	1	1	0	0	MEX3A	mex-3 homolog A (C. elegans)
hsa-miR-564	0	0	1	0	1	1	FLJ14186	uncharacterized LOC401149
hsa-miR-564	0	0	1	1	1	1	EP400	E1A binding protein p400
hsa-miR-564	1	0	1	0	1	1	ZCCHC3	zinc finger, CCHC domain containing 3
hsa-miR-564	0	0	1	1	1	1	TNIP2	TNFAIP3 interacting protein 2
hsa-miR-564	0	0	1	1	1	1	GTF2H1	general transcription factor IIH, polypeptide 1, 62kDa
hsa-miR-564	0	0	1	0	0	0	LOC729852	uncharacterized LOC729852
hsa-miR-564	0	0	1	1	0	0	C15orf23	chromosome 15 open reading frame 23
hsa-miR-564	0	0	1	1	1	1	NETO2	neuropilin (NRP) and tolloid (TLL)-like 2
hsa-miR-564	1	0	1	1	1	1	SULF1	sulfatase 1
hsa-miR-564	1	0	1	1	1	1	PDLIM2	PDZ and LIM domain 2 (mystique)
hsa-miR-564	0	0	1	0	0	0	LOC201617	uncharacterized LOC201617
hsa-miR-564	0	0	1	1	0	0	BEAN1	brain expressed, associated with NEDD4, 1
hsa-miR-564	1	0	1	1	1	1	LMNA	lamin A/C
hsa-miR-564	0	0	1	0	0	0	LOC284600	uncharacterized LOC284600
hsa-miR-564	1	0	1	1	1	1	CLCN5	chloride channel, voltage-sensitive 5
hsa-miR-564	0	0	1	1	0	0	SLC39A4	solute carrier family 39 (zinc transporter), member 4
hsa-miR-564	0	0	1	0	1	1	THAP6	THAP domain containing 6
hsa-miR-564	0	0	1	1	0	0	RGL3	ral guanine nucleotide dissociation stimulator-like 3
hsa-miR-564	0	0	1	1	1	1	TAF8	TAF8 RNA polymerase II, TATA box binding protein (TBP)-associated factor, 43kDa
hsa-miR-564	1	0	1	1	1	1	ANKRD29	ankyrin repeat domain 29
hsa-miR-564	0	0	1	1	0	0	KRT86	keratin 86
hsa-miR-564	0	0	1	1	0	0	TRIM41	tripartite motif containing 41
hsa-miR-564	1	0	1	1	1	1	ARID1B	AT rich interactive domain 1B (SWI1-like)
hsa-miR-564	0	0	1	1	1	1	ALG2	asparagine-linked glycosylation 2, alpha-1,3-mannosyltransferase homolog (S. cerevisiae)
hsa-miR-564	1	0	1	1	1	1	CYP46A1	cytochrome P450, family 46, subfamily A, polypeptide 1
hsa-miR-564	0	0	1	0	0	0	LOC643837	uncharacterized LOC643837
hsa-miR-564	0	0	1	1	0	0	SUGP1	SURP and G patch domain containing 1
hsa-miR-564	0	0	1	0	0	0	LOC283887	uncharacterized LOC283887
hsa-miR-564	1	0	1	1	0	0	PRMT8	protein arginine methyltransferase 8
hsa-miR-564	1	0	1	0	1	1	KIAA1456	KIAA1456
hsa-miR-564	1	0	1	1	1	1	KCND1	potassium voltage-gated channel, Shal-related subfamily, member 1
hsa-miR-564	1	0	1	1	1	1	PTPRU	protein tyrosine phosphatase, receptor type, U
hsa-miR-564	1	0	1	1	1	1	NDEL1	nudE nuclear distribution E homolog (A. nidulans)-like 1
hsa-miR-564	0	0	1	1	0	0	LAS1L	LAS1-like (S. cerevisiae)
hsa-miR-564	0	0	1	1	0	0	PSAPL1	prosaposin-like 1 (gene/pseudogene)
hsa-miR-564	0	0	1	0	0	0	CECR7	cat eye syndrome chromosome region, candidate 7 (non-protein coding)
hsa-miR-564	1	0	1	1	1	1	THTPA	thiamine triphosphatase
hsa-miR-564	1	0	1	1	1	1	SIK3	SIK family kinase 3
hsa-miR-564	0	0	1	1	0	0	SLC26A10	solute carrier family 26, member 10
hsa-miR-564	0	0	1	1	1	1	FRMPD2	FERM and PDZ domain containing 2
hsa-miR-564	0	0	1	1	0	0	C20orf27	chromosome 20 open reading frame 27
hsa-miR-564	1	0	1	0	1	1	CNTN2	contactin 2 (axonal)
hsa-miR-564	0	0	1	0	0	0	TMEM232	transmembrane protein 232
hsa-miR-564	0	0	1	1	1	1	DENND5A	DENN/MADD domain containing 5A
hsa-miR-564	1	0	1	1	0	0	ATXN7L3	ataxin 7-like 3
hsa-miR-564	0	0	1	1	0	0	CLDN4	claudin 4
hsa-miR-564	0	0	1	1	1	1	KLC4	kinesin light chain 4
hsa-miR-564	1	0	1	1	1	1	FMNL3	formin-like 3
hsa-miR-564	1	0	1	1	0	0	SLC30A3	solute carrier family 30 (zinc transporter), member 3
hsa-miR-564	1	0	1	1	1	1	SLC26A9	solute carrier family 26, member 9
hsa-miR-564	0	0	1	0	0	0	LOC285812	uncharacterized LOC285812
hsa-miR-564	0	0	1	1	0	0	GRINA	glutamate receptor, ionotropic, N-methyl D-aspartate-associated protein 1 (glutamate binding)
hsa-miR-564	1	0	1	1	1	1	NFYC	nuclear transcription factor Y, gamma
hsa-miR-564	1	0	1	1	1	1	EYA1	eyes absent homolog 1 (Drosophila)
hsa-miR-564	0	0	1	1	0	0	NCF1	neutrophil cytosolic factor 1
hsa-miR-564	0	0	1	1	0	0	C1orf86	chromosome 1 open reading frame 86
hsa-miR-564	0	0	1	1	0	0	TRIM46	tripartite motif containing 46
hsa-miR-564	1	0	1	0	1	1	KDM2A	lysine (K)-specific demethylase 2A
hsa-miR-564	0	0	1	1	0	0	WFIKKN1	WAP, follistatin/kazal, immunoglobulin, kunitz and netrin domain containing 1
hsa-miR-564	0	0	1	1	1	1	TBX19	T-box 19
hsa-miR-564	0	0	1	1	0	0	HEATR8	HEAT repeat containing 8
hsa-miR-564	0	0	1	0	0	0	LOC390660	FLJ00317 protein
hsa-miR-564	0	0	1	0	1	1	RUFY4	RUN and FYVE domain containing 4
hsa-miR-564	1	0	1	1	1	1	TAP2	transporter 2, ATP-binding cassette, sub-family B (MDR/TAP)
hsa-miR-564	1	0	1	1	1	1	CAMK2G	calcium/calmodulin-dependent protein kinase II gamma
hsa-miR-564	1	0	1	0	1	1	MAP3K3	mitogen-activated protein kinase kinase kinase 3
hsa-miR-564	0	0	1	1	0	0	NEK7	NIMA (never in mitosis gene a)-related kinase 7
hsa-miR-564	0	0	1	1	0	0	RIMBP3	RIMS binding protein 3
hsa-miR-564	0	0	1	1	1	1	AQP6	aquaporin 6, kidney specific
hsa-miR-564	0	0	1	1	0	0	LGI4	leucine-rich repeat LGI family, member 4
hsa-miR-564	0	0	1	1	0	0	TMEM91	transmembrane protein 91
hsa-miR-564	0	0	1	0	1	1	PLEKHM1P	pleckstrin homology domain containing, family M (with RUN domain) member 1 pseudogene
hsa-miR-564	1	0	1	0	0	0	NPEPL1	aminopeptidase-like 1
hsa-miR-564	1	0	1	0	1	1	JAZF1	JAZF zinc finger 1
hsa-miR-564	0	0	1	0	0	0	OIP5-AS1	OIP5 antisense RNA 1
hsa-miR-564	0	0	1	1	1	1	OSR2	odd-skipped related 2 (Drosophila)
hsa-miR-564	0	0	1	1	1	1	CRB1	crumbs homolog 1 (Drosophila)
hsa-miR-564	0	0	1	0	0	0	CLCN1	chloride channel, voltage-sensitive 1
hsa-miR-564	1	0	1	1	1	1	GGT7	gamma-glutamyltransferase 7
hsa-miR-564	0	0	1	0	0	0	FAM138C	family with sequence similarity 138, member C
hsa-miR-564	0	0	1	1	1	1	HMBOX1	homeobox containing 1
hsa-miR-564	1	0	1	1	1	1	RBM24	RNA binding motif protein 24
hsa-miR-564	1	0	1	1	0	0	ADAM15	ADAM metallopeptidase domain 15
hsa-miR-564	1	0	1	1	1	1	HMGA2	high mobility group AT-hook 2
hsa-miR-564	0	0	1	1	0	0	DHRS4	dehydrogenase/reductase (SDR family) member 4
hsa-miR-564	0	0	1	1	1	1	RHD	Rh blood group, D antigen
hsa-miR-564	1	0	1	1	0	0	PLXNB3	plexin B3
hsa-miR-564	1	0	1	1	1	1	NRGN	neurogranin (protein kinase C substrate, RC3)
hsa-miR-564	1	0	1	1	1	1	TSPAN14	tetraspanin 14
hsa-miR-564	1	0	1	0	1	1	DCAF10	DDB1 and CUL4 associated factor 10
hsa-miR-564	0	0	1	1	1	1	ARFGAP1	ADP-ribosylation factor GTPase activating protein 1
hsa-miR-564	1	0	1	1	1	1	TNPO3	transportin 3
hsa-miR-564	1	0	1	1	1	1	B4GALT3	UDP-Gal:betaGlcNAc beta 1,4- galactosyltransferase, polypeptide 3
hsa-miR-564	0	0	1	1	0	0	FLAD1	FAD1 flavin adenine dinucleotide synthetase homolog (S. cerevisiae)
hsa-miR-564	1	0	1	1	1	1	OTUD5	OTU domain containing 5
hsa-miR-564	0	0	1	1	1	1	ZNF771	zinc finger protein 771
hsa-miR-564	0	0	1	1	0	0	CAPNS1	calpain, small subunit 1
hsa-miR-564	0	0	1	1	0	0	KLHDC3	kelch domain containing 3
hsa-miR-564	1	0	1	1	1	1	DPH1	DPH1 homolog (S. cerevisiae)
hsa-miR-564	0	0	1	1	1	1	PTK7	PTK7 protein tyrosine kinase 7
hsa-miR-564	1	0	1	1	1	1	ZDHHC3	zinc finger, DHHC-type containing 3
hsa-miR-564	0	0	1	0	1	1	ZNF37A	zinc finger protein 37A
hsa-miR-564	1	0	1	0	1	1	ICMT	isoprenylcysteine carboxyl methyltransferase
hsa-miR-564	0	0	1	0	0	0	TCP11L2	t-complex 11 (mouse)-like 2
hsa-miR-564	0	0	1	0	0	0	LOC100130776	uncharacterized LOC100130776
hsa-miR-564	0	0	1	1	0	0	PRRG2	proline rich Gla (G-carboxyglutamic acid) 2
hsa-miR-564	1	0	1	1	1	1	EPHA4	EPH receptor A4
hsa-miR-564	0	0	1	0	0	0	CFL1P1	cofilin 1 (non-muscle) pseudogene 1
hsa-miR-564	0	0	1	0	1	1	MT1X	metallothionein 1X
hsa-miR-564	0	0	1	1	1	1	SNX17	sorting nexin 17
hsa-miR-564	0	0	1	1	0	0	TTC12	tetratricopeptide repeat domain 12
hsa-miR-564	1	0	1	1	1	1	CUL1	cullin 1
hsa-miR-564	0	0	1	1	0	0	CHERP	calcium homeostasis endoplasmic reticulum protein
hsa-miR-564	0	0	1	1	0	0	GGT1	gamma-glutamyltransferase 1
hsa-miR-564	0	0	1	1	1	1	TPPP3	tubulin polymerization-promoting protein family member 3
hsa-miR-564	1	0	1	1	1	1	CMIP	c-Maf inducing protein
hsa-miR-564	0	0	1	0	0	0	USP32P1	ubiquitin specific peptidase 32 pseudogene 1
hsa-miR-564	0	0	1	0	0	0	LOC339240	keratin 17 pseudogene
hsa-miR-564	1	0	1	1	1	1	KCNJ11	potassium inwardly-rectifying channel, subfamily J, member 11
hsa-miR-564	1	0	1	1	0	0	ZNF292	zinc finger protein 292
hsa-miR-564	0	0	1	1	0	0	AQP12B	aquaporin 12B
hsa-miR-564	0	0	1	0	1	1	PDGFC	platelet derived growth factor C
hsa-miR-564	0	0	1	1	1	1	FAM90A1	family with sequence similarity 90, member A1
hsa-miR-564	0	0	1	1	0	0	PTOV1	prostate tumor overexpressed 1
hsa-miR-564	0	0	1	0	0	0	LOC401176	uncharacterized LOC401176
hsa-miR-564	0	0	1	0	0	0	DKFZp686O1327	uncharacterized LOC401014
hsa-miR-564	0	0	1	0	1	1	LOC338758	uncharacterized LOC338758
hsa-miR-564	0	0	1	0	0	0	CLEC4GP1	C-type lectin domain family 4, member G pseudogene 1
hsa-miR-564	0	0	1	0	0	0	WASH2P	WAS protein family homolog 2 pseudogene
hsa-miR-564	0	0	1	1	1	1	ATP6V0B	ATPase, H+ transporting, lysosomal 21kDa, V0 subunit b
hsa-miR-564	0	0	1	1	0	0	GRIN2C	glutamate receptor, ionotropic, N-methyl D-aspartate 2C
hsa-miR-564	1	0	1	1	1	1	PRRG1	proline rich Gla (G-carboxyglutamic acid) 1
hsa-miR-564	1	0	1	1	1	1	ANXA4	annexin A4
hsa-miR-564	0	0	1	0	0	0	UBE2Q2P2	ubiquitin-conjugating enzyme E2Q family member 2 pseudogene 2
hsa-miR-564	1	0	1	0	1	1	MAGIX	MAGI family member, X-linked
hsa-miR-564	1	0	1	1	1	1	PDCD6IP	programmed cell death 6 interacting protein
hsa-miR-564	0	0	1	0	0	0	ULK4P1	unc-51-like kinase 4 (C. elegans) pseudogene 1
hsa-miR-564	0	0	1	0	0	0	LINC00152	long intergenic non-protein coding RNA 152
hsa-miR-564	0	0	1	0	0	0	OAZ3	ornithine decarboxylase antizyme 3
hsa-miR-564	0	0	1	1	0	0	DNHD1	dynein heavy chain domain 1
hsa-miR-564	0	0	1	1	0	0	ZNF703	zinc finger protein 703
hsa-miR-564	1	0	1	1	1	1	ST8SIA2	ST8 alpha-N-acetyl-neuraminide alpha-2,8-sialyltransferase 2
hsa-miR-564	0	0	1	1	0	0	IDUA	iduronidase, alpha-L-
hsa-miR-564	0	0	1	0	1	1	TCAIM	T cell activation inhibitor, mitochondrial
hsa-miR-564	1	0	1	1	1	1	TBP	TATA box binding protein
hsa-miR-564	0	0	1	0	0	0	LRRC37BP1	leucine rich repeat containing 37B pseudogene 1
hsa-miR-564	1	0	1	1	1	1	OSBP2	oxysterol binding protein 2
hsa-miR-564	0	0	1	1	0	0	WDR90	WD repeat domain 90
hsa-miR-564	0	0	1	1	0	0	HSF4	heat shock transcription factor 4
hsa-miR-564	1	0	1	1	1	1	PHC2	polyhomeotic homolog 2 (Drosophila)
hsa-miR-564	0	0	1	1	1	1	C10orf82	chromosome 10 open reading frame 82
hsa-miR-564	0	0	1	1	0	0	RPS24	ribosomal protein S24
hsa-miR-564	0	0	1	1	0	0	ANKRD33	ankyrin repeat domain 33
hsa-miR-564	0	0	1	1	1	1	DUSP19	dual specificity phosphatase 19
hsa-miR-564	1	0	1	1	1	1	DDAH1	dimethylarginine dimethylaminohydrolase 1
hsa-miR-564	0	0	1	1	1	1	CCNT2	cyclin T2
hsa-miR-564	1	0	1	1	1	1	NFIB	nuclear factor I/B
hsa-miR-564	1	0	1	1	1	1	PTER	phosphotriesterase related
hsa-miR-564	1	0	1	0	1	1	TTL	tubulin tyrosine ligase
hsa-miR-564	0	0	1	0	1	1	CD59	CD59 molecule, complement regulatory protein
hsa-miR-564	1	0	1	1	1	1	ARHGDIA	Rho GDP dissociation inhibitor (GDI) alpha
hsa-miR-564	0	0	1	1	1	1	DNM1	dynamin 1
hsa-miR-564	1	0	1	1	1	1	ARF1	ADP-ribosylation factor 1
hsa-miR-564	0	0	1	0	0	0	RPS16P10	ribosomal protein S16 pseudogene 10
hsa-miR-564	1	0	1	1	1	1	PCGF2	polycomb group ring finger 2
hsa-miR-564	0	0	1	0	0	0	LOC400768	uncharacterized LOC400768
hsa-miR-564	1	0	1	1	1	1	SETD8	SET domain containing (lysine methyltransferase) 8
hsa-miR-564	1	0	1	1	1	1	FGF11	fibroblast growth factor 11
hsa-miR-564	0	0	1	1	1	1	COPS7A	COP9 constitutive photomorphogenic homolog subunit 7A (Arabidopsis)
hsa-miR-564	1	0	1	1	1	1	CLTA	clathrin, light chain A
hsa-miR-564	0	0	1	1	0	0	FAM195A	family with sequence similarity 195, member A
hsa-miR-564	0	0	1	1	0	0	WISP2	WNT1 inducible signaling pathway protein 2
hsa-miR-564	0	0	1	1	1	1	HMGB2	high mobility group box 2
hsa-miR-564	0	0	1	1	0	0	IKBKG	inhibitor of kappa light polypeptide gene enhancer in B-cells, kinase gamma
hsa-miR-564	0	0	1	1	1	1	ANKRD53	ankyrin repeat domain 53
hsa-miR-564	0	0	1	1	1	1	STON1	stonin 1
hsa-miR-564	0	0	1	0	1	1	WASH3P	WAS protein family homolog 3 pseudogene
hsa-miR-564	0	0	1	1	0	0	PDK3	pyruvate dehydrogenase kinase, isozyme 3
hsa-miR-564	1	0	1	1	1	1	BAMBI	BMP and activin membrane-bound inhibitor homolog (Xenopus laevis)
hsa-miR-564	1	0	1	1	1	1	PTBP1	polypyrimidine tract binding protein 1
hsa-miR-564	1	0	1	1	1	1	SSBP3	single stranded DNA binding protein 3
hsa-miR-564	1	0	1	1	0	0	MTX1	metaxin 1
hsa-miR-564	1	0	1	1	1	1	PTPN18	protein tyrosine phosphatase, non-receptor type 18 (brain-derived)
hsa-miR-564	0	0	1	0	0	0	ARRDC1	arrestin domain containing 1
hsa-miR-564	1	0	1	1	1	1	TLK2	tousled-like kinase 2
hsa-miR-564	0	0	1	1	0	0	WDR43	WD repeat domain 43
hsa-miR-564	1	0	1	1	1	1	HN1	hematological and neurological expressed 1
hsa-miR-564	0	0	1	1	0	0	STUB1	STIP1 homology and U-box containing protein 1, E3 ubiquitin protein ligase
hsa-miR-564	0	0	1	1	0	0	FAM57B	family with sequence similarity 57, member B
hsa-miR-564	1	0	1	1	1	1	CNBP	CCHC-type zinc finger, nucleic acid binding protein
hsa-miR-564	1	0	1	1	1	1	NFYB	nuclear transcription factor Y, beta
hsa-miR-564	0	0	1	1	0	0	ATP6V0C	ATPase, H+ transporting, lysosomal 16kDa, V0 subunit c
hsa-miR-564	0	0	1	1	1	1	SLCO4A1	solute carrier organic anion transporter family, member 4A1
hsa-miR-564	1	0	1	1	0	0	INO80E	INO80 complex subunit E
hsa-miR-564	0	0	1	0	0	0	PRMT1	protein arginine methyltransferase 1
hsa-miR-564	1	0	1	1	1	1	YWHAE	tyrosine 3-monooxygenase/tryptophan 5-monooxygenase activation protein, epsilon polypeptide
hsa-miR-564	0	0	1	1	1	1	ZNF599	zinc finger protein 599
hsa-miR-564	1	0	1	1	1	1	JUNB	jun B proto-oncogene
hsa-miR-564	0	0	1	1	0	0	IL11RA	interleukin 11 receptor, alpha
hsa-miR-564	1	0	1	1	1	1	TARBP2	TAR (HIV-1) RNA binding protein 2
hsa-miR-564	1	0	1	1	1	1	KIAA2018	KIAA2018
hsa-miR-564	1	0	1	1	1	1	NAPEPLD	N-acyl phosphatidylethanolamine phospholipase D
hsa-miR-564	0	0	1	1	0	0	STK25	serine/threonine kinase 25
hsa-miR-564	0	0	1	1	1	1	MOBP	myelin-associated oligodendrocyte basic protein
hsa-miR-564	1	0	1	1	1	1	SP2	Sp2 transcription factor
hsa-miR-564	0	0	1	0	0	0	FAM226A	family with sequence similarity 226, member A (non-protein coding)
hsa-miR-564	0	0	1	0	0	0	GPR144	G protein-coupled receptor 144
hsa-miR-564	1	0	1	1	1	1	TPM1	tropomyosin 1 (alpha)
hsa-miR-564	0	0	1	1	0	0	GGT2	gamma-glutamyltransferase 2
hsa-miR-564	1	0	1	0	1	1	ITGB3	integrin, beta 3 (platelet glycoprotein IIIa, antigen CD61)
hsa-miR-564	1	0	1	1	1	1	LEP	leptin
hsa-miR-564	1	0	1	1	1	1	ATXN1	ataxin 1
hsa-miR-564	0	0	1	1	0	0	TGM1	transglutaminase 1 (K polypeptide epidermal type I, protein-glutamine-gamma-glutamyltransferase)
hsa-miR-564	1	0	1	0	1	1	PAFAH1B1	platelet-activating factor acetylhydrolase 1b, regulatory subunit 1 (45kDa)
hsa-miR-564	0	0	1	1	1	1	IGF2	insulin-like growth factor 2 (somatomedin A)
hsa-miR-564	1	0	1	1	1	1	ADRA1A	adrenoceptor alpha 1A
hsa-miR-564	1	0	1	0	1	1	KCNJ2	potassium inwardly-rectifying channel, subfamily J, member 2
hsa-miR-564	1	0	1	0	1	1	BMF	Bcl2 modifying factor
hsa-miR-564	1	0	1	1	1	1	EDA	ectodysplasin A
hsa-miR-564	0	0	1	1	1	1	RYK	receptor-like tyrosine kinase
hsa-miR-564	1	0	1	0	1	1	PDPN	podoplanin
hsa-miR-564	1	0	1	1	1	1	BRWD1	bromodomain and WD repeat domain containing 1
hsa-miR-564	1	0	1	0	1	1	SS18	synovial sarcoma translocation, chromosome 18
hsa-miR-564	1	0	1	1	1	1	CTDSPL	CTD (carboxy-terminal domain, RNA polymerase II, polypeptide A) small phosphatase-like
hsa-miR-564	1	0	1	1	1	1	BCAP29	B-cell receptor-associated protein 29
hsa-miR-564	0	0	1	1	0	0	CST9	cystatin 9 (testatin)
hsa-miR-564	1	0	1	0	1	1	CREB5	cAMP responsive element binding protein 5
hsa-miR-564	0	0	1	0	0	0	LOC441956	uncharacterized LOC441956
hsa-miR-564	1	0	1	1	1	1	NTRK2	neurotrophic tyrosine kinase, receptor, type 2
hsa-miR-564	1	0	1	0	1	1	BCL7A	B-cell CLL/lymphoma 7A
hsa-miR-564	1	0	1	0	1	1	TNRC6B	trinucleotide repeat containing 6B
hsa-miR-564	1	0	1	1	1	1	AFF3	AF4/FMR2 family, member 3
hsa-miR-564	1	0	1	0	1	1	ANO6	anoctamin 6
hsa-miR-564	1	0	1	1	1	1	UGGT1	UDP-glucose glycoprotein glucosyltransferase 1
hsa-miR-564	1	0	1	1	1	1	STK24	serine/threonine kinase 24
hsa-miR-564	1	0	1	1	1	1	AGAP1	ArfGAP with GTPase domain, ankyrin repeat and PH domain 1
hsa-miR-564	0	0	1	1	1	1	REV1	REV1, polymerase (DNA directed)
hsa-miR-564	1	0	1	1	1	1	DLX1	distal-less homeobox 1
hsa-miR-564	0	0	1	1	1	1	ATAD3C	ATPase family, AAA domain containing 3C
hsa-miR-564	0	0	1	1	1	1	FRMPD2P1	FERM and PDZ domain containing 2 pseudogene 1
hsa-miR-564	1	0	1	0	1	1	SRGAP2	SLIT-ROBO Rho GTPase activating protein 2
hsa-miR-564	0	0	1	1	1	1	SLC6A3	solute carrier family 6 (neurotransmitter transporter, dopamine), member 3
hsa-miR-564	1	0	1	1	1	1	METTL9	methyltransferase like 9
hsa-miR-564	1	0	1	1	1	1	ATG9A	autophagy related 9A
hsa-miR-564	1	0	1	1	1	1	PRR3	proline rich 3
hsa-miR-564	0	0	1	1	0	0	VPS37D	vacuolar protein sorting 37 homolog D (S. cerevisiae)
hsa-miR-564	1	0	1	1	0	0	DLGAP3	discs, large (Drosophila) homolog-associated protein 3
hsa-miR-564	1	0	1	1	1	1	SHANK3	SH3 and multiple ankyrin repeat domains 3
hsa-miR-564	0	0	1	0	0	0	C16orf90	chromosome 16 open reading frame 90
hsa-miR-564	1	0	1	1	1	1	MGA	MAX gene associated
hsa-miR-564	1	0	1	1	1	1	REPS2	RALBP1 associated Eps domain containing 2
hsa-miR-564	0	0	1	1	1	1	G6PC2	glucose-6-phosphatase, catalytic, 2
hsa-miR-564	1	0	1	0	1	1	PDE5A	phosphodiesterase 5A, cGMP-specific
hsa-miR-564	1	0	1	0	1	1	EFNB3	ephrin-B3
hsa-miR-564	1	0	1	0	1	1	B4GALT1	UDP-Gal:betaGlcNAc beta 1,4- galactosyltransferase, polypeptide 1
hsa-miR-564	0	0	1	1	0	0	CXCR5	chemokine (C-X-C motif) receptor 5
hsa-miR-564	1	0	1	0	1	1	BMP8B	bone morphogenetic protein 8b
hsa-miR-564	1	0	1	1	1	1	CENPB	centromere protein B, 80kDa
hsa-miR-564	1	0	1	1	1	1	MASP1	mannan-binding lectin serine peptidase 1 (C4/C2 activating component of Ra-reactive factor)
hsa-miR-564	1	0	1	1	1	1	CSNK2A1	casein kinase 2, alpha 1 polypeptide
hsa-miR-564	1	0	1	1	1	1	E2F3	E2F transcription factor 3
hsa-miR-564	0	0	1	1	0	0	EIF6	eukaryotic translation initiation factor 6
hsa-miR-564	1	0	1	1	1	1	LIFR	leukemia inhibitory factor receptor alpha
hsa-miR-564	1	0	1	1	1	1	MAFG	v-maf musculoaponeurotic fibrosarcoma oncogene homolog G (avian)
hsa-miR-564	0	0	1	1	1	1	PBX1	pre-B-cell leukemia homeobox 1
hsa-miR-564	0	0	1	1	0	0	PI3	peptidase inhibitor 3, skin-derived
hsa-miR-564	0	0	1	1	1	1	SEPT5	septin 5
hsa-miR-564	1	0	1	1	1	1	PPP2R1B	protein phosphatase 2, regulatory subunit A, beta
hsa-miR-564	1	0	1	1	1	1	PRKD1	protein kinase D1
hsa-miR-564	1	0	1	1	1	1	PTPN9	protein tyrosine phosphatase, non-receptor type 9
hsa-miR-564	1	0	1	1	0	0	RFX1	regulatory factor X, 1 (influences HLA class II expression)
hsa-miR-564	0	0	1	1	1	1	SDC2	syndecan 2
hsa-miR-564	1	0	1	0	1	1	ST6GAL1	ST6 beta-galactosamide alpha-2,6-sialyltranferase 1
hsa-miR-564	1	0	1	1	1	1	SKI	v-ski sarcoma viral oncogene homolog (avian)
hsa-miR-564	1	0	1	1	1	1	SMARCC1	SWI/SNF related, matrix associated, actin dependent regulator of chromatin, subfamily c, member 1
hsa-miR-564	1	0	1	1	1	1	SRF	serum response factor (c-fos serum response element-binding transcription factor)
hsa-miR-564	1	0	1	1	1	1	TFAP4	transcription factor AP-4 (activating enhancer binding protein 4)
hsa-miR-564	1	0	1	1	1	1	NR2E1	nuclear receptor subfamily 2, group E, member 1
hsa-miR-564	1	0	1	0	1	1	TUB	tubby homolog (mouse)
hsa-miR-564	1	0	1	1	1	1	ZIC3	Zic family member 3
hsa-miR-564	0	0	1	1	0	0	AP2S1	adaptor-related protein complex 2, sigma 1 subunit
hsa-miR-564	1	0	1	1	1	1	GMFB	glia maturation factor, beta
hsa-miR-564	1	0	1	1	1	1	MFHAS1	malignant fibrous histiocytoma amplified sequence 1
hsa-miR-564	1	0	1	1	1	1	DBN1	drebrin 1
hsa-miR-564	1	0	1	1	1	1	MLLT3	myeloid/lymphoid or mixed-lineage leukemia (trithorax homolog, Drosophila); translocated to, 3
hsa-miR-564	1	0	1	0	1	1	SCN2B	sodium channel, voltage-gated, type II, beta subunit
hsa-miR-564	1	0	1	1	1	1	BAP1	BRCA1 associated protein-1 (ubiquitin carboxy-terminal hydrolase)
hsa-miR-564	0	0	1	1	1	1	LIN7A	lin-7 homolog A (C. elegans)
hsa-miR-564	0	0	1	1	1	1	TAOK2	TAO kinase 2
hsa-miR-564	1	0	1	1	1	1	KIF3B	kinesin family member 3B
hsa-miR-564	0	0	1	1	1	1	XYLB	xylulokinase homolog (H. influenzae)
hsa-miR-564	1	0	1	1	1	1	LAMC2	laminin, gamma 2
hsa-miR-564	0	0	1	1	1	1	BCAM	basal cell adhesion molecule (Lutheran blood group)
hsa-miR-564	0	0	1	1	0	0	KCNK7	potassium channel, subfamily K, member 7
hsa-miR-564	1	0	1	1	1	1	CTDSP2	CTD (carboxy-terminal domain, RNA polymerase II, polypeptide A) small phosphatase 2
hsa-miR-564	1	0	1	0	1	1	DCAF7	DDB1 and CUL4 associated factor 7
hsa-miR-564	1	0	1	1	1	1	TMEM50B	transmembrane protein 50B
hsa-miR-564	1	0	1	1	1	1	CDK16	cyclin-dependent kinase 16
hsa-miR-564	1	0	1	1	1	1	SMC1A	structural maintenance of chromosomes 1A
hsa-miR-564	1	0	1	0	1	1	MXD4	MAX dimerization protein 4
hsa-miR-564	1	0	1	1	1	1	MMP24	matrix metallopeptidase 24 (membrane-inserted)
hsa-miR-564	1	0	1	1	1	1	RAPGEF4	Rap guanine nucleotide exchange factor (GEF) 4
hsa-miR-564	0	0	1	1	0	0	USF1	upstream transcription factor 1
hsa-miR-564	1	0	1	1	1	1	ZIC2	Zic family member 2
hsa-miR-564	0	0	1	1	1	1	HRH3	histamine receptor H3
hsa-miR-564	0	0	1	1	1	1	N6AMT1	N-6 adenine-specific DNA methyltransferase 1 (putative)
hsa-miR-564	0	0	1	1	0	0	PRSS50	protease, serine, 50
hsa-miR-564	0	0	1	1	0	0	ZDHHC8	zinc finger, DHHC-type containing 8
hsa-miR-564	0	0	1	0	1	1	EMR2	egf-like module containing, mucin-like, hormone receptor-like 2
hsa-miR-564	1	0	1	1	1	1	LYPD3	LY6/PLAUR domain containing 3
hsa-miR-564	1	0	1	1	1	1	EHD3	EH-domain containing 3
hsa-miR-564	0	0	1	1	1	1	FAM53B	family with sequence similarity 53, member B
hsa-miR-564	0	0	1	1	0	0	SETD1A	SET domain containing 1A
hsa-miR-564	0	0	1	1	1	1	TOX4	TOX high mobility group box family member 4
hsa-miR-564	0	0	1	0	1	1	PPM1E	protein phosphatase, Mg2+/Mn2+ dependent, 1E
hsa-miR-564	1	0	1	1	1	1	CUX2	cut-like homeobox 2
hsa-miR-564	1	0	1	1	1	1	PHF15	PHD finger protein 15
hsa-miR-564	1	0	1	0	1	1	LARP1	La ribonucleoprotein domain family, member 1
hsa-miR-564	0	0	1	1	1	1	TMEM87A	transmembrane protein 87A
hsa-miR-564	1	0	1	1	1	1	PLA2G3	phospholipase A2, group III
hsa-miR-564	1	0	1	1	1	1	VGLL3	vestigial like 3 (Drosophila)
hsa-miR-564	0	0	1	1	1	1	GNAS	GNAS complex locus
hsa-miR-564	1	0	1	0	1	1	KLHL3	kelch-like 3 (Drosophila)
hsa-miR-564	1	0	1	1	1	1	PLXNA3	plexin A3
hsa-miR-564	1	0	1	1	0	0	C17orf59	chromosome 17 open reading frame 59
hsa-miR-564	0	0	1	1	1	1	WHSC1L1	Wolf-Hirschhorn syndrome candidate 1-like 1
hsa-miR-564	1	0	1	1	0	0	SLC17A7	solute carrier family 17 (sodium-dependent inorganic phosphate cotransporter), member 7
hsa-miR-564	0	0	1	1	0	0	PDXP	pyridoxal (pyridoxine, vitamin B6) phosphatase
hsa-miR-564	0	0	1	0	1	1	TMEM63C	transmembrane protein 63C
hsa-miR-564	1	0	1	1	1	1	SLC12A5	solute carrier family 12 (potassium/chloride transporter), member 5
hsa-miR-564	1	0	1	1	1	1	USP31	ubiquitin specific peptidase 31
hsa-miR-564	1	0	1	1	1	1	NLGN2	neuroligin 2
hsa-miR-564	1	0	1	1	1	1	RANBP10	RAN binding protein 10
hsa-miR-564	0	0	1	1	0	0	MYL6	myosin, light chain 6, alkali, smooth muscle and non-muscle
hsa-miR-564	1	0	1	0	1	1	MCL1	myeloid cell leukemia sequence 1 (BCL2-related)
hsa-miR-564	1	0	1	0	1	1	CSNK1G1	casein kinase 1, gamma 1
hsa-miR-564	1	0	1	1	1	1	GIGYF1	GRB10 interacting GYF protein 1
hsa-miR-564	1	0	1	1	1	1	FAM160B2	family with sequence similarity 160, member B2
hsa-miR-564	0	0	1	1	0	0	CARD14	caspase recruitment domain family, member 14
hsa-miR-564	0	0	1	1	0	0	ZBED2	zinc finger, BED-type containing 2
hsa-miR-564	0	0	1	1	1	1	GLT25D1	glycosyltransferase 25 domain containing 1
hsa-miR-564	0	0	1	1	1	1	SH3D21	SH3 domain containing 21
hsa-miR-564	0	0	1	1	0	0	BAIAP2L2	BAI1-associated protein 2-like 2
hsa-miR-564	1	0	1	1	1	1	JHDM1D	jumonji C domain containing histone demethylase 1 homolog D (S. cerevisiae)
hsa-miR-564	1	0	1	0	1	1	C1orf21	chromosome 1 open reading frame 21
hsa-miR-564	1	0	1	1	1	1	RAB1B	RAB1B, member RAS oncogene family
hsa-miR-564	1	0	1	1	0	0	TCF7L1	transcription factor 7-like 1 (T-cell specific, HMG-box)
hsa-miR-564	1	0	1	1	1	1	ZNRF1	zinc and ring finger 1, E3 ubiquitin protein ligase
hsa-miR-564	0	0	1	0	1	1	LDOC1L	leucine zipper, down-regulated in cancer 1-like
hsa-miR-564	0	0	1	1	1	1	JAGN1	jagunal homolog 1 (Drosophila)
hsa-miR-564	1	0	1	1	1	1	RAB2B	RAB2B, member RAS oncogene family
hsa-miR-564	1	0	1	0	1	1	C5orf62	chromosome 5 open reading frame 62
hsa-miR-564	1	0	1	1	1	1	FOXQ1	forkhead box Q1
hsa-miR-564	1	0	1	1	1	1	ADAM19	ADAM metallopeptidase domain 19
hsa-miR-564	1	0	1	1	0	0	CCDC120	coiled-coil domain containing 120
hsa-miR-564	1	0	1	1	1	1	XKR4	XK, Kell blood group complex subunit-related family, member 4
hsa-miR-564	0	0	1	1	0	0	COL6A2	collagen, type VI, alpha 2
hsa-miR-564	0	0	1	1	0	0	GGTLC1	gamma-glutamyltransferase light chain 1
hsa-miR-564	1	0	1	0	1	1	SP1	Sp1 transcription factor
hsa-miR-564	1	0	1	1	0	0	LIPH	lipase, member H
hsa-miR-564	1	0	1	1	1	1	UBQLNL	ubiquilin-like
hsa-miR-564	1	0	1	0	1	1	DIRAS1	DIRAS family, GTP-binding RAS-like 1
hsa-miR-564	1	0	1	1	1	1	UBTD2	ubiquitin domain containing 2
hsa-miR-564	1	0	1	0	1	1	SYT11	synaptotagmin XI
hsa-miR-564	1	0	1	1	1	1	LSM12	LSM12 homolog (S. cerevisiae)
hsa-miR-564	1	0	1	0	1	1	TMEM154	transmembrane protein 154
hsa-miR-564	1	0	1	0	1	1	ST6GALNAC3	ST6 (alpha-N-acetyl-neuraminyl-2,3-beta-galactosyl-1,3)-N-acetylgalactosaminide alpha-2,6-sialyltransferase 3
hsa-miR-564	1	0	1	1	0	0	TMEM86A	transmembrane protein 86A
hsa-miR-564	1	0	1	1	1	1	DAZAP1	DAZ associated protein 1
hsa-miR-564	1	0	1	1	1	1	PIP5KL1	phosphatidylinositol-4-phosphate 5-kinase-like 1
hsa-miR-564	1	0	1	1	1	1	SLC9A9	solute carrier family 9, subfamily A (NHE9, cation proton antiporter 9), member 9
hsa-miR-564	1	0	1	1	1	1	SLC41A1	solute carrier family 41, member 1
hsa-miR-564	1	0	1	1	0	0	JPH2	junctophilin 2
hsa-miR-564	0	0	1	1	1	1	ATPIF1	ATPase inhibitory factor 1
hsa-miR-564	0	0	1	1	1	1	NPAS4	neuronal PAS domain protein 4
hsa-miR-564	1	0	1	1	1	1	ZSCAN22	zinc finger and SCAN domain containing 22
hsa-miR-564	1	0	1	1	1	1	RBM38	RNA binding motif protein 38
hsa-miR-564	0	0	1	1	0	0	RPS19BP1	ribosomal protein S19 binding protein 1
hsa-miR-564	1	0	1	0	1	1	PRICKLE2	prickle homolog 2 (Drosophila)
hsa-miR-564	1	0	1	1	1	1	CXCL12	chemokine (C-X-C motif) ligand 12
hsa-miR-564	1	0	1	1	1	1	MOG	myelin oligodendrocyte glycoprotein
hsa-miR-564	0	0	1	1	0	0	NPSR1	neuropeptide S receptor 1
hsa-miR-564	0	0	1	1	1	1	C4orf50	chromosome 4 open reading frame 50
hsa-miR-564	0	0	1	0	0	0	SNORA68	small nucleolar RNA, H/ACA box 68
hsa-miR-564	0	0	1	0	0	0	ESRRAP2	estrogen-related receptor alpha pseudogene 2
hsa-miR-564	0	0	1	0	0	0	MT1L	metallothionein 1L (gene/pseudogene)
hsa-miR-564	0	0	1	0	0	0	MIR155HG	MIR155 host gene (non-protein coding)
hsa-miR-564	0	0	1	0	0	0	TPI1P2	triosephosphate isomerase 1 pseudogene 2
hsa-miR-564	0	0	1	0	0	0	NXF4	nuclear RNA export factor 4 pseudogene
hsa-miR-564	0	0	1	0	0	0	SLC25A3P1	solute carrier family 25 (mitochondrial carrier; phosphate carrier), member 3 pseudogene 1
hsa-miR-564	0	0	1	0	0	0	TOP1P1	topoisomerase (DNA) I pseudogene 1
hsa-miR-564	0	0	1	0	0	0	SIGLEC16	sialic acid binding Ig-like lectin 16 (gene/pseudogene)
hsa-miR-564	0	0	1	0	0	0	SNX29P2	sorting nexin 29 pseudogene 2
hsa-miR-564	1	0	1	1	1	1	CASP2	caspase 2, apoptosis-related cysteine peptidase
hsa-miR-564	1	0	1	1	1	1	CBLB	Cbl proto-oncogene, E3 ubiquitin protein ligase B
hsa-miR-564	0	0	1	0	1	1	SRSF5	serine/arginine-rich splicing factor 5
hsa-miR-564	1	0	1	1	1	1	TCF3	transcription factor 3 (E2A immunoglobulin enhancer binding factors E12/E47)
hsa-miR-564	0	0	1	0	0	0	MUC5AC	mucin 5AC, oligomeric mucus/gel-forming
hsa-miR-564	0	0	1	1	1	1	C2orf56	chromosome 2 open reading frame 56
hsa-miR-564	0	0	0	1	1	1	CCL18	chemokine (C-C motif) ligand 18 (pulmonary and activation-regulated)
hsa-miR-564	0	0	1	1	0	0	RHBDD2	rhomboid domain containing 2
hsa-miR-564	0	0	0	1	0	0	IL32	interleukin 32
hsa-miR-564	1	0	1	1	1	1	TSPAN9	tetraspanin 9
hsa-miR-564	0	0	0	1	1	1	MRI1	methylthioribose-1-phosphate isomerase homolog (S. cerevisiae)
hsa-miR-564	0	0	0	1	0	0	BEST2	bestrophin 2
hsa-miR-564	0	0	0	1	0	0	TMEM161A	transmembrane protein 161A
hsa-miR-564	0	0	1	1	1	1	BCAR1	breast cancer anti-estrogen resistance 1
hsa-miR-564	0	0	1	1	0	0	HSD17B10	hydroxysteroid (17-beta) dehydrogenase 10
hsa-miR-564	0	0	1	1	1	1	IMPG2	interphotoreceptor matrix proteoglycan 2
hsa-miR-564	1	0	1	1	1	1	ACTN1	actinin, alpha 1
hsa-miR-564	1	0	1	1	1	1	LYRM2	LYR motif containing 2
hsa-miR-564	0	0	1	1	0	0	UQCRC1	ubiquinol-cytochrome c reductase core protein I
hsa-miR-564	0	0	0	1	0	0	NAT14	N-acetyltransferase 14 (GCN5-related, putative)
hsa-miR-564	1	0	1	1	0	0	OSGEP	O-sialoglycoprotein endopeptidase
hsa-miR-564	0	0	0	1	0	0	SLC25A1	solute carrier family 25 (mitochondrial carrier; citrate transporter), member 1
hsa-miR-564	0	0	0	1	0	0	GGTLC2	gamma-glutamyltransferase light chain 2
hsa-miR-564	1	0	1	1	1	1	ANKRD54	ankyrin repeat domain 54
hsa-miR-564	0	0	0	1	0	0	LMF2	lipase maturation factor 2
hsa-miR-564	0	0	1	1	1	1	RASL10A	RAS-like, family 10, member A
hsa-miR-564	0	0	1	1	1	1	ATP6V1D	ATPase, H+ transporting, lysosomal 34kDa, V1 subunit D
hsa-miR-564	0	0	1	1	1	1	TCFL5	transcription factor-like 5 (basic helix-loop-helix)
hsa-miR-564	0	0	1	1	0	0	TRIB3	tribbles homolog 3 (Drosophila)
hsa-miR-564	0	0	1	1	0	0	USP11	ubiquitin specific peptidase 11
hsa-miR-564	1	0	1	1	1	1	MMP2	matrix metallopeptidase 2 (gelatinase A, 72kDa gelatinase, 72kDa type IV collagenase)
hsa-miR-564	0	0	0	1	0	0	PDIA2	protein disulfide isomerase family A, member 2
hsa-miR-564	0	0	1	1	1	1	MTFMT	mitochondrial methionyl-tRNA formyltransferase
hsa-miR-564	0	0	1	1	0	0	CTSH	cathepsin H
hsa-miR-564	0	0	1	1	1	1	IL12RB1	interleukin 12 receptor, beta 1
hsa-miR-564	0	0	0	1	1	1	PEX11G	peroxisomal biogenesis factor 11 gamma
hsa-miR-564	0	0	1	1	0	0	SNAPC2	small nuclear RNA activating complex, polypeptide 2, 45kDa
hsa-miR-564	0	0	0	1	0	0	C19orf53	chromosome 19 open reading frame 53
hsa-miR-564	0	0	0	1	1	1	TGFB1	transforming growth factor, beta 1
hsa-miR-564	0	0	1	1	0	0	CDC37	cell division cycle 37 homolog (S. cerevisiae)
hsa-miR-564	0	0	0	1	0	0	ZNF574	zinc finger protein 574
hsa-miR-564	0	0	0	1	0	0	CPA2	carboxypeptidase A2 (pancreatic)
hsa-miR-564	0	0	1	1	0	0	RBM28	RNA binding motif protein 28
hsa-miR-564	0	0	0	1	0	0	MOGAT3	monoacylglycerol O-acyltransferase 3
hsa-miR-564	0	0	1	1	0	0	PLOD3	procollagen-lysine, 2-oxoglutarate 5-dioxygenase 3
hsa-miR-564	1	0	1	1	0	0	CLIP2	CAP-GLY domain containing linker protein 2
hsa-miR-564	0	0	1	1	1	1	TNFSF8	tumor necrosis factor (ligand) superfamily, member 8
hsa-miR-564	0	0	1	1	0	0	AATF	apoptosis antagonizing transcription factor
hsa-miR-564	0	0	0	1	1	1	ALDH3A1	aldehyde dehydrogenase 3 family, member A1
hsa-miR-564	1	0	1	1	1	1	SYNGR2	synaptogyrin 2
hsa-miR-564	0	0	0	1	1	1	CD82	CD82 molecule
hsa-miR-564	0	0	0	1	0	0	DBX1	developing brain homeobox 1
hsa-miR-564	0	0	1	1	1	1	PUS3	pseudouridylate synthase 3
hsa-miR-564	0	0	1	1	1	1	PANX1	pannexin 1
hsa-miR-564	0	0	0	1	1	1	GNB3	guanine nucleotide binding protein (G protein), beta polypeptide 3
hsa-miR-564	0	0	0	1	1	1	CDCA3	cell division cycle associated 3
hsa-miR-564	0	0	1	1	0	0	PKD2L2	polycystic kidney disease 2-like 2
hsa-miR-564	0	0	0	1	0	0	BNIP1	BCL2/adenovirus E1B 19kDa interacting protein 1
hsa-miR-564	0	0	0	1	1	1	DOK1	docking protein 1, 62kDa (downstream of tyrosine kinase 1)
hsa-miR-564	0	0	1	1	1	1	FANCL	Fanconi anemia, complementation group L
hsa-miR-564	1	0	1	1	0	0	CCDC92	coiled-coil domain containing 92
hsa-miR-564	0	0	1	1	0	0	FKBP15	FK506 binding protein 15, 133kDa
hsa-miR-564	0	0	1	1	1	1	IFT43	intraflagellar transport 43 homolog (Chlamydomonas)
hsa-miR-564	0	0	1	1	0	0	EXOSC8	exosome component 8
hsa-miR-564	0	0	0	1	0	0	GJA8	gap junction protein, alpha 8, 50kDa
hsa-miR-564	0	0	1	1	0	0	NPY	neuropeptide Y
hsa-miR-564	0	0	0	1	0	0	RAMP3	receptor (G protein-coupled) activity modifying protein 3
hsa-miR-564	0	0	0	1	0	0	ACADS	acyl-CoA dehydrogenase, C-2 to C-3 short chain
hsa-miR-564	0	0	1	1	0	0	STX10	syntaxin 10
hsa-miR-564	0	0	1	1	0	0	IL9R	interleukin 9 receptor
hsa-miR-564	0	0	1	1	0	0	LIPE	lipase, hormone-sensitive
hsa-miR-564	0	0	1	1	1	1	UNC5CL	unc-5 homolog C (C. elegans)-like
hsa-miR-564	0	0	0	1	0	0	TNFSF14	tumor necrosis factor (ligand) superfamily, member 14
hsa-miR-564	1	0	0	1	0	0	PRR12	proline rich 12
hsa-miR-564	0	0	1	1	1	1	DLGAP5	discs, large (Drosophila) homolog-associated protein 5
hsa-miR-564	1	0	1	1	1	1	HIVEP3	human immunodeficiency virus type I enhancer binding protein 3
hsa-miR-564	1	0	1	1	0	0	ABHD8	abhydrolase domain containing 8
hsa-miR-564	1	0	1	1	0	0	SYNGR3	synaptogyrin 3
hsa-miR-564	0	0	0	1	0	0	GNG13	guanine nucleotide binding protein (G protein), gamma 13
hsa-miR-564	0	0	0	1	0	0	TICAM1	toll-like receptor adaptor molecule 1
hsa-miR-564	1	0	1	1	0	0	CCDC136	coiled-coil domain containing 136
hsa-miR-564	1	0	1	1	1	1	IVD	isovaleryl-CoA dehydrogenase
hsa-miR-564	0	0	0	1	0	0	CLEC11A	C-type lectin domain family 11, member A
hsa-miR-564	0	0	0	1	1	1	SIGLEC9	sialic acid binding Ig-like lectin 9
hsa-miR-564	0	0	1	1	1	1	ANGEL1	angel homolog 1 (Drosophila)
hsa-miR-564	0	0	1	1	1	1	IGSF21	immunoglobin superfamily, member 21
hsa-miR-564	0	0	0	1	0	0	DDX11	DEAD/H (Asp-Glu-Ala-Asp/His) box helicase 11
hsa-miR-564	0	0	1	1	1	1	KIF16B	kinesin family member 16B
hsa-miR-564	0	0	1	1	0	0	KRT5	keratin 5
hsa-miR-564	0	0	0	1	0	0	GAMT	guanidinoacetate N-methyltransferase
hsa-miR-564	1	0	0	1	1	1	ELOF1	elongation factor 1 homolog (S. cerevisiae)
hsa-miR-564	0	0	0	1	0	0	PRKCSH	protein kinase C substrate 80K-H
hsa-miR-564	0	0	0	1	0	0	EXOC3L2	exocyst complex component 3-like 2
hsa-miR-564	0	0	1	1	1	1	APOE	apolipoprotein E
hsa-miR-564	0	0	0	1	0	0	INF2	inverted formin, FH2 and WH2 domain containing
hsa-miR-564	1	0	1	1	1	1	PRDM12	PR domain containing 12
hsa-miR-564	1	0	0	1	0	0	C1QL1	complement component 1, q subcomponent-like 1
hsa-miR-564	0	0	1	1	1	1	HSD17B7	hydroxysteroid (17-beta) dehydrogenase 7
hsa-miR-564	1	0	0	1	1	1	EMILIN2	elastin microfibril interfacer 2
hsa-miR-564	0	0	0	1	1	1	SLC52A1	solute carrier family 52, riboflavin transporter, member 1
hsa-miR-564	0	0	1	1	0	0	NXT1	NTF2-like export factor 1
hsa-miR-564	1	0	0	1	0	0	HAPLN2	hyaluronan and proteoglycan link protein 2
hsa-miR-564	0	0	0	1	0	0	PEMT	phosphatidylethanolamine N-methyltransferase
hsa-miR-564	1	0	1	1	0	0	CSNK1G2	casein kinase 1, gamma 2
hsa-miR-564	0	0	1	1	1	1	RTTN	rotatin
hsa-miR-564	0	0	0	1	1	1	RARRES3	retinoic acid receptor responder (tazarotene induced) 3
hsa-miR-564	0	0	1	1	0	0	SEC14L4	SEC14-like 4 (S. cerevisiae)
hsa-miR-564	1	0	1	1	0	0	RAB33A	RAB33A, member RAS oncogene family
hsa-miR-564	0	0	0	1	0	0	FAM189A2	family with sequence similarity 189, member A2
hsa-miR-564	0	0	1	1	0	0	EMX1	empty spiracles homeobox 1
hsa-miR-564	0	0	1	1	0	0	FHOD1	formin homology 2 domain containing 1
hsa-miR-564	0	0	0	1	0	0	CHRND	cholinergic receptor, nicotinic, delta (muscle)
hsa-miR-564	0	0	1	1	0	0	BLK	B lymphoid tyrosine kinase
hsa-miR-564	0	0	1	1	1	1	CCDC90B	coiled-coil domain containing 90B
hsa-miR-564	0	0	1	1	1	1	USP2	ubiquitin specific peptidase 2
hsa-miR-564	0	0	0	1	0	0	FXYD2	FXYD domain containing ion transport regulator 2
hsa-miR-564	0	0	0	1	1	1	PSMC1	proteasome (prosome, macropain) 26S subunit, ATPase, 1
hsa-miR-564	0	0	1	1	0	0	LPCAT3	lysophosphatidylcholine acyltransferase 3
hsa-miR-564	0	0	0	1	0	0	CHRNB4	cholinergic receptor, nicotinic, beta 4 (neuronal)
hsa-miR-564	0	0	1	1	1	1	P2RX7	purinergic receptor P2X, ligand-gated ion channel, 7
hsa-miR-564	0	0	1	1	1	1	SPPL2A	signal peptide peptidase like 2A
hsa-miR-564	0	0	1	1	0	0	APH1B	anterior pharynx defective 1 homolog B (C. elegans)
hsa-miR-564	1	0	1	1	1	1	NEO1	neogenin 1
hsa-miR-564	0	0	0	1	0	0	MYOM2	myomesin (M-protein) 2, 165kDa
hsa-miR-564	0	0	1	1	0	0	PKMYT1	protein kinase, membrane associated tyrosine/threonine 1
hsa-miR-564	0	0	1	1	0	0	HAGH	hydroxyacylglutathione hydrolase
hsa-miR-564	0	0	0	1	0	0	TELO2	TEL2, telomere maintenance 2, homolog (S. cerevisiae)
hsa-miR-564	0	0	0	1	1	1	ATP2C2	ATPase, Ca++ transporting, type 2C, member 2
hsa-miR-564	1	0	1	1	1	1	ARHGAP44	Rho GTPase activating protein 44
hsa-miR-564	0	0	1	1	0	0	TMEM59L	transmembrane protein 59-like
hsa-miR-564	0	0	1	1	1	1	ARPC1A	actin related protein 2/3 complex, subunit 1A, 41kDa
hsa-miR-564	0	0	0	1	0	0	CCDC94	coiled-coil domain containing 94
hsa-miR-564	1	0	1	1	1	1	MAPK3	mitogen-activated protein kinase 3
hsa-miR-564	0	0	0	1	0	0	ABCA7	ATP-binding cassette, sub-family A (ABC1), member 7
hsa-miR-564	0	0	1	1	1	1	EHD2	EH-domain containing 2
hsa-miR-564	0	0	0	1	0	0	ILVBL	ilvB (bacterial acetolactate synthase)-like
hsa-miR-564	0	0	1	1	1	1	PRKCG	protein kinase C, gamma
hsa-miR-564	0	0	0	1	0	0	DBH	dopamine beta-hydroxylase (dopamine beta-monooxygenase)
hsa-miR-564	1	0	1	1	1	1	PTPN4	protein tyrosine phosphatase, non-receptor type 4 (megakaryocyte)
hsa-miR-564	0	0	0	1	1	1	PET112	PET112 homolog (yeast)
hsa-miR-564	0	0	1	1	1	1	SEC22C	SEC22 vesicle trafficking protein homolog C (S. cerevisiae)
hsa-miR-564	0	0	1	1	0	0	UBE2S	ubiquitin-conjugating enzyme E2S
hsa-miR-564	1	0	1	1	1	1	ASB1	ankyrin repeat and SOCS box containing 1
hsa-miR-564	0	0	1	1	1	1	F11	coagulation factor XI
hsa-miR-564	0	0	1	1	0	0	MCM2	minichromosome maintenance complex component 2
hsa-miR-564	0	0	1	1	0	0	RPL26L1	ribosomal protein L26-like 1
hsa-miR-564	0	0	1	1	0	0	RPL24	ribosomal protein L24
hsa-miR-564	0	0	1	1	0	0	SUOX	sulfite oxidase
hsa-miR-564	0	0	1	1	1	1	CSAD	cysteine sulfinic acid decarboxylase
hsa-miR-564	1	0	1	1	0	0	ESYT1	extended synaptotagmin-like protein 1
hsa-miR-564	0	0	0	1	1	1	VPS33A	vacuolar protein sorting 33 homolog A (S. cerevisiae)
hsa-miR-564	0	0	1	1	0	0	GTF2A2	general transcription factor IIA, 2, 12kDa
hsa-miR-564	0	0	1	1	1	1	HEXA	hexosaminidase A (alpha polypeptide)
hsa-miR-564	0	0	0	1	0	0	RHCG	Rh family, C glycoprotein
hsa-miR-564	0	0	1	1	0	0	B9D1	B9 protein domain 1
hsa-miR-564	0	0	0	1	1	1	MYO19	myosin XIX
hsa-miR-564	1	0	1	1	1	1	CSNK1D	casein kinase 1, delta
hsa-miR-564	0	0	0	1	0	0	BCKDHA	branched chain keto acid dehydrogenase E1, alpha polypeptide
hsa-miR-564	1	0	1	1	0	0	ADAMTS10	ADAM metallopeptidase with thrombospondin type 1 motif, 10
hsa-miR-564	0	0	0	1	1	1	RNPEPL1	arginyl aminopeptidase (aminopeptidase B)-like 1
hsa-miR-564	0	0	1	1	1	1	FBN3	fibrillin 3
hsa-miR-564	0	0	1	1	0	0	KLHDC4	kelch domain containing 4
hsa-miR-564	0	0	1	1	1	1	POU2F1	POU class 2 homeobox 1
hsa-miR-564	0	0	1	1	0	0	REN	renin
hsa-miR-564	0	0	0	1	0	0	ITIH1	inter-alpha-trypsin inhibitor heavy chain 1
hsa-miR-564	0	0	1	1	1	1	UCN2	urocortin 2
hsa-miR-564	0	0	0	1	0	0	ANO7	anoctamin 7
hsa-miR-564	1	0	1	1	1	1	SLC18B1	solute carrier family 18, subfamily B, member 1
hsa-miR-564	1	0	1	1	1	1	GNA12	guanine nucleotide binding protein (G protein) alpha 12
hsa-miR-564	0	0	0	1	0	0	LYN	v-yes-1 Yamaguchi sarcoma viral related oncogene homolog
hsa-miR-564	0	0	1	1	0	0	PAOX	polyamine oxidase (exo-N4-amino)
hsa-miR-564	0	0	1	1	0	0	IMMP1L	IMP1 inner mitochondrial membrane peptidase-like (S. cerevisiae)
hsa-miR-564	0	0	1	1	0	0	SSRP1	structure specific recognition protein 1
hsa-miR-564	1	0	0	1	1	1	HMBS	hydroxymethylbilane synthase
hsa-miR-564	1	0	1	1	1	1	FADS1	fatty acid desaturase 1
hsa-miR-564	0	0	1	1	0	0	FADS3	fatty acid desaturase 3
hsa-miR-564	0	0	1	1	0	0	WDR74	WD repeat domain 74
hsa-miR-564	1	0	0	1	0	0	CDC42EP2	CDC42 effector protein (Rho GTPase binding) 2
hsa-miR-564	0	0	1	1	1	1	ATG10	autophagy related 10
hsa-miR-564	0	0	0	1	1	1	SERPINB4	serpin peptidase inhibitor, clade B (ovalbumin), member 4
hsa-miR-564	0	0	0	1	0	0	CXXC1	CXXC finger protein 1
hsa-miR-564	0	0	1	1	1	1	HEATR3	HEAT repeat containing 3
hsa-miR-564	0	0	1	1	0	0	NUP205	nucleoporin 205kDa
hsa-miR-564	1	0	0	1	1	1	WHAMM	WAS protein homolog associated with actin, golgi membranes and microtubules
hsa-miR-564	1	0	1	1	0	0	TYSND1	trypsin domain containing 1
hsa-miR-564	0	0	1	1	1	1	C21orf62	chromosome 21 open reading frame 62
hsa-miR-564	0	0	0	1	0	0	OGFR	opioid growth factor receptor
hsa-miR-564	0	0	1	1	1	1	MCAT	malonyl CoA:ACP acyltransferase (mitochondrial)
hsa-miR-564	0	0	1	1	0	0	GPR162	G protein-coupled receptor 162
hsa-miR-564	0	0	0	1	0	0	LEPREL2	leprecan-like 2
hsa-miR-564	0	0	0	1	0	0	ACE	angiotensin I converting enzyme (peptidyl-dipeptidase A) 1
hsa-miR-564	0	0	1	1	0	0	CHCHD6	coiled-coil-helix-coiled-coil-helix domain containing 6
hsa-miR-564	0	0	1	1	0	0	TNFRSF13C	tumor necrosis factor receptor superfamily, member 13C
hsa-miR-564	0	0	0	1	0	0	TFF1	trefoil factor 1
hsa-miR-564	1	0	0	1	1	1	G6PD	glucose-6-phosphate dehydrogenase
hsa-miR-564	0	0	0	1	0	0	GPSM1	G-protein signaling modulator 1
hsa-miR-564	0	0	0	1	0	0	MYL3	myosin, light chain 3, alkali; ventricular, skeletal, slow
hsa-miR-564	0	0	1	1	0	0	FGFR4	fibroblast growth factor receptor 4
hsa-miR-564	0	0	0	1	0	0	RDM1	RAD52 motif 1
hsa-miR-564	0	0	1	1	1	1	ZNF653	zinc finger protein 653
hsa-miR-564	0	0	1	1	0	0	KRT4	keratin 4
hsa-miR-564	0	0	1	1	0	0	CCDC42	coiled-coil domain containing 42
hsa-miR-564	0	0	1	1	1	1	CCDC78	coiled-coil domain containing 78
hsa-miR-564	0	0	0	1	0	0	NTN3	netrin 3
hsa-miR-564	0	0	1	1	1	1	UBXN1	UBX domain protein 1
hsa-miR-564	0	0	1	1	0	0	PDZK1IP1	PDZK1 interacting protein 1
hsa-miR-564	0	0	0	1	0	0	HAAO	3-hydroxyanthranilate 3,4-dioxygenase
hsa-miR-564	0	0	1	1	1	1	ALB	albumin
hsa-miR-564	0	0	1	1	1	1	PRRT3	proline-rich transmembrane protein 3
hsa-miR-564	1	0	1	1	1	1	SYN1	synapsin I
hsa-miR-564	0	0	1	1	1	1	C1orf212	chromosome 1 open reading frame 212
hsa-miR-564	1	0	1	1	1	1	KLF15	Kruppel-like factor 15
hsa-miR-564	1	0	1	1	0	0	CAMK2N2	calcium/calmodulin-dependent protein kinase II inhibitor 2
hsa-miR-564	0	0	1	1	0	0	APEH	N-acylaminoacyl-peptide hydrolase
hsa-miR-564	0	0	0	1	0	0	MST1R	macrophage stimulating 1 receptor (c-met-related tyrosine kinase)
hsa-miR-564	1	0	1	1	1	1	RELL2	RELT-like 2
hsa-miR-564	1	0	1	1	1	1	LMTK2	lemur tyrosine kinase 2
hsa-miR-564	0	0	0	1	0	0	NOS3	nitric oxide synthase 3 (endothelial cell)
hsa-miR-564	0	0	1	1	1	1	RPP25L	ribonuclease P/MRP 25kDa subunit-like
hsa-miR-564	0	0	1	1	0	0	C9orf24	chromosome 9 open reading frame 24
hsa-miR-564	0	0	1	1	0	0	SOHLH1	spermatogenesis and oogenesis specific basic helix-loop-helix 1
hsa-miR-564	0	0	1	1	1	1	TMEM52B	transmembrane protein 52B
hsa-miR-564	0	0	0	1	0	0	AMN	amnionless homolog (mouse)
hsa-miR-564	0	0	0	1	0	0	PLEKHF1	pleckstrin homology domain containing, family F (with FYVE domain) member 1
hsa-miR-564	0	0	1	1	0	0	MAPK7	mitogen-activated protein kinase 7
hsa-miR-564	0	0	1	1	0	0	CENPV	centromere protein V
hsa-miR-564	0	0	1	1	0	0	PEX11A	peroxisomal biogenesis factor 11 alpha
hsa-miR-564	1	0	1	1	0	0	JPH3	junctophilin 3
hsa-miR-564	0	0	0	1	0	0	MVD	mevalonate (diphospho) decarboxylase
hsa-miR-564	0	0	0	1	0	0	PROCA1	protein interacting with cyclin A1
hsa-miR-564	0	0	0	1	0	0	MFSD3	major facilitator superfamily domain containing 3
hsa-miR-564	0	0	0	1	1	1	FLJ30403	uncharacterized LOC729975
hsa-miR-564	0	0	0	1	0	0	SPSB3	splA/ryanodine receptor domain and SOCS box containing 3
hsa-miR-564	0	0	0	1	1	1	FADD	Fas (TNFRSF6)-associated via death domain
hsa-miR-564	0	0	0	1	0	0	LTBP3	latent transforming growth factor beta binding protein 3
hsa-miR-564	0	0	1	1	0	0	ZNF467	zinc finger protein 467
hsa-miR-564	1	0	1	1	1	1	NME6	NME/NM23 nucleoside diphosphate kinase 6
hsa-miR-564	0	0	0	1	0	0	TTC36	tetratricopeptide repeat domain 36
hsa-miR-564	0	0	0	1	1	1	PYDC1	PYD (pyrin domain) containing 1
hsa-miR-564	1	0	1	1	1	1	SLC50A1	solute carrier family 50 (sugar transporter), member 1
hsa-miR-564	1	0	0	1	0	0	TRABD	TraB domain containing
hsa-miR-564	1	0	1	1	0	0	THAP11	THAP domain containing 11
hsa-miR-564	0	0	1	1	0	0	FGGY	FGGY carbohydrate kinase domain containing
hsa-miR-564	1	0	0	1	0	0	TRAPPC1	trafficking protein particle complex 1
hsa-miR-564	0	0	1	1	0	0	PRKCDBP	protein kinase C, delta binding protein
hsa-miR-564	0	0	1	1	1	1	HS1BP3	HCLS1 binding protein 3
hsa-miR-564	0	0	0	1	0	0	PTCRA	pre T-cell antigen receptor alpha
hsa-miR-564	0	0	1	1	1	1	SMOX	spermine oxidase
hsa-miR-564	0	0	0	1	0	0	STX18	syntaxin 18
hsa-miR-564	0	0	0	1	0	0	REEP4	receptor accessory protein 4
hsa-miR-564	0	0	0	1	0	0	DCXR	dicarbonyl/L-xylulose reductase
hsa-miR-564	0	0	1	1	1	1	PPID	peptidylprolyl isomerase D
hsa-miR-564	0	0	0	1	0	0	THOP1	thimet oligopeptidase 1
hsa-miR-564	0	0	1	1	0	0	TMEM134	transmembrane protein 134
hsa-miR-564	0	0	1	1	0	0	CRB3	crumbs homolog 3 (Drosophila)
hsa-miR-564	0	0	0	1	0	0	CLDN15	claudin 15
hsa-miR-564	0	0	1	1	1	1	STOX2	storkhead box 2
hsa-miR-564	0	0	0	1	0	0	OR7D4	olfactory receptor, family 7, subfamily D, member 4
hsa-miR-564	0	0	1	1	0	0	DHX37	DEAH (Asp-Glu-Ala-His) box polypeptide 37
hsa-miR-564	0	0	1	1	0	0	CYP2W1	cytochrome P450, family 2, subfamily W, polypeptide 1
hsa-miR-564	1	0	1	1	1	1	RIC3	resistance to inhibitors of cholinesterase 3 homolog (C. elegans)
hsa-miR-564	0	0	1	1	0	0	CFLAR	CASP8 and FADD-like apoptosis regulator
hsa-miR-564	0	0	0	1	1	1	EPS8L1	EPS8-like 1
hsa-miR-564	0	0	0	1	1	1	DDX31	DEAD (Asp-Glu-Ala-Asp) box polypeptide 31
hsa-miR-564	1	0	1	1	1	1	SPSB4	splA/ryanodine receptor domain and SOCS box containing 4
hsa-miR-564	1	0	1	1	1	1	TNS1	tensin 1
hsa-miR-564	0	0	1	1	0	0	NEURL3	neuralized homolog 3 (Drosophila) pseudogene
hsa-miR-564	0	0	1	1	1	1	P2RY2	purinergic receptor P2Y, G-protein coupled, 2
hsa-miR-564	0	0	1	1	0	0	MARCH10	membrane-associated ring finger (C3HC4) 10, E3 ubiquitin protein ligase
hsa-miR-564	0	0	1	1	0	0	REC8	REC8 homolog (yeast)
hsa-miR-564	0	0	0	1	1	1	HSPB7	heat shock 27kDa protein family, member 7 (cardiovascular)
hsa-miR-564	0	0	1	1	0	0	CPT1B	carnitine palmitoyltransferase 1B (muscle)
hsa-miR-564	0	0	0	1	0	0	NAGPA	N-acetylglucosamine-1-phosphodiester alpha-N-acetylglucosaminidase
hsa-miR-564	0	0	1	1	0	0	LOC440434	aminopeptidase puromycin sensitive pseudogene
hsa-miR-564	0	0	1	1	0	0	RPS6KB2	ribosomal protein S6 kinase, 70kDa, polypeptide 2
hsa-miR-564	0	0	1	1	0	0	CD7	CD7 molecule
hsa-miR-564	1	0	1	1	0	0	PPP1CA	protein phosphatase 1, catalytic subunit, alpha isozyme
hsa-miR-564	1	0	1	1	0	0	GPR137	G protein-coupled receptor 137
hsa-miR-564	1	0	1	1	1	1	TRIP10	thyroid hormone receptor interactor 10
hsa-miR-564	0	0	1	1	1	1	GNAI2	guanine nucleotide binding protein (G protein), alpha inhibiting activity polypeptide 2
hsa-miR-564	0	0	0	1	1	1	ZNF620	zinc finger protein 620
hsa-miR-564	1	0	1	1	0	0	DLGAP1	discs, large (Drosophila) homolog-associated protein 1
hsa-miR-564	1	0	0	1	0	0	ARHGEF1	Rho guanine nucleotide exchange factor (GEF) 1
hsa-miR-564	0	0	0	1	0	0	DEF6	differentially expressed in FDCP 6 homolog (mouse)
hsa-miR-564	1	0	0	1	0	0	APBA3	amyloid beta (A4) precursor protein-binding, family A, member 3
hsa-miR-564	1	0	1	1	1	1	CABP1	calcium binding protein 1
hsa-miR-564	1	0	1	1	1	1	C7orf43	chromosome 7 open reading frame 43
hsa-miR-564	1	0	1	1	1	1	SIX5	SIX homeobox 5
hsa-miR-564	1	0	0	1	1	1	TUBB6	tubulin, beta 6 class V
hsa-miR-564	0	0	0	1	0	0	TNFRSF6B	tumor necrosis factor receptor superfamily, member 6b, decoy
hsa-miR-564	0	0	0	1	1	1	GRHPR	glyoxylate reductase/hydroxypyruvate reductase
hsa-miR-564	0	0	0	1	1	1	EPS8L2	EPS8-like 2
hsa-miR-564	0	0	0	1	0	0	CTXN1	cortexin 1
hsa-miR-564	0	0	0	1	1	1	ALOX12B	arachidonate 12-lipoxygenase, 12R type
hsa-miR-564	1	0	0	1	0	0	ZFPM1	zinc finger protein, multitype 1
hsa-miR-564	1	0	0	1	1	1	EPHA10	EPH receptor A10
hsa-miR-564	0	0	0	1	0	0	DOCK6	dedicator of cytokinesis 6
hsa-miR-564	0	0	0	1	0	0	METRNL	meteorin, glial cell differentiation regulator-like
hsa-miR-564	0	0	0	1	1	1	ZNF454	zinc finger protein 454
hsa-miR-564	0	0	0	1	1	1	ITGB2	integrin, beta 2 (complement component 3 receptor 3 and 4 subunit)
hsa-miR-564	1	0	1	1	1	1	PELI3	pellino E3 ubiquitin protein ligase family member 3
hsa-miR-564	1	0	1	1	0	0	IGSF9B	immunoglobulin superfamily, member 9B
hsa-miR-564	1	0	1	1	0	0	KIF17	kinesin family member 17
hsa-miR-564	0	0	0	1	0	0	RNF151	ring finger protein 151
hsa-miR-564	0	0	1	1	0	0	THAP4	THAP domain containing 4
hsa-miR-564	1	0	1	1	1	1	ULK1	unc-51-like kinase 1 (C. elegans)
hsa-miR-564	0	0	0	1	0	0	DOK7	docking protein 7
hsa-miR-564	0	0	1	1	0	0	POLR2A	polymerase (RNA) II (DNA directed) polypeptide A, 220kDa
hsa-miR-564	0	0	1	1	0	0	ACADVL	acyl-CoA dehydrogenase, very long chain
hsa-miR-564	0	0	1	1	1	1	RTBDN	retbindin
hsa-miR-564	1	0	0	1	0	0	HIC1	hypermethylated in cancer 1
hsa-miR-564	0	0	0	1	0	0	SPHK1	sphingosine kinase 1
hsa-miR-564	0	0	1	1	0	0	TCOF1	Treacher Collins-Franceschetti syndrome 1
hsa-miR-564	0	0	0	1	0	0	HTR1A	5-hydroxytryptamine (serotonin) receptor 1A, G protein-coupled
hsa-miR-564	0	0	0	1	0	0	ANAPC2	anaphase promoting complex subunit 2
hsa-miR-564	1	0	1	1	1	1	PLXND1	plexin D1
hsa-miR-564	0	0	1	1	1	1	CALCB	calcitonin-related polypeptide beta
hsa-miR-564	0	0	1	1	0	0	TRAPPC12	trafficking protein particle complex 12
hsa-miR-564	0	0	1	1	0	0	ADCK4	aarF domain containing kinase 4
hsa-miR-564	1	0	1	1	1	1	SSH2	slingshot homolog 2 (Drosophila)
hsa-miR-564	0	0	1	1	0	0	PLSCR3	phospholipid scramblase 3
hsa-miR-564	0	0	1	1	0	0	PRPF3	PRP3 pre-mRNA processing factor 3 homolog (S. cerevisiae)
hsa-miR-564	0	0	1	1	0	0	MRVI1-AS1	MRVI1 antisense RNA 1
hsa-miR-564	0	0	1	1	0	0	ODF3	outer dense fiber of sperm tails 3
hsa-miR-564	0	0	1	1	0	0	PGA3	pepsinogen 3, group I (pepsinogen A)
hsa-miR-564	0	0	1	1	0	0	CYP4F8	cytochrome P450, family 4, subfamily F, polypeptide 8
hsa-miR-564	0	0	0	1	0	0	NEU4	sialidase 4
hsa-miR-564	0	0	0	1	0	0	PTPRCAP	protein tyrosine phosphatase, receptor type, C-associated protein
hsa-miR-564	1	0	0	1	1	1	SSH1	slingshot homolog 1 (Drosophila)
hsa-miR-564	1	0	1	1	1	1	PPP6R1	protein phosphatase 6, regulatory subunit 1
hsa-miR-564	0	0	1	1	0	0	RNF123	ring finger protein 123
hsa-miR-564	0	0	0	1	0	0	ZAR1	zygote arrest 1
hsa-miR-564	0	0	0	1	0	0	HEXDC	hexosaminidase (glycosyl hydrolase family 20, catalytic domain) containing
hsa-miR-564	0	0	0	1	0	0	LGALS9C	lectin, galactoside-binding, soluble, 9C
hsa-miR-564	0	0	0	1	0	0	TNFRSF18	tumor necrosis factor receptor superfamily, member 18
hsa-miR-564	0	0	1	1	1	1	ANKRD44	ankyrin repeat domain 44
hsa-miR-564	0	0	1	1	0	0	FES	feline sarcoma oncogene
hsa-miR-564	0	0	0	1	1	1	GALNT9	UDP-N-acetyl-alpha-D-galactosamine:polypeptide N-acetylgalactosaminyltransferase 9 (GalNAc-T9)
hsa-miR-564	0	0	0	1	1	1	BCAN	brevican
hsa-miR-564	1	0	1	1	1	1	C11orf82	chromosome 11 open reading frame 82
hsa-miR-564	0	0	1	1	0	0	NOP56	NOP56 ribonucleoprotein homolog (yeast)
hsa-miR-564	0	0	1	1	1	1	MARCKSL1	MARCKS-like 1
hsa-miR-564	0	0	0	1	0	0	ADAT3	adenosine deaminase, tRNA-specific 3
hsa-miR-564	0	0	1	1	0	0	MFSD10	major facilitator superfamily domain containing 10
hsa-miR-564	0	0	1	1	0	0	MRPL11	mitochondrial ribosomal protein L11
hsa-miR-564	0	0	1	1	1	1	ZBTB3	zinc finger and BTB domain containing 3
hsa-miR-564	0	0	0	1	0	0	B4GALNT4	beta-1,4-N-acetyl-galactosaminyl transferase 4
hsa-miR-564	0	0	0	1	1	1	SLC52A2	solute carrier family 52, riboflavin transporter, member 2
hsa-miR-564	0	0	0	1	0	0	GGTLC3	gamma-glutamyltransferase light chain 3
hsa-miR-564	0	0	0	1	1	1	TMEM121	transmembrane protein 121
hsa-miR-564	0	0	1	1	1	1	PPP1R27	protein phosphatase 1, regulatory subunit 27
hsa-miR-564	0	0	0	1	0	0	DDX41	DEAD (Asp-Glu-Ala-Asp) box polypeptide 41
hsa-miR-564	0	0	1	1	0	0	WFDC10B	WAP four-disulfide core domain 10B
hsa-miR-564	0	0	1	1	1	1	ARHGAP27	Rho GTPase activating protein 27
hsa-miR-564	0	0	1	1	1	1	PCED1B	PC-esterase domain containing 1B
hsa-miR-564	0	0	0	1	0	0	CYP2F1	cytochrome P450, family 2, subfamily F, polypeptide 1
hsa-miR-564	0	0	0	1	0	0	NPBWR1	neuropeptides B/W receptor 1
hsa-miR-564	0	0	0	1	0	0	CCR10	chemokine (C-C motif) receptor 10
hsa-miR-564	0	0	0	1	1	1	ANO9	anoctamin 9
hsa-miR-564	0	0	1	1	0	0	MILR1	mast cell immunoglobulin-like receptor 1
hsa-miR-564	1	0	1	1	0	0	FAM83F	family with sequence similarity 83, member F
hsa-miR-564	1	0	1	1	1	1	FAM120A	family with sequence similarity 120A
hsa-miR-564	0	0	0	1	1	1	TOM1L2	target of myb1-like 2 (chicken)
hsa-miR-564	0	0	0	1	0	0	TAC4	tachykinin 4 (hemokinin)
hsa-miR-564	0	0	1	1	1	1	INO80C	INO80 complex subunit C
hsa-miR-564	0	0	0	1	0	0	AZU1	azurocidin 1
hsa-miR-564	0	0	1	1	1	1	CCDC18	coiled-coil domain containing 18
hsa-miR-564	0	0	0	1	0	0	HPDL	4-hydroxyphenylpyruvate dioxygenase-like
hsa-miR-564	1	0	1	1	1	1	RASSF4	Ras association (RalGDS/AF-6) domain family member 4
hsa-miR-564	0	0	1	1	0	0	DHRS4L2	dehydrogenase/reductase (SDR family) member 4 like 2
hsa-miR-564	0	0	0	1	1	1	TESC	tescalcin
hsa-miR-564	1	0	1	1	1	1	WDR20	WD repeat domain 20
hsa-miR-564	0	0	0	1	0	0	FAM183A	family with sequence similarity 183, member A
hsa-miR-564	0	0	0	1	0	0	TBX10	T-box 10
hsa-miR-564	0	0	1	1	0	0	LOXHD1	lipoxygenase homology domains 1
hsa-miR-564	0	0	1	1	1	1	TBC1D3C	TBC1 domain family, member 3C
hsa-miR-564	0	0	1	1	1	1	KLK5	kallikrein-related peptidase 5
hsa-miR-564	0	0	1	1	0	0	TESK1	testis-specific kinase 1
hsa-miR-564	0	0	1	1	1	1	C6orf223	chromosome 6 open reading frame 223
hsa-miR-564	1	0	0	1	1	1	IFFO1	intermediate filament family orphan 1
hsa-miR-564	0	0	1	1	1	1	PNPLA2	patatin-like phospholipase domain containing 2
hsa-miR-564	0	0	1	1	0	0	SH3BP1	SH3-domain binding protein 1
hsa-miR-564	0	0	0	1	1	1	SLMO1	slowmo homolog 1 (Drosophila)
hsa-miR-564	0	0	1	1	0	0	SBF1	SET binding factor 1
hsa-miR-564	1	0	1	1	1	1	OR51E2	olfactory receptor, family 51, subfamily E, member 2
hsa-miR-564	0	0	1	1	0	0	LUC7L	LUC7-like (S. cerevisiae)
hsa-miR-564	1	0	1	1	0	0	PPARD	peroxisome proliferator-activated receptor delta
hsa-miR-564	0	0	1	1	1	1	AIF1	allograft inflammatory factor 1
hsa-miR-564	0	0	0	1	1	1	OTUD6A	OTU domain containing 6A
hsa-miR-564	0	0	0	1	0	0	VSTM1	V-set and transmembrane domain containing 1
hsa-miR-564	1	0	1	1	1	1	PALM	paralemmin
hsa-miR-564	0	0	1	1	1	1	PAX4	paired box 4
hsa-miR-564	0	0	1	1	1	1	HPS1	Hermansky-Pudlak syndrome 1
hsa-miR-564	0	0	1	1	1	1	FAM180A	family with sequence similarity 180, member A
hsa-miR-564	0	0	1	1	1	1	ATP5G2	ATP synthase, H+ transporting, mitochondrial Fo complex, subunit C2 (subunit 9)
hsa-miR-564	0	0	1	1	0	0	DCBLD1	discoidin, CUB and LCCL domain containing 1
hsa-miR-564	0	0	1	1	1	1	TBCCD1	TBCC domain containing 1
hsa-miR-564	0	0	0	1	1	1	TBC1D3H	TBC1 domain family, member 3H
hsa-miR-564	0	0	0	1	0	0	C11orf96	chromosome 11 open reading frame 96
hsa-miR-564	1	0	1	1	0	0	XRRA1	X-ray radiation resistance associated 1
hsa-miR-564	0	0	1	1	1	1	RINL	Ras and Rab interactor-like
hsa-miR-564	0	0	0	1	1	1	POMT1	protein-O-mannosyltransferase 1
hsa-miR-564	0	0	1	1	1	1	PRX	periaxin
hsa-miR-564	1	0	1	1	1	1	OLFML2A	olfactomedin-like 2A
hsa-miR-564	0	0	0	1	0	0	JMJD7-PLA2G4B	JMJD7-PLA2G4B readthrough
hsa-miR-564	0	0	0	1	1	1	DCAKD	dephospho-CoA kinase domain containing
hsa-miR-564	0	0	1	1	1	1	ZFYVE28	zinc finger, FYVE domain containing 28
hsa-miR-564	0	0	0	1	1	1	TBC1D3B	TBC1 domain family, member 3B
hsa-miR-564	1	0	1	1	0	0	ST3GAL2	ST3 beta-galactoside alpha-2,3-sialyltransferase 2
hsa-miR-564	0	0	1	1	1	1	SUSD4	sushi domain containing 4
hsa-miR-564	0	0	0	1	0	0	CXXC11	CXXC finger protein 11
hsa-miR-564	0	0	1	1	1	1	DUSP28	dual specificity phosphatase 28
hsa-miR-564	0	0	1	1	1	1	APOD	apolipoprotein D
hsa-miR-564	0	0	1	1	0	0	PPM1G	protein phosphatase, Mg2+/Mn2+ dependent, 1G
hsa-miR-564	0	0	0	1	0	0	GTDC2	glycosyltransferase-like domain containing 2
hsa-miR-564	0	0	0	1	0	0	FLNA	filamin A, alpha
hsa-miR-564	0	0	0	1	0	0	CPSF4L	cleavage and polyadenylation specific factor 4-like
hsa-miR-564	0	0	1	1	1	1	LYNX1	Ly6/neurotoxin 1
hsa-miR-564	0	0	0	1	0	0	SDSL	serine dehydratase-like
hsa-miR-564	1	0	0	1	0	0	SNCG	synuclein, gamma (breast cancer-specific protein 1)
hsa-miR-564	1	0	1	1	1	1	ELFN2	extracellular leucine-rich repeat and fibronectin type III domain containing 2
hsa-miR-564	0	0	1	1	0	0	RHOG	ras homolog family member G
hsa-miR-564	1	0	1	1	1	1	UPF3A	UPF3 regulator of nonsense transcripts homolog A (yeast)
hsa-miR-564	0	0	0	1	1	1	XRCC3	X-ray repair complementing defective repair in Chinese hamster cells 3
hsa-miR-564	1	0	1	1	1	1	SLC12A9	solute carrier family 12 (potassium/chloride transporters), member 9
hsa-miR-564	0	0	1	1	0	0	GPT	glutamic-pyruvate transaminase (alanine aminotransferase)
hsa-miR-564	0	0	1	1	0	0	DNAJC4	DnaJ (Hsp40) homolog, subfamily C, member 4
hsa-miR-564	0	0	0	1	0	0	ENTPD2	ectonucleoside triphosphate diphosphohydrolase 2
hsa-miR-564	1	0	1	1	1	1	VPS13B	vacuolar protein sorting 13 homolog B (yeast)
hsa-miR-564	0	0	0	1	0	0	SPNS3	spinster homolog 3 (Drosophila)
hsa-miR-564	0	0	0	1	1	1	ZNF658B	zinc finger protein 658B, pseudogene
hsa-miR-564	0	0	1	1	1	1	MED24	mediator complex subunit 24
hsa-miR-564	1	0	1	1	1	1	ANXA2	annexin A2
hsa-miR-564	0	0	1	1	0	0	DUSP13	dual specificity phosphatase 13
hsa-miR-564	1	0	1	1	1	1	PTPRD	protein tyrosine phosphatase, receptor type, D
hsa-miR-564	0	0	1	1	1	1	ARHGEF26	Rho guanine nucleotide exchange factor (GEF) 26
hsa-miR-564	1	0	1	1	1	1	ATN1	atrophin 1
hsa-miR-564	0	0	1	1	1	1	TPCN2	two pore segment channel 2
hsa-miR-564	1	0	1	1	1	1	SPTBN1	spectrin, beta, non-erythrocytic 1
hsa-miR-564	1	0	1	1	0	0	TNPO2	transportin 2
hsa-miR-564	0	0	1	1	1	1	ZNF665	zinc finger protein 665
hsa-miR-564	0	0	1	1	1	1	PSRC1	proline/serine-rich coiled-coil 1
hsa-miR-564	0	0	1	1	0	0	MYBPHL	myosin binding protein H-like
hsa-miR-564	0	0	1	1	1	1	WFDC8	WAP four-disulfide core domain 8
hsa-miR-564	0	0	1	1	0	0	CCRL2	chemokine (C-C motif) receptor-like 2
hsa-miR-564	1	0	1	1	1	1	ACHE	acetylcholinesterase
hsa-miR-564	1	0	1	1	1	1	USP6	ubiquitin specific peptidase 6 (Tre-2 oncogene)
hsa-miR-564	0	0	1	1	1	1	QRICH1	glutamine-rich 1
hsa-miR-564	0	0	1	1	0	0	DHRS9	dehydrogenase/reductase (SDR family) member 9
hsa-miR-564	0	0	1	1	1	1	KBTBD4	kelch repeat and BTB (POZ) domain containing 4
hsa-miR-564	1	0	0	1	1	1	C14orf102	chromosome 14 open reading frame 102
hsa-miR-564	0	0	1	1	0	0	OXA1L	oxidase (cytochrome c) assembly 1-like
hsa-miR-564	1	0	0	1	0	0	RABEP2	rabaptin, RAB GTPase binding effector protein 2
hsa-miR-564	1	0	1	1	1	1	AKT2	v-akt murine thymoma viral oncogene homolog 2
hsa-miR-564	0	0	1	1	1	1	WDR55	WD repeat domain 55
hsa-miR-564	0	0	1	1	0	0	THNSL2	threonine synthase-like 2 (S. cerevisiae)
hsa-miR-564	1	0	1	1	1	1	GATAD2A	GATA zinc finger domain containing 2A
hsa-miR-564	0	0	1	1	0	0	TMEM126B	transmembrane protein 126B
hsa-miR-564	0	0	0	1	0	0	C17orf80	chromosome 17 open reading frame 80
hsa-miR-564	1	0	1	1	0	0	C16orf5	chromosome 16 open reading frame 5
hsa-miR-564	0	0	0	1	0	0	KRT78	keratin 78
hsa-miR-564	0	0	0	1	0	0	TEAD4	TEA domain family member 4
hsa-miR-564	0	0	1	1	1	1	GTPBP4	GTP binding protein 4
hsa-miR-564	1	0	1	1	1	1	CUX1	cut-like homeobox 1
hsa-miR-564	0	0	1	1	1	1	PRKAR1B	protein kinase, cAMP-dependent, regulatory, type I, beta
hsa-miR-564	1	0	1	1	1	1	NMB	neuromedin B
hsa-miR-564	0	0	0	1	0	0	TMEM119	transmembrane protein 119
hsa-miR-564	0	0	0	1	0	0	PARVB	parvin, beta
hsa-miR-564	0	0	0	1	0	0	SIGLEC14	sialic acid binding Ig-like lectin 14
hsa-miR-564	1	0	1	1	1	1	NTRK3	neurotrophic tyrosine kinase, receptor, type 3
hsa-miR-564	0	0	1	1	0	0	ISLR2	immunoglobulin superfamily containing leucine-rich repeat 2
hsa-miR-564	0	0	1	1	0	0	CALCA	calcitonin-related polypeptide alpha
hsa-miR-564	0	0	0	1	0	0	IFT140	intraflagellar transport 140 homolog (Chlamydomonas)
hsa-miR-564	0	0	1	1	0	0	NSMCE1	non-SMC element 1 homolog (S. cerevisiae)
hsa-miR-564	1	0	1	1	1	1	PNP	purine nucleoside phosphorylase
hsa-miR-564	0	0	0	1	1	1	C16orf59	chromosome 16 open reading frame 59
hsa-miR-564	0	0	1	1	1	1	NOS1AP	nitric oxide synthase 1 (neuronal) adaptor protein
hsa-miR-564	0	0	1	1	1	1	C1orf85	chromosome 1 open reading frame 85
hsa-miR-564	0	0	0	1	0	0	CHIT1	chitinase 1 (chitotriosidase)
hsa-miR-564	0	0	0	1	0	0	OR14K1	olfactory receptor, family 14, subfamily K, member 1
hsa-miR-564	1	0	1	1	1	1	EXO1	exonuclease 1
hsa-miR-564	0	0	0	1	1	1	TBCE	tubulin folding cofactor E
hsa-miR-564	1	0	0	1	1	1	TRIM67	tripartite motif containing 67
hsa-miR-564	0	0	0	1	1	1	OBSCN	obscurin, cytoskeletal calmodulin and titin-interacting RhoGEF
hsa-miR-564	0	0	1	1	1	1	PARK2	parkinson protein 2, E3 ubiquitin protein ligase (parkin)
hsa-miR-564	1	0	1	1	0	0	NEK2	NIMA (never in mitosis gene a)-related kinase 2
hsa-miR-564	0	0	0	1	0	0	ULBP3	UL16 binding protein 3
hsa-miR-564	0	0	0	1	1	1	ULBP1	UL16 binding protein 1
hsa-miR-564	0	0	0	1	0	0	SF3B5	splicing factor 3b, subunit 5, 10kDa
hsa-miR-564	1	0	1	1	1	1	CITED2	Cbp/p300-interacting transactivator, with Glu/Asp-rich carboxy-terminal domain, 2
hsa-miR-564	0	0	0	1	1	1	GPR161	G protein-coupled receptor 161
hsa-miR-564	0	0	1	1	1	1	UCK2	uridine-cytidine kinase 2
hsa-miR-564	0	0	1	1	0	0	PMF1	polyamine-modulated factor 1
hsa-miR-564	0	0	0	1	0	0	BGLAP	bone gamma-carboxyglutamate (gla) protein
hsa-miR-564	0	0	0	1	0	0	DPYSL4	dihydropyrimidinase-like 4
hsa-miR-564	0	0	0	1	0	0	CLRN3	clarin 3
hsa-miR-564	0	0	1	1	0	0	SELENBP1	selenium binding protein 1
hsa-miR-564	0	0	0	1	0	0	SFXN4	sideroflexin 4
hsa-miR-564	1	0	1	1	1	1	VAX1	ventral anterior homeobox 1
hsa-miR-564	1	0	1	1	1	1	VTI1A	vesicle transport through interaction with t-SNAREs homolog 1A (yeast)
hsa-miR-564	0	0	1	1	0	0	AVPR2	arginine vasopressin receptor 2
hsa-miR-564	0	0	0	1	0	0	SRPK3	SRSF protein kinase 3
hsa-miR-564	0	0	1	1	1	1	MRPL43	mitochondrial ribosomal protein L43
hsa-miR-564	0	0	0	1	1	1	CHRNA4	cholinergic receptor, nicotinic, alpha 4 (neuronal)
hsa-miR-564	0	0	1	1	0	0	NDUFB8	NADH dehydrogenase (ubiquinone) 1 beta subcomplex, 8, 19kDa
hsa-miR-564	0	0	1	1	0	0	BIRC7	baculoviral IAP repeat containing 7
hsa-miR-564	0	0	1	1	0	0	C10orf62	chromosome 10 open reading frame 62
hsa-miR-564	1	0	1	1	1	1	SORBS1	sorbin and SH3 domain containing 1
hsa-miR-564	0	0	0	1	0	0	TMEM61	transmembrane protein 61
hsa-miR-564	0	0	1	1	0	0	MCTS1	malignant T cell amplified sequence 1
hsa-miR-564	0	0	0	1	0	0	CYP2C19	cytochrome P450, family 2, subfamily C, polypeptide 19
hsa-miR-564	0	0	1	1	1	1	NKAP	NFKB activating protein
hsa-miR-564	1	0	1	1	1	1	NELF	nasal embryonic LHRH factor
hsa-miR-564	0	0	1	1	0	0	NDOR1	NADPH dependent diflavin oxidoreductase 1
hsa-miR-564	0	0	0	1	0	0	INPP5E	inositol polyphosphate-5-phosphatase, 72 kDa
hsa-miR-564	0	0	1	1	0	0	PMPCA	peptidase (mitochondrial processing) alpha
hsa-miR-564	0	0	0	1	0	0	OBP2B	odorant binding protein 2B
hsa-miR-564	0	0	0	1	0	0	GBGT1	globoside alpha-1,3-N-acetylgalactosaminyltransferase 1
hsa-miR-564	1	0	1	1	1	1	PRPS1	phosphoribosyl pyrophosphate synthetase 1
hsa-miR-564	0	0	1	1	0	0	DNTTIP1	deoxynucleotidyltransferase, terminal, interacting protein 1
hsa-miR-564	1	0	1	1	1	1	RIMS3	regulating synaptic membrane exocytosis 3
hsa-miR-564	0	0	0	1	1	1	ZNF684	zinc finger protein 684
hsa-miR-564	0	0	0	1	0	0	WDR34	WD repeat domain 34
hsa-miR-564	0	0	1	1	1	1	CNPY3	canopy 3 homolog (zebrafish)
hsa-miR-564	0	0	1	1	1	1	PKIG	protein kinase (cAMP-dependent, catalytic) inhibitor gamma
hsa-miR-564	0	0	1	1	1	1	NAP1L3	nucleosome assembly protein 1-like 3
hsa-miR-564	1	0	0	1	0	0	DPM2	dolichyl-phosphate mannosyltransferase polypeptide 2, regulatory subunit
hsa-miR-564	1	0	0	1	0	0	LMX1B	LIM homeobox transcription factor 1, beta
hsa-miR-564	1	0	1	1	1	1	NEK6	NIMA (never in mitosis gene a)-related kinase 6
hsa-miR-564	0	0	0	1	0	0	SERINC2	serine incorporator 2
hsa-miR-564	0	0	1	1	1	1	RCC1	regulator of chromosome condensation 1
hsa-miR-564	0	0	0	1	0	0	TULP1	tubby like protein 1
hsa-miR-564	0	0	0	1	1	1	C10orf71	chromosome 10 open reading frame 71
hsa-miR-564	0	0	0	1	0	0	CD52	CD52 molecule
hsa-miR-564	0	0	0	1	1	1	ITPR3	inositol 1,4,5-trisphosphate receptor, type 3
hsa-miR-564	0	0	1	1	0	0	GPRIN2	G protein regulated inducer of neurite outgrowth 2
hsa-miR-564	0	0	1	1	1	1	FAM21C	family with sequence similarity 21, member C
hsa-miR-564	0	0	0	1	0	0	GGNBP1	gametogenetin binding protein 1 (pseudogene)
hsa-miR-564	0	0	0	1	0	0	BMS1	BMS1 homolog, ribosome assembly protein (yeast)
hsa-miR-564	1	0	1	1	1	1	EPHA8	EPH receptor A8
hsa-miR-564	1	0	1	1	1	1	COL11A2	collagen, type XI, alpha 2
hsa-miR-564	0	0	0	1	0	0	LOC100128942	uncharacterized LOC100128942
hsa-miR-564	0	0	1	1	0	0	XAGE1D	X antigen family, member 1D
hsa-miR-564	0	0	0	1	1	1	PLA2G2A	phospholipase A2, group IIA (platelets, synovial fluid)
hsa-miR-564	0	0	0	1	0	0	CD300LD	CD300 molecule-like family member d
hsa-miR-564	0	0	1	1	0	0	C2	complement component 2
hsa-miR-564	0	0	1	1	0	0	F10	coagulation factor X
hsa-miR-564	1	0	1	1	1	1	MCF2L	MCF.2 cell line derived transforming sequence-like
hsa-miR-564	0	0	0	1	0	0	FAM131C	family with sequence similarity 131, member C
hsa-miR-564	1	0	1	1	1	1	C20orf112	chromosome 20 open reading frame 112
hsa-miR-564	0	0	0	1	0	0	VWA7	von Willebrand factor A domain containing 7
hsa-miR-564	0	0	0	1	0	0	CARS2	cysteinyl-tRNA synthetase 2, mitochondrial (putative)
hsa-miR-564	0	0	1	1	0	0	DDAH2	dimethylarginine dimethylaminohydrolase 2
hsa-miR-564	0	0	0	1	0	0	DAOA	D-amino acid oxidase activator
hsa-miR-564	0	0	1	1	0	0	PDSS1	prenyl (decaprenyl) diphosphate synthase, subunit 1
hsa-miR-564	1	0	1	1	1	1	GID4	GID complex subunit 4, VID24 homolog (S. cerevisiae)
hsa-miR-564	0	0	1	1	1	1	PRTFDC1	phosphoribosyl transferase domain containing 1
hsa-miR-564	0	0	1	1	1	1	SLC35A2	solute carrier family 35 (UDP-galactose transporter), member A2
hsa-miR-564	0	0	1	1	0	0	MAD2L2	MAD2 mitotic arrest deficient-like 2 (yeast)
hsa-miR-564	0	0	1	1	0	0	NUDT8	nudix (nucleoside diphosphate linked moiety X)-type motif 8
hsa-miR-564	0	0	0	1	1	1	TRIM15	tripartite motif containing 15
hsa-miR-564	0	0	1	1	1	1	WAS	Wiskott-Aldrich syndrome
hsa-miR-564	0	0	1	1	0	0	CST3	cystatin C
hsa-miR-564	0	0	0	1	0	0	POLD1	polymerase (DNA directed), delta 1, catalytic subunit
hsa-miR-564	0	0	1	1	1	1	CD300LG	CD300 molecule-like family member g
hsa-miR-564	0	0	1	1	0	0	SPATC1	spermatogenesis and centriole associated 1
hsa-miR-564	0	0	0	1	1	1	PYCRL	pyrroline-5-carboxylate reductase-like
hsa-miR-564	0	0	0	1	1	1	VIPR2	vasoactive intestinal peptide receptor 2
hsa-miR-564	0	0	1	1	0	0	FAM216A	family with sequence similarity 216, member A
hsa-miR-564	0	0	0	1	0	0	LRRC10B	leucine rich repeat containing 10B
hsa-miR-564	0	0	1	1	0	0	THSD1	thrombospondin, type I, domain containing 1
hsa-miR-564	0	0	1	1	0	0	PGA4	pepsinogen 4, group I (pepsinogen A)
hsa-miR-564	0	0	0	1	1	1	TBC1D3	TBC1 domain family, member 3
hsa-miR-564	1	0	1	1	1	1	TLN1	talin 1
hsa-miR-564	1	0	0	1	0	0	REEP2	receptor accessory protein 2
hsa-miR-564	0	0	1	1	0	0	ARHGEF16	Rho guanine nucleotide exchange factor (GEF) 16
hsa-miR-564	0	0	0	1	0	0	CD72	CD72 molecule
hsa-miR-564	1	0	1	1	0	0	PRKCZ	protein kinase C, zeta
hsa-miR-564	0	0	1	1	0	0	DHRS13	dehydrogenase/reductase (SDR family) member 13
hsa-miR-564	0	0	0	1	0	0	ACAP3	ArfGAP with coiled-coil, ankyrin repeat and PH domains 3
hsa-miR-564	1	0	1	1	1	1	SARM1	sterile alpha and TIR motif containing 1
hsa-miR-564	0	0	0	1	0	0	C1orf159	chromosome 1 open reading frame 159
hsa-miR-564	0	0	1	1	1	1	ANKRD16	ankyrin repeat domain 16
hsa-miR-564	0	0	1	1	0	0	IFNB1	interferon, beta 1, fibroblast
hsa-miR-564	0	0	1	1	0	0	CA5BP1	carbonic anhydrase VB pseudogene 1
hsa-miR-564	0	0	0	1	0	0	LOC100131878	uncharacterized LOC100131878
hsa-miR-564	0	0	1	1	1	1	SMR3B	submaxillary gland androgen regulated protein 3B
hsa-miR-564	1	0	1	1	1	1	PFKP	phosphofructokinase, platelet
hsa-miR-564	0	0	0	1	1	1	ADARB2	adenosine deaminase, RNA-specific, B2
hsa-miR-564	0	0	1	1	0	0	SLC25A6	solute carrier family 25 (mitochondrial carrier; adenine nucleotide translocator), member 6
hsa-miR-564	0	0	1	1	1	1	TMC5	transmembrane channel-like 5
hsa-miR-564	0	0	0	1	0	0	ANGPT4	angiopoietin 4
hsa-miR-564	0	0	1	1	1	1	TOLLIP	toll interacting protein
hsa-miR-564	0	0	0	1	0	0	LRRC23	leucine rich repeat containing 23
hsa-miR-564	0	0	1	1	1	1	DOCK8	dedicator of cytokinesis 8
hsa-miR-564	0	0	0	1	0	0	CEMP1	cementum protein 1
hsa-miR-564	0	0	1	1	0	0	PLA2G4F	phospholipase A2, group IVF
hsa-miR-564	1	0	1	1	1	1	TMEM128	transmembrane protein 128
hsa-miR-564	1	0	1	1	1	1	APBA2	amyloid beta (A4) precursor protein-binding, family A, member 2
hsa-miR-564	0	0	1	1	0	0	ARHGDIG	Rho GDP dissociation inhibitor (GDI) gamma
hsa-miR-564	0	0	1	1	1	1	METTL17	methyltransferase like 17
hsa-miR-564	0	0	0	1	1	1	TMEM191B	transmembrane protein 191B
hsa-miR-564	0	0	1	1	0	0	SNRNP25	small nuclear ribonucleoprotein 25kDa (U11/U12)
hsa-miR-564	1	0	1	1	1	1	COLQ	collagen-like tail subunit (single strand of homotrimer) of asymmetric acetylcholinesterase
hsa-miR-564	0	0	0	1	0	0	IL17RC	interleukin 17 receptor C
hsa-miR-564	0	0	1	1	0	0	TMEM151B	transmembrane protein 151B
hsa-miR-564	0	0	1	1	1	1	AGPHD1	aminoglycoside phosphotransferase domain containing 1
hsa-miR-564	0	0	0	1	1	1	C16orf7	chromosome 16 open reading frame 7
hsa-miR-564	0	0	1	1	0	0	NARF	nuclear prelamin A recognition factor
hsa-miR-564	0	0	1	1	1	1	GALK2	galactokinase 2
hsa-miR-564	0	0	1	0	1	1	AIPL1	aryl hydrocarbon receptor interacting protein-like 1
hsa-miR-564	1	0	1	1	1	1	EPB41L3	erythrocyte membrane protein band 4.1-like 3
hsa-miR-564	1	0	1	0	1	1	TBC1D2B	TBC1 domain family, member 2B
hsa-miR-564	0	0	1	1	1	1	LARS	leucyl-tRNA synthetase
hsa-miR-564	0	0	1	1	1	1	BBS1	Bardet-Biedl syndrome 1
hsa-miR-564	0	0	1	0	1	1	LOC646938	TBC1 domain family, member 2B pseudogene
