# Supplementary material for: Profiling of Selected MicroRNAs in Proliferative Eutopic Endometrium of Women with Ovarian Endometriosis
Source: Biomed Res Int. 2015 Aug 20;2015:760698. doi: 10.1155/2015/760698 (PMC4558423; doi:10.1155/2015/760698)
Supplement: Supplementary file 1 — Table I: The names of miRNAs significantly differentially expressed between eutopic endometrium of patients with endometriosis vs eutopic endometrium of patients without endometriosis. Table II: The associations between miRNA and mRNA, which presents detailed results of the search of six major databases i.e targetscan, tarbase, miranda, mirbase, mirtarget2 and pictar. [file 760698.f1.zip › 760698.f1/Table II/hsa-miR-566.tsv]

miR	targetscan	tarbase	miranda	mirbase	mirtarget2	pictar	GeneSymbol	GeneName
hsa-miR-566	1	0	1	0	1	1	KIAA0355	KIAA0355
hsa-miR-566	0	0	1	1	1	1	BAI2	brain-specific angiogenesis inhibitor 2
hsa-miR-566	1	0	1	1	1	1	RALGAPB	Ral GTPase activating protein, beta subunit (non-catalytic)
hsa-miR-566	1	0	1	1	1	1	IKZF4	IKAROS family zinc finger 4 (Eos)
hsa-miR-566	1	0	1	1	1	1	LZTS2	leucine zipper, putative tumor suppressor 2
hsa-miR-566	1	0	1	0	1	1	KIF5C	kinesin family member 5C
hsa-miR-566	1	0	1	1	0	0	ADAM15	ADAM metallopeptidase domain 15
hsa-miR-566	1	0	1	1	1	1	EPB41	erythrocyte membrane protein band 4.1 (elliptocytosis 1, RH-linked)
hsa-miR-566	1	0	1	1	1	1	ARHGEF3	Rho guanine nucleotide exchange factor (GEF) 3
hsa-miR-566	0	0	1	1	0	0	CDK10	cyclin-dependent kinase 10
hsa-miR-566	1	0	1	1	1	1	MEF2D	myocyte enhancer factor 2D
hsa-miR-566	0	0	1	0	0	0	TRPC2	transient receptor potential cation channel, subfamily C, member 2, pseudogene
hsa-miR-566	0	0	1	0	0	0	MIAT	myocardial infarction associated transcript (non-protein coding)
hsa-miR-566	1	0	1	0	1	1	FYB	FYN binding protein
hsa-miR-566	1	0	1	0	1	1	MLL2	myeloid/lymphoid or mixed-lineage leukemia 2
hsa-miR-566	0	0	1	1	1	1	FHL1	four and a half LIM domains 1
hsa-miR-566	0	0	1	1	0	0	SH2B1	SH2B adaptor protein 1
hsa-miR-566	1	0	1	1	1	1	SH3GLB1	SH3-domain GRB2-like endophilin B1
hsa-miR-566	0	0	1	0	0	0	MYO15B	myosin XVB pseudogene
hsa-miR-566	1	0	1	1	1	1	STX16	syntaxin 16
hsa-miR-566	0	0	1	1	1	1	GNAS	GNAS complex locus
hsa-miR-566	0	0	1	0	0	0	CD177	CD177 molecule
hsa-miR-566	1	0	1	1	1	1	NRXN3	neurexin 3
hsa-miR-566	0	0	1	1	0	0	IL4I1	interleukin 4 induced 1
hsa-miR-566	1	0	1	1	0	0	SMUG1	single-strand-selective monofunctional uracil-DNA glycosylase 1
hsa-miR-566	1	0	1	1	1	1	SMC4	structural maintenance of chromosomes 4
hsa-miR-566	0	0	1	0	0	0	SOX2-OT	SOX2 overlapping transcript (non-protein coding)
hsa-miR-566	0	0	1	0	0	0	DUXAP10	double homeobox A pseudogene 10
hsa-miR-566	1	0	1	1	1	1	USP33	ubiquitin specific peptidase 33
hsa-miR-566	1	0	1	1	1	1	ZNF385A	zinc finger protein 385A
hsa-miR-566	0	0	1	0	1	1	HEMK1	HemK methyltransferase family member 1
hsa-miR-566	0	0	1	0	0	0	CHST9-AS1	CHST9 antisense RNA 1
hsa-miR-566	1	0	1	0	1	1	AP1G1	adaptor-related protein complex 1, gamma 1 subunit
hsa-miR-566	0	0	1	1	0	0	UBE2J2	ubiquitin-conjugating enzyme E2, J2
hsa-miR-566	0	0	1	1	0	0	BEAN1	brain expressed, associated with NEDD4, 1
hsa-miR-566	0	0	1	0	0	0	JPX	JPX transcript, XIST activator (non-protein coding)
hsa-miR-566	1	0	1	0	1	1	PCGF3	polycomb group ring finger 3
hsa-miR-566	0	0	1	1	0	0	RGL3	ral guanine nucleotide dissociation stimulator-like 3
hsa-miR-566	1	0	1	1	1	1	MGAT1	mannosyl (alpha-1,3-)-glycoprotein beta-1,2-N-acetylglucosaminyltransferase
hsa-miR-566	0	0	1	0	0	0	FLJ32742	uncharacterized locus FLJ32742
hsa-miR-566	0	0	1	1	0	0	VWA5B1	von Willebrand factor A domain containing 5B1
hsa-miR-566	1	0	1	0	1	1	BLOC1S6	biogenesis of lysosomal organelles complex-1, subunit 6, pallidin
hsa-miR-566	0	0	1	1	0	0	SHKBP1	SH3KBP1 binding protein 1
hsa-miR-566	0	0	1	1	1	1	GSG1	germ cell associated 1
hsa-miR-566	1	0	1	0	1	1	SLC25A37	solute carrier family 25 (mitochondrial iron transporter), member 37
hsa-miR-566	1	0	1	1	1	1	LRRC57	leucine rich repeat containing 57
hsa-miR-566	0	0	1	1	1	1	LTBR	lymphotoxin beta receptor (TNFR superfamily, member 3)
hsa-miR-566	0	0	1	1	1	1	FBLN1	fibulin 1
hsa-miR-566	0	0	1	0	0	0	FAM66C	family with sequence similarity 66, member C
hsa-miR-566	1	0	1	1	0	0	FBRS	fibrosin
hsa-miR-566	0	0	1	1	0	0	ERGIC3	ERGIC and golgi 3
hsa-miR-566	0	0	1	1	1	1	FBXL22	F-box and leucine-rich repeat protein 22
hsa-miR-566	0	0	1	0	0	0	LOC400680	uncharacterized LOC400680
hsa-miR-566	1	0	1	1	1	1	ST7L	suppression of tumorigenicity 7 like
hsa-miR-566	0	0	1	0	0	0	CECR7	cat eye syndrome chromosome region, candidate 7 (non-protein coding)
hsa-miR-566	0	0	1	0	0	0	LOC100130954	uncharacterized LOC100130954
hsa-miR-566	0	0	1	1	0	0	KIAA0146	KIAA0146
hsa-miR-566	1	0	1	1	0	0	CACNB3	calcium channel, voltage-dependent, beta 3 subunit
hsa-miR-566	0	0	1	1	0	0	MARCH10	membrane-associated ring finger (C3HC4) 10, E3 ubiquitin protein ligase
hsa-miR-566	0	0	1	0	0	0	CLEC4GP1	C-type lectin domain family 4, member G pseudogene 1
hsa-miR-566	0	0	1	0	0	0	LOC650368	asparagine-linked glycosylation 1-like pseudogene
hsa-miR-566	0	0	1	0	1	1	LOC389641	uncharacterized LOC389641
hsa-miR-566	1	0	1	1	1	1	FAM122B	family with sequence similarity 122B
hsa-miR-566	0	0	1	1	1	1	CCDC66	coiled-coil domain containing 66
hsa-miR-566	1	0	1	1	1	1	DLGAP4	discs, large (Drosophila) homolog-associated protein 4
hsa-miR-566	0	0	1	1	1	1	ZNF337	zinc finger protein 337
hsa-miR-566	0	0	1	0	1	1	RASGRP3	RAS guanyl releasing protein 3 (calcium and DAG-regulated)
hsa-miR-566	0	0	1	1	1	1	KLC4	kinesin light chain 4
hsa-miR-566	0	0	1	1	1	1	USP4	ubiquitin specific peptidase 4 (proto-oncogene)
hsa-miR-566	1	0	1	1	1	1	NFYC	nuclear transcription factor Y, gamma
hsa-miR-566	1	0	1	0	1	1	KDM2A	lysine (K)-specific demethylase 2A
hsa-miR-566	0	0	1	1	1	1	MON1B	MON1 homolog B (yeast)
hsa-miR-566	0	0	1	0	0	0	IDO2	indoleamine 2,3-dioxygenase 2
hsa-miR-566	0	0	1	0	0	0	EMBP1	embigin pseudogene 1
hsa-miR-566	1	0	1	0	1	1	CYB561D1	cytochrome b-561 domain containing 1
hsa-miR-566	0	0	1	1	0	0	ZNF730	zinc finger protein 730
hsa-miR-566	0	0	1	1	0	0	C3orf20	chromosome 3 open reading frame 20
hsa-miR-566	1	0	1	1	0	0	BRSK2	BR serine/threonine kinase 2
hsa-miR-566	0	0	1	0	0	0	AGAP9	ArfGAP with GTPase domain, ankyrin repeat and PH domain 9
hsa-miR-566	1	0	1	1	1	1	CTSA	cathepsin A
hsa-miR-566	0	0	1	1	1	1	NECAP2	NECAP endocytosis associated 2
hsa-miR-566	0	0	1	1	0	0	ZNF414	zinc finger protein 414
hsa-miR-566	1	0	1	1	1	1	CAMK2G	calcium/calmodulin-dependent protein kinase II gamma
hsa-miR-566	0	0	1	1	0	0	PCSK5	proprotein convertase subtilisin/kexin type 5
hsa-miR-566	1	0	1	1	1	1	EDN1	endothelin 1
hsa-miR-566	1	0	1	1	1	1	TAB2	TGF-beta activated kinase 1/MAP3K7 binding protein 2
hsa-miR-566	0	0	1	1	0	0	ODF3	outer dense fiber of sperm tails 3
hsa-miR-566	0	0	1	0	0	0	DNAJC5B	DnaJ (Hsp40) homolog, subfamily C, member 5 beta
hsa-miR-566	0	0	1	1	1	1	AQP6	aquaporin 6, kidney specific
hsa-miR-566	0	0	1	0	0	0	FAM66D	family with sequence similarity 66, member D
hsa-miR-566	1	0	1	1	1	1	PKNOX2	PBX/knotted 1 homeobox 2
hsa-miR-566	1	0	1	0	1	1	CAMTA2	calmodulin binding transcription activator 2
hsa-miR-566	0	0	1	1	0	0	KRBA1	KRAB-A domain containing 1
hsa-miR-566	1	0	1	1	1	1	LYPD3	LY6/PLAUR domain containing 3
hsa-miR-566	1	0	1	1	1	1	FAM63B	family with sequence similarity 63, member B
hsa-miR-566	0	0	1	0	0	0	KGFLP1	fibroblast growth factor 7 pseudogene
hsa-miR-566	0	0	1	1	1	1	GON4L	gon-4-like (C. elegans)
hsa-miR-566	0	0	1	1	0	0	ASB16	ankyrin repeat and SOCS box containing 16
hsa-miR-566	0	0	1	1	1	1	RHD	Rh blood group, D antigen
hsa-miR-566	1	0	1	1	1	1	MYB	v-myb myeloblastosis viral oncogene homolog (avian)
hsa-miR-566	0	0	1	0	0	0	PTPRVP	protein tyrosine phosphatase, receptor type, V, pseudogene
hsa-miR-566	0	0	1	1	1	1	MPPE1	metallophosphoesterase 1
hsa-miR-566	0	0	1	1	1	1	FTO	fat mass and obesity associated
hsa-miR-566	0	0	1	1	1	1	CHEK1	checkpoint kinase 1
hsa-miR-566	1	0	1	1	1	1	SMO	smoothened, frizzled family receptor
hsa-miR-566	1	0	1	1	0	0	EIF4A1	eukaryotic translation initiation factor 4A1
hsa-miR-566	0	0	1	1	0	0	SPAG7	sperm associated antigen 7
hsa-miR-566	0	0	1	0	0	0	LRRC14	leucine rich repeat containing 14
hsa-miR-566	0	0	1	1	1	1	GNL3L	guanine nucleotide binding protein-like 3 (nucleolar)-like
hsa-miR-566	0	0	1	1	0	0	KLHDC3	kelch domain containing 3
hsa-miR-566	0	0	1	1	0	0	TMEM44	transmembrane protein 44
hsa-miR-566	0	0	1	1	1	1	RAB37	RAB37, member RAS oncogene family
hsa-miR-566	0	0	1	1	1	1	PEX14	peroxisomal biogenesis factor 14
hsa-miR-566	0	0	1	1	1	1	LRRK1	leucine-rich repeat kinase 1
hsa-miR-566	0	0	1	0	0	0	NBR2	neighbor of BRCA1 gene 2 (non-protein coding)
hsa-miR-566	1	0	1	1	1	1	CNEP1R1	CTD nuclear envelope phosphatase 1 regulatory subunit 1
hsa-miR-566	0	0	1	1	0	0	ARL6	ADP-ribosylation factor-like 6
hsa-miR-566	0	0	1	0	0	0	SNX29P2	sorting nexin 29 pseudogene 2
hsa-miR-566	0	0	1	0	0	0	ZBED3-AS1	ZBED3 antisense RNA 1
hsa-miR-566	0	0	1	1	1	1	SH3TC1	SH3 domain and tetratricopeptide repeats 1
hsa-miR-566	0	0	1	1	1	1	STAG3L1	stromal antigen 3-like 1
hsa-miR-566	0	0	1	1	1	1	ZNF100	zinc finger protein 100
hsa-miR-566	1	0	1	1	1	1	PITPNB	phosphatidylinositol transfer protein, beta
hsa-miR-566	1	0	1	1	1	1	ZNF282	zinc finger protein 282
hsa-miR-566	0	0	1	1	0	0	WASIR2	WASH and IL9R antisense RNA 2
hsa-miR-566	1	0	1	1	0	0	TBC1D10C	TBC1 domain family, member 10C
hsa-miR-566	0	0	1	1	0	0	FAM3B	family with sequence similarity 3, member B
hsa-miR-566	1	0	1	1	1	1	MACROD2	MACRO domain containing 2
hsa-miR-566	1	0	1	1	1	1	GAS8	growth arrest-specific 8
hsa-miR-566	0	0	1	0	0	0	LOC284889	uncharacterized LOC284889
hsa-miR-566	0	0	1	0	0	0	LINC00264	long intergenic non-protein coding RNA 264
hsa-miR-566	0	0	1	1	0	0	COX4I1	cytochrome c oxidase subunit IV isoform 1
hsa-miR-566	0	0	1	0	0	0	FLJ36000	uncharacterized FLJ36000
hsa-miR-566	0	0	1	0	0	0	LOC401074	uncharacterized LOC401074
hsa-miR-566	0	0	1	0	0	0	LOC255130	uncharacterized LOC255130
hsa-miR-566	1	0	1	1	0	0	ZNF292	zinc finger protein 292
hsa-miR-566	0	0	1	1	0	0	FAM159A	family with sequence similarity 159, member A
hsa-miR-566	0	0	1	0	0	0	LRRC37BP1	leucine rich repeat containing 37B pseudogene 1
hsa-miR-566	0	0	1	1	1	1	MST1	macrophage stimulating 1 (hepatocyte growth factor-like)
hsa-miR-566	0	0	1	1	1	1	MGC57346	uncharacterized LOC401884
hsa-miR-566	1	0	1	1	1	1	CARM1	coactivator-associated arginine methyltransferase 1
hsa-miR-566	0	0	1	0	0	0	LOC339529	uncharacterized LOC339529
hsa-miR-566	0	0	1	0	0	0	INHBA-AS1	INHBA antisense RNA 1
hsa-miR-566	0	0	1	0	0	0	SUZ12P1	suppressor of zeste 12 homolog pseudogene 1
hsa-miR-566	1	0	1	1	1	1	PTPRG	protein tyrosine phosphatase, receptor type, G
hsa-miR-566	0	0	1	1	1	1	LINC00086	long intergenic non-protein coding RNA 86
hsa-miR-566	0	0	1	0	0	0	LINC00265	long intergenic non-protein coding RNA 265
hsa-miR-566	0	0	1	1	1	1	C17orf97	chromosome 17 open reading frame 97
hsa-miR-566	1	0	1	1	1	1	CCAR1	cell division cycle and apoptosis regulator 1
hsa-miR-566	0	0	1	1	0	0	WDR90	WD repeat domain 90
hsa-miR-566	0	0	1	1	0	0	DHX30	DEAH (Asp-Glu-Ala-His) box polypeptide 30
hsa-miR-566	1	0	1	0	0	0	MICAL3	microtubule associated monoxygenase, calponin and LIM domain containing 3
hsa-miR-566	0	0	1	0	0	0	LOC727751	uncharacterized LOC727751
hsa-miR-566	0	0	1	0	0	0	AGSK1	golgin subfamily A member 2-like
hsa-miR-566	0	0	1	0	0	0	LOC727849	golgin A2 pseudogene
hsa-miR-566	1	0	1	0	1	1	MAGIX	MAGI family member, X-linked
hsa-miR-566	0	0	1	1	0	0	CYP4F30P	cytochrome P450, family 4, subfamily F, polypeptide 30, pseudogene
hsa-miR-566	0	0	1	1	1	1	IRX5	iroquois homeobox 5
hsa-miR-566	0	0	1	1	0	0	MASP2	mannan-binding lectin serine peptidase 2
hsa-miR-566	0	0	1	1	0	0	DNHD1	dynein heavy chain domain 1
hsa-miR-566	0	0	1	1	0	0	TMEM222	transmembrane protein 222
hsa-miR-566	0	0	1	1	1	1	OFD1	oral-facial-digital syndrome 1
hsa-miR-566	0	0	1	0	0	0	GUSBP9	glucuronidase, beta pseudogene 9
hsa-miR-566	1	0	1	1	1	1	OSBP2	oxysterol binding protein 2
hsa-miR-566	0	0	1	0	1	1	GOLGA8G	golgin A8 family, member G
hsa-miR-566	0	0	1	0	0	0	SMA4	glucuronidase, beta pseudogene
hsa-miR-566	1	0	1	0	1	1	TTC7B	tetratricopeptide repeat domain 7B
hsa-miR-566	0	0	1	0	0	0	FLJ39632	uncharacterized LOC642477
hsa-miR-566	1	0	1	1	1	1	ETS1	v-ets erythroblastosis virus E26 oncogene homolog 1 (avian)
hsa-miR-566	1	0	1	1	1	1	SLC35F1	solute carrier family 35, member F1
hsa-miR-566	1	0	1	1	1	1	ARHGDIA	Rho GDP dissociation inhibitor (GDI) alpha
hsa-miR-566	1	0	1	1	1	1	POU2F3	POU class 2 homeobox 3
hsa-miR-566	0	0	1	1	0	0	RBM28	RNA binding motif protein 28
hsa-miR-566	1	0	1	1	0	0	PHGDH	phosphoglycerate dehydrogenase
hsa-miR-566	1	0	1	1	1	1	LETMD1	LETM1 domain containing 1
hsa-miR-566	0	0	1	0	0	0	ARRDC1	arrestin domain containing 1
hsa-miR-566	1	0	1	1	0	0	ELOVL1	ELOVL fatty acid elongase 1
hsa-miR-566	1	0	1	0	1	1	PTPLAD1	protein tyrosine phosphatase-like A domain containing 1
hsa-miR-566	0	0	1	1	0	0	MUS81	MUS81 endonuclease homolog (S. cerevisiae)
hsa-miR-566	1	0	1	1	1	1	STK38L	serine/threonine kinase 38 like
hsa-miR-566	0	0	1	1	1	1	POLR2G	polymerase (RNA) II (DNA directed) polypeptide G
hsa-miR-566	1	0	1	1	1	1	TMEM245	transmembrane protein 245
hsa-miR-566	0	0	1	0	0	0	FLJ45248	FLJ45248 protein
hsa-miR-566	0	0	1	1	1	1	GLRX3	glutaredoxin 3
hsa-miR-566	1	0	1	1	1	1	MMP2	matrix metallopeptidase 2 (gelatinase A, 72kDa gelatinase, 72kDa type IV collagenase)
hsa-miR-566	0	0	1	1	0	0	NOX5	NADPH oxidase, EF-hand calcium binding domain 5
hsa-miR-566	0	0	1	1	1	1	RPUSD1	RNA pseudouridylate synthase domain containing 1
hsa-miR-566	0	0	1	1	0	0	TRIM29	tripartite motif containing 29
hsa-miR-566	0	0	1	1	0	0	NARF	nuclear prelamin A recognition factor
hsa-miR-566	0	0	1	1	0	0	EEF1A2	eukaryotic translation elongation factor 1 alpha 2
hsa-miR-566	0	0	1	1	0	0	TMEM120A	transmembrane protein 120A
hsa-miR-566	0	0	1	1	0	0	FAM57B	family with sequence similarity 57, member B
hsa-miR-566	1	0	1	1	1	1	EIF1	eukaryotic translation initiation factor 1
hsa-miR-566	1	0	1	1	1	1	GOLGA7	golgin A7
hsa-miR-566	0	0	1	1	1	1	IL15	interleukin 15
hsa-miR-566	1	0	1	1	1	1	RALY	RNA binding protein, autoantigenic (hnRNP-associated with lethal yellow homolog (mouse))
hsa-miR-566	0	0	1	0	0	0	FAM92A1	family with sequence similarity 92, member A1
hsa-miR-566	0	0	1	0	0	0	LOC100132984	uncharacterized LOC100132984
hsa-miR-566	0	0	1	1	1	1	SUGT1	SGT1, suppressor of G2 allele of SKP1 (S. cerevisiae)
hsa-miR-566	1	0	1	1	1	1	JUNB	jun B proto-oncogene
hsa-miR-566	0	0	1	0	0	0	DNAJC27-AS1	DNAJC27 antisense RNA 1
hsa-miR-566	0	0	1	1	0	0	TENC1	tensin like C1 domain containing phosphatase (tensin 2)
hsa-miR-566	0	0	1	0	0	0	ZNFX1-AS1	ZNFX1 antisense RNA 1
hsa-miR-566	0	0	1	1	1	1	MOBP	myelin-associated oligodendrocyte basic protein
hsa-miR-566	1	0	1	0	1	1	CBX7	chromobox homolog 7
hsa-miR-566	1	0	1	1	1	1	CADM3	cell adhesion molecule 3
hsa-miR-566	1	0	1	1	1	1	CABP1	calcium binding protein 1
hsa-miR-566	0	0	1	0	0	0	GPR144	G protein-coupled receptor 144
hsa-miR-566	0	0	1	1	0	0	KIF22	kinesin family member 22
hsa-miR-566	1	0	1	0	1	1	STAT3	signal transducer and activator of transcription 3 (acute-phase response factor)
hsa-miR-566	1	0	1	1	1	1	GRM1	glutamate receptor, metabotropic 1
hsa-miR-566	0	0	1	1	1	1	HLA-G	major histocompatibility complex, class I, G
hsa-miR-566	0	0	1	1	0	0	KCNH2	potassium voltage-gated channel, subfamily H (eag-related), member 2
hsa-miR-566	0	0	1	1	1	1	MTR	5-methyltetrahydrofolate-homocysteine methyltransferase
hsa-miR-566	0	0	1	1	1	1	RHO	rhodopsin
hsa-miR-566	1	0	1	1	1	1	GABRB3	gamma-aminobutyric acid (GABA) A receptor, beta 3
hsa-miR-566	1	0	1	1	1	1	IGF1R	insulin-like growth factor 1 receptor
hsa-miR-566	1	0	1	1	1	1	BICD2	bicaudal D homolog 2 (Drosophila)
hsa-miR-566	1	0	1	1	1	1	NCK2	NCK adaptor protein 2
hsa-miR-566	0	0	1	1	0	0	C1QL4	complement component 1, q subcomponent-like 4
hsa-miR-566	0	0	1	0	1	1	GOLGA8E	golgin A8 family, member E
hsa-miR-566	0	0	1	1	0	0	HES3	hairy and enhancer of split 3 (Drosophila)
hsa-miR-566	1	0	1	1	1	1	TGFBR2	transforming growth factor, beta receptor II (70/80kDa)
hsa-miR-566	0	0	1	1	0	0	CALCA	calcitonin-related polypeptide alpha
hsa-miR-566	0	0	1	1	0	0	ANGPTL4	angiopoietin-like 4
hsa-miR-566	0	0	1	1	0	0	AGTRAP	angiotensin II receptor-associated protein
hsa-miR-566	1	0	1	0	0	0	FAM127B	family with sequence similarity 127, member B
hsa-miR-566	1	0	1	1	0	0	DLGAP3	discs, large (Drosophila) homolog-associated protein 3
hsa-miR-566	1	0	1	1	1	1	MBOAT1	membrane bound O-acyltransferase domain containing 1
hsa-miR-566	1	0	1	1	1	1	DGKG	diacylglycerol kinase, gamma 90kDa
hsa-miR-566	1	0	1	1	1	1	MYO1C	myosin IC
hsa-miR-566	1	0	1	1	1	1	CTNND2	catenin (cadherin-associated protein), delta 2
hsa-miR-566	1	0	1	1	1	1	DYRK1A	dual-specificity tyrosine-(Y)-phosphorylation regulated kinase 1A
hsa-miR-566	1	0	1	1	1	1	EREG	epiregulin
hsa-miR-566	1	0	1	1	1	1	FOXF2	forkhead box F2
hsa-miR-566	1	0	1	1	1	1	NR6A1	nuclear receptor subfamily 6, group A, member 1
hsa-miR-566	0	0	1	1	1	1	CEACAM8	carcinoembryonic antigen-related cell adhesion molecule 8
hsa-miR-566	1	0	1	1	0	0	GYPC	glycophorin C (Gerbich blood group)
hsa-miR-566	0	0	1	1	0	0	IDH2	isocitrate dehydrogenase 2 (NADP+), mitochondrial
hsa-miR-566	1	0	1	1	1	1	KPNB1	karyopherin (importin) beta 1
hsa-miR-566	1	0	1	1	1	1	NPTX1	neuronal pentraxin I
hsa-miR-566	0	0	1	1	1	1	SEPT5	septin 5
hsa-miR-566	1	0	1	0	0	0	PPP1R10	protein phosphatase 1, regulatory subunit 10
hsa-miR-566	1	0	1	0	1	1	SORT1	sortilin 1
hsa-miR-566	1	0	1	1	1	1	SNAI2	snail homolog 2 (Drosophila)
hsa-miR-566	1	0	1	0	1	1	SOX11	SRY (sex determining region Y)-box 11
hsa-miR-566	0	0	1	1	1	1	STRN	striatin, calmodulin binding protein
hsa-miR-566	1	0	1	1	1	1	TFAP2B	transcription factor AP-2 beta (activating enhancer binding protein 2 beta)
hsa-miR-566	1	0	1	0	1	1	TSPYL1	TSPY-like 1
hsa-miR-566	0	0	1	1	1	1	TNFSF13	tumor necrosis factor (ligand) superfamily, member 13
hsa-miR-566	0	0	1	1	1	1	FABP3	fatty acid binding protein 3, muscle and heart (mammary-derived growth inhibitor)
hsa-miR-566	0	0	1	0	1	1	HABP2	hyaluronan binding protein 2
hsa-miR-566	1	0	1	1	1	1	SF1	splicing factor 1
hsa-miR-566	1	0	1	1	0	0	ZMYM3	zinc finger, MYM-type 3
hsa-miR-566	0	0	1	1	1	1	CEBPB	CCAAT/enhancer binding protein (C/EBP), beta
hsa-miR-566	1	0	1	1	1	1	DLX3	distal-less homeobox 3
hsa-miR-566	0	0	1	1	1	1	MALL	mal, T-cell differentiation protein-like
hsa-miR-566	0	0	1	1	1	1	FOSL1	FOS-like antigen 1
hsa-miR-566	1	0	1	1	1	1	TOM1L1	target of myb1 (chicken)-like 1
hsa-miR-566	0	0	1	1	0	0	RTN2	reticulon 2
hsa-miR-566	1	0	1	0	1	1	DCAF7	DDB1 and CUL4 associated factor 7
hsa-miR-566	0	0	1	0	1	1	SLC16A2	solute carrier family 16, member 2 (thyroid hormone transporter)
hsa-miR-566	1	0	1	1	1	1	RAB35	RAB35, member RAS oncogene family
hsa-miR-566	1	0	1	1	0	0	GRIN1	glutamate receptor, ionotropic, N-methyl D-aspartate 1
hsa-miR-566	1	0	1	1	1	1	TRAM2	translocation associated membrane protein 2
hsa-miR-566	1	0	1	0	1	1	PXDN	peroxidasin homolog (Drosophila)
hsa-miR-566	0	0	1	0	1	1	PIGN	phosphatidylinositol glycan anchor biosynthesis, class N
hsa-miR-566	1	0	1	1	1	1	TBKBP1	TBK1 binding protein 1
hsa-miR-566	0	0	1	1	1	1	FRMPD4	FERM and PDZ domain containing 4
hsa-miR-566	1	0	1	1	1	1	RUSC2	RUN and SH3 domain containing 2
hsa-miR-566	1	0	1	0	1	1	NMNAT2	nicotinamide nucleotide adenylyltransferase 2
hsa-miR-566	1	0	1	1	0	0	CIC	capicua homolog (Drosophila)
hsa-miR-566	1	0	1	1	1	1	CCDC28A	coiled-coil domain containing 28A
hsa-miR-566	1	0	1	1	1	1	RAPGEFL1	Rap guanine nucleotide exchange factor (GEF)-like 1
hsa-miR-566	0	0	1	1	0	0	TRMT112	tRNA methyltransferase 11-2 homolog (S. cerevisiae)
hsa-miR-566	0	0	1	1	1	1	SMG6	smg-6 homolog, nonsense mediated mRNA decay factor (C. elegans)
hsa-miR-566	1	0	1	1	0	0	C17orf59	chromosome 17 open reading frame 59
hsa-miR-566	0	0	1	1	1	1	HES2	hairy and enhancer of split 2 (Drosophila)
hsa-miR-566	0	0	1	0	1	1	ZNF490	zinc finger protein 490
hsa-miR-566	1	0	1	1	1	1	GNB4	guanine nucleotide binding protein (G protein), beta polypeptide 4
hsa-miR-566	1	0	1	1	0	0	HAND2	heart and neural crest derivatives expressed 2
hsa-miR-566	0	0	1	1	0	0	TMSB15A	thymosin beta 15a
hsa-miR-566	0	0	1	1	1	1	CLSPN	claspin
hsa-miR-566	1	0	1	1	1	1	XYLT1	xylosyltransferase I
hsa-miR-566	1	0	1	1	1	1	GIGYF1	GRB10 interacting GYF protein 1
hsa-miR-566	0	0	1	0	1	1	C1orf115	chromosome 1 open reading frame 115
hsa-miR-566	1	0	1	1	1	1	KLHL18	kelch-like 18 (Drosophila)
hsa-miR-566	1	0	1	1	1	1	HOXA3	homeobox A3
hsa-miR-566	0	0	1	1	0	0	URM1	ubiquitin related modifier 1
hsa-miR-566	1	0	1	0	1	1	SPRY4	sprouty homolog 4 (Drosophila)
hsa-miR-566	1	0	1	1	0	0	TCF7L1	transcription factor 7-like 1 (T-cell specific, HMG-box)
hsa-miR-566	1	0	1	1	0	0	SCRT1	scratch homolog 1, zinc finger protein (Drosophila)
hsa-miR-566	1	0	1	1	1	1	SOX7	SRY (sex determining region Y)-box 7
hsa-miR-566	0	0	1	1	1	1	FRMD8	FERM domain containing 8
hsa-miR-566	1	0	1	1	1	1	ANTXR1	anthrax toxin receptor 1
hsa-miR-566	0	0	1	1	1	1	INSM2	insulinoma-associated 2
hsa-miR-566	1	0	1	1	1	1	PPP1R9B	protein phosphatase 1, regulatory subunit 9B
hsa-miR-566	1	0	1	0	1	1	PPP1R15B	protein phosphatase 1, regulatory subunit 15B
hsa-miR-566	0	0	1	1	1	1	POLR2J2	polymerase (RNA) II (DNA directed) polypeptide J2
hsa-miR-566	1	0	1	1	1	1	C19orf6	chromosome 19 open reading frame 6
hsa-miR-566	1	0	1	1	0	0	FCHSD1	FCH and double SH3 domains 1
hsa-miR-566	1	0	1	1	1	1	BRWD1	bromodomain and WD repeat domain containing 1
hsa-miR-566	0	0	1	0	1	1	CCDC97	coiled-coil domain containing 97
hsa-miR-566	0	0	1	1	0	0	FAM46B	family with sequence similarity 46, member B
hsa-miR-566	0	0	1	1	1	1	MAG	myelin associated glycoprotein
hsa-miR-566	0	0	1	1	1	1	ZNF431	zinc finger protein 431
hsa-miR-566	1	0	1	1	1	1	GLCCI1	glucocorticoid induced transcript 1
hsa-miR-566	0	0	1	1	1	1	ZNF653	zinc finger protein 653
hsa-miR-566	0	0	1	1	0	0	LINC00477	long intergenic non-protein coding RNA 477
hsa-miR-566	0	0	1	1	1	1	SLFN5	schlafen family member 5
hsa-miR-566	1	0	1	0	1	1	DIRAS1	DIRAS family, GTP-binding RAS-like 1
hsa-miR-566	0	0	1	1	1	1	APOBEC3F	apolipoprotein B mRNA editing enzyme, catalytic polypeptide-like 3F
hsa-miR-566	0	0	1	1	0	0	TIGD3	tigger transposable element derived 3
hsa-miR-566	0	0	1	1	1	1	GLIS1	GLIS family zinc finger 1
hsa-miR-566	1	0	1	1	1	1	HEPACAM	hepatic and glial cell adhesion molecule
hsa-miR-566	0	0	1	1	0	0	CSF3R	colony stimulating factor 3 receptor (granulocyte)
hsa-miR-566	0	0	1	1	1	1	TNFSF12-TNFSF13	TNFSF12-TNFSF13 readthrough
hsa-miR-566	1	0	1	1	1	1	UBR1	ubiquitin protein ligase E3 component n-recognin 1
hsa-miR-566	0	0	1	1	1	1	WFDC8	WAP four-disulfide core domain 8
hsa-miR-566	1	0	1	1	1	1	RBM38	RNA binding motif protein 38
hsa-miR-566	1	0	1	0	1	1	SLC16A9	solute carrier family 16, member 9 (monocarboxylic acid transporter 9)
hsa-miR-566	0	0	1	1	1	1	SLC25A35	solute carrier family 25, member 35
hsa-miR-566	0	0	1	0	1	1	C1orf229	chromosome 1 open reading frame 229
hsa-miR-566	0	0	1	0	0	0	CELP	carboxyl ester lipase pseudogene
hsa-miR-566	0	0	1	0	0	0	HLA-H	major histocompatibility complex, class I, H (pseudogene)
hsa-miR-566	0	0	1	0	0	0	TPTEP1	transmembrane phosphatase with tensin homology pseudogene 1
hsa-miR-566	0	0	1	0	0	0	TPI1P2	triosephosphate isomerase 1 pseudogene 2
hsa-miR-566	0	0	1	0	0	0	SNORA33	small nucleolar RNA, H/ACA box 33
hsa-miR-566	0	0	1	0	0	0	HOXA11-AS	HOXA11 antisense RNA
hsa-miR-566	0	0	1	0	0	0	TPTE2P6	transmembrane phosphoinositide 3-phosphatase and tensin homolog 2 pseudogene 6
hsa-miR-566	0	0	1	0	0	0	DUSP5P	dual specificity phosphatase 5 pseudogene
hsa-miR-566	0	0	1	0	0	0	TCAM1P	testicular cell adhesion molecule 1 homolog (mouse), pseudogene
hsa-miR-566	0	0	1	0	0	0	PYY2	peptide YY, 2 (pseudogene)
hsa-miR-566	1	0	1	1	1	1	CASP2	caspase 2, apoptosis-related cysteine peptidase
hsa-miR-566	0	0	1	1	1	1	SPIB	Spi-B transcription factor (Spi-1/PU.1 related)
hsa-miR-566	0	0	1	1	0	0	RHBDD2	rhomboid domain containing 2
hsa-miR-566	0	0	1	1	1	1	PIGQ	phosphatidylinositol glycan anchor biosynthesis, class Q
hsa-miR-566	0	0	0	1	0	0	BEST2	bestrophin 2
hsa-miR-566	1	0	1	1	1	1	CLDN11	claudin 11
hsa-miR-566	1	0	1	1	1	1	ZNF280C	zinc finger protein 280C
hsa-miR-566	0	0	0	1	1	1	MBD3	methyl-CpG binding domain protein 3
hsa-miR-566	0	0	0	1	0	0	FAM50A	family with sequence similarity 50, member A
hsa-miR-566	1	0	1	1	1	1	KIAA1467	KIAA1467
hsa-miR-566	1	0	1	1	0	0	ITGB4	integrin, beta 4
hsa-miR-566	1	0	1	1	0	0	KHSRP	KH-type splicing regulatory protein
hsa-miR-566	0	0	1	1	0	0	REM1	RAS (RAD and GEM)-like GTP-binding 1
hsa-miR-566	0	0	0	1	1	1	SLC24A6	solute carrier family 24 (sodium/lithium/calcium exchanger), member 6
hsa-miR-566	1	0	1	1	1	1	GOLGA3	golgin A3
hsa-miR-566	0	0	1	1	0	0	CDC6	cell division cycle 6 homolog (S. cerevisiae)
hsa-miR-566	0	0	1	1	0	0	MARCH2	membrane-associated ring finger (C3HC4) 2, E3 ubiquitin protein ligase
hsa-miR-566	1	0	1	1	0	0	MAPK12	mitogen-activated protein kinase 12
hsa-miR-566	1	0	0	1	0	0	MICALL1	MICAL-like 1
hsa-miR-566	1	0	1	1	1	1	JOSD1	Josephin domain containing 1
hsa-miR-566	1	0	1	1	1	1	FAM118A	family with sequence similarity 118, member A
hsa-miR-566	0	0	1	1	1	1	PRMT5	protein arginine methyltransferase 5
hsa-miR-566	0	0	1	1	0	0	C14orf166B	chromosome 14 open reading frame 166B
hsa-miR-566	1	0	1	1	0	0	HUWE1	HECT, UBA and WWE domain containing 1, E3 ubiquitin protein ligase
hsa-miR-566	0	0	1	1	0	0	USP11	ubiquitin specific peptidase 11
hsa-miR-566	0	0	1	1	1	1	CCDC113	coiled-coil domain containing 113
hsa-miR-566	0	0	0	1	0	0	FAM173A	family with sequence similarity 173, member A
hsa-miR-566	0	0	0	1	1	1	MEFV	Mediterranean fever
hsa-miR-566	0	0	1	1	0	0	MAP4K1	mitogen-activated protein kinase kinase kinase kinase 1
hsa-miR-566	0	0	1	1	0	0	PPP1R37	protein phosphatase 1, regulatory subunit 37
hsa-miR-566	1	0	1	1	0	0	DOT1L	DOT1-like, histone H3 methyltransferase (S. cerevisiae)
hsa-miR-566	0	0	1	1	1	1	KIR3DX1	killer cell immunoglobulin-like receptor, three domains, X1
hsa-miR-566	0	0	0	1	0	0	C19orf53	chromosome 19 open reading frame 53
hsa-miR-566	0	0	1	1	0	0	SLC1A6	solute carrier family 1 (high affinity aspartate/glutamate transporter), member 6
hsa-miR-566	0	0	0	1	1	1	TGFB1	transforming growth factor, beta 1
hsa-miR-566	0	0	0	1	0	0	INSL3	insulin-like 3 (Leydig cell)
hsa-miR-566	0	0	0	1	1	1	JAK3	Janus kinase 3
hsa-miR-566	0	0	0	1	0	0	GAPDHS	glyceraldehyde-3-phosphate dehydrogenase, spermatogenic
hsa-miR-566	0	0	0	1	0	0	CPA2	carboxypeptidase A2 (pancreatic)
hsa-miR-566	0	0	1	1	1	1	SPATA6L	spermatogenesis associated 6-like
hsa-miR-566	0	0	1	1	1	1	NANOG	Nanog homeobox
hsa-miR-566	0	0	0	1	0	0	GATC	glutamyl-tRNA(Gln) amidotransferase, subunit C homolog (bacterial)
hsa-miR-566	0	0	1	1	0	0	SLC44A4	solute carrier family 44, member 4
hsa-miR-566	0	0	1	1	0	0	SLC4A9	solute carrier family 4, sodium bicarbonate cotransporter, member 9
hsa-miR-566	0	0	1	1	1	1	C1QTNF3	C1q and tumor necrosis factor related protein 3
hsa-miR-566	0	0	1	1	1	1	AMACR	alpha-methylacyl-CoA racemase
hsa-miR-566	1	0	1	1	1	1	ST8SIA4	ST8 alpha-N-acetyl-neuraminide alpha-2,8-sialyltransferase 4
hsa-miR-566	0	0	1	1	0	0	MOGS	mannosyl-oligosaccharide glucosidase
hsa-miR-566	0	0	1	1	1	1	IL1R1	interleukin 1 receptor, type I
hsa-miR-566	1	0	1	1	1	1	GREB1	growth regulation by estrogen in breast cancer 1
hsa-miR-566	0	0	1	1	1	1	ATP6V1B1	ATPase, H+ transporting, lysosomal 56/58kDa, V1 subunit B1
hsa-miR-566	0	0	0	1	0	0	OSCP1	organic solute carrier partner 1
hsa-miR-566	0	0	1	1	0	0	GSC	goosecoid homeobox
hsa-miR-566	0	0	0	1	1	1	GPR75	G protein-coupled receptor 75
hsa-miR-566	1	0	0	1	0	0	TMEM180	transmembrane protein 180
hsa-miR-566	0	0	1	1	0	0	SLC25A2	solute carrier family 25 (mitochondrial carrier; ornithine transporter) member 2
hsa-miR-566	0	0	0	1	0	0	GJA8	gap junction protein, alpha 8, 50kDa
hsa-miR-566	0	0	0	1	0	0	PEX16	peroxisomal biogenesis factor 16
hsa-miR-566	0	0	0	1	0	0	SLC25A51	solute carrier family 25, member 51
hsa-miR-566	0	0	0	1	1	1	NEUROG3	neurogenin 3
hsa-miR-566	0	0	1	1	1	1	DDX39A	DEAD (Asp-Glu-Ala-Asp) box polypeptide 39A
hsa-miR-566	0	0	0	1	0	0	BATF3	basic leucine zipper transcription factor, ATF-like 3
hsa-miR-566	0	0	0	1	0	0	GCNT7	glucosaminyl (N-acetyl) transferase family member 7
hsa-miR-566	0	0	0	1	1	1	MOCS3	molybdenum cofactor synthesis 3
hsa-miR-566	0	0	0	1	1	1	TBCC	tubulin folding cofactor C
hsa-miR-566	1	0	0	1	1	1	CLPP	ClpP caseinolytic peptidase, ATP-dependent, proteolytic subunit homolog (E. coli)
hsa-miR-566	0	0	0	1	0	0	C3	complement component 3
hsa-miR-566	0	0	0	1	0	0	SLURP1	secreted LY6/PLAUR domain containing 1
hsa-miR-566	0	0	1	1	0	0	CAPNS1	calpain, small subunit 1
hsa-miR-566	1	0	0	1	0	0	PRR12	proline rich 12
hsa-miR-566	0	0	0	1	1	1	F2RL3	coagulation factor II (thrombin) receptor-like 3
hsa-miR-566	0	0	1	1	0	0	WDR24	WD repeat domain 24
hsa-miR-566	0	0	0	1	0	0	EIF3K	eukaryotic translation initiation factor 3, subunit K
hsa-miR-566	0	0	1	1	0	0	GCAT	glycine C-acetyltransferase
hsa-miR-566	1	0	1	1	0	0	SDF2L1	stromal cell-derived factor 2-like 1
hsa-miR-566	0	0	1	1	1	1	A4GALT	alpha 1,4-galactosyltransferase
hsa-miR-566	0	0	0	1	0	0	GALR3	galanin receptor 3
hsa-miR-566	1	0	1	1	1	1	CCDC117	coiled-coil domain containing 117
hsa-miR-566	0	0	0	1	1	1	ARHGAP22	Rho GTPase activating protein 22
hsa-miR-566	1	0	1	1	1	1	IVD	isovaleryl-CoA dehydrogenase
hsa-miR-566	0	0	0	1	0	0	TMEM8A	transmembrane protein 8A
hsa-miR-566	0	0	1	1	0	0	ZNF221	zinc finger protein 221
hsa-miR-566	0	0	1	1	0	0	WDR18	WD repeat domain 18
hsa-miR-566	0	0	0	1	1	1	FBXO44	F-box protein 44
hsa-miR-566	1	0	1	1	1	1	TSG101	tumor susceptibility gene 101
hsa-miR-566	0	0	1	1	0	0	APOC1	apolipoprotein C-I
hsa-miR-566	0	0	0	1	1	1	SLC27A1	solute carrier family 27 (fatty acid transporter), member 1
hsa-miR-566	0	0	0	1	1	1	LSM4	LSM4 homolog, U6 small nuclear RNA associated (S. cerevisiae)
hsa-miR-566	1	0	1	1	0	0	JUND	jun D proto-oncogene
hsa-miR-566	0	0	1	1	0	0	SAG	S-antigen; retina and pineal gland (arrestin)
hsa-miR-566	0	0	0	1	0	0	CALY	calcyon neuron-specific vesicular protein
hsa-miR-566	0	0	0	1	0	0	TMEM160	transmembrane protein 160
hsa-miR-566	0	0	1	1	0	0	GRWD1	glutamate-rich WD repeat containing 1
hsa-miR-566	0	0	0	1	0	0	CCL25	chemokine (C-C motif) ligand 25
hsa-miR-566	0	0	1	1	1	1	RHPN2	rhophilin, Rho GTPase binding protein 2
hsa-miR-566	0	0	1	1	1	1	TRIM47	tripartite motif containing 47
hsa-miR-566	1	0	1	1	1	1	TERF2	telomeric repeat binding factor 2
hsa-miR-566	0	0	1	1	1	1	PDE6B	phosphodiesterase 6B, cGMP-specific, rod, beta
hsa-miR-566	0	0	1	1	0	0	HSPBP1	HSPA (heat shock 70kDa) binding protein, cytoplasmic cochaperone 1
hsa-miR-566	0	0	0	1	1	1	C1QTNF6	C1q and tumor necrosis factor related protein 6
hsa-miR-566	0	0	1	1	1	1	VHL	von Hippel-Lindau tumor suppressor, E3 ubiquitin protein ligase
hsa-miR-566	0	0	0	1	0	0	HNF1A	HNF1 homeobox A
hsa-miR-566	1	0	1	1	0	0	CCDC64	coiled-coil domain containing 64
hsa-miR-566	0	0	0	1	1	1	TSPAN31	tetraspanin 31
hsa-miR-566	0	0	1	1	1	1	EGR4	early growth response 4
hsa-miR-566	0	0	0	1	0	0	FBXL8	F-box and leucine-rich repeat protein 8
hsa-miR-566	1	0	1	1	0	0	CCM2	cerebral cavernous malformation 2
hsa-miR-566	0	0	0	1	1	1	TACO1	translational activator of mitochondrially encoded cytochrome c oxidase I
hsa-miR-566	0	0	0	1	0	0	IL36A	interleukin 36, alpha
hsa-miR-566	0	0	0	1	0	0	CAPN11	calpain 11
hsa-miR-566	0	0	1	1	1	1	DBR1	debranching enzyme homolog 1 (S. cerevisiae)
hsa-miR-566	1	0	1	1	1	1	RAB21	RAB21, member RAS oncogene family
hsa-miR-566	1	0	1	1	1	1	PTPRB	protein tyrosine phosphatase, receptor type, B
hsa-miR-566	0	0	0	1	1	1	LYZ	lysozyme
hsa-miR-566	0	0	1	1	0	0	DNAH3	dynein, axonemal, heavy chain 3
hsa-miR-566	1	0	1	1	1	1	TMEM159	transmembrane protein 159
hsa-miR-566	0	0	1	1	1	1	TRAF5	TNF receptor-associated factor 5
hsa-miR-566	0	0	0	1	1	1	SLC24A1	solute carrier family 24 (sodium/potassium/calcium exchanger), member 1
hsa-miR-566	0	0	0	1	1	1	VIPR2	vasoactive intestinal peptide receptor 2
hsa-miR-566	0	0	0	1	0	0	NUBP2	nucleotide binding protein 2
hsa-miR-566	0	0	0	1	0	0	TELO2	TEL2, telomere maintenance 2, homolog (S. cerevisiae)
hsa-miR-566	0	0	1	1	0	0	SLC12A3	solute carrier family 12 (sodium/chloride transporters), member 3
hsa-miR-566	0	0	0	1	0	0	CHST8	carbohydrate (N-acetylgalactosamine 4-0) sulfotransferase 8
hsa-miR-566	0	0	1	1	0	0	HPN	hepsin
hsa-miR-566	0	0	1	1	1	1	TOX4	TOX high mobility group box family member 4
hsa-miR-566	0	0	1	1	1	1	ACIN1	apoptotic chromatin condensation inducer 1
hsa-miR-566	0	0	0	1	0	0	CCDC124	coiled-coil domain containing 124
hsa-miR-566	1	0	0	1	0	0	MAST3	microtubule associated serine/threonine kinase 3
hsa-miR-566	0	0	0	1	0	0	GNA15	guanine nucleotide binding protein (G protein), alpha 15 (Gq class)
hsa-miR-566	0	0	1	1	1	1	SCARF1	scavenger receptor class F, member 1
hsa-miR-566	1	0	1	1	0	0	GRIN2D	glutamate receptor, ionotropic, N-methyl D-aspartate 2D
hsa-miR-566	0	0	1	1	1	1	GIPR	gastric inhibitory polypeptide receptor
hsa-miR-566	1	0	1	1	0	0	HIPK2	homeodomain interacting protein kinase 2
hsa-miR-566	0	0	0	1	0	0	MTIF2	mitochondrial translational initiation factor 2
hsa-miR-566	1	0	1	1	1	1	FAM20B	family with sequence similarity 20, member B
hsa-miR-566	0	0	0	1	0	0	WDR76	WD repeat domain 76
hsa-miR-566	1	0	1	1	1	1	CBL	Cbl proto-oncogene, E3 ubiquitin protein ligase
hsa-miR-566	0	0	0	1	0	0	GPR108	G protein-coupled receptor 108
hsa-miR-566	1	0	1	1	1	1	ASB1	ankyrin repeat and SOCS box containing 1
hsa-miR-566	0	0	0	1	0	0	NSUN2	NOP2/Sun RNA methyltransferase family, member 2
hsa-miR-566	0	0	1	1	1	1	F11	coagulation factor XI
hsa-miR-566	0	0	1	1	1	1	POT1	protection of telomeres 1 homolog (S. pombe)
hsa-miR-566	1	0	1	1	1	1	SLC2A4RG	SLC2A4 regulator
hsa-miR-566	0	0	0	1	0	0	SLC5A4	solute carrier family 5 (low affinity glucose cotransporter), member 4
hsa-miR-566	0	0	1	1	1	1	INHBE	inhibin, beta E
hsa-miR-566	0	0	0	1	0	0	FITM1	fat storage-inducing transmembrane protein 1
hsa-miR-566	0	0	0	1	0	0	RHCG	Rh family, C glycoprotein
hsa-miR-566	0	0	0	1	1	1	TXNL4B	thioredoxin-like 4B
hsa-miR-566	0	0	1	1	0	0	NUDT7	nudix (nucleoside diphosphate linked moiety X)-type motif 7
hsa-miR-566	0	0	1	1	0	0	GALNS	galactosamine (N-acetyl)-6-sulfate sulfatase
hsa-miR-566	1	0	1	1	1	1	RFFL	ring finger and FYVE-like domain containing E3 ubiquitin protein ligase
hsa-miR-566	0	0	0	1	0	0	OR4D1	olfactory receptor, family 4, subfamily D, member 1
hsa-miR-566	0	0	0	1	0	0	EIF4A3	eukaryotic translation initiation factor 4A3
hsa-miR-566	1	0	0	1	1	1	RNF157	ring finger protein 157
hsa-miR-566	0	0	1	1	0	0	NT5C3L	5'-nucleotidase, cytosolic III-like
hsa-miR-566	0	0	0	1	0	0	ARMC6	armadillo repeat containing 6
hsa-miR-566	0	0	0	1	0	0	CACNG8	calcium channel, voltage-dependent, gamma subunit 8
hsa-miR-566	0	0	0	1	0	0	ECSIT	ECSIT homolog (Drosophila)
hsa-miR-566	0	0	1	1	0	0	KLHDC4	kelch domain containing 4
hsa-miR-566	0	0	0	1	0	0	FAM176B	family with sequence similarity 176, member B
hsa-miR-566	0	0	0	1	0	0	FERD3L	Fer3-like (Drosophila)
hsa-miR-566	0	0	1	1	0	0	SRCRB4D	scavenger receptor cysteine rich domain containing, group B (4 domains)
hsa-miR-566	1	0	1	1	1	1	ASB6	ankyrin repeat and SOCS box containing 6
hsa-miR-566	0	0	1	1	1	1	RPP30	ribonuclease P/MRP 30kDa subunit
hsa-miR-566	1	0	0	1	1	1	PPRC1	peroxisome proliferator-activated receptor gamma, coactivator-related 1
hsa-miR-566	1	0	1	1	1	1	ADM	adrenomedullin
hsa-miR-566	0	0	1	1	1	1	SLC43A1	solute carrier family 43, member 1
hsa-miR-566	0	0	0	1	1	1	ORAOV1	oral cancer overexpressed 1
hsa-miR-566	0	0	1	1	1	1	MRPL49	mitochondrial ribosomal protein L49
hsa-miR-566	1	0	1	1	0	0	CCRN4L	CCR4 carbon catabolite repression 4-like (S. cerevisiae)
hsa-miR-566	1	0	1	1	1	1	QTRTD1	queuine tRNA-ribosyltransferase domain containing 1
hsa-miR-566	0	0	0	1	1	1	CCDC122	coiled-coil domain containing 122
hsa-miR-566	1	0	1	1	1	1	GTF2E1	general transcription factor IIE, polypeptide 1, alpha 56kDa
hsa-miR-566	0	0	0	1	0	0	LY96	lymphocyte antigen 96
hsa-miR-566	0	0	1	1	1	1	SKA1	spindle and kinetochore associated complex subunit 1
hsa-miR-566	0	0	0	1	0	0	MRPS17	mitochondrial ribosomal protein S17
hsa-miR-566	0	0	0	1	0	0	SLC7A7	solute carrier family 7 (amino acid transporter light chain, y+L system), member 7
hsa-miR-566	0	0	1	1	1	1	PPIL3	peptidylprolyl isomerase (cyclophilin)-like 3
hsa-miR-566	1	0	0	1	1	1	WHAMM	WAS protein homolog associated with actin, golgi membranes and microtubules
hsa-miR-566	0	0	1	1	1	1	CDK20	cyclin-dependent kinase 20
hsa-miR-566	0	0	0	1	0	0	COX6A2	cytochrome c oxidase subunit VIa polypeptide 2
hsa-miR-566	0	0	0	1	1	1	LYZL4	lysozyme-like 4
hsa-miR-566	1	0	1	1	1	1	RNF207	ring finger protein 207
hsa-miR-566	0	0	1	1	1	1	LRTOMT	leucine rich transmembrane and 0-methyltransferase domain containing
hsa-miR-566	0	0	0	1	0	0	TRMU	tRNA 5-methylaminomethyl-2-thiouridylate methyltransferase
hsa-miR-566	0	0	1	1	0	0	CRYAA	crystallin, alpha A
hsa-miR-566	0	0	0	1	0	0	RRP1	ribosomal RNA processing 1 homolog (S. cerevisiae)
hsa-miR-566	0	0	0	1	1	1	LRRC3	leucine rich repeat containing 3
hsa-miR-566	0	0	0	1	0	0	GPSM1	G-protein signaling modulator 1
hsa-miR-566	0	0	0	1	1	1	PHLDB3	pleckstrin homology-like domain, family B, member 3
hsa-miR-566	1	0	1	1	0	0	IER2	immediate early response 2
hsa-miR-566	0	0	1	1	1	1	ZNF250	zinc finger protein 250
hsa-miR-566	0	0	1	1	0	0	CCL5	chemokine (C-C motif) ligand 5
hsa-miR-566	0	0	0	1	0	0	OR7G1	olfactory receptor, family 7, subfamily G, member 1
hsa-miR-566	0	0	1	1	1	1	CXCL16	chemokine (C-X-C motif) ligand 16
hsa-miR-566	0	0	1	1	1	1	TNFSF12	tumor necrosis factor (ligand) superfamily, member 12
hsa-miR-566	0	0	1	1	0	0	LUC7L	LUC7-like (S. cerevisiae)
hsa-miR-566	0	0	0	1	0	0	PTX4	pentraxin 4, long
hsa-miR-566	0	0	0	1	0	0	HS3ST6	heparan sulfate (glucosamine) 3-O-sulfotransferase 6
hsa-miR-566	0	0	0	1	0	0	NTN3	netrin 3
hsa-miR-566	1	0	1	1	0	0	SLX4	SLX4 structure-specific endonuclease subunit homolog (S. cerevisiae)
hsa-miR-566	0	0	0	1	1	1	SLC25A45	solute carrier family 25, member 45
hsa-miR-566	0	0	1	1	1	1	MEGF6	multiple EGF-like-domains 6
hsa-miR-566	0	0	1	1	0	0	DCST1	DC-STAMP domain containing 1
hsa-miR-566	0	0	1	1	1	1	PRRT3	proline-rich transmembrane protein 3
hsa-miR-566	0	0	0	1	0	0	RTP3	receptor (chemosensory) transporter protein 3
hsa-miR-566	0	0	1	1	1	1	DTX3L	deltex 3-like (Drosophila)
hsa-miR-566	1	0	1	1	0	0	CAMK2N2	calcium/calmodulin-dependent protein kinase II inhibitor 2
hsa-miR-566	0	0	0	1	0	0	AGXT2L1	alanine-glyoxylate aminotransferase 2-like 1
hsa-miR-566	1	0	1	1	1	1	ELOVL7	ELOVL fatty acid elongase 7
hsa-miR-566	1	0	1	1	0	0	FIGF	c-fos induced growth factor (vascular endothelial growth factor D)
hsa-miR-566	0	0	1	1	1	1	TRIM13	tripartite motif containing 13
hsa-miR-566	0	0	0	1	0	0	C12orf55	chromosome 12 open reading frame 55
hsa-miR-566	1	0	1	1	1	1	SVOP	SV2 related protein homolog (rat)
hsa-miR-566	0	0	1	1	1	1	GLB1L3	galactosidase, beta 1-like 3
hsa-miR-566	0	0	0	1	0	0	TRMT61A	tRNA methyltransferase 61 homolog A (S. cerevisiae)
hsa-miR-566	0	0	1	1	0	0	FAM18A	family with sequence similarity 18, member A
hsa-miR-566	0	0	1	1	0	0	SAAL1	serum amyloid A-like 1
hsa-miR-566	0	0	0	1	0	0	OR4D6	olfactory receptor, family 4, subfamily D, member 6
hsa-miR-566	0	0	1	1	1	1	ACSF2	acyl-CoA synthetase family member 2
hsa-miR-566	0	0	0	1	1	1	ZNF91	zinc finger protein 91
hsa-miR-566	0	0	1	1	1	1	TRIM68	tripartite motif containing 68
hsa-miR-566	0	0	0	1	0	0	LY6D	lymphocyte antigen 6 complex, locus D
hsa-miR-566	0	0	0	1	0	0	HSD11B1L	hydroxysteroid (11-beta) dehydrogenase 1-like
hsa-miR-566	0	0	0	1	0	0	PELP1	proline, glutamate and leucine rich protein 1
hsa-miR-566	0	0	0	1	0	0	PRR25	proline rich 25
hsa-miR-566	0	0	0	1	0	0	E4F1	E4F transcription factor 1
hsa-miR-566	0	0	1	1	0	0	TTC21A	tetratricopeptide repeat domain 21A
hsa-miR-566	0	0	0	1	0	0	LTBP3	latent transforming growth factor beta binding protein 3
hsa-miR-566	0	0	1	1	0	0	IRF2BP1	interferon regulatory factor 2 binding protein 1
hsa-miR-566	0	0	1	1	1	1	GTF2IRD2	GTF2I repeat domain containing 2
hsa-miR-566	0	0	1	1	0	0	KARS	lysyl-tRNA synthetase
hsa-miR-566	1	0	0	1	0	0	ATPAF2	ATP synthase mitochondrial F1 complex assembly factor 2
hsa-miR-566	1	0	1	1	1	1	NEUROD2	neuronal differentiation 2
hsa-miR-566	0	0	0	1	0	0	GSX1	GS homeobox 1
hsa-miR-566	0	0	1	1	1	1	MXD3	MAX dimerization protein 3
hsa-miR-566	0	0	0	1	1	1	RHNO1	RAD9-HUS1-RAD1 interacting nuclear orphan 1
hsa-miR-566	0	0	1	1	0	0	FGGY	FGGY carbohydrate kinase domain containing
hsa-miR-566	1	0	1	1	1	1	PLEKHB2	pleckstrin homology domain containing, family B (evectins) member 2
hsa-miR-566	1	0	1	1	1	1	TTBK1	tau tubulin kinase 1
hsa-miR-566	0	0	0	1	0	0	ANKS3	ankyrin repeat and sterile alpha motif domain containing 3
hsa-miR-566	1	0	1	1	0	0	INO80E	INO80 complex subunit E
hsa-miR-566	0	0	0	1	1	1	C22orf15	chromosome 22 open reading frame 15
hsa-miR-566	0	0	0	1	1	1	NECAB2	N-terminal EF-hand calcium binding protein 2
hsa-miR-566	1	0	1	1	1	1	GRM5	glutamate receptor, metabotropic 5
hsa-miR-566	0	0	0	1	0	0	OR7G2	olfactory receptor, family 7, subfamily G, member 2
hsa-miR-566	1	0	1	1	1	1	TRIM5	tripartite motif containing 5
hsa-miR-566	0	0	0	1	0	0	OR10H3	olfactory receptor, family 10, subfamily H, member 3
hsa-miR-566	1	0	1	1	0	0	ADRA1B	adrenoceptor alpha 1B
hsa-miR-566	0	0	0	1	1	1	LRRC45	leucine rich repeat containing 45
hsa-miR-566	0	0	0	1	0	0	ASPSCR1	alveolar soft part sarcoma chromosome region, candidate 1
hsa-miR-566	0	0	0	1	0	0	OR10A2	olfactory receptor, family 10, subfamily A, member 2
hsa-miR-566	0	0	1	1	1	1	MRPS12	mitochondrial ribosomal protein S12
hsa-miR-566	0	0	0	1	0	0	SLC16A13	solute carrier family 16, member 13 (monocarboxylic acid transporter 13)
hsa-miR-566	0	0	0	1	0	0	MS4A10	membrane-spanning 4-domains, subfamily A, member 10
hsa-miR-566	0	0	0	1	0	0	SNX32	sorting nexin 32
hsa-miR-566	0	0	0	1	0	0	ATAD3B	ATPase family, AAA domain containing 3B
hsa-miR-566	0	0	1	1	0	0	RHOD	ras homolog family member D
hsa-miR-566	0	0	0	1	0	0	OR10H5	olfactory receptor, family 10, subfamily H, member 5
hsa-miR-566	0	0	1	1	0	0	BAD	BCL2-associated agonist of cell death
hsa-miR-566	1	0	1	1	1	1	TMEM9B	TMEM9 domain family, member B
hsa-miR-566	0	0	0	1	0	0	XCR1	chemokine (C motif) receptor 1
hsa-miR-566	1	0	0	1	0	0	EHBP1L1	EH domain binding protein 1-like 1
hsa-miR-566	1	0	1	1	1	1	AKIP1	A kinase (PRKA) interacting protein 1
hsa-miR-566	0	0	1	1	1	1	CD3EAP	CD3e molecule, epsilon associated protein
hsa-miR-566	1	0	1	1	1	1	FAM134C	family with sequence similarity 134, member C
hsa-miR-566	0	0	0	1	1	1	ADORA1	adenosine A1 receptor
hsa-miR-566	0	0	0	1	1	1	FBXW8	F-box and WD repeat domain containing 8
hsa-miR-566	0	0	0	1	1	1	EPS8L1	EPS8-like 1
hsa-miR-566	0	0	0	1	0	0	C21orf58	chromosome 21 open reading frame 58
hsa-miR-566	1	0	1	1	1	1	FUT1	fucosyltransferase 1 (galactoside 2-alpha-L-fucosyltransferase, H blood group)
hsa-miR-566	0	0	1	1	1	1	ANGEL2	angel homolog 2 (Drosophila)
hsa-miR-566	0	0	1	1	0	0	RFNG	RFNG O-fucosylpeptide 3-beta-N-acetylglucosaminyltransferase
hsa-miR-566	0	0	1	1	1	1	C14orf126	chromosome 14 open reading frame 126
hsa-miR-566	0	0	0	1	0	0	LEPREL2	leprecan-like 2
hsa-miR-566	0	0	1	1	0	0	GPR162	G protein-coupled receptor 162
hsa-miR-566	1	0	1	1	1	1	KIAA1033	KIAA1033
hsa-miR-566	1	0	1	1	1	1	PIP4K2B	phosphatidylinositol-5-phosphate 4-kinase, type II, beta
hsa-miR-566	0	0	0	1	0	0	RPL21	ribosomal protein L21
hsa-miR-566	1	0	1	1	1	1	SWSAP1	SWIM-type zinc finger 7 associated protein 1
hsa-miR-566	1	0	1	1	1	1	CLCF1	cardiotrophin-like cytokine factor 1
hsa-miR-566	0	0	0	1	0	0	TSGA10IP	testis specific, 10 interacting protein
hsa-miR-566	0	0	0	1	1	1	GTF2IRD2B	GTF2I repeat domain containing 2B
hsa-miR-566	0	0	0	1	0	0	GJC3	gap junction protein, gamma 3, 30.2kDa
hsa-miR-566	0	0	0	1	0	0	PARP10	poly (ADP-ribose) polymerase family, member 10
hsa-miR-566	0	0	0	1	1	1	LINC00471	long intergenic non-protein coding RNA 471
hsa-miR-566	1	0	1	1	1	1	FOXG1	forkhead box G1
hsa-miR-566	0	0	0	1	0	0	UTS2R	urotensin 2 receptor
hsa-miR-566	1	0	1	1	1	1	ZFX	zinc finger protein, X-linked
hsa-miR-566	0	0	0	1	0	0	OR4D11	olfactory receptor, family 4, subfamily D, member 11
hsa-miR-566	0	0	0	1	1	1	SLC15A1	solute carrier family 15 (oligopeptide transporter), member 1
hsa-miR-566	1	0	1	1	1	1	ING5	inhibitor of growth family, member 5
hsa-miR-566	0	0	1	1	1	1	KAZALD1	Kazal-type serine peptidase inhibitor domain 1
hsa-miR-566	0	0	0	1	0	0	RPL27A	ribosomal protein L27a
hsa-miR-566	0	0	1	1	0	0	C19orf18	chromosome 19 open reading frame 18
hsa-miR-566	0	0	1	1	0	0	KCNH6	potassium voltage-gated channel, subfamily H (eag-related), member 6
hsa-miR-566	0	0	0	1	0	0	LINS	lines homolog (Drosophila)
hsa-miR-566	0	0	1	1	0	0	CCDC114	coiled-coil domain containing 114
hsa-miR-566	0	0	0	1	0	0	OR11H6	olfactory receptor, family 11, subfamily H, member 6
hsa-miR-566	0	0	1	1	0	0	LCN15	lipocalin 15
hsa-miR-566	0	0	1	1	1	1	CYP8B1	cytochrome P450, family 8, subfamily B, polypeptide 1
hsa-miR-566	0	0	1	1	0	0	BCAT2	branched chain amino-acid transaminase 2, mitochondrial
hsa-miR-566	0	0	0	1	0	0	OR2AE1	olfactory receptor, family 2, subfamily AE, member 1
hsa-miR-566	0	0	0	1	1	1	ZNF552	zinc finger protein 552
hsa-miR-566	1	0	0	1	1	1	LLGL1	lethal giant larvae homolog 1 (Drosophila)
hsa-miR-566	0	0	1	1	0	0	RADIL	Ras association and DIL domains
hsa-miR-566	1	0	1	1	1	1	AFF3	AF4/FMR2 family, member 3
hsa-miR-566	1	0	1	1	1	1	SLC2A4	solute carrier family 2 (facilitated glucose transporter), member 4
hsa-miR-566	0	0	1	1	0	0	TRAPPC5	trafficking protein particle complex 5
hsa-miR-566	0	0	1	1	0	0	LRRN4CL	LRRN4 C-terminal like
hsa-miR-566	1	0	1	1	0	0	ZNF527	zinc finger protein 527
hsa-miR-566	0	0	0	1	0	0	S1PR2	sphingosine-1-phosphate receptor 2
hsa-miR-566	0	0	1	1	0	0	C22orf43	chromosome 22 open reading frame 43
hsa-miR-566	0	0	1	1	1	1	ZNF345	zinc finger protein 345
hsa-miR-566	1	0	1	1	1	1	IFNAR2	interferon (alpha, beta and omega) receptor 2
hsa-miR-566	0	0	1	1	1	1	RNF170	ring finger protein 170
hsa-miR-566	0	0	0	1	1	1	APOL1	apolipoprotein L, 1
hsa-miR-566	1	0	1	1	1	1	LCLAT1	lysocardiolipin acyltransferase 1
hsa-miR-566	0	0	1	1	1	1	SHISA2	shisa homolog 2 (Xenopus laevis)
hsa-miR-566	0	0	0	1	1	1	ZNF454	zinc finger protein 454
hsa-miR-566	0	0	1	1	1	1	BCKDHB	branched chain keto acid dehydrogenase E1, beta polypeptide
hsa-miR-566	0	0	0	1	0	0	GPS1	G protein pathway suppressor 1
hsa-miR-566	0	0	1	1	1	1	NQO1	NAD(P)H dehydrogenase, quinone 1
hsa-miR-566	1	0	1	1	0	0	SMCHD1	structural maintenance of chromosomes flexible hinge domain containing 1
hsa-miR-566	0	0	0	1	0	0	CYP4F43P	cytochrome P450, family 4, subfamily F, polypeptide 43, pseudogene
hsa-miR-566	0	0	0	1	0	0	RNF151	ring finger protein 151
hsa-miR-566	0	0	1	1	1	1	SFXN1	sideroflexin 1
hsa-miR-566	0	0	0	1	1	1	PLD6	phospholipase D family, member 6
hsa-miR-566	0	0	0	1	0	0	STAB1	stabilin 1
hsa-miR-566	0	0	1	1	1	1	IL12RB1	interleukin 12 receptor, beta 1
hsa-miR-566	0	0	1	1	0	0	MYPOP	Myb-related transcription factor, partner of profilin
hsa-miR-566	0	0	0	1	1	1	ZYX	zyxin
hsa-miR-566	0	0	1	1	0	0	B4GALNT3	beta-1,4-N-acetyl-galactosaminyl transferase 3
hsa-miR-566	0	0	1	1	0	0	CPSF3L	cleavage and polyadenylation specific factor 3-like
hsa-miR-566	0	0	0	1	0	0	SPEM1	spermatid maturation 1
hsa-miR-566	0	0	0	1	1	1	CYP2B6	cytochrome P450, family 2, subfamily B, polypeptide 6
hsa-miR-566	1	0	0	1	1	1	CRLF3	cytokine receptor-like factor 3
hsa-miR-566	0	0	1	1	1	1	LOC284023	uncharacterized LOC284023
hsa-miR-566	1	0	1	1	0	0	ECE2	endothelin converting enzyme 2
hsa-miR-566	0	0	1	1	1	1	NLRC3	NLR family, CARD domain containing 3
hsa-miR-566	0	0	1	1	0	0	CHCHD5	coiled-coil-helix-coiled-coil-helix domain containing 5
hsa-miR-566	0	0	1	1	0	0	MRVI1-AS1	MRVI1 antisense RNA 1
hsa-miR-566	0	0	0	1	0	0	ZNF7	zinc finger protein 7
hsa-miR-566	0	0	1	1	1	1	MARVELD2	MARVEL domain containing 2
hsa-miR-566	0	0	1	1	1	1	ISCA1	iron-sulfur cluster assembly 1 homolog (S. cerevisiae)
hsa-miR-566	1	0	0	1	1	1	SSH1	slingshot homolog 1 (Drosophila)
hsa-miR-566	1	0	0	1	1	1	PLEKHJ1	pleckstrin homology domain containing, family J member 1
hsa-miR-566	0	0	1	1	1	1	PTPLA	protein tyrosine phosphatase-like (proline instead of catalytic arginine), member A
hsa-miR-566	0	0	0	1	1	1	FLII	flightless I homolog (Drosophila)
hsa-miR-566	0	0	1	1	0	0	SEC16B	SEC16 homolog B (S. cerevisiae)
hsa-miR-566	0	0	1	1	0	0	TMEM86B	transmembrane protein 86B
hsa-miR-566	1	0	1	1	0	0	KIAA0556	KIAA0556
hsa-miR-566	0	0	1	1	0	0	EFCAB4A	EF-hand calcium binding domain 4A
hsa-miR-566	1	0	0	1	1	1	FANCF	Fanconi anemia, complementation group F
hsa-miR-566	1	0	0	1	0	0	KRT81	keratin 81
hsa-miR-566	1	0	1	1	0	0	C17orf70	chromosome 17 open reading frame 70
hsa-miR-566	0	0	1	1	0	0	AFMID	arylformamidase
hsa-miR-566	0	0	1	1	0	0	GPKOW	G patch domain and KOW motifs
hsa-miR-566	0	0	0	1	0	0	FAM65C	family with sequence similarity 65, member C
hsa-miR-566	0	0	0	1	0	0	OR2V2	olfactory receptor, family 2, subfamily V, member 2
hsa-miR-566	0	0	0	1	0	0	LRRC14B	leucine rich repeat containing 14B
hsa-miR-566	0	0	0	1	0	0	SLC9A7	solute carrier family 9, subfamily A (NHE7, cation proton antiporter 7), member 7
hsa-miR-566	0	0	1	1	1	1	HSD17B13	hydroxysteroid (17-beta) dehydrogenase 13
hsa-miR-566	1	0	1	1	1	1	AGAP2	ArfGAP with GTPase domain, ankyrin repeat and PH domain 2
hsa-miR-566	1	0	1	1	1	1	MCF2L2	MCF.2 cell line derived transforming sequence-like 2
hsa-miR-566	0	0	0	1	0	0	KRTAP5-3	keratin associated protein 5-3
hsa-miR-566	1	0	1	1	0	0	RIMS2	regulating synaptic membrane exocytosis 2
hsa-miR-566	0	0	0	1	0	0	USP17L3	ubiquitin specific peptidase 17-like 3
hsa-miR-566	0	0	0	1	0	0	NKX2-5	NK2 homeobox 5
hsa-miR-566	0	0	0	1	1	1	TRIM61	tripartite motif containing 61
hsa-miR-566	1	0	1	1	0	0	PTP4A3	protein tyrosine phosphatase type IVA, member 3
hsa-miR-566	0	0	0	1	0	0	ADAT3	adenosine deaminase, tRNA-specific 3
hsa-miR-566	0	0	1	1	0	0	MFSD5	major facilitator superfamily domain containing 5
hsa-miR-566	0	0	0	1	0	0	GDPGP1	GDP-D-glucose phosphorylase 1
hsa-miR-566	1	0	1	1	1	1	ZSCAN22	zinc finger and SCAN domain containing 22
hsa-miR-566	0	0	1	1	1	1	ZBTB3	zinc finger and BTB domain containing 3
hsa-miR-566	0	0	1	1	1	1	SKA2	spindle and kinetochore associated complex subunit 2
hsa-miR-566	0	0	0	1	1	1	TMEM121	transmembrane protein 121
hsa-miR-566	0	0	0	1	0	0	SAMD14	sterile alpha motif domain containing 14
hsa-miR-566	1	0	0	1	1	1	C1orf210	chromosome 1 open reading frame 210
hsa-miR-566	0	0	0	1	1	1	SNX20	sorting nexin 20
hsa-miR-566	0	0	0	1	1	1	IL3RA	interleukin 3 receptor, alpha (low affinity)
hsa-miR-566	0	0	1	1	0	0	ALYREF	Aly/REF export factor
hsa-miR-566	1	0	1	1	1	1	MTA1	metastasis associated 1
hsa-miR-566	0	0	1	1	1	1	RBM43	RNA binding motif protein 43
hsa-miR-566	0	0	1	1	0	0	HIST1H1B	histone cluster 1, H1b
hsa-miR-566	0	0	1	1	0	0	SOCS1	suppressor of cytokine signaling 1
hsa-miR-566	0	0	0	1	0	0	OR4F15	olfactory receptor, family 4, subfamily F, member 15
hsa-miR-566	0	0	1	1	1	1	MRPL12	mitochondrial ribosomal protein L12
hsa-miR-566	0	0	0	1	0	0	TMPRSS9	transmembrane protease, serine 9
hsa-miR-566	0	0	0	1	0	0	PRHOXNB	parahox cluster neighbor
hsa-miR-566	0	0	1	1	0	0	SIGIRR	single immunoglobulin and toll-interleukin 1 receptor (TIR) domain
hsa-miR-566	0	0	1	1	0	0	STAC3	SH3 and cysteine rich domain 3
hsa-miR-566	0	0	0	1	1	1	ZNF530	zinc finger protein 530
hsa-miR-566	0	0	1	1	0	0	MILR1	mast cell immunoglobulin-like receptor 1
hsa-miR-566	0	0	0	1	0	0	ACAA1	acetyl-CoA acyltransferase 1
hsa-miR-566	0	0	1	1	0	0	TAS1R1	taste receptor, type 1, member 1
hsa-miR-566	0	0	1	1	1	1	ZNF137P	zinc finger protein 137, pseudogene
hsa-miR-566	0	0	1	1	1	1	AIFM3	apoptosis-inducing factor, mitochondrion-associated, 3
hsa-miR-566	0	0	0	1	0	0	USP17L2	ubiquitin specific peptidase 17-like 2
hsa-miR-566	0	0	1	1	0	0	CCDC87	coiled-coil domain containing 87
hsa-miR-566	1	0	1	1	0	0	CELF5	CUGBP, Elav-like family member 5
hsa-miR-566	0	0	1	1	0	0	TXNRD2	thioredoxin reductase 2
hsa-miR-566	0	0	0	1	1	1	PDCD1	programmed cell death 1
hsa-miR-566	0	0	0	1	0	0	WDR86	WD repeat domain 86
hsa-miR-566	0	0	0	1	1	1	SLC25A23	solute carrier family 25 (mitochondrial carrier; phosphate carrier), member 23
hsa-miR-566	0	0	0	1	0	0	OR13F1	olfactory receptor, family 13, subfamily F, member 1
hsa-miR-566	0	0	0	1	1	1	RAX	retina and anterior neural fold homeobox
hsa-miR-566	0	0	1	1	1	1	ZNF626	zinc finger protein 626
hsa-miR-566	1	0	1	1	1	1	AGAP3	ArfGAP with GTPase domain, ankyrin repeat and PH domain 3
hsa-miR-566	1	0	1	1	1	1	SPTB	spectrin, beta, erythrocytic
hsa-miR-566	0	0	0	1	0	0	GRK1	G protein-coupled receptor kinase 1
hsa-miR-566	1	0	1	1	1	1	SFR1	SWI5-dependent recombination repair 1
hsa-miR-566	0	0	0	1	1	1	TRIM16	tripartite motif containing 16
hsa-miR-566	1	0	1	1	1	1	CDRT1	CMT1A duplicated region transcript 1
hsa-miR-566	0	0	1	1	1	1	IL18BP	interleukin 18 binding protein
hsa-miR-566	1	0	1	1	1	1	NUDT4	nudix (nucleoside diphosphate linked moiety X)-type motif 4
hsa-miR-566	0	0	1	1	0	0	WFDC3	WAP four-disulfide core domain 3
hsa-miR-566	1	0	1	1	1	1	BCL2L13	BCL2-like 13 (apoptosis facilitator)
hsa-miR-566	1	0	1	1	1	1	FAM60A	family with sequence similarity 60, member A
hsa-miR-566	0	0	1	1	1	1	CWF19L1	CWF19-like 1, cell cycle control (S. pombe)
hsa-miR-566	1	0	1	1	1	1	PLCB1	phospholipase C, beta 1 (phosphoinositide-specific)
hsa-miR-566	1	0	0	1	1	1	CYLC2	cylicin, basic protein of sperm head cytoskeleton 2
hsa-miR-566	1	0	1	1	1	1	ACACB	acetyl-CoA carboxylase beta
hsa-miR-566	1	0	1	1	1	1	EVI5	ecotropic viral integration site 5
hsa-miR-566	0	0	1	1	1	1	TBCCD1	TBCC domain containing 1
hsa-miR-566	1	0	0	1	0	0	CRTC1	CREB regulated transcription coactivator 1
hsa-miR-566	0	0	1	1	1	1	TMPRSS4	transmembrane protease, serine 4
hsa-miR-566	0	0	0	1	0	0	NOSIP	nitric oxide synthase interacting protein
hsa-miR-566	0	0	1	1	1	1	ATP1A1	ATPase, Na+/K+ transporting, alpha 1 polypeptide
hsa-miR-566	0	0	1	1	1	1	SIGLEC10	sialic acid binding Ig-like lectin 10
hsa-miR-566	0	0	0	1	1	1	VWA1	von Willebrand factor A domain containing 1
hsa-miR-566	0	0	1	1	1	1	VMAC	vimentin-type intermediate filament associated coiled-coil protein
hsa-miR-566	0	0	0	1	1	1	NCCRP1	non-specific cytotoxic cell receptor protein 1 homolog (zebrafish)
hsa-miR-566	0	0	1	1	1	1	ZNF493	zinc finger protein 493
hsa-miR-566	0	0	1	1	0	0	VHLL	von Hippel-Lindau tumor suppressor-like
hsa-miR-566	0	0	0	1	0	0	TSPAN32	tetraspanin 32
hsa-miR-566	0	0	0	1	0	0	SERHL2	serine hydrolase-like 2
hsa-miR-566	0	0	0	1	1	1	GFRAL	GDNF family receptor alpha like
hsa-miR-566	0	0	1	1	1	1	PTGES	prostaglandin E synthase
hsa-miR-566	0	0	0	1	1	1	ZNF77	zinc finger protein 77
hsa-miR-566	1	0	0	1	0	0	SYDE2	synapse defective 1, Rho GTPase, homolog 2 (C. elegans)
hsa-miR-566	1	0	1	1	1	1	MLL4	myeloid/lymphoid or mixed-lineage leukemia 4
hsa-miR-566	0	0	0	1	1	1	ZNF167	zinc finger protein 167
hsa-miR-566	1	0	1	1	0	0	CCDC30	coiled-coil domain containing 30
hsa-miR-566	0	0	0	1	0	0	C19orf35	chromosome 19 open reading frame 35
hsa-miR-566	0	0	1	1	0	0	GJA4	gap junction protein, alpha 4, 37kDa
hsa-miR-566	0	0	1	1	1	1	RAD51B	RAD51 homolog B (S. cerevisiae)
hsa-miR-566	1	0	1	1	1	1	UBE3B	ubiquitin protein ligase E3B
hsa-miR-566	0	0	0	1	0	0	C2orf66	chromosome 2 open reading frame 66
hsa-miR-566	0	0	1	1	1	1	CCDC125	coiled-coil domain containing 125
hsa-miR-566	0	0	0	1	0	0	TMEM120B	transmembrane protein 120B
hsa-miR-566	1	0	1	1	1	1	SNX21	sorting nexin family member 21
hsa-miR-566	0	0	1	1	0	0	GPRC5C	G protein-coupled receptor, family C, group 5, member C
hsa-miR-566	0	0	1	1	0	0	MATN4	matrilin 4
hsa-miR-566	0	0	1	1	0	0	ERAP2	endoplasmic reticulum aminopeptidase 2
hsa-miR-566	0	0	0	1	0	0	LRRC24	leucine rich repeat containing 24
hsa-miR-566	1	0	1	1	1	1	NTRK3	neurotrophic tyrosine kinase, receptor, type 3
hsa-miR-566	0	0	1	1	1	1	SNTN	sentan, cilia apical structure protein
hsa-miR-566	0	0	1	1	0	0	OSGIN1	oxidative stress induced growth inhibitor 1
hsa-miR-566	0	0	1	1	1	1	KBTBD12	kelch repeat and BTB (POZ) domain containing 12
hsa-miR-566	0	0	0	1	0	0	FLT3LG	fms-related tyrosine kinase 3 ligand
hsa-miR-566	1	0	1	1	1	1	TRIO	trio Rho guanine nucleotide exchange factor
hsa-miR-566	1	0	1	1	1	1	C1orf52	chromosome 1 open reading frame 52
hsa-miR-566	0	0	0	1	0	0	OR5W2	olfactory receptor, family 5, subfamily W, member 2
hsa-miR-566	0	0	0	1	1	1	DTNBP1	dystrobrevin binding protein 1
hsa-miR-566	0	0	1	1	1	1	POTEG	POTE ankyrin domain family, member G
hsa-miR-566	0	0	0	1	0	0	TNNI3	troponin I type 3 (cardiac)
hsa-miR-566	0	0	0	1	1	1	BRF1	BRF1 homolog, subunit of RNA polymerase III transcription initiation factor IIIB (S. cerevisiae)
hsa-miR-566	0	0	0	1	0	0	C19orf48	chromosome 19 open reading frame 48
hsa-miR-566	0	0	0	1	0	0	MUC4	mucin 4, cell surface associated
hsa-miR-566	1	0	1	1	1	1	R3HDM2	R3H domain containing 2
hsa-miR-566	1	0	1	1	0	0	ZDHHC1	zinc finger, DHHC-type containing 1
hsa-miR-566	0	0	0	1	0	0	SAMM50	sorting and assembly machinery component 50 homolog (S. cerevisiae)
hsa-miR-566	1	0	0	1	1	1	ZFP30	zinc finger protein 30 homolog (mouse)
hsa-miR-566	0	0	1	1	0	0	ASS1	argininosuccinate synthase 1
hsa-miR-566	1	0	1	1	1	1	CASP3	caspase 3, apoptosis-related cysteine peptidase
hsa-miR-566	0	0	0	1	0	0	TH	tyrosine hydroxylase
hsa-miR-566	0	0	0	1	0	0	ZNF383	zinc finger protein 383
hsa-miR-566	1	0	1	1	1	1	DMPK	dystrophia myotonica-protein kinase
hsa-miR-566	0	0	1	1	0	0	MCM7	minichromosome maintenance complex component 7
hsa-miR-566	0	0	0	1	1	1	NDUFV3	NADH dehydrogenase (ubiquinone) flavoprotein 3, 10kDa
hsa-miR-566	0	0	1	1	1	1	DDX55	DEAD (Asp-Glu-Ala-Asp) box polypeptide 55
hsa-miR-566	0	0	0	1	0	0	ZBTB45	zinc finger and BTB domain containing 45
hsa-miR-566	1	0	1	1	1	1	WNK3	WNK lysine deficient protein kinase 3
hsa-miR-566	0	0	0	1	0	0	PCDHB11	protocadherin beta 11
hsa-miR-566	0	0	0	1	0	0	CRYBA4	crystallin, beta A4
hsa-miR-566	0	0	0	1	0	0	MOV10L1	Mov10l1, Moloney leukemia virus 10-like 1, homolog (mouse)
hsa-miR-566	0	0	0	1	0	0	TMEM205	transmembrane protein 205
hsa-miR-566	0	0	0	1	1	1	ZNF43	zinc finger protein 43
hsa-miR-566	0	0	0	1	1	1	ARSG	arylsulfatase G
hsa-miR-566	1	0	1	1	1	1	KIAA1598	KIAA1598
hsa-miR-566	0	0	0	1	0	0	LEPREL4	leprecan-like 4
hsa-miR-566	1	0	0	1	0	0	CARD11	caspase recruitment domain family, member 11
hsa-miR-566	0	0	1	1	0	0	BCAS4	breast carcinoma amplified sequence 4
hsa-miR-566	0	0	0	1	1	1	GTF3C1	general transcription factor IIIC, polypeptide 1, alpha 220kDa
hsa-miR-566	0	0	0	1	0	0	CDK11B	cyclin-dependent kinase 11B
hsa-miR-566	0	0	1	1	1	1	MED24	mediator complex subunit 24
hsa-miR-566	0	0	1	1	0	0	C9orf9	chromosome 9 open reading frame 9
hsa-miR-566	1	0	1	1	1	1	ZNF770	zinc finger protein 770
hsa-miR-566	1	0	1	1	1	1	SH3BP2	SH3-domain binding protein 2
hsa-miR-566	1	0	1	1	1	1	PUS7	pseudouridylate synthase 7 homolog (S. cerevisiae)
hsa-miR-566	1	0	1	1	1	1	PIGR	polymeric immunoglobulin receptor
hsa-miR-566	1	0	1	1	0	0	DTNB	dystrobrevin, beta
hsa-miR-566	0	0	1	1	1	1	TMEM67	transmembrane protein 67
hsa-miR-566	0	0	1	1	1	1	TPCN2	two pore segment channel 2
hsa-miR-566	1	0	1	1	1	1	CXorf23	chromosome X open reading frame 23
hsa-miR-566	0	0	1	1	1	1	HCAR1	hydroxycarboxylic acid receptor 1
hsa-miR-566	0	0	0	1	1	1	MCRS1	microspherule protein 1
hsa-miR-566	0	0	0	1	0	0	ZNF628	zinc finger protein 628
hsa-miR-566	0	0	0	1	1	1	TOR4A	torsin family 4, member A
hsa-miR-566	0	0	1	1	1	1	N4BP2L2	NEDD4 binding protein 2-like 2
hsa-miR-566	0	0	1	1	1	1	SCAND3	SCAN domain containing 3
hsa-miR-566	1	0	0	1	1	1	PTRF	polymerase I and transcript release factor
hsa-miR-566	0	0	1	1	0	0	TRMT1	tRNA methyltransferase 1 homolog (S. cerevisiae)
hsa-miR-566	0	0	1	1	1	1	SFI1	Sfi1 homolog, spindle assembly associated (yeast)
hsa-miR-566	0	0	0	1	0	0	HMX3	H6 family homeobox 3
hsa-miR-566	0	0	1	1	1	1	PPHLN1	periphilin 1
hsa-miR-566	1	0	1	1	1	1	GRIK2	glutamate receptor, ionotropic, kainate 2
hsa-miR-566	1	0	1	1	1	1	ZSCAN2	zinc finger and SCAN domain containing 2
hsa-miR-566	1	0	1	1	1	1	ENTPD4	ectonucleoside triphosphate diphosphohydrolase 4
hsa-miR-566	1	0	1	1	1	1	QSOX2	quiescin Q6 sulfhydryl oxidase 2
hsa-miR-566	0	0	1	1	0	0	HIST1H4A	histone cluster 1, H4a
hsa-miR-566	0	0	1	1	0	0	AVPR2	arginine vasopressin receptor 2
hsa-miR-566	0	0	1	1	0	0	C9orf169	chromosome 9 open reading frame 169
hsa-miR-566	0	0	1	1	0	0	S100A5	S100 calcium binding protein A5
hsa-miR-566	0	0	0	1	0	0	BCS1L	BCS1-like (S. cerevisiae)
hsa-miR-566	0	0	0	1	0	0	TPGS1	tubulin polyglutamylase complex subunit 1
hsa-miR-566	0	0	0	1	0	0	CCDC90A	coiled-coil domain containing 90A
hsa-miR-566	1	0	1	1	1	1	LFNG	LFNG O-fucosylpeptide 3-beta-N-acetylglucosaminyltransferase
hsa-miR-566	1	0	1	1	1	1	TP53	tumor protein p53
hsa-miR-566	0	0	1	1	0	0	STYXL1	serine/threonine/tyrosine interacting-like 1
hsa-miR-566	0	0	0	1	0	0	CLN3	ceroid-lipofuscinosis, neuronal 3
hsa-miR-566	1	0	1	1	0	0	EFNA4	ephrin-A4
hsa-miR-566	0	0	1	1	0	0	TRAF3IP2	TRAF3 interacting protein 2
hsa-miR-566	0	0	0	1	0	0	DDA1	DET1 and DDB1 associated 1
hsa-miR-566	0	0	1	1	0	0	CTAG1B	cancer/testis antigen 1B
hsa-miR-566	1	0	0	1	0	0	TSTA3	tissue specific transplantation antigen P35B
hsa-miR-566	0	0	0	1	0	0	CTAG1A	cancer/testis antigen 1A
hsa-miR-566	1	0	1	1	1	1	DSC3	desmocollin 3
hsa-miR-566	0	0	0	1	0	0	TMEM119	transmembrane protein 119
hsa-miR-566	1	0	1	1	1	1	CERCAM	cerebral endothelial cell adhesion molecule
hsa-miR-566	0	0	0	1	0	0	LONP1	lon peptidase 1, mitochondrial
hsa-miR-566	0	0	0	1	0	0	DNAJC3	DnaJ (Hsp40) homolog, subfamily C, member 3
hsa-miR-566	0	0	0	1	0	0	PARVB	parvin, beta
hsa-miR-566	0	0	1	1	0	0	CPT1B	carnitine palmitoyltransferase 1B (muscle)
hsa-miR-566	0	0	1	1	0	0	ELMO3	engulfment and cell motility 3
hsa-miR-566	0	0	0	1	0	0	SIGLEC14	sialic acid binding Ig-like lectin 14
hsa-miR-566	0	0	1	1	1	1	C1orf56	chromosome 1 open reading frame 56
hsa-miR-566	0	0	1	1	1	1	LARS	leucyl-tRNA synthetase
hsa-miR-566	0	0	1	1	1	1	NUDT11	nudix (nucleoside diphosphate linked moiety X)-type motif 11
hsa-miR-566	0	0	1	1	0	0	C20orf141	chromosome 20 open reading frame 141
hsa-miR-566	0	0	1	1	0	0	NSMCE1	non-SMC element 1 homolog (S. cerevisiae)
hsa-miR-566	0	0	1	1	1	1	C1orf174	chromosome 1 open reading frame 174
hsa-miR-566	0	0	1	1	0	0	RPL10A	ribosomal protein L10a
hsa-miR-566	1	0	1	1	0	0	DFNB31	deafness, autosomal recessive 31
hsa-miR-566	0	0	1	1	0	0	RBM34	RNA binding motif protein 34
hsa-miR-566	0	0	0	1	1	1	ADCK3	aarF domain containing kinase 3
hsa-miR-566	0	0	1	1	1	1	INTS7	integrator complex subunit 7
hsa-miR-566	0	0	0	1	1	1	NUAK2	NUAK family, SNF1-like kinase, 2
hsa-miR-566	0	0	0	1	1	1	LGR6	leucine-rich repeat containing G protein-coupled receptor 6
hsa-miR-566	0	0	1	1	1	1	MTHFD1L	methylenetetrahydrofolate dehydrogenase (NADP+ dependent) 1-like
hsa-miR-566	1	0	1	1	1	1	PLEKHG1	pleckstrin homology domain containing, family G (with RhoGef domain) member 1
hsa-miR-566	0	0	0	1	1	1	RAB32	RAB32, member RAS oncogene family
hsa-miR-566	0	0	0	1	0	0	KIAA1614	KIAA1614
hsa-miR-566	1	0	1	1	1	1	TOR3A	torsin family 3, member A
hsa-miR-566	1	0	1	1	1	1	SELE	selectin E
hsa-miR-566	0	0	1	1	1	1	SFT2D2	SFT2 domain containing 2
hsa-miR-566	0	0	1	1	1	1	POU2F1	POU class 2 homeobox 1
hsa-miR-566	0	0	0	1	0	0	C1orf111	chromosome 1 open reading frame 111
hsa-miR-566	0	0	0	1	0	0	FCER1G	Fc fragment of IgE, high affinity I, receptor for; gamma polypeptide
hsa-miR-566	0	0	1	1	1	1	MED23	mediator complex subunit 23
hsa-miR-566	0	0	1	1	1	1	ATP1A4	ATPase, Na+/K+ transporting, alpha 4 polypeptide
hsa-miR-566	0	0	1	1	0	0	CCT3	chaperonin containing TCP1, subunit 3 (gamma)
hsa-miR-566	0	0	0	1	0	0	SCNM1	sodium channel modifier 1
hsa-miR-566	0	0	1	1	1	1	WASF1	WAS protein family, member 1
hsa-miR-566	0	0	1	1	0	0	NSMCE4A	non-SMC element 4 homolog A (S. cerevisiae)
hsa-miR-566	0	0	1	1	0	0	HIST2H2AA3	histone cluster 2, H2aa3
hsa-miR-566	0	0	0	1	0	0	LOC100130236	uncharacterized LOC100130236
hsa-miR-566	0	0	1	1	0	0	LIX1L	Lix1 homolog (mouse)-like
hsa-miR-566	0	0	1	1	0	0	ZDHHC6	zinc finger, DHHC-type containing 6
hsa-miR-566	1	0	1	1	1	1	PHTF1	putative homeodomain transcription factor 1
hsa-miR-566	1	0	1	1	1	1	CCBL2	cysteine conjugate-beta lyase 2
hsa-miR-566	0	0	1	1	1	1	HOGA1	4-hydroxy-2-oxoglutarate aldolase 1
hsa-miR-566	0	0	1	1	1	1	ELOVL5	ELOVL fatty acid elongase 5
hsa-miR-566	1	0	1	1	1	1	SORBS1	sorbin and SH3 domain containing 1
hsa-miR-566	0	0	1	1	0	0	RAE1	RAE1 RNA export 1 homolog (S. pombe)
hsa-miR-566	0	0	1	1	1	1	TMEM59	transmembrane protein 59
hsa-miR-566	0	0	1	1	1	1	LRRC42	leucine rich repeat containing 42
hsa-miR-566	1	0	1	1	1	1	EHMT1	euchromatic histone-lysine N-methyltransferase 1
hsa-miR-566	1	0	1	1	1	1	PARD6B	par-6 partitioning defective 6 homolog beta (C. elegans)
hsa-miR-566	1	0	1	1	0	0	KIAA1210	KIAA1210
hsa-miR-566	1	0	0	1	1	1	SDCCAG3	serologically defined colon cancer antigen 3
hsa-miR-566	0	0	1	1	1	1	SLC6A14	solute carrier family 6 (amino acid transporter), member 14
hsa-miR-566	0	0	1	1	0	0	ADAMTS13	ADAM metallopeptidase with thrombospondin type 1 motif, 13
hsa-miR-566	0	0	1	1	1	1	MED22	mediator complex subunit 22
hsa-miR-566	0	0	1	1	0	0	C10orf116	chromosome 10 open reading frame 116
hsa-miR-566	0	0	0	1	0	0	GBGT1	globoside alpha-1,3-N-acetylgalactosaminyltransferase 1
hsa-miR-566	0	0	1	1	0	0	PPAPDC3	phosphatidic acid phosphatase type 2 domain containing 3
hsa-miR-566	0	0	0	1	1	1	MPL	myeloproliferative leukemia virus oncogene
hsa-miR-566	0	0	0	1	0	0	NTMT1	N-terminal Xaa-Pro-Lys N-methyltransferase 1
hsa-miR-566	0	0	0	1	0	0	SPATA25	spermatogenesis associated 25
hsa-miR-566	1	0	1	1	0	0	ZSWIM1	zinc finger, SWIM-type containing 1
hsa-miR-566	0	0	0	1	1	1	ZNF684	zinc finger protein 684
hsa-miR-566	0	0	0	1	0	0	RPL36A	ribosomal protein L36a
hsa-miR-566	0	0	1	1	0	0	TOMM7	translocase of outer mitochondrial membrane 7 homolog (yeast)
hsa-miR-566	1	0	1	1	1	1	GDAP1L1	ganglioside induced differentiation associated protein 1-like 1
hsa-miR-566	0	0	0	1	0	0	LCN2	lipocalin 2
hsa-miR-566	0	0	0	1	0	0	UTP11L	UTP11-like, U3 small nucleolar ribonucleoprotein, (yeast)
hsa-miR-566	0	0	1	1	1	1	INPP5B	inositol polyphosphate-5-phosphatase, 75kDa
hsa-miR-566	0	0	1	1	1	1	COX7B	cytochrome c oxidase subunit VIIb
hsa-miR-566	0	0	1	1	1	1	MAGT1	magnesium transporter 1
hsa-miR-566	0	0	0	1	0	0	HJURP	Holliday junction recognition protein
hsa-miR-566	0	0	0	1	1	1	PTAFR	platelet-activating factor receptor
hsa-miR-566	0	0	0	1	0	0	ARMC12	armadillo repeat containing 12
hsa-miR-566	0	0	0	1	0	0	EYA3	eyes absent homolog 3 (Drosophila)
hsa-miR-566	1	0	1	1	0	0	DES	desmin
hsa-miR-566	1	0	1	1	0	0	DHDDS	dehydrodolichyl diphosphate synthase
hsa-miR-566	0	0	1	1	1	1	SUSD1	sushi domain containing 1
hsa-miR-566	0	0	1	1	0	0	SNX12	sorting nexin 12
hsa-miR-566	0	0	1	1	0	0	GDF5	growth differentiation factor 5
hsa-miR-566	1	0	1	1	1	1	KIF4A	kinesin family member 4A
hsa-miR-566	0	0	1	1	1	1	TAPBP	TAP binding protein (tapasin)
hsa-miR-566	0	0	0	1	1	1	FAM206A	family with sequence similarity 206, member A
hsa-miR-566	0	0	0	1	0	0	ASIP	agouti signaling protein
hsa-miR-566	0	0	1	1	0	0	XAGE1D	X antigen family, member 1D
hsa-miR-566	1	0	1	1	1	1	NCBP1	nuclear cap binding protein subunit 1, 80kDa
hsa-miR-566	0	0	0	1	1	1	TBXA2R	thromboxane A2 receptor
hsa-miR-566	0	0	0	1	0	0	BTBD17	BTB (POZ) domain containing 17
hsa-miR-566	0	0	0	1	0	0	PADI4	peptidyl arginine deiminase, type IV
hsa-miR-566	0	0	1	1	0	0	CROCC	ciliary rootlet coiled-coil, rootletin
hsa-miR-566	0	0	0	1	0	0	RSG1	REM2 and RAB-like small GTPase 1
hsa-miR-566	0	0	1	1	0	0	HSPA1L	heat shock 70kDa protein 1-like
hsa-miR-566	0	0	0	1	0	0	VWA7	von Willebrand factor A domain containing 7
hsa-miR-566	0	0	1	1	1	1	PECAM1	platelet/endothelial cell adhesion molecule 1
hsa-miR-566	0	0	1	1	1	1	ING1	inhibitor of growth family, member 1
hsa-miR-566	0	0	1	1	0	0	DDAH2	dimethylarginine dimethylaminohydrolase 2
hsa-miR-566	0	0	1	1	0	0	C6orf25	chromosome 6 open reading frame 25
hsa-miR-566	0	0	0	1	1	1	AGMAT	agmatine ureohydrolase (agmatinase)
hsa-miR-566	0	0	0	1	0	0	LY6G5C	lymphocyte antigen 6 complex, locus G5C
hsa-miR-566	0	0	1	1	1	1	NAA35	N(alpha)-acetyltransferase 35, NatC auxiliary subunit
hsa-miR-566	0	0	1	1	0	0	LTB	lymphotoxin beta (TNF superfamily, member 3)
hsa-miR-566	0	0	1	1	0	0	NFKBIL1	nuclear factor of kappa light polypeptide gene enhancer in B-cells inhibitor-like 1
hsa-miR-566	1	0	1	1	1	1	MFN2	mitofusin 2
hsa-miR-566	1	0	0	1	1	1	PRAF2	PRA1 domain family, member 2
hsa-miR-566	0	0	1	1	0	0	MAD2L2	MAD2 mitotic arrest deficient-like 2 (yeast)
hsa-miR-566	0	0	0	1	1	1	TRIM15	tripartite motif containing 15
hsa-miR-566	0	0	0	1	0	0	FBXO6	F-box protein 6
hsa-miR-566	0	0	0	1	0	0	ZFP57	zinc finger protein 57 homolog (mouse)
hsa-miR-566	1	0	1	1	0	0	EMC10	ER membrane protein complex subunit 10
hsa-miR-566	0	0	1	1	0	0	SRM	spermidine synthase
hsa-miR-566	0	0	0	1	0	0	CBY3	chibby homolog 3 (Drosophila)
hsa-miR-566	0	0	0	1	0	0	IZUMO2	IZUMO family member 2
hsa-miR-566	0	0	1	1	1	1	DFFA	DNA fragmentation factor, 45kDa, alpha polypeptide
hsa-miR-566	0	0	0	1	1	1	NMNAT1	nicotinamide nucleotide adenylyltransferase 1
hsa-miR-566	0	0	0	1	0	0	LOC100130027	uncharacterized LOC100130027
hsa-miR-566	0	0	1	1	0	0	SLC2A5	solute carrier family 2 (facilitated glucose/fructose transporter), member 5
hsa-miR-566	0	0	0	1	0	0	NOL9	nucleolar protein 9
hsa-miR-566	0	0	1	1	0	0	C11orf83	chromosome 11 open reading frame 83
hsa-miR-566	0	0	1	1	0	0	THSD1	thrombospondin, type I, domain containing 1
hsa-miR-566	1	0	1	1	1	1	PCDHA9	protocadherin alpha 9
hsa-miR-566	1	0	1	1	1	1	PCDHA2	protocadherin alpha 2
hsa-miR-566	0	0	0	1	0	0	OR5D16	olfactory receptor, family 5, subfamily D, member 16
hsa-miR-566	0	0	1	1	0	0	MORN1	MORN repeat containing 1
hsa-miR-566	0	0	1	1	1	1	MED4	mediator complex subunit 4
hsa-miR-566	1	0	1	1	1	1	CYP4V2	cytochrome P450, family 4, subfamily V, polypeptide 2
hsa-miR-566	0	0	0	1	0	0	GALT	galactose-1-phosphate uridylyltransferase
hsa-miR-566	0	0	1	1	0	0	DHRS13	dehydrogenase/reductase (SDR family) member 13
hsa-miR-566	1	0	1	1	1	1	ATXN1	ataxin 1
hsa-miR-566	0	0	0	1	0	0	TNFRSF4	tumor necrosis factor receptor superfamily, member 4
hsa-miR-566	0	0	0	1	0	0	DNAJC2	DnaJ (Hsp40) homolog, subfamily C, member 2
hsa-miR-566	0	0	0	1	0	0	C1orf159	chromosome 1 open reading frame 159
hsa-miR-566	1	0	1	1	1	1	SLC30A6	solute carrier family 30 (zinc transporter), member 6
hsa-miR-566	0	0	0	1	1	1	ZNF14	zinc finger protein 14
hsa-miR-566	0	0	1	1	0	0	KATNB1	katanin p80 (WD repeat containing) subunit B 1
hsa-miR-566	0	0	1	1	0	0	MPI	mannose phosphate isomerase
hsa-miR-566	0	0	0	1	0	0	TECPR1	tectonin beta-propeller repeat containing 1
hsa-miR-566	1	0	0	1	1	1	PDHA1	pyruvate dehydrogenase (lipoamide) alpha 1
hsa-miR-566	1	0	1	1	1	1	REPS2	RALBP1 associated Eps domain containing 2
hsa-miR-566	0	0	1	1	0	0	EXOC3L4	exocyst complex component 3-like 4
hsa-miR-566	0	0	1	1	1	1	CTPS2	CTP synthase 2
hsa-miR-566	0	0	0	1	0	0	EMILIN1	elastin microfibril interfacer 1
hsa-miR-566	0	0	1	1	0	0	ELP3	elongator acetyltransferase complex subunit 3
hsa-miR-566	0	0	0	1	0	0	LOC100129724	uncharacterized LOC100129724
hsa-miR-566	0	0	0	1	1	1	TMPRSS3	transmembrane protease, serine 3
hsa-miR-566	0	0	1	1	0	0	SHBG	sex hormone-binding globulin
hsa-miR-566	0	0	1	1	0	0	UMODL1	uromodulin-like 1
hsa-miR-566	1	0	1	1	1	1	ADRA1A	adrenoceptor alpha 1A
hsa-miR-566	0	0	1	1	1	1	SERPINB9	serpin peptidase inhibitor, clade B (ovalbumin), member 9
hsa-miR-566	0	0	1	1	1	1	SERF1B	small EDRK-rich factor 1B (centromeric)
hsa-miR-566	1	0	1	1	1	1	SGTB	small glutamine-rich tetratricopeptide repeat (TPR)-containing, beta
hsa-miR-566	0	0	1	1	0	0	SCUBE1	signal peptide, CUB domain, EGF-like 1
hsa-miR-566	0	0	0	1	1	1	SHOX	short stature homeobox
hsa-miR-566	0	0	0	1	0	0	RPL31P5	ribosomal protein L31 pseudogene 5
hsa-miR-566	0	0	0	1	0	0	PLCXD1	phosphatidylinositol-specific phospholipase C, X domain containing 1
hsa-miR-566	0	0	1	1	0	0	SIX6	SIX homeobox 6
hsa-miR-566	0	0	0	1	0	0	TPTE2P1	transmembrane phosphoinositide 3-phosphatase and tensin homolog 2 pseudogene 1
hsa-miR-566	0	0	0	1	1	1	DNAJC28	DnaJ (Hsp40) homolog, subfamily C, member 28
hsa-miR-566	0	0	1	1	0	0	SGCZ	sarcoglycan, zeta
hsa-miR-566	1	0	1	1	1	1	VLDLR	very low density lipoprotein receptor
hsa-miR-566	0	0	0	1	0	0	C22orf42	chromosome 22 open reading frame 42
hsa-miR-566	0	0	1	1	1	1	SLC45A2	solute carrier family 45, member 2
hsa-miR-566	0	0	0	1	0	0	ZNF205	zinc finger protein 205
hsa-miR-566	0	0	0	1	0	0	ATP8B3	ATPase, aminophospholipid transporter, class I, type 8B, member 3
hsa-miR-566	0	0	1	1	1	1	BST1	bone marrow stromal cell antigen 1
hsa-miR-566	0	0	1	1	0	0	NDUFS7	NADH dehydrogenase (ubiquinone) Fe-S protein 7, 20kDa (NADH-coenzyme Q reductase)
hsa-miR-566	0	0	0	1	0	0	LOC728419	ubiquitin carboxyl-terminal hydrolase 17-like
hsa-miR-566	0	0	0	1	0	0	LOC728379	ubiquitin carboxyl-terminal hydrolase 17-like
hsa-miR-566	1	0	1	1	1	1	IMPA2	inositol(myo)-1(or 4)-monophosphatase 2
hsa-miR-566	0	0	1	1	0	0	ARPC4	actin related protein 2/3 complex, subunit 4, 20kDa
hsa-miR-566	0	0	1	1	1	1	TTLL3	tubulin tyrosine ligase-like family, member 3
hsa-miR-566	0	0	1	1	1	1	C11orf31	chromosome 11 open reading frame 31
hsa-miR-566	0	0	1	1	1	1	C10orf82	chromosome 10 open reading frame 82
hsa-miR-566	0	0	1	1	1	1	AGPHD1	aminoglycoside phosphotransferase domain containing 1
hsa-miR-566	0	0	1	1	0	0	INTS1	integrator complex subunit 1
hsa-miR-566	0	0	1	1	0	0	WDR96	WD repeat domain 96
hsa-miR-566	0	0	0	1	0	0	MRPL28	mitochondrial ribosomal protein L28
hsa-miR-566	0	0	1	1	1	1	TARP	TCR gamma alternate reading frame protein
hsa-miR-566	1	0	1	1	1	1	IPPK	inositol 1,3,4,5,6-pentakisphosphate 2-kinase
hsa-miR-566	0	0	0	0	1	1	LOC728056	IQ motif and Sec7 domain 3 pseudogene
