# Supplementary material for: Profiling of Selected MicroRNAs in Proliferative Eutopic Endometrium of Women with Ovarian Endometriosis
Source: Biomed Res Int. 2015 Aug 20;2015:760698. doi: 10.1155/2015/760698 (PMC4558423; doi:10.1155/2015/760698)
Supplement: Supplementary file 1 — Table I: The names of miRNAs significantly differentially expressed between eutopic endometrium of patients with endometriosis vs eutopic endometrium of patients without endometriosis. Table II: The associations between miRNA and mRNA, which presents detailed results of the search of six major databases i.e targetscan, tarbase, miranda, mirbase, mirtarget2 and pictar. [file 760698.f1.zip › 760698.f1/Table II/hsa-miR-567.tsv]

miR	targetscan	tarbase	miranda	mirbase	mirtarget2	pictar	GeneSymbol	GeneName
hsa-miR-567	1	0	1	1	1	1	PLAU	plasminogen activator, urokinase
hsa-miR-567	1	0	1	1	1	1	ZFYVE16	zinc finger, FYVE domain containing 16
hsa-miR-567	1	0	1	1	1	1	PRUNE2	prune homolog 2 (Drosophila)
hsa-miR-567	0	0	1	1	1	1	HSPH1	heat shock 105kDa/110kDa protein 1
hsa-miR-567	1	0	1	1	1	1	NUPL1	nucleoporin like 1
hsa-miR-567	0	0	1	1	1	1	PREPL	prolyl endopeptidase-like
hsa-miR-567	1	0	1	0	1	1	CEP350	centrosomal protein 350kDa
hsa-miR-567	1	0	1	1	1	1	RNGTT	RNA guanylyltransferase and 5'-phosphatase
hsa-miR-567	1	0	1	1	1	1	GIGYF2	GRB10 interacting GYF protein 2
hsa-miR-567	1	0	1	1	0	0	SMCHD1	structural maintenance of chromosomes flexible hinge domain containing 1
hsa-miR-567	1	0	1	0	1	1	SNX13	sorting nexin 13
hsa-miR-567	1	0	1	0	1	1	DOCK4	dedicator of cytokinesis 4
hsa-miR-567	1	0	1	1	1	1	LPHN2	latrophilin 2
hsa-miR-567	1	0	1	1	1	1	DNM3	dynamin 3
hsa-miR-567	1	0	1	0	1	1	ATG14	autophagy related 14
hsa-miR-567	0	0	1	1	1	1	WDR47	WD repeat domain 47
hsa-miR-567	1	0	1	1	1	1	CDK12	cyclin-dependent kinase 12
hsa-miR-567	1	0	1	1	1	1	CALCR	calcitonin receptor
hsa-miR-567	1	0	1	1	1	1	UBE2K	ubiquitin-conjugating enzyme E2K
hsa-miR-567	1	0	1	1	1	1	C11orf9	chromosome 11 open reading frame 9
hsa-miR-567	1	0	1	1	1	1	RGL1	ral guanine nucleotide dissociation stimulator-like 1
hsa-miR-567	0	0	1	1	1	1	TBC1D30	TBC1 domain family, member 30
hsa-miR-567	1	0	1	1	1	1	PALLD	palladin, cytoskeletal associated protein
hsa-miR-567	1	0	1	1	0	0	FRMD4B	FERM domain containing 4B
hsa-miR-567	1	0	1	0	1	1	SRGAP3	SLIT-ROBO Rho GTPase activating protein 3
hsa-miR-567	0	0	1	1	0	0	ZC4H2	zinc finger, C4H2 domain containing
hsa-miR-567	1	0	1	1	1	1	RIMKLB	ribosomal modification protein rimK-like family member B
hsa-miR-567	0	0	1	1	1	1	FSTL5	follistatin-like 5
hsa-miR-567	1	0	1	1	1	1	FAM214B	family with sequence similarity 214, member B
hsa-miR-567	1	0	1	0	1	1	LMO3	LIM domain only 3 (rhombotin-like 2)
hsa-miR-567	1	0	1	1	1	1	SLC2A4RG	SLC2A4 regulator
hsa-miR-567	0	0	1	0	1	1	ZSWIM6	zinc finger, SWIM-type containing 6
hsa-miR-567	1	0	1	0	1	1	IGDCC4	immunoglobulin superfamily, DCC subclass, member 4
hsa-miR-567	1	0	1	1	1	1	SNX3	sorting nexin 3
hsa-miR-567	0	0	1	1	1	1	KIAA1704	KIAA1704
hsa-miR-567	1	0	1	0	1	1	SLC25A25	solute carrier family 25 (mitochondrial carrier; phosphate carrier), member 25
hsa-miR-567	1	0	1	1	1	1	OXR1	oxidation resistance 1
hsa-miR-567	1	0	1	1	1	1	SH3TC2	SH3 domain and tetratricopeptide repeats 2
hsa-miR-567	0	0	1	1	0	0	SLC22A10	solute carrier family 22, member 10
hsa-miR-567	1	0	1	0	0	0	ZBTB34	zinc finger and BTB domain containing 34
hsa-miR-567	1	0	1	1	1	1	ACBD5	acyl-CoA binding domain containing 5
hsa-miR-567	0	0	1	1	1	1	PDZD3	PDZ domain containing 3
hsa-miR-567	1	0	1	1	1	1	UBR3	ubiquitin protein ligase E3 component n-recognin 3 (putative)
hsa-miR-567	1	0	1	0	0	0	ZC3H12C	zinc finger CCCH-type containing 12C
hsa-miR-567	0	0	1	1	1	1	ACPP	acid phosphatase, prostate
hsa-miR-567	1	0	1	1	1	1	PAN3	PAN3 poly(A) specific ribonuclease subunit homolog (S. cerevisiae)
hsa-miR-567	0	0	1	1	1	1	ING4	inhibitor of growth family, member 4
hsa-miR-567	1	0	1	0	1	1	CCDC88A	coiled-coil domain containing 88A
hsa-miR-567	1	0	1	1	1	1	VLDLR	very low density lipoprotein receptor
hsa-miR-567	1	0	1	0	1	1	LRBA	LPS-responsive vesicle trafficking, beach and anchor containing
hsa-miR-567	1	0	1	1	1	1	COL11A1	collagen, type XI, alpha 1
hsa-miR-567	0	0	1	0	1	1	ATR	ataxia telangiectasia and Rad3 related
hsa-miR-567	0	0	1	1	1	1	PTK2	PTK2 protein tyrosine kinase 2
hsa-miR-567	0	0	1	0	1	1	DCAF11	DDB1 and CUL4 associated factor 11
hsa-miR-567	1	0	1	1	1	1	SLC8A1	solute carrier family 8 (sodium/calcium exchanger), member 1
hsa-miR-567	1	0	1	1	1	1	EIF4G3	eukaryotic translation initiation factor 4 gamma, 3
hsa-miR-567	1	0	1	0	1	1	PLAG1	pleiomorphic adenoma gene 1
hsa-miR-567	0	0	1	1	1	1	DGKI	diacylglycerol kinase, iota
hsa-miR-567	1	0	1	0	1	1	SLC6A6	solute carrier family 6 (neurotransmitter transporter, taurine), member 6
hsa-miR-567	1	0	1	0	1	1	ETV1	ets variant 1
hsa-miR-567	0	0	1	0	1	1	NPY1R	neuropeptide Y receptor Y1
hsa-miR-567	1	0	1	1	1	1	PPFIA1	protein tyrosine phosphatase, receptor type, f polypeptide (PTPRF), interacting protein (liprin), alpha 1
hsa-miR-567	1	0	1	0	1	1	CDON	Cdon homolog (mouse)
hsa-miR-567	1	0	1	0	1	1	AKAP13	A kinase (PRKA) anchor protein 13
hsa-miR-567	1	0	1	1	1	1	LIMA1	LIM domain and actin binding 1
hsa-miR-567	0	0	1	1	1	1	GPM6B	glycoprotein M6B
hsa-miR-567	1	0	1	1	1	1	PDLIM5	PDZ and LIM domain 5
hsa-miR-567	0	0	1	1	0	0	HLA-DMB	major histocompatibility complex, class II, DM beta
hsa-miR-567	1	0	1	1	1	1	ARHGEF3	Rho guanine nucleotide exchange factor (GEF) 3
hsa-miR-567	1	0	1	1	0	0	SYN3	synapsin III
hsa-miR-567	0	0	1	1	1	1	PTPRA	protein tyrosine phosphatase, receptor type, A
hsa-miR-567	1	0	1	0	1	1	ADD3	adducin 3 (gamma)
hsa-miR-567	1	0	1	1	1	1	HMGA2	high mobility group AT-hook 2
hsa-miR-567	1	0	1	1	1	1	ZFX	zinc finger protein, X-linked
hsa-miR-567	0	0	1	1	1	1	SGSH	N-sulfoglucosamine sulfohydrolase
hsa-miR-567	1	0	1	1	1	1	PHLDB2	pleckstrin homology-like domain, family B, member 2
hsa-miR-567	0	0	1	1	1	1	CELF1	CUGBP, Elav-like family member 1
hsa-miR-567	0	0	1	1	1	1	ACLY	ATP citrate lyase
hsa-miR-567	1	0	1	1	1	1	PCDH17	protocadherin 17
hsa-miR-567	0	0	1	0	1	1	C9orf91	chromosome 9 open reading frame 91
hsa-miR-567	1	0	1	0	0	0	MAP3K1	mitogen-activated protein kinase kinase kinase 1, E3 ubiquitin protein ligase
hsa-miR-567	0	0	1	1	1	1	UBE4B	ubiquitination factor E4B
hsa-miR-567	1	0	1	1	1	1	MBNL2	muscleblind-like splicing regulator 2
hsa-miR-567	0	0	1	1	1	1	LYPLA1	lysophospholipase I
hsa-miR-567	0	0	1	1	0	0	CARD10	caspase recruitment domain family, member 10
hsa-miR-567	0	0	1	0	0	0	C3orf79	chromosome 3 open reading frame 79
hsa-miR-567	0	0	1	1	0	0	ZNF814	zinc finger protein 814
hsa-miR-567	0	0	1	1	1	1	BBS9	Bardet-Biedl syndrome 9
hsa-miR-567	0	0	1	1	0	0	RBM5	RNA binding motif protein 5
hsa-miR-567	0	0	1	1	1	1	MSTO1	misato homolog 1 (Drosophila)
hsa-miR-567	1	0	1	1	1	1	EDNRB	endothelin receptor type B
hsa-miR-567	0	0	1	1	0	0	ABRACL	ABRA C-terminal like
hsa-miR-567	0	0	1	0	0	0	RPH3AL	rabphilin 3A-like (without C2 domains)
hsa-miR-567	1	0	1	1	1	1	HNRNPH3	heterogeneous nuclear ribonucleoprotein H3 (2H9)
hsa-miR-567	1	0	1	1	1	1	ZNF202	zinc finger protein 202
hsa-miR-567	1	0	1	1	1	1	ANKRD13A	ankyrin repeat domain 13A
hsa-miR-567	0	0	1	0	1	1	PDP1	pyruvate dehyrogenase phosphatase catalytic subunit 1
hsa-miR-567	0	0	1	0	1	1	ZDHHC17	zinc finger, DHHC-type containing 17
hsa-miR-567	0	0	1	1	1	1	SLC39A8	solute carrier family 39 (zinc transporter), member 8
hsa-miR-567	1	0	1	1	1	1	TSC22D2	TSC22 domain family, member 2
hsa-miR-567	1	0	1	1	1	1	EIF4A2	eukaryotic translation initiation factor 4A2
hsa-miR-567	1	0	1	1	1	1	KCNMB2	potassium large conductance calcium-activated channel, subfamily M, beta member 2
hsa-miR-567	1	0	1	1	1	1	SYDE1	synapse defective 1, Rho GTPase, homolog 1 (C. elegans)
hsa-miR-567	1	0	1	1	1	1	NXT2	nuclear transport factor 2-like export factor 2
hsa-miR-567	0	0	1	1	0	0	MVK	mevalonate kinase
hsa-miR-567	1	0	1	1	1	1	OGT	O-linked N-acetylglucosamine (GlcNAc) transferase
hsa-miR-567	1	0	1	1	1	1	DESI2	desumoylating isopeptidase 2
hsa-miR-567	1	0	1	1	1	1	STRN3	striatin, calmodulin binding protein 3
hsa-miR-567	0	0	1	1	1	1	NKX3-1	NK3 homeobox 1
hsa-miR-567	0	0	1	0	0	0	TIGD7	tigger transposable element derived 7
hsa-miR-567	1	0	1	1	0	0	REPS1	RALBP1 associated Eps domain containing 1
hsa-miR-567	1	0	1	1	1	1	SH3GLB1	SH3-domain GRB2-like endophilin B1
hsa-miR-567	0	0	1	1	0	0	TCP11	t-complex 11 homolog (mouse)
hsa-miR-567	1	0	1	1	1	1	VPS39	vacuolar protein sorting 39 homolog (S. cerevisiae)
hsa-miR-567	1	0	1	1	0	0	ZBTB37	zinc finger and BTB domain containing 37
hsa-miR-567	0	0	1	0	1	1	C1QTNF7	C1q and tumor necrosis factor related protein 7
hsa-miR-567	1	0	1	1	1	1	KCNIP2	Kv channel interacting protein 2
hsa-miR-567	0	0	1	1	1	1	U2AF1	U2 small nuclear RNA auxiliary factor 1
hsa-miR-567	1	0	1	1	1	1	LARP4	La ribonucleoprotein domain family, member 4
hsa-miR-567	0	0	1	1	0	0	SNRPN	small nuclear ribonucleoprotein polypeptide N
hsa-miR-567	1	0	1	1	1	1	NTRK2	neurotrophic tyrosine kinase, receptor, type 2
hsa-miR-567	1	0	1	1	0	0	YTHDF2	YTH domain family, member 2
hsa-miR-567	1	0	1	1	0	0	XRRA1	X-ray radiation resistance associated 1
hsa-miR-567	1	0	1	0	1	1	PPP1R12A	protein phosphatase 1, regulatory subunit 12A
hsa-miR-567	1	0	1	1	1	1	WAPAL	wings apart-like homolog (Drosophila)
hsa-miR-567	0	0	1	1	0	0	SVIP	small VCP/p97-interacting protein
hsa-miR-567	1	0	1	1	1	1	AFF2	AF4/FMR2 family, member 2
hsa-miR-567	1	0	1	1	1	1	SH2B3	SH2B adaptor protein 3
hsa-miR-567	1	0	1	0	1	1	DICER1	dicer 1, ribonuclease type III
hsa-miR-567	0	0	1	1	1	1	GNAS	GNAS complex locus
hsa-miR-567	1	0	1	1	1	1	SUCO	SUN domain containing ossification factor
hsa-miR-567	0	0	1	1	1	1	RANBP17	RAN binding protein 17
hsa-miR-567	0	0	1	1	1	1	CD1E	CD1e molecule
hsa-miR-567	1	0	1	1	1	1	NRXN3	neurexin 3
hsa-miR-567	0	0	1	1	0	0	MBD1	methyl-CpG binding domain protein 1
hsa-miR-567	1	0	1	1	1	1	PPP1R9A	protein phosphatase 1, regulatory subunit 9A
hsa-miR-567	0	0	1	1	1	1	DBR1	debranching enzyme homolog 1 (S. cerevisiae)
hsa-miR-567	0	0	1	1	0	0	NHLRC2	NHL repeat containing 2
hsa-miR-567	0	0	1	1	1	1	ESRP1	epithelial splicing regulatory protein 1
hsa-miR-567	0	0	1	1	1	1	PARPBP	PARP1 binding protein
hsa-miR-567	0	0	1	1	0	0	AP4B1	adaptor-related protein complex 4, beta 1 subunit
hsa-miR-567	0	0	1	0	0	0	TPTEP1	transmembrane phosphatase with tensin homology pseudogene 1
hsa-miR-567	1	0	1	0	1	1	VPS13D	vacuolar protein sorting 13 homolog D (S. cerevisiae)
hsa-miR-567	1	0	1	0	1	1	CLIC4	chloride intracellular channel 4
hsa-miR-567	1	0	1	1	1	1	PTBP3	polypyrimidine tract binding protein 3
hsa-miR-567	0	0	1	1	1	1	CXXC5	CXXC finger protein 5
hsa-miR-567	0	0	1	1	1	1	STAU2	staufen, RNA binding protein, homolog 2 (Drosophila)
hsa-miR-567	1	0	1	1	1	1	INSIG2	insulin induced gene 2
hsa-miR-567	0	0	1	0	0	0	DUXAP10	double homeobox A pseudogene 10
hsa-miR-567	0	0	1	1	1	1	LRRN1	leucine rich repeat neuronal 1
hsa-miR-567	0	0	1	1	0	0	BUB1	budding uninhibited by benzimidazoles 1 homolog (yeast)
hsa-miR-567	1	0	1	1	1	1	USP33	ubiquitin specific peptidase 33
hsa-miR-567	0	0	1	0	1	1	ARHGAP42	Rho GTPase activating protein 42
hsa-miR-567	0	0	1	1	1	1	METTL7A	methyltransferase like 7A
hsa-miR-567	0	0	1	0	0	0	IFFO2	intermediate filament family orphan 2
hsa-miR-567	1	0	1	1	1	1	DYRK2	dual-specificity tyrosine-(Y)-phosphorylation regulated kinase 2
hsa-miR-567	0	0	1	1	1	1	GGNBP2	gametogenetin binding protein 2
hsa-miR-567	0	0	1	0	1	1	ATXN1L	ataxin 1-like
hsa-miR-567	1	0	1	1	1	1	NAA30	N(alpha)-acetyltransferase 30, NatC catalytic subunit
hsa-miR-567	0	0	1	0	0	0	CCDC85C	coiled-coil domain containing 85C
hsa-miR-567	1	0	1	1	1	1	ITGA9	integrin, alpha 9
hsa-miR-567	1	0	1	1	1	1	RNF185	ring finger protein 185
hsa-miR-567	1	0	1	1	1	1	MARK1	MAP/microtubule affinity-regulating kinase 1
hsa-miR-567	0	0	1	1	1	1	STMN1	stathmin 1
hsa-miR-567	0	0	1	0	0	0	CHST9-AS1	CHST9 antisense RNA 1
hsa-miR-567	1	0	1	1	1	1	MBD5	methyl-CpG binding domain protein 5
hsa-miR-567	0	0	1	0	0	0	LOC154092	uncharacterized LOC154092
hsa-miR-567	0	0	1	0	0	0	CASC2	cancer susceptibility candidate 2 (non-protein coding)
hsa-miR-567	0	0	1	0	1	1	HDX	highly divergent homeobox
hsa-miR-567	0	0	1	1	0	0	ABHD16A	abhydrolase domain containing 16A
hsa-miR-567	0	0	1	1	0	0	C21orf59	chromosome 21 open reading frame 59
hsa-miR-567	0	0	1	0	0	0	SNHG11	small nucleolar RNA host gene 11 (non-protein coding)
hsa-miR-567	1	0	1	1	1	1	HERPUD2	HERPUD family member 2
hsa-miR-567	0	0	1	1	0	0	ACSM2A	acyl-CoA synthetase medium-chain family member 2A
hsa-miR-567	1	0	1	1	1	1	MAP3K7	mitogen-activated protein kinase kinase kinase 7
hsa-miR-567	0	0	1	0	0	0	LOC441204	uncharacterized LOC441204
hsa-miR-567	0	0	1	1	0	0	ZNF185	zinc finger protein 185 (LIM domain)
hsa-miR-567	1	0	1	1	1	1	CLCN5	chloride channel, voltage-sensitive 5
hsa-miR-567	1	0	1	1	1	1	PUM1	pumilio homolog 1 (Drosophila)
hsa-miR-567	0	0	1	1	1	1	LNX1	ligand of numb-protein X 1, E3 ubiquitin protein ligase
hsa-miR-567	1	0	1	1	1	1	TLE4	transducin-like enhancer of split 4 (E(sp1) homolog, Drosophila)
hsa-miR-567	0	0	1	0	0	0	LOC100125918	uncharacterized LOC100125918
hsa-miR-567	0	0	1	0	0	0	LOC285074	anaphase promoting complex subunit 1 pseudogene
hsa-miR-567	0	0	1	1	1	1	LYRM5	LYR motif containing 5
hsa-miR-567	1	0	1	1	1	1	ANKRD29	ankyrin repeat domain 29
hsa-miR-567	0	0	1	1	1	1	A2ML1	alpha-2-macroglobulin-like 1
hsa-miR-567	0	0	1	1	0	0	CERS5	ceramide synthase 5
hsa-miR-567	0	0	1	1	1	1	FXC1	fracture callus 1 homolog (rat)
hsa-miR-567	0	0	1	0	1	1	CCDC68	coiled-coil domain containing 68
hsa-miR-567	0	0	1	0	0	0	LINC00301	long intergenic non-protein coding RNA 301
hsa-miR-567	1	0	1	1	1	1	TBCK	TBC1 domain containing kinase
hsa-miR-567	0	0	1	0	1	1	CDHR3	cadherin-related family member 3
hsa-miR-567	1	0	1	1	1	1	PAX6	paired box 6
hsa-miR-567	1	0	1	1	1	1	UXS1	UDP-glucuronate decarboxylase 1
hsa-miR-567	0	0	1	1	0	0	LGR5	leucine-rich repeat containing G protein-coupled receptor 5
hsa-miR-567	1	0	1	1	1	1	STXBP5	syntaxin binding protein 5 (tomosyn)
hsa-miR-567	1	0	1	1	1	1	TLK1	tousled-like kinase 1
hsa-miR-567	0	0	1	1	0	0	CTNNBL1	catenin, beta like 1
hsa-miR-567	1	0	1	1	1	1	EGR2	early growth response 2
hsa-miR-567	1	0	1	1	1	1	FRY	furry homolog (Drosophila)
hsa-miR-567	0	0	1	0	0	0	LOC440910	uncharacterized LOC440910
hsa-miR-567	1	0	1	1	1	1	FBXW2	F-box and WD repeat domain containing 2
hsa-miR-567	1	0	1	1	1	1	EPN2	epsin 2
hsa-miR-567	0	0	1	1	0	0	SUGP1	SURP and G patch domain containing 1
hsa-miR-567	0	0	1	1	1	1	RASGRP2	RAS guanyl releasing protein 2 (calcium and DAG-regulated)
hsa-miR-567	1	0	1	1	1	1	GPD2	glycerol-3-phosphate dehydrogenase 2 (mitochondrial)
hsa-miR-567	0	0	1	1	1	1	LZTFL1	leucine zipper transcription factor-like 1
hsa-miR-567	1	0	1	1	1	1	SPTBN1	spectrin, beta, non-erythrocytic 1
hsa-miR-567	1	0	1	1	1	1	LRRC57	leucine rich repeat containing 57
hsa-miR-567	0	0	1	1	0	0	WBP1	WW domain binding protein 1
hsa-miR-567	1	0	1	1	1	1	SLC7A8	solute carrier family 7 (amino acid transporter light chain, L system), member 8
hsa-miR-567	1	0	1	1	1	1	SNAP25	synaptosomal-associated protein, 25kDa
hsa-miR-567	0	0	1	1	1	1	TMEM170A	transmembrane protein 170A
hsa-miR-567	1	0	1	1	1	1	CPNE8	copine VIII
hsa-miR-567	1	0	1	0	1	1	IL1RAP	interleukin 1 receptor accessory protein
hsa-miR-567	1	0	1	1	1	1	RASGEF1A	RasGEF domain family, member 1A
hsa-miR-567	0	0	1	1	1	1	MOBP	myelin-associated oligodendrocyte basic protein
hsa-miR-567	1	0	1	1	1	1	ATXN10	ataxin 10
hsa-miR-567	0	0	1	0	0	0	LOC100129858	uncharacterized LOC100129858
hsa-miR-567	1	0	1	1	1	1	FAM222B	family with sequence similarity 222, member B
hsa-miR-567	1	0	1	1	1	1	PEA15	phosphoprotein enriched in astrocytes 15
hsa-miR-567	0	0	1	0	1	1	C19orf66	chromosome 19 open reading frame 66
hsa-miR-567	1	0	1	1	1	1	GAPVD1	GTPase activating protein and VPS9 domains 1
hsa-miR-567	0	0	1	0	0	0	ZNF815P	zinc finger protein 815, pseudogene
hsa-miR-567	1	0	1	0	1	1	THRB	thyroid hormone receptor, beta
hsa-miR-567	0	0	1	0	1	1	SWAP70	SWAP switching B-cell complex 70kDa subunit
hsa-miR-567	0	0	1	1	1	1	EXTL2	exostoses (multiple)-like 2
hsa-miR-567	0	0	1	1	1	1	GBAS	glioblastoma amplified sequence
hsa-miR-567	0	0	1	1	0	0	C10orf68	chromosome 10 open reading frame 68
hsa-miR-567	1	0	1	1	1	1	HOOK1	hook homolog 1 (Drosophila)
hsa-miR-567	1	0	1	1	1	1	ST7L	suppression of tumorigenicity 7 like
hsa-miR-567	0	0	1	1	1	1	PRSS16	protease, serine, 16 (thymus)
hsa-miR-567	1	0	1	1	1	1	PIGA	phosphatidylinositol glycan anchor biosynthesis, class A
hsa-miR-567	1	0	1	1	0	0	ENTPD1	ectonucleoside triphosphate diphosphohydrolase 1
hsa-miR-567	1	0	1	1	1	1	IL20RA	interleukin 20 receptor, alpha
hsa-miR-567	1	0	1	1	1	1	LARP1B	La ribonucleoprotein domain family, member 1B
hsa-miR-567	1	0	1	1	1	1	NDFIP2	Nedd4 family interacting protein 2
hsa-miR-567	0	0	1	1	1	1	GPR128	G protein-coupled receptor 128
hsa-miR-567	1	0	1	1	1	1	SIK3	SIK family kinase 3
hsa-miR-567	1	0	1	1	1	1	BCL6B	B-cell CLL/lymphoma 6, member B
hsa-miR-567	0	0	1	1	0	0	YSK4	YSK4 Sps1/Ste20-related kinase homolog (S. cerevisiae)
hsa-miR-567	1	0	1	1	1	1	ABHD6	abhydrolase domain containing 6
hsa-miR-567	0	0	1	0	0	0	C1orf132	chromosome 1 open reading frame 132
hsa-miR-567	0	0	1	0	1	1	FLJ41200	uncharacterized LOC401492
hsa-miR-567	1	0	1	1	1	1	EGLN3	egl nine homolog 3 (C. elegans)
hsa-miR-567	0	0	1	0	0	0	MORN2	MORN repeat containing 2
hsa-miR-567	0	0	1	0	0	0	TMPRSS11BNL	TMPRSS11B N terminal-like
hsa-miR-567	1	0	1	1	1	1	IPPK	inositol 1,3,4,5,6-pentakisphosphate 2-kinase
hsa-miR-567	0	0	1	1	1	1	NOSTRIN	nitric oxide synthase trafficker
hsa-miR-567	0	0	1	1	1	1	EIF3E	eukaryotic translation initiation factor 3, subunit E
hsa-miR-567	0	0	1	0	0	0	TMEM232	transmembrane protein 232
hsa-miR-567	1	0	1	1	1	1	METAP2	methionyl aminopeptidase 2
hsa-miR-567	1	0	1	1	1	1	DENND5B	DENN/MADD domain containing 5B
hsa-miR-567	1	0	1	1	1	1	ATP11C	ATPase, class VI, type 11C
hsa-miR-567	0	0	1	0	0	0	LOC613266	uncharacterized LOC613266
hsa-miR-567	1	0	1	1	1	1	KPNA1	karyopherin alpha 1 (importin alpha 5)
hsa-miR-567	0	0	1	0	1	1	C17orf105	chromosome 17 open reading frame 105
hsa-miR-567	1	0	1	1	1	1	DPY19L3	dpy-19-like 3 (C. elegans)
hsa-miR-567	1	0	1	1	1	1	TP53INP1	tumor protein p53 inducible nuclear protein 1
hsa-miR-567	1	0	1	1	0	0	UBN2	ubinuclein 2
hsa-miR-567	0	0	1	1	0	0	FSIP2	fibrous sheath interacting protein 2
hsa-miR-567	0	0	1	1	1	1	PLEKHS1	pleckstrin homology domain containing, family S member 1
hsa-miR-567	1	0	1	0	1	1	ANO6	anoctamin 6
hsa-miR-567	0	0	1	1	1	1	USP54	ubiquitin specific peptidase 54
hsa-miR-567	0	0	1	1	1	1	C18orf54	chromosome 18 open reading frame 54
hsa-miR-567	1	0	1	1	1	1	MTOR	mechanistic target of rapamycin (serine/threonine kinase)
hsa-miR-567	1	0	1	1	1	1	DLG2	discs, large homolog 2 (Drosophila)
hsa-miR-567	1	0	1	1	1	1	CLIP1	CAP-GLY domain containing linker protein 1
hsa-miR-567	0	0	1	0	0	0	RPL23AP53	ribosomal protein L23a pseudogene 53
hsa-miR-567	1	0	1	1	1	1	TSHZ1	teashirt zinc finger homeobox 1
hsa-miR-567	1	0	1	0	1	1	ADIPOR2	adiponectin receptor 2
hsa-miR-567	1	0	1	1	1	1	CTNNA2	catenin (cadherin-associated protein), alpha 2
hsa-miR-567	1	0	1	1	1	1	LSM14A	LSM14A, SCD6 homolog A (S. cerevisiae)
hsa-miR-567	1	0	1	0	1	1	FNDC3B	fibronectin type III domain containing 3B
hsa-miR-567	0	0	1	1	1	1	PITX2	paired-like homeodomain 2
hsa-miR-567	0	0	1	0	0	0	LRRC9	leucine rich repeat containing 9
hsa-miR-567	1	0	1	1	1	1	ZNF655	zinc finger protein 655
hsa-miR-567	1	0	1	1	1	1	SLC12A6	solute carrier family 12 (potassium/chloride transporters), member 6
hsa-miR-567	0	0	1	0	0	0	FAM205B	transmembrane protein C9orf144B pseudogene
hsa-miR-567	1	0	1	0	1	1	KDM2A	lysine (K)-specific demethylase 2A
hsa-miR-567	1	0	1	0	1	1	NBR1	neighbor of BRCA1 gene 1
hsa-miR-567	1	0	1	1	1	1	BCAT1	branched chain amino-acid transaminase 1, cytosolic
hsa-miR-567	0	0	1	1	1	1	SHROOM3	shroom family member 3
hsa-miR-567	1	0	1	1	1	1	RNF111	ring finger protein 111
hsa-miR-567	1	0	1	0	1	1	FMNL2	formin-like 2
hsa-miR-567	1	0	1	1	1	1	MAP2K4	mitogen-activated protein kinase kinase 4
hsa-miR-567	0	0	1	0	0	0	AGAP9	ArfGAP with GTPase domain, ankyrin repeat and PH domain 9
hsa-miR-567	0	0	1	1	1	1	ARID1A	AT rich interactive domain 1A (SWI-like)
hsa-miR-567	1	0	1	1	1	1	GATA6	GATA binding protein 6
hsa-miR-567	1	0	1	0	1	1	SEZ6	seizure related 6 homolog (mouse)
hsa-miR-567	0	0	1	1	1	1	C5orf28	chromosome 5 open reading frame 28
hsa-miR-567	1	0	1	1	1	1	MEAF6	MYST/Esa1-associated factor 6
hsa-miR-567	1	0	1	1	1	1	TGFBR3	transforming growth factor, beta receptor III
hsa-miR-567	1	0	1	1	1	1	COBLL1	COBL-like 1
hsa-miR-567	1	0	1	1	1	1	PHTF2	putative homeodomain transcription factor 2
hsa-miR-567	1	0	1	1	1	1	NCOA1	nuclear receptor coactivator 1
hsa-miR-567	0	0	1	1	1	1	PTPN20B	protein tyrosine phosphatase, non-receptor type 20B
hsa-miR-567	0	0	1	1	1	1	PTPN20A	protein tyrosine phosphatase, non-receptor type 20A
hsa-miR-567	0	0	1	0	1	1	NEK1	NIMA (never in mitosis gene a)-related kinase 1
hsa-miR-567	1	0	1	1	1	1	NPAS3	neuronal PAS domain protein 3
hsa-miR-567	1	0	1	1	1	1	TAB2	TGF-beta activated kinase 1/MAP3K7 binding protein 2
hsa-miR-567	0	0	1	1	1	1	RTTN	rotatin
hsa-miR-567	0	0	1	1	1	1	ZNF280D	zinc finger protein 280D
hsa-miR-567	0	0	1	1	1	1	MCM10	minichromosome maintenance complex component 10
hsa-miR-567	1	0	1	1	1	1	SECISBP2	SECIS binding protein 2
hsa-miR-567	0	0	1	1	1	1	MIOS	missing oocyte, meiosis regulator, homolog (Drosophila)
hsa-miR-567	1	0	1	0	1	1	CEP170	centrosomal protein 170kDa
hsa-miR-567	1	0	1	1	1	1	NEO1	neogenin 1
hsa-miR-567	0	0	1	0	0	0	FAM66D	family with sequence similarity 66, member D
hsa-miR-567	0	0	1	1	1	1	IDH3A	isocitrate dehydrogenase 3 (NAD+) alpha
hsa-miR-567	0	0	1	1	1	1	HNRPLL	heterogeneous nuclear ribonucleoprotein L-like
hsa-miR-567	1	0	1	1	1	1	USP45	ubiquitin specific peptidase 45
hsa-miR-567	0	0	1	1	1	1	TMEM132C	transmembrane protein 132C
hsa-miR-567	1	0	1	1	1	1	ZEB1	zinc finger E-box binding homeobox 1
hsa-miR-567	1	0	1	1	1	1	FAM126B	family with sequence similarity 126, member B
hsa-miR-567	0	0	1	1	1	1	YAP1	Yes-associated protein 1
hsa-miR-567	1	0	1	1	0	0	PTAR1	protein prenyltransferase alpha subunit repeat containing 1
hsa-miR-567	1	0	1	1	1	1	FBXO3	F-box protein 3
hsa-miR-567	1	0	1	0	1	1	GPCPD1	glycerophosphocholine phosphodiesterase GDE1 homolog (S. cerevisiae)
hsa-miR-567	0	0	1	1	1	1	CCDC132	coiled-coil domain containing 132
hsa-miR-567	1	0	1	1	1	1	LPP	LIM domain containing preferred translocation partner in lipoma
hsa-miR-567	1	0	1	0	1	1	MEF2C	myocyte enhancer factor 2C
hsa-miR-567	0	0	1	1	1	1	NARG2	NMDA receptor regulated 2
hsa-miR-567	1	0	1	1	1	1	CAMK4	calcium/calmodulin-dependent protein kinase IV
hsa-miR-567	0	0	1	0	0	0	ADCY10P1	adenylate cyclase 10 (soluble) pseudogene 1
hsa-miR-567	1	0	1	0	1	1	JAZF1	JAZF zinc finger 1
hsa-miR-567	1	0	1	1	1	1	CADM2	cell adhesion molecule 2
hsa-miR-567	1	0	1	1	1	1	RICTOR	RPTOR independent companion of MTOR, complex 2
hsa-miR-567	1	0	1	1	1	1	WDR44	WD repeat domain 44
hsa-miR-567	1	0	1	1	1	1	IKZF2	IKAROS family zinc finger 2 (Helios)
hsa-miR-567	0	0	1	0	0	0	PMCHL1	pro-melanin-concentrating hormone-like 1, pseudogene
hsa-miR-567	0	0	1	0	0	0	PMCHL2	pro-melanin-concentrating hormone-like 2, pseudogene
hsa-miR-567	1	0	1	1	1	1	CLIC5	chloride intracellular channel 5
hsa-miR-567	0	0	1	0	0	0	KGFLP1	fibroblast growth factor 7 pseudogene
hsa-miR-567	1	0	1	1	1	1	ANGPT1	angiopoietin 1
hsa-miR-567	1	0	1	1	1	1	PIH1D3	PIH1 domain containing 3
hsa-miR-567	1	0	1	1	1	1	WDR26	WD repeat domain 26
hsa-miR-567	1	0	1	1	1	1	BCL11A	B-cell CLL/lymphoma 11A (zinc finger protein)
hsa-miR-567	0	0	1	1	1	1	IYD	iodotyrosine deiodinase
hsa-miR-567	0	0	1	1	1	1	GCOM1	GRINL1A complex locus 1
hsa-miR-567	1	0	1	1	1	1	IQGAP2	IQ motif containing GTPase activating protein 2
hsa-miR-567	0	0	1	1	1	1	TNFSF15	tumor necrosis factor (ligand) superfamily, member 15
hsa-miR-567	1	0	1	0	1	1	NHS	Nance-Horan syndrome (congenital cataracts and dental anomalies)
hsa-miR-567	1	0	1	1	1	1	ARHGAP20	Rho GTPase activating protein 20
hsa-miR-567	0	0	1	1	1	1	HMBOX1	homeobox containing 1
hsa-miR-567	0	0	1	1	1	1	SMPD1	sphingomyelin phosphodiesterase 1, acid lysosomal
hsa-miR-567	0	0	1	1	0	0	CLSTN3	calsyntenin 3
hsa-miR-567	1	0	1	1	1	1	AMOT	angiomotin
hsa-miR-567	1	0	1	1	1	1	RPRD1A	regulation of nuclear pre-mRNA domain containing 1A
hsa-miR-567	0	0	1	1	0	0	EWSR1	Ewing sarcoma breakpoint region 1
hsa-miR-567	0	0	1	1	1	1	FAM115A	family with sequence similarity 115, member A
hsa-miR-567	0	0	1	1	1	1	RLIM	ring finger protein, LIM domain interacting
hsa-miR-567	0	0	1	1	1	1	RAB7L1	RAB7, member RAS oncogene family-like 1
hsa-miR-567	0	0	1	1	1	1	NUPL2	nucleoporin like 2
hsa-miR-567	1	0	1	1	1	1	VTA1	Vps20-associated 1 homolog (S. cerevisiae)
hsa-miR-567	0	0	1	1	1	1	KIRREL2	kin of IRRE like 2 (Drosophila)
hsa-miR-567	0	0	1	1	0	0	AGBL5	ATP/GTP binding protein-like 5
hsa-miR-567	1	0	1	0	1	1	TMEM39A	transmembrane protein 39A
hsa-miR-567	1	0	1	1	0	0	FA2H	fatty acid 2-hydroxylase
hsa-miR-567	1	0	1	1	1	1	ZFAND5	zinc finger, AN1-type domain 5
hsa-miR-567	0	0	1	1	0	0	NDUFA3	NADH dehydrogenase (ubiquinone) 1 alpha subcomplex, 3, 9kDa
hsa-miR-567	1	0	1	1	1	1	TRIM2	tripartite motif containing 2
hsa-miR-567	0	0	1	1	1	1	PSEN1	presenilin 1
hsa-miR-567	0	0	1	1	0	0	WISP3	WNT1 inducible signaling pathway protein 3
hsa-miR-567	1	0	1	0	1	1	GUCY1A3	guanylate cyclase 1, soluble, alpha 3
hsa-miR-567	1	0	1	1	1	1	RBM7	RNA binding motif protein 7
hsa-miR-567	1	0	1	1	1	1	ZNF3	zinc finger protein 3
hsa-miR-567	0	0	1	1	1	1	PCNP	PEST proteolytic signal containing nuclear protein
hsa-miR-567	1	0	1	1	1	1	YY1	YY1 transcription factor
hsa-miR-567	1	0	1	1	1	1	ZBTB38	zinc finger and BTB domain containing 38
hsa-miR-567	0	0	1	0	1	1	ZNF37A	zinc finger protein 37A
hsa-miR-567	1	0	1	1	0	0	ARMCX2	armadillo repeat containing, X-linked 2
hsa-miR-567	0	0	1	1	1	1	C1QTNF3	C1q and tumor necrosis factor related protein 3
hsa-miR-567	0	0	1	1	1	1	POLR3F	polymerase (RNA) III (DNA directed) polypeptide F, 39 kDa
hsa-miR-567	0	0	1	1	1	1	ANKRD44	ankyrin repeat domain 44
hsa-miR-567	1	0	1	1	0	0	UBR7	ubiquitin protein ligase E3 component n-recognin 7 (putative)
hsa-miR-567	1	0	1	1	1	1	VTI1A	vesicle transport through interaction with t-SNAREs homolog 1A (yeast)
hsa-miR-567	0	0	1	0	0	0	LOC441528	uncharacterized LOC441528
hsa-miR-567	0	0	1	1	1	1	PARP9	poly (ADP-ribose) polymerase family, member 9
hsa-miR-567	0	0	1	0	0	0	FAM200B	family with sequence similarity 200, member B
hsa-miR-567	1	0	1	1	1	1	ZMAT4	zinc finger, matrin-type 4
hsa-miR-567	1	0	1	1	1	1	FAM222A	family with sequence similarity 222, member A
hsa-miR-567	1	0	1	1	1	1	NKTR	natural killer-tumor recognition sequence
hsa-miR-567	0	0	1	0	0	0	FAM92A1P2	family with sequence similarity 92, member A3
hsa-miR-567	0	0	1	1	1	1	RNF103	ring finger protein 103
hsa-miR-567	1	0	1	1	1	1	SPRYD7	SPRY domain containing 7
hsa-miR-567	0	0	1	1	1	1	CDC42SE2	CDC42 small effector 2
hsa-miR-567	0	0	1	1	0	0	C16orf91	chromosome 16 open reading frame 91
hsa-miR-567	1	0	1	0	1	1	CDK19	cyclin-dependent kinase 19
hsa-miR-567	1	0	1	1	1	1	NIPA1	non imprinted in Prader-Willi/Angelman syndrome 1
hsa-miR-567	1	0	1	1	0	0	NCLN	nicalin
hsa-miR-567	0	0	1	1	1	1	FAM221A	family with sequence similarity 221, member A
hsa-miR-567	0	0	1	1	0	0	CCDC171	coiled-coil domain containing 171
hsa-miR-567	1	0	1	1	1	1	CNTN4	contactin 4
hsa-miR-567	0	0	1	1	1	1	RHBDD1	rhomboid domain containing 1
hsa-miR-567	1	0	1	1	1	1	U2SURP	U2 snRNP-associated SURP domain containing
hsa-miR-567	0	0	1	1	0	0	ALPK1	alpha-kinase 1
hsa-miR-567	0	0	1	1	1	1	MLKL	mixed lineage kinase domain-like
hsa-miR-567	1	0	1	1	1	1	HTR2C	5-hydroxytryptamine (serotonin) receptor 2C, G protein-coupled
hsa-miR-567	0	0	1	1	0	0	TOMM5	translocase of outer mitochondrial membrane 5 homolog (yeast)
hsa-miR-567	1	0	1	1	1	1	SYT9	synaptotagmin IX
hsa-miR-567	0	0	1	1	1	1	PIK3AP1	phosphoinositide-3-kinase adaptor protein 1
hsa-miR-567	1	0	1	1	1	1	TIAL1	TIA1 cytotoxic granule-associated RNA binding protein-like 1
hsa-miR-567	0	0	1	1	1	1	COL25A1	collagen, type XXV, alpha 1
hsa-miR-567	1	0	1	1	1	1	RCOR3	REST corepressor 3
hsa-miR-567	1	0	1	1	1	1	PDZD2	PDZ domain containing 2
hsa-miR-567	1	0	1	1	1	1	FGF1	fibroblast growth factor 1 (acidic)
hsa-miR-567	1	0	1	1	1	1	SECISBP2L	SECIS binding protein 2-like
hsa-miR-567	1	0	1	1	1	1	MAK	male germ cell-associated kinase
hsa-miR-567	1	0	1	1	1	1	PLEKHA7	pleckstrin homology domain containing, family A member 7
hsa-miR-567	0	0	1	1	0	0	SLC44A3	solute carrier family 44, member 3
hsa-miR-567	0	0	1	1	1	1	HEXA	hexosaminidase A (alpha polypeptide)
hsa-miR-567	0	0	1	1	1	1	ZNF337	zinc finger protein 337
hsa-miR-567	0	0	1	0	1	1	DKFZP434I0714	uncharacterized protein DKFZP434I0714
hsa-miR-567	0	0	1	1	1	1	EDA2R	ectodysplasin A2 receptor
hsa-miR-567	0	0	1	0	0	0	TMPRSS12	transmembrane (C-terminal) protease, serine 12
hsa-miR-567	1	0	1	0	1	1	ATP11A	ATPase, class VI, type 11A
hsa-miR-567	1	0	1	1	1	1	CTDSPL2	CTD (carboxy-terminal domain, RNA polymerase II, polypeptide A) small phosphatase like 2
hsa-miR-567	0	0	1	0	0	0	C12orf77	chromosome 12 open reading frame 77
hsa-miR-567	0	0	1	1	1	1	CLEC12B	C-type lectin domain family 12, member B
hsa-miR-567	0	0	1	1	1	1	UBE3D	ubiquitin protein ligase E3D
hsa-miR-567	0	0	1	0	0	0	LOC729013	uncharacterized LOC729013
hsa-miR-567	1	0	1	1	0	0	RASGEF1B	RasGEF domain family, member 1B
hsa-miR-567	0	0	1	0	0	0	SRGAP2C	SLIT-ROBO Rho GTPase activating protein 2C
hsa-miR-567	1	0	1	1	1	1	FAM135B	family with sequence similarity 135, member B
hsa-miR-567	1	0	1	1	1	1	SOX6	SRY (sex determining region Y)-box 6
hsa-miR-567	0	0	1	1	1	1	C14orf118	chromosome 14 open reading frame 118
hsa-miR-567	1	0	1	1	1	1	PLS3	plastin 3
hsa-miR-567	1	0	1	1	1	1	TIMP2	TIMP metallopeptidase inhibitor 2
hsa-miR-567	1	0	1	1	1	1	SLITRK3	SLIT and NTRK-like family, member 3
hsa-miR-567	1	0	1	1	1	1	INTS6	integrator complex subunit 6
hsa-miR-567	0	0	1	1	0	0	NT5DC4	5'-nucleotidase domain containing 4
hsa-miR-567	1	0	1	0	1	1	TNFAIP3	tumor necrosis factor, alpha-induced protein 3
hsa-miR-567	1	0	1	1	1	1	TXNRD1	thioredoxin reductase 1
hsa-miR-567	0	0	1	0	0	0	LOC339260	uncharacterized LOC339260
hsa-miR-567	0	0	1	0	0	0	LOC283914	uncharacterized LOC283914
hsa-miR-567	0	0	1	0	1	1	IL33	interleukin 33
hsa-miR-567	0	0	1	0	1	1	LOC338758	uncharacterized LOC338758
hsa-miR-567	1	0	1	1	1	1	KIF2A	kinesin heavy chain member 2A
hsa-miR-567	1	0	1	1	1	1	RECK	reversion-inducing-cysteine-rich protein with kazal motifs
hsa-miR-567	0	0	1	1	1	1	FBXO38	F-box protein 38
hsa-miR-567	0	0	1	0	0	0	AURKAPS1	aurora kinase A pseudogene 1
hsa-miR-567	1	0	1	0	1	1	NUDT10	nudix (nucleoside diphosphate linked moiety X)-type motif 10
hsa-miR-567	1	0	1	1	1	1	FNDC3A	fibronectin type III domain containing 3A
hsa-miR-567	1	0	1	0	1	1	SEMA4G	sema domain, immunoglobulin domain (Ig), transmembrane domain (TM) and short cytoplasmic domain, (semaphorin) 4G
hsa-miR-567	0	0	1	1	1	1	LINC00086	long intergenic non-protein coding RNA 86
hsa-miR-567	0	0	1	1	1	1	RHOT1	ras homolog family member T1
hsa-miR-567	1	0	1	1	1	1	PCGF5	polycomb group ring finger 5
hsa-miR-567	1	0	1	1	1	1	HP1BP3	heterochromatin protein 1, binding protein 3
hsa-miR-567	1	0	1	1	1	1	OLFML2A	olfactomedin-like 2A
hsa-miR-567	0	0	1	1	0	0	CRYM-AS1	CRYM antisense RNA 1
hsa-miR-567	1	0	1	1	1	1	ATP8B4	ATPase, class I, type 8B, member 4
hsa-miR-567	0	0	1	1	1	1	C17orf97	chromosome 17 open reading frame 97
hsa-miR-567	1	0	1	1	1	1	KLHL28	kelch-like 28 (Drosophila)
hsa-miR-567	1	0	1	1	1	1	ZEB2	zinc finger E-box binding homeobox 2
hsa-miR-567	1	0	1	1	1	1	PRRG1	proline rich Gla (G-carboxyglutamic acid) 1
hsa-miR-567	0	0	1	1	0	0	WDR90	WD repeat domain 90
hsa-miR-567	0	0	1	1	1	1	C1orf109	chromosome 1 open reading frame 109
hsa-miR-567	0	0	1	1	1	1	SCLT1	sodium channel and clathrin linker 1
hsa-miR-567	1	0	1	1	1	1	EIF4G2	eukaryotic translation initiation factor 4 gamma, 2
hsa-miR-567	1	0	1	1	1	1	PDCD6IP	programmed cell death 6 interacting protein
hsa-miR-567	1	0	1	1	1	1	SLC26A7	solute carrier family 26, member 7
hsa-miR-567	1	0	1	1	1	1	PHACTR4	phosphatase and actin regulator 4
hsa-miR-567	1	0	1	1	1	1	SOCS2	suppressor of cytokine signaling 2
hsa-miR-567	0	0	1	1	0	0	RPS3	ribosomal protein S3
hsa-miR-567	1	0	1	1	1	1	OPCML	opioid binding protein/cell adhesion molecule-like
hsa-miR-567	1	0	1	1	1	1	WNT5A	wingless-type MMTV integration site family, member 5A
hsa-miR-567	0	0	1	1	1	1	C3orf67	chromosome 3 open reading frame 67
hsa-miR-567	1	0	1	0	1	1	AMMECR1L	AMME chromosomal region gene 1-like
hsa-miR-567	0	0	1	0	0	0	LINC00537	long intergenic non-protein coding RNA 537
hsa-miR-567	1	0	1	1	1	1	SYNE1	spectrin repeat containing, nuclear envelope 1
hsa-miR-567	1	0	1	1	1	1	ZMYND11	zinc finger, MYND-type containing 11
hsa-miR-567	0	0	1	1	1	1	KCTD3	potassium channel tetramerisation domain containing 3
hsa-miR-567	1	0	1	1	1	1	ACVR2B	activin A receptor, type IIB
hsa-miR-567	0	0	1	1	1	1	KLRF1	killer cell lectin-like receptor subfamily F, member 1
hsa-miR-567	0	0	1	1	1	1	TMEM52B	transmembrane protein 52B
hsa-miR-567	1	0	1	0	1	1	ARPP19	cAMP-regulated phosphoprotein, 19kDa
hsa-miR-567	1	0	1	0	1	1	CPEB2	cytoplasmic polyadenylation element binding protein 2
hsa-miR-567	1	0	1	1	1	1	GABRB2	gamma-aminobutyric acid (GABA) A receptor, beta 2
hsa-miR-567	0	0	1	1	1	1	TTN	titin
hsa-miR-567	0	0	1	1	1	1	RASAL2	RAS protein activator like 2
hsa-miR-567	0	0	1	0	0	0	INTS4L1	integrator complex subunit 4-like 1
hsa-miR-567	0	0	1	0	0	0	LRRC37A11P	leucine rich repeat containing 37, member A11, pseudogene
hsa-miR-567	1	0	1	1	1	1	NR3C2	nuclear receptor subfamily 3, group C, member 2
hsa-miR-567	0	0	1	1	0	0	RNF123	ring finger protein 123
hsa-miR-567	1	0	1	1	0	0	MAPKBP1	mitogen-activated protein kinase binding protein 1
hsa-miR-567	1	0	1	1	1	1	ST18	suppression of tumorigenicity 18 (breast carcinoma) (zinc finger protein)
hsa-miR-567	1	0	1	0	1	1	PRDM10	PR domain containing 10
hsa-miR-567	1	0	1	1	1	1	ANK2	ankyrin 2, neuronal
hsa-miR-567	1	0	1	1	1	1	CHIC1	cysteine-rich hydrophobic domain 1
hsa-miR-567	1	0	1	1	1	1	MLLT10	myeloid/lymphoid or mixed-lineage leukemia (trithorax homolog, Drosophila); translocated to, 10
hsa-miR-567	0	0	1	0	0	0	FAM225B	family with sequence similarity 225, member B (non-protein coding)
hsa-miR-567	1	0	1	0	1	1	FAM196A	family with sequence similarity 196, member A
hsa-miR-567	1	0	1	1	1	1	NIPAL2	NIPA-like domain containing 2
hsa-miR-567	0	0	1	0	0	0	MEG3	maternally expressed 3 (non-protein coding)
hsa-miR-567	0	0	1	1	1	1	TINF2	TERF1 (TRF1)-interacting nuclear factor 2
hsa-miR-567	1	0	1	1	1	1	CCNK	cyclin K
hsa-miR-567	0	0	1	0	0	0	FLJ39632	uncharacterized LOC642477
hsa-miR-567	1	0	1	1	1	1	ATP2B4	ATPase, Ca++ transporting, plasma membrane 4
hsa-miR-567	1	0	1	1	1	1	JPH1	junctophilin 1
hsa-miR-567	1	0	1	1	1	1	SGCD	sarcoglycan, delta (35kDa dystrophin-associated glycoprotein)
hsa-miR-567	0	0	1	1	1	1	AIG1	androgen-induced 1
hsa-miR-567	1	0	1	0	1	1	CLASP2	cytoplasmic linker associated protein 2
hsa-miR-567	0	0	1	1	1	1	CRB1	crumbs homolog 1 (Drosophila)
hsa-miR-567	0	0	1	1	1	1	KLHL8	kelch-like 8 (Drosophila)
hsa-miR-567	0	0	1	0	1	1	CPPED1	calcineurin-like phosphoesterase domain containing 1
hsa-miR-567	0	0	1	1	1	1	DEPDC5	DEP domain containing 5
hsa-miR-567	1	0	1	1	1	1	RAB30	RAB30, member RAS oncogene family
hsa-miR-567	1	0	1	1	1	1	SMAD4	SMAD family member 4
hsa-miR-567	1	0	1	1	0	0	RBM27	RNA binding motif protein 27
hsa-miR-567	0	0	1	1	1	1	ADH1B	alcohol dehydrogenase 1B (class I), beta polypeptide
hsa-miR-567	0	0	1	1	1	1	ARMCX3	armadillo repeat containing, X-linked 3
hsa-miR-567	0	0	1	1	1	1	ZNF365	zinc finger protein 365
hsa-miR-567	1	0	1	1	1	1	NEDD9	neural precursor cell expressed, developmentally down-regulated 9
hsa-miR-567	1	0	1	1	1	1	ZNF711	zinc finger protein 711
hsa-miR-567	0	0	1	0	1	1	TYW5	tRNA-yW synthesizing protein 5
hsa-miR-567	0	0	1	1	1	1	ATP2A2	ATPase, Ca++ transporting, cardiac muscle, slow twitch 2
hsa-miR-567	1	0	1	1	1	1	NFIB	nuclear factor I/B
hsa-miR-567	1	0	1	1	1	1	BCLAF1	BCL2-associated transcription factor 1
hsa-miR-567	1	0	1	1	1	1	AZI2	5-azacytidine induced 2
hsa-miR-567	1	0	1	0	1	1	IGF2BP3	insulin-like growth factor 2 mRNA binding protein 3
hsa-miR-567	1	0	1	1	1	1	PGAP1	post-GPI attachment to proteins 1
hsa-miR-567	1	0	1	1	1	1	EOGT	EGF domain-specific O-linked N-acetylglucosamine (GlcNAc) transferase
hsa-miR-567	1	0	1	0	1	1	TBL1XR1	transducin (beta)-like 1 X-linked receptor 1
hsa-miR-567	1	0	1	1	1	1	BSDC1	BSD domain containing 1
hsa-miR-567	0	0	1	0	0	0	LINC00341	long intergenic non-protein coding RNA 341
hsa-miR-567	0	0	1	1	1	1	DUSP26	dual specificity phosphatase 26 (putative)
hsa-miR-567	0	0	1	1	0	0	C11orf73	chromosome 11 open reading frame 73
hsa-miR-567	1	0	1	1	1	1	GPBP1	GC-rich promoter binding protein 1
hsa-miR-567	1	0	1	1	1	1	FUT9	fucosyltransferase 9 (alpha (1,3) fucosyltransferase)
hsa-miR-567	1	0	1	0	1	1	OLA1	Obg-like ATPase 1
hsa-miR-567	0	0	1	1	0	0	TPST2	tyrosylprotein sulfotransferase 2
hsa-miR-567	0	0	1	1	1	1	COPS8	COP9 constitutive photomorphogenic homolog subunit 8 (Arabidopsis)
hsa-miR-567	1	0	1	1	0	0	CRELD1	cysteine-rich with EGF-like domains 1
hsa-miR-567	0	0	1	1	1	1	TASP1	taspase, threonine aspartase, 1
hsa-miR-567	0	0	1	1	0	0	METTL23	methyltransferase like 23
hsa-miR-567	1	0	1	1	1	1	CHTF8	CTF8, chromosome transmission fidelity factor 8 homolog (S. cerevisiae)
hsa-miR-567	0	0	1	0	1	1	CD99P1	CD99 molecule pseudogene 1
hsa-miR-567	1	0	1	1	1	1	TMED5	transmembrane emp24 protein transport domain containing 5
hsa-miR-567	1	0	1	1	1	1	TRA2B	transformer 2 beta homolog (Drosophila)
hsa-miR-567	0	0	1	1	1	1	STON1	stonin 1
hsa-miR-567	0	0	1	1	1	1	EIF3J	eukaryotic translation initiation factor 3, subunit J
hsa-miR-567	0	0	1	1	1	1	PSMA1	proteasome (prosome, macropain) subunit, alpha type, 1
hsa-miR-567	0	0	1	1	1	1	VPS16	vacuolar protein sorting 16 homolog (S. cerevisiae)
hsa-miR-567	0	0	1	1	1	1	C1orf88	chromosome 1 open reading frame 88
hsa-miR-567	1	0	1	1	1	1	KCNIP4	Kv channel interacting protein 4
hsa-miR-567	1	0	1	1	0	0	FAT4	FAT tumor suppressor homolog 4 (Drosophila)
hsa-miR-567	1	0	1	1	1	1	NRN1	neuritin 1
hsa-miR-567	1	0	1	1	1	1	LAMTOR3	late endosomal/lysosomal adaptor, MAPK and MTOR activator 3
hsa-miR-567	1	0	1	1	1	1	NT5DC1	5'-nucleotidase domain containing 1
hsa-miR-567	0	0	1	1	0	0	PLB1	phospholipase B1
hsa-miR-567	0	0	1	0	1	1	VSTM2A	V-set and transmembrane domain containing 2A
hsa-miR-567	1	0	1	0	1	1	ANKH	ankylosis, progressive homolog (mouse)
hsa-miR-567	0	0	1	1	1	1	UBE2A	ubiquitin-conjugating enzyme E2A
hsa-miR-567	1	0	1	1	1	1	CNBP	CCHC-type zinc finger, nucleic acid binding protein
hsa-miR-567	1	0	1	1	1	1	ZNF207	zinc finger protein 207
hsa-miR-567	0	0	1	1	0	0	TBCEL	tubulin folding cofactor E-like
hsa-miR-567	1	0	1	1	1	1	ARMC8	armadillo repeat containing 8
hsa-miR-567	1	0	1	1	1	1	GDA	guanine deaminase
hsa-miR-567	0	0	1	1	0	0	GPC3	glypican 3
hsa-miR-567	0	0	1	0	0	0	FAM92A1	family with sequence similarity 92, member A1
hsa-miR-567	1	0	1	1	1	1	RND3	Rho family GTPase 3
hsa-miR-567	1	0	1	0	1	1	KIAA0240	KIAA0240
hsa-miR-567	0	0	1	1	1	1	BDP1	B double prime 1, subunit of RNA polymerase III transcription initiation factor IIIB
hsa-miR-567	1	0	1	1	1	1	FBXW7	F-box and WD repeat domain containing 7, E3 ubiquitin protein ligase
hsa-miR-567	0	0	1	1	1	1	ATG5	autophagy related 5
hsa-miR-567	1	0	1	1	1	1	KIAA2018	KIAA2018
hsa-miR-567	0	0	1	0	1	1	ZNF28	zinc finger protein 28
hsa-miR-567	1	0	1	0	1	1	CNTNAP2	contactin associated protein-like 2
hsa-miR-567	0	0	1	1	0	0	TENC1	tensin like C1 domain containing phosphatase (tensin 2)
hsa-miR-567	1	0	1	1	1	1	ZFHX3	zinc finger homeobox 3
hsa-miR-567	1	0	1	1	1	1	SP2	Sp2 transcription factor
hsa-miR-567	1	0	1	1	1	1	PI15	peptidase inhibitor 15
hsa-miR-567	1	0	1	1	1	1	PRKG1	protein kinase, cGMP-dependent, type I
hsa-miR-567	1	0	1	1	1	1	SEC14L1	SEC14-like 1 (S. cerevisiae)
hsa-miR-567	0	0	1	0	0	0	CDKN2B-AS1	CDKN2B antisense RNA 1
hsa-miR-567	0	0	1	1	1	1	MARVELD2	MARVEL domain containing 2
hsa-miR-567	0	0	1	1	1	1	EIF1AY	eukaryotic translation initiation factor 1A, Y-linked
hsa-miR-567	0	0	1	1	1	1	TNFSF10	tumor necrosis factor (ligand) superfamily, member 10
hsa-miR-567	1	0	1	1	1	1	BNC2	basonuclin 2
hsa-miR-567	1	0	1	0	1	1	DCBLD2	discoidin, CUB and LCCL domain containing 2
hsa-miR-567	0	0	1	0	1	1	OPRK1	opioid receptor, kappa 1
hsa-miR-567	1	0	1	0	0	0	YLPM1	YLP motif containing 1
hsa-miR-567	1	0	1	1	1	1	RALBP1	ralA binding protein 1
hsa-miR-567	1	0	1	1	1	1	CCNG2	cyclin G2
hsa-miR-567	1	0	1	0	1	1	BCL2	B-cell CLL/lymphoma 2
hsa-miR-567	0	0	1	1	1	1	PRKACA	protein kinase, cAMP-dependent, catalytic, alpha
hsa-miR-567	0	0	1	1	1	1	HLA-G	major histocompatibility complex, class I, G
hsa-miR-567	1	0	1	1	1	1	FAS	Fas (TNF receptor superfamily, member 6)
hsa-miR-567	0	0	1	1	1	1	BCHE	butyrylcholinesterase
hsa-miR-567	1	0	1	1	1	1	COL1A2	collagen, type I, alpha 2
hsa-miR-567	1	0	1	1	1	1	CPOX	coproporphyrinogen oxidase
hsa-miR-567	0	0	1	1	1	1	DPYD	dihydropyrimidine dehydrogenase
hsa-miR-567	1	0	1	0	1	1	SLC26A2	solute carrier family 26 (sulfate transporter), member 2
hsa-miR-567	1	0	1	1	1	1	ESR1	estrogen receptor 1
hsa-miR-567	0	0	1	1	1	1	F8	coagulation factor VIII, procoagulant component
hsa-miR-567	1	0	1	1	1	1	FBN1	fibrillin 1
hsa-miR-567	1	0	1	1	1	1	GK	glycerol kinase
hsa-miR-567	1	0	1	1	1	1	JAG1	jagged 1
hsa-miR-567	1	0	1	1	1	1	MITF	microphthalmia-associated transcription factor
hsa-miR-567	0	0	1	1	1	1	MTR	5-methyltetrahydrofolate-homocysteine methyltransferase
hsa-miR-567	1	0	1	1	1	1	PMP22	peripheral myelin protein 22
hsa-miR-567	0	0	1	1	1	1	PRNP	prion protein
hsa-miR-567	0	0	1	1	1	1	PTS	6-pyruvoyltetrahydropterin synthase
hsa-miR-567	0	0	1	1	1	1	RPGR	retinitis pigmentosa GTPase regulator
hsa-miR-567	1	0	1	1	1	1	ATXN1	ataxin 1
hsa-miR-567	0	0	1	1	1	1	SRD5A2	steroid-5-alpha-reductase, alpha polypeptide 2 (3-oxo-5 alpha-steroid delta 4-dehydrogenase alpha 2)
hsa-miR-567	1	1	1	1	1	1	CDKN1A	cyclin-dependent kinase inhibitor 1A (p21, Cip1)
hsa-miR-567	1	0	1	1	1	1	ATRX	alpha thalassemia/mental retardation syndrome X-linked
hsa-miR-567	1	0	1	1	1	1	PLP1	proteolipid protein 1
hsa-miR-567	0	0	1	1	1	1	RHO	rhodopsin
hsa-miR-567	0	0	1	1	1	1	CRX	cone-rod homeobox
hsa-miR-567	1	0	1	1	1	1	DCX	doublecortin
hsa-miR-567	1	0	1	1	1	1	FASLG	Fas ligand (TNF superfamily, member 6)
hsa-miR-567	0	0	1	1	1	1	IL11	interleukin 11
hsa-miR-567	0	0	1	1	1	1	ALDH1A1	aldehyde dehydrogenase 1 family, member A1
hsa-miR-567	1	0	1	1	1	1	DIO2	deiodinase, iodothyronine, type II
hsa-miR-567	1	0	1	0	1	1	GABRA4	gamma-aminobutyric acid (GABA) A receptor, alpha 4
hsa-miR-567	0	0	1	1	1	1	GAD2	glutamate decarboxylase 2 (pancreatic islets and brain, 65kDa)
hsa-miR-567	1	0	1	1	1	1	GRIA4	glutamate receptor, ionotropic, AMPA 4
hsa-miR-567	1	0	1	1	1	1	GRM1	glutamate receptor, metabotropic 1
hsa-miR-567	1	0	1	0	1	1	KCNJ2	potassium inwardly-rectifying channel, subfamily J, member 2
hsa-miR-567	1	0	1	1	1	1	ATP1B1	ATPase, Na+/K+ transporting, beta 1 polypeptide
hsa-miR-567	1	0	1	1	1	1	FAM13C	family with sequence similarity 13, member C
hsa-miR-567	0	0	1	0	0	0	KLK2	kallikrein-related peptidase 2
hsa-miR-567	1	0	1	1	1	1	DNAJB12	DnaJ (Hsp40) homolog, subfamily B, member 12
hsa-miR-567	0	0	1	1	1	1	SMAD1	SMAD family member 1
hsa-miR-567	1	0	1	1	1	1	RREB1	ras responsive element binding protein 1
hsa-miR-567	1	0	1	1	1	1	KLHL31	kelch-like 31 (Drosophila)
hsa-miR-567	0	0	1	1	1	1	TSPYL6	TSPY-like 6
hsa-miR-567	1	0	1	0	1	1	BMF	Bcl2 modifying factor
hsa-miR-567	1	0	1	0	1	1	LIN28B	lin-28 homolog B (C. elegans)
hsa-miR-567	0	0	1	0	0	0	FLJ42842	uncharacterized FLJ42842
hsa-miR-567	1	0	1	1	1	1	NCK2	NCK adaptor protein 2
hsa-miR-567	1	0	1	1	1	1	AK4	adenylate kinase 4
hsa-miR-567	1	0	1	0	1	1	YPEL2	yippee-like 2 (Drosophila)
hsa-miR-567	0	0	1	1	1	1	RYK	receptor-like tyrosine kinase
hsa-miR-567	0	0	1	0	1	1	GIMAP6	GTPase, IMAP family member 6
hsa-miR-567	1	0	1	0	1	1	SS18	synovial sarcoma translocation, chromosome 18
hsa-miR-567	1	0	1	1	1	1	CTDSPL	CTD (carboxy-terminal domain, RNA polymerase II, polypeptide A) small phosphatase-like
hsa-miR-567	0	0	1	1	1	1	WDHD1	WD repeat and HMG-box DNA binding protein 1
hsa-miR-567	0	0	1	1	0	0	CST9	cystatin 9 (testatin)
hsa-miR-567	1	0	1	1	1	1	FNIP1	folliculin interacting protein 1
hsa-miR-567	1	0	1	1	1	1	ZNF468	zinc finger protein 468
hsa-miR-567	1	0	1	1	1	1	CUL4A	cullin 4A
hsa-miR-567	0	0	1	1	0	0	GTSF1L	gametocyte specific factor 1-like
hsa-miR-567	1	0	1	0	1	1	RCHY1	ring finger and CHY zinc finger domain containing 1, E3 ubiquitin protein ligase
hsa-miR-567	0	0	1	1	1	1	SAMD13	sterile alpha motif domain containing 13
hsa-miR-567	1	0	1	0	1	1	CREB5	cAMP responsive element binding protein 5
hsa-miR-567	1	0	1	1	1	1	CENPP	centromere protein P
hsa-miR-567	1	0	1	1	1	1	DISC1	disrupted in schizophrenia 1
hsa-miR-567	1	0	1	1	1	1	SORCS1	sortilin-related VPS10 domain containing receptor 1
hsa-miR-567	1	0	1	1	1	1	FXR1	fragile X mental retardation, autosomal homolog 1
hsa-miR-567	0	0	1	1	1	1	C2orf68	chromosome 2 open reading frame 68
hsa-miR-567	0	0	1	0	1	1	C12orf69	chromosome 12 open reading frame 69
hsa-miR-567	1	0	1	0	1	1	SYT14L	synaptotagmin XIV-like
hsa-miR-567	1	0	1	1	1	1	KCNMA1	potassium large conductance calcium-activated channel, subfamily M, alpha member 1
hsa-miR-567	0	0	1	1	0	0	RTKN	rhotekin
hsa-miR-567	0	0	1	1	1	1	KIAA2026	KIAA2026
hsa-miR-567	1	0	1	1	1	1	PFKFB2	6-phosphofructo-2-kinase/fructose-2,6-biphosphatase 2
hsa-miR-567	1	0	1	1	1	1	SERBP1	SERPINE1 mRNA binding protein 1
hsa-miR-567	0	0	1	1	1	1	POLR2M	polymerase (RNA) II (DNA directed) polypeptide M
hsa-miR-567	1	0	1	1	1	1	KALRN	kalirin, RhoGEF kinase
hsa-miR-567	0	0	1	1	1	1	WASF1	WAS protein family, member 1
hsa-miR-567	1	0	1	0	1	1	CELF2	CUGBP, Elav-like family member 2
hsa-miR-567	1	0	1	0	1	1	CLLU1	chronic lymphocytic leukemia up-regulated 1
hsa-miR-567	1	0	1	1	1	1	TPD52	tumor protein D52
hsa-miR-567	1	0	1	0	1	1	RAB12	RAB12, member RAS oncogene family
hsa-miR-567	1	0	1	1	1	1	PLEKHG1	pleckstrin homology domain containing, family G (with RhoGef domain) member 1
hsa-miR-567	0	0	1	1	1	1	LRRC17	leucine rich repeat containing 17
hsa-miR-567	1	0	1	1	1	1	TFAP2A	transcription factor AP-2 alpha (activating enhancer binding protein 2 alpha)
hsa-miR-567	1	0	1	1	1	1	TMPO	thymopoietin
hsa-miR-567	1	0	1	1	1	1	MAGI1	membrane associated guanylate kinase, WW and PDZ domain containing 1
hsa-miR-567	0	0	1	1	1	1	FAM134B	family with sequence similarity 134, member B
hsa-miR-567	1	0	1	1	1	1	PDE4B	phosphodiesterase 4B, cAMP-specific
hsa-miR-567	1	0	1	1	1	1	KIAA0317	KIAA0317
hsa-miR-567	0	0	1	1	1	1	SKA1	spindle and kinetochore associated complex subunit 1
hsa-miR-567	1	0	1	0	1	1	GK5	glycerol kinase 5 (putative)
hsa-miR-567	0	0	1	1	1	1	MAP9	microtubule-associated protein 9
hsa-miR-567	1	0	1	0	1	1	USP9X	ubiquitin specific peptidase 9, X-linked
hsa-miR-567	1	0	1	0	1	1	CREBZF	CREB/ATF bZIP transcription factor
hsa-miR-567	1	0	1	1	1	1	CDC42	cell division cycle 42 (GTP binding protein, 25kDa)
hsa-miR-567	1	0	1	1	1	1	MLLT4	myeloid/lymphoid or mixed-lineage leukemia (trithorax homolog, Drosophila); translocated to, 4
hsa-miR-567	0	0	1	0	1	1	SCN3B	sodium channel, voltage-gated, type III, beta subunit
hsa-miR-567	0	0	1	0	1	1	STEAP2	STEAP family member 2, metalloreductase
hsa-miR-567	1	0	1	1	1	1	HMGCLL1	3-hydroxymethyl-3-methylglutaryl-CoA lyase-like 1
hsa-miR-567	1	0	1	1	1	1	RUFY2	RUN and FYVE domain containing 2
hsa-miR-567	0	0	1	1	1	1	MST4	serine/threonine protein kinase MST4
hsa-miR-567	0	0	1	1	1	1	C6orf162	chromosome 6 open reading frame 162
hsa-miR-567	1	0	1	1	1	1	DIAPH3	diaphanous homolog 3 (Drosophila)
hsa-miR-567	1	0	1	1	1	1	FRS2	fibroblast growth factor receptor substrate 2
hsa-miR-567	1	0	1	1	1	1	KDM5A	lysine (K)-specific demethylase 5A
hsa-miR-567	1	0	1	1	1	1	IRF2BP2	interferon regulatory factor 2 binding protein 2
hsa-miR-567	0	0	1	0	1	1	WTH3DI	RAB6C-like
hsa-miR-567	0	0	1	1	1	1	VCAM1	vascular cell adhesion molecule 1
hsa-miR-567	1	0	1	0	1	1	THSD7B	thrombospondin, type I, domain containing 7B
hsa-miR-567	0	0	1	1	1	1	HSF5	heat shock transcription factor family member 5
hsa-miR-567	1	0	1	0	1	1	ODZ3	odz, odd Oz/ten-m homolog 3 (Drosophila)
hsa-miR-567	0	0	1	0	1	1	WIPF3	WAS/WASL interacting protein family, member 3
hsa-miR-567	1	0	1	1	1	1	REPS2	RALBP1 associated Eps domain containing 2
hsa-miR-567	1	0	1	1	1	1	APAF1	apoptotic peptidase activating factor 1
hsa-miR-567	1	0	1	0	1	1	BMPR2	bone morphogenetic protein receptor, type II (serine/threonine kinase)
hsa-miR-567	1	0	1	0	1	1	KLF9	Kruppel-like factor 9
hsa-miR-567	1	0	1	1	1	1	CDH13	cadherin 13, H-cadherin (heart)
hsa-miR-567	1	0	1	0	1	1	CDK6	cyclin-dependent kinase 6
hsa-miR-567	0	0	1	1	1	1	CHUK	conserved helix-loop-helix ubiquitous kinase
hsa-miR-567	0	0	1	1	1	1	CCR1	chemokine (C-C motif) receptor 1
hsa-miR-567	1	0	1	0	1	1	CPD	carboxypeptidase D
hsa-miR-567	1	0	1	1	1	1	CREBL2	cAMP responsive element binding protein-like 2
hsa-miR-567	1	0	1	1	1	1	CTNND2	catenin (cadherin-associated protein), delta 2
hsa-miR-567	1	0	1	1	1	1	S1PR1	sphingosine-1-phosphate receptor 1
hsa-miR-567	0	0	1	0	1	1	EMP1	epithelial membrane protein 1
hsa-miR-567	1	0	1	1	1	1	EN2	engrailed homeobox 2
hsa-miR-567	1	0	1	1	1	1	FOXC1	forkhead box C1
hsa-miR-567	0	0	1	1	1	1	FRZB	frizzled-related protein
hsa-miR-567	0	0	1	1	1	1	IL13RA1	interleukin 13 receptor, alpha 1
hsa-miR-567	0	0	1	1	1	1	AOAH	acyloxyacyl hydrolase (neutrophil)
hsa-miR-567	1	0	1	1	1	1	APLP2	amyloid beta (A4) precursor-like protein 2
hsa-miR-567	1	0	1	1	1	1	BAAT	bile acid CoA: amino acid N-acyltransferase (glycine N-choloyltransferase)
hsa-miR-567	0	0	1	1	0	0	C5	complement component 5
hsa-miR-567	1	0	1	1	1	1	CBFB	core-binding factor, beta subunit
hsa-miR-567	1	0	1	0	1	1	CHML	choroideremia-like (Rab escort protein 2)
hsa-miR-567	1	0	1	1	1	1	COL15A1	collagen, type XV, alpha 1
hsa-miR-567	1	0	1	1	1	1	CSNK1D	casein kinase 1, delta
hsa-miR-567	1	0	1	1	1	1	EGR1	early growth response 1
hsa-miR-567	1	0	1	1	1	1	FGF7	fibroblast growth factor 7
hsa-miR-567	1	0	1	0	1	1	FUT4	fucosyltransferase 4 (alpha (1,3) fucosyltransferase, myeloid-specific)
hsa-miR-567	0	0	1	1	1	1	GTF2E2	general transcription factor IIE, polypeptide 2, beta 34kDa
hsa-miR-567	0	0	1	1	1	1	IL17A	interleukin 17A
hsa-miR-567	1	0	1	1	1	1	KPNA3	karyopherin alpha 3 (importin alpha 4)
hsa-miR-567	1	0	1	1	1	1	KPNA4	karyopherin alpha 4 (importin alpha 3)
hsa-miR-567	1	0	1	1	1	1	LIFR	leukemia inhibitory factor receptor alpha
hsa-miR-567	0	0	1	0	1	1	CXCL9	chemokine (C-X-C motif) ligand 9
hsa-miR-567	1	0	1	1	1	1	MSN	moesin
hsa-miR-567	1	0	1	1	1	1	PPP1R12B	protein phosphatase 1, regulatory subunit 12B
hsa-miR-567	1	0	1	1	1	1	NEUROD1	neuronal differentiation 1
hsa-miR-567	0	0	1	1	1	1	NID1	nidogen 1
hsa-miR-567	1	0	1	1	1	1	TNFRSF11B	tumor necrosis factor receptor superfamily, member 11b
hsa-miR-567	0	0	1	0	1	1	OPHN1	oligophrenin 1
hsa-miR-567	1	0	1	1	1	1	PAWR	PRKC, apoptosis, WT1, regulator
hsa-miR-567	0	0	1	1	1	1	PDE7A	phosphodiesterase 7A
hsa-miR-567	1	0	1	1	1	1	PHB	prohibitin
hsa-miR-567	1	0	1	1	1	1	PPP1CB	protein phosphatase 1, catalytic subunit, beta isozyme
hsa-miR-567	1	0	1	1	1	1	PRKAR2B	protein kinase, cAMP-dependent, regulatory, type II, beta
hsa-miR-567	0	0	1	1	1	1	PRKCB	protein kinase C, beta
hsa-miR-567	1	0	1	1	1	1	PRPS1	phosphoribosyl pyrophosphate synthetase 1
hsa-miR-567	1	0	1	0	1	1	RAB6A	RAB6A, member RAS oncogene family
hsa-miR-567	1	0	1	1	1	1	RAD23B	RAD23 homolog B (S. cerevisiae)
hsa-miR-567	1	0	1	1	1	1	RASA1	RAS p21 protein activator (GTPase activating protein) 1
hsa-miR-567	1	0	1	1	0	0	CCL3	chemokine (C-C motif) ligand 3
hsa-miR-567	0	0	1	1	1	1	SDC2	syndecan 2
hsa-miR-567	1	0	1	1	1	1	SMARCC1	SWI/SNF related, matrix associated, actin dependent regulator of chromatin, subfamily c, member 1
hsa-miR-567	1	0	1	1	1	1	SRF	serum response factor (c-fos serum response element-binding transcription factor)
hsa-miR-567	1	0	1	1	1	1	NR2E1	nuclear receptor subfamily 2, group E, member 1
hsa-miR-567	0	0	1	1	1	1	TRAF3	TNF receptor-associated factor 3
hsa-miR-567	1	0	1	1	1	1	UBE2B	ubiquitin-conjugating enzyme E2B
hsa-miR-567	1	0	1	1	1	1	UBE2N	ubiquitin-conjugating enzyme E2N
hsa-miR-567	0	0	1	1	1	1	XPNPEP2	X-prolyl aminopeptidase (aminopeptidase P) 2, membrane-bound
hsa-miR-567	1	0	1	1	1	1	KCNAB1	potassium voltage-gated channel, shaker-related subfamily, beta member 1
hsa-miR-567	1	0	1	1	1	1	DEK	DEK oncogene
hsa-miR-567	1	0	1	0	1	1	VAPA	VAMP (vesicle-associated membrane protein)-associated protein A, 33kDa
hsa-miR-567	1	0	1	1	1	1	B3GALT2	UDP-Gal:betaGlcNAc beta 1,3-galactosyltransferase, polypeptide 2
hsa-miR-567	1	0	1	1	1	1	MBTPS1	membrane-bound transcription factor peptidase, site 1
hsa-miR-567	0	0	1	1	0	0	ADAM23	ADAM metallopeptidase domain 23
hsa-miR-567	0	0	1	1	1	1	TRIM24	tripartite motif containing 24
hsa-miR-567	0	0	1	1	1	1	HERC1	HECT and RLD domain containing E3 ubiquitin protein ligase family member 1
hsa-miR-567	1	0	1	0	1	1	ST13	suppression of tumorigenicity 13 (colon carcinoma) (Hsp70 interacting protein)
hsa-miR-567	0	0	1	1	1	1	UBA3	ubiquitin-like modifier activating enzyme 3
hsa-miR-567	1	0	1	1	1	1	BTAF1	BTAF1 RNA polymerase II, B-TFIID transcription factor-associated, 170kDa (Mot1 homolog, S. cerevisiae)
hsa-miR-567	1	0	1	1	1	1	FGF13	fibroblast growth factor 13
hsa-miR-567	1	0	1	1	1	1	GMFB	glia maturation factor, beta
hsa-miR-567	0	0	1	0	1	1	HABP2	hyaluronan binding protein 2
hsa-miR-567	1	0	1	0	1	1	IREB2	iron-responsive element binding protein 2
hsa-miR-567	1	0	1	0	1	1	SLC1A2	solute carrier family 1 (glial high affinity glutamate transporter), member 2
hsa-miR-567	0	0	1	1	1	1	SLC28A1	solute carrier family 28 (sodium-coupled nucleoside transporter), member 1
hsa-miR-567	1	0	1	1	1	1	SOCS6	suppressor of cytokine signaling 6
hsa-miR-567	0	0	1	1	1	1	TRIP13	thyroid hormone receptor interactor 13
hsa-miR-567	1	0	1	1	1	1	ARL3	ADP-ribosylation factor-like 3
hsa-miR-567	1	0	1	1	1	1	BNIP2	BCL2/adenovirus E1B 19kDa interacting protein 2
hsa-miR-567	1	0	1	1	1	1	DACH1	dachshund homolog 1 (Drosophila)
hsa-miR-567	1	0	1	1	1	1	DAG1	dystroglycan 1 (dystrophin-associated glycoprotein 1)
hsa-miR-567	1	0	1	1	1	1	DLX2	distal-less homeobox 2
hsa-miR-567	1	0	1	1	1	1	DUSP1	dual specificity phosphatase 1
hsa-miR-567	1	0	1	1	1	1	DUSP8	dual specificity phosphatase 8
hsa-miR-567	1	0	1	1	1	1	EGR3	early growth response 3
hsa-miR-567	1	0	1	0	1	1	FGF5	fibroblast growth factor 5
hsa-miR-567	0	0	1	1	1	1	GPC5	glypican 5
hsa-miR-567	0	0	1	1	1	1	MGAM	maltase-glucoamylase (alpha-glucosidase)
hsa-miR-567	0	0	1	1	1	1	LATS1	LATS, large tumor suppressor, homolog 1 (Drosophila)
hsa-miR-567	0	0	1	1	1	1	KCNAB3	potassium voltage-gated channel, shaker-related subfamily, beta member 3
hsa-miR-567	0	0	1	1	1	1	CALB1	calbindin 1, 28kDa
hsa-miR-567	0	0	1	1	1	1	DSC1	desmocollin 1
hsa-miR-567	1	0	1	0	1	1	KRAS	v-Ki-ras2 Kirsten rat sarcoma viral oncogene homolog
hsa-miR-567	1	0	1	0	1	1	SCD	stearoyl-CoA desaturase (delta-9-desaturase)
hsa-miR-567	1	0	1	0	1	1	SEL1L	sel-1 suppressor of lin-12-like (C. elegans)
hsa-miR-567	1	0	1	1	1	1	GFPT2	glutamine-fructose-6-phosphate transaminase 2
hsa-miR-567	1	0	1	0	1	1	NUP153	nucleoporin 153kDa
hsa-miR-567	0	0	1	1	1	1	ABCD2	ATP-binding cassette, sub-family D (ALD), member 2
hsa-miR-567	1	0	1	1	1	1	DCC	deleted in colorectal carcinoma
hsa-miR-567	1	0	1	0	1	1	E2F1	E2F transcription factor 1
hsa-miR-567	0	0	1	0	1	1	EPHA3	EPH receptor A3
hsa-miR-567	0	0	1	1	1	1	MSTN	myostatin
hsa-miR-567	1	0	1	1	1	1	PDCL	phosducin-like
hsa-miR-567	1	0	1	1	1	1	ROCK1	Rho-associated, coiled-coil containing protein kinase 1
hsa-miR-567	1	0	1	1	0	0	SALL2	sal-like 2 (Drosophila)
hsa-miR-567	0	0	1	0	0	0	TNP2	transition protein 2 (during histone to protamine replacement)
hsa-miR-567	1	0	1	0	1	1	CCDC6	coiled-coil domain containing 6
hsa-miR-567	1	0	1	1	1	1	RND2	Rho family GTPase 2
hsa-miR-567	1	0	1	0	0	0	FRAT1	frequently rearranged in advanced T-cell lymphomas
hsa-miR-567	1	0	1	1	1	1	PIGK	phosphatidylinositol glycan anchor biosynthesis, class K
hsa-miR-567	1	0	1	1	1	1	HOXA1	homeobox A1
hsa-miR-567	1	0	1	1	1	1	LAMC2	laminin, gamma 2
hsa-miR-567	1	0	1	1	1	1	EVI5	ecotropic viral integration site 5
hsa-miR-567	1	0	1	1	1	1	UST	uronyl-2-sulfotransferase
hsa-miR-567	1	0	1	1	1	1	NAMPT	nicotinamide phosphoribosyltransferase
hsa-miR-567	1	0	1	1	1	1	LHFP	lipoma HMGIC fusion partner
hsa-miR-567	0	0	1	1	1	1	TXNDC9	thioredoxin domain containing 9
hsa-miR-567	0	0	1	1	1	1	KLRG1	killer cell lectin-like receptor subfamily G, member 1
hsa-miR-567	0	0	1	1	1	1	SAP18	Sin3A-associated protein, 18kDa
hsa-miR-567	1	0	1	1	1	1	GOLGA3	golgin A3
hsa-miR-567	1	0	1	1	1	1	MAT2A	methionine adenosyltransferase II, alpha
hsa-miR-567	1	0	1	1	1	1	MMP16	matrix metallopeptidase 16 (membrane-inserted)
hsa-miR-567	1	0	1	0	1	1	NAB1	NGFI-A binding protein 1 (EGR1 binding protein 1)
hsa-miR-567	1	0	1	1	1	1	PRCC	papillary renal cell carcinoma (translocation-associated)
hsa-miR-567	0	0	1	1	1	1	LANCL1	LanC lantibiotic synthetase component C-like 1 (bacterial)
hsa-miR-567	0	0	1	1	1	1	TRDN	triadin
hsa-miR-567	1	0	1	1	1	1	NEUROD2	neuronal differentiation 2
hsa-miR-567	0	0	1	1	1	1	NTS	neurotensin
hsa-miR-567	0	0	1	1	1	1	SLC30A9	solute carrier family 30 (zinc transporter), member 9
hsa-miR-567	0	0	1	1	1	1	FST	follistatin
hsa-miR-567	1	0	1	1	1	1	SEC23A	Sec23 homolog A (S. cerevisiae)
hsa-miR-567	1	0	1	1	1	1	NEBL	nebulette
hsa-miR-567	0	0	1	1	1	1	CLCA2	chloride channel accessory 2
hsa-miR-567	1	0	1	1	1	1	CTCF	CCCTC-binding factor (zinc finger protein)
hsa-miR-567	1	0	1	1	1	1	DCTN6	dynactin 6
hsa-miR-567	1	0	1	1	1	1	B3GNT2	UDP-GlcNAc:betaGal beta-1,3-N-acetylglucosaminyltransferase 2
hsa-miR-567	1	0	1	1	1	1	CORIN	corin, serine peptidase
hsa-miR-567	1	0	1	1	1	1	RBBP9	retinoblastoma binding protein 9
hsa-miR-567	1	0	1	1	1	1	PGRMC1	progesterone receptor membrane component 1
hsa-miR-567	0	0	1	1	1	1	LYVE1	lymphatic vessel endothelial hyaluronan receptor 1
hsa-miR-567	1	0	1	1	1	1	SNTB2	syntrophin, beta 2 (dystrophin-associated protein A1, 59kDa, basic component 2)
hsa-miR-567	1	0	1	0	1	1	TCEA1	transcription elongation factor A (SII), 1
hsa-miR-567	1	0	1	1	1	1	BTG2	BTG family, member 2
hsa-miR-567	1	0	1	1	1	1	ZBTB33	zinc finger and BTB domain containing 33
hsa-miR-567	1	0	1	1	1	1	PRDX3	peroxiredoxin 3
hsa-miR-567	1	0	1	1	1	1	CBX1	chromobox homolog 1
hsa-miR-567	1	0	1	1	1	1	PRRX1	paired related homeobox 1
hsa-miR-567	1	0	1	1	1	1	SRP72	signal recognition particle 72kDa
hsa-miR-567	1	0	1	1	1	1	NR4A3	nuclear receptor subfamily 4, group A, member 3
hsa-miR-567	1	0	1	1	1	1	ADAMTS1	ADAM metallopeptidase with thrombospondin type 1 motif, 1
hsa-miR-567	0	0	1	1	0	0	UPK1A	uroplakin 1A
hsa-miR-567	1	0	1	1	1	1	WWP1	WW domain containing E3 ubiquitin protein ligase 1
hsa-miR-567	1	0	1	1	1	1	SOX30	SRY (sex determining region Y)-box 30
hsa-miR-567	1	0	1	1	1	1	RAPGEF4	Rap guanine nucleotide exchange factor (GEF) 4
hsa-miR-567	1	0	1	1	1	1	ADAMTS5	ADAM metallopeptidase with thrombospondin type 1 motif, 5
hsa-miR-567	1	0	1	1	1	1	UTY	ubiquitously transcribed tetratricopeptide repeat gene, Y-linked
hsa-miR-567	1	0	1	1	1	1	VEZF1	vascular endothelial zinc finger 1
hsa-miR-567	1	0	1	1	1	1	CA5B	carbonic anhydrase VB, mitochondrial
hsa-miR-567	1	0	1	0	1	1	CHP1	calcineurin-like EF hand protein 1
hsa-miR-567	1	0	1	1	1	1	KLF12	Kruppel-like factor 12
hsa-miR-567	0	0	1	1	1	1	KLF8	Kruppel-like factor 8
hsa-miR-567	0	0	1	0	1	1	AP4E1	adaptor-related protein complex 4, epsilon 1 subunit
hsa-miR-567	0	0	1	0	1	1	PAXIP1	PAX interacting (with transcription-activation domain) protein 1
hsa-miR-567	1	0	1	1	1	1	ELL2	elongation factor, RNA polymerase II, 2
hsa-miR-567	1	0	1	1	1	1	HEY2	hairy/enhancer-of-split related with YRPW motif 2
hsa-miR-567	1	0	1	0	1	1	BLOC1S6	biogenesis of lysosomal organelles complex-1, subunit 6, pallidin
hsa-miR-567	0	0	1	0	1	1	PITPNC1	phosphatidylinositol transfer protein, cytoplasmic 1
hsa-miR-567	0	0	1	0	1	1	TLL1	tolloid-like 1
hsa-miR-567	0	0	1	1	1	1	N6AMT1	N-6 adenine-specific DNA methyltransferase 1 (putative)
hsa-miR-567	0	0	1	1	1	1	SCG3	secretogranin III
hsa-miR-567	1	0	1	0	1	1	TRHDE	thyrotropin-releasing hormone degrading enzyme
hsa-miR-567	1	0	1	1	1	1	NCKAP1	NCK-associated protein 1
hsa-miR-567	1	0	1	1	1	1	LRP12	low density lipoprotein receptor-related protein 12
hsa-miR-567	0	0	1	1	1	1	UBQLN1	ubiquilin 1
hsa-miR-567	1	0	1	1	1	1	WDR37	WD repeat domain 37
hsa-miR-567	1	0	1	1	1	1	KLF15	Kruppel-like factor 15
hsa-miR-567	0	0	1	1	1	1	CCDC113	coiled-coil domain containing 113
hsa-miR-567	0	0	1	0	1	1	SCN8A	sodium channel, voltage gated, type VIII, alpha subunit
hsa-miR-567	0	0	1	1	1	1	TM4SF1	transmembrane 4 L six family member 1
hsa-miR-567	0	0	1	1	1	1	UBL4A	ubiquitin-like 4A
hsa-miR-567	1	0	1	0	1	1	ODZ1	odz, odd Oz/ten-m homolog 1 (Drosophila)
hsa-miR-567	0	0	1	1	1	1	PLK4	polo-like kinase 4
hsa-miR-567	1	0	1	1	1	1	MAPRE2	microtubule-associated protein, RP/EB family, member 2
hsa-miR-567	0	0	1	1	1	1	IL1RAPL1	interleukin 1 receptor accessory protein-like 1
hsa-miR-567	0	0	1	1	1	1	HSPA4L	heat shock 70kDa protein 4-like
hsa-miR-567	0	0	1	1	0	0	OLFM1	olfactomedin 1
hsa-miR-567	0	0	1	1	1	1	DNAJC8	DnaJ (Hsp40) homolog, subfamily C, member 8
hsa-miR-567	0	0	1	1	1	1	TRAM1	translocation associated membrane protein 1
hsa-miR-567	1	0	1	1	1	1	SLC7A11	solute carrier family 7 (anionic amino acid transporter light chain, xc- system), member 11
hsa-miR-567	1	0	1	1	1	1	LHX6	LIM homeobox 6
hsa-miR-567	1	0	1	0	1	1	RNF11	ring finger protein 11
hsa-miR-567	1	0	1	1	1	1	AFF4	AF4/FMR2 family, member 4
hsa-miR-567	1	0	1	1	1	1	PDCD4	programmed cell death 4 (neoplastic transformation inhibitor)
hsa-miR-567	1	0	1	1	1	1	ERO1L	ERO1-like (S. cerevisiae)
hsa-miR-567	0	0	1	1	1	1	SOX8	SRY (sex determining region Y)-box 8
hsa-miR-567	1	0	1	1	1	1	GCC2	GRIP and coiled-coil domain containing 2
hsa-miR-567	1	0	1	0	1	1	BZW1	basic leucine zipper and W2 domains 1
hsa-miR-567	1	0	1	1	1	1	MRPL19	mitochondrial ribosomal protein L19
hsa-miR-567	1	0	1	1	1	1	ARHGEF11	Rho guanine nucleotide exchange factor (GEF) 11
hsa-miR-567	1	0	1	1	1	1	TBC1D4	TBC1 domain family, member 4
hsa-miR-567	1	0	1	0	1	1	LPPR4	lipid phosphate phosphatase-related protein type 4
hsa-miR-567	1	0	1	0	1	1	PDAP1	PDGFA associated protein 1
hsa-miR-567	1	0	1	1	1	1	RALGAPA1	Ral GTPase activating protein, alpha subunit 1 (catalytic)
hsa-miR-567	1	0	1	0	1	1	WDFY3	WD repeat and FYVE domain containing 3
hsa-miR-567	1	0	1	1	1	1	STK38L	serine/threonine kinase 38 like
hsa-miR-567	0	0	1	1	0	0	DOPEY1	dopey family member 1
hsa-miR-567	1	0	1	0	1	1	PDS5B	PDS5, regulator of cohesion maintenance, homolog B (S. cerevisiae)
hsa-miR-567	1	0	1	1	1	1	TRAK2	trafficking protein, kinesin binding 2
hsa-miR-567	1	0	1	1	1	1	ERP44	endoplasmic reticulum protein 44
hsa-miR-567	0	0	1	1	0	0	AVL9	AVL9 homolog (S. cerevisiase)
hsa-miR-567	1	0	1	1	1	1	RTF1	Rtf1, Paf1/RNA polymerase II complex component, homolog (S. cerevisiae)
hsa-miR-567	1	0	1	1	1	1	PRRC2C	proline-rich coiled-coil 2C
hsa-miR-567	1	0	1	1	1	1	ANKS1A	ankyrin repeat and sterile alpha motif domain containing 1A
hsa-miR-567	0	0	1	1	1	1	ADNP	activity-dependent neuroprotector homeobox
hsa-miR-567	0	0	1	1	1	1	LEPROTL1	leptin receptor overlapping transcript-like 1
hsa-miR-567	1	0	1	1	1	1	MOB4	MOB family member 4, phocein
hsa-miR-567	1	0	1	1	1	1	PARM1	prostate androgen-regulated mucin-like protein 1
hsa-miR-567	0	0	1	1	1	1	ZNF10	zinc finger protein 10
hsa-miR-567	1	0	1	0	1	1	PPP1R16B	protein phosphatase 1, regulatory subunit 16B
hsa-miR-567	1	0	1	1	1	1	WSB1	WD repeat and SOCS box containing 1
hsa-miR-567	1	0	1	0	1	1	WWC3	WWC family member 3
hsa-miR-567	1	0	1	0	1	1	RRM2B	ribonucleotide reductase M2 B (TP53 inducible)
hsa-miR-567	1	0	1	1	1	1	CDC40	cell division cycle 40 homolog (S. cerevisiae)
hsa-miR-567	1	0	1	1	1	1	RRP15	ribosomal RNA processing 15 homolog (S. cerevisiae)
hsa-miR-567	1	0	1	1	1	1	GOLT1B	golgi transport 1B
hsa-miR-567	1	0	1	0	1	1	CNR1	cannabinoid receptor 1 (brain)
hsa-miR-567	0	0	1	1	1	1	NAA20	N(alpha)-acetyltransferase 20, NatB catalytic subunit
hsa-miR-567	1	0	1	1	1	1	VGLL3	vestigial like 3 (Drosophila)
hsa-miR-567	1	0	1	1	1	1	RNF138	ring finger protein 138, E3 ubiquitin protein ligase
hsa-miR-567	1	0	1	1	1	1	TOB2	transducer of ERBB2, 2
hsa-miR-567	1	0	1	0	1	1	SELT	selenoprotein T
hsa-miR-567	0	0	1	1	1	1	FBXO40	F-box protein 40
hsa-miR-567	0	0	1	1	1	1	RSL24D1	ribosomal L24 domain containing 1
hsa-miR-567	1	0	1	1	1	1	CMPK1	cytidine monophosphate (UMP-CMP) kinase 1, cytosolic
hsa-miR-567	0	0	1	1	1	1	CENPF	centromere protein F, 350/400kDa (mitosin)
hsa-miR-567	0	0	1	1	1	1	UFC1	ubiquitin-fold modifier conjugating enzyme 1
hsa-miR-567	1	0	1	0	1	1	RAB8B	RAB8B, member RAS oncogene family
hsa-miR-567	0	0	1	0	1	1	ERGIC2	ERGIC and golgi 2
hsa-miR-567	1	0	1	1	1	1	UFM1	ubiquitin-fold modifier 1
hsa-miR-567	1	0	1	1	1	1	MEX3C	mex-3 homolog C (C. elegans)
hsa-miR-567	0	0	1	0	1	1	APLN	apelin
hsa-miR-567	1	0	1	0	1	1	KLHL3	kelch-like 3 (Drosophila)
hsa-miR-567	1	0	1	1	1	1	SIX4	SIX homeobox 4
hsa-miR-567	1	0	1	1	1	1	CPSF2	cleavage and polyadenylation specific factor 2, 100kDa
hsa-miR-567	1	0	1	1	1	1	ARID1B	AT rich interactive domain 1B (SWI1-like)
hsa-miR-567	0	0	1	1	1	1	SMG6	smg-6 homolog, nonsense mediated mRNA decay factor (C. elegans)
hsa-miR-567	0	0	1	1	1	1	BHMT2	betaine--homocysteine S-methyltransferase 2
hsa-miR-567	0	0	1	1	1	1	QRICH1	glutamine-rich 1
hsa-miR-567	0	0	1	1	1	1	ANKHD1	ankyrin repeat and KH domain containing 1
hsa-miR-567	1	0	1	1	1	1	ELOVL2	ELOVL fatty acid elongase 2
hsa-miR-567	1	0	1	0	1	1	CMTM6	CKLF-like MARVEL transmembrane domain containing 6
hsa-miR-567	1	0	1	1	1	1	RNF125	ring finger protein 125, E3 ubiquitin protein ligase
hsa-miR-567	0	0	1	1	1	1	TMEM70	transmembrane protein 70
hsa-miR-567	1	0	1	1	1	1	CDC37L1	cell division cycle 37 homolog (S. cerevisiae)-like 1
hsa-miR-567	0	0	1	1	1	1	SCYL2	SCY1-like 2 (S. cerevisiae)
hsa-miR-567	1	0	1	1	1	1	IFT57	intraflagellar transport 57 homolog (Chlamydomonas)
hsa-miR-567	1	0	1	1	1	1	MAGOHB	mago-nashi homolog B (Drosophila)
hsa-miR-567	0	0	1	1	1	1	AKIRIN2	akirin 2
hsa-miR-567	1	0	1	1	1	1	TMEM33	transmembrane protein 33
hsa-miR-567	0	0	1	1	1	1	NUDT11	nudix (nucleoside diphosphate linked moiety X)-type motif 11
hsa-miR-567	0	0	1	1	1	1	TMLHE	trimethyllysine hydroxylase, epsilon
hsa-miR-567	1	0	1	0	1	1	PARVA	parvin, alpha
hsa-miR-567	1	0	1	1	1	1	C9orf72	chromosome 9 open reading frame 72
hsa-miR-567	1	0	1	1	1	1	AGPAT5	1-acylglycerol-3-phosphate O-acyltransferase 5 (lysophosphatidic acid acyltransferase, epsilon)
hsa-miR-567	0	0	1	0	0	0	CACNA2D3	calcium channel, voltage-dependent, alpha 2/delta subunit 3
hsa-miR-567	1	0	1	1	1	1	EPB41L4B	erythrocyte membrane protein band 4.1 like 4B
hsa-miR-567	1	0	1	1	1	1	PAG1	phosphoprotein associated with glycosphingolipid microdomains 1
hsa-miR-567	1	0	1	0	1	1	BRK1	BRICK1, SCAR/WAVE actin-nucleating complex subunit
hsa-miR-567	0	0	1	1	1	1	CISD1	CDGSH iron sulfur domain 1
hsa-miR-567	1	0	1	0	1	1	LRP1B	low density lipoprotein receptor-related protein 1B
hsa-miR-567	1	0	1	1	1	1	CTTNBP2NL	CTTNBP2 N-terminal like
hsa-miR-567	1	0	1	0	1	1	ELMOD1	ELMO/CED-12 domain containing 1
hsa-miR-567	1	0	1	0	1	1	MAML3	mastermind-like 3 (Drosophila)
hsa-miR-567	0	0	1	1	1	1	ERRFI1	ERBB receptor feedback inhibitor 1
hsa-miR-567	0	0	1	1	0	0	TOMM7	translocase of outer mitochondrial membrane 7 homolog (yeast)
hsa-miR-567	0	0	1	1	1	1	TRMT13	tRNA methyltransferase 13 homolog (S. cerevisiae)
hsa-miR-567	1	0	1	0	1	1	CCNJ	cyclin J
hsa-miR-567	1	0	1	1	1	1	ANKRD50	ankyrin repeat domain 50
hsa-miR-567	1	0	1	0	1	1	EIF5A2	eukaryotic translation initiation factor 5A2
hsa-miR-567	0	0	1	1	1	1	ZNF695	zinc finger protein 695
hsa-miR-567	0	0	1	1	1	1	PLXDC1	plexin domain containing 1
hsa-miR-567	0	0	1	1	1	1	TCL6	T-cell leukemia/lymphoma 6 (non-protein coding)
hsa-miR-567	1	0	1	1	1	1	RAB22A	RAB22A, member RAS oncogene family
hsa-miR-567	0	0	1	1	1	1	SHROOM4	shroom family member 4
hsa-miR-567	1	0	1	1	1	1	RNF150	ring finger protein 150
hsa-miR-567	1	0	1	0	1	1	NUFIP2	nuclear fragile X mental retardation protein interacting protein 2
hsa-miR-567	1	0	1	1	1	1	MIB1	mindbomb E3 ubiquitin protein ligase 1
hsa-miR-567	1	0	1	1	1	1	SEMA6A	sema domain, transmembrane domain (TM), and cytoplasmic domain, (semaphorin) 6A
hsa-miR-567	0	0	1	1	1	1	ARRDC3	arrestin domain containing 3
hsa-miR-567	1	0	1	1	1	1	KLHL14	kelch-like 14 (Drosophila)
hsa-miR-567	1	0	1	1	1	1	SIPA1L2	signal-induced proliferation-associated 1 like 2
hsa-miR-567	1	0	1	1	1	1	ARHGAP21	Rho GTPase activating protein 21
hsa-miR-567	0	0	1	1	1	1	KLHL1	kelch-like 1 (Drosophila)
hsa-miR-567	1	0	1	0	1	1	GPAM	glycerol-3-phosphate acyltransferase, mitochondrial
hsa-miR-567	1	0	1	1	1	1	ALS2	amyotrophic lateral sclerosis 2 (juvenile)
hsa-miR-567	1	0	1	1	1	1	FAM160B1	family with sequence similarity 160, member B1
hsa-miR-567	1	0	1	1	1	1	RET	ret proto-oncogene
hsa-miR-567	0	0	1	1	0	0	CCL3L1	chemokine (C-C motif) ligand 3-like 1
hsa-miR-567	1	0	1	1	1	1	HCN1	hyperpolarization activated cyclic nucleotide-gated potassium channel 1
hsa-miR-567	0	0	1	0	1	1	SLC30A1	solute carrier family 30 (zinc transporter), member 1
hsa-miR-567	1	0	1	1	1	1	NTN4	netrin 4
hsa-miR-567	1	0	1	1	1	1	FAM60A	family with sequence similarity 60, member A
hsa-miR-567	1	0	1	1	1	1	SENP2	SUMO1/sentrin/SMT3 specific peptidase 2
hsa-miR-567	1	0	1	1	1	1	TRIB2	tribbles homolog 2 (Drosophila)
hsa-miR-567	0	0	1	0	1	1	SPCS3	signal peptidase complex subunit 3 homolog (S. cerevisiae)
hsa-miR-567	1	0	1	0	1	1	MCL1	myeloid cell leukemia sequence 1 (BCL2-related)
hsa-miR-567	1	0	1	1	1	1	SEC24A	SEC24 family, member A (S. cerevisiae)
hsa-miR-567	1	0	1	1	1	1	TIA1	TIA1 cytotoxic granule-associated RNA binding protein
hsa-miR-567	1	0	1	0	1	1	CSNK1G1	casein kinase 1, gamma 1
hsa-miR-567	0	0	1	1	0	0	ABHD4	abhydrolase domain containing 4
hsa-miR-567	1	0	1	0	1	1	GREM2	gremlin 2
hsa-miR-567	1	0	1	1	1	1	NDRG3	NDRG family member 3
hsa-miR-567	1	0	1	0	1	1	MRPS25	mitochondrial ribosomal protein S25
hsa-miR-567	1	0	1	0	1	1	DNMT3A	DNA (cytosine-5-)-methyltransferase 3 alpha
hsa-miR-567	1	0	1	0	1	1	HOXC8	homeobox C8
hsa-miR-567	1	0	1	1	1	1	NEUROD6	neuronal differentiation 6
hsa-miR-567	0	0	1	1	1	1	OSBPL11	oxysterol binding protein-like 11
hsa-miR-567	1	0	1	1	1	1	YTHDC2	YTH domain containing 2
hsa-miR-567	0	0	1	0	1	1	LRRC19	leucine rich repeat containing 19
hsa-miR-567	1	0	1	1	1	1	REEP1	receptor accessory protein 1
hsa-miR-567	0	0	1	1	1	1	HTR5A	5-hydroxytryptamine (serotonin) receptor 5A, G protein-coupled
hsa-miR-567	0	0	1	0	1	1	MRP63	mitochondrial ribosomal protein 63
hsa-miR-567	0	0	1	0	1	1	TRPM8	transient receptor potential cation channel, subfamily M, member 8
hsa-miR-567	1	0	1	0	1	1	NOTCH2	notch 2
hsa-miR-567	0	0	1	1	1	1	PDYN	prodynorphin
hsa-miR-567	1	0	1	1	1	1	NKAIN1	Na+/K+ transporting ATPase interacting 1
hsa-miR-567	0	0	1	1	1	1	STEAP4	STEAP family member 4
hsa-miR-567	1	0	1	0	1	1	ZFHX4	zinc finger homeobox 4
hsa-miR-567	1	0	1	1	1	1	CLMP	CXADR-like membrane protein
hsa-miR-567	0	0	1	1	1	1	ZBTB3	zinc finger and BTB domain containing 3
hsa-miR-567	1	0	1	1	1	1	CPED1	cadherin-like and PC-esterase domain containing 1
hsa-miR-567	1	0	1	1	1	1	POF1B	premature ovarian failure, 1B
hsa-miR-567	1	0	1	1	1	1	NAA50	N(alpha)-acetyltransferase 50, NatE catalytic subunit
hsa-miR-567	0	0	1	0	1	1	PDGFD	platelet derived growth factor D
hsa-miR-567	1	0	1	1	1	1	TNKS2	tankyrase, TRF1-interacting ankyrin-related ADP-ribose polymerase 2
hsa-miR-567	1	0	1	1	1	1	JHDM1D	jumonji C domain containing histone demethylase 1 homolog D (S. cerevisiae)
hsa-miR-567	1	0	1	1	1	1	SYNC	syncoilin, intermediate filament protein
hsa-miR-567	1	0	1	1	1	1	ANKRD13C	ankyrin repeat domain 13C
hsa-miR-567	0	0	1	1	1	1	PLA2G12A	phospholipase A2, group XIIA
hsa-miR-567	1	0	1	0	1	1	LBH	limb bud and heart development homolog (mouse)
hsa-miR-567	0	0	1	0	1	1	PHACTR1	phosphatase and actin regulator 1
hsa-miR-567	0	0	1	1	1	1	SPACA1	sperm acrosome associated 1
hsa-miR-567	0	0	1	1	1	1	SEH1L	SEH1-like (S. cerevisiae)
hsa-miR-567	0	0	1	1	1	1	TEX15	testis expressed 15
hsa-miR-567	0	0	1	1	1	1	CCDC70	coiled-coil domain containing 70
hsa-miR-567	1	0	1	0	1	1	TMEM47	transmembrane protein 47
hsa-miR-567	0	0	1	0	1	1	ENAM	enamelin
hsa-miR-567	1	0	1	1	1	1	SNX25	sorting nexin 25
hsa-miR-567	1	0	1	1	1	1	PATZ1	POZ (BTB) and AT hook containing zinc finger 1
hsa-miR-567	1	0	1	0	1	1	SRSF8	serine/arginine-rich splicing factor 8
hsa-miR-567	0	0	1	0	1	1	RAB6C	RAB6C, member RAS oncogene family
hsa-miR-567	1	0	1	1	1	1	FBXO30	F-box protein 30
hsa-miR-567	0	0	1	1	0	0	ARL6	ADP-ribosylation factor-like 6
hsa-miR-567	1	0	1	1	1	1	DSEL	dermatan sulfate epimerase-like
hsa-miR-567	1	0	1	1	1	1	ARID5B	AT rich interactive domain 5B (MRF1-like)
hsa-miR-567	1	0	1	0	1	1	FAR1	fatty acyl CoA reductase 1
hsa-miR-567	1	0	1	1	1	1	SLITRK6	SLIT and NTRK-like family, member 6
hsa-miR-567	0	0	1	1	1	1	ATP13A4	ATPase type 13A4
hsa-miR-567	0	0	1	0	1	1	LDOC1L	leucine zipper, down-regulated in cancer 1-like
hsa-miR-567	1	0	1	1	1	1	HOOK3	hook homolog 3 (Drosophila)
hsa-miR-567	1	0	1	1	1	1	HIATL1	hippocampus abundant transcript-like 1
hsa-miR-567	1	0	1	0	1	1	GLYR1	glyoxylate reductase 1 homolog (Arabidopsis)
hsa-miR-567	0	0	1	1	1	1	ADTRP	androgen-dependent TFPI-regulating protein
hsa-miR-567	0	0	1	1	1	1	RPUSD4	RNA pseudouridylate synthase domain containing 4
hsa-miR-567	0	0	1	1	1	1	TMEM87B	transmembrane protein 87B
hsa-miR-567	1	0	1	0	1	1	PPP1R15B	protein phosphatase 1, regulatory subunit 15B
hsa-miR-567	1	0	1	1	1	1	CGNL1	cingulin-like 1
hsa-miR-567	1	0	1	1	1	1	RBM17	RNA binding motif protein 17
hsa-miR-567	1	0	1	1	1	1	POLR2C	polymerase (RNA) II (DNA directed) polypeptide C, 33kDa
hsa-miR-567	1	0	1	1	1	1	TRIM5	tripartite motif containing 5
hsa-miR-567	1	0	1	1	1	1	EPT1	ethanolaminephosphotransferase 1 (CDP-ethanolamine-specific)
hsa-miR-567	1	0	1	1	1	1	MAL2	mal, T-cell differentiation protein 2 (gene/pseudogene)
hsa-miR-567	1	0	1	0	1	1	TMEM123	transmembrane protein 123
hsa-miR-567	0	0	1	1	0	0	APOA5	apolipoprotein A-V
hsa-miR-567	1	0	1	1	1	1	NAA15	N(alpha)-acetyltransferase 15, NatA auxiliary subunit
hsa-miR-567	1	0	1	0	1	1	ANTXR2	anthrax toxin receptor 2
hsa-miR-567	1	0	1	1	1	1	SLC44A1	solute carrier family 44, member 1
hsa-miR-567	0	0	1	1	1	1	C14orf126	chromosome 14 open reading frame 126
hsa-miR-567	1	0	1	1	1	1	SPSB4	splA/ryanodine receptor domain and SOCS box containing 4
hsa-miR-567	1	0	1	0	1	1	SOCS4	suppressor of cytokine signaling 4
hsa-miR-567	1	0	1	1	1	1	DYRK1A	dual-specificity tyrosine-(Y)-phosphorylation regulated kinase 1A
hsa-miR-567	0	0	1	1	1	1	KCNG3	potassium voltage-gated channel, subfamily G, member 3
hsa-miR-567	0	0	1	0	1	1	SYNPO2	synaptopodin 2
hsa-miR-567	1	0	1	1	1	1	ADAMTS19	ADAM metallopeptidase with thrombospondin type 1 motif, 19
hsa-miR-567	1	0	1	1	0	0	PYGO2	pygopus homolog 2 (Drosophila)
hsa-miR-567	1	0	1	1	1	1	GLCCI1	glucocorticoid induced transcript 1
hsa-miR-567	0	0	1	1	1	1	PGK2	phosphoglycerate kinase 2
hsa-miR-567	1	0	1	1	1	1	MSI2	musashi homolog 2 (Drosophila)
hsa-miR-567	0	0	1	0	1	1	MYO3B	myosin IIIB
hsa-miR-567	1	0	1	1	1	1	DNER	delta/notch-like EGF repeat containing
hsa-miR-567	0	0	1	1	1	1	PPIL4	peptidylprolyl isomerase (cyclophilin)-like 4
hsa-miR-567	0	0	1	1	1	1	KCNC2	potassium voltage-gated channel, Shaw-related subfamily, member 2
hsa-miR-567	1	0	1	1	1	1	PPTC7	PTC7 protein phosphatase homolog (S. cerevisiae)
hsa-miR-567	1	0	1	1	1	1	FAM91A1	family with sequence similarity 91, member A1
hsa-miR-567	0	0	1	1	1	1	C7orf45	chromosome 7 open reading frame 45
hsa-miR-567	0	0	1	1	1	1	C7orf33	chromosome 7 open reading frame 33
hsa-miR-567	0	0	1	1	1	1	CRYZL1	crystallin, zeta (quinone reductase)-like 1
hsa-miR-567	1	0	1	1	1	1	SGMS1	sphingomyelin synthase 1
hsa-miR-567	1	0	1	1	1	1	UBTD2	ubiquitin domain containing 2
hsa-miR-567	1	0	1	1	1	1	BHLHE22	basic helix-loop-helix family, member e22
hsa-miR-567	1	0	1	1	1	1	FAM123B	family with sequence similarity 123B
hsa-miR-567	0	0	1	1	1	1	CNIH3	cornichon homolog 3 (Drosophila)
hsa-miR-567	0	0	1	0	1	1	HORMAD2	HORMA domain containing 2
hsa-miR-567	0	0	1	1	0	0	C3orf30	chromosome 3 open reading frame 30
hsa-miR-567	1	0	1	1	1	1	C7orf60	chromosome 7 open reading frame 60
hsa-miR-567	1	0	1	0	1	1	MOSPD2	motile sperm domain containing 2
hsa-miR-567	1	0	1	0	1	1	RWDD4	RWD domain containing 4
hsa-miR-567	1	0	1	0	1	1	ST6GALNAC3	ST6 (alpha-N-acetyl-neuraminyl-2,3-beta-galactosyl-1,3)-N-acetylgalactosaminide alpha-2,6-sialyltransferase 3
hsa-miR-567	1	0	1	1	1	1	MAMDC2	MAM domain containing 2
hsa-miR-567	0	0	1	1	1	1	FAM71C	family with sequence similarity 71, member C
hsa-miR-567	1	0	1	0	1	1	ZCCHC24	zinc finger, CCHC domain containing 24
hsa-miR-567	1	0	1	1	1	1	LRIG3	leucine-rich repeats and immunoglobulin-like domains 3
hsa-miR-567	1	0	1	1	1	1	HS6ST3	heparan sulfate 6-O-sulfotransferase 3
hsa-miR-567	1	0	1	1	1	1	C2orf69	chromosome 2 open reading frame 69
hsa-miR-567	1	0	1	1	1	1	CACUL1	CDK2-associated, cullin domain 1
hsa-miR-567	0	0	1	1	0	0	SLC38A6	solute carrier family 38, member 6
hsa-miR-567	1	0	1	1	1	1	RDH10	retinol dehydrogenase 10 (all-trans)
hsa-miR-567	1	0	1	0	1	1	PLEKHH2	pleckstrin homology domain containing, family H (with MyTH4 domain) member 2
hsa-miR-567	0	0	1	1	1	1	REXO1L1	REX1, RNA exonuclease 1 homolog (S. cerevisiae)-like 1
hsa-miR-567	1	0	1	1	1	1	AQP11	aquaporin 11
hsa-miR-567	0	0	1	1	0	0	REM2	RAS (RAD and GEM)-like GTP binding 2
hsa-miR-567	1	0	1	0	1	1	C3orf58	chromosome 3 open reading frame 58
hsa-miR-567	0	0	1	1	1	1	FAM98B	family with sequence similarity 98, member B
hsa-miR-567	0	0	1	1	1	1	CDRT4	CMT1A duplicated region transcript 4
hsa-miR-567	1	0	1	1	1	1	SLC9A9	solute carrier family 9, subfamily A (NHE9, cation proton antiporter 9), member 9
hsa-miR-567	1	0	1	1	1	1	UBR1	ubiquitin protein ligase E3 component n-recognin 1
hsa-miR-567	0	0	1	1	0	0	C12orf60	chromosome 12 open reading frame 60
hsa-miR-567	1	0	1	0	1	1	CCDC71L	coiled-coil domain containing 71-like
hsa-miR-567	1	0	1	1	1	1	ZADH2	zinc binding alcohol dehydrogenase domain containing 2
hsa-miR-567	1	0	1	1	1	1	PPAP2B	phosphatidic acid phosphatase type 2B
hsa-miR-567	1	0	1	1	1	1	LRRTM3	leucine rich repeat transmembrane neuronal 3
hsa-miR-567	0	0	1	1	1	1	SESTD1	SEC14 and spectrin domains 1
hsa-miR-567	0	0	1	1	1	1	ZNF831	zinc finger protein 831
hsa-miR-567	0	0	1	1	1	1	SIRPD	signal-regulatory protein delta
hsa-miR-567	1	0	1	1	1	1	MB21D2	Mab-21 domain containing 2
hsa-miR-567	0	0	1	1	1	1	C4orf26	chromosome 4 open reading frame 26
hsa-miR-567	1	0	1	0	1	1	ARL5B	ADP-ribosylation factor-like 5B
hsa-miR-567	0	0	1	0	1	1	KRT28	keratin 28
hsa-miR-567	0	0	1	1	1	1	CCDC67	coiled-coil domain containing 67
hsa-miR-567	0	0	1	1	1	1	USP12	ubiquitin specific peptidase 12
hsa-miR-567	0	0	1	1	1	1	ZSWIM2	zinc finger, SWIM-type containing 2
hsa-miR-567	0	0	1	0	1	1	VSIG1	V-set and immunoglobulin domain containing 1
hsa-miR-567	1	0	1	0	1	1	RNF144B	ring finger protein 144B
hsa-miR-567	1	0	1	1	1	1	KIF1B	kinesin family member 1B
hsa-miR-567	1	0	1	1	1	1	SPTY2D1	SPT2, Suppressor of Ty, domain containing 1 (S. cerevisiae)
hsa-miR-567	1	0	1	0	1	1	FAM73A	family with sequence similarity 73, member A
hsa-miR-567	1	0	1	0	1	1	ZC3H6	zinc finger CCCH-type containing 6
hsa-miR-567	0	0	1	1	1	1	ZPBP2	zona pellucida binding protein 2
hsa-miR-567	1	0	1	0	1	1	PRICKLE2	prickle homolog 2 (Drosophila)
hsa-miR-567	0	0	1	1	1	1	PTHLH	parathyroid hormone-like hormone
hsa-miR-567	0	0	1	1	1	1	IKBIP	IKBKB interacting protein
hsa-miR-567	0	0	1	1	1	1	AMACR	alpha-methylacyl-CoA racemase
hsa-miR-567	1	0	1	1	1	1	ATRNL1	attractin-like 1
hsa-miR-567	1	0	1	1	1	1	FREM2	FRAS1 related extracellular matrix protein 2
hsa-miR-567	1	0	1	1	1	1	ADAMTSL3	ADAMTS-like 3
hsa-miR-567	0	0	1	0	0	0	MIR155HG	MIR155 host gene (non-protein coding)
hsa-miR-567	0	0	1	0	0	0	TTTY15	testis-specific transcript, Y-linked 15 (non-protein coding)
hsa-miR-567	0	0	1	0	0	0	VENTXP1	VENT homeobox pseudogene 1
hsa-miR-567	0	0	1	0	0	0	SNORA4	small nucleolar RNA, H/ACA box 4
hsa-miR-567	0	0	1	0	0	0	HTR7P1	5-hydroxytryptamine (serotonin) receptor 7 pseudogene 1
hsa-miR-567	0	0	1	0	0	0	TRIM78P	tripartite motif containing 78, pseudogene
hsa-miR-567	0	0	1	0	0	0	RPL29P2	ribosomal protein L29 pseudogene 2
hsa-miR-567	0	0	1	0	0	0	NUDT9P1	nudix (nucleoside diphosphate linked moiety X)-type motif 9 pseudogene 1
hsa-miR-567	0	0	1	0	0	0	TCAM1P	testicular cell adhesion molecule 1 homolog (mouse), pseudogene
hsa-miR-567	0	0	1	0	0	0	SNORA24	small nucleolar RNA, H/ACA box 24
hsa-miR-567	0	0	1	0	0	0	SNORA39	small nucleolar RNA, H/ACA box 39
hsa-miR-567	0	0	1	0	0	0	SNORA45	small nucleolar RNA, H/ACA box 45
hsa-miR-567	0	0	1	0	0	0	SNORD45C	small nucleolar RNA, C/D box 45C
hsa-miR-567	0	0	1	0	0	0	HSP90AB2P	heat shock protein 90kDa alpha (cytosolic), class B member 2, pseudogene
hsa-miR-567	0	0	1	0	0	0	USP32P1	ubiquitin specific peptidase 32 pseudogene 1
hsa-miR-567	1	0	1	1	1	1	FGFR2	fibroblast growth factor receptor 2
hsa-miR-567	1	0	1	1	1	1	TRIO	trio Rho guanine nucleotide exchange factor
hsa-miR-567	0	0	1	1	1	1	CD84	CD84 molecule
hsa-miR-567	0	0	1	1	0	0	GPR17	G protein-coupled receptor 17
hsa-miR-567	0	0	0	1	0	0	PRR5-ARHGAP8	PRR5-ARHGAP8 readthrough
hsa-miR-567	0	0	1	1	0	0	PRR5	proline rich 5 (renal)
hsa-miR-567	0	0	1	1	0	0	ARHGAP8	Rho GTPase activating protein 8
hsa-miR-567	0	0	1	1	1	1	SLC7A9	solute carrier family 7 (glycoprotein-associated amino acid transporter light chain, bo,+ system), member 9
hsa-miR-567	0	0	1	1	1	1	STRAP	serine/threonine kinase receptor associated protein
hsa-miR-567	0	0	1	1	1	1	AP3M2	adaptor-related protein complex 3, mu 2 subunit
hsa-miR-567	0	0	0	1	1	1	PSG6	pregnancy specific beta-1-glycoprotein 6
hsa-miR-567	1	0	1	1	1	1	LYRM2	LYR motif containing 2
hsa-miR-567	0	0	1	1	0	0	NME8	NME/NM23 family member 8
hsa-miR-567	0	0	0	1	0	0	OR1I1	olfactory receptor, family 1, subfamily I, member 1
hsa-miR-567	0	0	0	1	1	1	ADH7	alcohol dehydrogenase 7 (class IV), mu or sigma polypeptide
hsa-miR-567	0	0	0	1	0	0	GSTA3	glutathione S-transferase alpha 3
hsa-miR-567	0	0	1	1	1	1	TMEM14A	transmembrane protein 14A
hsa-miR-567	0	0	1	1	0	0	GSTT2	glutathione S-transferase theta 2
hsa-miR-567	0	0	1	1	1	1	C22orf28	chromosome 22 open reading frame 28
hsa-miR-567	0	0	0	1	0	0	PYGL	phosphorylase, glycogen, liver
hsa-miR-567	0	0	1	1	1	1	VRK1	vaccinia related kinase 1
hsa-miR-567	0	0	0	1	1	1	H2BFWT	H2B histone family, member W, testis-specific
hsa-miR-567	0	0	0	1	1	1	MRPL32	mitochondrial ribosomal protein L32
hsa-miR-567	0	0	0	1	0	0	IBSP	integrin-binding sialoprotein
hsa-miR-567	0	0	1	1	1	1	CXCL6	chemokine (C-X-C motif) ligand 6 (granulocyte chemotactic protein 2)
hsa-miR-567	0	0	1	1	1	1	GAR1	GAR1 ribonucleoprotein homolog (yeast)
hsa-miR-567	0	0	0	1	0	0	DBX1	developing brain homeobox 1
hsa-miR-567	0	0	1	1	0	0	NUP107	nucleoporin 107kDa
hsa-miR-567	1	0	1	1	1	1	SRSF9	serine/arginine-rich splicing factor 9
hsa-miR-567	0	0	1	1	1	1	MRPS30	mitochondrial ribosomal protein S30
hsa-miR-567	0	0	0	1	1	1	PRLR	prolactin receptor
hsa-miR-567	0	0	1	1	0	0	PCDH12	protocadherin 12
hsa-miR-567	0	0	0	1	0	0	BNIP1	BCL2/adenovirus E1B 19kDa interacting protein 1
hsa-miR-567	0	0	0	1	0	0	CYB561D2	cytochrome b-561 domain containing 2
hsa-miR-567	0	0	1	1	0	0	INO80B	INO80 complex subunit B
hsa-miR-567	1	0	1	1	1	1	ORC2	origin recognition complex, subunit 2
hsa-miR-567	0	0	1	1	0	0	CLCA1	chloride channel accessory 1
hsa-miR-567	0	0	1	1	0	0	CCNI	cyclin I
hsa-miR-567	0	0	1	1	1	1	RARRES1	retinoic acid receptor responder (tazarotene induced) 1
hsa-miR-567	1	0	0	1	1	1	CNTRL	centriolin
hsa-miR-567	1	0	1	1	1	1	AFTPH	aftiphilin
hsa-miR-567	0	0	1	1	0	0	LIPF	lipase, gastric
hsa-miR-567	0	0	1	1	0	0	ARMC4	armadillo repeat containing 4
hsa-miR-567	0	0	1	1	0	0	GJB6	gap junction protein, beta 6, 30kDa
hsa-miR-567	0	0	0	1	1	1	RAB9A	RAB9A, member RAS oncogene family
hsa-miR-567	0	0	0	1	0	0	ZNF350	zinc finger protein 350
hsa-miR-567	0	0	1	1	1	1	BMP4	bone morphogenetic protein 4
hsa-miR-567	1	0	1	1	1	1	LAMP5	lysosomal-associated membrane protein family, member 5
hsa-miR-567	0	0	0	1	0	0	PYCARD	PYD and CARD domain containing
hsa-miR-567	0	0	0	1	0	0	OR7A10	olfactory receptor, family 7, subfamily A, member 10
hsa-miR-567	0	0	0	1	1	1	RAC2	ras-related C3 botulinum toxin substrate 2 (rho family, small GTP binding protein Rac2)
hsa-miR-567	0	0	1	1	1	1	PMPCB	peptidase (mitochondrial processing) beta
hsa-miR-567	0	0	0	1	1	1	MTX2	metaxin 2
hsa-miR-567	1	0	1	1	1	1	PIAS1	protein inhibitor of activated STAT, 1
hsa-miR-567	0	0	1	1	1	1	SOX15	SRY (sex determining region Y)-box 15
hsa-miR-567	0	0	0	1	1	1	EAPP	E2F-associated phosphoprotein
hsa-miR-567	0	0	1	1	1	1	PSG2	pregnancy specific beta-1-glycoprotein 2
hsa-miR-567	0	0	1	1	1	1	KRT12	keratin 12
hsa-miR-567	0	0	0	1	1	1	EFCAB4B	EF-hand calcium binding domain 4B
hsa-miR-567	1	0	1	1	1	1	XPO7	exportin 7
hsa-miR-567	0	0	0	1	0	0	NSUN5	NOP2/Sun domain family, member 5
hsa-miR-567	0	0	0	1	0	0	USHBP1	Usher syndrome 1C binding protein 1
hsa-miR-567	0	0	1	1	0	0	HRC	histidine rich calcium binding protein
hsa-miR-567	0	0	0	1	0	0	TNNI2	troponin I type 2 (skeletal, fast)
hsa-miR-567	0	0	0	1	0	0	TUBGCP2	tubulin, gamma complex associated protein 2
hsa-miR-567	0	0	1	1	0	0	FAM153B	family with sequence similarity 153, member B
hsa-miR-567	0	0	0	1	1	1	ZCCHC9	zinc finger, CCHC domain containing 9
hsa-miR-567	0	0	0	1	0	0	PODNL1	podocan-like 1
hsa-miR-567	0	0	1	1	1	1	IGJ	immunoglobulin J polypeptide, linker protein for immunoglobulin alpha and mu polypeptides
hsa-miR-567	0	0	1	1	1	1	HRSP12	heat-responsive protein 12
hsa-miR-567	0	0	1	1	0	0	ZSWIM3	zinc finger, SWIM-type containing 3
hsa-miR-567	0	0	1	1	1	1	USPL1	ubiquitin specific peptidase like 1
hsa-miR-567	0	0	1	1	0	0	CATSPERB	catsper channel auxiliary subunit beta
hsa-miR-567	0	0	1	1	1	1	ATPBD4	ATP binding domain 4
hsa-miR-567	0	0	1	1	1	1	KIAA1009	KIAA1009
hsa-miR-567	0	0	1	1	1	1	PIGC	phosphatidylinositol glycan anchor biosynthesis, class C
hsa-miR-567	0	0	1	1	0	0	CYP27A1	cytochrome P450, family 27, subfamily A, polypeptide 1
hsa-miR-567	1	0	0	1	1	1	TGFBRAP1	transforming growth factor, beta receptor associated protein 1
hsa-miR-567	0	0	1	1	1	1	CHST12	carbohydrate (chondroitin 4) sulfotransferase 12
hsa-miR-567	1	0	1	1	1	1	AKAP2	A kinase (PRKA) anchor protein 2
hsa-miR-567	1	0	1	1	1	1	PALM2	paralemmin 2
hsa-miR-567	1	0	1	1	1	1	PALM2-AKAP2	PALM2-AKAP2 readthrough
hsa-miR-567	0	0	1	1	1	1	HEMGN	hemogen
hsa-miR-567	0	0	0	1	1	1	TLR2	toll-like receptor 2
hsa-miR-567	0	0	1	1	1	1	MMP20	matrix metallopeptidase 20
hsa-miR-567	0	0	1	1	1	1	TTLL7	tubulin tyrosine ligase-like family, member 7
hsa-miR-567	0	0	1	1	1	1	ASUN	asunder, spermatogenesis regulator homolog (Drosphila)
hsa-miR-567	1	0	0	1	1	1	ABCC9	ATP-binding cassette, sub-family C (CFTR/MRP), member 9
hsa-miR-567	0	0	1	1	0	0	PPWD1	peptidylprolyl isomerase domain and WD repeat containing 1
hsa-miR-567	0	0	1	1	1	1	ZNF397	zinc finger protein 397
hsa-miR-567	0	0	1	1	0	0	SNW1	SNW domain containing 1
hsa-miR-567	0	0	1	1	1	1	SPPL2A	signal peptide peptidase like 2A
hsa-miR-567	0	0	1	1	0	0	RBMS2	RNA binding motif, single stranded interacting protein 2
hsa-miR-567	0	0	1	1	1	1	RAB27B	RAB27B, member RAS oncogene family
hsa-miR-567	0	0	1	1	1	1	C16orf80	chromosome 16 open reading frame 80
hsa-miR-567	1	0	1	1	1	1	HACE1	HECT domain and ankyrin repeat containing E3 ubiquitin protein ligase 1
hsa-miR-567	0	0	1	1	1	1	MSH4	mutS homolog 4 (E. coli)
hsa-miR-567	0	0	1	1	1	1	BIRC3	baculoviral IAP repeat containing 3
hsa-miR-567	1	0	1	1	1	1	FNBP4	formin binding protein 4
hsa-miR-567	1	0	1	1	1	1	LRP2	low density lipoprotein receptor-related protein 2
hsa-miR-567	0	0	1	1	1	1	CHIC2	cysteine-rich hydrophobic domain 2
hsa-miR-567	0	0	1	1	1	1	NOP58	NOP58 ribonucleoprotein homolog (yeast)
hsa-miR-567	0	0	1	1	0	0	GCKR	glucokinase (hexokinase 4) regulator
hsa-miR-567	0	0	1	1	0	0	PRDM5	PR domain containing 5
hsa-miR-567	1	0	1	1	1	1	FRAS1	Fraser syndrome 1
hsa-miR-567	0	0	0	1	1	1	ANKRD7	ankyrin repeat domain 7
hsa-miR-567	0	0	1	1	0	0	EXOSC7	exosome component 7
hsa-miR-567	0	0	0	1	0	0	DAXX	death-domain associated protein
hsa-miR-567	0	0	1	1	0	0	GLT8D1	glycosyltransferase 8 domain containing 1
hsa-miR-567	0	0	1	1	0	0	NDUFA9	NADH dehydrogenase (ubiquinone) 1 alpha subcomplex, 9, 39kDa
hsa-miR-567	1	0	1	1	1	1	RFX4	regulatory factor X, 4 (influences HLA class II expression)
hsa-miR-567	1	0	1	1	1	1	TARBP2	TAR (HIV-1) RNA binding protein 2
hsa-miR-567	0	0	0	1	0	0	GCNT3	glucosaminyl (N-acetyl) transferase 3, mucin type
hsa-miR-567	0	0	1	1	0	0	SRP14	signal recognition particle 14kDa (homologous Alu RNA binding protein)
hsa-miR-567	0	0	1	1	0	0	KIF2B	kinesin family member 2B
hsa-miR-567	0	0	0	1	0	0	LOC113230	uncharacterized LOC113230
hsa-miR-567	0	0	1	1	1	1	PSG5	pregnancy specific beta-1-glycoprotein 5
hsa-miR-567	0	0	0	1	1	1	PSG4	pregnancy specific beta-1-glycoprotein 4
hsa-miR-567	0	0	0	1	1	1	PSG9	pregnancy specific beta-1-glycoprotein 9
hsa-miR-567	0	0	0	1	0	0	EPHX1	epoxide hydrolase 1, microsomal (xenobiotic)
hsa-miR-567	0	0	1	1	0	0	CLEC4F	C-type lectin domain family 4, member F
hsa-miR-567	1	0	1	1	1	1	CASP10	caspase 10, apoptosis-related cysteine peptidase
hsa-miR-567	0	0	1	1	1	1	NAF1	nuclear assembly factor 1 homolog (S. cerevisiae)
hsa-miR-567	0	0	0	1	0	0	RNF175	ring finger protein 175
hsa-miR-567	0	0	0	1	0	0	GPR174	G protein-coupled receptor 174
hsa-miR-567	0	0	1	1	0	0	EIF3H	eukaryotic translation initiation factor 3, subunit H
hsa-miR-567	0	0	1	1	0	0	SSRP1	structure specific recognition protein 1
hsa-miR-567	0	0	0	1	1	1	ST14	suppression of tumorigenicity 14 (colon carcinoma)
hsa-miR-567	0	0	1	1	1	1	SLC25A31	solute carrier family 25 (mitochondrial carrier; adenine nucleotide translocator), member 31
hsa-miR-567	0	0	0	1	1	1	NBAS	neuroblastoma amplified sequence
hsa-miR-567	0	0	1	1	0	0	GEMIN6	gem (nuclear organelle) associated protein 6
hsa-miR-567	0	0	0	1	1	1	CAPSL	calcyphosine-like
hsa-miR-567	0	0	1	1	0	0	JAKMIP1	janus kinase and microtubule interacting protein 1
hsa-miR-567	0	0	1	1	0	0	NUBP1	nucleotide binding protein 1
hsa-miR-567	0	0	1	1	1	1	CCDC148	coiled-coil domain containing 148
hsa-miR-567	0	0	1	1	1	1	TMPRSS11D	transmembrane protease, serine 11D
hsa-miR-567	1	0	1	1	1	1	GDPD1	glycerophosphodiester phosphodiesterase domain containing 1
hsa-miR-567	0	0	0	1	0	0	GSTA5	glutathione S-transferase alpha 5
hsa-miR-567	1	0	1	1	1	1	PDLIM3	PDZ and LIM domain 3
hsa-miR-567	0	0	1	1	0	0	ATP5J	ATP synthase, H+ transporting, mitochondrial Fo complex, subunit F6
hsa-miR-567	0	0	0	1	0	0	RBM45	RNA binding motif protein 45
hsa-miR-567	0	0	1	1	0	0	CSF1R	colony stimulating factor 1 receptor
hsa-miR-567	0	0	1	1	0	0	ADCY8	adenylate cyclase 8 (brain)
hsa-miR-567	0	0	0	1	1	1	ZNF19	zinc finger protein 19
hsa-miR-567	1	0	0	1	1	1	TSPAN33	tetraspanin 33
hsa-miR-567	0	0	0	1	0	0	FCER1G	Fc fragment of IgE, high affinity I, receptor for; gamma polypeptide
hsa-miR-567	0	0	1	1	0	0	CCDC142	coiled-coil domain containing 142
hsa-miR-567	0	0	1	1	0	0	PKD2L2	polycystic kidney disease 2-like 2
hsa-miR-567	0	0	1	1	0	0	GSTT2B	glutathione S-transferase theta 2B (gene/pseudogene)
hsa-miR-567	1	0	1	1	1	1	CPNE2	copine II
hsa-miR-567	0	0	1	1	0	0	PDE9A	phosphodiesterase 9A
hsa-miR-567	0	0	0	1	1	1	NLRP8	NLR family, pyrin domain containing 8
hsa-miR-567	0	0	1	1	0	0	NLRX1	NLR family member X1
hsa-miR-567	0	0	1	1	1	1	ZNF382	zinc finger protein 382
hsa-miR-567	0	0	0	1	1	1	FDXR	ferredoxin reductase
hsa-miR-567	0	0	0	1	1	1	MEIOB	meiosis specific with OB domains
hsa-miR-567	0	0	0	1	1	1	REL	v-rel reticuloendotheliosis viral oncogene homolog (avian)
hsa-miR-567	0	0	0	1	1	1	PQLC3	PQ loop repeat containing 3
hsa-miR-567	0	0	1	1	1	1	ARHGAP15	Rho GTPase activating protein 15
hsa-miR-567	0	0	0	1	0	0	YY1AP1	YY1 associated protein 1
hsa-miR-567	0	0	0	1	0	0	RNPEP	arginyl aminopeptidase (aminopeptidase B)
hsa-miR-567	0	0	1	1	0	0	KRTCAP2	keratinocyte associated protein 2
hsa-miR-567	0	0	0	1	1	1	MFSD8	major facilitator superfamily domain containing 8
hsa-miR-567	1	0	1	1	1	1	OTUD4	OTU domain containing 4
hsa-miR-567	0	0	0	1	1	1	LSM6	LSM6 homolog, U6 small nuclear RNA associated (S. cerevisiae)
hsa-miR-567	0	0	0	1	0	0	ANKRD33B	ankyrin repeat domain 33B
hsa-miR-567	0	0	1	1	1	1	RAPGEF6	Rap guanine nucleotide exchange factor (GEF) 6
hsa-miR-567	0	0	1	1	0	0	KIAA0146	KIAA0146
hsa-miR-567	1	0	1	1	1	1	PHAX	phosphorylated adaptor for RNA export
hsa-miR-567	0	0	0	1	0	0	ALDH7A1	aldehyde dehydrogenase 7 family, member A1
hsa-miR-567	0	0	1	1	0	0	DCSTAMP	dendrocyte expressed seven transmembrane protein
hsa-miR-567	0	0	1	1	1	1	CXorf22	chromosome X open reading frame 22
hsa-miR-567	0	0	1	1	1	1	STOX1	storkhead box 1
hsa-miR-567	0	0	0	1	0	0	SPATA19	spermatogenesis associated 19
hsa-miR-567	0	0	1	1	1	1	FAM227B	family with sequence similarity 227, member B
hsa-miR-567	1	0	1	1	1	1	TMEM100	transmembrane protein 100
hsa-miR-567	0	0	0	1	0	0	NNMT	nicotinamide N-methyltransferase
hsa-miR-567	0	0	1	1	1	1	CLPX	ClpX caseinolytic peptidase X homolog (E. coli)
hsa-miR-567	1	0	1	1	1	1	XRCC6BP1	XRCC6 binding protein 1
hsa-miR-567	0	0	0	1	1	1	RCCD1	RCC1 domain containing 1
hsa-miR-567	0	0	1	1	0	0	SMG8	smg-8 homolog, nonsense mediated mRNA decay factor (C. elegans)
hsa-miR-567	1	0	1	1	1	1	ZNF701	zinc finger protein 701
hsa-miR-567	0	0	1	1	0	0	ANKRD33	ankyrin repeat domain 33
hsa-miR-567	0	0	1	1	1	1	HRASLS5	HRAS-like suppressor family, member 5
hsa-miR-567	0	0	1	1	0	0	ZNF467	zinc finger protein 467
hsa-miR-567	0	0	0	1	0	0	OR5AR1	olfactory receptor, family 5, subfamily AR, member 1
hsa-miR-567	0	0	1	1	1	1	POLR1D	polymerase (RNA) I polypeptide D, 16kDa
hsa-miR-567	0	0	1	1	1	1	DONSON	downstream neighbor of SON
hsa-miR-567	0	0	0	1	0	0	CEL	carboxyl ester lipase (bile salt-stimulated lipase)
hsa-miR-567	0	0	0	1	1	1	DRD5	dopamine receptor D5
hsa-miR-567	0	0	0	1	0	0	ECEL1	endothelin converting enzyme-like 1
hsa-miR-567	0	0	0	1	1	1	SMN1	survival of motor neuron 1, telomeric
hsa-miR-567	1	0	1	1	0	0	HTR1E	5-hydroxytryptamine (serotonin) receptor 1E, G protein-coupled
hsa-miR-567	0	0	0	1	1	1	MGAT2	mannosyl (alpha-1,6-)-glycoprotein beta-1,2-N-acetylglucosaminyltransferase
hsa-miR-567	0	0	1	1	1	1	LCMT2	leucine carboxyl methyltransferase 2
hsa-miR-567	0	0	0	1	0	0	ATOH1	atonal homolog 1 (Drosophila)
hsa-miR-567	0	0	1	1	1	1	SNX7	sorting nexin 7
hsa-miR-567	0	0	1	1	1	1	GLB1	galactosidase, beta 1
hsa-miR-567	1	0	1	1	1	1	NABP1	nucleic acid binding protein 1
hsa-miR-567	0	0	1	1	1	1	DLEC1	deleted in lung and esophageal cancer 1
hsa-miR-567	1	0	1	1	1	1	CHD6	chromodomain helicase DNA binding protein 6
hsa-miR-567	0	0	0	1	0	0	ANAPC10	anaphase promoting complex subunit 10
hsa-miR-567	1	0	1	1	1	1	OLR1	oxidized low density lipoprotein (lectin-like) receptor 1
hsa-miR-567	0	0	1	1	1	1	TRIM59	tripartite motif containing 59
hsa-miR-567	0	0	1	1	1	1	CC2D2A	coiled-coil and C2 domain containing 2A
hsa-miR-567	0	0	1	1	0	0	ANKHD1-EIF4EBP3	ANKHD1-EIF4EBP3 readthrough
hsa-miR-567	0	0	1	1	0	0	EIF4EBP3	eukaryotic translation initiation factor 4E binding protein 3
hsa-miR-567	0	0	0	1	1	1	DDX31	DEAD (Asp-Glu-Ala-Asp) box polypeptide 31
hsa-miR-567	0	0	1	1	1	1	PIK3R6	phosphoinositide-3-kinase, regulatory subunit 6
hsa-miR-567	0	0	0	1	1	1	USP36	ubiquitin specific peptidase 36
hsa-miR-567	0	0	1	1	0	0	KRT25	keratin 25
hsa-miR-567	0	0	0	1	0	0	DNAH7	dynein, axonemal, heavy chain 7
hsa-miR-567	0	0	1	1	0	0	GLIPR1L1	GLI pathogenesis-related 1 like 1
hsa-miR-567	0	0	1	1	0	0	GRINA	glutamate receptor, ionotropic, N-methyl D-aspartate-associated protein 1 (glutamate binding)
hsa-miR-567	0	0	1	1	0	0	C2CD3	C2 calcium-dependent domain containing 3
hsa-miR-567	0	0	0	1	1	1	B3GALNT2	beta-1,3-N-acetylgalactosaminyltransferase 2
hsa-miR-567	0	0	0	1	0	0	OR4K17	olfactory receptor, family 4, subfamily K, member 17
hsa-miR-567	1	0	1	1	1	1	COL4A3	collagen, type IV, alpha 3 (Goodpasture antigen)
hsa-miR-567	0	0	1	1	0	0	ASCC1	activating signal cointegrator 1 complex subunit 1
hsa-miR-567	0	0	0	1	0	0	C2orf73	chromosome 2 open reading frame 73
hsa-miR-567	0	0	1	1	1	1	DERL3	derlin 3
hsa-miR-567	0	0	1	1	0	0	PLCZ1	phospholipase C, zeta 1
hsa-miR-567	0	0	1	1	1	1	SHISA3	shisa homolog 3 (Xenopus laevis)
hsa-miR-567	0	0	1	1	1	1	PCK1	phosphoenolpyruvate carboxykinase 1 (soluble)
hsa-miR-567	0	0	1	1	1	1	KIDINS220	kinase D-interacting substrate, 220kDa
hsa-miR-567	0	0	1	1	1	1	ZNF611	zinc finger protein 611
hsa-miR-567	1	0	1	1	1	1	EZH2	enhancer of zeste homolog 2 (Drosophila)
hsa-miR-567	0	0	1	1	1	1	GLIPR1L2	GLI pathogenesis-related 1 like 2
hsa-miR-567	0	0	1	1	0	0	PRPF31	PRP31 pre-mRNA processing factor 31 homolog (S. cerevisiae)
hsa-miR-567	0	0	1	1	0	0	D2HGDH	D-2-hydroxyglutarate dehydrogenase
hsa-miR-567	0	0	0	1	0	0	GJD4	gap junction protein, delta 4, 40.1kDa
hsa-miR-567	0	0	0	1	0	0	B3GNT8	UDP-GlcNAc:betaGal beta-1,3-N-acetylglucosaminyltransferase 8
hsa-miR-567	1	0	1	1	0	0	ATAD5	ATPase family, AAA domain containing 5
hsa-miR-567	0	0	1	1	1	1	COX5A	cytochrome c oxidase subunit Va
hsa-miR-567	0	0	1	1	1	1	DDX10	DEAD (Asp-Glu-Ala-Asp) box polypeptide 10
hsa-miR-567	0	0	1	1	0	0	ZNF335	zinc finger protein 335
hsa-miR-567	0	0	1	1	0	0	CPSF3L	cleavage and polyadenylation specific factor 3-like
hsa-miR-567	1	0	1	1	1	1	DDHD1	DDHD domain containing 1
hsa-miR-567	0	0	0	1	0	0	ANAPC2	anaphase promoting complex subunit 2
hsa-miR-567	1	0	1	1	1	1	GALNT14	UDP-N-acetyl-alpha-D-galactosamine:polypeptide N-acetylgalactosaminyltransferase 14 (GalNAc-T14)
hsa-miR-567	1	0	1	1	1	1	ZNF410	zinc finger protein 410
hsa-miR-567	0	0	1	1	1	1	FAM153C	family with sequence similarity 153, member C, pseudogene
hsa-miR-567	0	0	1	1	1	1	ASCC3	activating signal cointegrator 1 complex subunit 3
hsa-miR-567	0	0	1	1	1	1	METTL1	methyltransferase like 1
hsa-miR-567	0	0	0	1	1	1	CABP4	calcium binding protein 4
hsa-miR-567	1	0	1	1	1	1	NFKBIZ	nuclear factor of kappa light polypeptide gene enhancer in B-cells inhibitor, zeta
hsa-miR-567	1	0	1	1	1	1	CHRNA3	cholinergic receptor, nicotinic, alpha 3 (neuronal)
hsa-miR-567	0	0	0	1	1	1	FLII	flightless I homolog (Drosophila)
hsa-miR-567	0	0	0	1	1	1	DDX53	DEAD (Asp-Glu-Ala-Asp) box polypeptide 53
hsa-miR-567	0	0	1	1	1	1	HSD17B13	hydroxysteroid (17-beta) dehydrogenase 13
hsa-miR-567	0	0	1	1	0	0	TAF9	TAF9 RNA polymerase II, TATA box binding protein (TBP)-associated factor, 32kDa
hsa-miR-567	0	0	0	1	1	1	YBEY	ybeY metallopeptidase (putative)
hsa-miR-567	0	0	1	1	0	0	MFSD5	major facilitator superfamily domain containing 5
hsa-miR-567	1	0	1	1	1	1	PEX26	peroxisomal biogenesis factor 26
hsa-miR-567	0	0	1	1	1	1	CAV3	caveolin 3
hsa-miR-567	0	0	1	1	0	0	MRPL11	mitochondrial ribosomal protein L11
hsa-miR-567	0	0	0	1	0	0	SAMD14	sterile alpha motif domain containing 14
hsa-miR-567	0	0	0	1	0	0	AMY1B	amylase, alpha 1B (salivary)
hsa-miR-567	0	0	1	1	1	1	EP400	E1A binding protein p400
hsa-miR-567	1	0	1	1	0	0	GRIN2A	glutamate receptor, ionotropic, N-methyl D-aspartate 2A
hsa-miR-567	0	0	1	1	0	0	NSUN5P2	NOP2/Sun domain family, member 5 pseudogene 2
hsa-miR-567	0	0	1	1	1	1	XKR3	XK, Kell blood group complex subunit-related family, member 3
hsa-miR-567	0	0	1	1	1	1	UPP1	uridine phosphorylase 1
hsa-miR-567	0	0	1	1	1	1	MGAT4C	mannosyl (alpha-1,3-)-glycoprotein beta-1,4-N-acetylglucosaminyltransferase, isozyme C (putative)
hsa-miR-567	0	0	1	1	0	0	GPR19	G protein-coupled receptor 19
hsa-miR-567	0	0	0	1	0	0	OR6A2	olfactory receptor, family 6, subfamily A, member 2
hsa-miR-567	0	0	1	1	1	1	NLRP9	NLR family, pyrin domain containing 9
hsa-miR-567	0	0	1	1	1	1	IGIP	IgA-inducing protein homolog (Bos taurus)
hsa-miR-567	0	0	1	1	1	1	MINA	MYC induced nuclear antigen
hsa-miR-567	0	0	0	1	1	1	CCBE1	collagen and calcium binding EGF domains 1
hsa-miR-567	0	0	0	1	0	0	C19orf59	chromosome 19 open reading frame 59
hsa-miR-567	0	0	0	1	0	0	KRTAP13-4	keratin associated protein 13-4
hsa-miR-567	0	0	0	1	1	1	ZNF761	zinc finger protein 761
hsa-miR-567	0	0	0	1	1	1	CCDC84	coiled-coil domain containing 84
hsa-miR-567	0	0	1	1	0	0	TRIM7	tripartite motif containing 7
hsa-miR-567	1	0	1	1	1	1	FMR1	fragile X mental retardation 1
hsa-miR-567	0	0	1	1	1	1	C2orf76	chromosome 2 open reading frame 76
hsa-miR-567	0	0	1	1	1	1	DEFB106A	defensin, beta 106A
hsa-miR-567	0	0	0	1	1	1	INTU	inturned planar cell polarity effector homolog (Drosophila)
hsa-miR-567	0	0	0	1	0	0	DEFB106B	defensin, beta 106B
hsa-miR-567	0	0	1	1	0	0	GGTLC1	gamma-glutamyltransferase light chain 1
hsa-miR-567	0	0	1	1	1	1	SLC6A16	solute carrier family 6, member 16
hsa-miR-567	1	0	1	1	1	1	PNRC1	proline-rich nuclear receptor coactivator 1
hsa-miR-567	0	0	1	1	1	1	SPAG17	sperm associated antigen 17
hsa-miR-567	0	0	1	1	0	0	ANG	angiogenin, ribonuclease, RNase A family, 5
hsa-miR-567	0	0	1	1	1	1	PARK2	parkinson protein 2, E3 ubiquitin protein ligase (parkin)
hsa-miR-567	0	0	1	1	1	1	PSMD10	proteasome (prosome, macropain) 26S subunit, non-ATPase, 10
hsa-miR-567	0	0	0	1	1	1	CLEC12A	C-type lectin domain family 12, member A
hsa-miR-567	1	0	1	1	1	1	TFPI	tissue factor pathway inhibitor (lipoprotein-associated coagulation inhibitor)
hsa-miR-567	0	0	1	1	0	0	DEFB119	defensin, beta 119
hsa-miR-567	0	0	1	1	0	0	AMTN	amelotin
hsa-miR-567	0	0	0	1	0	0	DCHS2	dachsous 2 (Drosophila)
hsa-miR-567	0	0	1	1	1	1	VRK2	vaccinia related kinase 2
hsa-miR-567	0	0	1	1	0	0	PGM1	phosphoglucomutase 1
hsa-miR-567	0	0	0	1	1	1	SOX18	SRY (sex determining region Y)-box 18
hsa-miR-567	0	0	0	1	0	0	FSCB	fibrous sheath CABYR binding protein
hsa-miR-567	0	0	0	1	1	1	TPX2	TPX2, microtubule-associated, homolog (Xenopus laevis)
hsa-miR-567	0	0	1	1	0	0	CYB5A	cytochrome b5 type A (microsomal)
hsa-miR-567	0	0	1	1	0	0	GOLGB1	golgin B1
hsa-miR-567	0	0	0	1	1	1	SYCP2L	synaptonemal complex protein 2-like
hsa-miR-567	1	0	1	1	1	1	SLC38A3	solute carrier family 38, member 3
hsa-miR-567	1	0	1	1	1	1	TMEM248	transmembrane protein 248
hsa-miR-567	0	0	1	1	1	1	DLGAP5	discs, large (Drosophila) homolog-associated protein 5
hsa-miR-567	0	0	1	1	0	0	DPY30	dpy-30 homolog (C. elegans)
hsa-miR-567	0	0	1	1	1	1	TSHR	thyroid stimulating hormone receptor
hsa-miR-567	0	0	0	1	0	0	NLRP13	NLR family, pyrin domain containing 13
hsa-miR-567	0	0	0	1	1	1	DFNA5	deafness, autosomal dominant 5
hsa-miR-567	0	0	1	1	0	0	INTS8	integrator complex subunit 8
hsa-miR-567	0	0	0	1	1	1	ZNF177	zinc finger protein 177
hsa-miR-567	1	0	0	1	1	1	COL9A3	collagen, type IX, alpha 3
hsa-miR-567	1	0	1	1	1	1	RNF13	ring finger protein 13
hsa-miR-567	1	0	1	1	1	1	GAD1	glutamate decarboxylase 1 (brain, 67kDa)
hsa-miR-567	1	0	1	1	1	1	STARD13	StAR-related lipid transfer (START) domain containing 13
hsa-miR-567	1	0	1	1	1	1	UNC79	unc-79 homolog (C. elegans)
hsa-miR-567	1	0	1	1	1	1	TPM4	tropomyosin 4
hsa-miR-567	0	0	0	1	0	0	TBC1D23	TBC1 domain family, member 23
hsa-miR-567	1	0	1	1	1	1	R3HDM2	R3H domain containing 2
hsa-miR-567	0	0	1	1	1	1	PSAT1	phosphoserine aminotransferase 1
hsa-miR-567	1	0	0	1	1	1	AURKA	aurora kinase A
hsa-miR-567	1	0	0	1	0	0	SNCG	synuclein, gamma (breast cancer-specific protein 1)
hsa-miR-567	0	0	0	1	0	0	P2RX2	purinergic receptor P2X, ligand-gated ion channel, 2
hsa-miR-567	0	0	1	1	1	1	EPPIN	epididymal peptidase inhibitor
hsa-miR-567	0	0	1	1	0	0	WFDC6	WAP four-disulfide core domain 6
hsa-miR-567	0	0	1	1	1	1	C11orf54	chromosome 11 open reading frame 54
hsa-miR-567	0	0	0	1	1	1	H2BFM	H2B histone family, member M
hsa-miR-567	0	0	0	1	1	1	ZNF140	zinc finger protein 140
hsa-miR-567	0	0	1	1	1	1	MXRA7	matrix-remodelling associated 7
hsa-miR-567	1	0	1	1	1	1	TMF1	TATA element modulatory factor 1
hsa-miR-567	0	0	1	1	1	1	PXDNL	peroxidasin homolog (Drosophila)-like
hsa-miR-567	1	0	0	1	1	1	IFFO1	intermediate filament family orphan 1
hsa-miR-567	0	0	1	1	0	0	TXNDC11	thioredoxin domain containing 11
hsa-miR-567	0	0	1	1	1	1	SMC1B	structural maintenance of chromosomes 1B
hsa-miR-567	0	0	1	1	1	1	N4BP2L2	NEDD4 binding protein 2-like 2
hsa-miR-567	1	0	1	1	0	0	SAMD4A	sterile alpha motif domain containing 4A
hsa-miR-567	0	0	0	1	0	0	OR8D1	olfactory receptor, family 8, subfamily D, member 1
hsa-miR-567	0	0	0	1	0	0	ANKLE2	ankyrin repeat and LEM domain containing 2
hsa-miR-567	0	0	1	1	1	1	APOL2	apolipoprotein L, 2
hsa-miR-567	0	0	1	1	0	0	EDC4	enhancer of mRNA decapping 4
hsa-miR-567	1	0	1	1	1	1	SGMS2	sphingomyelin synthase 2
hsa-miR-567	0	0	1	1	0	0	PLCG2	phospholipase C, gamma 2 (phosphatidylinositol-specific)
hsa-miR-567	0	0	1	1	0	0	IFT172	intraflagellar transport 172 homolog (Chlamydomonas)
hsa-miR-567	0	0	0	1	1	1	TPTE	transmembrane phosphatase with tensin homology
hsa-miR-567	0	0	0	1	0	0	OR5H6	olfactory receptor, family 5, subfamily H, member 6
hsa-miR-567	0	0	1	1	1	1	PTPN22	protein tyrosine phosphatase, non-receptor type 22 (lymphoid)
hsa-miR-567	0	0	1	1	1	1	ZMYM1	zinc finger, MYM-type 1
hsa-miR-567	0	0	0	1	1	1	TXNRD3	thioredoxin reductase 3
hsa-miR-567	0	0	1	1	0	0	AXDND1	axonemal dynein light chain domain containing 1
hsa-miR-567	1	0	1	1	0	0	KAZN	kazrin, periplakin interacting protein
hsa-miR-567	1	0	0	1	1	1	DCLRE1A	DNA cross-link repair 1A
hsa-miR-567	1	0	1	1	1	1	TLR10	toll-like receptor 10
hsa-miR-567	0	0	1	1	1	1	GPRASP1	G protein-coupled receptor associated sorting protein 1
hsa-miR-567	0	0	1	1	1	1	SMC3	structural maintenance of chromosomes 3
hsa-miR-567	1	0	1	1	1	1	TRPM3	transient receptor potential cation channel, subfamily M, member 3
hsa-miR-567	0	0	0	1	1	1	MOK	MOK protein kinase
hsa-miR-567	0	0	0	1	0	0	C1orf68	chromosome 1 open reading frame 68
hsa-miR-567	1	0	1	1	1	1	T	T, brachyury homolog (mouse)
hsa-miR-567	0	0	0	1	1	1	FLVCR1	feline leukemia virus subgroup C cellular receptor 1
hsa-miR-567	1	0	1	1	0	0	NEK2	NIMA (never in mitosis gene a)-related kinase 2
hsa-miR-567	0	0	1	1	1	1	CR2	complement component (3d/Epstein Barr virus) receptor 2
hsa-miR-567	0	0	1	1	1	1	DYRK3	dual-specificity tyrosine-(Y)-phosphorylation regulated kinase 3
hsa-miR-567	0	0	0	1	0	0	ASPM	asp (abnormal spindle) homolog, microcephaly associated (Drosophila)
hsa-miR-567	0	0	1	1	1	1	FAM5C	family with sequence similarity 5, member C
hsa-miR-567	0	0	1	1	1	1	PLA2G4A	phospholipase A2, group IVA (cytosolic, calcium-dependent)
hsa-miR-567	0	0	1	1	0	0	MR1	major histocompatibility complex, class I-related
hsa-miR-567	0	0	1	1	1	1	RALGPS2	Ral GEF with PH domain and SH3 binding motif 2
hsa-miR-567	0	0	0	1	1	1	MRPS14	mitochondrial ribosomal protein S14
hsa-miR-567	0	0	1	1	0	0	IFNGR1	interferon gamma receptor 1
hsa-miR-567	0	0	1	1	1	1	HSD17B7	hydroxysteroid (17-beta) dehydrogenase 7
hsa-miR-567	0	0	1	1	1	1	C1orf85	chromosome 1 open reading frame 85
hsa-miR-567	0	0	1	1	1	1	CENPW	centromere protein W
hsa-miR-567	1	0	1	1	0	0	PBXIP1	pre-B-cell leukemia homeobox interacting protein 1
hsa-miR-567	0	0	1	1	0	0	ZUFSP	zinc finger with UFM1-specific peptidase domain
hsa-miR-567	0	0	0	1	0	0	LCE1C	late cornified envelope 1C
hsa-miR-567	0	0	0	1	0	0	MMP21	matrix metallopeptidase 21
hsa-miR-567	0	0	1	1	0	0	SETDB1	SET domain, bifurcated 1
hsa-miR-567	0	0	1	1	1	1	PDSS2	prenyl (decaprenyl) diphosphate synthase, subunit 2
hsa-miR-567	0	0	1	1	1	1	INPP5F	inositol polyphosphate-5-phosphatase F
hsa-miR-567	0	0	0	1	1	1	TDRD1	tudor domain containing 1
hsa-miR-567	0	0	1	1	0	0	FAM72B	family with sequence similarity 72, member B
hsa-miR-567	0	0	1	1	1	1	CGA	glycoprotein hormones, alpha polypeptide
hsa-miR-567	0	0	1	1	1	1	LRIF1	ligand dependent nuclear receptor interacting factor 1
hsa-miR-567	0	0	0	1	0	0	C1orf194	chromosome 1 open reading frame 194
hsa-miR-567	1	0	1	1	1	1	SLC30A7	solute carrier family 30 (zinc transporter), member 7
hsa-miR-567	0	0	1	1	0	0	FRRS1	ferric-chelate reductase 1
hsa-miR-567	0	0	0	1	0	0	MB21D1	Mab-21 domain containing 1
hsa-miR-567	1	0	1	1	1	1	VMA21	VMA21 vacuolar H+-ATPase homolog (S. cerevisiae)
hsa-miR-567	0	0	1	1	1	1	MTM1	myotubularin 1
hsa-miR-567	0	0	0	1	1	1	ABCC2	ATP-binding cassette, sub-family C (CFTR/MRP), member 2
hsa-miR-567	1	0	1	1	1	1	GTF2B	general transcription factor IIB
hsa-miR-567	0	0	1	1	0	0	PYROXD2	pyridine nucleotide-disulphide oxidoreductase domain 2
hsa-miR-567	0	0	1	1	1	1	LMBRD1	LMBR1 domain containing 1
hsa-miR-567	1	0	0	1	0	0	GNG5	guanine nucleotide binding protein (G protein), gamma 5
hsa-miR-567	0	0	0	1	0	0	DNASE2B	deoxyribonuclease II beta
hsa-miR-567	0	0	0	1	0	0	GSTA2	glutathione S-transferase alpha 2
hsa-miR-567	0	0	0	1	0	0	SPO11	SPO11 meiotic protein covalently bound to DSB homolog (S. cerevisiae)
hsa-miR-567	1	0	1	1	1	1	CUL4B	cullin 4B
hsa-miR-567	0	0	1	1	1	1	KCNG1	potassium voltage-gated channel, subfamily G, member 1
hsa-miR-567	0	0	1	1	0	0	DPM1	dolichyl-phosphate mannosyltransferase polypeptide 1, catalytic subunit
hsa-miR-567	0	0	1	1	1	1	SLC25A43	solute carrier family 25, member 43
hsa-miR-567	0	0	0	1	1	1	GLT6D1	glycosyltransferase 6 domain containing 1
hsa-miR-567	0	0	0	1	0	0	SARDH	sarcosine dehydrogenase
hsa-miR-567	1	0	0	1	0	0	CCDC17	coiled-coil domain containing 17
hsa-miR-567	0	0	1	1	1	1	TRUB2	TruB pseudouridine (psi) synthase homolog 2 (E. coli)
hsa-miR-567	0	0	1	1	1	1	RBM18	RNA binding motif protein 18
hsa-miR-567	0	0	0	1	1	1	LHFPL5	lipoma HMGIC fusion partner-like 5
hsa-miR-567	0	0	1	1	0	0	AGAP6	ArfGAP with GTPase domain, ankyrin repeat and PH domain 6
hsa-miR-567	0	0	1	1	0	0	C10orf128	chromosome 10 open reading frame 128
hsa-miR-567	0	0	1	1	1	1	SPAG16	sperm associated antigen 16
hsa-miR-567	1	0	1	1	0	0	SVEP1	sushi, von Willebrand factor type A, EGF and pentraxin domain containing 1
hsa-miR-567	0	0	0	1	0	0	CUTA	cutA divalent cation tolerance homolog (E. coli)
hsa-miR-567	0	0	1	1	1	1	ZNF33B	zinc finger protein 33B
hsa-miR-567	0	0	1	1	0	0	FRRS1L	ferric-chelate reductase 1-like
hsa-miR-567	0	0	0	1	1	1	PSMB9	proteasome (prosome, macropain) subunit, beta type, 9 (large multifunctional peptidase 2)
hsa-miR-567	0	0	0	1	0	0	OR10G8	olfactory receptor, family 10, subfamily G, member 8
hsa-miR-567	0	0	0	1	0	0	OR10G9	olfactory receptor, family 10, subfamily G, member 9
hsa-miR-567	0	0	0	1	1	1	C9orf156	chromosome 9 open reading frame 156
hsa-miR-567	1	0	1	1	1	1	IARS	isoleucyl-tRNA synthetase
hsa-miR-567	1	0	1	1	1	1	SPEN	spen homolog, transcriptional regulator (Drosophila)
hsa-miR-567	0	0	1	1	0	0	CLIC1	chloride intracellular channel 1
hsa-miR-567	0	0	1	1	0	0	FGF14	fibroblast growth factor 14
hsa-miR-567	0	0	0	1	0	0	NME1-NME2	NME1-NME2 readthrough
hsa-miR-567	0	0	1	1	0	0	NME1	NME/NM23 nucleoside diphosphate kinase 1
hsa-miR-567	0	0	0	1	0	0	NME2	NME/NM23 nucleoside diphosphate kinase 2
hsa-miR-567	0	0	0	1	1	1	GPR183	G protein-coupled receptor 183
hsa-miR-567	0	0	0	1	0	0	HLA-F	major histocompatibility complex, class I, F
hsa-miR-567	0	0	1	1	1	1	GABBR1	gamma-aminobutyric acid (GABA) B receptor, 1
hsa-miR-567	1	0	1	1	1	1	FAM108B1	family with sequence similarity 108, member B1
hsa-miR-567	0	0	1	1	1	1	SLC39A12	solute carrier family 39 (zinc transporter), member 12
hsa-miR-567	0	0	1	1	1	1	TNFRSF9	tumor necrosis factor receptor superfamily, member 9
hsa-miR-567	0	0	1	1	0	0	NPR2	natriuretic peptide receptor B/guanylate cyclase B (atrionatriuretic peptide receptor B)
hsa-miR-567	0	0	0	1	0	0	ITGA8	integrin, alpha 8
hsa-miR-567	1	0	1	1	1	1	DFFB	DNA fragmentation factor, 40kDa, beta polypeptide (caspase-activated DNase)
hsa-miR-567	1	0	1	1	1	1	MRS2	MRS2 magnesium homeostasis factor homolog (S. cerevisiae)
hsa-miR-567	1	0	1	1	1	1	PKHD1L1	polycystic kidney and hepatic disease 1 (autosomal recessive)-like 1
hsa-miR-567	1	0	1	1	0	0	PRKCZ	protein kinase C, zeta
hsa-miR-567	0	0	0	1	0	0	SDHAF1	succinate dehydrogenase complex assembly factor 1
hsa-miR-567	0	0	1	1	1	1	CHGB	chromogranin B (secretogranin 1)
hsa-miR-567	0	0	0	1	1	1	CCDC122	coiled-coil domain containing 122
hsa-miR-567	0	0	1	1	1	1	XDH	xanthine dehydrogenase
hsa-miR-567	0	0	0	1	1	1	PAK1IP1	PAK1 interacting protein 1
hsa-miR-567	0	0	1	1	0	0	CCDC112	coiled-coil domain containing 112
hsa-miR-567	1	0	1	1	1	1	TXNDC5	thioredoxin domain containing 5 (endoplasmic reticulum)
hsa-miR-567	1	0	1	1	1	1	BLOC1S5	biogenesis of lysosomal organelles complex-1, subunit 5, muted
hsa-miR-567	0	0	1	1	1	1	LINGO2	leucine rich repeat and Ig domain containing 2
hsa-miR-567	0	0	1	1	1	1	ANKRD16	ankyrin repeat domain 16
hsa-miR-567	0	0	0	1	1	1	CDKN2A	cyclin-dependent kinase inhibitor 2A
hsa-miR-567	0	0	0	1	0	0	OR52J3	olfactory receptor, family 52, subfamily J, member 3
hsa-miR-567	1	0	1	1	1	1	DENND4C	DENN/MADD domain containing 4C
hsa-miR-567	0	0	1	1	0	0	CNTLN	centlein, centrosomal protein
hsa-miR-567	0	0	1	1	1	1	DOCK5	dedicator of cytokinesis 5
hsa-miR-567	0	0	1	1	1	1	SMN2	survival of motor neuron 2, centromeric
hsa-miR-567	0	0	1	1	0	0	POLR2B	polymerase (RNA) II (DNA directed) polypeptide B, 140kDa
hsa-miR-567	0	0	0	1	0	0	ZNF232	zinc finger protein 232
hsa-miR-567	1	0	1	1	1	1	GREB1	growth regulation by estrogen in breast cancer 1
hsa-miR-567	0	0	1	1	0	0	NPSR1	neuropeptide S receptor 1
hsa-miR-567	0	0	0	1	0	0	LOC100131094	uncharacterized LOC100131094
hsa-miR-567	0	0	1	1	1	1	PRB1	proline-rich protein BstNI subfamily 1
hsa-miR-567	0	0	1	1	1	1	PRB4	proline-rich protein BstNI subfamily 4
hsa-miR-567	0	0	1	1	0	0	PRB2	proline-rich protein BstNI subfamily 2
hsa-miR-567	0	0	1	1	1	1	SPATA6L	spermatogenesis associated 6-like
hsa-miR-567	0	0	1	1	1	1	DAZ2	deleted in azoospermia 2
hsa-miR-567	0	0	0	1	1	1	RBMY1E	RNA binding motif protein, Y-linked, family 1, member E
hsa-miR-567	0	0	0	1	1	1	RBMY1D	RNA binding motif protein, Y-linked, family 1, member D
hsa-miR-567	0	0	0	1	1	1	N6AMT2	N-6 adenine-specific DNA methyltransferase 2 (putative)
hsa-miR-567	0	0	0	1	0	0	TSPY8	testis specific protein, Y-linked 8
hsa-miR-567	0	0	1	1	1	1	PARP15	poly (ADP-ribose) polymerase family, member 15
hsa-miR-567	0	0	1	1	0	0	TIGIT	T cell immunoreceptor with Ig and ITIM domains
hsa-miR-567	0	0	0	1	0	0	VILL	villin-like
hsa-miR-567	0	0	1	1	1	1	AGPHD1	aminoglycoside phosphotransferase domain containing 1
hsa-miR-567	0	0	0	1	0	0	TPTE2	transmembrane phosphoinositide 3-phosphatase and tensin homolog 2
hsa-miR-567	1	0	0	1	1	1	LIPA	lipase A, lysosomal acid, cholesterol esterase
hsa-miR-567	0	0	1	1	1	1	RS1	retinoschisin 1
hsa-miR-567	0	0	1	1	1	1	FCGR3A	Fc fragment of IgG, low affinity IIIa, receptor (CD16a)
hsa-miR-567	0	0	1	1	1	1	FCGR3B	Fc fragment of IgG, low affinity IIIb, receptor (CD16b)
hsa-miR-567	1	0	1	1	1	1	IGF1R	insulin-like growth factor 1 receptor
hsa-miR-567	0	0	0	1	1	1	PTAFR	platelet-activating factor receptor
hsa-miR-567	0	0	0	1	1	1	FLJ45139	FLJ45139 protein
hsa-miR-567	0	0	1	1	1	1	ZNF182	zinc finger protein 182
hsa-miR-567	0	0	1	1	1	1	FAM154B	family with sequence similarity 154, member B
hsa-miR-567	0	0	0	0	1	1	TDP1	tyrosyl-DNA phosphodiesterase 1
hsa-miR-567	0	0	1	1	1	1	C12orf29	chromosome 12 open reading frame 29
hsa-miR-567	1	0	1	0	1	1	FAM102B	family with sequence similarity 102, member B
hsa-miR-567	0	0	1	1	1	1	XKR9	XK, Kell blood group complex subunit-related family, member 9
hsa-miR-567	1	0	1	1	1	1	ARHGAP24	Rho GTPase activating protein 24
hsa-miR-567	1	0	0	1	1	1	PRDM15	PR domain containing 15
hsa-miR-567	1	0	1	1	1	1	SMAP1	small ArfGAP 1
hsa-miR-567	1	0	1	1	1	1	QSER1	glutamine and serine rich 1
hsa-miR-567	1	0	1	0	1	1	TRAPPC6B	trafficking protein particle complex 6B
hsa-miR-567	0	0	0	1	1	1	EPB41L2	erythrocyte membrane protein band 4.1-like 2
hsa-miR-567	1	0	1	1	1	1	EREG	epiregulin
hsa-miR-567	1	0	1	1	1	1	ALCAM	activated leukocyte cell adhesion molecule
hsa-miR-567	0	0	1	1	1	1	HLA-DOA	major histocompatibility complex, class II, DO alpha
hsa-miR-567	1	0	1	1	1	1	NCBP1	nuclear cap binding protein subunit 1, 80kDa
hsa-miR-567	1	0	1	1	1	1	PBX2	pre-B-cell leukemia homeobox 2
hsa-miR-567	0	0	1	1	1	1	PFDN4	prefoldin subunit 4
hsa-miR-567	1	0	1	1	1	1	TCF3	transcription factor 3 (E2A immunoglobulin enhancer binding factors E12/E47)
hsa-miR-567	1	0	1	1	1	1	FZD6	frizzled family receptor 6
hsa-miR-567	1	0	1	0	1	1	CHST3	carbohydrate (chondroitin 6) sulfotransferase 3
hsa-miR-567	0	0	0	1	1	1	CCR6	chemokine (C-C motif) receptor 6
hsa-miR-567	0	0	1	1	1	1	COX15	COX15 homolog, cytochrome c oxidase assembly protein (yeast)
hsa-miR-567	1	0	1	1	1	1	RAB7A	RAB7A, member RAS oncogene family
hsa-miR-567	0	0	1	0	1	1	ADIPOQ	adiponectin, C1Q and collagen domain containing
hsa-miR-567	0	0	0	1	1	1	ABCG1	ATP-binding cassette, sub-family G (WHITE), member 1
hsa-miR-567	0	0	0	1	1	1	POLR2K	polymerase (RNA) II (DNA directed) polypeptide K, 7.0kDa
hsa-miR-567	1	0	0	1	1	1	AKAP12	A kinase (PRKA) anchor protein 12
hsa-miR-567	0	0	0	1	1	1	MAGEA3	melanoma antigen family A, 3
hsa-miR-567	0	0	0	1	1	1	MAGEA6	melanoma antigen family A, 6
hsa-miR-567	0	0	1	1	1	1	NAALAD2	N-acetylated alpha-linked acidic dipeptidase 2
hsa-miR-567	1	0	1	0	1	1	CALCRL	calcitonin receptor-like
hsa-miR-567	0	0	0	1	1	1	FXYD3	FXYD domain containing ion transport regulator 3
hsa-miR-567	1	0	1	0	1	1	POLR3G	polymerase (RNA) III (DNA directed) polypeptide G (32kD)
hsa-miR-567	1	0	1	1	1	1	ZNF12	zinc finger protein 12
hsa-miR-567	0	0	1	1	1	1	NUDT21	nudix (nucleoside diphosphate linked moiety X)-type motif 21
hsa-miR-567	1	0	1	0	1	1	PTPRT	protein tyrosine phosphatase, receptor type, T
hsa-miR-567	0	0	1	0	1	1	ZXDB	zinc finger, X-linked, duplicated B
hsa-miR-567	0	0	1	1	1	1	ATP1B4	ATPase, Na+/K+ transporting, beta 4 polypeptide
hsa-miR-567	1	0	1	1	1	1	NNT	nicotinamide nucleotide transhydrogenase
hsa-miR-567	0	0	1	0	1	1	SEMA3E	sema domain, immunoglobulin domain (Ig), short basic domain, secreted, (semaphorin) 3E
hsa-miR-567	1	0	0	1	1	1	OR11A1	olfactory receptor, family 11, subfamily A, member 1
hsa-miR-567	1	0	1	1	1	1	MKRN2	makorin ring finger protein 2
hsa-miR-567	0	0	0	1	1	1	ANGPTL3	angiopoietin-like 3
hsa-miR-567	0	0	0	1	1	1	ZNF354C	zinc finger protein 354C
hsa-miR-567	1	0	1	0	1	1	TOMM20	translocase of outer mitochondrial membrane 20 homolog (yeast)
hsa-miR-567	1	0	1	1	1	1	SNAP91	synaptosomal-associated protein, 91kDa homolog (mouse)
hsa-miR-567	1	0	1	0	1	1	DIS3	DIS3 mitotic control homolog (S. cerevisiae)
hsa-miR-567	1	0	1	0	1	1	CAMTA2	calmodulin binding transcription activator 2
hsa-miR-567	1	0	1	0	1	1	EFR3A	EFR3 homolog A (S. cerevisiae)
hsa-miR-567	1	0	1	0	1	1	LARP4B	La ribonucleoprotein domain family, member 4B
hsa-miR-567	1	0	1	1	1	1	ARAP2	ArfGAP with RhoGAP domain, ankyrin repeat and PH domain 2
hsa-miR-567	1	0	1	0	1	1	OSBPL3	oxysterol binding protein-like 3
hsa-miR-567	1	0	0	0	1	1	OPA1	optic atrophy 1 (autosomal dominant)
hsa-miR-567	1	0	1	1	1	1	TAF9B	TAF9B RNA polymerase II, TATA box binding protein (TBP)-associated factor, 31kDa
hsa-miR-567	1	0	1	0	1	1	ANKFY1	ankyrin repeat and FYVE domain containing 1
hsa-miR-567	0	0	1	1	1	1	MRPL35	mitochondrial ribosomal protein L35
hsa-miR-567	1	0	1	1	1	1	TET2	tet methylcytosine dioxygenase 2
hsa-miR-567	0	0	1	1	1	1	DDX60	DEAD (Asp-Glu-Ala-Asp) box polypeptide 60
hsa-miR-567	1	0	1	1	1	1	CNNM2	cyclin M2
hsa-miR-567	0	0	0	1	1	1	SAMD9	sterile alpha motif domain containing 9
hsa-miR-567	0	0	0	1	1	1	FAM206A	family with sequence similarity 206, member A
hsa-miR-567	0	0	1	1	1	1	QRSL1	glutaminyl-tRNA synthase (glutamine-hydrolyzing)-like 1
hsa-miR-567	0	0	1	1	1	1	ALG13	asparagine-linked glycosylation 13 homolog (S. cerevisiae)
hsa-miR-567	0	0	0	1	1	1	KCNJ16	potassium inwardly-rectifying channel, subfamily J, member 16
hsa-miR-567	1	0	1	1	1	1	C12orf4	chromosome 12 open reading frame 4
hsa-miR-567	0	0	0	1	1	1	SPC25	SPC25, NDC80 kinetochore complex component, homolog (S. cerevisiae)
hsa-miR-567	0	0	1	0	1	1	TRMT5	tRNA methyltransferase 5 homolog (S. cerevisiae)
hsa-miR-567	1	0	1	0	1	1	SH3RF1	SH3 domain containing ring finger 1
hsa-miR-567	1	0	1	0	1	1	GPR107	G protein-coupled receptor 107
hsa-miR-567	0	0	1	0	1	1	SLC13A1	solute carrier family 13 (sodium/sulfate symporters), member 1
hsa-miR-567	0	0	1	1	1	1	BBS1	Bardet-Biedl syndrome 1
hsa-miR-567	0	0	1	0	1	1	C5orf44	chromosome 5 open reading frame 44
hsa-miR-567	1	0	1	1	1	1	ATF7IP2	activating transcription factor 7 interacting protein 2
hsa-miR-567	0	0	1	1	1	1	CCDC170	coiled-coil domain containing 170
hsa-miR-567	1	0	1	0	1	1	RAB33B	RAB33B, member RAS oncogene family
hsa-miR-567	1	0	1	0	1	1	THAP2	THAP domain containing, apoptosis associated protein 2
hsa-miR-567	0	0	1	1	1	1	TSSK1B	testis-specific serine kinase 1B
hsa-miR-567	1	0	1	0	1	1	PSD2	pleckstrin and Sec7 domain containing 2
hsa-miR-567	0	0	1	1	1	1	BEST3	bestrophin 3
hsa-miR-567	0	0	1	0	1	1	AGBL4	ATP/GTP binding protein-like 4
hsa-miR-567	0	0	0	1	1	1	FANCD2	Fanconi anemia, complementation group D2
hsa-miR-567	0	0	1	1	1	1	CLEC4D	C-type lectin domain family 4, member D
hsa-miR-567	1	0	0	1	1	1	TMEM45B	transmembrane protein 45B
hsa-miR-567	0	0	0	1	1	1	ADAMTS16	ADAM metallopeptidase with thrombospondin type 1 motif, 16
hsa-miR-567	0	0	0	1	1	1	ZNF684	zinc finger protein 684
hsa-miR-567	0	0	1	1	1	1	KANSL1L	KAT8 regulatory NSL complex subunit 1-like
hsa-miR-567	0	0	1	0	1	1	SH3RF2	SH3 domain containing ring finger 2
hsa-miR-567	0	0	1	1	1	1	PLD5	phospholipase D family, member 5
hsa-miR-567	1	0	0	1	1	1	NKAIN4	Na+/K+ transporting ATPase interacting 4
hsa-miR-567	0	0	1	0	1	1	LIX1	Lix1 homolog (chicken)
hsa-miR-567	0	0	0	1	1	1	SEPSECS	Sep (O-phosphoserine) tRNA:Sec (selenocysteine) tRNA synthase
hsa-miR-567	0	0	1	1	1	1	CREG2	cellular repressor of E1A-stimulated genes 2
hsa-miR-567	0	0	1	1	1	1	C4orf33	chromosome 4 open reading frame 33
hsa-miR-567	0	0	1	1	1	1	ZNF100	zinc finger protein 100
hsa-miR-567	0	0	1	1	1	1	MPV17L	MPV17 mitochondrial membrane protein-like
hsa-miR-567	0	0	0	1	1	1	OR7D2	olfactory receptor, family 7, subfamily D, member 2
hsa-miR-567	1	0	1	0	1	1	C5orf51	chromosome 5 open reading frame 51
hsa-miR-567	1	0	1	0	1	1	LONRF2	LON peptidase N-terminal domain and ring finger 2
hsa-miR-567	0	0	0	0	1	1	LOC285484	uncharacterized LOC285484
