# Supplementary material for: Profiling of Selected MicroRNAs in Proliferative Eutopic Endometrium of Women with Ovarian Endometriosis
Source: Biomed Res Int. 2015 Aug 20;2015:760698. doi: 10.1155/2015/760698 (PMC4558423; doi:10.1155/2015/760698)
Supplement: Supplementary file 1 — Table I: The names of miRNAs significantly differentially expressed between eutopic endometrium of patients with endometriosis vs eutopic endometrium of patients without endometriosis. Table II: The associations between miRNA and mRNA, which presents detailed results of the search of six major databases i.e targetscan, tarbase, miranda, mirbase, mirtarget2 and pictar. [file 760698.f1.zip › 760698.f1/Table II/hsa-miR-568.tsv]

miR	targetscan	tarbase	miranda	mirbase	mirtarget2	pictar	GeneSymbol	GeneName
hsa-miR-568	1	0	1	1	1	1	ARNTL	aryl hydrocarbon receptor nuclear translocator-like
hsa-miR-568	1	0	1	1	1	1	PDZD2	PDZ domain containing 2
hsa-miR-568	1	0	1	1	1	1	ZFYVE16	zinc finger, FYVE domain containing 16
hsa-miR-568	1	0	1	1	1	1	CHD9	chromodomain helicase DNA binding protein 9
hsa-miR-568	1	0	1	0	1	1	KIAA0355	KIAA0355
hsa-miR-568	1	0	1	1	1	1	FAM65B	family with sequence similarity 65, member B
hsa-miR-568	1	0	1	1	1	1	ABCC5	ATP-binding cassette, sub-family C (CFTR/MRP), member 5
hsa-miR-568	1	0	1	0	1	1	GAS7	growth arrest-specific 7
hsa-miR-568	1	0	1	1	1	1	NUPL1	nucleoporin like 1
hsa-miR-568	1	0	1	1	1	1	PPIP5K2	diphosphoinositol pentakisphosphate kinase 2
hsa-miR-568	0	0	1	1	1	1	PDE4DIP	phosphodiesterase 4D interacting protein
hsa-miR-568	1	0	1	1	1	1	RNGTT	RNA guanylyltransferase and 5'-phosphatase
hsa-miR-568	1	0	1	1	1	1	BAI3	brain-specific angiogenesis inhibitor 3
hsa-miR-568	1	0	1	1	1	1	NRXN1	neurexin 1
hsa-miR-568	1	0	1	1	1	1	SLC4A7	solute carrier family 4, sodium bicarbonate cotransporter, member 7
hsa-miR-568	1	0	1	1	1	1	HIPK1	homeodomain interacting protein kinase 1
hsa-miR-568	1	0	1	1	1	1	GIGYF2	GRB10 interacting GYF protein 2
hsa-miR-568	0	0	1	1	0	0	ATP10B	ATPase, class V, type 10B
hsa-miR-568	1	0	1	0	1	1	DOCK4	dedicator of cytokinesis 4
hsa-miR-568	1	0	1	1	1	1	MATR3	matrin 3
hsa-miR-568	1	0	1	0	1	1	LPHN3	latrophilin 3
hsa-miR-568	1	0	1	1	1	1	DMXL2	Dmx-like 2
hsa-miR-568	0	0	1	1	0	0	FAM169A	family with sequence similarity 169, member A
hsa-miR-568	1	0	1	1	1	1	CALCR	calcitonin receptor
hsa-miR-568	1	0	1	1	1	1	UBE2K	ubiquitin-conjugating enzyme E2K
hsa-miR-568	1	0	1	1	1	1	RGL1	ral guanine nucleotide dissociation stimulator-like 1
hsa-miR-568	0	0	1	1	1	1	FASTKD2	FAST kinase domains 2
hsa-miR-568	1	0	1	1	1	1	RPGRIP1L	RPGRIP1-like
hsa-miR-568	1	0	1	1	0	0	FRMD4B	FERM domain containing 4B
hsa-miR-568	0	0	1	0	1	1	TP53TG3	TP53 target 3
hsa-miR-568	0	0	1	0	0	0	TP53TG3B	TP53 target 3B
hsa-miR-568	0	0	1	1	1	1	AGTPBP1	ATP/GTP binding protein 1
hsa-miR-568	1	0	1	1	1	1	FOXJ3	forkhead box J3
hsa-miR-568	1	0	1	1	1	1	NLGN1	neuroligin 1
hsa-miR-568	1	0	1	0	1	1	ZNF507	zinc finger protein 507
hsa-miR-568	1	0	1	1	1	1	SMARCAD1	SWI/SNF-related, matrix-associated actin-dependent regulator of chromatin, subfamily a, containing DEAD/H box 1
hsa-miR-568	1	0	1	0	1	1	ODZ2	odz, odd Oz/ten-m homolog 2 (Drosophila)
hsa-miR-568	1	0	1	0	1	1	GPR158	G protein-coupled receptor 158
hsa-miR-568	1	0	1	0	1	1	PPFIBP1	PTPRF interacting protein, binding protein 1 (liprin beta 1)
hsa-miR-568	1	0	1	1	0	0	ATAD2B	ATPase family, AAA domain containing 2B
hsa-miR-568	1	0	1	1	1	1	ASAP1	ArfGAP with SH3 domain, ankyrin repeat and PH domain 1
hsa-miR-568	1	0	1	0	1	1	ANKFY1	ankyrin repeat and FYVE domain containing 1
hsa-miR-568	0	0	1	1	0	0	FAM184B	family with sequence similarity 184, member B
hsa-miR-568	1	0	1	1	1	1	STK36	serine/threonine kinase 36
hsa-miR-568	0	0	1	1	1	1	KIF20B	kinesin family member 20B
hsa-miR-568	1	0	1	1	1	1	PCDH19	protocadherin 19
hsa-miR-568	1	0	1	1	1	1	HACE1	HECT domain and ankyrin repeat containing E3 ubiquitin protein ligase 1
hsa-miR-568	1	0	1	1	1	1	LRRC7	leucine rich repeat containing 7
hsa-miR-568	0	0	1	1	1	1	IFT80	intraflagellar transport 80 homolog (Chlamydomonas)
hsa-miR-568	0	0	1	0	1	1	KIAA1468	KIAA1468
hsa-miR-568	1	0	1	1	1	1	BAZ2B	bromodomain adjacent to zinc finger domain, 2B
hsa-miR-568	0	0	1	0	0	0	NYAP2	neuronal tyrosine-phosphorylated phosphoinositide-3-kinase adaptor 2
hsa-miR-568	0	0	1	0	1	1	ZSWIM6	zinc finger, SWIM-type containing 6
hsa-miR-568	1	0	1	1	1	1	ZNF532	zinc finger protein 532
hsa-miR-568	1	0	1	1	0	0	MAGI3	membrane associated guanylate kinase, WW and PDZ domain containing 3
hsa-miR-568	1	0	1	1	1	1	PHF21A	PHD finger protein 21A
hsa-miR-568	0	0	1	1	1	1	BHLHB9	basic helix-loop-helix domain containing, class B, 9
hsa-miR-568	1	0	1	0	1	1	RIMS1	regulating synaptic membrane exocytosis 1
hsa-miR-568	1	0	1	1	1	1	LCOR	ligand dependent nuclear receptor corepressor
hsa-miR-568	1	0	1	1	1	1	LZTS2	leucine zipper, putative tumor suppressor 2
hsa-miR-568	0	0	1	1	0	0	SPIRE2	spire homolog 2 (Drosophila)
hsa-miR-568	1	0	1	1	1	1	AHCTF1	AT hook containing transcription factor 1
hsa-miR-568	0	0	1	1	1	1	SLC11A2	solute carrier family 11 (proton-coupled divalent metal ion transporters), member 2
hsa-miR-568	1	0	1	1	1	1	HNRPDL	heterogeneous nuclear ribonucleoprotein D-like
hsa-miR-568	1	0	1	1	1	1	BCL2L11	BCL2-like 11 (apoptosis facilitator)
hsa-miR-568	1	0	1	1	1	1	OXR1	oxidation resistance 1
hsa-miR-568	1	0	1	1	1	1	SH3TC2	SH3 domain and tetratricopeptide repeats 2
hsa-miR-568	1	0	1	1	1	1	PRDM16	PR domain containing 16
hsa-miR-568	1	0	1	0	0	0	ZBTB34	zinc finger and BTB domain containing 34
hsa-miR-568	1	0	1	1	1	1	ACBD5	acyl-CoA binding domain containing 5
hsa-miR-568	1	0	1	1	1	1	FHOD3	formin homology 2 domain containing 3
hsa-miR-568	0	0	1	0	1	1	RASSF8	Ras association (RalGDS/AF-6) domain family (N-terminal) member 8
hsa-miR-568	1	0	1	0	0	0	ZC3H12C	zinc finger CCCH-type containing 12C
hsa-miR-568	0	0	1	1	0	0	MED12	mediator complex subunit 12
hsa-miR-568	0	0	1	1	0	0	HELLS	helicase, lymphoid-specific
hsa-miR-568	1	0	1	1	1	1	PAN3	PAN3 poly(A) specific ribonuclease subunit homolog (S. cerevisiae)
hsa-miR-568	1	0	1	0	1	1	LIN54	lin-54 homolog (C. elegans)
hsa-miR-568	1	0	1	1	1	1	KCNMA1	potassium large conductance calcium-activated channel, subfamily M, alpha member 1
hsa-miR-568	1	0	1	0	1	1	BEND4	BEN domain containing 4
hsa-miR-568	1	1	1	1	1	1	BACE1	beta-site APP-cleaving enzyme 1
hsa-miR-568	1	0	1	1	1	1	ARHGEF7	Rho guanine nucleotide exchange factor (GEF) 7
hsa-miR-568	1	0	1	1	1	1	ADARB1	adenosine deaminase, RNA-specific, B1
hsa-miR-568	1	0	1	1	1	1	LTBP1	latent transforming growth factor beta binding protein 1
hsa-miR-568	0	0	1	0	1	1	ATR	ataxia telangiectasia and Rad3 related
hsa-miR-568	1	0	1	1	1	1	SHC1	SHC (Src homology 2 domain containing) transforming protein 1
hsa-miR-568	0	0	1	0	1	1	ITPR1	inositol 1,4,5-trisphosphate receptor, type 1
hsa-miR-568	1	0	1	1	1	1	BACH2	BTB and CNC homology 1, basic leucine zipper transcription factor 2
hsa-miR-568	1	0	1	1	0	0	GRIN1	glutamate receptor, ionotropic, N-methyl D-aspartate 1
hsa-miR-568	1	0	1	1	1	1	MEF2A	myocyte enhancer factor 2A
hsa-miR-568	0	0	1	1	0	0	SMARCC2	SWI/SNF related, matrix associated, actin dependent regulator of chromatin, subfamily c, member 2
hsa-miR-568	0	0	1	1	1	1	DYNC1I2	dynein, cytoplasmic 1, intermediate chain 2
hsa-miR-568	1	0	1	1	1	1	SLC8A1	solute carrier family 8 (sodium/calcium exchanger), member 1
hsa-miR-568	1	0	1	1	1	1	SYNCRIP	synaptotagmin binding, cytoplasmic RNA interacting protein
hsa-miR-568	1	0	1	1	1	1	RLF	rearranged L-myc fusion
hsa-miR-568	1	0	1	1	1	1	DTNA	dystrobrevin, alpha
hsa-miR-568	1	0	1	0	1	1	PLAG1	pleiomorphic adenoma gene 1
hsa-miR-568	1	0	1	0	1	1	SLC6A6	solute carrier family 6 (neurotransmitter transporter, taurine), member 6
hsa-miR-568	1	0	1	1	1	1	PRKACB	protein kinase, cAMP-dependent, catalytic, beta
hsa-miR-568	1	0	1	0	1	1	ETV1	ets variant 1
hsa-miR-568	0	0	1	0	1	1	NPY1R	neuropeptide Y receptor Y1
hsa-miR-568	1	0	1	1	1	1	REV3L	REV3-like, polymerase (DNA directed), zeta, catalytic subunit
hsa-miR-568	1	0	1	1	1	1	ABI1	abl-interactor 1
hsa-miR-568	1	0	1	1	1	1	TWF1	twinfilin, actin-binding protein, homolog 1 (Drosophila)
hsa-miR-568	1	0	1	0	1	1	CHL1	cell adhesion molecule with homology to L1CAM (close homolog of L1)
hsa-miR-568	0	0	1	1	1	1	DGKE	diacylglycerol kinase, epsilon 64kDa
hsa-miR-568	1	0	1	1	1	1	EPHA5	EPH receptor A5
hsa-miR-568	1	0	1	1	1	1	SATB2	SATB homeobox 2
hsa-miR-568	1	0	1	1	1	1	AEBP2	AE binding protein 2
hsa-miR-568	1	0	1	0	1	1	CDON	Cdon homolog (mouse)
hsa-miR-568	0	0	1	1	1	1	PPP1R12C	protein phosphatase 1, regulatory subunit 12C
hsa-miR-568	0	0	1	0	0	0	CACNA1B	calcium channel, voltage-dependent, N type, alpha 1B subunit
hsa-miR-568	1	0	1	1	1	1	MYO5A	myosin VA (heavy chain 12, myoxin)
hsa-miR-568	1	0	1	1	1	1	LIMA1	LIM domain and actin binding 1
hsa-miR-568	0	0	1	1	0	0	SLC22A8	solute carrier family 22 (organic anion transporter), member 8
hsa-miR-568	0	0	1	1	1	1	ELOVL5	ELOVL fatty acid elongase 5
hsa-miR-568	1	0	1	1	1	1	TEAD1	TEA domain family member 1 (SV40 transcriptional enhancer factor)
hsa-miR-568	1	0	1	1	1	1	ZFX	zinc finger protein, X-linked
hsa-miR-568	0	0	1	1	1	1	PLD1	phospholipase D1, phosphatidylcholine-specific
hsa-miR-568	1	0	1	0	1	1	PDE7B	phosphodiesterase 7B
hsa-miR-568	1	0	1	1	1	1	APC	adenomatous polyposis coli
hsa-miR-568	0	0	1	0	1	1	PARG	poly (ADP-ribose) glycohydrolase
hsa-miR-568	1	0	1	0	1	1	MLL2	myeloid/lymphoid or mixed-lineage leukemia 2
hsa-miR-568	1	0	1	1	1	1	SLC4A4	solute carrier family 4, sodium bicarbonate cotransporter, member 4
hsa-miR-568	0	0	1	0	0	0	ZNRD1-AS1	ZNRD1 antisense RNA 1
hsa-miR-568	1	0	1	1	1	1	MYT1L	myelin transcription factor 1-like
hsa-miR-568	1	0	1	0	1	1	CELF2	CUGBP, Elav-like family member 2
hsa-miR-568	1	0	1	0	0	0	MAP3K1	mitogen-activated protein kinase kinase kinase 1, E3 ubiquitin protein ligase
hsa-miR-568	1	0	1	1	1	1	SHOC2	soc-2 suppressor of clear homolog (C. elegans)
hsa-miR-568	0	0	1	1	0	0	SGK223	homolog of rat pragma of Rnd2
hsa-miR-568	1	0	1	1	1	1	TP63	tumor protein p63
hsa-miR-568	0	0	1	1	1	1	SSBP2	single-stranded DNA binding protein 2
hsa-miR-568	0	0	1	1	1	1	LYPLA1	lysophospholipase I
hsa-miR-568	0	0	1	1	0	0	FAM48A	family with sequence similarity 48, member A
hsa-miR-568	1	0	1	1	1	1	GLS	glutaminase
hsa-miR-568	1	0	1	0	1	1	CD164	CD164 molecule, sialomucin
hsa-miR-568	1	0	1	1	1	1	KAT6B	K(lysine) acetyltransferase 6B
hsa-miR-568	1	0	1	1	1	1	EDNRB	endothelin receptor type B
hsa-miR-568	1	0	1	1	1	1	HNRNPH3	heterogeneous nuclear ribonucleoprotein H3 (2H9)
hsa-miR-568	1	0	1	1	1	1	CAB39	calcium binding protein 39
hsa-miR-568	1	0	1	1	1	1	SORBS1	sorbin and SH3 domain containing 1
hsa-miR-568	1	0	1	1	1	1	AASDHPPT	aminoadipate-semialdehyde dehydrogenase-phosphopantetheinyl transferase
hsa-miR-568	1	0	1	1	1	1	HMG20A	high mobility group 20A
hsa-miR-568	1	0	1	1	1	1	USP15	ubiquitin specific peptidase 15
hsa-miR-568	1	0	1	0	0	0	PRPF40A	PRP40 pre-mRNA processing factor 40 homolog A (S. cerevisiae)
hsa-miR-568	1	0	1	1	1	1	ANKRD13A	ankyrin repeat domain 13A
hsa-miR-568	1	0	1	1	1	1	AGPAT3	1-acylglycerol-3-phosphate O-acyltransferase 3
hsa-miR-568	0	0	1	1	1	1	FGFR1OP2	FGFR1 oncogene partner 2
hsa-miR-568	1	0	1	1	1	1	STXBP6	syntaxin binding protein 6 (amisyn)
hsa-miR-568	0	0	1	1	1	1	CDC16	cell division cycle 16 homolog (S. cerevisiae)
hsa-miR-568	1	0	1	1	1	1	USP25	ubiquitin specific peptidase 25
hsa-miR-568	0	0	1	1	1	1	SLC39A8	solute carrier family 39 (zinc transporter), member 8
hsa-miR-568	0	0	1	1	0	0	NCOA6	nuclear receptor coactivator 6
hsa-miR-568	1	0	1	1	1	1	CCNL1	cyclin L1
hsa-miR-568	0	0	1	1	1	1	LMBRD1	LMBR1 domain containing 1
hsa-miR-568	1	0	1	1	1	1	KCNMB2	potassium large conductance calcium-activated channel, subfamily M, beta member 2
hsa-miR-568	1	0	1	1	1	1	MYLIP	myosin regulatory light chain interacting protein
hsa-miR-568	0	0	1	1	1	1	BRD7	bromodomain containing 7
hsa-miR-568	0	0	1	1	1	1	EAF2	ELL associated factor 2
hsa-miR-568	0	0	1	1	1	1	HERPUD1	homocysteine-inducible, endoplasmic reticulum stress-inducible, ubiquitin-like domain member 1
hsa-miR-568	0	0	1	1	1	1	CD28	CD28 molecule
hsa-miR-568	1	0	1	1	1	1	DESI2	desumoylating isopeptidase 2
hsa-miR-568	1	0	1	1	1	1	STRN3	striatin, calmodulin binding protein 3
hsa-miR-568	1	0	1	1	1	1	ELF2	E74-like factor 2 (ets domain transcription factor)
hsa-miR-568	1	0	1	1	1	1	ABI2	abl-interactor 2
hsa-miR-568	0	0	1	1	1	1	CCR3	chemokine (C-C motif) receptor 3
hsa-miR-568	1	0	1	1	1	1	RBM47	RNA binding motif protein 47
hsa-miR-568	1	0	1	1	1	1	SH3GLB1	SH3-domain GRB2-like endophilin B1
hsa-miR-568	1	0	1	0	1	1	TRPS1	trichorhinophalangeal syndrome I
hsa-miR-568	1	0	1	1	1	1	ERGIC1	endoplasmic reticulum-golgi intermediate compartment (ERGIC) 1
hsa-miR-568	0	0	1	1	1	1	C21orf7	chromosome 21 open reading frame 7
hsa-miR-568	0	0	1	1	1	1	ZNF331	zinc finger protein 331
hsa-miR-568	0	0	1	1	1	1	ASUN	asunder, spermatogenesis regulator homolog (Drosphila)
hsa-miR-568	0	0	1	0	1	1	ERBB2IP	erbb2 interacting protein
hsa-miR-568	0	0	1	1	0	0	TRIM69	tripartite motif containing 69
hsa-miR-568	1	0	1	1	1	1	MGEA5	meningioma expressed antigen 5 (hyaluronidase)
hsa-miR-568	1	0	1	1	1	1	METTL10	methyltransferase like 10
hsa-miR-568	1	0	1	0	1	1	GLYR1	glyoxylate reductase 1 homolog (Arabidopsis)
hsa-miR-568	0	0	1	1	1	1	FCRLA	Fc receptor-like A
hsa-miR-568	0	0	1	1	0	0	FEZF2	FEZ family zinc finger 2
hsa-miR-568	0	0	1	1	1	1	RERG	RAS-like, estrogen-regulated, growth inhibitor
hsa-miR-568	0	0	1	1	1	1	SLC6A15	solute carrier family 6 (neutral amino acid transporter), member 15
hsa-miR-568	1	0	1	1	1	1	PBX3	pre-B-cell leukemia homeobox 3
hsa-miR-568	1	0	1	1	1	1	ATAD1	ATPase family, AAA domain containing 1
hsa-miR-568	1	0	1	1	1	1	LARP4	La ribonucleoprotein domain family, member 4
hsa-miR-568	0	0	1	0	1	1	ZNF268	zinc finger protein 268
hsa-miR-568	0	0	1	1	1	1	MAD2L1	MAD2 mitotic arrest deficient-like 1 (yeast)
hsa-miR-568	1	0	1	1	1	1	RCAN1	regulator of calcineurin 1
hsa-miR-568	1	0	1	1	1	1	MAGI1	membrane associated guanylate kinase, WW and PDZ domain containing 1
hsa-miR-568	1	0	1	1	1	1	PSIP1	PC4 and SFRS1 interacting protein 1
hsa-miR-568	0	0	1	0	1	1	LYPD6B	LY6/PLAUR domain containing 6B
hsa-miR-568	1	0	1	1	0	0	XRRA1	X-ray radiation resistance associated 1
hsa-miR-568	1	0	1	1	1	1	RBFOX1	RNA binding protein, fox-1 homolog (C. elegans) 1
hsa-miR-568	1	0	1	0	1	1	PPP1R12A	protein phosphatase 1, regulatory subunit 12A
hsa-miR-568	0	0	1	1	1	1	CSPG5	chondroitin sulfate proteoglycan 5 (neuroglycan C)
hsa-miR-568	1	0	1	1	1	1	ASB8	ankyrin repeat and SOCS box containing 8
hsa-miR-568	1	0	1	1	1	1	CPNE4	copine IV
hsa-miR-568	1	0	1	1	1	1	ZC3H14	zinc finger CCCH-type containing 14
hsa-miR-568	1	0	1	1	1	1	WAPAL	wings apart-like homolog (Drosophila)
hsa-miR-568	0	0	1	1	1	1	AMPH	amphiphysin
hsa-miR-568	0	0	1	1	1	1	RBM11	RNA binding motif protein 11
hsa-miR-568	1	0	1	0	1	1	NUDCD1	NudC domain containing 1
hsa-miR-568	0	0	1	1	1	1	TTLL11	tubulin tyrosine ligase-like family, member 11
hsa-miR-568	0	0	1	1	1	1	BMP2K	BMP2 inducible kinase
hsa-miR-568	0	0	1	1	0	0	SVIP	small VCP/p97-interacting protein
hsa-miR-568	1	0	1	0	1	1	IL1RAP	interleukin 1 receptor accessory protein
hsa-miR-568	1	0	1	1	1	1	GPR64	G protein-coupled receptor 64
hsa-miR-568	0	0	1	1	0	0	CLDN7	claudin 7
hsa-miR-568	0	0	1	0	0	0	ADAM5	ADAM metallopeptidase domain 5, pseudogene
hsa-miR-568	0	0	1	1	1	1	CLDND1	claudin domain containing 1
hsa-miR-568	0	0	1	1	1	1	CD1E	CD1e molecule
hsa-miR-568	1	0	1	1	1	1	SAV1	salvador homolog 1 (Drosophila)
hsa-miR-568	0	0	1	0	1	1	COL13A1	collagen, type XIII, alpha 1
hsa-miR-568	1	0	1	1	1	1	VAMP7	vesicle-associated membrane protein 7
hsa-miR-568	0	0	1	1	1	1	WWTR1	WW domain containing transcription regulator 1
hsa-miR-568	1	0	1	1	1	1	RAB3IP	RAB3A interacting protein (rabin3)
hsa-miR-568	1	0	1	1	1	1	PDE1B	phosphodiesterase 1B, calmodulin-dependent
hsa-miR-568	1	0	1	1	1	1	NAV3	neuron navigator 3
hsa-miR-568	1	0	1	1	1	1	PPP3CB	protein phosphatase 3, catalytic subunit, beta isozyme
hsa-miR-568	1	0	1	1	1	1	ARL4C	ADP-ribosylation factor-like 4C
hsa-miR-568	0	0	1	1	1	1	PHACTR3	phosphatase and actin regulator 3
hsa-miR-568	1	0	1	1	1	1	PPP1R9A	protein phosphatase 1, regulatory subunit 9A
hsa-miR-568	0	0	1	1	0	0	NHLRC2	NHL repeat containing 2
hsa-miR-568	1	0	1	0	1	1	NFAT5	nuclear factor of activated T-cells 5, tonicity-responsive
hsa-miR-568	0	0	1	0	0	0	FLJ20518	FSHD region gene 2 family, member C pseudogene
hsa-miR-568	0	0	1	1	1	1	UBE2Q2	ubiquitin-conjugating enzyme E2Q family member 2
hsa-miR-568	0	0	1	0	0	0	TUG1	taurine upregulated 1 (non-protein coding)
hsa-miR-568	1	0	1	1	1	1	ARHGAP12	Rho GTPase activating protein 12
hsa-miR-568	1	0	1	1	1	1	ARGLU1	arginine and glutamate rich 1
hsa-miR-568	0	0	1	0	0	0	MCM3AP-AS1	MCM3AP antisense RNA 1
hsa-miR-568	0	0	1	1	1	1	STOX2	storkhead box 2
hsa-miR-568	0	0	1	1	1	1	RNF220	ring finger protein 220
hsa-miR-568	1	0	1	1	1	1	EIF2C1	eukaryotic translation initiation factor 2C, 1
hsa-miR-568	1	0	1	1	1	1	PTBP3	polypyrimidine tract binding protein 3
hsa-miR-568	0	0	1	1	1	1	GBP3	guanylate binding protein 3
hsa-miR-568	0	0	1	1	1	1	MCOLN3	mucolipin 3
hsa-miR-568	1	0	1	1	1	1	ACER3	alkaline ceramidase 3
hsa-miR-568	0	0	1	1	0	0	ANAPC7	anaphase promoting complex subunit 7
hsa-miR-568	0	0	1	1	1	1	CCPG1	cell cycle progression 1
hsa-miR-568	1	0	1	1	0	0	DFNB31	deafness, autosomal recessive 31
hsa-miR-568	1	0	1	1	1	1	S100PBP	S100P binding protein
hsa-miR-568	1	0	1	1	1	1	SMEK2	SMEK homolog 2, suppressor of mek1 (Dictyostelium)
hsa-miR-568	1	0	1	1	1	1	SRP72	signal recognition particle 72kDa
hsa-miR-568	0	0	1	0	1	1	ARHGAP42	Rho GTPase activating protein 42
hsa-miR-568	0	0	1	1	0	0	ACTR6	ARP6 actin-related protein 6 homolog (yeast)
hsa-miR-568	1	0	1	1	1	1	DERL1	derlin 1
hsa-miR-568	1	0	1	0	1	1	C14orf101	chromosome 14 open reading frame 101
hsa-miR-568	1	0	1	1	0	0	ST6GALNAC6	ST6 (alpha-N-acetyl-neuraminyl-2,3-beta-galactosyl-1,3)-N-acetylgalactosaminide alpha-2,6-sialyltransferase 6
hsa-miR-568	0	0	1	0	0	0	LOC286059	tumor necrosis factor receptor superfamily, member 10d, decoy with truncated death domain pseudogene
hsa-miR-568	0	0	1	0	0	0	IFFO2	intermediate filament family orphan 2
hsa-miR-568	1	0	1	1	1	1	DYRK2	dual-specificity tyrosine-(Y)-phosphorylation regulated kinase 2
hsa-miR-568	1	0	1	1	1	1	SLC35A3	solute carrier family 35 (UDP-N-acetylglucosamine (UDP-GlcNAc) transporter), member A3
hsa-miR-568	1	0	1	1	1	1	ABI3BP	ABI family, member 3 (NESH) binding protein
hsa-miR-568	1	0	1	0	1	1	MYO5B	myosin VB
hsa-miR-568	1	0	1	1	1	1	DENND4C	DENN/MADD domain containing 4C
hsa-miR-568	1	0	1	1	1	1	NAA30	N(alpha)-acetyltransferase 30, NatC catalytic subunit
hsa-miR-568	0	0	1	0	1	1	FLJ22447	uncharacterized LOC400221
hsa-miR-568	0	0	1	1	1	1	FAM124B	family with sequence similarity 124B
hsa-miR-568	1	0	1	0	0	0	KIF26A	kinesin family member 26A
hsa-miR-568	0	0	1	1	0	0	EXOC6B	exocyst complex component 6B
hsa-miR-568	1	0	1	1	1	1	ITGA9	integrin, alpha 9
hsa-miR-568	1	0	1	1	1	1	FOXP1	forkhead box P1
hsa-miR-568	0	0	1	1	1	1	RNF146	ring finger protein 146
hsa-miR-568	0	0	1	1	1	1	KDM2B	lysine (K)-specific demethylase 2B
hsa-miR-568	1	0	1	1	1	1	MARK1	MAP/microtubule affinity-regulating kinase 1
hsa-miR-568	1	0	1	1	1	1	NFASC	neurofascin
hsa-miR-568	0	0	1	1	1	1	BBS1	Bardet-Biedl syndrome 1
hsa-miR-568	1	0	1	1	1	1	TMEM2	transmembrane protein 2
hsa-miR-568	1	0	1	1	1	1	GPD2	glycerol-3-phosphate dehydrogenase 2 (mitochondrial)
hsa-miR-568	1	0	1	1	1	1	ARHGAP36	Rho GTPase activating protein 36
hsa-miR-568	0	0	1	0	0	0	FAM185A	family with sequence similarity 185, member A
hsa-miR-568	1	0	1	1	1	1	TPPP	tubulin polymerization promoting protein
hsa-miR-568	0	0	1	1	1	1	C8orf46	chromosome 8 open reading frame 46
hsa-miR-568	0	0	1	0	0	0	CHST9-AS1	CHST9 antisense RNA 1
hsa-miR-568	1	0	1	1	1	1	MBD5	methyl-CpG binding domain protein 5
hsa-miR-568	0	0	1	0	0	0	LOC154092	uncharacterized LOC154092
hsa-miR-568	1	0	1	1	0	0	SMARCA4	SWI/SNF related, matrix associated, actin dependent regulator of chromatin, subfamily a, member 4
hsa-miR-568	1	0	1	1	1	1	FRMD6	FERM domain containing 6
hsa-miR-568	0	0	1	1	1	1	AGXT2	alanine--glyoxylate aminotransferase 2
hsa-miR-568	1	0	1	1	1	1	DIXDC1	DIX domain containing 1
hsa-miR-568	1	0	1	1	1	1	TMTC1	transmembrane and tetratricopeptide repeat containing 1
hsa-miR-568	0	0	1	0	0	0	LOC440894	uncharacterized LOC440894
hsa-miR-568	1	0	1	0	1	1	PTPRE	protein tyrosine phosphatase, receptor type, E
hsa-miR-568	0	0	1	0	0	0	JPX	JPX transcript, XIST activator (non-protein coding)
hsa-miR-568	1	0	1	1	1	1	ZIC4	Zic family member 4
hsa-miR-568	0	0	1	0	1	1	FAM70A	family with sequence similarity 70, member A
hsa-miR-568	1	0	1	1	1	1	CLCN5	chloride channel, voltage-sensitive 5
hsa-miR-568	1	0	1	1	1	1	PUM1	pumilio homolog 1 (Drosophila)
hsa-miR-568	1	0	1	1	0	0	SLC29A2	solute carrier family 29 (nucleoside transporters), member 2
hsa-miR-568	1	0	1	0	1	1	PLEKHA1	pleckstrin homology domain containing, family A (phosphoinositide binding specific) member 1
hsa-miR-568	1	0	1	0	1	1	NCAM1	neural cell adhesion molecule 1
hsa-miR-568	0	0	1	1	1	1	FXC1	fracture callus 1 homolog (rat)
hsa-miR-568	0	0	1	1	1	1	ZBTB26	zinc finger and BTB domain containing 26
hsa-miR-568	0	0	1	0	0	0	C6orf228	chromosome 6 open reading frame 228
hsa-miR-568	0	0	1	0	1	1	UHMK1	U2AF homology motif (UHM) kinase 1
hsa-miR-568	1	0	1	1	1	1	HLF	hepatic leukemia factor
hsa-miR-568	0	0	1	1	1	1	PKIB	protein kinase (cAMP-dependent, catalytic) inhibitor beta
hsa-miR-568	0	0	1	1	1	1	PDZRN3	PDZ domain containing ring finger 3
hsa-miR-568	1	0	1	1	1	1	SIRT1	sirtuin 1
hsa-miR-568	1	0	1	1	1	1	PAX6	paired box 6
hsa-miR-568	1	0	1	1	1	1	UBAP1	ubiquitin associated protein 1
hsa-miR-568	0	0	1	1	1	1	TFPI2	tissue factor pathway inhibitor 2
hsa-miR-568	1	0	1	1	1	1	TTC13	tetratricopeptide repeat domain 13
hsa-miR-568	1	0	1	1	1	1	BOC	Boc homolog (mouse)
hsa-miR-568	1	0	1	1	1	1	SH3BP5	SH3-domain binding protein 5 (BTK-associated)
hsa-miR-568	0	0	1	0	0	0	LOC152225	uncharacterized LOC152225
hsa-miR-568	1	0	1	1	1	1	TLK1	tousled-like kinase 1
hsa-miR-568	0	0	1	1	1	1	STBD1	starch binding domain 1
hsa-miR-568	0	0	1	0	1	1	TMSB15B	thymosin beta 15B
hsa-miR-568	0	0	1	1	1	1	MAPK10	mitogen-activated protein kinase 10
hsa-miR-568	1	0	1	1	1	1	ARIH2	ariadne homolog 2 (Drosophila)
hsa-miR-568	1	0	1	1	1	1	FRY	furry homolog (Drosophila)
hsa-miR-568	1	0	1	1	1	1	AMMECR1	Alport syndrome, mental retardation, midface hypoplasia and elliptocytosis chromosomal region gene 1
hsa-miR-568	0	0	1	1	0	0	CDK15	cyclin-dependent kinase 15
hsa-miR-568	1	0	1	1	1	1	FBXW2	F-box and WD repeat domain containing 2
hsa-miR-568	1	0	1	1	1	1	LUC7L2	LUC7-like 2 (S. cerevisiae)
hsa-miR-568	0	0	1	0	1	1	SSPN	sarcospan
hsa-miR-568	0	0	1	1	1	1	STAMBPL1	STAM binding protein-like 1
hsa-miR-568	1	0	1	1	1	1	GCFC1	GC-rich sequence DNA-binding factor 1
hsa-miR-568	0	0	1	1	1	1	LZTFL1	leucine zipper transcription factor-like 1
hsa-miR-568	1	0	1	1	1	1	SPTBN1	spectrin, beta, non-erythrocytic 1
hsa-miR-568	1	0	1	1	1	1	MCMBP	minichromosome maintenance complex binding protein
hsa-miR-568	1	0	1	1	1	1	MAP3K12	mitogen-activated protein kinase kinase kinase 12
hsa-miR-568	0	0	1	0	0	0	PART1	prostate androgen-regulated transcript 1 (non-protein coding)
hsa-miR-568	1	0	1	1	1	1	SNAP25	synaptosomal-associated protein, 25kDa
hsa-miR-568	1	0	1	0	1	1	ARL6IP6	ADP-ribosylation-like factor 6 interacting protein 6
hsa-miR-568	1	0	1	0	1	1	NCOA7	nuclear receptor coactivator 7
hsa-miR-568	1	0	1	1	1	1	GCLC	glutamate-cysteine ligase, catalytic subunit
hsa-miR-568	0	0	1	0	0	0	LOC285500	uncharacterized LOC285500
hsa-miR-568	1	0	1	1	1	1	TBC1D20	TBC1 domain family, member 20
hsa-miR-568	1	0	1	1	1	1	KLF4	Kruppel-like factor 4 (gut)
hsa-miR-568	1	0	1	1	1	1	TMEM100	transmembrane protein 100
hsa-miR-568	0	0	1	1	1	1	MOBP	myelin-associated oligodendrocyte basic protein
hsa-miR-568	1	0	1	1	1	1	ANKRD46	ankyrin repeat domain 46
hsa-miR-568	0	0	1	0	1	1	MTRF1L	mitochondrial translational release factor 1-like
hsa-miR-568	1	0	1	0	1	1	UVRAG	UV radiation resistance associated gene
hsa-miR-568	1	0	1	1	1	1	CNEP1R1	CTD nuclear envelope phosphatase 1 regulatory subunit 1
hsa-miR-568	1	0	1	1	1	1	ACSL1	acyl-CoA synthetase long-chain family member 1
hsa-miR-568	1	0	1	1	0	0	FBRS	fibrosin
hsa-miR-568	0	0	1	0	0	0	OTUD1	OTU domain containing 1
hsa-miR-568	1	0	1	1	1	1	LRP8	low density lipoprotein receptor-related protein 8, apolipoprotein e receptor
hsa-miR-568	0	0	1	0	0	0	ZNF300P1	zinc finger protein 300 pseudogene 1
hsa-miR-568	0	0	1	1	1	1	MPHOSPH9	M-phase phosphoprotein 9
hsa-miR-568	1	0	1	0	1	1	KBTBD8	kelch repeat and BTB (POZ) domain containing 8
hsa-miR-568	1	0	1	1	1	1	SYT6	synaptotagmin VI
hsa-miR-568	1	0	1	1	1	1	ETS2	v-ets erythroblastosis virus E26 oncogene homolog 2 (avian)
hsa-miR-568	0	0	1	0	0	0	LOC401463	uncharacterized LOC401463
hsa-miR-568	0	0	1	1	0	0	RBM5	RNA binding motif protein 5
hsa-miR-568	1	0	1	0	1	1	YPEL2	yippee-like 2 (Drosophila)
hsa-miR-568	0	0	1	0	1	1	TNFAIP8	tumor necrosis factor, alpha-induced protein 8
hsa-miR-568	1	0	1	1	1	1	TMEM185A	transmembrane protein 185A
hsa-miR-568	1	0	1	0	1	1	AGFG1	ArfGAP with FG repeats 1
hsa-miR-568	1	0	1	1	1	1	NSUN4	NOP2/Sun domain family, member 4
hsa-miR-568	0	0	1	1	1	1	ATP9B	ATPase, class II, type 9B
hsa-miR-568	0	0	1	1	1	1	CKAP2L	cytoskeleton associated protein 2-like
hsa-miR-568	1	0	1	1	1	1	CHD6	chromodomain helicase DNA binding protein 6
hsa-miR-568	1	0	1	1	1	1	LARP1B	La ribonucleoprotein domain family, member 1B
hsa-miR-568	1	0	1	1	1	1	NDFIP2	Nedd4 family interacting protein 2
hsa-miR-568	1	0	1	1	1	1	HBP1	HMG-box transcription factor 1
hsa-miR-568	1	0	1	1	1	1	LMX1A	LIM homeobox transcription factor 1, alpha
hsa-miR-568	1	0	1	1	1	1	SIK3	SIK family kinase 3
hsa-miR-568	1	0	1	1	1	1	ZNF275	zinc finger protein 275
hsa-miR-568	0	0	1	1	1	1	ARHGEF26	Rho guanine nucleotide exchange factor (GEF) 26
hsa-miR-568	0	0	1	0	1	1	FLJ41200	uncharacterized LOC401492
hsa-miR-568	1	0	1	0	1	1	KCNK2	potassium channel, subfamily K, member 2
hsa-miR-568	0	0	1	1	1	1	FAM19A2	family with sequence similarity 19 (chemokine (C-C motif)-like), member A2
hsa-miR-568	0	0	1	1	0	0	LIX1L	Lix1 homolog (mouse)-like
hsa-miR-568	1	0	1	0	1	1	WDR82	WD repeat domain 82
hsa-miR-568	1	0	1	0	0	0	GPR137C	G protein-coupled receptor 137C
hsa-miR-568	1	0	1	1	1	1	ESYT2	extended synaptotagmin-like protein 2
hsa-miR-568	0	0	1	1	0	0	NMI	N-myc (and STAT) interactor
hsa-miR-568	1	0	1	1	1	1	GJC1	gap junction protein, gamma 1, 45kDa
hsa-miR-568	1	0	1	0	1	1	DCUN1D4	DCN1, defective in cullin neddylation 1, domain containing 4 (S. cerevisiae)
hsa-miR-568	1	0	1	1	1	1	VPS54	vacuolar protein sorting 54 homolog (S. cerevisiae)
hsa-miR-568	0	0	1	0	1	1	NAIP	NLR family, apoptosis inhibitory protein
hsa-miR-568	0	0	1	1	1	1	IDS	iduronate 2-sulfatase
hsa-miR-568	1	0	1	1	1	1	XPO1	exportin 1 (CRM1 homolog, yeast)
hsa-miR-568	0	0	1	1	1	1	ATPBD4	ATP binding domain 4
hsa-miR-568	1	0	1	1	1	1	C17orf85	chromosome 17 open reading frame 85
hsa-miR-568	1	0	1	1	0	0	GXYLT1	glucoside xylosyltransferase 1
hsa-miR-568	1	0	1	1	1	1	PIAS3	protein inhibitor of activated STAT, 3
hsa-miR-568	0	0	1	1	1	1	CTPS2	CTP synthase 2
hsa-miR-568	0	0	1	1	1	1	MKX	mohawk homeobox
hsa-miR-568	0	0	1	1	1	1	ZNF337	zinc finger protein 337
hsa-miR-568	1	0	1	1	1	1	SACS	spastic ataxia of Charlevoix-Saguenay (sacsin)
hsa-miR-568	1	0	1	1	1	1	KPNA1	karyopherin alpha 1 (importin alpha 5)
hsa-miR-568	1	0	1	1	1	1	TP53INP1	tumor protein p53 inducible nuclear protein 1
hsa-miR-568	1	0	1	1	0	0	UBN2	ubinuclein 2
hsa-miR-568	1	0	1	1	1	1	CHD5	chromodomain helicase DNA binding protein 5
hsa-miR-568	1	0	1	1	1	1	LIN9	lin-9 homolog (C. elegans)
hsa-miR-568	0	0	1	1	1	1	CCDC132	coiled-coil domain containing 132
hsa-miR-568	1	0	1	1	1	1	DMXL1	Dmx-like 1
hsa-miR-568	1	0	1	1	1	1	LRIG1	leucine-rich repeats and immunoglobulin-like domains 1
hsa-miR-568	1	0	1	1	1	1	DLG2	discs, large homolog 2 (Drosophila)
hsa-miR-568	1	0	1	0	1	1	GPR180	G protein-coupled receptor 180
hsa-miR-568	0	0	1	1	0	0	HS3ST5	heparan sulfate (glucosamine) 3-O-sulfotransferase 5
hsa-miR-568	0	0	1	0	0	0	RPL23AP53	ribosomal protein L23a pseudogene 53
hsa-miR-568	1	0	1	1	1	1	TSHZ1	teashirt zinc finger homeobox 1
hsa-miR-568	0	0	1	1	1	1	DOCK9	dedicator of cytokinesis 9
hsa-miR-568	1	0	1	1	1	1	PHF17	PHD finger protein 17
hsa-miR-568	0	0	1	0	0	0	GRAMD1B	GRAM domain containing 1B
hsa-miR-568	1	0	1	1	1	1	ENAH	enabled homolog (Drosophila)
hsa-miR-568	1	0	1	0	1	1	FNDC3B	fibronectin type III domain containing 3B
hsa-miR-568	0	0	1	1	1	1	PITX2	paired-like homeodomain 2
hsa-miR-568	0	0	1	0	0	0	ERVFRD-2	endogenous retrovirus group FRD, member 2
hsa-miR-568	1	0	1	0	1	1	CAPRIN1	cell cycle associated protein 1
hsa-miR-568	1	0	1	0	1	1	YOD1	YOD1 OTU deubiquinating enzyme 1 homolog (S. cerevisiae)
hsa-miR-568	0	0	1	1	1	1	MCU	mitochondrial calcium uniporter
hsa-miR-568	1	0	1	0	1	1	PLSCR4	phospholipid scramblase 4
hsa-miR-568	1	0	1	1	1	1	FRYL	FRY-like
hsa-miR-568	1	0	1	1	1	1	PUS7	pseudouridylate synthase 7 homolog (S. cerevisiae)
hsa-miR-568	0	0	1	1	1	1	ZNF662	zinc finger protein 662
hsa-miR-568	1	0	1	1	1	1	ADAMTSL1	ADAMTS-like 1
hsa-miR-568	1	0	1	1	1	1	ADAMTS19	ADAM metallopeptidase with thrombospondin type 1 motif, 19
hsa-miR-568	1	0	1	1	1	1	CD200	CD200 molecule
hsa-miR-568	1	0	1	0	1	1	ESRRG	estrogen-related receptor gamma
hsa-miR-568	0	0	1	0	0	0	LOC100133315	transient receptor potential cation channel, subfamily C, member 2-like
hsa-miR-568	1	0	1	1	1	1	WTAP	Wilms tumor 1 associated protein
hsa-miR-568	0	0	1	1	0	0	ZNF730	zinc finger protein 730
hsa-miR-568	0	0	1	1	1	1	PHF12	PHD finger protein 12
hsa-miR-568	0	0	1	0	0	0	AGAP9	ArfGAP with GTPase domain, ankyrin repeat and PH domain 9
hsa-miR-568	0	0	1	1	1	1	AKTIP	AKT interacting protein
hsa-miR-568	1	0	1	0	1	1	TMEM106B	transmembrane protein 106B
hsa-miR-568	0	0	1	1	1	1	ARID1A	AT rich interactive domain 1A (SWI-like)
hsa-miR-568	1	0	1	1	1	1	GATA6	GATA binding protein 6
hsa-miR-568	1	0	1	1	0	0	ATP13A3	ATPase type 13A3
hsa-miR-568	1	0	1	1	1	1	TBC1D15	TBC1 domain family, member 15
hsa-miR-568	1	0	1	1	1	1	MEAF6	MYST/Esa1-associated factor 6
hsa-miR-568	1	0	1	1	0	0	ABLIM3	actin binding LIM protein family, member 3
hsa-miR-568	1	0	1	1	0	0	ZNF219	zinc finger protein 219
hsa-miR-568	0	0	1	1	1	1	SERPINE2	serpin peptidase inhibitor, clade E (nexin, plasminogen activator inhibitor type 1), member 2
hsa-miR-568	1	0	1	1	1	1	PHTF2	putative homeodomain transcription factor 2
hsa-miR-568	1	0	1	1	1	1	BIN2	bridging integrator 2
hsa-miR-568	1	0	1	1	1	1	NOVA1	neuro-oncological ventral antigen 1
hsa-miR-568	0	0	1	1	1	1	RABGAP1L	RAB GTPase activating protein 1-like
hsa-miR-568	0	0	1	1	1	1	PTPN20B	protein tyrosine phosphatase, non-receptor type 20B
hsa-miR-568	0	0	1	1	1	1	PTPN20A	protein tyrosine phosphatase, non-receptor type 20A
hsa-miR-568	0	0	1	0	1	1	NEK1	NIMA (never in mitosis gene a)-related kinase 1
hsa-miR-568	0	0	1	1	0	0	NEK7	NIMA (never in mitosis gene a)-related kinase 7
hsa-miR-568	1	0	1	1	1	1	ARF6	ADP-ribosylation factor 6
hsa-miR-568	0	0	1	1	1	1	ARIH1	ariadne homolog, ubiquitin-conjugating enzyme E2 binding protein, 1 (Drosophila)
hsa-miR-568	0	0	1	0	0	0	TPTE2P6	transmembrane phosphoinositide 3-phosphatase and tensin homolog 2 pseudogene 6
hsa-miR-568	1	0	1	1	1	1	ARPP21	cAMP-regulated phosphoprotein, 21kDa
hsa-miR-568	1	0	1	1	1	1	SMC6	structural maintenance of chromosomes 6
hsa-miR-568	1	0	1	1	1	1	SLC25A36	solute carrier family 25 (pyrimidine nucleotide carrier ), member 36
hsa-miR-568	0	0	1	1	0	0	PACSIN2	protein kinase C and casein kinase substrate in neurons 2
hsa-miR-568	0	0	1	1	1	1	RHOT1	ras homolog family member T1
hsa-miR-568	0	0	1	0	0	0	JAKMIP3	Janus kinase and microtubule interacting protein 3
hsa-miR-568	1	0	1	1	1	1	NBEA	neurobeachin
hsa-miR-568	0	0	1	1	0	0	DOPEY1	dopey family member 1
hsa-miR-568	1	0	1	1	1	1	EZR	ezrin
hsa-miR-568	0	0	1	1	0	0	HELQ	helicase, POLQ-like
hsa-miR-568	0	0	1	1	1	1	ING3	inhibitor of growth family, member 3
hsa-miR-568	0	0	1	1	1	1	ARL13B	ADP-ribosylation factor-like 13B
hsa-miR-568	1	0	1	1	1	1	YTHDF3	YTH domain family, member 3
hsa-miR-568	0	0	1	1	1	1	TMEM132C	transmembrane protein 132C
hsa-miR-568	1	0	1	1	1	1	MIER1	mesoderm induction early response 1 homolog (Xenopus laevis)
hsa-miR-568	1	0	1	1	1	1	KDM6A	lysine (K)-specific demethylase 6A
hsa-miR-568	1	0	1	1	1	1	MTMR10	myotubularin related protein 10
hsa-miR-568	0	0	1	0	0	0	SLC25A30	solute carrier family 25, member 30
hsa-miR-568	0	0	1	1	1	1	SRSF11	serine/arginine-rich splicing factor 11
hsa-miR-568	1	0	1	1	1	1	CHMP7	charged multivesicular body protein 7
hsa-miR-568	1	0	1	1	0	0	USP24	ubiquitin specific peptidase 24
hsa-miR-568	1	0	1	1	1	1	MLL3	myeloid/lymphoid or mixed-lineage leukemia 3
hsa-miR-568	1	0	1	0	1	1	MPP5	membrane protein, palmitoylated 5 (MAGUK p55 subfamily member 5)
hsa-miR-568	1	0	1	1	1	1	RNF180	ring finger protein 180
hsa-miR-568	1	0	1	1	1	1	NABP1	nucleic acid binding protein 1
hsa-miR-568	1	0	1	1	1	1	FBXO3	F-box protein 3
hsa-miR-568	0	0	1	1	1	1	CYP20A1	cytochrome P450, family 20, subfamily A, polypeptide 1
hsa-miR-568	0	0	1	1	1	1	AMIGO2	adhesion molecule with Ig-like domain 2
hsa-miR-568	1	0	1	0	1	1	GPCPD1	glycerophosphocholine phosphodiesterase GDE1 homolog (S. cerevisiae)
hsa-miR-568	1	0	1	1	1	1	LPP	LIM domain containing preferred translocation partner in lipoma
hsa-miR-568	1	0	1	0	1	1	MEF2C	myocyte enhancer factor 2C
hsa-miR-568	1	0	1	1	1	1	FAM126A	family with sequence similarity 126, member A
hsa-miR-568	0	0	1	1	1	1	NARG2	NMDA receptor regulated 2
hsa-miR-568	1	0	1	1	0	0	KIAA1109	KIAA1109
hsa-miR-568	1	0	1	0	1	1	CLINT1	clathrin interactor 1
hsa-miR-568	0	0	1	1	0	0	ATL1	atlastin GTPase 1
hsa-miR-568	0	0	1	1	1	1	SOAT1	sterol O-acyltransferase 1
hsa-miR-568	1	0	1	1	1	1	HERC2	HECT and RLD domain containing E3 ubiquitin protein ligase 2
hsa-miR-568	1	0	1	1	1	1	ANKRD12	ankyrin repeat domain 12
hsa-miR-568	1	0	1	1	1	1	CADM2	cell adhesion molecule 2
hsa-miR-568	0	0	1	0	1	1	SRR	serine racemase
hsa-miR-568	1	0	1	0	1	1	NR3C1	nuclear receptor subfamily 3, group C, member 1 (glucocorticoid receptor)
hsa-miR-568	1	0	1	1	1	1	BOLL	bol, boule-like (Drosophila)
hsa-miR-568	0	0	1	1	1	1	INTS7	integrator complex subunit 7
hsa-miR-568	0	0	1	1	1	1	SLAMF7	SLAM family member 7
hsa-miR-568	0	0	1	1	0	0	AUH	AU RNA binding protein/enoyl-CoA hydratase
hsa-miR-568	1	0	1	1	1	1	PPP3CA	protein phosphatase 3, catalytic subunit, alpha isozyme
hsa-miR-568	1	0	1	1	1	1	RNF38	ring finger protein 38
hsa-miR-568	1	0	1	1	1	1	IKZF2	IKAROS family zinc finger 2 (Helios)
hsa-miR-568	0	0	1	1	1	1	KIF2C	kinesin family member 2C
hsa-miR-568	1	0	1	1	1	1	RCAN2	regulator of calcineurin 2
hsa-miR-568	1	0	1	0	1	1	BDNF	brain-derived neurotrophic factor
hsa-miR-568	1	0	1	1	1	1	SORCS1	sortilin-related VPS10 domain containing receptor 1
hsa-miR-568	1	0	1	1	1	1	ANGPT1	angiopoietin 1
hsa-miR-568	1	0	1	1	1	1	LUZP2	leucine zipper protein 2
hsa-miR-568	0	0	1	1	1	1	APTX	aprataxin
hsa-miR-568	0	0	1	1	1	1	BCOR	BCL6 corepressor
hsa-miR-568	1	0	1	1	1	1	LAMA3	laminin, alpha 3
hsa-miR-568	1	0	1	1	1	1	TAB3	TGF-beta activated kinase 1/MAP3K7 binding protein 3
hsa-miR-568	0	0	1	1	1	1	GCOM1	GRINL1A complex locus 1
hsa-miR-568	0	0	1	1	1	1	MFAP5	microfibrillar associated protein 5
hsa-miR-568	1	0	1	0	1	1	AP2B1	adaptor-related protein complex 2, beta 1 subunit
hsa-miR-568	1	0	1	1	1	1	CAMTA1	calmodulin binding transcription activator 1
hsa-miR-568	1	0	1	0	1	1	DLEU7	deleted in lymphocytic leukemia, 7
hsa-miR-568	0	0	1	1	1	1	IL20	interleukin 20
hsa-miR-568	1	0	1	1	1	1	NLGN4X	neuroligin 4, X-linked
hsa-miR-568	0	0	1	1	0	0	GLIPR1L1	GLI pathogenesis-related 1 like 1
hsa-miR-568	0	0	1	1	0	0	C16orf48	chromosome 16 open reading frame 48
hsa-miR-568	1	0	1	1	1	1	SSX2IP	synovial sarcoma, X breakpoint 2 interacting protein
hsa-miR-568	1	0	1	0	1	1	ANKRD28	ankyrin repeat domain 28
hsa-miR-568	1	0	1	1	1	1	SP3	Sp3 transcription factor
hsa-miR-568	1	0	1	0	1	1	NHS	Nance-Horan syndrome (congenital cataracts and dental anomalies)
hsa-miR-568	0	0	1	1	1	1	PLD5	phospholipase D family, member 5
hsa-miR-568	1	0	1	1	1	1	ANKRD11	ankyrin repeat domain 11
hsa-miR-568	0	0	1	1	1	1	AICDA	activation-induced cytidine deaminase
hsa-miR-568	1	0	1	0	1	1	LRAT	lecithin retinol acyltransferase (phosphatidylcholine--retinol O-acyltransferase)
hsa-miR-568	0	0	1	0	1	1	RAB18	RAB18, member RAS oncogene family
hsa-miR-568	0	0	1	1	1	1	ILDR1	immunoglobulin-like domain containing receptor 1
hsa-miR-568	1	0	1	1	1	1	TRIT1	tRNA isopentenyltransferase 1
hsa-miR-568	1	0	1	1	1	1	QKI	QKI, KH domain containing, RNA binding
hsa-miR-568	1	0	1	1	1	1	MYB	v-myb myeloblastosis viral oncogene homolog (avian)
hsa-miR-568	1	0	1	1	1	1	PCDH11X	protocadherin 11 X-linked
hsa-miR-568	1	0	1	0	1	1	RASGRP1	RAS guanyl releasing protein 1 (calcium and DAG-regulated)
hsa-miR-568	1	0	1	1	1	1	AMOT	angiomotin
hsa-miR-568	1	0	1	1	1	1	RPRD1A	regulation of nuclear pre-mRNA domain containing 1A
hsa-miR-568	0	0	1	1	1	1	FAM115A	family with sequence similarity 115, member A
hsa-miR-568	1	0	1	0	1	1	FAM46A	family with sequence similarity 46, member A
hsa-miR-568	1	0	1	0	1	1	BAG4	BCL2-associated athanogene 4
hsa-miR-568	0	0	1	1	0	0	ANXA5	annexin A5
hsa-miR-568	0	0	1	1	1	1	ATG3	autophagy related 3
hsa-miR-568	1	0	1	0	1	1	DCAF10	DDB1 and CUL4 associated factor 10
hsa-miR-568	1	0	1	1	1	1	LEPREL1	leprecan-like 1
hsa-miR-568	0	0	1	1	0	0	SCG5	secretogranin V (7B2 protein)
hsa-miR-568	1	0	1	0	1	1	C15orf41	chromosome 15 open reading frame 41
hsa-miR-568	0	0	1	1	1	1	ACPP	acid phosphatase, prostate
hsa-miR-568	1	0	1	1	1	1	CALM1	calmodulin 1 (phosphorylase kinase, delta)
hsa-miR-568	1	0	1	1	1	1	RSU1	Ras suppressor protein 1
hsa-miR-568	0	0	1	1	1	1	MLIP	muscular LMNA-interacting protein
hsa-miR-568	0	0	1	1	0	0	PANK2	pantothenate kinase 2
hsa-miR-568	1	0	1	1	1	1	ATP6AP2	ATPase, H+ transporting, lysosomal accessory protein 2
hsa-miR-568	1	0	1	1	1	1	GRIA2	glutamate receptor, ionotropic, AMPA 2
hsa-miR-568	1	0	1	1	1	1	SZRD1	SUZ RNA binding domain containing 1
hsa-miR-568	1	0	1	1	1	1	TRIM2	tripartite motif containing 2
hsa-miR-568	0	0	1	1	1	1	HDHD2	haloacid dehalogenase-like hydrolase domain containing 2
hsa-miR-568	1	0	1	1	1	1	BTG3	BTG family, member 3
hsa-miR-568	0	0	1	1	1	1	PLXDC2	plexin domain containing 2
hsa-miR-568	1	0	1	1	1	1	RBM7	RNA binding motif protein 7
hsa-miR-568	0	0	1	1	1	1	RNF170	ring finger protein 170
hsa-miR-568	1	0	1	1	1	1	CAP1	CAP, adenylate cyclase-associated protein 1 (yeast)
hsa-miR-568	1	0	1	1	0	0	CAPN12	calpain 12
hsa-miR-568	1	0	1	1	1	1	ETF1	eukaryotic translation termination factor 1
hsa-miR-568	1	0	1	1	1	1	PAPOLA	poly(A) polymerase alpha
hsa-miR-568	0	0	1	0	0	0	KLHL15	kelch-like 15 (Drosophila)
hsa-miR-568	1	0	1	1	1	1	ZBTB38	zinc finger and BTB domain containing 38
hsa-miR-568	0	0	1	0	1	1	ZNF37A	zinc finger protein 37A
hsa-miR-568	1	0	1	1	1	1	RIMKLB	ribosomal modification protein rimK-like family member B
hsa-miR-568	1	0	1	0	1	1	NR1D2	nuclear receptor subfamily 1, group D, member 2
hsa-miR-568	1	0	1	1	1	1	NUMBL	numb homolog (Drosophila)-like
hsa-miR-568	0	0	1	1	1	1	MFSD4	major facilitator superfamily domain containing 4
hsa-miR-568	0	0	1	1	1	1	ANKRD44	ankyrin repeat domain 44
hsa-miR-568	0	0	1	1	0	0	C1orf51	chromosome 1 open reading frame 51
hsa-miR-568	0	0	1	1	1	1	RDH11	retinol dehydrogenase 11 (all-trans/9-cis/11-cis)
hsa-miR-568	0	0	1	0	0	0	FAM200B	family with sequence similarity 200, member B
hsa-miR-568	1	0	1	1	1	1	ARHGEF9	Cdc42 guanine nucleotide exchange factor (GEF) 9
hsa-miR-568	0	0	1	0	1	1	ZNF718	zinc finger protein 718
hsa-miR-568	0	0	1	0	0	0	TMEM208	transmembrane protein 208
hsa-miR-568	0	0	1	1	1	1	C10orf88	chromosome 10 open reading frame 88
hsa-miR-568	0	0	1	0	0	0	FAM92A1P2	family with sequence similarity 92, member A3
hsa-miR-568	1	0	1	1	1	1	SPRYD7	SPRY domain containing 7
hsa-miR-568	1	0	1	0	1	1	CDK19	cyclin-dependent kinase 19
hsa-miR-568	0	0	1	1	1	1	TLR4	toll-like receptor 4
hsa-miR-568	1	0	1	1	1	1	CNTN4	contactin 4
hsa-miR-568	0	0	1	1	1	1	WDR67	WD repeat domain 67
hsa-miR-568	0	0	1	1	1	1	MAP2	microtubule-associated protein 2
hsa-miR-568	1	0	1	1	1	1	B3GNT5	UDP-GlcNAc:betaGal beta-1,3-N-acetylglucosaminyltransferase 5
hsa-miR-568	0	0	1	0	0	0	LOC400891	chromosome 14 open reading frame 166B pseudogene
hsa-miR-568	0	0	1	1	1	1	CKMT2	creatine kinase, mitochondrial 2 (sarcomeric)
hsa-miR-568	1	0	1	1	1	1	CASD1	CAS1 domain containing 1
hsa-miR-568	0	0	1	1	1	1	TFAM	transcription factor A, mitochondrial
hsa-miR-568	0	0	1	1	0	0	TMEM251	transmembrane protein 251
hsa-miR-568	0	0	1	1	1	1	TMEM117	transmembrane protein 117
hsa-miR-568	0	0	1	1	1	1	LPAR1	lysophosphatidic acid receptor 1
hsa-miR-568	0	0	1	1	1	1	CTNNA3	catenin (cadherin-associated protein), alpha 3
hsa-miR-568	0	0	1	1	0	0	AGBL3	ATP/GTP binding protein-like 3
hsa-miR-568	1	0	1	1	1	1	ELAVL2	ELAV (embryonic lethal, abnormal vision, Drosophila)-like 2 (Hu antigen B)
hsa-miR-568	1	0	1	1	1	1	GABRA1	gamma-aminobutyric acid (GABA) A receptor, alpha 1
hsa-miR-568	1	0	1	1	1	1	MUM1L1	melanoma associated antigen (mutated) 1-like 1
hsa-miR-568	1	0	1	1	1	1	BZRAP1	benzodiazapine receptor (peripheral) associated protein 1
hsa-miR-568	1	0	1	1	1	1	RCOR3	REST corepressor 3
hsa-miR-568	0	0	1	1	1	1	C7orf53	chromosome 7 open reading frame 53
hsa-miR-568	0	0	1	0	0	0	LOC643648	uncharacterized LOC643648
hsa-miR-568	1	0	1	1	1	1	RAB5B	RAB5B, member RAS oncogene family
hsa-miR-568	1	0	1	1	1	1	RHOBTB1	Rho-related BTB domain containing 1
hsa-miR-568	1	0	1	1	1	1	ZNF521	zinc finger protein 521
hsa-miR-568	1	0	1	1	1	1	SORL1	sortilin-related receptor, L(DLR class) A repeats containing
hsa-miR-568	1	0	1	1	1	1	SECISBP2L	SECIS binding protein 2-like
hsa-miR-568	1	0	1	1	1	1	MAK	male germ cell-associated kinase
hsa-miR-568	1	0	1	1	1	1	ADAM19	ADAM metallopeptidase domain 19
hsa-miR-568	1	0	1	1	0	0	FAM150B	family with sequence similarity 150, member B
hsa-miR-568	1	0	1	0	1	1	TBC1D2B	TBC1 domain family, member 2B
hsa-miR-568	1	0	1	1	1	1	TTC26	tetratricopeptide repeat domain 26
hsa-miR-568	1	0	1	1	1	1	LPGAT1	lysophosphatidylglycerol acyltransferase 1
hsa-miR-568	0	0	1	0	1	1	DKFZP434I0714	uncharacterized protein DKFZP434I0714
hsa-miR-568	1	0	1	0	1	1	DDX3Y	DEAD (Asp-Glu-Ala-Asp) box polypeptide 3, Y-linked
hsa-miR-568	0	0	1	1	1	1	KIF16B	kinesin family member 16B
hsa-miR-568	1	0	1	1	1	1	NKAIN2	Na+/K+ transporting ATPase interacting 2
hsa-miR-568	1	0	1	1	1	1	ZZZ3	zinc finger, ZZ-type containing 3
hsa-miR-568	0	0	1	0	0	0	TMPRSS12	transmembrane (C-terminal) protease, serine 12
hsa-miR-568	1	0	1	0	1	1	ATP11A	ATPase, class VI, type 11A
hsa-miR-568	1	0	1	1	1	1	CTDSPL2	CTD (carboxy-terminal domain, RNA polymerase II, polypeptide A) small phosphatase like 2
hsa-miR-568	0	0	1	0	0	0	C12orf77	chromosome 12 open reading frame 77
hsa-miR-568	0	0	1	1	1	1	SNAPC3	small nuclear RNA activating complex, polypeptide 3, 50kDa
hsa-miR-568	1	0	1	1	1	1	IMPACT	Impact homolog (mouse)
hsa-miR-568	0	0	1	0	0	0	FAM201A	family with sequence similarity 201, member A
hsa-miR-568	1	0	1	1	1	1	LHX8	LIM homeobox 8
hsa-miR-568	0	0	1	1	1	1	FAM171B	family with sequence similarity 171, member B
hsa-miR-568	1	0	1	1	1	1	ELMO2	engulfment and cell motility 2
hsa-miR-568	1	0	1	1	1	1	HECTD2	HECT domain containing E3 ubiquitin protein ligase 2
hsa-miR-568	1	0	1	1	1	1	MEIS1	Meis homeobox 1
hsa-miR-568	1	0	1	1	1	1	ACVR1	activin A receptor, type I
hsa-miR-568	1	0	1	0	1	1	CPEB4	cytoplasmic polyadenylation element binding protein 4
hsa-miR-568	1	0	1	1	1	1	CEP128	centrosomal protein 128kDa
hsa-miR-568	1	0	1	1	1	1	BNC2	basonuclin 2
hsa-miR-568	1	0	1	0	1	1	YAF2	YY1 associated factor 2
hsa-miR-568	1	0	1	1	1	1	CMIP	c-Maf inducing protein
hsa-miR-568	1	0	1	1	1	1	GALNT1	UDP-N-acetyl-alpha-D-galactosamine:polypeptide N-acetylgalactosaminyltransferase 1 (GalNAc-T1)
hsa-miR-568	1	0	1	1	1	1	DPP10	dipeptidyl-peptidase 10 (non-functional)
hsa-miR-568	1	0	1	0	1	1	ARID2	AT rich interactive domain 2 (ARID, RFX-like)
hsa-miR-568	1	0	1	1	1	1	PRR16	proline rich 16
hsa-miR-568	0	0	1	1	0	0	CCDC152	coiled-coil domain containing 152
hsa-miR-568	1	0	1	1	1	1	FGFR2	fibroblast growth factor receptor 2
hsa-miR-568	0	0	1	1	1	1	CACHD1	cache domain containing 1
hsa-miR-568	1	0	1	1	1	1	PAIP2	poly(A) binding protein interacting protein 2
hsa-miR-568	1	0	1	1	1	1	CEP57	centrosomal protein 57kDa
hsa-miR-568	0	0	1	1	1	1	FBXL4	F-box and leucine-rich repeat protein 4
hsa-miR-568	0	0	1	1	1	1	VBP1	von Hippel-Lindau binding protein 1
hsa-miR-568	0	0	1	0	0	0	RNASEK	ribonuclease, RNase K
hsa-miR-568	1	0	1	0	1	1	G2E3	G2/M-phase specific E3 ubiquitin protein ligase
hsa-miR-568	1	0	1	1	1	1	FOSB	FBJ murine osteosarcoma viral oncogene homolog B
hsa-miR-568	1	0	1	1	1	1	DACH2	dachshund homolog 2 (Drosophila)
hsa-miR-568	1	0	1	1	1	1	FBXO8	F-box protein 8
hsa-miR-568	1	0	1	1	1	1	BVES	blood vessel epicardial substance
hsa-miR-568	1	0	1	1	1	1	DYNC2LI1	dynein, cytoplasmic 2, light intermediate chain 1
hsa-miR-568	0	0	1	1	0	0	MTCH1	mitochondrial carrier 1
hsa-miR-568	0	0	1	1	1	1	STAG1	stromal antigen 1
hsa-miR-568	0	0	1	1	1	1	SIAE	sialic acid acetylesterase
hsa-miR-568	0	0	1	0	1	1	FAM13B	family with sequence similarity 13, member B
hsa-miR-568	1	0	1	0	1	1	TNFAIP3	tumor necrosis factor, alpha-induced protein 3
hsa-miR-568	0	0	1	1	1	1	C4orf32	chromosome 4 open reading frame 32
hsa-miR-568	0	0	1	0	0	0	LOC643837	uncharacterized LOC643837
hsa-miR-568	1	0	1	0	1	1	USP6NL	USP6 N-terminal like
hsa-miR-568	0	0	1	0	0	0	LOC401176	uncharacterized LOC401176
hsa-miR-568	0	0	1	0	0	0	MORF4L2-AS1	MORF4L2 antisense RNA 1
hsa-miR-568	0	0	1	0	0	0	DKFZp686O1327	uncharacterized LOC401014
hsa-miR-568	1	0	1	1	1	1	RNF145	ring finger protein 145
hsa-miR-568	0	0	1	0	0	0	LOC728342	uncharacterized LOC728342
hsa-miR-568	1	0	1	1	1	1	SENP1	SUMO1/sentrin specific peptidase 1
hsa-miR-568	1	0	1	0	1	1	LYPD6	LY6/PLAUR domain containing 6
hsa-miR-568	1	0	1	1	1	1	HSDL2	hydroxysteroid dehydrogenase like 2
hsa-miR-568	0	0	1	0	1	1	FBXO42	F-box protein 42
hsa-miR-568	0	0	1	1	0	0	ANKAR	ankyrin and armadillo repeat containing
hsa-miR-568	0	0	1	1	0	0	SETDB2	SET domain, bifurcated 2
hsa-miR-568	0	0	1	0	1	1	LOC338758	uncharacterized LOC338758
hsa-miR-568	1	0	1	1	1	1	BRD1	bromodomain containing 1
hsa-miR-568	1	0	1	0	1	1	ZNF800	zinc finger protein 800
hsa-miR-568	1	0	1	1	1	1	RMND5A	required for meiotic nuclear division 5 homolog A (S. cerevisiae)
hsa-miR-568	1	0	1	1	1	1	CLVS1	clavesin 1
hsa-miR-568	0	0	1	0	0	0	FAM66C	family with sequence similarity 66, member C
hsa-miR-568	1	0	1	0	1	1	RNF182	ring finger protein 182
hsa-miR-568	1	0	1	0	1	1	ARHGAP5	Rho GTPase activating protein 5
hsa-miR-568	0	0	1	1	1	1	FBXO38	F-box protein 38
hsa-miR-568	0	0	1	0	0	0	AURKAPS1	aurora kinase A pseudogene 1
hsa-miR-568	1	0	1	1	1	1	GATA2	GATA binding protein 2
hsa-miR-568	1	0	1	1	1	1	YWHAZ	tyrosine 3-monooxygenase/tryptophan 5-monooxygenase activation protein, zeta polypeptide
hsa-miR-568	1	0	1	1	1	1	PCGF5	polycomb group ring finger 5
hsa-miR-568	1	0	1	0	1	1	C14orf43	chromosome 14 open reading frame 43
hsa-miR-568	0	0	1	1	1	1	LRRFIP2	leucine rich repeat (in FLII) interacting protein 2
hsa-miR-568	0	0	1	0	1	1	SLC1A3	solute carrier family 1 (glial high affinity glutamate transporter), member 3
hsa-miR-568	0	0	1	1	0	0	TINAG	tubulointerstitial nephritis antigen
hsa-miR-568	0	0	1	1	0	0	CRYM-AS1	CRYM antisense RNA 1
hsa-miR-568	1	0	1	1	1	1	KLHL28	kelch-like 28 (Drosophila)
hsa-miR-568	0	0	1	1	1	1	ZNF365	zinc finger protein 365
hsa-miR-568	1	0	1	1	1	1	PRRG1	proline rich Gla (G-carboxyglutamic acid) 1
hsa-miR-568	0	0	1	0	1	1	GUCY1B3	guanylate cyclase 1, soluble, beta 3
hsa-miR-568	0	0	1	1	1	1	ABCA9	ATP-binding cassette, sub-family A (ABC1), member 9
hsa-miR-568	1	0	1	1	1	1	PRKG1	protein kinase, cGMP-dependent, type I
hsa-miR-568	0	0	1	1	0	0	LRRIQ3	leucine-rich repeats and IQ motif containing 3
hsa-miR-568	1	0	1	1	1	1	NIPBL	Nipped-B homolog (Drosophila)
hsa-miR-568	0	0	1	1	1	1	PIM3	pim-3 oncogene
hsa-miR-568	1	0	1	1	1	1	UEVLD	UEV and lactate/malate dehyrogenase domains
hsa-miR-568	1	0	1	1	1	1	ADCY6	adenylate cyclase 6
hsa-miR-568	0	0	1	1	1	1	ZNF33B	zinc finger protein 33B
hsa-miR-568	1	0	1	1	1	1	IL15RA	interleukin 15 receptor, alpha
hsa-miR-568	1	0	1	1	1	1	ZNF449	zinc finger protein 449
hsa-miR-568	0	0	1	1	1	1	SH2D1B	SH2 domain containing 1B
hsa-miR-568	1	0	1	1	1	1	C18orf1	chromosome 18 open reading frame 1
hsa-miR-568	0	0	1	1	1	1	CTSL2	cathepsin L2
hsa-miR-568	0	0	1	1	1	1	KCTD18	potassium channel tetramerisation domain containing 18
hsa-miR-568	1	0	1	1	1	1	CDKN1C	cyclin-dependent kinase inhibitor 1C (p57, Kip2)
hsa-miR-568	1	0	1	1	0	0	SNX18	sorting nexin 18
hsa-miR-568	1	0	1	1	1	1	PDCD6IP	programmed cell death 6 interacting protein
hsa-miR-568	1	0	1	1	1	1	SLC26A7	solute carrier family 26, member 7
hsa-miR-568	0	0	1	0	0	0	FOXN3-AS2	FOXN3 antisense RNA 2
hsa-miR-568	1	0	1	1	1	1	SCAF8	SR-related CTD-associated factor 8
hsa-miR-568	1	0	1	1	1	1	AHR	aryl hydrocarbon receptor
hsa-miR-568	1	0	1	0	1	1	HMGB3	high mobility group box 3
hsa-miR-568	1	0	1	0	1	1	TGFBR1	transforming growth factor, beta receptor 1
hsa-miR-568	1	0	1	0	1	1	MAP4K3	mitogen-activated protein kinase kinase kinase kinase 3
hsa-miR-568	1	0	1	1	1	1	OPCML	opioid binding protein/cell adhesion molecule-like
hsa-miR-568	1	0	1	1	1	1	WNT5A	wingless-type MMTV integration site family, member 5A
hsa-miR-568	0	0	1	1	1	1	C3orf67	chromosome 3 open reading frame 67
hsa-miR-568	1	0	1	0	1	1	DPYSL3	dihydropyrimidinase-like 3
hsa-miR-568	1	0	1	1	1	1	SAMD4B	sterile alpha motif domain containing 4B
hsa-miR-568	1	0	1	1	0	0	SLC45A4	solute carrier family 45, member 4
hsa-miR-568	1	0	1	1	1	1	NOTCH2NL	notch 2 N-terminal like
hsa-miR-568	1	0	1	1	1	1	ZMYND11	zinc finger, MYND-type containing 11
hsa-miR-568	0	0	1	1	1	1	SPDYA	speedy homolog A (Xenopus laevis)
hsa-miR-568	0	0	1	1	1	1	ZCWPW2	zinc finger, CW type with PWWP domain 2
hsa-miR-568	0	0	1	0	0	0	FRG1B	FSHD region gene 1 family, member B
hsa-miR-568	1	0	1	1	1	1	ST8SIA2	ST8 alpha-N-acetyl-neuraminide alpha-2,8-sialyltransferase 2
hsa-miR-568	1	0	1	1	1	1	ACVR2B	activin A receptor, type IIB
hsa-miR-568	0	0	1	1	1	1	KLRF1	killer cell lectin-like receptor subfamily F, member 1
hsa-miR-568	1	0	1	0	1	1	ARPP19	cAMP-regulated phosphoprotein, 19kDa
hsa-miR-568	0	0	1	1	0	0	MTMR11	myotubularin related protein 11
hsa-miR-568	1	0	1	0	1	1	MYBL1	v-myb myeloblastosis viral oncogene homolog (avian)-like 1
hsa-miR-568	1	0	1	1	1	1	ARFIP1	ADP-ribosylation factor interacting protein 1
hsa-miR-568	0	0	1	1	0	0	PLA2G16	phospholipase A2, group XVI
hsa-miR-568	1	0	1	0	1	1	CPEB2	cytoplasmic polyadenylation element binding protein 2
hsa-miR-568	0	0	1	1	0	0	TMC1	transmembrane channel-like 1
hsa-miR-568	0	0	1	1	1	1	CCDC126	coiled-coil domain containing 126
hsa-miR-568	1	0	1	1	1	1	SLC35G1	solute carrier family 35, member G1
hsa-miR-568	0	0	1	1	1	1	SPHKAP	SPHK1 interactor, AKAP domain containing
hsa-miR-568	1	0	1	1	1	1	GABRB2	gamma-aminobutyric acid (GABA) A receptor, beta 2
hsa-miR-568	0	0	1	1	1	1	POSTN	periostin, osteoblast specific factor
hsa-miR-568	0	0	1	1	0	0	TMEM126B	transmembrane protein 126B
hsa-miR-568	1	0	1	1	1	1	SP4	Sp4 transcription factor
hsa-miR-568	1	0	1	0	1	1	BTBD3	BTB (POZ) domain containing 3
hsa-miR-568	1	0	1	0	1	1	KIF5C	kinesin family member 5C
hsa-miR-568	0	0	1	1	1	1	STAU2	staufen, RNA binding protein, homolog 2 (Drosophila)
hsa-miR-568	1	0	1	1	1	1	TET2	tet methylcytosine dioxygenase 2
hsa-miR-568	0	0	1	1	1	1	SMTNL2	smoothelin-like 2
hsa-miR-568	1	0	1	1	1	1	SLK	STE20-like kinase
hsa-miR-568	1	0	1	1	1	1	NR3C2	nuclear receptor subfamily 3, group C, member 2
hsa-miR-568	0	0	1	1	1	1	LRCH1	leucine-rich repeats and calponin homology (CH) domain containing 1
hsa-miR-568	1	0	1	1	1	1	PAX3	paired box 3
hsa-miR-568	1	0	1	1	1	1	SHANK2	SH3 and multiple ankyrin repeat domains 2
hsa-miR-568	0	0	1	0	0	0	BTF3P11	basic transcription factor 3 pseudogene 11
hsa-miR-568	1	0	1	1	1	1	TNS1	tensin 1
hsa-miR-568	1	0	1	0	1	1	PRDM10	PR domain containing 10
hsa-miR-568	1	0	1	1	1	1	OTUD4	OTU domain containing 4
hsa-miR-568	1	0	1	0	1	1	CAMSAP2	calmodulin regulated spectrin-associated protein family, member 2
hsa-miR-568	0	0	1	1	1	1	KANSL1L	KAT8 regulatory NSL complex subunit 1-like
hsa-miR-568	1	0	1	1	1	1	JMJD1C	jumonji domain containing 1C
hsa-miR-568	1	0	1	1	1	1	ZEB2	zinc finger E-box binding homeobox 2
hsa-miR-568	1	0	1	1	1	1	TRAPPC8	trafficking protein particle complex 8
hsa-miR-568	0	0	1	0	0	0	FAM225B	family with sequence similarity 225, member B (non-protein coding)
hsa-miR-568	1	0	1	1	1	1	FNDC3A	fibronectin type III domain containing 3A
hsa-miR-568	0	0	1	1	0	0	CCDC144A	coiled-coil domain containing 144A
hsa-miR-568	1	0	1	0	1	1	TTC7B	tetratricopeptide repeat domain 7B
hsa-miR-568	0	0	1	1	1	1	HAUS4	HAUS augmin-like complex, subunit 4
hsa-miR-568	1	0	1	1	1	1	NUMB	numb homolog (Drosophila)
hsa-miR-568	0	0	1	1	1	1	DLGAP5	discs, large (Drosophila) homolog-associated protein 5
hsa-miR-568	1	0	1	1	1	1	BTBD7	BTB (POZ) domain containing 7
hsa-miR-568	1	0	1	1	1	1	EIF5	eukaryotic translation initiation factor 5
hsa-miR-568	1	0	1	1	1	1	ERMAP	erythroblast membrane-associated protein (Scianna blood group)
hsa-miR-568	0	0	1	0	0	0	ADCY10P1	adenylate cyclase 10 (soluble) pseudogene 1
hsa-miR-568	0	0	1	0	0	0	DKFZp686D0853	uncharacterized LOC401613
hsa-miR-568	1	0	1	1	1	1	ATP2B4	ATPase, Ca++ transporting, plasma membrane 4
hsa-miR-568	1	0	1	1	1	1	JPH1	junctophilin 1
hsa-miR-568	1	0	1	1	1	1	RBL2	retinoblastoma-like 2 (p130)
hsa-miR-568	1	0	1	1	1	1	MIER3	mesoderm induction early response 1, family member 3
hsa-miR-568	0	0	1	0	0	0	RGPD4	RANBP2-like and GRIP domain containing 4
hsa-miR-568	1	0	1	1	1	1	SGCD	sarcoglycan, delta (35kDa dystrophin-associated glycoprotein)
hsa-miR-568	0	0	1	1	1	1	NUP54	nucleoporin 54kDa
hsa-miR-568	0	0	1	1	1	1	SLC12A8	solute carrier family 12 (potassium/chloride transporters), member 8
hsa-miR-568	1	0	1	0	1	1	MTX3	metaxin 3
hsa-miR-568	1	0	1	1	1	1	FAM184A	family with sequence similarity 184, member A
hsa-miR-568	0	0	1	1	1	1	CRB1	crumbs homolog 1 (Drosophila)
hsa-miR-568	0	0	1	0	1	1	CPPED1	calcineurin-like phosphoesterase domain containing 1
hsa-miR-568	0	0	1	1	1	1	SLC26A3	solute carrier family 26, member 3
hsa-miR-568	1	0	1	1	1	1	SPPL3	signal peptide peptidase like 3
hsa-miR-568	1	0	1	1	1	1	C7orf31	chromosome 7 open reading frame 31
hsa-miR-568	1	0	1	1	1	1	TJP1	tight junction protein 1
hsa-miR-568	0	0	1	1	1	1	COL6A3	collagen, type VI, alpha 3
hsa-miR-568	1	0	1	1	1	1	RORB	RAR-related orphan receptor B
hsa-miR-568	0	0	1	0	0	0	TRAF3IP2-AS1	TRAF3IP2 antisense RNA 1
hsa-miR-568	0	0	1	0	1	1	PRH2	proline-rich protein HaeIII subfamily 2
hsa-miR-568	1	0	1	1	1	1	MYCBP2	MYC binding protein 2, E3 ubiquitin protein ligase
hsa-miR-568	0	0	1	1	1	1	VPS35	vacuolar protein sorting 35 homolog (S. cerevisiae)
hsa-miR-568	0	0	1	1	1	1	IPCEF1	interaction protein for cytohesin exchange factors 1
hsa-miR-568	0	0	1	1	1	1	SCAPER	S-phase cyclin A-associated protein in the ER
hsa-miR-568	1	0	1	1	0	0	RBM27	RNA binding motif protein 27
hsa-miR-568	1	0	1	1	1	1	CBX3	chromobox homolog 3
hsa-miR-568	1	0	1	1	0	0	CECR2	cat eye syndrome chromosome region, candidate 2
hsa-miR-568	0	0	1	1	1	1	PPP1R1C	protein phosphatase 1, regulatory (inhibitor) subunit 1C
hsa-miR-568	1	0	1	1	1	1	EPS15	epidermal growth factor receptor pathway substrate 15
hsa-miR-568	1	0	1	1	1	1	STARD13	StAR-related lipid transfer (START) domain containing 13
hsa-miR-568	1	0	1	0	1	1	EML4	echinoderm microtubule associated protein like 4
hsa-miR-568	1	0	1	1	1	1	KLHL2	kelch-like 2, Mayven (Drosophila)
hsa-miR-568	0	0	1	0	0	0	OVOS	ovostatin
hsa-miR-568	1	0	1	1	1	1	NEDD9	neural precursor cell expressed, developmentally down-regulated 9
hsa-miR-568	1	0	1	1	1	1	HDAC1	histone deacetylase 1
hsa-miR-568	1	0	1	1	1	1	ATP6V1C1	ATPase, H+ transporting, lysosomal 42kDa, V1 subunit C1
hsa-miR-568	0	0	1	1	1	1	CCNT2	cyclin T2
hsa-miR-568	1	0	1	1	1	1	PTPRB	protein tyrosine phosphatase, receptor type, B
hsa-miR-568	1	0	1	1	1	1	ATP7B	ATPase, Cu++ transporting, beta polypeptide
hsa-miR-568	0	0	1	0	1	1	TYW5	tRNA-yW synthesizing protein 5
hsa-miR-568	1	0	1	1	1	1	PHF3	PHD finger protein 3
hsa-miR-568	0	0	1	1	1	1	ATP2A2	ATPase, Ca++ transporting, cardiac muscle, slow twitch 2
hsa-miR-568	1	0	1	1	1	1	NFIB	nuclear factor I/B
hsa-miR-568	1	0	1	1	1	1	C5orf24	chromosome 5 open reading frame 24
hsa-miR-568	1	0	1	1	1	1	PTER	phosphotriesterase related
hsa-miR-568	1	0	1	1	1	1	PGAP1	post-GPI attachment to proteins 1
hsa-miR-568	0	0	1	1	1	1	ABCD3	ATP-binding cassette, sub-family D (ALD), member 3
hsa-miR-568	1	0	1	1	1	1	HIF1A	hypoxia inducible factor 1, alpha subunit (basic helix-loop-helix transcription factor)
hsa-miR-568	1	0	1	1	1	1	CALD1	caldesmon 1
hsa-miR-568	1	0	1	1	1	1	EOGT	EGF domain-specific O-linked N-acetylglucosamine (GlcNAc) transferase
hsa-miR-568	1	0	1	0	1	1	TBL1XR1	transducin (beta)-like 1 X-linked receptor 1
hsa-miR-568	1	0	1	0	1	1	C1orf21	chromosome 1 open reading frame 21
hsa-miR-568	0	0	1	1	0	0	NEB	nebulin
hsa-miR-568	1	0	1	1	1	1	LYST	lysosomal trafficking regulator
hsa-miR-568	1	0	1	1	1	1	BSDC1	BSD domain containing 1
hsa-miR-568	1	0	1	1	1	1	SEL1L3	sel-1 suppressor of lin-12-like 3 (C. elegans)
hsa-miR-568	0	0	1	1	1	1	CHEK1	checkpoint kinase 1
hsa-miR-568	0	0	1	1	0	0	SPATA6	spermatogenesis associated 6
hsa-miR-568	0	0	1	1	0	0	CHCHD3	coiled-coil-helix-coiled-coil-helix domain containing 3
hsa-miR-568	1	0	1	1	1	1	FUT9	fucosyltransferase 9 (alpha (1,3) fucosyltransferase)
hsa-miR-568	1	0	1	1	1	1	EIF4B	eukaryotic translation initiation factor 4B
hsa-miR-568	0	0	1	1	1	1	FANCL	Fanconi anemia, complementation group L
hsa-miR-568	0	0	1	1	1	1	SLCO1C1	solute carrier organic anion transporter family, member 1C1
hsa-miR-568	1	0	1	1	1	1	CNIH2	cornichon homolog 2 (Drosophila)
hsa-miR-568	0	0	1	1	1	1	COPS8	COP9 constitutive photomorphogenic homolog subunit 8 (Arabidopsis)
hsa-miR-568	0	0	1	0	0	0	CMAHP	cytidine monophospho-N-acetylneuraminic acid hydroxylase, pseudogene
hsa-miR-568	0	0	1	1	1	1	ADK	adenosine kinase
hsa-miR-568	0	0	1	1	0	0	MIF4GD	MIF4G domain containing
hsa-miR-568	1	0	1	1	1	1	HAPLN1	hyaluronan and proteoglycan link protein 1
hsa-miR-568	1	0	1	1	1	1	FGF11	fibroblast growth factor 11
hsa-miR-568	0	0	1	1	1	1	SLC25A4	solute carrier family 25 (mitochondrial carrier; adenine nucleotide translocator), member 4
hsa-miR-568	0	0	1	1	1	1	FAT1	FAT tumor suppressor homolog 1 (Drosophila)
hsa-miR-568	0	0	1	1	1	1	SUMO3	SMT3 suppressor of mif two 3 homolog 3 (S. cerevisiae)
hsa-miR-568	1	0	1	1	1	1	ADM	adrenomedullin
hsa-miR-568	0	0	1	1	1	1	MTCP1	mature T-cell proliferation 1
hsa-miR-568	0	0	1	0	1	1	CD99P1	CD99 molecule pseudogene 1
hsa-miR-568	0	0	1	1	0	0	RPS2	ribosomal protein S2
hsa-miR-568	0	0	1	0	0	0	TRIQK	triple QxxK/R motif containing
hsa-miR-568	1	0	1	1	1	1	NTM	neurotrimin
hsa-miR-568	1	0	1	1	1	1	NFKBIA	nuclear factor of kappa light polypeptide gene enhancer in B-cells inhibitor, alpha
hsa-miR-568	1	0	1	0	1	1	RPS6KB1	ribosomal protein S6 kinase, 70kDa, polypeptide 1
hsa-miR-568	0	0	1	1	0	0	KIAA0100	KIAA0100
hsa-miR-568	0	0	1	1	1	1	PECR	peroxisomal trans-2-enoyl-CoA reductase
hsa-miR-568	1	0	1	1	0	0	YPEL3	yippee-like 3 (Drosophila)
hsa-miR-568	0	0	1	0	0	0	LOC643072	uncharacterized LOC643072
hsa-miR-568	1	0	1	1	1	1	TMEM248	transmembrane protein 248
hsa-miR-568	0	0	1	0	1	1	MMAA	methylmalonic aciduria (cobalamin deficiency) cblA type
hsa-miR-568	0	0	1	1	1	1	MS4A6A	membrane-spanning 4-domains, subfamily A, member 6A
hsa-miR-568	0	0	1	1	0	0	CD38	CD38 molecule
hsa-miR-568	1	0	1	1	1	1	TMEM245	transmembrane protein 245
hsa-miR-568	1	0	1	1	1	1	WIPF1	WAS/WASL interacting protein family, member 1
hsa-miR-568	0	0	1	1	1	1	MRPS7	mitochondrial ribosomal protein S7
hsa-miR-568	0	0	1	1	1	1	BMPR1A	bone morphogenetic protein receptor, type IA
hsa-miR-568	0	0	1	1	1	1	C1orf88	chromosome 1 open reading frame 88
hsa-miR-568	1	0	1	1	1	1	KCNIP4	Kv channel interacting protein 4
hsa-miR-568	0	0	1	0	0	0	LOC645513	uncharacterized LOC645513
hsa-miR-568	0	0	1	1	0	0	NOX5	NADPH oxidase, EF-hand calcium binding domain 5
hsa-miR-568	0	0	1	1	1	1	TRMT61B	tRNA methyltransferase 61 homolog B (S. cerevisiae)
hsa-miR-568	1	0	1	1	1	1	CAMK2A	calcium/calmodulin-dependent protein kinase II alpha
hsa-miR-568	0	0	1	0	1	1	VSTM2A	V-set and transmembrane domain containing 2A
hsa-miR-568	1	0	1	1	1	1	FUBP3	far upstream element (FUSE) binding protein 3
hsa-miR-568	0	0	1	1	0	0	CD53	CD53 molecule
hsa-miR-568	0	0	1	1	1	1	UBE2F	ubiquitin-conjugating enzyme E2F (putative)
hsa-miR-568	1	0	1	1	1	1	BAALC	brain and acute leukemia, cytoplasmic
hsa-miR-568	0	0	1	1	0	0	TAMM41	TAM41, mitochondrial translocator assembly and maintenance protein, homolog (S. cerevisiae)
hsa-miR-568	1	0	1	1	1	1	KCNS3	potassium voltage-gated channel, delayed-rectifier, subfamily S, member 3
hsa-miR-568	1	0	1	1	1	1	NFYB	nuclear transcription factor Y, beta
hsa-miR-568	1	0	1	1	0	0	ATP6V1B2	ATPase, H+ transporting, lysosomal 56/58kDa, V1 subunit B2
hsa-miR-568	0	0	1	1	1	1	HOXC9	homeobox C9
hsa-miR-568	0	0	1	1	1	1	ZNF333	zinc finger protein 333
hsa-miR-568	1	0	1	1	1	1	SNX1	sorting nexin 1
hsa-miR-568	0	0	1	1	1	1	DNAJC25	DnaJ (Hsp40) homolog, subfamily C , member 25
hsa-miR-568	1	0	1	1	1	1	ARHGEF40	Rho guanine nucleotide exchange factor (GEF) 40
hsa-miR-568	0	0	1	1	1	1	FAM18B1	family with sequence similarity 18, member B1
hsa-miR-568	1	0	1	1	1	1	HSPD1	heat shock 60kDa protein 1 (chaperonin)
hsa-miR-568	0	0	1	1	1	1	TSEN15	tRNA splicing endonuclease 15 homolog (S. cerevisiae)
hsa-miR-568	1	0	1	1	1	1	DNAJA2	DnaJ (Hsp40) homolog, subfamily A, member 2
hsa-miR-568	1	0	1	0	1	1	CD47	CD47 molecule
hsa-miR-568	1	0	1	1	1	1	RUNX1	runt-related transcription factor 1
hsa-miR-568	1	0	1	1	1	1	ID2	inhibitor of DNA binding 2, dominant negative helix-loop-helix protein
hsa-miR-568	0	0	1	1	1	1	INPP5K	inositol polyphosphate-5-phosphatase K
hsa-miR-568	0	0	1	1	0	0	CLK2	CDC-like kinase 2
hsa-miR-568	1	0	1	1	1	1	PHF20L1	PHD finger protein 20-like 1
hsa-miR-568	1	0	1	1	1	1	ATPAF1	ATP synthase mitochondrial F1 complex assembly factor 1
hsa-miR-568	0	0	1	1	1	1	PTMA	prothymosin, alpha
hsa-miR-568	1	0	1	1	1	1	TIPRL	TIP41, TOR signaling pathway regulator-like (S. cerevisiae)
hsa-miR-568	0	0	1	1	1	1	NUDT21	nudix (nucleoside diphosphate linked moiety X)-type motif 21
hsa-miR-568	0	0	1	1	1	1	COPS4	COP9 constitutive photomorphogenic homolog subunit 4 (Arabidopsis)
hsa-miR-568	1	0	1	1	1	1	LGALSL	lectin, galactoside-binding-like
hsa-miR-568	1	0	1	0	1	1	DNMT3A	DNA (cytosine-5-)-methyltransferase 3 alpha
hsa-miR-568	0	0	1	1	1	1	VPS16	vacuolar protein sorting 16 homolog (S. cerevisiae)
hsa-miR-568	0	0	1	1	0	0	DUSP11	dual specificity phosphatase 11 (RNA/RNP complex 1-interacting)
hsa-miR-568	0	0	1	0	0	0	FAM47E	family with sequence similarity 47, member E
hsa-miR-568	1	0	1	1	1	1	STAG2	stromal antigen 2
hsa-miR-568	0	0	1	1	1	1	CCP110	centriolar coiled coil protein 110kDa
hsa-miR-568	1	0	1	1	1	1	PTPRG	protein tyrosine phosphatase, receptor type, G
hsa-miR-568	1	0	1	1	1	1	FBXW7	F-box and WD repeat domain containing 7, E3 ubiquitin protein ligase
hsa-miR-568	0	0	1	1	1	1	ATG5	autophagy related 5
hsa-miR-568	0	0	1	0	0	0	LINC00661	long intergenic non-protein coding RNA 661
hsa-miR-568	1	0	1	1	1	1	NKTR	natural killer-tumor recognition sequence
hsa-miR-568	1	0	1	1	1	1	HECW2	HECT, C2 and WW domain containing E3 ubiquitin protein ligase 2
hsa-miR-568	1	0	1	1	1	1	KIAA2018	KIAA2018
hsa-miR-568	1	0	1	0	1	1	PTP4A1	protein tyrosine phosphatase type IVA, member 1
hsa-miR-568	1	0	1	0	1	1	XRN1	5'-3' exoribonuclease 1
hsa-miR-568	1	0	1	0	1	1	OSBPL8	oxysterol binding protein-like 8
hsa-miR-568	1	0	1	0	1	1	MCFD2	multiple coagulation factor deficiency 2
hsa-miR-568	0	0	1	1	1	1	ARMCX1	armadillo repeat containing, X-linked 1
hsa-miR-568	1	0	1	0	1	1	ZNF652	zinc finger protein 652
hsa-miR-568	0	0	1	0	0	0	LOC440518	golgin A2 pseudogene
hsa-miR-568	1	0	1	1	1	1	GABPB1	GA binding protein transcription factor, beta subunit 1
hsa-miR-568	0	0	1	1	1	1	SLC39A14	solute carrier family 39 (zinc transporter), member 14
hsa-miR-568	1	0	1	1	1	1	PI15	peptidase inhibitor 15
hsa-miR-568	1	0	1	1	1	1	NKX2-1	NK2 homeobox 1
hsa-miR-568	1	0	1	1	1	1	RBPMS	RNA binding protein with multiple splicing
hsa-miR-568	1	0	1	0	1	1	KLHDC10	kelch domain containing 10
hsa-miR-568	1	0	1	0	1	1	LONRF2	LON peptidase N-terminal domain and ring finger 2
hsa-miR-568	0	0	1	1	1	1	PARP14	poly (ADP-ribose) polymerase family, member 14
hsa-miR-568	1	0	1	1	1	1	TMEFF2	transmembrane protein with EGF-like and two follistatin-like domains 2
hsa-miR-568	1	0	1	1	0	0	DPY19L1	dpy-19-like 1 (C. elegans)
hsa-miR-568	0	0	1	0	0	0	FAM92A1	family with sequence similarity 92, member A1
hsa-miR-568	0	0	1	1	1	1	DHX36	DEAH (Asp-Glu-Ala-His) box polypeptide 36
hsa-miR-568	1	0	1	0	1	1	DCBLD2	discoidin, CUB and LCCL domain containing 2
hsa-miR-568	0	0	1	1	1	1	PROS1	protein S (alpha)
hsa-miR-568	1	0	1	1	1	1	LGR4	leucine-rich repeat containing G protein-coupled receptor 4
hsa-miR-568	1	0	1	1	1	1	IRF1	interferon regulatory factor 1
hsa-miR-568	0	0	1	1	1	1	MORC4	MORC family CW-type zinc finger 4
hsa-miR-568	0	0	1	1	1	1	RFC1	replication factor C (activator 1) 1, 145kDa
hsa-miR-568	0	0	1	1	1	1	PLCB4	phospholipase C, beta 4
hsa-miR-568	1	0	1	0	1	1	BCL2	B-cell CLL/lymphoma 2
hsa-miR-568	1	0	1	1	1	1	IGF1	insulin-like growth factor 1 (somatomedin C)
hsa-miR-568	0	0	1	1	1	1	GAD2	glutamate decarboxylase 2 (pancreatic islets and brain, 65kDa)
hsa-miR-568	1	0	1	0	1	1	ACVR2A	activin A receptor, type IIA
hsa-miR-568	1	0	1	1	1	1	FAS	Fas (TNF receptor superfamily, member 6)
hsa-miR-568	0	0	1	1	0	0	ASPA	aspartoacylase
hsa-miR-568	0	0	1	1	0	0	CD40LG	CD40 ligand
hsa-miR-568	1	0	1	1	1	1	COL4A3	collagen, type IV, alpha 3 (Goodpasture antigen)
hsa-miR-568	1	0	1	1	1	1	DMD	dystrophin
hsa-miR-568	1	0	1	1	1	1	ESR1	estrogen receptor 1
hsa-miR-568	0	0	1	1	1	1	F5	coagulation factor V (proaccelerin, labile factor)
hsa-miR-568	0	0	1	0	1	1	MS4A2	membrane-spanning 4-domains, subfamily A, member 2
hsa-miR-568	1	0	1	1	1	1	GALC	galactosylceramidase
hsa-miR-568	1	0	1	1	1	1	GJA1	gap junction protein, alpha 1, 43kDa
hsa-miR-568	1	0	1	1	1	1	GK	glycerol kinase
hsa-miR-568	1	0	1	1	1	1	TBX5	T-box 5
hsa-miR-568	1	0	1	0	1	1	SGCB	sarcoglycan, beta (43kDa dystrophin-associated glycoprotein)
hsa-miR-568	1	0	1	1	1	1	MITF	microphthalmia-associated transcription factor
hsa-miR-568	0	0	1	1	1	1	MTM1	myotubularin 1
hsa-miR-568	1	0	1	1	1	1	NF1	neurofibromin 1
hsa-miR-568	1	0	1	1	1	1	NPC1	Niemann-Pick disease, type C1
hsa-miR-568	0	0	1	1	0	0	PCCA	propionyl CoA carboxylase, alpha polypeptide
hsa-miR-568	0	0	1	0	1	1	PGK1	phosphoglycerate kinase 1
hsa-miR-568	1	0	1	0	1	1	PKD2	polycystic kidney disease 2 (autosomal dominant)
hsa-miR-568	1	0	1	0	1	1	PTEN	phosphatase and tensin homolog
hsa-miR-568	0	0	1	1	1	1	SLC5A1	solute carrier family 5 (sodium/glucose cotransporter), member 1
hsa-miR-568	1	0	1	1	1	1	SOX9	SRY (sex determining region Y)-box 9
hsa-miR-568	0	0	1	1	1	1	SRD5A2	steroid-5-alpha-reductase, alpha polypeptide 2 (3-oxo-5 alpha-steroid delta 4-dehydrogenase alpha 2)
hsa-miR-568	0	0	1	1	1	1	THBD	thrombomodulin
hsa-miR-568	1	0	1	1	1	1	TIMP3	TIMP metallopeptidase inhibitor 3
hsa-miR-568	0	0	1	1	1	1	WAS	Wiskott-Aldrich syndrome
hsa-miR-568	1	0	1	0	1	1	PAFAH1B1	platelet-activating factor acetylhydrolase 1b, regulatory subunit 1 (45kDa)
hsa-miR-568	0	0	1	1	1	1	OXCT1	3-oxoacid CoA transferase 1
hsa-miR-568	1	0	1	0	1	1	PCSK1	proprotein convertase subtilisin/kexin type 1
hsa-miR-568	0	0	1	1	1	1	UGT1A1	UDP glucuronosyltransferase 1 family, polypeptide A1
hsa-miR-568	1	0	1	1	1	1	ATRX	alpha thalassemia/mental retardation syndrome X-linked
hsa-miR-568	0	0	1	1	1	1	COL10A1	collagen, type X, alpha 1
hsa-miR-568	1	0	1	1	1	1	HOXD13	homeobox D13
hsa-miR-568	1	0	1	1	1	1	LDLR	low density lipoprotein receptor
hsa-miR-568	1	0	1	1	1	1	IL1A	interleukin 1, alpha
hsa-miR-568	0	0	1	1	1	1	C7	complement component 7
hsa-miR-568	1	0	1	0	1	1	IGFBP5	insulin-like growth factor binding protein 5
hsa-miR-568	0	0	1	1	1	1	IL6	interleukin 6 (interferon, beta 2)
hsa-miR-568	0	0	1	1	1	1	SELL	selectin L
hsa-miR-568	0	0	1	1	1	1	ADH4	alcohol dehydrogenase 4 (class II), pi polypeptide
hsa-miR-568	0	0	1	1	1	1	CRH	corticotropin releasing hormone
hsa-miR-568	1	0	1	0	0	0	CSF2	colony stimulating factor 2 (granulocyte-macrophage)
hsa-miR-568	1	0	1	1	1	1	DIO2	deiodinase, iodothyronine, type II
hsa-miR-568	0	0	1	1	1	1	GABRA5	gamma-aminobutyric acid (GABA) A receptor, alpha 5
hsa-miR-568	1	0	1	1	1	1	GABRB3	gamma-aminobutyric acid (GABA) A receptor, beta 3
hsa-miR-568	1	0	1	1	1	1	GABRG2	gamma-aminobutyric acid (GABA) A receptor, gamma 2
hsa-miR-568	1	0	1	1	1	1	GAD1	glutamate decarboxylase 1 (brain, 67kDa)
hsa-miR-568	0	0	1	1	1	1	GLRB	glycine receptor, beta
hsa-miR-568	1	0	1	1	1	1	GRM8	glutamate receptor, metabotropic 8
hsa-miR-568	1	0	1	1	1	1	HTR1F	5-hydroxytryptamine (serotonin) receptor 1F, G protein-coupled
hsa-miR-568	0	0	1	1	1	1	IL12A	interleukin 12A (natural killer cell stimulatory factor 1, cytotoxic lymphocyte maturation factor 1, p35)
hsa-miR-568	1	0	1	0	1	1	KCNJ2	potassium inwardly-rectifying channel, subfamily J, member 2
hsa-miR-568	1	0	1	1	1	1	MME	membrane metallo-endopeptidase
hsa-miR-568	0	0	1	1	1	1	NPY2R	neuropeptide Y receptor Y2
hsa-miR-568	1	0	1	1	0	0	PDE3A	phosphodiesterase 3A, cGMP-inhibited
hsa-miR-568	1	0	1	1	1	1	PPP3R1	protein phosphatase 3, regulatory subunit B, alpha
hsa-miR-568	1	0	1	1	1	1	PTGER2	prostaglandin E receptor 2 (subtype EP2), 53kDa
hsa-miR-568	0	0	1	1	1	1	PTGS2	prostaglandin-endoperoxide synthase 2 (prostaglandin G/H synthase and cyclooxygenase)
hsa-miR-568	1	0	1	1	1	1	RARA	retinoic acid receptor, alpha
hsa-miR-568	0	0	1	1	0	0	RPL29	ribosomal protein L29
hsa-miR-568	0	0	1	1	1	1	ZNF676	zinc finger protein 676
hsa-miR-568	1	0	1	0	1	1	SMAD5	SMAD family member 5
hsa-miR-568	1	0	1	0	1	1	UBE2W	ubiquitin-conjugating enzyme E2W (putative)
hsa-miR-568	1	0	1	0	1	1	SPOPL	speckle-type POZ protein-like
hsa-miR-568	0	0	1	1	1	1	FLJ45079	FLJ45079 protein
hsa-miR-568	1	0	1	1	1	1	ATP1B1	ATPase, Na+/K+ transporting, beta 1 polypeptide
hsa-miR-568	1	0	1	1	1	1	MIR22HG	MIR22 host gene (non-protein coding)
hsa-miR-568	1	0	1	1	1	1	FAM13C	family with sequence similarity 13, member C
hsa-miR-568	1	0	1	1	1	1	AFTPH	aftiphilin
hsa-miR-568	0	0	1	1	1	1	SUMO4	SMT3 suppressor of mif two 3 homolog 4 (S. cerevisiae)
hsa-miR-568	1	0	1	1	1	1	LCLAT1	lysocardiolipin acyltransferase 1
hsa-miR-568	1	0	1	1	1	1	GATA3	GATA binding protein 3
hsa-miR-568	1	0	1	1	1	1	C1orf173	chromosome 1 open reading frame 173
hsa-miR-568	0	0	1	1	1	1	PTRH1	peptidyl-tRNA hydrolase 1 homolog (S. cerevisiae)
hsa-miR-568	1	0	1	1	1	1	HMGXB4	HMG box domain containing 4
hsa-miR-568	1	0	1	1	1	1	BICD2	bicaudal D homolog 2 (Drosophila)
hsa-miR-568	1	0	1	0	1	1	BMF	Bcl2 modifying factor
hsa-miR-568	1	0	1	0	1	1	ZNF740	zinc finger protein 740
hsa-miR-568	0	0	1	1	1	1	CCDC144NL	coiled-coil domain containing 144 family, N-terminal like
hsa-miR-568	1	0	1	0	1	1	LIN28B	lin-28 homolog B (C. elegans)
hsa-miR-568	0	0	1	1	1	1	DBX2	developing brain homeobox 2
hsa-miR-568	1	0	1	1	1	1	NCK2	NCK adaptor protein 2
hsa-miR-568	0	0	1	1	1	1	FRG2	FSHD region gene 2
hsa-miR-568	1	0	1	1	1	1	EBF3	early B-cell factor 3
hsa-miR-568	1	0	1	1	1	1	EDA	ectodysplasin A
hsa-miR-568	0	0	1	1	1	1	LINC00478	long intergenic non-protein coding RNA 478
hsa-miR-568	1	0	1	1	1	1	TCEAL1	transcription elongation factor A (SII)-like 1
hsa-miR-568	1	0	1	1	1	1	ATN1	atrophin 1
hsa-miR-568	0	0	1	1	1	1	IGIP	IgA-inducing protein homolog (Bos taurus)
hsa-miR-568	1	0	1	1	1	1	CNOT4	CCR4-NOT transcription complex, subunit 4
hsa-miR-568	1	0	1	1	1	1	FNIP1	folliculin interacting protein 1
hsa-miR-568	1	0	1	1	1	1	SHE	Src homology 2 domain containing E
hsa-miR-568	1	0	1	0	1	1	PM20D2	peptidase M20 domain containing 2
hsa-miR-568	1	0	1	0	1	1	FAM102B	family with sequence similarity 102, member B
hsa-miR-568	1	0	1	0	1	1	ZC3H12B	zinc finger CCCH-type containing 12B
hsa-miR-568	0	0	1	1	1	1	SAMD13	sterile alpha motif domain containing 13
hsa-miR-568	1	0	1	1	1	1	ATP11C	ATPase, class VI, type 11C
hsa-miR-568	1	0	1	0	1	1	CREB5	cAMP responsive element binding protein 5
hsa-miR-568	0	0	1	0	1	1	ERVMER61-1	endogenous retrovirus group MER61, member 1
hsa-miR-568	1	0	1	1	1	1	GRAMD2	GRAM domain containing 2
hsa-miR-568	1	0	1	1	1	1	SLC25A53	solute carrier family 25, member 53
hsa-miR-568	1	0	1	1	1	1	DISC1	disrupted in schizophrenia 1
hsa-miR-568	0	0	1	1	1	1	SPIN4	spindlin family, member 4
hsa-miR-568	1	0	1	1	1	1	PABPC1L2A	poly(A) binding protein, cytoplasmic 1-like 2A
hsa-miR-568	1	0	1	1	1	1	TRNP1	TMF1-regulated nuclear protein 1
hsa-miR-568	1	0	1	0	1	1	SYT14L	synaptotagmin XIV-like
hsa-miR-568	1	0	1	1	1	1	KATNAL1	katanin p60 subunit A-like 1
hsa-miR-568	1	0	1	1	1	1	CA7	carbonic anhydrase VII
hsa-miR-568	0	0	1	0	1	1	BAG5	BCL2-associated athanogene 5
hsa-miR-568	1	0	1	1	1	1	RUNX2	runt-related transcription factor 2
hsa-miR-568	1	0	1	1	1	1	PHF6	PHD finger protein 6
hsa-miR-568	1	0	1	0	1	1	GOPC	golgi-associated PDZ and coiled-coil motif containing
hsa-miR-568	0	0	1	1	1	1	USP1	ubiquitin specific peptidase 1
hsa-miR-568	1	0	1	1	1	1	ZHX1	zinc fingers and homeoboxes 1
hsa-miR-568	0	0	1	1	1	1	KIAA2026	KIAA2026
hsa-miR-568	1	0	1	1	1	1	VMA21	VMA21 vacuolar H+-ATPase homolog (S. cerevisiae)
hsa-miR-568	0	0	1	1	1	1	ACTBL2	actin, beta-like 2
hsa-miR-568	1	0	1	0	1	1	BRCC3	BRCA1/BRCA2-containing complex, subunit 3
hsa-miR-568	1	0	1	1	1	1	NTRK2	neurotrophic tyrosine kinase, receptor, type 2
hsa-miR-568	1	0	1	1	1	1	SERBP1	SERPINE1 mRNA binding protein 1
hsa-miR-568	1	0	1	1	1	1	GPHN	gephyrin
hsa-miR-568	1	0	1	1	1	1	CANX	calnexin
hsa-miR-568	1	0	1	0	1	1	BCL7A	B-cell CLL/lymphoma 7A
hsa-miR-568	1	0	1	0	1	1	TNRC6B	trinucleotide repeat containing 6B
hsa-miR-568	1	0	1	1	1	1	YIPF5	Yip1 domain family, member 5
hsa-miR-568	1	0	1	1	1	1	FNBP1L	formin binding protein 1-like
hsa-miR-568	0	0	1	1	1	1	SC5DL	sterol-C5-desaturase (ERG3 delta-5-desaturase homolog, S. cerevisiae)-like
hsa-miR-568	1	0	1	1	1	1	AFF3	AF4/FMR2 family, member 3
hsa-miR-568	1	0	1	1	1	1	VEGFA	vascular endothelial growth factor A
hsa-miR-568	1	0	1	1	1	1	KCTD21	potassium channel tetramerisation domain containing 21
hsa-miR-568	1	0	1	1	1	1	RGS7BP	regulator of G-protein signaling 7 binding protein
hsa-miR-568	1	0	1	1	1	1	PLEKHG1	pleckstrin homology domain containing, family G (with RhoGef domain) member 1
hsa-miR-568	0	0	1	1	1	1	FAM24A	family with sequence similarity 24, member A
hsa-miR-568	1	0	1	1	1	1	SLC10A7	solute carrier family 10 (sodium/bile acid cotransporter family), member 7
hsa-miR-568	1	0	1	0	1	1	MSRB3	methionine sulfoxide reductase B3
hsa-miR-568	0	0	1	1	1	1	TP53BP2	tumor protein p53 binding protein, 2
hsa-miR-568	0	0	1	1	1	1	LRRC17	leucine rich repeat containing 17
hsa-miR-568	0	0	1	1	1	1	CALML4	calmodulin-like 4
hsa-miR-568	1	0	1	1	1	1	MAF	v-maf musculoaponeurotic fibrosarcoma oncogene homolog (avian)
hsa-miR-568	1	0	1	1	1	1	CSNK1G3	casein kinase 1, gamma 3
hsa-miR-568	0	0	1	0	1	1	STXBP1	syntaxin binding protein 1
hsa-miR-568	1	0	1	1	1	1	STK24	serine/threonine kinase 24
hsa-miR-568	1	0	1	0	1	1	GPR126	G protein-coupled receptor 126
hsa-miR-568	1	0	1	1	1	1	MYCL1	v-myc myelocytomatosis viral oncogene homolog 1, lung carcinoma derived (avian)
hsa-miR-568	1	0	1	0	1	1	SRGAP3	SLIT-ROBO Rho GTPase activating protein 3
hsa-miR-568	1	0	1	1	1	1	TMEM98	transmembrane protein 98
hsa-miR-568	1	0	1	1	1	1	PPM1B	protein phosphatase, Mg2+/Mn2+ dependent, 1B
hsa-miR-568	1	0	1	1	1	1	ZNF704	zinc finger protein 704
hsa-miR-568	0	0	1	1	1	1	TRAF5	TNF receptor-associated factor 5
hsa-miR-568	1	0	1	1	1	1	GALNTL6	UDP-N-acetyl-alpha-D-galactosamine:polypeptide N-acetylgalactosaminyltransferase-like 6
hsa-miR-568	1	0	1	1	1	1	SMOC1	SPARC related modular calcium binding 1
hsa-miR-568	1	0	1	1	1	1	AGAP1	ArfGAP with GTPase domain, ankyrin repeat and PH domain 1
hsa-miR-568	1	0	1	1	1	1	USP14	ubiquitin specific peptidase 14 (tRNA-guanine transglycosylase)
hsa-miR-568	1	0	1	1	1	1	PDE4B	phosphodiesterase 4B, cAMP-specific
hsa-miR-568	1	0	1	1	1	1	RUFY3	RUN and FYVE domain containing 3
hsa-miR-568	1	0	1	0	1	1	SCML1	sex comb on midleg-like 1 (Drosophila)
hsa-miR-568	0	0	1	1	1	1	CTLA4	cytotoxic T-lymphocyte-associated protein 4
hsa-miR-568	0	0	1	1	1	1	BTF3	basic transcription factor 3
hsa-miR-568	0	0	1	1	1	1	REV1	REV1, polymerase (DNA directed)
hsa-miR-568	1	0	1	1	1	1	DLX1	distal-less homeobox 1
hsa-miR-568	0	0	1	0	1	1	RGS21	regulator of G-protein signaling 21
hsa-miR-568	0	0	1	1	1	1	ATAD3C	ATPase family, AAA domain containing 3C
hsa-miR-568	0	0	1	1	1	1	HEPACAM2	HEPACAM family member 2
hsa-miR-568	1	0	1	1	1	1	KIAA0317	KIAA0317
hsa-miR-568	1	0	1	0	1	1	GK5	glycerol kinase 5 (putative)
hsa-miR-568	1	0	1	1	1	1	KCNC4	potassium voltage-gated channel, Shaw-related subfamily, member 4
hsa-miR-568	1	0	1	0	1	1	USP9X	ubiquitin specific peptidase 9, X-linked
hsa-miR-568	1	0	1	0	1	1	CREBZF	CREB/ATF bZIP transcription factor
hsa-miR-568	0	0	1	1	0	0	C7orf63	chromosome 7 open reading frame 63
hsa-miR-568	1	0	1	1	1	1	CHN2	chimerin (chimaerin) 2
hsa-miR-568	1	0	1	0	1	1	FAM133B	family with sequence similarity 133, member B
hsa-miR-568	1	0	1	0	1	1	CEP44	centrosomal protein 44kDa
hsa-miR-568	0	0	1	1	1	1	SPOCK3	sparc/osteonectin, cwcv and kazal-like domains proteoglycan (testican) 3
hsa-miR-568	1	0	1	1	1	1	PAPD5	PAP associated domain containing 5
hsa-miR-568	0	0	1	1	1	1	MTHFD2	methylenetetrahydrofolate dehydrogenase (NADP+ dependent) 2, methenyltetrahydrofolate cyclohydrolase
hsa-miR-568	1	0	1	1	1	1	MTMR12	myotubularin related protein 12
hsa-miR-568	1	0	1	1	1	1	NCALD	neurocalcin delta
hsa-miR-568	0	0	1	1	1	1	SI	sucrase-isomaltase (alpha-glucosidase)
hsa-miR-568	1	0	1	1	1	1	HMGCLL1	3-hydroxymethyl-3-methylglutaryl-CoA lyase-like 1
hsa-miR-568	1	0	1	1	1	1	GLIS3	GLIS family zinc finger 3
hsa-miR-568	0	0	1	1	1	1	PSPC1	paraspeckle component 1
hsa-miR-568	0	0	1	1	1	1	MST4	serine/threonine protein kinase MST4
hsa-miR-568	1	0	1	1	1	1	PABPC1L2B	poly(A) binding protein, cytoplasmic 1-like 2B
hsa-miR-568	1	0	1	1	1	1	DIAPH3	diaphanous homolog 3 (Drosophila)
hsa-miR-568	1	0	1	1	1	1	SLC9A6	solute carrier family 9, subfamily A (NHE6, cation proton antiporter 6), member 6
hsa-miR-568	1	0	1	1	1	1	GLRA3	glycine receptor, alpha 3
hsa-miR-568	1	0	1	1	1	1	NSL1	NSL1, MIND kinetochore complex component, homolog (S. cerevisiae)
hsa-miR-568	0	0	1	1	1	1	TMEM8B	transmembrane protein 8B
hsa-miR-568	1	0	1	1	1	1	ERBB4	v-erb-a erythroblastic leukemia viral oncogene homolog 4 (avian)
hsa-miR-568	0	0	1	1	0	0	NGDN	neuroguidin, EIF4E binding protein
hsa-miR-568	1	0	1	1	1	1	SLA	Src-like-adaptor
hsa-miR-568	0	0	1	1	1	1	TOP2B	topoisomerase (DNA) II beta 180kDa
hsa-miR-568	0	0	1	1	1	1	UGT1A6	UDP glucuronosyltransferase 1 family, polypeptide A6
hsa-miR-568	1	0	1	1	1	1	QSER1	glutamine and serine rich 1
hsa-miR-568	1	0	1	1	1	1	METTL9	methyltransferase like 9
hsa-miR-568	1	0	1	1	1	1	CDC14B	CDC14 cell division cycle 14 homolog B (S. cerevisiae)
hsa-miR-568	1	0	1	1	1	1	ZNF436	zinc finger protein 436
hsa-miR-568	1	0	1	1	1	1	RNF214	ring finger protein 214
hsa-miR-568	0	0	1	0	1	1	WTH3DI	RAB6C-like
hsa-miR-568	0	0	1	1	1	1	VCAM1	vascular cell adhesion molecule 1
hsa-miR-568	1	0	1	1	1	1	DACT1	dapper, antagonist of beta-catenin, homolog 1 (Xenopus laevis)
hsa-miR-568	0	0	1	1	1	1	XIRP2	xin actin-binding repeat containing 2
hsa-miR-568	1	0	1	1	1	1	CREBBP	CREB binding protein
hsa-miR-568	1	0	1	1	1	1	PACRG	PARK2 co-regulated
hsa-miR-568	1	0	1	1	1	1	FAM155A	family with sequence similarity 155, member A
hsa-miR-568	1	0	1	1	1	1	BEND3	BEN domain containing 3
hsa-miR-568	0	0	1	1	0	0	SLC35F4	solute carrier family 35, member F4
hsa-miR-568	1	0	1	1	1	1	ZNF697	zinc finger protein 697
hsa-miR-568	1	0	1	0	1	1	ODZ3	odz, odd Oz/ten-m homolog 3 (Drosophila)
hsa-miR-568	1	0	1	0	1	1	MEGF9	multiple EGF-like-domains 9
hsa-miR-568	0	0	1	1	1	1	TBX18	T-box 18
hsa-miR-568	1	0	1	1	1	1	MGA	MAX gene associated
hsa-miR-568	1	0	1	0	1	1	SCN3A	sodium channel, voltage-gated, type III, alpha subunit
hsa-miR-568	1	0	1	0	1	1	PDE5A	phosphodiesterase 5A, cGMP-specific
hsa-miR-568	0	0	1	1	0	0	ADCY8	adenylate cyclase 8 (brain)
hsa-miR-568	1	0	1	1	1	1	ADCYAP1	adenylate cyclase activating polypeptide 1 (pituitary)
hsa-miR-568	1	0	1	1	1	1	PRDM1	PR domain containing 1, with ZNF domain
hsa-miR-568	1	0	1	1	1	1	BMP2	bone morphogenetic protein 2
hsa-miR-568	1	0	1	0	1	1	KLF9	Kruppel-like factor 9
hsa-miR-568	0	0	1	0	1	1	CAV2	caveolin 2
hsa-miR-568	1	0	1	1	1	1	CDH13	cadherin 13, H-cadherin (heart)
hsa-miR-568	1	0	1	0	1	1	CDK6	cyclin-dependent kinase 6
hsa-miR-568	1	0	1	1	1	1	CHD1	chromodomain helicase DNA binding protein 1
hsa-miR-568	0	0	1	1	0	0	CLCA1	chloride channel accessory 1
hsa-miR-568	0	0	1	1	1	1	CLIC2	chloride intracellular channel 2
hsa-miR-568	1	0	1	1	1	1	CTNND2	catenin (cadherin-associated protein), delta 2
hsa-miR-568	1	0	1	1	1	1	CELSR3	cadherin, EGF LAG seven-pass G-type receptor 3 (flamingo homolog, Drosophila)
hsa-miR-568	1	0	1	1	1	1	EIF1AX	eukaryotic translation initiation factor 1A, X-linked
hsa-miR-568	1	0	1	1	1	1	ELAVL1	ELAV (embryonic lethal, abnormal vision, Drosophila)-like 1 (Hu antigen R)
hsa-miR-568	1	0	1	1	1	1	EN2	engrailed homeobox 2
hsa-miR-568	1	0	1	1	1	1	EP300	E1A binding protein p300
hsa-miR-568	1	0	1	1	1	1	EREG	epiregulin
hsa-miR-568	1	0	1	1	1	1	FOXF1	forkhead box F1
hsa-miR-568	1	0	1	1	1	1	FOXC1	forkhead box C1
hsa-miR-568	0	0	1	0	1	1	FMO2	flavin containing monooxygenase 2 (non-functional)
hsa-miR-568	1	0	1	0	1	1	MPPED2	metallophosphoesterase domain containing 2
hsa-miR-568	1	0	1	1	1	1	BNC1	basonuclin 1
hsa-miR-568	1	0	1	1	1	1	BTG1	B-cell translocation gene 1, anti-proliferative
hsa-miR-568	1	0	1	1	1	1	CBFB	core-binding factor, beta subunit
hsa-miR-568	0	0	1	1	1	1	CD1D	CD1d molecule
hsa-miR-568	0	0	1	1	0	0	CD19	CD19 molecule
hsa-miR-568	0	0	1	1	1	1	CD34	CD34 molecule
hsa-miR-568	1	0	1	1	1	1	CD69	CD69 molecule
hsa-miR-568	1	0	1	1	1	1	CDH5	cadherin 5, type 2 (vascular endothelium)
hsa-miR-568	1	0	1	1	1	1	CDH11	cadherin 11, type 2, OB-cadherin (osteoblast)
hsa-miR-568	1	0	1	1	1	1	MASP1	mannan-binding lectin serine peptidase 1 (C4/C2 activating component of Ra-reactive factor)
hsa-miR-568	0	0	1	1	1	1	CSN2	casein beta
hsa-miR-568	1	0	1	1	1	1	CTNNB1	catenin (cadherin-associated protein), beta 1, 88kDa
hsa-miR-568	1	0	1	1	1	1	DR1	down-regulator of transcription 1, TBP-binding (negative cofactor 2)
hsa-miR-568	0	0	1	1	1	1	DSG1	desmoglein 1
hsa-miR-568	1	0	1	1	1	1	HBEGF	heparin-binding EGF-like growth factor
hsa-miR-568	1	0	1	1	0	0	E2F4	E2F transcription factor 4, p107/p130-binding
hsa-miR-568	1	0	1	1	1	1	EIF4E	eukaryotic translation initiation factor 4E
hsa-miR-568	1	0	1	1	1	1	ENPEP	glutamyl aminopeptidase (aminopeptidase A)
hsa-miR-568	1	0	1	0	1	1	ETV6	ets variant 6
hsa-miR-568	1	0	1	1	1	1	FBN2	fibrillin 2
hsa-miR-568	1	0	1	0	1	1	FOXO1	forkhead box O1
hsa-miR-568	0	0	1	1	1	1	FLI1	Friend leukemia virus integration 1
hsa-miR-568	1	0	1	0	1	1	FUT4	fucosyltransferase 4 (alpha (1,3) fucosyltransferase, myeloid-specific)
hsa-miR-568	1	0	1	1	1	1	GAB1	GRB2-associated binding protein 1
hsa-miR-568	1	0	1	1	1	1	GBP1	guanylate binding protein 1, interferon-inducible
hsa-miR-568	1	0	1	0	1	1	GNAI1	guanine nucleotide binding protein (G protein), alpha inhibiting activity polypeptide 1
hsa-miR-568	1	0	1	1	1	1	GOLGA1	golgin A1
hsa-miR-568	0	0	1	1	1	1	CXCL3	chemokine (C-X-C motif) ligand 3
hsa-miR-568	0	0	1	1	1	1	HMGCS1	3-hydroxy-3-methylglutaryl-CoA synthase 1 (soluble)
hsa-miR-568	0	0	1	1	1	1	IRF8	interferon regulatory factor 8
hsa-miR-568	1	0	1	0	1	1	IRF2	interferon regulatory factor 2
hsa-miR-568	1	0	1	1	1	1	ITGA2	integrin, alpha 2 (CD49B, alpha 2 subunit of VLA-2 receptor)
hsa-miR-568	1	0	1	1	1	1	ITGB8	integrin, beta 8
hsa-miR-568	1	0	1	1	1	1	JAK1	Janus kinase 1
hsa-miR-568	1	0	1	1	1	1	KCNA3	potassium voltage-gated channel, shaker-related subfamily, member 3
hsa-miR-568	1	0	1	1	1	1	KCNA4	potassium voltage-gated channel, shaker-related subfamily, member 4
hsa-miR-568	1	0	1	1	1	1	KCNA6	potassium voltage-gated channel, shaker-related subfamily, member 6
hsa-miR-568	0	0	1	1	1	1	KLRC1	killer cell lectin-like receptor subfamily C, member 1
hsa-miR-568	0	0	1	1	1	1	KLRC2	killer cell lectin-like receptor subfamily C, member 2
hsa-miR-568	1	0	1	1	1	1	KPNA4	karyopherin alpha 4 (importin alpha 3)
hsa-miR-568	1	0	1	1	1	1	IPO5	importin 5
hsa-miR-568	1	0	1	1	1	1	LBR	lamin B receptor
hsa-miR-568	1	0	1	1	1	1	LIFR	leukemia inhibitory factor receptor alpha
hsa-miR-568	1	0	1	1	1	1	LRP6	low density lipoprotein receptor-related protein 6
hsa-miR-568	0	0	1	1	1	1	TACSTD2	tumor-associated calcium signal transducer 2
hsa-miR-568	1	0	1	0	1	1	MXD1	MAX dimerization protein 1
hsa-miR-568	1	0	1	1	1	1	MATN2	matrilin 2
hsa-miR-568	1	0	1	1	1	1	ME1	malic enzyme 1, NADP(+)-dependent, cytosolic
hsa-miR-568	0	0	1	1	1	1	MMP19	matrix metallopeptidase 19
hsa-miR-568	0	0	1	1	1	1	MSX2	msh homeobox 2
hsa-miR-568	1	0	1	0	1	1	IRF4	interferon regulatory factor 4
hsa-miR-568	0	0	1	1	1	1	MYOD1	myogenic differentiation 1
hsa-miR-568	1	0	1	1	1	1	PPP1R12B	protein phosphatase 1, regulatory subunit 12B
hsa-miR-568	1	0	1	1	1	1	NDUFA4	NADH dehydrogenase (ubiquinone) 1 alpha subcomplex, 4, 9kDa
hsa-miR-568	1	0	1	1	1	1	NEUROD1	neuronal differentiation 1
hsa-miR-568	1	0	1	1	1	1	NGF	nerve growth factor (beta polypeptide)
hsa-miR-568	0	0	1	1	1	1	NID1	nidogen 1
hsa-miR-568	1	0	1	1	1	1	NPTX1	neuronal pentraxin I
hsa-miR-568	1	0	1	1	1	1	TNFRSF11B	tumor necrosis factor receptor superfamily, member 11b
hsa-miR-568	1	0	1	0	1	1	PAK2	p21 protein (Cdc42/Rac)-activated kinase 2
hsa-miR-568	1	0	1	0	1	1	PAPPA	pregnancy-associated plasma protein A, pappalysin 1
hsa-miR-568	1	0	1	1	1	1	PCDH8	protocadherin 8
hsa-miR-568	0	0	1	1	1	1	PCK1	phosphoenolpyruvate carboxykinase 1 (soluble)
hsa-miR-568	0	0	1	1	0	0	PDGFRB	platelet-derived growth factor receptor, beta polypeptide
hsa-miR-568	0	0	1	1	1	1	PEX13	peroxisomal biogenesis factor 13
hsa-miR-568	0	0	1	0	1	1	PMP2	peripheral myelin protein 2
hsa-miR-568	1	0	1	1	1	1	PPP1CB	protein phosphatase 1, catalytic subunit, beta isozyme
hsa-miR-568	1	0	1	1	1	1	PPP1CC	protein phosphatase 1, catalytic subunit, gamma isozyme
hsa-miR-568	0	0	1	1	0	0	PPP1R8	protein phosphatase 1, regulatory subunit 8
hsa-miR-568	1	0	1	0	0	0	PPP1R10	protein phosphatase 1, regulatory subunit 10
hsa-miR-568	0	0	1	1	1	1	MAP2K6	mitogen-activated protein kinase kinase 6
hsa-miR-568	0	0	1	1	0	0	PSMA3	proteasome (prosome, macropain) subunit, alpha type, 3
hsa-miR-568	1	0	1	1	1	1	PTPN4	protein tyrosine phosphatase, non-receptor type 4 (megakaryocyte)
hsa-miR-568	0	0	1	1	1	1	PTPRC	protein tyrosine phosphatase, receptor type, C
hsa-miR-568	0	0	1	1	1	1	RING1	ring finger protein 1
hsa-miR-568	1	0	1	1	1	1	ROBO2	roundabout, axon guidance receptor, homolog 2 (Drosophila)
hsa-miR-568	1	0	1	0	1	1	SORT1	sortilin 1
hsa-miR-568	1	0	1	1	1	1	CCL1	chemokine (C-C motif) ligand 1
hsa-miR-568	0	0	1	1	1	1	CCL2	chemokine (C-C motif) ligand 2
hsa-miR-568	1	0	1	1	1	1	CCL21	chemokine (C-C motif) ligand 21
hsa-miR-568	0	0	1	0	1	1	CXCL5	chemokine (C-X-C motif) ligand 5
hsa-miR-568	0	0	1	1	1	1	SDC2	syndecan 2
hsa-miR-568	0	0	1	1	1	1	SLAMF1	signaling lymphocytic activation molecule family member 1
hsa-miR-568	1	0	1	1	1	1	SLC7A1	solute carrier family 7 (cationic amino acid transporter, y+ system), member 1
hsa-miR-568	0	0	1	1	1	1	SMARCA1	SWI/SNF related, matrix associated, actin dependent regulator of chromatin, subfamily a, member 1
hsa-miR-568	1	0	1	1	1	1	SNX2	sorting nexin 2
hsa-miR-568	1	0	1	0	1	1	SOX11	SRY (sex determining region Y)-box 11
hsa-miR-568	0	0	1	1	1	1	SP100	SP100 nuclear antigen
hsa-miR-568	1	0	1	1	1	1	SRF	serum response factor (c-fos serum response element-binding transcription factor)
hsa-miR-568	1	0	1	1	1	1	STAC	SH3 and cysteine rich domain
hsa-miR-568	0	0	1	1	1	1	STAT5A	signal transducer and activator of transcription 5A
hsa-miR-568	1	0	1	1	1	1	SVIL	supervillin
hsa-miR-568	0	0	1	0	1	1	TCF21	transcription factor 21
hsa-miR-568	1	0	1	1	1	1	TEC	tec protein tyrosine kinase
hsa-miR-568	1	0	1	0	1	1	THBS1	thrombospondin 1
hsa-miR-568	1	0	1	1	1	1	TIAM1	T-cell lymphoma invasion and metastasis 1
hsa-miR-568	1	0	1	0	1	1	SEC62	SEC62 homolog (S. cerevisiae)
hsa-miR-568	1	0	1	1	1	1	TSPAN6	tetraspanin 6
hsa-miR-568	1	0	1	1	1	1	TRAPPC10	trafficking protein particle complex 10
hsa-miR-568	1	0	1	1	1	1	NR2C2	nuclear receptor subfamily 2, group C, member 2
hsa-miR-568	0	0	1	1	1	1	UBE2A	ubiquitin-conjugating enzyme E2A
hsa-miR-568	1	0	1	0	1	1	UBE2D2	ubiquitin-conjugating enzyme E2D 2
hsa-miR-568	1	0	1	1	1	1	UBE2D3	ubiquitin-conjugating enzyme E2D 3
hsa-miR-568	1	0	1	1	1	1	UBE2H	ubiquitin-conjugating enzyme E2H
hsa-miR-568	0	0	1	1	1	1	UBE2I	ubiquitin-conjugating enzyme E2I
hsa-miR-568	0	0	1	1	0	0	UGCG	UDP-glucose ceramide glucosyltransferase
hsa-miR-568	1	0	1	1	1	1	YY1	YY1 transcription factor
hsa-miR-568	1	0	1	1	0	0	ZFP36	zinc finger protein 36, C3H type, homolog (mouse)
hsa-miR-568	1	0	1	1	1	1	ZIC3	Zic family member 3
hsa-miR-568	1	0	1	1	1	1	FZD5	frizzled family receptor 5
hsa-miR-568	1	0	1	1	1	1	DEK	DEK oncogene
hsa-miR-568	1	0	1	1	1	1	ADAM12	ADAM metallopeptidase domain 12
hsa-miR-568	1	0	1	1	1	1	CUL5	cullin 5
hsa-miR-568	1	0	1	1	1	1	HMGA2	high mobility group AT-hook 2
hsa-miR-568	1	0	1	1	1	1	AKAP1	A kinase (PRKA) anchor protein 1
hsa-miR-568	1	0	1	1	1	1	NRIP1	nuclear receptor interacting protein 1
hsa-miR-568	1	0	1	1	1	1	TRRAP	transformation/transcription domain-associated protein
hsa-miR-568	1	0	1	1	1	1	FZD7	frizzled family receptor 7
hsa-miR-568	0	0	1	1	1	1	PIP5K1B	phosphatidylinositol-4-phosphate 5-kinase, type I, beta
hsa-miR-568	1	0	1	1	1	1	EEA1	early endosome antigen 1
hsa-miR-568	1	0	1	0	1	1	CUL3	cullin 3
hsa-miR-568	1	0	1	1	1	1	CILP	cartilage intermediate layer protein, nucleotide pyrophosphohydrolase
hsa-miR-568	0	0	1	1	1	1	PEX3	peroxisomal biogenesis factor 3
hsa-miR-568	1	0	1	0	1	1	CNTNAP1	contactin associated protein 1
hsa-miR-568	1	0	1	1	1	1	CBX4	chromobox homolog 4
hsa-miR-568	0	0	1	1	1	1	AGPS	alkylglycerone phosphate synthase
hsa-miR-568	1	0	1	1	1	1	BHLHE40	basic helix-loop-helix family, member e40
hsa-miR-568	1	0	1	1	1	1	CDC14A	CDC14 cell division cycle 14 homolog A (S. cerevisiae)
hsa-miR-568	0	0	1	1	1	1	PRPF18	PRP18 pre-mRNA processing factor 18 homolog (S. cerevisiae)
hsa-miR-568	1	0	1	1	1	1	TNFSF11	tumor necrosis factor (ligand) superfamily, member 11
hsa-miR-568	0	0	1	1	1	1	SLC25A12	solute carrier family 25 (aspartate/glutamate carrier), member 12
hsa-miR-568	1	0	1	0	1	1	TNKS	tankyrase, TRF1-interacting ankyrin-related ADP-ribose polymerase
hsa-miR-568	1	0	1	0	1	1	IRS2	insulin receptor substrate 2
hsa-miR-568	0	0	1	1	1	1	SNX4	sorting nexin 4
hsa-miR-568	1	0	1	1	1	1	ADAM9	ADAM metallopeptidase domain 9
hsa-miR-568	1	0	1	1	1	1	NR5A2	nuclear receptor subfamily 5, group A, member 2
hsa-miR-568	1	0	1	1	1	1	SNAP23	synaptosomal-associated protein, 23kDa
hsa-miR-568	1	0	1	1	1	1	IQGAP1	IQ motif containing GTPase activating protein 1
hsa-miR-568	1	0	1	1	1	1	KAT2B	K(lysine) acetyltransferase 2B
hsa-miR-568	1	0	1	1	1	1	FUBP1	far upstream element (FUSE) binding protein 1
hsa-miR-568	0	0	1	1	1	1	PRPF4B	PRP4 pre-mRNA processing factor 4 homolog B (yeast)
hsa-miR-568	0	0	1	0	1	1	AP1S2	adaptor-related protein complex 1, sigma 2 subunit
hsa-miR-568	1	0	1	0	1	1	ST13	suppression of tumorigenicity 13 (colon carcinoma) (Hsp70 interacting protein)
hsa-miR-568	1	0	1	0	1	1	WASL	Wiskott-Aldrich syndrome-like
hsa-miR-568	0	0	1	1	1	1	UBA3	ubiquitin-like modifier activating enzyme 3
hsa-miR-568	1	0	1	1	1	1	BTAF1	BTAF1 RNA polymerase II, B-TFIID transcription factor-associated, 170kDa (Mot1 homolog, S. cerevisiae)
hsa-miR-568	1	0	1	1	1	1	CDH17	cadherin 17, LI cadherin (liver-intestine)
hsa-miR-568	1	0	1	1	1	1	CTSS	cathepsin S
hsa-miR-568	0	0	1	1	1	1	DDIT3	DNA-damage-inducible transcript 3
hsa-miR-568	0	0	1	1	1	1	TIMM8A	translocase of inner mitochondrial membrane 8 homolog A (yeast)
hsa-miR-568	1	0	1	1	1	1	EFNB2	ephrin-B2
hsa-miR-568	1	0	1	1	1	1	HNF4G	hepatocyte nuclear factor 4, gamma
hsa-miR-568	1	0	1	0	1	1	SLC1A2	solute carrier family 1 (glial high affinity glutamate transporter), member 2
hsa-miR-568	1	0	1	1	1	1	MFHAS1	malignant fibrous histiocytoma amplified sequence 1
hsa-miR-568	1	0	1	0	1	1	MED14	mediator complex subunit 14
hsa-miR-568	1	0	1	1	1	1	SOCS6	suppressor of cytokine signaling 6
hsa-miR-568	0	0	1	1	1	1	HOMER1	homer homolog 1 (Drosophila)
hsa-miR-568	1	0	1	0	1	1	AKAP6	A kinase (PRKA) anchor protein 6
hsa-miR-568	0	0	1	1	1	1	CARTPT	CART prepropeptide
hsa-miR-568	1	0	1	1	1	1	GDA	guanine deaminase
hsa-miR-568	0	0	1	1	1	1	ACTL6A	actin-like 6A
hsa-miR-568	1	0	1	0	1	1	ACVR1B	activin A receptor, type IB
hsa-miR-568	0	0	1	1	1	1	ASCL1	achaete-scute complex homolog 1 (Drosophila)
hsa-miR-568	1	0	1	1	1	1	BNIP2	BCL2/adenovirus E1B 19kDa interacting protein 2
hsa-miR-568	0	0	1	1	1	1	COL12A1	collagen, type XII, alpha 1
hsa-miR-568	1	0	1	1	1	1	DACH1	dachshund homolog 1 (Drosophila)
hsa-miR-568	1	0	1	1	1	1	DAG1	dystroglycan 1 (dystrophin-associated glycoprotein 1)
hsa-miR-568	1	0	1	1	1	1	DUSP1	dual specificity phosphatase 1
hsa-miR-568	1	0	1	1	1	1	DUSP2	dual specificity phosphatase 2
hsa-miR-568	1	0	1	1	1	1	EFNA1	ephrin-A1
hsa-miR-568	1	0	1	1	1	1	EPHB2	EPH receptor B2
hsa-miR-568	1	0	1	1	1	1	ERG	v-ets erythroblastosis virus E26 oncogene homolog (avian)
hsa-miR-568	1	0	1	1	1	1	ACSL3	acyl-CoA synthetase long-chain family member 3
hsa-miR-568	1	0	1	0	1	1	FGF5	fibroblast growth factor 5
hsa-miR-568	0	0	1	0	1	1	GALNT3	UDP-N-acetyl-alpha-D-galactosamine:polypeptide N-acetylgalactosaminyltransferase 3 (GalNAc-T3)
hsa-miR-568	0	0	1	1	1	1	GCSH	glycine cleavage system protein H (aminomethyl carrier)
hsa-miR-568	0	0	1	1	0	0	GTF2A2	general transcription factor IIA, 2, 12kDa
hsa-miR-568	0	0	1	1	1	1	FOXA1	forkhead box A1
hsa-miR-568	1	0	1	1	1	1	LRP2	low density lipoprotein receptor-related protein 2
hsa-miR-568	1	0	1	0	1	1	SCN2B	sodium channel, voltage-gated, type II, beta subunit
hsa-miR-568	1	0	1	1	1	1	WNT11	wingless-type MMTV integration site family, member 11
hsa-miR-568	1	0	1	1	1	1	SF1	splicing factor 1
hsa-miR-568	1	0	1	1	1	1	MTMR6	myotubularin related protein 6
hsa-miR-568	1	0	1	1	1	1	MTMR4	myotubularin related protein 4
hsa-miR-568	0	0	1	1	1	1	BUB3	budding uninhibited by benzimidazoles 3 homolog (yeast)
hsa-miR-568	1	0	1	1	1	1	RPS6KA5	ribosomal protein S6 kinase, 90kDa, polypeptide 5
hsa-miR-568	1	0	1	1	1	1	MED1	mediator complex subunit 1
hsa-miR-568	1	0	1	1	1	1	B4GALT6	UDP-Gal:betaGlcNAc beta 1,4- galactosyltransferase, polypeptide 6
hsa-miR-568	1	0	1	1	1	1	B4GALT5	UDP-Gal:betaGlcNAc beta 1,4- galactosyltransferase, polypeptide 5
hsa-miR-568	1	0	1	1	1	1	ARHGAP29	Rho GTPase activating protein 29
hsa-miR-568	1	0	1	1	1	1	HOMER2	homer homolog 2 (Drosophila)
hsa-miR-568	1	0	1	0	1	1	ROCK2	Rho-associated, coiled-coil containing protein kinase 2
hsa-miR-568	1	0	1	1	1	1	ONECUT2	one cut homeobox 2
hsa-miR-568	0	0	1	1	1	1	CD8B	CD8b molecule
hsa-miR-568	0	0	1	1	1	1	CDH6	cadherin 6, type 2, K-cadherin (fetal kidney)
hsa-miR-568	0	0	1	1	1	1	CDKN2B	cyclin-dependent kinase inhibitor 2B (p15, inhibits CDK4)
hsa-miR-568	1	0	1	0	1	1	DOCK3	dedicator of cytokinesis 3
hsa-miR-568	0	0	1	0	1	1	DSC2	desmocollin 2
hsa-miR-568	1	0	1	1	1	1	JARID2	jumonji, AT rich interactive domain 2
hsa-miR-568	1	0	1	1	1	1	ATXN3	ataxin 3
hsa-miR-568	0	0	1	1	1	1	RAC3	ras-related C3 botulinum toxin substrate 3 (rho family, small GTP binding protein Rac3)
hsa-miR-568	0	0	1	1	1	1	RGPD5	RANBP2-like and GRIP domain containing 5
hsa-miR-568	1	0	1	1	1	1	KDM5A	lysine (K)-specific demethylase 5A
hsa-miR-568	1	0	1	0	1	1	SEL1L	sel-1 suppressor of lin-12-like (C. elegans)
hsa-miR-568	0	0	1	1	1	1	SIM1	single-minded homolog 1 (Drosophila)
hsa-miR-568	1	0	1	1	1	1	BMI1	BMI1 polycomb ring finger oncogene
hsa-miR-568	1	0	1	1	1	1	FOXN3	forkhead box N3
hsa-miR-568	1	1	1	1	1	1	MAP3K8	mitogen-activated protein kinase kinase kinase 8
hsa-miR-568	1	0	1	1	1	1	ARID3A	AT rich interactive domain 3A (BRIGHT-like)
hsa-miR-568	1	0	1	1	1	1	ELK3	ELK3, ETS-domain protein (SRF accessory protein 2)
hsa-miR-568	0	0	1	0	1	1	EPHA3	EPH receptor A3
hsa-miR-568	1	0	1	1	1	1	ETS1	v-ets erythroblastosis virus E26 oncogene homolog 1 (avian)
hsa-miR-568	0	0	1	1	1	1	MSTN	myostatin
hsa-miR-568	1	0	1	1	1	1	GPM6A	glycoprotein M6A
hsa-miR-568	1	0	1	1	1	1	GPR6	G protein-coupled receptor 6
hsa-miR-568	0	0	1	1	1	1	PDIA3	protein disulfide isomerase family A, member 3
hsa-miR-568	1	0	1	1	1	1	H3F3B	H3 histone, family 3B (H3.3B)
hsa-miR-568	1	0	1	1	1	1	HAS3	hyaluronan synthase 3
hsa-miR-568	1	0	1	1	1	1	PHF2	PHD finger protein 2
hsa-miR-568	1	0	1	0	1	1	PRKCE	protein kinase C, epsilon
hsa-miR-568	1	0	1	1	1	1	RALA	v-ral simian leukemia viral oncogene homolog A (ras related)
hsa-miR-568	0	0	1	1	1	1	MALL	mal, T-cell differentiation protein-like
hsa-miR-568	1	0	1	0	1	1	CCDC6	coiled-coil domain containing 6
hsa-miR-568	1	0	1	1	1	1	SCARB2	scavenger receptor class B, member 2
hsa-miR-568	1	0	1	1	1	1	MNX1	motor neuron and pancreas homeobox 1
hsa-miR-568	1	0	1	1	1	1	TLX1	T-cell leukemia homeobox 1
hsa-miR-568	1	0	1	1	1	1	HOXA1	homeobox A1
hsa-miR-568	0	0	1	1	1	1	HES1	hairy and enhancer of split 1, (Drosophila)
hsa-miR-568	0	0	1	1	1	1	ING1	inhibitor of growth family, member 1
hsa-miR-568	0	0	1	1	0	0	IVL	involucrin
hsa-miR-568	0	0	1	0	1	1	LCP2	lymphocyte cytosolic protein 2 (SH2 domain containing leukocyte protein of 76kDa)
hsa-miR-568	1	0	1	1	1	1	RGS4	regulator of G-protein signaling 4
hsa-miR-568	1	0	1	1	1	1	SYT1	synaptotagmin I
hsa-miR-568	1	0	1	1	1	1	EVI5	ecotropic viral integration site 5
hsa-miR-568	1	0	1	1	1	1	ST8SIA4	ST8 alpha-N-acetyl-neuraminide alpha-2,8-sialyltransferase 4
hsa-miR-568	1	0	1	1	1	1	ARPC5	actin related protein 2/3 complex, subunit 5, 16kDa
hsa-miR-568	0	0	1	1	1	1	ACTR3	ARP3 actin-related protein 3 homolog (yeast)
hsa-miR-568	1	0	1	0	1	1	TSPAN2	tetraspanin 2
hsa-miR-568	1	0	1	1	1	1	NAMPT	nicotinamide phosphoribosyltransferase
hsa-miR-568	1	0	1	1	1	1	LHFPL2	lipoma HMGIC fusion partner-like 2
hsa-miR-568	0	0	1	1	1	1	MPHOSPH6	M-phase phosphoprotein 6
hsa-miR-568	0	0	1	1	1	1	PRG4	proteoglycan 4
hsa-miR-568	1	0	1	1	1	1	PRKD3	protein kinase D3
hsa-miR-568	0	0	1	1	1	1	SLC17A2	solute carrier family 17 (sodium phosphate), member 2
hsa-miR-568	1	0	1	0	1	1	SPRY3	sprouty homolog 3 (Drosophila)
hsa-miR-568	0	0	1	0	1	1	STAM2	signal transducing adaptor molecule (SH3 domain and ITAM motif) 2
hsa-miR-568	1	0	1	1	1	1	PURA	purine-rich element binding protein A
hsa-miR-568	0	0	1	1	1	1	CD5L	CD5 molecule-like
hsa-miR-568	1	0	1	1	1	1	GOLGA3	golgin A3
hsa-miR-568	1	0	1	0	1	1	NBR1	neighbor of BRCA1 gene 1
hsa-miR-568	1	0	1	1	1	1	MEOX2	mesenchyme homeobox 2
hsa-miR-568	1	0	1	1	1	1	MMP16	matrix metallopeptidase 16 (membrane-inserted)
hsa-miR-568	1	0	1	1	1	1	MTF1	metal-regulatory transcription factor 1
hsa-miR-568	1	0	1	1	1	1	RNF6	ring finger protein (C3H2C3 type) 6
hsa-miR-568	0	0	1	1	1	1	STK10	serine/threonine kinase 10
hsa-miR-568	0	0	1	1	1	1	TSC22D1	TSC22 domain family, member 1
hsa-miR-568	1	0	1	1	1	1	ENDOU	endonuclease, polyU-specific
hsa-miR-568	1	0	1	1	1	1	LIPG	lipase, endothelial
hsa-miR-568	0	0	1	1	1	1	TRDN	triadin
hsa-miR-568	1	0	1	1	0	0	AGFG2	ArfGAP with FG repeats 2
hsa-miR-568	1	0	1	1	1	1	CITED2	Cbp/p300-interacting transactivator, with Glu/Asp-rich carboxy-terminal domain, 2
hsa-miR-568	1	0	1	1	1	1	SEMA3A	sema domain, immunoglobulin domain (Ig), short basic domain, secreted, (semaphorin) 3A
hsa-miR-568	1	0	1	1	1	1	BPNT1	3'(2'), 5'-bisphosphate nucleotidase 1
hsa-miR-568	1	0	1	0	1	1	SCML2	sex comb on midleg-like 2 (Drosophila)
hsa-miR-568	1	0	1	1	1	1	TMEM50B	transmembrane protein 50B
hsa-miR-568	1	0	1	1	1	1	DYNC1LI2	dynein, cytoplasmic 1, light intermediate chain 2
hsa-miR-568	1	0	1	1	1	1	NEUROG1	neurogenin 1
hsa-miR-568	1	0	1	1	1	1	NR4A2	nuclear receptor subfamily 4, group A, member 2
hsa-miR-568	0	0	1	0	1	1	OAS3	2'-5'-oligoadenylate synthetase 3, 100kDa
hsa-miR-568	0	0	1	1	0	0	PCP4	Purkinje cell protein 4
hsa-miR-568	1	0	1	1	1	1	PDGFRA	platelet-derived growth factor receptor, alpha polypeptide
hsa-miR-568	1	0	1	1	1	1	ENPP1	ectonucleotide pyrophosphatase/phosphodiesterase 1
hsa-miR-568	1	0	1	1	1	1	POU4F1	POU class 4 homeobox 1
hsa-miR-568	0	0	1	1	1	1	PPEF2	protein phosphatase, EF-hand calcium binding domain 2
hsa-miR-568	1	0	1	0	1	1	PPP1R2	protein phosphatase 1, regulatory (inhibitor) subunit 2
hsa-miR-568	1	0	1	1	1	1	PRKAA1	protein kinase, AMP-activated, alpha 1 catalytic subunit
hsa-miR-568	1	0	1	1	1	1	PRKCD	protein kinase C, delta
hsa-miR-568	1	0	1	1	1	1	PKN2	protein kinase N2
hsa-miR-568	0	0	1	0	0	0	PTPN13	protein tyrosine phosphatase, non-receptor type 13 (APO-1/CD95 (Fas)-associated phosphatase)
hsa-miR-568	1	0	1	1	1	1	RANBP2	RAN binding protein 2
hsa-miR-568	0	0	1	0	1	1	ZNF192	zinc finger protein 192
hsa-miR-568	1	0	1	1	1	1	SMC1A	structural maintenance of chromosomes 1A
hsa-miR-568	1	0	1	1	1	1	TUBGCP3	tubulin, gamma complex associated protein 3
hsa-miR-568	1	0	1	1	1	1	ZER1	zer-1 homolog (C. elegans)
hsa-miR-568	0	0	1	1	1	1	PIBF1	progesterone immunomodulatory binding factor 1
hsa-miR-568	1	0	1	1	1	1	ZNF238	zinc finger protein 238
hsa-miR-568	0	0	1	1	1	1	UBE2E3	ubiquitin-conjugating enzyme E2E 3
hsa-miR-568	0	0	1	1	0	0	CHERP	calcium homeostasis endoplasmic reticulum protein
hsa-miR-568	1	0	1	1	1	1	NEBL	nebulette
hsa-miR-568	1	0	1	1	1	1	HEXIM1	hexamethylene bis-acetamide inducible 1
hsa-miR-568	1	0	1	1	1	1	SLC2A1	solute carrier family 2 (facilitated glucose transporter), member 1
hsa-miR-568	1	0	1	1	1	1	ELL	elongation factor RNA polymerase II
hsa-miR-568	0	0	1	1	1	1	CLCA2	chloride channel accessory 2
hsa-miR-568	1	0	1	0	1	1	MAP4K5	mitogen-activated protein kinase kinase kinase kinase 5
hsa-miR-568	1	0	1	1	1	1	B3GNT2	UDP-GlcNAc:betaGal beta-1,3-N-acetylglucosaminyltransferase 2
hsa-miR-568	1	0	1	1	1	1	CORIN	corin, serine peptidase
hsa-miR-568	0	0	1	1	1	1	POLD3	polymerase (DNA-directed), delta 3, accessory subunit
hsa-miR-568	1	0	1	0	1	1	API5	apoptosis inhibitor 5
hsa-miR-568	1	0	1	1	1	1	SRSF10	serine/arginine-rich splicing factor 10
hsa-miR-568	0	0	1	1	1	1	FGL2	fibrinogen-like 2
hsa-miR-568	0	0	1	1	1	1	SMR3B	submaxillary gland androgen regulated protein 3B
hsa-miR-568	1	0	1	1	1	1	MMP24	matrix metallopeptidase 24 (membrane-inserted)
hsa-miR-568	1	0	1	1	1	1	SPIN1	spindlin 1
hsa-miR-568	1	0	1	1	1	1	DIAPH2	diaphanous homolog 2 (Drosophila)
hsa-miR-568	1	0	1	1	1	1	SNTB2	syntrophin, beta 2 (dystrophin-associated protein A1, 59kDa, basic component 2)
hsa-miR-568	0	0	1	1	1	1	SYPL1	synaptophysin-like 1
hsa-miR-568	1	0	1	1	1	1	ZBTB33	zinc finger and BTB domain containing 33
hsa-miR-568	0	0	1	1	0	0	STIP1	stress-induced-phosphoprotein 1
hsa-miR-568	0	0	1	1	1	1	PKIA	protein kinase (cAMP-dependent, catalytic) inhibitor alpha
hsa-miR-568	0	0	1	1	1	1	TMED10	transmembrane emp24-like trafficking protein 10 (yeast)
hsa-miR-568	1	0	1	1	1	1	FERMT2	fermitin family member 2
hsa-miR-568	1	0	1	1	1	1	PRRX1	paired related homeobox 1
hsa-miR-568	1	0	1	0	1	1	SLC5A3	solute carrier family 5 (sodium/myo-inositol cotransporter), member 3
hsa-miR-568	0	0	1	1	1	1	TAF5	TAF5 RNA polymerase II, TATA box binding protein (TBP)-associated factor, 100kDa
hsa-miR-568	1	0	1	1	1	1	NR4A3	nuclear receptor subfamily 4, group A, member 3
hsa-miR-568	1	0	1	1	1	1	ADAMTS1	ADAM metallopeptidase with thrombospondin type 1 motif, 1
hsa-miR-568	0	0	1	1	1	1	RTN4	reticulon 4
hsa-miR-568	1	0	1	1	1	1	DDX52	DEAD (Asp-Glu-Ala-Asp) box polypeptide 52
hsa-miR-568	0	0	1	1	1	1	TOPBP1	topoisomerase (DNA) II binding protein 1
hsa-miR-568	0	0	1	1	1	1	DNAJB4	DnaJ (Hsp40) homolog, subfamily B, member 4
hsa-miR-568	1	0	1	1	1	1	ESM1	endothelial cell-specific molecule 1
hsa-miR-568	1	0	1	1	1	1	ADAMTS5	ADAM metallopeptidase with thrombospondin type 1 motif, 5
hsa-miR-568	0	0	1	1	1	1	RPP14	ribonuclease P/MRP 14kDa subunit
hsa-miR-568	1	0	1	1	1	1	FSTL1	follistatin-like 1
hsa-miR-568	1	0	1	1	1	1	TMF1	TATA element modulatory factor 1
hsa-miR-568	0	0	1	1	1	1	UGT1A4	UDP glucuronosyltransferase 1 family, polypeptide A4
hsa-miR-568	1	0	1	1	1	1	UTY	ubiquitously transcribed tetratricopeptide repeat gene, Y-linked
hsa-miR-568	1	0	1	1	1	1	VCP	valosin containing protein
hsa-miR-568	1	0	1	1	1	1	VEZF1	vascular endothelial zinc finger 1
hsa-miR-568	0	0	1	0	1	1	ZNF208	zinc finger protein 208
hsa-miR-568	0	0	1	1	0	0	SLC14A2	solute carrier family 14 (urea transporter), member 2
hsa-miR-568	1	0	1	1	1	1	TESK2	testis-specific kinase 2
hsa-miR-568	1	0	1	0	1	1	PRSS23	protease, serine, 23
hsa-miR-568	0	0	1	1	1	1	WBP4	WW domain binding protein 4 (formin binding protein 21)
hsa-miR-568	1	0	1	1	1	1	RNF139	ring finger protein 139
hsa-miR-568	1	0	1	1	1	1	CA5B	carbonic anhydrase VB, mitochondrial
hsa-miR-568	0	0	1	1	1	1	SLC6A14	solute carrier family 6 (amino acid transporter), member 14
hsa-miR-568	1	0	1	1	1	1	KLF12	Kruppel-like factor 12
hsa-miR-568	1	0	1	1	1	1	RNF13	ring finger protein 13
hsa-miR-568	1	0	1	1	1	1	PHLDA1	pleckstrin homology-like domain, family A, member 1
hsa-miR-568	1	0	1	1	1	1	ELL2	elongation factor, RNA polymerase II, 2
hsa-miR-568	1	0	1	1	1	1	APPL1	adaptor protein, phosphotyrosine interaction, PH domain and leucine zipper containing 1
hsa-miR-568	1	0	1	1	1	1	RYBP	RING1 and YY1 binding protein
hsa-miR-568	1	0	1	1	1	1	DKK1	dickkopf 1 homolog (Xenopus laevis)
hsa-miR-568	1	0	1	1	1	1	HEY2	hairy/enhancer-of-split related with YRPW motif 2
hsa-miR-568	1	0	1	1	1	1	HS2ST1	heparan sulfate 2-O-sulfotransferase 1
hsa-miR-568	0	0	1	1	1	1	IL36RN	interleukin 36 receptor antagonist
hsa-miR-568	1	0	1	1	1	1	KCND2	potassium voltage-gated channel, Shal-related subfamily, member 2
hsa-miR-568	1	0	1	0	1	1	ACAP2	ArfGAP with coiled-coil, ankyrin repeat and PH domains 2
hsa-miR-568	1	0	1	0	1	1	FBXL7	F-box and leucine-rich repeat protein 7
hsa-miR-568	1	0	1	0	1	1	MYCBP	c-myc binding protein
hsa-miR-568	1	0	1	1	1	1	NNT	nicotinamide nucleotide transhydrogenase
hsa-miR-568	1	0	1	0	1	1	BLOC1S6	biogenesis of lysosomal organelles complex-1, subunit 6, pallidin
hsa-miR-568	0	0	1	1	1	1	H2AFV	H2A histone family, member V
hsa-miR-568	1	0	1	1	1	1	SF3B3	splicing factor 3b, subunit 3, 130kDa
hsa-miR-568	1	0	1	1	1	1	SLC17A5	solute carrier family 17 (anion/sugar transporter), member 5
hsa-miR-568	1	0	1	1	1	1	STAT5B	signal transducer and activator of transcription 5B
hsa-miR-568	0	0	1	0	1	1	TLL1	tolloid-like 1
hsa-miR-568	1	0	1	1	1	1	TRPC5	transient receptor potential cation channel, subfamily C, member 5
hsa-miR-568	1	0	1	1	1	1	YWHAG	tyrosine 3-monooxygenase/tryptophan 5-monooxygenase activation protein, gamma polypeptide
hsa-miR-568	1	0	1	0	1	1	FLRT2	fibronectin leucine rich transmembrane protein 2
hsa-miR-568	1	0	1	1	1	1	STK39	serine threonine kinase 39
hsa-miR-568	1	0	1	1	1	1	ZNF215	zinc finger protein 215
hsa-miR-568	1	0	1	1	1	1	PPARGC1A	peroxisome proliferator-activated receptor gamma, coactivator 1 alpha
hsa-miR-568	1	0	1	0	1	1	TRHDE	thyrotropin-releasing hormone degrading enzyme
hsa-miR-568	1	0	1	1	1	1	SLC25A24	solute carrier family 25 (mitochondrial carrier; phosphate carrier), member 24
hsa-miR-568	1	0	1	1	1	1	AK2	adenylate kinase 2
hsa-miR-568	0	0	1	1	1	1	UBQLN1	ubiquilin 1
hsa-miR-568	0	0	1	1	1	1	UBQLN2	ubiquilin 2
hsa-miR-568	0	0	1	0	1	1	EMR2	egf-like module containing, mucin-like, hormone receptor-like 2
hsa-miR-568	1	0	1	1	1	1	BAZ1A	bromodomain adjacent to zinc finger domain, 1A
hsa-miR-568	1	0	1	1	1	1	NRG1	neuregulin 1
hsa-miR-568	1	0	1	1	1	1	SOCS5	suppressor of cytokine signaling 5
hsa-miR-568	1	0	1	1	1	1	WDR37	WD repeat domain 37
hsa-miR-568	0	0	1	1	1	1	MRPL42	mitochondrial ribosomal protein L42
hsa-miR-568	0	0	1	1	1	1	TMEM14A	transmembrane protein 14A
hsa-miR-568	1	0	1	1	1	1	RGCC	regulator of cell cycle
hsa-miR-568	0	0	1	1	1	1	ORMDL2	ORM1-like 2 (S. cerevisiae)
hsa-miR-568	0	0	1	0	1	1	SCN8A	sodium channel, voltage gated, type VIII, alpha subunit
hsa-miR-568	0	0	1	1	1	1	TM4SF1	transmembrane 4 L six family member 1
hsa-miR-568	1	0	1	0	1	1	VAMP2	vesicle-associated membrane protein 2 (synaptobrevin 2)
hsa-miR-568	0	0	1	0	1	1	ADAMTS3	ADAM metallopeptidase with thrombospondin type 1 motif, 3
hsa-miR-568	1	0	1	0	1	1	ODZ1	odz, odd Oz/ten-m homolog 1 (Drosophila)
hsa-miR-568	1	0	1	1	1	1	MAPRE2	microtubule-associated protein, RP/EB family, member 2
hsa-miR-568	0	0	1	1	1	1	IL1RAPL1	interleukin 1 receptor accessory protein-like 1
hsa-miR-568	0	0	1	1	1	1	HSPA4L	heat shock 70kDa protein 4-like
hsa-miR-568	0	0	1	1	1	1	DNAJC8	DnaJ (Hsp40) homolog, subfamily C, member 8
hsa-miR-568	1	0	1	1	0	0	BRD4	bromodomain containing 4
hsa-miR-568	1	0	1	1	1	1	LEMD3	LEM domain containing 3
hsa-miR-568	1	0	1	1	1	1	PATZ1	POZ (BTB) and AT hook containing zinc finger 1
hsa-miR-568	1	0	1	1	1	1	CORO1C	coronin, actin binding protein, 1C
hsa-miR-568	0	0	1	1	0	0	PPP1R15A	protein phosphatase 1, regulatory subunit 15A
hsa-miR-568	1	0	1	1	1	1	SLC7A11	solute carrier family 7 (anionic amino acid transporter light chain, xc- system), member 11
hsa-miR-568	1	0	1	0	1	1	RNF11	ring finger protein 11
hsa-miR-568	1	0	1	1	1	1	ZBTB11	zinc finger and BTB domain containing 11
hsa-miR-568	1	0	1	1	1	1	DKK2	dickkopf 2 homolog (Xenopus laevis)
hsa-miR-568	1	0	1	1	1	1	AFF4	AF4/FMR2 family, member 4
hsa-miR-568	1	0	1	1	1	1	PDCD4	programmed cell death 4 (neoplastic transformation inhibitor)
hsa-miR-568	1	0	1	1	1	1	KLHL20	kelch-like 20 (Drosophila)
hsa-miR-568	0	0	1	1	1	1	GOLIM4	golgi integral membrane protein 4
hsa-miR-568	0	0	1	1	1	1	KCNMB4	potassium large conductance calcium-activated channel, subfamily M, beta member 4
hsa-miR-568	1	0	1	1	1	1	CNOT2	CCR4-NOT transcription complex, subunit 2
hsa-miR-568	1	0	1	1	1	1	GRHL1	grainyhead-like 1 (Drosophila)
hsa-miR-568	1	0	1	1	1	1	OTX1	orthodenticle homeobox 1
hsa-miR-568	1	0	1	1	1	1	ERO1L	ERO1-like (S. cerevisiae)
hsa-miR-568	1	0	1	0	1	1	ATP11B	ATPase, class VI, type 11B
hsa-miR-568	1	0	1	1	1	1	ZNF592	zinc finger protein 592
hsa-miR-568	0	0	1	0	1	1	LPIN2	lipin 2
hsa-miR-568	0	0	1	1	1	1	FAM53B	family with sequence similarity 53, member B
hsa-miR-568	1	0	1	0	1	1	BZW1	basic leucine zipper and W2 domains 1
hsa-miR-568	0	0	1	1	0	0	EMC2	ER membrane protein complex subunit 2
hsa-miR-568	1	0	1	1	1	1	MLL4	myeloid/lymphoid or mixed-lineage leukemia 4
hsa-miR-568	0	0	1	1	1	1	FRMPD4	FERM and PDZ domain containing 4
hsa-miR-568	1	0	1	1	1	1	KIAA0247	KIAA0247
hsa-miR-568	1	0	1	0	1	1	SERTAD2	SERTA domain containing 2
hsa-miR-568	1	0	1	0	1	1	MAML1	mastermind-like 1 (Drosophila)
hsa-miR-568	1	0	1	0	1	1	KIAA0494	KIAA0494
hsa-miR-568	0	0	1	0	1	1	EPM2AIP1	EPM2A (laforin) interacting protein 1
hsa-miR-568	1	0	1	0	1	1	TRIL	TLR4 interactor with leucine-rich repeats
hsa-miR-568	1	0	1	0	1	1	PJA2	praja ring finger 2, E3 ubiquitin protein ligase
hsa-miR-568	0	0	1	1	1	1	TOX4	TOX high mobility group box family member 4
hsa-miR-568	1	0	1	1	1	1	TBC1D4	TBC1 domain family, member 4
hsa-miR-568	1	0	1	1	1	1	RHOBTB3	Rho-related BTB domain containing 3
hsa-miR-568	1	0	1	0	1	1	RAB11FIP2	RAB11 family interacting protein 2 (class I)
hsa-miR-568	1	0	1	0	1	1	ICK	intestinal cell (MAK-like) kinase
hsa-miR-568	1	0	1	1	1	1	R3HDM2	R3H domain containing 2
hsa-miR-568	0	0	1	1	1	1	ENPP4	ectonucleotide pyrophosphatase/phosphodiesterase 4 (putative)
hsa-miR-568	1	0	1	1	1	1	SPAST	spastin
hsa-miR-568	1	0	1	1	1	1	SORCS3	sortilin-related VPS10 domain containing receptor 3
hsa-miR-568	1	0	1	0	1	1	WDFY3	WD repeat and FYVE domain containing 3
hsa-miR-568	1	0	1	1	1	1	RAB21	RAB21, member RAS oncogene family
hsa-miR-568	0	0	1	1	0	0	EXOSC7	exosome component 7
hsa-miR-568	0	0	1	1	1	1	MYO16	myosin XVI
hsa-miR-568	1	0	1	0	1	1	PDS5B	PDS5, regulator of cohesion maintenance, homolog B (S. cerevisiae)
hsa-miR-568	1	0	1	0	1	1	ZNF609	zinc finger protein 609
hsa-miR-568	1	0	1	1	1	1	TRAK2	trafficking protein, kinesin binding 2
hsa-miR-568	0	0	1	1	1	1	KDM4C	lysine (K)-specific demethylase 4C
hsa-miR-568	1	0	1	1	1	1	TBC1D9	TBC1 domain family, member 9 (with GRAM domain)
hsa-miR-568	1	0	1	0	1	1	LARP4B	La ribonucleoprotein domain family, member 4B
hsa-miR-568	1	0	1	1	1	1	RCOR1	REST corepressor 1
hsa-miR-568	1	0	1	1	1	1	PRRC2C	proline-rich coiled-coil 2C
hsa-miR-568	0	0	1	1	1	1	FBXO28	F-box protein 28
hsa-miR-568	1	0	1	1	1	1	CSTF2T	cleavage stimulation factor, 3' pre-RNA, subunit 2, 64kDa, tau variant
hsa-miR-568	1	0	1	1	1	1	CUX2	cut-like homeobox 2
hsa-miR-568	1	0	1	1	1	1	DNAJC13	DnaJ (Hsp40) homolog, subfamily C, member 13
hsa-miR-568	1	0	1	0	1	1	ARHGEF12	Rho guanine nucleotide exchange factor (GEF) 12
hsa-miR-568	1	0	1	0	1	1	LARP1	La ribonucleoprotein domain family, member 1
hsa-miR-568	1	0	1	1	1	1	MED13L	mediator complex subunit 13-like
hsa-miR-568	1	0	1	1	1	1	ASXL1	additional sex combs like 1 (Drosophila)
hsa-miR-568	0	0	1	1	1	1	ADNP	activity-dependent neuroprotector homeobox
hsa-miR-568	0	0	1	1	1	1	LEPROTL1	leptin receptor overlapping transcript-like 1
hsa-miR-568	1	0	1	1	1	1	RIMBP2	RIMS binding protein 2
hsa-miR-568	0	0	1	1	1	1	NUP188	nucleoporin 188kDa
hsa-miR-568	1	0	1	1	1	1	MOB4	MOB family member 4, phocein
hsa-miR-568	0	0	1	1	1	1	ANAPC13	anaphase promoting complex subunit 13
hsa-miR-568	0	0	1	1	1	1	ZNF10	zinc finger protein 10
hsa-miR-568	1	0	1	1	1	1	RNF19A	ring finger protein 19A, E3 ubiquitin protein ligase
hsa-miR-568	0	0	1	0	1	1	TMEM158	transmembrane protein 158 (gene/pseudogene)
hsa-miR-568	1	0	1	1	1	1	CNOT6	CCR4-NOT transcription complex, subunit 6
hsa-miR-568	1	0	1	0	1	1	MTMR9	myotubularin related protein 9
hsa-miR-568	0	0	1	1	1	1	SOSTDC1	sclerostin domain containing 1
hsa-miR-568	1	0	1	1	1	1	KIAA1429	KIAA1429
hsa-miR-568	0	0	1	1	1	1	TMEM87A	transmembrane protein 87A
hsa-miR-568	1	0	1	1	1	1	LRRTM2	leucine rich repeat transmembrane neuronal 2
hsa-miR-568	1	0	1	1	1	1	LTN1	listerin E3 ubiquitin protein ligase 1
hsa-miR-568	1	0	1	1	1	1	SLITRK5	SLIT and NTRK-like family, member 5
hsa-miR-568	1	0	1	1	1	1	TOR1AIP1	torsin A interacting protein 1
hsa-miR-568	1	0	1	1	1	1	ABCA12	ATP-binding cassette, sub-family A (ABC1), member 12
hsa-miR-568	0	0	1	1	1	1	BRPF3	bromodomain and PHD finger containing, 3
hsa-miR-568	1	0	1	0	1	1	RRM2B	ribonucleotide reductase M2 B (TP53 inducible)
hsa-miR-568	0	0	1	1	1	1	PCF11	PCF11, cleavage and polyadenylation factor subunit, homolog (S. cerevisiae)
hsa-miR-568	1	0	1	1	1	1	HOOK1	hook homolog 1 (Drosophila)
hsa-miR-568	1	0	1	0	1	1	TRIM33	tripartite motif containing 33
hsa-miR-568	0	0	1	1	0	0	TXNDC11	thioredoxin domain containing 11
hsa-miR-568	1	0	1	1	1	1	TRMT6	tRNA methyltransferase 6 homolog (S. cerevisiae)
hsa-miR-568	1	0	1	1	1	1	TAF9B	TAF9B RNA polymerase II, TATA box binding protein (TBP)-associated factor, 31kDa
hsa-miR-568	1	0	1	0	1	1	KLF13	Kruppel-like factor 13
hsa-miR-568	0	0	1	1	0	0	ZC2HC1A	zinc finger, C2HC-type containing 1A
hsa-miR-568	1	0	1	1	1	1	UBE2J1	ubiquitin-conjugating enzyme E2, J1
hsa-miR-568	0	0	1	0	1	1	OTUD6B	OTU domain containing 6B
hsa-miR-568	0	0	1	1	1	1	MED31	mediator complex subunit 31
hsa-miR-568	0	0	1	1	1	1	HDGFRP3	hepatoma-derived growth factor, related protein 3
hsa-miR-568	1	0	1	0	1	1	CNR1	cannabinoid receptor 1 (brain)
hsa-miR-568	0	0	1	1	1	1	ZFR	zinc finger RNA binding protein
hsa-miR-568	0	0	1	1	1	1	COMMD10	COMM domain containing 10
hsa-miR-568	1	0	1	1	1	1	VGLL3	vestigial like 3 (Drosophila)
hsa-miR-568	1	0	1	1	1	1	NLK	nemo-like kinase
hsa-miR-568	1	0	1	1	1	1	RNF138	ring finger protein 138, E3 ubiquitin protein ligase
hsa-miR-568	0	0	1	1	1	1	RSL24D1	ribosomal L24 domain containing 1
hsa-miR-568	1	0	1	1	1	1	RAPGEFL1	Rap guanine nucleotide exchange factor (GEF)-like 1
hsa-miR-568	1	0	1	1	1	1	ARID4B	AT rich interactive domain 4B (RBP1-like)
hsa-miR-568	1	0	1	1	1	1	GLTP	glycolipid transfer protein
hsa-miR-568	1	0	1	0	1	1	CRIM1	cysteine rich transmembrane BMP regulator 1 (chordin-like)
hsa-miR-568	1	0	1	1	1	1	VTA1	Vps20-associated 1 homolog (S. cerevisiae)
hsa-miR-568	0	0	1	1	0	0	CXorf26	chromosome X open reading frame 26
hsa-miR-568	1	0	1	0	1	1	RAB8B	RAB8B, member RAS oncogene family
hsa-miR-568	1	0	1	1	1	1	RAB6B	RAB6B, member RAS oncogene family
hsa-miR-568	1	0	1	1	1	1	UFM1	ubiquitin-fold modifier 1
hsa-miR-568	1	0	1	1	1	1	ZNF644	zinc finger protein 644
hsa-miR-568	0	0	1	1	1	1	USP18	ubiquitin specific peptidase 18
hsa-miR-568	1	0	1	1	1	1	SIX4	SIX homeobox 4
hsa-miR-568	1	0	1	1	1	1	GALNT7	UDP-N-acetyl-alpha-D-galactosamine:polypeptide N-acetylgalactosaminyltransferase 7 (GalNAc-T7)
hsa-miR-568	1	0	1	1	1	1	CPSF2	cleavage and polyadenylation specific factor 2, 100kDa
hsa-miR-568	1	0	1	1	1	1	MDM1	Mdm1 nuclear protein homolog (mouse)
hsa-miR-568	0	0	1	1	1	1	POLE3	polymerase (DNA directed), epsilon 3, accessory subunit
hsa-miR-568	0	0	1	0	1	1	CHRAC1	chromatin accessibility complex 1
hsa-miR-568	1	0	1	1	1	1	ARID1B	AT rich interactive domain 1B (SWI1-like)
hsa-miR-568	1	0	1	1	1	1	GRID1	glutamate receptor, ionotropic, delta 1
hsa-miR-568	1	0	1	1	1	1	ZC3H7B	zinc finger CCCH-type containing 7B
hsa-miR-568	1	0	1	1	1	1	DIRAS2	DIRAS family, GTP-binding RAS-like 2
hsa-miR-568	0	0	1	0	1	1	VEZT	vezatin, adherens junctions transmembrane protein
hsa-miR-568	0	0	1	1	1	1	BHMT2	betaine--homocysteine S-methyltransferase 2
hsa-miR-568	1	0	1	1	1	1	NOTCH1	notch 1
hsa-miR-568	0	0	1	1	1	1	LRRC16A	leucine rich repeat containing 16A
hsa-miR-568	1	0	1	1	1	1	HAUS6	HAUS augmin-like complex, subunit 6
hsa-miR-568	0	0	1	1	0	0	NUP62CL	nucleoporin 62kDa C-terminal like
hsa-miR-568	1	0	1	0	1	1	DCAF16	DDB1 and CUL4 associated factor 16
hsa-miR-568	1	0	1	1	1	1	TBC1D8B	TBC1 domain family, member 8B (with GRAM domain)
hsa-miR-568	1	0	1	1	1	1	LPPR1	lipid phosphate phosphatase-related protein type 1
hsa-miR-568	1	0	1	1	1	1	PNRC2	proline-rich nuclear receptor coactivator 2
hsa-miR-568	1	0	1	0	1	1	CHD7	chromodomain helicase DNA binding protein 7
hsa-miR-568	1	0	1	0	1	1	CMTM6	CKLF-like MARVEL transmembrane domain containing 6
hsa-miR-568	1	0	1	1	1	1	FAM120C	family with sequence similarity 120C
hsa-miR-568	1	0	1	1	1	1	FBXO34	F-box protein 34
hsa-miR-568	0	0	1	1	1	1	FKBP14	FK506 binding protein 14, 22 kDa
hsa-miR-568	0	0	1	1	1	1	IWS1	IWS1 homolog (S. cerevisiae)
hsa-miR-568	0	0	1	1	1	1	SCYL2	SCY1-like 2 (S. cerevisiae)
hsa-miR-568	0	0	1	0	1	1	MREG	melanoregulin
hsa-miR-568	1	0	1	1	1	1	AGGF1	angiogenic factor with G patch and FHA domains 1
hsa-miR-568	1	0	1	1	1	1	FIGN	fidgetin
hsa-miR-568	1	0	1	1	1	1	FAM178A	family with sequence similarity 178, member A
hsa-miR-568	0	0	1	1	0	0	CEP55	centrosomal protein 55kDa
hsa-miR-568	1	0	1	0	1	1	MSL2	male-specific lethal 2 homolog (Drosophila)
hsa-miR-568	1	0	1	1	1	1	RIC8B	resistance to inhibitors of cholinesterase 8 homolog B (C. elegans)
hsa-miR-568	0	0	1	1	1	1	NUDT11	nudix (nucleoside diphosphate linked moiety X)-type motif 11
hsa-miR-568	0	0	1	1	1	1	TMLHE	trimethyllysine hydroxylase, epsilon
hsa-miR-568	1	0	1	1	1	1	TMEM184C	transmembrane protein 184C
hsa-miR-568	1	0	1	1	1	1	ZNF701	zinc finger protein 701
hsa-miR-568	1	0	1	1	1	1	ZNF654	zinc finger protein 654
hsa-miR-568	1	0	1	1	1	1	C9orf72	chromosome 9 open reading frame 72
hsa-miR-568	1	0	1	0	1	1	LIN7C	lin-7 homolog C (C. elegans)
hsa-miR-568	0	0	1	1	1	1	STK32B	serine/threonine kinase 32B
hsa-miR-568	0	0	1	1	1	1	STYK1	serine/threonine/tyrosine kinase 1
hsa-miR-568	1	0	1	1	1	1	RRN3	RRN3 RNA polymerase I transcription factor homolog (S. cerevisiae)
hsa-miR-568	1	0	1	0	1	1	BRK1	BRICK1, SCAR/WAVE actin-nucleating complex subunit
hsa-miR-568	0	0	1	0	0	0	FAM45B	family with sequence similarity 45, member A pseudogene
hsa-miR-568	1	0	1	1	1	1	LRRC59	leucine rich repeat containing 59
hsa-miR-568	1	0	1	0	1	1	LRP1B	low density lipoprotein receptor-related protein 1B
hsa-miR-568	1	0	1	1	1	1	CSGALNACT2	chondroitin sulfate N-acetylgalactosaminyltransferase 2
hsa-miR-568	1	0	1	1	1	1	SLC16A10	solute carrier family 16, member 10 (aromatic amino acid transporter)
hsa-miR-568	1	0	1	1	1	1	MLL5	myeloid/lymphoid or mixed-lineage leukemia 5 (trithorax homolog, Drosophila)
hsa-miR-568	1	0	1	1	1	1	CTTNBP2NL	CTTNBP2 N-terminal like
hsa-miR-568	1	0	1	0	1	1	MAML3	mastermind-like 3 (Drosophila)
hsa-miR-568	1	0	1	1	1	1	AJAP1	adherens junctions associated protein 1
hsa-miR-568	1	0	1	1	1	1	GNG12	guanine nucleotide binding protein (G protein), gamma 12
hsa-miR-568	1	0	1	1	1	1	HOXA10	homeobox A10
hsa-miR-568	1	0	1	1	1	1	KCTD5	potassium channel tetramerisation domain containing 5
hsa-miR-568	1	0	1	0	1	1	FAM190B	family with sequence similarity 190, member B
hsa-miR-568	0	0	1	1	1	1	GNL3L	guanine nucleotide binding protein-like 3 (nucleolar)-like
hsa-miR-568	0	0	1	1	1	1	UGT1A10	UDP glucuronosyltransferase 1 family, polypeptide A10
hsa-miR-568	0	0	1	1	1	1	UGT1A8	UDP glucuronosyltransferase 1 family, polypeptide A8
hsa-miR-568	0	0	1	1	1	1	UGT1A7	UDP glucuronosyltransferase 1 family, polypeptide A7
hsa-miR-568	0	0	1	1	1	1	UGT1A5	UDP glucuronosyltransferase 1 family, polypeptide A5
hsa-miR-568	1	0	1	0	1	1	CCNJ	cyclin J
hsa-miR-568	1	0	1	1	1	1	PLEKHA3	pleckstrin homology domain containing, family A (phosphoinositide binding specific) member 3
hsa-miR-568	0	0	1	1	1	1	UGT1A3	UDP glucuronosyltransferase 1 family, polypeptide A3
hsa-miR-568	1	0	1	1	1	1	GTPBP2	GTP binding protein 2
hsa-miR-568	1	0	1	1	1	1	SEPT3	septin 3
hsa-miR-568	1	0	1	0	1	1	UBFD1	ubiquitin family domain containing 1
hsa-miR-568	1	0	1	1	1	1	SERTAD4	SERTA domain containing 4
hsa-miR-568	1	0	1	1	1	1	CYP26B1	cytochrome P450, family 26, subfamily B, polypeptide 1
hsa-miR-568	1	0	1	1	1	1	C8orf4	chromosome 8 open reading frame 4
hsa-miR-568	1	0	1	1	1	1	FEM1C	fem-1 homolog c (C. elegans)
hsa-miR-568	1	0	1	0	1	1	PMEPA1	prostate transmembrane protein, androgen induced 1
hsa-miR-568	1	0	1	1	1	1	ANKRD50	ankyrin repeat domain 50
hsa-miR-568	1	0	1	0	1	1	SLC17A6	solute carrier family 17 (sodium-dependent inorganic phosphate cotransporter), member 6
hsa-miR-568	0	0	1	1	1	1	DST	dystonin
hsa-miR-568	1	0	1	0	1	1	EIF5A2	eukaryotic translation initiation factor 5A2
hsa-miR-568	1	0	1	1	1	1	PCDH9	protocadherin 9
hsa-miR-568	0	0	1	1	0	0	LYRM4	LYR motif containing 4
hsa-miR-568	1	0	1	1	1	1	PTGFRN	prostaglandin F2 receptor negative regulator
hsa-miR-568	1	0	1	1	1	1	ATP8B2	ATPase, aminophospholipid transporter, class I, type 8B, member 2
hsa-miR-568	1	0	1	0	1	1	DCUN1D1	DCN1, defective in cullin neddylation 1, domain containing 1 (S. cerevisiae)
hsa-miR-568	1	0	1	1	1	1	ZNF512B	zinc finger protein 512B
hsa-miR-568	0	0	1	0	1	1	ZNF490	zinc finger protein 490
hsa-miR-568	0	0	1	1	1	1	SHROOM4	shroom family member 4
hsa-miR-568	1	0	1	1	1	1	DLG3	discs, large homolog 3 (Drosophila)
hsa-miR-568	1	0	1	1	1	1	ZNF608	zinc finger protein 608
hsa-miR-568	1	0	1	0	1	1	NUFIP2	nuclear fragile X mental retardation protein interacting protein 2
hsa-miR-568	1	0	1	1	1	1	MIB1	mindbomb E3 ubiquitin protein ligase 1
hsa-miR-568	1	0	1	0	1	1	SYT4	synaptotagmin IV
hsa-miR-568	1	0	1	1	1	1	NCEH1	neutral cholesterol ester hydrolase 1
hsa-miR-568	0	0	1	1	1	1	ARRDC3	arrestin domain containing 3
hsa-miR-568	1	0	1	1	1	1	KLHL14	kelch-like 14 (Drosophila)
hsa-miR-568	1	0	1	1	1	1	SIPA1L2	signal-induced proliferation-associated 1 like 2
hsa-miR-568	1	0	1	1	1	1	TSHZ3	teashirt zinc finger homeobox 3
hsa-miR-568	1	0	1	1	1	1	ZBTB2	zinc finger and BTB domain containing 2
hsa-miR-568	0	0	1	1	1	1	KLHL1	kelch-like 1 (Drosophila)
hsa-miR-568	0	0	1	1	1	1	EPG5	ectopic P-granules autophagy protein 5 homolog (C. elegans)
hsa-miR-568	0	0	1	1	1	1	UGT1A9	UDP glucuronosyltransferase 1 family, polypeptide A9
hsa-miR-568	1	0	1	0	1	1	RAP2A	RAP2A, member of RAS oncogene family
hsa-miR-568	1	0	1	1	1	1	HCN1	hyperpolarization activated cyclic nucleotide-gated potassium channel 1
hsa-miR-568	1	0	1	0	1	1	NMT1	N-myristoyltransferase 1
hsa-miR-568	0	0	1	1	1	1	HRH4	histamine receptor H4
hsa-miR-568	1	0	1	1	1	1	SENP2	SUMO1/sentrin/SMT3 specific peptidase 2
hsa-miR-568	0	0	1	0	1	1	CFL2	cofilin 2 (muscle)
hsa-miR-568	1	0	1	1	1	1	DHX35	DEAH (Asp-Glu-Ala-His) box polypeptide 35
hsa-miR-568	0	0	1	1	1	1	MS4A1	membrane-spanning 4-domains, subfamily A, member 1
hsa-miR-568	0	0	1	1	1	1	GJA3	gap junction protein, alpha 3, 46kDa
hsa-miR-568	1	0	1	0	1	1	MCL1	myeloid cell leukemia sequence 1 (BCL2-related)
hsa-miR-568	0	0	1	1	1	1	NR0B2	nuclear receptor subfamily 0, group B, member 2
hsa-miR-568	1	0	1	1	1	1	SEC24A	SEC24 family, member A (S. cerevisiae)
hsa-miR-568	1	0	1	1	1	1	SNX16	sorting nexin 16
hsa-miR-568	1	0	1	1	1	1	LRRC4	leucine rich repeat containing 4
hsa-miR-568	1	0	1	1	1	1	ABCG4	ATP-binding cassette, sub-family G (WHITE), member 4
hsa-miR-568	0	0	1	1	1	1	RAB38	RAB38, member RAS oncogene family
hsa-miR-568	1	0	1	1	1	1	HIF3A	hypoxia inducible factor 3, alpha subunit
hsa-miR-568	0	0	1	1	1	1	HHIP	hedgehog interacting protein
hsa-miR-568	1	0	1	0	1	1	ELOVL4	ELOVL fatty acid elongase 4
hsa-miR-568	1	0	1	1	1	1	DEPTOR	DEP domain containing MTOR-interacting protein
hsa-miR-568	1	0	1	1	1	1	FBXL17	F-box and leucine-rich repeat protein 17
hsa-miR-568	1	0	1	0	1	1	USP46	ubiquitin specific peptidase 46
hsa-miR-568	0	0	1	1	1	1	METTL4	methyltransferase like 4
hsa-miR-568	1	0	1	0	1	1	BCL11B	B-cell CLL/lymphoma 11B (zinc finger protein)
hsa-miR-568	1	0	1	1	1	1	C1orf116	chromosome 1 open reading frame 116
hsa-miR-568	1	0	1	1	1	1	C7orf23	chromosome 7 open reading frame 23
hsa-miR-568	1	0	1	1	1	1	EFHD2	EF-hand domain family, member D2
hsa-miR-568	0	0	1	1	0	0	IRX3	iroquois homeobox 3
hsa-miR-568	0	0	1	1	1	1	PLA2G4A	phospholipase A2, group IVA (cytosolic, calcium-dependent)
hsa-miR-568	0	0	1	1	1	1	CEP70	centrosomal protein 70kDa
hsa-miR-568	0	0	1	1	1	1	LPAL2	lipoprotein, Lp(a)-like 2, pseudogene
hsa-miR-568	1	0	1	1	1	1	IRF2BPL	interferon regulatory factor 2 binding protein-like
hsa-miR-568	0	0	1	1	1	1	NDNF	neuron-derived neurotrophic factor
hsa-miR-568	0	0	1	1	1	1	AKIRIN1	akirin 1
hsa-miR-568	1	0	1	1	1	1	DHX40	DEAH (Asp-Glu-Ala-His) box polypeptide 40
hsa-miR-568	0	0	1	1	1	1	STEAP4	STEAP family member 4
hsa-miR-568	0	0	1	1	1	1	LRRK1	leucine-rich repeat kinase 1
hsa-miR-568	0	0	1	1	1	1	E2F8	E2F transcription factor 8
hsa-miR-568	0	0	1	1	1	1	TTLL7	tubulin tyrosine ligase-like family, member 7
hsa-miR-568	1	0	1	1	1	1	C15orf29	chromosome 15 open reading frame 29
hsa-miR-568	1	0	1	0	1	1	ZFHX4	zinc finger homeobox 4
hsa-miR-568	1	0	1	1	1	1	CCDC82	coiled-coil domain containing 82
hsa-miR-568	0	0	1	1	1	1	WDR78	WD repeat domain 78
hsa-miR-568	1	0	1	1	1	1	CLMP	CXADR-like membrane protein
hsa-miR-568	1	0	1	1	1	1	CEP76	centrosomal protein 76kDa
hsa-miR-568	1	0	1	1	1	1	GRHL2	grainyhead-like 2 (Drosophila)
hsa-miR-568	1	0	1	1	1	1	POF1B	premature ovarian failure, 1B
hsa-miR-568	0	0	1	1	0	0	TMEM156	transmembrane protein 156
hsa-miR-568	1	0	1	0	1	1	NAA25	N(alpha)-acetyltransferase 25, NatB auxiliary subunit
hsa-miR-568	0	0	1	1	1	1	GPR110	G protein-coupled receptor 110
hsa-miR-568	0	0	1	1	1	1	CCDC170	coiled-coil domain containing 170
hsa-miR-568	1	0	1	0	1	1	EDEM3	ER degradation enhancer, mannosidase alpha-like 3
hsa-miR-568	1	0	1	1	1	1	TRIB1	tribbles homolog 1 (Drosophila)
hsa-miR-568	1	0	1	1	1	1	TNKS2	tankyrase, TRF1-interacting ankyrin-related ADP-ribose polymerase 2
hsa-miR-568	1	0	1	0	1	1	SRCIN1	SRC kinase signaling inhibitor 1
hsa-miR-568	1	0	1	1	1	1	JHDM1D	jumonji C domain containing histone demethylase 1 homolog D (S. cerevisiae)
hsa-miR-568	1	0	1	1	1	1	RAI1	retinoic acid induced 1
hsa-miR-568	0	0	1	1	1	1	HMGN5	high mobility group nucleosome binding domain 5
hsa-miR-568	0	0	1	1	1	1	BCL2L14	BCL2-like 14 (apoptosis facilitator)
hsa-miR-568	1	0	1	1	1	1	TUBB1	tubulin, beta 1 class VI
hsa-miR-568	1	0	1	1	1	1	SGPP1	sphingosine-1-phosphate phosphatase 1
hsa-miR-568	1	0	1	1	1	1	MAP4	microtubule-associated protein 4
hsa-miR-568	1	0	1	1	1	1	C6orf62	chromosome 6 open reading frame 62
hsa-miR-568	0	0	1	1	1	1	TEX15	testis expressed 15
hsa-miR-568	0	0	1	1	0	0	NUF2	NUF2, NDC80 kinetochore complex component, homolog (S. cerevisiae)
hsa-miR-568	0	0	1	1	1	1	COG3	component of oligomeric golgi complex 3
hsa-miR-568	1	0	1	0	1	1	TMEM47	transmembrane protein 47
hsa-miR-568	1	0	1	1	1	1	HSDL1	hydroxysteroid dehydrogenase like 1
hsa-miR-568	1	0	1	1	0	0	FZD8	frizzled family receptor 8
hsa-miR-568	0	0	1	1	1	1	MAGT1	magnesium transporter 1
hsa-miR-568	0	0	1	1	1	1	ACAD11	acyl-CoA dehydrogenase family, member 11
hsa-miR-568	1	0	1	1	1	1	ARID5B	AT rich interactive domain 5B (MRF1-like)
hsa-miR-568	1	0	1	0	1	1	FAR1	fatty acyl CoA reductase 1
hsa-miR-568	1	0	1	1	1	1	SLITRK6	SLIT and NTRK-like family, member 6
hsa-miR-568	0	0	1	1	1	1	METTL25	methyltransferase like 25
hsa-miR-568	1	0	1	1	1	1	ZNRF1	zinc and ring finger 1, E3 ubiquitin protein ligase
hsa-miR-568	1	0	1	0	1	1	PSD2	pleckstrin and Sec7 domain containing 2
hsa-miR-568	0	0	1	1	1	1	YIPF4	Yip1 domain family, member 4
hsa-miR-568	0	0	1	1	1	1	TMEM101	transmembrane protein 101
hsa-miR-568	1	0	1	1	1	1	HOOK3	hook homolog 3 (Drosophila)
hsa-miR-568	0	0	1	1	1	1	CYSTM1	cysteine-rich transmembrane module containing 1
hsa-miR-568	1	0	1	1	1	1	SYVN1	synovial apoptosis inhibitor 1, synoviolin
hsa-miR-568	0	0	1	0	1	1	IMMP2L	IMP2 inner mitochondrial membrane peptidase-like (S. cerevisiae)
hsa-miR-568	1	0	1	1	1	1	USP38	ubiquitin specific peptidase 38
hsa-miR-568	0	0	1	1	0	0	KIF2B	kinesin family member 2B
hsa-miR-568	1	0	1	1	1	1	TRIM63	tripartite motif containing 63, E3 ubiquitin protein ligase
hsa-miR-568	0	0	1	0	1	1	TRIM52	tripartite motif containing 52
hsa-miR-568	1	0	1	1	1	1	GPR124	G protein-coupled receptor 124
hsa-miR-568	0	0	1	0	1	1	CBR4	carbonyl reductase 4
hsa-miR-568	0	0	1	1	1	1	FAM136A	family with sequence similarity 136, member A
hsa-miR-568	1	0	1	0	1	1	PPP1R15B	protein phosphatase 1, regulatory subunit 15B
hsa-miR-568	1	0	1	1	1	1	SPRYD3	SPRY domain containing 3
hsa-miR-568	1	0	1	1	1	1	RAB2B	RAB2B, member RAS oncogene family
hsa-miR-568	1	0	1	1	1	1	ABHD13	abhydrolase domain containing 13
hsa-miR-568	1	0	1	0	1	1	UBASH3B	ubiquitin associated and SH3 domain containing B
hsa-miR-568	1	0	1	1	1	1	AJUBA	ajuba LIM protein
hsa-miR-568	1	0	1	1	1	1	ARHGAP19	Rho GTPase activating protein 19
hsa-miR-568	1	0	1	1	1	1	PCDH10	protocadherin 10
hsa-miR-568	1	0	1	1	1	1	PCDH11Y	protocadherin 11 Y-linked
hsa-miR-568	1	0	1	1	1	1	HIAT1	hippocampus abundant transcript 1
hsa-miR-568	1	0	1	1	1	1	TRIM55	tripartite motif containing 55
hsa-miR-568	1	0	1	0	1	1	EAF1	ELL associated factor 1
hsa-miR-568	1	0	1	1	1	1	SLC45A3	solute carrier family 45, member 3
hsa-miR-568	0	0	1	0	1	1	PNPT1	polyribonucleotide nucleotidyltransferase 1
hsa-miR-568	0	0	1	1	1	1	ZIC5	Zic family member 5
hsa-miR-568	0	0	1	1	1	1	EPSTI1	epithelial stromal interaction 1 (breast)
hsa-miR-568	0	0	1	1	1	1	MRPS36	mitochondrial ribosomal protein S36
hsa-miR-568	1	0	1	1	1	1	TANC1	tetratricopeptide repeat, ankyrin repeat and coiled-coil containing 1
hsa-miR-568	0	0	1	1	1	1	CTTNBP2	cortactin binding protein 2
hsa-miR-568	1	0	1	1	1	1	EPT1	ethanolaminephosphotransferase 1 (CDP-ethanolamine-specific)
hsa-miR-568	1	0	1	1	1	1	SYS1	SYS1 Golgi-localized integral membrane protein homolog (S. cerevisiae)
hsa-miR-568	0	0	1	1	1	1	ZNF830	zinc finger protein 830
hsa-miR-568	1	0	1	1	1	1	SLC2A13	solute carrier family 2 (facilitated glucose transporter), member 13
hsa-miR-568	1	0	1	1	1	1	WDFY2	WD repeat and FYVE domain containing 2
hsa-miR-568	0	0	1	1	1	1	IL22RA2	interleukin 22 receptor, alpha 2
hsa-miR-568	1	0	1	1	1	1	MED12L	mediator complex subunit 12-like
hsa-miR-568	1	0	1	1	1	1	ANTXR1	anthrax toxin receptor 1
hsa-miR-568	0	0	1	0	1	1	ZNF518B	zinc finger protein 518B
hsa-miR-568	0	0	1	1	1	1	MIA2	melanoma inhibitory activity 2
hsa-miR-568	1	0	1	1	1	1	NAA15	N(alpha)-acetyltransferase 15, NatA auxiliary subunit
hsa-miR-568	0	0	1	1	1	1	CCNE2	cyclin E2
hsa-miR-568	0	0	1	1	0	0	WNT8A	wingless-type MMTV integration site family, member 8A
hsa-miR-568	0	0	1	1	1	1	CLEC4D	C-type lectin domain family 4, member D
hsa-miR-568	1	0	1	1	1	1	SLC44A1	solute carrier family 44, member 1
hsa-miR-568	0	0	1	1	1	1	CTCFL	CCCTC-binding factor (zinc finger protein)-like
hsa-miR-568	0	0	1	1	1	1	MED30	mediator complex subunit 30
hsa-miR-568	1	0	1	1	1	1	NRSN1	neurensin 1
hsa-miR-568	1	0	1	0	1	1	SOCS4	suppressor of cytokine signaling 4
hsa-miR-568	0	0	1	1	1	1	COLEC12	collectin sub-family member 12
hsa-miR-568	1	0	1	1	1	1	JDP2	Jun dimerization protein 2
hsa-miR-568	0	0	1	1	1	1	RGS18	regulator of G-protein signaling 18
hsa-miR-568	1	0	1	1	1	1	WHSC1	Wolf-Hirschhorn syndrome candidate 1
hsa-miR-568	0	0	1	0	1	1	PAQR8	progestin and adipoQ receptor family member VIII
hsa-miR-568	1	0	1	1	0	0	UNC5A	unc-5 homolog A (C. elegans)
hsa-miR-568	0	0	1	1	1	1	RAD51B	RAD51 homolog B (S. cerevisiae)
hsa-miR-568	0	0	1	1	1	1	CASC4	cancer susceptibility candidate 4
hsa-miR-568	1	0	1	1	1	1	KCTD12	potassium channel tetramerisation domain containing 12
hsa-miR-568	1	0	1	0	1	1	SP1	Sp1 transcription factor
hsa-miR-568	1	0	1	0	1	1	FCHO2	FCH domain only 2
hsa-miR-568	0	0	1	1	0	0	LEO1	Leo1, Paf1/RNA polymerase II complex component, homolog (S. cerevisiae)
hsa-miR-568	0	0	1	1	1	1	NETO1	neuropilin (NRP) and tolloid (TLL)-like 1
hsa-miR-568	0	0	1	1	1	1	ADAMTS17	ADAM metallopeptidase with thrombospondin type 1 motif, 17
hsa-miR-568	0	0	1	1	1	1	PPIL4	peptidylprolyl isomerase (cyclophilin)-like 4
hsa-miR-568	1	0	1	1	1	1	PPTC7	PTC7 protein phosphatase homolog (S. cerevisiae)
hsa-miR-568	0	0	1	1	1	1	KCNH5	potassium voltage-gated channel, subfamily H (eag-related), member 5
hsa-miR-568	0	0	1	0	1	1	SLC17A8	solute carrier family 17 (sodium-dependent inorganic phosphate cotransporter), member 8
hsa-miR-568	1	0	1	1	1	1	ATRN	attractin
hsa-miR-568	1	0	1	0	1	1	CNOT6L	CCR4-NOT transcription complex, subunit 6-like
hsa-miR-568	1	0	1	1	1	1	RFTN2	raftlin family member 2
hsa-miR-568	1	0	1	1	1	1	TMEM182	transmembrane protein 182
hsa-miR-568	1	0	1	1	1	1	MBNL2	muscleblind-like splicing regulator 2
hsa-miR-568	1	0	1	1	1	1	FAM91A1	family with sequence similarity 91, member A1
hsa-miR-568	0	0	1	0	1	1	UBLCP1	ubiquitin-like domain containing CTD phosphatase 1
hsa-miR-568	1	0	1	0	1	1	ZBTB47	zinc finger and BTB domain containing 47
hsa-miR-568	1	0	1	0	1	1	MTPN	myotrophin
hsa-miR-568	1	0	1	1	1	1	FAM110B	family with sequence similarity 110, member B
hsa-miR-568	0	0	1	1	1	1	TCEAL7	transcription elongation factor A (SII)-like 7
hsa-miR-568	0	0	1	1	1	1	ERP27	endoplasmic reticulum protein 27
hsa-miR-568	0	0	1	1	1	1	CDYL2	chromodomain protein, Y-like 2
hsa-miR-568	0	0	1	1	1	1	EFCAB13	EF-hand calcium binding domain 13
hsa-miR-568	0	0	1	1	1	1	C15orf43	chromosome 15 open reading frame 43
hsa-miR-568	1	0	1	1	1	1	ZNF362	zinc finger protein 362
hsa-miR-568	0	0	1	1	1	1	CNIH3	cornichon homolog 3 (Drosophila)
hsa-miR-568	0	0	1	0	1	1	HORMAD2	HORMA domain containing 2
hsa-miR-568	1	0	1	1	1	1	SPRED1	sprouty-related, EVH1 domain containing 1
hsa-miR-568	1	0	1	0	1	1	DCP2	DCP2 decapping enzyme homolog (S. cerevisiae)
hsa-miR-568	0	0	1	1	1	1	SNX31	sorting nexin 31
hsa-miR-568	0	0	1	1	1	1	CCER1	coiled-coil glutamate-rich protein 1
hsa-miR-568	1	0	1	0	1	1	FAM116A	family with sequence similarity 116, member A
hsa-miR-568	1	0	1	0	1	1	RWDD4	RWD domain containing 4
hsa-miR-568	1	0	1	1	1	1	HOXA9	homeobox A9
hsa-miR-568	1	0	1	1	1	1	PDIK1L	PDLIM1 interacting kinase 1 like
hsa-miR-568	1	0	1	0	1	1	N4BP1	NEDD4 binding protein 1
hsa-miR-568	1	0	1	1	1	1	IQCK	IQ motif containing K
hsa-miR-568	1	0	1	1	1	1	C3orf45	chromosome 3 open reading frame 45
hsa-miR-568	1	0	1	1	1	1	CEP120	centrosomal protein 120kDa
hsa-miR-568	1	0	1	1	1	1	TXLNB	taxilin beta
hsa-miR-568	1	0	1	1	1	1	TMEM161B	transmembrane protein 161B
hsa-miR-568	1	0	1	0	1	1	ZCCHC24	zinc finger, CCHC domain containing 24
hsa-miR-568	1	0	1	1	1	1	LRIG3	leucine-rich repeats and immunoglobulin-like domains 3
hsa-miR-568	1	0	1	1	1	1	CREBRF	CREB3 regulatory factor
hsa-miR-568	0	0	1	1	1	1	IKBIP	IKBKB interacting protein
hsa-miR-568	1	0	1	1	1	1	ELMOD2	ELMO/CED-12 domain containing 2
hsa-miR-568	0	0	1	0	1	1	RTP1	receptor (chemosensory) transporter protein 1
hsa-miR-568	0	0	1	1	1	1	TAF1L	TAF1 RNA polymerase II, TATA box binding protein (TBP)-associated factor, 210kDa-like
hsa-miR-568	1	0	1	1	1	1	RC3H1	ring finger and CCCH-type domains 1
hsa-miR-568	0	0	1	1	1	1	IL29	interleukin 29 (interferon, lambda 1)
hsa-miR-568	1	0	1	0	1	1	KLHDC1	kelch domain containing 1
hsa-miR-568	0	0	1	1	0	0	SLITRK4	SLIT and NTRK-like family, member 4
hsa-miR-568	1	0	1	1	1	1	SIK1	salt-inducible kinase 1
hsa-miR-568	1	0	1	1	1	1	MOB1B	MOB kinase activator 1B
hsa-miR-568	1	0	1	1	1	1	TTBK2	tau tubulin kinase 2
hsa-miR-568	1	0	1	1	1	1	FAM117B	family with sequence similarity 117, member B
hsa-miR-568	0	0	1	1	1	1	C15orf26	chromosome 15 open reading frame 26
hsa-miR-568	0	0	1	1	1	1	C8orf47	chromosome 8 open reading frame 47
hsa-miR-568	0	0	1	1	0	0	EPHX4	epoxide hydrolase 4
hsa-miR-568	1	0	1	0	1	1	PGM2L1	phosphoglucomutase 2-like 1
hsa-miR-568	1	0	1	0	1	1	KSR2	kinase suppressor of ras 2
hsa-miR-568	1	0	1	1	1	1	DIP2B	DIP2 disco-interacting protein 2 homolog B (Drosophila)
hsa-miR-568	0	0	1	0	1	1	C5orf64	chromosome 5 open reading frame 64
hsa-miR-568	1	0	1	1	1	1	XKR6	XK, Kell blood group complex subunit-related family, member 6
hsa-miR-568	0	0	1	1	1	1	FAM133A	family with sequence similarity 133, member A
hsa-miR-568	1	0	1	0	1	1	SREK1IP1	SREK1-interacting protein 1
hsa-miR-568	1	0	1	1	1	1	SLC41A1	solute carrier family 41, member 1
hsa-miR-568	0	0	1	0	1	1	C17orf49	chromosome 17 open reading frame 49
hsa-miR-568	1	0	1	1	1	1	UBR1	ubiquitin protein ligase E3 component n-recognin 1
hsa-miR-568	1	0	1	1	1	1	C4orf34	chromosome 4 open reading frame 34
hsa-miR-568	0	0	1	1	1	1	CHSY3	chondroitin sulfate synthase 3
hsa-miR-568	0	0	1	1	1	1	XKR3	XK, Kell blood group complex subunit-related family, member 3
hsa-miR-568	1	0	1	0	1	1	CCDC71L	coiled-coil domain containing 71-like
hsa-miR-568	0	0	1	1	0	0	CHMP4B	charged multivesicular body protein 4B
hsa-miR-568	1	0	1	1	1	1	INADL	InaD-like (Drosophila)
hsa-miR-568	1	0	1	1	1	1	PPAP2B	phosphatidic acid phosphatase type 2B
hsa-miR-568	1	0	1	1	1	1	LRRTM3	leucine rich repeat transmembrane neuronal 3
hsa-miR-568	1	0	1	1	1	1	PRIMA1	proline rich membrane anchor 1
hsa-miR-568	1	0	1	1	1	1	PTF1A	pancreas specific transcription factor, 1a
hsa-miR-568	0	0	1	1	1	1	ZNF831	zinc finger protein 831
hsa-miR-568	1	0	1	1	1	1	MB21D2	Mab-21 domain containing 2
hsa-miR-568	1	0	1	1	1	1	TMEM26	transmembrane protein 26
hsa-miR-568	0	0	1	1	1	1	STXBP4	syntaxin binding protein 4
hsa-miR-568	1	0	1	1	1	1	MTDH	metadherin
hsa-miR-568	0	0	1	0	1	1	SLCO4C1	solute carrier organic anion transporter family, member 4C1
[truncated: 584 more rows]
