# Supplementary material for: Profiling of Selected MicroRNAs in Proliferative Eutopic Endometrium of Women with Ovarian Endometriosis
Source: Biomed Res Int. 2015 Aug 20;2015:760698. doi: 10.1155/2015/760698 (PMC4558423; doi:10.1155/2015/760698)
Supplement: Supplementary file 1 — Table I: The names of miRNAs significantly differentially expressed between eutopic endometrium of patients with endometriosis vs eutopic endometrium of patients without endometriosis. Table II: The associations between miRNA and mRNA, which presents detailed results of the search of six major databases i.e targetscan, tarbase, miranda, mirbase, mirtarget2 and pictar. [file 760698.f1.zip › 760698.f1/Table II/hsa-miR-571.tsv]

miR	targetscan	tarbase	miranda	mirbase	mirtarget2	pictar	GeneSymbol	GeneName
hsa-miR-571	1	0	1	1	1	1	CHD9	chromodomain helicase DNA binding protein 9
hsa-miR-571	1	0	1	1	0	0	HUWE1	HECT, UBA and WWE domain containing 1, E3 ubiquitin protein ligase
hsa-miR-571	0	0	1	1	1	1	PPIP5K1	diphosphoinositol pentakisphosphate kinase 1
hsa-miR-571	1	0	1	0	1	1	KIAA0408	KIAA0408
hsa-miR-571	0	0	1	1	1	1	PDE4DIP	phosphodiesterase 4D interacting protein
hsa-miR-571	1	0	1	1	0	0	OTUD3	OTU domain containing 3
hsa-miR-571	1	0	1	1	1	1	HIPK1	homeodomain interacting protein kinase 1
hsa-miR-571	1	0	1	1	1	1	TP63	tumor protein p63
hsa-miR-571	1	0	1	1	0	0	ESYT1	extended synaptotagmin-like protein 1
hsa-miR-571	1	0	1	1	1	1	DNM3	dynamin 3
hsa-miR-571	1	0	1	0	0	0	DTX4	deltex homolog 4 (Drosophila)
hsa-miR-571	1	0	1	1	1	1	CIT	citron (rho-interacting, serine/threonine kinase 21)
hsa-miR-571	1	0	1	1	1	1	C11orf9	chromosome 11 open reading frame 9
hsa-miR-571	0	0	1	1	0	0	FAM149B1	family with sequence similarity 149, member B1
hsa-miR-571	1	0	1	1	1	1	RPGRIP1L	RPGRIP1-like
hsa-miR-571	1	0	1	1	0	0	FRMD4B	FERM domain containing 4B
hsa-miR-571	1	0	1	1	1	1	NLGN1	neuroligin 1
hsa-miR-571	1	0	1	1	1	1	FAM208A	family with sequence similarity 208, member A
hsa-miR-571	1	0	1	0	1	1	ODZ2	odz, odd Oz/ten-m homolog 2 (Drosophila)
hsa-miR-571	0	0	1	1	1	1	TMCC3	transmembrane and coiled-coil domain family 3
hsa-miR-571	1	0	1	0	1	1	SRGAP3	SLIT-ROBO Rho GTPase activating protein 3
hsa-miR-571	0	0	1	1	0	0	ZC4H2	zinc finger, C4H2 domain containing
hsa-miR-571	1	0	1	1	1	1	RALGAPB	Ral GTPase activating protein, beta subunit (non-catalytic)
hsa-miR-571	1	0	1	1	0	0	ATAD2B	ATPase family, AAA domain containing 2B
hsa-miR-571	1	0	1	1	1	1	STK36	serine/threonine kinase 36
hsa-miR-571	0	0	1	1	0	0	TNFRSF12A	tumor necrosis factor receptor superfamily, member 12A
hsa-miR-571	1	0	1	0	0	0	NYNRIN	NYN domain and retroviral integrase containing
hsa-miR-571	0	0	1	1	1	1	KLHL13	kelch-like 13 (Drosophila)
hsa-miR-571	1	0	1	1	1	1	PCDH19	protocadherin 19
hsa-miR-571	0	0	1	1	1	1	NLGN3	neuroligin 3
hsa-miR-571	0	0	1	0	0	0	NYAP2	neuronal tyrosine-phosphorylated phosphoinositide-3-kinase adaptor 2
hsa-miR-571	1	0	1	1	1	1	FRAS1	Fraser syndrome 1
hsa-miR-571	1	0	1	0	1	1	LMO3	LIM domain only 3 (rhombotin-like 2)
hsa-miR-571	0	0	1	1	0	0	TMEM132A	transmembrane protein 132A
hsa-miR-571	1	0	1	1	0	0	MAGI3	membrane associated guanylate kinase, WW and PDZ domain containing 3
hsa-miR-571	1	0	1	0	1	1	JPH4	junctophilin 4
hsa-miR-571	0	0	1	1	0	0	TPGS2	tubulin polyglutamylase complex subunit 2
hsa-miR-571	0	0	1	0	0	0	NBLA00301	Nbla00301
hsa-miR-571	1	0	1	1	1	1	OXR1	oxidation resistance 1
hsa-miR-571	0	0	1	1	0	0	GOLT1A	golgi transport 1A
hsa-miR-571	1	0	1	0	1	1	RNF43	ring finger protein 43
hsa-miR-571	1	0	1	0	0	0	RNF169	ring finger protein 169
hsa-miR-571	1	0	1	0	0	0	ZBTB34	zinc finger and BTB domain containing 34
hsa-miR-571	1	0	1	1	1	1	ACBD5	acyl-CoA binding domain containing 5
hsa-miR-571	1	0	1	0	0	0	ZC3H12C	zinc finger CCCH-type containing 12C
hsa-miR-571	0	0	1	1	0	0	DDB2	damage-specific DNA binding protein 2, 48kDa
hsa-miR-571	1	0	1	1	1	1	KCNMA1	potassium large conductance calcium-activated channel, subfamily M, alpha member 1
hsa-miR-571	1	0	1	1	1	1	VLDLR	very low density lipoprotein receptor
hsa-miR-571	0	0	1	1	0	0	KCNC3	potassium voltage-gated channel, Shaw-related subfamily, member 3
hsa-miR-571	1	0	1	1	1	1	PML	promyelocytic leukemia
hsa-miR-571	0	0	1	1	1	1	MAZ	MYC-associated zinc finger protein (purine-binding transcription factor)
hsa-miR-571	1	0	1	1	1	1	RLF	rearranged L-myc fusion
hsa-miR-571	1	0	1	1	1	1	EIF4G3	eukaryotic translation initiation factor 4 gamma, 3
hsa-miR-571	0	0	1	1	1	1	TFRC	transferrin receptor (p90, CD71)
hsa-miR-571	1	0	1	0	1	1	CHL1	cell adhesion molecule with homology to L1CAM (close homolog of L1)
hsa-miR-571	1	0	1	1	1	1	SPTB	spectrin, beta, erythrocytic
hsa-miR-571	0	0	1	0	1	1	ACTN2	actinin, alpha 2
hsa-miR-571	0	0	1	1	1	1	STAU1	staufen, RNA binding protein, homolog 1 (Drosophila)
hsa-miR-571	0	0	1	1	0	0	BMP1	bone morphogenetic protein 1
hsa-miR-571	1	0	1	0	1	1	TBL1X	transducin (beta)-like 1X-linked
hsa-miR-571	1	0	1	1	1	1	EPB41	erythrocyte membrane protein band 4.1 (elliptocytosis 1, RH-linked)
hsa-miR-571	1	0	1	1	1	1	ARHGEF3	Rho guanine nucleotide exchange factor (GEF) 3
hsa-miR-571	0	0	1	1	0	0	SLC22A8	solute carrier family 22 (organic anion transporter), member 8
hsa-miR-571	0	0	1	1	0	0	TRIM27	tripartite motif containing 27
hsa-miR-571	1	0	1	1	1	1	ANPEP	alanyl (membrane) aminopeptidase
hsa-miR-571	0	0	1	0	0	0	LOC644277	uncharacterized LOC644277
hsa-miR-571	0	0	1	1	1	1	CD55	CD55 molecule, decay accelerating factor for complement (Cromer blood group)
hsa-miR-571	0	0	1	0	0	0	MIAT	myocardial infarction associated transcript (non-protein coding)
hsa-miR-571	1	0	1	0	1	1	DDX3X	DEAD (Asp-Glu-Ala-Asp) box polypeptide 3, X-linked
hsa-miR-571	1	0	1	0	1	1	MLL2	myeloid/lymphoid or mixed-lineage leukemia 2
hsa-miR-571	0	0	1	1	0	0	MR1	major histocompatibility complex, class I-related
hsa-miR-571	1	0	1	1	1	1	CBFA2T2	core-binding factor, runt domain, alpha subunit 2; translocated to, 2
hsa-miR-571	0	0	1	1	0	0	KIR2DL3	killer cell immunoglobulin-like receptor, two domains, long cytoplasmic tail, 3
hsa-miR-571	0	0	1	1	1	1	PPEF2	protein phosphatase, EF-hand calcium binding domain 2
hsa-miR-571	0	0	1	1	0	0	SPTBN2	spectrin, beta, non-erythrocytic 2
hsa-miR-571	0	0	1	1	1	1	SLC11A2	solute carrier family 11 (proton-coupled divalent metal ion transporters), member 2
hsa-miR-571	0	0	1	1	1	1	CD84	CD84 molecule
hsa-miR-571	1	0	1	1	1	1	CTNND1	catenin (cadherin-associated protein), delta 1
hsa-miR-571	1	0	1	1	1	1	LDB2	LIM domain binding 2
hsa-miR-571	1	0	1	1	0	0	PAK1	p21 protein (Cdc42/Rac)-activated kinase 1
hsa-miR-571	0	0	1	1	1	1	PCF11	PCF11, cleavage and polyadenylation factor subunit, homolog (S. cerevisiae)
hsa-miR-571	1	0	1	0	1	1	CELF2	CUGBP, Elav-like family member 2
hsa-miR-571	1	0	1	1	1	1	GLS	glutaminase
hsa-miR-571	0	0	1	1	1	1	FHL1	four and a half LIM domains 1
hsa-miR-571	1	0	1	1	0	0	RASSF1	Ras association (RalGDS/AF-6) domain family member 1
hsa-miR-571	0	0	1	1	1	1	IL18BP	interleukin 18 binding protein
hsa-miR-571	1	0	1	1	1	1	NF2	neurofibromin 2 (merlin)
hsa-miR-571	0	0	1	1	0	0	CALHM2	calcium homeostasis modulator 2
hsa-miR-571	1	0	1	1	1	1	FBN2	fibrillin 2
hsa-miR-571	0	0	1	1	1	1	CHPT1	choline phosphotransferase 1
hsa-miR-571	0	0	1	1	1	1	SLCO2B1	solute carrier organic anion transporter family, member 2B1
hsa-miR-571	0	0	1	1	1	1	PGLYRP4	peptidoglycan recognition protein 4
hsa-miR-571	0	0	1	0	0	0	TIGD7	tigger transposable element derived 7
hsa-miR-571	1	0	1	1	1	1	SH3GLB1	SH3-domain GRB2-like endophilin B1
hsa-miR-571	1	0	1	1	1	1	FASLG	Fas ligand (TNF superfamily, member 6)
hsa-miR-571	1	0	1	1	1	1	TMUB2	transmembrane and ubiquitin-like domain containing 2
hsa-miR-571	0	0	1	1	0	0	ZAN	zonadhesin
hsa-miR-571	0	0	1	1	1	1	FCRL5	Fc receptor-like 5
hsa-miR-571	1	0	1	1	1	1	CALU	calumenin
hsa-miR-571	0	0	1	1	1	1	SLC6A15	solute carrier family 6 (neutral amino acid transporter), member 15
hsa-miR-571	1	0	1	1	1	1	KCNIP2	Kv channel interacting protein 2
hsa-miR-571	1	0	1	1	1	1	LARP4	La ribonucleoprotein domain family, member 4
hsa-miR-571	1	0	1	1	0	0	SEPT8	septin 8
hsa-miR-571	0	0	1	1	1	1	RGS14	regulator of G-protein signaling 14
hsa-miR-571	1	0	1	0	1	1	IL1RAP	interleukin 1 receptor accessory protein
hsa-miR-571	1	0	1	1	1	1	SUCO	SUN domain containing ossification factor
hsa-miR-571	1	0	1	1	1	1	ILF3	interleukin enhancer binding factor 3, 90kDa
hsa-miR-571	0	0	1	1	1	1	SLC37A1	solute carrier family 37 (glycerol-3-phosphate transporter), member 1
hsa-miR-571	0	0	1	1	1	1	RANBP17	RAN binding protein 17
hsa-miR-571	0	0	1	1	1	1	CD1E	CD1e molecule
hsa-miR-571	1	0	1	1	1	1	SLAMF6	SLAM family member 6
hsa-miR-571	1	0	1	1	1	1	PALM2	paralemmin 2
hsa-miR-571	1	0	1	1	1	1	NRXN3	neurexin 3
hsa-miR-571	0	0	1	0	0	0	CASC2	cancer susceptibility candidate 2 (non-protein coding)
hsa-miR-571	0	0	1	1	0	0	ASAP3	ArfGAP with SH3 domain, ankyrin repeat and PH domain 3
hsa-miR-571	0	0	1	1	0	0	GPRC5C	G protein-coupled receptor, family C, group 5, member C
hsa-miR-571	1	0	1	0	1	1	NFAT5	nuclear factor of activated T-cells 5, tonicity-responsive
hsa-miR-571	1	0	1	1	1	1	ARGLU1	arginine and glutamate rich 1
hsa-miR-571	0	0	1	1	0	0	RFWD2	ring finger and WD repeat domain 2, E3 ubiquitin protein ligase
hsa-miR-571	1	0	1	0	1	1	VPS13D	vacuolar protein sorting 13 homolog D (S. cerevisiae)
hsa-miR-571	1	0	1	1	1	1	RIC8B	resistance to inhibitors of cholinesterase 8 homolog B (C. elegans)
hsa-miR-571	1	0	1	1	1	1	EIF2C1	eukaryotic translation initiation factor 2C, 1
hsa-miR-571	1	0	1	0	1	1	CLIC4	chloride intracellular channel 4
hsa-miR-571	1	0	1	1	1	1	WDTC1	WD and tetratricopeptide repeats 1
hsa-miR-571	0	0	1	1	1	1	TCP11L1	t-complex 11 (mouse)-like 1
hsa-miR-571	0	0	1	0	0	0	C17orf72	chromosome 17 open reading frame 72
hsa-miR-571	0	0	1	0	0	0	SOX2-OT	SOX2 overlapping transcript (non-protein coding)
hsa-miR-571	0	0	1	1	1	1	ARMC5	armadillo repeat containing 5
hsa-miR-571	0	0	1	1	1	1	SPATA5L1	spermatogenesis associated 5-like 1
hsa-miR-571	0	0	1	1	1	1	CLEC4M	C-type lectin domain family 4, member M
hsa-miR-571	1	0	1	1	1	1	ARHGEF15	Rho guanine nucleotide exchange factor (GEF) 15
hsa-miR-571	0	0	1	0	1	1	FLJ14186	uncharacterized LOC401149
hsa-miR-571	0	0	1	1	1	1	METTL7A	methyltransferase like 7A
hsa-miR-571	0	0	1	1	0	0	SPON2	spondin 2, extracellular matrix protein
hsa-miR-571	1	0	1	1	1	1	PHACTR4	phosphatase and actin regulator 4
hsa-miR-571	1	0	1	0	1	1	ATP2B1	ATPase, Ca++ transporting, plasma membrane 1
hsa-miR-571	0	0	1	1	0	0	MOGAT2	monoacylglycerol O-acyltransferase 2
hsa-miR-571	1	0	1	1	0	0	POMGNT1	protein O-linked mannose beta1,2-N-acetylglucosaminyltransferase
hsa-miR-571	0	0	1	1	1	1	GTF2H1	general transcription factor IIH, polypeptide 1, 62kDa
hsa-miR-571	1	0	1	1	1	1	NFASC	neurofascin
hsa-miR-571	1	0	1	1	1	1	TMEM2	transmembrane protein 2
hsa-miR-571	0	0	1	1	1	1	FAM107A	family with sequence similarity 107, member A
hsa-miR-571	1	0	1	1	0	0	C15orf27	chromosome 15 open reading frame 27
hsa-miR-571	0	0	1	1	1	1	C8orf46	chromosome 8 open reading frame 46
hsa-miR-571	0	0	1	1	1	1	MTRF1	mitochondrial translational release factor 1
hsa-miR-571	1	0	1	1	1	1	PPM1L	protein phosphatase, Mg2+/Mn2+ dependent, 1L
hsa-miR-571	0	0	1	0	0	0	LOC401242	uncharacterized LOC401242
hsa-miR-571	1	0	1	1	0	0	AUP1	ancient ubiquitous protein 1
hsa-miR-571	1	0	1	1	1	1	DIXDC1	DIX domain containing 1
hsa-miR-571	0	0	1	1	0	0	DNAH9	dynein, axonemal, heavy chain 9
hsa-miR-571	1	0	1	0	1	1	RNF165	ring finger protein 165
hsa-miR-571	0	0	1	1	0	0	ANXA11	annexin A11
hsa-miR-571	1	0	1	0	1	1	PTPRE	protein tyrosine phosphatase, receptor type, E
hsa-miR-571	1	0	1	0	1	1	FSTL4	follistatin-like 4
hsa-miR-571	0	0	1	1	0	0	CHRM3	cholinergic receptor, muscarinic 3
hsa-miR-571	0	0	1	0	1	1	FAM70A	family with sequence similarity 70, member A
hsa-miR-571	1	0	1	1	1	1	PUM1	pumilio homolog 1 (Drosophila)
hsa-miR-571	0	0	1	1	1	1	GNB2	guanine nucleotide binding protein (G protein), beta polypeptide 2
hsa-miR-571	0	0	1	0	0	0	ERVV-1	endogenous retrovirus group V, member 1
hsa-miR-571	0	0	1	0	0	0	LOC255187	hCG1980447
hsa-miR-571	0	0	1	1	0	0	HECTD3	HECT domain containing E3 ubiquitin protein ligase 3
hsa-miR-571	1	0	1	1	1	1	TLE4	transducin-like enhancer of split 4 (E(sp1) homolog, Drosophila)
hsa-miR-571	0	0	1	0	0	0	FLJ32742	uncharacterized locus FLJ32742
hsa-miR-571	0	0	1	0	0	0	LINC00637	long intergenic non-protein coding RNA 637
hsa-miR-571	0	0	1	1	1	1	ZNF385B	zinc finger protein 385B
hsa-miR-571	1	0	1	1	0	0	HS6ST1	heparan sulfate 6-O-sulfotransferase 1
hsa-miR-571	1	0	1	1	1	1	ARID1B	AT rich interactive domain 1B (SWI1-like)
hsa-miR-571	1	0	1	1	1	1	PRRT2	proline-rich transmembrane protein 2
hsa-miR-571	0	0	1	0	1	1	CADM1	cell adhesion molecule 1
hsa-miR-571	1	0	1	1	1	1	CYP46A1	cytochrome P450, family 46, subfamily A, polypeptide 1
hsa-miR-571	0	0	1	1	0	0	LAMA1	laminin, alpha 1
hsa-miR-571	0	0	1	1	0	0	APLP1	amyloid beta (A4) precursor-like protein 1
hsa-miR-571	1	0	1	1	1	1	SLC25A3	solute carrier family 25 (mitochondrial carrier; phosphate carrier), member 3
hsa-miR-571	0	0	1	1	0	0	ADH6	alcohol dehydrogenase 6 (class V)
hsa-miR-571	0	0	1	1	0	0	C6orf163	chromosome 6 open reading frame 163
hsa-miR-571	1	0	1	1	1	1	SARM1	sterile alpha and TIR motif containing 1
hsa-miR-571	0	0	1	1	1	1	TMPRSS11D	transmembrane protease, serine 11D
hsa-miR-571	0	0	1	1	0	0	WBP1	WW domain binding protein 1
hsa-miR-571	1	0	1	1	1	1	SNAP25	synaptosomal-associated protein, 25kDa
hsa-miR-571	0	0	1	0	0	0	ZNF806	zinc finger protein 806
hsa-miR-571	0	0	1	0	0	0	LINC00340	long intergenic non-protein coding RNA 340
hsa-miR-571	1	0	1	1	1	1	RASGEF1A	RasGEF domain family, member 1A
hsa-miR-571	1	0	1	1	1	1	NDEL1	nudE nuclear distribution E homolog (A. nidulans)-like 1
hsa-miR-571	1	0	1	1	1	1	CTNNB1	catenin (cadherin-associated protein), beta 1, 88kDa
hsa-miR-571	1	0	1	0	1	1	UVRAG	UV radiation resistance associated gene
hsa-miR-571	0	0	1	1	1	1	SIRPB2	signal-regulatory protein beta 2
hsa-miR-571	0	0	1	0	0	0	LOC100129620	uncharacterized LOC100129620
hsa-miR-571	1	0	1	1	1	1	RNF185	ring finger protein 185
hsa-miR-571	1	0	1	1	1	1	FAM98A	family with sequence similarity 98, member A
hsa-miR-571	1	0	1	1	1	1	FADS1	fatty acid desaturase 1
hsa-miR-571	0	0	1	1	1	1	ZNF673	zinc finger family member 673
hsa-miR-571	0	0	1	0	0	0	C1orf204	chromosome 1 open reading frame 204
hsa-miR-571	1	0	1	1	1	1	SNRNP70	small nuclear ribonucleoprotein 70kDa (U1)
hsa-miR-571	0	0	1	0	0	0	LOC285505	uncharacterized LOC285505
hsa-miR-571	1	0	1	1	1	1	EPB41L1	erythrocyte membrane protein band 4.1-like 1
hsa-miR-571	1	0	1	1	1	1	KL	klotho
hsa-miR-571	1	0	1	1	1	1	POU2F3	POU class 2 homeobox 3
hsa-miR-571	0	0	1	1	0	0	ACAD10	acyl-CoA dehydrogenase family, member 10
hsa-miR-571	0	0	1	1	1	1	FAM217A	family with sequence similarity 217, member A
hsa-miR-571	1	0	1	1	1	1	LZTS2	leucine zipper, putative tumor suppressor 2
hsa-miR-571	0	0	1	1	0	0	STXBP2	syntaxin binding protein 2
hsa-miR-571	0	0	1	0	0	0	LOC728095	uncharacterized LOC728095
hsa-miR-571	1	0	1	0	1	1	LRRTM4	leucine rich repeat transmembrane neuronal 4
hsa-miR-571	0	0	1	1	1	1	SLFN13	schlafen family member 13
hsa-miR-571	1	0	1	1	1	1	LMX1A	LIM homeobox transcription factor 1, alpha
hsa-miR-571	0	0	1	1	0	0	KIAA0146	KIAA0146
hsa-miR-571	1	0	1	1	1	1	SIK3	SIK family kinase 3
hsa-miR-571	1	0	1	1	1	1	ZBTB4	zinc finger and BTB domain containing 4
hsa-miR-571	0	0	1	1	1	1	ARHGEF26	Rho guanine nucleotide exchange factor (GEF) 26
hsa-miR-571	1	0	1	1	1	1	KALRN	kalirin, RhoGEF kinase
hsa-miR-571	1	0	1	1	1	1	CBLB	Cbl proto-oncogene, E3 ubiquitin protein ligase B
hsa-miR-571	1	0	1	1	0	0	KCNC1	potassium voltage-gated channel, Shaw-related subfamily, member 1
hsa-miR-571	0	0	1	0	0	0	LOC650368	asparagine-linked glycosylation 1-like pseudogene
hsa-miR-571	1	0	1	1	1	1	PRDM2	PR domain containing 2, with ZNF domain
hsa-miR-571	1	0	1	0	1	1	DCUN1D4	DCN1, defective in cullin neddylation 1, domain containing 4 (S. cerevisiae)
hsa-miR-571	1	0	1	1	0	0	BCORL1	BCL6 corepressor-like 1
hsa-miR-571	0	0	1	1	1	1	C2orf91	chromosome 2 open reading frame 91
hsa-miR-571	0	0	1	1	0	0	LOC100128239	uncharacterized LOC100128239
hsa-miR-571	1	0	1	1	1	1	KTN1	kinectin 1 (kinesin receptor)
hsa-miR-571	1	0	1	1	1	1	KPNA1	karyopherin alpha 1 (importin alpha 5)
hsa-miR-571	0	0	1	0	1	1	CTBP1-AS1	CTBP1 antisense RNA 1
hsa-miR-571	0	0	1	0	0	0	FAM75D4	family with sequence similarity 75, member D4
hsa-miR-571	0	0	1	1	1	1	EPPIN	epididymal peptidase inhibitor
hsa-miR-571	0	0	1	1	0	0	C20orf141	chromosome 20 open reading frame 141
hsa-miR-571	1	0	1	1	1	1	CSRNP3	cysteine-serine-rich nuclear protein 3
hsa-miR-571	0	0	1	1	1	1	PLEKHS1	pleckstrin homology domain containing, family S member 1
hsa-miR-571	0	0	1	0	1	1	LOC388942	uncharacterized LOC388942
hsa-miR-571	0	0	1	1	0	0	CLDN4	claudin 4
hsa-miR-571	1	0	1	1	1	1	KLC2	kinesin light chain 2
hsa-miR-571	0	0	1	1	1	1	C18orf54	chromosome 18 open reading frame 54
hsa-miR-571	1	0	1	0	1	1	GPR180	G protein-coupled receptor 180
hsa-miR-571	1	0	1	1	1	1	NIPBL	Nipped-B homolog (Drosophila)
hsa-miR-571	0	0	1	1	1	1	SZT2	seizure threshold 2 homolog (mouse)
hsa-miR-571	0	0	1	0	0	0	RPL23AP53	ribosomal protein L23a pseudogene 53
hsa-miR-571	1	0	1	1	1	1	MFSD6	major facilitator superfamily domain containing 6
hsa-miR-571	1	0	1	1	0	0	PEAK1	NKF3 kinase family member
hsa-miR-571	1	0	1	1	1	1	RNF44	ring finger protein 44
hsa-miR-571	0	0	1	0	0	0	ERVFRD-2	endogenous retrovirus group FRD, member 2
hsa-miR-571	0	0	1	1	0	0	BPIFB1	BPI fold containing family B, member 1
hsa-miR-571	0	0	1	0	0	0	FAM71E2	family with sequence similarity 71, member E2
hsa-miR-571	0	0	1	1	0	0	LOC100128682	uncharacterized LOC100128682
hsa-miR-571	0	0	1	0	0	0	FAM205B	transmembrane protein C9orf144B pseudogene
hsa-miR-571	1	0	1	1	1	1	KCTD12	potassium channel tetramerisation domain containing 12
hsa-miR-571	0	0	1	1	1	1	CD160	CD160 molecule
hsa-miR-571	1	0	1	1	1	1	BCAT1	branched chain amino-acid transaminase 1, cytosolic
hsa-miR-571	1	0	1	0	1	1	USP37	ubiquitin specific peptidase 37
hsa-miR-571	0	0	1	1	1	1	PDDC1	Parkinson disease 7 domain containing 1
hsa-miR-571	0	0	1	0	0	0	EMBP1	embigin pseudogene 1
hsa-miR-571	1	0	1	1	1	1	ADAMTSL1	ADAMTS-like 1
hsa-miR-571	1	0	1	1	1	1	DPY19L3	dpy-19-like 3 (C. elegans)
hsa-miR-571	0	0	1	1	0	0	HEATR8	HEAT repeat containing 8
hsa-miR-571	0	0	1	0	1	1	KIF1A	kinesin family member 1A
hsa-miR-571	0	0	1	1	0	0	DTHD1	death domain containing 1
hsa-miR-571	1	0	1	1	1	1	MAP2K4	mitogen-activated protein kinase kinase 4
hsa-miR-571	1	0	1	0	1	1	ZNF607	zinc finger protein 607
hsa-miR-571	0	0	1	0	1	1	ATP6V0E2	ATPase, H+ transporting V0 subunit e2
hsa-miR-571	0	0	1	1	1	1	AGPAT9	1-acylglycerol-3-phosphate O-acyltransferase 9
hsa-miR-571	1	0	1	1	1	1	RPS6KA4	ribosomal protein S6 kinase, 90kDa, polypeptide 4
hsa-miR-571	1	0	1	1	0	0	ABLIM3	actin binding LIM protein family, member 3
hsa-miR-571	1	0	1	0	1	1	MAP3K3	mitogen-activated protein kinase kinase kinase 3
hsa-miR-571	1	0	1	1	1	1	SETX	senataxin
hsa-miR-571	1	0	1	1	1	1	EDN1	endothelin 1
hsa-miR-571	1	0	1	0	1	1	TEAD3	TEA domain family member 3
hsa-miR-571	0	0	1	1	1	1	RABGAP1L	RAB GTPase activating protein 1-like
hsa-miR-571	0	0	1	1	0	0	MSH5	mutS homolog 5 (E. coli)
hsa-miR-571	0	0	1	1	0	0	SAPCD1	suppressor APC domain containing 1
hsa-miR-571	0	0	1	1	0	0	DOPEY1	dopey family member 1
hsa-miR-571	1	0	1	0	1	1	GRIN3A	glutamate receptor, ionotropic, N-methyl-D-aspartate 3A
hsa-miR-571	0	0	1	1	1	1	MESP2	mesoderm posterior 2 homolog (mouse)
hsa-miR-571	1	0	1	1	1	1	MAP4	microtubule-associated protein 4
hsa-miR-571	1	0	1	1	1	1	CHMP7	charged multivesicular body protein 7
hsa-miR-571	1	0	1	1	0	0	USP24	ubiquitin specific peptidase 24
hsa-miR-571	1	0	1	1	1	1	RNF180	ring finger protein 180
hsa-miR-571	1	0	1	1	1	1	PRRC1	proline-rich coiled-coil 1
hsa-miR-571	1	0	1	1	1	1	NABP1	nucleic acid binding protein 1
hsa-miR-571	0	0	1	1	1	1	VIT	vitrin
hsa-miR-571	1	0	1	1	0	0	PTAR1	protein prenyltransferase alpha subunit repeat containing 1
hsa-miR-571	0	0	1	0	0	0	FAM225A	family with sequence similarity 225, member A (non-protein coding)
hsa-miR-571	0	0	1	0	0	0	LOC286135	uncharacterized LOC286135
hsa-miR-571	0	0	1	0	0	0	ADCY10P1	adenylate cyclase 10 (soluble) pseudogene 1
hsa-miR-571	1	0	1	1	1	1	IL17RD	interleukin 17 receptor D
hsa-miR-571	1	0	1	1	1	1	DIS3L2	DIS3 mitotic control homolog (S. cerevisiae)-like 2
hsa-miR-571	1	0	1	1	1	1	MBD6	methyl-CpG binding domain protein 6
hsa-miR-571	0	0	1	1	1	1	TEX2	testis expressed 2
hsa-miR-571	0	0	1	1	1	1	PNMAL1	paraneoplastic Ma antigen family-like 1
hsa-miR-571	1	0	1	1	1	1	RICTOR	RPTOR independent companion of MTOR, complex 2
hsa-miR-571	1	0	1	0	1	1	KIF21B	kinesin family member 21B
hsa-miR-571	0	0	1	0	1	1	SYNPO2	synaptopodin 2
hsa-miR-571	1	0	1	1	1	1	FBXL5	F-box and leucine-rich repeat protein 5
hsa-miR-571	1	0	1	1	1	1	IKZF2	IKAROS family zinc finger 2 (Helios)
hsa-miR-571	0	0	1	1	1	1	KLHL7	kelch-like 7 (Drosophila)
hsa-miR-571	0	0	1	1	1	1	CD209	CD209 molecule
hsa-miR-571	0	0	1	1	1	1	GPRASP1	G protein-coupled receptor associated sorting protein 1
hsa-miR-571	0	0	1	1	1	1	MED19	mediator complex subunit 19
hsa-miR-571	0	0	1	1	0	0	CMTM1	CKLF-like MARVEL transmembrane domain containing 1
hsa-miR-571	0	0	1	1	1	1	CEP41	centrosomal protein 41kDa
hsa-miR-571	0	0	1	1	1	1	DNAJB14	DnaJ (Hsp40) homolog, subfamily B, member 14
hsa-miR-571	0	0	1	1	1	1	IYD	iodotyrosine deiodinase
hsa-miR-571	1	0	1	1	1	1	OPRM1	opioid receptor, mu 1
hsa-miR-571	0	0	1	1	1	1	MFAP5	microfibrillar associated protein 5
hsa-miR-571	0	0	1	1	1	1	GCOM1	GRINL1A complex locus 1
hsa-miR-571	0	0	1	1	0	0	EGFL8	EGF-like-domain, multiple 8
hsa-miR-571	0	0	1	1	0	0	VSIG4	V-set and immunoglobulin domain containing 4
hsa-miR-571	1	0	1	1	0	0	CLASRP	CLK4-associating serine/arginine rich protein
hsa-miR-571	0	0	1	1	1	1	POTEG	POTE ankyrin domain family, member G
hsa-miR-571	1	0	1	1	1	1	MECP2	methyl CpG binding protein 2 (Rett syndrome)
hsa-miR-571	0	0	1	1	1	1	AGER	advanced glycosylation end product-specific receptor
hsa-miR-571	0	0	1	1	1	1	KCNJ13	potassium inwardly-rectifying channel, subfamily J, member 13
hsa-miR-571	1	0	1	1	1	1	PRKACB	protein kinase, cAMP-dependent, catalytic, beta
hsa-miR-571	1	0	1	1	1	1	RPRD1A	regulation of nuclear pre-mRNA domain containing 1A
hsa-miR-571	0	0	1	1	1	1	FAM115A	family with sequence similarity 115, member A
hsa-miR-571	0	0	1	1	0	0	GFOD2	glucose-fructose oxidoreductase domain containing 2
hsa-miR-571	0	0	1	1	1	1	PAFAH1B2	platelet-activating factor acetylhydrolase 1b, catalytic subunit 2 (30kDa)
hsa-miR-571	1	0	1	0	1	1	DPYSL5	dihydropyrimidinase-like 5
hsa-miR-571	1	0	1	1	1	1	RIMS3	regulating synaptic membrane exocytosis 3
hsa-miR-571	1	0	1	0	0	0	TGFA	transforming growth factor, alpha
hsa-miR-571	0	0	1	1	1	1	KIRREL2	kin of IRRE like 2 (Drosophila)
hsa-miR-571	1	0	1	1	1	1	CALM1	calmodulin 1 (phosphorylase kinase, delta)
hsa-miR-571	0	0	1	1	1	1	TMEM30A	transmembrane protein 30A
hsa-miR-571	0	0	1	0	0	0	LOC154761	family with sequence similarity 115, member C pseudogene
hsa-miR-571	1	0	1	1	0	0	IQSEC1	IQ motif and Sec7 domain 1
hsa-miR-571	0	0	1	1	1	1	GNL3L	guanine nucleotide binding protein-like 3 (nucleolar)-like
hsa-miR-571	0	0	1	0	0	0	GRAMD1B	GRAM domain containing 1B
hsa-miR-571	0	0	1	1	0	0	WISP3	WNT1 inducible signaling pathway protein 3
hsa-miR-571	0	0	1	0	0	0	LOC201651	arylacetamide deacetylase (esterase) pseudogene
hsa-miR-571	0	0	1	1	0	0	ITGB3BP	integrin beta 3 binding protein (beta3-endonexin)
hsa-miR-571	0	0	1	1	0	0	USP19	ubiquitin specific peptidase 19
hsa-miR-571	1	0	1	1	1	1	PAPOLA	poly(A) polymerase alpha
hsa-miR-571	1	0	1	1	1	1	ZNF512	zinc finger protein 512
hsa-miR-571	1	0	1	1	0	0	AKT1S1	AKT1 substrate 1 (proline-rich)
hsa-miR-571	1	0	1	1	1	1	ORMDL3	ORM1-like 3 (S. cerevisiae)
hsa-miR-571	0	0	1	1	0	0	ZBTB32	zinc finger and BTB domain containing 32
hsa-miR-571	0	0	1	0	0	0	ZNF720	zinc finger protein 720
hsa-miR-571	1	0	1	1	1	1	SUZ12	suppressor of zeste 12 homolog (Drosophila)
hsa-miR-571	0	0	1	0	0	0	AZGP1P1	alpha-2-glycoprotein 1, zinc-binding pseudogene 1
hsa-miR-571	0	0	1	1	1	1	CDC42SE2	CDC42 small effector 2
hsa-miR-571	0	0	1	1	1	1	TLR4	toll-like receptor 4
hsa-miR-571	1	0	1	1	1	1	CRKL	v-crk sarcoma virus CT10 oncogene homolog (avian)-like
hsa-miR-571	0	0	1	1	1	1	WDR67	WD repeat domain 67
hsa-miR-571	0	0	1	0	1	1	FHAD1	forkhead-associated (FHA) phosphopeptide binding domain 1
hsa-miR-571	0	0	1	1	1	1	MAP2	microtubule-associated protein 2
hsa-miR-571	1	0	1	1	1	1	U2SURP	U2 snRNP-associated SURP domain containing
hsa-miR-571	0	0	1	1	1	1	ANKZF1	ankyrin repeat and zinc finger domain containing 1
hsa-miR-571	0	0	1	1	1	1	CASC1	cancer susceptibility candidate 1
hsa-miR-571	1	0	1	1	1	1	TMEM127	transmembrane protein 127
hsa-miR-571	0	0	1	0	1	1	VEZT	vezatin, adherens junctions transmembrane protein
hsa-miR-571	0	0	1	0	0	0	LINC00301	long intergenic non-protein coding RNA 301
hsa-miR-571	0	0	1	1	1	1	TFAM	transcription factor A, mitochondrial
hsa-miR-571	0	0	1	0	0	0	ZNF503-AS2	ZNF503 antisense RNA 2
hsa-miR-571	1	0	1	0	1	1	SV2B	synaptic vesicle glycoprotein 2B
hsa-miR-571	0	0	1	1	0	0	UBL7	ubiquitin-like 7 (bone marrow stromal cell-derived)
hsa-miR-571	0	0	1	1	1	1	SH3TC1	SH3 domain and tetratricopeptide repeats 1
hsa-miR-571	1	0	1	1	0	0	FAM83F	family with sequence similarity 83, member F
hsa-miR-571	0	0	1	0	0	0	CFL1P1	cofilin 1 (non-muscle) pseudogene 1
hsa-miR-571	0	0	1	1	0	0	GLG1	golgi glycoprotein 1
hsa-miR-571	0	0	1	1	1	1	C7orf53	chromosome 7 open reading frame 53
hsa-miR-571	1	0	1	1	1	1	RAB5B	RAB5B, member RAS oncogene family
hsa-miR-571	0	0	1	1	1	1	SNAP47	synaptosomal-associated protein, 47kDa
hsa-miR-571	1	0	1	1	1	1	RHOBTB1	Rho-related BTB domain containing 1
hsa-miR-571	1	0	1	1	1	1	SECISBP2L	SECIS binding protein 2-like
hsa-miR-571	0	0	1	1	0	0	RAB4B	RAB4B, member RAS oncogene family
hsa-miR-571	1	0	1	1	1	1	SIRPA	signal-regulatory protein alpha
hsa-miR-571	0	0	1	1	0	0	LINC00176	long intergenic non-protein coding RNA 176
hsa-miR-571	1	0	1	1	1	1	ATF7IP2	activating transcription factor 7 interacting protein 2
hsa-miR-571	0	0	1	1	0	0	TNMD	tenomodulin
hsa-miR-571	1	0	1	0	1	1	RHOBTB2	Rho-related BTB domain containing 2
hsa-miR-571	1	0	1	1	1	1	NKAIN2	Na+/K+ transporting ATPase interacting 2
hsa-miR-571	1	0	1	1	1	1	THRA	thyroid hormone receptor, alpha
hsa-miR-571	0	0	1	0	0	0	LINC00494	long intergenic non-protein coding RNA 494
hsa-miR-571	0	0	1	1	1	1	C6	complement component 6
hsa-miR-571	0	0	1	1	0	0	SNTG2	syntrophin, gamma 2
hsa-miR-571	0	0	1	0	0	0	HOXA-AS2	HOXA cluster antisense RNA 2
hsa-miR-571	0	0	1	0	1	1	C9orf57	chromosome 9 open reading frame 57
hsa-miR-571	0	0	1	1	1	1	CNTN1	contactin 1
hsa-miR-571	1	0	1	1	1	1	SLC35F3	solute carrier family 35, member F3
hsa-miR-571	0	0	1	1	0	0	CLSTN3	calsyntenin 3
hsa-miR-571	0	0	1	1	0	0	CCDC152	coiled-coil domain containing 152
hsa-miR-571	0	0	1	0	0	0	LINC00326	long intergenic non-protein coding RNA 326
hsa-miR-571	0	0	1	1	1	1	BCO2	beta-carotene oxygenase 2
hsa-miR-571	0	0	1	1	1	1	CARD8	caspase recruitment domain family, member 8
hsa-miR-571	1	0	1	1	1	1	FKBP5	FK506 binding protein 5
hsa-miR-571	1	0	1	1	1	1	ADD1	adducin 1 (alpha)
hsa-miR-571	0	0	1	1	1	1	DGKH	diacylglycerol kinase, eta
hsa-miR-571	1	0	1	1	1	1	ARHGAP30	Rho GTPase activating protein 30
hsa-miR-571	0	0	1	0	0	0	LOC339260	uncharacterized LOC339260
hsa-miR-571	0	0	1	1	1	1	STRADA	STE20-related kinase adaptor alpha
hsa-miR-571	0	0	1	0	0	0	FAM27E3	family with sequence similarity 27, member E3
hsa-miR-571	1	0	1	1	1	1	PCYT1B	phosphate cytidylyltransferase 1, choline, beta
hsa-miR-571	0	0	1	0	1	1	FBXO42	F-box protein 42
hsa-miR-571	1	0	1	1	1	1	RTKN2	rhotekin 2
hsa-miR-571	1	0	1	1	1	1	WSB1	WD repeat and SOCS box containing 1
hsa-miR-571	1	0	1	1	1	1	PTPRG	protein tyrosine phosphatase, receptor type, G
hsa-miR-571	1	0	1	0	1	1	ARHGAP5	Rho GTPase activating protein 5
hsa-miR-571	1	0	1	1	1	1	FNDC3A	fibronectin type III domain containing 3A
hsa-miR-571	0	0	1	1	1	1	HLA-DQA1	major histocompatibility complex, class II, DQ alpha 1
hsa-miR-571	1	0	1	1	1	1	PPP2R5E	protein phosphatase 2, regulatory subunit B', epsilon isoform
hsa-miR-571	0	0	1	1	0	0	ABHD1	abhydrolase domain containing 1
hsa-miR-571	0	0	1	1	1	1	C17orf97	chromosome 17 open reading frame 97
hsa-miR-571	0	0	1	0	0	0	USP32P1	ubiquitin specific peptidase 32 pseudogene 1
hsa-miR-571	1	0	1	1	0	0	ANKIB1	ankyrin repeat and IBR domain containing 1
hsa-miR-571	0	0	1	1	1	1	SCLT1	sodium channel and clathrin linker 1
hsa-miR-571	1	0	1	1	1	1	GANAB	glucosidase, alpha; neutral AB
hsa-miR-571	0	0	1	1	1	1	ATP2A2	ATPase, Ca++ transporting, cardiac muscle, slow twitch 2
hsa-miR-571	1	0	1	1	1	1	ASPH	aspartate beta-hydroxylase
hsa-miR-571	0	0	1	0	0	0	PABPC1P2	poly(A) binding protein, cytoplasmic 1 pseudogene 2
hsa-miR-571	1	0	1	1	1	1	LINGO1	leucine rich repeat and Ig domain containing 1
hsa-miR-571	1	0	1	1	0	0	DCAF15	DDB1 and CUL4 associated factor 15
hsa-miR-571	0	0	1	1	0	0	CYP4F30P	cytochrome P450, family 4, subfamily F, polypeptide 30, pseudogene
hsa-miR-571	1	0	1	1	1	1	SOCS2	suppressor of cytokine signaling 2
hsa-miR-571	1	0	1	1	1	1	LRRC32	leucine rich repeat containing 32
hsa-miR-571	0	0	1	0	0	0	LOC440416	uncharacterized LOC440416
hsa-miR-571	0	0	1	0	0	0	PHKA2-AS1	PHKA2 antisense RNA 1
hsa-miR-571	0	0	1	0	0	0	TBC1D25	TBC1 domain family, member 25
hsa-miR-571	1	0	1	0	1	1	MEST	mesoderm specific transcript homolog (mouse)
hsa-miR-571	1	0	1	0	1	1	PIK3R3	phosphoinositide-3-kinase, regulatory subunit 3 (gamma)
hsa-miR-571	0	0	1	1	1	1	XG	Xg blood group
hsa-miR-571	1	0	1	1	1	1	SLC36A2	solute carrier family 36 (proton/amino acid symporter), member 2
hsa-miR-571	0	0	1	0	0	0	MT1JP	metallothionein 1J, pseudogene
hsa-miR-571	1	0	1	0	1	1	VANGL2	vang-like 2 (van gogh, Drosophila)
hsa-miR-571	0	0	1	1	0	0	RIPPLY1	ripply1 homolog (zebrafish)
hsa-miR-571	0	0	1	0	0	0	FAM71F2	family with sequence similarity 71, member F2
hsa-miR-571	0	0	1	1	1	1	MUC21	mucin 21, cell surface associated
hsa-miR-571	1	0	1	1	1	1	KLHL17	kelch-like 17 (Drosophila)
hsa-miR-571	0	0	1	0	0	0	FBXL19-AS1	FBXL19 antisense RNA 1 (head to head)
hsa-miR-571	0	0	1	1	0	0	FMN1	formin 1
hsa-miR-571	0	0	1	1	1	1	PCNP	PEST proteolytic signal containing nuclear protein
hsa-miR-571	0	0	1	1	1	1	TTN	titin
hsa-miR-571	0	0	1	1	0	0	TMEM126B	transmembrane protein 126B
hsa-miR-571	0	0	1	0	0	0	LRRC37A11P	leucine rich repeat containing 37, member A11, pseudogene
hsa-miR-571	0	0	1	1	0	0	RNF123	ring finger protein 123
hsa-miR-571	0	0	1	1	0	0	RGS9	regulator of G-protein signaling 9
hsa-miR-571	0	0	1	1	0	0	RGSL1	regulator of G-protein signaling like 1
hsa-miR-571	0	0	1	0	0	0	TUBA4B	tubulin, alpha 4b (pseudogene)
hsa-miR-571	1	0	1	0	1	1	CAMSAP2	calmodulin regulated spectrin-associated protein family, member 2
hsa-miR-571	0	0	1	0	0	0	FAM225B	family with sequence similarity 225, member B (non-protein coding)
hsa-miR-571	0	0	1	0	1	1	AP1S2	adaptor-related protein complex 1, sigma 2 subunit
hsa-miR-571	0	0	1	0	1	1	GPX8	glutathione peroxidase 8 (putative)
hsa-miR-571	1	0	1	1	1	1	ETS1	v-ets erythroblastosis virus E26 oncogene homolog 1 (avian)
hsa-miR-571	1	0	1	0	1	1	CLASP2	cytoplasmic linker associated protein 2
hsa-miR-571	1	0	1	1	1	1	C7orf31	chromosome 7 open reading frame 31
hsa-miR-571	0	0	1	1	1	1	THSD4	thrombospondin, type I, domain containing 4
hsa-miR-571	0	0	1	1	1	1	COL6A3	collagen, type VI, alpha 3
hsa-miR-571	1	0	1	1	1	1	RORB	RAR-related orphan receptor B
hsa-miR-571	0	0	1	1	1	1	GTF3C2	general transcription factor IIIC, polypeptide 2, beta 110kDa
hsa-miR-571	1	0	1	1	1	1	MASP1	mannan-binding lectin serine peptidase 1 (C4/C2 activating component of Ra-reactive factor)
hsa-miR-571	1	0	1	1	1	1	CGN	cingulin
hsa-miR-571	1	0	1	1	1	1	SLC39A13	solute carrier family 39 (zinc transporter), member 13
hsa-miR-571	1	0	1	1	1	1	RREB1	ras responsive element binding protein 1
hsa-miR-571	1	0	1	1	1	1	GTDC1	glycosyltransferase-like domain containing 1
hsa-miR-571	1	0	1	0	0	0	CTSB	cathepsin B
hsa-miR-571	0	0	1	1	1	1	DOCK5	dedicator of cytokinesis 5
hsa-miR-571	1	0	1	1	1	1	NAV1	neuron navigator 1
hsa-miR-571	0	0	1	0	0	0	TMEM232	transmembrane protein 232
hsa-miR-571	1	0	1	1	1	1	RECK	reversion-inducing-cysteine-rich protein with kazal motifs
hsa-miR-571	1	0	1	1	1	1	BZRAP1	benzodiazapine receptor (peripheral) associated protein 1
hsa-miR-571	1	0	1	1	1	1	HIF1A	hypoxia inducible factor 1, alpha subunit (basic helix-loop-helix transcription factor)
hsa-miR-571	0	0	1	1	1	1	KIAA1328	KIAA1328
hsa-miR-571	0	0	1	1	1	1	C4orf40	chromosome 4 open reading frame 40
hsa-miR-571	0	0	1	1	0	0	EIF3L	eukaryotic translation initiation factor 3, subunit L
hsa-miR-571	0	0	1	0	0	0	DCTN2	dynactin 2 (p50)
hsa-miR-571	0	0	1	1	0	0	PPT2	palmitoyl-protein thioesterase 2
hsa-miR-571	0	0	1	1	1	1	RABEPK	Rab9 effector protein with kelch motifs
hsa-miR-571	1	0	1	1	1	1	CLU	clusterin
hsa-miR-571	1	0	1	0	0	0	IGLON5	IgLON family member 5
hsa-miR-571	0	0	1	1	0	0	HSD3B1	hydroxy-delta-5-steroid dehydrogenase, 3 beta- and steroid delta-isomerase 1
hsa-miR-571	0	0	1	1	1	1	TTC27	tetratricopeptide repeat domain 27
hsa-miR-571	1	0	1	1	1	1	LETMD1	LETM1 domain containing 1
hsa-miR-571	0	0	1	1	0	0	FXYD7	FXYD domain containing ion transport regulator 7
hsa-miR-571	1	0	1	1	1	1	FGF11	fibroblast growth factor 11
hsa-miR-571	0	0	1	1	1	1	ATP5F1	ATP synthase, H+ transporting, mitochondrial Fo complex, subunit B1
hsa-miR-571	1	0	1	1	1	1	CHTF8	CTF8, chromosome transmission fidelity factor 8 homolog (S. cerevisiae)
hsa-miR-571	0	0	1	1	1	1	GGPS1	geranylgeranyl diphosphate synthase 1
hsa-miR-571	0	0	1	1	1	1	STON1	stonin 1
hsa-miR-571	1	0	1	1	1	1	STK38L	serine/threonine kinase 38 like
hsa-miR-571	0	0	1	1	0	0	BRE	brain and reproductive organ-expressed (TNFRSF1A modulator)
hsa-miR-571	0	0	1	1	1	1	POLR2G	polymerase (RNA) II (DNA directed) polypeptide G
hsa-miR-571	0	0	1	1	1	1	GLRX3	glutaredoxin 3
hsa-miR-571	0	0	1	0	1	1	RASA4	RAS p21 protein activator 4
hsa-miR-571	0	0	1	1	1	1	KLHDC2	kelch domain containing 2
hsa-miR-571	0	0	1	1	0	0	PPOX	protoporphyrinogen oxidase
hsa-miR-571	0	0	1	1	0	0	PTGDS	prostaglandin D2 synthase 21kDa (brain)
hsa-miR-571	1	0	1	1	1	1	KCNIP4	Kv channel interacting protein 4
hsa-miR-571	0	0	1	0	1	1	SRSF5	serine/arginine-rich splicing factor 5
hsa-miR-571	0	0	1	1	0	0	CCDC22	coiled-coil domain containing 22
hsa-miR-571	0	0	1	1	1	1	PEX19	peroxisomal biogenesis factor 19
hsa-miR-571	0	0	1	1	1	1	DEDD	death effector domain containing
hsa-miR-571	1	0	1	1	1	1	CAMK2A	calcium/calmodulin-dependent protein kinase II alpha
hsa-miR-571	1	0	1	1	1	1	FUBP3	far upstream element (FUSE) binding protein 3
hsa-miR-571	1	0	1	1	1	1	ARL4A	ADP-ribosylation factor-like 4A
hsa-miR-571	1	0	1	1	1	1	BAALC	brain and acute leukemia, cytoplasmic
hsa-miR-571	1	0	1	1	1	1	ANAPC16	anaphase promoting complex subunit 16
hsa-miR-571	0	0	1	1	1	1	ACSF3	acyl-CoA synthetase family member 3
hsa-miR-571	1	0	1	1	1	1	ARMC8	armadillo repeat containing 8
hsa-miR-571	1	0	1	0	1	1	CD47	CD47 molecule
hsa-miR-571	1	0	1	1	1	1	YWHAE	tyrosine 3-monooxygenase/tryptophan 5-monooxygenase activation protein, epsilon polypeptide
hsa-miR-571	0	0	1	1	0	0	TESK1	testis-specific kinase 1
hsa-miR-571	0	0	1	0	0	0	LOC100132984	uncharacterized LOC100132984
hsa-miR-571	0	0	1	1	1	1	SUGT1	SGT1, suppressor of G2 allele of SKP1 (S. cerevisiae)
hsa-miR-571	1	0	1	1	1	1	JUNB	jun B proto-oncogene
hsa-miR-571	1	0	1	0	1	1	KIAA0240	KIAA0240
hsa-miR-571	0	0	1	0	0	0	LOC731789	uncharacterized LOC731789
hsa-miR-571	0	0	1	0	0	0	LINC00661	long intergenic non-protein coding RNA 661
hsa-miR-571	0	0	1	0	0	0	MUC19	mucin 19, oligomeric
hsa-miR-571	1	0	1	1	1	1	TIPARP	TCDD-inducible poly(ADP-ribose) polymerase
hsa-miR-571	1	0	1	1	1	1	SLC39A10	solute carrier family 39 (zinc transporter), member 10
hsa-miR-571	1	0	1	1	1	1	BNC2	basonuclin 2
hsa-miR-571	1	0	1	0	1	1	CNTNAP2	contactin associated protein-like 2
hsa-miR-571	0	0	1	1	0	0	GOLGB1	golgin B1
hsa-miR-571	0	0	1	1	1	1	SLC39A14	solute carrier family 39 (zinc transporter), member 14
hsa-miR-571	1	0	1	0	1	1	KLHDC10	kelch domain containing 10
hsa-miR-571	1	0	1	0	1	1	LONRF2	LON peptidase N-terminal domain and ring finger 2
hsa-miR-571	1	0	1	1	1	1	QKI	QKI, KH domain containing, RNA binding
hsa-miR-571	1	0	1	1	1	1	BCL2L11	BCL2-like 11 (apoptosis facilitator)
hsa-miR-571	1	0	1	1	1	1	TNFAIP1	tumor necrosis factor, alpha-induced protein 1 (endothelial)
hsa-miR-571	1	0	1	0	1	1	EPDR1	ependymin related protein 1 (zebrafish)
hsa-miR-571	0	0	1	0	0	0	LCE6A	late cornified envelope 6A
hsa-miR-571	1	0	1	1	1	1	GRM1	glutamate receptor, metabotropic 1
hsa-miR-571	1	0	1	0	1	1	BCL2	B-cell CLL/lymphoma 2
hsa-miR-571	1	0	1	1	1	1	IGF1	insulin-like growth factor 1 (somatomedin C)
hsa-miR-571	1	0	1	1	1	1	COL4A3	collagen, type IV, alpha 3 (Goodpasture antigen)
hsa-miR-571	1	0	1	1	1	1	COL4A4	collagen, type IV, alpha 4
hsa-miR-571	0	0	1	1	1	1	EDN3	endothelin 3
hsa-miR-571	1	0	1	1	1	1	FUCA1	fucosidase, alpha-L- 1, tissue
hsa-miR-571	1	0	1	0	1	1	G6PC	glucose-6-phosphatase, catalytic subunit
hsa-miR-571	1	0	1	1	1	1	GALC	galactosylceramidase
hsa-miR-571	1	0	1	1	1	1	GK	glycerol kinase
hsa-miR-571	1	0	1	1	1	1	KCNA1	potassium voltage-gated channel, shaker-related subfamily, member 1 (episodic ataxia with myokymia)
hsa-miR-571	0	0	1	1	1	1	LPL	lipoprotein lipase
hsa-miR-571	1	0	1	1	1	1	MITF	microphthalmia-associated transcription factor
hsa-miR-571	1	0	1	1	1	1	NF1	neurofibromin 1
hsa-miR-571	1	0	1	1	1	1	ATXN1	ataxin 1
hsa-miR-571	1	0	1	1	1	1	TAT	tyrosine aminotransferase
hsa-miR-571	1	0	1	1	1	1	CHM	choroideremia (Rab escort protein 1)
hsa-miR-571	0	0	1	1	1	1	LAMA2	laminin, alpha 2
hsa-miR-571	0	0	1	1	1	1	LTBP2	latent transforming growth factor beta binding protein 2
hsa-miR-571	1	0	1	1	0	0	NOTCH3	notch 3
hsa-miR-571	1	0	1	0	1	1	PCSK1	proprotein convertase subtilisin/kexin type 1
hsa-miR-571	1	0	1	1	1	1	ATRX	alpha thalassemia/mental retardation syndrome X-linked
hsa-miR-571	0	0	1	1	1	1	CYP11B2	cytochrome P450, family 11, subfamily B, polypeptide 2
hsa-miR-571	1	0	1	1	1	1	MPZ	myelin protein zero
hsa-miR-571	1	0	1	1	1	1	DCX	doublecortin
hsa-miR-571	1	0	1	1	1	1	CXCL12	chemokine (C-X-C motif) ligand 12
hsa-miR-571	0	0	1	1	1	1	IFNG	interferon, gamma
hsa-miR-571	1	0	1	1	1	1	ADRA1A	adrenoceptor alpha 1A
hsa-miR-571	1	0	1	1	1	1	CHRM1	cholinergic receptor, muscarinic 1
hsa-miR-571	0	0	1	1	1	1	EPO	erythropoietin
hsa-miR-571	0	0	1	1	1	1	GABRA5	gamma-aminobutyric acid (GABA) A receptor, alpha 5
hsa-miR-571	1	0	1	1	1	1	GRM7	glutamate receptor, metabotropic 7
hsa-miR-571	1	0	1	0	1	1	KCNJ2	potassium inwardly-rectifying channel, subfamily J, member 2
hsa-miR-571	0	0	1	1	1	1	NPY2R	neuropeptide Y receptor Y2
hsa-miR-571	0	0	1	1	0	0	PTGIR	prostaglandin I2 (prostacyclin) receptor (IP)
hsa-miR-571	0	0	1	1	0	0	TMEM211	transmembrane protein 211
hsa-miR-571	1	0	1	0	1	1	ARHGEF37	Rho guanine nucleotide exchange factor (GEF) 37
hsa-miR-571	1	0	1	1	1	1	C1orf173	chromosome 1 open reading frame 173
hsa-miR-571	0	0	1	1	1	1	C11orf49	chromosome 11 open reading frame 49
hsa-miR-571	1	0	1	1	1	1	LEPR	leptin receptor
hsa-miR-571	1	0	1	0	1	1	ZNF740	zinc finger protein 740
hsa-miR-571	1	0	1	0	1	1	LIN28B	lin-28 homolog B (C. elegans)
hsa-miR-571	0	0	1	1	1	1	SCP2	sterol carrier protein 2
hsa-miR-571	1	0	1	1	1	1	CTDSPL	CTD (carboxy-terminal domain, RNA polymerase II, polypeptide A) small phosphatase-like
hsa-miR-571	1	0	1	1	1	1	BCAP29	B-cell receptor-associated protein 29
hsa-miR-571	1	0	1	1	1	1	RBM33	RNA binding motif protein 33
hsa-miR-571	1	0	1	0	1	1	KIAA2022	KIAA2022
hsa-miR-571	0	0	1	1	1	1	MXI1	MAX interactor 1
hsa-miR-571	0	0	1	1	1	1	NCMAP	noncompact myelin associated protein
hsa-miR-571	1	0	1	1	1	1	FOXP4	forkhead box P4
hsa-miR-571	1	0	1	0	1	1	ZKSCAN2	zinc finger with KRAB and SCAN domains 2
hsa-miR-571	0	0	1	0	1	1	LINC00268	long intergenic non-protein coding RNA 268
hsa-miR-571	1	0	1	1	1	1	RUNX2	runt-related transcription factor 2
hsa-miR-571	0	0	1	1	0	0	RTKN	rhotekin
hsa-miR-571	1	0	1	1	1	1	PHF6	PHD finger protein 6
hsa-miR-571	1	0	1	1	1	1	NTRK2	neurotrophic tyrosine kinase, receptor, type 2
hsa-miR-571	0	0	1	0	0	0	ADIG	adipogenin
hsa-miR-571	1	0	1	1	1	1	SLC35F1	solute carrier family 35, member F1
hsa-miR-571	1	0	1	0	1	1	CYB5RL	cytochrome b5 reductase-like
hsa-miR-571	1	0	1	1	1	1	UBE2V1	ubiquitin-conjugating enzyme E2 variant 1
hsa-miR-571	1	0	1	1	1	1	RRM2	ribonucleotide reductase M2
hsa-miR-571	0	0	1	1	1	1	KCNIP1	Kv channel interacting protein 1
hsa-miR-571	0	0	1	1	1	1	CTLA4	cytotoxic T-lymphocyte-associated protein 4
hsa-miR-571	0	0	1	1	1	1	ATAD3C	ATPase family, AAA domain containing 3C
hsa-miR-571	1	0	1	1	1	1	DPP6	dipeptidyl-peptidase 6
hsa-miR-571	0	0	1	1	1	1	SIRPG	signal-regulatory protein gamma
hsa-miR-571	1	0	1	0	1	1	CCNL2	cyclin L2
hsa-miR-571	1	0	1	0	1	1	CREBZF	CREB/ATF bZIP transcription factor
hsa-miR-571	1	0	1	1	1	1	ZNF384	zinc finger protein 384
hsa-miR-571	0	0	1	0	1	1	OPALIN	oligodendrocytic myelin paranodal and inner loop protein
hsa-miR-571	0	0	1	0	1	1	SCN3B	sodium channel, voltage-gated, type III, beta subunit
hsa-miR-571	1	0	1	1	1	1	HTR4	5-hydroxytryptamine (serotonin) receptor 4, G protein-coupled
hsa-miR-571	0	0	1	1	1	1	MTHFD2	methylenetetrahydrofolate dehydrogenase (NADP+ dependent) 2, methenyltetrahydrofolate cyclohydrolase
hsa-miR-571	1	0	1	1	1	1	ERBB4	v-erb-a erythroblastic leukemia viral oncogene homolog 4 (avian)
hsa-miR-571	1	0	1	1	1	1	METTL9	methyltransferase like 9
hsa-miR-571	1	0	1	1	1	1	CDC14B	CDC14 cell division cycle 14 homolog B (S. cerevisiae)
hsa-miR-571	1	0	1	1	1	1	GRIA4	glutamate receptor, ionotropic, AMPA 4
hsa-miR-571	1	0	1	1	1	1	PHF16	PHD finger protein 16
hsa-miR-571	1	0	1	1	1	1	ECT2L	epithelial cell transforming sequence 2 oncogene-like
hsa-miR-571	1	0	1	1	1	1	ITGA6	integrin, alpha 6
hsa-miR-571	1	0	1	1	1	1	OCIAD1	OCIA domain containing 1
hsa-miR-571	1	0	1	1	1	1	CREBBP	CREB binding protein
hsa-miR-571	1	0	1	1	1	1	HAP1	huntingtin-associated protein 1
hsa-miR-571	1	0	1	1	1	1	LDB3	LIM domain binding 3
hsa-miR-571	1	0	1	1	1	1	ZNF697	zinc finger protein 697
hsa-miR-571	0	0	1	1	0	0	JMJD6	jumonji domain containing 6
hsa-miR-571	1	0	1	0	1	1	SCN3A	sodium channel, voltage-gated, type III, alpha subunit
hsa-miR-571	0	0	1	1	1	1	CRISP1	cysteine-rich secretory protein 1
hsa-miR-571	1	0	1	0	1	1	XIAP	X-linked inhibitor of apoptosis
hsa-miR-571	1	0	1	1	1	1	CHD1	chromodomain helicase DNA binding protein 1
hsa-miR-571	1	0	1	1	1	1	CTNND2	catenin (cadherin-associated protein), delta 2
hsa-miR-571	1	0	1	1	1	1	CELSR2	cadherin, EGF LAG seven-pass G-type receptor 2 (flamingo homolog, Drosophila)
hsa-miR-571	1	0	1	1	1	1	GPC4	glypican 4
hsa-miR-571	1	0	1	1	0	0	GDI1	GDP dissociation inhibitor 1
hsa-miR-571	1	0	1	0	1	1	B4GALT1	UDP-Gal:betaGlcNAc beta 1,4- galactosyltransferase, polypeptide 1
hsa-miR-571	0	0	1	1	0	0	ACRV1	acrosomal vesicle protein 1
hsa-miR-571	1	0	1	1	1	1	ADD2	adducin 2 (beta)
hsa-miR-571	1	0	1	1	1	1	AQP4	aquaporin 4
hsa-miR-571	1	0	1	1	1	1	ARF3	ADP-ribosylation factor 3
hsa-miR-571	0	0	1	1	1	1	RHOA	ras homolog family member A
hsa-miR-571	1	0	1	0	1	1	CCND2	cyclin D2
hsa-miR-571	1	0	1	1	1	1	CDK2	cyclin-dependent kinase 2
hsa-miR-571	1	0	1	0	1	1	COL19A1	collagen, type XIX, alpha 1
hsa-miR-571	1	0	1	1	1	1	CSNK2A1	casein kinase 2, alpha 1 polypeptide
hsa-miR-571	0	0	1	1	1	1	DSG1	desmoglein 1
hsa-miR-571	0	0	1	1	1	1	HOXB5	homeobox B5
hsa-miR-571	1	0	1	1	0	0	IHH	Indian hedgehog
hsa-miR-571	1	0	1	0	1	1	IRF2	interferon regulatory factor 2
hsa-miR-571	1	0	1	1	1	1	ITGA5	integrin, alpha 5 (fibronectin receptor, alpha polypeptide)
hsa-miR-571	1	0	1	1	1	1	KDR	kinase insert domain receptor (a type III receptor tyrosine kinase)
hsa-miR-571	1	0	1	1	1	1	KPNA3	karyopherin alpha 3 (importin alpha 4)
hsa-miR-571	1	0	1	1	1	1	IPO5	importin 5
hsa-miR-571	1	0	1	1	1	1	LRP1	low density lipoprotein receptor-related protein 1
hsa-miR-571	1	0	1	1	1	1	MAP1A	microtubule-associated protein 1A
hsa-miR-571	1	0	1	1	1	1	ADAM11	ADAM metallopeptidase domain 11
hsa-miR-571	0	0	1	0	1	1	CXCL9	chemokine (C-X-C motif) ligand 9
hsa-miR-571	0	0	1	1	0	0	MYOG	myogenin (myogenic factor 4)
hsa-miR-571	0	0	1	1	0	0	NOVA2	neuro-oncological ventral antigen 2
hsa-miR-571	0	0	1	0	1	1	OPHN1	oligophrenin 1
hsa-miR-571	1	0	1	1	1	1	PCSK6	proprotein convertase subtilisin/kexin type 6
hsa-miR-571	1	0	1	0	1	1	PAPPA	pregnancy-associated plasma protein A, pappalysin 1
hsa-miR-571	0	0	1	1	1	1	PDE6D	phosphodiesterase 6D, cGMP-specific, rod, delta
hsa-miR-571	0	0	1	1	0	0	PLP2	proteolipid protein 2 (colonic epithelium-enriched)
hsa-miR-571	0	0	1	0	1	1	PMP2	peripheral myelin protein 2
hsa-miR-571	1	0	1	0	1	1	MAPK4	mitogen-activated protein kinase 4
hsa-miR-571	0	0	1	1	0	0	MAPK7	mitogen-activated protein kinase 7
hsa-miR-571	1	0	1	1	1	1	PTPN11	protein tyrosine phosphatase, non-receptor type 11
hsa-miR-571	1	0	1	1	1	1	PTPRK	protein tyrosine phosphatase, receptor type, K
hsa-miR-571	0	0	1	1	1	1	PTPRR	protein tyrosine phosphatase, receptor type, R
hsa-miR-571	0	0	1	1	1	1	RFC3	replication factor C (activator 1) 3, 38kDa
hsa-miR-571	1	0	1	1	1	1	ROBO2	roundabout, axon guidance receptor, homolog 2 (Drosophila)
hsa-miR-571	1	0	1	0	1	1	SORT1	sortilin 1
hsa-miR-571	1	0	1	0	1	1	CCL22	chemokine (C-C motif) ligand 22
hsa-miR-571	0	0	1	1	1	1	SDC2	syndecan 2
hsa-miR-571	1	0	1	1	1	1	SRSF3	serine/arginine-rich splicing factor 3
hsa-miR-571	1	0	1	1	0	0	SLN	sarcolipin
hsa-miR-571	0	0	1	1	0	0	SNRPC	small nuclear ribonucleoprotein polypeptide C
hsa-miR-571	0	0	1	1	1	1	UAP1	UDP-N-acteylglucosamine pyrophosphorylase 1
hsa-miR-571	1	0	1	1	1	1	SRPR	signal recognition particle receptor (docking protein)
hsa-miR-571	0	0	1	1	1	1	STIM1	stromal interaction molecule 1
hsa-miR-571	1	0	1	1	0	0	SYP	synaptophysin
hsa-miR-571	0	0	1	1	0	0	TYROBP	TYRO protein tyrosine kinase binding protein
hsa-miR-571	1	0	1	1	1	1	UBE2B	ubiquitin-conjugating enzyme E2B
hsa-miR-571	0	0	1	1	1	1	UBE2D1	ubiquitin-conjugating enzyme E2D 1
hsa-miR-571	1	0	1	0	1	1	UBE2D2	ubiquitin-conjugating enzyme E2D 2
hsa-miR-571	1	0	1	1	1	1	HMGA2	high mobility group AT-hook 2
hsa-miR-571	0	0	1	1	1	1	SCEL	sciellin
hsa-miR-571	1	0	1	1	1	1	NRP2	neuropilin 2
hsa-miR-571	1	0	1	1	1	1	KAT2B	K(lysine) acetyltransferase 2B
hsa-miR-571	0	0	1	1	1	1	BYSL	bystin-like
hsa-miR-571	1	0	1	0	1	1	DGKB	diacylglycerol kinase, beta 90kDa
hsa-miR-571	0	0	1	1	1	1	SLC1A1	solute carrier family 1 (neuronal/epithelial high affinity glutamate transporter, system Xag), member 1
hsa-miR-571	1	0	1	0	1	1	MED14	mediator complex subunit 14
hsa-miR-571	0	0	1	1	0	0	ATP6V1F	ATPase, H+ transporting, lysosomal 14kDa, V1 subunit F
hsa-miR-571	1	0	1	0	1	1	AKAP6	A kinase (PRKA) anchor protein 6
hsa-miR-571	1	0	1	1	1	1	GDA	guanine deaminase
hsa-miR-571	0	0	1	1	1	1	ACTL6A	actin-like 6A
hsa-miR-571	1	0	1	0	1	1	ACVR1B	activin A receptor, type IB
hsa-miR-571	0	0	1	1	1	1	CDH1	cadherin 1, type 1, E-cadherin (epithelial)
hsa-miR-571	0	0	1	1	1	1	COPA	coatomer protein complex, subunit alpha
hsa-miR-571	1	0	1	1	1	1	DBN1	drebrin 1
hsa-miR-571	1	0	1	0	1	1	ACSL4	acyl-CoA synthetase long-chain family member 4
hsa-miR-571	1	0	1	0	1	1	FGF5	fibroblast growth factor 5
hsa-miR-571	1	0	1	1	1	1	FLOT2	flotillin 2
hsa-miR-571	1	0	1	1	0	0	HOXC6	homeobox C6
hsa-miR-571	0	0	1	1	1	1	NFATC3	nuclear factor of activated T-cells, cytoplasmic, calcineurin-dependent 3
hsa-miR-571	1	0	1	0	1	1	SCN2B	sodium channel, voltage-gated, type II, beta subunit
hsa-miR-571	1	0	1	1	1	1	TCF15	transcription factor 15 (basic helix-loop-helix)
hsa-miR-571	1	0	1	1	1	1	SF1	splicing factor 1
hsa-miR-571	1	0	1	0	1	1	VAMP3	vesicle-associated membrane protein 3 (cellubrevin)
hsa-miR-571	0	0	1	0	1	1	ADIPOQ	adiponectin, C1Q and collagen domain containing
hsa-miR-571	1	0	1	1	1	1	ONECUT2	one cut homeobox 2
hsa-miR-571	1	0	1	1	1	1	FXR2	fragile X mental retardation, autosomal homolog 2
hsa-miR-571	0	0	1	1	0	0	PITX3	paired-like homeodomain 3
hsa-miR-571	0	0	1	1	1	1	SIM1	single-minded homolog 1 (Drosophila)
hsa-miR-571	1	0	1	1	1	1	HS3ST1	heparan sulfate (glucosamine) 3-O-sulfotransferase 1
hsa-miR-571	0	0	1	1	1	1	CLEC2B	C-type lectin domain family 2, member B
hsa-miR-571	1	0	1	0	1	1	E2F1	E2F transcription factor 1
hsa-miR-571	1	0	1	1	1	1	GABPB1	GA binding protein transcription factor, beta subunit 1
hsa-miR-571	1	0	1	1	1	1	HIP1	huntingtin interacting protein 1
hsa-miR-571	1	0	1	0	1	1	CCDC6	coiled-coil domain containing 6
hsa-miR-571	0	0	1	1	1	1	FOSL1	FOS-like antigen 1
hsa-miR-571	1	0	1	1	0	0	ZBTB22	zinc finger and BTB domain containing 22
hsa-miR-571	1	0	1	1	1	1	TOM1L1	target of myb1 (chicken)-like 1
hsa-miR-571	1	0	1	1	1	1	SCARB2	scavenger receptor class B, member 2
hsa-miR-571	1	0	1	1	1	1	LPP	LIM domain containing preferred translocation partner in lipoma
hsa-miR-571	1	0	1	1	1	1	SYT1	synaptotagmin I
hsa-miR-571	1	0	1	0	1	1	GPC6	glypican 6
hsa-miR-571	1	0	1	1	1	1	ACTR1A	ARP1 actin-related protein 1 homolog A, centractin alpha (yeast)
hsa-miR-571	0	0	1	1	1	1	IGSF6	immunoglobulin superfamily, member 6
hsa-miR-571	1	0	1	0	1	1	NBR1	neighbor of BRCA1 gene 1
hsa-miR-571	1	0	1	1	1	1	MAT2A	methionine adenosyltransferase II, alpha
hsa-miR-571	1	0	1	1	1	1	MEOX2	mesenchyme homeobox 2
hsa-miR-571	1	0	1	1	0	0	MLLT1	myeloid/lymphoid or mixed-lineage leukemia (trithorax homolog, Drosophila); translocated to, 1
hsa-miR-571	1	0	1	0	1	1	HDAC4	histone deacetylase 4
hsa-miR-571	1	0	1	0	1	1	SPATA2	spermatogenesis associated 2
hsa-miR-571	1	0	1	1	1	1	IRF9	interferon regulatory factor 9
hsa-miR-571	0	0	1	1	1	1	PA2G4	proliferation-associated 2G4, 38kDa
hsa-miR-571	1	0	1	1	1	1	STK4	serine/threonine kinase 4
hsa-miR-571	1	0	1	1	1	1	ZNF238	zinc finger protein 238
hsa-miR-571	1	0	1	1	1	1	CDRT1	CMT1A duplicated region transcript 1
hsa-miR-571	1	0	1	1	1	1	NEBL	nebulette
hsa-miR-571	0	0	1	1	0	0	UBD	ubiquitin D
hsa-miR-571	1	0	1	1	0	0	LBX1	ladybird homeobox 1
hsa-miR-571	0	0	1	1	1	1	CD226	CD226 molecule
hsa-miR-571	1	0	1	1	1	1	B3GNT2	UDP-GlcNAc:betaGal beta-1,3-N-acetylglucosaminyltransferase 2
hsa-miR-571	1	0	1	1	1	1	DIAPH2	diaphanous homolog 2 (Drosophila)
hsa-miR-571	1	0	1	1	1	1	LAPTM5	lysosomal protein transmembrane 5
hsa-miR-571	1	0	1	1	1	1	KAT6A	K(lysine) acetyltransferase 6A
hsa-miR-571	1	0	1	1	1	1	SF3A3	splicing factor 3a, subunit 3, 60kDa
hsa-miR-571	0	0	1	1	1	1	TMED2	transmembrane emp24 domain trafficking protein 2
hsa-miR-571	0	0	1	1	1	1	ASCC3	activating signal cointegrator 1 complex subunit 3
hsa-miR-571	1	0	1	0	1	1	SOX12	SRY (sex determining region Y)-box 12
hsa-miR-571	1	0	1	1	1	1	ABHD2	abhydrolase domain containing 2
hsa-miR-571	0	0	1	1	1	1	TMEM115	transmembrane protein 115
hsa-miR-571	0	0	1	0	1	1	ZXDB	zinc finger, X-linked, duplicated B
hsa-miR-571	1	0	1	1	1	1	ERLIN2	ER lipid raft associated 2
hsa-miR-571	0	0	1	1	1	1	HRH3	histamine receptor H3
hsa-miR-571	1	0	1	0	1	1	CHP1	calcineurin-like EF hand protein 1
hsa-miR-571	1	0	1	1	1	1	KLF12	Kruppel-like factor 12
hsa-miR-571	0	0	1	1	1	1	STAT1	signal transducer and activator of transcription 1, 91kDa
hsa-miR-571	1	0	1	1	1	1	PADI2	peptidyl arginine deiminase, type II
hsa-miR-571	1	0	1	1	1	1	KCNE1L	KCNE1-like
hsa-miR-571	1	0	1	0	1	1	ACAP2	ArfGAP with coiled-coil, ankyrin repeat and PH domains 2
hsa-miR-571	1	0	1	1	1	1	TLL2	tolloid-like 2
hsa-miR-571	0	0	1	1	1	1	N6AMT1	N-6 adenine-specific DNA methyltransferase 1 (putative)
hsa-miR-571	0	0	1	0	1	1	EMR2	egf-like module containing, mucin-like, hormone receptor-like 2
hsa-miR-571	0	0	1	1	1	1	MRPS18B	mitochondrial ribosomal protein S18B
hsa-miR-571	1	0	1	0	1	1	C16orf72	chromosome 16 open reading frame 72
hsa-miR-571	1	0	1	1	1	1	RNF7	ring finger protein 7
hsa-miR-571	0	0	1	1	0	0	QPRT	quinolinate phosphoribosyltransferase
hsa-miR-571	1	0	1	1	1	1	PATZ1	POZ (BTB) and AT hook containing zinc finger 1
hsa-miR-571	1	0	1	1	1	1	SLC7A11	solute carrier family 7 (anionic amino acid transporter light chain, xc- system), member 11
hsa-miR-571	1	0	1	0	1	1	RNF11	ring finger protein 11
hsa-miR-571	1	0	1	1	1	1	AFF4	AF4/FMR2 family, member 4
hsa-miR-571	1	0	1	1	1	1	EHD3	EH-domain containing 3
hsa-miR-571	1	0	1	1	1	1	FAF2	Fas associated factor family member 2
hsa-miR-571	1	0	1	1	1	1	RALGPS1	Ral GEF with PH domain and SH3 binding motif 1
hsa-miR-571	0	0	1	1	1	1	PHF14	PHD finger protein 14
hsa-miR-571	1	0	1	1	1	1	TBKBP1	TBK1 binding protein 1
hsa-miR-571	0	0	1	1	1	1	FRMPD4	FERM and PDZ domain containing 4
hsa-miR-571	1	0	1	0	1	1	MLEC	malectin
hsa-miR-571	1	0	1	0	1	1	SERTAD2	SERTA domain containing 2
hsa-miR-571	0	0	1	1	1	1	TATDN2	TatD DNase domain containing 2
hsa-miR-571	1	0	1	1	1	1	ARHGEF11	Rho guanine nucleotide exchange factor (GEF) 11
hsa-miR-571	0	0	1	0	1	1	EPM2AIP1	EPM2A (laforin) interacting protein 1
hsa-miR-571	0	0	1	0	1	1	PPM1E	protein phosphatase, Mg2+/Mn2+ dependent, 1E
hsa-miR-571	1	0	1	0	1	1	ZNF609	zinc finger protein 609
hsa-miR-571	1	0	1	0	1	1	PEG10	paternally expressed 10
hsa-miR-571	1	0	1	1	1	1	IQSEC2	IQ motif and Sec7 domain 2
hsa-miR-571	1	0	1	1	1	1	DDN	dendrin
hsa-miR-571	1	0	1	1	1	1	RCOR1	REST corepressor 1
hsa-miR-571	1	0	1	1	1	1	TRIM9	tripartite motif containing 9
hsa-miR-571	1	0	1	1	1	1	CUX2	cut-like homeobox 2
hsa-miR-571	1	0	1	1	1	1	PHF15	PHD finger protein 15
hsa-miR-571	0	0	1	1	1	1	DOCK9	dedicator of cytokinesis 9
hsa-miR-571	1	0	1	0	1	1	ARHGEF12	Rho guanine nucleotide exchange factor (GEF) 12
hsa-miR-571	1	0	1	1	1	1	MORC3	MORC family CW-type zinc finger 3
hsa-miR-571	1	0	1	1	1	1	CAMSAP1	calmodulin regulated spectrin-associated protein 1
hsa-miR-571	1	0	1	0	1	1	TRIM33	tripartite motif containing 33
hsa-miR-571	1	0	1	1	0	0	YBX2	Y box binding protein 2
hsa-miR-571	0	0	1	1	0	0	MRPL11	mitochondrial ribosomal protein L11
hsa-miR-571	1	0	1	1	1	1	MPC1	mitochondrial pyruvate carrier 1
hsa-miR-571	0	0	1	1	1	1	RSL24D1	ribosomal L24 domain containing 1
hsa-miR-571	0	0	1	1	1	1	SS18L2	synovial sarcoma translocation gene on chromosome 18-like 2
hsa-miR-571	0	0	1	1	1	1	DNAJB11	DnaJ (Hsp40) homolog, subfamily B, member 11
hsa-miR-571	0	0	1	1	0	0	GP6	glycoprotein VI (platelet)
hsa-miR-571	1	0	1	1	1	1	PHF20	PHD finger protein 20
hsa-miR-571	0	0	1	1	0	0	HIGD1B	HIG1 hypoxia inducible domain family, member 1B
hsa-miR-571	0	0	1	1	0	0	ATP8A2	ATPase, aminophospholipid transporter, class I, type 8A, member 2
hsa-miR-571	0	0	1	1	1	1	POLE3	polymerase (DNA directed), epsilon 3, accessory subunit
hsa-miR-571	1	0	1	0	1	1	CYTH1	cytohesin 1
hsa-miR-571	0	0	1	1	1	1	CYTH2	cytohesin 2
hsa-miR-571	1	0	1	1	1	1	GRID1	glutamate receptor, ionotropic, delta 1
hsa-miR-571	1	0	1	0	1	1	UBE2Q1	ubiquitin-conjugating enzyme E2Q family member 1
hsa-miR-571	1	0	1	1	0	0	C17orf59	chromosome 17 open reading frame 59
hsa-miR-571	1	0	1	1	1	1	TBC1D8B	TBC1 domain family, member 8B (with GRAM domain)
hsa-miR-571	0	0	1	1	1	1	SCYL2	SCY1-like 2 (S. cerevisiae)
hsa-miR-571	1	0	1	0	1	1	CCDC88A	coiled-coil domain containing 88A
hsa-miR-571	0	0	1	1	0	0	CEP55	centrosomal protein 55kDa
hsa-miR-571	1	0	1	0	1	1	MSL2	male-specific lethal 2 homolog (Drosophila)
hsa-miR-571	0	0	1	1	1	1	ZFP64	zinc finger protein 64 homolog (mouse)
hsa-miR-571	0	0	1	0	1	1	TMEM57	transmembrane protein 57
hsa-miR-571	1	0	1	1	1	1	LRRC20	leucine rich repeat containing 20
hsa-miR-571	0	0	1	1	0	0	PRR11	proline rich 11
hsa-miR-571	1	0	1	1	1	1	KIAA1598	KIAA1598
hsa-miR-571	0	0	1	1	1	1	TMEM144	transmembrane protein 144
hsa-miR-571	0	0	1	1	1	1	WDR33	WD repeat domain 33
hsa-miR-571	1	0	1	0	1	1	LRP1B	low density lipoprotein receptor-related protein 1B
hsa-miR-571	0	0	1	1	1	1	RIN2	Ras and Rab interactor 2
hsa-miR-571	1	0	1	1	1	1	PLEKHA3	pleckstrin homology domain containing, family A (phosphoinositide binding specific) member 3
hsa-miR-571	1	0	1	1	1	1	LRRC8A	leucine rich repeat containing 8 family, member A
hsa-miR-571	0	0	1	1	1	1	FMN2	formin 2
hsa-miR-571	1	0	1	0	1	1	KCMF1	potassium channel modulatory factor 1
hsa-miR-571	1	0	1	0	1	1	TM9SF3	transmembrane 9 superfamily member 3
hsa-miR-571	0	0	1	1	1	1	GRIPAP1	GRIP1 associated protein 1
hsa-miR-571	1	0	1	1	1	1	CCDC47	coiled-coil domain containing 47
hsa-miR-571	0	0	1	1	1	1	STOX2	storkhead box 2
hsa-miR-571	1	0	1	1	0	0	SLC17A7	solute carrier family 17 (sodium-dependent inorganic phosphate cotransporter), member 7
hsa-miR-571	1	0	1	0	1	1	EIF5A2	eukaryotic translation initiation factor 5A2
hsa-miR-571	0	0	1	1	1	1	ZNF695	zinc finger protein 695
hsa-miR-571	0	0	1	1	1	1	PLXDC1	plexin domain containing 1
hsa-miR-571	1	0	1	1	1	1	DSCAML1	Down syndrome cell adhesion molecule like 1
hsa-miR-571	0	0	1	1	1	1	SHROOM4	shroom family member 4
hsa-miR-571	1	0	1	1	1	1	RGAG1	retrotransposon gag domain containing 1
hsa-miR-571	1	0	1	0	1	1	NUFIP2	nuclear fragile X mental retardation protein interacting protein 2
hsa-miR-571	1	0	1	1	1	1	NLGN2	neuroligin 2
hsa-miR-571	1	0	1	0	1	1	WDFY1	WD repeat and FYVE domain containing 1
hsa-miR-571	1	0	1	1	1	1	RANBP10	RAN binding protein 10
hsa-miR-571	1	0	1	0	1	1	SH3RF1	SH3 domain containing ring finger 1
hsa-miR-571	1	0	1	1	1	1	ZNFX1	zinc finger, NFX1-type containing 1
hsa-miR-571	0	0	1	1	0	0	HOXD11	homeobox D11
hsa-miR-571	1	0	1	0	1	1	TP53INP2	tumor protein p53 inducible nuclear protein 2
hsa-miR-571	0	0	1	1	0	0	MYOZ1	myozenin 1
hsa-miR-571	0	0	1	1	1	1	HRH4	histamine receptor H4
hsa-miR-571	1	0	1	1	1	1	TRIB2	tribbles homolog 2 (Drosophila)
hsa-miR-571	1	0	1	1	1	1	BACH2	BTB and CNC homology 1, basic leucine zipper transcription factor 2
hsa-miR-571	0	0	1	0	1	1	CFL2	cofilin 2 (muscle)
hsa-miR-571	0	0	1	1	1	1	NXF3	nuclear RNA export factor 3
hsa-miR-571	0	0	1	1	1	1	CHP2	calcineurin-like EF hand protein 2
hsa-miR-571	1	0	1	1	1	1	XYLT1	xylosyltransferase I
hsa-miR-571	0	0	1	1	1	1	TCTA	T-cell leukemia translocation altered
hsa-miR-571	1	0	1	1	1	1	FBXL17	F-box and leucine-rich repeat protein 17
hsa-miR-571	1	0	1	1	0	0	UBE2Z	ubiquitin-conjugating enzyme E2Z
hsa-miR-571	1	0	1	1	1	1	NKAIN1	Na+/K+ transporting ATPase interacting 1
hsa-miR-571	1	0	1	1	1	1	PPP1R3B	protein phosphatase 1, regulatory subunit 3B
hsa-miR-571	1	0	1	1	1	1	DHX40	DEAH (Asp-Glu-Ala-His) box polypeptide 40
hsa-miR-571	0	0	1	0	1	1	C14orf169	chromosome 14 open reading frame 169
hsa-miR-571	0	0	1	1	1	1	NSUN7	NOP2/Sun domain family, member 7
hsa-miR-571	1	0	1	0	1	1	ZFHX4	zinc finger homeobox 4
hsa-miR-571	1	0	1	0	1	1	MOB3B	MOB kinase activator 3B
hsa-miR-571	0	0	1	1	0	0	NRSN2	neurensin 2
hsa-miR-571	1	0	1	1	1	1	KLHL18	kelch-like 18 (Drosophila)
hsa-miR-571	0	0	1	1	0	0	BPIFB2	BPI fold containing family B, member 2
hsa-miR-571	1	0	1	0	1	1	SETD7	SET domain containing (lysine methyltransferase) 7
hsa-miR-571	1	0	1	0	1	1	LBH	limb bud and heart development homolog (mouse)
hsa-miR-571	1	0	1	1	1	1	SNX27	sorting nexin family member 27
hsa-miR-571	0	0	1	1	0	0	DEFB126	defensin, beta 126
hsa-miR-571	0	0	1	1	1	1	FCRL4	Fc receptor-like 4
hsa-miR-571	1	0	1	0	1	1	THAP2	THAP domain containing, apoptosis associated protein 2
hsa-miR-571	1	0	1	1	1	1	CRISPLD1	cysteine-rich secretory protein LCCL domain containing 1
hsa-miR-571	1	0	1	1	1	1	PPP1R12B	protein phosphatase 1, regulatory subunit 12B
hsa-miR-571	1	0	1	1	1	1	LOXL4	lysyl oxidase-like 4
hsa-miR-571	1	0	1	1	1	1	SYVN1	synovial apoptosis inhibitor 1, synoviolin
hsa-miR-571	0	0	1	1	1	1	HCAR1	hydroxycarboxylic acid receptor 1
hsa-miR-571	1	0	1	1	1	1	ARHGEF39	Rho guanine nucleotide exchange factor (GEF) 39
hsa-miR-571	0	0	1	1	0	0	LSM10	LSM10, U7 small nuclear RNA associated
hsa-miR-571	0	0	1	1	1	1	POLR2J2	polymerase (RNA) II (DNA directed) polypeptide J2
hsa-miR-571	0	0	1	1	1	1	ZWINT	ZW10 interactor
hsa-miR-571	1	0	1	1	0	0	DMRTB1	DMRT-like family B with proline-rich C-terminal, 1
hsa-miR-571	1	0	1	0	1	1	SCRT2	scratch homolog 2, zinc finger protein (Drosophila)
hsa-miR-571	0	0	1	1	1	1	KRTAP3-3	keratin associated protein 3-3
hsa-miR-571	1	0	1	1	1	1	RASL10B	RAS-like, family 10, member B
hsa-miR-571	1	0	1	1	0	0	FCHSD1	FCH and double SH3 domains 1
hsa-miR-571	0	0	1	1	0	0	STK11IP	serine/threonine kinase 11 interacting protein
hsa-miR-571	0	0	1	1	0	0	FAM46B	family with sequence similarity 46, member B
hsa-miR-571	1	0	1	0	1	1	FAM129A	family with sequence similarity 129, member A
hsa-miR-571	0	0	1	1	1	1	MRGPRX2	MAS-related GPR, member X2
hsa-miR-571	0	0	1	1	1	1	CLEC4D	C-type lectin domain family 4, member D
hsa-miR-571	1	0	1	1	1	1	SLC44A1	solute carrier family 44, member 1
hsa-miR-571	0	0	1	1	0	0	WFDC10A	WAP four-disulfide core domain 10A
hsa-miR-571	1	0	1	0	1	1	SOCS4	suppressor of cytokine signaling 4
hsa-miR-571	1	0	1	1	1	1	ICA1L	islet cell autoantigen 1,69kDa-like
hsa-miR-571	0	0	1	1	1	1	GALM	galactose mutarotase (aldose 1-epimerase)
hsa-miR-571	0	0	1	1	1	1	C10orf82	chromosome 10 open reading frame 82
hsa-miR-571	0	0	1	1	0	0	LINC00477	long intergenic non-protein coding RNA 477
hsa-miR-571	1	0	1	1	1	1	MAX	MYC associated factor X
hsa-miR-571	0	0	1	1	1	1	SCARF1	scavenger receptor class F, member 1
hsa-miR-571	1	0	1	0	1	1	MTPN	myotrophin
hsa-miR-571	1	0	1	0	1	1	NFAM1	NFAT activating protein with ITAM motif 1
hsa-miR-571	0	0	1	1	1	1	GLIS1	GLIS family zinc finger 1
hsa-miR-571	1	0	1	1	1	1	POGLUT1	protein O-glucosyltransferase 1
hsa-miR-571	0	0	1	1	1	1	ERP27	endoplasmic reticulum protein 27
hsa-miR-571	1	0	1	1	1	1	LSM12	LSM12 homolog (S. cerevisiae)
hsa-miR-571	0	0	1	1	1	1	ZNF572	zinc finger protein 572
hsa-miR-571	1	0	1	1	1	1	SPRED1	sprouty-related, EVH1 domain containing 1
hsa-miR-571	1	0	1	1	1	1	ATXN7L1	ataxin 7-like 1
hsa-miR-571	0	0	1	1	1	1	TMEM130	transmembrane protein 130
hsa-miR-571	0	0	1	0	0	0	FLJ32955	uncharacterized protein FLJ32955
hsa-miR-571	1	0	1	1	1	1	SYT14	synaptotagmin XIV
hsa-miR-571	1	0	1	0	1	1	GPR26	G protein-coupled receptor 26
hsa-miR-571	1	0	1	1	1	1	HS6ST3	heparan sulfate 6-O-sulfotransferase 3
hsa-miR-571	1	0	1	1	1	1	CREBRF	CREB3 regulatory factor
hsa-miR-571	0	0	1	1	0	0	CPNE9	copine family member IX
hsa-miR-571	0	0	1	0	1	1	RTP1	receptor (chemosensory) transporter protein 1
hsa-miR-571	0	0	1	1	1	1	POFUT1	protein O-fucosyltransferase 1
hsa-miR-571	0	0	1	1	1	1	KCNH5	potassium voltage-gated channel, subfamily H (eag-related), member 5
hsa-miR-571	0	0	1	0	1	1	KRT18P55	keratin 18 pseudogene 55
hsa-miR-571	1	0	1	1	1	1	UBR1	ubiquitin protein ligase E3 component n-recognin 1
hsa-miR-571	0	0	1	1	0	0	TAS1R1	taste receptor, type 1, member 1
hsa-miR-571	1	0	1	1	1	1	ASB6	ankyrin repeat and SOCS box containing 6
hsa-miR-571	0	0	1	1	1	1	HSD17B13	hydroxysteroid (17-beta) dehydrogenase 13
hsa-miR-571	0	0	1	1	0	0	PAQR7	progestin and adipoQ receptor family member VII
hsa-miR-571	1	0	1	0	1	1	ZDHHC21	zinc finger, DHHC-type containing 21
hsa-miR-571	0	0	1	1	1	1	NPAS4	neuronal PAS domain protein 4
hsa-miR-571	0	0	1	1	1	1	DNAJC24	DnaJ (Hsp40) homolog, subfamily C, member 24
hsa-miR-571	0	0	1	1	1	1	TMPRSS11B	transmembrane protease, serine 11B
hsa-miR-571	1	0	1	1	1	1	DDX26B	DEAD/H (Asp-Glu-Ala-Asp/His) box polypeptide 26B
hsa-miR-571	1	0	1	0	1	1	RNF144B	ring finger protein 144B
hsa-miR-571	1	0	1	1	1	1	SUMF1	sulfatase modifying factor 1
hsa-miR-571	1	0	1	0	1	1	SRRM4	serine/arginine repetitive matrix 4
hsa-miR-571	1	0	1	1	1	1	ZBTB41	zinc finger and BTB domain containing 41
hsa-miR-571	1	0	1	1	1	1	ADAMTS6	ADAM metallopeptidase with thrombospondin type 1 motif, 6
hsa-miR-571	0	0	1	1	1	1	OLFML1	olfactomedin-like 1
hsa-miR-571	1	0	1	0	1	1	ZC3H6	zinc finger CCCH-type containing 6
hsa-miR-571	0	0	1	0	1	1	SIAH3	siah E3 ubiquitin protein ligase family member 3
hsa-miR-571	1	0	1	1	1	1	NSUN4	NOP2/Sun domain family, member 4
hsa-miR-571	1	0	1	1	1	1	TMEM189-UBE2V1	TMEM189-UBE2V1 readthrough
hsa-miR-571	0	0	1	1	1	1	CCDC80	coiled-coil domain containing 80
hsa-miR-571	1	0	1	1	0	0	KAZN	kazrin, periplakin interacting protein
hsa-miR-571	0	0	1	1	0	0	TRIM7	tripartite motif containing 7
hsa-miR-571	1	0	1	1	1	1	E2F7	E2F transcription factor 7
hsa-miR-571	1	0	1	1	1	1	ATRNL1	attractin-like 1
hsa-miR-571	0	0	1	0	1	1	C1orf229	chromosome 1 open reading frame 229
hsa-miR-571	0	0	1	0	1	1	TMEM215	transmembrane protein 215
hsa-miR-571	0	0	1	0	0	0	MIR155HG	MIR155 host gene (non-protein coding)
hsa-miR-571	0	0	1	0	0	0	TTTY2	testis-specific transcript, Y-linked 2 (non-protein coding)
hsa-miR-571	0	0	1	0	0	0	TTTY1	testis-specific transcript, Y-linked 1 (non-protein coding)
hsa-miR-571	0	0	1	0	0	0	TTTY15	testis-specific transcript, Y-linked 15 (non-protein coding)
hsa-miR-571	0	0	1	0	0	0	FTH1P7	ferritin, heavy polypeptide 1 pseudogene 7
hsa-miR-571	0	0	1	0	0	0	FTH1P8	ferritin, heavy polypeptide 1 pseudogene 8
hsa-miR-571	0	0	1	0	0	0	TRIM78P	tripartite motif containing 78, pseudogene
hsa-miR-571	0	0	1	0	0	0	RPL13P5	ribosomal protein L13 pseudogene 5
hsa-miR-571	0	0	1	0	0	0	LOC374443	C-type lectin domain family 2, member D pseudogene
hsa-miR-571	0	0	1	0	0	0	TPTE2P6	transmembrane phosphoinositide 3-phosphatase and tensin homolog 2 pseudogene 6
hsa-miR-571	0	0	1	0	0	0	DUSP5P	dual specificity phosphatase 5 pseudogene
hsa-miR-571	0	0	1	0	0	0	PTPRVP	protein tyrosine phosphatase, receptor type, V, pseudogene
hsa-miR-571	0	0	1	0	0	0	SNX29P2	sorting nexin 29 pseudogene 2
hsa-miR-571	0	0	1	0	0	0	TCAM1P	testicular cell adhesion molecule 1 homolog (mouse), pseudogene
hsa-miR-571	0	0	1	0	0	0	SNORD19	small nucleolar RNA, C/D box 19
hsa-miR-571	0	0	1	0	0	0	LILRP2	leukocyte immunoglobulin-like receptor pseudogene 2
hsa-miR-571	0	0	1	0	0	0	NBR2	neighbor of BRCA1 gene 2 (non-protein coding)
hsa-miR-571	0	0	1	0	0	0	HSP90AB2P	heat shock protein 90kDa alpha (cytosolic), class B member 2, pseudogene
hsa-miR-571	0	0	1	0	0	0	GMCL1P1	germ cell-less, spermatogenesis associated 1 pseudogene 1
hsa-miR-571	1	0	1	1	1	1	CASP2	caspase 2, apoptosis-related cysteine peptidase
hsa-miR-571	1	0	1	1	1	1	HOXA1	homeobox A1
hsa-miR-571	1	0	1	1	1	1	TRIO	trio Rho guanine nucleotide exchange factor
hsa-miR-571	0	0	1	0	0	0	GK3P	glycerol kinase 3 pseudogene
hsa-miR-571	0	0	1	1	1	1	HSPB6	heat shock protein, alpha-crystallin-related, B6
hsa-miR-571	0	0	0	1	1	1	PDK4	pyruvate dehydrogenase kinase, isozyme 4
hsa-miR-571	0	0	1	1	0	0	BAIAP2L1	BAI1-associated protein 2-like 1
hsa-miR-571	0	0	1	1	1	1	ARHGAP33	Rho GTPase activating protein 33
hsa-miR-571	1	0	0	1	0	0	PDK2	pyruvate dehydrogenase kinase, isozyme 2
hsa-miR-571	0	0	0	1	0	0	BEST2	bestrophin 2
hsa-miR-571	1	0	1	1	1	1	FGF4	fibroblast growth factor 4
hsa-miR-571	0	0	0	1	0	0	ASNS	asparagine synthetase (glutamine-hydrolyzing)
hsa-miR-571	0	0	1	1	0	0	ALPK1	alpha-kinase 1
hsa-miR-571	0	0	1	1	1	1	SLC9A3R2	solute carrier family 9, subfamily A (NHE3, cation proton antiporter 3), member 3 regulator 2
hsa-miR-571	0	0	0	1	0	0	GAL3ST2	galactose-3-O-sulfotransferase 2
hsa-miR-571	0	0	1	1	1	1	TDRD3	tudor domain containing 3
hsa-miR-571	0	0	0	1	1	1	ZNF324	zinc finger protein 324
hsa-miR-571	0	0	0	1	0	0	CETP	cholesteryl ester transfer protein, plasma
hsa-miR-571	0	0	0	1	0	0	FLT3LG	fms-related tyrosine kinase 3 ligand
hsa-miR-571	1	0	1	1	1	1	GOLGA3	golgin A3
hsa-miR-571	0	0	1	1	0	0	PLEKHG2	pleckstrin homology domain containing, family G (with RhoGef domain) member 2
hsa-miR-571	0	0	1	1	0	0	DLL3	delta-like 3 (Drosophila)
hsa-miR-571	0	0	0	1	0	0	CEBPE	CCAAT/enhancer binding protein (C/EBP), epsilon
hsa-miR-571	1	0	1	1	1	1	SLC7A8	solute carrier family 7 (amino acid transporter light chain, L system), member 8
hsa-miR-571	1	0	0	1	1	1	CDC34	cell division cycle 34 homolog (S. cerevisiae)
hsa-miR-571	1	0	1	1	0	0	MAPK12	mitogen-activated protein kinase 12
hsa-miR-571	1	0	1	1	1	1	SYNGR1	synaptogyrin 1
hsa-miR-571	0	0	1	1	0	0	CTSG	cathepsin G
hsa-miR-571	0	0	1	1	0	0	PSMA3	proteasome (prosome, macropain) subunit, alpha type, 3
hsa-miR-571	0	0	0	1	0	0	VTI1B	vesicle transport through interaction with t-SNAREs homolog 1B (yeast)
hsa-miR-571	0	0	0	1	1	1	SLC10A1	solute carrier family 10 (sodium/bile acid cotransporter family), member 1
hsa-miR-571	0	0	0	1	0	0	SRMS	src-related kinase lacking C-terminal regulatory tyrosine and N-terminal myristylation sites
hsa-miR-571	0	0	0	1	0	0	WDR13	WD repeat domain 13
hsa-miR-571	0	0	1	1	1	1	PIN4	protein (peptidylprolyl cis/trans isomerase) NIMA-interacting, 4 (parvulin)
hsa-miR-571	0	0	0	1	0	0	ACP5	acid phosphatase 5, tartrate resistant
hsa-miR-571	0	0	1	1	1	1	DECR2	2,4-dienoyl CoA reductase 2, peroxisomal
hsa-miR-571	0	0	1	1	0	0	ECH1	enoyl CoA hydratase 1, peroxisomal
hsa-miR-571	0	0	1	1	0	0	SLC1A6	solute carrier family 1 (high affinity aspartate/glutamate transporter), member 6
hsa-miR-571	0	0	1	1	0	0	EBI3	Epstein-Barr virus induced 3
hsa-miR-571	1	0	1	1	0	0	FSD1	fibronectin type III and SPRY domain containing 1
hsa-miR-571	0	0	1	1	0	0	CEACAM4	carcinoembryonic antigen-related cell adhesion molecule 4
hsa-miR-571	0	0	0	1	0	0	FKBP8	FK506 binding protein 8, 38kDa
hsa-miR-571	1	0	1	1	1	1	ABCF2	ATP-binding cassette, sub-family F (GCN20), member 2
hsa-miR-571	0	0	0	1	0	0	HOXA6	homeobox A6
hsa-miR-571	0	0	1	1	0	0	TFR2	transferrin receptor 2
hsa-miR-571	0	0	0	1	1	1	AEBP1	AE binding protein 1
hsa-miR-571	0	0	0	1	0	0	ZNF688	zinc finger protein 688
hsa-miR-571	0	0	0	1	1	1	ZNF785	zinc finger protein 785
hsa-miR-571	1	0	0	1	1	1	WNT3	wingless-type MMTV integration site family, member 3
hsa-miR-571	0	0	1	1	0	0	CACNG1	calcium channel, voltage-dependent, gamma subunit 1
hsa-miR-571	0	0	0	1	0	0	IBSP	integrin-binding sialoprotein
hsa-miR-571	0	0	1	1	1	1	PUS3	pseudouridylate synthase 3
hsa-miR-571	0	0	1	1	1	1	IL10RA	interleukin 10 receptor, alpha
hsa-miR-571	0	0	1	1	0	0	RPLP0	ribosomal protein, large, P0
hsa-miR-571	1	0	1	1	1	1	PRDM4	PR domain containing 4
hsa-miR-571	0	0	1	1	0	0	GMNN	geminin, DNA replication inhibitor
hsa-miR-571	0	0	1	1	1	1	C6orf118	chromosome 6 open reading frame 118
hsa-miR-571	0	0	0	1	1	1	EXOC2	exocyst complex component 2
hsa-miR-571	0	0	0	1	0	0	POU4F3	POU class 4 homeobox 3
hsa-miR-571	1	0	1	1	0	0	IRX4	iroquois homeobox 4
hsa-miR-571	0	0	0	1	0	0	LTF	lactotransferrin
hsa-miR-571	0	0	1	1	1	1	FAM162A	family with sequence similarity 162, member A
hsa-miR-571	0	0	0	1	0	0	TNNC1	troponin C type 1 (slow)
hsa-miR-571	0	0	1	1	0	0	INO80B	INO80 complex subunit B
hsa-miR-571	0	0	0	1	0	0	REG1A	regenerating islet-derived 1 alpha
hsa-miR-571	0	0	0	1	0	0	NEU2	sialidase 2 (cytosolic sialidase)
hsa-miR-571	0	0	0	1	1	1	WNT6	wingless-type MMTV integration site family, member 6
hsa-miR-571	0	0	1	1	0	0	MIIP	migration and invasion inhibitory protein
hsa-miR-571	0	0	1	1	0	0	GSC	goosecoid homeobox
hsa-miR-571	0	0	0	1	0	0	ADCK1	aarF domain containing kinase 1
hsa-miR-571	0	0	0	1	0	0	IFI27L2	interferon, alpha-inducible protein 27-like 2
hsa-miR-571	0	0	1	1	1	1	HOXA7	homeobox A7
hsa-miR-571	0	0	1	1	1	1	POLM	polymerase (DNA directed), mu
hsa-miR-571	0	0	1	1	0	0	FAAH	fatty acid amide hydrolase
hsa-miR-571	0	0	0	1	1	1	RAB9A	RAB9A, member RAS oncogene family
hsa-miR-571	0	0	1	1	1	1	CEACAM8	carcinoembryonic antigen-related cell adhesion molecule 8
hsa-miR-571	0	0	1	1	0	0	SIX1	SIX homeobox 1
hsa-miR-571	0	0	1	1	0	0	CTAG2	cancer/testis antigen 2
hsa-miR-571	0	0	0	1	0	0	SELO	selenoprotein O
hsa-miR-571	0	0	1	1	0	0	TAS2R16	taste receptor, type 2, member 16
hsa-miR-571	0	0	0	1	1	1	GDF2	growth differentiation factor 2
hsa-miR-571	0	0	0	1	0	0	SERINC4	serine incorporator 4
hsa-miR-571	0	0	1	1	1	1	MMP28	matrix metallopeptidase 28
hsa-miR-571	0	0	0	1	1	1	DOHH	deoxyhypusine hydroxylase/monooxygenase
hsa-miR-571	0	0	0	1	0	0	CFHR4	complement factor H-related 4
hsa-miR-571	0	0	0	1	1	1	APOC2	apolipoprotein C-II
hsa-miR-571	0	0	1	1	1	1	NDUFA10	NADH dehydrogenase (ubiquinone) 1 alpha subcomplex, 10, 42kDa
hsa-miR-571	0	0	0	1	0	0	TNNI2	troponin I type 2 (skeletal, fast)
hsa-miR-571	1	0	1	1	1	1	SLC6A8	solute carrier family 6 (neurotransmitter transporter, creatine), member 8
hsa-miR-571	0	0	0	1	0	0	F12	coagulation factor XII (Hageman factor)
hsa-miR-571	0	0	1	1	1	1	EMR3	egf-like module containing, mucin-like, hormone receptor-like 3
hsa-miR-571	0	0	0	1	0	0	ASGR2	asialoglycoprotein receptor 2
hsa-miR-571	0	0	0	1	1	1	SLC52A1	solute carrier family 52, riboflavin transporter, member 1
hsa-miR-571	0	0	0	1	0	0	RHBG	Rh family, B glycoprotein (gene/pseudogene)
hsa-miR-571	0	0	1	1	1	1	SERINC3	serine incorporator 3
hsa-miR-571	0	0	1	1	1	1	PDE6B	phosphodiesterase 6B, cGMP-specific, rod, beta
hsa-miR-571	0	0	0	1	1	1	C14orf159	chromosome 14 open reading frame 159
hsa-miR-571	0	0	1	1	0	0	WNT2B	wingless-type MMTV integration site family, member 2B
hsa-miR-571	1	0	1	1	1	1	SEMA6A	sema domain, transmembrane domain (TM), and cytoplasmic domain, (semaphorin) 6A
hsa-miR-571	0	0	1	1	1	1	EGR4	early growth response 4
hsa-miR-571	0	0	0	1	1	1	DYSF	dysferlin, limb girdle muscular dystrophy 2B (autosomal recessive)
hsa-miR-571	0	0	1	1	1	1	IL6	interleukin 6 (interferon, beta 2)
hsa-miR-571	1	0	1	1	1	1	BZW2	basic leucine zipper and W2 domains 2
hsa-miR-571	1	0	1	1	1	1	CCL21	chemokine (C-C motif) ligand 21
hsa-miR-571	0	0	0	1	0	0	CCL27	chemokine (C-C motif) ligand 27
hsa-miR-571	0	0	1	1	0	0	CLPS	colipase, pancreatic
hsa-miR-571	0	0	1	1	1	1	USP2	ubiquitin specific peptidase 2
hsa-miR-571	0	0	0	1	0	0	FXYD2	FXYD domain containing ion transport regulator 2
hsa-miR-571	0	0	1	1	0	0	ITPKA	inositol-trisphosphate 3-kinase A
hsa-miR-571	0	0	1	1	1	1	DBR1	debranching enzyme homolog 1 (S. cerevisiae)
hsa-miR-571	0	0	0	1	0	0	TNFRSF13B	tumor necrosis factor receptor superfamily, member 13B
hsa-miR-571	0	0	0	1	0	0	QRICH2	glutamine rich 2
hsa-miR-571	1	0	1	1	1	1	SEC14L1	SEC14-like 1 (S. cerevisiae)
hsa-miR-571	0	0	0	1	0	0	CCDC124	coiled-coil domain containing 124
hsa-miR-571	0	0	0	1	1	1	TYR	tyrosinase (oculocutaneous albinism IA)
hsa-miR-571	0	0	1	1	1	1	PRKCG	protein kinase C, gamma
hsa-miR-571	0	0	1	1	0	0	CD81	CD81 molecule
hsa-miR-571	0	0	1	1	1	1	POLR1A	polymerase (RNA) I polypeptide A, 194kDa
hsa-miR-571	0	0	0	1	0	0	GPR108	G protein-coupled receptor 108
hsa-miR-571	0	0	1	1	0	0	UBE2S	ubiquitin-conjugating enzyme E2S
hsa-miR-571	0	0	0	1	1	1	RAB17	RAB17, member RAS oncogene family
hsa-miR-571	1	0	1	1	1	1	KCNH4	potassium voltage-gated channel, subfamily H (eag-related), member 4
hsa-miR-571	1	0	0	1	0	0	KLF1	Kruppel-like factor 1 (erythroid)
hsa-miR-571	0	0	0	1	0	0	NIT2	nitrilase family, member 2
hsa-miR-571	0	0	1	1	1	1	PON3	paraoxonase 3
hsa-miR-571	0	0	1	1	0	0	GLT8D1	glycosyltransferase 8 domain containing 1
hsa-miR-571	0	0	1	1	0	0	FBXO7	F-box protein 7
hsa-miR-571	0	0	1	1	0	0	SMARCC2	SWI/SNF related, matrix associated, actin dependent regulator of chromatin, subfamily c, member 2
hsa-miR-571	0	0	0	1	0	0	ITGB7	integrin, beta 7
hsa-miR-571	0	0	0	1	1	1	WDR89	WD repeat domain 89
hsa-miR-571	0	0	1	1	0	0	DUOXA1	dual oxidase maturation factor 1
hsa-miR-571	0	0	1	1	1	1	HDC	histidine decarboxylase
hsa-miR-571	1	0	1	1	0	0	SCAMP2	secretory carrier membrane protein 2
hsa-miR-571	1	0	0	1	1	1	ZNF710	zinc finger protein 710
hsa-miR-571	1	0	1	1	1	1	PMAIP1	phorbol-12-myristate-13-acetate-induced protein 1
hsa-miR-571	0	0	1	1	0	0	FXYD1	FXYD domain containing ion transport regulator 1
hsa-miR-571	0	0	1	1	1	1	PSMA5	proteasome (prosome, macropain) subunit, alpha type, 5
hsa-miR-571	0	0	1	1	0	0	CREB3L4	cAMP responsive element binding protein 3-like 4
hsa-miR-571	0	0	0	1	0	0	EPHX1	epoxide hydrolase 1, microsomal (xenobiotic)
hsa-miR-571	0	0	1	1	1	1	FAM171B	family with sequence similarity 171, member B
hsa-miR-571	1	0	1	1	1	1	EPHA5	EPH receptor A5
hsa-miR-571	1	0	1	1	1	1	GLRA3	glycine receptor, alpha 3
hsa-miR-571	0	0	0	1	1	1	ZNF16	zinc finger protein 16
hsa-miR-571	0	0	1	1	0	0	FUOM	fucose mutarotase
hsa-miR-571	0	0	0	1	0	0	SCGB1A1	secretoglobin, family 1A, member 1 (uteroglobin)
hsa-miR-571	0	0	1	1	0	0	PIGT	phosphatidylinositol glycan anchor biosynthesis, class T
hsa-miR-571	0	0	1	1	1	1	DSPP	dentin sialophosphoprotein
hsa-miR-571	0	0	1	1	0	0	NUBP1	nucleotide binding protein 1
hsa-miR-571	1	0	1	1	1	1	PDLIM3	PDZ and LIM domain 3
hsa-miR-571	0	0	0	1	1	1	NAT2	N-acetyltransferase 2 (arylamine N-acetyltransferase)
hsa-miR-571	1	0	1	1	1	1	ATAD2	ATPase family, AAA domain containing 2
hsa-miR-571	0	0	1	1	0	0	KNG1	kininogen 1
hsa-miR-571	1	0	1	1	1	1	NRG1	neuregulin 1
hsa-miR-571	0	0	1	1	1	1	KCNJ6	potassium inwardly-rectifying channel, subfamily J, member 6
hsa-miR-571	0	0	1	1	1	1	CREB3L1	cAMP responsive element binding protein 3-like 1
hsa-miR-571	0	0	1	1	1	1	HIST1H2BD	histone cluster 1, H2bd
hsa-miR-571	0	0	0	1	0	0	HTR6	5-hydroxytryptamine (serotonin) receptor 6, G protein-coupled
hsa-miR-571	0	0	0	1	0	0	NPM2	nucleophosmin/nucleoplasmin 2
hsa-miR-571	0	0	1	1	0	0	VWA5B1	von Willebrand factor A domain containing 5B1
hsa-miR-571	0	0	0	1	0	0	FCER1G	Fc fragment of IgE, high affinity I, receptor for; gamma polypeptide
hsa-miR-571	0	0	1	1	1	1	C21orf62	chromosome 21 open reading frame 62
hsa-miR-571	1	0	1	1	1	1	SLC12A6	solute carrier family 12 (potassium/chloride transporters), member 6
hsa-miR-571	0	0	0	1	0	0	CBR3	carbonyl reductase 3
hsa-miR-571	0	0	1	1	0	0	TNFRSF13C	tumor necrosis factor receptor superfamily, member 13C
hsa-miR-571	0	0	0	1	0	0	KIR3DL3	killer cell immunoglobulin-like receptor, three domains, long cytoplasmic tail, 3
hsa-miR-571	0	0	0	1	1	1	KIR2DL1	killer cell immunoglobulin-like receptor, two domains, long cytoplasmic tail, 1
hsa-miR-571	0	0	1	1	0	0	KIR2DS4	killer cell immunoglobulin-like receptor, two domains, short cytoplasmic tail, 4
hsa-miR-571	0	0	0	1	1	1	ZNF20	zinc finger protein 20
hsa-miR-571	1	0	0	1	0	0	NBEAL2	neurobeachin-like 2
hsa-miR-571	0	0	0	1	0	0	LRWD1	leucine-rich repeats and WD repeat domain containing 1
hsa-miR-571	0	0	1	1	0	0	PSMC2	proteasome (prosome, macropain) 26S subunit, ATPase, 2
hsa-miR-571	0	0	1	1	0	0	ABCF3	ATP-binding cassette, sub-family F (GCN20), member 3
hsa-miR-571	1	0	1	1	1	1	NAGS	N-acetylglutamate synthase
hsa-miR-571	1	0	0	1	1	1	KRT72	keratin 72
hsa-miR-571	0	0	0	1	0	0	CCDC27	coiled-coil domain containing 27
hsa-miR-571	0	0	1	1	1	1	ARHGAP25	Rho GTPase activating protein 25
hsa-miR-571	0	0	0	1	0	0	TDRD10	tudor domain containing 10
hsa-miR-571	1	0	1	1	1	1	FZD5	frizzled family receptor 5
hsa-miR-571	0	0	1	1	1	1	RETNLB	resistin like beta
hsa-miR-571	0	0	0	1	1	1	CAND2	cullin-associated and neddylation-dissociated 2 (putative)
hsa-miR-571	0	0	1	1	1	1	KIAA1143	KIAA1143
hsa-miR-571	0	0	0	1	1	1	PRDM9	PR domain containing 9
hsa-miR-571	0	0	0	1	0	0	MB21D1	Mab-21 domain containing 1
hsa-miR-571	0	0	1	1	1	1	COG5	component of oligomeric golgi complex 5
hsa-miR-571	1	0	1	1	1	1	RELL2	RELT-like 2
hsa-miR-571	1	0	1	1	1	1	KIAA1324L	KIAA1324-like
hsa-miR-571	0	0	0	1	1	1	SBSPON	somatomedin B and thrombospondin, type 1 domain containing
hsa-miR-571	0	0	0	1	0	0	NOS3	nitric oxide synthase 3 (endothelial cell)
hsa-miR-571	0	0	1	1	0	0	DCSTAMP	dendrocyte expressed seven transmembrane protein
hsa-miR-571	0	0	1	1	1	1	COL14A1	collagen, type XIV, alpha 1
hsa-miR-571	0	0	1	1	1	1	MELK	maternal embryonic leucine zipper kinase
hsa-miR-571	0	0	1	1	1	1	STOX1	storkhead box 1
hsa-miR-571	0	0	1	1	0	0	RAPSN	receptor-associated protein of the synapse
hsa-miR-571	0	0	1	1	0	0	CCNDBP1	cyclin D-type binding-protein 1
hsa-miR-571	0	0	0	1	0	0	FER1L4	fer-1-like 4 (C. elegans) pseudogene
hsa-miR-571	0	0	0	1	1	1	CYP2S1	cytochrome P450, family 2, subfamily S, polypeptide 1
hsa-miR-571	0	0	1	1	0	0	SLC39A4	solute carrier family 39 (zinc transporter), member 4
hsa-miR-571	0	0	0	1	1	1	CYB5D2	cytochrome b5 domain containing 2
hsa-miR-571	0	0	1	1	0	0	NUDT8	nudix (nucleoside diphosphate linked moiety X)-type motif 8
hsa-miR-571	0	0	1	1	0	0	ZNF467	zinc finger protein 467
hsa-miR-571	0	0	0	1	0	0	OR8U1	olfactory receptor, family 8, subfamily U, member 1
hsa-miR-571	0	0	1	1	1	1	WIBG	within bgcn homolog (Drosophila)
hsa-miR-571	0	0	1	1	0	0	COX7B2	cytochrome c oxidase subunit VIIb2
hsa-miR-571	0	0	0	1	0	0	GSX1	GS homeobox 1
hsa-miR-571	0	0	1	1	0	0	C20orf196	chromosome 20 open reading frame 196
hsa-miR-571	0	0	1	1	0	0	COPS6	COP9 constitutive photomorphogenic homolog subunit 6 (Arabidopsis)
hsa-miR-571	0	0	0	1	0	0	ADCYAP1R1	adenylate cyclase activating polypeptide 1 (pituitary) receptor type I
hsa-miR-571	0	0	1	1	0	0	HIST1H1E	histone cluster 1, H1e
hsa-miR-571	0	0	0	1	0	0	ANKS3	ankyrin repeat and sterile alpha motif domain containing 3
hsa-miR-571	1	0	1	1	1	1	DCC	deleted in colorectal carcinoma
hsa-miR-571	0	0	0	1	0	0	REG1B	regenerating islet-derived 1 beta
hsa-miR-571	0	0	1	1	0	0	TTLL6	tubulin tyrosine ligase-like family, member 6
hsa-miR-571	1	0	1	1	1	1	UBTD2	ubiquitin domain containing 2
hsa-miR-571	1	0	0	1	1	1	SLC1A5	solute carrier family 1 (neutral amino acid transporter), member 5
hsa-miR-571	0	0	0	1	1	1	ZNF57	zinc finger protein 57
hsa-miR-571	0	0	0	1	1	1	LDHAL6B	lactate dehydrogenase A-like 6B
hsa-miR-571	0	0	0	1	0	0	AGXT	alanine-glyoxylate aminotransferase
hsa-miR-571	0	0	0	1	1	1	CCDC110	coiled-coil domain containing 110
hsa-miR-571	0	0	0	1	0	0	OR52K1	olfactory receptor, family 52, subfamily K, member 1
hsa-miR-571	0	0	1	1	0	0	WFDC5	WAP four-disulfide core domain 5
hsa-miR-571	0	0	0	1	0	0	FBXW10	F-box and WD repeat domain containing 10
hsa-miR-571	0	0	1	1	0	0	CCDC106	coiled-coil domain containing 106
hsa-miR-571	0	0	1	1	0	0	VEGFB	vascular endothelial growth factor B
hsa-miR-571	1	0	1	1	0	0	ATG4D	autophagy related 4D, cysteine peptidase
hsa-miR-571	0	0	1	1	1	1	USMG5	up-regulated during skeletal muscle growth 5 homolog (mouse)
hsa-miR-571	0	0	1	1	0	0	LMAN1L	lectin, mannose-binding, 1 like
hsa-miR-571	0	0	0	1	1	1	PRLR	prolactin receptor
hsa-miR-571	0	0	0	1	0	0	C21orf58	chromosome 21 open reading frame 58
hsa-miR-571	0	0	1	1	1	1	KLK6	kallikrein-related peptidase 6
hsa-miR-571	0	0	0	1	0	0	IQCF1	IQ motif containing F1
hsa-miR-571	0	0	1	1	0	0	SPNS1	spinster homolog 1 (Drosophila)
hsa-miR-571	1	0	1	1	0	0	CSRP2	cysteine and glycine-rich protein 2
hsa-miR-571	0	0	0	1	0	0	LEPREL2	leprecan-like 2
hsa-miR-571	0	0	1	1	0	0	GPR162	G protein-coupled receptor 162
hsa-miR-571	1	0	1	1	1	1	ZNF624	zinc finger protein 624
hsa-miR-571	0	0	0	1	1	1	ANKS4B	ankyrin repeat and sterile alpha motif domain containing 4B
hsa-miR-571	1	0	1	1	1	1	ADPGK	ADP-dependent glucokinase
hsa-miR-571	0	0	0	1	0	0	NAGPA	N-acetylglucosamine-1-phosphodiester alpha-N-acetylglucosaminidase
hsa-miR-571	0	0	1	1	0	0	POLD4	polymerase (DNA-directed), delta 4, accessory subunit
hsa-miR-571	0	0	1	1	1	1	SLC25A35	solute carrier family 25, member 35
hsa-miR-571	0	0	1	1	0	0	CD7	CD7 molecule
hsa-miR-571	0	0	1	1	1	1	JAM2	junctional adhesion molecule 2
hsa-miR-571	0	0	0	1	0	0	PARP10	poly (ADP-ribose) polymerase family, member 10
hsa-miR-571	1	0	1	1	1	1	GALE	UDP-galactose-4-epimerase
hsa-miR-571	0	0	1	1	1	1	RMND5B	required for meiotic nuclear division 5 homolog B (S. cerevisiae)
hsa-miR-571	0	0	1	1	0	0	C2CD3	C2 calcium-dependent domain containing 3
hsa-miR-571	0	0	1	1	0	0	TBC1D26	TBC1 domain family, member 26
hsa-miR-571	0	0	1	1	1	1	CD300LB	CD300 molecule-like family member b
hsa-miR-571	0	0	1	1	0	0	KCNH6	potassium voltage-gated channel, subfamily H (eag-related), member 6
hsa-miR-571	0	0	0	1	1	1	CCDC111	coiled-coil domain containing 111
hsa-miR-571	1	0	0	1	0	0	TNIP1	TNFAIP3 interacting protein 1
hsa-miR-571	1	0	1	1	1	1	VAT1	vesicle amine transport protein 1 homolog (T. californica)
hsa-miR-571	0	0	0	1	0	0	MAP7D3	MAP7 domain containing 3
hsa-miR-571	1	0	1	1	1	1	PRKAG1	protein kinase, AMP-activated, gamma 1 non-catalytic subunit
hsa-miR-571	0	0	0	1	0	0	UNCX	UNC homeobox
hsa-miR-571	1	0	1	1	1	1	SHMT1	serine hydroxymethyltransferase 1 (soluble)
hsa-miR-571	1	0	1	1	1	1	CABP1	calcium binding protein 1
hsa-miR-571	0	0	1	1	0	0	STOML1	stomatin (EPB72)-like 1
hsa-miR-571	0	0	1	1	0	0	ZBED2	zinc finger, BED-type containing 2
hsa-miR-571	0	0	0	1	0	0	ZNF271	zinc finger protein 271
hsa-miR-571	0	0	0	1	0	0	PGAM5	phosphoglycerate mutase family member 5
hsa-miR-571	0	0	0	1	0	0	DEFB124	defensin, beta 124
hsa-miR-571	1	0	0	1	1	1	TUBB6	tubulin, beta 6 class V
hsa-miR-571	0	0	1	1	0	0	SLCO3A1	solute carrier organic anion transporter family, member 3A1
hsa-miR-571	1	0	1	1	1	1	SH3BGRL3	SH3 domain binding glutamic acid-rich protein like 3
hsa-miR-571	1	0	0	1	1	1	EPHA10	EPH receptor A10
hsa-miR-571	0	0	0	1	1	1	OLFML3	olfactomedin-like 3
hsa-miR-571	0	0	0	1	0	0	OR51V1	olfactory receptor, family 51, subfamily V, member 1
hsa-miR-571	0	0	1	1	1	1	FBXO39	F-box protein 39
hsa-miR-571	0	0	0	1	0	0	GIPC3	GIPC PDZ domain containing family, member 3
hsa-miR-571	0	0	1	1	0	0	ZNF335	zinc finger protein 335
hsa-miR-571	0	0	1	1	0	0	CD37	CD37 molecule
hsa-miR-571	1	0	1	1	1	1	ST7	suppression of tumorigenicity 7
hsa-miR-571	0	0	0	1	0	0	B3GNT4	UDP-GlcNAc:betaGal beta-1,3-N-acetylglucosaminyltransferase 4
hsa-miR-571	0	0	1	1	0	0	PPIE	peptidylprolyl isomerase E (cyclophilin E)
hsa-miR-571	0	0	1	1	1	1	BAIAP3	BAI1-associated protein 3
hsa-miR-571	0	0	1	1	1	1	SH3GL3	SH3-domain GRB2-like 3
hsa-miR-571	0	0	0	1	0	0	MC5R	melanocortin 5 receptor
hsa-miR-571	1	0	0	1	1	1	SSH1	slingshot homolog 1 (Drosophila)
hsa-miR-571	0	0	0	1	1	1	FLII	flightless I homolog (Drosophila)
hsa-miR-571	1	0	1	1	0	0	KIAA0556	KIAA0556
hsa-miR-571	0	0	0	1	1	1	ELP6	elongator acetyltransferase complex subunit 6
hsa-miR-571	0	0	1	1	0	0	BRAP	BRCA1 associated protein
hsa-miR-571	0	0	0	1	0	0	OXCT2	3-oxoacid CoA transferase 2
hsa-miR-571	0	0	0	1	0	0	SERHL2	serine hydrolase-like 2
hsa-miR-571	1	0	0	1	0	0	KRT81	keratin 81
hsa-miR-571	0	0	0	1	0	0	OR2V2	olfactory receptor, family 2, subfamily V, member 2
hsa-miR-571	0	0	1	1	0	0	CTAG1B	cancer/testis antigen 1B
hsa-miR-571	1	0	1	1	1	1	MYT1	myelin transcription factor 1
hsa-miR-571	0	0	1	1	0	0	FES	feline sarcoma oncogene
hsa-miR-571	0	0	0	1	1	1	GALNT9	UDP-N-acetyl-alpha-D-galactosamine:polypeptide N-acetylgalactosaminyltransferase 9 (GalNAc-T9)
hsa-miR-571	0	0	1	1	0	0	AVL9	AVL9 homolog (S. cerevisiase)
hsa-miR-571	0	0	0	1	1	1	CXorf69	chromosome X open reading frame 69
hsa-miR-571	0	0	1	1	0	0	INTS5	integrator complex subunit 5
hsa-miR-571	0	0	0	1	0	0	ALAS2	aminolevulinate, delta-, synthase 2
hsa-miR-571	0	0	0	1	0	0	ALG12	asparagine-linked glycosylation 12, alpha-1,6-mannosyltransferase homolog (S. cerevisiae)
hsa-miR-571	1	0	1	1	1	1	NOTUM	notum pectinacetylesterase homolog (Drosophila)
hsa-miR-571	0	0	0	1	1	1	SNX20	sorting nexin 20
hsa-miR-571	0	0	1	1	1	1	RGS7	regulator of G-protein signaling 7
hsa-miR-571	0	0	0	1	0	0	NPBWR1	neuropeptides B/W receptor 1
hsa-miR-571	1	0	1	1	1	1	CLSTN2	calsyntenin 2
hsa-miR-571	1	0	0	1	0	0	RGS19	regulator of G-protein signaling 19
hsa-miR-571	0	0	0	1	0	0	CTAG1A	cancer/testis antigen 1A
hsa-miR-571	0	0	1	1	0	0	C3orf26	chromosome 3 open reading frame 26
hsa-miR-571	0	0	1	1	0	0	ZSCAN30	zinc finger and SCAN domain containing 30
hsa-miR-571	0	0	0	1	0	0	NPB	neuropeptide B
hsa-miR-571	0	0	0	1	0	0	OIT3	oncoprotein induced transcript 3
hsa-miR-571	0	0	0	1	0	0	FGF3	fibroblast growth factor 3
hsa-miR-571	0	0	0	1	0	0	TAC4	tachykinin 4 (hemokinin)
hsa-miR-571	0	0	0	1	1	1	GPATCH4	G patch domain containing 4
hsa-miR-571	1	0	1	1	1	1	RASSF4	Ras association (RalGDS/AF-6) domain family member 4
hsa-miR-571	0	0	0	1	1	1	CMTM7	CKLF-like MARVEL transmembrane domain containing 7
hsa-miR-571	0	0	1	1	0	0	HTR3E	5-hydroxytryptamine (serotonin) receptor 3E, ionotropic
hsa-miR-571	0	0	0	1	0	0	ST6GALNAC4	ST6 (alpha-N-acetyl-neuraminyl-2,3-beta-galactosyl-1,3)-N-acetylgalactosaminide alpha-2,6-sialyltransferase 4
hsa-miR-571	0	0	0	1	1	1	PKD1L2	polycystic kidney disease 1-like 2
hsa-miR-571	1	0	1	1	1	1	CAPN3	calpain 3, (p94)
hsa-miR-571	0	0	0	1	1	1	MEN1	multiple endocrine neoplasia I
hsa-miR-571	1	0	1	1	1	1	SERF2	small EDRK-rich factor 2
hsa-miR-571	1	0	1	1	1	1	C15orf63	chromosome 15 open reading frame 63
hsa-miR-571	1	0	0	1	1	1	TAGAP	T-cell activation RhoGTPase activating protein
hsa-miR-571	0	0	0	1	0	0	FBLL1	fibrillarin-like 1
hsa-miR-571	0	0	0	1	0	0	GJB5	gap junction protein, beta 5, 31.1kDa
hsa-miR-571	0	0	1	1	0	0	RGS12	regulator of G-protein signaling 12
hsa-miR-571	0	0	0	1	0	0	CATSPER4	cation channel, sperm associated 4
hsa-miR-571	0	0	0	1	1	1	ABHD12	abhydrolase domain containing 12
hsa-miR-571	0	0	0	1	0	0	FCRL6	Fc receptor-like 6
hsa-miR-571	0	0	0	1	0	0	SLC26A5	solute carrier family 26, member 5 (prestin)
hsa-miR-571	0	0	0	1	0	0	NAALADL1	N-acetylated alpha-linked acidic dipeptidase-like 1
hsa-miR-571	0	0	1	1	1	1	VRK2	vaccinia related kinase 2
hsa-miR-571	0	0	1	1	0	0	SPAG8	sperm associated antigen 8
hsa-miR-571	1	0	1	1	1	1	RILPL1	Rab interacting lysosomal protein-like 1
hsa-miR-571	1	0	1	1	0	0	PFKM	phosphofructokinase, muscle
hsa-miR-571	0	0	0	1	1	1	PLEKHG5	pleckstrin homology domain containing, family G (with RhoGef domain) member 5
hsa-miR-571	0	0	0	1	0	0	ENO4	enolase family member 4
hsa-miR-571	1	0	1	1	0	0	KAT5	K(lysine) acetyltransferase 5
hsa-miR-571	1	0	0	1	0	0	SYDE2	synapse defective 1, Rho GTPase, homolog 2 (C. elegans)
hsa-miR-571	0	0	1	1	0	0	SPRR2B	small proline-rich protein 2B
hsa-miR-571	1	0	0	1	0	0	ATP13A2	ATPase type 13A2
hsa-miR-571	0	0	0	1	0	0	ARHGAP11B	Rho GTPase activating protein 11B
hsa-miR-571	0	0	0	1	1	1	ZNF167	zinc finger protein 167
hsa-miR-571	0	0	1	1	0	0	CIR1	corepressor interacting with RBPJ, 1
hsa-miR-571	0	0	1	1	1	1	OAS2	2'-5'-oligoadenylate synthetase 2, 69/71kDa
hsa-miR-571	0	0	0	1	0	0	PODXL2	podocalyxin-like 2
hsa-miR-571	0	0	0	1	0	0	ZNF79	zinc finger protein 79
hsa-miR-571	0	0	0	1	0	0	BTBD8	BTB (POZ) domain containing 8
hsa-miR-571	0	0	0	1	1	1	FOXD4L3	forkhead box D4-like 3
hsa-miR-571	0	0	1	1	0	0	MCM7	minichromosome maintenance complex component 7
hsa-miR-571	0	0	1	1	0	0	SLC6A13	solute carrier family 6 (neurotransmitter transporter, GABA), member 13
hsa-miR-571	0	0	1	1	1	1	CASP8	caspase 8, apoptosis-related cysteine peptidase
hsa-miR-571	0	0	0	1	1	1	ZNF177	zinc finger protein 177
hsa-miR-571	0	0	0	1	0	0	SOWAHD	sosondowah ankyrin repeat domain family member D
hsa-miR-571	0	0	0	1	0	0	CPSF4L	cleavage and polyadenylation specific factor 4-like
hsa-miR-571	0	0	1	1	0	0	KCNQ1	potassium voltage-gated channel, KQT-like subfamily, member 1
hsa-miR-571	0	0	1	1	0	0	PRICKLE1	prickle homolog 1 (Drosophila)
hsa-miR-571	0	0	0	1	0	0	LTB4R	leukotriene B4 receptor
hsa-miR-571	1	0	1	1	1	1	ARID3B	AT rich interactive domain 3B (BRIGHT-like)
hsa-miR-571	0	0	0	1	0	0	FCER2	Fc fragment of IgE, low affinity II, receptor for (CD23)
hsa-miR-571	1	0	1	1	1	1	SENP7	SUMO1/sentrin specific peptidase 7
hsa-miR-571	0	0	0	1	1	1	ALDH3B2	aldehyde dehydrogenase 3 family, member B2
hsa-miR-571	0	0	0	1	0	0	BPIFB6	BPI fold containing family B, member 6
hsa-miR-571	0	0	1	1	0	0	P2RY6	pyrimidinergic receptor P2Y, G-protein coupled, 6
hsa-miR-571	0	0	0	1	0	0	CCDC37	coiled-coil domain containing 37
hsa-miR-571	0	0	1	1	0	0	MPI	mannose phosphate isomerase
hsa-miR-571	1	0	1	1	1	1	ATP2B2	ATPase, Ca++ transporting, plasma membrane 2
hsa-miR-571	0	0	0	1	1	1	MYL1	myosin, light chain 1, alkali; skeletal, fast
hsa-miR-571	1	0	1	1	1	1	FAM184A	family with sequence similarity 184, member A
hsa-miR-571	0	0	1	1	0	0	DPAGT1	dolichyl-phosphate (UDP-N-acetylglucosamine) N-acetylglucosaminephosphotransferase 1 (GlcNAc-1-P transferase)
hsa-miR-571	1	0	1	1	1	1	DMPK	dystrophia myotonica-protein kinase
hsa-miR-571	0	0	1	1	0	0	FBXO2	F-box protein 2
hsa-miR-571	0	0	1	1	1	1	RFPL1	ret finger protein-like 1
hsa-miR-571	0	0	0	1	1	1	TRIM16	tripartite motif containing 16
hsa-miR-571	0	0	0	1	0	0	C9orf131	chromosome 9 open reading frame 131
hsa-miR-571	0	0	0	1	0	0	CTSL3	cathepsin L family member 3
hsa-miR-571	0	0	1	1	0	0	C11orf48	chromosome 11 open reading frame 48
hsa-miR-571	0	0	1	1	0	0	TBL3	transducin (beta)-like 3
hsa-miR-571	0	0	0	1	1	1	ARSG	arylsulfatase G
hsa-miR-571	0	0	1	1	1	1	ITGB1BP1	integrin beta 1 binding protein 1
hsa-miR-571	0	0	0	1	0	0	PLEKHA4	pleckstrin homology domain containing, family A (phosphoinositide binding specific) member 4
hsa-miR-571	0	0	0	1	0	0	NEK5	NIMA (never in mitosis gene a)-related kinase 5
hsa-miR-571	1	0	1	1	1	1	PER2	period homolog 2 (Drosophila)
hsa-miR-571	0	0	0	1	1	1	EMC1	ER membrane protein complex subunit 1
hsa-miR-571	0	0	1	1	0	0	CEP250	centrosomal protein 250kDa
hsa-miR-571	0	0	0	1	0	0	LIPC	lipase, hepatic
hsa-miR-571	0	0	0	1	0	0	KATNAL2	katanin p60 subunit A-like 2
hsa-miR-571	1	0	0	1	1	1	ZNF614	zinc finger protein 614
hsa-miR-571	0	0	0	1	0	0	ZNF432	zinc finger protein 432
hsa-miR-571	1	0	1	1	0	0	APBB3	amyloid beta (A4) precursor protein-binding, family B, member 3
hsa-miR-571	1	0	1	1	1	1	SHANK2	SH3 and multiple ankyrin repeat domains 2
hsa-miR-571	0	0	1	1	0	0	AKNAD1	AKNA domain containing 1
hsa-miR-571	0	0	1	1	1	1	SPSB1	splA/ryanodine receptor domain and SOCS box containing 1
hsa-miR-571	0	0	0	1	0	0	PADI6	peptidyl arginine deiminase, type VI
hsa-miR-571	0	0	1	1	0	0	NIF3L1	NIF3 NGG1 interacting factor 3-like 1 (S. cerevisiae)
hsa-miR-571	0	0	1	1	1	1	MYPN	myopalladin
hsa-miR-571	0	0	1	1	0	0	TRAPPC4	trafficking protein particle complex 4
hsa-miR-571	1	0	1	1	1	1	FGFR2	fibroblast growth factor receptor 2
hsa-miR-571	1	0	0	1	0	0	TRPV6	transient receptor potential cation channel, subfamily V, member 6
hsa-miR-571	0	0	0	1	0	0	KRT78	keratin 78
hsa-miR-571	1	0	1	1	1	1	AGAP3	ArfGAP with GTPase domain, ankyrin repeat and PH domain 3
hsa-miR-571	0	0	1	1	1	1	ATP2A3	ATPase, Ca++ transporting, ubiquitous
hsa-miR-571	0	0	0	1	1	1	LCE1B	late cornified envelope 1B
hsa-miR-571	0	0	0	1	1	1	RDH14	retinol dehydrogenase 14 (all-trans/9-cis/11-cis)
hsa-miR-571	1	0	0	1	1	1	NT5C1B	5'-nucleotidase, cytosolic IB
hsa-miR-571	0	0	0	1	1	1	SPRR2D	small proline-rich protein 2D
hsa-miR-571	1	0	1	1	1	1	SCAF1	SR-related CTD-associated factor 1
hsa-miR-571	0	0	1	1	0	0	IFI6	interferon, alpha-inducible protein 6
hsa-miR-571	0	0	0	1	0	0	PPEF1	protein phosphatase, EF-hand calcium binding domain 1
hsa-miR-571	0	0	1	1	1	1	NAA35	N(alpha)-acetyltransferase 35, NatC auxiliary subunit
hsa-miR-571	0	0	0	1	1	1	FAM63A	family with sequence similarity 63, member A
hsa-miR-571	0	0	1	1	1	1	PCDH15	protocadherin-related 15
hsa-miR-571	1	0	1	1	1	1	ILF2	interleukin enhancer binding factor 2, 45kDa
hsa-miR-571	0	0	1	1	0	0	GPX6	glutathione peroxidase 6 (olfactory)
hsa-miR-571	0	0	1	1	1	1	SELM	selenoprotein M
hsa-miR-571	0	0	0	1	1	1	BNIPL	BCL2/adenovirus E1B 19kD interacting protein like
hsa-miR-571	1	0	1	1	1	1	HNRNPU	heterogeneous nuclear ribonucleoprotein U (scaffold attachment factor A)
hsa-miR-571	0	0	1	1	0	0	PLG	plasminogen
hsa-miR-571	0	0	0	1	0	0	G0S2	G0/G1switch 2
hsa-miR-571	0	0	0	1	0	0	LEMD1	LEM domain containing 1
hsa-miR-571	0	0	0	1	0	0	PHLDA3	pleckstrin homology-like domain, family A, member 3
hsa-miR-571	0	0	1	1	0	0	ABRACL	ABRA C-terminal like
hsa-miR-571	1	0	1	1	0	0	REPS1	RALBP1 associated Eps domain containing 1
hsa-miR-571	0	0	1	1	0	0	TNR	tenascin R
hsa-miR-571	0	0	1	1	1	1	XCL2	chemokine (C motif) ligand 2
hsa-miR-571	0	0	1	1	1	1	MAEL	maelstrom homolog (Drosophila)
hsa-miR-571	0	0	0	1	0	0	C1orf111	chromosome 1 open reading frame 111
hsa-miR-571	0	0	1	1	1	1	NR1I3	nuclear receptor subfamily 1, group I, member 3
hsa-miR-571	0	0	1	1	1	1	CASQ1	calsequestrin 1 (fast-twitch, skeletal muscle)
hsa-miR-571	0	0	1	1	1	1	CRP	C-reactive protein, pentraxin-related
hsa-miR-571	0	0	1	1	0	0	AIM2	absent in melanoma 2
hsa-miR-571	0	0	1	1	0	0	CCT3	chaperonin containing TCP1, subunit 3 (gamma)
hsa-miR-571	1	0	1	1	0	0	EFNA4	ephrin-A4
hsa-miR-571	0	0	1	1	0	0	PAOX	polyamine oxidase (exo-N4-amino)
hsa-miR-571	0	0	1	1	1	1	RAB13	RAB13, member RAS oncogene family
hsa-miR-571	0	0	0	1	0	0	UROS	uroporphyrinogen III synthase
hsa-miR-571	0	0	0	1	0	0	LCE2B	late cornified envelope 2B
hsa-miR-571	0	0	0	1	0	0	LCE2C	late cornified envelope 2C
hsa-miR-571	0	0	0	1	1	1	LCE2D	late cornified envelope 2D
hsa-miR-571	0	0	0	1	1	1	DMBT1	deleted in malignant brain tumors 1
hsa-miR-571	0	0	0	1	0	0	ANXA9	annexin A9
hsa-miR-571	0	0	1	1	0	0	SETDB1	SET domain, bifurcated 1
hsa-miR-571	1	0	0	1	0	0	PLEKHO1	pleckstrin homology domain containing, family O member 1
hsa-miR-571	0	0	1	1	1	1	FAM204A	family with sequence similarity 204, member A
hsa-miR-571	0	0	1	1	0	0	NBPF9	neuroblastoma breakpoint family, member 9
hsa-miR-571	0	0	0	1	0	0	NRAP	nebulin-related anchoring protein
hsa-miR-571	1	0	1	1	1	1	SCAF11	SR-related CTD-associated factor 11
hsa-miR-571	0	0	1	1	0	0	NBPF8	neuroblastoma breakpoint family, member 8
hsa-miR-571	0	0	0	1	0	0	HSD3B2	hydroxy-delta-5-steroid dehydrogenase, 3 beta- and steroid delta-isomerase 2
hsa-miR-571	0	0	1	1	0	0	CD101	CD101 molecule
hsa-miR-571	1	0	1	1	0	0	ZNF292	zinc finger protein 292
hsa-miR-571	1	0	1	1	1	1	CYB5R4	cytochrome b5 reductase 4
hsa-miR-571	0	0	1	1	1	1	PCMTD2	protein-L-isoaspartate (D-aspartate) O-methyltransferase domain containing 2
hsa-miR-571	0	0	0	1	0	0	TEX28	testis expressed 28
hsa-miR-571	0	0	1	1	0	0	KIAA1324	KIAA1324
hsa-miR-571	0	0	0	1	0	0	TNFRSF6B	tumor necrosis factor receptor superfamily, member 6b, decoy
hsa-miR-571	0	0	1	1	0	0	RTEL1	regulator of telomere elongation helicase 1
hsa-miR-571	0	0	1	1	0	0	NAA10	N(alpha)-acetyltransferase 10, NatA catalytic subunit
hsa-miR-571	0	0	1	1	1	1	NSDHL	NAD(P) dependent steroid dehydrogenase-like
hsa-miR-571	0	0	1	1	0	0	NDUFB8	NADH dehydrogenase (ubiquinone) 1 beta subcomplex, 8, 19kDa
hsa-miR-571	0	0	1	1	0	0	MTMR1	myotubularin related protein 1
hsa-miR-571	0	0	1	1	0	0	BARHL2	BarH-like homeobox 2
hsa-miR-571	0	0	0	1	1	1	ABCC2	ATP-binding cassette, sub-family C (CFTR/MRP), member 2
hsa-miR-571	0	0	0	1	1	1	GBP2	guanylate binding protein 2, interferon-inducible
hsa-miR-571	0	0	1	1	1	1	CUTC	cutC copper transporter homolog (E. coli)
hsa-miR-571	0	0	1	1	0	0	ODF2L	outer dense fiber of sperm tails 2-like
hsa-miR-571	0	0	1	1	1	1	DEPDC1	DEP domain containing 1
hsa-miR-571	1	0	1	1	1	1	WLS	wntless homolog (Drosophila)
hsa-miR-571	0	0	0	1	0	0	C8B	complement component 8, beta polypeptide
hsa-miR-571	0	0	1	1	1	1	LRRC42	leucine rich repeat containing 42
hsa-miR-571	0	0	0	1	1	1	CPT2	carnitine palmitoyltransferase 2
hsa-miR-571	0	0	1	1	1	1	MYOF	myoferlin
hsa-miR-571	0	0	0	1	0	0	TCTE1	t-complex-associated-testis-expressed 1
hsa-miR-571	0	0	1	1	0	0	NDOR1	NADPH dependent diflavin oxidoreductase 1
hsa-miR-571	0	0	0	1	0	0	C9orf116	chromosome 9 open reading frame 116
hsa-miR-571	0	0	1	1	0	0	ADAMTS13	ADAM metallopeptidase with thrombospondin type 1 motif, 13
hsa-miR-571	0	0	1	1	0	0	MUTYH	mutY homolog (E. coli)
hsa-miR-571	0	0	1	1	1	1	TMEM53	transmembrane protein 53
hsa-miR-571	0	0	0	1	0	0	SFTPA2	surfactant protein A2
hsa-miR-571	0	0	1	1	0	0	PLTP	phospholipid transfer protein
hsa-miR-571	0	0	1	1	0	0	NGFRAP1	nerve growth factor receptor (TNFRSF16) associated protein 1
hsa-miR-571	0	0	0	1	0	0	ZNF642	zinc finger protein 642
hsa-miR-571	1	0	1	1	1	1	TOMM34	translocase of outer mitochondrial membrane 34
hsa-miR-571	0	0	0	1	1	1	ADA	adenosine deaminase
hsa-miR-571	0	0	1	1	1	1	TAF8	TAF8 RNA polymerase II, TATA box binding protein (TBP)-associated factor, 43kDa
hsa-miR-571	0	0	1	1	0	0	C9orf16	chromosome 9 open reading frame 16
hsa-miR-571	0	0	1	1	1	1	SRPX2	sushi-repeat containing protein, X-linked 2
hsa-miR-571	0	0	1	1	1	1	INPP5B	inositol polyphosphate-5-phosphatase, 75kDa
hsa-miR-571	0	0	1	1	1	1	IFT52	intraflagellar transport 52 homolog (Chlamydomonas)
hsa-miR-571	0	0	1	1	0	0	TREML1	triggering receptor expressed on myeloid cells-like 1
hsa-miR-571	0	0	1	1	1	1	MOCS1	molybdenum cofactor synthesis 1
hsa-miR-571	0	0	0	1	0	0	KIF6	kinesin family member 6
hsa-miR-571	0	0	1	1	0	0	FPGS	folylpolyglutamate synthase
hsa-miR-571	0	0	0	1	0	0	GPR35	G protein-coupled receptor 35
hsa-miR-571	0	0	1	1	1	1	FGD2	FYVE, RhoGEF and PH domain containing 2
hsa-miR-571	1	0	0	1	0	0	FAM167B	family with sequence similarity 167, member B
hsa-miR-571	0	0	1	1	1	1	MRRF	mitochondrial ribosome recycling factor
hsa-miR-571	0	0	1	1	1	1	CTNNA3	catenin (cadherin-associated protein), alpha 3
hsa-miR-571	1	0	0	1	0	0	XKR8	XK, Kell blood group complex subunit-related family, member 8
hsa-miR-571	0	0	0	1	0	0	SMPDL3B	sphingomyelin phosphodiesterase, acid-like 3B
hsa-miR-571	0	0	1	1	1	1	RBM39	RNA binding motif protein 39
hsa-miR-571	0	0	0	1	0	0	ROMO1	reactive oxygen species modulator 1
hsa-miR-571	0	0	1	1	1	1	SLC9A1	solute carrier family 9, subfamily A (NHE1, cation proton antiporter 1), member 1
hsa-miR-571	0	0	0	1	0	0	SLC18A3	solute carrier family 18 (vesicular acetylcholine), member 3
hsa-miR-571	0	0	0	1	1	1	C10orf71	chromosome 10 open reading frame 71
hsa-miR-571	0	0	1	1	0	0	ALOX5	arachidonate 5-lipoxygenase
hsa-miR-571	0	0	0	1	0	0	GGNBP1	gametogenetin binding protein 1 (pseudogene)
hsa-miR-571	0	0	1	1	1	1	HMGCL	3-hydroxymethyl-3-methylglutaryl-CoA lyase
hsa-miR-571	0	0	1	1	0	0	P2RY4	pyrimidinergic receptor P2Y, G-protein coupled, 4
hsa-miR-571	0	0	1	1	0	0	CELA3A	chymotrypsin-like elastase family, member 3A
hsa-miR-571	0	0	1	1	0	0	CELA3B	chymotrypsin-like elastase family, member 3B
hsa-miR-571	0	0	1	1	1	1	ALPL	alkaline phosphatase, liver/bone/kidney
hsa-miR-571	1	0	0	1	0	0	PSMB8	proteasome (prosome, macropain) subunit, beta type, 8 (large multifunctional peptidase 7)
hsa-miR-571	0	0	1	1	0	0	FSIP2	fibrous sheath interacting protein 2
hsa-miR-571	0	0	0	1	0	0	OR10G8	olfactory receptor, family 10, subfamily G, member 8
hsa-miR-571	0	0	0	1	0	0	DFNB59	deafness, autosomal recessive 59
hsa-miR-571	1	0	1	1	1	1	FGD1	FYVE, RhoGEF and PH domain containing 1
hsa-miR-571	0	0	0	1	0	0	C9orf129	chromosome 9 open reading frame 129
hsa-miR-571	0	0	0	1	1	1	SUSD3	sushi domain containing 3
hsa-miR-571	0	0	0	1	0	0	SDHB	succinate dehydrogenase complex, subunit B, iron sulfur (Ip)
hsa-miR-571	1	0	1	1	1	1	C20orf112	chromosome 20 open reading frame 112
hsa-miR-571	0	0	1	1	0	0	HLA-C	major histocompatibility complex, class I, C
hsa-miR-571	0	0	0	1	1	1	FLOT1	flotillin 1
hsa-miR-571	0	0	0	1	1	1	GPR183	G protein-coupled receptor 183
hsa-miR-571	0	0	1	1	0	0	RPP21	ribonuclease P/MRP 21kDa subunit
hsa-miR-571	0	0	0	1	1	1	TRIM15	tripartite motif containing 15
hsa-miR-571	0	0	1	1	0	0	UGGT2	UDP-glucose glycoprotein glucosyltransferase 2
hsa-miR-571	0	0	1	1	1	1	SLC15A4	solute carrier family 15, member 4
hsa-miR-571	1	0	0	1	0	0	TBC1D8	TBC1 domain family, member 8 (with GRAM domain)
hsa-miR-571	0	0	0	1	1	1	BTNL9	butyrophilin-like 9
hsa-miR-571	1	0	1	1	1	1	CLDN10	claudin 10
hsa-miR-571	1	0	1	1	1	1	SOX21	SRY (sex determining region Y)-box 21
hsa-miR-571	0	0	1	1	0	0	MASP2	mannan-binding lectin serine peptidase 2
hsa-miR-571	0	0	0	1	0	0	C1orf127	chromosome 1 open reading frame 127
hsa-miR-571	0	0	1	1	0	0	FOXD4L4	forkhead box D4-like 4
hsa-miR-571	0	0	0	1	0	0	FOXD4L5	forkhead box D4-like 5
hsa-miR-571	0	0	0	1	0	0	CBWD6	COBW domain containing 6
hsa-miR-571	0	0	0	1	0	0	FOXD4L6	forkhead box D4-like 6
hsa-miR-571	0	0	0	1	0	0	FOXD4L2	forkhead box D4-like 2
hsa-miR-571	0	0	1	1	0	0	TCTN1	tectonic family member 1
hsa-miR-571	1	0	1	1	1	1	HIF3A	hypoxia inducible factor 3, alpha subunit
hsa-miR-571	1	0	1	1	0	0	GPR137	G protein-coupled receptor 137
hsa-miR-571	0	0	0	1	0	0	ASB10	ankyrin repeat and SOCS box containing 10
hsa-miR-571	1	0	1	1	1	1	CHD5	chromodomain helicase DNA binding protein 5
hsa-miR-571	1	0	1	1	1	1	FAM65B	family with sequence similarity 65, member B
hsa-miR-571	0	0	0	1	1	1	GPLD1	glycosylphosphatidylinositol specific phospholipase D1
hsa-miR-571	0	0	0	1	0	0	CD72	CD72 molecule
hsa-miR-571	0	0	1	1	0	0	MORN1	MORN repeat containing 1
hsa-miR-571	0	0	1	1	1	1	SRPX	sushi-repeat containing protein, X-linked
hsa-miR-571	0	0	0	1	0	0	C4orf47	chromosome 4 open reading frame 47
hsa-miR-571	0	0	1	1	0	0	DCTN3	dynactin 3 (p22)
hsa-miR-571	0	0	0	1	0	0	TNFRSF4	tumor necrosis factor receptor superfamily, member 4
hsa-miR-571	0	0	0	1	1	1	MCMDC2	minichromosome maintenance domain containing 2
hsa-miR-571	0	0	1	1	1	1	MUC17	mucin 17, cell surface associated
hsa-miR-571	0	0	1	1	1	1	STOML3	stomatin (EPB72)-like 3
hsa-miR-571	0	0	1	1	0	0	SLCO6A1	solute carrier organic anion transporter family, member 6A1
hsa-miR-571	0	0	1	1	0	0	SLC4A11	solute carrier family 4, sodium borate transporter, member 11
hsa-miR-571	0	0	1	1	0	0	EXOC3L4	exocyst complex component 3-like 4
hsa-miR-571	0	0	0	1	1	1	IFNA2	interferon, alpha 2
hsa-miR-571	0	0	1	1	0	0	FBXO16	F-box protein 16
hsa-miR-571	0	0	0	1	1	1	HBB	hemoglobin, beta
hsa-miR-571	0	0	1	1	0	0	HBD	hemoglobin, delta
hsa-miR-571	0	0	1	1	0	0	CA5BP1	carbonic anhydrase VB pseudogene 1
hsa-miR-571	0	0	1	1	1	1	POLR2M	polymerase (RNA) II (DNA directed) polypeptide M
hsa-miR-571	0	0	1	1	1	1	SNAPC3	small nuclear RNA activating complex, polypeptide 3, 50kDa
hsa-miR-571	0	0	1	1	0	0	FREM1	FRAS1 related extracellular matrix 1
hsa-miR-571	0	0	1	1	0	0	CEP152	centrosomal protein 152kDa
hsa-miR-571	0	0	1	1	0	0	DDX1	DEAD (Asp-Glu-Ala-Asp) box helicase 1
hsa-miR-571	1	0	0	1	0	0	TGM3	transglutaminase 3 (E polypeptide, protein-glutamine-gamma-glutamyltransferase)
hsa-miR-571	0	0	0	1	0	0	TNNT3	troponin T type 3 (skeletal, fast)
hsa-miR-571	0	0	1	1	1	1	SIRPD	signal-regulatory protein delta
hsa-miR-571	0	0	0	1	0	0	ANGPT4	angiopoietin 4
hsa-miR-571	0	0	1	1	1	1	SLC52A3	solute carrier family 52, riboflavin transporter, member 3
hsa-miR-571	0	0	0	1	1	1	RFPL3	ret finger protein-like 3
hsa-miR-571	0	0	1	1	1	1	FAHD1	fumarylacetoacetate hydrolase domain containing 1
hsa-miR-571	0	0	0	1	1	1	RBMY1E	RNA binding motif protein, Y-linked, family 1, member E
hsa-miR-571	0	0	0	1	1	1	RBMY1D	RNA binding motif protein, Y-linked, family 1, member D
hsa-miR-571	0	0	1	1	0	0	LNP1	leukemia NUP98 fusion partner 1
hsa-miR-571	1	0	1	1	0	0	SRRM3	serine/arginine repetitive matrix 3
hsa-miR-571	0	0	1	1	0	0	TM6SF2	transmembrane 6 superfamily member 2
hsa-miR-571	0	0	1	1	1	1	EP400	E1A binding protein p400
hsa-miR-571	1	0	1	0	1	1	IL6R	interleukin 6 receptor
hsa-miR-571	0	0	0	1	1	1	ADORA1	adenosine A1 receptor
hsa-miR-571	0	0	0	1	1	1	HTR3A	5-hydroxytryptamine (serotonin) receptor 3A, ionotropic
hsa-miR-571	0	0	1	1	1	1	MAOB	monoamine oxidase B
hsa-miR-571	1	0	1	1	1	1	RUNX1	runt-related transcription factor 1
hsa-miR-571	1	0	1	1	1	1	RAP1A	RAP1A, member of RAS oncogene family
hsa-miR-571	1	0	0	1	1	1	SLC5A9	solute carrier family 5 (sodium/glucose cotransporter), member 9
hsa-miR-571	1	0	1	1	1	1	CUL4B	cullin 4B
hsa-miR-571	0	0	1	1	1	1	CLIC2	chloride intracellular channel 2
hsa-miR-571	0	0	1	0	1	1	ACADSB	acyl-CoA dehydrogenase, short/branched chain
hsa-miR-571	0	0	1	1	1	1	NDUFB5	NADH dehydrogenase (ubiquinone) 1 beta subcomplex, 5, 16kDa
hsa-miR-571	0	0	0	1	1	1	RAC2	ras-related C3 botulinum toxin substrate 2 (rho family, small GTP binding protein Rac2)
hsa-miR-571	0	0	0	1	1	1	TXK	TXK tyrosine kinase
hsa-miR-571	0	0	0	1	1	1	DNALI1	dynein, axonemal, light intermediate chain 1
hsa-miR-571	1	0	1	1	1	1	PAX8	paired box 8
hsa-miR-571	1	0	1	1	1	1	GPR3	G protein-coupled receptor 3
hsa-miR-571	0	0	1	1	1	1	LIMK2	LIM domain kinase 2
hsa-miR-571	0	0	1	1	1	1	PEG3	paternally expressed 3
hsa-miR-571	0	0	1	1	1	1	TFDP2	transcription factor Dp-2 (E2F dimerization partner 2)
hsa-miR-571	1	0	1	1	1	1	KDM5B	lysine (K)-specific demethylase 5B
hsa-miR-571	0	0	1	0	1	1	HHLA2	HERV-H LTR-associating 2
hsa-miR-571	1	0	1	1	1	1	SLC17A5	solute carrier family 17 (anion/sugar transporter), member 5
hsa-miR-571	0	0	1	0	1	1	ADAMTS3	ADAM metallopeptidase with thrombospondin type 1 motif, 3
hsa-miR-571	1	0	1	0	1	1	KIAA0232	KIAA0232
hsa-miR-571	1	0	1	1	1	1	HECW1	HECT, C2 and WW domain containing E3 ubiquitin protein ligase 1
hsa-miR-571	1	0	1	0	1	1	FLVCR2	feline leukemia virus subgroup C cellular receptor family, member 2
hsa-miR-571	1	0	1	1	1	1	SGTB	small glutamine-rich tetratricopeptide repeat (TPR)-containing, beta
hsa-miR-571	0	0	0	1	1	1	ZNF471	zinc finger protein 471
hsa-miR-571	0	0	1	1	1	1	MARCH4	membrane-associated ring finger (C3HC4) 4, E3 ubiquitin protein ligase
hsa-miR-571	1	0	1	0	1	1	NECAB1	N-terminal EF-hand calcium binding protein 1
hsa-miR-571	1	0	1	1	1	1	GRAMD3	GRAM domain containing 3
hsa-miR-571	1	0	1	1	1	1	TMEM245	transmembrane protein 245
hsa-miR-571	0	0	1	1	1	1	HDHD2	haloacid dehalogenase-like hydrolase domain containing 2
hsa-miR-571	1	0	1	1	1	1	UTP15	UTP15, U3 small nucleolar ribonucleoprotein, homolog (S. cerevisiae)
hsa-miR-571	0	0	0	1	1	1	TMPRSS3	transmembrane protease, serine 3
hsa-miR-571	0	0	1	1	1	1	MSL3	male-specific lethal 3 homolog (Drosophila)
hsa-miR-571	1	0	1	0	1	1	SLC39A11	solute carrier family 39 (metal ion transporter), member 11
hsa-miR-571	0	0	1	1	1	1	CASC5	cancer susceptibility candidate 5
hsa-miR-571	0	0	1	1	1	1	ZNF781	zinc finger protein 781
hsa-miR-571	0	0	0	1	1	1	NME9	NME/NM23 family member 9
hsa-miR-571	0	0	1	1	1	1	ZNF831	zinc finger protein 831
hsa-miR-571	0	0	0	1	1	1	NRBP2	nuclear receptor binding protein 2
hsa-miR-571	0	0	0	1	1	1	SFTPB	surfactant protein B
hsa-miR-571	0	0	1	1	1	1	C11orf88	chromosome 11 open reading frame 88
hsa-miR-571	0	0	1	1	1	1	C15orf54	chromosome 15 open reading frame 54
hsa-miR-571	0	0	0	0	1	1	LOC728100	uncharacterized LOC728100
hsa-miR-571	0	0	0	0	1	1	LOC401220	uncharacterized LOC401220
