# Supplementary material for: Profiling of Selected MicroRNAs in Proliferative Eutopic Endometrium of Women with Ovarian Endometriosis
Source: Biomed Res Int. 2015 Aug 20;2015:760698. doi: 10.1155/2015/760698 (PMC4558423; doi:10.1155/2015/760698)
Supplement: Supplementary file 1 — Table I: The names of miRNAs significantly differentially expressed between eutopic endometrium of patients with endometriosis vs eutopic endometrium of patients without endometriosis. Table II: The associations between miRNA and mRNA, which presents detailed results of the search of six major databases i.e targetscan, tarbase, miranda, mirbase, mirtarget2 and pictar. [file 760698.f1.zip › 760698.f1/Table II/hsa-miR-572.tsv]

miR	targetscan	tarbase	miranda	mirbase	mirtarget2	pictar	GeneSymbol	GeneName
hsa-miR-572	0	0	1	1	1	1	C2CD2L	C2CD2-like
hsa-miR-572	1	0	1	1	0	0	SEC14L5	SEC14-like 5 (S. cerevisiae)
hsa-miR-572	0	0	1	1	0	0	ZNF862	zinc finger protein 862
hsa-miR-572	1	0	1	1	1	1	WWC1	WW and C2 domain containing 1
hsa-miR-572	1	0	1	0	0	0	DTX4	deltex homolog 4 (Drosophila)
hsa-miR-572	1	0	1	1	1	1	PCDH19	protocadherin 19
hsa-miR-572	1	0	1	1	0	0	EBF4	early B-cell factor 4
hsa-miR-572	1	0	1	0	0	0	PITPNM2	phosphatidylinositol transfer protein, membrane-associated 2
hsa-miR-572	1	0	1	0	1	1	RNF43	ring finger protein 43
hsa-miR-572	0	0	1	1	1	1	BIRC5	baculoviral IAP repeat containing 5
hsa-miR-572	1	0	1	1	1	1	ADARB1	adenosine deaminase, RNA-specific, B1
hsa-miR-572	1	0	1	1	1	1	SHC1	SHC (Src homology 2 domain containing) transforming protein 1
hsa-miR-572	1	0	1	1	0	0	TSPYL2	TSPY-like 2
hsa-miR-572	1	0	1	1	1	1	MTA1	metastasis associated 1
hsa-miR-572	0	0	1	1	0	0	DNMT1	DNA (cytosine-5-)-methyltransferase 1
hsa-miR-572	0	0	1	1	0	0	IGFBP2	insulin-like growth factor binding protein 2, 36kDa
hsa-miR-572	0	0	1	0	0	0	ALOX12P2	arachidonate 12-lipoxygenase pseudogene 2
hsa-miR-572	0	0	1	1	1	1	CYP4F3	cytochrome P450, family 4, subfamily F, polypeptide 3
hsa-miR-572	0	0	1	1	0	0	SLC38A6	solute carrier family 38, member 6
hsa-miR-572	0	0	1	0	1	1	SERF1A	small EDRK-rich factor 1A (telomeric)
hsa-miR-572	1	0	1	0	1	1	CD164	CD164 molecule, sialomucin
hsa-miR-572	1	0	1	1	1	1	NF2	neurofibromin 2 (merlin)
hsa-miR-572	1	0	1	1	1	1	TSC22D2	TSC22 domain family, member 2
hsa-miR-572	1	0	1	1	1	1	SNTB2	syntrophin, beta 2 (dystrophin-associated protein A1, 59kDa, basic component 2)
hsa-miR-572	1	0	1	1	1	1	PUM2	pumilio homolog 2 (Drosophila)
hsa-miR-572	1	0	1	1	0	0	EPC1	enhancer of polycomb homolog 1 (Drosophila)
hsa-miR-572	0	0	1	1	1	1	TBC1D2	TBC1 domain family, member 2
hsa-miR-572	1	0	1	1	1	1	LETMD1	LETM1 domain containing 1
hsa-miR-572	1	0	1	1	1	1	DDR1	discoidin domain receptor tyrosine kinase 1
hsa-miR-572	0	0	1	1	0	0	BPIFA1	BPI fold containing family A, member 1
hsa-miR-572	0	0	1	1	1	1	PTK7	PTK7 protein tyrosine kinase 7
hsa-miR-572	0	0	1	0	0	0	CD177	CD177 molecule
hsa-miR-572	1	0	1	1	1	1	NRXN3	neurexin 3
hsa-miR-572	1	0	1	1	1	1	ARHGAP17	Rho GTPase activating protein 17
hsa-miR-572	1	0	1	1	1	1	PTBP3	polypyrimidine tract binding protein 3
hsa-miR-572	0	0	1	1	0	0	ADCK4	aarF domain containing kinase 4
hsa-miR-572	1	0	1	1	0	0	UQCC	ubiquinol-cytochrome c reductase complex chaperone
hsa-miR-572	0	0	1	1	0	0	JMJD4	jumonji domain containing 4
hsa-miR-572	1	0	1	1	1	1	WDTC1	WD and tetratricopeptide repeats 1
hsa-miR-572	0	0	1	1	1	1	SPATA5L1	spermatogenesis associated 5-like 1
hsa-miR-572	1	0	1	1	1	1	ARHGEF15	Rho guanine nucleotide exchange factor (GEF) 15
hsa-miR-572	1	0	1	0	1	1	C14orf101	chromosome 14 open reading frame 101
hsa-miR-572	1	0	1	1	1	1	FAM131A	family with sequence similarity 131, member A
hsa-miR-572	0	0	1	1	1	1	METTL7A	methyltransferase like 7A
hsa-miR-572	0	0	1	1	0	0	EIF4ENIF1	eukaryotic translation initiation factor 4E nuclear import factor 1
hsa-miR-572	1	0	1	1	1	1	POLK	polymerase (DNA directed) kappa
hsa-miR-572	0	0	1	0	0	0	KIAA0664L3	KIAA0664-like 3
hsa-miR-572	0	0	1	0	0	0	FLJ31104	uncharacterized LOC441072
hsa-miR-572	0	0	1	0	0	0	LOC440894	uncharacterized LOC440894
hsa-miR-572	1	0	1	1	1	1	GABARAPL1	GABA(A) receptor-associated protein like 1
hsa-miR-572	0	0	1	1	0	0	VWA5B1	von Willebrand factor A domain containing 5B1
hsa-miR-572	1	0	1	0	1	1	NCAM1	neural cell adhesion molecule 1
hsa-miR-572	0	0	1	0	0	0	LOC284014	uncharacterized LOC284014
hsa-miR-572	0	0	1	1	0	0	TRIM41	tripartite motif containing 41
hsa-miR-572	0	0	1	1	0	0	SYTL1	synaptotagmin-like 1
hsa-miR-572	1	0	1	1	0	0	MMP11	matrix metallopeptidase 11 (stromelysin 3)
hsa-miR-572	0	0	1	1	1	1	RPL13	ribosomal protein L13
hsa-miR-572	0	0	1	0	0	0	LOC283887	uncharacterized LOC283887
hsa-miR-572	0	0	1	1	0	0	SERPINH1	serpin peptidase inhibitor, clade H (heat shock protein 47), member 1, (collagen binding protein 1)
hsa-miR-572	1	0	1	1	0	0	RABL6	RAB, member RAS oncogene family-like 6
hsa-miR-572	0	0	1	0	0	0	LINC00340	long intergenic non-protein coding RNA 340
hsa-miR-572	0	0	1	1	1	1	METTL13	methyltransferase like 13
hsa-miR-572	0	0	1	0	0	0	MYO1H	myosin IH
hsa-miR-572	0	0	1	1	1	1	BAG1	BCL2-associated athanogene
hsa-miR-572	0	0	1	1	1	1	GNAI2	guanine nucleotide binding protein (G protein), alpha inhibiting activity polypeptide 2
hsa-miR-572	1	0	1	1	1	1	SNRNP70	small nuclear ribonucleoprotein 70kDa (U1)
hsa-miR-572	0	0	1	1	1	1	PPP1R27	protein phosphatase 1, regulatory subunit 27
hsa-miR-572	0	0	1	1	1	1	EHD1	EH-domain containing 1
hsa-miR-572	0	0	1	1	0	0	CORO1A	coronin, actin binding protein, 1A
hsa-miR-572	0	0	1	1	0	0	TAPBPL	TAP binding protein-like
hsa-miR-572	0	0	1	0	0	0	CECR7	cat eye syndrome chromosome region, candidate 7 (non-protein coding)
hsa-miR-572	0	0	1	1	1	1	RP1	retinitis pigmentosa 1 (autosomal dominant)
hsa-miR-572	0	0	1	1	0	0	KIAA0146	KIAA0146
hsa-miR-572	1	0	1	1	1	1	AGAP2	ArfGAP with GTPase domain, ankyrin repeat and PH domain 2
hsa-miR-572	0	0	1	1	1	1	NFKB1	nuclear factor of kappa light polypeptide gene enhancer in B-cells 1
hsa-miR-572	0	0	1	1	0	0	SLC26A10	solute carrier family 26, member 10
hsa-miR-572	1	0	1	0	1	1	KCNK2	potassium channel, subfamily K, member 2
hsa-miR-572	0	0	1	0	0	0	LOC650368	asparagine-linked glycosylation 1-like pseudogene
hsa-miR-572	0	0	1	1	0	0	KRT37	keratin 37
hsa-miR-572	0	0	1	0	0	0	MYL5	myosin, light chain 5, regulatory
hsa-miR-572	0	0	1	0	0	0	DKFZP434H168	uncharacterized LOC26077
hsa-miR-572	0	0	1	0	0	0	LOC728716	uncharacterized LOC728716
hsa-miR-572	1	0	1	1	1	1	DLGAP4	discs, large (Drosophila) homolog-associated protein 4
hsa-miR-572	1	0	1	1	1	1	DLG2	discs, large homolog 2 (Drosophila)
hsa-miR-572	0	0	1	0	0	0	HNRNPKP3	heterogeneous nuclear ribonucleoprotein K pseudogene 3
hsa-miR-572	0	0	1	0	0	0	LOC100127955	uncharacterized LOC100127955
hsa-miR-572	1	0	1	0	0	0	SLC16A3	solute carrier family 16, member 3 (monocarboxylic acid transporter 4)
hsa-miR-572	1	0	1	1	0	0	ST3GAL2	ST3 beta-galactoside alpha-2,3-sialyltransferase 2
hsa-miR-572	0	0	1	1	1	1	ANXA6	annexin A6
hsa-miR-572	0	0	1	1	1	1	TMC5	transmembrane channel-like 5
hsa-miR-572	0	0	1	1	1	1	KAZALD1	Kazal-type serine peptidase inhibitor domain 1
hsa-miR-572	1	0	1	1	0	0	ZNF219	zinc finger protein 219
hsa-miR-572	0	0	1	1	1	1	TAOK2	TAO kinase 2
hsa-miR-572	1	0	1	1	1	1	TRIOBP	TRIO and F-actin binding protein
hsa-miR-572	0	0	1	1	1	1	MYPN	myopalladin
hsa-miR-572	1	0	1	1	1	1	FAM63B	family with sequence similarity 63, member B
hsa-miR-572	1	0	1	1	1	1	MBD6	methyl-CpG binding domain protein 6
hsa-miR-572	0	0	1	1	0	0	LETM2	leucine zipper-EF-hand containing transmembrane protein 2
hsa-miR-572	1	0	1	1	1	1	ILF3	interleukin enhancer binding factor 3, 90kDa
hsa-miR-572	0	0	1	1	1	1	PIGG	phosphatidylinositol glycan anchor biosynthesis, class G
hsa-miR-572	1	0	1	1	0	0	CLASRP	CLK4-associating serine/arginine rich protein
hsa-miR-572	0	0	1	1	0	0	RAET1E	retinoic acid early transcript 1E
hsa-miR-572	0	0	1	0	0	0	ZNFX1-AS1	ZNFX1 antisense RNA 1
hsa-miR-572	1	0	1	1	1	1	MECP2	methyl CpG binding protein 2 (Rett syndrome)
hsa-miR-572	0	0	1	1	0	0	PAOX	polyamine oxidase (exo-N4-amino)
hsa-miR-572	1	0	1	0	1	1	LRAT	lecithin retinol acyltransferase (phosphatidylcholine--retinol O-acyltransferase)
hsa-miR-572	0	0	1	1	0	0	DHRS4	dehydrogenase/reductase (SDR family) member 4
hsa-miR-572	0	0	1	1	1	1	FCRLB	Fc receptor-like B
hsa-miR-572	1	0	1	1	1	1	HOXC13	homeobox C13
hsa-miR-572	0	0	1	1	1	1	PITX1	paired-like homeodomain 1
hsa-miR-572	0	0	1	0	0	0	LOC93622	Morf4 family associated protein 1-like 1 pseudogene
hsa-miR-572	0	0	1	1	0	0	TALDO1	transaldolase 1
hsa-miR-572	1	0	1	1	1	1	SLC27A4	solute carrier family 27 (fatty acid transporter), member 4
hsa-miR-572	0	0	1	1	1	1	GTPBP8	GTP-binding protein 8 (putative)
hsa-miR-572	0	0	1	0	0	0	LRRC14	leucine rich repeat containing 14
hsa-miR-572	0	0	1	1	0	0	FLAD1	FAD1 flavin adenine dinucleotide synthetase homolog (S. cerevisiae)
hsa-miR-572	1	0	1	1	1	1	PRDM2	PR domain containing 2, with ZNF domain
hsa-miR-572	0	0	1	1	1	1	EAF2	ELL associated factor 2
hsa-miR-572	0	0	1	1	1	1	CDC42SE2	CDC42 small effector 2
hsa-miR-572	0	0	1	1	0	0	CCDC114	coiled-coil domain containing 114
hsa-miR-572	0	0	1	1	1	1	HYAL1	hyaluronoglucosaminidase 1
hsa-miR-572	1	0	1	1	1	1	TMEM127	transmembrane protein 127
hsa-miR-572	0	0	1	0	0	0	ZNF503-AS2	ZNF503 antisense RNA 2
hsa-miR-572	1	0	1	1	1	1	ZNF282	zinc finger protein 282
hsa-miR-572	1	0	1	1	1	1	PFAS	phosphoribosylformylglycinamidine synthase
hsa-miR-572	0	0	1	1	0	0	RAB4B	RAB4B, member RAS oncogene family
hsa-miR-572	0	0	1	0	1	1	DKFZP434I0714	uncharacterized protein DKFZP434I0714
hsa-miR-572	1	0	1	1	1	1	WDR48	WD repeat domain 48
hsa-miR-572	0	0	1	0	0	0	LINC00264	long intergenic non-protein coding RNA 264
hsa-miR-572	0	0	1	0	0	0	FLJ36000	uncharacterized FLJ36000
hsa-miR-572	0	0	1	1	0	0	C1orf87	chromosome 1 open reading frame 87
hsa-miR-572	0	0	1	1	1	1	MGC57346	uncharacterized LOC401884
hsa-miR-572	0	0	1	0	0	0	SUZ12P1	suppressor of zeste 12 homolog pseudogene 1
hsa-miR-572	1	0	1	1	1	1	PTPRG	protein tyrosine phosphatase, receptor type, G
hsa-miR-572	0	0	1	1	0	0	NISCH	nischarin
hsa-miR-572	1	0	1	0	1	1	SEMA4G	sema domain, immunoglobulin domain (Ig), transmembrane domain (TM) and short cytoplasmic domain, (semaphorin) 4G
hsa-miR-572	0	0	1	1	0	0	SREBF2	sterol regulatory element binding transcription factor 2
hsa-miR-572	0	0	1	1	0	0	EDC4	enhancer of mRNA decapping 4
hsa-miR-572	1	0	1	1	1	1	GRHL1	grainyhead-like 1 (Drosophila)
hsa-miR-572	0	0	1	1	0	0	TMEM183A	transmembrane protein 183A
hsa-miR-572	0	0	1	1	1	1	TTLL9	tubulin tyrosine ligase-like family, member 9
hsa-miR-572	0	0	1	0	0	0	PTGER4P2	prostaglandin E receptor 4 (subtype EP4) pseudogene 2
hsa-miR-572	0	0	1	0	0	0	ZRANB2-AS1	ZRANB2 antisense RNA 1
hsa-miR-572	0	0	1	0	0	0	SDHAP2	succinate dehydrogenase complex, subunit A, flavoprotein pseudogene 2
hsa-miR-572	0	0	1	1	0	0	ASIC4	acid-sensing (proton-gated) ion channel family member 4
hsa-miR-572	0	0	1	0	0	0	C17orf89	chromosome 17 open reading frame 89
hsa-miR-572	0	0	1	1	0	0	TMC1	transmembrane channel-like 1
hsa-miR-572	0	0	1	0	0	0	FBXL19-AS1	FBXL19 antisense RNA 1 (head to head)
hsa-miR-572	0	0	1	0	0	0	LRRC37A11P	leucine rich repeat containing 37, member A11, pseudogene
hsa-miR-572	0	0	1	1	0	0	RNF123	ring finger protein 123
hsa-miR-572	0	0	1	1	0	0	C14orf178	chromosome 14 open reading frame 178
hsa-miR-572	0	0	1	1	0	0	SOCS7	suppressor of cytokine signaling 7
hsa-miR-572	1	0	1	1	1	1	MACROD2	MACRO domain containing 2
hsa-miR-572	0	0	1	1	0	0	HSF4	heat shock transcription factor 4
hsa-miR-572	0	0	1	0	0	0	FUT8-AS1	FUT8 antisense RNA 1
hsa-miR-572	1	0	1	0	1	1	FAM73A	family with sequence similarity 73, member A
hsa-miR-572	1	0	1	1	1	1	MASP1	mannan-binding lectin serine peptidase 1 (C4/C2 activating component of Ra-reactive factor)
hsa-miR-572	0	0	1	1	1	1	CC2D2A	coiled-coil and C2 domain containing 2A
hsa-miR-572	1	0	1	1	1	1	BZRAP1	benzodiazapine receptor (peripheral) associated protein 1
hsa-miR-572	0	0	1	1	1	1	KIAA1328	KIAA1328
hsa-miR-572	0	0	1	1	0	0	RPS24	ribosomal protein S24
hsa-miR-572	0	0	1	1	0	0	MRPL48	mitochondrial ribosomal protein L48
hsa-miR-572	1	0	1	1	1	1	TARBP2	TAR (HIV-1) RNA binding protein 2
hsa-miR-572	1	0	1	1	0	0	EEFSEC	eukaryotic elongation factor, selenocysteine-tRNA-specific
hsa-miR-572	0	0	1	1	1	1	CYTH2	cytohesin 2
hsa-miR-572	0	0	1	1	0	0	SRM	spermidine synthase
hsa-miR-572	1	0	1	1	1	1	POLR2D	polymerase (RNA) II (DNA directed) polypeptide D
hsa-miR-572	0	0	1	1	1	1	CD99	CD99 molecule
hsa-miR-572	1	0	1	0	1	1	EIF4H	eukaryotic translation initiation factor 4H
hsa-miR-572	0	0	1	1	0	0	C9orf16	chromosome 9 open reading frame 16
hsa-miR-572	1	0	1	1	1	1	RALB	v-ral simian leukemia viral oncogene homolog B (ras related; GTP binding protein)
hsa-miR-572	0	0	1	1	0	0	IKBKG	inhibitor of kappa light polypeptide gene enhancer in B-cells, kinase gamma
hsa-miR-572	1	0	1	1	1	1	STK38L	serine/threonine kinase 38 like
hsa-miR-572	0	0	1	1	0	0	C1orf122	chromosome 1 open reading frame 122
hsa-miR-572	0	0	1	0	0	0	ZNF720	zinc finger protein 720
hsa-miR-572	0	0	1	1	0	0	PRR5	proline rich 5 (renal)
hsa-miR-572	1	0	1	1	1	1	TIMP3	TIMP metallopeptidase inhibitor 3
hsa-miR-572	0	0	1	1	0	0	STUB1	STIP1 homology and U-box containing protein 1, E3 ubiquitin protein ligase
hsa-miR-572	1	0	1	1	1	1	ATAT1	alpha tubulin acetyltransferase 1
hsa-miR-572	1	0	1	1	0	0	LMAN2	lectin, mannose-binding 2
hsa-miR-572	0	0	1	0	0	0	ZNF674-AS1	ZNF674 antisense RNA 1
hsa-miR-572	0	0	1	1	0	0	CCDC107	coiled-coil domain containing 107
hsa-miR-572	1	0	1	1	0	0	CCM2	cerebral cavernous malformation 2
hsa-miR-572	0	0	1	0	0	0	PRMT1	protein arginine methyltransferase 1
hsa-miR-572	0	0	1	0	0	0	CHEK2P2	checkpoint kinase 2 pseudogene 2
hsa-miR-572	0	0	1	1	0	0	TESK1	testis-specific kinase 1
hsa-miR-572	0	0	1	1	1	1	VPS16	vacuolar protein sorting 16 homolog (S. cerevisiae)
hsa-miR-572	1	0	1	0	1	1	KIAA0664	KIAA0664
hsa-miR-572	0	0	1	1	0	0	TENC1	tensin like C1 domain containing phosphatase (tensin 2)
hsa-miR-572	0	0	1	1	1	1	AKAP17A	A kinase (PRKA) anchor protein 17A
hsa-miR-572	0	0	1	1	0	0	COL6A2	collagen, type VI, alpha 2
hsa-miR-572	0	0	1	1	1	1	COL7A1	collagen, type VII, alpha 1
hsa-miR-572	1	0	1	0	1	1	CYBB	cytochrome b-245, beta polypeptide
hsa-miR-572	0	0	1	1	1	1	ALDH1B1	aldehyde dehydrogenase 1 family, member B1
hsa-miR-572	1	0	1	1	1	1	GRM1	glutamate receptor, metabotropic 1
hsa-miR-572	0	0	1	1	1	1	CC2D2B	coiled-coil and C2 domain containing 2B
hsa-miR-572	1	0	1	0	1	1	CACNA1I	calcium channel, voltage-dependent, T type, alpha 1I subunit
hsa-miR-572	0	0	1	0	0	0	RNASEK	ribonuclease, RNase K
hsa-miR-572	0	0	1	0	0	0	C9orf173	chromosome 9 open reading frame 173
hsa-miR-572	0	0	1	0	1	1	FLJ46347	uncharacterized LOC389064
hsa-miR-572	1	0	1	1	1	1	C12orf68	chromosome 12 open reading frame 68
hsa-miR-572	1	0	1	0	1	1	TNRC6B	trinucleotide repeat containing 6B
hsa-miR-572	1	0	1	1	0	0	MANEAL	mannosidase, endo-alpha-like
hsa-miR-572	1	0	1	0	1	1	DCUN1D4	DCN1, defective in cullin neddylation 1, domain containing 4 (S. cerevisiae)
hsa-miR-572	1	0	1	1	1	1	ATG9A	autophagy related 9A
hsa-miR-572	1	0	1	1	1	1	DGKG	diacylglycerol kinase, gamma 90kDa
hsa-miR-572	1	0	1	1	1	1	KPNB1	karyopherin (importin) beta 1
hsa-miR-572	1	0	1	1	1	1	MN1	meningioma (disrupted in balanced translocation) 1
hsa-miR-572	1	0	1	1	1	1	RCN1	reticulocalbin 1, EF-hand calcium binding domain
hsa-miR-572	1	0	1	1	0	0	RFX1	regulatory factor X, 1 (influences HLA class II expression)
hsa-miR-572	1	0	1	1	1	1	SFRP2	secreted frizzled-related protein 2
hsa-miR-572	0	0	1	1	1	1	SULT2A1	sulfotransferase family, cytosolic, 2A, dehydroepiandrosterone (DHEA)-preferring, member 1
hsa-miR-572	1	0	1	1	1	1	BCL2L2	BCL2-like 2
hsa-miR-572	0	0	1	1	1	1	COL12A1	collagen, type XII, alpha 1
hsa-miR-572	1	0	1	1	1	1	ONECUT1	one cut homeobox 1
hsa-miR-572	0	0	1	1	0	0	PRY	PTPN13-like, Y-linked
hsa-miR-572	1	0	1	0	1	1	MAPKAPK2	mitogen-activated protein kinase-activated protein kinase 2
hsa-miR-572	1	0	1	1	1	1	ONECUT2	one cut homeobox 2
hsa-miR-572	1	0	1	1	1	1	HSPA5	heat shock 70kDa protein 5 (glucose-regulated protein, 78kDa)
hsa-miR-572	0	0	1	1	1	1	PA2G4	proliferation-associated 2G4, 38kDa
hsa-miR-572	1	0	1	1	1	1	CDRT1	CMT1A duplicated region transcript 1
hsa-miR-572	1	0	1	1	1	1	DYNLT3	dynein, light chain, Tctex-type 3
hsa-miR-572	0	0	1	1	1	1	TBR1	T-box, brain, 1
hsa-miR-572	1	0	1	1	0	0	CCDC85B	coiled-coil domain containing 85B
hsa-miR-572	1	0	1	1	1	1	RAB35	RAB35, member RAS oncogene family
hsa-miR-572	0	0	1	1	0	0	LTB	lymphotoxin beta (TNF superfamily, member 3)
hsa-miR-572	0	0	1	1	1	1	FAM50B	family with sequence similarity 50, member B
hsa-miR-572	1	0	1	1	1	1	RHOQ	ras homolog family member Q
hsa-miR-572	1	0	1	1	1	1	PPARGC1A	peroxisome proliferator-activated receptor gamma, coactivator 1 alpha
hsa-miR-572	1	0	1	0	1	1	DIEXF	digestive organ expansion factor homolog (zebrafish)
hsa-miR-572	1	0	1	1	1	1	AFF4	AF4/FMR2 family, member 4
hsa-miR-572	1	0	1	0	1	1	LARP4B	La ribonucleoprotein domain family, member 4B
hsa-miR-572	1	0	1	0	1	1	LARP1	La ribonucleoprotein domain family, member 1
hsa-miR-572	1	0	1	1	1	1	MAGI1	membrane associated guanylate kinase, WW and PDZ domain containing 1
hsa-miR-572	0	0	1	0	1	1	MREG	melanoregulin
hsa-miR-572	1	0	1	0	1	1	KIF26B	kinesin family member 26B
hsa-miR-572	0	0	1	0	1	1	WDR60	WD repeat domain 60
hsa-miR-572	0	0	1	1	1	1	BDP1	B double prime 1, subunit of RNA polymerase III transcription initiation factor IIIB
hsa-miR-572	1	0	1	1	0	0	HOXB6	homeobox B6
hsa-miR-572	1	0	1	1	1	1	POLE4	polymerase (DNA-directed), epsilon 4, accessory subunit
hsa-miR-572	0	0	1	1	1	1	PRX	periaxin
hsa-miR-572	0	0	1	1	0	0	HOXD11	homeobox D11
hsa-miR-572	0	0	1	1	1	1	CHST6	carbohydrate (N-acetylglucosamine 6-O) sulfotransferase 6
hsa-miR-572	1	0	1	1	1	1	LPPR2	lipid phosphate phosphatase-related protein type 2
hsa-miR-572	1	0	1	1	1	1	NEUROG2	neurogenin 2
hsa-miR-572	1	0	1	1	1	1	RAB1B	RAB1B, member RAS oncogene family
hsa-miR-572	0	0	1	1	1	1	COG3	component of oligomeric golgi complex 3
hsa-miR-572	0	0	1	1	1	1	RNASEH2C	ribonuclease H2, subunit C
hsa-miR-572	0	0	1	1	0	0	PCDH1	protocadherin 1
hsa-miR-572	1	0	1	1	1	1	RASL10B	RAS-like, family 10, member B
hsa-miR-572	1	0	1	1	0	0	FCHSD1	FCH and double SH3 domains 1
hsa-miR-572	1	0	1	0	0	0	ANKRD40	ankyrin repeat domain 40
hsa-miR-572	0	0	1	1	0	0	SCGB3A2	secretoglobin, family 3A, member 2
hsa-miR-572	0	0	1	1	1	1	CDKN2B	cyclin-dependent kinase inhibitor 2B (p15, inhibits CDK4)
hsa-miR-572	1	0	1	0	1	1	EDARADD	EDAR-associated death domain
hsa-miR-572	1	0	1	1	1	1	KLHL6	kelch-like 6 (Drosophila)
hsa-miR-572	0	0	1	1	1	1	C1orf213	chromosome 1 open reading frame 213
hsa-miR-572	0	0	1	1	0	0	KLK15	kallikrein-related peptidase 15
hsa-miR-572	1	0	1	1	1	1	FAM91A1	family with sequence similarity 91, member A1
hsa-miR-572	0	0	1	1	1	1	DACT3	dapper, antagonist of beta-catenin, homolog 3 (Xenopus laevis)
hsa-miR-572	1	0	1	1	1	1	NEK10	NIMA (never in mitosis gene a)- related kinase 10
hsa-miR-572	0	0	1	1	1	1	CD8B	CD8b molecule
hsa-miR-572	0	0	1	1	1	1	REXO1L1	REX1, RNA exonuclease 1 homolog (S. cerevisiae)-like 1
hsa-miR-572	0	0	1	1	0	0	PRSS36	protease, serine, 36
hsa-miR-572	1	0	1	0	1	1	KSR2	kinase suppressor of ras 2
hsa-miR-572	0	0	1	1	0	0	C20orf79	chromosome 20 open reading frame 79
hsa-miR-572	0	0	1	0	1	1	HCG27	HLA complex group 27 (non-protein coding)
hsa-miR-572	1	0	1	1	1	1	BCL9L	B-cell CLL/lymphoma 9-like
hsa-miR-572	1	0	1	1	1	1	AQP1	aquaporin 1 (Colton blood group)
hsa-miR-572	0	0	1	1	1	1	LHFPL4	lipoma HMGIC fusion partner-like 4
hsa-miR-572	0	0	1	0	1	1	WASH3P	WAS protein family homolog 3 pseudogene
hsa-miR-572	0	0	1	0	1	1	CLEC17A	C-type lectin domain family 17, member A
hsa-miR-572	0	0	1	0	0	0	LOC339240	keratin 17 pseudogene
hsa-miR-572	0	0	1	0	0	0	SNX29P2	sorting nexin 29 pseudogene 2
hsa-miR-572	1	0	1	0	1	1	NFIX	nuclear factor I/X (CCAAT-binding transcription factor)
hsa-miR-572	1	0	1	1	1	1	TRIO	trio Rho guanine nucleotide exchange factor
hsa-miR-572	0	0	1	1	1	1	CD6	CD6 molecule
hsa-miR-572	1	0	1	1	1	1	OSBPL7	oxysterol binding protein-like 7
hsa-miR-572	0	0	1	1	1	1	ALDH3B1	aldehyde dehydrogenase 3 family, member B1
hsa-miR-572	1	0	1	1	0	0	SEMA3B	sema domain, immunoglobulin domain (Ig), short basic domain, secreted, (semaphorin) 3B
hsa-miR-572	0	0	1	1	1	1	GRIPAP1	GRIP1 associated protein 1
hsa-miR-572	1	0	1	1	0	0	SLC45A4	solute carrier family 45, member 4
hsa-miR-572	1	0	1	1	1	1	PPP1R3F	protein phosphatase 1, regulatory subunit 3F
hsa-miR-572	0	0	1	1	0	0	GNA11	guanine nucleotide binding protein (G protein), alpha 11 (Gq class)
hsa-miR-572	0	0	1	1	0	0	ISOC2	isochorismatase domain containing 2
hsa-miR-572	0	0	0	1	0	0	TMEM161A	transmembrane protein 161A
hsa-miR-572	0	0	1	1	1	1	PIGB	phosphatidylinositol glycan anchor biosynthesis, class B
hsa-miR-572	0	0	1	1	0	0	BPIFB2	BPI fold containing family B, member 2
hsa-miR-572	0	0	0	1	0	0	RAPGEF3	Rap guanine nucleotide exchange factor (GEF) 3
hsa-miR-572	0	0	0	1	0	0	TMEM38A	transmembrane protein 38A
hsa-miR-572	0	0	0	1	0	0	GSTP1	glutathione S-transferase pi 1
hsa-miR-572	0	0	1	1	1	1	CHRD	chordin
hsa-miR-572	0	0	0	1	0	0	TEKT2	tektin 2 (testicular)
hsa-miR-572	0	0	0	1	0	0	CATSPERG	catsper channel auxiliary subunit gamma
hsa-miR-572	1	0	0	1	1	1	CDC34	cell division cycle 34 homolog (S. cerevisiae)
hsa-miR-572	0	0	0	1	0	0	POLRMT	polymerase (RNA) mitochondrial (DNA directed)
hsa-miR-572	0	0	0	1	1	1	GADD45B	growth arrest and DNA-damage-inducible, beta
hsa-miR-572	0	0	1	1	1	1	SNRPD3	small nuclear ribonucleoprotein D3 polypeptide 18kDa
hsa-miR-572	0	0	1	1	0	0	CBY1	chibby homolog 1 (Drosophila)
hsa-miR-572	0	0	1	1	1	1	PABPC1L	poly(A) binding protein, cytoplasmic 1-like
hsa-miR-572	0	0	1	1	0	0	BIRC7	baculoviral IAP repeat containing 7
hsa-miR-572	0	0	1	1	0	0	PTK6	PTK6 protein tyrosine kinase 6
hsa-miR-572	0	0	0	1	0	0	RENBP	renin binding protein
hsa-miR-572	1	0	1	1	0	0	HUWE1	HECT, UBA and WWE domain containing 1, E3 ubiquitin protein ligase
hsa-miR-572	0	0	1	1	0	0	TIMP1	TIMP metallopeptidase inhibitor 1
hsa-miR-572	0	0	0	1	0	0	ACP5	acid phosphatase 5, tartrate resistant
hsa-miR-572	0	0	0	1	1	1	NME3	NME/NM23 nucleoside diphosphate kinase 3
hsa-miR-572	1	0	1	1	1	1	FBXO31	F-box protein 31
hsa-miR-572	0	0	1	1	1	1	MAZ	MYC-associated zinc finger protein (purine-binding transcription factor)
hsa-miR-572	0	0	1	1	1	1	CSK	c-src tyrosine kinase
hsa-miR-572	1	0	1	1	0	0	PNPLA6	patatin-like phospholipase domain containing 6
hsa-miR-572	0	0	0	1	0	0	AMH	anti-Mullerian hormone
hsa-miR-572	0	0	0	1	0	0	RETN	resistin
hsa-miR-572	0	0	1	1	0	0	EBI3	Epstein-Barr virus induced 3
hsa-miR-572	0	0	1	1	0	0	HAS1	hyaluronan synthase 1
hsa-miR-572	0	0	0	1	0	0	CAPS	calcyphosine
hsa-miR-572	0	0	0	1	0	0	GAPDHS	glyceraldehyde-3-phosphate dehydrogenase, spermatogenic
hsa-miR-572	1	0	0	1	1	1	WNT3	wingless-type MMTV integration site family, member 3
hsa-miR-572	0	0	0	1	1	1	ALDH3A1	aldehyde dehydrogenase 3 family, member A1
hsa-miR-572	1	0	1	1	1	1	CDR2L	cerebellar degeneration-related protein 2-like
hsa-miR-572	0	0	0	1	1	1	UNC93B1	unc-93 homolog B1 (C. elegans)
hsa-miR-572	0	0	0	1	0	0	MRPL23	mitochondrial ribosomal protein L23
hsa-miR-572	0	0	0	1	0	0	ENO2	enolase 2 (gamma, neuronal)
hsa-miR-572	0	0	1	1	0	0	SLC44A4	solute carrier family 44, member 4
hsa-miR-572	0	0	0	1	0	0	KISS1R	KISS1 receptor
hsa-miR-572	0	0	1	1	0	0	MIIP	migration and invasion inhibitory protein
hsa-miR-572	0	0	1	1	0	0	LEPRE1	leucine proline-enriched proteoglycan (leprecan) 1
hsa-miR-572	0	0	1	1	0	0	MRPS2	mitochondrial ribosomal protein S2
hsa-miR-572	0	0	0	1	1	1	NEUROG3	neurogenin 3
hsa-miR-572	1	0	1	1	0	0	C19orf43	chromosome 19 open reading frame 43
hsa-miR-572	0	0	0	1	0	0	HMGB1P1	high mobility group box 1 pseudogene 1
hsa-miR-572	0	0	1	1	0	0	LIPE	lipase, hormone-sensitive
hsa-miR-572	0	0	0	1	0	0	NT5C	5', 3'-nucleotidase, cytosolic
hsa-miR-572	1	0	1	1	1	1	EML2	echinoderm microtubule associated protein like 2
hsa-miR-572	0	0	0	1	0	0	S1PR4	sphingosine-1-phosphate receptor 4
hsa-miR-572	1	0	1	1	1	1	RALY	RNA binding protein, autoantigenic (hnRNP-associated with lethal yellow homolog (mouse))
hsa-miR-572	0	0	0	1	0	0	SLURP1	secreted LY6/PLAUR domain containing 1
hsa-miR-572	1	0	1	1	0	0	PLEKHG3	pleckstrin homology domain containing, family G (with RhoGef domain) member 3
hsa-miR-572	0	0	1	1	0	0	WDR24	WD repeat domain 24
hsa-miR-572	0	0	0	1	0	0	SELO	selenoprotein O
hsa-miR-572	0	0	1	1	0	0	KLK12	kallikrein-related peptidase 12
hsa-miR-572	0	0	0	1	1	1	DOHH	deoxyhypusine hydroxylase/monooxygenase
hsa-miR-572	0	0	0	1	1	1	LILRA3	leukocyte immunoglobulin-like receptor, subfamily A (without TM domain), member 3
hsa-miR-572	1	0	1	1	1	1	PVRL2	poliovirus receptor-related 2 (herpesvirus entry mediator B)
hsa-miR-572	0	0	0	1	1	1	BST2	bone marrow stromal cell antigen 2
hsa-miR-572	1	0	1	1	1	1	PRDM12	PR domain containing 12
hsa-miR-572	1	0	1	1	1	1	UBE2M	ubiquitin-conjugating enzyme E2M
hsa-miR-572	0	0	1	1	0	0	GMFG	glia maturation factor, gamma
hsa-miR-572	1	0	0	1	0	0	C1QL1	complement component 1, q subcomponent-like 1
hsa-miR-572	0	0	1	1	0	0	RPL27	ribosomal protein L27
hsa-miR-572	1	0	0	1	0	0	HAPLN2	hyaluronan and proteoglycan link protein 2
hsa-miR-572	0	0	1	1	0	0	IGHMBP2	immunoglobulin mu binding protein 2
hsa-miR-572	0	0	1	1	0	0	MATN4	matrilin 4
hsa-miR-572	0	0	1	1	1	1	PDE6B	phosphodiesterase 6B, cGMP-specific, rod, beta
hsa-miR-572	0	0	0	1	0	0	ERN2	endoplasmic reticulum to nucleus signaling 2
hsa-miR-572	1	0	1	1	1	1	TRAFD1	TRAF-type zinc finger domain containing 1
hsa-miR-572	1	0	1	1	1	1	PHF21A	PHD finger protein 21A
hsa-miR-572	0	0	1	1	0	0	EMX1	empty spiracles homeobox 1
hsa-miR-572	0	0	1	1	0	0	TBRG4	transforming growth factor beta regulator 4
hsa-miR-572	0	0	0	1	0	0	DDX56	DEAD (Asp-Glu-Ala-Asp) box helicase 56
hsa-miR-572	0	0	1	1	0	0	BLK	B lymphoid tyrosine kinase
hsa-miR-572	0	0	1	1	0	0	SIT1	signaling threshold regulating transmembrane adaptor 1
hsa-miR-572	0	0	0	1	0	0	CD72	CD72 molecule
hsa-miR-572	0	0	0	1	0	0	GMPR	guanosine monophosphate reductase
hsa-miR-572	0	0	1	1	0	0	YIPF3	Yip1 domain family, member 3
hsa-miR-572	0	0	1	1	0	0	GTF2H4	general transcription factor IIH, polypeptide 4, 52kDa
hsa-miR-572	0	0	0	1	1	1	ABCG5	ATP-binding cassette, sub-family G (WHITE), member 5
hsa-miR-572	0	0	1	1	0	0	EIF4EBP3	eukaryotic translation initiation factor 4E binding protein 3
hsa-miR-572	0	0	1	1	0	0	ANKHD1-EIF4EBP3	ANKHD1-EIF4EBP3 readthrough
hsa-miR-572	0	0	1	1	1	1	ANKHD1	ankyrin repeat and KH domain containing 1
hsa-miR-572	1	0	0	1	1	1	PKD1	polycystic kidney disease 1 (autosomal dominant)
hsa-miR-572	0	0	1	1	1	1	ACIN1	apoptotic chromatin condensation inducer 1
hsa-miR-572	0	0	0	1	0	0	QRICH2	glutamine rich 2
hsa-miR-572	1	0	1	1	1	1	UPF1	UPF1 regulator of nonsense transcripts homolog (yeast)
hsa-miR-572	0	0	0	1	0	0	GNA15	guanine nucleotide binding protein (G protein), alpha 15 (Gq class)
hsa-miR-572	1	0	0	1	1	1	SMARCB1	SWI/SNF related, matrix associated, actin dependent regulator of chromatin, subfamily b, member 1
hsa-miR-572	1	0	0	1	0	0	MED15	mediator complex subunit 15
hsa-miR-572	0	0	1	1	0	0	ARVCF	armadillo repeat gene deleted in velocardiofacial syndrome
hsa-miR-572	1	0	1	1	0	0	GRIN2D	glutamate receptor, ionotropic, N-methyl D-aspartate 2D
hsa-miR-572	0	0	1	1	0	0	AKAP8L	A kinase (PRKA) anchor protein 8-like
hsa-miR-572	0	0	1	1	1	1	PPP1R12C	protein phosphatase 1, regulatory subunit 12C
hsa-miR-572	1	0	1	1	0	0	HIPK2	homeodomain interacting protein kinase 2
hsa-miR-572	0	0	0	1	1	1	FOXRED1	FAD-dependent oxidoreductase domain containing 1
hsa-miR-572	1	0	1	1	1	1	PVRL1	poliovirus receptor-related 1 (herpesvirus entry mediator C)
hsa-miR-572	1	0	1	1	1	1	FRAS1	Fraser syndrome 1
hsa-miR-572	0	0	1	1	1	1	TAX1BP1	Tax1 (human T-cell leukemia virus type I) binding protein 1
hsa-miR-572	0	0	1	1	0	0	MARK2	MAP/microtubule affinity-regulating kinase 2
hsa-miR-572	0	0	0	1	1	1	POLA2	polymerase (DNA directed), alpha 2, accessory subunit
hsa-miR-572	0	0	1	1	0	0	PTPN23	protein tyrosine phosphatase, non-receptor type 23
hsa-miR-572	1	0	1	1	1	1	CHKA	choline kinase alpha
hsa-miR-572	0	0	1	1	1	1	ZNF33A	zinc finger protein 33A
hsa-miR-572	0	0	1	1	1	1	MAPKAP1	mitogen-activated protein kinase associated protein 1
hsa-miR-572	0	0	1	1	1	1	DEPDC5	DEP domain containing 5
hsa-miR-572	0	0	0	1	0	0	CD27	CD27 molecule
hsa-miR-572	0	0	1	1	0	0	REM2	RAS (RAD and GEM)-like GTP binding 2
hsa-miR-572	0	0	1	1	0	0	DUOXA1	dual oxidase maturation factor 1
hsa-miR-572	1	0	0	1	1	1	ZNF710	zinc finger protein 710
hsa-miR-572	0	0	1	1	1	1	IGSF6	immunoglobulin superfamily, member 6
hsa-miR-572	0	0	1	1	0	0	DHX38	DEAH (Asp-Glu-Ala-His) box polypeptide 38
hsa-miR-572	1	0	1	1	1	1	GATA6	GATA binding protein 6
hsa-miR-572	0	0	0	1	0	0	PPAP2C	phosphatidic acid phosphatase type 2C
hsa-miR-572	0	0	0	1	0	0	CIB3	calcium and integrin binding family member 3
hsa-miR-572	0	0	1	1	0	0	NTN5	netrin 5
hsa-miR-572	0	0	1	1	0	0	ZNF593	zinc finger protein 593
hsa-miR-572	1	0	1	1	0	0	KCNN3	potassium intermediate/small conductance calcium-activated channel, subfamily N, member 3
hsa-miR-572	0	0	1	1	1	1	MARCH4	membrane-associated ring finger (C3HC4) 4, E3 ubiquitin protein ligase
hsa-miR-572	0	0	1	1	0	0	CNPY2	canopy 2 homolog (zebrafish)
hsa-miR-572	0	0	1	1	0	0	PLA1A	phospholipase A1 member A
hsa-miR-572	1	0	1	1	1	1	PIK3R1	phosphoinositide-3-kinase, regulatory subunit 1 (alpha)
hsa-miR-572	0	0	0	1	0	0	FERD3L	Fer3-like (Drosophila)
hsa-miR-572	0	0	1	1	1	1	FAM83A	family with sequence similarity 83, member A
hsa-miR-572	0	0	1	1	0	0	LSM14B	LSM14B, SCD6 homolog B (S. cerevisiae)
hsa-miR-572	0	0	0	1	0	0	PLCB3	phospholipase C, beta 3 (phosphatidylinositol-specific)
hsa-miR-572	1	0	1	1	1	1	TMEM218	transmembrane protein 218
hsa-miR-572	1	0	1	1	1	1	SETBP1	SET binding protein 1
hsa-miR-572	0	0	0	1	1	1	ZNF773	zinc finger protein 773
hsa-miR-572	1	0	1	1	1	1	RPIA	ribose 5-phosphate isomerase A
hsa-miR-572	0	0	0	1	0	0	GRAP	GRB2-related adaptor protein
hsa-miR-572	0	0	0	1	0	0	C16orf74	chromosome 16 open reading frame 74
hsa-miR-572	0	0	1	1	0	0	AIFM1	apoptosis-inducing factor, mitochondrion-associated, 1
hsa-miR-572	0	0	0	1	0	0	IL34	interleukin 34
hsa-miR-572	0	0	0	1	0	0	HPD	4-hydroxyphenylpyruvate dioxygenase
hsa-miR-572	0	0	0	1	0	0	LRRC43	leucine rich repeat containing 43
hsa-miR-572	0	0	1	1	0	0	GPR153	G protein-coupled receptor 153
hsa-miR-572	0	0	1	1	1	1	C2orf62	chromosome 2 open reading frame 62
hsa-miR-572	0	0	1	1	0	0	SPATA2L	spermatogenesis associated 2-like
hsa-miR-572	0	0	0	1	0	0	TRMU	tRNA 5-methylaminomethyl-2-thiouridylate methyltransferase
hsa-miR-572	0	0	0	1	0	0	PRKD2	protein kinase D2
hsa-miR-572	0	0	1	1	0	0	ATP13A1	ATPase type 13A1
hsa-miR-572	0	0	0	1	0	0	RSPH1	radial spoke head 1 homolog (Chlamydomonas)
hsa-miR-572	0	0	0	1	0	0	PWP2	PWP2 periodic tryptophan protein homolog (yeast)
hsa-miR-572	1	0	0	1	0	0	NBEAL2	neurobeachin-like 2
hsa-miR-572	0	0	0	1	0	0	TONSL	tonsoku-like, DNA repair protein
hsa-miR-572	0	0	1	1	0	0	FOXH1	forkhead box H1
hsa-miR-572	0	0	1	1	0	0	CCDC105	coiled-coil domain containing 105
hsa-miR-572	0	0	0	1	1	1	SCGB3A1	secretoglobin, family 3A, member 1
hsa-miR-572	0	0	0	1	1	1	FDXR	ferredoxin reductase
hsa-miR-572	0	0	0	1	0	0	RDM1	RAD52 motif 1
hsa-miR-572	0	0	0	1	0	0	SSTR5	somatostatin receptor 5
hsa-miR-572	0	0	0	1	0	0	HAAO	3-hydroxyanthranilate 3,4-dioxygenase
hsa-miR-572	0	0	0	1	0	0	KCNF1	potassium voltage-gated channel, subfamily F, member 1
hsa-miR-572	0	0	0	1	0	0	GLB1L	galactosidase, beta 1-like
hsa-miR-572	0	0	1	1	0	0	DPPA2	developmental pluripotency associated 2
hsa-miR-572	0	0	1	1	0	0	TKT	transketolase
hsa-miR-572	0	0	1	1	1	1	ZDHHC19	zinc finger, DHHC-type containing 19
hsa-miR-572	0	0	1	1	1	1	PPM1M	protein phosphatase, Mg2+/Mn2+ dependent, 1M
hsa-miR-572	0	0	0	1	1	1	CCDC127	coiled-coil domain containing 127
hsa-miR-572	0	0	1	1	1	1	HEATR2	HEAT repeat containing 2
hsa-miR-572	0	0	0	1	0	0	PHOX2A	paired-like homeobox 2a
hsa-miR-572	0	0	1	1	1	1	HPRT1	hypoxanthine phosphoribosyltransferase 1
hsa-miR-572	1	0	1	1	1	1	COL4A2	collagen, type IV, alpha 2
hsa-miR-572	0	0	0	1	0	0	SERPINA4	serpin peptidase inhibitor, clade A (alpha-1 antiproteinase, antitrypsin), member 4
hsa-miR-572	0	0	1	1	0	0	FOXN4	forkhead box N4
hsa-miR-572	0	0	0	1	0	0	CDH16	cadherin 16, KSP-cadherin
hsa-miR-572	1	0	1	1	1	1	PHLPP2	PH domain and leucine rich repeat protein phosphatase 2
hsa-miR-572	1	0	1	1	0	0	PPIB	peptidylprolyl isomerase B (cyclophilin B)
hsa-miR-572	0	0	1	1	1	1	PDIA3	protein disulfide isomerase family A, member 3
hsa-miR-572	0	0	1	1	0	0	GNGT2	guanine nucleotide binding protein (G protein), gamma transducing activity polypeptide 2
hsa-miR-572	0	0	0	1	0	0	COQ4	coenzyme Q4 homolog (S. cerevisiae)
hsa-miR-572	0	0	0	1	0	0	MVD	mevalonate (diphospho) decarboxylase
hsa-miR-572	0	0	0	1	0	0	TP53I13	tumor protein p53 inducible protein 13
hsa-miR-572	0	0	0	1	1	1	SEMA6B	sema domain, transmembrane domain (TM), and cytoplasmic domain, (semaphorin) 6B
hsa-miR-572	0	0	0	1	0	0	ICT1	immature colon carcinoma transcript 1
hsa-miR-572	0	0	1	1	0	0	TMEM88	transmembrane protein 88
hsa-miR-572	0	0	0	1	0	0	SPSB3	splA/ryanodine receptor domain and SOCS box containing 3
hsa-miR-572	0	0	0	1	0	0	SLC22A11	solute carrier family 22 (organic anion/urate transporter), member 11
hsa-miR-572	0	0	1	1	0	0	ZNF467	zinc finger protein 467
hsa-miR-572	0	0	1	1	0	0	FAM151A	family with sequence similarity 151, member A
hsa-miR-572	0	0	0	1	0	0	GAA	glucosidase, alpha; acid
hsa-miR-572	0	0	1	1	0	0	GPR82	G protein-coupled receptor 82
hsa-miR-572	1	0	1	1	1	1	NEUROD2	neuronal differentiation 2
hsa-miR-572	0	0	1	1	0	0	CDK5R2	cyclin-dependent kinase 5, regulatory subunit 2 (p39)
hsa-miR-572	0	0	0	1	0	0	AMDHD2	amidohydrolase domain containing 2
hsa-miR-572	0	0	1	1	1	1	CEBPB	CCAAT/enhancer binding protein (C/EBP), beta
hsa-miR-572	0	0	1	1	1	1	MXD3	MAX dimerization protein 3
hsa-miR-572	1	0	0	1	0	0	TRABD	TraB domain containing
hsa-miR-572	0	0	1	1	0	0	BTD	biotinidase
hsa-miR-572	1	0	1	1	1	1	CRTC2	CREB regulated transcription coactivator 2
hsa-miR-572	0	0	0	1	1	1	MRAP	melanocortin 2 receptor accessory protein
hsa-miR-572	0	0	1	1	0	0	VAV1	vav 1 guanine nucleotide exchange factor
hsa-miR-572	0	0	1	1	1	1	C15orf40	chromosome 15 open reading frame 40
hsa-miR-572	0	0	1	1	0	0	HSPB2	heat shock 27kDa protein 2
hsa-miR-572	0	0	1	1	1	1	INSL5	insulin-like 5
hsa-miR-572	0	0	1	1	0	0	ZNHIT1	zinc finger, HIT-type containing 1
hsa-miR-572	0	0	1	1	0	0	STIP1	stress-induced-phosphoprotein 1
hsa-miR-572	1	0	1	1	0	0	HTR1E	5-hydroxytryptamine (serotonin) receptor 1E, G protein-coupled
hsa-miR-572	1	0	1	1	1	1	GRM5	glutamate receptor, metabotropic 5
hsa-miR-572	0	0	0	1	0	0	DEGS2	delta(4)-desaturase, sphingolipid 2
hsa-miR-572	1	0	1	1	1	1	BCR	breakpoint cluster region
hsa-miR-572	0	0	1	1	0	0	HOXD4	homeobox D4
hsa-miR-572	0	0	1	1	1	1	C2orf68	chromosome 2 open reading frame 68
hsa-miR-572	0	0	1	1	0	0	TMEM150A	transmembrane protein 150A
hsa-miR-572	0	0	0	1	1	1	FOXD4L1	forkhead box D4-like 1
hsa-miR-572	0	0	1	1	1	1	COG8	component of oligomeric golgi complex 8
hsa-miR-572	0	0	1	1	1	1	INSM2	insulinoma-associated 2
hsa-miR-572	0	0	1	1	1	1	NDUFA10	NADH dehydrogenase (ubiquinone) 1 alpha subcomplex, 10, 42kDa
hsa-miR-572	0	0	1	1	1	1	HTRA3	HtrA serine peptidase 3
hsa-miR-572	0	0	0	1	0	0	THOP1	thimet oligopeptidase 1
hsa-miR-572	0	0	0	1	0	0	EFEMP2	EGF containing fibulin-like extracellular matrix protein 2
hsa-miR-572	0	0	1	1	0	0	DIRC1	disrupted in renal carcinoma 1
hsa-miR-572	0	0	1	1	1	1	PROP1	PROP paired-like homeobox 1
hsa-miR-572	0	0	1	1	0	0	RHOD	ras homolog family member D
hsa-miR-572	0	0	0	1	0	0	XCR1	chemokine (C motif) receptor 1
hsa-miR-572	1	0	0	1	0	0	EHBP1L1	EH domain binding protein 1-like 1
hsa-miR-572	1	0	0	1	1	1	TMEM234	transmembrane protein 234
hsa-miR-572	0	0	0	1	0	0	STON1-GTF2A1L	STON1-GTF2A1L readthrough
hsa-miR-572	0	0	1	1	1	1	STON1	stonin 1
hsa-miR-572	0	0	1	1	0	0	PSMD2	proteasome (prosome, macropain) 26S subunit, non-ATPase, 2
hsa-miR-572	0	0	1	1	0	0	SLC4A2	solute carrier family 4, anion exchanger, member 2 (erythrocyte membrane protein band 3-like 1)
hsa-miR-572	0	0	0	1	0	0	HHATL	hedgehog acyltransferase-like
hsa-miR-572	1	0	1	1	1	1	HAP1	huntingtin-associated protein 1
hsa-miR-572	1	0	1	1	1	1	AKT2	v-akt murine thymoma viral oncogene homolog 2
hsa-miR-572	0	0	1	1	0	0	RIN1	Ras and Rab interactor 1
hsa-miR-572	1	0	0	1	0	0	CTU2	cytosolic thiouridylase subunit 2 homolog (S. pombe)
hsa-miR-572	0	0	0	1	0	0	GUK1	guanylate kinase 1
hsa-miR-572	0	0	1	1	0	0	RHBDF2	rhomboid 5 homolog 2 (Drosophila)
hsa-miR-572	0	0	1	1	0	0	SLC6A13	solute carrier family 6 (neurotransmitter transporter, GABA), member 13
hsa-miR-572	0	0	0	1	0	0	C12orf54	chromosome 12 open reading frame 54
hsa-miR-572	0	0	0	1	1	1	CHAF1B	chromatin assembly factor 1, subunit B (p60)
hsa-miR-572	0	0	1	1	0	0	KCNH6	potassium voltage-gated channel, subfamily H (eag-related), member 6
hsa-miR-572	1	0	0	1	0	0	TNIP1	TNFAIP3 interacting protein 1
hsa-miR-572	0	0	1	1	1	1	RNASEH1	ribonuclease H1
hsa-miR-572	0	0	0	1	0	0	MATK	megakaryocyte-associated tyrosine kinase
hsa-miR-572	0	0	0	1	1	1	ITGA11	integrin, alpha 11
hsa-miR-572	1	0	1	1	1	1	LZTS2	leucine zipper, putative tumor suppressor 2
hsa-miR-572	0	0	0	1	0	0	OS9	osteosarcoma amplified 9, endoplasmic reticulum lectin
hsa-miR-572	0	0	1	1	0	0	TUBA8	tubulin, alpha 8
hsa-miR-572	0	0	0	1	0	0	UNCX	UNC homeobox
hsa-miR-572	1	0	1	1	1	1	CALR	calreticulin
hsa-miR-572	1	0	1	1	1	1	KLF4	Kruppel-like factor 4 (gut)
hsa-miR-572	0	0	1	1	0	0	DNAJC7	DnaJ (Hsp40) homolog, subfamily C, member 7
hsa-miR-572	0	0	1	1	1	1	BIN1	bridging integrator 1
hsa-miR-572	0	0	0	1	0	0	FAM125A	family with sequence similarity 125, member A
hsa-miR-572	0	0	0	1	0	0	TRPT1	tRNA phosphotransferase 1
hsa-miR-572	0	0	1	1	1	1	SPAG11B	sperm associated antigen 11B
hsa-miR-572	0	0	0	1	0	0	TNFRSF6B	tumor necrosis factor receptor superfamily, member 6b, decoy
hsa-miR-572	0	0	1	1	0	0	RTEL1	regulator of telomere elongation helicase 1
hsa-miR-572	1	0	1	1	1	1	IGSF3	immunoglobulin superfamily, member 3
hsa-miR-572	0	0	0	1	0	0	CTXN1	cortexin 1
hsa-miR-572	1	0	0	1	0	0	TMEM184A	transmembrane protein 184A
hsa-miR-572	0	0	0	1	1	1	DIS3L	DIS3 mitotic control homolog (S. cerevisiae)-like
hsa-miR-572	1	0	1	1	0	0	UBASH3A	ubiquitin associated and SH3 domain containing A
hsa-miR-572	0	0	1	1	1	1	LRRN1	leucine rich repeat neuronal 1
hsa-miR-572	0	0	1	1	1	1	USP54	ubiquitin specific peptidase 54
hsa-miR-572	0	0	0	1	0	0	SHROOM1	shroom family member 1
hsa-miR-572	0	0	0	1	1	1	ZNF454	zinc finger protein 454
hsa-miR-572	0	0	1	1	1	1	ARHGEF25	Rho guanine nucleotide exchange factor (GEF) 25
hsa-miR-572	0	0	0	1	0	0	FAM83H	family with sequence similarity 83, member H
hsa-miR-572	1	0	1	1	1	1	MAP4	microtubule-associated protein 4
hsa-miR-572	1	0	1	1	0	0	SENP3	SUMO1/sentrin/SMT3 specific peptidase 3
hsa-miR-572	0	0	0	1	0	0	SEPT1	septin 1
hsa-miR-572	0	0	0	1	0	0	RNF151	ring finger protein 151
hsa-miR-572	1	0	1	1	1	1	TMEM132E	transmembrane protein 132E
hsa-miR-572	0	0	0	1	0	0	FAM3A	family with sequence similarity 3, member A
hsa-miR-572	0	0	0	1	0	0	RPRML	reprimo-like
hsa-miR-572	1	0	1	1	1	1	ZBTB7A	zinc finger and BTB domain containing 7A
hsa-miR-572	0	0	0	1	0	0	UFSP1	UFM1-specific peptidase 1 (non-functional)
hsa-miR-572	0	0	1	1	0	0	POLR2A	polymerase (RNA) II (DNA directed) polypeptide A, 220kDa
hsa-miR-572	0	0	0	1	0	0	TMEM102	transmembrane protein 102
hsa-miR-572	0	0	0	1	0	0	ZNF687	zinc finger protein 687
hsa-miR-572	0	0	0	1	0	0	B3GNT4	UDP-GlcNAc:betaGal beta-1,3-N-acetylglucosaminyltransferase 4
hsa-miR-572	0	0	0	1	0	0	SLC6A18	solute carrier family 6, member 18
hsa-miR-572	0	0	0	1	1	1	FBXW5	F-box and WD repeat domain containing 5
hsa-miR-572	0	0	0	1	0	0	GSG2	germ cell associated 2 (haspin)
hsa-miR-572	0	0	0	1	0	0	NIM1	serine/threonine-protein kinase NIM1
hsa-miR-572	1	0	0	1	1	1	SSH1	slingshot homolog 1 (Drosophila)
hsa-miR-572	0	0	0	1	0	0	SPAG11A	sperm associated antigen 11A
hsa-miR-572	0	0	1	1	1	1	HARBI1	harbinger transposase derived 1
hsa-miR-572	1	0	0	1	0	0	GGT5	gamma-glutamyltransferase 5
hsa-miR-572	0	0	0	1	1	1	BTBD6	BTB (POZ) domain containing 6
hsa-miR-572	0	0	1	1	0	0	GAS6	growth arrest-specific 6
hsa-miR-572	0	0	1	1	0	0	DHX30	DEAH (Asp-Glu-Ala-His) box polypeptide 30
hsa-miR-572	0	0	0	1	0	0	ADAT3	adenosine deaminase, tRNA-specific 3
hsa-miR-572	0	0	0	1	0	0	MAPK8IP2	mitogen-activated protein kinase 8 interacting protein 2
hsa-miR-572	0	0	1	1	0	0	MFSD10	major facilitator superfamily domain containing 10
hsa-miR-572	0	0	0	1	1	1	C14orf80	chromosome 14 open reading frame 80
hsa-miR-572	0	0	0	1	0	0	CLDN5	claudin 5
hsa-miR-572	0	0	1	1	0	0	IDH2	isocitrate dehydrogenase 2 (NADP+), mitochondrial
hsa-miR-572	0	0	1	1	0	0	RXFP3	relaxin/insulin-like family peptide receptor 3
hsa-miR-572	0	0	0	1	1	1	TMEM121	transmembrane protein 121
hsa-miR-572	0	0	1	1	1	1	PRR14L	proline rich 14-like
hsa-miR-572	1	0	0	1	1	1	SUGP2	SURP and G patch domain containing 2
hsa-miR-572	0	0	1	1	1	1	MYOM3	myomesin family, member 3
hsa-miR-572	0	0	1	1	0	0	KRBA2	KRAB-A domain containing 2
hsa-miR-572	1	0	1	1	1	1	KCNJ12	potassium inwardly-rectifying channel, subfamily J, member 12
hsa-miR-572	0	0	1	1	0	0	SOCS1	suppressor of cytokine signaling 1
hsa-miR-572	1	0	1	1	0	0	KCNH7	potassium voltage-gated channel, subfamily H (eag-related), member 7
hsa-miR-572	0	0	1	1	1	1	PIWIL3	piwi-like 3 (Drosophila)
hsa-miR-572	0	0	0	1	0	0	PRHOXNB	parahox cluster neighbor
hsa-miR-572	0	0	1	1	0	0	STAC3	SH3 and cysteine rich domain 3
hsa-miR-572	0	0	1	1	1	1	GEMIN8	gem (nuclear organelle) associated protein 8
hsa-miR-572	0	0	1	1	0	0	C3orf26	chromosome 3 open reading frame 26
hsa-miR-572	0	0	0	1	0	0	MAFA	v-maf musculoaponeurotic fibrosarcoma oncogene homolog A (avian)
hsa-miR-572	1	0	1	1	1	1	PPFIA3	protein tyrosine phosphatase, receptor type, f polypeptide (PTPRF), interacting protein (liprin), alpha 3
hsa-miR-572	0	0	1	1	1	1	PLCD1	phospholipase C, delta 1
hsa-miR-572	0	0	1	1	0	0	RPS19BP1	ribosomal protein S19 binding protein 1
hsa-miR-572	0	0	0	1	1	1	H1FNT	H1 histone family, member N, testis-specific
hsa-miR-572	1	0	1	1	1	1	MARK3	MAP/microtubule affinity-regulating kinase 3
hsa-miR-572	0	0	1	1	0	0	HM13	histocompatibility (minor) 13
hsa-miR-572	0	0	0	1	0	0	TNRC6C	trinucleotide repeat containing 6C
hsa-miR-572	0	0	0	1	0	0	ST6GALNAC4	ST6 (alpha-N-acetyl-neuraminyl-2,3-beta-galactosyl-1,3)-N-acetylgalactosaminide alpha-2,6-sialyltransferase 4
hsa-miR-572	0	0	0	1	0	0	ZNF671	zinc finger protein 671
hsa-miR-572	0	0	1	1	0	0	ZBTB16	zinc finger and BTB domain containing 16
hsa-miR-572	0	0	1	1	0	0	SRA1	steroid receptor RNA activator 1
hsa-miR-572	0	0	1	1	0	0	SLC12A4	solute carrier family 12 (potassium/chloride transporters), member 4
hsa-miR-572	0	0	0	1	1	1	C11orf95	chromosome 11 open reading frame 95
hsa-miR-572	1	0	1	1	1	1	RUNX3	runt-related transcription factor 3
hsa-miR-572	0	0	0	1	0	0	NOSIP	nitric oxide synthase interacting protein
hsa-miR-572	0	0	0	1	0	0	SFN	stratifin
hsa-miR-572	0	0	0	1	0	0	TSPAN32	tetraspanin 32
hsa-miR-572	0	0	1	1	0	0	NCR3	natural cytotoxicity triggering receptor 3
hsa-miR-572	0	0	1	1	0	0	KCNK7	potassium channel, subfamily K, member 7
hsa-miR-572	1	0	1	1	1	1	C20orf26	chromosome 20 open reading frame 26
hsa-miR-572	0	0	1	1	0	0	MPO	myeloperoxidase
hsa-miR-572	1	0	1	1	0	0	NAPRT1	nicotinate phosphoribosyltransferase domain containing 1
hsa-miR-572	0	0	1	1	1	1	RINL	Ras and Rab interactor-like
hsa-miR-572	0	0	0	1	0	0	EXD3	exonuclease 3'-5' domain containing 3
hsa-miR-572	0	0	1	1	0	0	CLDN4	claudin 4
hsa-miR-572	0	0	0	1	0	0	DPM3	dolichyl-phosphate mannosyltransferase polypeptide 3
hsa-miR-572	0	0	0	1	0	0	WDR86	WD repeat domain 86
hsa-miR-572	0	0	1	1	1	1	ZDHHC14	zinc finger, DHHC-type containing 14
hsa-miR-572	0	0	0	1	0	0	PODXL2	podocalyxin-like 2
hsa-miR-572	1	0	1	1	1	1	CBX4	chromobox homolog 4
hsa-miR-572	0	0	0	1	1	1	DOCK2	dedicator of cytokinesis 2
hsa-miR-572	0	0	0	1	1	1	ZNF791	zinc finger protein 791
hsa-miR-572	0	0	0	1	0	0	LRRC24	leucine rich repeat containing 24
hsa-miR-572	1	0	1	1	0	0	TH1L	TH1-like (Drosophila)
hsa-miR-572	1	0	1	1	1	1	MLLT4	myeloid/lymphoid or mixed-lineage leukemia (trithorax homolog, Drosophila); translocated to, 4
hsa-miR-572	0	0	0	1	0	0	IZUMO4	IZUMO family member 4
hsa-miR-572	0	0	0	1	0	0	C19orf48	chromosome 19 open reading frame 48
hsa-miR-572	0	0	1	1	0	0	SLC28A2	solute carrier family 28 (sodium-coupled nucleoside transporter), member 2
hsa-miR-572	0	0	1	1	1	1	MFSD7	major facilitator superfamily domain containing 7
hsa-miR-572	0	0	1	1	0	0	MYL6	myosin, light chain 6, alkali, smooth muscle and non-muscle
hsa-miR-572	0	0	1	1	0	0	UBE2J2	ubiquitin-conjugating enzyme E2, J2
hsa-miR-572	0	0	0	1	1	1	CRHR2	corticotropin releasing hormone receptor 2
hsa-miR-572	1	0	1	1	0	0	ZDHHC1	zinc finger, DHHC-type containing 1
hsa-miR-572	0	0	0	1	1	1	CBS	cystathionine-beta-synthase
hsa-miR-572	0	0	1	1	1	1	TRIM4	tripartite motif containing 4
hsa-miR-572	0	0	0	1	0	0	NOXO1	NADPH oxidase organizer 1
hsa-miR-572	0	0	0	1	1	1	TRIM16	tripartite motif containing 16
hsa-miR-572	0	0	0	1	1	1	GNL3	guanine nucleotide binding protein-like 3 (nucleolar)
hsa-miR-572	0	0	0	1	0	0	CRYBA4	crystallin, beta A4
hsa-miR-572	1	0	1	1	1	1	PTPRS	protein tyrosine phosphatase, receptor type, S
hsa-miR-572	1	0	1	1	1	1	ABCA2	ATP-binding cassette, sub-family A (ABC1), member 2
hsa-miR-572	0	0	0	1	0	0	ENTPD2	ectonucleoside triphosphate diphosphohydrolase 2
hsa-miR-572	0	0	1	1	1	1	MTFP1	mitochondrial fission process 1
hsa-miR-572	0	0	1	1	0	0	DPF1	D4, zinc and double PHD fingers family 1
hsa-miR-572	0	0	0	1	0	0	NEK5	NIMA (never in mitosis gene a)-related kinase 5
hsa-miR-572	0	0	0	1	0	0	TRIM17	tripartite motif containing 17
hsa-miR-572	0	0	0	1	0	0	ZGPAT	zinc finger, CCCH-type with G patch domain
hsa-miR-572	0	0	0	1	0	0	MMP23B	matrix metallopeptidase 23B
hsa-miR-572	0	0	0	1	1	1	GTF3C1	general transcription factor IIIC, polypeptide 1, alpha 220kDa
hsa-miR-572	1	0	1	1	1	1	NCOR2	nuclear receptor corepressor 2
hsa-miR-572	0	0	0	1	0	0	POTEE	POTE ankyrin domain family, member E
hsa-miR-572	0	0	0	1	1	1	LCNL1	lipocalin-like 1
hsa-miR-572	0	0	0	1	0	0	ZNF628	zinc finger protein 628
hsa-miR-572	0	0	1	1	1	1	MAP1LC3C	microtubule-associated protein 1 light chain 3 gamma
hsa-miR-572	0	0	0	1	1	1	PRAMEF8	PRAME family member 8
hsa-miR-572	1	0	1	1	0	0	SLC29A2	solute carrier family 29 (nucleoside transporters), member 2
hsa-miR-572	1	0	1	1	1	1	ACHE	acetylcholinesterase
hsa-miR-572	0	0	0	1	0	0	POTEF	POTE ankyrin domain family, member F
hsa-miR-572	0	0	0	1	0	0	ARID5A	AT rich interactive domain 5A (MRF1-like)
hsa-miR-572	0	0	1	1	1	1	PRAMEF12	PRAME family member 12
hsa-miR-572	0	0	1	1	1	1	CDK5RAP1	CDK5 regulatory subunit associated protein 1
hsa-miR-572	0	0	0	1	0	0	LRRC8B	leucine rich repeat containing 8 family, member B
hsa-miR-572	0	0	1	1	0	0	LINC00176	long intergenic non-protein coding RNA 176
hsa-miR-572	0	0	1	1	0	0	TOMM7	translocase of outer mitochondrial membrane 7 homolog (yeast)
hsa-miR-572	0	0	1	1	1	1	POLR2J2	polymerase (RNA) II (DNA directed) polypeptide J2
hsa-miR-572	0	0	0	1	0	0	PIEZO1	piezo-type mechanosensitive ion channel component 1
hsa-miR-572	1	0	1	1	1	1	DEM1	defects in morphology 1 homolog (S. cerevisiae)
hsa-miR-572	1	0	1	1	1	1	ENTPD4	ectonucleoside triphosphate diphosphohydrolase 4
hsa-miR-572	0	0	0	1	0	0	ZNF669	zinc finger protein 669
hsa-miR-572	1	0	1	1	0	0	DUS2L	dihydrouridine synthase 2-like, SMM1 homolog (S. cerevisiae)
hsa-miR-572	0	0	0	1	0	0	CFH	complement factor H
hsa-miR-572	0	0	1	1	1	1	MPDU1	mannose-P-dolichol utilization defect 1
hsa-miR-572	0	0	1	1	0	0	ART5	ADP-ribosyltransferase 5
hsa-miR-572	0	0	1	1	0	0	PTPRF	protein tyrosine phosphatase, receptor type, F
hsa-miR-572	1	0	1	1	1	1	FAM84A	family with sequence similarity 84, member A
hsa-miR-572	0	0	1	1	1	1	CMTM3	CKLF-like MARVEL transmembrane domain containing 3
hsa-miR-572	0	0	0	1	0	0	ZMYND10	zinc finger, MYND-type containing 10
hsa-miR-572	0	0	1	1	0	0	CUEDC1	CUE domain containing 1
hsa-miR-572	0	0	1	1	1	1	MAP1LC3A	microtubule-associated protein 1 light chain 3 alpha
hsa-miR-572	0	0	1	1	0	0	ZCWPW1	zinc finger, CW type with PWWP domain 1
hsa-miR-572	0	0	0	1	0	0	PRAMEF7	PRAME family member 7
hsa-miR-572	0	0	1	1	0	0	SLC34A3	solute carrier family 34 (sodium phosphate), member 3
hsa-miR-572	1	0	1	1	1	1	CDC42BPB	CDC42 binding protein kinase beta (DMPK-like)
hsa-miR-572	0	0	0	1	0	0	POU3F3	POU class 3 homeobox 3
hsa-miR-572	0	0	1	1	0	0	NSMCE1	non-SMC element 1 homolog (S. cerevisiae)
hsa-miR-572	0	0	1	1	0	0	NCAPH2	non-SMC condensin II complex, subunit H2
hsa-miR-572	0	0	0	1	0	0	SNRNP35	small nuclear ribonucleoprotein 35kDa (U11/U12)
hsa-miR-572	0	0	1	1	0	0	CNKSR1	connector enhancer of kinase suppressor of Ras 1
hsa-miR-572	0	0	0	1	0	0	C19orf45	chromosome 19 open reading frame 45
hsa-miR-572	1	0	1	1	0	0	PLXNB3	plexin B3
hsa-miR-572	0	0	0	1	1	1	OBSCN	obscurin, cytoskeletal calmodulin and titin-interacting RhoGEF
hsa-miR-572	1	0	1	1	1	1	RPS6KA2	ribosomal protein S6 kinase, 90kDa, polypeptide 2
hsa-miR-572	0	0	1	1	1	1	PARK2	parkinson protein 2, E3 ubiquitin protein ligase (parkin)
hsa-miR-572	1	0	1	1	0	0	HLX	H2.0-like homeobox
hsa-miR-572	1	0	1	1	1	1	AGPAT4	1-acylglycerol-3-phosphate O-acyltransferase 4 (lysophosphatidic acid acyltransferase, delta)
hsa-miR-572	0	0	0	1	0	0	G0S2	G0/G1switch 2
hsa-miR-572	0	0	1	1	0	0	C4BPB	complement component 4 binding protein, beta
hsa-miR-572	1	0	1	1	1	1	NFASC	neurofascin
hsa-miR-572	0	0	1	1	1	1	GINM1	glycoprotein integral membrane 1
hsa-miR-572	0	0	1	1	0	0	FCGR2A	Fc fragment of IgG, low affinity IIa, receptor (CD32)
hsa-miR-572	0	0	1	1	0	0	VSIG8	V-set and immunoglobulin domain containing 8
hsa-miR-572	0	0	1	1	1	1	CRP	C-reactive protein, pentraxin-related
hsa-miR-572	0	0	0	1	0	0	TTC24	tetratricopeptide repeat domain 24
hsa-miR-572	0	0	0	1	0	0	RHBG	Rh family, B glycoprotein (gene/pseudogene)
hsa-miR-572	1	0	1	1	1	1	SLC50A1	solute carrier family 50 (sugar transporter), member 1
hsa-miR-572	0	0	0	1	1	1	SMPDL3A	sphingomyelin phosphodiesterase, acid-like 3A
hsa-miR-572	0	0	0	1	0	0	NKX6-2	NK6 homeobox 2
hsa-miR-572	0	0	0	1	0	0	LCE2B	late cornified envelope 2B
hsa-miR-572	0	0	0	1	1	1	LCE2D	late cornified envelope 2D
hsa-miR-572	0	0	0	1	0	0	UROS	uroporphyrinogen III synthase
hsa-miR-572	1	0	1	1	1	1	CRCT1	cysteine-rich C-terminal 1
hsa-miR-572	0	0	1	1	1	1	GRK5	G protein-coupled receptor kinase 5
hsa-miR-572	0	0	1	1	0	0	HIST2H2AA3	histone cluster 2, H2aa3
hsa-miR-572	0	0	1	1	1	1	RBM20	RNA binding motif protein 20
hsa-miR-572	0	0	0	1	0	0	FAM165A	family with sequence similarity 165, member B pseudogene
hsa-miR-572	0	0	0	1	0	0	NPBWR2	neuropeptides B/W receptor 2
hsa-miR-572	0	0	1	1	0	0	PITX3	paired-like homeodomain 3
hsa-miR-572	0	0	1	1	1	1	RTCA	RNA 3'-terminal phosphate cyclase
hsa-miR-572	1	0	1	1	0	0	POLL	polymerase (DNA directed), lambda
hsa-miR-572	1	0	1	1	0	0	LBX1	ladybird homeobox 1
hsa-miR-572	0	0	1	1	0	0	PRRG3	proline rich Gla (G-carboxyglutamic acid) 3 (transmembrane)
hsa-miR-572	0	0	0	1	1	1	TTC22	tetratricopeptide repeat domain 22
hsa-miR-572	1	0	1	1	1	1	CUL4B	cullin 4B
hsa-miR-572	1	0	1	1	1	1	RUNX2	runt-related transcription factor 2
hsa-miR-572	0	0	1	1	0	0	ENTPD8	ectonucleoside triphosphate diphosphohydrolase 8
hsa-miR-572	1	0	1	1	1	1	LONRF3	LON peptidase N-terminal domain and ring finger 3
hsa-miR-572	0	0	0	1	0	0	EGFL7	EGF-like-domain, multiple 7
hsa-miR-572	0	0	0	1	0	0	UBAC1	UBA domain containing 1
hsa-miR-572	0	0	1	1	1	1	MED22	mediator complex subunit 22
hsa-miR-572	0	0	0	1	1	1	TSPAN1	tetraspanin 1
hsa-miR-572	1	0	1	1	1	1	CDH22	cadherin 22, type 2
hsa-miR-572	0	0	1	1	0	0	MMP9	matrix metallopeptidase 9 (gelatinase B, 92kDa gelatinase, 92kDa type IV collagenase)
hsa-miR-572	0	0	0	1	0	0	PRRX2	paired related homeobox 2
hsa-miR-572	0	0	0	1	0	0	LOC100128077	uncharacterized LOC100128077
hsa-miR-572	0	0	1	1	0	0	COMTD1	catechol-O-methyltransferase domain containing 1
hsa-miR-572	0	0	0	1	0	0	KCNQ4	potassium voltage-gated channel, KQT-like subfamily, member 4
hsa-miR-572	0	0	1	1	0	0	COL9A2	collagen, type IX, alpha 2
hsa-miR-572	0	0	1	1	0	0	GNMT	glycine N-methyltransferase
hsa-miR-572	1	0	1	1	1	1	CDK9	cyclin-dependent kinase 9
hsa-miR-572	1	0	1	1	1	1	FAM129B	family with sequence similarity 129, member B
hsa-miR-572	0	0	1	1	1	1	FTSJD2	FtsJ methyltransferase domain containing 2
hsa-miR-572	0	0	0	1	0	0	SERINC2	serine incorporator 2
hsa-miR-572	1	0	1	1	1	1	PUM1	pumilio homolog 1 (Drosophila)
hsa-miR-572	1	0	1	1	1	1	PHACTR4	phosphatase and actin regulator 4
hsa-miR-572	1	0	1	1	1	1	FBXW2	F-box and WD repeat domain containing 2
hsa-miR-572	1	0	1	1	0	0	CD164L2	CD164 sialomucin-like 2
hsa-miR-572	0	0	1	1	1	1	EXTL1	exostoses (multiple)-like 1
hsa-miR-572	0	0	0	1	0	0	GGNBP1	gametogenetin binding protein 1 (pseudogene)
hsa-miR-572	1	0	1	1	1	1	CSGALNACT2	chondroitin sulfate N-acetylgalactosaminyltransferase 2
hsa-miR-572	0	0	1	1	0	0	NARF	nuclear prelamin A recognition factor
hsa-miR-572	0	0	1	1	0	0	RPS18	ribosomal protein S18
hsa-miR-572	1	0	1	1	1	1	ABCA1	ATP-binding cassette, sub-family A (ABC1), member 1
hsa-miR-572	0	0	0	1	0	0	ASIP	agouti signaling protein
hsa-miR-572	0	0	1	1	1	1	FLJ45079	FLJ45079 protein
hsa-miR-572	1	0	0	1	0	0	PQLC2	PQ loop repeat containing 2
hsa-miR-572	0	0	0	1	0	0	FKBPL	FK506 binding protein like
hsa-miR-572	0	0	1	1	0	0	FBP1	fructose-1,6-bisphosphatase 1
hsa-miR-572	0	0	1	1	1	1	IGSF21	immunoglobin superfamily, member 21
hsa-miR-572	0	0	0	1	1	1	SUSD3	sushi domain containing 3
hsa-miR-572	0	0	1	1	1	1	SLC35F2	solute carrier family 35, member F2
hsa-miR-572	0	0	1	1	0	0	DDAH2	dimethylarginine dimethylaminohydrolase 2
hsa-miR-572	0	0	1	1	1	1	SHC3	SHC (Src homology 2 domain containing) transforming protein 3
hsa-miR-572	0	0	0	1	0	0	HCK	hemopoietic cell kinase
hsa-miR-572	1	0	1	1	1	1	C6orf47	chromosome 6 open reading frame 47
hsa-miR-572	0	0	1	1	1	1	PRAMEF5	PRAME family member 5
hsa-miR-572	0	0	0	1	1	1	PRAMEF23	PRAME family member 23
hsa-miR-572	0	0	0	1	0	0	PRAMEF6	PRAME family member 6
hsa-miR-572	0	0	1	1	1	1	IDNK	idnK, gluconokinase homolog (E. coli)
hsa-miR-572	0	0	0	1	1	1	RABL2A	RAB, member of RAS oncogene family-like 2A
hsa-miR-572	0	0	1	1	1	1	C6orf136	chromosome 6 open reading frame 136
hsa-miR-572	1	0	1	1	1	1	CLCN6	chloride channel, voltage-sensitive 6
hsa-miR-572	0	0	0	1	0	0	TRIM31	tripartite motif containing 31
hsa-miR-572	0	0	1	1	1	1	ALDH1A1	aldehyde dehydrogenase 1 family, member A1
hsa-miR-572	1	0	1	1	1	1	CASZ1	castor zinc finger 1
hsa-miR-572	0	0	1	1	0	0	MED25	mediator complex subunit 25
hsa-miR-572	1	0	1	1	1	1	RNF207	ring finger protein 207
hsa-miR-572	0	0	1	1	0	0	NPR2	natriuretic peptide receptor B/guanylate cyclase B (atrionatriuretic peptide receptor B)
hsa-miR-572	0	0	0	1	1	1	OLAH	oleoyl-ACP hydrolase
hsa-miR-572	0	0	0	1	0	0	AARD	alanine and arginine rich domain containing protein
hsa-miR-572	1	0	0	1	0	0	REEP2	receptor accessory protein 2
hsa-miR-572	0	0	1	1	0	0	GFRA3	GDNF family receptor alpha 3
hsa-miR-572	0	0	1	1	0	0	ARHGEF16	Rho guanine nucleotide exchange factor (GEF) 16
hsa-miR-572	0	0	1	1	0	0	C1orf86	chromosome 1 open reading frame 86
hsa-miR-572	1	0	1	1	0	0	PRKCZ	protein kinase C, zeta
hsa-miR-572	0	0	1	1	0	0	C17orf79	chromosome 17 open reading frame 79
hsa-miR-572	0	0	1	1	0	0	DHRS13	dehydrogenase/reductase (SDR family) member 13
hsa-miR-572	0	0	1	1	1	1	B3GALT6	UDP-Gal:betaGal beta 1,3-galactosyltransferase polypeptide 6
hsa-miR-572	0	0	1	1	0	0	EXOC3L4	exocyst complex component 3-like 4
hsa-miR-572	0	0	0	1	0	0	LOC100131831	uncharacterized LOC100131831
hsa-miR-572	0	0	1	1	1	1	SHROOM3	shroom family member 3
hsa-miR-572	0	0	1	1	1	1	SERF1B	small EDRK-rich factor 1B (centromeric)
hsa-miR-572	0	0	0	1	1	1	GMDS	GDP-mannose 4,6-dehydratase
hsa-miR-572	0	0	1	1	0	0	FREM1	FRAS1 related extracellular matrix 1
hsa-miR-572	0	0	0	1	1	1	DDC	dopa decarboxylase (aromatic L-amino acid decarboxylase)
hsa-miR-572	0	0	0	1	1	1	ADARB2	adenosine deaminase, RNA-specific, B2
hsa-miR-572	0	0	0	1	0	0	CRLF2	cytokine receptor-like factor 2
hsa-miR-572	0	0	0	1	0	0	C22orf42	chromosome 22 open reading frame 42
hsa-miR-572	0	0	1	1	1	1	TPO	thyroid peroxidase
hsa-miR-572	1	0	1	1	1	1	CD9	CD9 molecule
hsa-miR-572	0	0	0	1	0	0	SLC7A4	solute carrier family 7 (orphan transporter), member 4
hsa-miR-572	0	0	0	1	0	0	RNASE12	ribonuclease, RNase A family, 12 (non-active)
hsa-miR-572	0	0	1	1	0	0	DNAH2	dynein, axonemal, heavy chain 2
hsa-miR-572	0	0	0	1	0	0	ASPDH	aspartate dehydrogenase domain containing
hsa-miR-572	0	0	1	1	0	0	INTS1	integrator complex subunit 1
hsa-miR-572	1	0	1	1	1	1	NIPAL3	NIPA-like domain containing 3
hsa-miR-572	1	0	0	1	0	0	HEATR5A	HEAT repeat containing 5A
hsa-miR-572	0	0	1	1	1	1	LIMS3	LIM and senescent cell antigen-like domains 3
hsa-miR-572	1	0	1	0	1	1	KIAA0930	KIAA0930
hsa-miR-572	1	0	1	0	1	1	MAP4K4	mitogen-activated protein kinase kinase kinase kinase 4
hsa-miR-572	1	0	1	1	1	1	CIB2	calcium and integrin binding family member 2
hsa-miR-572	0	0	0	0	1	1	COQ9	coenzyme Q9 homolog (S. cerevisiae)
hsa-miR-572	1	0	1	1	1	1	TMC7	transmembrane channel-like 7
hsa-miR-572	0	0	1	0	1	1	BRI3BP	BRI3 binding protein
