# Supplementary material for: Profiling of Selected MicroRNAs in Proliferative Eutopic Endometrium of Women with Ovarian Endometriosis
Source: Biomed Res Int. 2015 Aug 20;2015:760698. doi: 10.1155/2015/760698 (PMC4558423; doi:10.1155/2015/760698)
Supplement: Supplementary file 1 — Table I: The names of miRNAs significantly differentially expressed between eutopic endometrium of patients with endometriosis vs eutopic endometrium of patients without endometriosis. Table II: The associations between miRNA and mRNA, which presents detailed results of the search of six major databases i.e targetscan, tarbase, miranda, mirbase, mirtarget2 and pictar. [file 760698.f1.zip › 760698.f1/Table II/hsa-miR-573.tsv]

miR	targetscan	tarbase	miranda	mirbase	mirtarget2	pictar	GeneSymbol	GeneName
hsa-miR-573	1	0	1	1	1	1	PLAU	plasminogen activator, urokinase
hsa-miR-573	1	0	1	1	1	1	ZFYVE16	zinc finger, FYVE domain containing 16
hsa-miR-573	1	0	1	1	1	1	CHD9	chromodomain helicase DNA binding protein 9
hsa-miR-573	1	0	1	1	1	1	FAM65B	family with sequence similarity 65, member B
hsa-miR-573	1	0	1	0	1	1	PTPRT	protein tyrosine phosphatase, receptor type, T
hsa-miR-573	1	0	1	0	1	1	KIAA0408	KIAA0408
hsa-miR-573	1	0	1	1	1	1	NUPL1	nucleoporin like 1
hsa-miR-573	1	0	1	0	1	1	MTSS1	metastasis suppressor 1
hsa-miR-573	1	0	1	1	1	1	RNGTT	RNA guanylyltransferase and 5'-phosphatase
hsa-miR-573	0	0	1	1	1	1	SPAG9	sperm associated antigen 9
hsa-miR-573	0	0	1	1	0	0	ZNF862	zinc finger protein 862
hsa-miR-573	1	0	1	1	1	1	BAI3	brain-specific angiogenesis inhibitor 3
hsa-miR-573	1	0	1	1	1	1	GPATCH8	G patch domain containing 8
hsa-miR-573	1	0	1	1	0	0	TBC1D12	TBC1 domain family, member 12
hsa-miR-573	1	0	1	1	1	1	ATG13	autophagy related 13
hsa-miR-573	0	0	1	1	1	1	DZIP3	DAZ interacting protein 3, zinc finger
hsa-miR-573	1	0	1	0	1	1	SNX13	sorting nexin 13
hsa-miR-573	0	0	1	1	0	0	ATP10B	ATPase, class V, type 10B
hsa-miR-573	1	0	1	0	1	1	LPHN3	latrophilin 3
hsa-miR-573	1	0	1	1	1	1	LPHN2	latrophilin 2
hsa-miR-573	1	0	1	1	1	1	DNM3	dynamin 3
hsa-miR-573	1	0	1	1	1	1	DMXL2	Dmx-like 2
hsa-miR-573	1	0	1	1	1	1	UBR5	ubiquitin protein ligase E3 component n-recognin 5
hsa-miR-573	1	0	1	1	1	1	CALCR	calcitonin receptor
hsa-miR-573	1	0	1	1	1	1	RGL1	ral guanine nucleotide dissociation stimulator-like 1
hsa-miR-573	0	0	1	0	0	0	THSD7A	thrombospondin, type I, domain containing 7A
hsa-miR-573	0	0	1	1	0	0	FAM149B1	family with sequence similarity 149, member B1
hsa-miR-573	0	0	1	1	1	1	TBC1D30	TBC1 domain family, member 30
hsa-miR-573	1	0	1	1	1	1	RPGRIP1L	RPGRIP1-like
hsa-miR-573	1	0	1	1	1	1	FNBP4	formin binding protein 4
hsa-miR-573	1	0	1	1	1	1	FOXJ3	forkhead box J3
hsa-miR-573	1	0	1	0	1	1	ZNF507	zinc finger protein 507
hsa-miR-573	1	0	1	1	1	1	PRRC2C	proline-rich coiled-coil 2C
hsa-miR-573	1	0	1	1	1	1	SMARCAD1	SWI/SNF-related, matrix-associated actin-dependent regulator of chromatin, subfamily a, containing DEAD/H box 1
hsa-miR-573	1	0	1	0	1	1	GPR158	G protein-coupled receptor 158
hsa-miR-573	1	0	1	0	1	1	SRGAP3	SLIT-ROBO Rho GTPase activating protein 3
hsa-miR-573	0	0	1	1	0	0	ZC4H2	zinc finger, C4H2 domain containing
hsa-miR-573	1	0	1	1	1	1	ZMIZ1	zinc finger, MIZ-type containing 1
hsa-miR-573	1	0	1	1	1	1	MKL2	MKL/myocardin-like 2
hsa-miR-573	1	0	1	1	1	1	ASAP1	ArfGAP with SH3 domain, ankyrin repeat and PH domain 1
hsa-miR-573	0	0	1	1	0	0	FAM184B	family with sequence similarity 184, member B
hsa-miR-573	0	0	1	1	1	1	GKAP1	G kinase anchoring protein 1
hsa-miR-573	1	0	1	1	1	1	PCDH19	protocadherin 19
hsa-miR-573	1	0	1	0	1	1	KCTD16	potassium channel tetramerisation domain containing 16
hsa-miR-573	1	0	1	1	1	1	ATP2C1	ATPase, Ca++ transporting, type 2C, member 1
hsa-miR-573	0	0	1	1	1	1	IFT80	intraflagellar transport 80 homolog (Chlamydomonas)
hsa-miR-573	0	0	1	0	0	0	COG1	component of oligomeric golgi complex 1
hsa-miR-573	1	0	1	1	1	1	UPF2	UPF2 regulator of nonsense transcripts homolog (yeast)
hsa-miR-573	1	1	1	1	1	1	NFIA	nuclear factor I/A
hsa-miR-573	1	0	1	1	0	0	KIAA1549	KIAA1549
hsa-miR-573	1	0	1	1	1	1	PPP6R3	protein phosphatase 6, regulatory subunit 3
hsa-miR-573	1	0	1	1	1	1	ZNF532	zinc finger protein 532
hsa-miR-573	1	0	1	0	0	0	TANC2	tetratricopeptide repeat, ankyrin repeat and coiled-coil containing 2
hsa-miR-573	1	0	1	1	1	1	PER3	period homolog 3 (Drosophila)
hsa-miR-573	0	0	1	1	1	1	PBLD	phenazine biosynthesis-like protein domain containing
hsa-miR-573	1	0	1	1	1	1	ITPRIP	inositol 1,4,5-trisphosphate receptor interacting protein
hsa-miR-573	0	0	1	1	1	1	POC1B	POC1 centriolar protein homolog B (Chlamydomonas)
hsa-miR-573	1	0	1	1	1	1	IKZF4	IKAROS family zinc finger 4 (Eos)
hsa-miR-573	0	0	1	1	1	1	FANCI	Fanconi anemia, complementation group I
hsa-miR-573	1	0	1	1	1	1	LZTS2	leucine zipper, putative tumor suppressor 2
hsa-miR-573	0	0	1	1	0	0	SPIRE2	spire homolog 2 (Drosophila)
hsa-miR-573	0	0	1	1	1	1	UNC80	unc-80 homolog (C. elegans)
hsa-miR-573	0	0	1	1	1	1	SLC11A2	solute carrier family 11 (proton-coupled divalent metal ion transporters), member 2
hsa-miR-573	1	0	1	1	1	1	NAV2	neuron navigator 2
hsa-miR-573	0	0	1	1	1	1	C3orf15	chromosome 3 open reading frame 15
hsa-miR-573	1	0	1	1	1	1	CSRNP1	cysteine-serine-rich nuclear protein 1
hsa-miR-573	1	0	1	1	1	1	HNRPDL	heterogeneous nuclear ribonucleoprotein D-like
hsa-miR-573	1	0	1	0	0	0	SMYD4	SET and MYND domain containing 4
hsa-miR-573	1	0	1	1	1	1	SSH3	slingshot homolog 3 (Drosophila)
hsa-miR-573	0	0	1	1	0	0	TPGS2	tubulin polyglutamylase complex subunit 2
hsa-miR-573	1	0	1	1	1	1	OXR1	oxidation resistance 1
hsa-miR-573	1	0	1	1	1	1	SH3TC2	SH3 domain and tetratricopeptide repeats 2
hsa-miR-573	1	0	1	0	0	0	FAT3	FAT tumor suppressor homolog 3 (Drosophila)
hsa-miR-573	1	0	1	0	0	0	ZBTB34	zinc finger and BTB domain containing 34
hsa-miR-573	1	0	1	1	1	1	ACBD5	acyl-CoA binding domain containing 5
hsa-miR-573	1	0	1	1	1	1	FHOD3	formin homology 2 domain containing 3
hsa-miR-573	1	0	1	0	0	0	ZC3H12C	zinc finger CCCH-type containing 12C
hsa-miR-573	1	0	1	1	1	1	C11orf57	chromosome 11 open reading frame 57
hsa-miR-573	1	0	1	1	1	1	TRPM3	transient receptor potential cation channel, subfamily M, member 3
hsa-miR-573	0	0	1	1	0	0	HELLS	helicase, lymphoid-specific
hsa-miR-573	0	0	1	1	1	1	IL7	interleukin 7
hsa-miR-573	1	0	1	1	1	1	PAN3	PAN3 poly(A) specific ribonuclease subunit homolog (S. cerevisiae)
hsa-miR-573	0	0	1	1	1	1	MICAL2	microtubule associated monoxygenase, calponin and LIM domain containing 2
hsa-miR-573	0	0	1	1	0	0	SGCE	sarcoglycan, epsilon
hsa-miR-573	1	0	1	0	1	1	BEND4	BEN domain containing 4
hsa-miR-573	0	0	1	1	1	1	PCBP2	poly(rC) binding protein 2
hsa-miR-573	0	0	1	1	0	0	APH1B	anterior pharynx defective 1 homolog B (C. elegans)
hsa-miR-573	0	0	1	1	1	1	SYBU	syntabulin (syntaxin-interacting)
hsa-miR-573	1	0	1	0	1	1	NFE2L2	nuclear factor (erythroid-derived 2)-like 2
hsa-miR-573	1	0	1	1	1	1	SHC1	SHC (Src homology 2 domain containing) transforming protein 1
hsa-miR-573	1	0	1	1	1	1	BACH2	BTB and CNC homology 1, basic leucine zipper transcription factor 2
hsa-miR-573	1	0	1	1	0	0	GRIN1	glutamate receptor, ionotropic, N-methyl D-aspartate 1
hsa-miR-573	1	0	1	1	1	1	PHC1	polyhomeotic homolog 1 (Drosophila)
hsa-miR-573	0	0	1	1	1	1	DNM1L	dynamin 1-like
hsa-miR-573	1	0	1	0	1	1	PLAG1	pleiomorphic adenoma gene 1
hsa-miR-573	1	0	1	1	0	0	CACNB1	calcium channel, voltage-dependent, beta 1 subunit
hsa-miR-573	1	0	1	1	1	1	FMR1	fragile X mental retardation 1
hsa-miR-573	1	0	1	1	1	1	PRKACB	protein kinase, cAMP-dependent, catalytic, beta
hsa-miR-573	1	0	1	0	1	1	DPYSL2	dihydropyrimidinase-like 2
hsa-miR-573	1	0	1	0	1	1	ETV1	ets variant 1
hsa-miR-573	1	0	1	1	1	1	DMTF1	cyclin D binding myb-like transcription factor 1
hsa-miR-573	1	0	1	1	1	1	REV3L	REV3-like, polymerase (DNA directed), zeta, catalytic subunit
hsa-miR-573	1	0	1	1	1	1	EPHA7	EPH receptor A7
hsa-miR-573	1	0	1	1	1	1	TWF1	twinfilin, actin-binding protein, homolog 1 (Drosophila)
hsa-miR-573	1	0	1	0	1	1	CHL1	cell adhesion molecule with homology to L1CAM (close homolog of L1)
hsa-miR-573	0	0	1	1	1	1	DGKE	diacylglycerol kinase, epsilon 64kDa
hsa-miR-573	1	0	1	1	1	1	EPHA5	EPH receptor A5
hsa-miR-573	1	0	1	1	1	1	SATB2	SATB homeobox 2
hsa-miR-573	1	0	1	1	1	1	AEBP2	AE binding protein 2
hsa-miR-573	1	0	1	0	1	1	CDON	Cdon homolog (mouse)
hsa-miR-573	0	0	1	1	1	1	RYR1	ryanodine receptor 1 (skeletal)
hsa-miR-573	0	0	1	1	1	1	GPM6B	glycoprotein M6B
hsa-miR-573	1	0	1	1	1	1	PDLIM5	PDZ and LIM domain 5
hsa-miR-573	1	0	1	1	1	1	HNRNPK	heterogeneous nuclear ribonucleoprotein K
hsa-miR-573	0	0	1	1	0	0	CFLAR	CASP8 and FADD-like apoptosis regulator
hsa-miR-573	1	0	1	1	1	1	ARHGEF3	Rho guanine nucleotide exchange factor (GEF) 3
hsa-miR-573	0	0	1	1	0	0	PXK	PX domain containing serine/threonine kinase
hsa-miR-573	0	0	1	1	0	0	SLC22A8	solute carrier family 22 (organic anion transporter), member 8
hsa-miR-573	1	0	1	0	1	1	ADD3	adducin 3 (gamma)
hsa-miR-573	0	0	1	1	1	1	MYO9A	myosin IXA
hsa-miR-573	1	0	1	1	1	1	OSBPL10	oxysterol binding protein-like 10
hsa-miR-573	0	0	1	1	1	1	DDX10	DEAD (Asp-Glu-Ala-Asp) box polypeptide 10
hsa-miR-573	0	0	1	1	0	0	TRIM27	tripartite motif containing 27
hsa-miR-573	1	0	1	1	1	1	ZFX	zinc finger protein, X-linked
hsa-miR-573	1	0	1	1	1	1	PHLDB2	pleckstrin homology-like domain, family B, member 2
hsa-miR-573	0	0	1	1	1	1	PLD1	phospholipase D1, phosphatidylcholine-specific
hsa-miR-573	1	0	1	0	1	1	CAV1	caveolin 1, caveolae protein, 22kDa
hsa-miR-573	1	0	1	0	1	1	PDE7B	phosphodiesterase 7B
hsa-miR-573	1	0	1	1	1	1	PICALM	phosphatidylinositol binding clathrin assembly protein
hsa-miR-573	1	0	1	1	1	1	SDHC	succinate dehydrogenase complex, subunit C, integral membrane protein, 15kDa
hsa-miR-573	1	0	1	1	1	1	INSC	inscuteable homolog (Drosophila)
hsa-miR-573	0	0	1	0	0	0	MIAT	myocardial infarction associated transcript (non-protein coding)
hsa-miR-573	1	0	1	1	1	1	MDM4	Mdm4 p53 binding protein homolog (mouse)
hsa-miR-573	0	0	1	1	0	0	MUC3A	mucin 3A, cell surface associated
hsa-miR-573	1	0	1	1	1	1	SLC4A4	solute carrier family 4, sodium bicarbonate cotransporter, member 4
hsa-miR-573	0	0	1	1	1	1	MFSD11	major facilitator superfamily domain containing 11
hsa-miR-573	0	0	1	0	0	0	ZNRD1-AS1	ZNRD1 antisense RNA 1
hsa-miR-573	1	0	1	1	1	1	MID1	midline 1 (Opitz/BBB syndrome)
hsa-miR-573	0	0	1	1	1	1	SH3GL3	SH3-domain GRB2-like 3
hsa-miR-573	1	0	1	1	1	1	MYT1L	myelin transcription factor 1-like
hsa-miR-573	1	0	1	0	1	1	CELF2	CUGBP, Elav-like family member 2
hsa-miR-573	0	0	1	0	0	0	PLD2	phospholipase D2
hsa-miR-573	1	0	1	0	0	0	MAP3K1	mitogen-activated protein kinase kinase kinase 1, E3 ubiquitin protein ligase
hsa-miR-573	1	0	1	1	1	1	SHOC2	soc-2 suppressor of clear homolog (C. elegans)
hsa-miR-573	1	0	1	1	1	1	MBNL2	muscleblind-like splicing regulator 2
hsa-miR-573	1	0	1	1	1	1	CTNND1	catenin (cadherin-associated protein), delta 1
hsa-miR-573	1	0	1	1	1	1	ERLIN1	ER lipid raft associated 1
hsa-miR-573	0	0	1	1	1	1	GNAS	GNAS complex locus
hsa-miR-573	0	0	1	1	1	1	RGS7	regulator of G-protein signaling 7
hsa-miR-573	0	0	1	1	1	1	BBS9	Bardet-Biedl syndrome 9
hsa-miR-573	1	0	1	1	1	1	GLS	glutaminase
hsa-miR-573	0	0	1	1	1	1	SH2D1A	SH2 domain containing 1A
hsa-miR-573	1	0	1	1	1	1	SLMAP	sarcolemma associated protein
hsa-miR-573	0	0	1	1	0	0	AVPR2	arginine vasopressin receptor 2
hsa-miR-573	1	0	1	0	1	1	CD164	CD164 molecule, sialomucin
hsa-miR-573	0	0	1	1	0	0	RBM5	RNA binding motif protein 5
hsa-miR-573	0	0	1	1	1	1	GUCA1C	guanylate cyclase activator 1C
hsa-miR-573	1	0	1	0	0	0	PPME1	protein phosphatase methylesterase 1
hsa-miR-573	1	0	1	1	1	1	KAT6B	K(lysine) acetyltransferase 6B
hsa-miR-573	0	0	1	1	1	1	MAP3K4	mitogen-activated protein kinase kinase kinase 4
hsa-miR-573	1	0	1	1	1	1	PRUNE	prune homolog (Drosophila)
hsa-miR-573	0	0	1	1	1	1	DMRT2	doublesex and mab-3 related transcription factor 2
hsa-miR-573	1	0	1	1	1	1	CAB39	calcium binding protein 39
hsa-miR-573	1	0	1	1	1	1	TAOK3	TAO kinase 3
hsa-miR-573	0	0	1	0	1	1	CLEC5A	C-type lectin domain family 5, member A
hsa-miR-573	1	0	1	1	1	1	ANKRD13A	ankyrin repeat domain 13A
hsa-miR-573	1	0	1	1	1	1	AGPAT3	1-acylglycerol-3-phosphate O-acyltransferase 3
hsa-miR-573	0	0	1	1	1	1	FAM114A2	family with sequence similarity 114, member A2
hsa-miR-573	1	0	1	1	1	1	USP25	ubiquitin specific peptidase 25
hsa-miR-573	1	0	1	0	1	1	AMOTL2	angiomotin like 2
hsa-miR-573	1	0	1	1	1	1	C16orf70	chromosome 16 open reading frame 70
hsa-miR-573	0	0	1	1	0	0	SLC24A2	solute carrier family 24 (sodium/potassium/calcium exchanger), member 2
hsa-miR-573	1	0	1	1	1	1	DAB2	disabled homolog 2, mitogen-responsive phosphoprotein (Drosophila)
hsa-miR-573	1	0	1	1	1	1	C3orf18	chromosome 3 open reading frame 18
hsa-miR-573	0	0	1	1	1	1	SLC39A8	solute carrier family 39 (zinc transporter), member 8
hsa-miR-573	0	0	1	0	1	1	SLC38A4	solute carrier family 38, member 4
hsa-miR-573	1	0	1	1	1	1	SENP7	SUMO1/sentrin specific peptidase 7
hsa-miR-573	1	0	1	1	1	1	EIF4A2	eukaryotic translation initiation factor 4A2
hsa-miR-573	1	0	1	1	1	1	KCNMB2	potassium large conductance calcium-activated channel, subfamily M, beta member 2
hsa-miR-573	1	0	1	1	1	1	MYLIP	myosin regulatory light chain interacting protein
hsa-miR-573	0	0	1	1	1	1	CSNK1A1	casein kinase 1, alpha 1
hsa-miR-573	0	0	1	1	1	1	SAMSN1	SAM domain, SH3 domain and nuclear localization signals 1
hsa-miR-573	0	0	1	1	1	1	CD28	CD28 molecule
hsa-miR-573	0	0	1	1	1	1	MFF	mitochondrial fission factor
hsa-miR-573	1	0	1	1	1	1	C21orf91	chromosome 21 open reading frame 91
hsa-miR-573	1	0	1	1	1	1	SNTB2	syntrophin, beta 2 (dystrophin-associated protein A1, 59kDa, basic component 2)
hsa-miR-573	0	0	1	1	1	1	DAZ2	deleted in azoospermia 2
hsa-miR-573	0	0	1	0	1	1	DAZ3	deleted in azoospermia 3
hsa-miR-573	1	0	1	1	0	0	LMO2	LIM domain only 2 (rhombotin-like 1)
hsa-miR-573	0	0	1	1	0	0	HES6	hairy and enhancer of split 6 (Drosophila)
hsa-miR-573	1	0	1	1	1	1	SH3GLB1	SH3-domain GRB2-like endophilin B1
hsa-miR-573	1	0	1	0	1	1	PARP11	poly (ADP-ribose) polymerase family, member 11
hsa-miR-573	1	0	1	1	1	1	DYRK4	dual-specificity tyrosine-(Y)-phosphorylation regulated kinase 4
hsa-miR-573	1	0	1	0	1	1	TRPS1	trichorhinophalangeal syndrome I
hsa-miR-573	0	0	1	1	1	1	ZNF331	zinc finger protein 331
hsa-miR-573	1	0	1	1	1	1	PUM2	pumilio homolog 2 (Drosophila)
hsa-miR-573	0	0	1	0	1	1	ERBB2IP	erbb2 interacting protein
hsa-miR-573	0	0	1	1	0	0	KCNK6	potassium channel, subfamily K, member 6
hsa-miR-573	1	0	1	1	1	1	CALN1	calneuron 1
hsa-miR-573	0	0	1	1	1	1	SLC4A5	solute carrier family 4, sodium bicarbonate cotransporter, member 5
hsa-miR-573	1	0	1	1	1	1	METTL10	methyltransferase like 10
hsa-miR-573	1	0	1	1	1	1	SPTBN4	spectrin, beta, non-erythrocytic 4
hsa-miR-573	1	0	1	1	0	0	RAB34	RAB34, member RAS oncogene family
hsa-miR-573	0	0	1	1	0	0	IL17F	interleukin 17F
hsa-miR-573	0	0	1	1	0	0	ZAN	zonadhesin
hsa-miR-573	0	0	1	1	1	1	SEMA6C	sema domain, transmembrane domain (TM), and cytoplasmic domain, (semaphorin) 6C
hsa-miR-573	0	0	1	1	1	1	SLC6A15	solute carrier family 6 (neutral amino acid transporter), member 15
hsa-miR-573	1	0	1	1	1	1	CALCOCO1	calcium binding and coiled-coil domain 1
hsa-miR-573	1	0	1	1	1	1	LARP4	La ribonucleoprotein domain family, member 4
hsa-miR-573	1	0	1	1	1	1	SON	SON DNA binding protein
hsa-miR-573	1	0	1	1	1	1	PDE8A	phosphodiesterase 8A
hsa-miR-573	0	0	1	1	0	0	SNRPN	small nuclear ribonucleoprotein polypeptide N
hsa-miR-573	1	0	1	1	1	1	NTRK2	neurotrophic tyrosine kinase, receptor, type 2
hsa-miR-573	0	0	1	1	1	1	C10orf90	chromosome 10 open reading frame 90
hsa-miR-573	0	0	1	1	1	1	PSRC1	proline/serine-rich coiled-coil 1
hsa-miR-573	1	0	1	1	1	1	RBFOX1	RNA binding protein, fox-1 homolog (C. elegans) 1
hsa-miR-573	1	0	1	0	1	1	PPP1R12A	protein phosphatase 1, regulatory subunit 12A
hsa-miR-573	1	0	1	1	1	1	HNRNPU	heterogeneous nuclear ribonucleoprotein U (scaffold attachment factor A)
hsa-miR-573	1	0	1	1	0	0	POLR2J3	polymerase (RNA) II (DNA directed) polypeptide J3
hsa-miR-573	1	0	1	1	1	1	WAPAL	wings apart-like homolog (Drosophila)
hsa-miR-573	1	0	1	1	1	1	LRRC7	leucine rich repeat containing 7
hsa-miR-573	0	0	1	1	1	1	BMP2K	BMP2 inducible kinase
hsa-miR-573	0	0	1	1	1	1	PTK7	PTK7 protein tyrosine kinase 7
hsa-miR-573	1	0	1	0	1	1	IL1RAP	interleukin 1 receptor accessory protein
hsa-miR-573	1	0	1	1	1	1	PLAGL1	pleiomorphic adenoma gene-like 1
hsa-miR-573	1	0	1	0	1	1	DICER1	dicer 1, ribonuclease type III
hsa-miR-573	1	0	1	1	1	1	CACNA2D2	calcium channel, voltage-dependent, alpha 2/delta subunit 2
hsa-miR-573	0	0	1	1	1	1	TCFL5	transcription factor-like 5 (basic helix-loop-helix)
hsa-miR-573	0	0	1	0	0	0	CACNA2D3	calcium channel, voltage-dependent, alpha 2/delta subunit 3
hsa-miR-573	0	0	1	1	1	1	WWTR1	WW domain containing transcription regulator 1
hsa-miR-573	0	0	1	1	1	1	STK33	serine/threonine kinase 33
hsa-miR-573	1	0	1	1	1	1	SLAMF6	SLAM family member 6
hsa-miR-573	1	0	1	1	1	1	PALM2	paralemmin 2
hsa-miR-573	1	0	1	1	1	1	RAB3IP	RAB3A interacting protein (rabin3)
hsa-miR-573	1	0	1	1	1	1	EMID2	EMI domain containing 2
hsa-miR-573	1	0	1	1	1	1	NRXN3	neurexin 3
hsa-miR-573	1	0	1	1	1	1	ARL4C	ADP-ribosylation factor-like 4C
hsa-miR-573	1	0	1	1	1	1	SLC35A1	solute carrier family 35 (CMP-sialic acid transporter), member A1
hsa-miR-573	0	0	1	0	0	0	COL28A1	collagen, type XXVIII, alpha 1
hsa-miR-573	1	0	1	1	1	1	AKAP2	A kinase (PRKA) anchor protein 2
hsa-miR-573	1	0	1	0	1	1	NFAT5	nuclear factor of activated T-cells 5, tonicity-responsive
hsa-miR-573	0	0	1	0	1	1	TRMT10A	tRNA methyltransferase 10 homolog A (S. cerevisiae)
hsa-miR-573	0	0	1	1	1	1	PARP16	poly (ADP-ribose) polymerase family, member 16
hsa-miR-573	0	0	1	0	0	0	TUG1	taurine upregulated 1 (non-protein coding)
hsa-miR-573	0	0	1	1	1	1	PARPBP	PARP1 binding protein
hsa-miR-573	0	0	1	1	1	1	OLFM4	olfactomedin 4
hsa-miR-573	0	0	1	1	1	1	BANK1	B-cell scaffold protein with ankyrin repeats 1
hsa-miR-573	0	0	1	0	1	1	EBF2	early B-cell factor 2
hsa-miR-573	0	0	1	0	0	0	TPTEP1	transmembrane phosphatase with tensin homology pseudogene 1
hsa-miR-573	1	0	1	1	1	1	HNRNPF	heterogeneous nuclear ribonucleoprotein F
hsa-miR-573	1	0	1	1	1	1	SCAMP1	secretory carrier membrane protein 1
hsa-miR-573	1	0	1	0	1	1	CLIC4	chloride intracellular channel 4
hsa-miR-573	1	0	1	1	1	1	PTBP3	polypyrimidine tract binding protein 3
hsa-miR-573	1	0	1	1	1	1	ARMC8	armadillo repeat containing 8
hsa-miR-573	0	0	1	1	1	1	RSRC2	arginine/serine-rich coiled-coil 2
hsa-miR-573	0	0	1	0	0	0	LINC00284	long intergenic non-protein coding RNA 284
hsa-miR-573	1	0	1	1	1	1	KLHDC8B	kelch domain containing 8B
hsa-miR-573	0	0	1	1	1	1	FAM175A	family with sequence similarity 175, member A
hsa-miR-573	0	0	1	1	0	0	C17orf53	chromosome 17 open reading frame 53
hsa-miR-573	0	0	1	1	0	0	MTBP	Mdm2, transformed 3T3 cell double minute 2, p53 binding protein (mouse) binding protein, 104kDa
hsa-miR-573	1	0	1	1	1	1	PGAP1	post-GPI attachment to proteins 1
hsa-miR-573	0	0	1	1	1	1	CCPG1	cell cycle progression 1
hsa-miR-573	1	0	1	1	1	1	UNKL	unkempt homolog (Drosophila)-like
hsa-miR-573	1	0	1	1	0	0	UQCC	ubiquinol-cytochrome c reductase complex chaperone
hsa-miR-573	0	0	1	0	0	0	SOX2-OT	SOX2 overlapping transcript (non-protein coding)
hsa-miR-573	0	0	1	0	0	0	DUXAP10	double homeobox A pseudogene 10
hsa-miR-573	0	0	1	1	1	1	VPRBP	Vpr (HIV-1) binding protein
hsa-miR-573	1	0	1	0	1	1	UBP1	upstream binding protein 1 (LBP-1a)
hsa-miR-573	1	0	1	1	1	1	MACF1	microtubule-actin crosslinking factor 1
hsa-miR-573	0	0	1	1	1	1	C14orf118	chromosome 14 open reading frame 118
hsa-miR-573	0	0	1	0	0	0	LINC00475	long intergenic non-protein coding RNA 475
hsa-miR-573	1	0	1	1	1	1	PHF20L1	PHD finger protein 20-like 1
hsa-miR-573	0	0	1	0	0	0	LOC284561	uncharacterized LOC284561
hsa-miR-573	1	0	1	1	1	1	RAB11FIP5	RAB11 family interacting protein 5 (class I)
hsa-miR-573	0	0	1	1	1	1	CXorf57	chromosome X open reading frame 57
hsa-miR-573	0	0	1	1	1	1	SIGLEC1	sialic acid binding Ig-like lectin 1, sialoadhesin
hsa-miR-573	0	0	1	0	0	0	IFFO2	intermediate filament family orphan 2
hsa-miR-573	1	0	1	1	1	1	DYRK2	dual-specificity tyrosine-(Y)-phosphorylation regulated kinase 2
hsa-miR-573	1	0	1	1	1	1	SLC35A3	solute carrier family 35 (UDP-N-acetylglucosamine (UDP-GlcNAc) transporter), member A3
hsa-miR-573	0	0	1	1	1	1	PPFIBP2	PTPRF interacting protein, binding protein 2 (liprin beta 2)
hsa-miR-573	1	0	1	1	1	1	DLC1	deleted in liver cancer 1
hsa-miR-573	1	0	1	1	1	1	ARFGEF1	ADP-ribosylation factor guanine nucleotide-exchange factor 1 (brefeldin A-inhibited)
hsa-miR-573	1	0	1	1	1	1	YPEL5	yippee-like 5 (Drosophila)
hsa-miR-573	1	0	1	1	1	1	NAA30	N(alpha)-acetyltransferase 30, NatC catalytic subunit
hsa-miR-573	1	0	1	0	1	1	ZCCHC3	zinc finger, CCHC domain containing 3
hsa-miR-573	0	0	1	0	0	0	LINC00340	long intergenic non-protein coding RNA 340
hsa-miR-573	1	0	1	1	0	0	UBXN7	UBX domain protein 7
hsa-miR-573	1	0	1	1	0	0	SLAIN2	SLAIN motif family, member 2
hsa-miR-573	1	0	1	1	1	1	ITGA9	integrin, alpha 9
hsa-miR-573	0	0	1	0	1	1	ZCCHC8	zinc finger, CCHC domain containing 8
hsa-miR-573	0	0	1	1	1	1	PLEKHS1	pleckstrin homology domain containing, family S member 1
hsa-miR-573	0	0	1	1	1	1	SPRTN	SprT-like N-terminal domain
hsa-miR-573	0	0	1	1	1	1	RNF146	ring finger protein 146
hsa-miR-573	0	0	1	1	1	1	KDM2B	lysine (K)-specific demethylase 2B
hsa-miR-573	0	0	1	1	1	1	CCDC14	coiled-coil domain containing 14
hsa-miR-573	0	0	1	1	1	1	NETO2	neuropilin (NRP) and tolloid (TLL)-like 2
hsa-miR-573	1	0	1	1	1	1	FAM40A	family with sequence similarity 40, member A
hsa-miR-573	1	0	1	0	1	1	CCNL2	cyclin L2
hsa-miR-573	0	0	1	1	1	1	SNAP47	synaptosomal-associated protein, 47kDa
hsa-miR-573	0	0	1	1	0	0	IMPDH1	IMP (inosine 5'-monophosphate) dehydrogenase 1
hsa-miR-573	0	0	1	0	0	0	KIAA0664L3	KIAA0664-like 3
hsa-miR-573	0	0	1	1	1	1	C8orf46	chromosome 8 open reading frame 46
hsa-miR-573	0	0	1	0	0	0	CHST9-AS1	CHST9 antisense RNA 1
hsa-miR-573	1	0	1	0	1	1	AP1G1	adaptor-related protein complex 1, gamma 1 subunit
hsa-miR-573	0	0	1	0	0	0	LOC100131060	uncharacterized LOC100131060
hsa-miR-573	0	0	1	1	1	1	KLC4	kinesin light chain 4
hsa-miR-573	0	0	1	1	0	0	SLC26A8	solute carrier family 26, member 8
hsa-miR-573	0	0	1	0	0	0	FLJ30838	uncharacterized LOC400955
hsa-miR-573	1	0	1	1	1	1	FRMD6	FERM domain containing 6
hsa-miR-573	0	0	1	0	0	0	FLJ31104	uncharacterized LOC441072
hsa-miR-573	1	0	1	1	1	1	HERPUD2	HERPUD family member 2
hsa-miR-573	1	0	1	0	1	1	RNF165	ring finger protein 165
hsa-miR-573	1	0	1	1	1	1	EXD2	exonuclease 3'-5' domain containing 2
hsa-miR-573	1	0	1	1	1	1	ZNF664	zinc finger protein 664
hsa-miR-573	1	0	1	0	1	1	FSTL4	follistatin-like 4
hsa-miR-573	1	0	1	1	1	1	AGPAT1	1-acylglycerol-3-phosphate O-acyltransferase 1 (lysophosphatidic acid acyltransferase, alpha)
hsa-miR-573	1	0	1	1	1	1	ZIC4	Zic family member 4
hsa-miR-573	0	0	1	0	1	1	FAM70A	family with sequence similarity 70, member A
hsa-miR-573	1	0	1	1	1	1	PHF15	PHD finger protein 15
hsa-miR-573	0	0	1	0	0	0	FLJ30901	uncharacterized protein FLJ30901
hsa-miR-573	0	0	1	1	0	0	ZNF185	zinc finger protein 185 (LIM domain)
hsa-miR-573	1	0	1	1	1	1	CLCN5	chloride channel, voltage-sensitive 5
hsa-miR-573	0	0	1	1	0	0	ACOT8	acyl-CoA thioesterase 8
hsa-miR-573	0	0	1	1	1	1	PTCD2	pentatricopeptide repeat domain 2
hsa-miR-573	1	0	1	1	1	1	TBC1D14	TBC1 domain family, member 14
hsa-miR-573	1	0	1	0	1	1	PCGF3	polycomb group ring finger 3
hsa-miR-573	1	0	1	1	1	1	MAP3K11	mitogen-activated protein kinase kinase kinase 11
hsa-miR-573	0	0	1	0	0	0	LOC145820	uncharacterized LOC145820
hsa-miR-573	0	0	1	1	1	1	MS4A14	membrane-spanning 4-domains, subfamily A, member 14
hsa-miR-573	1	0	1	0	1	1	PLEKHA1	pleckstrin homology domain containing, family A (phosphoinositide binding specific) member 1
hsa-miR-573	1	0	1	1	1	1	ANKRD29	ankyrin repeat domain 29
hsa-miR-573	0	0	1	0	0	0	UBE2QL1	ubiquitin-conjugating enzyme E2Q family-like 1
hsa-miR-573	1	0	1	1	1	1	ZFYVE21	zinc finger, FYVE domain containing 21
hsa-miR-573	0	0	1	1	0	0	PTOV1	prostate tumor overexpressed 1
hsa-miR-573	1	0	1	1	1	1	TBCK	TBC1 domain containing kinase
hsa-miR-573	1	0	1	1	1	1	BLCAP	bladder cancer associated protein
hsa-miR-573	1	0	1	1	1	1	UBAP1	ubiquitin associated protein 1
hsa-miR-573	1	0	1	0	1	1	SLC25A37	solute carrier family 25 (mitochondrial iron transporter), member 37
hsa-miR-573	0	0	1	1	0	0	PIGO	phosphatidylinositol glycan anchor biosynthesis, class O
hsa-miR-573	0	0	1	1	1	1	SAE1	SUMO1 activating enzyme subunit 1
hsa-miR-573	0	0	1	1	1	1	STBD1	starch binding domain 1
hsa-miR-573	0	0	1	0	0	0	LOC643837	uncharacterized LOC643837
hsa-miR-573	1	0	1	1	1	1	ARIH2	ariadne homolog 2 (Drosophila)
hsa-miR-573	0	0	1	0	0	0	SEC14L2	SEC14-like 2 (S. cerevisiae)
hsa-miR-573	0	0	1	0	0	0	FLJ34208	uncharacterized LOC401106
hsa-miR-573	1	0	1	1	1	1	FBXW2	F-box and WD repeat domain containing 2
hsa-miR-573	0	0	1	0	0	0	KIAA1430	KIAA1430
hsa-miR-573	1	0	1	1	1	1	LUC7L2	LUC7-like 2 (S. cerevisiae)
hsa-miR-573	1	0	1	1	1	1	GNG2	guanine nucleotide binding protein (G protein), gamma 2
hsa-miR-573	1	0	1	1	1	1	IVNS1ABP	influenza virus NS1A binding protein
hsa-miR-573	1	0	1	1	1	1	SPTBN1	spectrin, beta, non-erythrocytic 1
hsa-miR-573	1	0	1	1	1	1	DZIP1	DAZ interacting protein 1
hsa-miR-573	1	0	1	1	1	1	LRRC57	leucine rich repeat containing 57
hsa-miR-573	1	0	1	1	1	1	CTNNA1	catenin (cadherin-associated protein), alpha 1, 102kDa
hsa-miR-573	0	0	1	1	1	1	FRMD3	FERM domain containing 3
hsa-miR-573	0	0	1	1	1	1	SPOCK1	sparc/osteonectin, cwcv and kazal-like domains proteoglycan (testican) 1
hsa-miR-573	0	0	1	0	1	1	RALYL	RALY RNA binding protein-like
hsa-miR-573	1	0	1	1	1	1	SEPT4	septin 4
hsa-miR-573	1	0	1	0	1	1	NCOA7	nuclear receptor coactivator 7
hsa-miR-573	0	0	1	1	0	0	C9orf24	chromosome 9 open reading frame 24
hsa-miR-573	0	0	1	0	1	1	AGBL4	ATP/GTP binding protein-like 4
hsa-miR-573	1	0	1	1	1	1	LPPR2	lipid phosphate phosphatase-related protein type 2
hsa-miR-573	0	0	1	0	0	0	FLJ37798	uncharacterized LOC401264
hsa-miR-573	0	0	1	1	0	0	DPAGT1	dolichyl-phosphate (UDP-N-acetylglucosamine) N-acetylglucosaminephosphotransferase 1 (GlcNAc-1-P transferase)
hsa-miR-573	1	0	1	1	1	1	RASGEF1A	RasGEF domain family, member 1A
hsa-miR-573	0	0	1	0	0	0	LOC730101	uncharacterized LOC730101
hsa-miR-573	0	0	1	1	1	1	LTBR	lymphotoxin beta receptor (TNFR superfamily, member 3)
hsa-miR-573	1	0	1	1	1	1	CNEP1R1	CTD nuclear envelope phosphatase 1 regulatory subunit 1
hsa-miR-573	0	0	1	1	1	1	SETD2	SET domain containing 2
hsa-miR-573	0	0	1	0	0	0	LOC100129858	uncharacterized LOC100129858
hsa-miR-573	1	0	1	1	1	1	CS	citrate synthase
hsa-miR-573	1	0	1	1	1	1	EPB41L4A	erythrocyte membrane protein band 4.1 like 4A
hsa-miR-573	1	0	1	1	1	1	ACSL1	acyl-CoA synthetase long-chain family member 1
hsa-miR-573	1	0	1	1	1	1	GAPVD1	GTPase activating protein and VPS9 domains 1
hsa-miR-573	0	0	1	0	0	0	ZNF815P	zinc finger protein 815, pseudogene
hsa-miR-573	0	0	1	0	0	0	OTUD1	OTU domain containing 1
hsa-miR-573	0	0	1	0	0	0	METTL21CP1	methyltransferase like 21C pseudogene 1
hsa-miR-573	1	0	1	1	1	1	LRP8	low density lipoprotein receptor-related protein 8, apolipoprotein e receptor
hsa-miR-573	1	0	1	0	1	1	THRB	thyroid hormone receptor, beta
hsa-miR-573	1	0	1	0	0	0	PID1	phosphotyrosine interaction domain containing 1
hsa-miR-573	1	0	1	0	1	1	KBTBD8	kelch repeat and BTB (POZ) domain containing 8
hsa-miR-573	1	0	1	1	1	1	SYT6	synaptotagmin VI
hsa-miR-573	0	0	1	0	0	0	LOC285505	uncharacterized LOC285505
hsa-miR-573	0	0	1	1	1	1	IL17RE	interleukin 17 receptor E
hsa-miR-573	1	0	1	1	1	1	ETS2	v-ets erythroblastosis virus E26 oncogene homolog 2 (avian)
hsa-miR-573	1	0	1	1	1	1	STIM2	stromal interaction molecule 2
hsa-miR-573	0	0	1	0	1	1	SWAP70	SWAP switching B-cell complex 70kDa subunit
hsa-miR-573	1	0	1	1	1	1	CDV3	CDV3 homolog (mouse)
hsa-miR-573	0	0	1	1	1	1	ZNF513	zinc finger protein 513
hsa-miR-573	1	0	1	1	1	1	SPARC	secreted protein, acidic, cysteine-rich (osteonectin)
hsa-miR-573	0	0	1	0	0	0	CCDC150	coiled-coil domain containing 150
hsa-miR-573	0	0	1	1	0	0	CHCHD5	coiled-coil-helix-coiled-coil-helix domain containing 5
hsa-miR-573	1	0	1	1	1	1	EBF3	early B-cell factor 3
hsa-miR-573	0	0	1	0	0	0	DNAJB8-AS1	DNAJB8 antisense RNA 1
hsa-miR-573	1	0	1	1	1	1	GOLGA8B	golgin A8 family, member B
hsa-miR-573	0	0	1	1	1	1	CBWD5	COBW domain containing 5
hsa-miR-573	1	0	1	1	1	1	HOOK1	hook homolog 1 (Drosophila)
hsa-miR-573	1	0	1	1	1	1	VAV3	vav 3 guanine nucleotide exchange factor
hsa-miR-573	0	0	1	1	1	1	HCCS	holocytochrome c synthase
hsa-miR-573	0	0	1	1	1	1	CKAP2L	cytoskeleton associated protein 2-like
hsa-miR-573	0	0	1	1	0	0	CORO1A	coronin, actin binding protein, 1A
hsa-miR-573	0	0	1	1	1	1	POLR1D	polymerase (RNA) I polypeptide D, 16kDa
hsa-miR-573	0	0	1	0	0	0	CECR7	cat eye syndrome chromosome region, candidate 7 (non-protein coding)
hsa-miR-573	1	0	1	1	1	1	CHD6	chromodomain helicase DNA binding protein 6
hsa-miR-573	0	0	1	1	0	0	TMEM150A	transmembrane protein 150A
hsa-miR-573	0	0	1	0	0	0	LOC338579	ankyrin repeat domain-containing protein 30B pseudogene
hsa-miR-573	1	0	1	0	1	1	UNC5D	unc-5 homolog D (C. elegans)
hsa-miR-573	0	0	1	1	1	1	ABCC12	ATP-binding cassette, sub-family C (CFTR/MRP), member 12
hsa-miR-573	0	0	1	1	1	1	SLFN13	schlafen family member 13
hsa-miR-573	1	0	1	1	1	1	HBP1	HMG-box transcription factor 1
hsa-miR-573	0	0	1	1	0	0	KIAA0146	KIAA0146
hsa-miR-573	1	0	1	1	1	1	PXN	paxillin
hsa-miR-573	0	0	1	1	1	1	GFI1	growth factor independent 1 transcription repressor
hsa-miR-573	0	0	1	1	1	1	FRMPD2	FERM and PDZ domain containing 2
hsa-miR-573	0	0	1	1	1	1	ARHGEF26	Rho guanine nucleotide exchange factor (GEF) 26
hsa-miR-573	0	0	1	0	1	1	FLJ41200	uncharacterized LOC401492
hsa-miR-573	1	0	1	1	1	1	IKBKAP	inhibitor of kappa light polypeptide gene enhancer in B-cells, kinase complex-associated protein
hsa-miR-573	1	0	1	1	1	1	MDGA2	MAM domain containing glycosylphosphatidylinositol anchor 2
hsa-miR-573	0	0	1	0	0	0	TMPRSS11BNL	TMPRSS11B N terminal-like
hsa-miR-573	1	0	1	1	1	1	IPPK	inositol 1,3,4,5,6-pentakisphosphate 2-kinase
hsa-miR-573	0	0	1	0	0	0	LOC285043	uncharacterized LOC285043
hsa-miR-573	1	0	1	0	0	0	GPR137C	G protein-coupled receptor 137C
hsa-miR-573	1	0	1	1	1	1	SH2D4B	SH2 domain containing 4B
hsa-miR-573	0	0	1	1	1	1	PKP4	plakophilin 4
hsa-miR-573	1	0	1	1	1	1	SMAP1	small ArfGAP 1
hsa-miR-573	1	0	1	0	1	1	DCUN1D4	DCN1, defective in cullin neddylation 1, domain containing 4 (S. cerevisiae)
hsa-miR-573	0	0	1	0	0	0	EML6	echinoderm microtubule associated protein like 6
hsa-miR-573	1	0	1	0	1	1	TTYH3	tweety homolog 3 (Drosophila)
hsa-miR-573	0	0	1	1	1	1	IDS	iduronate 2-sulfatase
hsa-miR-573	1	0	1	1	1	1	HARS	histidyl-tRNA synthetase
hsa-miR-573	1	0	1	1	1	1	SLC44A1	solute carrier family 44, member 1
hsa-miR-573	0	0	1	1	1	1	ATPBD4	ATP binding domain 4
hsa-miR-573	1	0	1	1	1	1	SEPHS1	selenophosphate synthetase 1
hsa-miR-573	1	0	1	1	1	1	ATXN7	ataxin 7
hsa-miR-573	1	0	1	1	0	0	GXYLT1	glucoside xylosyltransferase 1
hsa-miR-573	0	0	1	1	1	1	CTPS2	CTP synthase 2
hsa-miR-573	1	0	1	1	1	1	SACS	spastic ataxia of Charlevoix-Saguenay (sacsin)
hsa-miR-573	0	0	1	1	1	1	CYB5D1	cytochrome b5 domain containing 1
hsa-miR-573	1	0	1	1	1	1	KPNA1	karyopherin alpha 1 (importin alpha 5)
hsa-miR-573	1	0	1	0	0	0	MSL1	male-specific lethal 1 homolog (Drosophila)
hsa-miR-573	1	0	1	1	1	1	MACROD2	MACRO domain containing 2
hsa-miR-573	1	0	1	1	0	0	UBN2	ubinuclein 2
hsa-miR-573	0	0	1	1	0	0	FSIP2	fibrous sheath interacting protein 2
hsa-miR-573	0	0	1	1	1	1	RBM39	RNA binding motif protein 39
hsa-miR-573	0	0	1	0	0	0	LOC729177	uncharacterized LOC729177
hsa-miR-573	1	0	1	1	1	1	PLEKHB2	pleckstrin homology domain containing, family B (evectins) member 2
hsa-miR-573	1	0	1	1	1	1	SIKE1	suppressor of IKBKE 1
hsa-miR-573	1	0	1	0	1	1	ANO6	anoctamin 6
hsa-miR-573	0	0	1	0	1	1	LOC388942	uncharacterized LOC388942
hsa-miR-573	0	0	1	1	1	1	C18orf54	chromosome 18 open reading frame 54
hsa-miR-573	1	0	1	1	0	0	LRRC73	leucine rich repeat containing 73
hsa-miR-573	1	0	1	0	1	1	GPR180	G protein-coupled receptor 180
hsa-miR-573	0	0	1	1	1	1	SPICE1	spindle and centriole associated protein 1
hsa-miR-573	1	0	1	1	1	1	CLIP1	CAP-GLY domain containing linker protein 1
hsa-miR-573	1	0	1	1	1	1	CLTC	clathrin, heavy chain (Hc)
hsa-miR-573	0	0	1	1	1	1	DOCK9	dedicator of cytokinesis 9
hsa-miR-573	0	0	1	1	1	1	RALGAPA2	Ral GTPase activating protein, alpha subunit 2 (catalytic)
hsa-miR-573	0	0	1	1	1	1	ERI2	ERI1 exoribonuclease family member 2
hsa-miR-573	1	0	1	1	1	1	LSM14A	LSM14A, SCD6 homolog A (S. cerevisiae)
hsa-miR-573	0	0	1	0	0	0	LOC285812	uncharacterized LOC285812
hsa-miR-573	0	0	1	0	0	0	LOC100128262	uncharacterized LOC100128262
hsa-miR-573	1	0	1	0	1	1	FNDC3B	fibronectin type III domain containing 3B
hsa-miR-573	1	0	1	1	1	1	AFAP1	actin filament associated protein 1
hsa-miR-573	0	0	1	0	0	0	LRRC9	leucine rich repeat containing 9
hsa-miR-573	1	0	1	1	0	0	MAN1B1	mannosidase, alpha, class 1B, member 1
hsa-miR-573	1	0	1	1	0	0	SMCR7	Smith-Magenis syndrome chromosome region, candidate 7
hsa-miR-573	0	0	1	1	1	1	MON1B	MON1 homolog B (yeast)
hsa-miR-573	1	0	1	1	1	1	FRYL	FRY-like
hsa-miR-573	1	0	1	1	1	1	BCAT1	branched chain amino-acid transaminase 1, cytosolic
hsa-miR-573	1	0	1	0	1	1	KPNA6	karyopherin alpha 6 (importin alpha 7)
hsa-miR-573	1	0	1	1	1	1	PUS7	pseudouridylate synthase 7 homolog (S. cerevisiae)
hsa-miR-573	1	0	1	1	0	0	NBEAL1	neurobeachin-like 1
hsa-miR-573	0	0	1	0	0	0	IDO2	indoleamine 2,3-dioxygenase 2
hsa-miR-573	0	0	1	0	0	0	LOC100129940	uncharacterized LOC100129940
hsa-miR-573	0	0	1	0	0	0	EMBP1	embigin pseudogene 1
hsa-miR-573	1	0	1	0	1	1	CYB561D1	cytochrome b-561 domain containing 1
hsa-miR-573	1	0	1	1	1	1	PHC2	polyhomeotic homolog 2 (Drosophila)
hsa-miR-573	0	0	1	1	1	1	NLRP11	NLR family, pyrin domain containing 11
hsa-miR-573	1	0	1	1	1	1	CD200	CD200 molecule
hsa-miR-573	1	0	1	1	1	1	RBM24	RNA binding motif protein 24
hsa-miR-573	0	0	1	1	0	0	HEATR8	HEAT repeat containing 8
hsa-miR-573	0	0	1	0	0	0	LOC494141	mitochondrial carrier triple repeat 1 pseudogene
hsa-miR-573	0	0	1	0	1	1	GALNT13	UDP-N-acetyl-alpha-D-galactosamine:polypeptide N-acetylgalactosaminyltransferase 13 (GalNAc-T13)
hsa-miR-573	0	0	1	1	1	1	ZNF680	zinc finger protein 680
hsa-miR-573	1	0	1	1	1	1	RNF111	ring finger protein 111
hsa-miR-573	1	0	1	0	1	1	FMNL2	formin-like 2
hsa-miR-573	0	0	1	1	0	0	ISOC2	isochorismatase domain containing 2
hsa-miR-573	0	0	1	0	0	0	LOC100124692	maltase-glucoamylase (alpha-glucosidase) pseudogene
hsa-miR-573	0	0	1	1	0	0	CYP4X1	cytochrome P450, family 4, subfamily X, polypeptide 1
hsa-miR-573	1	0	1	1	1	1	PPP2R5C	protein phosphatase 2, regulatory subunit B', gamma
hsa-miR-573	1	0	1	1	1	1	SMAD7	SMAD family member 7
hsa-miR-573	0	0	1	1	0	0	DTHD1	death domain containing 1
hsa-miR-573	1	0	1	1	1	1	LRRK2	leucine-rich repeat kinase 2
hsa-miR-573	1	0	1	0	1	1	ZNF607	zinc finger protein 607
hsa-miR-573	0	0	1	1	0	0	ZSCAN18	zinc finger and SCAN domain containing 18
hsa-miR-573	0	0	1	1	1	1	AKTIP	AKT interacting protein
hsa-miR-573	0	0	1	1	0	0	TM6SF1	transmembrane 6 superfamily member 1
hsa-miR-573	1	0	1	0	1	1	TMEM106B	transmembrane protein 106B
hsa-miR-573	0	0	1	1	1	1	CRISP3	cysteine-rich secretory protein 3
hsa-miR-573	1	0	1	1	1	1	B3GALNT1	beta-1,3-N-acetylgalactosaminyltransferase 1 (globoside blood group)
hsa-miR-573	1	0	1	1	1	1	GATA6	GATA binding protein 6
hsa-miR-573	1	0	1	1	1	1	RPS6KA4	ribosomal protein S6 kinase, 90kDa, polypeptide 4
hsa-miR-573	1	0	1	1	1	1	CYYR1	cysteine/tyrosine-rich 1
hsa-miR-573	1	0	1	1	1	1	TBC1D15	TBC1 domain family, member 15
hsa-miR-573	0	0	1	1	1	1	CD48	CD48 molecule
hsa-miR-573	1	0	1	1	0	0	ABLIM3	actin binding LIM protein family, member 3
hsa-miR-573	1	0	1	1	1	1	COBLL1	COBL-like 1
hsa-miR-573	1	0	1	1	1	1	UPK1B	uroplakin 1B
hsa-miR-573	1	0	1	1	1	1	LUC7L3	LUC7-like 3 (S. cerevisiae)
hsa-miR-573	0	0	1	1	0	0	MTMR1	myotubularin related protein 1
hsa-miR-573	1	0	1	1	1	1	NOVA1	neuro-oncological ventral antigen 1
hsa-miR-573	1	0	1	1	1	1	APBB2	amyloid beta (A4) precursor protein-binding, family B, member 2
hsa-miR-573	1	0	1	1	1	1	AHCYL1	adenosylhomocysteinase-like 1
hsa-miR-573	0	0	1	0	0	0	PART1	prostate androgen-regulated transcript 1 (non-protein coding)
hsa-miR-573	0	0	1	1	0	0	NEK7	NIMA (never in mitosis gene a)-related kinase 7
hsa-miR-573	1	0	1	1	1	1	TAB2	TGF-beta activated kinase 1/MAP3K7 binding protein 2
hsa-miR-573	1	0	1	0	1	1	DCDC2	doublecortin domain containing 2
hsa-miR-573	0	0	1	1	1	1	TTLL5	tubulin tyrosine ligase-like family, member 5
hsa-miR-573	0	0	1	0	0	0	DNAJC5B	DnaJ (Hsp40) homolog, subfamily C, member 5 beta
hsa-miR-573	0	0	1	1	1	1	ZNF280D	zinc finger protein 280D
hsa-miR-573	1	0	1	1	1	1	SLC25A36	solute carrier family 25 (pyrimidine nucleotide carrier ), member 36
hsa-miR-573	0	0	1	1	0	0	BAG3	BCL2-associated athanogene 3
hsa-miR-573	1	0	1	1	1	1	DNAJC16	DnaJ (Hsp40) homolog, subfamily C, member 16
hsa-miR-573	1	0	1	1	1	1	NBEA	neurobeachin
hsa-miR-573	1	0	1	0	1	1	GPR85	G protein-coupled receptor 85
hsa-miR-573	1	0	1	0	1	1	CEP170	centrosomal protein 170kDa
hsa-miR-573	0	0	1	1	0	0	DOPEY1	dopey family member 1
hsa-miR-573	1	0	1	0	1	1	GRIN3A	glutamate receptor, ionotropic, N-methyl-D-aspartate 3A
hsa-miR-573	0	0	1	1	1	1	HNRPLL	heterogeneous nuclear ribonucleoprotein L-like
hsa-miR-573	1	0	1	1	1	1	YTHDF3	YTH domain family, member 3
hsa-miR-573	1	0	1	0	0	0	SYNPO	synaptopodin
hsa-miR-573	1	0	1	1	1	1	LIMCH1	LIM and calponin homology domains 1
hsa-miR-573	0	0	1	1	1	1	PDE4DIP	phosphodiesterase 4D interacting protein
hsa-miR-573	0	0	1	0	1	1	GAB3	GRB2-associated binding protein 3
hsa-miR-573	0	0	1	1	1	1	BEND7	BEN domain containing 7
hsa-miR-573	1	0	1	1	1	1	QTRTD1	queuine tRNA-ribosyltransferase domain containing 1
hsa-miR-573	1	0	1	1	1	1	FAM126B	family with sequence similarity 126, member B
hsa-miR-573	1	0	1	1	1	1	CHMP7	charged multivesicular body protein 7
hsa-miR-573	1	0	1	1	1	1	MLL3	myeloid/lymphoid or mixed-lineage leukemia 3
hsa-miR-573	1	0	1	0	1	1	FAM214A	family with sequence similarity 214, member A
hsa-miR-573	1	0	1	1	1	1	RNF180	ring finger protein 180
hsa-miR-573	1	0	1	0	1	1	STYX	serine/threonine/tyrosine interacting protein
hsa-miR-573	0	0	1	1	1	1	INPP5B	inositol polyphosphate-5-phosphatase, 75kDa
hsa-miR-573	0	0	1	0	1	1	PAPD4	PAP associated domain containing 4
hsa-miR-573	0	0	1	1	1	1	NARG2	NMDA receptor regulated 2
hsa-miR-573	0	0	1	1	1	1	C12orf50	chromosome 12 open reading frame 50
hsa-miR-573	0	0	1	1	1	1	CEP192	centrosomal protein 192kDa
hsa-miR-573	1	0	1	0	1	1	CLINT1	clathrin interactor 1
hsa-miR-573	0	0	1	1	0	0	ATL1	atlastin GTPase 1
hsa-miR-573	1	0	1	0	1	1	CNOT7	CCR4-NOT transcription complex, subunit 7
hsa-miR-573	0	0	1	1	1	1	PCDH20	protocadherin 20
hsa-miR-573	0	0	1	1	1	1	CAND1	cullin-associated and neddylation-dissociated 1
hsa-miR-573	1	0	1	0	0	0	NPEPL1	aminopeptidase-like 1
hsa-miR-573	1	0	1	1	1	1	SLC24A4	solute carrier family 24 (sodium/potassium/calcium exchanger), member 4
hsa-miR-573	1	0	1	0	1	1	JAZF1	JAZF zinc finger 1
hsa-miR-573	1	0	1	1	1	1	RBM26	RNA binding motif protein 26
hsa-miR-573	0	0	1	1	1	1	C8orf34	chromosome 8 open reading frame 34
hsa-miR-573	1	0	1	1	1	1	RICTOR	RPTOR independent companion of MTOR, complex 2
hsa-miR-573	1	0	1	1	1	1	PPP3CA	protein phosphatase 3, catalytic subunit, alpha isozyme
hsa-miR-573	1	0	1	1	1	1	RNF38	ring finger protein 38
hsa-miR-573	1	0	1	1	1	1	IKZF2	IKAROS family zinc finger 2 (Helios)
hsa-miR-573	0	0	1	1	0	0	ERAP2	endoplasmic reticulum aminopeptidase 2
hsa-miR-573	0	0	1	0	1	1	CD80	CD80 molecule
hsa-miR-573	0	0	1	0	0	0	LOC374443	C-type lectin domain family 2, member D pseudogene
hsa-miR-573	0	0	1	0	0	0	KGFLP1	fibroblast growth factor 7 pseudogene
hsa-miR-573	1	0	1	1	1	1	RFFL	ring finger and FYVE-like domain containing E3 ubiquitin protein ligase
hsa-miR-573	1	0	1	1	1	1	ITSN1	intersectin 1 (SH3 domain protein)
hsa-miR-573	0	0	1	0	1	1	ARMC10	armadillo repeat containing 10
hsa-miR-573	0	0	1	1	1	1	DNAJB14	DnaJ (Hsp40) homolog, subfamily B, member 14
hsa-miR-573	0	0	1	1	1	1	APTX	aprataxin
hsa-miR-573	1	0	1	1	1	1	PIH1D3	PIH1 domain containing 3
hsa-miR-573	1	0	1	1	1	1	WDR26	WD repeat domain 26
hsa-miR-573	0	0	1	1	0	0	DNAH1	dynein, axonemal, heavy chain 1
hsa-miR-573	1	0	1	1	1	1	BCL11A	B-cell CLL/lymphoma 11A (zinc finger protein)
hsa-miR-573	1	0	1	1	1	1	ILF3	interleukin enhancer binding factor 3, 90kDa
hsa-miR-573	1	0	1	1	1	1	TPP1	tripeptidyl peptidase I
hsa-miR-573	1	0	1	1	1	1	RAI14	retinoic acid induced 14
hsa-miR-573	1	0	1	1	1	1	LAMA3	laminin, alpha 3
hsa-miR-573	0	0	1	1	1	1	GCOM1	GRINL1A complex locus 1
hsa-miR-573	1	0	1	1	1	1	NPL	N-acetylneuraminate pyruvate lyase (dihydrodipicolinate synthase)
hsa-miR-573	0	0	1	1	1	1	MFAP5	microfibrillar associated protein 5
hsa-miR-573	0	0	1	0	0	0	ZNFX1-AS1	ZNFX1 antisense RNA 1
hsa-miR-573	1	0	1	0	1	1	AP2B1	adaptor-related protein complex 2, beta 1 subunit
hsa-miR-573	0	0	1	0	0	0	LINC00085	long intergenic non-protein coding RNA 85
hsa-miR-573	0	0	1	1	1	1	TNFSF15	tumor necrosis factor (ligand) superfamily, member 15
hsa-miR-573	1	0	1	1	1	1	VPS45	vacuolar protein sorting 45 homolog (S. cerevisiae)
hsa-miR-573	1	0	1	0	1	1	NHS	Nance-Horan syndrome (congenital cataracts and dental anomalies)
hsa-miR-573	0	0	1	0	1	1	BRWD3	bromodomain and WD repeat domain containing 3
hsa-miR-573	0	0	1	1	0	0	SH2D6	SH2 domain containing 6
hsa-miR-573	0	0	1	0	1	1	XKR5	XK, Kell blood group complex subunit-related family, member 5
hsa-miR-573	0	0	1	1	1	1	AICDA	activation-induced cytidine deaminase
hsa-miR-573	1	0	1	1	1	1	MECP2	methyl CpG binding protein 2 (Rett syndrome)
hsa-miR-573	1	0	1	0	1	1	LRAT	lecithin retinol acyltransferase (phosphatidylcholine--retinol O-acyltransferase)
hsa-miR-573	0	0	1	1	1	1	DIO1	deiodinase, iodothyronine, type I
hsa-miR-573	0	0	1	0	1	1	RAB18	RAB18, member RAS oncogene family
hsa-miR-573	1	0	1	1	1	1	HMGA2	high mobility group AT-hook 2
hsa-miR-573	0	0	1	1	1	1	IL24	interleukin 24
hsa-miR-573	0	0	1	1	1	1	ILDR1	immunoglobulin-like domain containing receptor 1
hsa-miR-573	0	0	1	1	1	1	RPAIN	RPA interacting protein
hsa-miR-573	0	0	1	1	0	0	C15orf61	chromosome 15 open reading frame 61
hsa-miR-573	1	0	1	1	0	0	DGAT2	diacylglycerol O-acyltransferase 2
hsa-miR-573	1	0	1	1	1	1	QKI	QKI, KH domain containing, RNA binding
hsa-miR-573	1	0	1	1	1	1	MYB	v-myb myeloblastosis viral oncogene homolog (avian)
hsa-miR-573	0	0	1	0	1	1	KCNE1	potassium voltage-gated channel, Isk-related family, member 1
hsa-miR-573	1	0	1	1	0	0	TAF4B	TAF4b RNA polymerase II, TATA box binding protein (TBP)-associated factor, 105kDa
hsa-miR-573	0	0	1	1	1	1	IL23R	interleukin 23 receptor
hsa-miR-573	1	0	1	1	1	1	AMOT	angiomotin
hsa-miR-573	0	0	1	1	1	1	ZCCHC17	zinc finger, CCHC domain containing 17
hsa-miR-573	1	0	1	0	1	1	BAG4	BCL2-associated athanogene 4
hsa-miR-573	1	0	1	1	1	1	PAFAH2	platelet-activating factor acetylhydrolase 2, 40kDa
hsa-miR-573	1	0	1	1	1	1	AZI2	5-azacytidine induced 2
hsa-miR-573	0	0	1	1	1	1	TMOD1	tropomodulin 1
hsa-miR-573	0	0	1	1	1	1	ATG3	autophagy related 3
hsa-miR-573	1	0	1	0	1	1	DPYSL5	dihydropyrimidinase-like 5
hsa-miR-573	1	0	1	1	1	1	TSPAN14	tetraspanin 14
hsa-miR-573	1	0	1	1	1	1	RIMS3	regulating synaptic membrane exocytosis 3
hsa-miR-573	1	0	1	0	1	1	DCAF10	DDB1 and CUL4 associated factor 10
hsa-miR-573	0	0	1	1	0	0	SNRPB	small nuclear ribonucleoprotein polypeptides B and B1
hsa-miR-573	1	0	1	0	1	1	CGGBP1	CGG triplet repeat binding protein 1
hsa-miR-573	1	0	1	1	1	1	MBNL1	muscleblind-like splicing regulator 1
hsa-miR-573	0	0	1	0	0	0	MGC13053	uncharacterized MGC13053
hsa-miR-573	1	0	1	1	1	1	U2SURP	U2 snRNP-associated SURP domain containing
hsa-miR-573	1	0	1	0	1	1	VAMP4	vesicle-associated membrane protein 4
hsa-miR-573	0	0	1	1	1	1	DYDC2	DPY30 domain containing 2
hsa-miR-573	1	0	1	0	1	1	DDX3X	DEAD (Asp-Glu-Ala-Asp) box polypeptide 3, X-linked
hsa-miR-573	0	0	1	1	0	0	PRR11	proline rich 11
hsa-miR-573	0	0	1	1	1	1	TMEM30A	transmembrane protein 30A
hsa-miR-573	1	0	1	1	1	1	GSPT1	G1 to S phase transition 1
hsa-miR-573	1	0	1	1	1	1	ZFAND5	zinc finger, AN1-type domain 5
hsa-miR-573	1	0	1	1	1	1	TRIM2	tripartite motif containing 2
hsa-miR-573	0	0	1	1	1	1	PSEN1	presenilin 1
hsa-miR-573	1	0	1	1	1	1	SUPT16H	suppressor of Ty 16 homolog (S. cerevisiae)
hsa-miR-573	1	0	1	1	1	1	DPH1	DPH1 homolog (S. cerevisiae)
hsa-miR-573	1	0	1	1	1	1	RBM7	RNA binding motif protein 7
hsa-miR-573	0	0	1	1	1	1	PCNP	PEST proteolytic signal containing nuclear protein
hsa-miR-573	1	0	1	1	1	1	ETF1	eukaryotic translation termination factor 1
hsa-miR-573	0	0	1	0	0	0	LOC729013	uncharacterized LOC729013
hsa-miR-573	1	0	1	1	1	1	SOX5	SRY (sex determining region Y)-box 5
hsa-miR-573	0	0	1	0	0	0	MGC21881	uncharacterized locus MGC21881
hsa-miR-573	0	0	1	0	0	0	KLHL15	kelch-like 15 (Drosophila)
hsa-miR-573	1	0	1	1	1	1	ZDHHC3	zinc finger, DHHC-type containing 3
hsa-miR-573	0	0	1	0	1	1	ZNF37A	zinc finger protein 37A
hsa-miR-573	1	0	1	1	1	1	TMEM9B	TMEM9 domain family, member B
hsa-miR-573	1	0	1	0	1	1	NR1D2	nuclear receptor subfamily 1, group D, member 2
hsa-miR-573	1	0	1	0	1	1	NECAB1	N-terminal EF-hand calcium binding protein 1
hsa-miR-573	0	0	1	1	1	1	FAM122C	family with sequence similarity 122C
hsa-miR-573	1	0	1	1	1	1	NRF1	nuclear respiratory factor 1
hsa-miR-573	0	0	1	1	1	1	PARP9	poly (ADP-ribose) polymerase family, member 9
hsa-miR-573	0	0	1	0	0	0	FAM200B	family with sequence similarity 200, member B
hsa-miR-573	1	0	1	1	1	1	SUZ12	suppressor of zeste 12 homolog (Drosophila)
hsa-miR-573	0	0	1	0	1	1	TP53RK	TP53 regulating kinase
hsa-miR-573	0	0	1	1	1	1	NELL2	NEL-like 2 (chicken)
hsa-miR-573	1	0	1	1	1	1	WHSC1	Wolf-Hirschhorn syndrome candidate 1
hsa-miR-573	1	0	1	1	1	1	TM9SF4	transmembrane 9 superfamily protein member 4
hsa-miR-573	0	0	1	0	0	0	FAM92A1P2	family with sequence similarity 92, member A3
hsa-miR-573	1	0	1	1	1	1	VASP	vasodilator-stimulated phosphoprotein
hsa-miR-573	1	0	1	1	1	1	SPG20	spastic paraplegia 20 (Troyer syndrome)
hsa-miR-573	0	0	1	1	1	1	MAP2	microtubule-associated protein 2
hsa-miR-573	1	0	1	1	1	1	TMEM127	transmembrane protein 127
hsa-miR-573	0	0	1	1	1	1	BIRC2	baculoviral IAP repeat containing 2
hsa-miR-573	1	0	1	1	1	1	SENP6	SUMO1/sentrin specific peptidase 6
hsa-miR-573	0	0	1	0	1	1	PAPOLG	poly(A) polymerase gamma
hsa-miR-573	1	0	1	1	1	1	HTR2C	5-hydroxytryptamine (serotonin) receptor 2C, G protein-coupled
hsa-miR-573	1	0	1	0	0	0	KCNU1	potassium channel, subfamily U, member 1
hsa-miR-573	0	0	1	1	1	1	LRMP	lymphoid-restricted membrane protein
hsa-miR-573	0	0	1	1	1	1	B4GALNT1	beta-1,4-N-acetyl-galactosaminyl transferase 1
hsa-miR-573	1	0	1	0	1	1	TFEC	transcription factor EC
hsa-miR-573	0	0	1	1	1	1	PIK3AP1	phosphoinositide-3-kinase adaptor protein 1
hsa-miR-573	1	0	1	0	1	1	SV2B	synaptic vesicle glycoprotein 2B
hsa-miR-573	1	0	1	1	1	1	TIAL1	TIA1 cytotoxic granule-associated RNA binding protein-like 1
hsa-miR-573	0	0	1	1	1	1	PIP5K1B	phosphatidylinositol-4-phosphate 5-kinase, type I, beta
hsa-miR-573	1	0	1	1	1	1	EYA4	eyes absent homolog 4 (Drosophila)
hsa-miR-573	1	0	1	1	1	1	ELAVL2	ELAV (embryonic lethal, abnormal vision, Drosophila)-like 2 (Hu antigen B)
hsa-miR-573	1	0	1	1	1	1	GABRA1	gamma-aminobutyric acid (GABA) A receptor, alpha 1
hsa-miR-573	0	0	1	0	0	0	LOC729307	uncharacterized LOC729307
hsa-miR-573	1	0	1	1	1	1	ZPLD1	zona pellucida-like domain containing 1
hsa-miR-573	1	0	1	1	1	1	PITPNB	phosphatidylinositol transfer protein, beta
hsa-miR-573	1	0	1	0	1	1	RNF4	ring finger protein 4
hsa-miR-573	0	0	1	1	1	1	C7orf53	chromosome 7 open reading frame 53
hsa-miR-573	1	0	1	1	1	1	PHF17	PHD finger protein 17
hsa-miR-573	0	0	1	0	0	0	LOC643648	uncharacterized LOC643648
hsa-miR-573	1	0	1	1	1	1	DCLK2	doublecortin-like kinase 2
hsa-miR-573	1	0	1	1	1	1	SORL1	sortilin-related receptor, L(DLR class) A repeats containing
hsa-miR-573	0	0	1	1	0	0	IGFN1	immunoglobulin-like and fibronectin type III domain containing 1
hsa-miR-573	0	0	1	1	1	1	IL20RB	interleukin 20 receptor beta
hsa-miR-573	0	0	1	0	0	0	HILS1	histone linker H1 domain, spermatid-specific 1, pseudogene
hsa-miR-573	0	0	1	1	1	1	ZNF337	zinc finger protein 337
hsa-miR-573	1	0	1	1	1	1	LPGAT1	lysophosphatidylglycerol acyltransferase 1
hsa-miR-573	0	0	1	1	1	1	EDA2R	ectodysplasin A2 receptor
hsa-miR-573	1	0	1	1	0	0	CHST4	carbohydrate (N-acetylglucosamine 6-O) sulfotransferase 4
hsa-miR-573	0	0	1	0	1	1	KSR1	kinase suppressor of ras 1
hsa-miR-573	0	0	1	1	1	1	NR1H4	nuclear receptor subfamily 1, group H, member 4
hsa-miR-573	0	0	1	1	0	0	C2orf80	chromosome 2 open reading frame 80
hsa-miR-573	0	0	1	1	1	1	SEC24D	SEC24 family, member D (S. cerevisiae)
hsa-miR-573	0	0	1	1	1	1	ARHGAP6	Rho GTPase activating protein 6
hsa-miR-573	0	0	1	0	0	0	HOXA-AS2	HOXA cluster antisense RNA 2
hsa-miR-573	0	0	1	1	1	1	CLEC12B	C-type lectin domain family 12, member B
hsa-miR-573	0	0	1	1	1	1	UBE3D	ubiquitin protein ligase E3D
hsa-miR-573	1	0	1	1	1	1	IMPACT	Impact homolog (mouse)
hsa-miR-573	1	0	1	1	1	1	PEX5L	peroxisomal biogenesis factor 5-like
hsa-miR-573	0	0	1	0	1	1	C9orf57	chromosome 9 open reading frame 57
hsa-miR-573	1	0	1	1	1	1	SLC35G1	solute carrier family 35, member G1
hsa-miR-573	1	0	1	1	1	1	LHX8	LIM homeobox 8
hsa-miR-573	1	0	1	1	1	1	HECTD2	HECT domain containing E3 ubiquitin protein ligase 2
hsa-miR-573	1	0	1	1	1	1	MEIS1	Meis homeobox 1
hsa-miR-573	0	0	1	1	1	1	CELF1	CUGBP, Elav-like family member 1
hsa-miR-573	1	0	1	1	0	0	RASGEF1B	RasGEF domain family, member 1B
hsa-miR-573	1	0	1	0	1	1	CPEB4	cytoplasmic polyadenylation element binding protein 4
hsa-miR-573	1	0	1	1	1	1	BNC2	basonuclin 2
hsa-miR-573	1	0	1	1	1	1	FAM135B	family with sequence similarity 135, member B
hsa-miR-573	1	0	1	0	1	1	RAG1	recombination activating gene 1
hsa-miR-573	0	0	1	0	0	0	LOC286184	uncharacterized LOC286184
hsa-miR-573	1	0	1	0	1	1	YAF2	YY1 associated factor 2
hsa-miR-573	0	0	1	0	0	0	MGC42157	uncharacterized locus MGC42157
hsa-miR-573	1	0	1	1	1	1	DPP10	dipeptidyl-peptidase 10 (non-functional)
hsa-miR-573	1	0	1	0	1	1	ARID2	AT rich interactive domain 2 (ARID, RFX-like)
hsa-miR-573	0	0	1	0	0	0	FLJ36000	uncharacterized FLJ36000
hsa-miR-573	0	0	1	1	1	1	C11orf88	chromosome 11 open reading frame 88
hsa-miR-573	1	0	1	1	1	1	DACH2	dachshund homolog 2 (Drosophila)
hsa-miR-573	0	0	1	0	0	0	LOC339622	uncharacterized LOC339622
hsa-miR-573	1	0	1	1	1	1	SLITRK3	SLIT and NTRK-like family, member 3
hsa-miR-573	1	0	1	0	1	1	PCSK2	proprotein convertase subtilisin/kexin type 2
hsa-miR-573	1	0	1	1	1	1	INTS6	integrator complex subunit 6
hsa-miR-573	0	0	1	1	1	1	MDFIC	MyoD family inhibitor domain containing
hsa-miR-573	1	0	1	1	1	1	UNC13C	unc-13 homolog C (C. elegans)
hsa-miR-573	0	0	1	1	1	1	SIAE	sialic acid acetylesterase
hsa-miR-573	0	0	1	0	1	1	FAM13B	family with sequence similarity 13, member B
hsa-miR-573	0	0	1	0	1	1	METTL12	methyltransferase like 12
hsa-miR-573	0	0	1	1	1	1	VPS35	vacuolar protein sorting 35 homolog (S. cerevisiae)
hsa-miR-573	1	0	1	1	1	1	FAM123A	family with sequence similarity 123A
hsa-miR-573	1	0	1	0	1	1	HSPA12A	heat shock 70kDa protein 12A
hsa-miR-573	0	0	1	0	0	0	ALOX12P2	arachidonate 12-lipoxygenase pseudogene 2
hsa-miR-573	0	0	1	1	1	1	GOLGA6L9	golgin A6 family-like 9
hsa-miR-573	1	0	1	1	1	1	CLOCK	clock homolog (mouse)
hsa-miR-573	0	0	1	1	1	1	MTHFD2L	methylenetetrahydrofolate dehydrogenase (NADP+ dependent) 2-like
hsa-miR-573	0	0	1	1	1	1	C4orf32	chromosome 4 open reading frame 32
hsa-miR-573	0	0	1	1	1	1	NSUN7	NOP2/Sun domain family, member 7
hsa-miR-573	1	0	1	1	1	1	FKBP5	FK506 binding protein 5
hsa-miR-573	0	0	1	0	0	0	LINC00347	long intergenic non-protein coding RNA 347
hsa-miR-573	0	0	1	0	0	0	DKFZp686O1327	uncharacterized LOC401014
hsa-miR-573	0	0	1	1	1	1	MYO3A	myosin IIIA
hsa-miR-573	0	0	1	1	1	1	MGC57346	uncharacterized LOC401884
hsa-miR-573	0	0	1	0	0	0	LOC283914	uncharacterized LOC283914
hsa-miR-573	1	0	1	1	1	1	ZFAND4	zinc finger, AN1-type domain 4
hsa-miR-573	1	0	1	1	1	1	SF3B1	splicing factor 3b, subunit 1, 155kDa
hsa-miR-573	0	0	1	0	0	0	DPY19L2P4	dpy-19-like 2 pseudogene 4 (C. elegans)
hsa-miR-573	0	0	1	0	1	1	LOC401021	uncharacterized LOC401021
hsa-miR-573	1	0	1	0	1	1	ZNF800	zinc finger protein 800
hsa-miR-573	1	0	1	1	1	1	RMND5A	required for meiotic nuclear division 5 homolog A (S. cerevisiae)
hsa-miR-573	1	0	1	1	1	1	RTKN2	rhotekin 2
hsa-miR-573	0	0	1	1	1	1	ZNF74	zinc finger protein 74
hsa-miR-573	0	0	1	1	1	1	INO80C	INO80 complex subunit C
hsa-miR-573	1	0	1	1	1	1	PELI1	pellino E3 ubiquitin protein ligase 1
hsa-miR-573	1	0	1	0	1	1	ARHGAP5	Rho GTPase activating protein 5
hsa-miR-573	0	0	1	0	1	1	ITGA1	integrin, alpha 1
hsa-miR-573	0	0	1	1	1	1	FBXO38	F-box protein 38
hsa-miR-573	1	0	1	1	1	1	PDCD6	programmed cell death 6
hsa-miR-573	1	0	1	1	1	1	LARP1B	La ribonucleoprotein domain family, member 1B
hsa-miR-573	0	0	1	1	1	1	WDR93	WD repeat domain 93
hsa-miR-573	1	0	1	1	1	1	FNDC3A	fibronectin type III domain containing 3A
hsa-miR-573	1	0	1	0	1	1	SMURF2	SMAD specific E3 ubiquitin protein ligase 2
hsa-miR-573	1	0	1	1	1	1	YWHAZ	tyrosine 3-monooxygenase/tryptophan 5-monooxygenase activation protein, zeta polypeptide
hsa-miR-573	0	0	1	1	1	1	RHOT1	ras homolog family member T1
hsa-miR-573	1	0	1	1	1	1	PCGF5	polycomb group ring finger 5
hsa-miR-573	0	0	1	1	0	0	LYZL6	lysozyme-like 6
hsa-miR-573	0	0	1	1	1	1	MPP3	membrane protein, palmitoylated 3 (MAGUK p55 subfamily member 3)
hsa-miR-573	1	0	1	0	1	1	KDM2A	lysine (K)-specific demethylase 2A
hsa-miR-573	1	0	1	1	1	1	ATP8B4	ATPase, class I, type 8B, member 4
hsa-miR-573	1	0	1	1	1	1	ZFP161	zinc finger protein 161 homolog (mouse)
hsa-miR-573	1	0	1	1	1	1	KLHL28	kelch-like 28 (Drosophila)
hsa-miR-573	1	0	1	1	1	1	PRRG1	proline rich Gla (G-carboxyglutamic acid) 1
hsa-miR-573	1	0	1	0	1	1	C7orf41	chromosome 7 open reading frame 41
hsa-miR-573	0	0	1	0	0	0	LOC550643	uncharacterized LOC550643
hsa-miR-573	0	0	1	1	0	0	C14orf2	chromosome 14 open reading frame 2
hsa-miR-573	0	0	1	1	1	1	GPATCH2	G patch domain containing 2
hsa-miR-573	1	0	1	1	1	1	ANXA4	annexin A4
hsa-miR-573	1	0	1	1	1	1	UEVLD	UEV and lactate/malate dehyrogenase domains
hsa-miR-573	1	0	1	1	1	1	MYLK	myosin light chain kinase
hsa-miR-573	0	0	1	1	1	1	ZNF33B	zinc finger protein 33B
hsa-miR-573	1	0	1	1	1	1	IARS	isoleucyl-tRNA synthetase
hsa-miR-573	0	0	1	0	0	0	LINC00442	long intergenic non-protein coding RNA 442
hsa-miR-573	0	0	1	0	0	0	PCP4L1	Purkinje cell protein 4 like 1
hsa-miR-573	0	0	1	1	0	0	SRA1	steroid receptor RNA activator 1
hsa-miR-573	0	0	1	1	0	0	ZP1	zona pellucida glycoprotein 1 (sperm receptor)
hsa-miR-573	1	0	1	1	1	1	SLC26A7	solute carrier family 26, member 7
hsa-miR-573	1	0	1	1	1	1	MAPKAPK3	mitogen-activated protein kinase-activated protein kinase 3
hsa-miR-573	1	0	1	1	1	1	MYEF2	myelin expression factor 2
hsa-miR-573	1	0	1	1	1	1	SRPK2	SRSF protein kinase 2
hsa-miR-573	0	0	1	0	0	0	PTGER4P2	prostaglandin E receptor 4 (subtype EP4) pseudogene 2
hsa-miR-573	0	0	1	0	0	0	FOXN3-AS2	FOXN3 antisense RNA 2
hsa-miR-573	1	0	1	1	1	1	DDR1	discoidin domain receptor tyrosine kinase 1
hsa-miR-573	0	0	1	0	0	0	ULK4P1	unc-51-like kinase 4 (C. elegans) pseudogene 1
hsa-miR-573	0	0	1	0	0	0	JPX	JPX transcript, XIST activator (non-protein coding)
hsa-miR-573	0	0	1	1	1	1	TNFSF12	tumor necrosis factor (ligand) superfamily, member 12
hsa-miR-573	0	0	1	0	0	0	ULK4P3	unc-51-like kinase 4 (C. elegans) pseudogene 3
hsa-miR-573	0	0	1	1	1	1	FRMPDP2	FERM and PDZ domain containing 2 pseudogene 2
hsa-miR-573	0	0	1	1	1	1	FRMPD2P1	FERM and PDZ domain containing 2 pseudogene 1
hsa-miR-573	0	0	1	0	1	1	WDR27	WD repeat domain 27
hsa-miR-573	0	0	1	1	0	0	C8orf31	chromosome 8 open reading frame 31
hsa-miR-573	1	0	1	1	0	0	PLEKHG3	pleckstrin homology domain containing, family G (with RhoGef domain) member 3
hsa-miR-573	0	0	1	1	0	0	C8orf82	chromosome 8 open reading frame 82
hsa-miR-573	0	0	1	1	1	1	VPS16	vacuolar protein sorting 16 homolog (S. cerevisiae)
hsa-miR-573	1	0	1	1	1	1	OPCML	opioid binding protein/cell adhesion molecule-like
hsa-miR-573	1	0	1	1	1	1	WNT5A	wingless-type MMTV integration site family, member 5A
hsa-miR-573	0	0	1	0	0	0	ABCC6P1	ATP-binding cassette, sub-family C, member 6 pseudogene 1
hsa-miR-573	1	0	1	1	1	1	EIF2AK4	eukaryotic translation initiation factor 2 alpha kinase 4
hsa-miR-573	1	0	1	1	1	1	ZBTB7A	zinc finger and BTB domain containing 7A
hsa-miR-573	0	0	1	0	0	0	LOC554249	uncharacterized LOC554249
hsa-miR-573	0	0	1	1	1	1	PRL	prolactin
hsa-miR-573	0	0	1	1	1	1	C1orf141	chromosome 1 open reading frame 141
hsa-miR-573	1	0	1	1	1	1	C18orf34	chromosome 18 open reading frame 34
hsa-miR-573	1	0	1	1	1	1	RHOBTB1	Rho-related BTB domain containing 1
hsa-miR-573	0	0	1	1	0	0	HERC2P3	hect domain and RLD 2 pseudogene 3
hsa-miR-573	1	0	1	0	1	1	PIK3R3	phosphoinositide-3-kinase, regulatory subunit 3 (gamma)
hsa-miR-573	1	0	1	1	1	1	ELOVL7	ELOVL fatty acid elongase 7
hsa-miR-573	1	0	1	1	1	1	ACVR2B	activin A receptor, type IIB
hsa-miR-573	0	0	1	1	1	1	OFD1	oral-facial-digital syndrome 1
hsa-miR-573	1	0	1	1	1	1	SYNJ1	synaptojanin 1
hsa-miR-573	0	0	1	1	1	1	COL8A2	collagen, type VIII, alpha 2
hsa-miR-573	1	0	1	0	1	1	ARPP19	cAMP-regulated phosphoprotein, 19kDa
hsa-miR-573	0	0	1	1	1	1	CYP3A43	cytochrome P450, family 3, subfamily A, polypeptide 43
hsa-miR-573	1	0	1	0	1	1	MYBL1	v-myb myeloblastosis viral oncogene homolog (avian)-like 1
hsa-miR-573	0	0	1	0	0	0	LOC441493	uncharacterized LOC441493
hsa-miR-573	0	0	1	1	1	1	SPHKAP	SPHK1 interactor, AKAP domain containing
hsa-miR-573	1	0	1	1	1	1	GABRB2	gamma-aminobutyric acid (GABA) A receptor, beta 2
hsa-miR-573	1	0	1	1	1	1	ZNF763	zinc finger protein 763
hsa-miR-573	0	0	1	1	1	1	MUC21	mucin 21, cell surface associated
hsa-miR-573	0	0	1	0	0	0	FBXL19-AS1	FBXL19 antisense RNA 1 (head to head)
hsa-miR-573	1	0	1	0	1	1	RBM23	RNA binding motif protein 23
hsa-miR-573	1	0	1	1	1	1	PTPRD	protein tyrosine phosphatase, receptor type, D
hsa-miR-573	0	0	1	1	0	0	FMN1	formin 1
hsa-miR-573	0	0	1	1	1	1	TTN	titin
hsa-miR-573	0	0	1	1	0	0	C1orf122	chromosome 1 open reading frame 122
hsa-miR-573	0	0	1	1	1	1	DET1	de-etiolated homolog 1 (Arabidopsis)
hsa-miR-573	1	0	1	1	1	1	CERS6	ceramide synthase 6
hsa-miR-573	1	0	1	1	1	1	SP4	Sp4 transcription factor
hsa-miR-573	1	0	1	0	1	1	BTBD3	BTB (POZ) domain containing 3
hsa-miR-573	1	0	1	0	1	1	KIF5C	kinesin family member 5C
hsa-miR-573	1	0	1	0	1	1	MAP3K9	mitogen-activated protein kinase kinase kinase 9
hsa-miR-573	0	0	1	0	0	0	LRRC37A11P	leucine rich repeat containing 37, member A11, pseudogene
hsa-miR-573	0	0	1	1	1	1	UNC13B	unc-13 homolog B (C. elegans)
hsa-miR-573	0	0	1	1	0	0	PRAMEF10	PRAME family member 10
hsa-miR-573	1	0	1	0	1	1	ROBO1	roundabout, axon guidance receptor, homolog 1 (Drosophila)
hsa-miR-573	0	0	1	1	1	1	LRCH1	leucine-rich repeats and calponin homology (CH) domain containing 1
hsa-miR-573	1	0	1	1	1	1	TMEM64	transmembrane protein 64
hsa-miR-573	1	0	1	1	1	1	SHANK2	SH3 and multiple ankyrin repeat domains 2
hsa-miR-573	0	0	1	0	0	0	BTF3P11	basic transcription factor 3 pseudogene 11
hsa-miR-573	1	0	1	1	1	1	ST18	suppression of tumorigenicity 18 (breast carcinoma) (zinc finger protein)
hsa-miR-573	1	0	1	0	1	1	PRDM10	PR domain containing 10
hsa-miR-573	1	0	1	1	1	1	OTUD4	OTU domain containing 4
hsa-miR-573	1	0	1	1	1	1	PIKFYVE	phosphoinositide kinase, FYVE finger containing
hsa-miR-573	1	0	1	0	1	1	LRCH2	leucine-rich repeats and calponin homology (CH) domain containing 2
hsa-miR-573	1	0	1	0	1	1	CAMSAP2	calmodulin regulated spectrin-associated protein family, member 2
hsa-miR-573	1	0	1	1	1	1	ANK2	ankyrin 2, neuronal
hsa-miR-573	1	0	1	1	1	1	MEGF11	multiple EGF-like-domains 11
hsa-miR-573	1	0	1	1	1	1	JMJD1C	jumonji domain containing 1C
hsa-miR-573	1	0	1	1	1	1	GPR68	G protein-coupled receptor 68
hsa-miR-573	0	0	1	1	1	1	SLC22A23	solute carrier family 22, member 23
hsa-miR-573	1	0	1	1	1	1	MLLT10	myeloid/lymphoid or mixed-lineage leukemia (trithorax homolog, Drosophila); translocated to, 10
hsa-miR-573	0	0	1	1	0	0	TTC21A	tetratricopeptide repeat domain 21A
hsa-miR-573	0	0	1	1	0	0	MILR1	mast cell immunoglobulin-like receptor 1
hsa-miR-573	1	0	1	0	1	1	FAM196A	family with sequence similarity 196, member A
hsa-miR-573	0	0	1	1	0	0	TCHH	trichohyalin
hsa-miR-573	1	0	1	1	1	1	NIPAL2	NIPA-like domain containing 2
hsa-miR-573	0	0	1	1	0	0	CCDC144A	coiled-coil domain containing 144A
hsa-miR-573	0	0	1	1	1	1	TINF2	TERF1 (TRF1)-interacting nuclear factor 2
hsa-miR-573	0	0	1	0	0	0	LOC100133207	uncharacterized LOC100133207
hsa-miR-573	0	0	1	1	1	1	RAD51B	RAD51 homolog B (S. cerevisiae)
hsa-miR-573	1	0	1	1	1	1	BTBD7	BTB (POZ) domain containing 7
hsa-miR-573	0	0	1	0	0	0	FLJ39632	uncharacterized LOC642477
hsa-miR-573	1	0	1	1	1	1	EIF5	eukaryotic translation initiation factor 5
hsa-miR-573	1	0	1	1	1	1	LITAF	lipopolysaccharide-induced TNF factor
hsa-miR-573	1	0	1	1	1	1	SASH1	SAM and SH3 domain containing 1
hsa-miR-573	0	0	1	0	0	0	DKFZp686D0853	uncharacterized LOC401613
hsa-miR-573	1	0	1	1	1	1	RAB7A	RAB7A, member RAS oncogene family
hsa-miR-573	1	0	1	1	1	1	MIER3	mesoderm induction early response 1, family member 3
hsa-miR-573	0	0	1	0	1	1	GPX8	glutathione peroxidase 8 (putative)
hsa-miR-573	1	0	1	0	1	1	MTX3	metaxin 3
hsa-miR-573	0	0	1	1	1	1	DSG3	desmoglein 3
hsa-miR-573	1	0	1	1	0	0	CCDC30	coiled-coil domain containing 30
hsa-miR-573	1	0	1	0	1	1	CLASP2	cytoplasmic linker associated protein 2
hsa-miR-573	1	0	1	0	0	0	HEPHL1	hephaestin-like 1
hsa-miR-573	0	0	1	1	1	1	VCAN	versican
hsa-miR-573	0	0	1	1	1	1	COL6A3	collagen, type VI, alpha 3
hsa-miR-573	0	0	1	1	1	1	GTF3C2	general transcription factor IIIC, polypeptide 2, beta 110kDa
hsa-miR-573	1	0	1	1	1	1	SMAD4	SMAD family member 4
hsa-miR-573	0	0	1	0	1	1	PRH2	proline-rich protein HaeIII subfamily 2
hsa-miR-573	1	0	1	1	1	1	MASP1	mannan-binding lectin serine peptidase 1 (C4/C2 activating component of Ra-reactive factor)
hsa-miR-573	0	0	1	1	1	1	PRR14L	proline rich 14-like
hsa-miR-573	1	0	1	1	0	0	CECR2	cat eye syndrome chromosome region, candidate 2
hsa-miR-573	0	0	1	1	1	1	MLIP	muscular LMNA-interacting protein
hsa-miR-573	0	0	1	1	0	0	PRKCQ	protein kinase C, theta
hsa-miR-573	1	0	1	1	1	1	STARD13	StAR-related lipid transfer (START) domain containing 13
hsa-miR-573	1	0	1	1	1	1	KLHL2	kelch-like 2, Mayven (Drosophila)
hsa-miR-573	1	0	1	1	1	1	TC2N	tandem C2 domains, nuclear
hsa-miR-573	0	0	1	0	1	1	MYO3B	myosin IIIB
hsa-miR-573	1	0	1	1	1	1	PDXDC1	pyridoxal-dependent decarboxylase domain containing 1
hsa-miR-573	1	0	1	1	1	1	DDAH1	dimethylarginine dimethylaminohydrolase 1
hsa-miR-573	0	0	1	1	1	1	CCNT2	cyclin T2
hsa-miR-573	1	0	1	1	1	1	NFIB	nuclear factor I/B
hsa-miR-573	1	0	1	0	1	1	KLHL24	kelch-like 24 (Drosophila)
hsa-miR-573	1	0	1	0	1	1	IGF2BP3	insulin-like growth factor 2 mRNA binding protein 3
hsa-miR-573	0	0	1	0	0	0	LOC286299	uncharacterized LOC286299
hsa-miR-573	0	0	1	1	1	1	DAZL	deleted in azoospermia-like
hsa-miR-573	1	0	1	1	1	1	RECK	reversion-inducing-cysteine-rich protein with kazal motifs
hsa-miR-573	1	0	1	1	1	1	FAM179B	family with sequence similarity 179, member B
hsa-miR-573	0	0	1	1	0	0	ALS2CR11	amyotrophic lateral sclerosis 2 (juvenile) chromosome region, candidate 11
hsa-miR-573	0	0	1	1	1	1	SSFA2	sperm specific antigen 2
hsa-miR-573	0	0	1	1	1	1	IPO11	importin 11
hsa-miR-573	1	0	1	1	1	1	HIC2	hypermethylated in cancer 2
hsa-miR-573	1	0	1	1	1	1	BSDC1	BSD domain containing 1
hsa-miR-573	1	0	1	1	1	1	AP2M1	adaptor-related protein complex 2, mu 1 subunit
hsa-miR-573	0	0	1	1	1	1	HPGD	hydroxyprostaglandin dehydrogenase 15-(NAD)
hsa-miR-573	1	0	1	0	0	0	PLSCR5	phospholipid scramblase family, member 5
hsa-miR-573	0	0	1	1	1	1	FGG	fibrinogen gamma chain
hsa-miR-573	1	0	1	0	1	1	RNF144A	ring finger protein 144A
hsa-miR-573	0	0	1	1	1	1	CAT	catalase
hsa-miR-573	0	0	1	1	0	0	CHCHD3	coiled-coil-helix-coiled-coil-helix domain containing 3
hsa-miR-573	0	0	1	0	0	0	LOC100128988	uncharacterized LOC100128988
hsa-miR-573	1	0	1	1	1	1	FUT9	fucosyltransferase 9 (alpha (1,3) fucosyltransferase)
hsa-miR-573	0	0	1	0	0	0	GGTA1P	glycoprotein, alpha-galactosyltransferase 1 pseudogene
hsa-miR-573	0	0	1	1	0	0	TBC1D22A	TBC1 domain family, member 22A
hsa-miR-573	1	0	1	0	1	1	OLA1	Obg-like ATPase 1
hsa-miR-573	1	0	1	1	1	1	DDX19B	DEAD (Asp-Glu-Ala-Asp) box polypeptide 19B
hsa-miR-573	0	0	1	1	0	0	ITGB3BP	integrin beta 3 binding protein (beta3-endonexin)
hsa-miR-573	0	0	1	1	1	1	ADK	adenosine kinase
hsa-miR-573	1	0	1	1	1	1	SETD8	SET domain containing (lysine methyltransferase) 8
hsa-miR-573	0	0	1	1	1	1	CCDC132	coiled-coil domain containing 132
hsa-miR-573	1	0	1	0	1	1	BNIP3L	BCL2/adenovirus E1B 19kDa interacting protein 3-like
hsa-miR-573	0	0	1	1	0	0	DPM1	dolichyl-phosphate mannosyltransferase polypeptide 1, catalytic subunit
hsa-miR-573	1	0	1	1	1	1	CHTF8	CTF8, chromosome transmission fidelity factor 8 homolog (S. cerevisiae)
hsa-miR-573	0	0	1	0	1	1	ANKS1B	ankyrin repeat and sterile alpha motif domain containing 1B
hsa-miR-573	0	0	1	1	0	0	TRAF3IP3	TRAF3 interacting protein 3
hsa-miR-573	1	0	1	1	1	1	COPZ1	coatomer protein complex, subunit zeta 1
hsa-miR-573	1	0	1	1	1	1	FBXO9	F-box protein 9
hsa-miR-573	0	0	1	1	0	0	WISP2	WNT1 inducible signaling pathway protein 2
hsa-miR-573	0	0	1	1	1	1	CD55	CD55 molecule, decay accelerating factor for complement (Cromer blood group)
hsa-miR-573	0	0	1	1	1	1	GRAP2	GRB2-related adaptor protein 2
hsa-miR-573	1	0	1	0	1	1	RPS6KB1	ribosomal protein S6 kinase, 70kDa, polypeptide 1
hsa-miR-573	0	0	1	1	0	0	TRMT44	tRNA methyltransferase 44 homolog (S. cerevisiae)
hsa-miR-573	0	0	1	1	1	1	TRIM68	tripartite motif containing 68
hsa-miR-573	1	0	1	1	1	1	TMEM248	transmembrane protein 248
hsa-miR-573	0	0	1	0	1	1	MMAA	methylmalonic aciduria (cobalamin deficiency) cblA type
hsa-miR-573	0	0	1	0	0	0	C12orf75	chromosome 12 open reading frame 75
hsa-miR-573	1	0	1	1	1	1	ARFIP2	ADP-ribosylation factor interacting protein 2
hsa-miR-573	0	0	1	1	0	0	CD38	CD38 molecule
hsa-miR-573	0	0	1	1	1	1	STXBP3	syntaxin binding protein 3
hsa-miR-573	0	0	1	1	0	0	BRE	brain and reproductive organ-expressed (TNFRSF1A modulator)
hsa-miR-573	1	0	1	1	1	1	TMEM245	transmembrane protein 245
hsa-miR-573	0	0	1	0	1	1	TMEM155	transmembrane protein 155
hsa-miR-573	0	0	1	1	0	0	CSH1	chorionic somatomammotropin hormone 1 (placental lactogen)
hsa-miR-573	0	0	1	1	1	1	SSB	Sjogren syndrome antigen B (autoantigen La)
hsa-miR-573	0	0	1	1	1	1	BMPR1A	bone morphogenetic protein receptor, type IA
hsa-miR-573	1	0	1	1	1	1	BTBD10	BTB (POZ) domain containing 10
hsa-miR-573	0	0	1	1	1	1	KLHDC2	kelch domain containing 2
hsa-miR-573	1	0	1	1	0	0	TBC1D17	TBC1 domain family, member 17
hsa-miR-573	1	0	1	1	1	1	MMP2	matrix metallopeptidase 2 (gelatinase A, 72kDa gelatinase, 72kDa type IV collagenase)
hsa-miR-573	0	0	1	1	0	0	PTGDS	prostaglandin D2 synthase 21kDa (brain)
hsa-miR-573	0	0	1	1	0	0	NOX5	NADPH oxidase, EF-hand calcium binding domain 5
hsa-miR-573	1	0	1	1	0	0	FAT4	FAT tumor suppressor homolog 4 (Drosophila)
hsa-miR-573	0	0	1	0	0	0	ZNF720	zinc finger protein 720
hsa-miR-573	1	0	1	1	1	1	FOS	FBJ murine osteosarcoma viral oncogene homolog
hsa-miR-573	0	0	1	1	0	0	FABP1	fatty acid binding protein 1, liver
hsa-miR-573	0	0	1	1	0	0	CSH2	chorionic somatomammotropin hormone 2
hsa-miR-573	1	0	1	0	1	1	ANKH	ankylosis, progressive homolog (mouse)
hsa-miR-573	1	0	1	1	1	1	YWHAQ	tyrosine 3-monooxygenase/tryptophan 5-monooxygenase activation protein, theta polypeptide
hsa-miR-573	0	0	1	1	1	1	LDHA	lactate dehydrogenase A
hsa-miR-573	1	0	1	1	1	1	PFN2	profilin 2
hsa-miR-573	0	0	1	1	1	1	FUS	fused in sarcoma
hsa-miR-573	1	0	1	1	1	1	ZNF207	zinc finger protein 207
hsa-miR-573	0	0	1	1	1	1	SLCO4A1	solute carrier organic anion transporter family, member 4A1
hsa-miR-573	0	0	1	1	0	0	AATF	apoptosis antagonizing transcription factor
hsa-miR-573	0	0	1	1	1	1	FAM18B1	family with sequence similarity 18, member B1
hsa-miR-573	1	0	1	1	1	1	RNF2	ring finger protein 2
hsa-miR-573	0	0	1	1	0	0	OXA1L	oxidase (cytochrome c) assembly 1-like
hsa-miR-573	1	0	1	0	1	1	MAP1B	microtubule-associated protein 1B
hsa-miR-573	1	0	1	1	1	1	HMGN2	high mobility group nucleosomal binding domain 2
hsa-miR-573	0	0	1	1	0	0	CCDC107	coiled-coil domain containing 107
hsa-miR-573	0	0	1	1	1	1	HUS1	HUS1 checkpoint homolog (S. pombe)
hsa-miR-573	1	0	1	1	1	1	TMEM55B	transmembrane protein 55B
hsa-miR-573	1	0	1	1	1	1	LYRM1	LYR motif containing 1
hsa-miR-573	0	0	1	1	1	1	TBRG1	transforming growth factor beta regulator 1
hsa-miR-573	1	0	1	1	0	0	STAG3L4	stromal antigen 3-like 4
hsa-miR-573	0	0	1	1	0	0	OLFM1	olfactomedin 1
hsa-miR-573	1	0	1	0	1	1	TSC1	tuberous sclerosis 1
hsa-miR-573	0	0	1	1	0	0	RPS6KB2	ribosomal protein S6 kinase, 70kDa, polypeptide 2
hsa-miR-573	0	0	1	1	1	1	ZNF397	zinc finger protein 397
hsa-miR-573	0	0	1	1	0	0	CLK2	CDC-like kinase 2
hsa-miR-573	1	0	1	1	1	1	WIPI2	WD repeat domain, phosphoinositide interacting 2
hsa-miR-573	0	0	1	0	1	1	SEPT7	septin 7
hsa-miR-573	0	0	1	0	0	0	LOC100132984	uncharacterized LOC100132984
hsa-miR-573	0	0	1	0	1	1	TSPAN7	tetraspanin 7
hsa-miR-573	0	0	1	1	1	1	NUDT21	nudix (nucleoside diphosphate linked moiety X)-type motif 21
hsa-miR-573	1	0	1	1	1	1	LHX9	LIM homeobox 9
hsa-miR-573	1	0	1	1	1	1	LGALSL	lectin, galactoside-binding-like
hsa-miR-573	1	0	1	0	1	1	KIAA0240	KIAA0240
hsa-miR-573	1	0	1	1	1	1	CHD2	chromodomain helicase DNA binding protein 2
hsa-miR-573	1	0	1	1	1	1	STAG2	stromal antigen 2
hsa-miR-573	1	0	1	1	1	1	PTPRG	protein tyrosine phosphatase, receptor type, G
hsa-miR-573	0	0	1	1	1	1	BDP1	B double prime 1, subunit of RNA polymerase III transcription initiation factor IIIB
hsa-miR-573	0	0	1	1	1	1	SYNE2	spectrin repeat containing, nuclear envelope 2
hsa-miR-573	0	0	1	1	1	1	ATG5	autophagy related 5
hsa-miR-573	1	0	1	1	1	1	NKTR	natural killer-tumor recognition sequence
hsa-miR-573	1	0	1	0	1	1	PTP4A1	protein tyrosine phosphatase type IVA, member 1
hsa-miR-573	1	0	1	0	1	1	SLC7A6	solute carrier family 7 (amino acid transporter light chain, y+L system), member 6
hsa-miR-573	0	0	1	0	0	0	MUC19	mucin 19, oligomeric
hsa-miR-573	1	0	1	0	1	1	XRN1	5'-3' exoribonuclease 1
hsa-miR-573	1	0	1	0	1	1	OSBPL8	oxysterol binding protein-like 8
hsa-miR-573	0	0	1	0	1	1	HDAC9	histone deacetylase 9
hsa-miR-573	1	0	1	0	1	1	MCFD2	multiple coagulation factor deficiency 2
hsa-miR-573	1	0	1	1	1	1	BCL2L1	BCL2-like 1
hsa-miR-573	1	0	1	1	0	0	DGCR2	DiGeorge syndrome critical region gene 2
hsa-miR-573	0	0	1	1	1	1	MOBP	myelin-associated oligodendrocyte basic protein
hsa-miR-573	1	0	1	1	1	1	SP2	Sp2 transcription factor
hsa-miR-573	1	0	1	1	1	1	PI15	peptidase inhibitor 15
hsa-miR-573	1	0	1	1	1	1	PRKG1	protein kinase, cGMP-dependent, type I
hsa-miR-573	1	0	1	1	1	1	RB1CC1	RB1-inducible coiled-coil 1
hsa-miR-573	0	0	1	1	1	1	ATF2	activating transcription factor 2
hsa-miR-573	0	0	1	1	1	1	MPV17L	MPV17 mitochondrial membrane protein-like
hsa-miR-573	1	0	1	1	1	1	TMEFF2	transmembrane protein with EGF-like and two follistatin-like domains 2
hsa-miR-573	1	0	1	1	1	1	RSPO1	R-spondin 1
hsa-miR-573	0	0	1	1	1	1	PTGS1	prostaglandin-endoperoxide synthase 1 (prostaglandin G/H synthase and cyclooxygenase)
hsa-miR-573	1	0	1	1	0	0	DPY19L1	dpy-19-like 1 (C. elegans)
hsa-miR-573	0	0	1	0	0	0	FAM92A1	family with sequence similarity 92, member A1
hsa-miR-573	0	0	1	0	0	0	POM121L8P	POM121 transmembrane nucleoporin-like 8 pseudogene
hsa-miR-573	1	0	1	0	1	1	DCBLD2	discoidin, CUB and LCCL domain containing 2
hsa-miR-573	1	0	1	1	1	1	SLC4A8	solute carrier family 4, sodium bicarbonate cotransporter, member 8
hsa-miR-573	0	0	1	0	0	0	GPR144	G protein-coupled receptor 144
hsa-miR-573	0	0	1	1	1	1	AKAP17A	A kinase (PRKA) anchor protein 17A
hsa-miR-573	1	0	1	1	1	1	MLL	myeloid/lymphoid or mixed-lineage leukemia (trithorax homolog, Drosophila)
hsa-miR-573	1	0	1	1	1	1	RALBP1	ralA binding protein 1
hsa-miR-573	1	0	1	1	1	1	GRM1	glutamate receptor, metabotropic 1
hsa-miR-573	1	0	1	0	1	1	YES1	v-yes-1 Yamaguchi sarcoma viral oncogene homolog 1
hsa-miR-573	1	0	1	1	1	1	TPM1	tropomyosin 1 (alpha)
hsa-miR-573	0	0	1	1	1	1	GLB1	galactosidase, beta 1
hsa-miR-573	1	0	1	1	1	1	IGF1	insulin-like growth factor 1 (somatomedin C)
hsa-miR-573	0	0	1	1	1	1	GAD2	glutamate decarboxylase 2 (pancreatic islets and brain, 65kDa)
hsa-miR-573	1	0	1	1	1	1	CD44	CD44 molecule (Indian blood group)
hsa-miR-573	1	0	1	0	1	1	ACVR2A	activin A receptor, type IIA
hsa-miR-573	1	0	1	0	1	1	ATM	ataxia telangiectasia mutated
hsa-miR-573	0	0	1	1	1	1	BCHE	butyrylcholinesterase
hsa-miR-573	1	0	1	1	1	1	COL4A3	collagen, type IV, alpha 3 (Goodpasture antigen)
hsa-miR-573	1	0	1	1	1	1	ESR1	estrogen receptor 1
hsa-miR-573	1	0	1	1	1	1	FBN1	fibrillin 1
hsa-miR-573	0	0	1	0	1	1	MS4A2	membrane-spanning 4-domains, subfamily A, member 2
hsa-miR-573	1	0	1	1	1	1	GALC	galactosylceramidase
hsa-miR-573	1	0	1	1	1	1	GJA1	gap junction protein, alpha 1, 43kDa
hsa-miR-573	1	0	1	1	1	1	KCNA1	potassium voltage-gated channel, shaker-related subfamily, member 1 (episodic ataxia with myokymia)
hsa-miR-573	1	0	1	0	1	1	KIT	v-kit Hardy-Zuckerman 4 feline sarcoma viral oncogene homolog
hsa-miR-573	0	0	1	1	1	1	KRT12	keratin 12
hsa-miR-573	1	0	1	1	1	1	NF1	neurofibromin 1
hsa-miR-573	0	0	1	1	0	0	PHKG2	phosphorylase kinase, gamma 2 (testis)
hsa-miR-573	1	0	1	0	1	1	PKD2	polycystic kidney disease 2 (autosomal dominant)
hsa-miR-573	0	0	1	1	1	1	PKP1	plakophilin 1 (ectodermal dysplasia/skin fragility syndrome)
hsa-miR-573	0	0	1	1	1	1	PTS	6-pyruvoyltetrahydropterin synthase
hsa-miR-573	0	0	1	1	1	1	RPGR	retinitis pigmentosa GTPase regulator
hsa-miR-573	1	0	1	1	1	1	ATXN1	ataxin 1
hsa-miR-573	1	0	1	1	1	1	TAT	tyrosine aminotransferase
hsa-miR-573	1	0	1	1	1	1	TIMP3	TIMP metallopeptidase inhibitor 3
hsa-miR-573	0	0	1	1	1	1	TSHR	thyroid stimulating hormone receptor
hsa-miR-573	1	0	1	1	1	1	HLCS	holocarboxylase synthetase (biotin-(proprionyl-CoA-carboxylase (ATP-hydrolysing)) ligase)
hsa-miR-573	0	0	1	1	1	1	LTBP2	latent transforming growth factor beta binding protein 2
hsa-miR-573	1	0	1	0	1	1	PAFAH1B1	platelet-activating factor acetylhydrolase 1b, regulatory subunit 1 (45kDa)
hsa-miR-573	1	0	1	1	0	0	NOTCH3	notch 3
hsa-miR-573	0	0	1	1	1	1	OXCT1	3-oxoacid CoA transferase 1
hsa-miR-573	0	0	1	1	0	0	PHEX	phosphate regulating endopeptidase homolog, X-linked
hsa-miR-573	1	0	1	1	1	1	AMPD3	adenosine monophosphate deaminase 3
hsa-miR-573	1	0	1	1	1	1	AQP2	aquaporin 2 (collecting duct)
hsa-miR-573	1	0	1	1	1	1	MPZ	myelin protein zero
hsa-miR-573	1	0	1	1	1	1	IL10	interleukin 10
hsa-miR-573	0	0	1	1	1	1	C7	complement component 7
hsa-miR-573	0	0	1	1	1	1	HGF	hepatocyte growth factor (hepapoietin A; scatter factor)
hsa-miR-573	1	0	1	1	1	1	ADRA1A	adrenoceptor alpha 1A
hsa-miR-573	1	0	1	0	1	1	ALDH1A3	aldehyde dehydrogenase 1 family, member A3
hsa-miR-573	1	0	1	0	1	1	CACNA1E	calcium channel, voltage-dependent, R type, alpha 1E subunit
hsa-miR-573	0	0	1	1	1	1	DCK	deoxycytidine kinase
hsa-miR-573	1	0	1	1	1	1	DRD1	dopamine receptor D1
hsa-miR-573	0	0	1	1	1	1	GABRA5	gamma-aminobutyric acid (GABA) A receptor, alpha 5
hsa-miR-573	1	0	1	1	1	1	GABRB3	gamma-aminobutyric acid (GABA) A receptor, beta 3
hsa-miR-573	1	0	1	1	1	1	GABRG2	gamma-aminobutyric acid (GABA) A receptor, gamma 2
hsa-miR-573	1	0	1	1	0	0	GRIN2A	glutamate receptor, ionotropic, N-methyl D-aspartate 2A
hsa-miR-573	1	0	1	1	1	1	IGF1R	insulin-like growth factor 1 receptor
hsa-miR-573	0	0	1	1	1	1	IL1R1	interleukin 1 receptor, type I
hsa-miR-573	0	0	1	1	1	1	IL12A	interleukin 12A (natural killer cell stimulatory factor 1, cytotoxic lymphocyte maturation factor 1, p35)
hsa-miR-573	1	0	1	0	1	1	KCNJ2	potassium inwardly-rectifying channel, subfamily J, member 2
hsa-miR-573	1	0	1	1	1	1	PTGER2	prostaglandin E receptor 2 (subtype EP2), 53kDa
hsa-miR-573	1	0	1	1	1	1	PTGFR	prostaglandin F receptor (FP)
hsa-miR-573	1	0	1	1	1	1	RARB	retinoic acid receptor, beta
hsa-miR-573	1	0	1	0	1	1	SMAD5	SMAD family member 5
hsa-miR-573	1	0	1	0	1	1	SPOPL	speckle-type POZ protein-like
hsa-miR-573	0	0	1	1	0	0	RNASE9	ribonuclease, RNase A family, 9 (non-active)
hsa-miR-573	0	0	1	1	1	1	MED11	mediator complex subunit 11
hsa-miR-573	1	0	1	1	1	1	MTUS1	microtubule associated tumor suppressor 1
hsa-miR-573	1	0	1	1	1	1	ATP5G3	ATP synthase, H+ transporting, mitochondrial Fo complex, subunit C3 (subunit 9)
hsa-miR-573	1	0	1	1	1	1	WNK3	WNK lysine deficient protein kinase 3
hsa-miR-573	0	0	1	1	1	1	STAG3L1	stromal antigen 3-like 1
hsa-miR-573	1	0	1	0	1	1	SMAD2	SMAD family member 2
hsa-miR-573	1	0	1	1	1	1	LEPR	leptin receptor
hsa-miR-573	1	0	1	1	1	1	HMGXB4	HMG box domain containing 4
hsa-miR-573	0	0	1	1	0	0	ATP5J	ATP synthase, H+ transporting, mitochondrial Fo complex, subunit F6
hsa-miR-573	1	0	1	1	1	1	KLHL31	kelch-like 31 (Drosophila)
hsa-miR-573	1	0	1	1	0	0	NOMO3	NODAL modulator 3
hsa-miR-573	0	0	1	1	1	1	CCDC144NL	coiled-coil domain containing 144 family, N-terminal like
hsa-miR-573	0	0	1	1	1	1	ZCCHC16	zinc finger, CCHC domain containing 16
hsa-miR-573	0	0	1	0	1	1	ZNF705A	zinc finger protein 705A
hsa-miR-573	0	0	1	1	1	1	DBX2	developing brain homeobox 2
hsa-miR-573	0	0	1	0	1	1	FLJ16124	FLJ16124 protein
hsa-miR-573	1	0	1	1	1	1	NCK2	NCK adaptor protein 2
hsa-miR-573	0	0	1	1	1	1	OR9Q1	olfactory receptor, family 9, subfamily Q, member 1
hsa-miR-573	0	0	1	1	1	1	HMGN2P46	high mobility group nucleosomal binding domain 2 pseudogene 46
hsa-miR-573	0	0	1	1	1	1	DAZ4	deleted in azoospermia 4
hsa-miR-573	1	0	1	0	1	1	YPEL2	yippee-like 2 (Drosophila)
hsa-miR-573	1	0	1	1	1	1	PLCXD3	phosphatidylinositol-specific phospholipase C, X domain containing 3
hsa-miR-573	1	0	1	1	1	1	EDA	ectodysplasin A
hsa-miR-573	1	0	1	0	1	1	PDPN	podoplanin
hsa-miR-573	0	0	1	0	1	1	WDR35	WD repeat domain 35
hsa-miR-573	0	0	1	1	1	1	LRRC18	leucine rich repeat containing 18
hsa-miR-573	0	0	1	1	1	1	SCP2	sterol carrier protein 2
hsa-miR-573	1	0	1	1	1	1	L3MBTL3	l(3)mbt-like 3 (Drosophila)
hsa-miR-573	1	0	1	1	1	1	IGF2BP2	insulin-like growth factor 2 mRNA binding protein 2
hsa-miR-573	1	0	1	1	1	1	IGSF3	immunoglobulin superfamily, member 3
hsa-miR-573	0	0	1	1	1	1	KLHDC9	kelch domain containing 9
hsa-miR-573	1	0	1	1	1	1	TULP4	tubby like protein 4
hsa-miR-573	1	0	1	1	1	1	LMBRD2	LMBR1 domain containing 2
hsa-miR-573	1	0	1	0	1	1	CPLX2	complexin 2
hsa-miR-573	1	0	1	1	1	1	ZDHHC9	zinc finger, DHHC-type containing 9
hsa-miR-573	1	0	1	1	1	1	CTDSPL	CTD (carboxy-terminal domain, RNA polymerase II, polypeptide A) small phosphatase-like
hsa-miR-573	1	0	1	1	1	1	BCAP29	B-cell receptor-associated protein 29
hsa-miR-573	1	0	1	0	1	1	KIAA2022	KIAA2022
hsa-miR-573	1	0	1	0	1	1	RCHY1	ring finger and CHY zinc finger domain containing 1, E3 ubiquitin protein ligase
hsa-miR-573	0	0	1	1	1	1	HRNR	hornerin
hsa-miR-573	1	0	1	0	1	1	ERMN	ermin, ERM-like protein
hsa-miR-573	1	0	1	1	1	1	ARHGAP28	Rho GTPase activating protein 28
hsa-miR-573	0	0	1	0	1	1	LPPR5	lipid phosphate phosphatase-related protein type 5
hsa-miR-573	0	0	1	1	1	1	SERP2	stress-associated endoplasmic reticulum protein family member 2
hsa-miR-573	1	0	1	1	1	1	BCL2L15	BCL2-like 15
hsa-miR-573	0	0	1	1	1	1	ZMAT1	zinc finger, matrin-type 1
hsa-miR-573	1	0	1	0	1	1	CREB5	cAMP responsive element binding protein 5
hsa-miR-573	0	0	1	1	1	1	CHCHD7	coiled-coil-helix-coiled-coil-helix domain containing 7
hsa-miR-573	0	0	1	1	1	1	LECT1	leukocyte cell derived chemotaxin 1
hsa-miR-573	1	0	1	0	1	1	DNAJC21	DnaJ (Hsp40) homolog, subfamily C, member 21
hsa-miR-573	0	0	1	1	0	0	C9orf117	chromosome 9 open reading frame 117
hsa-miR-573	0	0	1	0	1	1	LINC00596	long intergenic non-protein coding RNA 596
hsa-miR-573	1	0	1	1	1	1	SLC25A53	solute carrier family 25, member 53
hsa-miR-573	1	0	1	0	1	1	RGMB	RGM domain family, member B
hsa-miR-573	0	0	1	1	1	1	SPIN4	spindlin family, member 4
hsa-miR-573	1	0	1	1	1	1	PABPC1L2A	poly(A) binding protein, cytoplasmic 1-like 2A
hsa-miR-573	1	0	1	1	1	1	UBE2NL	ubiquitin-conjugating enzyme E2N-like
hsa-miR-573	0	0	1	1	1	1	C9orf152	chromosome 9 open reading frame 152
hsa-miR-573	1	0	1	1	1	1	KCNMA1	potassium large conductance calcium-activated channel, subfamily M, alpha member 1
hsa-miR-573	1	0	1	1	1	1	RUNX2	runt-related transcription factor 2
hsa-miR-573	1	0	1	1	1	1	PHF6	PHD finger protein 6
hsa-miR-573	1	0	1	1	1	1	MSMO1	methylsterol monooxygenase 1
hsa-miR-573	1	0	1	1	1	1	TMCC1	transmembrane and coiled-coil domain family 1
hsa-miR-573	0	0	1	1	1	1	KIAA2026	KIAA2026
hsa-miR-573	0	0	1	1	1	1	RAB28	RAB28, member RAS oncogene family
hsa-miR-573	1	0	1	1	1	1	VMA21	VMA21 vacuolar H+-ATPase homolog (S. cerevisiae)
hsa-miR-573	0	0	1	1	1	1	ACTBL2	actin, beta-like 2
hsa-miR-573	0	0	1	1	0	0	POLR3H	polymerase (RNA) III (DNA directed) polypeptide H (22.9kD)
hsa-miR-573	1	0	1	1	1	1	DKK3	dickkopf 3 homolog (Xenopus laevis)
hsa-miR-573	1	0	1	1	1	1	SERBP1	SERPINE1 mRNA binding protein 1
hsa-miR-573	0	0	1	1	1	1	POLR2M	polymerase (RNA) II (DNA directed) polypeptide M
hsa-miR-573	0	0	1	0	1	1	TM2D2	TM2 domain containing 2
hsa-miR-573	1	0	1	0	1	1	RGAG4	retrotransposon gag domain containing 4
hsa-miR-573	0	0	1	1	1	1	LRRC66	leucine rich repeat containing 66
hsa-miR-573	1	0	1	1	1	1	CANX	calnexin
hsa-miR-573	1	0	1	1	1	1	KALRN	kalirin, RhoGEF kinase
hsa-miR-573	0	0	1	1	1	1	NBN	nibrin
hsa-miR-573	1	0	1	0	1	1	TNRC6B	trinucleotide repeat containing 6B
hsa-miR-573	1	0	1	1	1	1	TGFBR2	transforming growth factor, beta receptor II (70/80kDa)
hsa-miR-573	0	0	1	1	1	1	SC5DL	sterol-C5-desaturase (ERG3 delta-5-desaturase homolog, S. cerevisiae)-like
hsa-miR-573	1	0	1	1	1	1	ARPP21	cAMP-regulated phosphoprotein, 21kDa
hsa-miR-573	1	0	1	1	1	1	AFF3	AF4/FMR2 family, member 3
hsa-miR-573	1	0	1	0	1	1	C3orf70	chromosome 3 open reading frame 70
hsa-miR-573	1	0	1	0	1	1	SAMD5	sterile alpha motif domain containing 5
hsa-miR-573	1	0	1	0	1	1	MSRB3	methionine sulfoxide reductase B3
hsa-miR-573	0	0	1	1	1	1	CALML4	calmodulin-like 4
hsa-miR-573	1	0	1	1	0	0	MANEAL	mannosidase, endo-alpha-like
hsa-miR-573	1	0	1	1	1	1	MAF	v-maf musculoaponeurotic fibrosarcoma oncogene homolog (avian)
hsa-miR-573	0	0	1	0	1	1	STXBP1	syntaxin binding protein 1
hsa-miR-573	1	0	1	1	1	1	TFAP2A	transcription factor AP-2 alpha (activating enhancer binding protein 2 alpha)
hsa-miR-573	1	0	1	1	1	1	PPM1B	protein phosphatase, Mg2+/Mn2+ dependent, 1B
hsa-miR-573	0	0	1	1	1	1	PHF12	PHD finger protein 12
hsa-miR-573	1	0	1	1	1	1	ZNF704	zinc finger protein 704
hsa-miR-573	1	0	1	1	1	1	GALNTL6	UDP-N-acetyl-alpha-D-galactosamine:polypeptide N-acetylgalactosaminyltransferase-like 6
hsa-miR-573	1	0	1	0	1	1	RYR2	ryanodine receptor 2 (cardiac)
hsa-miR-573	1	0	1	1	1	1	PDE4B	phosphodiesterase 4B, cAMP-specific
hsa-miR-573	0	0	1	1	1	1	MARVELD2	MARVEL domain containing 2
hsa-miR-573	0	0	1	1	1	1	MAP9	microtubule-associated protein 9
hsa-miR-573	0	0	1	0	1	1	ZNF705D	zinc finger protein 705D
hsa-miR-573	0	0	1	1	0	0	LOC643923	uncharacterized LOC643923
hsa-miR-573	1	0	1	1	1	1	CDC42	cell division cycle 42 (GTP binding protein, 25kDa)
hsa-miR-573	1	0	1	1	1	1	CHN2	chimerin (chimaerin) 2
hsa-miR-573	1	0	1	1	1	1	MLLT4	myeloid/lymphoid or mixed-lineage leukemia (trithorax homolog, Drosophila); translocated to, 4
hsa-miR-573	1	0	1	1	1	1	SCN2A	sodium channel, voltage-gated, type II, alpha subunit
hsa-miR-573	0	0	1	0	1	1	SCN3B	sodium channel, voltage-gated, type III, beta subunit
hsa-miR-573	1	0	1	1	1	1	HTR4	5-hydroxytryptamine (serotonin) receptor 4, G protein-coupled
hsa-miR-573	1	0	1	1	1	1	PAPD5	PAP associated domain containing 5
hsa-miR-573	1	0	1	1	1	1	PRKAG2	protein kinase, AMP-activated, gamma 2 non-catalytic subunit
hsa-miR-573	0	0	1	1	1	1	SI	sucrase-isomaltase (alpha-glucosidase)
hsa-miR-573	1	0	1	1	1	1	HMGCLL1	3-hydroxymethyl-3-methylglutaryl-CoA lyase-like 1
hsa-miR-573	1	0	1	1	1	1	FILIP1L	filamin A interacting protein 1-like
hsa-miR-573	1	0	1	1	1	1	C2orf88	chromosome 2 open reading frame 88
hsa-miR-573	1	0	1	1	1	1	SLC9A6	solute carrier family 9, subfamily A (NHE6, cation proton antiporter 6), member 6
hsa-miR-573	1	0	1	1	1	1	NSL1	NSL1, MIND kinetochore complex component, homolog (S. cerevisiae)
hsa-miR-573	1	0	1	1	1	1	FRS2	fibroblast growth factor receptor substrate 2
hsa-miR-573	0	0	1	1	1	1	POT1	protection of telomeres 1 homolog (S. pombe)
hsa-miR-573	1	0	1	1	1	1	ERBB4	v-erb-a erythroblastic leukemia viral oncogene homolog 4 (avian)
hsa-miR-573	0	0	1	1	1	1	TTC14	tetratricopeptide repeat domain 14
hsa-miR-573	1	0	1	1	1	1	TPM3	tropomyosin 3
hsa-miR-573	1	0	1	1	1	1	NET1	neuroepithelial cell transforming 1
hsa-miR-573	0	0	1	1	1	1	CTXN3	cortexin 3
hsa-miR-573	0	0	1	0	1	1	TOP2A	topoisomerase (DNA) II alpha 170kDa
hsa-miR-573	1	0	1	1	1	1	METTL9	methyltransferase like 9
hsa-miR-573	1	0	1	1	1	1	ATG9A	autophagy related 9A
hsa-miR-573	1	0	1	1	1	1	SREK1	splicing regulatory glutamine/lysine-rich protein 1
hsa-miR-573	1	0	1	1	1	1	IRF2BP2	interferon regulatory factor 2 binding protein 2
hsa-miR-573	0	0	1	1	1	1	TCF19	transcription factor 19
hsa-miR-573	1	0	1	0	1	1	UBXN2B	UBX domain protein 2B
hsa-miR-573	1	0	1	1	1	1	ALG9	asparagine-linked glycosylation 9, alpha-1,2-mannosyltransferase homolog (S. cerevisiae)
hsa-miR-573	1	0	1	1	1	1	SRSF1	serine/arginine-rich splicing factor 1
hsa-miR-573	1	0	1	1	1	1	HNRNPUL2	heterogeneous nuclear ribonucleoprotein U-like 2
hsa-miR-573	1	0	1	1	1	1	DMP1	dentin matrix acidic phosphoprotein 1
hsa-miR-573	1	0	1	0	1	1	KIAA1147	KIAA1147
hsa-miR-573	1	0	1	1	1	1	FAM155A	family with sequence similarity 155, member A
hsa-miR-573	1	0	1	0	1	1	CCDC85A	coiled-coil domain containing 85A
hsa-miR-573	0	0	1	0	1	1	EPHA6	EPH receptor A6
hsa-miR-573	1	0	1	1	1	1	ZNF697	zinc finger protein 697
hsa-miR-573	1	0	1	1	1	1	MBOAT1	membrane bound O-acyltransferase domain containing 1
hsa-miR-573	1	0	1	0	1	1	MEGF9	multiple EGF-like-domains 9
hsa-miR-573	0	0	1	1	1	1	TBX18	T-box 18
hsa-miR-573	0	0	1	0	1	1	WIPF3	WAS/WASL interacting protein family, member 3
hsa-miR-573	0	0	1	1	1	1	SNTN	sentan, cilia apical structure protein
hsa-miR-573	0	0	1	1	1	1	PPP1R1C	protein phosphatase 1, regulatory (inhibitor) subunit 1C
hsa-miR-573	1	0	1	1	1	1	DGKG	diacylglycerol kinase, gamma 90kDa
hsa-miR-573	1	0	1	1	1	1	REPS2	RALBP1 associated Eps domain containing 2
hsa-miR-573	0	0	1	1	1	1	G6PC2	glucose-6-phosphatase, catalytic, 2
hsa-miR-573	1	0	1	0	1	1	PDE5A	phosphodiesterase 5A, cGMP-specific
hsa-miR-573	1	0	1	1	1	1	ADAM10	ADAM metallopeptidase domain 10
hsa-miR-573	1	0	1	1	1	1	ADCY9	adenylate cyclase 9
hsa-miR-573	0	0	1	1	1	1	AMELX	amelogenin, X-linked
hsa-miR-573	1	0	1	0	1	1	XIAP	X-linked inhibitor of apoptosis
hsa-miR-573	1	0	1	0	1	1	BMPR2	bone morphogenetic protein receptor, type II (serine/threonine kinase)
hsa-miR-573	1	0	1	1	1	1	CAMK2D	calcium/calmodulin-dependent protein kinase II delta
hsa-miR-573	1	0	1	1	1	1	CDH13	cadherin 13, H-cadherin (heart)
hsa-miR-573	1	0	1	1	1	1	CDS1	CDP-diacylglycerol synthase (phosphatidate cytidylyltransferase) 1
hsa-miR-573	0	0	1	1	1	1	CCR1	chemokine (C-C motif) receptor 1
hsa-miR-573	1	0	1	1	1	1	MAPK14	mitogen-activated protein kinase 14
hsa-miR-573	1	0	1	1	1	1	S1PR1	sphingosine-1-phosphate receptor 1
hsa-miR-573	0	0	1	0	1	1	EMP1	epithelial membrane protein 1
hsa-miR-573	1	0	1	1	1	1	EN2	engrailed homeobox 2
hsa-miR-573	1	0	1	1	1	1	GPC4	glypican 4
hsa-miR-573	0	0	1	0	1	1	FMO2	flavin containing monooxygenase 2 (non-functional)
hsa-miR-573	0	0	1	1	0	0	GCKR	glucokinase (hexokinase 4) regulator
hsa-miR-573	1	0	1	1	1	1	GCNT1	glucosaminyl (N-acetyl) transferase 1, core 2
hsa-miR-573	0	0	1	1	0	0	GUCY2F	guanylate cyclase 2F, retinal
hsa-miR-573	0	0	1	1	0	0	IGFBP7	insulin-like growth factor binding protein 7
hsa-miR-573	1	0	1	1	1	1	ADD2	adducin 2 (beta)
hsa-miR-573	1	0	1	1	1	1	AQP4	aquaporin 4
hsa-miR-573	1	0	1	1	1	1	ARF3	ADP-ribosylation factor 3
hsa-miR-573	0	0	1	1	1	1	RHOA	ras homolog family member A
hsa-miR-573	0	0	1	1	1	1	ATP5F1	ATP synthase, H+ transporting, mitochondrial Fo complex, subunit B1
hsa-miR-573	1	0	1	1	1	1	ATP6V1A	ATPase, H+ transporting, lysosomal 70kDa, V1 subunit A
hsa-miR-573	1	0	1	1	1	1	BAAT	bile acid CoA: amino acid N-acyltransferase (glycine N-choloyltransferase)
hsa-miR-573	1	0	1	1	1	1	BNC1	basonuclin 1
hsa-miR-573	1	0	1	1	1	1	BTG1	B-cell translocation gene 1, anti-proliferative
hsa-miR-573	0	0	1	1	0	0	C5	complement component 5
hsa-miR-573	0	0	1	1	1	1	CD22	CD22 molecule
hsa-miR-573	1	0	1	1	1	1	CD69	CD69 molecule
hsa-miR-573	1	0	1	1	1	1	CDC25A	cell division cycle 25 homolog A (S. pombe)
hsa-miR-573	1	0	1	1	1	1	CDH2	cadherin 2, type 1, N-cadherin (neuronal)
hsa-miR-573	0	0	1	1	0	0	CDKN2D	cyclin-dependent kinase inhibitor 2D (p19, inhibits CDK4)
hsa-miR-573	0	0	1	1	1	1	CDR2	cerebellar degeneration-related protein 2, 62kDa
hsa-miR-573	0	0	1	1	1	1	CHGB	chromogranin B (secretogranin 1)
hsa-miR-573	0	0	1	1	0	0	CLC	Charcot-Leyden crystal protein
hsa-miR-573	1	0	1	1	1	1	CLCN4	chloride channel, voltage-sensitive 4
hsa-miR-573	0	0	1	1	0	0	CNTFR	ciliary neurotrophic factor receptor
hsa-miR-573	0	0	1	1	1	1	SLC31A2	solute carrier family 31 (copper transporters), member 2
hsa-miR-573	0	0	1	1	1	1	CSN2	casein beta
hsa-miR-573	1	0	1	1	1	1	CSNK2A1	casein kinase 2, alpha 1 polypeptide
hsa-miR-573	1	0	1	1	1	1	DR1	down-regulator of transcription 1, TBP-binding (negative cofactor 2)
hsa-miR-573	1	0	1	1	1	1	E2F3	E2F transcription factor 3
hsa-miR-573	1	0	1	1	1	1	EGR1	early growth response 1
hsa-miR-573	1	0	1	1	1	1	ENPEP	glutamyl aminopeptidase (aminopeptidase A)
hsa-miR-573	1	0	1	1	1	1	FBN2	fibrillin 2
hsa-miR-573	1	0	1	1	1	1	FGF7	fibroblast growth factor 7
hsa-miR-573	1	0	1	1	1	1	FGF9	fibroblast growth factor 9 (glia-activating factor)
hsa-miR-573	1	0	1	0	1	1	FOXO1	forkhead box O1
hsa-miR-573	1	0	1	0	1	1	FUT4	fucosyltransferase 4 (alpha (1,3) fucosyltransferase, myeloid-specific)
hsa-miR-573	1	0	1	1	1	1	HIVEP1	human immunodeficiency virus type I enhancer binding protein 1
hsa-miR-573	0	0	1	1	1	1	FOXN2	forkhead box N2
hsa-miR-573	0	0	1	1	1	1	ITGB1	integrin, beta 1 (fibronectin receptor, beta polypeptide, antigen CD29 includes MDF2, MSK12)
hsa-miR-573	1	0	1	1	1	1	ITGB8	integrin, beta 8
hsa-miR-573	1	0	1	1	1	1	KCNA3	potassium voltage-gated channel, shaker-related subfamily, member 3
hsa-miR-573	0	0	1	1	1	1	KLRC1	killer cell lectin-like receptor subfamily C, member 1
hsa-miR-573	0	0	1	1	1	1	KLRC2	killer cell lectin-like receptor subfamily C, member 2
hsa-miR-573	1	0	1	1	1	1	KPNB1	karyopherin (importin) beta 1
hsa-miR-573	0	0	1	1	0	0	KRT4	keratin 4
hsa-miR-573	1	0	1	1	1	1	LAMP2	lysosomal-associated membrane protein 2
hsa-miR-573	1	0	1	1	1	1	LIFR	leukemia inhibitory factor receptor alpha
hsa-miR-573	1	0	1	1	1	1	LY75	lymphocyte antigen 75
hsa-miR-573	1	0	1	1	1	1	MATN2	matrilin 2
hsa-miR-573	0	0	1	0	1	1	CXCL9	chemokine (C-X-C motif) ligand 9
hsa-miR-573	0	0	1	1	0	0	MMP12	matrix metallopeptidase 12 (macrophage elastase)
hsa-miR-573	1	0	1	1	1	1	MSN	moesin
hsa-miR-573	1	0	1	1	1	1	PPP1R12B	protein phosphatase 1, regulatory subunit 12B
hsa-miR-573	1	0	1	1	1	1	NDN	necdin homolog (mouse)
hsa-miR-573	0	0	1	1	1	1	NID1	nidogen 1
hsa-miR-573	0	0	1	1	1	1	NOV	nephroblastoma overexpressed
hsa-miR-573	1	0	1	1	1	1	NPAS2	neuronal PAS domain protein 2
hsa-miR-573	1	0	1	1	1	1	NPAT	nuclear protein, ataxia-telangiectasia locus
hsa-miR-573	0	0	1	0	1	1	OPHN1	oligophrenin 1
hsa-miR-573	1	0	1	0	1	1	PAK2	p21 protein (Cdc42/Rac)-activated kinase 2
hsa-miR-573	1	0	1	0	1	1	CDK17	cyclin-dependent kinase 17
hsa-miR-573	0	0	1	1	1	1	PEX13	peroxisomal biogenesis factor 13
hsa-miR-573	1	0	1	1	1	1	PHB	prohibitin
hsa-miR-573	0	0	1	1	1	1	SERPINB8	serpin peptidase inhibitor, clade B (ovalbumin), member 8
hsa-miR-573	1	0	1	1	1	1	PLAGL2	pleiomorphic adenoma gene-like 2
hsa-miR-573	0	0	1	0	1	1	PLN	phospholamban
hsa-miR-573	1	0	1	1	1	1	PPP1CB	protein phosphatase 1, catalytic subunit, beta isozyme
hsa-miR-573	1	0	1	0	1	1	PRKCA	protein kinase C, alpha
hsa-miR-573	1	0	1	1	1	1	MAPK6	mitogen-activated protein kinase 6
hsa-miR-573	0	0	1	1	1	1	MAPK9	mitogen-activated protein kinase 9
hsa-miR-573	0	0	1	1	1	1	MAP2K1	mitogen-activated protein kinase kinase 1
hsa-miR-573	1	0	1	1	1	1	PROX1	prospero homeobox 1
hsa-miR-573	1	0	1	1	1	1	PTPN2	protein tyrosine phosphatase, non-receptor type 2
hsa-miR-573	1	0	1	1	1	1	PTPN9	protein tyrosine phosphatase, non-receptor type 9
hsa-miR-573	0	0	1	0	1	1	RAB3B	RAB3B, member RAS oncogene family
hsa-miR-573	1	0	1	1	1	1	RAD23B	RAD23 homolog B (S. cerevisiae)
hsa-miR-573	1	0	1	1	1	1	RASA1	RAS p21 protein activator (GTPase activating protein) 1
hsa-miR-573	0	0	1	1	0	0	RNASE3	ribonuclease, RNase A family, 3
hsa-miR-573	0	0	1	1	1	1	RPA1	replication protein A1, 70kDa
hsa-miR-573	1	0	1	1	1	1	CCL1	chemokine (C-C motif) ligand 1
hsa-miR-573	1	0	1	0	1	1	CCL22	chemokine (C-C motif) ligand 22
hsa-miR-573	0	0	1	0	1	1	CXCL5	chemokine (C-X-C motif) ligand 5
hsa-miR-573	0	0	1	1	1	1	XCL1	chemokine (C motif) ligand 1
hsa-miR-573	0	0	1	1	1	1	SDC2	syndecan 2
hsa-miR-573	1	0	1	0	1	1	SFRP1	secreted frizzled-related protein 1
hsa-miR-573	1	0	1	1	0	0	SLN	sarcolipin
hsa-miR-573	1	0	1	1	1	1	SNAI2	snail homolog 2 (Drosophila)
hsa-miR-573	1	0	1	1	1	1	SMARCC1	SWI/SNF related, matrix associated, actin dependent regulator of chromatin, subfamily c, member 1
hsa-miR-573	1	0	1	0	1	1	SOX4	SRY (sex determining region Y)-box 4
hsa-miR-573	1	0	1	0	1	1	SOX11	SRY (sex determining region Y)-box 11
hsa-miR-573	0	0	1	1	1	1	SRP9	signal recognition particle 9kDa
hsa-miR-573	0	0	1	0	1	1	TRIM21	tripartite motif containing 21
hsa-miR-573	0	0	1	1	1	1	STIM1	stromal interaction molecule 1
hsa-miR-573	0	0	1	1	1	1	XCL2	chemokine (C motif) ligand 2
hsa-miR-573	1	0	1	0	1	1	TAL1	T-cell acute lymphocytic leukemia 1
hsa-miR-573	1	0	1	1	1	1	TFAP2B	transcription factor AP-2 beta (activating enhancer binding protein 2 beta)
hsa-miR-573	1	0	1	1	1	1	TGFB3	transforming growth factor, beta 3
hsa-miR-573	1	0	1	0	1	1	SEC62	SEC62 homolog (S. cerevisiae)
hsa-miR-573	0	0	1	1	1	1	TPR	translocated promoter region, nuclear basket protein
hsa-miR-573	0	0	1	1	1	1	TRAF3	TNF receptor-associated factor 3
hsa-miR-573	0	0	1	1	1	1	UBE2D1	ubiquitin-conjugating enzyme E2D 1
hsa-miR-573	1	0	1	1	1	1	UBE2D3	ubiquitin-conjugating enzyme E2D 3
hsa-miR-573	0	0	1	1	1	1	UBE2I	ubiquitin-conjugating enzyme E2I
hsa-miR-573	1	0	1	1	1	1	UBE2N	ubiquitin-conjugating enzyme E2N
hsa-miR-573	1	0	1	1	1	1	VSNL1	visinin-like 1
hsa-miR-573	1	0	1	1	1	1	YY1	YY1 transcription factor
hsa-miR-573	1	0	1	0	1	1	BSN	bassoon (presynaptic cytomatrix protein)
hsa-miR-573	1	0	1	1	1	1	FZD5	frizzled family receptor 5
hsa-miR-573	1	0	1	1	1	1	CUL5	cullin 5
hsa-miR-573	1	0	1	1	1	1	NRIP1	nuclear receptor interacting protein 1
hsa-miR-573	0	0	1	1	1	1	STX7	syntaxin 7
hsa-miR-573	1	0	1	0	1	1	VAPA	VAMP (vesicle-associated membrane protein)-associated protein A, 33kDa
hsa-miR-573	0	0	1	1	1	1	ITGA10	integrin, alpha 10
hsa-miR-573	0	0	1	1	1	1	KMO	kynurenine 3-monooxygenase (kynurenine 3-hydroxylase)
hsa-miR-573	0	0	1	1	1	1	SNX4	sorting nexin 4
hsa-miR-573	1	0	1	1	1	1	NR5A2	nuclear receptor subfamily 5, group A, member 2
hsa-miR-573	1	0	1	1	1	1	SNAP23	synaptosomal-associated protein, 23kDa
hsa-miR-573	1	0	1	1	1	1	NRP2	neuropilin 2
hsa-miR-573	1	0	1	0	1	1	WASL	Wiskott-Aldrich syndrome-like
hsa-miR-573	1	0	1	1	1	1	SOCS3	suppressor of cytokine signaling 3
hsa-miR-573	1	0	1	0	1	1	SEMA5A	sema domain, seven thrombospondin repeats (type 1 and type 1-like), transmembrane domain (TM) and short cytoplasmic domain, (semaphorin) 5A
hsa-miR-573	0	0	1	1	1	1	CA8	carbonic anhydrase VIII
hsa-miR-573	0	0	1	1	1	1	CDKN1B	cyclin-dependent kinase inhibitor 1B (p27, Kip1)
hsa-miR-573	1	0	1	0	1	1	DGKB	diacylglycerol kinase, beta 90kDa
hsa-miR-573	0	0	1	1	1	1	TIMM8A	translocase of inner mitochondrial membrane 8 homolog A (yeast)
hsa-miR-573	1	0	1	1	1	1	EFNB2	ephrin-B2
hsa-miR-573	1	0	1	1	1	1	FGF12	fibroblast growth factor 12
hsa-miR-573	0	0	1	1	1	1	FKBP1B	FK506 binding protein 1B, 12.6 kDa
hsa-miR-573	1	0	1	1	1	1	GMFB	glia maturation factor, beta
hsa-miR-573	0	0	1	1	1	1	GYG1	glycogenin 1
hsa-miR-573	1	0	1	0	1	1	SLC1A2	solute carrier family 1 (glial high affinity glutamate transporter), member 2
hsa-miR-573	1	0	1	0	1	1	MED14	mediator complex subunit 14
hsa-miR-573	1	0	1	1	1	1	SOCS6	suppressor of cytokine signaling 6
hsa-miR-573	1	0	1	0	1	1	AKAP6	A kinase (PRKA) anchor protein 6
hsa-miR-573	0	0	1	0	1	1	CYTIP	cytohesin 1 interacting protein
hsa-miR-573	1	0	1	1	1	1	GDA	guanine deaminase
hsa-miR-573	1	0	1	0	1	1	ACVR1B	activin A receptor, type IB
hsa-miR-573	1	0	1	1	1	1	ASTN1	astrotactin 1
hsa-miR-573	1	0	1	1	1	1	DUSP2	dual specificity phosphatase 2
hsa-miR-573	1	0	1	1	1	1	EGR3	early growth response 3
hsa-miR-573	1	0	1	0	1	1	ACSL4	acyl-CoA synthetase long-chain family member 4
hsa-miR-573	1	0	1	1	1	1	FOXD2	forkhead box D2
hsa-miR-573	1	0	1	1	1	1	FUT8	fucosyltransferase 8 (alpha (1,6) fucosyltransferase)
hsa-miR-573	1	0	1	1	1	1	ONECUT1	one cut homeobox 1
hsa-miR-573	1	0	1	0	1	1	PKNOX1	PBX/knotted 1 homeobox 1
hsa-miR-573	0	0	1	0	1	1	POU4F2	POU class 4 homeobox 2
hsa-miR-573	0	0	1	1	1	1	PABPN1	poly(A) binding protein, nuclear 1
hsa-miR-573	1	0	1	1	1	1	COIL	coilin
hsa-miR-573	1	0	1	1	1	1	RAB11A	RAB11A, member RAS oncogene family
hsa-miR-573	0	0	1	1	1	1	CDY1	chromodomain protein, Y-linked, 1
hsa-miR-573	1	0	1	1	1	1	SPARCL1	SPARC-like 1 (hevin)
hsa-miR-573	1	0	1	1	1	1	MTMR6	myotubularin related protein 6
hsa-miR-573	1	0	1	1	1	1	MTMR4	myotubularin related protein 4
hsa-miR-573	1	0	1	1	1	1	XPR1	xenotropic and polytropic retrovirus receptor 1
hsa-miR-573	1	0	1	1	1	1	RPS6KA5	ribosomal protein S6 kinase, 90kDa, polypeptide 5
hsa-miR-573	1	0	1	1	1	1	STK17A	serine/threonine kinase 17a
hsa-miR-573	1	0	1	1	1	1	KIF3B	kinesin family member 3B
hsa-miR-573	1	0	1	0	1	1	ARHGEF6	Rac/Cdc42 guanine nucleotide exchange factor (GEF) 6
hsa-miR-573	1	0	1	1	1	1	AKAP7	A kinase (PRKA) anchor protein 7
hsa-miR-573	1	0	1	0	1	1	ROCK2	Rho-associated, coiled-coil containing protein kinase 2
hsa-miR-573	1	0	1	1	1	1	KIF23	kinesin family member 23
hsa-miR-573	0	0	1	1	0	0	PDIA4	protein disulfide isomerase family A, member 4
hsa-miR-573	0	0	1	1	1	1	CD8B	CD8b molecule
hsa-miR-573	0	0	1	1	1	1	EPYC	epiphycan
hsa-miR-573	0	0	1	1	1	1	JAK2	Janus kinase 2
hsa-miR-573	1	0	1	1	1	1	KCNJ8	potassium inwardly-rectifying channel, subfamily J, member 8
hsa-miR-573	0	0	1	1	0	0	MARS	methionyl-tRNA synthetase
hsa-miR-573	1	0	1	1	1	1	PIK3CD	phosphatidylinositol-4,5-bisphosphate 3-kinase, catalytic subunit delta
hsa-miR-573	0	0	1	1	1	1	PSMD5	proteasome (prosome, macropain) 26S subunit, non-ATPase, 5
hsa-miR-573	1	0	1	0	1	1	SEL1L	sel-1 suppressor of lin-12-like (C. elegans)
hsa-miR-573	0	0	1	1	1	1	XYLB	xylulokinase homolog (H. influenzae)
hsa-miR-573	1	0	1	1	1	1	OXSR1	oxidative-stress responsive 1
hsa-miR-573	1	0	1	1	1	1	MED13	mediator complex subunit 13
hsa-miR-573	0	0	1	1	1	1	CLEC2B	C-type lectin domain family 2, member B
hsa-miR-573	0	0	1	1	1	1	GIF	gastric intrinsic factor (vitamin B synthesis)
hsa-miR-573	1	0	1	1	1	1	FOXN3	forkhead box N3
hsa-miR-573	1	0	1	1	1	1	FOXG1	forkhead box G1
hsa-miR-573	1	0	1	1	1	1	GABPB1	GA binding protein transcription factor, beta subunit 1
hsa-miR-573	1	0	1	1	1	1	GAS2	growth arrest-specific 2
hsa-miR-573	1	0	1	1	1	1	GPR3	G protein-coupled receptor 3
hsa-miR-573	1	0	1	0	1	1	PRKAB2	protein kinase, AMP-activated, beta 2 non-catalytic subunit
hsa-miR-573	1	0	1	0	1	1	CCDC6	coiled-coil domain containing 6
hsa-miR-573	1	0	1	0	0	0	FRAT1	frequently rearranged in advanced T-cell lymphomas
hsa-miR-573	1	0	1	1	1	1	ABCA1	ATP-binding cassette, sub-family A (ABC1), member 1
hsa-miR-573	1	0	1	1	1	1	SCARB2	scavenger receptor class B, member 2
hsa-miR-573	1	0	1	1	1	1	INSIG1	insulin induced gene 1
hsa-miR-573	0	0	1	0	1	1	LCP2	lymphocyte cytosolic protein 2 (SH2 domain containing leukocyte protein of 76kDa)
hsa-miR-573	1	0	1	1	1	1	MYF5	myogenic factor 5
hsa-miR-573	1	0	1	1	1	1	NHLH2	nescient helix loop helix 2
hsa-miR-573	1	0	1	1	1	1	SYT1	synaptotagmin I
hsa-miR-573	1	0	1	1	1	1	TERF2	telomeric repeat binding factor 2
hsa-miR-573	1	0	1	1	1	1	TMPRSS2	transmembrane protease, serine 2
hsa-miR-573	1	0	1	1	1	1	ARPC5	actin related protein 2/3 complex, subunit 5, 16kDa
hsa-miR-573	1	0	1	1	1	1	ACTR1A	ARP1 actin-related protein 1 homolog A, centractin alpha (yeast)
hsa-miR-573	0	0	1	1	1	1	TOB1	transducer of ERBB2, 1
hsa-miR-573	1	0	1	1	1	1	LHFP	lipoma HMGIC fusion partner
hsa-miR-573	0	0	1	0	1	1	CD96	CD96 molecule
hsa-miR-573	1	0	1	0	1	1	SPRY3	sprouty homolog 3 (Drosophila)
hsa-miR-573	1	0	1	1	1	1	BET1	blocked early in transport 1 homolog (S. cerevisiae)
hsa-miR-573	1	0	1	0	1	1	NBR1	neighbor of BRCA1 gene 1
hsa-miR-573	1	0	1	1	1	1	MAN1A1	mannosidase, alpha, class 1A, member 1
hsa-miR-573	1	0	1	1	1	1	MAP3K5	mitogen-activated protein kinase kinase kinase 5
hsa-miR-573	1	0	1	1	1	1	MMP16	matrix metallopeptidase 16 (membrane-inserted)
hsa-miR-573	1	0	1	1	1	1	MTF1	metal-regulatory transcription factor 1
hsa-miR-573	0	0	1	1	1	1	AKR1D1	aldo-keto reductase family 1, member D1 (delta 4-3-ketosteroid-5-beta-reductase)
hsa-miR-573	0	0	1	1	0	0	PKDREJ	polycystic kidney disease (polycystin) and REJ homolog (sperm receptor for egg jelly homolog, sea urchin)
hsa-miR-573	0	0	1	1	1	1	TRDN	triadin
hsa-miR-573	1	0	1	1	1	1	CITED2	Cbp/p300-interacting transactivator, with Glu/Asp-rich carboxy-terminal domain, 2
hsa-miR-573	1	0	1	1	1	1	SEMA3A	sema domain, immunoglobulin domain (Ig), short basic domain, secreted, (semaphorin) 3A
hsa-miR-573	0	0	1	1	1	1	KRT1	keratin 1
hsa-miR-573	1	0	1	1	1	1	NEUROG1	neurogenin 1
hsa-miR-573	1	0	1	1	1	1	NR4A2	nuclear receptor subfamily 4, group A, member 2
hsa-miR-573	1	0	1	1	1	1	PCBP1	poly(rC) binding protein 1
hsa-miR-573	0	0	1	1	1	1	PIK3CA	phosphatidylinositol-4,5-bisphosphate 3-kinase, catalytic subunit alpha
hsa-miR-573	1	0	1	0	1	1	PITPNA	phosphatidylinositol transfer protein, alpha
hsa-miR-573	0	0	1	1	1	1	PPEF2	protein phosphatase, EF-hand calcium binding domain 2
hsa-miR-573	1	0	1	1	1	1	PRKAA1	protein kinase, AMP-activated, alpha 1 catalytic subunit
hsa-miR-573	0	0	1	1	1	1	PRKCH	protein kinase C, eta
hsa-miR-573	1	0	1	1	1	1	PKN2	protein kinase N2
hsa-miR-573	1	0	1	1	1	1	SMC1A	structural maintenance of chromosomes 1A
hsa-miR-573	0	0	1	1	1	1	PGRMC2	progesterone receptor membrane component 2
hsa-miR-573	1	0	1	1	1	1	TUBGCP3	tubulin, gamma complex associated protein 3
hsa-miR-573	1	0	1	1	1	1	FBLN5	fibulin 5
hsa-miR-573	1	0	1	1	1	1	TIMM17A	translocase of inner mitochondrial membrane 17 homolog A (yeast)
hsa-miR-573	1	0	1	0	1	1	APPBP2	amyloid beta precursor protein (cytoplasmic tail) binding protein 2
hsa-miR-573	1	0	1	1	1	1	NEBL	nebulette
hsa-miR-573	1	0	1	1	1	1	CDC42EP3	CDC42 effector protein (Rho GTPase binding) 3
hsa-miR-573	1	0	1	1	1	1	HEXIM1	hexamethylene bis-acetamide inducible 1
hsa-miR-573	1	0	1	0	1	1	GNAI3	guanine nucleotide binding protein (G protein), alpha inhibiting activity polypeptide 3
hsa-miR-573	0	0	1	0	1	1	SLC16A2	solute carrier family 16, member 2 (thyroid hormone transporter)
hsa-miR-573	1	0	1	0	1	1	IGF2BP1	insulin-like growth factor 2 mRNA binding protein 1
hsa-miR-573	0	0	1	1	1	1	FARS2	phenylalanyl-tRNA synthetase 2, mitochondrial
hsa-miR-573	0	0	1	1	1	1	KLRAP1	killer cell lectin-like receptor subfamily A pseudogene 1
hsa-miR-573	1	0	1	1	1	1	KDM5B	lysine (K)-specific demethylase 5B
hsa-miR-573	1	0	1	1	1	1	PLK2	polo-like kinase 2
hsa-miR-573	0	0	1	1	0	0	WNK2	WNK lysine deficient protein kinase 2
hsa-miR-573	0	0	1	1	1	1	FGL2	fibrinogen-like 2
hsa-miR-573	1	0	1	1	1	1	MMP24	matrix metallopeptidase 24 (membrane-inserted)
hsa-miR-573	1	0	1	1	1	1	CDH10	cadherin 10, type 2 (T2-cadherin)
hsa-miR-573	1	0	1	1	1	1	DIAPH2	diaphanous homolog 2 (Drosophila)
hsa-miR-573	0	0	1	1	1	1	IFRD2	interferon-related developmental regulator 2
hsa-miR-573	0	0	1	1	0	0	HNRNPA0	heterogeneous nuclear ribonucleoprotein A0
hsa-miR-573	0	0	1	1	1	1	TMED2	transmembrane emp24 domain trafficking protein 2
hsa-miR-573	0	0	1	1	0	0	C10orf116	chromosome 10 open reading frame 116
hsa-miR-573	1	0	1	1	1	1	GLIPR1	GLI pathogenesis-related 1
hsa-miR-573	1	0	1	1	1	1	CD86	CD86 molecule
hsa-miR-573	0	0	1	1	1	1	CEACAM7	carcinoembryonic antigen-related cell adhesion molecule 7
hsa-miR-573	1	0	1	1	1	1	RP2	retinitis pigmentosa 2 (X-linked recessive)
hsa-miR-573	1	0	1	1	1	1	SCN1A	sodium channel, voltage-gated, type I, alpha subunit
hsa-miR-573	1	0	1	0	1	1	SLC5A3	solute carrier family 5 (sodium/myo-inositol cotransporter), member 3
hsa-miR-573	1	0	1	0	1	1	SOX12	SRY (sex determining region Y)-box 12
hsa-miR-573	1	0	1	1	1	1	SYN1	synapsin I
hsa-miR-573	0	0	1	1	1	1	TAF5	TAF5 RNA polymerase II, TATA box binding protein (TBP)-associated factor, 100kDa
hsa-miR-573	1	0	1	1	1	1	NR4A3	nuclear receptor subfamily 4, group A, member 3
hsa-miR-573	1	0	1	1	1	1	ABHD2	abhydrolase domain containing 2
hsa-miR-573	1	0	1	1	1	1	ESM1	endothelial cell-specific molecule 1
hsa-miR-573	1	0	1	1	1	1	ADAMTS5	ADAM metallopeptidase with thrombospondin type 1 motif, 5
hsa-miR-573	1	0	1	1	1	1	FSTL1	follistatin-like 1
hsa-miR-573	1	0	1	1	1	1	UTRN	utrophin
hsa-miR-573	1	0	1	1	1	1	ZNF81	zinc finger protein 81
hsa-miR-573	1	0	1	1	1	1	VEZF1	vascular endothelial zinc finger 1
hsa-miR-573	1	0	1	1	1	1	TESK2	testis-specific kinase 2
hsa-miR-573	0	0	1	1	1	1	WIF1	WNT inhibitory factor 1
hsa-miR-573	1	0	1	1	1	1	PALM2-AKAP2	PALM2-AKAP2 readthrough
hsa-miR-573	1	0	1	1	1	1	DUSP10	dual specificity phosphatase 10
hsa-miR-573	1	0	1	0	1	1	CHP1	calcineurin-like EF hand protein 1
hsa-miR-573	1	0	1	1	1	1	KLF12	Kruppel-like factor 12
hsa-miR-573	0	0	1	1	0	0	GPN1	GPN-loop GTPase 1
hsa-miR-573	0	0	1	0	1	1	AP4E1	adaptor-related protein complex 4, epsilon 1 subunit
hsa-miR-573	1	0	1	1	1	1	PHLDA1	pleckstrin homology-like domain, family A, member 1
hsa-miR-573	1	0	1	1	1	1	TARDBP	TAR DNA binding protein
hsa-miR-573	0	0	1	1	1	1	AK5	adenylate kinase 5
hsa-miR-573	1	0	1	1	1	1	APPL1	adaptor protein, phosphotyrosine interaction, PH domain and leucine zipper containing 1
hsa-miR-573	0	0	1	1	1	1	AHSA1	AHA1, activator of heat shock 90kDa protein ATPase homolog 1 (yeast)
hsa-miR-573	1	0	1	0	1	1	FZD4	frizzled family receptor 4
hsa-miR-573	1	0	1	1	1	1	RABGAP1	RAB GTPase activating protein 1
hsa-miR-573	0	0	1	1	1	1	RAB3GAP1	RAB3 GTPase activating protein subunit 1 (catalytic)
hsa-miR-573	1	0	1	1	1	1	RYBP	RING1 and YY1 binding protein
hsa-miR-573	0	0	1	1	1	1	TKTL1	transketolase-like 1
hsa-miR-573	1	0	1	1	1	1	HEY2	hairy/enhancer-of-split related with YRPW motif 2
hsa-miR-573	1	0	1	1	1	1	MAPRE1	microtubule-associated protein, RP/EB family, member 1
hsa-miR-573	1	0	1	0	1	1	MYO10	myosin X
hsa-miR-573	1	0	1	1	1	1	NNT	nicotinamide nucleotide transhydrogenase
hsa-miR-573	1	0	1	1	1	1	ZNF281	zinc finger protein 281
hsa-miR-573	0	0	1	1	1	1	N6AMT1	N-6 adenine-specific DNA methyltransferase 1 (putative)
hsa-miR-573	1	0	1	1	1	1	CLCF1	cardiotrophin-like cytokine factor 1
hsa-miR-573	0	0	1	1	1	1	ABT1	activator of basal transcription 1
hsa-miR-573	1	0	1	1	1	1	SLC25A24	solute carrier family 25 (mitochondrial carrier; phosphate carrier), member 24
hsa-miR-573	1	0	1	1	1	1	NCKAP1	NCK-associated protein 1
hsa-miR-573	1	0	1	1	1	1	LRP12	low density lipoprotein receptor-related protein 12
hsa-miR-573	0	0	1	1	1	1	UBQLN1	ubiquilin 1
hsa-miR-573	0	0	1	0	1	1	EMR2	egf-like module containing, mucin-like, hormone receptor-like 2
hsa-miR-573	1	0	1	0	1	1	CHMP2B	charged multivesicular body protein 2B
hsa-miR-573	1	0	1	1	1	1	ZBTB44	zinc finger and BTB domain containing 44
hsa-miR-573	0	0	1	0	1	1	SCN8A	sodium channel, voltage gated, type VIII, alpha subunit
hsa-miR-573	1	0	1	1	0	0	HOXC11	homeobox C11
hsa-miR-573	1	0	1	0	1	1	LIMD1	LIM domains containing 1
hsa-miR-573	0	0	1	1	1	1	IL1RAPL1	interleukin 1 receptor accessory protein-like 1
hsa-miR-573	0	0	1	1	0	0	NOMO1	NODAL modulator 1
hsa-miR-573	1	0	1	0	1	1	FJX1	four jointed box 1 (Drosophila)
hsa-miR-573	0	0	1	1	1	1	LAMP3	lysosomal-associated membrane protein 3
hsa-miR-573	0	0	1	1	1	1	CLUL1	clusterin-like 1 (retinal)
hsa-miR-573	1	0	1	1	1	1	ZBTB11	zinc finger and BTB domain containing 11
hsa-miR-573	1	0	1	1	1	1	AFF4	AF4/FMR2 family, member 4
hsa-miR-573	1	0	1	1	1	1	SLC40A1	solute carrier family 40 (iron-regulated transporter), member 1
hsa-miR-573	1	0	1	1	1	1	VSX1	visual system homeobox 1
hsa-miR-573	1	0	1	1	1	1	RALGPS1	Ral GEF with PH domain and SH3 binding motif 1
hsa-miR-573	1	0	1	0	1	1	EDEM1	ER degradation enhancer, mannosidase alpha-like 1
hsa-miR-573	1	0	1	1	1	1	ARHGAP32	Rho GTPase activating protein 32
hsa-miR-573	1	0	1	0	1	1	TOX	thymocyte selection-associated high mobility group box
hsa-miR-573	1	0	1	1	1	1	DAZAP2	DAZ associated protein 2
hsa-miR-573	1	0	1	0	1	1	KIAA0494	KIAA0494
hsa-miR-573	1	0	1	1	1	1	KIAA0753	KIAA0753
hsa-miR-573	0	0	1	0	1	1	EPM2AIP1	EPM2A (laforin) interacting protein 1
hsa-miR-573	1	0	1	1	1	1	LRIG2	leucine-rich repeats and immunoglobulin-like domains 2
hsa-miR-573	1	0	1	1	1	1	FCHSD2	FCH and double SH3 domains 2
hsa-miR-573	1	0	1	1	1	1	TBC1D4	TBC1 domain family, member 4
hsa-miR-573	1	0	1	1	1	1	NUAK1	NUAK family, SNF1-like kinase, 1
hsa-miR-573	0	0	1	0	1	1	VASH1	vasohibin 1
hsa-miR-573	1	0	1	0	1	1	ZBTB1	zinc finger and BTB domain containing 1
hsa-miR-573	1	0	1	1	1	1	RAB21	RAB21, member RAS oncogene family
hsa-miR-573	1	0	1	0	1	1	PDS5B	PDS5, regulator of cohesion maintenance, homolog B (S. cerevisiae)
hsa-miR-573	1	0	1	0	1	1	NMNAT2	nicotinamide nucleotide adenylyltransferase 2
hsa-miR-573	1	0	1	1	1	1	ERP44	endoplasmic reticulum protein 44
hsa-miR-573	1	0	1	1	1	1	TBC1D9	TBC1 domain family, member 9 (with GRAM domain)
hsa-miR-573	1	0	1	1	0	0	RFTN1	raftlin, lipid raft linker 1
hsa-miR-573	1	0	1	1	1	1	RCOR1	REST corepressor 1
hsa-miR-573	1	0	1	1	1	1	SIK2	salt-inducible kinase 2
hsa-miR-573	1	0	1	1	1	1	PDS5A	PDS5, regulator of cohesion maintenance, homolog A (S. cerevisiae)
hsa-miR-573	1	0	1	0	1	1	KIAA1024	KIAA1024
hsa-miR-573	1	0	1	0	1	1	ARHGEF12	Rho guanine nucleotide exchange factor (GEF) 12
hsa-miR-573	0	0	1	0	1	1	ZDHHC17	zinc finger, DHHC-type containing 17
hsa-miR-573	1	0	1	1	1	1	PARM1	prostate androgen-regulated mucin-like protein 1
hsa-miR-573	0	0	1	1	0	0	ABHD14A	abhydrolase domain containing 14A
hsa-miR-573	1	0	1	1	1	1	CNOT6	CCR4-NOT transcription complex, subunit 6
hsa-miR-573	1	0	1	1	1	1	ATL3	atlastin GTPase 3
hsa-miR-573	1	0	1	1	1	1	MYRIP	myosin VIIA and Rab interacting protein
hsa-miR-573	0	0	1	1	1	1	SOSTDC1	sclerostin domain containing 1
hsa-miR-573	0	0	1	1	1	1	NIPSNAP3A	nipsnap homolog 3A (C. elegans)
hsa-miR-573	1	0	1	0	1	1	GLCE	glucuronic acid epimerase
hsa-miR-573	1	0	1	1	1	1	TOR1AIP1	torsin A interacting protein 1
hsa-miR-573	0	0	1	1	0	0	CCZ1	CCZ1 vacuolar protein trafficking and biogenesis associated homolog (S. cerevisiae)
hsa-miR-573	1	0	1	1	1	1	WSB1	WD repeat and SOCS box containing 1
hsa-miR-573	0	0	1	1	1	1	TES	testis derived transcript (3 LIM domains)
hsa-miR-573	1	0	1	1	1	1	FAM155B	family with sequence similarity 155, member B
hsa-miR-573	1	0	1	0	1	1	WWC3	WWC family member 3
hsa-miR-573	1	0	1	0	1	1	RRM2B	ribonucleotide reductase M2 B (TP53 inducible)
hsa-miR-573	1	0	1	1	1	1	CDC40	cell division cycle 40 homolog (S. cerevisiae)
hsa-miR-573	1	0	1	0	1	1	TRIM33	tripartite motif containing 33
hsa-miR-573	1	0	1	1	1	1	TAF9B	TAF9B RNA polymerase II, TATA box binding protein (TBP)-associated factor, 31kDa
hsa-miR-573	1	0	1	1	1	1	UBE2J1	ubiquitin-conjugating enzyme E2, J1
hsa-miR-573	0	0	1	0	1	1	OTUD6B	OTU domain containing 6B
hsa-miR-573	1	0	1	1	1	1	SLMO2	slowmo homolog 2 (Drosophila)
hsa-miR-573	0	0	1	1	1	1	PPIL1	peptidylprolyl isomerase (cyclophilin)-like 1
hsa-miR-573	1	0	1	0	1	1	CNR1	cannabinoid receptor 1 (brain)
hsa-miR-573	0	0	1	1	1	1	RAB10	RAB10, member RAS oncogene family
hsa-miR-573	0	0	1	1	1	1	COMMD10	COMM domain containing 10
hsa-miR-573	1	0	1	1	1	1	VGLL3	vestigial like 3 (Drosophila)
hsa-miR-573	1	0	1	1	1	1	SNX9	sorting nexin 9
hsa-miR-573	1	0	1	1	1	1	CYB5R4	cytochrome b5 reductase 4
hsa-miR-573	1	0	1	1	1	1	AKAP11	A kinase (PRKA) anchor protein 11
hsa-miR-573	1	0	1	1	1	1	BIRC6	baculoviral IAP repeat containing 6
hsa-miR-573	1	0	1	0	1	1	SELT	selenoprotein T
hsa-miR-573	1	0	1	1	1	1	CMPK1	cytidine monophosphate (UMP-CMP) kinase 1, cytosolic
hsa-miR-573	0	0	1	0	1	1	ERAP1	endoplasmic reticulum aminopeptidase 1
hsa-miR-573	0	0	1	1	1	1	KLRF1	killer cell lectin-like receptor subfamily F, member 1
hsa-miR-573	1	0	1	0	1	1	RAB8B	RAB8B, member RAS oncogene family
hsa-miR-573	0	0	1	0	1	1	GPR83	G protein-coupled receptor 83
hsa-miR-573	1	0	1	1	1	1	GCNT4	glucosaminyl (N-acetyl) transferase 4, core 2
hsa-miR-573	1	0	1	1	1	1	ZNF644	zinc finger protein 644
hsa-miR-573	0	0	1	1	1	1	MRPL35	mitochondrial ribosomal protein L35
hsa-miR-573	1	0	1	1	1	1	MEX3C	mex-3 homolog C (C. elegans)
hsa-miR-573	1	0	1	0	1	1	FZD3	frizzled family receptor 3
hsa-miR-573	1	0	1	1	1	1	SIX4	SIX homeobox 4
hsa-miR-573	1	0	1	1	1	1	HAO1	hydroxyacid oxidase (glycolate oxidase) 1
hsa-miR-573	1	0	1	0	1	1	ZRANB1	zinc finger, RAN-binding domain containing 1
hsa-miR-573	0	0	1	0	1	1	VEZT	vezatin, adherens junctions transmembrane protein
hsa-miR-573	1	0	1	0	1	1	KCTD9	potassium channel tetramerisation domain containing 9
hsa-miR-573	0	0	1	1	1	1	LRRC16A	leucine rich repeat containing 16A
hsa-miR-573	0	0	1	0	1	1	OTUB1	OTU domain, ubiquitin aldehyde binding 1
hsa-miR-573	1	0	1	1	1	1	VPS13C	vacuolar protein sorting 13 homolog C (S. cerevisiae)
hsa-miR-573	1	0	1	0	1	1	FAM46C	family with sequence similarity 46, member C
hsa-miR-573	1	0	1	0	1	1	DCAF16	DDB1 and CUL4 associated factor 16
hsa-miR-573	1	0	1	1	1	1	LPPR1	lipid phosphate phosphatase-related protein type 1
hsa-miR-573	1	0	1	1	1	1	ALKBH5	alkB, alkylation repair homolog 5 (E. coli)
hsa-miR-573	0	0	1	1	1	1	WHSC1L1	Wolf-Hirschhorn syndrome candidate 1-like 1
hsa-miR-573	1	0	1	1	1	1	SLC48A1	solute carrier family 48 (heme transporter), member 1
hsa-miR-573	1	0	1	1	1	1	FAM120C	family with sequence similarity 120C
hsa-miR-573	0	0	1	1	1	1	C1orf56	chromosome 1 open reading frame 56
hsa-miR-573	1	0	1	1	1	1	HIF1AN	hypoxia inducible factor 1, alpha subunit inhibitor
hsa-miR-573	0	0	1	1	0	0	TRMT12	tRNA methyltransferase 12 homolog (S. cerevisiae)
hsa-miR-573	0	0	1	1	1	1	SCYL2	SCY1-like 2 (S. cerevisiae)
hsa-miR-573	1	0	1	1	1	1	ARGLU1	arginine and glutamate rich 1
hsa-miR-573	1	0	1	1	1	1	ATG2B	autophagy related 2B
hsa-miR-573	0	0	1	1	1	1	HEATR1	HEAT repeat containing 1
hsa-miR-573	1	0	1	0	1	1	CCDC88A	coiled-coil domain containing 88A
hsa-miR-573	1	0	1	0	1	1	ARMC1	armadillo repeat containing 1
hsa-miR-573	1	0	1	1	1	1	FAM178A	family with sequence similarity 178, member A
hsa-miR-573	1	0	1	0	1	1	MSL2	male-specific lethal 2 homolog (Drosophila)
hsa-miR-573	0	0	1	1	1	1	SEC61A2	Sec61 alpha 2 subunit (S. cerevisiae)
hsa-miR-573	1	0	1	1	1	1	RIC8B	resistance to inhibitors of cholinesterase 8 homolog B (C. elegans)
hsa-miR-573	0	0	1	1	1	1	NUDT11	nudix (nucleoside diphosphate linked moiety X)-type motif 11
hsa-miR-573	1	0	1	0	1	1	LGI2	leucine-rich repeat LGI family, member 2
hsa-miR-573	0	0	1	0	1	1	GOLPH3L	golgi phosphoprotein 3-like
hsa-miR-573	0	0	1	1	1	1	RCBTB1	regulator of chromosome condensation (RCC1) and BTB (POZ) domain containing protein 1
hsa-miR-573	0	0	1	1	1	1	TMLHE	trimethyllysine hydroxylase, epsilon
hsa-miR-573	1	0	1	1	0	0	ETNK2	ethanolamine kinase 2
hsa-miR-573	1	0	1	1	1	1	ZNF654	zinc finger protein 654
hsa-miR-573	1	0	1	1	1	1	SPTLC3	serine palmitoyltransferase, long chain base subunit 3
hsa-miR-573	1	0	1	1	1	1	KIAA1598	KIAA1598
hsa-miR-573	1	0	1	1	1	1	DDX19A	DEAD (Asp-Glu-Ala-Asp) box polypeptide 19A
hsa-miR-573	1	0	1	0	1	1	LIN7C	lin-7 homolog C (C. elegans)
hsa-miR-573	1	0	1	1	1	1	RSBN1	round spermatid basic protein 1
hsa-miR-573	1	0	1	1	1	1	DRAM1	DNA-damage regulated autophagy modulator 1
hsa-miR-573	1	0	1	1	1	1	SLC39A9	solute carrier family 39 (zinc transporter), member 9
hsa-miR-573	0	0	1	1	1	1	STK32B	serine/threonine kinase 32B
hsa-miR-573	1	0	1	0	1	1	FOXJ2	forkhead box J2
hsa-miR-573	1	0	1	1	1	1	KIAA1199	KIAA1199
hsa-miR-573	1	0	1	0	1	1	TMEM55A	transmembrane protein 55A
hsa-miR-573	1	0	1	0	1	1	ELMOD1	ELMO/CED-12 domain containing 1
hsa-miR-573	1	0	1	0	1	1	MAML3	mastermind-like 3 (Drosophila)
hsa-miR-573	1	0	1	0	1	1	KLHL9	kelch-like 9 (Drosophila)
hsa-miR-573	1	0	1	0	1	1	FAM190B	family with sequence similarity 190, member B
hsa-miR-573	1	0	1	1	1	1	PLEKHA3	pleckstrin homology domain containing, family A (phosphoinositide binding specific) member 3
hsa-miR-573	1	0	1	1	1	1	SEPT3	septin 3
hsa-miR-573	1	0	1	1	1	1	EPB41L4B	erythrocyte membrane protein band 4.1 like 4B
hsa-miR-573	1	0	1	0	1	1	UBFD1	ubiquitin family domain containing 1
hsa-miR-573	0	0	1	1	0	0	IL36G	interleukin 36, gamma
hsa-miR-573	1	0	1	0	1	1	SLAMF8	SLAM family member 8
hsa-miR-573	1	0	1	1	1	1	WRNIP1	Werner helicase interacting protein 1
hsa-miR-573	1	0	1	0	1	1	PAPOLB	poly(A) polymerase beta (testis specific)
hsa-miR-573	1	0	1	1	1	1	C1GALT1	core 1 synthase, glycoprotein-N-acetylgalactosamine 3-beta-galactosyltransferase, 1
hsa-miR-573	1	0	1	1	1	1	FEM1C	fem-1 homolog c (C. elegans)
hsa-miR-573	1	0	1	1	0	0	C11orf75	chromosome 11 open reading frame 75
hsa-miR-573	1	0	1	1	1	1	SMYD2	SET and MYND domain containing 2
hsa-miR-573	1	0	1	1	1	1	CCDC47	coiled-coil domain containing 47
hsa-miR-573	0	0	1	1	0	0	MRPL1	mitochondrial ribosomal protein L1
hsa-miR-573	1	0	1	1	0	0	SLC17A7	solute carrier family 17 (sodium-dependent inorganic phosphate cotransporter), member 7
hsa-miR-573	1	0	1	1	1	1	KIAA1244	KIAA1244
hsa-miR-573	1	0	1	0	1	1	EIF5A2	eukaryotic translation initiation factor 5A2
hsa-miR-573	0	0	1	1	1	1	IL22	interleukin 22
hsa-miR-573	1	0	1	0	1	1	DCUN1D1	DCN1, defective in cullin neddylation 1, domain containing 1 (S. cerevisiae)
hsa-miR-573	0	0	1	1	1	1	TMEM27	transmembrane protein 27
hsa-miR-573	1	0	1	0	1	1	FAM40B	family with sequence similarity 40, member B
hsa-miR-573	1	0	1	1	1	1	USP31	ubiquitin specific peptidase 31
hsa-miR-573	1	0	1	1	1	1	RNF150	ring finger protein 150
hsa-miR-573	1	0	1	0	1	1	NUFIP2	nuclear fragile X mental retardation protein interacting protein 2
hsa-miR-573	1	0	1	1	1	1	MIB1	mindbomb E3 ubiquitin protein ligase 1
hsa-miR-573	1	0	1	0	1	1	SYT4	synaptotagmin IV
hsa-miR-573	0	0	1	1	1	1	ARRDC3	arrestin domain containing 3
hsa-miR-573	1	0	1	1	1	1	KLHL14	kelch-like 14 (Drosophila)
hsa-miR-573	1	0	1	1	1	1	SIPA1L2	signal-induced proliferation-associated 1 like 2
hsa-miR-573	0	0	1	0	1	1	TRMT5	tRNA methyltransferase 5 homolog (S. cerevisiae)
hsa-miR-573	1	0	1	0	1	1	SH3RF1	SH3 domain containing ring finger 1
hsa-miR-573	1	0	1	1	1	1	CNTN3	contactin 3 (plasmacytoma associated)
hsa-miR-573	1	0	1	1	1	1	ZFP14	zinc finger protein 14 homolog (mouse)
hsa-miR-573	1	0	1	1	1	1	FAM160B1	family with sequence similarity 160, member B1
hsa-miR-573	0	0	1	1	1	1	GNAO1	guanine nucleotide binding protein (G protein), alpha activating activity polypeptide O
hsa-miR-573	0	0	1	1	0	0	HIST1H2AJ	histone cluster 1, H2aj
hsa-miR-573	1	0	1	1	1	1	HCN1	hyperpolarization activated cyclic nucleotide-gated potassium channel 1
hsa-miR-573	1	0	1	1	1	1	CLDN1	claudin 1
hsa-miR-573	0	0	1	1	1	1	RNASEL	ribonuclease L (2',5'-oligoisoadenylate synthetase-dependent)
hsa-miR-573	1	0	1	1	1	1	GRHL3	grainyhead-like 3 (Drosophila)
hsa-miR-573	1	0	1	0	1	1	TP53INP2	tumor protein p53 inducible nuclear protein 2
hsa-miR-573	1	0	1	1	1	1	RHOU	ras homolog family member U
hsa-miR-573	1	0	1	1	1	1	RPRD1B	regulation of nuclear pre-mRNA domain containing 1B
hsa-miR-573	1	0	1	1	1	1	NTN4	netrin 4
hsa-miR-573	1	0	1	1	1	1	FAM60A	family with sequence similarity 60, member A
hsa-miR-573	1	0	1	1	1	1	DMRT3	doublesex and mab-3 related transcription factor 3
hsa-miR-573	1	0	1	1	1	1	CDH22	cadherin 22, type 2
hsa-miR-573	1	0	1	1	1	1	PELI2	pellino E3 ubiquitin protein ligase family member 2
hsa-miR-573	1	0	1	1	1	1	ZFYVE1	zinc finger, FYVE domain containing 1
hsa-miR-573	0	0	1	1	1	1	KCNN2	potassium intermediate/small conductance calcium-activated channel, subfamily N, member 2
hsa-miR-573	1	0	1	1	1	1	PRDM12	PR domain containing 12
hsa-miR-573	1	0	1	1	1	1	SENP2	SUMO1/sentrin/SMT3 specific peptidase 2
hsa-miR-573	1	0	1	1	1	1	TRIB2	tribbles homolog 2 (Drosophila)
hsa-miR-573	0	0	1	0	1	1	CFL2	cofilin 2 (muscle)
hsa-miR-573	0	0	1	1	1	1	ITM2B	integral membrane protein 2B
hsa-miR-573	1	0	1	1	1	1	TIA1	TIA1 cytotoxic granule-associated RNA binding protein
hsa-miR-573	1	0	1	0	1	1	CSNK1G1	casein kinase 1, gamma 1
hsa-miR-573	1	0	1	1	1	1	EGLN1	egl nine homolog 1 (C. elegans)
hsa-miR-573	0	0	1	1	0	0	ABHD4	abhydrolase domain containing 4
hsa-miR-573	1	0	1	1	1	1	GOLPH3	golgi phosphoprotein 3 (coat-protein)
hsa-miR-573	1	0	1	1	1	1	XYLT1	xylosyltransferase I
hsa-miR-573	1	0	1	1	1	1	NDRG3	NDRG family member 3
hsa-miR-573	1	0	1	1	1	1	SUDS3	suppressor of defective silencing 3 homolog (S. cerevisiae)
hsa-miR-573	0	0	1	1	1	1	ACBD3	acyl-CoA binding domain containing 3
hsa-miR-573	0	0	1	1	1	1	SFXN1	sideroflexin 1
hsa-miR-573	1	0	1	1	1	1	FBXL17	F-box and leucine-rich repeat protein 17
hsa-miR-573	1	0	1	0	1	1	USP46	ubiquitin specific peptidase 46
hsa-miR-573	0	0	1	1	1	1	METTL4	methyltransferase like 4
hsa-miR-573	1	0	1	1	1	1	RFX7	regulatory factor X, 7
hsa-miR-573	1	0	1	0	1	1	BCL11B	B-cell CLL/lymphoma 11B (zinc finger protein)
hsa-miR-573	1	0	1	1	0	0	UBE2Z	ubiquitin-conjugating enzyme E2Z
hsa-miR-573	0	0	1	1	1	1	AUNIP	aurora kinase A and ninein interacting protein
hsa-miR-573	1	0	1	1	0	0	C19orf43	chromosome 19 open reading frame 43
hsa-miR-573	1	0	1	1	0	0	PHF23	PHD finger protein 23
hsa-miR-573	1	0	1	1	1	1	DSC3	desmocollin 3
hsa-miR-573	1	0	1	1	1	1	FYCO1	FYVE and coiled-coil domain containing 1
hsa-miR-573	1	0	1	1	1	1	RNF128	ring finger protein 128, E3 ubiquitin protein ligase
hsa-miR-573	1	0	1	1	1	1	C10orf76	chromosome 10 open reading frame 76
hsa-miR-573	0	0	1	1	1	1	NDNF	neuron-derived neurotrophic factor
hsa-miR-573	1	0	1	1	1	1	ARSJ	arylsulfatase family, member J
hsa-miR-573	0	0	1	1	1	1	AKIRIN1	akirin 1
hsa-miR-573	1	0	1	1	1	1	USB1	U6 snRNA biogenesis 1
hsa-miR-573	0	0	1	1	1	1	LRRK1	leucine-rich repeat kinase 1
hsa-miR-573	0	0	1	1	1	1	GLT25D1	glycosyltransferase 25 domain containing 1
hsa-miR-573	0	0	1	1	1	1	TEFM	transcription elongation factor, mitochondrial
hsa-miR-573	0	0	1	1	1	1	SNIP1	Smad nuclear interacting protein 1
hsa-miR-573	1	0	1	0	1	1	ZFHX4	zinc finger homeobox 4
hsa-miR-573	1	0	1	1	1	1	PIP4K2C	phosphatidylinositol-5-phosphate 4-kinase, type II, gamma
hsa-miR-573	0	0	1	1	1	1	AGBL2	ATP/GTP binding protein-like 2
hsa-miR-573	1	0	1	1	1	1	L2HGDH	L-2-hydroxyglutarate dehydrogenase
hsa-miR-573	0	0	1	1	1	1	ERMP1	endoplasmic reticulum metallopeptidase 1
hsa-miR-573	0	0	1	1	1	1	ZNF767	zinc finger family member 767
hsa-miR-573	0	0	1	1	1	1	ZNF606	zinc finger protein 606
hsa-miR-573	1	0	1	0	1	1	VCPIP1	valosin containing protein (p97)/p47 complex interacting protein 1
hsa-miR-573	1	0	1	1	1	1	NAA50	N(alpha)-acetyltransferase 50, NatE catalytic subunit
hsa-miR-573	1	0	1	1	1	1	SLC35F5	solute carrier family 35, member F5
hsa-miR-573	1	0	1	1	1	1	CYB5B	cytochrome b5 type B (outer mitochondrial membrane)
hsa-miR-573	1	0	1	1	1	1	JHDM1D	jumonji C domain containing histone demethylase 1 homolog D (S. cerevisiae)
hsa-miR-573	1	0	1	0	1	1	SETD7	SET domain containing (lysine methyltransferase) 7
hsa-miR-573	1	0	1	1	1	1	PTPRO	protein tyrosine phosphatase, receptor type, O
hsa-miR-573	1	0	1	1	1	1	TMX1	thioredoxin-related transmembrane protein 1
hsa-miR-573	1	0	1	1	1	1	NRBF2	nuclear receptor binding factor 2
hsa-miR-573	1	0	1	1	1	1	SGPP1	sphingosine-1-phosphate phosphatase 1
hsa-miR-573	1	0	1	0	1	1	VOPP1	vesicular, overexpressed in cancer, prosurvival protein 1
hsa-miR-573	1	0	1	0	1	1	C1orf21	chromosome 1 open reading frame 21
hsa-miR-573	1	0	1	0	1	1	CSRNP2	cysteine-serine-rich nuclear protein 2
hsa-miR-573	1	0	1	1	1	1	ANKRD13C	ankyrin repeat domain 13C
hsa-miR-573	0	0	1	1	0	0	TMEM163	transmembrane protein 163
hsa-miR-573	1	0	1	1	1	1	C6orf62	chromosome 6 open reading frame 62
hsa-miR-573	1	0	1	1	1	1	PPP1R14C	protein phosphatase 1, regulatory (inhibitor) subunit 14C
hsa-miR-573	0	0	1	1	1	1	FAHD1	fumarylacetoacetate hydrolase domain containing 1
hsa-miR-573	1	0	1	1	0	0	TCF7L1	transcription factor 7-like 1 (T-cell specific, HMG-box)
hsa-miR-573	1	0	1	1	1	1	GABARAPL1	GABA(A) receptor-associated protein like 1
hsa-miR-573	1	0	1	0	1	1	TMEM47	transmembrane protein 47
hsa-miR-573	1	0	1	1	1	1	CRISPLD1	cysteine-rich secretory protein LCCL domain containing 1
hsa-miR-573	1	0	1	0	1	1	SH3BGRL2	SH3 domain binding glutamic acid-rich protein like 2
hsa-miR-573	0	0	1	0	1	1	KRTAP4-12	keratin associated protein 4-12
hsa-miR-573	1	0	1	1	1	1	FAM175B	family with sequence similarity 175, member B
hsa-miR-573	1	0	1	0	1	1	FAR1	fatty acyl CoA reductase 1
hsa-miR-573	1	0	1	0	1	1	PSD2	pleckstrin and Sec7 domain containing 2
hsa-miR-573	0	0	1	1	0	0	NICN1	nicolin 1
hsa-miR-573	0	0	1	1	1	1	VPS25	vacuolar protein sorting 25 homolog (S. cerevisiae)
hsa-miR-573	1	0	1	1	1	1	HOOK3	hook homolog 3 (Drosophila)
hsa-miR-573	0	0	1	1	0	0	STK19	serine/threonine kinase 19
hsa-miR-573	0	0	1	1	1	1	JAGN1	jagunal homolog 1 (Drosophila)
hsa-miR-573	1	0	1	1	1	1	PARD6B	par-6 partitioning defective 6 homolog beta (C. elegans)
hsa-miR-573	1	0	1	1	1	1	HIATL1	hippocampus abundant transcript-like 1
hsa-miR-573	0	0	1	1	1	1	SPZ1	spermatogenic leucine zipper 1
hsa-miR-573	1	0	1	0	1	1	GLYR1	glyoxylate reductase 1 homolog (Arabidopsis)
hsa-miR-573	0	0	1	1	1	1	EMR3	egf-like module containing, mucin-like, hormone receptor-like 3
hsa-miR-573	0	0	1	1	1	1	RETNLB	resistin like beta
hsa-miR-573	1	0	1	1	1	1	PPP1R9B	protein phosphatase 1, regulatory subunit 9B
hsa-miR-573	1	0	1	0	1	1	INA	internexin neuronal intermediate filament protein, alpha
hsa-miR-573	1	0	1	1	1	1	RSPO3	R-spondin 3
hsa-miR-573	1	0	1	1	1	1	SPRYD3	SPRY domain containing 3
hsa-miR-573	1	0	1	1	1	1	ABHD13	abhydrolase domain containing 13
hsa-miR-573	1	0	1	0	1	1	UBASH3B	ubiquitin associated and SH3 domain containing B
hsa-miR-573	0	0	1	1	1	1	FBXL20	F-box and leucine-rich repeat protein 20
hsa-miR-573	0	0	1	1	1	1	POLR2J2	polymerase (RNA) II (DNA directed) polypeptide J2
hsa-miR-573	0	0	1	1	0	0	MUC13	mucin 13, cell surface associated
hsa-miR-573	1	0	1	1	1	1	HIAT1	hippocampus abundant transcript 1
hsa-miR-573	1	0	1	0	1	1	PURB	purine-rich element binding protein B
hsa-miR-573	1	0	1	1	1	1	TP53INP1	tumor protein p53 inducible nuclear protein 1
hsa-miR-573	1	0	1	1	1	1	TANC1	tetratricopeptide repeat, ankyrin repeat and coiled-coil containing 1
hsa-miR-573	1	0	1	1	1	1	TPD52L3	tumor protein D52-like 3
hsa-miR-573	1	0	1	1	1	1	SYS1	SYS1 Golgi-localized integral membrane protein homolog (S. cerevisiae)
hsa-miR-573	1	0	1	1	1	1	BRWD1	bromodomain and WD repeat domain containing 1
hsa-miR-573	0	0	1	1	1	1	ZNF830	zinc finger protein 830
hsa-miR-573	1	0	1	1	1	1	XKR4	XK, Kell blood group complex subunit-related family, member 4
hsa-miR-573	0	0	1	1	1	1	PLEKHG4B	pleckstrin homology domain containing, family G (with RhoGef domain) member 4B
hsa-miR-573	0	0	1	1	1	1	SCAND3	SCAN domain containing 3
hsa-miR-573	0	0	1	0	1	1	ZNF518B	zinc finger protein 518B
hsa-miR-573	1	0	1	0	1	1	ANTXR2	anthrax toxin receptor 2
hsa-miR-573	0	0	1	1	1	1	FBXO32	F-box protein 32
hsa-miR-573	0	0	1	1	1	1	BCCIP	BRCA2 and CDKN1A interacting protein
hsa-miR-573	0	0	1	1	1	1	CBLN4	cerebellin 4 precursor
hsa-miR-573	0	0	1	1	1	1	C14orf126	chromosome 14 open reading frame 126
hsa-miR-573	1	0	1	0	1	1	SOCS4	suppressor of cytokine signaling 4
hsa-miR-573	0	0	1	1	0	0	ASB17	ankyrin repeat and SOCS box containing 17
hsa-miR-573	0	0	1	1	1	1	KCNG3	potassium voltage-gated channel, subfamily G, member 3
hsa-miR-573	0	0	1	1	0	0	CITED4	Cbp/p300-interacting transactivator, with Glu/Asp-rich carboxy-terminal domain, 4
hsa-miR-573	1	0	1	1	1	1	ZAK	sterile alpha motif and leucine zipper containing kinase AZK
hsa-miR-573	1	0	1	1	1	1	GNPDA2	glucosamine-6-phosphate deaminase 2
hsa-miR-573	1	0	1	1	1	1	MARS2	methionyl-tRNA synthetase 2, mitochondrial
hsa-miR-573	0	0	1	0	1	1	SP140L	SP140 nuclear body protein-like
hsa-miR-573	1	0	1	1	1	1	ICA1L	islet cell autoantigen 1,69kDa-like
hsa-miR-573	1	0	1	0	1	1	SP1	Sp1 transcription factor
hsa-miR-573	1	0	1	1	1	1	PKHD1	polycystic kidney and hepatic disease 1 (autosomal recessive)
hsa-miR-573	0	0	1	1	0	0	MAGEE2	melanoma antigen family E, 2
hsa-miR-573	0	0	1	1	1	1	ADAMTS17	ADAM metallopeptidase with thrombospondin type 1 motif, 17
hsa-miR-573	1	0	1	1	1	1	TSTD2	thiosulfate sulfurtransferase (rhodanese)-like domain containing 2
hsa-miR-573	0	0	1	1	1	1	KCNH5	potassium voltage-gated channel, subfamily H (eag-related), member 5
hsa-miR-573	1	0	1	1	1	1	MAPK1IP1L	mitogen-activated protein kinase 1 interacting protein 1-like
hsa-miR-573	1	0	1	1	1	1	TMEM182	transmembrane protein 182
hsa-miR-573	0	0	1	1	1	1	ADHFE1	alcohol dehydrogenase, iron containing, 1
hsa-miR-573	0	0	1	1	0	0	DHRS13	dehydrogenase/reductase (SDR family) member 13
hsa-miR-573	0	0	1	1	1	1	C6orf118	chromosome 6 open reading frame 118
hsa-miR-573	1	0	1	0	1	1	ZBTB47	zinc finger and BTB domain containing 47
hsa-miR-573	1	0	1	1	1	1	SLC2A12	solute carrier family 2 (facilitated glucose transporter), member 12
hsa-miR-573	0	0	1	1	0	0	CSNK1A1L	casein kinase 1, alpha 1-like
hsa-miR-573	1	0	1	1	1	1	VTI1A	vesicle transport through interaction with t-SNAREs homolog 1A (yeast)
hsa-miR-573	0	0	1	0	1	1	DDIT4L	DNA-damage-inducible transcript 4-like
hsa-miR-573	1	0	1	1	1	1	OSR1	odd-skipped related 1 (Drosophila)
hsa-miR-573	0	0	1	0	1	1	SPATA18	spermatogenesis associated 18
hsa-miR-573	0	0	1	1	0	0	TMEM217	transmembrane protein 217
hsa-miR-573	1	0	1	1	1	1	MAP3K7	mitogen-activated protein kinase kinase kinase 7
hsa-miR-573	0	0	1	1	1	1	SLC15A4	solute carrier family 15, member 4
hsa-miR-573	1	0	1	1	1	1	FAM110B	family with sequence similarity 110, member B
hsa-miR-573	0	0	1	1	1	1	TTC30A	tetratricopeptide repeat domain 30A
hsa-miR-573	1	0	1	1	1	1	LSM12	LSM12 homolog (S. cerevisiae)
hsa-miR-573	0	0	1	1	1	1	KLHDC7A	kelch domain containing 7A
hsa-miR-573	0	0	1	1	1	1	XIRP2	xin actin-binding repeat containing 2
hsa-miR-573	0	0	1	0	1	1	KBTBD3	kelch repeat and BTB (POZ) domain containing 3
hsa-miR-573	1	0	1	1	1	1	CEP128	centrosomal protein 128kDa
hsa-miR-573	1	0	1	1	1	1	LRFN5	leucine rich repeat and fibronectin type III domain containing 5
hsa-miR-573	1	0	1	1	1	1	FAM81A	family with sequence similarity 81, member A
hsa-miR-573	1	0	1	1	1	1	ZNF362	zinc finger protein 362
hsa-miR-573	0	0	1	0	1	1	HORMAD2	HORMA domain containing 2
hsa-miR-573	1	0	1	0	1	1	TMTC2	transmembrane and tetratricopeptide repeat containing 2
hsa-miR-573	1	0	1	0	1	1	FAM116A	family with sequence similarity 116, member A
hsa-miR-573	1	0	1	1	1	1	BEND6	BEN domain containing 6
hsa-miR-573	1	0	1	1	1	1	NXPH1	neurexophilin 1
hsa-miR-573	1	0	1	1	1	1	PDIK1L	PDLIM1 interacting kinase 1 like
hsa-miR-573	1	0	1	1	1	1	WTAP	Wilms tumor 1 associated protein
hsa-miR-573	1	0	1	1	1	1	FAS	Fas (TNF receptor superfamily, member 6)
hsa-miR-573	0	0	1	1	1	1	TMEM130	transmembrane protein 130
hsa-miR-573	1	0	1	0	1	1	ST6GALNAC3	ST6 (alpha-N-acetyl-neuraminyl-2,3-beta-galactosyl-1,3)-N-acetylgalactosaminide alpha-2,6-sialyltransferase 3
hsa-miR-573	1	0	1	1	1	1	PRSS35	protease, serine, 35
hsa-miR-573	1	0	1	0	1	1	TAPT1	transmembrane anterior posterior transformation 1
hsa-miR-573	0	0	1	0	1	1	LNX2	ligand of numb-protein X 2
hsa-miR-573	1	0	1	1	1	1	LRIG3	leucine-rich repeats and immunoglobulin-like domains 3
hsa-miR-573	1	0	1	1	1	1	HS6ST3	heparan sulfate 6-O-sulfotransferase 3
hsa-miR-573	1	0	1	1	1	1	CRYBG3	beta-gamma crystallin domain containing 3
hsa-miR-573	1	0	1	1	1	1	CREBRF	CREB3 regulatory factor
hsa-miR-573	0	0	1	1	0	0	LIX1L	Lix1 homolog (mouse)-like
hsa-miR-573	1	0	1	1	1	1	NAP1L5	nucleosome assembly protein 1-like 5
hsa-miR-573	1	0	1	1	1	1	PHF13	PHD finger protein 13
hsa-miR-573	1	0	1	1	1	1	RAB39B	RAB39B, member RAS oncogene family
hsa-miR-573	1	0	1	0	1	1	PLEKHH2	pleckstrin homology domain containing, family H (with MyTH4 domain) member 2
hsa-miR-573	0	0	1	1	0	0	KCNE2	potassium voltage-gated channel, Isk-related family, member 2
hsa-miR-573	1	0	1	1	1	1	IL16	interleukin 16
hsa-miR-573	0	0	1	0	1	1	CTAGE1	cutaneous T-cell lymphoma-associated antigen 1
hsa-miR-573	0	0	1	1	0	0	SLITRK4	SLIT and NTRK-like family, member 4
hsa-miR-573	1	0	1	1	1	1	MOB1B	MOB kinase activator 1B
hsa-miR-573	1	0	1	1	1	1	MMGT1	membrane magnesium transporter 1
hsa-miR-573	0	0	1	1	1	1	SLC25A26	solute carrier family 25 (S-adenosylmethionine carrier), member 26
hsa-miR-573	1	0	1	1	1	1	CNTD1	cyclin N-terminal domain containing 1
hsa-miR-573	0	0	1	1	1	1	FNDC7	fibronectin type III domain containing 7
hsa-miR-573	1	0	1	0	1	1	C3orf58	chromosome 3 open reading frame 58
hsa-miR-573	1	0	1	1	1	1	RFX6	regulatory factor X, 6
hsa-miR-573	0	0	1	1	0	0	NOMO2	NODAL modulator 2
hsa-miR-573	1	0	1	1	1	1	XKR6	XK, Kell blood group complex subunit-related family, member 6
hsa-miR-573	0	0	1	1	1	1	AQPEP	laeverin
hsa-miR-573	1	0	1	0	1	1	SREK1IP1	SREK1-interacting protein 1
hsa-miR-573	0	0	1	1	1	1	CCDC50	coiled-coil domain containing 50
hsa-miR-573	1	0	1	0	1	1	FAM84B	family with sequence similarity 84, member B
hsa-miR-573	1	0	1	1	1	1	UBR1	ubiquitin protein ligase E3 component n-recognin 1
hsa-miR-573	0	0	1	1	1	1	FAM9A	family with sequence similarity 9, member A
hsa-miR-573	1	0	1	1	1	1	SYT9	synaptotagmin IX
hsa-miR-573	0	0	1	1	1	1	IL6ST	interleukin 6 signal transducer (gp130, oncostatin M receptor)
hsa-miR-573	0	0	1	1	0	0	AGR3	anterior gradient 3 homolog (Xenopus laevis)
hsa-miR-573	1	0	1	1	1	1	INADL	InaD-like (Drosophila)
hsa-miR-573	1	0	1	1	1	1	STX12	syntaxin 12
hsa-miR-573	1	0	1	1	1	1	PKHD1L1	polycystic kidney and hepatic disease 1 (autosomal recessive)-like 1
hsa-miR-573	1	0	1	1	1	1	LRRTM3	leucine rich repeat transmembrane neuronal 3
hsa-miR-573	0	0	1	1	1	1	SESTD1	SEC14 and spectrin domains 1
hsa-miR-573	1	0	1	1	1	1	FAM134C	family with sequence similarity 134, member C
hsa-miR-573	1	0	1	1	1	1	MARCH3	membrane-associated ring finger (C3HC4) 3, E3 ubiquitin protein ligase
hsa-miR-573	0	0	1	1	1	1	ZNF831	zinc finger protein 831
hsa-miR-573	0	0	1	1	1	1	CMTM4	CKLF-like MARVEL transmembrane domain containing 4
hsa-miR-573	0	0	1	0	1	1	SLCO4C1	solute carrier organic anion transporter family, member 4C1
hsa-miR-573	0	0	1	0	1	1	ZNF445	zinc finger protein 445
hsa-miR-573	0	0	1	1	1	1	CCDC67	coiled-coil domain containing 67
hsa-miR-573	0	0	1	0	1	1	HCG27	HLA complex group 27 (non-protein coding)
hsa-miR-573	0	0	1	1	0	0	DCDC1	doublecortin domain containing 1
hsa-miR-573	1	0	1	1	1	1	ADAT2	adenosine deaminase, tRNA-specific 2
hsa-miR-573	1	0	1	1	1	1	ISM2	isthmin 2 homolog (zebrafish)
hsa-miR-573	0	0	1	1	1	1	C1QL2	complement component 1, q subcomponent-like 2
hsa-miR-573	0	0	1	0	1	1	VSTM2A	V-set and transmembrane domain containing 2A
hsa-miR-573	1	0	1	0	1	1	C12orf36	chromosome 12 open reading frame 36
hsa-miR-573	0	0	1	0	1	1	EPHA3	EPH receptor A3
hsa-miR-573	1	0	1	1	1	1	SP8	Sp8 transcription factor
hsa-miR-573	1	0	1	0	1	1	RNF144B	ring finger protein 144B
hsa-miR-573	0	0	1	0	1	1	C16orf82	chromosome 16 open reading frame 82
hsa-miR-573	1	0	1	1	1	1	NIN	ninein (GSK3B interacting protein)
hsa-miR-573	1	0	1	0	1	1	HNRNPA3	heterogeneous nuclear ribonucleoprotein A3
hsa-miR-573	1	0	1	1	1	1	ZBTB41	zinc finger and BTB domain containing 41
hsa-miR-573	1	0	1	1	1	1	ADAMTS6	ADAM metallopeptidase with thrombospondin type 1 motif, 6
hsa-miR-573	0	0	1	1	1	1	HIBCH	3-hydroxyisobutyryl-CoA hydrolase
hsa-miR-573	1	0	1	1	1	1	CCZ1B	CCZ1 vacuolar protein trafficking and biogenesis associated homolog B (S. cerevisiae)
hsa-miR-573	1	0	1	1	1	1	ASB7	ankyrin repeat and SOCS box containing 7
hsa-miR-573	1	0	1	1	1	1	KCTD4	potassium channel tetramerisation domain containing 4
hsa-miR-573	0	0	1	1	1	1	EMB	embigin
hsa-miR-573	0	0	1	0	0	0	IGFL1	IGF-like family member 1
hsa-miR-573	0	0	1	0	1	1	CA13	carbonic anhydrase XIII
hsa-miR-573	0	0	1	0	1	1	GYPE	glycophorin E (MNS blood group)
hsa-miR-573	1	0	1	0	1	1	PRICKLE2	prickle homolog 2 (Drosophila)
hsa-miR-573	0	0	1	1	1	1	PTHLH	parathyroid hormone-like hormone
hsa-miR-573	1	0	1	1	1	1	NAPEPLD	N-acyl phosphatidylethanolamine phospholipase D
hsa-miR-573	1	0	1	0	1	1	LHFPL3	lipoma HMGIC fusion partner-like 3
hsa-miR-573	0	0	1	1	1	1	ILDR2	immunoglobulin-like domain containing receptor 2
hsa-miR-573	0	0	1	1	1	1	IKBIP	IKBKB interacting protein
hsa-miR-573	1	0	1	1	1	1	FBXO33	F-box protein 33
hsa-miR-573	0	0	1	1	0	0	HEATR4	HEAT repeat containing 4
hsa-miR-573	0	0	1	1	1	1	ZRANB2	zinc finger, RAN-binding domain containing 2
hsa-miR-573	1	0	1	0	1	1	CAPRIN1	cell cycle associated protein 1
hsa-miR-573	1	0	1	0	1	1	MBLAC2	metallo-beta-lactamase domain containing 2
hsa-miR-573	0	0	1	1	1	1	SERTM1	serine-rich and transmembrane domain containing 1
hsa-miR-573	1	0	1	1	1	1	PPAPDC2	phosphatidic acid phosphatase type 2 domain containing 2
hsa-miR-573	1	0	1	1	1	1	IGSF1	immunoglobulin superfamily, member 1
hsa-miR-573	1	0	1	1	1	1	ATRNL1	attractin-like 1
hsa-miR-573	0	0	1	0	0	0	EFCAB12	EF-hand calcium binding domain 12
hsa-miR-573	0	0	1	1	1	1	C10orf129	chromosome 10 open reading frame 129
hsa-miR-573	1	0	1	1	1	1	GADL1	glutamate decarboxylase-like 1
hsa-miR-573	0	0	1	0	0	0	C16orf47	chromosome 16 open reading frame 47
hsa-miR-573	1	0	1	1	0	0	CD164L2	CD164 sialomucin-like 2
hsa-miR-573	0	0	1	0	1	1	FSD1L	fibronectin type III and SPRY domain containing 1-like
hsa-miR-573	1	0	1	1	1	1	XKRX	XK, Kell blood group complex subunit-related, X-linked
hsa-miR-573	1	0	1	1	1	1	RAPH1	Ras association (RalGDS/AF-6) and pleckstrin homology domains 1
hsa-miR-573	0	0	1	0	1	1	SIGLEC15	sialic acid binding Ig-like lectin 15
hsa-miR-573	0	0	1	0	0	0	PCDHB19P	protocadherin beta 19 pseudogene
hsa-miR-573	0	0	1	0	0	0	MIR155HG	MIR155 host gene (non-protein coding)
hsa-miR-573	0	0	1	0	0	0	TTTY2	testis-specific transcript, Y-linked 2 (non-protein coding)
hsa-miR-573	0	0	1	0	0	0	TTTY22	testis-specific transcript, Y-linked 22 (non-protein coding)
hsa-miR-573	0	0	1	0	0	0	TTTY23	testis-specific transcript, Y-linked 23 (non-protein coding)
hsa-miR-573	0	0	1	0	0	0	TTTY15	testis-specific transcript, Y-linked 15 (non-protein coding)
hsa-miR-573	0	0	1	0	0	0	TTTY19	testis-specific transcript, Y-linked 19 (non-protein coding)
hsa-miR-573	0	0	1	0	0	0	GOLGA2P3Y	golgin A2 pseudogene 3, Y-linked
hsa-miR-573	0	0	1	0	0	0	CSNK2A1P	casein kinase 2, alpha 1 polypeptide pseudogene
hsa-miR-573	0	0	1	0	0	0	NXF4	nuclear RNA export factor 4 pseudogene
hsa-miR-573	0	0	1	0	0	0	SNORA4	small nucleolar RNA, H/ACA box 4
hsa-miR-573	0	0	1	0	0	0	AOC4	amine oxidase, copper containing 3 (vascular adhesion protein 1) pseudogene
hsa-miR-573	0	0	1	0	0	0	SEPHS1P1	selenophosphate synthetase 1 pseudogene 1
hsa-miR-573	0	0	1	0	0	0	TPTE2P3	transmembrane phosphoinositide 3-phosphatase and tensin homolog 2 pseudogene 3
hsa-miR-573	0	0	1	0	0	0	TMED10P1	transmembrane emp24-like trafficking protein 10 (yeast) pseudogene 1
hsa-miR-573	0	0	1	0	0	0	MALAT1	metastasis associated lung adenocarcinoma transcript 1 (non-protein coding)
hsa-miR-573	0	0	1	0	0	0	SNX29P2	sorting nexin 29 pseudogene 2
hsa-miR-573	0	0	1	0	0	0	SCARNA6	small Cajal body-specific RNA 6
hsa-miR-573	0	0	1	0	0	0	HSP90B3P	heat shock protein 90kDa beta (Grp94), member 3, pseudogene
hsa-miR-573	0	0	1	0	0	0	GBP1P1	guanylate binding protein 1, interferon-inducible pseudogene 1
hsa-miR-573	0	0	1	0	0	0	SNORD116-24	small nucleolar RNA, C/D box 116-24
hsa-miR-573	0	0	1	0	0	0	SNORD116-25	small nucleolar RNA, C/D box 116-25
hsa-miR-573	0	0	1	0	0	0	SNORD116-26	small nucleolar RNA, C/D box 116-26
[truncated: 579 more rows]
