# Supplementary material for: Profiling of Selected MicroRNAs in Proliferative Eutopic Endometrium of Women with Ovarian Endometriosis
Source: Biomed Res Int. 2015 Aug 20;2015:760698. doi: 10.1155/2015/760698 (PMC4558423; doi:10.1155/2015/760698)
Supplement: Supplementary file 1 — Table I: The names of miRNAs significantly differentially expressed between eutopic endometrium of patients with endometriosis vs eutopic endometrium of patients without endometriosis. Table II: The associations between miRNA and mRNA, which presents detailed results of the search of six major databases i.e targetscan, tarbase, miranda, mirbase, mirtarget2 and pictar. [file 760698.f1.zip › 760698.f1/Table II/hsa-miR-574-3p.tsv]

miR	targetscan	tarbase	miranda	mirbase	mirtarget2	pictar	GeneSymbol	GeneName
hsa-miR-574-3p	1	0	1	1	0	0	SRCAP	Snf2-related CREBBP activator protein
hsa-miR-574-3p	1	0	1	0	1	1	KIAA0355	KIAA0355
hsa-miR-574-3p	1	0	1	0	1	1	PTPRT	protein tyrosine phosphatase, receptor type, T
hsa-miR-574-3p	0	0	1	1	0	0	ZNF862	zinc finger protein 862
hsa-miR-574-3p	1	0	1	1	1	1	TP63	tumor protein p63
hsa-miR-574-3p	1	0	1	0	0	0	DTX4	deltex homolog 4 (Drosophila)
hsa-miR-574-3p	0	0	1	0	1	1	TP53TG3	TP53 target 3
hsa-miR-574-3p	0	0	1	0	0	0	TP53TG3B	TP53 target 3B
hsa-miR-574-3p	1	0	1	1	0	0	EBF4	early B-cell factor 4
hsa-miR-574-3p	1	0	1	0	1	1	SEMA6D	sema domain, transmembrane domain (TM), and cytoplasmic domain, (semaphorin) 6D
hsa-miR-574-3p	1	0	1	1	0	0	MAGI3	membrane associated guanylate kinase, WW and PDZ domain containing 3
hsa-miR-574-3p	0	0	1	1	1	1	BHLHB9	basic helix-loop-helix domain containing, class B, 9
hsa-miR-574-3p	1	0	1	1	0	0	SEMA4C	sema domain, immunoglobulin domain (Ig), transmembrane domain (TM) and short cytoplasmic domain, (semaphorin) 4C
hsa-miR-574-3p	1	0	1	1	1	1	SH3TC2	SH3 domain and tetratricopeptide repeats 2
hsa-miR-574-3p	1	0	1	0	0	0	ZBTB34	zinc finger and BTB domain containing 34
hsa-miR-574-3p	1	0	1	1	1	1	FAT2	FAT tumor suppressor homolog 2 (Drosophila)
hsa-miR-574-3p	1	1	1	1	1	1	BACE1	beta-site APP-cleaving enzyme 1
hsa-miR-574-3p	0	0	1	0	0	0	PIDD	p53-induced death domain protein
hsa-miR-574-3p	1	0	1	1	1	1	MEF2A	myocyte enhancer factor 2A
hsa-miR-574-3p	1	0	1	1	1	1	GIT1	G protein-coupled receptor kinase interacting ArfGAP 1
hsa-miR-574-3p	1	0	1	1	0	0	GRIN2A	glutamate receptor, ionotropic, N-methyl D-aspartate 2A
hsa-miR-574-3p	1	0	1	0	1	1	PDE7B	phosphodiesterase 7B
hsa-miR-574-3p	1	0	1	1	1	1	MEF2D	myocyte enhancer factor 2D
hsa-miR-574-3p	1	0	1	1	1	1	MBNL2	muscleblind-like splicing regulator 2
hsa-miR-574-3p	0	0	1	1	1	1	FHL1	four and a half LIM domains 1
hsa-miR-574-3p	1	0	1	1	0	0	RASSF1	Ras association (RalGDS/AF-6) domain family member 1
hsa-miR-574-3p	0	0	1	1	0	0	TCF25	transcription factor 25 (basic helix-loop-helix)
hsa-miR-574-3p	0	0	1	1	0	0	PACSIN3	protein kinase C and casein kinase substrate in neurons 3
hsa-miR-574-3p	1	0	1	1	1	1	C3orf18	chromosome 3 open reading frame 18
hsa-miR-574-3p	0	0	1	1	1	1	CHPT1	choline phosphotransferase 1
hsa-miR-574-3p	1	0	1	1	1	1	NXT2	nuclear transport factor 2-like export factor 2
hsa-miR-574-3p	1	0	1	1	1	1	STRN3	striatin, calmodulin binding protein 3
hsa-miR-574-3p	0	0	1	0	0	0	TIGD7	tigger transposable element derived 7
hsa-miR-574-3p	1	0	1	1	1	1	ATAD1	ATPase family, AAA domain containing 1
hsa-miR-574-3p	1	0	1	1	1	1	LARP4	La ribonucleoprotein domain family, member 4
hsa-miR-574-3p	0	0	1	1	1	1	GNAS	GNAS complex locus
hsa-miR-574-3p	1	0	1	1	1	1	NRXN3	neurexin 3
hsa-miR-574-3p	1	0	1	0	1	1	NFAT5	nuclear factor of activated T-cells 5, tonicity-responsive
hsa-miR-574-3p	0	0	1	0	0	0	TUG1	taurine upregulated 1 (non-protein coding)
hsa-miR-574-3p	1	0	1	1	1	1	PPFIA4	protein tyrosine phosphatase, receptor type, f polypeptide (PTPRF), interacting protein (liprin), alpha 4
hsa-miR-574-3p	1	0	1	1	1	1	BAZ2A	bromodomain adjacent to zinc finger domain, 2A
hsa-miR-574-3p	0	0	1	0	1	1	FLJ14186	uncharacterized LOC401149
hsa-miR-574-3p	0	0	1	1	1	1	HDAC7	histone deacetylase 7
hsa-miR-574-3p	1	0	1	1	1	1	SEC63	SEC63 homolog (S. cerevisiae)
hsa-miR-574-3p	0	0	1	1	1	1	NETO2	neuropilin (NRP) and tolloid (TLL)-like 2
hsa-miR-574-3p	0	0	1	0	0	0	KIAA0664L3	KIAA0664-like 3
hsa-miR-574-3p	1	0	1	1	0	0	SMARCA4	SWI/SNF related, matrix associated, actin dependent regulator of chromatin, subfamily a, member 4
hsa-miR-574-3p	1	0	1	1	1	1	PPP1R3F	protein phosphatase 1, regulatory subunit 3F
hsa-miR-574-3p	1	0	1	1	1	1	SHISA5	shisa homolog 5 (Xenopus laevis)
hsa-miR-574-3p	0	0	1	1	0	0	CHRM3	cholinergic receptor, muscarinic 3
hsa-miR-574-3p	0	0	1	1	1	1	BRD2	bromodomain containing 2
hsa-miR-574-3p	0	0	1	1	0	0	GRIP2	glutamate receptor interacting protein 2
hsa-miR-574-3p	1	0	1	1	1	1	HLF	hepatic leukemia factor
hsa-miR-574-3p	0	0	1	1	1	1	HDAC8	histone deacetylase 8
hsa-miR-574-3p	0	0	1	1	1	1	CAMKV	CaM kinase-like vesicle-associated
hsa-miR-574-3p	1	0	1	0	1	1	SLC25A37	solute carrier family 25 (mitochondrial iron transporter), member 37
hsa-miR-574-3p	0	0	1	1	1	1	HNRNPH1	heterogeneous nuclear ribonucleoprotein H1 (H)
hsa-miR-574-3p	1	0	1	1	1	1	GPD2	glycerol-3-phosphate dehydrogenase 2 (mitochondrial)
hsa-miR-574-3p	1	0	1	1	0	0	PRMT8	protein arginine methyltransferase 8
hsa-miR-574-3p	0	0	1	1	0	0	SERPINH1	serpin peptidase inhibitor, clade H (heat shock protein 47), member 1, (collagen binding protein 1)
hsa-miR-574-3p	0	0	1	1	0	0	NDUFA4L2	NADH dehydrogenase (ubiquinone) 1 alpha subcomplex, 4-like 2
hsa-miR-574-3p	1	0	1	1	1	1	SIAH1	siah E3 ubiquitin protein ligase 1
hsa-miR-574-3p	1	0	1	1	1	1	CUL2	cullin 2
hsa-miR-574-3p	0	0	1	1	1	1	AQP3	aquaporin 3 (Gill blood group)
hsa-miR-574-3p	1	0	1	1	1	1	LRP8	low density lipoprotein receptor-related protein 8, apolipoprotein e receptor
hsa-miR-574-3p	1	0	1	1	0	0	DNM2	dynamin 2
hsa-miR-574-3p	0	0	1	1	1	1	RGS14	regulator of G-protein signaling 14
hsa-miR-574-3p	0	0	1	1	1	1	FAM76A	family with sequence similarity 76, member A
hsa-miR-574-3p	1	0	1	1	1	1	LMX1A	LIM homeobox transcription factor 1, alpha
hsa-miR-574-3p	0	0	1	1	1	1	PRRT1	proline-rich transmembrane protein 1
hsa-miR-574-3p	1	0	1	0	1	1	WDR82	WD repeat domain 82
hsa-miR-574-3p	1	0	1	1	1	1	DAB2IP	DAB2 interacting protein
hsa-miR-574-3p	0	0	1	0	0	0	FAM47E	family with sequence similarity 47, member E
hsa-miR-574-3p	1	0	1	1	1	1	C17orf85	chromosome 17 open reading frame 85
hsa-miR-574-3p	0	0	1	1	0	0	UBR2	ubiquitin protein ligase E3 component n-recognin 2
hsa-miR-574-3p	1	0	1	1	1	1	FAM122B	family with sequence similarity 122B
hsa-miR-574-3p	1	0	1	1	0	0	ATXN7L3	ataxin 7-like 3
hsa-miR-574-3p	1	0	1	1	1	1	PIK3R1	phosphoinositide-3-kinase, regulatory subunit 1 (alpha)
hsa-miR-574-3p	1	0	1	1	1	1	DLG2	discs, large homolog 2 (Drosophila)
hsa-miR-574-3p	1	0	1	1	1	1	MKRN1	makorin ring finger protein 1
hsa-miR-574-3p	1	0	1	1	1	1	CLTC	clathrin, heavy chain (Hc)
hsa-miR-574-3p	1	0	1	1	1	1	LSM14A	LSM14A, SCD6 homolog A (S. cerevisiae)
hsa-miR-574-3p	1	0	1	1	0	0	PEAK1	NKF3 kinase family member
hsa-miR-574-3p	0	0	1	0	0	0	EP400NL	EP400 N-terminal like
hsa-miR-574-3p	1	0	1	0	1	1	KDM2A	lysine (K)-specific demethylase 2A
hsa-miR-574-3p	0	0	1	1	1	1	SHROOM3	shroom family member 3
hsa-miR-574-3p	0	0	1	1	0	0	HEATR8	HEAT repeat containing 8
hsa-miR-574-3p	1	0	1	0	1	1	RXRA	retinoid X receptor, alpha
hsa-miR-574-3p	0	0	1	0	0	0	AGAP9	ArfGAP with GTPase domain, ankyrin repeat and PH domain 9
hsa-miR-574-3p	1	0	1	1	1	1	PTPN2	protein tyrosine phosphatase, non-receptor type 2
hsa-miR-574-3p	0	0	1	1	1	1	RNF135	ring finger protein 135
hsa-miR-574-3p	1	0	1	1	1	1	SMAP2	small ArfGAP2
hsa-miR-574-3p	0	0	1	0	0	0	KIAA0913	KIAA0913
hsa-miR-574-3p	1	0	1	1	1	1	KIAA1033	KIAA1033
hsa-miR-574-3p	1	0	1	1	1	1	USP45	ubiquitin specific peptidase 45
hsa-miR-574-3p	0	0	1	1	1	1	VWA3B	von Willebrand factor A domain containing 3B
hsa-miR-574-3p	0	0	1	1	1	1	NARG2	NMDA receptor regulated 2
hsa-miR-574-3p	0	0	1	1	0	0	CD37	CD37 molecule
hsa-miR-574-3p	1	0	1	1	1	1	FBXL5	F-box and leucine-rich repeat protein 5
hsa-miR-574-3p	1	0	1	1	1	1	RNF38	ring finger protein 38
hsa-miR-574-3p	1	0	1	1	1	1	IKZF2	IKAROS family zinc finger 2 (Helios)
hsa-miR-574-3p	0	0	1	0	0	0	CLCN1	chloride channel, voltage-sensitive 1
hsa-miR-574-3p	0	0	1	0	0	0	CR1L	complement component (3b/4b) receptor 1-like
hsa-miR-574-3p	0	0	1	1	0	0	DNAH1	dynein, axonemal, heavy chain 1
hsa-miR-574-3p	1	0	1	1	1	1	CAMTA1	calmodulin binding transcription activator 1
hsa-miR-574-3p	0	0	1	0	1	1	ANKS1B	ankyrin repeat and sterile alpha motif domain containing 1B
hsa-miR-574-3p	0	0	1	1	1	1	TIMM50	translocase of inner mitochondrial membrane 50 homolog (S. cerevisiae)
hsa-miR-574-3p	0	0	1	1	0	0	DHRS4	dehydrogenase/reductase (SDR family) member 4
hsa-miR-574-3p	1	0	1	1	1	1	NTNG1	netrin G1
hsa-miR-574-3p	0	0	1	1	1	1	CDK20	cyclin-dependent kinase 20
hsa-miR-574-3p	1	0	1	1	1	1	PRKACB	protein kinase, cAMP-dependent, catalytic, beta
hsa-miR-574-3p	1	0	1	1	1	1	TBC1D22B	TBC1 domain family, member 22B
hsa-miR-574-3p	1	0	1	0	0	0	VGLL4	vestigial like 4 (Drosophila)
hsa-miR-574-3p	1	0	1	1	1	1	RIMS3	regulating synaptic membrane exocytosis 3
hsa-miR-574-3p	1	0	1	1	0	0	DHDDS	dehydrodolichyl diphosphate synthase
hsa-miR-574-3p	1	0	1	1	1	1	ZNF410	zinc finger protein 410
hsa-miR-574-3p	1	0	1	1	1	1	CALM1	calmodulin 1 (phosphorylase kinase, delta)
hsa-miR-574-3p	0	0	1	0	0	0	ATXN7L3B	ataxin 7-like 3B
hsa-miR-574-3p	1	0	1	1	1	1	RELL2	RELT-like 2
hsa-miR-574-3p	1	0	1	0	1	1	NR1D2	nuclear receptor subfamily 1, group D, member 2
hsa-miR-574-3p	1	0	1	1	1	1	NRF1	nuclear respiratory factor 1
hsa-miR-574-3p	1	0	1	0	1	1	ARHGAP26	Rho GTPase activating protein 26
hsa-miR-574-3p	0	0	1	1	1	1	CDC42SE2	CDC42 small effector 2
hsa-miR-574-3p	1	0	1	1	1	1	SPOCK2	sparc/osteonectin, cwcv and kazal-like domains proteoglycan (testican) 2
hsa-miR-574-3p	0	0	1	0	0	0	FLJ35390	uncharacterized LOC255031
hsa-miR-574-3p	0	0	1	0	0	0	TRAV20	T cell receptor alpha variable 20
hsa-miR-574-3p	0	0	1	1	0	0	TTC12	tetratricopeptide repeat domain 12
hsa-miR-574-3p	0	0	1	0	0	0	LOC415056	uncharacterized LOC415056
hsa-miR-574-3p	0	0	1	1	1	1	NUB1	negative regulator of ubiquitin-like proteins 1
hsa-miR-574-3p	0	0	1	0	0	0	FAM66C	family with sequence similarity 66, member C
hsa-miR-574-3p	1	0	1	1	1	1	ELMO2	engulfment and cell motility 2
hsa-miR-574-3p	0	0	1	1	1	1	TBC1D16	TBC1 domain family, member 16
hsa-miR-574-3p	1	0	1	1	1	1	BNC2	basonuclin 2
hsa-miR-574-3p	0	0	1	0	1	1	KSR1	kinase suppressor of ras 1
hsa-miR-574-3p	1	0	1	1	1	1	CMIP	c-Maf inducing protein
hsa-miR-574-3p	1	0	1	1	1	1	FOSB	FBJ murine osteosarcoma viral oncogene homolog B
hsa-miR-574-3p	0	0	1	1	0	0	PTOV1	prostate tumor overexpressed 1
hsa-miR-574-3p	1	0	1	0	1	1	USP6NL	USP6 N-terminal like
hsa-miR-574-3p	0	0	1	0	0	0	MORF4L2-AS1	MORF4L2 antisense RNA 1
hsa-miR-574-3p	1	0	1	1	1	1	CARM1	coactivator-associated arginine methyltransferase 1
hsa-miR-574-3p	0	0	1	1	1	1	ZNF589	zinc finger protein 589
hsa-miR-574-3p	0	0	1	1	0	0	NISCH	nischarin
hsa-miR-574-3p	1	0	1	0	1	1	SEMA4G	sema domain, immunoglobulin domain (Ig), transmembrane domain (TM) and short cytoplasmic domain, (semaphorin) 4G
hsa-miR-574-3p	0	0	1	1	1	1	RHOT1	ras homolog family member T1
hsa-miR-574-3p	1	0	1	1	1	1	ZSCAN29	zinc finger and SCAN domain containing 29
hsa-miR-574-3p	1	0	1	1	0	0	MANEAL	mannosidase, endo-alpha-like
hsa-miR-574-3p	0	0	1	1	1	1	ATF7IP	activating transcription factor 7 interacting protein
hsa-miR-574-3p	1	0	1	0	0	0	PRRT4	proline-rich transmembrane protein 4
hsa-miR-574-3p	0	0	1	1	1	1	PIM3	pim-3 oncogene
hsa-miR-574-3p	1	0	1	1	1	1	MYLK	myosin light chain kinase
hsa-miR-574-3p	0	0	1	1	1	1	ATP2A2	ATPase, Ca++ transporting, cardiac muscle, slow twitch 2
hsa-miR-574-3p	1	0	1	1	0	0	PLEKHG3	pleckstrin homology domain containing, family G (with RhoGef domain) member 3
hsa-miR-574-3p	0	0	1	0	1	1	TGFB2	transforming growth factor, beta 2
hsa-miR-574-3p	1	0	1	1	1	1	ACVR2B	activin A receptor, type IIB
hsa-miR-574-3p	1	0	1	1	0	0	KIAA1644	KIAA1644
hsa-miR-574-3p	0	0	1	0	0	0	INTS4L1	integrator complex subunit 4-like 1
hsa-miR-574-3p	0	0	1	1	0	0	PRAMEF10	PRAME family member 10
hsa-miR-574-3p	1	0	1	1	1	1	TMEM132B	transmembrane protein 132B
hsa-miR-574-3p	0	0	1	1	1	1	SLC8A3	solute carrier family 8 (sodium/calcium exchanger), member 3
hsa-miR-574-3p	1	0	1	1	1	1	SLMAP	sarcolemma associated protein
hsa-miR-574-3p	1	0	1	1	1	1	INSC	inscuteable homolog (Drosophila)
hsa-miR-574-3p	0	0	1	1	1	1	HSF2	heat shock transcription factor 2
hsa-miR-574-3p	0	0	1	0	0	0	FLJ39632	uncharacterized LOC642477
hsa-miR-574-3p	1	0	1	1	1	1	SGCD	sarcoglycan, delta (35kDa dystrophin-associated glycoprotein)
hsa-miR-574-3p	1	0	1	1	1	1	ETS1	v-ets erythroblastosis virus E26 oncogene homolog 1 (avian)
hsa-miR-574-3p	0	0	1	1	1	1	AIG1	androgen-induced 1
hsa-miR-574-3p	0	0	1	0	0	0	OVOS	ovostatin
hsa-miR-574-3p	1	0	1	1	1	1	DCAF5	DDB1 and CUL4 associated factor 5
hsa-miR-574-3p	0	0	1	1	1	1	CCNT2	cyclin T2
hsa-miR-574-3p	0	0	1	0	0	0	LINC00338	long intergenic non-protein coding RNA 338
hsa-miR-574-3p	1	0	1	1	1	1	HIC2	hypermethylated in cancer 2
hsa-miR-574-3p	0	0	1	1	1	1	PLA2G4C	phospholipase A2, group IVC (cytosolic, calcium-independent)
hsa-miR-574-3p	1	0	1	1	1	1	ARHGDIA	Rho GDP dissociation inhibitor (GDI) alpha
hsa-miR-574-3p	1	0	1	1	0	0	LAYN	layilin
hsa-miR-574-3p	1	0	1	0	0	0	IGLON5	IgLON family member 5
hsa-miR-574-3p	0	0	1	0	0	0	SPATA17	spermatogenesis associated 17
hsa-miR-574-3p	0	0	1	0	0	0	H19	H19, imprinted maternally expressed transcript (non-protein coding)
hsa-miR-574-3p	0	0	1	1	1	1	TASP1	taspase, threonine aspartase, 1
hsa-miR-574-3p	0	0	1	1	0	0	NGDN	neuroguidin, EIF4E binding protein
hsa-miR-574-3p	1	0	1	1	1	1	COPZ1	coatomer protein complex, subunit zeta 1
hsa-miR-574-3p	1	0	1	1	1	1	FBXO9	F-box protein 9
hsa-miR-574-3p	0	0	1	1	0	0	IKBKG	inhibitor of kappa light polypeptide gene enhancer in B-cells, kinase gamma
hsa-miR-574-3p	0	0	1	1	1	1	ATG4A	autophagy related 4A, cysteine peptidase
hsa-miR-574-3p	0	0	1	1	1	1	CPZ	carboxypeptidase Z
hsa-miR-574-3p	1	0	1	1	1	1	HN1	hematological and neurological expressed 1
hsa-miR-574-3p	0	0	1	0	0	0	PRMT1	protein arginine methyltransferase 1
hsa-miR-574-3p	0	0	1	1	0	0	GPRC5C	G protein-coupled receptor, family C, group 5, member C
hsa-miR-574-3p	1	0	1	1	1	1	MYT1	myelin transcription factor 1
hsa-miR-574-3p	0	0	1	1	0	0	FES	feline sarcoma oncogene
hsa-miR-574-3p	1	0	1	0	1	1	SLC7A6	solute carrier family 7 (amino acid transporter light chain, y+L system), member 6
hsa-miR-574-3p	1	0	1	1	1	1	SNRK	SNF related kinase
hsa-miR-574-3p	0	0	1	0	1	1	ZNF28	zinc finger protein 28
hsa-miR-574-3p	1	0	1	0	1	1	CNTNAP2	contactin associated protein-like 2
hsa-miR-574-3p	1	0	1	1	1	1	SLC30A7	solute carrier family 30 (zinc transporter), member 7
hsa-miR-574-3p	0	0	1	1	1	1	MOBP	myelin-associated oligodendrocyte basic protein
hsa-miR-574-3p	0	0	1	1	1	1	LTA	lymphotoxin alpha (TNF superfamily, member 1)
hsa-miR-574-3p	0	0	1	1	1	1	CD274	CD274 molecule
hsa-miR-574-3p	1	0	1	0	1	1	DCBLD2	discoidin, CUB and LCCL domain containing 2
hsa-miR-574-3p	1	0	1	1	1	1	AFF1	AF4/FMR2 family, member 1
hsa-miR-574-3p	1	0	1	1	1	1	PML	promyelocytic leukemia
hsa-miR-574-3p	1	0	1	1	1	1	COL4A4	collagen, type IV, alpha 4
hsa-miR-574-3p	0	0	1	1	1	1	COL7A1	collagen, type VII, alpha 1
hsa-miR-574-3p	1	0	1	1	1	1	TBX5	T-box 5
hsa-miR-574-3p	0	0	1	1	1	1	MTM1	myotubularin 1
hsa-miR-574-3p	1	0	1	1	1	1	TIMP3	TIMP metallopeptidase inhibitor 3
hsa-miR-574-3p	0	0	1	1	1	1	CRX	cone-rod homeobox
hsa-miR-574-3p	0	0	1	1	1	1	IL6	interleukin 6 (interferon, beta 2)
hsa-miR-574-3p	1	0	1	1	0	0	ADRA1B	adrenoceptor alpha 1B
hsa-miR-574-3p	1	0	1	0	1	1	CACNA1E	calcium channel, voltage-dependent, R type, alpha 1E subunit
hsa-miR-574-3p	0	0	1	1	1	1	HTR7	5-hydroxytryptamine (serotonin) receptor 7, adenylate cyclase-coupled
hsa-miR-574-3p	0	0	1	1	0	0	SNCB	synuclein, beta
hsa-miR-574-3p	1	0	1	0	1	1	SPOPL	speckle-type POZ protein-like
hsa-miR-574-3p	0	0	1	0	0	0	RNASEK	ribonuclease, RNase K
hsa-miR-574-3p	1	0	1	1	1	1	EDA	ectodysplasin A
hsa-miR-574-3p	1	0	1	0	1	1	IP6K1	inositol hexakisphosphate kinase 1
hsa-miR-574-3p	1	0	1	1	1	1	TCEAL8	transcription elongation factor A (SII)-like 8
hsa-miR-574-3p	1	0	1	0	1	1	C18orf25	chromosome 18 open reading frame 25
hsa-miR-574-3p	0	0	1	1	1	1	LDLRAD2	low density lipoprotein receptor class A domain containing 2
hsa-miR-574-3p	0	0	1	1	0	0	SPRR2G	small proline-rich protein 2G
hsa-miR-574-3p	0	0	1	1	0	0	LAT	linker for activation of T cells
hsa-miR-574-3p	1	0	1	1	1	1	TMCC1	transmembrane and coiled-coil domain family 1
hsa-miR-574-3p	1	0	1	0	1	1	TNRC6B	trinucleotide repeat containing 6B
hsa-miR-574-3p	1	0	1	0	1	1	RAB12	RAB12, member RAS oncogene family
hsa-miR-574-3p	1	0	1	1	1	1	VEGFA	vascular endothelial growth factor A
hsa-miR-574-3p	0	0	1	1	0	0	SSX4B	synovial sarcoma, X breakpoint 4B
hsa-miR-574-3p	1	0	1	1	1	1	FAM3C	family with sequence similarity 3, member C
hsa-miR-574-3p	0	0	1	1	1	1	C6orf162	chromosome 6 open reading frame 162
hsa-miR-574-3p	1	0	1	1	1	1	FRS2	fibroblast growth factor receptor substrate 2
hsa-miR-574-3p	0	0	1	1	1	1	ZNF586	zinc finger protein 586
hsa-miR-574-3p	1	0	1	0	1	1	XIAP	X-linked inhibitor of apoptosis
hsa-miR-574-3p	1	0	1	0	1	1	CDK6	cyclin-dependent kinase 6
hsa-miR-574-3p	0	0	1	1	1	1	CCR1	chemokine (C-C motif) receptor 1
hsa-miR-574-3p	1	0	1	1	1	1	CTNND2	catenin (cadherin-associated protein), delta 2
hsa-miR-574-3p	1	0	1	1	1	1	EP300	E1A binding protein p300
hsa-miR-574-3p	1	0	1	1	1	1	NDST1	N-deacetylase/N-sulfotransferase (heparan glucosaminyl) 1
hsa-miR-574-3p	1	0	1	1	1	1	ARF3	ADP-ribosylation factor 3
hsa-miR-574-3p	1	0	1	1	1	1	ATP6V1A	ATPase, H+ transporting, lysosomal 70kDa, V1 subunit A
hsa-miR-574-3p	0	0	1	1	0	0	CDKN2D	cyclin-dependent kinase inhibitor 2D (p19, inhibits CDK4)
hsa-miR-574-3p	1	0	1	1	1	1	DUSP6	dual specificity phosphatase 6
hsa-miR-574-3p	1	0	1	1	1	1	E2F3	E2F transcription factor 3
hsa-miR-574-3p	0	0	1	1	1	1	GNAQ	guanine nucleotide binding protein (G protein), q polypeptide
hsa-miR-574-3p	0	0	1	1	1	1	GRN	granulin
hsa-miR-574-3p	0	0	1	1	1	1	GTF2E2	general transcription factor IIE, polypeptide 2, beta 34kDa
hsa-miR-574-3p	1	0	1	0	1	1	KIF3C	kinesin family member 3C
hsa-miR-574-3p	1	0	1	1	1	1	KPNB1	karyopherin (importin) beta 1
hsa-miR-574-3p	1	0	1	1	1	1	KPNA4	karyopherin alpha 4 (importin alpha 3)
hsa-miR-574-3p	1	0	1	1	1	1	SMARCC1	SWI/SNF related, matrix associated, actin dependent regulator of chromatin, subfamily c, member 1
hsa-miR-574-3p	1	0	1	1	1	1	SRF	serum response factor (c-fos serum response element-binding transcription factor)
hsa-miR-574-3p	0	0	1	1	0	0	SSX2	synovial sarcoma, X breakpoint 2
hsa-miR-574-3p	1	0	1	0	1	1	STC1	stanniocalcin 1
hsa-miR-574-3p	1	0	1	0	1	1	TAL1	T-cell acute lymphocytic leukemia 1
hsa-miR-574-3p	1	0	1	0	1	1	BSN	bassoon (presynaptic cytomatrix protein)
hsa-miR-574-3p	0	0	1	0	1	1	RHOB	ras homolog family member B
hsa-miR-574-3p	1	0	1	1	1	1	BCL2L2	BCL2-like 2
hsa-miR-574-3p	1	0	1	1	1	1	EFNB2	ephrin-B2
hsa-miR-574-3p	1	0	1	0	1	1	ACVR1B	activin A receptor, type IB
hsa-miR-574-3p	1	0	1	1	1	1	EGR3	early growth response 3
hsa-miR-574-3p	1	0	1	1	1	1	ENSA	endosulfine alpha
hsa-miR-574-3p	1	0	1	1	1	1	EPHB3	EPH receptor B3
hsa-miR-574-3p	0	0	1	1	1	1	NFATC3	nuclear factor of activated T-cells, cytoplasmic, calcineurin-dependent 3
hsa-miR-574-3p	1	0	1	0	1	1	PKNOX1	PBX/knotted 1 homeobox 1
hsa-miR-574-3p	1	0	1	1	1	1	TCF15	transcription factor 15 (basic helix-loop-helix)
hsa-miR-574-3p	0	0	1	0	1	1	BPY2	basic charge, Y-linked, 2
hsa-miR-574-3p	1	0	1	1	1	1	SYNGR1	synaptogyrin 1
hsa-miR-574-3p	1	0	1	0	1	1	MAPKAPK2	mitogen-activated protein kinase-activated protein kinase 2
hsa-miR-574-3p	1	0	1	1	1	1	B4GALT5	UDP-Gal:betaGlcNAc beta 1,4- galactosyltransferase, polypeptide 5
hsa-miR-574-3p	1	0	1	1	1	1	MED13	mediator complex subunit 13
hsa-miR-574-3p	1	0	1	0	1	1	E2F1	E2F transcription factor 1
hsa-miR-574-3p	0	0	1	0	1	1	FOSL2	FOS-like antigen 2
hsa-miR-574-3p	1	0	1	1	1	1	GFRA1	GDNF family receptor alpha 1
hsa-miR-574-3p	1	0	1	1	1	1	PHF2	PHD finger protein 2
hsa-miR-574-3p	1	0	1	0	1	1	SRC	v-src sarcoma (Schmidt-Ruppin A-2) viral oncogene homolog (avian)
hsa-miR-574-3p	1	0	1	0	1	1	CCDC6	coiled-coil domain containing 6
hsa-miR-574-3p	1	0	1	1	1	1	RND2	Rho family GTPase 2
hsa-miR-574-3p	1	0	1	1	1	1	GABBR2	gamma-aminobutyric acid (GABA) B receptor, 2
hsa-miR-574-3p	0	0	1	1	1	1	SSX1	synovial sarcoma, X breakpoint 1
hsa-miR-574-3p	0	0	1	1	0	0	SSX4	synovial sarcoma, X breakpoint 4
hsa-miR-574-3p	1	0	1	1	1	1	ACTR1A	ARP1 actin-related protein 1 homolog A, centractin alpha (yeast)
hsa-miR-574-3p	1	0	1	1	1	1	NAMPT	nicotinamide phosphoribosyltransferase
hsa-miR-574-3p	1	0	1	0	1	1	SPRY3	sprouty homolog 3 (Drosophila)
hsa-miR-574-3p	1	0	1	0	1	1	MAP1B	microtubule-associated protein 1B
hsa-miR-574-3p	1	0	1	1	1	1	MMP16	matrix metallopeptidase 16 (membrane-inserted)
hsa-miR-574-3p	1	0	1	1	1	1	DAGLA	diacylglycerol lipase, alpha
hsa-miR-574-3p	1	0	1	1	1	1	LASP1	LIM and SH3 protein 1
hsa-miR-574-3p	1	0	1	0	1	1	PITPNA	phosphatidylinositol transfer protein, alpha
hsa-miR-574-3p	0	0	1	1	0	0	PNOC	prepronociceptin
hsa-miR-574-3p	0	0	1	1	0	0	CCL19	chemokine (C-C motif) ligand 19
hsa-miR-574-3p	1	0	1	1	1	1	ZNF238	zinc finger protein 238
hsa-miR-574-3p	1	0	1	1	1	1	MMP24	matrix metallopeptidase 24 (membrane-inserted)
hsa-miR-574-3p	0	0	1	1	1	1	SYPL1	synaptophysin-like 1
hsa-miR-574-3p	0	0	1	1	1	1	PKIA	protein kinase (cAMP-dependent, catalytic) inhibitor alpha
hsa-miR-574-3p	1	0	1	0	1	1	CHP1	calcineurin-like EF hand protein 1
hsa-miR-574-3p	1	0	1	1	1	1	KLF12	Kruppel-like factor 12
hsa-miR-574-3p	0	0	1	1	1	1	TMED3	transmembrane emp24 protein transport domain containing 3
hsa-miR-574-3p	1	0	1	1	1	1	ELL2	elongation factor, RNA polymerase II, 2
hsa-miR-574-3p	0	0	1	0	1	1	SEMA3E	sema domain, immunoglobulin domain (Ig), short basic domain, secreted, (semaphorin) 3E
hsa-miR-574-3p	1	0	1	1	1	1	TLL2	tolloid-like 2
hsa-miR-574-3p	0	0	1	0	1	1	EMR2	egf-like module containing, mucin-like, hormone receptor-like 2
hsa-miR-574-3p	1	0	1	1	1	1	SLC7A11	solute carrier family 7 (anionic amino acid transporter light chain, xc- system), member 11
hsa-miR-574-3p	1	0	1	1	1	1	CSDC2	cold shock domain containing C2, RNA binding
hsa-miR-574-3p	1	0	1	0	1	1	HUNK	hormonally up-regulated Neu-associated kinase
hsa-miR-574-3p	1	0	1	1	1	1	RALGPS1	Ral GEF with PH domain and SH3 binding motif 1
hsa-miR-574-3p	1	0	1	1	1	1	KDM4A	lysine (K)-specific demethylase 4A
hsa-miR-574-3p	1	0	1	1	1	1	TBKBP1	TBK1 binding protein 1
hsa-miR-574-3p	1	0	1	0	1	1	TOMM20	translocase of outer mitochondrial membrane 20 homolog (yeast)
hsa-miR-574-3p	0	0	1	1	0	0	PCNXL2	pecanex-like 2 (Drosophila)
hsa-miR-574-3p	1	0	1	1	1	1	SV2A	synaptic vesicle glycoprotein 2A
hsa-miR-574-3p	1	0	1	1	1	1	ZCCHC14	zinc finger, CCHC domain containing 14
hsa-miR-574-3p	1	0	1	1	1	1	RCOR1	REST corepressor 1
hsa-miR-574-3p	0	0	1	1	0	0	SPEF1	sperm flagellar 1
hsa-miR-574-3p	1	0	1	1	1	1	RNF19A	ring finger protein 19A, E3 ubiquitin protein ligase
hsa-miR-574-3p	1	0	1	0	1	1	ERC2	ELKS/RAB6-interacting/CAST family member 2
hsa-miR-574-3p	1	0	1	1	1	1	PHF19	PHD finger protein 19
hsa-miR-574-3p	1	0	1	0	1	1	CNR1	cannabinoid receptor 1 (brain)
hsa-miR-574-3p	1	0	1	1	1	1	RNF138	ring finger protein 138, E3 ubiquitin protein ligase
hsa-miR-574-3p	1	0	1	0	1	1	SELT	selenoprotein T
hsa-miR-574-3p	1	0	1	0	1	1	CRIM1	cysteine rich transmembrane BMP regulator 1 (chordin-like)
hsa-miR-574-3p	1	0	1	0	1	1	KLHL3	kelch-like 3 (Drosophila)
hsa-miR-574-3p	0	0	1	0	1	1	WDR5	WD repeat domain 5
hsa-miR-574-3p	1	0	1	0	1	1	FAM46C	family with sequence similarity 46, member C
hsa-miR-574-3p	1	0	1	1	1	1	ZDHHC7	zinc finger, DHHC-type containing 7
hsa-miR-574-3p	1	0	1	1	1	1	WDYHV1	WDYHV motif containing 1
hsa-miR-574-3p	1	0	1	1	1	1	PACS1	phosphofurin acidic cluster sorting protein 1
hsa-miR-574-3p	1	0	1	1	1	1	RPRD1A	regulation of nuclear pre-mRNA domain containing 1A
hsa-miR-574-3p	1	0	1	1	1	1	NRP2	neuropilin 2
hsa-miR-574-3p	1	0	1	1	1	1	HOXA5	homeobox A5
hsa-miR-574-3p	1	0	1	1	1	1	USP31	ubiquitin specific peptidase 31
hsa-miR-574-3p	0	0	1	1	1	1	SSX3	synovial sarcoma, X breakpoint 3
hsa-miR-574-3p	0	0	1	1	0	0	SSX5	synovial sarcoma, X breakpoint 5
hsa-miR-574-3p	0	0	1	1	0	0	MAGEA5	melanoma antigen family A, 5
hsa-miR-574-3p	1	0	1	1	1	1	CRY2	cryptochrome 2 (photolyase-like)
hsa-miR-574-3p	0	0	1	1	1	1	GABBR1	gamma-aminobutyric acid (GABA) B receptor, 1
hsa-miR-574-3p	1	0	1	0	1	1	EDAR	ectodysplasin A receptor
hsa-miR-574-3p	0	0	1	1	1	1	GLIPR2	GLI pathogenesis-related 2
hsa-miR-574-3p	1	0	1	1	1	1	MESDC1	mesoderm development candidate 1
hsa-miR-574-3p	1	0	1	1	1	1	C6orf106	chromosome 6 open reading frame 106
hsa-miR-574-3p	1	0	1	1	1	1	RFX7	regulatory factor X, 7
hsa-miR-574-3p	1	0	1	1	1	1	REEP1	receptor accessory protein 1
hsa-miR-574-3p	0	0	1	0	1	1	KXD1	KxDL motif containing 1
hsa-miR-574-3p	0	0	1	1	1	1	WDR77	WD repeat domain 77
hsa-miR-574-3p	1	0	1	1	1	1	CCNJL	cyclin J-like
hsa-miR-574-3p	1	0	1	1	1	1	TMC7	transmembrane channel-like 7
hsa-miR-574-3p	1	0	1	1	0	0	PVRL4	poliovirus receptor-related 4
hsa-miR-574-3p	0	0	1	1	0	0	C11orf68	chromosome 11 open reading frame 68
hsa-miR-574-3p	0	0	1	1	0	0	C19orf44	chromosome 19 open reading frame 44
hsa-miR-574-3p	1	0	1	1	0	0	MAF1	MAF1 homolog (S. cerevisiae)
hsa-miR-574-3p	0	0	1	1	0	0	DNTTIP1	deoxynucleotidyltransferase, terminal, interacting protein 1
hsa-miR-574-3p	1	0	1	1	0	0	UNC5A	unc-5 homolog A (C. elegans)
hsa-miR-574-3p	1	0	1	0	1	1	NUS1	nuclear undecaprenyl pyrophosphate synthase 1 homolog (S. cerevisiae)
hsa-miR-574-3p	1	0	1	1	1	1	PKHD1	polycystic kidney and hepatic disease 1 (autosomal recessive)
hsa-miR-574-3p	1	0	1	1	1	1	BACE2	beta-site APP-cleaving enzyme 2
hsa-miR-574-3p	0	0	1	1	1	1	ADAMTS17	ADAM metallopeptidase with thrombospondin type 1 motif, 17
hsa-miR-574-3p	0	0	1	1	1	1	LONRF1	LON peptidase N-terminal domain and ring finger 1
hsa-miR-574-3p	1	0	1	0	1	1	UBXN10	UBX domain protein 10
hsa-miR-574-3p	0	0	1	1	0	0	DOK6	docking protein 6
hsa-miR-574-3p	0	0	1	1	1	1	CNPY4	canopy 4 homolog (zebrafish)
hsa-miR-574-3p	0	0	1	1	0	0	SSX6	synovial sarcoma, X breakpoint 6 (pseudogene)
hsa-miR-574-3p	0	0	1	1	1	1	CDRT4	CMT1A duplicated region transcript 4
hsa-miR-574-3p	0	0	1	1	0	0	TIGIT	T cell immunoreceptor with Ig and ITIM domains
hsa-miR-574-3p	1	0	1	1	1	1	UBR1	ubiquitin protein ligase E3 component n-recognin 1
hsa-miR-574-3p	0	0	1	1	1	1	ATPIF1	ATPase inhibitory factor 1
hsa-miR-574-3p	1	0	1	1	1	1	MARCH3	membrane-associated ring finger (C3HC4) 3, E3 ubiquitin protein ligase
hsa-miR-574-3p	0	0	1	0	1	1	FAM169B	family with sequence similarity 169, member B
hsa-miR-574-3p	1	0	1	1	1	1	ADAMTS6	ADAM metallopeptidase with thrombospondin type 1 motif, 6
hsa-miR-574-3p	0	0	1	1	0	0	TMEM173	transmembrane protein 173
hsa-miR-574-3p	1	0	1	0	1	1	PRICKLE2	prickle homolog 2 (Drosophila)
hsa-miR-574-3p	1	0	1	1	1	1	STAC2	SH3 and cysteine rich domain 2
hsa-miR-574-3p	0	0	1	1	0	0	C9orf169	chromosome 9 open reading frame 169
hsa-miR-574-3p	0	0	1	1	1	1	SERTM1	serine-rich and transmembrane domain containing 1
hsa-miR-574-3p	0	0	1	1	1	1	FLJ45983	uncharacterized LOC399717
hsa-miR-574-3p	0	0	1	1	0	0	TTTY8	testis-specific transcript, Y-linked 8 (non-protein coding)
hsa-miR-574-3p	0	0	1	0	0	0	SNORA3	small nucleolar RNA, H/ACA box 3
hsa-miR-574-3p	0	0	1	0	0	0	SNORD96A	small nucleolar RNA, C/D box 96A
hsa-miR-574-3p	0	0	1	0	0	0	PYY2	peptide YY, 2 (pseudogene)
hsa-miR-574-3p	0	0	1	1	0	0	STK19	serine/threonine kinase 19
hsa-miR-574-3p	1	0	1	1	0	0	FGFR3	fibroblast growth factor receptor 3
hsa-miR-574-3p	0	0	1	1	1	1	FUCA2	fucosidase, alpha-L- 2, plasma
hsa-miR-574-3p	1	0	1	1	1	1	DVL2	dishevelled, dsh homolog 2 (Drosophila)
hsa-miR-574-3p	0	0	0	1	0	0	PRR5-ARHGAP8	PRR5-ARHGAP8 readthrough
hsa-miR-574-3p	0	0	1	1	0	0	PRR5	proline rich 5 (renal)
hsa-miR-574-3p	0	0	1	1	0	0	ARHGAP8	Rho GTPase activating protein 8
hsa-miR-574-3p	1	0	1	1	1	1	OSBPL7	oxysterol binding protein-like 7
hsa-miR-574-3p	0	0	0	1	0	0	LRRC23	leucine rich repeat containing 23
hsa-miR-574-3p	0	0	1	1	0	0	CPA1	carboxypeptidase A1 (pancreatic)
hsa-miR-574-3p	0	0	1	1	1	1	GRIPAP1	GRIP1 associated protein 1
hsa-miR-574-3p	1	0	1	1	0	0	SLC45A4	solute carrier family 45, member 4
hsa-miR-574-3p	1	0	1	1	1	1	CDC27	cell division cycle 27 homolog (S. cerevisiae)
hsa-miR-574-3p	0	0	0	1	0	0	CECR5	cat eye syndrome chromosome region, candidate 5
hsa-miR-574-3p	0	0	1	1	1	1	AQR	aquarius homolog (mouse)
hsa-miR-574-3p	1	0	1	1	1	1	PANX2	pannexin 2
hsa-miR-574-3p	1	0	0	1	1	1	NADK	NAD kinase
hsa-miR-574-3p	1	0	1	1	1	1	EPHA8	EPH receptor A8
hsa-miR-574-3p	0	0	0	1	1	1	C4orf6	chromosome 4 open reading frame 6
hsa-miR-574-3p	0	0	0	1	0	0	GSTP1	glutathione S-transferase pi 1
hsa-miR-574-3p	0	0	0	1	0	0	IGSF9	immunoglobulin superfamily, member 9
hsa-miR-574-3p	1	0	1	1	1	1	TRMT6	tRNA methyltransferase 6 homolog (S. cerevisiae)
hsa-miR-574-3p	0	0	1	1	1	1	KRT23	keratin 23 (histone deacetylase inducible)
hsa-miR-574-3p	1	0	1	1	1	1	STX1B	syntaxin 1B
hsa-miR-574-3p	0	0	0	1	0	0	POLRMT	polymerase (RNA) mitochondrial (DNA directed)
hsa-miR-574-3p	0	0	1	1	1	1	DMC1	DMC1 dosage suppressor of mck1 homolog, meiosis-specific homologous recombination (yeast)
hsa-miR-574-3p	0	0	1	1	0	0	CBY1	chibby homolog 1 (Drosophila)
hsa-miR-574-3p	0	0	0	1	0	0	RTDR1	rhabdoid tumor deletion region gene 1
hsa-miR-574-3p	1	0	1	1	1	1	SMCR7L	Smith-Magenis syndrome chromosome region, candidate 7-like
hsa-miR-574-3p	1	0	1	1	1	1	FAM118A	family with sequence similarity 118, member A
hsa-miR-574-3p	0	0	1	1	1	1	PABPN1	poly(A) binding protein, nuclear 1
hsa-miR-574-3p	0	0	1	1	0	0	CPNE6	copine VI (neuronal)
hsa-miR-574-3p	0	0	1	1	0	0	MYBL2	v-myb myeloblastosis viral oncogene homolog (avian)-like 2
hsa-miR-574-3p	0	0	0	1	0	0	CTSZ	cathepsin Z
hsa-miR-574-3p	0	0	1	1	1	1	SLCO4A1	solute carrier organic anion transporter family, member 4A1
hsa-miR-574-3p	0	0	1	1	1	1	F9	coagulation factor IX
hsa-miR-574-3p	0	0	0	1	0	0	RENBP	renin binding protein
hsa-miR-574-3p	1	0	0	1	1	1	SGCG	sarcoglycan, gamma (35kDa dystrophin-associated glycoprotein)
hsa-miR-574-3p	0	0	0	1	0	0	ACSM1	acyl-CoA synthetase medium-chain family member 1
hsa-miR-574-3p	1	0	1	1	1	1	HMOX2	heme oxygenase (decycling) 2
hsa-miR-574-3p	0	0	0	1	0	0	VPS18	vacuolar protein sorting 18 homolog (S. cerevisiae)
hsa-miR-574-3p	0	0	0	1	0	0	PAF1	Paf1, RNA polymerase II associated factor, homolog (S. cerevisiae)
hsa-miR-574-3p	1	0	1	1	0	0	RUVBL2	RuvB-like 2 (E. coli)
hsa-miR-574-3p	0	0	1	1	0	0	PPP1R37	protein phosphatase 1, regulatory subunit 37
hsa-miR-574-3p	1	0	1	1	0	0	DOT1L	DOT1-like, histone H3 methyltransferase (S. cerevisiae)
hsa-miR-574-3p	0	0	0	1	1	1	ZIM2	zinc finger, imprinted 2
hsa-miR-574-3p	0	0	1	1	1	1	PEG3	paternally expressed 3
hsa-miR-574-3p	0	0	0	1	1	1	EPHX3	epoxide hydrolase 3
hsa-miR-574-3p	0	0	0	1	0	0	NKG7	natural killer cell group 7 sequence
hsa-miR-574-3p	1	0	1	1	0	0	RASIP1	Ras interacting protein 1
hsa-miR-574-3p	0	0	1	1	1	1	RAB3A	RAB3A, member RAS oncogene family
hsa-miR-574-3p	0	0	0	1	0	0	SMG9	smg-9 homolog, nonsense mediated mRNA decay factor (C. elegans)
hsa-miR-574-3p	1	0	1	1	0	0	STX1A	syntaxin 1A (brain)
hsa-miR-574-3p	0	0	1	1	1	1	TNFSF8	tumor necrosis factor (ligand) superfamily, member 8
hsa-miR-574-3p	0	0	1	1	1	1	GDF10	growth differentiation factor 10
hsa-miR-574-3p	0	0	1	1	0	0	PITRM1	pitrilysin metallopeptidase 1
hsa-miR-574-3p	1	0	0	1	1	1	WNT3	wingless-type MMTV integration site family, member 3
hsa-miR-574-3p	0	0	0	1	0	0	RCVRN	recoverin
hsa-miR-574-3p	1	0	1	1	1	1	WFS1	Wolfram syndrome 1 (wolframin)
hsa-miR-574-3p	1	0	1	1	0	0	ATG2A	autophagy related 2A
hsa-miR-574-3p	1	0	1	1	0	0	DGAT2	diacylglycerol O-acyltransferase 2
hsa-miR-574-3p	0	0	1	1	1	1	USP5	ubiquitin specific peptidase 5 (isopeptidase T)
hsa-miR-574-3p	0	0	1	1	1	1	GPR63	G protein-coupled receptor 63
hsa-miR-574-3p	1	0	1	1	0	0	IRX4	iroquois homeobox 4
hsa-miR-574-3p	0	0	1	1	1	1	EIF1B	eukaryotic translation initiation factor 1B
hsa-miR-574-3p	0	0	1	1	0	0	WBP1	WW domain binding protein 1
hsa-miR-574-3p	0	0	1	1	0	0	INO80B	INO80 complex subunit B
hsa-miR-574-3p	0	0	1	1	0	0	FAM82A1	family with sequence similarity 82, member A1
hsa-miR-574-3p	0	0	0	1	0	0	AKR7A2	aldo-keto reductase family 7, member A2 (aflatoxin aldehyde reductase)
hsa-miR-574-3p	0	0	1	1	1	1	MYL12B	myosin, light chain 12B, regulatory
hsa-miR-574-3p	0	0	1	1	0	0	CMYA5	cardiomyopathy associated 5
hsa-miR-574-3p	1	0	1	1	1	1	GPR68	G protein-coupled receptor 68
hsa-miR-574-3p	1	0	1	1	0	0	ST3GAL4	ST3 beta-galactoside alpha-2,3-sialyltransferase 4
hsa-miR-574-3p	1	0	1	1	1	1	TEX14	testis expressed 14
hsa-miR-574-3p	0	0	1	1	0	0	GHRHR	growth hormone releasing hormone receptor
hsa-miR-574-3p	0	0	1	1	1	1	HOXA7	homeobox A7
hsa-miR-574-3p	0	0	1	1	0	0	SNRPA	small nuclear ribonucleoprotein polypeptide A
hsa-miR-574-3p	0	0	1	1	0	0	WFDC3	WAP four-disulfide core domain 3
hsa-miR-574-3p	0	0	0	1	0	0	ARHGAP40	Rho GTPase activating protein 40
hsa-miR-574-3p	1	0	1	1	1	1	HIF3A	hypoxia inducible factor 3, alpha subunit
hsa-miR-574-3p	1	0	1	1	1	1	ATXN1	ataxin 1
hsa-miR-574-3p	0	0	1	1	0	0	TRMT2B	tRNA methyltransferase 2 homolog B (S. cerevisiae)
hsa-miR-574-3p	0	0	1	1	0	0	CD70	CD70 molecule
hsa-miR-574-3p	0	0	0	1	0	0	TNFSF14	tumor necrosis factor (ligand) superfamily, member 14
hsa-miR-574-3p	0	0	1	1	1	1	ZNF598	zinc finger protein 598
hsa-miR-574-3p	0	0	1	1	0	0	VIL1	villin 1
hsa-miR-574-3p	0	0	1	1	0	0	STYXL1	serine/threonine/tyrosine interacting-like 1
hsa-miR-574-3p	0	0	1	1	0	0	PMS2P3	postmeiotic segregation increased 2 pseudogene 3
hsa-miR-574-3p	1	0	1	1	0	0	SDF2L1	stromal cell-derived factor 2-like 1
hsa-miR-574-3p	0	0	1	1	1	1	NAA38	N(alpha)-acetyltransferase 38, NatC auxiliary subunit
hsa-miR-574-3p	0	0	0	1	0	0	MRM1	mitochondrial rRNA methyltransferase 1 homolog (S. cerevisiae)
hsa-miR-574-3p	0	0	0	1	1	1	AP1M2	adaptor-related protein complex 1, mu 2 subunit
hsa-miR-574-3p	0	0	0	1	0	0	KLK9	kallikrein-related peptidase 9
hsa-miR-574-3p	0	0	0	1	1	1	EAPP	E2F-associated phosphoprotein
hsa-miR-574-3p	0	0	0	1	0	0	PBX4	pre-B-cell leukemia homeobox 4
hsa-miR-574-3p	0	0	1	1	0	0	ALOX12	arachidonate 12-lipoxygenase
hsa-miR-574-3p	0	0	0	1	0	0	ADAMTS2	ADAM metallopeptidase with thrombospondin type 1 motif, 2
hsa-miR-574-3p	0	0	1	1	0	0	KRT33B	keratin 33B
hsa-miR-574-3p	0	0	0	1	0	0	DDX11	DEAD/H (Asp-Glu-Ala-Asp/His) box helicase 11
hsa-miR-574-3p	0	0	1	1	1	1	TRPC4AP	transient receptor potential cation channel, subfamily C, member 4 associated protein
hsa-miR-574-3p	0	0	0	1	0	0	TYMP	thymidine phosphorylase
hsa-miR-574-3p	0	0	0	1	0	0	APOC4	apolipoprotein C-IV
hsa-miR-574-3p	1	0	1	1	1	1	NCAN	neurocan
hsa-miR-574-3p	0	0	0	1	0	0	PLVAP	plasmalemma vesicle associated protein
hsa-miR-574-3p	0	0	0	1	0	0	USHBP1	Usher syndrome 1C binding protein 1
hsa-miR-574-3p	1	0	1	1	0	0	ANGPTL6	angiopoietin-like 6
hsa-miR-574-3p	0	0	1	1	0	0	BPIFB1	BPI fold containing family B, member 1
hsa-miR-574-3p	0	0	0	1	1	1	PRDM9	PR domain containing 9
hsa-miR-574-3p	0	0	0	1	0	0	FBXW9	F-box and WD repeat domain containing 9
hsa-miR-574-3p	0	0	0	1	1	1	GAS2L2	growth arrest-specific 2 like 2
hsa-miR-574-3p	0	0	1	1	0	0	RAMP1	receptor (G protein-coupled) activity modifying protein 1
hsa-miR-574-3p	0	0	1	1	0	0	SLC2A11	solute carrier family 2 (facilitated glucose transporter), member 11
hsa-miR-574-3p	0	0	1	1	1	1	ACTR3B	ARP3 actin-related protein 3 homolog B (yeast)
hsa-miR-574-3p	1	0	1	1	1	1	MRO	maestro
hsa-miR-574-3p	0	0	1	1	1	1	MIP	major intrinsic protein of lens fiber
hsa-miR-574-3p	1	0	1	1	1	1	PRADC1	protease-associated domain containing 1
hsa-miR-574-3p	0	0	0	1	0	0	FBXL8	F-box and leucine-rich repeat protein 8
hsa-miR-574-3p	0	0	1	1	1	1	URB2	URB2 ribosome biogenesis 2 homolog (S. cerevisiae)
hsa-miR-574-3p	0	0	1	1	0	0	GPR45	G protein-coupled receptor 45
hsa-miR-574-3p	1	0	1	1	1	1	NEK3	NIMA (never in mitosis gene a)-related kinase 3
hsa-miR-574-3p	0	0	0	1	1	1	TACO1	translational activator of mitochondrially encoded cytochrome c oxidase I
hsa-miR-574-3p	0	0	1	1	0	0	TMEM62	transmembrane protein 62
hsa-miR-574-3p	1	0	0	1	1	1	CENPO	centromere protein O
hsa-miR-574-3p	1	0	1	1	1	1	GALC	galactosylceramidase
hsa-miR-574-3p	1	0	0	1	0	0	LHX5	LIM homeobox 5
hsa-miR-574-3p	1	0	1	1	1	1	CYP46A1	cytochrome P450, family 46, subfamily A, polypeptide 1
hsa-miR-574-3p	0	0	1	1	0	0	SGCA	sarcoglycan, alpha (50kDa dystrophin-associated glycoprotein)
hsa-miR-574-3p	0	0	0	1	0	0	MYOM2	myomesin (M-protein) 2, 165kDa
hsa-miR-574-3p	1	0	1	1	1	1	VMP1	vacuole membrane protein 1
hsa-miR-574-3p	0	0	1	1	0	0	ITGA2B	integrin, alpha 2b (platelet glycoprotein IIb of IIb/IIIa complex, antigen CD41)
hsa-miR-574-3p	0	0	1	1	1	1	INVS	inversin
hsa-miR-574-3p	0	0	0	1	0	0	RPL8	ribosomal protein L8
hsa-miR-574-3p	0	0	0	1	0	0	MOV10L1	Mov10l1, Moloney leukemia virus 10-like 1, homolog (mouse)
hsa-miR-574-3p	1	0	1	1	1	1	ELL	elongation factor RNA polymerase II
hsa-miR-574-3p	1	0	1	1	1	1	CSE1L	CSE1 chromosome segregation 1-like (yeast)
hsa-miR-574-3p	1	0	1	1	1	1	TFAP2B	transcription factor AP-2 beta (activating enhancer binding protein 2 beta)
hsa-miR-574-3p	0	0	0	1	0	0	ABCA7	ATP-binding cassette, sub-family A (ABC1), member 7
hsa-miR-574-3p	0	0	1	1	0	0	ARVCF	armadillo repeat gene deleted in velocardiofacial syndrome
hsa-miR-574-3p	1	0	1	1	0	0	SYP	synaptophysin
hsa-miR-574-3p	0	0	1	1	0	0	AP2S1	adaptor-related protein complex 2, sigma 1 subunit
hsa-miR-574-3p	0	0	0	1	0	0	LIG1	ligase I, DNA, ATP-dependent
hsa-miR-574-3p	0	0	1	1	1	1	GLTSCR1	glioma tumor suppressor candidate region gene 1
hsa-miR-574-3p	0	0	1	1	0	0	CD81	CD81 molecule
hsa-miR-574-3p	1	0	1	1	0	0	OSBPL5	oxysterol binding protein-like 5
hsa-miR-574-3p	0	0	0	1	0	0	NDUFS3	NADH dehydrogenase (ubiquinone) Fe-S protein 3, 30kDa (NADH-coenzyme Q reductase)
hsa-miR-574-3p	0	0	1	1	0	0	LTK	leukocyte receptor tyrosine kinase
hsa-miR-574-3p	0	0	0	1	0	0	CAPG	capping protein (actin filament), gelsolin-like
hsa-miR-574-3p	1	0	0	1	1	1	MFN1	mitofusin 1
hsa-miR-574-3p	1	0	1	1	1	1	UPK1B	uroplakin 1B
hsa-miR-574-3p	1	0	1	1	0	0	GSK3B	glycogen synthase kinase 3 beta
hsa-miR-574-3p	0	0	1	1	1	1	TIMMDC1	translocase of inner mitochondrial membrane domain containing 1
hsa-miR-574-3p	0	0	1	1	1	1	RIOK1	RIO kinase 1 (yeast)
hsa-miR-574-3p	0	0	1	1	0	0	WDR70	WD repeat domain 70
hsa-miR-574-3p	0	0	1	1	0	0	POR	P450 (cytochrome) oxidoreductase
hsa-miR-574-3p	0	0	1	1	1	1	TAX1BP1	Tax1 (human T-cell leukemia virus type I) binding protein 1
hsa-miR-574-3p	0	0	1	1	0	0	EXOSC7	exosome component 7
hsa-miR-574-3p	0	0	0	1	1	1	CCDC65	coiled-coil domain containing 65
hsa-miR-574-3p	1	0	0	1	1	1	ACVRL1	activin A receptor type II-like 1
hsa-miR-574-3p	0	0	1	1	1	1	FAM181A	family with sequence similarity 181, member A
hsa-miR-574-3p	0	0	1	1	1	1	TSPAN3	tetraspanin 3
hsa-miR-574-3p	0	0	0	1	0	0	MFGE8	milk fat globule-EGF factor 8 protein
hsa-miR-574-3p	0	0	1	1	1	1	SEC11A	SEC11 homolog A (S. cerevisiae)
hsa-miR-574-3p	0	0	1	1	0	0	CLEC18B	C-type lectin domain family 18, member B
hsa-miR-574-3p	0	0	1	1	0	0	NDUFB10	NADH dehydrogenase (ubiquinone) 1 beta subcomplex, 10, 22kDa
hsa-miR-574-3p	0	0	0	1	1	1	NOB1	NIN1/RPN12 binding protein 1 homolog (S. cerevisiae)
hsa-miR-574-3p	1	0	1	1	1	1	RASL10B	RAS-like, family 10, member B
hsa-miR-574-3p	1	0	1	1	1	1	CBX8	chromobox homolog 8
hsa-miR-574-3p	0	0	0	1	0	0	PPAP2C	phosphatidic acid phosphatase type 2C
hsa-miR-574-3p	0	0	1	1	0	0	WTIP	Wilms tumor 1 interacting protein
hsa-miR-574-3p	0	0	0	1	1	1	C19orf52	chromosome 19 open reading frame 52
hsa-miR-574-3p	0	0	0	1	0	0	ECSIT	ECSIT homolog (Drosophila)
hsa-miR-574-3p	1	0	0	1	0	0	PGD	phosphogluconate dehydrogenase
hsa-miR-574-3p	1	0	1	1	1	1	C1orf216	chromosome 1 open reading frame 216
hsa-miR-574-3p	0	0	0	1	0	0	FAM176B	family with sequence similarity 176, member B
hsa-miR-574-3p	0	0	0	1	0	0	ADAMTSL4	ADAMTS-like 4
hsa-miR-574-3p	0	0	1	1	1	1	ANKRD53	ankyrin repeat domain 53
hsa-miR-574-3p	0	0	0	1	0	0	CPO	carboxypeptidase O
hsa-miR-574-3p	1	0	1	1	1	1	ABCA12	ATP-binding cassette, sub-family A (ABC1), member 12
hsa-miR-574-3p	0	0	1	1	1	1	TM4SF19	transmembrane 4 L six family member 19
hsa-miR-574-3p	1	0	1	1	0	0	EIF2B5	eukaryotic translation initiation factor 2B, subunit 5 epsilon, 82kDa
hsa-miR-574-3p	0	0	0	1	1	1	HERC6	HECT and RLD domain containing E3 ubiquitin protein ligase family member 6
hsa-miR-574-3p	0	0	0	1	1	1	SPATA5	spermatogenesis associated 5
hsa-miR-574-3p	1	0	1	1	1	1	ZMAT2	zinc finger, matrin-type 2
hsa-miR-574-3p	0	0	1	1	0	0	PNLDC1	poly(A)-specific ribonuclease (PARN)-like domain containing 1
hsa-miR-574-3p	1	0	1	1	1	1	ESYT2	extended synaptotagmin-like protein 2
hsa-miR-574-3p	0	0	1	1	0	0	POMZP3	POM121 and ZP3 fusion
hsa-miR-574-3p	0	0	0	1	0	0	FRMPD3	FERM and PDZ domain containing 3
hsa-miR-574-3p	1	0	0	1	1	1	C10orf47	chromosome 10 open reading frame 47
hsa-miR-574-3p	0	0	1	1	0	0	PAOX	polyamine oxidase (exo-N4-amino)
hsa-miR-574-3p	1	0	1	1	1	1	ADM	adrenomedullin
hsa-miR-574-3p	0	0	0	1	0	0	OR5F1	olfactory receptor, family 5, subfamily F, member 1
hsa-miR-574-3p	0	0	1	1	1	1	SLC43A1	solute carrier family 43, member 1
hsa-miR-574-3p	0	0	1	1	0	0	RPS3	ribosomal protein S3
hsa-miR-574-3p	0	0	0	1	0	0	C20orf78	chromosome 20 open reading frame 78
hsa-miR-574-3p	0	0	1	1	1	1	MTA2	metastasis associated 1 family, member 2
hsa-miR-574-3p	1	0	1	1	1	1	SNPH	syntaphilin
hsa-miR-574-3p	1	0	1	1	0	0	PPP4C	protein phosphatase 4, catalytic subunit
hsa-miR-574-3p	1	0	1	1	1	1	TMEM218	transmembrane protein 218
hsa-miR-574-3p	0	0	1	1	1	1	MIA2	melanoma inhibitory activity 2
hsa-miR-574-3p	0	0	0	1	0	0	DCP1B	DCP1 decapping enzyme homolog B (S. cerevisiae)
hsa-miR-574-3p	0	0	1	1	1	1	CDC123	cell division cycle 123 homolog (S. cerevisiae)
hsa-miR-574-3p	0	0	1	1	1	1	G6PC2	glucose-6-phosphatase, catalytic, 2
hsa-miR-574-3p	1	0	1	1	1	1	GJA1	gap junction protein, alpha 1, 43kDa
hsa-miR-574-3p	1	0	1	1	1	1	BMP3	bone morphogenetic protein 3
hsa-miR-574-3p	0	0	1	1	0	0	FEZF2	FEZ family zinc finger 2
hsa-miR-574-3p	1	0	1	1	1	1	GDPD1	glycerophosphodiester phosphodiesterase domain containing 1
hsa-miR-574-3p	1	0	1	1	1	1	CHST9	carbohydrate (N-acetylgalactosamine 4-0) sulfotransferase 9
hsa-miR-574-3p	1	0	1	1	1	1	TOMM70A	translocase of outer mitochondrial membrane 70 homolog A (S. cerevisiae)
hsa-miR-574-3p	0	0	1	1	0	0	ATP5J	ATP synthase, H+ transporting, mitochondrial Fo complex, subunit F6
hsa-miR-574-3p	0	0	1	1	0	0	OTOA	otoancorin
hsa-miR-574-3p	0	0	0	1	0	0	MED7	mediator complex subunit 7
hsa-miR-574-3p	0	0	1	1	1	1	SLC28A1	solute carrier family 28 (sodium-coupled nucleoside transporter), member 1
hsa-miR-574-3p	0	0	1	1	1	1	TDRD9	tudor domain containing 9
hsa-miR-574-3p	0	0	1	1	0	0	AIFM1	apoptosis-inducing factor, mitochondrion-associated, 1
hsa-miR-574-3p	1	0	1	1	0	0	FBRS	fibrosin
hsa-miR-574-3p	0	0	1	1	0	0	CLEC18A	C-type lectin domain family 18, member A
hsa-miR-574-3p	0	0	1	1	0	0	MX1	myxovirus (influenza virus) resistance 1, interferon-inducible protein p78 (mouse)
hsa-miR-574-3p	1	0	1	1	1	1	ZNF618	zinc finger protein 618
hsa-miR-574-3p	0	0	1	1	1	1	RAB28	RAB28, member RAS oncogene family
hsa-miR-574-3p	0	0	0	1	1	1	WDR66	WD repeat domain 66
hsa-miR-574-3p	1	0	1	1	1	1	DUSP2	dual specificity phosphatase 2
hsa-miR-574-3p	0	0	0	1	0	0	CDH15	cadherin 15, type 1, M-cadherin (myotubule)
hsa-miR-574-3p	0	0	1	1	0	0	SPATA2L	spermatogenesis associated 2-like
hsa-miR-574-3p	1	0	1	1	0	0	PSKH1	protein serine kinase H1
hsa-miR-574-3p	0	0	0	1	0	0	CILP2	cartilage intermediate layer protein 2
hsa-miR-574-3p	0	0	0	1	0	0	RSPH1	radial spoke head 1 homolog (Chlamydomonas)
hsa-miR-574-3p	0	0	0	1	0	0	RRP1	ribosomal RNA processing 1 homolog (S. cerevisiae)
hsa-miR-574-3p	1	0	0	1	1	1	CACFD1	calcium channel flower domain containing 1
hsa-miR-574-3p	0	0	1	1	0	0	NCR1	natural cytotoxicity triggering receptor 1
hsa-miR-574-3p	0	0	0	1	1	1	NLRP8	NLR family, pyrin domain containing 8
hsa-miR-574-3p	1	0	0	1	0	0	NBEAL2	neurobeachin-like 2
hsa-miR-574-3p	0	0	1	1	0	0	CCDC12	coiled-coil domain containing 12
hsa-miR-574-3p	1	0	1	1	0	0	HK3	hexokinase 3 (white cell)
hsa-miR-574-3p	0	0	0	1	0	0	CCDC130	coiled-coil domain containing 130
hsa-miR-574-3p	0	0	0	1	0	0	LY6E	lymphocyte antigen 6 complex, locus E
hsa-miR-574-3p	0	0	0	1	1	1	FDXR	ferredoxin reductase
hsa-miR-574-3p	0	0	1	1	0	0	ALDH16A1	aldehyde dehydrogenase 16 family, member A1
hsa-miR-574-3p	0	0	1	1	0	0	LUC7L	LUC7-like (S. cerevisiae)
hsa-miR-574-3p	0	0	1	1	1	1	JMJD8	jumonji domain containing 8
hsa-miR-574-3p	0	0	0	1	0	0	CYP4A22	cytochrome P450, family 4, subfamily A, polypeptide 22
hsa-miR-574-3p	0	0	0	1	1	1	ZNF496	zinc finger protein 496
hsa-miR-574-3p	1	0	1	1	1	1	LRRTM1	leucine rich repeat transmembrane neuronal 1
hsa-miR-574-3p	0	0	1	1	0	0	DPY30	dpy-30 homolog (C. elegans)
hsa-miR-574-3p	1	0	1	1	1	1	SLC16A14	solute carrier family 16, member 14 (monocarboxylic acid transporter 14)
hsa-miR-574-3p	1	0	1	1	1	1	EN1	engrailed homeobox 1
hsa-miR-574-3p	1	0	1	1	1	1	STK36	serine/threonine kinase 36
hsa-miR-574-3p	0	0	1	1	1	1	GYG1	glycogenin 1
hsa-miR-574-3p	1	0	1	1	0	0	RPN1	ribophorin I
hsa-miR-574-3p	0	0	0	1	1	1	WDR65	WD repeat domain 65
hsa-miR-574-3p	1	0	1	1	1	1	FOXQ1	forkhead box Q1
hsa-miR-574-3p	0	0	0	1	0	0	GPER	G protein-coupled estrogen receptor 1
hsa-miR-574-3p	0	0	1	1	0	0	TMC1	transmembrane channel-like 1
hsa-miR-574-3p	0	0	1	1	0	0	RNF183	ring finger protein 183
hsa-miR-574-3p	0	0	1	1	1	1	MELK	maternal embryonic leucine zipper kinase
hsa-miR-574-3p	1	0	1	1	1	1	WDFY2	WD repeat and FYVE domain containing 2
hsa-miR-574-3p	1	0	1	1	1	1	NAA30	N(alpha)-acetyltransferase 30, NatC catalytic subunit
hsa-miR-574-3p	0	0	1	1	0	0	SOHLH1	spermatogenesis and oogenesis specific basic helix-loop-helix 1
hsa-miR-574-3p	1	0	1	1	1	1	LARP6	La ribonucleoprotein domain family, member 6
hsa-miR-574-3p	0	0	1	1	1	1	MMP3	matrix metallopeptidase 3 (stromelysin 1, progelatinase)
hsa-miR-574-3p	0	0	0	1	1	1	ZNF211	zinc finger protein 211
hsa-miR-574-3p	0	0	1	1	0	0	SCNN1G	sodium channel, non-voltage-gated 1, gamma subunit
hsa-miR-574-3p	1	0	1	1	1	1	RBPMS2	RNA binding protein with multiple splicing 2
hsa-miR-574-3p	0	0	1	1	1	1	MRPL16	mitochondrial ribosomal protein L16
hsa-miR-574-3p	1	0	1	1	1	1	GREM1	gremlin 1
hsa-miR-574-3p	0	0	1	1	0	0	SLC26A10	solute carrier family 26, member 10
hsa-miR-574-3p	0	0	1	1	1	1	ARHGEF25	Rho guanine nucleotide exchange factor (GEF) 25
hsa-miR-574-3p	0	0	1	1	1	1	HERPUD1	homocysteine-inducible, endoplasmic reticulum stress-inducible, ubiquitin-like domain member 1
hsa-miR-574-3p	0	0	0	1	0	0	BPIFC	BPI fold containing family C
hsa-miR-574-3p	0	0	0	1	0	0	PROCA1	protein interacting with cyclin A1
hsa-miR-574-3p	0	0	0	1	0	0	TP53I13	tumor protein p53 inducible protein 13
hsa-miR-574-3p	0	0	1	1	1	1	RHEBL1	Ras homolog enriched in brain like 1
hsa-miR-574-3p	0	0	0	1	1	1	SEMA6B	sema domain, transmembrane domain (TM), and cytoplasmic domain, (semaphorin) 6B
hsa-miR-574-3p	0	0	0	1	1	1	GLOD4	glyoxalase domain containing 4
hsa-miR-574-3p	0	0	1	1	0	0	PRDX2	peroxiredoxin 2
hsa-miR-574-3p	0	0	1	1	0	0	TMEM88	transmembrane protein 88
hsa-miR-574-3p	0	0	1	1	0	0	TMC8	transmembrane channel-like 8
hsa-miR-574-3p	0	0	1	1	0	0	VPS37C	vacuolar protein sorting 37 homolog C (S. cerevisiae)
hsa-miR-574-3p	0	0	1	1	0	0	FGB	fibrinogen beta chain
hsa-miR-574-3p	0	0	1	1	0	0	PDILT	protein disulfide isomerase-like, testis expressed
hsa-miR-574-3p	1	0	1	1	1	1	ZNF25	zinc finger protein 25
hsa-miR-574-3p	0	0	1	1	0	0	CDK5R2	cyclin-dependent kinase 5, regulatory subunit 2 (p39)
hsa-miR-574-3p	0	0	0	1	0	0	OR8J1	olfactory receptor, family 8, subfamily J, member 1
hsa-miR-574-3p	0	0	1	1	0	0	POP7	processing of precursor 7, ribonuclease P/MRP subunit (S. cerevisiae)
hsa-miR-574-3p	0	0	0	1	0	0	OR10G3	olfactory receptor, family 10, subfamily G, member 3
hsa-miR-574-3p	1	0	1	1	0	0	EGLN2	egl nine homolog 2 (C. elegans)
hsa-miR-574-3p	1	0	1	1	1	1	GPRIN1	G protein regulated inducer of neurite outgrowth 1
hsa-miR-574-3p	0	0	1	1	0	0	FAM110A	family with sequence similarity 110, member A
hsa-miR-574-3p	0	0	0	1	0	0	C11orf24	chromosome 11 open reading frame 24
hsa-miR-574-3p	0	0	1	1	0	0	SLC6A19	solute carrier family 6 (neutral amino acid transporter), member 19
hsa-miR-574-3p	1	0	1	1	1	1	IL13	interleukin 13
hsa-miR-574-3p	0	0	1	1	1	1	DSCAM	Down syndrome cell adhesion molecule
hsa-miR-574-3p	0	0	0	1	0	0	C14orf183	chromosome 14 open reading frame 183
hsa-miR-574-3p	1	0	1	1	0	0	C15orf27	chromosome 15 open reading frame 27
hsa-miR-574-3p	0	0	0	1	0	0	DEGS2	delta(4)-desaturase, sphingolipid 2
hsa-miR-574-3p	0	0	0	1	0	0	DTYMK	deoxythymidylate kinase (thymidylate kinase)
hsa-miR-574-3p	1	0	1	1	1	1	ONECUT1	one cut homeobox 1
hsa-miR-574-3p	0	0	0	1	0	0	MGMT	O-6-methylguanine-DNA methyltransferase
hsa-miR-574-3p	0	0	1	1	0	0	USP19	ubiquitin specific peptidase 19
hsa-miR-574-3p	1	0	1	1	1	1	IBTK	inhibitor of Bruton agammaglobulinemia tyrosine kinase
hsa-miR-574-3p	0	0	0	1	1	1	ZNF17	zinc finger protein 17
hsa-miR-574-3p	0	0	0	1	0	0	THOP1	thimet oligopeptidase 1
hsa-miR-574-3p	0	0	0	1	0	0	RXFP1	relaxin/insulin-like family peptide receptor 1
hsa-miR-574-3p	0	0	1	1	1	1	ASCC2	activating signal cointegrator 1 complex subunit 2
hsa-miR-574-3p	0	0	1	1	0	0	SNTG2	syntrophin, gamma 2
hsa-miR-574-3p	0	0	1	1	1	1	PSMD1	proteasome (prosome, macropain) 26S subunit, non-ATPase, 1
hsa-miR-574-3p	0	0	1	1	1	1	BTK	Bruton agammaglobulinemia tyrosine kinase
hsa-miR-574-3p	0	0	0	1	1	1	TLR1	toll-like receptor 1
hsa-miR-574-3p	0	0	0	1	1	1	HFE	hemochromatosis
hsa-miR-574-3p	0	0	1	1	0	0	EEF2	eukaryotic translation elongation factor 2
hsa-miR-574-3p	0	0	1	1	1	1	ZMIZ2	zinc finger, MIZ-type containing 2
hsa-miR-574-3p	1	0	1	1	1	1	FAM134C	family with sequence similarity 134, member C
hsa-miR-574-3p	0	0	1	1	1	1	CHST2	carbohydrate (N-acetylglucosamine-6-O) sulfotransferase 2
hsa-miR-574-3p	0	0	1	1	0	0	CARD14	caspase recruitment domain family, member 14
hsa-miR-574-3p	0	0	1	1	0	0	CFLAR	CASP8 and FADD-like apoptosis regulator
hsa-miR-574-3p	0	0	0	1	0	0	VN1R4	vomeronasal 1 receptor 4
hsa-miR-574-3p	0	0	1	1	0	0	MARCH10	membrane-associated ring finger (C3HC4) 10, E3 ubiquitin protein ligase
hsa-miR-574-3p	0	0	0	1	1	1	MUM1	melanoma associated antigen (mutated) 1
hsa-miR-574-3p	0	0	0	1	0	0	DAK	dihydroxyacetone kinase 2 homolog (S. cerevisiae)
hsa-miR-574-3p	1	0	0	1	0	0	CTU2	cytosolic thiouridylase subunit 2 homolog (S. pombe)
hsa-miR-574-3p	1	0	1	1	1	1	PMP22	peripheral myelin protein 22
hsa-miR-574-3p	0	0	1	1	0	0	RPS6KB2	ribosomal protein S6 kinase, 70kDa, polypeptide 2
hsa-miR-574-3p	0	0	0	1	0	0	ZNF852	zinc finger protein 852
hsa-miR-574-3p	1	0	1	1	1	1	FBXO34	F-box protein 34
hsa-miR-574-3p	0	0	0	1	0	0	C12orf54	chromosome 12 open reading frame 54
hsa-miR-574-3p	0	0	1	1	0	0	CLEC18C	C-type lectin domain family 18, member C
hsa-miR-574-3p	1	0	1	1	1	1	LUZP1	leucine zipper protein 1
hsa-miR-574-3p	0	0	1	1	0	0	AGTRAP	angiotensin II receptor-associated protein
hsa-miR-574-3p	0	0	1	1	1	1	CKS2	CDC28 protein kinase regulatory subunit 2
hsa-miR-574-3p	0	0	1	1	0	0	C19orf18	chromosome 19 open reading frame 18
hsa-miR-574-3p	0	0	0	1	0	0	FUT7	fucosyltransferase 7 (alpha (1,3) fucosyltransferase)
hsa-miR-574-3p	0	0	0	1	0	0	FARSA	phenylalanyl-tRNA synthetase, alpha subunit
hsa-miR-574-3p	0	0	0	1	0	0	EXOC3	exocyst complex component 3
hsa-miR-574-3p	1	0	1	1	1	1	EDC3	enhancer of mRNA decapping 3 homolog (S. cerevisiae)
hsa-miR-574-3p	0	0	1	1	0	0	LEO1	Leo1, Paf1/RNA polymerase II complex component, homolog (S. cerevisiae)
hsa-miR-574-3p	0	0	1	1	1	1	MDH2	malate dehydrogenase 2, NAD (mitochondrial)
hsa-miR-574-3p	0	0	1	1	0	0	SLC41A3	solute carrier family 41, member 3
hsa-miR-574-3p	0	0	1	1	0	0	TUBA8	tubulin, alpha 8
hsa-miR-574-3p	0	0	1	1	1	1	C9orf78	chromosome 9 open reading frame 78
hsa-miR-574-3p	0	0	1	1	0	0	DNAJC7	DnaJ (Hsp40) homolog, subfamily C, member 7
hsa-miR-574-3p	1	0	1	1	0	0	TNK2	tyrosine kinase, non-receptor, 2
hsa-miR-574-3p	1	0	0	1	1	1	LLGL1	lethal giant larvae homolog 1 (Drosophila)
hsa-miR-574-3p	1	0	1	1	1	1	FAM63B	family with sequence similarity 63, member B
hsa-miR-574-3p	0	0	0	1	0	0	C3orf32	chromosome 3 open reading frame 32
hsa-miR-574-3p	0	0	0	1	0	0	MAMDC4	MAM domain containing 4
hsa-miR-574-3p	0	0	0	1	0	0	TRPT1	tRNA phosphotransferase 1
hsa-miR-574-3p	0	0	0	1	0	0	PXMP2	peroxisomal membrane protein 2, 22kDa
hsa-miR-574-3p	0	0	1	1	0	0	CERS5	ceramide synthase 5
hsa-miR-574-3p	0	0	1	1	1	1	RGS3	regulator of G-protein signaling 3
hsa-miR-574-3p	0	0	0	1	1	1	PROM2	prominin 2
hsa-miR-574-3p	0	0	0	1	0	0	DEFB124	defensin, beta 124
hsa-miR-574-3p	0	0	1	1	1	1	AMOTL1	angiomotin like 1
hsa-miR-574-3p	1	0	1	1	1	1	SLC24A4	solute carrier family 24 (sodium/potassium/calcium exchanger), member 4
hsa-miR-574-3p	0	0	0	1	0	0	TNFRSF6B	tumor necrosis factor receptor superfamily, member 6b, decoy
hsa-miR-574-3p	0	0	1	1	0	0	RTEL1	regulator of telomere elongation helicase 1
hsa-miR-574-3p	0	0	1	1	0	0	PLCZ1	phospholipase C, zeta 1
hsa-miR-574-3p	1	0	1	1	1	1	SLC25A42	solute carrier family 25, member 42
hsa-miR-574-3p	0	0	1	1	0	0	CCDC88B	coiled-coil domain containing 88B
hsa-miR-574-3p	1	0	0	1	0	0	TMEM184A	transmembrane protein 184A
hsa-miR-574-3p	1	0	1	1	1	1	NT5DC1	5'-nucleotidase domain containing 1
hsa-miR-574-3p	0	0	1	1	1	1	HSPH1	heat shock 105kDa/110kDa protein 1
hsa-miR-574-3p	0	0	1	1	1	1	RASGRP2	RAS guanyl releasing protein 2 (calcium and DAG-regulated)
hsa-miR-574-3p	0	0	1	1	1	1	GALNT11	UDP-N-acetyl-alpha-D-galactosamine:polypeptide N-acetylgalactosaminyltransferase 11 (GalNAc-T11)
hsa-miR-574-3p	0	0	0	1	1	1	C16orf53	chromosome 16 open reading frame 53
hsa-miR-574-3p	0	0	1	1	0	0	CXorf56	chromosome X open reading frame 56
hsa-miR-574-3p	0	0	0	1	0	0	SLC25A19	solute carrier family 25 (mitochondrial thiamine pyrophosphate carrier), member 19
hsa-miR-574-3p	0	0	0	1	0	0	WBSCR28	Williams-Beuren syndrome chromosome region 28
hsa-miR-574-3p	0	0	0	1	0	0	GPS1	G protein pathway suppressor 1
hsa-miR-574-3p	0	0	1	1	1	1	CIRBP	cold inducible RNA binding protein
hsa-miR-574-3p	1	0	1	1	0	0	IGSF9B	immunoglobulin superfamily, member 9B
hsa-miR-574-3p	1	0	1	1	0	0	DUOX1	dual oxidase 1
hsa-miR-574-3p	0	0	0	1	1	1	PLD6	phospholipase D family, member 6
hsa-miR-574-3p	0	0	1	1	0	0	THAP4	THAP domain containing 4
hsa-miR-574-3p	0	0	1	1	1	1	PRKCB	protein kinase C, beta
hsa-miR-574-3p	0	0	0	1	0	0	ACBD4	acyl-CoA binding domain containing 4
hsa-miR-574-3p	0	0	0	1	1	1	POLR2L	polymerase (RNA) II (DNA directed) polypeptide L, 7.6kDa
hsa-miR-574-3p	0	0	0	1	1	1	TPRX1	tetra-peptide repeat homeobox 1
hsa-miR-574-3p	0	0	1	1	1	1	COX5A	cytochrome c oxidase subunit Va
hsa-miR-574-3p	0	0	1	1	0	0	SPNS1	spinster homolog 1 (Drosophila)
hsa-miR-574-3p	0	0	1	1	1	1	SLC34A1	solute carrier family 34 (sodium phosphate), member 1
hsa-miR-574-3p	0	0	0	1	0	0	SLC6A18	solute carrier family 6, member 18
hsa-miR-574-3p	0	0	1	1	1	1	FAM193A	family with sequence similarity 193, member A
hsa-miR-574-3p	1	0	1	1	1	1	ZNF580	zinc finger protein 580
hsa-miR-574-3p	0	0	1	1	1	1	KIAA0319L	KIAA0319-like
hsa-miR-574-3p	0	0	1	1	1	1	PRDM7	PR domain containing 7
hsa-miR-574-3p	0	0	1	1	1	1	ARHGEF4	Rho guanine nucleotide exchange factor (GEF) 4
hsa-miR-574-3p	1	0	1	1	1	1	ZNF562	zinc finger protein 562
hsa-miR-574-3p	1	0	1	1	1	1	CD300LF	CD300 molecule-like family member f
hsa-miR-574-3p	1	0	1	1	0	0	SRRM3	serine/arginine repetitive matrix 3
hsa-miR-574-3p	1	0	1	1	1	1	DKK3	dickkopf 3 homolog (Xenopus laevis)
hsa-miR-574-3p	1	0	1	1	1	1	PPP6R1	protein phosphatase 6, regulatory subunit 1
hsa-miR-574-3p	1	0	1	1	1	1	CEP97	centrosomal protein 97kDa
hsa-miR-574-3p	1	0	0	1	1	1	MMS19	MMS19 nucleotide excision repair homolog (S. cerevisiae)
hsa-miR-574-3p	0	0	0	1	1	1	BRF1	BRF1 homolog, subunit of RNA polymerase III transcription initiation factor IIIB (S. cerevisiae)
hsa-miR-574-3p	0	0	1	1	0	0	RNF123	ring finger protein 123
hsa-miR-574-3p	0	0	0	1	0	0	ZNF610	zinc finger protein 610
hsa-miR-574-3p	0	0	0	1	0	0	HEXDC	hexosaminidase (glycosyl hydrolase family 20, catalytic domain) containing
hsa-miR-574-3p	0	0	0	1	0	0	TNFRSF18	tumor necrosis factor receptor superfamily, member 18
hsa-miR-574-3p	0	0	1	1	1	1	IP6K2	inositol hexakisphosphate kinase 2
hsa-miR-574-3p	0	0	0	1	0	0	ARSI	arylsulfatase family, member I
hsa-miR-574-3p	1	0	1	1	1	1	SEPT9	septin 9
hsa-miR-574-3p	0	0	1	1	0	0	HGS	hepatocyte growth factor-regulated tyrosine kinase substrate
hsa-miR-574-3p	0	0	0	1	1	1	MAGEA6	melanoma antigen family A, 6
hsa-miR-574-3p	0	0	0	1	1	1	MAGEA2B	melanoma antigen family A, 2B
hsa-miR-574-3p	0	0	0	1	0	0	MAGEB17	melanoma antigen family B, 17
hsa-miR-574-3p	0	0	1	1	1	1	CAV3	caveolin 3
hsa-miR-574-3p	0	0	0	1	1	1	SLC52A2	solute carrier family 52, riboflavin transporter, member 2
hsa-miR-574-3p	0	0	1	1	0	0	IDH2	isocitrate dehydrogenase 2 (NADP+), mitochondrial
hsa-miR-574-3p	1	0	1	1	0	0	ORAI1	ORAI calcium release-activated calcium modulator 1
hsa-miR-574-3p	1	0	0	1	0	0	MAPK11	mitogen-activated protein kinase 11
hsa-miR-574-3p	0	0	1	1	0	0	MX2	myxovirus (influenza virus) resistance 2 (mouse)
hsa-miR-574-3p	0	0	1	1	1	1	KDELR1	KDEL (Lys-Asp-Glu-Leu) endoplasmic reticulum protein retention receptor 1
hsa-miR-574-3p	0	0	1	1	1	1	CD300C	CD300c molecule
hsa-miR-574-3p	0	0	0	1	0	0	C2orf82	chromosome 2 open reading frame 82
hsa-miR-574-3p	0	0	1	1	1	1	POFUT2	protein O-fucosyltransferase 2
hsa-miR-574-3p	1	0	1	1	0	0	TRAIP	TRAF interacting protein
hsa-miR-574-3p	1	0	1	1	1	1	CDC20B	cell division cycle 20 homolog B (S. cerevisiae)
hsa-miR-574-3p	0	0	1	1	1	1	ODF3L1	outer dense fiber of sperm tails 3-like 1
hsa-miR-574-3p	0	0	0	1	0	0	IL1R2	interleukin 1 receptor, type II
hsa-miR-574-3p	1	0	1	1	1	1	LAMP1	lysosomal-associated membrane protein 1
hsa-miR-574-3p	1	0	1	1	0	0	NOG	noggin
hsa-miR-574-3p	0	0	1	1	1	1	VSTM4	V-set and transmembrane domain containing 4
hsa-miR-574-3p	0	0	0	1	0	0	ZNF804B	zinc finger protein 804B
hsa-miR-574-3p	0	0	0	1	1	1	METTL2A	methyltransferase like 2A
hsa-miR-574-3p	0	0	0	1	0	0	C19orf59	chromosome 19 open reading frame 59
hsa-miR-574-3p	1	0	1	1	0	0	GAS2L1	growth arrest-specific 2 like 1
hsa-miR-574-3p	0	0	0	1	0	0	USP17L2	ubiquitin specific peptidase 17-like 2
hsa-miR-574-3p	0	0	1	1	1	1	SEPT10	septin 10
hsa-miR-574-3p	1	0	1	1	1	1	F3	coagulation factor III (thromboplastin, tissue factor)
hsa-miR-574-3p	0	0	1	1	1	1	AKR1CL1	aldo-keto reductase family 1, member C-like 1
hsa-miR-574-3p	0	0	1	1	0	0	TRIM7	tripartite motif containing 7
hsa-miR-574-3p	0	0	1	1	0	0	PFDN5	prefoldin subunit 5
hsa-miR-574-3p	0	0	1	1	0	0	PRMT2	protein arginine methyltransferase 2
hsa-miR-574-3p	1	0	1	1	1	1	MARK3	MAP/microtubule affinity-regulating kinase 3
hsa-miR-574-3p	0	0	1	1	1	1	LYNX1	Ly6/neurotoxin 1
hsa-miR-574-3p	0	0	1	1	0	0	RNASE11	ribonuclease, RNase A family, 11 (non-active)
hsa-miR-574-3p	0	0	1	1	1	1	SPAG17	sperm associated antigen 17
hsa-miR-574-3p	0	0	1	1	0	0	ZNF584	zinc finger protein 584
hsa-miR-574-3p	0	0	0	1	0	0	ZNF324B	zinc finger protein 324B
hsa-miR-574-3p	1	0	1	1	1	1	SEC23B	Sec23 homolog B (S. cerevisiae)
hsa-miR-574-3p	0	0	1	1	0	0	CHID1	chitinase domain containing 1
hsa-miR-574-3p	0	0	0	1	1	1	SLMO1	slowmo homolog 1 (Drosophila)
hsa-miR-574-3p	0	0	0	1	0	0	EEF1D	eukaryotic translation elongation factor 1 delta (guanine nucleotide exchange protein)
hsa-miR-574-3p	1	0	1	1	1	1	FGF1	fibroblast growth factor 1 (acidic)
hsa-miR-574-3p	1	0	1	1	1	1	SCHIP1	schwannomin interacting protein 1
hsa-miR-574-3p	0	0	0	1	0	0	KPTN	kaptin (actin binding protein)
hsa-miR-574-3p	1	0	0	1	0	0	LRFN2	leucine rich repeat and fibronectin type III domain containing 2
hsa-miR-574-3p	0	0	0	1	0	0	CHCHD2P9	coiled-coil-helix-coiled-coil-helix domain containing 2 pseudogene 9
hsa-miR-574-3p	1	0	1	1	0	0	CHST4	carbohydrate (N-acetylglucosamine 6-O) sulfotransferase 4
hsa-miR-574-3p	0	0	1	1	0	0	DCBLD1	discoidin, CUB and LCCL domain containing 1
hsa-miR-574-3p	0	0	1	1	0	0	KRTDAP	keratinocyte differentiation-associated protein
hsa-miR-574-3p	0	0	0	1	0	0	SFN	stratifin
hsa-miR-574-3p	0	0	0	1	0	0	C11orf96	chromosome 11 open reading frame 96
hsa-miR-574-3p	0	0	0	1	0	0	GJB4	gap junction protein, beta 4, 30.3kDa
hsa-miR-574-3p	0	0	0	1	0	0	TSPAN32	tetraspanin 32
hsa-miR-574-3p	0	0	0	1	1	1	CCDC169	coiled-coil domain containing 169
hsa-miR-574-3p	0	0	0	1	0	0	ALG1L	asparagine-linked glycosylation 1-like
hsa-miR-574-3p	0	0	1	1	0	0	ARHGAP9	Rho GTPase activating protein 9
hsa-miR-574-3p	0	0	1	1	0	0	MPO	myeloperoxidase
hsa-miR-574-3p	1	0	1	1	0	0	RANBP3	RAN binding protein 3
hsa-miR-574-3p	1	0	1	1	1	1	KCNK10	potassium channel, subfamily K, member 10
hsa-miR-574-3p	0	0	0	1	1	1	CRYZ	crystallin, zeta (quinone reductase)
hsa-miR-574-3p	0	0	0	1	1	1	PNCK	pregnancy up-regulated non-ubiquitously expressed CaM kinase
hsa-miR-574-3p	0	0	1	1	1	1	ZNF169	zinc finger protein 169
hsa-miR-574-3p	0	0	0	1	0	0	EXD3	exonuclease 3'-5' domain containing 3
hsa-miR-574-3p	0	0	1	1	1	1	ESR2	estrogen receptor 2 (ER beta)
hsa-miR-574-3p	1	0	1	1	1	1	NPAS3	neuronal PAS domain protein 3
hsa-miR-574-3p	0	0	1	1	1	1	LRRC29	leucine rich repeat containing 29
hsa-miR-574-3p	0	0	0	1	0	0	PRY2	PTPN13-like, Y-linked 2
hsa-miR-574-3p	0	0	0	1	1	1	NME9	NME/NM23 family member 9
hsa-miR-574-3p	0	0	1	1	0	0	IDH3B	isocitrate dehydrogenase 3 (NAD+) beta
hsa-miR-574-3p	0	0	1	1	1	1	ABLIM2	actin binding LIM protein family, member 2
hsa-miR-574-3p	0	0	1	1	1	1	C20orf24	chromosome 20 open reading frame 24
hsa-miR-574-3p	0	0	1	1	0	0	NYX	nyctalopin
hsa-miR-574-3p	1	0	1	1	1	1	TMTC4	transmembrane and tetratricopeptide repeat containing 4
hsa-miR-574-3p	0	0	0	1	1	1	CIDEA	cell death-inducing DFFA-like effector a
hsa-miR-574-3p	1	0	1	1	0	0	MADD	MAP-kinase activating death domain
hsa-miR-574-3p	0	0	0	1	0	0	QRFP	pyroglutamylated RFamide peptide
hsa-miR-574-3p	0	0	0	1	0	0	CXXC11	CXXC finger protein 11
hsa-miR-574-3p	0	0	1	1	0	0	SIGLEC6	sialic acid binding Ig-like lectin 6
hsa-miR-574-3p	0	0	1	1	0	0	ERAP2	endoplasmic reticulum aminopeptidase 2
hsa-miR-574-3p	1	0	1	1	1	1	CASKIN1	CASK interacting protein 1
hsa-miR-574-3p	0	0	1	1	0	0	HIST1H1C	histone cluster 1, H1c
hsa-miR-574-3p	0	0	1	1	1	1	SP140	SP140 nuclear body protein
hsa-miR-574-3p	0	0	0	1	1	1	FAM69C	family with sequence similarity 69, member C
hsa-miR-574-3p	1	0	1	1	1	1	CASZ1	castor zinc finger 1
hsa-miR-574-3p	0	0	0	1	1	1	DTNBP1	dystrobrevin binding protein 1
hsa-miR-574-3p	0	0	1	1	0	0	KCNQ1	potassium voltage-gated channel, KQT-like subfamily, member 1
hsa-miR-574-3p	0	0	0	1	0	0	BCAP31	B-cell receptor-associated protein 31
hsa-miR-574-3p	0	0	1	1	0	0	CDK5RAP2	CDK5 regulatory subunit associated protein 2
hsa-miR-574-3p	1	0	1	1	1	1	TRIM3	tripartite motif containing 3
hsa-miR-574-3p	1	0	0	1	1	1	PCBP3	poly(rC) binding protein 3
hsa-miR-574-3p	1	0	0	1	1	1	AURKA	aurora kinase A
hsa-miR-574-3p	0	0	0	1	0	0	RPL36	ribosomal protein L36
hsa-miR-574-3p	1	0	1	1	0	0	HINFP	histone H4 transcription factor
hsa-miR-574-3p	0	0	1	1	1	1	BTN2A2	butyrophilin, subfamily 2, member A2
hsa-miR-574-3p	0	0	1	1	0	0	CDK10	cyclin-dependent kinase 10
hsa-miR-574-3p	0	0	1	1	1	1	TAP1	transporter 1, ATP-binding cassette, sub-family B (MDR/TAP)
hsa-miR-574-3p	0	0	1	1	0	0	FBXO2	F-box protein 2
hsa-miR-574-3p	0	0	1	1	1	1	LRMP	lymphoid-restricted membrane protein
hsa-miR-574-3p	0	0	0	1	1	1	GNL3	guanine nucleotide binding protein-like 3 (nucleolar)
hsa-miR-574-3p	0	0	0	1	1	1	KCNQ2	potassium voltage-gated channel, KQT-like subfamily, member 2
hsa-miR-574-3p	1	0	1	1	1	1	TWIST1	twist homolog 1 (Drosophila)
hsa-miR-574-3p	1	0	1	1	1	1	STEAP3	STEAP family member 3, metalloreductase
hsa-miR-574-3p	0	0	1	1	1	1	TSGA10	testis specific, 10
hsa-miR-574-3p	0	0	0	1	1	1	GPAA1	glycosylphosphatidylinositol anchor attachment protein 1 homolog (yeast)
hsa-miR-574-3p	1	0	1	1	1	1	LINGO1	leucine rich repeat and Ig domain containing 1
hsa-miR-574-3p	1	0	1	1	1	1	COL5A1	collagen, type V, alpha 1
hsa-miR-574-3p	0	0	0	1	0	0	CGB8	chorionic gonadotropin, beta polypeptide 8
hsa-miR-574-3p	0	0	1	1	0	0	ZNF252P	zinc finger protein 252, pseudogene
hsa-miR-574-3p	1	0	1	1	1	1	RBPJ	recombination signal binding protein for immunoglobulin kappa J region
hsa-miR-574-3p	0	0	0	1	0	0	PLEKHA4	pleckstrin homology domain containing, family A (phosphoinositide binding specific) member 4
hsa-miR-574-3p	0	0	1	1	0	0	DHCR7	7-dehydrocholesterol reductase
hsa-miR-574-3p	1	0	1	1	1	1	TRRAP	transformation/transcription domain-associated protein
hsa-miR-574-3p	1	0	1	1	1	1	WWP2	WW domain containing E3 ubiquitin protein ligase 2
hsa-miR-574-3p	0	0	0	1	0	0	ZNF578	zinc finger protein 578
hsa-miR-574-3p	0	0	0	1	1	1	ZNF528	zinc finger protein 528
hsa-miR-574-3p	0	0	1	1	1	1	RANGAP1	Ran GTPase activating protein 1
hsa-miR-574-3p	1	0	1	1	1	1	ANXA2	annexin A2
hsa-miR-574-3p	0	0	0	1	1	1	PITPNM1	phosphatidylinositol transfer protein, membrane-associated 1
hsa-miR-574-3p	0	0	0	1	1	1	MYOM1	myomesin 1, 185kDa
hsa-miR-574-3p	1	0	1	1	0	0	PLD3	phospholipase D family, member 3
hsa-miR-574-3p	0	0	1	1	0	0	TSGA13	testis specific, 13
hsa-miR-574-3p	0	0	1	1	1	1	PEX14	peroxisomal biogenesis factor 14
hsa-miR-574-3p	0	0	1	1	1	1	TPCN2	two pore segment channel 2
hsa-miR-574-3p	0	0	1	1	0	0	ATRIP	ATR interacting protein
hsa-miR-574-3p	0	0	0	1	0	0	ZNF628	zinc finger protein 628
hsa-miR-574-3p	1	0	1	1	1	1	ERG	v-ets erythroblastosis virus E26 oncogene homolog (avian)
hsa-miR-574-3p	0	0	0	1	0	0	DNAJC22	DnaJ (Hsp40) homolog, subfamily C, member 22
hsa-miR-574-3p	1	0	1	1	1	1	PSAP	prosaposin
hsa-miR-574-3p	0	0	0	1	0	0	OR51D1	olfactory receptor, family 51, subfamily D, member 1
hsa-miR-574-3p	0	0	1	1	1	1	PRAMEF12	PRAME family member 12
hsa-miR-574-3p	0	0	0	1	0	0	HIST4H4	histone cluster 4, H4
hsa-miR-574-3p	0	0	1	1	1	1	C1orf177	chromosome 1 open reading frame 177
hsa-miR-574-3p	0	0	1	1	0	0	HNRNPAB	heterogeneous nuclear ribonucleoprotein A/B
hsa-miR-574-3p	0	0	1	1	1	1	APOL2	apolipoprotein L, 2
hsa-miR-574-3p	0	0	1	1	0	0	SIPA1L1	signal-induced proliferation-associated 1 like 1
hsa-miR-574-3p	0	0	0	1	0	0	GIMAP5	GTPase, IMAP family member 5
hsa-miR-574-3p	0	0	1	1	0	0	STIP1	stress-induced-phosphoprotein 1
hsa-miR-574-3p	0	0	1	1	1	1	NUDT3	nudix (nucleoside diphosphate linked moiety X)-type motif 3
hsa-miR-574-3p	1	0	1	1	0	0	PDE3A	phosphodiesterase 3A, cGMP-inhibited
hsa-miR-574-3p	0	0	1	1	1	1	MTHFD2L	methylenetetrahydrofolate dehydrogenase (NADP+ dependent) 2-like
hsa-miR-574-3p	1	0	1	1	0	0	ZSWIM5	zinc finger, SWIM-type containing 5
hsa-miR-574-3p	0	0	0	1	1	1	MB	myoglobin
hsa-miR-574-3p	0	0	1	1	1	1	SERHL	serine hydrolase-like
hsa-miR-574-3p	1	0	1	1	1	1	SEPT2	septin 2
hsa-miR-574-3p	0	0	1	1	1	1	GTPBP4	GTP binding protein 4
hsa-miR-574-3p	0	0	1	1	1	1	STIL	SCL/TAL1 interrupting locus
hsa-miR-574-3p	0	0	1	1	1	1	CYR61	cysteine-rich, angiogenic inducer, 61
hsa-miR-574-3p	0	0	1	1	1	1	NUDT11	nudix (nucleoside diphosphate linked moiety X)-type motif 11
hsa-miR-574-3p	0	0	0	1	0	0	SHARPIN	SHANK-associated RH domain interactor
hsa-miR-574-3p	1	0	1	1	0	0	KAZN	kazrin, periplakin interacting protein
hsa-miR-574-3p	0	0	0	1	0	0	PPEF1	protein phosphatase, EF-hand calcium binding domain 1
hsa-miR-574-3p	0	0	1	1	0	0	ZNF511	zinc finger protein 511
hsa-miR-574-3p	0	0	0	1	1	1	ABCA4	ATP-binding cassette, sub-family A (ABC1), member 4
hsa-miR-574-3p	0	0	1	1	1	1	GPRASP1	G protein-coupled receptor associated sorting protein 1
hsa-miR-574-3p	1	0	0	1	0	0	GPATCH3	G patch domain containing 3
hsa-miR-574-3p	0	0	0	1	1	1	MOK	MOK protein kinase
hsa-miR-574-3p	0	0	1	1	1	1	PRC1	protein regulator of cytokinesis 1
hsa-miR-574-3p	1	0	1	1	1	1	TSNAX	translin-associated factor X
hsa-miR-574-3p	1	0	1	1	1	1	RPS6KA2	ribosomal protein S6 kinase, 90kDa, polypeptide 2
hsa-miR-574-3p	0	0	1	1	1	1	INTS7	integrator complex subunit 7
hsa-miR-574-3p	1	0	1	1	0	0	DYNLT1	dynein, light chain, Tctex-type 1
hsa-miR-574-3p	0	0	1	1	1	1	IL24	interleukin 24
hsa-miR-574-3p	0	0	1	1	0	0	TMEM9	transmembrane protein 9
hsa-miR-574-3p	0	0	1	1	1	1	ATP6V1G3	ATPase, H+ transporting, lysosomal 13kDa, V1 subunit G3
hsa-miR-574-3p	1	0	1	1	1	1	ARPC5	actin related protein 2/3 complex, subunit 5, 16kDa
hsa-miR-574-3p	0	0	1	1	0	0	MPC2	mitochondrial pyruvate carrier 2
hsa-miR-574-3p	1	0	1	1	1	1	RGS4	regulator of G-protein signaling 4
hsa-miR-574-3p	1	0	1	1	1	1	PEA15	phosphoprotein enriched in astrocytes 15
hsa-miR-574-3p	1	0	1	1	1	1	PTPRK	protein tyrosine phosphatase, receptor type, K
hsa-miR-574-3p	0	0	0	1	0	0	TTC40	tetratricopeptide repeat domain 40
hsa-miR-574-3p	1	0	1	1	0	0	TCERG1L	transcription elongation regulator 1-like
hsa-miR-574-3p	0	0	0	1	0	0	CLRN3	clarin 3
hsa-miR-574-3p	0	0	1	1	0	0	S100A16	S100 calcium binding protein A16
hsa-miR-574-3p	0	0	1	1	0	0	IVL	involucrin
hsa-miR-574-3p	0	0	1	1	0	0	LINGO4	leucine rich repeat and Ig domain containing 4
hsa-miR-574-3p	0	0	1	1	1	1	HTRA1	HtrA serine peptidase 1
hsa-miR-574-3p	1	0	1	1	1	1	ANP32E	acidic (leucine-rich) nuclear phosphoprotein 32 family, member E
hsa-miR-574-3p	0	0	1	1	0	0	MTMR11	myotubularin related protein 11
hsa-miR-574-3p	0	0	1	1	0	0	HIST2H2AA3	histone cluster 2, H2aa3
hsa-miR-574-3p	0	0	1	1	0	0	PNLIPRP3	pancreatic lipase-related protein 3
hsa-miR-574-3p	0	0	0	1	0	0	VWA2	von Willebrand factor A domain containing 2
hsa-miR-574-3p	1	0	1	1	1	1	MAP3K7	mitogen-activated protein kinase kinase kinase 7
hsa-miR-574-3p	0	0	1	1	1	1	ATP1A1	ATPase, Na+/K+ transporting, alpha 1 polypeptide
hsa-miR-574-3p	0	0	1	1	1	1	RBM20	RNA binding motif protein 20
hsa-miR-574-3p	1	0	1	1	1	1	KCNA2	potassium voltage-gated channel, shaker-related subfamily, member 2
hsa-miR-574-3p	1	0	1	1	1	1	CNNM2	cyclin M2
hsa-miR-574-3p	1	0	0	1	0	0	SAMD10	sterile alpha motif domain containing 10
hsa-miR-574-3p	0	0	1	1	0	0	NAA10	N(alpha)-acetyltransferase 10, NatA catalytic subunit
hsa-miR-574-3p	0	0	0	1	0	0	PPDPF	pancreatic progenitor cell differentiation and proliferation factor homolog (zebrafish)
hsa-miR-574-3p	0	0	1	1	1	1	SFXN3	sideroflexin 3
hsa-miR-574-3p	0	0	0	1	1	1	MAGEA3	melanoma antigen family A, 3
hsa-miR-574-3p	0	0	1	1	0	0	KHDC1	KH homology domain containing 1
hsa-miR-574-3p	0	0	0	1	0	0	KHDC1L	KH homology domain containing 1-like
hsa-miR-574-3p	0	0	0	1	1	1	ABCC2	ATP-binding cassette, sub-family C (CFTR/MRP), member 2
hsa-miR-574-3p	0	0	1	1	1	1	GOT1	glutamic-oxaloacetic transaminase 1, soluble (aspartate aminotransferase 1)
hsa-miR-574-3p	1	0	1	1	1	1	HS2ST1	heparan sulfate 2-O-sulfotransferase 1
hsa-miR-574-3p	0	0	1	1	1	1	RBMX2	RNA binding motif protein, X-linked 2
hsa-miR-574-3p	0	0	1	1	1	1	GSTA4	glutathione S-transferase alpha 4
hsa-miR-574-3p	0	0	1	1	1	1	GPR115	G protein-coupled receptor 115
hsa-miR-574-3p	0	0	1	1	0	0	MCTS1	malignant T cell amplified sequence 1
hsa-miR-574-3p	0	0	0	1	0	0	FAM209A	family with sequence similarity 209, member A
hsa-miR-574-3p	0	0	1	1	0	0	PLCE1	phospholipase C, epsilon 1
hsa-miR-574-3p	0	0	1	1	1	1	LGI1	leucine-rich, glioma inactivated 1
hsa-miR-574-3p	0	0	0	1	0	0	SLC1A7	solute carrier family 1 (glutamate transporter), member 7
hsa-miR-574-3p	0	0	1	1	1	1	C1orf185	chromosome 1 open reading frame 185
hsa-miR-574-3p	0	0	0	1	1	1	IFIT1	interferon-induced protein with tetratricopeptide repeats 1
hsa-miR-574-3p	0	0	0	1	1	1	CYP4A11	cytochrome P450, family 4, subfamily A, polypeptide 11
hsa-miR-574-3p	1	0	0	1	0	0	ANKRD22	ankyrin repeat domain 22
hsa-miR-574-3p	0	0	0	1	0	0	GBGT1	globoside alpha-1,3-N-acetylgalactosaminyltransferase 1
hsa-miR-574-3p	1	0	0	1	0	0	CCDC17	coiled-coil domain containing 17
hsa-miR-574-3p	0	0	0	1	0	0	RSPH9	radial spoke head 9 homolog (Chlamydomonas)
hsa-miR-574-3p	1	0	1	1	1	1	AIF1L	allograft inflammatory factor 1-like
hsa-miR-574-3p	0	0	0	1	0	0	NTMT1	N-terminal Xaa-Pro-Lys N-methyltransferase 1
hsa-miR-574-3p	0	0	1	1	1	1	SLC22A7	solute carrier family 22 (organic anion transporter), member 7
hsa-miR-574-3p	0	0	0	1	0	0	KCNQ4	potassium voltage-gated channel, KQT-like subfamily, member 4
hsa-miR-574-3p	0	0	0	1	0	0	ENDOG	endonuclease G
hsa-miR-574-3p	1	0	1	1	1	1	NFYC	nuclear transcription factor Y, gamma
hsa-miR-574-3p	1	0	1	1	1	1	PLAU	plasminogen activator, urokinase
hsa-miR-574-3p	1	0	1	1	1	1	RLF	rearranged L-myc fusion
hsa-miR-574-3p	1	0	1	1	1	1	SYNPO2L	synaptopodin 2-like
hsa-miR-574-3p	1	0	0	1	1	1	HNF4A	hepatocyte nuclear factor 4, alpha
hsa-miR-574-3p	0	0	1	1	0	0	C9orf16	chromosome 9 open reading frame 16
hsa-miR-574-3p	1	0	1	1	1	1	ADPRHL2	ADP-ribosylhydrolase like 2
hsa-miR-574-3p	0	0	1	1	1	1	PPA1	pyrophosphatase (inorganic) 1
hsa-miR-574-3p	0	0	1	1	0	0	H2AFY2	H2A histone family, member Y2
hsa-miR-574-3p	1	0	1	1	1	1	RPRD1B	regulation of nuclear pre-mRNA domain containing 1B
hsa-miR-574-3p	0	0	1	1	1	1	RNF19B	ring finger protein 19B
hsa-miR-574-3p	0	0	1	1	1	1	LHX2	LIM homeobox 2
hsa-miR-574-3p	1	0	1	1	1	1	MATN1	matrilin 1, cartilage matrix protein
hsa-miR-574-3p	0	0	1	1	1	1	TTLL11	tubulin tyrosine ligase-like family, member 11
hsa-miR-574-3p	1	0	1	1	1	1	ZDHHC18	zinc finger, DHHC-type containing 18
hsa-miR-574-3p	0	0	1	1	1	1	ARID1A	AT rich interactive domain 1A (SWI-like)
hsa-miR-574-3p	0	0	0	1	1	1	SLC30A2	solute carrier family 30 (zinc transporter), member 2
hsa-miR-574-3p	0	0	1	1	1	1	HMGCL	3-hydroxymethyl-3-methylglutaryl-CoA lyase
hsa-miR-574-3p	0	0	1	1	0	0	WDR46	WD repeat domain 46
hsa-miR-574-3p	0	0	0	1	0	0	OR13C3	olfactory receptor, family 13, subfamily C, member 3
hsa-miR-574-3p	1	0	1	1	1	1	NTM	neurotrimin
hsa-miR-574-3p	1	0	1	1	1	1	NRP1	neuropilin 1
hsa-miR-574-3p	0	0	0	1	1	1	TMCO4	transmembrane and coiled-coil domains 4
hsa-miR-574-3p	0	0	1	1	0	0	TSR2	TSR2, 20S rRNA accumulation, homolog (S. cerevisiae)
hsa-miR-574-3p	0	0	1	1	0	0	GALK1	galactokinase 1
hsa-miR-574-3p	0	0	1	1	1	1	LOC100499484-C9ORF174	LOC100499484-C9orf174 readthrough
hsa-miR-574-3p	0	0	1	1	0	0	UBR4	ubiquitin protein ligase E3 component n-recognin 4
hsa-miR-574-3p	0	0	1	1	0	0	LLGL2	lethal giant larvae homolog 2 (Drosophila)
hsa-miR-574-3p	1	0	1	1	1	1	ARHGAP12	Rho GTPase activating protein 12
hsa-miR-574-3p	0	0	0	1	0	0	GRTP1	growth hormone regulated TBC protein 1
hsa-miR-574-3p	0	0	0	1	0	0	FAM156B	family with sequence similarity 156, member B
hsa-miR-574-3p	0	0	0	1	0	0	CLCNKB	chloride channel, voltage-sensitive Kb
hsa-miR-574-3p	0	0	1	1	1	1	CLCNKA	chloride channel, voltage-sensitive Ka
hsa-miR-574-3p	1	0	1	1	1	1	MBD5	methyl-CpG binding domain protein 5
hsa-miR-574-3p	0	0	1	1	1	1	APBB1IP	amyloid beta (A4) precursor protein-binding, family B, member 1 interacting protein
hsa-miR-574-3p	1	0	1	1	0	0	WDR45	WD repeat domain 45
hsa-miR-574-3p	1	0	1	1	1	1	TLE1	transducin-like enhancer of split 1 (E(sp1) homolog, Drosophila)
hsa-miR-574-3p	0	0	1	1	1	1	SLC35A2	solute carrier family 35 (UDP-galactose transporter), member A2
hsa-miR-574-3p	1	0	1	1	1	1	ENTPD6	ectonucleoside triphosphate diphosphohydrolase 6 (putative)
hsa-miR-574-3p	0	0	1	1	0	0	MAD2L2	MAD2 mitotic arrest deficient-like 2 (yeast)
hsa-miR-574-3p	1	0	1	1	1	1	VSX1	visual system homeobox 1
hsa-miR-574-3p	0	0	0	1	0	0	ACSS1	acyl-CoA synthetase short-chain family member 1
hsa-miR-574-3p	0	0	1	1	0	0	SLC38A5	solute carrier family 38, member 5
hsa-miR-574-3p	0	0	1	1	1	1	MGC57346	uncharacterized LOC401884
hsa-miR-574-3p	1	0	1	1	0	0	DNAJC1	DnaJ (Hsp40) homolog, subfamily C, member 1
hsa-miR-574-3p	0	0	1	1	0	0	SLC2A5	solute carrier family 2 (facilitated glucose/fructose transporter), member 5
hsa-miR-574-3p	0	0	0	1	0	0	ZNF133	zinc finger protein 133
hsa-miR-574-3p	1	0	1	1	1	1	SHB	Src homology 2 domain containing adaptor protein B
hsa-miR-574-3p	0	0	1	1	0	0	HES5	hairy and enhancer of split 5 (Drosophila)
hsa-miR-574-3p	0	0	1	1	0	0	PLCH2	phospholipase C, eta 2
hsa-miR-574-3p	0	0	0	1	0	0	SPI1	spleen focus forming virus (SFFV) proviral integration oncogene spi1
hsa-miR-574-3p	1	0	1	1	0	0	PRKCZ	protein kinase C, zeta
hsa-miR-574-3p	0	0	0	1	0	0	KIAA1751	KIAA1751
hsa-miR-574-3p	0	0	1	1	1	1	FUK	fucokinase
hsa-miR-574-3p	0	0	0	1	1	1	MAGEB1	melanoma antigen family B, 1
hsa-miR-574-3p	0	0	1	1	1	1	B3GALT6	UDP-Gal:betaGal beta 1,3-galactosyltransferase polypeptide 6
hsa-miR-574-3p	0	0	0	1	0	0	DNAJC2	DnaJ (Hsp40) homolog, subfamily C, member 2
hsa-miR-574-3p	1	0	1	1	1	1	ZSCAN2	zinc finger and SCAN domain containing 2
hsa-miR-574-3p	1	0	1	1	1	1	ZNF827	zinc finger protein 827
hsa-miR-574-3p	0	0	1	1	0	0	AQP7	aquaporin 7
hsa-miR-574-3p	1	0	1	1	1	1	NFX1	nuclear transcription factor, X-box binding 1
hsa-miR-574-3p	0	0	1	1	1	1	AP5S1	adaptor-related protein complex 5, sigma 1 subunit
hsa-miR-574-3p	0	0	1	1	1	1	ADAM32	ADAM metallopeptidase domain 32
hsa-miR-574-3p	0	0	1	1	1	1	ITPA	inosine triphosphatase (nucleoside triphosphate pyrophosphatase)
hsa-miR-574-3p	0	0	1	1	1	1	PXDC1	PX domain containing 1
hsa-miR-574-3p	0	0	1	1	1	1	ALOX5AP	arachidonate 5-lipoxygenase-activating protein
hsa-miR-574-3p	0	0	0	1	1	1	NAP1L4	nucleosome assembly protein 1-like 4
hsa-miR-574-3p	1	0	1	1	1	1	ADRA1A	adrenoceptor alpha 1A
hsa-miR-574-3p	0	0	1	1	0	0	PLSCR3	phospholipid scramblase 3
hsa-miR-574-3p	0	0	0	1	0	0	FAM116B	family with sequence similarity 116, member B
hsa-miR-574-3p	0	0	1	1	1	1	SIRPB2	signal-regulatory protein beta 2
hsa-miR-574-3p	1	0	1	1	1	1	CCDC149	coiled-coil domain containing 149
hsa-miR-574-3p	1	0	1	1	1	1	DGKG	diacylglycerol kinase, gamma 90kDa
hsa-miR-574-3p	0	0	1	1	1	1	DOCK8	dedicator of cytokinesis 8
hsa-miR-574-3p	1	0	1	1	0	0	FSCN1	fascin homolog 1, actin-bundling protein (Strongylocentrotus purpuratus)
hsa-miR-574-3p	0	0	0	1	0	0	DNASE1L2	deoxyribonuclease I-like 2
hsa-miR-574-3p	0	0	1	1	0	0	SIGIRR	single immunoglobulin and toll-interleukin 1 receptor (TIR) domain
hsa-miR-574-3p	0	0	1	1	1	1	SAP18	Sin3A-associated protein, 18kDa
hsa-miR-574-3p	0	0	1	1	0	0	GPX3	glutathione peroxidase 3 (plasma)
hsa-miR-574-3p	0	0	1	1	0	0	LRRIQ3	leucine-rich repeats and IQ motif containing 3
hsa-miR-574-3p	0	0	1	1	1	1	SMYD3	SET and MYND domain containing 3
hsa-miR-574-3p	0	0	1	1	0	0	FAM83G	family with sequence similarity 83, member G
hsa-miR-574-3p	0	0	1	1	1	1	DUOX2	dual oxidase 2
hsa-miR-574-3p	1	0	1	1	1	1	FAM168B	family with sequence similarity 168, member B
hsa-miR-574-3p	0	0	1	1	1	1	IL17REL	interleukin 17 receptor E-like
hsa-miR-574-3p	0	0	1	1	1	1	SLC6A3	solute carrier family 6 (neurotransmitter transporter, dopamine), member 3
hsa-miR-574-3p	0	0	1	1	1	1	TMPRSS11D	transmembrane protease, serine 11D
hsa-miR-574-3p	1	0	1	0	1	1	SEL1L	sel-1 suppressor of lin-12-like (C. elegans)
hsa-miR-574-3p	1	0	1	1	1	1	ZBTB5	zinc finger and BTB domain containing 5
hsa-miR-574-3p	0	0	0	0	1	1	LOC729264	TP53-target gene 3 protein-like
