# Supplementary material for: Profiling of Selected MicroRNAs in Proliferative Eutopic Endometrium of Women with Ovarian Endometriosis
Source: Biomed Res Int. 2015 Aug 20;2015:760698. doi: 10.1155/2015/760698 (PMC4558423; doi:10.1155/2015/760698)
Supplement: Supplementary file 1 — Table I: The names of miRNAs significantly differentially expressed between eutopic endometrium of patients with endometriosis vs eutopic endometrium of patients without endometriosis. Table II: The associations between miRNA and mRNA, which presents detailed results of the search of six major databases i.e targetscan, tarbase, miranda, mirbase, mirtarget2 and pictar. [file 760698.f1.zip › 760698.f1/Table II/hsa-miR-574-5p.tsv]

miR	targetscan	tarbase	miranda	mirbase	mirtarget2	pictar	GeneSymbol	GeneName
hsa-miR-574-5p	1	0	1	1	0	0	SRCAP	Snf2-related CREBBP activator protein
hsa-miR-574-5p	1	0	1	0	1	1	KIAA0355	KIAA0355
hsa-miR-574-5p	0	0	1	1	1	1	BAI2	brain-specific angiogenesis inhibitor 2
hsa-miR-574-5p	1	0	1	0	1	1	PTPRT	protein tyrosine phosphatase, receptor type, T
hsa-miR-574-5p	0	0	1	1	1	1	RABGAP1L	RAB GTPase activating protein 1-like
hsa-miR-574-5p	1	0	1	0	1	1	CEP350	centrosomal protein 350kDa
hsa-miR-574-5p	1	0	1	1	1	1	IQSEC2	IQ motif and Sec7 domain 2
hsa-miR-574-5p	0	0	1	1	0	0	ZNF862	zinc finger protein 862
hsa-miR-574-5p	1	0	1	1	0	0	PCLO	piccolo (presynaptic cytomatrix protein)
hsa-miR-574-5p	1	0	1	1	1	1	NRXN1	neurexin 1
hsa-miR-574-5p	1	0	1	1	1	1	GIGYF2	GRB10 interacting GYF protein 2
hsa-miR-574-5p	1	0	1	1	0	0	ESYT1	extended synaptotagmin-like protein 1
hsa-miR-574-5p	1	0	1	0	1	1	ATG14	autophagy related 14
hsa-miR-574-5p	1	0	1	1	1	1	DMXL2	Dmx-like 2
hsa-miR-574-5p	1	0	1	1	1	1	WWC1	WW and C2 domain containing 1
hsa-miR-574-5p	1	0	1	1	1	1	CPEB3	cytoplasmic polyadenylation element binding protein 3
hsa-miR-574-5p	1	0	1	1	1	1	NLGN4Y	neuroligin 4, Y-linked
hsa-miR-574-5p	1	0	1	1	1	1	RGL1	ral guanine nucleotide dissociation stimulator-like 1
hsa-miR-574-5p	0	0	1	0	0	0	THSD7A	thrombospondin, type I, domain containing 7A
hsa-miR-574-5p	0	0	1	1	1	1	TBC1D30	TBC1 domain family, member 30
hsa-miR-574-5p	1	0	1	1	0	0	STXBP5L	syntaxin binding protein 5-like
hsa-miR-574-5p	1	0	1	1	1	1	FOXJ3	forkhead box J3
hsa-miR-574-5p	1	0	1	1	1	1	NLGN1	neuroligin 1
hsa-miR-574-5p	1	0	1	0	1	1	ZNF507	zinc finger protein 507
hsa-miR-574-5p	0	0	1	0	0	0	C11orf21	chromosome 11 open reading frame 21
hsa-miR-574-5p	1	0	1	1	1	1	RALGAPB	Ral GTPase activating protein, beta subunit (non-catalytic)
hsa-miR-574-5p	1	0	1	1	1	1	RIMKLB	ribosomal modification protein rimK-like family member B
hsa-miR-574-5p	1	0	1	1	0	0	ATAD2B	ATPase family, AAA domain containing 2B
hsa-miR-574-5p	1	0	1	0	0	0	ODZ4	odz, odd Oz/ten-m homolog 4 (Drosophila)
hsa-miR-574-5p	1	0	1	0	0	0	NYNRIN	NYN domain and retroviral integrase containing
hsa-miR-574-5p	1	0	1	1	1	1	PCDH19	protocadherin 19
hsa-miR-574-5p	1	0	1	0	1	1	KCTD16	potassium channel tetramerisation domain containing 16
hsa-miR-574-5p	0	0	1	1	1	1	NLGN3	neuroligin 3
hsa-miR-574-5p	1	0	1	1	1	1	FRAS1	Fraser syndrome 1
hsa-miR-574-5p	1	0	1	1	1	1	INADL	InaD-like (Drosophila)
hsa-miR-574-5p	0	0	1	0	1	1	ZSWIM6	zinc finger, SWIM-type containing 6
hsa-miR-574-5p	1	0	1	0	1	1	IGDCC4	immunoglobulin superfamily, DCC subclass, member 4
hsa-miR-574-5p	0	0	1	0	0	0	TTC28-AS1	TTC28 antisense RNA 1
hsa-miR-574-5p	0	0	1	1	1	1	BHLHB9	basic helix-loop-helix domain containing, class B, 9
hsa-miR-574-5p	1	0	1	0	1	1	RIMS1	regulating synaptic membrane exocytosis 1
hsa-miR-574-5p	1	0	1	1	1	1	IKZF4	IKAROS family zinc finger 4 (Eos)
hsa-miR-574-5p	1	0	1	1	1	1	LCOR	ligand dependent nuclear receptor corepressor
hsa-miR-574-5p	0	0	1	1	0	0	SH3GLB2	SH3-domain GRB2-like endophilin B2
hsa-miR-574-5p	0	0	1	1	0	0	NTNG2	netrin G2
hsa-miR-574-5p	0	0	1	1	1	1	SLC11A2	solute carrier family 11 (proton-coupled divalent metal ion transporters), member 2
hsa-miR-574-5p	1	0	1	0	0	0	SMYD4	SET and MYND domain containing 4
hsa-miR-574-5p	1	0	1	1	1	1	TET2	tet methylcytosine dioxygenase 2
hsa-miR-574-5p	1	0	1	1	1	1	SH3TC2	SH3 domain and tetratricopeptide repeats 2
hsa-miR-574-5p	1	0	1	0	0	0	FAT3	FAT tumor suppressor homolog 3 (Drosophila)
hsa-miR-574-5p	1	0	1	0	0	0	ZBTB34	zinc finger and BTB domain containing 34
hsa-miR-574-5p	0	0	1	1	1	1	PDZD3	PDZ domain containing 3
hsa-miR-574-5p	1	0	1	1	1	1	RFX4	regulatory factor X, 4 (influences HLA class II expression)
hsa-miR-574-5p	1	0	1	0	0	0	ZC3H12C	zinc finger CCCH-type containing 12C
hsa-miR-574-5p	0	0	1	1	1	1	PAK3	p21 protein (Cdc42/Rac)-activated kinase 3
hsa-miR-574-5p	0	0	1	1	0	0	DDB2	damage-specific DNA binding protein 2, 48kDa
hsa-miR-574-5p	0	0	1	1	0	0	SSPO	SCO-spondin homolog (Bos taurus)
hsa-miR-574-5p	1	0	1	0	1	1	LIN54	lin-54 homolog (C. elegans)
hsa-miR-574-5p	0	0	1	0	0	0	TIFAB	TRAF-interacting protein with forkhead-associated domain, family member B
hsa-miR-574-5p	0	0	1	0	1	1	ACE2	angiotensin I converting enzyme (peptidyl-dipeptidase A) 2
hsa-miR-574-5p	0	0	1	1	1	1	SYBU	syntabulin (syntaxin-interacting)
hsa-miR-574-5p	1	0	1	1	1	1	COL11A1	collagen, type XI, alpha 1
hsa-miR-574-5p	0	0	1	0	1	1	ATR	ataxia telangiectasia and Rad3 related
hsa-miR-574-5p	1	0	1	1	1	1	DAPK1	death-associated protein kinase 1
hsa-miR-574-5p	1	0	1	1	0	0	GRIN1	glutamate receptor, ionotropic, N-methyl D-aspartate 1
hsa-miR-574-5p	0	0	1	1	0	0	KCNC3	potassium voltage-gated channel, Shaw-related subfamily, member 3
hsa-miR-574-5p	1	0	1	1	1	1	RPS6KA3	ribosomal protein S6 kinase, 90kDa, polypeptide 3
hsa-miR-574-5p	1	0	1	1	0	0	ELN	elastin
hsa-miR-574-5p	1	0	1	1	1	1	NFYC	nuclear transcription factor Y, gamma
hsa-miR-574-5p	1	0	1	1	1	1	CLIP4	CAP-GLY domain containing linker protein family, member 4
hsa-miR-574-5p	1	0	1	1	1	1	DTNA	dystrobrevin, alpha
hsa-miR-574-5p	1	0	1	0	1	1	PLAG1	pleiomorphic adenoma gene 1
hsa-miR-574-5p	1	0	1	0	1	1	MPPED2	metallophosphoesterase domain containing 2
hsa-miR-574-5p	1	0	1	1	0	0	TSPYL2	TSPY-like 2
hsa-miR-574-5p	1	0	1	1	1	1	PRKACB	protein kinase, cAMP-dependent, catalytic, beta
hsa-miR-574-5p	1	0	1	1	1	1	EPHA7	EPH receptor A7
hsa-miR-574-5p	1	0	1	1	1	1	SATB2	SATB homeobox 2
hsa-miR-574-5p	1	0	1	0	1	1	CDON	Cdon homolog (mouse)
hsa-miR-574-5p	1	0	1	1	1	1	ANK1	ankyrin 1, erythrocytic
hsa-miR-574-5p	1	0	1	1	1	1	GIT1	G protein-coupled receptor kinase interacting ArfGAP 1
hsa-miR-574-5p	0	0	1	1	1	1	ZNF747	zinc finger protein 747
hsa-miR-574-5p	0	0	1	1	0	0	BMP1	bone morphogenetic protein 1
hsa-miR-574-5p	1	0	1	0	1	1	TBL1X	transducin (beta)-like 1X-linked
hsa-miR-574-5p	1	0	1	0	1	1	RPL28	ribosomal protein L28
hsa-miR-574-5p	0	0	1	0	0	0	LOC348162	uncharacterized protein 348162
hsa-miR-574-5p	0	0	1	1	0	0	SLC22A8	solute carrier family 22 (organic anion transporter), member 8
hsa-miR-574-5p	0	0	1	1	1	1	KIF3A	kinesin family member 3A
hsa-miR-574-5p	0	0	1	1	1	1	ELOVL5	ELOVL fatty acid elongase 5
hsa-miR-574-5p	1	0	1	1	1	1	HMGA2	high mobility group AT-hook 2
hsa-miR-574-5p	1	0	1	1	1	1	TEAD1	TEA domain family member 1 (SV40 transcriptional enhancer factor)
hsa-miR-574-5p	1	0	1	1	0	0	PPP2R5D	protein phosphatase 2, regulatory subunit B', delta
hsa-miR-574-5p	1	0	1	1	1	1	ZFX	zinc finger protein, X-linked
hsa-miR-574-5p	0	0	1	1	1	1	PLD1	phospholipase D1, phosphatidylcholine-specific
hsa-miR-574-5p	1	0	1	1	1	1	MEF2D	myocyte enhancer factor 2D
hsa-miR-574-5p	1	0	1	1	0	0	TNPO2	transportin 2
hsa-miR-574-5p	0	0	1	0	0	0	MIAT	myocardial infarction associated transcript (non-protein coding)
hsa-miR-574-5p	1	0	1	0	1	1	MLL2	myeloid/lymphoid or mixed-lineage leukemia 2
hsa-miR-574-5p	1	0	1	0	1	1	PDE4D	phosphodiesterase 4D, cAMP-specific
hsa-miR-574-5p	0	0	1	0	1	1	ZMYM2	zinc finger, MYM-type 2
hsa-miR-574-5p	0	0	1	1	0	0	KIR2DL3	killer cell immunoglobulin-like receptor, two domains, long cytoplasmic tail, 3
hsa-miR-574-5p	1	0	1	1	1	1	MYT1L	myelin transcription factor 1-like
hsa-miR-574-5p	0	0	1	1	1	1	CD84	CD84 molecule
hsa-miR-574-5p	1	0	1	1	1	1	SHOC2	soc-2 suppressor of clear homolog (C. elegans)
hsa-miR-574-5p	0	0	1	0	1	1	GPR98	G protein-coupled receptor 98
hsa-miR-574-5p	0	0	1	1	1	1	SLIT2	slit homolog 2 (Drosophila)
hsa-miR-574-5p	1	0	1	1	1	1	MBNL2	muscleblind-like splicing regulator 2
hsa-miR-574-5p	1	0	1	1	1	1	ERLIN1	ER lipid raft associated 1
hsa-miR-574-5p	1	0	1	1	0	0	PAK1	p21 protein (Cdc42/Rac)-activated kinase 1
hsa-miR-574-5p	0	0	1	1	1	1	EPN1	epsin 1
hsa-miR-574-5p	0	0	1	1	0	0	SGK223	homolog of rat pragma of Rnd2
hsa-miR-574-5p	0	0	1	1	0	0	CARD10	caspase recruitment domain family, member 10
hsa-miR-574-5p	1	0	1	1	1	1	VAPB	VAMP (vesicle-associated membrane protein)-associated protein B and C
hsa-miR-574-5p	0	0	1	1	1	1	RGS7	regulator of G-protein signaling 7
hsa-miR-574-5p	0	0	1	1	1	1	PCBP4	poly(rC) binding protein 4
hsa-miR-574-5p	1	0	1	1	1	1	SLMAP	sarcolemma associated protein
hsa-miR-574-5p	1	0	1	0	1	1	CD164	CD164 molecule, sialomucin
hsa-miR-574-5p	0	0	1	1	1	1	EIF2A	eukaryotic translation initiation factor 2A, 65kDa
hsa-miR-574-5p	1	0	1	1	1	1	EDNRB	endothelin receptor type B
hsa-miR-574-5p	0	0	1	1	1	1	DMRT2	doublesex and mab-3 related transcription factor 2
hsa-miR-574-5p	1	0	1	1	1	1	SORBS1	sorbin and SH3 domain containing 1
hsa-miR-574-5p	0	0	1	0	1	1	CLEC5A	C-type lectin domain family 5, member A
hsa-miR-574-5p	0	0	1	1	1	1	HEPH	hephaestin
hsa-miR-574-5p	1	0	1	1	1	1	USP25	ubiquitin specific peptidase 25
hsa-miR-574-5p	0	0	1	1	0	0	SLC24A2	solute carrier family 24 (sodium/potassium/calcium exchanger), member 2
hsa-miR-574-5p	0	0	1	1	1	1	SLC39A8	solute carrier family 39 (zinc transporter), member 8
hsa-miR-574-5p	1	0	1	1	1	1	TSC22D2	TSC22 domain family, member 2
hsa-miR-574-5p	0	0	1	1	1	1	SLCO2B1	solute carrier organic anion transporter family, member 2B1
hsa-miR-574-5p	1	0	1	1	1	1	NXT2	nuclear transport factor 2-like export factor 2
hsa-miR-574-5p	0	0	1	1	1	1	CD28	CD28 molecule
hsa-miR-574-5p	1	0	1	1	1	1	SUFU	suppressor of fused homolog (Drosophila)
hsa-miR-574-5p	0	0	1	1	0	0	SH2B1	SH2B adaptor protein 1
hsa-miR-574-5p	1	0	1	1	1	1	DESI2	desumoylating isopeptidase 2
hsa-miR-574-5p	1	0	1	1	1	1	ABI2	abl-interactor 2
hsa-miR-574-5p	1	0	1	1	1	1	RBM47	RNA binding motif protein 47
hsa-miR-574-5p	1	0	1	0	1	1	TRPS1	trichorhinophalangeal syndrome I
hsa-miR-574-5p	0	0	1	1	0	0	HPSE2	heparanase 2
hsa-miR-574-5p	0	0	1	0	0	0	LOC645355	uncharacterized LOC645355
hsa-miR-574-5p	1	0	1	1	1	1	KLHL12	kelch-like 12 (Drosophila)
hsa-miR-574-5p	0	0	1	1	0	0	TTTY7	testis-specific transcript, Y-linked 7 (non-protein coding)
hsa-miR-574-5p	1	0	1	1	1	1	CALU	calumenin
hsa-miR-574-5p	0	0	1	1	1	1	SLC6A15	solute carrier family 6 (neutral amino acid transporter), member 15
hsa-miR-574-5p	1	0	1	1	1	1	KCNIP2	Kv channel interacting protein 2
hsa-miR-574-5p	1	0	1	0	1	1	WIPF2	WAS/WASL interacting protein family, member 2
hsa-miR-574-5p	1	0	1	1	1	1	CALCOCO1	calcium binding and coiled-coil domain 1
hsa-miR-574-5p	1	0	1	1	1	1	LARP4	La ribonucleoprotein domain family, member 4
hsa-miR-574-5p	0	0	1	1	0	0	SNRPN	small nuclear ribonucleoprotein polypeptide N
hsa-miR-574-5p	1	0	1	1	1	1	NTRK2	neurotrophic tyrosine kinase, receptor, type 2
hsa-miR-574-5p	0	0	1	0	0	0	ABCC13	ATP-binding cassette, sub-family C (CFTR/MRP), member 13, pseudogene
hsa-miR-574-5p	1	0	1	1	0	0	FOXP2	forkhead box P2
hsa-miR-574-5p	1	0	1	1	1	1	HNRNPU	heterogeneous nuclear ribonucleoprotein U (scaffold attachment factor A)
hsa-miR-574-5p	1	0	1	1	1	1	CACNB2	calcium channel, voltage-dependent, beta 2 subunit
hsa-miR-574-5p	1	0	1	1	1	1	ZC3H14	zinc finger CCCH-type containing 14
hsa-miR-574-5p	0	0	1	1	1	1	SLC2A14	solute carrier family 2 (facilitated glucose transporter), member 14
hsa-miR-574-5p	0	0	1	1	1	1	BMP2K	BMP2 inducible kinase
hsa-miR-574-5p	1	0	1	1	1	1	PTBP2	polypyrimidine tract binding protein 2
hsa-miR-574-5p	1	0	1	0	1	1	IL1RAP	interleukin 1 receptor accessory protein
hsa-miR-574-5p	0	0	1	1	1	1	ANKRD36B	ankyrin repeat domain 36B
hsa-miR-574-5p	1	0	1	1	1	1	AFF2	AF4/FMR2 family, member 2
hsa-miR-574-5p	1	0	1	1	0	0	PNPLA6	patatin-like phospholipase domain containing 6
hsa-miR-574-5p	0	0	1	1	0	0	ADAMTS13	ADAM metallopeptidase with thrombospondin type 1 motif, 13
hsa-miR-574-5p	1	0	1	1	1	1	SUCO	SUN domain containing ossification factor
hsa-miR-574-5p	0	0	1	1	1	1	CLDND1	claudin domain containing 1
hsa-miR-574-5p	0	0	1	1	1	1	CD1E	CD1e molecule
hsa-miR-574-5p	1	0	1	1	1	1	PALM2	paralemmin 2
hsa-miR-574-5p	0	0	1	0	0	0	LY6G6E	lymphocyte antigen 6 complex, locus G6E (pseudogene)
hsa-miR-574-5p	1	0	1	1	1	1	NRXN3	neurexin 3
hsa-miR-574-5p	0	0	1	1	1	1	BPHL	biphenyl hydrolase-like (serine hydrolase)
hsa-miR-574-5p	1	0	1	1	1	1	NOX4	NADPH oxidase 4
hsa-miR-574-5p	0	0	1	1	1	1	SLC8A3	solute carrier family 8 (sodium/calcium exchanger), member 3
hsa-miR-574-5p	0	0	1	1	0	0	OTOP2	otopetrin 2
hsa-miR-574-5p	1	0	1	1	1	1	PPP1R9A	protein phosphatase 1, regulatory subunit 9A
hsa-miR-574-5p	1	0	1	1	0	0	TRPM4	transient receptor potential cation channel, subfamily M, member 4
hsa-miR-574-5p	1	0	1	1	1	1	AKAP2	A kinase (PRKA) anchor protein 2
hsa-miR-574-5p	1	0	1	0	1	1	NFAT5	nuclear factor of activated T-cells 5, tonicity-responsive
hsa-miR-574-5p	1	0	1	1	1	1	ENOX2	ecto-NOX disulfide-thiol exchanger 2
hsa-miR-574-5p	0	0	1	1	1	1	OLFM4	olfactomedin 4
hsa-miR-574-5p	1	0	1	1	1	1	HNRNPF	heterogeneous nuclear ribonucleoprotein F
hsa-miR-574-5p	0	0	1	1	1	1	STOX2	storkhead box 2
hsa-miR-574-5p	0	0	1	1	1	1	RNF220	ring finger protein 220
hsa-miR-574-5p	1	0	1	0	1	1	CLIC4	chloride intracellular channel 4
hsa-miR-574-5p	1	0	1	1	1	1	PTBP3	polypyrimidine tract binding protein 3
hsa-miR-574-5p	1	0	1	1	1	1	MYEF2	myelin expression factor 2
hsa-miR-574-5p	1	0	1	1	1	1	INSIG2	insulin induced gene 2
hsa-miR-574-5p	0	0	1	1	0	0	ANAPC7	anaphase promoting complex subunit 7
hsa-miR-574-5p	0	0	1	1	0	0	UBR4	ubiquitin protein ligase E3 component n-recognin 4
hsa-miR-574-5p	0	0	1	1	1	1	CCPG1	cell cycle progression 1
hsa-miR-574-5p	1	0	1	1	1	1	SUN1	Sad1 and UNC84 domain containing 1
hsa-miR-574-5p	1	0	1	1	0	0	UQCC	ubiquinol-cytochrome c reductase complex chaperone
hsa-miR-574-5p	0	0	1	0	0	0	SOX2-OT	SOX2 overlapping transcript (non-protein coding)
hsa-miR-574-5p	0	0	1	1	1	1	INPP5B	inositol polyphosphate-5-phosphatase, 75kDa
hsa-miR-574-5p	0	0	1	1	1	1	SPATA5L1	spermatogenesis associated 5-like 1
hsa-miR-574-5p	0	0	1	1	1	1	SMYD3	SET and MYND domain containing 3
hsa-miR-574-5p	1	0	1	1	1	1	POMT2	protein-O-mannosyltransferase 2
hsa-miR-574-5p	0	0	1	0	0	0	LOC284561	uncharacterized LOC284561
hsa-miR-574-5p	0	0	1	0	1	1	FLJ14186	uncharacterized LOC401149
hsa-miR-574-5p	1	0	1	1	1	1	COPS7B	COP9 constitutive photomorphogenic homolog subunit 7B (Arabidopsis)
hsa-miR-574-5p	0	0	1	1	1	1	UNC13D	unc-13 homolog D (C. elegans)
hsa-miR-574-5p	0	0	1	0	0	0	IFFO2	intermediate filament family orphan 2
hsa-miR-574-5p	1	0	1	1	1	1	ARFGEF1	ADP-ribosylation factor guanine nucleotide-exchange factor 1 (brefeldin A-inhibited)
hsa-miR-574-5p	1	0	1	0	1	1	ZCCHC3	zinc finger, CCHC domain containing 3
hsa-miR-574-5p	0	0	1	0	0	0	CCDC85C	coiled-coil domain containing 85C
hsa-miR-574-5p	0	0	1	0	1	1	FLJ22763	uncharacterized LOC401081
hsa-miR-574-5p	1	0	1	1	1	1	DCAF8	DDB1 and CUL4 associated factor 8
hsa-miR-574-5p	0	0	1	1	1	1	GTF2H1	general transcription factor IIH, polypeptide 1, 62kDa
hsa-miR-574-5p	1	0	1	1	1	1	RNF185	ring finger protein 185
hsa-miR-574-5p	1	0	1	1	1	1	MARK1	MAP/microtubule affinity-regulating kinase 1
hsa-miR-574-5p	1	0	1	1	1	1	NFASC	neurofascin
hsa-miR-574-5p	1	0	1	1	1	1	GPD2	glycerol-3-phosphate dehydrogenase 2 (mitochondrial)
hsa-miR-574-5p	0	0	1	1	0	0	FAM153B	family with sequence similarity 153, member B
hsa-miR-574-5p	1	0	1	1	1	1	MBD5	methyl-CpG binding domain protein 5
hsa-miR-574-5p	1	0	1	0	1	1	AP1G1	adaptor-related protein complex 1, gamma 1 subunit
hsa-miR-574-5p	0	0	1	0	0	0	CASC2	cancer susceptibility candidate 2 (non-protein coding)
hsa-miR-574-5p	0	0	1	1	1	1	BCAR3	breast cancer anti-estrogen resistance 3
hsa-miR-574-5p	1	0	1	1	1	1	DIXDC1	DIX domain containing 1
hsa-miR-574-5p	1	0	1	1	1	1	TMTC1	transmembrane and tetratricopeptide repeat containing 1
hsa-miR-574-5p	0	0	1	1	0	0	BEAN1	brain expressed, associated with NEDD4, 1
hsa-miR-574-5p	1	0	1	1	0	0	SLC26A6	solute carrier family 26, member 6
hsa-miR-574-5p	1	0	1	1	1	1	SHISA5	shisa homolog 5 (Xenopus laevis)
hsa-miR-574-5p	1	0	1	1	1	1	ZIC4	Zic family member 4
hsa-miR-574-5p	0	0	1	0	1	1	FAM70A	family with sequence similarity 70, member A
hsa-miR-574-5p	1	0	1	1	1	1	CLCN5	chloride channel, voltage-sensitive 5
hsa-miR-574-5p	0	0	1	1	0	0	PYGM	phosphorylase, glycogen, muscle
hsa-miR-574-5p	1	0	1	1	1	1	SORBS2	sorbin and SH3 domain containing 2
hsa-miR-574-5p	1	0	1	1	1	1	PUM1	pumilio homolog 1 (Drosophila)
hsa-miR-574-5p	0	0	1	1	1	1	GNB2	guanine nucleotide binding protein (G protein), beta polypeptide 2
hsa-miR-574-5p	1	0	1	1	1	1	GABARAPL1	GABA(A) receptor-associated protein like 1
hsa-miR-574-5p	1	0	1	1	1	1	ZBTB10	zinc finger and BTB domain containing 10
hsa-miR-574-5p	1	0	1	0	1	1	PCGF3	polycomb group ring finger 3
hsa-miR-574-5p	0	0	1	1	1	1	PSME3	proteasome (prosome, macropain) activator subunit 3 (PA28 gamma; Ki)
hsa-miR-574-5p	0	0	1	1	0	0	NXF2	nuclear RNA export factor 2
hsa-miR-574-5p	0	0	1	1	1	1	ZBTB26	zinc finger and BTB domain containing 26
hsa-miR-574-5p	1	0	1	0	1	1	PLEKHA1	pleckstrin homology domain containing, family A (phosphoinositide binding specific) member 1
hsa-miR-574-5p	1	0	1	0	1	1	NCAM1	neural cell adhesion molecule 1
hsa-miR-574-5p	0	0	1	1	1	1	A2ML1	alpha-2-macroglobulin-like 1
hsa-miR-574-5p	0	0	1	1	0	0	CERS5	ceramide synthase 5
hsa-miR-574-5p	0	0	1	0	0	0	LINC00301	long intergenic non-protein coding RNA 301
hsa-miR-574-5p	0	0	1	1	0	0	MRPL46	mitochondrial ribosomal protein L46
hsa-miR-574-5p	1	0	1	1	1	1	FAM73B	family with sequence similarity 73, member B
hsa-miR-574-5p	1	0	1	1	0	0	LRCH4	leucine-rich repeats and calponin homology (CH) domain containing 4
hsa-miR-574-5p	0	0	1	1	1	1	HDAC8	histone deacetylase 8
hsa-miR-574-5p	0	0	1	1	1	1	ZNF460	zinc finger protein 460
hsa-miR-574-5p	0	0	1	1	0	0	NISCH	nischarin
hsa-miR-574-5p	0	0	1	1	0	0	CPAMD8	C3 and PZP-like, alpha-2-macroglobulin domain containing 8
hsa-miR-574-5p	0	0	1	1	1	1	CAMKV	CaM kinase-like vesicle-associated
hsa-miR-574-5p	0	0	1	1	0	0	LGR5	leucine-rich repeat containing G protein-coupled receptor 5
hsa-miR-574-5p	1	0	1	1	1	1	STXBP5	syntaxin binding protein 5 (tomosyn)
hsa-miR-574-5p	1	0	1	1	1	1	TLK1	tousled-like kinase 1
hsa-miR-574-5p	1	0	1	1	1	1	CYP46A1	cytochrome P450, family 46, subfamily A, polypeptide 1
hsa-miR-574-5p	0	0	1	0	0	0	LOC643837	uncharacterized LOC643837
hsa-miR-574-5p	0	0	1	1	1	1	MAPK10	mitogen-activated protein kinase 10
hsa-miR-574-5p	0	0	1	1	1	1	CCDC102B	coiled-coil domain containing 102B
hsa-miR-574-5p	1	0	1	1	1	1	EGR2	early growth response 2
hsa-miR-574-5p	0	0	1	1	1	1	POU2F1	POU class 2 homeobox 1
hsa-miR-574-5p	1	0	1	1	1	1	TSN	translin
hsa-miR-574-5p	1	0	1	0	1	1	TEF	thyrotrophic embryonic factor
hsa-miR-574-5p	1	0	1	1	1	1	LUC7L2	LUC7-like 2 (S. cerevisiae)
hsa-miR-574-5p	1	0	1	1	1	1	HDAC2	histone deacetylase 2
hsa-miR-574-5p	1	0	1	1	1	1	GNG2	guanine nucleotide binding protein (G protein), gamma 2
hsa-miR-574-5p	1	0	1	1	1	1	MAFK	v-maf musculoaponeurotic fibrosarcoma oncogene homolog K (avian)
hsa-miR-574-5p	1	0	1	1	0	0	PRMT8	protein arginine methyltransferase 8
hsa-miR-574-5p	0	0	1	1	0	0	EIF3B	eukaryotic translation initiation factor 3, subunit B
hsa-miR-574-5p	1	0	1	0	0	0	SH3RF3	SH3 domain containing ring finger 3
hsa-miR-574-5p	0	0	1	0	0	0	CXXC1P1	CXXC finger protein 1 pseudogene 1
hsa-miR-574-5p	1	0	1	1	1	1	SSH3	slingshot homolog 3 (Drosophila)
hsa-miR-574-5p	1	0	1	0	1	1	MAGIX	MAGI family member, X-linked
hsa-miR-574-5p	1	0	1	1	1	1	KCND1	potassium voltage-gated channel, Shal-related subfamily, member 1
hsa-miR-574-5p	1	0	1	1	1	1	SNAP25	synaptosomal-associated protein, 25kDa
hsa-miR-574-5p	0	0	1	0	0	0	ZNF806	zinc finger protein 806
hsa-miR-574-5p	1	0	1	1	1	1	SYT1	synaptotagmin I
hsa-miR-574-5p	0	0	1	1	0	0	C9orf24	chromosome 9 open reading frame 24
hsa-miR-574-5p	0	0	1	1	0	0	CES4A	carboxylesterase 4A
hsa-miR-574-5p	1	0	1	1	1	1	NMT2	N-myristoyltransferase 2
hsa-miR-574-5p	0	0	1	1	1	1	TMEM170A	transmembrane protein 170A
hsa-miR-574-5p	1	0	1	1	1	1	RASGEF1A	RasGEF domain family, member 1A
hsa-miR-574-5p	0	0	1	1	1	1	AES	amino-terminal enhancer of split
hsa-miR-574-5p	0	0	1	0	0	0	LINC00486	long intergenic non-protein coding RNA 486
hsa-miR-574-5p	1	0	1	0	1	1	SLC39A11	solute carrier family 39 (metal ion transporter), member 11
hsa-miR-574-5p	0	0	1	1	0	0	ZNF185	zinc finger protein 185 (LIM domain)
hsa-miR-574-5p	1	0	1	1	1	1	EPHB1	EPH receptor B1
hsa-miR-574-5p	1	0	1	0	1	1	UVRAG	UV radiation resistance associated gene
hsa-miR-574-5p	1	0	1	1	1	1	KCNIP3	Kv channel interacting protein 3, calsenilin
hsa-miR-574-5p	1	0	1	1	1	1	FAM222B	family with sequence similarity 222, member B
hsa-miR-574-5p	1	0	1	1	1	1	SPATS2	spermatogenesis associated, serine-rich 2
hsa-miR-574-5p	0	0	1	0	0	0	LOC284577	uncharacterized LOC284577
hsa-miR-574-5p	1	0	1	1	1	1	ANKRD10	ankyrin repeat domain 10
hsa-miR-574-5p	1	0	1	1	1	1	CS	citrate synthase
hsa-miR-574-5p	1	0	1	1	1	1	PEA15	phosphoprotein enriched in astrocytes 15
hsa-miR-574-5p	0	0	1	1	0	0	MAP7D1	MAP7 domain containing 1
hsa-miR-574-5p	0	0	1	1	1	1	BAG1	BCL2-associated athanogene
hsa-miR-574-5p	1	0	1	1	1	1	AMT	aminomethyltransferase
hsa-miR-574-5p	1	0	1	1	1	1	ACSL1	acyl-CoA synthetase long-chain family member 1
hsa-miR-574-5p	1	0	1	1	1	1	FAM98A	family with sequence similarity 98, member A
hsa-miR-574-5p	1	0	1	1	1	1	GAPVD1	GTPase activating protein and VPS9 domains 1
hsa-miR-574-5p	0	0	1	1	0	0	MX1	myxovirus (influenza virus) resistance 1, interferon-inducible protein p78 (mouse)
hsa-miR-574-5p	0	0	1	0	0	0	METTL21CP1	methyltransferase like 21C pseudogene 1
hsa-miR-574-5p	1	0	1	1	1	1	LRP8	low density lipoprotein receptor-related protein 8, apolipoprotein e receptor
hsa-miR-574-5p	1	0	1	1	1	1	TCEANC2	transcription elongation factor A (SII) N-terminal and central domain containing 2
hsa-miR-574-5p	1	0	1	0	1	1	THRB	thyroid hormone receptor, beta
hsa-miR-574-5p	0	0	1	1	1	1	DNM1	dynamin 1
hsa-miR-574-5p	0	0	1	1	1	1	EPHX2	epoxide hydrolase 2, cytoplasmic
hsa-miR-574-5p	1	0	1	1	1	1	EPB41L1	erythrocyte membrane protein band 4.1-like 1
hsa-miR-574-5p	0	0	1	0	1	1	FLJ39639	uncharacterized protein FLJ39639
hsa-miR-574-5p	1	0	1	1	1	1	CAPN2	calpain 2, (m/II) large subunit
hsa-miR-574-5p	1	0	1	1	1	1	TMEM185A	transmembrane protein 185A
hsa-miR-574-5p	1	0	1	1	1	1	RAB11FIP4	RAB11 family interacting protein 4 (class II)
hsa-miR-574-5p	1	0	1	0	1	1	AGFG1	ArfGAP with FG repeats 1
hsa-miR-574-5p	0	0	1	0	0	0	LINC00293	long intergenic non-protein coding RNA 293
hsa-miR-574-5p	1	0	1	1	1	1	NSUN4	NOP2/Sun domain family, member 4
hsa-miR-574-5p	0	0	1	0	0	0	LOC285626	uncharacterized LOC285626
hsa-miR-574-5p	1	0	1	1	1	1	GOLGA8B	golgin A8 family, member B
hsa-miR-574-5p	0	0	1	1	1	1	ADGB	androglobin
hsa-miR-574-5p	0	0	1	1	0	0	PSAPL1	prosaposin-like 1 (gene/pseudogene)
hsa-miR-574-5p	0	0	1	1	0	0	HNRNPL	heterogeneous nuclear ribonucleoprotein L
hsa-miR-574-5p	1	0	1	1	1	1	ZCCHC2	zinc finger, CCHC domain containing 2
hsa-miR-574-5p	0	0	1	1	0	0	DCBLD1	discoidin, CUB and LCCL domain containing 1
hsa-miR-574-5p	1	0	1	1	0	0	ENTPD1	ectonucleoside triphosphate diphosphohydrolase 1
hsa-miR-574-5p	0	0	1	1	1	1	GTF2IRD2	GTF2I repeat domain containing 2
hsa-miR-574-5p	0	0	1	1	1	1	GRPEL1	GrpE-like 1, mitochondrial (E. coli)
hsa-miR-574-5p	1	0	1	1	1	1	THTPA	thiamine triphosphatase
hsa-miR-574-5p	1	0	1	1	1	1	NDFIP2	Nedd4 family interacting protein 2
hsa-miR-574-5p	0	0	1	1	0	0	SYT17	synaptotagmin XVII
hsa-miR-574-5p	1	0	1	1	1	1	CRMP1	collapsin response mediator protein 1
hsa-miR-574-5p	1	0	1	1	1	1	RPS6KC1	ribosomal protein S6 kinase, 52kDa, polypeptide 1
hsa-miR-574-5p	1	0	1	1	1	1	ZBTB4	zinc finger and BTB domain containing 4
hsa-miR-574-5p	0	0	1	1	0	0	DGKA	diacylglycerol kinase, alpha 80kDa
hsa-miR-574-5p	1	0	1	1	1	1	ZNF275	zinc finger protein 275
hsa-miR-574-5p	0	0	1	1	1	1	ARHGEF26	Rho guanine nucleotide exchange factor (GEF) 26
hsa-miR-574-5p	1	0	1	1	1	1	KALRN	kalirin, RhoGEF kinase
hsa-miR-574-5p	0	0	1	1	1	1	DNAJC24	DnaJ (Hsp40) homolog, subfamily C, member 24
hsa-miR-574-5p	1	0	1	1	0	0	KCNC1	potassium voltage-gated channel, Shaw-related subfamily, member 1
hsa-miR-574-5p	0	0	1	1	1	1	FAM5B	family with sequence similarity 5, member B
hsa-miR-574-5p	1	0	1	1	1	1	EGLN3	egl nine homolog 3 (C. elegans)
hsa-miR-574-5p	0	0	1	0	0	0	MORN2	MORN repeat containing 2
hsa-miR-574-5p	0	0	1	0	0	0	TMPRSS11BNL	TMPRSS11B N terminal-like
hsa-miR-574-5p	0	0	1	0	0	0	LOC650368	asparagine-linked glycosylation 1-like pseudogene
hsa-miR-574-5p	1	0	1	1	1	1	IPPK	inositol 1,3,4,5,6-pentakisphosphate 2-kinase
hsa-miR-574-5p	0	0	1	1	1	1	NOSTRIN	nitric oxide synthase trafficker
hsa-miR-574-5p	1	0	1	0	1	1	WDR82	WD repeat domain 82
hsa-miR-574-5p	1	0	1	0	0	0	GPR137C	G protein-coupled receptor 137C
hsa-miR-574-5p	1	0	1	1	1	1	OSBPL9	oxysterol binding protein-like 9
hsa-miR-574-5p	0	0	1	0	0	0	IL10RB	interleukin 10 receptor, beta
hsa-miR-574-5p	0	0	1	1	1	1	SLC9A1	solute carrier family 9, subfamily A (NHE1, cation proton antiporter 1), member 1
hsa-miR-574-5p	1	0	1	1	1	1	GJC1	gap junction protein, gamma 1, 45kDa
hsa-miR-574-5p	1	0	1	1	1	1	ABR	active BCR-related
hsa-miR-574-5p	0	0	1	0	0	0	LOC728716	uncharacterized LOC728716
hsa-miR-574-5p	1	0	1	1	1	1	C17orf85	chromosome 17 open reading frame 85
hsa-miR-574-5p	0	0	1	1	0	0	LOC100128239	uncharacterized LOC100128239
hsa-miR-574-5p	1	0	1	1	1	1	C15orf52	chromosome 15 open reading frame 52
hsa-miR-574-5p	1	0	1	0	0	0	ANKRD52	ankyrin repeat domain 52
hsa-miR-574-5p	1	0	1	1	1	1	DLGAP4	discs, large (Drosophila) homolog-associated protein 4
hsa-miR-574-5p	1	0	1	1	1	1	ATP11C	ATPase, class VI, type 11C
hsa-miR-574-5p	1	0	1	1	1	1	FAM122B	family with sequence similarity 122B
hsa-miR-574-5p	1	0	1	1	0	0	KIAA1211	KIAA1211
hsa-miR-574-5p	0	0	1	1	0	0	FSIP2	fibrous sheath interacting protein 2
hsa-miR-574-5p	1	0	1	1	0	0	ATXN7L3	ataxin 7-like 3
hsa-miR-574-5p	0	0	1	0	1	1	LOC388942	uncharacterized LOC388942
hsa-miR-574-5p	1	0	1	1	1	1	KLC2	kinesin light chain 2
hsa-miR-574-5p	0	0	1	1	1	1	TGM2	transglutaminase 2 (C polypeptide, protein-glutamine-gamma-glutamyltransferase)
hsa-miR-574-5p	1	0	1	1	1	1	DMXL1	Dmx-like 1
hsa-miR-574-5p	1	0	1	1	1	1	DLG2	discs, large homolog 2 (Drosophila)
hsa-miR-574-5p	0	0	1	1	0	0	TMEM151B	transmembrane protein 151B
hsa-miR-574-5p	0	0	1	1	1	1	SPICE1	spindle and centriole associated protein 1
hsa-miR-574-5p	0	0	1	1	1	1	KLC4	kinesin light chain 4
hsa-miR-574-5p	1	0	1	1	1	1	MKRN1	makorin ring finger protein 1
hsa-miR-574-5p	1	0	1	0	1	1	ADIPOR2	adiponectin receptor 2
hsa-miR-574-5p	1	0	1	1	1	1	KANK4	KN motif and ankyrin repeat domains 4
hsa-miR-574-5p	1	0	1	1	1	1	ENAH	enabled homolog (Drosophila)
hsa-miR-574-5p	1	0	1	0	1	1	SP6	Sp6 transcription factor
hsa-miR-574-5p	1	0	1	0	1	1	FNDC3B	fibronectin type III domain containing 3B
hsa-miR-574-5p	0	0	1	1	0	0	AADACL3	arylacetamide deacetylase-like 3
hsa-miR-574-5p	0	0	1	1	1	1	MCU	mitochondrial calcium uniporter
hsa-miR-574-5p	1	0	1	1	1	1	SLC12A6	solute carrier family 12 (potassium/chloride transporters), member 6
hsa-miR-574-5p	1	0	1	0	1	1	KDM2A	lysine (K)-specific demethylase 2A
hsa-miR-574-5p	1	0	1	1	1	1	BCAT1	branched chain amino-acid transaminase 1, cytosolic
hsa-miR-574-5p	0	0	1	0	0	0	LOC100129940	uncharacterized LOC100129940
hsa-miR-574-5p	1	0	1	1	1	1	PHC2	polyhomeotic homolog 2 (Drosophila)
hsa-miR-574-5p	1	0	1	1	1	1	RBM24	RNA binding motif protein 24
hsa-miR-574-5p	0	0	1	1	1	1	ENPP2	ectonucleotide pyrophosphatase/phosphodiesterase 2
hsa-miR-574-5p	1	0	1	1	1	1	SMAD7	SMAD family member 7
hsa-miR-574-5p	0	0	1	1	1	1	NR4A1	nuclear receptor subfamily 4, group A, member 1
hsa-miR-574-5p	1	0	1	1	1	1	CYYR1	cysteine/tyrosine-rich 1
hsa-miR-574-5p	0	0	1	0	1	1	BCAS1	breast carcinoma amplified sequence 1
hsa-miR-574-5p	1	0	1	1	1	1	CAMK2G	calcium/calmodulin-dependent protein kinase II gamma
hsa-miR-574-5p	1	0	1	0	1	1	MAP3K3	mitogen-activated protein kinase kinase kinase 3
hsa-miR-574-5p	1	0	1	1	1	1	COBLL1	COBL-like 1
hsa-miR-574-5p	1	0	1	1	1	1	EDN1	endothelin 1
hsa-miR-574-5p	1	0	1	0	1	1	TEAD3	TEA domain family member 3
hsa-miR-574-5p	1	0	1	1	1	1	AHCYL1	adenosylhomocysteinase-like 1
hsa-miR-574-5p	1	0	1	1	0	0	PRRC2B	proline-rich coiled-coil 2B
hsa-miR-574-5p	0	0	1	0	0	0	PART1	prostate androgen-regulated transcript 1 (non-protein coding)
hsa-miR-574-5p	0	0	1	1	0	0	PLK1S1	polo-like kinase 1 substrate 1
hsa-miR-574-5p	1	0	1	0	1	1	SLC2A3	solute carrier family 2 (facilitated glucose transporter), member 3
hsa-miR-574-5p	1	0	1	1	1	1	TAB2	TGF-beta activated kinase 1/MAP3K7 binding protein 2
hsa-miR-574-5p	0	0	1	1	0	0	TBC1D10B	TBC1 domain family, member 10B
hsa-miR-574-5p	0	0	1	0	0	0	POM121L8P	POM121 transmembrane nucleoporin-like 8 pseudogene
hsa-miR-574-5p	0	0	1	0	0	0	TPTE2P6	transmembrane phosphoinositide 3-phosphatase and tensin homolog 2 pseudogene 6
hsa-miR-574-5p	1	0	1	1	1	1	SMAP2	small ArfGAP2
hsa-miR-574-5p	0	0	1	1	1	1	KIDINS220	kinase D-interacting substrate, 220kDa
hsa-miR-574-5p	0	0	1	0	0	0	DNAJC5B	DnaJ (Hsp40) homolog, subfamily C, member 5 beta
hsa-miR-574-5p	1	0	1	1	1	1	PREX1	phosphatidylinositol-3,4,5-trisphosphate-dependent Rac exchange factor 1
hsa-miR-574-5p	1	0	1	1	1	1	GOLGA8A	golgin A8 family, member A
hsa-miR-574-5p	1	0	1	1	1	1	NBEA	neurobeachin
hsa-miR-574-5p	0	0	1	1	0	0	DOPEY1	dopey family member 1
hsa-miR-574-5p	0	0	1	1	1	1	SLC30A10	solute carrier family 30, member 10
hsa-miR-574-5p	1	0	1	1	1	1	PKNOX2	PBX/knotted 1 homeobox 2
hsa-miR-574-5p	0	0	1	1	1	1	COBL	cordon-bleu homolog (mouse)
hsa-miR-574-5p	1	0	1	1	1	1	YTHDF3	YTH domain family, member 3
hsa-miR-574-5p	1	0	1	1	1	1	TMEFF1	transmembrane protein with EGF-like and two follistatin-like domains 1
hsa-miR-574-5p	0	0	1	1	1	1	ZFP41	zinc finger protein 41 homolog (mouse)
hsa-miR-574-5p	1	0	1	1	1	1	MIER1	mesoderm induction early response 1 homolog (Xenopus laevis)
hsa-miR-574-5p	0	0	1	0	1	1	GAB3	GRB2-associated binding protein 3
hsa-miR-574-5p	0	0	1	1	1	1	BEND7	BEN domain containing 7
hsa-miR-574-5p	0	0	1	0	0	0	ZNF720	zinc finger protein 720
hsa-miR-574-5p	1	0	1	1	1	1	FAM126B	family with sequence similarity 126, member B
hsa-miR-574-5p	1	0	1	0	1	1	GPAM	glycerol-3-phosphate acyltransferase, mitochondrial
hsa-miR-574-5p	1	0	1	1	1	1	RNF180	ring finger protein 180
hsa-miR-574-5p	0	0	1	1	1	1	YAP1	Yes-associated protein 1
hsa-miR-574-5p	0	0	1	1	1	1	NEK9	NIMA (never in mitosis gene a)- related kinase 9
hsa-miR-574-5p	0	0	1	1	1	1	CCDC125	coiled-coil domain containing 125
hsa-miR-574-5p	1	0	1	1	1	1	SBF2	SET binding factor 2
hsa-miR-574-5p	1	0	1	0	1	1	GPCPD1	glycerophosphocholine phosphodiesterase GDE1 homolog (S. cerevisiae)
hsa-miR-574-5p	0	0	1	1	1	1	CCDC132	coiled-coil domain containing 132
hsa-miR-574-5p	0	0	1	0	1	1	PLEKHM1P	pleckstrin homology domain containing, family M (with RUN domain) member 1 pseudogene
hsa-miR-574-5p	1	0	1	1	1	1	BPTF	bromodomain PHD finger transcription factor
hsa-miR-574-5p	0	0	1	1	1	1	SOAT1	sterol O-acyltransferase 1
hsa-miR-574-5p	1	0	1	0	1	1	EXOC5	exocyst complex component 5
hsa-miR-574-5p	1	0	1	1	1	1	ATAT1	alpha tubulin acetyltransferase 1
hsa-miR-574-5p	0	0	1	1	0	0	TTLL6	tubulin tyrosine ligase-like family, member 6
hsa-miR-574-5p	1	0	1	1	1	1	RICTOR	RPTOR independent companion of MTOR, complex 2
hsa-miR-574-5p	1	0	1	0	1	1	NR3C1	nuclear receptor subfamily 3, group C, member 1 (glucocorticoid receptor)
hsa-miR-574-5p	1	0	1	0	1	1	PATL1	protein associated with topoisomerase II homolog 1 (yeast)
hsa-miR-574-5p	0	0	1	1	0	0	AUH	AU RNA binding protein/enoyl-CoA hydratase
hsa-miR-574-5p	0	0	1	1	1	1	TMEM130	transmembrane protein 130
hsa-miR-574-5p	0	0	1	0	0	0	PMCHL1	pro-melanin-concentrating hormone-like 1, pseudogene
hsa-miR-574-5p	0	0	1	0	0	0	PMCHL2	pro-melanin-concentrating hormone-like 2, pseudogene
hsa-miR-574-5p	0	0	1	1	1	1	KLHL7	kelch-like 7 (Drosophila)
hsa-miR-574-5p	0	0	1	1	1	1	ELAVL4	ELAV (embryonic lethal, abnormal vision, Drosophila)-like 4
hsa-miR-574-5p	1	0	1	1	1	1	RCAN2	regulator of calcineurin 2
hsa-miR-574-5p	1	0	1	1	1	1	SYNCRIP	synaptotagmin binding, cytoplasmic RNA interacting protein
hsa-miR-574-5p	1	0	1	1	1	1	DUSP16	dual specificity phosphatase 16
hsa-miR-574-5p	0	0	1	1	1	1	CRB1	crumbs homolog 1 (Drosophila)
hsa-miR-574-5p	1	0	1	0	1	1	BDNF	brain-derived neurotrophic factor
hsa-miR-574-5p	1	0	1	1	1	1	MIPOL1	mirror-image polydactyly 1
hsa-miR-574-5p	1	0	1	1	1	1	MARK4	MAP/microtubule affinity-regulating kinase 4
hsa-miR-574-5p	1	0	1	1	1	1	ANGPT1	angiopoietin 1
hsa-miR-574-5p	0	0	1	0	1	1	ARMC10	armadillo repeat containing 10
hsa-miR-574-5p	0	0	1	1	1	1	CEP41	centrosomal protein 41kDa
hsa-miR-574-5p	1	0	1	1	1	1	BCL11A	B-cell CLL/lymphoma 11A (zinc finger protein)
hsa-miR-574-5p	1	0	1	1	1	1	GFRA2	GDNF family receptor alpha 2
hsa-miR-574-5p	1	0	1	1	1	1	TAB3	TGF-beta activated kinase 1/MAP3K7 binding protein 3
hsa-miR-574-5p	0	0	1	1	1	1	MFAP5	microfibrillar associated protein 5
hsa-miR-574-5p	1	0	1	1	1	1	CAMTA1	calmodulin binding transcription activator 1
hsa-miR-574-5p	0	0	1	1	1	1	GCOM1	GRINL1A complex locus 1
hsa-miR-574-5p	0	0	1	1	0	0	LRRC28	leucine rich repeat containing 28
hsa-miR-574-5p	0	0	1	1	1	1	LINGO2	leucine rich repeat and Ig domain containing 2
hsa-miR-574-5p	0	0	1	1	1	1	SLC22A15	solute carrier family 22, member 15
hsa-miR-574-5p	0	0	1	1	1	1	GPR114	G protein-coupled receptor 114
hsa-miR-574-5p	1	0	1	1	1	1	NLGN4X	neuroligin 4, X-linked
hsa-miR-574-5p	1	0	1	0	1	1	ANKRD28	ankyrin repeat domain 28
hsa-miR-574-5p	1	0	1	1	1	1	ECT2	epithelial cell transforming sequence 2 oncogene
hsa-miR-574-5p	0	0	1	1	1	1	RPTN	repetin
hsa-miR-574-5p	0	0	1	1	1	1	PTPRC	protein tyrosine phosphatase, receptor type, C
hsa-miR-574-5p	0	0	1	1	1	1	TNFSF15	tumor necrosis factor (ligand) superfamily, member 15
hsa-miR-574-5p	0	0	1	1	1	1	TIMM50	translocase of inner mitochondrial membrane 50 homolog (S. cerevisiae)
hsa-miR-574-5p	1	0	1	1	1	1	VPS45	vacuolar protein sorting 45 homolog (S. cerevisiae)
hsa-miR-574-5p	1	0	1	0	1	1	NHS	Nance-Horan syndrome (congenital cataracts and dental anomalies)
hsa-miR-574-5p	0	0	1	1	1	1	POTEG	POTE ankyrin domain family, member G
hsa-miR-574-5p	0	0	1	0	1	1	BRWD3	bromodomain and WD repeat domain containing 3
hsa-miR-574-5p	0	0	1	0	0	0	NPIPL3	nuclear pore complex interacting protein-like 3
hsa-miR-574-5p	0	0	1	1	0	0	SH2D6	SH2 domain containing 6
hsa-miR-574-5p	1	0	1	1	1	1	MOG	myelin oligodendrocyte glycoprotein
hsa-miR-574-5p	0	0	1	0	1	1	RAB18	RAB18, member RAS oncogene family
hsa-miR-574-5p	0	0	1	1	1	1	SMPD1	sphingomyelin phosphodiesterase 1, acid lysosomal
hsa-miR-574-5p	1	0	1	1	1	1	ADAMTS6	ADAM metallopeptidase with thrombospondin type 1 motif, 6
hsa-miR-574-5p	1	0	1	1	1	1	PFKFB4	6-phosphofructo-2-kinase/fructose-2,6-biphosphatase 4
hsa-miR-574-5p	1	0	1	1	1	1	NTNG1	netrin G1
hsa-miR-574-5p	1	0	1	1	1	1	QKI	QKI, KH domain containing, RNA binding
hsa-miR-574-5p	0	0	1	1	0	0	DMKN	dermokine
hsa-miR-574-5p	1	0	1	1	1	1	SAT1	spermidine/spermine N1-acetyltransferase 1
hsa-miR-574-5p	1	0	1	1	0	0	TAF4B	TAF4b RNA polymerase II, TATA box binding protein (TBP)-associated factor, 105kDa
hsa-miR-574-5p	0	0	1	1	1	1	IYD	iodotyrosine deiodinase
hsa-miR-574-5p	0	0	1	0	1	1	MIS12	MIS12, MIND kinetochore complex component, homolog (S. pombe)
hsa-miR-574-5p	0	0	1	0	0	0	VWA5B2	von Willebrand factor A domain containing 5B2
hsa-miR-574-5p	1	0	1	1	1	1	ELOVL6	ELOVL fatty acid elongase 6
hsa-miR-574-5p	0	0	1	1	0	0	GNA11	guanine nucleotide binding protein (G protein), alpha 11 (Gq class)
hsa-miR-574-5p	0	0	1	1	1	1	RLIM	ring finger protein, LIM domain interacting
hsa-miR-574-5p	0	0	1	1	1	1	TMOD1	tropomodulin 1
hsa-miR-574-5p	1	0	1	1	0	0	SLC10A3	solute carrier family 10 (sodium/bile acid cotransporter family), member 3
hsa-miR-574-5p	0	0	1	1	1	1	ZNF589	zinc finger protein 589
hsa-miR-574-5p	1	0	1	1	1	1	POU2F2	POU class 2 homeobox 2
hsa-miR-574-5p	1	0	1	0	1	1	C15orf41	chromosome 15 open reading frame 41
hsa-miR-574-5p	0	0	1	1	1	1	C1orf94	chromosome 1 open reading frame 94
hsa-miR-574-5p	1	0	1	1	1	1	HMGA1	high mobility group AT-hook 1
hsa-miR-574-5p	1	0	1	1	1	1	TNPO3	transportin 3
hsa-miR-574-5p	1	0	1	1	0	0	SIGMAR1	sigma non-opioid intracellular receptor 1
hsa-miR-574-5p	1	0	1	1	1	1	GRIA2	glutamate receptor, ionotropic, AMPA 2
hsa-miR-574-5p	1	0	1	1	1	1	TRIM2	tripartite motif containing 2
hsa-miR-574-5p	0	0	1	1	0	0	TCN2	transcobalamin II
hsa-miR-574-5p	0	0	1	0	0	0	LRRC14	leucine rich repeat containing 14
hsa-miR-574-5p	0	0	1	1	0	0	HDAC6	histone deacetylase 6
hsa-miR-574-5p	0	0	1	1	1	1	GNL3L	guanine nucleotide binding protein-like 3 (nucleolar)-like
hsa-miR-574-5p	0	0	1	1	0	0	CAPNS1	calpain, small subunit 1
hsa-miR-574-5p	0	0	1	1	1	1	PLXDC2	plexin domain containing 2
hsa-miR-574-5p	0	0	1	1	1	1	KLF7	Kruppel-like factor 7 (ubiquitous)
hsa-miR-574-5p	0	0	1	1	1	1	DEDD2	death effector domain containing 2
hsa-miR-574-5p	0	0	1	1	1	1	KLHL29	kelch-like 29 (Drosophila)
hsa-miR-574-5p	1	0	1	1	0	0	LRFN1	leucine rich repeat and fibronectin type III domain containing 1
hsa-miR-574-5p	0	0	1	0	0	0	KLHL15	kelch-like 15 (Drosophila)
hsa-miR-574-5p	1	0	1	0	1	1	NR1D2	nuclear receptor subfamily 1, group D, member 2
hsa-miR-574-5p	1	0	1	1	1	1	NUMBL	numb homolog (Drosophila)-like
hsa-miR-574-5p	1	0	1	1	1	1	NRF1	nuclear respiratory factor 1
hsa-miR-574-5p	0	0	1	1	0	0	ZDHHC6	zinc finger, DHHC-type containing 6
hsa-miR-574-5p	0	0	1	0	0	0	FAM200B	family with sequence similarity 200, member B
hsa-miR-574-5p	1	0	1	1	1	1	ARHGEF9	Cdc42 guanine nucleotide exchange factor (GEF) 9
hsa-miR-574-5p	0	0	1	1	1	1	PRMT3	protein arginine methyltransferase 3
hsa-miR-574-5p	0	0	1	1	0	0	CYP27B1	cytochrome P450, family 27, subfamily B, polypeptide 1
hsa-miR-574-5p	0	0	1	1	1	1	NELL2	NEL-like 2 (chicken)
hsa-miR-574-5p	1	0	1	1	1	1	WHSC1	Wolf-Hirschhorn syndrome candidate 1
hsa-miR-574-5p	1	0	1	1	1	1	TM9SF4	transmembrane 9 superfamily protein member 4
hsa-miR-574-5p	0	0	1	1	0	0	C6orf130	chromosome 6 open reading frame 130
hsa-miR-574-5p	0	0	1	1	1	1	FHL5	four and a half LIM domains 5
hsa-miR-574-5p	1	0	1	1	1	1	SPRYD7	SPRY domain containing 7
hsa-miR-574-5p	0	0	1	1	0	0	FAM89B	family with sequence similarity 89, member B
hsa-miR-574-5p	0	0	1	0	0	0	FLJ35390	uncharacterized LOC255031
hsa-miR-574-5p	1	0	1	1	1	1	NIPA1	non imprinted in Prader-Willi/Angelman syndrome 1
hsa-miR-574-5p	1	0	1	1	1	1	VASP	vasodilator-stimulated phosphoprotein
hsa-miR-574-5p	0	0	1	1	0	0	PRRG2	proline rich Gla (G-carboxyglutamic acid) 2
hsa-miR-574-5p	0	0	1	1	1	1	MAP2	microtubule-associated protein 2
hsa-miR-574-5p	1	0	1	1	1	1	RSPO2	R-spondin 2
hsa-miR-574-5p	1	0	1	1	1	1	APPL2	adaptor protein, phosphotyrosine interaction, PH domain and leucine zipper containing 2
hsa-miR-574-5p	0	0	1	1	0	0	SYT3	synaptotagmin III
hsa-miR-574-5p	0	0	1	0	1	1	PAPOLG	poly(A) polymerase gamma
hsa-miR-574-5p	0	0	1	0	0	0	ANKRD19P	ankyrin repeat domain 19, pseudogene
hsa-miR-574-5p	0	0	1	1	1	1	ASTN2	astrotactin 2
hsa-miR-574-5p	0	0	1	0	0	0	LOC100130950	uncharacterized LOC100130950
hsa-miR-574-5p	1	0	1	1	1	1	SYT9	synaptotagmin IX
hsa-miR-574-5p	0	0	1	1	0	0	TSPAN16	tetraspanin 16
hsa-miR-574-5p	1	0	1	0	1	1	SV2B	synaptic vesicle glycoprotein 2B
hsa-miR-574-5p	1	0	1	1	1	1	TIAL1	TIA1 cytotoxic granule-associated RNA binding protein-like 1
hsa-miR-574-5p	1	0	1	1	1	1	TAF15	TAF15 RNA polymerase II, TATA box binding protein (TBP)-associated factor, 68kDa
hsa-miR-574-5p	1	0	1	1	1	1	GABRA1	gamma-aminobutyric acid (GABA) A receptor, alpha 1
hsa-miR-574-5p	0	0	1	1	1	1	STAT4	signal transducer and activator of transcription 4
hsa-miR-574-5p	0	0	1	0	1	1	FLJ25328	uncharacterized LOC148231
hsa-miR-574-5p	1	0	1	1	1	1	PITPNB	phosphatidylinositol transfer protein, beta
hsa-miR-574-5p	0	0	1	1	0	0	KIAA1324	KIAA1324
hsa-miR-574-5p	0	0	1	1	0	0	TTC12	tetratricopeptide repeat domain 12
hsa-miR-574-5p	1	0	1	1	1	1	FGF1	fibroblast growth factor 1 (acidic)
hsa-miR-574-5p	1	0	1	1	1	1	RAB5B	RAB5B, member RAS oncogene family
hsa-miR-574-5p	0	0	1	0	0	0	FAM86JP	family with sequence similarity 86, member A pseudogene
hsa-miR-574-5p	1	0	1	1	1	1	RHOBTB1	Rho-related BTB domain containing 1
hsa-miR-574-5p	1	0	1	1	1	1	SORL1	sortilin-related receptor, L(DLR class) A repeats containing
hsa-miR-574-5p	1	0	1	1	1	1	SIRPA	signal-regulatory protein alpha
hsa-miR-574-5p	0	0	1	0	0	0	BCAS3	breast carcinoma amplified sequence 3
hsa-miR-574-5p	0	0	1	1	0	0	LINC00176	long intergenic non-protein coding RNA 176
hsa-miR-574-5p	0	0	1	0	0	0	LOC415056	uncharacterized LOC415056
hsa-miR-574-5p	0	0	1	1	1	1	ZNF337	zinc finger protein 337
hsa-miR-574-5p	0	0	1	0	0	0	FAM66C	family with sequence similarity 66, member C
hsa-miR-574-5p	0	0	1	1	1	1	EDA2R	ectodysplasin A2 receptor
hsa-miR-574-5p	1	0	1	0	1	1	DDX3Y	DEAD (Asp-Glu-Ala-Asp) box polypeptide 3, Y-linked
hsa-miR-574-5p	1	0	1	0	1	1	PDE12	phosphodiesterase 12
hsa-miR-574-5p	0	0	1	0	0	0	BOD1L2	biorientation of chromosomes in cell division 1-like 2
hsa-miR-574-5p	1	0	1	1	1	1	NKAIN2	Na+/K+ transporting ATPase interacting 2
hsa-miR-574-5p	1	0	1	1	1	1	RAP2C	RAP2C, member of RAS oncogene family
hsa-miR-574-5p	0	0	1	0	1	1	KSR1	kinase suppressor of ras 1
hsa-miR-574-5p	1	0	1	1	0	0	CKAP5	cytoskeleton associated protein 5
hsa-miR-574-5p	0	0	1	1	1	1	ZNF781	zinc finger protein 781
hsa-miR-574-5p	1	0	1	1	1	1	CTDSPL2	CTD (carboxy-terminal domain, RNA polymerase II, polypeptide A) small phosphatase like 2
hsa-miR-574-5p	0	0	1	1	1	1	CLEC12B	C-type lectin domain family 12, member B
hsa-miR-574-5p	1	0	1	1	1	1	ZNF618	zinc finger protein 618
hsa-miR-574-5p	0	0	1	1	1	1	DUSP28	dual specificity phosphatase 28
hsa-miR-574-5p	0	0	1	0	0	0	LINC00642	long intergenic non-protein coding RNA 642
hsa-miR-574-5p	0	0	1	1	1	1	FAM171B	family with sequence similarity 171, member B
hsa-miR-574-5p	1	0	1	1	1	1	ELMO2	engulfment and cell motility 2
hsa-miR-574-5p	0	0	1	0	0	0	LOC654433	uncharacterized LOC654433
hsa-miR-574-5p	1	0	1	0	1	1	CLDN12	claudin 12
hsa-miR-574-5p	1	0	1	0	1	1	NEGR1	neuronal growth regulator 1
hsa-miR-574-5p	1	0	1	1	0	0	RASGEF1B	RasGEF domain family, member 1B
hsa-miR-574-5p	0	0	1	0	0	0	SRGAP2C	SLIT-ROBO Rho GTPase activating protein 2C
hsa-miR-574-5p	1	0	1	1	1	1	CEP128	centrosomal protein 128kDa
hsa-miR-574-5p	0	0	1	0	0	0	LOC286184	uncharacterized LOC286184
hsa-miR-574-5p	1	0	1	1	0	0	EBF4	early B-cell factor 4
hsa-miR-574-5p	1	0	1	0	1	1	MMD2	monocyte to macrophage differentiation-associated 2
hsa-miR-574-5p	0	0	1	1	1	1	KIAA1328	KIAA1328
hsa-miR-574-5p	1	0	1	1	1	1	GALNT1	UDP-N-acetyl-alpha-D-galactosamine:polypeptide N-acetylgalactosaminyltransferase 1 (GalNAc-T1)
hsa-miR-574-5p	1	0	1	1	1	1	DPP10	dipeptidyl-peptidase 10 (non-functional)
hsa-miR-574-5p	0	0	1	0	0	0	FLJ36000	uncharacterized FLJ36000
hsa-miR-574-5p	1	0	1	1	1	1	FGFR2	fibroblast growth factor receptor 2
hsa-miR-574-5p	1	0	1	0	1	1	GPR107	G protein-coupled receptor 107
hsa-miR-574-5p	1	0	1	1	1	1	INTS6	integrator complex subunit 6
hsa-miR-574-5p	0	0	1	1	0	0	TMEM95	transmembrane protein 95
hsa-miR-574-5p	0	0	1	0	0	0	A1BG-AS1	A1BG antisense RNA 1
hsa-miR-574-5p	0	0	1	1	1	1	PCMTD2	protein-L-isoaspartate (D-aspartate) O-methyltransferase domain containing 2
hsa-miR-574-5p	0	0	1	0	1	1	FAM13B	family with sequence similarity 13, member B
hsa-miR-574-5p	1	0	1	0	1	1	HSPA12A	heat shock 70kDa protein 12A
hsa-miR-574-5p	1	0	1	0	1	1	TNFAIP3	tumor necrosis factor, alpha-induced protein 3
hsa-miR-574-5p	1	0	1	1	1	1	ROCK1	Rho-associated, coiled-coil containing protein kinase 1
hsa-miR-574-5p	0	0	1	1	1	1	C4orf32	chromosome 4 open reading frame 32
hsa-miR-574-5p	0	0	1	0	0	0	LOC338579	ankyrin repeat domain-containing protein 30B pseudogene
hsa-miR-574-5p	0	0	1	0	0	0	LOC157381	uncharacterized LOC157381
hsa-miR-574-5p	0	0	1	0	0	0	SLC8A1-AS1	SLC8A1 antisense RNA 1
hsa-miR-574-5p	0	0	1	0	0	0	FAM27E3	family with sequence similarity 27, member E3
hsa-miR-574-5p	1	0	1	1	1	1	RNF145	ring finger protein 145
hsa-miR-574-5p	0	0	1	1	1	1	MST1	macrophage stimulating 1 (hepatocyte growth factor-like)
hsa-miR-574-5p	0	0	1	0	0	0	LOC283914	uncharacterized LOC283914
hsa-miR-574-5p	1	0	1	1	1	1	PPP2R5B	protein phosphatase 2, regulatory subunit B', beta
hsa-miR-574-5p	1	0	1	1	1	1	SENP1	SUMO1/sentrin specific peptidase 1
hsa-miR-574-5p	0	0	1	0	0	0	LOC286135	uncharacterized LOC286135
hsa-miR-574-5p	0	0	1	1	1	1	EBP	emopamil binding protein (sterol isomerase)
hsa-miR-574-5p	0	0	1	0	0	0	LOC348120	uncharacterized LOC348120
hsa-miR-574-5p	0	0	1	0	1	1	LOC401021	uncharacterized LOC401021
hsa-miR-574-5p	0	0	1	1	1	1	SGOL2	shugoshin-like 2 (S. pombe)
hsa-miR-574-5p	1	0	1	1	1	1	CLVS1	clavesin 1
hsa-miR-574-5p	0	0	1	1	0	0	ENTPD8	ectonucleoside triphosphate diphosphohydrolase 8
hsa-miR-574-5p	1	0	1	1	1	1	ANKRD46	ankyrin repeat domain 46
hsa-miR-574-5p	1	0	1	0	1	1	NUDT10	nudix (nucleoside diphosphate linked moiety X)-type motif 10
hsa-miR-574-5p	1	0	1	1	1	1	ZFP91	zinc finger protein 91 homolog (mouse)
hsa-miR-574-5p	0	0	1	1	0	0	TRABD2A	TraB domain containing 2A
hsa-miR-574-5p	1	0	1	0	1	1	HDAC5	histone deacetylase 5
hsa-miR-574-5p	1	0	1	1	1	1	PCGF5	polycomb group ring finger 5
hsa-miR-574-5p	1	0	1	0	1	1	C14orf43	chromosome 14 open reading frame 43
hsa-miR-574-5p	1	0	1	1	1	1	KLHL28	kelch-like 28 (Drosophila)
hsa-miR-574-5p	1	0	1	1	1	1	SOX5	SRY (sex determining region Y)-box 5
hsa-miR-574-5p	1	0	1	1	1	1	DHX57	DEAH (Asp-Glu-Ala-Asp/His) box polypeptide 57
hsa-miR-574-5p	1	0	1	1	1	1	PRRG1	proline rich Gla (G-carboxyglutamic acid) 1
hsa-miR-574-5p	0	0	1	1	0	0	NEB	nebulin
hsa-miR-574-5p	0	0	1	0	1	1	ASAP2	ArfGAP with SH3 domain, ankyrin repeat and PH domain 2
hsa-miR-574-5p	1	0	1	1	1	1	PDGFRA	platelet-derived growth factor receptor, alpha polypeptide
hsa-miR-574-5p	1	0	1	1	1	1	RANBP9	RAN binding protein 9
hsa-miR-574-5p	1	0	1	1	0	0	ANKIB1	ankyrin repeat and IBR domain containing 1
hsa-miR-574-5p	0	0	1	1	0	0	CLIC1	chloride intracellular channel 1
hsa-miR-574-5p	0	0	1	1	0	0	TSNARE1	t-SNARE domain containing 1
hsa-miR-574-5p	1	0	1	1	1	1	IARS	isoleucyl-tRNA synthetase
hsa-miR-574-5p	1	0	1	1	1	1	VTCN1	V-set domain containing T cell activation inhibitor 1
hsa-miR-574-5p	1	0	1	1	1	1	NRSN1	neurensin 1
hsa-miR-574-5p	0	0	1	0	0	0	PCP4L1	Purkinje cell protein 4 like 1
hsa-miR-574-5p	0	0	1	1	0	0	CELF3	CUGBP, Elav-like family member 3
hsa-miR-574-5p	1	0	1	1	1	1	SLC26A7	solute carrier family 26, member 7
hsa-miR-574-5p	0	0	1	1	1	1	TTLL9	tubulin tyrosine ligase-like family, member 9
hsa-miR-574-5p	1	0	1	1	1	1	ANLN	anillin, actin binding protein
hsa-miR-574-5p	0	0	1	1	1	1	MSTO1	misato homolog 1 (Drosophila)
hsa-miR-574-5p	1	0	1	1	1	1	DDR1	discoidin domain receptor tyrosine kinase 1
hsa-miR-574-5p	0	0	1	0	0	0	ULK4P1	unc-51-like kinase 4 (C. elegans) pseudogene 1
hsa-miR-574-5p	1	0	1	0	1	1	MAP4K3	mitogen-activated protein kinase kinase kinase kinase 3
hsa-miR-574-5p	1	0	1	0	1	1	TMEM194A	transmembrane protein 194A
hsa-miR-574-5p	0	0	1	0	0	0	LOC440416	uncharacterized LOC440416
hsa-miR-574-5p	1	0	1	1	1	1	WBP1L	WW domain binding protein 1-like
hsa-miR-574-5p	1	0	1	1	0	0	PLEKHG3	pleckstrin homology domain containing, family G (with RhoGef domain) member 3
hsa-miR-574-5p	0	0	1	1	0	0	EBNA1BP2	EBNA1 binding protein 2
hsa-miR-574-5p	1	0	1	0	1	1	AMMECR1L	AMME chromosomal region gene 1-like
hsa-miR-574-5p	1	0	1	1	0	0	TIMM17B	translocase of inner mitochondrial membrane 17 homolog B (yeast)
hsa-miR-574-5p	1	0	1	1	1	1	PLXNA2	plexin A2
hsa-miR-574-5p	0	0	1	1	1	1	TMBIM4	transmembrane BAX inhibitor motif containing 4
hsa-miR-574-5p	0	0	1	0	1	1	TGFB2	transforming growth factor, beta 2
hsa-miR-574-5p	1	0	1	1	1	1	ACVR2B	activin A receptor, type IIB
hsa-miR-574-5p	0	0	1	1	1	1	KLRF1	killer cell lectin-like receptor subfamily F, member 1
hsa-miR-574-5p	0	0	1	0	0	0	FAM106A	family with sequence similarity 106, member A
hsa-miR-574-5p	1	0	1	0	1	1	ARPP19	cAMP-regulated phosphoprotein, 19kDa
hsa-miR-574-5p	0	0	1	1	1	1	XG	Xg blood group
hsa-miR-574-5p	0	0	1	1	1	1	ZNF365	zinc finger protein 365
hsa-miR-574-5p	1	0	1	0	1	1	MYBL1	v-myb myeloblastosis viral oncogene homolog (avian)-like 1
hsa-miR-574-5p	1	0	1	0	1	1	CPEB2	cytoplasmic polyadenylation element binding protein 2
hsa-miR-574-5p	1	0	1	0	1	1	KCNT2	potassium channel, subfamily T, member 2
hsa-miR-574-5p	0	0	1	0	0	0	LOC441493	uncharacterized LOC441493
hsa-miR-574-5p	1	0	1	1	0	0	KIAA1644	KIAA1644
hsa-miR-574-5p	1	0	1	1	1	1	ACHE	acetylcholinesterase
hsa-miR-574-5p	1	0	1	1	1	1	ZNF763	zinc finger protein 763
hsa-miR-574-5p	0	0	1	0	0	0	FBXL19-AS1	FBXL19 antisense RNA 1 (head to head)
hsa-miR-574-5p	0	0	1	1	1	1	PAX4	paired box 4
hsa-miR-574-5p	0	0	1	1	1	1	TTN	titin
hsa-miR-574-5p	1	0	1	1	1	1	SP4	Sp4 transcription factor
hsa-miR-574-5p	1	0	1	0	1	1	KIAA1715	KIAA1715
hsa-miR-574-5p	0	0	1	0	0	0	FAM86C2P	family with sequence similarity 86, member A pseudogene
hsa-miR-574-5p	0	0	1	1	1	1	STAU2	staufen, RNA binding protein, homolog 2 (Drosophila)
hsa-miR-574-5p	0	0	1	1	1	1	RASAL2	RAS protein activator like 2
hsa-miR-574-5p	1	0	1	1	1	1	UBE4A	ubiquitination factor E4A
hsa-miR-574-5p	0	0	1	1	0	0	TMC2	transmembrane channel-like 2
hsa-miR-574-5p	1	0	1	1	1	1	NR3C2	nuclear receptor subfamily 3, group C, member 2
hsa-miR-574-5p	0	0	1	1	0	0	RNF123	ring finger protein 123
hsa-miR-574-5p	0	0	1	1	1	1	LRCH1	leucine-rich repeats and calponin homology (CH) domain containing 1
hsa-miR-574-5p	1	0	1	1	1	1	PPP6R1	protein phosphatase 6, regulatory subunit 1
hsa-miR-574-5p	0	0	1	1	1	1	FSHB	follicle stimulating hormone, beta polypeptide
hsa-miR-574-5p	1	0	1	1	1	1	PAX3	paired box 3
hsa-miR-574-5p	1	0	1	1	1	1	ST18	suppression of tumorigenicity 18 (breast carcinoma) (zinc finger protein)
hsa-miR-574-5p	1	0	1	1	1	1	OSBP2	oxysterol binding protein 2
hsa-miR-574-5p	0	0	1	1	0	0	RGSL1	regulator of G-protein signaling like 1
hsa-miR-574-5p	1	0	1	1	1	1	PIKFYVE	phosphoinositide kinase, FYVE finger containing
hsa-miR-574-5p	1	0	1	0	1	1	CAMSAP2	calmodulin regulated spectrin-associated protein family, member 2
hsa-miR-574-5p	1	0	1	1	1	1	ANK2	ankyrin 2, neuronal
hsa-miR-574-5p	1	0	1	1	1	1	CHIC1	cysteine-rich hydrophobic domain 1
hsa-miR-574-5p	0	0	1	1	1	1	HSF2	heat shock transcription factor 2
hsa-miR-574-5p	0	0	1	0	0	0	FAM225B	family with sequence similarity 225, member B (non-protein coding)
hsa-miR-574-5p	1	0	1	1	1	1	PCM1	pericentriolar material 1
hsa-miR-574-5p	1	0	1	1	1	1	BTBD7	BTB (POZ) domain containing 7
hsa-miR-574-5p	0	0	1	0	0	0	FLJ39632	uncharacterized LOC642477
hsa-miR-574-5p	1	0	1	1	0	0	KRT80	keratin 80
hsa-miR-574-5p	1	0	1	1	1	1	SASH1	SAM and SH3 domain containing 1
hsa-miR-574-5p	0	0	1	0	0	0	DKFZp686D0853	uncharacterized LOC401613
hsa-miR-574-5p	1	0	1	1	1	1	ATP2B4	ATPase, Ca++ transporting, plasma membrane 4
hsa-miR-574-5p	1	0	1	1	1	1	SGCD	sarcoglycan, delta (35kDa dystrophin-associated glycoprotein)
hsa-miR-574-5p	1	0	1	1	1	1	SLC35F1	solute carrier family 35, member F1
hsa-miR-574-5p	0	0	1	0	1	1	THUMPD1	THUMP domain containing 1
hsa-miR-574-5p	1	0	1	1	1	1	SMAD4	SMAD family member 4
hsa-miR-574-5p	0	0	1	1	1	1	VPS35	vacuolar protein sorting 35 homolog (S. cerevisiae)
hsa-miR-574-5p	1	0	1	1	1	1	MASP1	mannan-binding lectin serine peptidase 1 (C4/C2 activating component of Ra-reactive factor)
hsa-miR-574-5p	0	0	1	1	1	1	PRR14L	proline rich 14-like
hsa-miR-574-5p	1	0	1	1	1	1	CGN	cingulin
hsa-miR-574-5p	0	0	1	1	0	0	PRKCQ	protein kinase C, theta
hsa-miR-574-5p	0	0	1	1	0	0	ANKRD33	ankyrin repeat domain 33
hsa-miR-574-5p	1	0	1	0	1	1	EML4	echinoderm microtubule associated protein like 4
hsa-miR-574-5p	1	0	1	1	1	1	GTDC1	glycosyltransferase-like domain containing 1
hsa-miR-574-5p	0	0	1	0	1	1	MYO3B	myosin IIIB
hsa-miR-574-5p	1	0	1	1	1	1	DDAH1	dimethylarginine dimethylaminohydrolase 1
hsa-miR-574-5p	1	0	1	1	1	1	NFIB	nuclear factor I/B
hsa-miR-574-5p	0	0	1	0	0	0	LOC286299	uncharacterized LOC286299
hsa-miR-574-5p	0	0	1	1	1	1	DAZL	deleted in azoospermia-like
hsa-miR-574-5p	1	0	1	1	1	1	PGAP1	post-GPI attachment to proteins 1
hsa-miR-574-5p	1	0	1	1	1	1	CALD1	caldesmon 1
hsa-miR-574-5p	1	0	1	1	1	1	SLC30A7	solute carrier family 30 (zinc transporter), member 7
hsa-miR-574-5p	1	0	1	0	1	1	C1orf21	chromosome 1 open reading frame 21
hsa-miR-574-5p	1	0	1	1	1	1	CREB3L2	cAMP responsive element binding protein 3-like 2
hsa-miR-574-5p	1	0	1	1	1	1	SIN3A	SIN3 transcription regulator homolog A (yeast)
hsa-miR-574-5p	1	0	1	1	1	1	BSDC1	BSD domain containing 1
hsa-miR-574-5p	0	0	1	0	1	1	GINS3	GINS complex subunit 3 (Psf3 homolog)
hsa-miR-574-5p	0	0	1	0	0	0	LINC00341	long intergenic non-protein coding RNA 341
hsa-miR-574-5p	0	0	1	1	0	0	EIF3L	eukaryotic translation initiation factor 3, subunit L
hsa-miR-574-5p	0	0	1	0	1	1	CD59	CD59 molecule, complement regulatory protein
hsa-miR-574-5p	0	0	1	1	1	1	HPGD	hydroxyprostaglandin dehydrogenase 15-(NAD)
hsa-miR-574-5p	1	0	1	0	1	1	STX6	syntaxin 6
hsa-miR-574-5p	0	0	1	1	1	1	ARFGAP2	ADP-ribosylation factor GTPase activating protein 2
hsa-miR-574-5p	1	0	1	0	0	0	IGLON5	IgLON family member 5
hsa-miR-574-5p	1	0	1	1	1	1	GPBP1	GC-rich promoter binding protein 1
hsa-miR-574-5p	0	0	1	1	1	1	TMEM53	transmembrane protein 53
hsa-miR-574-5p	1	0	1	1	1	1	FUT9	fucosyltransferase 9 (alpha (1,3) fucosyltransferase)
hsa-miR-574-5p	1	0	1	1	1	1	TARBP2	TAR (HIV-1) RNA binding protein 2
hsa-miR-574-5p	0	0	1	0	0	0	LOC400768	uncharacterized LOC400768
hsa-miR-574-5p	1	0	1	0	1	1	OLA1	Obg-like ATPase 1
hsa-miR-574-5p	0	0	1	1	1	1	NR2C2AP	nuclear receptor 2C2-associated protein
hsa-miR-574-5p	1	0	1	1	1	1	CLDN11	claudin 11
hsa-miR-574-5p	0	0	1	1	0	0	ITGB3BP	integrin beta 3 binding protein (beta3-endonexin)
hsa-miR-574-5p	0	0	1	1	0	0	PHKA2	phosphorylase kinase, alpha 2 (liver)
hsa-miR-574-5p	0	0	1	1	0	0	MRPL37	mitochondrial ribosomal protein L37
hsa-miR-574-5p	0	0	1	1	1	1	CIRBP	cold inducible RNA binding protein
hsa-miR-574-5p	0	0	1	0	0	0	PRMT1	protein arginine methyltransferase 1
hsa-miR-574-5p	1	0	1	1	1	1	FGF11	fibroblast growth factor 11
hsa-miR-574-5p	1	0	1	1	0	0	ELOVL1	ELOVL fatty acid elongase 1
hsa-miR-574-5p	1	0	1	1	1	1	CTDNEP1	CTD nuclear envelope phosphatase 1
hsa-miR-574-5p	0	0	1	1	1	1	COPS7A	COP9 constitutive photomorphogenic homolog subunit 7A (Arabidopsis)
hsa-miR-574-5p	1	0	1	1	1	1	HMGN3	high mobility group nucleosomal binding domain 3
hsa-miR-574-5p	0	0	1	1	1	1	ABCD1	ATP-binding cassette, sub-family D (ALD), member 1
hsa-miR-574-5p	0	0	1	1	1	1	MRPS36	mitochondrial ribosomal protein S36
hsa-miR-574-5p	0	0	1	0	0	0	TRIQK	triple QxxK/R motif containing
hsa-miR-574-5p	0	0	1	0	1	1	IGF2-AS	IGF2 antisense RNA
hsa-miR-574-5p	1	0	1	1	1	1	TRA2B	transformer 2 beta homolog (Drosophila)
hsa-miR-574-5p	1	0	1	1	1	1	NFKBIA	nuclear factor of kappa light polypeptide gene enhancer in B-cells inhibitor, alpha
hsa-miR-574-5p	0	0	1	1	1	1	CCDC91	coiled-coil domain containing 91
hsa-miR-574-5p	0	0	1	1	1	1	CCDC115	coiled-coil domain containing 115
hsa-miR-574-5p	1	0	1	1	1	1	BAI3	brain-specific angiogenesis inhibitor 3
hsa-miR-574-5p	0	0	1	1	1	1	STON1	stonin 1
hsa-miR-574-5p	0	0	1	1	1	1	TRIM68	tripartite motif containing 68
hsa-miR-574-5p	1	0	1	1	1	1	STK38L	serine/threonine kinase 38 like
hsa-miR-574-5p	1	0	1	0	1	1	IP6K1	inositol hexakisphosphate kinase 1
hsa-miR-574-5p	0	0	1	1	1	1	C1orf88	chromosome 1 open reading frame 88
hsa-miR-574-5p	0	0	1	1	0	0	PTGDS	prostaglandin D2 synthase 21kDa (brain)
hsa-miR-574-5p	1	0	1	1	1	1	NRN1	neuritin 1
hsa-miR-574-5p	0	0	1	1	0	0	CCDC22	coiled-coil domain containing 22
hsa-miR-574-5p	0	0	1	1	1	1	SAP130	Sin3A-associated protein, 130kDa
hsa-miR-574-5p	0	0	1	0	0	0	PGF	placental growth factor
hsa-miR-574-5p	1	0	1	1	1	1	BIN3	bridging integrator 3
hsa-miR-574-5p	0	0	1	1	1	1	DEDD	death effector domain containing
hsa-miR-574-5p	0	0	1	1	1	1	RHEBL1	Ras homolog enriched in brain like 1
hsa-miR-574-5p	0	0	1	1	0	0	RGS9	regulator of G-protein signaling 9
hsa-miR-574-5p	1	0	1	1	1	1	FUBP3	far upstream element (FUSE) binding protein 3
hsa-miR-574-5p	0	0	1	1	1	1	ATP1A1	ATPase, Na+/K+ transporting, alpha 1 polypeptide
hsa-miR-574-5p	0	0	1	1	1	1	FKBP1B	FK506 binding protein 1B, 12.6 kDa
hsa-miR-574-5p	0	0	1	1	0	0	FAM57B	family with sequence similarity 57, member B
hsa-miR-574-5p	1	0	1	1	1	1	ARHGEF40	Rho guanine nucleotide exchange factor (GEF) 40
hsa-miR-574-5p	1	0	1	1	1	1	RNF2	ring finger protein 2
hsa-miR-574-5p	0	0	1	1	0	0	OXA1L	oxidase (cytochrome c) assembly 1-like
hsa-miR-574-5p	1	0	1	0	1	1	MAP1B	microtubule-associated protein 1B
hsa-miR-574-5p	0	0	1	1	1	1	HUS1	HUS1 checkpoint homolog (S. pombe)
hsa-miR-574-5p	0	0	1	1	1	1	TSEN15	tRNA splicing endonuclease 15 homolog (S. cerevisiae)
hsa-miR-574-5p	0	0	1	1	0	0	HEBP1	heme binding protein 1
hsa-miR-574-5p	1	0	1	1	1	1	TRAPPC3	trafficking protein particle complex 3
hsa-miR-574-5p	1	0	1	0	1	1	CD47	CD47 molecule
hsa-miR-574-5p	1	0	1	1	1	1	ATP1B1	ATPase, Na+/K+ transporting, beta 1 polypeptide
hsa-miR-574-5p	0	0	1	1	0	0	GPRC5C	G protein-coupled receptor, family C, group 5, member C
hsa-miR-574-5p	1	0	1	1	1	1	TIPRL	TIP41, TOR signaling pathway regulator-like (S. cerevisiae)
hsa-miR-574-5p	0	0	1	0	0	0	LOC100132984	uncharacterized LOC100132984
hsa-miR-574-5p	1	0	1	1	1	1	MAN1C1	mannosidase, alpha, class 1C, member 1
hsa-miR-574-5p	0	0	1	1	1	1	EPCAM	epithelial cell adhesion molecule
hsa-miR-574-5p	0	0	1	0	0	0	LOC100132352	FSHD region gene 1 pseudogene
hsa-miR-574-5p	1	0	1	1	1	1	RND3	Rho family GTPase 3
hsa-miR-574-5p	0	0	1	1	0	0	IDH3G	isocitrate dehydrogenase 3 (NAD+) gamma
hsa-miR-574-5p	1	0	1	1	1	1	PHACTR2	phosphatase and actin regulator 2
hsa-miR-574-5p	0	0	1	0	0	0	LINC00661	long intergenic non-protein coding RNA 661
hsa-miR-574-5p	1	0	1	1	1	1	HECW2	HECT, C2 and WW domain containing E3 ubiquitin protein ligase 2
hsa-miR-574-5p	0	0	1	1	0	0	FMN1	formin 1
hsa-miR-574-5p	1	0	1	0	1	1	OSBPL8	oxysterol binding protein-like 8
hsa-miR-574-5p	1	0	1	1	1	1	SNRK	SNF related kinase
hsa-miR-574-5p	1	0	1	1	1	1	TIPARP	TCDD-inducible poly(ADP-ribose) polymerase
hsa-miR-574-5p	1	0	1	1	0	0	POMGNT1	protein O-linked mannose beta1,2-N-acetylglucosaminyltransferase
hsa-miR-574-5p	1	0	1	1	1	1	TMEM128	transmembrane protein 128
hsa-miR-574-5p	1	0	1	0	1	1	ZNF652	zinc finger protein 652
hsa-miR-574-5p	1	0	1	1	1	1	METAP1	methionyl aminopeptidase 1
hsa-miR-574-5p	1	0	1	1	1	1	BCL2L1	BCL2-like 1
hsa-miR-574-5p	1	0	1	1	1	1	SLC16A12	solute carrier family 16, member 12 (monocarboxylic acid transporter 12)
hsa-miR-574-5p	0	0	1	1	1	1	ENKUR	enkurin, TRPC channel interacting protein
hsa-miR-574-5p	0	0	1	0	0	0	LOC440518	golgin A2 pseudogene
hsa-miR-574-5p	1	0	1	1	1	1	ZFHX3	zinc finger homeobox 3
hsa-miR-574-5p	1	0	1	1	1	1	NKX2-1	NK2 homeobox 1
hsa-miR-574-5p	1	0	1	1	1	1	RB1CC1	RB1-inducible coiled-coil 1
hsa-miR-574-5p	1	0	1	0	1	1	KLHDC10	kelch domain containing 10
hsa-miR-574-5p	1	0	1	1	1	1	RSPO1	R-spondin 1
hsa-miR-574-5p	0	0	1	1	1	1	BBOX1	butyrobetaine (gamma), 2-oxoglutarate dioxygenase (gamma-butyrobetaine hydroxylase) 1
hsa-miR-574-5p	0	0	1	1	1	1	MARVELD2	MARVEL domain containing 2
hsa-miR-574-5p	1	0	1	1	1	1	BNC2	basonuclin 2
hsa-miR-574-5p	1	0	1	0	1	1	DCBLD2	discoidin, CUB and LCCL domain containing 2
hsa-miR-574-5p	1	0	1	0	1	1	STAT3	signal transducer and activator of transcription 3 (acute-phase response factor)
hsa-miR-574-5p	0	0	1	1	1	1	PLCB4	phospholipase C, beta 4
hsa-miR-574-5p	1	0	1	1	1	1	GRM1	glutamate receptor, metabotropic 1
hsa-miR-574-5p	0	0	1	1	0	0	INHBA	inhibin, beta A
hsa-miR-574-5p	1	0	1	0	1	1	BCL2	B-cell CLL/lymphoma 2
hsa-miR-574-5p	0	0	1	1	0	0	COL6A2	collagen, type VI, alpha 2
hsa-miR-574-5p	0	0	1	1	0	0	CD40LG	CD40 ligand
hsa-miR-574-5p	1	0	1	1	1	1	DMD	dystrophin
hsa-miR-574-5p	0	0	1	1	1	1	EDN3	endothelin 3
hsa-miR-574-5p	1	0	1	1	1	1	ESR1	estrogen receptor 1
hsa-miR-574-5p	1	0	1	0	1	1	GHR	growth hormone receptor
hsa-miR-574-5p	1	0	1	1	1	1	GJA1	gap junction protein, alpha 1, 43kDa
hsa-miR-574-5p	1	0	1	1	1	1	GK	glycerol kinase
hsa-miR-574-5p	1	0	1	1	1	1	KCNA1	potassium voltage-gated channel, shaker-related subfamily, member 1 (episodic ataxia with myokymia)
hsa-miR-574-5p	1	0	1	1	1	1	LEP	leptin
hsa-miR-574-5p	1	0	1	1	1	1	MET	met proto-oncogene (hepatocyte growth factor receptor)
hsa-miR-574-5p	0	0	1	1	1	1	MTR	5-methyltetrahydrofolate-homocysteine methyltransferase
hsa-miR-574-5p	1	0	1	0	1	1	PTEN	phosphatase and tensin homolog
hsa-miR-574-5p	1	0	1	1	1	1	ATXN1	ataxin 1
hsa-miR-574-5p	1	0	1	1	1	1	TAT	tyrosine aminotransferase
hsa-miR-574-5p	1	0	1	1	1	1	TIMP3	TIMP metallopeptidase inhibitor 3
hsa-miR-574-5p	0	0	1	1	1	1	WAS	Wiskott-Aldrich syndrome
hsa-miR-574-5p	1	0	1	1	1	1	CHM	choroideremia (Rab escort protein 1)
hsa-miR-574-5p	1	0	1	1	1	1	HLCS	holocarboxylase synthetase (biotin-(proprionyl-CoA-carboxylase (ATP-hydrolysing)) ligase)
hsa-miR-574-5p	0	0	1	1	0	0	IL2RA	interleukin 2 receptor, alpha
hsa-miR-574-5p	0	0	1	1	1	1	L1CAM	L1 cell adhesion molecule
hsa-miR-574-5p	1	0	1	1	1	1	HNF1B	HNF1 homeobox B
hsa-miR-574-5p	1	0	1	1	1	1	ATRX	alpha thalassemia/mental retardation syndrome X-linked
hsa-miR-574-5p	1	0	1	1	1	1	PLP1	proteolipid protein 1
hsa-miR-574-5p	0	0	1	1	1	1	CRX	cone-rod homeobox
hsa-miR-574-5p	1	0	1	1	1	1	DCX	doublecortin
hsa-miR-574-5p	0	0	1	1	0	0	IL1B	interleukin 1, beta
hsa-miR-574-5p	0	0	1	1	1	1	C7	complement component 7
hsa-miR-574-5p	0	0	1	1	1	1	TAP1	transporter 1, ATP-binding cassette, sub-family B (MDR/TAP)
hsa-miR-574-5p	1	0	1	1	1	1	ADRA1A	adrenoceptor alpha 1A
hsa-miR-574-5p	1	0	1	1	1	1	DRD1	dopamine receptor D1
hsa-miR-574-5p	0	0	1	1	1	1	GABRA5	gamma-aminobutyric acid (GABA) A receptor, alpha 5
hsa-miR-574-5p	1	0	1	1	1	1	GABRB3	gamma-aminobutyric acid (GABA) A receptor, beta 3
hsa-miR-574-5p	1	0	1	1	1	1	GRM5	glutamate receptor, metabotropic 5
hsa-miR-574-5p	0	0	1	1	1	1	IL1R1	interleukin 1 receptor, type I
hsa-miR-574-5p	1	0	1	0	1	1	KCNJ2	potassium inwardly-rectifying channel, subfamily J, member 2
hsa-miR-574-5p	1	0	1	1	1	1	PTGFR	prostaglandin F receptor (FP)
hsa-miR-574-5p	0	0	1	1	1	1	BLOC1S2	biogenesis of lysosomal organelles complex-1, subunit 2
hsa-miR-574-5p	0	0	1	1	1	1	GALK2	galactokinase 2
hsa-miR-574-5p	0	0	1	1	0	0	TMEM211	transmembrane protein 211
hsa-miR-574-5p	0	0	1	1	1	1	FLJ45079	FLJ45079 protein
hsa-miR-574-5p	0	0	1	1	1	1	C4orf3	chromosome 4 open reading frame 3
hsa-miR-574-5p	1	0	1	1	1	1	TPD52L3	tumor protein D52-like 3
hsa-miR-574-5p	1	0	1	1	1	1	WLS	wntless homolog (Drosophila)
hsa-miR-574-5p	0	0	1	1	1	1	STAG3L1	stromal antigen 3-like 1
hsa-miR-574-5p	1	0	1	0	1	1	CACNA1I	calcium channel, voltage-dependent, T type, alpha 1I subunit
hsa-miR-574-5p	1	0	1	1	1	1	ABLIM1	actin binding LIM protein 1
hsa-miR-574-5p	1	0	1	0	1	1	SMAD2	SMAD family member 2
hsa-miR-574-5p	1	0	1	1	1	1	KLHL31	kelch-like 31 (Drosophila)
hsa-miR-574-5p	1	0	1	0	1	1	BMF	Bcl2 modifying factor
hsa-miR-574-5p	1	0	1	0	1	1	LIN28B	lin-28 homolog B (C. elegans)
hsa-miR-574-5p	1	0	1	0	1	1	LRRC55	leucine rich repeat containing 55
hsa-miR-574-5p	0	0	1	0	1	1	FLJ46347	uncharacterized LOC389064
hsa-miR-574-5p	1	0	1	1	1	1	EBF3	early B-cell factor 3
hsa-miR-574-5p	1	0	1	1	1	1	PLCXD3	phosphatidylinositol-specific phospholipase C, X domain containing 3
hsa-miR-574-5p	1	0	1	0	1	1	CPM	carboxypeptidase M
hsa-miR-574-5p	1	0	1	1	1	1	EDA	ectodysplasin A
hsa-miR-574-5p	1	0	1	1	1	1	TAC3	tachykinin 3
hsa-miR-574-5p	0	0	1	1	1	1	SCP2	sterol carrier protein 2
hsa-miR-574-5p	0	0	1	0	1	1	GIMAP6	GTPase, IMAP family member 6
hsa-miR-574-5p	1	0	1	1	1	1	IGSF3	immunoglobulin superfamily, member 3
hsa-miR-574-5p	0	0	1	0	1	1	C3orf56	chromosome 3 open reading frame 56
hsa-miR-574-5p	1	0	1	1	1	1	ZDHHC9	zinc finger, DHHC-type containing 9
hsa-miR-574-5p	1	0	1	1	1	1	CTDSPL	CTD (carboxy-terminal domain, RNA polymerase II, polypeptide A) small phosphatase-like
hsa-miR-574-5p	1	0	1	1	1	1	RBM33	RNA binding motif protein 33
hsa-miR-574-5p	0	0	1	1	1	1	MXRA7	matrix-remodelling associated 7
hsa-miR-574-5p	0	0	1	1	1	1	TCHHL1	trichohyalin-like 1
hsa-miR-574-5p	1	0	1	0	1	1	KIAA2022	KIAA2022
hsa-miR-574-5p	0	0	1	1	1	1	MXI1	MAX interactor 1
hsa-miR-574-5p	1	0	1	1	1	1	FNIP1	folliculin interacting protein 1
hsa-miR-574-5p	0	0	1	1	1	1	GCSAM	germinal center-associated, signaling and motility
hsa-miR-574-5p	0	0	1	1	0	0	ARMCX6	armadillo repeat containing, X-linked 6
hsa-miR-574-5p	0	0	1	1	1	1	SPIN3	spindlin family, member 3
hsa-miR-574-5p	1	0	1	1	1	1	SLC6A17	solute carrier family 6, member 17
hsa-miR-574-5p	1	0	1	0	1	1	C6orf222	chromosome 6 open reading frame 222
hsa-miR-574-5p	1	0	1	1	1	1	BCL2L15	BCL2-like 15
hsa-miR-574-5p	0	0	1	1	1	1	NCMAP	noncompact myelin associated protein
hsa-miR-574-5p	1	0	1	1	0	0	RPL21P44	ribosomal protein L21 pseudogene 44
hsa-miR-574-5p	0	0	1	1	1	1	DSTN	destrin (actin depolymerizing factor)
hsa-miR-574-5p	1	0	1	1	1	1	NTRK3	neurotrophic tyrosine kinase, receptor, type 3
hsa-miR-574-5p	0	0	1	1	0	0	RGR	retinal G protein coupled receptor
hsa-miR-574-5p	1	0	1	1	1	1	SLC25A53	solute carrier family 25, member 53
hsa-miR-574-5p	1	0	1	1	1	1	PABPC1L2A	poly(A) binding protein, cytoplasmic 1-like 2A
hsa-miR-574-5p	0	0	1	1	1	1	C9orf152	chromosome 9 open reading frame 152
hsa-miR-574-5p	1	0	1	1	1	1	SORCS1	sortilin-related VPS10 domain containing receptor 1
hsa-miR-574-5p	0	0	1	1	0	0	EPGN	epithelial mitogen homolog (mouse)
hsa-miR-574-5p	0	0	1	0	1	1	LINC00268	long intergenic non-protein coding RNA 268
hsa-miR-574-5p	1	0	1	1	1	1	KCNMA1	potassium large conductance calcium-activated channel, subfamily M, alpha member 1
hsa-miR-574-5p	0	0	1	1	1	1	BTBD11	BTB (POZ) domain containing 11
hsa-miR-574-5p	0	0	1	1	1	1	DCAF8L1	DDB1 and CUL4 associated factor 8-like 1
hsa-miR-574-5p	0	0	1	1	1	1	RAB28	RAB28, member RAS oncogene family
hsa-miR-574-5p	1	0	1	1	1	1	VMA21	VMA21 vacuolar H+-ATPase homolog (S. cerevisiae)
hsa-miR-574-5p	1	0	1	1	1	1	SH3PXD2B	SH3 and PX domains 2B
hsa-miR-574-5p	1	0	1	0	1	1	BRCC3	BRCA1/BRCA2-containing complex, subunit 3
hsa-miR-574-5p	1	0	1	1	1	1	SERBP1	SERPINE1 mRNA binding protein 1
hsa-miR-574-5p	0	0	1	1	0	0	FNTA	farnesyltransferase, CAAX box, alpha
hsa-miR-574-5p	1	0	1	0	1	1	RGAG4	retrotransposon gag domain containing 4
hsa-miR-574-5p	0	0	1	1	1	1	LRRC66	leucine rich repeat containing 66
hsa-miR-574-5p	1	0	1	1	1	1	CANX	calnexin
hsa-miR-574-5p	1	0	1	0	1	1	TNRC6B	trinucleotide repeat containing 6B
hsa-miR-574-5p	0	0	1	1	1	1	WASF1	WAS protein family, member 1
hsa-miR-574-5p	1	0	1	0	1	1	CELF2	CUGBP, Elav-like family member 2
hsa-miR-574-5p	1	0	1	1	1	1	AFF3	AF4/FMR2 family, member 3
hsa-miR-574-5p	1	0	1	1	1	1	TPD52	tumor protein D52
hsa-miR-574-5p	1	0	1	0	1	1	C3orf70	chromosome 3 open reading frame 70
hsa-miR-574-5p	1	0	1	1	1	1	VEGFA	vascular endothelial growth factor A
hsa-miR-574-5p	0	0	1	0	1	1	C6orf120	chromosome 6 open reading frame 120
hsa-miR-574-5p	0	0	1	1	1	1	CIB4	calcium and integrin binding family member 4
hsa-miR-574-5p	1	0	1	0	1	1	C2orf71	chromosome 2 open reading frame 71
hsa-miR-574-5p	0	0	1	1	0	0	GRB7	growth factor receptor-bound protein 7
hsa-miR-574-5p	1	0	1	0	1	1	SAMD5	sterile alpha motif domain containing 5
hsa-miR-574-5p	0	0	1	1	1	1	CALML4	calmodulin-like 4
hsa-miR-574-5p	1	0	1	1	1	1	RCE1	RCE1 homolog, prenyl protein protease (S. cerevisiae)
hsa-miR-574-5p	0	0	1	1	1	1	SLC35A2	solute carrier family 35 (UDP-galactose transporter), member A2
hsa-miR-574-5p	1	0	1	1	1	1	MYCL1	v-myc myelocytomatosis viral oncogene homolog 1, lung carcinoma derived (avian)
hsa-miR-574-5p	1	0	1	0	1	1	SRGAP3	SLIT-ROBO Rho GTPase activating protein 3
hsa-miR-574-5p	0	0	1	1	1	1	KCNIP1	Kv channel interacting protein 1
hsa-miR-574-5p	1	0	1	1	1	1	GALNTL6	UDP-N-acetyl-alpha-D-galactosamine:polypeptide N-acetylgalactosaminyltransferase-like 6
hsa-miR-574-5p	1	0	1	0	1	1	RYR2	ryanodine receptor 2 (cardiac)
hsa-miR-574-5p	0	0	1	1	1	1	C18orf62	chromosome 18 open reading frame 62
hsa-miR-574-5p	0	0	1	1	0	0	HSD17B10	hydroxysteroid (17-beta) dehydrogenase 10
hsa-miR-574-5p	0	0	1	1	1	1	EFEMP1	EGF containing fibulin-like extracellular matrix protein 1
hsa-miR-574-5p	1	0	1	1	1	1	ELMO1	engulfment and cell motility 1
hsa-miR-574-5p	1	0	1	1	1	1	KREMEN1	kringle containing transmembrane protein 1
hsa-miR-574-5p	1	0	1	1	1	1	KCNC4	potassium voltage-gated channel, Shaw-related subfamily, member 4
hsa-miR-574-5p	1	0	1	1	1	1	CBLN3	cerebellin 3 precursor
hsa-miR-574-5p	1	0	1	1	1	1	CDC42	cell division cycle 42 (GTP binding protein, 25kDa)
hsa-miR-574-5p	1	0	1	1	0	0	ANKRD34A	ankyrin repeat domain 34A
hsa-miR-574-5p	1	0	1	1	1	1	TCERG1	transcription elongation regulator 1
hsa-miR-574-5p	0	0	1	0	1	1	OPALIN	oligodendrocytic myelin paranodal and inner loop protein
hsa-miR-574-5p	0	0	1	0	1	1	SCN3B	sodium channel, voltage-gated, type III, beta subunit
hsa-miR-574-5p	0	0	1	1	1	1	SPOCK3	sparc/osteonectin, cwcv and kazal-like domains proteoglycan (testican) 3
hsa-miR-574-5p	1	0	1	0	1	1	CD83	CD83 molecule
hsa-miR-574-5p	0	0	1	1	1	1	MTHFD2	methylenetetrahydrofolate dehydrogenase (NADP+ dependent) 2, methenyltetrahydrofolate cyclohydrolase
hsa-miR-574-5p	1	0	1	1	1	1	FAM63B	family with sequence similarity 63, member B
hsa-miR-574-5p	0	0	1	1	1	1	BTNL8	butyrophilin-like 8
hsa-miR-574-5p	0	0	1	0	1	1	ABCE1	ATP-binding cassette, sub-family E (OABP), member 1
hsa-miR-574-5p	1	0	1	1	1	1	GLIS3	GLIS family zinc finger 3
hsa-miR-574-5p	1	0	1	1	1	1	C2orf88	chromosome 2 open reading frame 88
hsa-miR-574-5p	1	0	1	1	1	1	NSL1	NSL1, MIND kinetochore complex component, homolog (S. cerevisiae)
hsa-miR-574-5p	1	0	1	1	1	1	RERE	arginine-glutamic acid dipeptide (RE) repeats
hsa-miR-574-5p	0	0	1	1	1	1	SLC6A3	solute carrier family 6 (neurotransmitter transporter, dopamine), member 3
hsa-miR-574-5p	0	0	1	1	1	1	SLC6A4	solute carrier family 6 (neurotransmitter transporter, serotonin), member 4
hsa-miR-574-5p	0	0	1	1	1	1	FAM22G	family with sequence similarity 22, member G
hsa-miR-574-5p	1	0	1	0	1	1	SLC12A2	solute carrier family 12 (sodium/potassium/chloride transporters), member 2
hsa-miR-574-5p	0	0	1	1	1	1	RCC1	regulator of chromosome condensation 1
hsa-miR-574-5p	1	0	1	1	1	1	METTL9	methyltransferase like 9
hsa-miR-574-5p	0	0	1	1	1	1	ZNF586	zinc finger protein 586
hsa-miR-574-5p	1	0	1	1	1	1	PHF16	PHD finger protein 16
hsa-miR-574-5p	1	0	1	1	1	1	ALG9	asparagine-linked glycosylation 9, alpha-1,2-mannosyltransferase homolog (S. cerevisiae)
hsa-miR-574-5p	0	0	1	1	1	1	XIRP2	xin actin-binding repeat containing 2
hsa-miR-574-5p	1	0	1	1	1	1	CREBBP	CREB binding protein
hsa-miR-574-5p	1	0	1	1	1	1	VAV3	vav 3 guanine nucleotide exchange factor
hsa-miR-574-5p	0	0	1	1	0	0	ARHGAP9	Rho GTPase activating protein 9
hsa-miR-574-5p	1	0	1	1	0	0	DLGAP3	discs, large (Drosophila) homolog-associated protein 3
hsa-miR-574-5p	1	0	1	1	1	1	SHANK3	SH3 and multiple ankyrin repeat domains 3
hsa-miR-574-5p	0	0	1	1	0	0	SLC35F4	solute carrier family 35, member F4
hsa-miR-574-5p	1	0	1	1	1	1	ZNF697	zinc finger protein 697
hsa-miR-574-5p	0	0	1	0	1	1	TMEM150C	transmembrane protein 150C
hsa-miR-574-5p	0	0	1	1	1	1	PPP1R1C	protein phosphatase 1, regulatory (inhibitor) subunit 1C
hsa-miR-574-5p	1	0	1	1	1	1	DGKG	diacylglycerol kinase, gamma 90kDa
hsa-miR-574-5p	1	0	1	1	1	1	MYO1C	myosin IC
hsa-miR-574-5p	0	0	1	1	1	1	C15orf57	chromosome 15 open reading frame 57
hsa-miR-574-5p	1	0	1	1	1	1	NXF1	nuclear RNA export factor 1
hsa-miR-574-5p	0	0	1	1	1	1	LILRB1	leukocyte immunoglobulin-like receptor, subfamily B (with TM and ITIM domains), member 1
hsa-miR-574-5p	0	0	1	1	1	1	G6PC2	glucose-6-phosphatase, catalytic, 2
hsa-miR-574-5p	1	0	1	1	0	0	ASIC2	acid-sensing (proton-gated) ion channel 2
hsa-miR-574-5p	0	0	1	1	1	1	ACTA1	actin, alpha 1, skeletal muscle
hsa-miR-574-5p	1	0	1	1	1	1	ADCY9	adenylate cyclase 9
hsa-miR-574-5p	0	0	1	1	0	0	ARG2	arginase, type II
hsa-miR-574-5p	1	0	1	0	1	1	BMPR2	bone morphogenetic protein receptor, type II (serine/threonine kinase)
hsa-miR-574-5p	1	0	1	0	1	1	KLF9	Kruppel-like factor 9
hsa-miR-574-5p	1	0	1	1	1	1	CAMK2D	calcium/calmodulin-dependent protein kinase II delta
hsa-miR-574-5p	1	0	1	1	1	1	CASP10	caspase 10, apoptosis-related cysteine peptidase
hsa-miR-574-5p	0	0	1	1	1	1	CASQ1	calsequestrin 1 (fast-twitch, skeletal muscle)
hsa-miR-574-5p	0	0	1	1	1	1	CCNT2	cyclin T2
hsa-miR-574-5p	1	0	1	1	1	1	CDH13	cadherin 13, H-cadherin (heart)
hsa-miR-574-5p	1	0	1	0	1	1	CDK6	cyclin-dependent kinase 6
hsa-miR-574-5p	1	0	1	1	1	1	CDK9	cyclin-dependent kinase 9
hsa-miR-574-5p	1	0	1	1	1	1	CHD1	chromodomain helicase DNA binding protein 1
hsa-miR-574-5p	0	0	1	1	0	0	CLPTM1	cleft lip and palate associated transmembrane protein 1
hsa-miR-574-5p	0	0	1	1	1	1	CCR1	chemokine (C-C motif) receptor 1
hsa-miR-574-5p	1	0	1	1	0	0	CSRP2	cysteine and glycine-rich protein 2
hsa-miR-574-5p	1	0	1	1	1	1	CTNND2	catenin (cadherin-associated protein), delta 2
hsa-miR-574-5p	1	0	1	0	0	0	DLG4	discs, large homolog 4 (Drosophila)
hsa-miR-574-5p	1	0	1	1	1	1	CELSR3	cadherin, EGF LAG seven-pass G-type receptor 3 (flamingo homolog, Drosophila)
hsa-miR-574-5p	1	0	1	1	1	1	CELSR2	cadherin, EGF LAG seven-pass G-type receptor 2 (flamingo homolog, Drosophila)
hsa-miR-574-5p	0	0	1	0	1	1	EMP1	epithelial membrane protein 1
hsa-miR-574-5p	1	0	1	1	1	1	EN2	engrailed homeobox 2
hsa-miR-574-5p	1	0	1	1	1	1	FOXF2	forkhead box F2
hsa-miR-574-5p	1	0	1	1	1	1	IFIT2	interferon-induced protein with tetratricopeptide repeats 2
hsa-miR-574-5p	0	0	1	1	0	0	AARS	alanyl-tRNA synthetase
hsa-miR-574-5p	1	0	1	1	1	1	AQP4	aquaporin 4
hsa-miR-574-5p	1	0	1	0	1	1	ARNT	aryl hydrocarbon receptor nuclear translocator
hsa-miR-574-5p	1	0	1	1	1	1	BAAT	bile acid CoA: amino acid N-acyltransferase (glycine N-choloyltransferase)
hsa-miR-574-5p	0	0	1	0	0	0	BAI1	brain-specific angiogenesis inhibitor 1
hsa-miR-574-5p	0	0	1	1	0	0	BICD1	bicaudal D homolog 1 (Drosophila)
hsa-miR-574-5p	1	0	1	1	1	1	CBFB	core-binding factor, beta subunit
hsa-miR-574-5p	0	0	1	1	1	1	CD1D	CD1d molecule
hsa-miR-574-5p	1	0	1	1	1	1	COL4A1	collagen, type IV, alpha 1
hsa-miR-574-5p	1	0	1	1	1	1	COL4A6	collagen, type IV, alpha 6
hsa-miR-574-5p	1	0	1	1	1	1	COL15A1	collagen, type XV, alpha 1
hsa-miR-574-5p	0	0	1	1	1	1	CPS1	carbamoyl-phosphate synthase 1, mitochondrial
hsa-miR-574-5p	1	0	1	1	1	1	CREM	cAMP responsive element modulator
hsa-miR-574-5p	0	0	1	1	1	1	DLAT	dihydrolipoamide S-acetyltransferase
hsa-miR-574-5p	0	0	1	1	1	1	DSG1	desmoglein 1
hsa-miR-574-5p	1	0	1	1	1	1	E2F3	E2F transcription factor 3
hsa-miR-574-5p	1	0	1	1	1	1	EPB49	erythrocyte membrane protein band 4.9 (dematin)
hsa-miR-574-5p	1	0	1	0	1	1	FUT4	fucosyltransferase 4 (alpha (1,3) fucosyltransferase, myeloid-specific)
hsa-miR-574-5p	1	0	1	1	1	1	GAB1	GRB2-associated binding protein 1
hsa-miR-574-5p	0	0	1	1	0	0	GLP1R	glucagon-like peptide 1 receptor
hsa-miR-574-5p	1	0	1	1	1	1	GLRA2	glycine receptor, alpha 2
hsa-miR-574-5p	0	0	1	1	1	1	GNB1	guanine nucleotide binding protein (G protein), beta polypeptide 1
hsa-miR-574-5p	1	0	1	1	1	1	GOLGA1	golgin A1
hsa-miR-574-5p	0	0	1	1	1	1	GYS1	glycogen synthase 1 (muscle)
hsa-miR-574-5p	0	0	1	1	1	1	HLA-DOA	major histocompatibility complex, class II, DO alpha
hsa-miR-574-5p	0	0	1	1	1	1	IFNA14	interferon, alpha 14
hsa-miR-574-5p	1	0	1	1	0	0	IHH	Indian hedgehog
hsa-miR-574-5p	1	0	1	0	1	1	IRF2	interferon regulatory factor 2
hsa-miR-574-5p	0	0	1	1	1	1	ITGB1	integrin, beta 1 (fibronectin receptor, beta polypeptide, antigen CD29 includes MDF2, MSK12)
hsa-miR-574-5p	1	0	1	1	1	1	ITPR2	inositol 1,4,5-trisphosphate receptor, type 2
hsa-miR-574-5p	0	0	1	1	0	0	LALBA	lactalbumin, alpha-
hsa-miR-574-5p	1	0	1	0	1	1	LAMC1	laminin, gamma 1 (formerly LAMB2)
hsa-miR-574-5p	1	0	1	1	1	1	MN1	meningioma (disrupted in balanced translocation) 1
hsa-miR-574-5p	1	0	1	1	1	1	NGFR	nerve growth factor receptor
hsa-miR-574-5p	1	0	1	1	1	1	NPAS2	neuronal PAS domain protein 2
hsa-miR-574-5p	1	0	1	1	1	1	NPTX1	neuronal pentraxin I
hsa-miR-574-5p	0	0	1	0	1	1	OPHN1	oligophrenin 1
hsa-miR-574-5p	1	0	1	0	1	1	PAPPA	pregnancy-associated plasma protein A, pappalysin 1
hsa-miR-574-5p	1	0	1	0	1	1	CDK17	cyclin-dependent kinase 17
hsa-miR-574-5p	1	0	1	1	1	1	PLAGL2	pleiomorphic adenoma gene-like 2
hsa-miR-574-5p	0	0	1	1	0	0	PLCG2	phospholipase C, gamma 2 (phosphatidylinositol-specific)
hsa-miR-574-5p	0	0	1	1	0	0	POU5F1	POU class 5 homeobox 1
hsa-miR-574-5p	1	0	1	1	1	1	PPP1CC	protein phosphatase 1, catalytic subunit, gamma isozyme
hsa-miR-574-5p	1	0	1	1	1	1	PPP2R3A	protein phosphatase 2, regulatory subunit B'', alpha
hsa-miR-574-5p	1	0	1	1	1	1	PPP6C	protein phosphatase 6, catalytic subunit
hsa-miR-574-5p	1	0	1	1	1	1	PRKAR2B	protein kinase, cAMP-dependent, regulatory, type II, beta
hsa-miR-574-5p	1	0	1	0	1	1	PRKCA	protein kinase C, alpha
hsa-miR-574-5p	0	0	1	0	1	1	PSMD3	proteasome (prosome, macropain) 26S subunit, non-ATPase, 3
hsa-miR-574-5p	1	0	1	1	1	1	PTPN9	protein tyrosine phosphatase, non-receptor type 9
hsa-miR-574-5p	0	0	1	0	1	1	RAB3B	RAB3B, member RAS oncogene family
hsa-miR-574-5p	1	0	1	1	1	1	RAD23B	RAD23 homolog B (S. cerevisiae)
hsa-miR-574-5p	1	0	1	1	1	1	RASA1	RAS p21 protein activator (GTPase activating protein) 1
hsa-miR-574-5p	1	0	1	1	1	1	ROBO2	roundabout, axon guidance receptor, homolog 2 (Drosophila)
hsa-miR-574-5p	1	0	1	1	1	1	CCL21	chemokine (C-C motif) ligand 21
hsa-miR-574-5p	0	0	1	1	1	1	XCL1	chemokine (C motif) ligand 1
hsa-miR-574-5p	1	0	1	1	1	1	SFRP2	secreted frizzled-related protein 2
hsa-miR-574-5p	1	0	1	1	1	1	SHB	Src homology 2 domain containing adaptor protein B
hsa-miR-574-5p	1	0	1	1	1	1	SKI	v-ski sarcoma viral oncogene homolog (avian)
hsa-miR-574-5p	1	0	1	1	1	1	SNAI2	snail homolog 2 (Drosophila)
hsa-miR-574-5p	1	0	1	1	1	1	SNX2	sorting nexin 2
hsa-miR-574-5p	1	0	1	1	1	1	SOX2	SRY (sex determining region Y)-box 2
hsa-miR-574-5p	1	0	1	1	1	1	SRF	serum response factor (c-fos serum response element-binding transcription factor)
hsa-miR-574-5p	0	0	1	1	0	0	SSX2	synovial sarcoma, X breakpoint 2
hsa-miR-574-5p	0	0	1	1	1	1	STAT6	signal transducer and activator of transcription 6, interleukin-4 induced
hsa-miR-574-5p	1	0	1	0	1	1	TAL1	T-cell acute lymphocytic leukemia 1
hsa-miR-574-5p	1	0	1	1	1	1	TFAP2B	transcription factor AP-2 beta (activating enhancer binding protein 2 beta)
hsa-miR-574-5p	1	0	1	1	1	1	NR2E1	nuclear receptor subfamily 2, group E, member 1
hsa-miR-574-5p	0	0	1	1	1	1	TRAF3	TNF receptor-associated factor 3
hsa-miR-574-5p	1	0	1	1	1	1	UBE2H	ubiquitin-conjugating enzyme E2H
hsa-miR-574-5p	1	0	1	0	1	1	VCL	vinculin
hsa-miR-574-5p	1	0	1	1	1	1	VSNL1	visinin-like 1
hsa-miR-574-5p	1	0	1	0	1	1	YWHAB	tyrosine 3-monooxygenase/tryptophan 5-monooxygenase activation protein, beta polypeptide
hsa-miR-574-5p	1	0	1	1	1	1	PAX8	paired box 8
hsa-miR-574-5p	1	0	1	1	1	1	KCNAB1	potassium voltage-gated channel, shaker-related subfamily, beta member 1
hsa-miR-574-5p	1	0	1	1	1	1	ADAM12	ADAM metallopeptidase domain 12
hsa-miR-574-5p	1	0	1	1	1	1	CUL5	cullin 5
hsa-miR-574-5p	1	0	1	1	1	1	NRIP1	nuclear receptor interacting protein 1
hsa-miR-574-5p	1	0	1	1	1	1	CILP	cartilage intermediate layer protein, nucleotide pyrophosphohydrolase
hsa-miR-574-5p	0	0	1	1	1	1	CHST1	carbohydrate (keratan sulfate Gal-6) sulfotransferase 1
hsa-miR-574-5p	1	0	1	0	1	1	TNKS	tankyrase, TRF1-interacting ankyrin-related ADP-ribose polymerase
hsa-miR-574-5p	1	0	1	0	1	1	IRS2	insulin receptor substrate 2
hsa-miR-574-5p	1	0	1	1	1	1	SNAP23	synaptosomal-associated protein, 23kDa
hsa-miR-574-5p	1	0	1	1	1	1	FGF18	fibroblast growth factor 18
hsa-miR-574-5p	1	0	1	1	1	1	NRP2	neuropilin 2
hsa-miR-574-5p	1	0	1	1	1	1	KAT2B	K(lysine) acetyltransferase 2B
hsa-miR-574-5p	1	0	1	1	1	1	FUBP1	far upstream element (FUSE) binding protein 1
hsa-miR-574-5p	1	0	1	1	1	1	BCL2L2	BCL2-like 2
hsa-miR-574-5p	1	0	1	1	1	1	CDH12	cadherin 12, type 2 (N-cadherin 2)
hsa-miR-574-5p	1	0	1	0	1	1	SLC1A2	solute carrier family 1 (glial high affinity glutamate transporter), member 2
hsa-miR-574-5p	0	0	1	0	1	1	SLC1A3	solute carrier family 1 (glial high affinity glutamate transporter), member 3
hsa-miR-574-5p	0	0	1	1	1	1	CHST2	carbohydrate (N-acetylglucosamine-6-O) sulfotransferase 2
hsa-miR-574-5p	0	0	1	1	1	1	HOMER1	homer homolog 1 (Drosophila)
hsa-miR-574-5p	1	0	1	0	1	1	CHST3	carbohydrate (chondroitin 6) sulfotransferase 3
hsa-miR-574-5p	1	0	1	0	1	1	AKAP6	A kinase (PRKA) anchor protein 6
hsa-miR-574-5p	1	0	1	1	1	1	TRAF4	TNF receptor-associated factor 4
hsa-miR-574-5p	1	0	1	0	1	1	ACVR1B	activin A receptor, type IB
hsa-miR-574-5p	1	0	1	1	1	1	BNIP2	BCL2/adenovirus E1B 19kDa interacting protein 2
hsa-miR-574-5p	0	0	1	1	1	1	CBLN1	cerebellin 1 precursor
hsa-miR-574-5p	1	0	1	1	1	1	DAG1	dystroglycan 1 (dystrophin-associated glycoprotein 1)
hsa-miR-574-5p	1	0	1	1	1	1	DUSP1	dual specificity phosphatase 1
hsa-miR-574-5p	1	0	1	1	1	1	EFNB1	ephrin-B1
hsa-miR-574-5p	1	0	1	1	1	1	EPHB3	EPH receptor B3
hsa-miR-574-5p	0	0	1	1	1	1	EXTL1	exostoses (multiple)-like 1
hsa-miR-574-5p	1	0	1	1	1	1	FGD1	FYVE, RhoGEF and PH domain containing 1
hsa-miR-574-5p	0	0	1	1	1	1	GPC5	glypican 5
hsa-miR-574-5p	0	0	1	0	1	1	GALNT3	UDP-N-acetyl-alpha-D-galactosamine:polypeptide N-acetylgalactosaminyltransferase 3 (GalNAc-T3)
hsa-miR-574-5p	1	0	1	1	1	1	ONECUT1	one cut homeobox 1
hsa-miR-574-5p	1	0	1	1	0	0	HOXC6	homeobox C6
hsa-miR-574-5p	0	0	1	0	1	1	POU4F2	POU class 4 homeobox 2
hsa-miR-574-5p	1	0	1	0	1	1	SCN2B	sodium channel, voltage-gated, type II, beta subunit
hsa-miR-574-5p	0	0	1	1	1	1	TK2	thymidine kinase 2, mitochondrial
hsa-miR-574-5p	1	0	1	1	1	1	RAB11A	RAB11A, member RAS oncogene family
hsa-miR-574-5p	0	0	1	1	1	1	MGAM	maltase-glucoamylase (alpha-glucosidase)
hsa-miR-574-5p	1	0	1	1	1	1	RPS6KA5	ribosomal protein S6 kinase, 90kDa, polypeptide 5
hsa-miR-574-5p	1	0	1	1	1	1	NREP	neuronal regeneration related protein homolog (rat)
hsa-miR-574-5p	1	0	1	1	1	1	KIF3B	kinesin family member 3B
hsa-miR-574-5p	1	0	1	0	1	1	ARHGEF6	Rac/Cdc42 guanine nucleotide exchange factor (GEF) 6
hsa-miR-574-5p	1	0	1	0	1	1	ROCK2	Rho-associated, coiled-coil containing protein kinase 2
hsa-miR-574-5p	1	0	1	1	1	1	ONECUT2	one cut homeobox 2
hsa-miR-574-5p	1	0	1	1	1	1	CXCL14	chemokine (C-X-C motif) ligand 14
hsa-miR-574-5p	1	0	1	1	1	1	ZFP36L1	zinc finger protein 36, C3H type-like 1
hsa-miR-574-5p	1	0	1	1	1	1	JARID2	jumonji, AT rich interactive domain 2
hsa-miR-574-5p	1	0	1	0	1	1	KRAS	v-Ki-ras2 Kirsten rat sarcoma viral oncogene homolog
hsa-miR-574-5p	0	0	1	1	0	0	FXYD1	FXYD domain containing ion transport regulator 1
hsa-miR-574-5p	0	0	1	1	1	1	PRCP	prolylcarboxypeptidase (angiotensinase C)
hsa-miR-574-5p	1	0	1	1	1	1	RELN	reelin
hsa-miR-574-5p	1	0	1	0	1	1	SEL1L	sel-1 suppressor of lin-12-like (C. elegans)
hsa-miR-574-5p	0	0	1	1	0	0	SLC4A3	solute carrier family 4, anion exchanger, member 3
hsa-miR-574-5p	1	0	1	1	1	1	MED13	mediator complex subunit 13
hsa-miR-574-5p	1	0	1	0	1	1	CALM3	calmodulin 3 (phosphorylase kinase, delta)
hsa-miR-574-5p	1	0	1	1	1	1	FOXN3	forkhead box N3
hsa-miR-574-5p	0	0	1	1	1	1	CSN3	casein kappa
hsa-miR-574-5p	1	0	1	1	1	1	ARID3A	AT rich interactive domain 3A (BRIGHT-like)
hsa-miR-574-5p	1	0	1	1	1	1	GJA5	gap junction protein, alpha 5, 40kDa
hsa-miR-574-5p	0	0	1	1	1	1	GPR22	G protein-coupled receptor 22
hsa-miR-574-5p	1	0	1	0	1	1	CCDC6	coiled-coil domain containing 6
hsa-miR-574-5p	0	0	1	1	1	1	FOSL1	FOS-like antigen 1
hsa-miR-574-5p	1	0	1	1	1	1	RND2	Rho family GTPase 2
hsa-miR-574-5p	1	0	1	1	1	1	GABBR2	gamma-aminobutyric acid (GABA) B receptor, 2
hsa-miR-574-5p	1	0	1	1	1	1	AKT3	v-akt murine thymoma viral oncogene homolog 3 (protein kinase B, gamma)
hsa-miR-574-5p	1	0	1	1	1	1	MED6	mediator complex subunit 6
hsa-miR-574-5p	1	0	1	0	0	0	FRAT1	frequently rearranged in advanced T-cell lymphomas
hsa-miR-574-5p	1	0	1	1	1	1	PIGK	phosphatidylinositol glycan anchor biosynthesis, class K
hsa-miR-574-5p	1	0	1	1	1	1	LPP	LIM domain containing preferred translocation partner in lipoma
hsa-miR-574-5p	1	0	1	1	1	1	RGS4	regulator of G-protein signaling 4
hsa-miR-574-5p	0	0	1	1	0	0	S100A12	S100 calcium binding protein A12
hsa-miR-574-5p	0	0	1	1	1	1	SSX1	synovial sarcoma, X breakpoint 1
hsa-miR-574-5p	1	0	1	1	1	1	ST8SIA4	ST8 alpha-N-acetyl-neuraminide alpha-2,8-sialyltransferase 4
hsa-miR-574-5p	0	0	1	1	1	1	UBXN8	UBX domain protein 8
hsa-miR-574-5p	1	0	1	0	1	1	GPC6	glypican 6
hsa-miR-574-5p	1	0	1	1	1	1	ARPC5	actin related protein 2/3 complex, subunit 5, 16kDa
hsa-miR-574-5p	1	0	1	1	1	1	NAMPT	nicotinamide phosphoribosyltransferase
hsa-miR-574-5p	0	0	1	0	1	1	CD96	CD96 molecule
hsa-miR-574-5p	1	0	1	0	1	1	SPRY3	sprouty homolog 3 (Drosophila)
hsa-miR-574-5p	0	0	1	1	1	1	CD5L	CD5 molecule-like
hsa-miR-574-5p	1	0	1	1	1	1	FOXO4	forkhead box O4
hsa-miR-574-5p	1	0	1	1	1	1	MMP16	matrix metallopeptidase 16 (membrane-inserted)
hsa-miR-574-5p	1	0	1	1	1	1	MTF1	metal-regulatory transcription factor 1
hsa-miR-574-5p	1	0	1	0	1	1	NAB1	NGFI-A binding protein 1 (EGR1 binding protein 1)
hsa-miR-574-5p	1	0	1	1	0	0	NAB2	NGFI-A binding protein 2 (EGR1 binding protein 2)
hsa-miR-574-5p	1	0	1	0	1	1	HDAC4	histone deacetylase 4
hsa-miR-574-5p	1	0	1	1	1	1	HS3ST4	heparan sulfate (glucosamine) 3-O-sulfotransferase 4
hsa-miR-574-5p	1	0	1	0	1	1	HS3ST3B1	heparan sulfate (glucosamine) 3-O-sulfotransferase 3B1
hsa-miR-574-5p	0	0	1	1	0	0	LAMC3	laminin, gamma 3
hsa-miR-574-5p	1	0	1	1	1	1	CACNG2	calcium channel, voltage-dependent, gamma subunit 2
hsa-miR-574-5p	1	0	1	1	1	1	SEMA3A	sema domain, immunoglobulin domain (Ig), short basic domain, secreted, (semaphorin) 3A
hsa-miR-574-5p	1	0	1	1	1	1	DAGLA	diacylglycerol lipase, alpha
hsa-miR-574-5p	1	0	1	1	1	1	DNAJB1	DnaJ (Hsp40) homolog, subfamily B, member 1
hsa-miR-574-5p	1	0	1	1	1	1	NFATC1	nuclear factor of activated T-cells, cytoplasmic, calcineurin-dependent 1
hsa-miR-574-5p	0	0	1	1	1	1	NTS	neurotensin
hsa-miR-574-5p	1	0	1	1	1	1	NR4A2	nuclear receptor subfamily 4, group A, member 2
hsa-miR-574-5p	0	0	1	0	1	1	OAS3	2'-5'-oligoadenylate synthetase 3, 100kDa
hsa-miR-574-5p	1	0	1	1	1	1	POU4F1	POU class 4 homeobox 1
hsa-miR-574-5p	1	0	1	0	1	1	PPP1R2	protein phosphatase 1, regulatory (inhibitor) subunit 2
hsa-miR-574-5p	1	0	1	0	1	1	PRKAA2	protein kinase, AMP-activated, alpha 2 catalytic subunit
hsa-miR-574-5p	0	0	1	1	1	1	PRKCH	protein kinase C, eta
hsa-miR-574-5p	1	0	1	1	1	1	RAD21	RAD21 homolog (S. pombe)
hsa-miR-574-5p	1	0	1	1	1	1	SMC1A	structural maintenance of chromosomes 1A
hsa-miR-574-5p	1	0	1	1	1	1	NPEPPS	aminopeptidase puromycin sensitive
hsa-miR-574-5p	0	0	1	1	1	1	PGRMC2	progesterone receptor membrane component 2
hsa-miR-574-5p	1	0	1	1	1	1	TIMM17A	translocase of inner mitochondrial membrane 17 homolog A (yeast)
hsa-miR-574-5p	1	0	1	1	1	1	ZER1	zer-1 homolog (C. elegans)
hsa-miR-574-5p	1	0	1	1	1	1	SEC23A	Sec23 homolog A (S. cerevisiae)
hsa-miR-574-5p	0	0	1	0	0	0	CREB3	cAMP responsive element binding protein 3
hsa-miR-574-5p	1	0	1	0	1	1	APPBP2	amyloid beta precursor protein (cytoplasmic tail) binding protein 2
hsa-miR-574-5p	1	0	1	1	1	1	TRIM3	tripartite motif containing 3
hsa-miR-574-5p	1	0	1	1	1	1	CORIN	corin, serine peptidase
hsa-miR-574-5p	1	0	1	1	1	1	MAP3K2	mitogen-activated protein kinase kinase kinase 2
hsa-miR-574-5p	1	0	1	1	1	1	PGRMC1	progesterone receptor membrane component 1
hsa-miR-574-5p	0	0	1	1	1	1	CD300C	CD300c molecule
hsa-miR-574-5p	1	0	1	1	1	1	DIAPH2	diaphanous homolog 2 (Drosophila)
hsa-miR-574-5p	1	0	1	1	1	1	HIVEP2	human immunodeficiency virus type I enhancer binding protein 2
hsa-miR-574-5p	1	0	1	1	1	1	KAT6A	K(lysine) acetyltransferase 6A
hsa-miR-574-5p	1	0	1	0	1	1	SYNGAP1	synaptic Ras GTPase activating protein 1
hsa-miR-574-5p	0	0	1	1	1	1	TRIM10	tripartite motif containing 10
hsa-miR-574-5p	0	0	1	1	1	1	MYOT	myotilin
hsa-miR-574-5p	1	0	1	1	1	1	MORF4L1	mortality factor 4 like 1
hsa-miR-574-5p	1	0	1	1	1	1	CBX1	chromobox homolog 1
hsa-miR-574-5p	1	0	1	1	1	1	RAB35	RAB35, member RAS oncogene family
hsa-miR-574-5p	1	0	1	1	1	1	CD86	CD86 molecule
hsa-miR-574-5p	0	0	1	1	1	1	CEACAM7	carcinoembryonic antigen-related cell adhesion molecule 7
hsa-miR-574-5p	0	0	1	1	1	1	HOXD3	homeobox D3
hsa-miR-574-5p	1	0	1	1	1	1	RAC1	ras-related C3 botulinum toxin substrate 1 (rho family, small GTP binding protein Rac1)
hsa-miR-574-5p	1	0	1	1	1	1	RP2	retinitis pigmentosa 2 (X-linked recessive)
hsa-miR-574-5p	1	0	1	1	1	1	SCN1A	sodium channel, voltage-gated, type I, alpha subunit
hsa-miR-574-5p	0	0	1	1	0	0	SMTN	smoothelin
hsa-miR-574-5p	1	0	1	0	1	1	SOX12	SRY (sex determining region Y)-box 12
hsa-miR-574-5p	1	0	1	1	1	1	HSPA13	heat shock protein 70kDa family, member 13
hsa-miR-574-5p	1	0	1	1	1	1	ADAMTS5	ADAM metallopeptidase with thrombospondin type 1 motif, 5
hsa-miR-574-5p	0	0	1	1	1	1	FAF1	Fas (TNFRSF6) associated factor 1
hsa-miR-574-5p	1	0	1	1	1	1	ZIC2	Zic family member 2
hsa-miR-574-5p	1	0	1	1	1	1	ZNF81	zinc finger protein 81
hsa-miR-574-5p	0	0	1	0	1	1	ZXDB	zinc finger, X-linked, duplicated B
hsa-miR-574-5p	1	0	1	1	1	1	PALM2-AKAP2	PALM2-AKAP2 readthrough
hsa-miR-574-5p	1	0	1	1	1	1	PDCD10	programmed cell death 10
hsa-miR-574-5p	0	0	1	1	1	1	HRH3	histamine receptor H3
hsa-miR-574-5p	1	0	1	1	1	1	KLF12	Kruppel-like factor 12
hsa-miR-574-5p	0	0	1	1	1	1	KLF8	Kruppel-like factor 8
hsa-miR-574-5p	0	0	1	0	1	1	AP4E1	adaptor-related protein complex 4, epsilon 1 subunit
hsa-miR-574-5p	1	0	1	1	1	1	TARDBP	TAR DNA binding protein
hsa-miR-574-5p	0	0	1	1	0	0	STAP1	signal transducing adaptor family member 1
hsa-miR-574-5p	0	0	1	1	0	0	GLG1	golgi glycoprotein 1
hsa-miR-574-5p	1	0	1	1	1	1	MGEA5	meningioma expressed antigen 5 (hyaluronidase)
hsa-miR-574-5p	1	0	1	1	1	1	RYBP	RING1 and YY1 binding protein
hsa-miR-574-5p	1	0	1	1	1	1	RHOQ	ras homolog family member Q
hsa-miR-574-5p	0	0	1	1	1	1	RRAS2	related RAS viral (r-ras) oncogene homolog 2
hsa-miR-574-5p	1	0	1	0	1	1	G3BP2	GTPase activating protein (SH3 domain) binding protein 2
hsa-miR-574-5p	0	0	1	1	0	0	KIR2DS4	killer cell immunoglobulin-like receptor, two domains, short cytoplasmic tail, 4
hsa-miR-574-5p	1	0	1	0	1	1	MYCBP	c-myc binding protein
hsa-miR-574-5p	0	0	1	0	1	1	PLA2G2D	phospholipase A2, group IID
hsa-miR-574-5p	0	0	1	0	1	1	PITPNC1	phosphatidylinositol transfer protein, cytoplasmic 1
hsa-miR-574-5p	1	0	1	1	1	1	TRPC5	transient receptor potential cation channel, subfamily C, member 5
hsa-miR-574-5p	1	0	1	1	1	1	YWHAG	tyrosine 3-monooxygenase/tryptophan 5-monooxygenase activation protein, gamma polypeptide
hsa-miR-574-5p	1	0	1	1	1	1	ZNF281	zinc finger protein 281
hsa-miR-574-5p	0	0	1	1	1	1	CD24	CD24 molecule
hsa-miR-574-5p	1	0	1	0	1	1	FLRT2	fibronectin leucine rich transmembrane protein 2
hsa-miR-574-5p	0	0	1	1	0	0	LGALS13	lectin, galactoside-binding, soluble, 13
hsa-miR-574-5p	1	0	1	1	0	0	SNX15	sorting nexin 15
hsa-miR-574-5p	1	0	1	1	1	1	NCKAP1	NCK-associated protein 1
hsa-miR-574-5p	0	0	1	0	0	0	PILRB	paired immunoglobin-like type 2 receptor beta
hsa-miR-574-5p	0	0	1	1	0	0	NDUFA8	NADH dehydrogenase (ubiquinone) 1 alpha subcomplex, 8, 19kDa
hsa-miR-574-5p	1	0	1	1	1	1	VAMP1	vesicle-associated membrane protein 1 (synaptobrevin 1)
hsa-miR-574-5p	1	0	1	0	1	1	VAMP2	vesicle-associated membrane protein 2 (synaptobrevin 2)
hsa-miR-574-5p	0	0	1	1	0	0	GNPAT	glyceronephosphate O-acyltransferase
hsa-miR-574-5p	1	0	1	1	1	1	MAPRE2	microtubule-associated protein, RP/EB family, member 2
hsa-miR-574-5p	0	0	1	1	1	1	CAPN6	calpain 6
hsa-miR-574-5p	0	0	1	1	0	0	CLEC4E	C-type lectin domain family 4, member E
hsa-miR-574-5p	1	0	1	1	1	1	LHX6	LIM homeobox 6
hsa-miR-574-5p	0	0	1	1	1	1	LAMP3	lysosomal-associated membrane protein 3
hsa-miR-574-5p	1	0	1	1	1	1	AFF4	AF4/FMR2 family, member 4
hsa-miR-574-5p	1	0	1	1	1	1	SERP1	stress-associated endoplasmic reticulum protein 1
hsa-miR-574-5p	0	0	1	1	1	1	ARFGAP3	ADP-ribosylation factor GTPase activating protein 3
hsa-miR-574-5p	1	0	1	1	1	1	ERO1L	ERO1-like (S. cerevisiae)
hsa-miR-574-5p	0	0	1	1	1	1	EHD2	EH-domain containing 2
hsa-miR-574-5p	1	0	1	1	1	1	RALGPS1	Ral GEF with PH domain and SH3 binding motif 1
hsa-miR-574-5p	1	0	1	1	1	1	TBKBP1	TBK1 binding protein 1
hsa-miR-574-5p	0	0	1	1	1	1	FRMPD4	FERM and PDZ domain containing 4
hsa-miR-574-5p	1	0	1	1	1	1	KIAA0247	KIAA0247
hsa-miR-574-5p	1	0	1	1	1	1	SPCS2	signal peptidase complex subunit 2 homolog (S. cerevisiae)
hsa-miR-574-5p	1	0	1	0	1	1	SERTAD2	SERTA domain containing 2
hsa-miR-574-5p	0	0	1	0	1	1	ZBTB24	zinc finger and BTB domain containing 24
hsa-miR-574-5p	0	0	1	0	1	1	EPM2AIP1	EPM2A (laforin) interacting protein 1
hsa-miR-574-5p	0	0	1	0	1	1	PPM1E	protein phosphatase, Mg2+/Mn2+ dependent, 1E
hsa-miR-574-5p	1	0	1	0	1	1	ICK	intestinal cell (MAK-like) kinase
hsa-miR-574-5p	1	0	1	1	1	1	PLEKHA6	pleckstrin homology domain containing, family A member 6
hsa-miR-574-5p	1	0	1	1	1	1	DIP2C	DIP2 disco-interacting protein 2 homolog C (Drosophila)
hsa-miR-574-5p	1	0	1	0	1	1	WDFY3	WD repeat and FYVE domain containing 3
hsa-miR-574-5p	0	0	1	1	1	1	MYO16	myosin XVI
hsa-miR-574-5p	1	0	1	0	1	1	ZNF609	zinc finger protein 609
hsa-miR-574-5p	1	0	1	0	1	1	PEG10	paternally expressed 10
hsa-miR-574-5p	1	0	1	1	1	1	RCOR1	REST corepressor 1
hsa-miR-574-5p	1	0	1	1	1	1	TRIM9	tripartite motif containing 9
hsa-miR-574-5p	1	0	1	1	1	1	PLCB1	phospholipase C, beta 1 (phosphoinositide-specific)
hsa-miR-574-5p	1	0	1	1	1	1	PDS5A	PDS5, regulator of cohesion maintenance, homolog A (S. cerevisiae)
hsa-miR-574-5p	1	0	1	0	1	1	KIAA1024	KIAA1024
hsa-miR-574-5p	1	0	1	1	1	1	CUX2	cut-like homeobox 2
hsa-miR-574-5p	0	0	1	1	1	1	ANGEL1	angel homolog 1 (Drosophila)
hsa-miR-574-5p	1	0	1	0	1	1	ARHGEF12	Rho guanine nucleotide exchange factor (GEF) 12
hsa-miR-574-5p	1	0	1	1	0	0	SMG5	smg-5 homolog, nonsense mediated mRNA decay factor (C. elegans)
hsa-miR-574-5p	1	0	1	1	1	1	MED13L	mediator complex subunit 13-like
hsa-miR-574-5p	0	0	1	0	1	1	ZDHHC17	zinc finger, DHHC-type containing 17
hsa-miR-574-5p	0	0	1	1	1	1	ADNP	activity-dependent neuroprotector homeobox
hsa-miR-574-5p	0	0	1	1	1	1	NUP188	nucleoporin 188kDa
hsa-miR-574-5p	1	0	1	1	1	1	DSTYK	dual serine/threonine and tyrosine protein kinase
hsa-miR-574-5p	0	0	1	1	1	1	ANAPC13	anaphase promoting complex subunit 13
hsa-miR-574-5p	1	0	1	1	1	1	PARM1	prostate androgen-regulated mucin-like protein 1
hsa-miR-574-5p	1	0	1	1	1	1	RNF19A	ring finger protein 19A, E3 ubiquitin protein ligase
hsa-miR-574-5p	1	0	1	0	1	1	MTMR9	myotubularin related protein 9
hsa-miR-574-5p	0	0	1	1	1	1	TMEM87A	transmembrane protein 87A
hsa-miR-574-5p	1	0	1	1	1	1	LRRTM2	leucine rich repeat transmembrane neuronal 2
hsa-miR-574-5p	1	0	1	1	1	1	SLITRK5	SLIT and NTRK-like family, member 5
hsa-miR-574-5p	1	0	1	0	1	1	PPP1R16B	protein phosphatase 1, regulatory subunit 16B
hsa-miR-574-5p	0	0	1	1	1	1	TES	testis derived transcript (3 LIM domains)
hsa-miR-574-5p	1	0	1	1	1	1	FAM155B	family with sequence similarity 155, member B
hsa-miR-574-5p	1	0	1	0	1	1	WWC3	WWC family member 3
hsa-miR-574-5p	0	0	1	1	1	1	BRPF3	bromodomain and PHD finger containing, 3
hsa-miR-574-5p	1	0	1	0	1	1	TRIM33	tripartite motif containing 33
hsa-miR-574-5p	1	0	1	1	1	1	MEMO1	mediator of cell motility 1
hsa-miR-574-5p	1	0	1	1	1	1	PHF20L1	PHD finger protein 20-like 1
hsa-miR-574-5p	1	0	1	1	1	1	RRP15	ribosomal RNA processing 15 homolog (S. cerevisiae)
hsa-miR-574-5p	0	0	1	1	1	1	MRPS23	mitochondrial ribosomal protein S23
hsa-miR-574-5p	1	0	1	0	1	1	CNR1	cannabinoid receptor 1 (brain)
hsa-miR-574-5p	1	0	1	1	1	1	NLK	nemo-like kinase
hsa-miR-574-5p	1	0	1	1	1	1	AKAP11	A kinase (PRKA) anchor protein 11
hsa-miR-574-5p	1	0	1	1	1	1	BIRC6	baculoviral IAP repeat containing 6
hsa-miR-574-5p	0	0	1	0	1	1	FAM8A1	family with sequence similarity 8, member A1
hsa-miR-574-5p	1	0	1	0	1	1	HPCAL4	hippocalcin like 4
hsa-miR-574-5p	1	0	1	1	1	1	RAPGEFL1	Rap guanine nucleotide exchange factor (GEF)-like 1
hsa-miR-574-5p	1	0	1	1	0	0	IRX4	iroquois homeobox 4
hsa-miR-574-5p	0	0	1	1	0	0	NCKIPSD	NCK interacting protein with SH3 domain
hsa-miR-574-5p	1	0	1	0	1	1	RAB8B	RAB8B, member RAS oncogene family
hsa-miR-574-5p	0	0	1	0	1	1	GPR83	G protein-coupled receptor 83
hsa-miR-574-5p	1	0	1	1	1	1	CYP39A1	cytochrome P450, family 39, subfamily A, polypeptide 1
hsa-miR-574-5p	0	0	1	1	1	1	KDM3B	lysine (K)-specific demethylase 3B
hsa-miR-574-5p	1	0	1	1	1	1	HOXC10	homeobox C10
hsa-miR-574-5p	1	0	1	1	1	1	SIX4	SIX homeobox 4
hsa-miR-574-5p	1	0	1	1	1	1	ZC3H7B	zinc finger CCCH-type containing 7B
hsa-miR-574-5p	1	0	1	0	1	1	EIF2C4	eukaryotic translation initiation factor 2C, 4
hsa-miR-574-5p	0	0	1	1	1	1	LRRC16A	leucine rich repeat containing 16A
hsa-miR-574-5p	1	0	1	1	1	1	CNNM2	cyclin M2
hsa-miR-574-5p	1	0	1	1	1	1	VPS13C	vacuolar protein sorting 13 homolog C (S. cerevisiae)
hsa-miR-574-5p	1	0	1	1	1	1	ZNF3	zinc finger protein 3
hsa-miR-574-5p	1	0	1	1	1	1	TBC1D8B	TBC1 domain family, member 8B (with GRAM domain)
hsa-miR-574-5p	1	0	1	0	1	1	CHD7	chromodomain helicase DNA binding protein 7
hsa-miR-574-5p	1	0	1	1	1	1	IMPAD1	inositol monophosphatase domain containing 1
hsa-miR-574-5p	0	0	1	1	1	1	SOHLH2	spermatogenesis and oogenesis specific basic helix-loop-helix 2
hsa-miR-574-5p	1	0	1	1	1	1	RNF125	ring finger protein 125, E3 ubiquitin protein ligase
hsa-miR-574-5p	0	0	1	1	0	0	VPS37C	vacuolar protein sorting 37 homolog C (S. cerevisiae)
hsa-miR-574-5p	1	0	1	1	1	1	IFT57	intraflagellar transport 57 homolog (Chlamydomonas)
hsa-miR-574-5p	1	0	1	1	1	1	ARGLU1	arginine and glutamate rich 1
hsa-miR-574-5p	1	0	1	1	1	1	SOBP	sine oculis binding protein homolog (Drosophila)
hsa-miR-574-5p	0	0	1	1	1	1	HEATR1	HEAT repeat containing 1
hsa-miR-574-5p	1	0	1	0	1	1	CCDC88A	coiled-coil domain containing 88A
hsa-miR-574-5p	1	0	1	1	1	1	FIGN	fidgetin
hsa-miR-574-5p	0	0	1	0	0	0	C19orf73	chromosome 19 open reading frame 73
hsa-miR-574-5p	0	0	1	1	0	0	CEP55	centrosomal protein 55kDa
hsa-miR-574-5p	1	0	1	1	1	1	RIC8B	resistance to inhibitors of cholinesterase 8 homolog B (C. elegans)
hsa-miR-574-5p	1	0	1	1	1	1	RPRD1A	regulation of nuclear pre-mRNA domain containing 1A
hsa-miR-574-5p	1	0	1	0	1	1	SEPT11	septin 11
hsa-miR-574-5p	1	0	1	1	1	1	C9orf72	chromosome 9 open reading frame 72
hsa-miR-574-5p	1	0	1	1	1	1	SPTLC3	serine palmitoyltransferase, long chain base subunit 3
hsa-miR-574-5p	1	0	1	1	1	1	KIAA1598	KIAA1598
hsa-miR-574-5p	1	0	1	1	1	1	EPB41L4B	erythrocyte membrane protein band 4.1 like 4B
hsa-miR-574-5p	1	0	1	1	1	1	LRRC59	leucine rich repeat containing 59
hsa-miR-574-5p	1	0	1	1	1	1	CAMK2N1	calcium/calmodulin-dependent protein kinase II inhibitor 1
hsa-miR-574-5p	1	0	1	1	1	1	CTTNBP2NL	CTTNBP2 N-terminal like
hsa-miR-574-5p	1	0	1	1	1	1	HOXA10	homeobox A10
hsa-miR-574-5p	1	0	1	0	1	1	FAM190B	family with sequence similarity 190, member B
hsa-miR-574-5p	1	0	1	0	1	1	CCNJ	cyclin J
hsa-miR-574-5p	0	0	1	0	1	1	ARL15	ADP-ribosylation factor-like 15
hsa-miR-574-5p	1	0	1	1	1	1	SEPT3	septin 3
hsa-miR-574-5p	1	0	1	1	1	1	POLE4	polymerase (DNA-directed), epsilon 4, accessory subunit
hsa-miR-574-5p	0	0	1	0	1	1	ZC3HAV1	zinc finger CCCH-type, antiviral 1
hsa-miR-574-5p	1	0	1	0	1	1	KCMF1	potassium channel modulatory factor 1
hsa-miR-574-5p	1	0	1	1	1	1	C1GALT1	core 1 synthase, glycoprotein-N-acetylgalactosamine 3-beta-galactosyltransferase, 1
hsa-miR-574-5p	1	0	1	1	0	0	C11orf75	chromosome 11 open reading frame 75
hsa-miR-574-5p	0	0	1	1	1	1	PRTFDC1	phosphoribosyl transferase domain containing 1
hsa-miR-574-5p	1	0	1	0	1	1	OTUD7B	OTU domain containing 7B
hsa-miR-574-5p	1	0	1	0	1	1	MNT	MAX binding protein
hsa-miR-574-5p	0	0	1	1	1	1	PDSS2	prenyl (decaprenyl) diphosphate synthase, subunit 2
hsa-miR-574-5p	0	0	1	0	0	0	CD177	CD177 molecule
hsa-miR-574-5p	1	0	1	0	1	1	APMAP	adipocyte plasma membrane associated protein
hsa-miR-574-5p	1	0	1	0	1	1	ADCY2	adenylate cyclase 2 (brain)
hsa-miR-574-5p	1	0	1	1	1	1	SLC24A3	solute carrier family 24 (sodium/potassium/calcium exchanger), member 3
hsa-miR-574-5p	0	0	1	1	1	1	SHROOM4	shroom family member 4
hsa-miR-574-5p	1	0	1	1	1	1	USP31	ubiquitin specific peptidase 31
hsa-miR-574-5p	1	0	1	1	1	1	DLG3	discs, large homolog 3 (Drosophila)
hsa-miR-574-5p	1	0	1	1	1	1	ARHGAP31	Rho GTPase activating protein 31
hsa-miR-574-5p	1	0	1	1	1	1	MIB1	mindbomb E3 ubiquitin protein ligase 1
hsa-miR-574-5p	0	0	1	1	1	1	ARRDC3	arrestin domain containing 3
hsa-miR-574-5p	1	0	1	1	1	1	KLHL14	kelch-like 14 (Drosophila)
hsa-miR-574-5p	1	0	1	1	1	1	WDR48	WD repeat domain 48
hsa-miR-574-5p	1	0	1	1	1	1	TSHZ3	teashirt zinc finger homeobox 3
hsa-miR-574-5p	1	0	1	1	1	1	CNTN3	contactin 3 (plasmacytoma associated)
hsa-miR-574-5p	1	0	1	1	1	1	ZFP14	zinc finger protein 14 homolog (mouse)
hsa-miR-574-5p	0	0	1	1	1	1	B3GALT1	UDP-Gal:betaGlcNAc beta 1,3-galactosyltransferase, polypeptide 1
hsa-miR-574-5p	0	0	1	1	1	1	SSX3	synovial sarcoma, X breakpoint 3
hsa-miR-574-5p	0	0	1	1	0	0	SSX5	synovial sarcoma, X breakpoint 5
hsa-miR-574-5p	1	0	1	0	1	1	TMX4	thioredoxin-related transmembrane protein 4
hsa-miR-574-5p	0	0	1	1	0	0	TRIB3	tribbles homolog 3 (Drosophila)
hsa-miR-574-5p	0	0	1	0	1	1	MS4A7	membrane-spanning 4-domains, subfamily A, member 7
hsa-miR-574-5p	0	0	1	1	0	0	ZNF71	zinc finger protein 71
hsa-miR-574-5p	1	0	1	1	1	1	FAM60A	family with sequence similarity 60, member A
hsa-miR-574-5p	1	0	1	1	1	1	SNX6	sorting nexin 6
hsa-miR-574-5p	1	0	1	1	1	1	TMEM35	transmembrane protein 35
hsa-miR-574-5p	1	0	1	1	1	1	TRIB2	tribbles homolog 2 (Drosophila)
hsa-miR-574-5p	0	0	1	1	0	0	IL21	interleukin 21
hsa-miR-574-5p	0	0	1	1	1	1	GABBR1	gamma-aminobutyric acid (GABA) B receptor, 1
hsa-miR-574-5p	1	0	1	1	1	1	SLC22A3	solute carrier family 22 (extraneuronal monoamine transporter), member 3
hsa-miR-574-5p	1	0	1	1	1	1	GPR88	G protein-coupled receptor 88
hsa-miR-574-5p	1	0	1	1	1	1	GOLPH3	golgi phosphoprotein 3 (coat-protein)
hsa-miR-574-5p	1	0	1	1	1	1	SNX16	sorting nexin 16
hsa-miR-574-5p	0	0	1	1	1	1	NOD2	nucleotide-binding oligomerization domain containing 2
hsa-miR-574-5p	1	0	1	1	1	1	ABCG4	ATP-binding cassette, sub-family G (WHITE), member 4
hsa-miR-574-5p	1	0	1	0	1	1	EIF4H	eukaryotic translation initiation factor 4H
hsa-miR-574-5p	0	0	1	1	1	1	GLIPR2	GLI pathogenesis-related 2
hsa-miR-574-5p	1	0	1	1	1	1	HIF3A	hypoxia inducible factor 3, alpha subunit
hsa-miR-574-5p	0	0	1	1	1	1	HHIP	hedgehog interacting protein
hsa-miR-574-5p	1	0	1	1	1	1	TMEM168	transmembrane protein 168
hsa-miR-574-5p	1	0	1	0	1	1	HOXC8	homeobox C8
hsa-miR-574-5p	1	0	1	0	1	1	ELOVL4	ELOVL fatty acid elongase 4
hsa-miR-574-5p	1	0	1	1	1	1	RMND5A	required for meiotic nuclear division 5 homolog A (S. cerevisiae)
hsa-miR-574-5p	1	0	1	1	1	1	MARCH7	membrane-associated ring finger (C3HC4) 7, E3 ubiquitin protein ligase
hsa-miR-574-5p	0	0	1	0	1	1	NAIP	NLR family, apoptosis inhibitory protein
hsa-miR-574-5p	1	0	1	1	1	1	REEP1	receptor accessory protein 1
hsa-miR-574-5p	1	0	1	1	1	1	GRAMD3	GRAM domain containing 3
hsa-miR-574-5p	0	0	1	1	1	1	HTR5A	5-hydroxytryptamine (serotonin) receptor 5A, G protein-coupled
hsa-miR-574-5p	1	0	1	1	1	1	HOXB4	homeobox B4
hsa-miR-574-5p	0	0	1	0	1	1	MRP63	mitochondrial ribosomal protein 63
hsa-miR-574-5p	1	0	1	1	1	1	USB1	U6 snRNA biogenesis 1
hsa-miR-574-5p	1	0	1	1	1	1	DHX40	DEAH (Asp-Glu-Ala-His) box polypeptide 40
hsa-miR-574-5p	0	0	1	1	1	1	LRRK1	leucine-rich repeat kinase 1
hsa-miR-574-5p	0	0	1	1	1	1	GLT25D1	glycosyltransferase 25 domain containing 1
hsa-miR-574-5p	0	0	1	1	1	1	NSUN7	NOP2/Sun domain family, member 7
hsa-miR-574-5p	0	0	1	0	1	1	C1orf115	chromosome 1 open reading frame 115
hsa-miR-574-5p	1	0	1	1	1	1	CCDC82	coiled-coil domain containing 82
hsa-miR-574-5p	1	0	1	1	1	1	CPED1	cadherin-like and PC-esterase domain containing 1
hsa-miR-574-5p	1	0	1	1	1	1	KLHL18	kelch-like 18 (Drosophila)
hsa-miR-574-5p	1	0	1	0	1	1	VCPIP1	valosin containing protein (p97)/p47 complex interacting protein 1
hsa-miR-574-5p	0	0	1	1	1	1	COQ10B	coenzyme Q10 homolog B (S. cerevisiae)
hsa-miR-574-5p	1	0	1	1	1	1	TNKS2	tankyrase, TRF1-interacting ankyrin-related ADP-ribose polymerase 2
hsa-miR-574-5p	1	0	1	1	0	0	RNF39	ring finger protein 39
hsa-miR-574-5p	1	0	1	1	1	1	CYB5B	cytochrome b5 type B (outer mitochondrial membrane)
hsa-miR-574-5p	1	0	1	1	1	1	JHDM1D	jumonji C domain containing histone demethylase 1 homolog D (S. cerevisiae)
hsa-miR-574-5p	1	0	1	0	1	1	SETD7	SET domain containing (lysine methyltransferase) 7
hsa-miR-574-5p	1	0	1	0	1	1	VOPP1	vesicular, overexpressed in cancer, prosurvival protein 1
hsa-miR-574-5p	1	0	1	0	1	1	SPRY4	sprouty homolog 4 (Drosophila)
hsa-miR-574-5p	0	0	1	1	1	1	FCRL5	Fc receptor-like 5
hsa-miR-574-5p	1	0	1	1	1	1	SH3BGRL3	SH3 domain binding glutamic acid-rich protein like 3
hsa-miR-574-5p	0	0	1	1	1	1	CCDC70	coiled-coil domain containing 70
hsa-miR-574-5p	1	0	1	1	0	0	SCRT1	scratch homolog 1, zinc finger protein (Drosophila)
hsa-miR-574-5p	0	0	1	1	1	1	MS4A8B	membrane-spanning 4-domains, subfamily A, member 8B
hsa-miR-574-5p	1	0	1	0	1	1	SH3BGRL2	SH3 domain binding glutamic acid-rich protein like 2
hsa-miR-574-5p	0	0	1	0	1	1	ENAM	enamelin
hsa-miR-574-5p	1	0	1	1	1	1	OTP	orthopedia homeobox
hsa-miR-574-5p	0	0	1	1	1	1	ANKRD27	ankyrin repeat domain 27 (VPS9 domain)
hsa-miR-574-5p	1	0	1	1	1	1	LOXL4	lysyl oxidase-like 4
hsa-miR-574-5p	1	0	1	1	0	0	MAF1	MAF1 homolog (S. cerevisiae)
hsa-miR-574-5p	0	0	1	1	0	0	GARNL3	GTPase activating Rap/RanGAP domain-like 3
hsa-miR-574-5p	1	0	1	1	1	1	CAMKK1	calcium/calmodulin-dependent protein kinase kinase 1, alpha
hsa-miR-574-5p	0	0	1	1	0	0	NICN1	nicolin 1
hsa-miR-574-5p	1	0	1	1	1	1	PRADC1	protease-associated domain containing 1
hsa-miR-574-5p	0	0	1	0	1	1	TMEM246	transmembrane protein 246
hsa-miR-574-5p	1	0	1	1	1	1	SYVN1	synovial apoptosis inhibitor 1, synoviolin
hsa-miR-574-5p	1	0	1	1	1	1	PHF6	PHD finger protein 6
hsa-miR-574-5p	0	0	1	1	1	1	FNDC1	fibronectin type III domain containing 1
hsa-miR-574-5p	1	0	1	1	1	1	USP38	ubiquitin specific peptidase 38
hsa-miR-574-5p	1	0	1	1	1	1	HIATL1	hippocampus abundant transcript-like 1
hsa-miR-574-5p	1	0	1	1	1	1	PPP1R9B	protein phosphatase 1, regulatory subunit 9B
hsa-miR-574-5p	0	0	1	0	1	1	LMNB2	lamin B2
hsa-miR-574-5p	1	0	1	1	0	0	ORAI1	ORAI calcium release-activated calcium modulator 1
hsa-miR-574-5p	0	0	1	1	1	1	FBXL20	F-box and leucine-rich repeat protein 20
hsa-miR-574-5p	1	0	1	1	1	1	ARHGAP19	Rho GTPase activating protein 19
hsa-miR-574-5p	0	0	1	1	1	1	TMEM241	transmembrane protein 241
hsa-miR-574-5p	0	0	1	1	0	0	NXF5	nuclear RNA export factor 5
hsa-miR-574-5p	1	0	1	1	1	1	CASP2	caspase 2, apoptosis-related cysteine peptidase
hsa-miR-574-5p	1	0	1	1	1	1	TRIM5	tripartite motif containing 5
hsa-miR-574-5p	0	0	1	1	0	0	MUC13	mucin 13, cell surface associated
hsa-miR-574-5p	0	0	1	1	1	1	CABS1	calcium-binding protein, spermatid-specific 1
hsa-miR-574-5p	1	0	1	0	1	1	PURB	purine-rich element binding protein B
hsa-miR-574-5p	0	0	1	1	1	1	EPSTI1	epithelial stromal interaction 1 (breast)
hsa-miR-574-5p	1	0	1	1	1	1	SSH2	slingshot homolog 2 (Drosophila)
hsa-miR-574-5p	0	0	1	1	0	0	IMP4	IMP4, U3 small nucleolar ribonucleoprotein, homolog (yeast)
hsa-miR-574-5p	1	0	1	1	0	0	FCHSD1	FCH and double SH3 domains 1
hsa-miR-574-5p	1	0	1	1	1	1	TSPYL5	TSPY-like 5
hsa-miR-574-5p	1	0	1	1	1	1	BRWD1	bromodomain and WD repeat domain containing 1
hsa-miR-574-5p	0	0	1	0	1	1	CCDC97	coiled-coil domain containing 97
hsa-miR-574-5p	1	0	1	1	1	1	STX1B	syntaxin 1B
hsa-miR-574-5p	0	0	1	1	0	0	PGLYRP2	peptidoglycan recognition protein 2
hsa-miR-574-5p	1	0	1	1	1	1	MBD6	methyl-CpG binding domain protein 6
hsa-miR-574-5p	0	0	1	1	1	1	PLEKHG4B	pleckstrin homology domain containing, family G (with RhoGef domain) member 4B
hsa-miR-574-5p	1	0	1	1	1	1	SLITRK1	SLIT and NTRK-like family, member 1
hsa-miR-574-5p	0	0	1	1	0	0	TSGA13	testis specific, 13
hsa-miR-574-5p	1	0	1	1	1	1	MED12L	mediator complex subunit 12-like
hsa-miR-574-5p	1	0	1	1	1	1	PFN2	profilin 2
hsa-miR-574-5p	0	0	1	1	1	1	CCNE2	cyclin E2
hsa-miR-574-5p	1	0	1	0	1	1	ANTXR2	anthrax toxin receptor 2
hsa-miR-574-5p	1	0	1	1	1	1	PTP4A2	protein tyrosine phosphatase type IVA, member 2
hsa-miR-574-5p	1	0	1	1	1	1	SEPT4	septin 4
hsa-miR-574-5p	1	0	1	1	1	1	SLC44A1	solute carrier family 44, member 1
hsa-miR-574-5p	1	0	1	1	1	1	C20orf112	chromosome 20 open reading frame 112
hsa-miR-574-5p	0	0	1	1	1	1	CCDC34	coiled-coil domain containing 34
hsa-miR-574-5p	1	0	1	1	0	0	ADAMTS14	ADAM metallopeptidase with thrombospondin type 1 motif, 14
hsa-miR-574-5p	1	0	1	1	1	1	ZNF280B	zinc finger protein 280B
hsa-miR-574-5p	1	0	1	1	1	1	FAM210B	family with sequence similarity 210, member B
hsa-miR-574-5p	1	0	1	0	1	1	SOCS4	suppressor of cytokine signaling 4
hsa-miR-574-5p	1	0	1	1	1	1	KLHL6	kelch-like 6 (Drosophila)
hsa-miR-574-5p	1	0	1	1	1	1	JDP2	Jun dimerization protein 2
hsa-miR-574-5p	0	0	1	1	1	1	RGS18	regulator of G-protein signaling 18
hsa-miR-574-5p	1	0	1	0	1	1	C5orf20	chromosome 5 open reading frame 20
hsa-miR-574-5p	1	0	1	1	0	0	UNC5A	unc-5 homolog A (C. elegans)
hsa-miR-574-5p	1	0	1	1	1	1	BMPER	BMP binding endothelial regulator
hsa-miR-574-5p	1	0	1	1	1	1	ADAMTS19	ADAM metallopeptidase with thrombospondin type 1 motif, 19
hsa-miR-574-5p	0	0	1	1	1	1	PATE1	prostate and testis expressed 1
hsa-miR-574-5p	1	0	1	1	1	1	PCSK6	proprotein convertase subtilisin/kexin type 6
hsa-miR-574-5p	1	0	1	1	1	1	FAM122A	family with sequence similarity 122A
hsa-miR-574-5p	0	0	1	0	0	0	AP5B1	adaptor-related protein complex 5, beta 1 subunit
hsa-miR-574-5p	0	0	1	0	1	1	SP140L	SP140 nuclear body protein-like
hsa-miR-574-5p	0	0	1	1	0	0	KIF12	kinesin family member 12
hsa-miR-574-5p	1	0	1	1	1	1	GLCCI1	glucocorticoid induced transcript 1
hsa-miR-574-5p	0	0	1	1	0	0	ESAM	endothelial cell adhesion molecule
hsa-miR-574-5p	1	0	1	1	1	1	ARX	aristaless related homeobox
hsa-miR-574-5p	0	0	1	1	1	1	KCNH5	potassium voltage-gated channel, subfamily H (eag-related), member 5
hsa-miR-574-5p	1	0	1	1	1	1	ATRN	attractin
hsa-miR-574-5p	1	0	1	0	1	1	CNOT6L	CCR4-NOT transcription complex, subunit 6-like
hsa-miR-574-5p	1	0	1	1	1	1	MAPK1IP1L	mitogen-activated protein kinase 1 interacting protein 1-like
hsa-miR-574-5p	0	0	1	1	1	1	GTSF1	gametocyte specific factor 1
hsa-miR-574-5p	1	0	1	1	1	1	RFTN2	raftlin family member 2
hsa-miR-574-5p	0	0	1	1	0	0	LINC00477	long intergenic non-protein coding RNA 477
hsa-miR-574-5p	0	0	1	1	1	1	PUS10	pseudouridylate synthase 10
hsa-miR-574-5p	0	0	1	1	1	1	NXPE3	neurexophilin and PC-esterase domain family, member 3
hsa-miR-574-5p	0	0	1	1	1	1	DACT3	dapper, antagonist of beta-catenin, homolog 3 (Xenopus laevis)
hsa-miR-574-5p	1	0	1	1	1	1	SLC2A12	solute carrier family 2 (facilitated glucose transporter), member 12
hsa-miR-574-5p	0	0	1	0	0	0	MRPL10	mitochondrial ribosomal protein L10
hsa-miR-574-5p	0	0	1	1	1	1	SLC25A43	solute carrier family 25, member 43
hsa-miR-574-5p	1	0	1	1	1	1	LPIN1	lipin 1
hsa-miR-574-5p	1	0	1	1	1	1	SEPT6	septin 6
hsa-miR-574-5p	1	0	1	0	1	1	MTPN	myotrophin
hsa-miR-574-5p	0	0	1	1	0	0	IL11RA	interleukin 11 receptor, alpha
hsa-miR-574-5p	1	0	1	1	1	1	FAM110B	family with sequence similarity 110, member B
hsa-miR-574-5p	0	0	1	1	1	1	DMBX1	diencephalon/mesencephalon homeobox 1
hsa-miR-574-5p	0	0	1	1	1	1	LONRF1	LON peptidase N-terminal domain and ring finger 1
hsa-miR-574-5p	0	0	1	1	1	1	ERP27	endoplasmic reticulum protein 27
hsa-miR-574-5p	1	0	1	1	1	1	TBX15	T-box 15
hsa-miR-574-5p	0	0	1	0	1	1	AFAP1L1	actin filament associated protein 1-like 1
hsa-miR-574-5p	1	0	1	1	1	1	FAM123B	family with sequence similarity 123B
hsa-miR-574-5p	1	0	1	1	1	1	ZSCAN29	zinc finger and SCAN domain containing 29
hsa-miR-574-5p	1	0	1	1	1	1	C7orf60	chromosome 7 open reading frame 60
hsa-miR-574-5p	1	0	1	0	1	1	TMTC2	transmembrane and tetratricopeptide repeat containing 2
hsa-miR-574-5p	1	0	1	1	1	1	SPRED1	sprouty-related, EVH1 domain containing 1
hsa-miR-574-5p	0	0	1	1	1	1	CCER1	coiled-coil glutamate-rich protein 1
hsa-miR-574-5p	0	0	1	1	0	0	MS4A15	membrane-spanning 4-domains, subfamily A, member 15
hsa-miR-574-5p	1	0	1	1	1	1	ATXN7L1	ataxin 7-like 1
hsa-miR-574-5p	1	0	1	1	1	1	C15orf32	chromosome 15 open reading frame 32
hsa-miR-574-5p	1	0	1	1	1	1	TXLNB	taxilin beta
hsa-miR-574-5p	0	0	1	1	1	1	SLC22A7	solute carrier family 22 (organic anion transporter), member 7
hsa-miR-574-5p	0	0	1	1	0	0	DEFB123	defensin, beta 123
hsa-miR-574-5p	1	0	1	1	0	0	TMEM86A	transmembrane protein 86A
hsa-miR-574-5p	1	0	1	1	1	1	HS6ST3	heparan sulfate 6-O-sulfotransferase 3
hsa-miR-574-5p	1	0	1	1	1	1	CREBRF	CREB3 regulatory factor
hsa-miR-574-5p	1	0	1	1	1	1	CACUL1	CDK2-associated, cullin domain 1
hsa-miR-574-5p	0	0	1	1	1	1	ZFP91-CNTF	ZFP91-CNTF readthrough (non-protein coding)
hsa-miR-574-5p	1	0	1	0	1	1	PLEKHH2	pleckstrin homology domain containing, family H (with MyTH4 domain) member 2
hsa-miR-574-5p	1	0	1	1	1	1	RC3H1	ring finger and CCCH-type domains 1
hsa-miR-574-5p	1	0	1	0	1	1	KLHDC1	kelch domain containing 1
hsa-miR-574-5p	1	0	1	1	1	1	CSF1	colony stimulating factor 1 (macrophage)
hsa-miR-574-5p	0	0	1	1	1	1	REXO1L1	REX1, RNA exonuclease 1 homolog (S. cerevisiae)-like 1
hsa-miR-574-5p	0	0	1	1	0	0	SSX6	synovial sarcoma, X breakpoint 6 (pseudogene)
hsa-miR-574-5p	0	0	1	1	1	1	FAM163A	family with sequence similarity 163, member A
hsa-miR-574-5p	1	0	1	1	1	1	FAM117B	family with sequence similarity 117, member B
hsa-miR-574-5p	0	0	1	1	1	1	FNDC7	fibronectin type III domain containing 7
hsa-miR-574-5p	0	0	1	1	1	1	C17orf78	chromosome 17 open reading frame 78
hsa-miR-574-5p	1	0	1	1	1	1	RABL3	RAB, member of RAS oncogene family-like 3
hsa-miR-574-5p	1	0	1	1	1	1	SLC41A1	solute carrier family 41, member 1
hsa-miR-574-5p	0	0	1	1	1	1	CLEC14A	C-type lectin domain family 14, member A
hsa-miR-574-5p	0	0	1	1	0	0	HIST2H2AB	histone cluster 2, H2ab
hsa-miR-574-5p	1	0	1	1	1	1	RAB3IP	RAB3A interacting protein (rabin3)
hsa-miR-574-5p	0	0	1	1	1	1	LYNX1	Ly6/neurotoxin 1
hsa-miR-574-5p	0	0	1	1	1	1	TUBB	tubulin, beta class I
hsa-miR-574-5p	1	0	1	0	1	1	IQGAP3	IQ motif containing GTPase activating protein 3
hsa-miR-574-5p	0	0	1	1	1	1	STXBP4	syntaxin binding protein 4
hsa-miR-574-5p	0	0	1	1	1	1	IL22RA2	interleukin 22 receptor, alpha 2
hsa-miR-574-5p	0	0	1	0	1	1	ZNF445	zinc finger protein 445
hsa-miR-574-5p	1	0	1	1	1	1	TCF20	transcription factor 20 (AR1)
hsa-miR-574-5p	0	0	1	0	1	1	KRT28	keratin 28
hsa-miR-574-5p	1	0	1	1	1	1	UBXN2A	UBX domain protein 2A
hsa-miR-574-5p	1	0	1	0	1	1	EFHA2	EF-hand domain family, member A2
hsa-miR-574-5p	1	0	1	1	1	1	NF2	neurofibromin 2 (merlin)
hsa-miR-574-5p	0	0	1	1	0	0	NUDT8	nudix (nucleoside diphosphate linked moiety X)-type motif 8
hsa-miR-574-5p	1	0	1	1	1	1	TMEM229B	transmembrane protein 229B
hsa-miR-574-5p	0	0	1	1	1	1	SKA2	spindle and kinetochore associated complex subunit 2
hsa-miR-574-5p	1	0	1	1	1	1	NIN	ninein (GSK3B interacting protein)
hsa-miR-574-5p	1	0	1	0	1	1	HNRNPA3	heterogeneous nuclear ribonucleoprotein A3
hsa-miR-574-5p	1	0	1	1	0	0	TMEM219	transmembrane protein 219
hsa-miR-574-5p	1	0	1	1	1	1	TMEM65	transmembrane protein 65
hsa-miR-574-5p	1	0	1	0	1	1	SLC16A9	solute carrier family 16, member 9 (monocarboxylic acid transporter 9)
hsa-miR-574-5p	0	0	1	0	1	1	TCF21	transcription factor 21
hsa-miR-574-5p	0	0	1	1	0	0	ITIH6	inter-alpha-trypsin inhibitor heavy chain family, member 6
hsa-miR-574-5p	0	0	1	0	0	0	IGFL1	IGF-like family member 1
hsa-miR-574-5p	1	0	1	1	1	1	NHLRC1	NHL repeat containing 1
hsa-miR-574-5p	1	0	1	1	1	1	THRA	thyroid hormone receptor, alpha
hsa-miR-574-5p	0	0	1	1	1	1	SLC25A35	solute carrier family 25, member 35
hsa-miR-574-5p	1	0	1	1	1	1	FBXO33	F-box protein 33
hsa-miR-574-5p	1	0	1	1	1	1	RAPH1	Ras association (RalGDS/AF-6) and pleckstrin homology domains 1
hsa-miR-574-5p	1	0	1	1	1	1	E2F7	E2F transcription factor 7
hsa-miR-574-5p	1	0	1	0	1	1	MBLAC2	metallo-beta-lactamase domain containing 2
hsa-miR-574-5p	1	0	1	1	1	1	ENSA	endosulfine alpha
hsa-miR-574-5p	1	0	1	1	1	1	ATRNL1	attractin-like 1
hsa-miR-574-5p	0	0	1	1	1	1	PATE2	prostate and testis expressed 2
hsa-miR-574-5p	1	0	1	1	1	1	XKRX	XK, Kell blood group complex subunit-related, X-linked
hsa-miR-574-5p	0	0	1	0	0	0	CST13P	cystatin 13, pseudogene
hsa-miR-574-5p	0	0	1	0	0	0	PCDHB19P	protocadherin beta 19 pseudogene
hsa-miR-574-5p	0	0	1	0	0	0	MIR155HG	MIR155 host gene (non-protein coding)
hsa-miR-574-5p	0	0	1	0	0	0	TTTY2	testis-specific transcript, Y-linked 2 (non-protein coding)
hsa-miR-574-5p	0	0	1	0	0	0	PPP1R2P3	protein phosphatase 1, regulatory (inhibitor) subunit 2 pseudogene 3
hsa-miR-574-5p	0	0	1	0	0	0	NACAP1	nascent-polypeptide-associated complex alpha polypeptide pseudogene 1
hsa-miR-574-5p	0	0	1	0	0	0	LOC606724	coronin, actin binding protein, 1A pseudogene
hsa-miR-574-5p	0	0	1	0	0	0	CPS1-IT1	CPS1 intronic transcript 1 (non-protein coding)
hsa-miR-574-5p	0	0	1	0	0	0	PER4	period homolog 3 (Drosophila) pseudogene
hsa-miR-574-5p	0	0	1	0	0	0	NEAT1	nuclear paraspeckle assembly transcript 1 (non-protein coding)
hsa-miR-574-5p	0	0	1	0	0	0	RNASEH2CP1	ribonuclease H2, subunit C pseudogene 1
hsa-miR-574-5p	0	0	1	0	0	0	SNX29P2	sorting nexin 29 pseudogene 2
hsa-miR-574-5p	0	0	1	0	0	0	HSP90B3P	heat shock protein 90kDa beta (Grp94), member 3, pseudogene
hsa-miR-574-5p	0	0	1	0	0	0	SNORD116-13	small nucleolar RNA, C/D box 116-13
hsa-miR-574-5p	0	0	1	0	0	0	SNORD116-14	small nucleolar RNA, C/D box 116-14
hsa-miR-574-5p	0	0	1	0	0	0	SNORD116-17	small nucleolar RNA, C/D box 116-17
hsa-miR-574-5p	0	0	1	0	0	0	SNORD116-18	small nucleolar RNA, C/D box 116-18
hsa-miR-574-5p	0	0	1	0	0	0	SNORD116-20	small nucleolar RNA, C/D box 116-20
hsa-miR-574-5p	1	0	1	1	1	1	PDE4A	phosphodiesterase 4A, cAMP-specific
hsa-miR-574-5p	1	0	1	0	1	1	NFIX	nuclear factor I/X (CCAAT-binding transcription factor)
hsa-miR-574-5p	0	0	1	1	1	1	CNGB1	cyclic nucleotide gated channel beta 1
hsa-miR-574-5p	1	0	1	1	1	1	ZNF238	zinc finger protein 238
hsa-miR-574-5p	0	0	1	1	1	1	PEG3	paternally expressed 3
hsa-miR-574-5p	0	0	0	1	0	0	IL32	interleukin 32
hsa-miR-574-5p	0	0	0	1	1	1	ABHD5	abhydrolase domain containing 5
hsa-miR-574-5p	1	0	1	1	1	1	RALBP1	ralA binding protein 1
hsa-miR-574-5p	0	0	1	1	0	0	DNAH2	dynein, axonemal, heavy chain 2
hsa-miR-574-5p	1	0	0	1	1	1	NADK	NAD kinase
hsa-miR-574-5p	1	0	1	1	1	1	PDZD4	PDZ domain containing 4
hsa-miR-574-5p	0	0	1	1	1	1	SPP2	secreted phosphoprotein 2, 24kDa
hsa-miR-574-5p	0	0	0	1	1	1	RDH8	retinol dehydrogenase 8 (all-trans)
hsa-miR-574-5p	0	0	0	1	1	1	PLOD1	procollagen-lysine, 2-oxoglutarate 5-dioxygenase 1
hsa-miR-574-5p	1	0	1	1	1	1	DIMT1	DIM1 dimethyladenosine transferase 1 homolog (S. cerevisiae)
hsa-miR-574-5p	0	0	1	1	1	1	APOH	apolipoprotein H (beta-2-glycoprotein I)
hsa-miR-574-5p	0	0	1	1	1	1	POLR2E	polymerase (RNA) II (DNA directed) polypeptide E, 25kDa
hsa-miR-574-5p	0	0	1	1	0	0	CENPM	centromere protein M
hsa-miR-574-5p	0	0	0	1	0	0	MIOX	myo-inositol oxygenase
hsa-miR-574-5p	0	0	1	1	0	0	HDAC10	histone deacetylase 10
hsa-miR-574-5p	0	0	1	1	0	0	EEF1A2	eukaryotic translation elongation factor 1 alpha 2
hsa-miR-574-5p	0	0	0	1	0	0	SRMS	src-related kinase lacking C-terminal regulatory tyrosine and N-terminal myristylation sites
hsa-miR-574-5p	1	0	1	1	1	1	CHRDL1	chordin-like 1
hsa-miR-574-5p	0	0	1	1	0	0	CORO1A	coronin, actin binding protein, 1A
hsa-miR-574-5p	0	0	0	1	0	0	ACD	adrenocortical dysplasia homolog (mouse)
hsa-miR-574-5p	0	0	0	1	1	1	NME3	NME/NM23 nucleoside diphosphate kinase 3
hsa-miR-574-5p	0	0	1	1	0	0	WFDC1	WAP four-disulfide core domain 1
hsa-miR-574-5p	0	0	1	1	1	1	DECR2	2,4-dienoyl CoA reductase 2, peroxisomal
hsa-miR-574-5p	0	0	0	1	1	1	MEFV	Mediterranean fever
hsa-miR-574-5p	0	0	0	1	0	0	VPS18	vacuolar protein sorting 18 homolog (S. cerevisiae)
hsa-miR-574-5p	0	0	1	1	1	1	RP1	retinitis pigmentosa 1 (autosomal dominant)
hsa-miR-574-5p	0	0	1	1	0	0	LIN7B	lin-7 homolog B (C. elegans)
hsa-miR-574-5p	0	0	0	1	1	1	ZIM2	zinc finger, imprinted 2
hsa-miR-574-5p	0	0	1	1	1	1	NPVF	neuropeptide VF precursor
hsa-miR-574-5p	0	0	1	1	1	1	BCL7B	B-cell CLL/lymphoma 7B
hsa-miR-574-5p	1	0	1	1	1	1	VIM	vimentin
hsa-miR-574-5p	0	0	0	1	1	1	ST6GALNAC2	ST6 (alpha-N-acetyl-neuraminyl-2,3-beta-galactosyl-1,3)-N-acetylgalactosaminide alpha-2,6-sialyltransferase 2
hsa-miR-574-5p	0	0	1	1	1	1	AKAP10	A kinase (PRKA) anchor protein 10
hsa-miR-574-5p	0	0	1	1	0	0	FOXN1	forkhead box N1
hsa-miR-574-5p	0	0	0	1	0	0	DBX1	developing brain homeobox 1
hsa-miR-574-5p	0	0	1	1	1	1	TULP3	tubby like protein 3
hsa-miR-574-5p	1	0	1	1	1	1	EIF2B1	eukaryotic translation initiation factor 2B, subunit 1 alpha, 26kDa
hsa-miR-574-5p	0	0	0	1	1	1	RERGL	RERG/RAS-like
hsa-miR-574-5p	0	0	0	1	1	1	GNB3	guanine nucleotide binding protein (G protein), beta polypeptide 3
hsa-miR-574-5p	0	0	0	1	1	1	RSPH4A	radial spoke head 4 homolog A (Chlamydomonas)
hsa-miR-574-5p	0	0	0	1	1	1	GPLD1	glycosylphosphatidylinositol specific phospholipase D1
hsa-miR-574-5p	0	0	1	1	1	1	C6orf118	chromosome 6 open reading frame 118
hsa-miR-574-5p	0	0	1	1	0	0	PKD2L2	polycystic kidney disease 2-like 2
hsa-miR-574-5p	0	0	0	1	0	0	SLC6A7	solute carrier family 6 (neurotransmitter transporter, L-proline), member 7
hsa-miR-574-5p	0	0	1	1	1	1	SELK	selenoprotein K
hsa-miR-574-5p	0	0	1	1	0	0	RBP2	retinol binding protein 2, cellular
hsa-miR-574-5p	1	0	1	1	1	1	NCK2	NCK adaptor protein 2
hsa-miR-574-5p	1	0	0	1	0	0	APC2	adenomatosis polyposis coli 2
hsa-miR-574-5p	0	0	0	1	0	0	PRTN3	proteinase 3
hsa-miR-574-5p	0	0	1	1	0	0	GRIN3B	glutamate receptor, ionotropic, N-methyl-D-aspartate 3B
hsa-miR-574-5p	0	0	0	1	0	0	VAX2	ventral anterior homeobox 2
hsa-miR-574-5p	0	0	0	1	0	0	OSCP1	organic solute carrier partner 1
hsa-miR-574-5p	0	0	0	1	0	0	CTSD	cathepsin D
hsa-miR-574-5p	0	0	1	1	0	0	INSL4	insulin-like 4 (placenta)
hsa-miR-574-5p	0	0	1	1	1	1	CCDC53	coiled-coil domain containing 53
hsa-miR-574-5p	0	0	1	1	0	0	RASL11A	RAS-like, family 11, member A
hsa-miR-574-5p	0	0	1	1	1	1	HOXA7	homeobox A7
hsa-miR-574-5p	0	0	1	1	1	1	POLM	polymerase (DNA directed), mu
hsa-miR-574-5p	0	0	1	1	0	0	FAAH	fatty acid amide hydrolase
hsa-miR-574-5p	0	0	0	1	1	1	LILRB3	leukocyte immunoglobulin-like receptor, subfamily B (with TM and ITIM domains), member 3
hsa-miR-574-5p	0	0	0	1	0	0	C3	complement component 3
hsa-miR-574-5p	1	0	1	1	1	1	SNPH	syntaphilin
hsa-miR-574-5p	0	0	1	1	1	1	RRAS	related RAS viral (r-ras) oncogene homolog
hsa-miR-574-5p	0	0	0	1	1	1	STATH	statherin
hsa-miR-574-5p	0	0	1	1	0	0	DNASE1	deoxyribonuclease I
hsa-miR-574-5p	0	0	1	1	0	0	EPS15L1	epidermal growth factor receptor pathway substrate 15-like 1
hsa-miR-574-5p	0	0	1	1	1	1	ZNF598	zinc finger protein 598
hsa-miR-574-5p	0	0	0	1	0	0	SELO	selenoprotein O
hsa-miR-574-5p	0	0	0	1	1	1	ARHGAP22	Rho GTPase activating protein 22
hsa-miR-574-5p	0	0	1	1	0	0	CCL4	chemokine (C-C motif) ligand 4
hsa-miR-574-5p	0	0	1	1	1	1	VWA8	von Willebrand factor A domain containing 8
hsa-miR-574-5p	0	0	1	1	0	0	KRT5	keratin 5
hsa-miR-574-5p	0	0	0	1	0	0	ECSIT	ECSIT homolog (Drosophila)
hsa-miR-574-5p	0	0	0	1	0	0	PLVAP	plasmalemma vesicle associated protein
hsa-miR-574-5p	1	0	1	1	1	1	PRDM12	PR domain containing 12
hsa-miR-574-5p	0	0	1	1	0	0	RPL27	ribosomal protein L27
hsa-miR-574-5p	0	0	1	1	1	1	RHPN2	rhophilin, Rho GTPase binding protein 2
hsa-miR-574-5p	0	0	1	1	0	0	C19orf40	chromosome 19 open reading frame 40
hsa-miR-574-5p	0	0	1	1	1	1	IGJ	immunoglobulin J polypeptide, linker protein for immunoglobulin alpha and mu polypeptides
hsa-miR-574-5p	0	0	1	1	1	1	TRIM47	tripartite motif containing 47
hsa-miR-574-5p	0	0	0	1	1	1	SLC52A1	solute carrier family 52, riboflavin transporter, member 1
hsa-miR-574-5p	0	0	0	1	0	0	PEMT	phosphatidylethanolamine N-methyltransferase
hsa-miR-574-5p	0	0	1	1	1	1	COG6	component of oligomeric golgi complex 6
hsa-miR-574-5p	0	0	1	1	0	0	WNT2B	wingless-type MMTV integration site family, member 2B
hsa-miR-574-5p	1	0	1	1	1	1	TRAFD1	TRAF-type zinc finger domain containing 1
hsa-miR-574-5p	0	0	1	1	1	1	KIAA1009	KIAA1009
hsa-miR-574-5p	0	0	0	1	1	1	DYSF	dysferlin, limb girdle muscular dystrophy 2B (autosomal recessive)
hsa-miR-574-5p	0	0	1	1	1	1	CHST12	carbohydrate (chondroitin 4) sulfotransferase 12
hsa-miR-574-5p	0	0	1	1	1	1	NUPL2	nucleoporin like 2
hsa-miR-574-5p	0	0	0	1	0	0	ZFHX2	zinc finger homeobox 2
hsa-miR-574-5p	0	0	0	1	0	0	CCL27	chemokine (C-C motif) ligand 27
hsa-miR-574-5p	0	0	1	1	1	1	SIX3	SIX homeobox 3
hsa-miR-574-5p	0	0	1	1	1	1	CHRNA1	cholinergic receptor, nicotinic, alpha 1 (muscle)
hsa-miR-574-5p	1	0	1	1	1	1	SLC40A1	solute carrier family 40 (iron-regulated transporter), member 1
hsa-miR-574-5p	0	0	1	1	1	1	SLC16A7	solute carrier family 16, member 7 (monocarboxylic acid transporter 2)
hsa-miR-574-5p	0	0	0	1	1	1	PALB2	partner and localizer of BRCA2
hsa-miR-574-5p	0	0	0	1	0	0	DSG2	desmoglein 2
hsa-miR-574-5p	0	0	0	1	1	1	COX10	COX10 homolog, cytochrome c oxidase assembly protein, heme A: farnesyltransferase (yeast)
hsa-miR-574-5p	1	0	0	1	0	0	LHX5	LIM homeobox 5
hsa-miR-574-5p	0	0	1	1	0	0	SEMA7A	semaphorin 7A, GPI membrane anchor (John Milton Hagen blood group)
hsa-miR-574-5p	1	0	1	1	0	0	PIAS2	protein inhibitor of activated STAT, 2
hsa-miR-574-5p	0	0	0	1	0	0	HCK	hemopoietic cell kinase
hsa-miR-574-5p	1	0	1	1	1	1	ZMYND8	zinc finger, MYND-type containing 8
hsa-miR-574-5p	1	0	1	1	1	1	EEF2K	eukaryotic elongation factor-2 kinase
hsa-miR-574-5p	0	0	0	1	0	0	SLC27A5	solute carrier family 27 (fatty acid transporter), member 5
hsa-miR-574-5p	1	0	0	1	1	1	SMARCB1	SWI/SNF related, matrix associated, actin dependent regulator of chromatin, subfamily b, member 1
hsa-miR-574-5p	0	0	1	1	1	1	ACTR3	ARP3 actin-related protein 3 homolog (yeast)
hsa-miR-574-5p	0	0	1	1	0	0	P2RX3	purinergic receptor P2X, ligand-gated ion channel, 3
hsa-miR-574-5p	0	0	1	1	0	0	TCF25	transcription factor 25 (basic helix-loop-helix)
hsa-miR-574-5p	1	0	1	1	1	1	ATP2B3	ATPase, Ca++ transporting, plasma membrane 3
hsa-miR-574-5p	0	0	0	1	0	0	ELANE	elastase, neutrophil expressed
hsa-miR-574-5p	0	0	1	1	1	1	TAF1B	TATA box binding protein (TBP)-associated factor, RNA polymerase I, B, 63kDa
hsa-miR-574-5p	1	0	1	1	0	0	ARHGEF17	Rho guanine nucleotide exchange factor (GEF) 17
hsa-miR-574-5p	1	0	1	1	1	1	FNBP4	formin binding protein 4
hsa-miR-574-5p	1	0	1	1	1	1	LRP2	low density lipoprotein receptor-related protein 2
hsa-miR-574-5p	1	0	1	1	1	1	RAPGEF4	Rap guanine nucleotide exchange factor (GEF) 4
hsa-miR-574-5p	1	0	1	1	1	1	EZH1	enhancer of zeste homolog 1 (Drosophila)
hsa-miR-574-5p	0	0	1	1	0	0	CAD	carbamoyl-phosphate synthetase 2, aspartate transcarbamylase, and dihydroorotase
hsa-miR-574-5p	0	0	1	1	1	1	CLDN16	claudin 16
hsa-miR-574-5p	0	0	0	1	0	0	PPAP2A	phosphatidic acid phosphatase type 2A
hsa-miR-574-5p	0	0	1	1	1	1	MMRN1	multimerin 1
hsa-miR-574-5p	1	0	1	1	0	0	SPEG	SPEG complex locus
hsa-miR-574-5p	0	0	1	1	0	0	PTPN23	protein tyrosine phosphatase, non-receptor type 23
hsa-miR-574-5p	0	0	1	1	1	1	HYAL1	hyaluronoglucosaminidase 1
hsa-miR-574-5p	0	0	1	1	1	1	DIDO1	death inducer-obliterator 1
hsa-miR-574-5p	0	0	0	1	1	1	CCDC65	coiled-coil domain containing 65
hsa-miR-574-5p	1	0	1	1	1	1	BIN2	bridging integrator 2
hsa-miR-574-5p	0	0	1	1	1	1	BCL2A1	BCL2-related protein A1
hsa-miR-574-5p	1	0	1	1	1	1	MESDC1	mesoderm development candidate 1
hsa-miR-574-5p	1	0	1	1	1	1	IGF1R	insulin-like growth factor 1 receptor
hsa-miR-574-5p	0	0	1	1	1	1	WDR93	WD repeat domain 93
hsa-miR-574-5p	0	0	0	1	0	0	MFGE8	milk fat globule-EGF factor 8 protein
hsa-miR-574-5p	0	0	1	1	1	1	SEC11A	SEC11 homolog A (S. cerevisiae)
hsa-miR-574-5p	0	0	0	1	0	0	ZNF287	zinc finger protein 287
hsa-miR-574-5p	1	0	1	1	0	0	G6PC3	glucose 6 phosphatase, catalytic, 3
hsa-miR-574-5p	1	0	1	1	1	1	GNAL	guanine nucleotide binding protein (G protein), alpha activating activity polypeptide, olfactory type
hsa-miR-574-5p	0	0	1	1	0	0	CCDC40	coiled-coil domain containing 40
hsa-miR-574-5p	1	0	1	1	1	1	CSNK1D	casein kinase 1, delta
hsa-miR-574-5p	0	0	1	1	1	1	DYM	dymeclin
hsa-miR-574-5p	0	0	0	1	1	1	NFIC	nuclear factor I/C (CCAAT-binding transcription factor)
hsa-miR-574-5p	0	0	0	1	0	0	SSBP4	single stranded DNA binding protein 4
hsa-miR-574-5p	1	0	1	1	0	0	ADAMTS10	ADAM metallopeptidase with thrombospondin type 1 motif, 10
hsa-miR-574-5p	0	0	1	1	1	1	IL22RA1	interleukin 22 receptor, alpha 1
hsa-miR-574-5p	1	0	1	1	1	1	FNBP1L	formin binding protein 1-like
hsa-miR-574-5p	0	0	0	1	0	0	CAPN9	calpain 9
hsa-miR-574-5p	0	0	0	1	1	1	ACP1	acid phosphatase 1, soluble
hsa-miR-574-5p	0	0	0	1	0	0	EPHX1	epoxide hydrolase 1, microsomal (xenobiotic)
hsa-miR-574-5p	0	0	0	1	0	0	FAM198A	family with sequence similarity 198, member A
hsa-miR-574-5p	0	0	1	1	0	0	PLA1A	phospholipase A1 member A
hsa-miR-574-5p	0	0	1	1	1	1	SRPRB	signal recognition particle receptor, B subunit
hsa-miR-574-5p	0	0	1	1	1	1	NHP2	NHP2 ribonucleoprotein homolog (yeast)
hsa-miR-574-5p	0	0	1	1	0	0	PNLDC1	poly(A)-specific ribonuclease (PARN)-like domain containing 1
hsa-miR-574-5p	0	0	0	1	0	0	STRA8	stimulated by retinoic acid gene 8 homolog (mouse)
hsa-miR-574-5p	0	0	1	1	0	0	IL2RG	interleukin 2 receptor, gamma
hsa-miR-574-5p	0	0	1	1	0	0	GNRH1	gonadotropin-releasing hormone 1 (luteinizing-releasing hormone)
hsa-miR-574-5p	0	0	0	1	0	0	OR1K1	olfactory receptor, family 1, subfamily K, member 1
hsa-miR-574-5p	0	0	0	1	1	1	MSRB2	methionine sulfoxide reductase B2
hsa-miR-574-5p	0	0	0	1	0	0	OR5F1	olfactory receptor, family 5, subfamily F, member 1
hsa-miR-574-5p	1	0	1	1	1	1	NINL	ninein-like
hsa-miR-574-5p	0	0	0	1	1	1	OCSTAMP	osteoclast stimulatory transmembrane protein
hsa-miR-574-5p	0	0	0	1	0	0	FERMT3	fermitin family member 3
hsa-miR-574-5p	0	0	1	1	0	0	TBX6	T-box 6
hsa-miR-574-5p	0	0	0	1	1	1	LDHAL6A	lactate dehydrogenase A-like 6A
hsa-miR-574-5p	1	0	1	1	1	1	UBE3B	ubiquitin protein ligase E3B
hsa-miR-574-5p	0	0	1	1	1	1	CDC123	cell division cycle 123 homolog (S. cerevisiae)
hsa-miR-574-5p	1	0	1	1	1	1	ANO4	anoctamin 4
hsa-miR-574-5p	0	0	0	1	1	1	NVL	nuclear VCP-like
hsa-miR-574-5p	0	0	0	1	1	1	GLT1D1	glycosyltransferase 1 domain containing 1
hsa-miR-574-5p	0	0	0	1	1	1	CAPSL	calcyphosine-like
hsa-miR-574-5p	0	0	1	1	1	1	RAB3C	RAB3C, member RAS oncogene family
hsa-miR-574-5p	0	0	0	1	0	0	SPACA7	sperm acrosome associated 7
hsa-miR-574-5p	0	0	1	1	1	1	PANX3	pannexin 3
hsa-miR-574-5p	1	0	1	1	1	1	NRGN	neurogranin (protein kinase C substrate, RC3)
hsa-miR-574-5p	1	0	1	1	1	1	PDLIM3	PDZ and LIM domain 3
hsa-miR-574-5p	1	0	1	1	1	1	PIEZO2	piezo-type mechanosensitive ion channel component 2
hsa-miR-574-5p	0	0	1	1	1	1	PPIL3	peptidylprolyl isomerase (cyclophilin)-like 3
hsa-miR-574-5p	0	0	1	1	0	0	CSF1R	colony stimulating factor 1 receptor
hsa-miR-574-5p	0	0	1	1	0	0	TRIM42	tripartite motif containing 42
hsa-miR-574-5p	0	0	1	1	1	1	UQCRB	ubiquinol-cytochrome c reductase binding protein
hsa-miR-574-5p	1	0	1	1	1	1	RPUSD3	RNA pseudouridylate synthase domain containing 3
hsa-miR-574-5p	0	0	0	1	0	0	PSMG3	proteasome (prosome, macropain) assembly chaperone 3
hsa-miR-574-5p	1	0	1	1	0	0	DTNB	dystrobrevin, beta
hsa-miR-574-5p	0	0	0	1	1	1	PEX10	peroxisomal biogenesis factor 10
hsa-miR-574-5p	0	0	0	1	1	1	ELK4	ELK4, ETS-domain protein (SRF accessory protein 1)
hsa-miR-574-5p	0	0	0	1	0	0	CBR1	carbonyl reductase 1
hsa-miR-574-5p	1	0	1	1	1	1	CPNE2	copine II
hsa-miR-574-5p	1	0	1	1	0	0	HK3	hexokinase 3 (white cell)
hsa-miR-574-5p	0	0	1	1	0	0	PTCD1	pentatricopeptide repeat domain 1
hsa-miR-574-5p	0	0	0	1	1	1	HBB	hemoglobin, beta
hsa-miR-574-5p	0	0	1	1	0	0	HBD	hemoglobin, delta
hsa-miR-574-5p	1	0	1	1	1	1	UNK	unkempt homolog (Drosophila)
hsa-miR-574-5p	0	0	1	1	1	1	JMJD8	jumonji domain containing 8
hsa-miR-574-5p	1	0	1	1	1	1	RAVER2	ribonucleoprotein, PTB-binding 2
hsa-miR-574-5p	0	0	0	1	1	1	TMCO4	transmembrane and coiled-coil domains 4
hsa-miR-574-5p	0	0	0	1	1	1	REL	v-rel reticuloendotheliosis viral oncogene homolog (avian)
hsa-miR-574-5p	0	0	0	1	0	0	FEV	FEV (ETS oncogene family)
hsa-miR-574-5p	0	0	0	1	0	0	GLB1L	galactosidase, beta 1-like
hsa-miR-574-5p	0	0	1	1	1	1	PF4	platelet factor 4
hsa-miR-574-5p	0	0	1	1	0	0	ANXA5	annexin A5
hsa-miR-574-5p	0	0	1	1	1	1	GJB7	gap junction protein, beta 7, 25kDa
hsa-miR-574-5p	0	0	1	1	1	1	SCIN	scinderin
hsa-miR-574-5p	1	0	1	1	1	1	LMTK2	lemur tyrosine kinase 2
hsa-miR-574-5p	0	0	0	1	1	1	SBSPON	somatomedin B and thrombospondin, type 1 domain containing
hsa-miR-574-5p	1	0	0	1	1	1	CTHRC1	collagen triple helix repeat containing 1
hsa-miR-574-5p	1	0	1	1	1	1	ZHX1	zinc fingers and homeoboxes 1
hsa-miR-574-5p	0	0	1	1	0	0	PPP1R14D	protein phosphatase 1, regulatory (inhibitor) subunit 14D
hsa-miR-574-5p	0	0	1	1	0	0	CYB5R2	cytochrome b5 reductase 2
hsa-miR-574-5p	0	0	1	1	1	1	MMP3	matrix metallopeptidase 3 (stromelysin 1, progelatinase)
hsa-miR-574-5p	0	0	1	1	1	1	SLFN5	schlafen family member 5
hsa-miR-574-5p	1	0	1	1	0	0	PPIB	peptidylprolyl isomerase B (cyclophilin B)
hsa-miR-574-5p	1	0	1	1	1	1	DPP8	dipeptidyl-peptidase 8
hsa-miR-574-5p	0	0	1	1	0	0	FAM176C	family with sequence similarity 176, member C
hsa-miR-574-5p	1	0	1	1	1	1	RNF214	ring finger protein 214
hsa-miR-574-5p	0	0	0	1	0	0	ZNF668	zinc finger protein 668
hsa-miR-574-5p	0	0	1	1	1	1	TUBA1A	tubulin, alpha 1a
hsa-miR-574-5p	0	0	0	1	1	1	CYP2S1	cytochrome P450, family 2, subfamily S, polypeptide 1
hsa-miR-574-5p	0	0	0	1	0	0	ZNF560	zinc finger protein 560
hsa-miR-574-5p	0	0	0	1	0	0	ATP5H	ATP synthase, H+ transporting, mitochondrial Fo complex, subunit d
hsa-miR-574-5p	0	0	0	1	0	0	SPSB3	splA/ryanodine receptor domain and SOCS box containing 3
hsa-miR-574-5p	1	0	0	1	0	0	ZNF597	zinc finger protein 597
hsa-miR-574-5p	0	0	1	1	1	1	OGG1	8-oxoguanine DNA glycosylase
hsa-miR-574-5p	0	0	0	1	1	1	HSPB3	heat shock 27kDa protein 3
hsa-miR-574-5p	1	0	0	1	0	0	ATPAF2	ATP synthase mitochondrial F1 complex assembly factor 2
hsa-miR-574-5p	0	0	1	1	0	0	CDK5R2	cyclin-dependent kinase 5, regulatory subunit 2 (p39)
hsa-miR-574-5p	0	0	1	1	1	1	MMADHC	methylmalonic aciduria (cobalamin deficiency) cblD type, with homocystinuria
hsa-miR-574-5p	0	0	0	1	0	0	KCNJ4	potassium inwardly-rectifying channel, subfamily J, member 4
hsa-miR-574-5p	1	0	1	1	1	1	TTBK1	tau tubulin kinase 1
hsa-miR-574-5p	0	0	0	1	1	1	DRD5	dopamine receptor D5
hsa-miR-574-5p	0	0	0	1	1	1	CDKN2A	cyclin-dependent kinase inhibitor 2A
hsa-miR-574-5p	0	0	0	1	1	1	CST5	cystatin D
hsa-miR-574-5p	0	0	0	1	0	0	OR4K14	olfactory receptor, family 4, subfamily K, member 14
hsa-miR-574-5p	0	0	1	1	1	1	ITIH5	inter-alpha-trypsin inhibitor heavy chain family, member 5
hsa-miR-574-5p	0	0	0	1	0	0	SIGLEC7	sialic acid binding Ig-like lectin 7
hsa-miR-574-5p	0	0	1	1	1	1	HSPBAP1	HSPB (heat shock 27kDa) associated protein 1
hsa-miR-574-5p	1	0	1	1	1	1	LGI3	leucine-rich repeat LGI family, member 3
hsa-miR-574-5p	0	0	0	1	0	0	RLN3	relaxin 3
hsa-miR-574-5p	0	0	0	1	0	0	OR2M4	olfactory receptor, family 2, subfamily M, member 4
hsa-miR-574-5p	0	0	0	1	0	0	SPRR1B	small proline-rich protein 1B
hsa-miR-574-5p	0	0	1	1	0	0	HEXIM2	hexamethylene bis-acetamide inducible 2
hsa-miR-574-5p	0	0	0	1	0	0	AGXT	alanine-glyoxylate aminotransferase
hsa-miR-574-5p	1	0	1	1	0	0	NKIRAS2	NFKB inhibitor interacting Ras-like 2
hsa-miR-574-5p	0	0	0	1	0	0	RNASE8	ribonuclease, RNase A family, 8
hsa-miR-574-5p	0	0	0	1	1	1	KCNG4	potassium voltage-gated channel, subfamily G, member 4
hsa-miR-574-5p	0	0	0	1	0	0	FCN1	ficolin (collagen/fibrinogen domain containing) 1
hsa-miR-574-5p	0	0	0	1	0	0	CLDN15	claudin 15
hsa-miR-574-5p	0	0	0	1	0	0	ADCK5	aarF domain containing kinase 5
hsa-miR-574-5p	0	0	0	1	0	0	PPM1J	protein phosphatase, Mg2+/Mn2+ dependent, 1J
hsa-miR-574-5p	0	0	1	1	1	1	PPARG	peroxisome proliferator-activated receptor gamma
hsa-miR-574-5p	0	0	0	1	1	1	PRLR	prolactin receptor
hsa-miR-574-5p	0	0	0	1	0	0	NSUN5	NOP2/Sun domain family, member 5
hsa-miR-574-5p	0	0	1	1	0	0	ZDHHC24	zinc finger, DHHC-type containing 24
hsa-miR-574-5p	1	0	1	1	1	1	AKT2	v-akt murine thymoma viral oncogene homolog 2
hsa-miR-574-5p	1	0	1	1	1	1	AQP1	aquaporin 1 (Colton blood group)
hsa-miR-574-5p	1	0	0	1	0	0	CTU2	cytosolic thiouridylase subunit 2 homolog (S. pombe)
hsa-miR-574-5p	0	0	0	1	0	0	MCTP1	multiple C2 domains, transmembrane 1
hsa-miR-574-5p	0	0	0	1	0	0	OR5R1	olfactory receptor, family 5, subfamily R, member 1
hsa-miR-574-5p	0	0	0	1	0	0	DNAH7	dynein, axonemal, heavy chain 7
hsa-miR-574-5p	0	0	0	1	0	0	PODN	podocan
hsa-miR-574-5p	0	0	1	1	1	1	KCNRG	potassium channel regulator
hsa-miR-574-5p	0	0	0	1	0	0	OR4D11	olfactory receptor, family 4, subfamily D, member 11
hsa-miR-574-5p	1	0	1	1	1	1	TRIP10	thyroid hormone receptor interactor 10
hsa-miR-574-5p	0	0	0	1	1	1	SPAG6	sperm associated antigen 6
hsa-miR-574-5p	0	0	1	1	0	0	MPRIP	myosin phosphatase Rho interacting protein
hsa-miR-574-5p	0	0	1	1	1	1	POC1B	POC1 centriolar protein homolog B (Chlamydomonas)
hsa-miR-574-5p	0	0	1	1	1	1	OSBPL2	oxysterol binding protein-like 2
hsa-miR-574-5p	0	0	0	1	0	0	ZNF575	zinc finger protein 575
hsa-miR-574-5p	0	0	1	1	0	0	AGTRAP	angiotensin II receptor-associated protein
hsa-miR-574-5p	0	0	0	1	1	1	LILRB2	leukocyte immunoglobulin-like receptor, subfamily B (with TM and ITIM domains), member 2
hsa-miR-574-5p	0	0	1	1	0	0	TMEM136	transmembrane protein 136
hsa-miR-574-5p	1	0	1	1	1	1	HTR4	5-hydroxytryptamine (serotonin) receptor 4, G protein-coupled
hsa-miR-574-5p	1	0	1	1	1	1	SAMD12	sterile alpha motif domain containing 12
hsa-miR-574-5p	0	0	0	1	0	0	OR10K2	olfactory receptor, family 10, subfamily K, member 2
hsa-miR-574-5p	0	0	0	1	1	1	ITGA11	integrin, alpha 11
hsa-miR-574-5p	0	0	1	1	1	1	LILRB5	leukocyte immunoglobulin-like receptor, subfamily B (with TM and ITIM domains), member 5
hsa-miR-574-5p	1	0	1	1	1	1	PRKAG1	protein kinase, AMP-activated, gamma 1 non-catalytic subunit
hsa-miR-574-5p	1	0	1	1	1	1	PDCD6	programmed cell death 6
hsa-miR-574-5p	1	0	1	1	1	1	AHRR	aryl-hydrocarbon receptor repressor
hsa-miR-574-5p	0	0	0	1	0	0	ZFAND2A	zinc finger, AN1-type domain 2A
hsa-miR-574-5p	0	0	1	1	1	1	LRRC34	leucine rich repeat containing 34
hsa-miR-574-5p	0	0	0	1	0	0	OR52N2	olfactory receptor, family 52, subfamily N, member 2
hsa-miR-574-5p	0	0	1	1	0	0	CCDC101	coiled-coil domain containing 101
hsa-miR-574-5p	0	0	0	1	1	1	CES2	carboxylesterase 2
hsa-miR-574-5p	0	0	1	1	0	0	ASCC1	activating signal cointegrator 1 complex subunit 1
hsa-miR-574-5p	0	0	0	1	0	0	C3orf32	chromosome 3 open reading frame 32
hsa-miR-574-5p	0	0	1	1	1	1	RGS3	regulator of G-protein signaling 3
hsa-miR-574-5p	0	0	1	1	0	0	TMEM11	transmembrane protein 11
hsa-miR-574-5p	0	0	1	1	0	0	PLCZ1	phospholipase C, zeta 1
hsa-miR-574-5p	0	0	1	1	0	0	WFIKKN1	WAP, follistatin/kazal, immunoglobulin, kunitz and netrin domain containing 1
hsa-miR-574-5p	1	0	1	1	1	1	NT5DC1	5'-nucleotidase domain containing 1
hsa-miR-574-5p	0	0	0	1	0	0	METRNL	meteorin, glial cell differentiation regulator-like
hsa-miR-574-5p	1	0	1	1	0	0	PHF23	PHD finger protein 23
hsa-miR-574-5p	0	0	0	1	0	0	SLC25A19	solute carrier family 25 (mitochondrial thiamine pyrophosphate carrier), member 19
hsa-miR-574-5p	0	0	0	1	0	0	ZNF121	zinc finger protein 121
hsa-miR-574-5p	0	0	1	1	0	0	AAR2	AAR2 splicing factor homolog (S. cerevisiae)
hsa-miR-574-5p	0	0	1	1	1	1	TGIF2LY	TGFB-induced factor homeobox 2-like, Y-linked
hsa-miR-574-5p	0	0	0	1	0	0	CNPY1	canopy 1 homolog (zebrafish)
hsa-miR-574-5p	0	0	0	1	0	0	ACBD4	acyl-CoA binding domain containing 4
hsa-miR-574-5p	0	0	1	1	1	1	SLC14A1	solute carrier family 14 (urea transporter), member 1 (Kidd blood group)
hsa-miR-574-5p	0	0	0	1	0	0	FCRL6	Fc receptor-like 6
hsa-miR-574-5p	0	0	1	1	1	1	FAM175A	family with sequence similarity 175, member A
hsa-miR-574-5p	0	0	0	1	0	0	DNPEP	aspartyl aminopeptidase
hsa-miR-574-5p	0	0	0	1	0	0	SSNA1	Sjogren syndrome nuclear autoantigen 1
hsa-miR-574-5p	0	0	1	1	0	0	COG4	component of oligomeric golgi complex 4
hsa-miR-574-5p	0	0	1	1	0	0	CD37	CD37 molecule
hsa-miR-574-5p	0	0	1	1	0	0	STRA6	stimulated by retinoic acid gene 6 homolog (mouse)
hsa-miR-574-5p	0	0	0	1	0	0	TAF1D	TATA box binding protein (TBP)-associated factor, RNA polymerase I, D, 41kDa
hsa-miR-574-5p	1	0	1	1	1	1	FBXL16	F-box and leucine-rich repeat protein 16
hsa-miR-574-5p	0	0	1	1	1	1	PRMT5	protein arginine methyltransferase 5
hsa-miR-574-5p	0	0	0	1	0	0	ACTL9	actin-like 9
hsa-miR-574-5p	1	0	1	1	1	1	SCN4B	sodium channel, voltage-gated, type IV, beta subunit
hsa-miR-574-5p	0	0	1	1	1	1	SCAPER	S-phase cyclin A-associated protein in the ER
hsa-miR-574-5p	0	0	1	1	1	1	MRPS33	mitochondrial ribosomal protein S33
hsa-miR-574-5p	1	0	1	1	1	1	ZNF580	zinc finger protein 580
hsa-miR-574-5p	1	0	1	1	0	0	PACS2	phosphofurin acidic cluster sorting protein 2
hsa-miR-574-5p	1	0	1	1	1	1	FAM91A1	family with sequence similarity 91, member A1
hsa-miR-574-5p	1	0	1	1	0	0	TRAF7	TNF receptor-associated factor 7, E3 ubiquitin protein ligase
hsa-miR-574-5p	0	0	0	1	0	0	KIR3DL2	killer cell immunoglobulin-like receptor, three domains, long cytoplasmic tail, 2
hsa-miR-574-5p	0	0	0	1	1	1	GSTM4	glutathione S-transferase mu 4
hsa-miR-574-5p	0	0	1	1	1	1	C22orf25	chromosome 22 open reading frame 25
hsa-miR-574-5p	0	0	1	1	0	0	BOLA3	bolA homolog 3 (E. coli)
hsa-miR-574-5p	0	0	1	1	0	0	GAS6	growth arrest-specific 6
hsa-miR-574-5p	0	0	0	1	0	0	HEXDC	hexosaminidase (glycosyl hydrolase family 20, catalytic domain) containing
hsa-miR-574-5p	0	0	1	1	0	0	NPIP	nuclear pore complex interacting protein
hsa-miR-574-5p	0	0	0	1	0	0	HSF1	heat shock transcription factor 1
hsa-miR-574-5p	0	0	0	1	0	0	COA3	cytochrome C oxidase assembly factor 3
hsa-miR-574-5p	0	0	1	1	0	0	PCP4	Purkinje cell protein 4
hsa-miR-574-5p	0	0	1	1	0	0	GKN2	gastrokine 2
hsa-miR-574-5p	1	0	1	1	1	1	CALN1	calneuron 1
hsa-miR-574-5p	1	0	1	1	1	1	RGMA	RGM domain family, member A
hsa-miR-574-5p	0	0	0	1	0	0	OR4D9	olfactory receptor, family 4, subfamily D, member 9
hsa-miR-574-5p	1	0	0	1	0	0	FAM193B	family with sequence similarity 193, member B
hsa-miR-574-5p	0	0	0	1	0	0	DAOA	D-amino acid oxidase activator
hsa-miR-574-5p	0	0	1	1	1	1	CAV3	caveolin 3
hsa-miR-574-5p	0	0	1	1	0	0	MFSD6L	major facilitator superfamily domain containing 6-like
hsa-miR-574-5p	0	0	0	1	1	1	SLC52A2	solute carrier family 52, riboflavin transporter, member 2
hsa-miR-574-5p	0	0	1	1	1	1	CEND1	cell cycle exit and neuronal differentiation 1
hsa-miR-574-5p	0	0	1	1	1	1	GATSL3	GATS protein-like 3
hsa-miR-574-5p	0	0	1	1	0	0	HIST1H2AK	histone cluster 1, H2ak
hsa-miR-574-5p	0	0	0	1	0	0	LCN12	lipocalin 12
hsa-miR-574-5p	0	0	0	1	0	0	TLCD2	TLC domain containing 2
hsa-miR-574-5p	0	0	0	1	0	0	FEZF1	FEZ family zinc finger 1
hsa-miR-574-5p	0	0	1	1	1	1	TMEM106A	transmembrane protein 106A
hsa-miR-574-5p	0	0	1	1	1	1	SLC35D3	solute carrier family 35, member D3
hsa-miR-574-5p	0	0	1	1	1	1	SPRR3	small proline-rich protein 3
hsa-miR-574-5p	0	0	1	1	1	1	MGAT4C	mannosyl (alpha-1,3-)-glycoprotein beta-1,4-N-acetylglucosaminyltransferase, isozyme C (putative)
hsa-miR-574-5p	0	0	0	1	0	0	ALG12	asparagine-linked glycosylation 12, alpha-1,6-mannosyltransferase homolog (S. cerevisiae)
hsa-miR-574-5p	0	0	0	1	1	1	SNAI3	snail homolog 3 (Drosophila)
hsa-miR-574-5p	1	0	1	1	1	1	ATL3	atlastin GTPase 3
hsa-miR-574-5p	0	0	1	1	1	1	GEMIN8	gem (nuclear organelle) associated protein 8
hsa-miR-574-5p	0	0	1	1	0	0	C1orf227	chromosome 1 open reading frame 227
hsa-miR-574-5p	0	0	1	1	1	1	PION	pigeon homolog (Drosophila)
hsa-miR-574-5p	0	0	0	1	1	1	TOM1L2	target of myb1-like 2 (chicken)
hsa-miR-574-5p	0	0	0	1	0	0	KRTAP19-2	keratin associated protein 19-2
hsa-miR-574-5p	1	0	1	1	1	1	GPR125	G protein-coupled receptor 125
hsa-miR-574-5p	0	0	0	1	1	1	CCDC84	coiled-coil domain containing 84
hsa-miR-574-5p	0	0	0	1	0	0	TAC4	tachykinin 4 (hemokinin)
hsa-miR-574-5p	0	0	0	1	0	0	OR4C12	olfactory receptor, family 4, subfamily C, member 12
hsa-miR-574-5p	0	0	0	1	0	0	KRTAP20-1	keratin associated protein 20-1
hsa-miR-574-5p	0	0	1	1	1	1	CCK	cholecystokinin
hsa-miR-574-5p	1	0	1	1	1	1	CTBP2	C-terminal binding protein 2
hsa-miR-574-5p	0	0	0	1	1	1	H1FNT	H1 histone family, member N, testis-specific
hsa-miR-574-5p	0	0	0	1	0	0	OR13C8	olfactory receptor, family 13, subfamily C, member 8
hsa-miR-574-5p	0	0	1	1	1	1	KIR3DX1	killer cell immunoglobulin-like receptor, three domains, X1
hsa-miR-574-5p	1	0	1	1	1	1	SLC10A7	solute carrier family 10 (sodium/bile acid cotransporter family), member 7
hsa-miR-574-5p	0	0	0	1	1	1	VSTM2B	V-set and transmembrane domain containing 2B
hsa-miR-574-5p	1	0	1	1	1	1	BOLL	bol, boule-like (Drosophila)
hsa-miR-574-5p	0	0	1	1	0	0	SARNP	SAP domain containing ribonucleoprotein
hsa-miR-574-5p	0	0	1	1	1	1	SPAG17	sperm associated antigen 17
hsa-miR-574-5p	0	0	1	1	0	0	ARHGAP10	Rho GTPase activating protein 10
hsa-miR-574-5p	1	0	1	1	1	1	FNDC3A	fibronectin type III domain containing 3A
hsa-miR-574-5p	0	0	0	1	0	0	SERPINA9	serpin peptidase inhibitor, clade A (alpha-1 antiproteinase, antitrypsin), member 9
hsa-miR-574-5p	0	0	1	1	1	1	RAD51C	RAD51 homolog C (S. cerevisiae)
hsa-miR-574-5p	0	0	0	1	0	0	FBLL1	fibrillarin-like 1
hsa-miR-574-5p	0	0	1	1	1	1	PSMD10	proteasome (prosome, macropain) 26S subunit, non-ATPase, 10
[truncated: 267 more rows]
