# Supplementary material for: Profiling of Selected MicroRNAs in Proliferative Eutopic Endometrium of Women with Ovarian Endometriosis
Source: Biomed Res Int. 2015 Aug 20;2015:760698. doi: 10.1155/2015/760698 (PMC4558423; doi:10.1155/2015/760698)
Supplement: Supplementary file 1 — Table I: The names of miRNAs significantly differentially expressed between eutopic endometrium of patients with endometriosis vs eutopic endometrium of patients without endometriosis. Table II: The associations between miRNA and mRNA, which presents detailed results of the search of six major databases i.e targetscan, tarbase, miranda, mirbase, mirtarget2 and pictar. [file 760698.f1.zip › 760698.f1/Table II/hsa-miR-577.tsv]

miR	targetscan	tarbase	miranda	mirbase	mirtarget2	pictar	GeneSymbol	GeneName
hsa-miR-577	1	0	1	1	1	1	PLAU	plasminogen activator, urokinase
hsa-miR-577	0	0	1	0	0	0	NOP14-AS1	NOP14 antisense RNA 1
hsa-miR-577	1	0	1	1	0	0	RAPGEF2	Rap guanine nucleotide exchange factor (GEF) 2
hsa-miR-577	1	0	1	1	1	1	PRUNE2	prune homolog 2 (Drosophila)
hsa-miR-577	0	0	1	1	1	1	PPIP5K1	diphosphoinositol pentakisphosphate kinase 1
hsa-miR-577	1	0	1	1	1	1	FAM65B	family with sequence similarity 65, member B
hsa-miR-577	1	0	1	1	1	1	ABCC5	ATP-binding cassette, sub-family C (CFTR/MRP), member 5
hsa-miR-577	0	0	1	1	1	1	PEG3	paternally expressed 3
hsa-miR-577	1	0	1	0	1	1	KIAA0408	KIAA0408
hsa-miR-577	1	0	1	1	1	1	NUPL1	nucleoporin like 1
hsa-miR-577	0	0	1	1	1	1	PREPL	prolyl endopeptidase-like
hsa-miR-577	1	0	1	1	1	1	CDC42BPA	CDC42 binding protein kinase alpha (DMPK-like)
hsa-miR-577	1	0	1	1	0	0	OTUD3	OTU domain containing 3
hsa-miR-577	0	0	1	1	1	1	RABGAP1L	RAB GTPase activating protein 1-like
hsa-miR-577	1	0	1	1	0	0	DENND4B	DENN/MADD domain containing 4B
hsa-miR-577	1	0	1	0	1	1	CEP350	centrosomal protein 350kDa
hsa-miR-577	1	0	1	1	1	1	RNGTT	RNA guanylyltransferase and 5'-phosphatase
hsa-miR-577	0	0	1	1	0	0	ZNF862	zinc finger protein 862
hsa-miR-577	1	0	1	1	1	1	BAI3	brain-specific angiogenesis inhibitor 3
hsa-miR-577	1	0	1	1	1	1	NRXN1	neurexin 1
hsa-miR-577	1	0	1	1	1	1	KIF1B	kinesin family member 1B
hsa-miR-577	1	0	1	1	0	0	TBC1D12	TBC1 domain family, member 12
hsa-miR-577	1	0	1	1	1	1	SLC4A7	solute carrier family 4, sodium bicarbonate cotransporter, member 7
hsa-miR-577	1	0	1	1	1	1	HIPK1	homeodomain interacting protein kinase 1
hsa-miR-577	1	0	1	1	1	1	GIGYF2	GRB10 interacting GYF protein 2
hsa-miR-577	1	0	1	1	0	0	SMCHD1	structural maintenance of chromosomes flexible hinge domain containing 1
hsa-miR-577	0	0	1	1	0	0	PAN2	PAN2 poly(A) specific ribonuclease subunit homolog (S. cerevisiae)
hsa-miR-577	1	0	1	1	1	1	TP63	tumor protein p63
hsa-miR-577	1	0	1	0	1	1	DOCK4	dedicator of cytokinesis 4
hsa-miR-577	1	0	1	0	1	1	RBM12	RNA binding motif protein 12
hsa-miR-577	1	0	1	1	1	1	LPHN2	latrophilin 2
hsa-miR-577	1	0	1	1	1	1	WWC1	WW and C2 domain containing 1
hsa-miR-577	0	0	1	1	0	0	FAM169A	family with sequence similarity 169, member A
hsa-miR-577	0	0	1	1	1	1	WDR47	WD repeat domain 47
hsa-miR-577	1	0	1	1	1	1	UBR5	ubiquitin protein ligase E3 component n-recognin 5
hsa-miR-577	1	0	1	1	1	1	SEMA4F	sema domain, immunoglobulin domain (Ig), transmembrane domain (TM) and short cytoplasmic domain, (semaphorin) 4F
hsa-miR-577	1	0	1	1	1	1	CALCR	calcitonin receptor
hsa-miR-577	1	0	1	1	1	1	UBE2K	ubiquitin-conjugating enzyme E2K
hsa-miR-577	1	0	1	1	1	1	CIT	citron (rho-interacting, serine/threonine kinase 21)
hsa-miR-577	0	0	1	1	0	0	FAM149B1	family with sequence similarity 149, member B1
hsa-miR-577	0	0	1	0	1	1	TP53TG3	TP53 target 3
hsa-miR-577	0	0	1	0	0	0	TP53TG3B	TP53 target 3B
hsa-miR-577	0	0	1	1	1	1	AGTPBP1	ATP/GTP binding protein 1
hsa-miR-577	1	0	1	1	1	1	FOXJ3	forkhead box J3
hsa-miR-577	1	0	1	1	1	1	NLGN1	neuroligin 1
hsa-miR-577	1	0	1	1	1	1	PHF8	PHD finger protein 8
hsa-miR-577	1	0	1	1	1	1	SMARCAD1	SWI/SNF-related, matrix-associated actin-dependent regulator of chromatin, subfamily a, containing DEAD/H box 1
hsa-miR-577	0	0	1	1	1	1	TMCC3	transmembrane and coiled-coil domain family 3
hsa-miR-577	1	0	1	1	0	0	KIAA1210	KIAA1210
hsa-miR-577	1	0	1	1	1	1	ZMIZ1	zinc finger, MIZ-type containing 1
hsa-miR-577	1	0	1	0	1	1	PPFIBP1	PTPRF interacting protein, binding protein 1 (liprin beta 1)
hsa-miR-577	1	0	1	1	1	1	RIMKLB	ribosomal modification protein rimK-like family member B
hsa-miR-577	1	0	1	1	0	0	ATAD2B	ATPase family, AAA domain containing 2B
hsa-miR-577	1	0	1	1	1	1	MKL2	MKL/myocardin-like 2
hsa-miR-577	1	0	1	1	1	1	ASAP1	ArfGAP with SH3 domain, ankyrin repeat and PH domain 1
hsa-miR-577	0	0	1	1	1	1	GKAP1	G kinase anchoring protein 1
hsa-miR-577	0	0	1	1	1	1	KIF20B	kinesin family member 20B
hsa-miR-577	0	0	1	1	1	1	TCF7L2	transcription factor 7-like 2 (T-cell specific, HMG-box)
hsa-miR-577	0	0	1	1	1	1	KLHL13	kelch-like 13 (Drosophila)
hsa-miR-577	1	0	1	1	1	1	PCDH19	protocadherin 19
hsa-miR-577	1	0	1	0	1	1	KCTD16	potassium channel tetramerisation domain containing 16
hsa-miR-577	1	0	1	1	1	1	ATP2C1	ATPase, Ca++ transporting, type 2C, member 1
hsa-miR-577	1	0	1	1	1	1	TAOK1	TAO kinase 1
hsa-miR-577	1	0	1	1	1	1	LRRC7	leucine rich repeat containing 7
hsa-miR-577	0	0	1	1	1	1	IFT80	intraflagellar transport 80 homolog (Chlamydomonas)
hsa-miR-577	1	0	1	1	1	1	FAM135A	family with sequence similarity 135, member A
hsa-miR-577	0	0	1	1	1	1	OGG1	8-oxoguanine DNA glycosylase
hsa-miR-577	0	0	1	1	1	1	SCAPER	S-phase cyclin A-associated protein in the ER
hsa-miR-577	1	0	1	1	0	0	KIAA1462	KIAA1462
hsa-miR-577	1	0	1	1	1	1	BAZ2B	bromodomain adjacent to zinc finger domain, 2B
hsa-miR-577	1	0	1	0	1	1	SEMA6D	sema domain, transmembrane domain (TM), and cytoplasmic domain, (semaphorin) 6D
hsa-miR-577	0	0	1	0	0	0	NYAP2	neuronal tyrosine-phosphorylated phosphoinositide-3-kinase adaptor 2
hsa-miR-577	1	0	1	1	1	1	USP28	ubiquitin specific peptidase 28
hsa-miR-577	1	0	1	0	1	1	ZNF295	zinc finger protein 295
hsa-miR-577	1	0	1	0	1	1	LMO3	LIM domain only 3 (rhombotin-like 2)
hsa-miR-577	1	0	1	1	1	1	TOPORS	topoisomerase I binding, arginine/serine-rich, E3 ubiquitin protein ligase
hsa-miR-577	0	0	1	1	1	1	CEP192	centrosomal protein 192kDa
hsa-miR-577	0	0	1	0	1	1	ZSWIM6	zinc finger, SWIM-type containing 6
hsa-miR-577	1	0	1	0	0	0	TANC2	tetratricopeptide repeat, ankyrin repeat and coiled-coil containing 2
hsa-miR-577	1	0	1	1	1	1	SNX3	sorting nexin 3
hsa-miR-577	1	0	1	1	0	0	ARHGAP39	Rho GTPase activating protein 39
hsa-miR-577	0	0	1	1	1	1	BHLHB9	basic helix-loop-helix domain containing, class B, 9
hsa-miR-577	0	0	1	0	1	1	SETD5	SET domain containing 5
hsa-miR-577	1	0	1	1	1	1	NPAS3	neuronal PAS domain protein 3
hsa-miR-577	1	0	1	1	1	1	IKZF4	IKAROS family zinc finger 4 (Eos)
hsa-miR-577	1	0	1	1	1	1	CDK13	cyclin-dependent kinase 13
hsa-miR-577	1	0	1	0	1	1	JPH4	junctophilin 4
hsa-miR-577	0	0	1	1	0	0	SH3GLB2	SH3-domain GRB2-like endophilin B2
hsa-miR-577	0	0	1	1	1	1	SLC11A2	solute carrier family 11 (proton-coupled divalent metal ion transporters), member 2
hsa-miR-577	1	0	1	1	1	1	CSRNP1	cysteine-serine-rich nuclear protein 1
hsa-miR-577	1	0	1	1	1	1	HNRPDL	heterogeneous nuclear ribonucleoprotein D-like
hsa-miR-577	1	0	1	1	1	1	CSMD3	CUB and Sushi multiple domains 3
hsa-miR-577	1	0	1	1	1	1	LSM14A	LSM14A, SCD6 homolog A (S. cerevisiae)
hsa-miR-577	1	0	1	1	1	1	MAT2B	methionine adenosyltransferase II, beta
hsa-miR-577	1	0	1	1	1	1	SH3TC2	SH3 domain and tetratricopeptide repeats 2
hsa-miR-577	0	0	1	1	0	0	SLC22A10	solute carrier family 22, member 10
hsa-miR-577	1	0	1	0	0	0	FAT3	FAT tumor suppressor homolog 3 (Drosophila)
hsa-miR-577	1	0	1	0	1	1	RNF43	ring finger protein 43
hsa-miR-577	1	0	1	0	0	0	ZBTB34	zinc finger and BTB domain containing 34
hsa-miR-577	0	0	1	0	1	1	RASSF8	Ras association (RalGDS/AF-6) domain family (N-terminal) member 8
hsa-miR-577	1	0	1	1	1	1	RFX4	regulatory factor X, 4 (influences HLA class II expression)
hsa-miR-577	0	0	1	1	0	0	FAM22D	family with sequence similarity 22, member D
hsa-miR-577	1	0	1	0	0	0	ZC3H12C	zinc finger CCCH-type containing 12C
hsa-miR-577	1	0	1	1	1	1	C11orf57	chromosome 11 open reading frame 57
hsa-miR-577	1	1	1	1	1	1	BACE1	beta-site APP-cleaving enzyme 1
hsa-miR-577	0	0	1	0	1	1	ACE2	angiotensin I converting enzyme (peptidyl-dipeptidase A) 2
hsa-miR-577	0	0	1	1	1	1	SYBU	syntabulin (syntaxin-interacting)
hsa-miR-577	1	0	1	1	1	1	TRIM36	tripartite motif containing 36
hsa-miR-577	1	0	1	0	1	1	CCDC88A	coiled-coil domain containing 88A
hsa-miR-577	1	0	1	1	1	1	LTBP1	latent transforming growth factor beta binding protein 1
hsa-miR-577	1	0	1	1	1	1	AP3D1	adaptor-related protein complex 3, delta 1 subunit
hsa-miR-577	1	0	1	1	1	1	COL11A1	collagen, type XI, alpha 1
hsa-miR-577	1	0	1	1	1	1	BACH2	BTB and CNC homology 1, basic leucine zipper transcription factor 2
hsa-miR-577	0	0	1	0	1	1	ATF6	activating transcription factor 6
hsa-miR-577	0	0	1	1	0	0	KCNC3	potassium voltage-gated channel, Shaw-related subfamily, member 3
hsa-miR-577	1	0	1	1	1	1	RPS6KA3	ribosomal protein S6 kinase, 90kDa, polypeptide 3
hsa-miR-577	1	0	1	1	0	0	ELN	elastin
hsa-miR-577	1	0	1	1	1	1	MEF2A	myocyte enhancer factor 2A
hsa-miR-577	1	0	1	1	1	1	PCCB	propionyl CoA carboxylase, beta polypeptide
hsa-miR-577	1	0	1	1	1	1	CLIP4	CAP-GLY domain containing linker protein family, member 4
hsa-miR-577	1	0	1	1	1	1	SLC8A1	solute carrier family 8 (sodium/calcium exchanger), member 1
hsa-miR-577	1	0	1	1	0	0	GRIA1	glutamate receptor, ionotropic, AMPA 1
hsa-miR-577	1	0	1	1	1	1	SYNCRIP	synaptotagmin binding, cytoplasmic RNA interacting protein
hsa-miR-577	1	0	1	0	1	1	PLAG1	pleiomorphic adenoma gene 1
hsa-miR-577	1	0	1	1	1	1	RASSF5	Ras association (RalGDS/AF-6) domain family member 5
hsa-miR-577	0	0	1	1	1	1	DGKI	diacylglycerol kinase, iota
hsa-miR-577	1	0	1	1	1	1	E2F5	E2F transcription factor 5, p130-binding
hsa-miR-577	1	0	1	1	1	1	FMR1	fragile X mental retardation 1
hsa-miR-577	1	0	1	1	1	1	PRKACB	protein kinase, cAMP-dependent, catalytic, beta
hsa-miR-577	1	0	1	0	1	1	CHL1	cell adhesion molecule with homology to L1CAM (close homolog of L1)
hsa-miR-577	1	0	1	1	1	1	MTA1	metastasis associated 1
hsa-miR-577	1	0	1	1	1	1	EPHA5	EPH receptor A5
hsa-miR-577	1	0	1	1	1	1	SATB2	SATB homeobox 2
hsa-miR-577	1	0	1	1	1	1	AEBP2	AE binding protein 2
hsa-miR-577	1	0	1	0	1	1	CDON	Cdon homolog (mouse)
hsa-miR-577	1	0	1	1	1	1	NEO1	neogenin 1
hsa-miR-577	1	0	1	0	1	1	AKAP13	A kinase (PRKA) anchor protein 13
hsa-miR-577	0	0	1	1	1	1	ACO1	aconitase 1, soluble
hsa-miR-577	0	0	1	1	1	1	STAU1	staufen, RNA binding protein, homolog 1 (Drosophila)
hsa-miR-577	1	0	1	1	1	1	HNRNPK	heterogeneous nuclear ribonucleoprotein K
hsa-miR-577	1	0	1	1	1	1	IPO8	importin 8
hsa-miR-577	0	0	1	1	1	1	HLA-DQA1	major histocompatibility complex, class II, DQ alpha 1
hsa-miR-577	1	0	1	1	1	1	PTPRK	protein tyrosine phosphatase, receptor type, K
hsa-miR-577	0	0	1	1	1	1	KIF3A	kinesin family member 3A
hsa-miR-577	1	0	1	0	1	1	ADD3	adducin 3 (gamma)
hsa-miR-577	0	0	1	0	1	1	TGFB2	transforming growth factor, beta 2
hsa-miR-577	1	0	1	1	1	1	HMGA2	high mobility group AT-hook 2
hsa-miR-577	1	0	1	1	1	1	TEAD1	TEA domain family member 1 (SV40 transcriptional enhancer factor)
hsa-miR-577	1	0	1	1	1	1	OSBPL10	oxysterol binding protein-like 10
hsa-miR-577	1	0	1	1	1	1	GULP1	GULP, engulfment adaptor PTB domain containing 1
hsa-miR-577	1	0	1	1	1	1	PHLDB2	pleckstrin homology-like domain, family B, member 2
hsa-miR-577	0	0	1	1	1	1	PLD1	phospholipase D1, phosphatidylcholine-specific
hsa-miR-577	1	0	1	0	1	1	CAV1	caveolin 1, caveolae protein, 22kDa
hsa-miR-577	0	0	1	1	1	1	SPP1	secreted phosphoprotein 1
hsa-miR-577	1	0	1	1	1	1	APC	adenomatous polyposis coli
hsa-miR-577	1	0	1	1	1	1	MEF2D	myocyte enhancer factor 2D
hsa-miR-577	0	0	1	1	1	1	EIF4G1	eukaryotic translation initiation factor 4 gamma, 1
hsa-miR-577	1	0	1	1	1	1	PICALM	phosphatidylinositol binding clathrin assembly protein
hsa-miR-577	1	0	1	1	1	1	SDHC	succinate dehydrogenase complex, subunit C, integral membrane protein, 15kDa
hsa-miR-577	0	0	1	0	0	0	MIAT	myocardial infarction associated transcript (non-protein coding)
hsa-miR-577	0	0	1	0	1	1	PARG	poly (ADP-ribose) glycohydrolase
hsa-miR-577	0	0	1	1	1	1	BRCA1	breast cancer 1, early onset
hsa-miR-577	0	0	1	1	1	1	HDAC3	histone deacetylase 3
hsa-miR-577	1	0	1	1	0	0	RIMS2	regulating synaptic membrane exocytosis 2
hsa-miR-577	1	0	1	1	1	1	STX16	syntaxin 16
hsa-miR-577	1	0	1	1	1	1	DLGAP2	discs, large (Drosophila) homolog-associated protein 2
hsa-miR-577	1	0	1	0	1	1	MLL2	myeloid/lymphoid or mixed-lineage leukemia 2
hsa-miR-577	1	0	1	1	1	1	SLC4A4	solute carrier family 4, sodium bicarbonate cotransporter, member 4
hsa-miR-577	1	0	1	1	1	1	CBFA2T2	core-binding factor, runt domain, alpha subunit 2; translocated to, 2
hsa-miR-577	1	0	1	1	1	1	OVOL1	ovo-like 1(Drosophila)
hsa-miR-577	1	0	1	1	1	1	PCDH17	protocadherin 17
hsa-miR-577	1	0	1	0	1	1	CELF2	CUGBP, Elav-like family member 2
hsa-miR-577	1	0	1	0	0	0	MAP3K1	mitogen-activated protein kinase kinase kinase 1, E3 ubiquitin protein ligase
hsa-miR-577	0	0	1	1	1	1	KHDRBS3	KH domain containing, RNA binding, signal transduction associated 3
hsa-miR-577	0	0	1	1	1	1	CYP4F3	cytochrome P450, family 4, subfamily F, polypeptide 3
hsa-miR-577	1	0	1	1	1	1	SHOC2	soc-2 suppressor of clear homolog (C. elegans)
hsa-miR-577	1	0	1	1	1	1	PFKFB3	6-phosphofructo-2-kinase/fructose-2,6-biphosphatase 3
hsa-miR-577	1	0	1	1	1	1	CTNND1	catenin (cadherin-associated protein), delta 1
hsa-miR-577	0	0	1	1	1	1	ZNF33A	zinc finger protein 33A
hsa-miR-577	1	0	1	1	1	1	ERLIN1	ER lipid raft associated 1
hsa-miR-577	0	0	1	1	1	1	SC5DL	sterol-C5-desaturase (ERG3 delta-5-desaturase homolog, S. cerevisiae)-like
hsa-miR-577	0	0	1	1	1	1	TEX30	testis expressed 30
hsa-miR-577	0	0	1	1	1	1	LYPLA1	lysophospholipase I
hsa-miR-577	1	0	1	1	1	1	DMTF1	cyclin D binding myb-like transcription factor 1
hsa-miR-577	0	0	1	1	1	1	PCF11	PCF11, cleavage and polyadenylation factor subunit, homolog (S. cerevisiae)
hsa-miR-577	0	0	1	1	1	1	C11orf54	chromosome 11 open reading frame 54
hsa-miR-577	1	0	1	0	1	1	MAP4K4	mitogen-activated protein kinase kinase kinase kinase 4
hsa-miR-577	1	0	1	1	1	1	GLS	glutaminase
hsa-miR-577	1	0	1	1	1	1	SLMAP	sarcolemma associated protein
hsa-miR-577	1	0	1	0	1	1	CD164	CD164 molecule, sialomucin
hsa-miR-577	0	0	1	1	0	0	RBM5	RNA binding motif protein 5
hsa-miR-577	1	0	1	1	1	1	KAT6B	K(lysine) acetyltransferase 6B
hsa-miR-577	0	0	1	1	1	1	MAP3K4	mitogen-activated protein kinase kinase kinase 4
hsa-miR-577	1	0	1	1	1	1	PKN2	protein kinase N2
hsa-miR-577	1	0	1	0	1	1	CDK14	cyclin-dependent kinase 14
hsa-miR-577	0	0	1	1	1	1	ACIN1	apoptotic chromatin condensation inducer 1
hsa-miR-577	0	0	1	1	1	1	FAM35A	family with sequence similarity 35, member A
hsa-miR-577	0	0	1	1	1	1	CTNNAL1	catenin (cadherin-associated protein), alpha-like 1
hsa-miR-577	1	0	1	1	1	1	TAOK3	TAO kinase 3
hsa-miR-577	1	0	1	1	1	1	SORBS1	sorbin and SH3 domain containing 1
hsa-miR-577	1	0	1	1	1	1	AASDHPPT	aminoadipate-semialdehyde dehydrogenase-phosphopantetheinyl transferase
hsa-miR-577	1	0	1	0	1	1	BECN1	beclin 1, autophagy related
hsa-miR-577	1	0	1	1	1	1	HMG20A	high mobility group 20A
hsa-miR-577	1	0	1	1	1	1	MYNN	myoneurin
hsa-miR-577	1	0	1	1	1	1	C14orf129	chromosome 14 open reading frame 129
hsa-miR-577	0	0	1	1	1	1	CNPPD1	cyclin Pas1/PHO80 domain containing 1
hsa-miR-577	1	0	1	1	1	1	USP15	ubiquitin specific peptidase 15
hsa-miR-577	0	0	1	0	1	1	PDP1	pyruvate dehyrogenase phosphatase catalytic subunit 1
hsa-miR-577	0	0	1	1	1	1	SAP30L	SAP30-like
hsa-miR-577	0	0	1	1	1	1	MPP6	membrane protein, palmitoylated 6 (MAGUK p55 subfamily member 6)
hsa-miR-577	1	0	1	1	1	1	TLK2	tousled-like kinase 2
hsa-miR-577	1	0	1	1	1	1	USP25	ubiquitin specific peptidase 25
hsa-miR-577	1	0	1	1	1	1	CHFR	checkpoint with forkhead and ring finger domains, E3 ubiquitin protein ligase
hsa-miR-577	1	0	1	0	1	1	AMOTL2	angiomotin like 2
hsa-miR-577	1	0	1	1	1	1	BCL2L13	BCL2-like 13 (apoptosis facilitator)
hsa-miR-577	1	0	1	1	1	1	FBN2	fibrillin 2
hsa-miR-577	0	0	1	0	1	1	SLC38A4	solute carrier family 38, member 4
hsa-miR-577	1	0	1	1	1	1	SENP7	SUMO1/sentrin specific peptidase 7
hsa-miR-577	1	0	1	1	1	1	TSC22D2	TSC22 domain family, member 2
hsa-miR-577	1	0	1	1	1	1	CCNL1	cyclin L1
hsa-miR-577	1	0	1	1	1	1	KCNMB2	potassium large conductance calcium-activated channel, subfamily M, beta member 2
hsa-miR-577	0	0	1	1	1	1	CHRD	chordin
hsa-miR-577	1	0	1	1	1	1	NXT2	nuclear transport factor 2-like export factor 2
hsa-miR-577	0	0	1	1	1	1	SAMSN1	SAM domain, SH3 domain and nuclear localization signals 1
hsa-miR-577	1	0	1	1	1	1	OGT	O-linked N-acetylglucosamine (GlcNAc) transferase
hsa-miR-577	0	0	1	1	0	0	SH2B1	SH2B adaptor protein 1
hsa-miR-577	1	0	1	1	1	1	C21orf91	chromosome 21 open reading frame 91
hsa-miR-577	1	0	1	1	1	1	STRN3	striatin, calmodulin binding protein 3
hsa-miR-577	0	0	1	1	1	1	KIAA1704	KIAA1704
hsa-miR-577	0	0	1	1	1	1	DAZ2	deleted in azoospermia 2
hsa-miR-577	0	0	1	0	1	1	DAZ3	deleted in azoospermia 3
hsa-miR-577	0	0	1	1	1	1	DOCK10	dedicator of cytokinesis 10
hsa-miR-577	0	0	1	0	0	0	TIGD7	tigger transposable element derived 7
hsa-miR-577	1	0	1	1	1	1	ELF2	E74-like factor 2 (ets domain transcription factor)
hsa-miR-577	0	0	1	1	0	0	TRIM41	tripartite motif containing 41
hsa-miR-577	0	0	1	1	1	1	PJA1	praja ring finger 1, E3 ubiquitin protein ligase
hsa-miR-577	1	0	1	1	1	1	RBM47	RNA binding motif protein 47
hsa-miR-577	1	0	1	0	1	1	TRPS1	trichorhinophalangeal syndrome I
hsa-miR-577	0	0	1	1	1	1	DAZ1	deleted in azoospermia 1
hsa-miR-577	1	0	1	1	1	1	PUM2	pumilio homolog 2 (Drosophila)
hsa-miR-577	0	0	1	0	1	1	ERBB2IP	erbb2 interacting protein
hsa-miR-577	0	0	1	0	0	0	LOC645355	uncharacterized LOC645355
hsa-miR-577	0	0	1	1	1	1	PARP9	poly (ADP-ribose) polymerase family, member 9
hsa-miR-577	1	0	1	1	0	0	ZBTB37	zinc finger and BTB domain containing 37
hsa-miR-577	0	0	1	1	0	0	TTTY7	testis-specific transcript, Y-linked 7 (non-protein coding)
hsa-miR-577	1	0	1	1	1	1	BIVM	basic, immunoglobulin-like variable motif containing
hsa-miR-577	1	0	1	0	1	1	USP32	ubiquitin specific peptidase 32
hsa-miR-577	0	0	1	1	1	1	SLC6A15	solute carrier family 6 (neutral amino acid transporter), member 15
hsa-miR-577	1	0	1	1	1	1	CASD1	CAS1 domain containing 1
hsa-miR-577	1	0	1	1	1	1	ATAD1	ATPase family, AAA domain containing 1
hsa-miR-577	1	0	1	0	1	1	WIPF2	WAS/WASL interacting protein family, member 2
hsa-miR-577	1	0	1	1	1	1	LARP4	La ribonucleoprotein domain family, member 4
hsa-miR-577	0	0	1	1	1	1	CASP8	caspase 8, apoptosis-related cysteine peptidase
hsa-miR-577	1	0	1	1	1	1	PDE8A	phosphodiesterase 8A
hsa-miR-577	0	0	1	1	0	0	CREB3L4	cAMP responsive element binding protein 3-like 4
hsa-miR-577	1	0	1	1	1	1	MAGI1	membrane associated guanylate kinase, WW and PDZ domain containing 1
hsa-miR-577	0	0	1	1	1	1	SPSB1	splA/ryanodine receptor domain and SOCS box containing 1
hsa-miR-577	1	0	1	1	1	1	NTRK2	neurotrophic tyrosine kinase, receptor, type 2
hsa-miR-577	0	0	1	1	0	0	CNKSR2	connector enhancer of kinase suppressor of Ras 2
hsa-miR-577	1	0	1	1	1	1	ST3GAL3	ST3 beta-galactoside alpha-2,3-sialyltransferase 3
hsa-miR-577	1	0	1	1	1	1	RBFOX1	RNA binding protein, fox-1 homolog (C. elegans) 1
hsa-miR-577	1	0	1	0	1	1	PPP1R12A	protein phosphatase 1, regulatory subunit 12A
hsa-miR-577	1	0	1	1	1	1	HNRNPU	heterogeneous nuclear ribonucleoprotein U (scaffold attachment factor A)
hsa-miR-577	1	0	1	1	1	1	CPNE4	copine IV
hsa-miR-577	0	0	1	1	1	1	SAMD9L	sterile alpha motif domain containing 9-like
hsa-miR-577	1	0	1	1	1	1	WAPAL	wings apart-like homolog (Drosophila)
hsa-miR-577	1	0	1	1	1	1	BRSK1	BR serine/threonine kinase 1
hsa-miR-577	0	0	1	1	1	1	SLC2A14	solute carrier family 2 (facilitated glucose transporter), member 14
hsa-miR-577	0	0	1	1	1	1	AMPH	amphiphysin
hsa-miR-577	1	0	1	0	1	1	NUDCD1	NudC domain containing 1
hsa-miR-577	0	0	1	1	1	1	CHODL	chondrolectin
hsa-miR-577	1	0	1	0	1	1	IL1RAP	interleukin 1 receptor accessory protein
hsa-miR-577	1	0	1	1	1	1	VPS37A	vacuolar protein sorting 37 homolog A (S. cerevisiae)
hsa-miR-577	1	0	1	1	1	1	AFF2	AF4/FMR2 family, member 2
hsa-miR-577	1	0	1	1	1	1	PLAGL1	pleiomorphic adenoma gene-like 1
hsa-miR-577	0	0	1	1	1	1	GPR56	G protein-coupled receptor 56
hsa-miR-577	1	0	1	1	1	1	SH2B3	SH2B adaptor protein 3
hsa-miR-577	1	0	1	0	1	1	DICER1	dicer 1, ribonuclease type III
hsa-miR-577	1	0	1	1	1	1	ZNF281	zinc finger protein 281
hsa-miR-577	0	0	1	0	0	0	ADAM5	ADAM metallopeptidase domain 5, pseudogene
hsa-miR-577	1	0	1	0	1	1	CACNA1C	calcium channel, voltage-dependent, L type, alpha 1C subunit
hsa-miR-577	0	0	1	1	1	1	CLDND1	claudin domain containing 1
hsa-miR-577	0	0	1	1	1	1	TCFL5	transcription factor-like 5 (basic helix-loop-helix)
hsa-miR-577	1	0	1	0	1	1	GRB10	growth factor receptor-bound protein 10
hsa-miR-577	1	0	1	1	1	1	ILF3	interleukin enhancer binding factor 3, 90kDa
hsa-miR-577	0	0	1	0	1	1	COL13A1	collagen, type XIII, alpha 1
hsa-miR-577	1	0	1	1	1	1	VAMP7	vesicle-associated membrane protein 7
hsa-miR-577	0	0	1	0	1	1	SCN8A	sodium channel, voltage gated, type VIII, alpha subunit
hsa-miR-577	1	0	1	1	1	1	PALM2	paralemmin 2
hsa-miR-577	1	0	1	1	1	1	RAB3IP	RAB3A interacting protein (rabin3)
hsa-miR-577	0	0	1	0	1	1	SRPK1	SRSF protein kinase 1
hsa-miR-577	0	0	1	1	1	1	ZNF248	zinc finger protein 248
hsa-miR-577	1	0	1	1	1	1	NRXN3	neurexin 3
hsa-miR-577	1	0	1	1	1	1	ARL4C	ADP-ribosylation factor-like 4C
hsa-miR-577	0	0	1	1	1	1	DBR1	debranching enzyme homolog 1 (S. cerevisiae)
hsa-miR-577	0	0	1	0	0	0	FLJ20518	FSHD region gene 2 family, member C pseudogene
hsa-miR-577	0	0	1	0	0	0	TUG1	taurine upregulated 1 (non-protein coding)
hsa-miR-577	1	0	1	1	1	1	ARHGAP12	Rho GTPase activating protein 12
hsa-miR-577	0	0	1	1	1	1	SMOX	spermine oxidase
hsa-miR-577	1	0	1	1	1	1	BCAP29	B-cell receptor-associated protein 29
hsa-miR-577	1	0	1	1	1	1	ZC3H7A	zinc finger CCCH-type containing 7A
hsa-miR-577	0	0	1	1	0	0	AP4B1	adaptor-related protein complex 4, beta 1 subunit
hsa-miR-577	0	0	1	1	0	0	FAR2	fatty acyl CoA reductase 2
hsa-miR-577	0	0	1	1	1	1	STOX2	storkhead box 2
hsa-miR-577	1	0	1	1	1	1	EPN2	epsin 2
hsa-miR-577	0	0	1	1	1	1	ARAP3	ArfGAP with RhoGAP domain, ankyrin repeat and PH domain 3
hsa-miR-577	1	0	1	0	1	1	CLIC4	chloride intracellular channel 4
hsa-miR-577	1	0	1	1	1	1	PTBP3	polypyrimidine tract binding protein 3
hsa-miR-577	1	0	1	1	1	1	SLC38A2	solute carrier family 38, member 2
hsa-miR-577	0	0	1	1	1	1	LRIF1	ligand dependent nuclear receptor interacting factor 1
hsa-miR-577	0	0	1	1	1	1	MCOLN3	mucolipin 3
hsa-miR-577	1	0	1	1	1	1	MBD5	methyl-CpG binding domain protein 5
hsa-miR-577	1	0	1	1	1	1	ACER3	alkaline ceramidase 3
hsa-miR-577	1	0	1	1	1	1	HNRNPUL1	heterogeneous nuclear ribonucleoprotein U-like 1
hsa-miR-577	1	0	1	1	1	1	C12orf23	chromosome 12 open reading frame 23
hsa-miR-577	1	0	1	1	1	1	UNKL	unkempt homolog (Drosophila)-like
hsa-miR-577	1	0	1	1	0	0	UQCC	ubiquinol-cytochrome c reductase complex chaperone
hsa-miR-577	1	0	1	1	1	1	SLCO5A1	solute carrier organic anion transporter family, member 5A1
hsa-miR-577	1	0	1	0	0	0	ZNRF3	zinc and ring finger 3
hsa-miR-577	0	0	1	0	0	0	SOX2-OT	SOX2 overlapping transcript (non-protein coding)
hsa-miR-577	1	0	1	1	0	0	DFNB31	deafness, autosomal recessive 31
hsa-miR-577	0	0	1	0	0	0	DUXAP10	double homeobox A pseudogene 10
hsa-miR-577	1	0	1	1	1	1	STARD7	StAR-related lipid transfer (START) domain containing 7
hsa-miR-577	0	0	1	1	1	1	LRRN1	leucine rich repeat neuronal 1
hsa-miR-577	1	0	1	0	1	1	UBP1	upstream binding protein 1 (LBP-1a)
hsa-miR-577	1	0	1	1	1	1	MACF1	microtubule-actin crosslinking factor 1
hsa-miR-577	0	0	1	1	1	1	C14orf118	chromosome 14 open reading frame 118
hsa-miR-577	0	0	1	0	0	0	LINC00475	long intergenic non-protein coding RNA 475
hsa-miR-577	0	0	1	0	1	1	ARHGAP42	Rho GTPase activating protein 42
hsa-miR-577	1	0	1	1	1	1	BAIAP2	BAI1-associated protein 2
hsa-miR-577	0	0	1	0	0	0	LOC284561	uncharacterized LOC284561
hsa-miR-577	1	0	1	1	1	1	BAZ2A	bromodomain adjacent to zinc finger domain, 2A
hsa-miR-577	0	0	1	1	0	0	OBSL1	obscurin-like 1
hsa-miR-577	0	0	1	1	1	1	AMFR	autocrine motility factor receptor, E3 ubiquitin protein ligase
hsa-miR-577	1	0	1	0	1	1	C14orf101	chromosome 14 open reading frame 101
hsa-miR-577	0	0	1	0	0	0	LOC286059	tumor necrosis factor receptor superfamily, member 10d, decoy with truncated death domain pseudogene
hsa-miR-577	1	0	1	0	0	0	ZDBF2	zinc finger, DBF-type containing 2
hsa-miR-577	0	0	1	1	1	1	HDAC7	histone deacetylase 7
hsa-miR-577	0	0	1	1	1	1	SIGLEC1	sialic acid binding Ig-like lectin 1, sialoadhesin
hsa-miR-577	1	0	1	0	1	1	ATP2B1	ATPase, Ca++ transporting, plasma membrane 1
hsa-miR-577	1	0	1	1	1	1	SLC35A3	solute carrier family 35 (UDP-N-acetylglucosamine (UDP-GlcNAc) transporter), member A3
hsa-miR-577	1	0	1	1	1	1	ABHD3	abhydrolase domain containing 3
hsa-miR-577	0	0	1	1	0	0	UBR4	ubiquitin protein ligase E3 component n-recognin 4
hsa-miR-577	1	0	1	1	1	1	DLC1	deleted in liver cancer 1
hsa-miR-577	1	0	1	1	1	1	TNRC6A	trinucleotide repeat containing 6A
hsa-miR-577	1	0	1	1	1	1	YPEL5	yippee-like 5 (Drosophila)
hsa-miR-577	1	0	1	1	1	1	NAA30	N(alpha)-acetyltransferase 30, NatC catalytic subunit
hsa-miR-577	1	0	1	0	1	1	ZCCHC3	zinc finger, CCHC domain containing 3
hsa-miR-577	0	0	1	0	1	1	HEMK1	HemK methyltransferase family member 1
hsa-miR-577	1	0	1	1	1	1	HPS3	Hermansky-Pudlak syndrome 3
hsa-miR-577	1	0	1	1	0	0	UBXN7	UBX domain protein 7
hsa-miR-577	0	0	1	0	0	0	NEURL1B	neuralized homolog 1B (Drosophila)
hsa-miR-577	0	0	1	0	1	1	ZCCHC8	zinc finger, CCHC domain containing 8
hsa-miR-577	1	0	1	0	1	1	TOX3	TOX high mobility group box family member 3
hsa-miR-577	0	0	1	0	0	0	LOC729852	uncharacterized LOC729852
hsa-miR-577	0	0	1	1	0	0	CCDC81	coiled-coil domain containing 81
hsa-miR-577	0	0	1	1	1	1	GPBP1L1	GC-rich promoter binding protein 1-like 1
hsa-miR-577	1	0	1	1	1	1	FOXP1	forkhead box P1
hsa-miR-577	1	0	1	1	1	1	MARK1	MAP/microtubule affinity-regulating kinase 1
hsa-miR-577	0	0	1	0	0	0	JAKMIP2-AS1	JAKMIP2 antisense RNA 1
hsa-miR-577	1	0	1	0	1	1	CCNL2	cyclin L2
hsa-miR-577	0	0	1	1	0	0	TMEM107	transmembrane protein 107
hsa-miR-577	1	0	1	1	1	1	SLC38A1	solute carrier family 38, member 1
hsa-miR-577	1	0	1	1	1	1	GPD2	glycerol-3-phosphate dehydrogenase 2 (mitochondrial)
hsa-miR-577	1	0	1	1	1	1	SLAIN1	SLAIN motif family, member 1
hsa-miR-577	1	0	1	1	1	1	SGK1	serum/glucocorticoid regulated kinase 1
hsa-miR-577	0	0	1	1	1	1	TOX2	TOX high mobility group box family member 2
hsa-miR-577	0	0	1	0	0	0	LOC100131060	uncharacterized LOC100131060
hsa-miR-577	1	0	1	1	1	1	TPM1	tropomyosin 1 (alpha)
hsa-miR-577	1	0	1	1	1	1	FRMD6	FERM domain containing 6
hsa-miR-577	0	0	1	1	1	1	GLYATL1	glycine-N-acyltransferase-like 1
hsa-miR-577	1	0	1	1	1	1	DIXDC1	DIX domain containing 1
hsa-miR-577	1	0	1	0	1	1	RAB1A	RAB1A, member RAS oncogene family
hsa-miR-577	1	0	1	1	1	1	TMTC1	transmembrane and tetratricopeptide repeat containing 1
hsa-miR-577	0	0	1	1	1	1	SDK1	sidekick cell adhesion molecule 1
hsa-miR-577	1	0	1	1	1	1	LMNA	lamin A/C
hsa-miR-577	0	0	1	0	1	1	FAM70A	family with sequence similarity 70, member A
hsa-miR-577	1	0	1	1	1	1	CLCN5	chloride channel, voltage-sensitive 5
hsa-miR-577	1	0	1	1	1	1	SORBS2	sorbin and SH3 domain containing 2
hsa-miR-577	0	0	1	1	1	1	DST	dystonin
hsa-miR-577	1	0	1	1	1	1	FOPNL	FGFR1OP N-terminal like
hsa-miR-577	1	0	1	0	1	1	RABGEF1	RAB guanine nucleotide exchange factor (GEF) 1
hsa-miR-577	0	0	1	1	1	1	XAF1	XIAP associated factor 1
hsa-miR-577	1	0	1	1	1	1	ZBTB10	zinc finger and BTB domain containing 10
hsa-miR-577	1	0	1	1	1	1	PCMTD1	protein-L-isoaspartate (D-aspartate) O-methyltransferase domain containing 1
hsa-miR-577	1	0	1	1	1	1	HMGB1	high mobility group box 1
hsa-miR-577	1	0	1	1	1	1	MGAT1	mannosyl (alpha-1,3-)-glycoprotein beta-1,2-N-acetylglucosaminyltransferase
hsa-miR-577	1	0	1	1	1	1	TLE4	transducin-like enhancer of split 4 (E(sp1) homolog, Drosophila)
hsa-miR-577	0	0	1	1	1	1	CCDC102B	coiled-coil domain containing 102B
hsa-miR-577	0	0	1	0	0	0	LOC145820	uncharacterized LOC145820
hsa-miR-577	1	0	1	1	1	1	MPP7	membrane protein, palmitoylated 7 (MAGUK p55 subfamily member 7)
hsa-miR-577	0	0	1	1	1	1	ZBTB26	zinc finger and BTB domain containing 26
hsa-miR-577	1	0	1	0	1	1	PLEKHA1	pleckstrin homology domain containing, family A (phosphoinositide binding specific) member 1
hsa-miR-577	1	0	1	1	0	0	ZFYVE27	zinc finger, FYVE domain containing 27
hsa-miR-577	1	0	1	1	1	1	SEC22A	SEC22 vesicle trafficking protein homolog A (S. cerevisiae)
hsa-miR-577	0	0	1	0	1	1	CHURC1	churchill domain containing 1
hsa-miR-577	0	0	1	0	1	1	CCDC68	coiled-coil domain containing 68
hsa-miR-577	0	0	1	1	0	0	ANKAR	ankyrin and armadillo repeat containing
hsa-miR-577	0	0	1	0	1	1	UHMK1	U2AF homology motif (UHM) kinase 1
hsa-miR-577	1	0	1	1	1	1	HLF	hepatic leukemia factor
hsa-miR-577	1	0	1	1	1	1	EIF2AK4	eukaryotic translation initiation factor 2 alpha kinase 4
hsa-miR-577	1	0	1	1	1	1	BLCAP	bladder cancer associated protein
hsa-miR-577	1	0	1	1	1	1	PNISR	PNN-interacting serine/arginine-rich protein
hsa-miR-577	0	0	1	1	1	1	GALNT6	UDP-N-acetyl-alpha-D-galactosamine:polypeptide N-acetylgalactosaminyltransferase 6 (GalNAc-T6)
hsa-miR-577	0	0	1	1	0	0	GPR19	G protein-coupled receptor 19
hsa-miR-577	1	0	1	1	1	1	SIRT1	sirtuin 1
hsa-miR-577	1	0	1	1	1	1	UBAP1	ubiquitin associated protein 1
hsa-miR-577	1	0	1	1	1	1	UXS1	UDP-glucuronate decarboxylase 1
hsa-miR-577	0	0	1	0	1	1	CADM1	cell adhesion molecule 1
hsa-miR-577	0	0	1	1	0	0	PIGO	phosphatidylinositol glycan anchor biosynthesis, class O
hsa-miR-577	1	0	1	1	1	1	STXBP5	syntaxin binding protein 5 (tomosyn)
hsa-miR-577	1	0	1	1	1	1	WDR20	WD repeat domain 20
hsa-miR-577	0	0	1	0	0	0	LOC152225	uncharacterized LOC152225
hsa-miR-577	0	0	1	0	1	1	TMSB15B	thymosin beta 15B
hsa-miR-577	1	0	1	1	1	1	FRY	furry homolog (Drosophila)
hsa-miR-577	1	0	1	1	1	1	AMMECR1	Alport syndrome, mental retardation, midface hypoplasia and elliptocytosis chromosomal region gene 1
hsa-miR-577	1	0	1	1	1	1	SUPT16H	suppressor of Ty 16 homolog (S. cerevisiae)
hsa-miR-577	1	0	1	1	1	1	FBXW2	F-box and WD repeat domain containing 2
hsa-miR-577	0	0	1	1	1	1	NRCAM	neuronal cell adhesion molecule
hsa-miR-577	1	0	1	1	1	1	GNG2	guanine nucleotide binding protein (G protein), gamma 2
hsa-miR-577	1	0	1	1	1	1	IVNS1ABP	influenza virus NS1A binding protein
hsa-miR-577	0	0	1	0	1	1	SSPN	sarcospan
hsa-miR-577	0	0	1	1	1	1	STAMBPL1	STAM binding protein-like 1
hsa-miR-577	0	0	1	1	0	0	ARPC2	actin related protein 2/3 complex, subunit 2, 34kDa
hsa-miR-577	0	0	1	0	0	0	LOC257358	uncharacterized LOC257358
hsa-miR-577	1	0	1	1	1	1	SPTBN1	spectrin, beta, non-erythrocytic 1
hsa-miR-577	1	0	1	1	1	1	DZIP1	DAZ interacting protein 1
hsa-miR-577	0	0	1	1	1	1	CYP11B1	cytochrome P450, family 11, subfamily B, polypeptide 1
hsa-miR-577	1	0	1	1	1	1	DEM1	defects in morphology 1 homolog (S. cerevisiae)
hsa-miR-577	0	0	1	1	1	1	MARC1	mitochondrial amidoxime reducing component 1
hsa-miR-577	1	0	1	1	1	1	MAP3K12	mitogen-activated protein kinase kinase kinase 12
hsa-miR-577	0	0	1	0	0	0	ZNF790-AS1	ZNF790 antisense RNA 1
hsa-miR-577	0	0	1	0	1	1	RALYL	RALY RNA binding protein-like
hsa-miR-577	1	0	1	1	1	1	SYT1	synaptotagmin I
hsa-miR-577	1	0	1	0	1	1	ARL6IP6	ADP-ribosylation-like factor 6 interacting protein 6
hsa-miR-577	1	0	1	0	1	1	NCOA7	nuclear receptor coactivator 7
hsa-miR-577	0	0	1	0	0	0	LINC00340	long intergenic non-protein coding RNA 340
hsa-miR-577	1	0	1	1	1	1	GALNTL2	UDP-N-acetyl-alpha-D-galactosamine:polypeptide N-acetylgalactosaminyltransferase-like 2
hsa-miR-577	0	0	1	1	1	1	TMEM170A	transmembrane protein 170A
hsa-miR-577	1	0	1	1	1	1	CPNE8	copine VIII
hsa-miR-577	1	0	1	1	1	1	ARHGEF7	Rho guanine nucleotide exchange factor (GEF) 7
hsa-miR-577	1	0	1	1	1	1	KLF4	Kruppel-like factor 4 (gut)
hsa-miR-577	1	0	1	1	1	1	TMEM100	transmembrane protein 100
hsa-miR-577	1	0	1	0	1	1	SLC39A11	solute carrier family 39 (metal ion transporter), member 11
hsa-miR-577	1	0	1	1	1	1	EPHB1	EPH receptor B1
hsa-miR-577	0	0	1	1	1	1	EXOC4	exocyst complex component 4
hsa-miR-577	0	0	1	0	0	0	LOC100129858	uncharacterized LOC100129858
hsa-miR-577	0	0	1	0	0	0	LOC284577	uncharacterized LOC284577
hsa-miR-577	0	0	1	0	0	0	LOC730101	uncharacterized LOC730101
hsa-miR-577	0	0	1	0	1	1	HDAC9	histone deacetylase 9
hsa-miR-577	1	0	1	1	1	1	ZC3H11A	zinc finger CCCH-type containing 11A
hsa-miR-577	0	0	1	1	1	1	VDAC1	voltage-dependent anion channel 1
hsa-miR-577	1	0	1	1	1	1	EPB41L4A	erythrocyte membrane protein band 4.1 like 4A
hsa-miR-577	1	0	1	1	1	1	ACSL1	acyl-CoA synthetase long-chain family member 1
hsa-miR-577	0	0	1	1	1	1	CDKN2AIP	CDKN2A interacting protein
hsa-miR-577	0	0	1	1	1	1	RPE	ribulose-5-phosphate-3-epimerase
hsa-miR-577	1	0	1	1	1	1	FADS1	fatty acid desaturase 1
hsa-miR-577	1	0	1	1	1	1	SLITRK2	SLIT and NTRK-like family, member 2
hsa-miR-577	0	0	1	0	1	1	FLJ39080	uncharacterized LOC441355
hsa-miR-577	1	0	1	0	1	1	COL21A1	collagen, type XXI, alpha 1
hsa-miR-577	0	0	1	1	1	1	ZNF667	zinc finger protein 667
hsa-miR-577	0	0	1	1	0	0	DHX9	DEAH (Asp-Glu-Ala-His) box polypeptide 9
hsa-miR-577	1	0	1	0	1	1	KBTBD8	kelch repeat and BTB (POZ) domain containing 8
hsa-miR-577	0	0	1	1	1	1	ARMCX5	armadillo repeat containing, X-linked 5
hsa-miR-577	1	0	1	1	1	1	SYT6	synaptotagmin VI
hsa-miR-577	1	0	1	1	1	1	ETS2	v-ets erythroblastosis virus E26 oncogene homolog 2 (avian)
hsa-miR-577	1	0	1	1	1	1	CDV3	CDV3 homolog (mouse)
hsa-miR-577	0	0	1	1	1	1	RNASEH1	ribonuclease H1
hsa-miR-577	0	0	1	1	1	1	EXTL2	exostoses (multiple)-like 2
hsa-miR-577	1	0	1	1	1	1	GATA4	GATA binding protein 4
hsa-miR-577	1	0	1	1	1	1	RPL22	ribosomal protein L22
hsa-miR-577	0	0	1	0	1	1	TNFAIP8	tumor necrosis factor, alpha-induced protein 8
hsa-miR-577	1	0	1	1	1	1	POU2F3	POU class 2 homeobox 3
hsa-miR-577	1	0	1	1	1	1	RAB11FIP4	RAB11 family interacting protein 4 (class II)
hsa-miR-577	0	0	1	0	0	0	LINC00293	long intergenic non-protein coding RNA 293
hsa-miR-577	0	0	1	0	0	0	GOLGA6L1	golgin A6 family-like 1
hsa-miR-577	1	0	1	1	1	1	GDA	guanine deaminase
hsa-miR-577	1	0	1	1	1	1	GOLGA8B	golgin A8 family, member B
hsa-miR-577	1	0	1	0	1	1	PRKAR1A	protein kinase, cAMP-dependent, regulatory, type I, alpha
hsa-miR-577	1	0	1	1	1	1	IGSF11	immunoglobulin superfamily, member 11
hsa-miR-577	1	0	1	1	1	1	ZCCHC2	zinc finger, CCHC domain containing 2
hsa-miR-577	1	0	1	1	1	1	CHD6	chromodomain helicase DNA binding protein 6
hsa-miR-577	1	0	1	1	0	0	ENTPD1	ectonucleoside triphosphate diphosphohydrolase 1
hsa-miR-577	0	0	1	1	1	1	FAM76A	family with sequence similarity 76, member A
hsa-miR-577	1	0	1	1	1	1	LARP1B	La ribonucleoprotein domain family, member 1B
hsa-miR-577	0	0	1	1	1	1	TRPM7	transient receptor potential cation channel, subfamily M, member 7
hsa-miR-577	0	0	1	1	1	1	C1orf114	chromosome 1 open reading frame 114
hsa-miR-577	0	0	1	1	1	1	CHCHD1	coiled-coil-helix-coiled-coil-helix domain containing 1
hsa-miR-577	1	0	1	1	1	1	PCMT1	protein-L-isoaspartate (D-aspartate) O-methyltransferase
hsa-miR-577	1	0	1	1	0	0	TMEM131	transmembrane protein 131
hsa-miR-577	1	0	1	0	1	1	UNC5D	unc-5 homolog D (C. elegans)
hsa-miR-577	0	0	1	1	0	0	EFHB	EF-hand domain family, member B
hsa-miR-577	0	0	1	1	0	0	ZACN	zinc activated ligand-gated ion channel
hsa-miR-577	1	0	1	1	1	1	ACSL6	acyl-CoA synthetase long-chain family member 6
hsa-miR-577	0	0	1	1	1	1	UPP2	uridine phosphorylase 2
hsa-miR-577	0	0	1	1	1	1	SLFN13	schlafen family member 13
hsa-miR-577	1	0	1	1	1	1	ZMAT3	zinc finger, matrin-type 3
hsa-miR-577	1	0	1	1	1	1	HBP1	HMG-box transcription factor 1
hsa-miR-577	0	0	1	1	1	1	GPR128	G protein-coupled receptor 128
hsa-miR-577	0	0	1	1	1	1	RNF217	ring finger protein 217
hsa-miR-577	0	0	1	1	0	0	KIAA0146	KIAA0146
hsa-miR-577	1	0	1	1	1	1	WEE1	WEE1 homolog (S. pombe)
hsa-miR-577	1	0	1	1	1	1	BCL6B	B-cell CLL/lymphoma 6, member B
hsa-miR-577	1	0	1	1	1	1	ZBTB4	zinc finger and BTB domain containing 4
hsa-miR-577	1	0	1	1	1	1	ZNF275	zinc finger protein 275
hsa-miR-577	0	0	1	1	1	1	RNF103	ring finger protein 103
hsa-miR-577	0	0	1	1	1	1	FRMD5	FERM domain containing 5
hsa-miR-577	1	0	1	1	1	1	KALRN	kalirin, RhoGEF kinase
hsa-miR-577	1	0	1	1	0	0	KCNC1	potassium voltage-gated channel, Shaw-related subfamily, member 1
hsa-miR-577	0	0	1	0	1	1	FLJ41200	uncharacterized LOC401492
hsa-miR-577	1	0	1	1	1	1	TPRG1	tumor protein p63 regulated 1
hsa-miR-577	1	0	1	1	1	1	PLEKHH1	pleckstrin homology domain containing, family H (with MyTH4 domain) member 1
hsa-miR-577	0	0	1	1	1	1	FAM5B	family with sequence similarity 5, member B
hsa-miR-577	0	0	1	1	1	1	TMEM59	transmembrane protein 59
hsa-miR-577	1	0	1	1	1	1	FAM219A	family with sequence similarity 219, member A
hsa-miR-577	1	0	1	0	0	0	GPR137C	G protein-coupled receptor 137C
hsa-miR-577	1	0	1	1	1	1	OSBPL9	oxysterol binding protein-like 9
hsa-miR-577	0	0	1	1	1	1	TMEM17	transmembrane protein 17
hsa-miR-577	1	0	1	1	1	1	ESYT2	extended synaptotagmin-like protein 2
hsa-miR-577	1	0	1	1	1	1	METTL8	methyltransferase like 8
hsa-miR-577	1	0	1	1	1	1	PRDM2	PR domain containing 2, with ZNF domain
hsa-miR-577	1	0	1	1	1	1	SMAP1	small ArfGAP 1
hsa-miR-577	1	0	1	0	1	1	DCUN1D4	DCN1, defective in cullin neddylation 1, domain containing 4 (S. cerevisiae)
hsa-miR-577	0	0	1	1	0	0	LOC100129995	uncharacterized LOC100129995
hsa-miR-577	0	0	1	0	1	1	NAIP	NLR family, apoptosis inhibitory protein
hsa-miR-577	1	0	1	0	1	1	TTYH3	tweety homolog 3 (Drosophila)
hsa-miR-577	1	0	1	1	1	1	DAB2IP	DAB2 interacting protein
hsa-miR-577	0	0	1	1	1	1	IDS	iduronate 2-sulfatase
hsa-miR-577	1	0	1	1	1	1	KIF21A	kinesin family member 21A
hsa-miR-577	1	0	1	1	1	1	UBA2	ubiquitin-like modifier activating enzyme 2
hsa-miR-577	0	0	1	0	0	0	TMEM232	transmembrane protein 232
hsa-miR-577	1	0	1	1	1	1	ATXN7	ataxin 7
hsa-miR-577	1	0	1	1	0	0	GXYLT1	glucoside xylosyltransferase 1
hsa-miR-577	0	0	1	1	1	1	FAM179A	family with sequence similarity 179, member A
hsa-miR-577	1	0	1	1	1	1	METAP2	methionyl aminopeptidase 2
hsa-miR-577	0	0	1	1	1	1	MKX	mohawk homeobox
hsa-miR-577	1	0	1	0	0	0	ANKRD52	ankyrin repeat domain 52
hsa-miR-577	0	0	1	1	1	1	DENND5A	DENN/MADD domain containing 5A
hsa-miR-577	1	0	1	1	1	1	KTN1	kinectin 1 (kinesin receptor)
hsa-miR-577	0	0	1	1	1	1	SRPX	sushi-repeat containing protein, X-linked
hsa-miR-577	1	0	1	1	1	1	KPNA1	karyopherin alpha 1 (importin alpha 5)
hsa-miR-577	1	0	1	0	1	1	HECTD1	HECT domain containing E3 ubiquitin protein ligase 1
hsa-miR-577	0	0	1	1	1	1	RBM46	RNA binding motif protein 46
hsa-miR-577	1	0	1	1	1	1	MACROD2	MACRO domain containing 2
hsa-miR-577	1	0	1	1	1	1	DCTN4	dynactin 4 (p62)
hsa-miR-577	1	0	1	1	1	1	FAM122B	family with sequence similarity 122B
hsa-miR-577	1	0	1	1	0	0	PFKM	phosphofructokinase, muscle
hsa-miR-577	0	0	1	1	1	1	EPPIN	epididymal peptidase inhibitor
hsa-miR-577	0	0	1	1	0	0	FSIP2	fibrous sheath interacting protein 2
hsa-miR-577	1	0	1	1	0	0	ATXN7L3	ataxin 7-like 3
hsa-miR-577	1	0	1	1	1	1	CSRNP3	cysteine-serine-rich nuclear protein 3
hsa-miR-577	0	0	1	0	0	0	LOC729177	uncharacterized LOC729177
hsa-miR-577	1	0	1	1	1	1	SIKE1	suppressor of IKBKE 1
hsa-miR-577	1	0	1	1	1	1	PIK3R1	phosphoinositide-3-kinase, regulatory subunit 1 (alpha)
hsa-miR-577	1	0	1	1	1	1	SACM1L	SAC1 suppressor of actin mutations 1-like (yeast)
hsa-miR-577	0	0	1	1	1	1	C18orf54	chromosome 18 open reading frame 54
hsa-miR-577	0	0	1	1	1	1	RHPN2	rhophilin, Rho GTPase binding protein 2
hsa-miR-577	0	0	1	1	1	1	TGM2	transglutaminase 2 (C polypeptide, protein-glutamine-gamma-glutamyltransferase)
hsa-miR-577	1	0	1	1	1	1	ATP1A2	ATPase, Na+/K+ transporting, alpha 2 polypeptide
hsa-miR-577	1	0	1	0	0	0	CPLX1	complexin 1
hsa-miR-577	1	0	1	1	1	1	DMXL1	Dmx-like 1
hsa-miR-577	1	0	1	1	1	1	LRIG1	leucine-rich repeats and immunoglobulin-like domains 1
hsa-miR-577	1	0	1	0	1	1	GPR180	G protein-coupled receptor 180
hsa-miR-577	1	0	1	1	1	1	LRP2BP	LRP2 binding protein
hsa-miR-577	1	0	1	1	1	1	CLIP1	CAP-GLY domain containing linker protein 1
hsa-miR-577	0	0	1	0	0	0	RPL23AP53	ribosomal protein L23a pseudogene 53
hsa-miR-577	0	0	1	1	1	1	DOCK9	dedicator of cytokinesis 9
hsa-miR-577	1	0	1	1	1	1	UBE3C	ubiquitin protein ligase E3C
hsa-miR-577	1	0	1	1	1	1	PHF17	PHD finger protein 17
hsa-miR-577	0	0	1	1	1	1	ERI2	ERI1 exoribonuclease family member 2
hsa-miR-577	1	0	1	1	1	1	RALGDS	ral guanine nucleotide dissociation stimulator
hsa-miR-577	1	0	1	1	1	1	ENAH	enabled homolog (Drosophila)
hsa-miR-577	1	0	1	0	1	1	SP6	Sp6 transcription factor
hsa-miR-577	1	0	1	1	1	1	EYA1	eyes absent homolog 1 (Drosophila)
hsa-miR-577	1	0	1	0	1	1	FNDC3B	fibronectin type III domain containing 3B
hsa-miR-577	1	0	1	0	1	1	CAPRIN1	cell cycle associated protein 1
hsa-miR-577	0	0	1	0	1	1	LOC401321	uncharacterized LOC401321
hsa-miR-577	0	0	1	1	1	1	MCU	mitochondrial calcium uniporter
hsa-miR-577	0	0	1	0	0	0	LRRC9	leucine rich repeat containing 9
hsa-miR-577	0	0	1	1	0	0	TMEM136	transmembrane protein 136
hsa-miR-577	1	0	1	1	1	1	NSUN4	NOP2/Sun domain family, member 4
hsa-miR-577	1	0	1	1	1	1	BCAT1	branched chain amino-acid transaminase 1, cytosolic
hsa-miR-577	1	0	1	0	1	1	KPNA6	karyopherin alpha 6 (importin alpha 7)
hsa-miR-577	0	0	1	1	1	1	ATXN2	ataxin 2
hsa-miR-577	1	0	1	1	1	1	PUS7	pseudouridylate synthase 7 homolog (S. cerevisiae)
hsa-miR-577	0	0	1	1	1	1	ZNF662	zinc finger protein 662
hsa-miR-577	1	0	1	1	1	1	DPY19L3	dpy-19-like 3 (C. elegans)
hsa-miR-577	0	0	1	1	1	1	G3BP1	GTPase activating protein (SH3 domain) binding protein 1
hsa-miR-577	0	0	1	1	1	1	SQRDL	sulfide quinone reductase-like (yeast)
hsa-miR-577	0	0	1	0	0	0	LOC494141	mitochondrial carrier triple repeat 1 pseudogene
hsa-miR-577	1	0	1	0	1	1	RXRA	retinoid X receptor, alpha
hsa-miR-577	1	0	1	0	1	1	ESRRG	estrogen-related receptor gamma
hsa-miR-577	0	0	1	1	1	1	ZNF680	zinc finger protein 680
hsa-miR-577	1	0	1	1	0	0	FOXP2	forkhead box P2
hsa-miR-577	1	0	1	1	1	1	RNF111	ring finger protein 111
hsa-miR-577	1	0	1	0	1	1	FMNL2	formin-like 2
hsa-miR-577	1	0	1	1	1	1	WTAP	Wilms tumor 1 associated protein
hsa-miR-577	0	0	1	1	1	1	RNF19B	ring finger protein 19B
hsa-miR-577	1	0	1	1	1	1	RABGAP1	RAB GTPase activating protein 1
hsa-miR-577	0	0	1	1	1	1	SLC36A3	solute carrier family 36 (proton/amino acid symporter), member 3
hsa-miR-577	1	0	1	1	1	1	MAP2K4	mitogen-activated protein kinase kinase 4
hsa-miR-577	0	0	1	0	0	0	AGAP9	ArfGAP with GTPase domain, ankyrin repeat and PH domain 9
hsa-miR-577	1	0	1	1	1	1	SLC39A9	solute carrier family 39 (zinc transporter), member 9
hsa-miR-577	1	0	1	1	1	1	TAP2	transporter 2, ATP-binding cassette, sub-family B (MDR/TAP)
hsa-miR-577	0	0	1	1	1	1	FANCC	Fanconi anemia, complementation group C
hsa-miR-577	1	0	1	0	1	1	TMEM106B	transmembrane protein 106B
hsa-miR-577	0	0	1	1	1	1	ARID1A	AT rich interactive domain 1A (SWI-like)
hsa-miR-577	0	0	1	1	1	1	CRISP3	cysteine-rich secretory protein 3
hsa-miR-577	1	0	1	0	1	1	SEZ6	seizure related 6 homolog (mouse)
hsa-miR-577	1	0	1	1	0	0	ATP13A3	ATPase type 13A3
hsa-miR-577	1	0	1	1	1	1	ATL2	atlastin GTPase 2
hsa-miR-577	1	0	1	1	1	1	TBC1D15	TBC1 domain family, member 15
hsa-miR-577	1	0	1	1	1	1	MEAF6	MYST/Esa1-associated factor 6
hsa-miR-577	0	0	1	1	1	1	BTK	Bruton agammaglobulinemia tyrosine kinase
hsa-miR-577	1	0	1	1	1	1	CAMK2G	calcium/calmodulin-dependent protein kinase II gamma
hsa-miR-577	1	0	1	1	1	1	COBLL1	COBL-like 1
hsa-miR-577	1	0	1	1	1	1	PHTF2	putative homeodomain transcription factor 2
hsa-miR-577	0	0	1	1	1	1	PRSS16	protease, serine, 16 (thymus)
hsa-miR-577	0	0	1	1	1	1	ENPP3	ectonucleotide pyrophosphatase/phosphodiesterase 3
hsa-miR-577	0	0	1	1	0	0	MTMR1	myotubularin related protein 1
hsa-miR-577	1	0	1	1	1	1	DUSP3	dual specificity phosphatase 3
hsa-miR-577	1	0	1	1	1	1	APBB2	amyloid beta (A4) precursor protein-binding, family B, member 2
hsa-miR-577	1	0	1	1	1	1	DNM3	dynamin 3
hsa-miR-577	1	0	1	1	1	1	AHCYL1	adenosylhomocysteinase-like 1
hsa-miR-577	0	0	1	1	1	1	PTPN20B	protein tyrosine phosphatase, non-receptor type 20B
hsa-miR-577	0	0	1	1	1	1	PTPN20A	protein tyrosine phosphatase, non-receptor type 20A
hsa-miR-577	0	0	1	0	1	1	NEK1	NIMA (never in mitosis gene a)-related kinase 1
hsa-miR-577	0	0	1	1	0	0	FAM149A	family with sequence similarity 149, member A
hsa-miR-577	0	0	1	1	0	0	NEK7	NIMA (never in mitosis gene a)-related kinase 7
hsa-miR-577	0	0	1	1	1	1	TFDP2	transcription factor Dp-2 (E2F dimerization partner 2)
hsa-miR-577	0	0	1	1	0	0	PLK1S1	polo-like kinase 1 substrate 1
hsa-miR-577	1	0	1	0	1	1	SLC2A3	solute carrier family 2 (facilitated glucose transporter), member 3
hsa-miR-577	0	0	1	1	0	0	H2AFJ	H2A histone family, member J
hsa-miR-577	0	0	1	1	1	1	ZNF280D	zinc finger protein 280D
hsa-miR-577	1	0	1	1	1	1	SLC25A36	solute carrier family 25 (pyrimidine nucleotide carrier ), member 36
hsa-miR-577	0	0	1	1	1	1	TAOK2	TAO kinase 2
hsa-miR-577	1	0	1	1	1	1	KIAA1033	KIAA1033
hsa-miR-577	1	0	1	0	1	1	GPR85	G protein-coupled receptor 85
hsa-miR-577	1	0	1	1	1	1	TFE3	transcription factor binding to IGHM enhancer 3
hsa-miR-577	0	0	1	1	0	0	DOPEY1	dopey family member 1
hsa-miR-577	0	0	1	1	1	1	ING3	inhibitor of growth family, member 3
hsa-miR-577	1	0	1	0	1	1	FAM19A1	family with sequence similarity 19 (chemokine (C-C motif)-like), member A1
hsa-miR-577	1	0	1	1	1	1	USP45	ubiquitin specific peptidase 45
hsa-miR-577	1	0	1	0	1	1	ZNF507	zinc finger protein 507
hsa-miR-577	1	0	1	1	1	1	SLC30A8	solute carrier family 30 (zinc transporter), member 8
hsa-miR-577	1	0	1	1	1	1	YTHDF3	YTH domain family, member 3
hsa-miR-577	0	0	1	0	1	1	GAB3	GRB2-associated binding protein 3
hsa-miR-577	0	0	1	0	0	0	ZNF720	zinc finger protein 720
hsa-miR-577	1	0	1	1	1	1	FAM126B	family with sequence similarity 126, member B
hsa-miR-577	1	0	1	0	1	1	HNRNPA3	heterogeneous nuclear ribonucleoprotein A3
hsa-miR-577	0	0	1	1	1	1	SRSF11	serine/arginine-rich splicing factor 11
hsa-miR-577	1	0	1	1	1	1	CHMP7	charged multivesicular body protein 7
hsa-miR-577	1	0	1	1	1	1	MLL3	myeloid/lymphoid or mixed-lineage leukemia 3
hsa-miR-577	0	0	1	1	1	1	C10orf57	chromosome 10 open reading frame 57
hsa-miR-577	1	0	1	0	1	1	GPAM	glycerol-3-phosphate acyltransferase, mitochondrial
hsa-miR-577	1	0	1	0	1	1	MPP5	membrane protein, palmitoylated 5 (MAGUK p55 subfamily member 5)
hsa-miR-577	0	0	1	1	1	1	SYTL4	synaptotagmin-like 4
hsa-miR-577	0	0	1	1	1	1	YAP1	Yes-associated protein 1
hsa-miR-577	1	0	1	1	0	0	PTAR1	protein prenyltransferase alpha subunit repeat containing 1
hsa-miR-577	0	0	1	1	1	1	CYR61	cysteine-rich, angiogenic inducer, 61
hsa-miR-577	0	0	1	1	1	1	DAZ4	deleted in azoospermia 4
hsa-miR-577	0	0	1	0	1	1	PAPD4	PAP associated domain containing 4
hsa-miR-577	1	0	1	1	1	1	LPP	LIM domain containing preferred translocation partner in lipoma
hsa-miR-577	1	0	1	1	1	1	HMCN1	hemicentin 1
hsa-miR-577	1	0	1	0	1	1	MEF2C	myocyte enhancer factor 2C
hsa-miR-577	1	0	1	1	1	1	FAM126A	family with sequence similarity 126, member A
hsa-miR-577	0	0	1	1	1	1	NARG2	NMDA receptor regulated 2
hsa-miR-577	0	0	1	1	1	1	C12orf50	chromosome 12 open reading frame 50
hsa-miR-577	1	0	1	1	1	1	BPTF	bromodomain PHD finger transcription factor
hsa-miR-577	0	0	1	1	1	1	NEK11	NIMA (never in mitosis gene a)- related kinase 11
hsa-miR-577	0	0	1	1	1	1	NFE2L1	nuclear factor (erythroid-derived 2)-like 1
hsa-miR-577	0	0	1	0	0	0	EPHA1-AS1	EPHA1 antisense RNA 1
hsa-miR-577	1	0	1	0	1	1	CNOT7	CCR4-NOT transcription complex, subunit 7
hsa-miR-577	0	0	1	1	1	1	PCDH20	protocadherin 20
hsa-miR-577	1	0	1	1	1	1	ATAT1	alpha tubulin acetyltransferase 1
hsa-miR-577	0	0	1	1	1	1	CAND1	cullin-associated and neddylation-dissociated 1
hsa-miR-577	1	0	1	1	1	1	IL17RD	interleukin 17 receptor D
hsa-miR-577	1	0	1	1	1	1	ANKRD12	ankyrin repeat domain 12
hsa-miR-577	1	0	1	0	1	1	SMURF1	SMAD specific E3 ubiquitin protein ligase 1
hsa-miR-577	1	0	1	1	1	1	CADM2	cell adhesion molecule 2
hsa-miR-577	0	0	1	1	1	1	C8orf34	chromosome 8 open reading frame 34
hsa-miR-577	1	0	1	1	1	1	RICTOR	RPTOR independent companion of MTOR, complex 2
hsa-miR-577	0	0	1	1	0	0	BLNK	B-cell linker
hsa-miR-577	1	0	1	0	1	1	NR3C1	nuclear receptor subfamily 3, group C, member 1 (glucocorticoid receptor)
hsa-miR-577	1	0	1	1	1	1	BOLL	bol, boule-like (Drosophila)
hsa-miR-577	0	0	1	0	1	1	SYNPO2	synaptopodin 2
hsa-miR-577	1	0	1	1	1	1	FAM76B	family with sequence similarity 76, member B
hsa-miR-577	1	0	1	0	1	1	PATL1	protein associated with topoisomerase II homolog 1 (yeast)
hsa-miR-577	1	0	1	1	1	1	AP1AR	adaptor-related protein complex 1 associated regulatory protein
hsa-miR-577	1	0	1	0	1	1	PHYHIPL	phytanoyl-CoA 2-hydroxylase interacting protein-like
hsa-miR-577	1	0	1	0	1	1	APOLD1	apolipoprotein L domain containing 1
hsa-miR-577	1	0	1	1	1	1	FBXL5	F-box and leucine-rich repeat protein 5
hsa-miR-577	0	0	1	0	1	1	USO1	USO1 vesicle docking protein homolog (yeast)
hsa-miR-577	1	0	1	1	1	1	PPP3CA	protein phosphatase 3, catalytic subunit, alpha isozyme
hsa-miR-577	1	0	1	1	1	1	IKZF2	IKAROS family zinc finger 2 (Helios)
hsa-miR-577	0	0	1	0	0	0	PMCHL1	pro-melanin-concentrating hormone-like 1, pseudogene
hsa-miR-577	0	0	1	0	0	0	PMCHL2	pro-melanin-concentrating hormone-like 2, pseudogene
hsa-miR-577	0	0	1	1	1	1	KLHL7	kelch-like 7 (Drosophila)
hsa-miR-577	0	0	1	1	1	1	OSR2	odd-skipped related 2 (Drosophila)
hsa-miR-577	1	0	1	1	1	1	TACC1	transforming, acidic coiled-coil containing protein 1
hsa-miR-577	0	0	1	1	1	1	CRB1	crumbs homolog 1 (Drosophila)
hsa-miR-577	1	0	1	1	1	1	MIPOL1	mirror-image polydactyly 1
hsa-miR-577	0	0	1	0	0	0	LOC374443	C-type lectin domain family 2, member D pseudogene
hsa-miR-577	1	0	1	1	1	1	KIAA0907	KIAA0907
hsa-miR-577	1	0	1	1	1	1	ANGPT1	angiopoietin 1
hsa-miR-577	0	0	1	1	1	1	NFXL1	nuclear transcription factor, X-box binding-like 1
hsa-miR-577	0	0	1	1	1	1	CYP4B1	cytochrome P450, family 4, subfamily B, polypeptide 1
hsa-miR-577	0	0	1	1	1	1	DNAJB14	DnaJ (Hsp40) homolog, subfamily B, member 14
hsa-miR-577	1	0	1	1	1	1	PIH1D3	PIH1 domain containing 3
hsa-miR-577	1	0	1	1	1	1	WDR26	WD repeat domain 26
hsa-miR-577	0	0	1	1	0	0	DNAH1	dynein, axonemal, heavy chain 1
hsa-miR-577	1	0	1	1	1	1	BCL11A	B-cell CLL/lymphoma 11A (zinc finger protein)
hsa-miR-577	0	0	1	1	0	0	FANK1	fibronectin type III and ankyrin repeat domains 1
hsa-miR-577	0	0	1	1	1	1	IYD	iodotyrosine deiodinase
hsa-miR-577	1	0	1	1	1	1	PBRM1	polybromo 1
hsa-miR-577	1	0	1	1	1	1	OPRM1	opioid receptor, mu 1
hsa-miR-577	1	0	1	1	1	1	RAI14	retinoic acid induced 14
hsa-miR-577	0	0	1	1	1	1	GCOM1	GRINL1A complex locus 1
hsa-miR-577	1	0	1	1	1	1	TAB3	TGF-beta activated kinase 1/MAP3K7 binding protein 3
hsa-miR-577	0	0	1	1	1	1	MFAP5	microfibrillar associated protein 5
hsa-miR-577	0	0	1	1	1	1	PROK2	prokineticin 2
hsa-miR-577	1	0	1	1	1	1	CAMTA1	calmodulin binding transcription activator 1
hsa-miR-577	0	0	1	0	1	1	ANKS1B	ankyrin repeat and sterile alpha motif domain containing 1B
hsa-miR-577	0	0	1	1	1	1	IL20	interleukin 20
hsa-miR-577	1	0	1	0	1	1	MEGF9	multiple EGF-like-domains 9
hsa-miR-577	1	0	1	0	1	1	ANKRD28	ankyrin repeat domain 28
hsa-miR-577	1	0	1	1	0	0	USP7	ubiquitin specific peptidase 7 (herpes virus-associated)
hsa-miR-577	1	0	1	1	1	1	ECT2	epithelial cell transforming sequence 2 oncogene
hsa-miR-577	1	0	1	1	1	1	SP3	Sp3 transcription factor
hsa-miR-577	1	0	1	0	1	1	NHS	Nance-Horan syndrome (congenital cataracts and dental anomalies)
hsa-miR-577	1	0	1	1	1	1	ARHGAP20	Rho GTPase activating protein 20
hsa-miR-577	0	0	1	0	1	1	BRWD3	bromodomain and WD repeat domain containing 3
hsa-miR-577	1	0	1	1	1	1	ANKRD11	ankyrin repeat domain 11
hsa-miR-577	0	0	1	1	1	1	PMS1	PMS1 postmeiotic segregation increased 1 (S. cerevisiae)
hsa-miR-577	0	0	1	1	0	0	ART3	ADP-ribosyltransferase 3
hsa-miR-577	1	0	1	1	1	1	PLCH1	phospholipase C, eta 1
hsa-miR-577	0	0	1	1	0	0	PDE9A	phosphodiesterase 9A
hsa-miR-577	1	0	1	1	1	1	NTNG1	netrin G1
hsa-miR-577	1	0	1	1	1	1	QKI	QKI, KH domain containing, RNA binding
hsa-miR-577	1	0	1	1	1	1	MYB	v-myb myeloblastosis viral oncogene homolog (avian)
hsa-miR-577	0	0	1	1	1	1	P2RX7	purinergic receptor P2X, ligand-gated ion channel, 7
hsa-miR-577	1	0	1	1	1	1	PCDH11X	protocadherin 11 X-linked
hsa-miR-577	1	0	1	1	0	0	TRPC3	transient receptor potential cation channel, subfamily C, member 3
hsa-miR-577	1	0	1	1	0	0	TAF4B	TAF4b RNA polymerase II, TATA box binding protein (TBP)-associated factor, 105kDa
hsa-miR-577	1	0	1	1	1	1	AMOT	angiomotin
hsa-miR-577	1	0	1	1	1	1	NEK6	NIMA (never in mitosis gene a)-related kinase 6
hsa-miR-577	0	0	1	0	1	1	MIS12	MIS12, MIND kinetochore complex component, homolog (S. pombe)
hsa-miR-577	1	0	1	0	1	1	FAM46A	family with sequence similarity 46, member A
hsa-miR-577	1	0	1	1	1	1	CPSF6	cleavage and polyadenylation specific factor 6, 68kDa
hsa-miR-577	0	0	1	1	1	1	PAFAH1B2	platelet-activating factor acetylhydrolase 1b, catalytic subunit 2 (30kDa)
hsa-miR-577	1	0	1	1	1	1	TMUB2	transmembrane and ubiquitin-like domain containing 2
hsa-miR-577	0	0	1	1	1	1	PTDSS1	phosphatidylserine synthase 1
hsa-miR-577	0	0	1	1	1	1	RLIM	ring finger protein, LIM domain interacting
hsa-miR-577	1	0	1	1	1	1	TSPAN14	tetraspanin 14
hsa-miR-577	1	0	1	0	0	0	VGLL4	vestigial like 4 (Drosophila)
hsa-miR-577	1	0	1	0	1	1	DCAF10	DDB1 and CUL4 associated factor 10
hsa-miR-577	0	0	1	1	0	0	SNRPB	small nuclear ribonucleoprotein polypeptides B and B1
hsa-miR-577	0	0	1	0	1	1	HAUS3	HAUS augmin-like complex, subunit 3
hsa-miR-577	0	0	1	1	1	1	CNDP1	carnosine dipeptidase 1 (metallopeptidase M20 family)
hsa-miR-577	0	0	1	1	0	0	ZNF821	zinc finger protein 821
hsa-miR-577	1	0	1	1	1	1	LEPREL1	leprecan-like 1
hsa-miR-577	1	0	1	0	1	1	CGGBP1	CGG triplet repeat binding protein 1
hsa-miR-577	1	0	1	0	0	0	TGFA	transforming growth factor, alpha
hsa-miR-577	1	0	1	0	1	1	MAP2K7	mitogen-activated protein kinase kinase 7
hsa-miR-577	0	0	1	1	0	0	HDAC6	histone deacetylase 6
hsa-miR-577	1	0	1	0	1	1	C15orf41	chromosome 15 open reading frame 41
hsa-miR-577	1	0	1	1	1	1	KIAA1191	KIAA1191
hsa-miR-577	1	0	1	1	1	1	U2SURP	U2 snRNP-associated SURP domain containing
hsa-miR-577	1	0	1	1	0	0	OSTF1	osteoclast stimulating factor 1
hsa-miR-577	1	0	1	0	1	1	DDX3X	DEAD (Asp-Glu-Ala-Asp) box polypeptide 3, X-linked
hsa-miR-577	1	0	1	1	1	1	CALM1	calmodulin 1 (phosphorylase kinase, delta)
hsa-miR-577	1	0	1	1	1	1	SHMT2	serine hydroxymethyltransferase 2 (mitochondrial)
hsa-miR-577	1	0	1	1	1	1	SHOX2	short stature homeobox 2
hsa-miR-577	0	0	1	1	1	1	TMEM30A	transmembrane protein 30A
hsa-miR-577	1	0	1	1	1	1	MASTL	microtubule associated serine/threonine kinase-like
hsa-miR-577	1	0	1	0	1	1	MINOS1	mitochondrial inner membrane organizing system 1
hsa-miR-577	1	0	1	1	1	1	OTUD5	OTU domain containing 5
hsa-miR-577	0	0	1	1	1	1	TAF12	TAF12 RNA polymerase II, TATA box binding protein (TBP)-associated factor, 20kDa
hsa-miR-577	1	0	1	0	1	1	SEC62	SEC62 homolog (S. cerevisiae)
hsa-miR-577	1	0	1	0	1	1	RNF165	ring finger protein 165
hsa-miR-577	1	0	1	1	1	1	IDH1	isocitrate dehydrogenase 1 (NADP+), soluble
hsa-miR-577	1	0	1	1	0	0	ZMYM3	zinc finger, MYM-type 3
hsa-miR-577	1	0	1	1	1	1	DCAF8	DDB1 and CUL4 associated factor 8
hsa-miR-577	1	0	1	1	1	1	GDAP2	ganglioside induced differentiation associated protein 2
hsa-miR-577	1	0	1	1	1	1	SNCA	synuclein, alpha (non A4 component of amyloid precursor)
hsa-miR-577	0	0	1	1	1	1	KLHL29	kelch-like 29 (Drosophila)
hsa-miR-577	0	0	1	1	1	1	PTK7	PTK7 protein tyrosine kinase 7
hsa-miR-577	0	0	1	1	0	0	BEST1	bestrophin 1
hsa-miR-577	0	0	1	1	1	1	GIN1	gypsy retrotransposon integrase 1
hsa-miR-577	0	0	1	1	1	1	CCDC148	coiled-coil domain containing 148
hsa-miR-577	0	0	1	0	0	0	KLHL15	kelch-like 15 (Drosophila)
hsa-miR-577	1	0	1	1	1	1	ZBTB38	zinc finger and BTB domain containing 38
hsa-miR-577	1	0	1	1	1	1	ZNF512	zinc finger protein 512
hsa-miR-577	0	0	1	1	1	1	EXOG	endo/exonuclease (5'-3'), endonuclease G-like
hsa-miR-577	1	0	1	1	1	1	TMEM9B	TMEM9 domain family, member B
hsa-miR-577	1	0	1	0	1	1	NR1D2	nuclear receptor subfamily 1, group D, member 2
hsa-miR-577	1	0	1	1	1	1	NUMBL	numb homolog (Drosophila)-like
hsa-miR-577	1	0	1	0	1	1	NECAB1	N-terminal EF-hand calcium binding protein 1
hsa-miR-577	1	0	1	1	1	1	SCAMP1	secretory carrier membrane protein 1
hsa-miR-577	0	0	1	1	1	1	CMAS	cytidine monophosphate N-acetylneuraminic acid synthetase
hsa-miR-577	0	0	1	1	1	1	FAM122C	family with sequence similarity 122C
hsa-miR-577	1	0	1	0	1	1	CYBRD1	cytochrome b reductase 1
hsa-miR-577	1	0	1	1	0	0	USP53	ubiquitin specific peptidase 53
hsa-miR-577	0	0	1	1	1	1	CSDE1	cold shock domain containing E1, RNA-binding
hsa-miR-577	1	0	1	1	1	1	ZNF131	zinc finger protein 131
hsa-miR-577	1	0	1	1	1	1	WWC2	WW and C2 domain containing 2
hsa-miR-577	0	0	1	0	0	0	FAM200B	family with sequence similarity 200, member B
hsa-miR-577	0	0	1	1	1	1	TMEM67	transmembrane protein 67
hsa-miR-577	1	0	1	1	1	1	ARHGEF9	Cdc42 guanine nucleotide exchange factor (GEF) 9
hsa-miR-577	0	0	1	1	1	1	FGF21	fibroblast growth factor 21
hsa-miR-577	1	0	1	1	1	1	SUZ12	suppressor of zeste 12 homolog (Drosophila)
hsa-miR-577	0	0	1	0	1	1	CD99P1	CD99 molecule pseudogene 1
hsa-miR-577	0	0	1	1	1	1	C10orf88	chromosome 10 open reading frame 88
hsa-miR-577	0	0	1	1	1	1	COMMD7	COMM domain containing 7
hsa-miR-577	0	0	1	1	0	0	LYSMD2	LysM, putative peptidoglycan-binding, domain containing 2
hsa-miR-577	1	0	1	1	0	0	TET3	tet methylcytosine dioxygenase 3
hsa-miR-577	0	0	1	1	1	1	SRGN	serglycin
hsa-miR-577	0	0	1	1	1	1	C18orf32	chromosome 18 open reading frame 32
hsa-miR-577	1	0	1	1	1	1	SPRYD7	SPRY domain containing 7
hsa-miR-577	0	0	1	1	1	1	FBXO36	F-box protein 36
hsa-miR-577	0	0	1	1	1	1	CDC42SE2	CDC42 small effector 2
hsa-miR-577	0	0	1	1	1	1	VRK3	vaccinia related kinase 3
hsa-miR-577	1	0	1	1	1	1	SPOCK2	sparc/osteonectin, cwcv and kazal-like domains proteoglycan (testican) 2
hsa-miR-577	1	0	1	0	1	1	CDK19	cyclin-dependent kinase 19
hsa-miR-577	0	0	1	1	1	1	FAM221A	family with sequence similarity 221, member A
hsa-miR-577	1	0	1	1	1	1	VASP	vasodilator-stimulated phosphoprotein
hsa-miR-577	1	0	1	1	1	1	ZDHHC5	zinc finger, DHHC-type containing 5
hsa-miR-577	0	0	1	1	1	1	MAP2	microtubule-associated protein 2
hsa-miR-577	1	0	1	1	1	1	PHF2	PHD finger protein 2
hsa-miR-577	1	0	1	1	1	1	B3GNT5	UDP-GlcNAc:betaGal beta-1,3-N-acetylglucosaminyltransferase 5
hsa-miR-577	1	0	1	1	1	1	ACACB	acetyl-CoA carboxylase beta
hsa-miR-577	0	0	1	0	1	1	KIAA0895	KIAA0895
hsa-miR-577	1	0	1	1	1	1	HTR2C	5-hydroxytryptamine (serotonin) receptor 2C, G protein-coupled
hsa-miR-577	1	0	1	0	0	0	KCNU1	potassium channel, subfamily U, member 1
hsa-miR-577	0	0	1	1	0	0	FCRL3	Fc receptor-like 3
hsa-miR-577	0	0	1	0	0	0	C3orf55	chromosome 3 open reading frame 55
hsa-miR-577	0	0	1	1	1	1	ASTN2	astrotactin 2
hsa-miR-577	1	0	1	1	1	1	SYT9	synaptotagmin IX
hsa-miR-577	1	0	1	1	1	1	MRO	maestro
hsa-miR-577	0	0	1	1	0	0	SWI5	SWI5 recombination repair homolog (yeast)
hsa-miR-577	1	0	1	1	1	1	TIAL1	TIA1 cytotoxic granule-associated RNA binding protein-like 1
hsa-miR-577	0	0	1	1	0	0	TMEM251	transmembrane protein 251
hsa-miR-577	1	0	1	1	1	1	TAF15	TAF15 RNA polymerase II, TATA box binding protein (TBP)-associated factor, 68kDa
hsa-miR-577	0	0	1	1	1	1	CTNNA3	catenin (cadherin-associated protein), alpha 3
hsa-miR-577	1	0	1	1	1	1	ELAVL2	ELAV (embryonic lethal, abnormal vision, Drosophila)-like 2 (Hu antigen B)
hsa-miR-577	1	0	1	1	1	1	ZNF518A	zinc finger protein 518A
hsa-miR-577	0	0	1	1	1	1	AADAT	aminoadipate aminotransferase
hsa-miR-577	1	0	1	1	1	1	PLS1	plastin 1
hsa-miR-577	0	0	1	1	1	1	STAT4	signal transducer and activator of transcription 4
hsa-miR-577	1	0	1	1	1	1	MUM1L1	melanoma associated antigen (mutated) 1-like 1
hsa-miR-577	1	0	1	1	1	1	ZPLD1	zona pellucida-like domain containing 1
hsa-miR-577	1	0	1	1	1	1	C5orf25	chromosome 5 open reading frame 25
hsa-miR-577	1	0	1	1	1	1	SPATS2	spermatogenesis associated, serine-rich 2
hsa-miR-577	1	0	1	1	1	1	PMAIP1	phorbol-12-myristate-13-acetate-induced protein 1
hsa-miR-577	1	0	1	1	1	1	SF1	splicing factor 1
hsa-miR-577	1	0	1	1	1	1	RHOBTB1	Rho-related BTB domain containing 1
hsa-miR-577	1	0	1	1	1	1	SORL1	sortilin-related receptor, L(DLR class) A repeats containing
hsa-miR-577	1	0	1	1	1	1	SIRPA	signal-regulatory protein alpha
hsa-miR-577	1	0	1	1	1	1	CRKL	v-crk sarcoma virus CT10 oncogene homolog (avian)-like
hsa-miR-577	0	0	1	1	1	1	ZNF337	zinc finger protein 337
hsa-miR-577	0	0	1	0	0	0	LINC00452	long intergenic non-protein coding RNA 452
hsa-miR-577	1	0	1	1	1	1	LPGAT1	lysophosphatidylglycerol acyltransferase 1
hsa-miR-577	1	0	1	0	1	1	RHOBTB2	Rho-related BTB domain containing 2
hsa-miR-577	1	0	1	0	1	1	DDX3Y	DEAD (Asp-Glu-Ala-Asp) box polypeptide 3, Y-linked
hsa-miR-577	0	0	1	0	0	0	BOD1L2	biorientation of chromosomes in cell division 1-like 2
hsa-miR-577	0	0	1	0	0	0	TMPRSS12	transmembrane (C-terminal) protease, serine 12
hsa-miR-577	0	0	1	1	0	0	TMEM171	transmembrane protein 171
hsa-miR-577	1	0	1	1	1	1	RAP2C	RAP2C, member of RAS oncogene family
hsa-miR-577	1	0	1	1	1	1	GRIA4	glutamate receptor, ionotropic, AMPA 4
hsa-miR-577	0	0	1	0	1	1	FAM72A	family with sequence similarity 72, member A
hsa-miR-577	1	0	1	1	1	1	ZEB2	zinc finger E-box binding homeobox 2
hsa-miR-577	1	0	1	1	1	1	CTDSPL2	CTD (carboxy-terminal domain, RNA polymerase II, polypeptide A) small phosphatase like 2
hsa-miR-577	0	0	1	1	1	1	SEC24D	SEC24 family, member D (S. cerevisiae)
hsa-miR-577	0	0	1	0	0	0	LOC339862	uncharacterized LOC339862
hsa-miR-577	0	0	1	0	0	0	C12orf77	chromosome 12 open reading frame 77
hsa-miR-577	0	0	1	1	1	1	CLEC12B	C-type lectin domain family 12, member B
hsa-miR-577	0	0	1	0	0	0	FAM201A	family with sequence similarity 201, member A
hsa-miR-577	1	0	1	1	0	0	OLIG2	oligodendrocyte lineage transcription factor 2
hsa-miR-577	0	0	1	0	0	0	SPATA3	spermatogenesis associated 3
hsa-miR-577	0	0	1	0	0	0	LINC00642	long intergenic non-protein coding RNA 642
hsa-miR-577	1	0	1	1	1	1	LHX8	LIM homeobox 8
hsa-miR-577	0	0	1	1	1	1	FAM171B	family with sequence similarity 171, member B
hsa-miR-577	1	0	1	1	1	1	MEIS1	Meis homeobox 1
hsa-miR-577	1	0	1	0	1	1	NEGR1	neuronal growth regulator 1
hsa-miR-577	0	0	1	1	1	1	PLGRKT	plasminogen receptor, C-terminal lysine transmembrane protein
hsa-miR-577	0	0	1	0	0	0	SRGAP2C	SLIT-ROBO Rho GTPase activating protein 2C
hsa-miR-577	1	0	1	0	1	1	CPEB4	cytoplasmic polyadenylation element binding protein 4
hsa-miR-577	1	0	1	1	1	1	CEP128	centrosomal protein 128kDa
hsa-miR-577	1	0	1	1	1	1	BNC2	basonuclin 2
hsa-miR-577	0	0	1	0	0	0	CYP4F35P	cytochrome P450, family 4, subfamily F, polypeptide 35, pseudogene
hsa-miR-577	0	0	1	1	1	1	FAM71F1	family with sequence similarity 71, member F1
hsa-miR-577	0	0	1	0	0	0	LOC286184	uncharacterized LOC286184
hsa-miR-577	1	0	1	0	1	1	YAF2	YY1 associated factor 2
hsa-miR-577	1	0	1	1	1	1	SOX6	SRY (sex determining region Y)-box 6
hsa-miR-577	0	0	1	0	0	0	INHBA-AS1	INHBA antisense RNA 1
hsa-miR-577	1	0	1	1	1	1	CMIP	c-Maf inducing protein
hsa-miR-577	1	0	1	1	1	1	FOXK1	forkhead box K1
hsa-miR-577	1	0	1	1	1	1	GALNT1	UDP-N-acetyl-alpha-D-galactosamine:polypeptide N-acetylgalactosaminyltransferase 1 (GalNAc-T1)
hsa-miR-577	1	0	1	0	1	1	ARID2	AT rich interactive domain 2 (ARID, RFX-like)
hsa-miR-577	1	0	1	1	1	1	PRR16	proline rich 16
hsa-miR-577	1	0	1	1	1	1	PLS3	plastin 3
hsa-miR-577	0	0	1	1	0	0	CCDC152	coiled-coil domain containing 152
hsa-miR-577	0	0	1	1	1	1	IQCH	IQ motif containing H
hsa-miR-577	0	0	1	0	0	0	USP32P1	ubiquitin specific peptidase 32 pseudogene 1
hsa-miR-577	1	0	1	0	0	0	MSL1	male-specific lethal 1 homolog (Drosophila)
hsa-miR-577	1	0	1	0	1	1	LPHN3	latrophilin 3
hsa-miR-577	1	0	1	1	0	0	HES7	hairy and enhancer of split 7 (Drosophila)
hsa-miR-577	0	0	1	1	1	1	VBP1	von Hippel-Lindau binding protein 1
hsa-miR-577	1	0	1	1	1	1	FOSB	FBJ murine osteosarcoma viral oncogene homolog B
hsa-miR-577	1	0	1	1	1	1	DACH2	dachshund homolog 2 (Drosophila)
hsa-miR-577	1	0	1	0	1	1	PACSIN1	protein kinase C and casein kinase substrate in neurons 1
hsa-miR-577	0	0	1	1	1	1	TMEM45A	transmembrane protein 45A
hsa-miR-577	0	0	1	1	1	1	PCMTD2	protein-L-isoaspartate (D-aspartate) O-methyltransferase domain containing 2
hsa-miR-577	0	0	1	1	1	1	SIAE	sialic acid acetylesterase
hsa-miR-577	0	0	1	0	0	0	SLC7A11-AS1	SLC7A11 antisense RNA 1
hsa-miR-577	1	0	1	0	1	1	KIAA0430	KIAA0430
hsa-miR-577	0	0	1	0	1	1	FAM13B	family with sequence similarity 13, member B
hsa-miR-577	1	0	1	1	1	1	ARPP21	cAMP-regulated phosphoprotein, 21kDa
hsa-miR-577	1	0	1	1	1	1	FAM123A	family with sequence similarity 123A
hsa-miR-577	1	0	1	0	1	1	HSPA12A	heat shock 70kDa protein 12A
hsa-miR-577	0	0	1	1	1	1	C17orf104	chromosome 17 open reading frame 104
hsa-miR-577	1	0	1	1	1	1	TNFSF4	tumor necrosis factor (ligand) superfamily, member 4
hsa-miR-577	0	0	1	1	1	1	CARD8	caspase recruitment domain family, member 8
hsa-miR-577	0	0	1	0	0	0	CDKL3	cyclin-dependent kinase-like 3
hsa-miR-577	0	0	1	1	1	1	GOLGA6L9	golgin A6 family-like 9
hsa-miR-577	0	0	1	1	1	1	ZNF568	zinc finger protein 568
hsa-miR-577	0	0	1	1	1	1	MTHFD2L	methylenetetrahydrofolate dehydrogenase (NADP+ dependent) 2-like
hsa-miR-577	0	0	1	1	1	1	C4orf32	chromosome 4 open reading frame 32
hsa-miR-577	0	0	1	0	0	0	OR7E47P	olfactory receptor, family 7, subfamily E, member 47 pseudogene
hsa-miR-577	0	0	1	1	0	0	C1orf87	chromosome 1 open reading frame 87
hsa-miR-577	1	0	1	0	1	1	USP6NL	USP6 N-terminal like
hsa-miR-577	1	0	1	1	1	1	TXNRD1	thioredoxin reductase 1
hsa-miR-577	0	0	1	0	0	0	LOC338579	ankyrin repeat domain-containing protein 30B pseudogene
hsa-miR-577	0	0	1	0	0	0	LOC157381	uncharacterized LOC157381
hsa-miR-577	0	0	1	0	1	1	C12orf74	chromosome 12 open reading frame 74
hsa-miR-577	0	0	1	0	0	0	SLC8A1-AS1	SLC8A1 antisense RNA 1
hsa-miR-577	0	0	1	1	1	1	TMEM200A	transmembrane protein 200A
hsa-miR-577	1	0	1	1	1	1	RNF145	ring finger protein 145
hsa-miR-577	1	0	1	0	1	1	PSD3	pleckstrin and Sec7 domain containing 3
hsa-miR-577	1	0	1	1	1	1	TTC31	tetratricopeptide repeat domain 31
hsa-miR-577	0	0	1	0	0	0	LOC283914	uncharacterized LOC283914
hsa-miR-577	0	0	1	1	0	0	FAM72B	family with sequence similarity 72, member B
hsa-miR-577	1	0	1	1	0	0	SFXN5	sideroflexin 5
hsa-miR-577	1	0	1	0	1	1	LYPD6	LY6/PLAUR domain containing 6
hsa-miR-577	0	0	1	0	1	1	IL33	interleukin 33
hsa-miR-577	0	0	1	1	0	0	SETDB2	SET domain, bifurcated 2
hsa-miR-577	0	0	1	0	0	0	LOC348120	uncharacterized LOC348120
hsa-miR-577	0	0	1	0	0	0	DPY19L2P4	dpy-19-like 2 pseudogene 4 (C. elegans)
hsa-miR-577	1	0	1	1	1	1	BRD1	bromodomain containing 1
hsa-miR-577	1	0	1	1	1	1	KIF2A	kinesin heavy chain member 2A
hsa-miR-577	1	0	1	0	1	1	ZNF800	zinc finger protein 800
hsa-miR-577	0	0	1	1	0	0	MT3	metallothionein 3
hsa-miR-577	0	0	1	1	0	0	PLA1A	phospholipase A1 member A
hsa-miR-577	1	0	1	1	1	1	PTPRG	protein tyrosine phosphatase, receptor type, G
hsa-miR-577	1	0	1	1	1	1	PELI1	pellino E3 ubiquitin protein ligase 1
hsa-miR-577	1	0	1	0	1	1	RNF182	ring finger protein 182
hsa-miR-577	1	0	1	1	1	1	WASF3	WAS protein family, member 3
hsa-miR-577	0	0	1	1	1	1	FBXO38	F-box protein 38
hsa-miR-577	1	0	1	1	1	1	MBNL1	muscleblind-like splicing regulator 1
hsa-miR-577	1	0	1	1	1	1	ANGPTL1	angiopoietin-like 1
hsa-miR-577	1	0	1	1	1	1	GATA2	GATA binding protein 2
hsa-miR-577	1	0	1	0	1	1	SMURF2	SMAD specific E3 ubiquitin protein ligase 2
hsa-miR-577	1	0	1	1	1	1	PTPDC1	protein tyrosine phosphatase domain containing 1
hsa-miR-577	1	0	1	1	1	1	ZFP91	zinc finger protein 91 homolog (mouse)
hsa-miR-577	1	0	1	1	1	1	LIMD2	LIM domain containing 2
hsa-miR-577	1	0	1	1	1	1	YWHAZ	tyrosine 3-monooxygenase/tryptophan 5-monooxygenase activation protein, zeta polypeptide
hsa-miR-577	1	0	1	1	1	1	MKRN1	makorin ring finger protein 1
hsa-miR-577	1	0	1	1	1	1	PCGF5	polycomb group ring finger 5
hsa-miR-577	0	0	1	1	1	1	COG2	component of oligomeric golgi complex 2
hsa-miR-577	1	0	1	0	1	1	C14orf43	chromosome 14 open reading frame 43
hsa-miR-577	1	0	1	1	1	1	HP1BP3	heterochromatin protein 1, binding protein 3
hsa-miR-577	0	0	1	1	1	1	LRRFIP2	leucine rich repeat (in FLII) interacting protein 2
hsa-miR-577	1	0	1	1	1	1	KDM5C	lysine (K)-specific demethylase 5C
hsa-miR-577	0	0	1	1	0	0	C20orf152	chromosome 20 open reading frame 152
hsa-miR-577	1	0	1	1	1	1	KLHL28	kelch-like 28 (Drosophila)
hsa-miR-577	1	0	1	0	1	1	LYSMD3	LysM, putative peptidoglycan-binding, domain containing 3
hsa-miR-577	1	0	1	1	1	1	SOX5	SRY (sex determining region Y)-box 5
hsa-miR-577	0	0	1	1	1	1	ZNF365	zinc finger protein 365
hsa-miR-577	1	0	1	1	1	1	C14orf37	chromosome 14 open reading frame 37
hsa-miR-577	0	0	1	1	1	1	GPATCH2	G patch domain containing 2
hsa-miR-577	0	0	1	1	1	1	CAMLG	calcium modulating ligand
hsa-miR-577	1	0	1	1	1	1	GRIK2	glutamate receptor, ionotropic, kainate 2
hsa-miR-577	1	0	1	1	0	0	ANKIB1	ankyrin repeat and IBR domain containing 1
hsa-miR-577	0	0	1	0	0	0	GNN	Grp94 neighboring nucleotidase pseudogene
hsa-miR-577	1	0	1	1	1	1	ROBO2	roundabout, axon guidance receptor, homolog 2 (Drosophila)
hsa-miR-577	0	0	1	1	1	1	SCLT1	sodium channel and clathrin linker 1
hsa-miR-577	1	0	1	1	1	1	UEVLD	UEV and lactate/malate dehyrogenase domains
hsa-miR-577	1	0	1	1	1	1	MYLK	myosin light chain kinase
hsa-miR-577	0	0	1	1	0	0	PLB1	phospholipase B1
hsa-miR-577	0	0	1	1	1	1	ZNF189	zinc finger protein 189
hsa-miR-577	0	0	1	1	1	1	ATP2A2	ATPase, Ca++ transporting, cardiac muscle, slow twitch 2
hsa-miR-577	1	0	1	1	1	1	LMO4	LIM domain only 4
hsa-miR-577	0	0	1	0	0	0	LINC00052	long intergenic non-protein coding RNA 52
hsa-miR-577	1	0	1	1	1	1	CUX1	cut-like homeobox 1
hsa-miR-577	0	0	1	1	1	1	SH2D1B	SH2 domain containing 1B
hsa-miR-577	1	0	1	1	1	1	C18orf1	chromosome 18 open reading frame 1
hsa-miR-577	0	0	1	0	0	0	DPY19L2P1	dpy-19-like 2 pseudogene 1 (C. elegans)
hsa-miR-577	0	0	1	1	0	0	TBCA	tubulin folding cofactor A
hsa-miR-577	0	0	1	1	1	1	SLAMF1	signaling lymphocytic activation molecule family member 1
hsa-miR-577	1	0	1	1	1	1	KPNA2	karyopherin alpha 2 (RAG cohort 1, importin alpha 1)
hsa-miR-577	1	0	1	1	1	1	PDCD6IP	programmed cell death 6 interacting protein
hsa-miR-577	1	0	1	1	1	1	SLC26A7	solute carrier family 26, member 7
hsa-miR-577	1	0	1	1	1	1	SRPK2	SRSF protein kinase 2
hsa-miR-577	0	0	1	1	1	1	AQPEP	laeverin
hsa-miR-577	0	0	1	0	0	0	PTGER4P2	prostaglandin E receptor 4 (subtype EP4) pseudogene 2
hsa-miR-577	0	0	1	0	0	0	SPDYE8P	speedy homolog E8 (Xenopus laevis), pseudogene
hsa-miR-577	1	0	1	1	1	1	EED	embryonic ectoderm development
hsa-miR-577	0	0	1	0	0	0	FOXN3-AS2	FOXN3 antisense RNA 2
hsa-miR-577	1	0	1	1	1	1	SOCS2	suppressor of cytokine signaling 2
hsa-miR-577	1	0	1	1	1	1	ANLN	anillin, actin binding protein
hsa-miR-577	1	0	1	1	1	1	AHR	aryl hydrocarbon receptor
hsa-miR-577	1	0	1	0	1	1	HMGB3	high mobility group box 3
hsa-miR-577	1	0	1	0	1	1	TGFBR1	transforming growth factor, beta receptor 1
hsa-miR-577	0	0	1	1	1	1	PCDH18	protocadherin 18
hsa-miR-577	1	0	1	0	1	1	TMEM194A	transmembrane protein 194A
hsa-miR-577	0	0	1	0	0	0	LOC100147773	uncharacterized LOC100147773
hsa-miR-577	1	0	1	1	1	1	KDELR2	KDEL (Lys-Asp-Glu-Leu) endoplasmic reticulum protein retention receptor 2
hsa-miR-577	0	0	1	0	0	0	LOC440416	uncharacterized LOC440416
hsa-miR-577	1	0	1	1	1	1	OPCML	opioid binding protein/cell adhesion molecule-like
hsa-miR-577	1	0	1	1	1	1	WNT5A	wingless-type MMTV integration site family, member 5A
hsa-miR-577	1	0	1	0	1	1	AMMECR1L	AMME chromosomal region gene 1-like
hsa-miR-577	1	0	1	1	1	1	GRAMD4	GRAM domain containing 4
hsa-miR-577	1	0	1	1	1	1	ZBTB7A	zinc finger and BTB domain containing 7A
hsa-miR-577	1	0	1	1	1	1	NOTCH2NL	notch 2 N-terminal like
hsa-miR-577	1	0	1	1	1	1	C18orf34	chromosome 18 open reading frame 34
hsa-miR-577	1	0	1	1	1	1	ESRRA	estrogen-related receptor alpha
hsa-miR-577	1	0	1	1	1	1	ACVR2B	activin A receptor, type IIB
hsa-miR-577	0	0	1	1	1	1	TMEM52B	transmembrane protein 52B
hsa-miR-577	1	0	1	0	1	1	ARPP19	cAMP-regulated phosphoprotein, 19kDa
hsa-miR-577	0	0	1	0	1	1	TCAIM	T cell activation inhibitor, mitochondrial
hsa-miR-577	1	0	1	0	1	1	MYBL1	v-myb myeloblastosis viral oncogene homolog (avian)-like 1
hsa-miR-577	1	0	1	1	1	1	IL28RA	interleukin 28 receptor, alpha (interferon, lambda receptor)
hsa-miR-577	1	0	1	1	0	0	HAND2	heart and neural crest derivatives expressed 2
hsa-miR-577	1	0	1	0	1	1	CPEB2	cytoplasmic polyadenylation element binding protein 2
hsa-miR-577	1	0	1	0	1	1	KCNT2	potassium channel, subfamily T, member 2
hsa-miR-577	0	0	1	0	0	0	C5orf49	chromosome 5 open reading frame 49
hsa-miR-577	0	0	1	0	0	0	LOC283174	uncharacterized LOC283174
hsa-miR-577	1	0	1	1	1	1	GABRB2	gamma-aminobutyric acid (GABA) A receptor, beta 2
hsa-miR-577	0	0	1	1	1	1	MUC21	mucin 21, cell surface associated
hsa-miR-577	1	0	1	1	1	1	PTPRD	protein tyrosine phosphatase, receptor type, D
hsa-miR-577	1	0	1	1	1	1	USP34	ubiquitin specific peptidase 34
hsa-miR-577	1	0	1	1	1	1	SUV420H1	suppressor of variegation 4-20 homolog 1 (Drosophila)
hsa-miR-577	1	0	1	0	1	1	DNAJC6	DnaJ (Hsp40) homolog, subfamily C, member 6
hsa-miR-577	1	0	1	1	1	1	CERS6	ceramide synthase 6
hsa-miR-577	1	0	1	1	1	1	SP4	Sp4 transcription factor
hsa-miR-577	1	0	1	1	1	1	HNRNPR	heterogeneous nuclear ribonucleoprotein R
hsa-miR-577	0	0	1	1	1	1	RASAL2	RAS protein activator like 2
hsa-miR-577	0	0	1	1	0	0	GKN2	gastrokine 2
hsa-miR-577	0	0	1	1	0	0	ASB3	ankyrin repeat and SOCS box containing 3
hsa-miR-577	1	0	1	0	1	1	ROBO1	roundabout, axon guidance receptor, homolog 1 (Drosophila)
hsa-miR-577	0	0	1	1	1	1	LOC100499484-C9ORF174	LOC100499484-C9orf174 readthrough
hsa-miR-577	0	0	1	1	1	1	LRCH1	leucine-rich repeats and calponin homology (CH) domain containing 1
hsa-miR-577	0	0	1	1	1	1	FSHB	follicle stimulating hormone, beta polypeptide
hsa-miR-577	1	0	1	1	1	1	TMEM64	transmembrane protein 64
hsa-miR-577	1	0	1	1	0	0	MAPKBP1	mitogen-activated protein kinase binding protein 1
hsa-miR-577	1	0	1	1	1	1	KIAA0528	KIAA0528
hsa-miR-577	1	0	1	1	1	1	ST18	suppression of tumorigenicity 18 (breast carcinoma) (zinc finger protein)
hsa-miR-577	1	0	1	1	1	1	KIAA1324L	KIAA1324-like
hsa-miR-577	1	0	1	0	1	1	PRDM10	PR domain containing 10
hsa-miR-577	0	0	1	0	0	0	LRRC37BP1	leucine rich repeat containing 37B pseudogene 1
hsa-miR-577	1	0	1	1	1	1	OTUD4	OTU domain containing 4
hsa-miR-577	1	0	1	1	1	1	FKBP1A	FK506 binding protein 1A, 12kDa
hsa-miR-577	0	0	1	1	0	0	PLCXD2	phosphatidylinositol-specific phospholipase C, X domain containing 2
hsa-miR-577	0	0	1	0	1	1	GOLGA8G	golgin A8 family, member G
hsa-miR-577	1	0	1	0	1	1	LRCH2	leucine-rich repeats and calponin homology (CH) domain containing 2
hsa-miR-577	1	0	1	0	1	1	CAMSAP2	calmodulin regulated spectrin-associated protein family, member 2
hsa-miR-577	1	0	1	1	1	1	ZMYM4	zinc finger, MYM-type 4
hsa-miR-577	1	0	1	1	1	1	CHIC1	cysteine-rich hydrophobic domain 1
hsa-miR-577	1	0	1	0	1	1	LHFPL3	lipoma HMGIC fusion partner-like 3
hsa-miR-577	1	0	1	1	1	1	MLLT10	myeloid/lymphoid or mixed-lineage leukemia (trithorax homolog, Drosophila); translocated to, 10
hsa-miR-577	1	0	1	1	1	1	TDRD5	tudor domain containing 5
hsa-miR-577	1	0	1	0	1	1	FAM196A	family with sequence similarity 196, member A
hsa-miR-577	1	0	1	1	1	1	FNDC3A	fibronectin type III domain containing 3A
hsa-miR-577	0	0	1	1	0	0	CCDC144A	coiled-coil domain containing 144A
hsa-miR-577	0	0	1	1	1	1	UCHL5	ubiquitin carboxyl-terminal hydrolase L5
hsa-miR-577	0	0	1	1	0	0	CNKSR1	connector enhancer of kinase suppressor of Ras 1
hsa-miR-577	1	0	1	1	1	1	NUMB	numb homolog (Drosophila)
hsa-miR-577	1	0	1	1	1	1	CHGA	chromogranin A (parathyroid secretory protein 1)
hsa-miR-577	0	0	1	0	0	0	FLJ39632	uncharacterized LOC642477
hsa-miR-577	0	0	1	1	1	1	IP6K2	inositol hexakisphosphate kinase 2
hsa-miR-577	1	0	1	1	0	0	KRT80	keratin 80
hsa-miR-577	0	0	1	1	1	1	FUCA2	fucosidase, alpha-L- 2, plasma
hsa-miR-577	0	0	1	0	0	0	DKFZp686D0853	uncharacterized LOC401613
hsa-miR-577	1	0	1	1	1	1	JPH1	junctophilin 1
hsa-miR-577	0	0	1	0	1	1	FEZ2	fasciculation and elongation protein zeta 2 (zygin II)
hsa-miR-577	1	0	1	1	1	1	MIER3	mesoderm induction early response 1, family member 3
hsa-miR-577	1	0	1	1	1	1	SGCD	sarcoglycan, delta (35kDa dystrophin-associated glycoprotein)
hsa-miR-577	1	0	1	1	1	1	SUN2	Sad1 and UNC84 domain containing 2
hsa-miR-577	1	0	1	1	1	1	ETS1	v-ets erythroblastosis virus E26 oncogene homolog 1 (avian)
hsa-miR-577	0	0	1	1	0	0	TTC5	tetratricopeptide repeat domain 5
hsa-miR-577	0	0	1	1	1	1	KLHL8	kelch-like 8 (Drosophila)
hsa-miR-577	0	0	1	1	0	0	CDK5RAP2	CDK5 regulatory subunit associated protein 2
hsa-miR-577	0	0	1	1	1	1	GLIPR1L2	GLI pathogenesis-related 1 like 2
hsa-miR-577	1	0	1	1	1	1	PRKRIR	protein-kinase, interferon-inducible double stranded RNA dependent inhibitor, repressor of (P58 repressor)
hsa-miR-577	1	0	1	0	1	1	FAM73A	family with sequence similarity 73, member A
hsa-miR-577	0	0	1	0	0	0	TRAF3IP2-AS1	TRAF3IP2 antisense RNA 1
hsa-miR-577	1	0	1	1	1	1	SMAD4	SMAD family member 4
hsa-miR-577	0	0	1	1	1	1	TSGA10	testis specific, 10
hsa-miR-577	1	0	1	1	1	1	SH3BP4	SH3-domain binding protein 4
hsa-miR-577	1	0	1	1	1	1	MYCBP2	MYC binding protein 2, E3 ubiquitin protein ligase
hsa-miR-577	0	0	1	1	0	0	NXF2	nuclear RNA export factor 2
hsa-miR-577	0	0	1	1	1	1	IPCEF1	interaction protein for cytohesin exchange factors 1
hsa-miR-577	0	0	1	1	1	1	PRR14L	proline rich 14-like
hsa-miR-577	0	0	1	1	1	1	CC2D2A	coiled-coil and C2 domain containing 2A
hsa-miR-577	1	0	1	1	1	1	CGN	cingulin
hsa-miR-577	1	0	1	1	0	0	RBM27	RNA binding motif protein 27
hsa-miR-577	1	0	1	1	0	0	CECR2	cat eye syndrome chromosome region, candidate 2
hsa-miR-577	0	0	1	1	1	1	B4GALT4	UDP-Gal:betaGlcNAc beta 1,4- galactosyltransferase, polypeptide 4
hsa-miR-577	0	0	1	1	1	1	ADH1B	alcohol dehydrogenase 1B (class I), beta polypeptide
hsa-miR-577	0	0	1	1	1	1	MLIP	muscular LMNA-interacting protein
hsa-miR-577	0	0	1	0	1	1	THAP6	THAP domain containing 6
hsa-miR-577	0	0	1	1	1	1	FAM9C	family with sequence similarity 9, member C
hsa-miR-577	0	0	1	1	1	1	PPP1R1C	protein phosphatase 1, regulatory (inhibitor) subunit 1C
hsa-miR-577	0	0	1	0	0	0	LINC00240	long intergenic non-protein coding RNA 240
hsa-miR-577	0	0	1	1	0	0	PRKCQ	protein kinase C, theta
hsa-miR-577	1	0	1	1	1	1	EPS15	epidermal growth factor receptor pathway substrate 15
hsa-miR-577	1	0	1	1	1	1	USP6	ubiquitin specific peptidase 6 (Tre-2 oncogene)
hsa-miR-577	1	0	1	1	1	1	VPS26A	vacuolar protein sorting 26 homolog A (S. pombe)
hsa-miR-577	1	0	1	1	1	1	KLHL2	kelch-like 2, Mayven (Drosophila)
hsa-miR-577	0	0	1	1	1	1	ARMCX3	armadillo repeat containing, X-linked 3
hsa-miR-577	1	0	1	1	1	1	TC2N	tandem C2 domains, nuclear
hsa-miR-577	0	0	1	0	1	1	B3GALTL	beta 1,3-galactosyltransferase-like
hsa-miR-577	1	0	1	1	1	1	DCAF5	DDB1 and CUL4 associated factor 5
hsa-miR-577	0	0	1	1	0	0	ELP3	elongator acetyltransferase complex subunit 3
hsa-miR-577	1	0	1	1	1	1	ATP6V1C1	ATPase, H+ transporting, lysosomal 42kDa, V1 subunit C1
hsa-miR-577	1	0	1	1	1	1	ZNF711	zinc finger protein 711
hsa-miR-577	0	0	1	1	1	1	CCNT2	cyclin T2
hsa-miR-577	0	0	1	1	1	1	DDX21	DEAD (Asp-Glu-Ala-Asp) box helicase 21
hsa-miR-577	1	0	1	1	1	1	NFIB	nuclear factor I/B
hsa-miR-577	1	0	1	1	1	1	NAV1	neuron navigator 1
hsa-miR-577	1	0	1	0	1	1	KLHL24	kelch-like 24 (Drosophila)
hsa-miR-577	1	0	1	1	1	1	RDX	radixin
hsa-miR-577	0	0	1	1	1	1	DAZL	deleted in azoospermia-like
hsa-miR-577	1	0	1	1	1	1	PGAP1	post-GPI attachment to proteins 1
hsa-miR-577	0	0	1	1	1	1	ABCD3	ATP-binding cassette, sub-family D (ALD), member 3
hsa-miR-577	0	0	1	1	1	1	THSD4	thrombospondin, type I, domain containing 4
hsa-miR-577	0	0	1	1	1	1	IFRD1	interferon-related developmental regulator 1
hsa-miR-577	1	0	1	1	1	1	CALD1	caldesmon 1
hsa-miR-577	1	0	1	1	1	1	EOGT	EGF domain-specific O-linked N-acetylglucosamine (GlcNAc) transferase
hsa-miR-577	0	0	1	1	1	1	CCDC146	coiled-coil domain containing 146
hsa-miR-577	0	0	1	1	1	1	USP54	ubiquitin specific peptidase 54
hsa-miR-577	1	0	1	1	1	1	LYST	lysosomal trafficking regulator
hsa-miR-577	1	0	1	1	1	1	CREB3L2	cAMP responsive element binding protein 3-like 2
hsa-miR-577	0	0	1	1	1	1	IPO11	importin 11
hsa-miR-577	1	0	1	1	1	1	SIN3A	SIN3 transcription regulator homolog A (yeast)
hsa-miR-577	1	0	1	1	1	1	HIC2	hypermethylated in cancer 2
hsa-miR-577	0	0	1	1	1	1	POLR2H	polymerase (RNA) II (DNA directed) polypeptide H
hsa-miR-577	0	0	1	1	1	1	FGG	fibrinogen gamma chain
hsa-miR-577	1	0	1	1	0	0	SMARCA2	SWI/SNF related, matrix associated, actin dependent regulator of chromatin, subfamily a, member 2
hsa-miR-577	1	0	1	0	1	1	STX6	syntaxin 6
hsa-miR-577	1	0	1	1	1	1	ARF1	ADP-ribosylation factor 1
hsa-miR-577	1	0	1	1	1	1	FUT9	fucosyltransferase 9 (alpha (1,3) fucosyltransferase)
hsa-miR-577	0	0	1	0	0	0	GGTA1P	glycoprotein, alpha-galactosyltransferase 1 pseudogene
hsa-miR-577	0	0	1	1	1	1	CETN2	centrin, EF-hand protein, 2
hsa-miR-577	0	0	1	1	1	1	DUT	deoxyuridine triphosphatase
hsa-miR-577	0	0	1	1	0	0	RAD54L	RAD54-like (S. cerevisiae)
hsa-miR-577	1	0	1	0	1	1	OLA1	Obg-like ATPase 1
hsa-miR-577	0	0	1	1	1	1	IER3	immediate early response 3
hsa-miR-577	1	0	1	1	1	1	CLDN11	claudin 11
hsa-miR-577	0	0	1	1	0	0	ITGB3BP	integrin beta 3 binding protein (beta3-endonexin)
hsa-miR-577	1	0	1	1	1	1	AP3S1	adaptor-related protein complex 3, sigma 1 subunit
hsa-miR-577	0	0	1	1	1	1	MMADHC	methylmalonic aciduria (cobalamin deficiency) cblD type, with homocystinuria
hsa-miR-577	1	0	1	1	1	1	DOLPP1	dolichyl pyrophosphate phosphatase 1
hsa-miR-577	0	0	1	1	1	1	ADK	adenosine kinase
hsa-miR-577	0	0	1	1	1	1	ERLEC1	endoplasmic reticulum lectin 1
hsa-miR-577	0	0	1	1	1	1	PTGES3	prostaglandin E synthase 3 (cytosolic)
hsa-miR-577	0	0	1	1	0	0	RPL11	ribosomal protein L11
hsa-miR-577	1	0	1	1	1	1	SIX5	SIX homeobox 5
hsa-miR-577	1	0	1	0	1	1	BNIP3L	BCL2/adenovirus E1B 19kDa interacting protein 3-like
hsa-miR-577	0	0	1	1	1	1	TASP1	taspase, threonine aspartase, 1
hsa-miR-577	1	0	1	1	1	1	CAAP1	caspase activity and apoptosis inhibitor 1
hsa-miR-577	0	0	1	1	1	1	BLZF1	basic leucine zipper nuclear factor 1
hsa-miR-577	1	0	1	1	1	1	SMARCE1	SWI/SNF related, matrix associated, actin dependent regulator of chromatin, subfamily e, member 1
hsa-miR-577	0	0	1	1	1	1	PLAUR	plasminogen activator, urokinase receptor
hsa-miR-577	0	0	1	1	1	1	PROCR	protein C receptor, endothelial
hsa-miR-577	0	0	1	0	0	0	TRIQK	triple QxxK/R motif containing
hsa-miR-577	0	0	1	1	0	0	HAS1	hyaluronan synthase 1
hsa-miR-577	1	0	1	1	1	1	DRAM2	DNA-damage regulated autophagy modulator 2
hsa-miR-577	0	0	1	0	1	1	EMX2	empty spiracles homeobox 2
hsa-miR-577	1	0	1	1	1	1	NTM	neurotrimin
hsa-miR-577	1	0	1	1	1	1	FBXO9	F-box protein 9
hsa-miR-577	1	0	1	1	1	1	PLEKHB2	pleckstrin homology domain containing, family B (evectins) member 2
hsa-miR-577	0	0	1	1	1	1	CCDC91	coiled-coil domain containing 91
hsa-miR-577	1	0	1	0	1	1	RPS6KB1	ribosomal protein S6 kinase, 70kDa, polypeptide 1
hsa-miR-577	0	0	1	1	1	1	STON1	stonin 1
hsa-miR-577	0	0	1	1	1	1	XBP1	X-box binding protein 1
hsa-miR-577	0	0	1	1	1	1	MS4A6A	membrane-spanning 4-domains, subfamily A, member 6A
hsa-miR-577	1	0	1	1	1	1	STK38L	serine/threonine kinase 38 like
hsa-miR-577	0	0	1	1	1	1	EIF3J	eukaryotic translation initiation factor 3, subunit J
hsa-miR-577	1	0	1	1	1	1	TMEM245	transmembrane protein 245
hsa-miR-577	0	0	1	1	0	0	CDK2AP2	cyclin-dependent kinase 2 associated protein 2
hsa-miR-577	1	0	1	1	1	1	PTBP1	polypyrimidine tract binding protein 1
hsa-miR-577	0	0	1	0	0	0	FLJ45248	FLJ45248 protein
hsa-miR-577	0	0	1	0	1	1	TMEM155	transmembrane protein 155
hsa-miR-577	0	0	1	1	1	1	GLRX3	glutaredoxin 3
hsa-miR-577	0	0	1	1	0	0	RNASEH2B	ribonuclease H2, subunit B
hsa-miR-577	1	0	1	1	1	1	BTBD10	BTB (POZ) domain containing 10
hsa-miR-577	0	0	1	1	1	1	RAD1	RAD1 homolog (S. pombe)
hsa-miR-577	1	0	1	1	1	1	CUL4A	cullin 4A
hsa-miR-577	1	0	1	1	0	0	FAT4	FAT tumor suppressor homolog 4 (Drosophila)
hsa-miR-577	1	0	1	1	1	1	NRN1	neuritin 1
hsa-miR-577	0	0	1	1	1	1	CD3E	CD3e molecule, epsilon (CD3-TCR complex)
hsa-miR-577	0	0	1	1	1	1	SAP130	Sin3A-associated protein, 130kDa
hsa-miR-577	1	0	1	1	1	1	LAMTOR3	late endosomal/lysosomal adaptor, MAPK and MTOR activator 3
hsa-miR-577	0	0	1	1	1	1	PEX19	peroxisomal biogenesis factor 19
hsa-miR-577	0	0	1	1	0	0	WDR43	WD repeat domain 43
hsa-miR-577	1	0	1	1	1	1	FOS	FBJ murine osteosarcoma viral oncogene homolog
hsa-miR-577	0	0	1	1	1	1	DEDD	death effector domain containing
hsa-miR-577	1	0	1	1	1	1	NT5DC1	5'-nucleotidase domain containing 1
hsa-miR-577	1	0	1	0	1	1	NLN	neurolysin (metallopeptidase M3 family)
hsa-miR-577	0	0	1	0	1	1	VSTM2A	V-set and transmembrane domain containing 2A
hsa-miR-577	0	0	1	1	1	1	CTSK	cathepsin K
hsa-miR-577	1	0	1	1	1	1	ARL4A	ADP-ribosylation factor-like 4A
hsa-miR-577	0	0	1	1	1	1	UBE2F	ubiquitin-conjugating enzyme E2F (putative)
hsa-miR-577	0	0	1	1	0	0	MYCBPAP	MYCBP associated protein
hsa-miR-577	1	0	1	1	1	1	PFN2	profilin 2
hsa-miR-577	0	0	1	1	0	0	YIPF3	Yip1 domain family, member 3
hsa-miR-577	0	0	1	1	1	1	FAM18B1	family with sequence similarity 18, member B1
hsa-miR-577	1	0	1	1	1	1	RNF2	ring finger protein 2
hsa-miR-577	1	0	1	1	1	1	HSPD1	heat shock 60kDa protein 1 (chaperonin)
hsa-miR-577	1	0	1	0	1	1	MAP1B	microtubule-associated protein 1B
hsa-miR-577	0	0	1	1	1	1	TSEN15	tRNA splicing endonuclease 15 homolog (S. cerevisiae)
hsa-miR-577	1	0	1	0	1	1	CD47	CD47 molecule
hsa-miR-577	1	0	1	1	1	1	ATP1B1	ATPase, Na+/K+ transporting, beta 1 polypeptide
hsa-miR-577	1	0	1	1	1	1	RUNX1	runt-related transcription factor 1
hsa-miR-577	0	0	1	0	0	0	CHEK2P2	checkpoint kinase 2 pseudogene 2
hsa-miR-577	1	0	1	1	1	1	ATPAF1	ATP synthase mitochondrial F1 complex assembly factor 1
hsa-miR-577	0	0	1	1	1	1	PTMA	prothymosin, alpha
hsa-miR-577	0	0	1	1	1	1	BEX4	brain expressed, X-linked 4
hsa-miR-577	1	0	1	1	1	1	MYT1	myelin transcription factor 1
hsa-miR-577	0	0	1	1	1	1	NUDT21	nudix (nucleoside diphosphate linked moiety X)-type motif 21
hsa-miR-577	1	0	1	1	1	1	LGALSL	lectin, galactoside-binding-like
hsa-miR-577	1	0	1	0	1	1	DNMT3A	DNA (cytosine-5-)-methyltransferase 3 alpha
hsa-miR-577	1	0	1	1	1	1	TFPI	tissue factor pathway inhibitor (lipoprotein-associated coagulation inhibitor)
hsa-miR-577	1	0	1	1	1	1	RND3	Rho family GTPase 3
hsa-miR-577	0	0	1	1	0	0	FAM3B	family with sequence similarity 3, member B
hsa-miR-577	0	0	1	0	1	1	SERF1A	small EDRK-rich factor 1A (telomeric)
hsa-miR-577	1	0	1	1	1	1	STAG2	stromal antigen 2
hsa-miR-577	0	0	1	1	1	1	CCP110	centriolar coiled coil protein 110kDa
hsa-miR-577	0	0	1	1	1	1	BDP1	B double prime 1, subunit of RNA polymerase III transcription initiation factor IIIB
hsa-miR-577	1	0	1	1	1	1	FBXW7	F-box and WD repeat domain containing 7, E3 ubiquitin protein ligase
hsa-miR-577	0	0	1	1	1	1	UPRT	uracil phosphoribosyltransferase (FUR1) homolog (S. cerevisiae)
hsa-miR-577	1	0	1	1	1	1	PHACTR2	phosphatase and actin regulator 2
hsa-miR-577	0	0	1	1	1	1	ISX	intestine-specific homeobox
hsa-miR-577	0	0	1	0	1	1	STARD8	StAR-related lipid transfer (START) domain containing 8
hsa-miR-577	1	0	1	1	1	1	NKTR	natural killer-tumor recognition sequence
hsa-miR-577	1	0	1	0	1	1	MEGF10	multiple EGF-like-domains 10
hsa-miR-577	1	0	1	1	1	1	KIAA2018	KIAA2018
hsa-miR-577	0	0	1	1	0	0	FMN1	formin 1
hsa-miR-577	0	0	1	0	1	1	USP10	ubiquitin specific peptidase 10
hsa-miR-577	1	0	1	0	1	1	XRN1	5'-3' exoribonuclease 1
hsa-miR-577	1	0	1	0	1	1	OSBPL8	oxysterol binding protein-like 8
hsa-miR-577	1	0	1	1	1	1	SLC39A10	solute carrier family 39 (zinc transporter), member 10
hsa-miR-577	1	0	1	0	1	1	CNTNAP2	contactin associated protein-like 2
hsa-miR-577	1	0	1	1	1	1	SLC30A7	solute carrier family 30 (zinc transporter), member 7
hsa-miR-577	0	0	1	1	1	1	ZMYM1	zinc finger, MYM-type 1
hsa-miR-577	1	0	1	1	1	1	ZFHX3	zinc finger homeobox 3
hsa-miR-577	1	0	1	1	1	1	GRM5	glutamate receptor, metabotropic 5
hsa-miR-577	0	0	1	1	1	1	SLC39A14	solute carrier family 39 (zinc transporter), member 14
hsa-miR-577	1	0	1	1	1	1	PI15	peptidase inhibitor 15
hsa-miR-577	1	0	1	1	1	1	PRKG1	protein kinase, cGMP-dependent, type I
hsa-miR-577	0	0	1	1	1	1	UBXN8	UBX domain protein 8
hsa-miR-577	0	0	1	0	0	0	61E3.4	nuclear pore complex interacting protein-like
hsa-miR-577	1	0	1	0	1	1	CBX7	chromobox homolog 7
hsa-miR-577	1	0	1	1	1	1	ATP2B3	ATPase, Ca++ transporting, plasma membrane 3
hsa-miR-577	1	0	1	1	1	1	MOSPD1	motile sperm domain containing 1
hsa-miR-577	1	0	1	1	1	1	ITSN1	intersectin 1 (SH3 domain protein)
hsa-miR-577	1	0	1	1	0	0	LGSN	lengsin, lens protein with glutamine synthetase domain
hsa-miR-577	0	0	1	0	0	0	POM121L8P	POM121 transmembrane nucleoporin-like 8 pseudogene
hsa-miR-577	0	0	1	1	1	1	EIF1AY	eukaryotic translation initiation factor 1A, Y-linked
hsa-miR-577	0	0	1	1	1	1	SCIN	scinderin
hsa-miR-577	1	0	1	1	1	1	LGR4	leucine-rich repeat containing G protein-coupled receptor 4
hsa-miR-577	1	0	1	1	1	1	TNFAIP1	tumor necrosis factor, alpha-induced protein 1 (endothelial)
hsa-miR-577	1	0	1	1	1	1	CDC27	cell division cycle 27 homolog (S. cerevisiae)
hsa-miR-577	1	0	1	0	1	1	EPDR1	ependymin related protein 1 (zebrafish)
hsa-miR-577	1	0	1	1	1	1	SPHK2	sphingosine kinase 2
hsa-miR-577	1	0	1	1	1	1	TMEM220	transmembrane protein 220
hsa-miR-577	1	0	1	0	1	1	KCNB1	potassium voltage-gated channel, Shab-related subfamily, member 1
hsa-miR-577	1	0	1	1	1	1	MLL	myeloid/lymphoid or mixed-lineage leukemia (trithorax homolog, Drosophila)
hsa-miR-577	1	0	1	1	1	1	ATP2B2	ATPase, Ca++ transporting, plasma membrane 2
hsa-miR-577	1	0	1	1	1	1	AFF1	AF4/FMR2 family, member 1
hsa-miR-577	1	0	1	0	1	1	STAT3	signal transducer and activator of transcription 3 (acute-phase response factor)
hsa-miR-577	0	0	1	0	1	1	OPRK1	opioid receptor, kappa 1
hsa-miR-577	1	0	1	1	1	1	CCNG2	cyclin G2
hsa-miR-577	1	0	1	0	1	1	BCL2	B-cell CLL/lymphoma 2
hsa-miR-577	1	0	1	0	1	1	YES1	v-yes-1 Yamaguchi sarcoma viral oncogene homolog 1
hsa-miR-577	1	0	1	1	1	1	IGF1	insulin-like growth factor 1 (somatomedin C)
hsa-miR-577	0	0	1	1	1	1	NPR3	natriuretic peptide receptor C/guanylate cyclase C (atrionatriuretic peptide receptor C)
hsa-miR-577	0	0	1	1	1	1	GAD2	glutamate decarboxylase 2 (pancreatic islets and brain, 65kDa)
hsa-miR-577	1	0	1	0	1	1	ACVR2A	activin A receptor, type IIA
hsa-miR-577	1	0	1	1	0	0	ADRB3	adrenoceptor beta 3
hsa-miR-577	0	0	1	1	1	1	ATP7A	ATPase, Cu++ transporting, alpha polypeptide
hsa-miR-577	1	0	1	1	1	1	COL1A1	collagen, type I, alpha 1
hsa-miR-577	1	0	1	1	1	1	COL3A1	collagen, type III, alpha 1
hsa-miR-577	1	0	1	1	1	1	COL4A4	collagen, type IV, alpha 4
hsa-miR-577	1	0	1	1	1	1	CPOX	coproporphyrinogen oxidase
hsa-miR-577	0	0	1	1	1	1	DPYD	dihydropyrimidine dehydrogenase
hsa-miR-577	1	0	1	0	1	1	SLC26A2	solute carrier family 26 (sulfate transporter), member 2
hsa-miR-577	1	0	1	1	1	1	F13A1	coagulation factor XIII, A1 polypeptide
hsa-miR-577	0	0	1	1	1	1	F8	coagulation factor VIII, procoagulant component
hsa-miR-577	0	0	1	1	1	1	FABP2	fatty acid binding protein 2, intestinal
hsa-miR-577	1	0	1	1	1	1	FBN1	fibrillin 1
hsa-miR-577	1	0	1	0	1	1	G6PC	glucose-6-phosphatase, catalytic subunit
hsa-miR-577	0	0	1	0	1	1	GBE1	glucan (1,4-alpha-), branching enzyme 1
hsa-miR-577	1	0	1	0	1	1	GCH1	GTP cyclohydrolase 1
hsa-miR-577	1	0	1	0	1	1	GHR	growth hormone receptor
hsa-miR-577	1	0	1	1	1	1	GJA1	gap junction protein, alpha 1, 43kDa
hsa-miR-577	1	0	1	0	1	1	GLI3	GLI family zinc finger 3
hsa-miR-577	1	0	1	1	1	1	HK2	hexokinase 2
hsa-miR-577	0	0	1	1	1	1	HPRT1	hypoxanthine phosphoribosyltransferase 1
hsa-miR-577	0	0	1	1	1	1	HSD11B2	hydroxysteroid (11-beta) dehydrogenase 2
hsa-miR-577	1	0	1	0	1	1	ITGB3	integrin, beta 3 (platelet glycoprotein IIIa, antigen CD61)
hsa-miR-577	1	0	1	1	1	1	JAG1	jagged 1
hsa-miR-577	0	0	1	0	1	1	KAL1	Kallmann syndrome 1 sequence
hsa-miR-577	1	0	1	1	1	1	KCNA1	potassium voltage-gated channel, shaker-related subfamily, member 1 (episodic ataxia with myokymia)
hsa-miR-577	1	0	1	0	1	1	KIT	v-kit Hardy-Zuckerman 4 feline sarcoma viral oncogene homolog
hsa-miR-577	1	0	1	1	1	1	MET	met proto-oncogene (hepatocyte growth factor receptor)
hsa-miR-577	1	0	1	1	1	1	MITF	microphthalmia-associated transcription factor
hsa-miR-577	1	0	1	1	1	1	NF1	neurofibromin 1
hsa-miR-577	1	0	1	0	1	1	PTEN	phosphatase and tensin homolog
hsa-miR-577	1	0	1	1	1	1	RB1	retinoblastoma 1
hsa-miR-577	0	0	1	1	1	1	RPGR	retinitis pigmentosa GTPase regulator
hsa-miR-577	0	0	1	1	1	1	RS1	retinoschisin 1
hsa-miR-577	1	0	1	1	1	1	ATXN1	ataxin 1
hsa-miR-577	1	0	1	1	1	1	SOX9	SRY (sex determining region Y)-box 9
hsa-miR-577	0	0	1	1	1	1	THBD	thrombomodulin
hsa-miR-577	1	0	1	1	1	1	TIMP3	TIMP metallopeptidase inhibitor 3
hsa-miR-577	0	0	1	1	1	1	CASR	calcium-sensing receptor
hsa-miR-577	1	0	1	1	1	1	CHM	choroideremia (Rab escort protein 1)
hsa-miR-577	1	0	1	0	1	1	CYBB	cytochrome b-245, beta polypeptide
hsa-miR-577	0	0	1	1	1	1	GM2A	GM2 ganglioside activator
hsa-miR-577	0	0	1	1	1	1	LTBP2	latent transforming growth factor beta binding protein 2
hsa-miR-577	1	0	1	0	1	1	PAFAH1B1	platelet-activating factor acetylhydrolase 1b, regulatory subunit 1 (45kDa)
hsa-miR-577	1	0	1	1	0	0	NOTCH3	notch 3
hsa-miR-577	1	0	1	0	1	1	PCSK1	proprotein convertase subtilisin/kexin type 1
hsa-miR-577	1	0	1	0	1	1	RAG1	recombination activating gene 1
hsa-miR-577	0	0	1	0	1	1	SLC10A2	solute carrier family 10 (sodium/bile acid cotransporter family), member 2
hsa-miR-577	1	0	1	1	1	1	ATRX	alpha thalassemia/mental retardation syndrome X-linked
hsa-miR-577	0	0	1	1	1	1	CYP11B2	cytochrome P450, family 11, subfamily B, polypeptide 2
hsa-miR-577	1	0	1	1	1	1	MPZ	myelin protein zero
hsa-miR-577	0	0	1	1	1	1	WRN	Werner syndrome, RecQ helicase-like
hsa-miR-577	1	0	1	1	1	1	DCX	doublecortin
hsa-miR-577	0	0	1	1	1	1	FCGR1A	Fc fragment of IgG, high affinity Ia, receptor (CD64)
hsa-miR-577	1	0	1	1	1	1	IL10	interleukin 10
hsa-miR-577	0	0	1	1	0	0	IL3	interleukin 3 (colony-stimulating factor, multiple)
hsa-miR-577	1	0	1	1	1	1	TNF	tumor necrosis factor
hsa-miR-577	1	0	1	0	1	1	IGFBP5	insulin-like growth factor binding protein 5
hsa-miR-577	1	0	1	1	1	1	CD44	CD44 molecule (Indian blood group)
hsa-miR-577	0	0	1	1	1	1	IFNG	interferon, gamma
hsa-miR-577	0	0	1	1	1	1	IL11	interleukin 11
hsa-miR-577	1	0	1	0	1	1	ADRB1	adrenoceptor beta 1
hsa-miR-577	1	0	1	0	1	1	ALDH1A3	aldehyde dehydrogenase 1 family, member A3
hsa-miR-577	1	0	1	1	1	1	CACNB4	calcium channel, voltage-dependent, beta 4 subunit
hsa-miR-577	0	0	1	1	1	1	CRH	corticotropin releasing hormone
hsa-miR-577	0	0	1	1	1	1	CYP7A1	cytochrome P450, family 7, subfamily A, polypeptide 1
hsa-miR-577	1	0	1	1	1	1	DIO2	deiodinase, iodothyronine, type II
hsa-miR-577	1	0	1	0	1	1	GABRA4	gamma-aminobutyric acid (GABA) A receptor, alpha 4
hsa-miR-577	1	0	1	1	1	1	GABRB3	gamma-aminobutyric acid (GABA) A receptor, beta 3
hsa-miR-577	1	0	1	1	1	1	GABRG2	gamma-aminobutyric acid (GABA) A receptor, gamma 2
hsa-miR-577	1	0	1	1	0	0	GRIN2A	glutamate receptor, ionotropic, N-methyl D-aspartate 2A
hsa-miR-577	1	0	1	1	1	1	GRM7	glutamate receptor, metabotropic 7
hsa-miR-577	1	0	1	1	1	1	GRM8	glutamate receptor, metabotropic 8
hsa-miR-577	1	0	1	1	1	1	IGF1R	insulin-like growth factor 1 receptor
hsa-miR-577	0	0	1	1	1	1	IL5	interleukin 5 (colony-stimulating factor, eosinophil)
hsa-miR-577	0	0	1	1	1	1	MAOB	monoamine oxidase B
hsa-miR-577	1	0	1	0	1	1	KITLG	KIT ligand
hsa-miR-577	1	0	1	1	1	1	PDE3B	phosphodiesterase 3B, cGMP-inhibited
hsa-miR-577	0	0	1	1	0	0	POLR2A	polymerase (RNA) II (DNA directed) polypeptide A, 220kDa
hsa-miR-577	1	0	1	1	1	1	PTGER2	prostaglandin E receptor 2 (subtype EP2), 53kDa
hsa-miR-577	1	0	1	1	1	1	PTGFR	prostaglandin F receptor (FP)
hsa-miR-577	1	0	1	1	1	1	RARB	retinoic acid receptor, beta
hsa-miR-577	1	0	1	0	1	1	SMAD5	SMAD family member 5
hsa-miR-577	0	0	1	1	1	1	C16orf87	chromosome 16 open reading frame 87
hsa-miR-577	1	0	1	0	1	1	UBE2W	ubiquitin-conjugating enzyme E2W (putative)
hsa-miR-577	0	0	1	1	1	1	CYP27C1	cytochrome P450, family 27, subfamily C, polypeptide 1
hsa-miR-577	0	0	1	1	1	1	FLJ45079	FLJ45079 protein
hsa-miR-577	0	0	1	1	1	1	DDI1	DNA-damage inducible 1 homolog 1 (S. cerevisiae)
hsa-miR-577	1	0	1	1	1	1	FAM13C	family with sequence similarity 13, member C
hsa-miR-577	0	0	1	0	0	0	KLK2	kallikrein-related peptidase 2
hsa-miR-577	0	0	1	1	1	1	FCGR2B	Fc fragment of IgG, low affinity IIb, receptor (CD32)
hsa-miR-577	1	0	1	1	1	1	WLS	wntless homolog (Drosophila)
hsa-miR-577	1	0	1	1	1	1	C1orf173	chromosome 1 open reading frame 173
hsa-miR-577	1	0	1	0	1	1	CACNA1I	calcium channel, voltage-dependent, T type, alpha 1I subunit
hsa-miR-577	1	0	1	0	1	1	SMAD2	SMAD family member 2
hsa-miR-577	0	0	1	1	0	0	C1orf95	chromosome 1 open reading frame 95
hsa-miR-577	1	0	1	1	1	1	HMGXB4	HMG box domain containing 4
hsa-miR-577	1	0	1	1	1	1	RREB1	ras responsive element binding protein 1
hsa-miR-577	1	0	1	1	1	1	KLHL31	kelch-like 31 (Drosophila)
hsa-miR-577	1	0	1	1	1	1	RBMS3	RNA binding motif, single stranded interacting protein 3
hsa-miR-577	1	0	1	0	1	1	BMF	Bcl2 modifying factor
hsa-miR-577	0	0	1	1	1	1	CCDC144NL	coiled-coil domain containing 144 family, N-terminal like
hsa-miR-577	1	0	1	0	1	1	LIN28B	lin-28 homolog B (C. elegans)
hsa-miR-577	0	0	1	1	1	1	DBX2	developing brain homeobox 2
hsa-miR-577	0	0	1	0	1	1	FLJ16124	FLJ16124 protein
hsa-miR-577	0	0	1	1	1	1	CLEC2D	C-type lectin domain family 2, member D
hsa-miR-577	1	0	1	1	1	1	AK4	adenylate kinase 4
hsa-miR-577	1	0	1	0	1	1	YPEL2	yippee-like 2 (Drosophila)
hsa-miR-577	1	0	1	1	1	1	EBF3	early B-cell factor 3
hsa-miR-577	1	0	1	1	1	1	PLCXD3	phosphatidylinositol-specific phospholipase C, X domain containing 3
hsa-miR-577	0	0	1	1	1	1	SUMO1	SMT3 suppressor of mif two 3 homolog 1 (S. cerevisiae)
hsa-miR-577	1	0	1	1	1	1	ADAM9	ADAM metallopeptidase domain 9
hsa-miR-577	0	0	1	1	1	1	RYK	receptor-like tyrosine kinase
hsa-miR-577	0	0	1	1	1	1	WBP5	WW domain binding protein 5
hsa-miR-577	1	0	1	1	1	1	TCEAL1	transcription elongation factor A (SII)-like 1
hsa-miR-577	1	0	1	1	1	1	TCEAL8	transcription elongation factor A (SII)-like 8
hsa-miR-577	0	0	1	1	1	1	SCP2	sterol carrier protein 2
hsa-miR-577	1	0	1	1	1	1	L3MBTL3	l(3)mbt-like 3 (Drosophila)
hsa-miR-577	0	0	1	1	1	1	IGIP	IgA-inducing protein homolog (Bos taurus)
hsa-miR-577	0	0	1	0	1	1	GIMAP6	GTPase, IMAP family member 6
hsa-miR-577	1	0	1	1	1	1	IGF2BP2	insulin-like growth factor 2 mRNA binding protein 2
hsa-miR-577	1	0	1	1	1	1	IGSF3	immunoglobulin superfamily, member 3
hsa-miR-577	0	0	1	1	1	1	KLHDC9	kelch domain containing 9
hsa-miR-577	1	0	1	1	1	1	EI24	etoposide induced 2.4 mRNA
hsa-miR-577	0	0	1	1	1	1	TRIM13	tripartite motif containing 13
hsa-miR-577	1	0	1	1	1	1	TULP4	tubby like protein 4
hsa-miR-577	1	0	1	0	1	1	SS18	synovial sarcoma translocation, chromosome 18
hsa-miR-577	0	0	1	1	1	1	UACA	uveal autoantigen with coiled-coil domains and ankyrin repeats
hsa-miR-577	1	0	1	0	1	1	C18orf25	chromosome 18 open reading frame 25
hsa-miR-577	1	0	1	1	1	1	CTDSPL	CTD (carboxy-terminal domain, RNA polymerase II, polypeptide A) small phosphatase-like
hsa-miR-577	0	0	1	1	1	1	TCHHL1	trichohyalin-like 1
hsa-miR-577	1	0	1	0	1	1	KIAA2022	KIAA2022
hsa-miR-577	0	0	1	1	1	1	CCDC147	coiled-coil domain containing 147
hsa-miR-577	1	0	1	1	1	1	LUZP2	leucine zipper protein 2
hsa-miR-577	0	0	1	1	1	1	TMEM230	transmembrane protein 230
hsa-miR-577	1	0	1	1	1	1	ZNF655	zinc finger protein 655
hsa-miR-577	1	0	1	0	1	1	ERMN	ermin, ERM-like protein
hsa-miR-577	0	0	1	0	1	1	ZNF648	zinc finger protein 648
hsa-miR-577	1	0	1	0	1	1	PM20D2	peptidase M20 domain containing 2
hsa-miR-577	0	0	1	0	1	1	LPPR5	lipid phosphate phosphatase-related protein type 5
hsa-miR-577	0	0	1	1	1	1	SPIN3	spindlin family, member 3
hsa-miR-577	0	0	1	1	0	0	TMEM244	transmembrane protein 244
hsa-miR-577	1	0	1	0	1	1	FAM102B	family with sequence similarity 102, member B
hsa-miR-577	1	0	1	1	1	1	C10orf114	chromosome 10 open reading frame 114
hsa-miR-577	0	0	1	1	1	1	NCMAP	noncompact myelin associated protein
hsa-miR-577	1	0	1	0	1	1	CREB5	cAMP responsive element binding protein 5
hsa-miR-577	0	0	1	1	0	0	RPS8	ribosomal protein S8
hsa-miR-577	1	0	1	0	1	1	DNAJC21	DnaJ (Hsp40) homolog, subfamily C, member 21
hsa-miR-577	0	0	1	0	1	1	GOLGA8E	golgin A8 family, member E
hsa-miR-577	0	0	1	1	1	1	C1orf146	chromosome 1 open reading frame 146
hsa-miR-577	1	0	1	1	1	1	GOSR2	golgi SNAP receptor complex member 2
hsa-miR-577	1	0	1	1	1	1	SLC25A53	solute carrier family 25, member 53
hsa-miR-577	0	0	1	1	1	1	SPIN4	spindlin family, member 4
hsa-miR-577	1	0	1	0	1	1	ZKSCAN2	zinc finger with KRAB and SCAN domains 2
hsa-miR-577	1	0	1	1	1	1	UBE2NL	ubiquitin-conjugating enzyme E2N-like
hsa-miR-577	1	0	1	1	1	1	SORCS1	sortilin-related VPS10 domain containing receptor 1
hsa-miR-577	1	0	1	0	1	1	FIGNL2	fidgetin-like 2
hsa-miR-577	0	0	1	0	1	1	LINC00268	long intergenic non-protein coding RNA 268
hsa-miR-577	1	0	1	0	1	1	SYT14L	synaptotagmin XIV-like
hsa-miR-577	1	0	1	1	1	1	KATNAL1	katanin p60 subunit A-like 1
hsa-miR-577	1	0	1	1	1	1	RUNX2	runt-related transcription factor 2
hsa-miR-577	1	0	1	1	1	1	PHF6	PHD finger protein 6
hsa-miR-577	1	0	1	1	1	1	TMCC1	transmembrane and coiled-coil domain family 1
hsa-miR-577	1	0	1	0	1	1	GOPC	golgi-associated PDZ and coiled-coil motif containing
hsa-miR-577	1	0	1	1	1	1	ZHX1	zinc fingers and homeoboxes 1
hsa-miR-577	1	0	1	1	1	1	VMA21	VMA21 vacuolar H+-ATPase homolog (S. cerevisiae)
hsa-miR-577	0	0	1	1	1	1	ACTBL2	actin, beta-like 2
hsa-miR-577	1	0	1	1	1	1	PFKFB2	6-phosphofructo-2-kinase/fructose-2,6-biphosphatase 2
hsa-miR-577	1	0	1	0	1	1	TFEC	transcription factor EC
hsa-miR-577	1	0	1	1	1	1	SERBP1	SERPINE1 mRNA binding protein 1
hsa-miR-577	1	0	1	0	1	1	RGAG4	retrotransposon gag domain containing 4
hsa-miR-577	1	0	1	0	1	1	TNRC6B	trinucleotide repeat containing 6B
hsa-miR-577	1	0	1	1	1	1	SLC6A9	solute carrier family 6 (neurotransmitter transporter, glycine), member 9
hsa-miR-577	1	0	1	1	1	1	YIPF5	Yip1 domain family, member 5
hsa-miR-577	1	0	1	1	1	1	AFF3	AF4/FMR2 family, member 3
hsa-miR-577	1	0	1	0	1	1	CLLU1	chronic lymphocytic leukemia up-regulated 1
hsa-miR-577	1	0	1	0	1	1	ANO6	anoctamin 6
hsa-miR-577	1	0	1	1	1	1	VEGFA	vascular endothelial growth factor A
hsa-miR-577	1	0	1	1	1	1	ARHGAP24	Rho GTPase activating protein 24
hsa-miR-577	1	0	1	1	1	1	SLC35F1	solute carrier family 35, member F1
hsa-miR-577	1	0	1	1	1	1	RGS7BP	regulator of G-protein signaling 7 binding protein
hsa-miR-577	1	0	1	1	1	1	SLC10A7	solute carrier family 10 (sodium/bile acid cotransporter family), member 7
hsa-miR-577	1	0	1	0	1	1	SAMD5	sterile alpha motif domain containing 5
hsa-miR-577	1	0	1	0	1	1	MSRB3	methionine sulfoxide reductase B3
hsa-miR-577	1	0	1	1	1	1	SRSF7	serine/arginine-rich splicing factor 7
hsa-miR-577	0	0	1	1	1	1	RNLS	renalase, FAD-dependent amine oxidase
hsa-miR-577	0	0	1	1	1	1	TRMT11	tRNA methyltransferase 11 homolog (S. cerevisiae)
hsa-miR-577	0	0	1	1	1	1	CALML4	calmodulin-like 4
hsa-miR-577	1	0	1	1	1	1	CSNK1G3	casein kinase 1, gamma 3
hsa-miR-577	0	0	1	0	1	1	STXBP1	syntaxin binding protein 1
hsa-miR-577	1	0	1	1	1	1	TFAP2A	transcription factor AP-2 alpha (activating enhancer binding protein 2 alpha)
hsa-miR-577	1	0	1	1	1	1	UBE2V1	ubiquitin-conjugating enzyme E2 variant 1
hsa-miR-577	1	0	1	1	1	1	STK24	serine/threonine kinase 24
hsa-miR-577	0	0	1	1	1	1	PLGLB1	plasminogen-like B1
hsa-miR-577	0	0	1	1	1	1	HNRNPH2	heterogeneous nuclear ribonucleoprotein H2 (H')
hsa-miR-577	1	0	1	0	1	1	GPR126	G protein-coupled receptor 126
hsa-miR-577	1	0	1	1	1	1	RRM1	ribonucleotide reductase M1
hsa-miR-577	1	0	1	0	1	1	NPNT	nephronectin
hsa-miR-577	1	0	1	1	1	1	TMEM98	transmembrane protein 98
hsa-miR-577	0	0	1	1	1	1	CSTF3	cleavage stimulation factor, 3' pre-RNA, subunit 3, 77kDa
hsa-miR-577	0	0	1	1	1	1	PHF12	PHD finger protein 12
hsa-miR-577	0	0	1	1	1	1	CTLA4	cytotoxic T-lymphocyte-associated protein 4
hsa-miR-577	0	0	1	1	1	1	BTF3	basic transcription factor 3
hsa-miR-577	0	0	1	1	1	1	PRPS2	phosphoribosyl pyrophosphate synthetase 2
hsa-miR-577	0	0	1	0	1	1	RGS21	regulator of G-protein signaling 21
hsa-miR-577	1	0	1	0	1	1	TTPAL	tocopherol (alpha) transfer protein-like
hsa-miR-577	0	0	1	1	1	1	EFEMP1	EGF containing fibulin-like extracellular matrix protein 1
hsa-miR-577	0	0	1	1	1	1	SPATA6L	spermatogenesis associated 6-like
hsa-miR-577	1	0	1	0	1	1	GK5	glycerol kinase 5 (putative)
hsa-miR-577	1	0	1	1	1	1	AP1S3	adaptor-related protein complex 1, sigma 3 subunit
hsa-miR-577	1	0	1	1	1	1	KCNC4	potassium voltage-gated channel, Shaw-related subfamily, member 4
hsa-miR-577	0	0	1	1	1	1	MAP9	microtubule-associated protein 9
hsa-miR-577	1	0	1	0	1	1	CREBZF	CREB/ATF bZIP transcription factor
hsa-miR-577	1	0	1	1	1	1	CHN2	chimerin (chimaerin) 2
hsa-miR-577	1	0	1	1	1	1	MLLT4	myeloid/lymphoid or mixed-lineage leukemia (trithorax homolog, Drosophila); translocated to, 4
hsa-miR-577	1	0	1	1	1	1	FAM3C	family with sequence similarity 3, member C
hsa-miR-577	1	0	1	0	1	1	FAM133B	family with sequence similarity 133, member B
hsa-miR-577	1	0	1	1	1	1	SPTSSB	serine palmitoyltransferase, small subunit B
hsa-miR-577	0	0	1	0	1	1	OPALIN	oligodendrocytic myelin paranodal and inner loop protein
hsa-miR-577	1	0	1	1	1	1	SCN2A	sodium channel, voltage-gated, type II, alpha subunit
hsa-miR-577	0	0	1	1	1	1	SPOCK3	sparc/osteonectin, cwcv and kazal-like domains proteoglycan (testican) 3
hsa-miR-577	1	0	1	1	1	1	LFNG	LFNG O-fucosylpeptide 3-beta-N-acetylglucosaminyltransferase
hsa-miR-577	0	0	1	1	1	1	MCHR2	melanin-concentrating hormone receptor 2
hsa-miR-577	1	0	1	1	1	1	PAPD5	PAP associated domain containing 5
hsa-miR-577	1	0	1	1	1	1	MTMR12	myotubularin related protein 12
hsa-miR-577	1	0	1	1	1	1	FAM63B	family with sequence similarity 63, member B
hsa-miR-577	1	0	1	1	1	1	CYLD	cylindromatosis (turban tumor syndrome)
hsa-miR-577	1	0	1	1	1	1	HMGCLL1	3-hydroxymethyl-3-methylglutaryl-CoA lyase-like 1
hsa-miR-577	1	0	1	1	1	1	RUFY2	RUN and FYVE domain containing 2
hsa-miR-577	1	0	1	1	1	1	ZC2HC1C	zinc finger, C2HC-type containing 1C
hsa-miR-577	0	0	1	1	1	1	GEMIN8	gem (nuclear organelle) associated protein 8
hsa-miR-577	1	0	1	1	1	1	DIAPH3	diaphanous homolog 3 (Drosophila)
hsa-miR-577	1	0	1	1	1	1	SLC9A6	solute carrier family 9, subfamily A (NHE6, cation proton antiporter 6), member 6
hsa-miR-577	0	0	1	1	1	1	SMC2	structural maintenance of chromosomes 2
hsa-miR-577	1	0	1	1	1	1	FRS2	fibroblast growth factor receptor substrate 2
hsa-miR-577	1	0	1	1	1	1	ERBB4	v-erb-a erythroblastic leukemia viral oncogene homolog 4 (avian)
hsa-miR-577	0	0	1	1	1	1	TTC14	tetratricopeptide repeat domain 14
hsa-miR-577	0	0	1	1	1	1	TRAK1	trafficking protein, kinesin binding 1
hsa-miR-577	1	0	1	1	1	1	RERE	arginine-glutamic acid dipeptide (RE) repeats
hsa-miR-577	1	0	1	1	1	1	PVRL2	poliovirus receptor-related 2 (herpesvirus entry mediator B)
hsa-miR-577	0	0	1	1	1	1	SLC6A3	solute carrier family 6 (neurotransmitter transporter, dopamine), member 3
hsa-miR-577	1	0	1	0	1	1	TMEM237	transmembrane protein 237
hsa-miR-577	0	0	1	1	1	1	TUBG1	tubulin, gamma 1
hsa-miR-577	1	0	1	1	1	1	CDC14B	CDC14 cell division cycle 14 homolog B (S. cerevisiae)
hsa-miR-577	1	0	1	1	1	1	HS6ST2	heparan sulfate 6-O-sulfotransferase 2
hsa-miR-577	1	0	1	1	1	1	ZNF436	zinc finger protein 436
hsa-miR-577	1	0	1	1	1	1	PDE11A	phosphodiesterase 11A
hsa-miR-577	1	0	1	1	1	1	TMPRSS13	transmembrane protease, serine 13
hsa-miR-577	1	0	1	1	1	1	IRF2BP2	interferon regulatory factor 2 binding protein 2
hsa-miR-577	1	0	1	1	1	1	PRR3	proline rich 3
hsa-miR-577	0	0	1	0	1	1	WTH3DI	RAB6C-like
hsa-miR-577	1	0	1	1	1	1	ALG9	asparagine-linked glycosylation 9, alpha-1,2-mannosyltransferase homolog (S. cerevisiae)
hsa-miR-577	0	0	1	1	1	1	VCAM1	vascular cell adhesion molecule 1
hsa-miR-577	1	0	1	1	1	1	SRSF1	serine/arginine-rich splicing factor 1
hsa-miR-577	1	0	1	1	1	1	DACT1	dapper, antagonist of beta-catenin, homolog 1 (Xenopus laevis)
hsa-miR-577	1	0	1	1	1	1	TMTC4	transmembrane and tetratricopeptide repeat containing 4
hsa-miR-577	0	0	1	1	1	1	FKTN	fukutin
hsa-miR-577	1	0	1	1	1	1	CASZ1	castor zinc finger 1
hsa-miR-577	1	0	1	1	1	1	CREBBP	CREB binding protein
hsa-miR-577	0	0	1	1	1	1	TAX1BP1	Tax1 (human T-cell leukemia virus type I) binding protein 1
hsa-miR-577	1	0	1	1	1	1	VAV3	vav 3 guanine nucleotide exchange factor
hsa-miR-577	1	0	1	1	1	1	FAM155A	family with sequence similarity 155, member A
hsa-miR-577	0	0	1	1	1	1	HSF5	heat shock transcription factor family member 5
hsa-miR-577	1	0	1	1	1	1	MGA	MAX gene associated
hsa-miR-577	1	0	1	1	1	1	REPS2	RALBP1 associated Eps domain containing 2
hsa-miR-577	1	0	1	1	1	1	THOC2	THO complex 2
hsa-miR-577	1	0	1	0	1	1	PDE5A	phosphodiesterase 5A, cGMP-specific
hsa-miR-577	1	0	1	1	0	0	ASIC2	acid-sensing (proton-gated) ion channel 2
hsa-miR-577	1	0	1	1	1	1	ADCY9	adenylate cyclase 9
hsa-miR-577	0	0	1	1	1	1	PLIN2	perilipin 2
hsa-miR-577	0	0	1	1	1	1	ADSS	adenylosuccinate synthase
hsa-miR-577	0	0	1	0	1	1	ALOX15	arachidonate 15-lipoxygenase
hsa-miR-577	1	0	1	0	1	1	XIAP	X-linked inhibitor of apoptosis
hsa-miR-577	1	0	1	1	1	1	PRDM1	PR domain containing 1, with ZNF domain
hsa-miR-577	1	0	1	0	1	1	BMPR2	bone morphogenetic protein receptor, type II (serine/threonine kinase)
hsa-miR-577	1	0	1	0	1	1	KLF9	Kruppel-like factor 9
hsa-miR-577	0	0	1	1	1	1	ENTPD3	ectonucleoside triphosphate diphosphohydrolase 3
hsa-miR-577	0	0	1	1	1	1	CDC5L	CDC5 cell division cycle 5-like (S. pombe)
hsa-miR-577	0	0	1	1	0	0	CDC6	cell division cycle 6 homolog (S. cerevisiae)
hsa-miR-577	1	0	1	1	1	1	CDH13	cadherin 13, H-cadherin (heart)
hsa-miR-577	1	0	1	0	1	1	CDK6	cyclin-dependent kinase 6
hsa-miR-577	0	0	1	1	1	1	CDKN2C	cyclin-dependent kinase inhibitor 2C (p18, inhibits CDK4)
hsa-miR-577	1	0	1	1	1	1	CHD1	chromodomain helicase DNA binding protein 1
hsa-miR-577	0	0	1	1	1	1	CHUK	conserved helix-loop-helix ubiquitous kinase
hsa-miR-577	1	0	1	0	1	1	CPD	carboxypeptidase D
hsa-miR-577	1	0	1	1	1	1	CREBL2	cAMP responsive element binding protein-like 2
hsa-miR-577	1	0	1	1	1	1	MAPK14	mitogen-activated protein kinase 14
hsa-miR-577	1	0	1	1	1	1	CTNND2	catenin (cadherin-associated protein), delta 2
hsa-miR-577	1	0	1	1	1	1	S1PR1	sphingosine-1-phosphate receptor 1
hsa-miR-577	1	0	1	1	1	1	CELSR3	cadherin, EGF LAG seven-pass G-type receptor 3 (flamingo homolog, Drosophila)
hsa-miR-577	1	0	1	1	1	1	EIF1AX	eukaryotic translation initiation factor 1A, X-linked
hsa-miR-577	1	0	1	1	1	1	ELAVL1	ELAV (embryonic lethal, abnormal vision, Drosophila)-like 1 (Hu antigen R)
hsa-miR-577	1	0	1	1	1	1	EN1	engrailed homeobox 1
hsa-miR-577	1	0	1	1	1	1	EP300	E1A binding protein p300
hsa-miR-577	1	0	1	1	1	1	EREG	epiregulin
hsa-miR-577	1	0	1	1	1	1	EXTL3	exostoses (multiple)-like 3
hsa-miR-577	0	0	1	0	1	1	FMO2	flavin containing monooxygenase 2 (non-functional)
hsa-miR-577	1	0	1	1	1	1	NR6A1	nuclear receptor subfamily 6, group A, member 1
hsa-miR-577	1	0	1	0	1	1	GCNT2	glucosaminyl (N-acetyl) transferase 2, I-branching enzyme (I blood group)
hsa-miR-577	0	0	1	1	0	0	HSPB1	heat shock 27kDa protein 1
hsa-miR-577	0	0	1	1	1	1	IL13RA1	interleukin 13 receptor, alpha 1
hsa-miR-577	1	0	1	1	1	1	IRAK2	interleukin-1 receptor-associated kinase 2
hsa-miR-577	1	0	1	0	1	1	MPPED2	metallophosphoesterase domain containing 2
hsa-miR-577	0	0	1	1	1	1	PARP1	poly (ADP-ribose) polymerase 1
hsa-miR-577	1	0	1	1	1	1	ADRBK1	adrenergic, beta, receptor kinase 1
hsa-miR-577	1	0	1	1	1	1	AQP4	aquaporin 4
hsa-miR-577	0	0	1	0	1	1	AREG	amphiregulin
hsa-miR-577	0	0	1	1	1	1	ARF4	ADP-ribosylation factor 4
hsa-miR-577	0	0	1	1	1	1	RHOA	ras homolog family member A
hsa-miR-577	1	0	1	1	1	1	ATP6V1A	ATPase, H+ transporting, lysosomal 70kDa, V1 subunit A
hsa-miR-577	1	0	1	1	1	1	BCL6	B-cell CLL/lymphoma 6
hsa-miR-577	1	0	1	1	1	1	KLF5	Kruppel-like factor 5 (intestinal)
hsa-miR-577	1	0	1	1	1	1	BTG1	B-cell translocation gene 1, anti-proliferative
hsa-miR-577	1	0	1	1	1	1	CALM2	calmodulin 2 (phosphorylase kinase, delta)
hsa-miR-577	1	0	1	0	1	1	CCND2	cyclin D2
hsa-miR-577	1	0	1	1	1	1	CDC25A	cell division cycle 25 homolog A (S. pombe)
hsa-miR-577	1	0	1	1	1	1	CDH2	cadherin 2, type 1, N-cadherin (neuronal)
hsa-miR-577	0	0	1	1	1	1	CHGB	chromogranin B (secretogranin 1)
hsa-miR-577	1	0	1	0	1	1	CHML	choroideremia-like (Rab escort protein 2)
hsa-miR-577	0	0	1	1	1	1	CKS2	CDC28 protein kinase regulatory subunit 2
hsa-miR-577	1	0	1	1	1	1	CNN3	calponin 3, acidic
hsa-miR-577	1	0	1	0	1	1	COL19A1	collagen, type XIX, alpha 1
hsa-miR-577	0	0	1	0	0	0	CPE	carboxypeptidase E
hsa-miR-577	1	0	1	1	1	1	CREM	cAMP responsive element modulator
hsa-miR-577	0	0	1	1	1	1	CSN2	casein beta
hsa-miR-577	0	0	1	1	1	1	CTSE	cathepsin E
hsa-miR-577	0	0	1	1	1	1	DLAT	dihydrolipoamide S-acetyltransferase
hsa-miR-577	0	0	1	1	1	1	DSG1	desmoglein 1
hsa-miR-577	1	0	1	1	1	1	E2F3	E2F transcription factor 3
hsa-miR-577	0	0	1	1	0	0	EDN2	endothelin 2
hsa-miR-577	1	0	1	1	1	1	FGF7	fibroblast growth factor 7
hsa-miR-577	1	0	1	0	1	1	FUT4	fucosyltransferase 4 (alpha (1,3) fucosyltransferase, myeloid-specific)
hsa-miR-577	0	0	1	1	0	0	GARS	glycyl-tRNA synthetase
hsa-miR-577	1	0	1	1	1	1	GAS1	growth arrest-specific 1
hsa-miR-577	0	0	1	0	1	1	GCLM	glutamate-cysteine ligase, modifier subunit
hsa-miR-577	0	0	1	1	1	1	GNAQ	guanine nucleotide binding protein (G protein), q polypeptide
hsa-miR-577	0	0	1	1	1	1	CXCL3	chemokine (C-X-C motif) ligand 3
hsa-miR-577	0	0	1	0	1	1	GYPA	glycophorin A (MNS blood group)
hsa-miR-577	1	0	1	1	0	0	HK3	hexokinase 3 (white cell)
hsa-miR-577	0	0	1	1	1	1	FOXN2	forkhead box N2
hsa-miR-577	0	0	1	1	1	1	IRF8	interferon regulatory factor 8
hsa-miR-577	0	0	1	1	1	1	IL6ST	interleukin 6 signal transducer (gp130, oncostatin M receptor)
hsa-miR-577	1	0	1	0	1	1	IRF2	interferon regulatory factor 2
hsa-miR-577	1	0	1	1	1	1	ISL1	ISL LIM homeobox 1
hsa-miR-577	1	0	1	1	1	1	ITGA9	integrin, alpha 9
hsa-miR-577	0	0	1	0	1	1	ITGAV	integrin, alpha V
hsa-miR-577	1	0	1	1	1	1	ITGB8	integrin, beta 8
hsa-miR-577	1	0	1	1	1	1	JAG2	jagged 2
hsa-miR-577	1	0	1	1	1	1	KCNJ10	potassium inwardly-rectifying channel, subfamily J, member 10
hsa-miR-577	1	0	1	1	1	1	KPNA4	karyopherin alpha 4 (importin alpha 3)
hsa-miR-577	1	0	1	0	1	1	LAMC1	laminin, gamma 1 (formerly LAMB2)
hsa-miR-577	1	0	1	1	1	1	LRP6	low density lipoprotein receptor-related protein 6
hsa-miR-577	1	0	1	1	1	1	LY75	lymphocyte antigen 75
hsa-miR-577	0	0	1	1	1	1	TACSTD2	tumor-associated calcium signal transducer 2
hsa-miR-577	0	0	1	1	1	1	MAD2L1	MAD2 mitotic arrest deficient-like 1 (yeast)
hsa-miR-577	1	0	1	1	1	1	MAFK	v-maf musculoaponeurotic fibrosarcoma oncogene homolog K (avian)
hsa-miR-577	1	0	1	1	1	1	MAX	MYC associated factor X
hsa-miR-577	0	0	1	0	1	1	CXCL9	chemokine (C-X-C motif) ligand 9
hsa-miR-577	0	0	1	1	1	1	MMP3	matrix metallopeptidase 3 (stromelysin 1, progelatinase)
hsa-miR-577	0	0	1	1	1	1	MRC1	mannose receptor, C type 1
hsa-miR-577	0	0	1	1	1	1	MTRR	5-methyltetrahydrofolate-homocysteine methyltransferase reductase
hsa-miR-577	0	0	1	1	1	1	MYOD1	myogenic differentiation 1
hsa-miR-577	1	0	1	1	1	1	NCBP1	nuclear cap binding protein subunit 1, 80kDa
hsa-miR-577	0	0	1	1	0	0	NPPB	natriuretic peptide B
hsa-miR-577	1	0	1	1	1	1	NPTX1	neuronal pentraxin I
hsa-miR-577	1	0	1	1	1	1	NPTX2	neuronal pentraxin II
hsa-miR-577	1	0	1	1	1	1	TNFRSF11B	tumor necrosis factor receptor superfamily, member 11b
hsa-miR-577	0	0	1	0	1	1	OPHN1	oligophrenin 1
hsa-miR-577	1	0	1	1	1	1	OSBP	oxysterol binding protein
hsa-miR-577	1	0	1	1	1	1	FURIN	furin (paired basic amino acid cleaving enzyme)
hsa-miR-577	1	0	1	0	1	1	PAK2	p21 protein (Cdc42/Rac)-activated kinase 2
hsa-miR-577	1	0	1	0	1	1	PAPPA	pregnancy-associated plasma protein A, pappalysin 1
hsa-miR-577	1	0	1	1	1	1	PAWR	PRKC, apoptosis, WT1, regulator
hsa-miR-577	1	0	1	1	1	1	PCDH8	protocadherin 8
hsa-miR-577	0	0	1	1	1	1	PEX13	peroxisomal biogenesis factor 13
hsa-miR-577	1	0	1	1	1	1	PHF1	PHD finger protein 1
hsa-miR-577	0	0	1	1	1	1	PIK3C2B	phosphatidylinositol-4-phosphate 3-kinase, catalytic subunit type 2 beta
hsa-miR-577	0	0	1	1	1	1	PIM1	pim-1 oncogene
hsa-miR-577	1	0	1	1	1	1	PLAGL2	pleiomorphic adenoma gene-like 2
hsa-miR-577	1	0	1	0	1	1	POU3F1	POU class 3 homeobox 1
hsa-miR-577	1	0	1	1	1	1	PPP1CB	protein phosphatase 1, catalytic subunit, beta isozyme
hsa-miR-577	1	0	1	1	1	1	PPP2R1B	protein phosphatase 2, regulatory subunit A, beta
hsa-miR-577	0	0	1	1	1	1	PREP	prolyl endopeptidase
hsa-miR-577	1	0	1	1	1	1	MAPK6	mitogen-activated protein kinase 6
hsa-miR-577	0	0	1	1	1	1	MAP2K1	mitogen-activated protein kinase kinase 1
hsa-miR-577	0	0	1	1	0	0	PSMA3	proteasome (prosome, macropain) subunit, alpha type, 3
hsa-miR-577	0	0	1	1	1	1	PSMA5	proteasome (prosome, macropain) subunit, alpha type, 5
hsa-miR-577	1	0	1	1	0	0	PSMD7	proteasome (prosome, macropain) 26S subunit, non-ATPase, 7
hsa-miR-577	1	0	1	1	1	1	PTPN2	protein tyrosine phosphatase, non-receptor type 2
hsa-miR-577	0	0	1	1	1	1	PTPN12	protein tyrosine phosphatase, non-receptor type 12
hsa-miR-577	1	0	1	1	1	1	PTX3	pentraxin 3, long
hsa-miR-577	0	0	1	1	1	1	RAB3A	RAB3A, member RAS oncogene family
hsa-miR-577	1	0	1	0	1	1	RAB6A	RAB6A, member RAS oncogene family
hsa-miR-577	1	0	1	1	1	1	RAD23B	RAD23 homolog B (S. cerevisiae)
hsa-miR-577	1	0	1	1	1	1	ARID4A	AT rich interactive domain 4A (RBP1-like)
hsa-miR-577	1	0	1	1	1	1	RGS16	regulator of G-protein signaling 16
hsa-miR-577	1	0	1	0	1	1	SORT1	sortilin 1
hsa-miR-577	0	0	1	1	1	1	CCL2	chemokine (C-C motif) ligand 2
hsa-miR-577	0	0	1	0	1	1	CXCL5	chemokine (C-X-C motif) ligand 5
hsa-miR-577	0	0	1	1	1	1	SDC2	syndecan 2
hsa-miR-577	1	0	1	0	1	1	SFRP1	secreted frizzled-related protein 1
hsa-miR-577	1	0	1	1	1	1	SRSF2	serine/arginine-rich splicing factor 2
hsa-miR-577	1	0	1	1	1	1	SRSF3	serine/arginine-rich splicing factor 3
hsa-miR-577	1	0	1	1	1	1	SH3GL2	SH3-domain GRB2-like 2
hsa-miR-577	1	0	1	1	1	1	SLC9A2	solute carrier family 9, subfamily A (NHE2, cation proton antiporter 2), member 2
hsa-miR-577	0	0	1	0	0	0	SLC18A2	solute carrier family 18 (vesicular monoamine), member 2
hsa-miR-577	1	0	1	1	1	1	SMARCC1	SWI/SNF related, matrix associated, actin dependent regulator of chromatin, subfamily c, member 1
hsa-miR-577	0	0	1	1	1	1	SNRPB2	small nuclear ribonucleoprotein polypeptide B
hsa-miR-577	1	0	1	0	1	1	SOX11	SRY (sex determining region Y)-box 11
hsa-miR-577	0	0	1	1	1	1	UAP1	UDP-N-acteylglucosamine pyrophosphorylase 1
hsa-miR-577	1	0	1	1	1	1	SRI	sorcin
hsa-miR-577	1	0	1	0	1	1	STC1	stanniocalcin 1
hsa-miR-577	1	0	1	1	1	1	SYN2	synapsin II
hsa-miR-577	1	0	1	1	1	1	TAF4	TAF4 RNA polymerase II, TATA box binding protein (TBP)-associated factor, 135kDa
hsa-miR-577	1	0	1	1	1	1	TFAP2B	transcription factor AP-2 beta (activating enhancer binding protein 2 beta)
hsa-miR-577	1	0	1	1	1	1	TFAP2C	transcription factor AP-2 gamma (activating enhancer binding protein 2 gamma)
hsa-miR-577	1	0	1	0	1	1	THBS1	thrombospondin 1
hsa-miR-577	1	0	1	1	1	1	TIAM1	T-cell lymphoma invasion and metastasis 1
hsa-miR-577	0	0	1	1	1	1	TPP2	tripeptidyl peptidase II
hsa-miR-577	1	0	1	1	1	1	TRPC1	transient receptor potential cation channel, subfamily C, member 1
hsa-miR-577	1	0	1	0	1	1	TSPYL1	TSPY-like 1
hsa-miR-577	1	0	1	0	1	1	TUB	tubby homolog (mouse)
hsa-miR-577	1	0	1	1	1	1	UBE2B	ubiquitin-conjugating enzyme E2B
hsa-miR-577	1	0	1	1	1	1	UBE2N	ubiquitin-conjugating enzyme E2N
hsa-miR-577	1	0	1	0	1	1	YWHAB	tyrosine 3-monooxygenase/tryptophan 5-monooxygenase activation protein, beta polypeptide
hsa-miR-577	0	0	1	0	1	1	ZFY	zinc finger protein, Y-linked
hsa-miR-577	1	0	1	1	1	1	ZIC3	Zic family member 3
hsa-miR-577	0	0	1	1	1	1	ZNF137P	zinc finger protein 137, pseudogene
hsa-miR-577	0	0	1	1	1	1	ZNF143	zinc finger protein 143
hsa-miR-577	1	0	1	1	1	1	FZD5	frizzled family receptor 5
hsa-miR-577	1	0	1	1	1	1	DEK	DEK oncogene
hsa-miR-577	0	0	1	1	1	1	STAM	signal transducing adaptor molecule (SH3 domain and ITAM motif) 1
hsa-miR-577	1	0	1	1	1	1	CUL5	cullin 5
hsa-miR-577	1	0	1	1	1	1	NRIP1	nuclear receptor interacting protein 1
hsa-miR-577	1	0	1	0	1	1	SNN	stannin
hsa-miR-577	1	0	1	1	1	1	FZD1	frizzled family receptor 1
hsa-miR-577	1	0	1	1	1	1	FZD7	frizzled family receptor 7
hsa-miR-577	0	0	1	1	1	1	STX7	syntaxin 7
hsa-miR-577	1	0	1	0	1	1	VAPA	VAMP (vesicle-associated membrane protein)-associated protein A, 33kDa
hsa-miR-577	1	0	1	1	1	1	DYRK2	dual-specificity tyrosine-(Y)-phosphorylation regulated kinase 2
hsa-miR-577	1	0	1	0	1	1	CUL3	cullin 3
hsa-miR-577	1	0	1	1	1	1	KLF11	Kruppel-like factor 11
hsa-miR-577	1	0	1	1	1	1	SUPT3H	suppressor of Ty 3 homolog (S. cerevisiae)
hsa-miR-577	0	0	1	1	0	0	SEMA7A	semaphorin 7A, GPI membrane anchor (John Milton Hagen blood group)
hsa-miR-577	0	0	1	1	1	1	RGS5	regulator of G-protein signaling 5
hsa-miR-577	1	0	1	0	1	1	CNTNAP1	contactin associated protein 1
hsa-miR-577	0	0	1	1	0	0	NIPSNAP1	nipsnap homolog 1 (C. elegans)
hsa-miR-577	0	0	1	1	1	1	ITGA10	integrin, alpha 10
hsa-miR-577	0	0	1	1	1	1	CHST1	carbohydrate (keratan sulfate Gal-6) sulfotransferase 1
hsa-miR-577	1	0	1	1	1	1	CBX4	chromobox homolog 4
hsa-miR-577	1	0	1	1	1	1	BHLHE40	basic helix-loop-helix family, member e40
hsa-miR-577	1	0	1	1	1	1	CDC14A	CDC14 cell division cycle 14 homolog A (S. cerevisiae)
hsa-miR-577	1	0	1	1	1	1	TNFSF11	tumor necrosis factor (ligand) superfamily, member 11
hsa-miR-577	0	0	1	1	0	0	DCHS1	dachsous 1 (Drosophila)
hsa-miR-577	1	0	1	0	1	1	TNKS	tankyrase, TRF1-interacting ankyrin-related ADP-ribose polymerase
hsa-miR-577	0	0	1	1	1	1	EIF3A	eukaryotic translation initiation factor 3, subunit A
hsa-miR-577	0	0	1	1	1	1	SCEL	sciellin
hsa-miR-577	1	0	1	1	1	1	SUCLG2	succinate-CoA ligase, GDP-forming, beta subunit
hsa-miR-577	0	0	1	1	1	1	SUCLA2	succinate-CoA ligase, ADP-forming, beta subunit
hsa-miR-577	1	0	1	1	1	1	IQGAP1	IQ motif containing GTPase activating protein 1
hsa-miR-577	1	0	1	1	1	1	NRP2	neuropilin 2
hsa-miR-577	0	0	1	1	1	1	PRPF4B	PRP4 pre-mRNA processing factor 4 homolog B (yeast)
hsa-miR-577	0	0	1	0	1	1	AP1S2	adaptor-related protein complex 1, sigma 2 subunit
hsa-miR-577	0	0	1	1	1	1	HERC1	HECT and RLD domain containing E3 ubiquitin protein ligase family member 1
hsa-miR-577	1	0	1	0	1	1	ST13	suppression of tumorigenicity 13 (colon carcinoma) (Hsp70 interacting protein)
hsa-miR-577	1	0	1	0	1	1	WASL	Wiskott-Aldrich syndrome-like
hsa-miR-577	0	0	1	1	1	1	MPZL1	myelin protein zero-like 1
hsa-miR-577	0	0	1	1	1	1	UBA3	ubiquitin-like modifier activating enzyme 3
hsa-miR-577	1	0	1	1	1	1	BTAF1	BTAF1 RNA polymerase II, B-TFIID transcription factor-associated, 170kDa (Mot1 homolog, S. cerevisiae)
hsa-miR-577	1	0	1	1	1	1	BCL2L2	BCL2-like 2
hsa-miR-577	0	0	1	1	1	1	CETN1	centrin, EF-hand protein, 1
hsa-miR-577	1	0	1	1	1	1	CTSS	cathepsin S
hsa-miR-577	1	0	1	1	1	1	EFNB2	ephrin-B2
hsa-miR-577	0	0	1	0	1	1	EIF4EBP2	eukaryotic translation initiation factor 4E binding protein 2
hsa-miR-577	1	0	1	1	1	1	GMFB	glia maturation factor, beta
hsa-miR-577	1	0	1	0	1	1	IREB2	iron-responsive element binding protein 2
hsa-miR-577	0	0	1	1	1	1	SLC1A1	solute carrier family 1 (neuronal/epithelial high affinity glutamate transporter, system Xag), member 1
hsa-miR-577	1	0	1	0	1	1	SLC1A2	solute carrier family 1 (glial high affinity glutamate transporter), member 2
hsa-miR-577	1	0	1	1	1	1	MFHAS1	malignant fibrous histiocytoma amplified sequence 1
hsa-miR-577	1	0	1	0	1	1	MED14	mediator complex subunit 14
hsa-miR-577	1	0	1	1	1	1	SOCS6	suppressor of cytokine signaling 6
hsa-miR-577	0	0	1	1	1	1	TRIP13	thyroid hormone receptor interactor 13
hsa-miR-577	0	0	1	1	1	1	EFTUD2	elongation factor Tu GTP binding domain containing 2
hsa-miR-577	1	0	1	0	1	1	AKAP6	A kinase (PRKA) anchor protein 6
hsa-miR-577	0	0	1	0	1	1	CYTIP	cytohesin 1 interacting protein
hsa-miR-577	0	0	1	1	1	1	CARTPT	CART prepropeptide
hsa-miR-577	1	0	1	1	1	1	BNIP2	BCL2/adenovirus E1B 19kDa interacting protein 2
hsa-miR-577	1	0	1	0	1	1	CEBPA	CCAAT/enhancer binding protein (C/EBP), alpha
hsa-miR-577	0	0	1	1	1	1	CETN3	centrin, EF-hand protein, 3
hsa-miR-577	0	0	1	1	1	1	COL12A1	collagen, type XII, alpha 1
hsa-miR-577	1	0	1	1	1	1	COX11	COX11 cytochrome c oxidase assembly homolog (yeast)
hsa-miR-577	0	0	1	1	0	0	CPT1B	carnitine palmitoyltransferase 1B (muscle)
hsa-miR-577	1	0	1	1	1	1	CREB1	cAMP responsive element binding protein 1
hsa-miR-577	1	0	1	1	1	1	ATF6B	activating transcription factor 6 beta
hsa-miR-577	1	0	1	1	1	1	DACH1	dachshund homolog 1 (Drosophila)
hsa-miR-577	1	0	1	1	1	1	DLX2	distal-less homeobox 2
hsa-miR-577	1	0	1	1	1	1	DUSP8	dual specificity phosphatase 8
hsa-miR-577	1	0	1	1	1	1	EGR3	early growth response 3
hsa-miR-577	1	0	1	1	1	1	EPS8	epidermal growth factor receptor pathway substrate 8
hsa-miR-577	1	0	1	0	1	1	ACSL4	acyl-CoA synthetase long-chain family member 4
hsa-miR-577	1	0	1	1	1	1	FGD1	FYVE, RhoGEF and PH domain containing 1
hsa-miR-577	1	0	1	0	1	1	FGF5	fibroblast growth factor 5
hsa-miR-577	0	0	1	0	1	1	POU4F2	POU class 4 homeobox 2
hsa-miR-577	1	0	1	0	1	1	WNT7A	wingless-type MMTV integration site family, member 7A
hsa-miR-577	0	0	1	1	1	1	XPC	xeroderma pigmentosum, complementation group C
hsa-miR-577	1	0	1	1	1	1	BAP1	BRCA1 associated protein-1 (ubiquitin carboxy-terminal hydrolase)
hsa-miR-577	0	0	1	1	1	1	SDPR	serum deprivation response
hsa-miR-577	1	0	1	1	1	1	RAB11A	RAB11A, member RAS oncogene family
hsa-miR-577	0	0	1	1	1	1	MGAM	maltase-glucoamylase (alpha-glucosidase)
hsa-miR-577	1	0	1	1	1	1	MTMR4	myotubularin related protein 4
hsa-miR-577	0	0	1	1	1	1	LATS1	LATS, large tumor suppressor, homolog 1 (Drosophila)
hsa-miR-577	1	0	1	1	1	1	RABEP1	rabaptin, RAB GTPase binding effector protein 1
hsa-miR-577	0	0	1	0	1	1	CXorf1	chromosome X open reading frame 1
hsa-miR-577	1	0	1	1	0	0	COX7A2L	cytochrome c oxidase subunit VIIa polypeptide 2 like
hsa-miR-577	1	0	1	1	1	1	MAP3K13	mitogen-activated protein kinase kinase kinase 13
hsa-miR-577	1	0	1	1	1	1	LARGE	like-glycosyltransferase
hsa-miR-577	1	0	1	1	1	1	STK17A	serine/threonine kinase 17a
hsa-miR-577	0	0	1	1	1	1	MMP20	matrix metallopeptidase 20
hsa-miR-577	1	0	1	1	1	1	NREP	neuronal regeneration related protein homolog (rat)
hsa-miR-577	1	0	1	1	1	1	MED1	mediator complex subunit 1
hsa-miR-577	0	0	1	1	1	1	LHX2	LIM homeobox 2
hsa-miR-577	1	0	1	0	1	1	CDYL	chromodomain protein, Y-like
hsa-miR-577	0	0	1	1	1	1	EIF2AK3	eukaryotic translation initiation factor 2-alpha kinase 3
hsa-miR-577	1	0	1	1	1	1	AKAP7	A kinase (PRKA) anchor protein 7
hsa-miR-577	1	0	1	0	1	1	ROCK2	Rho-associated, coiled-coil containing protein kinase 2
hsa-miR-577	1	0	1	1	1	1	ONECUT2	one cut homeobox 2
hsa-miR-577	1	0	1	1	1	1	TBPL1	TBP-like 1
hsa-miR-577	0	0	1	1	1	1	NRG2	neuregulin 2
hsa-miR-577	0	0	1	1	1	1	ATP6V1G1	ATPase, H+ transporting, lysosomal 13kDa, V1 subunit G1
hsa-miR-577	0	0	1	1	1	1	MRPL33	mitochondrial ribosomal protein L33
hsa-miR-577	1	0	1	0	1	1	SEC22B	SEC22 vesicle trafficking protein homolog B (S. cerevisiae) (gene/pseudogene)
hsa-miR-577	0	0	1	1	0	0	PDIA4	protein disulfide isomerase family A, member 4
hsa-miR-577	0	0	1	1	1	1	CLCA3P	chloride channel accessory 3, pseudogene
hsa-miR-577	0	0	1	1	1	1	CALB1	calbindin 1, 28kDa
hsa-miR-577	0	0	1	1	1	1	CDH6	cadherin 6, type 2, K-cadherin (fetal kidney)
hsa-miR-577	0	0	1	1	1	1	GDF10	growth differentiation factor 10
hsa-miR-577	1	0	1	0	1	1	KRAS	v-Ki-ras2 Kirsten rat sarcoma viral oncogene homolog
hsa-miR-577	1	0	1	1	1	1	RELN	reelin
hsa-miR-577	1	0	1	0	1	1	SEL1L	sel-1 suppressor of lin-12-like (C. elegans)
hsa-miR-577	1	0	1	1	1	1	SIAH2	siah E3 ubiquitin protein ligase 2
hsa-miR-577	1	0	1	1	0	0	ADAMTS4	ADAM metallopeptidase with thrombospondin type 1 motif, 4
hsa-miR-577	1	0	1	1	1	1	HS3ST1	heparan sulfate (glucosamine) 3-O-sulfotransferase 1
hsa-miR-577	1	0	1	1	1	1	SLC23A2	solute carrier family 23 (nucleobase transporters), member 2
hsa-miR-577	1	0	1	1	1	1	FGF19	fibroblast growth factor 19
hsa-miR-577	1	0	1	1	1	1	MED13	mediator complex subunit 13
hsa-miR-577	0	0	1	1	1	1	CLEC2B	C-type lectin domain family 2, member B
hsa-miR-577	1	0	1	1	1	1	BMI1	BMI1 polycomb ring finger oncogene
hsa-miR-577	1	0	1	0	1	1	DLX6	distal-less homeobox 6
hsa-miR-577	0	0	1	0	1	1	EPHA3	EPH receptor A3
hsa-miR-577	1	0	1	1	1	1	GAS2	growth arrest-specific 2
hsa-miR-577	0	0	1	1	1	1	MSTN	myostatin
hsa-miR-577	1	0	1	1	1	1	GPR6	G protein-coupled receptor 6
hsa-miR-577	0	0	1	1	1	1	LPAR4	lysophosphatidic acid receptor 4
hsa-miR-577	0	0	1	1	1	1	GRK5	G protein-coupled receptor kinase 5
hsa-miR-577	0	0	1	1	1	1	H1F0	H1 histone family, member 0
hsa-miR-577	1	0	1	1	1	1	HAS2	hyaluronan synthase 2
hsa-miR-577	1	0	1	1	1	1	NCL	nucleolin
hsa-miR-577	1	0	1	0	1	1	PRKCE	protein kinase C, epsilon
hsa-miR-577	0	0	1	1	1	1	SEPP1	selenoprotein P, plasma, 1
hsa-miR-577	0	0	1	1	1	1	SKIL	SKI-like oncogene
hsa-miR-577	1	0	1	1	1	1	VEGFC	vascular endothelial growth factor C
hsa-miR-577	1	0	1	0	1	1	CCDC6	coiled-coil domain containing 6
hsa-miR-577	1	0	1	1	1	1	RND2	Rho family GTPase 2
hsa-miR-577	0	0	1	1	1	1	SMC3	structural maintenance of chromosomes 3
hsa-miR-577	1	0	1	1	0	0	ZBTB22	zinc finger and BTB domain containing 22
hsa-miR-577	0	0	1	1	1	1	ZRANB2	zinc finger, RAN-binding domain containing 2
hsa-miR-577	0	0	1	1	1	1	GNPDA1	glucosamine-6-phosphate deaminase 1
hsa-miR-577	1	0	1	1	1	1	PIGK	phosphatidylinositol glycan anchor biosynthesis, class K
hsa-miR-577	1	0	1	1	1	1	GTF2E1	general transcription factor IIE, polypeptide 1, alpha 56kDa
hsa-miR-577	1	0	1	1	1	1	HOXA1	homeobox A1
hsa-miR-577	0	0	1	1	1	1	HSD11B1	hydroxysteroid (11-beta) dehydrogenase 1
hsa-miR-577	0	0	1	0	1	1	LCP2	lymphocyte cytosolic protein 2 (SH2 domain containing leukocyte protein of 76kDa)
hsa-miR-577	1	0	1	1	1	1	LNPEP	leucyl/cystinyl aminopeptidase
hsa-miR-577	1	0	1	1	1	1	MAB21L1	mab-21-like 1 (C. elegans)
hsa-miR-577	1	0	1	1	1	1	NHLH1	nescient helix loop helix 1
hsa-miR-577	1	0	1	1	1	1	NHLH2	nescient helix loop helix 2
hsa-miR-577	0	0	1	0	1	1	POU3F2	POU class 3 homeobox 2
hsa-miR-577	1	0	1	1	1	1	RGS4	regulator of G-protein signaling 4
hsa-miR-577	1	0	1	1	1	1	RHEB	Ras homolog enriched in brain
hsa-miR-577	1	0	1	1	1	1	EVI5	ecotropic viral integration site 5
hsa-miR-577	1	0	1	1	1	1	ST8SIA4	ST8 alpha-N-acetyl-neuraminide alpha-2,8-sialyltransferase 4
hsa-miR-577	0	0	1	1	0	0	SNURF	SNRPN upstream reading frame
hsa-miR-577	1	0	1	1	1	1	UST	uronyl-2-sulfotransferase
hsa-miR-577	0	0	1	1	1	1	ACTR3	ARP3 actin-related protein 3 homolog (yeast)
hsa-miR-577	0	0	1	1	1	1	RNF41	ring finger protein 41
hsa-miR-577	1	0	1	0	1	1	CALCRL	calcitonin receptor-like
hsa-miR-577	1	0	1	1	1	1	SRRM1	serine/arginine repetitive matrix 1
hsa-miR-577	0	0	1	0	1	1	STAM2	signal transducing adaptor molecule (SH3 domain and ITAM motif) 2
hsa-miR-577	0	0	1	1	1	1	ZMPSTE24	zinc metallopeptidase STE24 homolog (S. cerevisiae)
hsa-miR-577	1	0	1	1	1	1	PURA	purine-rich element binding protein A
hsa-miR-577	1	0	1	1	1	1	GOLGA3	golgin A3
hsa-miR-577	1	0	1	1	1	1	MAT2A	methionine adenosyltransferase II, alpha
hsa-miR-577	0	0	1	1	1	1	MFAP3	microfibrillar-associated protein 3
hsa-miR-577	1	0	1	1	1	1	MMP16	matrix metallopeptidase 16 (membrane-inserted)
hsa-miR-577	1	0	1	1	1	1	MTF1	metal-regulatory transcription factor 1
hsa-miR-577	0	0	1	1	1	1	MYH1	myosin, heavy chain 1, skeletal muscle, adult
hsa-miR-577	1	0	1	0	1	1	NAB1	NGFI-A binding protein 1 (EGR1 binding protein 1)
hsa-miR-577	1	0	1	1	1	1	RNF6	ring finger protein (C3H2C3 type) 6
hsa-miR-577	0	0	1	1	1	1	SOX1	SRY (sex determining region Y)-box 1
hsa-miR-577	0	0	1	1	1	1	STK10	serine/threonine kinase 10
hsa-miR-577	1	0	1	1	1	1	TSNAX	translin-associated factor X
hsa-miR-577	1	0	1	0	1	1	HDAC4	histone deacetylase 4
hsa-miR-577	1	0	1	0	1	1	HS3ST3B1	heparan sulfate (glucosamine) 3-O-sulfotransferase 3B1
hsa-miR-577	0	0	1	1	1	1	TRDN	triadin
hsa-miR-577	1	0	1	1	0	0	AGFG2	ArfGAP with FG repeats 2
hsa-miR-577	1	0	1	1	1	1	SEMA3A	sema domain, immunoglobulin domain (Ig), short basic domain, secreted, (semaphorin) 3A
hsa-miR-577	1	0	1	1	1	1	TMEM50B	transmembrane protein 50B
hsa-miR-577	1	0	1	1	1	1	DYNC1LI2	dynein, cytoplasmic 1, light intermediate chain 2
hsa-miR-577	1	0	1	1	1	1	NEFL	neurofilament, light polypeptide
hsa-miR-577	0	0	1	1	1	1	NKX3-1	NK3 homeobox 1
hsa-miR-577	0	0	1	0	1	1	OAS3	2'-5'-oligoadenylate synthetase 3, 100kDa
hsa-miR-577	0	0	1	1	1	1	PA2G4	proliferation-associated 2G4, 38kDa
hsa-miR-577	0	0	1	1	0	0	PDE6H	phosphodiesterase 6H, cGMP-specific, cone, gamma
hsa-miR-577	1	0	1	0	1	1	PITPNA	phosphatidylinositol transfer protein, alpha
hsa-miR-577	1	0	1	1	1	1	POU4F1	POU class 4 homeobox 1
hsa-miR-577	1	0	1	1	1	1	PRKAA1	protein kinase, AMP-activated, alpha 1 catalytic subunit
hsa-miR-577	1	0	1	0	1	1	PRKAA2	protein kinase, AMP-activated, alpha 2 catalytic subunit
hsa-miR-577	0	0	1	1	1	1	PRKCH	protein kinase C, eta
hsa-miR-577	1	0	1	0	1	1	SRSF6	serine/arginine-rich splicing factor 6
hsa-miR-577	1	0	1	1	1	1	STK4	serine/threonine kinase 4
hsa-miR-577	1	0	1	1	1	1	SMC1A	structural maintenance of chromosomes 1A
hsa-miR-577	1	0	1	1	1	1	TUBGCP3	tubulin, gamma complex associated protein 3
hsa-miR-577	0	0	1	1	1	1	C1D	C1D nuclear receptor corepressor
hsa-miR-577	0	0	1	1	1	1	SLC30A9	solute carrier family 30 (zinc transporter), member 9
hsa-miR-577	0	0	1	1	1	1	PIBF1	progesterone immunomodulatory binding factor 1
hsa-miR-577	1	0	1	1	1	1	ZNF238	zinc finger protein 238
hsa-miR-577	1	0	1	1	1	1	SEC23A	Sec23 homolog A (S. cerevisiae)
hsa-miR-577	0	0	1	1	1	1	CAP2	CAP, adenylate cyclase-associated protein, 2 (yeast)
hsa-miR-577	1	0	1	1	1	1	SEMA3C	sema domain, immunoglobulin domain (Ig), short basic domain, secreted, (semaphorin) 3C
hsa-miR-577	1	0	1	0	1	1	APPBP2	amyloid beta precursor protein (cytoplasmic tail) binding protein 2
hsa-miR-577	1	0	1	1	1	1	NEBL	nebulette
hsa-miR-577	1	0	1	0	1	1	GNAI3	guanine nucleotide binding protein (G protein), alpha inhibiting activity polypeptide 3
hsa-miR-577	1	0	1	1	1	1	SLC2A1	solute carrier family 2 (facilitated glucose transporter), member 1
hsa-miR-577	1	0	1	0	1	1	NCOA2	nuclear receptor coactivator 2
hsa-miR-577	1	0	1	0	1	1	IGF2BP1	insulin-like growth factor 2 mRNA binding protein 1
hsa-miR-577	0	0	1	1	1	1	CD226	CD226 molecule
hsa-miR-577	1	0	1	1	1	1	RRAGA	Ras-related GTP binding A
hsa-miR-577	1	0	1	0	1	1	MAP4K5	mitogen-activated protein kinase kinase kinase kinase 5
hsa-miR-577	1	0	1	1	1	1	B3GNT2	UDP-GlcNAc:betaGal beta-1,3-N-acetylglucosaminyltransferase 2
hsa-miR-577	1	0	1	0	1	1	API5	apoptosis inhibitor 5
hsa-miR-577	1	0	1	1	1	1	MAP3K2	mitogen-activated protein kinase kinase kinase 2
hsa-miR-577	1	0	1	1	1	1	KDM5B	lysine (K)-specific demethylase 5B
hsa-miR-577	1	0	1	1	0	0	FRS3	fibroblast growth factor receptor substrate 3
hsa-miR-577	1	0	1	1	1	1	PGRMC1	progesterone receptor membrane component 1
hsa-miR-577	0	0	1	1	0	0	NMU	neuromedin U
hsa-miR-577	0	0	1	1	1	1	FGL2	fibrinogen-like 2
hsa-miR-577	1	0	1	1	1	1	MAN1A2	mannosidase, alpha, class 1A, member 2
hsa-miR-577	0	0	1	1	1	1	NUDT3	nudix (nucleoside diphosphate linked moiety X)-type motif 3
hsa-miR-577	0	0	1	1	1	1	GLO1	glyoxalase I
hsa-miR-577	1	0	1	1	1	1	CDH10	cadherin 10, type 2 (T2-cadherin)
hsa-miR-577	1	0	1	1	1	1	DIAPH2	diaphanous homolog 2 (Drosophila)
hsa-miR-577	1	0	1	1	1	1	HIVEP2	human immunodeficiency virus type I enhancer binding protein 2
hsa-miR-577	0	0	1	1	1	1	SSFA2	sperm specific antigen 2
hsa-miR-577	1	0	1	0	1	1	SYNGAP1	synaptic Ras GTPase activating protein 1
hsa-miR-577	1	0	1	1	1	1	ZBTB33	zinc finger and BTB domain containing 33
hsa-miR-577	1	0	1	1	1	1	MORF4L1	mortality factor 4 like 1
hsa-miR-577	0	0	1	1	1	1	MSL3	male-specific lethal 3 homolog (Drosophila)
hsa-miR-577	1	0	1	1	1	1	SF3A3	splicing factor 3a, subunit 3, 60kDa
hsa-miR-577	1	0	1	1	1	1	CBX1	chromobox homolog 1
hsa-miR-577	0	0	1	1	1	1	TMED10	transmembrane emp24-like trafficking protein 10 (yeast)
hsa-miR-577	1	0	1	1	1	1	FERMT2	fermitin family member 2
hsa-miR-577	0	0	1	1	0	0	PIM2	pim-2 oncogene
hsa-miR-577	1	0	1	1	1	1	CD86	CD86 molecule
hsa-miR-577	1	0	1	1	1	1	RIT1	Ras-like without CAAX 1
hsa-miR-577	1	0	1	1	1	1	RP2	retinitis pigmentosa 2 (X-linked recessive)
hsa-miR-577	1	0	1	1	1	1	SCN1A	sodium channel, voltage-gated, type I, alpha subunit
hsa-miR-577	1	0	1	0	1	1	SLC5A3	solute carrier family 5 (sodium/myo-inositol cotransporter), member 3
hsa-miR-577	1	0	1	1	1	1	HSPA13	heat shock protein 70kDa family, member 13
hsa-miR-577	1	0	1	1	1	1	ADAMTS1	ADAM metallopeptidase with thrombospondin type 1 motif, 1
hsa-miR-577	1	0	1	1	1	1	DDX52	DEAD (Asp-Glu-Ala-Asp) box polypeptide 52
hsa-miR-577	1	0	1	1	1	1	SOX30	SRY (sex determining region Y)-box 30
hsa-miR-577	0	0	1	1	0	0	UBE2C	ubiquitin-conjugating enzyme E2C
hsa-miR-577	1	0	1	1	1	1	RAPGEF4	Rap guanine nucleotide exchange factor (GEF) 4
hsa-miR-577	0	0	1	1	1	1	TOPBP1	topoisomerase (DNA) II binding protein 1
hsa-miR-577	0	0	1	1	1	1	DNAJB4	DnaJ (Hsp40) homolog, subfamily B, member 4
hsa-miR-577	1	0	1	1	1	1	ESM1	endothelial cell-specific molecule 1
hsa-miR-577	0	0	1	1	1	1	DMC1	DMC1 dosage suppressor of mck1 homolog, meiosis-specific homologous recombination (yeast)
hsa-miR-577	1	0	1	1	1	1	FSTL1	follistatin-like 1
hsa-miR-577	1	0	1	1	1	1	UBL3	ubiquitin-like 3
hsa-miR-577	1	0	1	1	1	1	TMF1	TATA element modulatory factor 1
hsa-miR-577	1	0	1	1	1	1	UTRN	utrophin
hsa-miR-577	1	0	1	1	1	1	ZIC2	Zic family member 2
hsa-miR-577	1	0	1	1	1	1	ZNF81	zinc finger protein 81
hsa-miR-577	0	0	1	1	1	1	ZNF146	zinc finger protein 146
hsa-miR-577	1	0	1	1	1	1	VEZF1	vascular endothelial zinc finger 1
hsa-miR-577	0	0	1	0	1	1	ZXDB	zinc finger, X-linked, duplicated B
hsa-miR-577	1	0	1	1	1	1	ERLIN2	ER lipid raft associated 2
hsa-miR-577	0	0	1	1	1	1	WBP4	WW domain binding protein 4 (formin binding protein 21)
hsa-miR-577	1	0	1	1	1	1	PDCD10	programmed cell death 10
hsa-miR-577	1	0	1	1	1	1	CA5B	carbonic anhydrase VB, mitochondrial
hsa-miR-577	1	0	1	1	1	1	KLF12	Kruppel-like factor 12
hsa-miR-577	0	0	1	0	1	1	PNMA2	paraneoplastic Ma antigen 2
hsa-miR-577	0	0	1	0	1	1	AP4E1	adaptor-related protein complex 4, epsilon 1 subunit
hsa-miR-577	1	0	1	1	1	1	PHLDA1	pleckstrin homology-like domain, family A, member 1
hsa-miR-577	0	0	1	1	1	1	MMRN1	multimerin 1
hsa-miR-577	1	0	1	1	1	1	TARDBP	TAR DNA binding protein
hsa-miR-577	0	0	1	1	0	0	DPF3	D4, zinc and double PHD fingers, family 3
hsa-miR-577	1	0	1	1	1	1	ELL2	elongation factor, RNA polymerase II, 2
hsa-miR-577	1	0	1	0	1	1	ZFPM2	zinc finger protein, multitype 2
hsa-miR-577	0	0	1	1	1	1	ABCB10	ATP-binding cassette, sub-family B (MDR/TAP), member 10
hsa-miR-577	1	0	1	0	1	1	CASP8AP2	caspase 8 associated protein 2
hsa-miR-577	0	0	1	1	1	1	EHF	ets homologous factor
hsa-miR-577	1	0	1	1	1	1	FBXL3	F-box and leucine-rich repeat protein 3
hsa-miR-577	1	0	1	1	1	1	MGAT4A	mannosyl (alpha-1,3-)-glycoprotein beta-1,4-N-acetylglucosaminyltransferase, isozyme A
hsa-miR-577	1	0	1	1	1	1	RHOQ	ras homolog family member Q
hsa-miR-577	1	0	1	1	1	1	HEY2	hairy/enhancer-of-split related with YRPW motif 2
hsa-miR-577	1	0	1	1	1	1	HS2ST1	heparan sulfate 2-O-sulfotransferase 1
hsa-miR-577	1	0	1	1	1	1	KCND2	potassium voltage-gated channel, Shal-related subfamily, member 2
hsa-miR-577	1	0	1	0	1	1	G3BP2	GTPase activating protein (SH3 domain) binding protein 2
hsa-miR-577	1	0	1	0	1	1	FBXL7	F-box and leucine-rich repeat protein 7
[truncated: 1,176 more rows]
