# Supplementary material for: Profiling of Selected MicroRNAs in Proliferative Eutopic Endometrium of Women with Ovarian Endometriosis
Source: Biomed Res Int. 2015 Aug 20;2015:760698. doi: 10.1155/2015/760698 (PMC4558423; doi:10.1155/2015/760698)
Supplement: Supplementary file 1 — Table I: The names of miRNAs significantly differentially expressed between eutopic endometrium of patients with endometriosis vs eutopic endometrium of patients without endometriosis. Table II: The associations between miRNA and mRNA, which presents detailed results of the search of six major databases i.e targetscan, tarbase, miranda, mirbase, mirtarget2 and pictar. [file 760698.f1.zip › 760698.f1/Table II/hsa-miR-579.tsv]

miR	targetscan	tarbase	miranda	mirbase	mirtarget2	pictar	GeneSymbol	GeneName
hsa-miR-579	1	0	1	1	1	1	ARNTL	aryl hydrocarbon receptor nuclear translocator-like
hsa-miR-579	1	0	1	1	1	1	DAAM2	dishevelled associated activator of morphogenesis 2
hsa-miR-579	1	0	1	1	1	1	FAM65B	family with sequence similarity 65, member B
hsa-miR-579	1	0	1	0	1	1	KIAA0408	KIAA0408
hsa-miR-579	1	0	1	1	1	1	NUPL1	nucleoporin like 1
hsa-miR-579	1	0	1	1	1	1	PPIP5K2	diphosphoinositol pentakisphosphate kinase 2
hsa-miR-579	1	0	1	1	0	0	OTUD3	OTU domain containing 3
hsa-miR-579	1	0	1	1	1	1	RNGTT	RNA guanylyltransferase and 5'-phosphatase
hsa-miR-579	1	0	1	1	1	1	BAI3	brain-specific angiogenesis inhibitor 3
hsa-miR-579	1	0	1	1	1	1	SLC4A7	solute carrier family 4, sodium bicarbonate cotransporter, member 7
hsa-miR-579	1	0	1	1	1	1	HIPK1	homeodomain interacting protein kinase 1
hsa-miR-579	0	0	1	1	1	1	L3MBTL1	l(3)mbt-like 1 (Drosophila)
hsa-miR-579	0	0	1	1	0	0	ATP10B	ATPase, class V, type 10B
hsa-miR-579	1	0	1	0	1	1	DOCK4	dedicator of cytokinesis 4
hsa-miR-579	1	0	1	0	1	1	RBM12	RNA binding motif protein 12
hsa-miR-579	1	0	1	1	1	1	DNM3	dynamin 3
hsa-miR-579	1	0	1	1	1	1	DMXL2	Dmx-like 2
hsa-miR-579	0	0	1	1	1	1	WDR47	WD repeat domain 47
hsa-miR-579	1	0	1	1	1	1	UBR5	ubiquitin protein ligase E3 component n-recognin 5
hsa-miR-579	1	0	1	1	1	1	ARHGEF15	Rho guanine nucleotide exchange factor (GEF) 15
hsa-miR-579	1	0	1	1	1	1	RNMT	RNA (guanine-7-) methyltransferase
hsa-miR-579	1	0	1	1	1	1	SEMA4F	sema domain, immunoglobulin domain (Ig), transmembrane domain (TM) and short cytoplasmic domain, (semaphorin) 4F
hsa-miR-579	1	0	1	1	1	1	CALCR	calcitonin receptor
hsa-miR-579	1	0	1	0	0	0	DTX4	deltex homolog 4 (Drosophila)
hsa-miR-579	1	0	1	1	1	1	CIT	citron (rho-interacting, serine/threonine kinase 21)
hsa-miR-579	1	0	1	1	1	1	NLGN4Y	neuroligin 4, Y-linked
hsa-miR-579	0	0	1	1	1	1	FASTKD2	FAST kinase domains 2
hsa-miR-579	0	0	1	1	0	0	FAM149B1	family with sequence similarity 149, member B1
hsa-miR-579	1	0	1	1	1	1	NTNG1	netrin G1
hsa-miR-579	0	0	1	1	1	1	TBC1D30	TBC1 domain family, member 30
hsa-miR-579	1	0	1	1	1	1	PALLD	palladin, cytoskeletal associated protein
hsa-miR-579	1	0	1	1	0	0	FRMD4B	FERM domain containing 4B
hsa-miR-579	1	0	1	1	1	1	FOXJ3	forkhead box J3
hsa-miR-579	1	0	1	1	1	1	NLGN1	neuroligin 1
hsa-miR-579	1	0	1	1	1	1	PRRC2C	proline-rich coiled-coil 2C
hsa-miR-579	1	0	1	1	1	1	SPIRE1	spire homolog 1 (Drosophila)
hsa-miR-579	1	0	1	1	1	1	ZMIZ1	zinc finger, MIZ-type containing 1
hsa-miR-579	1	0	1	0	0	0	HEG1	HEG homolog 1 (zebrafish)
hsa-miR-579	1	0	1	1	0	0	ATAD2B	ATPase family, AAA domain containing 2B
hsa-miR-579	1	0	1	0	1	1	ANKFY1	ankyrin repeat and FYVE domain containing 1
hsa-miR-579	0	0	1	0	0	0	MTA3	metastasis associated 1 family, member 3
hsa-miR-579	1	0	1	0	1	1	INTS2	integrator complex subunit 2
hsa-miR-579	1	0	1	1	1	1	RALGDS	ral guanine nucleotide dissociation stimulator
hsa-miR-579	1	0	1	1	1	1	PCDH19	protocadherin 19
hsa-miR-579	1	0	1	0	1	1	KCTD16	potassium channel tetramerisation domain containing 16
hsa-miR-579	1	0	1	1	1	1	ATP2C1	ATPase, Ca++ transporting, type 2C, member 1
hsa-miR-579	0	0	1	1	1	1	SCAPER	S-phase cyclin A-associated protein in the ER
hsa-miR-579	1	0	1	1	1	1	BAZ2B	bromodomain adjacent to zinc finger domain, 2B
hsa-miR-579	0	0	1	0	0	0	NYAP2	neuronal tyrosine-phosphorylated phosphoinositide-3-kinase adaptor 2
hsa-miR-579	1	0	1	1	1	1	FRAS1	Fraser syndrome 1
hsa-miR-579	1	0	1	1	0	0	KIAA1549	KIAA1549
hsa-miR-579	1	0	1	0	1	1	IGDCC4	immunoglobulin superfamily, DCC subclass, member 4
hsa-miR-579	1	0	1	1	1	1	ZNF532	zinc finger protein 532
hsa-miR-579	1	0	1	1	0	0	MAGI3	membrane associated guanylate kinase, WW and PDZ domain containing 3
hsa-miR-579	1	0	1	0	0	0	TANC2	tetratricopeptide repeat, ankyrin repeat and coiled-coil containing 2
hsa-miR-579	1	0	1	1	1	1	PHF21A	PHD finger protein 21A
hsa-miR-579	0	0	1	1	1	1	BHLHB9	basic helix-loop-helix domain containing, class B, 9
hsa-miR-579	0	0	1	0	1	1	SETD5	SET domain containing 5
hsa-miR-579	1	0	1	1	1	1	NPAS3	neuronal PAS domain protein 3
hsa-miR-579	0	0	1	1	1	1	SPOCK3	sparc/osteonectin, cwcv and kazal-like domains proteoglycan (testican) 3
hsa-miR-579	0	0	1	1	1	1	UNC80	unc-80 homolog (C. elegans)
hsa-miR-579	0	0	1	1	1	1	C3orf15	chromosome 3 open reading frame 15
hsa-miR-579	1	0	1	1	1	1	CSMD3	CUB and Sushi multiple domains 3
hsa-miR-579	0	0	1	0	0	0	MYSM1	Myb-like, SWIRM and MPN domains 1
hsa-miR-579	0	0	1	1	0	0	SEC16B	SEC16 homolog B (S. cerevisiae)
hsa-miR-579	1	0	1	1	1	1	LSM14A	LSM14A, SCD6 homolog A (S. cerevisiae)
hsa-miR-579	1	0	1	1	1	1	MAT2B	methionine adenosyltransferase II, beta
hsa-miR-579	1	0	1	1	1	1	OXR1	oxidation resistance 1
hsa-miR-579	1	0	1	1	1	1	SH3TC2	SH3 domain and tetratricopeptide repeats 2
hsa-miR-579	0	0	1	1	0	0	CIRH1A	cirrhosis, autosomal recessive 1A (cirhin)
hsa-miR-579	1	0	1	1	1	1	PRDM16	PR domain containing 16
hsa-miR-579	1	0	1	0	0	0	ZBTB34	zinc finger and BTB domain containing 34
hsa-miR-579	1	0	1	1	1	1	ACBD5	acyl-CoA binding domain containing 5
hsa-miR-579	0	0	1	1	1	1	MCF2	MCF.2 cell line derived transforming sequence
hsa-miR-579	0	0	1	0	1	1	RASSF8	Ras association (RalGDS/AF-6) domain family (N-terminal) member 8
hsa-miR-579	0	0	1	1	0	0	ANKRD18A	ankyrin repeat domain 18A
hsa-miR-579	1	0	1	1	1	1	UBR3	ubiquitin protein ligase E3 component n-recognin 3 (putative)
hsa-miR-579	1	0	1	1	1	1	C11orf57	chromosome 11 open reading frame 57
hsa-miR-579	0	0	1	1	1	1	PAK3	p21 protein (Cdc42/Rac)-activated kinase 3
hsa-miR-579	0	0	1	1	1	1	PMS1	PMS1 postmeiotic segregation increased 1 (S. cerevisiae)
hsa-miR-579	1	0	1	1	1	1	PAN3	PAN3 poly(A) specific ribonuclease subunit homolog (S. cerevisiae)
hsa-miR-579	1	0	1	0	1	1	LIN54	lin-54 homolog (C. elegans)
hsa-miR-579	0	0	1	1	0	0	SGCE	sarcoglycan, epsilon
hsa-miR-579	1	1	1	1	1	1	BACE1	beta-site APP-cleaving enzyme 1
hsa-miR-579	1	0	1	1	1	1	NRXN2	neurexin 2
hsa-miR-579	0	0	1	1	1	1	FN1	fibronectin 1
hsa-miR-579	1	0	1	1	1	1	UBE3A	ubiquitin protein ligase E3A
hsa-miR-579	1	0	1	1	1	1	ADARB1	adenosine deaminase, RNA-specific, B1
hsa-miR-579	1	0	1	1	1	1	TRIM36	tripartite motif containing 36
hsa-miR-579	1	0	1	0	1	1	CCDC88A	coiled-coil domain containing 88A
hsa-miR-579	1	0	1	1	1	1	LTBP1	latent transforming growth factor beta binding protein 1
hsa-miR-579	1	0	1	1	1	1	VLDLR	very low density lipoprotein receptor
hsa-miR-579	0	0	1	0	1	1	ATR	ataxia telangiectasia and Rad3 related
hsa-miR-579	0	0	1	0	1	1	ITPR1	inositol 1,4,5-trisphosphate receptor, type 1
hsa-miR-579	1	0	1	1	1	1	PML	promyelocytic leukemia
hsa-miR-579	1	0	1	1	1	1	PHC1	polyhomeotic homolog 1 (Drosophila)
hsa-miR-579	1	0	1	1	1	1	SYNCRIP	synaptotagmin binding, cytoplasmic RNA interacting protein
hsa-miR-579	1	0	1	1	1	1	E2F5	E2F transcription factor 5, p130-binding
hsa-miR-579	1	0	1	1	1	1	FMR1	fragile X mental retardation 1
hsa-miR-579	1	0	1	1	1	1	PRKACB	protein kinase, cAMP-dependent, catalytic, beta
hsa-miR-579	1	0	1	0	1	1	DPYSL2	dihydropyrimidinase-like 2
hsa-miR-579	1	0	1	0	1	1	ETV1	ets variant 1
hsa-miR-579	0	0	1	1	1	1	DDX39B	DEAD (Asp-Glu-Ala-Asp) box polypeptide 39B
hsa-miR-579	1	0	1	1	1	1	REV3L	REV3-like, polymerase (DNA directed), zeta, catalytic subunit
hsa-miR-579	1	0	1	1	1	1	EPHA7	EPH receptor A7
hsa-miR-579	1	0	1	1	1	1	TWF1	twinfilin, actin-binding protein, homolog 1 (Drosophila)
hsa-miR-579	1	0	1	1	1	1	SATB2	SATB homeobox 2
hsa-miR-579	0	0	1	1	0	0	PSMB2	proteasome (prosome, macropain) subunit, beta type, 2
hsa-miR-579	0	0	1	1	1	1	GPM6B	glycoprotein M6B
hsa-miR-579	1	0	1	1	1	1	ARHGEF3	Rho guanine nucleotide exchange factor (GEF) 3
hsa-miR-579	0	0	1	1	1	1	KIF3A	kinesin family member 3A
hsa-miR-579	0	0	1	1	1	1	CHN1	chimerin (chimaerin) 1
hsa-miR-579	1	0	1	0	1	1	ADD3	adducin 3 (gamma)
hsa-miR-579	1	0	1	1	1	1	TEAD1	TEA domain family member 1 (SV40 transcriptional enhancer factor)
hsa-miR-579	1	0	1	1	1	1	ZFX	zinc finger protein, X-linked
hsa-miR-579	1	0	1	1	1	1	PHLDB2	pleckstrin homology-like domain, family B, member 2
hsa-miR-579	0	0	1	1	1	1	PLD1	phospholipase D1, phosphatidylcholine-specific
hsa-miR-579	1	0	1	0	1	1	PDE7B	phosphodiesterase 7B
hsa-miR-579	1	0	1	1	1	1	APC	adenomatous polyposis coli
hsa-miR-579	1	0	1	1	1	1	PDLIM3	PDZ and LIM domain 3
hsa-miR-579	1	0	1	1	1	1	DLGAP2	discs, large (Drosophila) homolog-associated protein 2
hsa-miR-579	1	0	1	0	1	1	MLL2	myeloid/lymphoid or mixed-lineage leukemia 2
hsa-miR-579	1	0	1	1	1	1	SLC4A4	solute carrier family 4, sodium bicarbonate cotransporter, member 4
hsa-miR-579	1	0	1	0	1	1	PDE4D	phosphodiesterase 4D, cAMP-specific
hsa-miR-579	1	0	1	1	1	1	PCDH17	protocadherin 17
hsa-miR-579	0	0	1	1	1	1	SH3GL3	SH3-domain GRB2-like 3
hsa-miR-579	0	0	1	1	1	1	CYP4F3	cytochrome P450, family 4, subfamily F, polypeptide 3
hsa-miR-579	1	0	1	1	1	1	CTNND1	catenin (cadherin-associated protein), delta 1
hsa-miR-579	1	0	1	1	1	1	TP63	tumor protein p63
hsa-miR-579	1	0	1	1	1	1	AKAP9	A kinase (PRKA) anchor protein (yotiao) 9
hsa-miR-579	0	0	1	1	1	1	MINPP1	multiple inositol-polyphosphate phosphatase 1
hsa-miR-579	0	0	1	0	0	0	C3orf79	chromosome 3 open reading frame 79
hsa-miR-579	0	0	1	1	1	1	RGS7	regulator of G-protein signaling 7
hsa-miR-579	0	0	1	1	1	1	RER1	RER1 retention in endoplasmic reticulum 1 homolog (S. cerevisiae)
hsa-miR-579	1	0	1	0	1	1	MAP4K4	mitogen-activated protein kinase kinase kinase kinase 4
hsa-miR-579	1	0	1	1	1	1	GLS	glutaminase
hsa-miR-579	1	0	1	1	1	1	SLMAP	sarcolemma associated protein
hsa-miR-579	1	0	1	0	1	1	CD164	CD164 molecule, sialomucin
hsa-miR-579	0	0	1	1	0	0	RBM5	RNA binding motif protein 5
hsa-miR-579	0	0	1	1	0	0	COPB1	coatomer protein complex, subunit beta 1
hsa-miR-579	1	0	1	1	1	1	LRRFIP1	leucine rich repeat (in FLII) interacting protein 1
hsa-miR-579	0	0	1	1	1	1	COG6	component of oligomeric golgi complex 6
hsa-miR-579	1	0	1	0	1	1	CDK14	cyclin-dependent kinase 14
hsa-miR-579	0	0	1	1	1	1	TIAM2	T-cell lymphoma invasion and metastasis 2
hsa-miR-579	0	0	1	1	1	1	ACIN1	apoptotic chromatin condensation inducer 1
hsa-miR-579	0	0	1	1	1	1	FAM35A	family with sequence similarity 35, member A
hsa-miR-579	0	0	1	1	1	1	CTNNAL1	catenin (cadherin-associated protein), alpha-like 1
hsa-miR-579	1	0	1	1	1	1	SORBS1	sorbin and SH3 domain containing 1
hsa-miR-579	1	0	1	1	1	1	C14orf129	chromosome 14 open reading frame 129
hsa-miR-579	0	0	1	1	1	1	AIG1	androgen-induced 1
hsa-miR-579	1	0	1	1	1	1	USP15	ubiquitin specific peptidase 15
hsa-miR-579	0	0	1	0	1	1	PDP1	pyruvate dehyrogenase phosphatase catalytic subunit 1
hsa-miR-579	1	0	1	1	1	1	STXBP6	syntaxin binding protein 6 (amisyn)
hsa-miR-579	1	0	1	1	0	0	ZCCHC4	zinc finger, CCHC domain containing 4
hsa-miR-579	1	0	1	1	1	1	SEPT9	septin 9
hsa-miR-579	0	0	1	0	1	1	SLC38A4	solute carrier family 38, member 4
hsa-miR-579	0	0	1	0	0	0	BPESC1	blepharophimosis, epicanthus inversus and ptosis, candidate 1 (non-protein coding)
hsa-miR-579	1	0	1	1	1	1	TSC22D2	TSC22 domain family, member 2
hsa-miR-579	1	0	1	1	1	1	CCNL1	cyclin L1
hsa-miR-579	1	0	1	1	1	1	KCNMB2	potassium large conductance calcium-activated channel, subfamily M, beta member 2
hsa-miR-579	0	0	1	1	0	0	DBNDD2	dysbindin (dystrobrevin binding protein 1) domain containing 2
hsa-miR-579	1	0	1	1	1	1	OGT	O-linked N-acetylglucosamine (GlcNAc) transferase
hsa-miR-579	1	0	1	1	1	1	C21orf91	chromosome 21 open reading frame 91
hsa-miR-579	1	0	1	1	1	1	SNTB2	syntrophin, beta 2 (dystrophin-associated protein A1, 59kDa, basic component 2)
hsa-miR-579	1	0	1	1	1	1	STRN3	striatin, calmodulin binding protein 3
hsa-miR-579	0	0	1	1	1	1	DOCK10	dedicator of cytokinesis 10
hsa-miR-579	0	0	1	1	0	0	ELMOD3	ELMO/CED-12 domain containing 3
hsa-miR-579	1	0	1	1	1	1	ABI2	abl-interactor 2
hsa-miR-579	1	0	1	1	1	1	SH3GLB1	SH3-domain GRB2-like endophilin B1
hsa-miR-579	1	0	1	0	1	1	TRPS1	trichorhinophalangeal syndrome I
hsa-miR-579	0	0	1	1	1	1	C21orf7	chromosome 21 open reading frame 7
hsa-miR-579	0	0	1	1	1	1	ZNF331	zinc finger protein 331
hsa-miR-579	0	0	1	1	1	1	ZNF638	zinc finger protein 638
hsa-miR-579	0	0	1	0	1	1	ERBB2IP	erbb2 interacting protein
hsa-miR-579	1	0	1	1	1	1	CALN1	calneuron 1
hsa-miR-579	0	0	1	1	1	1	PARP9	poly (ADP-ribose) polymerase family, member 9
hsa-miR-579	1	0	1	1	1	1	BIVM	basic, immunoglobulin-like variable motif containing
hsa-miR-579	1	0	1	0	1	1	USP32	ubiquitin specific peptidase 32
hsa-miR-579	1	0	1	1	1	1	BBC3	BCL2 binding component 3
hsa-miR-579	1	0	1	1	1	1	ATAD1	ATPase family, AAA domain containing 1
hsa-miR-579	0	0	1	1	1	1	CASP8	caspase 8, apoptosis-related cysteine peptidase
hsa-miR-579	0	0	1	1	1	1	ORMDL1	ORM1-like 1 (S. cerevisiae)
hsa-miR-579	1	0	1	1	1	1	ZAK	sterile alpha motif and leucine zipper containing kinase AZK
hsa-miR-579	0	0	1	1	1	1	LGI1	leucine-rich, glioma inactivated 1
hsa-miR-579	1	0	1	1	1	1	ZC3H14	zinc finger CCCH-type containing 14
hsa-miR-579	1	0	1	1	1	1	WAPAL	wings apart-like homolog (Drosophila)
hsa-miR-579	1	0	1	1	1	1	F3	coagulation factor III (thromboplastin, tissue factor)
hsa-miR-579	0	0	1	1	1	1	CHODL	chondrolectin
hsa-miR-579	1	0	1	1	1	1	PTBP2	polypyrimidine tract binding protein 2
hsa-miR-579	1	0	1	0	1	1	IL1RAP	interleukin 1 receptor accessory protein
hsa-miR-579	1	0	1	1	1	1	GPR64	G protein-coupled receptor 64
hsa-miR-579	1	0	1	1	1	1	AFF2	AF4/FMR2 family, member 2
hsa-miR-579	1	0	1	1	1	1	PLAGL1	pleiomorphic adenoma gene-like 1
hsa-miR-579	0	0	1	1	1	1	TCFL5	transcription factor-like 5 (basic helix-loop-helix)
hsa-miR-579	0	0	1	0	0	0	CACNA2D3	calcium channel, voltage-dependent, alpha 2/delta subunit 3
hsa-miR-579	0	0	1	1	1	1	CD28	CD28 molecule
hsa-miR-579	0	0	1	0	0	0	CASC2	cancer susceptibility candidate 2 (non-protein coding)
hsa-miR-579	0	0	1	1	1	1	MED23	mediator complex subunit 23
hsa-miR-579	1	0	1	1	1	1	ARL4C	ADP-ribosylation factor-like 4C
hsa-miR-579	0	0	1	1	1	1	PHACTR3	phosphatase and actin regulator 3
hsa-miR-579	0	0	1	1	0	0	IL4I1	interleukin 4 induced 1
hsa-miR-579	1	0	1	1	1	1	PPP1R9A	protein phosphatase 1, regulatory subunit 9A
hsa-miR-579	0	0	1	1	0	0	NHLRC2	NHL repeat containing 2
hsa-miR-579	1	0	1	1	1	1	AKAP2	A kinase (PRKA) anchor protein 2
hsa-miR-579	1	0	1	0	1	1	NFAT5	nuclear factor of activated T-cells 5, tonicity-responsive
hsa-miR-579	0	0	1	1	1	1	OLFM4	olfactomedin 4
hsa-miR-579	0	0	1	1	0	0	RADIL	Ras association and DIL domains
hsa-miR-579	1	0	1	1	1	1	PTBP3	polypyrimidine tract binding protein 3
hsa-miR-579	0	0	1	1	1	1	MCOLN3	mucolipin 3
hsa-miR-579	1	0	1	1	1	1	ACER3	alkaline ceramidase 3
hsa-miR-579	0	0	1	1	1	1	MBNL3	muscleblind-like splicing regulator 3
hsa-miR-579	1	0	1	1	1	1	MAEA	macrophage erythroblast attacher
hsa-miR-579	1	0	1	1	1	1	SLCO5A1	solute carrier organic anion transporter family, member 5A1
hsa-miR-579	0	0	1	0	0	0	LOC149134	uncharacterized LOC149134
hsa-miR-579	1	0	1	1	1	1	S100PBP	S100P binding protein
hsa-miR-579	1	0	1	0	1	1	DCAF17	DDB1 and CUL4 associated factor 17
hsa-miR-579	0	0	1	1	1	1	TTC23	tetratricopeptide repeat domain 23
hsa-miR-579	1	0	1	1	1	1	STARD7	StAR-related lipid transfer (START) domain containing 7
hsa-miR-579	0	0	1	1	1	1	C14orf118	chromosome 14 open reading frame 118
hsa-miR-579	0	0	1	0	0	0	LOC284561	uncharacterized LOC284561
hsa-miR-579	1	0	1	1	1	1	DERL1	derlin 1
hsa-miR-579	0	0	1	1	1	1	CWF19L1	CWF19-like 1, cell cycle control (S. pombe)
hsa-miR-579	0	0	1	1	1	1	CXorf57	chromosome X open reading frame 57
hsa-miR-579	1	0	1	1	1	1	DYRK2	dual-specificity tyrosine-(Y)-phosphorylation regulated kinase 2
hsa-miR-579	0	0	1	0	1	1	ATXN1L	ataxin 1-like
hsa-miR-579	0	0	1	1	1	1	CC2D2A	coiled-coil and C2 domain containing 2A
hsa-miR-579	0	0	1	0	0	0	LINC00340	long intergenic non-protein coding RNA 340
hsa-miR-579	0	0	1	1	1	1	FAM124B	family with sequence similarity 124B
hsa-miR-579	0	0	1	0	1	1	FLJ22763	uncharacterized LOC401081
hsa-miR-579	0	0	1	1	1	1	USP48	ubiquitin specific peptidase 48
hsa-miR-579	0	0	1	0	1	1	FLJ23152	uncharacterized LOC401236
hsa-miR-579	1	0	1	1	1	1	ITGA9	integrin, alpha 9
hsa-miR-579	0	0	1	0	1	1	ZCCHC8	zinc finger, CCHC domain containing 8
hsa-miR-579	0	0	1	1	1	1	GTF2H1	general transcription factor IIH, polypeptide 1, 62kDa
hsa-miR-579	1	0	1	0	1	1	TOX3	TOX high mobility group box family member 3
hsa-miR-579	1	0	1	1	1	1	RNF185	ring finger protein 185
hsa-miR-579	0	0	1	0	0	0	LOC729852	uncharacterized LOC729852
hsa-miR-579	1	0	1	1	1	1	FOXP1	forkhead box P1
hsa-miR-579	1	0	1	1	1	1	SEC63	SEC63 homolog (S. cerevisiae)
hsa-miR-579	1	0	1	1	1	1	FAM53C	family with sequence similarity 53, member C
hsa-miR-579	0	0	1	0	1	1	TWSG1	twisted gastrulation homolog 1 (Drosophila)
hsa-miR-579	1	0	1	1	1	1	SLC38A1	solute carrier family 38, member 1
hsa-miR-579	1	0	1	1	1	1	GPD2	glycerol-3-phosphate dehydrogenase 2 (mitochondrial)
hsa-miR-579	1	0	1	1	1	1	STRBP	spermatid perinuclear RNA binding protein
hsa-miR-579	1	0	1	1	1	1	KCTD15	potassium channel tetramerisation domain containing 15
hsa-miR-579	0	0	1	1	0	0	FAM153B	family with sequence similarity 153, member B
hsa-miR-579	0	0	1	1	1	1	MTRF1	mitochondrial translational release factor 1
hsa-miR-579	1	0	1	0	1	1	AP1G1	adaptor-related protein complex 1, gamma 1 subunit
hsa-miR-579	0	0	1	0	0	0	FLJ30838	uncharacterized LOC400955
hsa-miR-579	1	0	1	1	1	1	FRMD6	FERM domain containing 6
hsa-miR-579	0	0	1	0	0	0	LOC219688	uncharacterized LOC219688
hsa-miR-579	0	0	1	0	0	0	FLJ31104	uncharacterized LOC441072
hsa-miR-579	0	0	1	0	0	0	LOC201617	uncharacterized LOC201617
hsa-miR-579	1	0	1	0	1	1	RAB1A	RAB1A, member RAS oncogene family
hsa-miR-579	1	0	1	1	1	1	ZNF664	zinc finger protein 664
hsa-miR-579	0	0	1	1	1	1	ANKRD36B	ankyrin repeat domain 36B
hsa-miR-579	1	0	1	1	1	1	RAI2	retinoic acid induced 2
hsa-miR-579	0	0	1	0	1	1	FAM70A	family with sequence similarity 70, member A
hsa-miR-579	0	0	1	0	0	0	LOC441204	uncharacterized LOC441204
hsa-miR-579	1	0	1	1	1	1	CLCN5	chloride channel, voltage-sensitive 5
hsa-miR-579	1	0	1	1	1	1	SORBS2	sorbin and SH3 domain containing 2
hsa-miR-579	0	0	1	1	1	1	IPO4	importin 4
hsa-miR-579	1	0	1	0	1	1	RABGEF1	RAB guanine nucleotide exchange factor (GEF) 1
hsa-miR-579	1	0	1	1	1	1	ZBTB10	zinc finger and BTB domain containing 10
hsa-miR-579	1	0	1	1	1	1	PCMTD1	protein-L-isoaspartate (D-aspartate) O-methyltransferase domain containing 1
hsa-miR-579	1	0	1	1	1	1	GORASP1	golgi reassembly stacking protein 1, 65kDa
hsa-miR-579	1	0	1	1	1	1	MGAT1	mannosyl (alpha-1,3-)-glycoprotein beta-1,2-N-acetylglucosaminyltransferase
hsa-miR-579	1	0	1	1	1	1	TLE4	transducin-like enhancer of split 4 (E(sp1) homolog, Drosophila)
hsa-miR-579	0	0	1	0	1	1	ARHGAP42	Rho GTPase activating protein 42
hsa-miR-579	1	0	1	0	1	1	NCAM1	neural cell adhesion molecule 1
hsa-miR-579	1	0	1	1	1	1	SEC22A	SEC22 vesicle trafficking protein homolog A (S. cerevisiae)
hsa-miR-579	0	0	1	0	1	1	CHURC1	churchill domain containing 1
hsa-miR-579	0	0	1	0	0	0	LOC285074	anaphase promoting complex subunit 1 pseudogene
hsa-miR-579	0	0	1	0	0	0	TUG1	taurine upregulated 1 (non-protein coding)
hsa-miR-579	0	0	1	0	0	0	UBE2QL1	ubiquitin-conjugating enzyme E2Q family-like 1
hsa-miR-579	0	0	1	1	1	1	FXC1	fracture callus 1 homolog (rat)
hsa-miR-579	1	0	1	1	1	1	AKNA	AT-hook transcription factor
hsa-miR-579	1	0	1	1	1	1	ZNF449	zinc finger protein 449
hsa-miR-579	1	0	1	0	1	1	CLASP1	cytoplasmic linker associated protein 1
hsa-miR-579	0	0	1	1	1	1	SEC16A	SEC16 homolog A (S. cerevisiae)
hsa-miR-579	1	0	1	1	1	1	SIRT1	sirtuin 1
hsa-miR-579	1	0	1	1	1	1	PAX6	paired box 6
hsa-miR-579	0	0	1	0	1	1	CADM1	cell adhesion molecule 1
hsa-miR-579	1	0	1	1	1	1	STXBP5	syntaxin binding protein 5 (tomosyn)
hsa-miR-579	1	0	1	1	1	1	CBFA2T3	core-binding factor, runt domain, alpha subunit 2; translocated to, 3
hsa-miR-579	0	0	1	1	0	0	ACOT11	acyl-CoA thioesterase 11
hsa-miR-579	1	0	1	1	1	1	AMMECR1	Alport syndrome, mental retardation, midface hypoplasia and elliptocytosis chromosomal region gene 1
hsa-miR-579	1	0	1	1	1	1	RBMX	RNA binding motif protein, X-linked
hsa-miR-579	0	0	1	0	0	0	LOC440910	uncharacterized LOC440910
hsa-miR-579	1	0	1	1	1	1	FBXW2	F-box and WD repeat domain containing 2
hsa-miR-579	1	0	1	1	1	1	TSN	translin
hsa-miR-579	0	0	1	1	1	1	NRCAM	neuronal cell adhesion molecule
hsa-miR-579	0	0	1	0	1	1	SSPN	sarcospan
hsa-miR-579	1	0	1	1	1	1	GCFC1	GC-rich sequence DNA-binding factor 1
hsa-miR-579	0	0	1	1	1	1	AP5S1	adaptor-related protein complex 5, sigma 1 subunit
hsa-miR-579	0	0	1	1	1	1	SPOCK1	sparc/osteonectin, cwcv and kazal-like domains proteoglycan (testican) 1
hsa-miR-579	1	0	1	1	1	1	SNAP25	synaptosomal-associated protein, 25kDa
hsa-miR-579	1	0	1	0	1	1	GATAD2B	GATA zinc finger domain containing 2B
hsa-miR-579	1	0	1	1	1	1	GALNTL2	UDP-N-acetyl-alpha-D-galactosamine:polypeptide N-acetylgalactosaminyltransferase-like 2
hsa-miR-579	0	0	1	1	1	1	C9orf47	chromosome 9 open reading frame 47
hsa-miR-579	1	0	1	1	1	1	CPNE8	copine VIII
hsa-miR-579	0	0	1	1	1	1	CHRM5	cholinergic receptor, muscarinic 5
hsa-miR-579	0	0	1	1	0	0	ZNF185	zinc finger protein 185 (LIM domain)
hsa-miR-579	0	0	1	1	1	1	MYO6	myosin VI
hsa-miR-579	1	0	1	1	1	1	EPHB1	EPH receptor B1
hsa-miR-579	1	0	1	0	1	1	UVRAG	UV radiation resistance associated gene
hsa-miR-579	1	0	1	1	1	1	KCNIP3	Kv channel interacting protein 3, calsenilin
hsa-miR-579	1	0	1	1	1	1	FAM222B	family with sequence similarity 222, member B
hsa-miR-579	1	0	1	1	1	1	ANKRD10	ankyrin repeat domain 10
hsa-miR-579	1	0	1	1	1	1	CS	citrate synthase
hsa-miR-579	0	0	1	1	0	0	C11orf74	chromosome 11 open reading frame 74
hsa-miR-579	1	0	1	1	1	1	EPB41L4A	erythrocyte membrane protein band 4.1 like 4A
hsa-miR-579	1	0	1	1	1	1	ACSL1	acyl-CoA synthetase long-chain family member 1
hsa-miR-579	1	0	1	1	1	1	FAM98A	family with sequence similarity 98, member A
hsa-miR-579	0	0	1	1	1	1	SUSD4	sushi domain containing 4
hsa-miR-579	1	0	1	1	1	1	SLITRK2	SLIT and NTRK-like family, member 2
hsa-miR-579	0	0	1	0	0	0	OTUD1	OTU domain containing 1
hsa-miR-579	0	0	1	0	1	1	FLJ39080	uncharacterized LOC441355
hsa-miR-579	0	0	1	0	0	0	ZNF300P1	zinc finger protein 300 pseudogene 1
hsa-miR-579	0	0	1	1	1	1	MPHOSPH9	M-phase phosphoprotein 9
hsa-miR-579	0	0	1	0	0	0	LOC643327	uncharacterized LOC643327
hsa-miR-579	1	0	1	0	1	1	KBTBD8	kelch repeat and BTB (POZ) domain containing 8
hsa-miR-579	1	0	1	1	1	1	ETS2	v-ets erythroblastosis virus E26 oncogene homolog 2 (avian)
hsa-miR-579	0	0	1	1	0	0	TCEANC	transcription elongation factor A (SII) N-terminal and central domain containing
hsa-miR-579	0	0	1	1	1	1	GBAS	glioblastoma amplified sequence
hsa-miR-579	1	0	1	0	1	1	YPEL2	yippee-like 2 (Drosophila)
hsa-miR-579	0	0	1	0	0	0	LOC400680	uncharacterized LOC400680
hsa-miR-579	1	0	1	1	1	1	TMEM185A	transmembrane protein 185A
hsa-miR-579	1	0	1	0	1	1	AGFG1	ArfGAP with FG repeats 1
hsa-miR-579	0	0	1	0	0	0	LINC00293	long intergenic non-protein coding RNA 293
hsa-miR-579	1	0	1	1	1	1	NSUN4	NOP2/Sun domain family, member 4
hsa-miR-579	0	0	1	1	0	0	PRSS37	protease, serine, 37
hsa-miR-579	0	0	1	1	0	0	C10orf68	chromosome 10 open reading frame 68
hsa-miR-579	0	0	1	1	0	0	PSAPL1	prosaposin-like 1 (gene/pseudogene)
hsa-miR-579	1	0	1	1	1	1	HOOK1	hook homolog 1 (Drosophila)
hsa-miR-579	1	0	1	1	1	1	CHD6	chromodomain helicase DNA binding protein 6
hsa-miR-579	0	0	1	1	0	0	ZNF283	zinc finger protein 283
hsa-miR-579	0	0	1	1	0	0	DCBLD1	discoidin, CUB and LCCL domain containing 1
hsa-miR-579	1	0	1	1	1	1	IL20RA	interleukin 20 receptor, alpha
hsa-miR-579	0	0	1	0	0	0	LOC338579	ankyrin repeat domain-containing protein 30B pseudogene
hsa-miR-579	1	0	1	1	1	1	NDFIP2	Nedd4 family interacting protein 2
hsa-miR-579	0	0	1	0	1	1	MYLK4	myosin light chain kinase family, member 4
hsa-miR-579	0	0	1	1	0	0	PROKR1	prokineticin receptor 1
hsa-miR-579	0	0	1	1	1	1	WDR64	WD repeat domain 64
hsa-miR-579	1	0	1	1	1	1	ZBTB4	zinc finger and BTB domain containing 4
hsa-miR-579	0	0	1	1	1	1	FRMPD2	FERM and PDZ domain containing 2
hsa-miR-579	0	0	1	1	1	1	DNAJC24	DnaJ (Hsp40) homolog, subfamily C, member 24
hsa-miR-579	1	0	1	1	0	0	KCNC1	potassium voltage-gated channel, Shaw-related subfamily, member 1
hsa-miR-579	0	0	1	0	1	1	FLJ41200	uncharacterized LOC401492
hsa-miR-579	1	0	1	1	1	1	TPRG1	tumor protein p63 regulated 1
hsa-miR-579	1	0	1	1	1	1	MDGA2	MAM domain containing glycosylphosphatidylinositol anchor 2
hsa-miR-579	1	0	1	0	1	1	KCNK2	potassium channel, subfamily K, member 2
hsa-miR-579	0	0	1	1	1	1	CC2D2B	coiled-coil and C2 domain containing 2B
hsa-miR-579	0	0	1	0	0	0	TMPRSS11BNL	TMPRSS11B N terminal-like
hsa-miR-579	0	0	1	1	1	1	FAM19A2	family with sequence similarity 19 (chemokine (C-C motif)-like), member A2
hsa-miR-579	1	0	1	1	1	1	EPAS1	endothelial PAS domain protein 1
hsa-miR-579	1	0	1	0	0	0	GPR137C	G protein-coupled receptor 137C
hsa-miR-579	1	0	1	1	1	1	SH2D4B	SH2 domain containing 4B
hsa-miR-579	1	0	1	1	1	1	OSBPL9	oxysterol binding protein-like 9
hsa-miR-579	0	0	1	1	0	0	NMI	N-myc (and STAT) interactor
hsa-miR-579	0	0	1	0	0	0	EML6	echinoderm microtubule associated protein like 6
hsa-miR-579	1	0	1	1	1	1	KIF21A	kinesin family member 21A
hsa-miR-579	1	0	1	1	1	1	CORO2B	coronin, actin binding protein, 2B
hsa-miR-579	0	0	1	0	0	0	TMEM232	transmembrane protein 232
hsa-miR-579	0	0	1	1	0	0	GABRA2	gamma-aminobutyric acid (GABA) A receptor, alpha 2
hsa-miR-579	1	0	1	1	1	1	CTGF	connective tissue growth factor
hsa-miR-579	0	0	1	1	1	1	MKX	mohawk homeobox
hsa-miR-579	1	0	1	1	1	1	ATP11C	ATPase, class VI, type 11C
hsa-miR-579	1	0	1	1	1	1	KPNA1	karyopherin alpha 1 (importin alpha 5)
hsa-miR-579	0	0	1	1	0	0	UBR2	ubiquitin protein ligase E3 component n-recognin 2
hsa-miR-579	1	0	1	1	1	1	DPY19L3	dpy-19-like 3 (C. elegans)
hsa-miR-579	0	0	1	1	1	1	RBM46	RNA binding motif protein 46
hsa-miR-579	1	0	1	1	1	1	MACROD2	MACRO domain containing 2
hsa-miR-579	1	0	1	1	1	1	FAM122B	family with sequence similarity 122B
hsa-miR-579	0	0	1	1	0	0	FSIP2	fibrous sheath interacting protein 2
hsa-miR-579	0	0	1	0	0	0	ADCY10P1	adenylate cyclase 10 (soluble) pseudogene 1
hsa-miR-579	0	0	1	1	1	1	RBM39	RNA binding motif protein 39
hsa-miR-579	1	0	1	1	1	1	LRIG1	leucine-rich repeats and immunoglobulin-like domains 1
hsa-miR-579	1	0	1	1	1	1	DLG2	discs, large homolog 2 (Drosophila)
hsa-miR-579	1	0	1	0	1	1	GPR180	G protein-coupled receptor 180
hsa-miR-579	0	0	1	1	1	1	SPICE1	spindle and centriole associated protein 1
hsa-miR-579	0	0	1	1	1	1	MOBP	myelin-associated oligodendrocyte basic protein
hsa-miR-579	0	0	1	1	1	1	CSPP1	centrosome and spindle pole associated protein 1
hsa-miR-579	1	0	1	0	1	1	ADIPOR2	adiponectin receptor 2
hsa-miR-579	0	0	1	1	1	1	RALGAPA2	Ral GTPase activating protein, alpha subunit 2 (catalytic)
hsa-miR-579	1	0	1	1	1	1	PHF17	PHD finger protein 17
hsa-miR-579	0	0	1	0	1	1	NPHP4	nephronophthisis 4
hsa-miR-579	0	0	1	1	1	1	ERI2	ERI1 exoribonuclease family member 2
hsa-miR-579	0	0	1	0	0	0	LOC285812	uncharacterized LOC285812
hsa-miR-579	1	0	1	1	1	1	AFAP1	actin filament associated protein 1
hsa-miR-579	1	0	1	0	1	1	CAPRIN1	cell cycle associated protein 1
hsa-miR-579	1	0	1	0	1	1	YOD1	YOD1 OTU deubiquinating enzyme 1 homolog (S. cerevisiae)
hsa-miR-579	0	0	1	1	0	0	TMEM136	transmembrane protein 136
hsa-miR-579	1	0	1	1	1	1	ZNF655	zinc finger protein 655
hsa-miR-579	1	0	1	1	1	1	SLC12A6	solute carrier family 12 (potassium/chloride transporters), member 6
hsa-miR-579	0	0	1	0	0	0	EP400NL	EP400 N-terminal like
hsa-miR-579	1	0	1	1	1	1	KALRN	kalirin, RhoGEF kinase
hsa-miR-579	1	0	1	1	0	0	MAN1B1	mannosidase, alpha, class 1B, member 1
hsa-miR-579	1	0	1	1	1	1	BCAT1	branched chain amino-acid transaminase 1, cytosolic
hsa-miR-579	0	0	1	0	0	0	EMBP1	embigin pseudogene 1
hsa-miR-579	0	0	1	0	0	0	PINLYP	phospholipase A2 inhibitor and LY6/PLAUR domain containing
hsa-miR-579	0	0	1	1	0	0	HEATR8	HEAT repeat containing 8
hsa-miR-579	0	0	1	0	0	0	LOC390660	FLJ00317 protein
hsa-miR-579	1	0	1	0	1	1	ESRRG	estrogen-related receptor gamma
hsa-miR-579	0	0	1	1	0	0	HSH2D	hematopoietic SH2 domain containing
hsa-miR-579	0	0	1	1	0	0	ISOC2	isochorismatase domain containing 2
hsa-miR-579	1	0	1	1	1	1	LRRK2	leucine-rich repeat kinase 2
hsa-miR-579	1	0	1	1	1	1	MAP2K4	mitogen-activated protein kinase kinase 4
hsa-miR-579	0	0	1	1	1	1	NR4A1	nuclear receptor subfamily 4, group A, member 1
hsa-miR-579	0	0	1	0	0	0	AGAP9	ArfGAP with GTPase domain, ankyrin repeat and PH domain 9
hsa-miR-579	1	0	1	1	1	1	RBBP4	retinoblastoma binding protein 4
hsa-miR-579	0	0	1	1	1	1	CRISP3	cysteine-rich secretory protein 3
hsa-miR-579	1	0	1	1	0	0	ATP13A3	ATPase type 13A3
hsa-miR-579	1	0	1	1	1	1	TOM1L1	target of myb1 (chicken)-like 1
hsa-miR-579	1	0	1	1	1	1	EIF4G3	eukaryotic translation initiation factor 4 gamma, 3
hsa-miR-579	0	0	1	0	1	1	BCAS1	breast carcinoma amplified sequence 1
hsa-miR-579	0	0	1	1	0	0	PCSK5	proprotein convertase subtilisin/kexin type 5
hsa-miR-579	1	0	1	1	1	1	COBLL1	COBL-like 1
hsa-miR-579	0	0	1	1	0	0	HSPB11	heat shock protein family B (small), member 11
hsa-miR-579	1	0	1	1	1	1	NOVA1	neuro-oncological ventral antigen 1
hsa-miR-579	1	0	1	1	1	1	MARCH7	membrane-associated ring finger (C3HC4) 7, E3 ubiquitin protein ligase
hsa-miR-579	0	0	1	1	0	0	KAT8	K(lysine) acetyltransferase 8
hsa-miR-579	1	0	1	1	1	1	RIF1	RAP1 interacting factor homolog (yeast)
hsa-miR-579	0	0	1	0	0	0	POM121L9P	POM121 transmembrane nucleoporin-like 9, pseudogene
hsa-miR-579	0	0	1	1	0	0	TBC1D10B	TBC1 domain family, member 10B
hsa-miR-579	0	0	1	0	0	0	POM121L8P	POM121 transmembrane nucleoporin-like 8 pseudogene
hsa-miR-579	1	0	1	1	1	1	ARF6	ADP-ribosylation factor 6
hsa-miR-579	0	0	1	1	1	1	ARIH1	ariadne homolog, ubiquitin-conjugating enzyme E2 binding protein, 1 (Drosophila)
hsa-miR-579	1	0	1	1	1	1	ARPP21	cAMP-regulated phosphoprotein, 21kDa
hsa-miR-579	0	0	1	1	0	0	H2AFJ	H2A histone family, member J
hsa-miR-579	1	0	1	1	1	1	SLC25A36	solute carrier family 25 (pyrimidine nucleotide carrier ), member 36
hsa-miR-579	1	0	1	1	1	1	NBEA	neurobeachin
hsa-miR-579	1	0	1	0	1	1	CEP170	centrosomal protein 170kDa
hsa-miR-579	1	0	1	1	1	1	GPBP1	GC-rich promoter binding protein 1
hsa-miR-579	0	0	1	1	0	0	DOPEY1	dopey family member 1
hsa-miR-579	1	0	1	1	1	1	EZR	ezrin
hsa-miR-579	1	0	1	1	1	1	CTTNBP2NL	CTTNBP2 N-terminal like
hsa-miR-579	1	0	1	1	0	0	FAM108C1	family with sequence similarity 108, member C1
hsa-miR-579	0	0	1	0	0	0	FAM66D	family with sequence similarity 66, member D
hsa-miR-579	0	0	1	1	1	1	IDH3A	isocitrate dehydrogenase 3 (NAD+) alpha
hsa-miR-579	0	0	1	1	1	1	ING3	inhibitor of growth family, member 3
hsa-miR-579	1	0	1	1	1	1	SLC30A8	solute carrier family 30 (zinc transporter), member 8
hsa-miR-579	1	0	1	1	1	1	YTHDF3	YTH domain family, member 3
hsa-miR-579	1	0	1	1	1	1	TMEFF1	transmembrane protein with EGF-like and two follistatin-like domains 1
hsa-miR-579	1	0	1	1	1	1	LIMCH1	LIM and calponin homology domains 1
hsa-miR-579	1	0	1	1	1	1	MIER1	mesoderm induction early response 1 homolog (Xenopus laevis)
hsa-miR-579	0	0	1	1	1	1	BEND7	BEN domain containing 7
hsa-miR-579	1	0	1	0	1	1	FAM214A	family with sequence similarity 214, member A
hsa-miR-579	1	0	1	0	1	1	STYX	serine/threonine/tyrosine interacting protein
hsa-miR-579	0	0	1	1	1	1	YAP1	Yes-associated protein 1
hsa-miR-579	1	0	1	1	0	0	PTAR1	protein prenyltransferase alpha subunit repeat containing 1
hsa-miR-579	0	0	1	1	1	1	RANBP17	RAN binding protein 17
hsa-miR-579	1	0	1	0	1	1	MEF2C	myocyte enhancer factor 2C
hsa-miR-579	1	0	1	1	1	1	FAM126A	family with sequence similarity 126, member A
hsa-miR-579	0	0	1	1	1	1	NARG2	NMDA receptor regulated 2
hsa-miR-579	0	0	1	1	1	1	CCDC66	coiled-coil domain containing 66
hsa-miR-579	0	0	1	1	0	0	TMEM116	transmembrane protein 116
hsa-miR-579	1	0	1	1	1	1	ANP32E	acidic (leucine-rich) nuclear phosphoprotein 32 family, member E
hsa-miR-579	0	0	1	1	1	1	SLC30A5	solute carrier family 30 (zinc transporter), member 5
hsa-miR-579	1	0	1	0	1	1	EXOC5	exocyst complex component 5
hsa-miR-579	0	0	1	1	1	1	PCDH20	protocadherin 20
hsa-miR-579	1	0	1	1	1	1	CADM2	cell adhesion molecule 2
hsa-miR-579	1	0	1	1	1	1	C1orf131	chromosome 1 open reading frame 131
hsa-miR-579	1	0	1	1	1	1	RICTOR	RPTOR independent companion of MTOR, complex 2
hsa-miR-579	1	0	1	1	1	1	FAM76B	family with sequence similarity 76, member B
hsa-miR-579	1	0	1	1	1	1	AP1AR	adaptor-related protein complex 1 associated regulatory protein
hsa-miR-579	0	0	1	1	1	1	SLAMF7	SLAM family member 7
hsa-miR-579	0	0	1	0	1	1	USO1	USO1 vesicle docking protein homolog (yeast)
hsa-miR-579	0	0	1	1	1	1	MOXD1	monooxygenase, DBH-like 1
hsa-miR-579	1	0	1	1	1	1	IKZF2	IKAROS family zinc finger 2 (Helios)
hsa-miR-579	0	0	1	1	1	1	KLHL7	kelch-like 7 (Drosophila)
hsa-miR-579	1	0	1	1	1	1	CLIC5	chloride intracellular channel 5
hsa-miR-579	1	0	1	0	1	1	BDNF	brain-derived neurotrophic factor
hsa-miR-579	0	0	1	1	0	0	DHRS4	dehydrogenase/reductase (SDR family) member 4
hsa-miR-579	1	0	1	1	1	1	SORCS1	sortilin-related VPS10 domain containing receptor 1
hsa-miR-579	1	0	1	1	1	1	PIH1D3	PIH1 domain containing 3
hsa-miR-579	1	0	1	1	1	1	WDR26	WD repeat domain 26
hsa-miR-579	1	0	1	1	1	1	BCL11A	B-cell CLL/lymphoma 11A (zinc finger protein)
hsa-miR-579	0	0	1	1	1	1	IYD	iodotyrosine deiodinase
hsa-miR-579	1	0	1	1	1	1	PBRM1	polybromo 1
hsa-miR-579	1	0	1	1	1	1	TAB3	TGF-beta activated kinase 1/MAP3K7 binding protein 3
hsa-miR-579	0	0	1	1	1	1	GCOM1	GRINL1A complex locus 1
hsa-miR-579	1	0	1	1	1	1	IQGAP2	IQ motif containing GTPase activating protein 2
hsa-miR-579	0	0	1	0	1	1	ANKS1B	ankyrin repeat and sterile alpha motif domain containing 1B
hsa-miR-579	0	0	1	1	1	1	SLC22A12	solute carrier family 22 (organic anion/urate transporter), member 12
hsa-miR-579	1	0	1	0	1	1	MEGF9	multiple EGF-like-domains 9
hsa-miR-579	1	0	1	0	1	1	ANKRD28	ankyrin repeat domain 28
hsa-miR-579	1	0	1	1	1	1	SP3	Sp3 transcription factor
hsa-miR-579	1	0	1	0	1	1	NHS	Nance-Horan syndrome (congenital cataracts and dental anomalies)
hsa-miR-579	1	0	1	1	1	1	MECP2	methyl CpG binding protein 2 (Rett syndrome)
hsa-miR-579	0	0	1	0	1	1	RAB18	RAB18, member RAS oncogene family
hsa-miR-579	1	0	1	1	1	1	ALCAM	activated leukocyte cell adhesion molecule
hsa-miR-579	0	0	1	1	0	0	FAM170A	family with sequence similarity 170, member A
hsa-miR-579	1	0	1	1	1	1	MAPT	microtubule-associated protein tau
hsa-miR-579	1	0	1	1	1	1	QKI	QKI, KH domain containing, RNA binding
hsa-miR-579	1	0	1	1	1	1	MYB	v-myb myeloblastosis viral oncogene homolog (avian)
hsa-miR-579	1	0	1	1	1	1	PCDH11X	protocadherin 11 X-linked
hsa-miR-579	1	0	1	1	0	0	TAF4B	TAF4b RNA polymerase II, TATA box binding protein (TBP)-associated factor, 105kDa
hsa-miR-579	0	0	1	1	1	1	SLC6A2	solute carrier family 6 (neurotransmitter transporter, noradrenalin), member 2
hsa-miR-579	1	0	1	0	1	1	FAM46A	family with sequence similarity 46, member A
hsa-miR-579	1	0	1	1	1	1	ELOVL6	ELOVL fatty acid elongase 6
hsa-miR-579	1	0	1	1	1	1	AZI2	5-azacytidine induced 2
hsa-miR-579	1	0	1	1	1	1	MYCN	v-myc myelocytomatosis viral related oncogene, neuroblastoma derived (avian)
hsa-miR-579	1	0	1	0	1	1	DCAF10	DDB1 and CUL4 associated factor 10
hsa-miR-579	1	0	1	1	0	0	DHDDS	dehydrodolichyl diphosphate synthase
hsa-miR-579	1	0	1	1	1	1	SPRY2	sprouty homolog 2 (Drosophila)
hsa-miR-579	1	0	1	0	1	1	CGGBP1	CGG triplet repeat binding protein 1
hsa-miR-579	0	0	1	1	1	1	GGCT	gamma-glutamylcyclotransferase
hsa-miR-579	1	0	1	1	1	1	U2SURP	U2 snRNP-associated SURP domain containing
hsa-miR-579	1	0	1	0	1	1	VAMP4	vesicle-associated membrane protein 4
hsa-miR-579	1	0	1	0	1	1	ATM	ataxia telangiectasia mutated
hsa-miR-579	1	0	1	1	1	1	CALM1	calmodulin 1 (phosphorylase kinase, delta)
hsa-miR-579	1	0	1	1	1	1	RSU1	Ras suppressor protein 1
hsa-miR-579	1	0	1	1	0	0	SIGMAR1	sigma non-opioid intracellular receptor 1
hsa-miR-579	1	0	1	1	1	1	GRIA2	glutamate receptor, ionotropic, AMPA 2
hsa-miR-579	1	0	1	1	1	1	SZRD1	SUZ RNA binding domain containing 1
hsa-miR-579	1	0	1	1	1	1	ZFAND5	zinc finger, AN1-type domain 5
hsa-miR-579	0	0	1	1	1	1	BBOX1	butyrobetaine (gamma), 2-oxoglutarate dioxygenase (gamma-butyrobetaine hydroxylase) 1
hsa-miR-579	1	0	1	1	1	1	TRIM2	tripartite motif containing 2
hsa-miR-579	0	0	1	1	1	1	HDHD2	haloacid dehalogenase-like hydrolase domain containing 2
hsa-miR-579	0	0	1	1	1	1	TAF12	TAF12 RNA polymerase II, TATA box binding protein (TBP)-associated factor, 20kDa
hsa-miR-579	0	0	1	1	1	1	DEDD2	death effector domain containing 2
hsa-miR-579	0	0	1	1	1	1	PCNP	PEST proteolytic signal containing nuclear protein
hsa-miR-579	1	0	1	1	1	1	YY1	YY1 transcription factor
hsa-miR-579	1	0	1	1	1	1	ETF1	eukaryotic translation termination factor 1
hsa-miR-579	0	0	1	1	0	0	CCDC36	coiled-coil domain containing 36
hsa-miR-579	0	0	1	0	0	0	KLHL15	kelch-like 15 (Drosophila)
hsa-miR-579	0	0	1	1	0	0	MAST2	microtubule associated serine/threonine kinase 2
hsa-miR-579	1	0	1	1	1	1	RIMKLB	ribosomal modification protein rimK-like family member B
hsa-miR-579	1	0	1	0	1	1	NECAB1	N-terminal EF-hand calcium binding protein 1
hsa-miR-579	0	0	1	1	1	1	POLR3F	polymerase (RNA) III (DNA directed) polypeptide F, 39 kDa
hsa-miR-579	1	0	1	0	1	1	CYBRD1	cytochrome b reductase 1
hsa-miR-579	0	0	1	1	1	1	CSDE1	cold shock domain containing E1, RNA-binding
hsa-miR-579	0	0	1	0	0	0	TCP11L2	t-complex 11 (mouse)-like 2
hsa-miR-579	1	0	1	1	1	1	WWC2	WW and C2 domain containing 2
hsa-miR-579	1	0	1	1	1	1	SUZ12	suppressor of zeste 12 homolog (Drosophila)
hsa-miR-579	1	0	1	1	1	1	KIAA1217	KIAA1217
hsa-miR-579	1	0	1	1	1	1	ZMAT4	zinc finger, matrin-type 4
hsa-miR-579	0	0	1	0	1	1	TMSB15B	thymosin beta 15B
hsa-miR-579	1	0	1	1	1	1	NKTR	natural killer-tumor recognition sequence
hsa-miR-579	1	0	1	1	1	1	TM9SF4	transmembrane 9 superfamily protein member 4
hsa-miR-579	0	0	1	1	1	1	CDC42SE2	CDC42 small effector 2
hsa-miR-579	0	0	1	1	1	1	ABCA8	ATP-binding cassette, sub-family A (ABC1), member 8
hsa-miR-579	0	0	1	1	1	1	FAM221A	family with sequence similarity 221, member A
hsa-miR-579	1	0	1	1	1	1	EPHA4	EPH receptor A4
hsa-miR-579	0	0	1	0	0	0	EVPLL	envoplakin-like
hsa-miR-579	1	0	1	1	1	1	RSPO2	R-spondin 2
hsa-miR-579	0	0	1	1	1	1	SELP	selectin P (granule membrane protein 140kDa, antigen CD62)
hsa-miR-579	0	0	1	1	1	1	MLKL	mixed lineage kinase domain-like
hsa-miR-579	1	0	1	1	1	1	ACACB	acetyl-CoA carboxylase beta
hsa-miR-579	0	0	1	1	0	0	FCRL3	Fc receptor-like 3
hsa-miR-579	0	0	1	1	1	1	TFAM	transcription factor A, mitochondrial
hsa-miR-579	1	0	1	0	1	1	TFEC	transcription factor EC
hsa-miR-579	1	0	1	1	1	1	EYA4	eyes absent homolog 4 (Drosophila)
hsa-miR-579	1	0	1	1	1	1	ELAVL2	ELAV (embryonic lethal, abnormal vision, Drosophila)-like 2 (Hu antigen B)
hsa-miR-579	1	0	1	1	1	1	FAM160A2	family with sequence similarity 160, member A2
hsa-miR-579	0	0	1	1	1	1	IQCH	IQ motif containing H
hsa-miR-579	1	0	1	1	0	0	FAM83F	family with sequence similarity 83, member F
hsa-miR-579	0	0	1	1	1	1	STAT4	signal transducer and activator of transcription 4
hsa-miR-579	0	0	1	0	0	0	LOC729307	uncharacterized LOC729307
hsa-miR-579	1	0	1	1	1	1	RCOR3	REST corepressor 3
hsa-miR-579	1	0	1	1	1	1	SF1	splicing factor 1
hsa-miR-579	1	0	1	1	1	1	FGF1	fibroblast growth factor 1 (acidic)
hsa-miR-579	0	0	1	1	1	1	CDADC1	cytidine and dCMP deaminase domain containing 1
hsa-miR-579	0	0	1	1	0	0	WASIR2	WASH and IL9R antisense RNA 2
hsa-miR-579	1	0	1	1	1	1	SECISBP2L	SECIS binding protein 2-like
hsa-miR-579	0	0	1	0	0	0	LINC00238	long intergenic non-protein coding RNA 238
hsa-miR-579	0	0	1	1	0	0	TNMD	tenomodulin
hsa-miR-579	0	0	1	1	1	1	ZNF337	zinc finger protein 337
hsa-miR-579	1	0	1	1	1	1	FAM120A	family with sequence similarity 120A
hsa-miR-579	0	0	1	1	1	1	KIF16B	kinesin family member 16B
hsa-miR-579	0	0	1	0	1	1	GPR155	G protein-coupled receptor 155
hsa-miR-579	1	0	1	1	1	1	NKAIN2	Na+/K+ transporting ATPase interacting 2
hsa-miR-579	1	0	1	1	1	1	CTDSPL2	CTD (carboxy-terminal domain, RNA polymerase II, polypeptide A) small phosphatase like 2
hsa-miR-579	0	0	1	1	1	1	FAM171B	family with sequence similarity 171, member B
hsa-miR-579	1	0	1	1	1	1	HECTD2	HECT domain containing E3 ubiquitin protein ligase 2
hsa-miR-579	1	0	1	1	0	0	RASGEF1B	RasGEF domain family, member 1B
hsa-miR-579	1	0	1	1	0	0	TMEM131	transmembrane protein 131
hsa-miR-579	1	0	1	0	1	1	CPEB4	cytoplasmic polyadenylation element binding protein 4
hsa-miR-579	1	0	1	1	1	1	BNC2	basonuclin 2
hsa-miR-579	1	0	1	1	1	1	FAM135B	family with sequence similarity 135, member B
hsa-miR-579	0	0	1	0	0	0	LOC286184	uncharacterized LOC286184
hsa-miR-579	1	0	1	1	1	1	SOX6	SRY (sex determining region Y)-box 6
hsa-miR-579	0	0	1	0	0	0	CRYBB2P1	crystallin, beta B2 pseudogene 1
hsa-miR-579	0	0	1	1	1	1	COPA	coatomer protein complex, subunit alpha
hsa-miR-579	1	0	1	1	1	1	DPP10	dipeptidyl-peptidase 10 (non-functional)
hsa-miR-579	0	0	1	0	0	0	LINC00264	long intergenic non-protein coding RNA 264
hsa-miR-579	1	0	1	0	1	1	ARID2	AT rich interactive domain 2 (ARID, RFX-like)
hsa-miR-579	0	0	1	1	0	0	CCDC152	coiled-coil domain containing 152
hsa-miR-579	0	0	1	0	0	0	FLJ36000	uncharacterized FLJ36000
hsa-miR-579	1	0	1	0	0	0	CT62	cancer/testis antigen 62
hsa-miR-579	1	0	1	1	1	1	MARCKS	myristoylated alanine-rich protein kinase C substrate
hsa-miR-579	0	0	1	0	0	0	TOB1-AS1	TOB1 antisense RNA 1
hsa-miR-579	1	0	1	1	1	1	DPP8	dipeptidyl-peptidase 8
hsa-miR-579	1	0	1	1	1	1	DACH2	dachshund homolog 2 (Drosophila)
hsa-miR-579	1	0	1	1	1	1	BVES	blood vessel epicardial substance
hsa-miR-579	1	0	1	1	1	1	INTS6	integrator complex subunit 6
hsa-miR-579	0	0	1	1	1	1	FAM71F1	family with sequence similarity 71, member F1
hsa-miR-579	0	0	1	1	1	1	PCMTD2	protein-L-isoaspartate (D-aspartate) O-methyltransferase domain containing 2
hsa-miR-579	1	0	1	0	1	1	KIAA0430	KIAA0430
hsa-miR-579	0	0	1	0	1	1	FAM13B	family with sequence similarity 13, member B
hsa-miR-579	1	0	1	1	1	1	LRRC4C	leucine rich repeat containing 4C
hsa-miR-579	1	0	1	0	1	1	HSPA12A	heat shock 70kDa protein 12A
hsa-miR-579	0	0	1	0	0	0	LOC154092	uncharacterized LOC154092
hsa-miR-579	0	0	1	1	1	1	BCO2	beta-carotene oxygenase 2
hsa-miR-579	1	0	1	1	1	1	TNFSF4	tumor necrosis factor (ligand) superfamily, member 4
hsa-miR-579	1	0	1	1	1	1	ROCK1	Rho-associated, coiled-coil containing protein kinase 1
hsa-miR-579	0	0	1	1	1	1	RABGAP1L	RAB GTPase activating protein 1-like
hsa-miR-579	0	0	1	1	1	1	MTHFD2L	methylenetetrahydrofolate dehydrogenase (NADP+ dependent) 2-like
hsa-miR-579	1	0	1	1	1	1	C12orf76	chromosome 12 open reading frame 76
hsa-miR-579	0	0	1	1	1	1	C3orf33	chromosome 3 open reading frame 33
hsa-miR-579	0	0	1	0	0	0	LINC00347	long intergenic non-protein coding RNA 347
hsa-miR-579	0	0	1	1	1	1	TMEM200A	transmembrane protein 200A
hsa-miR-579	0	0	1	0	0	0	LOC728342	uncharacterized LOC728342
hsa-miR-579	0	0	1	1	1	1	MYO3A	myosin IIIA
hsa-miR-579	1	0	1	1	1	1	MAMDC2	MAM domain containing 2
hsa-miR-579	0	0	1	1	1	1	MGC57346	uncharacterized LOC401884
hsa-miR-579	1	0	1	0	1	1	LYPD6	LY6/PLAUR domain containing 6
hsa-miR-579	0	0	1	0	1	1	IL33	interleukin 33
hsa-miR-579	0	0	1	1	0	0	ANKAR	ankyrin and armadillo repeat containing
hsa-miR-579	0	0	1	1	1	1	DDX4	DEAD (Asp-Glu-Ala-Asp) box polypeptide 4
hsa-miR-579	0	0	1	0	0	0	LOC348120	uncharacterized LOC348120
hsa-miR-579	0	0	1	1	1	1	OLFML2B	olfactomedin-like 2B
hsa-miR-579	1	0	1	1	1	1	SMARCE1	SWI/SNF related, matrix associated, actin dependent regulator of chromatin, subfamily e, member 1
hsa-miR-579	1	0	1	1	1	1	RTKN2	rhotekin 2
hsa-miR-579	1	0	1	1	1	1	WSB1	WD repeat and SOCS box containing 1
hsa-miR-579	0	0	1	1	1	1	ZNF589	zinc finger protein 589
hsa-miR-579	0	0	1	0	1	1	ITGA1	integrin, alpha 1
hsa-miR-579	0	0	1	1	0	0	NLRC5	NLR family, CARD domain containing 5
hsa-miR-579	1	0	1	1	1	1	FNDC3A	fibronectin type III domain containing 3A
hsa-miR-579	0	0	1	1	0	0	GPRASP2	G protein-coupled receptor associated sorting protein 2
hsa-miR-579	0	0	1	1	1	1	PLEKHA8	pleckstrin homology domain containing, family A (phosphoinositide binding specific) member 8
hsa-miR-579	1	0	1	1	1	1	PPP2R5E	protein phosphatase 2, regulatory subunit B', epsilon isoform
hsa-miR-579	0	0	1	0	0	0	ADAM5	ADAM metallopeptidase domain 5, pseudogene
hsa-miR-579	0	0	1	1	1	1	IDI1	isopentenyl-diphosphate delta isomerase 1
hsa-miR-579	0	0	1	0	0	0	LOC388436	uncharacterized LOC388436
hsa-miR-579	1	0	1	1	1	1	SOX5	SRY (sex determining region Y)-box 5
hsa-miR-579	1	0	1	1	1	1	PRRG1	proline rich Gla (G-carboxyglutamic acid) 1
hsa-miR-579	1	0	1	1	1	1	MTMR10	myotubularin related protein 10
hsa-miR-579	0	0	1	1	1	1	ST6GALNAC1	ST6 (alpha-N-acetyl-neuraminyl-2,3-beta-galactosyl-1,3)-N-acetylgalactosaminide alpha-2,6-sialyltransferase 1
hsa-miR-579	1	0	1	1	1	1	RANBP9	RAN binding protein 9
hsa-miR-579	0	0	1	1	1	1	ATF7IP	activating transcription factor 7 interacting protein
hsa-miR-579	0	0	1	0	0	0	GNN	Grp94 neighboring nucleotidase pseudogene
hsa-miR-579	0	0	1	1	1	1	ZNF333	zinc finger protein 333
hsa-miR-579	0	0	1	1	1	1	STAG1	stromal antigen 1
hsa-miR-579	1	0	1	1	1	1	ADCY6	adenylate cyclase 6
hsa-miR-579	0	0	1	1	1	1	ZNF33B	zinc finger protein 33B
hsa-miR-579	1	0	1	1	1	1	EIF4G2	eukaryotic translation initiation factor 4 gamma, 2
hsa-miR-579	0	0	1	0	0	0	KANSL1-AS1	KANSL1 antisense RNA 1
hsa-miR-579	1	0	1	1	1	1	CKAP2	cytoskeleton associated protein 2
hsa-miR-579	1	0	1	1	1	1	AP3M1	adaptor-related protein complex 3, mu 1 subunit
hsa-miR-579	1	0	1	1	1	1	GRHL1	grainyhead-like 1 (Drosophila)
hsa-miR-579	1	0	1	1	1	1	SLC26A7	solute carrier family 26, member 7
hsa-miR-579	0	0	1	1	1	1	C21orf62	chromosome 21 open reading frame 62
hsa-miR-579	0	0	1	1	0	0	CYP4F30P	cytochrome P450, family 4, subfamily F, polypeptide 30, pseudogene
hsa-miR-579	1	0	1	0	1	1	TGFBR1	transforming growth factor, beta receptor 1
hsa-miR-579	1	0	1	1	1	1	USP47	ubiquitin specific peptidase 47
hsa-miR-579	0	0	1	1	1	1	PCDH18	protocadherin 18
hsa-miR-579	1	0	1	1	1	1	FARP1	FERM, RhoGEF (ARHGEF) and pleckstrin domain protein 1 (chondrocyte-derived)
hsa-miR-579	1	0	1	1	1	1	CTBP1	C-terminal binding protein 1
hsa-miR-579	0	0	1	1	1	1	FRMPDP2	FERM and PDZ domain containing 2 pseudogene 2
hsa-miR-579	0	0	1	1	1	1	FRMPD2P1	FERM and PDZ domain containing 2 pseudogene 1
hsa-miR-579	0	0	1	0	0	0	LOC440416	uncharacterized LOC440416
hsa-miR-579	0	0	1	0	0	0	LOC283070	uncharacterized LOC283070
hsa-miR-579	1	0	1	1	1	1	WNT5A	wingless-type MMTV integration site family, member 5A
hsa-miR-579	1	0	1	0	1	1	DPYSL3	dihydropyrimidinase-like 3
hsa-miR-579	0	0	1	0	0	0	LINC00537	long intergenic non-protein coding RNA 537
hsa-miR-579	0	0	1	0	1	1	CCL4L2	chemokine (C-C motif) ligand 4-like 2
hsa-miR-579	0	0	1	1	1	1	CCL4L1	chemokine (C-C motif) ligand 4-like 1
hsa-miR-579	0	0	1	1	1	1	KLRF1	killer cell lectin-like receptor subfamily F, member 1
hsa-miR-579	0	0	1	1	1	1	TMEM52B	transmembrane protein 52B
hsa-miR-579	0	0	1	1	1	1	PARPBP	PARP1 binding protein
hsa-miR-579	0	0	1	1	1	1	ZNF365	zinc finger protein 365
hsa-miR-579	1	0	1	1	1	1	SLC36A2	solute carrier family 36 (proton/amino acid symporter), member 2
hsa-miR-579	1	0	1	0	1	1	MYBL1	v-myb myeloblastosis viral oncogene homolog (avian)-like 1
hsa-miR-579	1	0	1	1	1	1	SLC35G1	solute carrier family 35, member G1
hsa-miR-579	0	0	1	1	1	1	SPHKAP	SPHK1 interactor, AKAP domain containing
hsa-miR-579	1	0	1	1	1	1	GABRB2	gamma-aminobutyric acid (GABA) A receptor, beta 2
hsa-miR-579	0	0	1	1	1	1	SLC25A35	solute carrier family 25, member 35
hsa-miR-579	1	0	1	1	1	1	NR2F2	nuclear receptor subfamily 2, group F, member 2
hsa-miR-579	1	0	1	1	1	1	PTPRD	protein tyrosine phosphatase, receptor type, D
hsa-miR-579	0	0	1	0	0	0	LOC727924	uncharacterized LOC727924
hsa-miR-579	0	0	1	1	0	0	TMEM126B	transmembrane protein 126B
hsa-miR-579	0	0	1	1	1	1	CCDC125	coiled-coil domain containing 125
hsa-miR-579	1	0	1	0	1	1	DNAJC6	DnaJ (Hsp40) homolog, subfamily C, member 6
hsa-miR-579	1	0	1	0	1	1	BTBD3	BTB (POZ) domain containing 3
hsa-miR-579	1	0	1	1	1	1	UBE4A	ubiquitination factor E4A
hsa-miR-579	1	0	1	1	1	1	SLK	STE20-like kinase
hsa-miR-579	0	0	1	0	0	0	LRRC37A11P	leucine rich repeat containing 37, member A11, pseudogene
hsa-miR-579	0	0	1	0	0	0	LINC00310	long intergenic non-protein coding RNA 310
hsa-miR-579	0	0	1	0	0	0	MAGEL2	MAGE-like 2
hsa-miR-579	1	0	1	0	1	1	ROBO1	roundabout, axon guidance receptor, homolog 1 (Drosophila)
hsa-miR-579	1	0	1	1	1	1	TMEM64	transmembrane protein 64
hsa-miR-579	1	0	1	1	1	1	ST18	suppression of tumorigenicity 18 (breast carcinoma) (zinc finger protein)
hsa-miR-579	1	0	1	1	1	1	KIAA1324L	KIAA1324-like
hsa-miR-579	1	0	1	0	1	1	PRDM10	PR domain containing 10
hsa-miR-579	1	0	1	1	1	1	OTUD4	OTU domain containing 4
hsa-miR-579	0	0	1	0	0	0	EEF1DP3	eukaryotic translation elongation factor 1 delta pseudogene 3
hsa-miR-579	1	0	1	0	1	1	LRCH2	leucine-rich repeats and calponin homology (CH) domain containing 2
hsa-miR-579	1	0	1	0	1	1	CAMSAP2	calmodulin regulated spectrin-associated protein family, member 2
hsa-miR-579	1	0	1	1	1	1	MEGF11	multiple EGF-like-domains 11
hsa-miR-579	1	0	1	1	1	1	ZMYM4	zinc finger, MYM-type 4
hsa-miR-579	1	0	1	1	1	1	CHIC1	cysteine-rich hydrophobic domain 1
hsa-miR-579	1	0	1	1	1	1	CADPS	Ca++-dependent secretion activator
hsa-miR-579	0	0	1	1	0	0	TCHH	trichohyalin
hsa-miR-579	1	0	1	1	1	1	TMEM218	transmembrane protein 218
hsa-miR-579	0	0	1	1	1	1	UCHL5	ubiquitin carboxyl-terminal hydrolase L5
hsa-miR-579	1	0	1	1	1	1	CCNK	cyclin K
hsa-miR-579	0	0	1	1	1	1	CNIH	cornichon homolog (Drosophila)
hsa-miR-579	1	0	1	1	1	1	GOLGA5	golgin A5
hsa-miR-579	1	0	1	1	1	1	BTBD7	BTB (POZ) domain containing 7
hsa-miR-579	1	0	1	0	1	1	HMGB3	high mobility group box 3
hsa-miR-579	1	0	1	1	0	0	RGS6	regulator of G-protein signaling 6
hsa-miR-579	0	0	1	0	0	0	DKFZp686D0853	uncharacterized LOC401613
hsa-miR-579	1	0	1	1	1	1	ATP2B4	ATPase, Ca++ transporting, plasma membrane 4
hsa-miR-579	1	0	1	1	1	1	JPH1	junctophilin 1
hsa-miR-579	0	0	1	0	1	1	AP1S2	adaptor-related protein complex 1, sigma 2 subunit
hsa-miR-579	1	0	1	1	1	1	SGCD	sarcoglycan, delta (35kDa dystrophin-associated glycoprotein)
hsa-miR-579	1	0	1	0	1	1	MTX3	metaxin 3
hsa-miR-579	1	0	1	1	1	1	C7orf31	chromosome 7 open reading frame 31
hsa-miR-579	1	0	1	1	1	1	PRKRIR	protein-kinase, interferon-inducible double stranded RNA dependent inhibitor, repressor of (P58 repressor)
hsa-miR-579	0	0	1	1	1	1	COL6A3	collagen, type VI, alpha 3
hsa-miR-579	0	0	1	1	1	1	GTF3C2	general transcription factor IIIC, polypeptide 2, beta 110kDa
hsa-miR-579	1	0	1	1	1	1	MYCBP2	MYC binding protein 2, E3 ubiquitin protein ligase
hsa-miR-579	0	0	1	1	1	1	IPCEF1	interaction protein for cytohesin exchange factors 1
hsa-miR-579	1	0	1	1	1	1	PRDM2	PR domain containing 2, with ZNF domain
hsa-miR-579	1	0	1	1	1	1	CGN	cingulin
hsa-miR-579	1	0	1	1	0	0	RBM27	RNA binding motif protein 27
hsa-miR-579	0	0	1	0	0	0	LINC00240	long intergenic non-protein coding RNA 240
hsa-miR-579	1	0	1	1	1	1	USP6	ubiquitin specific peptidase 6 (Tre-2 oncogene)
hsa-miR-579	1	0	1	1	1	1	RREB1	ras responsive element binding protein 1
hsa-miR-579	1	0	1	1	1	1	DCAF5	DDB1 and CUL4 associated factor 5
hsa-miR-579	1	0	1	1	1	1	GDI2	GDP dissociation inhibitor 2
hsa-miR-579	1	0	1	1	1	1	NEDD9	neural precursor cell expressed, developmentally down-regulated 9
hsa-miR-579	1	0	1	1	1	1	DDAH1	dimethylarginine dimethylaminohydrolase 1
hsa-miR-579	0	0	1	0	1	1	TYW5	tRNA-yW synthesizing protein 5
hsa-miR-579	1	0	1	1	1	1	NFIB	nuclear factor I/B
hsa-miR-579	1	0	1	1	1	1	SOGA2	SOGA family member 2
hsa-miR-579	1	0	1	1	1	1	C5orf24	chromosome 5 open reading frame 24
hsa-miR-579	0	0	1	1	1	1	ABCD3	ATP-binding cassette, sub-family D (ALD), member 3
hsa-miR-579	0	0	1	0	0	0	ZNRD1-AS1	ZNRD1 antisense RNA 1
hsa-miR-579	1	0	1	1	1	1	WLS	wntless homolog (Drosophila)
hsa-miR-579	0	0	1	1	1	1	SSFA2	sperm specific antigen 2
hsa-miR-579	1	0	1	0	1	1	TBL1XR1	transducin (beta)-like 1 X-linked receptor 1
hsa-miR-579	0	0	1	1	1	1	CCDC146	coiled-coil domain containing 146
hsa-miR-579	0	0	1	0	1	1	STT3A	STT3, subunit of the oligosaccharyltransferase complex, homolog A (S. cerevisiae)
hsa-miR-579	1	0	1	1	1	1	CREB3L2	cAMP responsive element binding protein 3-like 2
hsa-miR-579	0	0	1	0	1	1	CD59	CD59 molecule, complement regulatory protein
hsa-miR-579	0	0	1	1	1	1	HPGD	hydroxyprostaglandin dehydrogenase 15-(NAD)
hsa-miR-579	1	0	1	1	0	0	SMARCA2	SWI/SNF related, matrix associated, actin dependent regulator of chromatin, subfamily a, member 2
hsa-miR-579	0	0	1	1	0	0	ABCA6	ATP-binding cassette, sub-family A (ABC1), member 6
hsa-miR-579	1	0	1	1	1	1	FUT9	fucosyltransferase 9 (alpha (1,3) fucosyltransferase)
hsa-miR-579	0	0	1	0	0	0	GGTA1P	glycoprotein, alpha-galactosyltransferase 1 pseudogene
hsa-miR-579	0	0	1	1	1	1	UPRT	uracil phosphoribosyltransferase (FUR1) homolog (S. cerevisiae)
hsa-miR-579	1	0	1	1	1	1	DDX19B	DEAD (Asp-Glu-Ala-Asp) box polypeptide 19B
hsa-miR-579	0	0	1	1	1	1	SEC22C	SEC22 vesicle trafficking protein homolog C (S. cerevisiae)
hsa-miR-579	0	0	1	1	1	1	ATP1B3	ATPase, Na+/K+ transporting, beta 3 polypeptide
hsa-miR-579	0	0	1	1	1	1	PTGES3	prostaglandin E synthase 3 (cytosolic)
hsa-miR-579	0	0	1	1	0	0	RPL11	ribosomal protein L11
hsa-miR-579	1	0	1	0	1	1	BNIP3L	BCL2/adenovirus E1B 19kDa interacting protein 3-like
hsa-miR-579	1	0	1	1	1	1	TPM4	tropomyosin 4
hsa-miR-579	0	0	1	1	1	1	PPP1R1C	protein phosphatase 1, regulatory (inhibitor) subunit 1C
hsa-miR-579	1	0	1	1	1	1	CHTF8	CTF8, chromosome transmission fidelity factor 8 homolog (S. cerevisiae)
hsa-miR-579	0	0	1	0	1	1	CD99P1	CD99 molecule pseudogene 1
hsa-miR-579	0	0	1	1	0	0	CGRRF1	cell growth regulator with ring finger domain 1
hsa-miR-579	1	0	1	1	1	1	NTM	neurotrimin
hsa-miR-579	0	0	1	1	1	1	IFNGR2	interferon gamma receptor 2 (interferon gamma transducer 1)
hsa-miR-579	1	0	1	1	1	1	TRA2B	transformer 2 beta homolog (Drosophila)
hsa-miR-579	1	0	1	1	1	1	PLEKHB2	pleckstrin homology domain containing, family B (evectins) member 2
hsa-miR-579	0	0	1	0	1	1	PDCD5	programmed cell death 5
hsa-miR-579	0	0	1	1	1	1	GRAP2	GRB2-related adaptor protein 2
hsa-miR-579	1	0	1	0	1	1	RPS6KB1	ribosomal protein S6 kinase, 70kDa, polypeptide 1
hsa-miR-579	0	0	1	1	1	1	STON1	stonin 1
hsa-miR-579	0	0	1	0	0	0	LOC643072	uncharacterized LOC643072
hsa-miR-579	0	0	1	1	0	0	STK19	serine/threonine kinase 19
hsa-miR-579	0	0	1	1	1	1	EIF3J	eukaryotic translation initiation factor 3, subunit J
hsa-miR-579	0	0	1	1	1	1	STXBP3	syntaxin binding protein 3
hsa-miR-579	0	0	1	1	1	1	ATG4A	autophagy related 4A, cysteine peptidase
hsa-miR-579	0	0	1	1	1	1	PDLIM1	PDZ and LIM domain 1
hsa-miR-579	1	0	1	1	1	1	BTBD10	BTB (POZ) domain containing 10
hsa-miR-579	0	0	1	1	1	1	C1orf88	chromosome 1 open reading frame 88
hsa-miR-579	0	0	1	0	0	0	LOC645513	uncharacterized LOC645513
hsa-miR-579	1	0	1	1	1	1	CUL4A	cullin 4A
hsa-miR-579	1	0	1	1	0	0	FAT4	FAT tumor suppressor homolog 4 (Drosophila)
hsa-miR-579	1	0	1	1	1	1	NRN1	neuritin 1
hsa-miR-579	0	0	1	0	0	0	LOC100130353	hippocampus abundant transcript-like 1 pseudogene
hsa-miR-579	0	0	1	1	0	0	TUSC3	tumor suppressor candidate 3
hsa-miR-579	0	0	1	0	0	0	ZNF720	zinc finger protein 720
hsa-miR-579	1	0	1	1	1	1	TLE1	transducin-like enhancer of split 1 (E(sp1) homolog, Drosophila)
hsa-miR-579	1	0	1	1	1	1	NT5DC1	5'-nucleotidase domain containing 1
hsa-miR-579	1	0	1	1	1	1	PPP3CB	protein phosphatase 3, catalytic subunit, beta isozyme
hsa-miR-579	1	0	1	1	1	1	ARL4A	ADP-ribosylation factor-like 4A
hsa-miR-579	0	0	1	1	1	1	CD1C	CD1c molecule
hsa-miR-579	1	0	1	1	1	1	ANAPC16	anaphase promoting complex subunit 16
hsa-miR-579	1	0	1	1	0	0	LMAN2	lectin, mannose-binding 2
hsa-miR-579	0	0	1	0	0	0	ZNF674-AS1	ZNF674 antisense RNA 1
hsa-miR-579	1	0	1	1	1	1	GDA	guanine deaminase
hsa-miR-579	1	0	1	1	1	1	LYRM1	LYR motif containing 1
hsa-miR-579	1	0	1	0	1	1	CD47	CD47 molecule
hsa-miR-579	1	0	1	1	1	1	RUNX1	runt-related transcription factor 1
hsa-miR-579	0	0	1	1	1	1	SLC33A1	solute carrier family 33 (acetyl-CoA transporter), member 1
hsa-miR-579	0	0	1	0	1	1	DENR	density-regulated protein
hsa-miR-579	1	0	1	1	1	1	ATPAF1	ATP synthase mitochondrial F1 complex assembly factor 1
hsa-miR-579	1	0	1	1	1	1	MYT1	myelin transcription factor 1
hsa-miR-579	0	0	1	1	1	1	NUDT21	nudix (nucleoside diphosphate linked moiety X)-type motif 21
hsa-miR-579	1	0	1	1	1	1	CALR	calreticulin
hsa-miR-579	1	0	1	1	1	1	LGALSL	lectin, galactoside-binding-like
hsa-miR-579	1	0	1	1	1	1	TFPI	tissue factor pathway inhibitor (lipoprotein-associated coagulation inhibitor)
hsa-miR-579	1	0	1	1	1	1	SERF2	small EDRK-rich factor 2
hsa-miR-579	1	0	1	1	1	1	RND3	Rho family GTPase 3
hsa-miR-579	1	0	1	0	1	1	KIAA0240	KIAA0240
hsa-miR-579	1	0	1	1	1	1	STAG2	stromal antigen 2
hsa-miR-579	0	0	1	0	0	0	LOC731789	uncharacterized LOC731789
hsa-miR-579	0	0	1	1	1	1	BDP1	B double prime 1, subunit of RNA polymerase III transcription initiation factor IIIB
hsa-miR-579	0	0	1	1	1	1	ISX	intestine-specific homeobox
hsa-miR-579	1	0	1	0	1	1	MEGF10	multiple EGF-like-domains 10
hsa-miR-579	1	0	1	0	1	1	PTP4A1	protein tyrosine phosphatase type IVA, member 1
hsa-miR-579	0	0	1	0	1	1	USP10	ubiquitin specific peptidase 10
hsa-miR-579	1	0	1	0	1	1	OSBPL8	oxysterol binding protein-like 8
hsa-miR-579	0	0	1	0	1	1	HDAC9	histone deacetylase 9
hsa-miR-579	1	0	1	0	1	1	MCFD2	multiple coagulation factor deficiency 2
hsa-miR-579	0	0	1	1	1	1	ARMCX1	armadillo repeat containing, X-linked 1
hsa-miR-579	1	0	1	1	1	1	SNRK	SNF related kinase
hsa-miR-579	1	0	1	1	1	1	TIPARP	TCDD-inducible poly(ADP-ribose) polymerase
hsa-miR-579	1	0	1	1	1	1	NAPEPLD	N-acyl phosphatidylethanolamine phospholipase D
hsa-miR-579	1	0	1	1	1	1	ZFHX3	zinc finger homeobox 3
hsa-miR-579	1	0	1	1	1	1	PI15	peptidase inhibitor 15
hsa-miR-579	1	0	1	1	1	1	RB1CC1	RB1-inducible coiled-coil 1
hsa-miR-579	1	0	1	0	1	1	KLHDC10	kelch domain containing 10
hsa-miR-579	1	0	1	0	1	1	LONRF2	LON peptidase N-terminal domain and ring finger 2
hsa-miR-579	1	0	1	0	1	1	CBX7	chromobox homolog 7
hsa-miR-579	0	0	1	1	1	1	GPR34	G protein-coupled receptor 34
hsa-miR-579	1	0	1	1	1	1	RSPO1	R-spondin 1
hsa-miR-579	1	0	1	1	0	0	DPY19L1	dpy-19-like 1 (C. elegans)
hsa-miR-579	0	0	1	0	0	0	CDKN2B-AS1	CDKN2B antisense RNA 1
hsa-miR-579	1	0	1	1	0	0	LGSN	lengsin, lens protein with glutamine synthetase domain
hsa-miR-579	0	0	1	1	1	1	TNFSF10	tumor necrosis factor (ligand) superfamily, member 10
hsa-miR-579	1	0	1	0	1	1	DAPP1	dual adaptor of phosphotyrosine and 3-phosphoinositides
hsa-miR-579	1	0	1	0	1	1	RBBP5	retinoblastoma binding protein 5
hsa-miR-579	0	0	1	1	0	0	SLCO3A1	solute carrier organic anion transporter family, member 3A1
hsa-miR-579	0	0	1	1	1	1	PROS1	protein S (alpha)
hsa-miR-579	1	0	1	1	1	1	IRF1	interferon regulatory factor 1
hsa-miR-579	1	0	1	1	1	1	TMEM220	transmembrane protein 220
hsa-miR-579	1	0	1	1	1	1	ATP2B2	ATPase, Ca++ transporting, plasma membrane 2
hsa-miR-579	1	0	1	1	1	1	AFF1	AF4/FMR2 family, member 1
hsa-miR-579	1	0	1	0	0	0	YLPM1	YLP motif containing 1
hsa-miR-579	1	0	1	0	1	1	BCL2	B-cell CLL/lymphoma 2
hsa-miR-579	1	0	1	1	1	1	IGF1	insulin-like growth factor 1 (somatomedin C)
hsa-miR-579	0	0	1	1	1	1	NPR3	natriuretic peptide receptor C/guanylate cyclase C (atrionatriuretic peptide receptor C)
hsa-miR-579	1	0	1	0	1	1	ACVR2A	activin A receptor, type IIA
hsa-miR-579	1	0	1	1	1	1	ARSB	arylsulfatase B
hsa-miR-579	1	0	1	1	1	1	COL4A3	collagen, type IV, alpha 3 (Goodpasture antigen)
hsa-miR-579	1	0	1	1	1	1	COL4A4	collagen, type IV, alpha 4
hsa-miR-579	1	0	1	1	1	1	COL5A1	collagen, type V, alpha 1
hsa-miR-579	1	0	1	1	1	1	CYP19A1	cytochrome P450, family 19, subfamily A, polypeptide 1
hsa-miR-579	1	0	1	1	1	1	DMD	dystrophin
hsa-miR-579	0	0	1	1	1	1	DPYD	dihydropyrimidine dehydrogenase
hsa-miR-579	1	0	1	1	1	1	GALC	galactosylceramidase
hsa-miR-579	1	0	1	1	1	1	GJA1	gap junction protein, alpha 1, 43kDa
hsa-miR-579	1	0	1	1	1	1	TBX5	T-box 5
hsa-miR-579	0	0	1	1	1	1	HPRT1	hypoxanthine phosphoribosyltransferase 1
hsa-miR-579	1	0	1	1	1	1	JAG1	jagged 1
hsa-miR-579	1	0	1	1	1	1	KCNA1	potassium voltage-gated channel, shaker-related subfamily, member 1 (episodic ataxia with myokymia)
hsa-miR-579	1	0	1	0	1	1	SGCB	sarcoglycan, beta (43kDa dystrophin-associated glycoprotein)
hsa-miR-579	0	0	1	1	1	1	LPL	lipoprotein lipase
hsa-miR-579	1	0	1	1	1	1	MET	met proto-oncogene (hepatocyte growth factor receptor)
hsa-miR-579	1	0	1	1	1	1	MITF	microphthalmia-associated transcription factor
hsa-miR-579	0	0	1	1	1	1	MTR	5-methyltetrahydrofolate-homocysteine methyltransferase
hsa-miR-579	1	0	1	0	1	1	PTEN	phosphatase and tensin homolog
hsa-miR-579	1	0	1	1	1	1	SOX9	SRY (sex determining region Y)-box 9
hsa-miR-579	0	0	1	1	1	1	SRD5A2	steroid-5-alpha-reductase, alpha polypeptide 2 (3-oxo-5 alpha-steroid delta 4-dehydrogenase alpha 2)
hsa-miR-579	1	0	1	0	1	1	CYBB	cytochrome b-245, beta polypeptide
hsa-miR-579	0	0	1	1	1	1	LTBP2	latent transforming growth factor beta binding protein 2
hsa-miR-579	0	0	1	0	1	1	SLC10A2	solute carrier family 10 (sodium/bile acid cotransporter family), member 2
hsa-miR-579	0	0	1	1	1	1	UGT1A1	UDP glucuronosyltransferase 1 family, polypeptide A1
hsa-miR-579	0	0	1	1	0	0	BARD1	BRCA1 associated RING domain 1
hsa-miR-579	1	0	1	1	1	1	AQP2	aquaporin 2 (collecting duct)
hsa-miR-579	1	0	1	1	1	1	MPZ	myelin protein zero
hsa-miR-579	1	0	1	1	1	1	PLP1	proteolipid protein 1
hsa-miR-579	1	0	1	1	1	1	DCX	doublecortin
hsa-miR-579	0	0	1	1	1	1	FCGR1A	Fc fragment of IgG, high affinity Ia, receptor (CD64)
hsa-miR-579	1	0	1	0	1	1	ALDH1A3	aldehyde dehydrogenase 1 family, member A3
hsa-miR-579	1	0	1	1	1	1	CACNB4	calcium channel, voltage-dependent, beta 4 subunit
hsa-miR-579	1	0	1	1	1	1	CHRM1	cholinergic receptor, muscarinic 1
hsa-miR-579	0	0	1	1	1	1	CYP7A1	cytochrome P450, family 7, subfamily A, polypeptide 1
hsa-miR-579	0	0	1	1	1	1	GABRA5	gamma-aminobutyric acid (GABA) A receptor, alpha 5
hsa-miR-579	1	0	1	1	1	1	GAD1	glutamate decarboxylase 1 (brain, 67kDa)
hsa-miR-579	0	0	1	1	1	1	GLRB	glycine receptor, beta
hsa-miR-579	1	0	1	1	1	1	GRIA4	glutamate receptor, ionotropic, AMPA 4
hsa-miR-579	1	0	1	1	1	1	GRM8	glutamate receptor, metabotropic 8
hsa-miR-579	0	0	1	1	1	1	HTR7	5-hydroxytryptamine (serotonin) receptor 7, adenylate cyclase-coupled
hsa-miR-579	1	0	1	1	1	1	IGF1R	insulin-like growth factor 1 receptor
hsa-miR-579	1	0	1	0	1	1	KCNJ2	potassium inwardly-rectifying channel, subfamily J, member 2
hsa-miR-579	1	0	1	1	1	1	PTGER4	prostaglandin E receptor 4 (subtype EP4)
hsa-miR-579	0	0	1	1	1	1	PTGS2	prostaglandin-endoperoxide synthase 2 (prostaglandin G/H synthase and cyclooxygenase)
hsa-miR-579	0	0	1	1	1	1	BLOC1S2	biogenesis of lysosomal organelles complex-1, subunit 2
hsa-miR-579	1	0	1	0	1	1	SPOPL	speckle-type POZ protein-like
hsa-miR-579	0	0	1	1	1	1	SMAD1	SMAD family member 1
hsa-miR-579	1	0	1	1	1	1	KLHL31	kelch-like 31 (Drosophila)
hsa-miR-579	0	0	1	1	1	1	ANXA13	annexin A13
hsa-miR-579	0	0	1	1	1	1	ZCCHC16	zinc finger, CCHC domain containing 16
hsa-miR-579	1	0	1	0	1	1	LIN28B	lin-28 homolog B (C. elegans)
hsa-miR-579	0	0	1	0	1	1	ZNF705A	zinc finger protein 705A
hsa-miR-579	0	0	1	1	1	1	DBX2	developing brain homeobox 2
hsa-miR-579	1	0	1	1	1	1	NCK2	NCK adaptor protein 2
hsa-miR-579	1	0	1	1	1	1	AK4	adenylate kinase 4
hsa-miR-579	1	0	1	1	1	1	NFKBIZ	nuclear factor of kappa light polypeptide gene enhancer in B-cells inhibitor, zeta
hsa-miR-579	0	0	1	1	1	1	LINC00478	long intergenic non-protein coding RNA 478
hsa-miR-579	0	0	1	1	1	1	MAPKAP1	mitogen-activated protein kinase associated protein 1
hsa-miR-579	1	0	1	0	1	1	PDPN	podoplanin
hsa-miR-579	0	0	1	0	1	1	GIMAP6	GTPase, IMAP family member 6
hsa-miR-579	1	0	1	1	1	1	TULP4	tubby like protein 4
hsa-miR-579	1	0	1	1	1	1	LMBRD2	LMBR1 domain containing 2
hsa-miR-579	1	0	1	0	1	1	SS18	synovial sarcoma translocation, chromosome 18
hsa-miR-579	0	0	1	1	1	1	CCDC73	coiled-coil domain containing 73
hsa-miR-579	0	0	1	1	1	1	WDHD1	WD repeat and HMG-box DNA binding protein 1
hsa-miR-579	1	0	1	1	1	1	BCAP29	B-cell receptor-associated protein 29
hsa-miR-579	1	0	1	1	1	1	FNIP1	folliculin interacting protein 1
hsa-miR-579	1	0	1	1	1	1	LUZP2	leucine zipper protein 2
hsa-miR-579	1	0	1	0	1	1	RCHY1	ring finger and CHY zinc finger domain containing 1, E3 ubiquitin protein ligase
hsa-miR-579	0	0	1	1	1	1	TMEM230	transmembrane protein 230
hsa-miR-579	1	0	1	0	1	1	ERMN	ermin, ERM-like protein
hsa-miR-579	1	0	1	1	1	1	ARHGAP28	Rho GTPase activating protein 28
hsa-miR-579	1	0	1	1	1	1	SHE	Src homology 2 domain containing E
hsa-miR-579	0	0	1	1	1	1	SPIN3	spindlin family, member 3
hsa-miR-579	1	0	1	0	1	1	FAM102B	family with sequence similarity 102, member B
hsa-miR-579	1	0	1	0	1	1	ZC3H12B	zinc finger CCCH-type containing 12B
hsa-miR-579	1	0	1	1	1	1	BCL2L15	BCL2-like 15
hsa-miR-579	0	0	1	1	1	1	SAMD13	sterile alpha motif domain containing 13
hsa-miR-579	0	0	1	1	1	1	NCMAP	noncompact myelin associated protein
hsa-miR-579	1	0	1	0	1	1	FYTTD1	forty-two-three domain containing 1
hsa-miR-579	0	0	1	1	1	1	DSTN	destrin (actin depolymerizing factor)
hsa-miR-579	1	0	1	0	1	1	CREB5	cAMP responsive element binding protein 5
hsa-miR-579	0	0	1	1	1	1	CHCHD7	coiled-coil-helix-coiled-coil-helix domain containing 7
hsa-miR-579	0	0	1	0	1	1	LINC00596	long intergenic non-protein coding RNA 596
hsa-miR-579	1	0	1	1	1	1	PABPC1L2A	poly(A) binding protein, cytoplasmic 1-like 2A
hsa-miR-579	1	0	1	0	1	1	ZKSCAN2	zinc finger with KRAB and SCAN domains 2
hsa-miR-579	0	0	1	1	1	1	CCNC	cyclin C
hsa-miR-579	0	0	1	1	1	1	PAGE5	P antigen family, member 5 (prostate associated)
hsa-miR-579	1	0	1	1	1	1	LHX9	LIM homeobox 9
hsa-miR-579	1	0	1	1	1	1	NLE1	notchless homolog 1 (Drosophila)
hsa-miR-579	0	0	1	1	0	0	PAGE2B	P antigen family, member 2B
hsa-miR-579	0	0	1	1	1	1	PAPSS2	3'-phosphoadenosine 5'-phosphosulfate synthase 2
hsa-miR-579	1	0	1	1	1	1	TMCC1	transmembrane and coiled-coil domain family 1
hsa-miR-579	1	0	1	0	1	1	GOPC	golgi-associated PDZ and coiled-coil motif containing
hsa-miR-579	1	0	1	1	1	1	VMA21	VMA21 vacuolar H+-ATPase homolog (S. cerevisiae)
hsa-miR-579	0	0	1	1	1	1	ACTBL2	actin, beta-like 2
hsa-miR-579	0	0	1	1	1	1	MTCP1	mature T-cell proliferation 1
hsa-miR-579	1	0	1	1	1	1	PFKFB2	6-phosphofructo-2-kinase/fructose-2,6-biphosphatase 2
hsa-miR-579	1	0	1	1	1	1	DKK3	dickkopf 3 homolog (Xenopus laevis)
hsa-miR-579	0	0	1	1	1	1	POLR2M	polymerase (RNA) II (DNA directed) polypeptide M
hsa-miR-579	0	0	1	1	1	1	NPIPL1	nuclear pore complex interacting protein-like 1
hsa-miR-579	1	0	1	1	1	1	GPHN	gephyrin
hsa-miR-579	0	0	1	1	1	1	LRRC66	leucine rich repeat containing 66
hsa-miR-579	1	0	1	1	1	1	SH3KBP1	SH3-domain kinase binding protein 1
hsa-miR-579	1	0	1	0	1	1	TNRC6B	trinucleotide repeat containing 6B
hsa-miR-579	0	0	1	1	1	1	WASF1	WAS protein family, member 1
hsa-miR-579	1	0	1	1	1	1	AFF3	AF4/FMR2 family, member 3
hsa-miR-579	1	0	1	0	1	1	CLLU1	chronic lymphocytic leukemia up-regulated 1
hsa-miR-579	1	0	1	1	1	1	TPD52	tumor protein D52
hsa-miR-579	1	0	1	1	1	1	KCTD21	potassium channel tetramerisation domain containing 21
hsa-miR-579	0	0	1	1	1	1	ZNF451	zinc finger protein 451
hsa-miR-579	1	0	1	0	1	1	MSRB3	methionine sulfoxide reductase B3
hsa-miR-579	1	0	1	1	1	1	TFAP2A	transcription factor AP-2 alpha (activating enhancer binding protein 2 alpha)
hsa-miR-579	1	0	1	1	1	1	KLF10	Kruppel-like factor 10
hsa-miR-579	1	0	1	0	1	1	NPNT	nephronectin
hsa-miR-579	1	0	1	1	1	1	MAGI1	membrane associated guanylate kinase, WW and PDZ domain containing 1
hsa-miR-579	1	0	1	1	1	1	PPM1B	protein phosphatase, Mg2+/Mn2+ dependent, 1B
hsa-miR-579	0	0	1	1	1	1	PHF12	PHD finger protein 12
hsa-miR-579	0	0	1	1	0	0	SSX4B	synovial sarcoma, X breakpoint 4B
hsa-miR-579	0	0	1	1	1	1	FAM134B	family with sequence similarity 134, member B
hsa-miR-579	1	0	1	1	1	1	AGAP1	ArfGAP with GTPase domain, ankyrin repeat and PH domain 1
hsa-miR-579	1	0	1	0	1	1	ARL5A	ADP-ribosylation factor-like 5A
hsa-miR-579	0	0	1	1	1	1	C18orf62	chromosome 18 open reading frame 62
hsa-miR-579	1	0	1	1	1	1	SCD5	stearoyl-CoA desaturase 5
hsa-miR-579	1	0	1	1	1	1	DLX1	distal-less homeobox 1
hsa-miR-579	1	0	1	1	1	1	ATP6V1C2	ATPase, H+ transporting, lysosomal 42kDa, V1 subunit C2
hsa-miR-579	1	0	1	0	1	1	GK5	glycerol kinase 5 (putative)
hsa-miR-579	1	0	1	0	1	1	USP9X	ubiquitin specific peptidase 9, X-linked
hsa-miR-579	0	0	1	0	1	1	ZNF705D	zinc finger protein 705D
hsa-miR-579	1	0	1	1	1	1	CDC42	cell division cycle 42 (GTP binding protein, 25kDa)
hsa-miR-579	1	0	1	1	1	1	MLLT4	myeloid/lymphoid or mixed-lineage leukemia (trithorax homolog, Drosophila); translocated to, 4
hsa-miR-579	0	0	1	1	0	0	MEOX1	mesenchyme homeobox 1
hsa-miR-579	0	0	1	0	1	1	OPALIN	oligodendrocytic myelin paranodal and inner loop protein
hsa-miR-579	0	0	1	1	1	1	MLH3	mutL homolog 3 (E. coli)
hsa-miR-579	1	0	1	1	1	1	SCN2A	sodium channel, voltage-gated, type II, alpha subunit
hsa-miR-579	1	0	1	1	1	1	PAPD5	PAP associated domain containing 5
hsa-miR-579	1	0	1	1	1	1	ZBTB8A	zinc finger and BTB domain containing 8A
hsa-miR-579	0	0	1	0	1	1	STEAP2	STEAP family member 2, metalloreductase
hsa-miR-579	1	0	1	1	1	1	CYLD	cylindromatosis (turban tumor syndrome)
hsa-miR-579	1	0	1	1	1	1	PPP4R1	protein phosphatase 4, regulatory subunit 1
hsa-miR-579	1	0	1	1	1	1	HMGCLL1	3-hydroxymethyl-3-methylglutaryl-CoA lyase-like 1
hsa-miR-579	0	0	1	1	1	1	MST4	serine/threonine protein kinase MST4
hsa-miR-579	0	0	1	1	1	1	C6orf162	chromosome 6 open reading frame 162
hsa-miR-579	1	0	1	1	1	1	PABPC1L2B	poly(A) binding protein, cytoplasmic 1-like 2B
hsa-miR-579	1	0	1	1	1	1	ZNF706	zinc finger protein 706
hsa-miR-579	1	0	1	1	1	1	C2orf88	chromosome 2 open reading frame 88
hsa-miR-579	1	0	1	1	1	1	SLC9A6	solute carrier family 9, subfamily A (NHE6, cation proton antiporter 6), member 6
hsa-miR-579	1	0	1	1	1	1	FRS2	fibroblast growth factor receptor substrate 2
hsa-miR-579	1	0	1	1	1	1	ERBB4	v-erb-a erythroblastic leukemia viral oncogene homolog 4 (avian)
hsa-miR-579	0	0	1	1	1	1	TTC14	tetratricopeptide repeat domain 14
hsa-miR-579	0	0	1	1	1	1	TRAK1	trafficking protein, kinesin binding 1
hsa-miR-579	1	0	1	1	1	1	NET1	neuroepithelial cell transforming 1
hsa-miR-579	0	0	1	1	1	1	KIR3DX1	killer cell immunoglobulin-like receptor, three domains, X1
hsa-miR-579	1	0	1	1	1	1	C5orf43	chromosome 5 open reading frame 43
hsa-miR-579	0	0	1	1	1	1	CTXN3	cortexin 3
hsa-miR-579	0	0	1	1	1	1	UGT1A6	UDP glucuronosyltransferase 1 family, polypeptide A6
hsa-miR-579	1	0	1	1	1	1	QSER1	glutamine and serine rich 1
hsa-miR-579	1	0	1	1	1	1	CDC14B	CDC14 cell division cycle 14 homolog B (S. cerevisiae)
hsa-miR-579	1	0	1	1	1	1	PDE11A	phosphodiesterase 11A
hsa-miR-579	1	0	1	1	1	1	IRF2BP2	interferon regulatory factor 2 binding protein 2
hsa-miR-579	1	0	1	1	1	1	PRR3	proline rich 3
hsa-miR-579	1	0	1	0	1	1	UBXN2B	UBX domain protein 2B
hsa-miR-579	1	0	1	1	1	1	ALG9	asparagine-linked glycosylation 9, alpha-1,2-mannosyltransferase homolog (S. cerevisiae)
hsa-miR-579	0	0	1	1	0	0	ASAH2B	N-acylsphingosine amidohydrolase (non-lysosomal ceramidase) 2B
hsa-miR-579	1	0	1	1	1	1	TMTC4	transmembrane and tetratricopeptide repeat containing 4
hsa-miR-579	1	0	1	1	1	1	N4BP2L1	NEDD4 binding protein 2-like 1
hsa-miR-579	0	0	1	1	1	1	FKTN	fukutin
hsa-miR-579	1	0	1	1	1	1	CUL4B	cullin 4B
hsa-miR-579	1	0	1	1	1	1	VAV3	vav 3 guanine nucleotide exchange factor
hsa-miR-579	1	0	1	1	1	1	LDB3	LIM domain binding 3
hsa-miR-579	1	0	1	0	1	1	THSD7B	thrombospondin, type I, domain containing 7B
hsa-miR-579	1	0	1	0	1	1	CCDC85A	coiled-coil domain containing 85A
hsa-miR-579	0	0	1	1	0	0	LMTK3	lemur tyrosine kinase 3
hsa-miR-579	0	0	1	1	1	1	HSF5	heat shock transcription factor family member 5
hsa-miR-579	1	0	1	0	1	1	ODZ3	odz, odd Oz/ten-m homolog 3 (Drosophila)
hsa-miR-579	0	0	1	0	1	1	TMEM150C	transmembrane protein 150C
hsa-miR-579	0	0	1	1	1	1	TBX18	T-box 18
hsa-miR-579	1	0	1	0	1	1	SCN3A	sodium channel, voltage-gated, type III, alpha subunit
hsa-miR-579	1	0	1	0	1	1	PDE5A	phosphodiesterase 5A, cGMP-specific
hsa-miR-579	0	0	1	1	1	1	ADSS	adenylosuccinate synthase
hsa-miR-579	0	0	1	0	1	1	ALOX15	arachidonate 15-lipoxygenase
hsa-miR-579	1	0	1	1	1	1	APAF1	apoptotic peptidase activating factor 1
hsa-miR-579	1	0	1	0	1	1	XIAP	X-linked inhibitor of apoptosis
hsa-miR-579	1	0	1	0	1	1	BACH1	BTB and CNC homology 1, basic leucine zipper transcription factor 1
hsa-miR-579	1	0	1	0	1	1	BMPR2	bone morphogenetic protein receptor, type II (serine/threonine kinase)
hsa-miR-579	1	0	1	0	1	1	KLF9	Kruppel-like factor 9
hsa-miR-579	0	0	1	1	1	1	CASQ1	calsequestrin 1 (fast-twitch, skeletal muscle)
hsa-miR-579	0	0	1	0	1	1	CAV2	caveolin 2
hsa-miR-579	0	0	1	1	1	1	CDC5L	CDC5 cell division cycle 5-like (S. pombe)
hsa-miR-579	1	0	1	0	1	1	CDK6	cyclin-dependent kinase 6
hsa-miR-579	0	0	1	1	1	1	CHUK	conserved helix-loop-helix ubiquitous kinase
hsa-miR-579	1	0	1	0	1	1	CPD	carboxypeptidase D
hsa-miR-579	1	0	1	1	1	1	CREBL2	cAMP responsive element binding protein-like 2
hsa-miR-579	1	0	1	1	1	1	MAPK14	mitogen-activated protein kinase 14
hsa-miR-579	0	0	1	1	1	1	CX3CR1	chemokine (C-X3-C motif) receptor 1
hsa-miR-579	1	0	1	1	1	1	S1PR1	sphingosine-1-phosphate receptor 1
hsa-miR-579	1	0	1	1	1	1	EREG	epiregulin
hsa-miR-579	0	0	1	1	1	1	FRZB	frizzled-related protein
hsa-miR-579	0	0	1	1	0	0	GAGE1	G antigen 1
hsa-miR-579	0	0	1	1	0	0	DNAJA1	DnaJ (Hsp40) homolog, subfamily A, member 1
hsa-miR-579	1	0	1	0	1	1	MPPED2	metallophosphoesterase domain containing 2
hsa-miR-579	1	0	1	1	1	1	AQP4	aquaporin 4
hsa-miR-579	1	0	1	1	1	1	BCL6	B-cell CLL/lymphoma 6
hsa-miR-579	1	0	1	1	1	1	BNC1	basonuclin 1
hsa-miR-579	1	0	1	1	1	1	CALM2	calmodulin 2 (phosphorylase kinase, delta)
hsa-miR-579	1	0	1	1	1	1	CDK2	cyclin-dependent kinase 2
hsa-miR-579	1	0	1	1	1	1	COL4A1	collagen, type IV, alpha 1
hsa-miR-579	1	0	1	1	1	1	COL4A6	collagen, type IV, alpha 6
hsa-miR-579	1	0	1	1	1	1	COL15A1	collagen, type XV, alpha 1
hsa-miR-579	1	0	1	1	1	1	DBT	dihydrolipoamide branched chain transacylase E2
hsa-miR-579	0	0	1	1	1	1	DPT	dermatopontin
hsa-miR-579	0	0	1	1	1	1	DSG1	desmoglein 1
hsa-miR-579	1	0	1	1	1	1	DUSP6	dual specificity phosphatase 6
hsa-miR-579	1	0	1	1	1	1	E2F3	E2F transcription factor 3
hsa-miR-579	0	0	1	1	0	0	EDN2	endothelin 2
hsa-miR-579	0	0	1	1	0	0	EIF5A	eukaryotic translation initiation factor 5A
hsa-miR-579	1	0	1	0	1	1	ETV6	ets variant 6
hsa-miR-579	0	0	1	1	0	0	GNA11	guanine nucleotide binding protein (G protein), alpha 11 (Gq class)
hsa-miR-579	1	0	1	1	1	1	GNAZ	guanine nucleotide binding protein (G protein), alpha z polypeptide
hsa-miR-579	0	0	1	1	1	1	CXCL3	chemokine (C-X-C motif) ligand 3
hsa-miR-579	0	0	1	1	1	1	GTF2E2	general transcription factor IIE, polypeptide 2, beta 34kDa
hsa-miR-579	0	0	1	0	1	1	GYPA	glycophorin A (MNS blood group)
hsa-miR-579	1	0	1	1	1	1	HIVEP1	human immunodeficiency virus type I enhancer binding protein 1
hsa-miR-579	0	0	1	1	1	1	HMGCS1	3-hydroxy-3-methylglutaryl-CoA synthase 1 (soluble)
hsa-miR-579	1	0	1	1	1	1	HOXD10	homeobox D10
hsa-miR-579	1	0	1	1	1	1	IL13	interleukin 13
hsa-miR-579	0	0	1	1	0	0	ITPKA	inositol-trisphosphate 3-kinase A
hsa-miR-579	1	0	1	1	1	1	KCNA3	potassium voltage-gated channel, shaker-related subfamily, member 3
hsa-miR-579	1	0	1	1	1	1	KCNA4	potassium voltage-gated channel, shaker-related subfamily, member 4
hsa-miR-579	1	0	1	1	1	1	KPNA3	karyopherin alpha 3 (importin alpha 4)
hsa-miR-579	1	0	1	1	1	1	KPNA4	karyopherin alpha 4 (importin alpha 3)
hsa-miR-579	1	0	1	1	1	1	IPO5	importin 5
hsa-miR-579	1	0	1	1	1	1	LEPR	leptin receptor
hsa-miR-579	1	0	1	1	1	1	LIF	leukemia inhibitory factor
hsa-miR-579	0	0	1	1	1	1	LOX	lysyl oxidase
hsa-miR-579	1	0	1	1	1	1	MAN2A1	mannosidase, alpha, class 2A, member 1
hsa-miR-579	0	0	1	1	1	1	MMP19	matrix metallopeptidase 19
hsa-miR-579	1	0	1	1	1	1	MSN	moesin
hsa-miR-579	1	0	1	1	1	1	MSR1	macrophage scavenger receptor 1
hsa-miR-579	1	0	1	1	1	1	MYH9	myosin, heavy chain 9, non-muscle
hsa-miR-579	0	0	1	1	1	1	NID1	nidogen 1
hsa-miR-579	0	0	1	1	1	1	NOV	nephroblastoma overexpressed
hsa-miR-579	1	0	1	1	1	1	NPAT	nuclear protein, ataxia-telangiectasia locus
hsa-miR-579	1	0	1	1	1	1	NPTX1	neuronal pentraxin I
hsa-miR-579	1	0	1	1	1	1	TNFRSF11B	tumor necrosis factor receptor superfamily, member 11b
hsa-miR-579	1	0	1	0	1	1	PAK2	p21 protein (Cdc42/Rac)-activated kinase 2
hsa-miR-579	1	0	1	0	1	1	PDK1	pyruvate dehydrogenase kinase, isozyme 1
hsa-miR-579	0	0	1	1	1	1	PFDN4	prefoldin subunit 4
hsa-miR-579	1	0	1	1	1	1	PHB	prohibitin
hsa-miR-579	0	0	1	1	1	1	PIK3C2B	phosphatidylinositol-4-phosphate 3-kinase, catalytic subunit type 2 beta
hsa-miR-579	1	0	1	1	1	1	PLAGL2	pleiomorphic adenoma gene-like 2
hsa-miR-579	0	0	1	0	1	1	PLN	phospholamban
hsa-miR-579	1	0	1	1	1	1	PPP1CB	protein phosphatase 1, catalytic subunit, beta isozyme
hsa-miR-579	1	0	1	1	1	1	PPP1CC	protein phosphatase 1, catalytic subunit, gamma isozyme
hsa-miR-579	0	0	1	1	1	1	PPP1R3A	protein phosphatase 1, regulatory subunit 3A
hsa-miR-579	0	0	1	1	1	1	HHEX	hematopoietically expressed homeobox
hsa-miR-579	1	0	1	0	1	1	PRKCA	protein kinase C, alpha
hsa-miR-579	1	0	1	1	1	1	PRKD1	protein kinase D1
hsa-miR-579	1	0	1	1	1	1	MAPK6	mitogen-activated protein kinase 6
hsa-miR-579	1	0	1	1	1	1	PRPS1	phosphoribosyl pyrophosphate synthetase 1
hsa-miR-579	1	0	1	1	1	1	ARID4A	AT rich interactive domain 4A (RBP1-like)
hsa-miR-579	0	0	1	1	1	1	RFC3	replication factor C (activator 1) 3, 38kDa
hsa-miR-579	0	0	1	1	1	1	RING1	ring finger protein 1
hsa-miR-579	1	0	1	0	1	1	SORT1	sortilin 1
hsa-miR-579	0	0	1	1	1	1	SDHD	succinate dehydrogenase complex, subunit D, integral membrane protein
hsa-miR-579	0	0	1	1	1	1	SLAMF1	signaling lymphocytic activation molecule family member 1
hsa-miR-579	1	0	1	0	1	1	SLC6A1	solute carrier family 6 (neurotransmitter transporter, GABA), member 1
hsa-miR-579	1	0	1	1	1	1	SNAI2	snail homolog 2 (Drosophila)
hsa-miR-579	1	0	1	1	1	1	SMARCC1	SWI/SNF related, matrix associated, actin dependent regulator of chromatin, subfamily c, member 1
hsa-miR-579	1	0	1	0	1	1	SOX11	SRY (sex determining region Y)-box 11
hsa-miR-579	1	0	1	1	1	1	SRPR	signal recognition particle receptor (docking protein)
hsa-miR-579	0	0	1	1	0	0	SSX2	synovial sarcoma, X breakpoint 2
hsa-miR-579	1	0	1	0	1	1	STC1	stanniocalcin 1
hsa-miR-579	1	0	1	0	1	1	TAL1	T-cell acute lymphocytic leukemia 1
hsa-miR-579	0	0	1	0	1	1	TDGF1	teratocarcinoma-derived growth factor 1
hsa-miR-579	0	0	1	1	0	0	HIRA	HIR histone cell cycle regulation defective homolog A (S. cerevisiae)
hsa-miR-579	0	0	1	1	1	1	UBE2D1	ubiquitin-conjugating enzyme E2D 1
hsa-miR-579	1	0	1	1	1	1	UBE2D3	ubiquitin-conjugating enzyme E2D 3
hsa-miR-579	1	0	1	0	1	1	UBE2G2	ubiquitin-conjugating enzyme E2G 2
hsa-miR-579	1	0	1	0	1	1	ZIC1	Zic family member 1
hsa-miR-579	1	0	1	1	1	1	FZD5	frizzled family receptor 5
hsa-miR-579	0	0	1	1	1	1	STAM	signal transducing adaptor molecule (SH3 domain and ITAM motif) 1
hsa-miR-579	1	0	1	1	1	1	CUL5	cullin 5
hsa-miR-579	1	0	1	1	1	1	HMGA2	high mobility group AT-hook 2
hsa-miR-579	1	0	1	1	1	1	NRIP1	nuclear receptor interacting protein 1
hsa-miR-579	1	0	1	1	1	1	FZD1	frizzled family receptor 1
hsa-miR-579	0	0	1	1	1	1	HIST2H2BE	histone cluster 2, H2be
hsa-miR-579	0	0	1	1	1	1	PIP5K1A	phosphatidylinositol-4-phosphate 5-kinase, type I, alpha
hsa-miR-579	1	0	1	1	1	1	EEA1	early endosome antigen 1
hsa-miR-579	0	0	1	1	0	0	GPR65	G protein-coupled receptor 65
hsa-miR-579	0	0	1	1	1	1	ITGA10	integrin, alpha 10
hsa-miR-579	1	0	1	0	1	1	TNKS	tankyrase, TRF1-interacting ankyrin-related ADP-ribose polymerase
hsa-miR-579	1	0	1	1	1	1	NR5A2	nuclear receptor subfamily 5, group A, member 2
hsa-miR-579	1	0	1	1	1	1	SNAP23	synaptosomal-associated protein, 23kDa
hsa-miR-579	1	0	1	1	1	1	KAT2B	K(lysine) acetyltransferase 2B
hsa-miR-579	1	0	1	1	1	1	FUBP1	far upstream element (FUSE) binding protein 1
hsa-miR-579	0	0	1	1	1	1	PRPF4B	PRP4 pre-mRNA processing factor 4 homolog B (yeast)
hsa-miR-579	0	0	1	1	1	1	RNF8	ring finger protein 8, E3 ubiquitin protein ligase
hsa-miR-579	0	0	1	1	1	1	UBA3	ubiquitin-like modifier activating enzyme 3
hsa-miR-579	1	0	1	1	1	1	ACOX1	acyl-CoA oxidase 1, palmitoyl
hsa-miR-579	0	0	1	0	1	1	RHOB	ras homolog family member B
hsa-miR-579	0	0	1	0	1	1	EIF4EBP2	eukaryotic translation initiation factor 4E binding protein 2
hsa-miR-579	1	0	1	1	1	1	HNF4G	hepatocyte nuclear factor 4, gamma
hsa-miR-579	1	0	1	1	1	1	RAB5A	RAB5A, member RAS oncogene family
hsa-miR-579	1	0	1	0	1	1	SLC1A2	solute carrier family 1 (glial high affinity glutamate transporter), member 2
hsa-miR-579	1	0	1	1	1	1	STK17B	serine/threonine kinase 17b
hsa-miR-579	0	0	1	1	1	1	SEP15	15 kDa selenoprotein
hsa-miR-579	1	0	1	0	1	1	AKAP6	A kinase (PRKA) anchor protein 6
hsa-miR-579	1	0	1	1	1	1	ARL3	ADP-ribosylation factor-like 3
hsa-miR-579	0	0	1	1	1	1	BST1	bone marrow stromal cell antigen 1
hsa-miR-579	0	0	1	1	1	1	COL12A1	collagen, type XII, alpha 1
hsa-miR-579	0	0	1	1	0	0	COX6A1	cytochrome c oxidase subunit VIa polypeptide 1
hsa-miR-579	1	0	1	1	1	1	DUSP5	dual specificity phosphatase 5
hsa-miR-579	1	0	1	0	1	1	ACSL4	acyl-CoA synthetase long-chain family member 4
hsa-miR-579	1	0	1	0	1	1	ARHGAP35	Rho GTPase activating protein 35
hsa-miR-579	1	0	1	1	1	1	ONECUT1	one cut homeobox 1
hsa-miR-579	1	0	1	1	1	1	LRP2	low density lipoprotein receptor-related protein 2
hsa-miR-579	1	0	1	1	1	1	NCAM2	neural cell adhesion molecule 2
hsa-miR-579	1	0	1	0	1	1	USP9Y	ubiquitin specific peptidase 9, Y-linked
hsa-miR-579	1	0	1	1	1	1	RAB11A	RAB11A, member RAS oncogene family
hsa-miR-579	1	0	1	1	0	0	PIAS2	protein inhibitor of activated STAT, 2
hsa-miR-579	0	0	1	1	0	0	PRY	PTPN13-like, Y-linked
hsa-miR-579	0	0	1	0	0	0	XKRY	XK, Kell blood group complex subunit-related, Y-linked
hsa-miR-579	0	0	1	0	1	1	CXorf1	chromosome X open reading frame 1
hsa-miR-579	1	0	1	1	1	1	SYNGR1	synaptogyrin 1
hsa-miR-579	1	0	1	1	1	1	MAP3K13	mitogen-activated protein kinase kinase kinase 13
hsa-miR-579	0	0	1	1	1	1	BUB3	budding uninhibited by benzimidazoles 3 homolog (yeast)
hsa-miR-579	1	0	1	1	1	1	STK17A	serine/threonine kinase 17a
hsa-miR-579	1	0	1	1	1	1	MED1	mediator complex subunit 1
hsa-miR-579	1	0	1	1	1	1	B4GALT6	UDP-Gal:betaGlcNAc beta 1,4- galactosyltransferase, polypeptide 6
hsa-miR-579	1	0	1	1	1	1	NRXN3	neurexin 3
hsa-miR-579	1	0	1	1	1	1	AKAP7	A kinase (PRKA) anchor protein 7
hsa-miR-579	1	0	1	1	1	1	ONECUT2	one cut homeobox 2
hsa-miR-579	1	0	1	1	1	1	KIF23	kinesin family member 23
hsa-miR-579	1	0	1	1	1	1	CXCL14	chemokine (C-X-C motif) ligand 14
hsa-miR-579	0	0	1	1	1	1	CALB1	calbindin 1, 28kDa
hsa-miR-579	0	0	1	1	1	1	CD8B	CD8b molecule
hsa-miR-579	1	0	1	0	1	1	DOCK3	dedicator of cytokinesis 3
hsa-miR-579	1	0	1	1	1	1	JARID2	jumonji, AT rich interactive domain 2
hsa-miR-579	1	0	1	1	1	1	ATXN3	ataxin 3
hsa-miR-579	1	0	1	1	0	0	MMP14	matrix metallopeptidase 14 (membrane-inserted)
hsa-miR-579	0	0	1	1	0	0	ROR1	receptor tyrosine kinase-like orphan receptor 1
hsa-miR-579	0	0	1	1	1	1	PRB1	proline-rich protein BstNI subfamily 1
hsa-miR-579	0	0	1	1	1	1	ABCD4	ATP-binding cassette, sub-family D (ALD), member 4
hsa-miR-579	1	0	1	0	1	1	SEL1L	sel-1 suppressor of lin-12-like (C. elegans)
hsa-miR-579	0	0	1	1	1	1	ABCD2	ATP-binding cassette, sub-family D (ALD), member 2
hsa-miR-579	1	1	1	1	1	1	MAP3K8	mitogen-activated protein kinase kinase kinase 8
hsa-miR-579	1	0	1	1	1	1	DCC	deleted in colorectal carcinoma
hsa-miR-579	1	0	1	1	1	1	ELK3	ELK3, ETS-domain protein (SRF accessory protein 2)
hsa-miR-579	0	0	1	0	1	1	FOSL2	FOS-like antigen 2
hsa-miR-579	1	0	1	1	1	1	GABPB1	GA binding protein transcription factor, beta subunit 1
hsa-miR-579	0	0	1	1	1	1	MSTN	myostatin
hsa-miR-579	1	0	1	1	1	1	GFRA1	GDNF family receptor alpha 1
hsa-miR-579	1	0	1	1	1	1	GPM6A	glycoprotein M6A
hsa-miR-579	0	0	1	1	1	1	GPR22	G protein-coupled receptor 22
hsa-miR-579	0	0	1	1	1	1	LPAR4	lysophosphatidic acid receptor 4
hsa-miR-579	0	0	1	1	1	1	GRK5	G protein-coupled receptor kinase 5
hsa-miR-579	1	0	1	1	1	1	HAS2	hyaluronan synthase 2
hsa-miR-579	1	0	1	1	1	1	PDCL	phosducin-like
hsa-miR-579	0	0	1	1	1	1	PPP1R3C	protein phosphatase 1, regulatory subunit 3C
hsa-miR-579	1	0	1	0	1	1	PRKAB2	protein kinase, AMP-activated, beta 2 non-catalytic subunit
hsa-miR-579	1	0	1	0	1	1	PRKCE	protein kinase C, epsilon
hsa-miR-579	1	0	1	1	1	1	RALA	v-ral simian leukemia viral oncogene homolog A (ras related)
hsa-miR-579	0	0	1	1	1	1	CXCL11	chemokine (C-X-C motif) ligand 11
hsa-miR-579	0	0	1	1	1	1	SKIL	SKI-like oncogene
hsa-miR-579	1	0	1	1	1	1	RND2	Rho family GTPase 2
hsa-miR-579	1	0	1	1	1	1	AKT3	v-akt murine thymoma viral oncogene homolog 3 (protein kinase B, gamma)
hsa-miR-579	1	0	1	1	1	1	PIGK	phosphatidylinositol glycan anchor biosynthesis, class K
hsa-miR-579	0	0	1	1	1	1	HSD11B1	hydroxysteroid (11-beta) dehydrogenase 1
hsa-miR-579	0	0	1	1	1	1	ING1	inhibitor of growth family, member 1
hsa-miR-579	1	0	1	1	1	1	INSIG1	insulin induced gene 1
hsa-miR-579	0	0	1	0	1	1	POU3F2	POU class 3 homeobox 2
hsa-miR-579	1	0	1	1	1	1	RHEB	Ras homolog enriched in brain
hsa-miR-579	0	0	1	1	1	1	SSX1	synovial sarcoma, X breakpoint 1
hsa-miR-579	0	0	1	1	0	0	SSX4	synovial sarcoma, X breakpoint 4
hsa-miR-579	1	0	1	1	0	0	DPP3	dipeptidyl-peptidase 3
hsa-miR-579	1	0	1	0	1	1	GPC6	glypican 6
hsa-miR-579	1	0	1	1	1	1	ARPC5	actin related protein 2/3 complex, subunit 5, 16kDa
hsa-miR-579	1	0	1	0	1	1	TSPAN2	tetraspanin 2
hsa-miR-579	1	0	1	0	1	1	CALCRL	calcitonin receptor-like
hsa-miR-579	0	0	1	1	1	1	NUTF2	nuclear transport factor 2
hsa-miR-579	0	0	1	0	1	1	CD96	CD96 molecule
hsa-miR-579	1	0	1	0	1	1	SPRY3	sprouty homolog 3 (Drosophila)
hsa-miR-579	1	0	1	1	1	1	MEOX2	mesenchyme homeobox 2
hsa-miR-579	1	0	1	1	1	1	TSNAX	translin-associated factor X
hsa-miR-579	0	0	1	1	1	1	TRDN	triadin
hsa-miR-579	1	0	1	1	1	1	CITED2	Cbp/p300-interacting transactivator, with Glu/Asp-rich carboxy-terminal domain, 2
hsa-miR-579	1	0	1	1	1	1	SEMA3A	sema domain, immunoglobulin domain (Ig), short basic domain, secreted, (semaphorin) 3A
hsa-miR-579	1	0	1	1	1	1	SPON1	spondin 1, extracellular matrix protein
hsa-miR-579	1	0	1	1	1	1	CAPZA1	capping protein (actin filament) muscle Z-line, alpha 1
hsa-miR-579	1	0	1	1	1	1	DYNC1LI2	dynein, cytoplasmic 1, light intermediate chain 2
hsa-miR-579	1	0	1	1	1	1	NEFL	neurofilament, light polypeptide
hsa-miR-579	1	0	1	1	1	1	NEUROD2	neuronal differentiation 2
hsa-miR-579	1	0	1	1	1	1	NSF	N-ethylmaleimide-sensitive factor
hsa-miR-579	1	0	1	1	1	1	NR4A2	nuclear receptor subfamily 4, group A, member 2
hsa-miR-579	1	0	1	1	1	1	CDK16	cyclin-dependent kinase 16
hsa-miR-579	1	0	1	1	1	1	POU4F1	POU class 4 homeobox 1
hsa-miR-579	0	0	1	1	0	0	PRB2	proline-rich protein BstNI subfamily 2
hsa-miR-579	0	0	1	0	0	0	PRB3	proline-rich protein BstNI subfamily 3
hsa-miR-579	1	0	1	1	1	1	PRKAA1	protein kinase, AMP-activated, alpha 1 catalytic subunit
hsa-miR-579	1	0	1	1	1	1	PKN2	protein kinase N2
hsa-miR-579	0	0	1	1	1	1	ZNF230	zinc finger protein 230
hsa-miR-579	1	0	1	1	1	1	SMC1A	structural maintenance of chromosomes 1A
hsa-miR-579	1	0	1	1	1	1	ZNF238	zinc finger protein 238
hsa-miR-579	0	0	1	1	1	1	SLC25A17	solute carrier family 25 (mitochondrial carrier; peroxisomal membrane protein, 34kDa), member 17
hsa-miR-579	1	0	1	0	1	1	APPBP2	amyloid beta precursor protein (cytoplasmic tail) binding protein 2
hsa-miR-579	1	0	1	1	1	1	NEBL	nebulette
hsa-miR-579	1	0	1	1	1	1	SPTLC1	serine palmitoyltransferase, long chain base subunit 1
hsa-miR-579	0	0	1	1	1	1	PARP4	poly (ADP-ribose) polymerase family, member 4
hsa-miR-579	1	0	1	1	1	1	HEXIM1	hexamethylene bis-acetamide inducible 1
hsa-miR-579	0	0	1	1	0	0	STAMBP	STAM binding protein
hsa-miR-579	0	0	1	1	1	1	EVI2B	ecotropic viral integration site 2B
hsa-miR-579	1	0	1	0	1	1	GNAI3	guanine nucleotide binding protein (G protein), alpha inhibiting activity polypeptide 3
hsa-miR-579	0	0	1	1	1	1	CLCA2	chloride channel accessory 2
hsa-miR-579	0	0	1	1	1	1	CD226	CD226 molecule
hsa-miR-579	1	0	1	0	1	1	MAP4K5	mitogen-activated protein kinase kinase kinase kinase 5
hsa-miR-579	1	0	1	1	1	1	KDM5B	lysine (K)-specific demethylase 5B
hsa-miR-579	0	0	1	1	1	1	PPP1R17	protein phosphatase 1, regulatory subunit 17
hsa-miR-579	0	0	1	1	1	1	FGL2	fibrinogen-like 2
hsa-miR-579	1	0	1	1	1	1	MAN1A2	mannosidase, alpha, class 1A, member 2
hsa-miR-579	0	0	1	1	1	1	NUDT3	nudix (nucleoside diphosphate linked moiety X)-type motif 3
hsa-miR-579	1	0	1	1	1	1	CDH10	cadherin 10, type 2 (T2-cadherin)
hsa-miR-579	1	0	1	1	1	1	DIAPH2	diaphanous homolog 2 (Drosophila)
hsa-miR-579	0	0	1	1	1	1	SYPL1	synaptophysin-like 1
hsa-miR-579	1	0	1	0	1	1	TCEA1	transcription elongation factor A (SII), 1
hsa-miR-579	1	0	1	1	1	1	LAPTM5	lysosomal protein transmembrane 5
hsa-miR-579	0	0	1	1	1	1	CEACAM7	carcinoembryonic antigen-related cell adhesion molecule 7
hsa-miR-579	1	0	1	1	1	1	RP2	retinitis pigmentosa 2 (X-linked recessive)
hsa-miR-579	1	0	1	0	1	1	SLC5A3	solute carrier family 5 (sodium/myo-inositol cotransporter), member 3
hsa-miR-579	1	0	1	0	1	1	SOX12	SRY (sex determining region Y)-box 12
hsa-miR-579	0	0	1	1	1	1	TAF5	TAF5 RNA polymerase II, TATA box binding protein (TBP)-associated factor, 100kDa
hsa-miR-579	1	0	1	1	1	1	NR4A3	nuclear receptor subfamily 4, group A, member 3
hsa-miR-579	1	0	1	0	1	1	PAPD7	PAP associated domain containing 7
hsa-miR-579	1	0	1	1	1	1	SOX30	SRY (sex determining region Y)-box 30
hsa-miR-579	1	0	1	1	1	1	KAT7	K(lysine) acetyltransferase 7
hsa-miR-579	1	0	1	1	1	1	SOX21	SRY (sex determining region Y)-box 21
hsa-miR-579	1	0	1	1	1	1	SSR3	signal sequence receptor, gamma (translocon-associated protein gamma)
hsa-miR-579	1	0	1	1	1	1	TMF1	TATA element modulatory factor 1
hsa-miR-579	0	0	1	1	1	1	UGT1A4	UDP glucuronosyltransferase 1 family, polypeptide A4
hsa-miR-579	1	0	1	1	1	1	UTRN	utrophin
hsa-miR-579	1	0	1	1	1	1	UTY	ubiquitously transcribed tetratricopeptide repeat gene, Y-linked
hsa-miR-579	1	0	1	1	1	1	PALM2-AKAP2	PALM2-AKAP2 readthrough
hsa-miR-579	1	0	1	1	1	1	DUSP10	dual specificity phosphatase 10
hsa-miR-579	1	0	1	1	1	1	CA5B	carbonic anhydrase VB, mitochondrial
hsa-miR-579	0	0	1	1	0	0	GPR45	G protein-coupled receptor 45
hsa-miR-579	1	0	1	1	1	1	KLF12	Kruppel-like factor 12
hsa-miR-579	0	0	1	0	1	1	PNMA2	paraneoplastic Ma antigen 2
hsa-miR-579	0	0	1	1	1	1	STAT1	signal transducer and activator of transcription 1, 91kDa
hsa-miR-579	0	0	1	1	0	0	AKR7A3	aldo-keto reductase family 7, member A3 (aflatoxin aldehyde reductase)
hsa-miR-579	0	0	1	1	1	1	ATF5	activating transcription factor 5
hsa-miR-579	1	0	1	1	1	1	ELL2	elongation factor, RNA polymerase II, 2
hsa-miR-579	1	0	1	0	1	1	ZFPM2	zinc finger protein, multitype 2
hsa-miR-579	0	0	1	1	1	1	ABCB10	ATP-binding cassette, sub-family B (MDR/TAP), member 10
hsa-miR-579	1	0	1	1	1	1	ICOS	inducible T-cell co-stimulator
hsa-miR-579	1	0	1	1	1	1	APPL1	adaptor protein, phosphotyrosine interaction, PH domain and leucine zipper containing 1
hsa-miR-579	1	0	1	0	1	1	CASP8AP2	caspase 8 associated protein 2
hsa-miR-579	1	0	1	1	1	1	RABGAP1	RAB GTPase activating protein 1
hsa-miR-579	0	0	1	1	1	1	RAB3GAP1	RAB3 GTPase activating protein subunit 1 (catalytic)
hsa-miR-579	0	0	1	1	0	0	SIRT4	sirtuin 4
hsa-miR-579	1	0	1	1	1	1	DKK1	dickkopf 1 homolog (Xenopus laevis)
hsa-miR-579	0	0	1	1	1	1	SEPHS2	selenophosphate synthetase 2
hsa-miR-579	1	0	1	1	1	1	RHOQ	ras homolog family member Q
hsa-miR-579	0	0	1	1	1	1	RRAS2	related RAS viral (r-ras) oncogene homolog 2
hsa-miR-579	1	0	1	1	1	1	HS2ST1	heparan sulfate 2-O-sulfotransferase 1
hsa-miR-579	1	0	1	1	1	1	KCND2	potassium voltage-gated channel, Shal-related subfamily, member 2
hsa-miR-579	1	0	1	0	1	1	G3BP2	GTPase activating protein (SH3 domain) binding protein 2
hsa-miR-579	1	0	1	0	1	1	FBXL7	F-box and leucine-rich repeat protein 7
hsa-miR-579	1	0	1	1	1	1	KIF4A	kinesin family member 4A
hsa-miR-579	1	0	1	1	1	1	MAPRE1	microtubule-associated protein, RP/EB family, member 1
hsa-miR-579	1	0	1	1	1	1	MMD	monocyte to macrophage differentiation-associated
hsa-miR-579	1	0	1	0	1	1	MYCBP	c-myc binding protein
hsa-miR-579	0	0	1	1	1	1	TTC33	tetratricopeptide repeat domain 33
hsa-miR-579	1	0	1	0	1	1	BLOC1S6	biogenesis of lysosomal organelles complex-1, subunit 6, pallidin
hsa-miR-579	0	0	1	0	1	1	TLL1	tolloid-like 1
hsa-miR-579	1	0	1	0	1	1	FLRT2	fibronectin leucine rich transmembrane protein 2
hsa-miR-579	0	0	1	1	1	1	N6AMT1	N-6 adenine-specific DNA methyltransferase 1 (putative)
hsa-miR-579	1	0	1	1	1	1	PPARGC1A	peroxisome proliferator-activated receptor gamma, coactivator 1 alpha
hsa-miR-579	1	0	1	1	1	1	SLC30A4	solute carrier family 30 (zinc transporter), member 4
hsa-miR-579	1	0	1	1	1	1	SLC25A24	solute carrier family 25 (mitochondrial carrier; phosphate carrier), member 24
hsa-miR-579	1	0	1	1	1	1	NCKAP1	NCK-associated protein 1
hsa-miR-579	1	0	1	1	1	1	LRP12	low density lipoprotein receptor-related protein 12
hsa-miR-579	1	0	1	0	1	1	CLIC4	chloride intracellular channel 4
hsa-miR-579	1	0	1	1	1	1	SOCS5	suppressor of cytokine signaling 5
hsa-miR-579	1	0	1	1	1	1	WDR37	WD repeat domain 37
hsa-miR-579	1	0	1	0	1	1	OSTM1	osteopetrosis associated transmembrane protein 1
hsa-miR-579	1	0	1	0	1	1	C16orf72	chromosome 16 open reading frame 72
hsa-miR-579	1	0	1	1	1	1	SCN11A	sodium channel, voltage-gated, type XI, alpha subunit
hsa-miR-579	0	0	1	1	1	1	ORMDL2	ORM1-like 2 (S. cerevisiae)
hsa-miR-579	0	0	1	0	1	1	SCN8A	sodium channel, voltage gated, type VIII, alpha subunit
hsa-miR-579	1	0	1	1	1	1	VAMP1	vesicle-associated membrane protein 1 (synaptobrevin 1)
hsa-miR-579	0	0	1	0	1	1	ADAMTS3	ADAM metallopeptidase with thrombospondin type 1 motif, 3
hsa-miR-579	1	0	1	1	1	1	CELSR1	cadherin, EGF LAG seven-pass G-type receptor 1 (flamingo homolog, Drosophila)
hsa-miR-579	1	0	1	0	1	1	ODZ1	odz, odd Oz/ten-m homolog 1 (Drosophila)
hsa-miR-579	0	0	1	1	0	0	ADAMTS7	ADAM metallopeptidase with thrombospondin type 1 motif, 7
hsa-miR-579	0	0	1	1	1	1	HSPA4L	heat shock 70kDa protein 4-like
hsa-miR-579	1	0	1	1	1	1	CBX6	chromobox homolog 6
hsa-miR-579	1	0	1	1	1	1	TGDS	TDP-glucose 4,6-dehydratase
hsa-miR-579	1	0	1	1	1	1	LEMD3	LEM domain containing 3
hsa-miR-579	1	0	1	1	1	1	CORO1C	coronin, actin binding protein, 1C
hsa-miR-579	1	0	1	1	1	1	SLC7A11	solute carrier family 7 (anionic amino acid transporter light chain, xc- system), member 11
hsa-miR-579	0	0	1	0	1	1	EID1	EP300 interacting inhibitor of differentiation 1
hsa-miR-579	1	0	1	1	1	1	MTCH2	mitochondrial carrier 2
hsa-miR-579	1	0	1	0	1	1	RNF11	ring finger protein 11
hsa-miR-579	0	0	1	1	1	1	LAMP3	lysosomal-associated membrane protein 3
hsa-miR-579	0	0	1	1	1	1	TCL6	T-cell leukemia/lymphoma 6 (non-protein coding)
hsa-miR-579	1	0	1	1	1	1	AFF4	AF4/FMR2 family, member 4
hsa-miR-579	1	0	1	1	0	0	RBMXL2	RNA binding motif protein, X-linked-like 2
hsa-miR-579	0	0	1	0	1	1	CTR9	Ctr9, Paf1/RNA polymerase II complex component, homolog (S. cerevisiae)
hsa-miR-579	0	0	1	0	1	1	LPIN2	lipin 2
hsa-miR-579	0	0	1	1	1	1	FAM53B	family with sequence similarity 53, member B
hsa-miR-579	1	0	1	0	1	1	BZW1	basic leucine zipper and W2 domains 1
hsa-miR-579	1	0	1	0	1	1	MLEC	malectin
hsa-miR-579	1	0	1	0	1	1	SERTAD2	SERTA domain containing 2
hsa-miR-579	1	0	1	1	1	1	MRPL19	mitochondrial ribosomal protein L19
hsa-miR-579	1	0	1	0	1	1	KIAA0494	KIAA0494
hsa-miR-579	0	0	1	0	1	1	EPM2AIP1	EPM2A (laforin) interacting protein 1
hsa-miR-579	1	0	1	0	1	1	TRIL	TLR4 interactor with leucine-rich repeats
hsa-miR-579	1	0	1	0	1	1	PJA2	praja ring finger 2, E3 ubiquitin protein ligase
hsa-miR-579	1	0	1	1	1	1	TOMM70A	translocase of outer mitochondrial membrane 70 homolog A (S. cerevisiae)
hsa-miR-579	1	0	1	0	1	1	LPPR4	lipid phosphate phosphatase-related protein type 4
hsa-miR-579	1	0	1	0	1	1	SV2B	synaptic vesicle glycoprotein 2B
hsa-miR-579	1	0	1	1	1	1	PLEKHA6	pleckstrin homology domain containing, family A member 6
hsa-miR-579	0	0	1	1	1	1	ENPP4	ectonucleotide pyrophosphatase/phosphodiesterase 4 (putative)
hsa-miR-579	1	0	1	1	1	1	SPAST	spastin
hsa-miR-579	1	0	1	1	1	1	FBXO21	F-box protein 21
hsa-miR-579	1	0	1	1	1	1	PHLPP2	PH domain and leucine rich repeat protein phosphatase 2
hsa-miR-579	1	0	1	1	1	1	ERP44	endoplasmic reticulum protein 44
hsa-miR-579	1	0	1	0	1	1	ARHGAP26	Rho GTPase activating protein 26
hsa-miR-579	1	0	1	1	1	1	TBC1D9	TBC1 domain family, member 9 (with GRAM domain)
hsa-miR-579	1	0	1	1	1	1	RCOR1	REST corepressor 1
hsa-miR-579	0	0	1	1	1	1	FBXO28	F-box protein 28
hsa-miR-579	1	0	1	1	1	1	MYO1D	myosin ID
hsa-miR-579	1	0	1	1	1	1	PDS5A	PDS5, regulator of cohesion maintenance, homolog A (S. cerevisiae)
hsa-miR-579	1	0	1	0	1	1	KIAA1024	KIAA1024
hsa-miR-579	1	0	1	1	1	1	CUX2	cut-like homeobox 2
hsa-miR-579	1	0	1	1	1	1	PHF15	PHD finger protein 15
hsa-miR-579	1	0	1	1	1	1	ZFYVE26	zinc finger, FYVE domain containing 26
hsa-miR-579	1	0	1	1	1	1	RIMBP2	RIMS binding protein 2
hsa-miR-579	0	0	1	1	1	1	BRI3	brain protein I3
hsa-miR-579	1	0	1	1	1	1	MOB4	MOB family member 4, phocein
hsa-miR-579	1	0	1	1	1	1	PARM1	prostate androgen-regulated mucin-like protein 1
hsa-miR-579	0	0	1	1	1	1	ZNF10	zinc finger protein 10
hsa-miR-579	1	0	1	1	1	1	RNF19A	ring finger protein 19A, E3 ubiquitin protein ligase
hsa-miR-579	1	0	1	1	1	1	CNOT6	CCR4-NOT transcription complex, subunit 6
hsa-miR-579	1	0	1	1	1	1	MYRIP	myosin VIIA and Rab interacting protein
hsa-miR-579	1	0	1	1	1	1	NSL1	NSL1, MIND kinetochore complex component, homolog (S. cerevisiae)
hsa-miR-579	1	0	1	1	1	1	KIAA1429	KIAA1429
hsa-miR-579	1	0	1	1	1	1	CLIP3	CAP-GLY domain containing linker protein 3
hsa-miR-579	1	0	1	0	1	1	OSBPL3	oxysterol binding protein-like 3
hsa-miR-579	1	0	1	0	1	1	GLCE	glucuronic acid epimerase
hsa-miR-579	1	0	1	0	1	1	PPP1R16B	protein phosphatase 1, regulatory subunit 16B
hsa-miR-579	0	0	1	1	1	1	TES	testis derived transcript (3 LIM domains)
hsa-miR-579	1	0	1	1	1	1	ABCA12	ATP-binding cassette, sub-family A (ABC1), member 12
hsa-miR-579	1	0	1	0	1	1	WWC3	WWC family member 3
hsa-miR-579	0	0	1	1	1	1	BRPF3	bromodomain and PHD finger containing, 3
hsa-miR-579	1	0	1	1	1	1	AZIN1	antizyme inhibitor 1
hsa-miR-579	0	0	1	1	1	1	PCF11	PCF11, cleavage and polyadenylation factor subunit, homolog (S. cerevisiae)
hsa-miR-579	1	0	1	0	1	1	TRIM33	tripartite motif containing 33
hsa-miR-579	1	0	1	1	0	0	YBX2	Y box binding protein 2
hsa-miR-579	1	0	1	1	1	1	PHF20L1	PHD finger protein 20-like 1
hsa-miR-579	1	0	1	1	1	1	UBE2J1	ubiquitin-conjugating enzyme E2, J1
hsa-miR-579	0	0	1	1	1	1	LACTB2	lactamase, beta 2
hsa-miR-579	1	0	1	1	1	1	SLMO2	slowmo homolog 2 (Drosophila)
hsa-miR-579	0	0	1	1	1	1	ISOC1	isochorismatase domain containing 1
hsa-miR-579	0	0	1	1	1	1	PPIL1	peptidylprolyl isomerase (cyclophilin)-like 1
hsa-miR-579	1	0	1	1	1	1	GOLT1B	golgi transport 1B
hsa-miR-579	1	0	1	0	1	1	CNR1	cannabinoid receptor 1 (brain)
hsa-miR-579	1	0	1	1	1	1	VGLL3	vestigial like 3 (Drosophila)
hsa-miR-579	1	0	1	1	1	1	SNX9	sorting nexin 9
hsa-miR-579	1	0	1	1	1	1	NLK	nemo-like kinase
hsa-miR-579	0	0	1	0	1	1	FAM8A1	family with sequence similarity 8, member A1
hsa-miR-579	1	0	1	0	1	1	SELT	selenoprotein T
hsa-miR-579	1	0	1	0	1	1	PTPLAD1	protein tyrosine phosphatase-like A domain containing 1
hsa-miR-579	1	0	1	0	1	1	CRIM1	cysteine rich transmembrane BMP regulator 1 (chordin-like)
hsa-miR-579	0	0	1	0	1	1	ERAP1	endoplasmic reticulum aminopeptidase 1
hsa-miR-579	0	0	1	1	1	1	SPAG11B	sperm associated antigen 11B
hsa-miR-579	0	0	1	0	1	1	ERGIC2	ERGIC and golgi 2
hsa-miR-579	1	0	1	1	1	1	CYP39A1	cytochrome P450, family 39, subfamily A, polypeptide 1
hsa-miR-579	0	0	1	1	1	1	PLAC8	placenta-specific 8
hsa-miR-579	1	0	1	0	1	1	FZD3	frizzled family receptor 3
hsa-miR-579	1	0	1	1	1	1	SIX4	SIX homeobox 4
hsa-miR-579	1	0	1	1	1	1	CPSF2	cleavage and polyadenylation specific factor 2, 100kDa
hsa-miR-579	0	0	1	0	1	1	TRIM44	tripartite motif containing 44
hsa-miR-579	0	0	1	0	1	1	VEZT	vezatin, adherens junctions transmembrane protein
hsa-miR-579	1	0	1	0	1	1	EIF2C4	eukaryotic translation initiation factor 2C, 4
hsa-miR-579	0	0	1	0	1	1	GIPC2	GIPC PDZ domain containing family, member 2
hsa-miR-579	1	0	1	1	1	1	ZNF280C	zinc finger protein 280C
hsa-miR-579	0	0	1	1	1	1	ARHGEF38	Rho guanine nucleotide exchange factor (GEF) 38
hsa-miR-579	0	0	1	1	0	0	GDPD2	glycerophosphodiester phosphodiesterase domain containing 2
hsa-miR-579	0	0	1	1	1	1	QRICH1	glutamine-rich 1
hsa-miR-579	0	0	1	1	0	0	CNTLN	centlein, centrosomal protein
hsa-miR-579	0	0	1	0	1	1	CWC25	CWC25 spliceosome-associated protein homolog (S. cerevisiae)
hsa-miR-579	0	0	1	1	1	1	WHSC1L1	Wolf-Hirschhorn syndrome candidate 1-like 1
hsa-miR-579	0	0	1	1	1	1	TRMT10C	tRNA methyltransferase 10 homolog C (S. cerevisiae)
hsa-miR-579	1	0	1	0	1	1	MARCH5	membrane-associated ring finger (C3HC4) 5
hsa-miR-579	0	0	1	1	0	0	VPS37C	vacuolar protein sorting 37 homolog C (S. cerevisiae)
hsa-miR-579	0	0	1	1	1	1	SCYL2	SCY1-like 2 (S. cerevisiae)
hsa-miR-579	0	0	1	0	1	1	MREG	melanoregulin
hsa-miR-579	0	0	1	1	1	1	YEATS2	YEATS domain containing 2
hsa-miR-579	0	0	1	1	1	1	SRBD1	S1 RNA binding domain 1
hsa-miR-579	1	0	1	0	1	1	IPO9	importin 9
hsa-miR-579	1	0	1	1	1	1	FIGN	fidgetin
hsa-miR-579	0	0	1	1	1	1	TMEM38B	transmembrane protein 38B
hsa-miR-579	0	0	1	0	1	1	SHQ1	SHQ1 homolog (S. cerevisiae)
hsa-miR-579	1	0	1	0	1	1	MSL2	male-specific lethal 2 homolog (Drosophila)
hsa-miR-579	0	0	1	1	1	1	SEC61A2	Sec61 alpha 2 subunit (S. cerevisiae)
hsa-miR-579	1	0	1	0	1	1	PARVA	parvin, alpha
hsa-miR-579	0	0	1	1	1	1	AP5M1	adaptor-related protein complex 5, mu 1 subunit
hsa-miR-579	1	0	1	1	1	1	CCAR1	cell division cycle and apoptosis regulator 1
hsa-miR-579	1	0	1	1	1	1	PGM2	phosphoglucomutase 2
hsa-miR-579	1	0	1	1	1	1	SPTLC3	serine palmitoyltransferase, long chain base subunit 3
hsa-miR-579	1	0	1	1	1	1	DDX19A	DEAD (Asp-Glu-Ala-Asp) box polypeptide 19A
hsa-miR-579	0	0	1	1	1	1	TMEM144	transmembrane protein 144
hsa-miR-579	1	0	1	0	1	1	LIN7C	lin-7 homolog C (C. elegans)
hsa-miR-579	1	0	1	1	1	1	RSBN1	round spermatid basic protein 1
hsa-miR-579	0	0	1	0	1	1	BLOC1S4	biogenesis of lysosomal organelles complex-1, subunit 4, cappuccino
hsa-miR-579	1	0	1	1	1	1	DRAM1	DNA-damage regulated autophagy modulator 1
hsa-miR-579	0	0	1	1	1	1	SYNJ2BP	synaptojanin 2 binding protein
hsa-miR-579	1	0	1	0	1	1	TMEM106B	transmembrane protein 106B
hsa-miR-579	1	0	1	1	1	1	EPB41L4B	erythrocyte membrane protein band 4.1 like 4B
hsa-miR-579	1	0	1	1	1	1	PAG1	phosphoprotein associated with glycosphingolipid microdomains 1
hsa-miR-579	0	0	1	1	1	1	HDAC8	histone deacetylase 8
hsa-miR-579	1	0	1	1	1	1	LRRC59	leucine rich repeat containing 59
hsa-miR-579	1	0	1	1	1	1	CSGALNACT2	chondroitin sulfate N-acetylgalactosaminyltransferase 2
hsa-miR-579	1	0	1	1	1	1	ETNK1	ethanolamine kinase 1
hsa-miR-579	0	0	1	1	1	1	ELAC1	elaC homolog 1 (E. coli)
hsa-miR-579	1	0	1	0	1	1	MAML3	mastermind-like 3 (Drosophila)
hsa-miR-579	1	0	1	1	1	1	TAP2	transporter 2, ATP-binding cassette, sub-family B (MDR/TAP)
hsa-miR-579	1	0	1	1	1	1	GNG12	guanine nucleotide binding protein (G protein), gamma 12
hsa-miR-579	1	0	1	0	1	1	KLHL9	kelch-like 9 (Drosophila)
hsa-miR-579	1	0	1	0	1	1	CYCS	cytochrome c, somatic
hsa-miR-579	0	0	1	1	1	1	ERRFI1	ERBB receptor feedback inhibitor 1
hsa-miR-579	1	0	1	1	1	1	HOXA10	homeobox A10
hsa-miR-579	1	0	1	1	1	1	BRWD1	bromodomain and WD repeat domain containing 1
hsa-miR-579	0	0	1	1	1	1	RIN2	Ras and Rab interactor 2
hsa-miR-579	1	0	1	1	1	1	DENND1B	DENN/MADD domain containing 1B
hsa-miR-579	0	0	1	1	1	1	UGT1A10	UDP glucuronosyltransferase 1 family, polypeptide A10
hsa-miR-579	0	0	1	1	1	1	UGT1A8	UDP glucuronosyltransferase 1 family, polypeptide A8
hsa-miR-579	0	0	1	1	1	1	UGT1A7	UDP glucuronosyltransferase 1 family, polypeptide A7
hsa-miR-579	0	0	1	1	1	1	UGT1A5	UDP glucuronosyltransferase 1 family, polypeptide A5
hsa-miR-579	1	0	1	0	1	1	CCNJ	cyclin J
hsa-miR-579	0	0	1	0	1	1	ARL15	ADP-ribosylation factor-like 15
hsa-miR-579	1	0	1	1	1	1	PLEKHA3	pleckstrin homology domain containing, family A (phosphoinositide binding specific) member 3
hsa-miR-579	0	0	1	1	1	1	UGT1A3	UDP glucuronosyltransferase 1 family, polypeptide A3
hsa-miR-579	1	0	1	0	1	1	UBFD1	ubiquitin family domain containing 1
hsa-miR-579	0	0	1	1	1	1	BDH2	3-hydroxybutyrate dehydrogenase, type 2
hsa-miR-579	1	0	1	1	1	1	C1GALT1	core 1 synthase, glycoprotein-N-acetylgalactosamine 3-beta-galactosyltransferase, 1
hsa-miR-579	1	0	1	1	1	1	C5orf15	chromosome 5 open reading frame 15
hsa-miR-579	0	0	1	1	1	1	PRTFDC1	phosphoribosyl transferase domain containing 1
hsa-miR-579	1	0	1	0	1	1	OTUD7B	OTU domain containing 7B
hsa-miR-579	1	0	1	1	1	1	ANKRD50	ankyrin repeat domain 50
hsa-miR-579	1	0	1	1	1	1	KIAA1244	KIAA1244
hsa-miR-579	0	0	1	1	0	0	ENTPD7	ectonucleoside triphosphate diphosphohydrolase 7
hsa-miR-579	0	0	1	1	1	1	CYSLTR2	cysteinyl leukotriene receptor 2
hsa-miR-579	0	0	1	1	1	1	PDSS2	prenyl (decaprenyl) diphosphate synthase, subunit 2
hsa-miR-579	1	0	1	0	1	1	EIF5A2	eukaryotic translation initiation factor 5A2
hsa-miR-579	1	0	1	1	1	1	SCYL3	SCY1-like 3 (S. cerevisiae)
hsa-miR-579	0	0	1	1	1	1	IL22	interleukin 22
hsa-miR-579	1	0	1	0	1	1	DCUN1D1	DCN1, defective in cullin neddylation 1, domain containing 1 (S. cerevisiae)
hsa-miR-579	1	0	1	1	1	1	NRIP3	nuclear receptor interacting protein 3
hsa-miR-579	1	0	1	1	1	1	RAB22A	RAB22A, member RAS oncogene family
hsa-miR-579	1	0	1	1	1	1	DSCAML1	Down syndrome cell adhesion molecule like 1
hsa-miR-579	1	0	1	0	1	1	KCNS2	potassium voltage-gated channel, delayed-rectifier, subfamily S, member 2
hsa-miR-579	0	0	1	1	1	1	SHROOM4	shroom family member 4
hsa-miR-579	1	0	1	1	1	1	USP31	ubiquitin specific peptidase 31
hsa-miR-579	1	0	1	0	1	1	NUFIP2	nuclear fragile X mental retardation protein interacting protein 2
hsa-miR-579	1	0	1	1	1	1	MIB1	mindbomb E3 ubiquitin protein ligase 1
hsa-miR-579	1	0	1	1	1	1	NCEH1	neutral cholesterol ester hydrolase 1
hsa-miR-579	0	0	1	0	1	1	TRMT5	tRNA methyltransferase 5 homolog (S. cerevisiae)
hsa-miR-579	1	0	1	1	1	1	ARHGAP21	Rho GTPase activating protein 21
hsa-miR-579	1	0	1	0	1	1	WDFY1	WD repeat and FYVE domain containing 1
hsa-miR-579	1	0	1	1	1	1	RANBP10	RAN binding protein 10
hsa-miR-579	1	0	1	1	1	1	ZBTB2	zinc finger and BTB domain containing 2
hsa-miR-579	1	0	1	1	1	1	ZFP14	zinc finger protein 14 homolog (mouse)
hsa-miR-579	1	0	1	0	1	1	GPAM	glycerol-3-phosphate acyltransferase, mitochondrial
hsa-miR-579	1	0	1	1	1	1	ALS2	amyotrophic lateral sclerosis 2 (juvenile)
hsa-miR-579	1	0	1	1	1	1	NIN	ninein (GSK3B interacting protein)
hsa-miR-579	1	0	1	1	1	1	FAM160B1	family with sequence similarity 160, member B1
hsa-miR-579	0	0	1	1	1	1	SSX3	synovial sarcoma, X breakpoint 3
hsa-miR-579	0	0	1	1	0	0	SSX5	synovial sarcoma, X breakpoint 5
hsa-miR-579	0	0	1	1	1	1	UGT1A9	UDP glucuronosyltransferase 1 family, polypeptide A9
hsa-miR-579	0	0	1	1	1	1	HIST1H2BD	histone cluster 1, H2bd
hsa-miR-579	1	0	1	1	1	1	HCN1	hyperpolarization activated cyclic nucleotide-gated potassium channel 1
hsa-miR-579	1	0	1	0	1	1	NMT1	N-myristoyltransferase 1
hsa-miR-579	0	0	1	1	1	1	SLC15A2	solute carrier family 15 (H+/peptide transporter), member 2
hsa-miR-579	1	0	1	0	1	1	XK	X-linked Kx blood group (McLeod syndrome)
hsa-miR-579	0	0	1	0	1	1	SLCO1A2	solute carrier organic anion transporter family, member 1A2
hsa-miR-579	1	0	1	1	1	1	TMSB4X	thymosin beta 4, X-linked
hsa-miR-579	1	0	1	0	1	1	TMX4	thioredoxin-related transmembrane protein 4
hsa-miR-579	1	0	1	1	1	1	KCNK10	potassium channel, subfamily K, member 10
hsa-miR-579	1	0	1	1	1	1	RPRD1B	regulation of nuclear pre-mRNA domain containing 1B
hsa-miR-579	1	0	1	1	1	1	DMRT3	doublesex and mab-3 related transcription factor 3
hsa-miR-579	1	0	1	1	1	1	PELI2	pellino E3 ubiquitin protein ligase family member 2
hsa-miR-579	0	0	1	1	1	1	IL22RA1	interleukin 22 receptor, alpha 1
hsa-miR-579	0	0	1	1	1	1	SCPEP1	serine carboxypeptidase 1
hsa-miR-579	1	0	1	1	1	1	SENP2	SUMO1/sentrin/SMT3 specific peptidase 2
hsa-miR-579	0	0	1	1	0	0	FCGR2A	Fc fragment of IgG, low affinity IIa, receptor (CD32)
hsa-miR-579	1	0	1	1	1	1	BACH2	BTB and CNC homology 1, basic leucine zipper transcription factor 2
hsa-miR-579	0	0	1	1	1	1	GJA3	gap junction protein, alpha 3, 46kDa
hsa-miR-579	1	0	1	1	1	1	GRIK2	glutamate receptor, ionotropic, kainate 2
hsa-miR-579	1	0	1	1	1	1	SEC24A	SEC24 family, member A (S. cerevisiae)
hsa-miR-579	1	0	1	0	1	1	CSNK1G1	casein kinase 1, gamma 1
hsa-miR-579	1	0	1	1	1	1	GPR88	G protein-coupled receptor 88
hsa-miR-579	0	0	1	1	1	1	FAM204A	family with sequence similarity 204, member A
hsa-miR-579	1	0	1	0	1	1	CERS2	ceramide synthase 2
hsa-miR-579	0	0	1	1	1	1	CHP2	calcineurin-like EF hand protein 2
hsa-miR-579	1	0	1	1	1	1	SNX16	sorting nexin 16
hsa-miR-579	1	0	1	0	1	1	GREM2	gremlin 2
hsa-miR-579	0	0	1	1	1	1	HHIP	hedgehog interacting protein
hsa-miR-579	1	0	1	1	1	1	NDRG3	NDRG family member 3
hsa-miR-579	1	0	1	1	1	1	PRRX1	paired related homeobox 1
hsa-miR-579	1	0	1	1	1	1	NEUROD6	neuronal differentiation 6
hsa-miR-579	0	0	1	1	1	1	OSBPL11	oxysterol binding protein-like 11
hsa-miR-579	1	0	1	1	1	1	FBXL17	F-box and leucine-rich repeat protein 17
hsa-miR-579	1	0	1	1	1	1	YTHDC2	YTH domain containing 2
hsa-miR-579	1	0	1	0	1	1	USP46	ubiquitin specific peptidase 46
hsa-miR-579	1	0	1	1	1	1	RFX7	regulatory factor X, 7
hsa-miR-579	1	0	1	0	1	1	BCL11B	B-cell CLL/lymphoma 11B (zinc finger protein)
hsa-miR-579	1	0	1	1	1	1	SOWAHC	sosondowah ankyrin repeat domain family member C
hsa-miR-579	0	0	1	0	1	1	ANKRA2	ankyrin repeat, family A (RFXANK-like), 2
hsa-miR-579	1	0	1	1	0	0	UBE2Z	ubiquitin-conjugating enzyme E2Z
hsa-miR-579	1	0	1	1	1	1	EBF1	early B-cell factor 1
hsa-miR-579	1	0	1	1	1	1	HOXB4	homeobox B4
hsa-miR-579	0	0	1	0	1	1	TRPM8	transient receptor potential cation channel, subfamily M, member 8
hsa-miR-579	1	0	1	1	0	0	PHF23	PHD finger protein 23
hsa-miR-579	1	0	1	1	1	1	EFHD2	EF-hand domain family, member D2
hsa-miR-579	0	0	1	1	0	0	IRX1	iroquois homeobox 1
hsa-miR-579	1	0	1	0	1	1	NOTCH2	notch 2
hsa-miR-579	0	0	1	1	1	1	PDYN	prodynorphin
hsa-miR-579	1	0	1	1	1	1	HOXD1	homeobox D1
hsa-miR-579	1	0	1	1	1	1	GCC1	GRIP and coiled-coil domain containing 1
hsa-miR-579	1	0	1	1	1	1	CDC73	cell division cycle 73, Paf1/RNA polymerase II complex component, homolog (S. cerevisiae)
hsa-miR-579	1	0	1	1	1	1	ARSJ	arylsulfatase family, member J
hsa-miR-579	0	0	1	1	1	1	LRRK1	leucine-rich repeat kinase 1
hsa-miR-579	0	0	1	1	1	1	TTLL7	tubulin tyrosine ligase-like family, member 7
hsa-miR-579	0	0	1	1	1	1	CXorf36	chromosome X open reading frame 36
hsa-miR-579	1	0	1	0	1	1	ZFHX4	zinc finger homeobox 4
hsa-miR-579	1	0	1	1	1	1	CCDC82	coiled-coil domain containing 82
hsa-miR-579	1	0	1	1	0	0	SYNDIG1	synapse differentiation inducing 1
hsa-miR-579	1	0	1	1	1	1	GRHL2	grainyhead-like 2 (Drosophila)
hsa-miR-579	1	0	1	1	1	1	POF1B	premature ovarian failure, 1B
hsa-miR-579	1	0	1	1	1	1	KLHL18	kelch-like 18 (Drosophila)
hsa-miR-579	0	0	1	1	1	1	ZNF606	zinc finger protein 606
hsa-miR-579	1	0	1	1	1	1	OPA3	optic atrophy 3 (autosomal recessive, with chorea and spastic paraplegia)
hsa-miR-579	1	0	1	1	1	1	PROSER1	proline and serine rich 1
hsa-miR-579	1	0	1	1	1	1	NAA50	N(alpha)-acetyltransferase 50, NatE catalytic subunit
hsa-miR-579	1	0	1	1	1	1	EFHC2	EF-hand domain (C-terminal) containing 2
hsa-miR-579	1	0	1	0	1	1	EDEM3	ER degradation enhancer, mannosidase alpha-like 3
hsa-miR-579	1	0	1	1	1	1	CYB5B	cytochrome b5 type B (outer mitochondrial membrane)
hsa-miR-579	1	0	1	0	1	1	SETD7	SET domain containing (lysine methyltransferase) 7
hsa-miR-579	1	0	1	1	1	1	NRBF2	nuclear receptor binding factor 2
hsa-miR-579	1	0	1	1	1	1	FAM117A	family with sequence similarity 117, member A
hsa-miR-579	1	0	1	0	1	1	C1orf21	chromosome 1 open reading frame 21
hsa-miR-579	1	0	1	1	1	1	MAP4	microtubule-associated protein 4
hsa-miR-579	1	0	1	1	1	1	VMP1	vacuole membrane protein 1
hsa-miR-579	1	0	1	0	1	1	SPRY4	sprouty homolog 4 (Drosophila)
hsa-miR-579	0	0	1	1	1	1	FCRL4	Fc receptor-like 4
hsa-miR-579	1	0	1	0	1	1	RAB33B	RAB33B, member RAS oncogene family
hsa-miR-579	0	0	1	1	1	1	COG3	component of oligomeric golgi complex 3
hsa-miR-579	1	0	1	0	1	1	TMEM47	transmembrane protein 47
hsa-miR-579	1	0	1	1	1	1	SESN2	sestrin 2
hsa-miR-579	1	0	1	1	1	1	CRISPLD1	cysteine-rich secretory protein LCCL domain containing 1
hsa-miR-579	1	0	1	0	1	1	SH3BGRL2	SH3 domain binding glutamic acid-rich protein like 2
hsa-miR-579	1	0	1	0	1	1	ITCH	itchy E3 ubiquitin protein ligase
hsa-miR-579	0	0	1	0	1	1	KRTAP1-5	keratin associated protein 1-5
hsa-miR-579	0	0	1	1	1	1	KRTAP3-2	keratin associated protein 3-2
hsa-miR-579	1	0	1	0	1	1	FAM172A	family with sequence similarity 172, member A
hsa-miR-579	0	0	1	1	1	1	ANKRD27	ankyrin repeat domain 27 (VPS9 domain)
hsa-miR-579	1	0	1	1	1	1	FBXO30	F-box protein 30
hsa-miR-579	0	0	1	1	1	1	C4orf17	chromosome 4 open reading frame 17
hsa-miR-579	1	0	1	1	1	1	DSEL	dermatan sulfate epimerase-like
hsa-miR-579	1	0	1	1	1	1	ARID5B	AT rich interactive domain 5B (MRF1-like)
hsa-miR-579	1	0	1	1	1	1	ANTXR1	anthrax toxin receptor 1
hsa-miR-579	1	0	1	1	0	0	MAF1	MAF1 homolog (S. cerevisiae)
hsa-miR-579	1	0	1	1	1	1	DNAJC14	DnaJ (Hsp40) homolog, subfamily C, member 14
hsa-miR-579	0	0	1	1	1	1	CYSTM1	cysteine-rich transmembrane module containing 1
hsa-miR-579	1	0	1	1	1	1	DCTN5	dynactin 5 (p25)
hsa-miR-579	0	0	1	1	0	0	LYZL1	lysozyme-like 1
hsa-miR-579	1	0	1	1	1	1	PARD6B	par-6 partitioning defective 6 homolog beta (C. elegans)
hsa-miR-579	1	0	1	1	1	1	ABHD13	abhydrolase domain containing 13
hsa-miR-579	0	0	1	1	1	1	MICALCL	MICAL C-terminal like
hsa-miR-579	1	0	1	1	1	1	AJUBA	ajuba LIM protein
hsa-miR-579	1	0	1	1	1	1	RBM17	RNA binding motif protein 17
hsa-miR-579	1	0	1	1	1	1	TMEM60	transmembrane protein 60
hsa-miR-579	0	0	1	1	1	1	POLR2J2	polymerase (RNA) II (DNA directed) polypeptide J2
hsa-miR-579	1	0	1	1	1	1	PCDH11Y	protocadherin 11 Y-linked
hsa-miR-579	0	0	1	1	1	1	TRIM4	tripartite motif containing 4
hsa-miR-579	1	0	1	0	1	1	PURB	purine-rich element binding protein B
hsa-miR-579	1	0	1	1	1	1	EPT1	ethanolaminephosphotransferase 1 (CDP-ethanolamine-specific)
hsa-miR-579	0	0	1	1	1	1	NACC1	nucleus accumbens associated 1, BEN and BTB (POZ) domain containing
hsa-miR-579	1	0	1	1	1	1	MBD6	methyl-CpG binding domain protein 6
hsa-miR-579	0	0	1	1	0	0	STK11IP	serine/threonine kinase 11 interacting protein
hsa-miR-579	1	0	1	1	1	1	WDFY2	WD repeat and FYVE domain containing 2
hsa-miR-579	0	0	1	1	0	0	RBP7	retinol binding protein 7, cellular
hsa-miR-579	0	0	1	1	0	0	APOA5	apolipoprotein A-V
hsa-miR-579	1	0	1	1	1	1	TRIM9	tripartite motif containing 9
hsa-miR-579	0	0	1	0	1	1	ZNF518B	zinc finger protein 518B
hsa-miR-579	1	0	1	0	1	1	CCND1	cyclin D1
hsa-miR-579	1	0	1	1	1	1	NAA15	N(alpha)-acetyltransferase 15, NatA auxiliary subunit
hsa-miR-579	1	0	1	0	1	1	ANTXR2	anthrax toxin receptor 2
hsa-miR-579	0	0	1	1	1	1	CTCFL	CCCTC-binding factor (zinc finger protein)-like
hsa-miR-579	1	0	1	1	1	1	ZNF280B	zinc finger protein 280B
hsa-miR-579	1	0	1	1	1	1	KLHL6	kelch-like 6 (Drosophila)
hsa-miR-579	0	0	1	1	0	0	RXFP2	relaxin/insulin-like family peptide receptor 2
hsa-miR-579	1	0	1	1	1	1	PRRC1	proline-rich coiled-coil 1
hsa-miR-579	0	0	1	0	1	1	SYNPO2	synaptopodin 2
hsa-miR-579	1	0	1	1	1	1	DCN	decorin
hsa-miR-579	0	0	1	1	1	1	RAD51B	RAD51 homolog B (S. cerevisiae)
hsa-miR-579	0	0	1	1	1	1	PKD1L1	polycystic kidney disease 1 like 1
hsa-miR-579	1	0	1	1	1	1	PANK1	pantothenate kinase 1
hsa-miR-579	0	0	1	1	1	1	NAF1	nuclear assembly factor 1 homolog (S. cerevisiae)
hsa-miR-579	1	0	1	1	1	1	MARS2	methionyl-tRNA synthetase 2, mitochondrial
hsa-miR-579	1	0	1	1	1	1	GLCCI1	glucocorticoid induced transcript 1
hsa-miR-579	1	0	1	1	1	1	KCTD12	potassium channel tetramerisation domain containing 12
hsa-miR-579	1	0	1	0	1	1	NUS1	nuclear undecaprenyl pyrophosphate synthase 1 homolog (S. cerevisiae)
hsa-miR-579	1	0	1	1	1	1	ICA1L	islet cell autoantigen 1,69kDa-like
hsa-miR-579	1	0	1	0	1	1	FCHO2	FCH domain only 2
hsa-miR-579	1	0	1	1	1	1	MBOAT2	membrane bound O-acyltransferase domain containing 2
hsa-miR-579	0	0	1	1	1	1	FAM122C	family with sequence similarity 122C
hsa-miR-579	0	0	1	1	1	1	KCNC2	potassium voltage-gated channel, Shaw-related subfamily, member 2
hsa-miR-579	1	0	1	1	1	1	ATRN	attractin
hsa-miR-579	1	0	1	1	1	1	MAPK1IP1L	mitogen-activated protein kinase 1 interacting protein 1-like
hsa-miR-579	1	0	1	1	1	1	KCNH8	potassium voltage-gated channel, subfamily H (eag-related), member 8
hsa-miR-579	0	0	1	1	0	0	OTOA	otoancorin
hsa-miR-579	1	0	1	0	1	1	CENPBD1	CENPB DNA-binding domains containing 1
hsa-miR-579	0	0	1	0	1	1	DDIT4L	DNA-damage-inducible transcript 4-like
hsa-miR-579	0	0	1	0	1	1	SPATA18	spermatogenesis associated 18
hsa-miR-579	0	0	1	1	1	1	C7orf45	chromosome 7 open reading frame 45
hsa-miR-579	0	0	1	1	1	1	APOBEC3F	apolipoprotein B mRNA editing enzyme, catalytic polypeptide-like 3F
hsa-miR-579	1	0	1	1	1	1	RBFOX1	RNA binding protein, fox-1 homolog (C. elegans) 1
hsa-miR-579	0	0	1	1	1	1	LONRF1	LON peptidase N-terminal domain and ring finger 1
hsa-miR-579	0	0	1	1	1	1	TTC30A	tetratricopeptide repeat domain 30A
hsa-miR-579	0	0	1	1	0	0	TEX26	testis expressed 26
hsa-miR-579	0	0	1	1	1	1	EFCAB13	EF-hand calcium binding domain 13
hsa-miR-579	1	0	1	1	1	1	MUM1L1	melanoma associated antigen (mutated) 1-like 1
hsa-miR-579	1	0	1	1	1	1	FAM123B	family with sequence similarity 123B
hsa-miR-579	1	0	1	1	1	1	FAM81A	family with sequence similarity 81, member A
hsa-miR-579	1	0	1	1	1	1	ZNF362	zinc finger protein 362
hsa-miR-579	0	0	1	0	1	1	HORMAD2	HORMA domain containing 2
hsa-miR-579	0	0	1	1	1	1	ENTHD1	ENTH domain containing 1
hsa-miR-579	1	0	1	1	1	1	PPM1K	protein phosphatase, Mg2+/Mn2+ dependent, 1K
hsa-miR-579	1	0	1	1	1	1	C7orf60	chromosome 7 open reading frame 60
hsa-miR-579	1	0	1	0	1	1	DCP2	DCP2 decapping enzyme homolog (S. cerevisiae)
hsa-miR-579	1	0	1	1	1	1	TCTEX1D1	Tctex1 domain containing 1
hsa-miR-579	1	0	1	0	1	1	FAM116A	family with sequence similarity 116, member A
hsa-miR-579	0	0	1	1	0	0	DOK6	docking protein 6
hsa-miR-579	1	0	1	1	1	1	PDIK1L	PDLIM1 interacting kinase 1 like
hsa-miR-579	1	0	1	1	1	1	WTAP	Wilms tumor 1 associated protein
hsa-miR-579	1	0	1	0	1	1	ST6GALNAC3	ST6 (alpha-N-acetyl-neuraminyl-2,3-beta-galactosyl-1,3)-N-acetylgalactosaminide alpha-2,6-sialyltransferase 3
hsa-miR-579	0	0	1	0	1	1	LIX1	Lix1 homolog (chicken)
hsa-miR-579	0	0	1	1	1	1	COL6A5	collagen, type VI, alpha 5
hsa-miR-579	0	0	1	1	1	1	SLC22A7	solute carrier family 22 (organic anion transporter), member 7
hsa-miR-579	1	0	1	0	1	1	ENPP6	ectonucleotide pyrophosphatase/phosphodiesterase 6
hsa-miR-579	1	0	1	1	1	1	LRIG3	leucine-rich repeats and immunoglobulin-like domains 3
hsa-miR-579	1	0	1	1	1	1	C2orf69	chromosome 2 open reading frame 69
hsa-miR-579	0	0	1	1	1	1	CREG2	cellular repressor of E1A-stimulated genes 2
hsa-miR-579	1	0	1	1	1	1	PKHD1	polycystic kidney and hepatic disease 1 (autosomal recessive)
hsa-miR-579	1	0	1	1	1	1	RAB39B	RAB39B, member RAS oncogene family
hsa-miR-579	1	0	1	1	1	1	RDH10	retinol dehydrogenase 10 (all-trans)
hsa-miR-579	1	0	1	1	1	1	CAMK2D	calcium/calmodulin-dependent protein kinase II delta
hsa-miR-579	0	0	1	0	1	1	CTAGE1	cutaneous T-cell lymphoma-associated antigen 1
hsa-miR-579	1	0	1	1	1	1	SIK1	salt-inducible kinase 1
hsa-miR-579	0	0	1	1	0	0	SSX6	synovial sarcoma, X breakpoint 6 (pseudogene)
hsa-miR-579	1	0	1	1	1	1	MOB1B	MOB kinase activator 1B
hsa-miR-579	1	0	1	1	1	1	MMGT1	membrane magnesium transporter 1
hsa-miR-579	1	0	1	1	1	1	TTBK2	tau tubulin kinase 2
hsa-miR-579	1	0	1	1	1	1	FAM117B	family with sequence similarity 117, member B
hsa-miR-579	0	0	1	1	1	1	APLF	aprataxin and PNKP like factor
hsa-miR-579	0	0	1	1	0	0	CT47A11	cancer/testis antigen family 47, member A11
hsa-miR-579	1	0	1	0	1	1	PGM2L1	phosphoglucomutase 2-like 1
hsa-miR-579	1	0	1	1	1	1	DIP2B	DIP2 disco-interacting protein 2 homolog B (Drosophila)
hsa-miR-579	0	0	1	1	1	1	FAM98B	family with sequence similarity 98, member B
hsa-miR-579	0	0	1	1	1	1	SIGLECL1	SIGLEC family like 1
hsa-miR-579	1	0	1	1	1	1	RIMKLA	ribosomal modification protein rimK-like family member A
hsa-miR-579	1	0	1	1	1	1	SLC9A9	solute carrier family 9, subfamily A (NHE9, cation proton antiporter 9), member 9
hsa-miR-579	1	0	1	1	1	1	XKR6	XK, Kell blood group complex subunit-related family, member 6
hsa-miR-579	0	0	1	1	1	1	MAGEB18	melanoma antigen family B, 18
hsa-miR-579	1	0	1	0	1	1	SREK1IP1	SREK1-interacting protein 1
hsa-miR-579	1	0	1	0	1	1	FAM84B	family with sequence similarity 84, member B
hsa-miR-579	1	0	1	1	1	1	SCN4B	sodium channel, voltage-gated, type IV, beta subunit
hsa-miR-579	0	0	1	1	1	1	SVOPL	SVOP-like
hsa-miR-579	1	0	1	1	1	1	SYT9	synaptotagmin IX
hsa-miR-579	0	0	1	1	1	1	IL6ST	interleukin 6 signal transducer (gp130, oncostatin M receptor)
hsa-miR-579	0	0	1	1	1	1	CHSY3	chondroitin sulfate synthase 3
hsa-miR-579	0	0	1	1	1	1	MRPL43	mitochondrial ribosomal protein L43
hsa-miR-579	0	0	1	1	0	0	CHMP4B	charged multivesicular body protein 4B
hsa-miR-579	1	0	1	1	1	1	INADL	InaD-like (Drosophila)
hsa-miR-579	1	0	1	1	1	1	STX12	syntaxin 12
hsa-miR-579	1	0	1	0	1	1	PDE12	phosphodiesterase 12
hsa-miR-579	1	0	1	1	1	1	LRRTM3	leucine rich repeat transmembrane neuronal 3
hsa-miR-579	0	0	1	1	1	1	HSD17B13	hydroxysteroid (17-beta) dehydrogenase 13
hsa-miR-579	1	0	1	1	1	1	MARCH3	membrane-associated ring finger (C3HC4) 3, E3 ubiquitin protein ligase
hsa-miR-579	0	0	1	1	1	1	ZNF831	zinc finger protein 831
hsa-miR-579	1	0	1	1	1	1	TMEM26	transmembrane protein 26
hsa-miR-579	0	0	1	1	1	1	STXBP4	syntaxin binding protein 4
hsa-miR-579	1	0	1	1	1	1	MTDH	metadherin
hsa-miR-579	1	0	1	0	1	1	ARL5B	ADP-ribosylation factor-like 5B
hsa-miR-579	0	0	1	1	1	1	CCDC67	coiled-coil domain containing 67
hsa-miR-579	0	0	1	1	0	0	ANKRD37	ankyrin repeat domain 37
hsa-miR-579	0	0	1	0	1	1	SPATA12	spermatogenesis associated 12
hsa-miR-579	0	0	1	1	0	0	DCDC1	doublecortin domain containing 1
hsa-miR-579	1	0	1	1	1	1	RPS6KA5	ribosomal protein S6 kinase, 90kDa, polypeptide 5
hsa-miR-579	0	0	1	0	1	1	CMC1	COX assembly mitochondrial protein 1 homolog (S. cerevisiae)
hsa-miR-579	0	0	1	0	1	1	VSTM2A	V-set and transmembrane domain containing 2A
hsa-miR-579	0	0	1	0	1	1	TMED4	transmembrane emp24 protein transport domain containing 4
hsa-miR-579	0	0	1	1	1	1	SKA2	spindle and kinetochore associated complex subunit 2
hsa-miR-579	1	0	1	1	1	1	SUMF1	sulfatase modifying factor 1
hsa-miR-579	1	0	1	0	1	1	TMSB4XP8	thymosin beta 4, X-linked pseudogene 8
hsa-miR-579	0	0	1	1	0	0	LYZL2	lysozyme-like 2
hsa-miR-579	1	0	1	1	1	1	RNF7	ring finger protein 7
hsa-miR-579	1	0	1	0	1	1	HNRNPA3	heterogeneous nuclear ribonucleoprotein A3
hsa-miR-579	1	0	1	1	1	1	SPTY2D1	SPT2, Suppressor of Ty, domain containing 1 (S. cerevisiae)
hsa-miR-579	1	0	1	1	1	1	TMEM65	transmembrane protein 65
hsa-miR-579	0	0	1	0	1	1	BTNL3	butyrophilin-like 3
hsa-miR-579	1	0	1	1	1	1	C1orf52	chromosome 1 open reading frame 52
hsa-miR-579	1	0	1	0	1	1	LYSMD3	LysM, putative peptidoglycan-binding, domain containing 3
hsa-miR-579	0	0	1	1	1	1	APOOL	apolipoprotein O-like
hsa-miR-579	0	0	1	1	1	1	OLFML1	olfactomedin-like 1
hsa-miR-579	0	0	1	1	0	0	VWC2	von Willebrand factor C domain containing 2
hsa-miR-579	1	0	1	0	1	1	ZC3H6	zinc finger CCCH-type containing 6
hsa-miR-579	1	0	1	1	1	1	PTGER3	prostaglandin E receptor 3 (subtype EP3)
hsa-miR-579	1	0	1	0	1	1	PRICKLE2	prickle homolog 2 (Drosophila)
hsa-miR-579	1	0	1	0	1	1	LHFPL3	lipoma HMGIC fusion partner-like 3
hsa-miR-579	0	0	1	1	1	1	THAP1	THAP domain containing, apoptosis associated protein 1
hsa-miR-579	1	0	1	1	1	1	CXCL12	chemokine (C-X-C motif) ligand 12
hsa-miR-579	0	0	1	1	0	0	FOXD4L4	forkhead box D4-like 4
hsa-miR-579	1	0	1	1	1	1	THRA	thyroid hormone receptor, alpha
hsa-miR-579	0	0	1	1	1	1	IKBIP	IKBKB interacting protein
hsa-miR-579	1	0	1	1	0	0	KAZN	kazrin, periplakin interacting protein
hsa-miR-579	1	0	1	1	1	1	FBXO33	F-box protein 33
hsa-miR-579	0	0	1	1	1	1	ELP5	elongator acetyltransferase complex subunit 5
hsa-miR-579	1	0	1	1	1	1	PPAPDC2	phosphatidic acid phosphatase type 2 domain containing 2
hsa-miR-579	1	0	1	1	1	1	IGSF1	immunoglobulin superfamily, member 1
hsa-miR-579	1	0	1	1	1	1	ATRNL1	attractin-like 1
hsa-miR-579	0	0	1	1	0	0	PAGE2	P antigen family, member 2 (prostate associated)
hsa-miR-579	1	0	1	1	1	1	FREM2	FRAS1 related extracellular matrix protein 2
hsa-miR-579	1	0	1	0	1	1	NCKAP5	NCK-associated protein 5
hsa-miR-579	1	0	1	1	1	1	SKIDA1	SKI/DACH domain containing 1
hsa-miR-579	1	0	1	1	1	1	TNFAIP8L3	tumor necrosis factor, alpha-induced protein 8-like 3
hsa-miR-579	0	0	1	1	0	0	TMPRSS11F	transmembrane protease, serine 11F
hsa-miR-579	0	0	1	1	1	1	DEFB132	defensin, beta 132
hsa-miR-579	0	0	1	0	1	1	TMEM215	transmembrane protein 215
hsa-miR-579	0	0	1	0	0	0	CELP	carboxyl ester lipase pseudogene
hsa-miR-579	0	0	1	0	0	0	TFAMP1	transcription factor A, mitochondrial pseudogene 1
hsa-miR-579	0	0	1	0	0	0	MT1L	metallothionein 1L (gene/pseudogene)
hsa-miR-579	0	0	1	0	0	0	TTTY2	testis-specific transcript, Y-linked 2 (non-protein coding)
hsa-miR-579	0	0	1	0	0	0	TTTY4B	testis-specific transcript, Y-linked 4B (non-protein coding)
hsa-miR-579	0	0	1	0	0	0	DKFZP586I1420	uncharacterized protein DKFZp586I1420
hsa-miR-579	0	0	1	0	0	0	ST13P6	suppression of tumorigenicity 13 (colon carcinoma) (Hsp70 interacting protein) pseudogene 6
hsa-miR-579	0	0	1	0	0	0	NXF4	nuclear RNA export factor 4 pseudogene
hsa-miR-579	0	0	1	0	0	0	TDGF1P3	teratocarcinoma-derived growth factor 1 pseudogene 3
hsa-miR-579	0	0	1	0	0	0	HYALP1	hyaluronoglucosaminidase pseudogene 1
hsa-miR-579	0	0	1	0	0	0	HTR7P1	5-hydroxytryptamine (serotonin) receptor 7 pseudogene 1
hsa-miR-579	0	0	1	0	0	0	NUDT9P1	nudix (nucleoside diphosphate linked moiety X)-type motif 9 pseudogene 1
hsa-miR-579	0	0	1	0	0	0	PER4	period homolog 3 (Drosophila) pseudogene
hsa-miR-579	0	0	1	0	0	0	LOC256880	uncharacterized LOC256880
hsa-miR-579	0	0	1	0	0	0	TPTE2P6	transmembrane phosphoinositide 3-phosphatase and tensin homolog 2 pseudogene 6
hsa-miR-579	0	0	1	0	0	0	MALAT1	metastasis associated lung adenocarcinoma transcript 1 (non-protein coding)
hsa-miR-579	0	0	1	0	0	0	DUSP5P	dual specificity phosphatase 5 pseudogene
hsa-miR-579	0	0	1	0	0	0	IGBP1P1	immunoglobulin (CD79A) binding protein 1 pseudogene 1
hsa-miR-579	0	0	1	0	0	0	SNX29P2	sorting nexin 29 pseudogene 2
hsa-miR-579	0	0	1	0	0	0	SNORD69	small nucleolar RNA, C/D box 69
hsa-miR-579	0	0	1	0	0	0	SYS1-DBNDD2	SYS1-DBNDD2 readthrough (non-protein coding)
hsa-miR-579	0	0	1	0	0	0	USP32P1	ubiquitin specific peptidase 32 pseudogene 1
hsa-miR-579	0	0	1	0	0	0	HAR1A	highly accelerated region 1A (non-protein coding)
hsa-miR-579	0	0	1	0	0	0	GMCL1P1	germ cell-less, spermatogenesis associated 1 pseudogene 1
hsa-miR-579	0	0	1	0	0	0	SNORD116-28	small nucleolar RNA, C/D box 116-28
hsa-miR-579	0	0	1	1	0	0	SNRPN	small nuclear ribonucleoprotein polypeptide N
hsa-miR-579	1	0	1	1	0	0	KIAA1549L	KIAA1549-like
hsa-miR-579	1	0	1	1	1	1	FBN2	fibrillin 2
hsa-miR-579	0	0	1	1	1	1	RXRB	retinoid X receptor, beta
hsa-miR-579	0	0	0	1	1	1	CCL18	chemokine (C-C motif) ligand 18 (pulmonary and activation-regulated)
hsa-miR-579	0	0	1	1	0	0	BAIAP2L1	BAI1-associated protein 2-like 1
hsa-miR-579	0	0	1	1	1	1	RPAP3	RNA polymerase II associated protein 3
hsa-miR-579	1	0	1	1	1	1	HOXA11	homeobox A11
hsa-miR-579	0	0	1	1	0	0	TSR3	TSR3, 20S rRNA accumulation, homolog (S. cerevisiae)
hsa-miR-579	0	0	0	1	0	0	CRLF1	cytokine receptor-like factor 1
hsa-miR-579	0	0	0	1	1	1	ASAH2C	N-acylsphingosine amidohydrolase (non-lysosomal ceramidase) 2C
hsa-miR-579	0	0	1	1	1	1	TDRD3	tudor domain containing 3
hsa-miR-579	0	0	0	1	0	0	TRIP6	thyroid hormone receptor interactor 6
hsa-miR-579	0	0	1	1	0	0	OAS1	2'-5'-oligoadenylate synthetase 1, 40/46kDa
hsa-miR-579	0	0	1	1	0	0	TGM1	transglutaminase 1 (K polypeptide epidermal type I, protein-glutamine-gamma-glutamyltransferase)
hsa-miR-579	0	0	0	1	1	1	ADH1A	alcohol dehydrogenase 1A (class I), alpha polypeptide
hsa-miR-579	0	0	1	1	1	1	AMELY	amelogenin, Y-linked
hsa-miR-579	0	0	1	1	0	0	RBX1	ring-box 1, E3 ubiquitin protein ligase
hsa-miR-579	0	0	1	1	1	1	METTL21D	methyltransferase like 21D
hsa-miR-579	0	0	1	1	1	1	TIMM9	translocase of inner mitochondrial membrane 9 homolog (yeast)
hsa-miR-579	1	0	0	1	1	1	SALL4	sal-like 4 (Drosophila)
hsa-miR-579	0	0	1	1	0	0	CRYM	crystallin, mu
hsa-miR-579	1	0	0	1	1	1	C16orf88	chromosome 16 open reading frame 88
hsa-miR-579	0	0	0	1	0	0	DKK4	dickkopf homolog 4 (Xenopus laevis)
hsa-miR-579	0	0	0	1	1	1	PEX11G	peroxisomal biogenesis factor 11 gamma
hsa-miR-579	0	0	0	1	1	1	CACNG7	calcium channel, voltage-dependent, gamma subunit 7
hsa-miR-579	0	0	0	1	0	0	SLC5A5	solute carrier family 5 (sodium iodide symporter), member 5
hsa-miR-579	1	0	1	1	1	1	TSPAN12	tetraspanin 12
hsa-miR-579	1	0	1	1	1	1	CHN2	chimerin (chimaerin) 2
hsa-miR-579	0	0	1	1	1	1	RLN1	relaxin 1
hsa-miR-579	0	0	0	1	1	1	SUPT4H1	suppressor of Ty 4 homolog 1 (S. cerevisiae)
hsa-miR-579	0	0	1	1	0	0	PIGL	phosphatidylinositol glycan anchor biosynthesis, class L
hsa-miR-579	1	0	1	1	1	1	HLF	hepatic leukemia factor
hsa-miR-579	0	0	1	1	0	0	CD38	CD38 molecule
hsa-miR-579	0	0	1	1	1	1	SPA17	sperm autoantigenic protein 17
hsa-miR-579	0	0	0	1	0	0	MYF6	myogenic factor 6 (herculin)
hsa-miR-579	0	0	1	1	0	0	NUP107	nucleoporin 107kDa
hsa-miR-579	0	0	0	1	1	1	MRPL2	mitochondrial ribosomal protein L2
hsa-miR-579	0	0	1	1	0	0	HRG	histidine-rich glycoprotein
hsa-miR-579	0	0	1	1	1	1	PCGF1	polycomb group ring finger 1
hsa-miR-579	0	0	0	1	1	1	DOK1	docking protein 1, 62kDa (downstream of tyrosine kinase 1)
hsa-miR-579	0	0	0	1	0	0	VAX2	ventral anterior homeobox 2
hsa-miR-579	0	0	0	1	0	0	OSCP1	organic solute carrier partner 1
hsa-miR-579	0	0	0	1	0	0	RPS25	ribosomal protein S25
hsa-miR-579	0	0	1	1	1	1	ARMC2	armadillo repeat containing 2
hsa-miR-579	0	0	1	1	1	1	EBPL	emopamil binding protein-like
hsa-miR-579	0	0	0	1	0	0	ZNF350	zinc finger protein 350
hsa-miR-579	0	0	0	1	0	0	PEPD	peptidase D
hsa-miR-579	0	0	1	1	0	0	PEX6	peroxisomal biogenesis factor 6
hsa-miR-579	0	0	1	1	1	1	SH3TC1	SH3 domain and tetratricopeptide repeats 1
hsa-miR-579	0	0	0	1	1	1	STATH	statherin
hsa-miR-579	0	0	1	1	1	1	HSPA2	heat shock 70kDa protein 2
hsa-miR-579	0	0	1	1	0	0	EMC6	ER membrane protein complex subunit 6
hsa-miR-579	1	0	1	1	1	1	PIAS1	protein inhibitor of activated STAT, 1
hsa-miR-579	0	0	1	1	0	0	KLK12	kallikrein-related peptidase 12
hsa-miR-579	0	0	1	1	0	0	CERS4	ceramide synthase 4
hsa-miR-579	0	0	0	1	0	0	PDGFRL	platelet-derived growth factor receptor-like
hsa-miR-579	1	0	1	1	1	1	TSG101	tumor susceptibility gene 101
hsa-miR-579	0	0	1	1	0	0	C3orf20	chromosome 3 open reading frame 20
hsa-miR-579	0	0	1	1	1	1	FUS	fused in sarcoma
hsa-miR-579	0	0	1	1	1	1	C19orf12	chromosome 19 open reading frame 12
hsa-miR-579	0	0	1	1	1	1	IMMT	inner membrane protein, mitochondrial
hsa-miR-579	0	0	1	1	0	0	CCDC59	coiled-coil domain containing 59
hsa-miR-579	0	0	0	1	1	1	C14orf159	chromosome 14 open reading frame 159
hsa-miR-579	0	0	0	1	1	1	TRPM1	transient receptor potential cation channel, subfamily M, member 1
hsa-miR-579	0	0	0	1	1	1	CCDC102A	coiled-coil domain containing 102A
hsa-miR-579	1	0	1	1	1	1	NPL	N-acetylneuraminate pyruvate lyase (dihydrodipicolinate synthase)
hsa-miR-579	0	0	0	1	1	1	HTR2B	5-hydroxytryptamine (serotonin) receptor 2B, G protein-coupled
hsa-miR-579	1	0	0	1	1	1	USP44	ubiquitin specific peptidase 44
hsa-miR-579	0	0	0	1	0	0	CAMK2B	calcium/calmodulin-dependent protein kinase II beta
hsa-miR-579	0	0	1	1	0	0	TTC5	tetratricopeptide repeat domain 5
hsa-miR-579	0	0	0	1	1	1	MRPL47	mitochondrial ribosomal protein L47
hsa-miR-579	0	0	0	1	0	0	PSMB7	proteasome (prosome, macropain) subunit, beta type, 7
hsa-miR-579	0	0	1	1	0	0	KIF13A	kinesin family member 13A
hsa-miR-579	0	0	1	1	1	1	TUBB2B	tubulin, beta 2B class IIb
hsa-miR-579	1	0	1	1	1	1	SORL1	sortilin-related receptor, L(DLR class) A repeats containing
hsa-miR-579	1	0	1	1	1	1	CCBL2	cysteine conjugate-beta lyase 2
hsa-miR-579	1	0	1	1	1	1	KIF11	kinesin family member 11
hsa-miR-579	0	0	1	1	1	1	SSB	Sjogren syndrome antigen B (autoantigen La)
hsa-miR-579	0	0	1	1	1	1	CHRNA1	cholinergic receptor, nicotinic, alpha 1 (muscle)
hsa-miR-579	0	0	0	1	0	0	WDR12	WD repeat domain 12
hsa-miR-579	0	0	0	1	1	1	COL8A1	collagen, type VIII, alpha 1
hsa-miR-579	0	0	1	1	1	1	EPYC	epiphycan
hsa-miR-579	1	0	1	1	1	1	CDRT1	CMT1A duplicated region transcript 1
hsa-miR-579	0	0	0	1	1	1	TRIM16	tripartite motif containing 16
hsa-miR-579	0	0	0	1	0	0	MYOM2	myomesin (M-protein) 2, 165kDa
hsa-miR-579	0	0	1	1	0	0	ZNF839	zinc finger protein 839
hsa-miR-579	0	0	0	1	1	1	MLYCD	malonyl-CoA decarboxylase
hsa-miR-579	0	0	1	1	1	1	SLC9A3R1	solute carrier family 9, subfamily A (NHE3, cation proton antiporter 3), member 3 regulator 1
hsa-miR-579	0	0	1	1	1	1	MSH4	mutS homolog 4 (E. coli)
hsa-miR-579	0	0	1	1	0	0	PRPF31	PRP31 pre-mRNA processing factor 31 homolog (S. cerevisiae)
hsa-miR-579	0	0	1	1	0	0	ALG6	asparagine-linked glycosylation 6, alpha-1,3-glucosyltransferase homolog (S. cerevisiae)
hsa-miR-579	0	0	0	1	1	1	DCPS	decapping enzyme, scavenger
hsa-miR-579	0	0	1	1	1	1	EPCAM	epithelial cell adhesion molecule
hsa-miR-579	0	0	1	1	1	1	POLR1A	polymerase (RNA) I polypeptide A, 194kDa
hsa-miR-579	1	0	1	1	1	1	FRYL	FRY-like
hsa-miR-579	0	0	1	1	0	0	NDST4	N-deacetylase/N-sulfotransferase (heparan glucosaminyl) 4
hsa-miR-579	0	0	1	1	1	1	COPS4	COP9 constitutive photomorphogenic homolog subunit 4 (Arabidopsis)
hsa-miR-579	0	0	1	1	0	0	IL21	interleukin 21
hsa-miR-579	0	0	0	1	0	0	FGF10	fibroblast growth factor 10
hsa-miR-579	0	0	1	1	1	1	DNAJB11	DnaJ (Hsp40) homolog, subfamily B, member 11
hsa-miR-579	1	0	1	1	1	1	TNPO3	transportin 3
hsa-miR-579	0	0	1	1	0	0	POLB	polymerase (DNA directed), beta
hsa-miR-579	0	0	1	1	0	0	EXOSC7	exosome component 7
hsa-miR-579	0	0	1	1	0	0	MCCC1	methylcrotonoyl-CoA carboxylase 1 (alpha)
hsa-miR-579	0	0	1	1	1	1	UBXN8	UBX domain protein 8
hsa-miR-579	0	0	1	1	0	0	ADAM18	ADAM metallopeptidase domain 18
hsa-miR-579	0	0	1	1	0	0	FSCN3	fascin homolog 3, actin-bundling protein, testicular (Strongylocentrotus purpuratus)
hsa-miR-579	0	0	0	1	0	0	SLC5A4	solute carrier family 5 (low affinity glucose cotransporter), member 4
hsa-miR-579	0	0	1	1	0	0	NDUFA9	NADH dehydrogenase (ubiquinone) 1 alpha subcomplex, 9, 39kDa
hsa-miR-579	0	0	0	1	0	0	RBP5	retinol binding protein 5, cellular
hsa-miR-579	0	0	1	1	1	1	AMDHD1	amidohydrolase domain containing 1
hsa-miR-579	0	0	1	1	0	0	GPR84	G protein-coupled receptor 84
hsa-miR-579	0	0	0	1	1	1	WDR89	WD repeat domain 89
hsa-miR-579	0	0	1	1	1	1	SLC27A2	solute carrier family 27 (fatty acid transporter), member 2
hsa-miR-579	1	0	0	1	1	1	ZNF710	zinc finger protein 710
hsa-miR-579	0	0	0	1	1	1	C17orf64	chromosome 17 open reading frame 64
hsa-miR-579	0	0	0	1	0	0	IL19	interleukin 19
hsa-miR-579	0	0	0	1	0	0	FAM176B	family with sequence similarity 176, member B
hsa-miR-579	0	0	1	1	0	0	SETDB1	SET domain, bifurcated 1
hsa-miR-579	1	0	1	1	1	1	ETAA1	Ewing tumor-associated antigen 1
hsa-miR-579	0	0	1	1	1	1	SULT1C4	sulfotransferase family, cytosolic, 1C, member 4
hsa-miR-579	1	0	1	1	1	1	EPHA5	EPH receptor A5
hsa-miR-579	0	0	0	1	0	0	SLC10A6	solute carrier family 10 (sodium/bile acid cotransporter family), member 6
hsa-miR-579	0	0	0	1	1	1	FAM105A	family with sequence similarity 105, member A
hsa-miR-579	1	0	1	1	1	1	PIK3R1	phosphoinositide-3-kinase, regulatory subunit 1 (alpha)
hsa-miR-579	0	0	1	1	1	1	CDKAL1	CDK5 regulatory subunit associated protein 1-like 1
hsa-miR-579	0	0	1	1	0	0	AGBL3	ATP/GTP binding protein-like 3
hsa-miR-579	0	0	1	1	1	1	ADHFE1	alcohol dehydrogenase, iron containing, 1
hsa-miR-579	0	0	1	1	0	0	MRPS28	mitochondrial ribosomal protein S28
hsa-miR-579	0	0	1	1	0	0	C8orf76	chromosome 8 open reading frame 76
hsa-miR-579	0	0	1	1	1	1	IDNK	idnK, gluconokinase homolog (E. coli)
hsa-miR-579	0	0	0	1	0	0	WDR85	WD repeat domain 85
hsa-miR-579	0	0	1	1	1	1	HSD17B12	hydroxysteroid (17-beta) dehydrogenase 12
hsa-miR-579	0	0	0	1	1	1	APIP	APAF1 interacting protein
hsa-miR-579	0	0	0	1	0	0	OR8K1	olfactory receptor, family 8, subfamily K, member 1
hsa-miR-579	1	0	0	1	1	1	DHRS12	dehydrogenase/reductase (SDR family) member 12
hsa-miR-579	0	0	1	1	1	1	MIA2	melanoma inhibitory activity 2
hsa-miR-579	0	0	0	1	1	1	C11orf53	chromosome 11 open reading frame 53
hsa-miR-579	1	0	1	1	0	0	GXYLT1	glucoside xylosyltransferase 1
hsa-miR-579	0	0	0	1	1	1	GUF1	GUF1 GTPase homolog (S. cerevisiae)
hsa-miR-579	0	0	0	1	1	1	NVL	nuclear VCP-like
hsa-miR-579	1	0	1	1	1	1	PTH	parathyroid hormone
hsa-miR-579	0	0	0	1	1	1	CAPSL	calcyphosine-like
hsa-miR-579	0	0	1	1	0	0	CFDP1	craniofacial development protein 1
hsa-miR-579	0	0	0	1	0	0	GPR15	G protein-coupled receptor 15
hsa-miR-579	0	0	0	1	1	1	HHIPL2	HHIP-like 2
hsa-miR-579	0	0	0	1	0	0	GEMIN5	gem (nuclear organelle) associated protein 5
hsa-miR-579	0	0	0	1	0	0	FAM161B	family with sequence similarity 161, member B
hsa-miR-579	0	0	0	1	1	1	NTAN1	N-terminal asparagine amidase
hsa-miR-579	0	0	0	1	1	1	COQ5	coenzyme Q5 homolog, methyltransferase (S. cerevisiae)
hsa-miR-579	0	0	0	1	0	0	BRAF	v-raf murine sarcoma viral oncogene homolog B1
hsa-miR-579	0	0	0	1	0	0	CBR1	carbonyl reductase 1
hsa-miR-579	0	0	1	1	0	0	GPR162	G protein-coupled receptor 162
hsa-miR-579	0	0	0	1	0	0	LEPREL2	leprecan-like 2
hsa-miR-579	0	0	0	1	1	1	SSU72	SSU72 RNA polymerase II CTD phosphatase homolog (S. cerevisiae)
hsa-miR-579	0	0	0	1	0	0	WDR63	WD repeat domain 63
hsa-miR-579	1	0	1	1	1	1	MERTK	c-mer proto-oncogene tyrosine kinase
hsa-miR-579	0	0	1	1	1	1	WDR52	WD repeat domain 52
hsa-miR-579	0	0	1	1	0	0	RPL9	ribosomal protein L9
hsa-miR-579	0	0	1	1	0	0	CPA3	carboxypeptidase A3 (mast cell)
hsa-miR-579	0	0	1	1	0	0	TRIM54	tripartite motif containing 54
hsa-miR-579	1	0	1	1	0	0	RPN1	ribophorin I
hsa-miR-579	0	0	1	1	1	1	SLC51A	solute carrier family 51, alpha subunit
hsa-miR-579	0	0	0	1	0	0	AGXT2L1	alanine-glyoxylate aminotransferase 2-like 1
hsa-miR-579	0	0	1	1	1	1	IL15	interleukin 15
hsa-miR-579	0	0	1	1	1	1	SLC7A13	solute carrier family 7 (anionic amino acid transporter), member 13
hsa-miR-579	0	0	1	1	0	0	WBSCR27	Williams Beuren syndrome chromosome region 27
hsa-miR-579	0	0	1	1	0	0	SSX7	synovial sarcoma, X breakpoint 7
hsa-miR-579	1	0	1	1	1	1	NEMF	nuclear export mediator factor
hsa-miR-579	0	0	1	1	1	1	AKR1E2	aldo-keto reductase family 1, member E2
hsa-miR-579	1	0	1	1	0	0	AGFG2	ArfGAP with FG repeats 2
hsa-miR-579	0	0	1	1	1	1	GRIK5	glutamate receptor, ionotropic, kainate 5
hsa-miR-579	0	0	0	1	0	0	RILP	Rab interacting lysosomal protein
hsa-miR-579	0	0	0	1	1	1	PBK	PDZ binding kinase
hsa-miR-579	0	0	0	1	1	1	HSPB3	heat shock 27kDa protein 3
hsa-miR-579	0	0	0	1	0	0	OR8U1	olfactory receptor, family 8, subfamily U, member 1
hsa-miR-579	0	0	0	1	0	0	ALKBH3	alkB, alkylation repair homolog 3 (E. coli)
hsa-miR-579	1	0	1	1	1	1	CTNNA1	catenin (cadherin-associated protein), alpha 1, 102kDa
hsa-miR-579	0	0	1	1	1	1	DONSON	downstream neighbor of SON
hsa-miR-579	0	0	1	1	0	0	ZNF30	zinc finger protein 30
[truncated: 454 more rows]
