# Supplementary material for: Profiling of Selected MicroRNAs in Proliferative Eutopic Endometrium of Women with Ovarian Endometriosis
Source: Biomed Res Int. 2015 Aug 20;2015:760698. doi: 10.1155/2015/760698 (PMC4558423; doi:10.1155/2015/760698)
Supplement: Supplementary file 1 — Table I: The names of miRNAs significantly differentially expressed between eutopic endometrium of patients with endometriosis vs eutopic endometrium of patients without endometriosis. Table II: The associations between miRNA and mRNA, which presents detailed results of the search of six major databases i.e targetscan, tarbase, miranda, mirbase, mirtarget2 and pictar. [file 760698.f1.zip › 760698.f1/Table II/hsa-miR-580.tsv]

miR	targetscan	tarbase	miranda	mirbase	mirtarget2	pictar	GeneSymbol	GeneName
hsa-miR-580	1	0	1	1	1	1	ZFYVE16	zinc finger, FYVE domain containing 16
hsa-miR-580	1	0	1	0	0	0	TRANK1	tetratricopeptide repeat and ankyrin repeat containing 1
hsa-miR-580	1	0	1	0	1	1	KIAA0355	KIAA0355
hsa-miR-580	1	0	1	0	1	1	KIAA0408	KIAA0408
hsa-miR-580	1	0	1	1	1	1	NUPL1	nucleoporin like 1
hsa-miR-580	1	0	1	1	1	1	PPIP5K2	diphosphoinositol pentakisphosphate kinase 2
hsa-miR-580	0	0	1	1	1	1	PREPL	prolyl endopeptidase-like
hsa-miR-580	1	0	1	0	1	1	NEDD4L	neural precursor cell expressed, developmentally down-regulated 4-like, E3 ubiquitin protein ligase
hsa-miR-580	1	0	1	1	0	0	OTUD3	OTU domain containing 3
hsa-miR-580	1	0	1	1	0	0	DENND4B	DENN/MADD domain containing 4B
hsa-miR-580	1	0	1	0	1	1	CEP350	centrosomal protein 350kDa
hsa-miR-580	1	0	1	1	1	1	RNGTT	RNA guanylyltransferase and 5'-phosphatase
hsa-miR-580	1	0	1	1	1	1	GPATCH8	G patch domain containing 8
hsa-miR-580	1	0	1	1	0	0	PCLO	piccolo (presynaptic cytomatrix protein)
hsa-miR-580	1	0	1	1	1	1	NRXN1	neurexin 1
hsa-miR-580	1	0	1	1	1	1	KIF1B	kinesin family member 1B
hsa-miR-580	1	0	1	0	1	1	CHST15	carbohydrate (N-acetylgalactosamine 4-sulfate 6-O) sulfotransferase 15
hsa-miR-580	1	0	1	1	1	1	HIPK1	homeodomain interacting protein kinase 1
hsa-miR-580	1	0	1	1	1	1	GIGYF2	GRB10 interacting GYF protein 2
hsa-miR-580	1	0	1	1	0	0	SMCHD1	structural maintenance of chromosomes flexible hinge domain containing 1
hsa-miR-580	1	0	1	1	1	1	ANKRD17	ankyrin repeat domain 17
hsa-miR-580	0	0	1	1	0	0	PAN2	PAN2 poly(A) specific ribonuclease subunit homolog (S. cerevisiae)
hsa-miR-580	1	0	1	1	1	1	TP63	tumor protein p63
hsa-miR-580	1	0	1	0	1	1	SNX13	sorting nexin 13
hsa-miR-580	1	0	1	1	1	1	MATR3	matrin 3
hsa-miR-580	1	0	1	0	1	1	RBM12	RNA binding motif protein 12
hsa-miR-580	1	0	1	1	1	1	LPHN2	latrophilin 2
hsa-miR-580	1	0	1	1	1	1	DNM3	dynamin 3
hsa-miR-580	0	0	1	1	1	1	WDR47	WD repeat domain 47
hsa-miR-580	1	0	1	1	1	1	UBE2K	ubiquitin-conjugating enzyme E2K
hsa-miR-580	1	0	1	0	0	0	DTX4	deltex homolog 4 (Drosophila)
hsa-miR-580	1	0	1	1	1	1	CPEB3	cytoplasmic polyadenylation element binding protein 3
hsa-miR-580	1	0	1	1	1	1	CIT	citron (rho-interacting, serine/threonine kinase 21)
hsa-miR-580	1	0	1	1	1	1	C11orf9	chromosome 11 open reading frame 9
hsa-miR-580	1	0	1	1	1	1	RGL1	ral guanine nucleotide dissociation stimulator-like 1
hsa-miR-580	1	0	1	1	0	0	PCNX	pecanex homolog (Drosophila)
hsa-miR-580	0	0	1	0	1	1	TP53TG3	TP53 target 3
hsa-miR-580	0	0	1	0	0	0	TP53TG3B	TP53 target 3B
hsa-miR-580	1	0	1	1	0	0	ZC3H4	zinc finger CCCH-type containing 4
hsa-miR-580	1	0	1	1	1	1	NLGN1	neuroligin 1
hsa-miR-580	1	0	1	0	1	1	ZNF507	zinc finger protein 507
hsa-miR-580	1	0	1	1	1	1	SPIRE1	spire homolog 1 (Drosophila)
hsa-miR-580	1	0	1	0	1	1	GPR158	G protein-coupled receptor 158
hsa-miR-580	1	0	1	1	1	1	NDRG4	NDRG family member 4
hsa-miR-580	1	0	1	1	1	1	RALGAPB	Ral GTPase activating protein, beta subunit (non-catalytic)
hsa-miR-580	1	0	1	1	1	1	ZMIZ1	zinc finger, MIZ-type containing 1
hsa-miR-580	1	0	1	1	0	0	ATAD2B	ATPase family, AAA domain containing 2B
hsa-miR-580	1	0	1	1	1	1	MKL2	MKL/myocardin-like 2
hsa-miR-580	1	0	1	1	1	1	ASAP1	ArfGAP with SH3 domain, ankyrin repeat and PH domain 1
hsa-miR-580	0	0	1	1	1	1	KLHL13	kelch-like 13 (Drosophila)
hsa-miR-580	1	0	1	1	1	1	PCDH19	protocadherin 19
hsa-miR-580	1	0	1	0	1	1	KCTD16	potassium channel tetramerisation domain containing 16
hsa-miR-580	1	0	1	1	1	1	LRRC7	leucine rich repeat containing 7
hsa-miR-580	0	0	1	0	1	1	KIAA1468	KIAA1468
hsa-miR-580	1	0	1	1	1	1	FAM214B	family with sequence similarity 214, member B
hsa-miR-580	1	0	1	0	1	1	LMO3	LIM domain only 3 (rhombotin-like 2)
hsa-miR-580	0	0	1	0	1	1	ZSWIM6	zinc finger, SWIM-type containing 6
hsa-miR-580	1	0	1	0	0	0	TANC2	tetratricopeptide repeat, ankyrin repeat and coiled-coil containing 2
hsa-miR-580	0	0	1	1	0	0	SLC22A16	solute carrier family 22 (organic cation/carnitine transporter), member 16
hsa-miR-580	1	0	1	1	1	1	IKZF4	IKAROS family zinc finger 4 (Eos)
hsa-miR-580	0	0	1	1	0	0	FOCAD	focadhesin
hsa-miR-580	1	0	1	1	1	1	KIAA1804	mixed lineage kinase 4
hsa-miR-580	1	0	1	1	1	1	AHCTF1	AT hook containing transcription factor 1
hsa-miR-580	0	0	1	1	1	1	C3orf15	chromosome 3 open reading frame 15
hsa-miR-580	1	0	1	1	1	1	HNRPDL	heterogeneous nuclear ribonucleoprotein D-like
hsa-miR-580	1	0	1	1	1	1	CSMD3	CUB and Sushi multiple domains 3
hsa-miR-580	1	0	1	0	1	1	SLC25A25	solute carrier family 25 (mitochondrial carrier; phosphate carrier), member 25
hsa-miR-580	1	0	1	1	1	1	LSM14A	LSM14A, SCD6 homolog A (S. cerevisiae)
hsa-miR-580	1	0	1	1	1	1	BCL2L11	BCL2-like 11 (apoptosis facilitator)
hsa-miR-580	1	0	1	1	1	1	MAT2B	methionine adenosyltransferase II, beta
hsa-miR-580	1	0	1	1	1	1	POGZ	pogo transposable element with ZNF domain
hsa-miR-580	1	0	1	1	1	1	OXR1	oxidation resistance 1
hsa-miR-580	1	0	1	1	1	1	SH3TC2	SH3 domain and tetratricopeptide repeats 2
hsa-miR-580	0	0	1	1	0	0	SLC22A10	solute carrier family 22, member 10
hsa-miR-580	1	0	1	0	0	0	ZBTB34	zinc finger and BTB domain containing 34
hsa-miR-580	0	0	1	1	1	1	MCF2	MCF.2 cell line derived transforming sequence
hsa-miR-580	0	0	1	0	1	1	RASSF8	Ras association (RalGDS/AF-6) domain family (N-terminal) member 8
hsa-miR-580	1	0	1	1	1	1	PAM	peptidylglycine alpha-amidating monooxygenase
hsa-miR-580	1	0	1	1	1	1	UBR3	ubiquitin protein ligase E3 component n-recognin 3 (putative)
hsa-miR-580	1	0	1	0	0	0	ZC3H12C	zinc finger CCCH-type containing 12C
hsa-miR-580	1	0	1	0	1	1	LIN54	lin-54 homolog (C. elegans)
hsa-miR-580	1	0	1	1	1	1	KCNMA1	potassium large conductance calcium-activated channel, subfamily M, alpha member 1
hsa-miR-580	1	0	1	0	1	1	BEND4	BEN domain containing 4
hsa-miR-580	1	1	1	1	1	1	BACE1	beta-site APP-cleaving enzyme 1
hsa-miR-580	0	0	1	1	1	1	PCBP2	poly(rC) binding protein 2
hsa-miR-580	1	0	1	1	1	1	TRIM36	tripartite motif containing 36
hsa-miR-580	1	0	1	0	1	1	LRBA	LPS-responsive vesicle trafficking, beach and anchor containing
hsa-miR-580	1	0	1	1	1	1	COL11A1	collagen, type XI, alpha 1
hsa-miR-580	0	0	1	1	1	1	SEPT10	septin 10
hsa-miR-580	1	0	1	1	1	1	RPS6KA3	ribosomal protein S6 kinase, 90kDa, polypeptide 3
hsa-miR-580	1	0	1	1	0	0	ELN	elastin
hsa-miR-580	0	0	1	1	0	0	STON2	stonin 2
hsa-miR-580	0	0	1	1	1	1	PTK2	PTK2 protein tyrosine kinase 2
hsa-miR-580	1	0	1	1	1	1	SYNCRIP	synaptotagmin binding, cytoplasmic RNA interacting protein
hsa-miR-580	1	0	1	0	1	1	PLAG1	pleiomorphic adenoma gene 1
hsa-miR-580	1	0	1	1	1	1	RASSF5	Ras association (RalGDS/AF-6) domain family member 5
hsa-miR-580	1	0	1	0	1	1	MPPED2	metallophosphoesterase domain containing 2
hsa-miR-580	1	0	1	0	1	1	SLC6A6	solute carrier family 6 (neurotransmitter transporter, taurine), member 6
hsa-miR-580	1	0	1	1	0	0	TSPYL2	TSPY-like 2
hsa-miR-580	1	0	1	1	1	1	FMR1	fragile X mental retardation 1
hsa-miR-580	1	0	1	1	1	1	ABI1	abl-interactor 1
hsa-miR-580	1	0	1	1	1	1	EPHA7	EPH receptor A7
hsa-miR-580	0	0	1	1	1	1	DGKE	diacylglycerol kinase, epsilon 64kDa
hsa-miR-580	1	0	1	1	1	1	EPHA5	EPH receptor A5
hsa-miR-580	1	0	1	1	1	1	AEBP2	AE binding protein 2
hsa-miR-580	1	0	1	1	1	1	ANK1	ankyrin 1, erythrocytic
hsa-miR-580	0	0	1	1	0	0	IFT27	intraflagellar transport 27 homolog (Chlamydomonas)
hsa-miR-580	1	0	1	1	0	0	EHMT2	euchromatic histone-lysine N-methyltransferase 2
hsa-miR-580	1	0	1	1	0	0	RGS6	regulator of G-protein signaling 6
hsa-miR-580	1	0	1	1	1	1	LIMA1	LIM domain and actin binding 1
hsa-miR-580	0	0	1	1	1	1	GPM6B	glycoprotein M6B
hsa-miR-580	1	0	1	1	1	1	CTAGE5	CTAGE family, member 5
hsa-miR-580	1	0	1	1	1	1	PDLIM5	PDZ and LIM domain 5
hsa-miR-580	0	0	1	1	1	1	STAU1	staufen, RNA binding protein, homolog 1 (Drosophila)
hsa-miR-580	1	0	1	1	1	1	IPO8	importin 8
hsa-miR-580	0	0	1	1	1	1	HLA-DQA1	major histocompatibility complex, class II, DQ alpha 1
hsa-miR-580	1	0	1	1	1	1	PTPRK	protein tyrosine phosphatase, receptor type, K
hsa-miR-580	1	0	1	1	0	0	SYN3	synapsin III
hsa-miR-580	0	0	1	1	0	0	PXK	PX domain containing serine/threonine kinase
hsa-miR-580	1	0	1	1	1	1	SATB1	SATB homeobox 1
hsa-miR-580	0	0	1	1	0	0	MBD1	methyl-CpG binding domain protein 1
hsa-miR-580	0	0	1	1	1	1	KIF3A	kinesin family member 3A
hsa-miR-580	1	0	1	1	1	1	HMGA2	high mobility group AT-hook 2
hsa-miR-580	1	0	1	1	1	1	TEAD1	TEA domain family member 1 (SV40 transcriptional enhancer factor)
hsa-miR-580	1	0	1	1	0	0	PPP2R5D	protein phosphatase 2, regulatory subunit B', delta
hsa-miR-580	0	0	1	1	1	1	DDX10	DEAD (Asp-Glu-Ala-Asp) box polypeptide 10
hsa-miR-580	0	0	1	1	0	0	MSH5	mutS homolog 5 (E. coli)
hsa-miR-580	0	0	1	1	1	1	SPP1	secreted phosphoprotein 1
hsa-miR-580	1	0	1	0	1	1	PDE7B	phosphodiesterase 7B
hsa-miR-580	1	0	1	1	1	1	PICALM	phosphatidylinositol binding clathrin assembly protein
hsa-miR-580	0	0	1	0	1	1	MS4A4E	membrane-spanning 4-domains, subfamily A, member 4E
hsa-miR-580	1	0	1	0	1	1	FYB	FYN binding protein
hsa-miR-580	0	0	1	0	1	1	PARG	poly (ADP-ribose) glycohydrolase
hsa-miR-580	1	0	1	1	1	1	DLGAP2	discs, large (Drosophila) homolog-associated protein 2
hsa-miR-580	1	0	1	0	1	1	MLL2	myeloid/lymphoid or mixed-lineage leukemia 2
hsa-miR-580	1	0	1	0	1	1	PDE4D	phosphodiesterase 4D, cAMP-specific
hsa-miR-580	1	0	1	1	1	1	CBFA2T2	core-binding factor, runt domain, alpha subunit 2; translocated to, 2
hsa-miR-580	1	0	1	1	1	1	YME1L1	YME1-like 1 (S. cerevisiae)
hsa-miR-580	0	0	1	0	0	0	ZNRD1-AS1	ZNRD1 antisense RNA 1
hsa-miR-580	1	0	1	0	0	0	MAP3K1	mitogen-activated protein kinase kinase kinase 1, E3 ubiquitin protein ligase
hsa-miR-580	0	0	1	1	1	1	UBE4B	ubiquitination factor E4B
hsa-miR-580	1	0	1	1	1	1	LDB2	LIM domain binding 2
hsa-miR-580	1	0	1	1	0	0	PRRC2A	proline-rich coiled-coil 2A
hsa-miR-580	1	0	1	1	1	1	USP3	ubiquitin specific peptidase 3
hsa-miR-580	0	0	1	1	1	1	LYPLA1	lysophospholipase I
hsa-miR-580	1	0	1	1	1	1	AKAP9	A kinase (PRKA) anchor protein (yotiao) 9
hsa-miR-580	0	0	1	1	1	1	RER1	RER1 retention in endoplasmic reticulum 1 homolog (S. cerevisiae)
hsa-miR-580	0	0	1	1	1	1	PCBP4	poly(rC) binding protein 4
hsa-miR-580	1	0	1	1	1	1	GLS	glutaminase
hsa-miR-580	0	0	1	1	1	1	THOC7	THO complex 7 homolog (Drosophila)
hsa-miR-580	1	0	1	0	0	0	PPME1	protein phosphatase methylesterase 1
hsa-miR-580	0	0	1	1	1	1	SMC2	structural maintenance of chromosomes 2
hsa-miR-580	1	0	1	1	1	1	EDNRB	endothelin receptor type B
hsa-miR-580	0	0	1	1	1	1	DCAF6	DDB1 and CUL4 associated factor 6
hsa-miR-580	1	0	1	0	1	1	CDK14	cyclin-dependent kinase 14
hsa-miR-580	0	0	1	1	1	1	TIAM2	T-cell lymphoma invasion and metastasis 2
hsa-miR-580	1	0	1	1	1	1	PRUNE	prune homolog (Drosophila)
hsa-miR-580	1	0	1	1	1	1	TAOK3	TAO kinase 3
hsa-miR-580	1	0	1	1	1	1	AASDHPPT	aminoadipate-semialdehyde dehydrogenase-phosphopantetheinyl transferase
hsa-miR-580	1	0	1	0	1	1	BECN1	beclin 1, autophagy related
hsa-miR-580	0	0	1	0	1	1	CLEC5A	C-type lectin domain family 5, member A
hsa-miR-580	1	0	1	1	1	1	HMG20A	high mobility group 20A
hsa-miR-580	1	0	1	0	0	0	PRPF40A	PRP40 pre-mRNA processing factor 40 homolog A (S. cerevisiae)
hsa-miR-580	1	0	1	1	1	1	ZNF202	zinc finger protein 202
hsa-miR-580	0	0	1	0	1	1	PDP1	pyruvate dehyrogenase phosphatase catalytic subunit 1
hsa-miR-580	0	0	1	1	1	1	FAM114A2	family with sequence similarity 114, member A2
hsa-miR-580	1	0	1	1	1	1	TLK2	tousled-like kinase 2
hsa-miR-580	1	0	1	1	1	1	DNAJA4	DnaJ (Hsp40) homolog, subfamily A, member 4
hsa-miR-580	0	0	1	0	1	1	SLC38A4	solute carrier family 38, member 4
hsa-miR-580	0	0	1	0	0	0	BPESC1	blepharophimosis, epicanthus inversus and ptosis, candidate 1 (non-protein coding)
hsa-miR-580	1	0	1	1	1	1	SENP7	SUMO1/sentrin specific peptidase 7
hsa-miR-580	1	0	1	1	1	1	TSC22D2	TSC22 domain family, member 2
hsa-miR-580	1	0	1	1	1	1	NXT2	nuclear transport factor 2-like export factor 2
hsa-miR-580	0	0	1	1	1	1	BRD7	bromodomain containing 7
hsa-miR-580	0	0	1	1	1	1	FASTKD2	FAST kinase domains 2
hsa-miR-580	1	0	1	1	1	1	C21orf91	chromosome 21 open reading frame 91
hsa-miR-580	0	0	1	0	0	0	TIGD7	tigger transposable element derived 7
hsa-miR-580	1	0	1	1	1	1	ABI2	abl-interactor 2
hsa-miR-580	1	0	1	1	1	1	RBM47	RNA binding motif protein 47
hsa-miR-580	1	0	1	0	1	1	PARP11	poly (ADP-ribose) polymerase family, member 11
hsa-miR-580	1	0	1	0	1	1	TRPS1	trichorhinophalangeal syndrome I
hsa-miR-580	1	0	1	1	1	1	ERGIC1	endoplasmic reticulum-golgi intermediate compartment (ERGIC) 1
hsa-miR-580	0	0	1	1	0	0	KCNK6	potassium channel, subfamily K, member 6
hsa-miR-580	0	0	1	1	0	0	SHCBP1L	SHC SH2-domain binding protein 1-like
hsa-miR-580	1	0	1	1	1	1	MGEA5	meningioma expressed antigen 5 (hyaluronidase)
hsa-miR-580	1	0	1	1	1	1	CHST9	carbohydrate (N-acetylgalactosamine 4-0) sulfotransferase 9
hsa-miR-580	1	0	1	1	1	1	CALU	calumenin
hsa-miR-580	1	0	1	0	1	1	WIPF2	WAS/WASL interacting protein family, member 2
hsa-miR-580	1	0	1	1	1	1	CALCOCO1	calcium binding and coiled-coil domain 1
hsa-miR-580	1	0	1	1	1	1	LARP4	La ribonucleoprotein domain family, member 4
hsa-miR-580	0	0	1	0	0	0	NBPF10	neuroblastoma breakpoint family, member 10
hsa-miR-580	0	0	1	1	1	1	PARK2	parkinson protein 2, E3 ubiquitin protein ligase (parkin)
hsa-miR-580	0	0	1	1	1	1	OLFM3	olfactomedin 3
hsa-miR-580	0	0	1	1	1	1	CLEC7A	C-type lectin domain family 7, member A
hsa-miR-580	1	0	1	1	1	1	MAGI1	membrane associated guanylate kinase, WW and PDZ domain containing 1
hsa-miR-580	0	0	1	0	0	0	ANKRD30BP2	ankyrin repeat domain 30B pseudogene 2
hsa-miR-580	0	0	1	0	0	0	RMST	rhabdomyosarcoma 2 associated transcript (non-protein coding)
hsa-miR-580	1	0	1	1	0	0	XRRA1	X-ray radiation resistance associated 1
hsa-miR-580	1	0	1	1	0	0	SEPT8	septin 8
hsa-miR-580	0	0	1	1	1	1	PSRC1	proline/serine-rich coiled-coil 1
hsa-miR-580	1	0	1	1	1	1	RBFOX1	RNA binding protein, fox-1 homolog (C. elegans) 1
hsa-miR-580	1	0	1	1	0	0	FOXP2	forkhead box P2
hsa-miR-580	1	0	1	0	1	1	PPP1R12A	protein phosphatase 1, regulatory subunit 12A
hsa-miR-580	1	0	1	1	1	1	ZC3H14	zinc finger CCCH-type containing 14
hsa-miR-580	0	0	1	1	1	1	SAMD9L	sterile alpha motif domain containing 9-like
hsa-miR-580	0	0	1	1	1	1	CARD8	caspase recruitment domain family, member 8
hsa-miR-580	1	0	1	0	1	1	IL1RAP	interleukin 1 receptor accessory protein
hsa-miR-580	0	0	1	1	1	1	ANKRD36B	ankyrin repeat domain 36B
hsa-miR-580	1	0	1	1	1	1	AFF2	AF4/FMR2 family, member 2
hsa-miR-580	1	0	1	1	1	1	SUCO	SUN domain containing ossification factor
hsa-miR-580	1	0	1	1	1	1	CACNA2D2	calcium channel, voltage-dependent, alpha 2/delta subunit 2
hsa-miR-580	0	0	1	1	1	1	CD1E	CD1e molecule
hsa-miR-580	1	0	1	1	1	1	VAMP7	vesicle-associated membrane protein 7
hsa-miR-580	0	0	1	1	1	1	WWTR1	WW domain containing transcription regulator 1
hsa-miR-580	0	0	1	1	1	1	STK33	serine/threonine kinase 33
hsa-miR-580	1	0	1	1	1	1	PALM2	paralemmin 2
hsa-miR-580	0	0	1	0	1	1	SRPK1	SRSF protein kinase 1
hsa-miR-580	0	0	1	1	1	1	TRDN	triadin
hsa-miR-580	0	0	1	1	1	1	TAF1	TAF1 RNA polymerase II, TATA box binding protein (TBP)-associated factor, 250kDa
hsa-miR-580	1	0	1	1	1	1	NOX4	NADPH oxidase 4
hsa-miR-580	1	0	1	1	1	1	PPP1R9A	protein phosphatase 1, regulatory subunit 9A
hsa-miR-580	0	0	1	1	1	1	ESRP1	epithelial splicing regulatory protein 1
hsa-miR-580	1	0	1	1	1	1	AKAP2	A kinase (PRKA) anchor protein 2
hsa-miR-580	1	0	1	0	1	1	NFAT5	nuclear factor of activated T-cells 5, tonicity-responsive
hsa-miR-580	0	0	1	0	1	1	TRMT10A	tRNA methyltransferase 10 homolog A (S. cerevisiae)
hsa-miR-580	1	0	1	1	1	1	ENOX2	ecto-NOX disulfide-thiol exchanger 2
hsa-miR-580	0	0	1	1	1	1	PARP16	poly (ADP-ribose) polymerase family, member 16
hsa-miR-580	0	0	1	0	0	0	FLJ20518	FSHD region gene 2 family, member C pseudogene
hsa-miR-580	0	0	1	0	0	0	TUG1	taurine upregulated 1 (non-protein coding)
hsa-miR-580	0	0	1	1	1	1	PARPBP	PARP1 binding protein
hsa-miR-580	0	0	1	1	1	1	BANK1	B-cell scaffold protein with ankyrin repeats 1
hsa-miR-580	1	0	1	1	1	1	BCAP29	B-cell receptor-associated protein 29
hsa-miR-580	0	0	1	0	1	1	EBF2	early B-cell factor 2
hsa-miR-580	1	0	1	1	1	1	HNRNPF	heterogeneous nuclear ribonucleoprotein F
hsa-miR-580	0	0	1	1	1	1	STOX2	storkhead box 2
hsa-miR-580	1	0	1	1	1	1	RIC8B	resistance to inhibitors of cholinesterase 8 homolog B (C. elegans)
hsa-miR-580	1	0	1	1	1	1	PTBP3	polypyrimidine tract binding protein 3
hsa-miR-580	1	0	1	1	1	1	SLC38A2	solute carrier family 38, member 2
hsa-miR-580	0	0	1	1	1	1	GBP3	guanylate binding protein 3
hsa-miR-580	1	0	1	1	1	1	MKLN1	muskelin 1, intracellular mediator containing kelch motifs
hsa-miR-580	1	0	1	0	1	1	SPATS2L	spermatogenesis associated, serine-rich 2-like
hsa-miR-580	1	0	1	1	0	0	DPP3	dipeptidyl-peptidase 3
hsa-miR-580	0	0	1	1	0	0	MTBP	Mdm2, transformed 3T3 cell double minute 2, p53 binding protein (mouse) binding protein, 104kDa
hsa-miR-580	0	0	1	0	0	0	SOX2-OT	SOX2 overlapping transcript (non-protein coding)
hsa-miR-580	1	0	1	1	1	1	S100PBP	S100P binding protein
hsa-miR-580	0	0	1	1	0	0	POLR3E	polymerase (RNA) III (DNA directed) polypeptide E (80kD)
hsa-miR-580	1	0	1	1	1	1	STARD7	StAR-related lipid transfer (START) domain containing 7
hsa-miR-580	0	0	1	1	1	1	LRRN1	leucine rich repeat neuronal 1
hsa-miR-580	1	0	1	1	1	1	MACF1	microtubule-actin crosslinking factor 1
hsa-miR-580	0	0	1	1	1	1	C14orf118	chromosome 14 open reading frame 118
hsa-miR-580	0	0	1	0	0	0	LINC00475	long intergenic non-protein coding RNA 475
hsa-miR-580	0	0	1	1	0	0	ACTR6	ARP6 actin-related protein 6 homolog (yeast)
hsa-miR-580	1	0	1	1	1	1	PHF20L1	PHD finger protein 20-like 1
hsa-miR-580	0	0	1	0	0	0	LOC284561	uncharacterized LOC284561
hsa-miR-580	1	0	1	1	1	1	DERL1	derlin 1
hsa-miR-580	0	0	1	1	1	1	CWF19L1	CWF19-like 1, cell cycle control (S. pombe)
hsa-miR-580	0	0	1	1	1	1	NSUN7	NOP2/Sun domain family, member 7
hsa-miR-580	0	0	1	0	1	1	FLJ14186	uncharacterized LOC401149
hsa-miR-580	0	0	1	1	1	1	CXorf57	chromosome X open reading frame 57
hsa-miR-580	1	0	1	1	1	1	COPS7B	COP9 constitutive photomorphogenic homolog subunit 7B (Arabidopsis)
hsa-miR-580	0	0	1	1	1	1	SIGLEC1	sialic acid binding Ig-like lectin 1, sialoadhesin
hsa-miR-580	0	0	1	1	1	1	GGNBP2	gametogenetin binding protein 2
hsa-miR-580	1	0	1	0	1	1	ATP2B1	ATPase, Ca++ transporting, plasma membrane 1
hsa-miR-580	1	0	1	1	1	1	ABI3BP	ABI family, member 3 (NESH) binding protein
hsa-miR-580	0	0	1	0	1	1	ATXN1L	ataxin 1-like
hsa-miR-580	1	0	1	1	1	1	PHACTR4	phosphatase and actin regulator 4
hsa-miR-580	1	0	1	1	1	1	DLC1	deleted in liver cancer 1
hsa-miR-580	1	0	1	1	1	1	KANK1	KN motif and ankyrin repeat domains 1
hsa-miR-580	1	0	1	0	1	1	CADPS2	Ca++-dependent secretion activator 2
hsa-miR-580	1	0	1	1	1	1	TNRC6A	trinucleotide repeat containing 6A
hsa-miR-580	1	0	1	1	1	1	NAA30	N(alpha)-acetyltransferase 30, NatC catalytic subunit
hsa-miR-580	1	0	1	0	1	1	ZCCHC3	zinc finger, CCHC domain containing 3
hsa-miR-580	0	0	1	0	1	1	FLJ22447	uncharacterized LOC400221
hsa-miR-580	0	0	1	0	0	0	LINC00340	long intergenic non-protein coding RNA 340
hsa-miR-580	0	0	1	1	1	1	FAM124B	family with sequence similarity 124B
hsa-miR-580	0	0	1	0	1	1	FLJ22763	uncharacterized LOC401081
hsa-miR-580	1	0	1	1	0	0	MAGI3	membrane associated guanylate kinase, WW and PDZ domain containing 3
hsa-miR-580	0	0	1	0	0	0	LOC729852	uncharacterized LOC729852
hsa-miR-580	0	0	1	1	1	1	HDC	histidine decarboxylase
hsa-miR-580	1	0	1	1	1	1	FOXP1	forkhead box P1
hsa-miR-580	0	0	1	1	1	1	SPRTN	SprT-like N-terminal domain
hsa-miR-580	1	0	1	1	1	1	SEC63	SEC63 homolog (S. cerevisiae)
hsa-miR-580	0	0	1	1	1	1	KDM2B	lysine (K)-specific demethylase 2B
hsa-miR-580	1	0	1	0	1	1	ATP10D	ATPase, class V, type 10D
hsa-miR-580	0	0	1	1	1	1	NETO2	neuropilin (NRP) and tolloid (TLL)-like 2
hsa-miR-580	1	0	1	1	1	1	SLC38A1	solute carrier family 38, member 1
hsa-miR-580	1	0	1	1	1	1	GPD2	glycerol-3-phosphate dehydrogenase 2 (mitochondrial)
hsa-miR-580	1	0	1	1	1	1	STRBP	spermatid perinuclear RNA binding protein
hsa-miR-580	1	0	1	1	1	1	SLAIN1	SLAIN motif family, member 1
hsa-miR-580	1	0	1	1	1	1	C22orf13	chromosome 22 open reading frame 13
hsa-miR-580	0	0	1	0	0	0	LOC254559	uncharacterized LOC254559
hsa-miR-580	0	0	1	0	0	0	LOC283508	uncharacterized LOC283508
hsa-miR-580	0	0	1	1	1	1	C8orf46	chromosome 8 open reading frame 46
hsa-miR-580	0	0	1	0	0	0	CHST9-AS1	CHST9 antisense RNA 1
hsa-miR-580	1	0	1	0	1	1	AP1G1	adaptor-related protein complex 1, gamma 1 subunit
hsa-miR-580	0	0	1	1	1	1	FBXO5	F-box protein 5
hsa-miR-580	0	0	1	1	0	0	ABHD16A	abhydrolase domain containing 16A
hsa-miR-580	0	0	1	1	1	1	TBC1D30	TBC1 domain family, member 30
hsa-miR-580	1	0	1	1	1	1	FRMD6	FERM domain containing 6
hsa-miR-580	0	0	1	0	1	1	C17orf108	chromosome 17 open reading frame 108
hsa-miR-580	0	0	1	0	0	0	LOC201617	uncharacterized LOC201617
hsa-miR-580	0	0	1	1	1	1	DECR2	2,4-dienoyl CoA reductase 2, peroxisomal
hsa-miR-580	0	0	1	1	1	1	SLCO1B3	solute carrier organic anion transporter family, member 1B3
hsa-miR-580	1	0	1	1	1	1	DIXDC1	DIX domain containing 1
hsa-miR-580	0	0	1	1	1	1	MSTO1	misato homolog 1 (Drosophila)
hsa-miR-580	1	0	1	1	1	1	SCAMP5	secretory carrier membrane protein 5
hsa-miR-580	1	0	1	1	1	1	CLCN5	chloride channel, voltage-sensitive 5
hsa-miR-580	1	0	1	1	1	1	SORBS2	sorbin and SH3 domain containing 2
hsa-miR-580	1	0	1	1	1	1	PUM1	pumilio homolog 1 (Drosophila)
hsa-miR-580	0	0	1	1	1	1	GNB2	guanine nucleotide binding protein (G protein), beta polypeptide 2
hsa-miR-580	1	0	1	1	1	1	MGAT1	mannosyl (alpha-1,3-)-glycoprotein beta-1,2-N-acetylglucosaminyltransferase
hsa-miR-580	0	0	1	1	1	1	PSME3	proteasome (prosome, macropain) activator subunit 3 (PA28 gamma; Ki)
hsa-miR-580	0	0	1	1	1	1	C14orf79	chromosome 14 open reading frame 79
hsa-miR-580	0	0	1	0	0	0	FLJ32742	uncharacterized locus FLJ32742
hsa-miR-580	0	0	1	0	0	0	LOC100125918	uncharacterized LOC100125918
hsa-miR-580	0	0	1	1	0	0	NXF2	nuclear RNA export factor 2
hsa-miR-580	1	0	1	0	1	1	NCAM1	neural cell adhesion molecule 1
hsa-miR-580	0	0	1	0	1	1	CHURC1	churchill domain containing 1
hsa-miR-580	1	0	1	1	1	1	IST1	increased sodium tolerance 1 homolog (yeast)
hsa-miR-580	0	0	1	1	1	1	SPICE1	spindle and centriole associated protein 1
hsa-miR-580	1	0	1	1	1	1	HLF	hepatic leukemia factor
hsa-miR-580	0	0	1	1	1	1	GALNT6	UDP-N-acetyl-alpha-D-galactosamine:polypeptide N-acetylgalactosaminyltransferase 6 (GalNAc-T6)
hsa-miR-580	0	0	1	0	0	0	SDHAP2	succinate dehydrogenase complex, subunit A, flavoprotein pseudogene 2
hsa-miR-580	1	0	1	0	1	1	TPBG	trophoblast glycoprotein
hsa-miR-580	1	0	1	1	1	1	SIRT1	sirtuin 1
hsa-miR-580	1	0	1	1	1	1	PAX6	paired box 6
hsa-miR-580	0	0	1	1	0	0	PVRL3	poliovirus receptor-related 3
hsa-miR-580	1	0	1	1	1	1	FAM73B	family with sequence similarity 73, member B
hsa-miR-580	0	0	1	1	1	1	TFPI2	tissue factor pathway inhibitor 2
hsa-miR-580	0	0	1	1	0	0	PIGO	phosphatidylinositol glycan anchor biosynthesis, class O
hsa-miR-580	1	0	1	1	1	1	WDR20	WD repeat domain 20
hsa-miR-580	0	0	1	0	1	1	TMSB15B	thymosin beta 15B
hsa-miR-580	1	0	1	1	1	1	ARIH2	ariadne homolog 2 (Drosophila)
hsa-miR-580	0	0	1	1	1	1	BBS9	Bardet-Biedl syndrome 9
hsa-miR-580	1	0	1	1	1	1	FRY	furry homolog (Drosophila)
hsa-miR-580	1	0	1	1	1	1	AMMECR1	Alport syndrome, mental retardation, midface hypoplasia and elliptocytosis chromosomal region gene 1
hsa-miR-580	0	0	1	0	1	1	PIANP	PILR alpha associated neural protein
hsa-miR-580	1	0	1	1	1	1	FBXW2	F-box and WD repeat domain containing 2
hsa-miR-580	1	0	1	1	1	1	LUC7L2	LUC7-like 2 (S. cerevisiae)
hsa-miR-580	1	0	1	1	1	1	GNG2	guanine nucleotide binding protein (G protein), gamma 2
hsa-miR-580	1	0	1	1	1	1	IVNS1ABP	influenza virus NS1A binding protein
hsa-miR-580	1	0	1	1	1	1	GCFC1	GC-rich sequence DNA-binding factor 1
hsa-miR-580	1	0	1	1	1	1	DZIP1	DAZ interacting protein 1
hsa-miR-580	0	0	1	1	0	0	HSD17B4	hydroxysteroid (17-beta) dehydrogenase 4
hsa-miR-580	0	0	1	1	1	1	SLC16A1	solute carrier family 16, member 1 (monocarboxylic acid transporter 1)
hsa-miR-580	1	0	1	1	1	1	DEM1	defects in morphology 1 homolog (S. cerevisiae)
hsa-miR-580	0	0	1	1	1	1	MARC1	mitochondrial amidoxime reducing component 1
hsa-miR-580	1	0	1	1	1	1	LRRC57	leucine rich repeat containing 57
hsa-miR-580	1	0	1	1	1	1	SSH3	slingshot homolog 3 (Drosophila)
hsa-miR-580	0	0	1	1	1	1	SPOCK1	sparc/osteonectin, cwcv and kazal-like domains proteoglycan (testican) 1
hsa-miR-580	1	0	1	1	1	1	SIAH1	siah E3 ubiquitin protein ligase 1
hsa-miR-580	0	0	1	1	0	0	RASGRF2	Ras protein-specific guanine nucleotide-releasing factor 2
hsa-miR-580	0	0	1	1	1	1	METTL13	methyltransferase like 13
hsa-miR-580	0	0	1	1	1	1	ATP6V1H	ATPase, H+ transporting, lysosomal 50/57kDa, V1 subunit H
hsa-miR-580	1	0	1	1	1	1	CPNE8	copine VIII
hsa-miR-580	0	0	1	1	0	0	TMEM108	transmembrane protein 108
hsa-miR-580	0	0	1	1	1	1	MOBP	myelin-associated oligodendrocyte basic protein
hsa-miR-580	0	0	1	1	0	0	ZNF185	zinc finger protein 185 (LIM domain)
hsa-miR-580	1	0	1	1	1	1	EPHB1	EPH receptor B1
hsa-miR-580	0	0	1	0	0	0	LOC730101	uncharacterized LOC730101
hsa-miR-580	1	0	1	1	1	1	CNEP1R1	CTD nuclear envelope phosphatase 1 regulatory subunit 1
hsa-miR-580	1	0	1	0	1	1	FAM129A	family with sequence similarity 129, member A
hsa-miR-580	0	0	1	0	0	0	LOC100129858	uncharacterized LOC100129858
hsa-miR-580	1	0	1	1	1	1	SPATS2	spermatogenesis associated, serine-rich 2
hsa-miR-580	0	0	1	0	1	1	NBPF3	neuroblastoma breakpoint family, member 3
hsa-miR-580	1	0	1	1	1	1	RNF185	ring finger protein 185
hsa-miR-580	0	0	1	1	1	1	VDAC1	voltage-dependent anion channel 1
hsa-miR-580	0	0	1	0	1	1	C1orf198	chromosome 1 open reading frame 198
hsa-miR-580	1	0	1	1	1	1	FAM98A	family with sequence similarity 98, member A
hsa-miR-580	1	0	1	1	1	1	GAPVD1	GTPase activating protein and VPS9 domains 1
hsa-miR-580	0	0	1	0	0	0	OTUD1	OTU domain containing 1
hsa-miR-580	1	0	1	1	1	1	LRP8	low density lipoprotein receptor-related protein 8, apolipoprotein e receptor
hsa-miR-580	0	0	1	1	0	0	ERGIC3	ERGIC and golgi 3
hsa-miR-580	0	0	1	1	1	1	ZNF667	zinc finger protein 667
hsa-miR-580	1	0	1	0	1	1	THRB	thyroid hormone receptor, beta
hsa-miR-580	1	0	1	0	1	1	KBTBD8	kelch repeat and BTB (POZ) domain containing 8
hsa-miR-580	1	0	1	1	1	1	ETS2	v-ets erythroblastosis virus E26 oncogene homolog 2 (avian)
hsa-miR-580	1	0	1	1	1	1	STIM2	stromal interaction molecule 2
hsa-miR-580	0	0	1	1	1	1	SC5DL	sterol-C5-desaturase (ERG3 delta-5-desaturase homolog, S. cerevisiae)-like
hsa-miR-580	1	0	1	1	1	1	CDV3	CDV3 homolog (mouse)
hsa-miR-580	0	0	1	1	1	1	EXTL2	exostoses (multiple)-like 2
hsa-miR-580	0	0	1	1	0	0	TCEANC	transcription elongation factor A (SII) N-terminal and central domain containing
hsa-miR-580	1	0	1	0	1	1	YPEL2	yippee-like 2 (Drosophila)
hsa-miR-580	0	0	1	0	1	1	TNFAIP8	tumor necrosis factor, alpha-induced protein 8
hsa-miR-580	0	0	1	0	0	0	LOC400680	uncharacterized LOC400680
hsa-miR-580	1	0	1	1	1	1	POU2F3	POU class 2 homeobox 3
hsa-miR-580	1	0	1	0	1	1	AGFG1	ArfGAP with FG repeats 1
hsa-miR-580	0	0	1	0	0	0	LOC100128560	uncharacterized LOC100128560
hsa-miR-580	1	0	1	1	1	1	GOLGA8B	golgin A8 family, member B
hsa-miR-580	0	0	1	1	1	1	ADGB	androglobin
hsa-miR-580	1	0	1	0	1	1	PRKAR1A	protein kinase, cAMP-dependent, regulatory, type I, alpha
hsa-miR-580	0	0	1	0	0	0	LOC284385	uncharacterized LOC284385
hsa-miR-580	0	0	1	1	0	0	PSAPL1	prosaposin-like 1 (gene/pseudogene)
hsa-miR-580	0	0	1	1	1	1	PRSS16	protease, serine, 16 (thymus)
hsa-miR-580	0	0	1	1	1	1	POLR1D	polymerase (RNA) I polypeptide D, 16kDa
hsa-miR-580	1	0	1	1	1	1	GATM	glycine amidinotransferase (L-arginine:glycine amidinotransferase)
hsa-miR-580	1	0	1	1	1	1	CHD6	chromodomain helicase DNA binding protein 6
hsa-miR-580	1	0	1	1	0	0	ENTPD1	ectonucleoside triphosphate diphosphohydrolase 1
hsa-miR-580	1	0	1	1	1	1	IL20RA	interleukin 20 receptor, alpha
hsa-miR-580	0	0	1	1	1	1	FAM76A	family with sequence similarity 76, member A
hsa-miR-580	1	0	1	1	1	1	NDFIP2	Nedd4 family interacting protein 2
hsa-miR-580	0	0	1	0	1	1	MYLK4	myosin light chain kinase family, member 4
hsa-miR-580	1	0	1	0	1	1	UNC5D	unc-5 homolog D (C. elegans)
hsa-miR-580	1	0	1	1	1	1	GLUD1	glutamate dehydrogenase 1
hsa-miR-580	0	0	1	1	0	0	SLC14A2	solute carrier family 14 (urea transporter), member 2
hsa-miR-580	1	0	1	1	1	1	LMX1A	LIM homeobox transcription factor 1, alpha
hsa-miR-580	1	0	1	1	1	1	SIK3	SIK family kinase 3
hsa-miR-580	1	0	1	1	1	1	ZNF25	zinc finger protein 25
hsa-miR-580	1	0	1	1	1	1	KALRN	kalirin, RhoGEF kinase
hsa-miR-580	0	0	1	1	1	1	DNAJC24	DnaJ (Hsp40) homolog, subfamily C, member 24
hsa-miR-580	1	0	1	1	1	1	CBLB	Cbl proto-oncogene, E3 ubiquitin protein ligase B
hsa-miR-580	0	0	1	0	1	1	FLJ41200	uncharacterized LOC401492
hsa-miR-580	1	0	1	1	1	1	IKBKAP	inhibitor of kappa light polypeptide gene enhancer in B-cells, kinase complex-associated protein
hsa-miR-580	1	0	1	1	1	1	EGLN3	egl nine homolog 3 (C. elegans)
hsa-miR-580	0	0	1	1	1	1	EXD1	exonuclease 3'-5' domain containing 1
hsa-miR-580	1	0	1	1	1	1	ATG4B	autophagy related 4B, cysteine peptidase
hsa-miR-580	0	0	1	1	1	1	TMEM59	transmembrane protein 59
hsa-miR-580	0	0	1	0	0	0	TMPRSS11BNL	TMPRSS11B N terminal-like
hsa-miR-580	0	0	1	1	1	1	FAM19A2	family with sequence similarity 19 (chemokine (C-C motif)-like), member A2
hsa-miR-580	1	0	1	1	1	1	PHKB	phosphorylase kinase, beta
hsa-miR-580	1	0	1	1	1	1	FAM219A	family with sequence similarity 219, member A
hsa-miR-580	1	0	1	0	0	0	GPR137C	G protein-coupled receptor 137C
hsa-miR-580	1	0	1	1	1	1	SH2D4B	SH2 domain containing 4B
hsa-miR-580	1	0	1	1	1	1	OSBPL9	oxysterol binding protein-like 9
hsa-miR-580	1	0	1	1	1	1	ESYT2	extended synaptotagmin-like protein 2
hsa-miR-580	1	0	1	1	1	1	METTL8	methyltransferase like 8
hsa-miR-580	0	0	1	0	0	0	DKFZP434H168	uncharacterized LOC26077
hsa-miR-580	1	0	1	1	1	1	PRDM2	PR domain containing 2, with ZNF domain
hsa-miR-580	1	0	1	0	1	1	DCUN1D4	DCN1, defective in cullin neddylation 1, domain containing 4 (S. cerevisiae)
hsa-miR-580	1	0	1	1	1	1	NECAB3	N-terminal EF-hand calcium binding protein 3
hsa-miR-580	1	0	1	1	1	1	VPS54	vacuolar protein sorting 54 homolog (S. cerevisiae)
hsa-miR-580	1	0	1	1	1	1	KIF21A	kinesin family member 21A
hsa-miR-580	0	0	1	1	1	1	C3orf67	chromosome 3 open reading frame 67
hsa-miR-580	1	0	1	1	1	1	C17orf85	chromosome 17 open reading frame 85
hsa-miR-580	1	0	1	1	1	1	C11orf30	chromosome 11 open reading frame 30
hsa-miR-580	1	0	1	1	0	0	GXYLT1	glucoside xylosyltransferase 1
hsa-miR-580	1	0	1	1	1	1	IGFBP3	insulin-like growth factor binding protein 3
hsa-miR-580	1	0	1	1	1	1	DLGAP4	discs, large (Drosophila) homolog-associated protein 4
hsa-miR-580	0	0	1	0	1	1	RASGRP3	RAS guanyl releasing protein 3 (calcium and DAG-regulated)
hsa-miR-580	0	0	1	0	0	0	LOC613266	uncharacterized LOC613266
hsa-miR-580	0	0	1	0	1	1	C17orf105	chromosome 17 open reading frame 105
hsa-miR-580	1	0	1	1	1	1	DPY19L3	dpy-19-like 3 (C. elegans)
hsa-miR-580	1	0	1	1	0	0	UBN2	ubinuclein 2
hsa-miR-580	1	0	1	1	1	1	DCTN4	dynactin 4 (p62)
hsa-miR-580	0	0	1	1	0	0	FSIP2	fibrous sheath interacting protein 2
hsa-miR-580	1	0	1	1	1	1	CSRNP3	cysteine-serine-rich nuclear protein 3
hsa-miR-580	1	0	1	1	1	1	LIN9	lin-9 homolog (C. elegans)
hsa-miR-580	1	0	1	1	1	1	IL16	interleukin 16
hsa-miR-580	1	0	1	1	1	1	PLEKHB2	pleckstrin homology domain containing, family B (evectins) member 2
hsa-miR-580	1	0	1	1	1	1	PIK3R1	phosphoinositide-3-kinase, regulatory subunit 1 (alpha)
hsa-miR-580	0	0	1	1	1	1	BDH1	3-hydroxybutyrate dehydrogenase, type 1
hsa-miR-580	0	0	1	1	1	1	STRC	stereocilin
hsa-miR-580	1	0	1	0	1	1	CLEC16A	C-type lectin domain family 16, member A
hsa-miR-580	1	0	1	1	1	1	DLG2	discs, large homolog 2 (Drosophila)
hsa-miR-580	1	0	1	0	1	1	GPR180	G protein-coupled receptor 180
hsa-miR-580	0	0	1	1	0	0	NPIP	nuclear pore complex interacting protein
hsa-miR-580	0	0	1	1	0	0	HS3ST5	heparan sulfate (glucosamine) 3-O-sulfotransferase 5
hsa-miR-580	1	0	1	1	1	1	CLIP1	CAP-GLY domain containing linker protein 1
hsa-miR-580	0	0	1	0	0	0	RPL23AP53	ribosomal protein L23a pseudogene 53
hsa-miR-580	1	0	1	1	1	1	MKRN1	makorin ring finger protein 1
hsa-miR-580	1	0	1	1	1	1	MFSD6	major facilitator superfamily domain containing 6
hsa-miR-580	1	0	1	0	1	1	ADIPOR2	adiponectin receptor 2
hsa-miR-580	1	0	1	1	1	1	CTNNA2	catenin (cadherin-associated protein), alpha 2
hsa-miR-580	1	0	1	1	1	1	PHF17	PHD finger protein 17
hsa-miR-580	1	0	1	1	1	1	ENAH	enabled homolog (Drosophila)
hsa-miR-580	0	0	1	1	0	0	SLC22A25	solute carrier family 22, member 25
hsa-miR-580	1	0	1	1	0	0	PEAK1	NKF3 kinase family member
hsa-miR-580	1	0	1	1	1	1	EYA1	eyes absent homolog 1 (Drosophila)
hsa-miR-580	1	0	1	1	1	1	CROT	carnitine O-octanoyltransferase
hsa-miR-580	1	0	1	0	1	1	CAPRIN1	cell cycle associated protein 1
hsa-miR-580	0	0	1	1	1	1	MCU	mitochondrial calcium uniporter
hsa-miR-580	1	0	1	1	1	1	SLC12A6	solute carrier family 12 (potassium/chloride transporters), member 6
hsa-miR-580	0	0	1	0	0	0	FAM205B	transmembrane protein C9orf144B pseudogene
hsa-miR-580	1	0	1	1	1	1	FRYL	FRY-like
hsa-miR-580	1	0	1	1	1	1	SH3D19	SH3 domain containing 19
hsa-miR-580	1	0	1	1	1	1	BCAT1	branched chain amino-acid transaminase 1, cytosolic
hsa-miR-580	1	0	1	1	1	1	DSE	dermatan sulfate epimerase
hsa-miR-580	1	0	1	1	1	1	PUS7	pseudouridylate synthase 7 homolog (S. cerevisiae)
hsa-miR-580	0	0	1	1	1	1	ZNF662	zinc finger protein 662
hsa-miR-580	0	0	1	1	1	1	SHROOM3	shroom family member 3
hsa-miR-580	0	0	1	1	1	1	TBX19	T-box 19
hsa-miR-580	0	0	1	1	1	1	G3BP1	GTPase activating protein (SH3 domain) binding protein 1
hsa-miR-580	0	0	1	1	0	0	HEATR8	HEAT repeat containing 8
hsa-miR-580	0	0	1	0	0	0	LOC494141	mitochondrial carrier triple repeat 1 pseudogene
hsa-miR-580	0	0	1	0	0	0	LOC100124692	maltase-glucoamylase (alpha-glucosidase) pseudogene
hsa-miR-580	1	0	1	0	1	1	STK3	serine/threonine kinase 3
hsa-miR-580	1	0	1	1	1	1	PPP2R5C	protein phosphatase 2, regulatory subunit B', gamma
hsa-miR-580	1	0	1	1	1	1	SMAD7	SMAD family member 7
hsa-miR-580	0	0	1	1	0	0	SLCO6A1	solute carrier organic anion transporter family, member 6A1
hsa-miR-580	0	0	1	1	1	1	ZNF346	zinc finger protein 346
hsa-miR-580	0	0	1	1	0	0	ZNF730	zinc finger protein 730
hsa-miR-580	1	0	1	1	1	1	MAP2K4	mitogen-activated protein kinase kinase 4
hsa-miR-580	0	0	1	1	1	1	PHF12	PHD finger protein 12
hsa-miR-580	0	0	1	0	0	0	AGAP9	ArfGAP with GTPase domain, ankyrin repeat and PH domain 9
hsa-miR-580	0	0	1	1	1	1	KAZALD1	Kazal-type serine peptidase inhibitor domain 1
hsa-miR-580	1	0	1	1	1	1	TAP2	transporter 2, ATP-binding cassette, sub-family B (MDR/TAP)
hsa-miR-580	1	0	1	0	1	1	TMEM106B	transmembrane protein 106B
hsa-miR-580	0	0	1	1	1	1	CRISP3	cysteine-rich secretory protein 3
hsa-miR-580	1	0	1	1	1	1	CYFIP2	cytoplasmic FMR1 interacting protein 2
hsa-miR-580	0	0	1	0	1	1	PEX5	peroxisomal biogenesis factor 5
hsa-miR-580	0	0	1	1	1	1	C5orf28	chromosome 5 open reading frame 28
hsa-miR-580	1	0	1	1	1	1	TBC1D15	TBC1 domain family, member 15
hsa-miR-580	1	0	1	1	1	1	MEAF6	MYST/Esa1-associated factor 6
hsa-miR-580	0	0	1	0	0	0	RRN3P2	RNA polymerase I transcription factor homolog (S. cerevisiae) pseudogene 2
hsa-miR-580	1	0	1	0	1	1	MAP3K3	mitogen-activated protein kinase kinase kinase 3
hsa-miR-580	1	0	1	1	1	1	COBLL1	COBL-like 1
hsa-miR-580	1	0	1	1	1	1	LUC7L3	LUC7-like 3 (S. cerevisiae)
hsa-miR-580	1	0	1	1	1	1	NCOA1	nuclear receptor coactivator 1
hsa-miR-580	1	0	1	1	1	1	APBB2	amyloid beta (A4) precursor protein-binding, family B, member 2
hsa-miR-580	0	0	1	1	1	1	PTPN20B	protein tyrosine phosphatase, non-receptor type 20B
hsa-miR-580	0	0	1	1	1	1	PTPN20A	protein tyrosine phosphatase, non-receptor type 20A
hsa-miR-580	0	0	1	0	0	0	PART1	prostate androgen-regulated transcript 1 (non-protein coding)
hsa-miR-580	0	0	1	0	1	1	NEK1	NIMA (never in mitosis gene a)-related kinase 1
hsa-miR-580	1	0	1	1	1	1	NPAS3	neuronal PAS domain protein 3
hsa-miR-580	0	0	1	1	0	0	TBC1D10B	TBC1 domain family, member 10B
hsa-miR-580	0	0	1	0	0	0	POM121L8P	POM121 transmembrane nucleoporin-like 8 pseudogene
hsa-miR-580	1	0	1	1	1	1	ARF6	ADP-ribosylation factor 6
hsa-miR-580	0	0	1	1	1	1	ARIH1	ariadne homolog, ubiquitin-conjugating enzyme E2 binding protein, 1 (Drosophila)
hsa-miR-580	0	0	1	1	0	0	SAPCD1	suppressor APC domain containing 1
hsa-miR-580	0	0	1	0	0	0	TPTE2P6	transmembrane phosphoinositide 3-phosphatase and tensin homolog 2 pseudogene 6
hsa-miR-580	0	0	1	1	1	1	MTPAP	mitochondrial poly(A) polymerase
hsa-miR-580	1	0	1	1	1	1	SMAP2	small ArfGAP2
hsa-miR-580	1	0	1	1	1	1	FBXL17	F-box and leucine-rich repeat protein 17
hsa-miR-580	0	0	1	1	1	1	GMEB2	glucocorticoid modulatory element binding protein 2
hsa-miR-580	0	0	1	0	0	0	DNAJC5B	DnaJ (Hsp40) homolog, subfamily C, member 5 beta
hsa-miR-580	1	0	1	1	1	1	SLC25A36	solute carrier family 25 (pyrimidine nucleotide carrier ), member 36
hsa-miR-580	1	0	1	1	1	1	FAM107B	family with sequence similarity 107, member B
hsa-miR-580	0	0	1	1	1	1	RHOT1	ras homolog family member T1
hsa-miR-580	1	0	1	0	1	1	DNAJC5	DnaJ (Hsp40) homolog, subfamily C, member 5
hsa-miR-580	1	0	1	1	1	1	NBEA	neurobeachin
hsa-miR-580	1	0	1	1	1	1	KIAA1033	KIAA1033
hsa-miR-580	1	0	1	0	1	1	GPR85	G protein-coupled receptor 85
hsa-miR-580	1	0	1	0	1	1	CEP170	centrosomal protein 170kDa
hsa-miR-580	0	0	1	1	0	0	DOPEY1	dopey family member 1
hsa-miR-580	0	0	1	1	1	1	SLC30A10	solute carrier family 30, member 10
hsa-miR-580	0	0	1	0	0	0	FAM66D	family with sequence similarity 66, member D
hsa-miR-580	1	0	1	1	1	1	MSANTD2	Myb/SANT-like DNA-binding domain containing 2
hsa-miR-580	1	0	1	0	1	1	BRPF1	bromodomain and PHD finger containing, 1
hsa-miR-580	1	0	1	1	1	1	MIER1	mesoderm induction early response 1 homolog (Xenopus laevis)
hsa-miR-580	0	0	1	0	1	1	GAB3	GRB2-associated binding protein 3
hsa-miR-580	1	0	1	1	1	1	GNPTAB	N-acetylglucosamine-1-phosphate transferase, alpha and beta subunits
hsa-miR-580	0	0	1	1	1	1	BEND7	BEN domain containing 7
hsa-miR-580	1	0	1	0	1	1	HNRNPA3	heterogeneous nuclear ribonucleoprotein A3
hsa-miR-580	0	0	1	1	1	1	SRSF11	serine/arginine-rich splicing factor 11
hsa-miR-580	1	0	1	0	0	0	YLPM1	YLP motif containing 1
hsa-miR-580	1	0	1	1	0	0	USP24	ubiquitin specific peptidase 24
hsa-miR-580	0	0	1	1	1	1	C10orf57	chromosome 10 open reading frame 57
hsa-miR-580	1	0	1	1	1	1	RNF180	ring finger protein 180
hsa-miR-580	0	0	1	1	1	1	YAP1	Yes-associated protein 1
hsa-miR-580	0	0	1	1	1	1	VIT	vitrin
hsa-miR-580	1	0	1	1	0	0	PTAR1	protein prenyltransferase alpha subunit repeat containing 1
hsa-miR-580	1	0	1	1	1	1	TMEM182	transmembrane protein 182
hsa-miR-580	1	0	1	1	1	1	TMEM68	transmembrane protein 68
hsa-miR-580	0	0	1	1	1	1	CCDC132	coiled-coil domain containing 132
hsa-miR-580	1	0	1	1	1	1	LPP	LIM domain containing preferred translocation partner in lipoma
hsa-miR-580	0	0	1	1	1	1	NARG2	NMDA receptor regulated 2
hsa-miR-580	0	0	1	1	1	1	C12orf50	chromosome 12 open reading frame 50
hsa-miR-580	1	0	1	1	1	1	UHRF2	ubiquitin-like with PHD and ring finger domains 2, E3 ubiquitin protein ligase
hsa-miR-580	0	0	1	0	0	0	EPHA1-AS1	EPHA1 antisense RNA 1
hsa-miR-580	1	0	1	1	1	1	NRP1	neuropilin 1
hsa-miR-580	0	0	1	1	1	1	NUSAP1	nucleolar and spindle associated protein 1
hsa-miR-580	1	0	1	0	1	1	CNOT7	CCR4-NOT transcription complex, subunit 7
hsa-miR-580	1	0	1	1	1	1	ANP32E	acidic (leucine-rich) nuclear phosphoprotein 32 family, member E
hsa-miR-580	1	0	1	0	1	1	EXOC5	exocyst complex component 5
hsa-miR-580	0	0	1	1	1	1	PCDH20	protocadherin 20
hsa-miR-580	0	0	1	1	1	1	CAND1	cullin-associated and neddylation-dissociated 1
hsa-miR-580	1	0	1	0	1	1	JAZF1	JAZF zinc finger 1
hsa-miR-580	1	0	1	1	1	1	RICTOR	RPTOR independent companion of MTOR, complex 2
hsa-miR-580	1	0	1	1	1	1	MSANTD4	Myb/SANT-like DNA-binding domain containing 4 with coiled-coils
hsa-miR-580	1	0	1	0	1	1	COX18	COX18 cytochrome c oxidase assembly homolog (S. cerevisiae)
hsa-miR-580	1	0	1	0	1	1	NR3C1	nuclear receptor subfamily 3, group C, member 1 (glucocorticoid receptor)
hsa-miR-580	1	0	1	1	1	1	BOLL	bol, boule-like (Drosophila)
hsa-miR-580	1	0	1	1	1	1	FAM76B	family with sequence similarity 76, member B
hsa-miR-580	1	0	1	0	1	1	APOLD1	apolipoprotein L domain containing 1
hsa-miR-580	1	0	1	1	1	1	FBXL5	F-box and leucine-rich repeat protein 5
hsa-miR-580	1	0	1	1	1	1	PPP3CA	protein phosphatase 3, catalytic subunit, alpha isozyme
hsa-miR-580	1	0	1	1	1	1	WDR44	WD repeat domain 44
hsa-miR-580	1	0	1	1	1	1	RNF38	ring finger protein 38
hsa-miR-580	1	0	1	1	1	1	IKZF2	IKAROS family zinc finger 2 (Helios)
hsa-miR-580	0	0	1	0	0	0	PMCHL1	pro-melanin-concentrating hormone-like 1, pseudogene
hsa-miR-580	0	0	1	0	1	1	STEAP2	STEAP family member 2, metalloreductase
hsa-miR-580	0	0	1	1	0	0	ERAP2	endoplasmic reticulum aminopeptidase 2
hsa-miR-580	1	0	1	1	1	1	CLIC5	chloride intracellular channel 5
hsa-miR-580	1	0	1	0	1	1	BDNF	brain-derived neurotrophic factor
hsa-miR-580	1	0	1	1	1	1	TXNRD1	thioredoxin reductase 1
hsa-miR-580	0	0	1	0	0	0	KGFLP1	fibroblast growth factor 7 pseudogene
hsa-miR-580	1	0	1	1	1	1	ANGPT1	angiopoietin 1
hsa-miR-580	0	0	1	1	1	1	NFXL1	nuclear transcription factor, X-box binding-like 1
hsa-miR-580	0	0	1	1	0	0	TPRKB	TP53RK binding protein
hsa-miR-580	0	0	1	1	1	1	CEP41	centrosomal protein 41kDa
hsa-miR-580	1	0	1	1	1	1	BCL11A	B-cell CLL/lymphoma 11A (zinc finger protein)
hsa-miR-580	0	0	1	1	0	0	NIF3L1	NIF3 NGG1 interacting factor 3-like 1 (S. cerevisiae)
hsa-miR-580	1	0	1	1	1	1	TPP1	tripeptidyl peptidase I
hsa-miR-580	1	0	1	1	1	1	PBRM1	polybromo 1
hsa-miR-580	1	0	1	1	1	1	TAB3	TGF-beta activated kinase 1/MAP3K7 binding protein 3
hsa-miR-580	0	0	1	1	1	1	GCOM1	GRINL1A complex locus 1
hsa-miR-580	0	0	1	1	1	1	ATF7IP	activating transcription factor 7 interacting protein
hsa-miR-580	0	0	1	1	1	1	MFAP5	microfibrillar associated protein 5
hsa-miR-580	1	0	1	1	1	1	CAMTA1	calmodulin binding transcription activator 1
hsa-miR-580	0	0	1	1	1	1	LINGO2	leucine rich repeat and Ig domain containing 2
hsa-miR-580	1	0	1	1	0	0	LAYN	layilin
hsa-miR-580	1	0	1	1	1	1	NLGN4X	neuroligin 4, X-linked
hsa-miR-580	0	0	1	1	1	1	KDELC2	KDEL (Lys-Asp-Glu-Leu) containing 2
hsa-miR-580	0	0	1	1	0	0	GLIPR1L1	GLI pathogenesis-related 1 like 1
hsa-miR-580	0	0	1	1	0	0	SNRPN	small nuclear ribonucleoprotein polypeptide N
hsa-miR-580	1	0	1	1	1	1	OPRM1	opioid receptor, mu 1
hsa-miR-580	0	0	1	1	1	1	PTGR2	prostaglandin reductase 2
hsa-miR-580	1	0	1	1	1	1	SP3	Sp3 transcription factor
hsa-miR-580	1	0	1	0	1	1	CHRM2	cholinergic receptor, muscarinic 2
hsa-miR-580	1	0	1	0	1	1	NHS	Nance-Horan syndrome (congenital cataracts and dental anomalies)
hsa-miR-580	0	0	1	1	1	1	POTEG	POTE ankyrin domain family, member G
hsa-miR-580	1	0	1	1	1	1	MECP2	methyl CpG binding protein 2 (Rett syndrome)
hsa-miR-580	1	0	1	1	0	0	ADAM15	ADAM metallopeptidase domain 15
hsa-miR-580	0	0	1	0	1	1	RAB18	RAB18, member RAS oncogene family
hsa-miR-580	1	0	1	1	1	1	BHLHE41	basic helix-loop-helix family, member e41
hsa-miR-580	0	0	1	1	1	1	ILDR1	immunoglobulin-like domain containing receptor 1
hsa-miR-580	1	0	1	1	1	1	PLCH1	phospholipase C, eta 1
hsa-miR-580	1	0	1	1	1	1	NIPA2	non imprinted in Prader-Willi/Angelman syndrome 2
hsa-miR-580	0	0	1	1	0	0	STX10	syntaxin 10
hsa-miR-580	1	0	1	1	1	1	QKI	QKI, KH domain containing, RNA binding
hsa-miR-580	1	0	1	1	1	1	MYB	v-myb myeloblastosis viral oncogene homolog (avian)
hsa-miR-580	1	0	1	1	1	1	CD109	CD109 molecule
hsa-miR-580	1	0	1	1	1	1	PCDH11X	protocadherin 11 X-linked
hsa-miR-580	0	0	1	1	0	0	NBPF8	neuroblastoma breakpoint family, member 8
hsa-miR-580	0	0	1	1	1	1	CDK20	cyclin-dependent kinase 20
hsa-miR-580	1	0	1	1	1	1	AMOT	angiomotin
hsa-miR-580	0	0	1	1	1	1	ENOPH1	enolase-phosphatase 1
hsa-miR-580	0	0	1	1	1	1	B4GALT2	UDP-Gal:betaGlcNAc beta 1,4- galactosyltransferase, polypeptide 2
hsa-miR-580	0	0	1	1	1	1	RLIM	ring finger protein, LIM domain interacting
hsa-miR-580	0	0	1	1	1	1	BOD1	biorientation of chromosomes in cell division 1
hsa-miR-580	1	0	1	1	1	1	PPP1R11	protein phosphatase 1, regulatory (inhibitor) subunit 11
hsa-miR-580	1	0	1	0	1	1	DCAF10	DDB1 and CUL4 associated factor 10
hsa-miR-580	1	0	1	1	0	0	SLC10A3	solute carrier family 10 (sodium/bile acid cotransporter family), member 3
hsa-miR-580	0	0	1	1	1	1	LZIC	leucine zipper and CTNNBIP1 domain containing
hsa-miR-580	0	0	1	1	0	0	RBM14	RNA binding motif protein 14
hsa-miR-580	1	0	1	1	1	1	TRIM39	tripartite motif containing 39
hsa-miR-580	1	0	1	0	1	1	DDX3X	DEAD (Asp-Glu-Ala-Asp) box polypeptide 3, X-linked
hsa-miR-580	0	0	1	1	1	1	TMEM30A	transmembrane protein 30A
hsa-miR-580	1	0	1	1	1	1	AGK	acylglycerol kinase
hsa-miR-580	1	0	1	1	1	1	GRIA2	glutamate receptor, ionotropic, AMPA 2
hsa-miR-580	1	0	1	1	1	1	SZRD1	SUZ RNA binding domain containing 1
hsa-miR-580	1	0	1	1	1	1	TRIM2	tripartite motif containing 2
hsa-miR-580	1	0	1	1	1	1	GDA	guanine deaminase
hsa-miR-580	1	0	1	1	1	1	ETF1	eukaryotic translation termination factor 1
hsa-miR-580	0	0	1	1	1	1	EAF2	ELL associated factor 2
hsa-miR-580	0	0	1	1	1	1	TOMM40L	translocase of outer mitochondrial membrane 40 homolog (yeast)-like
hsa-miR-580	0	0	1	0	0	0	KLHL15	kelch-like 15 (Drosophila)
hsa-miR-580	1	0	1	1	1	1	ZNF512	zinc finger protein 512
hsa-miR-580	1	0	1	0	1	1	NR1D2	nuclear receptor subfamily 1, group D, member 2
hsa-miR-580	0	0	1	1	1	1	MYL12A	myosin, light chain 12A, regulatory, non-sarcomeric
hsa-miR-580	1	0	1	1	1	1	FAM199X	family with sequence similarity 199, X-linked
hsa-miR-580	0	0	1	1	1	1	POLR3F	polymerase (RNA) III (DNA directed) polypeptide F, 39 kDa
hsa-miR-580	1	0	1	1	1	1	ELF4	E74-like factor 4 (ets domain transcription factor)
hsa-miR-580	0	0	1	1	1	1	RDH11	retinol dehydrogenase 11 (all-trans/9-cis/11-cis)
hsa-miR-580	0	0	1	1	1	1	PRIM2	primase, DNA, polypeptide 2 (58kDa)
hsa-miR-580	1	0	1	1	1	1	WWC2	WW and C2 domain containing 2
hsa-miR-580	1	0	1	1	1	1	SUZ12	suppressor of zeste 12 homolog (Drosophila)
hsa-miR-580	1	0	1	1	1	1	KIAA1217	KIAA1217
hsa-miR-580	0	0	1	1	1	1	CENPL	centromere protein L
hsa-miR-580	1	0	1	1	1	1	ZMAT4	zinc finger, matrin-type 4
hsa-miR-580	0	0	1	1	1	1	NELL2	NEL-like 2 (chicken)
hsa-miR-580	1	0	1	1	1	1	NKTR	natural killer-tumor recognition sequence
hsa-miR-580	0	0	1	0	1	1	ZNF718	zinc finger protein 718
hsa-miR-580	0	0	1	1	1	1	PDE1C	phosphodiesterase 1C, calmodulin-dependent 70kDa
hsa-miR-580	0	0	1	1	1	1	CDC42SE2	CDC42 small effector 2
hsa-miR-580	0	0	1	0	0	0	SNX29P2	sorting nexin 29 pseudogene 2
hsa-miR-580	0	0	1	0	0	0	FLJ35390	uncharacterized LOC255031
hsa-miR-580	1	0	1	1	1	1	NIPA1	non imprinted in Prader-Willi/Angelman syndrome 1
hsa-miR-580	1	0	1	1	1	1	SPG20	spastic paraplegia 20 (Troyer syndrome)
hsa-miR-580	1	0	1	1	1	1	RSPO2	R-spondin 2
hsa-miR-580	0	0	1	1	0	0	CASS4	Cas scaffolding protein family member 4
hsa-miR-580	0	0	1	1	1	1	SELP	selectin P (granule membrane protein 140kDa, antigen CD62)
hsa-miR-580	1	0	1	1	1	1	CD300LF	CD300 molecule-like family member f
hsa-miR-580	0	0	1	0	1	1	PAPOLG	poly(A) polymerase gamma
hsa-miR-580	1	0	1	1	1	1	HTR2C	5-hydroxytryptamine (serotonin) receptor 2C, G protein-coupled
hsa-miR-580	0	0	1	1	0	0	FCRL3	Fc receptor-like 3
hsa-miR-580	0	0	1	1	1	1	CCDC146	coiled-coil domain containing 146
hsa-miR-580	0	0	1	1	1	1	PIK3AP1	phosphoinositide-3-kinase adaptor protein 1
hsa-miR-580	1	0	1	0	1	1	SV2B	synaptic vesicle glycoprotein 2B
hsa-miR-580	1	0	1	1	1	1	TIAL1	TIA1 cytotoxic granule-associated RNA binding protein-like 1
hsa-miR-580	0	0	1	1	1	1	CD48	CD48 molecule
hsa-miR-580	1	0	1	1	1	1	GABRA1	gamma-aminobutyric acid (GABA) A receptor, alpha 1
hsa-miR-580	1	0	1	1	1	1	ZNF518A	zinc finger protein 518A
hsa-miR-580	0	0	1	1	1	1	SLC22A2	solute carrier family 22 (organic cation transporter), member 2
hsa-miR-580	1	0	1	1	1	1	EPB41L4A	erythrocyte membrane protein band 4.1 like 4A
hsa-miR-580	0	0	1	1	1	1	TMEM67	transmembrane protein 67
hsa-miR-580	0	0	1	0	0	0	ATP8B5P	ATPase, class I, type 8B, member 5, pseudogene
hsa-miR-580	1	0	1	1	1	1	RCOR3	REST corepressor 3
hsa-miR-580	1	0	1	1	1	1	C5orf25	chromosome 5 open reading frame 25
hsa-miR-580	1	0	1	1	1	1	TTC39C	tetratricopeptide repeat domain 39C
hsa-miR-580	0	0	1	1	1	1	UBXN1	UBX domain protein 1
hsa-miR-580	0	0	1	1	0	0	WASIR2	WASH and IL9R antisense RNA 2
hsa-miR-580	1	0	1	1	1	1	SORL1	sortilin-related receptor, L(DLR class) A repeats containing
hsa-miR-580	1	0	1	1	1	1	PPP2R2C	protein phosphatase 2, regulatory subunit B, gamma
hsa-miR-580	1	0	1	1	1	1	SECISBP2L	SECIS binding protein 2-like
hsa-miR-580	1	0	1	1	1	1	CRKL	v-crk sarcoma virus CT10 oncogene homolog (avian)-like
hsa-miR-580	0	0	1	0	0	0	LINC00238	long intergenic non-protein coding RNA 238
hsa-miR-580	1	0	1	1	1	1	FBXL16	F-box and leucine-rich repeat protein 16
hsa-miR-580	0	0	1	0	1	1	DKFZP434I0714	uncharacterized protein DKFZP434I0714
hsa-miR-580	0	0	1	1	1	1	EDA2R	ectodysplasin A2 receptor
hsa-miR-580	1	0	1	1	1	1	FAM120A	family with sequence similarity 120A
hsa-miR-580	0	0	1	0	0	0	TMPRSS12	transmembrane (C-terminal) protease, serine 12
hsa-miR-580	1	0	1	0	1	1	ATP11A	ATPase, class VI, type 11A
hsa-miR-580	0	0	1	1	0	0	PGS1	phosphatidylglycerophosphate synthase 1
hsa-miR-580	0	0	1	1	1	1	C6	complement component 6
hsa-miR-580	1	0	1	1	1	1	CTDSPL2	CTD (carboxy-terminal domain, RNA polymerase II, polypeptide A) small phosphatase like 2
hsa-miR-580	0	0	1	1	1	1	SEC24D	SEC24 family, member D (S. cerevisiae)
hsa-miR-580	0	0	1	0	0	0	LOC339862	uncharacterized LOC339862
hsa-miR-580	0	0	1	1	0	0	VPS8	vacuolar protein sorting 8 homolog (S. cerevisiae)
hsa-miR-580	0	0	1	1	1	1	UBE3D	ubiquitin protein ligase E3D
hsa-miR-580	1	0	1	1	1	1	DMD	dystrophin
hsa-miR-580	1	0	1	1	1	1	PEX5L	peroxisomal biogenesis factor 5-like
hsa-miR-580	0	0	1	0	0	0	FAM201A	family with sequence similarity 201, member A
hsa-miR-580	1	0	1	1	1	1	SLC38A9	solute carrier family 38, member 9
hsa-miR-580	0	0	1	0	1	1	C9orf57	chromosome 9 open reading frame 57
hsa-miR-580	1	0	1	1	1	1	SLC35G1	solute carrier family 35, member G1
hsa-miR-580	1	0	1	1	1	1	HECTD2	HECT domain containing E3 ubiquitin protein ligase 2
hsa-miR-580	1	0	1	1	1	1	MEIS1	Meis homeobox 1
hsa-miR-580	1	0	1	0	1	1	CPEB4	cytoplasmic polyadenylation element binding protein 4
hsa-miR-580	0	0	1	0	0	0	CYP4F35P	cytochrome P450, family 4, subfamily F, polypeptide 35, pseudogene
hsa-miR-580	1	0	1	1	1	1	FAM135B	family with sequence similarity 135, member B
hsa-miR-580	0	0	1	0	0	0	LOC286184	uncharacterized LOC286184
hsa-miR-580	1	0	1	1	1	1	SOX6	SRY (sex determining region Y)-box 6
hsa-miR-580	1	0	1	1	1	1	SLC35F3	solute carrier family 35, member F3
hsa-miR-580	0	0	1	0	0	0	CRYBB2P1	crystallin, beta B2 pseudogene 1
hsa-miR-580	1	0	1	1	1	1	GALNT1	UDP-N-acetyl-alpha-D-galactosamine:polypeptide N-acetylgalactosaminyltransferase 1 (GalNAc-T1)
hsa-miR-580	1	0	1	1	1	1	DPP10	dipeptidyl-peptidase 10 (non-functional)
hsa-miR-580	1	0	1	0	1	1	ARID2	AT rich interactive domain 2 (ARID, RFX-like)
hsa-miR-580	1	0	1	1	1	1	PLS3	plastin 3
hsa-miR-580	0	0	1	1	0	0	CCDC152	coiled-coil domain containing 152
hsa-miR-580	1	0	1	1	1	1	FGFR2	fibroblast growth factor receptor 2
hsa-miR-580	0	0	1	1	1	1	CACHD1	cache domain containing 1
hsa-miR-580	0	0	1	0	0	0	USP32P1	ubiquitin specific peptidase 32 pseudogene 1
hsa-miR-580	1	0	1	0	0	0	CT62	cancer/testis antigen 62
hsa-miR-580	0	0	1	0	0	0	LINC00326	long intergenic non-protein coding RNA 326
hsa-miR-580	1	0	1	0	1	1	LPHN3	latrophilin 3
hsa-miR-580	0	0	1	1	1	1	FBXL4	F-box and leucine-rich repeat protein 4
hsa-miR-580	1	0	1	1	1	1	DPP8	dipeptidyl-peptidase 8
hsa-miR-580	1	0	1	1	1	1	DACH2	dachshund homolog 2 (Drosophila)
hsa-miR-580	1	0	1	1	1	1	SLITRK3	SLIT and NTRK-like family, member 3
hsa-miR-580	1	0	1	1	1	1	BVES	blood vessel epicardial substance
hsa-miR-580	1	0	1	0	1	1	PCSK2	proprotein convertase subtilisin/kexin type 2
hsa-miR-580	1	0	1	1	1	1	INTS6	integrator complex subunit 6
hsa-miR-580	0	0	1	1	0	0	MTCH1	mitochondrial carrier 1
hsa-miR-580	1	0	1	0	1	1	KIAA0430	KIAA0430
hsa-miR-580	0	0	1	0	1	1	FAM13B	family with sequence similarity 13, member B
hsa-miR-580	0	0	1	0	1	1	METTL12	methyltransferase like 12
hsa-miR-580	1	0	1	1	1	1	FAM123A	family with sequence similarity 123A
hsa-miR-580	1	0	1	0	1	1	HSPA12A	heat shock 70kDa protein 12A
hsa-miR-580	1	0	1	1	1	1	PRRG1	proline rich Gla (G-carboxyglutamic acid) 1
hsa-miR-580	0	0	1	0	1	1	PDGFC	platelet derived growth factor C
hsa-miR-580	1	0	1	0	1	1	TNFAIP3	tumor necrosis factor, alpha-induced protein 3
hsa-miR-580	1	0	1	1	1	1	ROCK1	Rho-associated, coiled-coil containing protein kinase 1
hsa-miR-580	0	0	1	1	1	1	GOLGA6L9	golgin A6 family-like 9
hsa-miR-580	1	0	1	1	1	1	CLOCK	clock homolog (mouse)
hsa-miR-580	0	0	1	1	1	1	MTHFD2L	methylenetetrahydrofolate dehydrogenase (NADP+ dependent) 2-like
hsa-miR-580	0	0	1	1	1	1	C4orf32	chromosome 4 open reading frame 32
hsa-miR-580	0	0	1	1	1	1	COL22A1	collagen, type XXII, alpha 1
hsa-miR-580	0	0	1	1	1	1	FAM90A1	family with sequence similarity 90, member A1
hsa-miR-580	1	0	1	0	1	1	USP6NL	USP6 N-terminal like
hsa-miR-580	1	0	1	1	1	1	ADD1	adducin 1 (alpha)
hsa-miR-580	0	0	1	0	0	0	MORF4L2-AS1	MORF4L2 antisense RNA 1
hsa-miR-580	0	0	1	0	0	0	DKFZp686O1327	uncharacterized LOC401014
hsa-miR-580	1	0	1	0	1	1	PSD3	pleckstrin and Sec7 domain containing 3
hsa-miR-580	1	0	1	1	1	1	MAMDC2	MAM domain containing 2
hsa-miR-580	0	0	1	0	0	0	LOC283914	uncharacterized LOC283914
hsa-miR-580	1	0	1	1	1	1	PPP2R5B	protein phosphatase 2, regulatory subunit B', beta
hsa-miR-580	1	0	1	1	1	1	PCYT1B	phosphate cytidylyltransferase 1, choline, beta
hsa-miR-580	1	0	1	0	1	1	LYPD6	LY6/PLAUR domain containing 6
hsa-miR-580	0	0	1	1	1	1	LOC100499484-C9ORF174	LOC100499484-C9orf174 readthrough
hsa-miR-580	0	0	1	0	0	0	INHBA-AS1	INHBA antisense RNA 1
hsa-miR-580	0	0	1	1	1	1	DDX4	DEAD (Asp-Glu-Ala-Asp) box polypeptide 4
hsa-miR-580	0	0	1	0	0	0	LOC348120	uncharacterized LOC348120
hsa-miR-580	0	0	1	0	0	0	DPY19L2P4	dpy-19-like 2 pseudogene 4 (C. elegans)
hsa-miR-580	1	0	1	0	1	1	ZNF800	zinc finger protein 800
hsa-miR-580	1	0	1	1	1	1	RTKN2	rhotekin 2
hsa-miR-580	0	0	1	1	1	1	ZNF74	zinc finger protein 74
hsa-miR-580	1	0	1	1	1	1	CLVS1	clavesin 1
hsa-miR-580	1	0	1	0	1	1	ARHGAP5	Rho GTPase activating protein 5
hsa-miR-580	0	0	1	0	1	1	ITGA1	integrin, alpha 1
hsa-miR-580	0	0	1	1	1	1	FBXO38	F-box protein 38
hsa-miR-580	1	0	1	1	1	1	MBNL1	muscleblind-like splicing regulator 1
hsa-miR-580	1	0	1	1	1	1	ANGPTL1	angiopoietin-like 1
hsa-miR-580	0	0	1	0	0	0	IDI2-AS1	IDI2 antisense RNA 1
hsa-miR-580	1	0	1	0	1	1	NUDT10	nudix (nucleoside diphosphate linked moiety X)-type motif 10
hsa-miR-580	1	0	1	1	1	1	PTPDC1	protein tyrosine phosphatase domain containing 1
hsa-miR-580	0	0	1	1	0	0	AGAP8	ArfGAP with GTPase domain, ankyrin repeat and PH domain 8
hsa-miR-580	1	0	1	1	1	1	ZFP91	zinc finger protein 91 homolog (mouse)
hsa-miR-580	1	0	1	1	1	1	YWHAZ	tyrosine 3-monooxygenase/tryptophan 5-monooxygenase activation protein, zeta polypeptide
hsa-miR-580	1	0	1	1	1	1	PCGF5	polycomb group ring finger 5
hsa-miR-580	0	0	1	1	1	1	KDELC1	KDEL (Lys-Asp-Glu-Leu) containing 1
hsa-miR-580	1	0	1	0	1	1	C14orf43	chromosome 14 open reading frame 43
hsa-miR-580	1	0	1	1	1	1	KLHL28	kelch-like 28 (Drosophila)
hsa-miR-580	1	0	1	0	1	1	LYSMD3	LysM, putative peptidoglycan-binding, domain containing 3
hsa-miR-580	0	0	1	1	1	1	SPAG9	sperm associated antigen 9
hsa-miR-580	1	0	1	1	1	1	SOX5	SRY (sex determining region Y)-box 5
hsa-miR-580	0	0	1	1	1	1	ZNF365	zinc finger protein 365
hsa-miR-580	1	0	1	1	1	1	ZEB2	zinc finger E-box binding homeobox 2
hsa-miR-580	0	0	1	1	0	0	AGAP4	ArfGAP with GTPase domain, ankyrin repeat and PH domain 4
hsa-miR-580	1	0	1	1	1	1	ZSCAN29	zinc finger and SCAN domain containing 29
hsa-miR-580	0	0	1	1	1	1	CDH26	cadherin 26
hsa-miR-580	0	0	1	0	1	1	ASAP2	ArfGAP with SH3 domain, ankyrin repeat and PH domain 2
hsa-miR-580	0	0	1	1	0	0	DHX30	DEAH (Asp-Glu-Ala-His) box polypeptide 30
hsa-miR-580	1	0	1	1	0	0	MANEAL	mannosidase, endo-alpha-like
hsa-miR-580	0	0	1	1	1	1	KIAA1009	KIAA1009
hsa-miR-580	1	0	1	1	1	1	ANXA4	annexin A4
hsa-miR-580	1	0	1	1	1	1	NIPBL	Nipped-B homolog (Drosophila)
hsa-miR-580	1	0	1	1	1	1	MGAT5B	mannosyl (alpha-1,6-)-glycoprotein beta-1,6-N-acetyl-glucosaminyltransferase, isozyme B
hsa-miR-580	0	0	1	1	0	0	PRSS55	protease, serine, 55
hsa-miR-580	0	0	1	1	0	0	SLC38A6	solute carrier family 38, member 6
hsa-miR-580	1	0	1	1	1	1	UEVLD	UEV and lactate/malate dehyrogenase domains
hsa-miR-580	1	0	1	1	1	1	MYLK	myosin light chain kinase
hsa-miR-580	0	0	1	1	1	1	STAG1	stromal antigen 1
hsa-miR-580	1	0	1	1	1	1	EIF4G2	eukaryotic translation initiation factor 4 gamma, 2
hsa-miR-580	1	0	1	1	1	1	IL15RA	interleukin 15 receptor, alpha
hsa-miR-580	0	0	1	1	1	1	ZNF189	zinc finger protein 189
hsa-miR-580	1	0	1	1	1	1	ZNF449	zinc finger protein 449
hsa-miR-580	0	0	1	1	1	1	SH2D1B	SH2 domain containing 1B
hsa-miR-580	0	0	1	0	0	0	DPY19L2P1	dpy-19-like 2 pseudogene 1 (C. elegans)
hsa-miR-580	1	0	1	1	1	1	AP3M1	adaptor-related protein complex 3, mu 1 subunit
hsa-miR-580	1	0	1	1	1	1	NRSN1	neurensin 1
hsa-miR-580	0	0	1	0	0	0	ZNF66P	zinc finger protein 66, pseudogene
hsa-miR-580	0	0	1	1	1	1	SLAMF1	signaling lymphocytic activation molecule family member 1
hsa-miR-580	0	0	1	0	0	0	LINC00442	long intergenic non-protein coding RNA 442
hsa-miR-580	0	0	1	0	0	0	LEF1-AS1	LEF1 antisense RNA 1
hsa-miR-580	0	0	1	0	0	0	PABPC1P2	poly(A) binding protein, cytoplasmic 1 pseudogene 2
hsa-miR-580	1	0	1	1	1	1	PDCD6IP	programmed cell death 6 interacting protein
hsa-miR-580	1	0	1	1	1	1	SLC26A7	solute carrier family 26, member 7
hsa-miR-580	1	0	1	1	1	1	MAPKAPK3	mitogen-activated protein kinase-activated protein kinase 3
hsa-miR-580	1	0	1	1	1	1	SRPK2	SRSF protein kinase 2
hsa-miR-580	0	0	1	0	0	0	PTGER4P2	prostaglandin E receptor 4 (subtype EP4) pseudogene 2
hsa-miR-580	1	0	1	1	1	1	ANLN	anillin, actin binding protein
hsa-miR-580	1	0	1	0	1	1	TGFBR1	transforming growth factor, beta receptor 1
hsa-miR-580	1	0	1	1	1	1	FARP1	FERM, RhoGEF (ARHGEF) and pleckstrin domain protein 1 (chondrocyte-derived)
hsa-miR-580	1	0	1	0	1	1	TMEM194A	transmembrane protein 194A
hsa-miR-580	0	0	1	0	0	0	LOC100147773	uncharacterized LOC100147773
hsa-miR-580	0	0	1	1	1	1	CTXN3	cortexin 3
hsa-miR-580	0	0	1	1	0	0	RPS21	ribosomal protein S21
hsa-miR-580	0	0	1	0	0	0	LOC440416	uncharacterized LOC440416
hsa-miR-580	1	0	1	1	1	1	C1orf173	chromosome 1 open reading frame 173
hsa-miR-580	1	0	1	1	1	1	OPCML	opioid binding protein/cell adhesion molecule-like
hsa-miR-580	0	0	1	1	0	0	TSPY3	testis specific protein, Y-linked 3
hsa-miR-580	1	0	1	1	1	1	NTRK2	neurotrophic tyrosine kinase, receptor, type 2
hsa-miR-580	0	0	1	0	0	0	LOC441259	PMS2 postmeiotic segregation increased 2 (S. cerevisiae)-like
hsa-miR-580	0	0	1	0	0	0	LINC00537	long intergenic non-protein coding RNA 537
hsa-miR-580	1	0	1	1	1	1	SAMD4B	sterile alpha motif domain containing 4B
hsa-miR-580	1	0	1	1	1	1	FMNL3	formin-like 3
hsa-miR-580	1	0	1	1	1	1	ZMYND11	zinc finger, MYND-type containing 11
hsa-miR-580	0	0	1	1	1	1	SPDYA	speedy homolog A (Xenopus laevis)
hsa-miR-580	0	0	1	1	1	1	ZCWPW2	zinc finger, CW type with PWWP domain 2
hsa-miR-580	1	0	1	1	1	1	ELOVL7	ELOVL fatty acid elongase 7
hsa-miR-580	0	0	1	0	0	0	FRG1B	FSHD region gene 1 family, member B
hsa-miR-580	0	0	1	1	1	1	KLRF1	killer cell lectin-like receptor subfamily F, member 1
hsa-miR-580	0	0	1	1	1	1	TUBAL3	tubulin, alpha-like 3
hsa-miR-580	0	0	1	1	0	0	MTMR11	myotubularin related protein 11
hsa-miR-580	1	0	1	1	1	1	LRRC15	leucine rich repeat containing 15
hsa-miR-580	1	0	1	0	1	1	MYBL1	v-myb myeloblastosis viral oncogene homolog (avian)-like 1
hsa-miR-580	0	0	1	1	0	0	FBXO16	F-box protein 16
hsa-miR-580	1	0	1	1	1	1	HNRNPA1	heterogeneous nuclear ribonucleoprotein A1
hsa-miR-580	1	0	1	1	1	1	ARFIP1	ADP-ribosylation factor interacting protein 1
hsa-miR-580	0	0	1	1	0	0	PLA2G16	phospholipase A2, group XVI
hsa-miR-580	0	0	1	1	0	0	TMC1	transmembrane channel-like 1
hsa-miR-580	0	0	1	1	1	1	CCDC126	coiled-coil domain containing 126
hsa-miR-580	0	0	1	1	1	1	SPHKAP	SPHK1 interactor, AKAP domain containing
hsa-miR-580	1	0	1	1	1	1	GABRB2	gamma-aminobutyric acid (GABA) A receptor, beta 2
hsa-miR-580	0	0	1	1	1	1	MUC21	mucin 21, cell surface associated
hsa-miR-580	1	0	1	1	1	1	SUV420H1	suppressor of variegation 4-20 homolog 1 (Drosophila)
hsa-miR-580	1	0	1	1	1	1	CERS6	ceramide synthase 6
hsa-miR-580	1	0	1	0	1	1	BTBD3	BTB (POZ) domain containing 3
hsa-miR-580	1	0	1	1	1	1	TET2	tet methylcytosine dioxygenase 2
hsa-miR-580	0	0	1	1	0	0	EPN3	epsin 3
hsa-miR-580	0	0	1	1	1	1	RBM25	RNA binding motif protein 25
hsa-miR-580	1	0	1	1	1	1	SLK	STE20-like kinase
hsa-miR-580	1	0	1	1	1	1	NR3C2	nuclear receptor subfamily 3, group C, member 2
hsa-miR-580	0	0	1	0	0	0	KIAA0284	KIAA0284
hsa-miR-580	0	0	1	1	1	1	ZNF621	zinc finger protein 621
hsa-miR-580	1	0	1	1	1	1	ST18	suppression of tumorigenicity 18 (breast carcinoma) (zinc finger protein)
hsa-miR-580	1	0	1	1	1	1	GRIA3	glutamate receptor, ionotropic, AMPA 3
hsa-miR-580	1	0	1	1	1	1	OTUD4	OTU domain containing 4
hsa-miR-580	0	0	1	1	0	0	PLCXD2	phosphatidylinositol-specific phospholipase C, X domain containing 2
hsa-miR-580	0	0	1	1	1	1	SULT1C4	sulfotransferase family, cytosolic, 1C, member 4
hsa-miR-580	1	0	1	0	1	1	CAMSAP2	calmodulin regulated spectrin-associated protein family, member 2
hsa-miR-580	0	0	1	1	1	1	RNF14	ring finger protein 14
hsa-miR-580	1	0	1	1	1	1	MEGF11	multiple EGF-like-domains 11
hsa-miR-580	1	0	1	1	1	1	JMJD1C	jumonji domain containing 1C
hsa-miR-580	1	0	1	1	1	1	ZMYM4	zinc finger, MYM-type 4
hsa-miR-580	0	0	1	1	1	1	SFI1	Sfi1 homolog, spindle assembly associated (yeast)
hsa-miR-580	0	0	1	0	0	0	FAM225B	family with sequence similarity 225, member B (non-protein coding)
hsa-miR-580	0	0	1	1	0	0	AGAP6	ArfGAP with GTPase domain, ankyrin repeat and PH domain 6
hsa-miR-580	1	0	1	0	1	1	FAM196A	family with sequence similarity 196, member A
hsa-miR-580	1	0	1	1	1	1	TMEM218	transmembrane protein 218
hsa-miR-580	1	0	1	1	1	1	FNDC3A	fibronectin type III domain containing 3A
hsa-miR-580	0	0	1	1	0	0	CCDC144A	coiled-coil domain containing 144A
hsa-miR-580	0	0	1	0	0	0	MEG3	maternally expressed 3 (non-protein coding)
hsa-miR-580	0	0	1	1	1	1	DLGAP5	discs, large (Drosophila) homolog-associated protein 5
hsa-miR-580	0	0	1	0	0	0	LINC00643	long intergenic non-protein coding RNA 643
hsa-miR-580	0	0	1	1	1	1	RAD17	RAD17 homolog (S. pombe)
hsa-miR-580	1	0	1	1	0	0	KRT80	keratin 80
hsa-miR-580	1	0	1	1	1	1	SASH1	SAM and SH3 domain containing 1
hsa-miR-580	1	0	1	1	1	1	RBL2	retinoblastoma-like 2 (p130)
hsa-miR-580	1	0	1	1	1	1	RAB7A	RAB7A, member RAS oncogene family
hsa-miR-580	0	0	1	0	1	1	FEZ2	fasciculation and elongation protein zeta 2 (zygin II)
hsa-miR-580	1	0	1	1	1	1	MIER3	mesoderm induction early response 1, family member 3
hsa-miR-580	1	0	1	1	0	0	ABL2	v-abl Abelson murine leukemia viral oncogene homolog 2
hsa-miR-580	0	0	1	1	1	1	DSG3	desmoglein 3
hsa-miR-580	1	0	1	1	1	1	C7orf31	chromosome 7 open reading frame 31
hsa-miR-580	1	0	1	1	1	1	NFASC	neurofascin
hsa-miR-580	0	0	1	1	1	1	PRR14L	proline rich 14-like
hsa-miR-580	0	0	1	1	1	1	ADH1B	alcohol dehydrogenase 1B (class I), beta polypeptide
hsa-miR-580	0	0	1	1	1	1	MLIP	muscular LMNA-interacting protein
hsa-miR-580	1	0	1	1	1	1	CASP3	caspase 3, apoptosis-related cysteine peptidase
hsa-miR-580	1	0	1	1	1	1	TLN2	talin 2
hsa-miR-580	0	0	1	1	0	0	PRKCQ	protein kinase C, theta
hsa-miR-580	1	0	1	1	1	1	EPS15	epidermal growth factor receptor pathway substrate 15
hsa-miR-580	1	0	1	1	1	1	VPS26A	vacuolar protein sorting 26 homolog A (S. pombe)
hsa-miR-580	1	0	1	0	1	1	EML4	echinoderm microtubule associated protein like 4
hsa-miR-580	0	0	1	1	1	1	HTR2A	5-hydroxytryptamine (serotonin) receptor 2A, G protein-coupled
hsa-miR-580	0	0	1	1	1	1	ARMCX3	armadillo repeat containing, X-linked 3
hsa-miR-580	1	0	1	1	1	1	TC2N	tandem C2 domains, nuclear
hsa-miR-580	0	0	1	1	1	1	TMEM48	transmembrane protein 48
hsa-miR-580	1	0	1	1	1	1	NEDD9	neural precursor cell expressed, developmentally down-regulated 9
hsa-miR-580	1	0	1	1	1	1	ZNF711	zinc finger protein 711
hsa-miR-580	1	0	1	1	1	1	DDAH1	dimethylarginine dimethylaminohydrolase 1
hsa-miR-580	1	0	1	1	1	1	LCA5	Leber congenital amaurosis 5
hsa-miR-580	0	0	1	1	1	1	CCNT2	cyclin T2
hsa-miR-580	1	0	1	1	1	1	PHF3	PHD finger protein 3
hsa-miR-580	1	0	1	1	1	1	NFIB	nuclear factor I/B
hsa-miR-580	1	0	1	1	1	1	NAV1	neuron navigator 1
hsa-miR-580	1	0	1	0	1	1	KLHL24	kelch-like 24 (Drosophila)
hsa-miR-580	0	0	1	0	0	0	TMEM232	transmembrane protein 232
hsa-miR-580	1	0	1	1	1	1	RDX	radixin
hsa-miR-580	0	0	1	1	1	1	DAZL	deleted in azoospermia-like
hsa-miR-580	1	0	1	1	1	1	PGAP1	post-GPI attachment to proteins 1
hsa-miR-580	1	0	1	1	1	1	FAM179B	family with sequence similarity 179, member B
hsa-miR-580	1	0	1	1	1	1	HIF1A	hypoxia inducible factor 1, alpha subunit (basic helix-loop-helix transcription factor)
hsa-miR-580	0	0	1	1	1	1	IFRD1	interferon-related developmental regulator 1
hsa-miR-580	1	0	1	1	1	1	EOGT	EGF domain-specific O-linked N-acetylglucosamine (GlcNAc) transferase
hsa-miR-580	0	0	1	1	1	1	SSFA2	sperm specific antigen 2
hsa-miR-580	1	0	1	0	1	1	TBL1XR1	transducin (beta)-like 1 X-linked receptor 1
hsa-miR-580	1	0	1	1	1	1	FAM208A	family with sequence similarity 208, member A
hsa-miR-580	0	0	1	1	1	1	USP54	ubiquitin specific peptidase 54
hsa-miR-580	1	0	1	1	1	1	DLG5	discs, large homolog 5 (Drosophila)
hsa-miR-580	1	0	1	1	1	1	CREB3L2	cAMP responsive element binding protein 3-like 2
hsa-miR-580	1	0	1	0	1	1	TTL	tubulin tyrosine ligase
hsa-miR-580	0	0	1	1	1	1	IPO11	importin 11
hsa-miR-580	0	0	1	0	1	1	CD59	CD59 molecule, complement regulatory protein
hsa-miR-580	0	0	1	1	0	0	AHSG	alpha-2-HS-glycoprotein
hsa-miR-580	1	0	1	0	1	1	RNF144A	ring finger protein 144A
hsa-miR-580	0	0	1	1	1	1	TMEM53	transmembrane protein 53
hsa-miR-580	1	0	1	1	1	1	RSBN1L	round spermatid basic protein 1-like
hsa-miR-580	0	0	1	0	0	0	GGTA1P	glycoprotein, alpha-galactosyltransferase 1 pseudogene
hsa-miR-580	0	0	1	0	0	0	RPS16P10	ribosomal protein S16 pseudogene 10
hsa-miR-580	0	0	1	1	1	1	CETN2	centrin, EF-hand protein, 2
hsa-miR-580	0	0	1	0	0	0	FLJ30838	uncharacterized LOC400955
hsa-miR-580	1	0	1	1	1	1	CUL4A	cullin 4A
hsa-miR-580	1	0	1	1	1	1	EIF4B	eukaryotic translation initiation factor 4B
hsa-miR-580	0	0	1	1	1	1	RNFT1	ring finger protein, transmembrane 1
hsa-miR-580	1	0	1	1	1	1	CLDN11	claudin 11
hsa-miR-580	0	0	1	1	1	1	COPS8	COP9 constitutive photomorphogenic homolog subunit 8 (Arabidopsis)
hsa-miR-580	0	0	1	0	0	0	LOC285141	uncharacterized protein LOC285141
hsa-miR-580	1	0	1	1	1	1	SLC35D2	solute carrier family 35, member D2
hsa-miR-580	0	0	1	1	1	1	ADK	adenosine kinase
hsa-miR-580	1	0	1	1	1	1	HAPLN1	hyaluronan and proteoglycan link protein 1
hsa-miR-580	0	0	1	1	1	1	CHCHD4	coiled-coil-helix-coiled-coil-helix domain containing 4
hsa-miR-580	1	0	1	1	1	1	ACTG1	actin, gamma 1
hsa-miR-580	0	0	1	0	0	0	MYCT1	myc target 1
hsa-miR-580	0	0	1	1	0	0	SPAG8	sperm associated antigen 8
hsa-miR-580	1	0	1	1	1	1	SSR1	signal sequence receptor, alpha
hsa-miR-580	0	0	1	0	0	0	LOC387647	patched domain containing 3 pseudogene
hsa-miR-580	0	0	1	1	0	0	RAD54B	RAD54 homolog B (S. cerevisiae)
hsa-miR-580	1	0	1	1	1	1	DRAM2	DNA-damage regulated autophagy modulator 2
hsa-miR-580	0	0	1	1	1	1	DCTD	dCMP deaminase
hsa-miR-580	0	0	1	1	1	1	ANKRD53	ankyrin repeat domain 53
hsa-miR-580	0	0	1	1	1	1	PSG2	pregnancy specific beta-1-glycoprotein 2
hsa-miR-580	1	0	1	1	1	1	CCDC25	coiled-coil domain containing 25
hsa-miR-580	0	0	1	1	0	0	PDK3	pyruvate dehydrogenase kinase, isozyme 3
hsa-miR-580	0	0	1	1	0	0	CD38	CD38 molecule
hsa-miR-580	1	0	1	1	1	1	PHTF1	putative homeodomain transcription factor 1
hsa-miR-580	0	0	1	0	0	0	SBDSP1	Shwachman-Bodian-Diamond syndrome pseudogene 1
hsa-miR-580	1	0	1	1	1	1	DKK3	dickkopf 3 homolog (Xenopus laevis)
hsa-miR-580	0	0	1	1	1	1	QPCT	glutaminyl-peptide cyclotransferase
hsa-miR-580	0	0	1	1	1	1	MRPS7	mitochondrial ribosomal protein S7
hsa-miR-580	0	0	1	1	1	1	BMPR1A	bone morphogenetic protein receptor, type IA
hsa-miR-580	1	0	1	1	1	1	PEX2	peroxisomal biogenesis factor 2
hsa-miR-580	0	0	1	1	1	1	NARS	asparaginyl-tRNA synthetase
hsa-miR-580	0	0	1	1	0	0	NOX5	NADPH oxidase, EF-hand calcium binding domain 5
hsa-miR-580	1	0	1	1	1	1	LAMTOR3	late endosomal/lysosomal adaptor, MAPK and MTOR activator 3
hsa-miR-580	1	0	1	1	1	1	ARNTL	aryl hydrocarbon receptor nuclear translocator-like
hsa-miR-580	0	0	1	1	1	1	PEX19	peroxisomal biogenesis factor 19
hsa-miR-580	1	0	1	1	1	1	IMPA2	inositol(myo)-1(or 4)-monophosphatase 2
hsa-miR-580	0	0	1	1	0	0	WDR43	WD repeat domain 43
hsa-miR-580	1	0	1	0	1	1	C15orf41	chromosome 15 open reading frame 41
hsa-miR-580	1	0	1	1	1	1	FOS	FBJ murine osteosarcoma viral oncogene homolog
hsa-miR-580	1	0	1	1	1	1	CAMK2A	calcium/calmodulin-dependent protein kinase II alpha
hsa-miR-580	0	0	1	1	1	1	JMJD8	jumonji domain containing 8
hsa-miR-580	0	0	1	0	1	1	SUMO2	SMT3 suppressor of mif two 3 homolog 2 (S. cerevisiae)
hsa-miR-580	0	0	1	1	1	1	MAEL	maelstrom homolog (Drosophila)
hsa-miR-580	1	0	1	1	1	1	ATAT1	alpha tubulin acetyltransferase 1
hsa-miR-580	0	0	1	1	1	1	UBE2F	ubiquitin-conjugating enzyme E2F (putative)
hsa-miR-580	1	0	1	1	1	1	KCNS3	potassium voltage-gated channel, delayed-rectifier, subfamily S, member 3
hsa-miR-580	1	0	1	1	1	1	CNBP	CCHC-type zinc finger, nucleic acid binding protein
hsa-miR-580	0	0	1	1	0	0	METTL5	methyltransferase like 5
hsa-miR-580	0	0	1	0	0	0	LOC93622	Morf4 family associated protein 1-like 1 pseudogene
hsa-miR-580	1	0	1	1	1	1	NFYB	nuclear transcription factor Y, beta
hsa-miR-580	0	0	1	1	1	1	GFM1	G elongation factor, mitochondrial 1
hsa-miR-580	0	0	1	1	1	1	CXADR	coxsackie virus and adenovirus receptor
hsa-miR-580	1	0	1	1	1	1	F11R	F11 receptor
hsa-miR-580	0	0	1	1	1	1	ZNF333	zinc finger protein 333
hsa-miR-580	0	0	1	1	1	1	DNAJC25	DnaJ (Hsp40) homolog, subfamily C , member 25
hsa-miR-580	1	0	1	1	0	0	LMAN2	lectin, mannose-binding 2
hsa-miR-580	0	0	1	1	1	1	FAM18B1	family with sequence similarity 18, member B1
hsa-miR-580	1	0	1	1	1	1	RNF2	ring finger protein 2
hsa-miR-580	0	0	1	0	0	0	ZNF674-AS1	ZNF674 antisense RNA 1
hsa-miR-580	1	0	1	0	1	1	MAP1B	microtubule-associated protein 1B
hsa-miR-580	1	0	1	1	1	1	HMGN2	high mobility group nucleosomal binding domain 2
hsa-miR-580	0	0	1	1	0	0	BCKDK	branched chain ketoacid dehydrogenase kinase
hsa-miR-580	1	0	1	1	0	0	STAG3L4	stromal antigen 3-like 4
hsa-miR-580	1	0	1	1	1	1	TRAPPC3	trafficking protein particle complex 3
hsa-miR-580	1	0	1	1	1	1	MFSD2A	major facilitator superfamily domain containing 2A
hsa-miR-580	0	0	1	1	0	0	EIF4E2	eukaryotic translation initiation factor 4E family member 2
hsa-miR-580	0	0	1	1	1	1	PLAC8	placenta-specific 8
hsa-miR-580	1	0	1	0	1	1	CD47	CD47 molecule
hsa-miR-580	0	0	1	0	0	0	NUDT18	nudix (nucleoside diphosphate linked moiety X)-type motif 18
hsa-miR-580	1	0	1	1	1	1	TMBIM6	transmembrane BAX inhibitor motif containing 6
hsa-miR-580	1	0	1	1	1	1	WIPI2	WD repeat domain, phosphoinositide interacting 2
hsa-miR-580	1	0	1	1	0	0	FOXO3	forkhead box O3
hsa-miR-580	0	0	1	1	0	0	TESK1	testis-specific kinase 1
hsa-miR-580	0	0	1	0	1	1	SEPT7	septin 7
hsa-miR-580	1	0	1	1	1	1	RHOBTB1	Rho-related BTB domain containing 1
hsa-miR-580	1	0	1	1	1	1	MYT1	myelin transcription factor 1
hsa-miR-580	0	0	1	1	1	1	ANXA7	annexin A7
hsa-miR-580	1	0	1	1	1	1	MED1	mediator complex subunit 1
hsa-miR-580	1	0	1	1	1	1	LGALSL	lectin, galactoside-binding-like
hsa-miR-580	1	0	1	1	1	1	TFPI	tissue factor pathway inhibitor (lipoprotein-associated coagulation inhibitor)
hsa-miR-580	0	0	1	1	0	0	DUSP11	dual specificity phosphatase 11 (RNA/RNP complex 1-interacting)
hsa-miR-580	1	0	1	0	1	1	KIAA0240	KIAA0240
hsa-miR-580	0	0	1	0	0	0	FAM47E	family with sequence similarity 47, member E
hsa-miR-580	1	0	1	0	1	1	KDM1B	lysine (K)-specific demethylase 1B
hsa-miR-580	0	0	1	0	0	0	LOC731789	uncharacterized LOC731789
hsa-miR-580	0	0	1	1	1	1	CCP110	centriolar coiled coil protein 110kDa
hsa-miR-580	1	0	1	1	1	1	FBXW7	F-box and WD repeat domain containing 7, E3 ubiquitin protein ligase
hsa-miR-580	0	0	1	1	1	1	UPRT	uracil phosphoribosyltransferase (FUR1) homolog (S. cerevisiae)
hsa-miR-580	0	0	1	1	1	1	ATG5	autophagy related 5
hsa-miR-580	1	0	1	1	1	1	HECW2	HECT, C2 and WW domain containing E3 ubiquitin protein ligase 2
hsa-miR-580	1	0	1	0	1	1	MEGF10	multiple EGF-like-domains 10
hsa-miR-580	1	0	1	1	1	1	KIAA2018	KIAA2018
hsa-miR-580	1	0	1	0	1	1	XRN1	5'-3' exoribonuclease 1
hsa-miR-580	1	0	1	0	1	1	MCFD2	multiple coagulation factor deficiency 2
hsa-miR-580	0	0	1	1	1	1	SDAD1	SDA1 domain containing 1
hsa-miR-580	0	0	1	1	1	1	OAT	ornithine aminotransferase
hsa-miR-580	1	0	1	1	1	1	SLC16A12	solute carrier family 16, member 12 (monocarboxylic acid transporter 12)
hsa-miR-580	1	0	1	1	1	1	PHF21B	PHD finger protein 21B
hsa-miR-580	1	0	1	1	1	1	ZFHX3	zinc finger homeobox 3
hsa-miR-580	0	0	1	1	1	1	TMEM41B	transmembrane protein 41B
hsa-miR-580	1	0	1	1	1	1	SEC14L1	SEC14-like 1 (S. cerevisiae)
hsa-miR-580	1	0	1	0	1	1	CBX7	chromobox homolog 7
hsa-miR-580	0	0	1	1	0	0	SPINK5	serine peptidase inhibitor, Kazal type 5
hsa-miR-580	0	0	1	1	1	1	PTGS1	prostaglandin-endoperoxide synthase 1 (prostaglandin G/H synthase and cyclooxygenase)
hsa-miR-580	0	0	1	1	1	1	CD274	CD274 molecule
hsa-miR-580	1	0	1	1	1	1	MOSPD1	motile sperm domain containing 1
hsa-miR-580	1	0	1	1	1	1	ITSN1	intersectin 1 (SH3 domain protein)
hsa-miR-580	0	0	1	1	1	1	MARVELD2	MARVEL domain containing 2
hsa-miR-580	1	0	1	0	1	1	RBBP5	retinoblastoma binding protein 5
hsa-miR-580	1	0	1	1	1	1	LGR4	leucine-rich repeat containing G protein-coupled receptor 4
hsa-miR-580	0	0	1	1	1	1	MORC4	MORC family CW-type zinc finger 4
hsa-miR-580	0	0	1	0	1	1	ITGAM	integrin, alpha M (complement component 3 receptor 3 subunit)
hsa-miR-580	1	0	1	1	1	1	MLL	myeloid/lymphoid or mixed-lineage leukemia (trithorax homolog, Drosophila)
hsa-miR-580	0	0	1	1	1	1	ADPRH	ADP-ribosylarginine hydrolase
hsa-miR-580	0	0	1	1	1	1	PCYT1A	phosphate cytidylyltransferase 1, choline, alpha
hsa-miR-580	1	0	1	0	1	1	BCL2	B-cell CLL/lymphoma 2
hsa-miR-580	1	0	1	0	1	1	YES1	v-yes-1 Yamaguchi sarcoma viral oncogene homolog 1
hsa-miR-580	0	0	1	1	1	1	CD55	CD55 molecule, decay accelerating factor for complement (Cromer blood group)
hsa-miR-580	0	0	1	1	1	1	ELF1	E74-like factor 1 (ets domain transcription factor)
hsa-miR-580	1	0	1	1	1	1	CD44	CD44 molecule (Indian blood group)
hsa-miR-580	0	0	1	0	0	0	TSPY1	testis specific protein, Y-linked 1
hsa-miR-580	0	0	1	1	0	0	ASPA	aspartoacylase
hsa-miR-580	1	0	1	1	1	1	COL4A4	collagen, type IV, alpha 4
hsa-miR-580	1	0	1	1	1	1	CPOX	coproporphyrinogen oxidase
hsa-miR-580	1	0	1	1	1	1	DLD	dihydrolipoamide dehydrogenase
hsa-miR-580	1	0	1	0	1	1	SLC26A2	solute carrier family 26 (sulfate transporter), member 2
hsa-miR-580	0	0	1	1	1	1	FABP2	fatty acid binding protein 2, intestinal
hsa-miR-580	0	0	1	0	1	1	MS4A2	membrane-spanning 4-domains, subfamily A, member 2
hsa-miR-580	0	0	1	0	1	1	GBE1	glucan (1,4-alpha-), branching enzyme 1
hsa-miR-580	1	0	1	0	1	1	GHR	growth hormone receptor
hsa-miR-580	1	0	1	1	1	1	GJA1	gap junction protein, alpha 1, 43kDa
hsa-miR-580	1	0	1	1	1	1	GK	glycerol kinase
hsa-miR-580	1	0	1	0	1	1	GLI3	GLI family zinc finger 3
hsa-miR-580	0	0	1	1	0	0	HTN3	histatin 3
hsa-miR-580	1	0	1	0	1	1	ITGB3	integrin, beta 3 (platelet glycoprotein IIIa, antigen CD61)
hsa-miR-580	0	0	1	0	1	1	KAL1	Kallmann syndrome 1 sequence
hsa-miR-580	1	0	1	0	1	1	SGCB	sarcoglycan, beta (43kDa dystrophin-associated glycoprotein)
hsa-miR-580	1	0	1	1	1	1	MET	met proto-oncogene (hepatocyte growth factor receptor)
hsa-miR-580	1	0	1	1	1	1	MITF	microphthalmia-associated transcription factor
hsa-miR-580	0	0	1	1	1	1	MTR	5-methyltetrahydrofolate-homocysteine methyltransferase
hsa-miR-580	0	0	1	1	1	1	NDP	Norrie disease (pseudoglioma)
hsa-miR-580	1	0	1	1	1	1	NF1	neurofibromin 1
hsa-miR-580	0	0	1	1	1	1	PTS	6-pyruvoyltetrahydropterin synthase
hsa-miR-580	1	0	1	1	1	1	ATXN1	ataxin 1
hsa-miR-580	0	0	1	1	1	1	WAS	Wiskott-Aldrich syndrome
hsa-miR-580	1	0	1	1	1	1	CHM	choroideremia (Rab escort protein 1)
hsa-miR-580	0	0	1	1	1	1	LTBP2	latent transforming growth factor beta binding protein 2
hsa-miR-580	0	0	1	1	1	1	OXCT1	3-oxoacid CoA transferase 1
hsa-miR-580	1	0	1	1	1	1	RFX5	regulatory factor X, 5 (influences HLA class II expression)
hsa-miR-580	0	0	1	1	0	0	BARD1	BRCA1 associated RING domain 1
hsa-miR-580	1	0	1	1	1	1	TWIST1	twist homolog 1 (Drosophila)
hsa-miR-580	0	0	1	1	1	1	ALPL	alkaline phosphatase, liver/bone/kidney
hsa-miR-580	1	0	1	1	1	1	ATRX	alpha thalassemia/mental retardation syndrome X-linked
hsa-miR-580	0	0	1	1	1	1	VHL	von Hippel-Lindau tumor suppressor, E3 ubiquitin protein ligase
hsa-miR-580	1	0	1	1	1	1	DCX	doublecortin
hsa-miR-580	1	0	1	1	1	1	IL10	interleukin 10
hsa-miR-580	1	0	1	1	1	1	IL1A	interleukin 1, alpha
hsa-miR-580	0	0	1	1	1	1	IL2	interleukin 2
hsa-miR-580	0	0	1	1	1	1	HGF	hepatocyte growth factor (hepapoietin A; scatter factor)
hsa-miR-580	1	0	1	1	1	1	CXCL12	chemokine (C-X-C motif) ligand 12
hsa-miR-580	0	0	1	1	1	1	GSR	glutathione reductase
hsa-miR-580	1	0	1	0	1	1	ABAT	4-aminobutyrate aminotransferase
hsa-miR-580	1	0	1	1	1	1	GABRB3	gamma-aminobutyric acid (GABA) A receptor, beta 3
hsa-miR-580	1	0	1	1	1	1	HTR4	5-hydroxytryptamine (serotonin) receptor 4, G protein-coupled
hsa-miR-580	1	0	1	0	1	1	KCNJ2	potassium inwardly-rectifying channel, subfamily J, member 2
hsa-miR-580	0	0	1	1	1	1	NPY2R	neuropeptide Y receptor Y2
hsa-miR-580	1	0	1	1	1	1	PPP3R1	protein phosphatase 3, regulatory subunit B, alpha
hsa-miR-580	1	0	1	1	1	1	PTGDR	prostaglandin D2 receptor (DP)
hsa-miR-580	1	0	1	1	1	1	PTGER2	prostaglandin E receptor 2 (subtype EP2), 53kDa
hsa-miR-580	0	0	1	1	1	1	PTGS2	prostaglandin-endoperoxide synthase 2 (prostaglandin G/H synthase and cyclooxygenase)
hsa-miR-580	1	0	1	1	1	1	RARB	retinoic acid receptor, beta
hsa-miR-580	0	0	1	1	1	1	C16orf87	chromosome 16 open reading frame 87
hsa-miR-580	1	0	1	0	1	1	UBE2W	ubiquitin-conjugating enzyme E2W (putative)
hsa-miR-580	0	0	1	1	1	1	GALK2	galactokinase 2
hsa-miR-580	1	0	1	0	1	1	FLJ33360	FLJ33360 protein
hsa-miR-580	0	0	1	1	1	1	CC2D2B	coiled-coil and C2 domain containing 2B
hsa-miR-580	1	0	1	1	1	1	ATP1B1	ATPase, Na+/K+ transporting, beta 1 polypeptide
hsa-miR-580	1	0	1	1	1	1	C14orf37	chromosome 14 open reading frame 37
hsa-miR-580	1	0	1	1	1	1	TPD52L3	tumor protein D52-like 3
hsa-miR-580	1	0	1	1	1	1	FAM13C	family with sequence similarity 13, member C
hsa-miR-580	1	0	1	0	1	1	PLEKHA1	pleckstrin homology domain containing, family A (phosphoinositide binding specific) member 1
hsa-miR-580	0	0	1	1	1	1	SUMO4	SMT3 suppressor of mif two 3 homolog 4 (S. cerevisiae)
hsa-miR-580	1	0	1	1	1	1	LCLAT1	lysocardiolipin acyltransferase 1
hsa-miR-580	0	0	1	1	1	1	EPSTI1	epithelial stromal interaction 1 (breast)
hsa-miR-580	1	0	1	1	1	1	DNAJB12	DnaJ (Hsp40) homolog, subfamily B, member 12
hsa-miR-580	1	0	1	0	1	1	SMAD2	SMAD family member 2
hsa-miR-580	1	0	1	1	1	1	BICD2	bicaudal D homolog 2 (Drosophila)
hsa-miR-580	1	0	1	0	1	1	BMF	Bcl2 modifying factor
hsa-miR-580	1	0	1	0	1	1	LIN28B	lin-28 homolog B (C. elegans)
hsa-miR-580	1	0	1	1	1	1	NCK2	NCK adaptor protein 2
hsa-miR-580	1	0	1	0	1	1	LRRC55	leucine rich repeat containing 55
hsa-miR-580	0	0	1	1	1	1	FRG2	FSHD region gene 2
hsa-miR-580	1	0	1	0	1	1	PKP2	plakophilin 2
hsa-miR-580	1	0	1	1	1	1	EBF3	early B-cell factor 3
hsa-miR-580	1	0	1	1	1	1	PLCXD3	phosphatidylinositol-specific phospholipase C, X domain containing 3
hsa-miR-580	0	0	1	1	1	1	LINC00478	long intergenic non-protein coding RNA 478
hsa-miR-580	1	0	1	1	1	1	ADAM9	ADAM metallopeptidase domain 9
hsa-miR-580	0	0	1	1	1	1	IP6K2	inositol hexakisphosphate kinase 2
hsa-miR-580	0	0	1	1	1	1	CR2	complement component (3d/Epstein Barr virus) receptor 2
hsa-miR-580	1	0	1	0	1	1	GOSR1	golgi SNAP receptor complex member 1
hsa-miR-580	0	0	1	1	1	1	SCP2	sterol carrier protein 2
hsa-miR-580	0	0	1	0	1	1	C8orf22	chromosome 8 open reading frame 22
hsa-miR-580	0	0	1	0	1	1	GIMAP6	GTPase, IMAP family member 6
hsa-miR-580	1	0	1	1	1	1	IGF2BP2	insulin-like growth factor 2 mRNA binding protein 2
hsa-miR-580	1	0	1	1	1	1	IGSF3	immunoglobulin superfamily, member 3
hsa-miR-580	0	0	1	0	0	0	RWDD1	RWD domain containing 1
hsa-miR-580	1	0	1	1	1	1	ZDHHC9	zinc finger, DHHC-type containing 9
hsa-miR-580	0	0	1	1	1	1	FAM154B	family with sequence similarity 154, member B
hsa-miR-580	1	0	1	0	1	1	C18orf25	chromosome 18 open reading frame 25
hsa-miR-580	1	0	1	1	1	1	UMOD	uromodulin
hsa-miR-580	1	0	1	1	1	1	RBM33	RNA binding motif protein 33
hsa-miR-580	0	0	1	1	1	1	PIWIL3	piwi-like 3 (Drosophila)
hsa-miR-580	1	0	1	0	1	1	KIAA2022	KIAA2022
hsa-miR-580	0	0	1	1	1	1	MXI1	MAX interactor 1
hsa-miR-580	1	0	1	1	1	1	EML1	echinoderm microtubule associated protein like 1
hsa-miR-580	0	0	1	1	1	1	CCDC147	coiled-coil domain containing 147
hsa-miR-580	1	0	1	1	1	1	FNIP1	folliculin interacting protein 1
hsa-miR-580	1	0	1	1	1	1	LUZP2	leucine zipper protein 2
hsa-miR-580	1	0	1	0	1	1	RCHY1	ring finger and CHY zinc finger domain containing 1, E3 ubiquitin protein ligase
hsa-miR-580	1	0	1	0	1	1	ERMN	ermin, ERM-like protein
hsa-miR-580	1	0	1	1	1	1	ARHGAP28	Rho GTPase activating protein 28
hsa-miR-580	0	0	1	1	1	1	SPIN3	spindlin family, member 3
hsa-miR-580	1	0	1	0	1	1	FAM102B	family with sequence similarity 102, member B
hsa-miR-580	0	0	1	1	1	1	SERP2	stress-associated endoplasmic reticulum protein family member 2
hsa-miR-580	0	0	1	1	0	0	C1orf189	chromosome 1 open reading frame 189
hsa-miR-580	1	0	1	1	1	1	ATP11C	ATPase, class VI, type 11C
hsa-miR-580	1	0	1	0	1	1	FYTTD1	forty-two-three domain containing 1
hsa-miR-580	1	0	1	0	1	1	CREB5	cAMP responsive element binding protein 5
hsa-miR-580	1	0	1	1	1	1	CENPP	centromere protein P
hsa-miR-580	0	0	1	1	1	1	GRP	gastrin-releasing peptide
hsa-miR-580	1	0	1	1	1	1	DYNC2LI1	dynein, cytoplasmic 2, light intermediate chain 1
hsa-miR-580	1	0	1	1	1	1	SLC25A53	solute carrier family 25, member 53
hsa-miR-580	0	0	1	1	1	1	SPIN4	spindlin family, member 4
hsa-miR-580	1	0	1	1	1	1	PABPC1L2A	poly(A) binding protein, cytoplasmic 1-like 2A
hsa-miR-580	1	0	1	1	1	1	SORCS1	sortilin-related VPS10 domain containing receptor 1
hsa-miR-580	0	0	1	1	1	1	CCNC	cyclin C
hsa-miR-580	1	0	1	1	1	1	H3F3C	H3 histone, family 3C
hsa-miR-580	0	0	1	0	1	1	LINC00268	long intergenic non-protein coding RNA 268
hsa-miR-580	1	0	1	1	1	1	RUNX2	runt-related transcription factor 2
hsa-miR-580	1	0	1	1	1	1	TMCC1	transmembrane and coiled-coil domain family 1
hsa-miR-580	1	0	1	0	1	1	GOPC	golgi-associated PDZ and coiled-coil motif containing
hsa-miR-580	0	0	1	1	0	0	ALDH18A1	aldehyde dehydrogenase 18 family, member A1
hsa-miR-580	0	0	1	1	1	1	BTBD11	BTB (POZ) domain containing 11
hsa-miR-580	1	0	1	1	1	1	ZHX1	zinc fingers and homeoboxes 1
hsa-miR-580	1	0	1	1	1	1	VMA21	VMA21 vacuolar H+-ATPase homolog (S. cerevisiae)
hsa-miR-580	0	0	1	1	1	1	ACTBL2	actin, beta-like 2
hsa-miR-580	0	0	1	1	1	1	VPS13A	vacuolar protein sorting 13 homolog A (S. cerevisiae)
hsa-miR-580	1	0	1	1	1	1	SERBP1	SERPINE1 mRNA binding protein 1
hsa-miR-580	0	0	1	1	0	0	RPS17	ribosomal protein S17
hsa-miR-580	1	0	1	1	1	1	ABCC5	ATP-binding cassette, sub-family C (CFTR/MRP), member 5
hsa-miR-580	0	0	1	0	1	1	TM2D2	TM2 domain containing 2
hsa-miR-580	0	0	1	1	1	1	VNN3	vanin 3
hsa-miR-580	1	0	1	0	1	1	BCL7A	B-cell CLL/lymphoma 7A
hsa-miR-580	1	0	1	0	1	1	TNRC6B	trinucleotide repeat containing 6B
hsa-miR-580	1	0	1	1	1	1	TGFBR2	transforming growth factor, beta receptor II (70/80kDa)
hsa-miR-580	1	0	1	0	1	1	CLLU1	chronic lymphocytic leukemia up-regulated 1
hsa-miR-580	1	0	1	0	1	1	ANO6	anoctamin 6
hsa-miR-580	1	0	1	1	1	1	KCTD21	potassium channel tetramerisation domain containing 21
hsa-miR-580	0	0	1	0	1	1	C6orf120	chromosome 6 open reading frame 120
hsa-miR-580	1	0	1	1	1	1	RGS7BP	regulator of G-protein signaling 7 binding protein
hsa-miR-580	1	0	1	0	1	1	SAMD5	sterile alpha motif domain containing 5
hsa-miR-580	0	0	1	1	1	1	ATF3	activating transcription factor 3
hsa-miR-580	1	0	1	0	1	1	MSRB3	methionine sulfoxide reductase B3
hsa-miR-580	0	0	1	1	1	1	RNLS	renalase, FAD-dependent amine oxidase
hsa-miR-580	0	0	1	1	1	1	CALML4	calmodulin-like 4
hsa-miR-580	1	0	1	1	1	1	MAF	v-maf musculoaponeurotic fibrosarcoma oncogene homolog (avian)
hsa-miR-580	1	0	1	1	1	1	CSNK1G3	casein kinase 1, gamma 3
hsa-miR-580	1	0	1	1	1	1	TFAP2A	transcription factor AP-2 alpha (activating enhancer binding protein 2 alpha)
hsa-miR-580	1	0	1	1	1	1	TMPO	thymopoietin
hsa-miR-580	1	0	1	1	1	1	UBE2V1	ubiquitin-conjugating enzyme E2 variant 1
hsa-miR-580	1	0	1	1	1	1	STK24	serine/threonine kinase 24
hsa-miR-580	0	0	1	1	1	1	PLGLB1	plasminogen-like B1
hsa-miR-580	1	0	1	0	1	1	NPNT	nephronectin
hsa-miR-580	1	0	1	0	1	1	SRGAP3	SLIT-ROBO Rho GTPase activating protein 3
hsa-miR-580	0	0	1	1	1	1	CSTF3	cleavage stimulation factor, 3' pre-RNA, subunit 3, 77kDa
hsa-miR-580	1	0	1	1	1	1	ZNF704	zinc finger protein 704
hsa-miR-580	0	0	1	1	1	1	TRAF5	TNF receptor-associated factor 5
hsa-miR-580	1	0	1	1	1	1	KCNIP3	Kv channel interacting protein 3, calsenilin
hsa-miR-580	1	0	1	1	1	1	SDHC	succinate dehydrogenase complex, subunit C, integral membrane protein, 15kDa
hsa-miR-580	1	0	1	1	1	1	PDE4B	phosphodiesterase 4B, cAMP-specific
hsa-miR-580	1	0	1	1	1	1	SCD5	stearoyl-CoA desaturase 5
hsa-miR-580	1	0	1	0	1	1	CDC42SE1	CDC42 small effector 1
hsa-miR-580	0	0	1	1	1	1	ATAD3C	ATPase family, AAA domain containing 3C
hsa-miR-580	0	0	1	1	1	1	EFEMP1	EGF containing fibulin-like extracellular matrix protein 1
hsa-miR-580	1	0	1	1	1	1	DPP6	dipeptidyl-peptidase 6
hsa-miR-580	0	0	1	1	1	1	HEPACAM2	HEPACAM family member 2
hsa-miR-580	1	0	1	1	1	1	KIAA0317	KIAA0317
hsa-miR-580	1	0	1	0	1	1	GK5	glycerol kinase 5 (putative)
hsa-miR-580	1	0	1	1	1	1	KREMEN1	kringle containing transmembrane protein 1
hsa-miR-580	1	0	1	0	1	1	USP9X	ubiquitin specific peptidase 9, X-linked
hsa-miR-580	1	0	1	0	1	1	CREBZF	CREB/ATF bZIP transcription factor
hsa-miR-580	0	0	1	1	1	1	ANKRD55	ankyrin repeat domain 55
hsa-miR-580	1	0	1	0	1	1	FAM133B	family with sequence similarity 133, member B
hsa-miR-580	0	0	1	1	1	1	MUC17	mucin 17, cell surface associated
hsa-miR-580	0	0	1	1	1	1	MLH3	mutL homolog 3 (E. coli)
hsa-miR-580	1	0	1	1	1	1	SCN2A	sodium channel, voltage-gated, type II, alpha subunit
hsa-miR-580	0	0	1	0	1	1	SCN3B	sodium channel, voltage-gated, type III, beta subunit
hsa-miR-580	0	0	1	1	1	1	SPOCK3	sparc/osteonectin, cwcv and kazal-like domains proteoglycan (testican) 3
hsa-miR-580	0	0	1	1	1	1	MCHR2	melanin-concentrating hormone receptor 2
hsa-miR-580	1	0	1	1	1	1	MTMR12	myotubularin related protein 12
hsa-miR-580	0	0	1	1	1	1	ZXDC	ZXD family zinc finger C
hsa-miR-580	1	0	1	1	1	1	HMGCLL1	3-hydroxymethyl-3-methylglutaryl-CoA lyase-like 1
hsa-miR-580	0	0	1	1	1	1	MST4	serine/threonine protein kinase MST4
hsa-miR-580	1	0	1	1	1	1	FILIP1L	filamin A interacting protein 1-like
hsa-miR-580	1	0	1	1	1	1	CEP85L	centrosomal protein 85kDa-like
hsa-miR-580	0	0	1	1	1	1	GEMIN8	gem (nuclear organelle) associated protein 8
hsa-miR-580	1	0	1	1	1	1	PABPC1L2B	poly(A) binding protein, cytoplasmic 1-like 2B
hsa-miR-580	1	0	1	1	1	1	ERBB4	v-erb-a erythroblastic leukemia viral oncogene homolog 4 (avian)
hsa-miR-580	1	0	1	1	1	1	KDM5A	lysine (K)-specific demethylase 5A
hsa-miR-580	0	0	1	1	1	1	TRAK1	trafficking protein, kinesin binding 1
hsa-miR-580	0	0	1	1	1	1	SEC24B	SEC24 family, member B (S. cerevisiae)
hsa-miR-580	1	0	1	0	1	1	TMEM237	transmembrane protein 237
hsa-miR-580	0	0	1	1	1	1	ZNF557	zinc finger protein 557
hsa-miR-580	1	0	1	0	1	1	SLC12A2	solute carrier family 12 (sodium/potassium/chloride transporters), member 2
hsa-miR-580	1	0	1	1	1	1	QSER1	glutamine and serine rich 1
hsa-miR-580	1	0	1	1	1	1	METTL9	methyltransferase like 9
hsa-miR-580	1	0	1	1	1	1	ZNF436	zinc finger protein 436
hsa-miR-580	1	0	1	1	1	1	SREK1	splicing regulatory glutamine/lysine-rich protein 1
hsa-miR-580	1	0	1	1	1	1	GRIA4	glutamate receptor, ionotropic, AMPA 4
hsa-miR-580	1	0	1	1	1	1	PHF16	PHD finger protein 16
hsa-miR-580	0	0	1	0	0	0	AGAP7	ArfGAP with GTPase domain, ankyrin repeat and PH domain 7
hsa-miR-580	1	0	1	1	1	1	ALG9	asparagine-linked glycosylation 9, alpha-1,2-mannosyltransferase homolog (S. cerevisiae)
hsa-miR-580	0	0	1	1	0	0	KRTAP27-1	keratin associated protein 27-1
hsa-miR-580	0	0	1	1	0	0	FAM127A	family with sequence similarity 127, member A
hsa-miR-580	1	0	1	1	1	1	TMTC4	transmembrane and tetratricopeptide repeat containing 4
hsa-miR-580	1	0	1	1	1	1	N4BP2L1	NEDD4 binding protein 2-like 1
hsa-miR-580	1	0	1	1	1	1	CASZ1	castor zinc finger 1
hsa-miR-580	1	0	1	1	1	1	VAV3	vav 3 guanine nucleotide exchange factor
hsa-miR-580	1	0	1	1	1	1	PACRG	PARK2 co-regulated
hsa-miR-580	1	0	1	0	1	1	CCDC85A	coiled-coil domain containing 85A
hsa-miR-580	0	0	1	1	1	1	HSF5	heat shock transcription factor family member 5
hsa-miR-580	0	0	1	0	1	1	EPHA6	EPH receptor A6
hsa-miR-580	0	0	1	0	0	0	LRRIQ4	leucine-rich repeats and IQ motif containing 4
hsa-miR-580	1	0	1	1	1	1	ZNF697	zinc finger protein 697
hsa-miR-580	1	0	1	0	1	1	ODZ3	odz, odd Oz/ten-m homolog 3 (Drosophila)
hsa-miR-580	0	0	1	0	1	1	ISCA1P1	iron-sulfur cluster assembly 1 homolog (S. cerevisiae) pseudogene 1
hsa-miR-580	1	0	1	1	1	1	DGKG	diacylglycerol kinase, gamma 90kDa
hsa-miR-580	1	0	1	1	1	1	REPS2	RALBP1 associated Eps domain containing 2
hsa-miR-580	1	0	1	1	1	1	ADCY9	adenylate cyclase 9
hsa-miR-580	0	0	1	1	1	1	CRISP1	cysteine-rich secretory protein 1
hsa-miR-580	0	0	1	1	0	0	AOX1	aldehyde oxidase 1
hsa-miR-580	1	0	1	0	1	1	XIAP	X-linked inhibitor of apoptosis
hsa-miR-580	0	0	1	1	0	0	ARG2	arginase, type II
hsa-miR-580	1	0	1	0	1	1	BACH1	BTB and CNC homology 1, basic leucine zipper transcription factor 1
hsa-miR-580	1	0	1	1	1	1	BMP2	bone morphogenetic protein 2
hsa-miR-580	1	0	1	0	1	1	BMPR2	bone morphogenetic protein receptor, type II (serine/threonine kinase)
hsa-miR-580	1	0	1	1	1	1	CAMK2D	calcium/calmodulin-dependent protein kinase II delta
hsa-miR-580	1	0	1	0	1	1	CDK6	cyclin-dependent kinase 6
hsa-miR-580	1	0	1	0	1	1	CPD	carboxypeptidase D
hsa-miR-580	1	0	1	1	1	1	MAPK14	mitogen-activated protein kinase 14
hsa-miR-580	0	0	1	1	1	1	DAD1	defender against cell death 1
hsa-miR-580	0	0	1	1	1	1	DARS	aspartyl-tRNA synthetase
hsa-miR-580	0	0	1	0	1	1	DOCK1	dedicator of cytokinesis 1
hsa-miR-580	1	0	1	1	1	1	EIF1AX	eukaryotic translation initiation factor 1A, X-linked
hsa-miR-580	0	0	1	0	1	1	FMO2	flavin containing monooxygenase 2 (non-functional)
hsa-miR-580	0	0	1	1	0	0	GAGE1	G antigen 1
hsa-miR-580	0	0	1	1	1	1	B4GALNT1	beta-1,4-N-acetyl-galactosaminyl transferase 1
hsa-miR-580	0	0	1	1	1	1	IL13RA1	interleukin 13 receptor, alpha 1
hsa-miR-580	0	0	1	1	0	0	RHOG	ras homolog family member G
hsa-miR-580	0	0	1	1	0	0	BICD1	bicaudal D homolog 1 (Drosophila)
hsa-miR-580	1	0	1	1	1	1	BNC1	basonuclin 1
hsa-miR-580	1	0	1	0	1	1	CCND2	cyclin D2
hsa-miR-580	1	0	1	1	1	1	CLTB	clathrin, light chain B
hsa-miR-580	1	0	1	1	1	1	COL4A1	collagen, type IV, alpha 1
hsa-miR-580	0	0	1	1	1	1	CPB1	carboxypeptidase B1 (tissue)
hsa-miR-580	0	0	1	0	0	0	CPE	carboxypeptidase E
hsa-miR-580	0	0	1	1	1	1	GADD45A	growth arrest and DNA-damage-inducible, alpha
hsa-miR-580	1	0	1	1	1	1	DLST	dihydrolipoamide S-succinyltransferase (E2 component of 2-oxo-glutarate complex)
hsa-miR-580	0	0	1	1	1	1	DSG1	desmoglein 1
hsa-miR-580	1	0	1	1	1	1	E2F3	E2F transcription factor 3
hsa-miR-580	1	0	1	1	1	1	EGR1	early growth response 1
hsa-miR-580	1	0	1	1	1	1	EIF4E	eukaryotic translation initiation factor 4E
hsa-miR-580	0	0	1	0	1	1	FGF2	fibroblast growth factor 2 (basic)
hsa-miR-580	1	0	1	1	1	1	FGF7	fibroblast growth factor 7
hsa-miR-580	1	0	1	1	1	1	FGF9	fibroblast growth factor 9 (glia-activating factor)
hsa-miR-580	1	0	1	0	1	1	FOXO1	forkhead box O1
hsa-miR-580	0	0	1	1	1	1	FLI1	Friend leukemia virus integration 1
hsa-miR-580	0	0	1	1	1	1	FPR3	formyl peptide receptor 3
hsa-miR-580	1	0	1	1	1	1	FRK	fyn-related kinase
hsa-miR-580	0	0	1	1	0	0	FUT5	fucosyltransferase 5 (alpha (1,3) fucosyltransferase)
hsa-miR-580	1	0	1	1	1	1	GAS1	growth arrest-specific 1
hsa-miR-580	0	0	1	1	1	1	GFAP	glial fibrillary acidic protein
hsa-miR-580	0	0	1	0	1	1	GCLM	glutamate-cysteine ligase, modifier subunit
hsa-miR-580	0	0	1	1	1	1	HOXA4	homeobox A4
hsa-miR-580	0	0	1	1	1	1	HOXB2	homeobox B2
hsa-miR-580	1	0	1	1	1	1	HOXD10	homeobox D10
hsa-miR-580	1	0	1	1	1	1	HSPA4	heat shock 70kDa protein 4
hsa-miR-580	0	0	1	1	1	1	IFNA14	interferon, alpha 14
hsa-miR-580	0	0	1	1	1	1	IFNW1	interferon, omega 1
hsa-miR-580	0	0	1	1	1	1	IL17A	interleukin 17A
hsa-miR-580	0	0	1	1	0	0	INSL4	insulin-like 4 (placenta)
hsa-miR-580	1	0	1	0	1	1	IRF2	interferon regulatory factor 2
hsa-miR-580	0	0	1	0	1	1	ITGAV	integrin, alpha V
hsa-miR-580	1	0	1	1	1	1	ITGB8	integrin, beta 8
hsa-miR-580	1	0	1	1	1	1	ITPR2	inositol 1,4,5-trisphosphate receptor, type 2
hsa-miR-580	1	0	1	1	1	1	JUN	jun proto-oncogene
hsa-miR-580	1	0	1	1	1	1	KCNJ10	potassium inwardly-rectifying channel, subfamily J, member 10
hsa-miR-580	1	0	1	1	1	1	KPNA4	karyopherin alpha 4 (importin alpha 3)
hsa-miR-580	1	0	1	1	1	1	LIFR	leukemia inhibitory factor receptor alpha
hsa-miR-580	1	0	1	1	1	1	MAN2A1	mannosidase, alpha, class 2A, member 1
hsa-miR-580	1	0	1	1	1	1	MATN1	matrilin 1, cartilage matrix protein
hsa-miR-580	0	0	1	1	0	0	MYBL2	v-myb myeloblastosis viral oncogene homolog (avian)-like 2
hsa-miR-580	1	0	1	1	1	1	PPP1R12B	protein phosphatase 1, regulatory subunit 12B
hsa-miR-580	1	0	1	1	1	1	NEUROD1	neuronal differentiation 1
hsa-miR-580	1	0	1	1	1	1	NPAS2	neuronal PAS domain protein 2
hsa-miR-580	1	0	1	1	1	1	NPAT	nuclear protein, ataxia-telangiectasia locus
hsa-miR-580	1	0	1	0	1	1	NRAS	neuroblastoma RAS viral (v-ras) oncogene homolog
hsa-miR-580	0	0	1	1	0	0	NTSR1	neurotensin receptor 1 (high affinity)
hsa-miR-580	0	0	1	0	1	1	OAZ2	ornithine decarboxylase antizyme 2
hsa-miR-580	0	0	1	0	1	1	OPHN1	oligophrenin 1
hsa-miR-580	1	0	1	1	1	1	PCSK6	proprotein convertase subtilisin/kexin type 6
hsa-miR-580	1	0	1	0	1	1	PAK2	p21 protein (Cdc42/Rac)-activated kinase 2
hsa-miR-580	1	0	1	1	1	1	PBX2	pre-B-cell leukemia homeobox 2
hsa-miR-580	1	0	1	0	1	1	PCDHGC3	protocadherin gamma subfamily C, 3
hsa-miR-580	0	0	1	1	1	1	PDE6D	phosphodiesterase 6D, cGMP-specific, rod, delta
hsa-miR-580	0	0	1	1	0	0	PER1	period homolog 1 (Drosophila)
hsa-miR-580	1	0	1	1	1	1	PGAM1	phosphoglycerate mutase 1 (brain)
hsa-miR-580	0	0	1	1	1	1	SERPINB8	serpin peptidase inhibitor, clade B (ovalbumin), member 8
hsa-miR-580	1	0	1	1	1	1	PLAGL2	pleiomorphic adenoma gene-like 2
hsa-miR-580	0	0	1	1	1	1	PLGLB2	plasminogen-like B2
hsa-miR-580	1	0	1	0	1	1	POU3F1	POU class 3 homeobox 1
hsa-miR-580	1	0	1	1	1	1	PPP1CB	protein phosphatase 1, catalytic subunit, beta isozyme
hsa-miR-580	1	0	1	0	0	0	PPP1R10	protein phosphatase 1, regulatory subunit 10
hsa-miR-580	1	0	1	1	1	1	PPP2CA	protein phosphatase 2, catalytic subunit, alpha isozyme
hsa-miR-580	1	0	1	0	1	1	PPP2R2A	protein phosphatase 2, regulatory subunit B, alpha
hsa-miR-580	1	0	1	1	1	1	PRKAR2B	protein kinase, cAMP-dependent, regulatory, type II, beta
hsa-miR-580	1	0	1	1	1	1	MAPK6	mitogen-activated protein kinase 6
hsa-miR-580	0	0	1	1	0	0	MAPK7	mitogen-activated protein kinase 7
hsa-miR-580	0	0	1	1	1	1	MAPK13	mitogen-activated protein kinase 13
hsa-miR-580	0	0	1	1	1	1	MAP2K1	mitogen-activated protein kinase kinase 1
hsa-miR-580	1	0	1	1	1	1	PRPS1	phosphoribosyl pyrophosphate synthetase 1
hsa-miR-580	1	0	1	1	1	1	PTPN4	protein tyrosine phosphatase, non-receptor type 4 (megakaryocyte)
hsa-miR-580	1	0	1	1	1	1	RAD23B	RAD23 homolog B (S. cerevisiae)
hsa-miR-580	1	0	1	0	1	1	RAP2B	RAP2B, member of RAS oncogene family
hsa-miR-580	1	0	1	1	1	1	ROBO2	roundabout, axon guidance receptor, homolog 2 (Drosophila)
hsa-miR-580	1	0	1	0	1	1	CCL22	chemokine (C-C motif) ligand 22
hsa-miR-580	0	0	1	1	1	1	SDC2	syndecan 2
hsa-miR-580	0	0	1	1	1	1	SDHD	succinate dehydrogenase complex, subunit D, integral membrane protein
hsa-miR-580	1	0	1	0	1	1	SFRP1	secreted frizzled-related protein 1
hsa-miR-580	1	0	1	1	1	1	SRSF2	serine/arginine-rich splicing factor 2
hsa-miR-580	1	0	1	1	1	1	SRSF3	serine/arginine-rich splicing factor 3
hsa-miR-580	0	0	1	1	1	1	SH3BGRL	SH3 domain binding glutamic acid-rich protein like
hsa-miR-580	1	0	1	0	1	1	ST6GAL1	ST6 beta-galactosamide alpha-2,6-sialyltranferase 1
hsa-miR-580	1	0	1	0	1	1	SLC6A1	solute carrier family 6 (neurotransmitter transporter, GABA), member 1
hsa-miR-580	1	0	1	1	1	1	SMARCC1	SWI/SNF related, matrix associated, actin dependent regulator of chromatin, subfamily c, member 1
hsa-miR-580	1	0	1	0	1	1	SOX4	SRY (sex determining region Y)-box 4
hsa-miR-580	1	0	1	0	1	1	SOX11	SRY (sex determining region Y)-box 11
hsa-miR-580	0	0	1	1	1	1	STIM1	stromal interaction molecule 1
hsa-miR-580	1	0	1	1	1	1	TAF4	TAF4 RNA polymerase II, TATA box binding protein (TBP)-associated factor, 135kDa
hsa-miR-580	1	0	1	1	1	1	TIAM1	T-cell lymphoma invasion and metastasis 1
hsa-miR-580	1	0	1	0	1	1	SEC62	SEC62 homolog (S. cerevisiae)
hsa-miR-580	1	0	1	1	1	1	NR2E1	nuclear receptor subfamily 2, group E, member 1
hsa-miR-580	1	0	1	1	1	1	TRAPPC10	trafficking protein particle complex 10
hsa-miR-580	1	0	1	1	1	1	NR2C2	nuclear receptor subfamily 2, group C, member 2
hsa-miR-580	0	0	1	1	1	1	TRAF3	TNF receptor-associated factor 3
hsa-miR-580	1	0	1	0	1	1	TSPYL1	TSPY-like 1
hsa-miR-580	0	0	1	1	1	1	UBE2D1	ubiquitin-conjugating enzyme E2D 1
hsa-miR-580	0	0	1	1	1	1	UBE2E1	ubiquitin-conjugating enzyme E2E 1
hsa-miR-580	1	0	1	0	1	1	VCL	vinculin
hsa-miR-580	1	0	1	1	1	1	YY1	YY1 transcription factor
hsa-miR-580	1	0	1	1	1	1	ZIC3	Zic family member 3
hsa-miR-580	1	0	1	1	1	1	ZNF131	zinc finger protein 131
hsa-miR-580	0	0	1	1	1	1	ZNF143	zinc finger protein 143
hsa-miR-580	1	0	1	1	1	1	CUL5	cullin 5
hsa-miR-580	1	0	1	1	1	1	NRIP1	nuclear receptor interacting protein 1
hsa-miR-580	0	0	1	1	0	0	HIST1H2BL	histone cluster 1, H2bl
hsa-miR-580	0	0	1	1	1	1	PIP5K1A	phosphatidylinositol-4-phosphate 5-kinase, type I, alpha
hsa-miR-580	1	0	1	1	1	1	EEA1	early endosome antigen 1
hsa-miR-580	0	0	1	1	1	1	STX7	syntaxin 7
hsa-miR-580	1	0	1	0	1	1	VAPA	VAMP (vesicle-associated membrane protein)-associated protein A, 33kDa
hsa-miR-580	1	0	1	1	1	1	DYRK2	dual-specificity tyrosine-(Y)-phosphorylation regulated kinase 2
hsa-miR-580	0	0	1	1	1	1	ITGA10	integrin, alpha 10
hsa-miR-580	1	0	1	0	1	1	PCDHGA12	protocadherin gamma subfamily A, 12
hsa-miR-580	1	0	1	0	1	1	PCDHGB4	protocadherin gamma subfamily B, 4
hsa-miR-580	0	0	1	1	0	0	ADAM21	ADAM metallopeptidase domain 21
hsa-miR-580	1	0	1	1	1	1	NR5A2	nuclear receptor subfamily 5, group A, member 2
hsa-miR-580	1	0	1	1	1	1	SUCLG2	succinate-CoA ligase, GDP-forming, beta subunit
hsa-miR-580	1	0	1	1	1	1	NRP2	neuropilin 2
hsa-miR-580	1	0	1	1	1	1	KAT2B	K(lysine) acetyltransferase 2B
hsa-miR-580	0	0	1	0	1	1	AP1S2	adaptor-related protein complex 1, sigma 2 subunit
hsa-miR-580	0	0	1	1	1	1	TIMELESS	timeless homolog (Drosophila)
hsa-miR-580	1	0	1	0	1	1	WASL	Wiskott-Aldrich syndrome-like
hsa-miR-580	1	0	1	1	1	1	CDKL2	cyclin-dependent kinase-like 2 (CDC2-related kinase)
hsa-miR-580	0	0	1	1	1	1	UBA3	ubiquitin-like modifier activating enzyme 3
hsa-miR-580	1	0	1	1	1	1	BTAF1	BTAF1 RNA polymerase II, B-TFIID transcription factor-associated, 170kDa (Mot1 homolog, S. cerevisiae)
hsa-miR-580	0	0	1	0	0	0	ARRB1	arrestin, beta 1
hsa-miR-580	0	0	1	1	1	1	CETN1	centrin, EF-hand protein, 1
hsa-miR-580	1	0	1	0	1	1	DGKB	diacylglycerol kinase, beta 90kDa
hsa-miR-580	0	0	1	1	1	1	TIMM8A	translocase of inner mitochondrial membrane 8 homolog A (yeast)
hsa-miR-580	0	0	1	1	1	1	FKBP1B	FK506 binding protein 1B, 12.6 kDa
hsa-miR-580	1	0	1	1	1	1	GMFB	glia maturation factor, beta
hsa-miR-580	0	0	1	1	1	1	GYG1	glycogenin 1
hsa-miR-580	1	0	1	1	1	1	HNF4G	hepatocyte nuclear factor 4, gamma
hsa-miR-580	1	0	1	1	1	1	RAB5A	RAB5A, member RAS oncogene family
hsa-miR-580	0	0	1	1	1	1	SLC1A1	solute carrier family 1 (neuronal/epithelial high affinity glutamate transporter, system Xag), member 1
hsa-miR-580	1	0	1	0	1	1	SLC1A2	solute carrier family 1 (glial high affinity glutamate transporter), member 2
hsa-miR-580	0	0	1	1	0	0	EBAG9	estrogen receptor binding site associated, antigen, 9
hsa-miR-580	1	0	1	0	1	1	MED14	mediator complex subunit 14
hsa-miR-580	1	0	1	1	1	1	SOCS6	suppressor of cytokine signaling 6
hsa-miR-580	0	0	1	1	1	1	SEP15	15 kDa selenoprotein
hsa-miR-580	1	0	1	1	1	1	MED21	mediator complex subunit 21
hsa-miR-580	1	0	1	0	1	1	AKAP6	A kinase (PRKA) anchor protein 6
hsa-miR-580	0	0	1	1	1	1	CDH1	cadherin 1, type 1, E-cadherin (epithelial)
hsa-miR-580	0	0	1	1	1	1	COL12A1	collagen, type XII, alpha 1
hsa-miR-580	1	0	1	1	1	1	COX11	COX11 cytochrome c oxidase assembly homolog (yeast)
hsa-miR-580	1	0	1	1	1	1	CREB1	cAMP responsive element binding protein 1
hsa-miR-580	1	0	1	1	1	1	DACH1	dachshund homolog 1 (Drosophila)
hsa-miR-580	1	0	1	1	1	1	EPS8	epidermal growth factor receptor pathway substrate 8
hsa-miR-580	1	0	1	0	1	1	ETV5	ets variant 5
hsa-miR-580	1	0	1	0	1	1	ACSL4	acyl-CoA synthetase long-chain family member 4
hsa-miR-580	1	0	1	0	1	1	FGF5	fibroblast growth factor 5
hsa-miR-580	1	0	1	0	1	1	FOXD1	forkhead box D1
hsa-miR-580	1	0	1	1	1	1	FUT8	fucosyltransferase 8 (alpha (1,6) fucosyltransferase)
hsa-miR-580	0	0	1	1	1	1	GCSH	glycine cleavage system protein H (aminomethyl carrier)
hsa-miR-580	0	0	1	1	1	1	FOXA1	forkhead box A1
hsa-miR-580	0	0	1	0	1	1	POU4F2	POU class 4 homeobox 2
hsa-miR-580	0	0	1	1	1	1	CDK2AP1	cyclin-dependent kinase 2 associated protein 1
hsa-miR-580	1	0	1	1	1	1	COIL	coilin
hsa-miR-580	0	0	1	1	1	1	PNPLA4	patatin-like phospholipase domain containing 4
hsa-miR-580	0	0	1	1	1	1	LIN7A	lin-7 homolog A (C. elegans)
hsa-miR-580	0	0	1	1	1	1	VNN1	vanin 1
hsa-miR-580	0	0	1	0	1	1	BPY2	basic charge, Y-linked, 2
hsa-miR-580	1	0	1	1	1	1	MTMR6	myotubularin related protein 6
hsa-miR-580	1	0	1	1	1	1	SCAF11	SR-related CTD-associated factor 11
hsa-miR-580	1	0	1	1	1	1	DCLK1	doublecortin-like kinase 1
hsa-miR-580	1	0	1	1	0	0	TXNL1	thioredoxin-like 1
hsa-miR-580	0	0	1	1	1	1	LHX2	LIM homeobox 2
hsa-miR-580	0	0	1	0	1	1	ADIPOQ	adiponectin, C1Q and collagen domain containing
hsa-miR-580	1	0	1	1	1	1	KIF3B	kinesin family member 3B
hsa-miR-580	0	0	1	1	0	0	TM9SF2	transmembrane 9 superfamily member 2
hsa-miR-580	0	0	1	1	0	0	SLC22A14	solute carrier family 22, member 14
hsa-miR-580	0	0	1	1	1	1	CYP7B1	cytochrome P450, family 7, subfamily B, polypeptide 1
hsa-miR-580	1	0	1	1	1	1	AKAP7	A kinase (PRKA) anchor protein 7
hsa-miR-580	1	0	1	0	1	1	ROCK2	Rho-associated, coiled-coil containing protein kinase 2
hsa-miR-580	1	0	1	1	1	1	ONECUT2	one cut homeobox 2
hsa-miR-580	1	0	1	1	1	1	KIF23	kinesin family member 23
hsa-miR-580	1	0	1	1	1	1	TBPL1	TBP-like 1
hsa-miR-580	1	0	1	1	1	1	VPS4B	vacuolar protein sorting 4 homolog B (S. cerevisiae)
hsa-miR-580	1	0	1	0	1	1	SEC22B	SEC22 vesicle trafficking protein homolog B (S. cerevisiae) (gene/pseudogene)
hsa-miR-580	0	0	1	1	1	1	CDH6	cadherin 6, type 2, K-cadherin (fetal kidney)
hsa-miR-580	0	0	1	0	1	1	DSC2	desmocollin 2
hsa-miR-580	1	0	1	0	1	1	KIF5A	kinesin family member 5A
hsa-miR-580	1	0	1	0	1	1	KRAS	v-Ki-ras2 Kirsten rat sarcoma viral oncogene homolog
hsa-miR-580	0	0	1	1	1	1	PDE1A	phosphodiesterase 1A, calmodulin-dependent
hsa-miR-580	1	0	1	0	1	1	SCD	stearoyl-CoA desaturase (delta-9-desaturase)
hsa-miR-580	1	0	1	0	1	1	SEL1L	sel-1 suppressor of lin-12-like (C. elegans)
hsa-miR-580	1	0	1	1	1	1	SIAH2	siah E3 ubiquitin protein ligase 2
hsa-miR-580	1	0	1	1	1	1	SLC23A2	solute carrier family 23 (nucleobase transporters), member 2
hsa-miR-580	1	0	1	1	1	1	MED13	mediator complex subunit 13
hsa-miR-580	0	0	1	1	0	0	CNGA2	cyclic nucleotide gated channel alpha 2
hsa-miR-580	1	0	1	1	0	0	BCL3	B-cell CLL/lymphoma 3
hsa-miR-580	1	0	1	1	1	1	BMI1	BMI1 polycomb ring finger oncogene
hsa-miR-580	1	0	1	1	1	1	CBL	Cbl proto-oncogene, E3 ubiquitin protein ligase
hsa-miR-580	1	0	1	1	1	1	FOXN3	forkhead box N3
hsa-miR-580	1	1	1	1	1	1	MAP3K8	mitogen-activated protein kinase kinase kinase 8
hsa-miR-580	0	0	1	0	1	1	EPHA3	EPH receptor A3
hsa-miR-580	1	0	1	1	1	1	ETS1	v-ets erythroblastosis virus E26 oncogene homolog 1 (avian)
hsa-miR-580	0	0	1	0	0	0	FER	fer (fps/fes related) tyrosine kinase
hsa-miR-580	1	0	1	1	1	1	HAS3	hyaluronan synthase 3
hsa-miR-580	0	0	1	1	1	1	PPP1R3C	protein phosphatase 1, regulatory subunit 3C
hsa-miR-580	1	0	1	0	1	1	PRKAB2	protein kinase, AMP-activated, beta 2 non-catalytic subunit
hsa-miR-580	0	0	1	1	0	0	ARHGEF5	Rho guanine nucleotide exchange factor (GEF) 5
hsa-miR-580	1	0	1	0	1	1	CCDC6	coiled-coil domain containing 6
hsa-miR-580	1	0	1	1	1	1	RND2	Rho family GTPase 2
hsa-miR-580	0	0	1	1	1	1	SMC3	structural maintenance of chromosomes 3
hsa-miR-580	0	0	1	1	1	1	FAIM3	Fas apoptotic inhibitory molecule 3
hsa-miR-580	0	0	1	1	1	1	CER1	cerberus 1, cysteine knot superfamily, homolog (Xenopus laevis)
hsa-miR-580	0	0	1	1	1	1	ZRANB2	zinc finger, RAN-binding domain containing 2
hsa-miR-580	0	0	1	1	1	1	GNPDA1	glucosamine-6-phosphate deaminase 1
hsa-miR-580	1	0	1	1	1	1	ABCA1	ATP-binding cassette, sub-family A (ABC1), member 1
hsa-miR-580	1	0	1	1	1	1	SCARB2	scavenger receptor class B, member 2
hsa-miR-580	1	0	1	1	1	1	HOXA1	homeobox A1
hsa-miR-580	0	0	1	1	1	1	ING1	inhibitor of growth family, member 1
hsa-miR-580	1	0	1	1	1	1	IRS1	insulin receptor substrate 1
hsa-miR-580	0	0	1	1	0	0	LMNB1	lamin B1
hsa-miR-580	1	0	1	1	1	1	NHLH2	nescient helix loop helix 2
hsa-miR-580	1	0	1	1	1	1	RHEB	Ras homolog enriched in brain
hsa-miR-580	0	0	1	1	1	1	TAF11	TAF11 RNA polymerase II, TATA box binding protein (TBP)-associated factor, 28kDa
hsa-miR-580	1	0	1	1	1	1	EVI5	ecotropic viral integration site 5
hsa-miR-580	1	0	1	1	1	1	ST8SIA4	ST8 alpha-N-acetyl-neuraminide alpha-2,8-sialyltransferase 4
hsa-miR-580	1	0	1	1	1	1	NAMPT	nicotinamide phosphoribosyltransferase
hsa-miR-580	0	0	1	1	0	0	LPCAT3	lysophosphatidylcholine acyltransferase 3
hsa-miR-580	0	0	1	1	1	1	RNF41	ring finger protein 41
hsa-miR-580	0	0	1	0	1	1	CD96	CD96 molecule
hsa-miR-580	1	0	1	0	1	1	SPRY3	sprouty homolog 3 (Drosophila)
hsa-miR-580	0	0	1	1	1	1	CD5L	CD5 molecule-like
hsa-miR-580	1	0	1	1	1	1	MEOX2	mesenchyme homeobox 2
hsa-miR-580	1	0	1	1	1	1	MMP16	matrix metallopeptidase 16 (membrane-inserted)
hsa-miR-580	1	0	1	1	1	1	MTF1	metal-regulatory transcription factor 1
hsa-miR-580	1	0	1	1	1	1	LIPG	lipase, endothelial
hsa-miR-580	0	0	1	1	1	1	LANCL1	LanC lantibiotic synthetase component C-like 1 (bacterial)
hsa-miR-580	1	0	1	1	1	1	SEMA3A	sema domain, immunoglobulin domain (Ig), short basic domain, secreted, (semaphorin) 3A
hsa-miR-580	1	0	1	1	1	1	IRF9	interferon regulatory factor 9
hsa-miR-580	1	0	1	1	1	1	SPON1	spondin 1, extracellular matrix protein
hsa-miR-580	0	0	1	1	0	0	BMP1	bone morphogenetic protein 1
hsa-miR-580	1	0	1	1	1	1	CAPZA2	capping protein (actin filament) muscle Z-line, alpha 2
hsa-miR-580	0	0	1	1	1	1	IRF6	interferon regulatory factor 6
hsa-miR-580	1	0	1	1	1	1	NR4A2	nuclear receptor subfamily 4, group A, member 2
hsa-miR-580	0	0	1	1	1	1	PA2G4	proliferation-associated 2G4, 38kDa
hsa-miR-580	0	0	1	1	0	0	PCP4	Purkinje cell protein 4
hsa-miR-580	1	0	1	1	1	1	PPP2R5E	protein phosphatase 2, regulatory subunit B', epsilon isoform
hsa-miR-580	0	0	1	1	1	1	PRKG2	protein kinase, cGMP-dependent, type II
hsa-miR-580	0	0	1	1	1	1	PROP1	PROP paired-like homeobox 1
hsa-miR-580	1	0	1	1	1	1	ITSN2	intersectin 2
hsa-miR-580	1	0	1	1	1	1	SMC1A	structural maintenance of chromosomes 1A
hsa-miR-580	1	0	1	1	1	1	TUBGCP3	tubulin, gamma complex associated protein 3
hsa-miR-580	0	0	1	1	1	1	C1D	C1D nuclear receptor corepressor
hsa-miR-580	1	0	1	1	1	1	ZER1	zer-1 homolog (C. elegans)
hsa-miR-580	0	0	1	1	1	1	SLC25A17	solute carrier family 25 (mitochondrial carrier; peroxisomal membrane protein, 34kDa), member 17
hsa-miR-580	0	0	1	1	1	1	LRRC41	leucine rich repeat containing 41
hsa-miR-580	1	0	1	0	1	1	APPBP2	amyloid beta precursor protein (cytoplasmic tail) binding protein 2
hsa-miR-580	1	0	1	1	1	1	NEBL	nebulette
hsa-miR-580	0	0	1	1	1	1	COLEC10	collectin sub-family member 10 (C-type lectin)
hsa-miR-580	1	0	1	1	1	1	MAB21L2	mab-21-like 2 (C. elegans)
hsa-miR-580	1	0	1	1	1	1	DYNLT3	dynein, light chain, Tctex-type 3
hsa-miR-580	1	0	1	1	1	1	ELL	elongation factor RNA polymerase II
hsa-miR-580	1	0	1	0	1	1	IGF2BP1	insulin-like growth factor 2 mRNA binding protein 1
hsa-miR-580	1	0	1	1	1	1	KHDRBS1	KH domain containing, RNA binding, signal transduction associated 1
hsa-miR-580	0	0	1	1	1	1	CD226	CD226 molecule
hsa-miR-580	1	0	1	1	1	1	RRAGA	Ras-related GTP binding A
hsa-miR-580	1	0	1	0	1	1	MAP4K5	mitogen-activated protein kinase kinase kinase kinase 5
hsa-miR-580	1	0	1	1	1	1	B3GNT2	UDP-GlcNAc:betaGal beta-1,3-N-acetylglucosaminyltransferase 2
hsa-miR-580	1	0	1	1	1	1	PLK2	polo-like kinase 2
hsa-miR-580	0	0	1	1	1	1	PPP1R17	protein phosphatase 1, regulatory subunit 17
hsa-miR-580	0	0	1	1	0	0	NMU	neuromedin U
hsa-miR-580	1	0	1	1	1	1	MAN1A2	mannosidase, alpha, class 1A, member 2
hsa-miR-580	0	0	1	1	1	1	GLO1	glyoxalase I
hsa-miR-580	1	0	1	1	1	1	SNTB2	syntrophin, beta 2 (dystrophin-associated protein A1, 59kDa, basic component 2)
hsa-miR-580	0	0	1	1	1	1	SYPL1	synaptophysin-like 1
hsa-miR-580	1	0	1	1	1	1	ZBTB33	zinc finger and BTB domain containing 33
hsa-miR-580	0	0	1	1	1	1	TRIM10	tripartite motif containing 10
hsa-miR-580	0	0	1	1	1	1	PKIA	protein kinase (cAMP-dependent, catalytic) inhibitor alpha
hsa-miR-580	0	0	1	1	1	1	TMED10	transmembrane emp24-like trafficking protein 10 (yeast)
hsa-miR-580	0	0	1	1	0	0	EIF2D	eukaryotic translation initiation factor 2D
hsa-miR-580	0	0	1	1	0	0	IDH3B	isocitrate dehydrogenase 3 (NAD+) beta
hsa-miR-580	1	0	1	1	1	1	PRRX1	paired related homeobox 1
hsa-miR-580	0	0	1	0	1	1	PSG1	pregnancy specific beta-1-glycoprotein 1
hsa-miR-580	0	0	1	1	1	1	ALX1	ALX homeobox 1
hsa-miR-580	1	0	1	1	1	1	DDX52	DEAD (Asp-Glu-Ala-Asp) box polypeptide 52
hsa-miR-580	1	0	1	1	1	1	ABHD2	abhydrolase domain containing 2
hsa-miR-580	0	0	1	1	1	1	KERA	keratocan
hsa-miR-580	1	0	1	1	1	1	ADAMTS5	ADAM metallopeptidase with thrombospondin type 1 motif, 5
hsa-miR-580	1	0	1	1	1	1	FGFR1OP	FGFR1 oncogene partner
hsa-miR-580	1	0	1	1	1	1	TRIO	trio Rho guanine nucleotide exchange factor
hsa-miR-580	0	0	1	1	1	1	USH2A	Usher syndrome 2A (autosomal recessive, mild)
hsa-miR-580	1	0	1	1	1	1	UTRN	utrophin
hsa-miR-580	1	0	1	1	1	1	ZNF81	zinc finger protein 81
hsa-miR-580	1	0	1	1	1	1	VEZF1	vascular endothelial zinc finger 1
hsa-miR-580	0	0	1	0	1	1	ZNF208	zinc finger protein 208
hsa-miR-580	0	0	1	0	1	1	ZXDB	zinc finger, X-linked, duplicated B
hsa-miR-580	1	0	1	1	1	1	TESK2	testis-specific kinase 2
hsa-miR-580	1	0	1	1	1	1	ERLIN2	ER lipid raft associated 2
hsa-miR-580	1	0	1	1	1	1	PALM2-AKAP2	PALM2-AKAP2 readthrough
hsa-miR-580	1	0	1	1	1	1	HPS5	Hermansky-Pudlak syndrome 5
hsa-miR-580	0	0	1	1	1	1	SLC6A14	solute carrier family 6 (amino acid transporter), member 14
hsa-miR-580	1	0	1	0	1	1	CHP1	calcineurin-like EF hand protein 1
hsa-miR-580	1	0	1	1	1	1	KLF12	Kruppel-like factor 12
hsa-miR-580	0	0	1	0	0	0	PHB2	prohibitin 2
hsa-miR-580	0	0	1	0	1	1	AP4E1	adaptor-related protein complex 4, epsilon 1 subunit
hsa-miR-580	1	0	1	1	1	1	PHLDA1	pleckstrin homology-like domain, family A, member 1
hsa-miR-580	0	0	1	1	1	1	MMRN1	multimerin 1
hsa-miR-580	0	0	1	1	1	1	KLRK1	killer cell lectin-like receptor subfamily K, member 1
hsa-miR-580	0	0	1	1	0	0	DPF3	D4, zinc and double PHD fingers, family 3
hsa-miR-580	1	0	1	0	1	1	ZFPM2	zinc finger protein, multitype 2
hsa-miR-580	0	0	1	1	1	1	GLUD2	glutamate dehydrogenase 2
hsa-miR-580	1	0	1	1	1	1	ICOS	inducible T-cell co-stimulator
hsa-miR-580	0	0	1	1	0	0	STAP1	signal transducing adaptor family member 1
hsa-miR-580	0	0	1	1	1	1	CHIC2	cysteine-rich hydrophobic domain 2
hsa-miR-580	1	0	1	0	1	1	EIF2C2	eukaryotic translation initiation factor 2C, 2
hsa-miR-580	1	0	1	0	1	1	FZD4	frizzled family receptor 4
hsa-miR-580	1	0	1	1	1	1	MGAT4A	mannosyl (alpha-1,3-)-glycoprotein beta-1,4-N-acetylglucosaminyltransferase, isozyme A
hsa-miR-580	0	0	1	1	1	1	RAB3GAP1	RAB3 GTPase activating protein subunit 1 (catalytic)
hsa-miR-580	1	0	1	1	1	1	RYBP	RING1 and YY1 binding protein
hsa-miR-580	1	0	1	1	1	1	DKK1	dickkopf 1 homolog (Xenopus laevis)
hsa-miR-580	1	0	1	1	1	1	RHOQ	ras homolog family member Q
hsa-miR-580	1	0	1	1	1	1	HEY2	hairy/enhancer-of-split related with YRPW motif 2
hsa-miR-580	1	0	1	0	1	1	PXDN	peroxidasin homolog (Drosophila)
hsa-miR-580	1	0	1	1	1	1	LDOC1	leucine zipper, down-regulated in cancer 1
hsa-miR-580	1	0	1	1	1	1	LSM5	LSM5 homolog, U6 small nuclear RNA associated (S. cerevisiae)
hsa-miR-580	0	0	1	1	1	1	MAFF	v-maf musculoaponeurotic fibrosarcoma oncogene homolog F (avian)
hsa-miR-580	1	0	1	1	1	1	MMD	monocyte to macrophage differentiation-associated
hsa-miR-580	0	0	1	1	1	1	TTC33	tetratricopeptide repeat domain 33
hsa-miR-580	1	0	1	0	1	1	BLOC1S6	biogenesis of lysosomal organelles complex-1, subunit 6, pallidin
hsa-miR-580	0	0	1	0	1	1	PITPNC1	phosphatidylinositol transfer protein, cytoplasmic 1
hsa-miR-580	1	0	1	0	1	1	FLRT2	fibronectin leucine rich transmembrane protein 2
hsa-miR-580	1	0	1	1	1	1	STK39	serine threonine kinase 39
hsa-miR-580	1	0	1	0	1	1	VPS4A	vacuolar protein sorting 4 homolog A (S. cerevisiae)
hsa-miR-580	0	0	1	1	1	1	SNX10	sorting nexin 10
hsa-miR-580	0	0	1	1	1	1	NME7	NME/NM23 family member 7
hsa-miR-580	0	0	1	1	0	0	KCNJ14	potassium inwardly-rectifying channel, subfamily J, member 14
hsa-miR-580	0	0	1	1	1	1	PURG	purine-rich element binding protein G
hsa-miR-580	1	0	1	0	1	1	TRHDE	thyrotropin-releasing hormone degrading enzyme
hsa-miR-580	1	0	1	1	1	1	SLC25A24	solute carrier family 25 (mitochondrial carrier; phosphate carrier), member 24
hsa-miR-580	1	0	1	1	1	1	AK2	adenylate kinase 2
hsa-miR-580	0	0	1	1	1	1	UBQLN1	ubiquilin 1
hsa-miR-580	0	0	1	0	1	1	RCAN3	RCAN family member 3
hsa-miR-580	1	0	1	1	1	1	BAZ1A	bromodomain adjacent to zinc finger domain, 1A
hsa-miR-580	0	0	1	1	1	1	METTL7A	methyltransferase like 7A
hsa-miR-580	0	0	1	1	1	1	MRPL42	mitochondrial ribosomal protein L42
hsa-miR-580	1	0	1	0	1	1	C16orf72	chromosome 16 open reading frame 72
hsa-miR-580	0	0	1	1	1	1	CCDC113	coiled-coil domain containing 113
hsa-miR-580	0	0	1	1	1	1	ORMDL2	ORM1-like 2 (S. cerevisiae)
hsa-miR-580	0	0	1	1	0	0	CNIH4	cornichon homolog 4 (Drosophila)
hsa-miR-580	0	0	1	0	1	1	SCN8A	sodium channel, voltage gated, type VIII, alpha subunit
hsa-miR-580	1	0	1	0	1	1	ODZ1	odz, odd Oz/ten-m homolog 1 (Drosophila)
hsa-miR-580	0	0	1	1	1	1	TRAM1	translocation associated membrane protein 1
hsa-miR-580	1	0	1	1	1	1	TGDS	TDP-glucose 4,6-dehydratase
hsa-miR-580	1	0	1	1	1	1	LEMD3	LEM domain containing 3
hsa-miR-580	0	0	1	1	1	1	OPN3	opsin 3
hsa-miR-580	1	0	1	1	1	1	LHX6	LIM homeobox 6
hsa-miR-580	1	0	1	0	1	1	RNF11	ring finger protein 11
hsa-miR-580	1	0	1	1	0	0	SND1	staphylococcal nuclease and tudor domain containing 1
hsa-miR-580	1	0	1	1	1	1	GHITM	growth hormone inducible transmembrane protein
hsa-miR-580	0	0	1	1	1	1	LAMP3	lysosomal-associated membrane protein 3
hsa-miR-580	1	0	1	1	1	1	ZBTB11	zinc finger and BTB domain containing 11
hsa-miR-580	1	0	1	1	1	1	AFF4	AF4/FMR2 family, member 4
hsa-miR-580	1	0	1	1	1	1	SERP1	stress-associated endoplasmic reticulum protein 1
hsa-miR-580	1	0	1	1	1	1	KLHL20	kelch-like 20 (Drosophila)
hsa-miR-580	1	0	1	1	0	0	RBMXL2	RNA binding motif protein, X-linked-like 2
hsa-miR-580	0	0	1	1	1	1	GOLIM4	golgi integral membrane protein 4
hsa-miR-580	1	0	1	1	1	1	ERO1L	ERO1-like (S. cerevisiae)
hsa-miR-580	1	0	1	1	1	1	VSX1	visual system homeobox 1
hsa-miR-580	1	0	1	1	1	1	EHD3	EH-domain containing 3
hsa-miR-580	1	0	1	0	1	1	ATP11B	ATPase, class VI, type 11B
hsa-miR-580	0	0	1	1	1	1	HOXC4	homeobox C4
hsa-miR-580	1	0	1	1	1	1	ZNF592	zinc finger protein 592
hsa-miR-580	1	0	1	0	1	1	SH3PXD2A	SH3 and PX domains 2A
hsa-miR-580	1	0	1	1	1	1	RALGPS1	Ral GEF with PH domain and SH3 binding motif 1
hsa-miR-580	0	0	1	1	1	1	FAM53B	family with sequence similarity 53, member B
hsa-miR-580	1	0	1	1	1	1	KDM4A	lysine (K)-specific demethylase 4A
hsa-miR-580	1	0	1	0	1	1	BZW1	basic leucine zipper and W2 domains 1
hsa-miR-580	1	0	1	0	1	1	EDEM1	ER degradation enhancer, mannosidase alpha-like 1
hsa-miR-580	1	0	1	1	1	1	ULK2	unc-51-like kinase 2 (C. elegans)
hsa-miR-580	1	0	1	1	1	1	TBKBP1	TBK1 binding protein 1
hsa-miR-580	1	0	1	0	1	1	TOX	thymocyte selection-associated high mobility group box
hsa-miR-580	1	0	1	0	1	1	MLEC	malectin
hsa-miR-580	1	0	1	0	1	1	MAML1	mastermind-like 1 (Drosophila)
hsa-miR-580	0	0	1	1	1	1	SNX19	sorting nexin 19
hsa-miR-580	1	0	1	0	1	1	TRIL	TLR4 interactor with leucine-rich repeats
hsa-miR-580	1	0	1	0	1	1	PJA2	praja ring finger 2, E3 ubiquitin protein ligase
hsa-miR-580	1	0	1	1	1	1	TOMM70A	translocase of outer mitochondrial membrane 70 homolog A (S. cerevisiae)
hsa-miR-580	1	0	1	1	1	1	FCHSD2	FCH and double SH3 domains 2
hsa-miR-580	0	0	1	1	1	1	TOX4	TOX high mobility group box family member 4
hsa-miR-580	1	0	1	1	1	1	HELZ	helicase with zinc finger
hsa-miR-580	0	0	1	1	1	1	N4BP2L2	NEDD4 binding protein 2-like 2
hsa-miR-580	0	0	1	0	1	1	PPM1E	protein phosphatase, Mg2+/Mn2+ dependent, 1E
hsa-miR-580	1	0	1	1	1	1	CHSY1	chondroitin sulfate synthase 1
hsa-miR-580	1	0	1	0	1	1	ICK	intestinal cell (MAK-like) kinase
hsa-miR-580	1	0	1	1	1	1	R3HDM2	R3H domain containing 2
hsa-miR-580	0	0	1	1	1	1	ENPP4	ectonucleotide pyrophosphatase/phosphodiesterase 4 (putative)
hsa-miR-580	1	0	1	1	1	1	SORCS3	sortilin-related VPS10 domain containing receptor 3
hsa-miR-580	1	0	1	0	1	1	WDFY3	WD repeat and FYVE domain containing 3
hsa-miR-580	0	0	1	1	1	1	MYO16	myosin XVI
hsa-miR-580	1	0	1	0	1	1	PDS5B	PDS5, regulator of cohesion maintenance, homolog B (S. cerevisiae)
hsa-miR-580	1	0	1	1	1	1	TRAK2	trafficking protein, kinesin binding 2
hsa-miR-580	1	0	1	1	1	1	ERP44	endoplasmic reticulum protein 44
hsa-miR-580	1	0	1	1	1	1	HECW1	HECT, C2 and WW domain containing E3 ubiquitin protein ligase 1
hsa-miR-580	1	0	1	0	1	1	PEG10	paternally expressed 10
hsa-miR-580	1	0	1	1	1	1	SMG1	smg-1 homolog, phosphatidylinositol 3-kinase-related kinase (C. elegans)
hsa-miR-580	1	0	1	1	1	1	TAB2	TGF-beta activated kinase 1/MAP3K7 binding protein 2
hsa-miR-580	1	0	1	0	1	1	LARP4B	La ribonucleoprotein domain family, member 4B
hsa-miR-580	1	0	1	1	1	1	TRIM9	tripartite motif containing 9
hsa-miR-580	1	0	1	1	1	1	SIK2	salt-inducible kinase 2
hsa-miR-580	1	0	1	1	1	1	PLCB1	phospholipase C, beta 1 (phosphoinositide-specific)
hsa-miR-580	1	0	1	1	1	1	PDS5A	PDS5, regulator of cohesion maintenance, homolog A (S. cerevisiae)
hsa-miR-580	1	0	1	0	1	1	KIAA1024	KIAA1024
hsa-miR-580	1	0	1	1	1	1	NUP160	nucleoporin 160kDa
hsa-miR-580	1	0	1	1	1	1	ANKS1A	ankyrin repeat and sterile alpha motif domain containing 1A
hsa-miR-580	1	0	1	0	1	1	KHNYN	KH and NYN domain containing
hsa-miR-580	1	0	1	1	1	1	MED13L	mediator complex subunit 13-like
hsa-miR-580	0	0	1	0	1	1	ZDHHC17	zinc finger, DHHC-type containing 17
hsa-miR-580	0	0	1	1	1	1	LEPROTL1	leptin receptor overlapping transcript-like 1
hsa-miR-580	0	0	1	1	1	1	ANAPC13	anaphase promoting complex subunit 13
hsa-miR-580	1	0	1	1	1	1	DCAF12	DDB1 and CUL4 associated factor 12
hsa-miR-580	1	0	1	1	1	1	MXRA5	matrix-remodelling associated 5
hsa-miR-580	1	0	1	1	1	1	CNOT6	CCR4-NOT transcription complex, subunit 6
hsa-miR-580	1	0	1	1	1	1	LRRTM2	leucine rich repeat transmembrane neuronal 2
hsa-miR-580	0	0	1	1	1	1	HERC4	HECT and RLD domain containing E3 ubiquitin protein ligase 4
hsa-miR-580	0	0	1	1	1	1	GIMAP2	GTPase, IMAP family member 2
hsa-miR-580	0	0	1	1	1	1	BRPF3	bromodomain and PHD finger containing, 3
hsa-miR-580	1	0	1	0	1	1	RRM2B	ribonucleotide reductase M2 B (TP53 inducible)
hsa-miR-580	1	0	1	1	1	1	ST8SIA3	ST8 alpha-N-acetyl-neuraminide alpha-2,8-sialyltransferase 3
hsa-miR-580	1	0	1	1	1	1	HOOK1	hook homolog 1 (Drosophila)
hsa-miR-580	1	0	1	1	1	1	MEMO1	mediator of cell motility 1
hsa-miR-580	1	0	1	1	1	1	TAF9B	TAF9B RNA polymerase II, TATA box binding protein (TBP)-associated factor, 31kDa
hsa-miR-580	0	0	1	1	0	0	HEBP1	heme binding protein 1
hsa-miR-580	0	0	1	1	1	1	SCCPDH	saccharopine dehydrogenase (putative)
hsa-miR-580	1	0	1	1	1	1	UBE2J1	ubiquitin-conjugating enzyme E2, J1
hsa-miR-580	0	0	1	1	1	1	SBDS	Shwachman-Bodian-Diamond syndrome
hsa-miR-580	1	0	1	0	1	1	WNT16	wingless-type MMTV integration site family, member 16
hsa-miR-580	0	0	1	1	1	1	COMMD2	COMM domain containing 2
hsa-miR-580	1	0	1	1	1	1	MPC1	mitochondrial pyruvate carrier 1
hsa-miR-580	0	0	1	1	1	1	RAB10	RAB10, member RAS oncogene family
hsa-miR-580	1	0	1	1	1	1	SNX9	sorting nexin 9
hsa-miR-580	1	0	1	1	1	1	AKAP11	A kinase (PRKA) anchor protein 11
hsa-miR-580	1	0	1	1	1	1	BIRC6	baculoviral IAP repeat containing 6
hsa-miR-580	1	0	1	0	1	1	HPCAL4	hippocalcin like 4
hsa-miR-580	1	0	1	1	1	1	RNF138	ring finger protein 138, E3 ubiquitin protein ligase
hsa-miR-580	1	0	1	1	1	1	TOB2	transducer of ERBB2, 2
hsa-miR-580	1	0	1	1	1	1	CMPK1	cytidine monophosphate (UMP-CMP) kinase 1, cytosolic
hsa-miR-580	0	0	1	1	1	1	CD244	CD244 molecule, natural killer cell receptor 2B4
hsa-miR-580	1	0	1	0	1	1	PTPLAD1	protein tyrosine phosphatase-like A domain containing 1
hsa-miR-580	0	0	1	0	1	1	ERAP1	endoplasmic reticulum aminopeptidase 1
hsa-miR-580	1	0	1	1	1	1	VTA1	Vps20-associated 1 homolog (S. cerevisiae)
hsa-miR-580	0	0	1	1	1	1	AMBN	ameloblastin (enamel matrix protein)
hsa-miR-580	0	0	1	1	1	1	CHCHD8	coiled-coil-helix-coiled-coil-helix domain containing 8
hsa-miR-580	1	0	1	1	1	1	RAB6B	RAB6B, member RAS oncogene family
hsa-miR-580	1	0	1	1	1	1	CYP39A1	cytochrome P450, family 39, subfamily A, polypeptide 1
hsa-miR-580	1	0	1	1	1	1	SIX4	SIX homeobox 4
hsa-miR-580	1	0	1	1	1	1	TMED9	transmembrane emp24 protein transport domain containing 9
hsa-miR-580	0	0	1	0	1	1	VEZT	vezatin, adherens junctions transmembrane protein
hsa-miR-580	1	0	1	0	1	1	EIF2C4	eukaryotic translation initiation factor 2C, 4
hsa-miR-580	1	0	1	1	1	1	ZNF280C	zinc finger protein 280C
hsa-miR-580	0	0	1	1	1	1	ERCC6L	excision repair cross-complementing rodent repair deficiency, complementation group 6-like
hsa-miR-580	1	0	1	0	1	1	FAM46C	family with sequence similarity 46, member C
hsa-miR-580	0	0	1	1	1	1	WHSC1L1	Wolf-Hirschhorn syndrome candidate 1-like 1
hsa-miR-580	1	0	1	0	1	1	CMTM6	CKLF-like MARVEL transmembrane domain containing 6
hsa-miR-580	1	0	1	1	1	1	UBE2R2	ubiquitin-conjugating enzyme E2R 2
hsa-miR-580	1	0	1	1	1	1	IMPAD1	inositol monophosphatase domain containing 1
hsa-miR-580	1	0	1	0	1	1	MARCH5	membrane-associated ring finger (C3HC4) 5
hsa-miR-580	0	0	1	1	1	1	COMMD8	COMM domain containing 8
hsa-miR-580	1	0	1	1	1	1	FAM120C	family with sequence similarity 120C
hsa-miR-580	0	0	1	1	1	1	NLRP2	NLR family, pyrin domain containing 2
hsa-miR-580	0	0	1	1	1	1	PIGX	phosphatidylinositol glycan anchor biosynthesis, class X
hsa-miR-580	0	0	1	1	1	1	C2orf42	chromosome 2 open reading frame 42
hsa-miR-580	1	0	1	0	1	1	SEMA4G	sema domain, immunoglobulin domain (Ig), transmembrane domain (TM) and short cytoplasmic domain, (semaphorin) 4G
hsa-miR-580	1	0	1	1	1	1	CDC37L1	cell division cycle 37 homolog (S. cerevisiae)-like 1
hsa-miR-580	0	0	1	1	1	1	SCYL2	SCY1-like 2 (S. cerevisiae)
hsa-miR-580	1	0	1	1	1	1	C9orf40	chromosome 9 open reading frame 40
hsa-miR-580	1	0	1	1	1	1	IFT57	intraflagellar transport 57 homolog (Chlamydomonas)
hsa-miR-580	1	0	1	1	1	1	ATG2B	autophagy related 2B
hsa-miR-580	0	0	1	1	0	0	CEP55	centrosomal protein 55kDa
hsa-miR-580	1	0	1	0	1	1	MSL2	male-specific lethal 2 homolog (Drosophila)
hsa-miR-580	0	0	1	1	1	1	SLC4A1AP	solute carrier family 4 (anion exchanger), member 1, adaptor protein
hsa-miR-580	1	0	1	1	1	1	RPRD1A	regulation of nuclear pre-mRNA domain containing 1A
hsa-miR-580	1	0	1	1	1	1	TBC1D13	TBC1 domain family, member 13
hsa-miR-580	0	0	1	1	0	0	CCDC87	coiled-coil domain containing 87
hsa-miR-580	0	0	1	1	1	1	PHF10	PHD finger protein 10
hsa-miR-580	1	0	1	1	1	1	C9orf72	chromosome 9 open reading frame 72
hsa-miR-580	0	0	1	1	1	1	TMEM144	transmembrane protein 144
hsa-miR-580	1	0	1	0	1	1	LIN7C	lin-7 homolog C (C. elegans)
hsa-miR-580	1	0	1	1	1	1	RSBN1	round spermatid basic protein 1
hsa-miR-580	1	0	1	1	1	1	DRAM1	DNA-damage regulated autophagy modulator 1
hsa-miR-580	1	0	1	1	1	1	SLC39A9	solute carrier family 39 (zinc transporter), member 9
hsa-miR-580	0	0	1	1	0	0	IL26	interleukin 26
hsa-miR-580	0	0	1	1	0	0	C17orf79	chromosome 17 open reading frame 79
hsa-miR-580	0	0	1	1	1	1	LAPTM4B	lysosomal protein transmembrane 4 beta
hsa-miR-580	1	0	1	0	1	1	FOXJ2	forkhead box J2
hsa-miR-580	1	0	1	1	1	1	EPB41L4B	erythrocyte membrane protein band 4.1 like 4B
hsa-miR-580	1	0	1	1	1	1	RRN3	RRN3 RNA polymerase I transcription factor homolog (S. cerevisiae)
hsa-miR-580	0	0	1	1	1	1	BDP1	B double prime 1, subunit of RNA polymerase III transcription initiation factor IIIB
hsa-miR-580	1	0	1	1	1	1	PAG1	phosphoprotein associated with glycosphingolipid microdomains 1
hsa-miR-580	0	0	1	1	1	1	CISD1	CDGSH iron sulfur domain 1
hsa-miR-580	0	0	1	0	0	0	FAM45B	family with sequence similarity 45, member A pseudogene
hsa-miR-580	1	0	1	1	1	1	ETNK1	ethanolamine kinase 1
hsa-miR-580	0	0	1	0	0	0	APOBR	apolipoprotein B receptor
hsa-miR-580	1	0	1	1	1	1	CTTNBP2NL	CTTNBP2 N-terminal like
hsa-miR-580	1	0	1	1	1	1	PCDHGA1	protocadherin gamma subfamily A, 1
hsa-miR-580	1	0	1	0	1	1	PCDHGA10	protocadherin gamma subfamily A, 10
hsa-miR-580	1	0	1	0	1	1	PCDHGA11	protocadherin gamma subfamily A, 11
hsa-miR-580	1	0	1	1	1	1	PCDHGA2	protocadherin gamma subfamily A, 2
hsa-miR-580	1	0	1	0	1	1	PCDHGA3	protocadherin gamma subfamily A, 3
hsa-miR-580	1	0	1	0	1	1	PCDHGA4	protocadherin gamma subfamily A, 4
hsa-miR-580	1	0	1	0	1	1	PCDHGA5	protocadherin gamma subfamily A, 5
hsa-miR-580	1	0	1	0	1	1	PCDHGA6	protocadherin gamma subfamily A, 6
hsa-miR-580	1	0	1	0	1	1	PCDHGA7	protocadherin gamma subfamily A, 7
hsa-miR-580	1	0	1	0	1	1	PCDHGA9	protocadherin gamma subfamily A, 9
hsa-miR-580	1	0	1	0	1	1	PCDHGB1	protocadherin gamma subfamily B, 1
hsa-miR-580	1	0	1	0	1	1	PCDHGB2	protocadherin gamma subfamily B, 2
hsa-miR-580	1	0	1	0	1	1	PCDHGB3	protocadherin gamma subfamily B, 3
hsa-miR-580	1	0	1	0	1	1	PCDHGB5	protocadherin gamma subfamily B, 5
hsa-miR-580	1	0	1	0	1	1	PCDHGB6	protocadherin gamma subfamily B, 6
hsa-miR-580	1	0	1	0	1	1	PCDHGB7	protocadherin gamma subfamily B, 7
hsa-miR-580	1	0	1	0	1	1	PCDHGC4	protocadherin gamma subfamily C, 4
hsa-miR-580	1	0	1	0	1	1	PCDHGC5	protocadherin gamma subfamily C, 5
hsa-miR-580	0	0	1	1	1	1	RIN2	Ras and Rab interactor 2
hsa-miR-580	1	0	1	0	1	1	FAM190B	family with sequence similarity 190, member B
hsa-miR-580	0	0	1	1	1	1	DHX29	DEAH (Asp-Glu-Ala-His) box polypeptide 29
hsa-miR-580	1	0	1	0	1	1	CCNJ	cyclin J
hsa-miR-580	0	0	1	0	1	1	ARL15	ADP-ribosylation factor-like 15
hsa-miR-580	0	0	1	1	1	1	KLHL4	kelch-like 4 (Drosophila)
hsa-miR-580	1	0	1	1	1	1	CCBL2	cysteine conjugate-beta lyase 2
hsa-miR-580	1	0	1	1	1	1	ERO1LB	ERO1-like beta (S. cerevisiae)
hsa-miR-580	0	0	1	1	1	1	FMN2	formin 2
hsa-miR-580	1	0	1	0	1	1	KCMF1	potassium channel modulatory factor 1
hsa-miR-580	1	0	1	0	1	1	SLAMF8	SLAM family member 8
hsa-miR-580	1	0	1	1	1	1	FEM1C	fem-1 homolog c (C. elegans)
hsa-miR-580	0	0	1	1	1	1	ACN9	ACN9 homolog (S. cerevisiae)
hsa-miR-580	1	0	1	1	1	1	C5orf15	chromosome 5 open reading frame 15
hsa-miR-580	0	0	1	1	1	1	PRTFDC1	phosphoribosyl transferase domain containing 1
hsa-miR-580	1	0	1	1	0	0	SLC17A7	solute carrier family 17 (sodium-dependent inorganic phosphate cotransporter), member 7
hsa-miR-580	1	0	1	1	1	1	KIAA1244	KIAA1244
hsa-miR-580	1	0	1	1	1	1	PAK7	p21 protein (Cdc42/Rac)-activated kinase 7
hsa-miR-580	1	0	1	1	1	1	PITHD1	PITH (C-terminal proteasome-interacting domain of thioredoxin-like) domain containing 1
hsa-miR-580	0	0	1	1	1	1	HRASLS	HRAS-like suppressor
hsa-miR-580	1	0	1	0	1	1	EIF5A2	eukaryotic translation initiation factor 5A2
hsa-miR-580	0	0	1	1	0	0	CHRNA10	cholinergic receptor, nicotinic, alpha 10 (neuronal)
hsa-miR-580	1	0	1	1	1	1	PCDH9	protocadherin 9
hsa-miR-580	0	0	1	1	1	1	PLXDC1	plexin domain containing 1
hsa-miR-580	1	0	1	1	1	1	PTGFRN	prostaglandin F2 receptor negative regulator
hsa-miR-580	1	0	1	0	1	1	DCUN1D1	DCN1, defective in cullin neddylation 1, domain containing 1 (S. cerevisiae)
hsa-miR-580	1	0	1	1	1	1	RAB22A	RAB22A, member RAS oncogene family
hsa-miR-580	0	0	1	1	0	0	AMIGO1	adhesion molecule with Ig-like domain 1
hsa-miR-580	0	0	1	0	1	1	ZNF490	zinc finger protein 490
hsa-miR-580	0	0	1	1	1	1	SHROOM4	shroom family member 4
hsa-miR-580	1	0	1	1	1	1	USP31	ubiquitin specific peptidase 31
hsa-miR-580	1	0	1	1	1	1	DLG3	discs, large homolog 3 (Drosophila)
hsa-miR-580	1	0	1	0	1	1	NUFIP2	nuclear fragile X mental retardation protein interacting protein 2
hsa-miR-580	1	0	1	1	1	1	MIB1	mindbomb E3 ubiquitin protein ligase 1
hsa-miR-580	1	0	1	1	1	1	SIPA1L2	signal-induced proliferation-associated 1 like 2
hsa-miR-580	0	0	1	0	1	1	TRMT5	tRNA methyltransferase 5 homolog (S. cerevisiae)
hsa-miR-580	1	0	1	1	1	1	RANBP10	RAN binding protein 10
hsa-miR-580	1	0	1	1	1	1	TSHZ3	teashirt zinc finger homeobox 3
hsa-miR-580	0	0	1	1	1	1	KLHL1	kelch-like 1 (Drosophila)
hsa-miR-580	1	0	1	1	1	1	CNTN3	contactin 3 (plasmacytoma associated)
hsa-miR-580	1	0	1	0	1	1	GPAM	glycerol-3-phosphate acyltransferase, mitochondrial
hsa-miR-580	1	0	1	1	1	1	ALS2	amyotrophic lateral sclerosis 2 (juvenile)
hsa-miR-580	0	0	1	1	1	1	SLC7A14	solute carrier family 7 (orphan transporter), member 14
hsa-miR-580	0	0	1	1	1	1	B3GALT1	UDP-Gal:betaGlcNAc beta 1,3-galactosyltransferase, polypeptide 1
hsa-miR-580	0	0	1	1	1	1	SSX3	synovial sarcoma, X breakpoint 3
hsa-miR-580	1	0	1	1	1	1	SNTB1	syntrophin, beta 1 (dystrophin-associated protein A1, 59kDa, basic component 1)
hsa-miR-580	1	0	1	0	1	1	RAP2A	RAP2A, member of RAS oncogene family
hsa-miR-580	0	0	1	1	0	0	IFNA7	interferon, alpha 7
hsa-miR-580	0	0	1	1	1	1	SLC15A2	solute carrier family 15 (H+/peptide transporter), member 2
hsa-miR-580	1	0	1	0	1	1	XK	X-linked Kx blood group (McLeod syndrome)
hsa-miR-580	1	0	1	1	1	1	CLDN1	claudin 1
hsa-miR-580	1	0	1	1	1	1	GRHL3	grainyhead-like 3 (Drosophila)
hsa-miR-580	0	0	1	0	1	1	MS4A7	membrane-spanning 4-domains, subfamily A, member 7
hsa-miR-580	1	0	1	1	1	1	RPRD1B	regulation of nuclear pre-mRNA domain containing 1B
hsa-miR-580	0	0	1	1	1	1	OSTC	oligosaccharyltransferase complex subunit
hsa-miR-580	1	0	1	1	1	1	NTN4	netrin 4
hsa-miR-580	0	0	1	1	1	1	PRDM13	PR domain containing 13
hsa-miR-580	1	0	1	1	1	1	SENP2	SUMO1/sentrin/SMT3 specific peptidase 2
hsa-miR-580	1	0	1	1	1	1	TMEM35	transmembrane protein 35
hsa-miR-580	1	0	1	0	1	1	TSPYL4	TSPY-like 4
hsa-miR-580	1	0	1	1	1	1	BACH2	BTB and CNC homology 1, basic leucine zipper transcription factor 2
hsa-miR-580	1	0	1	0	1	1	MCL1	myeloid cell leukemia sequence 1 (BCL2-related)
hsa-miR-580	1	0	1	1	1	1	SLC22A3	solute carrier family 22 (extraneuronal monoamine transporter), member 3
hsa-miR-580	1	0	1	1	1	1	SEC24A	SEC24 family, member A (S. cerevisiae)
hsa-miR-580	0	0	1	1	1	1	ITM2B	integral membrane protein 2B
hsa-miR-580	1	0	1	0	1	1	GAN	gigaxonin
hsa-miR-580	1	0	1	0	1	1	CSNK1G1	casein kinase 1, gamma 1
hsa-miR-580	1	0	1	1	1	1	EGLN1	egl nine homolog 1 (C. elegans)
hsa-miR-580	1	0	1	1	1	1	SNX16	sorting nexin 16
hsa-miR-580	0	0	1	1	1	1	POPDC3	popeye domain containing 3
hsa-miR-580	1	0	1	1	1	1	XPO4	exportin 4
hsa-miR-580	1	0	1	1	1	1	HIF3A	hypoxia inducible factor 3, alpha subunit
hsa-miR-580	1	0	1	0	1	1	GREM2	gremlin 2
hsa-miR-580	0	0	1	1	1	1	HHIP	hedgehog interacting protein
hsa-miR-580	1	0	1	1	1	1	NDRG3	NDRG family member 3
hsa-miR-580	1	0	1	1	1	1	TMEM168	transmembrane protein 168
hsa-miR-580	0	0	1	1	0	0	TSPY2	testis specific protein, Y-linked 2
hsa-miR-580	0	0	1	1	1	1	ACBD3	acyl-CoA binding domain containing 3
hsa-miR-580	1	0	1	1	1	1	FAM59A	family with sequence similarity 59, member A
hsa-miR-580	1	0	1	1	1	1	YTHDC2	YTH domain containing 2
hsa-miR-580	0	0	1	1	1	1	METTL4	methyltransferase like 4
hsa-miR-580	1	0	1	1	1	1	RFX7	regulatory factor X, 7
hsa-miR-580	0	0	1	0	1	1	NAIP	NLR family, apoptosis inhibitory protein
hsa-miR-580	1	0	1	0	1	1	BCL11B	B-cell CLL/lymphoma 11B (zinc finger protein)
hsa-miR-580	1	0	1	1	1	1	REEP1	receptor accessory protein 1
hsa-miR-580	1	0	1	1	1	1	SOWAHC	sosondowah ankyrin repeat domain family member C
hsa-miR-580	1	0	1	1	1	1	GID4	GID complex subunit 4, VID24 homolog (S. cerevisiae)
hsa-miR-580	1	0	1	1	0	0	APOO	apolipoprotein O
hsa-miR-580	1	0	1	1	1	1	FAM134A	family with sequence similarity 134, member A
hsa-miR-580	1	0	1	1	0	0	PHF23	PHD finger protein 23
hsa-miR-580	1	0	1	1	1	1	C7orf23	chromosome 7 open reading frame 23
hsa-miR-580	1	0	1	1	1	1	EFHD2	EF-hand domain family, member D2
hsa-miR-580	1	0	1	1	1	1	LRRC2	leucine rich repeat containing 2
hsa-miR-580	1	0	1	1	1	1	NKAIN1	Na+/K+ transporting ATPase interacting 1
hsa-miR-580	0	0	1	1	0	0	TNFAIP8L2	tumor necrosis factor, alpha-induced protein 8-like 2
hsa-miR-580	1	0	1	1	1	1	PPP1R3B	protein phosphatase 1, regulatory subunit 3B
hsa-miR-580	0	0	1	1	1	1	SAP30L	SAP30-like
hsa-miR-580	0	0	1	1	0	0	NARS2	asparaginyl-tRNA synthetase 2, mitochondrial (putative)
hsa-miR-580	0	0	1	1	1	1	TTLL7	tubulin tyrosine ligase-like family, member 7
hsa-miR-580	0	0	1	0	1	1	C1orf115	chromosome 1 open reading frame 115
hsa-miR-580	1	0	1	0	1	1	ZFHX4	zinc finger homeobox 4
hsa-miR-580	0	0	1	1	1	1	WDR78	WD repeat domain 78
hsa-miR-580	1	0	1	1	1	1	CLMP	CXADR-like membrane protein
hsa-miR-580	0	0	1	1	1	1	PREX2	phosphatidylinositol-3,4,5-trisphosphate-dependent Rac exchange factor 2
hsa-miR-580	1	0	1	1	1	1	CPED1	cadherin-like and PC-esterase domain containing 1
hsa-miR-580	1	0	1	0	1	1	NAA25	N(alpha)-acetyltransferase 25, NatB auxiliary subunit
hsa-miR-580	1	0	1	1	1	1	KLHL18	kelch-like 18 (Drosophila)
hsa-miR-580	1	0	1	0	1	1	VCPIP1	valosin containing protein (p97)/p47 complex interacting protein 1
hsa-miR-580	1	0	1	1	1	1	SLC35F5	solute carrier family 35, member F5
hsa-miR-580	1	0	1	0	1	1	EDEM3	ER degradation enhancer, mannosidase alpha-like 3
hsa-miR-580	1	0	1	1	1	1	TRIB1	tribbles homolog 1 (Drosophila)
hsa-miR-580	0	0	1	0	0	0	CXXC4	CXXC finger protein 4
hsa-miR-580	1	0	1	1	1	1	CYB5B	cytochrome b5 type B (outer mitochondrial membrane)
hsa-miR-580	1	0	1	1	1	1	JHDM1D	jumonji C domain containing histone demethylase 1 homolog D (S. cerevisiae)
hsa-miR-580	1	0	1	0	1	1	SETD7	SET domain containing (lysine methyltransferase) 7
hsa-miR-580	1	0	1	1	1	1	HOXA3	homeobox A3
hsa-miR-580	1	0	1	1	1	1	SYNC	syncoilin, intermediate filament protein
hsa-miR-580	1	0	1	1	1	1	SGPP1	sphingosine-1-phosphate phosphatase 1
hsa-miR-580	1	0	1	0	1	1	C1orf21	chromosome 1 open reading frame 21
hsa-miR-580	1	0	1	1	1	1	MAP4	microtubule-associated protein 4
hsa-miR-580	0	0	1	1	1	1	ISCA1	iron-sulfur cluster assembly 1 homolog (S. cerevisiae)
hsa-miR-580	0	0	1	1	1	1	ARPC5L	actin related protein 2/3 complex, subunit 5-like
hsa-miR-580	0	0	1	1	1	1	SEH1L	SEH1-like (S. cerevisiae)
hsa-miR-580	1	0	1	1	1	1	GABARAPL1	GABA(A) receptor-associated protein like 1
hsa-miR-580	1	0	1	1	1	1	ANO3	anoctamin 3
hsa-miR-580	1	0	1	1	1	1	DNAL1	dynein, axonemal, light chain 1
hsa-miR-580	0	0	1	1	1	1	COG3	component of oligomeric golgi complex 3
hsa-miR-580	1	0	1	0	1	1	TMEM47	transmembrane protein 47
hsa-miR-580	1	0	1	0	1	1	SH3BGRL2	SH3 domain binding glutamic acid-rich protein like 2
hsa-miR-580	0	0	1	1	1	1	INHBE	inhibin, beta E
hsa-miR-580	1	0	1	0	1	1	ITCH	itchy E3 ubiquitin protein ligase
hsa-miR-580	0	0	1	0	1	1	ENAM	enamelin
hsa-miR-580	1	0	1	1	0	0	SPATA16	spermatogenesis associated 16
hsa-miR-580	1	0	1	0	1	1	PCDHGA8	protocadherin gamma subfamily A, 8
hsa-miR-580	1	0	1	1	1	1	OTP	orthopedia homeobox
hsa-miR-580	1	0	1	1	1	1	FBXO30	F-box protein 30
hsa-miR-580	1	0	1	1	1	1	FAM175B	family with sequence similarity 175, member B
hsa-miR-580	1	0	1	1	1	1	ARID5B	AT rich interactive domain 5B (MRF1-like)
hsa-miR-580	0	0	1	1	1	1	FAM96A	family with sequence similarity 96, member A
hsa-miR-580	0	0	1	1	0	0	GARNL3	GTPase activating Rap/RanGAP domain-like 3
hsa-miR-580	0	0	1	1	0	0	NICN1	nicolin 1
hsa-miR-580	1	0	1	1	1	1	ING5	inhibitor of growth family, member 5
hsa-miR-580	1	0	1	1	1	1	BRMS1L	breast cancer metastasis-suppressor 1-like
hsa-miR-580	0	0	1	1	1	1	C5orf4	chromosome 5 open reading frame 4
hsa-miR-580	0	0	1	1	1	1	FNDC1	fibronectin type III domain containing 1
hsa-miR-580	0	0	1	1	1	1	HCAR1	hydroxycarboxylic acid receptor 1
hsa-miR-580	1	0	1	0	1	1	ADO	2-aminoethanethiol (cysteamine) dioxygenase
hsa-miR-580	1	0	1	0	1	1	PPP1R15B	protein phosphatase 1, regulatory subunit 15B
hsa-miR-580	1	0	1	1	1	1	ABHD13	abhydrolase domain containing 13
hsa-miR-580	1	0	1	1	1	1	ARHGAP19	Rho GTPase activating protein 19
hsa-miR-580	1	0	1	1	1	1	PCDH11Y	protocadherin 11 Y-linked
hsa-miR-580	0	0	1	0	1	1	TSLP	thymic stromal lymphopoietin
hsa-miR-580	1	0	1	1	1	1	HIAT1	hippocampus abundant transcript 1
hsa-miR-580	0	0	1	1	1	1	ZIC5	Zic family member 5
hsa-miR-580	1	0	1	0	1	1	PURB	purine-rich element binding protein B
hsa-miR-580	1	0	1	1	1	1	ADAM19	ADAM metallopeptidase domain 19
hsa-miR-580	0	0	1	1	1	1	MRPS36	mitochondrial ribosomal protein S36
hsa-miR-580	1	0	1	1	1	1	TP53INP1	tumor protein p53 inducible nuclear protein 1
hsa-miR-580	0	0	1	1	1	1	LHX4	LIM homeobox 4
hsa-miR-580	0	0	1	1	1	1	CTTNBP2	cortactin binding protein 2
hsa-miR-580	0	0	1	0	1	1	C9orf123	chromosome 9 open reading frame 123
hsa-miR-580	1	0	1	1	1	1	EPT1	ethanolaminephosphotransferase 1 (CDP-ethanolamine-specific)
hsa-miR-580	0	0	1	1	1	1	ARHGAP18	Rho GTPase activating protein 18
hsa-miR-580	1	0	1	1	1	1	STX1B	syntaxin 1B
hsa-miR-580	1	0	1	1	1	1	SLC2A13	solute carrier family 2 (facilitated glucose transporter), member 13
hsa-miR-580	0	0	1	1	1	1	PLEKHG4B	pleckstrin homology domain containing, family G (with RhoGef domain) member 4B
hsa-miR-580	1	0	1	1	1	1	ESCO1	establishment of cohesion 1 homolog 1 (S. cerevisiae)
hsa-miR-580	1	0	1	0	1	1	TMEM123	transmembrane protein 123
hsa-miR-580	0	0	1	1	0	0	THEM4	thioesterase superfamily member 4
hsa-miR-580	1	0	1	1	1	1	SRSF10	serine/arginine-rich splicing factor 10
[truncated: 679 more rows]
