# Supplementary material for: Profiling of Selected MicroRNAs in Proliferative Eutopic Endometrium of Women with Ovarian Endometriosis
Source: Biomed Res Int. 2015 Aug 20;2015:760698. doi: 10.1155/2015/760698 (PMC4558423; doi:10.1155/2015/760698)
Supplement: Supplementary file 1 — Table I: The names of miRNAs significantly differentially expressed between eutopic endometrium of patients with endometriosis vs eutopic endometrium of patients without endometriosis. Table II: The associations between miRNA and mRNA, which presents detailed results of the search of six major databases i.e targetscan, tarbase, miranda, mirbase, mirtarget2 and pictar. [file 760698.f1.zip › 760698.f1/Table II/hsa-miR-582-3p.tsv]

miR	targetscan	tarbase	miranda	mirbase	mirtarget2	pictar	GeneSymbol	GeneName
hsa-miR-582-3p	1	0	1	1	1	1	ZFYVE16	zinc finger, FYVE domain containing 16
hsa-miR-582-3p	1	0	1	1	1	1	CHD9	chromodomain helicase DNA binding protein 9
hsa-miR-582-3p	1	0	1	1	0	0	RAPGEF2	Rap guanine nucleotide exchange factor (GEF) 2
hsa-miR-582-3p	1	0	1	1	1	1	IGSF1	immunoglobulin superfamily, member 1
hsa-miR-582-3p	1	0	1	0	1	1	PTPRT	protein tyrosine phosphatase, receptor type, T
hsa-miR-582-3p	1	0	1	0	1	1	KIAA0408	KIAA0408
hsa-miR-582-3p	1	0	1	0	1	1	NEDD4L	neural precursor cell expressed, developmentally down-regulated 4-like, E3 ubiquitin protein ligase
hsa-miR-582-3p	0	0	1	0	1	1	KLHL21	kelch-like 21 (Drosophila)
hsa-miR-582-3p	1	0	1	0	1	1	CEP350	centrosomal protein 350kDa
hsa-miR-582-3p	0	0	1	1	1	1	NEU3	sialidase 3 (membrane sialidase)
hsa-miR-582-3p	1	0	1	1	0	0	SUSD5	sushi domain containing 5
hsa-miR-582-3p	1	0	1	1	0	0	PCLO	piccolo (presynaptic cytomatrix protein)
hsa-miR-582-3p	1	0	1	1	1	1	PPP6R2	protein phosphatase 6, regulatory subunit 2
hsa-miR-582-3p	1	0	1	0	1	1	LPHN3	latrophilin 3
hsa-miR-582-3p	1	0	1	1	1	1	DNM3	dynamin 3
hsa-miR-582-3p	1	0	1	1	1	1	DMXL2	Dmx-like 2
hsa-miR-582-3p	1	0	1	1	1	1	CDK12	cyclin-dependent kinase 12
hsa-miR-582-3p	1	0	1	1	1	1	CIT	citron (rho-interacting, serine/threonine kinase 21)
hsa-miR-582-3p	1	0	1	1	1	1	C11orf9	chromosome 11 open reading frame 9
hsa-miR-582-3p	1	0	1	1	1	1	RGL1	ral guanine nucleotide dissociation stimulator-like 1
hsa-miR-582-3p	0	0	1	1	1	1	TBC1D30	TBC1 domain family, member 30
hsa-miR-582-3p	1	0	1	1	1	1	NLGN1	neuroligin 1
hsa-miR-582-3p	1	0	1	0	1	1	ZNF507	zinc finger protein 507
hsa-miR-582-3p	1	0	1	1	1	1	SMARCAD1	SWI/SNF-related, matrix-associated actin-dependent regulator of chromatin, subfamily a, containing DEAD/H box 1
hsa-miR-582-3p	1	0	1	1	1	1	SPIRE1	spire homolog 1 (Drosophila)
hsa-miR-582-3p	1	0	1	1	0	0	ATAD2B	ATPase family, AAA domain containing 2B
hsa-miR-582-3p	1	0	1	1	1	1	ASAP1	ArfGAP with SH3 domain, ankyrin repeat and PH domain 1
hsa-miR-582-3p	0	0	1	1	1	1	FILIP1	filamin A interacting protein 1
hsa-miR-582-3p	1	0	1	1	1	1	STK36	serine/threonine kinase 36
hsa-miR-582-3p	0	0	1	1	1	1	CA10	carbonic anhydrase X
hsa-miR-582-3p	1	0	1	0	1	1	KCTD16	potassium channel tetramerisation domain containing 16
hsa-miR-582-3p	1	0	1	1	1	1	CASK	calcium/calmodulin-dependent serine protein kinase (MAGUK family)
hsa-miR-582-3p	1	0	1	1	0	0	ZSWIM5	zinc finger, SWIM-type containing 5
hsa-miR-582-3p	1	0	1	1	1	1	PPP6R3	protein phosphatase 6, regulatory subunit 3
hsa-miR-582-3p	1	0	1	1	0	0	MAGI3	membrane associated guanylate kinase, WW and PDZ domain containing 3
hsa-miR-582-3p	1	0	1	1	1	1	PTBP2	polypyrimidine tract binding protein 2
hsa-miR-582-3p	0	0	1	1	1	1	BHLHB9	basic helix-loop-helix domain containing, class B, 9
hsa-miR-582-3p	0	0	1	1	1	1	SPEF2	sperm flagellar 2
hsa-miR-582-3p	1	0	1	0	1	1	RIMS1	regulating synaptic membrane exocytosis 1
hsa-miR-582-3p	1	0	1	1	1	1	NPAS3	neuronal PAS domain protein 3
hsa-miR-582-3p	1	0	1	1	1	1	BCL2L11	BCL2-like 11 (apoptosis facilitator)
hsa-miR-582-3p	0	0	1	0	1	1	MYO18B	myosin XVIIIB
hsa-miR-582-3p	0	0	1	0	1	1	CADM1	cell adhesion molecule 1
hsa-miR-582-3p	1	0	1	0	0	0	ZC3H12C	zinc finger CCCH-type containing 12C
hsa-miR-582-3p	0	0	1	1	1	1	MICAL2	microtubule associated monoxygenase, calponin and LIM domain containing 2
hsa-miR-582-3p	1	0	1	0	1	1	NFE2L2	nuclear factor (erythroid-derived 2)-like 2
hsa-miR-582-3p	0	0	1	0	1	1	ATR	ataxia telangiectasia and Rad3 related
hsa-miR-582-3p	1	0	1	1	1	1	OSBPL6	oxysterol binding protein-like 6
hsa-miR-582-3p	0	0	1	1	0	0	STON2	stonin 2
hsa-miR-582-3p	1	0	1	1	1	1	MEF2A	myocyte enhancer factor 2A
hsa-miR-582-3p	0	0	1	1	1	1	DNM1L	dynamin 1-like
hsa-miR-582-3p	1	0	1	1	1	1	SYNCRIP	synaptotagmin binding, cytoplasmic RNA interacting protein
hsa-miR-582-3p	1	0	1	0	1	1	PLAG1	pleiomorphic adenoma gene 1
hsa-miR-582-3p	1	0	1	1	0	0	TSPYL2	TSPY-like 2
hsa-miR-582-3p	1	0	1	1	1	1	E2F5	E2F transcription factor 5, p130-binding
hsa-miR-582-3p	1	0	1	0	1	1	DPYSL2	dihydropyrimidinase-like 2
hsa-miR-582-3p	1	0	1	1	1	1	TBX2	T-box 2
hsa-miR-582-3p	1	0	1	1	1	1	PML	promyelocytic leukemia
hsa-miR-582-3p	0	0	1	1	0	0	IFT27	intraflagellar transport 27 homolog (Chlamydomonas)
hsa-miR-582-3p	0	0	1	1	1	1	RYR1	ryanodine receptor 1 (skeletal)
hsa-miR-582-3p	0	0	1	0	0	0	CACNA1B	calcium channel, voltage-dependent, N type, alpha 1B subunit
hsa-miR-582-3p	1	0	1	0	1	1	TBL1X	transducin (beta)-like 1X-linked
hsa-miR-582-3p	1	0	1	1	1	1	COL24A1	collagen, type XXIV, alpha 1
hsa-miR-582-3p	0	0	1	1	0	0	SLC22A8	solute carrier family 22 (organic anion transporter), member 8
hsa-miR-582-3p	1	0	1	1	1	1	GOLGA4	golgin A4
hsa-miR-582-3p	0	0	1	1	0	0	MBD1	methyl-CpG binding domain protein 1
hsa-miR-582-3p	0	0	1	1	1	1	KIF3A	kinesin family member 3A
hsa-miR-582-3p	1	0	1	1	1	1	OSBPL10	oxysterol binding protein-like 10
hsa-miR-582-3p	1	0	1	1	1	1	GULP1	GULP, engulfment adaptor PTB domain containing 1
hsa-miR-582-3p	1	0	1	1	1	1	PHLDB2	pleckstrin homology-like domain, family B, member 2
hsa-miR-582-3p	1	0	1	1	1	1	MEF2D	myocyte enhancer factor 2D
hsa-miR-582-3p	0	0	1	0	1	1	MS4A4E	membrane-spanning 4-domains, subfamily A, member 4E
hsa-miR-582-3p	0	0	1	0	1	1	PARG	poly (ADP-ribose) glycohydrolase
hsa-miR-582-3p	1	0	1	0	1	1	MLL2	myeloid/lymphoid or mixed-lineage leukemia 2
hsa-miR-582-3p	1	0	1	0	1	1	PDE4D	phosphodiesterase 4D, cAMP-specific
hsa-miR-582-3p	0	0	1	0	0	0	ALOX12P2	arachidonate 12-lipoxygenase pseudogene 2
hsa-miR-582-3p	1	0	1	1	1	1	PCDH17	protocadherin 17
hsa-miR-582-3p	1	0	1	0	1	1	CELF2	CUGBP, Elav-like family member 2
hsa-miR-582-3p	1	0	1	1	1	1	ZFAND6	zinc finger, AN1-type domain 6
hsa-miR-582-3p	1	0	1	1	1	1	CTNND1	catenin (cadherin-associated protein), delta 1
hsa-miR-582-3p	1	0	1	1	1	1	CBFA2T2	core-binding factor, runt domain, alpha subunit 2; translocated to, 2
hsa-miR-582-3p	1	0	1	1	1	1	TMEM159	transmembrane protein 159
hsa-miR-582-3p	1	0	1	1	0	0	PRRC2A	proline-rich coiled-coil 2A
hsa-miR-582-3p	0	0	1	1	1	1	ERAL1	Era G-protein-like 1 (E. coli)
hsa-miR-582-3p	0	0	1	1	1	1	MINPP1	multiple inositol-polyphosphate phosphatase 1
hsa-miR-582-3p	0	0	1	1	1	1	PLEKHB1	pleckstrin homology domain containing, family B (evectins) member 1
hsa-miR-582-3p	1	0	1	1	1	1	LPHN2	latrophilin 2
hsa-miR-582-3p	1	0	1	0	1	1	CDK14	cyclin-dependent kinase 14
hsa-miR-582-3p	1	0	1	0	1	1	FAM19A5	family with sequence similarity 19 (chemokine (C-C motif)-like), member A5
hsa-miR-582-3p	1	0	1	1	1	1	C14orf129	chromosome 14 open reading frame 129
hsa-miR-582-3p	0	0	1	1	1	1	SAP30L	SAP30-like
hsa-miR-582-3p	0	0	1	1	1	1	ZMYM5	zinc finger, MYM-type 5
hsa-miR-582-3p	1	0	1	1	1	1	MARK3	MAP/microtubule affinity-regulating kinase 3
hsa-miR-582-3p	0	0	1	1	1	1	SCLY	selenocysteine lyase
hsa-miR-582-3p	0	0	1	0	1	1	CLDN2	claudin 2
hsa-miR-582-3p	1	0	1	1	1	1	TSC22D2	TSC22 domain family, member 2
hsa-miR-582-3p	1	0	1	1	1	1	NXT2	nuclear transport factor 2-like export factor 2
hsa-miR-582-3p	0	0	1	1	0	0	DBNDD2	dysbindin (dystrobrevin binding protein 1) domain containing 2
hsa-miR-582-3p	1	0	1	1	1	1	OGT	O-linked N-acetylglucosamine (GlcNAc) transferase
hsa-miR-582-3p	1	0	1	1	1	1	RSF1	remodeling and spacing factor 1
hsa-miR-582-3p	1	0	1	1	1	1	STRN3	striatin, calmodulin binding protein 3
hsa-miR-582-3p	0	0	1	1	0	0	NYX	nyctalopin
hsa-miR-582-3p	1	0	1	1	1	1	RBM47	RNA binding motif protein 47
hsa-miR-582-3p	1	0	1	0	1	1	TRPS1	trichorhinophalangeal syndrome I
hsa-miR-582-3p	0	0	1	1	1	1	ZNF331	zinc finger protein 331
hsa-miR-582-3p	1	0	1	1	1	1	PUM2	pumilio homolog 2 (Drosophila)
hsa-miR-582-3p	1	0	1	1	1	1	RNF6	ring finger protein (C3H2C3 type) 6
hsa-miR-582-3p	0	0	1	0	1	1	C1QTNF7	C1q and tumor necrosis factor related protein 7
hsa-miR-582-3p	0	0	1	1	1	1	U2AF1	U2 small nuclear RNA auxiliary factor 1
hsa-miR-582-3p	0	0	1	1	1	1	WBP2NL	WBP2 N-terminal like
hsa-miR-582-3p	0	0	1	1	1	1	MAD2L1	MAD2 mitotic arrest deficient-like 1 (yeast)
hsa-miR-582-3p	0	0	1	1	1	1	RAPGEF6	Rap guanine nucleotide exchange factor (GEF) 6
hsa-miR-582-3p	1	0	1	1	1	1	RCAN1	regulator of calcineurin 1
hsa-miR-582-3p	0	0	1	1	0	0	SNRPN	small nuclear ribonucleoprotein polypeptide N
hsa-miR-582-3p	1	0	1	1	1	1	NTRK2	neurotrophic tyrosine kinase, receptor, type 2
hsa-miR-582-3p	0	0	1	0	1	1	NBPF15	neuroblastoma breakpoint family, member 15
hsa-miR-582-3p	1	0	1	1	1	1	RBFOX1	RNA binding protein, fox-1 homolog (C. elegans) 1
hsa-miR-582-3p	1	0	1	0	1	1	PPP1R12A	protein phosphatase 1, regulatory subunit 12A
hsa-miR-582-3p	1	0	1	1	1	1	WAPAL	wings apart-like homolog (Drosophila)
hsa-miR-582-3p	0	0	1	1	0	0	CLDN19	claudin 19
hsa-miR-582-3p	1	0	1	1	1	1	IQCK	IQ motif containing K
hsa-miR-582-3p	0	0	1	1	1	1	ANKRD36B	ankyrin repeat domain 36B
hsa-miR-582-3p	1	0	1	1	1	1	AFF2	AF4/FMR2 family, member 2
hsa-miR-582-3p	0	0	1	1	1	1	KCNJ13	potassium inwardly-rectifying channel, subfamily J, member 13
hsa-miR-582-3p	0	0	1	1	1	1	RANBP17	RAN binding protein 17
hsa-miR-582-3p	0	0	1	1	0	0	KIF13A	kinesin family member 13A
hsa-miR-582-3p	0	0	1	0	0	0	CD177	CD177 molecule
hsa-miR-582-3p	1	0	1	1	1	1	NAV3	neuron navigator 3
hsa-miR-582-3p	0	0	1	1	1	1	ZNF248	zinc finger protein 248
hsa-miR-582-3p	1	0	1	1	1	1	VAMP7	vesicle-associated membrane protein 7
hsa-miR-582-3p	1	0	1	1	1	1	ARL4C	ADP-ribosylation factor-like 4C
hsa-miR-582-3p	1	0	1	1	1	1	XIRP1	xin actin-binding repeat containing 1
hsa-miR-582-3p	1	0	1	1	1	1	PPP1R9A	protein phosphatase 1, regulatory subunit 9A
hsa-miR-582-3p	1	0	1	1	1	1	AKAP2	A kinase (PRKA) anchor protein 2
hsa-miR-582-3p	1	0	1	0	1	1	NFAT5	nuclear factor of activated T-cells 5, tonicity-responsive
hsa-miR-582-3p	0	0	1	0	0	0	TUG1	taurine upregulated 1 (non-protein coding)
hsa-miR-582-3p	0	0	1	1	1	1	HEATR3	HEAT repeat containing 3
hsa-miR-582-3p	1	0	1	1	1	1	CCZ1B	CCZ1 vacuolar protein trafficking and biogenesis associated homolog B (S. cerevisiae)
hsa-miR-582-3p	1	0	1	1	1	1	ARGLU1	arginine and glutamate rich 1
hsa-miR-582-3p	0	0	1	1	1	1	STOX2	storkhead box 2
hsa-miR-582-3p	1	0	1	1	1	1	PTBP3	polypyrimidine tract binding protein 3
hsa-miR-582-3p	1	0	1	1	1	1	ZNF395	zinc finger protein 395
hsa-miR-582-3p	1	0	1	1	1	1	INSIG2	insulin induced gene 2
hsa-miR-582-3p	1	0	1	1	1	1	UNKL	unkempt homolog (Drosophila)-like
hsa-miR-582-3p	1	0	1	1	1	1	SMEK2	SMEK homolog 2, suppressor of mek1 (Dictyostelium)
hsa-miR-582-3p	1	0	1	1	1	1	MACF1	microtubule-actin crosslinking factor 1
hsa-miR-582-3p	1	0	1	1	1	1	SRP72	signal recognition particle 72kDa
hsa-miR-582-3p	0	0	1	1	1	1	C14orf118	chromosome 14 open reading frame 118
hsa-miR-582-3p	0	0	1	0	0	0	LOC284561	uncharacterized LOC284561
hsa-miR-582-3p	1	0	1	1	1	1	PPFIA3	protein tyrosine phosphatase, receptor type, f polypeptide (PTPRF), interacting protein (liprin), alpha 3
hsa-miR-582-3p	1	0	1	1	1	1	CEP85	centrosomal protein 85kDa
hsa-miR-582-3p	1	0	1	1	0	0	MEX3A	mex-3 homolog A (C. elegans)
hsa-miR-582-3p	0	0	1	1	1	1	CXorf57	chromosome X open reading frame 57
hsa-miR-582-3p	0	0	1	1	1	1	EP400	E1A binding protein p400
hsa-miR-582-3p	0	0	1	1	1	1	CC2D2A	coiled-coil and C2 domain containing 2A
hsa-miR-582-3p	1	0	1	1	1	1	TNRC6A	trinucleotide repeat containing 6A
hsa-miR-582-3p	1	0	1	1	1	1	NAA30	N(alpha)-acetyltransferase 30, NatC catalytic subunit
hsa-miR-582-3p	1	0	1	0	1	1	ZCCHC3	zinc finger, CCHC domain containing 3
hsa-miR-582-3p	1	0	1	1	1	1	RNF185	ring finger protein 185
hsa-miR-582-3p	0	0	1	1	0	0	FAM48A	family with sequence similarity 48, member A
hsa-miR-582-3p	0	0	1	1	1	1	NETO2	neuropilin (NRP) and tolloid (TLL)-like 2
hsa-miR-582-3p	1	0	1	1	1	1	STRBP	spermatid perinuclear RNA binding protein
hsa-miR-582-3p	0	0	1	0	0	0	LOC283508	uncharacterized LOC283508
hsa-miR-582-3p	1	0	1	0	1	1	AP1G1	adaptor-related protein complex 1, gamma 1 subunit
hsa-miR-582-3p	0	0	1	0	0	0	FLJ30838	uncharacterized LOC400955
hsa-miR-582-3p	1	0	1	1	1	1	DIXDC1	DIX domain containing 1
hsa-miR-582-3p	1	0	1	1	1	1	ZNF664	zinc finger protein 664
hsa-miR-582-3p	0	0	1	0	1	1	FAM70A	family with sequence similarity 70, member A
hsa-miR-582-3p	1	0	1	1	1	1	CLCN5	chloride channel, voltage-sensitive 5
hsa-miR-582-3p	1	0	1	1	1	1	SORBS2	sorbin and SH3 domain containing 2
hsa-miR-582-3p	0	0	1	1	0	0	BTN2A3P	butyrophilin, subfamily 2, member A3, pseudogene
hsa-miR-582-3p	0	0	1	1	0	0	MLF1	myeloid leukemia factor 1
hsa-miR-582-3p	0	0	1	1	1	1	COPS5	COP9 constitutive photomorphogenic homolog subunit 5 (Arabidopsis)
hsa-miR-582-3p	0	0	1	0	0	0	TUBA3FP	tubulin, alpha 3f, pseudogene
hsa-miR-582-3p	0	0	1	1	0	0	NXF2	nuclear RNA export factor 2
hsa-miR-582-3p	1	0	1	0	1	1	PLEKHA1	pleckstrin homology domain containing, family A (phosphoinositide binding specific) member 1
hsa-miR-582-3p	1	0	1	0	1	1	NCAM1	neural cell adhesion molecule 1
hsa-miR-582-3p	0	0	1	0	1	1	CHURC1	churchill domain containing 1
hsa-miR-582-3p	0	0	1	1	1	1	A2ML1	alpha-2-macroglobulin-like 1
hsa-miR-582-3p	0	0	1	0	0	0	LOC284014	uncharacterized LOC284014
hsa-miR-582-3p	0	0	1	1	1	1	ZBTB26	zinc finger and BTB domain containing 26
hsa-miR-582-3p	1	0	1	1	1	1	FAM73B	family with sequence similarity 73, member B
hsa-miR-582-3p	0	0	1	1	1	1	CAMKV	CaM kinase-like vesicle-associated
hsa-miR-582-3p	0	0	1	1	1	1	TFPI2	tissue factor pathway inhibitor 2
hsa-miR-582-3p	1	0	1	1	1	1	PIP4K2C	phosphatidylinositol-5-phosphate 4-kinase, type II, gamma
hsa-miR-582-3p	1	0	1	1	1	1	TTC13	tetratricopeptide repeat domain 13
hsa-miR-582-3p	1	0	1	1	1	1	STXBP5	syntaxin binding protein 5 (tomosyn)
hsa-miR-582-3p	0	0	1	0	0	0	LOC152225	uncharacterized LOC152225
hsa-miR-582-3p	0	0	1	1	1	1	SAE1	SUMO1 activating enzyme subunit 1
hsa-miR-582-3p	1	0	1	1	1	1	TLK1	tousled-like kinase 1
hsa-miR-582-3p	0	0	1	0	1	1	TMSB15B	thymosin beta 15B
hsa-miR-582-3p	1	0	1	1	1	1	AMMECR1	Alport syndrome, mental retardation, midface hypoplasia and elliptocytosis chromosomal region gene 1
hsa-miR-582-3p	0	0	1	0	0	0	LOC440910	uncharacterized LOC440910
hsa-miR-582-3p	1	0	1	1	1	1	FBXW2	F-box and WD repeat domain containing 2
hsa-miR-582-3p	1	0	1	1	1	1	TSN	translin
hsa-miR-582-3p	1	0	1	0	1	1	CRTAP	cartilage associated protein
hsa-miR-582-3p	0	0	1	1	1	1	CHPT1	choline phosphotransferase 1
hsa-miR-582-3p	0	0	1	0	0	0	LOC550112	uncharacterized LOC550112
hsa-miR-582-3p	0	0	1	1	1	1	SLC16A1	solute carrier family 16, member 1 (monocarboxylic acid transporter 1)
hsa-miR-582-3p	0	0	1	0	0	0	CXXC1P1	CXXC finger protein 1 pseudogene 1
hsa-miR-582-3p	1	0	1	1	1	1	KCND1	potassium voltage-gated channel, Shal-related subfamily, member 1
hsa-miR-582-3p	1	0	1	1	1	1	SYT1	synaptotagmin I
hsa-miR-582-3p	0	0	1	1	1	1	C9orf47	chromosome 9 open reading frame 47
hsa-miR-582-3p	1	0	1	1	1	1	GCLC	glutamate-cysteine ligase, catalytic subunit
hsa-miR-582-3p	1	0	1	1	1	1	UBA6	ubiquitin-like modifier activating enzyme 6
hsa-miR-582-3p	1	0	1	1	1	1	ARHGEF7	Rho guanine nucleotide exchange factor (GEF) 7
hsa-miR-582-3p	1	0	1	1	1	1	TMEM100	transmembrane protein 100
hsa-miR-582-3p	0	0	1	0	0	0	LINC00486	long intergenic non-protein coding RNA 486
hsa-miR-582-3p	1	0	1	1	1	1	EPHB1	EPH receptor B1
hsa-miR-582-3p	1	0	1	0	1	1	UVRAG	UV radiation resistance associated gene
hsa-miR-582-3p	0	0	1	1	1	1	SIRPB2	signal-regulatory protein beta 2
hsa-miR-582-3p	0	0	1	0	0	0	LOC100129620	uncharacterized LOC100129620
hsa-miR-582-3p	1	0	1	1	1	1	FAM222B	family with sequence similarity 222, member B
hsa-miR-582-3p	0	0	1	1	1	1	CDK5RAP1	CDK5 regulatory subunit associated protein 1
hsa-miR-582-3p	0	0	1	1	0	0	KDM5D	lysine (K)-specific demethylase 5D
hsa-miR-582-3p	0	0	1	0	0	0	C1orf204	chromosome 1 open reading frame 204
hsa-miR-582-3p	0	0	1	0	0	0	LOC643327	uncharacterized LOC643327
hsa-miR-582-3p	1	0	1	1	1	1	C3orf62	chromosome 3 open reading frame 62
hsa-miR-582-3p	1	0	1	1	1	1	CCDC141	coiled-coil domain containing 141
hsa-miR-582-3p	1	0	1	1	1	1	STIM2	stromal interaction molecule 2
hsa-miR-582-3p	0	0	1	1	0	0	TCEANC	transcription elongation factor A (SII) N-terminal and central domain containing
hsa-miR-582-3p	1	0	1	1	1	1	TMEM185A	transmembrane protein 185A
hsa-miR-582-3p	1	0	1	1	1	1	HOOK1	hook homolog 1 (Drosophila)
hsa-miR-582-3p	0	0	1	1	1	1	CKAP2L	cytoskeleton associated protein 2-like
hsa-miR-582-3p	1	0	1	1	1	1	PIGA	phosphatidylinositol glycan anchor biosynthesis, class A
hsa-miR-582-3p	1	0	1	1	1	1	CHD6	chromodomain helicase DNA binding protein 6
hsa-miR-582-3p	0	0	1	1	0	0	FBXO16	F-box protein 16
hsa-miR-582-3p	1	0	1	1	1	1	NAP1L1	nucleosome assembly protein 1-like 1
hsa-miR-582-3p	0	0	1	1	0	0	SLC14A2	solute carrier family 14 (urea transporter), member 2
hsa-miR-582-3p	1	0	1	1	1	1	LMX1A	LIM homeobox transcription factor 1, alpha
hsa-miR-582-3p	0	0	1	1	1	1	RNF217	ring finger protein 217
hsa-miR-582-3p	0	0	1	1	0	0	KIAA0146	KIAA0146
hsa-miR-582-3p	1	0	1	1	1	1	ZNF275	zinc finger protein 275
hsa-miR-582-3p	0	0	1	1	0	0	GPR113	G protein-coupled receptor 113
hsa-miR-582-3p	1	0	1	1	1	1	FGD5	FYVE, RhoGEF and PH domain containing 5
hsa-miR-582-3p	0	0	1	0	0	0	LOC650368	asparagine-linked glycosylation 1-like pseudogene
hsa-miR-582-3p	1	0	1	0	0	0	GPR137C	G protein-coupled receptor 137C
hsa-miR-582-3p	1	0	1	1	1	1	SFR1	SWI5-dependent recombination repair 1
hsa-miR-582-3p	0	0	1	0	0	0	LOC100133029	sirtuin 5 pseudogene
hsa-miR-582-3p	0	0	1	1	1	1	TMEM17	transmembrane protein 17
hsa-miR-582-3p	1	0	1	1	1	1	SMAP1	small ArfGAP 1
hsa-miR-582-3p	0	0	1	0	1	1	NAIP	NLR family, apoptosis inhibitory protein
hsa-miR-582-3p	0	0	1	1	0	0	NPIP	nuclear pore complex interacting protein
hsa-miR-582-3p	1	0	1	1	1	1	SGIP1	SH3-domain GRB2-like (endophilin) interacting protein 1
hsa-miR-582-3p	1	0	1	1	0	0	GXYLT1	glucoside xylosyltransferase 1
hsa-miR-582-3p	1	0	1	1	1	1	SACS	spastic ataxia of Charlevoix-Saguenay (sacsin)
hsa-miR-582-3p	0	0	1	1	0	0	FSIP2	fibrous sheath interacting protein 2
hsa-miR-582-3p	1	0	1	1	1	1	COPS7B	COP9 constitutive photomorphogenic homolog subunit 7B (Arabidopsis)
hsa-miR-582-3p	1	0	1	1	1	1	MRPL30	mitochondrial ribosomal protein L30
hsa-miR-582-3p	1	0	1	1	1	1	ODF2	outer dense fiber of sperm tails 2
hsa-miR-582-3p	1	0	1	1	1	1	CLIP1	CAP-GLY domain containing linker protein 1
hsa-miR-582-3p	1	0	1	1	1	1	MKRN1	makorin ring finger protein 1
hsa-miR-582-3p	1	0	1	0	1	1	N4BP3	NEDD4 binding protein 3
hsa-miR-582-3p	1	0	1	1	1	1	PHF17	PHD finger protein 17
hsa-miR-582-3p	1	0	1	0	1	1	YAF2	YY1 associated factor 2
hsa-miR-582-3p	1	0	1	1	1	1	ENAH	enabled homolog (Drosophila)
hsa-miR-582-3p	0	0	1	1	1	1	PIN4	protein (peptidylprolyl cis/trans isomerase) NIMA-interacting, 4 (parvulin)
hsa-miR-582-3p	1	0	1	1	0	0	PEAK1	NKF3 kinase family member
hsa-miR-582-3p	1	0	1	1	1	1	R3HDM1	R3H domain containing 1
hsa-miR-582-3p	0	0	1	0	0	0	TRAV20	T cell receptor alpha variable 20
hsa-miR-582-3p	1	0	1	0	1	1	YOD1	YOD1 OTU deubiquinating enzyme 1 homolog (S. cerevisiae)
hsa-miR-582-3p	0	0	1	1	1	1	CD160	CD160 molecule
hsa-miR-582-3p	1	0	1	1	1	1	FRYL	FRY-like
hsa-miR-582-3p	1	0	1	1	1	1	AIF1L	allograft inflammatory factor 1-like
hsa-miR-582-3p	1	0	1	1	1	1	BCAT1	branched chain amino-acid transaminase 1, cytosolic
hsa-miR-582-3p	0	0	1	1	1	1	TPK1	thiamin pyrophosphokinase 1
hsa-miR-582-3p	0	0	1	1	1	1	ZNF662	zinc finger protein 662
hsa-miR-582-3p	1	0	1	1	1	1	SYDE1	synapse defective 1, Rho GTPase, homolog 1 (C. elegans)
hsa-miR-582-3p	0	0	1	0	0	0	FLJ26245	uncharacterized LOC400533
hsa-miR-582-3p	0	0	1	1	1	1	LYPD1	LY6/PLAUR domain containing 1
hsa-miR-582-3p	0	0	1	0	0	0	LOC494141	mitochondrial carrier triple repeat 1 pseudogene
hsa-miR-582-3p	0	0	1	1	1	1	TRIM28	tripartite motif containing 28
hsa-miR-582-3p	1	0	1	0	1	1	ESRRG	estrogen-related receptor gamma
hsa-miR-582-3p	1	0	1	1	0	0	FOXP2	forkhead box P2
hsa-miR-582-3p	1	0	1	1	1	1	RABGAP1	RAB GTPase activating protein 1
hsa-miR-582-3p	0	0	1	1	0	0	ZNF730	zinc finger protein 730
hsa-miR-582-3p	1	0	1	1	1	1	LRRK2	leucine-rich repeat kinase 2
hsa-miR-582-3p	0	0	1	0	0	0	AGAP9	ArfGAP with GTPase domain, ankyrin repeat and PH domain 9
hsa-miR-582-3p	1	0	1	1	1	1	TAP2	transporter 2, ATP-binding cassette, sub-family B (MDR/TAP)
hsa-miR-582-3p	1	0	1	1	1	1	MEAF6	MYST/Esa1-associated factor 6
hsa-miR-582-3p	0	0	1	1	1	1	SERPINE2	serpin peptidase inhibitor, clade E (nexin, plasminogen activator inhibitor type 1), member 2
hsa-miR-582-3p	1	0	1	1	1	1	SETX	senataxin
hsa-miR-582-3p	0	0	1	1	1	1	PTPN20B	protein tyrosine phosphatase, non-receptor type 20B
hsa-miR-582-3p	0	0	1	1	1	1	PTPN20A	protein tyrosine phosphatase, non-receptor type 20A
hsa-miR-582-3p	0	0	1	0	0	0	PART1	prostate androgen-regulated transcript 1 (non-protein coding)
hsa-miR-582-3p	0	0	1	1	0	0	NEK7	NIMA (never in mitosis gene a)-related kinase 7
hsa-miR-582-3p	0	0	1	1	1	1	TFDP2	transcription factor Dp-2 (E2F dimerization partner 2)
hsa-miR-582-3p	0	0	1	1	0	0	PLK1S1	polo-like kinase 1 substrate 1
hsa-miR-582-3p	1	0	1	1	1	1	TAB2	TGF-beta activated kinase 1/MAP3K7 binding protein 2
hsa-miR-582-3p	0	0	1	1	1	1	ARIH1	ariadne homolog, ubiquitin-conjugating enzyme E2 binding protein, 1 (Drosophila)
hsa-miR-582-3p	1	0	1	1	1	1	ARPP21	cAMP-regulated phosphoprotein, 21kDa
hsa-miR-582-3p	0	0	1	1	0	0	ODF3	outer dense fiber of sperm tails 3
hsa-miR-582-3p	0	0	1	0	0	0	KIAA0913	KIAA0913
hsa-miR-582-3p	1	0	1	1	1	1	KIAA1033	KIAA1033
hsa-miR-582-3p	0	0	1	1	0	0	MUS81	MUS81 endonuclease homolog (S. cerevisiae)
hsa-miR-582-3p	0	0	1	0	0	0	RPL23AP82	ribosomal protein L23a pseudogene 82
hsa-miR-582-3p	1	0	1	1	0	0	FAM108C1	family with sequence similarity 108, member C1
hsa-miR-582-3p	1	0	1	1	1	1	YTHDF3	YTH domain family, member 3
hsa-miR-582-3p	1	0	1	1	1	1	TMEFF1	transmembrane protein with EGF-like and two follistatin-like domains 1
hsa-miR-582-3p	1	0	1	1	1	1	MIER1	mesoderm induction early response 1 homolog (Xenopus laevis)
hsa-miR-582-3p	1	0	1	1	1	1	NFX1	nuclear transcription factor, X-box binding 1
hsa-miR-582-3p	1	0	1	0	0	0	YLPM1	YLP motif containing 1
hsa-miR-582-3p	0	0	1	1	1	1	C10orf57	chromosome 10 open reading frame 57
hsa-miR-582-3p	0	0	1	1	0	0	HEATR8	HEAT repeat containing 8
hsa-miR-582-3p	1	0	1	0	1	1	FAM214A	family with sequence similarity 214, member A
hsa-miR-582-3p	1	0	1	1	1	1	RNF180	ring finger protein 180
hsa-miR-582-3p	0	0	1	1	1	1	YAP1	Yes-associated protein 1
hsa-miR-582-3p	1	0	1	0	1	1	MEF2C	myocyte enhancer factor 2C
hsa-miR-582-3p	1	0	1	1	1	1	FAM126A	family with sequence similarity 126, member A
hsa-miR-582-3p	1	0	1	1	1	1	CAMK4	calcium/calmodulin-dependent protein kinase IV
hsa-miR-582-3p	1	0	1	0	1	1	CLINT1	clathrin interactor 1
hsa-miR-582-3p	1	0	1	1	1	1	IL17RD	interleukin 17 receptor D
hsa-miR-582-3p	0	0	1	1	1	1	TDRD9	tudor domain containing 9
hsa-miR-582-3p	0	0	1	1	0	0	TTLL6	tubulin tyrosine ligase-like family, member 6
hsa-miR-582-3p	1	0	1	0	1	1	SMURF1	SMAD specific E3 ubiquitin protein ligase 1
hsa-miR-582-3p	0	0	1	1	1	1	PNMAL1	paraneoplastic Ma antigen family-like 1
hsa-miR-582-3p	1	0	1	1	1	1	ZNF207	zinc finger protein 207
hsa-miR-582-3p	1	0	1	1	1	1	AP1AR	adaptor-related protein complex 1 associated regulatory protein
hsa-miR-582-3p	1	0	1	1	1	1	IKZF2	IKAROS family zinc finger 2 (Helios)
hsa-miR-582-3p	0	0	1	1	1	1	ALS2CR8	amyotrophic lateral sclerosis 2 (juvenile) chromosome region, candidate 8
hsa-miR-582-3p	1	0	1	1	1	1	TXNRD1	thioredoxin reductase 1
hsa-miR-582-3p	0	0	1	0	0	0	KGFLP1	fibroblast growth factor 7 pseudogene
hsa-miR-582-3p	1	0	1	1	1	1	RFFL	ring finger and FYVE-like domain containing E3 ubiquitin protein ligase
hsa-miR-582-3p	0	0	1	1	1	1	NFXL1	nuclear transcription factor, X-box binding-like 1
hsa-miR-582-3p	1	0	1	1	1	1	PIH1D3	PIH1 domain containing 3
hsa-miR-582-3p	1	0	1	1	1	1	WDR26	WD repeat domain 26
hsa-miR-582-3p	0	0	1	1	0	0	DNAH1	dynein, axonemal, heavy chain 1
hsa-miR-582-3p	1	0	1	1	1	1	PBRM1	polybromo 1
hsa-miR-582-3p	0	0	1	1	1	1	GCOM1	GRINL1A complex locus 1
hsa-miR-582-3p	1	0	1	1	1	1	TAB3	TGF-beta activated kinase 1/MAP3K7 binding protein 3
hsa-miR-582-3p	0	0	1	0	0	0	ZNFX1-AS1	ZNFX1 antisense RNA 1
hsa-miR-582-3p	0	0	1	0	1	1	ANKS1B	ankyrin repeat and sterile alpha motif domain containing 1B
hsa-miR-582-3p	0	0	1	1	1	1	PIGG	phosphatidylinositol glycan anchor biosynthesis, class G
hsa-miR-582-3p	0	0	1	1	1	1	TNFRSF19	tumor necrosis factor receptor superfamily, member 19
hsa-miR-582-3p	1	0	1	1	0	0	CLASRP	CLK4-associating serine/arginine rich protein
hsa-miR-582-3p	1	0	1	1	1	1	ECT2	epithelial cell transforming sequence 2 oncogene
hsa-miR-582-3p	1	0	1	1	1	1	FAM120A	family with sequence similarity 120A
hsa-miR-582-3p	1	0	1	0	1	1	NHS	Nance-Horan syndrome (congenital cataracts and dental anomalies)
hsa-miR-582-3p	0	0	1	1	1	1	UGT2B4	UDP glucuronosyltransferase 2 family, polypeptide B4
hsa-miR-582-3p	0	0	1	1	1	1	EHBP1	EH domain binding protein 1
hsa-miR-582-3p	0	0	1	1	1	1	AICDA	activation-induced cytidine deaminase
hsa-miR-582-3p	1	0	1	0	1	1	LRAT	lecithin retinol acyltransferase (phosphatidylcholine--retinol O-acyltransferase)
hsa-miR-582-3p	0	0	1	1	1	1	DIO1	deiodinase, iodothyronine, type I
hsa-miR-582-3p	0	0	1	1	0	0	DHRS4	dehydrogenase/reductase (SDR family) member 4
hsa-miR-582-3p	0	0	1	1	1	1	KANK2	KN motif and ankyrin repeat domains 2
hsa-miR-582-3p	1	0	1	1	1	1	PLCH1	phospholipase C, eta 1
hsa-miR-582-3p	0	0	1	1	0	0	C15orf61	chromosome 15 open reading frame 61
hsa-miR-582-3p	1	0	1	1	1	1	RTN3	reticulon 3
hsa-miR-582-3p	1	0	1	1	1	1	POLK	polymerase (DNA directed) kappa
hsa-miR-582-3p	1	0	1	1	1	1	QKI	QKI, KH domain containing, RNA binding
hsa-miR-582-3p	1	0	1	1	1	1	MYB	v-myb myeloblastosis viral oncogene homolog (avian)
hsa-miR-582-3p	0	0	1	1	0	0	KLK4	kallikrein-related peptidase 4
hsa-miR-582-3p	0	0	1	1	1	1	IL23R	interleukin 23 receptor
hsa-miR-582-3p	1	0	1	1	1	1	AMOT	angiomotin
hsa-miR-582-3p	0	0	1	0	1	1	MIS12	MIS12, MIND kinetochore complex component, homolog (S. pombe)
hsa-miR-582-3p	1	0	1	0	1	1	FAM46A	family with sequence similarity 46, member A
hsa-miR-582-3p	0	0	1	1	1	1	ZCCHC17	zinc finger, CCHC domain containing 17
hsa-miR-582-3p	0	0	1	1	1	1	SNX11	sorting nexin 11
hsa-miR-582-3p	1	0	1	1	1	1	PDLIM3	PDZ and LIM domain 3
hsa-miR-582-3p	0	0	1	1	1	1	PTDSS1	phosphatidylserine synthase 1
hsa-miR-582-3p	0	0	1	1	1	1	RLIM	ring finger protein, LIM domain interacting
hsa-miR-582-3p	0	0	1	1	1	1	MRRF	mitochondrial ribosome recycling factor
hsa-miR-582-3p	0	0	1	1	1	1	TUFT1	tuftelin 1
hsa-miR-582-3p	1	0	1	1	1	1	NONO	non-POU domain containing, octamer-binding
hsa-miR-582-3p	0	0	1	1	1	1	REXO2	REX2, RNA exonuclease 2 homolog (S. cerevisiae)
hsa-miR-582-3p	0	0	1	1	0	0	RUSC1	RUN and SH3 domain containing 1
hsa-miR-582-3p	0	0	1	0	0	0	MGC13053	uncharacterized MGC13053
hsa-miR-582-3p	1	0	1	1	1	1	U2SURP	U2 snRNP-associated SURP domain containing
hsa-miR-582-3p	0	0	1	1	1	1	ATXN2L	ataxin 2-like
hsa-miR-582-3p	0	0	1	1	1	1	GNL3L	guanine nucleotide binding protein-like 3 (nucleolar)-like
hsa-miR-582-3p	0	0	1	1	0	0	KLHDC3	kelch domain containing 3
hsa-miR-582-3p	1	0	1	1	1	1	DPH1	DPH1 homolog (S. cerevisiae)
hsa-miR-582-3p	0	0	1	1	0	0	RPL10A	ribosomal protein L10a
hsa-miR-582-3p	0	0	1	0	0	0	KLHL15	kelch-like 15 (Drosophila)
hsa-miR-582-3p	1	0	1	1	1	1	ZBTB38	zinc finger and BTB domain containing 38
hsa-miR-582-3p	0	0	1	1	1	1	C1QTNF3	C1q and tumor necrosis factor related protein 3
hsa-miR-582-3p	0	0	1	1	1	1	CMAS	cytidine monophosphate N-acetylneuraminic acid synthetase
hsa-miR-582-3p	0	0	1	1	1	1	MBIP	MAP3K12 binding inhibitory protein 1
hsa-miR-582-3p	1	0	1	1	0	0	UBR7	ubiquitin protein ligase E3 component n-recognin 7 (putative)
hsa-miR-582-3p	0	0	1	1	1	1	CSDE1	cold shock domain containing E1, RNA-binding
hsa-miR-582-3p	1	0	1	1	1	1	ZNF131	zinc finger protein 131
hsa-miR-582-3p	0	0	1	1	1	1	SLC17A3	solute carrier family 17 (sodium phosphate), member 3
hsa-miR-582-3p	0	0	1	0	1	1	ZNF641	zinc finger protein 641
hsa-miR-582-3p	0	0	1	1	1	1	CCNE2	cyclin E2
hsa-miR-582-3p	1	0	1	0	1	1	BTF3L4	basic transcription factor 3-like 4
hsa-miR-582-3p	0	0	1	1	1	1	C10orf88	chromosome 10 open reading frame 88
hsa-miR-582-3p	0	0	1	1	0	0	CA5BP1	carbonic anhydrase VB pseudogene 1
hsa-miR-582-3p	0	0	1	0	0	0	LOC284260	uncharacterized LOC284260
hsa-miR-582-3p	0	0	1	1	1	1	COMMD7	COMM domain containing 7
hsa-miR-582-3p	0	0	1	1	0	0	ENOX1	ecto-NOX disulfide-thiol exchanger 1
hsa-miR-582-3p	1	0	1	0	1	1	CDK19	cyclin-dependent kinase 19
hsa-miR-582-3p	0	0	1	0	0	0	SNX29P2	sorting nexin 29 pseudogene 2
hsa-miR-582-3p	1	0	1	1	1	1	METTL8	methyltransferase like 8
hsa-miR-582-3p	1	0	1	1	1	1	EPHA4	EPH receptor A4
hsa-miR-582-3p	0	0	1	1	0	0	TRO	trophinin
hsa-miR-582-3p	0	0	1	0	0	0	EVPLL	envoplakin-like
hsa-miR-582-3p	0	0	1	1	1	1	MAP2	microtubule-associated protein 2
hsa-miR-582-3p	1	0	1	1	1	1	RSPO2	R-spondin 2
hsa-miR-582-3p	1	0	1	1	1	1	APPL2	adaptor protein, phosphotyrosine interaction, PH domain and leucine zipper containing 2
hsa-miR-582-3p	1	0	1	1	1	1	ZBTB11	zinc finger and BTB domain containing 11
hsa-miR-582-3p	0	0	1	0	1	1	PAPOLG	poly(A) polymerase gamma
hsa-miR-582-3p	1	0	1	0	0	0	KCNU1	potassium channel, subfamily U, member 1
hsa-miR-582-3p	0	0	1	1	1	1	SEMA3D	sema domain, immunoglobulin domain (Ig), short basic domain, secreted, (semaphorin) 3D
hsa-miR-582-3p	1	0	1	0	1	1	TFEC	transcription factor EC
hsa-miR-582-3p	1	0	1	0	1	1	SV2B	synaptic vesicle glycoprotein 2B
hsa-miR-582-3p	0	0	1	1	1	1	PIP5K1B	phosphatidylinositol-4-phosphate 5-kinase, type I, beta
hsa-miR-582-3p	1	0	1	1	1	1	TAF15	TAF15 RNA polymerase II, TATA box binding protein (TBP)-associated factor, 68kDa
hsa-miR-582-3p	1	0	1	1	1	1	ELAVL2	ELAV (embryonic lethal, abnormal vision, Drosophila)-like 2 (Hu antigen B)
hsa-miR-582-3p	1	0	1	1	1	1	ZNF518A	zinc finger protein 518A
hsa-miR-582-3p	1	0	1	1	1	1	EPB41L4A	erythrocyte membrane protein band 4.1 like 4A
hsa-miR-582-3p	1	0	1	1	0	0	FAM83F	family with sequence similarity 83, member F
hsa-miR-582-3p	0	0	1	1	1	1	RBM42	RNA binding motif protein 42
hsa-miR-582-3p	1	0	1	0	1	1	RNF4	ring finger protein 4
hsa-miR-582-3p	1	0	1	1	1	1	ZNF521	zinc finger protein 521
hsa-miR-582-3p	0	0	1	1	1	1	HEXA	hexosaminidase A (alpha polypeptide)
hsa-miR-582-3p	1	0	1	0	1	1	DDX3Y	DEAD (Asp-Glu-Ala-Asp) box polypeptide 3, Y-linked
hsa-miR-582-3p	1	0	1	0	1	1	PDE12	phosphodiesterase 12
hsa-miR-582-3p	1	0	1	1	1	1	NKAIN2	Na+/K+ transporting ATPase interacting 2
hsa-miR-582-3p	0	0	1	0	0	0	TMPRSS12	transmembrane (C-terminal) protease, serine 12
hsa-miR-582-3p	1	0	1	1	1	1	ZEB2	zinc finger E-box binding homeobox 2
hsa-miR-582-3p	1	0	1	1	1	1	CTDSPL2	CTD (carboxy-terminal domain, RNA polymerase II, polypeptide A) small phosphatase like 2
hsa-miR-582-3p	0	0	1	1	1	1	SEC24D	SEC24 family, member D (S. cerevisiae)
hsa-miR-582-3p	1	0	1	1	1	1	MACROD2	MACRO domain containing 2
hsa-miR-582-3p	1	0	1	1	1	1	HECTD2	HECT domain containing E3 ubiquitin protein ligase 2
hsa-miR-582-3p	1	0	1	1	1	1	BNC2	basonuclin 2
hsa-miR-582-3p	0	0	1	1	1	1	ZNF138	zinc finger protein 138
hsa-miR-582-3p	1	0	1	1	1	1	UBXN2A	UBX domain protein 2A
hsa-miR-582-3p	1	0	1	1	1	1	C4orf19	chromosome 4 open reading frame 19
hsa-miR-582-3p	1	0	1	1	1	1	GALNT1	UDP-N-acetyl-alpha-D-galactosamine:polypeptide N-acetylgalactosaminyltransferase 1 (GalNAc-T1)
hsa-miR-582-3p	1	0	1	1	1	1	DPP10	dipeptidyl-peptidase 10 (non-functional)
hsa-miR-582-3p	1	0	1	1	1	1	PRR16	proline rich 16
hsa-miR-582-3p	0	0	1	0	0	0	LOC100134868	uncharacterized LOC100134868
hsa-miR-582-3p	0	0	1	0	0	0	FLJ36000	uncharacterized FLJ36000
hsa-miR-582-3p	0	0	1	1	1	1	IQCH	IQ motif containing H
hsa-miR-582-3p	0	0	1	0	0	0	TOB1-AS1	TOB1 antisense RNA 1
hsa-miR-582-3p	0	0	1	1	1	1	SLTM	SAFB-like, transcription modulator
hsa-miR-582-3p	1	0	1	1	1	1	DPP8	dipeptidyl-peptidase 8
hsa-miR-582-3p	1	0	1	1	1	1	DACH2	dachshund homolog 2 (Drosophila)
hsa-miR-582-3p	1	0	1	0	1	1	PCSK2	proprotein convertase subtilisin/kexin type 2
hsa-miR-582-3p	0	0	1	1	1	1	MDFIC	MyoD family inhibitor domain containing
hsa-miR-582-3p	1	0	1	1	1	1	UNC13C	unc-13 homolog C (C. elegans)
hsa-miR-582-3p	1	0	1	0	1	1	KIAA0430	KIAA0430
hsa-miR-582-3p	1	0	1	1	1	1	TNFSF4	tumor necrosis factor (ligand) superfamily, member 4
hsa-miR-582-3p	0	0	1	0	1	1	PDGFC	platelet derived growth factor C
hsa-miR-582-3p	0	0	1	1	0	0	C1orf87	chromosome 1 open reading frame 87
hsa-miR-582-3p	0	0	1	0	1	1	C12orf74	chromosome 12 open reading frame 74
hsa-miR-582-3p	0	0	1	0	0	0	LOC339260	uncharacterized LOC339260
hsa-miR-582-3p	1	0	1	1	1	1	AGAP3	ArfGAP with GTPase domain, ankyrin repeat and PH domain 3
hsa-miR-582-3p	0	0	1	0	0	0	LOC283914	uncharacterized LOC283914
hsa-miR-582-3p	1	0	1	1	1	1	SUPT7L	suppressor of Ty 7 (S. cerevisiae)-like
hsa-miR-582-3p	0	0	1	0	0	0	INHBA-AS1	INHBA antisense RNA 1
hsa-miR-582-3p	0	0	1	0	1	1	LOC338758	uncharacterized LOC338758
hsa-miR-582-3p	1	0	1	1	1	1	KIF2A	kinesin heavy chain member 2A
hsa-miR-582-3p	0	0	1	0	0	0	LOC729678	uncharacterized LOC729678
hsa-miR-582-3p	1	0	1	1	1	1	RMND5A	required for meiotic nuclear division 5 homolog A (S. cerevisiae)
hsa-miR-582-3p	1	0	1	1	1	1	PTPRG	protein tyrosine phosphatase, receptor type, G
hsa-miR-582-3p	1	0	1	1	1	1	CLVS1	clavesin 1
hsa-miR-582-3p	1	0	1	0	1	1	ARHGAP5	Rho GTPase activating protein 5
hsa-miR-582-3p	1	0	1	1	1	1	FNDC3A	fibronectin type III domain containing 3A
hsa-miR-582-3p	0	0	1	1	1	1	RHOT1	ras homolog family member T1
hsa-miR-582-3p	0	0	1	1	1	1	HLA-DQA1	major histocompatibility complex, class II, DQ alpha 1
hsa-miR-582-3p	1	0	1	1	1	1	BZW2	basic leucine zipper and W2 domains 2
hsa-miR-582-3p	1	0	1	1	1	1	HP1BP3	heterochromatin protein 1, binding protein 3
hsa-miR-582-3p	0	0	1	0	1	1	C17orf51	chromosome 17 open reading frame 51
hsa-miR-582-3p	0	0	1	1	0	0	CRYM-AS1	CRYM antisense RNA 1
hsa-miR-582-3p	1	0	1	1	1	1	KLHL28	kelch-like 28 (Drosophila)
hsa-miR-582-3p	1	0	1	1	1	1	PRRG1	proline rich Gla (G-carboxyglutamic acid) 1
hsa-miR-582-3p	0	0	1	1	0	0	PRSS55	protease, serine, 55
hsa-miR-582-3p	0	0	1	1	1	1	VNN2	vanin 2
hsa-miR-582-3p	1	0	1	1	1	1	AP3M1	adaptor-related protein complex 3, mu 1 subunit
hsa-miR-582-3p	0	0	1	0	0	0	LEF1-AS1	LEF1 antisense RNA 1
hsa-miR-582-3p	0	0	1	0	0	0	PABPC1P2	poly(A) binding protein, cytoplasmic 1 pseudogene 2
hsa-miR-582-3p	1	0	1	1	1	1	MYEF2	myelin expression factor 2
hsa-miR-582-3p	1	0	1	1	1	1	BAZ2B	bromodomain adjacent to zinc finger domain, 2B
hsa-miR-582-3p	1	0	1	0	1	1	TGFBR1	transforming growth factor, beta receptor 1
hsa-miR-582-3p	1	0	1	0	1	1	TMEM194A	transmembrane protein 194A
hsa-miR-582-3p	0	0	1	1	0	0	CEP250	centrosomal protein 250kDa
hsa-miR-582-3p	1	0	1	1	1	1	WNT5A	wingless-type MMTV integration site family, member 5A
hsa-miR-582-3p	0	0	1	1	1	1	C3orf67	chromosome 3 open reading frame 67
hsa-miR-582-3p	0	0	1	1	0	0	C16orf86	chromosome 16 open reading frame 86
hsa-miR-582-3p	1	0	1	1	1	1	ZMYND11	zinc finger, MYND-type containing 11
hsa-miR-582-3p	1	0	1	1	1	1	ELOVL7	ELOVL fatty acid elongase 7
hsa-miR-582-3p	0	0	1	0	1	1	TGFB2	transforming growth factor, beta 2
hsa-miR-582-3p	1	0	1	1	1	1	ACVR2B	activin A receptor, type IIB
hsa-miR-582-3p	1	0	1	0	1	1	KCNT2	potassium channel, subfamily T, member 2
hsa-miR-582-3p	0	0	1	0	0	0	LOC441493	uncharacterized LOC441493
hsa-miR-582-3p	1	0	1	1	1	1	ACHE	acetylcholinesterase
hsa-miR-582-3p	1	0	1	0	0	0	PWWP2A	PWWP domain containing 2A
hsa-miR-582-3p	1	0	1	1	1	1	GABRB2	gamma-aminobutyric acid (GABA) A receptor, beta 2
hsa-miR-582-3p	1	0	1	0	1	1	RBM23	RNA binding motif protein 23
hsa-miR-582-3p	1	0	1	1	1	1	NR2F2	nuclear receptor subfamily 2, group F, member 2
hsa-miR-582-3p	1	0	1	1	1	1	PNISR	PNN-interacting serine/arginine-rich protein
hsa-miR-582-3p	1	0	1	1	1	1	SUV420H1	suppressor of variegation 4-20 homolog 1 (Drosophila)
hsa-miR-582-3p	1	0	1	1	1	1	SP4	Sp4 transcription factor
hsa-miR-582-3p	1	0	1	0	1	1	KIF5C	kinesin family member 5C
hsa-miR-582-3p	0	0	1	1	1	1	RASAL2	RAS protein activator like 2
hsa-miR-582-3p	0	0	1	1	1	1	SLC8A3	solute carrier family 8 (sodium/calcium exchanger), member 3
hsa-miR-582-3p	0	0	1	1	1	1	ATP1B4	ATPase, Na+/K+ transporting, beta 4 polypeptide
hsa-miR-582-3p	0	0	1	0	0	0	EEF1DP3	eukaryotic translation elongation factor 1 delta pseudogene 3
hsa-miR-582-3p	1	0	1	0	1	1	LRCH2	leucine-rich repeats and calponin homology (CH) domain containing 2
hsa-miR-582-3p	1	0	1	1	1	1	MEGF11	multiple EGF-like-domains 11
hsa-miR-582-3p	1	0	1	1	1	1	TRAPPC8	trafficking protein particle complex 8
hsa-miR-582-3p	1	0	1	1	1	1	ZMYM4	zinc finger, MYM-type 4
hsa-miR-582-3p	0	0	1	1	1	1	HSF2	heat shock transcription factor 2
hsa-miR-582-3p	1	0	1	1	1	1	MLLT10	myeloid/lymphoid or mixed-lineage leukemia (trithorax homolog, Drosophila); translocated to, 10
hsa-miR-582-3p	0	0	1	1	0	0	HSF4	heat shock transcription factor 4
hsa-miR-582-3p	1	0	1	1	1	1	CADPS	Ca++-dependent secretion activator
hsa-miR-582-3p	1	0	1	1	1	1	PTPRZ1	protein tyrosine phosphatase, receptor-type, Z polypeptide 1
hsa-miR-582-3p	0	0	1	1	1	1	UCHL5	ubiquitin carboxyl-terminal hydrolase L5
hsa-miR-582-3p	1	0	1	1	1	1	ACTR10	actin-related protein 10 homolog (S. cerevisiae)
hsa-miR-582-3p	1	0	1	1	1	1	BTBD7	BTB (POZ) domain containing 7
hsa-miR-582-3p	0	0	1	1	1	1	IP6K2	inositol hexakisphosphate kinase 2
hsa-miR-582-3p	1	0	1	1	1	1	MIER3	mesoderm induction early response 1, family member 3
hsa-miR-582-3p	1	0	1	1	1	1	SGCD	sarcoglycan, delta (35kDa dystrophin-associated glycoprotein)
hsa-miR-582-3p	0	0	1	1	1	1	NUP54	nucleoporin 54kDa
hsa-miR-582-3p	0	0	1	1	1	1	PDZRN4	PDZ domain containing ring finger 4
hsa-miR-582-3p	1	0	1	0	1	1	CLASP2	cytoplasmic linker associated protein 2
hsa-miR-582-3p	0	0	1	1	0	0	TTC5	tetratricopeptide repeat domain 5
hsa-miR-582-3p	1	0	1	1	1	1	SPPL3	signal peptide peptidase like 3
hsa-miR-582-3p	0	0	1	1	1	1	PSMA2	proteasome (prosome, macropain) subunit, alpha type, 2
hsa-miR-582-3p	0	0	1	0	0	0	EML6	echinoderm microtubule associated protein like 6
hsa-miR-582-3p	1	0	1	1	1	1	SH3BP4	SH3-domain binding protein 4
hsa-miR-582-3p	0	0	1	1	1	1	VPS35	vacuolar protein sorting 35 homolog (S. cerevisiae)
hsa-miR-582-3p	1	0	1	1	1	1	PRDM2	PR domain containing 2, with ZNF domain
hsa-miR-582-3p	1	0	1	1	0	0	CECR2	cat eye syndrome chromosome region, candidate 2
hsa-miR-582-3p	1	0	1	1	1	1	STARD13	StAR-related lipid transfer (START) domain containing 13
hsa-miR-582-3p	1	0	1	1	1	1	TSC22D3	TSC22 domain family, member 3
hsa-miR-582-3p	1	0	1	1	1	1	DCAF5	DDB1 and CUL4 associated factor 5
hsa-miR-582-3p	1	0	1	1	1	1	NEDD9	neural precursor cell expressed, developmentally down-regulated 9
hsa-miR-582-3p	1	0	1	0	0	0	CTSB	cathepsin B
hsa-miR-582-3p	0	0	1	0	1	1	TYW5	tRNA-yW synthesizing protein 5
hsa-miR-582-3p	0	0	1	1	1	1	ATP2A2	ATPase, Ca++ transporting, cardiac muscle, slow twitch 2
hsa-miR-582-3p	1	0	1	1	1	1	NAV1	neuron navigator 1
hsa-miR-582-3p	1	0	1	0	1	1	KLHL24	kelch-like 24 (Drosophila)
hsa-miR-582-3p	1	0	1	0	1	1	IGF2BP3	insulin-like growth factor 2 mRNA binding protein 3
hsa-miR-582-3p	1	0	1	1	1	1	C5orf24	chromosome 5 open reading frame 24
hsa-miR-582-3p	0	0	1	1	1	1	MPP4	membrane protein, palmitoylated 4 (MAGUK p55 subfamily member 4)
hsa-miR-582-3p	0	0	1	1	0	0	SAMD7	sterile alpha motif domain containing 7
hsa-miR-582-3p	1	0	1	1	1	1	RDX	radixin
hsa-miR-582-3p	1	0	1	1	1	1	PGAP1	post-GPI attachment to proteins 1
hsa-miR-582-3p	1	0	1	1	1	1	TMEM135	transmembrane protein 135
hsa-miR-582-3p	1	0	1	1	1	1	HIF1A	hypoxia inducible factor 1, alpha subunit (basic helix-loop-helix transcription factor)
hsa-miR-582-3p	0	0	1	1	1	1	KIAA1328	KIAA1328
hsa-miR-582-3p	0	0	1	1	1	1	SSFA2	sperm specific antigen 2
hsa-miR-582-3p	1	0	1	0	1	1	TBL1XR1	transducin (beta)-like 1 X-linked receptor 1
hsa-miR-582-3p	1	0	1	1	1	1	FAM208A	family with sequence similarity 208, member A
hsa-miR-582-3p	1	0	1	1	1	1	LYST	lysosomal trafficking regulator
hsa-miR-582-3p	1	0	1	1	1	1	SIN3A	SIN3 transcription regulator homolog A (yeast)
hsa-miR-582-3p	1	0	1	1	1	1	SSR2	signal sequence receptor, beta (translocon-associated protein beta)
hsa-miR-582-3p	1	0	1	1	0	0	GSK3B	glycogen synthase kinase 3 beta
hsa-miR-582-3p	0	0	1	1	1	1	POLR2H	polymerase (RNA) II (DNA directed) polypeptide H
hsa-miR-582-3p	1	0	1	0	1	1	RNF144A	ring finger protein 144A
hsa-miR-582-3p	0	0	1	1	0	0	SLC39A7	solute carrier family 39 (zinc transporter), member 7
hsa-miR-582-3p	0	0	1	0	0	0	LOC100128988	uncharacterized LOC100128988
hsa-miR-582-3p	1	0	1	1	1	1	FUT9	fucosyltransferase 9 (alpha (1,3) fucosyltransferase)
hsa-miR-582-3p	0	0	1	1	1	1	TTC27	tetratricopeptide repeat domain 27
hsa-miR-582-3p	0	0	1	1	1	1	FBXO36	F-box protein 36
hsa-miR-582-3p	0	0	1	1	0	0	ACTB	actin, beta
hsa-miR-582-3p	0	0	1	1	1	1	COPS8	COP9 constitutive photomorphogenic homolog subunit 8 (Arabidopsis)
hsa-miR-582-3p	0	0	1	1	0	0	MIF4GD	MIF4G domain containing
hsa-miR-582-3p	1	0	1	1	1	1	FGF11	fibroblast growth factor 11
hsa-miR-582-3p	1	0	1	0	1	1	BNIP3L	BCL2/adenovirus E1B 19kDa interacting protein 3-like
hsa-miR-582-3p	0	0	1	1	1	1	TASP1	taspase, threonine aspartase, 1
hsa-miR-582-3p	0	0	1	1	1	1	TUBA1A	tubulin, alpha 1a
hsa-miR-582-3p	1	0	1	1	1	1	TPM4	tropomyosin 4
hsa-miR-582-3p	1	0	1	1	1	1	CDK7	cyclin-dependent kinase 7
hsa-miR-582-3p	1	0	1	1	1	1	DAZAP1	DAZ associated protein 1
hsa-miR-582-3p	0	0	1	1	0	0	TRAF3IP3	TRAF3 interacting protein 3
hsa-miR-582-3p	1	0	1	1	1	1	TRA2B	transformer 2 beta homolog (Drosophila)
hsa-miR-582-3p	1	0	1	1	1	1	TMEM248	transmembrane protein 248
hsa-miR-582-3p	0	0	1	1	0	0	PNKP	polynucleotide kinase 3'-phosphatase
hsa-miR-582-3p	1	0	1	1	1	1	ARFIP2	ADP-ribosylation factor interacting protein 2
hsa-miR-582-3p	0	0	1	1	1	1	EIF3J	eukaryotic translation initiation factor 3, subunit J
hsa-miR-582-3p	0	0	1	1	0	0	ATRAID	all-trans retinoic acid-induced differentiation factor
hsa-miR-582-3p	1	0	1	1	1	1	WIPF1	WAS/WASL interacting protein family, member 1
hsa-miR-582-3p	1	0	1	1	1	1	BTBD10	BTB (POZ) domain containing 10
hsa-miR-582-3p	0	0	1	1	0	0	NOX5	NADPH oxidase, EF-hand calcium binding domain 5
hsa-miR-582-3p	1	0	1	1	0	0	FAT4	FAT tumor suppressor homolog 4 (Drosophila)
hsa-miR-582-3p	0	0	1	1	0	0	ELP4	elongator acetyltransferase complex subunit 4
hsa-miR-582-3p	0	0	1	1	1	1	SAP130	Sin3A-associated protein, 130kDa
hsa-miR-582-3p	0	0	1	1	1	1	TFAM	transcription factor A, mitochondrial
hsa-miR-582-3p	1	0	1	1	1	1	ARNTL	aryl hydrocarbon receptor nuclear translocator-like
hsa-miR-582-3p	0	0	1	1	1	1	PEX19	peroxisomal biogenesis factor 19
hsa-miR-582-3p	1	0	1	1	1	1	YWHAQ	tyrosine 3-monooxygenase/tryptophan 5-monooxygenase activation protein, theta polypeptide
hsa-miR-582-3p	1	0	1	1	1	1	FUBP3	far upstream element (FUSE) binding protein 3
hsa-miR-582-3p	1	0	1	1	1	1	CNBP	CCHC-type zinc finger, nucleic acid binding protein
hsa-miR-582-3p	0	0	1	1	1	1	SLCO4A1	solute carrier organic anion transporter family, member 4A1
hsa-miR-582-3p	1	0	1	1	1	1	RNF2	ring finger protein 2
hsa-miR-582-3p	0	0	1	1	0	0	CHRNA5	cholinergic receptor, nicotinic, alpha 5 (neuronal)
hsa-miR-582-3p	0	0	1	1	0	0	BCKDK	branched chain ketoacid dehydrogenase kinase
hsa-miR-582-3p	0	0	1	1	1	1	FMO1	flavin containing monooxygenase 1
hsa-miR-582-3p	0	0	1	1	0	0	HAGH	hydroxyacylglutathione hydrolase
hsa-miR-582-3p	1	0	1	1	1	1	RBPJ	recombination signal binding protein for immunoglobulin kappa J region
hsa-miR-582-3p	1	0	1	0	1	1	CD47	CD47 molecule
hsa-miR-582-3p	0	0	1	1	1	1	ZNF346	zinc finger protein 346
hsa-miR-582-3p	0	0	1	1	1	1	PAAF1	proteasomal ATPase-associated factor 1
hsa-miR-582-3p	1	0	1	1	0	0	FOXO3	forkhead box O3
hsa-miR-582-3p	0	0	1	0	1	1	SEPT7	septin 7
hsa-miR-582-3p	0	0	1	1	1	1	BEX4	brain expressed, X-linked 4
hsa-miR-582-3p	0	0	1	1	1	1	COPS4	COP9 constitutive photomorphogenic homolog subunit 4 (Arabidopsis)
hsa-miR-582-3p	1	0	1	1	1	1	SERF2	small EDRK-rich factor 2
hsa-miR-582-3p	1	0	1	1	1	1	RND3	Rho family GTPase 3
hsa-miR-582-3p	1	0	1	0	1	1	NMT1	N-myristoyltransferase 1
hsa-miR-582-3p	0	0	1	1	0	0	FAM3B	family with sequence similarity 3, member B
hsa-miR-582-3p	1	0	1	1	1	1	SLMAP	sarcolemma associated protein
hsa-miR-582-3p	1	0	1	0	1	1	KIAA0240	KIAA0240
hsa-miR-582-3p	1	0	1	0	1	1	BTRC	beta-transducin repeat containing E3 ubiquitin protein ligase
hsa-miR-582-3p	0	0	1	1	1	1	SYNE2	spectrin repeat containing, nuclear envelope 2
hsa-miR-582-3p	1	0	1	1	1	1	KIAA2018	KIAA2018
hsa-miR-582-3p	1	0	1	0	1	1	XRN1	5'-3' exoribonuclease 1
hsa-miR-582-3p	1	0	1	0	1	1	OSBPL8	oxysterol binding protein-like 8
hsa-miR-582-3p	0	0	1	1	1	1	SLC25A26	solute carrier family 25 (S-adenosylmethionine carrier), member 26
hsa-miR-582-3p	1	0	1	1	1	1	SLC39A10	solute carrier family 39 (zinc transporter), member 10
hsa-miR-582-3p	1	0	1	1	1	1	TMEM128	transmembrane protein 128
hsa-miR-582-3p	0	0	1	0	1	1	SYNPR	synaptoporin
hsa-miR-582-3p	0	0	1	1	1	1	ATF2	activating transcription factor 2
hsa-miR-582-3p	0	0	1	1	1	1	PTGS1	prostaglandin-endoperoxide synthase 1 (prostaglandin G/H synthase and cyclooxygenase)
hsa-miR-582-3p	0	0	1	1	1	1	MARVELD2	MARVEL domain containing 2
hsa-miR-582-3p	1	0	1	0	1	1	DCBLD2	discoidin, CUB and LCCL domain containing 2
hsa-miR-582-3p	0	0	1	1	1	1	PROS1	protein S (alpha)
hsa-miR-582-3p	1	0	1	1	1	1	LGR4	leucine-rich repeat containing G protein-coupled receptor 4
hsa-miR-582-3p	1	0	1	1	1	1	AGL	amylo-alpha-1, 6-glucosidase, 4-alpha-glucanotransferase
hsa-miR-582-3p	0	0	1	1	1	1	ATP7A	ATPase, Cu++ transporting, alpha polypeptide
hsa-miR-582-3p	1	0	1	1	1	1	COL3A1	collagen, type III, alpha 1
hsa-miR-582-3p	0	0	1	1	1	1	DPYD	dihydropyrimidine dehydrogenase
hsa-miR-582-3p	1	0	1	0	1	1	GHR	growth hormone receptor
hsa-miR-582-3p	1	0	1	1	1	1	GJA1	gap junction protein, alpha 1, 43kDa
hsa-miR-582-3p	1	0	1	0	1	1	GLI3	GLI family zinc finger 3
hsa-miR-582-3p	1	0	1	1	1	1	NF1	neurofibromin 1
hsa-miR-582-3p	1	0	1	0	1	1	PTEN	phosphatase and tensin homolog
hsa-miR-582-3p	0	0	1	1	1	1	RPGR	retinitis pigmentosa GTPase regulator
hsa-miR-582-3p	1	0	1	1	1	1	SOX9	SRY (sex determining region Y)-box 9
hsa-miR-582-3p	0	0	1	1	1	1	SLC25A20	solute carrier family 25 (carnitine/acylcarnitine translocase), member 20
hsa-miR-582-3p	1	0	1	0	1	1	CYBB	cytochrome b-245, beta polypeptide
hsa-miR-582-3p	0	0	1	1	1	1	LTBP2	latent transforming growth factor beta binding protein 2
hsa-miR-582-3p	1	0	1	1	1	1	ATRX	alpha thalassemia/mental retardation syndrome X-linked
hsa-miR-582-3p	1	0	1	1	1	1	DCX	doublecortin
hsa-miR-582-3p	1	0	1	1	1	1	ADRA1A	adrenoceptor alpha 1A
hsa-miR-582-3p	1	0	1	1	1	1	CACNB4	calcium channel, voltage-dependent, beta 4 subunit
hsa-miR-582-3p	1	0	1	1	1	1	DIO2	deiodinase, iodothyronine, type II
hsa-miR-582-3p	1	0	1	1	1	1	GABRB3	gamma-aminobutyric acid (GABA) A receptor, beta 3
hsa-miR-582-3p	0	0	1	1	1	1	GRIN2B	glutamate receptor, ionotropic, N-methyl D-aspartate 2B
hsa-miR-582-3p	1	0	1	1	1	1	MME	membrane metallo-endopeptidase
hsa-miR-582-3p	0	0	1	1	1	1	NPY2R	neuropeptide Y receptor Y2
hsa-miR-582-3p	1	0	1	1	1	1	PTGER2	prostaglandin E receptor 2 (subtype EP2), 53kDa
hsa-miR-582-3p	1	0	1	1	1	1	RARB	retinoic acid receptor, beta
hsa-miR-582-3p	1	0	1	0	1	1	SMAD5	SMAD family member 5
hsa-miR-582-3p	1	0	1	0	1	1	UBE2W	ubiquitin-conjugating enzyme E2W (putative)
hsa-miR-582-3p	1	0	1	0	1	1	GDF6	growth differentiation factor 6
hsa-miR-582-3p	1	0	1	1	1	1	GATA3	GATA binding protein 3
hsa-miR-582-3p	0	0	1	1	1	1	SMAD1	SMAD family member 1
hsa-miR-582-3p	0	0	1	1	0	0	ATP5J	ATP synthase, H+ transporting, mitochondrial Fo complex, subunit F6
hsa-miR-582-3p	1	0	1	1	1	1	RREB1	ras responsive element binding protein 1
hsa-miR-582-3p	0	0	1	1	1	1	ALG11	asparagine-linked glycosylation 11, alpha-1,2-mannosyltransferase homolog (yeast)
hsa-miR-582-3p	1	0	1	0	1	1	LIN28B	lin-28 homolog B (C. elegans)
hsa-miR-582-3p	0	0	1	1	1	1	CLEC2D	C-type lectin domain family 2, member D
hsa-miR-582-3p	1	0	1	0	1	1	LRRC55	leucine rich repeat containing 55
hsa-miR-582-3p	0	0	1	1	1	1	PRR13	proline rich 13
hsa-miR-582-3p	0	0	1	1	1	1	LINC00478	long intergenic non-protein coding RNA 478
hsa-miR-582-3p	0	0	1	1	1	1	MAPKAP1	mitogen-activated protein kinase associated protein 1
hsa-miR-582-3p	1	0	1	0	1	1	GOSR1	golgi SNAP receptor complex member 1
hsa-miR-582-3p	1	0	1	1	1	1	BRWD1	bromodomain and WD repeat domain containing 1
hsa-miR-582-3p	0	0	1	1	0	0	C1orf186	chromosome 1 open reading frame 186
hsa-miR-582-3p	1	0	1	1	1	1	ZDHHC9	zinc finger, DHHC-type containing 9
hsa-miR-582-3p	1	0	1	1	1	1	CTDSPL	CTD (carboxy-terminal domain, RNA polymerase II, polypeptide A) small phosphatase-like
hsa-miR-582-3p	1	0	1	1	1	1	BCAP29	B-cell receptor-associated protein 29
hsa-miR-582-3p	1	0	1	0	1	1	PM20D2	peptidase M20 domain containing 2
hsa-miR-582-3p	0	0	1	1	1	1	SPIN3	spindlin family, member 3
hsa-miR-582-3p	1	0	1	0	1	1	ZC3H12B	zinc finger CCCH-type containing 12B
hsa-miR-582-3p	0	0	1	1	1	1	SERP2	stress-associated endoplasmic reticulum protein family member 2
hsa-miR-582-3p	1	0	1	1	1	1	BCL2L15	BCL2-like 15
hsa-miR-582-3p	0	0	1	1	1	1	HGF	hepatocyte growth factor (hepapoietin A; scatter factor)
hsa-miR-582-3p	1	0	1	0	1	1	CREB5	cAMP responsive element binding protein 5
hsa-miR-582-3p	0	0	1	1	1	1	CHCHD7	coiled-coil-helix-coiled-coil-helix domain containing 7
hsa-miR-582-3p	1	0	1	1	1	1	GOSR2	golgi SNAP receptor complex member 2
hsa-miR-582-3p	1	0	1	1	1	1	SLC25A53	solute carrier family 25, member 53
hsa-miR-582-3p	1	0	1	0	1	1	ZKSCAN2	zinc finger with KRAB and SCAN domains 2
hsa-miR-582-3p	1	0	1	1	1	1	UBE2NL	ubiquitin-conjugating enzyme E2N-like
hsa-miR-582-3p	0	0	1	1	1	1	CCNC	cyclin C
hsa-miR-582-3p	1	0	1	0	1	1	SYT14L	synaptotagmin XIV-like
hsa-miR-582-3p	1	0	1	1	1	1	KCNMA1	potassium large conductance calcium-activated channel, subfamily M, alpha member 1
hsa-miR-582-3p	1	0	1	1	1	1	TMCC1	transmembrane and coiled-coil domain family 1
hsa-miR-582-3p	1	0	1	1	1	1	ZHX1	zinc fingers and homeoboxes 1
hsa-miR-582-3p	0	0	1	1	1	1	KIAA2026	KIAA2026
hsa-miR-582-3p	1	0	1	1	1	1	SERBP1	SERPINE1 mRNA binding protein 1
hsa-miR-582-3p	0	0	1	1	1	1	MURC	muscle-related coiled-coil protein
hsa-miR-582-3p	1	0	1	1	1	1	ABCC5	ATP-binding cassette, sub-family C (CFTR/MRP), member 5
hsa-miR-582-3p	0	0	1	1	1	1	LRRC66	leucine rich repeat containing 66
hsa-miR-582-3p	1	0	1	0	1	1	TNRC6B	trinucleotide repeat containing 6B
hsa-miR-582-3p	0	0	1	1	0	0	DPPA5	developmental pluripotency associated 5
hsa-miR-582-3p	1	0	1	0	1	1	ANO6	anoctamin 6
hsa-miR-582-3p	1	0	1	1	1	1	FAM108B1	family with sequence similarity 108, member B1
hsa-miR-582-3p	1	0	1	1	1	1	CSNK1G3	casein kinase 1, gamma 3
hsa-miR-582-3p	1	0	1	1	1	1	STK24	serine/threonine kinase 24
hsa-miR-582-3p	1	0	1	1	1	1	AMD1	adenosylmethionine decarboxylase 1
hsa-miR-582-3p	1	0	1	0	1	1	RYR2	ryanodine receptor 2 (cardiac)
hsa-miR-582-3p	1	0	1	1	1	1	AGAP1	ArfGAP with GTPase domain, ankyrin repeat and PH domain 1
hsa-miR-582-3p	1	0	1	1	1	1	ACPL2	acid phosphatase-like 2
hsa-miR-582-3p	0	0	1	1	1	1	CEP112	centrosomal protein 112kDa
hsa-miR-582-3p	0	0	1	1	1	1	CTLA4	cytotoxic T-lymphocyte-associated protein 4
hsa-miR-582-3p	1	0	1	1	1	1	ELMO1	engulfment and cell motility 1
hsa-miR-582-3p	1	0	1	1	1	1	KIAA0317	KIAA0317
hsa-miR-582-3p	0	0	1	1	1	1	SKA1	spindle and kinetochore associated complex subunit 1
hsa-miR-582-3p	1	0	1	0	1	1	GK5	glycerol kinase 5 (putative)
hsa-miR-582-3p	1	0	1	1	1	1	KCNC4	potassium voltage-gated channel, Shaw-related subfamily, member 4
hsa-miR-582-3p	1	0	1	1	1	1	PTGFR	prostaglandin F receptor (FP)
hsa-miR-582-3p	1	0	1	0	1	1	CREBZF	CREB/ATF bZIP transcription factor
hsa-miR-582-3p	1	0	1	1	1	1	CDC42	cell division cycle 42 (GTP binding protein, 25kDa)
hsa-miR-582-3p	1	0	1	1	1	1	ZNF384	zinc finger protein 384
hsa-miR-582-3p	1	0	1	0	1	1	FAM133B	family with sequence similarity 133, member B
hsa-miR-582-3p	1	0	1	1	1	1	SCN2A	sodium channel, voltage-gated, type II, alpha subunit
hsa-miR-582-3p	1	0	1	1	1	1	PAPD5	PAP associated domain containing 5
hsa-miR-582-3p	1	0	1	0	1	1	DCUN1D4	DCN1, defective in cullin neddylation 1, domain containing 4 (S. cerevisiae)
hsa-miR-582-3p	1	0	1	1	1	1	ZBTB8A	zinc finger and BTB domain containing 8A
hsa-miR-582-3p	1	0	1	1	1	1	FAM63B	family with sequence similarity 63, member B
hsa-miR-582-3p	1	0	1	1	1	1	NCALD	neurocalcin delta
hsa-miR-582-3p	0	0	1	0	1	1	STEAP2	STEAP family member 2, metalloreductase
hsa-miR-582-3p	1	0	1	1	1	1	HEY1	hairy/enhancer-of-split related with YRPW motif 1
hsa-miR-582-3p	0	0	1	1	1	1	SI	sucrase-isomaltase (alpha-glucosidase)
hsa-miR-582-3p	1	0	1	1	1	1	C2orf88	chromosome 2 open reading frame 88
hsa-miR-582-3p	1	0	1	1	1	1	SLC9A6	solute carrier family 9, subfamily A (NHE6, cation proton antiporter 6), member 6
hsa-miR-582-3p	0	0	1	1	1	1	TMPRSS7	transmembrane protease, serine 7
hsa-miR-582-3p	1	0	1	1	1	1	ERBB4	v-erb-a erythroblastic leukemia viral oncogene homolog 4 (avian)
hsa-miR-582-3p	1	0	1	1	1	1	MZT1	mitotic spindle organizing protein 1
hsa-miR-582-3p	1	0	1	1	1	1	PDE11A	phosphodiesterase 11A
hsa-miR-582-3p	1	0	1	1	1	1	IRF2BP2	interferon regulatory factor 2 binding protein 2
hsa-miR-582-3p	0	0	1	1	1	1	KLK10	kallikrein-related peptidase 10
hsa-miR-582-3p	1	0	1	0	1	1	UBXN2B	UBX domain protein 2B
hsa-miR-582-3p	0	0	1	1	0	0	FAM127A	family with sequence similarity 127, member A
hsa-miR-582-3p	1	0	1	0	0	0	FAM127B	family with sequence similarity 127, member B
hsa-miR-582-3p	1	0	1	0	1	1	FAM127C	family with sequence similarity 127, member C
hsa-miR-582-3p	1	0	1	1	1	1	N4BP2L1	NEDD4 binding protein 2-like 1
hsa-miR-582-3p	0	0	1	1	1	1	FKTN	fukutin
hsa-miR-582-3p	1	0	1	1	1	1	CREBBP	CREB binding protein
hsa-miR-582-3p	1	0	1	1	1	1	CUL4B	cullin 4B
hsa-miR-582-3p	1	0	1	1	1	1	DMP1	dentin matrix acidic phosphoprotein 1
hsa-miR-582-3p	1	0	1	1	1	1	REPS2	RALBP1 associated Eps domain containing 2
hsa-miR-582-3p	0	0	1	1	1	1	PLIN2	perilipin 2
hsa-miR-582-3p	1	0	1	1	1	1	SLC25A5	solute carrier family 25 (mitochondrial carrier; adenine nucleotide translocator), member 5
hsa-miR-582-3p	1	0	1	1	1	1	PRDM1	PR domain containing 1, with ZNF domain
hsa-miR-582-3p	1	0	1	0	1	1	BMPR2	bone morphogenetic protein receptor, type II (serine/threonine kinase)
hsa-miR-582-3p	1	0	1	0	1	1	KLF9	Kruppel-like factor 9
hsa-miR-582-3p	1	0	1	0	1	1	CPD	carboxypeptidase D
hsa-miR-582-3p	1	0	1	1	1	1	MAPK14	mitogen-activated protein kinase 14
hsa-miR-582-3p	1	0	1	1	1	1	CTNND2	catenin (cadherin-associated protein), delta 2
hsa-miR-582-3p	1	0	1	0	1	1	EIF2S3	eukaryotic translation initiation factor 2, subunit 3 gamma, 52kDa
hsa-miR-582-3p	1	0	1	0	1	1	ELAVL3	ELAV (embryonic lethal, abnormal vision, Drosophila)-like 3 (Hu antigen C)
hsa-miR-582-3p	1	0	1	1	1	1	EP300	E1A binding protein p300
hsa-miR-582-3p	1	0	1	1	1	1	GPC4	glypican 4
hsa-miR-582-3p	1	0	1	1	1	1	FOXC1	forkhead box C1
hsa-miR-582-3p	1	0	1	1	1	1	GCNT1	glucosaminyl (N-acetyl) transferase 1, core 2
hsa-miR-582-3p	0	0	1	1	1	1	RHOA	ras homolog family member A
hsa-miR-582-3p	0	0	1	1	0	0	RHOG	ras homolog family member G
hsa-miR-582-3p	1	0	1	1	1	1	ATP6V1A	ATPase, H+ transporting, lysosomal 70kDa, V1 subunit A
hsa-miR-582-3p	1	0	1	0	1	1	CCND2	cyclin D2
hsa-miR-582-3p	0	0	1	1	1	1	CD1D	CD1d molecule
hsa-miR-582-3p	0	0	1	1	1	1	CEACAM8	carcinoembryonic antigen-related cell adhesion molecule 8
hsa-miR-582-3p	1	0	1	0	1	1	CHML	choroideremia-like (Rab escort protein 2)
hsa-miR-582-3p	1	0	1	1	1	1	COL4A6	collagen, type IV, alpha 6
hsa-miR-582-3p	1	0	1	0	1	1	COL19A1	collagen, type XIX, alpha 1
hsa-miR-582-3p	1	0	1	1	1	1	CTNNB1	catenin (cadherin-associated protein), beta 1, 88kDa
hsa-miR-582-3p	1	0	1	1	1	1	DBT	dihydrolipoamide branched chain transacylase E2
hsa-miR-582-3p	0	0	1	1	0	0	DDB1	damage-specific DNA binding protein 1, 127kDa
hsa-miR-582-3p	0	0	1	1	1	1	GADD45A	growth arrest and DNA-damage-inducible, alpha
hsa-miR-582-3p	0	0	1	1	1	1	DLAT	dihydrolipoamide S-acetyltransferase
hsa-miR-582-3p	0	0	1	1	1	1	DPT	dermatopontin
hsa-miR-582-3p	1	0	1	1	1	1	DUSP6	dual specificity phosphatase 6
hsa-miR-582-3p	1	0	1	1	1	1	FBN2	fibrillin 2
hsa-miR-582-3p	0	0	1	0	1	1	FGF2	fibroblast growth factor 2 (basic)
hsa-miR-582-3p	1	0	1	1	1	1	FGF7	fibroblast growth factor 7
hsa-miR-582-3p	1	0	1	1	1	1	FGF9	fibroblast growth factor 9 (glia-activating factor)
hsa-miR-582-3p	1	0	1	1	1	1	GAS1	growth arrest-specific 1
hsa-miR-582-3p	0	0	1	1	1	1	GFAP	glial fibrillary acidic protein
hsa-miR-582-3p	0	0	1	1	1	1	GNB1	guanine nucleotide binding protein (G protein), beta polypeptide 1
hsa-miR-582-3p	1	0	1	1	0	0	INHBB	inhibin, beta B
hsa-miR-582-3p	0	0	1	0	1	1	ITGAV	integrin, alpha V
hsa-miR-582-3p	1	0	1	0	1	1	KIF3C	kinesin family member 3C
hsa-miR-582-3p	1	0	1	1	1	1	KPNA3	karyopherin alpha 3 (importin alpha 4)
hsa-miR-582-3p	0	0	1	1	1	1	KRT32	keratin 32
hsa-miR-582-3p	1	0	1	1	1	1	LY75	lymphocyte antigen 75
hsa-miR-582-3p	1	0	1	1	1	1	MAN2A1	mannosidase, alpha, class 2A, member 1
hsa-miR-582-3p	0	0	1	0	1	1	MFNG	MFNG O-fucosylpeptide 3-beta-N-acetylglucosaminyltransferase
hsa-miR-582-3p	0	0	1	0	1	1	CXCL9	chemokine (C-X-C motif) ligand 9
hsa-miR-582-3p	0	0	1	1	1	1	MRC1	mannose receptor, C type 1
hsa-miR-582-3p	1	0	1	1	1	1	NPAS2	neuronal PAS domain protein 2
hsa-miR-582-3p	1	0	1	1	1	1	OLR1	oxidized low density lipoprotein (lectin-like) receptor 1
hsa-miR-582-3p	0	0	1	1	1	1	PAFAH1B2	platelet-activating factor acetylhydrolase 1b, catalytic subunit 2 (30kDa)
hsa-miR-582-3p	1	0	1	1	1	1	PCDH8	protocadherin 8
hsa-miR-582-3p	0	0	1	1	1	1	PFDN4	prefoldin subunit 4
hsa-miR-582-3p	0	0	1	1	0	0	PGM1	phosphoglucomutase 1
hsa-miR-582-3p	0	0	1	1	1	1	PIM1	pim-1 oncogene
hsa-miR-582-3p	0	0	1	1	0	0	PLP2	proteolipid protein 2 (colonic epithelium-enriched)
hsa-miR-582-3p	1	0	1	1	1	1	PPP1CC	protein phosphatase 1, catalytic subunit, gamma isozyme
hsa-miR-582-3p	0	0	1	1	0	0	PPP1R8	protein phosphatase 1, regulatory subunit 8
hsa-miR-582-3p	1	0	1	1	1	1	PPP2CA	protein phosphatase 2, catalytic subunit, alpha isozyme
hsa-miR-582-3p	1	0	1	0	1	1	MAPK4	mitogen-activated protein kinase 4
hsa-miR-582-3p	1	0	1	0	1	1	RAB6A	RAB6A, member RAS oncogene family
hsa-miR-582-3p	1	0	1	0	1	1	SORT1	sortilin 1
hsa-miR-582-3p	0	0	1	0	1	1	CXCL5	chemokine (C-X-C motif) ligand 5
hsa-miR-582-3p	1	0	1	1	1	1	SRSF2	serine/arginine-rich splicing factor 2
hsa-miR-582-3p	1	0	1	0	1	1	SLC6A1	solute carrier family 6 (neurotransmitter transporter, GABA), member 1
hsa-miR-582-3p	0	0	1	1	1	1	UAP1	UDP-N-acteylglucosamine pyrophosphorylase 1
hsa-miR-582-3p	1	0	1	0	1	1	STC1	stanniocalcin 1
hsa-miR-582-3p	0	0	1	1	1	1	STIM1	stromal interaction molecule 1
hsa-miR-582-3p	1	0	1	0	1	1	SEC62	SEC62 homolog (S. cerevisiae)
hsa-miR-582-3p	1	0	1	1	1	1	NR2C2	nuclear receptor subfamily 2, group C, member 2
hsa-miR-582-3p	1	0	1	1	1	1	UBE2H	ubiquitin-conjugating enzyme E2H
hsa-miR-582-3p	0	0	1	1	1	1	ZNF143	zinc finger protein 143
hsa-miR-582-3p	1	0	1	1	1	1	KCNAB1	potassium voltage-gated channel, shaker-related subfamily, beta member 1
hsa-miR-582-3p	1	0	1	1	1	1	HMGA2	high mobility group AT-hook 2
hsa-miR-582-3p	1	0	1	1	1	1	AKAP1	A kinase (PRKA) anchor protein 1
hsa-miR-582-3p	0	0	1	1	1	1	PEX3	peroxisomal biogenesis factor 3
hsa-miR-582-3p	0	0	1	1	1	1	UNC5C	unc-5 homolog C (C. elegans)
hsa-miR-582-3p	1	0	1	0	1	1	TNKS	tankyrase, TRF1-interacting ankyrin-related ADP-ribose polymerase
hsa-miR-582-3p	1	0	1	0	1	1	IRS2	insulin receptor substrate 2
hsa-miR-582-3p	1	0	1	1	1	1	SUCLG2	succinate-CoA ligase, GDP-forming, beta subunit
hsa-miR-582-3p	1	0	1	1	1	1	ALDH1A2	aldehyde dehydrogenase 1 family, member A2
hsa-miR-582-3p	0	0	1	1	1	1	PRPF4B	PRP4 pre-mRNA processing factor 4 homolog B (yeast)
hsa-miR-582-3p	0	0	1	1	1	1	UBA3	ubiquitin-like modifier activating enzyme 3
hsa-miR-582-3p	0	0	1	1	1	1	CDKN1B	cyclin-dependent kinase inhibitor 1B (p27, Kip1)
hsa-miR-582-3p	1	0	1	0	1	1	EIF2S1	eukaryotic translation initiation factor 2, subunit 1 alpha, 35kDa
hsa-miR-582-3p	1	0	1	1	1	1	EYA4	eyes absent homolog 4 (Drosophila)
hsa-miR-582-3p	1	0	1	1	1	1	RAB5A	RAB5A, member RAS oncogene family
hsa-miR-582-3p	1	0	1	0	1	1	SLC1A2	solute carrier family 1 (glial high affinity glutamate transporter), member 2
hsa-miR-582-3p	0	0	1	1	1	1	SNRPD3	small nuclear ribonucleoprotein D3 polypeptide 18kDa
hsa-miR-582-3p	1	0	1	0	1	1	CYTH3	cytohesin 3
hsa-miR-582-3p	1	0	1	0	1	1	MED14	mediator complex subunit 14
hsa-miR-582-3p	1	0	1	1	1	1	GDA	guanine deaminase
hsa-miR-582-3p	1	0	1	1	1	1	ARL3	ADP-ribosylation factor-like 3
hsa-miR-582-3p	1	0	1	1	1	1	MLLT3	myeloid/lymphoid or mixed-lineage leukemia (trithorax homolog, Drosophila); translocated to, 3
hsa-miR-582-3p	0	0	1	1	1	1	PEX14	peroxisomal biogenesis factor 14
hsa-miR-582-3p	0	0	1	1	1	1	TRAF6	TNF receptor-associated factor 6, E3 ubiquitin protein ligase
hsa-miR-582-3p	0	0	1	0	1	1	CXorf1	chromosome X open reading frame 1
hsa-miR-582-3p	0	0	1	1	1	1	BUB3	budding uninhibited by benzimidazoles 3 homolog (yeast)
hsa-miR-582-3p	1	0	1	1	1	1	DCLK1	doublecortin-like kinase 1
hsa-miR-582-3p	1	0	1	1	1	1	XPR1	xenotropic and polytropic retrovirus receptor 1
hsa-miR-582-3p	1	0	1	1	1	1	NREP	neuronal regeneration related protein homolog (rat)
hsa-miR-582-3p	1	0	1	1	1	1	HOMER2	homer homolog 2 (Drosophila)
hsa-miR-582-3p	1	0	1	0	1	1	ROCK2	Rho-associated, coiled-coil containing protein kinase 2
hsa-miR-582-3p	1	0	1	1	1	1	CXCL14	chemokine (C-X-C motif) ligand 14
hsa-miR-582-3p	1	0	1	1	1	1	JARID2	jumonji, AT rich interactive domain 2
hsa-miR-582-3p	1	0	1	1	1	1	RELN	reelin
hsa-miR-582-3p	1	0	1	1	1	1	KDM5A	lysine (K)-specific demethylase 5A
hsa-miR-582-3p	1	0	1	0	1	1	SEL1L	sel-1 suppressor of lin-12-like (C. elegans)
hsa-miR-582-3p	1	0	1	1	0	0	ZMYM3	zinc finger, MYM-type 3
hsa-miR-582-3p	0	0	1	1	1	1	CLEC2B	C-type lectin domain family 2, member B
hsa-miR-582-3p	0	0	1	1	1	1	ATP5C1	ATP synthase, H+ transporting, mitochondrial F1 complex, gamma polypeptide 1
hsa-miR-582-3p	1	0	1	1	1	1	FOXN3	forkhead box N3
hsa-miR-582-3p	1	0	1	1	1	1	ELK3	ELK3, ETS-domain protein (SRF accessory protein 2)
hsa-miR-582-3p	1	0	1	1	1	1	GPM6A	glycoprotein M6A
hsa-miR-582-3p	0	0	1	1	1	1	PDIA3	protein disulfide isomerase family A, member 3
hsa-miR-582-3p	0	0	1	1	1	1	H1F0	H1 histone family, member 0
hsa-miR-582-3p	0	0	1	1	1	1	NFIL3	nuclear factor, interleukin 3 regulated
hsa-miR-582-3p	1	0	1	1	1	1	PDCL	phosducin-like
hsa-miR-582-3p	1	0	1	1	1	1	RALA	v-ral simian leukemia viral oncogene homolog A (ras related)
hsa-miR-582-3p	0	0	1	1	1	1	PAPSS1	3'-phosphoadenosine 5'-phosphosulfate synthase 1
hsa-miR-582-3p	1	0	1	1	0	0	NOG	noggin
hsa-miR-582-3p	1	0	1	1	1	1	HOXA1	homeobox A1
hsa-miR-582-3p	1	0	1	1	1	1	TERF2	telomeric repeat binding factor 2
hsa-miR-582-3p	0	0	1	1	0	0	VDAC3	voltage-dependent anion channel 3
hsa-miR-582-3p	1	0	1	1	1	1	EVI5	ecotropic viral integration site 5
hsa-miR-582-3p	1	0	1	1	1	1	CTDSP2	CTD (carboxy-terminal domain, RNA polymerase II, polypeptide A) small phosphatase 2
hsa-miR-582-3p	0	0	1	1	1	1	CEBPZ	CCAAT/enhancer binding protein (C/EBP), zeta
hsa-miR-582-3p	1	0	1	0	1	1	CALCRL	calcitonin receptor-like
hsa-miR-582-3p	0	0	1	1	1	1	NUTF2	nuclear transport factor 2
hsa-miR-582-3p	0	0	1	1	1	1	PRG4	proteoglycan 4
hsa-miR-582-3p	1	0	1	0	1	1	SPRY3	sprouty homolog 3 (Drosophila)
hsa-miR-582-3p	1	0	1	1	1	1	BET1	blocked early in transport 1 homolog (S. cerevisiae)
hsa-miR-582-3p	0	0	1	1	1	1	SF3A1	splicing factor 3a, subunit 1, 120kDa
hsa-miR-582-3p	1	0	1	1	1	1	MAN1A1	mannosidase, alpha, class 1A, member 1
hsa-miR-582-3p	1	0	1	1	1	1	MAT2A	methionine adenosyltransferase II, alpha
hsa-miR-582-3p	1	0	1	1	1	1	MAP3K5	mitogen-activated protein kinase kinase kinase 5
hsa-miR-582-3p	1	0	1	1	1	1	MTF1	metal-regulatory transcription factor 1
hsa-miR-582-3p	1	0	1	1	1	1	LIPG	lipase, endothelial
hsa-miR-582-3p	1	0	1	0	1	1	SCML2	sex comb on midleg-like 2 (Drosophila)
hsa-miR-582-3p	0	0	1	1	1	1	KRT1	keratin 1
hsa-miR-582-3p	1	0	1	1	1	1	CAPZA1	capping protein (actin filament) muscle Z-line, alpha 1
hsa-miR-582-3p	1	0	1	1	1	1	DYNC1LI2	dynein, cytoplasmic 1, light intermediate chain 2
hsa-miR-582-3p	1	0	1	1	1	1	DNAJB1	DnaJ (Hsp40) homolog, subfamily B, member 1
hsa-miR-582-3p	1	0	1	1	1	1	NEFL	neurofilament, light polypeptide
hsa-miR-582-3p	1	0	1	1	1	1	NR4A2	nuclear receptor subfamily 4, group A, member 2
hsa-miR-582-3p	1	0	1	1	1	1	POU4F1	POU class 4 homeobox 1
hsa-miR-582-3p	1	0	1	0	1	1	PPP1R2	protein phosphatase 1, regulatory (inhibitor) subunit 2
hsa-miR-582-3p	0	0	1	1	1	1	LRRC41	leucine rich repeat containing 41
hsa-miR-582-3p	1	0	1	1	1	1	VAT1	vesicle amine transport protein 1 homolog (T. californica)
hsa-miR-582-3p	1	0	1	0	1	1	APPBP2	amyloid beta precursor protein (cytoplasmic tail) binding protein 2
hsa-miR-582-3p	1	0	1	1	1	1	ANP32B	acidic (leucine-rich) nuclear phosphoprotein 32 family, member B
hsa-miR-582-3p	0	0	1	1	0	0	CCT2	chaperonin containing TCP1, subunit 2 (beta)
hsa-miR-582-3p	1	0	1	1	1	1	SLC2A1	solute carrier family 2 (facilitated glucose transporter), member 1
hsa-miR-582-3p	0	0	1	1	1	1	CLCA2	chloride channel accessory 2
hsa-miR-582-3p	1	0	1	1	1	1	CORIN	corin, serine peptidase
hsa-miR-582-3p	0	0	1	1	1	1	TBR1	T-box, brain, 1
hsa-miR-582-3p	1	0	1	1	0	0	FRS3	fibroblast growth factor receptor substrate 3
hsa-miR-582-3p	1	0	1	1	1	1	CDH10	cadherin 10, type 2 (T2-cadherin)
hsa-miR-582-3p	1	0	1	1	1	1	KAT6A	K(lysine) acetyltransferase 6A
hsa-miR-582-3p	1	0	1	1	1	1	ZBTB33	zinc finger and BTB domain containing 33
hsa-miR-582-3p	0	0	1	1	1	1	TRIM10	tripartite motif containing 10
hsa-miR-582-3p	1	0	1	1	1	1	FERMT2	fermitin family member 2
hsa-miR-582-3p	1	0	1	1	1	1	SCN1A	sodium channel, voltage-gated, type I, alpha subunit
hsa-miR-582-3p	1	0	1	0	1	1	SLC5A3	solute carrier family 5 (sodium/myo-inositol cotransporter), member 3
hsa-miR-582-3p	1	0	1	0	1	1	PAPD7	PAP associated domain containing 7
hsa-miR-582-3p	1	0	1	1	1	1	TMF1	TATA element modulatory factor 1
hsa-miR-582-3p	0	0	1	0	1	1	ZNF208	zinc finger protein 208
hsa-miR-582-3p	0	0	1	0	1	1	ZXDB	zinc finger, X-linked, duplicated B
hsa-miR-582-3p	1	0	1	1	1	1	PALM2-AKAP2	PALM2-AKAP2 readthrough
hsa-miR-582-3p	1	0	1	0	1	1	CHP1	calcineurin-like EF hand protein 1
hsa-miR-582-3p	1	0	1	0	1	1	ZFPM2	zinc finger protein, multitype 2
hsa-miR-582-3p	0	0	1	1	1	1	FRAT2	frequently rearranged in advanced T-cell lymphomas 2
hsa-miR-582-3p	0	0	1	1	1	1	AK5	adenylate kinase 5
hsa-miR-582-3p	1	0	1	1	1	1	FBXL3	F-box and leucine-rich repeat protein 3
hsa-miR-582-3p	1	0	1	1	1	1	MGAT4A	mannosyl (alpha-1,3-)-glycoprotein beta-1,4-N-acetylglucosaminyltransferase, isozyme A
hsa-miR-582-3p	1	0	1	1	1	1	MGEA5	meningioma expressed antigen 5 (hyaluronidase)
hsa-miR-582-3p	1	0	1	1	1	1	RHOQ	ras homolog family member Q
hsa-miR-582-3p	1	0	1	1	1	1	HEY2	hairy/enhancer-of-split related with YRPW motif 2
hsa-miR-582-3p	1	0	1	0	1	1	G3BP2	GTPase activating protein (SH3 domain) binding protein 2
hsa-miR-582-3p	0	0	1	1	1	1	SLC39A6	solute carrier family 39 (zinc transporter), member 6
hsa-miR-582-3p	1	0	1	1	1	1	PRDM4	PR domain containing 4
hsa-miR-582-3p	0	0	1	1	1	1	UCK2	uridine-cytidine kinase 2
hsa-miR-582-3p	1	0	1	0	1	1	FLRT2	fibronectin leucine rich transmembrane protein 2
hsa-miR-582-3p	0	0	1	1	1	1	N6AMT1	N-6 adenine-specific DNA methyltransferase 1 (putative)
hsa-miR-582-3p	0	0	1	1	1	1	ABT1	activator of basal transcription 1
hsa-miR-582-3p	1	0	1	1	1	1	LRP12	low density lipoprotein receptor-related protein 12
hsa-miR-582-3p	1	0	1	1	1	1	NRG1	neuregulin 1
hsa-miR-582-3p	1	0	1	1	1	1	LAMP2	lysosomal-associated membrane protein 2
hsa-miR-582-3p	1	0	1	1	1	1	ZBTB43	zinc finger and BTB domain containing 43
hsa-miR-582-3p	0	0	1	1	0	0	REM1	RAS (RAD and GEM)-like GTP-binding 1
hsa-miR-582-3p	0	0	1	1	1	1	CCDC113	coiled-coil domain containing 113
hsa-miR-582-3p	1	0	1	1	1	1	CRIPT	cysteine-rich PDZ-binding protein
hsa-miR-582-3p	1	0	1	1	1	1	MAPRE2	microtubule-associated protein, RP/EB family, member 2
hsa-miR-582-3p	0	0	1	1	1	1	HSPA4L	heat shock 70kDa protein 4-like
hsa-miR-582-3p	1	0	1	1	1	1	LEMD3	LEM domain containing 3
hsa-miR-582-3p	1	0	1	1	1	1	PATZ1	POZ (BTB) and AT hook containing zinc finger 1
hsa-miR-582-3p	1	0	1	1	1	1	SLC7A11	solute carrier family 7 (anionic amino acid transporter light chain, xc- system), member 11
hsa-miR-582-3p	1	0	1	0	1	1	RNF11	ring finger protein 11
hsa-miR-582-3p	0	0	1	1	1	1	KCNV1	potassium channel, subfamily V, member 1
hsa-miR-582-3p	1	0	1	1	1	1	LYPD3	LY6/PLAUR domain containing 3
hsa-miR-582-3p	1	0	1	1	1	1	AFF4	AF4/FMR2 family, member 4
hsa-miR-582-3p	0	0	1	1	0	0	SIT1	signaling threshold regulating transmembrane adaptor 1
hsa-miR-582-3p	1	0	1	1	1	1	VSX1	visual system homeobox 1
hsa-miR-582-3p	0	0	1	0	1	1	CTR9	Ctr9, Paf1/RNA polymerase II complex component, homolog (S. cerevisiae)
hsa-miR-582-3p	1	0	1	1	1	1	RALGPS1	Ral GEF with PH domain and SH3 binding motif 1
hsa-miR-582-3p	1	0	1	1	0	0	TTLL4	tubulin tyrosine ligase-like family, member 4
hsa-miR-582-3p	0	0	1	1	1	1	FAM53B	family with sequence similarity 53, member B
hsa-miR-582-3p	0	0	1	1	1	1	FAM115A	family with sequence similarity 115, member A
hsa-miR-582-3p	1	0	1	0	1	1	MLEC	malectin
hsa-miR-582-3p	1	0	1	1	1	1	KIAA0247	KIAA0247
hsa-miR-582-3p	1	0	1	1	1	1	RASSF2	Ras association (RalGDS/AF-6) domain family member 2
hsa-miR-582-3p	1	0	1	0	1	1	KIAA0232	KIAA0232
hsa-miR-582-3p	0	0	1	0	1	1	DHCR24	24-dehydrocholesterol reductase
hsa-miR-582-3p	1	0	1	1	1	1	MRPL19	mitochondrial ribosomal protein L19
hsa-miR-582-3p	1	0	1	0	1	1	SCRN1	secernin 1
hsa-miR-582-3p	0	0	1	1	1	1	KIAA0141	KIAA0141
hsa-miR-582-3p	1	0	1	1	1	1	JAKMIP2	janus kinase and microtubule interacting protein 2
hsa-miR-582-3p	1	0	1	0	1	1	PJA2	praja ring finger 2, E3 ubiquitin protein ligase
hsa-miR-582-3p	1	0	1	1	1	1	NUAK1	NUAK family, SNF1-like kinase, 1
hsa-miR-582-3p	0	0	1	1	1	1	ADNP2	ADNP homeobox 2
hsa-miR-582-3p	1	0	1	1	1	1	CHSY1	chondroitin sulfate synthase 1
hsa-miR-582-3p	1	0	1	1	1	1	RUFY3	RUN and FYVE domain containing 3
hsa-miR-582-3p	1	0	1	0	1	1	WDFY3	WD repeat and FYVE domain containing 3
hsa-miR-582-3p	1	0	1	0	1	1	PEG10	paternally expressed 10
hsa-miR-582-3p	1	0	1	1	1	1	ZNF423	zinc finger protein 423
hsa-miR-582-3p	1	0	1	1	1	1	RTF1	Rtf1, Paf1/RNA polymerase II complex component, homolog (S. cerevisiae)
hsa-miR-582-3p	1	0	1	1	1	1	GPD1L	glycerol-3-phosphate dehydrogenase 1-like
hsa-miR-582-3p	1	0	1	0	1	1	LARP4B	La ribonucleoprotein domain family, member 4B
hsa-miR-582-3p	1	0	1	1	1	1	MED13L	mediator complex subunit 13-like
hsa-miR-582-3p	0	0	1	0	1	1	ZDHHC17	zinc finger, DHHC-type containing 17
hsa-miR-582-3p	1	0	1	0	1	1	KCTD2	potassium channel tetramerisation domain containing 2
hsa-miR-582-3p	1	0	1	1	1	1	CAMSAP1	calmodulin regulated spectrin-associated protein 1
hsa-miR-582-3p	1	0	1	0	1	1	GLCE	glucuronic acid epimerase
hsa-miR-582-3p	0	0	1	1	1	1	BRPF3	bromodomain and PHD finger containing, 3
hsa-miR-582-3p	0	0	1	1	0	0	GPKOW	G patch domain and KOW motifs
hsa-miR-582-3p	1	0	1	1	1	1	AZIN1	antizyme inhibitor 1
hsa-miR-582-3p	0	0	1	0	1	1	DERA	deoxyribose-phosphate aldolase (putative)
hsa-miR-582-3p	1	0	1	1	1	1	PHF20L1	PHD finger protein 20-like 1
hsa-miR-582-3p	1	0	1	1	1	1	UBE2J1	ubiquitin-conjugating enzyme E2, J1
hsa-miR-582-3p	1	0	1	1	1	1	SLMO2	slowmo homolog 2 (Drosophila)
hsa-miR-582-3p	0	0	1	1	1	1	COMMD2	COMM domain containing 2
hsa-miR-582-3p	0	0	1	1	1	1	ZFR	zinc finger RNA binding protein
hsa-miR-582-3p	0	0	1	1	1	1	RAB10	RAB10, member RAS oncogene family
hsa-miR-582-3p	0	0	1	1	1	1	DYNC1LI1	dynein, cytoplasmic 1, light intermediate chain 1
hsa-miR-582-3p	1	0	1	1	1	1	CYB5R4	cytochrome b5 reductase 4
hsa-miR-582-3p	1	0	1	1	1	1	AKAP11	A kinase (PRKA) anchor protein 11
hsa-miR-582-3p	1	0	1	0	1	1	SELT	selenoprotein T
hsa-miR-582-3p	1	0	1	1	1	1	RAB14	RAB14, member RAS oncogene family
hsa-miR-582-3p	0	0	1	1	1	1	CENPF	centromere protein F, 350/400kDa (mitosin)
hsa-miR-582-3p	1	0	1	1	1	1	ARID4B	AT rich interactive domain 4B (RBP1-like)
hsa-miR-582-3p	1	0	1	0	1	1	PTPLAD1	protein tyrosine phosphatase-like A domain containing 1
hsa-miR-582-3p	1	0	1	0	1	1	CRIM1	cysteine rich transmembrane BMP regulator 1 (chordin-like)
hsa-miR-582-3p	0	0	1	0	0	0	ANKRD39	ankyrin repeat domain 39
hsa-miR-582-3p	1	0	1	1	1	1	VTA1	Vps20-associated 1 homolog (S. cerevisiae)
hsa-miR-582-3p	1	0	1	1	1	1	DNAJC27	DnaJ (Hsp40) homolog, subfamily C, member 27
hsa-miR-582-3p	0	0	1	1	1	1	CHCHD8	coiled-coil-helix-coiled-coil-helix domain containing 8
hsa-miR-582-3p	1	0	1	1	1	1	RAB6B	RAB6B, member RAS oncogene family
hsa-miR-582-3p	0	0	1	1	1	1	GNAS	GNAS complex locus
hsa-miR-582-3p	0	0	1	0	1	1	APLN	apelin
hsa-miR-582-3p	1	0	1	0	1	1	KLHL3	kelch-like 3 (Drosophila)
hsa-miR-582-3p	1	0	1	1	1	1	SIX4	SIX homeobox 4
hsa-miR-582-3p	0	0	1	0	1	1	TRIM44	tripartite motif containing 44
hsa-miR-582-3p	0	0	1	0	1	1	VEZT	vezatin, adherens junctions transmembrane protein
hsa-miR-582-3p	1	0	1	1	0	0	C17orf59	chromosome 17 open reading frame 59
hsa-miR-582-3p	1	0	1	0	1	1	FAM46C	family with sequence similarity 46, member C
hsa-miR-582-3p	1	0	1	1	1	1	TBC1D8B	TBC1 domain family, member 8B (with GRAM domain)
hsa-miR-582-3p	1	0	1	0	1	1	CHD7	chromodomain helicase DNA binding protein 7
hsa-miR-582-3p	1	0	1	1	1	1	YTHDF1	YTH domain family, member 1
hsa-miR-582-3p	0	0	1	1	1	1	TMEM70	transmembrane protein 70
hsa-miR-582-3p	1	0	1	1	0	0	LAMTOR1	late endosomal/lysosomal adaptor, MAPK and MTOR activator 1
hsa-miR-582-3p	0	0	1	1	1	1	SCYL2	SCY1-like 2 (S. cerevisiae)
hsa-miR-582-3p	1	0	1	1	1	1	FAM178A	family with sequence similarity 178, member A
hsa-miR-582-3p	1	0	1	1	1	1	TMEM33	transmembrane protein 33
hsa-miR-582-3p	0	0	1	1	0	0	SMG8	smg-8 homolog, nonsense mediated mRNA decay factor (C. elegans)
hsa-miR-582-3p	1	0	1	1	1	1	RPRD1A	regulation of nuclear pre-mRNA domain containing 1A
hsa-miR-582-3p	1	0	1	1	0	0	ETNK2	ethanolamine kinase 2
hsa-miR-582-3p	1	0	1	1	1	1	ZNF654	zinc finger protein 654
hsa-miR-582-3p	0	0	1	1	1	1	RBM41	RNA binding motif protein 41
hsa-miR-582-3p	1	0	1	1	1	1	KIAA1598	KIAA1598
hsa-miR-582-3p	1	0	1	0	1	1	LIN7C	lin-7 homolog C (C. elegans)
hsa-miR-582-3p	1	0	1	1	1	1	RSBN1	round spermatid basic protein 1
hsa-miR-582-3p	1	0	1	1	1	1	DRAM1	DNA-damage regulated autophagy modulator 1
hsa-miR-582-3p	1	0	1	0	1	1	FOXJ2	forkhead box J2
hsa-miR-582-3p	1	0	1	1	1	1	PAG1	phosphoprotein associated with glycosphingolipid microdomains 1
hsa-miR-582-3p	1	0	1	0	1	1	BRK1	BRICK1, SCAR/WAVE actin-nucleating complex subunit
hsa-miR-582-3p	0	0	1	1	1	1	BEX1	brain expressed, X-linked 1
hsa-miR-582-3p	0	0	1	1	1	1	HDAC8	histone deacetylase 8
hsa-miR-582-3p	1	0	1	1	1	1	STRADB	STE20-related kinase adaptor beta
hsa-miR-582-3p	1	0	1	0	1	1	SMPD3	sphingomyelin phosphodiesterase 3, neutral membrane (neutral sphingomyelinase II)
hsa-miR-582-3p	1	0	1	1	1	1	MLL5	myeloid/lymphoid or mixed-lineage leukemia 5 (trithorax homolog, Drosophila)
hsa-miR-582-3p	1	0	1	1	1	1	CTTNBP2NL	CTTNBP2 N-terminal like
hsa-miR-582-3p	0	0	1	0	1	1	ARL15	ADP-ribosylation factor-like 15
hsa-miR-582-3p	1	0	1	0	1	1	UBFD1	ubiquitin family domain containing 1
hsa-miR-582-3p	0	0	1	1	1	1	KLHL4	kelch-like 4 (Drosophila)
hsa-miR-582-3p	1	0	1	1	1	1	SERTAD4	SERTA domain containing 4
hsa-miR-582-3p	1	0	1	1	1	1	CYP26B1	cytochrome P450, family 26, subfamily B, polypeptide 1
hsa-miR-582-3p	0	0	1	1	0	0	BARHL2	BarH-like homeobox 2
hsa-miR-582-3p	0	0	1	1	1	1	FMN2	formin 2
hsa-miR-582-3p	1	0	1	1	1	1	MDM1	Mdm1 nuclear protein homolog (mouse)
hsa-miR-582-3p	0	0	1	1	1	1	TMEM167B	transmembrane protein 167B
hsa-miR-582-3p	0	0	1	1	1	1	CMC2	COX assembly mitochondrial protein 2 homolog (S. cerevisiae)
hsa-miR-582-3p	0	0	1	1	1	1	PAPPA2	pappalysin 2
hsa-miR-582-3p	0	0	1	1	1	1	CYSLTR2	cysteinyl leukotriene receptor 2
hsa-miR-582-3p	1	0	1	1	1	1	OSM	oncostatin M
hsa-miR-582-3p	1	0	1	0	1	1	ADCY2	adenylate cyclase 2 (brain)
hsa-miR-582-3p	0	0	1	1	1	1	SHROOM4	shroom family member 4
hsa-miR-582-3p	1	0	1	1	1	1	ARHGAP31	Rho GTPase activating protein 31
hsa-miR-582-3p	1	0	1	1	1	1	RGAG1	retrotransposon gag domain containing 1
hsa-miR-582-3p	1	0	1	1	1	1	MIB1	mindbomb E3 ubiquitin protein ligase 1
hsa-miR-582-3p	1	0	1	0	1	1	KLHDC5	kelch domain containing 5
hsa-miR-582-3p	0	0	1	1	1	1	MARCH4	membrane-associated ring finger (C3HC4) 4, E3 ubiquitin protein ligase
hsa-miR-582-3p	1	0	1	1	1	1	ARHGAP21	Rho GTPase activating protein 21
hsa-miR-582-3p	0	0	1	0	1	1	SYT13	synaptotagmin XIII
hsa-miR-582-3p	1	0	1	1	1	1	RANBP10	RAN binding protein 10
hsa-miR-582-3p	1	0	1	1	1	1	CNTN3	contactin 3 (plasmacytoma associated)
hsa-miR-582-3p	1	0	1	1	1	1	ZFP14	zinc finger protein 14 homolog (mouse)
hsa-miR-582-3p	1	0	1	1	1	1	CLDN1	claudin 1
hsa-miR-582-3p	1	0	1	1	1	1	BACH2	BTB and CNC homology 1, basic leucine zipper transcription factor 2
hsa-miR-582-3p	0	0	1	1	1	1	GABBR1	gamma-aminobutyric acid (GABA) B receptor, 1
hsa-miR-582-3p	1	0	1	0	1	1	MCL1	myeloid cell leukemia sequence 1 (BCL2-related)
hsa-miR-582-3p	1	0	1	1	1	1	EGLN1	egl nine homolog 1 (C. elegans)
hsa-miR-582-3p	0	0	1	1	0	0	ABHD4	abhydrolase domain containing 4
hsa-miR-582-3p	1	0	1	1	1	1	TMEM168	transmembrane protein 168
hsa-miR-582-3p	0	0	1	1	1	1	SUSD1	sushi domain containing 1
hsa-miR-582-3p	1	0	1	0	1	1	MRPS25	mitochondrial ribosomal protein S25
hsa-miR-582-3p	1	0	1	1	1	1	PRRX1	paired related homeobox 1
hsa-miR-582-3p	1	0	1	1	1	1	NEUROD6	neuronal differentiation 6
hsa-miR-582-3p	1	0	1	1	1	1	IL25	interleukin 25
hsa-miR-582-3p	0	0	1	1	0	0	DDX50	DEAD (Asp-Glu-Ala-Asp) box polypeptide 50
hsa-miR-582-3p	0	0	1	1	1	1	PDYN	prodynorphin
hsa-miR-582-3p	1	0	1	1	1	1	PSTPIP2	proline-serine-threonine phosphatase interacting protein 2
hsa-miR-582-3p	1	0	1	0	1	1	MOB3B	MOB kinase activator 3B
hsa-miR-582-3p	0	0	1	1	1	1	ZNF767	zinc finger family member 767
hsa-miR-582-3p	1	0	1	1	1	1	CPED1	cadherin-like and PC-esterase domain containing 1
hsa-miR-582-3p	0	0	1	1	1	1	ESRP2	epithelial splicing regulatory protein 2
hsa-miR-582-3p	1	0	1	1	0	0	UBTD1	ubiquitin domain containing 1
hsa-miR-582-3p	1	0	1	0	1	1	VCPIP1	valosin containing protein (p97)/p47 complex interacting protein 1
hsa-miR-582-3p	0	0	1	1	1	1	C1orf129	chromosome 1 open reading frame 129
hsa-miR-582-3p	1	0	1	1	1	1	RNF34	ring finger protein 34, E3 ubiquitin protein ligase
hsa-miR-582-3p	1	0	1	1	1	1	SLC35F5	solute carrier family 35, member F5
hsa-miR-582-3p	1	0	1	1	1	1	TNKS2	tankyrase, TRF1-interacting ankyrin-related ADP-ribose polymerase 2
hsa-miR-582-3p	1	0	1	1	1	1	CYB5B	cytochrome b5 type B (outer mitochondrial membrane)
hsa-miR-582-3p	1	0	1	1	1	1	JHDM1D	jumonji C domain containing histone demethylase 1 homolog D (S. cerevisiae)
hsa-miR-582-3p	1	0	1	1	1	1	NRBF2	nuclear receptor binding factor 2
hsa-miR-582-3p	1	0	1	0	1	1	CSRNP2	cysteine-serine-rich nuclear protein 2
hsa-miR-582-3p	1	0	1	1	1	1	C6orf62	chromosome 6 open reading frame 62
hsa-miR-582-3p	0	0	1	1	1	1	PABPC3	poly(A) binding protein, cytoplasmic 3
hsa-miR-582-3p	1	0	1	1	1	1	ANO3	anoctamin 3
hsa-miR-582-3p	1	0	1	0	1	1	THAP2	THAP domain containing, apoptosis associated protein 2
hsa-miR-582-3p	1	0	1	0	1	1	TMEM47	transmembrane protein 47
hsa-miR-582-3p	1	0	1	1	1	1	SESN2	sestrin 2
hsa-miR-582-3p	1	0	1	0	1	1	SH3BGRL2	SH3 domain binding glutamic acid-rich protein like 2
hsa-miR-582-3p	1	0	1	0	1	1	ITCH	itchy E3 ubiquitin protein ligase
hsa-miR-582-3p	0	0	1	0	1	1	ENAM	enamelin
hsa-miR-582-3p	0	0	1	1	0	0	MRPS5	mitochondrial ribosomal protein S5
hsa-miR-582-3p	1	0	1	0	1	1	SRSF8	serine/arginine-rich splicing factor 8
hsa-miR-582-3p	0	0	1	1	1	1	MAGT1	magnesium transporter 1
hsa-miR-582-3p	0	0	1	1	1	1	TKTL2	transketolase-like 2
hsa-miR-582-3p	1	0	1	1	1	1	ARID5B	AT rich interactive domain 5B (MRF1-like)
hsa-miR-582-3p	1	0	1	1	1	1	SLITRK6	SLIT and NTRK-like family, member 6
hsa-miR-582-3p	1	0	1	1	1	1	DCTN5	dynactin 5 (p25)
hsa-miR-582-3p	1	0	1	0	1	1	GLYR1	glyoxylate reductase 1 homolog (Arabidopsis)
hsa-miR-582-3p	0	0	1	1	1	1	RNASE7	ribonuclease, RNase A family, 7
hsa-miR-582-3p	1	0	1	0	1	1	PPP1R15B	protein phosphatase 1, regulatory subunit 15B
hsa-miR-582-3p	0	0	1	1	1	1	MICALCL	MICAL C-terminal like
hsa-miR-582-3p	1	0	1	0	1	1	UBASH3B	ubiquitin associated and SH3 domain containing B
hsa-miR-582-3p	1	0	1	1	1	1	TMEM60	transmembrane protein 60
hsa-miR-582-3p	1	0	1	0	1	1	PURB	purine-rich element binding protein B
hsa-miR-582-3p	1	0	1	1	1	1	ADAM19	ADAM metallopeptidase domain 19
hsa-miR-582-3p	1	0	1	1	1	1	TP53INP1	tumor protein p53 inducible nuclear protein 1
hsa-miR-582-3p	1	0	1	0	0	0	SMYD4	SET and MYND domain containing 4
hsa-miR-582-3p	1	0	1	0	1	1	TMEM123	transmembrane protein 123
hsa-miR-582-3p	1	0	1	1	1	1	NAA15	N(alpha)-acetyltransferase 15, NatA auxiliary subunit
hsa-miR-582-3p	0	0	1	1	1	1	PABPC5	poly(A) binding protein, cytoplasmic 5
hsa-miR-582-3p	1	0	1	1	1	1	GPR62	G protein-coupled receptor 62
hsa-miR-582-3p	1	0	1	1	1	1	KLHL6	kelch-like 6 (Drosophila)
hsa-miR-582-3p	1	0	1	1	1	1	JDP2	Jun dimerization protein 2
hsa-miR-582-3p	1	0	1	1	1	1	PCSK6	proprotein convertase subtilisin/kexin type 6
hsa-miR-582-3p	1	0	1	1	1	1	KCTD12	potassium channel tetramerisation domain containing 12
hsa-miR-582-3p	1	0	1	1	1	1	VANGL1	vang-like 1 (van gogh, Drosophila)
hsa-miR-582-3p	0	0	1	0	1	1	MYO3B	myosin IIIB
hsa-miR-582-3p	0	0	1	1	1	1	CASC5	cancer susceptibility candidate 5
hsa-miR-582-3p	1	0	1	0	1	1	CNOT6L	CCR4-NOT transcription complex, subunit 6-like
hsa-miR-582-3p	1	0	1	1	1	1	MAPK1IP1L	mitogen-activated protein kinase 1 interacting protein 1-like
hsa-miR-582-3p	0	0	1	1	1	1	GTSF1	gametocyte specific factor 1
hsa-miR-582-3p	0	0	1	1	0	0	MBD3L2	methyl-CpG binding domain protein 3-like 2
hsa-miR-582-3p	1	0	1	1	1	1	MBNL2	muscleblind-like splicing regulator 2
hsa-miR-582-3p	0	0	1	1	1	1	NXPE3	neurexophilin and PC-esterase domain family, member 3
hsa-miR-582-3p	1	0	1	0	1	1	CENPBD1	CENPB DNA-binding domains containing 1
hsa-miR-582-3p	0	0	1	0	1	1	DDIT4L	DNA-damage-inducible transcript 4-like
hsa-miR-582-3p	0	0	1	1	0	0	TCEB3C	transcription elongation factor B polypeptide 3C (elongin A3)
hsa-miR-582-3p	1	0	1	1	1	1	SEPT6	septin 6
hsa-miR-582-3p	1	0	1	0	1	1	MTPN	myotrophin
hsa-miR-582-3p	0	0	1	1	1	1	GLIS1	GLIS family zinc finger 1
hsa-miR-582-3p	0	0	1	1	1	1	LONRF1	LON peptidase N-terminal domain and ring finger 1
hsa-miR-582-3p	1	0	1	0	1	1	SYT11	synaptotagmin XI
hsa-miR-582-3p	0	0	1	1	1	1	ZNF561	zinc finger protein 561
hsa-miR-582-3p	1	0	1	1	1	1	POGLUT1	protein O-glucosyltransferase 1
hsa-miR-582-3p	0	0	1	1	1	1	RMI2	RMI2, RecQ mediated genome instability 2, homolog (S. cerevisiae)
hsa-miR-582-3p	1	0	1	1	1	1	LSM12	LSM12 homolog (S. cerevisiae)
hsa-miR-582-3p	1	0	1	1	1	1	GRPEL2	GrpE-like 2, mitochondrial (E. coli)
hsa-miR-582-3p	1	0	1	1	1	1	FAM81A	family with sequence similarity 81, member A
hsa-miR-582-3p	1	0	1	1	1	1	ZNF362	zinc finger protein 362
hsa-miR-582-3p	1	0	1	0	1	1	MOSPD2	motile sperm domain containing 2
hsa-miR-582-3p	1	0	1	1	1	1	SPRED1	sprouty-related, EVH1 domain containing 1
hsa-miR-582-3p	1	0	1	0	1	1	DCP2	DCP2 decapping enzyme homolog (S. cerevisiae)
hsa-miR-582-3p	0	0	1	1	1	1	FAM227B	family with sequence similarity 227, member B
hsa-miR-582-3p	1	0	1	1	1	1	TCTEX1D1	Tctex1 domain containing 1
hsa-miR-582-3p	1	0	1	1	1	1	UHRF2	ubiquitin-like with PHD and ring finger domains 2, E3 ubiquitin protein ligase
hsa-miR-582-3p	1	0	1	1	1	1	EED	embryonic ectoderm development
hsa-miR-582-3p	1	0	1	0	1	1	ST6GALNAC3	ST6 (alpha-N-acetyl-neuraminyl-2,3-beta-galactosyl-1,3)-N-acetylgalactosaminide alpha-2,6-sialyltransferase 3
hsa-miR-582-3p	1	0	1	1	1	1	C3orf45	chromosome 3 open reading frame 45
hsa-miR-582-3p	1	0	1	1	1	1	CEP120	centrosomal protein 120kDa
hsa-miR-582-3p	1	0	1	1	1	1	MAMDC2	MAM domain containing 2
hsa-miR-582-3p	1	0	1	1	1	1	FBXL16	F-box and leucine-rich repeat protein 16
hsa-miR-582-3p	1	0	1	1	1	1	TMEM161B	transmembrane protein 161B
hsa-miR-582-3p	1	0	1	0	1	1	ZCCHC24	zinc finger, CCHC domain containing 24
hsa-miR-582-3p	1	0	1	1	1	1	C2orf69	chromosome 2 open reading frame 69
hsa-miR-582-3p	0	0	1	1	1	1	ANKRD44	ankyrin repeat domain 44
hsa-miR-582-3p	0	0	1	1	0	0	LIX1L	Lix1 homolog (mouse)-like
hsa-miR-582-3p	1	0	1	1	1	1	RAB39B	RAB39B, member RAS oncogene family
hsa-miR-582-3p	1	0	1	1	1	1	POM121	POM121 transmembrane nucleoporin
hsa-miR-582-3p	1	0	1	0	1	1	PLEKHH2	pleckstrin homology domain containing, family H (with MyTH4 domain) member 2
hsa-miR-582-3p	1	0	1	1	1	1	MMGT1	membrane magnesium transporter 1
hsa-miR-582-3p	0	0	1	1	1	1	FAM98B	family with sequence similarity 98, member B
hsa-miR-582-3p	1	0	1	0	1	1	SREK1IP1	SREK1-interacting protein 1
hsa-miR-582-3p	0	0	1	1	1	1	YIPF6	Yip1 domain family, member 6
hsa-miR-582-3p	0	0	1	1	1	1	GRIK1	glutamate receptor, ionotropic, kainate 1
hsa-miR-582-3p	1	0	1	0	1	1	CCDC71L	coiled-coil domain containing 71-like
hsa-miR-582-3p	1	0	1	1	1	1	STX12	syntaxin 12
hsa-miR-582-3p	0	0	1	1	1	1	GPIHBP1	glycosylphosphatidylinositol anchored high density lipoprotein binding protein 1
hsa-miR-582-3p	0	0	1	1	1	1	STXBP4	syntaxin binding protein 4
hsa-miR-582-3p	0	0	1	1	1	1	CMTM4	CKLF-like MARVEL transmembrane domain containing 4
hsa-miR-582-3p	0	0	1	1	0	0	C7orf34	chromosome 7 open reading frame 34
hsa-miR-582-3p	1	0	1	1	1	1	TCF20	transcription factor 20 (AR1)
hsa-miR-582-3p	0	0	1	1	0	0	CENPV	centromere protein V
hsa-miR-582-3p	0	0	1	1	1	1	USP12	ubiquitin specific peptidase 12
hsa-miR-582-3p	1	0	1	1	1	1	ADAT2	adenosine deaminase, tRNA-specific 2
hsa-miR-582-3p	0	0	1	0	1	1	VSTM2A	V-set and transmembrane domain containing 2A
hsa-miR-582-3p	1	0	1	1	1	1	GDPD1	glycerophosphodiester phosphodiesterase domain containing 1
hsa-miR-582-3p	1	0	1	1	1	1	SUMF1	sulfatase modifying factor 1
hsa-miR-582-3p	1	0	1	0	1	1	HNRNPA3	heterogeneous nuclear ribonucleoprotein A3
hsa-miR-582-3p	0	0	1	1	1	1	ISCA2	iron-sulfur cluster assembly 2 homolog (S. cerevisiae)
hsa-miR-582-3p	1	0	1	1	1	1	ZBTB41	zinc finger and BTB domain containing 41
hsa-miR-582-3p	1	0	1	0	1	1	LYSMD3	LysM, putative peptidoglycan-binding, domain containing 3
hsa-miR-582-3p	1	0	1	0	1	1	NRK	Nik related kinase
hsa-miR-582-3p	0	0	1	1	1	1	OLFML1	olfactomedin-like 1
hsa-miR-582-3p	0	0	1	1	1	1	FAM174A	family with sequence similarity 174, member A
hsa-miR-582-3p	0	0	1	1	1	1	EFCAB5	EF-hand calcium binding domain 5
hsa-miR-582-3p	1	0	1	0	1	1	ZC3H6	zinc finger CCCH-type containing 6
hsa-miR-582-3p	0	0	1	1	1	1	COL25A1	collagen, type XXV, alpha 1
hsa-miR-582-3p	1	0	1	0	1	1	PRICKLE2	prickle homolog 2 (Drosophila)
hsa-miR-582-3p	1	0	1	1	1	1	NSUN4	NOP2/Sun domain family, member 4
hsa-miR-582-3p	0	0	1	1	0	0	FOXD4L4	forkhead box D4-like 4
hsa-miR-582-3p	1	0	1	1	1	1	BLOC1S5	biogenesis of lysosomal organelles complex-1, subunit 5, muted
hsa-miR-582-3p	1	0	1	1	1	1	FBXO33	F-box protein 33
hsa-miR-582-3p	0	0	1	1	1	1	SHC4	SHC (Src homology 2 domain containing) family, member 4
hsa-miR-582-3p	1	0	1	1	1	1	E2F7	E2F transcription factor 7
hsa-miR-582-3p	1	0	1	1	1	1	TNFAIP8L3	tumor necrosis factor, alpha-induced protein 8-like 3
hsa-miR-582-3p	0	0	1	0	1	1	ASB18	ankyrin repeat and SOCS box containing 18
hsa-miR-582-3p	1	0	1	0	1	1	STAT3	signal transducer and activator of transcription 3 (acute-phase response factor)
hsa-miR-582-3p	0	0	1	0	0	0	TTTY15	testis-specific transcript, Y-linked 15 (non-protein coding)
hsa-miR-582-3p	0	0	1	0	0	0	PPP1R2P3	protein phosphatase 1, regulatory (inhibitor) subunit 2 pseudogene 3
hsa-miR-582-3p	0	0	1	0	0	0	NXF4	nuclear RNA export factor 4 pseudogene
hsa-miR-582-3p	0	0	1	0	0	0	PDIA3P	protein disulfide isomerase family A, member 3 pseudogene
hsa-miR-582-3p	0	0	1	0	0	0	FMO6P	flavin containing monooxygenase 6 pseudogene
hsa-miR-582-3p	0	0	1	0	0	0	HYALP1	hyaluronoglucosaminidase pseudogene 1
hsa-miR-582-3p	0	0	1	0	0	0	NUDT9P1	nudix (nucleoside diphosphate linked moiety X)-type motif 9 pseudogene 1
hsa-miR-582-3p	0	0	1	0	0	0	TPTE2P6	transmembrane phosphoinositide 3-phosphatase and tensin homolog 2 pseudogene 6
hsa-miR-582-3p	0	0	1	0	0	0	RNF126P1	ring finger protein 126 pseudogene 1
hsa-miR-582-3p	0	0	1	0	0	0	MALAT1	metastasis associated lung adenocarcinoma transcript 1 (non-protein coding)
hsa-miR-582-3p	1	0	1	1	0	0	HOXC5	homeobox C5
hsa-miR-582-3p	0	0	1	0	0	0	SYS1-DBNDD2	SYS1-DBNDD2 readthrough (non-protein coding)
hsa-miR-582-3p	1	0	1	1	1	1	TRIO	trio Rho guanine nucleotide exchange factor
hsa-miR-582-3p	0	0	1	1	1	1	SPIB	Spi-B transcription factor (Spi-1/PU.1 related)
hsa-miR-582-3p	1	0	1	1	1	1	HS3ST1	heparan sulfate (glucosamine) 3-O-sulfotransferase 1
hsa-miR-582-3p	0	0	0	1	0	0	RPS20	ribosomal protein S20
hsa-miR-582-3p	0	0	0	1	1	1	ABHD5	abhydrolase domain containing 5
hsa-miR-582-3p	0	0	0	1	1	1	FTSJ1	FtsJ RNA methyltransferase homolog 1 (E. coli)
hsa-miR-582-3p	0	0	1	1	1	1	ENPP2	ectonucleotide pyrophosphatase/phosphodiesterase 2
hsa-miR-582-3p	0	0	1	1	1	1	AQR	aquarius homolog (mouse)
hsa-miR-582-3p	0	0	1	1	1	1	SPP2	secreted phosphoprotein 2, 24kDa
hsa-miR-582-3p	0	0	0	1	0	0	ZNF222	zinc finger protein 222
hsa-miR-582-3p	0	0	1	1	0	0	ZW10	ZW10, kinetochore associated, homolog (Drosophila)
hsa-miR-582-3p	0	0	1	1	1	1	SPG21	spastic paraplegia 21 (autosomal recessive, Mast syndrome)
hsa-miR-582-3p	0	0	0	1	1	1	ZNF184	zinc finger protein 184
hsa-miR-582-3p	0	0	1	1	0	0	PDXP	pyridoxal (pyridoxine, vitamin B6) phosphatase
hsa-miR-582-3p	0	0	1	1	0	0	SH3BP1	SH3-domain binding protein 1
hsa-miR-582-3p	0	0	0	1	1	1	BIK	BCL2-interacting killer (apoptosis-inducing)
hsa-miR-582-3p	1	0	1	1	1	1	CCNK	cyclin K
hsa-miR-582-3p	0	0	1	1	0	0	FKBP3	FK506 binding protein 3, 25kDa
hsa-miR-582-3p	1	0	1	1	1	1	ZFYVE21	zinc finger, FYVE domain containing 21
hsa-miR-582-3p	0	0	1	1	1	1	PABPC1L	poly(A) binding protein, cytoplasmic 1-like
hsa-miR-582-3p	1	0	1	1	0	0	TXNL1	thioredoxin-like 1
hsa-miR-582-3p	0	0	0	1	0	0	MLNR	motilin receptor
hsa-miR-582-3p	0	0	1	1	1	1	RP1	retinitis pigmentosa 1 (autosomal dominant)
hsa-miR-582-3p	0	0	0	1	1	1	POP4	processing of precursor 4, ribonuclease P/MRP subunit (S. cerevisiae)
hsa-miR-582-3p	1	0	1	1	1	1	RAB3D	RAB3D, member RAS oncogene family
hsa-miR-582-3p	0	0	0	1	1	1	DNASE2	deoxyribonuclease II, lysosomal
hsa-miR-582-3p	0	0	0	1	1	1	CRHR2	corticotropin releasing hormone receptor 2
hsa-miR-582-3p	0	0	0	1	0	0	AIMP2	aminoacyl tRNA synthetase complex-interacting multifunctional protein 2
hsa-miR-582-3p	0	0	0	1	0	0	RARRES2	retinoic acid receptor responder (tazarotene induced) 2
hsa-miR-582-3p	1	0	1	1	1	1	SEC61B	Sec61 beta subunit
hsa-miR-582-3p	0	0	0	1	0	0	EDF1	endothelial differentiation-related factor 1
hsa-miR-582-3p	0	0	1	1	1	1	DNAJC12	DnaJ (Hsp40) homolog, subfamily C, member 12
hsa-miR-582-3p	0	0	1	1	0	0	AATF	apoptosis antagonizing transcription factor
hsa-miR-582-3p	0	0	0	1	0	0	HSD17B1	hydroxysteroid (17-beta) dehydrogenase 1
hsa-miR-582-3p	0	0	0	1	1	1	MANBA	mannosidase, beta A, lysosomal
hsa-miR-582-3p	0	0	1	1	1	1	GAR1	GAR1 ribonucleoprotein homolog (yeast)
hsa-miR-582-3p	0	0	1	1	1	1	LDHA	lactate dehydrogenase A
hsa-miR-582-3p	0	0	1	1	0	0	CRYAB	crystallin, alpha B
hsa-miR-582-3p	0	0	1	1	1	1	C11orf63	chromosome 11 open reading frame 63
hsa-miR-582-3p	1	0	1	1	0	0	DGAT2	diacylglycerol O-acyltransferase 2
hsa-miR-582-3p	0	0	1	1	0	0	RPLP0	ribosomal protein, large, P0
hsa-miR-582-3p	1	0	1	1	1	1	MYF5	myogenic factor 5
hsa-miR-582-3p	0	0	1	1	1	1	RAD51AP1	RAD51 associated protein 1
hsa-miR-582-3p	0	0	1	1	1	1	HCFC2	host cell factor C2
hsa-miR-582-3p	1	0	1	1	1	1	SRSF9	serine/arginine-rich splicing factor 9
hsa-miR-582-3p	1	0	1	1	1	1	FAM65B	family with sequence similarity 65, member B
hsa-miR-582-3p	0	0	1	1	1	1	MCM3	minichromosome maintenance complex component 3
hsa-miR-582-3p	0	0	1	1	1	1	MRPS30	mitochondrial ribosomal protein S30
hsa-miR-582-3p	0	0	1	1	1	1	CDH9	cadherin 9, type 2 (T1-cadherin)
hsa-miR-582-3p	0	0	0	1	0	0	BNIP1	BCL2/adenovirus E1B 19kDa interacting protein 1
hsa-miR-582-3p	0	0	0	1	0	0	SPR	sepiapterin reductase (7,8-dihydrobiopterin:NADP+ oxidoreductase)
hsa-miR-582-3p	0	0	1	1	0	0	MASP2	mannan-binding lectin serine peptidase 2
hsa-miR-582-3p	1	0	1	1	1	1	ADPRHL2	ADP-ribosylhydrolase like 2
hsa-miR-582-3p	1	0	1	1	1	1	DUSP4	dual specificity phosphatase 4
hsa-miR-582-3p	1	0	1	1	1	1	AHR	aryl hydrocarbon receptor
hsa-miR-582-3p	0	0	1	1	1	1	EBPL	emopamil binding protein-like
hsa-miR-582-3p	0	0	0	1	1	1	BBS2	Bardet-Biedl syndrome 2
hsa-miR-582-3p	0	0	0	1	0	0	NT5C	5', 3'-nucleotidase, cytosolic
hsa-miR-582-3p	1	0	1	1	1	1	MAX	MYC associated factor X
hsa-miR-582-3p	0	0	1	1	0	0	DNASE1	deoxyribonuclease I
hsa-miR-582-3p	0	0	1	1	1	1	APOPT1	apoptogenic 1, mitochondrial
hsa-miR-582-3p	0	0	0	1	0	0	PLA2G2C	phospholipase A2, group IIC
hsa-miR-582-3p	0	0	1	1	1	1	GNG11	guanine nucleotide binding protein (G protein), gamma 11
hsa-miR-582-3p	0	0	1	1	0	0	GCAT	glycine C-acetyltransferase
hsa-miR-582-3p	1	0	1	1	0	0	HOXD9	homeobox D9
hsa-miR-582-3p	0	0	1	1	1	1	SOX15	SRY (sex determining region Y)-box 15
hsa-miR-582-3p	0	0	1	1	1	1	IGSF21	immunoglobin superfamily, member 21
hsa-miR-582-3p	0	0	1	1	0	0	KRT33B	keratin 33B
hsa-miR-582-3p	0	0	0	1	1	1	BST2	bone marrow stromal cell antigen 2
hsa-miR-582-3p	0	0	1	1	1	1	OSBPL2	oxysterol binding protein-like 2
hsa-miR-582-3p	0	0	1	1	0	0	ATP6V1E1	ATPase, H+ transporting, lysosomal 31kDa, V1 subunit E1
hsa-miR-582-3p	0	0	1	1	0	0	COX4I1	cytochrome c oxidase subunit IV isoform 1
hsa-miR-582-3p	0	0	1	1	1	1	FST	follistatin
hsa-miR-582-3p	0	0	0	1	1	1	DOCK2	dedicator of cytokinesis 2
hsa-miR-582-3p	0	0	1	1	0	0	KLB	klotho beta
hsa-miR-582-3p	0	0	1	1	1	1	OASL	2'-5'-oligoadenylate synthetase-like
hsa-miR-582-3p	1	0	1	1	1	1	TRAFD1	TRAF-type zinc finger domain containing 1
hsa-miR-582-3p	0	0	1	1	1	1	AKIRIN2	akirin 2
hsa-miR-582-3p	0	0	0	1	1	1	MRPL47	mitochondrial ribosomal protein L47
hsa-miR-582-3p	0	0	1	1	1	1	CTSL2	cathepsin L2
hsa-miR-582-3p	0	0	0	1	1	1	TLR2	toll-like receptor 2
hsa-miR-582-3p	1	0	1	1	1	1	ANKRD42	ankyrin repeat domain 42
hsa-miR-582-3p	0	0	1	1	0	0	BUD13	BUD13 homolog (S. cerevisiae)
hsa-miR-582-3p	0	0	1	1	0	0	PSMD11	proteasome (prosome, macropain) 26S subunit, non-ATPase, 11
hsa-miR-582-3p	0	0	0	1	1	1	SERPINA10	serpin peptidase inhibitor, clade A (alpha-1 antiproteinase, antitrypsin), member 10
hsa-miR-582-3p	0	0	1	1	1	1	RAB27B	RAB27B, member RAS oncogene family
hsa-miR-582-3p	0	0	0	1	0	0	PSMB1	proteasome (prosome, macropain) subunit, beta type, 1
hsa-miR-582-3p	0	0	1	1	0	0	PGS1	phosphatidylglycerophosphate synthase 1
hsa-miR-582-3p	0	0	0	1	1	1	LGALS3BP	lectin, galactoside-binding, soluble, 3 binding protein
hsa-miR-582-3p	0	0	0	1	0	0	CCDC124	coiled-coil domain containing 124
hsa-miR-582-3p	1	0	1	1	1	1	HACE1	HECT domain and ankyrin repeat containing E3 ubiquitin protein ligase 1
hsa-miR-582-3p	1	0	1	1	1	1	OVCA2	ovarian tumor suppressor candidate 2
hsa-miR-582-3p	0	0	0	1	1	1	CLNS1A	chloride channel, nucleotide-sensitive, 1A
hsa-miR-582-3p	0	0	1	1	0	0	TCF25	transcription factor 25 (basic helix-loop-helix)
hsa-miR-582-3p	0	0	1	1	0	0	IFIH1	interferon induced with helicase C domain 1
hsa-miR-582-3p	1	0	1	1	1	1	FNBP4	formin binding protein 4
hsa-miR-582-3p	0	0	1	1	1	1	PIK3CA	phosphatidylinositol-4,5-bisphosphate 3-kinase, catalytic subunit alpha
hsa-miR-582-3p	0	0	0	1	0	0	TECTA	tectorin alpha
hsa-miR-582-3p	0	0	0	1	1	1	EFHD1	EF-hand domain family, member D1
hsa-miR-582-3p	0	0	1	1	1	1	DARS	aspartyl-tRNA synthetase
hsa-miR-582-3p	1	0	1	1	1	1	ARHGAP24	Rho GTPase activating protein 24
hsa-miR-582-3p	0	0	0	1	0	0	HERC5	HECT and RLD domain containing E3 ubiquitin protein ligase 5
hsa-miR-582-3p	0	0	1	1	1	1	C2orf42	chromosome 2 open reading frame 42
hsa-miR-582-3p	0	0	1	1	1	1	SEC22C	SEC22 vesicle trafficking protein homolog C (S. cerevisiae)
hsa-miR-582-3p	1	0	1	1	1	1	RAP1GDS1	RAP1, GTP-GDP dissociation stimulator 1
hsa-miR-582-3p	0	0	1	1	1	1	GRPEL1	GrpE-like 1, mitochondrial (E. coli)
hsa-miR-582-3p	0	0	1	1	1	1	MSH3	mutS homolog 3 (E. coli)
hsa-miR-582-3p	0	0	0	1	0	0	INTS12	integrator complex subunit 12
hsa-miR-582-3p	1	0	1	1	1	1	SEMA3A	sema domain, immunoglobulin domain (Ig), short basic domain, secreted, (semaphorin) 3A
hsa-miR-582-3p	0	0	1	1	0	0	MCCC1	methylcrotonoyl-CoA carboxylase 1 (alpha)
hsa-miR-582-3p	1	0	1	1	0	0	KIAA1549L	KIAA1549-like
hsa-miR-582-3p	1	0	1	1	1	1	SRI	sorcin
hsa-miR-582-3p	1	0	1	1	1	1	RUFY2	RUN and FYVE domain containing 2
hsa-miR-582-3p	0	0	1	1	0	0	IDE	insulin-degrading enzyme
hsa-miR-582-3p	0	0	1	1	1	1	SLC5A1	solute carrier family 5 (sodium/glucose cotransporter), member 1
hsa-miR-582-3p	0	0	1	1	1	1	SLC15A4	solute carrier family 15, member 4
hsa-miR-582-3p	0	0	1	1	1	1	SORD	sorbitol dehydrogenase
hsa-miR-582-3p	0	0	1	1	1	1	HDC	histidine decarboxylase
hsa-miR-582-3p	0	0	0	1	1	1	MYO19	myosin XIX
hsa-miR-582-3p	0	0	0	1	0	0	C17orf80	chromosome 17 open reading frame 80
hsa-miR-582-3p	0	0	1	1	1	1	DOPEY2	dopey family member 2
hsa-miR-582-3p	0	0	1	1	1	1	SLC47A1	solute carrier family 47, member 1
hsa-miR-582-3p	0	0	1	1	0	0	RPL13A	ribosomal protein L13a
hsa-miR-582-3p	0	0	1	1	0	0	SLC44A3	solute carrier family 44, member 3
hsa-miR-582-3p	0	0	1	1	0	0	NUF2	NUF2, NDC80 kinetochore complex component, homolog (S. cerevisiae)
hsa-miR-582-3p	0	0	0	1	1	1	ZNF167	zinc finger protein 167
hsa-miR-582-3p	1	0	1	1	1	1	SCD5	stearoyl-CoA desaturase 5
hsa-miR-582-3p	0	0	0	1	1	1	SPATA5	spermatogenesis associated 5
hsa-miR-582-3p	0	0	1	1	0	0	SKP2	S-phase kinase-associated protein 2, E3 ubiquitin protein ligase
hsa-miR-582-3p	0	0	0	1	1	1	CRHBP	corticotropin releasing hormone binding protein
hsa-miR-582-3p	0	0	1	1	1	1	FARS2	phenylalanyl-tRNA synthetase 2, mitochondrial
hsa-miR-582-3p	0	0	1	1	1	1	UIMC1	ubiquitin interaction motif containing 1
hsa-miR-582-3p	0	0	0	1	0	0	TAAR6	trace amine associated receptor 6
hsa-miR-582-3p	1	0	0	1	1	1	IGFBP1	insulin-like growth factor binding protein 1
hsa-miR-582-3p	0	0	0	1	1	1	SUMF2	sulfatase modifying factor 2
hsa-miR-582-3p	0	0	1	1	0	0	MRPS28	mitochondrial ribosomal protein S28
hsa-miR-582-3p	0	0	1	1	1	1	BCCIP	BRCA2 and CDKN1A interacting protein
hsa-miR-582-3p	0	0	1	1	0	0	SSRP1	structure specific recognition protein 1
hsa-miR-582-3p	1	0	0	1	1	1	HMBS	hydroxymethylbilane synthase
hsa-miR-582-3p	0	0	0	1	1	1	MPZL2	myelin protein zero-like 2
hsa-miR-582-3p	0	0	1	1	1	1	UHRF1BP1L	UHRF1 binding protein 1-like
hsa-miR-582-3p	0	0	1	1	1	1	CCDC83	coiled-coil domain containing 83
hsa-miR-582-3p	0	0	1	1	1	1	SLC25A4	solute carrier family 25 (mitochondrial carrier; adenine nucleotide translocator), member 4
hsa-miR-582-3p	0	0	1	1	1	1	ARL14EP	ADP-ribosylation factor-like 14 effector protein
hsa-miR-582-3p	0	0	0	1	0	0	ATP5A1	ATP synthase, H+ transporting, mitochondrial F1 complex, alpha subunit 1, cardiac muscle
hsa-miR-582-3p	1	0	0	1	0	0	POC5	POC5 centriolar protein homolog (Chlamydomonas)
hsa-miR-582-3p	0	0	1	1	0	0	ZNF117	zinc finger protein 117
hsa-miR-582-3p	0	0	1	1	1	1	IFLTD1	intermediate filament tail domain containing 1
hsa-miR-582-3p	0	0	1	1	0	0	NUBP1	nucleotide binding protein 1
hsa-miR-582-3p	0	0	1	1	0	0	FEZF2	FEZ family zinc finger 2
hsa-miR-582-3p	0	0	1	1	1	1	ACAA2	acetyl-CoA acyltransferase 2
hsa-miR-582-3p	0	0	0	1	0	0	CXXC1	CXXC finger protein 1
hsa-miR-582-3p	0	0	0	1	0	0	USP43	ubiquitin specific peptidase 43
hsa-miR-582-3p	0	0	0	1	1	1	ABCC3	ATP-binding cassette, sub-family C (CFTR/MRP), member 3
hsa-miR-582-3p	0	0	0	1	1	1	LRGUK	leucine-rich repeats and guanylate kinase domain containing
hsa-miR-582-3p	0	0	1	1	0	0	NUP205	nucleoporin 205kDa
hsa-miR-582-3p	0	0	0	1	0	0	FAM161B	family with sequence similarity 161, member B
hsa-miR-582-3p	0	0	1	1	1	1	DCK	deoxycytidine kinase
hsa-miR-582-3p	0	0	1	1	1	1	TTLL5	tubulin tyrosine ligase-like family, member 5
hsa-miR-582-3p	0	0	1	1	1	1	RWDD2B	RWD domain containing 2B
hsa-miR-582-3p	0	0	0	1	0	0	TSPY8	testis specific protein, Y-linked 8
hsa-miR-582-3p	0	0	0	1	1	1	LYZL4	lysozyme-like 4
hsa-miR-582-3p	0	0	0	1	0	0	TIMP4	TIMP metallopeptidase inhibitor 4
hsa-miR-582-3p	0	0	0	1	0	0	CCNB2	cyclin B2
hsa-miR-582-3p	0	0	1	1	1	1	PREX2	phosphatidylinositol-3,4,5-trisphosphate-dependent Rac exchange factor 2
hsa-miR-582-3p	1	0	1	1	1	1	MRPL17	mitochondrial ribosomal protein L17
hsa-miR-582-3p	0	0	1	1	1	1	PKD1L1	polycystic kidney disease 1 like 1
hsa-miR-582-3p	1	0	1	1	1	1	NCOA5	nuclear receptor coactivator 5
hsa-miR-582-3p	0	0	0	1	1	1	ZNF235	zinc finger protein 235
hsa-miR-582-3p	0	0	0	1	0	0	RSPH1	radial spoke head 1 homolog (Chlamydomonas)
hsa-miR-582-3p	1	0	1	1	1	1	AGPAT3	1-acylglycerol-3-phosphate O-acyltransferase 3
hsa-miR-582-3p	0	0	0	1	0	0	FTCD	formiminotransferase cyclodeaminase
hsa-miR-582-3p	0	0	0	1	1	1	NLRP8	NLR family, pyrin domain containing 8
hsa-miR-582-3p	0	0	1	1	1	1	CD3G	CD3g molecule, gamma (CD3-TCR complex)
hsa-miR-582-3p	0	0	1	1	0	0	NLRX1	NLR family member X1
hsa-miR-582-3p	0	0	1	1	1	1	FCRL2	Fc receptor-like 2
hsa-miR-582-3p	0	0	1	1	1	1	IKZF3	IKAROS family zinc finger 3 (Aiolos)
hsa-miR-582-3p	0	0	1	1	1	1	PM20D1	peptidase M20 domain containing 1
hsa-miR-582-3p	1	0	1	1	1	1	GABRB1	gamma-aminobutyric acid (GABA) A receptor, beta 1
hsa-miR-582-3p	0	0	1	1	0	0	IGFBP7	insulin-like growth factor binding protein 7
hsa-miR-582-3p	0	0	1	1	1	1	WDR52	WD repeat domain 52
hsa-miR-582-3p	0	0	1	1	1	1	GYG1	glycogenin 1
hsa-miR-582-3p	1	0	1	1	1	1	C3orf65	chromosome 3 open reading frame 65
hsa-miR-582-3p	0	0	1	1	1	1	KIF27	kinesin family member 27
hsa-miR-582-3p	0	0	1	1	1	1	OXGR1	oxoglutarate (alpha-ketoglutarate) receptor 1
hsa-miR-582-3p	0	0	1	1	1	1	VDAC2	voltage-dependent anion channel 2
hsa-miR-582-3p	1	0	1	1	1	1	COPS2	COP9 constitutive photomorphogenic homolog subunit 2 (Arabidopsis)
hsa-miR-582-3p	1	0	1	1	1	1	TAZ	tafazzin
hsa-miR-582-3p	0	0	0	1	0	0	ACAT1	acetyl-CoA acetyltransferase 1
hsa-miR-582-3p	0	0	1	1	0	0	CRABP1	cellular retinoic acid binding protein 1
hsa-miR-582-3p	1	0	1	1	1	1	ZNF3	zinc finger protein 3
hsa-miR-582-3p	0	0	0	1	1	1	MARVELD3	MARVEL domain containing 3
hsa-miR-582-3p	0	0	1	1	1	1	SNRPD1	small nuclear ribonucleoprotein D1 polypeptide 16kDa
hsa-miR-582-3p	1	0	1	1	1	1	SPRYD3	SPRY domain containing 3
hsa-miR-582-3p	1	0	1	1	1	1	CTTN	cortactin
hsa-miR-582-3p	0	0	0	1	0	0	FOXA3	forkhead box A3
hsa-miR-582-3p	0	0	0	1	1	1	THAP9	THAP domain containing 9
hsa-miR-582-3p	1	0	1	1	0	0	ZCCHC4	zinc finger, CCHC domain containing 4
hsa-miR-582-3p	0	0	0	1	0	0	PRY2	PTPN13-like, Y-linked 2
hsa-miR-582-3p	1	0	1	1	1	1	PLEKHB2	pleckstrin homology domain containing, family B (evectins) member 2
hsa-miR-582-3p	1	0	1	1	0	0	ENHO	energy homeostasis associated
hsa-miR-582-3p	0	0	1	1	1	1	SEC61A2	Sec61 alpha 2 subunit (S. cerevisiae)
hsa-miR-582-3p	0	0	0	1	0	0	BOLA2B	bolA homolog 2B (E. coli)
hsa-miR-582-3p	0	0	0	1	0	0	DTYMK	deoxythymidylate kinase (thymidylate kinase)
hsa-miR-582-3p	0	0	0	1	0	0	CENPN	centromere protein N
hsa-miR-582-3p	0	0	1	1	1	1	KCNG3	potassium voltage-gated channel, subfamily G, member 3
hsa-miR-582-3p	0	0	0	1	1	1	AVEN	apoptosis, caspase activation inhibitor
hsa-miR-582-3p	0	0	0	1	1	1	CDY1B	chromodomain protein, Y-linked, 1B
hsa-miR-582-3p	0	0	0	1	0	0	TMEM223	transmembrane protein 223
hsa-miR-582-3p	1	0	1	1	1	1	HARS	histidyl-tRNA synthetase
hsa-miR-582-3p	0	0	0	1	1	1	NAT1	N-acetyltransferase 1 (arylamine N-acetyltransferase)
hsa-miR-582-3p	0	0	0	1	1	1	ETFDH	electron-transferring-flavoprotein dehydrogenase
hsa-miR-582-3p	0	0	0	1	0	0	SNUPN	snurportin 1
hsa-miR-582-3p	0	0	0	1	0	0	MUCL1	mucin-like 1
hsa-miR-582-3p	0	0	1	1	1	1	PTGR1	prostaglandin reductase 1
hsa-miR-582-3p	1	0	1	1	1	1	EEF1A1	eukaryotic translation elongation factor 1 alpha 1
hsa-miR-582-3p	1	0	1	1	0	0	ATG4D	autophagy related 4D, cysteine peptidase
hsa-miR-582-3p	0	0	1	1	1	1	HADH	hydroxyacyl-CoA dehydrogenase
hsa-miR-582-3p	0	0	0	1	1	1	LOC729317	voltage-dependent anion channel 2 pseudogene
hsa-miR-582-3p	0	0	0	1	1	1	KRT2	keratin 2
hsa-miR-582-3p	0	0	0	1	0	0	OR10A6	olfactory receptor, family 10, subfamily A, member 6
hsa-miR-582-3p	0	0	1	1	1	1	WDR69	WD repeat domain 69
hsa-miR-582-3p	0	0	1	1	0	0	CCDC13	coiled-coil domain containing 13
hsa-miR-582-3p	0	0	1	1	1	1	PARP14	poly (ADP-ribose) polymerase family, member 14
hsa-miR-582-3p	0	0	1	1	0	0	SPERT	spermatid associated
hsa-miR-582-3p	0	0	1	1	0	0	TTC18	tetratricopeptide repeat domain 18
hsa-miR-582-3p	0	0	1	1	1	1	MAP9	microtubule-associated protein 9
hsa-miR-582-3p	0	0	1	1	1	1	ISCA1	iron-sulfur cluster assembly 1 homolog (S. cerevisiae)
hsa-miR-582-3p	1	0	1	1	1	1	URI1	URI1, prefoldin-like chaperone
hsa-miR-582-3p	0	0	1	1	0	0	RPS6KB2	ribosomal protein S6 kinase, 70kDa, polypeptide 2
hsa-miR-582-3p	0	0	1	1	1	1	JAM2	junctional adhesion molecule 2
hsa-miR-582-3p	1	0	1	1	1	1	PTH1R	parathyroid hormone 1 receptor
hsa-miR-582-3p	0	0	1	1	0	0	RHBDF2	rhomboid 5 homolog 2 (Drosophila)
hsa-miR-582-3p	0	0	1	1	1	1	ZNF280D	zinc finger protein 280D
hsa-miR-582-3p	0	0	0	1	0	0	OR8K5	olfactory receptor, family 8, subfamily K, member 5
hsa-miR-582-3p	0	0	1	1	1	1	MRPS23	mitochondrial ribosomal protein S23
hsa-miR-582-3p	1	0	1	1	1	1	UCP3	uncoupling protein 3 (mitochondrial, proton carrier)
hsa-miR-582-3p	0	0	1	1	1	1	CKS2	CDC28 protein kinase regulatory subunit 2
hsa-miR-582-3p	0	0	1	1	1	1	TMEM132C	transmembrane protein 132C
hsa-miR-582-3p	1	0	1	1	1	1	ARSJ	arylsulfatase family, member J
hsa-miR-582-3p	0	0	1	1	0	0	RPL5	ribosomal protein L5
hsa-miR-582-3p	0	0	0	1	1	1	MCM9	minichromosome maintenance complex component 9
hsa-miR-582-3p	0	0	1	1	1	1	VRK3	vaccinia related kinase 3
hsa-miR-582-3p	0	0	1	1	1	1	PNMA1	paraneoplastic Ma antigen 1
hsa-miR-582-3p	0	0	1	1	1	1	WHSC1L1	Wolf-Hirschhorn syndrome candidate 1-like 1
hsa-miR-582-3p	0	0	0	1	0	0	OR52N4	olfactory receptor, family 52, subfamily N, member 4
hsa-miR-582-3p	0	0	0	1	0	0	HNRNPCL1	heterogeneous nuclear ribonucleoprotein C-like 1
hsa-miR-582-3p	0	0	1	1	1	1	COX14	COX14 cytochrome c oxidase assembly homolog (S. cerevisiae)
hsa-miR-582-3p	0	0	0	1	0	0	OR2M3	olfactory receptor, family 2, subfamily M, member 3
hsa-miR-582-3p	0	0	0	1	1	1	EPS8L2	EPS8-like 2
hsa-miR-582-3p	0	0	0	1	1	1	ETV4	ets variant 4
hsa-miR-582-3p	0	0	1	1	1	1	TEX35	testis expressed 35
hsa-miR-582-3p	0	0	1	1	1	1	PCK1	phosphoenolpyruvate carboxykinase 1 (soluble)
hsa-miR-582-3p	0	0	0	1	1	1	FAM82B	family with sequence similarity 82, member B
hsa-miR-582-3p	0	0	0	1	1	1	OLFML3	olfactomedin-like 3
hsa-miR-582-3p	0	0	1	1	1	1	APITD1	apoptosis-inducing, TAF9-like domain 1
hsa-miR-582-3p	0	0	1	1	1	1	CORT	cortistatin
hsa-miR-582-3p	0	0	0	1	0	0	OR4F21	olfactory receptor, family 4, subfamily F, member 21
hsa-miR-582-3p	0	0	1	1	0	0	SPACA4	sperm acrosome associated 4
hsa-miR-582-3p	1	0	1	1	1	1	BPTF	bromodomain PHD finger transcription factor
hsa-miR-582-3p	0	0	1	1	1	1	FHL2	four and a half LIM domains 2
hsa-miR-582-3p	1	0	0	1	1	1	FAM210A	family with sequence similarity 210, member A
hsa-miR-582-3p	1	0	1	1	1	1	IFT20	intraflagellar transport 20 homolog (Chlamydomonas)
hsa-miR-582-3p	0	0	0	1	0	0	TRIM75	tripartite motif containing 75
hsa-miR-582-3p	1	0	1	1	1	1	SEC24A	SEC24 family, member A (S. cerevisiae)
hsa-miR-582-3p	0	0	1	1	0	0	TYMS	thymidylate synthetase
hsa-miR-582-3p	1	0	1	1	1	1	TAF7L	TAF7-like RNA polymerase II, TATA box binding protein (TBP)-associated factor, 50kDa
hsa-miR-582-3p	0	0	1	1	1	1	YARS2	tyrosyl-tRNA synthetase 2, mitochondrial
hsa-miR-582-3p	0	0	1	1	1	1	CYTH2	cytohesin 2
hsa-miR-582-3p	0	0	0	1	0	0	GYLTL1B	glycosyltransferase-like 1B
hsa-miR-582-3p	0	0	1	1	0	0	BBX	bobby sox homolog (Drosophila)
hsa-miR-582-3p	1	0	1	1	1	1	RNF10	ring finger protein 10
hsa-miR-582-3p	0	0	0	1	0	0	PTPRCAP	protein tyrosine phosphatase, receptor type, C-associated protein
hsa-miR-582-3p	0	0	0	1	0	0	GPR139	G protein-coupled receptor 139
hsa-miR-582-3p	1	0	1	1	1	1	CHRNA3	cholinergic receptor, nicotinic, alpha 3 (neuronal)
hsa-miR-582-3p	0	0	1	1	1	1	RBBP8	retinoblastoma binding protein 8
hsa-miR-582-3p	0	0	1	1	1	1	CETN1	centrin, EF-hand protein, 1
hsa-miR-582-3p	1	0	0	1	1	1	FANCF	Fanconi anemia, complementation group F
hsa-miR-582-3p	0	0	0	1	0	0	EFCAB10	EF-hand calcium binding domain 10
hsa-miR-582-3p	1	0	1	1	1	1	ATPAF1	ATP synthase mitochondrial F1 complex assembly factor 1
hsa-miR-582-3p	0	0	0	1	0	0	MBD3L5	methyl-CpG binding domain protein 3-like 5
hsa-miR-582-3p	0	0	0	1	0	0	ALG12	asparagine-linked glycosylation 12, alpha-1,6-mannosyltransferase homolog (S. cerevisiae)
hsa-miR-582-3p	0	0	0	1	0	0	ADSSL1	adenylosuccinate synthase like 1
hsa-miR-582-3p	0	0	0	1	0	0	BOLA2	bolA homolog 2 (E. coli)
hsa-miR-582-3p	0	0	1	1	0	0	EWSR1	Ewing sarcoma breakpoint region 1
hsa-miR-582-3p	0	0	0	1	0	0	ZNF479	zinc finger protein 479
hsa-miR-582-3p	0	0	0	1	0	0	PRAMEF11	PRAME family member 11
hsa-miR-582-3p	1	0	1	1	1	1	ACTG1	actin, gamma 1
hsa-miR-582-3p	0	0	1	1	1	1	MGAT4C	mannosyl (alpha-1,3-)-glycoprotein beta-1,4-N-acetylglucosaminyltransferase, isozyme C (putative)
hsa-miR-582-3p	0	0	1	1	0	0	WDR53	WD repeat domain 53
hsa-miR-582-3p	0	0	1	1	1	1	CMTM3	CKLF-like MARVEL transmembrane domain containing 3
hsa-miR-582-3p	0	0	1	1	1	1	C11orf88	chromosome 11 open reading frame 88
hsa-miR-582-3p	1	0	1	1	1	1	PCDH7	protocadherin 7
hsa-miR-582-3p	0	0	1	1	0	0	FAM212A	family with sequence similarity 212, member A
hsa-miR-582-3p	1	0	0	1	1	1	PGP	phosphoglycolate phosphatase
hsa-miR-582-3p	0	0	1	1	0	0	GABRQ	gamma-aminobutyric acid (GABA) A receptor, theta
hsa-miR-582-3p	0	0	0	1	0	0	GABRG3	gamma-aminobutyric acid (GABA) A receptor, gamma 3
hsa-miR-582-3p	0	0	0	1	0	0	MBD3L3	methyl-CpG binding domain protein 3-like 3
hsa-miR-582-3p	0	0	1	1	0	0	CCDC87	coiled-coil domain containing 87
hsa-miR-582-3p	0	0	0	1	0	0	MT1B	metallothionein 1B
hsa-miR-582-3p	0	0	0	1	0	0	QRFPR	pyroglutamylated RFamide peptide receptor
hsa-miR-582-3p	0	0	1	1	0	0	TRIM7	tripartite motif containing 7
hsa-miR-582-3p	0	0	1	1	1	1	LGMN	legumain
hsa-miR-582-3p	0	0	1	1	0	0	MSANTD3	Myb/SANT-like DNA-binding domain containing 3
hsa-miR-582-3p	0	0	1	1	0	0	DHRS4L2	dehydrogenase/reductase (SDR family) member 4 like 2
hsa-miR-582-3p	0	0	0	1	1	1	INTU	inturned planar cell polarity effector homolog (Drosophila)
hsa-miR-582-3p	0	0	0	1	0	0	OR5D14	olfactory receptor, family 5, subfamily D, member 14
hsa-miR-582-3p	0	0	1	1	0	0	HYAL3	hyaluronoglucosaminidase 3
hsa-miR-582-3p	0	0	1	1	1	1	PISD	phosphatidylserine decarboxylase
hsa-miR-582-3p	0	0	1	1	1	1	BRIX1	BRX1, biogenesis of ribosomes, homolog (S. cerevisiae)
hsa-miR-582-3p	1	0	1	1	1	1	FTSJD1	FtsJ methyltransferase domain containing 1
hsa-miR-582-3p	0	0	0	1	0	0	CHCHD2P9	coiled-coil-helix-coiled-coil-helix domain containing 2 pseudogene 9
hsa-miR-582-3p	1	0	1	1	1	1	CA7	carbonic anhydrase VII
hsa-miR-582-3p	0	0	1	1	1	1	FAIM	Fas apoptotic inhibitory molecule
hsa-miR-582-3p	1	0	1	1	1	1	NR4A3	nuclear receptor subfamily 4, group A, member 3
hsa-miR-582-3p	0	0	0	1	1	1	NPY5R	neuropeptide Y receptor Y5
hsa-miR-582-3p	0	0	1	1	0	0	DCBLD1	discoidin, CUB and LCCL domain containing 1
hsa-miR-582-3p	0	0	1	1	0	0	HSFY1	heat shock transcription factor, Y-linked 1
hsa-miR-582-3p	0	0	1	1	1	1	GAL3ST1	galactose-3-O-sulfotransferase 1
hsa-miR-582-3p	0	0	0	1	1	1	DTNBP1	dystrobrevin binding protein 1
hsa-miR-582-3p	0	0	1	1	1	1	TMPRSS4	transmembrane protease, serine 4
hsa-miR-582-3p	0	0	0	1	0	0	OSTN	osteocrin
hsa-miR-582-3p	0	0	1	1	1	1	LRRC17	leucine rich repeat containing 17
hsa-miR-582-3p	0	0	0	1	0	0	NAALADL1	N-acetylated alpha-linked acidic dipeptidase-like 1
hsa-miR-582-3p	0	0	1	1	1	1	SLC26A3	solute carrier family 26, member 3
hsa-miR-582-3p	0	0	0	1	0	0	ZSCAN16	zinc finger and SCAN domain containing 16
hsa-miR-582-3p	0	0	1	1	1	1	SLC5A12	solute carrier family 5 (sodium/glucose cotransporter), member 12
hsa-miR-582-3p	1	0	1	1	0	0	PFKM	phosphofructokinase, muscle
hsa-miR-582-3p	0	0	1	1	0	0	MPST	mercaptopyruvate sulfurtransferase
hsa-miR-582-3p	1	0	1	1	1	1	VAPB	VAMP (vesicle-associated membrane protein)-associated protein B and C
hsa-miR-582-3p	1	0	1	1	1	1	C5orf25	chromosome 5 open reading frame 25
hsa-miR-582-3p	0	0	1	1	1	1	CNTNAP3B	contactin associated protein-like 3B
hsa-miR-582-3p	0	0	1	1	1	1	TTN	titin
hsa-miR-582-3p	0	0	1	1	1	1	CLEC14A	C-type lectin domain family 14, member A
hsa-miR-582-3p	0	0	1	1	1	1	OAS2	2'-5'-oligoadenylate synthetase 2, 69/71kDa
hsa-miR-582-3p	0	0	1	1	0	0	ZNF30	zinc finger protein 30
hsa-miR-582-3p	1	0	1	1	0	0	CDC42BPG	CDC42 binding protein kinase gamma (DMPK-like)
hsa-miR-582-3p	1	0	1	1	0	0	MADD	MAP-kinase activating death domain
hsa-miR-582-3p	0	0	0	1	1	1	CTSL1	cathepsin L1
hsa-miR-582-3p	0	0	0	1	0	0	TAF6	TAF6 RNA polymerase II, TATA box binding protein (TBP)-associated factor, 80kDa
hsa-miR-582-3p	0	0	0	1	0	0	TNNI3	troponin I type 3 (cardiac)
hsa-miR-582-3p	1	0	1	1	1	1	HSPD1	heat shock 60kDa protein 1 (chaperonin)
hsa-miR-582-3p	0	0	0	1	0	0	OR52B6	olfactory receptor, family 52, subfamily B, member 6
hsa-miR-582-3p	0	0	1	1	0	0	NISCH	nischarin
hsa-miR-582-3p	1	0	1	1	1	1	MBTPS1	membrane-bound transcription factor peptidase, site 1
hsa-miR-582-3p	1	0	1	1	1	1	VPS39	vacuolar protein sorting 39 homolog (S. cerevisiae)
hsa-miR-582-3p	1	0	1	1	1	1	MYNN	myoneurin
hsa-miR-582-3p	0	0	1	1	0	0	C7orf25	chromosome 7 open reading frame 25
hsa-miR-582-3p	1	0	1	1	1	1	KIF1B	kinesin family member 1B
hsa-miR-582-3p	0	0	0	1	1	1	SLC23A1	solute carrier family 23 (nucleobase transporters), member 1
hsa-miR-582-3p	0	0	0	1	0	0	ATG7	autophagy related 7
hsa-miR-582-3p	0	0	1	1	0	0	STK31	serine/threonine kinase 31
hsa-miR-582-3p	0	0	0	1	0	0	PCDHB11	protocadherin beta 11
hsa-miR-582-3p	0	0	1	1	0	0	GLYCTK	glycerate kinase
hsa-miR-582-3p	0	0	0	1	1	1	ALDH9A1	aldehyde dehydrogenase 9 family, member A1
hsa-miR-582-3p	0	0	1	1	0	0	IL31RA	interleukin 31 receptor A
hsa-miR-582-3p	0	0	1	1	0	0	SH2D6	SH2 domain containing 6
hsa-miR-582-3p	1	0	1	1	1	1	ATRNL1	attractin-like 1
hsa-miR-582-3p	0	0	0	1	0	0	PRAMEF6	PRAME family member 6
hsa-miR-582-3p	0	0	1	1	1	1	GPM6B	glycoprotein M6B
hsa-miR-582-3p	0	0	1	1	1	1	DBI	diazepam binding inhibitor (GABA receptor modulator, acyl-CoA binding protein)
hsa-miR-582-3p	0	0	1	1	0	0	GMNN	geminin, DNA replication inhibitor
hsa-miR-582-3p	0	0	0	1	1	1	PIK3R4	phosphoinositide-3-kinase, regulatory subunit 4
hsa-miR-582-3p	0	0	1	1	1	1	NEK11	NIMA (never in mitosis gene a)- related kinase 11
hsa-miR-582-3p	0	0	1	1	1	1	ABCD4	ATP-binding cassette, sub-family D (ALD), member 4
hsa-miR-582-3p	0	0	0	1	1	1	ZNF23	zinc finger protein 23
hsa-miR-582-3p	1	0	1	1	1	1	ZBTB20	zinc finger and BTB domain containing 20
hsa-miR-582-3p	0	0	1	1	1	1	PPA2	pyrophosphatase (inorganic) 2
hsa-miR-582-3p	0	0	1	1	1	1	SMC1B	structural maintenance of chromosomes 1B
hsa-miR-582-3p	0	0	1	1	0	0	BMX	BMX non-receptor tyrosine kinase
hsa-miR-582-3p	0	0	1	1	1	1	ENPP3	ectonucleotide pyrophosphatase/phosphodiesterase 3
hsa-miR-582-3p	1	0	1	1	1	1	TMUB2	transmembrane and ubiquitin-like domain containing 2
hsa-miR-582-3p	0	0	0	1	1	1	FAM47C	family with sequence similarity 47, member C
hsa-miR-582-3p	0	0	0	1	0	0	LRRC8B	leucine rich repeat containing 8 family, member B
hsa-miR-582-3p	1	0	1	1	1	1	MYO5A	myosin VA (heavy chain 12, myoxin)
hsa-miR-582-3p	1	0	1	1	1	1	TXNDC15	thioredoxin domain containing 15
hsa-miR-582-3p	0	0	0	1	0	0	LOC729458	methyl-CpG-binding domain protein 3-like 2-like
hsa-miR-582-3p	0	0	1	1	1	1	ATP5S	ATP synthase, H+ transporting, mitochondrial Fo complex, subunit s (factor B)
hsa-miR-582-3p	1	0	1	1	1	1	CHM	choroideremia (Rab escort protein 1)
hsa-miR-582-3p	0	0	1	1	0	0	TSKS	testis-specific serine kinase substrate
hsa-miR-582-3p	0	0	1	1	1	1	MYOF	myoferlin
hsa-miR-582-3p	0	0	1	1	0	0	XRCC6	X-ray repair complementing defective repair in Chinese hamster cells 6
hsa-miR-582-3p	0	0	1	1	0	0	MYOZ1	myozenin 1
hsa-miR-582-3p	1	0	1	1	1	1	STX16	syntaxin 16
hsa-miR-582-3p	1	0	1	1	1	1	ATP11C	ATPase, class VI, type 11C
hsa-miR-582-3p	1	0	1	1	0	0	EFNA4	ephrin-A4
hsa-miR-582-3p	0	0	0	1	0	0	CHCHD2	coiled-coil-helix-coiled-coil-helix domain containing 2
hsa-miR-582-3p	0	0	0	1	0	0	OR2L3	olfactory receptor, family 2, subfamily L, member 3
hsa-miR-582-3p	0	0	1	1	1	1	HOXA4	homeobox A4
hsa-miR-582-3p	1	0	1	1	1	1	PIK3CD	phosphatidylinositol-4,5-bisphosphate 3-kinase, catalytic subunit delta
hsa-miR-582-3p	0	0	1	1	1	1	WWTR1	WW domain containing transcription regulator 1
hsa-miR-582-3p	0	0	1	1	1	1	TAF11	TAF11 RNA polymerase II, TATA box binding protein (TBP)-associated factor, 28kDa
hsa-miR-582-3p	1	0	1	1	1	1	KIAA0922	KIAA0922
hsa-miR-582-3p	0	0	1	1	0	0	AMY2B	amylase, alpha 2B (pancreatic)
hsa-miR-582-3p	0	0	1	1	1	1	SMC3	structural maintenance of chromosomes 3
hsa-miR-582-3p	0	0	0	1	1	1	C16orf59	chromosome 16 open reading frame 59
hsa-miR-582-3p	0	0	1	1	1	1	BCOR	BCL6 corepressor
hsa-miR-582-3p	0	0	1	1	1	1	CXorf22	chromosome X open reading frame 22
hsa-miR-582-3p	0	0	0	1	1	1	BNIPL	BCL2/adenovirus E1B 19kD interacting protein like
hsa-miR-582-3p	0	0	0	1	1	1	ZNF670	zinc finger protein 670
hsa-miR-582-3p	1	0	1	1	1	1	NTPCR	nucleoside-triphosphatase, cancer-related
hsa-miR-582-3p	0	0	1	1	0	0	GNPAT	glyceronephosphate O-acyltransferase
hsa-miR-582-3p	0	0	0	1	1	1	ADCK3	aarF domain containing kinase 3
hsa-miR-582-3p	0	0	0	1	0	0	MIXL1	Mix paired-like homeobox
hsa-miR-582-3p	1	0	1	1	1	1	AGPAT4	1-acylglycerol-3-phosphate O-acyltransferase 4 (lysophosphatidic acid acyltransferase, delta)
hsa-miR-582-3p	0	0	0	1	1	1	LAX1	lymphocyte transmembrane adaptor 1
hsa-miR-582-3p	0	0	1	1	1	1	MTHFD1L	methylenetetrahydrofolate dehydrogenase (NADP+ dependent) 1-like
hsa-miR-582-3p	0	0	0	1	1	1	DDX59	DEAD (Asp-Glu-Ala-Asp) box polypeptide 59
hsa-miR-582-3p	0	0	1	1	1	1	C1orf53	chromosome 1 open reading frame 53
hsa-miR-582-3p	0	0	0	1	0	0	CFHR1	complement factor H-related 1
hsa-miR-582-3p	0	0	0	1	0	0	CFH	complement factor H
hsa-miR-582-3p	0	0	0	1	0	0	GLRX2	glutaredoxin 2
hsa-miR-582-3p	1	0	1	1	1	1	TROVE2	TROVE domain family, member 2
hsa-miR-582-3p	1	0	1	1	1	1	NPL	N-acetylneuraminate pyruvate lyase (dihydrodipicolinate synthase)
hsa-miR-582-3p	0	0	1	1	0	0	PORCN	porcupine homolog (Drosophila)
hsa-miR-582-3p	0	0	1	1	1	1	AIG1	androgen-induced 1
hsa-miR-582-3p	1	0	1	1	1	1	TXLNB	taxilin beta
hsa-miR-582-3p	1	0	1	1	1	1	ECT2L	epithelial cell transforming sequence 2 oncogene-like
hsa-miR-582-3p	0	0	1	1	1	1	RABGAP1L	RAB GTPase activating protein 1-like
hsa-miR-582-3p	0	0	1	1	1	1	HSD17B7	hydroxysteroid (17-beta) dehydrogenase 7
hsa-miR-582-3p	0	0	1	1	0	0	PYHIN1	pyrin and HIN domain family, member 1
hsa-miR-582-3p	1	0	1	1	1	1	PTPRK	protein tyrosine phosphatase, receptor type, K
hsa-miR-582-3p	0	0	1	1	0	0	SOGA3	SOGA family member 3
hsa-miR-582-3p	1	0	1	1	1	1	RSPO3	R-spondin 3
hsa-miR-582-3p	0	0	1	1	1	1	CENPW	centromere protein W
hsa-miR-582-3p	1	0	1	1	0	0	PBXIP1	pre-B-cell leukemia homeobox interacting protein 1
hsa-miR-582-3p	0	0	0	1	1	1	RSPH4A	radial spoke head 4 homolog A (Chlamydomonas)
hsa-miR-582-3p	0	0	1	1	1	1	C6orf225	chromosome 6 open reading frame 225
hsa-miR-582-3p	0	0	0	1	0	0	CLRN3	clarin 3
hsa-miR-582-3p	0	0	0	1	1	1	SNAPIN	SNAP-associated protein
hsa-miR-582-3p	0	0	1	1	1	1	S100A3	S100 calcium binding protein A3
hsa-miR-582-3p	1	0	1	1	1	1	CDC40	cell division cycle 40 homolog (S. cerevisiae)
hsa-miR-582-3p	0	0	1	1	0	0	PPAPDC1A	phosphatidic acid phosphatase type 2 domain containing 1A
hsa-miR-582-3p	1	0	1	1	1	1	RGS10	regulator of G-protein signaling 10
hsa-miR-582-3p	0	0	1	1	1	1	PREP	prolyl endopeptidase
hsa-miR-582-3p	0	0	1	1	1	1	PRLHR	prolactin releasing hormone receptor
hsa-miR-582-3p	0	0	1	1	1	1	MMS22L	MMS22-like, DNA repair protein
hsa-miR-582-3p	0	0	0	1	1	1	MANEA	mannosidase, endo-alpha
hsa-miR-582-3p	0	0	1	1	1	1	PLEKHS1	pleckstrin homology domain containing, family S member 1
hsa-miR-582-3p	0	0	1	1	1	1	ADAM30	ADAM metallopeptidase domain 30
hsa-miR-582-3p	1	0	1	1	1	1	MPP1	membrane protein, palmitoylated 1, 55kDa
hsa-miR-582-3p	1	0	1	1	1	1	HIPK1	homeodomain interacting protein kinase 1
hsa-miR-582-3p	0	0	1	1	1	1	UBL4A	ubiquitin-like 4A
hsa-miR-582-3p	1	0	1	1	1	1	ST7L	suppression of tumorigenicity 7 like
hsa-miR-582-3p	0	0	0	1	1	1	PDCD11	programmed cell death 11
hsa-miR-582-3p	0	0	0	1	0	0	GSTM2	glutathione S-transferase mu 2 (muscle)
hsa-miR-582-3p	0	0	1	1	1	1	IMPG1	interphotoreceptor matrix proteoglycan 1
hsa-miR-582-3p	1	0	1	1	1	1	SENP6	SUMO1/sentrin specific peptidase 6
hsa-miR-582-3p	1	0	1	1	1	1	CNN3	calponin 3, acidic
hsa-miR-582-3p	0	0	1	1	1	1	BCAR3	breast cancer anti-estrogen resistance 3
hsa-miR-582-3p	0	0	1	1	0	0	HFM1	HFM1, ATP-dependent DNA helicase homolog (S. cerevisiae)
hsa-miR-582-3p	0	0	0	1	0	0	C6orf57	chromosome 6 open reading frame 57
hsa-miR-582-3p	0	0	1	1	0	0	SLC25A28	solute carrier family 25 (mitochondrial iron transporter), member 28
hsa-miR-582-3p	1	0	1	1	1	1	ZNHIT6	zinc finger, HIT-type containing 6
hsa-miR-582-3p	0	0	1	1	1	1	CTBS	chitobiase, di-N-acetyl-
hsa-miR-582-3p	1	0	0	1	1	1	BAG2	BCL2-associated athanogene 2
hsa-miR-582-3p	0	0	1	1	1	1	KIAA1586	KIAA1586
hsa-miR-582-3p	0	0	1	1	1	1	RABGGTB	Rab geranylgeranyltransferase, beta subunit
hsa-miR-582-3p	0	0	0	1	1	1	CRYZ	crystallin, zeta (quinone reductase)
hsa-miR-582-3p	1	0	1	1	1	1	RAP2C	RAP2C, member of RAS oncogene family
hsa-miR-582-3p	1	0	1	1	1	1	LRRC1	leucine rich repeat containing 1
hsa-miR-582-3p	0	0	1	1	1	1	PPP1R3D	protein phosphatase 1, regulatory subunit 3D
hsa-miR-582-3p	1	0	1	1	1	1	PDE4B	phosphodiesterase 4B, cAMP-specific
hsa-miR-582-3p	0	0	1	1	0	0	L1TD1	LINE-1 type transposase domain containing 1
hsa-miR-582-3p	0	0	0	1	0	0	C8B	complement component 8, beta polypeptide
hsa-miR-582-3p	0	0	0	1	1	1	CDCP2	CUB domain containing protein 2
hsa-miR-582-3p	0	0	0	1	0	0	PNPLA7	patatin-like phospholipase domain containing 7
hsa-miR-582-3p	1	0	1	1	1	1	NELF	nasal embryonic LHRH factor
hsa-miR-582-3p	0	0	0	1	0	0	ECHDC2	enoyl CoA hydratase domain containing 2
hsa-miR-582-3p	1	0	1	1	1	1	FAS	Fas (TNF receptor superfamily, member 6)
hsa-miR-582-3p	1	0	0	1	0	0	CCDC17	coiled-coil domain containing 17
hsa-miR-582-3p	0	0	1	1	0	0	GTF3C5	general transcription factor IIIC, polypeptide 5, 63kDa
hsa-miR-582-3p	1	0	1	1	1	1	PRPS1	phosphoribosyl pyrophosphate synthetase 1
hsa-miR-582-3p	0	0	1	1	0	0	CCDC23	coiled-coil domain containing 23
hsa-miR-582-3p	0	0	1	1	0	0	LEPRE1	leucine proline-enriched proteoglycan (leprecan) 1
hsa-miR-582-3p	0	0	1	1	1	1	BEX2	brain expressed X-linked 2
hsa-miR-582-3p	1	0	1	1	1	1	PLAU	plasminogen activator, urokinase
hsa-miR-582-3p	0	0	1	1	0	0	PPIE	peptidylprolyl isomerase E (cyclophilin E)
hsa-miR-582-3p	0	0	1	1	0	0	CSF3R	colony stimulating factor 3 receptor (granulocyte)
hsa-miR-582-3p	0	0	0	1	0	0	TDRG1	testis development related 1 (non-protein coding)
hsa-miR-582-3p	0	0	0	1	1	1	TSPAN15	tetraspanin 15
hsa-miR-582-3p	0	0	1	1	1	1	C1orf94	chromosome 1 open reading frame 94
hsa-miR-582-3p	0	0	1	1	0	0	GARNL3	GTPase activating Rap/RanGAP domain-like 3
hsa-miR-582-3p	0	0	0	1	0	0	BMP2KL	BMP2 inducible kinase-like
hsa-miR-582-3p	0	0	1	1	1	1	SRSF4	serine/arginine-rich splicing factor 4
hsa-miR-582-3p	0	0	1	1	0	0	CDK1	cyclin-dependent kinase 1
hsa-miR-582-3p	0	0	0	1	1	1	LHFPL5	lipoma HMGIC fusion partner-like 5
hsa-miR-582-3p	0	0	1	1	1	1	PSMD5	proteasome (prosome, macropain) 26S subunit, non-ATPase, 5
hsa-miR-582-3p	0	0	1	1	0	0	TCP11	t-complex 11 homolog (mouse)
hsa-miR-582-3p	0	0	1	1	1	1	DEC1	deleted in esophageal cancer 1
hsa-miR-582-3p	0	0	0	1	1	1	NFS1	NFS1 nitrogen fixation 1 homolog (S. cerevisiae)
hsa-miR-582-3p	0	0	1	1	0	0	COL27A1	collagen, type XXVII, alpha 1
hsa-miR-582-3p	1	0	1	1	0	0	DHDDS	dehydrodolichyl diphosphate synthase
hsa-miR-582-3p	0	0	0	1	1	1	FAM83C	family with sequence similarity 83, member C
hsa-miR-582-3p	0	0	0	1	1	1	RAB41	RAB41, member RAS oncogene family
hsa-miR-582-3p	0	0	0	1	0	0	ARR3	arrestin 3, retinal (X-arrestin)
hsa-miR-582-3p	1	0	1	1	1	1	RAPH1	Ras association (RalGDS/AF-6) and pleckstrin homology domains 1
hsa-miR-582-3p	0	0	1	1	0	0	MYH7B	myosin, heavy chain 7B, cardiac muscle, beta
hsa-miR-582-3p	0	0	1	1	0	0	PARD3	par-3 partitioning defective 3 homolog (C. elegans)
hsa-miR-582-3p	0	0	1	1	0	0	XAGE1D	X antigen family, member 1D
hsa-miR-582-3p	0	0	1	1	0	0	HSPA1L	heat shock 70kDa protein 1-like
hsa-miR-582-3p	0	0	0	1	0	0	CLCNKB	chloride channel, voltage-sensitive Kb
hsa-miR-582-3p	0	0	0	1	0	0	LY6G5C	lymphocyte antigen 6 complex, locus G5C
hsa-miR-582-3p	1	0	1	1	0	0	CLYBL	citrate lyase beta like
hsa-miR-582-3p	0	0	1	1	1	1	GKAP1	G kinase anchoring protein 1
hsa-miR-582-3p	0	0	0	1	0	0	CEP78	centrosomal protein 78kDa
hsa-miR-582-3p	1	0	1	1	1	1	MAP3K14	mitogen-activated protein kinase kinase kinase 14
hsa-miR-582-3p	0	0	0	1	0	0	OR2B3	olfactory receptor, family 2, subfamily B, member 3
hsa-miR-582-3p	0	0	0	1	0	0	OR2W1	olfactory receptor, family 2, subfamily W, member 1
hsa-miR-582-3p	1	0	1	1	1	1	FAM122A	family with sequence similarity 122A
hsa-miR-582-3p	0	0	1	1	0	0	CCDC114	coiled-coil domain containing 114
hsa-miR-582-3p	0	0	1	1	0	0	TCTN1	tectonic family member 1
hsa-miR-582-3p	0	0	1	1	1	1	CNTNAP3	contactin associated protein-like 3
hsa-miR-582-3p	0	0	1	1	0	0	GKN1	gastrokine 1
hsa-miR-582-3p	1	0	1	1	1	1	AHNAK	AHNAK nucleoprotein
hsa-miR-582-3p	0	0	1	1	1	1	SLC41A2	solute carrier family 41, member 2
hsa-miR-582-3p	0	0	1	1	1	1	MAOB	monoamine oxidase B
hsa-miR-582-3p	0	0	0	1	1	1	ARHGEF35	Rho guanine nucleotide exchange factor (GEF) 35
hsa-miR-582-3p	0	0	0	1	1	1	OLAH	oleoyl-ACP hydrolase
hsa-miR-582-3p	0	0	0	1	1	1	GPLD1	glycosylphosphatidylinositol specific phospholipase D1
hsa-miR-582-3p	0	0	1	1	1	1	DEPDC4	DEP domain containing 4
hsa-miR-582-3p	0	0	0	1	1	1	LRRC47	leucine rich repeat containing 47
hsa-miR-582-3p	0	0	0	1	0	0	LOC100129697	uncharacterized LOC100129697
hsa-miR-582-3p	0	0	0	1	0	0	LIG3	ligase III, DNA, ATP-dependent
hsa-miR-582-3p	1	0	1	1	0	0	COX7A2L	cytochrome c oxidase subunit VIIa polypeptide 2 like
hsa-miR-582-3p	0	0	1	1	0	0	KIAA0226L	KIAA0226-like
hsa-miR-582-3p	0	0	1	1	1	1	PRR5L	proline rich 5 like
hsa-miR-582-3p	0	0	1	1	1	1	NUDT5	nudix (nucleoside diphosphate linked moiety X)-type motif 5
hsa-miR-582-3p	0	0	1	1	1	1	CHGB	chromogranin B (secretogranin 1)
hsa-miR-582-3p	1	0	1	1	1	1	ZBTB10	zinc finger and BTB domain containing 10
hsa-miR-582-3p	1	0	1	1	0	0	APOO	apolipoprotein O
hsa-miR-582-3p	0	0	1	1	0	0	UBAP2	ubiquitin associated protein 2
hsa-miR-582-3p	0	0	0	1	0	0	SLC9A5	solute carrier family 9, subfamily A (NHE5, cation proton antiporter 5), member 5
hsa-miR-582-3p	1	0	1	1	1	1	SLC25A15	solute carrier family 25 (mitochondrial carrier; ornithine transporter) member 15
hsa-miR-582-3p	0	0	0	1	1	1	ZNF789	zinc finger protein 789
hsa-miR-582-3p	1	0	1	1	1	1	CAMK2D	calcium/calmodulin-dependent protein kinase II delta
hsa-miR-582-3p	0	0	1	1	0	0	ERAP2	endoplasmic reticulum aminopeptidase 2
hsa-miR-582-3p	0	0	1	1	0	0	MPV17	MpV17 mitochondrial inner membrane protein
hsa-miR-582-3p	0	0	1	1	1	1	RFC3	replication factor C (activator 1) 3, 38kDa
hsa-miR-582-3p	0	0	1	1	0	0	DDRGK1	DDRGK domain containing 1
hsa-miR-582-3p	0	0	1	1	0	0	FOCAD	focadhesin
hsa-miR-582-3p	0	0	1	1	1	1	ASB9	ankyrin repeat and SOCS box containing 9
hsa-miR-582-3p	1	0	1	1	1	1	PSIP1	PC4 and SFRS1 interacting protein 1
hsa-miR-582-3p	0	0	1	1	1	1	SLC30A5	solute carrier family 30 (zinc transporter), member 5
hsa-miR-582-3p	0	0	0	1	1	1	DDC	dopa decarboxylase (aromatic L-amino acid decarboxylase)
hsa-miR-582-3p	0	0	1	1	1	1	FKBP1B	FK506 binding protein 1B, 12.6 kDa
hsa-miR-582-3p	1	0	1	1	1	1	HDHD1	haloacid dehalogenase-like hydrolase domain containing 1
hsa-miR-582-3p	0	0	0	1	0	0	LOC389906	zinc finger protein 839 pseudogene
hsa-miR-582-3p	0	0	0	1	0	0	MBD3L4	methyl-CpG binding domain protein 3-like 4
hsa-miR-582-3p	1	0	1	1	1	1	MCHR1	melanin-concentrating hormone receptor 1
hsa-miR-582-3p	0	0	0	1	1	1	GART	phosphoribosylglycinamide formyltransferase, phosphoribosylglycinamide synthetase, phosphoribosylaminoimidazole synthetase
hsa-miR-582-3p	1	0	1	1	1	1	CDC37L1	cell division cycle 37 homolog (S. cerevisiae)-like 1
hsa-miR-582-3p	0	0	0	1	0	0	TLR6	toll-like receptor 6
hsa-miR-582-3p	1	0	1	1	1	1	GLIS3	GLIS family zinc finger 3
hsa-miR-582-3p	0	0	0	1	0	0	C20orf96	chromosome 20 open reading frame 96
hsa-miR-582-3p	0	0	1	1	1	1	CBWD1	COBW domain containing 1
hsa-miR-582-3p	0	0	0	1	0	0	TAS2R1	taste receptor, type 2, member 1
hsa-miR-582-3p	0	0	0	1	0	0	USP17L4	ubiquitin specific peptidase 17-like 4
hsa-miR-582-3p	0	0	0	1	1	1	RBMY1E	RNA binding motif protein, Y-linked, family 1, member E
hsa-miR-582-3p	0	0	0	1	1	1	RBMY1D	RNA binding motif protein, Y-linked, family 1, member D
hsa-miR-582-3p	0	0	1	1	1	1	CSPG5	chondroitin sulfate proteoglycan 5 (neuroglycan C)
hsa-miR-582-3p	1	0	1	1	1	1	PIP5KL1	phosphatidylinositol-4-phosphate 5-kinase-like 1
hsa-miR-582-3p	0	0	1	1	0	0	SLCO6A1	solute carrier organic anion transporter family, member 6A1
hsa-miR-582-3p	0	0	1	1	1	1	KCNN2	potassium intermediate/small conductance calcium-activated channel, subfamily N, member 2
hsa-miR-582-3p	1	0	1	1	1	1	FAM168B	family with sequence similarity 168, member B
hsa-miR-582-3p	1	0	1	0	1	1	RPL28	ribosomal protein L28
hsa-miR-582-3p	0	0	1	0	1	1	C9orf170	chromosome 9 open reading frame 170
hsa-miR-582-3p	0	0	1	1	1	1	POLR2M	polymerase (RNA) II (DNA directed) polypeptide M
hsa-miR-582-3p	0	0	1	0	1	1	C3orf17	chromosome 3 open reading frame 17
hsa-miR-582-3p	1	0	1	1	1	1	CRTC3	CREB regulated transcription coactivator 3
hsa-miR-582-3p	1	0	1	1	1	1	NET1	neuroepithelial cell transforming 1
hsa-miR-582-3p	1	0	1	0	1	1	SLC7A6	solute carrier family 7 (amino acid transporter light chain, y+L system), member 6
hsa-miR-582-3p	1	0	1	1	1	1	BCLAF1	BCL2-associated transcription factor 1
hsa-miR-582-3p	1	0	1	1	1	1	GJC1	gap junction protein, gamma 1, 45kDa
hsa-miR-582-3p	1	0	1	1	1	1	ANGPT1	angiopoietin 1
hsa-miR-582-3p	0	0	0	0	1	1	C1R	complement component 1, r subcomponent
hsa-miR-582-3p	1	0	1	1	1	1	PRKAR2B	protein kinase, cAMP-dependent, regulatory, type II, beta
hsa-miR-582-3p	1	0	1	1	1	1	PTPN11	protein tyrosine phosphatase, non-receptor type 11
hsa-miR-582-3p	0	0	1	1	1	1	RAD1	RAD1 homolog (S. pombe)
hsa-miR-582-3p	0	0	1	1	1	1	TFRC	transferrin receptor (p90, CD71)
hsa-miR-582-3p	1	0	1	0	1	1	PTP4A1	protein tyrosine phosphatase type IVA, member 1
hsa-miR-582-3p	1	0	1	1	1	1	RNMT	RNA (guanine-7-) methyltransferase
hsa-miR-582-3p	1	0	1	0	1	1	SKAP2	src kinase associated phosphoprotein 2
hsa-miR-582-3p	0	0	1	1	1	1	IDI1	isopentenyl-diphosphate delta isomerase 1
hsa-miR-582-3p	1	0	1	1	1	1	LRP2	low density lipoprotein receptor-related protein 2
hsa-miR-582-3p	0	0	1	1	1	1	STK10	serine/threonine kinase 10
hsa-miR-582-3p	1	0	1	1	1	1	RBM3	RNA binding motif (RNP1, RRM) protein 3
hsa-miR-582-3p	1	0	1	1	1	1	EPB41L1	erythrocyte membrane protein band 4.1-like 1
hsa-miR-582-3p	0	0	0	1	1	1	FBXW8	F-box and WD repeat domain containing 8
hsa-miR-582-3p	0	0	0	1	1	1	RHBDD3	rhomboid domain containing 3
hsa-miR-582-3p	1	0	1	1	1	1	ATP6V0A2	ATPase, H+ transporting, lysosomal V0 subunit a2
hsa-miR-582-3p	0	0	0	1	1	1	GPR160	G protein-coupled receptor 160
hsa-miR-582-3p	1	0	1	1	1	1	CEP57	centrosomal protein 57kDa
hsa-miR-582-3p	1	0	1	1	1	1	LPGAT1	lysophosphatidylglycerol acyltransferase 1
hsa-miR-582-3p	0	0	0	0	1	1	MESDC2	mesoderm development candidate 2
hsa-miR-582-3p	0	0	1	0	1	1	KIAA0895	KIAA0895
hsa-miR-582-3p	0	0	0	0	1	1	SMU1	smu-1 suppressor of mec-8 and unc-52 homolog (C. elegans)
hsa-miR-582-3p	0	0	1	1	1	1	RIN2	Ras and Rab interactor 2
hsa-miR-582-3p	1	0	1	1	1	1	NIN	ninein (GSK3B interacting protein)
hsa-miR-582-3p	1	0	1	1	1	1	KLHL12	kelch-like 12 (Drosophila)
hsa-miR-582-3p	0	0	1	0	1	1	FUNDC2	FUN14 domain containing 2
hsa-miR-582-3p	0	0	1	0	1	1	MRP63	mitochondrial ribosomal protein 63
hsa-miR-582-3p	1	0	1	1	1	1	CLIP4	CAP-GLY domain containing linker protein family, member 4
hsa-miR-582-3p	0	0	1	1	1	1	MAP6D1	MAP6 domain containing 1
hsa-miR-582-3p	1	0	1	0	1	1	RAB33B	RAB33B, member RAS oncogene family
hsa-miR-582-3p	0	0	0	1	1	1	TTLL2	tubulin tyrosine ligase-like family, member 2
hsa-miR-582-3p	0	0	0	1	1	1	PROK1	prokineticin 1
hsa-miR-582-3p	1	0	1	1	1	1	SLC26A9	solute carrier family 26, member 9
hsa-miR-582-3p	0	0	1	0	1	1	SP140L	SP140 nuclear body protein-like
hsa-miR-582-3p	1	0	1	1	1	1	PKHD1	polycystic kidney and hepatic disease 1 (autosomal recessive)
hsa-miR-582-3p	1	0	1	1	1	1	FAM76B	family with sequence similarity 76, member B
hsa-miR-582-3p	0	0	0	1	1	1	SKA3	spindle and kinetochore associated complex subunit 3
hsa-miR-582-3p	1	0	1	1	1	1	CRYBG3	beta-gamma crystallin domain containing 3
hsa-miR-582-3p	1	0	1	1	1	1	LCORL	ligand dependent nuclear receptor corepressor-like
hsa-miR-582-3p	1	0	1	1	1	1	WDR17	WD repeat domain 17
hsa-miR-582-3p	1	0	1	1	1	1	RNF149	ring finger protein 149
hsa-miR-582-3p	1	0	1	0	1	1	GPR180	G protein-coupled receptor 180
hsa-miR-582-3p	1	0	1	0	1	1	WDR72	WD repeat domain 72
hsa-miR-582-3p	0	0	0	1	1	1	MACC1	metastasis associated in colon cancer 1
hsa-miR-582-3p	1	0	0	1	1	1	ZNF615	zinc finger protein 615
hsa-miR-582-3p	1	0	1	0	1	1	ACACA	acetyl-CoA carboxylase alpha
hsa-miR-582-3p	1	0	1	0	1	1	NCKAP5	NCK-associated protein 5
hsa-miR-582-3p	0	0	1	0	1	1	FLJ39639	uncharacterized protein FLJ39639
