# Supplementary material for: Profiling of Selected MicroRNAs in Proliferative Eutopic Endometrium of Women with Ovarian Endometriosis
Source: Biomed Res Int. 2015 Aug 20;2015:760698. doi: 10.1155/2015/760698 (PMC4558423; doi:10.1155/2015/760698)
Supplement: Supplementary file 1 — Table I: The names of miRNAs significantly differentially expressed between eutopic endometrium of patients with endometriosis vs eutopic endometrium of patients without endometriosis. Table II: The associations between miRNA and mRNA, which presents detailed results of the search of six major databases i.e targetscan, tarbase, miranda, mirbase, mirtarget2 and pictar. [file 760698.f1.zip › 760698.f1/Table II/hsa-miR-583.tsv]

miR	targetscan	tarbase	miranda	mirbase	mirtarget2	pictar	GeneSymbol	GeneName
hsa-miR-583	1	0	1	1	1	1	ZFYVE16	zinc finger, FYVE domain containing 16
hsa-miR-583	1	0	1	1	1	1	ARNT2	aryl-hydrocarbon receptor nuclear translocator 2
hsa-miR-583	1	0	1	1	0	0	SRCAP	Snf2-related CREBBP activator protein
hsa-miR-583	1	0	1	1	1	1	ABCC5	ATP-binding cassette, sub-family C (CFTR/MRP), member 5
hsa-miR-583	1	0	1	0	1	1	PTPRT	protein tyrosine phosphatase, receptor type, T
hsa-miR-583	1	0	1	1	1	1	ZHX3	zinc fingers and homeoboxes 3
hsa-miR-583	1	0	1	0	1	1	NEDD4L	neural precursor cell expressed, developmentally down-regulated 4-like, E3 ubiquitin protein ligase
hsa-miR-583	1	0	1	1	0	0	OTUD3	OTU domain containing 3
hsa-miR-583	1	0	1	0	1	1	CEP350	centrosomal protein 350kDa
hsa-miR-583	0	0	1	1	0	0	ZNF862	zinc finger protein 862
hsa-miR-583	1	0	1	1	1	1	GPATCH8	G patch domain containing 8
hsa-miR-583	1	0	1	1	1	1	NRXN1	neurexin 1
hsa-miR-583	1	0	1	1	1	1	HIPK1	homeodomain interacting protein kinase 1
hsa-miR-583	1	0	1	1	1	1	GIGYF2	GRB10 interacting GYF protein 2
hsa-miR-583	1	0	1	1	1	1	SMOC2	SPARC related modular calcium binding 2
hsa-miR-583	1	0	1	1	0	0	KAZN	kazrin, periplakin interacting protein
hsa-miR-583	1	0	1	0	1	1	DOCK4	dedicator of cytokinesis 4
hsa-miR-583	0	0	1	1	1	1	MICAL2	microtubule associated monoxygenase, calponin and LIM domain containing 2
hsa-miR-583	1	0	1	1	1	1	AHCYL2	adenosylhomocysteinase-like 2
hsa-miR-583	1	0	1	1	1	1	LMO7	LIM domain 7
hsa-miR-583	1	0	1	0	0	0	DTX4	deltex homolog 4 (Drosophila)
hsa-miR-583	1	0	1	1	1	1	CPEB3	cytoplasmic polyadenylation element binding protein 3
hsa-miR-583	1	0	1	1	1	1	C11orf9	chromosome 11 open reading frame 9
hsa-miR-583	1	0	1	1	1	1	RGL1	ral guanine nucleotide dissociation stimulator-like 1
hsa-miR-583	0	0	1	0	0	0	THSD7A	thrombospondin, type I, domain containing 7A
hsa-miR-583	0	0	1	1	1	1	FASTKD2	FAST kinase domains 2
hsa-miR-583	1	0	1	1	1	1	RPGRIP1L	RPGRIP1-like
hsa-miR-583	1	0	1	1	0	0	KIAA1045	KIAA1045
hsa-miR-583	1	0	1	1	0	0	ZC3H4	zinc finger CCCH-type containing 4
hsa-miR-583	1	0	1	1	1	1	NLGN1	neuroligin 1
hsa-miR-583	1	0	1	1	1	1	PHF8	PHD finger protein 8
hsa-miR-583	1	0	1	1	1	1	ZMYND8	zinc finger, MYND-type containing 8
hsa-miR-583	1	0	1	0	1	1	SRGAP3	SLIT-ROBO Rho GTPase activating protein 3
hsa-miR-583	0	0	1	1	0	0	ZC4H2	zinc finger, C4H2 domain containing
hsa-miR-583	1	0	1	1	1	1	ATXN7L1	ataxin 7-like 1
hsa-miR-583	1	0	1	1	1	1	RALGAPB	Ral GTPase activating protein, beta subunit (non-catalytic)
hsa-miR-583	1	0	1	1	1	1	RIMKLB	ribosomal modification protein rimK-like family member B
hsa-miR-583	1	0	1	1	0	0	ATAD2B	ATPase family, AAA domain containing 2B
hsa-miR-583	1	0	1	1	1	1	MKL2	MKL/myocardin-like 2
hsa-miR-583	1	0	1	1	1	1	STK36	serine/threonine kinase 36
hsa-miR-583	0	0	1	1	1	1	SLC7A9	solute carrier family 7 (glycoprotein-associated amino acid transporter light chain, bo,+ system), member 9
hsa-miR-583	0	0	1	1	1	1	CA10	carbonic anhydrase X
hsa-miR-583	0	0	1	1	1	1	KLHL13	kelch-like 13 (Drosophila)
hsa-miR-583	1	0	1	1	1	1	HACE1	HECT domain and ankyrin repeat containing E3 ubiquitin protein ligase 1
hsa-miR-583	1	0	1	1	1	1	CASK	calcium/calmodulin-dependent serine protein kinase (MAGUK family)
hsa-miR-583	0	0	1	1	1	1	SCAPER	S-phase cyclin A-associated protein in the ER
hsa-miR-583	0	0	1	0	0	0	NYAP2	neuronal tyrosine-phosphorylated phosphoinositide-3-kinase adaptor 2
hsa-miR-583	1	0	1	1	1	1	FRAS1	Fraser syndrome 1
hsa-miR-583	1	0	1	1	0	0	KIAA1549	KIAA1549
hsa-miR-583	1	0	1	0	0	0	TANC2	tetratricopeptide repeat, ankyrin repeat and coiled-coil containing 2
hsa-miR-583	1	0	1	1	1	1	SNX3	sorting nexin 3
hsa-miR-583	1	0	1	1	1	1	PHF21A	PHD finger protein 21A
hsa-miR-583	0	0	1	0	1	1	SETD5	SET domain containing 5
hsa-miR-583	1	0	1	1	1	1	NPAS3	neuronal PAS domain protein 3
hsa-miR-583	1	0	1	1	1	1	LCOR	ligand dependent nuclear receptor corepressor
hsa-miR-583	1	0	1	1	1	1	LZTS2	leucine zipper, putative tumor suppressor 2
hsa-miR-583	1	0	1	1	0	0	ZNF527	zinc finger protein 527
hsa-miR-583	1	0	1	0	1	1	JPH4	junctophilin 4
hsa-miR-583	0	0	1	1	0	0	COL27A1	collagen, type XXVII, alpha 1
hsa-miR-583	1	0	1	1	1	1	NAV2	neuron navigator 2
hsa-miR-583	1	0	1	1	1	1	HNRPDL	heterogeneous nuclear ribonucleoprotein D-like
hsa-miR-583	1	0	1	1	1	1	OXR1	oxidation resistance 1
hsa-miR-583	0	0	1	1	1	1	KIAA1967	KIAA1967
hsa-miR-583	1	0	1	1	1	1	SH3TC2	SH3 domain and tetratricopeptide repeats 2
hsa-miR-583	0	0	1	1	0	0	CIRH1A	cirrhosis, autosomal recessive 1A (cirhin)
hsa-miR-583	1	0	1	0	1	1	RNF43	ring finger protein 43
hsa-miR-583	1	0	1	0	0	0	ZBTB34	zinc finger and BTB domain containing 34
hsa-miR-583	1	0	1	1	1	1	PAM	peptidylglycine alpha-amidating monooxygenase
hsa-miR-583	1	0	1	1	1	1	SMEK1	SMEK homolog 1, suppressor of mek1 (Dictyostelium)
hsa-miR-583	0	0	1	1	0	0	ANKRD18A	ankyrin repeat domain 18A
hsa-miR-583	1	0	1	1	1	1	TRPM3	transient receptor potential cation channel, subfamily M, member 3
hsa-miR-583	1	0	1	1	1	1	PAN3	PAN3 poly(A) specific ribonuclease subunit homolog (S. cerevisiae)
hsa-miR-583	1	1	1	1	1	1	BACE1	beta-site APP-cleaving enzyme 1
hsa-miR-583	1	0	1	1	1	1	UBE3A	ubiquitin protein ligase E3A
hsa-miR-583	0	0	1	1	0	0	OVGP1	oviductal glycoprotein 1, 120kDa
hsa-miR-583	1	0	1	1	0	0	NDST2	N-deacetylase/N-sulfotransferase (heparan glucosaminyl) 2
hsa-miR-583	1	0	1	1	1	1	BACH2	BTB and CNC homology 1, basic leucine zipper transcription factor 2
hsa-miR-583	1	0	1	0	1	1	PCDHA13	protocadherin alpha 13
hsa-miR-583	1	0	1	1	1	1	PCDHA4	protocadherin alpha 4
hsa-miR-583	0	0	1	1	0	0	KCNC3	potassium voltage-gated channel, Shaw-related subfamily, member 3
hsa-miR-583	1	0	1	1	1	1	RPS6KA3	ribosomal protein S6 kinase, 90kDa, polypeptide 3
hsa-miR-583	1	0	1	1	1	1	PML	promyelocytic leukemia
hsa-miR-583	1	0	1	1	1	1	CLIP4	CAP-GLY domain containing linker protein family, member 4
hsa-miR-583	0	0	1	1	1	1	MAZ	MYC-associated zinc finger protein (purine-binding transcription factor)
hsa-miR-583	1	0	1	1	1	1	PHC1	polyhomeotic homolog 1 (Drosophila)
hsa-miR-583	1	0	1	1	1	1	SLC8A1	solute carrier family 8 (sodium/calcium exchanger), member 1
hsa-miR-583	1	0	1	1	1	1	RLF	rearranged L-myc fusion
hsa-miR-583	1	0	1	0	1	1	PLAG1	pleiomorphic adenoma gene 1
hsa-miR-583	0	0	1	1	1	1	DGKI	diacylglycerol kinase, iota
hsa-miR-583	1	0	1	1	0	0	TSPYL2	TSPY-like 2
hsa-miR-583	1	0	1	0	1	1	DPYSL2	dihydropyrimidinase-like 2
hsa-miR-583	1	0	1	1	1	1	EPHA7	EPH receptor A7
hsa-miR-583	1	0	1	1	1	1	SATB2	SATB homeobox 2
hsa-miR-583	1	0	1	1	1	1	TBX2	T-box 2
hsa-miR-583	0	0	1	1	0	0	IFT27	intraflagellar transport 27 homolog (Chlamydomonas)
hsa-miR-583	1	0	1	1	1	1	MINK1	misshapen-like kinase 1
hsa-miR-583	0	0	1	1	0	0	PSMB2	proteasome (prosome, macropain) subunit, beta type, 2
hsa-miR-583	1	0	1	1	1	1	MYO5A	myosin VA (heavy chain 12, myoxin)
hsa-miR-583	1	0	1	1	1	1	PDLIM5	PDZ and LIM domain 5
hsa-miR-583	0	0	1	1	0	0	BMP1	bone morphogenetic protein 1
hsa-miR-583	0	0	1	1	0	0	CFLAR	CASP8 and FADD-like apoptosis regulator
hsa-miR-583	0	0	1	1	1	1	HLA-DQA1	major histocompatibility complex, class II, DQ alpha 1
hsa-miR-583	1	0	1	1	1	1	ARHGEF3	Rho guanine nucleotide exchange factor (GEF) 3
hsa-miR-583	1	0	1	1	1	1	COL24A1	collagen, type XXIV, alpha 1
hsa-miR-583	0	0	1	1	1	1	KIF3A	kinesin family member 3A
hsa-miR-583	1	0	1	0	1	1	ADD3	adducin 3 (gamma)
hsa-miR-583	0	0	1	0	1	1	TGFB2	transforming growth factor, beta 2
hsa-miR-583	0	0	1	1	0	0	MSH5	mutS homolog 5 (E. coli)
hsa-miR-583	1	0	1	1	1	1	ZFX	zinc finger protein, X-linked
hsa-miR-583	1	0	1	1	1	1	ANPEP	alanyl (membrane) aminopeptidase
hsa-miR-583	0	0	1	1	1	1	CENPE	centromere protein E, 312kDa
hsa-miR-583	1	0	1	1	1	1	APC	adenomatous polyposis coli
hsa-miR-583	1	0	1	1	1	1	MEF2D	myocyte enhancer factor 2D
hsa-miR-583	1	0	1	1	0	0	TNPO2	transportin 2
hsa-miR-583	1	0	1	1	1	1	PICALM	phosphatidylinositol binding clathrin assembly protein
hsa-miR-583	1	0	1	1	1	1	SDHC	succinate dehydrogenase complex, subunit C, integral membrane protein, 15kDa
hsa-miR-583	0	0	1	0	0	0	MIAT	myocardial infarction associated transcript (non-protein coding)
hsa-miR-583	1	0	1	0	1	1	DDX3X	DEAD (Asp-Glu-Ala-Asp) box polypeptide 3, X-linked
hsa-miR-583	0	0	1	0	1	1	PARG	poly (ADP-ribose) glycohydrolase
hsa-miR-583	1	0	1	1	1	1	STX16	syntaxin 16
hsa-miR-583	1	0	1	0	1	1	MLL2	myeloid/lymphoid or mixed-lineage leukemia 2
hsa-miR-583	1	0	1	1	1	1	SLC4A4	solute carrier family 4, sodium bicarbonate cotransporter, member 4
hsa-miR-583	1	0	1	1	1	1	ENTPD4	ectonucleoside triphosphate diphosphohydrolase 4
hsa-miR-583	0	0	1	1	0	0	SPTBN2	spectrin, beta, non-erythrocytic 2
hsa-miR-583	1	0	1	1	1	1	PCDH17	protocadherin 17
hsa-miR-583	0	0	1	1	0	0	PLA1A	phospholipase A1 member A
hsa-miR-583	1	0	1	1	1	1	SOCS2	suppressor of cytokine signaling 2
hsa-miR-583	1	0	1	0	0	0	MAP3K1	mitogen-activated protein kinase kinase kinase 1, E3 ubiquitin protein ligase
hsa-miR-583	1	0	1	1	1	1	LDB2	LIM domain binding 2
hsa-miR-583	1	0	1	1	1	1	CTNND1	catenin (cadherin-associated protein), delta 1
hsa-miR-583	1	0	1	1	1	1	CBFA2T2	core-binding factor, runt domain, alpha subunit 2; translocated to, 2
hsa-miR-583	1	0	1	1	1	1	TP63	tumor protein p63
hsa-miR-583	0	0	1	1	1	1	SSBP2	single-stranded DNA binding protein 2
hsa-miR-583	0	0	1	1	1	1	PCF11	PCF11, cleavage and polyadenylation factor subunit, homolog (S. cerevisiae)
hsa-miR-583	0	0	1	1	1	1	RGS7	regulator of G-protein signaling 7
hsa-miR-583	1	0	1	1	1	1	GLS	glutaminase
hsa-miR-583	0	0	1	1	1	1	FHL1	four and a half LIM domains 1
hsa-miR-583	0	0	1	1	1	1	SH2D1A	SH2 domain containing 1A
hsa-miR-583	1	0	1	1	1	1	SLMAP	sarcolemma associated protein
hsa-miR-583	0	0	1	1	1	1	IL18BP	interleukin 18 binding protein
hsa-miR-583	1	0	1	1	1	1	HP1BP3	heterochromatin protein 1, binding protein 3
hsa-miR-583	1	0	1	1	1	1	EDNRB	endothelin receptor type B
hsa-miR-583	0	0	1	1	1	1	NEXN	nexilin (F actin binding protein)
hsa-miR-583	0	0	1	1	1	1	MAP3K4	mitogen-activated protein kinase kinase kinase 4
hsa-miR-583	0	0	1	1	1	1	ACIN1	apoptotic chromatin condensation inducer 1
hsa-miR-583	1	0	1	1	1	1	SORBS1	sorbin and SH3 domain containing 1
hsa-miR-583	1	0	1	1	1	1	AASDHPPT	aminoadipate-semialdehyde dehydrogenase-phosphopantetheinyl transferase
hsa-miR-583	0	0	1	1	1	1	HEPH	hephaestin
hsa-miR-583	1	0	1	1	1	1	C16orf70	chromosome 16 open reading frame 70
hsa-miR-583	1	0	1	1	1	1	FAM49B	family with sequence similarity 49, member B
hsa-miR-583	1	0	1	1	1	1	EIF4A2	eukaryotic translation initiation factor 4A2
hsa-miR-583	1	0	1	1	0	0	TDRKH	tudor and KH domain containing
hsa-miR-583	1	0	1	1	1	1	DESI2	desumoylating isopeptidase 2
hsa-miR-583	1	0	1	1	1	1	C21orf91	chromosome 21 open reading frame 91
hsa-miR-583	1	0	1	1	1	1	STRN3	striatin, calmodulin binding protein 3
hsa-miR-583	0	0	1	0	0	0	TIGD7	tigger transposable element derived 7
hsa-miR-583	1	0	1	1	1	1	ABI2	abl-interactor 2
hsa-miR-583	1	0	1	1	1	1	SH3GLB1	SH3-domain GRB2-like endophilin B1
hsa-miR-583	1	0	1	0	1	1	TRPS1	trichorhinophalangeal syndrome I
hsa-miR-583	0	0	1	1	1	1	RANGRF	RAN guanine nucleotide release factor
hsa-miR-583	1	0	1	1	1	1	ERGIC1	endoplasmic reticulum-golgi intermediate compartment (ERGIC) 1
hsa-miR-583	1	0	1	1	1	1	PUM2	pumilio homolog 2 (Drosophila)
hsa-miR-583	0	0	1	0	1	1	ERBB2IP	erbb2 interacting protein
hsa-miR-583	1	0	1	1	1	1	TAGLN3	transgelin 3
hsa-miR-583	1	0	1	1	1	1	KLHL12	kelch-like 12 (Drosophila)
hsa-miR-583	0	0	1	1	1	1	PARP9	poly (ADP-ribose) polymerase family, member 9
hsa-miR-583	0	0	1	0	1	1	KANSL3	KAT8 regulatory NSL complex subunit 3
hsa-miR-583	1	0	1	1	1	1	VEGFA	vascular endothelial growth factor A
hsa-miR-583	1	0	1	1	1	1	SPTBN4	spectrin, beta, non-erythrocytic 4
hsa-miR-583	1	0	1	1	1	1	CPEB1	cytoplasmic polyadenylation element binding protein 1
hsa-miR-583	1	0	1	1	1	1	CALU	calumenin
hsa-miR-583	1	0	1	0	1	1	USP32	ubiquitin specific peptidase 32
hsa-miR-583	1	0	1	1	1	1	CASD1	CAS1 domain containing 1
hsa-miR-583	1	0	1	1	1	1	ATAD1	ATPase family, AAA domain containing 1
hsa-miR-583	1	0	1	0	1	1	WIPF2	WAS/WASL interacting protein family, member 2
hsa-miR-583	1	0	1	1	1	1	CALCOCO1	calcium binding and coiled-coil domain 1
hsa-miR-583	1	0	1	1	1	1	LARP4	La ribonucleoprotein domain family, member 4
hsa-miR-583	1	0	1	1	1	1	SON	SON DNA binding protein
hsa-miR-583	0	0	1	1	1	1	CASP8	caspase 8, apoptosis-related cysteine peptidase
hsa-miR-583	0	0	1	0	1	1	MYO3B	myosin IIIB
hsa-miR-583	1	0	1	1	1	1	MAGI1	membrane associated guanylate kinase, WW and PDZ domain containing 1
hsa-miR-583	0	0	1	1	0	0	CNKSR2	connector enhancer of kinase suppressor of Ras 2
hsa-miR-583	0	0	1	0	1	1	NBPF15	neuroblastoma breakpoint family, member 15
hsa-miR-583	0	0	1	1	0	0	BRE	brain and reproductive organ-expressed (TNFRSF1A modulator)
hsa-miR-583	1	0	1	1	1	1	ST3GAL3	ST3 beta-galactoside alpha-2,3-sialyltransferase 3
hsa-miR-583	1	0	1	1	0	0	SAMD4A	sterile alpha motif domain containing 4A
hsa-miR-583	1	0	1	1	1	1	PSIP1	PC4 and SFRS1 interacting protein 1
hsa-miR-583	0	0	1	1	1	1	PPP1R1B	protein phosphatase 1, regulatory (inhibitor) subunit 1B
hsa-miR-583	1	0	1	1	1	1	NCOA5	nuclear receptor coactivator 5
hsa-miR-583	0	0	1	1	1	1	AMPH	amphiphysin
hsa-miR-583	1	0	1	0	1	1	TXLNA	taxilin alpha
hsa-miR-583	0	0	1	1	1	1	RBM11	RNA binding motif protein 11
hsa-miR-583	1	0	1	0	1	1	NUDCD1	NudC domain containing 1
hsa-miR-583	1	0	1	1	1	1	INADL	InaD-like (Drosophila)
hsa-miR-583	1	0	1	1	1	1	AFF2	AF4/FMR2 family, member 2
hsa-miR-583	1	0	1	1	1	1	SH2B3	SH2B adaptor protein 3
hsa-miR-583	1	0	1	1	1	1	SUCO	SUN domain containing ossification factor
hsa-miR-583	0	0	1	1	1	1	WWTR1	WW domain containing transcription regulator 1
hsa-miR-583	1	0	1	1	1	1	PALM2	paralemmin 2
hsa-miR-583	0	0	1	0	0	0	LY6G6E	lymphocyte antigen 6 complex, locus G6E (pseudogene)
hsa-miR-583	1	0	1	1	1	1	NRXN3	neurexin 3
hsa-miR-583	1	0	1	1	1	1	NAV3	neuron navigator 3
hsa-miR-583	1	0	1	1	1	1	PPP3CB	protein phosphatase 3, catalytic subunit, beta isozyme
hsa-miR-583	1	0	1	1	1	1	ARL4C	ADP-ribosylation factor-like 4C
hsa-miR-583	1	0	1	0	1	1	NAALADL2	N-acetylated alpha-linked acidic dipeptidase-like 2
hsa-miR-583	0	0	1	1	1	1	TFEB	transcription factor EB
hsa-miR-583	1	0	1	1	1	1	NOX4	NADPH oxidase 4
hsa-miR-583	0	0	1	1	0	0	IL4I1	interleukin 4 induced 1
hsa-miR-583	0	0	1	1	0	0	NHLRC2	NHL repeat containing 2
hsa-miR-583	0	0	1	1	0	0	ACSS2	acyl-CoA synthetase short-chain family member 2
hsa-miR-583	1	0	1	0	1	1	NFAT5	nuclear factor of activated T-cells 5, tonicity-responsive
hsa-miR-583	0	0	1	1	1	1	PARP16	poly (ADP-ribose) polymerase family, member 16
hsa-miR-583	0	0	1	0	0	0	TUG1	taurine upregulated 1 (non-protein coding)
hsa-miR-583	0	0	1	1	0	0	ZCWPW1	zinc finger, CW type with PWWP domain 1
hsa-miR-583	1	0	1	1	1	1	ARHGAP17	Rho GTPase activating protein 17
hsa-miR-583	1	0	1	1	0	0	SALL2	sal-like 2 (Drosophila)
hsa-miR-583	0	0	1	1	1	1	STOX2	storkhead box 2
hsa-miR-583	1	0	1	1	1	1	CADM3	cell adhesion molecule 3
hsa-miR-583	1	0	1	1	1	1	EIF2C1	eukaryotic translation initiation factor 2C, 1
hsa-miR-583	1	0	1	1	1	1	PTBP3	polypyrimidine tract binding protein 3
hsa-miR-583	1	0	1	1	1	1	SLC38A2	solute carrier family 38, member 2
hsa-miR-583	1	0	1	1	1	1	LRRN3	leucine rich repeat neuronal 3
hsa-miR-583	1	0	1	1	1	1	HNRNPUL1	heterogeneous nuclear ribonucleoprotein U-like 1
hsa-miR-583	1	0	1	1	1	1	INSIG2	insulin induced gene 2
hsa-miR-583	0	0	1	1	1	1	SNCAIP	synuclein, alpha interacting protein
hsa-miR-583	0	0	1	1	1	1	RBM15	RNA binding motif protein 15
hsa-miR-583	1	0	1	0	0	0	ZNRF3	zinc and ring finger 3
hsa-miR-583	0	0	1	0	0	0	DUXAP10	double homeobox A pseudogene 10
hsa-miR-583	1	0	1	1	1	1	S100PBP	S100P binding protein
hsa-miR-583	1	0	1	1	1	1	SMEK2	SMEK homolog 2, suppressor of mek1 (Dictyostelium)
hsa-miR-583	0	0	1	1	0	0	TTC17	tetratricopeptide repeat domain 17
hsa-miR-583	0	0	1	1	1	1	TTC23	tetratricopeptide repeat domain 23
hsa-miR-583	0	0	1	1	1	1	LRRN1	leucine rich repeat neuronal 1
hsa-miR-583	1	0	1	1	1	1	SRP72	signal recognition particle 72kDa
hsa-miR-583	0	0	1	1	0	0	BUB1	budding uninhibited by benzimidazoles 1 homolog (yeast)
hsa-miR-583	0	0	1	0	0	0	LINC00475	long intergenic non-protein coding RNA 475
hsa-miR-583	1	0	1	1	1	1	BAIAP2	BAI1-associated protein 2
hsa-miR-583	1	0	1	1	1	1	PPFIA3	protein tyrosine phosphatase, receptor type, f polypeptide (PTPRF), interacting protein (liprin), alpha 3
hsa-miR-583	1	0	1	1	1	1	PAX8	paired box 8
hsa-miR-583	0	0	1	1	1	1	CWF19L1	CWF19-like 1, cell cycle control (S. pombe)
hsa-miR-583	0	0	1	0	1	1	FLJ14186	uncharacterized LOC401149
hsa-miR-583	1	0	1	1	1	1	SCAF1	SR-related CTD-associated factor 1
hsa-miR-583	1	0	1	0	1	1	STK40	serine/threonine kinase 40
hsa-miR-583	1	0	1	1	1	1	DYRK2	dual-specificity tyrosine-(Y)-phosphorylation regulated kinase 2
hsa-miR-583	1	0	1	0	1	1	ATP2B1	ATPase, Ca++ transporting, plasma membrane 1
hsa-miR-583	1	0	1	1	1	1	GBF1	golgi brefeldin A resistant guanine nucleotide exchange factor 1
hsa-miR-583	1	0	1	0	1	1	MYO5B	myosin VB
hsa-miR-583	1	0	1	1	1	1	ARFGEF1	ADP-ribosylation factor guanine nucleotide-exchange factor 1 (brefeldin A-inhibited)
hsa-miR-583	1	0	1	1	1	1	NAA30	N(alpha)-acetyltransferase 30, NatC catalytic subunit
hsa-miR-583	0	0	1	0	1	1	HEMK1	HemK methyltransferase family member 1
hsa-miR-583	0	0	1	1	0	0	MOGAT2	monoacylglycerol O-acyltransferase 2
hsa-miR-583	0	0	1	1	1	1	FAM124B	family with sequence similarity 124B
hsa-miR-583	0	0	1	1	0	0	EXOC6B	exocyst complex component 6B
hsa-miR-583	1	0	1	1	1	1	DCAF8	DDB1 and CUL4 associated factor 8
hsa-miR-583	0	0	1	1	1	1	SH3YL1	SH3 domain containing, Ysc84-like 1 (S. cerevisiae)
hsa-miR-583	0	0	1	1	1	1	GTF2H1	general transcription factor IIH, polypeptide 1, 62kDa
hsa-miR-583	1	0	1	1	1	1	RNF185	ring finger protein 185
hsa-miR-583	1	0	1	1	1	1	LRP4	low density lipoprotein receptor-related protein 4
hsa-miR-583	1	0	1	1	1	1	FOXP1	forkhead box P1
hsa-miR-583	1	0	1	1	0	0	NKIRAS2	NFKB inhibitor interacting Ras-like 2
hsa-miR-583	1	0	1	1	1	1	FAM53C	family with sequence similarity 53, member C
hsa-miR-583	1	0	1	1	1	1	NFASC	neurofascin
hsa-miR-583	0	0	1	0	0	0	JAKMIP2-AS1	JAKMIP2 antisense RNA 1
hsa-miR-583	0	0	1	0	1	1	TWSG1	twisted gastrulation homolog 1 (Drosophila)
hsa-miR-583	0	0	1	1	1	1	DCAF4	DDB1 and CUL4 associated factor 4
hsa-miR-583	1	0	1	1	1	1	TMEM2	transmembrane protein 2
hsa-miR-583	1	0	1	1	1	1	GPD2	glycerol-3-phosphate dehydrogenase 2 (mitochondrial)
hsa-miR-583	1	0	1	1	1	1	ARHGAP36	Rho GTPase activating protein 36
hsa-miR-583	0	0	1	1	1	1	FAM107A	family with sequence similarity 107, member A
hsa-miR-583	0	0	1	0	0	0	LOC254559	uncharacterized LOC254559
hsa-miR-583	1	0	1	0	1	1	AP1G1	adaptor-related protein complex 1, gamma 1 subunit
hsa-miR-583	1	0	1	1	1	1	TPM1	tropomyosin 1 (alpha)
hsa-miR-583	0	0	1	1	1	1	GABRP	gamma-aminobutyric acid (GABA) A receptor, pi
hsa-miR-583	0	0	1	1	0	0	C21orf59	chromosome 21 open reading frame 59
hsa-miR-583	0	0	1	0	0	0	FLJ30838	uncharacterized LOC400955
hsa-miR-583	1	0	1	1	1	1	FRMD6	FERM domain containing 6
hsa-miR-583	0	0	1	0	0	0	LOC157273	uncharacterized LOC157273
hsa-miR-583	1	0	1	1	1	1	DIXDC1	DIX domain containing 1
hsa-miR-583	0	0	1	1	0	0	DNAH9	dynein, axonemal, heavy chain 9
hsa-miR-583	1	0	1	0	1	1	RNF165	ring finger protein 165
hsa-miR-583	0	0	1	0	0	0	BTBD19	BTB (POZ) domain containing 19
hsa-miR-583	0	0	1	1	1	1	PDE1C	phosphodiesterase 1C, calmodulin-dependent 70kDa
hsa-miR-583	1	0	1	1	1	1	TMEM25	transmembrane protein 25
hsa-miR-583	1	0	1	1	1	1	AGPAT1	1-acylglycerol-3-phosphate O-acyltransferase 1 (lysophosphatidic acid acyltransferase, alpha)
hsa-miR-583	1	0	1	1	1	1	ZIC4	Zic family member 4
hsa-miR-583	1	0	1	1	1	1	SCAMP5	secretory carrier membrane protein 5
hsa-miR-583	1	0	1	1	1	1	CLCN5	chloride channel, voltage-sensitive 5
hsa-miR-583	0	0	1	0	0	0	LOC255187	hCG1980447
hsa-miR-583	0	0	1	0	1	1	SNRNP48	small nuclear ribonucleoprotein 48kDa (U11/U12)
hsa-miR-583	0	0	1	0	1	1	AGBL1	ATP/GTP binding protein-like 1
hsa-miR-583	1	0	1	1	1	1	ZBTB10	zinc finger and BTB domain containing 10
hsa-miR-583	0	0	1	0	1	1	ZNF498	zinc finger protein 498
hsa-miR-583	1	0	1	0	1	1	PCGF3	polycomb group ring finger 3
hsa-miR-583	0	0	1	1	1	1	PSME3	proteasome (prosome, macropain) activator subunit 3 (PA28 gamma; Ki)
hsa-miR-583	1	0	1	1	1	1	TLE4	transducin-like enhancer of split 4 (E(sp1) homolog, Drosophila)
hsa-miR-583	0	0	1	1	1	1	MYBPC1	myosin binding protein C, slow type
hsa-miR-583	1	0	1	0	1	1	NCAM1	neural cell adhesion molecule 1
hsa-miR-583	0	0	1	1	1	1	SEC61A2	Sec61 alpha 2 subunit (S. cerevisiae)
hsa-miR-583	1	0	1	1	1	1	ANKRD49	ankyrin repeat domain 49
hsa-miR-583	0	0	1	1	0	0	PORCN	porcupine homolog (Drosophila)
hsa-miR-583	1	0	1	1	1	1	ANKRD29	ankyrin repeat domain 29
hsa-miR-583	0	0	1	0	0	0	LINC00637	long intergenic non-protein coding RNA 637
hsa-miR-583	0	0	1	0	1	1	UHMK1	U2AF homology motif (UHM) kinase 1
hsa-miR-583	0	0	1	1	0	0	TRIM41	tripartite motif containing 41
hsa-miR-583	0	0	1	1	0	0	PIGO	phosphatidylinositol glycan anchor biosynthesis, class O
hsa-miR-583	1	0	1	1	1	1	ARID1B	AT rich interactive domain 1B (SWI1-like)
hsa-miR-583	1	0	1	1	1	1	GANC	glucosidase, alpha; neutral C
hsa-miR-583	1	0	1	1	1	1	CNOT4	CCR4-NOT transcription complex, subunit 4
hsa-miR-583	1	0	1	0	1	1	TPBG	trophoblast glycoprotein
hsa-miR-583	0	0	1	1	0	0	SHKBP1	SH3KBP1 binding protein 1
hsa-miR-583	0	0	1	1	0	0	CPAMD8	C3 and PZP-like, alpha-2-macroglobulin domain containing 8
hsa-miR-583	1	0	1	1	1	1	CLIC5	chloride intracellular channel 5
hsa-miR-583	1	0	1	1	0	0	B3GAT3	beta-1,3-glucuronyltransferase 3 (glucuronosyltransferase I)
hsa-miR-583	0	0	1	1	1	1	CAMKV	CaM kinase-like vesicle-associated
hsa-miR-583	0	0	1	0	1	1	CADM1	cell adhesion molecule 1
hsa-miR-583	0	0	1	1	0	0	PPP2R1A	protein phosphatase 2, regulatory subunit A, alpha
hsa-miR-583	1	0	1	1	1	1	ARIH2	ariadne homolog 2 (Drosophila)
hsa-miR-583	1	0	1	1	1	1	AMMECR1	Alport syndrome, mental retardation, midface hypoplasia and elliptocytosis chromosomal region gene 1
hsa-miR-583	0	0	1	1	1	1	KBTBD4	kelch repeat and BTB (POZ) domain containing 4
hsa-miR-583	1	0	1	1	1	1	SUPT16H	suppressor of Ty 16 homolog (S. cerevisiae)
hsa-miR-583	0	0	1	0	1	1	TBX5-AS1	TBX5 antisense RNA 1
hsa-miR-583	1	0	1	1	1	1	FBXW2	F-box and WD repeat domain containing 2
hsa-miR-583	0	0	1	1	1	1	SP100	SP100 nuclear antigen
hsa-miR-583	0	0	1	0	0	0	KIAA1430	KIAA1430
hsa-miR-583	1	0	1	1	1	1	GNG2	guanine nucleotide binding protein (G protein), gamma 2
hsa-miR-583	0	0	1	1	0	0	SAMD15	sterile alpha motif domain containing 15
hsa-miR-583	1	0	1	1	1	1	ODF2	outer dense fiber of sperm tails 2
hsa-miR-583	0	0	1	0	0	0	LOC283887	uncharacterized LOC283887
hsa-miR-583	1	0	1	1	1	1	RRBP1	ribosome binding protein 1 homolog 180kDa (dog)
hsa-miR-583	0	0	1	1	0	0	METTL3	methyltransferase like 3
hsa-miR-583	0	0	1	1	0	0	ARPC2	actin related protein 2/3 complex, subunit 2, 34kDa
hsa-miR-583	0	0	1	1	1	1	XPNPEP1	X-prolyl aminopeptidase (aminopeptidase P) 1, soluble
hsa-miR-583	0	0	1	0	0	0	LOC257358	uncharacterized LOC257358
hsa-miR-583	0	0	1	1	0	0	SERPINH1	serpin peptidase inhibitor, clade H (heat shock protein 47), member 1, (collagen binding protein 1)
hsa-miR-583	0	0	1	1	1	1	CYP11B1	cytochrome P450, family 11, subfamily B, polypeptide 1
hsa-miR-583	1	0	1	1	1	1	CTNNA1	catenin (cadherin-associated protein), alpha 1, 102kDa
hsa-miR-583	0	0	1	1	0	0	WBP1	WW domain binding protein 1
hsa-miR-583	0	0	1	0	0	0	PART1	prostate androgen-regulated transcript 1 (non-protein coding)
hsa-miR-583	1	0	1	1	1	1	SLC7A8	solute carrier family 7 (amino acid transporter light chain, L system), member 8
hsa-miR-583	1	0	1	1	1	1	SIAH1	siah E3 ubiquitin protein ligase 1
hsa-miR-583	1	0	1	0	1	1	GATAD2B	GATA zinc finger domain containing 2B
hsa-miR-583	0	0	1	1	0	0	CES4A	carboxylesterase 4A
hsa-miR-583	0	0	1	1	1	1	ATP6V1H	ATPase, H+ transporting, lysosomal 50/57kDa, V1 subunit H
hsa-miR-583	1	0	1	1	1	1	LPPR2	lipid phosphate phosphatase-related protein type 2
hsa-miR-583	1	0	1	1	1	1	ANKRD46	ankyrin repeat domain 46
hsa-miR-583	1	0	1	1	1	1	EPHB1	EPH receptor B1
hsa-miR-583	1	0	1	0	1	1	UVRAG	UV radiation resistance associated gene
hsa-miR-583	0	0	1	0	0	0	LOC730101	uncharacterized LOC730101
hsa-miR-583	0	0	1	1	0	0	PLCB2	phospholipase C, beta 2
hsa-miR-583	0	0	1	1	1	1	SIRPB2	signal-regulatory protein beta 2
hsa-miR-583	1	0	1	1	1	1	FAM222B	family with sequence similarity 222, member B
hsa-miR-583	1	0	1	1	1	1	SPATS2	spermatogenesis associated, serine-rich 2
hsa-miR-583	1	0	1	1	0	0	FSCN1	fascin homolog 1, actin-bundling protein (Strongylocentrotus purpuratus)
hsa-miR-583	1	0	1	1	1	1	CS	citrate synthase
hsa-miR-583	1	0	1	1	1	1	GAPVD1	GTPase activating protein and VPS9 domains 1
hsa-miR-583	1	0	1	1	1	1	CRTC2	CREB regulated transcription coactivator 2
hsa-miR-583	1	0	1	0	1	1	KIAA1737	KIAA1737
hsa-miR-583	1	0	1	0	1	1	KBTBD8	kelch repeat and BTB (POZ) domain containing 8
hsa-miR-583	1	0	1	1	1	1	SYT6	synaptotagmin VI
hsa-miR-583	1	0	1	1	1	1	SNRNP70	small nuclear ribonucleoprotein 70kDa (U1)
hsa-miR-583	1	0	1	1	1	1	EPB41L1	erythrocyte membrane protein band 4.1-like 1
hsa-miR-583	0	0	1	1	1	1	EXTL2	exostoses (multiple)-like 2
hsa-miR-583	0	0	1	0	0	0	CCDC150	coiled-coil domain containing 150
hsa-miR-583	0	0	1	0	0	0	LOC400680	uncharacterized LOC400680
hsa-miR-583	0	0	1	0	0	0	LRRC69	leucine rich repeat containing 69
hsa-miR-583	1	0	1	1	1	1	GOLGA8B	golgin A8 family, member B
hsa-miR-583	0	0	1	1	1	1	PLA2G5	phospholipase A2, group V
hsa-miR-583	0	0	1	1	1	1	CKAP2L	cytoskeleton associated protein 2-like
hsa-miR-583	1	0	1	0	1	1	LRBA	LPS-responsive vesicle trafficking, beach and anchor containing
hsa-miR-583	1	0	1	1	1	1	ZCCHC2	zinc finger, CCHC domain containing 2
hsa-miR-583	0	0	1	1	1	1	RP1	retinitis pigmentosa 1 (autosomal dominant)
hsa-miR-583	0	0	1	1	0	0	DCBLD1	discoidin, CUB and LCCL domain containing 1
hsa-miR-583	0	0	1	1	1	1	VIPAS39	VPS33B interacting protein, apical-basolateral polarity regulator, spe-39 homolog
hsa-miR-583	0	0	1	1	1	1	SYTL4	synaptotagmin-like 4
hsa-miR-583	0	0	1	1	1	1	CHCHD1	coiled-coil-helix-coiled-coil-helix domain containing 1
hsa-miR-583	0	0	1	1	0	0	PRICKLE1	prickle homolog 1 (Drosophila)
hsa-miR-583	1	0	1	1	0	0	WIZ	widely interspaced zinc finger motifs
hsa-miR-583	0	0	1	1	0	0	MX2	myxovirus (influenza virus) resistance 2 (mouse)
hsa-miR-583	1	0	1	1	1	1	PXN	paxillin
hsa-miR-583	1	0	1	1	1	1	ZBTB4	zinc finger and BTB domain containing 4
hsa-miR-583	1	0	1	1	1	1	ZNF275	zinc finger protein 275
hsa-miR-583	0	0	1	1	1	1	RNF103	ring finger protein 103
hsa-miR-583	0	0	1	1	0	0	SLC26A10	solute carrier family 26, member 10
hsa-miR-583	1	0	1	1	1	1	ABHD6	abhydrolase domain containing 6
hsa-miR-583	0	0	1	1	1	1	ARHGEF26	Rho guanine nucleotide exchange factor (GEF) 26
hsa-miR-583	1	0	1	1	1	1	CBLB	Cbl proto-oncogene, E3 ubiquitin protein ligase B
hsa-miR-583	1	0	1	1	1	1	PLEKHH1	pleckstrin homology domain containing, family H (with MyTH4 domain) member 1
hsa-miR-583	1	0	1	1	1	1	MDGA2	MAM domain containing glycosylphosphatidylinositol anchor 2
hsa-miR-583	0	0	1	0	0	0	LGALS17A	Charcot-Leyden crystal protein pseudogene
hsa-miR-583	1	0	1	1	1	1	IPPK	inositol 1,3,4,5,6-pentakisphosphate 2-kinase
hsa-miR-583	1	0	1	1	1	1	FAM219A	family with sequence similarity 219, member A
hsa-miR-583	0	0	1	0	0	0	LOC644248	uncharacterized LOC644248
hsa-miR-583	0	0	1	0	0	0	LOC100133029	sirtuin 5 pseudogene
hsa-miR-583	0	0	1	1	1	1	ANKRD44	ankyrin repeat domain 44
hsa-miR-583	1	0	1	1	1	1	DERL1	derlin 1
hsa-miR-583	1	0	1	1	1	1	METTL8	methyltransferase like 8
hsa-miR-583	0	0	1	0	0	0	DKFZP434H168	uncharacterized LOC26077
hsa-miR-583	0	0	1	1	0	0	C20orf27	chromosome 20 open reading frame 27
hsa-miR-583	1	0	1	1	1	1	DAB2IP	DAB2 interacting protein
hsa-miR-583	1	0	1	1	1	1	FAM122B	family with sequence similarity 122B
hsa-miR-583	0	0	1	1	1	1	IDS	iduronate 2-sulfatase
hsa-miR-583	0	0	1	1	1	1	TPD52L1	tumor protein D52-like 1
hsa-miR-583	1	0	1	1	1	1	CELF6	CUGBP, Elav-like family member 6
hsa-miR-583	0	0	1	1	1	1	C2orf91	chromosome 2 open reading frame 91
hsa-miR-583	1	0	1	1	1	1	SGIP1	SH3-domain GRB2-like (endophilin) interacting protein 1
hsa-miR-583	1	0	1	1	1	1	C11orf30	chromosome 11 open reading frame 30
hsa-miR-583	1	0	1	1	1	1	ATXN7	ataxin 7
hsa-miR-583	1	0	1	1	1	1	PIAS3	protein inhibitor of activated STAT, 3
hsa-miR-583	0	0	1	0	0	0	C3orf72	chromosome 3 open reading frame 72
hsa-miR-583	0	0	1	1	1	1	MKX	mohawk homeobox
hsa-miR-583	1	0	1	0	0	0	ANKRD52	ankyrin repeat domain 52
hsa-miR-583	0	0	1	1	1	1	ZNF337	zinc finger protein 337
hsa-miR-583	1	0	1	1	1	1	KPNA1	karyopherin alpha 1 (importin alpha 5)
hsa-miR-583	0	0	1	1	0	0	GUCA1A	guanylate cyclase activator 1A (retina)
hsa-miR-583	1	0	1	0	1	1	HECTD1	HECT domain containing E3 ubiquitin protein ligase 1
hsa-miR-583	0	0	1	0	0	0	FAM95B1	family with sequence similarity 95, member B1
hsa-miR-583	0	0	1	1	1	1	RBM46	RNA binding motif protein 46
hsa-miR-583	1	0	1	1	1	1	MACROD2	MACRO domain containing 2
hsa-miR-583	0	0	1	1	1	1	EPPIN	epididymal peptidase inhibitor
hsa-miR-583	0	0	1	1	0	0	C20orf141	chromosome 20 open reading frame 141
hsa-miR-583	0	0	1	1	0	0	FSIP2	fibrous sheath interacting protein 2
hsa-miR-583	1	0	1	1	1	1	DPY19L3	dpy-19-like 3 (C. elegans)
hsa-miR-583	0	0	1	0	1	1	LOC388942	uncharacterized LOC388942
hsa-miR-583	0	0	1	1	0	0	CLDN4	claudin 4
hsa-miR-583	1	0	1	1	1	1	SLC1A4	solute carrier family 1 (glutamate/neutral amino acid transporter), member 4
hsa-miR-583	0	0	1	1	0	0	SPATS1	spermatogenesis associated, serine-rich 1
hsa-miR-583	1	0	1	1	1	1	DLG2	discs, large homolog 2 (Drosophila)
hsa-miR-583	1	0	1	0	1	1	GPR180	G protein-coupled receptor 180
hsa-miR-583	0	0	1	0	0	0	HNRNPKP3	heterogeneous nuclear ribonucleoprotein K pseudogene 3
hsa-miR-583	1	0	1	1	1	1	C14orf28	chromosome 14 open reading frame 28
hsa-miR-583	1	0	1	1	1	1	CLIP1	CAP-GLY domain containing linker protein 1
hsa-miR-583	1	0	1	1	1	1	EIF4E3	eukaryotic translation initiation factor 4E family member 3
hsa-miR-583	0	0	1	0	0	0	RPL23AP53	ribosomal protein L23a pseudogene 53
hsa-miR-583	1	0	1	1	1	1	ENAH	enabled homolog (Drosophila)
hsa-miR-583	1	0	1	0	1	1	SP6	Sp6 transcription factor
hsa-miR-583	1	0	1	1	1	1	CXorf23	chromosome X open reading frame 23
hsa-miR-583	0	0	1	0	0	0	ERVFRD-2	endogenous retrovirus group FRD, member 2
hsa-miR-583	0	0	1	0	1	1	LOC401321	uncharacterized LOC401321
hsa-miR-583	0	0	1	1	0	0	C1orf86	chromosome 1 open reading frame 86
hsa-miR-583	1	0	1	0	1	1	YOD1	YOD1 OTU deubiquinating enzyme 1 homolog (S. cerevisiae)
hsa-miR-583	0	0	1	1	1	1	MCU	mitochondrial calcium uniporter
hsa-miR-583	1	0	1	1	1	1	SLC12A6	solute carrier family 12 (potassium/chloride transporters), member 6
hsa-miR-583	1	0	1	0	1	1	KDM2A	lysine (K)-specific demethylase 2A
hsa-miR-583	0	0	1	0	0	0	IGHG1	immunoglobulin heavy constant gamma 1 (G1m marker)
hsa-miR-583	0	0	1	1	1	1	CD160	CD160 molecule
hsa-miR-583	0	0	1	1	0	0	C17orf107	chromosome 17 open reading frame 107
hsa-miR-583	1	0	1	0	1	1	NBR1	neighbor of BRCA1 gene 1
hsa-miR-583	1	0	1	1	1	1	AIF1L	allograft inflammatory factor 1-like
hsa-miR-583	1	0	1	1	1	1	BCAT1	branched chain amino-acid transaminase 1, cytosolic
hsa-miR-583	1	0	1	0	1	1	USP37	ubiquitin specific peptidase 37
hsa-miR-583	1	0	1	1	1	1	SDCBP	syndecan binding protein (syntenin)
hsa-miR-583	0	0	1	0	0	0	EMBP1	embigin pseudogene 1
hsa-miR-583	1	0	1	0	1	1	CYB561D1	cytochrome b-561 domain containing 1
hsa-miR-583	0	0	1	0	0	0	PINLYP	phospholipase A2 inhibitor and LY6/PLAUR domain containing
hsa-miR-583	0	0	1	0	0	0	FLJ26245	uncharacterized LOC400533
hsa-miR-583	0	0	1	1	1	1	TBX19	T-box 19
hsa-miR-583	0	0	1	1	0	0	ACSM2B	acyl-CoA synthetase medium-chain family member 2B
hsa-miR-583	0	0	1	1	0	0	HEATR8	HEAT repeat containing 8
hsa-miR-583	0	0	1	1	1	1	ST8SIA5	ST8 alpha-N-acetyl-neuraminide alpha-2,8-sialyltransferase 5
hsa-miR-583	1	0	1	1	1	1	GPD1	glycerol-3-phosphate dehydrogenase 1 (soluble)
hsa-miR-583	1	0	1	1	0	0	ELN	elastin
hsa-miR-583	0	0	1	0	0	0	LOC494141	mitochondrial carrier triple repeat 1 pseudogene
hsa-miR-583	0	0	1	1	1	1	SLTM	SAFB-like, transcription modulator
hsa-miR-583	1	0	1	0	1	1	STK3	serine/threonine kinase 3
hsa-miR-583	1	0	1	1	1	1	WTAP	Wilms tumor 1 associated protein
hsa-miR-583	0	0	1	1	1	1	RNF19B	ring finger protein 19B
hsa-miR-583	0	0	1	1	1	1	SLC36A3	solute carrier family 36 (proton/amino acid symporter), member 3
hsa-miR-583	0	0	1	0	0	0	AGAP9	ArfGAP with GTPase domain, ankyrin repeat and PH domain 9
hsa-miR-583	1	0	1	1	1	1	NME6	NME/NM23 nucleoside diphosphate kinase 6
hsa-miR-583	1	0	1	1	1	1	TAP2	transporter 2, ATP-binding cassette, sub-family B (MDR/TAP)
hsa-miR-583	0	0	1	1	1	1	ARID1A	AT rich interactive domain 1A (SWI-like)
hsa-miR-583	1	0	1	1	1	1	RPS6KA4	ribosomal protein S6 kinase, 90kDa, polypeptide 4
hsa-miR-583	1	0	1	1	1	1	CYFIP2	cytoplasmic FMR1 interacting protein 2
hsa-miR-583	1	0	1	1	0	0	ABLIM3	actin binding LIM protein family, member 3
hsa-miR-583	1	0	1	1	1	1	CAMK2G	calcium/calmodulin-dependent protein kinase II gamma
hsa-miR-583	0	0	1	1	1	1	SERPINE2	serpin peptidase inhibitor, clade E (nexin, plasminogen activator inhibitor type 1), member 2
hsa-miR-583	1	0	1	1	1	1	COBLL1	COBL-like 1
hsa-miR-583	1	0	1	1	1	1	PHTF2	putative homeodomain transcription factor 2
hsa-miR-583	1	0	1	1	1	1	AHCYL1	adenosylhomocysteinase-like 1
hsa-miR-583	0	0	1	0	0	0	NBPF10	neuroblastoma breakpoint family, member 10
hsa-miR-583	1	0	1	1	0	0	PRRC2B	proline-rich coiled-coil 2B
hsa-miR-583	1	0	1	1	1	1	NECAP1	NECAP endocytosis associated 1
hsa-miR-583	0	0	1	1	0	0	FAAH	fatty acid amide hydrolase
hsa-miR-583	0	0	1	1	0	0	TBC1D10B	TBC1 domain family, member 10B
hsa-miR-583	1	0	1	1	1	1	ZNF608	zinc finger protein 608
hsa-miR-583	1	0	1	1	1	1	ARF6	ADP-ribosylation factor 6
hsa-miR-583	0	0	1	1	0	0	H2AFJ	H2A histone family, member J
hsa-miR-583	1	0	1	1	1	1	SECISBP2	SECIS binding protein 2
hsa-miR-583	0	0	1	1	1	1	MYO9A	myosin IXA
hsa-miR-583	1	0	1	1	1	1	ERI1	exoribonuclease 1
hsa-miR-583	1	0	1	1	1	1	GOLGA8A	golgin A8 family, member A
hsa-miR-583	0	0	1	1	1	1	TAOK2	TAO kinase 2
hsa-miR-583	1	0	1	1	1	1	NBEA	neurobeachin
hsa-miR-583	1	0	1	1	1	1	KIAA1033	KIAA1033
hsa-miR-583	0	0	1	1	0	0	NXF2	nuclear RNA export factor 2
hsa-miR-583	1	0	1	0	1	1	GPR85	G protein-coupled receptor 85
hsa-miR-583	1	0	1	0	1	1	CEP170	centrosomal protein 170kDa
hsa-miR-583	0	0	1	1	0	0	DOPEY1	dopey family member 1
hsa-miR-583	1	0	1	1	1	1	CTTNBP2NL	CTTNBP2 N-terminal like
hsa-miR-583	1	0	1	1	1	1	NEO1	neogenin 1
hsa-miR-583	1	0	1	0	1	1	GRIN3A	glutamate receptor, ionotropic, N-methyl-D-aspartate 3A
hsa-miR-583	0	0	1	0	0	0	FAM66D	family with sequence similarity 66, member D
hsa-miR-583	0	0	1	1	1	1	ARL13B	ADP-ribosylation factor-like 13B
hsa-miR-583	1	0	1	1	1	1	YTHDF3	YTH domain family, member 3
hsa-miR-583	1	0	1	1	1	1	KDM6A	lysine (K)-specific demethylase 6A
hsa-miR-583	1	0	1	1	1	1	FAM126B	family with sequence similarity 126, member B
hsa-miR-583	0	0	1	1	1	1	EGFLAM	EGF-like, fibronectin type III and laminin G domains
hsa-miR-583	1	0	1	1	1	1	CHMP7	charged multivesicular body protein 7
hsa-miR-583	1	0	1	1	1	1	NFX1	nuclear transcription factor, X-box binding 1
hsa-miR-583	1	0	1	0	0	0	YLPM1	YLP motif containing 1
hsa-miR-583	0	0	1	1	1	1	C10orf57	chromosome 10 open reading frame 57
hsa-miR-583	0	0	1	1	1	1	YAP1	Yes-associated protein 1
hsa-miR-583	0	0	1	0	0	0	FAM225A	family with sequence similarity 225, member A (non-protein coding)
hsa-miR-583	1	0	1	1	1	1	EHMT1	euchromatic histone-lysine N-methyltransferase 1
hsa-miR-583	1	0	1	1	1	1	POU6F1	POU class 6 homeobox 1
hsa-miR-583	0	0	1	1	0	0	LGI4	leucine-rich repeat LGI family, member 4
hsa-miR-583	1	0	1	1	1	1	FAM126A	family with sequence similarity 126, member A
hsa-miR-583	1	0	1	1	1	1	BPTF	bromodomain PHD finger transcription factor
hsa-miR-583	0	0	1	1	1	1	CEP192	centrosomal protein 192kDa
hsa-miR-583	0	0	1	1	0	0	TMEM116	transmembrane protein 116
hsa-miR-583	1	0	1	0	1	1	CLINT1	clathrin interactor 1
hsa-miR-583	0	0	1	1	0	0	FAM18A	family with sequence similarity 18, member A
hsa-miR-583	1	0	1	1	1	1	ANO1	anoctamin 1, calcium activated chloride channel
hsa-miR-583	1	0	1	1	1	1	IL17RD	interleukin 17 receptor D
hsa-miR-583	1	0	1	1	1	1	PRPF38B	PRP38 pre-mRNA processing factor 38 (yeast) domain containing B
hsa-miR-583	1	0	1	1	1	1	ANKRD12	ankyrin repeat domain 12
hsa-miR-583	1	0	1	1	1	1	MBD6	methyl-CpG binding domain protein 6
hsa-miR-583	0	0	1	1	1	1	C8orf34	chromosome 8 open reading frame 34
hsa-miR-583	1	0	1	1	1	1	RICTOR	RPTOR independent companion of MTOR, complex 2
hsa-miR-583	1	0	1	0	1	1	COX18	COX18 cytochrome c oxidase assembly homolog (S. cerevisiae)
hsa-miR-583	1	0	1	1	1	1	SET	SET nuclear oncogene
hsa-miR-583	0	0	1	0	1	1	PSG1	pregnancy specific beta-1-glycoprotein 1
hsa-miR-583	1	0	1	1	1	1	PPP3CA	protein phosphatase 3, catalytic subunit, alpha isozyme
hsa-miR-583	1	0	1	1	1	1	IKZF2	IKAROS family zinc finger 2 (Helios)
hsa-miR-583	0	0	1	1	1	1	KLHL7	kelch-like 7 (Drosophila)
hsa-miR-583	0	0	1	1	0	0	ERAP2	endoplasmic reticulum aminopeptidase 2
hsa-miR-583	1	0	1	1	1	1	DUSP16	dual specificity phosphatase 16
hsa-miR-583	0	0	1	1	1	1	CRB1	crumbs homolog 1 (Drosophila)
hsa-miR-583	1	0	1	0	1	1	BDNF	brain-derived neurotrophic factor
hsa-miR-583	0	0	1	0	0	0	GRIK1-AS1	GRIK1 antisense RNA 1
hsa-miR-583	1	0	1	1	1	1	SORCS1	sortilin-related VPS10 domain containing receptor 1
hsa-miR-583	0	0	1	0	0	0	CLCN1	chloride channel, voltage-sensitive 1
hsa-miR-583	1	0	1	1	1	1	KIAA0907	KIAA0907
hsa-miR-583	0	0	1	1	1	1	SHPRH	SNF2 histone linker PHD RING helicase, E3 ubiquitin protein ligase
hsa-miR-583	1	0	1	1	1	1	LUZP2	leucine zipper protein 2
hsa-miR-583	0	0	1	1	1	1	CEP41	centrosomal protein 41kDa
hsa-miR-583	1	0	1	1	1	1	WDR26	WD repeat domain 26
hsa-miR-583	0	0	1	1	0	0	DNAH1	dynein, axonemal, heavy chain 1
hsa-miR-583	1	0	1	1	1	1	TPP1	tripeptidyl peptidase I
hsa-miR-583	0	0	1	1	1	1	SUGT1	SGT1, suppressor of G2 allele of SKP1 (S. cerevisiae)
hsa-miR-583	0	0	1	1	0	0	CCL4	chemokine (C-C motif) ligand 4
hsa-miR-583	1	0	1	1	1	1	GFRA2	GDNF family receptor alpha 2
hsa-miR-583	0	0	1	1	1	1	ATF7IP	activating transcription factor 7 interacting protein
hsa-miR-583	0	0	1	1	1	1	MFAP5	microfibrillar associated protein 5
hsa-miR-583	1	0	1	0	1	1	AP2B1	adaptor-related protein complex 2, beta 1 subunit
hsa-miR-583	1	0	1	1	1	1	NPM1	nucleophosmin (nucleolar phosphoprotein B23, numatrin)
hsa-miR-583	1	0	1	1	1	1	CAMTA1	calmodulin binding transcription activator 1
hsa-miR-583	0	0	1	1	0	0	LRRC28	leucine rich repeat containing 28
hsa-miR-583	0	0	1	1	1	1	LHFPL1	lipoma HMGIC fusion partner-like 1
hsa-miR-583	0	0	1	1	0	0	VSIG4	V-set and immunoglobulin domain containing 4
hsa-miR-583	0	0	1	1	1	1	GPR114	G protein-coupled receptor 114
hsa-miR-583	0	0	1	0	1	1	FAM198B	family with sequence similarity 198, member B
hsa-miR-583	0	0	1	1	1	1	TNFRSF19	tumor necrosis factor receptor superfamily, member 19
hsa-miR-583	0	0	1	1	1	1	GBP5	guanylate binding protein 5
hsa-miR-583	1	0	1	1	1	1	OPRM1	opioid receptor, mu 1
hsa-miR-583	0	0	1	1	1	1	VWA5A	von Willebrand factor A domain containing 5A
hsa-miR-583	1	0	1	1	1	1	SSX2IP	synovial sarcoma, X breakpoint 2 interacting protein
hsa-miR-583	1	0	1	0	1	1	ANKRD28	ankyrin repeat domain 28
hsa-miR-583	0	0	1	1	1	1	PAQR5	progestin and adipoQ receptor family member V
hsa-miR-583	1	0	1	1	1	1	SP3	Sp3 transcription factor
hsa-miR-583	1	0	1	1	1	1	FAM120A	family with sequence similarity 120A
hsa-miR-583	0	0	1	0	1	1	BRWD3	bromodomain and WD repeat domain containing 3
hsa-miR-583	0	0	1	1	1	1	EHBP1	EH domain binding protein 1
hsa-miR-583	1	0	1	1	1	1	MECP2	methyl CpG binding protein 2 (Rett syndrome)
hsa-miR-583	0	0	1	1	0	0	ASB16	ankyrin repeat and SOCS box containing 16
hsa-miR-583	0	0	1	1	1	1	ANXA10	annexin A10
hsa-miR-583	0	0	1	1	1	1	SMPD1	sphingomyelin phosphodiesterase 1, acid lysosomal
hsa-miR-583	1	0	1	1	1	1	PLCH1	phospholipase C, eta 1
hsa-miR-583	1	0	1	1	1	1	NTNG1	netrin G1
hsa-miR-583	0	0	1	1	1	1	CEACAM1	carcinoembryonic antigen-related cell adhesion molecule 1 (biliary glycoprotein)
hsa-miR-583	0	0	1	0	1	1	CCL4L2	chemokine (C-C motif) ligand 4-like 2
hsa-miR-583	0	0	1	1	1	1	CCL4L1	chemokine (C-C motif) ligand 4-like 1
hsa-miR-583	1	0	1	1	1	1	QKI	QKI, KH domain containing, RNA binding
hsa-miR-583	1	0	1	1	1	1	CD109	CD109 molecule
hsa-miR-583	1	0	1	1	1	1	PCDH11X	protocadherin 11 X-linked
hsa-miR-583	1	0	1	1	1	1	TBC1D22B	TBC1 domain family, member 22B
hsa-miR-583	0	0	1	1	1	1	IL23R	interleukin 23 receptor
hsa-miR-583	0	0	1	1	1	1	IYD	iodotyrosine deiodinase
hsa-miR-583	1	0	1	1	1	1	RPRD1A	regulation of nuclear pre-mRNA domain containing 1A
hsa-miR-583	0	0	1	0	1	1	MIS12	MIS12, MIND kinetochore complex component, homolog (S. pombe)
hsa-miR-583	1	0	1	0	1	1	BAG4	BCL2-associated athanogene 4
hsa-miR-583	0	0	1	1	0	0	DGUOK	deoxyguanosine kinase
hsa-miR-583	0	0	1	1	1	1	B4GALT2	UDP-Gal:betaGlcNAc beta 1,4- galactosyltransferase, polypeptide 2
hsa-miR-583	1	0	1	1	1	1	TSPAN14	tetraspanin 14
hsa-miR-583	0	0	1	1	1	1	TUFT1	tuftelin 1
hsa-miR-583	0	0	1	1	0	0	ZNF576	zinc finger protein 576
hsa-miR-583	1	0	1	1	1	1	RIMS3	regulating synaptic membrane exocytosis 3
hsa-miR-583	0	0	1	1	1	1	FTO	fat mass and obesity associated
hsa-miR-583	1	0	1	1	0	0	DHDDS	dehydrodolichyl diphosphate synthase
hsa-miR-583	1	0	1	1	1	1	ZNF410	zinc finger protein 410
hsa-miR-583	1	0	1	0	1	1	CGGBP1	CGG triplet repeat binding protein 1
hsa-miR-583	1	0	1	1	1	1	MBNL1	muscleblind-like splicing regulator 1
hsa-miR-583	1	0	1	0	1	1	MAP2K7	mitogen-activated protein kinase kinase 7
hsa-miR-583	1	0	1	1	1	1	POU2F2	POU class 2 homeobox 2
hsa-miR-583	1	0	1	0	1	1	C15orf41	chromosome 15 open reading frame 41
hsa-miR-583	1	0	1	1	1	1	KIAA1191	KIAA1191
hsa-miR-583	1	0	1	1	1	1	PCGF5	polycomb group ring finger 5
hsa-miR-583	1	0	1	1	1	1	PTMS	parathymosin
hsa-miR-583	0	0	1	1	0	0	RBM14	RNA binding motif protein 14
hsa-miR-583	1	0	1	1	1	1	SHMT2	serine hydroxymethyltransferase 2 (mitochondrial)
hsa-miR-583	0	0	1	1	1	1	TMEM30A	transmembrane protein 30A
hsa-miR-583	1	0	1	0	1	1	TMEM39A	transmembrane protein 39A
hsa-miR-583	1	0	1	1	1	1	ZFAND5	zinc finger, AN1-type domain 5
hsa-miR-583	1	0	1	0	0	0	XPNPEP3	X-prolyl aminopeptidase (aminopeptidase P) 3, putative
hsa-miR-583	0	0	1	1	0	0	SETMAR	SET domain and mariner transposase fusion gene
hsa-miR-583	0	0	1	1	1	1	GNL3L	guanine nucleotide binding protein-like 3 (nucleolar)-like
hsa-miR-583	0	0	1	1	1	1	PSEN1	presenilin 1
hsa-miR-583	0	0	1	0	0	0	GRAMD1B	GRAM domain containing 1B
hsa-miR-583	1	0	1	0	1	1	FNDC3B	fibronectin type III domain containing 3B
hsa-miR-583	0	0	1	1	1	1	NUP98	nucleoporin 98kDa
hsa-miR-583	0	0	1	1	0	0	KLHDC3	kelch domain containing 3
hsa-miR-583	1	0	1	1	1	1	RBM7	RNA binding motif protein 7
hsa-miR-583	0	0	1	1	1	1	PCNP	PEST proteolytic signal containing nuclear protein
hsa-miR-583	0	0	1	1	0	0	PTPMT1	protein tyrosine phosphatase, mitochondrial 1
hsa-miR-583	0	0	1	1	0	0	CNTROB	centrobin, centrosomal BRCA2 interacting protein
hsa-miR-583	1	0	1	1	1	1	PRDM2	PR domain containing 2, with ZNF domain
hsa-miR-583	1	0	1	1	1	1	PAPOLA	poly(A) polymerase alpha
hsa-miR-583	1	0	1	1	1	1	ZNF512	zinc finger protein 512
hsa-miR-583	0	0	1	0	1	1	ZNF37A	zinc finger protein 37A
hsa-miR-583	1	0	1	1	1	1	TMEM9B	TMEM9 domain family, member B
hsa-miR-583	1	0	1	0	1	1	NR1D2	nuclear receptor subfamily 1, group D, member 2
hsa-miR-583	1	0	1	1	1	1	ASH2L	ash2 (absent, small, or homeotic)-like (Drosophila)
hsa-miR-583	0	0	1	1	0	0	DPY30	dpy-30 homolog (C. elegans)
hsa-miR-583	1	0	1	1	1	1	FAM176A	family with sequence similarity 176, member A
hsa-miR-583	0	0	1	1	0	0	CLPTM1L	CLPTM1-like
hsa-miR-583	0	0	1	1	1	1	CMAS	cytidine monophosphate N-acetylneuraminic acid synthetase
hsa-miR-583	1	0	1	0	1	1	CYBRD1	cytochrome b reductase 1
hsa-miR-583	0	0	1	1	0	0	PREB	prolactin regulatory element binding
hsa-miR-583	1	0	1	1	0	0	UBR7	ubiquitin protein ligase E3 component n-recognin 7 (putative)
hsa-miR-583	0	0	1	1	0	0	ZDHHC6	zinc finger, DHHC-type containing 6
hsa-miR-583	0	0	1	1	0	0	ZBTB32	zinc finger and BTB domain containing 32
hsa-miR-583	0	0	1	0	0	0	LOC100144602	uncharacterized LOC100144602
hsa-miR-583	0	0	1	1	1	1	GLIPR2	GLI pathogenesis-related 2
hsa-miR-583	1	0	1	1	1	1	ARHGEF9	Cdc42 guanine nucleotide exchange factor (GEF) 9
hsa-miR-583	0	0	1	1	1	1	FGF21	fibroblast growth factor 21
hsa-miR-583	0	0	1	1	1	1	PTCD2	pentatricopeptide repeat domain 2
hsa-miR-583	1	0	1	0	1	1	ARHGAP26	Rho GTPase activating protein 26
hsa-miR-583	0	0	1	1	1	1	SNX17	sorting nexin 17
hsa-miR-583	0	0	1	0	0	0	NBR2	neighbor of BRCA1 gene 2 (non-protein coding)
hsa-miR-583	0	0	1	0	0	0	SNX29P2	sorting nexin 29 pseudogene 2
hsa-miR-583	0	0	1	1	1	1	PPHLN1	periphilin 1
hsa-miR-583	1	0	1	1	1	1	CNTN4	contactin 4
hsa-miR-583	0	0	1	0	0	0	EVPLL	envoplakin-like
hsa-miR-583	1	0	1	0	1	1	CERS3	ceramide synthase 3
hsa-miR-583	0	0	1	1	1	1	RHBDD1	rhomboid domain containing 1
hsa-miR-583	1	0	1	1	1	1	RSPO2	R-spondin 2
hsa-miR-583	0	0	1	0	0	0	TRGV7	T cell receptor gamma variable 7 (pseudogene)
hsa-miR-583	1	0	1	1	1	1	PTPRD	protein tyrosine phosphatase, receptor type, D
hsa-miR-583	1	0	1	1	1	1	B3GNT5	UDP-GlcNAc:betaGal beta-1,3-N-acetylglucosaminyltransferase 5
hsa-miR-583	0	0	1	1	1	1	SELP	selectin P (granule membrane protein 140kDa, antigen CD62)
hsa-miR-583	1	0	1	1	1	1	TMEM127	transmembrane protein 127
hsa-miR-583	0	0	1	0	1	1	KIAA0895	KIAA0895
hsa-miR-583	1	0	1	1	1	1	HTR2C	5-hydroxytryptamine (serotonin) receptor 2C, G protein-coupled
hsa-miR-583	1	0	1	0	0	0	KCNU1	potassium channel, subfamily U, member 1
hsa-miR-583	0	0	1	1	1	1	ASTN2	astrotactin 2
hsa-miR-583	1	0	1	0	1	1	SV2B	synaptic vesicle glycoprotein 2B
hsa-miR-583	1	0	1	1	1	1	ELAVL2	ELAV (embryonic lethal, abnormal vision, Drosophila)-like 2 (Hu antigen B)
hsa-miR-583	1	0	1	1	1	1	EPB41L4A	erythrocyte membrane protein band 4.1 like 4A
hsa-miR-583	1	0	1	0	1	1	RNF4	ring finger protein 4
hsa-miR-583	1	0	1	1	1	1	SF1	splicing factor 1
hsa-miR-583	1	0	1	1	1	1	TTC39C	tetratricopeptide repeat domain 39C
hsa-miR-583	0	0	1	1	1	1	UBXN1	UBX domain protein 1
hsa-miR-583	1	0	1	1	1	1	RAB5B	RAB5B, member RAS oncogene family
hsa-miR-583	1	0	1	1	0	0	MRC2	mannose receptor, C type 2
hsa-miR-583	1	0	1	1	1	1	SORL1	sortilin-related receptor, L(DLR class) A repeats containing
hsa-miR-583	1	0	1	1	1	1	SECISBP2L	SECIS binding protein 2-like
hsa-miR-583	1	0	1	1	1	1	ADAM19	ADAM metallopeptidase domain 19
hsa-miR-583	0	0	1	0	0	0	LINC00238	long intergenic non-protein coding RNA 238
hsa-miR-583	1	0	1	1	1	1	PCDHA5	protocadherin alpha 5
hsa-miR-583	0	0	1	1	0	0	ADAP2	ArfGAP with dual PH domains 2
hsa-miR-583	1	0	1	1	1	1	ATF7IP2	activating transcription factor 7 interacting protein 2
hsa-miR-583	0	0	1	1	0	0	TNMD	tenomodulin
hsa-miR-583	0	0	1	1	1	1	HEXA	hexosaminidase A (alpha polypeptide)
hsa-miR-583	1	0	1	1	1	1	PAK4	p21 protein (Cdc42/Rac)-activated kinase 4
hsa-miR-583	1	0	1	1	1	1	CLK4	CDC-like kinase 4
hsa-miR-583	1	0	1	0	1	1	RHOBTB2	Rho-related BTB domain containing 2
hsa-miR-583	0	0	1	1	1	1	KIF16B	kinesin family member 16B
hsa-miR-583	1	0	1	1	1	1	NKAIN2	Na+/K+ transporting ATPase interacting 2
hsa-miR-583	1	0	1	1	1	1	ZZZ3	zinc finger, ZZ-type containing 3
hsa-miR-583	0	0	1	0	0	0	TMPRSS12	transmembrane (C-terminal) protease, serine 12
hsa-miR-583	0	0	1	1	0	0	DYNLRB2	dynein, light chain, roadblock-type 2
hsa-miR-583	1	0	1	1	0	0	CHST4	carbohydrate (N-acetylglucosamine 6-O) sulfotransferase 4
hsa-miR-583	0	0	1	1	0	0	PGS1	phosphatidylglycerophosphate synthase 1
hsa-miR-583	1	0	1	1	1	1	ZEB2	zinc finger E-box binding homeobox 2
hsa-miR-583	0	0	1	1	0	0	C2orf80	chromosome 2 open reading frame 80
hsa-miR-583	1	0	1	1	1	1	CTDSPL2	CTD (carboxy-terminal domain, RNA polymerase II, polypeptide A) small phosphatase like 2
hsa-miR-583	0	0	1	1	1	1	CBLN2	cerebellin 2 precursor
hsa-miR-583	1	0	1	1	1	1	ZNF618	zinc finger protein 618
hsa-miR-583	0	0	1	1	1	1	UBE3D	ubiquitin protein ligase E3D
hsa-miR-583	0	0	1	1	1	1	DUSP28	dual specificity phosphatase 28
hsa-miR-583	0	0	1	0	0	0	FAM201A	family with sequence similarity 201, member A
hsa-miR-583	0	0	1	0	0	0	SPATA3	spermatogenesis associated 3
hsa-miR-583	0	0	1	0	0	0	LINC00642	long intergenic non-protein coding RNA 642
hsa-miR-583	1	0	1	1	1	1	HECTD2	HECT domain containing E3 ubiquitin protein ligase 2
hsa-miR-583	1	0	1	1	1	1	MEIS1	Meis homeobox 1
hsa-miR-583	1	0	1	0	1	1	CLDN12	claudin 12
hsa-miR-583	1	0	1	0	1	1	NEGR1	neuronal growth regulator 1
hsa-miR-583	0	0	1	0	0	0	SRGAP2C	SLIT-ROBO Rho GTPase activating protein 2C
hsa-miR-583	1	0	1	0	1	1	CPEB4	cytoplasmic polyadenylation element binding protein 4
hsa-miR-583	1	0	1	1	1	1	FAM135B	family with sequence similarity 135, member B
hsa-miR-583	0	0	1	1	0	0	FNTA	farnesyltransferase, CAAX box, alpha
hsa-miR-583	0	0	1	0	1	1	KSR1	kinase suppressor of ras 1
hsa-miR-583	1	0	1	1	1	1	SOX6	SRY (sex determining region Y)-box 6
hsa-miR-583	1	0	1	1	1	1	CTBP2	C-terminal binding protein 2
hsa-miR-583	1	0	1	1	1	1	PLS3	plastin 3
hsa-miR-583	0	0	1	0	0	0	FLJ36000	uncharacterized FLJ36000
hsa-miR-583	1	0	1	1	1	1	FGFR2	fibroblast growth factor receptor 2
hsa-miR-583	1	0	1	1	1	1	PAIP2	poly(A) binding protein interacting protein 2
hsa-miR-583	0	0	1	0	0	0	USP32P1	ubiquitin specific peptidase 32 pseudogene 1
hsa-miR-583	1	0	1	0	0	0	CT62	cancer/testis antigen 62
hsa-miR-583	0	0	1	0	0	0	LOC401074	uncharacterized LOC401074
hsa-miR-583	0	0	1	0	0	0	DLGAP1-AS3	DLGAP1 antisense RNA 3
hsa-miR-583	0	0	1	1	1	1	FAM21C	family with sequence similarity 21, member C
hsa-miR-583	1	0	1	1	1	1	FOSB	FBJ murine osteosarcoma viral oncogene homolog B
hsa-miR-583	1	0	1	1	1	1	DACH2	dachshund homolog 2 (Drosophila)
hsa-miR-583	1	0	1	1	1	1	BVES	blood vessel epicardial substance
hsa-miR-583	0	0	1	1	1	1	PRRT3	proline-rich transmembrane protein 3
hsa-miR-583	1	0	1	1	1	1	LEF1	lymphoid enhancer-binding factor 1
hsa-miR-583	0	0	1	0	0	0	SLC7A11-AS1	SLC7A11 antisense RNA 1
hsa-miR-583	1	0	1	0	1	1	KIAA0430	KIAA0430
hsa-miR-583	0	0	1	1	1	1	VPS35	vacuolar protein sorting 35 homolog (S. cerevisiae)
hsa-miR-583	1	0	1	1	1	1	FAM123A	family with sequence similarity 123A
hsa-miR-583	1	0	1	0	1	1	HSPA12A	heat shock 70kDa protein 12A
hsa-miR-583	1	0	1	0	1	1	DCUN1D4	DCN1, defective in cullin neddylation 1, domain containing 4 (S. cerevisiae)
hsa-miR-583	1	0	1	0	1	1	TNFAIP3	tumor necrosis factor, alpha-induced protein 3
hsa-miR-583	0	0	1	1	1	1	GOLGA6L9	golgin A6 family-like 9
hsa-miR-583	0	0	1	1	1	1	ZNF568	zinc finger protein 568
hsa-miR-583	0	0	1	1	1	1	COL22A1	collagen, type XXII, alpha 1
hsa-miR-583	0	0	1	0	1	1	C11orf93	chromosome 11 open reading frame 93
hsa-miR-583	1	0	1	1	1	1	FKBP5	FK506 binding protein 5
hsa-miR-583	0	0	1	0	0	0	LOC728853	WD repeat domain 87 pseudogene
hsa-miR-583	0	0	1	0	0	0	LOC401176	uncharacterized LOC401176
hsa-miR-583	1	0	1	1	1	1	AGAP3	ArfGAP with GTPase domain, ankyrin repeat and PH domain 3
hsa-miR-583	0	0	1	1	1	1	C14orf45	chromosome 14 open reading frame 45
hsa-miR-583	1	0	1	0	1	1	PSD3	pleckstrin and Sec7 domain containing 3
hsa-miR-583	1	0	1	1	1	1	MAMDC2	MAM domain containing 2
hsa-miR-583	0	0	1	1	1	1	MGC57346	uncharacterized LOC401884
hsa-miR-583	0	0	1	0	0	0	LOC283914	uncharacterized LOC283914
hsa-miR-583	1	0	1	1	1	1	ZFAND4	zinc finger, AN1-type domain 4
hsa-miR-583	1	0	1	1	1	1	PPP2R5B	protein phosphatase 2, regulatory subunit B', beta
hsa-miR-583	0	0	1	1	1	1	DOCK8	dedicator of cytokinesis 8
hsa-miR-583	1	0	1	1	1	1	SENP1	SUMO1/sentrin specific peptidase 1
hsa-miR-583	0	0	1	1	0	0	TOM1	target of myb1 (chicken)
hsa-miR-583	1	0	1	0	0	0	MICAL3	microtubule associated monoxygenase, calponin and LIM domain containing 3
hsa-miR-583	1	0	1	0	1	1	LYPD6	LY6/PLAUR domain containing 6
hsa-miR-583	0	0	1	0	1	1	IL33	interleukin 33
hsa-miR-583	0	0	1	0	0	0	DPY19L2P4	dpy-19-like 2 pseudogene 4 (C. elegans)
hsa-miR-583	1	0	1	0	1	1	CDK19	cyclin-dependent kinase 19
hsa-miR-583	0	0	1	0	0	0	LOC255025	uncharacterized LOC255025
hsa-miR-583	1	0	1	1	1	1	PTPRG	protein tyrosine phosphatase, receptor type, G
hsa-miR-583	1	0	1	0	1	1	FAM131B	family with sequence similarity 131, member B
hsa-miR-583	1	0	1	1	1	1	ZFP91	zinc finger protein 91 homolog (mouse)
hsa-miR-583	0	0	1	1	0	0	TRABD2A	TraB domain containing 2A
hsa-miR-583	1	0	1	1	1	1	YWHAZ	tyrosine 3-monooxygenase/tryptophan 5-monooxygenase activation protein, zeta polypeptide
hsa-miR-583	0	0	1	1	1	1	RAB3IL1	RAB3A interacting protein (rabin3)-like 1
hsa-miR-583	1	0	1	1	1	1	MKRN1	makorin ring finger protein 1
hsa-miR-583	0	0	1	1	1	1	SLC25A35	solute carrier family 25, member 35
hsa-miR-583	1	0	1	0	1	1	C14orf43	chromosome 14 open reading frame 43
hsa-miR-583	0	0	1	0	0	0	LINC00265	long intergenic non-protein coding RNA 265
hsa-miR-583	0	0	1	0	1	1	C17orf51	chromosome 17 open reading frame 51
hsa-miR-583	1	0	1	1	1	1	OLFML2A	olfactomedin-like 2A
hsa-miR-583	1	0	1	1	1	1	KDM5C	lysine (K)-specific demethylase 5C
hsa-miR-583	0	0	1	1	0	0	CRYM-AS1	CRYM antisense RNA 1
hsa-miR-583	0	0	1	1	1	1	MPP3	membrane protein, palmitoylated 3 (MAGUK p55 subfamily member 3)
hsa-miR-583	1	0	1	1	1	1	PRRG1	proline rich Gla (G-carboxyglutamic acid) 1
hsa-miR-583	1	0	1	1	1	1	GTDC1	glycosyltransferase-like domain containing 1
hsa-miR-583	0	0	1	1	1	1	GPATCH2	G patch domain containing 2
hsa-miR-583	0	0	1	1	0	0	DHX30	DEAH (Asp-Glu-Ala-His) box polypeptide 30
hsa-miR-583	0	0	1	1	1	1	SCLT1	sodium channel and clathrin linker 1
hsa-miR-583	0	0	1	1	1	1	ZNF333	zinc finger protein 333
hsa-miR-583	1	0	1	1	1	1	MYLK	myosin light chain kinase
hsa-miR-583	1	0	1	1	1	1	ADCY6	adenylate cyclase 6
hsa-miR-583	1	0	1	1	1	1	ZNF449	zinc finger protein 449
hsa-miR-583	1	0	1	1	1	1	RAB2B	RAB2B, member RAS oncogene family
hsa-miR-583	0	0	1	0	0	0	LINC00052	long intergenic non-protein coding RNA 52
hsa-miR-583	1	0	1	1	1	1	C18orf1	chromosome 18 open reading frame 1
hsa-miR-583	1	0	1	1	1	1	PDCD6IP	programmed cell death 6 interacting protein
hsa-miR-583	1	0	1	1	1	1	SLC26A7	solute carrier family 26, member 7
hsa-miR-583	1	0	1	1	1	1	SRPK2	SRSF protein kinase 2
hsa-miR-583	0	0	1	0	0	0	PTGER4P2	prostaglandin E receptor 4 (subtype EP4) pseudogene 2
hsa-miR-583	0	0	1	0	0	0	SPDYE8P	speedy homolog E8 (Xenopus laevis), pseudogene
hsa-miR-583	0	0	1	1	0	0	CYP4F30P	cytochrome P450, family 4, subfamily F, polypeptide 30, pseudogene
hsa-miR-583	1	0	1	1	0	0	CHTOP	chromatin target of PRMT1
hsa-miR-583	0	0	1	1	1	1	SLC11A1	solute carrier family 11 (proton-coupled divalent metal ion transporters), member 1
hsa-miR-583	1	0	1	0	1	1	TMEM194A	transmembrane protein 194A
hsa-miR-583	1	0	1	0	1	1	NCOA7	nuclear receptor coactivator 7
hsa-miR-583	0	0	1	1	1	1	ABHD14B	abhydrolase domain containing 14B
hsa-miR-583	0	0	1	1	0	0	S100A1	S100 calcium binding protein A1
hsa-miR-583	0	0	1	1	1	1	PCED1B	PC-esterase domain containing 1B
hsa-miR-583	1	0	1	1	1	1	OPCML	opioid binding protein/cell adhesion molecule-like
hsa-miR-583	1	0	1	1	1	1	WNT5A	wingless-type MMTV integration site family, member 5A
hsa-miR-583	0	0	1	0	0	0	LOC441259	PMS2 postmeiotic segregation increased 2 (S. cerevisiae)-like
hsa-miR-583	1	0	1	0	1	1	DPYSL3	dihydropyrimidinase-like 3
hsa-miR-583	1	0	1	0	1	1	AMMECR1L	AMME chromosomal region gene 1-like
hsa-miR-583	1	0	1	1	1	1	EIF2AK4	eukaryotic translation initiation factor 2 alpha kinase 4
hsa-miR-583	0	0	1	0	0	0	LINC00537	long intergenic non-protein coding RNA 537
hsa-miR-583	1	0	1	1	1	1	HNRNPC	heterogeneous nuclear ribonucleoprotein C (C1/C2)
hsa-miR-583	1	0	1	1	1	1	SYNE1	spectrin repeat containing, nuclear envelope 1
hsa-miR-583	1	0	1	1	0	0	TIMM17B	translocase of inner mitochondrial membrane 17 homolog B (yeast)
hsa-miR-583	1	0	1	0	1	1	PIK3R3	phosphoinositide-3-kinase, regulatory subunit 3 (gamma)
hsa-miR-583	1	0	1	1	1	1	ACVR2B	activin A receptor, type IIB
hsa-miR-583	0	0	1	1	1	1	OFD1	oral-facial-digital syndrome 1
hsa-miR-583	1	0	1	1	1	1	WNT10B	wingless-type MMTV integration site family, member 10B
hsa-miR-583	0	0	1	0	0	0	ABCA11P	ATP-binding cassette, sub-family A (ABC1), member 11, pseudogene
hsa-miR-583	1	0	1	0	1	1	LRRTM4	leucine rich repeat transmembrane neuronal 4
hsa-miR-583	1	0	1	1	1	1	OTUD5	OTU domain containing 5
hsa-miR-583	0	0	1	1	1	1	TMEM52B	transmembrane protein 52B
hsa-miR-583	1	0	1	1	1	1	LRRC15	leucine rich repeat containing 15
hsa-miR-583	1	0	1	1	1	1	SLC36A2	solute carrier family 36 (proton/amino acid symporter), member 2
hsa-miR-583	1	0	1	1	1	1	IL28RA	interleukin 28 receptor, alpha (interferon, lambda receptor)
hsa-miR-583	1	0	1	1	0	0	HAND2	heart and neural crest derivatives expressed 2
hsa-miR-583	1	0	1	1	1	1	ARFIP1	ADP-ribosylation factor interacting protein 1
hsa-miR-583	1	0	1	0	1	1	CPEB2	cytoplasmic polyadenylation element binding protein 2
hsa-miR-583	1	0	1	0	1	1	KCNT2	potassium channel, subfamily T, member 2
hsa-miR-583	0	0	1	1	0	0	TMC1	transmembrane channel-like 1
hsa-miR-583	1	0	1	0	0	0	PWWP2A	PWWP domain containing 2A
hsa-miR-583	0	0	1	1	1	1	C2orf76	chromosome 2 open reading frame 76
hsa-miR-583	1	0	1	1	1	1	PNISR	PNN-interacting serine/arginine-rich protein
hsa-miR-583	1	0	1	1	1	1	USP34	ubiquitin specific peptidase 34
hsa-miR-583	0	0	1	1	0	0	TMEM126B	transmembrane protein 126B
hsa-miR-583	0	0	1	1	0	0	SLC17A4	solute carrier family 17 (sodium phosphate), member 4
hsa-miR-583	1	0	1	1	1	1	SP4	Sp4 transcription factor
hsa-miR-583	1	0	1	1	1	1	HNRNPR	heterogeneous nuclear ribonucleoprotein R
hsa-miR-583	1	0	1	1	1	1	TET2	tet methylcytosine dioxygenase 2
hsa-miR-583	0	0	1	1	1	1	RASAL2	RAS protein activator like 2
hsa-miR-583	0	0	1	1	0	0	TMC2	transmembrane channel-like 2
hsa-miR-583	1	0	1	1	1	1	SLK	STE20-like kinase
hsa-miR-583	0	0	1	1	0	0	PRAMEF10	PRAME family member 10
hsa-miR-583	0	0	1	1	1	1	LRCH1	leucine-rich repeats and calponin homology (CH) domain containing 1
hsa-miR-583	0	0	1	1	1	1	FSHB	follicle stimulating hormone, beta polypeptide
hsa-miR-583	1	0	1	1	1	1	TMEM64	transmembrane protein 64
hsa-miR-583	1	0	1	1	1	1	SHANK2	SH3 and multiple ankyrin repeat domains 2
hsa-miR-583	1	0	1	0	1	1	PRDM10	PR domain containing 10
hsa-miR-583	0	0	1	0	1	1	NWD1	NACHT and WD repeat domain containing 1
hsa-miR-583	1	0	1	1	1	1	OTUD4	OTU domain containing 4
hsa-miR-583	0	0	1	1	0	0	SOCS7	suppressor of cytokine signaling 7
hsa-miR-583	1	0	1	1	1	1	PIKFYVE	phosphoinositide kinase, FYVE finger containing
hsa-miR-583	1	0	1	1	1	1	ANK2	ankyrin 2, neuronal
hsa-miR-583	0	0	1	1	1	1	RNF14	ring finger protein 14
hsa-miR-583	1	0	1	1	1	1	COLQ	collagen-like tail subunit (single strand of homotrimer) of asymmetric acetylcholinesterase
hsa-miR-583	1	0	1	1	1	1	CHIC1	cysteine-rich hydrophobic domain 1
hsa-miR-583	0	0	1	0	0	0	FAM225B	family with sequence similarity 225, member B (non-protein coding)
hsa-miR-583	1	0	1	1	1	1	PHC2	polyhomeotic homolog 2 (Drosophila)
hsa-miR-583	1	0	1	0	0	0	SDR39U1	short chain dehydrogenase/reductase family 39U, member 1
hsa-miR-583	0	0	1	1	1	1	TINF2	TERF1 (TRF1)-interacting nuclear factor 2
hsa-miR-583	0	0	1	1	0	0	CHMP4A	charged multivesicular body protein 4A
hsa-miR-583	1	0	1	1	1	1	CCNK	cyclin K
hsa-miR-583	0	0	1	0	0	0	LINC00643	long intergenic non-protein coding RNA 643
hsa-miR-583	1	0	1	1	1	1	BTBD7	BTB (POZ) domain containing 7
hsa-miR-583	0	0	1	0	0	0	FLJ39632	uncharacterized LOC642477
hsa-miR-583	1	0	1	0	1	1	GNS	glucosamine (N-acetyl)-6-sulfatase
hsa-miR-583	1	0	1	1	1	1	EIF5	eukaryotic translation initiation factor 5
hsa-miR-583	1	0	1	1	1	1	ATP2B4	ATPase, Ca++ transporting, plasma membrane 4
hsa-miR-583	1	0	1	1	1	1	RAB7A	RAB7A, member RAS oncogene family
hsa-miR-583	1	0	1	1	1	1	MTFR1	mitochondrial fission regulator 1
hsa-miR-583	0	0	1	1	1	1	SLC12A8	solute carrier family 12 (potassium/chloride transporters), member 8
hsa-miR-583	1	0	1	1	1	1	FZD6	frizzled family receptor 6
hsa-miR-583	0	0	1	1	1	1	AIG1	androgen-induced 1
hsa-miR-583	0	0	1	1	0	0	TTC5	tetratricopeptide repeat domain 5
hsa-miR-583	1	0	1	1	1	1	SPPL3	signal peptide peptidase like 3
hsa-miR-583	0	0	1	1	1	1	VCAN	versican
hsa-miR-583	0	0	1	1	1	1	PSMA2	proteasome (prosome, macropain) subunit, alpha type, 2
hsa-miR-583	1	0	1	1	1	1	RAB30	RAB30, member RAS oncogene family
hsa-miR-583	1	0	1	1	1	1	RORB	RAR-related orphan receptor B
hsa-miR-583	0	0	1	1	1	1	GTF3C2	general transcription factor IIIC, polypeptide 2, beta 110kDa
hsa-miR-583	0	0	1	1	1	1	PRR14L	proline rich 14-like
hsa-miR-583	1	0	1	1	1	1	CGN	cingulin
hsa-miR-583	0	0	1	1	1	1	C5orf45	chromosome 5 open reading frame 45
hsa-miR-583	0	0	1	1	1	1	UHRF1BP1L	UHRF1 binding protein 1-like
hsa-miR-583	1	0	1	1	0	0	RBM27	RNA binding motif protein 27
hsa-miR-583	0	0	1	1	1	1	ADH1B	alcohol dehydrogenase 1B (class I), beta polypeptide
hsa-miR-583	0	0	1	1	0	0	CST3	cystatin C
hsa-miR-583	1	0	1	1	1	1	ABCA13	ATP-binding cassette, sub-family A (ABC1), member 13
hsa-miR-583	0	0	1	1	1	1	FAM9C	family with sequence similarity 9, member C
hsa-miR-583	1	0	1	1	1	1	TLN2	talin 2
hsa-miR-583	1	0	1	1	1	1	GABPA	GA binding protein transcription factor, alpha subunit 60kDa
hsa-miR-583	0	0	1	1	1	1	DUSP19	dual specificity phosphatase 19
hsa-miR-583	1	0	1	0	1	1	VPS36	vacuolar protein sorting 36 homolog (S. cerevisiae)
hsa-miR-583	1	0	1	1	1	1	TSC22D3	TSC22 domain family, member 3
hsa-miR-583	1	0	1	1	1	1	HDAC1	histone deacetylase 1
hsa-miR-583	1	0	1	1	1	1	DDAH1	dimethylarginine dimethylaminohydrolase 1
hsa-miR-583	0	0	1	1	1	1	CCNT2	cyclin T2
hsa-miR-583	0	0	1	1	0	0	FBXO7	F-box protein 7
hsa-miR-583	0	0	1	1	1	1	ATP2A2	ATPase, Ca++ transporting, cardiac muscle, slow twitch 2
hsa-miR-583	1	0	1	1	1	1	NFIB	nuclear factor I/B
hsa-miR-583	1	0	1	1	1	1	BCLAF1	BCL2-associated transcription factor 1
hsa-miR-583	1	0	1	1	1	1	GAP43	growth associated protein 43
hsa-miR-583	1	0	1	1	1	1	NAV1	neuron navigator 1
hsa-miR-583	1	0	1	1	1	1	AZI2	5-azacytidine induced 2
hsa-miR-583	1	0	1	1	1	1	C5orf24	chromosome 5 open reading frame 24
hsa-miR-583	1	0	1	1	1	1	RDX	radixin
hsa-miR-583	1	0	1	1	1	1	PTER	phosphotriesterase related
hsa-miR-583	0	0	1	1	1	1	DAZL	deleted in azoospermia-like
hsa-miR-583	1	0	1	1	1	1	PGAP1	post-GPI attachment to proteins 1
hsa-miR-583	1	0	1	1	1	1	CACNB4	calcium channel, voltage-dependent, beta 4 subunit
hsa-miR-583	0	0	1	1	0	0	ALS2CR11	amyotrophic lateral sclerosis 2 (juvenile) chromosome region, candidate 11
hsa-miR-583	0	0	1	0	0	0	ZNRD1-AS1	ZNRD1 antisense RNA 1
hsa-miR-583	0	0	1	1	0	0	CEP152	centrosomal protein 152kDa
hsa-miR-583	0	0	1	1	1	1	SSFA2	sperm specific antigen 2
hsa-miR-583	0	0	1	1	1	1	C4orf40	chromosome 4 open reading frame 40
hsa-miR-583	1	0	1	0	1	1	C1orf21	chromosome 1 open reading frame 21
hsa-miR-583	0	0	1	1	1	1	USP54	ubiquitin specific peptidase 54
hsa-miR-583	1	0	1	1	1	1	CREB3L2	cAMP responsive element binding protein 3-like 2
hsa-miR-583	1	0	1	1	1	1	SIN3A	SIN3 transcription regulator homolog A (yeast)
hsa-miR-583	1	0	1	1	1	1	BSDC1	BSD domain containing 1
hsa-miR-583	1	0	1	1	1	1	AAMP	angio-associated, migratory cell protein
hsa-miR-583	0	0	1	1	0	0	PPAPDC1B	phosphatidic acid phosphatase type 2 domain containing 1B
hsa-miR-583	0	0	1	1	0	0	PPT2	palmitoyl-protein thioesterase 2
hsa-miR-583	1	0	1	0	1	1	RNF144A	ring finger protein 144A
hsa-miR-583	0	0	1	1	1	1	DUSP26	dual specificity phosphatase 26 (putative)
hsa-miR-583	0	0	1	1	1	1	SMYD5	SMYD family member 5
hsa-miR-583	0	0	1	1	1	1	KIAA0141	KIAA0141
hsa-miR-583	0	0	1	0	0	0	LOC100128988	uncharacterized LOC100128988
hsa-miR-583	1	0	1	1	1	1	FUT9	fucosyltransferase 9 (alpha (1,3) fucosyltransferase)
hsa-miR-583	1	0	1	1	1	1	FAM192A	family with sequence similarity 192, member A
hsa-miR-583	0	0	1	0	0	0	RPS16P10	ribosomal protein S16 pseudogene 10
hsa-miR-583	0	0	1	1	0	0	APOA1BP	apolipoprotein A-I binding protein
hsa-miR-583	1	0	1	0	1	1	OLA1	Obg-like ATPase 1
hsa-miR-583	0	0	1	1	0	0	PSG8	pregnancy specific beta-1-glycoprotein 8
hsa-miR-583	1	0	1	1	1	1	NME4	NME/NM23 nucleoside diphosphate kinase 4
hsa-miR-583	0	0	1	1	1	1	ATP1B3	ATPase, Na+/K+ transporting, beta 3 polypeptide
hsa-miR-583	0	0	1	1	1	1	COPS8	COP9 constitutive photomorphogenic homolog subunit 8 (Arabidopsis)
hsa-miR-583	1	0	1	1	0	0	RUVBL2	RuvB-like 2 (E. coli)
hsa-miR-583	0	0	1	1	1	1	MMADHC	methylmalonic aciduria (cobalamin deficiency) cblD type, with homocystinuria
hsa-miR-583	1	1	1	1	0	0	EFNA3	ephrin-A3
hsa-miR-583	0	0	1	0	1	1	BLM	Bloom syndrome, RecQ helicase-like
hsa-miR-583	1	0	1	1	1	1	E2F3	E2F transcription factor 3
hsa-miR-583	1	0	1	1	0	0	CRELD1	cysteine-rich with EGF-like domains 1
hsa-miR-583	0	0	1	0	0	0	H19	H19, imprinted maternally expressed transcript (non-protein coding)
hsa-miR-583	0	0	1	1	1	1	TASP1	taspase, threonine aspartase, 1
hsa-miR-583	1	0	1	1	0	0	STX5	syntaxin 5
hsa-miR-583	1	0	1	1	1	1	SSR1	signal sequence receptor, alpha
hsa-miR-583	0	0	1	1	0	0	METTL23	methyltransferase like 23
hsa-miR-583	1	0	1	1	1	1	SMARCE1	SWI/SNF related, matrix associated, actin dependent regulator of chromatin, subfamily e, member 1
hsa-miR-583	0	0	1	0	1	1	CD99P1	CD99 molecule pseudogene 1
hsa-miR-583	1	0	1	1	1	1	DAZAP1	DAZ associated protein 1
hsa-miR-583	1	0	1	1	1	1	NTM	neurotrimin
hsa-miR-583	1	0	1	1	1	1	UPF3A	UPF3 regulator of nonsense transcripts homolog A (yeast)
hsa-miR-583	0	0	1	1	1	1	CCDC115	coiled-coil domain containing 115
hsa-miR-583	0	0	1	1	0	0	NR1H2	nuclear receptor subfamily 1, group H, member 2
hsa-miR-583	0	0	1	1	1	1	ALB	albumin
hsa-miR-583	1	0	1	1	0	0	PNPLA6	patatin-like phospholipase domain containing 6
hsa-miR-583	0	0	1	1	1	1	DCTD	dCMP deaminase
hsa-miR-583	0	0	1	1	1	1	GRAP2	GRB2-related adaptor protein 2
hsa-miR-583	0	0	1	1	1	1	STON1	stonin 1
hsa-miR-583	0	0	1	0	0	0	LOC643072	uncharacterized LOC643072
hsa-miR-583	1	0	1	1	1	1	PCTP	phosphatidylcholine transfer protein
hsa-miR-583	1	0	1	1	1	1	TMEM248	transmembrane protein 248
hsa-miR-583	0	0	1	1	0	0	B9D1	B9 protein domain 1
hsa-miR-583	0	0	1	1	0	0	C20orf43	chromosome 20 open reading frame 43
hsa-miR-583	0	0	1	0	0	0	C12orf75	chromosome 12 open reading frame 75
hsa-miR-583	1	0	1	1	1	1	MTCH2	mitochondrial carrier 2
hsa-miR-583	0	0	1	1	0	0	DOK5	docking protein 5
hsa-miR-583	0	0	1	1	1	1	ATG4A	autophagy related 4A, cysteine peptidase
hsa-miR-583	0	0	1	1	1	1	TOX4	TOX high mobility group box family member 4
hsa-miR-583	0	0	1	1	1	1	NFATC4	nuclear factor of activated T-cells, cytoplasmic, calcineurin-dependent 4
hsa-miR-583	0	0	1	0	0	0	FLJ45248	FLJ45248 protein
hsa-miR-583	0	0	1	0	1	1	TMEM155	transmembrane protein 155
hsa-miR-583	0	0	1	1	0	0	RNASEH2B	ribonuclease H2, subunit B
hsa-miR-583	1	0	1	0	1	1	IP6K1	inositol hexakisphosphate kinase 1
hsa-miR-583	1	0	1	1	1	1	BTBD10	BTB (POZ) domain containing 10
hsa-miR-583	0	0	1	1	1	1	ZDHHC16	zinc finger, DHHC-type containing 16
hsa-miR-583	1	0	1	1	1	1	NRN1	neuritin 1
hsa-miR-583	0	0	1	0	0	0	LOC100130353	hippocampus abundant transcript-like 1 pseudogene
hsa-miR-583	0	0	1	1	0	0	CSF3R	colony stimulating factor 3 receptor (granulocyte)
hsa-miR-583	1	0	1	1	1	1	GPR137B	G protein-coupled receptor 137B
hsa-miR-583	0	0	1	1	0	0	DOK2	docking protein 2, 56kDa
hsa-miR-583	0	0	1	0	0	0	PGF	placental growth factor
hsa-miR-583	0	0	1	1	0	0	WDR43	WD repeat domain 43
hsa-miR-583	1	0	1	1	1	1	FOS	FBJ murine osteosarcoma viral oncogene homolog
hsa-miR-583	0	0	1	1	1	1	DEDD	death effector domain containing
hsa-miR-583	1	0	1	1	1	1	SLC39A1	solute carrier family 39 (zinc transporter), member 1
hsa-miR-583	0	0	1	0	1	1	VSTM2A	V-set and transmembrane domain containing 2A
hsa-miR-583	0	0	1	0	1	1	SUMO2	SMT3 suppressor of mif two 3 homolog 2 (S. cerevisiae)
hsa-miR-583	0	0	1	1	1	1	TMCO1	transmembrane and coiled-coil domains 1
hsa-miR-583	0	0	1	1	1	1	ATP1A1	ATPase, Na+/K+ transporting, alpha 1 polypeptide
hsa-miR-583	0	0	1	1	1	1	FKBP1B	FK506 binding protein 1B, 12.6 kDa
hsa-miR-583	0	0	1	0	0	0	LOC100132352	FSHD region gene 1 pseudogene
hsa-miR-583	1	0	1	1	1	1	PFN2	profilin 2
hsa-miR-583	0	0	1	1	0	0	ATP6V0C	ATPase, H+ transporting, lysosomal 16kDa, V0 subunit c
hsa-miR-583	0	0	1	1	1	1	IL15	interleukin 15
hsa-miR-583	1	0	1	1	1	1	SNX1	sorting nexin 1
hsa-miR-583	0	0	1	1	0	0	YIPF3	Yip1 domain family, member 3
hsa-miR-583	1	0	1	1	1	1	ARHGEF40	Rho guanine nucleotide exchange factor (GEF) 40
hsa-miR-583	1	0	1	1	0	0	INO80E	INO80 complex subunit E
hsa-miR-583	0	0	1	0	0	0	ZNF674-AS1	ZNF674 antisense RNA 1
hsa-miR-583	1	0	1	0	1	1	MAP1B	microtubule-associated protein 1B
hsa-miR-583	1	0	1	1	1	1	HMGN2	high mobility group nucleosomal binding domain 2
hsa-miR-583	0	0	1	1	1	1	FMO1	flavin containing monooxygenase 1
hsa-miR-583	0	0	1	0	0	0	RNF115	ring finger protein 115
hsa-miR-583	1	0	1	1	1	1	TRAPPC3	trafficking protein particle complex 3
hsa-miR-583	1	0	1	0	1	1	SLC2A3	solute carrier family 2 (facilitated glucose transporter), member 3
hsa-miR-583	1	0	1	0	1	1	CD47	CD47 molecule
hsa-miR-583	0	0	1	0	0	0	PRMT1	protein arginine methyltransferase 1
hsa-miR-583	1	0	1	1	1	1	YWHAE	tyrosine 3-monooxygenase/tryptophan 5-monooxygenase activation protein, epsilon polypeptide
hsa-miR-583	0	0	1	1	1	1	CDKAL1	CDK5 regulatory subunit associated protein 1-like 1
hsa-miR-583	1	0	1	1	0	0	FOXO3	forkhead box O3
hsa-miR-583	1	0	1	1	1	1	PHF20L1	PHD finger protein 20-like 1
hsa-miR-583	0	0	1	0	1	1	SEPT7	septin 7
hsa-miR-583	0	0	1	1	1	1	BEX4	brain expressed, X-linked 4
hsa-miR-583	0	0	1	1	1	1	PSMD9	proteasome (prosome, macropain) 26S subunit, non-ATPase, 9
hsa-miR-583	1	0	1	1	1	1	LGALSL	lectin, galactoside-binding-like
hsa-miR-583	1	0	1	0	1	1	DNMT3A	DNA (cytosine-5-)-methyltransferase 3 alpha
hsa-miR-583	0	0	1	1	1	1	ZFAND2B	zinc finger, AN1-type domain 2B
hsa-miR-583	1	0	1	1	1	1	GABPB2	GA binding protein transcription factor, beta subunit 2
hsa-miR-583	0	0	1	0	0	0	FAM47E	family with sequence similarity 47, member E
hsa-miR-583	0	0	1	1	1	1	UPRT	uracil phosphoribosyltransferase (FUR1) homolog (S. cerevisiae)
hsa-miR-583	1	0	1	1	1	1	KIAA2018	KIAA2018
hsa-miR-583	0	0	1	1	0	0	FMN1	formin 1
hsa-miR-583	0	0	1	0	0	0	MUC19	mucin 19, oligomeric
hsa-miR-583	1	0	1	0	1	1	XRN1	5'-3' exoribonuclease 1
hsa-miR-583	1	0	1	0	1	1	OSBPL8	oxysterol binding protein-like 8
hsa-miR-583	1	0	1	0	1	1	MCFD2	multiple coagulation factor deficiency 2
hsa-miR-583	1	0	1	1	1	1	TIPARP	TCDD-inducible poly(ADP-ribose) polymerase
hsa-miR-583	1	0	1	0	1	1	ZNF652	zinc finger protein 652
hsa-miR-583	0	0	1	1	0	0	TENC1	tensin like C1 domain containing phosphatase (tensin 2)
hsa-miR-583	0	0	1	1	1	1	MSS51	MSS51 mitochondrial translational activator homolog (S. cerevisiae)
hsa-miR-583	1	0	1	1	1	1	PHF21B	PHD finger protein 21B
hsa-miR-583	1	0	1	1	1	1	ZFHX3	zinc finger homeobox 3
hsa-miR-583	1	0	1	1	1	1	SP2	Sp2 transcription factor
hsa-miR-583	1	0	1	1	1	1	PI15	peptidase inhibitor 15
hsa-miR-583	1	0	1	1	1	1	MAN2A2	mannosidase, alpha, class 2A, member 2
hsa-miR-583	1	0	1	0	1	1	KLHDC10	kelch domain containing 10
hsa-miR-583	0	0	1	1	1	1	PARP14	poly (ADP-ribose) polymerase family, member 14
hsa-miR-583	1	0	1	1	1	1	TMEFF2	transmembrane protein with EGF-like and two follistatin-like domains 2
hsa-miR-583	0	0	1	1	1	1	PTGS1	prostaglandin-endoperoxide synthase 1 (prostaglandin G/H synthase and cyclooxygenase)
hsa-miR-583	1	0	1	1	1	1	ATP2B3	ATPase, Ca++ transporting, plasma membrane 3
hsa-miR-583	1	0	1	1	0	0	DPY19L1	dpy-19-like 1 (C. elegans)
hsa-miR-583	1	0	1	1	1	1	MOSPD1	motile sperm domain containing 1
hsa-miR-583	1	0	1	1	1	1	GLIS3	GLIS family zinc finger 3
hsa-miR-583	1	0	1	1	1	1	ANKRD42	ankyrin repeat domain 42
hsa-miR-583	0	0	1	0	0	0	POM121L8P	POM121 transmembrane nucleoporin-like 8 pseudogene
hsa-miR-583	0	0	1	0	0	0	LOC728377	Rho guanine nucleotide exchange factor (GEF) 5 pseudogene
hsa-miR-583	0	0	1	0	0	0	PILRB	paired immunoglobin-like type 2 receptor beta
hsa-miR-583	0	0	1	1	0	0	SLCO3A1	solute carrier organic anion transporter family, member 3A1
hsa-miR-583	1	0	1	1	1	1	TNFAIP1	tumor necrosis factor, alpha-induced protein 1 (endothelial)
hsa-miR-583	1	0	1	1	1	1	IRF1	interferon regulatory factor 1
hsa-miR-583	0	0	1	0	0	0	GPR144	G protein-coupled receptor 144
hsa-miR-583	1	0	1	1	1	1	MLL	myeloid/lymphoid or mixed-lineage leukemia (trithorax homolog, Drosophila)
hsa-miR-583	0	0	1	0	1	1	OPRK1	opioid receptor, kappa 1
hsa-miR-583	1	0	1	1	1	1	RALBP1	ralA binding protein 1
hsa-miR-583	1	0	1	1	1	1	CCNG2	cyclin G2
hsa-miR-583	1	0	1	1	1	1	GRM1	glutamate receptor, metabotropic 1
hsa-miR-583	0	0	1	1	0	0	INHBA	inhibin, beta A
hsa-miR-583	1	0	1	0	1	1	BCL2	B-cell CLL/lymphoma 2
hsa-miR-583	1	0	1	1	1	1	IGF1	insulin-like growth factor 1 (somatomedin C)
hsa-miR-583	0	0	1	1	1	1	HLA-G	major histocompatibility complex, class I, G
hsa-miR-583	0	0	1	1	1	1	ATP7A	ATPase, Cu++ transporting, alpha polypeptide
hsa-miR-583	0	0	1	1	1	1	CHRNA1	cholinergic receptor, nicotinic, alpha 1 (muscle)
hsa-miR-583	1	0	1	1	1	1	COL1A2	collagen, type I, alpha 2
hsa-miR-583	1	0	1	1	1	1	COL3A1	collagen, type III, alpha 1
hsa-miR-583	1	0	1	0	1	1	SLC26A2	solute carrier family 26 (sulfate transporter), member 2
hsa-miR-583	0	0	1	1	0	0	EMD	emerin
hsa-miR-583	1	0	1	1	1	1	ESR1	estrogen receptor 1
hsa-miR-583	0	0	1	1	1	1	F8	coagulation factor VIII, procoagulant component
hsa-miR-583	1	0	1	1	1	1	GALC	galactosylceramidase
hsa-miR-583	1	0	1	1	1	1	GJA1	gap junction protein, alpha 1, 43kDa
hsa-miR-583	1	0	1	1	1	1	GK	glycerol kinase
hsa-miR-583	1	0	1	0	1	1	GLI3	GLI family zinc finger 3
hsa-miR-583	0	0	1	1	1	1	GLDC	glycine dehydrogenase (decarboxylating)
hsa-miR-583	1	0	1	1	1	1	TBX5	T-box 5
hsa-miR-583	1	0	1	0	1	1	ITGB3	integrin, beta 3 (platelet glycoprotein IIIa, antigen CD61)
hsa-miR-583	1	0	1	1	1	1	KCNA1	potassium voltage-gated channel, shaker-related subfamily, member 1 (episodic ataxia with myokymia)
hsa-miR-583	1	0	1	0	1	1	KIT	v-kit Hardy-Zuckerman 4 feline sarcoma viral oncogene homolog
hsa-miR-583	0	0	1	1	1	1	MUT	methylmalonyl CoA mutase
hsa-miR-583	1	0	1	1	1	1	NF1	neurofibromin 1
hsa-miR-583	1	0	1	0	1	1	PTEN	phosphatase and tensin homolog
hsa-miR-583	1	0	1	1	1	1	ATXN1	ataxin 1
hsa-miR-583	1	0	1	1	1	1	SOX9	SRY (sex determining region Y)-box 9
hsa-miR-583	0	0	1	1	1	1	SRD5A2	steroid-5-alpha-reductase, alpha polypeptide 2 (3-oxo-5 alpha-steroid delta 4-dehydrogenase alpha 2)
hsa-miR-583	0	0	1	1	0	0	SERPINA7	serpin peptidase inhibitor, clade A (alpha-1 antiproteinase, antitrypsin), member 7
hsa-miR-583	0	0	1	1	0	0	IL2RA	interleukin 2 receptor, alpha
hsa-miR-583	1	0	1	1	0	0	LOR	loricrin
hsa-miR-583	1	0	1	0	1	1	PAFAH1B1	platelet-activating factor acetylhydrolase 1b, regulatory subunit 1 (45kDa)
hsa-miR-583	1	0	1	1	0	0	NOTCH3	notch 3
hsa-miR-583	0	0	1	1	1	1	PECAM1	platelet/endothelial cell adhesion molecule 1
hsa-miR-583	1	0	1	1	1	1	RFX5	regulatory factor X, 5 (influences HLA class II expression)
hsa-miR-583	1	0	1	1	1	1	HOXA13	homeobox A13
hsa-miR-583	1	0	1	1	1	1	MPZ	myelin protein zero
hsa-miR-583	1	0	1	1	1	1	PLP1	proteolipid protein 1
hsa-miR-583	0	0	1	1	1	1	FCGR1A	Fc fragment of IgG, high affinity Ia, receptor (CD64)
hsa-miR-583	1	0	1	1	1	1	CR1	complement component (3b/4b) receptor 1 (Knops blood group)
hsa-miR-583	0	0	1	1	0	0	IL9	interleukin 9
hsa-miR-583	1	0	1	0	1	1	IGFBP5	insulin-like growth factor binding protein 5
hsa-miR-583	1	0	1	1	1	1	CD44	CD44 molecule (Indian blood group)
hsa-miR-583	0	0	1	1	1	1	IGF2	insulin-like growth factor 2 (somatomedin A)
hsa-miR-583	0	0	1	1	1	1	SELL	selectin L
hsa-miR-583	1	0	1	0	1	1	CACNA1E	calcium channel, voltage-dependent, R type, alpha 1E subunit
hsa-miR-583	0	0	1	0	0	0	GABRA3	gamma-aminobutyric acid (GABA) A receptor, alpha 3
hsa-miR-583	1	0	1	1	1	1	GABRB3	gamma-aminobutyric acid (GABA) A receptor, beta 3
hsa-miR-583	1	0	1	1	1	1	GABRG2	gamma-aminobutyric acid (GABA) A receptor, gamma 2
hsa-miR-583	1	0	1	1	1	1	GRIA4	glutamate receptor, ionotropic, AMPA 4
hsa-miR-583	1	0	1	1	1	1	GRM7	glutamate receptor, metabotropic 7
hsa-miR-583	0	0	1	1	1	1	HRH1	histamine receptor H1
hsa-miR-583	0	0	1	1	1	1	HTR7	5-hydroxytryptamine (serotonin) receptor 7, adenylate cyclase-coupled
hsa-miR-583	1	0	1	1	1	1	IGF1R	insulin-like growth factor 1 receptor
hsa-miR-583	0	0	1	1	1	1	ITGAX	integrin, alpha X (complement component 3 receptor 4 subunit)
hsa-miR-583	1	0	1	0	1	1	KCNJ2	potassium inwardly-rectifying channel, subfamily J, member 2
hsa-miR-583	0	0	1	1	1	1	MAOB	monoamine oxidase B
hsa-miR-583	1	0	1	1	1	1	PTGFR	prostaglandin F receptor (FP)
hsa-miR-583	1	0	1	1	1	1	RARB	retinoic acid receptor, beta
hsa-miR-583	1	0	1	0	1	1	SMAD5	SMAD family member 5
hsa-miR-583	1	0	1	1	1	1	ATP1B1	ATPase, Na+/K+ transporting, beta 1 polypeptide
hsa-miR-583	1	0	1	1	1	1	TPD52L3	tumor protein D52-like 3
hsa-miR-583	1	0	1	0	1	1	CLDN18	claudin 18
hsa-miR-583	0	0	1	1	1	1	SUMO4	SMT3 suppressor of mif two 3 homolog 4 (S. cerevisiae)
hsa-miR-583	1	0	1	1	1	1	WNK3	WNK lysine deficient protein kinase 3
hsa-miR-583	1	0	1	0	1	1	SMAD2	SMAD family member 2
hsa-miR-583	1	0	1	1	1	1	RREB1	ras responsive element binding protein 1
hsa-miR-583	1	0	1	1	1	1	KLHL31	kelch-like 31 (Drosophila)
hsa-miR-583	0	0	1	1	1	1	CCDC144NL	coiled-coil domain containing 144 family, N-terminal like
hsa-miR-583	1	0	1	0	1	1	LIN28B	lin-28 homolog B (C. elegans)
hsa-miR-583	0	0	1	0	0	0	FLJ42842	uncharacterized FLJ42842
hsa-miR-583	0	0	1	1	1	1	CLEC2D	C-type lectin domain family 2, member D
hsa-miR-583	0	0	1	1	1	1	HMGN2P46	high mobility group nucleosomal binding domain 2 pseudogene 46
hsa-miR-583	1	0	1	1	1	1	EDA	ectodysplasin A
hsa-miR-583	0	0	1	1	1	1	IP6K2	inositol hexakisphosphate kinase 2
hsa-miR-583	1	0	1	1	1	1	TCEAL1	transcription elongation factor A (SII)-like 1
hsa-miR-583	1	0	1	1	1	1	TAC3	tachykinin 3
hsa-miR-583	1	0	1	1	0	0	SDC1	syndecan 1
hsa-miR-583	1	0	1	0	1	1	GOSR1	golgi SNAP receptor complex member 1
hsa-miR-583	0	0	1	1	1	1	SCP2	sterol carrier protein 2
hsa-miR-583	1	0	1	1	1	1	NTRK3	neurotrophic tyrosine kinase, receptor, type 3
hsa-miR-583	1	0	1	1	1	1	IGSF3	immunoglobulin superfamily, member 3
hsa-miR-583	1	0	1	1	1	1	BRWD1	bromodomain and WD repeat domain containing 1
hsa-miR-583	0	0	1	1	1	1	TRIM13	tripartite motif containing 13
hsa-miR-583	0	0	1	1	0	0	C1orf186	chromosome 1 open reading frame 186
hsa-miR-583	1	0	1	1	1	1	ZDHHC9	zinc finger, DHHC-type containing 9
hsa-miR-583	1	0	1	0	1	1	C18orf25	chromosome 18 open reading frame 25
hsa-miR-583	0	0	1	1	0	0	SLC41A3	solute carrier family 41, member 3
hsa-miR-583	1	0	1	0	1	1	KIAA2022	KIAA2022
hsa-miR-583	0	0	1	1	1	1	MXI1	MAX interactor 1
hsa-miR-583	0	0	1	0	1	1	ZNF648	zinc finger protein 648
hsa-miR-583	0	0	1	1	1	1	SPIN3	spindlin family, member 3
hsa-miR-583	1	0	1	0	1	1	ZC3H12B	zinc finger CCCH-type containing 12B
hsa-miR-583	1	0	1	1	1	1	BCL2L15	BCL2-like 15
hsa-miR-583	1	0	1	1	1	1	FAM171A1	family with sequence similarity 171, member A1
hsa-miR-583	1	0	1	0	1	1	RGMB	RGM domain family, member B
hsa-miR-583	0	0	1	0	1	1	GNRHR	gonadotropin-releasing hormone receptor
hsa-miR-583	1	0	1	1	1	1	UBE2NL	ubiquitin-conjugating enzyme E2N-like
hsa-miR-583	1	0	1	1	1	1	TRNP1	TMF1-regulated nuclear protein 1
hsa-miR-583	0	0	1	1	1	1	C17orf97	chromosome 17 open reading frame 97
hsa-miR-583	0	0	1	0	1	1	C12orf69	chromosome 12 open reading frame 69
hsa-miR-583	0	0	1	0	1	1	LINC00268	long intergenic non-protein coding RNA 268
hsa-miR-583	1	0	1	1	1	1	KCNMA1	potassium large conductance calcium-activated channel, subfamily M, alpha member 1
hsa-miR-583	0	0	1	1	0	0	ALDH18A1	aldehyde dehydrogenase 18 family, member A1
hsa-miR-583	0	0	1	1	1	1	FAM78B	family with sequence similarity 78, member B
hsa-miR-583	1	0	1	1	1	1	VMA21	VMA21 vacuolar H+-ATPase homolog (S. cerevisiae)
hsa-miR-583	0	0	1	1	1	1	ACTBL2	actin, beta-like 2
hsa-miR-583	1	0	1	1	1	1	SH3PXD2B	SH3 and PX domains 2B
hsa-miR-583	1	0	1	1	1	1	NTRK2	neurotrophic tyrosine kinase, receptor, type 2
hsa-miR-583	1	0	1	0	1	1	TNRC6B	trinucleotide repeat containing 6B
hsa-miR-583	1	0	1	0	1	1	CELF2	CUGBP, Elav-like family member 2
hsa-miR-583	1	0	1	0	1	1	CLLU1	chronic lymphocytic leukemia up-regulated 1
hsa-miR-583	0	0	1	1	1	1	CELF1	CUGBP, Elav-like family member 1
hsa-miR-583	0	0	1	0	1	1	C6orf120	chromosome 6 open reading frame 120
hsa-miR-583	1	0	1	1	1	1	RGS7BP	regulator of G-protein signaling 7 binding protein
hsa-miR-583	1	0	1	1	1	1	PLEKHG1	pleckstrin homology domain containing, family G (with RhoGef domain) member 1
hsa-miR-583	0	0	1	1	1	1	DCAF4L1	DDB1 and CUL4 associated factor 4-like 1
hsa-miR-583	1	0	1	0	1	1	MSRB3	methionine sulfoxide reductase B3
hsa-miR-583	1	0	1	1	1	1	YTHDC1	YTH domain containing 1
hsa-miR-583	1	0	1	1	1	1	MAF	v-maf musculoaponeurotic fibrosarcoma oncogene homolog (avian)
hsa-miR-583	1	0	1	1	1	1	CSNK1G3	casein kinase 1, gamma 3
hsa-miR-583	1	0	1	1	1	1	TFAP2A	transcription factor AP-2 alpha (activating enhancer binding protein 2 alpha)
hsa-miR-583	0	0	1	1	1	1	SLC35A2	solute carrier family 35 (UDP-galactose transporter), member A2
hsa-miR-583	1	0	1	0	1	1	GPR126	G protein-coupled receptor 126
hsa-miR-583	1	0	1	0	1	1	NPNT	nephronectin
hsa-miR-583	1	0	1	1	1	1	TMEM98	transmembrane protein 98
hsa-miR-583	0	0	1	1	1	1	SPECC1	sperm antigen with calponin homology and coiled-coil domains 1
hsa-miR-583	1	0	1	1	1	1	PPM1B	protein phosphatase, Mg2+/Mn2+ dependent, 1B
hsa-miR-583	0	0	1	1	1	1	TRAF5	TNF receptor-associated factor 5
hsa-miR-583	0	0	1	1	1	1	ERP29	endoplasmic reticulum protein 29
hsa-miR-583	0	0	1	1	0	0	SLC25A52	solute carrier family 25, member 52
hsa-miR-583	0	0	1	1	1	1	KCNIP1	Kv channel interacting protein 1
hsa-miR-583	1	0	1	0	1	1	RYR2	ryanodine receptor 2 (cardiac)
hsa-miR-583	1	0	1	0	1	1	RYR3	ryanodine receptor 3
hsa-miR-583	0	0	1	1	1	1	C18orf62	chromosome 18 open reading frame 62
hsa-miR-583	1	1	1	1	1	1	TRIM71	tripartite motif containing 71, E3 ubiquitin protein ligase
hsa-miR-583	1	0	1	1	1	1	ELMO1	engulfment and cell motility 1
hsa-miR-583	1	0	1	1	1	1	KIAA0317	KIAA0317
hsa-miR-583	1	0	1	0	1	1	GK5	glycerol kinase 5 (putative)
hsa-miR-583	1	0	1	1	1	1	KCNC4	potassium voltage-gated channel, Shaw-related subfamily, member 4
hsa-miR-583	1	0	1	1	1	1	CBLN3	cerebellin 3 precursor
hsa-miR-583	1	0	1	1	1	1	CDC42	cell division cycle 42 (GTP binding protein, 25kDa)
hsa-miR-583	1	0	1	1	1	1	ZNF384	zinc finger protein 384
hsa-miR-583	1	0	1	1	1	1	CHN2	chimerin (chimaerin) 2
hsa-miR-583	0	0	1	1	1	1	MYH11	myosin, heavy chain 11, smooth muscle
hsa-miR-583	1	0	1	1	1	1	LFNG	LFNG O-fucosylpeptide 3-beta-N-acetylglucosaminyltransferase
hsa-miR-583	0	0	1	1	1	1	BTNL8	butyrophilin-like 8
hsa-miR-583	0	0	1	1	1	1	ATF3	activating transcription factor 3
hsa-miR-583	1	0	1	1	1	1	CYLD	cylindromatosis (turban tumor syndrome)
hsa-miR-583	0	0	1	1	1	1	MST4	serine/threonine protein kinase MST4
hsa-miR-583	1	0	1	1	1	1	SLC9A6	solute carrier family 9, subfamily A (NHE6, cation proton antiporter 6), member 6
hsa-miR-583	1	0	1	1	1	1	ERBB4	v-erb-a erythroblastic leukemia viral oncogene homolog 4 (avian)
hsa-miR-583	1	0	1	1	1	1	KDM5A	lysine (K)-specific demethylase 5A
hsa-miR-583	1	0	1	0	1	1	SRGAP2	SLIT-ROBO Rho GTPase activating protein 2
hsa-miR-583	1	0	1	1	1	1	TPM3	tropomyosin 3
hsa-miR-583	1	0	1	0	1	1	SLC12A2	solute carrier family 12 (sodium/potassium/chloride transporters), member 2
hsa-miR-583	0	0	1	1	1	1	RCC1	regulator of chromosome condensation 1
hsa-miR-583	1	0	1	0	1	1	SLC7A6	solute carrier family 7 (amino acid transporter light chain, y+L system), member 6
hsa-miR-583	1	0	1	1	1	1	ZNF436	zinc finger protein 436
hsa-miR-583	1	0	1	1	1	1	SREK1	splicing regulatory glutamine/lysine-rich protein 1
hsa-miR-583	1	0	1	1	1	1	IRF2BP2	interferon regulatory factor 2 binding protein 2
hsa-miR-583	1	0	1	1	1	1	PRR3	proline rich 3
hsa-miR-583	0	0	1	0	1	1	WTH3DI	RAB6C-like
hsa-miR-583	1	0	1	1	1	1	SRSF1	serine/arginine-rich splicing factor 1
hsa-miR-583	1	0	1	0	0	0	FAM127B	family with sequence similarity 127, member B
hsa-miR-583	0	0	1	1	1	1	FKTN	fukutin
hsa-miR-583	1	0	1	1	1	1	ITGA6	integrin, alpha 6
hsa-miR-583	1	0	1	1	1	1	CREBBP	CREB binding protein
hsa-miR-583	1	0	1	1	1	1	CUL4B	cullin 4B
hsa-miR-583	0	0	1	1	1	1	LRRIQ1	leucine-rich repeats and IQ motif containing 1
hsa-miR-583	1	0	1	1	1	1	DMP1	dentin matrix acidic phosphoprotein 1
hsa-miR-583	1	0	1	1	1	1	LDB3	LIM domain binding 3
hsa-miR-583	1	0	1	1	1	1	KDM6B	lysine (K)-specific demethylase 6B
hsa-miR-583	1	0	1	0	1	1	CCDC85A	coiled-coil domain containing 85A
hsa-miR-583	0	0	1	0	1	1	EPHA6	EPH receptor A6
hsa-miR-583	0	0	1	1	1	1	TMEM202	transmembrane protein 202
hsa-miR-583	0	0	1	0	1	1	ISCA1P1	iron-sulfur cluster assembly 1 homolog (S. cerevisiae) pseudogene 1
hsa-miR-583	1	0	1	1	1	1	REPS2	RALBP1 associated Eps domain containing 2
hsa-miR-583	1	0	1	1	1	1	THOC2	THO complex 2
hsa-miR-583	0	0	1	1	1	1	G6PC2	glucose-6-phosphatase, catalytic, 2
hsa-miR-583	1	0	1	0	1	1	PDE5A	phosphodiesterase 5A, cGMP-specific
hsa-miR-583	1	0	1	1	1	1	ASIC1	acid-sensing (proton-gated) ion channel 1
hsa-miR-583	0	0	1	1	0	0	AFP	alpha-fetoprotein
hsa-miR-583	0	0	1	1	0	0	AOX1	aldehyde oxidase 1
hsa-miR-583	0	0	1	1	1	1	ARHGDIB	Rho GDP dissociation inhibitor (GDI) beta
hsa-miR-583	1	0	1	0	1	1	BMPR2	bone morphogenetic protein receptor, type II (serine/threonine kinase)
hsa-miR-583	1	0	1	0	1	1	CDK6	cyclin-dependent kinase 6
hsa-miR-583	1	0	1	1	1	1	CHD1	chromodomain helicase DNA binding protein 1
hsa-miR-583	1	0	1	1	1	1	CREBL2	cAMP responsive element binding protein-like 2
hsa-miR-583	0	0	1	1	0	0	DIO3	deiodinase, iodothyronine, type III
hsa-miR-583	1	0	1	1	1	1	DYRK1A	dual-specificity tyrosine-(Y)-phosphorylation regulated kinase 1A
hsa-miR-583	1	0	1	1	1	1	CELSR3	cadherin, EGF LAG seven-pass G-type receptor 3 (flamingo homolog, Drosophila)
hsa-miR-583	1	0	1	1	1	1	CELSR2	cadherin, EGF LAG seven-pass G-type receptor 2 (flamingo homolog, Drosophila)
hsa-miR-583	1	0	1	0	1	1	EIF2S3	eukaryotic translation initiation factor 2, subunit 3 gamma, 52kDa
hsa-miR-583	0	0	1	0	1	1	EMP1	epithelial membrane protein 1
hsa-miR-583	1	0	1	1	1	1	EN2	engrailed homeobox 2
hsa-miR-583	1	0	1	1	1	1	EP300	E1A binding protein p300
hsa-miR-583	1	0	1	1	1	1	FOXF1	forkhead box F1
hsa-miR-583	1	0	1	1	1	1	FOXC1	forkhead box C1
hsa-miR-583	0	0	1	1	1	1	FRZB	frizzled-related protein
hsa-miR-583	1	0	1	1	0	0	GDI1	GDP dissociation inhibitor 1
hsa-miR-583	1	0	1	1	1	1	AHNAK	AHNAK nucleoprotein
hsa-miR-583	1	0	1	1	1	1	AQP4	aquaporin 4
hsa-miR-583	0	0	1	0	1	1	AREG	amphiregulin
hsa-miR-583	1	0	1	1	1	1	ARF3	ADP-ribosylation factor 3
hsa-miR-583	0	0	1	1	1	1	ARF4	ADP-ribosylation factor 4
hsa-miR-583	0	0	1	1	1	1	ARF5	ADP-ribosylation factor 5
hsa-miR-583	1	0	1	0	1	1	ARNT	aryl hydrocarbon receptor nuclear translocator
hsa-miR-583	1	0	1	1	1	1	ATP6V1A	ATPase, H+ transporting, lysosomal 70kDa, V1 subunit A
hsa-miR-583	1	0	1	1	1	1	BCL6	B-cell CLL/lymphoma 6
hsa-miR-583	0	0	1	1	1	1	CALB2	calbindin 2
hsa-miR-583	1	0	1	1	1	1	CALM2	calmodulin 2 (phosphorylase kinase, delta)
hsa-miR-583	1	0	1	0	1	1	CCND2	cyclin D2
hsa-miR-583	0	0	1	1	1	1	CD1D	CD1d molecule
hsa-miR-583	1	0	1	1	1	1	CDC25A	cell division cycle 25 homolog A (S. pombe)
hsa-miR-583	1	0	1	1	1	1	CDH11	cadherin 11, type 2, OB-cadherin (osteoblast)
hsa-miR-583	1	0	1	1	1	1	CENPB	centromere protein B, 80kDa
hsa-miR-583	1	0	1	1	1	1	CLCN3	chloride channel, voltage-sensitive 3
hsa-miR-583	1	0	1	1	1	1	CNN3	calponin 3, acidic
hsa-miR-583	1	0	1	1	1	1	COL4A1	collagen, type IV, alpha 1
hsa-miR-583	1	0	1	1	1	1	SLC31A1	solute carrier family 31 (copper transporters), member 1
hsa-miR-583	1	0	1	1	1	1	CTNNB1	catenin (cadherin-associated protein), beta 1, 88kDa
hsa-miR-583	0	0	1	1	0	0	DDB1	damage-specific DNA binding protein 1, 127kDa
hsa-miR-583	1	0	1	1	1	1	DPP4	dipeptidyl-peptidase 4
hsa-miR-583	1	0	1	1	1	1	ENPEP	glutamyl aminopeptidase (aminopeptidase A)
hsa-miR-583	1	0	1	0	1	1	ETV6	ets variant 6
hsa-miR-583	0	0	1	1	1	1	FPR3	formyl peptide receptor 3
hsa-miR-583	1	0	1	0	1	1	FUT4	fucosyltransferase 4 (alpha (1,3) fucosyltransferase, myeloid-specific)
hsa-miR-583	0	0	1	1	1	1	FYN	FYN oncogene related to SRC, FGR, YES
hsa-miR-583	1	0	1	0	1	1	GNAI1	guanine nucleotide binding protein (G protein), alpha inhibiting activity polypeptide 1
hsa-miR-583	1	0	1	1	1	1	GRB2	growth factor receptor-bound protein 2
hsa-miR-583	0	0	1	1	1	1	CXCL3	chemokine (C-X-C motif) ligand 3
hsa-miR-583	0	0	1	1	1	1	GZMK	granzyme K (granzyme 3; tryptase II)
hsa-miR-583	1	0	1	1	1	1	HIVEP1	human immunodeficiency virus type I enhancer binding protein 1
hsa-miR-583	0	0	1	1	1	1	HLA-DOA	major histocompatibility complex, class II, DO alpha
hsa-miR-583	0	0	1	1	1	1	HMGCS1	3-hydroxy-3-methylglutaryl-CoA synthase 1 (soluble)
hsa-miR-583	0	0	1	1	1	1	HOXB2	homeobox B2
hsa-miR-583	0	0	1	1	1	1	FOXN2	forkhead box N2
hsa-miR-583	0	0	1	1	1	1	IL17A	interleukin 17A
hsa-miR-583	1	0	1	1	0	0	INHBB	inhibin, beta B
hsa-miR-583	1	0	1	1	1	1	INSM1	insulinoma-associated 1
hsa-miR-583	1	0	1	1	1	1	ITGA2	integrin, alpha 2 (CD49B, alpha 2 subunit of VLA-2 receptor)
hsa-miR-583	1	0	1	1	1	1	ITGB8	integrin, beta 8
hsa-miR-583	1	0	1	1	1	1	JUN	jun proto-oncogene
hsa-miR-583	1	0	1	1	1	1	KCNJ10	potassium inwardly-rectifying channel, subfamily J, member 10
hsa-miR-583	1	0	1	1	1	1	KDR	kinase insert domain receptor (a type III receptor tyrosine kinase)
hsa-miR-583	1	0	1	0	1	1	KIF3C	kinesin family member 3C
hsa-miR-583	1	0	1	1	1	1	KPNA3	karyopherin alpha 3 (importin alpha 4)
hsa-miR-583	0	0	1	1	0	0	KRT4	keratin 4
hsa-miR-583	0	0	1	1	0	0	KRT33B	keratin 33B
hsa-miR-583	1	0	1	1	1	1	LIF	leukemia inhibitory factor
hsa-miR-583	1	0	1	1	1	1	M6PR	mannose-6-phosphate receptor (cation dependent)
hsa-miR-583	1	0	1	0	1	1	MXD1	MAX dimerization protein 1
hsa-miR-583	1	0	1	1	1	1	MAFG	v-maf musculoaponeurotic fibrosarcoma oncogene homolog G (avian)
hsa-miR-583	1	0	1	1	1	1	MAX	MYC associated factor X
hsa-miR-583	1	0	1	1	1	1	ADAM11	ADAM metallopeptidase domain 11
hsa-miR-583	0	0	1	0	1	1	MFNG	MFNG O-fucosylpeptide 3-beta-N-acetylglucosaminyltransferase
hsa-miR-583	1	0	1	1	1	1	MN1	meningioma (disrupted in balanced translocation) 1
hsa-miR-583	1	0	1	1	1	1	MSN	moesin
hsa-miR-583	0	0	1	1	0	0	MYOG	myogenin (myogenic factor 4)
hsa-miR-583	1	0	1	1	1	1	NGFR	nerve growth factor receptor
hsa-miR-583	0	0	1	1	1	1	NID1	nidogen 1
hsa-miR-583	1	0	1	1	1	1	NKX2-2	NK2 homeobox 2
hsa-miR-583	1	0	1	1	1	1	NPAS2	neuronal PAS domain protein 2
hsa-miR-583	0	0	1	1	0	0	NTSR1	neurotensin receptor 1 (high affinity)
hsa-miR-583	1	0	1	1	1	1	OSBP	oxysterol binding protein
hsa-miR-583	0	0	1	1	0	0	P2RX3	purinergic receptor P2X, ligand-gated ion channel, 3
hsa-miR-583	1	0	1	0	1	1	PAK2	p21 protein (Cdc42/Rac)-activated kinase 2
hsa-miR-583	1	0	1	0	1	1	PCDHGC3	protocadherin gamma subfamily C, 3
hsa-miR-583	0	0	1	1	0	0	PGM1	phosphoglucomutase 1
hsa-miR-583	0	0	1	1	1	1	PIM1	pim-1 oncogene
hsa-miR-583	1	0	1	1	1	1	PLAGL2	pleiomorphic adenoma gene-like 2
hsa-miR-583	0	0	1	1	0	0	PLP2	proteolipid protein 2 (colonic epithelium-enriched)
hsa-miR-583	0	0	1	1	0	0	PPP1R8	protein phosphatase 1, regulatory subunit 8
hsa-miR-583	1	0	1	1	1	1	PPP2R1B	protein phosphatase 2, regulatory subunit A, beta
hsa-miR-583	1	0	1	1	1	1	PPP6C	protein phosphatase 6, catalytic subunit
hsa-miR-583	0	0	1	1	1	1	PRKACA	protein kinase, cAMP-dependent, catalytic, alpha
hsa-miR-583	1	0	1	1	1	1	PRKAR2B	protein kinase, cAMP-dependent, regulatory, type II, beta
hsa-miR-583	1	0	1	0	1	1	PRKCA	protein kinase C, alpha
hsa-miR-583	0	0	1	1	1	1	PRKCB	protein kinase C, beta
hsa-miR-583	1	0	1	1	1	1	PRKD1	protein kinase D1
hsa-miR-583	0	0	1	1	1	1	HTRA1	HtrA serine peptidase 1
hsa-miR-583	1	0	1	1	1	1	PTPN9	protein tyrosine phosphatase, non-receptor type 9
hsa-miR-583	1	0	1	1	1	1	PTPRJ	protein tyrosine phosphatase, receptor type, J
hsa-miR-583	1	0	1	1	1	1	PTPRK	protein tyrosine phosphatase, receptor type, K
hsa-miR-583	1	0	1	0	1	1	RAB6A	RAB6A, member RAS oncogene family
hsa-miR-583	1	0	1	0	1	1	RAP2B	RAP2B, member of RAS oncogene family
hsa-miR-583	1	0	1	1	1	1	ARID4A	AT rich interactive domain 4A (RBP1-like)
hsa-miR-583	1	0	1	1	1	1	RBL1	retinoblastoma-like 1 (p107)
hsa-miR-583	0	0	1	1	0	0	RBP1	retinol binding protein 1, cellular
hsa-miR-583	0	0	1	1	1	1	RING1	ring finger protein 1
hsa-miR-583	0	0	1	1	0	0	S100A5	S100 calcium binding protein A5
hsa-miR-583	0	0	1	1	1	1	SDC4	syndecan 4
hsa-miR-583	1	0	1	1	1	1	SRSF3	serine/arginine-rich splicing factor 3
hsa-miR-583	1	0	1	0	1	1	ST6GAL1	ST6 beta-galactosamide alpha-2,6-sialyltranferase 1
hsa-miR-583	1	0	1	0	1	1	SLC6A1	solute carrier family 6 (neurotransmitter transporter, GABA), member 1
hsa-miR-583	1	0	1	0	1	1	SLC6A6	solute carrier family 6 (neurotransmitter transporter, taurine), member 6
hsa-miR-583	0	0	1	1	0	0	SLPI	secretory leukocyte peptidase inhibitor
hsa-miR-583	1	0	1	1	1	1	SMARCC1	SWI/SNF related, matrix associated, actin dependent regulator of chromatin, subfamily c, member 1
hsa-miR-583	1	0	1	1	1	1	SMARCD1	SWI/SNF related, matrix associated, actin dependent regulator of chromatin, subfamily d, member 1
hsa-miR-583	1	0	1	1	1	1	SMARCD2	SWI/SNF related, matrix associated, actin dependent regulator of chromatin, subfamily d, member 2
hsa-miR-583	1	0	1	1	1	1	SNX2	sorting nexin 2
hsa-miR-583	1	0	1	0	1	1	SOX4	SRY (sex determining region Y)-box 4
hsa-miR-583	1	0	1	1	1	1	SRI	sorcin
hsa-miR-583	1	0	1	1	1	1	SRF	serum response factor (c-fos serum response element-binding transcription factor)
hsa-miR-583	0	0	1	0	1	1	TRIM21	tripartite motif containing 21
hsa-miR-583	1	0	1	1	1	1	STAC	SH3 and cysteine rich domain
hsa-miR-583	1	0	1	0	1	1	STC1	stanniocalcin 1
hsa-miR-583	0	0	1	1	1	1	STRN	striatin, calmodulin binding protein
hsa-miR-583	0	0	1	1	1	1	SUPT6H	suppressor of Ty 6 homolog (S. cerevisiae)
hsa-miR-583	1	0	1	1	1	1	TAF4	TAF4 RNA polymerase II, TATA box binding protein (TBP)-associated factor, 135kDa
hsa-miR-583	0	0	1	0	1	1	TCEA3	transcription elongation factor A (SII), 3
hsa-miR-583	1	0	1	1	1	1	TDG	thymine-DNA glycosylase
hsa-miR-583	1	0	1	1	1	1	TFAP4	transcription factor AP-4 (activating enhancer binding protein 4)
hsa-miR-583	1	0	1	1	1	1	TIAM1	T-cell lymphoma invasion and metastasis 1
hsa-miR-583	1	0	1	0	1	1	SEC62	SEC62 homolog (S. cerevisiae)
hsa-miR-583	1	0	1	1	1	1	NR2E1	nuclear receptor subfamily 2, group E, member 1
hsa-miR-583	1	0	1	1	1	1	TRPC1	transient receptor potential cation channel, subfamily C, member 1
hsa-miR-583	1	0	1	0	1	1	TSPYL1	TSPY-like 1
hsa-miR-583	0	0	1	1	0	0	TTC1	tetratricopeptide repeat domain 1
hsa-miR-583	0	0	1	1	1	1	UBE2D1	ubiquitin-conjugating enzyme E2D 1
hsa-miR-583	1	0	1	1	1	1	UBE2N	ubiquitin-conjugating enzyme E2N
hsa-miR-583	1	0	1	1	1	1	YWHAH	tyrosine 3-monooxygenase/tryptophan 5-monooxygenase activation protein, eta polypeptide
hsa-miR-583	1	0	1	1	0	0	ZFP36	zinc finger protein 36, C3H type, homolog (mouse)
hsa-miR-583	0	0	1	0	1	1	ZFY	zinc finger protein, Y-linked
hsa-miR-583	1	0	1	0	1	1	ZIC1	Zic family member 1
hsa-miR-583	1	0	1	1	1	1	ZNF131	zinc finger protein 131
hsa-miR-583	1	0	1	1	1	1	FZD5	frizzled family receptor 5
hsa-miR-583	1	0	1	1	1	1	HMGA2	high mobility group AT-hook 2
hsa-miR-583	1	0	1	1	1	1	FZD1	frizzled family receptor 1
hsa-miR-583	1	0	1	1	1	1	FZD7	frizzled family receptor 7
hsa-miR-583	0	0	1	1	1	1	PIP5K1A	phosphatidylinositol-4-phosphate 5-kinase, type I, alpha
hsa-miR-583	0	0	1	1	1	1	BFSP2	beaded filament structural protein 2, phakinin
hsa-miR-583	0	0	1	1	0	0	DUSP11	dual specificity phosphatase 11 (RNA/RNP complex 1-interacting)
hsa-miR-583	1	0	1	1	1	1	KLF11	Kruppel-like factor 11
hsa-miR-583	1	0	1	1	1	1	SUPT3H	suppressor of Ty 3 homolog (S. cerevisiae)
hsa-miR-583	1	0	1	0	1	1	CNTNAP1	contactin associated protein 1
hsa-miR-583	0	0	1	1	1	1	ITGA10	integrin, alpha 10
hsa-miR-583	0	0	1	1	1	1	AGPS	alkylglycerone phosphate synthase
hsa-miR-583	1	0	1	0	1	1	PCDHGA12	protocadherin gamma subfamily A, 12
hsa-miR-583	1	0	1	0	1	1	PCDHGB4	protocadherin gamma subfamily B, 4
hsa-miR-583	1	0	1	0	1	1	TNKS	tankyrase, TRF1-interacting ankyrin-related ADP-ribose polymerase
hsa-miR-583	1	0	1	1	1	1	SRSF9	serine/arginine-rich splicing factor 9
hsa-miR-583	1	0	1	1	1	1	B3GALT2	UDP-Gal:betaGlcNAc beta 1,3-galactosyltransferase, polypeptide 2
hsa-miR-583	1	0	1	1	1	1	NR5A2	nuclear receptor subfamily 5, group A, member 2
hsa-miR-583	0	0	1	1	0	0	DLK1	delta-like 1 homolog (Drosophila)
hsa-miR-583	0	0	1	1	1	1	SUCLA2	succinate-CoA ligase, ADP-forming, beta subunit
hsa-miR-583	0	0	1	1	1	1	IL18R1	interleukin 18 receptor 1
hsa-miR-583	1	0	1	1	1	1	NRP2	neuropilin 2
hsa-miR-583	1	0	1	0	1	1	CDK5R1	cyclin-dependent kinase 5, regulatory subunit 1 (p35)
hsa-miR-583	1	0	1	0	1	1	SGPL1	sphingosine-1-phosphate lyase 1
hsa-miR-583	1	0	1	1	1	1	FUBP1	far upstream element (FUSE) binding protein 1
hsa-miR-583	0	0	1	0	1	1	AP1S2	adaptor-related protein complex 1, sigma 2 subunit
hsa-miR-583	0	0	1	1	1	1	ATP6V0E1	ATPase, H+ transporting, lysosomal 9kDa, V0 subunit e1
hsa-miR-583	0	0	1	1	1	1	RNF8	ring finger protein 8, E3 ubiquitin protein ligase
hsa-miR-583	0	0	1	1	1	1	UBA3	ubiquitin-like modifier activating enzyme 3
hsa-miR-583	1	0	1	1	1	1	MAP7	microtubule-associated protein 7
hsa-miR-583	1	0	1	1	1	1	CTSS	cathepsin S
hsa-miR-583	0	0	1	1	1	1	TIMM8A	translocase of inner mitochondrial membrane 8 homolog A (yeast)
hsa-miR-583	1	0	1	0	1	1	E2F2	E2F transcription factor 2
hsa-miR-583	0	0	1	0	1	1	EIF4EBP2	eukaryotic translation initiation factor 4E binding protein 2
hsa-miR-583	0	0	1	0	1	1	HABP2	hyaluronan binding protein 2
hsa-miR-583	1	0	1	0	1	1	SLC1A2	solute carrier family 1 (glial high affinity glutamate transporter), member 2
hsa-miR-583	1	0	1	1	1	1	SYT7	synaptotagmin VII
hsa-miR-583	1	0	1	0	1	1	MED14	mediator complex subunit 14
hsa-miR-583	1	0	1	1	1	1	MED21	mediator complex subunit 21
hsa-miR-583	0	0	1	1	1	1	CHST2	carbohydrate (N-acetylglucosamine-6-O) sulfotransferase 2
hsa-miR-583	1	0	1	0	1	1	AKAP6	A kinase (PRKA) anchor protein 6
hsa-miR-583	1	0	1	1	1	1	SLC25A27	solute carrier family 25, member 27
hsa-miR-583	1	0	1	0	1	1	ACVR1B	activin A receptor, type IB
hsa-miR-583	1	0	1	1	1	1	ASTN1	astrotactin 1
hsa-miR-583	0	0	1	1	1	1	COL12A1	collagen, type XII, alpha 1
hsa-miR-583	0	0	1	1	1	1	CSK	c-src tyrosine kinase
hsa-miR-583	1	0	1	1	1	1	DACH1	dachshund homolog 1 (Drosophila)
hsa-miR-583	1	0	1	1	1	1	DBN1	drebrin 1
hsa-miR-583	1	0	1	1	1	1	DVL2	dishevelled, dsh homolog 2 (Drosophila)
hsa-miR-583	1	0	1	1	0	0	ERH	enhancer of rudimentary homolog (Drosophila)
hsa-miR-583	0	0	1	0	1	1	FOXE1	forkhead box E1 (thyroid transcription factor 2)
hsa-miR-583	1	0	1	1	1	1	FOXD2	forkhead box D2
hsa-miR-583	1	0	1	1	1	1	FUT8	fucosyltransferase 8 (alpha (1,6) fucosyltransferase)
hsa-miR-583	0	0	1	1	1	1	FOXA1	forkhead box A1
hsa-miR-583	0	0	1	1	1	1	HOXB7	homeobox B7
hsa-miR-583	1	0	1	1	1	1	MLLT3	myeloid/lymphoid or mixed-lineage leukemia (trithorax homolog, Drosophila); translocated to, 3
hsa-miR-583	0	0	1	1	1	1	SMS	spermine synthase
hsa-miR-583	1	0	1	1	1	1	WNT11	wingless-type MMTV integration site family, member 11
hsa-miR-583	0	0	1	1	1	1	PNPLA4	patatin-like phospholipase domain containing 4
hsa-miR-583	0	0	1	0	1	1	BPY2	basic charge, Y-linked, 2
hsa-miR-583	1	0	1	1	1	1	MTMR4	myotubularin related protein 4
hsa-miR-583	0	0	1	1	1	1	RRP9	ribosomal RNA processing 9, small subunit (SSU) processome component, homolog (yeast)
hsa-miR-583	1	0	1	1	1	1	XPR1	xenotropic and polytropic retrovirus receptor 1
hsa-miR-583	0	0	1	1	1	1	MTA2	metastasis associated 1 family, member 2
hsa-miR-583	1	0	1	0	1	1	MAPKAPK2	mitogen-activated protein kinase-activated protein kinase 2
hsa-miR-583	1	0	1	0	1	1	VAMP3	vesicle-associated membrane protein 3 (cellubrevin)
hsa-miR-583	0	0	1	1	1	1	LHX2	LIM homeobox 2
hsa-miR-583	0	0	1	0	1	1	ADIPOQ	adiponectin, C1Q and collagen domain containing
hsa-miR-583	1	0	1	1	1	1	KIF3B	kinesin family member 3B
hsa-miR-583	1	0	1	0	1	1	CDYL	chromodomain protein, Y-like
hsa-miR-583	1	0	1	0	1	1	ARHGEF6	Rac/Cdc42 guanine nucleotide exchange factor (GEF) 6
hsa-miR-583	1	0	1	1	1	1	CXCL14	chemokine (C-X-C motif) ligand 14
hsa-miR-583	0	0	1	1	1	1	ATP6V1G1	ATPase, H+ transporting, lysosomal 13kDa, V1 subunit G1
hsa-miR-583	1	0	1	1	1	1	SEC24C	SEC24 family, member C (S. cerevisiae)
hsa-miR-583	1	0	1	1	1	1	ZFP36L1	zinc finger protein 36, C3H type-like 1
hsa-miR-583	1	0	1	0	1	1	DOCK3	dedicator of cytokinesis 3
hsa-miR-583	0	0	1	0	1	1	DSC2	desmocollin 2
hsa-miR-583	1	0	1	1	1	1	GABRE	gamma-aminobutyric acid (GABA) A receptor, epsilon
hsa-miR-583	1	0	1	1	1	1	JARID2	jumonji, AT rich interactive domain 2
hsa-miR-583	0	0	1	1	0	0	NUCB2	nucleobindin 2
hsa-miR-583	0	0	1	1	1	1	PTH2R	parathyroid hormone 2 receptor
hsa-miR-583	0	0	1	1	0	0	RAPSN	receptor-associated protein of the synapse
hsa-miR-583	1	0	1	0	1	1	SCD	stearoyl-CoA desaturase (delta-9-desaturase)
hsa-miR-583	1	0	1	0	1	1	SEL1L	sel-1 suppressor of lin-12-like (C. elegans)
hsa-miR-583	1	0	1	1	0	0	ZMYM3	zinc finger, MYM-type 3
hsa-miR-583	1	0	1	1	1	1	OXSR1	oxidative-stress responsive 1
hsa-miR-583	1	0	1	1	1	1	MED13	mediator complex subunit 13
hsa-miR-583	1	0	1	0	1	1	NUP153	nucleoporin 153kDa
hsa-miR-583	1	0	1	0	1	1	CALM3	calmodulin 3 (phosphorylase kinase, delta)
hsa-miR-583	1	0	1	1	1	1	FOXN3	forkhead box N3
hsa-miR-583	1	0	1	0	1	1	DLX6	distal-less homeobox 6
hsa-miR-583	1	0	1	0	1	1	E2F1	E2F transcription factor 1
hsa-miR-583	1	0	1	1	1	1	ELK3	ELK3, ETS-domain protein (SRF accessory protein 2)
hsa-miR-583	0	0	1	0	1	1	FOSL2	FOS-like antigen 2
hsa-miR-583	0	0	1	1	1	1	MSTN	myostatin
hsa-miR-583	0	0	1	1	0	0	HIST1H1D	histone cluster 1, H1d
hsa-miR-583	1	0	1	1	1	1	HAS2	hyaluronan synthase 2
hsa-miR-583	1	0	1	1	1	1	HAS3	hyaluronan synthase 3
hsa-miR-583	1	0	1	1	0	0	HCFC1	host cell factor C1 (VP16-accessory protein)
hsa-miR-583	1	0	1	1	1	1	MYCL1	v-myc myelocytomatosis viral oncogene homolog 1, lung carcinoma derived (avian)
hsa-miR-583	1	0	1	0	1	1	PRKAB2	protein kinase, AMP-activated, beta 2 non-catalytic subunit
hsa-miR-583	1	0	1	0	1	1	PRKCE	protein kinase C, epsilon
hsa-miR-583	1	0	1	1	1	1	RALA	v-ral simian leukemia viral oncogene homolog A (ras related)
hsa-miR-583	1	0	1	0	1	1	CCDC6	coiled-coil domain containing 6
hsa-miR-583	1	0	1	1	1	1	RND2	Rho family GTPase 2
hsa-miR-583	0	0	1	1	1	1	PAPSS1	3'-phosphoadenosine 5'-phosphosulfate synthase 1
hsa-miR-583	1	0	1	1	1	1	PIGK	phosphatidylinositol glycan anchor biosynthesis, class K
hsa-miR-583	1	0	1	1	1	1	GTF2E1	general transcription factor IIE, polypeptide 1, alpha 56kDa
hsa-miR-583	1	0	1	1	1	1	HOXA11	homeobox A11
hsa-miR-583	0	0	1	1	1	1	ITK	IL2-inducible T-cell kinase
hsa-miR-583	1	0	1	1	1	1	LAMC2	laminin, gamma 2
hsa-miR-583	1	0	1	1	1	1	SMAD6	SMAD family member 6
hsa-miR-583	0	0	1	0	1	1	POU3F2	POU class 3 homeobox 2
hsa-miR-583	1	0	1	1	1	1	DLL1	delta-like 1 (Drosophila)
hsa-miR-583	1	0	1	1	1	1	TERF2	telomeric repeat binding factor 2
hsa-miR-583	1	0	1	0	1	1	GPC6	glypican 6
hsa-miR-583	0	0	1	1	1	1	ACTR3	ARP3 actin-related protein 3 homolog (yeast)
hsa-miR-583	1	0	1	1	1	1	NAMPT	nicotinamide phosphoribosyltransferase
hsa-miR-583	0	0	1	1	1	1	RNF41	ring finger protein 41
hsa-miR-583	1	0	1	0	1	1	DCAF7	DDB1 and CUL4 associated factor 7
hsa-miR-583	1	0	1	1	1	1	GLYAT	glycine-N-acyltransferase
hsa-miR-583	1	0	1	0	1	1	SPRY3	sprouty homolog 3 (Drosophila)
hsa-miR-583	1	0	1	1	1	1	EFS	embryonal Fyn-associated substrate
hsa-miR-583	1	0	1	1	1	1	MAT2A	methionine adenosyltransferase II, alpha
hsa-miR-583	1	0	1	1	1	1	MMP16	matrix metallopeptidase 16 (membrane-inserted)
hsa-miR-583	0	0	1	1	0	0	MT1G	metallothionein 1G
hsa-miR-583	0	0	1	1	0	0	MT1H	metallothionein 1H
hsa-miR-583	0	0	1	1	1	1	MT2A	metallothionein 2A
hsa-miR-583	0	0	1	1	0	0	SKP2	S-phase kinase-associated protein 2, E3 ubiquitin protein ligase
hsa-miR-583	0	0	1	1	1	1	TSC22D1	TSC22 domain family, member 1
hsa-miR-583	1	0	1	1	1	1	ENDOU	endonuclease, polyU-specific
hsa-miR-583	1	0	1	1	1	1	LIPG	lipase, endothelial
hsa-miR-583	0	0	1	1	0	0	PKDREJ	polycystic kidney disease (polycystin) and REJ homolog (sperm receptor for egg jelly homolog, sea urchin)
hsa-miR-583	1	0	1	1	1	1	SEMA3A	sema domain, immunoglobulin domain (Ig), short basic domain, secreted, (semaphorin) 3A
hsa-miR-583	1	0	1	1	1	1	IRF9	interferon regulatory factor 9
hsa-miR-583	0	0	1	1	0	0	NEDD8	neural precursor cell expressed, developmentally down-regulated 8
hsa-miR-583	1	0	1	1	1	1	NEFL	neurofilament, light polypeptide
hsa-miR-583	1	0	1	1	1	1	NEUROD2	neuronal differentiation 2
hsa-miR-583	1	0	1	1	1	1	NSF	N-ethylmaleimide-sensitive factor
hsa-miR-583	1	0	1	1	1	1	NR4A2	nuclear receptor subfamily 4, group A, member 2
hsa-miR-583	0	0	1	1	1	1	PA2G4	proliferation-associated 2G4, 38kDa
hsa-miR-583	1	0	1	0	1	1	PITPNA	phosphatidylinositol transfer protein, alpha
hsa-miR-583	0	0	1	1	1	1	PPP2R5A	protein phosphatase 2, regulatory subunit B', alpha
hsa-miR-583	1	0	1	1	1	1	PPP2R5E	protein phosphatase 2, regulatory subunit B', epsilon isoform
hsa-miR-583	1	0	1	1	1	1	STK4	serine/threonine kinase 4
hsa-miR-583	1	0	1	1	1	1	SMC1A	structural maintenance of chromosomes 1A
hsa-miR-583	1	0	1	1	1	1	NPEPPS	aminopeptidase puromycin sensitive
hsa-miR-583	1	0	1	1	1	1	TUBGCP3	tubulin, gamma complex associated protein 3
hsa-miR-583	1	0	1	1	1	1	ZNF238	zinc finger protein 238
hsa-miR-583	1	0	1	1	1	1	SEC23A	Sec23 homolog A (S. cerevisiae)
hsa-miR-583	0	0	1	1	1	1	CAP2	CAP, adenylate cyclase-associated protein, 2 (yeast)
hsa-miR-583	0	0	1	1	1	1	LRRC41	leucine rich repeat containing 41
hsa-miR-583	0	0	1	1	1	1	TM9SF1	transmembrane 9 superfamily member 1
hsa-miR-583	0	0	1	1	1	1	NPC2	Niemann-Pick disease, type C2
hsa-miR-583	1	0	1	1	1	1	PAIP1	poly(A) binding protein interacting protein 1
hsa-miR-583	0	0	1	1	0	0	SPAG5	sperm associated antigen 5
hsa-miR-583	0	0	1	1	0	0	ALX3	ALX homeobox 3
hsa-miR-583	1	0	1	0	1	1	GNAI3	guanine nucleotide binding protein (G protein), alpha inhibiting activity polypeptide 3
hsa-miR-583	0	0	1	0	1	1	SLC16A2	solute carrier family 16, member 2 (thyroid hormone transporter)
hsa-miR-583	0	0	1	1	1	1	CLCA2	chloride channel accessory 2
hsa-miR-583	1	0	1	0	1	1	IGF2BP1	insulin-like growth factor 2 mRNA binding protein 1
hsa-miR-583	1	0	1	1	1	1	CTCF	CCCTC-binding factor (zinc finger protein)
hsa-miR-583	0	0	1	1	1	1	CD226	CD226 molecule
hsa-miR-583	1	0	1	0	1	1	API5	apoptosis inhibitor 5
hsa-miR-583	1	0	1	1	1	1	PLK2	polo-like kinase 2
hsa-miR-583	1	0	1	1	1	1	SRSF10	serine/arginine-rich splicing factor 10
hsa-miR-583	0	0	1	1	1	1	JTB	jumping translocation breakpoint
hsa-miR-583	0	0	1	1	0	0	BRD8	bromodomain containing 8
hsa-miR-583	0	0	1	1	1	1	NUDT3	nudix (nucleoside diphosphate linked moiety X)-type motif 3
hsa-miR-583	1	0	1	1	1	1	SPIN1	spindlin 1
hsa-miR-583	1	0	1	1	1	1	HIVEP2	human immunodeficiency virus type I enhancer binding protein 2
hsa-miR-583	1	0	1	1	1	1	PPP1R1A	protein phosphatase 1, regulatory (inhibitor) subunit 1A
hsa-miR-583	0	0	1	1	1	1	SYPL1	synaptophysin-like 1
hsa-miR-583	1	0	1	1	1	1	BTG2	BTG family, member 2
hsa-miR-583	1	0	1	0	1	1	SYNGAP1	synaptic Ras GTPase activating protein 1
hsa-miR-583	0	0	1	1	1	1	TRIM10	tripartite motif containing 10
hsa-miR-583	1	0	1	1	1	1	SF3A3	splicing factor 3a, subunit 3, 60kDa
hsa-miR-583	0	0	1	1	1	1	TMED10	transmembrane emp24-like trafficking protein 10 (yeast)
hsa-miR-583	1	0	1	1	1	1	PRRX1	paired related homeobox 1
hsa-miR-583	1	0	1	1	1	1	RAC1	ras-related C3 botulinum toxin substrate 1 (rho family, small GTP binding protein Rac1)
hsa-miR-583	1	0	1	1	1	1	RIT1	Ras-like without CAAX 1
hsa-miR-583	1	0	1	1	1	1	SCN1A	sodium channel, voltage-gated, type I, alpha subunit
hsa-miR-583	1	0	1	1	1	1	SKP1	S-phase kinase-associated protein 1
hsa-miR-583	1	0	1	1	1	1	ABHD2	abhydrolase domain containing 2
hsa-miR-583	0	0	1	1	0	0	UBE2C	ubiquitin-conjugating enzyme E2C
hsa-miR-583	0	0	1	1	1	1	TOPBP1	topoisomerase (DNA) II binding protein 1
hsa-miR-583	1	0	1	1	1	1	KAT7	K(lysine) acetyltransferase 7
hsa-miR-583	1	0	1	1	1	1	FSTL1	follistatin-like 1
hsa-miR-583	1	0	1	1	1	1	SSR3	signal sequence receptor, gamma (translocon-associated protein gamma)
hsa-miR-583	0	0	1	1	0	0	TCEB2	transcription elongation factor B (SIII), polypeptide 2 (18kDa, elongin B)
hsa-miR-583	0	0	1	0	1	1	ZXDB	zinc finger, X-linked, duplicated B
hsa-miR-583	0	0	1	1	1	1	WBP4	WW domain binding protein 4 (formin binding protein 21)
hsa-miR-583	1	0	1	1	1	1	RNF139	ring finger protein 139
hsa-miR-583	0	0	1	1	1	1	GPR176	G protein-coupled receptor 176
hsa-miR-583	0	0	1	1	1	1	SLC6A14	solute carrier family 6 (amino acid transporter), member 14
hsa-miR-583	1	0	1	0	1	1	CHP1	calcineurin-like EF hand protein 1
hsa-miR-583	1	0	1	1	1	1	KLF12	Kruppel-like factor 12
hsa-miR-583	0	0	1	1	1	1	GABARAPL2	GABA(A) receptor-associated protein-like 2
hsa-miR-583	1	0	1	1	1	1	CASC3	cancer susceptibility candidate 3
hsa-miR-583	0	0	1	1	0	0	DPF3	D4, zinc and double PHD fingers, family 3
hsa-miR-583	0	0	1	1	1	1	FRAT2	frequently rearranged in advanced T-cell lymphomas 2
hsa-miR-583	1	0	1	1	1	1	ICOS	inducible T-cell co-stimulator
hsa-miR-583	0	0	1	1	0	0	STAP1	signal transducing adaptor family member 1
hsa-miR-583	0	0	1	1	1	1	AHSA1	AHA1, activator of heat shock 90kDa protein ATPase homolog 1 (yeast)
hsa-miR-583	0	0	1	1	1	1	EHF	ets homologous factor
hsa-miR-583	0	0	1	1	1	1	FOXI1	forkhead box I1
hsa-miR-583	1	0	1	0	1	1	FZD4	frizzled family receptor 4
hsa-miR-583	1	0	1	1	1	1	MGAT4A	mannosyl (alpha-1,3-)-glycoprotein beta-1,4-N-acetylglucosaminyltransferase, isozyme A
hsa-miR-583	1	0	1	1	1	1	MGEA5	meningioma expressed antigen 5 (hyaluronidase)
hsa-miR-583	1	0	1	1	1	1	HS2ST1	heparan sulfate 2-O-sulfotransferase 1
hsa-miR-583	0	0	1	1	1	1	IL36RN	interleukin 36 receptor antagonist
hsa-miR-583	1	0	1	1	1	1	KCND2	potassium voltage-gated channel, Shal-related subfamily, member 2
hsa-miR-583	1	0	1	0	1	1	G3BP2	GTPase activating protein (SH3 domain) binding protein 2
hsa-miR-583	1	0	1	0	1	1	FBXL7	F-box and leucine-rich repeat protein 7
hsa-miR-583	1	0	1	1	1	1	LSM5	LSM5 homolog, U6 small nuclear RNA associated (S. cerevisiae)
hsa-miR-583	1	0	1	1	1	1	MAPRE1	microtubule-associated protein, RP/EB family, member 1
hsa-miR-583	1	0	1	1	1	1	MMD	monocyte to macrophage differentiation-associated
hsa-miR-583	1	0	1	1	1	1	NNT	nicotinamide nucleotide transhydrogenase
hsa-miR-583	1	0	1	1	1	1	NUFIP1	nuclear fragile X mental retardation protein interacting protein 1
hsa-miR-583	1	0	1	1	1	1	RANBP6	RAN binding protein 6
hsa-miR-583	1	0	1	1	1	1	TRPC5	transient receptor potential cation channel, subfamily C, member 5
hsa-miR-583	1	0	1	1	1	1	YWHAG	tyrosine 3-monooxygenase/tryptophan 5-monooxygenase activation protein, gamma polypeptide
hsa-miR-583	1	0	1	0	1	1	FLRT2	fibronectin leucine rich transmembrane protein 2
hsa-miR-583	1	0	1	1	1	1	STK39	serine threonine kinase 39
hsa-miR-583	0	0	1	1	1	1	N6AMT1	N-6 adenine-specific DNA methyltransferase 1 (putative)
hsa-miR-583	0	0	1	1	1	1	C16orf80	chromosome 16 open reading frame 80
hsa-miR-583	1	0	1	1	1	1	PPARGC1A	peroxisome proliferator-activated receptor gamma, coactivator 1 alpha
hsa-miR-583	0	0	1	1	0	0	LGALS13	lectin, galactoside-binding, soluble, 13
hsa-miR-583	0	0	1	0	1	1	LINC00312	long intergenic non-protein coding RNA 312
hsa-miR-583	0	0	1	1	1	1	PURG	purine-rich element binding protein G
hsa-miR-583	1	0	1	1	1	1	SLC25A24	solute carrier family 25 (mitochondrial carrier; phosphate carrier), member 24
hsa-miR-583	0	0	1	0	1	1	EMR2	egf-like module containing, mucin-like, hormone receptor-like 2
hsa-miR-583	1	0	1	1	1	1	LAMP2	lysosomal-associated membrane protein 2
hsa-miR-583	1	0	1	1	1	1	SOCS5	suppressor of cytokine signaling 5
hsa-miR-583	1	0	1	1	0	0	DEXI	Dexi homolog (mouse)
hsa-miR-583	1	0	1	0	1	1	C16orf72	chromosome 16 open reading frame 72
hsa-miR-583	1	0	1	1	1	1	VAMP1	vesicle-associated membrane protein 1 (synaptobrevin 1)
hsa-miR-583	1	0	1	1	1	1	MAPRE2	microtubule-associated protein, RP/EB family, member 2
hsa-miR-583	1	0	1	1	1	1	LEMD3	LEM domain containing 3
hsa-miR-583	0	0	1	1	1	1	DAPK2	death-associated protein kinase 2
hsa-miR-583	0	0	1	1	0	0	PKD2L2	polycystic kidney disease 2-like 2
hsa-miR-583	1	0	1	1	1	1	CACNG4	calcium channel, voltage-dependent, gamma subunit 4
hsa-miR-583	0	0	1	1	1	1	ARFGAP3	ADP-ribosylation factor GTPase activating protein 3
hsa-miR-583	0	0	1	1	0	0	LMCD1	LIM and cysteine-rich domains 1
hsa-miR-583	1	0	1	1	1	1	ERO1L	ERO1-like (S. cerevisiae)
hsa-miR-583	1	0	1	1	1	1	HERC3	HECT and RLD domain containing E3 ubiquitin protein ligase 3
hsa-miR-583	0	0	1	1	1	1	HOXC4	homeobox C4
hsa-miR-583	1	0	1	1	1	1	RALGPS1	Ral GEF with PH domain and SH3 binding motif 1
hsa-miR-583	0	0	1	1	1	1	PHF14	PHD finger protein 14
hsa-miR-583	1	0	1	1	1	1	KDM4A	lysine (K)-specific demethylase 4A
hsa-miR-583	1	0	1	1	1	1	SPCS2	signal peptidase complex subunit 2 homolog (S. cerevisiae)
hsa-miR-583	1	0	1	0	1	1	SERTAD2	SERTA domain containing 2
hsa-miR-583	0	0	1	0	1	1	DHCR24	24-dehydrocholesterol reductase
hsa-miR-583	1	0	1	1	1	1	MRPL19	mitochondrial ribosomal protein L19
hsa-miR-583	1	0	1	0	1	1	KIAA0494	KIAA0494
hsa-miR-583	1	0	1	0	1	1	ARHGAP11A	Rho GTPase activating protein 11A
hsa-miR-583	0	0	1	0	1	1	ZBTB24	zinc finger and BTB domain containing 24
hsa-miR-583	1	0	1	1	1	1	TOMM70A	translocase of outer mitochondrial membrane 70 homolog A (S. cerevisiae)
hsa-miR-583	1	0	1	1	1	1	ZBTB39	zinc finger and BTB domain containing 39
hsa-miR-583	1	0	1	1	1	1	NUAK1	NUAK family, SNF1-like kinase, 1
hsa-miR-583	1	0	1	1	1	1	ARHGAP44	Rho GTPase activating protein 44
hsa-miR-583	1	0	1	0	1	1	PDAP1	PDGFA associated protein 1
hsa-miR-583	1	0	1	1	1	1	CHSY1	chondroitin sulfate synthase 1
hsa-miR-583	1	0	1	1	1	1	R3HDM2	R3H domain containing 2
hsa-miR-583	1	0	1	0	1	1	WDFY3	WD repeat and FYVE domain containing 3
hsa-miR-583	1	0	1	1	1	1	SPEN	spen homolog, transcriptional regulator (Drosophila)
hsa-miR-583	1	0	1	1	1	1	SMG1	smg-1 homolog, phosphatidylinositol 3-kinase-related kinase (C. elegans)
hsa-miR-583	1	0	1	1	0	0	CIC	capicua homolog (Drosophila)
hsa-miR-583	1	0	1	1	1	1	RTF1	Rtf1, Paf1/RNA polymerase II complex component, homolog (S. cerevisiae)
hsa-miR-583	1	0	1	1	1	1	GPD1L	glycerol-3-phosphate dehydrogenase 1-like
hsa-miR-583	1	0	1	0	1	1	LARP4B	La ribonucleoprotein domain family, member 4B
hsa-miR-583	1	0	1	1	1	1	RCOR1	REST corepressor 1
hsa-miR-583	0	0	1	1	1	1	ARL6IP1	ADP-ribosylation factor-like 6 interacting protein 1
hsa-miR-583	0	0	1	1	1	1	FBXO28	F-box protein 28
hsa-miR-583	1	0	1	1	1	1	PLCB1	phospholipase C, beta 1 (phosphoinositide-specific)
hsa-miR-583	1	0	1	0	1	1	KIAA1024	KIAA1024
hsa-miR-583	1	0	1	1	1	1	ANKS1A	ankyrin repeat and sterile alpha motif domain containing 1A
hsa-miR-583	1	0	1	1	1	1	CUX2	cut-like homeobox 2
hsa-miR-583	1	0	1	0	1	1	KHNYN	KH and NYN domain containing
hsa-miR-583	0	0	1	0	1	1	ZDHHC17	zinc finger, DHHC-type containing 17
hsa-miR-583	0	0	1	1	1	1	LEPROTL1	leptin receptor overlapping transcript-like 1
hsa-miR-583	1	0	1	1	1	1	DSTYK	dual serine/threonine and tyrosine protein kinase
hsa-miR-583	1	0	1	1	1	1	PARM1	prostate androgen-regulated mucin-like protein 1
hsa-miR-583	1	0	1	1	1	1	CCDC28A	coiled-coil domain containing 28A
hsa-miR-583	1	0	1	1	1	1	CNOT6	CCR4-NOT transcription complex, subunit 6
hsa-miR-583	1	0	1	1	1	1	NSL1	NSL1, MIND kinetochore complex component, homolog (S. cerevisiae)
hsa-miR-583	1	0	1	1	1	1	PNKD	paroxysmal nonkinesigenic dyskinesia
hsa-miR-583	1	0	1	0	1	1	OSBPL3	oxysterol binding protein-like 3
hsa-miR-583	1	0	1	1	1	1	LRRTM2	leucine rich repeat transmembrane neuronal 2
hsa-miR-583	1	0	1	1	1	1	SLITRK5	SLIT and NTRK-like family, member 5
hsa-miR-583	1	0	1	0	1	1	PPP1R16B	protein phosphatase 1, regulatory subunit 16B
hsa-miR-583	0	0	1	1	1	1	GIMAP2	GTPase, IMAP family member 2
hsa-miR-583	0	0	1	1	1	1	BRPF3	bromodomain and PHD finger containing, 3
hsa-miR-583	0	0	1	1	0	0	DESI1	desumoylating isopeptidase 1
hsa-miR-583	1	0	1	0	1	1	RRM2B	ribonucleotide reductase M2 B (TP53 inducible)
hsa-miR-583	1	0	1	1	1	1	PLA2G3	phospholipase A2, group III
hsa-miR-583	1	0	1	0	0	0	CD207	CD207 molecule, langerin
hsa-miR-583	1	0	1	1	1	1	ST8SIA3	ST8 alpha-N-acetyl-neuraminide alpha-2,8-sialyltransferase 3
hsa-miR-583	1	0	1	0	1	1	TRIM33	tripartite motif containing 33
hsa-miR-583	1	0	1	1	1	1	TXNDC12	thioredoxin domain containing 12 (endoplasmic reticulum)
hsa-miR-583	0	0	1	0	0	0	RPS27L	ribosomal protein S27-like
hsa-miR-583	1	0	1	1	1	1	MEMO1	mediator of cell motility 1
hsa-miR-583	0	0	1	1	1	1	POLR1D	polymerase (RNA) I polypeptide D, 16kDa
hsa-miR-583	0	0	1	1	1	1	ISOC1	isochorismatase domain containing 1
hsa-miR-583	1	0	1	1	1	1	RRP15	ribosomal RNA processing 15 homolog (S. cerevisiae)
hsa-miR-583	0	0	1	1	1	1	RAB10	RAB10, member RAS oncogene family
hsa-miR-583	1	0	1	1	1	1	VGLL3	vestigial like 3 (Drosophila)
hsa-miR-583	1	0	1	1	1	1	AKAP11	A kinase (PRKA) anchor protein 11
hsa-miR-583	1	0	1	1	1	1	BIRC6	baculoviral IAP repeat containing 6
hsa-miR-583	1	0	1	0	1	1	HPCAL4	hippocalcin like 4
hsa-miR-583	1	0	1	1	1	1	RNF138	ring finger protein 138, E3 ubiquitin protein ligase
hsa-miR-583	1	0	1	1	1	1	TOB2	transducer of ERBB2, 2
hsa-miR-583	1	0	1	0	1	1	SELT	selenoprotein T
hsa-miR-583	1	0	1	1	1	1	CMPK1	cytidine monophosphate (UMP-CMP) kinase 1, cytosolic
hsa-miR-583	1	0	1	1	1	1	RAB14	RAB14, member RAS oncogene family
hsa-miR-583	1	0	1	1	1	1	RAPGEFL1	Rap guanine nucleotide exchange factor (GEF)-like 1
hsa-miR-583	1	0	1	1	1	1	LUC7L3	LUC7-like 3 (S. cerevisiae)
hsa-miR-583	1	0	1	1	1	1	PHF20	PHD finger protein 20
hsa-miR-583	1	0	1	0	1	1	CRIM1	cysteine rich transmembrane BMP regulator 1 (chordin-like)
hsa-miR-583	0	0	1	1	0	0	NCKIPSD	NCK interacting protein with SH3 domain
hsa-miR-583	1	0	1	0	1	1	RAB8B	RAB8B, member RAS oncogene family
hsa-miR-583	1	0	1	1	1	1	WAC	WW domain containing adaptor with coiled-coil
hsa-miR-583	1	0	1	0	1	1	KLHL3	kelch-like 3 (Drosophila)
hsa-miR-583	1	0	1	1	1	1	SIX4	SIX homeobox 4
hsa-miR-583	1	0	1	1	1	1	GALNT7	UDP-N-acetyl-alpha-D-galactosamine:polypeptide N-acetylgalactosaminyltransferase 7 (GalNAc-T7)
hsa-miR-583	0	0	1	1	1	1	POLE3	polymerase (DNA directed), epsilon 3, accessory subunit
hsa-miR-583	1	0	1	1	1	1	PLXNA3	plexin A3
hsa-miR-583	1	0	1	1	1	1	INO80	INO80 homolog (S. cerevisiae)
hsa-miR-583	0	0	1	1	1	1	KIF27	kinesin family member 27
hsa-miR-583	1	0	1	0	1	1	KCTD9	potassium channel tetramerisation domain containing 9
hsa-miR-583	1	0	1	1	1	1	HAUS6	HAUS augmin-like complex, subunit 6
hsa-miR-583	0	0	1	0	1	1	OTUB1	OTU domain, ubiquitin aldehyde binding 1
hsa-miR-583	1	0	1	1	1	1	VPS13C	vacuolar protein sorting 13 homolog C (S. cerevisiae)
hsa-miR-583	1	0	1	0	1	1	FAM46C	family with sequence similarity 46, member C
hsa-miR-583	1	0	1	0	1	1	DCAF16	DDB1 and CUL4 associated factor 16
hsa-miR-583	1	0	1	1	0	0	INO80D	INO80 complex subunit D
hsa-miR-583	1	0	1	0	1	1	FLVCR2	feline leukemia virus subgroup C cellular receptor family, member 2
hsa-miR-583	1	0	1	0	1	1	MARCH5	membrane-associated ring finger (C3HC4) 5
hsa-miR-583	1	0	1	1	1	1	FAM120C	family with sequence similarity 120C
hsa-miR-583	1	0	1	1	1	1	CDCA4	cell division cycle associated 4
hsa-miR-583	0	0	1	1	1	1	WIPI1	WD repeat domain, phosphoinositide interacting 1
hsa-miR-583	0	0	1	0	1	1	MREG	melanoregulin
hsa-miR-583	1	0	1	1	1	1	WDYHV1	WDYHV motif containing 1
hsa-miR-583	1	0	1	1	1	1	ATG2B	autophagy related 2B
hsa-miR-583	0	0	1	1	1	1	RBM22	RNA binding motif protein 22
hsa-miR-583	1	0	1	0	1	1	CCDC88A	coiled-coil domain containing 88A
hsa-miR-583	1	0	1	1	1	1	FAM178A	family with sequence similarity 178, member A
hsa-miR-583	1	0	1	0	1	1	LGI2	leucine-rich repeat LGI family, member 2
hsa-miR-583	0	0	1	1	0	0	CCDC87	coiled-coil domain containing 87
hsa-miR-583	0	0	1	1	1	1	C1orf106	chromosome 1 open reading frame 106
hsa-miR-583	1	0	1	1	1	1	PI4K2B	phosphatidylinositol 4-kinase type 2 beta
hsa-miR-583	1	0	1	1	1	1	RSBN1	round spermatid basic protein 1
hsa-miR-583	0	0	1	1	1	1	WDR33	WD repeat domain 33
hsa-miR-583	0	0	1	1	1	1	STK32B	serine/threonine kinase 32B
hsa-miR-583	1	0	1	0	1	1	FOXJ2	forkhead box J2
hsa-miR-583	1	0	1	1	1	1	RRN3	RRN3 RNA polymerase I transcription factor homolog (S. cerevisiae)
hsa-miR-583	0	0	1	1	1	1	BDP1	B double prime 1, subunit of RNA polymerase III transcription initiation factor IIIB
hsa-miR-583	0	0	1	0	0	0	KDM3A	lysine (K)-specific demethylase 3A
hsa-miR-583	1	0	1	1	1	1	PAG1	phosphoprotein associated with glycosphingolipid microdomains 1
hsa-miR-583	1	0	1	1	1	1	LRRC59	leucine rich repeat containing 59
hsa-miR-583	1	0	1	0	1	1	LRP1B	low density lipoprotein receptor-related protein 1B
hsa-miR-583	0	0	1	1	0	0	GABRQ	gamma-aminobutyric acid (GABA) A receptor, theta
hsa-miR-583	1	0	1	1	1	1	CAMK2N1	calcium/calmodulin-dependent protein kinase II inhibitor 1
hsa-miR-583	1	0	1	1	1	1	CSGALNACT2	chondroitin sulfate N-acetylgalactosaminyltransferase 2
hsa-miR-583	1	0	1	1	1	1	GNG12	guanine nucleotide binding protein (G protein), gamma 12
hsa-miR-583	1	0	1	0	1	1	PCDHAC1	protocadherin alpha subfamily C, 1
hsa-miR-583	1	0	1	0	1	1	PCDHAC2	protocadherin alpha subfamily C, 2
hsa-miR-583	1	0	1	1	1	1	PCDHA1	protocadherin alpha 1
hsa-miR-583	1	0	1	0	1	1	PCDHA10	protocadherin alpha 10
hsa-miR-583	1	0	1	0	1	1	PCDHA11	protocadherin alpha 11
hsa-miR-583	1	0	1	0	1	1	PCDHA12	protocadherin alpha 12
hsa-miR-583	1	0	1	1	1	1	PCDHA2	protocadherin alpha 2
hsa-miR-583	1	0	1	1	1	1	PCDHA3	protocadherin alpha 3
hsa-miR-583	1	0	1	1	1	1	PCDHA6	protocadherin alpha 6
hsa-miR-583	1	0	1	0	1	1	PCDHA7	protocadherin alpha 7
hsa-miR-583	1	0	1	1	1	1	PCDHA8	protocadherin alpha 8
hsa-miR-583	1	0	1	1	1	1	PCDHGA1	protocadherin gamma subfamily A, 1
hsa-miR-583	1	0	1	0	1	1	PCDHGA10	protocadherin gamma subfamily A, 10
hsa-miR-583	1	0	1	0	1	1	PCDHGA11	protocadherin gamma subfamily A, 11
hsa-miR-583	1	0	1	1	1	1	PCDHGA2	protocadherin gamma subfamily A, 2
hsa-miR-583	1	0	1	0	1	1	PCDHGA3	protocadherin gamma subfamily A, 3
hsa-miR-583	1	0	1	0	1	1	PCDHGA4	protocadherin gamma subfamily A, 4
hsa-miR-583	1	0	1	0	1	1	PCDHGA5	protocadherin gamma subfamily A, 5
hsa-miR-583	1	0	1	0	1	1	PCDHGA6	protocadherin gamma subfamily A, 6
hsa-miR-583	1	0	1	0	1	1	PCDHGA7	protocadherin gamma subfamily A, 7
hsa-miR-583	1	0	1	0	1	1	PCDHGA9	protocadherin gamma subfamily A, 9
hsa-miR-583	1	0	1	0	1	1	PCDHGB1	protocadherin gamma subfamily B, 1
hsa-miR-583	1	0	1	0	1	1	PCDHGB2	protocadherin gamma subfamily B, 2
hsa-miR-583	1	0	1	0	1	1	PCDHGB3	protocadherin gamma subfamily B, 3
hsa-miR-583	1	0	1	0	1	1	PCDHGB5	protocadherin gamma subfamily B, 5
hsa-miR-583	1	0	1	0	1	1	PCDHGB6	protocadherin gamma subfamily B, 6
hsa-miR-583	1	0	1	0	1	1	PCDHGB7	protocadherin gamma subfamily B, 7
hsa-miR-583	1	0	1	0	1	1	PCDHGC4	protocadherin gamma subfamily C, 4
hsa-miR-583	1	0	1	0	1	1	PCDHGC5	protocadherin gamma subfamily C, 5
hsa-miR-583	1	0	1	1	1	1	SASH3	SAM and SH3 domain containing 3
hsa-miR-583	1	0	1	0	1	1	FAM190B	family with sequence similarity 190, member B
hsa-miR-583	1	0	1	0	1	1	CCDC93	coiled-coil domain containing 93
hsa-miR-583	0	0	1	1	1	1	TRMT13	tRNA methyltransferase 13 homolog (S. cerevisiae)
hsa-miR-583	1	0	1	1	1	1	SEPT3	septin 3
hsa-miR-583	1	0	1	0	1	1	UBFD1	ubiquitin family domain containing 1
hsa-miR-583	0	0	1	1	1	1	RNF20	ring finger protein 20, E3 ubiquitin protein ligase
hsa-miR-583	1	0	1	0	1	1	SLAMF8	SLAM family member 8
hsa-miR-583	0	0	1	1	0	0	LGALS14	lectin, galactoside-binding, soluble, 14
hsa-miR-583	1	0	1	1	1	1	FEM1C	fem-1 homolog c (C. elegans)
hsa-miR-583	1	0	1	1	0	0	C11orf75	chromosome 11 open reading frame 75
hsa-miR-583	1	0	1	0	1	1	OTUD7B	OTU domain containing 7B
hsa-miR-583	1	0	1	1	0	0	SLC17A7	solute carrier family 17 (sodium-dependent inorganic phosphate cotransporter), member 7
hsa-miR-583	1	0	1	1	1	1	PCDH9	protocadherin 9
hsa-miR-583	0	0	1	1	1	1	FGF23	fibroblast growth factor 23
hsa-miR-583	0	0	1	1	1	1	TMEM27	transmembrane protein 27
hsa-miR-583	0	0	1	1	0	0	AMIGO1	adhesion molecule with Ig-like domain 1
hsa-miR-583	1	0	1	1	1	1	DLG3	discs, large homolog 3 (Drosophila)
hsa-miR-583	1	0	1	1	1	1	ARHGAP31	Rho GTPase activating protein 31
hsa-miR-583	1	0	1	1	1	1	RGAG1	retrotransposon gag domain containing 1
hsa-miR-583	1	0	1	0	1	1	NUFIP2	nuclear fragile X mental retardation protein interacting protein 2
hsa-miR-583	1	0	1	0	1	1	SYT4	synaptotagmin IV
hsa-miR-583	0	0	1	1	1	1	ARRDC3	arrestin domain containing 3
hsa-miR-583	1	0	1	1	1	1	SIPA1L2	signal-induced proliferation-associated 1 like 2
hsa-miR-583	0	0	1	0	1	1	TRMT5	tRNA methyltransferase 5 homolog (S. cerevisiae)
hsa-miR-583	1	0	1	1	1	1	ARHGAP21	Rho GTPase activating protein 21
hsa-miR-583	1	0	1	1	1	1	HOMEZ	homeobox and leucine zipper encoding
hsa-miR-583	1	0	1	1	1	1	RANBP10	RAN binding protein 10
hsa-miR-583	1	0	1	1	1	1	TSHZ3	teashirt zinc finger homeobox 3
hsa-miR-583	1	0	1	1	1	1	CNTN3	contactin 3 (plasmacytoma associated)
hsa-miR-583	1	0	1	1	1	1	ZFP14	zinc finger protein 14 homolog (mouse)
hsa-miR-583	0	0	1	1	1	1	PRX	periaxin
hsa-miR-583	0	0	1	1	1	1	EPG5	ectopic P-granules autophagy protein 5 homolog (C. elegans)
hsa-miR-583	0	0	1	1	1	1	PPM1A	protein phosphatase, Mg2+/Mn2+ dependent, 1A
hsa-miR-583	1	0	1	1	1	1	KCNJ12	potassium inwardly-rectifying channel, subfamily J, member 12
hsa-miR-583	0	0	1	1	1	1	TLX3	T-cell leukemia homeobox 3
hsa-miR-583	1	0	1	1	1	1	HCN1	hyperpolarization activated cyclic nucleotide-gated potassium channel 1
hsa-miR-583	1	0	1	0	1	1	NMT1	N-myristoyltransferase 1
hsa-miR-583	1	0	1	1	1	1	CLDN1	claudin 1
hsa-miR-583	1	0	1	1	1	1	ADCY1	adenylate cyclase 1 (brain)
hsa-miR-583	0	0	1	1	0	0	HOXD11	homeobox D11
hsa-miR-583	1	0	1	0	1	1	TP53INP2	tumor protein p53 inducible nuclear protein 2
hsa-miR-583	1	0	1	1	1	1	FAM60A	family with sequence similarity 60, member A
hsa-miR-583	1	0	1	1	1	1	TRIB2	tribbles homolog 2 (Drosophila)
hsa-miR-583	1	0	1	1	1	1	OTX2	orthodenticle homeobox 2
hsa-miR-583	1	0	1	1	1	1	SLC5A7	solute carrier family 5 (choline transporter), member 7
hsa-miR-583	0	0	1	1	1	1	FANCE	Fanconi anemia, complementation group E
hsa-miR-583	1	0	1	0	0	0	ALX4	ALX homeobox 4
hsa-miR-583	0	0	1	0	1	1	SPCS3	signal peptidase complex subunit 3 homolog (S. cerevisiae)
hsa-miR-583	0	0	1	1	0	0	C12orf44	chromosome 12 open reading frame 44
hsa-miR-583	1	0	1	1	1	1	SEC24A	SEC24 family, member A (S. cerevisiae)
hsa-miR-583	1	0	1	0	1	1	CSNK1G1	casein kinase 1, gamma 1
hsa-miR-583	0	0	1	1	1	1	CLSPN	claspin
hsa-miR-583	0	0	1	1	1	1	PERP	PERP, TP53 apoptosis effector
hsa-miR-583	1	0	1	1	1	1	GOLPH3	golgi phosphoprotein 3 (coat-protein)
hsa-miR-583	1	0	1	1	1	1	SNX16	sorting nexin 16
hsa-miR-583	1	0	1	0	1	1	EDAR	ectodysplasin A receptor
hsa-miR-583	0	0	1	1	1	1	HHIP	hedgehog interacting protein
hsa-miR-583	1	0	1	1	1	1	TMEM168	transmembrane protein 168
hsa-miR-583	1	0	1	1	1	1	NEUROD6	neuronal differentiation 6
hsa-miR-583	1	0	1	1	1	1	FAM160B2	family with sequence similarity 160, member B2
hsa-miR-583	1	0	1	1	1	1	C6orf106	chromosome 6 open reading frame 106
hsa-miR-583	1	0	1	1	1	1	FNDC4	fibronectin type III domain containing 4
hsa-miR-583	1	0	1	1	1	1	FBXL17	F-box and leucine-rich repeat protein 17
hsa-miR-583	1	0	1	1	1	1	MARCH7	membrane-associated ring finger (C3HC4) 7, E3 ubiquitin protein ligase
hsa-miR-583	1	0	1	1	1	1	YTHDC2	YTH domain containing 2
hsa-miR-583	1	0	1	0	1	1	BCL11B	B-cell CLL/lymphoma 11B (zinc finger protein)
hsa-miR-583	1	0	1	1	0	0	UBE2Z	ubiquitin-conjugating enzyme E2Z
hsa-miR-583	1	0	1	1	1	1	FGFR1	fibroblast growth factor receptor 1
hsa-miR-583	1	0	1	1	1	1	HOXB4	homeobox B4
hsa-miR-583	1	0	1	1	1	1	NEUROG2	neurogenin 2
hsa-miR-583	0	0	1	0	1	1	TRPM8	transient receptor potential cation channel, subfamily M, member 8
hsa-miR-583	1	0	1	1	0	0	PHF23	PHD finger protein 23
hsa-miR-583	0	0	1	1	1	1	PRR15L	proline rich 15-like
hsa-miR-583	1	0	1	1	1	1	EFHD2	EF-hand domain family, member D2
hsa-miR-583	0	0	1	1	1	1	PDYN	prodynorphin
hsa-miR-583	1	0	1	1	1	1	PSTPIP2	proline-serine-threonine phosphatase interacting protein 2
hsa-miR-583	1	0	1	1	1	1	NKAIN1	Na+/K+ transporting ATPase interacting 1
hsa-miR-583	1	0	1	1	1	1	GCC1	GRIP and coiled-coil domain containing 1
hsa-miR-583	0	0	1	1	0	0	EPS8L3	EPS8-like 3
hsa-miR-583	1	0	1	1	1	1	CDC73	cell division cycle 73, Paf1/RNA polymerase II complex component, homolog (S. cerevisiae)
hsa-miR-583	1	0	1	1	1	1	C3orf52	chromosome 3 open reading frame 52
hsa-miR-583	1	0	1	1	1	1	ZNF329	zinc finger protein 329
hsa-miR-583	0	0	1	1	1	1	GALNT12	UDP-N-acetyl-alpha-D-galactosamine:polypeptide N-acetylgalactosaminyltransferase 12 (GalNAc-T12)
hsa-miR-583	0	0	1	1	1	1	CXorf36	chromosome X open reading frame 36
hsa-miR-583	0	0	1	1	0	0	CATSPERB	catsper channel auxiliary subunit beta
hsa-miR-583	1	0	1	1	1	1	PIP4K2C	phosphatidylinositol-5-phosphate 4-kinase, type II, gamma
hsa-miR-583	0	0	1	1	1	1	NHEJ1	nonhomologous end-joining factor 1
hsa-miR-583	0	0	1	1	1	1	ZNF767	zinc finger family member 767
hsa-miR-583	0	0	1	1	1	1	DOCK5	dedicator of cytokinesis 5
hsa-miR-583	1	0	1	1	1	1	KLHL18	kelch-like 18 (Drosophila)
hsa-miR-583	0	0	1	1	0	0	BAIAP2L2	BAI1-associated protein 2-like 2
hsa-miR-583	1	0	1	0	1	1	VCPIP1	valosin containing protein (p97)/p47 complex interacting protein 1
hsa-miR-583	0	0	1	1	1	1	CCDC170	coiled-coil domain containing 170
hsa-miR-583	1	0	1	1	1	1	RNF34	ring finger protein 34, E3 ubiquitin protein ligase
hsa-miR-583	1	0	1	1	1	1	OPA3	optic atrophy 3 (autosomal recessive, with chorea and spastic paraplegia)
hsa-miR-583	1	0	1	1	1	1	TRIB1	tribbles homolog 1 (Drosophila)
hsa-miR-583	1	0	1	1	1	1	JHDM1D	jumonji C domain containing histone demethylase 1 homolog D (S. cerevisiae)
hsa-miR-583	1	0	1	0	1	1	VOPP1	vesicular, overexpressed in cancer, prosurvival protein 1
hsa-miR-583	1	0	1	1	1	1	FAM117A	family with sequence similarity 117, member A
hsa-miR-583	1	0	1	1	1	1	PDRG1	p53 and DNA-damage regulated 1
hsa-miR-583	1	0	1	1	1	1	MAP4	microtubule-associated protein 4
hsa-miR-583	1	0	1	0	1	1	LBH	limb bud and heart development homolog (mouse)
hsa-miR-583	1	0	1	1	1	1	SNX27	sorting nexin family member 27
hsa-miR-583	1	0	1	1	1	1	C6orf62	chromosome 6 open reading frame 62
hsa-miR-583	0	0	1	1	1	1	ISCA1	iron-sulfur cluster assembly 1 homolog (S. cerevisiae)
hsa-miR-583	1	0	1	1	1	1	TIGD6	tigger transposable element derived 6
hsa-miR-583	0	0	1	1	1	1	SEH1L	SEH1-like (S. cerevisiae)
hsa-miR-583	0	0	1	1	1	1	TEX15	testis expressed 15
hsa-miR-583	1	0	1	0	1	1	TMEM47	transmembrane protein 47
hsa-miR-583	0	0	1	1	0	0	TRAPPC9	trafficking protein particle complex 9
hsa-miR-583	1	0	1	0	1	1	ITCH	itchy E3 ubiquitin protein ligase
hsa-miR-583	1	0	1	1	1	1	PCDHA9	protocadherin alpha 9
hsa-miR-583	0	0	1	0	1	1	ENAM	enamelin
hsa-miR-583	1	0	1	1	1	1	SNX25	sorting nexin 25
hsa-miR-583	0	0	1	1	0	0	KRTAP17-1	keratin associated protein 17-1
hsa-miR-583	1	0	1	0	1	1	FAM172A	family with sequence similarity 172, member A
hsa-miR-583	1	0	1	0	1	1	PCDHGA8	protocadherin gamma subfamily A, 8
hsa-miR-583	0	0	1	1	1	1	MAGT1	magnesium transporter 1
hsa-miR-583	0	0	1	1	1	1	C4orf17	chromosome 4 open reading frame 17
hsa-miR-583	1	0	1	1	1	1	ARID5B	AT rich interactive domain 5B (MRF1-like)
hsa-miR-583	1	0	1	1	1	1	ANTXR1	anthrax toxin receptor 1
hsa-miR-583	1	0	1	1	1	1	ZDHHC18	zinc finger, DHHC-type containing 18
hsa-miR-583	0	0	1	1	0	0	C9orf89	chromosome 9 open reading frame 89
hsa-miR-583	1	0	1	1	1	1	BRMS1L	breast cancer metastasis-suppressor 1-like
hsa-miR-583	1	0	1	1	1	1	DNAJC14	DnaJ (Hsp40) homolog, subfamily C, member 14
hsa-miR-583	0	0	1	1	1	1	C15orf48	chromosome 15 open reading frame 48
hsa-miR-583	1	0	1	1	1	1	DCTN5	dynactin 5 (p25)
hsa-miR-583	0	0	1	1	1	1	JAGN1	jagunal homolog 1 (Drosophila)
hsa-miR-583	1	0	1	1	1	1	PARD6B	par-6 partitioning defective 6 homolog beta (C. elegans)
hsa-miR-583	1	0	1	1	1	1	PPP1R9B	protein phosphatase 1, regulatory subunit 9B
hsa-miR-583	1	0	1	1	1	1	ARHGEF39	Rho guanine nucleotide exchange factor (GEF) 39
hsa-miR-583	1	0	1	0	1	1	UBASH3B	ubiquitin associated and SH3 domain containing B
hsa-miR-583	1	0	1	1	1	1	ARHGAP19	Rho GTPase activating protein 19
hsa-miR-583	1	0	1	1	1	1	PDGFA	platelet-derived growth factor alpha polypeptide
hsa-miR-583	1	0	1	1	1	1	TRIM55	tripartite motif containing 55
hsa-miR-583	0	0	1	1	1	1	ZIC5	Zic family member 5
hsa-miR-583	1	0	1	0	1	1	PURB	purine-rich element binding protein B
hsa-miR-583	1	0	1	1	0	0	CAMK2N2	calcium/calmodulin-dependent protein kinase II inhibitor 2
hsa-miR-583	1	0	1	1	0	0	KCNH7	potassium voltage-gated channel, subfamily H (eag-related), member 7
hsa-miR-583	1	0	1	1	0	0	FCHSD1	FCH and double SH3 domains 1
hsa-miR-583	1	0	1	1	1	1	EPT1	ethanolaminephosphotransferase 1 (CDP-ethanolamine-specific)
hsa-miR-583	1	0	1	1	1	1	SYS1	SYS1 Golgi-localized integral membrane protein homolog (S. cerevisiae)
hsa-miR-583	1	0	1	1	0	0	CCDC120	coiled-coil domain containing 120
hsa-miR-583	1	0	1	1	1	1	SLC18B1	solute carrier family 18, subfamily B, member 1
hsa-miR-583	1	0	1	1	1	1	XKR4	XK, Kell blood group complex subunit-related family, member 4
hsa-miR-583	1	0	1	1	1	1	SLITRK1	SLIT and NTRK-like family, member 1
hsa-miR-583	0	0	1	1	1	1	LENG8	leukocyte receptor cluster (LRC) member 8
hsa-miR-583	0	0	1	1	0	0	FAM46B	family with sequence similarity 46, member B
hsa-miR-583	1	0	1	1	1	1	TRIM9	tripartite motif containing 9
hsa-miR-583	1	0	1	1	0	0	AP1S1	adaptor-related protein complex 1, sigma 1 subunit
hsa-miR-583	1	0	1	1	1	1	NAA15	N(alpha)-acetyltransferase 15, NatA auxiliary subunit
hsa-miR-583	1	0	1	1	1	1	SLC44A1	solute carrier family 44, member 1
hsa-miR-583	0	0	1	1	1	1	CDKN2AIPNL	CDKN2A interacting protein N-terminal like
hsa-miR-583	1	0	1	1	1	1	NRSN1	neurensin 1
hsa-miR-583	1	0	1	1	1	1	JDP2	Jun dimerization protein 2
hsa-miR-583	0	0	1	0	1	1	PAQR8	progestin and adipoQ receptor family member VIII
hsa-miR-583	1	0	1	1	1	1	BMPER	BMP binding endothelial regulator
hsa-miR-583	0	0	1	1	1	1	PATE1	prostate and testis expressed 1
hsa-miR-583	1	0	1	1	1	1	FAM122A	family with sequence similarity 122A
hsa-miR-583	0	0	1	0	1	1	SP140L	SP140 nuclear body protein-like
hsa-miR-583	1	0	1	0	1	1	NUS1	nuclear undecaprenyl pyrophosphate synthase 1 homolog (S. cerevisiae)
hsa-miR-583	1	0	1	1	1	1	ICA1L	islet cell autoantigen 1,69kDa-like
hsa-miR-583	1	0	1	0	1	1	SP1	Sp1 transcription factor
hsa-miR-583	1	0	1	0	1	1	FCHO2	FCH domain only 2
hsa-miR-583	0	0	1	1	0	0	PLD4	phospholipase D family, member 4
hsa-miR-583	1	0	1	1	1	1	CD200R1	CD200 receptor 1
hsa-miR-583	0	0	1	1	1	1	ADAMTS17	ADAM metallopeptidase with thrombospondin type 1 motif, 17
hsa-miR-583	1	0	1	1	1	1	RPIA	ribose 5-phosphate isomerase A
hsa-miR-583	1	0	1	0	1	1	CNOT6L	CCR4-NOT transcription complex, subunit 6-like
hsa-miR-583	1	0	1	1	1	1	SAMD8	sterile alpha motif domain containing 8
hsa-miR-583	0	0	1	1	0	0	LINC00477	long intergenic non-protein coding RNA 477
hsa-miR-583	0	0	1	1	0	0	LSM14B	LSM14B, SCD6 homolog B (S. cerevisiae)
hsa-miR-583	0	0	1	1	1	1	PUS10	pseudouridylate synthase 10
hsa-miR-583	0	0	1	1	1	1	ALG14	asparagine-linked glycosylation 14 homolog (S. cerevisiae)
hsa-miR-583	0	0	1	1	1	1	DACT3	dapper, antagonist of beta-catenin, homolog 3 (Xenopus laevis)
hsa-miR-583	0	0	1	1	0	0	CISH	cytokine inducible SH2-containing protein
hsa-miR-583	0	0	1	1	0	0	SENP8	SUMO/sentrin specific peptidase family member 8
hsa-miR-583	0	0	1	0	1	1	DDIT4L	DNA-damage-inducible transcript 4-like
hsa-miR-583	1	0	1	1	1	1	CCSAP	centriole, cilia and spindle-associated protein
hsa-miR-583	0	0	1	1	0	0	TMEM217	transmembrane protein 217
hsa-miR-583	0	0	1	1	0	0	TIGD3	tigger transposable element derived 3
hsa-miR-583	1	0	1	1	1	1	SEPT6	septin 6
hsa-miR-583	1	0	1	1	1	1	FAM110B	family with sequence similarity 110, member B
hsa-miR-583	0	0	1	1	1	1	WFDC9	WAP four-disulfide core domain 9
hsa-miR-583	0	0	1	1	1	1	LONRF1	LON peptidase N-terminal domain and ring finger 1
hsa-miR-583	1	0	1	1	1	1	POGLUT1	protein O-glucosyltransferase 1
hsa-miR-583	0	0	1	1	0	0	C16orf46	chromosome 16 open reading frame 46
hsa-miR-583	1	0	1	1	1	1	LSM12	LSM12 homolog (S. cerevisiae)
hsa-miR-583	1	0	1	1	1	1	TBX15	T-box 15
hsa-miR-583	1	0	1	1	1	1	FAM123B	family with sequence similarity 123B
hsa-miR-583	0	0	1	1	1	1	C12orf66	chromosome 12 open reading frame 66
hsa-miR-583	1	0	1	1	1	1	CEP128	centrosomal protein 128kDa
hsa-miR-583	1	0	1	1	1	1	LRFN5	leucine rich repeat and fibronectin type III domain containing 5
hsa-miR-583	0	0	1	1	1	1	TMEM199	transmembrane protein 199
hsa-miR-583	1	0	1	1	1	1	SRFBP1	serum response factor binding protein 1
hsa-miR-583	1	0	1	1	1	1	C7orf60	chromosome 7 open reading frame 60
hsa-miR-583	0	0	1	1	0	0	MARCH10	membrane-associated ring finger (C3HC4) 10, E3 ubiquitin protein ligase
hsa-miR-583	1	0	1	1	0	0	ZNF579	zinc finger protein 579
hsa-miR-583	1	0	1	1	1	1	UBE2E2	ubiquitin-conjugating enzyme E2E 2
hsa-miR-583	0	0	1	1	1	1	GAPT	GRB2-binding adaptor protein, transmembrane
hsa-miR-583	1	0	1	0	1	1	ZBTB9	zinc finger and BTB domain containing 9
hsa-miR-583	0	0	1	1	1	1	CNPY4	canopy 4 homolog (zebrafish)
hsa-miR-583	1	0	1	0	1	1	C7orf41	chromosome 7 open reading frame 41
hsa-miR-583	1	0	1	1	1	1	FAS	Fas (TNF receptor superfamily, member 6)
hsa-miR-583	1	0	1	1	1	1	UHRF2	ubiquitin-like with PHD and ring finger domains 2, E3 ubiquitin protein ligase
hsa-miR-583	1	0	1	1	0	0	MAGI3	membrane associated guanylate kinase, WW and PDZ domain containing 3
hsa-miR-583	0	0	1	0	1	1	TMEM92	transmembrane protein 92
hsa-miR-583	0	0	1	0	1	1	LIX1	Lix1 homolog (chicken)
hsa-miR-583	0	0	1	1	1	1	BEND2	BEN domain containing 2
hsa-miR-583	0	0	1	1	0	0	APCDD1L	adenomatosis polyposis coli down-regulated 1-like
hsa-miR-583	1	0	1	0	1	1	ZCCHC24	zinc finger, CCHC domain containing 24
hsa-miR-583	1	0	1	1	1	1	HS6ST3	heparan sulfate 6-O-sulfotransferase 3
hsa-miR-583	1	0	1	1	1	1	LCORL	ligand dependent nuclear receptor corepressor-like
hsa-miR-583	1	0	1	1	0	0	FAM43A	family with sequence similarity 43, member A
hsa-miR-583	1	0	1	1	1	1	FNDC5	fibronectin type III domain containing 5
hsa-miR-583	1	0	1	1	1	1	CACUL1	CDK2-associated, cullin domain 1
hsa-miR-583	0	0	1	1	1	1	CDY1	chromodomain protein, Y-linked, 1
hsa-miR-583	0	0	1	1	1	1	ZFP91-CNTF	ZFP91-CNTF readthrough (non-protein coding)
hsa-miR-583	1	0	1	1	1	1	POM121	POM121 transmembrane nucleoporin
hsa-miR-583	1	0	1	0	1	1	PLEKHH2	pleckstrin homology domain containing, family H (with MyTH4 domain) member 2
hsa-miR-583	1	0	1	1	1	1	CAMK2D	calcium/calmodulin-dependent protein kinase II delta
hsa-miR-583	0	0	1	1	0	0	KCNE2	potassium voltage-gated channel, Isk-related family, member 2
hsa-miR-583	0	0	1	1	1	1	REXO1L1	REX1, RNA exonuclease 1 homolog (S. cerevisiae)-like 1
hsa-miR-583	1	0	1	1	1	1	SMG7	smg-7 homolog, nonsense mediated mRNA decay factor (C. elegans)
hsa-miR-583	1	0	1	1	1	1	DCUN1D3	DCN1, defective in cullin neddylation 1, domain containing 3 (S. cerevisiae)
[truncated: 645 more rows]
