# Supplementary material for: Profiling of Selected MicroRNAs in Proliferative Eutopic Endometrium of Women with Ovarian Endometriosis
Source: Biomed Res Int. 2015 Aug 20;2015:760698. doi: 10.1155/2015/760698 (PMC4558423; doi:10.1155/2015/760698)
Supplement: Supplementary file 1 — Table I: The names of miRNAs significantly differentially expressed between eutopic endometrium of patients with endometriosis vs eutopic endometrium of patients without endometriosis. Table II: The associations between miRNA and mRNA, which presents detailed results of the search of six major databases i.e targetscan, tarbase, miranda, mirbase, mirtarget2 and pictar. [file 760698.f1.zip › 760698.f1/Table II/hsa-miR-587.tsv]

miR	targetscan	tarbase	miranda	mirbase	mirtarget2	pictar	GeneSymbol	GeneName
hsa-miR-587	1	0	1	0	0	0	TRANK1	tetratricopeptide repeat and ankyrin repeat containing 1
hsa-miR-587	1	0	1	1	1	1	PRUNE2	prune homolog 2 (Drosophila)
hsa-miR-587	0	0	1	1	1	1	HSPH1	heat shock 105kDa/110kDa protein 1
hsa-miR-587	1	0	1	1	1	1	ABCC5	ATP-binding cassette, sub-family C (CFTR/MRP), member 5
hsa-miR-587	1	0	1	1	1	1	NUPL1	nucleoporin like 1
hsa-miR-587	1	0	1	0	1	1	MTSS1	metastasis suppressor 1
hsa-miR-587	1	0	1	0	1	1	NEDD4L	neural precursor cell expressed, developmentally down-regulated 4-like, E3 ubiquitin protein ligase
hsa-miR-587	0	0	1	1	1	1	PDE4DIP	phosphodiesterase 4D interacting protein
hsa-miR-587	1	0	1	1	0	0	OTUD3	OTU domain containing 3
hsa-miR-587	1	0	1	0	1	1	CEP350	centrosomal protein 350kDa
hsa-miR-587	1	0	1	1	1	1	RNGTT	RNA guanylyltransferase and 5'-phosphatase
hsa-miR-587	1	0	1	1	0	0	SUSD5	sushi domain containing 5
hsa-miR-587	1	0	1	1	1	1	GPATCH8	G patch domain containing 8
hsa-miR-587	1	0	1	0	1	1	MAGI2	membrane associated guanylate kinase, WW and PDZ domain containing 2
hsa-miR-587	0	0	1	1	0	0	ATP10B	ATPase, class V, type 10B
hsa-miR-587	1	0	1	0	1	1	DOCK4	dedicator of cytokinesis 4
hsa-miR-587	1	0	1	0	1	1	RBM12	RNA binding motif protein 12
hsa-miR-587	1	0	1	1	1	1	DNM3	dynamin 3
hsa-miR-587	1	0	1	1	1	1	LMO7	LIM domain 7
hsa-miR-587	0	0	1	1	1	1	MAU2	MAU2 chromatid cohesion factor homolog (C. elegans)
hsa-miR-587	1	0	1	1	1	1	UBR5	ubiquitin protein ligase E3 component n-recognin 5
hsa-miR-587	1	0	1	1	1	1	RGL1	ral guanine nucleotide dissociation stimulator-like 1
hsa-miR-587	0	0	1	0	0	0	THSD7A	thrombospondin, type I, domain containing 7A
hsa-miR-587	1	0	1	1	1	1	PALLD	palladin, cytoskeletal associated protein
hsa-miR-587	1	0	1	1	0	0	STXBP5L	syntaxin binding protein 5-like
hsa-miR-587	1	0	1	1	0	0	FRMD4B	FERM domain containing 4B
hsa-miR-587	0	0	1	1	1	1	DBF4	DBF4 homolog (S. cerevisiae)
hsa-miR-587	1	0	1	1	0	0	KIAA1045	KIAA1045
hsa-miR-587	1	0	1	1	1	1	ZMIZ1	zinc finger, MIZ-type containing 1
hsa-miR-587	1	0	1	1	1	1	ASAP1	ArfGAP with SH3 domain, ankyrin repeat and PH domain 1
hsa-miR-587	0	0	1	1	1	1	FILIP1	filamin A interacting protein 1
hsa-miR-587	0	0	1	1	1	1	KIF20B	kinesin family member 20B
hsa-miR-587	1	0	1	1	1	1	DKK2	dickkopf 2 homolog (Xenopus laevis)
hsa-miR-587	1	0	1	1	1	1	PCDH19	protocadherin 19
hsa-miR-587	1	0	1	1	1	1	UPF2	UPF2 regulator of nonsense transcripts homolog (yeast)
hsa-miR-587	1	0	1	1	1	1	FAM135A	family with sequence similarity 135, member A
hsa-miR-587	0	0	1	0	1	1	MUC3B	mucin 3B, cell surface associated
hsa-miR-587	1	0	1	1	1	1	CASK	calcium/calmodulin-dependent serine protein kinase (MAGUK family)
hsa-miR-587	1	0	1	0	1	1	ZNF295	zinc finger protein 295
hsa-miR-587	1	0	1	0	1	1	LMO3	LIM domain only 3 (rhombotin-like 2)
hsa-miR-587	1	0	1	1	1	1	INADL	InaD-like (Drosophila)
hsa-miR-587	1	0	1	1	1	1	PPP6R3	protein phosphatase 6, regulatory subunit 3
hsa-miR-587	0	0	1	0	0	0	CHD8	chromodomain helicase DNA binding protein 8
hsa-miR-587	0	0	1	1	1	1	CEP192	centrosomal protein 192kDa
hsa-miR-587	0	0	1	1	1	1	PBLD	phenazine biosynthesis-like protein domain containing
hsa-miR-587	0	0	1	0	0	0	TTC28-AS1	TTC28 antisense RNA 1
hsa-miR-587	0	0	1	1	1	1	KIAA1704	KIAA1704
hsa-miR-587	1	0	1	1	1	1	AHCTF1	AT hook containing transcription factor 1
hsa-miR-587	0	0	1	1	0	0	TPGS2	tubulin polyglutamylase complex subunit 2
hsa-miR-587	1	0	1	1	0	0	ZNF292	zinc finger protein 292
hsa-miR-587	1	0	1	1	1	1	SH3TC2	SH3 domain and tetratricopeptide repeats 2
hsa-miR-587	1	0	1	0	0	0	RNF169	ring finger protein 169
hsa-miR-587	1	0	1	1	1	1	UBR3	ubiquitin protein ligase E3 component n-recognin 3 (putative)
hsa-miR-587	0	0	1	1	0	0	SSPO	SCO-spondin homolog (Bos taurus)
hsa-miR-587	0	0	1	0	0	0	TIFAB	TRAF-interacting protein with forkhead-associated domain, family member B
hsa-miR-587	0	0	1	0	1	1	ACE2	angiotensin I converting enzyme (peptidyl-dipeptidase A) 2
hsa-miR-587	1	0	1	1	1	1	UBE3A	ubiquitin protein ligase E3A
hsa-miR-587	1	0	1	1	1	1	ADARB1	adenosine deaminase, RNA-specific, B1
hsa-miR-587	0	0	1	1	1	1	CAST	calpastatin
hsa-miR-587	1	0	1	0	1	1	LRBA	LPS-responsive vesicle trafficking, beach and anchor containing
hsa-miR-587	1	0	1	1	1	1	COL11A1	collagen, type XI, alpha 1
hsa-miR-587	1	0	1	1	1	1	DAPK1	death-associated protein kinase 1
hsa-miR-587	1	0	1	0	1	1	PCDHA13	protocadherin alpha 13
hsa-miR-587	1	0	1	1	1	1	PCDHA4	protocadherin alpha 4
hsa-miR-587	1	0	1	1	1	1	NFYC	nuclear transcription factor Y, gamma
hsa-miR-587	1	0	1	1	1	1	CLIP4	CAP-GLY domain containing linker protein family, member 4
hsa-miR-587	1	0	1	1	1	1	RLF	rearranged L-myc fusion
hsa-miR-587	1	0	1	0	1	1	PLAG1	pleiomorphic adenoma gene 1
hsa-miR-587	1	0	1	1	0	0	TSPYL2	TSPY-like 2
hsa-miR-587	1	0	1	0	1	1	ETV1	ets variant 1
hsa-miR-587	1	0	1	1	1	1	ZNF207	zinc finger protein 207
hsa-miR-587	1	0	1	1	1	1	SATB2	SATB homeobox 2
hsa-miR-587	1	0	1	1	1	1	TBX2	T-box 2
hsa-miR-587	1	0	1	1	1	1	AEBP2	AE binding protein 2
hsa-miR-587	1	0	1	1	1	1	NEO1	neogenin 1
hsa-miR-587	1	0	1	1	0	0	FGFR3	fibroblast growth factor receptor 3
hsa-miR-587	1	0	1	1	1	1	MYO5A	myosin VA (heavy chain 12, myoxin)
hsa-miR-587	0	0	1	1	1	1	STAU1	staufen, RNA binding protein, homolog 1 (Drosophila)
hsa-miR-587	1	0	1	1	1	1	HNRNPK	heterogeneous nuclear ribonucleoprotein K
hsa-miR-587	0	0	1	1	0	0	CFLAR	CASP8 and FADD-like apoptosis regulator
hsa-miR-587	1	0	1	1	1	1	COL24A1	collagen, type XXIV, alpha 1
hsa-miR-587	0	0	1	1	0	0	SLC22A8	solute carrier family 22 (organic anion transporter), member 8
hsa-miR-587	1	0	1	1	1	1	SATB1	SATB homeobox 1
hsa-miR-587	1	0	1	0	1	1	ADD3	adducin 3 (gamma)
hsa-miR-587	0	0	1	1	1	1	DDX10	DEAD (Asp-Glu-Ala-Asp) box polypeptide 10
hsa-miR-587	1	0	1	1	1	1	PHLDB2	pleckstrin homology-like domain, family B, member 2
hsa-miR-587	1	0	1	0	1	1	FYB	FYN binding protein
hsa-miR-587	1	0	1	1	1	1	SLC4A4	solute carrier family 4, sodium bicarbonate cotransporter, member 4
hsa-miR-587	1	0	1	0	1	1	PDE4D	phosphodiesterase 4D, cAMP-specific
hsa-miR-587	0	0	1	0	1	1	ZMYM2	zinc finger, MYM-type 2
hsa-miR-587	1	0	1	1	1	1	CBFA2T2	core-binding factor, runt domain, alpha subunit 2; translocated to, 2
hsa-miR-587	0	0	1	1	1	1	MFSD11	major facilitator superfamily domain containing 11
hsa-miR-587	1	0	1	1	1	1	MYT1L	myelin transcription factor 1-like
hsa-miR-587	1	0	1	0	1	1	CELF2	CUGBP, Elav-like family member 2
hsa-miR-587	1	0	1	1	1	1	SOCS2	suppressor of cytokine signaling 2
hsa-miR-587	1	0	1	1	1	1	SHOC2	soc-2 suppressor of clear homolog (C. elegans)
hsa-miR-587	1	0	1	1	1	1	CTNND1	catenin (cadherin-associated protein), delta 1
hsa-miR-587	0	0	1	1	1	1	SC5DL	sterol-C5-desaturase (ERG3 delta-5-desaturase homolog, S. cerevisiae)-like
hsa-miR-587	0	0	1	1	1	1	LYPLA1	lysophospholipase I
hsa-miR-587	0	0	1	1	1	1	PCBP4	poly(rC) binding protein 4
hsa-miR-587	1	0	1	0	0	0	PPME1	protein phosphatase methylesterase 1
hsa-miR-587	1	0	1	1	1	1	KAT6B	K(lysine) acetyltransferase 6B
hsa-miR-587	1	0	1	1	1	1	EDNRB	endothelin receptor type B
hsa-miR-587	1	0	1	1	1	1	LRRFIP1	leucine rich repeat (in FLII) interacting protein 1
hsa-miR-587	1	0	1	0	1	1	CDK14	cyclin-dependent kinase 14
hsa-miR-587	0	0	1	1	1	1	ACIN1	apoptotic chromatin condensation inducer 1
hsa-miR-587	0	0	1	1	1	1	DMRT2	doublesex and mab-3 related transcription factor 2
hsa-miR-587	0	0	1	0	1	1	CLEC5A	C-type lectin domain family 5, member A
hsa-miR-587	1	0	1	1	1	1	MYNN	myoneurin
hsa-miR-587	1	0	1	1	1	1	USP15	ubiquitin specific peptidase 15
hsa-miR-587	0	0	1	0	1	1	ZDHHC17	zinc finger, DHHC-type containing 17
hsa-miR-587	0	0	1	1	1	1	NBPF14	neuroblastoma breakpoint family, member 14
hsa-miR-587	1	0	1	1	1	1	DNAJA4	DnaJ (Hsp40) homolog, subfamily A, member 4
hsa-miR-587	1	0	1	1	1	1	BCL2L13	BCL2-like 13 (apoptosis facilitator)
hsa-miR-587	1	0	1	1	1	1	TSC22D2	TSC22 domain family, member 2
hsa-miR-587	0	0	1	0	0	0	ARL17A	ADP-ribosylation factor-like 17A
hsa-miR-587	1	0	1	1	1	1	KCNMB2	potassium large conductance calcium-activated channel, subfamily M, beta member 2
hsa-miR-587	1	0	1	1	1	1	NXT2	nuclear transport factor 2-like export factor 2
hsa-miR-587	0	0	1	1	1	1	SLC30A5	solute carrier family 30 (zinc transporter), member 5
hsa-miR-587	1	0	1	1	1	1	ABI2	abl-interactor 2
hsa-miR-587	1	0	1	1	1	1	SH3GLB1	SH3-domain GRB2-like endophilin B1
hsa-miR-587	1	0	1	0	1	1	TRPS1	trichorhinophalangeal syndrome I
hsa-miR-587	1	0	1	1	1	1	ERGIC1	endoplasmic reticulum-golgi intermediate compartment (ERGIC) 1
hsa-miR-587	0	0	1	1	1	1	ZNF331	zinc finger protein 331
hsa-miR-587	1	0	1	1	1	1	PUM2	pumilio homolog 2 (Drosophila)
hsa-miR-587	0	0	1	0	1	1	ERBB2IP	erbb2 interacting protein
hsa-miR-587	1	0	1	1	1	1	PCDH11Y	protocadherin 11 Y-linked
hsa-miR-587	0	0	1	1	1	1	CYP3A43	cytochrome P450, family 3, subfamily A, polypeptide 43
hsa-miR-587	1	0	1	1	1	1	CALN1	calneuron 1
hsa-miR-587	1	0	1	1	1	1	FASLG	Fas ligand (TNF superfamily, member 6)
hsa-miR-587	0	0	1	0	0	0	LOC645355	uncharacterized LOC645355
hsa-miR-587	1	0	1	1	1	1	DCLRE1B	DNA cross-link repair 1B
hsa-miR-587	0	0	1	1	1	1	FCRL1	Fc receptor-like 1
hsa-miR-587	0	0	1	0	0	0	AFG3L1P	AFG3 ATPase family gene 3-like 1 (S. cerevisiae), pseudogene
hsa-miR-587	0	0	1	1	1	1	SLC6A15	solute carrier family 6 (neutral amino acid transporter), member 15
hsa-miR-587	0	0	1	1	1	1	MS4A4A	membrane-spanning 4-domains, subfamily A, member 4A
hsa-miR-587	1	0	1	1	1	1	ATAD1	ATPase family, AAA domain containing 1
hsa-miR-587	0	0	1	0	0	0	NBPF10	neuroblastoma breakpoint family, member 10
hsa-miR-587	0	0	1	0	0	0	CLRN1-AS1	CLRN1 antisense RNA 1
hsa-miR-587	0	0	1	1	1	1	WBP2NL	WBP2 N-terminal like
hsa-miR-587	0	0	1	1	1	1	OLFM3	olfactomedin 3
hsa-miR-587	0	0	1	1	0	0	SNRPN	small nuclear ribonucleoprotein polypeptide N
hsa-miR-587	0	0	1	0	0	0	ABCC13	ATP-binding cassette, sub-family C (CFTR/MRP), member 13, pseudogene
hsa-miR-587	0	0	1	0	1	1	NBPF15	neuroblastoma breakpoint family, member 15
hsa-miR-587	0	0	1	1	1	1	PPP1R1B	protein phosphatase 1, regulatory (inhibitor) subunit 1B
hsa-miR-587	1	0	1	1	0	0	SEPT8	septin 8
hsa-miR-587	1	0	1	1	1	1	RBFOX1	RNA binding protein, fox-1 homolog (C. elegans) 1
hsa-miR-587	1	0	1	1	1	1	WAPAL	wings apart-like homolog (Drosophila)
hsa-miR-587	0	0	1	1	1	1	CARD8	caspase recruitment domain family, member 8
hsa-miR-587	0	0	1	1	1	1	BMP2K	BMP2 inducible kinase
hsa-miR-587	0	0	1	1	1	1	ZNF638	zinc finger protein 638
hsa-miR-587	1	0	1	0	1	1	IL1RAP	interleukin 1 receptor accessory protein
hsa-miR-587	1	0	1	1	1	1	GPR64	G protein-coupled receptor 64
hsa-miR-587	1	0	1	1	1	1	DPP9	dipeptidyl-peptidase 9
hsa-miR-587	1	0	1	1	1	1	AFF2	AF4/FMR2 family, member 2
hsa-miR-587	1	0	1	1	1	1	PLAGL1	pleiomorphic adenoma gene-like 1
hsa-miR-587	1	0	1	0	1	1	DICER1	dicer 1, ribonuclease type III
hsa-miR-587	1	0	1	1	1	1	UBAP2L	ubiquitin associated protein 2-like
hsa-miR-587	1	0	1	1	1	1	ILF3	interleukin enhancer binding factor 3, 90kDa
hsa-miR-587	0	0	1	0	0	0	CD177	CD177 molecule
hsa-miR-587	1	0	1	1	1	1	NRXN3	neurexin 3
hsa-miR-587	0	0	1	0	1	1	SRPK1	SRSF protein kinase 1
hsa-miR-587	1	0	1	1	1	1	ARL4C	ADP-ribosylation factor-like 4C
hsa-miR-587	1	0	1	1	1	1	SYT14	synaptotagmin XIV
hsa-miR-587	1	0	1	1	1	1	XIRP1	xin actin-binding repeat containing 1
hsa-miR-587	0	0	1	1	1	1	DEPDC5	DEP domain containing 5
hsa-miR-587	1	0	1	1	1	1	PPP1R9A	protein phosphatase 1, regulatory subunit 9A
hsa-miR-587	0	0	1	1	0	0	NHLRC2	NHL repeat containing 2
hsa-miR-587	1	0	1	1	1	1	AKAP2	A kinase (PRKA) anchor protein 2
hsa-miR-587	1	0	1	0	1	1	NFAT5	nuclear factor of activated T-cells 5, tonicity-responsive
hsa-miR-587	0	0	1	0	0	0	FLJ20518	FSHD region gene 2 family, member C pseudogene
hsa-miR-587	0	0	1	0	0	0	TUG1	taurine upregulated 1 (non-protein coding)
hsa-miR-587	0	0	1	0	0	0	LINC00284	long intergenic non-protein coding RNA 284
hsa-miR-587	1	0	1	1	1	1	C12orf23	chromosome 12 open reading frame 23
hsa-miR-587	1	0	1	0	0	0	ZNRF3	zinc and ring finger 3
hsa-miR-587	0	0	1	0	0	0	DUXAP10	double homeobox A pseudogene 10
hsa-miR-587	1	0	1	1	1	1	S100PBP	S100P binding protein
hsa-miR-587	1	0	1	1	1	1	SMEK2	SMEK homolog 2, suppressor of mek1 (Dictyostelium)
hsa-miR-587	1	0	1	0	1	1	DCAF17	DDB1 and CUL4 associated factor 17
hsa-miR-587	1	0	1	0	1	1	UBP1	upstream binding protein 1 (LBP-1a)
hsa-miR-587	0	0	1	0	1	1	GVINP1	GTPase, very large interferon inducible pseudogene 1
hsa-miR-587	1	0	1	1	1	1	PHF20L1	PHD finger protein 20-like 1
hsa-miR-587	0	0	1	0	0	0	LOC284561	uncharacterized LOC284561
hsa-miR-587	0	0	1	1	1	1	IPP	intracisternal A particle-promoted polypeptide
hsa-miR-587	0	0	1	0	0	0	FLJ21408	uncharacterized LOC400512
hsa-miR-587	1	0	1	1	1	1	GBF1	golgi brefeldin A resistant guanine nucleotide exchange factor 1
hsa-miR-587	1	0	1	0	1	1	MYO5B	myosin VB
hsa-miR-587	1	0	1	1	1	1	PHACTR4	phosphatase and actin regulator 4
hsa-miR-587	0	0	1	1	1	1	CC2D2A	coiled-coil and C2 domain containing 2A
hsa-miR-587	1	0	1	1	1	1	DLC1	deleted in liver cancer 1
hsa-miR-587	1	0	1	1	1	1	ARFGEF1	ADP-ribosylation factor guanine nucleotide-exchange factor 1 (brefeldin A-inhibited)
hsa-miR-587	1	0	1	1	1	1	DENND4C	DENN/MADD domain containing 4C
hsa-miR-587	0	0	1	0	0	0	LINC00340	long intergenic non-protein coding RNA 340
hsa-miR-587	1	0	1	1	1	1	POLK	polymerase (DNA directed) kappa
hsa-miR-587	0	0	1	1	1	1	TGIF1	TGFB-induced factor homeobox 1
hsa-miR-587	0	0	1	0	1	1	FLJ23152	uncharacterized LOC401236
hsa-miR-587	1	0	1	1	1	1	RNF185	ring finger protein 185
hsa-miR-587	0	0	1	1	1	1	DUSP14	dual specificity phosphatase 14
hsa-miR-587	1	0	1	1	1	1	FOXP1	forkhead box P1
hsa-miR-587	0	0	1	1	1	1	MINA	MYC induced nuclear antigen
hsa-miR-587	0	0	1	1	1	1	NETO2	neuropilin (NRP) and tolloid (TLL)-like 2
hsa-miR-587	1	0	1	1	1	1	SLC38A1	solute carrier family 38, member 1
hsa-miR-587	1	0	1	1	1	1	ZNF462	zinc finger protein 462
hsa-miR-587	1	0	1	1	1	1	SLAIN1	SLAIN motif family, member 1
hsa-miR-587	0	0	1	0	0	0	FAM185A	family with sequence similarity 185, member A
hsa-miR-587	0	0	1	1	1	1	C8orf46	chromosome 8 open reading frame 46
hsa-miR-587	0	0	1	0	0	0	CHST9-AS1	CHST9 antisense RNA 1
hsa-miR-587	1	0	1	1	1	1	TPM1	tropomyosin 1 (alpha)
hsa-miR-587	0	0	1	1	0	0	ABHD16A	abhydrolase domain containing 16A
hsa-miR-587	0	0	1	1	1	1	OPTN	optineurin
hsa-miR-587	0	0	1	0	0	0	LOC201617	uncharacterized LOC201617
hsa-miR-587	0	0	1	1	0	0	ACSM2A	acyl-CoA synthetase medium-chain family member 2A
hsa-miR-587	1	0	1	1	1	1	DIXDC1	DIX domain containing 1
hsa-miR-587	1	0	1	1	1	1	TMTC1	transmembrane and tetratricopeptide repeat containing 1
hsa-miR-587	1	0	1	0	1	1	PTPRE	protein tyrosine phosphatase, receptor type, E
hsa-miR-587	1	0	1	1	1	1	AGPAT1	1-acylglycerol-3-phosphate O-acyltransferase 1 (lysophosphatidic acid acyltransferase, alpha)
hsa-miR-587	1	0	1	1	1	1	CLCN5	chloride channel, voltage-sensitive 5
hsa-miR-587	1	0	1	1	1	1	SORBS2	sorbin and SH3 domain containing 2
hsa-miR-587	1	0	1	1	1	1	PUM1	pumilio homolog 1 (Drosophila)
hsa-miR-587	0	0	1	1	1	1	PTCD2	pentatricopeptide repeat domain 2
hsa-miR-587	0	0	1	1	1	1	DST	dystonin
hsa-miR-587	1	0	1	1	1	1	TPM3	tropomyosin 3
hsa-miR-587	1	0	1	1	1	1	ZBTB10	zinc finger and BTB domain containing 10
hsa-miR-587	0	0	1	0	0	0	LOC147004	uncharacterized LOC147004
hsa-miR-587	0	0	1	0	0	0	LOC100128505	uncharacterized LOC100128505
hsa-miR-587	1	0	1	0	1	1	PLEKHA1	pleckstrin homology domain containing, family A (phosphoinositide binding specific) member 1
hsa-miR-587	1	0	1	1	1	1	SEC22A	SEC22 vesicle trafficking protein homolog A (S. cerevisiae)
hsa-miR-587	1	0	1	1	1	1	ANKRD29	ankyrin repeat domain 29
hsa-miR-587	0	0	1	1	1	1	ZNF385B	zinc finger protein 385B
hsa-miR-587	0	0	1	1	1	1	PKIB	protein kinase (cAMP-dependent, catalytic) inhibitor beta
hsa-miR-587	0	0	1	1	1	1	PDZRN3	PDZ domain containing ring finger 3
hsa-miR-587	1	0	1	0	1	1	TPBG	trophoblast glycoprotein
hsa-miR-587	1	0	1	1	1	1	PAX6	paired box 6
hsa-miR-587	0	0	1	0	1	1	CADM1	cell adhesion molecule 1
hsa-miR-587	0	0	1	1	1	1	STBD1	starch binding domain 1
hsa-miR-587	0	0	1	1	0	0	CTNNBL1	catenin, beta like 1
hsa-miR-587	1	0	1	1	1	1	FBXW2	F-box and WD repeat domain containing 2
hsa-miR-587	0	0	1	1	0	0	GAS6	growth arrest-specific 6
hsa-miR-587	1	0	1	1	1	1	GNG2	guanine nucleotide binding protein (G protein), gamma 2
hsa-miR-587	1	0	1	0	1	1	CRTAP	cartilage associated protein
hsa-miR-587	1	0	1	1	1	1	SLBP	stem-loop binding protein
hsa-miR-587	0	0	1	1	1	1	MARC1	mitochondrial amidoxime reducing component 1
hsa-miR-587	1	0	1	1	1	1	LRRC57	leucine rich repeat containing 57
hsa-miR-587	1	0	1	1	1	1	MAP3K12	mitogen-activated protein kinase kinase kinase 12
hsa-miR-587	1	0	1	0	1	1	NCOA7	nuclear receptor coactivator 7
hsa-miR-587	0	0	1	1	0	0	CES4A	carboxylesterase 4A
hsa-miR-587	1	0	1	1	1	1	NMT2	N-myristoyltransferase 2
hsa-miR-587	0	0	1	1	1	1	TMEM170A	transmembrane protein 170A
hsa-miR-587	0	0	1	1	1	1	LRRC34	leucine rich repeat containing 34
hsa-miR-587	0	0	1	1	1	1	MOBP	myelin-associated oligodendrocyte basic protein
hsa-miR-587	0	0	1	1	1	1	CHRM5	cholinergic receptor, muscarinic 5
hsa-miR-587	0	0	1	1	1	1	MYO6	myosin VI
hsa-miR-587	1	0	1	1	1	1	EPHB1	EPH receptor B1
hsa-miR-587	0	0	1	0	0	0	LOC730101	uncharacterized LOC730101
hsa-miR-587	1	0	1	1	1	1	CNEP1R1	CTD nuclear envelope phosphatase 1 regulatory subunit 1
hsa-miR-587	1	0	1	1	1	1	ZC3H11A	zinc finger CCCH-type containing 11A
hsa-miR-587	1	0	1	0	1	1	STC2	stanniocalcin 2
hsa-miR-587	1	0	1	1	1	1	PEA15	phosphoprotein enriched in astrocytes 15
hsa-miR-587	1	0	1	1	1	1	GAPVD1	GTPase activating protein and VPS9 domains 1
hsa-miR-587	0	0	1	1	1	1	GNAI2	guanine nucleotide binding protein (G protein), alpha inhibiting activity polypeptide 2
hsa-miR-587	0	0	1	0	0	0	FAM66C	family with sequence similarity 66, member C
hsa-miR-587	0	0	1	1	1	1	XRCC5	X-ray repair complementing defective repair in Chinese hamster cells 5 (double-strand-break rejoining)
hsa-miR-587	1	0	1	0	1	1	COL21A1	collagen, type XXI, alpha 1
hsa-miR-587	0	0	1	0	0	0	C1orf204	chromosome 1 open reading frame 204
hsa-miR-587	1	0	1	1	0	0	CHD3	chromodomain helicase DNA binding protein 3
hsa-miR-587	1	0	1	0	1	1	THRB	thyroid hormone receptor, beta
hsa-miR-587	1	0	1	0	0	0	PID1	phosphotyrosine interaction domain containing 1
hsa-miR-587	0	0	1	1	0	0	NACA	nascent polypeptide-associated complex alpha subunit
hsa-miR-587	1	0	1	1	1	1	ETS2	v-ets erythroblastosis virus E26 oncogene homolog 2 (avian)
hsa-miR-587	1	0	1	1	1	1	CDV3	CDV3 homolog (mouse)
hsa-miR-587	0	0	1	0	1	1	TNFAIP8	tumor necrosis factor, alpha-induced protein 8
hsa-miR-587	0	0	1	0	0	0	LOC400680	uncharacterized LOC400680
hsa-miR-587	1	0	1	1	1	1	POU2F3	POU class 2 homeobox 3
hsa-miR-587	0	0	1	1	1	1	PARP15	poly (ADP-ribose) polymerase family, member 15
hsa-miR-587	1	0	1	1	1	1	IGSF11	immunoglobulin superfamily, member 11
hsa-miR-587	0	0	1	1	1	1	PRSS16	protease, serine, 16 (thymus)
hsa-miR-587	0	0	1	1	1	1	POLR1D	polymerase (RNA) I polypeptide D, 16kDa
hsa-miR-587	1	0	1	1	1	1	PIGA	phosphatidylinositol glycan anchor biosynthesis, class A
hsa-miR-587	0	0	1	1	1	1	RP1	retinitis pigmentosa 1 (autosomal dominant)
hsa-miR-587	0	0	1	0	0	0	LOC100130954	uncharacterized LOC100130954
hsa-miR-587	0	0	1	1	1	1	ARFGAP2	ADP-ribosylation factor GTPase activating protein 2
hsa-miR-587	0	0	1	0	0	0	LOC728095	uncharacterized LOC728095
hsa-miR-587	0	0	1	1	1	1	C1orf114	chromosome 1 open reading frame 114
hsa-miR-587	0	0	1	0	1	1	MYLK4	myosin light chain kinase family, member 4
hsa-miR-587	0	0	1	1	1	1	UPP2	uridine phosphorylase 2
hsa-miR-587	0	0	1	1	1	1	SLFN13	schlafen family member 13
hsa-miR-587	1	0	1	1	1	1	LMX1A	LIM homeobox transcription factor 1, alpha
hsa-miR-587	0	0	1	1	0	0	KIAA0146	KIAA0146
hsa-miR-587	0	0	1	1	1	1	GGA1	golgi-associated, gamma adaptin ear containing, ARF binding protein 1
hsa-miR-587	1	0	1	1	1	1	PPP1R21	protein phosphatase 1, regulatory subunit 21
hsa-miR-587	1	0	1	1	1	1	ABHD6	abhydrolase domain containing 6
hsa-miR-587	0	0	1	1	1	1	ARHGEF26	Rho guanine nucleotide exchange factor (GEF) 26
hsa-miR-587	1	0	1	1	1	1	KALRN	kalirin, RhoGEF kinase
hsa-miR-587	1	0	1	1	0	0	KCNC1	potassium voltage-gated channel, Shaw-related subfamily, member 1
hsa-miR-587	0	0	1	0	0	0	C1orf132	chromosome 1 open reading frame 132
hsa-miR-587	1	0	1	1	1	1	TPRG1	tumor protein p63 regulated 1
hsa-miR-587	1	0	1	1	1	1	EGLN3	egl nine homolog 3 (C. elegans)
hsa-miR-587	0	0	1	0	0	0	MORN2	MORN repeat containing 2
hsa-miR-587	0	0	1	0	0	0	TMPRSS11BNL	TMPRSS11B N terminal-like
hsa-miR-587	0	0	1	1	1	1	FAM19A2	family with sequence similarity 19 (chemokine (C-C motif)-like), member A2
hsa-miR-587	1	0	1	1	1	1	EPAS1	endothelial PAS domain protein 1
hsa-miR-587	0	0	1	0	0	0	LOC285043	uncharacterized LOC285043
hsa-miR-587	1	0	1	0	0	0	GPR137C	G protein-coupled receptor 137C
hsa-miR-587	0	0	1	1	1	1	PKP4	plakophilin 4
hsa-miR-587	0	0	1	1	1	1	HGD	homogentisate 1,2-dioxygenase
hsa-miR-587	0	0	1	0	1	1	NAIP	NLR family, apoptosis inhibitory protein
hsa-miR-587	0	0	1	1	1	1	IDS	iduronate 2-sulfatase
hsa-miR-587	1	0	1	1	1	1	KIF21A	kinesin family member 21A
hsa-miR-587	1	0	1	1	1	1	UBA2	ubiquitin-like modifier activating enzyme 2
hsa-miR-587	0	0	1	0	0	0	TMEM232	transmembrane protein 232
hsa-miR-587	1	0	1	1	0	0	GXYLT1	glucoside xylosyltransferase 1
hsa-miR-587	1	0	1	1	1	1	PIAS3	protein inhibitor of activated STAT, 3
hsa-miR-587	1	0	1	1	1	1	CTGF	connective tissue growth factor
hsa-miR-587	0	0	1	1	1	1	MKX	mohawk homeobox
hsa-miR-587	1	0	1	1	1	1	ATP11C	ATPase, class VI, type 11C
hsa-miR-587	0	0	1	0	1	1	RASGRP3	RAS guanyl releasing protein 3 (calcium and DAG-regulated)
hsa-miR-587	0	0	1	1	1	1	C11orf45	chromosome 11 open reading frame 45
hsa-miR-587	1	0	1	0	0	0	MSL1	male-specific lethal 1 homolog (Drosophila)
hsa-miR-587	1	0	1	1	1	1	MACROD2	MACRO domain containing 2
hsa-miR-587	1	0	1	1	1	1	CHD5	chromodomain helicase DNA binding protein 5
hsa-miR-587	0	0	1	1	1	1	EPPIN	epididymal peptidase inhibitor
hsa-miR-587	0	0	1	1	0	0	C20orf141	chromosome 20 open reading frame 141
hsa-miR-587	1	0	1	1	1	1	DPY19L3	dpy-19-like 3 (C. elegans)
hsa-miR-587	1	0	1	1	1	1	COPS7B	COP9 constitutive photomorphogenic homolog subunit 7B (Arabidopsis)
hsa-miR-587	1	0	1	1	1	1	PIK3R1	phosphoinositide-3-kinase, regulatory subunit 1 (alpha)
hsa-miR-587	1	0	1	1	1	1	SACM1L	SAC1 suppressor of actin mutations 1-like (yeast)
hsa-miR-587	0	0	1	1	1	1	CCDC132	coiled-coil domain containing 132
hsa-miR-587	0	0	1	1	1	1	C18orf54	chromosome 18 open reading frame 54
hsa-miR-587	1	0	1	1	1	1	DMXL1	Dmx-like 1
hsa-miR-587	1	0	1	0	1	1	CLEC16A	C-type lectin domain family 16, member A
hsa-miR-587	1	0	1	1	1	1	DLG2	discs, large homolog 2 (Drosophila)
hsa-miR-587	1	0	1	1	1	1	EIF4E3	eukaryotic translation initiation factor 4E family member 3
hsa-miR-587	0	0	1	0	0	0	RPL23AP53	ribosomal protein L23a pseudogene 53
hsa-miR-587	1	0	1	1	0	0	SNX30	sorting nexin family member 30
hsa-miR-587	1	0	1	0	1	1	ADIPOR2	adiponectin receptor 2
hsa-miR-587	1	0	1	1	1	1	CTNNA2	catenin (cadherin-associated protein), alpha 2
hsa-miR-587	1	0	1	1	1	1	PHF17	PHD finger protein 17
hsa-miR-587	1	0	1	1	1	1	ENAH	enabled homolog (Drosophila)
hsa-miR-587	1	0	1	1	1	1	R3HDM1	R3H domain containing 1
hsa-miR-587	1	0	1	0	1	1	FNDC3B	fibronectin type III domain containing 3B
hsa-miR-587	1	0	1	1	1	1	PLA2G15	phospholipase A2, group XV
hsa-miR-587	1	0	1	0	1	1	CAPRIN1	cell cycle associated protein 1
hsa-miR-587	0	0	1	0	0	0	FAM71E2	family with sequence similarity 71, member E2
hsa-miR-587	0	0	1	0	0	0	LOC100128098	uncharacterized LOC100128098
hsa-miR-587	1	0	1	0	1	1	YOD1	YOD1 OTU deubiquinating enzyme 1 homolog (S. cerevisiae)
hsa-miR-587	0	0	1	0	0	0	LRRC9	leucine rich repeat containing 9
hsa-miR-587	1	0	1	0	0	0	SP7	Sp7 transcription factor
hsa-miR-587	1	0	1	0	1	1	USP37	ubiquitin specific peptidase 37
hsa-miR-587	1	0	1	1	1	1	DSE	dermatan sulfate epimerase
hsa-miR-587	1	0	1	0	1	1	KPNA6	karyopherin alpha 6 (importin alpha 7)
hsa-miR-587	1	0	1	1	0	0	NBEAL1	neurobeachin-like 1
hsa-miR-587	0	0	1	0	0	0	LOC100129940	uncharacterized LOC100129940
hsa-miR-587	0	0	1	0	0	0	EMBP1	embigin pseudogene 1
hsa-miR-587	1	0	1	1	1	1	ADAMTS19	ADAM metallopeptidase with thrombospondin type 1 motif, 19
hsa-miR-587	1	0	1	1	1	1	MRFAP1	Morf4 family associated protein 1
hsa-miR-587	0	0	1	1	1	1	ENPP2	ectonucleotide pyrophosphatase/phosphodiesterase 2
hsa-miR-587	1	0	1	0	1	1	ESRRG	estrogen-related receptor gamma
hsa-miR-587	0	0	1	0	1	1	GALNT13	UDP-N-acetyl-alpha-D-galactosamine:polypeptide N-acetylgalactosaminyltransferase 13 (GalNAc-T13)
hsa-miR-587	0	0	1	1	1	1	SYTL2	synaptotagmin-like 2
hsa-miR-587	0	0	1	1	1	1	RNF19B	ring finger protein 19B
hsa-miR-587	0	0	1	1	1	1	SLC36A3	solute carrier family 36 (proton/amino acid symporter), member 3
hsa-miR-587	0	0	1	1	1	1	PDE2A	phosphodiesterase 2A, cGMP-stimulated
hsa-miR-587	1	0	1	1	1	1	MAP2K4	mitogen-activated protein kinase kinase 4
hsa-miR-587	0	0	1	1	0	0	C9orf96	chromosome 9 open reading frame 96
hsa-miR-587	0	0	1	1	0	0	FIZ1	FLT3-interacting zinc finger 1
hsa-miR-587	0	0	1	1	1	1	CRISP3	cysteine-rich secretory protein 3
hsa-miR-587	1	0	1	1	1	1	GATA6	GATA binding protein 6
hsa-miR-587	1	0	1	1	1	1	CYYR1	cysteine/tyrosine-rich 1
hsa-miR-587	1	0	1	1	1	1	MEAF6	MYST/Esa1-associated factor 6
hsa-miR-587	0	0	1	1	1	1	RNF135	ring finger protein 135
hsa-miR-587	1	0	1	1	1	1	EDN1	endothelin 1
hsa-miR-587	0	0	1	1	1	1	ARIH1	ariadne homolog, ubiquitin-conjugating enzyme E2 binding protein, 1 (Drosophila)
hsa-miR-587	1	0	1	1	1	1	SMAP2	small ArfGAP2
hsa-miR-587	1	0	1	0	1	1	DNAJC5	DnaJ (Hsp40) homolog, subfamily C, member 5
hsa-miR-587	1	0	1	0	1	1	CEP170	centrosomal protein 170kDa
hsa-miR-587	0	0	1	1	0	0	DOPEY1	dopey family member 1
hsa-miR-587	0	0	1	0	0	0	LRRC37BP1	leucine rich repeat containing 37B pseudogene 1
hsa-miR-587	0	0	1	1	1	1	IDH3A	isocitrate dehydrogenase 3 (NAD+) alpha
hsa-miR-587	1	0	1	1	1	1	MTMR10	myotubularin related protein 10
hsa-miR-587	0	0	1	1	1	1	BEND7	BEN domain containing 7
hsa-miR-587	1	0	1	1	1	1	FAM126B	family with sequence similarity 126, member B
hsa-miR-587	1	0	1	1	1	1	CHMP7	charged multivesicular body protein 7
hsa-miR-587	1	0	1	0	0	0	YLPM1	YLP motif containing 1
hsa-miR-587	1	0	1	1	0	0	USP24	ubiquitin specific peptidase 24
hsa-miR-587	0	0	1	1	1	1	CCDC125	coiled-coil domain containing 125
hsa-miR-587	0	0	1	1	1	1	METTL15	methyltransferase like 15
hsa-miR-587	1	0	1	1	0	0	PTAR1	protein prenyltransferase alpha subunit repeat containing 1
hsa-miR-587	0	0	1	1	1	1	CYR61	cysteine-rich, angiogenic inducer, 61
hsa-miR-587	1	0	1	1	1	1	LPP	LIM domain containing preferred translocation partner in lipoma
hsa-miR-587	1	0	1	0	1	1	MEF2C	myocyte enhancer factor 2C
hsa-miR-587	1	0	1	1	1	1	FAM126A	family with sequence similarity 126, member A
hsa-miR-587	0	0	1	1	1	1	NARG2	NMDA receptor regulated 2
hsa-miR-587	0	0	1	1	1	1	C12orf50	chromosome 12 open reading frame 50
hsa-miR-587	1	0	1	1	1	1	ANO1	anoctamin 1, calcium activated chloride channel
hsa-miR-587	1	0	1	1	1	1	CCBL2	cysteine conjugate-beta lyase 2
hsa-miR-587	1	0	1	1	1	1	NRP1	neuropilin 1
hsa-miR-587	0	0	1	0	0	0	ADCY10P1	adenylate cyclase 10 (soluble) pseudogene 1
hsa-miR-587	1	0	1	1	1	1	ATAT1	alpha tubulin acetyltransferase 1
hsa-miR-587	1	0	1	1	1	1	IL17RD	interleukin 17 receptor D
hsa-miR-587	0	0	1	1	1	1	PCDH15	protocadherin-related 15
hsa-miR-587	1	0	1	1	1	1	STXBP5	syntaxin binding protein 5 (tomosyn)
hsa-miR-587	1	0	1	1	1	1	ANKRD12	ankyrin repeat domain 12
hsa-miR-587	1	0	1	1	1	1	CAPRIN2	caprin family member 2
hsa-miR-587	1	0	1	1	1	1	MBD6	methyl-CpG binding domain protein 6
hsa-miR-587	1	0	1	0	1	1	SMURF1	SMAD specific E3 ubiquitin protein ligase 1
hsa-miR-587	1	0	1	0	1	1	NR3C1	nuclear receptor subfamily 3, group C, member 1 (glucocorticoid receptor)
hsa-miR-587	1	0	1	1	1	1	SET	SET nuclear oncogene
hsa-miR-587	1	0	1	1	1	1	RNF38	ring finger protein 38
hsa-miR-587	1	0	1	1	1	1	IKZF2	IKAROS family zinc finger 2 (Helios)
hsa-miR-587	0	0	1	1	1	1	KLHL7	kelch-like 7 (Drosophila)
hsa-miR-587	0	0	1	1	1	1	OSR2	odd-skipped related 2 (Drosophila)
hsa-miR-587	0	0	1	0	0	0	GRIK1-AS1	GRIK1 antisense RNA 1
hsa-miR-587	1	0	1	1	1	1	RFFL	ring finger and FYVE-like domain containing E3 ubiquitin protein ligase
hsa-miR-587	1	0	1	1	1	1	USF2	upstream transcription factor 2, c-fos interacting
hsa-miR-587	0	0	1	1	1	1	CYP4B1	cytochrome P450, family 4, subfamily B, polypeptide 1
hsa-miR-587	0	0	1	1	1	1	CEP41	centrosomal protein 41kDa
hsa-miR-587	0	0	1	1	1	1	DNAJB14	DnaJ (Hsp40) homolog, subfamily B, member 14
hsa-miR-587	0	0	1	1	1	1	APTX	aprataxin
hsa-miR-587	0	0	1	1	1	1	IYD	iodotyrosine deiodinase
hsa-miR-587	1	0	1	1	1	1	PBRM1	polybromo 1
hsa-miR-587	1	0	1	1	1	1	GFRA2	GDNF family receptor alpha 2
hsa-miR-587	1	0	1	1	1	1	LAMA3	laminin, alpha 3
hsa-miR-587	0	0	1	1	1	1	GCOM1	GRINL1A complex locus 1
hsa-miR-587	1	0	1	1	1	1	NPM1	nucleophosmin (nucleolar phosphoprotein B23, numatrin)
hsa-miR-587	0	0	1	1	1	1	PROK2	prokineticin 2
hsa-miR-587	1	0	1	1	1	1	CAMTA1	calmodulin binding transcription activator 1
hsa-miR-587	0	0	1	0	1	1	ANKS1B	ankyrin repeat and sterile alpha motif domain containing 1B
hsa-miR-587	0	0	1	1	1	1	LINGO2	leucine rich repeat and Ig domain containing 2
hsa-miR-587	0	0	1	1	1	1	TNFRSF19	tumor necrosis factor receptor superfamily, member 19
hsa-miR-587	1	0	1	1	1	1	SSX2IP	synovial sarcoma, X breakpoint 2 interacting protein
hsa-miR-587	1	0	1	1	1	1	ECT2	epithelial cell transforming sequence 2 oncogene
hsa-miR-587	0	0	1	1	1	1	IKZF3	IKAROS family zinc finger 3 (Aiolos)
hsa-miR-587	0	0	1	1	1	1	PMS1	PMS1 postmeiotic segregation increased 1 (S. cerevisiae)
hsa-miR-587	1	0	1	1	1	1	CHRDL1	chordin-like 1
hsa-miR-587	1	0	1	1	1	1	CD109	CD109 molecule
hsa-miR-587	0	0	1	1	0	0	NBPF8	neuroblastoma breakpoint family, member 8
hsa-miR-587	1	0	1	1	1	1	AMOT	angiomotin
hsa-miR-587	1	0	1	1	1	1	CTSA	cathepsin A
hsa-miR-587	1	0	1	1	1	1	ELOVL6	ELOVL fatty acid elongase 6
hsa-miR-587	0	0	1	1	1	1	PAFAH1B2	platelet-activating factor acetylhydrolase 1b, catalytic subunit 2 (30kDa)
hsa-miR-587	0	0	1	1	1	1	TMOD1	tropomodulin 1
hsa-miR-587	1	0	1	1	1	1	TSPAN14	tetraspanin 14
hsa-miR-587	1	0	1	0	1	1	DCAF10	DDB1 and CUL4 associated factor 10
hsa-miR-587	0	0	1	1	0	0	SNRPB	small nuclear ribonucleoprotein polypeptides B and B1
hsa-miR-587	1	0	1	0	1	1	CGGBP1	CGG triplet repeat binding protein 1
hsa-miR-587	1	0	1	1	1	1	POU2F2	POU class 2 homeobox 2
hsa-miR-587	0	0	1	1	1	1	ARPC1A	actin related protein 2/3 complex, subunit 1A, 41kDa
hsa-miR-587	1	0	1	0	1	1	VAMP4	vesicle-associated membrane protein 4
hsa-miR-587	1	0	1	1	1	1	TRIM39	tripartite motif containing 39
hsa-miR-587	1	0	1	0	1	1	DDX3X	DEAD (Asp-Glu-Ala-Asp) box polypeptide 3, X-linked
hsa-miR-587	1	0	1	1	1	1	CALM1	calmodulin 1 (phosphorylase kinase, delta)
hsa-miR-587	0	0	1	1	1	1	ICA1	islet cell autoantigen 1, 69kDa
hsa-miR-587	1	0	1	1	1	1	SHOX2	short stature homeobox 2
hsa-miR-587	0	0	1	1	1	1	TMEM30A	transmembrane protein 30A
hsa-miR-587	0	0	1	0	0	0	ATXN7L3B	ataxin 7-like 3B
hsa-miR-587	0	0	1	1	1	1	HMBOX1	homeobox containing 1
hsa-miR-587	1	0	1	1	0	0	MARCH9	membrane-associated ring finger (C3HC4) 9
hsa-miR-587	1	0	1	1	1	1	ATP6AP2	ATPase, H+ transporting, lysosomal accessory protein 2
hsa-miR-587	1	0	1	1	1	1	GRIA2	glutamate receptor, ionotropic, AMPA 2
hsa-miR-587	1	0	1	1	1	1	TRIM2	tripartite motif containing 2
hsa-miR-587	0	0	1	1	1	1	HDHD2	haloacid dehalogenase-like hydrolase domain containing 2
hsa-miR-587	0	0	1	0	0	0	GRAMD1B	GRAM domain containing 1B
hsa-miR-587	1	0	1	1	1	1	RBM7	RNA binding motif protein 7
hsa-miR-587	0	0	1	1	1	1	RNF170	ring finger protein 170
hsa-miR-587	0	0	1	1	1	1	KLHL29	kelch-like 29 (Drosophila)
hsa-miR-587	0	0	1	0	0	0	CEP170P1	centrosomal protein 170kDa pseudogene 1
hsa-miR-587	1	0	1	1	0	0	LRFN1	leucine rich repeat and fibronectin type III domain containing 1
hsa-miR-587	1	0	1	1	1	1	PAPOLA	poly(A) polymerase alpha
hsa-miR-587	0	0	1	0	0	0	KLHL15	kelch-like 15 (Drosophila)
hsa-miR-587	1	0	1	1	1	1	FAM176A	family with sequence similarity 176, member A
hsa-miR-587	0	0	1	1	0	0	CLPTM1L	CLPTM1-like
hsa-miR-587	1	0	1	0	1	1	CYBRD1	cytochrome b reductase 1
hsa-miR-587	1	0	1	0	1	1	ICMT	isoprenylcysteine carboxyl methyltransferase
hsa-miR-587	0	0	1	0	0	0	FAM200B	family with sequence similarity 200, member B
hsa-miR-587	0	0	1	1	0	0	RPS21	ribosomal protein S21
hsa-miR-587	0	0	1	0	1	1	TP53RK	TP53 regulating kinase
hsa-miR-587	0	0	1	0	1	1	CD99P1	CD99 molecule pseudogene 1
hsa-miR-587	0	0	1	1	0	0	PTPMT1	protein tyrosine phosphatase, mitochondrial 1
hsa-miR-587	1	0	1	1	1	1	WHSC1	Wolf-Hirschhorn syndrome candidate 1
hsa-miR-587	1	0	1	1	0	0	ACOXL	acyl-CoA oxidase-like
hsa-miR-587	0	0	1	1	1	1	RNF103	ring finger protein 103
hsa-miR-587	0	0	1	1	1	1	CDC42SE2	CDC42 small effector 2
hsa-miR-587	1	0	1	0	1	1	CDK19	cyclin-dependent kinase 19
hsa-miR-587	0	0	1	1	1	1	TLR4	toll-like receptor 4
hsa-miR-587	1	0	1	1	1	1	RSPO2	R-spondin 2
hsa-miR-587	1	0	1	1	1	1	APPL2	adaptor protein, phosphotyrosine interaction, PH domain and leucine zipper containing 2
hsa-miR-587	1	0	1	0	0	0	KCNU1	potassium channel, subfamily U, member 1
hsa-miR-587	1	0	1	1	1	1	GIGYF2	GRB10 interacting GYF protein 2
hsa-miR-587	0	0	1	1	1	1	SEMA3D	sema domain, immunoglobulin domain (Ig), short basic domain, secreted, (semaphorin) 3D
hsa-miR-587	0	0	1	1	1	1	TFAM	transcription factor A, mitochondrial
hsa-miR-587	1	0	1	0	1	1	SV2B	synaptic vesicle glycoprotein 2B
hsa-miR-587	0	0	1	1	1	1	CD48	CD48 molecule
hsa-miR-587	1	0	1	1	1	1	GABRA1	gamma-aminobutyric acid (GABA) A receptor, alpha 1
hsa-miR-587	1	0	1	1	1	1	ZNF518A	zinc finger protein 518A
hsa-miR-587	1	0	1	1	1	1	MUM1L1	melanoma associated antigen (mutated) 1-like 1
hsa-miR-587	1	0	1	1	1	1	RCOR3	REST corepressor 3
hsa-miR-587	0	0	1	1	1	1	C7orf53	chromosome 7 open reading frame 53
hsa-miR-587	1	0	1	1	1	1	RAB5B	RAB5B, member RAS oncogene family
hsa-miR-587	1	0	1	1	1	1	SORL1	sortilin-related receptor, L(DLR class) A repeats containing
hsa-miR-587	1	0	1	1	1	1	SECISBP2L	SECIS binding protein 2-like
hsa-miR-587	0	0	1	1	1	1	DQX1	DEAQ box RNA-dependent ATPase 1
hsa-miR-587	1	0	1	1	1	1	PLEKHA7	pleckstrin homology domain containing, family A member 7
hsa-miR-587	1	0	1	1	1	1	PCDHA5	protocadherin alpha 5
hsa-miR-587	1	0	1	1	1	1	QTRTD1	queuine tRNA-ribosyltransferase domain containing 1
hsa-miR-587	0	0	1	0	0	0	LINC00452	long intergenic non-protein coding RNA 452
hsa-miR-587	1	0	1	0	1	1	DDX3Y	DEAD (Asp-Glu-Ala-Asp) box polypeptide 3, Y-linked
hsa-miR-587	1	0	1	1	1	1	NKAIN2	Na+/K+ transporting ATPase interacting 2
hsa-miR-587	1	0	1	1	1	1	GRIA4	glutamate receptor, ionotropic, AMPA 4
hsa-miR-587	1	0	1	1	1	1	CTDSPL2	CTD (carboxy-terminal domain, RNA polymerase II, polypeptide A) small phosphatase like 2
hsa-miR-587	0	0	1	1	0	0	VPS8	vacuolar protein sorting 8 homolog (S. cerevisiae)
hsa-miR-587	0	0	1	1	1	1	SNAPC3	small nuclear RNA activating complex, polypeptide 3, 50kDa
hsa-miR-587	0	0	1	1	0	0	IQUB	IQ motif and ubiquitin domain containing
hsa-miR-587	1	0	1	1	1	1	SMG7	smg-7 homolog, nonsense mediated mRNA decay factor (C. elegans)
hsa-miR-587	0	0	1	1	1	1	TADA1	transcriptional adaptor 1
hsa-miR-587	1	0	1	0	1	1	CLDN12	claudin 12
hsa-miR-587	1	0	1	0	1	1	NEGR1	neuronal growth regulator 1
hsa-miR-587	1	0	1	0	1	1	CPEB4	cytoplasmic polyadenylation element binding protein 4
hsa-miR-587	1	0	1	1	1	1	BNC2	basonuclin 2
hsa-miR-587	1	0	1	1	1	1	WDR48	WD repeat domain 48
hsa-miR-587	0	0	1	1	1	1	KIAA1328	KIAA1328
hsa-miR-587	0	0	1	1	1	1	TTC39B	tetratricopeptide repeat domain 39B
hsa-miR-587	1	0	1	0	1	1	ARID2	AT rich interactive domain 2 (ARID, RFX-like)
hsa-miR-587	1	0	1	1	1	1	PRR16	proline rich 16
hsa-miR-587	0	0	1	1	0	0	CCDC152	coiled-coil domain containing 152
hsa-miR-587	0	0	1	1	1	1	CACHD1	cache domain containing 1
hsa-miR-587	1	0	1	1	1	1	DACH2	dachshund homolog 2 (Drosophila)
hsa-miR-587	0	0	1	1	1	1	ZFP90	zinc finger protein 90 homolog (mouse)
hsa-miR-587	1	0	1	1	1	1	BVES	blood vessel epicardial substance
hsa-miR-587	0	0	1	1	1	1	SIAE	sialic acid acetylesterase
hsa-miR-587	0	0	1	0	1	1	FAM13B	family with sequence similarity 13, member B
hsa-miR-587	1	0	1	1	1	1	FAM123A	family with sequence similarity 123A
hsa-miR-587	0	0	1	1	0	0	AQP12B	aquaporin 12B
hsa-miR-587	0	0	1	1	1	1	MTHFD2L	methylenetetrahydrofolate dehydrogenase (NADP+ dependent) 2-like
hsa-miR-587	1	0	1	1	1	1	FKBP5	FK506 binding protein 5
hsa-miR-587	0	0	1	1	1	1	CBWD5	COBW domain containing 5
hsa-miR-587	1	0	1	1	1	1	HLTF	helicase-like transcription factor
hsa-miR-587	0	0	1	1	1	1	MGC57346	uncharacterized LOC401884
hsa-miR-587	0	0	1	0	0	0	LOC283914	uncharacterized LOC283914
hsa-miR-587	0	0	1	1	1	1	NUDT13	nudix (nucleoside diphosphate linked moiety X)-type motif 13
hsa-miR-587	0	0	1	0	1	1	IL33	interleukin 33
hsa-miR-587	0	0	1	0	0	0	INHBA-AS1	INHBA antisense RNA 1
hsa-miR-587	1	0	1	0	1	1	KDM2A	lysine (K)-specific demethylase 2A
hsa-miR-587	1	0	1	1	1	1	TOMM40	translocase of outer mitochondrial membrane 40 homolog (yeast)
hsa-miR-587	1	0	1	0	1	1	ZNF800	zinc finger protein 800
hsa-miR-587	1	0	1	1	1	1	RTKN2	rhotekin 2
hsa-miR-587	1	0	1	1	1	1	WSB1	WD repeat and SOCS box containing 1
hsa-miR-587	0	0	1	1	0	0	FKBP11	FK506 binding protein 11, 19 kDa
hsa-miR-587	1	0	1	1	1	1	PTPRG	protein tyrosine phosphatase, receptor type, G
hsa-miR-587	1	0	1	1	1	1	PELI1	pellino E3 ubiquitin protein ligase 1
hsa-miR-587	1	0	1	1	1	1	MBNL1	muscleblind-like splicing regulator 1
hsa-miR-587	0	0	1	1	1	1	WDR93	WD repeat domain 93
hsa-miR-587	1	0	1	1	1	1	YWHAZ	tyrosine 3-monooxygenase/tryptophan 5-monooxygenase activation protein, zeta polypeptide
hsa-miR-587	0	0	1	1	1	1	RHOT1	ras homolog family member T1
hsa-miR-587	1	0	1	1	1	1	PCGF5	polycomb group ring finger 5
hsa-miR-587	0	0	1	1	1	1	COG2	component of oligomeric golgi complex 2
hsa-miR-587	1	0	1	0	1	1	C14orf43	chromosome 14 open reading frame 43
hsa-miR-587	0	0	1	0	1	1	C17orf51	chromosome 17 open reading frame 51
hsa-miR-587	1	0	1	1	1	1	ATP8B4	ATPase, class I, type 8B, member 4
hsa-miR-587	0	0	1	1	1	1	IDI1	isopentenyl-diphosphate delta isomerase 1
hsa-miR-587	0	0	1	1	1	1	ZBTB8OS	zinc finger and BTB domain containing 8 opposite strand
hsa-miR-587	0	0	1	1	1	1	CLEC2D	C-type lectin domain family 2, member D
hsa-miR-587	1	0	1	1	1	1	PTPN3	protein tyrosine phosphatase, non-receptor type 3
hsa-miR-587	0	0	1	1	1	1	P2RX6	purinergic receptor P2X, ligand-gated ion channel, 6
hsa-miR-587	0	0	1	0	0	0	GNN	Grp94 neighboring nucleotidase pseudogene
hsa-miR-587	0	0	1	1	1	1	VNN2	vanin 2
hsa-miR-587	0	0	1	0	0	0	LOC158435	uncharacterized LOC158435
hsa-miR-587	0	0	1	1	0	0	ZNF253	zinc finger protein 253
hsa-miR-587	1	0	1	1	1	1	ZNF449	zinc finger protein 449
hsa-miR-587	1	0	1	1	1	1	NRSN1	neurensin 1
hsa-miR-587	0	0	1	0	0	0	PABPC1P2	poly(A) binding protein, cytoplasmic 1 pseudogene 2
hsa-miR-587	1	0	1	1	1	1	PDCD6IP	programmed cell death 6 interacting protein
hsa-miR-587	0	0	1	1	1	1	AQPEP	laeverin
hsa-miR-587	1	0	1	1	1	1	SCAF8	SR-related CTD-associated factor 8
hsa-miR-587	1	0	1	1	1	1	LRRC32	leucine rich repeat containing 32
hsa-miR-587	0	0	1	1	1	1	CFHR3	complement factor H-related 3
hsa-miR-587	1	0	1	1	1	1	C1orf173	chromosome 1 open reading frame 173
hsa-miR-587	1	0	1	1	1	1	OPCML	opioid binding protein/cell adhesion molecule-like
hsa-miR-587	0	0	1	1	1	1	IRX5	iroquois homeobox 5
hsa-miR-587	0	0	1	1	0	0	TSPY3	testis specific protein, Y-linked 3
hsa-miR-587	1	0	1	1	1	1	PARP8	poly (ADP-ribose) polymerase family, member 8
hsa-miR-587	0	0	1	0	0	0	ABCC6P1	ATP-binding cassette, sub-family C, member 6 pseudogene 1
hsa-miR-587	0	0	1	1	1	1	HOXD8	homeobox D8
hsa-miR-587	0	0	1	1	1	1	SPDYA	speedy homolog A (Xenopus laevis)
hsa-miR-587	1	0	1	0	1	1	MYBL1	v-myb myeloblastosis viral oncogene homolog (avian)-like 1
hsa-miR-587	0	0	1	1	0	0	FBXW12	F-box and WD repeat domain containing 12
hsa-miR-587	0	0	1	0	0	0	LOC643837	uncharacterized LOC643837
hsa-miR-587	1	0	1	0	1	1	CPEB2	cytoplasmic polyadenylation element binding protein 2
hsa-miR-587	0	0	1	1	0	0	C10orf128	chromosome 10 open reading frame 128
hsa-miR-587	0	0	1	1	0	0	RIPPLY1	ripply1 homolog (zebrafish)
hsa-miR-587	0	0	1	0	1	1	C9orf91	chromosome 9 open reading frame 91
hsa-miR-587	0	0	1	0	0	0	LOC727924	uncharacterized LOC727924
hsa-miR-587	0	0	1	1	1	1	TTN	titin
hsa-miR-587	1	0	1	1	1	1	TLR10	toll-like receptor 10
hsa-miR-587	0	0	1	0	0	0	INTS4L1	integrator complex subunit 4-like 1
hsa-miR-587	0	0	1	0	0	0	LRRC37A11P	leucine rich repeat containing 37, member A11, pseudogene
hsa-miR-587	1	0	1	1	1	1	TMEM132B	transmembrane protein 132B
hsa-miR-587	1	0	1	0	1	1	PRDM10	PR domain containing 10
hsa-miR-587	1	0	1	1	1	1	GRIA3	glutamate receptor, ionotropic, AMPA 3
hsa-miR-587	0	0	1	1	1	1	LRCH1	leucine-rich repeats and calponin homology (CH) domain containing 1
hsa-miR-587	1	0	1	1	1	1	OTUD4	OTU domain containing 4
hsa-miR-587	0	0	1	1	0	0	SOCS7	suppressor of cytokine signaling 7
hsa-miR-587	0	0	1	1	1	1	RNF14	ring finger protein 14
hsa-miR-587	0	0	1	0	0	0	LINC00314	long intergenic non-protein coding RNA 314
hsa-miR-587	0	0	1	1	1	1	SLC22A23	solute carrier family 22, member 23
hsa-miR-587	0	0	1	1	1	1	GLB1L3	galactosidase, beta 1-like 3
hsa-miR-587	1	0	1	1	1	1	CADPS	Ca++-dependent secretion activator
hsa-miR-587	0	0	1	1	0	0	TCHH	trichohyalin
hsa-miR-587	1	0	1	1	1	1	NIPAL2	NIPA-like domain containing 2
hsa-miR-587	1	0	1	0	1	1	TTC7B	tetratricopeptide repeat domain 7B
hsa-miR-587	0	0	1	0	0	0	LOC100133207	uncharacterized LOC100133207
hsa-miR-587	0	0	1	1	1	1	CNIH	cornichon homolog (Drosophila)
hsa-miR-587	0	0	1	0	0	0	FLJ39632	uncharacterized LOC642477
hsa-miR-587	0	0	1	1	1	1	NCBP2	nuclear cap binding protein subunit 2, 20kDa
hsa-miR-587	1	0	1	1	1	1	ATP2B4	ATPase, Ca++ transporting, plasma membrane 4
hsa-miR-587	1	0	1	1	1	1	JPH1	junctophilin 1
hsa-miR-587	1	0	1	1	1	1	RBL2	retinoblastoma-like 2 (p130)
hsa-miR-587	0	0	1	0	1	1	FEZ2	fasciculation and elongation protein zeta 2 (zygin II)
hsa-miR-587	1	0	1	1	1	1	MIER3	mesoderm induction early response 1, family member 3
hsa-miR-587	1	0	1	1	1	1	HECTD2	HECT domain containing E3 ubiquitin protein ligase 2
hsa-miR-587	0	0	1	1	1	1	STAT2	signal transducer and activator of transcription 2, 113kDa
hsa-miR-587	1	0	1	1	1	1	ETS1	v-ets erythroblastosis virus E26 oncogene homolog 1 (avian)
hsa-miR-587	1	0	1	1	1	1	SLC35F1	solute carrier family 35, member F1
hsa-miR-587	1	0	1	1	1	1	TGOLN2	trans-golgi network protein 2
hsa-miR-587	0	0	1	1	0	0	CDK5RAP2	CDK5 regulatory subunit associated protein 2
hsa-miR-587	0	0	1	1	1	1	PSMA2	proteasome (prosome, macropain) subunit, alpha type, 2
hsa-miR-587	1	0	1	1	1	1	PRKRIR	protein-kinase, interferon-inducible double stranded RNA dependent inhibitor, repressor of (P58 repressor)
hsa-miR-587	1	0	1	1	1	1	MASP1	mannan-binding lectin serine peptidase 1 (C4/C2 activating component of Ra-reactive factor)
hsa-miR-587	1	0	1	1	0	0	RBM27	RNA binding motif protein 27
hsa-miR-587	1	0	1	1	0	0	CECR2	cat eye syndrome chromosome region, candidate 2
hsa-miR-587	0	0	1	1	1	1	B4GALT4	UDP-Gal:betaGlcNAc beta 1,4- galactosyltransferase, polypeptide 4
hsa-miR-587	0	0	1	1	1	1	NIPSNAP3B	nipsnap homolog 3B (C. elegans)
hsa-miR-587	1	0	1	1	1	1	EPS15	epidermal growth factor receptor pathway substrate 15
hsa-miR-587	1	0	1	0	1	1	EML4	echinoderm microtubule associated protein like 4
hsa-miR-587	0	0	1	0	1	1	ANKRD36	ankyrin repeat domain 36
hsa-miR-587	1	0	1	1	1	1	KLHL2	kelch-like 2, Mayven (Drosophila)
hsa-miR-587	0	0	1	0	1	1	MYO3B	myosin IIIB
hsa-miR-587	1	0	1	1	1	1	CYB5B	cytochrome b5 type B (outer mitochondrial membrane)
hsa-miR-587	0	0	1	0	0	0	OVOS	ovostatin
hsa-miR-587	1	0	1	1	1	1	PPFIA1	protein tyrosine phosphatase, receptor type, f polypeptide (PTPRF), interacting protein (liprin), alpha 1
hsa-miR-587	1	0	1	1	1	1	ATP6V1C1	ATPase, H+ transporting, lysosomal 42kDa, V1 subunit C1
hsa-miR-587	1	0	1	1	1	1	AKT1	v-akt murine thymoma viral oncogene homolog 1
hsa-miR-587	1	0	1	0	0	0	CTSB	cathepsin B
hsa-miR-587	1	0	1	1	1	1	PHF3	PHD finger protein 3
hsa-miR-587	1	0	1	1	1	1	NFIB	nuclear factor I/B
hsa-miR-587	1	0	1	1	1	1	NAV1	neuron navigator 1
hsa-miR-587	1	0	1	0	1	1	IGF2BP3	insulin-like growth factor 2 mRNA binding protein 3
hsa-miR-587	1	0	1	1	1	1	RDX	radixin
hsa-miR-587	1	0	1	1	1	1	PTER	phosphotriesterase related
hsa-miR-587	1	0	1	1	1	1	PGAP1	post-GPI attachment to proteins 1
hsa-miR-587	1	0	1	1	1	1	RECK	reversion-inducing-cysteine-rich protein with kazal motifs
hsa-miR-587	1	0	1	1	1	1	TMEM135	transmembrane protein 135
hsa-miR-587	0	0	1	0	0	0	ZNRD1-AS1	ZNRD1 antisense RNA 1
hsa-miR-587	1	0	1	1	1	1	EOGT	EGF domain-specific O-linked N-acetylglucosamine (GlcNAc) transferase
hsa-miR-587	0	0	1	1	1	1	PRPSAP2	phosphoribosyl pyrophosphate synthetase-associated protein 2
hsa-miR-587	0	0	1	0	0	0	ANKRD62	ankyrin repeat domain 62
hsa-miR-587	0	0	1	1	1	1	USP54	ubiquitin specific peptidase 54
hsa-miR-587	1	0	1	1	1	1	LYST	lysosomal trafficking regulator
hsa-miR-587	0	0	1	1	1	1	IPO11	importin 11
hsa-miR-587	1	0	1	1	1	1	HIC2	hypermethylated in cancer 2
hsa-miR-587	0	0	1	1	1	1	LRRC42	leucine rich repeat containing 42
hsa-miR-587	0	0	1	1	1	1	HPGD	hydroxyprostaglandin dehydrogenase 15-(NAD)
hsa-miR-587	0	0	1	1	1	1	POLR2H	polymerase (RNA) II (DNA directed) polypeptide H
hsa-miR-587	0	0	1	1	0	0	CRIP2	cysteine-rich protein 2
hsa-miR-587	0	0	1	1	0	0	PPT2	palmitoyl-protein thioesterase 2
hsa-miR-587	0	0	1	1	1	1	SNRNP27	small nuclear ribonucleoprotein 27kDa (U4/U6.U5)
hsa-miR-587	1	0	1	0	1	1	RNF144A	ring finger protein 144A
hsa-miR-587	0	0	1	0	1	1	IDO1	indoleamine 2,3-dioxygenase 1
hsa-miR-587	0	0	1	1	1	1	PSG2	pregnancy specific beta-1-glycoprotein 2
hsa-miR-587	0	0	1	1	1	1	RAB3GAP2	RAB3 GTPase activating protein subunit 2 (non-catalytic)
hsa-miR-587	0	0	1	1	0	0	EMX1	empty spiracles homeobox 1
hsa-miR-587	1	0	1	1	1	1	PCGF2	polycomb group ring finger 2
hsa-miR-587	0	0	1	1	1	1	FBXO36	F-box protein 36
hsa-miR-587	0	0	1	1	0	0	URM1	ubiquitin related modifier 1
hsa-miR-587	1	0	1	1	0	0	MDFI	MyoD family inhibitor
hsa-miR-587	0	0	1	0	0	0	ABCB5	ATP-binding cassette, sub-family B (MDR/TAP), member 5
hsa-miR-587	0	0	1	1	1	1	DMWD	dystrophia myotonica, WD repeat containing
hsa-miR-587	1	0	1	1	1	1	ARL1	ADP-ribosylation factor-like 1
hsa-miR-587	1	0	1	1	1	1	PTN	pleiotrophin
hsa-miR-587	0	0	1	1	1	1	ADK	adenosine kinase
hsa-miR-587	0	0	1	1	1	1	CIRBP	cold inducible RNA binding protein
hsa-miR-587	1	0	1	1	1	1	NEU1	sialidase 1 (lysosomal sialidase)
hsa-miR-587	0	0	1	1	1	1	HSPB8	heat shock 22kDa protein 8
hsa-miR-587	1	0	1	0	1	1	BNIP3L	BCL2/adenovirus E1B 19kDa interacting protein 3-like
hsa-miR-587	1	0	1	1	1	1	HNRNPA1	heterogeneous nuclear ribonucleoprotein A1
hsa-miR-587	0	0	1	1	0	0	SPAG8	sperm associated antigen 8
hsa-miR-587	1	0	1	1	1	1	SSR1	signal sequence receptor, alpha
hsa-miR-587	1	0	1	1	1	1	ADM	adrenomedullin
hsa-miR-587	1	0	1	0	1	1	EIF4H	eukaryotic translation initiation factor 4H
hsa-miR-587	1	0	1	0	1	1	ARL6IP6	ADP-ribosylation-like factor 6 interacting protein 6
hsa-miR-587	0	0	1	0	1	1	C17orf108	chromosome 17 open reading frame 108
hsa-miR-587	1	0	1	1	1	1	CCNE1	cyclin E1
hsa-miR-587	0	0	1	1	0	0	RAD54B	RAD54 homolog B (S. cerevisiae)
hsa-miR-587	1	0	1	1	1	1	FBXO9	F-box protein 9
hsa-miR-587	0	0	1	0	0	0	STK16	serine/threonine kinase 16
hsa-miR-587	0	0	1	1	1	1	GGPS1	geranylgeranyl diphosphate synthase 1
hsa-miR-587	0	0	1	1	1	1	ELP5	elongator acetyltransferase complex subunit 5
hsa-miR-587	0	0	1	1	1	1	PECR	peroxisomal trans-2-enoyl-CoA reductase
hsa-miR-587	0	0	1	1	1	1	STON1	stonin 1
hsa-miR-587	1	0	1	1	1	1	PPP2R4	protein phosphatase 2A activator, regulatory subunit 4
hsa-miR-587	0	0	1	0	1	1	PSG11	pregnancy specific beta-1-glycoprotein 11
hsa-miR-587	0	0	1	1	1	1	MS4A6A	membrane-spanning 4-domains, subfamily A, member 6A
hsa-miR-587	1	0	1	1	1	1	TMEM245	transmembrane protein 245
hsa-miR-587	1	0	1	1	1	1	WIPF1	WAS/WASL interacting protein family, member 1
hsa-miR-587	1	0	1	1	1	1	TMEM66	transmembrane protein 66
hsa-miR-587	0	0	1	1	1	1	BMPR1A	bone morphogenetic protein receptor, type IA
hsa-miR-587	0	0	1	1	1	1	CAPZB	capping protein (actin filament) muscle Z-line, beta
hsa-miR-587	0	0	1	1	1	1	HADHB	hydroxyacyl-CoA dehydrogenase/3-ketoacyl-CoA thiolase/enoyl-CoA hydratase (trifunctional protein), beta subunit
hsa-miR-587	0	0	1	0	0	0	ZNF720	zinc finger protein 720
hsa-miR-587	1	0	1	1	1	1	ARNTL	aryl hydrocarbon receptor nuclear translocator-like
hsa-miR-587	1	0	1	1	1	1	TLE1	transducin-like enhancer of split 1 (E(sp1) homolog, Drosophila)
hsa-miR-587	1	0	1	1	1	1	FOS	FBJ murine osteosarcoma viral oncogene homolog
hsa-miR-587	0	0	1	1	1	1	CHEK1	checkpoint kinase 1
hsa-miR-587	0	0	1	1	1	1	ODC1	ornithine decarboxylase 1
hsa-miR-587	0	0	1	1	0	0	TMEM132A	transmembrane protein 132A
hsa-miR-587	1	0	1	1	1	1	YWHAQ	tyrosine 3-monooxygenase/tryptophan 5-monooxygenase activation protein, theta polypeptide
hsa-miR-587	0	0	1	0	1	1	GINS3	GINS complex subunit 3 (Psf3 homolog)
hsa-miR-587	0	0	1	1	1	1	ATP1A1	ATPase, Na+/K+ transporting, alpha 1 polypeptide
hsa-miR-587	1	0	1	1	1	1	ARL4A	ADP-ribosylation factor-like 4A
hsa-miR-587	0	0	1	1	1	1	CD1C	CD1c molecule
hsa-miR-587	0	0	1	1	1	1	FUS	fused in sarcoma
hsa-miR-587	0	0	1	1	1	1	PSG5	pregnancy specific beta-1-glycoprotein 5
hsa-miR-587	1	0	1	1	1	1	NFYB	nuclear transcription factor Y, beta
hsa-miR-587	0	0	1	1	1	1	GFM1	G elongation factor, mitochondrial 1
hsa-miR-587	1	0	1	1	1	1	F11R	F11 receptor
hsa-miR-587	0	0	1	1	1	1	ZNF333	zinc finger protein 333
hsa-miR-587	1	0	1	1	1	1	ARMC8	armadillo repeat containing 8
hsa-miR-587	1	0	1	1	1	1	RNF2	ring finger protein 2
hsa-miR-587	1	0	1	1	1	1	HMGN2	high mobility group nucleosomal binding domain 2
hsa-miR-587	0	0	1	1	0	0	STT3B	STT3, subunit of the oligosaccharyltransferase complex, homolog B (S. cerevisiae)
hsa-miR-587	0	0	1	1	1	1	RNF166	ring finger protein 166
hsa-miR-587	1	0	1	0	1	1	CD47	CD47 molecule
hsa-miR-587	0	0	1	0	0	0	NUDT18	nudix (nucleoside diphosphate linked moiety X)-type motif 18
hsa-miR-587	1	0	1	1	1	1	ATP1B1	ATPase, Na+/K+ transporting, beta 1 polypeptide
hsa-miR-587	1	0	1	1	1	1	RUNX1	runt-related transcription factor 1
hsa-miR-587	0	0	1	0	0	0	CHEK2P2	checkpoint kinase 2 pseudogene 2
hsa-miR-587	1	0	1	1	1	1	YWHAE	tyrosine 3-monooxygenase/tryptophan 5-monooxygenase activation protein, epsilon polypeptide
hsa-miR-587	1	0	1	1	1	1	TIPRL	TIP41, TOR signaling pathway regulator-like (S. cerevisiae)
hsa-miR-587	1	0	1	1	1	1	TFPI	tissue factor pathway inhibitor (lipoprotein-associated coagulation inhibitor)
hsa-miR-587	0	0	1	0	0	0	LOC100132352	FSHD region gene 1 pseudogene
hsa-miR-587	0	0	1	0	0	0	MYSM1	Myb-like, SWIRM and MPN domains 1
hsa-miR-587	0	0	1	1	1	1	C22orf25	chromosome 22 open reading frame 25
hsa-miR-587	1	0	1	1	1	1	FBXW7	F-box and WD repeat domain containing 7, E3 ubiquitin protein ligase
hsa-miR-587	1	0	1	1	1	1	NKTR	natural killer-tumor recognition sequence
hsa-miR-587	1	0	1	0	1	1	MEGF10	multiple EGF-like-domains 10
hsa-miR-587	1	0	1	1	1	1	KIAA2018	KIAA2018
hsa-miR-587	0	0	1	1	0	0	FMN1	formin 1
hsa-miR-587	1	0	1	1	1	1	SLC39A10	solute carrier family 39 (zinc transporter), member 10
hsa-miR-587	1	0	1	0	1	1	CNTNAP2	contactin associated protein-like 2
hsa-miR-587	1	0	1	0	1	1	ZNF652	zinc finger protein 652
hsa-miR-587	1	0	1	1	1	1	BCL2L1	BCL2-like 1
hsa-miR-587	0	0	1	1	0	0	TENC1	tensin like C1 domain containing phosphatase (tensin 2)
hsa-miR-587	1	0	1	1	1	1	SP2	Sp2 transcription factor
hsa-miR-587	1	0	1	1	1	1	METAP1	methionyl aminopeptidase 1
hsa-miR-587	1	0	1	0	1	1	EFR3A	EFR3 homolog A (S. cerevisiae)
hsa-miR-587	0	0	1	1	1	1	PTGS1	prostaglandin-endoperoxide synthase 1 (prostaglandin G/H synthase and cyclooxygenase)
hsa-miR-587	0	0	1	1	1	1	MARVELD2	MARVEL domain containing 2
hsa-miR-587	0	0	1	1	0	0	NBPF9	neuroblastoma breakpoint family, member 9
hsa-miR-587	0	0	1	1	1	1	SCIN	scinderin
hsa-miR-587	1	0	1	0	1	1	RBBP5	retinoblastoma binding protein 5
hsa-miR-587	1	0	1	1	1	1	CDC27	cell division cycle 27 homolog (S. cerevisiae)
hsa-miR-587	1	0	1	1	1	1	MLL	myeloid/lymphoid or mixed-lineage leukemia (trithorax homolog, Drosophila)
hsa-miR-587	1	0	1	1	1	1	CCNG2	cyclin G2
hsa-miR-587	1	0	1	0	1	1	BCL2	B-cell CLL/lymphoma 2
hsa-miR-587	1	0	1	1	1	1	IGF1	insulin-like growth factor 1 (somatomedin C)
hsa-miR-587	1	0	1	0	1	1	ACVR2A	activin A receptor, type IIA
hsa-miR-587	0	0	1	0	0	0	TSPY1	testis specific protein, Y-linked 1
hsa-miR-587	0	0	1	1	1	1	ATP7A	ATPase, Cu++ transporting, alpha polypeptide
hsa-miR-587	0	0	1	1	0	0	CD40LG	CD40 ligand
hsa-miR-587	1	0	1	1	1	1	COL1A2	collagen, type I, alpha 2
hsa-miR-587	1	0	1	1	1	1	COL4A4	collagen, type IV, alpha 4
hsa-miR-587	1	0	1	1	1	1	DMD	dystrophin
hsa-miR-587	1	0	1	0	1	1	EXT1	exostosin 1
hsa-miR-587	1	0	1	1	1	1	FBN1	fibrillin 1
hsa-miR-587	0	0	1	1	1	1	FXN	frataxin
hsa-miR-587	1	0	1	0	1	1	GLI3	GLI family zinc finger 3
hsa-miR-587	1	0	1	1	1	1	HK2	hexokinase 2
hsa-miR-587	1	0	1	1	1	1	KCNA1	potassium voltage-gated channel, shaker-related subfamily, member 1 (episodic ataxia with myokymia)
hsa-miR-587	1	0	1	1	1	1	MET	met proto-oncogene (hepatocyte growth factor receptor)
hsa-miR-587	0	0	1	1	1	1	PEX7	peroxisomal biogenesis factor 7
hsa-miR-587	1	0	1	1	1	1	ATXN1	ataxin 1
hsa-miR-587	0	0	1	1	0	0	SERPINA7	serpin peptidase inhibitor, clade A (alpha-1 antiproteinase, antitrypsin), member 7
hsa-miR-587	0	0	1	1	1	1	THBD	thrombomodulin
hsa-miR-587	0	0	1	0	1	1	GNRHR	gonadotropin-releasing hormone receptor
hsa-miR-587	0	0	1	1	0	0	IL2RA	interleukin 2 receptor, alpha
hsa-miR-587	0	0	1	1	1	1	KRT10	keratin 10
hsa-miR-587	0	0	1	1	1	1	LTBP2	latent transforming growth factor beta binding protein 2
hsa-miR-587	1	0	1	0	1	1	PAFAH1B1	platelet-activating factor acetylhydrolase 1b, regulatory subunit 1 (45kDa)
hsa-miR-587	0	0	1	1	1	1	PECAM1	platelet/endothelial cell adhesion molecule 1
hsa-miR-587	1	0	1	1	1	1	TWIST1	twist homolog 1 (Drosophila)
hsa-miR-587	0	0	1	1	1	1	ALPL	alkaline phosphatase, liver/bone/kidney
hsa-miR-587	1	0	1	1	1	1	DCX	doublecortin
hsa-miR-587	0	0	1	1	0	0	IL1B	interleukin 1, beta
hsa-miR-587	1	0	1	1	1	1	IL8	interleukin 8
hsa-miR-587	0	0	1	1	1	1	LTA	lymphotoxin alpha (TNF superfamily, member 1)
hsa-miR-587	0	0	1	1	1	1	IL6	interleukin 6 (interferon, beta 2)
hsa-miR-587	0	0	1	1	1	1	IGF2	insulin-like growth factor 2 (somatomedin A)
hsa-miR-587	1	0	1	1	1	1	CHRNA7	cholinergic receptor, nicotinic, alpha 7 (neuronal)
hsa-miR-587	1	0	1	0	1	1	GABRA4	gamma-aminobutyric acid (GABA) A receptor, alpha 4
hsa-miR-587	1	0	1	1	1	1	GABRB3	gamma-aminobutyric acid (GABA) A receptor, beta 3
hsa-miR-587	1	0	1	1	1	1	GAD1	glutamate decarboxylase 1 (brain, 67kDa)
hsa-miR-587	0	0	1	1	1	1	GAD2	glutamate decarboxylase 2 (pancreatic islets and brain, 65kDa)
hsa-miR-587	1	0	1	1	1	1	GRM1	glutamate receptor, metabotropic 1
hsa-miR-587	0	0	1	1	1	1	GRM3	glutamate receptor, metabotropic 3
hsa-miR-587	1	0	1	1	1	1	PTGER2	prostaglandin E receptor 2 (subtype EP2), 53kDa
hsa-miR-587	0	0	1	1	1	1	BLOC1S2	biogenesis of lysosomal organelles complex-1, subunit 2
hsa-miR-587	0	0	1	0	1	1	ZDHHC13	zinc finger, DHHC-type containing 13
hsa-miR-587	1	0	1	1	1	1	TPD52L3	tumor protein D52-like 3
hsa-miR-587	1	0	1	1	1	1	FAM13C	family with sequence similarity 13, member C
hsa-miR-587	0	0	1	0	0	0	KLK2	kallikrein-related peptidase 2
hsa-miR-587	1	0	1	1	1	1	AFTPH	aftiphilin
hsa-miR-587	1	0	1	1	1	1	KCTD11	potassium channel tetramerisation domain containing 11
hsa-miR-587	1	0	1	1	1	1	ABLIM1	actin binding LIM protein 1
hsa-miR-587	1	0	1	1	1	1	LEPR	leptin receptor
hsa-miR-587	1	0	1	1	1	1	HMGXB4	HMG box domain containing 4
hsa-miR-587	1	0	1	1	1	1	KLHL31	kelch-like 31 (Drosophila)
hsa-miR-587	1	0	1	0	1	1	BMF	Bcl2 modifying factor
hsa-miR-587	1	0	1	0	1	1	LIN28B	lin-28 homolog B (C. elegans)
hsa-miR-587	0	0	1	1	0	0	PAPL	iron/zinc purple acid phosphatase-like protein
hsa-miR-587	1	0	1	0	1	1	LRRC55	leucine rich repeat containing 55
hsa-miR-587	0	0	1	1	1	1	FRG2	FSHD region gene 2
hsa-miR-587	0	0	1	1	1	1	HMGN2P46	high mobility group nucleosomal binding domain 2 pseudogene 46
hsa-miR-587	0	0	1	1	0	0	ZNF32	zinc finger protein 32
hsa-miR-587	0	0	1	1	0	0	SPIN2B	spindlin family, member 2B
hsa-miR-587	0	0	1	1	1	1	SCP2	sterol carrier protein 2
hsa-miR-587	1	0	1	1	1	1	NTRK3	neurotrophic tyrosine kinase, receptor, type 3
hsa-miR-587	1	0	1	1	1	1	IGSF3	immunoglobulin superfamily, member 3
hsa-miR-587	0	0	1	1	0	0	C1orf186	chromosome 1 open reading frame 186
hsa-miR-587	0	0	1	1	1	1	BUB3	budding uninhibited by benzimidazoles 3 homolog (yeast)
hsa-miR-587	1	0	1	1	1	1	ZDHHC9	zinc finger, DHHC-type containing 9
hsa-miR-587	1	0	1	1	1	1	EML1	echinoderm microtubule associated protein like 1
hsa-miR-587	0	0	1	1	1	1	CCDC147	coiled-coil domain containing 147
hsa-miR-587	1	0	1	1	1	1	FNIP1	folliculin interacting protein 1
hsa-miR-587	0	0	1	0	1	1	ZNF648	zinc finger protein 648
hsa-miR-587	1	0	1	1	1	1	ARHGAP28	Rho GTPase activating protein 28
hsa-miR-587	0	0	1	1	1	1	TECRL	trans-2,3-enoyl-CoA reductase-like
hsa-miR-587	0	0	1	0	1	1	THEMIS	thymocyte selection associated
hsa-miR-587	1	0	1	1	1	1	FAM171A1	family with sequence similarity 171, member A1
hsa-miR-587	0	0	1	1	1	1	DSTN	destrin (actin depolymerizing factor)
hsa-miR-587	1	0	1	0	1	1	CREB5	cAMP responsive element binding protein 5
hsa-miR-587	1	0	1	1	1	1	BTBD1	BTB (POZ) domain containing 1
hsa-miR-587	1	0	1	1	1	1	CENPP	centromere protein P
hsa-miR-587	1	0	1	0	1	1	DNAJC21	DnaJ (Hsp40) homolog, subfamily C, member 21
hsa-miR-587	0	0	1	0	1	1	GOLGA8E	golgin A8 family, member E
hsa-miR-587	0	0	1	1	1	1	CCNC	cyclin C
hsa-miR-587	0	0	1	0	1	1	LINC00268	long intergenic non-protein coding RNA 268
hsa-miR-587	1	0	1	0	1	1	SYT14L	synaptotagmin XIV-like
hsa-miR-587	1	0	1	1	1	1	RUNX2	runt-related transcription factor 2
hsa-miR-587	1	0	1	1	1	1	VMA21	VMA21 vacuolar H+-ATPase homolog (S. cerevisiae)
hsa-miR-587	1	0	1	1	1	1	NTRK2	neurotrophic tyrosine kinase, receptor, type 2
hsa-miR-587	1	0	1	0	1	1	TNRC6B	trinucleotide repeat containing 6B
hsa-miR-587	1	0	1	1	1	1	TGFBR2	transforming growth factor, beta receptor II (70/80kDa)
hsa-miR-587	1	0	1	1	1	1	FAM108B1	family with sequence similarity 108, member B1
hsa-miR-587	0	0	1	1	1	1	SUN3	Sad1 and UNC84 domain containing 3
hsa-miR-587	0	0	1	1	1	1	MS4A3	membrane-spanning 4-domains, subfamily A, member 3 (hematopoietic cell-specific)
hsa-miR-587	1	0	1	0	1	1	MSRB3	methionine sulfoxide reductase B3
hsa-miR-587	0	0	1	1	1	1	CALML4	calmodulin-like 4
hsa-miR-587	1	0	1	1	1	1	MAF	v-maf musculoaponeurotic fibrosarcoma oncogene homolog (avian)
hsa-miR-587	1	0	1	1	1	1	CSNK1G3	casein kinase 1, gamma 3
hsa-miR-587	0	0	1	1	1	1	SLC35A2	solute carrier family 35 (UDP-galactose transporter), member A2
hsa-miR-587	1	0	1	1	1	1	MAGI1	membrane associated guanylate kinase, WW and PDZ domain containing 1
hsa-miR-587	1	0	1	1	1	1	MYCL1	v-myc myelocytomatosis viral oncogene homolog 1, lung carcinoma derived (avian)
hsa-miR-587	0	0	1	1	0	0	NGRN	neugrin, neurite outgrowth associated
hsa-miR-587	1	0	1	1	1	1	PPM1B	protein phosphatase, Mg2+/Mn2+ dependent, 1B
hsa-miR-587	0	0	1	1	1	1	KCNIP1	Kv channel interacting protein 1
hsa-miR-587	0	0	1	1	1	1	MAP9	microtubule-associated protein 9
hsa-miR-587	1	0	1	0	1	1	CREBZF	CREB/ATF bZIP transcription factor
hsa-miR-587	1	0	1	1	1	1	CDC42	cell division cycle 42 (GTP binding protein, 25kDa)
hsa-miR-587	1	0	1	1	1	1	MLLT4	myeloid/lymphoid or mixed-lineage leukemia (trithorax homolog, Drosophila); translocated to, 4
hsa-miR-587	1	0	1	1	1	1	TCERG1	transcription elongation regulator 1
hsa-miR-587	0	0	1	1	1	1	SPOCK3	sparc/osteonectin, cwcv and kazal-like domains proteoglycan (testican) 3
hsa-miR-587	1	0	1	1	1	1	PAPD5	PAP associated domain containing 5
hsa-miR-587	0	0	1	1	1	1	MTHFD2	methylenetetrahydrofolate dehydrogenase (NADP+ dependent) 2, methenyltetrahydrofolate cyclohydrolase
hsa-miR-587	1	0	1	1	1	1	ZBTB8A	zinc finger and BTB domain containing 8A
hsa-miR-587	1	0	1	1	1	1	FAM63B	family with sequence similarity 63, member B
hsa-miR-587	1	0	1	1	1	1	PRKAG2	protein kinase, AMP-activated, gamma 2 non-catalytic subunit
hsa-miR-587	0	0	1	0	1	1	ABCE1	ATP-binding cassette, sub-family E (OABP), member 1
hsa-miR-587	1	0	1	1	1	1	PPP4R1	protein phosphatase 4, regulatory subunit 1
hsa-miR-587	1	0	1	1	1	1	FILIP1L	filamin A interacting protein 1-like
hsa-miR-587	1	0	1	1	1	1	ZNF706	zinc finger protein 706
hsa-miR-587	1	0	1	1	1	1	NSL1	NSL1, MIND kinetochore complex component, homolog (S. cerevisiae)
hsa-miR-587	1	0	1	1	1	1	ERBB4	v-erb-a erythroblastic leukemia viral oncogene homolog 4 (avian)
hsa-miR-587	1	0	1	0	1	1	SLC12A2	solute carrier family 12 (sodium/potassium/chloride transporters), member 2
hsa-miR-587	1	0	1	1	1	1	HIPK3	homeodomain interacting protein kinase 3
hsa-miR-587	1	0	1	1	1	1	QSER1	glutamine and serine rich 1
hsa-miR-587	1	0	1	1	1	1	HS6ST2	heparan sulfate 6-O-sulfotransferase 2
hsa-miR-587	1	0	1	1	1	1	ZNF436	zinc finger protein 436
hsa-miR-587	1	0	1	1	1	1	SREK1	splicing regulatory glutamine/lysine-rich protein 1
hsa-miR-587	1	0	1	1	1	1	IRF2BP2	interferon regulatory factor 2 binding protein 2
hsa-miR-587	0	0	1	1	1	1	ZNF586	zinc finger protein 586
hsa-miR-587	1	0	1	1	1	1	PHF16	PHD finger protein 16
hsa-miR-587	1	0	1	1	1	1	SRSF1	serine/arginine-rich splicing factor 1
hsa-miR-587	1	0	1	1	1	1	DACT1	dapper, antagonist of beta-catenin, homolog 1 (Xenopus laevis)
hsa-miR-587	1	0	1	1	1	1	ZNF697	zinc finger protein 697
hsa-miR-587	1	0	1	0	1	1	MEGF9	multiple EGF-like-domains 9
hsa-miR-587	1	0	1	1	1	1	REPS2	RALBP1 associated Eps domain containing 2
hsa-miR-587	1	0	1	1	1	1	ASIC1	acid-sensing (proton-gated) ion channel 1
hsa-miR-587	1	0	1	1	1	1	ADAM10	ADAM metallopeptidase domain 10
hsa-miR-587	0	0	1	1	1	1	CRISP1	cysteine-rich secretory protein 1
hsa-miR-587	1	0	1	1	1	1	BMP2	bone morphogenetic protein 2
hsa-miR-587	1	0	1	0	1	1	BMPR2	bone morphogenetic protein receptor, type II (serine/threonine kinase)
hsa-miR-587	1	0	1	0	1	1	KLF9	Kruppel-like factor 9
hsa-miR-587	0	0	1	1	1	1	ENTPD3	ectonucleoside triphosphate diphosphohydrolase 3
hsa-miR-587	0	0	1	1	1	1	CHUK	conserved helix-loop-helix ubiquitous kinase
hsa-miR-587	0	0	1	1	1	1	CLIC2	chloride intracellular channel 2
hsa-miR-587	1	0	1	1	1	1	CREBL2	cAMP responsive element binding protein-like 2
hsa-miR-587	1	0	1	1	1	1	MAPK14	mitogen-activated protein kinase 14
hsa-miR-587	1	0	1	1	1	1	CTNND2	catenin (cadherin-associated protein), delta 2
hsa-miR-587	1	0	1	1	1	1	DYRK1A	dual-specificity tyrosine-(Y)-phosphorylation regulated kinase 1A
hsa-miR-587	1	0	1	1	1	1	EIF1AX	eukaryotic translation initiation factor 1A, X-linked
hsa-miR-587	0	0	1	0	1	1	EMP1	epithelial membrane protein 1
hsa-miR-587	1	0	1	1	1	1	EP300	E1A binding protein p300
hsa-miR-587	1	0	1	1	1	1	EREG	epiregulin
hsa-miR-587	0	0	1	1	1	1	ARF5	ADP-ribosylation factor 5
hsa-miR-587	1	0	1	1	1	1	BNC1	basonuclin 1
hsa-miR-587	1	0	1	1	1	1	BTG1	B-cell translocation gene 1, anti-proliferative
hsa-miR-587	1	0	1	1	1	1	CD69	CD69 molecule
hsa-miR-587	1	0	1	1	1	1	CDH2	cadherin 2, type 1, N-cadherin (neuronal)
hsa-miR-587	0	0	1	1	1	1	CDR2	cerebellar degeneration-related protein 2, 62kDa
hsa-miR-587	0	0	1	1	1	1	SLC31A2	solute carrier family 31 (copper transporters), member 2
hsa-miR-587	0	0	1	1	0	0	COX7A2	cytochrome c oxidase subunit VIIa polypeptide 2 (liver)
hsa-miR-587	0	0	1	1	1	1	CSN2	casein beta
hsa-miR-587	1	0	1	1	1	1	CTNNB1	catenin (cadherin-associated protein), beta 1, 88kDa
hsa-miR-587	1	0	1	1	1	1	DPP4	dipeptidyl-peptidase 4
hsa-miR-587	1	0	1	1	1	1	DR1	down-regulator of transcription 1, TBP-binding (negative cofactor 2)
hsa-miR-587	0	0	1	1	1	1	DSG1	desmoglein 1
hsa-miR-587	1	0	1	1	1	1	E2F3	E2F transcription factor 3
hsa-miR-587	1	0	1	0	1	1	ETV6	ets variant 6
hsa-miR-587	1	0	1	1	1	1	F2R	coagulation factor II (thrombin) receptor
hsa-miR-587	1	0	1	1	1	1	FGF7	fibroblast growth factor 7
hsa-miR-587	1	0	1	0	1	1	FOXO1	forkhead box O1
hsa-miR-587	1	0	1	1	1	1	FRK	fyn-related kinase
hsa-miR-587	1	0	1	0	1	1	FUT4	fucosyltransferase 4 (alpha (1,3) fucosyltransferase, myeloid-specific)
hsa-miR-587	0	0	1	1	1	1	GFAP	glial fibrillary acidic protein
hsa-miR-587	1	0	1	1	1	1	GLRA2	glycine receptor, alpha 2
hsa-miR-587	0	0	1	1	1	1	GNAQ	guanine nucleotide binding protein (G protein), q polypeptide
hsa-miR-587	0	0	1	1	1	1	IL12B	interleukin 12B (natural killer cell stimulatory factor 2, cytotoxic lymphocyte maturation factor 2, p40)
hsa-miR-587	1	0	1	1	1	1	ISL1	ISL LIM homeobox 1
hsa-miR-587	1	0	1	1	1	1	ITGB8	integrin, beta 8
hsa-miR-587	1	0	1	1	1	1	JUN	jun proto-oncogene
hsa-miR-587	1	0	1	1	1	1	KCNA5	potassium voltage-gated channel, shaker-related subfamily, member 5
hsa-miR-587	0	0	1	1	0	0	KCNK3	potassium channel, subfamily K, member 3
hsa-miR-587	1	0	1	1	1	1	KPNA4	karyopherin alpha 4 (importin alpha 3)
hsa-miR-587	0	0	1	1	0	0	LECT2	leukocyte cell-derived chemotaxin 2
hsa-miR-587	1	0	1	1	1	1	LIFR	leukemia inhibitory factor receptor alpha
hsa-miR-587	1	0	1	1	1	1	M6PR	mannose-6-phosphate receptor (cation dependent)
hsa-miR-587	1	0	1	1	1	1	MARCKS	myristoylated alanine-rich protein kinase C substrate
hsa-miR-587	1	0	1	1	1	1	MATN2	matrilin 2
hsa-miR-587	0	0	1	0	1	1	CXCL9	chemokine (C-X-C motif) ligand 9
hsa-miR-587	1	0	1	1	1	1	MSN	moesin
hsa-miR-587	0	0	1	1	1	1	CEACAM6	carcinoembryonic antigen-related cell adhesion molecule 6 (non-specific cross reacting antigen)
hsa-miR-587	1	0	1	1	1	1	NDN	necdin homolog (mouse)
hsa-miR-587	0	0	1	1	1	1	NID1	nidogen 1
hsa-miR-587	0	0	1	0	1	1	OPHN1	oligophrenin 1
hsa-miR-587	1	0	1	1	1	1	PPP2R1B	protein phosphatase 2, regulatory subunit A, beta
hsa-miR-587	1	0	1	0	1	1	PPP2R2A	protein phosphatase 2, regulatory subunit B, alpha
hsa-miR-587	1	0	1	0	1	1	PRKCA	protein kinase C, alpha
hsa-miR-587	0	0	1	1	1	1	PRKCB	protein kinase C, beta
hsa-miR-587	1	0	1	1	1	1	PRKD1	protein kinase D1
hsa-miR-587	0	0	1	1	1	1	PTPRC	protein tyrosine phosphatase, receptor type, C
hsa-miR-587	0	0	1	1	1	1	PTPRR	protein tyrosine phosphatase, receptor type, R
hsa-miR-587	1	0	1	0	1	1	RAP2B	RAP2B, member of RAS oncogene family
hsa-miR-587	0	0	1	1	1	1	RNASE4	ribonuclease, RNase A family, 4
hsa-miR-587	1	0	1	0	1	1	SORT1	sortilin 1
hsa-miR-587	1	0	1	1	1	1	SALL1	sal-like 1 (Drosophila)
hsa-miR-587	1	0	1	1	1	1	SLC7A1	solute carrier family 7 (cationic amino acid transporter, y+ system), member 1
hsa-miR-587	1	0	1	1	1	1	SLIT3	slit homolog 3 (Drosophila)
hsa-miR-587	0	0	1	1	1	1	SMARCA1	SWI/SNF related, matrix associated, actin dependent regulator of chromatin, subfamily a, member 1
hsa-miR-587	1	0	1	1	1	1	SMARCC1	SWI/SNF related, matrix associated, actin dependent regulator of chromatin, subfamily c, member 1
hsa-miR-587	1	0	1	0	1	1	SOX11	SRY (sex determining region Y)-box 11
hsa-miR-587	1	0	1	1	1	1	SRI	sorcin
hsa-miR-587	0	0	1	1	1	1	TAPBP	TAP binding protein (tapasin)
hsa-miR-587	1	0	1	0	1	1	THBS1	thrombospondin 1
hsa-miR-587	1	0	1	1	1	1	NR2E1	nuclear receptor subfamily 2, group E, member 1
hsa-miR-587	1	0	1	1	1	1	TRAPPC10	trafficking protein particle complex 10
hsa-miR-587	1	0	1	1	0	0	TNP1	transition protein 1 (during histone to protamine replacement)
hsa-miR-587	0	0	1	1	1	1	TTK	TTK protein kinase
hsa-miR-587	1	0	1	1	1	1	UBE2D3	ubiquitin-conjugating enzyme E2D 3
hsa-miR-587	1	0	1	1	1	1	YWHAH	tyrosine 3-monooxygenase/tryptophan 5-monooxygenase activation protein, eta polypeptide
hsa-miR-587	1	0	1	1	1	1	ZIC3	Zic family member 3
hsa-miR-587	1	0	1	1	1	1	PAX8	paired box 8
hsa-miR-587	1	0	1	1	1	1	DEK	DEK oncogene
hsa-miR-587	1	0	1	1	1	1	ADAM12	ADAM metallopeptidase domain 12
hsa-miR-587	1	0	1	1	1	1	HMGA2	high mobility group AT-hook 2
hsa-miR-587	0	0	1	1	1	1	DDO	D-aspartate oxidase
hsa-miR-587	0	0	1	1	1	1	AGPS	alkylglycerone phosphate synthase
hsa-miR-587	1	0	1	1	1	1	BHLHE40	basic helix-loop-helix family, member e40
hsa-miR-587	0	0	1	1	1	1	SLC25A12	solute carrier family 25 (aspartate/glutamate carrier), member 12
hsa-miR-587	1	0	1	0	1	1	TNKS	tankyrase, TRF1-interacting ankyrin-related ADP-ribose polymerase
hsa-miR-587	1	0	1	0	1	1	IRS2	insulin receptor substrate 2
hsa-miR-587	1	0	1	1	1	1	SUCLG2	succinate-CoA ligase, GDP-forming, beta subunit
hsa-miR-587	1	0	1	1	1	1	NRP2	neuropilin 2
hsa-miR-587	1	0	1	1	1	1	KAT2B	K(lysine) acetyltransferase 2B
hsa-miR-587	1	0	1	0	1	1	SGPL1	sphingosine-1-phosphate lyase 1
hsa-miR-587	0	0	1	1	1	1	PRPF4B	PRP4 pre-mRNA processing factor 4 homolog B (yeast)
hsa-miR-587	1	0	1	0	1	1	ST13	suppression of tumorigenicity 13 (colon carcinoma) (Hsp70 interacting protein)
hsa-miR-587	0	0	1	1	1	1	ATP6V0E1	ATPase, H+ transporting, lysosomal 9kDa, V0 subunit e1
hsa-miR-587	0	0	1	1	0	0	NPR2	natriuretic peptide receptor B/guanylate cyclase B (atrionatriuretic peptide receptor B)
hsa-miR-587	1	0	1	1	1	1	ACOX1	acyl-CoA oxidase 1, palmitoyl
hsa-miR-587	1	0	1	1	1	1	EFNB2	ephrin-B2
hsa-miR-587	1	0	1	1	1	1	EYA4	eyes absent homolog 4 (Drosophila)
hsa-miR-587	1	0	1	1	1	1	FGF12	fibroblast growth factor 12
hsa-miR-587	1	0	1	0	1	1	SLC1A2	solute carrier family 1 (glial high affinity glutamate transporter), member 2
hsa-miR-587	0	0	1	0	1	1	SLC1A3	solute carrier family 1 (glial high affinity glutamate transporter), member 3
hsa-miR-587	1	0	1	1	1	1	SOCS6	suppressor of cytokine signaling 6
hsa-miR-587	0	0	1	1	0	0	PIGL	phosphatidylinositol glycan anchor biosynthesis, class L
hsa-miR-587	1	0	1	1	1	1	GDA	guanine deaminase
hsa-miR-587	1	0	1	1	1	1	ARL3	ADP-ribosylation factor-like 3
hsa-miR-587	1	0	1	1	1	1	BNIP2	BCL2/adenovirus E1B 19kDa interacting protein 2
hsa-miR-587	0	0	1	1	1	1	COL12A1	collagen, type XII, alpha 1
hsa-miR-587	0	0	1	1	1	1	CYP8B1	cytochrome P450, family 8, subfamily B, polypeptide 1
hsa-miR-587	1	0	1	1	1	1	DAG1	dystroglycan 1 (dystrophin-associated glycoprotein 1)
hsa-miR-587	1	0	1	0	1	1	FGF5	fibroblast growth factor 5
hsa-miR-587	1	0	1	1	1	1	MLLT3	myeloid/lymphoid or mixed-lineage leukemia (trithorax homolog, Drosophila); translocated to, 3
hsa-miR-587	1	0	1	1	1	1	SF1	splicing factor 1
hsa-miR-587	0	0	1	1	1	1	PNPLA4	patatin-like phospholipase domain containing 4
hsa-miR-587	1	0	1	1	0	0	PIAS2	protein inhibitor of activated STAT, 2
hsa-miR-587	0	0	1	1	1	1	CDY1	chromodomain protein, Y-linked, 1
hsa-miR-587	1	0	1	1	0	0	COX7A2L	cytochrome c oxidase subunit VIIa polypeptide 2 like
hsa-miR-587	1	0	1	1	1	1	XPR1	xenotropic and polytropic retrovirus receptor 1
hsa-miR-587	1	0	1	1	1	1	STK17A	serine/threonine kinase 17a
hsa-miR-587	1	0	1	1	1	1	NREP	neuronal regeneration related protein homolog (rat)
hsa-miR-587	1	0	1	1	1	1	B4GALT6	UDP-Gal:betaGlcNAc beta 1,4- galactosyltransferase, polypeptide 6
hsa-miR-587	1	0	1	1	1	1	SNAP29	synaptosomal-associated protein, 29kDa
hsa-miR-587	1	0	1	1	1	1	NRXN1	neurexin 1
hsa-miR-587	0	0	1	1	1	1	EIF2AK3	eukaryotic translation initiation factor 2-alpha kinase 3
hsa-miR-587	1	0	1	1	1	1	ONECUT2	one cut homeobox 2
hsa-miR-587	1	0	1	1	1	1	FXR2	fragile X mental retardation, autosomal homolog 2
hsa-miR-587	0	0	1	1	1	1	GDF10	growth differentiation factor 10
hsa-miR-587	1	0	1	0	1	1	SEL1L	sel-1 suppressor of lin-12-like (C. elegans)
hsa-miR-587	0	0	1	1	1	1	SIM1	single-minded homolog 1 (Drosophila)
hsa-miR-587	1	0	1	1	1	1	OXSR1	oxidative-stress responsive 1
hsa-miR-587	0	0	1	1	1	1	CLEC2B	C-type lectin domain family 2, member B
hsa-miR-587	1	0	1	1	1	1	BMI1	BMI1 polycomb ring finger oncogene
hsa-miR-587	1	0	1	1	1	1	CBL	Cbl proto-oncogene, E3 ubiquitin protein ligase
hsa-miR-587	1	1	1	1	1	1	MAP3K8	mitogen-activated protein kinase kinase kinase 8
hsa-miR-587	1	0	1	1	1	1	CRK	v-crk sarcoma virus CT10 oncogene homolog (avian)
hsa-miR-587	1	0	1	1	1	1	DLX3	distal-less homeobox 3
hsa-miR-587	0	0	1	1	1	1	MSTN	myostatin
hsa-miR-587	1	0	1	1	1	1	GJA5	gap junction protein, alpha 5, 40kDa
hsa-miR-587	0	0	1	1	1	1	PDIA3	protein disulfide isomerase family A, member 3
hsa-miR-587	0	0	1	1	0	0	NCKAP1L	NCK-associated protein 1-like
hsa-miR-587	0	0	1	1	1	1	PPP1R3C	protein phosphatase 1, regulatory subunit 3C
hsa-miR-587	1	0	1	0	1	1	PRKAB2	protein kinase, AMP-activated, beta 2 non-catalytic subunit
hsa-miR-587	1	0	1	0	1	1	PRKCE	protein kinase C, epsilon
hsa-miR-587	1	0	1	1	1	1	ROCK1	Rho-associated, coiled-coil containing protein kinase 1
hsa-miR-587	1	0	1	0	1	1	CCDC6	coiled-coil domain containing 6
hsa-miR-587	1	0	1	1	1	1	MLF2	myeloid leukemia factor 2
hsa-miR-587	0	0	1	1	1	1	MAPK8IP1	mitogen-activated protein kinase 8 interacting protein 1
hsa-miR-587	1	0	1	1	1	1	MED6	mediator complex subunit 6
hsa-miR-587	1	0	1	1	1	1	KCNE3	potassium voltage-gated channel, Isk-related family, member 3
hsa-miR-587	1	0	1	1	1	1	ABCA1	ATP-binding cassette, sub-family A (ABC1), member 1
hsa-miR-587	1	0	1	1	1	1	TLX1	T-cell leukemia homeobox 1
hsa-miR-587	1	0	1	1	1	1	INSIG1	insulin induced gene 1
hsa-miR-587	1	0	1	1	1	1	SMAD6	SMAD family member 6
hsa-miR-587	1	0	1	1	1	1	NHLH2	nescient helix loop helix 2
hsa-miR-587	1	0	1	1	1	1	ATP8B1	ATPase, aminophospholipid transporter, class I, type 8B, member 1
hsa-miR-587	1	0	1	1	1	1	RGS4	regulator of G-protein signaling 4
hsa-miR-587	1	0	1	1	1	1	DLL1	delta-like 1 (Drosophila)
hsa-miR-587	0	0	1	1	1	1	CCL8	chemokine (C-C motif) ligand 8
hsa-miR-587	1	0	1	1	1	1	TERF2	telomeric repeat binding factor 2
hsa-miR-587	0	0	1	1	0	0	VDAC3	voltage-dependent anion channel 3
hsa-miR-587	1	0	1	1	1	1	EVI5	ecotropic viral integration site 5
hsa-miR-587	1	0	1	1	1	1	ST8SIA4	ST8 alpha-N-acetyl-neuraminide alpha-2,8-sialyltransferase 4
hsa-miR-587	1	0	1	1	1	1	UST	uronyl-2-sulfotransferase
hsa-miR-587	0	0	1	1	1	1	TOB1	transducer of ERBB2, 1
hsa-miR-587	0	0	1	1	0	0	PDZK1IP1	PDZK1 interacting protein 1
hsa-miR-587	1	0	1	0	1	1	CALCRL	calcitonin receptor-like
hsa-miR-587	0	0	1	1	1	1	DDX39A	DEAD (Asp-Glu-Ala-Asp) box polypeptide 39A
hsa-miR-587	0	0	1	1	1	1	KLRG1	killer cell lectin-like receptor subfamily G, member 1
hsa-miR-587	0	0	1	0	1	1	CD96	CD96 molecule
hsa-miR-587	1	0	1	0	1	1	DCAF7	DDB1 and CUL4 associated factor 7
hsa-miR-587	0	0	1	0	1	1	STAM2	signal transducing adaptor molecule (SH3 domain and ITAM motif) 2
hsa-miR-587	0	0	1	1	1	1	ZMPSTE24	zinc metallopeptidase STE24 homolog (S. cerevisiae)
hsa-miR-587	0	0	1	1	1	1	DSCR4	Down syndrome critical region gene 4
hsa-miR-587	1	0	1	1	1	1	BET1	blocked early in transport 1 homolog (S. cerevisiae)
hsa-miR-587	0	0	1	1	1	1	SAP18	Sin3A-associated protein, 18kDa
hsa-miR-587	1	0	1	1	1	1	MAP3K5	mitogen-activated protein kinase kinase kinase 5
hsa-miR-587	1	0	1	1	1	1	MTF1	metal-regulatory transcription factor 1
hsa-miR-587	1	0	1	0	1	1	NAB1	NGFI-A binding protein 1 (EGR1 binding protein 1)
hsa-miR-587	1	0	1	1	1	1	CAPZA1	capping protein (actin filament) muscle Z-line, alpha 1
hsa-miR-587	1	0	1	1	1	1	DYNC1LI2	dynein, cytoplasmic 1, light intermediate chain 2
hsa-miR-587	1	0	1	1	1	1	DNAJB1	DnaJ (Hsp40) homolog, subfamily B, member 1
hsa-miR-587	0	0	1	1	1	1	IRF6	interferon regulatory factor 6
hsa-miR-587	1	0	1	1	1	1	NCK1	NCK adaptor protein 1
hsa-miR-587	1	0	1	1	1	1	NEUROD2	neuronal differentiation 2
hsa-miR-587	1	0	1	1	1	1	NFATC1	nuclear factor of activated T-cells, cytoplasmic, calcineurin-dependent 1
hsa-miR-587	1	0	1	0	1	1	PPP1R2	protein phosphatase 1, regulatory (inhibitor) subunit 2
hsa-miR-587	1	0	1	0	1	1	SRSF6	serine/arginine-rich splicing factor 6
hsa-miR-587	1	0	1	1	1	1	STK4	serine/threonine kinase 4
hsa-miR-587	0	0	1	1	1	1	ZNF230	zinc finger protein 230
hsa-miR-587	0	0	1	1	1	1	HMGN4	high mobility group nucleosomal binding domain 4
hsa-miR-587	1	0	1	1	1	1	SEC23A	Sec23 homolog A (S. cerevisiae)
hsa-miR-587	1	0	1	0	1	1	APPBP2	amyloid beta precursor protein (cytoplasmic tail) binding protein 2
hsa-miR-587	1	0	1	1	1	1	NEBL	nebulette
hsa-miR-587	1	0	1	0	1	1	GNAI3	guanine nucleotide binding protein (G protein), alpha inhibiting activity polypeptide 3
hsa-miR-587	1	0	1	1	1	1	DYNLT3	dynein, light chain, Tctex-type 3
hsa-miR-587	1	0	1	0	1	1	IGF2BP1	insulin-like growth factor 2 mRNA binding protein 1
hsa-miR-587	1	0	1	1	1	1	CORIN	corin, serine peptidase
hsa-miR-587	1	0	1	0	1	1	API5	apoptosis inhibitor 5
hsa-miR-587	1	0	1	1	1	1	MAP3K2	mitogen-activated protein kinase kinase kinase 2
hsa-miR-587	1	0	1	1	1	1	SRSF10	serine/arginine-rich splicing factor 10
hsa-miR-587	1	0	1	1	1	1	TSPAN9	tetraspanin 9
hsa-miR-587	0	0	1	1	0	0	NMU	neuromedin U
hsa-miR-587	0	0	1	1	1	1	FGL2	fibrinogen-like 2
hsa-miR-587	0	0	1	1	1	1	LYVE1	lymphatic vessel endothelial hyaluronan receptor 1
hsa-miR-587	1	0	1	1	1	1	MAN1A2	mannosidase, alpha, class 1A, member 2
hsa-miR-587	1	0	1	1	1	1	CDH10	cadherin 10, type 2 (T2-cadherin)
hsa-miR-587	1	0	1	1	1	1	HIVEP2	human immunodeficiency virus type I enhancer binding protein 2
hsa-miR-587	1	0	1	1	1	1	BTG2	BTG family, member 2
hsa-miR-587	0	0	1	1	1	1	PKIA	protein kinase (cAMP-dependent, catalytic) inhibitor alpha
hsa-miR-587	1	0	1	1	1	1	SCN1A	sodium channel, voltage-gated, type I, alpha subunit
hsa-miR-587	1	0	1	0	1	1	SLC5A3	solute carrier family 5 (sodium/myo-inositol cotransporter), member 3
hsa-miR-587	1	0	1	1	1	1	SYN1	synapsin I
hsa-miR-587	1	0	1	1	1	1	NR4A3	nuclear receptor subfamily 4, group A, member 3
hsa-miR-587	1	0	1	0	1	1	WASF2	WAS protein family, member 2
hsa-miR-587	1	0	1	0	1	1	PAPD7	PAP associated domain containing 7
hsa-miR-587	0	0	1	1	1	1	DNAJB4	DnaJ (Hsp40) homolog, subfamily B, member 4
hsa-miR-587	1	0	1	1	1	1	ESM1	endothelial cell-specific molecule 1
hsa-miR-587	0	0	1	1	1	1	RPP14	ribonuclease P/MRP 14kDa subunit
hsa-miR-587	1	0	1	1	1	1	FGFR1OP	FGFR1 oncogene partner
hsa-miR-587	0	0	1	1	1	1	POLR3A	polymerase (RNA) III (DNA directed) polypeptide A, 155kDa
hsa-miR-587	1	0	1	1	1	1	SSR3	signal sequence receptor, gamma (translocon-associated protein gamma)
hsa-miR-587	1	0	1	1	1	1	VEZF1	vascular endothelial zinc finger 1
hsa-miR-587	1	0	1	1	1	1	PALM2-AKAP2	PALM2-AKAP2 readthrough
hsa-miR-587	1	0	1	1	1	1	HPS5	Hermansky-Pudlak syndrome 5
hsa-miR-587	1	0	1	1	1	1	KLF12	Kruppel-like factor 12
hsa-miR-587	0	0	1	1	1	1	STXBP3	syntaxin binding protein 3
hsa-miR-587	0	0	1	0	1	1	AP4E1	adaptor-related protein complex 4, epsilon 1 subunit
hsa-miR-587	1	0	1	1	1	1	TARDBP	TAR DNA binding protein
hsa-miR-587	0	0	1	1	1	1	ABCB10	ATP-binding cassette, sub-family B (MDR/TAP), member 10
hsa-miR-587	1	0	1	1	1	1	ICOS	inducible T-cell co-stimulator
hsa-miR-587	1	0	1	1	1	1	APPL1	adaptor protein, phosphotyrosine interaction, PH domain and leucine zipper containing 1
hsa-miR-587	1	0	1	0	1	1	FZD4	frizzled family receptor 4
hsa-miR-587	1	0	1	1	1	1	MGAT4A	mannosyl (alpha-1,3-)-glycoprotein beta-1,4-N-acetylglucosaminyltransferase, isozyme A
hsa-miR-587	1	0	1	1	1	1	DKK1	dickkopf 1 homolog (Xenopus laevis)
hsa-miR-587	1	0	1	1	1	1	HS2ST1	heparan sulfate 2-O-sulfotransferase 1
hsa-miR-587	1	0	1	1	1	1	KCND2	potassium voltage-gated channel, Shal-related subfamily, member 2
hsa-miR-587	1	0	1	0	1	1	MYO10	myosin X
hsa-miR-587	1	0	1	1	1	1	TSPAN12	tetraspanin 12
hsa-miR-587	1	0	1	0	1	1	BLOC1S6	biogenesis of lysosomal organelles complex-1, subunit 6, pallidin
hsa-miR-587	1	0	1	1	1	1	PRDM4	PR domain containing 4
hsa-miR-587	0	0	1	0	1	1	TLL1	tolloid-like 1
hsa-miR-587	1	0	1	1	1	1	TLL2	tolloid-like 2
hsa-miR-587	0	0	1	1	1	1	CD24	CD24 molecule
hsa-miR-587	1	0	1	1	1	1	STK39	serine threonine kinase 39
hsa-miR-587	1	0	1	0	1	1	RBM15B	RNA binding motif protein 15B
hsa-miR-587	0	0	1	1	0	0	GMPPB	GDP-mannose pyrophosphorylase B
hsa-miR-587	0	0	1	1	0	0	KCNJ14	potassium inwardly-rectifying channel, subfamily J, member 14
hsa-miR-587	0	0	1	1	1	1	PURG	purine-rich element binding protein G
hsa-miR-587	1	0	1	1	1	1	SLC25A24	solute carrier family 25 (mitochondrial carrier; phosphate carrier), member 24
hsa-miR-587	0	0	1	0	1	1	EMR2	egf-like module containing, mucin-like, hormone receptor-like 2
hsa-miR-587	0	0	1	1	1	1	METTL7A	methyltransferase like 7A
hsa-miR-587	0	0	1	1	0	0	GNPAT	glyceronephosphate O-acyltransferase
hsa-miR-587	0	0	1	0	1	1	ADAMTS3	ADAM metallopeptidase with thrombospondin type 1 motif, 3
hsa-miR-587	1	0	1	1	1	1	CELSR1	cadherin, EGF LAG seven-pass G-type receptor 1 (flamingo homolog, Drosophila)
hsa-miR-587	1	0	1	1	1	1	SLC25A15	solute carrier family 25 (mitochondrial carrier; ornithine transporter) member 15
hsa-miR-587	1	0	1	1	1	1	PATZ1	POZ (BTB) and AT hook containing zinc finger 1
hsa-miR-587	1	0	1	1	1	1	SLC7A11	solute carrier family 7 (anionic amino acid transporter light chain, xc- system), member 11
hsa-miR-587	1	0	1	0	1	1	DIEXF	digestive organ expansion factor homolog (zebrafish)
hsa-miR-587	0	0	1	1	1	1	LAMP3	lysosomal-associated membrane protein 3
hsa-miR-587	0	0	1	0	0	0	SND1-IT1	SND1 intronic transcript 1 (non-protein coding)
hsa-miR-587	0	0	1	1	1	1	TCL6	T-cell leukemia/lymphoma 6 (non-protein coding)
hsa-miR-587	0	0	1	1	0	0	DKKL1	dickkopf-like 1
hsa-miR-587	1	0	1	1	1	1	AFF4	AF4/FMR2 family, member 4
hsa-miR-587	0	0	1	1	1	1	LSM3	LSM3 homolog, U6 small nuclear RNA associated (S. cerevisiae)
hsa-miR-587	1	0	1	0	1	1	HUNK	hormonally up-regulated Neu-associated kinase
hsa-miR-587	1	0	1	0	1	1	SH3PXD2A	SH3 and PX domains 2A
hsa-miR-587	1	0	1	0	1	1	PPM1F	protein phosphatase, Mg2+/Mn2+ dependent, 1F
hsa-miR-587	1	0	1	0	1	1	BZW1	basic leucine zipper and W2 domains 1
hsa-miR-587	1	0	1	0	1	1	EDEM1	ER degradation enhancer, mannosidase alpha-like 1
hsa-miR-587	0	0	1	1	0	0	ZNF646	zinc finger protein 646
hsa-miR-587	0	0	1	1	0	0	SETD1A	SET domain containing 1A
hsa-miR-587	0	0	1	1	1	1	FRMPD4	FERM and PDZ domain containing 4
hsa-miR-587	1	0	1	0	1	1	TOX	thymocyte selection-associated high mobility group box
hsa-miR-587	1	0	1	0	1	1	MAML1	mastermind-like 1 (Drosophila)
hsa-miR-587	0	0	1	1	1	1	SNX19	sorting nexin 19
hsa-miR-587	1	0	1	1	1	1	DAZAP2	DAZ associated protein 2
hsa-miR-587	1	0	1	1	1	1	ARHGEF11	Rho guanine nucleotide exchange factor (GEF) 11
hsa-miR-587	1	0	1	1	1	1	FCHSD2	FCH and double SH3 domains 2
hsa-miR-587	1	0	1	1	1	1	NUAK1	NUAK family, SNF1-like kinase, 1
hsa-miR-587	1	0	1	0	1	1	ZBTB40	zinc finger and BTB domain containing 40
hsa-miR-587	0	0	1	1	1	1	N4BP2L2	NEDD4 binding protein 2-like 2
hsa-miR-587	1	0	1	1	1	1	SORCS3	sortilin-related VPS10 domain containing receptor 3
hsa-miR-587	1	0	1	0	1	1	PDS5B	PDS5, regulator of cohesion maintenance, homolog B (S. cerevisiae)
hsa-miR-587	1	0	1	0	1	1	NMNAT2	nicotinamide nucleotide adenylyltransferase 2
hsa-miR-587	1	0	1	0	1	1	PEG10	paternally expressed 10
hsa-miR-587	1	0	1	1	0	0	CIC	capicua homolog (Drosophila)
hsa-miR-587	1	0	1	1	1	1	TRIM9	tripartite motif containing 9
hsa-miR-587	1	0	1	1	1	1	MED13L	mediator complex subunit 13-like
hsa-miR-587	0	0	1	1	1	1	LEPROTL1	leptin receptor overlapping transcript-like 1
hsa-miR-587	0	0	1	1	1	1	ANAPC13	anaphase promoting complex subunit 13
hsa-miR-587	0	0	1	1	1	1	ZNF10	zinc finger protein 10
hsa-miR-587	1	0	1	1	1	1	CNOT6	CCR4-NOT transcription complex, subunit 6
hsa-miR-587	0	0	1	1	1	1	NIPSNAP3A	nipsnap homolog 3A (C. elegans)
hsa-miR-587	1	0	1	1	1	1	ABCA12	ATP-binding cassette, sub-family A (ABC1), member 12
hsa-miR-587	1	0	1	1	1	1	ST8SIA3	ST8 alpha-N-acetyl-neuraminide alpha-2,8-sialyltransferase 3
hsa-miR-587	1	0	1	1	1	1	EIF5B	eukaryotic translation initiation factor 5B
hsa-miR-587	1	0	1	1	1	1	TXNDC12	thioredoxin domain containing 12 (endoplasmic reticulum)
hsa-miR-587	1	0	1	1	1	1	UBE2J1	ubiquitin-conjugating enzyme E2, J1
hsa-miR-587	0	0	1	1	1	1	HSD17B12	hydroxysteroid (17-beta) dehydrogenase 12
hsa-miR-587	0	0	1	1	1	1	NAA38	N(alpha)-acetyltransferase 38, NatC auxiliary subunit
hsa-miR-587	1	0	1	1	1	1	VGLL3	vestigial like 3 (Drosophila)
hsa-miR-587	1	0	1	1	1	1	AKAP11	A kinase (PRKA) anchor protein 11
hsa-miR-587	1	0	1	1	1	1	RNF138	ring finger protein 138, E3 ubiquitin protein ligase
hsa-miR-587	0	0	1	1	1	1	CD244	CD244 molecule, natural killer cell receptor 2B4
hsa-miR-587	1	0	1	1	1	1	PHF20	PHD finger protein 20
hsa-miR-587	0	0	1	0	1	1	ERGIC2	ERGIC and golgi 2
hsa-miR-587	1	0	1	1	1	1	GALNT7	UDP-N-acetyl-alpha-D-galactosamine:polypeptide N-acetylgalactosaminyltransferase 7 (GalNAc-T7)
hsa-miR-587	1	0	1	1	1	1	CPSF2	cleavage and polyadenylation specific factor 2, 100kDa
hsa-miR-587	0	0	1	0	1	1	CHRAC1	chromatin accessibility complex 1
hsa-miR-587	1	0	1	0	1	1	ZRANB1	zinc finger, RAN-binding domain containing 1
hsa-miR-587	0	0	1	0	1	1	TRIM44	tripartite motif containing 44
hsa-miR-587	1	0	1	0	1	1	EIF2C4	eukaryotic translation initiation factor 2C, 4
hsa-miR-587	1	0	1	0	1	1	KCTD9	potassium channel tetramerisation domain containing 9
hsa-miR-587	0	0	1	0	1	1	GIPC2	GIPC PDZ domain containing family, member 2
hsa-miR-587	1	0	1	1	1	1	TBC1D8B	TBC1 domain family, member 8B (with GRAM domain)
hsa-miR-587	1	0	1	1	1	1	ALKBH5	alkB, alkylation repair homolog 5 (E. coli)
hsa-miR-587	0	0	1	1	1	1	WHSC1L1	Wolf-Hirschhorn syndrome candidate 1-like 1
hsa-miR-587	1	0	1	1	1	1	YTHDF1	YTH domain family, member 1
hsa-miR-587	1	0	1	1	1	1	UBE2R2	ubiquitin-conjugating enzyme E2R 2
hsa-miR-587	1	0	1	1	1	1	IMPAD1	inositol monophosphatase domain containing 1
hsa-miR-587	0	0	1	1	1	1	TMEM38B	transmembrane protein 38B
hsa-miR-587	0	0	1	1	1	1	TSR1	TSR1, 20S rRNA accumulation, homolog (S. cerevisiae)
hsa-miR-587	1	0	1	1	1	1	LRRC20	leucine rich repeat containing 20
hsa-miR-587	1	0	1	1	1	1	UBA6	ubiquitin-like modifier activating enzyme 6
hsa-miR-587	1	0	1	1	1	1	TMEM184C	transmembrane protein 184C
hsa-miR-587	1	0	1	1	1	1	SPTLC3	serine palmitoyltransferase, long chain base subunit 3
hsa-miR-587	1	0	1	1	1	1	RSBN1	round spermatid basic protein 1
hsa-miR-587	1	0	1	1	1	1	DRAM1	DNA-damage regulated autophagy modulator 1
hsa-miR-587	0	0	1	1	1	1	STK32B	serine/threonine kinase 32B
hsa-miR-587	0	0	1	1	1	1	LAPTM4B	lysosomal protein transmembrane 4 beta
hsa-miR-587	1	0	1	0	1	1	FOXJ2	forkhead box J2
hsa-miR-587	0	0	1	1	1	1	STYK1	serine/threonine/tyrosine kinase 1
hsa-miR-587	0	0	1	1	1	1	BDP1	B double prime 1, subunit of RNA polymerase III transcription initiation factor IIIB
hsa-miR-587	1	0	1	1	1	1	PAG1	phosphoprotein associated with glycosphingolipid microdomains 1
hsa-miR-587	1	0	1	1	1	1	LRRC59	leucine rich repeat containing 59
hsa-miR-587	1	0	1	0	1	1	LRP1B	low density lipoprotein receptor-related protein 1B
hsa-miR-587	1	0	1	1	1	1	ETNK1	ethanolamine kinase 1
hsa-miR-587	1	0	1	0	1	1	TMEM55A	transmembrane protein 55A
hsa-miR-587	1	0	1	1	1	1	GNG12	guanine nucleotide binding protein (G protein), gamma 12
hsa-miR-587	1	0	1	0	1	1	PCDHAC1	protocadherin alpha subfamily C, 1
hsa-miR-587	1	0	1	0	1	1	PCDHAC2	protocadherin alpha subfamily C, 2
hsa-miR-587	1	0	1	1	1	1	PCDHA1	protocadherin alpha 1
hsa-miR-587	1	0	1	0	1	1	PCDHA10	protocadherin alpha 10
hsa-miR-587	1	0	1	0	1	1	PCDHA11	protocadherin alpha 11
hsa-miR-587	1	0	1	0	1	1	PCDHA12	protocadherin alpha 12
hsa-miR-587	1	0	1	1	1	1	PCDHA2	protocadherin alpha 2
hsa-miR-587	1	0	1	1	1	1	PCDHA3	protocadherin alpha 3
hsa-miR-587	1	0	1	1	1	1	PCDHA6	protocadherin alpha 6
hsa-miR-587	1	0	1	0	1	1	PCDHA7	protocadherin alpha 7
hsa-miR-587	1	0	1	1	1	1	PCDHA8	protocadherin alpha 8
hsa-miR-587	0	0	1	1	0	0	SPIN2A	spindlin family, member 2A
hsa-miR-587	1	0	1	0	1	1	CCNJ	cyclin J
hsa-miR-587	0	0	1	0	1	1	ARL15	ADP-ribosylation factor-like 15
hsa-miR-587	1	0	1	1	1	1	EPB41L4B	erythrocyte membrane protein band 4.1 like 4B
hsa-miR-587	1	0	1	1	1	1	ERO1LB	ERO1-like beta (S. cerevisiae)
hsa-miR-587	0	0	1	1	1	1	FMN2	formin 2
hsa-miR-587	1	0	1	1	1	1	CNNM4	cyclin M4
hsa-miR-587	1	0	1	0	1	1	MNT	MAX binding protein
hsa-miR-587	0	0	1	1	1	1	CXCR7	chemokine (C-X-C motif) receptor 7
hsa-miR-587	0	0	1	1	1	1	ANKMY2	ankyrin repeat and MYND domain containing 2
hsa-miR-587	1	0	1	1	1	1	ANKRD50	ankyrin repeat domain 50
hsa-miR-587	1	0	1	1	1	1	PCDH9	protocadherin 9
hsa-miR-587	1	0	1	1	1	1	EPHA8	EPH receptor A8
hsa-miR-587	1	0	1	0	1	1	DCUN1D1	DCN1, defective in cullin neddylation 1, domain containing 1 (S. cerevisiae)
hsa-miR-587	1	0	1	1	1	1	NRIP3	nuclear receptor interacting protein 3
hsa-miR-587	1	0	1	1	1	1	RAB22A	RAB22A, member RAS oncogene family
hsa-miR-587	1	0	1	0	1	1	KCNS2	potassium voltage-gated channel, delayed-rectifier, subfamily S, member 2
hsa-miR-587	0	0	1	0	1	1	ZNF490	zinc finger protein 490
hsa-miR-587	1	0	1	1	1	1	USP31	ubiquitin specific peptidase 31
hsa-miR-587	1	0	1	1	1	1	MIB1	mindbomb E3 ubiquitin protein ligase 1
hsa-miR-587	1	0	1	0	1	1	ALPK3	alpha-kinase 3
hsa-miR-587	1	0	1	1	1	1	NCEH1	neutral cholesterol ester hydrolase 1
hsa-miR-587	0	0	1	1	1	1	ARRDC3	arrestin domain containing 3
hsa-miR-587	0	0	1	0	1	1	TRMT5	tRNA methyltransferase 5 homolog (S. cerevisiae)
hsa-miR-587	1	0	1	1	1	1	ZFP14	zinc finger protein 14 homolog (mouse)
hsa-miR-587	1	0	1	0	1	1	GPAM	glycerol-3-phosphate acyltransferase, mitochondrial
hsa-miR-587	1	0	1	1	1	1	FAM160B1	family with sequence similarity 160, member B1
hsa-miR-587	0	0	1	1	1	1	PPM1A	protein phosphatase, Mg2+/Mn2+ dependent, 1A
hsa-miR-587	1	0	1	0	1	1	RAP2A	RAP2A, member of RAS oncogene family
hsa-miR-587	1	0	1	1	1	1	HCN1	hyperpolarization activated cyclic nucleotide-gated potassium channel 1
hsa-miR-587	1	0	1	0	1	1	NMT1	N-myristoyltransferase 1
hsa-miR-587	0	0	1	1	0	0	SPINK2	serine peptidase inhibitor, Kazal type 2 (acrosin-trypsin inhibitor)
hsa-miR-587	0	0	1	1	0	0	HOXD11	homeobox D11
hsa-miR-587	0	0	1	0	1	1	MS4A7	membrane-spanning 4-domains, subfamily A, member 7
hsa-miR-587	1	0	1	0	1	1	TP53INP2	tumor protein p53 inducible nuclear protein 2
hsa-miR-587	0	0	1	1	0	0	MYOZ1	myozenin 1
hsa-miR-587	1	0	1	1	1	1	PELI2	pellino E3 ubiquitin protein ligase family member 2
hsa-miR-587	0	0	1	0	1	1	SPCS3	signal peptidase complex subunit 3 homolog (S. cerevisiae)
hsa-miR-587	1	0	1	1	1	1	GRIK2	glutamate receptor, ionotropic, kainate 2
hsa-miR-587	1	0	1	1	1	1	PPP1R11	protein phosphatase 1, regulatory (inhibitor) subunit 11
hsa-miR-587	1	0	1	1	1	1	SEC24A	SEC24 family, member A (S. cerevisiae)
hsa-miR-587	1	0	1	1	1	1	GPR88	G protein-coupled receptor 88
hsa-miR-587	0	0	1	1	1	1	TCTA	T-cell leukemia translocation altered
hsa-miR-587	1	0	1	1	1	1	ATL2	atlastin GTPase 2
hsa-miR-587	1	0	1	1	1	1	TMEM168	transmembrane protein 168
hsa-miR-587	0	0	1	1	0	0	TSPY2	testis specific protein, Y-linked 2
hsa-miR-587	1	0	1	0	1	1	ELOVL4	ELOVL fatty acid elongase 4
hsa-miR-587	0	0	1	1	1	1	ACBD3	acyl-CoA binding domain containing 3
hsa-miR-587	0	0	1	1	1	1	RBM15	RNA binding motif protein 15
hsa-miR-587	1	0	1	1	1	1	YTHDC2	YTH domain containing 2
hsa-miR-587	1	0	1	1	1	1	RFX7	regulatory factor X, 7
hsa-miR-587	1	0	1	0	1	1	BCL11B	B-cell CLL/lymphoma 11B (zinc finger protein)
hsa-miR-587	0	0	1	0	1	1	LRRC19	leucine rich repeat containing 19
hsa-miR-587	0	0	1	1	0	0	C20orf195	chromosome 20 open reading frame 195
hsa-miR-587	1	0	1	1	1	1	PSTPIP2	proline-serine-threonine phosphatase interacting protein 2
hsa-miR-587	1	0	1	1	1	1	ATP10A	ATPase, class V, type 10A
hsa-miR-587	0	0	1	1	1	1	NDNF	neuron-derived neurotrophic factor
hsa-miR-587	1	0	1	0	1	1	PLEKHF2	pleckstrin homology domain containing, family F (with FYVE domain) member 2
hsa-miR-587	0	0	1	0	1	1	ZYG11B	zyg-11 homolog B (C. elegans)
hsa-miR-587	0	0	1	1	1	1	E2F8	E2F transcription factor 8
hsa-miR-587	0	0	1	1	0	0	C10orf68	chromosome 10 open reading frame 68
hsa-miR-587	1	0	1	1	1	1	C15orf29	chromosome 15 open reading frame 29
hsa-miR-587	1	0	1	0	1	1	ZFHX4	zinc finger homeobox 4
hsa-miR-587	0	0	1	1	0	0	RNF122	ring finger protein 122
hsa-miR-587	1	0	1	1	0	0	SYNDIG1	synapse differentiation inducing 1
hsa-miR-587	1	0	1	0	1	1	VCPIP1	valosin containing protein (p97)/p47 complex interacting protein 1
hsa-miR-587	1	0	1	1	1	1	PROSER1	proline and serine rich 1
hsa-miR-587	1	0	1	1	1	1	NAA50	N(alpha)-acetyltransferase 50, NatE catalytic subunit
hsa-miR-587	1	0	1	0	1	1	EDEM3	ER degradation enhancer, mannosidase alpha-like 3
hsa-miR-587	0	0	1	0	1	1	PDGFD	platelet derived growth factor D
hsa-miR-587	1	0	1	0	1	1	TET1	tet methylcytosine dioxygenase 1
hsa-miR-587	1	0	1	1	1	1	JHDM1D	jumonji C domain containing histone demethylase 1 homolog D (S. cerevisiae)
hsa-miR-587	1	0	1	0	1	1	SETD7	SET domain containing (lysine methyltransferase) 7
hsa-miR-587	1	0	1	1	1	1	TUBB1	tubulin, beta 1 class VI
hsa-miR-587	1	0	1	1	1	1	SYNC	syncoilin, intermediate filament protein
hsa-miR-587	1	0	1	1	1	1	SGPP1	sphingosine-1-phosphate phosphatase 1
hsa-miR-587	1	0	1	0	1	1	VOPP1	vesicular, overexpressed in cancer, prosurvival protein 1
hsa-miR-587	0	0	1	1	1	1	TRMT1L	tRNA methyltransferase 1 homolog (S. cerevisiae)-like
hsa-miR-587	1	0	1	1	1	1	PPP1R14C	protein phosphatase 1, regulatory (inhibitor) subunit 14C
hsa-miR-587	0	0	1	1	1	1	PABPC3	poly(A) binding protein, cytoplasmic 3
hsa-miR-587	1	0	1	0	1	1	THAP2	THAP domain containing, apoptosis associated protein 2
hsa-miR-587	1	0	1	0	1	1	NUDT12	nudix (nucleoside diphosphate linked moiety X)-type motif 12
hsa-miR-587	1	0	1	0	1	1	TMEM47	transmembrane protein 47
hsa-miR-587	1	0	1	1	1	1	HSDL1	hydroxysteroid dehydrogenase like 1
hsa-miR-587	0	0	1	1	1	1	INHBE	inhibin, beta E
hsa-miR-587	1	0	1	0	1	1	ITCH	itchy E3 ubiquitin protein ligase
hsa-miR-587	0	0	1	1	0	0	GRWD1	glutamate-rich WD repeat containing 1
hsa-miR-587	1	0	1	1	1	1	PCDHA9	protocadherin alpha 9
hsa-miR-587	1	0	1	0	1	1	FAM172A	family with sequence similarity 172, member A
hsa-miR-587	1	0	1	0	1	1	SRSF8	serine/arginine-rich splicing factor 8
hsa-miR-587	1	0	1	1	1	1	OTP	orthopedia homeobox
hsa-miR-587	0	0	1	1	1	1	MAGT1	magnesium transporter 1
hsa-miR-587	0	0	1	1	1	1	ARMC2	armadillo repeat containing 2
hsa-miR-587	0	0	1	1	1	1	KBTBD7	kelch repeat and BTB (POZ) domain containing 7
hsa-miR-587	1	0	1	1	1	1	ARID5B	AT rich interactive domain 5B (MRF1-like)
hsa-miR-587	0	0	1	1	0	0	C19orf44	chromosome 19 open reading frame 44
hsa-miR-587	1	0	1	1	1	1	LOXL4	lysyl oxidase-like 4
hsa-miR-587	1	0	1	0	1	1	FAR1	fatty acyl CoA reductase 1
hsa-miR-587	1	0	1	0	1	1	PSD2	pleckstrin and Sec7 domain containing 2
hsa-miR-587	0	0	1	1	0	0	NICN1	nicolin 1
hsa-miR-587	1	0	1	1	1	1	NTPCR	nucleoside-triphosphatase, cancer-related
hsa-miR-587	0	0	1	1	1	1	CYSTM1	cysteine-rich transmembrane module containing 1
hsa-miR-587	1	0	1	1	1	1	PARD6B	par-6 partitioning defective 6 homolog beta (C. elegans)
hsa-miR-587	0	0	1	1	1	1	EMR3	egf-like module containing, mucin-like, hormone receptor-like 3
hsa-miR-587	1	0	1	1	1	1	TMEM25	transmembrane protein 25
hsa-miR-587	0	0	1	1	1	1	FAM136A	family with sequence similarity 136, member A
hsa-miR-587	1	0	1	1	1	1	ABHD13	abhydrolase domain containing 13
hsa-miR-587	1	0	1	0	1	1	UBASH3B	ubiquitin associated and SH3 domain containing B
hsa-miR-587	0	0	1	0	1	1	PIGY	phosphatidylinositol glycan anchor biosynthesis, class Y
hsa-miR-587	1	0	1	1	1	1	PCDH11X	protocadherin 11 X-linked
hsa-miR-587	0	0	1	1	1	1	RBM18	RNA binding motif protein 18
hsa-miR-587	1	0	1	1	1	1	NKD1	naked cuticle homolog 1 (Drosophila)
hsa-miR-587	1	0	1	1	1	1	C5orf30	chromosome 5 open reading frame 30
hsa-miR-587	1	0	1	1	1	1	TANC1	tetratricopeptide repeat, ankyrin repeat and coiled-coil containing 1
hsa-miR-587	1	0	1	1	1	1	EPT1	ethanolaminephosphotransferase 1 (CDP-ethanolamine-specific)
hsa-miR-587	1	0	1	1	1	1	BRWD1	bromodomain and WD repeat domain containing 1
hsa-miR-587	0	0	1	1	1	1	CARD16	caspase recruitment domain family, member 16
hsa-miR-587	0	0	1	1	1	1	PLEKHG4B	pleckstrin homology domain containing, family G (with RhoGef domain) member 4B
hsa-miR-587	1	0	1	1	1	1	SLITRK1	SLIT and NTRK-like family, member 1
hsa-miR-587	1	0	1	1	1	1	ESCO1	establishment of cohesion 1 homolog 1 (S. cerevisiae)
hsa-miR-587	0	0	1	1	1	1	SCAND3	SCAN domain containing 3
hsa-miR-587	0	0	1	1	1	1	IL22RA2	interleukin 22 receptor, alpha 2
hsa-miR-587	0	0	1	1	1	1	LEAP2	liver expressed antimicrobial peptide 2
hsa-miR-587	0	0	1	1	1	1	HTRA3	HtrA serine peptidase 3
hsa-miR-587	0	0	1	1	1	1	IP6K3	inositol hexakisphosphate kinase 3
hsa-miR-587	1	0	1	1	1	1	GCFC1	GC-rich sequence DNA-binding factor 1
hsa-miR-587	0	0	1	1	1	1	FBXO32	F-box protein 32
hsa-miR-587	0	0	1	1	1	1	PPP4R4	protein phosphatase 4, regulatory subunit 4
hsa-miR-587	0	0	1	1	1	1	ABCA10	ATP-binding cassette, sub-family A (ABC1), member 10
hsa-miR-587	0	0	1	1	1	1	CLEC4D	C-type lectin domain family 4, member D
hsa-miR-587	1	0	1	1	1	1	SLC44A1	solute carrier family 44, member 1
hsa-miR-587	0	0	1	1	1	1	SLC32A1	solute carrier family 32 (GABA vesicular transporter), member 1
hsa-miR-587	0	0	1	1	1	1	RSAD2	radical S-adenosyl methionine domain containing 2
hsa-miR-587	1	0	1	1	1	1	COL11A2	collagen, type XI, alpha 2
hsa-miR-587	0	0	1	1	1	1	COLEC12	collectin sub-family member 12
hsa-miR-587	1	0	1	1	1	1	ZAK	sterile alpha motif and leucine zipper containing kinase AZK
hsa-miR-587	1	0	1	1	1	1	FAM122A	family with sequence similarity 122A
hsa-miR-587	1	0	1	1	1	1	GLCCI1	glucocorticoid induced transcript 1
hsa-miR-587	1	0	1	0	1	1	NUS1	nuclear undecaprenyl pyrophosphate synthase 1 homolog (S. cerevisiae)
hsa-miR-587	0	0	1	1	1	1	TAF8	TAF8 RNA polymerase II, TATA box binding protein (TBP)-associated factor, 43kDa
hsa-miR-587	1	0	1	0	1	1	FCHO2	FCH domain only 2
hsa-miR-587	0	0	1	1	1	1	MS4A6E	membrane-spanning 4-domains, subfamily A, member 6E
hsa-miR-587	0	0	1	1	1	1	CHRFAM7A	CHRNA7 (cholinergic receptor, nicotinic, alpha 7, exons 5-10) and FAM7A (family with sequence similarity 7A, exons A-E) fusion
hsa-miR-587	1	0	1	1	1	1	ATRN	attractin
hsa-miR-587	1	0	1	1	1	1	FAM76B	family with sequence similarity 76, member B
hsa-miR-587	1	0	1	1	1	1	MBNL2	muscleblind-like splicing regulator 2
hsa-miR-587	0	0	1	1	0	0	PEBP4	phosphatidylethanolamine-binding protein 4
hsa-miR-587	1	0	1	1	1	1	FAM91A1	family with sequence similarity 91, member A1
hsa-miR-587	0	0	1	1	1	1	SLFN5	schlafen family member 5
hsa-miR-587	0	0	1	0	1	1	DDIT4L	DNA-damage-inducible transcript 4-like
hsa-miR-587	0	0	1	1	0	0	TCEB3C	transcription elongation factor B polypeptide 3C (elongin A3)
hsa-miR-587	0	0	1	1	0	0	TIGD3	tigger transposable element derived 3
hsa-miR-587	1	0	1	0	1	1	MTPN	myotrophin
hsa-miR-587	1	0	1	1	1	1	UBTD2	ubiquitin domain containing 2
hsa-miR-587	1	0	1	1	1	1	GRPEL2	GrpE-like 2, mitochondrial (E. coli)
hsa-miR-587	1	0	1	1	1	1	FAM123B	family with sequence similarity 123B
hsa-miR-587	1	0	1	1	1	1	FGFBP3	fibroblast growth factor binding protein 3
hsa-miR-587	1	0	1	1	1	1	ZSCAN29	zinc finger and SCAN domain containing 29
hsa-miR-587	0	0	1	1	0	0	C19orf18	chromosome 19 open reading frame 18
hsa-miR-587	1	0	1	1	1	1	C7orf60	chromosome 7 open reading frame 60
hsa-miR-587	0	0	1	1	1	1	RASEF	RAS and EF-hand domain containing
hsa-miR-587	1	0	1	1	1	1	SPRED1	sprouty-related, EVH1 domain containing 1
hsa-miR-587	0	0	1	1	1	1	SNX31	sorting nexin 31
hsa-miR-587	0	0	1	1	1	1	CCER1	coiled-coil glutamate-rich protein 1
hsa-miR-587	0	0	1	1	1	1	RALGPS2	Ral GEF with PH domain and SH3 binding motif 2
hsa-miR-587	1	0	1	1	1	1	TCTEX1D1	Tctex1 domain containing 1
hsa-miR-587	0	0	1	1	1	1	DNAJC18	DnaJ (Hsp40) homolog, subfamily C, member 18
hsa-miR-587	1	0	1	1	1	1	HEPACAM	hepatic and glial cell adhesion molecule
hsa-miR-587	1	0	1	1	1	1	NXPH1	neurexophilin 1
hsa-miR-587	1	0	1	1	1	1	TMEM151A	transmembrane protein 151A
hsa-miR-587	0	0	1	1	1	1	DEFB125	defensin, beta 125
hsa-miR-587	1	0	1	0	1	1	ZCCHC24	zinc finger, CCHC domain containing 24
hsa-miR-587	1	0	1	1	1	1	LRIG3	leucine-rich repeats and immunoglobulin-like domains 3
hsa-miR-587	1	0	1	1	1	1	HS6ST3	heparan sulfate 6-O-sulfotransferase 3
hsa-miR-587	1	0	1	0	1	1	MDGA1	MAM domain containing glycosylphosphatidylinositol anchor 1
hsa-miR-587	1	0	1	1	1	1	ZNF367	zinc finger protein 367
hsa-miR-587	0	0	1	1	1	1	TAF1L	TAF1 RNA polymerase II, TATA box binding protein (TBP)-associated factor, 210kDa-like
hsa-miR-587	0	0	1	1	1	1	GPR112	G protein-coupled receptor 112
hsa-miR-587	1	0	1	1	1	1	RAB39B	RAB39B, member RAS oncogene family
hsa-miR-587	1	0	1	1	1	1	RDH10	retinol dehydrogenase 10 (all-trans)
hsa-miR-587	1	0	1	0	1	1	KLHDC1	kelch domain containing 1
hsa-miR-587	1	0	1	1	1	1	AQP11	aquaporin 11
hsa-miR-587	0	0	1	1	1	1	FNDC7	fibronectin type III domain containing 7
hsa-miR-587	1	0	1	0	1	1	RNF152	ring finger protein 152
hsa-miR-587	1	0	1	0	1	1	PGM2L1	phosphoglucomutase 2-like 1
hsa-miR-587	1	0	1	1	1	1	XKR6	XK, Kell blood group complex subunit-related family, member 6
hsa-miR-587	0	0	1	1	1	1	FAM133A	family with sequence similarity 133, member A
hsa-miR-587	1	0	1	0	1	1	FAM84B	family with sequence similarity 84, member B
hsa-miR-587	1	0	1	1	1	1	UBR1	ubiquitin protein ligase E3 component n-recognin 1
hsa-miR-587	1	0	1	1	1	1	STX12	syntaxin 12
hsa-miR-587	0	0	1	1	1	1	MAGEC3	melanoma antigen family C, 3
hsa-miR-587	0	0	1	1	0	0	CCDC36	coiled-coil domain containing 36
hsa-miR-587	1	0	1	1	1	1	MARCH3	membrane-associated ring finger (C3HC4) 3, E3 ubiquitin protein ligase
hsa-miR-587	0	0	1	1	1	1	ZNF831	zinc finger protein 831
hsa-miR-587	1	0	1	1	1	1	TMEM26	transmembrane protein 26
hsa-miR-587	0	0	1	0	1	1	KRTAP13-2	keratin associated protein 13-2
hsa-miR-587	0	0	1	1	1	1	CCDC67	coiled-coil domain containing 67
hsa-miR-587	0	0	1	1	1	1	LYRM7	Lyrm7 homolog (mouse)
hsa-miR-587	1	0	1	0	1	1	EFHA2	EF-hand domain family, member A2
hsa-miR-587	1	0	1	1	1	1	BCL6B	B-cell CLL/lymphoma 6, member B
hsa-miR-587	1	0	1	1	1	1	RPS6KA5	ribosomal protein S6 kinase, 90kDa, polypeptide 5
hsa-miR-587	1	0	1	1	1	1	BCL9L	B-cell CLL/lymphoma 9-like
hsa-miR-587	0	0	1	0	1	1	VSIG1	V-set and immunoglobulin domain containing 1
hsa-miR-587	0	0	1	1	1	1	C2orf48	chromosome 2 open reading frame 48
hsa-miR-587	1	0	1	1	1	1	SUMF1	sulfatase modifying factor 1
hsa-miR-587	1	0	1	0	1	1	VSX2	visual system homeobox 2
hsa-miR-587	1	0	1	1	1	1	NIN	ninein (GSK3B interacting protein)
hsa-miR-587	1	0	1	1	1	1	SPTY2D1	SPT2, Suppressor of Ty, domain containing 1 (S. cerevisiae)
hsa-miR-587	1	0	1	1	1	1	TMEM65	transmembrane protein 65
hsa-miR-587	1	0	1	1	1	1	ADAMTS6	ADAM metallopeptidase with thrombospondin type 1 motif, 6
hsa-miR-587	1	0	1	1	1	1	E2F6	E2F transcription factor 6
hsa-miR-587	0	0	1	1	1	1	EMB	embigin
hsa-miR-587	0	0	1	1	1	1	APOOL	apolipoprotein O-like
hsa-miR-587	1	0	1	1	1	1	RAB43	RAB43, member RAS oncogene family
hsa-miR-587	0	0	1	0	1	1	ANKRD45	ankyrin repeat domain 45
hsa-miR-587	1	0	1	0	1	1	FAM73A	family with sequence similarity 73, member A
hsa-miR-587	1	0	1	1	1	1	MIA3	melanoma inhibitory activity family, member 3
hsa-miR-587	0	0	1	0	1	1	KLHL30	kelch-like 30 (Drosophila)
hsa-miR-587	0	0	1	1	1	1	ZPBP2	zona pellucida binding protein 2
hsa-miR-587	0	0	1	1	1	1	PTHLH	parathyroid hormone-like hormone
hsa-miR-587	1	0	1	1	1	1	CCNG1	cyclin G1
hsa-miR-587	1	0	1	1	1	1	THRA	thyroid hormone receptor, alpha
hsa-miR-587	1	0	1	1	1	1	FBXO33	F-box protein 33
hsa-miR-587	1	0	1	1	1	1	MEX3D	mex-3 homolog D (C. elegans)
hsa-miR-587	1	0	1	1	1	1	FIBIN	fin bud initiation factor homolog (zebrafish)
hsa-miR-587	0	0	1	1	1	1	SERTM1	serine-rich and transmembrane domain containing 1
hsa-miR-587	1	0	1	1	1	1	PPAPDC2	phosphatidic acid phosphatase type 2 domain containing 2
hsa-miR-587	0	0	1	1	1	1	TMIGD1	transmembrane and immunoglobulin domain containing 1
hsa-miR-587	1	0	1	1	1	1	CYP4V2	cytochrome P450, family 4, subfamily V, polypeptide 2
hsa-miR-587	1	0	1	1	1	1	SKIDA1	SKI/DACH domain containing 1
hsa-miR-587	1	0	1	0	1	1	C17orf102	chromosome 17 open reading frame 102
hsa-miR-587	0	0	1	1	0	0	AMTN	amelotin
hsa-miR-587	0	0	1	0	0	0	TFAMP1	transcription factor A, mitochondrial pseudogene 1
hsa-miR-587	0	0	1	0	0	0	SNORD107	small nucleolar RNA, C/D box 107
hsa-miR-587	0	0	1	0	0	0	NACAP1	nascent-polypeptide-associated complex alpha polypeptide pseudogene 1
hsa-miR-587	0	0	1	0	0	0	OR7E91P	olfactory receptor, family 7, subfamily E, member 91 pseudogene
hsa-miR-587	0	0	1	0	0	0	DKFZP586I1420	uncharacterized protein DKFZp586I1420
hsa-miR-587	0	0	1	0	0	0	TPI1P2	triosephosphate isomerase 1 pseudogene 2
hsa-miR-587	0	0	1	0	0	0	RBMXP3	RNA binding motif protein, X-linked pseudogene 3
hsa-miR-587	0	0	1	0	0	0	ST13P6	suppression of tumorigenicity 13 (colon carcinoma) (Hsp70 interacting protein) pseudogene 6
hsa-miR-587	0	0	1	0	0	0	PDIA3P	protein disulfide isomerase family A, member 3 pseudogene
hsa-miR-587	0	0	1	0	0	0	MSX2P1	msh homeobox 2 pseudogene 1
hsa-miR-587	0	0	1	0	0	0	SNORD96A	small nucleolar RNA, C/D box 96A
hsa-miR-587	0	0	1	0	0	0	TRPC2	transient receptor potential cation channel, subfamily C, member 2, pseudogene
hsa-miR-587	0	0	1	0	0	0	HNRNPA3P1	heterogeneous nuclear ribonucleoprotein A3 pseudogene 1
hsa-miR-587	0	0	1	0	0	0	AOC4	amine oxidase, copper containing 3 (vascular adhesion protein 1) pseudogene
hsa-miR-587	0	0	1	0	0	0	PER4	period homolog 3 (Drosophila) pseudogene
hsa-miR-587	0	0	1	0	0	0	LOC374443	C-type lectin domain family 2, member D pseudogene
hsa-miR-587	0	0	1	0	0	0	AQP7P1	aquaporin 7 pseudogene 1
hsa-miR-587	0	0	1	0	0	0	RNF126P1	ring finger protein 126 pseudogene 1
hsa-miR-587	0	0	1	0	0	0	MALAT1	metastasis associated lung adenocarcinoma transcript 1 (non-protein coding)
hsa-miR-587	0	0	1	0	0	0	RNASEH2CP1	ribonuclease H2, subunit C pseudogene 1
hsa-miR-587	0	0	1	0	0	0	DUSP5P	dual specificity phosphatase 5 pseudogene
hsa-miR-587	0	0	1	0	0	0	HAS2-AS1	HAS2 antisense RNA 1
hsa-miR-587	0	0	1	0	0	0	SNX29P2	sorting nexin 29 pseudogene 2
hsa-miR-587	0	0	1	0	0	0	LOC284441	actin-related protein 2 pseudogene
hsa-miR-587	0	0	1	0	0	0	HSP90AB2P	heat shock protein 90kDa alpha (cytosolic), class B member 2, pseudogene
hsa-miR-587	0	0	1	0	0	0	GBP1P1	guanylate binding protein 1, interferon-inducible pseudogene 1
hsa-miR-587	0	0	1	0	0	0	SNORD116-28	small nucleolar RNA, C/D box 116-28
hsa-miR-587	1	0	1	1	0	0	KIAA1549L	KIAA1549-like
hsa-miR-587	0	0	1	1	1	1	PEG3	paternally expressed 3
hsa-miR-587	0	0	1	1	0	0	MUC1	mucin 1, cell surface associated
hsa-miR-587	0	0	1	1	1	1	FUCA2	fucosidase, alpha-L- 2, plasma
hsa-miR-587	0	0	1	1	1	1	CRY1	cryptochrome 1 (photolyase-like)
hsa-miR-587	0	0	0	1	1	1	MYOC	myocilin, trabecular meshwork inducible glucocorticoid response
hsa-miR-587	0	0	0	1	0	0	TARBP1	TAR (HIV-1) RNA binding protein 1
hsa-miR-587	0	0	1	1	0	0	TNFRSF17	tumor necrosis factor receptor superfamily, member 17
hsa-miR-587	0	0	0	1	1	1	NFE2L3	nuclear factor (erythroid-derived 2)-like 3
hsa-miR-587	0	0	0	1	0	0	ADCK2	aarF domain containing kinase 2
hsa-miR-587	0	0	0	1	0	0	CECR5	cat eye syndrome chromosome region, candidate 5
hsa-miR-587	0	1	0	1	0	0	FGF20	fibroblast growth factor 20
hsa-miR-587	0	0	1	1	0	0	FAR2	fatty acyl CoA reductase 2
hsa-miR-587	0	0	0	1	0	0	ZNF222	zinc finger protein 222
hsa-miR-587	0	0	0	1	0	0	PCDHB2	protocadherin beta 2
hsa-miR-587	0	0	0	1	0	0	IGSF9	immunoglobulin superfamily, member 9
hsa-miR-587	1	0	1	1	1	1	PDPR	pyruvate dehydrogenase phosphatase regulatory subunit
hsa-miR-587	1	0	1	1	0	0	OSGEP	O-sialoglycoprotein endopeptidase
hsa-miR-587	0	0	0	1	1	1	ZNF184	zinc finger protein 184
hsa-miR-587	0	0	1	1	0	0	MARCH2	membrane-associated ring finger (C3HC4) 2, E3 ubiquitin protein ligase
hsa-miR-587	0	0	1	1	1	1	DMC1	DMC1 dosage suppressor of mck1 homolog, meiosis-specific homologous recombination (yeast)
hsa-miR-587	0	0	1	1	1	1	SRP54	signal recognition particle 54kDa
hsa-miR-587	0	0	1	1	1	1	GSS	glutathione synthetase
hsa-miR-587	0	0	1	1	1	1	OLFM4	olfactomedin 4
hsa-miR-587	0	0	0	1	0	0	ZP2	zona pellucida glycoprotein 2 (sperm receptor)
hsa-miR-587	1	0	0	1	1	1	C16orf88	chromosome 16 open reading frame 88
hsa-miR-587	0	0	1	1	1	1	EIF3E	eukaryotic translation initiation factor 3, subunit E
hsa-miR-587	0	0	0	1	0	0	EXOSC5	exosome component 5
hsa-miR-587	0	0	0	1	0	0	EPOR	erythropoietin receptor
hsa-miR-587	0	0	0	1	0	0	LAMB1	laminin, beta 1
hsa-miR-587	0	0	1	1	1	1	NPVF	neuropeptide VF precursor
hsa-miR-587	0	0	1	1	1	1	YAE1D1	Yae1 domain containing 1
hsa-miR-587	1	0	0	1	0	0	ACTA2	actin, alpha 2, smooth muscle, aorta
hsa-miR-587	1	0	1	1	1	1	UTP18	UTP18 small subunit (SSU) processome component homolog (yeast)
hsa-miR-587	0	0	1	1	0	0	ZNHIT3	zinc finger, HIT-type containing 3
hsa-miR-587	0	0	1	1	1	1	CCL2	chemokine (C-C motif) ligand 2
hsa-miR-587	0	0	1	1	1	1	MYH1	myosin, heavy chain 1, skeletal muscle, adult
hsa-miR-587	0	0	0	1	1	1	SULT1E1	sulfotransferase family 1E, estrogen-preferring, member 1
hsa-miR-587	0	0	0	1	1	1	MANBA	mannosidase, beta A, lysosomal
hsa-miR-587	1	0	1	1	1	1	HSPA8	heat shock 70kDa protein 8
hsa-miR-587	0	0	1	1	1	1	RAD51AP1	RAD51 associated protein 1
hsa-miR-587	1	0	1	1	1	1	SRSF9	serine/arginine-rich splicing factor 9
hsa-miR-587	0	0	1	1	1	1	C6orf162	chromosome 6 open reading frame 162
hsa-miR-587	0	0	1	1	0	0	MLH1	mutL homolog 1, colon cancer, nonpolyposis type 2 (E. coli)
hsa-miR-587	0	0	1	1	1	1	EHHADH	enoyl-CoA, hydratase/3-hydroxyacyl CoA dehydrogenase
hsa-miR-587	0	0	0	1	1	1	DOK1	docking protein 1, 62kDa (downstream of tyrosine kinase 1)
hsa-miR-587	0	0	1	1	1	1	FANCL	Fanconi anemia, complementation group L
hsa-miR-587	0	0	0	1	1	1	WNT6	wingless-type MMTV integration site family, member 6
hsa-miR-587	0	0	0	1	0	0	KISS1R	KISS1 receptor
hsa-miR-587	1	0	0	1	1	1	CNTRL	centriolin
hsa-miR-587	0	0	1	1	1	1	MSX2	msh homeobox 2
hsa-miR-587	0	0	0	1	1	1	DARS2	aspartyl-tRNA synthetase 2, mitochondrial
hsa-miR-587	0	0	0	1	0	0	GSTM2	glutathione S-transferase mu 2 (muscle)
hsa-miR-587	0	0	1	1	1	1	COPA	coatomer protein complex, subunit alpha
hsa-miR-587	1	0	1	1	1	1	AHR	aryl hydrocarbon receptor
hsa-miR-587	1	0	1	1	1	1	CLTA	clathrin, light chain A
hsa-miR-587	0	0	0	1	0	0	MAGEA10	melanoma antigen family A, 10
hsa-miR-587	0	0	0	1	0	0	MCEE	methylmalonyl CoA epimerase
hsa-miR-587	0	0	0	1	1	1	APOBEC2	apolipoprotein B mRNA editing enzyme, catalytic polypeptide-like 2
hsa-miR-587	0	0	1	1	0	0	MEA1	male-enhanced antigen 1
hsa-miR-587	1	0	1	1	1	1	SCGB2A1	secretoglobin, family 2A, member 1
hsa-miR-587	0	0	0	1	1	1	BBS2	Bardet-Biedl syndrome 2
hsa-miR-587	0	0	1	1	1	1	OTOR	otoraplin
hsa-miR-587	0	0	1	1	0	0	SUGP1	SURP and G patch domain containing 1
hsa-miR-587	0	0	1	1	0	0	CTAG2	cancer/testis antigen 2
hsa-miR-587	0	0	1	1	1	1	GNG11	guanine nucleotide binding protein (G protein), gamma 11
hsa-miR-587	0	0	0	1	1	1	MTX2	metaxin 2
hsa-miR-587	0	0	1	1	0	0	CCL4	chemokine (C-C motif) ligand 4
hsa-miR-587	0	0	1	1	1	1	NALCN	sodium leak channel, non-selective
hsa-miR-587	0	0	1	1	1	1	C16orf62	chromosome 16 open reading frame 62
hsa-miR-587	0	0	0	1	0	0	PDGFRL	platelet-derived growth factor receptor-like
hsa-miR-587	0	0	0	1	0	0	GDF15	growth differentiation factor 15
hsa-miR-587	0	0	0	1	1	1	LSM4	LSM4 homolog, U6 small nuclear RNA associated (S. cerevisiae)
hsa-miR-587	1	0	1	1	1	1	SLC35D2	solute carrier family 35, member D2
hsa-miR-587	0	0	1	1	1	1	HRSP12	heat-responsive protein 12
hsa-miR-587	0	0	0	1	0	0	HSPA12B	heat shock 70kD protein 12B
hsa-miR-587	0	0	1	1	1	1	NTS	neurotensin
hsa-miR-587	1	0	1	1	1	1	IER3IP1	immediate early response 3 interacting protein 1
hsa-miR-587	1	0	1	1	1	1	AHNAK	AHNAK nucleoprotein
hsa-miR-587	0	0	0	1	1	1	PNPLA8	patatin-like phospholipase domain containing 8
hsa-miR-587	0	0	0	1	1	1	CDK4	cyclin-dependent kinase 4
hsa-miR-587	0	0	0	1	1	1	IL36B	interleukin 36, beta
hsa-miR-587	0	0	1	1	1	1	MRPS18B	mitochondrial ribosomal protein S18B
hsa-miR-587	0	0	1	1	1	1	MGARP	mitochondria-localized glutamic acid-rich protein
hsa-miR-587	0	0	1	1	1	1	NUSAP1	nucleolar and spindle associated protein 1
hsa-miR-587	0	0	0	1	1	1	ABCG5	ATP-binding cassette, sub-family G (WHITE), member 5
hsa-miR-587	0	0	1	1	1	1	EXOC6	exocyst complex component 6
hsa-miR-587	0	0	1	1	0	0	COX17	COX17 cytochrome c oxidase assembly homolog (S. cerevisiae)
hsa-miR-587	0	0	0	1	1	1	JKAMP	JNK1/MAPK8-associated membrane protein
hsa-miR-587	0	0	1	1	1	1	ERP29	endoplasmic reticulum protein 29
hsa-miR-587	0	0	1	1	1	1	GIPR	gastric inhibitory polypeptide receptor
hsa-miR-587	0	0	0	1	0	0	ILVBL	ilvB (bacterial acetolactate synthase)-like
hsa-miR-587	0	0	1	1	1	1	POLD3	polymerase (DNA-directed), delta 3, accessory subunit
hsa-miR-587	0	0	0	1	0	0	GRB14	growth factor receptor-bound protein 14
hsa-miR-587	0	0	0	1	0	0	TECTA	tectorin alpha
hsa-miR-587	0	0	0	1	1	1	SLC25A23	solute carrier family 25 (mitochondrial carrier; phosphate carrier), member 23
hsa-miR-587	0	0	0	1	1	1	GPSM2	G-protein signaling modulator 2
hsa-miR-587	1	0	1	1	0	0	GSK3B	glycogen synthase kinase 3 beta
hsa-miR-587	0	0	1	1	0	0	NDST4	N-deacetylase/N-sulfotransferase (heparan glucosaminyl) 4
hsa-miR-587	0	0	0	1	0	0	FGF10	fibroblast growth factor 10
hsa-miR-587	0	0	1	1	1	1	FASTKD3	FAST kinase domains 3
hsa-miR-587	0	0	0	1	0	0	EFR3B	EFR3 homolog B (S. cerevisiae)
hsa-miR-587	0	0	0	1	0	0	PPAP2A	phosphatidic acid phosphatase type 2A
hsa-miR-587	1	0	1	1	1	1	TBC1D19	TBC1 domain family, member 19
hsa-miR-587	0	0	1	1	1	1	LMAN2L	lectin, mannose-binding 2-like
hsa-miR-587	0	0	1	1	1	1	MRPL3	mitochondrial ribosomal protein L3
hsa-miR-587	0	0	0	1	1	1	ANKRD7	ankyrin repeat domain 7
hsa-miR-587	0	0	1	1	1	1	TJP2	tight junction protein 2
hsa-miR-587	0	0	1	1	0	0	PTPN23	protein tyrosine phosphatase, non-receptor type 23
hsa-miR-587	0	0	1	1	0	0	EXOSC7	exosome component 7
hsa-miR-587	0	0	0	1	1	1	PMS2	PMS2 postmeiotic segregation increased 2 (S. cerevisiae)
hsa-miR-587	1	0	1	1	1	1	FAM160A2	family with sequence similarity 160, member A2
hsa-miR-587	0	0	0	1	0	0	ETFA	electron-transfer-flavoprotein, alpha polypeptide
hsa-miR-587	0	0	1	1	1	1	BCL2A1	BCL2-related protein A1
hsa-miR-587	0	0	0	1	0	0	MAN2C1	mannosidase, alpha, class 2C, member 1
hsa-miR-587	0	0	1	1	0	0	AFG3L2	AFG3 ATPase family gene 3-like 2 (S. cerevisiae)
hsa-miR-587	1	0	1	1	1	1	PMAIP1	phorbol-12-myristate-13-acetate-induced protein 1
hsa-miR-587	0	0	0	1	1	1	TXNL4A	thioredoxin-like 4A
hsa-miR-587	0	0	1	1	0	0	TMEM91	transmembrane protein 91
hsa-miR-587	0	0	0	1	0	0	BCKDHA	branched chain keto acid dehydrogenase E1, alpha polypeptide
hsa-miR-587	0	0	0	1	0	0	RNF175	ring finger protein 175
hsa-miR-587	0	0	0	1	1	1	ADAMTS16	ADAM metallopeptidase with thrombospondin type 1 motif, 16
hsa-miR-587	1	0	0	1	1	1	EGFR	epidermal growth factor receptor
hsa-miR-587	0	0	0	1	0	0	RPL32P18	ribosomal protein L32 pseudogene 18
hsa-miR-587	0	0	1	1	1	1	ZNF182	zinc finger protein 182
hsa-miR-587	0	0	1	1	0	0	ZNF630	zinc finger protein 630
hsa-miR-587	0	0	1	1	1	1	SLC18A1	solute carrier family 18 (vesicular monoamine), member 1
hsa-miR-587	0	0	0	1	0	0	WDR85	WD repeat domain 85
hsa-miR-587	0	0	0	1	1	1	APIP	APAF1 interacting protein
hsa-miR-587	0	0	1	1	0	0	PIGT	phosphatidylinositol glycan anchor biosynthesis, class T
hsa-miR-587	0	0	0	1	0	0	GPHA2	glycoprotein hormone alpha 2
hsa-miR-587	0	0	1	1	1	1	HIRIP3	HIRA interacting protein 3
hsa-miR-587	1	0	0	1	1	1	DHRS12	dehydrogenase/reductase (SDR family) member 12
hsa-miR-587	1	0	1	1	1	1	GPM6A	glycoprotein M6A
hsa-miR-587	1	0	1	1	1	1	VEGFC	vascular endothelial growth factor C
hsa-miR-587	0	0	0	1	1	1	LDHAL6A	lactate dehydrogenase A-like 6A
hsa-miR-587	0	0	1	1	1	1	VWA8	von Willebrand factor A domain containing 8
hsa-miR-587	0	0	0	1	1	1	NBAS	neuroblastoma amplified sequence
hsa-miR-587	0	0	0	1	1	1	TDO2	tryptophan 2,3-dioxygenase
hsa-miR-587	0	0	1	1	1	1	RNF219	ring finger protein 219
hsa-miR-587	0	0	1	1	1	1	ANKRD44	ankyrin repeat domain 44
hsa-miR-587	0	0	1	1	1	1	CCDC50	coiled-coil domain containing 50
hsa-miR-587	1	0	1	1	1	1	TRIM36	tripartite motif containing 36
hsa-miR-587	0	0	1	1	1	1	DSPP	dentin sialophosphoprotein
hsa-miR-587	0	0	1	1	1	1	IFLTD1	intermediate filament tail domain containing 1
hsa-miR-587	1	0	1	1	1	1	SCOC	short coiled-coil protein
hsa-miR-587	0	0	1	1	1	1	PANX3	pannexin 3
hsa-miR-587	0	0	0	1	0	0	GSTA5	glutathione S-transferase alpha 5
hsa-miR-587	0	0	1	1	1	1	HEATR3	HEAT repeat containing 3
hsa-miR-587	0	0	1	1	1	1	CNOT8	CCR4-NOT transcription complex, subunit 8
hsa-miR-587	0	0	1	1	0	0	NUP205	nucleoporin 205kDa
hsa-miR-587	0	0	0	1	0	0	RBM45	RNA binding motif protein 45
hsa-miR-587	0	0	1	1	1	1	VBP1	von Hippel-Lindau binding protein 1
hsa-miR-587	0	0	0	1	1	1	NDUFAF6	NADH dehydrogenase (ubiquinone) complex I, assembly factor 6
hsa-miR-587	0	0	1	1	1	1	UQCRB	ubiquinol-cytochrome c reductase binding protein
hsa-miR-587	0	0	1	1	1	1	TATDN2	TatD DNase domain containing 2
hsa-miR-587	0	0	0	1	0	0	OR10K1	olfactory receptor, family 10, subfamily K, member 1
hsa-miR-587	0	0	1	1	0	0	SPATA2L	spermatogenesis associated 2-like
hsa-miR-587	0	0	0	1	0	0	TMEM141	transmembrane protein 141
hsa-miR-587	0	0	0	1	0	0	KIAA1984	KIAA1984
hsa-miR-587	0	0	1	1	0	0	GPR162	G protein-coupled receptor 162
hsa-miR-587	0	0	0	1	0	0	LEPREL2	leprecan-like 2
hsa-miR-587	0	0	1	1	0	0	CCDC58	coiled-coil domain containing 58
hsa-miR-587	0	0	1	1	0	0	SHKBP1	SH3KBP1 binding protein 1
hsa-miR-587	0	0	0	1	1	1	NLRP8	NLR family, pyrin domain containing 8
hsa-miR-587	0	0	1	1	1	1	FBXO17	F-box protein 17
hsa-miR-587	0	0	1	1	1	1	CXCL16	chemokine (C-X-C motif) ligand 16
hsa-miR-587	0	0	0	1	1	1	CHAC2	ChaC, cation transport regulator homolog 2 (E. coli)
hsa-miR-587	1	0	1	1	1	1	GABRB1	gamma-aminobutyric acid (GABA) A receptor, beta 1
hsa-miR-587	0	0	0	1	1	1	ZNF502	zinc finger protein 502
hsa-miR-587	0	0	1	1	0	0	MON1A	MON1 homolog A (yeast)
hsa-miR-587	0	0	0	1	0	0	MST1R	macrophage stimulating 1 receptor (c-met-related tyrosine kinase)
hsa-miR-587	1	0	1	1	1	1	TNFRSF11B	tumor necrosis factor receptor superfamily, member 11b
hsa-miR-587	0	0	1	1	1	1	RPUSD4	RNA pseudouridylate synthase domain containing 4
hsa-miR-587	0	0	1	1	1	1	PIWIL4	piwi-like 4 (Drosophila)
hsa-miR-587	0	0	0	1	1	1	AVPR1A	arginine vasopressin receptor 1A
hsa-miR-587	1	0	1	1	1	1	LARP6	La ribonucleoprotein domain family, member 6
hsa-miR-587	1	0	1	1	1	1	ZNF3	zinc finger protein 3
hsa-miR-587	0	0	1	1	1	1	TMED3	transmembrane emp24 protein transport domain containing 3
hsa-miR-587	1	0	1	1	1	1	NDEL1	nudE nuclear distribution E homolog (A. nidulans)-like 1
hsa-miR-587	0	0	0	1	0	0	CDH16	cadherin 16, KSP-cadherin
hsa-miR-587	1	0	1	1	0	0	AGFG2	ArfGAP with FG repeats 2
hsa-miR-587	0	0	1	1	1	1	RHEBL1	Ras homolog enriched in brain like 1
hsa-miR-587	0	0	0	1	0	0	ZNF524	zinc finger protein 524
hsa-miR-587	0	0	0	1	1	1	ZNF528	zinc finger protein 528
hsa-miR-587	0	0	0	1	0	0	ZNF578	zinc finger protein 578
hsa-miR-587	0	0	0	1	0	0	PELP1	proline, glutamate and leucine rich protein 1
hsa-miR-587	0	0	1	1	0	0	CD320	CD320 molecule
hsa-miR-587	0	0	0	1	1	1	ZNF443	zinc finger protein 443
hsa-miR-587	0	0	0	1	0	0	ULK4	unc-51-like kinase 4 (C. elegans)
hsa-miR-587	0	0	0	1	1	1	PDHB	pyruvate dehydrogenase (lipoamide) beta
hsa-miR-587	0	0	1	1	0	0	BUB1	budding uninhibited by benzimidazoles 1 homolog (yeast)
hsa-miR-587	1	0	1	1	1	1	INSR	insulin receptor
hsa-miR-587	1	0	1	1	1	1	IL16	interleukin 16
hsa-miR-587	0	0	1	1	0	0	C20orf196	chromosome 20 open reading frame 196
hsa-miR-587	1	0	1	1	1	1	MARK3	MAP/microtubule affinity-regulating kinase 3
hsa-miR-587	1	0	1	1	0	0	EGLN2	egl nine homolog 2 (C. elegans)
hsa-miR-587	0	0	0	1	1	1	GUSB	glucuronidase, beta
hsa-miR-587	0	0	1	1	1	1	TM4SF1	transmembrane 4 L six family member 1
hsa-miR-587	0	0	1	1	1	1	WFDC13	WAP four-disulfide core domain 13
hsa-miR-587	0	0	0	1	0	0	ATOH1	atonal homolog 1 (Drosophila)
hsa-miR-587	0	0	1	1	1	1	SNX7	sorting nexin 7
hsa-miR-587	0	0	1	1	1	1	INSM2	insulinoma-associated 2
hsa-miR-587	0	0	1	1	0	0	CNTNAP4	contactin associated protein-like 4
hsa-miR-587	0	0	1	1	0	0	GOLT1A	golgi transport 1A
hsa-miR-587	1	0	1	1	1	1	LRRN3	leucine rich repeat neuronal 3
hsa-miR-587	0	0	0	1	0	0	SNUPN	snurportin 1
hsa-miR-587	0	0	1	1	1	1	TAOK2	TAO kinase 2
hsa-miR-587	1	0	0	1	1	1	ZNF260	zinc finger protein 260
hsa-miR-587	0	0	1	1	0	0	TPT1	tumor protein, translationally-controlled 1
hsa-miR-587	0	0	0	1	0	0	OR4B1	olfactory receptor, family 4, subfamily B, member 1
hsa-miR-587	0	0	0	1	1	1	FAM86B2	family with sequence similarity 86, member B2
hsa-miR-587	0	0	1	1	1	1	INHBC	inhibin, beta C
hsa-miR-587	0	0	0	1	0	0	STON1-GTF2A1L	STON1-GTF2A1L readthrough
hsa-miR-587	0	0	0	1	0	0	GSTM1	glutathione S-transferase mu 1
hsa-miR-587	1	0	1	1	1	1	NAV2	neuron navigator 2
hsa-miR-587	1	0	1	1	1	1	NEFL	neurofilament, light polypeptide
hsa-miR-587	0	0	0	1	1	1	USP36	ubiquitin specific peptidase 36
hsa-miR-587	0	0	0	1	1	1	ZNF417	zinc finger protein 417
hsa-miR-587	1	0	1	1	1	1	AKNA	AT-hook transcription factor
hsa-miR-587	0	0	1	1	0	0	GLIPR1L1	GLI pathogenesis-related 1 like 1
hsa-miR-587	1	0	1	1	0	0	PEAK1	NKF3 kinase family member
hsa-miR-587	0	0	0	1	1	1	MRPL45	mitochondrial ribosomal protein L45
hsa-miR-587	0	0	0	1	0	0	OR8H1	olfactory receptor, family 8, subfamily H, member 1
hsa-miR-587	0	0	1	1	0	0	ZNF821	zinc finger protein 821
hsa-miR-587	0	0	0	1	0	0	CD163L1	CD163 molecule-like 1
hsa-miR-587	0	0	1	1	1	1	TIMM50	translocase of inner mitochondrial membrane 50 homolog (S. cerevisiae)
hsa-miR-587	0	0	0	1	0	0	DEFB103A	defensin, beta 103A
hsa-miR-587	0	0	1	1	1	1	MMP1	matrix metallopeptidase 1 (interstitial collagenase)
hsa-miR-587	0	0	1	1	1	1	TNIP2	TNFAIP3 interacting protein 2
hsa-miR-587	0	0	0	1	0	0	TMEM125	transmembrane protein 125
hsa-miR-587	0	0	1	1	0	0	LSM10	LSM10, U7 small nuclear RNA associated
hsa-miR-587	0	0	0	1	1	1	ZNF540	zinc finger protein 540
hsa-miR-587	0	0	0	1	1	1	ZNF552	zinc finger protein 552
hsa-miR-587	0	0	0	1	0	0	DEF6	differentially expressed in FDCP 6 homolog (mouse)
hsa-miR-587	0	0	0	1	0	0	OR56B1	olfactory receptor, family 56, subfamily B, member 1
hsa-miR-587	0	0	1	1	0	0	TMEM11	transmembrane protein 11
hsa-miR-587	0	0	1	1	1	1	COX14	COX14 cytochrome c oxidase assembly homolog (S. cerevisiae)
hsa-miR-587	0	0	1	1	0	0	KDM5D	lysine (K)-specific demethylase 5D
hsa-miR-587	0	0	0	1	0	0	OR2M7	olfactory receptor, family 2, subfamily M, member 7
hsa-miR-587	0	0	0	1	0	0	DEFB103B	defensin, beta 103B
hsa-miR-587	0	0	1	1	1	1	ZNF318	zinc finger protein 318
hsa-miR-587	1	0	0	1	1	1	PABPC1	poly(A) binding protein, cytoplasmic 1
hsa-miR-587	0	0	0	1	1	1	APOL1	apolipoprotein L, 1
hsa-miR-587	0	0	0	1	1	1	DIS3L	DIS3 mitotic control homolog (S. cerevisiae)-like
hsa-miR-587	0	0	1	1	1	1	ZDHHC22	zinc finger, DHHC-type containing 22
hsa-miR-587	1	0	1	1	1	1	PRR15	proline rich 15
hsa-miR-587	0	0	0	1	1	1	ZNF454	zinc finger protein 454
hsa-miR-587	0	0	0	1	0	0	GPS1	G protein pathway suppressor 1
hsa-miR-587	1	0	1	1	1	1	ITFG1	integrin alpha FG-GAP repeat containing 1
hsa-miR-587	0	0	1	1	0	0	KLK8	kallikrein-related peptidase 8
hsa-miR-587	0	0	0	1	1	1	OR7A5	olfactory receptor, family 7, subfamily A, member 5
hsa-miR-587	0	0	0	1	0	0	ZNF354B	zinc finger protein 354B
hsa-miR-587	0	0	0	1	1	1	ZNF18	zinc finger protein 18
hsa-miR-587	0	0	0	1	0	0	ABHD11	abhydrolase domain containing 11
hsa-miR-587	0	0	0	1	0	0	OR3A4P	olfactory receptor, family 3, subfamily A, member 4 pseudogene
hsa-miR-587	0	0	1	1	1	1	TMEM45A	transmembrane protein 45A
hsa-miR-587	0	0	1	1	1	1	TCP11L1	t-complex 11 (mouse)-like 1
hsa-miR-587	1	0	1	1	1	1	SAV1	salvador homolog 1 (Drosophila)
hsa-miR-587	0	0	0	1	1	1	C14orf177	chromosome 14 open reading frame 177
hsa-miR-587	0	0	1	1	1	1	KIF15	kinesin family member 15
hsa-miR-587	0	0	1	1	1	1	ZSCAN20	zinc finger and SCAN domain containing 20
hsa-miR-587	0	0	0	1	1	1	RFPL4B	ret finger protein-like 4B
hsa-miR-587	0	0	1	1	1	1	PARK2	parkinson protein 2, E3 ubiquitin protein ligase (parkin)
hsa-miR-587	0	0	1	1	0	0	CTAG1B	cancer/testis antigen 1B
hsa-miR-587	0	0	1	1	1	1	KCNJ15	potassium inwardly-rectifying channel, subfamily J, member 15
hsa-miR-587	0	0	0	1	1	1	CNOT10	CCR4-NOT transcription complex, subunit 10
hsa-miR-587	1	0	1	1	1	1	UTY	ubiquitously transcribed tetratricopeptide repeat gene, Y-linked
hsa-miR-587	0	0	0	1	0	0	C11orf35	chromosome 11 open reading frame 35
hsa-miR-587	0	0	0	1	1	1	CXorf69	chromosome X open reading frame 69
hsa-miR-587	0	0	0	1	0	0	WDR4	WD repeat domain 4
hsa-miR-587	1	0	1	1	1	1	KPNA2	karyopherin alpha 2 (RAG cohort 1, importin alpha 1)
hsa-miR-587	0	0	0	1	1	1	GLRX5	glutaredoxin 5
hsa-miR-587	0	0	1	1	0	0	DRG1	developmentally regulated GTP binding protein 1
hsa-miR-587	1	0	0	1	0	0	DGAT1	diacylglycerol O-acyltransferase 1
hsa-miR-587	0	0	0	1	0	0	IL1R2	interleukin 1 receptor, type II
hsa-miR-587	0	0	0	1	0	0	LCK	lymphocyte-specific protein tyrosine kinase
hsa-miR-587	0	0	0	1	0	0	CTAG1A	cancer/testis antigen 1A
hsa-miR-587	0	0	1	1	1	1	C18orf21	chromosome 18 open reading frame 21
hsa-miR-587	0	0	1	1	0	0	BCDIN3D	BCDIN3 domain containing
hsa-miR-587	0	0	0	1	0	0	OIT3	oncoprotein induced transcript 3
hsa-miR-587	0	0	1	1	0	0	LCE5A	late cornified envelope 5A
hsa-miR-587	0	0	1	1	0	0	TRIM7	tripartite motif containing 7
hsa-miR-587	0	0	1	1	1	1	CCK	cholecystokinin
hsa-miR-587	1	0	1	1	1	1	FOXK2	forkhead box K2
hsa-miR-587	0	0	0	1	1	1	GSTM4	glutathione S-transferase mu 4
hsa-miR-587	0	0	0	1	1	1	TBCD	tubulin folding cofactor D
hsa-miR-587	0	0	1	1	0	0	PLSCR2	phospholipid scramblase 2
hsa-miR-587	0	0	1	1	1	1	PPHLN1	periphilin 1
hsa-miR-587	0	0	1	1	1	1	QPCT	glutaminyl-peptide cyclotransferase
hsa-miR-587	0	0	0	1	1	1	NPY5R	neuropeptide Y receptor Y5
hsa-miR-587	0	0	0	1	0	0	OSTN	osteocrin
hsa-miR-587	1	0	1	1	1	1	NIPAL3	NIPA-like domain containing 3
hsa-miR-587	1	0	1	1	0	0	CANT1	calcium activated nucleotidase 1
hsa-miR-587	0	0	1	1	1	1	LRRC17	leucine rich repeat containing 17
hsa-miR-587	0	0	1	1	1	1	OGG1	8-oxoguanine DNA glycosylase
hsa-miR-587	1	0	1	1	1	1	RNF6	ring finger protein (C3H2C3 type) 6
hsa-miR-587	0	0	1	1	0	0	DMKN	dermokine
hsa-miR-587	0	0	1	1	1	1	SP100	SP100 nuclear antigen
hsa-miR-587	0	0	1	1	1	1	UTS2D	urotensin 2 domain containing
hsa-miR-587	0	0	0	1	0	0	FAM86B1	family with sequence similarity 86, member B1
hsa-miR-587	0	0	0	1	0	0	EXD3	exonuclease 3'-5' domain containing 3
hsa-miR-587	0	0	1	1	0	0	CASS4	Cas scaffolding protein family member 4
hsa-miR-587	0	0	1	1	1	1	ICAM4	intercellular adhesion molecule 4 (Landsteiner-Wiener blood group)
hsa-miR-587	0	0	0	1	1	1	VCX	variable charge, X-linked
hsa-miR-587	0	0	1	1	1	1	AKR7L	aldo-keto reductase family 7-like
hsa-miR-587	0	0	1	1	1	1	SMPD1	sphingomyelin phosphodiesterase 1, acid lysosomal
hsa-miR-587	0	0	1	1	0	0	GJA4	gap junction protein, alpha 4, 37kDa
hsa-miR-587	0	0	1	1	1	1	TSHR	thyroid stimulating hormone receptor
hsa-miR-587	1	0	1	1	1	1	RUFY2	RUN and FYVE domain containing 2
hsa-miR-587	1	0	1	1	1	1	HNRNPA1L2	heterogeneous nuclear ribonucleoprotein A1-like 2
hsa-miR-587	0	0	1	1	0	0	DAP3	death associated protein 3
hsa-miR-587	1	0	1	1	1	1	STARD13	StAR-related lipid transfer (START) domain containing 13
hsa-miR-587	0	0	0	1	1	1	NPFFR2	neuropeptide FF receptor 2
hsa-miR-587	1	0	1	1	1	1	DROSHA	drosha, ribonuclease type III
hsa-miR-587	0	0	0	1	1	1	SERPINB13	serpin peptidase inhibitor, clade B (ovalbumin), member 13
hsa-miR-587	0	0	1	1	0	0	MTMR11	myotubularin related protein 11
hsa-miR-587	0	0	1	1	1	1	PCDH18	protocadherin 18
hsa-miR-587	1	0	1	1	0	0	ADRB3	adrenoceptor beta 3
hsa-miR-587	0	0	1	1	1	1	NFATC3	nuclear factor of activated T-cells, cytoplasmic, calcineurin-dependent 3
hsa-miR-587	0	0	0	1	1	1	ZNF334	zinc finger protein 334
hsa-miR-587	0	0	0	1	1	1	ALDH3B2	aldehyde dehydrogenase 3 family, member B2
hsa-miR-587	0	0	1	1	0	0	COLEC11	collectin sub-family member 11
hsa-miR-587	0	0	1	1	1	1	GPR114	G protein-coupled receptor 114
hsa-miR-587	1	0	1	1	1	1	KDM5C	lysine (K)-specific demethylase 5C
hsa-miR-587	0	0	0	1	1	1	NDUFB6	NADH dehydrogenase (ubiquinone) 1 beta subcomplex, 6, 17kDa
hsa-miR-587	0	0	0	1	0	0	SAMM50	sorting and assembly machinery component 50 homolog (S. cerevisiae)
hsa-miR-587	0	0	1	1	1	1	ACLY	ATP citrate lyase
hsa-miR-587	0	0	1	1	1	1	SEPT10	septin 10
hsa-miR-587	0	0	0	1	0	0	ZBTB45	zinc finger and BTB domain containing 45
hsa-miR-587	0	0	0	1	0	0	SLC35E2	solute carrier family 35, member E2
hsa-miR-587	0	0	1	1	0	0	ANKRD35	ankyrin repeat domain 35
hsa-miR-587	0	0	0	1	1	1	GPR160	G protein-coupled receptor 160
hsa-miR-587	0	0	1	1	0	0	CEP250	centrosomal protein 250kDa
hsa-miR-587	0	0	0	1	0	0	MYOCD	myocardin
hsa-miR-587	1	0	1	1	1	1	TMED7	transmembrane emp24 protein transport domain containing 7
hsa-miR-587	0	0	0	1	1	1	TICAM2	toll-like receptor adaptor molecule 2
hsa-miR-587	0	0	1	1	1	1	PXDNL	peroxidasin homolog (Drosophila)-like
hsa-miR-587	0	0	1	1	1	1	BCKDHB	branched chain keto acid dehydrogenase E1, beta polypeptide
hsa-miR-587	0	0	1	1	1	1	RNF146	ring finger protein 146
hsa-miR-587	0	0	1	1	1	1	ARG1	arginase, liver
hsa-miR-587	0	0	0	1	1	1	ZNF23	zinc finger protein 23
hsa-miR-587	0	0	0	1	0	0	TRIM48	tripartite motif containing 48
hsa-miR-587	0	0	0	1	0	0	ZNF799	zinc finger protein 799
hsa-miR-587	0	0	0	1	1	1	SYT16	synaptotagmin XVI
hsa-miR-587	1	0	1	1	1	1	DEM1	defects in morphology 1 homolog (S. cerevisiae)
hsa-miR-587	0	0	1	1	1	1	ZNF781	zinc finger protein 781
hsa-miR-587	0	0	0	1	0	0	GIMAP5	GTPase, IMAP family member 5
hsa-miR-587	0	0	1	1	1	1	NLGN3	neuroligin 3
hsa-miR-587	0	0	0	1	1	1	AASS	aminoadipate-semialdehyde synthase
hsa-miR-587	0	0	1	1	0	0	TRAPPC4	trafficking protein particle complex 4
hsa-miR-587	1	0	1	1	1	1	PDLIM5	PDZ and LIM domain 5
hsa-miR-587	0	0	0	1	0	0	OR51A7	olfactory receptor, family 51, subfamily A, member 7
hsa-miR-587	0	0	0	1	0	0	OFCC1	orofacial cleft 1 candidate 1
hsa-miR-587	1	0	0	1	0	0	TRPV6	transient receptor potential cation channel, subfamily V, member 6
hsa-miR-587	0	0	1	1	0	0	PCNT	pericentrin
hsa-miR-587	0	0	0	1	1	1	IFI16	interferon, gamma-inducible protein 16
hsa-miR-587	0	0	1	1	0	0	SPINK5	serine peptidase inhibitor, Kazal type 5
hsa-miR-587	0	0	1	1	0	0	HKR1	HKR1, GLI-Kruppel zinc finger family member
hsa-miR-587	0	0	1	1	0	0	AXDND1	axonemal dynein light chain domain containing 1
hsa-miR-587	0	0	0	1	0	0	ARTN	artemin
hsa-miR-587	1	0	1	1	1	1	URI1	URI1, prefoldin-like chaperone
hsa-miR-587	0	0	1	1	1	1	HLA-DPB1	major histocompatibility complex, class II, DP beta 1
hsa-miR-587	0	0	0	1	1	1	EGFL6	EGF-like-domain, multiple 6
hsa-miR-587	0	0	1	1	0	0	AMY2B	amylase, alpha 2B (pancreatic)
hsa-miR-587	1	0	0	1	1	1	DCLRE1A	DNA cross-link repair 1A
hsa-miR-587	0	0	1	1	0	0	EGFL8	EGF-like-domain, multiple 8
hsa-miR-587	0	0	1	1	1	1	NAA35	N(alpha)-acetyltransferase 35, NatC auxiliary subunit
hsa-miR-587	0	0	1	1	0	0	SFT2D1	SFT2 domain containing 1
hsa-miR-587	0	0	0	1	0	0	ZNF669	zinc finger protein 669
hsa-miR-587	0	0	1	1	0	0	C1orf31	chromosome 1 open reading frame 31
hsa-miR-587	1	0	1	1	1	1	C1orf131	chromosome 1 open reading frame 131
hsa-miR-587	0	0	1	1	1	1	ACTA1	actin, alpha 1, skeletal muscle
hsa-miR-587	0	0	1	1	1	1	PARP1	poly (ADP-ribose) polymerase 1
hsa-miR-587	0	0	1	1	1	1	INTS7	integrator complex subunit 7
hsa-miR-587	1	0	1	1	1	1	CR1	complement component (3b/4b) receptor 1 (Knops blood group)
hsa-miR-587	0	0	0	1	0	0	LEMD1	LEM domain containing 1
hsa-miR-587	0	0	0	1	1	1	RAB32	RAB32, member RAS oncogene family
hsa-miR-587	1	0	0	1	1	1	SWT1	SWT1 RNA endoribonuclease homolog (S. cerevisiae)
hsa-miR-587	0	0	1	1	1	1	PEX3	peroxisomal biogenesis factor 3
hsa-miR-587	0	0	1	1	1	1	RASAL2	RAS protein activator like 2
hsa-miR-587	1	0	1	1	1	1	ASTN1	astrotactin 1
hsa-miR-587	0	0	1	1	1	1	C1orf129	chromosome 1 open reading frame 129
hsa-miR-587	0	0	1	1	1	1	BLZF1	basic leucine zipper nuclear factor 1
hsa-miR-587	0	0	1	1	1	1	TMCO1	transmembrane and coiled-coil domains 1
hsa-miR-587	0	0	1	1	0	0	PYHIN1	pyrin and HIN domain family, member 1
hsa-miR-587	0	0	1	1	0	0	TMEM244	transmembrane protein 244
hsa-miR-587	0	0	1	1	1	1	CENPW	centromere protein W
hsa-miR-587	0	0	1	1	0	0	RPS27	ribosomal protein S27
hsa-miR-587	0	0	0	1	0	0	ADAM8	ADAM metallopeptidase domain 8
hsa-miR-587	0	0	1	1	0	0	LCE2A	late cornified envelope 2A
hsa-miR-587	0	0	0	1	0	0	UROS	uroporphyrinogen III synthase
hsa-miR-587	0	0	1	1	0	0	LCE3D	late cornified envelope 3D
hsa-miR-587	1	0	1	1	1	1	ANP32E	acidic (leucine-rich) nuclear phosphoprotein 32 family, member E
hsa-miR-587	0	0	1	1	0	0	AP4B1	adaptor-related protein complex 4, beta 1 subunit
hsa-miR-587	0	0	1	1	1	1	ATP5F1	ATP synthase, H+ transporting, mitochondrial Fo complex, subunit B1
hsa-miR-587	1	0	1	1	1	1	TMED5	transmembrane emp24 protein transport domain containing 5
hsa-miR-587	0	0	1	1	1	1	LMBRD1	LMBR1 domain containing 1
hsa-miR-587	0	0	1	1	0	0	C10orf62	chromosome 10 open reading frame 62
hsa-miR-587	0	0	1	1	1	1	EXOSC1	exosome component 1
hsa-miR-587	1	0	1	1	1	1	MIER1	mesoderm induction early response 1 homolog (Xenopus laevis)
hsa-miR-587	0	0	1	1	1	1	C1orf177	chromosome 1 open reading frame 177
hsa-miR-587	0	0	1	1	1	1	SLC25A43	solute carrier family 25, member 43
hsa-miR-587	0	0	1	1	1	1	DDX27	DEAD (Asp-Glu-Ala-Asp) box polypeptide 27
hsa-miR-587	0	0	0	1	1	1	IFIT1B	interferon-induced protein with tetratricopeptide repeats 1B
hsa-miR-587	0	0	1	1	1	1	RNLS	renalase, FAD-dependent amine oxidase
hsa-miR-587	0	0	0	1	1	1	WFDC12	WAP four-disulfide core domain 12
hsa-miR-587	0	0	1	1	1	1	PABPC1L	poly(A) binding protein, cytoplasmic 1-like
hsa-miR-587	0	0	0	1	1	1	PABPC4	poly(A) binding protein, cytoplasmic 4 (inducible form)
hsa-miR-587	0	0	0	1	0	0	COQ4	coenzyme Q4 homolog (S. cerevisiae)
hsa-miR-587	0	0	0	1	0	0	TSPO2	translocator protein 2
hsa-miR-587	0	0	1	1	0	0	CYLC1	cylicin, basic protein of sperm head cytoskeleton 1
hsa-miR-587	0	0	1	1	0	0	C10orf35	chromosome 10 open reading frame 35
hsa-miR-587	0	0	0	1	0	0	TACR2	tachykinin receptor 2
hsa-miR-587	0	0	1	1	1	1	ZNF365	zinc finger protein 365
hsa-miR-587	0	0	1	1	1	1	SYT15	synaptotagmin XV
hsa-miR-587	0	0	1	1	0	0	GDPD2	glycerophosphodiester phosphodiesterase domain containing 2
hsa-miR-587	1	0	1	1	1	1	FUCA1	fucosidase, alpha-L- 1, tissue
hsa-miR-587	0	0	1	1	1	1	PROCR	protein C receptor, endothelial
hsa-miR-587	0	0	1	1	1	1	USP48	ubiquitin specific peptidase 48
hsa-miR-587	0	0	0	1	0	0	BTNL2	butyrophilin-like 2 (MHC class II associated)
hsa-miR-587	0	0	0	1	0	0	TMEM225	transmembrane protein 225
hsa-miR-587	0	0	1	1	0	0	CCDC7	coiled-coil domain containing 7
hsa-miR-587	0	0	0	1	0	0	DFNB59	deafness, autosomal recessive 59
hsa-miR-587	0	0	1	1	0	0	FBP2	fructose-1,6-bisphosphatase 2
hsa-miR-587	0	0	1	1	0	0	XAGE5	X antigen family, member 5
hsa-miR-587	0	0	1	1	1	1	C6orf48	chromosome 6 open reading frame 48
hsa-miR-587	0	0	1	1	1	1	KYNU	kynureninase
hsa-miR-587	0	0	1	1	0	0	CSNK2B	casein kinase 2, beta polypeptide
hsa-miR-587	0	0	0	1	1	1	LY6G5B	lymphocyte antigen 6 complex, locus G5B
hsa-miR-587	0	0	1	1	1	1	AIF1	allograft inflammatory factor 1
hsa-miR-587	0	0	1	1	0	0	FGF14	fibroblast growth factor 14
hsa-miR-587	0	0	1	1	0	0	PDSS1	prenyl (decaprenyl) diphosphate synthase, subunit 1
hsa-miR-587	0	0	1	1	0	0	PCCA	propionyl CoA carboxylase, alpha polypeptide
hsa-miR-587	0	0	1	1	1	1	IDNK	idnK, gluconokinase homolog (E. coli)
hsa-miR-587	0	0	1	1	1	1	FRMD3	FERM domain containing 3
hsa-miR-587	1	0	1	1	1	1	TLE4	transducin-like enhancer of split 4 (E(sp1) homolog, Drosophila)
hsa-miR-587	0	0	1	1	1	1	CPT1A	carnitine palmitoyltransferase 1A (liver)
hsa-miR-587	0	0	0	1	1	1	BTNL9	butyrophilin-like 9
hsa-miR-587	1	0	0	1	1	1	ABCC4	ATP-binding cassette, sub-family C (CFTR/MRP), member 4
hsa-miR-587	0	0	1	1	0	0	YIF1A	Yip1 interacting factor homolog A (S. cerevisiae)
hsa-miR-587	0	0	1	1	1	1	CNGA3	cyclic nucleotide gated channel alpha 3
hsa-miR-587	1	0	1	1	0	0	DNAJC1	DnaJ (Hsp40) homolog, subfamily C, member 1
hsa-miR-587	0	0	0	1	1	1	IL31	interleukin 31
hsa-miR-587	0	0	0	1	0	0	OR10C1	olfactory receptor, family 10, subfamily C, member 1
hsa-miR-587	1	0	1	1	1	1	NKX2-2	NK2 homeobox 2
hsa-miR-587	0	0	1	1	1	1	XRN2	5'-3' exoribonuclease 2
hsa-miR-587	0	0	0	1	1	1	NSUN6	NOP2/Sun domain family, member 6
hsa-miR-587	0	0	1	1	1	1	UCHL3	ubiquitin carboxyl-terminal esterase L3 (ubiquitin thiolesterase)
hsa-miR-587	0	0	0	1	1	1	ZNF658B	zinc finger protein 658B, pseudogene
hsa-miR-587	0	0	0	1	1	1	ZNF658	zinc finger protein 658
hsa-miR-587	0	0	1	1	1	1	CNTNAP3	contactin associated protein-like 3
hsa-miR-587	0	0	1	1	1	1	SNX5	sorting nexin 5
hsa-miR-587	0	0	1	1	1	1	KIAA0196	KIAA0196
hsa-miR-587	0	0	1	1	1	1	ALG11	asparagine-linked glycosylation 11, alpha-1,2-mannosyltransferase homolog (yeast)
hsa-miR-587	0	0	0	1	1	1	OLAH	oleoyl-ACP hydrolase
hsa-miR-587	0	0	1	1	1	1	EBPL	emopamil binding protein-like
hsa-miR-587	0	0	0	1	1	1	PHF11	PHD finger protein 11
hsa-miR-587	1	0	1	1	1	1	MRS2	MRS2 magnesium homeostasis factor homolog (S. cerevisiae)
hsa-miR-587	1	0	1	1	1	1	CCL7	chemokine (C-C motif) ligand 7
hsa-miR-587	0	0	1	1	1	1	FUK	fucokinase
hsa-miR-587	0	0	1	1	0	0	ELP4	elongator acetyltransferase complex subunit 4
hsa-miR-587	0	0	1	1	1	1	SERP2	stress-associated endoplasmic reticulum protein family member 2
hsa-miR-587	1	0	1	1	1	1	SMPX	small muscle protein, X-linked
hsa-miR-587	1	0	1	1	1	1	NFX1	nuclear transcription factor, X-box binding 1
hsa-miR-587	1	0	1	1	1	1	PFKFB3	6-phosphofructo-2-kinase/fructose-2,6-biphosphatase 3
hsa-miR-587	1	0	0	1	1	1	PDHA1	pyruvate dehydrogenase (lipoamide) alpha 1
hsa-miR-587	1	0	1	1	1	1	RREB1	ras responsive element binding protein 1
hsa-miR-587	1	0	1	1	1	1	KL	klotho
hsa-miR-587	0	0	0	1	0	0	S100G	S100 calcium binding protein G
hsa-miR-587	0	0	0	1	1	1	IFNA2	interferon, alpha 2
hsa-miR-587	1	0	1	1	1	1	CA5B	carbonic anhydrase VB, mitochondrial
hsa-miR-587	0	0	1	1	0	0	TBCA	tubulin folding cofactor A
hsa-miR-587	0	0	1	1	1	1	FAM154A	family with sequence similarity 154, member A
hsa-miR-587	0	0	1	1	1	1	BTF3	basic transcription factor 3
hsa-miR-587	0	0	1	1	1	1	DNM1L	dynamin 1-like
hsa-miR-587	0	0	1	1	1	1	CWC27	CWC27 spliceosome-associated protein homolog (S. cerevisiae)
hsa-miR-587	0	0	1	1	1	1	XG	Xg blood group
hsa-miR-587	0	0	1	1	1	1	RPAIN	RPA interacting protein
hsa-miR-587	0	0	1	1	1	1	GLDC	glycine dehydrogenase (decarboxylating)
hsa-miR-587	1	0	1	1	1	1	FKBP1A	FK506 binding protein 1A, 12kDa
hsa-miR-587	0	0	1	1	1	1	RFC1	replication factor C (activator 1) 1, 145kDa
hsa-miR-587	1	0	1	1	1	1	GPR125	G protein-coupled receptor 125
hsa-miR-587	1	0	1	1	1	1	CTAGE5	CTAGE family, member 5
hsa-miR-587	0	0	0	1	0	0	CDH18	cadherin 18, type 2
hsa-miR-587	0	0	1	1	0	0	CHEK2	checkpoint kinase 2
hsa-miR-587	0	0	0	1	0	0	MRPL36	mitochondrial ribosomal protein L36
hsa-miR-587	0	0	0	1	1	1	UPB1	ureidopropionase, beta
hsa-miR-587	0	0	0	1	0	0	TSPY8	testis specific protein, Y-linked 8
[truncated: 177 more rows]
