# Supplementary material for: Profiling of Selected MicroRNAs in Proliferative Eutopic Endometrium of Women with Ovarian Endometriosis
Source: Biomed Res Int. 2015 Aug 20;2015:760698. doi: 10.1155/2015/760698 (PMC4558423; doi:10.1155/2015/760698)
Supplement: Supplementary file 1 — Table I: The names of miRNAs significantly differentially expressed between eutopic endometrium of patients with endometriosis vs eutopic endometrium of patients without endometriosis. Table II: The associations between miRNA and mRNA, which presents detailed results of the search of six major databases i.e targetscan, tarbase, miranda, mirbase, mirtarget2 and pictar. [file 760698.f1.zip › 760698.f1/Table II/hsa-miR-588.tsv]

miR	targetscan	tarbase	miranda	mirbase	mirtarget2	pictar	GeneSymbol	GeneName
hsa-miR-588	1	0	1	1	1	1	TMCC2	transmembrane and coiled-coil domain family 2
hsa-miR-588	1	0	1	1	0	0	SRCAP	Snf2-related CREBBP activator protein
hsa-miR-588	1	0	1	1	0	0	RAPGEF2	Rap guanine nucleotide exchange factor (GEF) 2
hsa-miR-588	1	0	1	1	1	1	MCF2L	MCF.2 cell line derived transforming sequence-like
hsa-miR-588	1	0	1	0	1	1	PTPRT	protein tyrosine phosphatase, receptor type, T
hsa-miR-588	1	0	1	1	1	1	SGSM2	small G protein signaling modulator 2
hsa-miR-588	1	0	1	0	1	1	KIAA0408	KIAA0408
hsa-miR-588	1	0	1	1	1	1	NUPL1	nucleoporin like 1
hsa-miR-588	1	0	1	1	0	0	SEC14L5	SEC14-like 5 (S. cerevisiae)
hsa-miR-588	0	0	1	1	0	0	RAP1GAP	RAP1 GTPase activating protein
hsa-miR-588	1	0	1	0	1	1	CEP350	centrosomal protein 350kDa
hsa-miR-588	0	0	1	1	0	0	ZNF862	zinc finger protein 862
hsa-miR-588	1	0	1	1	1	1	GPATCH8	G patch domain containing 8
hsa-miR-588	1	0	1	1	1	1	GIGYF2	GRB10 interacting GYF protein 2
hsa-miR-588	0	0	1	1	0	0	ARHGEF2	Rho/Rac guanine nucleotide exchange factor (GEF) 2
hsa-miR-588	1	0	1	1	1	1	ATG13	autophagy related 13
hsa-miR-588	1	0	1	0	1	1	LPHN3	latrophilin 3
hsa-miR-588	0	0	1	1	1	1	SEC31A	SEC31 homolog A (S. cerevisiae)
hsa-miR-588	1	0	1	1	1	1	DMXL2	Dmx-like 2
hsa-miR-588	1	0	1	1	1	1	ARHGEF15	Rho guanine nucleotide exchange factor (GEF) 15
hsa-miR-588	1	0	1	1	1	1	FOXJ3	forkhead box J3
hsa-miR-588	1	0	1	1	0	0	KIAA1045	KIAA1045
hsa-miR-588	1	0	1	0	1	1	ODZ2	odz, odd Oz/ten-m homolog 2 (Drosophila)
hsa-miR-588	1	0	1	0	1	1	SRGAP3	SLIT-ROBO Rho GTPase activating protein 3
hsa-miR-588	1	0	1	1	1	1	RALGAPB	Ral GTPase activating protein, beta subunit (non-catalytic)
hsa-miR-588	1	0	1	1	0	0	ATAD2B	ATPase family, AAA domain containing 2B
hsa-miR-588	0	0	1	0	0	0	MTA3	metastasis associated 1 family, member 3
hsa-miR-588	0	0	1	1	1	1	TCF7L2	transcription factor 7-like 2 (T-cell specific, HMG-box)
hsa-miR-588	1	0	1	0	0	0	ODZ4	odz, odd Oz/ten-m homolog 4 (Drosophila)
hsa-miR-588	1	0	1	1	1	1	HACE1	HECT domain and ankyrin repeat containing E3 ubiquitin protein ligase 1
hsa-miR-588	1	0	1	0	0	0	PITPNM2	phosphatidylinositol transfer protein, membrane-associated 2
hsa-miR-588	1	0	1	0	1	1	SEMA6D	sema domain, transmembrane domain (TM), and cytoplasmic domain, (semaphorin) 6D
hsa-miR-588	1	0	1	1	0	0	ZSWIM5	zinc finger, SWIM-type containing 5
hsa-miR-588	1	0	1	1	1	1	KIAA1522	KIAA1522
hsa-miR-588	1	0	1	0	1	1	ZNF295	zinc finger protein 295
hsa-miR-588	1	0	1	1	0	0	NCKAP5L	NCK-associated protein 5-like
hsa-miR-588	1	0	1	0	1	1	IGDCC4	immunoglobulin superfamily, DCC subclass, member 4
hsa-miR-588	1	0	1	0	0	0	TANC2	tetratricopeptide repeat, ankyrin repeat and coiled-coil containing 2
hsa-miR-588	1	0	1	1	1	1	DOCK7	dedicator of cytokinesis 7
hsa-miR-588	1	0	1	0	1	1	RIMS1	regulating synaptic membrane exocytosis 1
hsa-miR-588	1	0	1	1	1	1	NPAS3	neuronal PAS domain protein 3
hsa-miR-588	1	0	1	0	1	1	JPH4	junctophilin 4
hsa-miR-588	1	0	1	1	1	1	POGZ	pogo transposable element with ZNF domain
hsa-miR-588	1	0	1	1	0	0	ADC	arginine decarboxylase
hsa-miR-588	0	0	1	1	0	0	CIRH1A	cirrhosis, autosomal recessive 1A (cirhin)
hsa-miR-588	0	0	1	1	0	0	SLC22A10	solute carrier family 22, member 10
hsa-miR-588	0	0	1	1	0	0	CNTNAP4	contactin associated protein-like 4
hsa-miR-588	1	1	1	1	1	1	BACE1	beta-site APP-cleaving enzyme 1
hsa-miR-588	0	0	1	1	0	0	PTPRF	protein tyrosine phosphatase, receptor type, F
hsa-miR-588	1	0	1	1	1	1	VLDLR	very low density lipoprotein receptor
hsa-miR-588	0	0	1	1	0	0	MPST	mercaptopyruvate sulfurtransferase
hsa-miR-588	1	0	1	1	1	1	COL11A1	collagen, type XI, alpha 1
hsa-miR-588	1	0	1	1	0	0	GRIN1	glutamate receptor, ionotropic, N-methyl D-aspartate 1
hsa-miR-588	1	0	1	0	1	1	PCDHA13	protocadherin alpha 13
hsa-miR-588	1	0	1	1	1	1	PCDHA4	protocadherin alpha 4
hsa-miR-588	1	0	1	1	1	1	DTNA	dystrobrevin, alpha
hsa-miR-588	1	0	1	1	1	1	RPS6KA2	ribosomal protein S6 kinase, 90kDa, polypeptide 2
hsa-miR-588	1	0	1	0	1	1	PLAG1	pleiomorphic adenoma gene 1
hsa-miR-588	1	0	1	1	0	0	CACNB1	calcium channel, voltage-dependent, beta 1 subunit
hsa-miR-588	1	0	1	1	0	0	TSPYL2	TSPY-like 2
hsa-miR-588	0	0	1	1	1	1	TFRC	transferrin receptor (p90, CD71)
hsa-miR-588	1	0	1	1	1	1	EPHA7	EPH receptor A7
hsa-miR-588	1	0	1	1	1	1	EPHA5	EPH receptor A5
hsa-miR-588	1	0	1	1	1	1	NEO1	neogenin 1
hsa-miR-588	0	0	1	1	0	0	ASIC3	acid-sensing (proton-gated) ion channel 3
hsa-miR-588	0	0	1	1	0	0	EIF4E2	eukaryotic translation initiation factor 4E family member 2
hsa-miR-588	0	0	1	1	1	1	RCBTB2	regulator of chromosome condensation (RCC1) and BTB (POZ) domain containing protein 2
hsa-miR-588	0	0	1	1	1	1	ZNF747	zinc finger protein 747
hsa-miR-588	0	0	1	1	1	1	ALDH3B1	aldehyde dehydrogenase 3 family, member B1
hsa-miR-588	0	0	1	1	0	0	TRIM27	tripartite motif containing 27
hsa-miR-588	1	0	1	1	1	1	MYO9B	myosin IXB
hsa-miR-588	1	0	1	1	1	1	MEF2D	myocyte enhancer factor 2D
hsa-miR-588	0	0	1	0	0	0	MIAT	myocardial infarction associated transcript (non-protein coding)
hsa-miR-588	0	0	1	1	0	0	MUC3A	mucin 3A, cell surface associated
hsa-miR-588	1	0	1	1	1	1	CBFA2T2	core-binding factor, runt domain, alpha subunit 2; translocated to, 2
hsa-miR-588	1	0	1	1	1	1	MRAS	muscle RAS oncogene homolog
hsa-miR-588	1	0	1	1	1	1	TMEM159	transmembrane protein 159
hsa-miR-588	1	0	1	1	0	0	ASPHD1	aspartate beta-hydroxylase domain containing 1
hsa-miR-588	1	0	1	1	1	1	EDNRB	endothelin receptor type B
hsa-miR-588	0	0	1	1	1	1	DMRT2	doublesex and mab-3 related transcription factor 2
hsa-miR-588	0	0	1	0	1	1	CLEC5A	C-type lectin domain family 5, member A
hsa-miR-588	0	0	1	1	0	0	ADAMTS7	ADAM metallopeptidase with thrombospondin type 1 motif, 7
hsa-miR-588	1	0	1	0	1	1	SLC34A2	solute carrier family 34 (sodium phosphate), member 2
hsa-miR-588	1	0	1	1	1	1	ANKRD13A	ankyrin repeat domain 13A
hsa-miR-588	1	0	1	1	1	1	C16orf70	chromosome 16 open reading frame 70
hsa-miR-588	1	0	1	1	1	1	SNPH	syntaphilin
hsa-miR-588	0	0	1	1	1	1	NPC1L1	NPC1 (Niemann-Pick disease, type C1, gene)-like 1
hsa-miR-588	1	0	1	1	1	1	TSC22D2	TSC22 domain family, member 2
hsa-miR-588	1	0	1	1	1	1	NXT2	nuclear transport factor 2-like export factor 2
hsa-miR-588	1	0	1	1	0	0	LMO2	LIM domain only 2 (rhombotin-like 1)
hsa-miR-588	1	0	1	0	1	1	TRPS1	trichorhinophalangeal syndrome I
hsa-miR-588	1	0	1	1	1	1	ERGIC1	endoplasmic reticulum-golgi intermediate compartment (ERGIC) 1
hsa-miR-588	1	0	1	1	1	1	RNF7	ring finger protein 7
hsa-miR-588	0	0	1	1	0	0	MUC1	mucin 1, cell surface associated
hsa-miR-588	0	0	1	1	0	0	TRO	trophinin
hsa-miR-588	1	0	1	1	1	1	DDR1	discoidin domain receptor tyrosine kinase 1
hsa-miR-588	1	0	1	1	1	1	BBC3	BCL2 binding component 3
hsa-miR-588	1	0	1	1	1	1	PBX3	pre-B-cell leukemia homeobox 3
hsa-miR-588	0	0	1	1	1	1	RGS20	regulator of G-protein signaling 20
hsa-miR-588	1	0	1	1	1	1	LARP4	La ribonucleoprotein domain family, member 4
hsa-miR-588	0	0	1	0	1	1	MYO3B	myosin IIIB
hsa-miR-588	0	0	1	1	0	0	SNRPN	small nuclear ribonucleoprotein polypeptide N
hsa-miR-588	0	0	1	0	0	0	MYO15B	myosin XVB pseudogene
hsa-miR-588	0	0	1	1	0	0	BRE	brain and reproductive organ-expressed (TNFRSF1A modulator)
hsa-miR-588	0	0	1	1	0	0	FOXN4	forkhead box N4
hsa-miR-588	1	0	1	1	1	1	ST3GAL3	ST3 beta-galactoside alpha-2,3-sialyltransferase 3
hsa-miR-588	0	0	1	1	1	1	RNF32	ring finger protein 32
hsa-miR-588	0	0	1	1	0	0	RASGEF1C	RasGEF domain family, member 1C
hsa-miR-588	1	0	1	1	0	0	FOXP2	forkhead box P2
hsa-miR-588	1	0	1	1	1	1	IQCK	IQ motif containing K
hsa-miR-588	1	0	1	0	1	1	IL1RAP	interleukin 1 receptor accessory protein
hsa-miR-588	0	0	1	1	0	0	NCR1	natural cytotoxicity triggering receptor 1
hsa-miR-588	1	0	1	1	1	1	SH2B3	SH2B adaptor protein 3
hsa-miR-588	1	0	1	1	1	1	ZNF281	zinc finger protein 281
hsa-miR-588	0	0	1	1	1	1	GNAS	GNAS complex locus
hsa-miR-588	0	0	1	0	0	0	LY6G6E	lymphocyte antigen 6 complex, locus G6E (pseudogene)
hsa-miR-588	1	0	1	1	1	1	NRXN3	neurexin 3
hsa-miR-588	1	0	1	1	1	1	NFYA	nuclear transcription factor Y, alpha
hsa-miR-588	1	0	1	1	1	1	ARL4C	ADP-ribosylation factor-like 4C
hsa-miR-588	1	0	1	0	1	1	NFAT5	nuclear factor of activated T-cells 5, tonicity-responsive
hsa-miR-588	0	0	1	0	0	0	TUG1	taurine upregulated 1 (non-protein coding)
hsa-miR-588	1	0	1	0	1	1	CLIC4	chloride intracellular channel 4
hsa-miR-588	1	0	1	1	0	0	SMUG1	single-strand-selective monofunctional uracil-DNA glycosylase 1
hsa-miR-588	1	0	1	1	1	1	MKLN1	muskelin 1, intracellular mediator containing kelch motifs
hsa-miR-588	1	0	1	1	1	1	KLHDC8B	kelch domain containing 8B
hsa-miR-588	0	0	1	0	0	0	C17orf72	chromosome 17 open reading frame 72
hsa-miR-588	0	0	1	1	0	0	UBR4	ubiquitin protein ligase E3 component n-recognin 4
hsa-miR-588	1	0	1	1	1	1	PGAP1	post-GPI attachment to proteins 1
hsa-miR-588	0	0	1	0	0	0	SOX2-OT	SOX2 overlapping transcript (non-protein coding)
hsa-miR-588	1	0	1	1	0	0	CCDC136	coiled-coil domain containing 136
hsa-miR-588	0	0	1	0	1	1	ZNF766	zinc finger protein 766
hsa-miR-588	1	0	1	1	0	0	MEX3A	mex-3 homolog A (C. elegans)
hsa-miR-588	0	0	1	1	1	1	METTL7A	methyltransferase like 7A
hsa-miR-588	1	0	1	1	1	1	MAPK8IP3	mitogen-activated protein kinase 8 interacting protein 3
hsa-miR-588	1	0	1	1	1	1	DYRK2	dual-specificity tyrosine-(Y)-phosphorylation regulated kinase 2
hsa-miR-588	1	0	1	0	1	1	ATP2B1	ATPase, Ca++ transporting, plasma membrane 1
hsa-miR-588	0	0	1	0	0	0	FLJ21408	uncharacterized LOC400512
hsa-miR-588	0	0	1	1	1	1	PPFIBP2	PTPRF interacting protein, binding protein 2 (liprin beta 2)
hsa-miR-588	1	0	1	1	1	1	ARFGEF1	ADP-ribosylation factor guanine nucleotide-exchange factor 1 (brefeldin A-inhibited)
hsa-miR-588	1	0	1	1	1	1	TNRC6A	trinucleotide repeat containing 6A
hsa-miR-588	1	0	1	0	1	1	ZCCHC3	zinc finger, CCHC domain containing 3
hsa-miR-588	0	0	1	1	0	0	PIF1	PIF1 5'-to-3' DNA helicase homolog (S. cerevisiae)
hsa-miR-588	0	0	1	1	0	0	ZNF276	zinc finger protein 276
hsa-miR-588	0	0	1	1	1	1	GTF2H1	general transcription factor IIH, polypeptide 1, 62kDa
hsa-miR-588	0	0	1	1	0	0	C15orf23	chromosome 15 open reading frame 23
hsa-miR-588	1	0	1	1	1	1	FAM53C	family with sequence similarity 53, member C
hsa-miR-588	1	0	1	1	1	1	NFASC	neurofascin
hsa-miR-588	0	0	1	0	0	0	KIAA0664L3	KIAA0664-like 3
hsa-miR-588	0	0	1	1	1	1	FAM107A	family with sequence similarity 107, member A
hsa-miR-588	0	0	1	0	0	0	FAM185A	family with sequence similarity 185, member A
hsa-miR-588	0	0	1	0	0	0	LOC154092	uncharacterized LOC154092
hsa-miR-588	0	0	1	0	0	0	LOC401242	uncharacterized LOC401242
hsa-miR-588	0	0	1	1	1	1	CCND3	cyclin D3
hsa-miR-588	1	0	1	1	1	1	GULP1	GULP, engulfment adaptor PTB domain containing 1
hsa-miR-588	1	0	1	0	0	0	PWWP2A	PWWP domain containing 2A
hsa-miR-588	0	0	1	1	0	0	DNAH9	dynein, axonemal, heavy chain 9
hsa-miR-588	0	0	1	1	0	0	CHRM3	cholinergic receptor, muscarinic 3
hsa-miR-588	0	0	1	0	0	0	LOC654433	uncharacterized LOC654433
hsa-miR-588	0	0	1	0	0	0	AFG3L1P	AFG3 ATPase family gene 3-like 1 (S. cerevisiae), pseudogene
hsa-miR-588	0	0	1	1	0	0	ZNF185	zinc finger protein 185 (LIM domain)
hsa-miR-588	0	0	1	0	0	0	PLCD4	phospholipase C, delta 4
hsa-miR-588	1	0	1	1	1	1	MGAT1	mannosyl (alpha-1,3-)-glycoprotein beta-1,2-N-acetylglucosaminyltransferase
hsa-miR-588	0	0	1	1	1	1	VWA3B	von Willebrand factor A domain containing 3B
hsa-miR-588	0	0	1	0	0	0	TUBA3FP	tubulin, alpha 3f, pseudogene
hsa-miR-588	0	0	1	1	0	0	NXF2	nuclear RNA export factor 2
hsa-miR-588	0	0	1	1	0	0	HSD3B7	hydroxy-delta-5-steroid dehydrogenase, 3 beta- and steroid delta-isomerase 7
hsa-miR-588	0	0	1	1	1	1	SEC61A2	Sec61 alpha 2 subunit (S. cerevisiae)
hsa-miR-588	0	0	1	1	0	0	PTOV1	prostate tumor overexpressed 1
hsa-miR-588	1	0	1	1	1	1	IST1	increased sodium tolerance 1 homolog (yeast)
hsa-miR-588	0	0	1	1	1	1	FXC1	fracture callus 1 homolog (rat)
hsa-miR-588	1	0	1	1	1	1	C6orf89	chromosome 6 open reading frame 89
hsa-miR-588	0	0	1	0	0	0	LINC00301	long intergenic non-protein coding RNA 301
hsa-miR-588	0	0	1	0	0	0	C6orf228	chromosome 6 open reading frame 228
hsa-miR-588	1	0	1	1	1	1	PHF15	PHD finger protein 15
hsa-miR-588	0	0	1	1	0	0	GRIP2	glutamate receptor interacting protein 2
hsa-miR-588	1	0	1	1	1	1	GANC	glucosidase, alpha; neutral C
hsa-miR-588	1	0	1	1	1	1	BLCAP	bladder cancer associated protein
hsa-miR-588	0	0	1	1	0	0	WDR83	WD repeat domain 83
hsa-miR-588	0	0	1	0	1	1	ELF5	E74-like factor 5 (ets domain transcription factor)
hsa-miR-588	0	0	1	1	0	0	CPAMD8	C3 and PZP-like, alpha-2-macroglobulin domain containing 8
hsa-miR-588	1	0	1	1	1	1	PIP4K2C	phosphatidylinositol-5-phosphate 4-kinase, type II, gamma
hsa-miR-588	0	0	1	1	0	0	ATP6AP1	ATPase, H+ transporting, lysosomal accessory protein 1
hsa-miR-588	0	0	1	0	1	1	TMSB15B	thymosin beta 15B
hsa-miR-588	0	0	1	1	0	0	ACOT11	acyl-CoA thioesterase 11
hsa-miR-588	0	0	1	1	0	0	RUVBL1	RuvB-like 1 (E. coli)
hsa-miR-588	0	0	1	1	0	0	TRMT44	tRNA methyltransferase 44 homolog (S. cerevisiae)
hsa-miR-588	0	0	1	1	0	0	C6orf163	chromosome 6 open reading frame 163
hsa-miR-588	0	0	1	1	0	0	GPX5	glutathione peroxidase 5 (epididymal androgen-related protein)
hsa-miR-588	1	0	1	1	1	1	GPD2	glycerol-3-phosphate dehydrogenase 2 (mitochondrial)
hsa-miR-588	1	0	1	1	0	0	TOE1	target of EGR1, member 1 (nuclear)
hsa-miR-588	0	0	1	1	1	1	CYP11B1	cytochrome P450, family 11, subfamily B, polypeptide 1
hsa-miR-588	0	0	1	0	0	0	CXXC1P1	CXXC finger protein 1 pseudogene 1
hsa-miR-588	0	0	1	1	1	1	WBSCR17	Williams-Beuren syndrome chromosome region 17
hsa-miR-588	1	0	1	1	1	1	DSE	dermatan sulfate epimerase
hsa-miR-588	0	0	1	1	1	1	MOBP	myelin-associated oligodendrocyte basic protein
hsa-miR-588	1	0	1	1	0	0	SAP30BP	SAP30 binding protein
hsa-miR-588	1	0	1	0	1	1	UVRAG	UV radiation resistance associated gene
hsa-miR-588	0	0	1	1	1	1	CHI3L1	chitinase 3-like 1 (cartilage glycoprotein-39)
hsa-miR-588	0	0	1	0	1	1	NBPF3	neuroblastoma breakpoint family, member 3
hsa-miR-588	1	0	1	1	1	1	ZC3H11A	zinc finger CCCH-type containing 11A
hsa-miR-588	1	0	1	0	1	1	NUP50	nucleoporin 50kDa
hsa-miR-588	1	0	1	0	1	1	STC2	stanniocalcin 2
hsa-miR-588	0	0	1	1	0	0	SLC6A12	solute carrier family 6 (neurotransmitter transporter, betaine/GABA), member 12
hsa-miR-588	1	0	1	1	1	1	EPB41L4A	erythrocyte membrane protein band 4.1 like 4A
hsa-miR-588	1	0	1	1	1	1	FADS1	fatty acid desaturase 1
hsa-miR-588	0	0	1	0	0	0	FAM66C	family with sequence similarity 66, member C
hsa-miR-588	1	0	1	1	0	0	FBRS	fibrosin
hsa-miR-588	1	0	1	1	1	1	LRP8	low density lipoprotein receptor-related protein 8, apolipoprotein e receptor
hsa-miR-588	0	0	1	0	0	0	C1orf204	chromosome 1 open reading frame 204
hsa-miR-588	1	0	1	0	1	1	KBTBD8	kelch repeat and BTB (POZ) domain containing 8
hsa-miR-588	0	0	1	1	0	0	CHCHD5	coiled-coil-helix-coiled-coil-helix domain containing 5
hsa-miR-588	0	0	1	0	0	0	LOC400680	uncharacterized LOC400680
hsa-miR-588	1	0	1	0	1	1	AGFG1	ArfGAP with FG repeats 1
hsa-miR-588	0	0	1	0	0	0	LOC100128560	uncharacterized LOC100128560
hsa-miR-588	0	0	1	1	0	0	PSAPL1	prosaposin-like 1 (gene/pseudogene)
hsa-miR-588	1	0	1	1	1	1	HOOK1	hook homolog 1 (Drosophila)
hsa-miR-588	0	0	1	0	0	0	THAP7-AS1	THAP7 antisense RNA 1
hsa-miR-588	0	0	1	1	0	0	STXBP2	syntaxin binding protein 2
hsa-miR-588	0	0	1	1	0	0	TMEM150A	transmembrane protein 150A
hsa-miR-588	0	0	1	1	1	1	RP1	retinitis pigmentosa 1 (autosomal dominant)
hsa-miR-588	0	0	1	1	1	1	ARFGAP2	ADP-ribosylation factor GTPase activating protein 2
hsa-miR-588	0	0	1	0	0	0	LOC338579	ankyrin repeat domain-containing protein 30B pseudogene
hsa-miR-588	0	0	1	1	0	0	GDPD5	glycerophosphodiester phosphodiesterase domain containing 5
hsa-miR-588	0	0	1	1	0	0	KIAA0146	KIAA0146
hsa-miR-588	1	0	1	1	0	0	WIZ	widely interspaced zinc finger motifs
hsa-miR-588	0	0	1	1	1	1	GGA1	golgi-associated, gamma adaptin ear containing, ARF binding protein 1
hsa-miR-588	0	0	1	1	0	0	YSK4	YSK4 Sps1/Ste20-related kinase homolog (S. cerevisiae)
hsa-miR-588	0	0	1	1	0	0	MX2	myxovirus (influenza virus) resistance 2 (mouse)
hsa-miR-588	1	0	1	1	1	1	ZNF275	zinc finger protein 275
hsa-miR-588	1	0	1	1	1	1	KALRN	kalirin, RhoGEF kinase
hsa-miR-588	0	0	1	1	0	0	SSPO	SCO-spondin homolog (Bos taurus)
hsa-miR-588	0	0	1	1	0	0	GCAT	glycine C-acetyltransferase
hsa-miR-588	0	0	1	0	0	0	LOC650368	asparagine-linked glycosylation 1-like pseudogene
hsa-miR-588	1	0	1	0	0	0	GPR137C	G protein-coupled receptor 137C
hsa-miR-588	1	0	1	1	1	1	DAB2IP	DAB2 interacting protein
hsa-miR-588	0	0	1	0	0	0	LINC00282	long intergenic non-protein coding RNA 282
hsa-miR-588	0	0	1	1	1	1	C2orf91	chromosome 2 open reading frame 91
hsa-miR-588	0	0	1	1	0	0	CUL9	cullin 9
hsa-miR-588	1	0	1	1	1	1	METAP2	methionyl aminopeptidase 2
hsa-miR-588	0	0	1	1	1	1	DENND5A	DENN/MADD domain containing 5A
hsa-miR-588	1	0	1	0	0	0	MSL1	male-specific lethal 1 homolog (Drosophila)
hsa-miR-588	0	0	1	1	1	1	EPPIN	epididymal peptidase inhibitor
hsa-miR-588	0	0	1	1	0	0	FSIP2	fibrous sheath interacting protein 2
hsa-miR-588	1	0	1	0	1	1	PLXNA1	plexin A1
hsa-miR-588	0	0	1	0	0	0	MIR143HG	MIR143 host gene (non-protein coding)
hsa-miR-588	0	0	1	1	1	1	USP54	ubiquitin specific peptidase 54
hsa-miR-588	0	0	1	1	0	0	NPIP	nuclear pore complex interacting protein
hsa-miR-588	0	0	1	0	0	0	HNRNPKP3	heterogeneous nuclear ribonucleoprotein K pseudogene 3
hsa-miR-588	0	0	1	1	0	0	TMEM151B	transmembrane protein 151B
hsa-miR-588	0	0	1	0	0	0	RPL23AP53	ribosomal protein L23a pseudogene 53
hsa-miR-588	1	0	1	1	0	0	MAN1B1	mannosidase, alpha, class 1B, member 1
hsa-miR-588	0	0	1	1	1	1	KLC4	kinesin light chain 4
hsa-miR-588	1	0	1	0	1	1	ADIPOR2	adiponectin receptor 2
hsa-miR-588	1	0	1	1	0	0	PTPN5	protein tyrosine phosphatase, non-receptor type 5 (striatum-enriched)
hsa-miR-588	1	0	1	1	1	1	PHF17	PHD finger protein 17
hsa-miR-588	1	0	1	1	1	1	ENAH	enabled homolog (Drosophila)
hsa-miR-588	1	0	1	1	0	0	PEAK1	NKF3 kinase family member
hsa-miR-588	1	0	1	0	1	1	SP6	Sp6 transcription factor
hsa-miR-588	0	0	1	0	0	0	ERVFRD-2	endogenous retrovirus group FRD, member 2
hsa-miR-588	1	0	1	1	1	1	PLA2G15	phospholipase A2, group XV
hsa-miR-588	0	0	1	1	0	0	BPIFB1	BPI fold containing family B, member 1
hsa-miR-588	1	0	1	0	1	1	YOD1	YOD1 OTU deubiquinating enzyme 1 homolog (S. cerevisiae)
hsa-miR-588	0	0	1	0	1	1	FAM46D	family with sequence similarity 46, member D
hsa-miR-588	0	0	1	0	0	0	FAM205B	transmembrane protein C9orf144B pseudogene
hsa-miR-588	1	0	1	1	1	1	WDR37	WD repeat domain 37
hsa-miR-588	1	0	1	1	0	0	C15orf39	chromosome 15 open reading frame 39
hsa-miR-588	0	0	1	0	0	0	FLJ46361	deleted in malignant brain tumors 1 pseudogene
hsa-miR-588	1	0	1	1	1	1	SLC4A8	solute carrier family 4, sodium bicarbonate cotransporter, member 8
hsa-miR-588	1	0	1	0	1	1	NBR1	neighbor of BRCA1 gene 1
hsa-miR-588	1	0	1	1	1	1	UPF1	UPF1 regulator of nonsense transcripts homolog (yeast)
hsa-miR-588	0	0	1	0	0	0	PINLYP	phospholipase A2 inhibitor and LY6/PLAUR domain containing
hsa-miR-588	0	0	1	1	1	1	TBX19	T-box 19
hsa-miR-588	0	0	1	0	0	0	LOC390660	FLJ00317 protein
hsa-miR-588	1	0	1	0	1	1	RXRA	retinoid X receptor, alpha
hsa-miR-588	0	0	1	0	1	1	GALNT13	UDP-N-acetyl-alpha-D-galactosamine:polypeptide N-acetylgalactosaminyltransferase 13 (GalNAc-T13)
hsa-miR-588	1	0	1	0	1	1	ZKSCAN2	zinc finger with KRAB and SCAN domains 2
hsa-miR-588	1	0	1	1	1	1	PPP2R5C	protein phosphatase 2, regulatory subunit B', gamma
hsa-miR-588	0	0	1	1	1	1	ZNF346	zinc finger protein 346
hsa-miR-588	0	0	1	1	0	0	ZNF730	zinc finger protein 730
hsa-miR-588	1	0	1	0	1	1	TMEM106B	transmembrane protein 106B
hsa-miR-588	1	0	1	1	1	1	CYYR1	cysteine/tyrosine-rich 1
hsa-miR-588	1	0	1	1	1	1	MEAF6	MYST/Esa1-associated factor 6
hsa-miR-588	0	0	1	1	0	0	NADSYN1	NAD synthetase 1
hsa-miR-588	1	0	1	1	1	1	WDR20	WD repeat domain 20
hsa-miR-588	1	0	1	1	1	1	LUC7L3	LUC7-like 3 (S. cerevisiae)
hsa-miR-588	0	0	1	1	0	0	TRIM69	tripartite motif containing 69
hsa-miR-588	0	0	1	1	1	1	PTPN20B	protein tyrosine phosphatase, non-receptor type 20B
hsa-miR-588	0	0	1	1	1	1	PTPN20A	protein tyrosine phosphatase, non-receptor type 20A
hsa-miR-588	0	0	1	1	0	0	OPLAH	5-oxoprolinase (ATP-hydrolysing)
hsa-miR-588	0	0	1	0	0	0	POM121L9P	POM121 transmembrane nucleoporin-like 9, pseudogene
hsa-miR-588	0	0	1	1	0	0	RIMBP3	RIMS binding protein 3
hsa-miR-588	0	0	1	1	0	0	MSH5	mutS homolog 5 (E. coli)
hsa-miR-588	0	0	1	1	0	0	SAPCD1	suppressor APC domain containing 1
hsa-miR-588	1	0	1	0	1	1	GPR85	G protein-coupled receptor 85
hsa-miR-588	1	0	1	1	1	1	PKNOX2	PBX/knotted 1 homeobox 2
hsa-miR-588	0	0	1	1	1	1	ING3	inhibitor of growth family, member 3
hsa-miR-588	0	0	1	1	0	0	KRBA1	KRAB-A domain containing 1
hsa-miR-588	0	0	1	1	1	1	SRSF11	serine/arginine-rich splicing factor 11
hsa-miR-588	0	0	1	1	1	1	MYPN	myopalladin
hsa-miR-588	1	0	1	1	1	1	PRRC1	proline-rich coiled-coil 1
hsa-miR-588	0	0	1	1	0	0	TMEM44	transmembrane protein 44
hsa-miR-588	1	0	1	0	1	1	MEF2C	myocyte enhancer factor 2C
hsa-miR-588	1	0	1	1	1	1	BPTF	bromodomain PHD finger transcription factor
hsa-miR-588	0	0	1	1	0	0	FCRL3	Fc receptor-like 3
hsa-miR-588	1	0	1	1	0	0	KIAA1109	KIAA1109
hsa-miR-588	1	0	1	1	1	1	NRP1	neuropilin 1
hsa-miR-588	1	0	1	1	1	1	IL17RD	interleukin 17 receptor D
hsa-miR-588	1	0	1	1	1	1	MBD6	methyl-CpG binding domain protein 6
hsa-miR-588	1	0	1	1	1	1	C1orf131	chromosome 1 open reading frame 131
hsa-miR-588	0	0	1	0	1	1	SRR	serine racemase
hsa-miR-588	0	0	1	1	1	1	KLHL29	kelch-like 29 (Drosophila)
hsa-miR-588	1	0	1	0	1	1	NR3C1	nuclear receptor subfamily 3, group C, member 1 (glucocorticoid receptor)
hsa-miR-588	1	0	1	1	1	1	FAM76B	family with sequence similarity 76, member B
hsa-miR-588	1	0	1	1	1	1	GAL3ST3	galactose-3-O-sulfotransferase 3
hsa-miR-588	0	0	1	1	0	0	ERAP2	endoplasmic reticulum aminopeptidase 2
hsa-miR-588	0	0	1	1	1	1	RUNDC3B	RUN domain containing 3B
hsa-miR-588	1	0	1	0	1	1	BDNF	brain-derived neurotrophic factor
hsa-miR-588	0	0	1	0	0	0	KGFLP1	fibroblast growth factor 7 pseudogene
hsa-miR-588	1	0	1	1	1	1	USF2	upstream transcription factor 2, c-fos interacting
hsa-miR-588	0	0	1	1	1	1	CEP41	centrosomal protein 41kDa
hsa-miR-588	0	0	1	1	1	1	APTX	aprataxin
hsa-miR-588	1	0	1	1	1	1	WDR26	WD repeat domain 26
hsa-miR-588	0	0	1	1	0	0	DNAH1	dynein, axonemal, heavy chain 1
hsa-miR-588	0	0	1	1	1	1	PINX1	PIN2/TERF1 interacting, telomerase inhibitor 1
hsa-miR-588	0	0	1	1	0	0	GLYCTK	glycerate kinase
hsa-miR-588	0	0	1	0	0	0	FAM138C	family with sequence similarity 138, member C
hsa-miR-588	0	0	1	1	0	0	VSIG4	V-set and immunoglobulin domain containing 4
hsa-miR-588	1	0	1	1	0	0	LAYN	layilin
hsa-miR-588	0	0	1	1	0	0	C16orf48	chromosome 16 open reading frame 48
hsa-miR-588	1	0	1	1	1	1	FGD4	FYVE, RhoGEF and PH domain containing 4
hsa-miR-588	1	0	1	1	1	1	SP3	Sp3 transcription factor
hsa-miR-588	1	0	1	1	1	1	FAM120A	family with sequence similarity 120A
hsa-miR-588	0	0	1	1	1	1	POTEG	POTE ankyrin domain family, member G
hsa-miR-588	1	0	1	1	1	1	ARHGAP20	Rho GTPase activating protein 20
hsa-miR-588	0	0	1	1	1	1	HMBOX1	homeobox containing 1
hsa-miR-588	0	0	1	0	1	1	XKR5	XK, Kell blood group complex subunit-related family, member 5
hsa-miR-588	1	0	1	1	1	1	MECP2	methyl CpG binding protein 2 (Rett syndrome)
hsa-miR-588	0	0	1	1	0	0	DHRS4	dehydrogenase/reductase (SDR family) member 4
hsa-miR-588	0	0	1	1	1	1	KANK2	KN motif and ankyrin repeat domains 2
hsa-miR-588	0	0	1	1	1	1	SMPD1	sphingomyelin phosphodiesterase 1, acid lysosomal
hsa-miR-588	0	0	1	1	0	0	CLSTN3	calsyntenin 3
hsa-miR-588	1	0	1	1	1	1	PFKFB4	6-phosphofructo-2-kinase/fructose-2,6-biphosphatase 4
hsa-miR-588	0	0	1	1	1	1	KCNJ13	potassium inwardly-rectifying channel, subfamily J, member 13
hsa-miR-588	0	0	1	0	0	0	LOC100128076	protein tyrosine phosphatase pseudogene
hsa-miR-588	0	0	1	0	0	0	PTPRVP	protein tyrosine phosphatase, receptor type, V, pseudogene
hsa-miR-588	1	0	1	1	1	1	PCDH11X	protocadherin 11 X-linked
hsa-miR-588	1	0	1	1	1	1	TBC1D22B	TBC1 domain family, member 22B
hsa-miR-588	0	0	1	1	1	1	WDR55	WD repeat domain 55
hsa-miR-588	1	0	1	1	1	1	TSPAN14	tetraspanin 14
hsa-miR-588	0	0	1	1	0	0	SNRPB	small nuclear ribonucleoprotein polypeptides B and B1
hsa-miR-588	0	0	1	0	1	1	HAUS3	HAUS augmin-like complex, subunit 3
hsa-miR-588	1	0	1	1	1	1	GABPB1	GA binding protein transcription factor, beta subunit 1
hsa-miR-588	1	0	1	1	1	1	POU2F2	POU class 2 homeobox 2
hsa-miR-588	1	0	1	1	1	1	U2SURP	U2 snRNP-associated SURP domain containing
hsa-miR-588	1	0	1	0	1	1	DDX3X	DEAD (Asp-Glu-Ala-Asp) box polypeptide 3, X-linked
hsa-miR-588	0	0	1	1	0	0	SPAG7	sperm associated antigen 7
hsa-miR-588	0	0	1	1	1	1	ZNF85	zinc finger protein 85
hsa-miR-588	1	0	1	1	1	1	HMGA1	high mobility group AT-hook 1
hsa-miR-588	0	0	1	0	0	0	ATXN7L3B	ataxin 7-like 3B
hsa-miR-588	0	0	1	0	0	0	LOC154761	family with sequence similarity 115, member C pseudogene
hsa-miR-588	1	0	1	1	0	0	FA2H	fatty acid 2-hydroxylase
hsa-miR-588	0	0	1	1	0	0	ARHGAP8	Rho GTPase activating protein 8
hsa-miR-588	1	0	1	1	1	1	SZRD1	SUZ RNA binding domain containing 1
hsa-miR-588	0	0	1	1	1	1	PWP1	PWP1 homolog (S. cerevisiae)
hsa-miR-588	0	0	1	1	1	1	ZNF598	zinc finger protein 598
hsa-miR-588	0	0	1	0	0	0	LRRC14	leucine rich repeat containing 14
hsa-miR-588	0	0	1	0	0	0	GRAMD1B	GRAM domain containing 1B
hsa-miR-588	0	0	1	0	1	1	GDE1	glycerophosphodiester phosphodiesterase 1
hsa-miR-588	1	0	1	1	1	1	DPH1	DPH1 homolog (S. cerevisiae)
hsa-miR-588	0	0	1	0	0	0	MGC21881	uncharacterized locus MGC21881
hsa-miR-588	0	0	1	1	1	1	C8orf33	chromosome 8 open reading frame 33
hsa-miR-588	1	0	1	1	1	1	PDGFRA	platelet-derived growth factor receptor, alpha polypeptide
hsa-miR-588	1	0	1	0	1	1	CYBRD1	cytochrome b reductase 1
hsa-miR-588	0	0	1	1	0	0	PREB	prolactin regulatory element binding
hsa-miR-588	1	0	1	1	1	1	NRF1	nuclear respiratory factor 1
hsa-miR-588	1	0	1	1	1	1	ELF4	E74-like factor 4 (ets domain transcription factor)
hsa-miR-588	1	0	1	1	0	0	USP53	ubiquitin specific peptidase 53
hsa-miR-588	1	0	1	1	1	1	ARHGEF9	Cdc42 guanine nucleotide exchange factor (GEF) 9
hsa-miR-588	0	0	1	0	0	0	ZNF720	zinc finger protein 720
hsa-miR-588	1	0	1	0	1	1	SLC19A2	solute carrier family 19 (thiamine transporter), member 2
hsa-miR-588	0	0	1	0	1	1	CD99P1	CD99 molecule pseudogene 1
hsa-miR-588	0	0	1	1	1	1	CCBP2	chemokine binding protein 2
hsa-miR-588	0	0	1	0	1	1	ZNF718	zinc finger protein 718
hsa-miR-588	0	0	1	0	0	0	EEF1DP3	eukaryotic translation elongation factor 1 delta pseudogene 3
hsa-miR-588	0	0	1	0	0	0	AZGP1P1	alpha-2-glycoprotein 1, zinc-binding pseudogene 1
hsa-miR-588	0	0	1	0	0	0	JMJD7	jumonji domain containing 7
hsa-miR-588	1	0	1	1	1	1	NIPA1	non imprinted in Prader-Willi/Angelman syndrome 1
hsa-miR-588	0	0	1	1	1	1	DSN1	DSN1, MIND kinetochore complex component, homolog (S. cerevisiae)
hsa-miR-588	1	0	1	1	1	1	SPG20	spastic paraplegia 20 (Troyer syndrome)
hsa-miR-588	1	0	1	1	1	1	ZDHHC5	zinc finger, DHHC-type containing 5
hsa-miR-588	0	0	1	1	1	1	MAP2	microtubule-associated protein 2
hsa-miR-588	1	0	1	1	1	1	PHF2	PHD finger protein 2
hsa-miR-588	0	0	1	1	0	0	ALPK1	alpha-kinase 1
hsa-miR-588	0	0	1	0	0	0	LOC400891	chromosome 14 open reading frame 166B pseudogene
hsa-miR-588	1	0	1	1	1	1	TMEM127	transmembrane protein 127
hsa-miR-588	0	0	1	0	0	0	BCAS3	breast carcinoma amplified sequence 3
hsa-miR-588	1	0	1	0	1	1	SV2B	synaptic vesicle glycoprotein 2B
hsa-miR-588	1	0	1	1	1	1	SULT4A1	sulfotransferase family 4A, member 1
hsa-miR-588	0	0	1	1	0	0	KIAA1324	KIAA1324
hsa-miR-588	0	0	1	1	1	1	RBM42	RNA binding motif protein 42
hsa-miR-588	0	0	1	1	1	1	C7orf53	chromosome 7 open reading frame 53
hsa-miR-588	0	0	1	1	0	0	TREM2	triggering receptor expressed on myeloid cells 2
hsa-miR-588	0	0	1	1	1	1	UBXN1	UBX domain protein 1
hsa-miR-588	1	0	1	1	1	1	FGF1	fibroblast growth factor 1 (acidic)
hsa-miR-588	0	0	1	1	1	1	C5orf22	chromosome 5 open reading frame 22
hsa-miR-588	1	0	1	1	1	1	RHOBTB1	Rho-related BTB domain containing 1
hsa-miR-588	1	0	1	1	1	1	SIRPA	signal-regulatory protein alpha
hsa-miR-588	0	0	1	1	0	0	IGFN1	immunoglobulin-like and fibronectin type III domain containing 1
hsa-miR-588	0	0	1	1	1	1	IL20RB	interleukin 20 receptor beta
hsa-miR-588	1	0	1	1	1	1	HMGCR	3-hydroxy-3-methylglutaryl-CoA reductase
hsa-miR-588	1	0	1	1	1	1	PCDHA5	protocadherin alpha 5
hsa-miR-588	1	0	1	1	1	1	ATF7IP2	activating transcription factor 7 interacting protein 2
hsa-miR-588	1	0	1	1	1	1	RIC8B	resistance to inhibitors of cholinesterase 8 homolog B (C. elegans)
hsa-miR-588	0	0	1	1	1	1	HEXA	hexosaminidase A (alpha polypeptide)
hsa-miR-588	1	0	1	0	1	1	DDX3Y	DEAD (Asp-Glu-Ala-Asp) box polypeptide 3, Y-linked
hsa-miR-588	1	0	1	1	1	1	ZZZ3	zinc finger, ZZ-type containing 3
hsa-miR-588	0	0	1	0	0	0	TMPRSS12	transmembrane (C-terminal) protease, serine 12
hsa-miR-588	0	0	1	1	1	1	CLCNKA	chloride channel, voltage-sensitive Ka
hsa-miR-588	0	0	1	0	1	1	KSR1	kinase suppressor of ras 1
hsa-miR-588	0	0	1	1	1	1	SNAPC3	small nuclear RNA activating complex, polypeptide 3, 50kDa
hsa-miR-588	1	0	1	1	1	1	ELMO2	engulfment and cell motility 2
hsa-miR-588	1	0	1	1	1	1	BNC2	basonuclin 2
hsa-miR-588	1	0	1	1	1	1	FAM135B	family with sequence similarity 135, member B
hsa-miR-588	0	0	1	0	0	0	LOC286184	uncharacterized LOC286184
hsa-miR-588	0	0	1	1	0	0	HSPA14	heat shock 70kDa protein 14
hsa-miR-588	0	0	1	1	0	0	COX4I1	cytochrome c oxidase subunit IV isoform 1
hsa-miR-588	0	0	1	0	0	0	FLJ36000	uncharacterized FLJ36000
hsa-miR-588	0	0	1	0	0	0	LINC00326	long intergenic non-protein coding RNA 326
hsa-miR-588	1	0	1	1	1	1	IL16	interleukin 16
hsa-miR-588	1	0	1	1	1	1	INTS6	integrator complex subunit 6
hsa-miR-588	0	0	1	1	0	0	MTCH1	mitochondrial carrier 1
hsa-miR-588	0	0	1	0	0	0	A1BG-AS1	A1BG antisense RNA 1
hsa-miR-588	1	0	1	1	1	1	ARPP21	cAMP-regulated phosphoprotein, 21kDa
hsa-miR-588	1	0	1	1	1	1	DOC2A	double C2-like domains, alpha
hsa-miR-588	0	0	1	1	1	1	DGKH	diacylglycerol kinase, eta
hsa-miR-588	0	0	1	1	1	1	STRADA	STE20-related kinase adaptor alpha
hsa-miR-588	0	0	1	1	1	1	DOCK8	dedicator of cytokinesis 8
hsa-miR-588	1	0	1	1	1	1	SENP1	SUMO1/sentrin specific peptidase 1
hsa-miR-588	0	0	1	0	0	0	LOC348120	uncharacterized LOC348120
hsa-miR-588	0	0	1	0	0	0	DPY19L2P4	dpy-19-like 2 pseudogene 4 (C. elegans)
hsa-miR-588	0	0	1	0	1	1	LOC338758	uncharacterized LOC338758
hsa-miR-588	1	0	1	0	1	1	KDM2A	lysine (K)-specific demethylase 2A
hsa-miR-588	1	0	1	1	1	1	RMND5A	required for meiotic nuclear division 5 homolog A (S. cerevisiae)
hsa-miR-588	0	0	1	1	1	1	SGOL2	shugoshin-like 2 (S. pombe)
hsa-miR-588	1	0	1	0	1	1	SEMA4G	sema domain, immunoglobulin domain (Ig), transmembrane domain (TM) and short cytoplasmic domain, (semaphorin) 4G
hsa-miR-588	1	0	1	1	1	1	YWHAZ	tyrosine 3-monooxygenase/tryptophan 5-monooxygenase activation protein, zeta polypeptide
hsa-miR-588	0	0	1	1	1	1	RAB3IL1	RAB3A interacting protein (rabin3)-like 1
hsa-miR-588	0	0	1	1	1	1	HLA-DQA1	major histocompatibility complex, class II, DQ alpha 1
hsa-miR-588	1	0	1	0	1	1	C14orf43	chromosome 14 open reading frame 43
hsa-miR-588	1	0	1	1	0	0	DALRD3	DALR anticodon binding domain containing 3
hsa-miR-588	0	0	1	1	1	1	ZNF254	zinc finger protein 254
hsa-miR-588	0	0	1	1	0	0	ABHD1	abhydrolase domain containing 1
hsa-miR-588	1	0	1	1	1	1	NCOA5	nuclear receptor coactivator 5
hsa-miR-588	0	0	1	1	0	0	GRIN2C	glutamate receptor, ionotropic, N-methyl D-aspartate 2C
hsa-miR-588	1	0	1	1	1	1	SOX5	SRY (sex determining region Y)-box 5
hsa-miR-588	1	0	1	1	1	1	DUSP9	dual specificity phosphatase 9
hsa-miR-588	1	0	1	1	1	1	GTDC1	glycosyltransferase-like domain containing 1
hsa-miR-588	0	0	1	1	0	0	DHX30	DEAH (Asp-Glu-Ala-His) box polypeptide 30
hsa-miR-588	1	0	1	0	0	0	PRRT4	proline-rich transmembrane protein 4
hsa-miR-588	0	0	1	1	1	1	ZNF333	zinc finger protein 333
hsa-miR-588	0	0	1	0	0	0	LOC158435	uncharacterized LOC158435
hsa-miR-588	0	0	1	0	0	0	ZNF66P	zinc finger protein 66, pseudogene
hsa-miR-588	1	0	1	1	1	1	SLC26A7	solute carrier family 26, member 7
hsa-miR-588	0	0	1	1	1	1	AQPEP	laeverin
hsa-miR-588	0	0	1	0	0	0	PTGER4P2	prostaglandin E receptor 4 (subtype EP4) pseudogene 2
hsa-miR-588	0	0	1	0	0	0	C17orf69	chromosome 17 open reading frame 69
hsa-miR-588	1	0	1	1	0	0	CHTOP	chromatin target of PRMT1
hsa-miR-588	0	0	1	0	0	0	ZRANB2-AS1	ZRANB2 antisense RNA 1
hsa-miR-588	1	0	1	0	1	1	HMGB3	high mobility group box 3
hsa-miR-588	1	0	1	0	1	1	TGFBR1	transforming growth factor, beta receptor 1
hsa-miR-588	1	0	1	0	1	1	MAP4K3	mitogen-activated protein kinase kinase kinase kinase 3
hsa-miR-588	0	0	1	0	0	0	LOC100147773	uncharacterized LOC100147773
hsa-miR-588	0	0	1	0	0	0	JPX	JPX transcript, XIST activator (non-protein coding)
hsa-miR-588	0	0	1	0	0	0	PHKA2-AS1	PHKA2 antisense RNA 1
hsa-miR-588	1	0	1	0	1	1	AMMECR1L	AMME chromosomal region gene 1-like
hsa-miR-588	0	0	1	0	0	0	LOC554249	uncharacterized LOC554249
hsa-miR-588	0	0	1	0	0	0	LOC643955	zinc finger protein 479 pseudogene
hsa-miR-588	1	0	1	1	1	1	ESRRA	estrogen-related receptor alpha
hsa-miR-588	0	0	1	0	0	0	LOC150776	sphingomyelin phosphodiesterase 4, neutral membrane (neutral sphingomyelinase-3) pseudogene
hsa-miR-588	1	0	1	1	1	1	STK38	serine/threonine kinase 38
hsa-miR-588	0	0	1	1	0	0	DNASE1	deoxyribonuclease I
hsa-miR-588	0	0	1	0	0	0	FRG1B	FSHD region gene 1 family, member B
hsa-miR-588	1	0	1	1	0	0	PLD3	phospholipase D family, member 3
hsa-miR-588	0	0	1	0	0	0	ABCA11P	ATP-binding cassette, sub-family A (ABC1), member 11, pseudogene
hsa-miR-588	0	0	1	1	0	0	SEC14L3	SEC14-like 3 (S. cerevisiae)
hsa-miR-588	0	0	1	1	1	1	ZNF365	zinc finger protein 365
hsa-miR-588	0	0	1	1	0	0	RGL4	ral guanine nucleotide dissociation stimulator-like 4
hsa-miR-588	1	0	1	1	1	1	GABRB2	gamma-aminobutyric acid (GABA) A receptor, beta 2
hsa-miR-588	0	0	1	1	0	0	RIPPLY1	ripply1 homolog (zebrafish)
hsa-miR-588	0	0	1	1	1	1	MUC21	mucin 21, cell surface associated
hsa-miR-588	1	0	1	1	1	1	KLHL17	kelch-like 17 (Drosophila)
hsa-miR-588	1	0	1	1	1	1	PPIF	peptidylprolyl isomerase F
hsa-miR-588	1	0	1	0	1	1	MAP3K9	mitogen-activated protein kinase kinase kinase 9
hsa-miR-588	0	0	1	1	1	1	UNC13B	unc-13 homolog B (C. elegans)
hsa-miR-588	1	0	1	0	1	1	ROBO1	roundabout, axon guidance receptor, homolog 1 (Drosophila)
hsa-miR-588	0	0	1	1	0	0	RNF123	ring finger protein 123
hsa-miR-588	0	0	1	1	1	1	NAA35	N(alpha)-acetyltransferase 35, NatC auxiliary subunit
hsa-miR-588	0	0	1	1	0	0	RGS12	regulator of G-protein signaling 12
hsa-miR-588	0	0	1	0	1	1	C20orf202	chromosome 20 open reading frame 202
hsa-miR-588	1	0	1	0	1	1	FAM196A	family with sequence similarity 196, member A
hsa-miR-588	0	0	1	1	1	1	TINF2	TERF1 (TRF1)-interacting nuclear factor 2
hsa-miR-588	0	0	1	0	0	0	LOC100133207	uncharacterized LOC100133207
hsa-miR-588	1	0	1	1	0	0	RGS6	regulator of G-protein signaling 6
hsa-miR-588	0	0	1	1	1	1	IP6K2	inositol hexakisphosphate kinase 2
hsa-miR-588	1	0	1	0	1	1	NFIX	nuclear factor I/X (CCAAT-binding transcription factor)
hsa-miR-588	0	0	1	0	1	1	GPX8	glutathione peroxidase 8 (putative)
hsa-miR-588	1	0	1	0	1	1	MTX3	metaxin 3
hsa-miR-588	0	0	1	0	0	0	PCNXL3	pecanex-like 3 (Drosophila)
hsa-miR-588	0	0	1	1	1	1	PSMA2	proteasome (prosome, macropain) subunit, alpha type, 2
hsa-miR-588	0	0	1	1	1	1	COL6A3	collagen, type VI, alpha 3
hsa-miR-588	1	0	1	1	1	1	MYCBP2	MYC binding protein 2, E3 ubiquitin protein ligase
hsa-miR-588	1	0	1	1	1	1	SLC39A13	solute carrier family 39 (zinc transporter), member 13
hsa-miR-588	0	0	1	1	0	0	ANKRD33	ankyrin repeat domain 33
hsa-miR-588	0	0	1	1	1	1	ARMCX3	armadillo repeat containing, X-linked 3
hsa-miR-588	1	0	1	1	1	1	TC2N	tandem C2 domains, nuclear
hsa-miR-588	0	0	1	0	1	1	B3GALTL	beta 1,3-galactosyltransferase-like
hsa-miR-588	1	0	1	0	0	0	CTSB	cathepsin B
hsa-miR-588	1	0	1	0	1	1	PCGF3	polycomb group ring finger 3
hsa-miR-588	1	0	1	1	1	1	NAV1	neuron navigator 1
hsa-miR-588	1	0	1	1	1	1	TMEM135	transmembrane protein 135
hsa-miR-588	0	0	1	1	1	1	SSFA2	sperm specific antigen 2
hsa-miR-588	1	0	1	0	1	1	C1orf21	chromosome 1 open reading frame 21
hsa-miR-588	1	0	1	1	1	1	LYST	lysosomal trafficking regulator
hsa-miR-588	0	0	1	0	1	1	CD59	CD59 molecule, complement regulatory protein
hsa-miR-588	1	0	1	1	1	1	AP2M1	adaptor-related protein complex 2, mu 1 subunit
hsa-miR-588	0	0	1	1	0	0	STMN4	stathmin-like 4
hsa-miR-588	1	0	1	1	0	0	SMARCA2	SWI/SNF related, matrix associated, actin dependent regulator of chromatin, subfamily a, member 2
hsa-miR-588	0	0	1	1	1	1	GRN	granulin
hsa-miR-588	1	0	1	1	1	1	CLU	clusterin
hsa-miR-588	0	0	1	1	0	0	GPX3	glutathione peroxidase 3 (plasma)
hsa-miR-588	0	0	1	1	1	1	GTPBP3	GTP binding protein 3 (mitochondrial)
hsa-miR-588	0	0	1	0	0	0	AKR1A1	aldo-keto reductase family 1, member A1 (aldehyde reductase)
hsa-miR-588	0	0	1	1	1	1	UPRT	uracil phosphoribosyltransferase (FUR1) homolog (S. cerevisiae)
hsa-miR-588	0	0	1	1	0	0	F2	coagulation factor II (thrombin)
hsa-miR-588	0	0	1	1	1	1	MDH2	malate dehydrogenase 2, NAD (mitochondrial)
hsa-miR-588	0	0	1	1	1	1	DMWD	dystrophia myotonica, WD repeat containing
hsa-miR-588	1	0	1	1	1	1	DOLPP1	dolichyl pyrophosphate phosphatase 1
hsa-miR-588	1	0	1	1	1	1	ANXA2	annexin A2
hsa-miR-588	0	0	1	0	0	0	ARRDC1	arrestin domain containing 1
hsa-miR-588	0	0	1	0	0	0	PRMT1	protein arginine methyltransferase 1
hsa-miR-588	1	0	1	1	1	1	NEU1	sialidase 1 (lysosomal sialidase)
hsa-miR-588	0	0	1	1	1	1	CCDC132	coiled-coil domain containing 132
hsa-miR-588	1	0	1	1	0	0	STX5	syntaxin 5
hsa-miR-588	0	0	1	0	0	0	SBDSP1	Shwachman-Bodian-Diamond syndrome pseudogene 1
hsa-miR-588	1	0	1	1	1	1	HMGN3	high mobility group nucleosomal binding domain 3
hsa-miR-588	0	0	1	1	0	0	HPCAL1	hippocalcin-like 1
hsa-miR-588	0	0	1	1	0	0	DNAJB2	DnaJ (Hsp40) homolog, subfamily B, member 2
hsa-miR-588	1	0	1	0	1	1	PTPLAD1	protein tyrosine phosphatase-like A domain containing 1
hsa-miR-588	1	0	1	1	1	1	CHTF8	CTF8, chromosome transmission fidelity factor 8 homolog (S. cerevisiae)
hsa-miR-588	0	0	1	1	0	0	MFSD10	major facilitator superfamily domain containing 10
hsa-miR-588	0	0	1	1	1	1	SORD	sorbitol dehydrogenase
hsa-miR-588	1	0	1	1	0	0	FSCN1	fascin homolog 1, actin-bundling protein (Strongylocentrotus purpuratus)
hsa-miR-588	0	0	1	0	1	1	EMX2	empty spiracles homeobox 2
hsa-miR-588	0	0	1	1	1	1	DCTD	dCMP deaminase
hsa-miR-588	0	0	1	1	1	1	PGAP2	post-GPI attachment to proteins 2
hsa-miR-588	1	0	1	1	1	1	LYPLA2	lysophospholipase II
hsa-miR-588	0	0	1	1	0	0	PDK3	pyruvate dehydrogenase kinase, isozyme 3
hsa-miR-588	0	0	1	0	0	0	TMEM208	transmembrane protein 208
hsa-miR-588	1	0	1	0	1	1	MGRN1	mahogunin ring finger 1, E3 ubiquitin protein ligase
hsa-miR-588	1	0	1	1	1	1	STK38L	serine/threonine kinase 38 like
hsa-miR-588	1	0	1	0	1	1	DCAF7	DDB1 and CUL4 associated factor 7
hsa-miR-588	0	0	1	1	0	0	DOK5	docking protein 5
hsa-miR-588	0	0	1	1	0	0	NRSN2	neurensin 2
hsa-miR-588	0	0	1	1	1	1	VPS16	vacuolar protein sorting 16 homolog (S. cerevisiae)
hsa-miR-588	0	0	1	0	0	0	LOC677759	uncharacterized LOC677759
hsa-miR-588	1	0	1	1	1	1	MMP2	matrix metallopeptidase 2 (gelatinase A, 72kDa gelatinase, 72kDa type IV collagenase)
hsa-miR-588	0	0	1	1	1	1	C1orf88	chromosome 1 open reading frame 88
hsa-miR-588	0	0	1	1	1	1	SERP2	stress-associated endoplasmic reticulum protein family member 2
hsa-miR-588	0	0	1	1	1	1	PEX19	peroxisomal biogenesis factor 19
hsa-miR-588	1	0	1	1	1	1	CAMK2A	calcium/calmodulin-dependent protein kinase II alpha
hsa-miR-588	0	0	1	1	0	0	RRNAD1	ribosomal RNA adenine dimethylase domain containing 1
hsa-miR-588	0	0	1	0	1	1	RPL10	ribosomal protein L10
hsa-miR-588	1	0	1	1	0	0	SHF	Src homology 2 domain containing F
hsa-miR-588	0	0	1	1	0	0	DDB2	damage-specific DNA binding protein 2, 48kDa
hsa-miR-588	0	0	1	1	1	1	FMO1	flavin containing monooxygenase 1
hsa-miR-588	0	0	1	1	1	1	EMC4	ER membrane protein complex subunit 4
hsa-miR-588	1	0	1	1	1	1	SRSF2	serine/arginine-rich splicing factor 2
hsa-miR-588	1	0	1	1	0	0	RUNDC3A	RUN domain containing 3A
hsa-miR-588	0	0	1	1	0	0	FAM216A	family with sequence similarity 216, member A
hsa-miR-588	0	0	1	1	1	1	INPP5K	inositol polyphosphate-5-phosphatase K
hsa-miR-588	0	0	1	1	0	0	TESK1	testis-specific kinase 1
hsa-miR-588	1	0	1	1	1	1	ATPAF1	ATP synthase mitochondrial F1 complex assembly factor 1
hsa-miR-588	0	0	1	0	0	0	LOC100132984	uncharacterized LOC100132984
hsa-miR-588	0	0	1	1	0	0	FES	feline sarcoma oncogene
hsa-miR-588	1	0	1	1	1	1	JUNB	jun B proto-oncogene
hsa-miR-588	0	0	1	1	1	1	ZFAND1	zinc finger, AN1-type domain 1
hsa-miR-588	1	0	1	1	1	1	LGALSL	lectin, galactoside-binding-like
hsa-miR-588	0	0	1	1	1	1	C10orf2	chromosome 10 open reading frame 2
hsa-miR-588	0	0	1	1	0	0	DOK3	docking protein 3
hsa-miR-588	0	0	1	1	1	1	BDP1	B double prime 1, subunit of RNA polymerase III transcription initiation factor IIIB
hsa-miR-588	0	0	1	1	1	1	CCP110	centriolar coiled coil protein 110kDa
hsa-miR-588	1	0	1	1	1	1	FBXW7	F-box and WD repeat domain containing 7, E3 ubiquitin protein ligase
hsa-miR-588	1	0	1	1	1	1	PHACTR2	phosphatase and actin regulator 2
hsa-miR-588	0	0	1	0	0	0	LINC00661	long intergenic non-protein coding RNA 661
hsa-miR-588	1	0	1	1	1	1	KIAA2018	KIAA2018
hsa-miR-588	1	0	1	0	1	1	SLC7A6	solute carrier family 7 (amino acid transporter light chain, y+L system), member 6
hsa-miR-588	0	0	1	1	0	0	TENC1	tensin like C1 domain containing phosphatase (tensin 2)
hsa-miR-588	1	0	1	1	1	1	ZFHX3	zinc finger homeobox 3
hsa-miR-588	1	0	1	1	1	1	RBPJ	recombination signal binding protein for immunoglobulin kappa J region
hsa-miR-588	1	0	1	1	1	1	PI15	peptidase inhibitor 15
hsa-miR-588	0	0	1	1	1	1	UBXN8	UBX domain protein 8
hsa-miR-588	1	0	1	0	1	1	CBX7	chromobox homolog 7
hsa-miR-588	0	0	1	1	0	0	SPATA20	spermatogenesis associated 20
hsa-miR-588	1	0	1	0	1	1	MAP2K7	mitogen-activated protein kinase kinase 7
hsa-miR-588	0	0	1	0	0	0	LOC728377	Rho guanine nucleotide exchange factor (GEF) 5 pseudogene
hsa-miR-588	0	0	1	1	1	1	DHX36	DEAH (Asp-Glu-Ala-His) box polypeptide 36
hsa-miR-588	0	0	1	0	0	0	FAM226A	family with sequence similarity 226, member A (non-protein coding)
hsa-miR-588	1	0	1	0	1	1	RBBP5	retinoblastoma binding protein 5
hsa-miR-588	1	0	1	0	1	1	DCBLD2	discoidin, CUB and LCCL domain containing 2
hsa-miR-588	1	0	1	1	1	1	MLL	myeloid/lymphoid or mixed-lineage leukemia (trithorax homolog, Drosophila)
hsa-miR-588	1	0	1	0	1	1	STAT3	signal transducer and activator of transcription 3 (acute-phase response factor)
hsa-miR-588	1	0	1	1	1	1	ZNF76	zinc finger protein 76
hsa-miR-588	1	0	1	0	1	1	ACVR2A	activin A receptor, type IIA
hsa-miR-588	1	0	1	1	1	1	COL4A4	collagen, type IV, alpha 4
hsa-miR-588	1	0	1	1	1	1	ESR1	estrogen receptor 1
hsa-miR-588	0	0	1	1	1	1	F8	coagulation factor VIII, procoagulant component
hsa-miR-588	1	0	1	1	1	1	FBN1	fibrillin 1
hsa-miR-588	1	0	1	0	1	1	GHR	growth hormone receptor
hsa-miR-588	0	0	1	1	0	0	GJB1	gap junction protein, beta 1, 32kDa
hsa-miR-588	0	0	1	1	1	1	HPRT1	hypoxanthine phosphoribosyltransferase 1
hsa-miR-588	0	0	1	1	1	1	LPL	lipoprotein lipase
hsa-miR-588	0	0	1	1	1	1	MTR	5-methyltetrahydrofolate-homocysteine methyltransferase
hsa-miR-588	0	0	1	0	1	1	MYO7A	myosin VIIA
hsa-miR-588	0	0	1	0	1	1	PGK1	phosphoglycerate kinase 1
hsa-miR-588	0	0	1	1	1	1	RPGR	retinitis pigmentosa GTPase regulator
hsa-miR-588	1	0	1	1	1	1	ATXN1	ataxin 1
hsa-miR-588	0	0	1	1	0	0	TCOF1	Treacher Collins-Franceschetti syndrome 1
hsa-miR-588	1	0	1	1	1	1	HLCS	holocarboxylase synthetase (biotin-(proprionyl-CoA-carboxylase (ATP-hydrolysing)) ligase)
hsa-miR-588	1	0	1	1	1	1	HOXD13	homeobox D13
hsa-miR-588	1	0	1	1	1	1	DCX	doublecortin
hsa-miR-588	0	0	1	1	1	1	FCGR1A	Fc fragment of IgG, high affinity Ia, receptor (CD64)
hsa-miR-588	1	0	1	1	1	1	IL10	interleukin 10
hsa-miR-588	0	0	1	1	1	1	NOS1	nitric oxide synthase 1 (neuronal)
hsa-miR-588	1	0	1	0	1	1	ADRA2B	adrenoceptor alpha 2B
hsa-miR-588	1	0	1	1	0	0	GRIN2A	glutamate receptor, ionotropic, N-methyl D-aspartate 2A
hsa-miR-588	1	0	1	1	1	1	PTGER2	prostaglandin E receptor 2 (subtype EP2), 53kDa
hsa-miR-588	0	0	1	1	1	1	CALHM1	calcium homeostasis modulator 1
hsa-miR-588	1	0	1	0	1	1	UBE2W	ubiquitin-conjugating enzyme E2W (putative)
hsa-miR-588	1	0	1	1	1	1	TPD52L3	tumor protein D52-like 3
hsa-miR-588	1	0	1	0	1	1	PLEKHA1	pleckstrin homology domain containing, family A (phosphoinositide binding specific) member 1
hsa-miR-588	1	0	1	1	0	0	AWAT2	acyl-CoA wax alcohol acyltransferase 2
hsa-miR-588	0	0	1	0	0	0	OR8G1	olfactory receptor, family 8, subfamily G, member 1
hsa-miR-588	0	0	1	1	1	1	PTRH1	peptidyl-tRNA hydrolase 1 homolog (S. cerevisiae)
hsa-miR-588	1	0	1	0	1	1	BMF	Bcl2 modifying factor
hsa-miR-588	0	0	1	0	1	1	FLJ16124	FLJ16124 protein
hsa-miR-588	0	0	1	0	1	1	FLJ46347	uncharacterized LOC389064
hsa-miR-588	1	0	1	1	1	1	AK4	adenylate kinase 4
hsa-miR-588	1	0	1	1	1	1	PLCXD3	phosphatidylinositol-specific phospholipase C, X domain containing 3
hsa-miR-588	1	0	1	1	1	1	ATN1	atrophin 1
hsa-miR-588	1	0	1	1	1	1	SPOP	speckle-type POZ protein
hsa-miR-588	0	0	1	1	1	1	TRIM13	tripartite motif containing 13
hsa-miR-588	0	0	1	1	1	1	AKR1CL1	aldo-keto reductase family 1, member C-like 1
hsa-miR-588	0	0	1	0	0	0	LINC00523	long intergenic non-protein coding RNA 523
hsa-miR-588	1	0	1	0	1	1	CPLX2	complexin 2
hsa-miR-588	0	0	1	1	1	1	UACA	uveal autoantigen with coiled-coil domains and ankyrin repeats
hsa-miR-588	0	0	1	1	1	1	CXCR4	chemokine (C-X-C motif) receptor 4
hsa-miR-588	1	0	1	1	1	1	LPHN1	latrophilin 1
hsa-miR-588	1	0	1	1	1	1	FAM168B	family with sequence similarity 168, member B
hsa-miR-588	1	0	1	0	1	1	FYTTD1	forty-two-three domain containing 1
hsa-miR-588	1	0	1	1	1	1	FOXP4	forkhead box P4
hsa-miR-588	0	0	1	1	0	0	RGR	retinal G protein coupled receptor
hsa-miR-588	1	0	1	1	1	1	SORCS1	sortilin-related VPS10 domain containing receptor 1
hsa-miR-588	0	0	1	1	1	1	C1orf192	chromosome 1 open reading frame 192
hsa-miR-588	0	0	1	1	1	1	LDLRAD2	low density lipoprotein receptor class A domain containing 2
hsa-miR-588	0	0	1	1	0	0	EMC6	ER membrane protein complex subunit 6
hsa-miR-588	1	0	1	1	1	1	SH3PXD2B	SH3 and PX domains 2B
hsa-miR-588	0	0	1	1	1	1	MURC	muscle-related coiled-coil protein
hsa-miR-588	1	0	1	1	1	1	SBK1	SH3-binding domain kinase 1
hsa-miR-588	1	0	1	0	1	1	RGAG4	retrotransposon gag domain containing 4
hsa-miR-588	0	0	1	1	1	1	VNN3	vanin 3
hsa-miR-588	1	0	1	1	1	1	UGGT1	UDP-glucose glycoprotein glucosyltransferase 1
hsa-miR-588	0	0	1	1	0	0	RPS24	ribosomal protein S24
hsa-miR-588	0	0	1	1	0	0	PCDP1	primary ciliary dyskinesia protein 1
hsa-miR-588	0	0	1	1	0	0	KLK3	kallikrein-related peptidase 3
hsa-miR-588	1	0	1	1	1	1	CTNS	cystinosin, lysosomal cystine transporter
hsa-miR-588	1	0	1	1	1	1	SCN1B	sodium channel, voltage-gated, type I, beta subunit
hsa-miR-588	0	0	1	1	1	1	ATAD3C	ATPase family, AAA domain containing 3C
hsa-miR-588	1	0	1	1	1	1	KCNC4	potassium voltage-gated channel, Shaw-related subfamily, member 4
hsa-miR-588	0	0	1	1	1	1	MDH1B	malate dehydrogenase 1B, NAD (soluble)
hsa-miR-588	1	0	1	1	1	1	ZNF384	zinc finger protein 384
hsa-miR-588	0	0	1	1	0	0	FAM83G	family with sequence similarity 83, member G
hsa-miR-588	1	0	1	1	1	1	HTR4	5-hydroxytryptamine (serotonin) receptor 4, G protein-coupled
hsa-miR-588	1	0	1	1	1	1	SLC2A4	solute carrier family 2 (facilitated glucose transporter), member 4
hsa-miR-588	1	0	1	1	1	1	PPP4R1	protein phosphatase 4, regulatory subunit 1
hsa-miR-588	1	0	1	1	1	1	HMGCLL1	3-hydroxymethyl-3-methylglutaryl-CoA lyase-like 1
hsa-miR-588	0	0	1	1	1	1	MST4	serine/threonine protein kinase MST4
hsa-miR-588	1	0	1	1	1	1	DIAPH3	diaphanous homolog 3 (Drosophila)
hsa-miR-588	1	0	1	1	1	1	FRS2	fibroblast growth factor receptor substrate 2
hsa-miR-588	0	0	1	1	1	1	SSTR2	somatostatin receptor 2
hsa-miR-588	1	0	1	1	1	1	ZNF436	zinc finger protein 436
hsa-miR-588	1	0	1	1	1	1	SREK1	splicing regulatory glutamine/lysine-rich protein 1
hsa-miR-588	0	0	1	1	1	1	VCAM1	vascular cell adhesion molecule 1
hsa-miR-588	1	0	1	0	0	0	FAM127B	family with sequence similarity 127, member B
hsa-miR-588	0	0	1	1	1	1	DIAPH1	diaphanous homolog 1 (Drosophila)
hsa-miR-588	1	0	1	0	1	1	FBXO41	F-box protein 41
hsa-miR-588	1	0	1	1	1	1	SHANK3	SH3 and multiple ankyrin repeat domains 3
hsa-miR-588	0	0	1	1	1	1	FTO	fat mass and obesity associated
hsa-miR-588	1	0	1	1	1	1	MGA	MAX gene associated
hsa-miR-588	1	0	1	1	1	1	DGKG	diacylglycerol kinase, gamma 90kDa
hsa-miR-588	1	0	1	1	1	1	PRDM1	PR domain containing 1, with ZNF domain
hsa-miR-588	1	0	1	1	1	1	BMP2	bone morphogenetic protein 2
hsa-miR-588	1	0	1	1	1	1	CCNA2	cyclin A2
hsa-miR-588	1	0	1	0	1	1	CDK6	cyclin-dependent kinase 6
hsa-miR-588	0	0	1	1	1	1	DKC1	dyskeratosis congenita 1, dyskerin
hsa-miR-588	1	0	1	1	1	1	DYRK1A	dual-specificity tyrosine-(Y)-phosphorylation regulated kinase 1A
hsa-miR-588	1	0	1	0	1	1	EFNB3	ephrin-B3
hsa-miR-588	1	0	1	1	1	1	CELSR2	cadherin, EGF LAG seven-pass G-type receptor 2 (flamingo homolog, Drosophila)
hsa-miR-588	1	0	1	1	1	1	EN2	engrailed homeobox 2
hsa-miR-588	1	0	1	1	1	1	GPC4	glypican 4
hsa-miR-588	1	0	1	0	1	1	B4GALT1	UDP-Gal:betaGlcNAc beta 1,4- galactosyltransferase, polypeptide 1
hsa-miR-588	1	0	1	1	1	1	NDST1	N-deacetylase/N-sulfotransferase (heparan glucosaminyl) 1
hsa-miR-588	0	0	1	1	1	1	IL13RA1	interleukin 13 receptor, alpha 1
hsa-miR-588	1	0	1	1	1	1	AQP4	aquaporin 4
hsa-miR-588	1	0	1	0	1	1	ATP1B2	ATPase, Na+/K+ transporting, beta 2 polypeptide
hsa-miR-588	1	0	1	1	1	1	KLF5	Kruppel-like factor 5 (intestinal)
hsa-miR-588	0	0	1	1	0	0	CD19	CD19 molecule
hsa-miR-588	1	0	1	1	0	0	CDH8	cadherin 8, type 2
hsa-miR-588	1	0	1	0	1	1	CEBPG	CCAAT/enhancer binding protein (C/EBP), gamma
hsa-miR-588	1	0	1	1	1	1	COL4A6	collagen, type IV, alpha 6
hsa-miR-588	1	0	1	1	1	1	SLC31A1	solute carrier family 31 (copper transporters), member 1
hsa-miR-588	1	0	1	1	1	1	CSNK2A1	casein kinase 2, alpha 1 polypeptide
hsa-miR-588	0	0	1	1	1	1	EDNRA	endothelin receptor type A
hsa-miR-588	1	0	1	1	1	1	ENPEP	glutamyl aminopeptidase (aminopeptidase A)
hsa-miR-588	1	0	1	0	1	1	FOXO1	forkhead box O1
hsa-miR-588	0	0	1	1	0	0	GLP1R	glucagon-like peptide 1 receptor
hsa-miR-588	0	0	1	1	1	1	HLA-DOA	major histocompatibility complex, class II, DO alpha
hsa-miR-588	0	0	1	1	0	0	EIF6	eukaryotic translation initiation factor 6
hsa-miR-588	1	0	1	1	1	1	ITGB8	integrin, beta 8
hsa-miR-588	1	0	1	1	1	1	JAK1	Janus kinase 1
hsa-miR-588	1	0	1	1	1	1	KCNJ10	potassium inwardly-rectifying channel, subfamily J, member 10
hsa-miR-588	0	0	1	0	1	1	KCNN1	potassium intermediate/small conductance calcium-activated channel, subfamily N, member 1
hsa-miR-588	1	0	1	0	1	1	KIF3C	kinesin family member 3C
hsa-miR-588	1	0	1	1	1	1	LIF	leukemia inhibitory factor
hsa-miR-588	0	0	1	0	1	1	MFNG	MFNG O-fucosylpeptide 3-beta-N-acetylglucosaminyltransferase
hsa-miR-588	0	0	1	0	1	1	CXCL9	chemokine (C-X-C motif) ligand 9
hsa-miR-588	0	0	1	1	0	0	MYBL2	v-myb myeloblastosis viral oncogene homolog (avian)-like 2
hsa-miR-588	0	0	1	1	1	1	NID1	nidogen 1
hsa-miR-588	0	0	1	1	0	0	NPPB	natriuretic peptide B
hsa-miR-588	0	0	1	0	1	1	OPHN1	oligophrenin 1
hsa-miR-588	0	0	1	1	0	0	PER1	period homolog 1 (Drosophila)
hsa-miR-588	0	0	1	1	0	0	PLP2	proteolipid protein 2 (colonic epithelium-enriched)
hsa-miR-588	0	0	1	1	0	0	PTPN6	protein tyrosine phosphatase, non-receptor type 6
hsa-miR-588	1	0	1	1	1	1	PTPN9	protein tyrosine phosphatase, non-receptor type 9
hsa-miR-588	0	0	1	1	1	1	RARS	arginyl-tRNA synthetase
hsa-miR-588	1	0	1	0	1	1	SORT1	sortilin 1
hsa-miR-588	0	0	1	1	1	1	SDC4	syndecan 4
hsa-miR-588	1	0	1	1	1	1	SRPR	signal recognition particle receptor (docking protein)
hsa-miR-588	1	0	1	0	1	1	TAL1	T-cell acute lymphocytic leukemia 1
hsa-miR-588	1	0	1	1	1	1	TFAP2B	transcription factor AP-2 beta (activating enhancer binding protein 2 beta)
hsa-miR-588	0	0	1	1	1	1	TTK	TTK protein kinase
hsa-miR-588	1	0	1	1	1	1	UBE2D3	ubiquitin-conjugating enzyme E2D 3
hsa-miR-588	1	0	1	1	1	1	UBE2H	ubiquitin-conjugating enzyme E2H
hsa-miR-588	1	0	1	1	1	1	ZIC3	Zic family member 3
hsa-miR-588	1	0	1	0	1	1	BSN	bassoon (presynaptic cytomatrix protein)
hsa-miR-588	1	0	1	1	1	1	FZD5	frizzled family receptor 5
hsa-miR-588	0	0	1	1	1	1	STAM	signal transducing adaptor molecule (SH3 domain and ITAM motif) 1
hsa-miR-588	1	0	1	1	1	1	HMGA2	high mobility group AT-hook 2
hsa-miR-588	0	0	1	1	1	1	CHST1	carbohydrate (keratan sulfate Gal-6) sulfotransferase 1
hsa-miR-588	1	0	1	1	1	1	EXO1	exonuclease 1
hsa-miR-588	1	0	1	1	1	1	VAMP8	vesicle-associated membrane protein 8 (endobrevin)
hsa-miR-588	0	0	1	1	1	1	SNX4	sorting nexin 4
hsa-miR-588	0	0	1	1	1	1	LDB1	LIM domain binding 1
hsa-miR-588	0	0	1	0	1	1	AP1S2	adaptor-related protein complex 1, sigma 2 subunit
hsa-miR-588	1	0	1	0	1	1	WASL	Wiskott-Aldrich syndrome-like
hsa-miR-588	0	0	1	1	1	1	RNF8	ring finger protein 8, E3 ubiquitin protein ligase
hsa-miR-588	0	0	1	1	1	1	UBA3	ubiquitin-like modifier activating enzyme 3
hsa-miR-588	0	0	1	1	1	1	ATF3	activating transcription factor 3
hsa-miR-588	0	0	1	1	0	0	AP2S1	adaptor-related protein complex 2, sigma 1 subunit
hsa-miR-588	1	0	1	0	1	1	PLK3	polo-like kinase 3
hsa-miR-588	1	0	1	1	0	0	COX8A	cytochrome c oxidase subunit VIIIA (ubiquitous)
hsa-miR-588	1	0	1	0	1	1	E2F2	E2F transcription factor 2
hsa-miR-588	1	0	1	1	1	1	SYT7	synaptotagmin VII
hsa-miR-588	0	0	1	1	0	0	GPR50	G protein-coupled receptor 50
hsa-miR-588	1	0	1	0	1	1	MED14	mediator complex subunit 14
hsa-miR-588	0	0	1	1	0	0	RIN1	Ras and Rab interactor 1
hsa-miR-588	1	0	1	1	1	1	ATF6B	activating transcription factor 6 beta
hsa-miR-588	1	0	1	1	1	1	DVL2	dishevelled, dsh homolog 2 (Drosophila)
hsa-miR-588	1	0	1	0	1	1	ETV5	ets variant 5
hsa-miR-588	1	0	1	1	1	1	FOXD2	forkhead box D2
hsa-miR-588	0	0	1	1	1	1	GP5	glycoprotein V (platelet)
hsa-miR-588	0	0	1	1	1	1	FOXA1	forkhead box A1
hsa-miR-588	0	0	1	1	0	0	NDUFA1	NADH dehydrogenase (ubiquinone) 1 alpha subcomplex, 1, 7.5kDa
hsa-miR-588	1	0	1	1	1	1	MTMR4	myotubularin related protein 4
hsa-miR-588	0	0	1	0	1	1	CXorf1	chromosome X open reading frame 1
hsa-miR-588	0	0	1	1	1	1	MMP20	matrix metallopeptidase 20
hsa-miR-588	0	0	1	1	0	0	SLC22A14	solute carrier family 22, member 14
hsa-miR-588	1	0	1	1	1	1	ONECUT2	one cut homeobox 2
hsa-miR-588	1	0	1	0	1	1	SPTLC2	serine palmitoyltransferase, long chain base subunit 2
hsa-miR-588	1	0	1	1	1	1	SEC24C	SEC24 family, member C (S. cerevisiae)
hsa-miR-588	0	0	1	1	1	1	CD8B	CD8b molecule
hsa-miR-588	1	0	1	0	1	1	SCD	stearoyl-CoA desaturase (delta-9-desaturase)
hsa-miR-588	1	0	1	1	1	1	OXSR1	oxidative-stress responsive 1
hsa-miR-588	0	0	1	1	1	1	ABCD2	ATP-binding cassette, sub-family D (ALD), member 2
hsa-miR-588	1	0	1	1	1	1	DLX3	distal-less homeobox 3
hsa-miR-588	1	0	1	0	1	1	E2F1	E2F transcription factor 1
hsa-miR-588	1	0	1	1	1	1	FOXG1	forkhead box G1
hsa-miR-588	1	0	1	1	1	1	GPR3	G protein-coupled receptor 3
hsa-miR-588	0	0	1	1	1	1	GRPR	gastrin-releasing peptide receptor
hsa-miR-588	1	0	1	1	1	1	HIP1	huntingtin interacting protein 1
hsa-miR-588	1	0	1	1	0	0	NNAT	neuronatin
hsa-miR-588	0	0	1	1	1	1	ST5	suppression of tumorigenicity 5
hsa-miR-588	1	0	1	0	0	0	FRAT1	frequently rearranged in advanced T-cell lymphomas
hsa-miR-588	1	0	1	1	1	1	ST8SIA4	ST8 alpha-N-acetyl-neuraminide alpha-2,8-sialyltransferase 4
hsa-miR-588	1	0	1	1	1	1	ARPC5	actin related protein 2/3 complex, subunit 5, 16kDa
hsa-miR-588	0	0	1	0	1	1	CD96	CD96 molecule
hsa-miR-588	1	0	1	1	1	1	PURA	purine-rich element binding protein A
hsa-miR-588	1	0	1	1	0	0	TRAIP	TRAF interacting protein
hsa-miR-588	1	0	1	1	1	1	MTF1	metal-regulatory transcription factor 1
hsa-miR-588	1	0	1	0	1	1	SPATA2	spermatogenesis associated 2
hsa-miR-588	1	0	1	1	1	1	HS3ST4	heparan sulfate (glucosamine) 3-O-sulfotransferase 4
hsa-miR-588	0	0	1	1	1	1	TRDN	triadin
hsa-miR-588	0	0	1	1	0	0	BMP1	bone morphogenetic protein 1
hsa-miR-588	1	0	1	1	1	1	DAGLA	diacylglycerol lipase, alpha
hsa-miR-588	1	0	1	1	1	1	NSF	N-ethylmaleimide-sensitive factor
hsa-miR-588	0	0	1	0	1	1	OAS3	2'-5'-oligoadenylate synthetase 3, 100kDa
hsa-miR-588	0	0	1	1	1	1	PA2G4	proliferation-associated 2G4, 38kDa
hsa-miR-588	1	0	1	1	1	1	POU4F1	POU class 4 homeobox 1
hsa-miR-588	1	0	1	0	1	1	PPP1R2	protein phosphatase 1, regulatory (inhibitor) subunit 2
hsa-miR-588	1	0	1	1	1	1	PKN2	protein kinase N2
hsa-miR-588	1	0	1	0	1	1	SRSF6	serine/arginine-rich splicing factor 6
hsa-miR-588	1	0	1	1	1	1	STK4	serine/threonine kinase 4
hsa-miR-588	0	0	1	1	1	1	TYRO3	TYRO3 protein tyrosine kinase
hsa-miR-588	1	0	1	1	1	1	SMC1A	structural maintenance of chromosomes 1A
hsa-miR-588	0	0	1	1	0	0	CIB1	calcium and integrin binding 1 (calmyrin)
hsa-miR-588	1	0	1	1	1	1	ANP32B	acidic (leucine-rich) nuclear phosphoprotein 32 family, member B
hsa-miR-588	1	0	1	1	1	1	HEXIM1	hexamethylene bis-acetamide inducible 1
hsa-miR-588	1	0	1	1	1	1	SLC2A1	solute carrier family 2 (facilitated glucose transporter), member 1
hsa-miR-588	1	0	1	1	1	1	CORIN	corin, serine peptidase
hsa-miR-588	0	0	1	0	1	1	SUB1	SUB1 homolog (S. cerevisiae)
hsa-miR-588	1	0	1	1	0	0	PSKH1	protein serine kinase H1
hsa-miR-588	0	0	1	1	1	1	ATF7	activating transcription factor 7
hsa-miR-588	1	0	1	0	1	1	SOX12	SRY (sex determining region Y)-box 12
hsa-miR-588	1	0	1	1	1	1	SSR3	signal sequence receptor, gamma (translocon-associated protein gamma)
hsa-miR-588	1	0	1	1	1	1	VCP	valosin containing protein
hsa-miR-588	1	0	1	1	1	1	VEZF1	vascular endothelial zinc finger 1
hsa-miR-588	1	0	1	0	1	1	PRSS23	protease, serine, 23
hsa-miR-588	1	0	1	1	1	1	KLF12	Kruppel-like factor 12
hsa-miR-588	1	0	1	1	1	1	MGEA5	meningioma expressed antigen 5 (hyaluronidase)
hsa-miR-588	1	0	1	1	1	1	RHOQ	ras homolog family member Q
hsa-miR-588	1	0	1	1	1	1	KCND2	potassium voltage-gated channel, Shal-related subfamily, member 2
hsa-miR-588	1	0	1	0	1	1	FLRT2	fibronectin leucine rich transmembrane protein 2
hsa-miR-588	0	0	1	1	1	1	N6AMT1	N-6 adenine-specific DNA methyltransferase 1 (putative)
hsa-miR-588	0	0	1	1	0	0	SLCO3A1	solute carrier organic anion transporter family, member 3A1
hsa-miR-588	1	0	1	1	1	1	SLC30A4	solute carrier family 30 (zinc transporter), member 4
hsa-miR-588	0	0	1	1	0	0	HILPDA	hypoxia inducible lipid droplet-associated
hsa-miR-588	0	0	1	0	1	1	EMR2	egf-like module containing, mucin-like, hormone receptor-like 2
hsa-miR-588	0	0	1	1	1	1	LRP10	low density lipoprotein receptor-related protein 10
hsa-miR-588	0	0	1	1	1	1	MRPL42	mitochondrial ribosomal protein L42
hsa-miR-588	1	0	1	0	1	1	C16orf72	chromosome 16 open reading frame 72
hsa-miR-588	1	0	1	1	0	0	HOXC11	homeobox C11
hsa-miR-588	1	0	1	0	1	1	ODZ1	odz, odd Oz/ten-m homolog 1 (Drosophila)
hsa-miR-588	0	0	1	1	0	0	TMEM50A	transmembrane protein 50A
hsa-miR-588	1	0	1	1	1	1	LHX6	LIM homeobox 6
hsa-miR-588	0	0	1	1	1	1	TSPAN13	tetraspanin 13
hsa-miR-588	0	0	1	1	0	0	KCNMB3	potassium large conductance calcium-activated channel, subfamily M beta member 3
hsa-miR-588	1	0	1	1	1	1	ZNF592	zinc finger protein 592
hsa-miR-588	1	0	1	0	1	1	SH3PXD2A	SH3 and PX domains 2A
hsa-miR-588	1	0	1	1	0	0	TTLL4	tubulin tyrosine ligase-like family, member 4
hsa-miR-588	0	0	1	1	0	0	SETD1A	SET domain containing 1A
hsa-miR-588	1	0	1	1	1	1	TBKBP1	TBK1 binding protein 1
hsa-miR-588	1	0	1	0	1	1	SERTAD2	SERTA domain containing 2
hsa-miR-588	1	0	1	1	1	1	RUSC2	RUN and SH3 domain containing 2
hsa-miR-588	1	0	1	1	1	1	FAM20B	family with sequence similarity 20, member B
hsa-miR-588	0	0	1	1	1	1	MYO16	myosin XVI
hsa-miR-588	1	0	1	0	1	1	ZNF609	zinc finger protein 609
hsa-miR-588	1	0	1	0	1	1	KIAA1024	KIAA1024
hsa-miR-588	1	0	1	1	1	1	DNAJC13	DnaJ (Hsp40) homolog, subfamily C, member 13
hsa-miR-588	1	0	1	0	1	1	KHNYN	KH and NYN domain containing
hsa-miR-588	1	0	1	1	1	1	CNOT6	CCR4-NOT transcription complex, subunit 6
hsa-miR-588	0	0	1	1	0	0	TSKU	tsukushi small leucine rich proteoglycan homolog (Xenopus laevis)
hsa-miR-588	0	0	1	1	1	1	BRPF3	bromodomain and PHD finger containing, 3
hsa-miR-588	1	0	1	1	1	1	WT1-AS	WT1 antisense RNA
hsa-miR-588	1	0	1	0	1	1	CNR1	cannabinoid receptor 1 (brain)
hsa-miR-588	0	0	1	1	1	1	ZFR	zinc finger RNA binding protein
hsa-miR-588	0	0	1	1	0	0	PKD2L1	polycystic kidney disease 2-like 1
hsa-miR-588	1	0	1	1	1	1	C20orf111	chromosome 20 open reading frame 111
hsa-miR-588	1	0	1	0	1	1	TMEM216	transmembrane protein 216
hsa-miR-588	0	0	1	1	0	0	IL23A	interleukin 23, alpha subunit p19
hsa-miR-588	0	0	1	1	1	1	KDM3B	lysine (K)-specific demethylase 3B
hsa-miR-588	1	0	1	0	1	1	KLHL3	kelch-like 3 (Drosophila)
hsa-miR-588	1	0	1	0	1	1	ZRANB1	zinc finger, RAN-binding domain containing 1
hsa-miR-588	0	0	1	0	1	1	VEZT	vezatin, adherens junctions transmembrane protein
hsa-miR-588	1	0	1	1	0	0	C17orf59	chromosome 17 open reading frame 59
hsa-miR-588	1	0	1	0	1	1	FAM46C	family with sequence similarity 46, member C
hsa-miR-588	1	0	1	1	1	1	ALKBH5	alkB, alkylation repair homolog 5 (E. coli)
hsa-miR-588	0	0	1	1	1	1	ODAM	odontogenic, ameloblast asssociated
hsa-miR-588	0	0	1	1	1	1	PIGX	phosphatidylinositol glycan anchor biosynthesis, class X
hsa-miR-588	1	0	1	1	1	1	CDC37L1	cell division cycle 37 homolog (S. cerevisiae)-like 1
hsa-miR-588	0	0	1	1	1	1	SRBD1	S1 RNA binding domain 1
hsa-miR-588	0	0	1	1	0	0	CEP55	centrosomal protein 55kDa
hsa-miR-588	1	0	1	0	1	1	LGI2	leucine-rich repeat LGI family, member 2
hsa-miR-588	1	0	1	1	1	1	LRRC20	leucine rich repeat containing 20
hsa-miR-588	0	0	1	1	1	1	TRIM62	tripartite motif containing 62
hsa-miR-588	1	0	1	1	1	1	RSBN1	round spermatid basic protein 1
hsa-miR-588	0	0	1	1	1	1	SYNJ2BP	synaptojanin 2 binding protein
hsa-miR-588	1	0	1	0	1	1	FOXJ2	forkhead box J2
hsa-miR-588	1	0	1	1	1	1	PAG1	phosphoprotein associated with glycosphingolipid microdomains 1
hsa-miR-588	0	0	1	1	0	0	TMEM176A	transmembrane protein 176A
hsa-miR-588	1	0	1	1	1	1	ETNK1	ethanolamine kinase 1
hsa-miR-588	1	0	1	1	1	1	KIAA1199	KIAA1199
hsa-miR-588	1	0	1	0	1	1	PCDHAC1	protocadherin alpha subfamily C, 1
hsa-miR-588	1	0	1	0	1	1	PCDHAC2	protocadherin alpha subfamily C, 2
hsa-miR-588	1	0	1	1	1	1	PCDHA1	protocadherin alpha 1
hsa-miR-588	1	0	1	0	1	1	PCDHA10	protocadherin alpha 10
hsa-miR-588	1	0	1	0	1	1	PCDHA11	protocadherin alpha 11
hsa-miR-588	1	0	1	0	1	1	PCDHA12	protocadherin alpha 12
hsa-miR-588	1	0	1	1	1	1	PCDHA2	protocadherin alpha 2
hsa-miR-588	1	0	1	1	1	1	PCDHA3	protocadherin alpha 3
hsa-miR-588	1	0	1	1	1	1	PCDHA6	protocadherin alpha 6
hsa-miR-588	1	0	1	0	1	1	PCDHA7	protocadherin alpha 7
hsa-miR-588	1	0	1	1	1	1	PCDHA8	protocadherin alpha 8
hsa-miR-588	0	0	1	1	0	0	RNF186	ring finger protein 186
hsa-miR-588	0	0	1	0	1	1	ARL15	ADP-ribosylation factor-like 15
hsa-miR-588	0	0	1	1	1	1	RPRM	reprimo, TP53 dependent G2 arrest mediator candidate
hsa-miR-588	1	0	1	0	1	1	SLAMF8	SLAM family member 8
hsa-miR-588	1	0	1	1	1	1	C1GALT1	core 1 synthase, glycoprotein-N-acetylgalactosamine 3-beta-galactosyltransferase, 1
hsa-miR-588	1	0	1	1	0	0	SLC17A7	solute carrier family 17 (sodium-dependent inorganic phosphate cotransporter), member 7
hsa-miR-588	0	0	1	1	0	0	PDXP	pyridoxal (pyridoxine, vitamin B6) phosphatase
hsa-miR-588	1	0	1	1	1	1	PAK7	p21 protein (Cdc42/Rac)-activated kinase 7
hsa-miR-588	1	0	1	1	1	1	PITHD1	PITH (C-terminal proteasome-interacting domain of thioredoxin-like) domain containing 1
hsa-miR-588	0	0	1	1	0	0	GPR84	G protein-coupled receptor 84
hsa-miR-588	1	0	1	0	1	1	EIF5A2	eukaryotic translation initiation factor 5A2
hsa-miR-588	1	0	1	0	1	1	KCNS2	potassium voltage-gated channel, delayed-rectifier, subfamily S, member 2
hsa-miR-588	0	0	1	1	1	1	SHROOM4	shroom family member 4
hsa-miR-588	1	0	1	1	1	1	ARHGAP31	Rho GTPase activating protein 31
hsa-miR-588	1	0	1	0	1	1	SYT4	synaptotagmin IV
hsa-miR-588	1	0	1	1	1	1	NLGN2	neuroligin 2
hsa-miR-588	0	0	1	1	1	1	ARRDC3	arrestin domain containing 3
hsa-miR-588	1	0	1	1	1	1	RANBP10	RAN binding protein 10
hsa-miR-588	0	0	1	1	1	1	KLHL1	kelch-like 1 (Drosophila)
hsa-miR-588	1	0	1	1	1	1	ZFP14	zinc finger protein 14 homolog (mouse)
hsa-miR-588	0	0	1	1	1	1	BCOR	BCL6 corepressor
hsa-miR-588	1	0	1	0	1	1	USP37	ubiquitin specific peptidase 37
hsa-miR-588	1	0	1	0	1	1	NMT1	N-myristoyltransferase 1
hsa-miR-588	1	0	1	0	1	1	TMX4	thioredoxin-related transmembrane protein 4
hsa-miR-588	1	0	1	1	1	1	DMRT3	doublesex and mab-3 related transcription factor 3
hsa-miR-588	1	0	1	1	1	1	ZFYVE1	zinc finger, FYVE domain containing 1
hsa-miR-588	0	0	1	1	1	1	CHST6	carbohydrate (N-acetylglucosamine 6-O) sulfotransferase 6
hsa-miR-588	1	0	1	1	1	1	PPP1R11	protein phosphatase 1, regulatory (inhibitor) subunit 11
hsa-miR-588	1	0	1	0	1	1	MCL1	myeloid cell leukemia sequence 1 (BCL2-related)
hsa-miR-588	0	0	1	1	1	1	PGM5	phosphoglucomutase 5
hsa-miR-588	0	0	1	1	1	1	SLC17A9	solute carrier family 17, member 9
hsa-miR-588	0	0	1	1	1	1	CHP2	calcineurin-like EF hand protein 2
hsa-miR-588	0	0	1	1	1	1	RHBDF1	rhomboid 5 homolog 1 (Drosophila)
hsa-miR-588	0	0	1	0	1	1	EBF2	early B-cell factor 2
hsa-miR-588	1	0	1	1	1	1	FBXL17	F-box and leucine-rich repeat protein 17
hsa-miR-588	1	0	1	1	1	1	MARCH7	membrane-associated ring finger (C3HC4) 7, E3 ubiquitin protein ligase
hsa-miR-588	1	0	1	0	1	1	USP46	ubiquitin specific peptidase 46
hsa-miR-588	0	0	1	1	0	0	DDRGK1	DDRGK domain containing 1
hsa-miR-588	0	0	1	1	1	1	METTL16	methyltransferase like 16
hsa-miR-588	0	0	1	1	0	0	DHRS11	dehydrogenase/reductase (SDR family) member 11
hsa-miR-588	1	0	1	0	1	1	PLEKHF2	pleckstrin homology domain containing, family F (with FYVE domain) member 2
hsa-miR-588	0	0	1	1	1	1	ZDHHC14	zinc finger, DHHC-type containing 14
hsa-miR-588	1	0	1	0	1	1	LIN28A	lin-28 homolog A (C. elegans)
hsa-miR-588	1	0	1	1	1	1	GRHL2	grainyhead-like 2 (Drosophila)
hsa-miR-588	0	0	1	1	1	1	CCDC170	coiled-coil domain containing 170
hsa-miR-588	1	0	1	1	1	1	NAA50	N(alpha)-acetyltransferase 50, NatE catalytic subunit
hsa-miR-588	1	0	1	1	1	1	JHDM1D	jumonji C domain containing histone demethylase 1 homolog D (S. cerevisiae)
hsa-miR-588	1	0	1	1	1	1	PTPRO	protein tyrosine phosphatase, receptor type, O
hsa-miR-588	1	0	1	0	1	1	CSRNP2	cysteine-serine-rich nuclear protein 2
hsa-miR-588	1	0	1	1	1	1	MAP4	microtubule-associated protein 4
hsa-miR-588	1	0	1	1	0	0	PVRL4	poliovirus receptor-related 4
hsa-miR-588	1	0	1	1	1	1	SNX27	sorting nexin family member 27
hsa-miR-588	1	0	1	1	1	1	RAB1B	RAB1B, member RAS oncogene family
hsa-miR-588	1	0	1	0	1	1	SH3BGRL2	SH3 domain binding glutamic acid-rich protein like 2
hsa-miR-588	1	0	1	0	1	1	ITCH	itchy E3 ubiquitin protein ligase
hsa-miR-588	1	0	1	1	1	1	PCDHA9	protocadherin alpha 9
hsa-miR-588	1	0	1	0	1	1	SRSF8	serine/arginine-rich splicing factor 8
hsa-miR-588	0	0	1	1	1	1	TKTL2	transketolase-like 2
hsa-miR-588	0	0	1	1	0	0	C19orf44	chromosome 19 open reading frame 44
hsa-miR-588	0	0	1	1	1	1	SLA2	Src-like-adaptor 2
hsa-miR-588	1	0	1	1	0	0	MAF1	MAF1 homolog (S. cerevisiae)
hsa-miR-588	1	0	1	0	1	1	PSD2	pleckstrin and Sec7 domain containing 2
hsa-miR-588	1	0	1	1	1	1	CAMKK1	calcium/calmodulin-dependent protein kinase kinase 1, alpha
hsa-miR-588	0	0	1	1	0	0	NICN1	nicolin 1
hsa-miR-588	1	0	1	1	1	1	ING5	inhibitor of growth family, member 5
hsa-miR-588	0	0	1	1	1	1	CYSTM1	cysteine-rich transmembrane module containing 1
hsa-miR-588	1	0	1	1	1	1	DCTN5	dynactin 5 (p25)
hsa-miR-588	1	0	1	1	1	1	HIATL1	hippocampus abundant transcript-like 1
hsa-miR-588	0	0	1	1	0	0	ACCS	1-aminocyclopropane-1-carboxylate synthase homolog (Arabidopsis)(non-functional)
hsa-miR-588	1	0	1	1	1	1	RSPO3	R-spondin 3
hsa-miR-588	0	0	1	1	1	1	FAM136A	family with sequence similarity 136, member A
hsa-miR-588	0	0	1	1	1	1	POLR2J2	polymerase (RNA) II (DNA directed) polypeptide J2
hsa-miR-588	1	0	1	1	1	1	PCDH11Y	protocadherin 11 Y-linked
hsa-miR-588	0	0	1	1	0	0	MUC13	mucin 13, cell surface associated
hsa-miR-588	1	0	1	1	1	1	XKR4	XK, Kell blood group complex subunit-related family, member 4
hsa-miR-588	0	0	1	1	1	1	PLEKHG4B	pleckstrin homology domain containing, family G (with RhoGef domain) member 4B
hsa-miR-588	0	0	1	1	0	0	APOA5	apolipoprotein A-V
hsa-miR-588	1	0	1	0	1	1	SOCS4	suppressor of cytokine signaling 4
hsa-miR-588	1	0	1	1	1	1	KLHL6	kelch-like 6 (Drosophila)
hsa-miR-588	0	0	1	1	1	1	CHST14	carbohydrate (N-acetylgalactosamine 4-0) sulfotransferase 14
hsa-miR-588	1	0	1	1	1	1	JDP2	Jun dimerization protein 2
hsa-miR-588	0	0	1	1	0	0	RXFP2	relaxin/insulin-like family peptide receptor 2
hsa-miR-588	0	0	1	0	1	1	PAQR8	progestin and adipoQ receptor family member VIII
hsa-miR-588	1	0	1	1	1	1	BMPER	BMP binding endothelial regulator
hsa-miR-588	1	0	1	1	1	1	PANK1	pantothenate kinase 1
hsa-miR-588	0	0	1	1	1	1	MRAP2	melanocortin 2 receptor accessory protein 2
hsa-miR-588	0	0	1	1	1	1	ADAMTS17	ADAM metallopeptidase with thrombospondin type 1 motif, 17
hsa-miR-588	1	0	1	1	0	0	GNAT1	guanine nucleotide binding protein (G protein), alpha transducing activity polypeptide 1
hsa-miR-588	0	0	1	0	0	0	CAPN13	calpain 13
hsa-miR-588	1	0	1	1	1	1	TEX261	testis expressed 261
hsa-miR-588	1	0	1	1	1	1	KCNH8	potassium voltage-gated channel, subfamily H (eag-related), member 8
hsa-miR-588	0	0	1	1	1	1	PXDNL	peroxidasin homolog (Drosophila)-like
hsa-miR-588	0	0	1	1	0	0	PEBP4	phosphatidylethanolamine-binding protein 4
hsa-miR-588	0	0	1	1	1	1	TRMT10B	tRNA methyltransferase 10 homolog B (S. cerevisiae)
hsa-miR-588	0	0	1	1	1	1	RIBC1	RIB43A domain with coiled-coils 1
hsa-miR-588	1	0	1	0	0	0	GPHB5	glycoprotein hormone beta 5
hsa-miR-588	0	0	1	1	0	0	TCEB3C	transcription elongation factor B polypeptide 3C (elongin A3)
hsa-miR-588	1	0	1	1	1	1	BOD1L1	biorientation of chromosomes in cell division 1-like 1
hsa-miR-588	0	0	1	1	0	0	RPUSD2	RNA pseudouridylate synthase domain containing 2
hsa-miR-588	1	0	1	1	1	1	UBTD2	ubiquitin domain containing 2
hsa-miR-588	1	0	1	1	1	1	TBX15	T-box 15
hsa-miR-588	1	0	1	1	1	1	FAM123B	family with sequence similarity 123B
hsa-miR-588	1	0	1	1	1	1	CEP128	centrosomal protein 128kDa
hsa-miR-588	0	0	1	1	0	0	WBSCR27	Williams Beuren syndrome chromosome region 27
hsa-miR-588	0	0	1	1	0	0	MUC20	mucin 20, cell surface associated
hsa-miR-588	1	0	1	1	1	1	PDIK1L	PDLIM1 interacting kinase 1 like
hsa-miR-588	1	0	1	1	1	1	WTAP	Wilms tumor 1 associated protein
hsa-miR-588	1	0	1	1	1	1	HS6ST3	heparan sulfate 6-O-sulfotransferase 3
hsa-miR-588	1	0	1	0	1	1	MDGA1	MAM domain containing glycosylphosphatidylinositol anchor 1
hsa-miR-588	1	0	1	1	1	1	CREBRF	CREB3 regulatory factor
hsa-miR-588	1	0	1	1	1	1	FNDC5	fibronectin type III domain containing 5
hsa-miR-588	0	0	1	1	1	1	PSMD10	proteasome (prosome, macropain) 26S subunit, non-ATPase, 10
hsa-miR-588	1	0	1	1	1	1	RDH10	retinol dehydrogenase 10 (all-trans)
hsa-miR-588	0	0	1	1	0	0	DEFB119	defensin, beta 119
hsa-miR-588	1	0	1	1	1	1	CCDC149	coiled-coil domain containing 149
hsa-miR-588	1	0	1	1	1	1	ARL10	ADP-ribosylation factor-like 10
hsa-miR-588	0	0	1	1	1	1	FAM133A	family with sequence similarity 133, member A
hsa-miR-588	1	0	1	1	1	1	UBR1	ubiquitin protein ligase E3 component n-recognin 1
hsa-miR-588	1	0	1	1	1	1	C4orf34	chromosome 4 open reading frame 34
hsa-miR-588	1	0	1	1	1	1	ASB6	ankyrin repeat and SOCS box containing 6
hsa-miR-588	1	0	1	0	1	1	ERC1	ELKS/RAB6-interacting/CAST family member 1
hsa-miR-588	1	0	1	0	1	1	ARNT	aryl hydrocarbon receptor nuclear translocator
hsa-miR-588	1	0	1	1	1	1	MTDH	metadherin
hsa-miR-588	1	0	1	0	1	1	ARL5B	ADP-ribosylation factor-like 5B
hsa-miR-588	0	0	1	1	1	1	NLRC3	NLR family, CARD domain containing 3
hsa-miR-588	0	0	1	1	1	1	DNAJC24	DnaJ (Hsp40) homolog, subfamily C, member 24
hsa-miR-588	0	0	1	0	1	1	SPATA12	spermatogenesis associated 12
hsa-miR-588	0	0	1	1	0	0	NUDT8	nudix (nucleoside diphosphate linked moiety X)-type motif 8
hsa-miR-588	1	0	1	1	1	1	ZSCAN22	zinc finger and SCAN domain containing 22
hsa-miR-588	1	0	1	0	1	1	BAGE2	B melanoma antigen family, member 2
hsa-miR-588	0	0	1	1	1	1	LRP5L	low density lipoprotein receptor-related protein 5-like
hsa-miR-588	1	0	1	1	1	1	FAM216B	family with sequence similarity 216, member B
hsa-miR-588	1	0	1	1	1	1	TMEM229B	transmembrane protein 229B
hsa-miR-588	0	0	1	1	1	1	CABP7	calcium binding protein 7
hsa-miR-588	1	0	1	1	1	1	ANKRD42	ankyrin repeat domain 42
hsa-miR-588	1	0	1	1	1	1	TMEM65	transmembrane protein 65
hsa-miR-588	1	0	1	1	1	1	ADAMTS6	ADAM metallopeptidase with thrombospondin type 1 motif, 6
hsa-miR-588	1	0	1	0	1	1	ZC3H6	zinc finger CCCH-type containing 6
hsa-miR-588	1	0	1	0	0	0	RAB15	RAB15, member RAS oncogene family
hsa-miR-588	0	0	1	1	1	1	COL25A1	collagen, type XXV, alpha 1
hsa-miR-588	1	0	1	0	1	1	PRICKLE2	prickle homolog 2 (Drosophila)
hsa-miR-588	0	0	1	1	1	1	COL18A1-AS1	COL18A1 antisense RNA 1
hsa-miR-588	0	0	1	1	1	1	CCDC80	coiled-coil domain containing 80
hsa-miR-588	1	0	1	1	1	1	ATRNL1	attractin-like 1
hsa-miR-588	1	0	1	1	1	1	FREM2	FRAS1 related extracellular matrix protein 2
hsa-miR-588	1	0	1	1	1	1	TEX19	testis expressed 19
hsa-miR-588	1	0	1	1	1	1	SAMD12	sterile alpha motif domain containing 12
hsa-miR-588	0	0	1	1	1	1	PATE2	prostate and testis expressed 2
hsa-miR-588	1	0	1	1	1	1	XKRX	XK, Kell blood group complex subunit-related, X-linked
hsa-miR-588	0	0	1	0	0	0	SNORD4A	small nucleolar RNA, C/D box 4A
hsa-miR-588	0	0	1	0	0	0	ESRRAP2	estrogen-related receptor alpha pseudogene 2
hsa-miR-588	0	0	1	0	0	0	PCDHB19P	protocadherin beta 19 pseudogene
hsa-miR-588	0	0	1	0	0	0	LOC339240	keratin 17 pseudogene
hsa-miR-588	0	0	1	0	0	0	LYPLA2P1	lysophospholipase II pseudogene 1
hsa-miR-588	0	0	1	0	0	0	ANXA2P3	annexin A2 pseudogene 3
hsa-miR-588	0	0	1	0	0	0	MIR155HG	MIR155 host gene (non-protein coding)
hsa-miR-588	0	0	1	0	0	0	LOC407835	mitogen-activated protein kinase kinase 2 pseudogene
hsa-miR-588	0	0	1	0	0	0	OR7E91P	olfactory receptor, family 7, subfamily E, member 91 pseudogene
hsa-miR-588	0	0	1	0	0	0	TPI1P2	triosephosphate isomerase 1 pseudogene 2
hsa-miR-588	0	0	1	0	0	0	RBMXP3	RNA binding motif protein, X-linked pseudogene 3
hsa-miR-588	0	0	1	0	0	0	FAM192BP	family with sequence similarity 192, member B pseudogene
hsa-miR-588	0	0	1	0	0	0	PDIA3P	protein disulfide isomerase family A, member 3 pseudogene
hsa-miR-588	0	0	1	0	0	0	SNORA52	small nucleolar RNA, H/ACA box 52
hsa-miR-588	0	0	1	0	0	0	DGCR5	DiGeorge syndrome critical region gene 5 (non-protein coding)
hsa-miR-588	0	0	1	0	0	0	HTR7P1	5-hydroxytryptamine (serotonin) receptor 7 pseudogene 1
hsa-miR-588	0	0	1	0	0	0	RNF126P1	ring finger protein 126 pseudogene 1
hsa-miR-588	0	0	1	0	0	0	SIGLEC16	sialic acid binding Ig-like lectin 16 (gene/pseudogene)
hsa-miR-588	0	0	1	0	0	0	LOC401010	nucleolar complex associated 2 homolog (S. cerevisiae) pseudogene
hsa-miR-588	0	0	1	0	0	0	DUSP5P	dual specificity phosphatase 5 pseudogene
hsa-miR-588	0	0	1	0	0	0	HNRNPA1P16	heterogeneous nuclear ribonucleoprotein A1 pseudogene 16
hsa-miR-588	0	0	1	0	0	0	TCAM1P	testicular cell adhesion molecule 1 homolog (mouse), pseudogene
hsa-miR-588	0	0	1	0	0	0	HSP90B3P	heat shock protein 90kDa beta (Grp94), member 3, pseudogene
hsa-miR-588	1	0	1	1	0	0	KIAA1549L	KIAA1549-like
hsa-miR-588	0	0	1	1	1	1	CNGB1	cyclic nucleotide gated channel beta 1
hsa-miR-588	0	0	1	1	1	1	PEG3	paternally expressed 3
hsa-miR-588	0	0	1	0	0	0	MUC5AC	mucin 5AC, oligomeric mucus/gel-forming
hsa-miR-588	0	0	1	1	0	0	GPR17	G protein-coupled receptor 17
hsa-miR-588	0	0	1	1	1	1	CACNG3	calcium channel, voltage-dependent, gamma subunit 3
hsa-miR-588	0	0	0	1	0	0	PRR5-ARHGAP8	PRR5-ARHGAP8 readthrough
hsa-miR-588	0	0	1	1	0	0	PRR5	proline rich 5 (renal)
hsa-miR-588	1	0	1	1	1	1	STARD3NL	STARD3 N-terminal like
hsa-miR-588	0	0	1	1	0	0	C20orf43	chromosome 20 open reading frame 43
hsa-miR-588	1	0	1	1	1	1	B4GALT7	xylosylprotein beta 1,4-galactosyltransferase, polypeptide 7
hsa-miR-588	0	0	0	1	0	0	TSPAN32	tetraspanin 32
hsa-miR-588	0	0	0	1	0	0	ZNF416	zinc finger protein 416
hsa-miR-588	1	0	1	1	1	1	C20orf112	chromosome 20 open reading frame 112
hsa-miR-588	1	0	1	1	1	1	PDRG1	p53 and DNA-damage regulated 1
hsa-miR-588	0	0	0	1	0	0	GMIP	GEM interacting protein
hsa-miR-588	0	0	0	1	1	1	RAB26	RAB26, member RAS oncogene family
hsa-miR-588	0	0	1	1	0	0	PSMD8	proteasome (prosome, macropain) 26S subunit, non-ATPase, 8
hsa-miR-588	1	0	0	1	1	1	CDC34	cell division cycle 34 homolog (S. cerevisiae)
hsa-miR-588	0	0	1	1	0	0	TCN2	transcobalamin II
hsa-miR-588	0	0	0	1	0	0	LGALS2	lectin, galactoside-binding, soluble, 2
hsa-miR-588	0	0	0	1	0	0	HSCB	HscB iron-sulfur cluster co-chaperone homolog (E. coli)
hsa-miR-588	0	0	1	1	0	0	PIGU	phosphatidylinositol glycan anchor biosynthesis, class U
hsa-miR-588	0	0	1	1	0	0	USP11	ubiquitin specific peptidase 11
hsa-miR-588	0	0	0	1	1	1	NTHL1	nth endonuclease III-like 1 (E. coli)
hsa-miR-588	0	0	1	1	0	0	QPRT	quinolinate phosphoribosyltransferase
hsa-miR-588	1	0	1	1	1	1	GDAP1	ganglioside induced differentiation associated protein 1
hsa-miR-588	0	0	0	1	0	0	CPA2	carboxypeptidase A2 (pancreatic)
hsa-miR-588	0	0	1	1	1	1	TMEM176B	transmembrane protein 176B
hsa-miR-588	0	0	0	1	1	1	ST6GALNAC2	ST6 (alpha-N-acetyl-neuraminyl-2,3-beta-galactosyl-1,3)-N-acetylgalactosaminide alpha-2,6-sialyltransferase 2
hsa-miR-588	0	0	0	1	0	0	ICAM2	intercellular adhesion molecule 2
hsa-miR-588	0	0	1	1	1	1	KRT32	keratin 32
hsa-miR-588	0	0	0	1	1	1	KAT2A	K(lysine) acetyltransferase 2A
hsa-miR-588	0	0	0	1	0	0	HSD17B1	hydroxysteroid (17-beta) dehydrogenase 1
hsa-miR-588	0	0	0	1	0	0	MRPL23	mitochondrial ribosomal protein L23
hsa-miR-588	1	0	0	1	1	1	SYT10	synaptotagmin X
hsa-miR-588	0	0	0	1	0	0	PRR4	proline rich 4 (lacrimal)
hsa-miR-588	0	0	0	1	1	1	GPN3	GPN-loop GTPase 3
hsa-miR-588	1	0	1	1	0	0	MYL2	myosin, light chain 2, regulatory, cardiac, slow
hsa-miR-588	0	0	0	1	1	1	PRLR	prolactin receptor
hsa-miR-588	0	0	0	1	0	0	ENO1	enolase 1, (alpha)
hsa-miR-588	1	0	1	1	0	0	CCDC92	coiled-coil domain containing 92
hsa-miR-588	0	0	0	1	0	0	ADCK1	aarF domain containing kinase 1
hsa-miR-588	1	0	0	1	0	0	TMEM180	transmembrane protein 180
hsa-miR-588	0	0	0	1	1	1	TTLL2	tubulin tyrosine ligase-like family, member 2
hsa-miR-588	0	0	1	1	1	1	POLM	polymerase (DNA directed), mu
hsa-miR-588	0	0	1	1	1	1	DYNLL1	dynein, light chain, LC8-type 1
hsa-miR-588	1	0	0	1	0	0	CD97	CD97 molecule
hsa-miR-588	0	0	0	1	0	0	BATF3	basic leucine zipper transcription factor, ATF-like 3
hsa-miR-588	0	0	0	1	0	0	ZNF350	zinc finger protein 350
hsa-miR-588	0	0	0	1	0	0	INHA	inhibin, alpha
hsa-miR-588	0	0	0	1	0	0	ACTR5	ARP5 actin-related protein 5 homolog (yeast)
hsa-miR-588	1	0	1	1	1	1	SOX9	SRY (sex determining region Y)-box 9
hsa-miR-588	0	0	0	1	1	1	ARMC7	armadillo repeat containing 7
hsa-miR-588	0	0	1	1	0	0	ARL2	ADP-ribosylation factor-like 2
hsa-miR-588	0	0	0	1	1	1	SDF2	stromal cell-derived factor 2
hsa-miR-588	0	0	1	1	1	1	L3HYPDH	L-3-hydroxyproline dehydratase (trans-)
hsa-miR-588	0	0	1	1	0	0	CTAG2	cancer/testis antigen 2
hsa-miR-588	0	0	0	1	0	0	TICAM1	toll-like receptor adaptor molecule 1
hsa-miR-588	0	0	0	1	0	0	SELO	selenoprotein O
hsa-miR-588	0	0	0	1	0	0	KLK9	kallikrein-related peptidase 9
hsa-miR-588	1	0	1	1	1	1	SALL1	sal-like 1 (Drosophila)
hsa-miR-588	0	0	1	1	0	0	PAM16	presequence translocase-associated motor 16 homolog (S. cerevisiae)
hsa-miR-588	0	0	1	1	1	1	CORO7	coronin 7
hsa-miR-588	0	0	0	1	1	1	TRMT2A	tRNA methyltransferase 2 homolog A (S. cerevisiae)
hsa-miR-588	0	0	0	1	0	0	APOC4	apolipoprotein C-IV
hsa-miR-588	0	0	1	1	0	0	APOC1	apolipoprotein C-I
hsa-miR-588	0	0	0	1	0	0	USHBP1	Usher syndrome 1C binding protein 1
hsa-miR-588	1	0	0	1	1	1	PRIC285	peroxisomal proliferator-activated receptor A interacting complex 285
hsa-miR-588	0	0	0	1	1	1	ZCCHC9	zinc finger, CCHC domain containing 9
hsa-miR-588	0	0	0	1	1	1	SLC52A1	solute carrier family 52, riboflavin transporter, member 1
hsa-miR-588	0	0	0	1	1	1	SCO1	SCO cytochrome oxidase deficient homolog 1 (yeast)
hsa-miR-588	0	0	1	1	0	0	LGALS12	lectin, galactoside-binding, soluble, 12
hsa-miR-588	0	0	1	1	0	0	SLC2A11	solute carrier family 2 (facilitated glucose transporter), member 11
hsa-miR-588	0	0	1	1	0	0	SEC14L4	SEC14-like 4 (S. cerevisiae)
hsa-miR-588	1	0	1	1	1	1	AMPD3	adenosine monophosphate deaminase 3
hsa-miR-588	1	0	1	1	1	1	TRAFD1	TRAF-type zinc finger domain containing 1
hsa-miR-588	0	0	0	1	1	1	AVIL	advillin
hsa-miR-588	0	0	0	1	1	1	BCMO1	beta-carotene 15,15'-monooxygenase 1
hsa-miR-588	0	0	1	1	1	1	IL6	interleukin 6 (interferon, beta 2)
hsa-miR-588	0	0	1	1	0	0	TBRG4	transforming growth factor beta regulator 4
hsa-miR-588	1	0	0	1	1	1	DBNL	drebrin-like
hsa-miR-588	1	0	1	1	0	0	CCM2	cerebral cavernous malformation 2
hsa-miR-588	0	0	1	1	1	1	RTP4	receptor (chemosensory) transporter protein 4
hsa-miR-588	0	0	0	1	0	0	PSMB7	proteasome (prosome, macropain) subunit, beta type, 7
hsa-miR-588	0	0	1	1	1	1	IFNA14	interferon, alpha 14
hsa-miR-588	0	0	1	1	0	0	PSORS1C2	psoriasis susceptibility 1 candidate 2
hsa-miR-588	0	0	1	1	1	1	MRPS18B	mitochondrial ribosomal protein S18B
hsa-miR-588	0	0	1	1	0	0	B9D1	B9 protein domain 1
hsa-miR-588	0	0	1	1	1	1	FLT4	fms-related tyrosine kinase 4
hsa-miR-588	1	0	0	1	0	0	SERPINA3	serpin peptidase inhibitor, clade A (alpha-1 antiproteinase, antitrypsin), member 3
hsa-miR-588	1	0	0	1	1	1	ATF1	activating transcription factor 1
hsa-miR-588	0	0	0	1	1	1	METTL2B	methyltransferase like 2B
hsa-miR-588	0	0	0	1	0	0	GSDMD	gasdermin D
hsa-miR-588	0	0	0	1	0	0	XRCC1	X-ray repair complementing defective repair in Chinese hamster cells 1
hsa-miR-588	0	0	1	1	1	1	ARPC1A	actin related protein 2/3 complex, subunit 1A, 41kDa
hsa-miR-588	0	0	0	1	0	0	CCDC94	coiled-coil domain containing 94
hsa-miR-588	0	0	0	1	0	0	ABCA7	ATP-binding cassette, sub-family A (ABC1), member 7
hsa-miR-588	0	0	0	1	0	0	CCDC61	coiled-coil domain containing 61
hsa-miR-588	0	0	1	1	0	0	AKAP8L	A kinase (PRKA) anchor protein 8-like
hsa-miR-588	1	0	1	1	1	1	SNRNP40	small nuclear ribonucleoprotein 40kDa (U5)
hsa-miR-588	0	0	1	1	0	0	POPDC2	popeye domain containing 2
hsa-miR-588	0	0	0	1	0	0	LXN	latexin
hsa-miR-588	1	0	1	1	1	1	ALS2	amyotrophic lateral sclerosis 2 (juvenile)
hsa-miR-588	0	0	1	1	0	0	MCM2	minichromosome maintenance complex component 2
hsa-miR-588	0	0	0	1	0	0	TRPC7	transient receptor potential cation channel, subfamily C, member 7
hsa-miR-588	0	0	0	1	0	0	SIL1	SIL1 homolog, endoplasmic reticulum chaperone (S. cerevisiae)
hsa-miR-588	1	0	0	1	0	0	UNC45A	unc-45 homolog A (C. elegans)
hsa-miR-588	1	0	1	1	1	1	CRTC3	CREB regulated transcription coactivator 3
hsa-miR-588	0	0	1	1	0	0	NEK8	NIMA (never in mitosis gene a)- related kinase 8
hsa-miR-588	0	0	1	1	0	0	AFG3L2	AFG3 ATPase family gene 3-like 2 (S. cerevisiae)
hsa-miR-588	1	0	1	1	1	1	CBX2	chromobox homolog 2
hsa-miR-588	0	0	1	1	0	0	NT5C3L	5'-nucleotidase, cytosolic III-like
hsa-miR-588	1	0	1	1	1	1	IGFBP4	insulin-like growth factor binding protein 4
hsa-miR-588	1	0	0	1	0	0	SH3GL1	SH3-domain GRB2-like 1
hsa-miR-588	0	0	1	1	1	1	PSG5	pregnancy specific beta-1-glycoprotein 5
hsa-miR-588	0	0	0	1	1	1	PSG4	pregnancy specific beta-1-glycoprotein 4
hsa-miR-588	0	0	1	1	1	1	BCAM	basal cell adhesion molecule (Lutheran blood group)
hsa-miR-588	0	0	0	1	0	0	GPR32	G protein-coupled receptor 32
hsa-miR-588	0	0	0	1	1	1	C1orf35	chromosome 1 open reading frame 35
hsa-miR-588	1	0	1	1	1	1	ABI3BP	ABI family, member 3 (NESH) binding protein
hsa-miR-588	0	0	1	1	1	1	GPR128	G protein-coupled receptor 128
hsa-miR-588	0	0	1	1	1	1	TM4SF19	transmembrane 4 L six family member 19
hsa-miR-588	0	0	0	1	0	0	SLC10A6	solute carrier family 10 (sodium/bile acid cotransporter family), member 6
hsa-miR-588	0	0	1	1	1	1	UIMC1	ubiquitin interaction motif containing 1
hsa-miR-588	0	0	1	1	0	0	NFKBIE	nuclear factor of kappa light polypeptide gene enhancer in B-cells inhibitor, epsilon
hsa-miR-588	0	0	1	1	0	0	IL2RG	interleukin 2 receptor, gamma
hsa-miR-588	0	0	0	1	1	1	ZNF16	zinc finger protein 16
hsa-miR-588	0	0	1	1	1	1	PLIN2	perilipin 2
hsa-miR-588	1	0	1	1	1	1	ADAMTSL1	ADAMTS-like 1
hsa-miR-588	0	0	1	1	0	0	TMX2	thioredoxin-related transmembrane protein 2
hsa-miR-588	0	0	1	1	0	0	PIGT	phosphatidylinositol glycan anchor biosynthesis, class T
hsa-miR-588	1	0	1	1	1	1	CD40	CD40 molecule, TNF receptor superfamily member 5
hsa-miR-588	0	0	1	1	1	1	AKR1B1	aldo-keto reductase family 1, member B1 (aldose reductase)
hsa-miR-588	1	0	1	1	1	1	TIAM1	T-cell lymphoma invasion and metastasis 1
hsa-miR-588	0	0	0	1	0	0	IL34	interleukin 34
hsa-miR-588	1	0	1	1	0	0	UBN2	ubinuclein 2
hsa-miR-588	1	0	1	1	1	1	FAM160B2	family with sequence similarity 160, member B2
hsa-miR-588	0	0	0	1	0	0	CHRNB3	cholinergic receptor, nicotinic, beta 3 (neuronal)
hsa-miR-588	0	0	0	1	0	0	TMEM141	transmembrane protein 141
hsa-miR-588	0	0	0	1	0	0	KIAA1984	KIAA1984
hsa-miR-588	0	0	1	1	0	0	GFRA4	GDNF family receptor alpha 4
hsa-miR-588	1	0	1	1	1	1	ALDH4A1	aldehyde dehydrogenase 4 family, member A1
hsa-miR-588	1	0	1	1	1	1	NR2F6	nuclear receptor subfamily 2, group F, member 6
hsa-miR-588	0	0	1	1	0	0	ANKLE1	ankyrin repeat and LEM domain containing 1
hsa-miR-588	0	0	0	1	0	0	ZG16B	zymogen granule protein 16 homolog B (rat)
hsa-miR-588	0	0	1	1	0	0	GNG3	guanine nucleotide binding protein (G protein), gamma 3
hsa-miR-588	0	0	0	1	1	1	LHCGR	luteinizing hormone/choriogonadotropin receptor
hsa-miR-588	0	0	0	1	1	1	TMEM79	transmembrane protein 79
hsa-miR-588	0	0	1	1	0	0	GRM2	glutamate receptor, metabotropic 2
hsa-miR-588	0	0	0	1	0	0	DAGLB	diacylglycerol lipase, beta
hsa-miR-588	1	0	1	1	1	1	GAS1	growth arrest-specific 1
hsa-miR-588	0	0	1	1	1	1	GPR176	G protein-coupled receptor 176
hsa-miR-588	0	0	1	1	0	0	PPP1R14D	protein phosphatase 1, regulatory (inhibitor) subunit 14D
hsa-miR-588	0	0	0	1	1	1	AVPR1A	arginine vasopressin receptor 1A
hsa-miR-588	0	0	1	1	0	0	CHRNA5	cholinergic receptor, nicotinic, alpha 5 (neuronal)
hsa-miR-588	0	0	0	1	0	0	NNMT	nicotinamide N-methyltransferase
hsa-miR-588	0	0	1	1	1	1	PLIN1	perilipin 1
hsa-miR-588	0	0	0	1	0	0	GPR182	G protein-coupled receptor 182
hsa-miR-588	1	0	1	1	1	1	SLC27A4	solute carrier family 27 (fatty acid transporter), member 4
hsa-miR-588	0	0	0	1	0	0	TRPM2	transient receptor potential cation channel, subfamily M, member 2
hsa-miR-588	0	0	0	1	0	0	PIEZO1	piezo-type mechanosensitive ion channel component 1
hsa-miR-588	0	0	0	1	1	1	ZNF582	zinc finger protein 582
hsa-miR-588	0	0	0	1	0	0	ACER1	alkaline ceramidase 1
hsa-miR-588	0	0	1	1	0	0	GHDC	GH3 domain containing
hsa-miR-588	0	0	0	1	0	0	LTBP3	latent transforming growth factor beta binding protein 3
hsa-miR-588	0	0	1	1	0	0	IRX1	iroquois homeobox 1
hsa-miR-588	0	0	1	1	0	0	DEFB4A	defensin, beta 4A
hsa-miR-588	0	0	1	1	1	1	ITGB1	integrin, beta 1 (fibronectin receptor, beta polypeptide, antigen CD29 includes MDF2, MSK12)
hsa-miR-588	0	0	1	1	0	0	HMCN2	hemicentin 2
hsa-miR-588	0	0	1	1	0	0	TEX13B	testis expressed 13B
hsa-miR-588	0	0	0	1	1	1	FUT3	fucosyltransferase 3 (galactoside 3(4)-L-fucosyltransferase, Lewis blood group)
hsa-miR-588	0	0	0	1	1	1	MRAP	melanocortin 2 receptor accessory protein
hsa-miR-588	1	0	1	1	0	0	DTNB	dystrobrevin, beta
hsa-miR-588	0	0	0	1	0	0	C11orf24	chromosome 11 open reading frame 24
hsa-miR-588	1	0	1	1	0	0	INO80E	INO80 complex subunit E
hsa-miR-588	1	0	1	1	0	0	XPO6	exportin 6
hsa-miR-588	0	0	0	1	1	1	GUSB	glucuronidase, beta
hsa-miR-588	0	0	1	1	1	1	ITIH5	inter-alpha-trypsin inhibitor heavy chain family, member 5
hsa-miR-588	0	0	1	1	1	1	C17orf28	chromosome 17 open reading frame 28
hsa-miR-588	0	0	0	1	0	0	DEGS2	delta(4)-desaturase, sphingolipid 2
hsa-miR-588	0	0	0	1	1	1	SLC9C1	solute carrier family 9, subfamily C (Na+-transporting carboxylic acid decarboxylase), member 1
hsa-miR-588	0	0	1	1	1	1	FEN1	flap structure-specific endonuclease 1
hsa-miR-588	0	0	1	1	0	0	GBX2	gastrulation brain homeobox 2
hsa-miR-588	0	0	0	1	0	0	RLN3	relaxin 3
hsa-miR-588	1	0	1	1	1	1	GTPBP2	GTP binding protein 2
hsa-miR-588	0	0	1	1	0	0	AVPI1	arginine vasopressin-induced 1
hsa-miR-588	1	0	1	1	1	1	SUCLG2	succinate-CoA ligase, GDP-forming, beta subunit
hsa-miR-588	0	0	0	1	0	0	THOP1	thimet oligopeptidase 1
hsa-miR-588	0	0	0	1	0	0	STARD6	StAR-related lipid transfer (START) domain containing 6
hsa-miR-588	1	0	1	1	1	1	PDLIM2	PDZ and LIM domain 2 (mystique)
hsa-miR-588	0	0	1	1	1	1	KLF7	Kruppel-like factor 7 (ubiquitous)
hsa-miR-588	0	0	1	1	0	0	CFLAR	CASP8 and FADD-like apoptosis regulator
hsa-miR-588	0	0	0	1	1	1	ATP6V0A4	ATPase, H+ transporting, lysosomal V0 subunit a4
hsa-miR-588	1	0	0	1	1	1	SNED1	sushi, nidogen and EGF-like domains 1
hsa-miR-588	0	0	1	1	0	0	MRPL48	mitochondrial ribosomal protein L48
hsa-miR-588	1	0	1	1	0	0	PRPF8	PRP8 pre-mRNA processing factor 8 homolog (S. cerevisiae)
hsa-miR-588	1	0	0	1	0	0	CTU2	cytosolic thiouridylase subunit 2 homolog (S. pombe)
hsa-miR-588	0	0	1	1	0	0	LAS1L	LAS1-like (S. cerevisiae)
hsa-miR-588	1	0	1	1	1	1	CAMSAP1	calmodulin regulated spectrin-associated protein 1
hsa-miR-588	0	0	1	1	0	0	POLD4	polymerase (DNA-directed), delta 4, accessory subunit
hsa-miR-588	0	0	1	1	0	0	KRI1	KRI1 homolog (S. cerevisiae)
hsa-miR-588	0	0	0	1	0	0	PARP10	poly (ADP-ribose) polymerase family, member 10
hsa-miR-588	0	0	0	1	1	1	HMHA1	histocompatibility (minor) HA-1
hsa-miR-588	0	0	1	1	0	0	GRINA	glutamate receptor, ionotropic, N-methyl D-aspartate-associated protein 1 (glutamate binding)
hsa-miR-588	0	0	1	1	0	0	GAK	cyclin G associated kinase
hsa-miR-588	1	0	1	1	0	0	PPP2R2D	protein phosphatase 2, regulatory subunit B, delta
hsa-miR-588	1	0	0	1	0	0	TNIP1	TNFAIP3 interacting protein 1
hsa-miR-588	1	0	1	1	1	1	RHOT2	ras homolog family member T2
hsa-miR-588	0	0	1	1	1	1	TMEM132C	transmembrane protein 132C
hsa-miR-588	0	0	0	1	1	1	WSB2	WD repeat and SOCS box containing 2
hsa-miR-588	0	0	0	1	0	0	RRP12	ribosomal RNA processing 12 homolog (S. cerevisiae)
hsa-miR-588	0	0	0	1	1	1	TDRD6	tudor domain containing 6
hsa-miR-588	0	0	0	1	0	0	LOC100129540	uncharacterized LOC100129540
hsa-miR-588	1	0	1	1	0	0	PDIA5	protein disulfide isomerase family A, member 5
hsa-miR-588	0	0	1	1	1	1	HYDIN	HYDIN, axonemal central pair apparatus protein
hsa-miR-588	0	0	0	1	0	0	DEF6	differentially expressed in FDCP 6 homolog (mouse)
hsa-miR-588	0	0	1	1	0	0	SDK2	sidekick cell adhesion molecule 2
hsa-miR-588	0	0	1	1	0	0	ASCC1	activating signal cointegrator 1 complex subunit 1
hsa-miR-588	0	0	0	1	0	0	STAG3	stromal antigen 3
hsa-miR-588	0	0	1	1	1	1	ZNF318	zinc finger protein 318
hsa-miR-588	0	0	1	1	1	1	CXCR2	chemokine (C-X-C motif) receptor 2
hsa-miR-588	0	0	1	1	0	0	FAM211B	family with sequence similarity 211, member B
hsa-miR-588	1	0	1	1	1	1	RALGPS1	Ral GEF with PH domain and SH3 binding motif 1
hsa-miR-588	0	0	1	1	0	0	KARS	lysyl-tRNA synthetase
hsa-miR-588	1	0	0	1	0	0	ZFPM1	zinc finger protein, multitype 1
hsa-miR-588	0	0	0	1	0	0	SLC16A8	solute carrier family 16, member 8 (monocarboxylic acid transporter 3)
hsa-miR-588	0	0	1	1	0	0	B3GNTL1	UDP-GlcNAc:betaGal beta-1,3-N-acetylglucosaminyltransferase-like 1
hsa-miR-588	0	0	0	1	0	0	HBA1	hemoglobin, alpha 1
hsa-miR-588	0	0	1	1	0	0	VWF	von Willebrand factor
hsa-miR-588	0	0	1	1	0	0	THAP4	THAP domain containing 4
hsa-miR-588	1	0	1	1	0	0	CCDC71	coiled-coil domain containing 71
hsa-miR-588	0	0	0	1	0	0	OR51G2	olfactory receptor, family 51, subfamily G, member 2
hsa-miR-588	0	0	0	1	0	0	TRIM72	tripartite motif containing 72
hsa-miR-588	0	0	0	1	0	0	ZNF836	zinc finger protein 836
hsa-miR-588	0	0	1	1	1	1	IL12RB1	interleukin 12 receptor, beta 1
hsa-miR-588	0	0	0	1	0	0	SSNA1	Sjogren syndrome nuclear autoantigen 1
hsa-miR-588	1	0	1	1	0	0	SMCR7	Smith-Magenis syndrome chromosome region, candidate 7
hsa-miR-588	0	0	0	1	0	0	OR3A4P	olfactory receptor, family 3, subfamily A, member 4 pseudogene
hsa-miR-588	1	0	1	1	1	1	LRRC57	leucine rich repeat containing 57
hsa-miR-588	0	0	0	1	0	0	WFDC11	WAP four-disulfide core domain 11
hsa-miR-588	0	0	1	1	1	1	BAIAP3	BAI1-associated protein 3
hsa-miR-588	0	0	1	1	1	1	SH3GL3	SH3-domain GRB2-like 3
hsa-miR-588	0	0	0	1	0	0	LINC00174	long intergenic non-protein coding RNA 174
hsa-miR-588	0	0	1	1	1	1	ATXN2L	ataxin 2-like
hsa-miR-588	0	0	0	1	0	0	PLCB3	phospholipase C, beta 3 (phosphatidylinositol-specific)
hsa-miR-588	0	0	0	1	1	1	FBXW5	F-box and WD repeat domain containing 5
hsa-miR-588	0	0	1	1	1	1	KLHDC7A	kelch domain containing 7A
hsa-miR-588	1	0	1	1	0	0	PACS2	phosphofurin acidic cluster sorting protein 2
hsa-miR-588	1	0	1	1	1	1	ZNF562	zinc finger protein 562
hsa-miR-588	0	0	1	1	0	0	POLR2J	polymerase (RNA) II (DNA directed) polypeptide J, 13.3kDa
hsa-miR-588	0	0	0	1	0	0	SPAG11A	sperm associated antigen 11A
hsa-miR-588	0	0	0	1	0	0	GPR139	G protein-coupled receptor 139
hsa-miR-588	0	0	0	1	0	0	NOC2L	nucleolar complex associated 2 homolog (S. cerevisiae)
hsa-miR-588	0	0	1	1	0	0	EFCAB4A	EF-hand calcium binding domain 4A
hsa-miR-588	0	0	1	1	1	1	SDHA	succinate dehydrogenase complex, subunit A, flavoprotein (Fp)
hsa-miR-588	0	0	0	1	0	0	RAB11B	RAB11B, member RAS oncogene family
hsa-miR-588	0	0	1	1	0	0	SPRR4	small proline-rich protein 4
hsa-miR-588	0	0	1	1	1	1	FMNL1	formin-like 1
hsa-miR-588	0	0	1	1	1	1	COL7A1	collagen, type VII, alpha 1
hsa-miR-588	0	0	1	1	0	0	CTAG1B	cancer/testis antigen 1B
hsa-miR-588	0	0	0	1	0	0	OR6B2	olfactory receptor, family 6, subfamily B, member 2
hsa-miR-588	0	0	0	1	0	0	POTEKP	POTE ankyrin domain family, member K, pseudogene
hsa-miR-588	0	0	0	1	0	0	C11orf35	chromosome 11 open reading frame 35
hsa-miR-588	0	0	0	1	0	0	ADAT3	adenosine deaminase, tRNA-specific 3
hsa-miR-588	0	0	0	1	1	1	C14orf80	chromosome 14 open reading frame 80
hsa-miR-588	0	0	0	1	0	0	ALG12	asparagine-linked glycosylation 12, alpha-1,6-mannosyltransferase homolog (S. cerevisiae)
hsa-miR-588	0	0	0	1	0	0	PRAMEF7	PRAME family member 7
hsa-miR-588	1	0	1	1	0	0	INPP5J	inositol polyphosphate-5-phosphatase J
hsa-miR-588	0	0	0	1	0	0	ZNF479	zinc finger protein 479
hsa-miR-588	1	0	1	1	1	1	SLC6A17	solute carrier family 6, member 17
hsa-miR-588	1	0	1	1	1	1	ACTG1	actin, gamma 1
hsa-miR-588	1	0	0	1	0	0	RGS19	regulator of G-protein signaling 19
hsa-miR-588	0	0	0	1	0	0	ZNF484	zinc finger protein 484
hsa-miR-588	0	0	0	1	0	0	OR6A2	olfactory receptor, family 6, subfamily A, member 2
hsa-miR-588	0	0	0	1	0	0	TAS2R60	taste receptor, type 2, member 60
hsa-miR-588	0	0	1	1	0	0	MILR1	mast cell immunoglobulin-like receptor 1
hsa-miR-588	0	0	1	1	1	1	TPRN	taperin
hsa-miR-588	0	0	0	1	0	0	CTAG1A	cancer/testis antigen 1A
hsa-miR-588	0	0	1	1	0	0	HIST1H2AJ	histone cluster 1, H2aj
hsa-miR-588	0	0	1	1	0	0	MED12	mediator complex subunit 12
hsa-miR-588	0	0	1	1	1	1	MRPL12	mitochondrial ribosomal protein L12
hsa-miR-588	0	0	0	1	1	1	TOM1L2	target of myb1-like 2 (chicken)
hsa-miR-588	0	0	0	1	0	0	FGF3	fibroblast growth factor 3
hsa-miR-588	1	0	0	1	0	0	UBL4B	ubiquitin-like 4B
hsa-miR-588	0	0	0	1	0	0	WDR86	WD repeat domain 86
hsa-miR-588	0	0	0	1	0	0	C20orf94	chromosome 20 open reading frame 94
hsa-miR-588	0	0	0	1	0	0	KRTAP22-1	keratin associated protein 22-1
hsa-miR-588	1	0	1	1	1	1	RASSF4	Ras association (RalGDS/AF-6) domain family member 4
hsa-miR-588	0	0	0	1	0	0	C6orf1	chromosome 6 open reading frame 1
hsa-miR-588	1	0	1	1	1	1	ZNF202	zinc finger protein 202
hsa-miR-588	0	0	1	1	1	1	IL17RE	interleukin 17 receptor E
hsa-miR-588	0	0	0	1	1	1	PKD1L2	polycystic kidney disease 1-like 2
hsa-miR-588	0	0	1	1	0	0	TBC1D22A	TBC1 domain family, member 22A
hsa-miR-588	0	0	0	1	0	0	TSPO	translocator protein (18kDa)
hsa-miR-588	0	0	0	1	0	0	ZNF394	zinc finger protein 394
hsa-miR-588	0	0	0	1	0	0	LOC642131	putative V-set and immunoglobulin domain-containing-like protein IGHV4OR15-8-like
hsa-miR-588	0	0	0	1	1	1	CERKL	ceramide kinase-like
hsa-miR-588	0	0	1	1	0	0	YIF1B	Yip1 interacting factor homolog B (S. cerevisiae)
hsa-miR-588	0	0	1	1	0	0	DMKN	dermokine
hsa-miR-588	0	0	0	1	0	0	INTS12	integrator complex subunit 12
hsa-miR-588	0	0	0	1	1	1	DDC	dopa decarboxylase (aromatic L-amino acid decarboxylase)
hsa-miR-588	0	0	0	1	0	0	ZSCAN16	zinc finger and SCAN domain containing 16
hsa-miR-588	0	0	1	1	0	0	GOLGB1	golgin B1
hsa-miR-588	1	0	1	1	0	0	PFKM	phosphofructokinase, muscle
hsa-miR-588	0	0	1	1	1	1	MOCS1	molybdenum cofactor synthesis 1
hsa-miR-588	0	0	1	1	1	1	BID	BH3 interacting domain death agonist
hsa-miR-588	0	0	0	1	1	1	DCAKD	dephospho-CoA kinase domain containing
hsa-miR-588	0	0	0	1	0	0	OTOG	otogelin
hsa-miR-588	1	0	0	1	0	0	MAP2K3	mitogen-activated protein kinase kinase 3
hsa-miR-588	0	0	0	1	0	0	NLRP13	NLR family, pyrin domain containing 13
hsa-miR-588	1	0	1	1	1	1	C3orf62	chromosome 3 open reading frame 62
hsa-miR-588	0	0	0	1	1	1	HHIPL2	HHIP-like 2
hsa-miR-588	1	0	1	1	0	0	SLC35E4	solute carrier family 35, member E4
hsa-miR-588	1	0	1	1	1	1	CDK18	cyclin-dependent kinase 18
hsa-miR-588	0	0	0	1	0	0	GLTPD1	glycolipid transfer protein domain containing 1
hsa-miR-588	0	0	0	1	1	1	ZNF14	zinc finger protein 14
hsa-miR-588	0	0	1	1	0	0	CCDC109B	coiled-coil domain containing 109B
hsa-miR-588	0	0	1	1	1	1	C14orf79	chromosome 14 open reading frame 79
hsa-miR-588	0	0	1	1	1	1	BPGM	2,3-bisphosphoglycerate mutase
hsa-miR-588	0	0	1	1	0	0	RAD51D	RAD51 homolog D (S. cerevisiae)
hsa-miR-588	0	0	0	1	0	0	FCER2	Fc fragment of IgE, low affinity II, receptor for (CD23)
hsa-miR-588	0	0	1	1	0	0	CLK3	CDC-like kinase 3
hsa-miR-588	0	0	1	1	1	1	NXPH4	neurexophilin 4
hsa-miR-588	1	0	1	1	1	1	MYLIP	myosin regulatory light chain interacting protein
hsa-miR-588	0	0	0	1	0	0	RHBDL1	rhomboid, veinlet-like 1 (Drosophila)
hsa-miR-588	1	0	1	1	1	1	HYOU1	hypoxia up-regulated 1
hsa-miR-588	1	0	1	1	1	1	SLC12A9	solute carrier family 12 (potassium/chloride transporters), member 9
hsa-miR-588	0	0	0	1	1	1	MADCAM1	mucosal vascular addressin cell adhesion molecule 1
hsa-miR-588	0	0	1	1	1	1	TAP1	transporter 1, ATP-binding cassette, sub-family B (MDR/TAP)
hsa-miR-588	1	0	1	1	1	1	WDR6	WD repeat domain 6
hsa-miR-588	0	0	0	1	0	0	ATG7	autophagy related 7
hsa-miR-588	1	0	1	1	1	1	ABHD2	abhydrolase domain containing 2
hsa-miR-588	1	0	1	1	0	0	BEGAIN	brain-enriched guanylate kinase-associated homolog (rat)
hsa-miR-588	1	0	1	1	0	0	GRK6	G protein-coupled receptor kinase 6
hsa-miR-588	0	0	0	1	1	1	LINC00610	long intergenic non-protein coding RNA 610
hsa-miR-588	0	0	1	1	1	1	TPRA1	transmembrane protein, adipocyte asscociated 1
hsa-miR-588	0	0	0	1	0	0	TNFRSF14	tumor necrosis factor receptor superfamily, member 14
hsa-miR-588	0	0	1	1	0	0	SREBF1	sterol regulatory element binding transcription factor 1
hsa-miR-588	0	0	1	1	1	1	MED24	mediator complex subunit 24
hsa-miR-588	0	0	1	1	1	1	PEX14	peroxisomal biogenesis factor 14
hsa-miR-588	1	0	1	1	1	1	PPP1R12B	protein phosphatase 1, regulatory subunit 12B
hsa-miR-588	0	0	1	1	1	1	PPP1R26	protein phosphatase 1, regulatory subunit 26
hsa-miR-588	1	0	1	1	1	1	MDGA2	MAM domain containing glycosylphosphatidylinositol anchor 2
hsa-miR-588	1	0	1	1	1	1	UNC50	unc-50 homolog (C. elegans)
hsa-miR-588	0	0	1	1	0	0	HOMER3	homer homolog 3 (Drosophila)
hsa-miR-588	1	0	1	1	1	1	SEMA4F	sema domain, immunoglobulin domain (Ig), transmembrane domain (TM) and short cytoplasmic domain, (semaphorin) 4F
hsa-miR-588	0	0	1	1	0	0	PLA2G4F	phospholipase A2, group IVF
hsa-miR-588	0	0	1	1	1	1	TUSC1	tumor suppressor candidate 1
hsa-miR-588	0	0	1	1	0	0	ZNF646	zinc finger protein 646
hsa-miR-588	0	0	1	1	1	1	MTPAP	mitochondrial poly(A) polymerase
hsa-miR-588	0	0	0	1	0	0	LRRC8B	leucine rich repeat containing 8 family, member B
hsa-miR-588	0	0	0	1	0	0	BCKDHA	branched chain keto acid dehydrogenase E1, alpha polypeptide
hsa-miR-588	0	0	1	1	0	0	TMEM91	transmembrane protein 91
hsa-miR-588	0	0	1	1	0	0	AXDND1	axonemal dynein light chain domain containing 1
hsa-miR-588	0	0	1	1	0	0	SH2B1	SH2B adaptor protein 1
hsa-miR-588	0	0	1	1	0	0	XRCC6	X-ray repair complementing defective repair in Chinese hamster cells 6
hsa-miR-588	0	0	0	1	0	0	CLN3	ceroid-lipofuscinosis, neuronal 3
hsa-miR-588	0	0	0	1	0	0	PHOSPHO2	phosphatase, orphan 2
hsa-miR-588	0	0	1	1	1	1	SPAG11B	sperm associated antigen 11B
hsa-miR-588	1	0	1	1	1	1	ARNT2	aryl-hydrocarbon receptor nuclear translocator 2
hsa-miR-588	1	0	1	1	1	1	FGFR2	fibroblast growth factor receptor 2
hsa-miR-588	0	0	0	1	0	0	PLEKHG4	pleckstrin homology domain containing, family G (with RhoGef domain) member 4
hsa-miR-588	1	0	1	1	1	1	COL4A2	collagen, type IV, alpha 2
hsa-miR-588	0	0	1	1	0	0	TPM2	tropomyosin 2 (beta)
hsa-miR-588	1	0	1	1	0	0	KAZN	kazrin, periplakin interacting protein
hsa-miR-588	0	0	1	1	1	1	HPS1	Hermansky-Pudlak syndrome 1
hsa-miR-588	0	0	1	1	0	0	FAM19A3	family with sequence similarity 19 (chemokine (C-C motif)-like), member A3
hsa-miR-588	0	0	1	1	0	0	HIST3H2A	histone cluster 3, H2a
hsa-miR-588	0	0	1	1	1	1	OPTC	opticin
hsa-miR-588	0	0	0	1	1	1	NUP43	nucleoporin 43kDa
hsa-miR-588	0	0	1	1	0	0	RGS8	regulator of G-protein signaling 8
hsa-miR-588	1	0	1	1	1	1	ECT2L	epithelial cell transforming sequence 2 oncogene-like
hsa-miR-588	1	0	1	1	1	1	DNM3	dynamin 3
hsa-miR-588	1	0	1	1	1	1	SLC18B1	solute carrier family 18, subfamily B, member 1
hsa-miR-588	1	0	1	1	1	1	ARHGAP30	Rho GTPase activating protein 30
hsa-miR-588	0	0	1	1	1	1	FCRL2	Fc receptor-like 2
hsa-miR-588	0	0	1	1	0	0	THBS3	thrombospondin 3
hsa-miR-588	0	0	1	1	0	0	PMVK	phosphomevalonate kinase
hsa-miR-588	0	0	1	1	0	0	KNDC1	kinase non-catalytic C-lobe domain (KIND) containing 1
hsa-miR-588	0	0	0	1	1	1	BNIP3	BCL2/adenovirus E1B 19kDa interacting protein 3
hsa-miR-588	0	0	0	1	0	0	S100A9	S100 calcium binding protein A9
hsa-miR-588	0	0	0	1	0	0	LCE1C	late cornified envelope 1C
hsa-miR-588	0	0	0	1	0	0	RPF2	ribosome production factor 2 homolog (S. cerevisiae)
hsa-miR-588	0	0	1	1	0	0	CUZD1	CUB and zona pellucida-like domains 1
hsa-miR-588	1	0	1	1	1	1	CDC40	cell division cycle 40 homolog (S. cerevisiae)
hsa-miR-588	0	0	0	1	1	1	FIG4	FIG4 homolog, SAC1 lipid phosphatase domain containing (S. cerevisiae)
hsa-miR-588	0	0	0	1	1	1	MICAL1	microtubule associated monoxygenase, calponin and LIM domain containing 1
hsa-miR-588	0	0	1	1	0	0	SETDB1	SET domain, bifurcated 1
hsa-miR-588	0	0	0	1	0	0	LOC100130236	uncharacterized LOC100130236
hsa-miR-588	0	0	0	1	0	0	VWA2	von Willebrand factor A domain containing 2
hsa-miR-588	0	0	0	1	0	0	FCGR1B	Fc fragment of IgG, high affinity Ib, receptor (CD64)
hsa-miR-588	0	0	0	1	0	0	HSD3B2	hydroxy-delta-5-steroid dehydrogenase, 3 beta- and steroid delta-isomerase 2
hsa-miR-588	0	0	0	1	1	1	CD2	CD2 molecule
hsa-miR-588	1	0	1	1	1	1	SYT6	synaptotagmin VI
hsa-miR-588	0	0	0	1	0	0	NPBWR2	neuropeptides B/W receptor 2
hsa-miR-588	0	0	0	1	1	1	AS3MT	arsenic (+3 oxidation state) methyltransferase
hsa-miR-588	0	0	1	1	0	0	MYBPHL	myosin binding protein H-like
hsa-miR-588	0	0	1	1	1	1	PSRC1	proline/serine-rich coiled-coil 1
hsa-miR-588	0	0	1	1	1	1	ELOVL3	ELOVL fatty acid elongase 3
hsa-miR-588	0	0	1	1	0	0	DPCD	deleted in primary ciliary dyskinesia homolog (mouse)
hsa-miR-588	0	0	1	1	0	0	PNMA6A	paraneoplastic Ma antigen family member 6A
hsa-miR-588	0	0	1	1	0	0	DPPA5	developmental pluripotency associated 5
hsa-miR-588	0	0	0	1	0	0	KHDC1L	KH homology domain containing 1-like
hsa-miR-588	0	0	1	1	0	0	KHDC1	KH homology domain containing 1
hsa-miR-588	0	0	1	1	0	0	HFM1	HFM1, ATP-dependent DNA helicase homolog (S. cerevisiae)
hsa-miR-588	0	0	1	1	1	1	IDS	iduronate 2-sulfatase
hsa-miR-588	0	0	1	1	1	1	CREG1	cellular repressor of E1A-stimulated genes 1
hsa-miR-588	0	0	1	1	1	1	ZNF451	zinc finger protein 451
hsa-miR-588	0	0	0	1	0	0	PSMA7	proteasome (prosome, macropain) subunit, alpha type, 7
hsa-miR-588	1	0	1	1	1	1	OPN5	opsin 5
hsa-miR-588	0	0	0	1	0	0	ECHDC2	enoyl CoA hydratase domain containing 2
hsa-miR-588	0	0	0	1	0	0	FAM65C	family with sequence similarity 65, member C
hsa-miR-588	0	0	0	1	0	0	EDF1	endothelial differentiation-related factor 1
hsa-miR-588	0	0	0	1	0	0	SARDH	sarcosine dehydrogenase
hsa-miR-588	0	0	1	1	0	0	NTNG2	netrin G2
hsa-miR-588	1	0	1	1	0	0	DYDC1	DPY30 domain containing 1
hsa-miR-588	0	0	1	1	0	0	PPAPDC3	phosphatidic acid phosphatase type 2 domain containing 3
hsa-miR-588	0	0	0	1	0	0	PLAC9	placenta-specific 9
hsa-miR-588	0	0	1	1	1	1	SZT2	seizure threshold 2 homolog (mouse)
hsa-miR-588	1	0	1	1	0	0	ZSWIM1	zinc finger, SWIM-type containing 1
hsa-miR-588	1	0	1	1	1	1	NFYC	nuclear transcription factor Y, gamma
hsa-miR-588	0	0	0	1	0	0	KCNK15	potassium channel, subfamily K, member 15
hsa-miR-588	0	0	0	1	1	1	NOX1	NADPH oxidase 1
hsa-miR-588	0	0	1	1	1	1	TAF8	TAF8 RNA polymerase II, TATA box binding protein (TBP)-associated factor, 43kDa
hsa-miR-588	0	0	1	1	0	0	TNMD	tenomodulin
hsa-miR-588	1	0	0	1	1	1	EPHA10	EPH receptor A10
hsa-miR-588	0	0	1	1	1	1	KLHL4	kelch-like 4 (Drosophila)
hsa-miR-588	1	0	1	1	0	0	ANGPTL2	angiopoietin-like 2
hsa-miR-588	1	0	1	1	1	1	COL16A1	collagen, type XVI, alpha 1
hsa-miR-588	0	0	0	1	1	1	CXCR3	chemokine (C-X-C motif) receptor 3
hsa-miR-588	0	0	1	1	1	1	MRRF	mitochondrial ribosome recycling factor
hsa-miR-588	0	0	1	1	1	1	PSMD5	proteasome (prosome, macropain) 26S subunit, non-ATPase, 5
hsa-miR-588	1	0	1	1	1	1	DBC1	deleted in bladder cancer 1
hsa-miR-588	1	0	1	1	0	0	ZMYM3	zinc finger, MYM-type 3
hsa-miR-588	0	0	0	1	1	1	FGR	Gardner-Rasheed feline sarcoma viral (v-fgr) oncogene homolog
hsa-miR-588	1	0	1	1	1	1	EPHA8	EPH receptor A8
hsa-miR-588	0	0	0	1	0	0	HLA-DMA	major histocompatibility complex, class II, DM alpha
hsa-miR-588	1	0	1	1	1	1	MGAT5B	mannosyl (alpha-1,6-)-glycoprotein beta-1,6-N-acetyl-glucosaminyltransferase, isozyme B
hsa-miR-588	0	0	1	1	1	1	NOTCH4	notch 4
hsa-miR-588	1	0	1	1	1	1	IQSEC2	IQ motif and Sec7 domain 2
hsa-miR-588	0	0	0	1	1	1	MFAP2	microfibrillar-associated protein 2
hsa-miR-588	0	0	1	1	0	0	F10	coagulation factor X
hsa-miR-588	0	0	1	1	0	0	SLC44A4	solute carrier family 44, member 4
hsa-miR-588	0	0	0	1	0	0	RSG1	REM2 and RAB-like small GTPase 1
hsa-miR-588	0	0	1	1	1	1	DYNC2H1	dynein, cytoplasmic 2, heavy chain 1
hsa-miR-588	0	0	1	1	1	1	KYNU	kynureninase
hsa-miR-588	0	0	1	1	0	0	ABHD16A	abhydrolase domain containing 16A
hsa-miR-588	0	0	1	1	0	0	CCDC22	coiled-coil domain containing 22
hsa-miR-588	0	0	0	1	0	0	DEFB121	defensin, beta 121
hsa-miR-588	1	0	1	1	1	1	TLE4	transducin-like enhancer of split 4 (E(sp1) homolog, Drosophila)
hsa-miR-588	0	0	1	1	0	0	HDAC6	histone deacetylase 6
hsa-miR-588	0	0	1	1	1	1	ZNRD1	zinc ribbon domain containing 1
hsa-miR-588	1	0	0	1	0	0	TBC1D8	TBC1 domain family, member 8 (with GRAM domain)
hsa-miR-588	0	0	1	1	1	1	CNGA3	cyclic nucleotide gated channel alpha 3
hsa-miR-588	0	0	0	1	0	0	SPDYC	speedy homolog C (Xenopus laevis)
hsa-miR-588	0	0	0	1	1	1	TMEM252	transmembrane protein 252
hsa-miR-588	0	0	1	1	0	0	HIST1H2AH	histone cluster 1, H2ah
hsa-miR-588	0	0	0	1	0	0	ZNF133	zinc finger protein 133
hsa-miR-588	0	0	1	1	0	0	ZBTB48	zinc finger and BTB domain containing 48
hsa-miR-588	0	0	1	1	0	0	GPR20	G protein-coupled receptor 20
hsa-miR-588	0	0	0	1	0	0	CUBN	cubilin (intrinsic factor-cobalamin receptor)
hsa-miR-588	1	0	1	1	1	1	PCDH9	protocadherin 9
hsa-miR-588	0	0	0	1	1	1	ARHGEF35	Rho guanine nucleotide exchange factor (GEF) 35
hsa-miR-588	1	0	1	1	1	1	PRDM16	PR domain containing 16
hsa-miR-588	0	0	0	1	0	0	CD72	CD72 molecule
hsa-miR-588	0	0	0	1	0	0	OR4A47	olfactory receptor, family 4, subfamily A, member 47
hsa-miR-588	0	0	1	1	0	0	PLCH2	phospholipase C, eta 2
hsa-miR-588	1	0	1	1	1	1	DYNC2LI1	dynein, cytoplasmic 2, light intermediate chain 1
hsa-miR-588	0	0	0	1	0	0	UCMA	upper zone of growth plate and cartilage matrix associated
hsa-miR-588	0	0	1	1	0	0	DCTN3	dynactin 3 (p22)
hsa-miR-588	0	0	0	1	0	0	NR0B1	nuclear receptor subfamily 0, group B, member 1
hsa-miR-588	1	0	1	1	0	0	AEN	apoptosis enhancing nuclease
hsa-miR-588	0	0	1	1	0	0	KATNB1	katanin p80 (WD repeat containing) subunit B 1
hsa-miR-588	1	0	1	1	1	1	PPP1R13B	protein phosphatase 1, regulatory subunit 13B
hsa-miR-588	0	0	1	1	0	0	IFT74	intraflagellar transport 74 homolog (Chlamydomonas)
hsa-miR-588	0	0	1	1	0	0	EXOC3L4	exocyst complex component 3-like 4
hsa-miR-588	0	0	0	1	0	0	IFNA5	interferon, alpha 5
hsa-miR-588	0	0	0	1	0	0	HBG2	hemoglobin, gamma G
hsa-miR-588	0	0	1	1	0	0	CA5BP1	carbonic anhydrase VB pseudogene 1
hsa-miR-588	0	0	1	1	0	0	CARS	cysteinyl-tRNA synthetase
hsa-miR-588	0	0	0	1	0	0	HADHA	hydroxyacyl-CoA dehydrogenase/3-ketoacyl-CoA thiolase/enoyl-CoA hydratase (trifunctional protein), alpha subunit
hsa-miR-588	0	0	0	1	1	1	ADARB2	adenosine deaminase, RNA-specific, B2
hsa-miR-588	0	0	1	1	0	0	TGM6	transglutaminase 6
hsa-miR-588	0	0	1	1	1	1	CSF2RA	colony stimulating factor 2 receptor, alpha, low-affinity (granulocyte-macrophage)
hsa-miR-588	0	0	0	1	0	0	C16orf96	chromosome 16 open reading frame 96
hsa-miR-588	0	0	1	1	1	1	RNF215	ring finger protein 215
hsa-miR-588	0	0	0	1	0	0	LOC100129936	uncharacterized LOC100129936
hsa-miR-588	0	0	1	1	1	1	GJB2	gap junction protein, beta 2, 26kDa
hsa-miR-588	0	0	0	1	0	0	HSFY2	heat shock transcription factor, Y linked 2
hsa-miR-588	0	0	0	1	1	1	TMEM191B	transmembrane protein 191B
hsa-miR-588	0	0	1	1	0	0	SNRNP25	small nuclear ribonucleoprotein 25kDa (U11/U12)
hsa-miR-588	1	0	1	1	1	1	CC2D1A	coiled-coil and C2 domain containing 1A
hsa-miR-588	0	0	0	1	0	0	RAB42	RAB42, member RAS oncogene family
hsa-miR-588	1	0	1	1	1	1	GRM7	glutamate receptor, metabotropic 7
hsa-miR-588	0	0	1	1	1	1	RFXAP	regulatory factor X-associated protein
hsa-miR-588	1	0	1	0	1	1	GABRA4	gamma-aminobutyric acid (GABA) A receptor, alpha 4
hsa-miR-588	0	0	0	1	1	1	FLJ45139	FLJ45139 protein
hsa-miR-588	1	0	1	1	1	1	DNAJB12	DnaJ (Hsp40) homolog, subfamily B, member 12
hsa-miR-588	1	0	1	1	1	1	BTBD7	BTB (POZ) domain containing 7
hsa-miR-588	0	0	1	0	1	1	NWD1	NACHT and WD repeat domain containing 1
hsa-miR-588	1	0	1	0	1	1	KIAA0930	KIAA0930
hsa-miR-588	1	0	1	1	1	1	RAP1B	RAP1B, member of RAS oncogene family
hsa-miR-588	1	0	1	1	1	1	NLE1	notchless homolog 1 (Drosophila)
hsa-miR-588	1	0	1	1	1	1	NTRK2	neurotrophic tyrosine kinase, receptor, type 2
hsa-miR-588	0	0	0	1	1	1	DCLRE1C	DNA cross-link repair 1C
hsa-miR-588	1	0	1	0	1	1	GK5	glycerol kinase 5 (putative)
hsa-miR-588	0	0	1	1	1	1	ABCC6	ATP-binding cassette, sub-family C (CFTR/MRP), member 6
hsa-miR-588	0	0	0	1	1	1	COX10	COX10 homolog, cytochrome c oxidase assembly protein, heme A: farnesyltransferase (yeast)
hsa-miR-588	1	0	1	1	1	1	MAFG	v-maf musculoaponeurotic fibrosarcoma oncogene homolog G (avian)
hsa-miR-588	0	0	1	1	1	1	P2RX7	purinergic receptor P2X, ligand-gated ion channel, 7
hsa-miR-588	0	0	1	1	1	1	PDE7A	phosphodiesterase 7A
hsa-miR-588	1	0	1	0	1	1	PLEK	pleckstrin
hsa-miR-588	1	0	1	0	1	1	PRKAR1A	protein kinase, cAMP-dependent, regulatory, type I, alpha
hsa-miR-588	0	0	0	1	1	1	AOC3	amine oxidase, copper containing 3 (vascular adhesion protein 1)
hsa-miR-588	1	0	1	0	1	1	IRS2	insulin receptor substrate 2
hsa-miR-588	1	0	1	0	1	1	SEMA5A	sema domain, seven thrombospondin repeats (type 1 and type 1-like), transmembrane domain (TM) and short cytoplasmic domain, (semaphorin) 5A
hsa-miR-588	0	0	0	0	1	1	TOP3A	topoisomerase (DNA) III alpha
hsa-miR-588	1	0	1	0	1	1	CNTN2	contactin 2 (axonal)
hsa-miR-588	1	0	1	1	1	1	ETS2	v-ets erythroblastosis virus E26 oncogene homolog 2 (avian)
hsa-miR-588	1	0	1	1	1	1	GPM6A	glycoprotein M6A
hsa-miR-588	0	0	1	1	1	1	XRCC2	X-ray repair complementing defective repair in Chinese hamster cells 2
hsa-miR-588	1	0	1	1	1	1	DMXL1	Dmx-like 1
hsa-miR-588	1	0	1	1	1	1	LAMC2	laminin, gamma 2
hsa-miR-588	0	0	0	0	1	1	DSCR3	Down syndrome critical region gene 3
hsa-miR-588	1	0	1	1	1	1	PFKFB2	6-phosphofructo-2-kinase/fructose-2,6-biphosphatase 2
hsa-miR-588	1	0	1	1	1	1	TXNIP	thioredoxin interacting protein
hsa-miR-588	1	0	1	1	1	1	ZBTB6	zinc finger and BTB domain containing 6
hsa-miR-588	1	0	1	1	1	1	SHANK2	SH3 and multiple ankyrin repeat domains 2
hsa-miR-588	1	0	1	1	1	1	GGA3	golgi-associated, gamma adaptin ear containing, ARF binding protein 3
hsa-miR-588	0	0	1	1	1	1	ZNF544	zinc finger protein 544
hsa-miR-588	0	0	1	1	1	1	SNX19	sorting nexin 19
hsa-miR-588	1	0	1	0	1	1	KBTBD11	kelch repeat and BTB (POZ) domain containing 11
hsa-miR-588	1	0	1	1	1	1	SYNM	synemin, intermediate filament protein
hsa-miR-588	1	0	1	1	1	1	DAAM2	dishevelled associated activator of morphogenesis 2
hsa-miR-588	1	0	1	1	1	1	RIMBP2	RIMS binding protein 2
hsa-miR-588	0	0	1	0	1	1	OTUD6B	OTU domain containing 6B
hsa-miR-588	1	0	1	0	1	1	KIF21B	kinesin family member 21B
hsa-miR-588	0	0	1	1	1	1	PGPEP1	pyroglutamyl-peptidase I
hsa-miR-588	0	0	0	1	1	1	ZWILCH	Zwilch, kinetochore associated, homolog (Drosophila)
hsa-miR-588	1	0	1	1	1	1	SMCR7L	Smith-Magenis syndrome chromosome region, candidate 7-like
hsa-miR-588	0	0	1	1	1	1	OTOR	otoraplin
hsa-miR-588	0	0	1	0	1	1	SLC6A20	solute carrier family 6 (proline IMINO transporter), member 20
hsa-miR-588	0	0	1	1	1	1	RIPK4	receptor-interacting serine-threonine kinase 4
hsa-miR-588	0	0	1	0	1	1	SERINC1	serine incorporator 1
hsa-miR-588	0	0	1	1	1	1	ZNF317	zinc finger protein 317
hsa-miR-588	0	0	0	1	1	1	TMBIM1	transmembrane BAX inhibitor motif containing 1
hsa-miR-588	1	0	1	1	1	1	AZI2	5-azacytidine induced 2
hsa-miR-588	0	0	1	1	1	1	CERK	ceramide kinase
hsa-miR-588	0	0	1	1	1	1	C12orf43	chromosome 12 open reading frame 43
hsa-miR-588	0	0	1	1	1	1	SIGLEC1	sialic acid binding Ig-like lectin 1, sialoadhesin
hsa-miR-588	1	0	1	1	1	1	SH3TC2	SH3 domain and tetratricopeptide repeats 2
hsa-miR-588	0	0	0	1	1	1	MCPH1	microcephalin 1
hsa-miR-588	1	0	0	0	1	1	C22orf29	chromosome 22 open reading frame 29
hsa-miR-588	1	0	1	0	1	1	DNAJC5	DnaJ (Hsp40) homolog, subfamily C, member 5
hsa-miR-588	0	0	0	1	1	1	NUAK2	NUAK family, SNF1-like kinase, 2
hsa-miR-588	1	0	1	0	1	1	CD99L2	CD99 molecule-like 2
hsa-miR-588	0	0	0	1	1	1	ZNF496	zinc finger protein 496
hsa-miR-588	0	0	1	0	1	1	CCDC97	coiled-coil domain containing 97
hsa-miR-588	1	0	1	1	1	1	CSMD2	CUB and Sushi multiple domains 2
hsa-miR-588	1	0	1	0	1	1	CNOT7	CCR4-NOT transcription complex, subunit 7
hsa-miR-588	0	0	1	1	1	1	C7orf29	chromosome 7 open reading frame 29
hsa-miR-588	0	0	0	1	1	1	CMBL	carboxymethylenebutenolidase homolog (Pseudomonas)
hsa-miR-588	0	0	1	1	1	1	TRUB1	TruB pseudouridine (psi) synthase homolog 1 (E. coli)
hsa-miR-588	0	0	1	1	1	1	ZNF558	zinc finger protein 558
hsa-miR-588	0	0	1	1	1	1	STOML3	stomatin (EPB72)-like 3
hsa-miR-588	1	0	1	1	1	1	KCNAB1	potassium voltage-gated channel, shaker-related subfamily, beta member 1
hsa-miR-588	1	0	1	1	1	1	DIP2B	DIP2 disco-interacting protein 2 homolog B (Drosophila)
hsa-miR-588	0	0	0	1	1	1	C2orf61	chromosome 2 open reading frame 61
hsa-miR-588	0	0	1	1	1	1	ACSF3	acyl-CoA synthetase family member 3
hsa-miR-588	0	0	1	1	1	1	MRPL43	mitochondrial ribosomal protein L43
hsa-miR-588	1	0	1	0	1	1	C12orf36	chromosome 12 open reading frame 36
hsa-miR-588	0	0	1	1	1	1	C11orf88	chromosome 11 open reading frame 88
hsa-miR-588	0	0	1	0	1	1	LOC401021	uncharacterized LOC401021
hsa-miR-588	0	0	0	0	1	1	POTEI	POTE ankyrin domain family, member I
hsa-miR-588	0	0	0	0	1	1	POTEJ	POTE ankyrin domain family, member J
