# Supplementary material for: Profiling of Selected MicroRNAs in Proliferative Eutopic Endometrium of Women with Ovarian Endometriosis
Source: Biomed Res Int. 2015 Aug 20;2015:760698. doi: 10.1155/2015/760698 (PMC4558423; doi:10.1155/2015/760698)
Supplement: Supplementary file 1 — Table I: The names of miRNAs significantly differentially expressed between eutopic endometrium of patients with endometriosis vs eutopic endometrium of patients without endometriosis. Table II: The associations between miRNA and mRNA, which presents detailed results of the search of six major databases i.e targetscan, tarbase, miranda, mirbase, mirtarget2 and pictar. [file 760698.f1.zip › 760698.f1/Table II/hsa-miR-592.tsv]

miR	targetscan	tarbase	miranda	mirbase	mirtarget2	pictar	GeneSymbol	GeneName
hsa-miR-592	1	0	1	1	1	1	ARNTL	aryl hydrocarbon receptor nuclear translocator-like
hsa-miR-592	1	0	1	1	1	1	PRUNE2	prune homolog 2 (Drosophila)
hsa-miR-592	1	0	1	1	1	1	ATMIN	ATM interactor
hsa-miR-592	1	0	1	1	1	1	RNGTT	RNA guanylyltransferase and 5'-phosphatase
hsa-miR-592	0	0	1	1	1	1	SPAG9	sperm associated antigen 9
hsa-miR-592	1	0	1	1	0	0	PCLO	piccolo (presynaptic cytomatrix protein)
hsa-miR-592	1	0	1	1	1	1	SIN3B	SIN3 transcription regulator homolog B (yeast)
hsa-miR-592	1	0	1	0	1	1	MAGI2	membrane associated guanylate kinase, WW and PDZ domain containing 2
hsa-miR-592	0	0	1	1	0	0	ATP10B	ATPase, class V, type 10B
hsa-miR-592	1	0	1	0	1	1	LPHN3	latrophilin 3
hsa-miR-592	1	0	1	0	0	0	MICAL3	microtubule associated monoxygenase, calponin and LIM domain containing 3
hsa-miR-592	1	0	1	1	1	1	RGL1	ral guanine nucleotide dissociation stimulator-like 1
hsa-miR-592	0	0	1	0	0	0	THSD7A	thrombospondin, type I, domain containing 7A
hsa-miR-592	1	0	1	1	1	1	NTNG1	netrin G1
hsa-miR-592	1	0	1	1	0	0	PCNX	pecanex homolog (Drosophila)
hsa-miR-592	1	0	1	1	1	1	RPGRIP1L	RPGRIP1-like
hsa-miR-592	1	0	1	1	0	0	FRMD4B	FERM domain containing 4B
hsa-miR-592	1	0	1	1	1	1	FOXJ3	forkhead box J3
hsa-miR-592	1	0	1	0	1	1	ZNF507	zinc finger protein 507
hsa-miR-592	1	0	1	0	1	1	GPR158	G protein-coupled receptor 158
hsa-miR-592	1	0	1	0	1	1	SRGAP3	SLIT-ROBO Rho GTPase activating protein 3
hsa-miR-592	1	0	1	1	0	0	KIAA1210	KIAA1210
hsa-miR-592	1	0	1	1	1	1	RIMKLB	ribosomal modification protein rimK-like family member B
hsa-miR-592	1	0	1	0	1	1	INTS2	integrator complex subunit 2
hsa-miR-592	1	0	1	1	1	1	PCDH19	protocadherin 19
hsa-miR-592	1	0	1	1	1	1	LRRC7	leucine rich repeat containing 7
hsa-miR-592	1	1	1	1	1	1	NFIA	nuclear factor I/A
hsa-miR-592	1	0	1	0	1	1	LMO3	LIM domain only 3 (rhombotin-like 2)
hsa-miR-592	1	0	1	1	1	1	TOPORS	topoisomerase I binding, arginine/serine-rich, E3 ubiquitin protein ligase
hsa-miR-592	1	0	1	1	1	1	PPP6R3	protein phosphatase 6, regulatory subunit 3
hsa-miR-592	0	0	1	0	1	1	ZSWIM6	zinc finger, SWIM-type containing 6
hsa-miR-592	1	0	1	1	1	1	MOV10	Mov10, Moloney leukemia virus 10, homolog (mouse)
hsa-miR-592	0	0	1	0	0	0	TTC28-AS1	TTC28 antisense RNA 1
hsa-miR-592	0	0	1	1	1	1	ZNF407	zinc finger protein 407
hsa-miR-592	0	0	1	1	0	0	FOCAD	focadhesin
hsa-miR-592	1	0	1	1	1	1	HNRPDL	heterogeneous nuclear ribonucleoprotein D-like
hsa-miR-592	0	0	1	0	0	0	MYSM1	Myb-like, SWIRM and MPN domains 1
hsa-miR-592	0	0	1	0	0	0	NBLA00301	Nbla00301
hsa-miR-592	1	0	1	1	0	0	ZNF292	zinc finger protein 292
hsa-miR-592	1	0	1	1	1	1	SH3TC2	SH3 domain and tetratricopeptide repeats 2
hsa-miR-592	1	0	1	0	0	0	FAT3	FAT tumor suppressor homolog 3 (Drosophila)
hsa-miR-592	1	0	1	0	0	0	ZBTB34	zinc finger and BTB domain containing 34
hsa-miR-592	1	0	1	1	1	1	SMEK1	SMEK homolog 1, suppressor of mek1 (Dictyostelium)
hsa-miR-592	1	0	1	0	0	0	ZC3H12C	zinc finger CCCH-type containing 12C
hsa-miR-592	0	0	1	1	0	0	DDB2	damage-specific DNA binding protein 2, 48kDa
hsa-miR-592	0	0	1	1	1	1	MICAL2	microtubule associated monoxygenase, calponin and LIM domain containing 2
hsa-miR-592	1	0	1	1	1	1	KCNMA1	potassium large conductance calcium-activated channel, subfamily M, alpha member 1
hsa-miR-592	1	0	1	1	1	1	DAPK1	death-associated protein kinase 1
hsa-miR-592	1	0	1	0	1	1	PCDHA13	protocadherin alpha 13
hsa-miR-592	1	0	1	1	1	1	PCDHA4	protocadherin alpha 4
hsa-miR-592	1	0	1	1	1	1	SLC8A1	solute carrier family 8 (sodium/calcium exchanger), member 1
hsa-miR-592	1	0	1	1	1	1	DTNA	dystrobrevin, alpha
hsa-miR-592	1	0	1	0	1	1	PLAG1	pleiomorphic adenoma gene 1
hsa-miR-592	1	0	1	0	1	1	MPPED2	metallophosphoesterase domain containing 2
hsa-miR-592	1	0	1	1	1	1	DMTF1	cyclin D binding myb-like transcription factor 1
hsa-miR-592	1	0	1	1	1	1	TWF1	twinfilin, actin-binding protein, homolog 1 (Drosophila)
hsa-miR-592	1	0	1	1	1	1	ARFGEF1	ADP-ribosylation factor guanine nucleotide-exchange factor 1 (brefeldin A-inhibited)
hsa-miR-592	1	0	1	1	1	1	MAP4	microtubule-associated protein 4
hsa-miR-592	1	0	1	1	1	1	SPTB	spectrin, beta, erythrocytic
hsa-miR-592	1	0	1	1	0	0	RGS6	regulator of G-protein signaling 6
hsa-miR-592	0	0	1	0	0	0	CACNA1B	calcium channel, voltage-dependent, N type, alpha 1B subunit
hsa-miR-592	0	0	1	1	0	0	IGFBP2	insulin-like growth factor binding protein 2, 36kDa
hsa-miR-592	0	0	1	0	1	1	ACTN2	actinin, alpha 2
hsa-miR-592	1	0	1	1	1	1	PDLIM5	PDZ and LIM domain 5
hsa-miR-592	0	0	1	1	0	0	CFLAR	CASP8 and FADD-like apoptosis regulator
hsa-miR-592	0	0	1	1	1	1	HLA-DQA1	major histocompatibility complex, class II, DQ alpha 1
hsa-miR-592	1	0	1	1	1	1	ARHGEF3	Rho guanine nucleotide exchange factor (GEF) 3
hsa-miR-592	1	0	1	1	0	0	GRIN2A	glutamate receptor, ionotropic, N-methyl D-aspartate 2A
hsa-miR-592	0	0	1	1	1	1	ELOVL5	ELOVL fatty acid elongase 5
hsa-miR-592	1	0	1	0	1	1	ADD3	adducin 3 (gamma)
hsa-miR-592	1	0	1	1	1	1	HMGA2	high mobility group AT-hook 2
hsa-miR-592	1	0	1	1	1	1	TEAD1	TEA domain family member 1 (SV40 transcriptional enhancer factor)
hsa-miR-592	1	0	1	1	1	1	PHLDB2	pleckstrin homology-like domain, family B, member 2
hsa-miR-592	0	0	1	1	1	1	PLD1	phospholipase D1, phosphatidylcholine-specific
hsa-miR-592	1	0	1	0	1	1	CAV1	caveolin 1, caveolae protein, 22kDa
hsa-miR-592	1	0	1	1	1	1	STX16	syntaxin 16
hsa-miR-592	1	0	1	1	1	1	CBFA2T2	core-binding factor, runt domain, alpha subunit 2; translocated to, 2
hsa-miR-592	1	0	1	1	1	1	PCDH17	protocadherin 17
hsa-miR-592	0	0	1	1	0	0	PLA1A	phospholipase A1 member A
hsa-miR-592	0	0	1	1	1	1	SH3GL3	SH3-domain GRB2-like 3
hsa-miR-592	1	0	1	1	1	1	MYT1L	myelin transcription factor 1-like
hsa-miR-592	1	0	1	1	1	1	SOCS2	suppressor of cytokine signaling 2
hsa-miR-592	0	0	1	1	1	1	UBE4B	ubiquitination factor E4B
hsa-miR-592	1	0	1	1	1	1	RUNX2	runt-related transcription factor 2
hsa-miR-592	1	0	1	1	1	1	ERLIN1	ER lipid raft associated 1
hsa-miR-592	1	0	1	1	1	1	TP63	tumor protein p63
hsa-miR-592	0	0	1	1	1	1	RER1	RER1 retention in endoplasmic reticulum 1 homolog (S. cerevisiae)
hsa-miR-592	0	0	1	1	1	1	PLEKHB1	pleckstrin homology domain containing, family B (evectins) member 1
hsa-miR-592	1	0	1	0	1	1	MAP4K4	mitogen-activated protein kinase kinase kinase kinase 4
hsa-miR-592	1	0	1	0	1	1	CD164	CD164 molecule, sialomucin
hsa-miR-592	1	0	1	0	1	1	CDK14	cyclin-dependent kinase 14
hsa-miR-592	0	0	1	1	1	1	DMRT2	doublesex and mab-3 related transcription factor 2
hsa-miR-592	1	0	1	1	1	1	TAOK3	TAO kinase 3
hsa-miR-592	0	0	1	1	1	1	AIG1	androgen-induced 1
hsa-miR-592	0	0	1	0	1	1	PDP1	pyruvate dehyrogenase phosphatase catalytic subunit 1
hsa-miR-592	0	0	1	1	1	1	FAM114A2	family with sequence similarity 114, member A2
hsa-miR-592	1	0	1	1	1	1	USP25	ubiquitin specific peptidase 25
hsa-miR-592	1	0	1	1	1	1	DNAJA4	DnaJ (Hsp40) homolog, subfamily A, member 4
hsa-miR-592	1	0	1	1	1	1	NXT2	nuclear transport factor 2-like export factor 2
hsa-miR-592	0	0	1	1	1	1	CSNK1A1	casein kinase 1, alpha 1
hsa-miR-592	0	0	1	1	1	1	RBM8A	RNA binding motif protein 8A
hsa-miR-592	1	0	1	1	1	1	ELF2	E74-like factor 2 (ets domain transcription factor)
hsa-miR-592	1	0	1	1	1	1	SH3GLB1	SH3-domain GRB2-like endophilin B1
hsa-miR-592	1	0	1	0	1	1	TRPS1	trichorhinophalangeal syndrome I
hsa-miR-592	1	0	1	1	1	1	PUM2	pumilio homolog 2 (Drosophila)
hsa-miR-592	0	0	1	1	1	1	ASUN	asunder, spermatogenesis regulator homolog (Drosphila)
hsa-miR-592	0	0	1	1	1	1	SLC4A5	solute carrier family 4, sodium bicarbonate cotransporter, member 5
hsa-miR-592	1	0	1	1	1	1	KLHL12	kelch-like 12 (Drosophila)
hsa-miR-592	1	0	1	1	1	1	METTL10	methyltransferase like 10
hsa-miR-592	1	0	1	1	1	1	SPTBN4	spectrin, beta, non-erythrocytic 4
hsa-miR-592	1	0	1	1	1	1	CPEB1	cytoplasmic polyadenylation element binding protein 1
hsa-miR-592	0	0	1	1	1	1	MS4A4A	membrane-spanning 4-domains, subfamily A, member 4A
hsa-miR-592	1	0	1	1	1	1	LARP4	La ribonucleoprotein domain family, member 4
hsa-miR-592	1	0	1	1	1	1	RBFOX1	RNA binding protein, fox-1 homolog (C. elegans) 1
hsa-miR-592	1	0	1	1	1	1	HNRNPU	heterogeneous nuclear ribonucleoprotein U (scaffold attachment factor A)
hsa-miR-592	1	0	1	1	1	1	ASB8	ankyrin repeat and SOCS box containing 8
hsa-miR-592	1	0	1	1	1	1	CACNB2	calcium channel, voltage-dependent, beta 2 subunit
hsa-miR-592	0	0	1	1	1	1	AMPH	amphiphysin
hsa-miR-592	1	0	1	1	1	1	PTBP2	polypyrimidine tract binding protein 2
hsa-miR-592	1	0	1	1	1	1	AFF2	AF4/FMR2 family, member 2
hsa-miR-592	0	0	1	1	1	1	CLDND1	claudin domain containing 1
hsa-miR-592	0	0	1	0	0	0	CACNA2D3	calcium channel, voltage-dependent, alpha 2/delta subunit 3
hsa-miR-592	0	0	1	1	1	1	CD1E	CD1e molecule
hsa-miR-592	0	0	1	1	1	1	CD28	CD28 molecule
hsa-miR-592	1	0	1	1	1	1	VAMP7	vesicle-associated membrane protein 7
hsa-miR-592	1	0	1	1	1	1	SLAMF6	SLAM family member 6
hsa-miR-592	1	0	1	1	1	1	NRXN3	neurexin 3
hsa-miR-592	0	0	1	0	0	0	CASC2	cancer susceptibility candidate 2 (non-protein coding)
hsa-miR-592	1	0	1	1	1	1	NAV3	neuron navigator 3
hsa-miR-592	0	0	1	1	1	1	ZNF248	zinc finger protein 248
hsa-miR-592	0	0	1	1	0	0	MBD1	methyl-CpG binding domain protein 1
hsa-miR-592	1	0	1	1	1	1	SYT14	synaptotagmin XIV
hsa-miR-592	0	0	1	1	0	0	GPRC5C	G protein-coupled receptor, family C, group 5, member C
hsa-miR-592	1	0	1	1	1	1	AKAP2	A kinase (PRKA) anchor protein 2
hsa-miR-592	1	0	1	1	1	1	SIK2	salt-inducible kinase 2
hsa-miR-592	0	0	1	1	1	1	PARPBP	PARP1 binding protein
hsa-miR-592	0	0	1	1	1	1	OLFM4	olfactomedin 4
hsa-miR-592	0	0	1	0	0	0	RNF31	ring finger protein 31
hsa-miR-592	0	0	1	1	1	1	STOX2	storkhead box 2
hsa-miR-592	1	0	1	1	1	1	RIC8B	resistance to inhibitors of cholinesterase 8 homolog B (C. elegans)
hsa-miR-592	0	0	1	1	0	0	PARP2	poly (ADP-ribose) polymerase 2
hsa-miR-592	1	0	1	1	1	1	LRRN3	leucine rich repeat neuronal 3
hsa-miR-592	1	0	1	1	1	1	MON2	MON2 homolog (S. cerevisiae)
hsa-miR-592	0	0	1	0	0	0	DUXAP10	double homeobox A pseudogene 10
hsa-miR-592	0	0	1	1	1	1	LRRN1	leucine rich repeat neuronal 1
hsa-miR-592	1	0	1	1	1	1	MACF1	microtubule-actin crosslinking factor 1
hsa-miR-592	0	0	1	0	1	1	ARHGAP42	Rho GTPase activating protein 42
hsa-miR-592	0	0	1	0	1	1	FLJ14186	uncharacterized LOC401149
hsa-miR-592	0	0	1	0	0	0	IFFO2	intermediate filament family orphan 2
hsa-miR-592	0	0	1	1	0	0	SPON2	spondin 2, extracellular matrix protein
hsa-miR-592	1	0	1	0	1	1	ATP2B1	ATPase, Ca++ transporting, plasma membrane 1
hsa-miR-592	1	0	1	1	1	1	ABI3BP	ABI family, member 3 (NESH) binding protein
hsa-miR-592	0	0	1	0	1	1	ATXN1L	ataxin 1-like
hsa-miR-592	1	0	1	1	1	1	KANK1	KN motif and ankyrin repeat domains 1
hsa-miR-592	1	0	1	1	1	1	DENND4C	DENN/MADD domain containing 4C
hsa-miR-592	1	0	1	1	1	1	NAA30	N(alpha)-acetyltransferase 30, NatC catalytic subunit
hsa-miR-592	0	0	1	1	0	0	ZNF276	zinc finger protein 276
hsa-miR-592	0	0	1	0	0	0	NEURL1B	neuralized homolog 1B (Drosophila)
hsa-miR-592	0	0	1	0	0	0	LOC729852	uncharacterized LOC729852
hsa-miR-592	0	0	1	1	1	1	KDM2B	lysine (K)-specific demethylase 2B
hsa-miR-592	1	0	1	1	0	0	SLC44A2	solute carrier family 44, member 2
hsa-miR-592	0	0	1	1	1	1	CCDC14	coiled-coil domain containing 14
hsa-miR-592	1	0	1	1	1	1	TMEM2	transmembrane protein 2
hsa-miR-592	1	0	1	1	1	1	GPD2	glycerol-3-phosphate dehydrogenase 2 (mitochondrial)
hsa-miR-592	1	0	1	1	1	1	SLAIN1	SLAIN motif family, member 1
hsa-miR-592	0	0	1	1	1	1	C8orf46	chromosome 8 open reading frame 46
hsa-miR-592	1	0	1	1	1	1	DLGAP4	discs, large (Drosophila) homolog-associated protein 4
hsa-miR-592	1	0	1	1	1	1	TPM1	tropomyosin 1 (alpha)
hsa-miR-592	0	0	1	1	1	1	CCND3	cyclin D3
hsa-miR-592	0	0	1	0	0	0	LOC201617	uncharacterized LOC201617
hsa-miR-592	0	0	1	1	1	1	SDK1	sidekick cell adhesion molecule 1
hsa-miR-592	1	0	1	1	1	1	EXD2	exonuclease 3'-5' domain containing 2
hsa-miR-592	0	0	1	1	0	0	BEAN1	brain expressed, associated with NEDD4, 1
hsa-miR-592	0	0	1	1	1	1	PDE1C	phosphodiesterase 1C, calmodulin-dependent 70kDa
hsa-miR-592	1	0	1	1	1	1	PHF15	PHD finger protein 15
hsa-miR-592	0	0	1	0	0	0	LOC441204	uncharacterized LOC441204
hsa-miR-592	1	0	1	1	1	1	CLCN5	chloride channel, voltage-sensitive 5
hsa-miR-592	0	0	1	0	0	0	LOC255187	hCG1980447
hsa-miR-592	1	0	1	1	1	1	APLP2	amyloid beta (A4) precursor-like protein 2
hsa-miR-592	1	0	1	1	1	1	MGAT1	mannosyl (alpha-1,3-)-glycoprotein beta-1,2-N-acetylglucosaminyltransferase
hsa-miR-592	0	0	1	1	1	1	PSME3	proteasome (prosome, macropain) activator subunit 3 (PA28 gamma; Ki)
hsa-miR-592	1	0	1	0	1	1	NCAM1	neural cell adhesion molecule 1
hsa-miR-592	1	0	1	1	1	1	ANKRD49	ankyrin repeat domain 49
hsa-miR-592	0	0	1	1	1	1	A2ML1	alpha-2-macroglobulin-like 1
hsa-miR-592	0	0	1	0	1	1	CCDC68	coiled-coil domain containing 68
hsa-miR-592	1	0	1	1	1	1	HLF	hepatic leukemia factor
hsa-miR-592	0	0	1	1	0	0	WDR83	WD repeat domain 83
hsa-miR-592	1	0	1	1	1	1	UBAP1	ubiquitin associated protein 1
hsa-miR-592	1	0	1	1	1	1	TLK1	tousled-like kinase 1
hsa-miR-592	0	0	1	0	0	0	LOC643837	uncharacterized LOC643837
hsa-miR-592	1	0	1	1	1	1	FRY	furry homolog (Drosophila)
hsa-miR-592	1	0	1	1	1	1	AMMECR1	Alport syndrome, mental retardation, midface hypoplasia and elliptocytosis chromosomal region gene 1
hsa-miR-592	1	0	1	1	1	1	FBXW2	F-box and WD repeat domain containing 2
hsa-miR-592	1	0	1	1	1	1	MAFK	v-maf musculoaponeurotic fibrosarcoma oncogene homolog K (avian)
hsa-miR-592	0	0	1	0	1	1	SSPN	sarcospan
hsa-miR-592	1	0	1	1	1	1	SARM1	sterile alpha and TIR motif containing 1
hsa-miR-592	1	0	1	1	1	1	SPTBN1	spectrin, beta, non-erythrocytic 1
hsa-miR-592	0	0	1	0	0	0	CXXC1P1	CXXC finger protein 1 pseudogene 1
hsa-miR-592	1	0	1	1	1	1	SNAP25	synaptosomal-associated protein, 25kDa
hsa-miR-592	0	0	1	0	0	0	ZNF806	zinc finger protein 806
hsa-miR-592	0	0	1	0	1	1	AGBL4	ATP/GTP binding protein-like 4
hsa-miR-592	1	0	1	1	1	1	KLF4	Kruppel-like factor 4 (gut)
hsa-miR-592	1	0	1	1	1	1	RASGEF1A	RasGEF domain family, member 1A
hsa-miR-592	1	0	1	1	1	1	NDEL1	nudE nuclear distribution E homolog (A. nidulans)-like 1
hsa-miR-592	1	0	1	0	1	1	UVRAG	UV radiation resistance associated gene
hsa-miR-592	1	0	1	1	1	1	CNEP1R1	CTD nuclear envelope phosphatase 1 regulatory subunit 1
hsa-miR-592	0	0	1	0	0	0	LOC284577	uncharacterized LOC284577
hsa-miR-592	1	0	1	1	1	1	RNF185	ring finger protein 185
hsa-miR-592	0	0	1	1	0	0	C11orf74	chromosome 11 open reading frame 74
hsa-miR-592	1	0	1	1	1	1	GAPVD1	GTPase activating protein and VPS9 domains 1
hsa-miR-592	0	0	1	1	1	1	SUSD4	sushi domain containing 4
hsa-miR-592	1	0	1	0	1	1	KIAA1737	KIAA1737
hsa-miR-592	1	0	1	0	1	1	THRB	thyroid hormone receptor, beta
hsa-miR-592	0	0	1	0	0	0	LOC400680	uncharacterized LOC400680
hsa-miR-592	0	0	1	1	1	1	FAM217A	family with sequence similarity 217, member A
hsa-miR-592	0	0	1	0	0	0	LINC00293	long intergenic non-protein coding RNA 293
hsa-miR-592	0	0	1	1	1	1	TEX35	testis expressed 35
hsa-miR-592	1	0	1	1	1	1	IGSF11	immunoglobulin superfamily, member 11
hsa-miR-592	0	0	1	1	0	0	HNRNPL	heterogeneous nuclear ribonucleoprotein L
hsa-miR-592	0	0	1	0	0	0	CECR7	cat eye syndrome chromosome region, candidate 7 (non-protein coding)
hsa-miR-592	0	0	1	0	0	0	LOC100130954	uncharacterized LOC100130954
hsa-miR-592	0	0	1	1	1	1	VIPAS39	VPS33B interacting protein, apical-basolateral polarity regulator, spe-39 homolog
hsa-miR-592	0	0	1	1	0	0	MAGED2	melanoma antigen family D, 2
hsa-miR-592	1	0	1	0	1	1	UNC5D	unc-5 homolog D (C. elegans)
hsa-miR-592	1	0	1	1	1	1	ACSL6	acyl-CoA synthetase long-chain family member 6
hsa-miR-592	0	0	1	1	1	1	SLFN13	schlafen family member 13
hsa-miR-592	0	0	1	1	1	1	GPR128	G protein-coupled receptor 128
hsa-miR-592	0	0	1	1	1	1	WDR64	WD repeat domain 64
hsa-miR-592	0	0	1	1	0	0	MARS	methionyl-tRNA synthetase
hsa-miR-592	1	0	1	1	1	1	TPRG1	tumor protein p63 regulated 1
hsa-miR-592	0	0	1	0	1	1	CWC22	CWC22 spliceosome-associated protein homolog (S. cerevisiae)
hsa-miR-592	1	0	1	1	1	1	IPPK	inositol 1,3,4,5,6-pentakisphosphate 2-kinase
hsa-miR-592	1	0	1	1	1	1	EPAS1	endothelial PAS domain protein 1
hsa-miR-592	1	0	1	1	1	1	PRDM2	PR domain containing 2, with ZNF domain
hsa-miR-592	1	0	1	1	1	1	GJC1	gap junction protein, gamma 1, 45kDa
hsa-miR-592	0	0	1	1	0	0	LOC100129995	uncharacterized LOC100129995
hsa-miR-592	1	0	1	1	1	1	ERBB3	v-erb-b2 erythroblastic leukemia viral oncogene homolog 3 (avian)
hsa-miR-592	1	0	1	1	1	1	CORO2B	coronin, actin binding protein, 2B
hsa-miR-592	0	0	1	1	1	1	ATPBD4	ATP binding domain 4
hsa-miR-592	1	0	1	1	1	1	SGIP1	SH3-domain GRB2-like (endophilin) interacting protein 1
hsa-miR-592	1	0	1	1	1	1	C17orf85	chromosome 17 open reading frame 85
hsa-miR-592	0	0	1	1	0	0	GABRA2	gamma-aminobutyric acid (GABA) A receptor, alpha 2
hsa-miR-592	1	0	1	1	1	1	CCDC149	coiled-coil domain containing 149
hsa-miR-592	0	0	1	1	1	1	DENND5A	DENN/MADD domain containing 5A
hsa-miR-592	0	0	1	1	1	1	FAM54A	family with sequence similarity 54, member A
hsa-miR-592	1	0	1	1	0	0	UBN2	ubinuclein 2
hsa-miR-592	0	0	1	0	1	1	LOC388942	uncharacterized LOC388942
hsa-miR-592	0	0	1	1	1	1	ZFYVE28	zinc finger, FYVE domain containing 28
hsa-miR-592	1	0	1	1	1	1	DLG2	discs, large homolog 2 (Drosophila)
hsa-miR-592	1	0	1	1	1	1	EIF4E3	eukaryotic translation initiation factor 4E family member 3
hsa-miR-592	1	0	1	1	0	0	MAN1B1	mannosidase, alpha, class 1B, member 1
hsa-miR-592	1	0	1	1	1	1	PHF17	PHD finger protein 17
hsa-miR-592	0	0	1	1	1	1	PIN4	protein (peptidylprolyl cis/trans isomerase) NIMA-interacting, 4 (parvulin)
hsa-miR-592	0	0	1	0	0	0	ERVFRD-2	endogenous retrovirus group FRD, member 2
hsa-miR-592	1	0	1	0	1	1	CAPRIN1	cell cycle associated protein 1
hsa-miR-592	0	0	1	0	0	0	LRRC9	leucine rich repeat containing 9
hsa-miR-592	0	0	1	1	0	0	TMEM136	transmembrane protein 136
hsa-miR-592	1	0	1	1	1	1	SLC12A6	solute carrier family 12 (potassium/chloride transporters), member 6
hsa-miR-592	0	0	1	1	0	0	FAM159A	family with sequence similarity 159, member A
hsa-miR-592	0	0	1	0	0	0	AFG3L1P	AFG3 ATPase family gene 3-like 1 (S. cerevisiae), pseudogene
hsa-miR-592	1	0	1	1	0	0	ATP2A1	ATPase, Ca++ transporting, cardiac muscle, fast twitch 1
hsa-miR-592	0	0	1	1	1	1	ATXN2	ataxin 2
hsa-miR-592	1	0	1	1	1	1	CD200	CD200 molecule
hsa-miR-592	0	0	1	0	0	0	LOC494141	mitochondrial carrier triple repeat 1 pseudogene
hsa-miR-592	1	0	1	0	1	1	ESRRG	estrogen-related receptor gamma
hsa-miR-592	1	0	1	1	1	1	SMAD7	SMAD family member 7
hsa-miR-592	0	0	1	1	1	1	ZNF346	zinc finger protein 346
hsa-miR-592	1	0	1	0	1	1	ZNF607	zinc finger protein 607
hsa-miR-592	0	0	1	1	1	1	KAZALD1	Kazal-type serine peptidase inhibitor domain 1
hsa-miR-592	0	0	1	1	1	1	CRISP3	cysteine-rich secretory protein 3
hsa-miR-592	1	0	1	1	1	1	B3GALNT1	beta-1,3-N-acetylgalactosaminyltransferase 1 (globoside blood group)
hsa-miR-592	1	0	1	1	1	1	CYYR1	cysteine/tyrosine-rich 1
hsa-miR-592	1	0	1	1	1	1	CYFIP2	cytoplasmic FMR1 interacting protein 2
hsa-miR-592	0	0	1	1	0	0	FERMT1	fermitin family member 1
hsa-miR-592	0	0	1	1	1	1	CCKBR	cholecystokinin B receptor
hsa-miR-592	1	0	1	1	1	1	NOVA1	neuro-oncological ventral antigen 1
hsa-miR-592	1	0	1	1	1	1	APBB2	amyloid beta (A4) precursor protein-binding, family B, member 2
hsa-miR-592	0	0	1	1	1	1	RABGAP1L	RAB GTPase activating protein 1-like
hsa-miR-592	0	0	1	0	1	1	NEK1	NIMA (never in mitosis gene a)-related kinase 1
hsa-miR-592	0	0	1	1	0	0	NEK7	NIMA (never in mitosis gene a)-related kinase 7
hsa-miR-592	0	0	1	0	0	0	ANKRD34C	ankyrin repeat domain 34C
hsa-miR-592	0	0	1	1	0	0	PLK1S1	polo-like kinase 1 substrate 1
hsa-miR-592	1	0	1	0	1	1	DCDC2	doublecortin domain containing 2
hsa-miR-592	0	0	1	1	1	1	AQP6	aquaporin 6, kidney specific
hsa-miR-592	1	0	1	0	1	1	CEP170	centrosomal protein 170kDa
hsa-miR-592	1	0	1	1	1	1	CTTNBP2NL	CTTNBP2 N-terminal like
hsa-miR-592	0	0	1	1	1	1	SLC30A10	solute carrier family 30, member 10
hsa-miR-592	1	0	1	0	1	1	GRIN3A	glutamate receptor, ionotropic, N-methyl-D-aspartate 3A
hsa-miR-592	1	0	1	1	0	0	FAM108C1	family with sequence similarity 108, member C1
hsa-miR-592	0	0	1	1	1	1	IDH3A	isocitrate dehydrogenase 3 (NAD+) alpha
hsa-miR-592	1	0	1	1	1	1	MIER1	mesoderm induction early response 1 homolog (Xenopus laevis)
hsa-miR-592	1	0	1	1	1	1	FAM126B	family with sequence similarity 126, member B
hsa-miR-592	1	0	1	0	1	1	HNRNPA3	heterogeneous nuclear ribonucleoprotein A3
hsa-miR-592	1	0	1	1	1	1	CHMP7	charged multivesicular body protein 7
hsa-miR-592	1	0	1	1	1	1	NFX1	nuclear transcription factor, X-box binding 1
hsa-miR-592	1	0	1	0	1	1	MEF2C	myocyte enhancer factor 2C
hsa-miR-592	1	0	1	1	1	1	FAM126A	family with sequence similarity 126, member A
hsa-miR-592	0	0	1	1	1	1	NARG2	NMDA receptor regulated 2
hsa-miR-592	0	0	1	0	1	1	C3orf43	chromosome 3 open reading frame 43
hsa-miR-592	0	0	1	0	0	0	EPHA1-AS1	EPHA1 antisense RNA 1
hsa-miR-592	1	0	1	1	1	1	NRP1	neuropilin 1
hsa-miR-592	1	0	1	1	1	1	CADM2	cell adhesion molecule 2
hsa-miR-592	1	0	1	1	1	1	RICTOR	RPTOR independent companion of MTOR, complex 2
hsa-miR-592	1	0	1	1	1	1	FAM76B	family with sequence similarity 76, member B
hsa-miR-592	0	0	1	0	1	1	USO1	USO1 vesicle docking protein homolog (yeast)
hsa-miR-592	1	0	1	1	1	1	TSHZ3	teashirt zinc finger homeobox 3
hsa-miR-592	0	0	1	1	1	1	TMEM130	transmembrane protein 130
hsa-miR-592	1	0	1	1	1	1	IKZF2	IKAROS family zinc finger 2 (Helios)
hsa-miR-592	0	0	1	0	0	0	PMCHL1	pro-melanin-concentrating hormone-like 1, pseudogene
hsa-miR-592	0	0	1	0	0	0	PMCHL2	pro-melanin-concentrating hormone-like 2, pseudogene
hsa-miR-592	0	0	1	1	1	1	CCDC62	coiled-coil domain containing 62
hsa-miR-592	1	0	1	1	1	1	SYNCRIP	synaptotagmin binding, cytoplasmic RNA interacting protein
hsa-miR-592	0	0	1	0	0	0	TDH	L-threonine dehydrogenase
hsa-miR-592	0	0	1	1	1	1	DNAJB14	DnaJ (Hsp40) homolog, subfamily B, member 14
hsa-miR-592	0	0	1	1	0	0	DNAH1	dynein, axonemal, heavy chain 1
hsa-miR-592	1	0	1	1	1	1	BCL11A	B-cell CLL/lymphoma 11A (zinc finger protein)
hsa-miR-592	0	0	1	1	1	1	GBP5	guanylate binding protein 5
hsa-miR-592	1	0	1	0	1	1	ANKRD28	ankyrin repeat domain 28
hsa-miR-592	0	0	1	1	1	1	PTPLA	protein tyrosine phosphatase-like (proline instead of catalytic arginine), member A
hsa-miR-592	0	0	1	1	0	0	SH2D6	SH2 domain containing 6
hsa-miR-592	0	0	1	1	1	1	HMBOX1	homeobox containing 1
hsa-miR-592	0	0	1	0	1	1	RAB18	RAB18, member RAS oncogene family
hsa-miR-592	0	0	1	1	1	1	HORMAD1	HORMA domain containing 1
hsa-miR-592	0	0	1	1	1	1	ILDR1	immunoglobulin-like domain containing receptor 1
hsa-miR-592	1	0	1	1	1	1	ADAMTS6	ADAM metallopeptidase with thrombospondin type 1 motif, 6
hsa-miR-592	0	0	1	1	1	1	AGER	advanced glycosylation end product-specific receptor
hsa-miR-592	1	0	1	1	1	1	QKI	QKI, KH domain containing, RNA binding
hsa-miR-592	1	0	1	1	1	1	MYB	v-myb myeloblastosis viral oncogene homolog (avian)
hsa-miR-592	1	0	1	1	1	1	CD109	CD109 molecule
hsa-miR-592	0	0	1	0	0	0	PTPRVP	protein tyrosine phosphatase, receptor type, V, pseudogene
hsa-miR-592	1	0	1	1	1	1	TBC1D22B	TBC1 domain family, member 22B
hsa-miR-592	0	0	1	1	1	1	IL23R	interleukin 23 receptor
hsa-miR-592	0	0	1	1	1	1	FAM115A	family with sequence similarity 115, member A
hsa-miR-592	1	0	1	0	1	1	FAM46A	family with sequence similarity 46, member A
hsa-miR-592	0	0	1	1	1	1	WDR55	WD repeat domain 55
hsa-miR-592	0	0	1	1	1	1	TMOD1	tropomodulin 1
hsa-miR-592	1	0	1	1	1	1	MYCN	v-myc myelocytomatosis viral related oncogene, neuroblastoma derived (avian)
hsa-miR-592	0	0	1	1	1	1	REXO2	REX2, RNA exonuclease 2 homolog (S. cerevisiae)
hsa-miR-592	0	0	1	1	1	1	ANAPC1	anaphase promoting complex subunit 1
hsa-miR-592	0	0	1	1	0	0	SCG5	secretogranin V (7B2 protein)
hsa-miR-592	0	0	1	1	1	1	ARPC1A	actin related protein 2/3 complex, subunit 1A, 41kDa
hsa-miR-592	1	0	1	0	1	1	FAXC	failed axon connections homolog (Drosophila)
hsa-miR-592	0	0	1	1	1	1	ACPP	acid phosphatase, prostate
hsa-miR-592	0	0	1	1	1	1	C1orf94	chromosome 1 open reading frame 94
hsa-miR-592	1	0	1	0	1	1	DDX3X	DEAD (Asp-Glu-Ala-Asp) box polypeptide 3, X-linked
hsa-miR-592	1	0	1	1	1	1	CALM1	calmodulin 1 (phosphorylase kinase, delta)
hsa-miR-592	1	0	1	1	1	1	SHOX2	short stature homeobox 2
hsa-miR-592	0	0	1	1	1	1	TMEM30A	transmembrane protein 30A
hsa-miR-592	0	0	1	1	0	0	BARX1	BARX homeobox 1
hsa-miR-592	1	0	1	0	1	1	TMEM39A	transmembrane protein 39A
hsa-miR-592	1	0	1	1	1	1	SZRD1	SUZ RNA binding domain containing 1
hsa-miR-592	1	0	1	1	1	1	TRIM2	tripartite motif containing 2
hsa-miR-592	1	0	1	1	1	1	SNCA	synuclein, alpha (non A4 component of amyloid precursor)
hsa-miR-592	0	0	1	1	1	1	KLHL29	kelch-like 29 (Drosophila)
hsa-miR-592	0	0	1	1	0	0	C8orf44	chromosome 8 open reading frame 44
hsa-miR-592	0	0	1	0	0	0	MGC21881	uncharacterized locus MGC21881
hsa-miR-592	0	0	1	1	1	1	GIN1	gypsy retrotransposon integrase 1
hsa-miR-592	0	0	1	0	0	0	KLHL15	kelch-like 15 (Drosophila)
hsa-miR-592	0	0	1	1	1	1	KRCC1	lysine-rich coiled-coil 1
hsa-miR-592	0	0	1	1	1	1	GLIPR2	GLI pathogenesis-related 2
hsa-miR-592	1	0	1	1	1	1	WWC2	WW and C2 domain containing 2
hsa-miR-592	0	0	1	0	0	0	FAM200B	family with sequence similarity 200, member B
hsa-miR-592	1	0	1	1	1	1	ARHGEF9	Cdc42 guanine nucleotide exchange factor (GEF) 9
hsa-miR-592	0	0	1	0	0	0	WDFY3-AS2	WDFY3 antisense RNA 2
hsa-miR-592	1	0	1	1	1	1	ZMAT4	zinc finger, matrin-type 4
hsa-miR-592	0	0	1	0	1	1	TMSB15B	thymosin beta 15B
hsa-miR-592	0	0	1	1	0	0	PTPMT1	protein tyrosine phosphatase, mitochondrial 1
hsa-miR-592	0	0	1	1	0	0	LYSMD2	LysM, putative peptidoglycan-binding, domain containing 2
hsa-miR-592	0	0	1	1	1	1	SRGN	serglycin
hsa-miR-592	0	0	1	1	1	1	RNF103	ring finger protein 103
hsa-miR-592	1	0	1	1	1	1	SPOCK2	sparc/osteonectin, cwcv and kazal-like domains proteoglycan (testican) 2
hsa-miR-592	1	0	1	0	1	1	CDK19	cyclin-dependent kinase 19
hsa-miR-592	0	0	1	1	0	0	GALNTL5	UDP-N-acetyl-alpha-D-galactosamine:polypeptide N-acetylgalactosaminyltransferase-like 5
hsa-miR-592	1	0	1	1	1	1	PELI3	pellino E3 ubiquitin protein ligase family member 3
hsa-miR-592	0	0	1	1	1	1	TRIM4	tripartite motif containing 4
hsa-miR-592	1	0	1	1	1	1	EPHA4	EPH receptor A4
hsa-miR-592	0	0	1	1	1	1	WDR67	WD repeat domain 67
hsa-miR-592	1	0	1	1	1	1	ZBTB11	zinc finger and BTB domain containing 11
hsa-miR-592	0	0	1	0	1	1	PAPOLG	poly(A) polymerase gamma
hsa-miR-592	0	0	1	1	0	0	CPT1C	carnitine palmitoyltransferase 1C
hsa-miR-592	0	0	1	0	0	0	C3orf55	chromosome 3 open reading frame 55
hsa-miR-592	1	0	1	0	1	1	TFEC	transcription factor EC
hsa-miR-592	0	0	1	0	0	0	BCAS3	breast carcinoma amplified sequence 3
hsa-miR-592	1	0	1	0	1	1	SV2B	synaptic vesicle glycoprotein 2B
hsa-miR-592	0	0	1	1	1	1	LPAR1	lysophosphatidic acid receptor 1
hsa-miR-592	1	0	1	1	1	1	PLS1	plastin 1
hsa-miR-592	1	0	1	1	1	1	RCOR3	REST corepressor 3
hsa-miR-592	0	0	1	1	1	1	CEPT1	choline/ethanolamine phosphotransferase 1
hsa-miR-592	1	0	1	1	1	1	PMAIP1	phorbol-12-myristate-13-acetate-induced protein 1
hsa-miR-592	1	0	1	0	1	1	KCTD2	potassium channel tetramerisation domain containing 2
hsa-miR-592	1	0	1	1	1	1	PCDHA5	protocadherin alpha 5
hsa-miR-592	1	0	1	0	1	1	KIF5A	kinesin family member 5A
hsa-miR-592	0	0	1	1	1	1	HRASLS5	HRAS-like suppressor family, member 5
hsa-miR-592	0	0	1	1	0	0	PLA2G6	phospholipase A2, group VI (cytosolic, calcium-independent)
hsa-miR-592	0	0	1	1	1	1	NUB1	negative regulator of ubiquitin-like proteins 1
hsa-miR-592	0	0	1	1	1	1	EDA2R	ectodysplasin A2 receptor
hsa-miR-592	1	0	1	0	1	1	PDE12	phosphodiesterase 12
hsa-miR-592	0	0	1	1	1	1	PIK3CG	phosphatidylinositol-4,5-bisphosphate 3-kinase, catalytic subunit gamma
hsa-miR-592	1	0	1	1	0	0	INO80E	INO80 complex subunit E
hsa-miR-592	1	0	1	1	1	1	CTDSPL2	CTD (carboxy-terminal domain, RNA polymerase II, polypeptide A) small phosphatase like 2
hsa-miR-592	0	0	1	1	1	1	SNAPC3	small nuclear RNA activating complex, polypeptide 3, 50kDa
hsa-miR-592	0	0	1	1	1	1	ATP1A4	ATPase, Na+/K+ transporting, alpha 4 polypeptide
hsa-miR-592	1	0	1	1	1	1	PEX5L	peroxisomal biogenesis factor 5-like
hsa-miR-592	1	0	1	0	1	1	NEGR1	neuronal growth regulator 1
hsa-miR-592	1	0	1	1	1	1	CEP128	centrosomal protein 128kDa
hsa-miR-592	0	0	1	1	1	1	KIAA1328	KIAA1328
hsa-miR-592	0	0	1	1	1	1	C14orf118	chromosome 14 open reading frame 118
hsa-miR-592	0	0	1	0	0	0	FLJ36000	uncharacterized FLJ36000
hsa-miR-592	1	0	1	1	1	1	FGFR2	fibroblast growth factor receptor 2
hsa-miR-592	0	0	1	1	1	1	CACHD1	cache domain containing 1
hsa-miR-592	0	0	1	0	0	0	LINC00326	long intergenic non-protein coding RNA 326
hsa-miR-592	0	0	1	1	1	1	C11orf88	chromosome 11 open reading frame 88
hsa-miR-592	0	0	1	1	1	1	VBP1	von Hippel-Lindau binding protein 1
hsa-miR-592	1	0	1	1	1	1	DPP8	dipeptidyl-peptidase 8
hsa-miR-592	1	0	1	1	1	1	DACH2	dachshund homolog 2 (Drosophila)
hsa-miR-592	1	0	1	1	1	1	BVES	blood vessel epicardial substance
hsa-miR-592	1	0	1	1	0	0	RGL2	ral guanine nucleotide dissociation stimulator-like 2
hsa-miR-592	0	0	1	0	0	0	SLC7A11-AS1	SLC7A11 antisense RNA 1
hsa-miR-592	0	0	1	0	1	1	FAM13B	family with sequence similarity 13, member B
hsa-miR-592	1	0	1	1	1	1	LRRC4C	leucine rich repeat containing 4C
hsa-miR-592	1	0	1	1	1	1	FAM123A	family with sequence similarity 123A
hsa-miR-592	1	0	1	1	1	1	ROCK1	Rho-associated, coiled-coil containing protein kinase 1
hsa-miR-592	0	0	1	1	1	1	MTHFD2L	methylenetetrahydrofolate dehydrogenase (NADP+ dependent) 2-like
hsa-miR-592	0	0	1	0	0	0	LINC00347	long intergenic non-protein coding RNA 347
hsa-miR-592	1	0	1	1	1	1	SOLH	small optic lobes homolog (Drosophila)
hsa-miR-592	1	0	1	1	1	1	AGAP3	ArfGAP with GTPase domain, ankyrin repeat and PH domain 3
hsa-miR-592	1	0	1	1	1	1	HLTF	helicase-like transcription factor
hsa-miR-592	1	0	1	0	1	1	PSD3	pleckstrin and Sec7 domain containing 3
hsa-miR-592	0	0	1	1	1	1	NADKD1	NAD kinase domain containing 1
hsa-miR-592	0	0	1	1	1	1	MGC57346	uncharacterized LOC401884
hsa-miR-592	0	0	1	0	0	0	LOC283914	uncharacterized LOC283914
hsa-miR-592	0	0	1	1	1	1	DOCK8	dedicator of cytokinesis 8
hsa-miR-592	1	0	1	1	1	1	SF3B1	splicing factor 3b, subunit 1, 155kDa
hsa-miR-592	0	0	1	1	1	1	DDX4	DEAD (Asp-Glu-Ala-Asp) box polypeptide 4
hsa-miR-592	1	0	1	1	1	1	CLVS1	clavesin 1
hsa-miR-592	1	0	1	1	1	1	PELI1	pellino E3 ubiquitin protein ligase 1
hsa-miR-592	1	0	1	0	1	1	ARHGAP5	Rho GTPase activating protein 5
hsa-miR-592	0	0	1	1	0	0	NLRC5	NLR family, CARD domain containing 5
hsa-miR-592	1	0	1	1	1	1	FNDC3A	fibronectin type III domain containing 3A
hsa-miR-592	0	0	1	0	0	0	BMS1P6	BMS1 pseudogene 6
hsa-miR-592	0	0	1	1	1	1	LRRFIP2	leucine rich repeat (in FLII) interacting protein 2
hsa-miR-592	1	0	1	1	1	1	NCOA5	nuclear receptor coactivator 5
hsa-miR-592	1	0	1	1	1	1	KLHL28	kelch-like 28 (Drosophila)
hsa-miR-592	0	0	1	1	0	0	ADAM7	ADAM metallopeptidase domain 7
hsa-miR-592	0	0	1	1	1	1	MCOLN3	mucolipin 3
hsa-miR-592	1	0	1	1	1	1	ZEB2	zinc finger E-box binding homeobox 2
hsa-miR-592	1	0	1	1	1	1	FNDC5	fibronectin type III domain containing 5
hsa-miR-592	0	0	1	1	1	1	GPATCH2	G patch domain containing 2
hsa-miR-592	0	0	1	1	0	0	TM6SF1	transmembrane 6 superfamily member 1
hsa-miR-592	0	0	1	1	0	0	C8orf31	chromosome 8 open reading frame 31
hsa-miR-592	1	0	1	1	1	1	NRSN1	neurensin 1
hsa-miR-592	1	0	1	1	1	1	GRHL1	grainyhead-like 1 (Drosophila)
hsa-miR-592	0	0	1	0	0	0	SPDYE8P	speedy homolog E8 (Xenopus laevis), pseudogene
hsa-miR-592	0	0	1	0	0	0	FOXN3-AS2	FOXN3 antisense RNA 2
hsa-miR-592	0	0	1	1	1	1	C21orf62	chromosome 21 open reading frame 62
hsa-miR-592	0	0	1	1	0	0	CYP4F30P	cytochrome P450, family 4, subfamily F, polypeptide 30, pseudogene
hsa-miR-592	0	0	1	1	1	1	CFHR3	complement factor H-related 3
hsa-miR-592	1	0	1	0	1	1	HMGB3	high mobility group box 3
hsa-miR-592	1	0	1	0	1	1	TMEM194A	transmembrane protein 194A
hsa-miR-592	0	0	1	0	0	0	LINC00152	long intergenic non-protein coding RNA 152
hsa-miR-592	0	0	1	0	0	0	OAZ3	ornithine decarboxylase antizyme 3
hsa-miR-592	1	0	1	1	1	1	OPCML	opioid binding protein/cell adhesion molecule-like
hsa-miR-592	1	0	1	0	1	1	AMMECR1L	AMME chromosomal region gene 1-like
hsa-miR-592	1	0	1	1	1	1	ZMYND11	zinc finger, MYND-type containing 11
hsa-miR-592	1	0	1	1	1	1	ELOVL7	ELOVL fatty acid elongase 7
hsa-miR-592	1	0	1	1	1	1	PLXNA2	plexin A2
hsa-miR-592	0	0	1	1	1	1	TMBIM4	transmembrane BAX inhibitor motif containing 4
hsa-miR-592	1	0	1	1	1	1	ACVR2B	activin A receptor, type IIB
hsa-miR-592	0	0	1	1	1	1	TMEM52B	transmembrane protein 52B
hsa-miR-592	0	0	1	1	1	1	COL8A2	collagen, type VIII, alpha 2
hsa-miR-592	0	0	1	1	1	1	XG	Xg blood group
hsa-miR-592	1	0	1	0	1	1	MYBL1	v-myb myeloblastosis viral oncogene homolog (avian)-like 1
hsa-miR-592	1	0	1	0	1	1	KCNT2	potassium channel, subfamily T, member 2
hsa-miR-592	0	0	1	1	0	0	ANAPC11	anaphase promoting complex subunit 11
hsa-miR-592	0	0	1	1	1	1	SPHKAP	SPHK1 interactor, AKAP domain containing
hsa-miR-592	1	0	1	0	0	0	PWWP2A	PWWP domain containing 2A
hsa-miR-592	1	0	1	1	1	1	PTPRD	protein tyrosine phosphatase, receptor type, D
hsa-miR-592	0	0	1	0	0	0	TPTEP1	transmembrane phosphatase with tensin homology pseudogene 1
hsa-miR-592	1	0	1	1	1	1	CERS6	ceramide synthase 6
hsa-miR-592	1	0	1	0	1	1	BTBD3	BTB (POZ) domain containing 3
hsa-miR-592	1	0	1	0	1	1	KIAA1715	KIAA1715
hsa-miR-592	0	0	1	1	0	0	C1QTNF9B	C1q and tumor necrosis factor related protein 9B
hsa-miR-592	0	0	1	0	0	0	INTS4L1	integrator complex subunit 4-like 1
hsa-miR-592	0	0	1	0	0	0	LINC00310	long intergenic non-protein coding RNA 310
hsa-miR-592	1	0	1	0	1	1	ROBO1	roundabout, axon guidance receptor, homolog 1 (Drosophila)
hsa-miR-592	0	0	1	1	1	1	LRCH1	leucine-rich repeats and calponin homology (CH) domain containing 1
hsa-miR-592	0	0	1	1	0	0	CNTN6	contactin 6
hsa-miR-592	1	0	1	0	1	1	PRDM10	PR domain containing 10
hsa-miR-592	1	0	1	1	1	1	GRIA3	glutamate receptor, ionotropic, AMPA 3
hsa-miR-592	1	0	1	1	1	1	OTUD4	OTU domain containing 4
hsa-miR-592	0	0	1	1	0	0	PLCXD2	phosphatidylinositol-specific phospholipase C, X domain containing 2
hsa-miR-592	0	0	1	1	1	1	C9orf171	chromosome 9 open reading frame 171
hsa-miR-592	0	0	1	0	0	0	EEF1DP3	eukaryotic translation elongation factor 1 delta pseudogene 3
hsa-miR-592	1	0	1	0	1	1	CAMSAP2	calmodulin regulated spectrin-associated protein family, member 2
hsa-miR-592	1	0	1	1	1	1	CHIC1	cysteine-rich hydrophobic domain 1
hsa-miR-592	1	0	1	1	1	1	PCM1	pericentriolar material 1
hsa-miR-592	0	0	1	0	0	0	FUT8-AS1	FUT8 antisense RNA 1
hsa-miR-592	0	0	1	0	0	0	TMED8	transmembrane emp24 protein transport domain containing 8
hsa-miR-592	0	0	1	0	0	0	LINC00643	long intergenic non-protein coding RNA 643
hsa-miR-592	1	0	1	1	1	1	ATP2B4	ATPase, Ca++ transporting, plasma membrane 4
hsa-miR-592	0	0	1	1	0	0	EYS	eyes shut homolog (Drosophila)
hsa-miR-592	1	0	1	1	1	1	SLC35F1	solute carrier family 35, member F1
hsa-miR-592	0	0	1	1	1	1	SLC26A3	solute carrier family 26, member 3
hsa-miR-592	1	0	1	1	1	1	TJP1	tight junction protein 1
hsa-miR-592	0	0	1	1	1	1	PSMA2	proteasome (prosome, macropain) subunit, alpha type, 2
hsa-miR-592	1	0	1	0	1	1	CPNE3	copine III
hsa-miR-592	1	0	1	1	0	0	CECR2	cat eye syndrome chromosome region, candidate 2
hsa-miR-592	1	0	1	1	1	1	ABCA13	ATP-binding cassette, sub-family A (ABC1), member 13
hsa-miR-592	0	0	1	0	0	0	LINC00240	long intergenic non-protein coding RNA 240
hsa-miR-592	0	0	1	1	0	0	PRKCQ	protein kinase C, theta
hsa-miR-592	1	0	1	1	1	1	GTDC1	glycosyltransferase-like domain containing 1
hsa-miR-592	1	0	1	1	1	1	KLHL2	kelch-like 2, Mayven (Drosophila)
hsa-miR-592	1	0	1	1	1	1	TC2N	tandem C2 domains, nuclear
hsa-miR-592	1	0	1	1	1	1	CYB5B	cytochrome b5 type B (outer mitochondrial membrane)
hsa-miR-592	0	0	1	0	0	0	OVOS	ovostatin
hsa-miR-592	0	0	1	1	1	1	TMEM48	transmembrane protein 48
hsa-miR-592	1	0	1	1	1	1	PDXDC1	pyridoxal-dependent decarboxylase domain containing 1
hsa-miR-592	0	0	1	1	1	1	CCNT2	cyclin T2
hsa-miR-592	1	0	1	1	1	1	NFIB	nuclear factor I/B
hsa-miR-592	1	0	1	0	1	1	IGF2BP3	insulin-like growth factor 2 mRNA binding protein 3
hsa-miR-592	1	0	1	1	1	1	C5orf24	chromosome 5 open reading frame 24
hsa-miR-592	0	0	1	1	1	1	DAZL	deleted in azoospermia-like
hsa-miR-592	1	0	1	1	1	1	CACNB4	calcium channel, voltage-dependent, beta 4 subunit
hsa-miR-592	1	0	1	1	1	1	WLS	wntless homolog (Drosophila)
hsa-miR-592	0	0	1	1	1	1	SSFA2	sperm specific antigen 2
hsa-miR-592	1	0	1	0	1	1	TBL1XR1	transducin (beta)-like 1 X-linked receptor 1
hsa-miR-592	1	0	1	0	1	1	TTL	tubulin tyrosine ligase
hsa-miR-592	0	0	1	1	1	1	IPO11	importin 11
hsa-miR-592	1	0	1	1	1	1	SIN3A	SIN3 transcription regulator homolog A (yeast)
hsa-miR-592	0	0	1	1	0	0	TEX33	testis expressed 33
hsa-miR-592	0	0	1	1	0	0	CSH1	chorionic somatomammotropin hormone 1 (placental lactogen)
hsa-miR-592	0	0	1	0	0	0	DCTN2	dynactin 2 (p50)
hsa-miR-592	0	0	1	1	0	0	H2AFY2	H2A histone family, member Y2
hsa-miR-592	0	0	1	1	0	0	EMX1	empty spiracles homeobox 1
hsa-miR-592	1	0	1	1	1	1	TARBP2	TAR (HIV-1) RNA binding protein 2
hsa-miR-592	0	0	1	1	1	1	PTPLAD2	protein tyrosine phosphatase-like A domain containing 2
hsa-miR-592	1	0	1	0	1	1	OLA1	Obg-like ATPase 1
hsa-miR-592	0	0	1	1	0	0	F2	coagulation factor II (thrombin)
hsa-miR-592	0	0	1	0	0	0	ABCB5	ATP-binding cassette, sub-family B (MDR/TAP), member 5
hsa-miR-592	0	0	1	1	1	1	CHCHD4	coiled-coil-helix-coiled-coil-helix domain containing 4
hsa-miR-592	0	0	1	1	1	1	FAT1	FAT tumor suppressor homolog 1 (Drosophila)
hsa-miR-592	0	0	1	1	1	1	TASP1	taspase, threonine aspartase, 1
hsa-miR-592	0	0	1	1	1	1	ABCD1	ATP-binding cassette, sub-family D (ALD), member 1
hsa-miR-592	1	0	1	1	1	1	SMARCE1	SWI/SNF related, matrix associated, actin dependent regulator of chromatin, subfamily e, member 1
hsa-miR-592	0	0	1	1	1	1	SMYD3	SET and MYND domain containing 3
hsa-miR-592	0	0	1	0	1	1	CD99P1	CD99 molecule pseudogene 1
hsa-miR-592	0	0	1	1	1	1	IFNGR2	interferon gamma receptor 2 (interferon gamma transducer 1)
hsa-miR-592	0	0	1	1	1	1	BFAR	bifunctional apoptosis regulator
hsa-miR-592	0	0	1	1	1	1	GRAP2	GRB2-related adaptor protein 2
hsa-miR-592	0	0	1	1	1	1	ANKRD53	ankyrin repeat domain 53
hsa-miR-592	1	0	1	1	0	0	MAP3K10	mitogen-activated protein kinase kinase kinase 10
hsa-miR-592	0	0	1	1	0	0	STK19	serine/threonine kinase 19
hsa-miR-592	1	0	1	1	1	1	WIPF1	WAS/WASL interacting protein family, member 1
hsa-miR-592	1	0	1	1	1	1	PTBP1	polypyrimidine tract binding protein 1
hsa-miR-592	0	0	1	1	0	0	C11orf68	chromosome 11 open reading frame 68
hsa-miR-592	1	0	1	1	1	1	DOK4	docking protein 4
hsa-miR-592	0	0	1	0	0	0	ZNF720	zinc finger protein 720
hsa-miR-592	0	0	1	1	1	1	TRMT61B	tRNA methyltransferase 61 homolog B (S. cerevisiae)
hsa-miR-592	0	0	1	1	1	1	NOLC1	nucleolar and coiled-body phosphoprotein 1
hsa-miR-592	0	0	1	1	1	1	CD1C	CD1c molecule
hsa-miR-592	1	0	1	1	1	1	BAALC	brain and acute leukemia, cytoplasmic
hsa-miR-592	0	0	1	1	0	0	ATP6V0C	ATPase, H+ transporting, lysosomal 16kDa, V0 subunit c
hsa-miR-592	0	0	1	1	1	1	HOXC9	homeobox C9
hsa-miR-592	0	0	1	1	1	1	CXADR	coxsackie virus and adenovirus receptor
hsa-miR-592	1	0	1	1	1	1	RNF2	ring finger protein 2
hsa-miR-592	0	0	1	1	0	0	CCNDBP1	cyclin D-type binding-protein 1
hsa-miR-592	1	0	1	1	1	1	HMGN2	high mobility group nucleosomal binding domain 2
hsa-miR-592	0	0	1	1	0	0	CCDC107	coiled-coil domain containing 107
hsa-miR-592	0	0	1	1	1	1	HUS1	HUS1 checkpoint homolog (S. pombe)
hsa-miR-592	1	0	1	1	1	1	RALY	RNA binding protein, autoantigenic (hnRNP-associated with lethal yellow homolog (mouse))
hsa-miR-592	1	0	1	1	1	1	TRAPPC3	trafficking protein particle complex 3
hsa-miR-592	1	0	1	0	1	1	CD47	CD47 molecule
hsa-miR-592	1	0	1	1	1	1	RUNX1	runt-related transcription factor 1
hsa-miR-592	0	0	1	1	0	0	RPS6KB2	ribosomal protein S6 kinase, 70kDa, polypeptide 2
hsa-miR-592	1	0	1	1	1	1	ATPAF1	ATP synthase mitochondrial F1 complex assembly factor 1
hsa-miR-592	0	0	1	0	0	0	LOC100132984	uncharacterized LOC100132984
hsa-miR-592	1	0	1	1	1	1	MPP1	membrane protein, palmitoylated 1, 55kDa
hsa-miR-592	0	0	1	1	1	1	ANXA7	annexin A7
hsa-miR-592	1	0	1	1	1	1	LGALSL	lectin, galactoside-binding-like
hsa-miR-592	1	0	1	0	1	1	NMT1	N-myristoyltransferase 1
hsa-miR-592	0	0	1	0	0	0	FAM47E	family with sequence similarity 47, member E
hsa-miR-592	0	0	1	1	1	1	ISX	intestine-specific homeobox
hsa-miR-592	1	0	1	1	0	0	POMGNT1	protein O-linked mannose beta1,2-N-acetylglucosaminyltransferase
hsa-miR-592	0	0	1	1	1	1	SLC25A26	solute carrier family 25 (S-adenosylmethionine carrier), member 26
hsa-miR-592	1	0	1	1	1	1	SLC39A10	solute carrier family 39 (zinc transporter), member 10
hsa-miR-592	1	0	1	0	1	1	CNTNAP2	contactin associated protein-like 2
hsa-miR-592	1	0	1	1	1	1	METAP1	methionyl aminopeptidase 1
hsa-miR-592	1	0	1	1	1	1	SP2	Sp2 transcription factor
hsa-miR-592	0	0	1	1	1	1	SLC39A14	solute carrier family 39 (zinc transporter), member 14
hsa-miR-592	1	0	1	1	1	1	NKX2-1	NK2 homeobox 1
hsa-miR-592	1	0	1	0	1	1	CBX7	chromobox homolog 7
hsa-miR-592	0	0	1	1	1	1	PTGS1	prostaglandin-endoperoxide synthase 1 (prostaglandin G/H synthase and cyclooxygenase)
hsa-miR-592	1	0	1	1	1	1	BTLA	B and T lymphocyte associated
hsa-miR-592	1	0	1	1	1	1	GLIS3	GLIS family zinc finger 3
hsa-miR-592	0	0	1	0	0	0	CDKN2B-AS1	CDKN2B antisense RNA 1
hsa-miR-592	0	0	1	1	1	1	MARVELD2	MARVEL domain containing 2
hsa-miR-592	1	0	1	1	1	1	LGR4	leucine-rich repeat containing G protein-coupled receptor 4
hsa-miR-592	0	0	1	0	0	0	C1orf81	chromosome 1 open reading frame 81
hsa-miR-592	0	0	1	1	0	0	CEACAM3	carcinoembryonic antigen-related cell adhesion molecule 3
hsa-miR-592	1	0	1	1	1	1	MLL	myeloid/lymphoid or mixed-lineage leukemia (trithorax homolog, Drosophila)
hsa-miR-592	1	0	1	0	0	0	YLPM1	YLP motif containing 1
hsa-miR-592	0	0	1	1	1	1	PLCB4	phospholipase C, beta 4
hsa-miR-592	1	0	1	1	1	1	IGF1	insulin-like growth factor 1 (somatomedin C)
hsa-miR-592	1	0	1	1	1	1	ZNF76	zinc finger protein 76
hsa-miR-592	1	0	1	0	1	1	ACVR2A	activin A receptor, type IIA
hsa-miR-592	0	0	1	1	1	1	CA2	carbonic anhydrase II
hsa-miR-592	1	0	1	1	1	1	COL4A3	collagen, type IV, alpha 3 (Goodpasture antigen)
hsa-miR-592	1	0	1	1	1	1	COL5A1	collagen, type V, alpha 1
hsa-miR-592	0	0	1	0	1	1	CYP1B1	cytochrome P450, family 1, subfamily B, polypeptide 1
hsa-miR-592	1	0	1	1	1	1	ESR1	estrogen receptor 1
hsa-miR-592	0	0	1	1	1	1	F8	coagulation factor VIII, procoagulant component
hsa-miR-592	0	0	1	1	0	0	FSHR	follicle stimulating hormone receptor
hsa-miR-592	1	0	1	0	1	1	GHR	growth hormone receptor
hsa-miR-592	1	0	1	0	1	1	GLI3	GLI family zinc finger 3
hsa-miR-592	1	0	1	0	1	1	KIT	v-kit Hardy-Zuckerman 4 feline sarcoma viral oncogene homolog
hsa-miR-592	0	0	1	1	1	1	LPL	lipoprotein lipase
hsa-miR-592	1	0	1	1	1	1	MITF	microphthalmia-associated transcription factor
hsa-miR-592	0	0	1	1	1	1	MSH2	mutS homolog 2, colon cancer, nonpolyposis type 1 (E. coli)
hsa-miR-592	1	0	1	0	1	1	PTEN	phosphatase and tensin homolog
hsa-miR-592	1	0	1	0	1	1	TSC1	tuberous sclerosis 1
hsa-miR-592	0	0	1	0	1	1	GNRHR	gonadotropin-releasing hormone receptor
hsa-miR-592	1	0	1	0	1	1	PAFAH1B1	platelet-activating factor acetylhydrolase 1b, regulatory subunit 1 (45kDa)
hsa-miR-592	1	0	1	1	1	1	SLC26A4	solute carrier family 26, member 4
hsa-miR-592	0	0	1	1	1	1	PECAM1	platelet/endothelial cell adhesion molecule 1
hsa-miR-592	1	0	1	1	1	1	APP	amyloid beta (A4) precursor protein
hsa-miR-592	1	0	1	1	1	1	ATRX	alpha thalassemia/mental retardation syndrome X-linked
hsa-miR-592	0	0	1	1	1	1	CYP11B2	cytochrome P450, family 11, subfamily B, polypeptide 2
hsa-miR-592	0	0	1	1	1	1	FCGR1A	Fc fragment of IgG, high affinity Ia, receptor (CD64)
hsa-miR-592	1	0	1	1	1	1	IL10	interleukin 10
hsa-miR-592	0	0	1	1	1	1	C7	complement component 7
hsa-miR-592	1	0	1	1	1	1	TNF	tumor necrosis factor
hsa-miR-592	0	0	1	1	1	1	SELL	selectin L
hsa-miR-592	0	0	1	1	1	1	ALDH1B1	aldehyde dehydrogenase 1 family, member B1
hsa-miR-592	1	0	1	1	1	1	GABRB3	gamma-aminobutyric acid (GABA) A receptor, beta 3
hsa-miR-592	1	0	1	1	1	1	IGF1R	insulin-like growth factor 1 receptor
hsa-miR-592	0	0	1	1	1	1	IL5	interleukin 5 (colony-stimulating factor, eosinophil)
hsa-miR-592	1	0	1	1	0	0	PDE3A	phosphodiesterase 3A, cGMP-inhibited
hsa-miR-592	1	0	1	1	1	1	PTGDR	prostaglandin D2 receptor (DP)
hsa-miR-592	1	0	1	1	1	1	RARB	retinoic acid receptor, beta
hsa-miR-592	0	0	1	0	1	1	DNAJB3	DnaJ (Hsp40) homolog, subfamily B, member 3
hsa-miR-592	1	0	1	0	1	1	ARHGEF37	Rho guanine nucleotide exchange factor (GEF) 37
hsa-miR-592	1	0	1	0	1	1	CLDN18	claudin 18
hsa-miR-592	1	0	1	1	1	1	AFTPH	aftiphilin
hsa-miR-592	1	0	1	1	1	1	LCLAT1	lysocardiolipin acyltransferase 1
hsa-miR-592	1	0	1	1	1	1	WNK3	WNK lysine deficient protein kinase 3
hsa-miR-592	1	0	1	1	1	1	C1orf173	chromosome 1 open reading frame 173
hsa-miR-592	0	0	1	1	0	0	BICD1	bicaudal D homolog 1 (Drosophila)
hsa-miR-592	1	0	1	1	1	1	HMGXB4	HMG box domain containing 4
hsa-miR-592	0	0	1	1	1	1	ANXA13	annexin A13
hsa-miR-592	0	0	1	1	1	1	ALG11	asparagine-linked glycosylation 11, alpha-1,2-mannosyltransferase homolog (yeast)
hsa-miR-592	1	0	1	0	1	1	LIN28B	lin-28 homolog B (C. elegans)
hsa-miR-592	0	0	1	0	1	1	ZNF705A	zinc finger protein 705A
hsa-miR-592	1	0	1	1	1	1	NCK2	NCK adaptor protein 2
hsa-miR-592	1	0	1	0	1	1	LRRC55	leucine rich repeat containing 55
hsa-miR-592	0	0	1	1	1	1	SUMO1	SMT3 suppressor of mif two 3 homolog 1 (S. cerevisiae)
hsa-miR-592	0	0	1	1	1	1	TCEAL6	transcription elongation factor A (SII)-like 6
hsa-miR-592	1	0	1	0	1	1	GOSR1	golgi SNAP receptor complex member 1
hsa-miR-592	1	0	1	1	1	1	L3MBTL3	l(3)mbt-like 3 (Drosophila)
hsa-miR-592	1	0	1	0	1	1	CPLX2	complexin 2
hsa-miR-592	0	0	1	1	1	1	FAM154B	family with sequence similarity 154, member B
hsa-miR-592	1	0	1	0	1	1	C18orf25	chromosome 18 open reading frame 25
hsa-miR-592	1	0	1	1	1	1	CTDSPL	CTD (carboxy-terminal domain, RNA polymerase II, polypeptide A) small phosphatase-like
hsa-miR-592	1	0	1	0	1	1	KIAA2022	KIAA2022
hsa-miR-592	0	0	1	1	1	1	MXI1	MAX interactor 1
hsa-miR-592	1	0	1	1	1	1	NUPL1	nucleoporin like 1
hsa-miR-592	1	0	1	1	1	1	FNIP1	folliculin interacting protein 1
hsa-miR-592	1	0	1	0	1	1	ERMN	ermin, ERM-like protein
hsa-miR-592	1	0	1	1	1	1	SHE	Src homology 2 domain containing E
hsa-miR-592	0	0	1	0	1	1	LPPR5	lipid phosphate phosphatase-related protein type 5
hsa-miR-592	1	0	1	0	1	1	ZC3H12B	zinc finger CCCH-type containing 12B
hsa-miR-592	1	0	1	1	1	1	SLC6A17	solute carrier family 6, member 17
hsa-miR-592	0	0	1	1	1	1	SAMD13	sterile alpha motif domain containing 13
hsa-miR-592	0	0	1	1	1	1	NCMAP	noncompact myelin associated protein
hsa-miR-592	1	0	1	1	1	1	ATP11C	ATPase, class VI, type 11C
hsa-miR-592	0	0	1	0	1	1	LINC00596	long intergenic non-protein coding RNA 596
hsa-miR-592	1	0	1	0	1	1	ZKSCAN2	zinc finger with KRAB and SCAN domains 2
hsa-miR-592	0	0	1	1	1	1	CCNC	cyclin C
hsa-miR-592	0	0	1	0	0	0	LOC400707	uncharacterized LOC400707
hsa-miR-592	0	0	1	1	1	1	LDLRAD2	low density lipoprotein receptor class A domain containing 2
hsa-miR-592	0	0	1	0	1	1	LINC00268	long intergenic non-protein coding RNA 268
hsa-miR-592	1	0	1	1	1	1	PHF6	PHD finger protein 6
hsa-miR-592	1	0	1	1	1	1	TMCC1	transmembrane and coiled-coil domain family 1
hsa-miR-592	1	0	1	0	1	1	GOPC	golgi-associated PDZ and coiled-coil motif containing
hsa-miR-592	0	0	1	1	1	1	CARD16	caspase recruitment domain family, member 16
hsa-miR-592	1	0	1	1	1	1	VMA21	VMA21 vacuolar H+-ATPase homolog (S. cerevisiae)
hsa-miR-592	1	0	1	1	1	1	SERBP1	SERPINE1 mRNA binding protein 1
hsa-miR-592	1	0	1	1	1	1	IQCB1	IQ motif containing B1
hsa-miR-592	1	0	1	0	1	1	RGAG4	retrotransposon gag domain containing 4
hsa-miR-592	1	0	1	1	1	1	CANX	calnexin
hsa-miR-592	1	0	1	0	1	1	TNRC6B	trinucleotide repeat containing 6B
hsa-miR-592	1	0	1	0	1	1	CELF2	CUGBP, Elav-like family member 2
hsa-miR-592	1	0	1	0	1	1	ANO6	anoctamin 6
hsa-miR-592	0	0	1	1	1	1	ARRDC2	arrestin domain containing 2
hsa-miR-592	1	0	1	0	1	1	SAMD5	sterile alpha motif domain containing 5
hsa-miR-592	1	0	1	1	1	1	MAF	v-maf musculoaponeurotic fibrosarcoma oncogene homolog (avian)
hsa-miR-592	1	0	1	1	1	1	TFAP2A	transcription factor AP-2 alpha (activating enhancer binding protein 2 alpha)
hsa-miR-592	0	0	1	1	1	1	C6orf225	chromosome 6 open reading frame 225
hsa-miR-592	1	0	1	1	1	1	ZNF704	zinc finger protein 704
hsa-miR-592	0	0	1	1	0	0	SSX4B	synovial sarcoma, X breakpoint 4B
hsa-miR-592	0	0	1	1	1	1	FAM134B	family with sequence similarity 134, member B
hsa-miR-592	1	0	1	1	1	1	KIAA0317	KIAA0317
hsa-miR-592	1	0	1	0	1	1	USP9X	ubiquitin specific peptidase 9, X-linked
hsa-miR-592	0	0	1	0	1	1	ZNF705D	zinc finger protein 705D
hsa-miR-592	1	0	1	0	1	1	CREBZF	CREB/ATF bZIP transcription factor
hsa-miR-592	1	0	1	1	1	1	CHN2	chimerin (chimaerin) 2
hsa-miR-592	1	0	1	1	1	1	TCERG1	transcription elongation regulator 1
hsa-miR-592	0	0	1	1	1	1	SPOCK3	sparc/osteonectin, cwcv and kazal-like domains proteoglycan (testican) 3
hsa-miR-592	1	0	1	1	1	1	MTMR12	myotubularin related protein 12
hsa-miR-592	1	0	1	1	1	1	GDAP1	ganglioside induced differentiation associated protein 1
hsa-miR-592	1	0	1	1	1	1	RUFY2	RUN and FYVE domain containing 2
hsa-miR-592	0	0	1	1	1	1	GEMIN8	gem (nuclear organelle) associated protein 8
hsa-miR-592	1	0	1	1	1	1	ZNF706	zinc finger protein 706
hsa-miR-592	1	0	1	1	1	1	C2orf88	chromosome 2 open reading frame 88
hsa-miR-592	0	0	1	1	1	1	TMEM8B	transmembrane protein 8B
hsa-miR-592	1	0	1	1	1	1	ERBB4	v-erb-a erythroblastic leukemia viral oncogene homolog 4 (avian)
hsa-miR-592	1	0	1	1	1	1	RERE	arginine-glutamic acid dipeptide (RE) repeats
hsa-miR-592	1	0	1	0	1	1	TMEM237	transmembrane protein 237
hsa-miR-592	0	0	1	1	1	1	SLC6A4	solute carrier family 6 (neurotransmitter transporter, serotonin), member 4
hsa-miR-592	1	0	1	1	1	1	QSER1	glutamine and serine rich 1
hsa-miR-592	1	0	1	1	1	1	ZNF436	zinc finger protein 436
hsa-miR-592	1	0	1	1	1	1	ATG9A	autophagy related 9A
hsa-miR-592	1	0	1	1	1	1	SREK1	splicing regulatory glutamine/lysine-rich protein 1
hsa-miR-592	0	0	1	1	1	1	PPCS	phosphopantothenoylcysteine synthetase
hsa-miR-592	1	0	1	1	1	1	PRR3	proline rich 3
hsa-miR-592	0	0	1	1	1	1	MTMR14	myotubularin related protein 14
hsa-miR-592	1	0	1	1	1	1	ALG9	asparagine-linked glycosylation 9, alpha-1,2-mannosyltransferase homolog (S. cerevisiae)
hsa-miR-592	1	0	1	1	1	1	ITGA6	integrin, alpha 6
hsa-miR-592	0	0	1	1	1	1	HSF5	heat shock transcription factor family member 5
hsa-miR-592	0	0	1	1	1	1	G6PC2	glucose-6-phosphatase, catalytic, 2
hsa-miR-592	1	0	1	1	0	0	ASIC2	acid-sensing (proton-gated) ion channel 2
hsa-miR-592	1	0	1	1	1	1	ADAM10	ADAM metallopeptidase domain 10
hsa-miR-592	0	0	1	1	1	1	CRISP1	cysteine-rich secretory protein 1
hsa-miR-592	0	0	1	1	1	1	AMELX	amelogenin, X-linked
hsa-miR-592	0	0	1	1	1	1	AMELY	amelogenin, Y-linked
hsa-miR-592	1	0	1	0	1	1	BACH1	BTB and CNC homology 1, basic leucine zipper transcription factor 1
hsa-miR-592	1	0	1	0	1	1	BMPR2	bone morphogenetic protein receptor, type II (serine/threonine kinase)
hsa-miR-592	1	0	1	1	1	1	CREBL2	cAMP responsive element binding protein-like 2
hsa-miR-592	1	0	1	1	1	1	MAPK14	mitogen-activated protein kinase 14
hsa-miR-592	1	0	1	1	1	1	DYRK1A	dual-specificity tyrosine-(Y)-phosphorylation regulated kinase 1A
hsa-miR-592	0	0	1	0	1	1	EMP1	epithelial membrane protein 1
hsa-miR-592	1	0	1	1	1	1	EREG	epiregulin
hsa-miR-592	1	0	1	1	0	0	FOXO3	forkhead box O3
hsa-miR-592	1	0	1	0	1	1	GCNT2	glucosaminyl (N-acetyl) transferase 2, I-branching enzyme (I blood group)
hsa-miR-592	1	0	1	0	1	1	B4GALT1	UDP-Gal:betaGlcNAc beta 1,4- galactosyltransferase, polypeptide 1
hsa-miR-592	0	0	1	1	0	0	GSTZ1	glutathione S-transferase zeta 1
hsa-miR-592	0	0	1	1	1	1	RHOA	ras homolog family member A
hsa-miR-592	1	0	1	1	1	1	BAAT	bile acid CoA: amino acid N-acyltransferase (glycine N-choloyltransferase)
hsa-miR-592	1	0	1	1	1	1	CBFB	core-binding factor, beta subunit
hsa-miR-592	0	0	1	1	1	1	CHGB	chromogranin B (secretogranin 1)
hsa-miR-592	1	0	1	1	1	1	MASP1	mannan-binding lectin serine peptidase 1 (C4/C2 activating component of Ra-reactive factor)
hsa-miR-592	1	0	1	1	1	1	CTNNB1	catenin (cadherin-associated protein), beta 1, 88kDa
hsa-miR-592	0	0	1	1	0	0	EFNA5	ephrin-A5
hsa-miR-592	1	0	1	1	1	1	EIF4E	eukaryotic translation initiation factor 4E
hsa-miR-592	1	0	1	0	1	1	ETV6	ets variant 6
hsa-miR-592	1	0	1	1	1	1	FBN2	fibrillin 2
hsa-miR-592	0	0	1	1	1	1	FLI1	Friend leukemia virus integration 1
hsa-miR-592	0	0	1	0	1	1	GCG	glucagon
hsa-miR-592	0	0	1	1	0	0	GLP1R	glucagon-like peptide 1 receptor
hsa-miR-592	1	0	1	1	1	1	GOLGA1	golgin A1
hsa-miR-592	1	0	1	1	1	1	GOT2	glutamic-oxaloacetic transaminase 2, mitochondrial (aspartate aminotransferase 2)
hsa-miR-592	0	0	1	0	1	1	GYPA	glycophorin A (MNS blood group)
hsa-miR-592	0	0	1	1	1	1	IL12B	interleukin 12B (natural killer cell stimulatory factor 2, cytotoxic lymphocyte maturation factor 2, p40)
hsa-miR-592	1	0	1	1	0	0	INHBB	inhibin, beta B
hsa-miR-592	1	0	1	1	1	1	ITGB8	integrin, beta 8
hsa-miR-592	1	0	1	1	1	1	ITPR2	inositol 1,4,5-trisphosphate receptor, type 2
hsa-miR-592	1	0	1	1	1	1	KPNA3	karyopherin alpha 3 (importin alpha 4)
hsa-miR-592	1	0	1	0	1	1	LAMC1	laminin, gamma 1 (formerly LAMB2)
hsa-miR-592	1	0	1	0	1	1	MXD1	MAX dimerization protein 1
hsa-miR-592	1	0	1	1	1	1	ME1	malic enzyme 1, NADP(+)-dependent, cytosolic
hsa-miR-592	1	0	1	1	1	1	MN1	meningioma (disrupted in balanced translocation) 1
hsa-miR-592	0	0	1	1	0	0	MNAT1	menage a trois homolog 1, cyclin H assembly factor (Xenopus laevis)
hsa-miR-592	1	0	1	1	1	1	PPP1R12B	protein phosphatase 1, regulatory subunit 12B
hsa-miR-592	1	0	1	1	1	1	NPTX1	neuronal pentraxin I
hsa-miR-592	1	0	1	1	1	1	PCSK6	proprotein convertase subtilisin/kexin type 6
hsa-miR-592	1	0	1	0	1	1	PAPPA	pregnancy-associated plasma protein A, pappalysin 1
hsa-miR-592	1	0	1	0	1	1	PCDHGC3	protocadherin gamma subfamily C, 3
hsa-miR-592	0	0	1	1	1	1	PDE6D	phosphodiesterase 6D, cGMP-specific, rod, delta
hsa-miR-592	0	0	1	1	1	1	PF4V1	platelet factor 4 variant 1
hsa-miR-592	0	0	1	0	1	1	PMP2	peripheral myelin protein 2
hsa-miR-592	1	0	1	1	1	1	PPP1CB	protein phosphatase 1, catalytic subunit, beta isozyme
hsa-miR-592	1	0	1	1	1	1	PPP1CC	protein phosphatase 1, catalytic subunit, gamma isozyme
hsa-miR-592	1	0	1	0	0	0	PPP1R10	protein phosphatase 1, regulatory subunit 10
hsa-miR-592	0	0	1	1	1	1	PREP	prolyl endopeptidase
hsa-miR-592	1	0	1	1	1	1	PTPN9	protein tyrosine phosphatase, non-receptor type 9
hsa-miR-592	1	0	1	0	1	1	RAP2B	RAP2B, member of RAS oncogene family
hsa-miR-592	0	0	1	1	1	1	RFC3	replication factor C (activator 1) 3, 38kDa
hsa-miR-592	1	0	1	1	0	0	RFX1	regulatory factor X, 1 (influences HLA class II expression)
hsa-miR-592	1	0	1	1	1	1	ROBO2	roundabout, axon guidance receptor, homolog 2 (Drosophila)
hsa-miR-592	1	0	1	1	1	1	SRSF3	serine/arginine-rich splicing factor 3
hsa-miR-592	1	0	1	1	1	1	SH3GL2	SH3-domain GRB2-like 2
hsa-miR-592	1	0	1	0	1	1	ST6GAL1	ST6 beta-galactosamide alpha-2,6-sialyltranferase 1
hsa-miR-592	0	0	1	0	0	0	SLC18A2	solute carrier family 18 (vesicular monoamine), member 2
hsa-miR-592	1	0	1	1	1	1	SOX2	SRY (sex determining region Y)-box 2
hsa-miR-592	1	0	1	0	1	1	STC1	stanniocalcin 1
hsa-miR-592	0	0	1	1	1	1	TAF2	TAF2 RNA polymerase II, TATA box binding protein (TBP)-associated factor, 150kDa
hsa-miR-592	1	0	1	1	1	1	TIAM1	T-cell lymphoma invasion and metastasis 1
hsa-miR-592	1	0	1	1	1	1	NR2E1	nuclear receptor subfamily 2, group E, member 1
hsa-miR-592	0	0	1	1	1	1	UBE2D1	ubiquitin-conjugating enzyme E2D 1
hsa-miR-592	1	0	1	1	1	1	UBE2D3	ubiquitin-conjugating enzyme E2D 3
hsa-miR-592	1	0	1	0	1	1	UBE2L3	ubiquitin-conjugating enzyme E2L 3
hsa-miR-592	0	0	1	0	1	1	ZFY	zinc finger protein, Y-linked
hsa-miR-592	0	0	1	1	1	1	ZNF137P	zinc finger protein 137, pseudogene
hsa-miR-592	1	0	1	1	1	1	FZD5	frizzled family receptor 5
hsa-miR-592	1	0	1	1	1	1	ADAM12	ADAM metallopeptidase domain 12
hsa-miR-592	0	0	1	1	1	1	STX7	syntaxin 7
hsa-miR-592	1	0	1	0	1	1	CUL3	cullin 3
hsa-miR-592	1	0	1	1	1	1	TNFSF11	tumor necrosis factor (ligand) superfamily, member 11
hsa-miR-592	1	0	1	0	1	1	PCDHGA12	protocadherin gamma subfamily A, 12
hsa-miR-592	1	0	1	0	1	1	PCDHGB4	protocadherin gamma subfamily B, 4
hsa-miR-592	1	0	1	0	1	1	TNKS	tankyrase, TRF1-interacting ankyrin-related ADP-ribose polymerase
hsa-miR-592	1	0	1	0	1	1	IRS2	insulin receptor substrate 2
hsa-miR-592	1	0	1	1	1	1	NRP2	neuropilin 2
hsa-miR-592	1	0	1	1	1	1	BCL2L2	BCL2-like 2
hsa-miR-592	1	0	1	1	1	1	EYA4	eyes absent homolog 4 (Drosophila)
hsa-miR-592	1	0	1	1	1	1	FGF13	fibroblast growth factor 13
hsa-miR-592	1	0	1	1	1	1	GMFB	glia maturation factor, beta
hsa-miR-592	1	0	1	1	1	1	HNF4G	hepatocyte nuclear factor 4, gamma
hsa-miR-592	1	0	1	1	1	1	RAB5A	RAB5A, member RAS oncogene family
hsa-miR-592	1	0	1	0	1	1	SLC1A2	solute carrier family 1 (glial high affinity glutamate transporter), member 2
hsa-miR-592	1	0	1	0	1	1	MED14	mediator complex subunit 14
hsa-miR-592	1	0	1	1	1	1	SOCS6	suppressor of cytokine signaling 6
hsa-miR-592	1	0	1	1	1	1	MED21	mediator complex subunit 21
hsa-miR-592	0	0	1	1	1	1	HOMER1	homer homolog 1 (Drosophila)
hsa-miR-592	1	0	1	0	1	1	AKAP6	A kinase (PRKA) anchor protein 6
hsa-miR-592	0	0	1	1	0	0	PIGL	phosphatidylinositol glycan anchor biosynthesis, class L
hsa-miR-592	0	0	1	1	1	1	EEF1E1	eukaryotic translation elongation factor 1 epsilon 1
hsa-miR-592	0	0	1	1	1	1	CARTPT	CART prepropeptide
hsa-miR-592	1	0	1	1	1	1	GDA	guanine deaminase
hsa-miR-592	0	0	1	1	1	1	BST1	bone marrow stromal cell antigen 1
hsa-miR-592	0	0	1	1	1	1	CDH1	cadherin 1, type 1, E-cadherin (epithelial)
hsa-miR-592	1	0	1	1	1	1	DAG1	dystroglycan 1 (dystrophin-associated glycoprotein 1)
hsa-miR-592	1	0	1	1	1	1	DUSP1	dual specificity phosphatase 1
hsa-miR-592	0	0	1	1	1	1	GPC5	glypican 5
hsa-miR-592	1	0	1	1	1	1	FUT8	fucosyltransferase 8 (alpha (1,6) fucosyltransferase)
hsa-miR-592	1	0	1	0	1	1	GALNT2	UDP-N-acetyl-alpha-D-galactosamine:polypeptide N-acetylgalactosaminyltransferase 2 (GalNAc-T2)
hsa-miR-592	1	0	1	1	1	1	FOXK2	forkhead box K2
hsa-miR-592	0	0	1	1	1	1	NDUFC2	NADH dehydrogenase (ubiquinone) 1, subcomplex unknown, 2, 14.5kDa
hsa-miR-592	0	0	1	1	1	1	PIGH	phosphatidylinositol glycan anchor biosynthesis, class H
hsa-miR-592	1	0	1	0	1	1	PKNOX1	PBX/knotted 1 homeobox 1
hsa-miR-592	0	0	1	0	1	1	POU4F2	POU class 4 homeobox 2
hsa-miR-592	1	0	1	1	1	1	BAP1	BRCA1 associated protein-1 (ubiquitin carboxy-terminal hydrolase)
hsa-miR-592	0	0	1	1	0	0	MAP3K6	mitogen-activated protein kinase kinase kinase 6
hsa-miR-592	1	0	1	1	1	1	DCLK1	doublecortin-like kinase 1
hsa-miR-592	1	0	1	1	1	1	XPR1	xenotropic and polytropic retrovirus receptor 1
hsa-miR-592	1	0	1	1	0	0	TXNL1	thioredoxin-like 1
hsa-miR-592	1	0	1	1	1	1	KIF3B	kinesin family member 3B
hsa-miR-592	0	0	1	1	0	0	AIM2	absent in melanoma 2
hsa-miR-592	1	0	1	1	1	1	AKAP7	A kinase (PRKA) anchor protein 7
hsa-miR-592	1	0	1	1	1	1	ONECUT2	one cut homeobox 2
hsa-miR-592	0	0	1	1	1	1	CALB1	calbindin 1, 28kDa
hsa-miR-592	0	0	1	1	1	1	CDKN2B	cyclin-dependent kinase inhibitor 2B (p15, inhibits CDK4)
hsa-miR-592	1	0	1	0	1	1	SCD	stearoyl-CoA desaturase (delta-9-desaturase)
hsa-miR-592	1	0	1	1	1	1	BMI1	BMI1 polycomb ring finger oncogene
hsa-miR-592	1	0	1	1	1	1	CBL	Cbl proto-oncogene, E3 ubiquitin protein ligase
hsa-miR-592	1	0	1	1	1	1	FOXN3	forkhead box N3
hsa-miR-592	0	0	1	1	1	1	MSTN	myostatin
hsa-miR-592	1	0	1	1	1	1	HIP1	huntingtin interacting protein 1
hsa-miR-592	1	0	1	0	1	1	PRKAB2	protein kinase, AMP-activated, beta 2 non-catalytic subunit
hsa-miR-592	1	0	1	0	1	1	CCDC6	coiled-coil domain containing 6
hsa-miR-592	0	0	1	1	1	1	ZRANB2	zinc finger, RAN-binding domain containing 2
hsa-miR-592	0	0	1	1	1	1	ING1	inhibitor of growth family, member 1
hsa-miR-592	1	0	1	1	1	1	RNASE6	ribonuclease, RNase A family, k6
hsa-miR-592	0	0	1	1	0	0	SSX4	synovial sarcoma, X breakpoint 4
hsa-miR-592	0	0	1	1	1	1	TAF1B	TATA box binding protein (TBP)-associated factor, RNA polymerase I, B, 63kDa
hsa-miR-592	1	0	1	1	0	0	DPP3	dipeptidyl-peptidase 3
hsa-miR-592	1	0	1	1	1	1	GIPC1	GIPC PDZ domain containing family, member 1
hsa-miR-592	1	0	1	0	1	1	CALCRL	calcitonin receptor-like
hsa-miR-592	0	0	1	1	1	1	NUTF2	nuclear transport factor 2
hsa-miR-592	1	0	1	1	1	1	SRRM1	serine/arginine repetitive matrix 1
hsa-miR-592	1	0	1	1	1	1	PURA	purine-rich element binding protein A
hsa-miR-592	1	0	1	1	1	1	MMP16	matrix metallopeptidase 16 (membrane-inserted)
hsa-miR-592	0	0	1	1	0	0	PPYR1	pancreatic polypeptide receptor 1
hsa-miR-592	1	0	1	1	1	1	RNF6	ring finger protein (C3H2C3 type) 6
hsa-miR-592	0	0	1	1	1	1	TSC22D1	TSC22 domain family, member 1
hsa-miR-592	1	0	1	0	1	1	HDAC4	histone deacetylase 4
hsa-miR-592	1	0	1	1	1	1	HS3ST4	heparan sulfate (glucosamine) 3-O-sulfotransferase 4
hsa-miR-592	0	0	1	1	1	1	TRDN	triadin
hsa-miR-592	1	0	1	1	1	1	NCK1	NCK adaptor protein 1
hsa-miR-592	0	0	1	1	0	0	TESK1	testis-specific kinase 1
hsa-miR-592	0	0	1	1	1	1	ZNF230	zinc finger protein 230
hsa-miR-592	1	0	1	1	1	1	SMC1A	structural maintenance of chromosomes 1A
hsa-miR-592	1	0	1	1	1	1	FBLN5	fibulin 5
hsa-miR-592	1	0	1	1	1	1	ZER1	zer-1 homolog (C. elegans)
hsa-miR-592	0	0	1	1	1	1	FST	follistatin
hsa-miR-592	0	0	1	1	1	1	SLC25A17	solute carrier family 25 (mitochondrial carrier; peroxisomal membrane protein, 34kDa), member 17
hsa-miR-592	1	0	1	1	1	1	PAIP1	poly(A) binding protein interacting protein 1
hsa-miR-592	1	0	1	1	1	1	HEXIM1	hexamethylene bis-acetamide inducible 1
hsa-miR-592	1	0	1	1	1	1	DYNLT3	dynein, light chain, Tctex-type 3
hsa-miR-592	1	0	1	1	1	1	MAP3K2	mitogen-activated protein kinase kinase kinase 2
hsa-miR-592	0	0	1	1	1	1	CLPX	ClpX caseinolytic peptidase X homolog (E. coli)
hsa-miR-592	1	0	1	1	1	1	PGRMC1	progesterone receptor membrane component 1
hsa-miR-592	0	0	1	1	1	1	FGL2	fibrinogen-like 2
hsa-miR-592	1	0	1	1	1	1	MMP24	matrix metallopeptidase 24 (membrane-inserted)
hsa-miR-592	1	0	1	0	1	1	SYNGAP1	synaptic Ras GTPase activating protein 1
hsa-miR-592	0	0	1	1	1	1	PKIA	protein kinase (cAMP-dependent, catalytic) inhibitor alpha
hsa-miR-592	0	0	1	1	1	1	TMED10	transmembrane emp24-like trafficking protein 10 (yeast)
hsa-miR-592	0	0	1	0	1	1	PSG1	pregnancy specific beta-1-glycoprotein 1
hsa-miR-592	1	0	1	0	1	1	SLC5A3	solute carrier family 5 (sodium/myo-inositol cotransporter), member 3
hsa-miR-592	1	0	1	1	1	1	SRP72	signal recognition particle 72kDa
hsa-miR-592	1	0	1	0	1	1	WASF2	WAS protein family, member 2
hsa-miR-592	1	0	1	1	1	1	UTRN	utrophin
hsa-miR-592	1	0	1	1	1	1	UTY	ubiquitously transcribed tetratricopeptide repeat gene, Y-linked
hsa-miR-592	0	0	1	0	1	1	ZXDB	zinc finger, X-linked, duplicated B
hsa-miR-592	1	0	1	1	1	1	TESK2	testis-specific kinase 2
hsa-miR-592	1	0	1	1	1	1	PALM2-AKAP2	PALM2-AKAP2 readthrough
hsa-miR-592	1	0	1	1	1	1	TARDBP	TAR DNA binding protein
hsa-miR-592	1	0	1	1	1	1	HDHD1	haloacid dehalogenase-like hydrolase domain containing 1
hsa-miR-592	1	0	1	1	0	0	ANGPTL2	angiopoietin-like 2
hsa-miR-592	1	0	1	0	1	1	FZD4	frizzled family receptor 4
hsa-miR-592	1	0	1	1	1	1	HS2ST1	heparan sulfate 2-O-sulfotransferase 1
hsa-miR-592	1	0	1	1	1	1	KCND2	potassium voltage-gated channel, Shal-related subfamily, member 2
hsa-miR-592	1	0	1	0	1	1	GAB2	GRB2-associated binding protein 2
hsa-miR-592	1	0	1	0	1	1	G3BP2	GTPase activating protein (SH3 domain) binding protein 2
hsa-miR-592	0	0	1	1	0	0	KIR2DS4	killer cell immunoglobulin-like receptor, two domains, short cytoplasmic tail, 4
hsa-miR-592	1	0	1	0	1	1	MYCBP	c-myc binding protein
hsa-miR-592	1	0	1	1	1	1	NNT	nicotinamide nucleotide transhydrogenase
hsa-miR-592	1	0	1	1	1	1	ATP6V0A2	ATPase, H+ transporting, lysosomal V0 subunit a2
hsa-miR-592	0	0	1	0	1	1	TLL1	tolloid-like 1
hsa-miR-592	1	0	1	1	1	1	TLL2	tolloid-like 2
hsa-miR-592	1	0	1	1	1	1	TRPC5	transient receptor potential cation channel, subfamily C, member 5
hsa-miR-592	1	0	1	1	1	1	YWHAG	tyrosine 3-monooxygenase/tryptophan 5-monooxygenase activation protein, gamma polypeptide
hsa-miR-592	0	0	1	1	1	1	CD24	CD24 molecule
hsa-miR-592	0	0	1	1	1	1	TBK1	TANK-binding kinase 1
hsa-miR-592	1	0	1	1	1	1	PPARGC1A	peroxisome proliferator-activated receptor gamma, coactivator 1 alpha
hsa-miR-592	0	0	1	1	1	1	PURG	purine-rich element binding protein G
hsa-miR-592	1	0	1	1	1	1	NCKAP1	NCK-associated protein 1
hsa-miR-592	0	0	1	0	1	1	EMR2	egf-like module containing, mucin-like, hormone receptor-like 2
hsa-miR-592	1	0	1	0	1	1	CLIC4	chloride intracellular channel 4
hsa-miR-592	1	0	1	1	1	1	NRG1	neuregulin 1
hsa-miR-592	1	0	1	1	1	1	SLC7A11	solute carrier family 7 (anionic amino acid transporter light chain, xc- system), member 11
hsa-miR-592	1	0	1	0	1	1	DIEXF	digestive organ expansion factor homolog (zebrafish)
hsa-miR-592	0	0	1	1	1	1	ARFGAP3	ADP-ribosylation factor GTPase activating protein 3
hsa-miR-592	1	0	1	0	1	1	HUNK	hormonally up-regulated Neu-associated kinase
hsa-miR-592	1	0	1	1	1	1	ZNF592	zinc finger protein 592
hsa-miR-592	1	0	1	1	1	1	RALGPS1	Ral GEF with PH domain and SH3 binding motif 1
hsa-miR-592	0	0	1	1	1	1	PHF14	PHD finger protein 14
hsa-miR-592	0	0	1	1	1	1	FRMPD4	FERM and PDZ domain containing 4
hsa-miR-592	1	0	1	1	1	1	SPCS2	signal peptidase complex subunit 2 homolog (S. cerevisiae)
hsa-miR-592	0	0	1	1	0	0	PCNXL2	pecanex-like 2 (Drosophila)
hsa-miR-592	1	0	1	0	1	1	PJA2	praja ring finger 2, E3 ubiquitin protein ligase
hsa-miR-592	1	0	1	1	1	1	MFN2	mitofusin 2
hsa-miR-592	1	0	1	1	1	1	JOSD1	Josephin domain containing 1
hsa-miR-592	1	0	1	0	1	1	PDAP1	PDGFA associated protein 1
hsa-miR-592	0	0	1	1	1	1	MYO16	myosin XVI
hsa-miR-592	1	0	1	0	1	1	PDS5B	PDS5, regulator of cohesion maintenance, homolog B (S. cerevisiae)
hsa-miR-592	1	0	1	0	1	1	GGA2	golgi-associated, gamma adaptin ear containing, ARF binding protein 2
hsa-miR-592	1	0	1	0	1	1	PEG10	paternally expressed 10
hsa-miR-592	1	0	1	1	1	1	TAB2	TGF-beta activated kinase 1/MAP3K7 binding protein 2
hsa-miR-592	1	0	1	1	1	1	RTF1	Rtf1, Paf1/RNA polymerase II complex component, homolog (S. cerevisiae)
hsa-miR-592	1	0	1	1	1	1	ZCCHC14	zinc finger, CCHC domain containing 14
hsa-miR-592	1	0	1	1	1	1	RCOR1	REST corepressor 1
hsa-miR-592	1	0	1	1	1	1	PRRC2C	proline-rich coiled-coil 2C
hsa-miR-592	1	0	1	1	1	1	PLCB1	phospholipase C, beta 1 (phosphoinositide-specific)
hsa-miR-592	1	0	1	0	1	1	KHNYN	KH and NYN domain containing
hsa-miR-592	0	0	1	0	1	1	ZDHHC17	zinc finger, DHHC-type containing 17
hsa-miR-592	0	0	1	1	1	1	ADNP	activity-dependent neuroprotector homeobox
hsa-miR-592	1	0	1	1	1	1	CCDC28A	coiled-coil domain containing 28A
hsa-miR-592	1	0	1	1	1	1	CNRIP1	cannabinoid receptor interacting protein 1
hsa-miR-592	0	0	1	1	1	1	TMEM87A	transmembrane protein 87A
hsa-miR-592	1	0	1	0	1	1	GLCE	glucuronic acid epimerase
hsa-miR-592	1	0	1	0	1	1	PPP1R16B	protein phosphatase 1, regulatory subunit 16B
hsa-miR-592	1	0	1	0	1	1	ERC2	ELKS/RAB6-interacting/CAST family member 2
hsa-miR-592	1	0	1	1	1	1	FAM155B	family with sequence similarity 155, member B
hsa-miR-592	1	0	1	1	1	1	PLA2G3	phospholipase A2, group III
hsa-miR-592	1	0	1	1	1	1	HOOK1	hook homolog 1 (Drosophila)
hsa-miR-592	1	0	1	1	1	1	TXNDC12	thioredoxin domain containing 12 (endoplasmic reticulum)
hsa-miR-592	0	0	1	1	1	1	SCCPDH	saccharopine dehydrogenase (putative)
hsa-miR-592	0	0	1	1	1	1	ZFR	zinc finger RNA binding protein
hsa-miR-592	0	0	1	1	1	1	DYNC1LI1	dynein, cytoplasmic 1, light intermediate chain 1
hsa-miR-592	0	0	1	1	1	1	HSD17B12	hydroxysteroid (17-beta) dehydrogenase 12
hsa-miR-592	1	0	1	1	1	1	RAB14	RAB14, member RAS oncogene family
hsa-miR-592	1	0	1	1	1	1	ARID4B	AT rich interactive domain 4B (RBP1-like)
hsa-miR-592	0	0	1	1	1	1	CD244	CD244 molecule, natural killer cell receptor 2B4
hsa-miR-592	1	0	1	0	1	1	RAB8B	RAB8B, member RAS oncogene family
hsa-miR-592	0	0	1	0	1	1	GPR83	G protein-coupled receptor 83
hsa-miR-592	0	0	1	1	1	1	KDM3B	lysine (K)-specific demethylase 3B
hsa-miR-592	1	0	1	1	1	1	UFM1	ubiquitin-fold modifier 1
hsa-miR-592	0	0	1	1	1	1	USP18	ubiquitin specific peptidase 18
hsa-miR-592	1	0	1	1	1	1	SIX4	SIX homeobox 4
hsa-miR-592	1	0	1	1	1	1	GALNT7	UDP-N-acetyl-alpha-D-galactosamine:polypeptide N-acetylgalactosaminyltransferase 7 (GalNAc-T7)
hsa-miR-592	1	0	1	1	1	1	CPSF2	cleavage and polyadenylation specific factor 2, 100kDa
hsa-miR-592	1	0	1	1	1	1	INO80	INO80 homolog (S. cerevisiae)
hsa-miR-592	1	0	1	1	1	1	VPS13C	vacuolar protein sorting 13 homolog C (S. cerevisiae)
hsa-miR-592	1	0	1	0	1	1	FAM46C	family with sequence similarity 46, member C
hsa-miR-592	0	0	1	1	0	0	CNTLN	centlein, centrosomal protein
hsa-miR-592	0	0	1	1	0	0	THG1L	tRNA-histidine guanylyltransferase 1-like (S. cerevisiae)
hsa-miR-592	1	0	1	1	1	1	ARGLU1	arginine and glutamate rich 1
hsa-miR-592	1	0	1	1	1	1	SAMD4B	sterile alpha motif domain containing 4B
hsa-miR-592	0	0	1	1	0	0	ARMC4	armadillo repeat containing 4
hsa-miR-592	1	0	1	1	1	1	FIGN	fidgetin
hsa-miR-592	1	0	1	0	1	1	LGI2	leucine-rich repeat LGI family, member 2
hsa-miR-592	0	0	1	1	1	1	TRIM62	tripartite motif containing 62
hsa-miR-592	0	0	1	0	1	1	MOB1A	MOB kinase activator 1A
hsa-miR-592	1	0	1	1	1	1	SPTLC3	serine palmitoyltransferase, long chain base subunit 3
hsa-miR-592	1	0	1	1	1	1	RSBN1	round spermatid basic protein 1
hsa-miR-592	0	0	1	1	1	1	STK32B	serine/threonine kinase 32B
hsa-miR-592	0	0	1	1	1	1	BDP1	B double prime 1, subunit of RNA polymerase III transcription initiation factor IIIB
hsa-miR-592	0	0	1	1	1	1	ZC3H15	zinc finger CCCH-type containing 15
hsa-miR-592	1	0	1	0	1	1	LRP1B	low density lipoprotein receptor-related protein 1B
hsa-miR-592	1	0	1	1	1	1	CAMK2N1	calcium/calmodulin-dependent protein kinase II inhibitor 1
hsa-miR-592	1	0	1	1	1	1	LANCL2	LanC lantibiotic synthetase component C-like 2 (bacterial)
hsa-miR-592	1	0	1	0	1	1	TMEM55A	transmembrane protein 55A
hsa-miR-592	1	0	1	0	1	1	MAML3	mastermind-like 3 (Drosophila)
hsa-miR-592	1	0	1	0	1	1	PCDHAC1	protocadherin alpha subfamily C, 1
hsa-miR-592	1	0	1	0	1	1	PCDHAC2	protocadherin alpha subfamily C, 2
hsa-miR-592	1	0	1	1	1	1	PCDHA1	protocadherin alpha 1
hsa-miR-592	1	0	1	0	1	1	PCDHA10	protocadherin alpha 10
hsa-miR-592	1	0	1	0	1	1	PCDHA11	protocadherin alpha 11
hsa-miR-592	1	0	1	0	1	1	PCDHA12	protocadherin alpha 12
hsa-miR-592	1	0	1	1	1	1	PCDHA2	protocadherin alpha 2
hsa-miR-592	1	0	1	1	1	1	PCDHA3	protocadherin alpha 3
hsa-miR-592	1	0	1	1	1	1	PCDHA6	protocadherin alpha 6
hsa-miR-592	1	0	1	0	1	1	PCDHA7	protocadherin alpha 7
hsa-miR-592	1	0	1	1	1	1	PCDHA8	protocadherin alpha 8
hsa-miR-592	1	0	1	1	1	1	PCDHGA1	protocadherin gamma subfamily A, 1
hsa-miR-592	1	0	1	0	1	1	PCDHGA10	protocadherin gamma subfamily A, 10
hsa-miR-592	1	0	1	0	1	1	PCDHGA11	protocadherin gamma subfamily A, 11
hsa-miR-592	1	0	1	1	1	1	PCDHGA2	protocadherin gamma subfamily A, 2
hsa-miR-592	1	0	1	0	1	1	PCDHGA3	protocadherin gamma subfamily A, 3
hsa-miR-592	1	0	1	0	1	1	PCDHGA4	protocadherin gamma subfamily A, 4
hsa-miR-592	1	0	1	0	1	1	PCDHGA5	protocadherin gamma subfamily A, 5
hsa-miR-592	1	0	1	0	1	1	PCDHGA6	protocadherin gamma subfamily A, 6
hsa-miR-592	1	0	1	0	1	1	PCDHGA7	protocadherin gamma subfamily A, 7
hsa-miR-592	1	0	1	0	1	1	PCDHGA9	protocadherin gamma subfamily A, 9
hsa-miR-592	1	0	1	0	1	1	PCDHGB1	protocadherin gamma subfamily B, 1
hsa-miR-592	1	0	1	0	1	1	PCDHGB2	protocadherin gamma subfamily B, 2
hsa-miR-592	1	0	1	0	1	1	PCDHGB3	protocadherin gamma subfamily B, 3
hsa-miR-592	1	0	1	0	1	1	PCDHGB5	protocadherin gamma subfamily B, 5
hsa-miR-592	1	0	1	0	1	1	PCDHGB6	protocadherin gamma subfamily B, 6
hsa-miR-592	1	0	1	0	1	1	PCDHGB7	protocadherin gamma subfamily B, 7
hsa-miR-592	1	0	1	0	1	1	PCDHGC4	protocadherin gamma subfamily C, 4
hsa-miR-592	1	0	1	0	1	1	PCDHGC5	protocadherin gamma subfamily C, 5
hsa-miR-592	0	0	1	1	0	0	SNTG1	syntrophin, gamma 1
hsa-miR-592	1	0	1	0	1	1	CNGB3	cyclic nucleotide gated channel beta 3
hsa-miR-592	1	0	1	1	1	1	EPB41L4B	erythrocyte membrane protein band 4.1 like 4B
hsa-miR-592	0	0	1	1	1	1	KLHL4	kelch-like 4 (Drosophila)
hsa-miR-592	1	0	1	1	1	1	C1GALT1	core 1 synthase, glycoprotein-N-acetylgalactosamine 3-beta-galactosyltransferase, 1
hsa-miR-592	1	0	1	1	1	1	KIAA1244	KIAA1244
hsa-miR-592	0	0	1	1	0	0	ENTPD7	ectonucleoside triphosphate diphosphohydrolase 7
hsa-miR-592	1	0	1	0	1	1	EIF5A2	eukaryotic translation initiation factor 5A2
hsa-miR-592	1	0	1	1	1	1	PCDH9	protocadherin 9
hsa-miR-592	1	0	1	1	1	1	ATP8B2	ATPase, aminophospholipid transporter, class I, type 8B, member 2
hsa-miR-592	1	0	1	1	1	1	RAB22A	RAB22A, member RAS oncogene family
hsa-miR-592	1	0	1	1	1	1	DLG3	discs, large homolog 3 (Drosophila)
hsa-miR-592	1	0	1	0	1	1	NUFIP2	nuclear fragile X mental retardation protein interacting protein 2
hsa-miR-592	0	0	1	0	1	1	TRMT5	tRNA methyltransferase 5 homolog (S. cerevisiae)
hsa-miR-592	1	0	1	0	1	1	SH3RF1	SH3 domain containing ring finger 1
hsa-miR-592	0	0	1	1	1	1	SSX3	synovial sarcoma, X breakpoint 3
hsa-miR-592	0	0	1	1	0	0	SSX5	synovial sarcoma, X breakpoint 5
hsa-miR-592	1	0	1	0	1	1	RAP2A	RAP2A, member of RAS oncogene family
hsa-miR-592	1	0	1	1	1	1	ZNFX1	zinc finger, NFX1-type containing 1
hsa-miR-592	0	0	1	1	0	0	DHH	desert hedgehog
hsa-miR-592	1	0	1	0	1	1	TSPYL4	TSPY-like 4
hsa-miR-592	1	0	1	1	1	1	CLCN6	chloride channel, voltage-sensitive 6
hsa-miR-592	1	0	1	1	1	1	FOXA2	forkhead box A2
hsa-miR-592	1	0	1	0	1	1	CERS2	ceramide synthase 2
hsa-miR-592	0	0	1	0	1	1	SLC13A1	solute carrier family 13 (sodium/sulfate symporters), member 1
hsa-miR-592	0	0	1	1	0	0	CSH2	chorionic somatomammotropin hormone 2
hsa-miR-592	1	0	1	1	1	1	RFX7	regulatory factor X, 7
hsa-miR-592	1	0	1	0	1	1	BCL11B	B-cell CLL/lymphoma 11B (zinc finger protein)
hsa-miR-592	1	0	1	1	1	1	REEP1	receptor accessory protein 1
hsa-miR-592	0	0	1	1	1	1	WDR77	WD repeat domain 77
hsa-miR-592	0	0	1	1	1	1	LPAL2	lipoprotein, Lp(a)-like 2, pseudogene
hsa-miR-592	1	0	1	1	1	1	RNF128	ring finger protein 128, E3 ubiquitin protein ligase
hsa-miR-592	0	0	1	1	1	1	NDNF	neuron-derived neurotrophic factor
hsa-miR-592	0	0	1	1	1	1	AKIRIN1	akirin 1
hsa-miR-592	0	0	1	1	1	1	GLT25D1	glycosyltransferase 25 domain containing 1
hsa-miR-592	0	0	1	1	1	1	NSUN7	NOP2/Sun domain family, member 7
hsa-miR-592	0	0	1	1	1	1	CXorf36	chromosome X open reading frame 36
hsa-miR-592	1	0	1	0	1	1	MOB3B	MOB kinase activator 3B
hsa-miR-592	0	0	1	1	1	1	ERMP1	endoplasmic reticulum metallopeptidase 1
hsa-miR-592	1	0	1	1	1	1	ZC3H12A	zinc finger CCCH-type containing 12A
hsa-miR-592	1	0	1	1	1	1	NAA50	N(alpha)-acetyltransferase 50, NatE catalytic subunit
hsa-miR-592	0	0	1	1	1	1	ANKRD36B	ankyrin repeat domain 36B
hsa-miR-592	1	0	1	0	1	1	EDEM3	ER degradation enhancer, mannosidase alpha-like 3
hsa-miR-592	1	0	1	1	1	1	TRIB1	tribbles homolog 1 (Drosophila)
hsa-miR-592	1	0	1	0	1	1	SETD7	SET domain containing (lysine methyltransferase) 7
hsa-miR-592	1	0	1	1	1	1	TUBB1	tubulin, beta 1 class VI
hsa-miR-592	1	0	1	1	1	1	ANKRD13C	ankyrin repeat domain 13C
hsa-miR-592	1	0	1	1	1	1	TRIM8	tripartite motif containing 8
hsa-miR-592	1	0	1	0	1	1	LBH	limb bud and heart development homolog (mouse)
hsa-miR-592	1	0	1	1	1	1	SNX27	sorting nexin family member 27
hsa-miR-592	0	0	1	1	1	1	ISCA1	iron-sulfur cluster assembly 1 homolog (S. cerevisiae)
hsa-miR-592	0	0	1	1	0	0	TBXAS1	thromboxane A synthase 1 (platelet)
hsa-miR-592	0	0	1	1	1	1	SEH1L	SEH1-like (S. cerevisiae)
hsa-miR-592	0	0	1	1	1	1	KIF18A	kinesin family member 18A
hsa-miR-592	1	0	1	0	1	1	RAB33B	RAB33B, member RAS oncogene family
hsa-miR-592	1	0	1	1	0	0	SCRT1	scratch homolog 1, zinc finger protein (Drosophila)
hsa-miR-592	1	0	1	1	1	1	HSDL1	hydroxysteroid dehydrogenase like 1
hsa-miR-592	1	0	1	1	1	1	PCDHA9	protocadherin alpha 9
hsa-miR-592	0	0	1	1	1	1	FCAMR	Fc receptor, IgA, IgM, high affinity
hsa-miR-592	1	0	1	0	1	1	FAM172A	family with sequence similarity 172, member A
hsa-miR-592	1	0	1	0	1	1	PCDHGA8	protocadherin gamma subfamily A, 8
hsa-miR-592	0	0	1	1	1	1	MAGT1	magnesium transporter 1
hsa-miR-592	1	0	1	1	1	1	DSEL	dermatan sulfate epimerase-like
hsa-miR-592	1	0	1	1	1	1	ARID5B	AT rich interactive domain 5B (MRF1-like)
hsa-miR-592	1	0	1	1	1	1	ANTXR1	anthrax toxin receptor 1
hsa-miR-592	1	0	1	1	1	1	USP38	ubiquitin specific peptidase 38
hsa-miR-592	1	0	1	1	1	1	RBBP6	retinoblastoma binding protein 6
hsa-miR-592	0	0	1	1	1	1	HAVCR2	hepatitis A virus cellular receptor 2
hsa-miR-592	1	0	1	1	0	0	ORAI1	ORAI calcium release-activated calcium modulator 1
hsa-miR-592	1	0	1	0	1	1	ADO	2-aminoethanethiol (cysteamine) dioxygenase
hsa-miR-592	0	0	1	1	1	1	FAM136A	family with sequence similarity 136, member A
hsa-miR-592	1	0	1	1	1	1	ABHD13	abhydrolase domain containing 13
hsa-miR-592	0	0	1	1	1	1	MICALCL	MICAL C-terminal like
hsa-miR-592	1	0	1	0	1	1	UBASH3B	ubiquitin associated and SH3 domain containing B
hsa-miR-592	0	0	1	0	1	1	TSLP	thymic stromal lymphopoietin
hsa-miR-592	1	0	1	1	1	1	MAP6	microtubule-associated protein 6
hsa-miR-592	0	0	1	1	1	1	ZIC5	Zic family member 5
hsa-miR-592	1	0	1	1	1	1	RASL10B	RAS-like, family 10, member B
hsa-miR-592	1	0	1	1	1	1	COL4A5	collagen, type IV, alpha 5
hsa-miR-592	0	0	1	0	1	1	C9orf123	chromosome 9 open reading frame 123
hsa-miR-592	1	0	1	1	1	1	BRWD1	bromodomain and WD repeat domain containing 1
hsa-miR-592	0	0	1	1	1	1	PLEKHG4B	pleckstrin homology domain containing, family G (with RhoGef domain) member 4B
hsa-miR-592	0	0	1	0	1	1	ZNF518B	zinc finger protein 518B
hsa-miR-592	0	0	1	1	1	1	WNT7B	wingless-type MMTV integration site family, member 7B
hsa-miR-592	0	0	1	1	1	1	RSAD2	radical S-adenosyl methionine domain containing 2
hsa-miR-592	1	0	1	1	1	1	ZNF280B	zinc finger protein 280B
hsa-miR-592	1	0	1	1	1	1	JDP2	Jun dimerization protein 2
hsa-miR-592	0	0	1	1	0	0	SYCE1	synaptonemal complex central element protein 1
hsa-miR-592	0	0	1	0	1	1	SYNPO2	synaptopodin 2
hsa-miR-592	1	0	1	1	1	1	GLCCI1	glucocorticoid induced transcript 1
hsa-miR-592	1	0	1	0	1	1	NUS1	nuclear undecaprenyl pyrophosphate synthase 1 homolog (S. cerevisiae)
hsa-miR-592	1	0	1	1	1	1	ICA1L	islet cell autoantigen 1,69kDa-like
hsa-miR-592	1	0	1	0	1	1	SP1	Sp1 transcription factor
hsa-miR-592	0	0	1	0	1	1	PRELID2	PRELI domain containing 2
hsa-miR-592	0	0	1	1	0	0	MAGEE2	melanoma antigen family E, 2
hsa-miR-592	0	0	1	1	0	0	SGCZ	sarcoglycan, zeta
hsa-miR-592	1	0	1	1	1	1	PPTC7	PTC7 protein phosphatase homolog (S. cerevisiae)
hsa-miR-592	1	0	1	1	1	1	FAM91A1	family with sequence similarity 91, member A1
hsa-miR-592	0	0	1	0	1	1	UBLCP1	ubiquitin-like domain containing CTD phosphatase 1
hsa-miR-592	1	0	1	1	1	1	UBQLNL	ubiquilin-like
hsa-miR-592	0	0	1	1	0	0	CSNK1A1L	casein kinase 1, alpha 1-like
hsa-miR-592	0	0	1	1	1	1	SLC25A43	solute carrier family 25, member 43
hsa-miR-592	1	0	1	0	1	1	MTPN	myotrophin
hsa-miR-592	0	0	1	1	1	1	CRYZL1	crystallin, zeta (quinone reductase)-like 1
hsa-miR-592	1	0	1	1	1	1	BOD1L1	biorientation of chromosomes in cell division 1-like 1
hsa-miR-592	0	0	1	1	1	1	LONRF1	LON peptidase N-terminal domain and ring finger 1
hsa-miR-592	1	0	1	1	1	1	FAM123B	family with sequence similarity 123B
hsa-miR-592	1	0	1	1	1	1	FAM81A	family with sequence similarity 81, member A
hsa-miR-592	0	0	1	1	0	0	HSFY1	heat shock transcription factor, Y-linked 1
hsa-miR-592	1	0	1	0	1	1	TMEM196	transmembrane protein 196
hsa-miR-592	1	0	1	1	1	1	FAS	Fas (TNF receptor superfamily, member 6)
hsa-miR-592	1	0	1	0	1	1	ST6GALNAC3	ST6 (alpha-N-acetyl-neuraminyl-2,3-beta-galactosyl-1,3)-N-acetylgalactosaminide alpha-2,6-sialyltransferase 3
hsa-miR-592	1	0	1	0	1	1	ZCCHC24	zinc finger, CCHC domain containing 24
hsa-miR-592	1	0	1	1	1	1	HS6ST3	heparan sulfate 6-O-sulfotransferase 3
hsa-miR-592	1	0	1	1	1	1	CREBRF	CREB3 regulatory factor
hsa-miR-592	1	0	1	1	1	1	DCUN1D3	DCN1, defective in cullin neddylation 1, domain containing 3 (S. cerevisiae)
hsa-miR-592	1	0	1	1	1	1	LSM11	LSM11, U7 small nuclear RNA associated
hsa-miR-592	1	0	1	0	1	1	PGM2L1	phosphoglucomutase 2-like 1
hsa-miR-592	1	0	1	1	1	1	DIP2B	DIP2 disco-interacting protein 2 homolog B (Drosophila)
hsa-miR-592	0	0	1	0	1	1	C5orf64	chromosome 5 open reading frame 64
hsa-miR-592	0	0	1	0	1	1	NKAIN3	Na+/K+ transporting ATPase interacting 3
hsa-miR-592	0	0	1	1	1	1	C3orf38	chromosome 3 open reading frame 38
hsa-miR-592	1	0	1	0	1	1	SREK1IP1	SREK1-interacting protein 1
hsa-miR-592	0	0	1	1	1	1	IFNE	interferon, epsilon
hsa-miR-592	0	0	1	1	1	1	SESTD1	SEC14 and spectrin domains 1
hsa-miR-592	1	0	1	1	1	1	TMEM26	transmembrane protein 26
hsa-miR-592	1	0	1	1	0	0	KCTD13	potassium channel tetramerisation domain containing 13
hsa-miR-592	0	0	1	1	1	1	LYRM7	Lyrm7 homolog (mouse)
hsa-miR-592	1	0	1	1	1	1	C1orf52	chromosome 1 open reading frame 52
hsa-miR-592	1	0	1	1	1	1	ASB7	ankyrin repeat and SOCS box containing 7
hsa-miR-592	0	0	1	0	0	0	MPZL3	myelin protein zero-like 3
hsa-miR-592	1	0	1	0	1	1	NRK	Nik related kinase
hsa-miR-592	1	0	1	0	1	1	ZC3H6	zinc finger CCCH-type containing 6
hsa-miR-592	0	0	1	1	1	1	PTHLH	parathyroid hormone-like hormone
hsa-miR-592	0	0	1	1	1	1	MDFIC	MyoD family inhibitor domain containing
hsa-miR-592	0	0	1	1	1	1	TMEM189	transmembrane protein 189
hsa-miR-592	1	0	1	1	1	1	VAX1	ventral anterior homeobox 1
hsa-miR-592	0	0	1	1	1	1	FAM179A	family with sequence similarity 179, member A
hsa-miR-592	0	0	1	1	1	1	ARHGAP27	Rho GTPase activating protein 27
hsa-miR-592	1	0	1	1	1	1	FBXO33	F-box protein 33
hsa-miR-592	1	0	1	1	1	1	E2F7	E2F transcription factor 7
hsa-miR-592	1	0	1	0	1	1	MBLAC2	metallo-beta-lactamase domain containing 2
hsa-miR-592	1	0	1	1	1	1	ENSA	endosulfine alpha
hsa-miR-592	0	0	1	0	1	1	NPSR1-AS1	NPSR1 antisense RNA 1
hsa-miR-592	0	0	1	1	1	1	CMPK2	cytidine monophosphate (UMP-CMP) kinase 2, mitochondrial
hsa-miR-592	1	0	1	1	1	1	C11orf87	chromosome 11 open reading frame 87
hsa-miR-592	0	0	1	0	1	1	FSD1L	fibronectin type III and SPRY domain containing 1-like
hsa-miR-592	1	0	1	1	1	1	CAPN3	calpain 3, (p94)
hsa-miR-592	0	0	1	0	0	0	PCDHB19P	protocadherin beta 19 pseudogene
hsa-miR-592	0	0	1	0	0	0	SNORD107	small nucleolar RNA, C/D box 107
hsa-miR-592	0	0	1	1	0	0	SNRPN	small nuclear ribonucleoprotein polypeptide N
hsa-miR-592	0	0	1	0	0	0	TTTY2	testis-specific transcript, Y-linked 2 (non-protein coding)
hsa-miR-592	0	0	1	0	0	0	TTTY15	testis-specific transcript, Y-linked 15 (non-protein coding)
hsa-miR-592	0	0	1	0	0	0	TTTY4B	testis-specific transcript, Y-linked 4B (non-protein coding)
hsa-miR-592	0	0	1	0	0	0	SEPHS1P1	selenophosphate synthetase 1 pseudogene 1
hsa-miR-592	0	0	1	0	0	0	PER4	period homolog 3 (Drosophila) pseudogene
hsa-miR-592	0	0	1	0	0	0	HCG26	HLA complex group 26 (non-protein coding)
hsa-miR-592	0	0	1	0	0	0	TPTE2P6	transmembrane phosphoinositide 3-phosphatase and tensin homolog 2 pseudogene 6
hsa-miR-592	0	0	1	0	0	0	SNORA28	small nucleolar RNA, H/ACA box 28
hsa-miR-592	0	0	1	0	0	0	SNORA45	small nucleolar RNA, H/ACA box 45
hsa-miR-592	0	0	1	0	0	0	NBR2	neighbor of BRCA1 gene 2 (non-protein coding)
hsa-miR-592	0	0	1	0	0	0	GBP1P1	guanylate binding protein 1, interferon-inducible pseudogene 1
hsa-miR-592	1	0	1	1	1	1	TRIO	trio Rho guanine nucleotide exchange factor
hsa-miR-592	0	0	0	1	0	0	IL32	interleukin 32
hsa-miR-592	0	1	0	1	0	0	FGF20	fibroblast growth factor 20
hsa-miR-592	0	0	1	1	0	0	NME8	NME/NM23 family member 8
hsa-miR-592	1	0	1	1	1	1	TRMT6	tRNA methyltransferase 6 homolog (S. cerevisiae)
hsa-miR-592	0	0	1	1	1	1	ABCC6	ATP-binding cassette, sub-family C (CFTR/MRP), member 6
hsa-miR-592	0	0	1	1	1	1	TMEM101	transmembrane protein 101
hsa-miR-592	0	0	1	1	1	1	CRISP2	cysteine-rich secretory protein 2
hsa-miR-592	0	0	1	1	0	0	CGRRF1	cell growth regulator with ring finger domain 1
hsa-miR-592	0	0	0	1	1	1	PLEK2	pleckstrin 2
hsa-miR-592	1	0	1	1	1	1	PXMP4	peroxisomal membrane protein 4, 24kDa
hsa-miR-592	0	0	0	1	0	0	FAM173A	family with sequence similarity 173, member A
hsa-miR-592	0	0	1	1	0	0	CTSH	cathepsin H
hsa-miR-592	0	0	0	1	0	0	CACTIN	cactin, spliceosome C complex subunit
hsa-miR-592	0	0	1	1	0	0	GLI1	GLI family zinc finger 1
hsa-miR-592	0	0	1	1	0	0	H2AFJ	H2A histone family, member J
hsa-miR-592	0	0	1	1	1	1	IFNG	interferon, gamma
hsa-miR-592	0	0	1	1	1	1	LOX	lysyl oxidase
hsa-miR-592	0	0	0	1	1	1	PCDHB5	protocadherin beta 5
hsa-miR-592	0	0	1	1	1	1	RARS	arginyl-tRNA synthetase
hsa-miR-592	0	0	1	1	1	1	COMMD2	COMM domain containing 2
hsa-miR-592	1	0	1	1	1	1	ID2	inhibitor of DNA binding 2, dominant negative helix-loop-helix protein
hsa-miR-592	0	0	1	1	0	0	FAM82A1	family with sequence similarity 82, member A1
hsa-miR-592	1	0	1	1	1	1	ORC2	origin recognition complex, subunit 2
hsa-miR-592	1	0	1	1	1	1	YWHAQ	tyrosine 3-monooxygenase/tryptophan 5-monooxygenase activation protein, theta polypeptide
hsa-miR-592	1	0	0	1	0	0	CD97	CD97 molecule
hsa-miR-592	1	0	1	1	1	1	EML2	echinoderm microtubule associated protein like 2
hsa-miR-592	1	0	1	1	1	1	C20orf26	chromosome 20 open reading frame 26
hsa-miR-592	0	0	1	1	0	0	HCST	hematopoietic cell signal transducer
hsa-miR-592	0	0	0	1	1	1	STATH	statherin
hsa-miR-592	1	0	1	1	1	1	EVI2A	ecotropic viral integration site 2A
hsa-miR-592	0	0	0	1	0	0	OR7C1	olfactory receptor, family 7, subfamily C, member 1
hsa-miR-592	0	0	1	1	1	1	ZNF598	zinc finger protein 598
hsa-miR-592	0	0	1	1	1	1	GNG11	guanine nucleotide binding protein (G protein), gamma 11
hsa-miR-592	0	0	0	1	0	0	GNGT1	guanine nucleotide binding protein (G protein), gamma transducing activity polypeptide 1
hsa-miR-592	0	0	0	1	1	1	CCRL1	chemokine (C-C motif) receptor-like 1
hsa-miR-592	1	0	1	1	1	1	SALL1	sal-like 1 (Drosophila)
hsa-miR-592	0	0	1	1	1	1	VWA8	von Willebrand factor A domain containing 8
hsa-miR-592	1	0	1	1	1	1	DMXL2	Dmx-like 2
hsa-miR-592	0	0	1	1	0	0	KRT5	keratin 5
hsa-miR-592	1	0	1	1	1	1	XPO7	exportin 7
hsa-miR-592	0	0	0	1	0	0	MAS1	MAS1 oncogene
hsa-miR-592	1	0	1	1	0	0	ANGPTL6	angiopoietin-like 6
hsa-miR-592	0	0	1	1	1	1	NOL11	nucleolar protein 11
hsa-miR-592	0	0	1	1	0	0	RAMP2	receptor (G protein-coupled) activity modifying protein 2
hsa-miR-592	0	0	0	1	0	0	ZSCAN5A	zinc finger and SCAN domain containing 5A
hsa-miR-592	0	0	1	1	1	1	RHPN2	rhophilin, Rho GTPase binding protein 2
hsa-miR-592	0	0	0	1	0	0	PODNL1	podocan-like 1
hsa-miR-592	0	0	1	1	1	1	LRRC41	leucine rich repeat containing 41
hsa-miR-592	1	0	1	1	0	0	MTUS2	microtubule associated tumor suppressor candidate 2
hsa-miR-592	0	0	0	1	1	1	ANKRD32	ankyrin repeat domain 32
hsa-miR-592	0	0	1	1	0	0	KRBA1	KRAB-A domain containing 1
hsa-miR-592	0	0	1	1	1	1	ACTR3B	ARP3 actin-related protein 3 homolog B (yeast)
hsa-miR-592	0	0	1	1	1	1	IMPA1	inositol(myo)-1(or 4)-monophosphatase 1
hsa-miR-592	0	0	0	1	1	1	CA1	carbonic anhydrase I
hsa-miR-592	0	0	1	1	1	1	ZCCHC11	zinc finger, CCHC domain containing 11
hsa-miR-592	1	0	1	1	1	1	C7orf23	chromosome 7 open reading frame 23
hsa-miR-592	1	0	1	1	0	0	REPS1	RALBP1 associated Eps domain containing 1
hsa-miR-592	0	0	0	1	0	0	NDUFAF1	NADH dehydrogenase (ubiquinone) complex I, assembly factor 1
hsa-miR-592	0	0	0	1	1	1	COL8A1	collagen, type VIII, alpha 1
hsa-miR-592	0	0	1	1	0	0	CCDC54	coiled-coil domain containing 54
hsa-miR-592	0	0	0	1	0	0	TMEM5	transmembrane protein 5
hsa-miR-592	1	0	1	1	1	1	UBE2K	ubiquitin-conjugating enzyme E2K
hsa-miR-592	1	0	1	1	1	1	MAN2A1	mannosidase, alpha, class 2A, member 1
hsa-miR-592	0	0	0	1	1	1	UTP20	UTP20, small subunit (SSU) processome component, homolog (yeast)
hsa-miR-592	1	0	1	1	1	1	SNX1	sorting nexin 1
hsa-miR-592	0	0	0	1	1	1	CDH19	cadherin 19, type 2
hsa-miR-592	0	0	1	1	1	1	DNAJB6	DnaJ (Hsp40) homolog, subfamily B, member 6
hsa-miR-592	0	0	1	1	0	0	AP2S1	adaptor-related protein complex 2, sigma 1 subunit
hsa-miR-592	0	0	1	1	1	1	LY9	lymphocyte antigen 9
hsa-miR-592	1	0	0	1	1	1	PARP12	poly (ADP-ribose) polymerase family, member 12
hsa-miR-592	0	0	0	1	0	0	ELANE	elastase, neutrophil expressed
hsa-miR-592	0	0	1	1	0	0	IFIH1	interferon induced with helicase C domain 1
hsa-miR-592	0	0	1	1	1	1	SRBD1	S1 RNA binding domain 1
hsa-miR-592	1	0	1	1	1	1	EIF2AK4	eukaryotic translation initiation factor 2 alpha kinase 4
hsa-miR-592	0	0	1	1	1	1	CHIC2	cysteine-rich hydrophobic domain 2
hsa-miR-592	0	0	1	1	1	1	HAT1	histone acetyltransferase 1
hsa-miR-592	0	0	0	1	0	0	NEIL3	nei endonuclease VIII-like 3 (E. coli)
hsa-miR-592	1	0	1	1	1	1	FGF12	fibroblast growth factor 12
hsa-miR-592	1	0	0	1	0	0	KLF1	Kruppel-like factor 1 (erythroid)
hsa-miR-592	0	0	0	1	1	1	CEP72	centrosomal protein 72kDa
hsa-miR-592	0	0	0	1	0	0	THOC3	THO complex 3
hsa-miR-592	1	0	1	1	1	1	TNPO3	transportin 3
hsa-miR-592	0	0	1	1	0	0	STAP1	signal transducing adaptor family member 1
hsa-miR-592	1	0	1	1	1	1	ST7	suppression of tumorigenicity 7
hsa-miR-592	1	0	1	1	0	0	KIAA1549L	KIAA1549-like
hsa-miR-592	1	0	1	1	1	1	SRI	sorcin
hsa-miR-592	0	0	1	1	1	1	C1RL	complement component 1, r subcomponent-like
hsa-miR-592	0	0	1	1	0	0	SYCP3	synaptonemal complex protein 3
hsa-miR-592	1	0	1	1	1	1	RFX4	regulatory factor X, 4 (influences HLA class II expression)
hsa-miR-592	0	0	0	1	0	0	ITGB7	integrin, beta 7
hsa-miR-592	0	0	1	1	1	1	CSAD	cysteine sulfinic acid decarboxylase
hsa-miR-592	1	0	1	1	0	0	CDH24	cadherin 24, type 2
hsa-miR-592	1	0	1	1	1	1	CRTC3	CREB regulated transcription coactivator 3
hsa-miR-592	1	0	0	1	0	0	PMM2	phosphomannomutase 2
hsa-miR-592	0	0	1	1	1	1	NCOR1	nuclear receptor corepressor 1
hsa-miR-592	0	0	1	1	0	0	CCDC40	coiled-coil domain containing 40
hsa-miR-592	0	0	0	1	1	1	C19orf52	chromosome 19 open reading frame 52
hsa-miR-592	0	0	1	1	0	0	KLHDC4	kelch domain containing 4
hsa-miR-592	0	0	1	1	0	0	ZNF593	zinc finger protein 593
hsa-miR-592	1	0	1	1	1	1	FNBP1L	formin binding protein 1-like
hsa-miR-592	0	0	0	1	1	1	PROK1	prokineticin 1
hsa-miR-592	0	0	0	1	0	0	TRIM43	tripartite motif containing 43
hsa-miR-592	0	0	1	1	1	1	ABHD10	abhydrolase domain containing 10
hsa-miR-592	0	0	1	1	1	1	SRPRB	signal recognition particle receptor, B subunit
hsa-miR-592	0	0	1	1	1	1	EIF2A	eukaryotic translation initiation factor 2A, 65kDa
hsa-miR-592	0	0	1	1	1	1	CABS1	calcium-binding protein, spermatid-specific 1
hsa-miR-592	0	0	1	1	1	1	NAF1	nuclear assembly factor 1 homolog (S. cerevisiae)
hsa-miR-592	0	0	1	1	1	1	MARCH1	membrane-associated ring finger (C3HC4) 1, E3 ubiquitin protein ligase
hsa-miR-592	0	0	0	1	0	0	TAAR1	trace amine associated receptor 1
hsa-miR-592	1	0	1	1	1	1	SLC18B1	solute carrier family 18, subfamily B, member 1
hsa-miR-592	0	0	0	1	0	0	GPR174	G protein-coupled receptor 174
hsa-miR-592	0	0	1	1	1	1	UPF3B	UPF3 regulator of nonsense transcripts homolog B (yeast)
hsa-miR-592	0	0	1	1	1	1	BCCIP	BRCA2 and CDKN1A interacting protein
hsa-miR-592	1	0	1	1	1	1	AASDHPPT	aminoadipate-semialdehyde dehydrogenase-phosphopantetheinyl transferase
hsa-miR-592	0	0	1	1	0	0	ESAM	endothelial cell adhesion molecule
hsa-miR-592	0	0	1	1	0	0	SLC22A9	solute carrier family 22 (organic anion transporter), member 9
hsa-miR-592	0	0	1	1	1	1	MRPL49	mitochondrial ribosomal protein L49
hsa-miR-592	0	0	0	1	0	0	OR5M9	olfactory receptor, family 5, subfamily M, member 9
hsa-miR-592	1	0	1	1	1	1	ANK3	ankyrin 3, node of Ranvier (ankyrin G)
hsa-miR-592	1	0	1	1	1	1	PTPRO	protein tyrosine phosphatase, receptor type, O
hsa-miR-592	1	0	1	1	1	1	ANO4	anoctamin 4
hsa-miR-592	0	0	0	1	0	0	TAKR	aldo-keto reductase, truncated
hsa-miR-592	0	0	0	1	1	1	SERPINB4	serpin peptidase inhibitor, clade B (ovalbumin), member 4
hsa-miR-592	1	0	1	1	1	1	CHST9	carbohydrate (N-acetylgalactosamine 4-0) sulfotransferase 9
hsa-miR-592	0	0	1	1	1	1	ACAA2	acetyl-CoA acyltransferase 2
hsa-miR-592	0	0	0	1	0	0	OR4K1	olfactory receptor, family 4, subfamily K, member 1
hsa-miR-592	0	0	0	1	0	0	RBM45	RNA binding motif protein 45
hsa-miR-592	0	0	0	1	1	1	ALS2CR12	amyotrophic lateral sclerosis 2 (juvenile) chromosome region, candidate 12
hsa-miR-592	1	0	1	1	1	1	DEPTOR	DEP domain containing MTOR-interacting protein
hsa-miR-592	0	0	0	1	1	1	ZNF19	zinc finger protein 19
hsa-miR-592	0	0	1	1	1	1	PREX2	phosphatidylinositol-3,4,5-trisphosphate-dependent Rac exchange factor 2
hsa-miR-592	0	0	1	1	0	0	MX1	myxovirus (influenza virus) resistance 1, interferon-inducible protein p78 (mouse)
hsa-miR-592	0	0	1	1	1	1	C12orf43	chromosome 12 open reading frame 43
hsa-miR-592	0	0	1	1	1	1	NPC1L1	NPC1 (Niemann-Pick disease, type C1, gene)-like 1
hsa-miR-592	0	0	0	1	0	0	CILP2	cartilage intermediate layer protein 2
hsa-miR-592	0	0	1	1	0	0	CRYAA	crystallin, alpha A
hsa-miR-592	0	0	0	1	0	0	MCM3AP	minichromosome maintenance complex component 3 associated protein
hsa-miR-592	0	0	1	1	0	0	LUC7L	LUC7-like (S. cerevisiae)
hsa-miR-592	0	0	0	1	1	1	LHCGR	luteinizing hormone/choriogonadotropin receptor
hsa-miR-592	0	0	1	1	1	1	C2orf47	chromosome 2 open reading frame 47
hsa-miR-592	0	0	0	1	1	1	STPG2	sperm-tail PG-rich repeat containing 2
hsa-miR-592	0	0	1	1	1	1	ATP13A4	ATPase type 13A4
hsa-miR-592	0	0	0	1	1	1	LOC375295	uncharacterized LOC375295
hsa-miR-592	0	0	1	1	0	0	STT3B	STT3, subunit of the oligosaccharyltransferase complex, homolog B (S. cerevisiae)
hsa-miR-592	0	0	1	1	0	0	DPPA2	developmental pluripotency associated 2
hsa-miR-592	0	0	1	1	0	0	SUCLG1	succinate-CoA ligase, alpha subunit
hsa-miR-592	0	0	1	1	1	1	WDR52	WD repeat domain 52
hsa-miR-592	0	0	1	1	1	1	CXCL3	chemokine (C-X-C motif) ligand 3
hsa-miR-592	1	0	1	1	1	1	FAM208A	family with sequence similarity 208, member A
hsa-miR-592	0	0	0	1	0	0	OTOP1	otopetrin 1
hsa-miR-592	0	0	1	1	0	0	GRM2	glutamate receptor, metabotropic 2
hsa-miR-592	0	0	1	1	1	1	LEAP2	liver expressed antimicrobial peptide 2
hsa-miR-592	0	0	1	1	0	0	STEAP1	six transmembrane epithelial antigen of the prostate 1
hsa-miR-592	1	0	1	1	1	1	LMTK2	lemur tyrosine kinase 2
hsa-miR-592	0	0	1	1	1	1	KCNV1	potassium channel, subfamily V, member 1
hsa-miR-592	0	0	1	1	0	0	COX6C	cytochrome c oxidase subunit VIc
hsa-miR-592	0	0	0	1	0	0	GPR101	G protein-coupled receptor 101
hsa-miR-592	0	0	1	1	0	0	PACSIN3	protein kinase C and casein kinase substrate in neurons 3
hsa-miR-592	0	0	1	1	1	1	HEATR3	HEAT repeat containing 3
hsa-miR-592	0	0	0	1	0	0	HPS6	Hermansky-Pudlak syndrome 6
hsa-miR-592	0	0	1	1	0	0	POLR3E	polymerase (RNA) III (DNA directed) polypeptide E (80kD)
hsa-miR-592	0	0	1	1	1	1	FAM96A	family with sequence similarity 96, member A
hsa-miR-592	0	0	1	1	0	0	SCNN1G	sodium channel, non-voltage-gated 1, gamma subunit
hsa-miR-592	0	0	1	1	1	1	GLYATL1	glycine-N-acyltransferase-like 1
hsa-miR-592	0	0	1	1	1	1	ACSF2	acyl-CoA synthetase family member 2
hsa-miR-592	1	0	1	1	1	1	RNF214	ring finger protein 214
hsa-miR-592	0	0	0	1	0	0	PSCA	prostate stem cell antigen
hsa-miR-592	0	0	1	1	0	0	TTC21A	tetratricopeptide repeat domain 21A
hsa-miR-592	0	0	0	1	0	0	PYGO1	pygopus homolog 1 (Drosophila)
hsa-miR-592	0	0	0	1	0	0	OR5B2	olfactory receptor, family 5, subfamily B, member 2
hsa-miR-592	0	0	0	1	0	0	CCBL1	cysteine conjugate-beta lyase, cytoplasmic
hsa-miR-592	0	0	1	1	1	1	ARFRP1	ADP-ribosylation factor related protein 1
hsa-miR-592	0	0	0	1	0	0	PRSS58	protease, serine, 58
hsa-miR-592	0	0	1	1	0	0	SLC6A19	solute carrier family 6 (neutral amino acid transporter), member 19
hsa-miR-592	1	0	1	1	1	1	TTC39C	tetratricopeptide repeat domain 39C
hsa-miR-592	0	0	0	1	0	0	OR1F1	olfactory receptor, family 1, subfamily F, member 1
hsa-miR-592	0	0	0	1	0	0	PTCRA	pre T-cell antigen receptor alpha
hsa-miR-592	0	0	0	1	0	0	ASL	argininosuccinate lyase
hsa-miR-592	1	0	1	1	0	0	HTR1E	5-hydroxytryptamine (serotonin) receptor 1E, G protein-coupled
hsa-miR-592	0	0	1	1	0	0	SLC22A25	solute carrier family 22, member 25
hsa-miR-592	0	0	1	1	1	1	MPLKIP	M-phase specific PLK1 interacting protein
hsa-miR-592	0	0	1	1	0	0	C3orf78	chromosome 3 open reading frame 78
hsa-miR-592	0	0	1	1	1	1	MYOZ2	myozenin 2
hsa-miR-592	0	0	0	1	0	0	GIMAP1	GTPase, IMAP family member 1
hsa-miR-592	0	0	0	1	0	0	MYEOV2	myeloma overexpressed 2
hsa-miR-592	0	0	0	1	0	0	AGXT	alanine-glyoxylate aminotransferase
hsa-miR-592	0	0	0	1	0	0	GOT1L1	glutamic-oxaloacetic transaminase 1-like 1
hsa-miR-592	0	0	1	1	0	0	PLG	plasminogen
hsa-miR-592	0	0	1	1	0	0	GMPPB	GDP-mannose pyrophosphorylase B
hsa-miR-592	0	0	0	1	0	0	OR4B1	olfactory receptor, family 4, subfamily B, member 1
hsa-miR-592	0	0	1	1	1	1	INHBC	inhibin, beta C
hsa-miR-592	0	0	0	1	1	1	ATP6V0A4	ATPase, H+ transporting, lysosomal V0 subunit a4
hsa-miR-592	0	0	1	1	0	0	AGR3	anterior gradient 3 homolog (Xenopus laevis)
hsa-miR-592	0	0	1	1	1	1	SUGT1	SGT1, suppressor of G2 allele of SKP1 (S. cerevisiae)
hsa-miR-592	0	0	0	1	1	1	RAG2	recombination activating gene 2
hsa-miR-592	0	0	0	1	0	0	PODN	podocan
hsa-miR-592	1	0	1	1	1	1	USP15	ubiquitin specific peptidase 15
hsa-miR-592	0	0	1	1	0	0	DNAH17	dynein, axonemal, heavy chain 17
hsa-miR-592	0	0	0	1	0	0	PUF60	poly-U binding splicing factor 60KDa
hsa-miR-592	0	0	1	1	1	1	MRPS23	mitochondrial ribosomal protein S23
hsa-miR-592	0	0	1	1	0	0	LGALS9	lectin, galactoside-binding, soluble, 9
hsa-miR-592	0	0	0	1	0	0	EXOC3L1	exocyst complex component 3-like 1
hsa-miR-592	0	0	0	1	0	0	LINS	lines homolog (Drosophila)
hsa-miR-592	1	0	0	1	1	1	RECQL	RecQ protein-like (DNA helicase Q1-like)
hsa-miR-592	0	0	1	1	1	1	MPP4	membrane protein, palmitoylated 4 (MAGUK p55 subfamily member 4)
hsa-miR-592	1	0	1	1	0	0	MTX1	metaxin 1
hsa-miR-592	0	0	1	1	1	1	TIGD2	tigger transposable element derived 2
hsa-miR-592	0	0	0	1	0	0	OR52N5	olfactory receptor, family 52, subfamily N, member 5
hsa-miR-592	0	0	0	1	0	0	ZNF554	zinc finger protein 554
hsa-miR-592	0	0	0	1	0	0	OR4F17	olfactory receptor, family 4, subfamily F, member 17
hsa-miR-592	1	0	1	1	1	1	GRIK2	glutamate receptor, ionotropic, kainate 2
hsa-miR-592	0	0	0	1	1	1	IL17RA	interleukin 17 receptor A
hsa-miR-592	1	0	0	1	0	0	RUFY1	RUN and FYVE domain containing 1
hsa-miR-592	1	0	0	1	1	1	ZFP82	zinc finger protein 82 homolog (mouse)
hsa-miR-592	0	0	0	1	1	1	C8orf40	chromosome 8 open reading frame 40
hsa-miR-592	0	0	1	1	1	1	GLIPR1L2	GLI pathogenesis-related 1 like 2
hsa-miR-592	1	0	1	1	0	0	CCDC71	coiled-coil domain containing 71
hsa-miR-592	0	0	0	1	0	0	OR51S1	olfactory receptor, family 51, subfamily S, member 1
hsa-miR-592	0	0	0	1	0	0	OR51F2	olfactory receptor, family 51, subfamily F, member 2
hsa-miR-592	0	0	1	1	1	1	FHL2	four and a half LIM domains 2
hsa-miR-592	0	0	1	1	1	1	KLHL7	kelch-like 7 (Drosophila)
hsa-miR-592	0	0	1	1	1	1	TMEM67	transmembrane protein 67
hsa-miR-592	1	0	1	1	0	0	SNX29	sorting nexin 29
hsa-miR-592	0	0	1	1	0	0	KLK4	kallikrein-related peptidase 4
hsa-miR-592	1	0	0	1	1	1	CRLF3	cytokine receptor-like factor 3
hsa-miR-592	1	0	1	1	1	1	C14orf28	chromosome 14 open reading frame 28
hsa-miR-592	0	0	1	1	0	0	RIC8A	resistance to inhibitors of cholinesterase 8 homolog A (C. elegans)
hsa-miR-592	1	0	1	1	1	1	RNF10	ring finger protein 10
hsa-miR-592	0	0	1	1	1	1	ARHGEF4	Rho guanine nucleotide exchange factor (GEF) 4
hsa-miR-592	0	0	0	1	0	0	OR4F5	olfactory receptor, family 4, subfamily F, member 5
hsa-miR-592	0	0	1	1	0	0	ACOT4	acyl-CoA thioesterase 4
hsa-miR-592	0	0	0	1	0	0	OR51E1	olfactory receptor, family 51, subfamily E, member 1
hsa-miR-592	1	0	0	1	0	0	KRT17	keratin 17
hsa-miR-592	0	0	1	1	1	1	C4orf17	chromosome 4 open reading frame 17
hsa-miR-592	0	0	1	1	1	1	FHL5	four and a half LIM domains 5
hsa-miR-592	0	0	1	1	0	0	EDDM3B	epididymal protein 3B
hsa-miR-592	1	0	0	1	1	1	ATG16L1	autophagy related 16-like 1 (S. cerevisiae)
hsa-miR-592	0	0	0	1	1	1	BTBD6	BTB (POZ) domain containing 6
hsa-miR-592	0	0	0	1	0	0	HEXDC	hexosaminidase (glycosyl hydrolase family 20, catalytic domain) containing
hsa-miR-592	0	0	1	1	1	1	ZNF181	zinc finger protein 181
hsa-miR-592	0	0	0	1	0	0	LGALS9C	lectin, galactoside-binding, soluble, 9C
hsa-miR-592	0	0	0	1	1	1	CRELD2	cysteine-rich with EGF-like domains 2
hsa-miR-592	0	0	0	1	0	0	OR2V2	olfactory receptor, family 2, subfamily V, member 2
hsa-miR-592	0	0	0	1	0	0	OR52A1	olfactory receptor, family 52, subfamily A, member 1
hsa-miR-592	0	0	1	1	1	1	DCAF8L1	DDB1 and CUL4 associated factor 8-like 1
hsa-miR-592	0	0	1	1	0	0	LYRM4	LYR motif containing 4
hsa-miR-592	0	0	1	1	0	0	USP51	ubiquitin specific peptidase 51
hsa-miR-592	0	0	0	1	0	0	ADSSL1	adenylosuccinate synthase like 1
hsa-miR-592	0	0	1	1	1	1	AKR1C2	aldo-keto reductase family 1, member C2 (dihydrodiol dehydrogenase 2; bile acid binding protein; 3-alpha hydroxysteroid dehydrogenase, type III)
hsa-miR-592	0	0	1	1	0	0	EIF3C	eukaryotic translation initiation factor 3, subunit C
hsa-miR-592	1	0	1	1	1	1	DSE	dermatan sulfate epimerase
hsa-miR-592	0	0	1	1	1	1	MGAT4C	mannosyl (alpha-1,3-)-glycoprotein beta-1,4-N-acetylglucosaminyltransferase, isozyme C (putative)
hsa-miR-592	0	0	1	1	0	0	MT1H	metallothionein 1H
hsa-miR-592	0	0	0	1	0	0	FAM200A	family with sequence similarity 200, member A
hsa-miR-592	0	0	0	1	0	0	LCK	lymphocyte-specific protein tyrosine kinase
hsa-miR-592	1	0	1	1	1	1	PCDH11Y	protocadherin 11 Y-linked
hsa-miR-592	1	0	1	1	1	1	EFHC2	EF-hand domain (C-terminal) containing 2
hsa-miR-592	0	0	0	1	0	0	OR10H1	olfactory receptor, family 10, subfamily H, member 1
hsa-miR-592	0	0	1	1	0	0	KIF9	kinesin family member 9
hsa-miR-592	0	0	0	1	0	0	OR4F4	olfactory receptor, family 4, subfamily F, member 4
hsa-miR-592	1	0	1	1	1	1	SUPT3H	suppressor of Ty 3 homolog (S. cerevisiae)
hsa-miR-592	0	0	0	1	1	1	INTU	inturned planar cell polarity effector homolog (Drosophila)
hsa-miR-592	0	0	1	1	1	1	ATPIF1	ATPase inhibitory factor 1
hsa-miR-592	0	0	1	1	0	0	RAD54B	RAD54 homolog B (S. cerevisiae)
hsa-miR-592	0	0	1	1	0	0	RNASEH2B	ribonuclease H2, subunit B
hsa-miR-592	0	0	1	1	0	0	IL1F10	interleukin 1 family, member 10 (theta)
hsa-miR-592	0	0	1	1	0	0	TTC8	tetratricopeptide repeat domain 8
hsa-miR-592	0	0	0	1	1	1	ZNF600	zinc finger protein 600
hsa-miR-592	0	0	0	1	0	0	WASF4P	WAS protein family, member 4, pseudogene
hsa-miR-592	0	0	0	1	1	1	ANKRD20A5P	ankyrin repeat domain 20 family, member A5, pseudogene
hsa-miR-592	0	0	1	1	0	0	RNASE9	ribonuclease, RNase A family, 9 (non-active)
hsa-miR-592	0	0	1	1	1	1	ING3	inhibitor of growth family, member 3
hsa-miR-592	1	0	1	1	1	1	NEDD9	neural precursor cell expressed, developmentally down-regulated 9
hsa-miR-592	0	0	1	1	0	0	AMTN	amelotin
hsa-miR-592	0	0	0	1	0	0	C1QA	complement component 1, q subcomponent, A chain
hsa-miR-592	0	0	0	1	0	0	TSPY8	testis specific protein, Y-linked 8
hsa-miR-592	1	0	1	1	1	1	PRDM8	PR domain containing 8
hsa-miR-592	0	0	0	1	0	0	DNAJB13	DnaJ (Hsp40) homolog, subfamily B, member 13
hsa-miR-592	1	0	1	1	1	1	BTG3	BTG family, member 3
hsa-miR-592	0	0	1	1	1	1	NDUFA5	NADH dehydrogenase (ubiquinone) 1 alpha subcomplex, 5, 13kDa
hsa-miR-592	0	0	0	1	0	0	PDC	phosducin
hsa-miR-592	0	0	0	1	1	1	SERPINB3	serpin peptidase inhibitor, clade B (ovalbumin), member 3
hsa-miR-592	0	0	0	1	1	1	AKD1	adenylate kinase domain containing 1
hsa-miR-592	0	0	0	1	0	0	IGFL3	IGF-like family member 3
hsa-miR-592	0	0	1	1	0	0	SBSN	suprabasin
hsa-miR-592	0	0	1	1	1	1	TSHR	thyroid stimulating hormone receptor
hsa-miR-592	1	0	1	1	1	1	TTC26	tetratricopeptide repeat domain 26
hsa-miR-592	1	0	1	1	1	1	FERMT2	fermitin family member 2
hsa-miR-592	0	0	1	1	1	1	SRPX	sushi-repeat containing protein, X-linked
hsa-miR-592	1	0	1	1	1	1	FGD6	FYVE, RhoGEF and PH domain containing 6
hsa-miR-592	0	0	0	1	0	0	CCDC38	coiled-coil domain containing 38
hsa-miR-592	0	0	1	1	0	0	SAPCD1	suppressor APC domain containing 1
hsa-miR-592	0	0	1	1	0	0	KLRD1	killer cell lectin-like receptor subfamily D, member 1
hsa-miR-592	1	0	1	1	1	1	ARHGAP12	Rho GTPase activating protein 12
hsa-miR-592	1	0	1	1	1	1	SENP7	SUMO1/sentrin specific peptidase 7
hsa-miR-592	0	0	1	1	0	0	UBAP2	ubiquitin associated protein 2
hsa-miR-592	1	0	1	1	1	1	FAM184A	family with sequence similarity 184, member A
hsa-miR-592	0	0	1	1	0	0	BPIFA1	BPI fold containing family A, member 1
hsa-miR-592	0	0	1	1	0	0	TRERF1	transcriptional regulating factor 1
hsa-miR-592	1	0	1	1	1	1	MAK	male germ cell-associated kinase
hsa-miR-592	1	0	1	1	0	0	CKAP5	cytoskeleton associated protein 5
hsa-miR-592	1	0	1	1	1	1	PTPRS	protein tyrosine phosphatase, receptor type, S
hsa-miR-592	0	0	0	1	1	1	NEIL1	nei endonuclease VIII-like 1 (E. coli)
hsa-miR-592	0	0	0	1	0	0	CXorf40B	chromosome X open reading frame 40B
hsa-miR-592	1	0	1	1	1	1	IL16	interleukin 16
hsa-miR-592	1	0	1	1	1	1	GFRA1	GDNF family receptor alpha 1
hsa-miR-592	0	0	0	1	0	0	LEPREL4	leprecan-like 4
hsa-miR-592	0	0	0	1	1	1	ZNF140	zinc finger protein 140
hsa-miR-592	1	0	1	1	1	1	DIAPH2	diaphanous homolog 2 (Drosophila)
hsa-miR-592	0	0	0	1	1	1	ZNF658B	zinc finger protein 658B, pseudogene
hsa-miR-592	1	0	1	1	1	1	KTN1	kinectin 1 (kinesin receptor)
hsa-miR-592	0	0	0	1	0	0	RPS26P25	ribosomal protein S26 pseudogene 25
hsa-miR-592	0	0	1	1	0	0	FAM149A	family with sequence similarity 149, member A
hsa-miR-592	0	0	0	1	1	1	PITPNM1	phosphatidylinositol transfer protein, membrane-associated 1
hsa-miR-592	0	0	1	1	1	1	BCKDHB	branched chain keto acid dehydrogenase E1, beta polypeptide
hsa-miR-592	0	0	1	1	1	1	UHRF1BP1L	UHRF1 binding protein 1-like
hsa-miR-592	1	0	0	1	1	1	IFFO1	intermediate filament family orphan 1
hsa-miR-592	1	0	1	1	1	1	ZBTB44	zinc finger and BTB domain containing 44
hsa-miR-592	1	0	0	1	1	1	C14orf102	chromosome 14 open reading frame 102
hsa-miR-592	0	0	0	1	1	1	OR2L13	olfactory receptor, family 2, subfamily L, member 13
hsa-miR-592	0	0	1	1	0	0	RNASET2	ribonuclease T2
hsa-miR-592	0	0	1	1	1	1	APOL2	apolipoprotein L, 2
hsa-miR-592	1	0	1	1	1	1	ADRA1A	adrenoceptor alpha 1A
hsa-miR-592	1	0	1	1	1	1	GABPB1	GA binding protein transcription factor, beta subunit 1
hsa-miR-592	0	0	1	1	0	0	CXorf40A	chromosome X open reading frame 40A
hsa-miR-592	0	0	1	1	1	1	LRP10	low density lipoprotein receptor-related protein 10
hsa-miR-592	0	0	1	1	0	0	SH3GLB2	SH3-domain GRB2-like endophilin B2
hsa-miR-592	0	0	1	1	0	0	PDSS1	prenyl (decaprenyl) diphosphate synthase, subunit 1
hsa-miR-592	1	0	1	1	1	1	OPRM1	opioid receptor, mu 1
hsa-miR-592	1	0	1	1	1	1	NMB	neuromedin B
hsa-miR-592	0	0	1	1	1	1	BBS1	Bardet-Biedl syndrome 1
hsa-miR-592	0	0	1	1	0	0	TWF2	twinfilin, actin-binding protein, homolog 2 (Drosophila)
hsa-miR-592	0	0	0	1	0	0	TLR9	toll-like receptor 9
hsa-miR-592	0	0	0	1	0	0	OR10A3	olfactory receptor, family 10, subfamily A, member 3
hsa-miR-592	0	0	0	1	1	1	GLT8D2	glycosyltransferase 8 domain containing 2
hsa-miR-592	0	0	1	1	1	1	TCEA2	transcription elongation factor A (SII), 2
hsa-miR-592	0	0	1	1	1	1	VWA5A	von Willebrand factor A domain containing 5A
hsa-miR-592	1	0	1	1	1	1	KIAA0753	KIAA0753
hsa-miR-592	1	0	1	1	1	1	TLR10	toll-like receptor 10
hsa-miR-592	1	0	1	1	1	1	ZFYVE9	zinc finger, FYVE domain containing 9
hsa-miR-592	0	0	1	1	1	1	CDY1	chromodomain protein, Y-linked, 1
hsa-miR-592	0	0	1	1	1	1	FAM9B	family with sequence similarity 9, member B
hsa-miR-592	0	0	1	1	1	1	GCSAML	germinal center-associated, signaling and motility-like
hsa-miR-592	0	0	1	1	1	1	HEATR1	HEAT repeat containing 1
hsa-miR-592	0	0	1	1	1	1	ACTA1	actin, alpha 1, skeletal muscle
hsa-miR-592	1	0	1	1	1	1	NSL1	NSL1, MIND kinetochore complex component, homolog (S. cerevisiae)
hsa-miR-592	0	0	1	1	0	0	UBE2T	ubiquitin-conjugating enzyme E2T (putative)
hsa-miR-592	0	0	0	1	1	1	RMND1	required for meiotic nuclear division 1 homolog (S. cerevisiae)
hsa-miR-592	0	0	1	1	1	1	ATP6V1G3	ATPase, H+ transporting, lysosomal 13kDa, V1 subunit G3
hsa-miR-592	0	0	1	1	1	1	UCHL5	ubiquitin carboxyl-terminal hydrolase L5
hsa-miR-592	0	0	1	1	1	1	PRG4	proteoglycan 4
hsa-miR-592	1	0	1	1	1	1	NPL	N-acetylneuraminate pyruvate lyase (dihydrodipicolinate synthase)
hsa-miR-592	0	0	1	1	1	1	FUCA2	fucosidase, alpha-L- 2, plasma
hsa-miR-592	1	0	1	1	1	1	ANGPTL1	angiopoietin-like 1
hsa-miR-592	0	0	1	1	1	1	RALGPS2	Ral GEF with PH domain and SH3 binding motif 2
hsa-miR-592	0	0	1	1	1	1	LENEP	lens epithelial protein
hsa-miR-592	0	0	1	1	0	0	S100A12	S100 calcium binding protein A12
hsa-miR-592	0	0	1	1	0	0	LCE2A	late cornified envelope 2A
hsa-miR-592	0	0	1	1	0	0	CUZD1	CUB and zona pellucida-like domains 1
hsa-miR-592	0	0	0	1	0	0	VWA2	von Willebrand factor A domain containing 2
hsa-miR-592	0	0	1	1	0	0	FAM72B	family with sequence similarity 72, member B
hsa-miR-592	0	0	1	1	1	1	CGA	glycoprotein hormones, alpha polypeptide
hsa-miR-592	0	0	1	1	1	1	DENND2D	DENN/MADD domain containing 2D
hsa-miR-592	1	0	1	1	1	1	KCNA2	potassium voltage-gated channel, shaker-related subfamily, member 2
hsa-miR-592	0	0	1	1	1	1	IMPG1	interphotoreceptor matrix proteoglycan 1
hsa-miR-592	1	0	1	1	1	1	TLX1	T-cell leukemia homeobox 1
hsa-miR-592	0	0	1	1	1	1	CUTC	cutC copper transporter homolog (E. coli)
hsa-miR-592	0	0	0	1	0	0	CXorf66	chromosome X open reading frame 66
hsa-miR-592	0	0	0	1	1	1	CRTAC1	cartilage acidic protein 1
hsa-miR-592	0	0	1	1	0	0	PLCE1	phospholipase C, epsilon 1
hsa-miR-592	1	0	1	1	1	1	EHMT1	euchromatic histone-lysine N-methyltransferase 1
hsa-miR-592	0	0	1	1	1	1	NKAP	NFKB activating protein
hsa-miR-592	0	0	0	1	0	0	C9orf141	chromosome 9 open reading frame 141
hsa-miR-592	0	0	1	1	0	0	PHPT1	phosphohistidine phosphatase 1
hsa-miR-592	0	0	1	1	1	1	KIF20B	kinesin family member 20B
hsa-miR-592	0	0	1	1	1	1	EIF2B3	eukaryotic translation initiation factor 2B, subunit 3 gamma, 58kDa
hsa-miR-592	1	0	1	1	1	1	CD40	CD40 molecule, TNF receptor superfamily member 5
hsa-miR-592	0	0	1	1	0	0	EDN2	endothelin 2
hsa-miR-592	0	0	1	1	1	1	TCEAL7	transcription elongation factor A (SII)-like 7
hsa-miR-592	0	0	0	1	0	0	WDR34	WD repeat domain 34
hsa-miR-592	0	0	0	1	0	0	CENPI	centromere protein I
hsa-miR-592	0	0	0	1	1	1	NOX1	NADPH oxidase 1
hsa-miR-592	0	0	1	1	1	1	APOOL	apolipoprotein O-like
hsa-miR-592	0	0	1	1	0	0	EIF3I	eukaryotic translation initiation factor 3, subunit I
hsa-miR-592	0	0	1	1	1	1	MRRF	mitochondrial ribosome recycling factor
hsa-miR-592	0	0	1	1	1	1	RPA2	replication protein A2, 32kDa
hsa-miR-592	0	0	1	1	1	1	DEC1	deleted in esophageal cancer 1
hsa-miR-592	1	0	1	1	1	1	SLC31A1	solute carrier family 31 (copper transporters), member 1
hsa-miR-592	0	0	0	1	0	0	CXorf65	chromosome X open reading frame 65
hsa-miR-592	1	0	1	1	0	0	SVEP1	sushi, von Willebrand factor type A, EGF and pentraxin domain containing 1
hsa-miR-592	0	0	0	1	1	1	RAB41	RAB41, member RAS oncogene family
hsa-miR-592	1	0	1	1	1	1	CASP10	caspase 10, apoptosis-related cysteine peptidase
hsa-miR-592	0	0	1	1	0	0	MSANTD3	Myb/SANT-like DNA-binding domain containing 3
hsa-miR-592	1	0	1	1	1	1	TMEFF1	transmembrane protein with EGF-like and two follistatin-like domains 1
hsa-miR-592	1	0	1	1	1	1	HP1BP3	heterochromatin protein 1, binding protein 3
hsa-miR-592	0	0	1	1	1	1	DDOST	dolichyl-diphosphooligosaccharide--protein glycosyltransferase
hsa-miR-592	1	0	1	1	1	1	TSTD2	thiosulfate sulfurtransferase (rhodanese)-like domain containing 2
hsa-miR-592	1	0	1	1	1	1	ALDH4A1	aldehyde dehydrogenase 4 family, member A1
hsa-miR-592	0	0	1	1	0	0	SPATA21	spermatogenesis associated 21
hsa-miR-592	0	0	1	1	1	1	C6orf48	chromosome 6 open reading frame 48
hsa-miR-592	1	0	1	1	1	1	C20orf112	chromosome 20 open reading frame 112
hsa-miR-592	0	0	0	1	0	0	VWA7	von Willebrand factor A domain containing 7
hsa-miR-592	0	0	0	1	1	1	LY6G5B	lymphocyte antigen 6 complex, locus G5B
hsa-miR-592	0	0	1	1	0	0	CSNK2B	casein kinase 2, beta polypeptide
hsa-miR-592	0	0	0	1	0	0	APOM	apolipoprotein M
hsa-miR-592	1	0	1	1	1	1	GID4	GID complex subunit 4, VID24 homolog (S. cerevisiae)
hsa-miR-592	0	0	0	1	1	1	MDC1	mediator of DNA-damage checkpoint 1
hsa-miR-592	0	0	1	1	1	1	RASEF	RAS and EF-hand domain containing
hsa-miR-592	0	0	0	1	1	1	TRIM15	tripartite motif containing 15
hsa-miR-592	0	0	1	1	1	1	TRIM10	tripartite motif containing 10
hsa-miR-592	0	0	1	1	1	1	COMMD3	COMM domain containing 3
hsa-miR-592	1	0	1	1	0	0	C9orf41	chromosome 9 open reading frame 41
hsa-miR-592	1	0	1	1	1	1	RILPL1	Rab interacting lysosomal protein-like 1
hsa-miR-592	0	0	1	1	0	0	UXT	ubiquitously-expressed, prefoldin-like chaperone
hsa-miR-592	1	0	1	1	1	1	FAM108B1	family with sequence similarity 108, member B1
hsa-miR-592	0	0	1	1	1	1	CBWD3	COBW domain containing 3
hsa-miR-592	0	0	1	1	1	1	CBWD5	COBW domain containing 5
hsa-miR-592	0	0	0	1	0	0	CBWD6	COBW domain containing 6
hsa-miR-592	1	0	1	1	1	1	PER3	period homolog 3 (Drosophila)
hsa-miR-592	0	0	0	1	0	0	CUBN	cubilin (intrinsic factor-cobalamin receptor)
hsa-miR-592	0	0	1	1	1	1	HES2	hairy and enhancer of split 2 (Drosophila)
hsa-miR-592	1	0	1	1	1	1	CASK	calcium/calmodulin-dependent serine protein kinase (MAGUK family)
hsa-miR-592	1	0	1	1	1	1	FBXO11	F-box protein 11
hsa-miR-592	0	0	1	1	1	1	TRIM24	tripartite motif containing 24
hsa-miR-592	0	0	1	1	1	1	C12orf50	chromosome 12 open reading frame 50
hsa-miR-592	0	0	1	1	1	1	NFATC3	nuclear factor of activated T-cells, cytoplasmic, calcineurin-dependent 3
hsa-miR-592	0	0	0	1	1	1	PAK1IP1	PAK1 interacting protein 1
hsa-miR-592	0	0	1	1	1	1	ACO1	aconitase 1, soluble
hsa-miR-592	0	0	1	1	1	1	BEND2	BEN domain containing 2
hsa-miR-592	0	0	1	1	1	1	PLAA	phospholipase A2-activating protein
hsa-miR-592	0	0	0	1	0	0	OR51F1	olfactory receptor, family 51, subfamily F, member 1
hsa-miR-592	0	0	1	1	1	1	FAM154A	family with sequence similarity 154, member A
hsa-miR-592	0	0	0	1	0	0	AKR1C3	aldo-keto reductase family 1, member C3 (3-alpha hydroxysteroid dehydrogenase, type II)
hsa-miR-592	0	0	1	1	1	1	SERF1B	small EDRK-rich factor 1B (centromeric)
hsa-miR-592	1	0	0	1	1	1	SLC46A3	solute carrier family 46, member 3
hsa-miR-592	0	0	1	1	0	0	TAF9	TAF9 RNA polymerase II, TATA box binding protein (TBP)-associated factor, 32kDa
hsa-miR-592	0	0	0	1	0	0	EIF3CL	eukaryotic translation initiation factor 3, subunit C-like
hsa-miR-592	0	0	1	1	0	0	FREM1	FRAS1 related extracellular matrix 1
hsa-miR-592	0	0	0	1	0	0	MTIF3	mitochondrial translational initiation factor 3
hsa-miR-592	1	0	1	1	0	0	CDK8	cyclin-dependent kinase 8
hsa-miR-592	0	0	1	1	1	1	SLCO1B3	solute carrier organic anion transporter family, member 1B3
hsa-miR-592	1	0	0	1	1	1	PDCD1LG2	programmed cell death 1 ligand 2
hsa-miR-592	0	0	1	1	0	0	RLN2	relaxin 2
hsa-miR-592	1	0	1	1	1	1	RCL1	RNA terminal phosphate cyclase-like 1
hsa-miR-592	0	0	1	1	1	1	KLRC3	killer cell lectin-like receptor subfamily C, member 3
hsa-miR-592	0	0	1	1	0	0	SEC14L4	SEC14-like 4 (S. cerevisiae)
hsa-miR-592	0	0	1	1	1	1	C1QTNF9	C1q and tumor necrosis factor related protein 9
hsa-miR-592	1	0	1	1	1	1	VLDLR	very low density lipoprotein receptor
hsa-miR-592	0	0	1	1	1	1	SLC45A2	solute carrier family 45, member 2
hsa-miR-592	0	0	0	1	1	1	BPY2B	basic charge, Y-linked, 2B
hsa-miR-592	0	0	1	1	1	1	CBWD1	COBW domain containing 1
hsa-miR-592	1	0	1	1	1	1	CD9	CD9 molecule
hsa-miR-592	0	0	1	1	1	1	RBMY1B	RNA binding motif protein, Y-linked, family 1, member B
hsa-miR-592	0	0	1	1	1	1	RBMY1A1	RNA binding motif protein, Y-linked, family 1, member A1
hsa-miR-592	0	0	0	1	0	0	KRTAP20-4	keratin associated protein 20-4
hsa-miR-592	0	0	0	1	0	0	TSPY4	testis specific protein, Y-linked 4
hsa-miR-592	0	0	1	1	1	1	MST1	macrophage stimulating 1 (hepatocyte growth factor-like)
hsa-miR-592	1	0	1	1	0	0	SLAIN2	SLAIN motif family, member 2
hsa-miR-592	0	0	0	1	0	0	ABP1	amiloride binding protein 1 (amine oxidase (copper-containing))
hsa-miR-592	0	0	1	1	1	1	AGPHD1	aminoglycoside phosphotransferase domain containing 1
hsa-miR-592	0	0	0	1	0	0	RAB42	RAB42, member RAS oncogene family
hsa-miR-592	0	0	1	1	1	1	PRIM2	primase, DNA, polypeptide 2 (58kDa)
hsa-miR-592	0	0	1	1	0	0	EXOSC8	exosome component 8
hsa-miR-592	0	0	0	1	0	0	TAS2R14	taste receptor, type 2, member 14
hsa-miR-592	0	0	1	1	1	1	CP	ceruloplasmin (ferroxidase)
hsa-miR-592	1	0	1	1	1	1	SOX9	SRY (sex determining region Y)-box 9
hsa-miR-592	0	0	1	1	1	1	CYP51A1	cytochrome P450, family 51, subfamily A, polypeptide 1
hsa-miR-592	0	0	1	0	1	1	OXTR	oxytocin receptor
hsa-miR-592	1	0	1	1	1	1	FAM13C	family with sequence similarity 13, member C
hsa-miR-592	1	0	1	1	1	1	EML1	echinoderm microtubule associated protein like 1
hsa-miR-592	1	0	1	1	1	1	LUZP2	leucine zipper protein 2
hsa-miR-592	1	0	1	1	1	1	PODXL	podocalyxin-like
hsa-miR-592	0	0	1	0	1	1	C6orf120	chromosome 6 open reading frame 120
hsa-miR-592	1	0	1	1	1	1	AP1S3	adaptor-related protein complex 1, sigma 3 subunit
hsa-miR-592	0	0	1	1	1	1	ZNF626	zinc finger protein 626
hsa-miR-592	1	0	1	0	1	1	KIAA1147	KIAA1147
hsa-miR-592	1	0	1	0	1	1	COL19A1	collagen, type XIX, alpha 1
hsa-miR-592	0	0	1	1	1	1	SERPINB8	serpin peptidase inhibitor, clade B (ovalbumin), member 8
hsa-miR-592	0	0	0	1	1	1	QSOX1	quiescin Q6 sulfhydryl oxidase 1
hsa-miR-592	1	0	1	1	1	1	RABIF	RAB interacting factor
hsa-miR-592	0	0	1	1	1	1	XCL1	chemokine (C motif) ligand 1
hsa-miR-592	1	0	1	1	1	1	SPARC	secreted protein, acidic, cysteine-rich (osteonectin)
hsa-miR-592	1	0	1	1	1	1	DEK	DEK oncogene
hsa-miR-592	1	0	1	0	1	1	SEMA5A	sema domain, seven thrombospondin repeats (type 1 and type 1-like), transmembrane domain (TM) and short cytoplasmic domain, (semaphorin) 5A
hsa-miR-592	0	0	1	1	1	1	GJB2	gap junction protein, beta 2, 26kDa
hsa-miR-592	1	0	1	1	1	1	ACOX1	acyl-CoA oxidase 1, palmitoyl
hsa-miR-592	1	0	1	1	1	1	RPS6KA3	ribosomal protein S6 kinase, 90kDa, polypeptide 3
hsa-miR-592	1	0	1	0	1	1	PRKX	protein kinase, X-linked
hsa-miR-592	0	0	1	1	1	1	SART1	squamous cell carcinoma antigen recognized by T cells
hsa-miR-592	1	0	1	1	1	1	ATP9A	ATPase, class II, type 9A
hsa-miR-592	1	0	0	1	1	1	NEDD4	neural precursor cell expressed, developmentally down-regulated 4, E3 ubiquitin protein ligase
hsa-miR-592	0	0	1	1	1	1	TMED2	transmembrane emp24 domain trafficking protein 2
hsa-miR-592	1	0	1	1	1	1	SOX21	SRY (sex determining region Y)-box 21
hsa-miR-592	0	0	1	1	1	1	ZNF75D	zinc finger protein 75D
hsa-miR-592	1	0	1	1	1	1	PHLDA1	pleckstrin homology-like domain, family A, member 1
hsa-miR-592	0	0	1	1	1	1	ATP1B4	ATPase, Na+/K+ transporting, beta 4 polypeptide
hsa-miR-592	0	0	1	1	1	1	ARHGAP6	Rho GTPase activating protein 6
hsa-miR-592	1	0	1	0	1	1	OSTM1	osteopetrosis associated transmembrane protein 1
hsa-miR-592	1	0	1	1	1	1	IL20RA	interleukin 20 receptor, alpha
hsa-miR-592	1	0	0	1	1	1	ZFP30	zinc finger protein 30 homolog (mouse)
hsa-miR-592	0	0	1	1	1	1	L3MBTL1	l(3)mbt-like 1 (Drosophila)
hsa-miR-592	0	0	1	1	1	1	RSL1D1	ribosomal L1 domain containing 1
hsa-miR-592	1	0	1	1	1	1	ST8SIA3	ST8 alpha-N-acetyl-neuraminide alpha-2,8-sialyltransferase 3
hsa-miR-592	0	0	0	1	1	1	FAM82B	family with sequence similarity 82, member B
hsa-miR-592	1	0	1	0	1	1	VPS36	vacuolar protein sorting 36 homolog (S. cerevisiae)
hsa-miR-592	0	0	1	1	1	1	XAF1	XIAP associated factor 1
hsa-miR-592	0	0	0	1	1	1	TOR4A	torsin family 4, member A
hsa-miR-592	1	0	1	1	1	1	SLC39A9	solute carrier family 39 (zinc transporter), member 9
hsa-miR-592	1	0	1	1	1	1	RRN3	RRN3 RNA polymerase I transcription factor homolog (S. cerevisiae)
hsa-miR-592	1	0	1	1	1	1	PAG1	phosphoprotein associated with glycosphingolipid microdomains 1
hsa-miR-592	1	0	1	1	1	1	CSGALNACT2	chondroitin sulfate N-acetylgalactosaminyltransferase 2
hsa-miR-592	0	0	1	1	1	1	HIST1H2AG	histone cluster 1, H2ag
hsa-miR-592	1	0	1	1	1	1	EPB41L4A	erythrocyte membrane protein band 4.1 like 4A
hsa-miR-592	0	0	1	1	1	1	THSD4	thrombospondin, type I, domain containing 4
hsa-miR-592	0	0	1	1	1	1	MED28	mediator complex subunit 28
hsa-miR-592	0	0	0	1	1	1	ULBP1	UL16 binding protein 1
hsa-miR-592	1	0	1	1	1	1	CRISPLD1	cysteine-rich secretory protein LCCL domain containing 1
hsa-miR-592	1	0	1	0	1	1	EAF1	ELL associated factor 1
hsa-miR-592	1	0	1	1	1	1	TRIM5	tripartite motif containing 5
hsa-miR-592	0	0	1	1	1	1	ABCC12	ATP-binding cassette, sub-family C (CFTR/MRP), member 12
hsa-miR-592	0	0	1	1	1	1	C3orf15	chromosome 3 open reading frame 15
hsa-miR-592	1	0	1	1	1	1	TMEM132B	transmembrane protein 132B
hsa-miR-592	1	0	1	1	1	1	KCTD12	potassium channel tetramerisation domain containing 12
hsa-miR-592	0	0	1	1	1	1	TRUB1	TruB pseudouridine (psi) synthase homolog 1 (E. coli)
hsa-miR-592	0	0	1	0	1	1	SLC17A8	solute carrier family 17 (sodium-dependent inorganic phosphate cotransporter), member 8
hsa-miR-592	0	0	0	0	1	1	SPATA13	spermatogenesis associated 13
hsa-miR-592	0	0	0	1	1	1	TRIM35	tripartite motif containing 35
hsa-miR-592	1	0	1	1	1	1	HECTD2	HECT domain containing E3 ubiquitin protein ligase 2
hsa-miR-592	1	0	1	0	1	1	GABRG1	gamma-aminobutyric acid (GABA) A receptor, gamma 1
hsa-miR-592	1	0	1	1	1	1	ANKS6	ankyrin repeat and sterile alpha motif domain containing 6
hsa-miR-592	1	0	1	1	1	1	C8orf37	chromosome 8 open reading frame 37
hsa-miR-592	0	0	1	1	1	1	DNAJC24	DnaJ (Hsp40) homolog, subfamily C, member 24
hsa-miR-592	1	0	1	0	1	1	SRRM4	serine/arginine repetitive matrix 4
hsa-miR-592	0	0	1	1	1	1	OR2C3	olfactory receptor, family 2, subfamily C, member 3
hsa-miR-592	1	0	1	0	1	1	ACACA	acetyl-CoA carboxylase alpha
hsa-miR-592	0	0	0	0	1	1	ROCK1P1	Rho-associated, coiled-coil containing protein kinase 1 pseudogene 1
hsa-miR-592	0	0	0	0	1	1	LOC730139	uncharacterized LOC730139
hsa-miR-592	0	0	0	0	1	1	RP1-177G6.2	uncharacterized LOC286411
hsa-miR-592	0	0	0	0	1	1	LOC646626	uncharacterized LOC646626
