# Supplementary material for: Profiling of Selected MicroRNAs in Proliferative Eutopic Endometrium of Women with Ovarian Endometriosis
Source: Biomed Res Int. 2015 Aug 20;2015:760698. doi: 10.1155/2015/760698 (PMC4558423; doi:10.1155/2015/760698)
Supplement: Supplementary file 1 — Table I: The names of miRNAs significantly differentially expressed between eutopic endometrium of patients with endometriosis vs eutopic endometrium of patients without endometriosis. Table II: The associations between miRNA and mRNA, which presents detailed results of the search of six major databases i.e targetscan, tarbase, miranda, mirbase, mirtarget2 and pictar. [file 760698.f1.zip › 760698.f1/Table II/hsa-miR-595.tsv]

miR	targetscan	tarbase	miranda	mirbase	mirtarget2	pictar	GeneSymbol	GeneName
hsa-miR-595	1	0	1	1	1	1	PLAU	plasminogen activator, urokinase
hsa-miR-595	1	0	1	1	1	1	CHD9	chromodomain helicase DNA binding protein 9
hsa-miR-595	1	0	1	0	1	1	PTPRT	protein tyrosine phosphatase, receptor type, T
hsa-miR-595	1	0	1	0	1	1	MTSS1	metastasis suppressor 1
hsa-miR-595	1	0	1	1	1	1	AUTS2	autism susceptibility candidate 2
hsa-miR-595	0	0	1	1	0	0	RAP1GAP	RAP1 GTPase activating protein
hsa-miR-595	1	0	1	1	1	1	ATG13	autophagy related 13
hsa-miR-595	0	0	1	1	1	1	MICAL2	microtubule associated monoxygenase, calponin and LIM domain containing 2
hsa-miR-595	1	0	1	0	1	1	RBM12	RNA binding motif protein 12
hsa-miR-595	1	0	1	1	1	1	CDK12	cyclin-dependent kinase 12
hsa-miR-595	1	0	1	1	1	1	CPEB3	cytoplasmic polyadenylation element binding protein 3
hsa-miR-595	1	0	1	1	1	1	CIT	citron (rho-interacting, serine/threonine kinase 21)
hsa-miR-595	0	0	1	0	0	0	THSD7A	thrombospondin, type I, domain containing 7A
hsa-miR-595	0	0	1	1	1	1	TBC1D30	TBC1 domain family, member 30
hsa-miR-595	1	0	1	1	0	0	FRMD4B	FERM domain containing 4B
hsa-miR-595	1	0	1	1	0	0	KIAA1045	KIAA1045
hsa-miR-595	1	0	1	0	1	1	ZNF507	zinc finger protein 507
hsa-miR-595	1	0	1	0	1	1	SRGAP3	SLIT-ROBO Rho GTPase activating protein 3
hsa-miR-595	1	0	1	1	0	0	ATAD2B	ATPase family, AAA domain containing 2B
hsa-miR-595	1	0	1	1	1	1	ASAP1	ArfGAP with SH3 domain, ankyrin repeat and PH domain 1
hsa-miR-595	1	0	1	1	1	1	PCDH19	protocadherin 19
hsa-miR-595	1	1	1	1	1	1	NFIA	nuclear factor I/A
hsa-miR-595	1	0	1	0	0	0	PITPNM2	phosphatidylinositol transfer protein, membrane-associated 2
hsa-miR-595	1	0	1	1	1	1	FRAS1	Fraser syndrome 1
hsa-miR-595	1	0	1	0	0	0	TANC2	tetratricopeptide repeat, ankyrin repeat and coiled-coil containing 2
hsa-miR-595	0	0	1	1	0	0	NTNG2	netrin G2
hsa-miR-595	0	0	1	1	1	1	SLC11A2	solute carrier family 11 (proton-coupled divalent metal ion transporters), member 2
hsa-miR-595	1	0	1	1	1	1	CSMD3	CUB and Sushi multiple domains 3
hsa-miR-595	1	0	1	1	1	1	POGZ	pogo transposable element with ZNF domain
hsa-miR-595	1	0	1	1	1	1	SH3TC2	SH3 domain and tetratricopeptide repeats 2
hsa-miR-595	1	0	1	0	0	0	ZBTB34	zinc finger and BTB domain containing 34
hsa-miR-595	0	0	1	1	1	1	MCF2	MCF.2 cell line derived transforming sequence
hsa-miR-595	1	0	1	1	1	1	PAM	peptidylglycine alpha-amidating monooxygenase
hsa-miR-595	1	0	1	1	1	1	C11orf57	chromosome 11 open reading frame 57
hsa-miR-595	1	0	1	1	1	1	TRPM3	transient receptor potential cation channel, subfamily M, member 3
hsa-miR-595	0	0	1	1	0	0	SSPO	SCO-spondin homolog (Bos taurus)
hsa-miR-595	0	0	1	1	1	1	PCBP2	poly(rC) binding protein 2
hsa-miR-595	0	0	1	1	1	1	SYBU	syntabulin (syntaxin-interacting)
hsa-miR-595	1	0	1	1	1	1	BACH2	BTB and CNC homology 1, basic leucine zipper transcription factor 2
hsa-miR-595	1	0	1	1	1	1	RPS6KA3	ribosomal protein S6 kinase, 90kDa, polypeptide 3
hsa-miR-595	1	0	1	1	0	0	ELN	elastin
hsa-miR-595	1	0	1	1	1	1	PCCB	propionyl CoA carboxylase, beta polypeptide
hsa-miR-595	0	0	1	1	1	1	DNM1L	dynamin 1-like
hsa-miR-595	0	0	1	1	1	1	PTK2	PTK2 protein tyrosine kinase 2
hsa-miR-595	1	0	1	0	1	1	PLAG1	pleiomorphic adenoma gene 1
hsa-miR-595	1	0	1	0	1	1	MPPED2	metallophosphoesterase domain containing 2
hsa-miR-595	1	0	1	1	1	1	PRKACB	protein kinase, cAMP-dependent, catalytic, beta
hsa-miR-595	0	0	1	1	0	0	CCNH	cyclin H
hsa-miR-595	1	0	1	1	1	1	EPHA5	EPH receptor A5
hsa-miR-595	1	0	1	1	1	1	SATB2	SATB homeobox 2
hsa-miR-595	0	0	1	1	1	1	ZNF747	zinc finger protein 747
hsa-miR-595	0	0	1	1	0	0	HLA-DMB	major histocompatibility complex, class II, DM beta
hsa-miR-595	1	0	1	1	1	1	COL24A1	collagen, type XXIV, alpha 1
hsa-miR-595	0	0	1	1	0	0	SLC22A8	solute carrier family 22 (organic anion transporter), member 8
hsa-miR-595	1	0	1	1	1	1	GOLGA4	golgin A4
hsa-miR-595	0	0	1	1	1	1	KIF3A	kinesin family member 3A
hsa-miR-595	0	0	1	1	1	1	ELOVL5	ELOVL fatty acid elongase 5
hsa-miR-595	1	0	1	0	1	1	ADD3	adducin 3 (gamma)
hsa-miR-595	1	0	1	1	1	1	OSBPL10	oxysterol binding protein-like 10
hsa-miR-595	0	0	1	1	0	0	TRIM27	tripartite motif containing 27
hsa-miR-595	1	0	1	1	1	1	ZFX	zinc finger protein, X-linked
hsa-miR-595	1	0	1	1	1	1	DLGAP2	discs, large (Drosophila) homolog-associated protein 2
hsa-miR-595	1	0	1	0	1	1	PDE4D	phosphodiesterase 4D, cAMP-specific
hsa-miR-595	0	0	1	1	1	1	CD84	CD84 molecule
hsa-miR-595	0	0	1	0	1	1	GPR98	G protein-coupled receptor 98
hsa-miR-595	1	0	1	1	1	1	MBNL2	muscleblind-like splicing regulator 2
hsa-miR-595	1	0	1	1	1	1	TP63	tumor protein p63
hsa-miR-595	1	0	1	1	1	1	USP3	ubiquitin specific peptidase 3
hsa-miR-595	0	0	1	1	1	1	RGS7	regulator of G-protein signaling 7
hsa-miR-595	1	0	1	0	1	1	MAP4K4	mitogen-activated protein kinase kinase kinase kinase 4
hsa-miR-595	0	0	1	1	0	0	RBM5	RNA binding motif protein 5
hsa-miR-595	0	0	1	1	1	1	EIF2A	eukaryotic translation initiation factor 2A, 65kDa
hsa-miR-595	1	0	1	1	1	1	EDNRB	endothelin receptor type B
hsa-miR-595	0	0	1	1	1	1	TMEM176B	transmembrane protein 176B
hsa-miR-595	0	0	1	1	1	1	DMRT2	doublesex and mab-3 related transcription factor 2
hsa-miR-595	1	0	1	1	1	1	TAOK3	TAO kinase 3
hsa-miR-595	0	0	1	0	1	1	CLEC5A	C-type lectin domain family 5, member A
hsa-miR-595	0	0	1	1	1	1	HEPH	hephaestin
hsa-miR-595	1	0	1	1	1	1	USP15	ubiquitin specific peptidase 15
hsa-miR-595	1	0	1	1	1	1	ANKRD13A	ankyrin repeat domain 13A
hsa-miR-595	0	0	1	0	1	1	PDP1	pyruvate dehyrogenase phosphatase catalytic subunit 1
hsa-miR-595	0	0	1	1	1	1	FAM114A2	family with sequence similarity 114, member A2
hsa-miR-595	1	0	1	1	1	1	USP25	ubiquitin specific peptidase 25
hsa-miR-595	1	0	1	1	1	1	TACC2	transforming, acidic coiled-coil containing protein 2
hsa-miR-595	0	0	1	0	0	0	BPESC1	blepharophimosis, epicanthus inversus and ptosis, candidate 1 (non-protein coding)
hsa-miR-595	0	0	1	1	1	1	SLCO2B1	solute carrier organic anion transporter family, member 2B1
hsa-miR-595	1	0	1	1	1	1	NXT2	nuclear transport factor 2-like export factor 2
hsa-miR-595	0	0	1	1	1	1	BRD7	bromodomain containing 7
hsa-miR-595	0	0	1	1	1	1	CD28	CD28 molecule
hsa-miR-595	1	0	1	1	1	1	RSF1	remodeling and spacing factor 1
hsa-miR-595	0	0	1	0	0	0	TIGD7	tigger transposable element derived 7
hsa-miR-595	0	0	1	1	0	0	HES6	hairy and enhancer of split 6 (Drosophila)
hsa-miR-595	1	0	1	1	1	1	ABI2	abl-interactor 2
hsa-miR-595	1	0	1	1	1	1	RBM47	RNA binding motif protein 47
hsa-miR-595	0	0	1	1	1	1	C21orf7	chromosome 21 open reading frame 7
hsa-miR-595	1	0	1	1	1	1	PUM2	pumilio homolog 2 (Drosophila)
hsa-miR-595	0	0	1	1	0	0	GHRHR	growth hormone releasing hormone receptor
hsa-miR-595	0	0	1	0	0	0	LOC645355	uncharacterized LOC645355
hsa-miR-595	1	0	1	1	0	0	ZBTB37	zinc finger and BTB domain containing 37
hsa-miR-595	1	0	1	1	1	1	LETMD1	LETM1 domain containing 1
hsa-miR-595	1	0	1	1	1	1	PBX3	pre-B-cell leukemia homeobox 3
hsa-miR-595	1	0	1	1	1	1	CALCOCO1	calcium binding and coiled-coil domain 1
hsa-miR-595	0	0	1	1	1	1	ORMDL1	ORM1-like 1 (S. cerevisiae)
hsa-miR-595	1	0	1	1	1	1	RCAN1	regulator of calcineurin 1
hsa-miR-595	0	0	1	1	0	0	SNRPN	small nuclear ribonucleoprotein polypeptide N
hsa-miR-595	1	0	1	1	0	0	SEPT8	septin 8
hsa-miR-595	0	0	1	1	1	1	LGI1	leucine-rich, glioma inactivated 1
hsa-miR-595	1	0	1	1	1	1	WAPAL	wings apart-like homolog (Drosophila)
hsa-miR-595	0	0	1	1	1	1	R3HCC1L	R3H domain and coiled-coil containing 1-like
hsa-miR-595	0	0	1	1	1	1	PTK7	PTK7 protein tyrosine kinase 7
hsa-miR-595	1	0	1	1	1	1	AFF2	AF4/FMR2 family, member 2
hsa-miR-595	0	0	1	1	0	0	ADAMTS13	ADAM metallopeptidase with thrombospondin type 1 motif, 13
hsa-miR-595	0	0	1	0	0	0	SNHG4	small nucleolar RNA host gene 4 (non-protein coding)
hsa-miR-595	0	0	1	1	1	1	C6orf48	chromosome 6 open reading frame 48
hsa-miR-595	1	0	1	1	1	1	SUCO	SUN domain containing ossification factor
hsa-miR-595	0	0	1	1	1	1	CLDND1	claudin domain containing 1
hsa-miR-595	0	0	1	1	1	1	STK33	serine/threonine kinase 33
hsa-miR-595	1	0	1	1	1	1	NRXN3	neurexin 3
hsa-miR-595	0	0	1	1	1	1	PHACTR3	phosphatase and actin regulator 3
hsa-miR-595	1	0	1	1	1	1	PPP1R9A	protein phosphatase 1, regulatory subunit 9A
hsa-miR-595	0	0	1	1	1	1	OLFM4	olfactomedin 4
hsa-miR-595	0	0	1	1	1	1	STOX2	storkhead box 2
hsa-miR-595	0	0	1	1	1	1	RNF220	ring finger protein 220
hsa-miR-595	0	0	1	1	1	1	RSRC2	arginine/serine-rich coiled-coil 2
hsa-miR-595	1	0	1	1	1	1	MYEF2	myelin expression factor 2
hsa-miR-595	0	0	1	1	0	0	ANAPC7	anaphase promoting complex subunit 7
hsa-miR-595	1	0	1	0	0	0	ZNRF3	zinc and ring finger 3
hsa-miR-595	0	0	1	1	1	1	SPATA5L1	spermatogenesis associated 5-like 1
hsa-miR-595	1	0	1	1	1	1	MACF1	microtubule-actin crosslinking factor 1
hsa-miR-595	0	0	1	1	1	1	NECAP2	NECAP endocytosis associated 2
hsa-miR-595	0	0	1	0	0	0	LOC284561	uncharacterized LOC284561
hsa-miR-595	0	0	1	0	1	1	FLJ14186	uncharacterized LOC401149
hsa-miR-595	0	0	1	0	0	0	IFFO2	intermediate filament family orphan 2
hsa-miR-595	1	0	1	0	1	1	ATP2B1	ATPase, Ca++ transporting, plasma membrane 1
hsa-miR-595	0	0	1	0	0	0	ARHGEF28	Rho guanine nucleotide exchange factor (GEF) 28
hsa-miR-595	1	0	1	1	1	1	KANK1	KN motif and ankyrin repeat domains 1
hsa-miR-595	1	0	1	1	1	1	NAA30	N(alpha)-acetyltransferase 30, NatC catalytic subunit
hsa-miR-595	1	0	1	0	1	1	ZCCHC3	zinc finger, CCHC domain containing 3
hsa-miR-595	0	0	1	0	0	0	CCDC85C	coiled-coil domain containing 85C
hsa-miR-595	1	0	1	1	0	0	UBXN7	UBX domain protein 7
hsa-miR-595	1	0	1	0	1	1	TOX3	TOX high mobility group box family member 3
hsa-miR-595	0	0	1	1	1	1	DUSP14	dual specificity phosphatase 14
hsa-miR-595	0	0	1	0	0	0	A1BG-AS1	A1BG antisense RNA 1
hsa-miR-595	0	0	1	1	1	1	RNF146	ring finger protein 146
hsa-miR-595	1	0	1	1	1	1	SLC38A1	solute carrier family 38, member 1
hsa-miR-595	1	0	1	1	1	1	GPD2	glycerol-3-phosphate dehydrogenase 2 (mitochondrial)
hsa-miR-595	0	0	1	1	1	1	STMN1	stathmin 1
hsa-miR-595	0	0	1	1	0	0	IMPDH1	IMP (inosine 5'-monophosphate) dehydrogenase 1
hsa-miR-595	0	0	1	0	0	0	LOC283508	uncharacterized LOC283508
hsa-miR-595	1	0	1	1	1	1	MBD5	methyl-CpG binding domain protein 5
hsa-miR-595	1	0	1	0	1	1	AP1G1	adaptor-related protein complex 1, gamma 1 subunit
hsa-miR-595	0	0	1	0	0	0	CASC2	cancer susceptibility candidate 2 (non-protein coding)
hsa-miR-595	1	0	1	1	1	1	TPM1	tropomyosin 1 (alpha)
hsa-miR-595	0	0	1	1	1	1	BCAR3	breast cancer anti-estrogen resistance 3
hsa-miR-595	1	0	1	1	1	1	FRMD6	FERM domain containing 6
hsa-miR-595	1	0	1	1	1	1	PDLIM2	PDZ and LIM domain 2 (mystique)
hsa-miR-595	0	0	1	1	1	1	CLHC1	clathrin heavy chain linker domain containing 1
hsa-miR-595	1	0	1	1	1	1	ZIC4	Zic family member 4
hsa-miR-595	1	0	1	1	1	1	CLCN5	chloride channel, voltage-sensitive 5
hsa-miR-595	1	0	1	1	1	1	PUM1	pumilio homolog 1 (Drosophila)
hsa-miR-595	0	0	1	1	1	1	C14orf79	chromosome 14 open reading frame 79
hsa-miR-595	0	0	1	1	0	0	NXF2	nuclear RNA export factor 2
hsa-miR-595	1	0	1	0	1	1	PLEKHA1	pleckstrin homology domain containing, family A (phosphoinositide binding specific) member 1
hsa-miR-595	0	0	1	1	0	0	AXDND1	axonemal dynein light chain domain containing 1
hsa-miR-595	1	0	1	0	1	1	NCAM1	neural cell adhesion molecule 1
hsa-miR-595	1	0	1	1	1	1	SEC22A	SEC22 vesicle trafficking protein homolog A (S. cerevisiae)
hsa-miR-595	0	0	1	1	1	1	A2ML1	alpha-2-macroglobulin-like 1
hsa-miR-595	0	0	1	0	0	0	LINC00301	long intergenic non-protein coding RNA 301
hsa-miR-595	1	0	1	1	1	1	FAM73B	family with sequence similarity 73, member B
hsa-miR-595	1	0	1	0	1	1	RNF165	ring finger protein 165
hsa-miR-595	0	0	1	1	1	1	GALNT6	UDP-N-acetyl-alpha-D-galactosamine:polypeptide N-acetylgalactosaminyltransferase 6 (GalNAc-T6)
hsa-miR-595	1	0	1	1	1	1	UXS1	UDP-glucuronate decarboxylase 1
hsa-miR-595	1	0	1	1	1	1	PIP4K2C	phosphatidylinositol-5-phosphate 4-kinase, type II, gamma
hsa-miR-595	1	0	1	1	1	1	TLK1	tousled-like kinase 1
hsa-miR-595	0	0	1	1	1	1	BBS9	Bardet-Biedl syndrome 9
hsa-miR-595	0	0	1	1	1	1	USP8	ubiquitin specific peptidase 8
hsa-miR-595	1	0	1	0	1	1	TEF	thyrotrophic embryonic factor
hsa-miR-595	1	0	1	1	1	1	ZNF286A	zinc finger protein 286A
hsa-miR-595	0	0	1	1	0	0	HNRNPL	heterogeneous nuclear ribonucleoprotein L
hsa-miR-595	0	0	1	0	1	1	SSPN	sarcospan
hsa-miR-595	1	0	1	1	0	0	PRMT8	protein arginine methyltransferase 8
hsa-miR-595	0	0	1	1	1	1	TGFBI	transforming growth factor, beta-induced, 68kDa
hsa-miR-595	1	0	1	1	1	1	CTNNA1	catenin (cadherin-associated protein), alpha 1, 102kDa
hsa-miR-595	0	0	1	1	0	0	CES4A	carboxylesterase 4A
hsa-miR-595	1	0	1	0	1	1	IL1RAP	interleukin 1 receptor accessory protein
hsa-miR-595	1	0	1	1	1	1	KLF4	Kruppel-like factor 4 (gut)
hsa-miR-595	1	0	1	1	1	1	RASGEF1A	RasGEF domain family, member 1A
hsa-miR-595	0	0	1	1	1	1	MOBP	myelin-associated oligodendrocyte basic protein
hsa-miR-595	1	0	1	0	1	1	UVRAG	UV radiation resistance associated gene
hsa-miR-595	0	0	1	1	1	1	LTBR	lymphotoxin beta receptor (TNFR superfamily, member 3)
hsa-miR-595	1	0	1	1	1	1	KCNIP3	Kv channel interacting protein 3, calsenilin
hsa-miR-595	1	0	1	1	1	1	SPATS2	spermatogenesis associated, serine-rich 2
hsa-miR-595	1	0	1	1	1	1	ANKRD10	ankyrin repeat domain 10
hsa-miR-595	1	0	1	1	1	1	ACSL1	acyl-CoA synthetase long-chain family member 1
hsa-miR-595	1	0	1	0	1	1	THRB	thyroid hormone receptor, beta
hsa-miR-595	1	0	1	1	1	1	CA12	carbonic anhydrase XII
hsa-miR-595	1	0	1	1	1	1	STIM2	stromal interaction molecule 2
hsa-miR-595	0	0	1	1	1	1	GBAS	glioblastoma amplified sequence
hsa-miR-595	1	0	1	1	1	1	CAPN2	calpain 2, (m/II) large subunit
hsa-miR-595	1	0	1	1	1	1	TMEM185A	transmembrane protein 185A
hsa-miR-595	1	0	1	1	1	1	NSUN4	NOP2/Sun domain family, member 4
hsa-miR-595	0	0	1	0	0	0	THAP7-AS1	THAP7 antisense RNA 1
hsa-miR-595	1	0	1	1	1	1	UGDH	UDP-glucose 6-dehydrogenase
hsa-miR-595	0	0	1	1	1	1	VIPAS39	VPS33B interacting protein, apical-basolateral polarity regulator, spe-39 homolog
hsa-miR-595	1	0	1	1	1	1	THTPA	thiamine triphosphatase
hsa-miR-595	0	0	1	1	0	0	ALDOA	aldolase A, fructose-bisphosphate
hsa-miR-595	1	0	1	1	1	1	TRAFD1	TRAF-type zinc finger domain containing 1
hsa-miR-595	0	0	1	1	1	1	ABCC12	ATP-binding cassette, sub-family C (CFTR/MRP), member 12
hsa-miR-595	1	0	1	1	1	1	UHRF2	ubiquitin-like with PHD and ring finger domains 2, E3 ubiquitin protein ligase
hsa-miR-595	1	0	1	1	1	1	HBP1	HMG-box transcription factor 1
hsa-miR-595	0	0	1	1	1	1	GPR128	G protein-coupled receptor 128
hsa-miR-595	0	0	1	1	1	1	FRMPD2	FERM and PDZ domain containing 2
hsa-miR-595	0	0	1	1	1	1	ARHGEF26	Rho guanine nucleotide exchange factor (GEF) 26
hsa-miR-595	1	0	1	1	1	1	KALRN	kalirin, RhoGEF kinase
hsa-miR-595	1	0	1	1	0	0	KCNC1	potassium voltage-gated channel, Shaw-related subfamily, member 1
hsa-miR-595	1	0	1	1	1	1	PLEKHH1	pleckstrin homology domain containing, family H (with MyTH4 domain) member 1
hsa-miR-595	0	0	1	1	1	1	FAM5B	family with sequence similarity 5, member B
hsa-miR-595	0	0	1	1	1	1	NOSTRIN	nitric oxide synthase trafficker
hsa-miR-595	1	0	1	1	1	1	EPAS1	endothelial PAS domain protein 1
hsa-miR-595	1	0	1	0	1	1	WDR82	WD repeat domain 82
hsa-miR-595	1	0	1	1	1	1	PRDM2	PR domain containing 2, with ZNF domain
hsa-miR-595	0	0	1	1	1	1	SLC9A1	solute carrier family 9, subfamily A (NHE1, cation proton antiporter 1), member 1
hsa-miR-595	1	0	1	1	1	1	GJC1	gap junction protein, gamma 1, 45kDa
hsa-miR-595	1	0	1	1	1	1	ADIPOR1	adiponectin receptor 1
hsa-miR-595	0	0	1	1	0	0	NPIP	nuclear pore complex interacting protein
hsa-miR-595	1	0	1	1	1	1	KIF21A	kinesin family member 21A
hsa-miR-595	1	0	1	1	1	1	C11orf30	chromosome 11 open reading frame 30
hsa-miR-595	0	0	1	1	1	1	DENND5A	DENN/MADD domain containing 5A
hsa-miR-595	0	0	1	1	1	1	CYB5D1	cytochrome b5 domain containing 1
hsa-miR-595	0	0	1	1	1	1	FAM54A	family with sequence similarity 54, member A
hsa-miR-595	1	0	1	0	1	1	HECTD1	HECT domain containing E3 ubiquitin protein ligase 1
hsa-miR-595	0	0	1	1	0	0	FSIP2	fibrous sheath interacting protein 2
hsa-miR-595	1	0	1	1	1	1	SIKE1	suppressor of IKBKE 1
hsa-miR-595	1	0	1	0	1	1	ANO6	anoctamin 6
hsa-miR-595	1	0	1	1	1	1	PHF17	PHD finger protein 17
hsa-miR-595	0	0	1	1	1	1	PIN4	protein (peptidylprolyl cis/trans isomerase) NIMA-interacting, 4 (parvulin)
hsa-miR-595	1	0	1	1	1	1	CXorf23	chromosome X open reading frame 23
hsa-miR-595	0	0	1	0	0	0	ERVFRD-2	endogenous retrovirus group FRD, member 2
hsa-miR-595	0	0	1	1	1	1	MCU	mitochondrial calcium uniporter
hsa-miR-595	1	0	1	1	1	1	FRYL	FRY-like
hsa-miR-595	1	0	1	1	0	0	NBEAL1	neurobeachin-like 1
hsa-miR-595	1	0	1	1	1	1	PHC2	polyhomeotic homolog 2 (Drosophila)
hsa-miR-595	0	0	1	1	1	1	TBX19	T-box 19
hsa-miR-595	0	0	1	0	0	0	LOC494141	mitochondrial carrier triple repeat 1 pseudogene
hsa-miR-595	0	0	1	0	0	0	LOC100124692	maltase-glucoamylase (alpha-glucosidase) pseudogene
hsa-miR-595	1	0	1	1	1	1	SMAD7	SMAD family member 7
hsa-miR-595	0	0	1	1	1	1	RNF19B	ring finger protein 19B
hsa-miR-595	0	0	1	1	0	0	ZNF730	zinc finger protein 730
hsa-miR-595	0	0	1	1	1	1	PRIM2	primase, DNA, polypeptide 2 (58kDa)
hsa-miR-595	1	0	1	1	1	1	LUC7L3	LUC7-like 3 (S. cerevisiae)
hsa-miR-595	1	0	1	1	1	1	EDN1	endothelin 1
hsa-miR-595	0	0	1	1	0	0	FAM149A	family with sequence similarity 149, member A
hsa-miR-595	0	0	1	1	0	0	NEK7	NIMA (never in mitosis gene a)-related kinase 7
hsa-miR-595	1	0	1	1	1	1	ARF6	ADP-ribosylation factor 6
hsa-miR-595	1	0	1	1	1	1	SLC25A36	solute carrier family 25 (pyrimidine nucleotide carrier ), member 36
hsa-miR-595	1	0	1	0	1	1	GPR85	G protein-coupled receptor 85
hsa-miR-595	1	0	1	1	1	1	NEO1	neogenin 1
hsa-miR-595	1	0	1	0	1	1	GRIN3A	glutamate receptor, ionotropic, N-methyl-D-aspartate 3A
hsa-miR-595	0	0	1	1	1	1	IDH3A	isocitrate dehydrogenase 3 (NAD+) alpha
hsa-miR-595	1	0	1	1	1	1	PKNOX2	PBX/knotted 1 homeobox 2
hsa-miR-595	0	0	1	1	1	1	COBL	cordon-bleu homolog (mouse)
hsa-miR-595	0	0	1	1	1	1	ARL13B	ADP-ribosylation factor-like 13B
hsa-miR-595	1	0	1	1	1	1	SLC30A8	solute carrier family 30 (zinc transporter), member 8
hsa-miR-595	1	0	1	1	1	1	YTHDF3	YTH domain family, member 3
hsa-miR-595	1	0	1	1	1	1	MAP4	microtubule-associated protein 4
hsa-miR-595	1	0	1	1	1	1	KDM6A	lysine (K)-specific demethylase 6A
hsa-miR-595	0	0	1	1	1	1	BEND7	BEN domain containing 7
hsa-miR-595	1	0	1	1	1	1	CHMP7	charged multivesicular body protein 7
hsa-miR-595	0	0	1	1	1	1	YAP1	Yes-associated protein 1
hsa-miR-595	0	0	1	1	1	1	NEK9	NIMA (never in mitosis gene a)- related kinase 9
hsa-miR-595	1	0	1	1	0	0	PTAR1	protein prenyltransferase alpha subunit repeat containing 1
hsa-miR-595	0	0	1	0	0	0	FAM225A	family with sequence similarity 225, member A (non-protein coding)
hsa-miR-595	1	0	1	1	1	1	POU6F1	POU class 6 homeobox 1
hsa-miR-595	0	0	1	1	1	1	NARG2	NMDA receptor regulated 2
hsa-miR-595	0	0	1	0	0	0	EPHA1-AS1	EPHA1 antisense RNA 1
hsa-miR-595	1	0	1	0	1	1	CNOT7	CCR4-NOT transcription complex, subunit 7
hsa-miR-595	1	0	1	0	1	1	EXOC5	exocyst complex component 5
hsa-miR-595	1	0	1	1	1	1	ATAT1	alpha tubulin acetyltransferase 1
hsa-miR-595	1	0	1	1	1	1	IL17RD	interleukin 17 receptor D
hsa-miR-595	1	0	1	1	1	1	DIS3L2	DIS3 mitotic control homolog (S. cerevisiae)-like 2
hsa-miR-595	0	0	1	0	1	1	SYNPO2	synaptopodin 2
hsa-miR-595	1	0	1	0	1	1	PATL1	protein associated with topoisomerase II homolog 1 (yeast)
hsa-miR-595	1	0	1	1	0	0	LRRC58	leucine rich repeat containing 58
hsa-miR-595	1	0	1	1	1	1	FBXL5	F-box and leucine-rich repeat protein 5
hsa-miR-595	0	0	1	1	1	1	TMEM130	transmembrane protein 130
hsa-miR-595	0	0	1	1	1	1	KLHL7	kelch-like 7 (Drosophila)
hsa-miR-595	1	0	1	1	1	1	SYNCRIP	synaptotagmin binding, cytoplasmic RNA interacting protein
hsa-miR-595	1	0	1	1	1	1	DUSP16	dual specificity phosphatase 16
hsa-miR-595	0	0	1	0	0	0	KGFLP1	fibroblast growth factor 7 pseudogene
hsa-miR-595	0	0	1	1	0	0	DNAH1	dynein, axonemal, heavy chain 1
hsa-miR-595	1	0	1	1	1	1	ILF3	interleukin enhancer binding factor 3, 90kDa
hsa-miR-595	1	0	1	1	1	1	TPP1	tripeptidyl peptidase I
hsa-miR-595	1	0	1	1	1	1	PBRM1	polybromo 1
hsa-miR-595	1	0	1	1	1	1	CAMTA1	calmodulin binding transcription activator 1
hsa-miR-595	0	0	1	1	1	1	SLC22A15	solute carrier family 22, member 15
hsa-miR-595	0	0	1	0	0	0	LINC00085	long intergenic non-protein coding RNA 85
hsa-miR-595	0	0	1	1	1	1	TNFSF15	tumor necrosis factor (ligand) superfamily, member 15
hsa-miR-595	1	0	1	0	1	1	NHS	Nance-Horan syndrome (congenital cataracts and dental anomalies)
hsa-miR-595	0	0	1	1	1	1	PLD5	phospholipase D family, member 5
hsa-miR-595	0	0	1	0	1	1	BRWD3	bromodomain and WD repeat domain containing 3
hsa-miR-595	1	0	1	1	1	1	ANKRD11	ankyrin repeat domain 11
hsa-miR-595	1	0	1	1	1	1	MECP2	methyl CpG binding protein 2 (Rett syndrome)
hsa-miR-595	1	0	1	1	0	0	ADAM15	ADAM metallopeptidase domain 15
hsa-miR-595	1	0	1	1	1	1	MCHR1	melanin-concentrating hormone receptor 1
hsa-miR-595	0	0	1	1	1	1	RHD	Rh blood group, D antigen
hsa-miR-595	0	0	1	1	1	1	CEACAM1	carcinoembryonic antigen-related cell adhesion molecule 1 (biliary glycoprotein)
hsa-miR-595	1	0	1	0	1	1	RASGRP1	RAS guanyl releasing protein 1 (calcium and DAG-regulated)
hsa-miR-595	1	0	1	0	1	1	BAG4	BCL2-associated athanogene 4
hsa-miR-595	0	0	1	0	0	0	VWA5B2	von Willebrand factor A domain containing 5B2
hsa-miR-595	0	0	1	1	1	1	RLIM	ring finger protein, LIM domain interacting
hsa-miR-595	0	0	1	1	1	1	TMOD1	tropomodulin 1
hsa-miR-595	1	0	1	0	1	1	DCAF10	DDB1 and CUL4 associated factor 10
hsa-miR-595	0	0	1	1	1	1	LRRIQ1	leucine-rich repeats and IQ motif containing 1
hsa-miR-595	1	0	1	1	1	1	CALM1	calmodulin 1 (phosphorylase kinase, delta)
hsa-miR-595	0	0	1	1	1	1	TMEM30A	transmembrane protein 30A
hsa-miR-595	1	0	1	1	1	1	GRIA2	glutamate receptor, ionotropic, AMPA 2
hsa-miR-595	1	0	1	1	1	1	TRIM2	tripartite motif containing 2
hsa-miR-595	0	0	1	0	1	1	GDE1	glycerophosphodiester phosphodiesterase 1
hsa-miR-595	1	0	1	0	1	1	GUCY1A3	guanylate cyclase 1, soluble, alpha 3
hsa-miR-595	1	0	1	1	1	1	GDAP2	ganglioside induced differentiation associated protein 2
hsa-miR-595	0	0	1	1	1	1	DEDD2	death effector domain containing 2
hsa-miR-595	0	0	1	1	1	1	GIN1	gypsy retrotransposon integrase 1
hsa-miR-595	0	0	1	0	0	0	KLHL15	kelch-like 15 (Drosophila)
hsa-miR-595	1	0	1	1	1	1	ZBTB38	zinc finger and BTB domain containing 38
hsa-miR-595	1	0	1	1	1	1	SREK1	splicing regulatory glutamine/lysine-rich protein 1
hsa-miR-595	0	0	1	0	0	0	TCP11L2	t-complex 11 (mouse)-like 2
hsa-miR-595	0	0	1	0	0	0	WDFY3-AS2	WDFY3 antisense RNA 2
hsa-miR-595	1	0	1	1	1	1	MID1IP1	MID1 interacting protein 1
hsa-miR-595	1	0	1	1	1	1	WHSC1	Wolf-Hirschhorn syndrome candidate 1
hsa-miR-595	0	0	1	1	0	0	ABCB4	ATP-binding cassette, sub-family B (MDR/TAP), member 4
hsa-miR-595	1	0	1	0	1	1	ARHGAP26	Rho GTPase activating protein 26
hsa-miR-595	1	0	1	0	1	1	CDK19	cyclin-dependent kinase 19
hsa-miR-595	1	0	1	1	1	1	EPHA4	EPH receptor A4
hsa-miR-595	0	0	1	1	1	1	WDR67	WD repeat domain 67
hsa-miR-595	0	0	1	1	0	0	COG4	component of oligomeric golgi complex 4
hsa-miR-595	1	0	1	1	1	1	RSPO2	R-spondin 2
hsa-miR-595	0	0	1	1	1	1	HS1BP3	HCLS1 binding protein 3
hsa-miR-595	1	0	1	1	1	1	APPL2	adaptor protein, phosphotyrosine interaction, PH domain and leucine zipper containing 2
hsa-miR-595	1	0	1	1	1	1	B3GNT5	UDP-GlcNAc:betaGal beta-1,3-N-acetylglucosaminyltransferase 5
hsa-miR-595	0	0	1	0	1	1	PAPOLG	poly(A) polymerase gamma
hsa-miR-595	1	0	1	1	1	1	HTR2C	5-hydroxytryptamine (serotonin) receptor 2C, G protein-coupled
hsa-miR-595	0	0	1	0	0	0	LOC100130950	uncharacterized LOC100130950
hsa-miR-595	1	0	1	1	1	1	SYT9	synaptotagmin IX
hsa-miR-595	1	0	1	1	1	1	PPARGC1A	peroxisome proliferator-activated receptor gamma, coactivator 1 alpha
hsa-miR-595	1	0	1	1	1	1	MRO	maestro
hsa-miR-595	1	0	1	0	1	1	SV2B	synaptic vesicle glycoprotein 2B
hsa-miR-595	1	0	1	1	1	1	GABRA1	gamma-aminobutyric acid (GABA) A receptor, alpha 1
hsa-miR-595	0	0	1	0	1	1	FLJ25328	uncharacterized LOC148231
hsa-miR-595	1	0	1	1	1	1	PITPNB	phosphatidylinositol transfer protein, beta
hsa-miR-595	0	0	1	1	0	0	KIAA1324	KIAA1324
hsa-miR-595	1	0	1	1	1	1	TTC39C	tetratricopeptide repeat domain 39C
hsa-miR-595	0	0	1	0	0	0	FAM86JP	family with sequence similarity 86, member A pseudogene
hsa-miR-595	0	0	1	0	0	0	BCAS3	breast carcinoma amplified sequence 3
hsa-miR-595	1	0	1	1	1	1	RIC8B	resistance to inhibitors of cholinesterase 8 homolog B (C. elegans)
hsa-miR-595	0	0	1	1	1	1	HEXA	hexosaminidase A (alpha polypeptide)
hsa-miR-595	0	0	1	1	0	0	FAM124A	family with sequence similarity 124A
hsa-miR-595	0	0	1	1	1	1	ZNF337	zinc finger protein 337
hsa-miR-595	1	0	1	1	1	1	CLK4	CDC-like kinase 4
hsa-miR-595	0	0	1	0	0	0	FAM66C	family with sequence similarity 66, member C
hsa-miR-595	1	0	1	1	1	1	FAM120A	family with sequence similarity 120A
hsa-miR-595	0	0	1	1	1	1	SLC6A16	solute carrier family 6, member 16
hsa-miR-595	0	0	1	0	0	0	TMPRSS12	transmembrane (C-terminal) protease, serine 12
hsa-miR-595	1	0	1	1	1	1	RAP2C	RAP2C, member of RAS oncogene family
hsa-miR-595	0	0	1	0	0	0	LOC339862	uncharacterized LOC339862
hsa-miR-595	0	0	1	1	1	1	TMEM139	transmembrane protein 139
hsa-miR-595	0	0	1	1	1	1	CLEC12B	C-type lectin domain family 12, member B
hsa-miR-595	1	0	1	1	1	1	ZNF618	zinc finger protein 618
hsa-miR-595	0	0	1	1	1	1	UBE3D	ubiquitin protein ligase E3D
hsa-miR-595	0	0	1	0	0	0	LOC654433	uncharacterized LOC654433
hsa-miR-595	1	0	1	0	1	1	CPEB4	cytoplasmic polyadenylation element binding protein 4
hsa-miR-595	1	0	1	1	1	1	SLC35F3	solute carrier family 35, member F3
hsa-miR-595	1	0	1	0	1	1	PDK1	pyruvate dehydrogenase kinase, isozyme 1
hsa-miR-595	1	0	1	1	1	1	FGFR2	fibroblast growth factor receptor 2
hsa-miR-595	1	0	1	1	1	1	PAIP2	poly(A) binding protein interacting protein 2
hsa-miR-595	0	0	1	0	0	0	LINC00326	long intergenic non-protein coding RNA 326
hsa-miR-595	0	0	1	1	1	1	SLTM	SAFB-like, transcription modulator
hsa-miR-595	0	0	1	0	1	1	LINC00634	long intergenic non-protein coding RNA 634
hsa-miR-595	0	0	1	0	1	1	TSLP	thymic stromal lymphopoietin
hsa-miR-595	1	0	1	1	1	1	ARPP21	cAMP-regulated phosphoprotein, 21kDa
hsa-miR-595	1	0	1	1	1	1	FAM123A	family with sequence similarity 123A
hsa-miR-595	1	0	1	0	1	1	HSPA12A	heat shock 70kDa protein 12A
hsa-miR-595	0	0	1	1	1	1	CARD8	caspase recruitment domain family, member 8
hsa-miR-595	1	0	1	0	1	1	TNFAIP3	tumor necrosis factor, alpha-induced protein 3
hsa-miR-595	0	0	1	1	1	1	SH3GL3	SH3-domain GRB2-like 3
hsa-miR-595	0	0	1	0	0	0	LOC283914	uncharacterized LOC283914
hsa-miR-595	1	0	1	1	1	1	CARM1	coactivator-associated arginine methyltransferase 1
hsa-miR-595	0	0	1	1	0	0	LILRA1	leukocyte immunoglobulin-like receptor, subfamily A (with TM domain), member 1
hsa-miR-595	1	0	1	1	1	1	SLC35G1	solute carrier family 35, member G1
hsa-miR-595	0	0	1	0	0	0	DPY19L2P4	dpy-19-like 2 pseudogene 4 (C. elegans)
hsa-miR-595	0	0	1	1	0	0	FAM170B	family with sequence similarity 170, member B
hsa-miR-595	0	0	1	0	1	1	LOC401021	uncharacterized LOC401021
hsa-miR-595	0	0	1	1	1	1	ZNF74	zinc finger protein 74
hsa-miR-595	1	0	1	1	1	1	PELI1	pellino E3 ubiquitin protein ligase 1
hsa-miR-595	1	0	1	0	1	1	ARHGAP5	Rho GTPase activating protein 5
hsa-miR-595	0	0	1	0	1	1	ITGA1	integrin, alpha 1
hsa-miR-595	1	0	1	1	1	1	ZFP91	zinc finger protein 91 homolog (mouse)
hsa-miR-595	1	0	1	1	1	1	PCGF5	polycomb group ring finger 5
hsa-miR-595	0	0	1	1	1	1	GRIK5	glutamate receptor, ionotropic, kainate 5
hsa-miR-595	1	0	1	1	0	0	DALRD3	DALR anticodon binding domain containing 3
hsa-miR-595	0	0	1	1	1	1	MPP3	membrane protein, palmitoylated 3 (MAGUK p55 subfamily member 3)
hsa-miR-595	1	0	1	1	1	1	ZEB2	zinc finger E-box binding homeobox 2
hsa-miR-595	1	0	1	1	1	1	PRRG1	proline rich Gla (G-carboxyglutamic acid) 1
hsa-miR-595	0	0	1	1	1	1	HMGN2P46	high mobility group nucleosomal binding domain 2 pseudogene 46
hsa-miR-595	0	0	1	1	1	1	CDH26	cadherin 26
hsa-miR-595	1	0	1	1	0	0	ANKRD13B	ankyrin repeat domain 13B
hsa-miR-595	1	0	1	1	1	1	PDGFRA	platelet-derived growth factor receptor, alpha polypeptide
hsa-miR-595	0	0	1	1	0	0	C14orf2	chromosome 14 open reading frame 2
hsa-miR-595	1	0	1	1	1	1	RANBP9	RAN binding protein 9
hsa-miR-595	1	0	1	1	1	1	IARS	isoleucyl-tRNA synthetase
hsa-miR-595	0	0	1	1	1	1	SH2D1B	SH2 domain containing 1B
hsa-miR-595	0	0	1	0	0	0	DPY19L2P1	dpy-19-like 2 pseudogene 1 (C. elegans)
hsa-miR-595	0	0	1	0	0	0	PCP4L1	Purkinje cell protein 4 like 1
hsa-miR-595	0	0	1	0	0	0	PTGER4P2	prostaglandin E receptor 4 (subtype EP4) pseudogene 2
hsa-miR-595	0	0	1	0	0	0	FOXN3-AS2	FOXN3 antisense RNA 2
hsa-miR-595	1	0	1	1	1	1	ANLN	anillin, actin binding protein
hsa-miR-595	0	0	1	1	1	1	SLC11A1	solute carrier family 11 (proton-coupled divalent metal ion transporters), member 1
hsa-miR-595	1	0	1	0	1	1	MAP4K3	mitogen-activated protein kinase kinase kinase kinase 3
hsa-miR-595	0	0	1	1	1	1	FRMPDP2	FERM and PDZ domain containing 2 pseudogene 2
hsa-miR-595	0	0	1	1	1	1	FRMPD2P1	FERM and PDZ domain containing 2 pseudogene 1
hsa-miR-595	0	0	1	0	1	1	WDR27	WD repeat domain 27
hsa-miR-595	0	0	1	0	0	0	LINC00152	long intergenic non-protein coding RNA 152
hsa-miR-595	0	0	1	1	0	0	EBNA1BP2	EBNA1 binding protein 2
hsa-miR-595	1	0	1	1	1	1	OPCML	opioid binding protein/cell adhesion molecule-like
hsa-miR-595	1	0	1	1	1	1	WNT5A	wingless-type MMTV integration site family, member 5A
hsa-miR-595	0	0	1	0	0	0	LINC00537	long intergenic non-protein coding RNA 537
hsa-miR-595	0	0	1	1	0	0	ZNF703	zinc finger protein 703
hsa-miR-595	1	0	1	1	1	1	ZMYND11	zinc finger, MYND-type containing 11
hsa-miR-595	0	0	1	1	0	0	DNASE1	deoxyribonuclease I
hsa-miR-595	1	0	1	1	1	1	LRRC15	leucine rich repeat containing 15
hsa-miR-595	1	0	1	1	1	1	SLC36A2	solute carrier family 36 (proton/amino acid symporter), member 2
hsa-miR-595	1	0	1	0	1	1	CPEB2	cytoplasmic polyadenylation element binding protein 2
hsa-miR-595	1	0	1	1	1	1	GABRB2	gamma-aminobutyric acid (GABA) A receptor, beta 2
hsa-miR-595	0	0	1	1	0	0	FMN1	formin 1
hsa-miR-595	1	0	1	1	1	1	USP34	ubiquitin specific peptidase 34
hsa-miR-595	1	0	1	1	1	1	SP4	Sp4 transcription factor
hsa-miR-595	1	0	1	0	1	1	BTBD3	BTB (POZ) domain containing 3
hsa-miR-595	1	0	1	1	1	1	HNRNPR	heterogeneous nuclear ribonucleoprotein R
hsa-miR-595	0	0	1	0	0	0	LRRC37A11P	leucine rich repeat containing 37, member A11, pseudogene
hsa-miR-595	1	0	1	1	1	1	NR3C2	nuclear receptor subfamily 3, group C, member 2
hsa-miR-595	0	0	1	1	0	0	RNF123	ring finger protein 123
hsa-miR-595	0	0	1	1	1	1	SLC8A3	solute carrier family 8 (sodium/calcium exchanger), member 3
hsa-miR-595	1	0	1	1	1	1	ST18	suppression of tumorigenicity 18 (breast carcinoma) (zinc finger protein)
hsa-miR-595	0	0	1	1	0	0	RGS9	regulator of G-protein signaling 9
hsa-miR-595	1	0	1	0	1	1	PRDM10	PR domain containing 10
hsa-miR-595	1	0	1	1	1	1	OTUD4	OTU domain containing 4
hsa-miR-595	1	0	1	1	1	1	OSBP2	oxysterol binding protein 2
hsa-miR-595	0	0	1	1	0	0	RGSL1	regulator of G-protein signaling like 1
hsa-miR-595	0	0	1	0	1	1	GOLGA8G	golgin A8 family, member G
hsa-miR-595	1	0	1	1	1	1	CHIC1	cysteine-rich hydrophobic domain 1
hsa-miR-595	0	0	1	0	1	1	C20orf202	chromosome 20 open reading frame 202
hsa-miR-595	0	0	1	0	0	0	FAM225B	family with sequence similarity 225, member B (non-protein coding)
hsa-miR-595	1	0	1	1	1	1	C18orf34	chromosome 18 open reading frame 34
hsa-miR-595	1	0	1	1	1	1	PBX2	pre-B-cell leukemia homeobox 2
hsa-miR-595	0	0	1	0	0	0	FUT8-AS1	FUT8 antisense RNA 1
hsa-miR-595	1	0	1	1	1	1	NUMB	numb homolog (Drosophila)
hsa-miR-595	0	0	1	1	1	1	DLGAP5	discs, large (Drosophila) homolog-associated protein 5
hsa-miR-595	0	0	1	0	0	0	FLJ39632	uncharacterized LOC642477
hsa-miR-595	1	0	1	1	1	1	EIF5	eukaryotic translation initiation factor 5
hsa-miR-595	1	0	1	1	1	1	SASH1	SAM and SH3 domain containing 1
hsa-miR-595	1	0	1	1	1	1	RAB7A	RAB7A, member RAS oncogene family
hsa-miR-595	1	0	1	1	1	1	SGCD	sarcoglycan, delta (35kDa dystrophin-associated glycoprotein)
hsa-miR-595	0	0	1	0	0	0	ZNF542	zinc finger protein 542
hsa-miR-595	1	0	1	1	1	1	SLC35F1	solute carrier family 35, member F1
hsa-miR-595	0	0	1	1	1	1	DEPDC5	DEP domain containing 5
hsa-miR-595	1	0	1	1	1	1	NFASC	neurofascin
hsa-miR-595	0	0	1	1	1	1	PSMA2	proteasome (prosome, macropain) subunit, alpha type, 2
hsa-miR-595	1	0	1	1	1	1	RAB30	RAB30, member RAS oncogene family
hsa-miR-595	1	0	1	1	0	0	CECR2	cat eye syndrome chromosome region, candidate 2
hsa-miR-595	0	0	1	1	1	1	MLIP	muscular LMNA-interacting protein
hsa-miR-595	1	0	1	1	1	1	GTDC1	glycosyltransferase-like domain containing 1
hsa-miR-595	1	0	1	1	1	1	KLHL2	kelch-like 2, Mayven (Drosophila)
hsa-miR-595	1	0	1	1	1	1	DDAH1	dimethylarginine dimethylaminohydrolase 1
hsa-miR-595	1	0	1	1	1	1	NFIB	nuclear factor I/B
hsa-miR-595	1	0	1	1	1	1	BCLAF1	BCL2-associated transcription factor 1
hsa-miR-595	0	0	1	0	0	0	LOC286299	uncharacterized LOC286299
hsa-miR-595	0	0	1	0	0	0	TMEM232	transmembrane protein 232
hsa-miR-595	1	0	1	1	1	1	PGAP1	post-GPI attachment to proteins 1
hsa-miR-595	1	0	1	1	1	1	TMEM135	transmembrane protein 135
hsa-miR-595	0	0	1	0	0	0	ZNRD1-AS1	ZNRD1 antisense RNA 1
hsa-miR-595	1	0	1	1	1	1	SIN3A	SIN3 transcription regulator homolog A (yeast)
hsa-miR-595	1	0	1	1	1	1	HIC2	hypermethylated in cancer 2
hsa-miR-595	0	0	1	0	1	1	GINS3	GINS complex subunit 3 (Psf3 homolog)
hsa-miR-595	0	0	1	1	1	1	C6orf223	chromosome 6 open reading frame 223
hsa-miR-595	0	0	1	1	1	1	HPGD	hydroxyprostaglandin dehydrogenase 15-(NAD)
hsa-miR-595	0	0	1	1	0	0	MARCH11	membrane-associated ring finger (C3HC4) 11
hsa-miR-595	0	0	1	1	0	0	AHSG	alpha-2-HS-glycoprotein
hsa-miR-595	1	0	1	0	1	1	STX6	syntaxin 6
hsa-miR-595	1	0	1	0	0	0	IGLON5	IgLON family member 5
hsa-miR-595	1	0	1	1	1	1	FUT9	fucosyltransferase 9 (alpha (1,3) fucosyltransferase)
hsa-miR-595	0	0	1	1	1	1	NR2C2AP	nuclear receptor 2C2-associated protein
hsa-miR-595	0	0	1	0	0	0	ABCB5	ATP-binding cassette, sub-family B (MDR/TAP), member 5
hsa-miR-595	1	0	1	0	0	0	SCAMP3	secretory carrier membrane protein 3
hsa-miR-595	0	0	1	1	1	1	COPS8	COP9 constitutive photomorphogenic homolog subunit 8 (Arabidopsis)
hsa-miR-595	0	0	1	1	0	0	ITGB3BP	integrin beta 3 binding protein (beta3-endonexin)
hsa-miR-595	0	0	1	0	0	0	PRMT1	protein arginine methyltransferase 1
hsa-miR-595	1	0	1	1	1	1	SETD8	SET domain containing (lysine methyltransferase) 8
hsa-miR-595	0	0	1	1	0	0	FAM64A	family with sequence similarity 64, member A
hsa-miR-595	1	0	1	1	1	1	SSR1	signal sequence receptor, alpha
hsa-miR-595	1	0	1	1	1	1	HMGN3	high mobility group nucleosomal binding domain 3
hsa-miR-595	0	0	1	1	1	1	ABCD1	ATP-binding cassette, sub-family D (ALD), member 1
hsa-miR-595	1	0	1	1	1	1	STARD3NL	STARD3 N-terminal like
hsa-miR-595	1	0	1	1	1	1	NFKBIA	nuclear factor of kappa light polypeptide gene enhancer in B-cells inhibitor, alpha
hsa-miR-595	0	0	1	0	0	0	C12orf75	chromosome 12 open reading frame 75
hsa-miR-595	0	0	1	1	0	0	DOK5	docking protein 5
hsa-miR-595	1	0	1	1	1	1	MMP2	matrix metallopeptidase 2 (gelatinase A, 72kDa gelatinase, 72kDa type IV collagenase)
hsa-miR-595	1	0	1	1	1	1	KCNIP4	Kv channel interacting protein 4
hsa-miR-595	0	0	1	0	0	0	LOC645513	uncharacterized LOC645513
hsa-miR-595	1	0	1	1	1	1	NRN1	neuritin 1
hsa-miR-595	0	0	1	1	1	1	SEC11A	SEC11 homolog A (S. cerevisiae)
hsa-miR-595	0	0	1	1	1	1	PEX19	peroxisomal biogenesis factor 19
hsa-miR-595	0	0	1	1	0	0	WDR43	WD repeat domain 43
hsa-miR-595	1	0	1	1	1	1	MEIS1	Meis homeobox 1
hsa-miR-595	0	0	1	1	1	1	RHEBL1	Ras homolog enriched in brain like 1
hsa-miR-595	0	0	1	1	1	1	ODC1	ornithine decarboxylase 1
hsa-miR-595	1	0	1	0	1	1	NLN	neurolysin (metallopeptidase M3 family)
hsa-miR-595	1	0	1	1	1	1	YWHAQ	tyrosine 3-monooxygenase/tryptophan 5-monooxygenase activation protein, theta polypeptide
hsa-miR-595	0	0	1	1	0	0	AATF	apoptosis antagonizing transcription factor
hsa-miR-595	0	0	1	1	0	0	PARD6A	par-6 partitioning defective 6 homolog alpha (C. elegans)
hsa-miR-595	1	0	1	1	1	1	ARHGEF40	Rho guanine nucleotide exchange factor (GEF) 40
hsa-miR-595	0	0	1	1	0	0	OXA1L	oxidase (cytochrome c) assembly 1-like
hsa-miR-595	0	0	1	1	1	1	HUS1	HUS1 checkpoint homolog (S. pombe)
hsa-miR-595	0	0	1	1	1	1	NCAPH	non-SMC condensin I complex, subunit H
hsa-miR-595	1	0	1	1	1	1	HIGD1A	HIG1 hypoxia inducible domain family, member 1A
hsa-miR-595	1	0	1	1	0	0	STAG3L4	stromal antigen 3-like 4
hsa-miR-595	0	0	1	1	1	1	ZNF259	zinc finger protein 259
hsa-miR-595	1	0	1	0	1	1	CD47	CD47 molecule
hsa-miR-595	0	0	1	1	0	0	TESK1	testis-specific kinase 1
hsa-miR-595	1	0	1	1	1	1	ATPAF1	ATP synthase mitochondrial F1 complex assembly factor 1
hsa-miR-595	0	0	1	0	0	0	LOC100132984	uncharacterized LOC100132984
hsa-miR-595	1	0	1	0	1	1	DNMT3A	DNA (cytosine-5-)-methyltransferase 3 alpha
hsa-miR-595	1	0	1	1	0	0	MMP11	matrix metallopeptidase 11 (stromelysin 3)
hsa-miR-595	0	0	1	0	0	0	LOC731789	uncharacterized LOC731789
hsa-miR-595	1	0	1	0	1	1	BTRC	beta-transducin repeat containing E3 ubiquitin protein ligase
hsa-miR-595	1	0	1	1	1	1	PHACTR2	phosphatase and actin regulator 2
hsa-miR-595	0	0	1	0	0	0	LINC00661	long intergenic non-protein coding RNA 661
hsa-miR-595	0	0	1	0	1	1	STARD8	StAR-related lipid transfer (START) domain containing 8
hsa-miR-595	0	0	1	0	1	1	USP10	ubiquitin specific peptidase 10
hsa-miR-595	1	0	1	0	1	1	OSBPL8	oxysterol binding protein-like 8
hsa-miR-595	1	0	1	1	1	1	TIPARP	TCDD-inducible poly(ADP-ribose) polymerase
hsa-miR-595	1	0	1	1	1	1	BCL2L1	BCL2-like 1
hsa-miR-595	1	0	1	1	1	1	SLC16A12	solute carrier family 16, member 12 (monocarboxylic acid transporter 12)
hsa-miR-595	0	0	1	1	0	0	TENC1	tensin like C1 domain containing phosphatase (tensin 2)
hsa-miR-595	1	0	1	1	1	1	ZFHX3	zinc finger homeobox 3
hsa-miR-595	1	0	1	1	1	1	PI15	peptidase inhibitor 15
hsa-miR-595	1	0	1	1	1	1	NKX2-1	NK2 homeobox 1
hsa-miR-595	1	0	1	1	1	1	RSPO1	R-spondin 1
hsa-miR-595	1	0	1	1	1	1	GLIS3	GLIS family zinc finger 3
hsa-miR-595	1	0	1	1	0	0	LGSN	lengsin, lens protein with glutamine synthetase domain
hsa-miR-595	0	0	1	0	0	0	POM121L8P	POM121 transmembrane nucleoporin-like 8 pseudogene
hsa-miR-595	1	0	1	1	1	1	BNC2	basonuclin 2
hsa-miR-595	1	0	1	0	1	1	DCBLD2	discoidin, CUB and LCCL domain containing 2
hsa-miR-595	0	0	1	1	1	1	AKAP17A	A kinase (PRKA) anchor protein 17A
hsa-miR-595	0	0	1	1	0	0	SUOX	sulfite oxidase
hsa-miR-595	0	0	1	1	0	0	INHBA	inhibin, beta A
hsa-miR-595	1	0	1	0	1	1	BCL2	B-cell CLL/lymphoma 2
hsa-miR-595	1	0	1	0	1	1	YES1	v-yes-1 Yamaguchi sarcoma viral oncogene homolog 1
hsa-miR-595	1	0	1	1	1	1	IGF1	insulin-like growth factor 1 (somatomedin C)
hsa-miR-595	0	0	1	1	1	1	APOH	apolipoprotein H (beta-2-glycoprotein I)
hsa-miR-595	1	0	1	1	1	1	COL4A4	collagen, type IV, alpha 4
hsa-miR-595	1	0	1	1	1	1	ESR1	estrogen receptor 1
hsa-miR-595	0	0	1	1	0	0	FANCA	Fanconi anemia, complementation group A
hsa-miR-595	1	0	1	1	1	1	GJA1	gap junction protein, alpha 1, 43kDa
hsa-miR-595	0	0	1	1	0	0	HTN3	histatin 3
hsa-miR-595	1	0	1	1	1	1	MET	met proto-oncogene (hepatocyte growth factor receptor)
hsa-miR-595	1	0	1	1	1	1	ATXN1	ataxin 1
hsa-miR-595	0	0	1	1	0	0	IL2RA	interleukin 2 receptor, alpha
hsa-miR-595	1	0	1	0	1	1	PAFAH1B1	platelet-activating factor acetylhydrolase 1b, regulatory subunit 1 (45kDa)
hsa-miR-595	1	0	1	1	1	1	TEK	TEK tyrosine kinase, endothelial
hsa-miR-595	0	0	1	1	1	1	CYP11B2	cytochrome P450, family 11, subfamily B, polypeptide 2
hsa-miR-595	1	0	1	1	1	1	HOXA13	homeobox A13
hsa-miR-595	1	0	1	1	1	1	MPZ	myelin protein zero
hsa-miR-595	0	0	1	1	0	0	IL1B	interleukin 1, beta
hsa-miR-595	0	0	1	1	1	1	C7	complement component 7
hsa-miR-595	1	0	1	1	1	1	CXCL12	chemokine (C-X-C motif) ligand 12
hsa-miR-595	0	0	1	1	1	1	IGF2	insulin-like growth factor 2 (somatomedin A)
hsa-miR-595	0	0	1	1	1	1	AGTR1	angiotensin II receptor, type 1
hsa-miR-595	0	0	1	1	1	1	EPO	erythropoietin
hsa-miR-595	1	0	1	0	1	1	GABRA4	gamma-aminobutyric acid (GABA) A receptor, alpha 4
hsa-miR-595	0	0	1	1	1	1	GRIN2B	glutamate receptor, ionotropic, N-methyl D-aspartate 2B
hsa-miR-595	1	0	1	1	1	1	HTR4	5-hydroxytryptamine (serotonin) receptor 4, G protein-coupled
hsa-miR-595	0	0	1	1	1	1	HTR7	5-hydroxytryptamine (serotonin) receptor 7, adenylate cyclase-coupled
hsa-miR-595	1	0	1	0	1	1	KCNJ2	potassium inwardly-rectifying channel, subfamily J, member 2
hsa-miR-595	0	0	1	1	1	1	MAOB	monoamine oxidase B
hsa-miR-595	1	0	1	1	1	1	PTGFR	prostaglandin F receptor (FP)
hsa-miR-595	1	0	1	1	1	1	REEP3	receptor accessory protein 3
hsa-miR-595	0	0	1	1	1	1	BLOC1S2	biogenesis of lysosomal organelles complex-1, subunit 2
hsa-miR-595	0	0	1	1	1	1	C16orf87	chromosome 16 open reading frame 87
hsa-miR-595	0	0	1	0	1	1	ZDHHC13	zinc finger, DHHC-type containing 13
hsa-miR-595	0	0	1	1	0	0	TMEM211	transmembrane protein 211
hsa-miR-595	1	0	1	0	1	1	SPOPL	speckle-type POZ protein-like
hsa-miR-595	1	0	1	1	1	1	C14orf37	chromosome 14 open reading frame 37
hsa-miR-595	1	0	1	1	1	1	LCLAT1	lysocardiolipin acyltransferase 1
hsa-miR-595	0	0	1	1	1	1	STAG3L1	stromal antigen 3-like 1
hsa-miR-595	1	0	1	1	1	1	KLHL31	kelch-like 31 (Drosophila)
hsa-miR-595	1	0	1	1	1	1	BICD2	bicaudal D homolog 2 (Drosophila)
hsa-miR-595	0	0	1	1	1	1	ANXA13	annexin A13
hsa-miR-595	0	0	1	0	1	1	ZNF705A	zinc finger protein 705A
hsa-miR-595	1	0	1	1	1	1	NRARP	NOTCH-regulated ankyrin repeat protein
hsa-miR-595	1	0	1	1	1	1	PLCXD3	phosphatidylinositol-specific phospholipase C, X domain containing 3
hsa-miR-595	1	0	1	1	1	1	EDA	ectodysplasin A
hsa-miR-595	1	0	1	1	1	1	IGSF3	immunoglobulin superfamily, member 3
hsa-miR-595	0	0	1	1	1	1	AKR1CL1	aldo-keto reductase family 1, member C-like 1
hsa-miR-595	1	0	1	1	1	1	RBM33	RNA binding motif protein 33
hsa-miR-595	1	0	1	0	1	1	KIAA2022	KIAA2022
hsa-miR-595	1	0	1	1	1	1	FNIP1	folliculin interacting protein 1
hsa-miR-595	0	0	1	1	1	1	SLC35D3	solute carrier family 35, member D3
hsa-miR-595	0	0	1	1	1	1	HGF	hepatocyte growth factor (hepapoietin A; scatter factor)
hsa-miR-595	0	0	1	1	1	1	NCMAP	noncompact myelin associated protein
hsa-miR-595	1	0	1	1	1	1	ATP11C	ATPase, class VI, type 11C
hsa-miR-595	0	0	1	0	1	1	GOLGA8E	golgin A8 family, member E
hsa-miR-595	1	0	1	1	1	1	SLC25A53	solute carrier family 25, member 53
hsa-miR-595	0	0	1	1	0	0	EPGN	epithelial mitogen homolog (mouse)
hsa-miR-595	0	0	1	0	1	1	LINC00268	long intergenic non-protein coding RNA 268
hsa-miR-595	1	0	1	1	1	1	CA7	carbonic anhydrase VII
hsa-miR-595	0	0	1	1	1	1	RAB28	RAB28, member RAS oncogene family
hsa-miR-595	1	0	1	1	1	1	VMA21	VMA21 vacuolar H+-ATPase homolog (S. cerevisiae)
hsa-miR-595	1	0	1	1	1	1	SH3PXD2B	SH3 and PX domains 2B
hsa-miR-595	1	0	1	0	1	1	BRCC3	BRCA1/BRCA2-containing complex, subunit 3
hsa-miR-595	1	0	1	1	1	1	SERBP1	SERPINE1 mRNA binding protein 1
hsa-miR-595	0	0	1	1	1	1	GCOM1	GRINL1A complex locus 1
hsa-miR-595	1	0	1	0	1	1	RGAG4	retrotransposon gag domain containing 4
hsa-miR-595	0	0	1	1	1	1	LRRC66	leucine rich repeat containing 66
hsa-miR-595	1	0	1	1	1	1	AFF3	AF4/FMR2 family, member 3
hsa-miR-595	0	0	1	1	0	0	KPRP	keratinocyte proline-rich protein
hsa-miR-595	0	0	1	1	0	0	GRB7	growth factor receptor-bound protein 7
hsa-miR-595	1	0	1	0	1	1	MSRB3	methionine sulfoxide reductase B3
hsa-miR-595	0	0	1	1	1	1	HNRNPH2	heterogeneous nuclear ribonucleoprotein H2 (H')
hsa-miR-595	1	0	1	1	1	1	ELMO1	engulfment and cell motility 1
hsa-miR-595	1	0	1	0	1	1	USP9X	ubiquitin specific peptidase 9, X-linked
hsa-miR-595	0	0	1	0	1	1	ZNF705D	zinc finger protein 705D
hsa-miR-595	1	0	1	0	1	1	CREBZF	CREB/ATF bZIP transcription factor
hsa-miR-595	1	0	1	1	1	1	CHN2	chimerin (chimaerin) 2
hsa-miR-595	1	0	1	1	1	1	MLLT4	myeloid/lymphoid or mixed-lineage leukemia (trithorax homolog, Drosophila); translocated to, 4
hsa-miR-595	1	0	1	1	1	1	FAM3C	family with sequence similarity 3, member C
hsa-miR-595	0	0	1	0	1	1	SCN3B	sodium channel, voltage-gated, type III, beta subunit
hsa-miR-595	1	0	1	1	1	1	HMGCLL1	3-hydroxymethyl-3-methylglutaryl-CoA lyase-like 1
hsa-miR-595	1	0	1	1	1	1	ZC2HC1C	zinc finger, C2HC-type containing 1C
hsa-miR-595	1	0	1	1	1	1	RERE	arginine-glutamic acid dipeptide (RE) repeats
hsa-miR-595	1	0	1	0	1	1	TMEM237	transmembrane protein 237
hsa-miR-595	0	0	1	1	1	1	FAM22G	family with sequence similarity 22, member G
hsa-miR-595	1	0	1	0	1	1	SLC12A2	solute carrier family 12 (sodium/potassium/chloride transporters), member 2
hsa-miR-595	1	0	1	0	1	1	SLC7A6	solute carrier family 7 (amino acid transporter light chain, y+L system), member 6
hsa-miR-595	1	0	1	1	1	1	CDC14B	CDC14 cell division cycle 14 homolog B (S. cerevisiae)
hsa-miR-595	1	0	1	1	1	1	ATG9A	autophagy related 9A
hsa-miR-595	0	0	1	1	1	1	XIRP2	xin actin-binding repeat containing 2
hsa-miR-595	1	0	1	1	1	1	LDB3	LIM domain binding 3
hsa-miR-595	1	0	1	0	1	1	FBXO41	F-box protein 41
hsa-miR-595	1	0	1	1	1	1	SHANK3	SH3 and multiple ankyrin repeat domains 3
hsa-miR-595	0	0	1	1	1	1	HSF5	heat shock transcription factor family member 5
hsa-miR-595	0	0	1	0	1	1	TMEM150C	transmembrane protein 150C
hsa-miR-595	1	0	1	1	1	1	UNC119B	unc-119 homolog B (C. elegans)
hsa-miR-595	1	0	1	1	1	1	DGKG	diacylglycerol kinase, gamma 90kDa
hsa-miR-595	1	0	1	1	1	1	REPS2	RALBP1 associated Eps domain containing 2
hsa-miR-595	1	0	1	1	1	1	ADCY9	adenylate cyclase 9
hsa-miR-595	1	0	1	0	1	1	BACH1	BTB and CNC homology 1, basic leucine zipper transcription factor 1
hsa-miR-595	1	0	1	1	1	1	CDH13	cadherin 13, H-cadherin (heart)
hsa-miR-595	1	0	1	0	1	1	CDK6	cyclin-dependent kinase 6
hsa-miR-595	0	0	1	1	1	1	CHUK	conserved helix-loop-helix ubiquitous kinase
hsa-miR-595	1	0	1	1	1	1	CREBL2	cAMP responsive element binding protein-like 2
hsa-miR-595	1	0	1	1	1	1	CTNND2	catenin (cadherin-associated protein), delta 2
hsa-miR-595	0	0	1	1	1	1	DARS	aspartyl-tRNA synthetase
hsa-miR-595	1	0	1	1	1	1	DYRK1A	dual-specificity tyrosine-(Y)-phosphorylation regulated kinase 1A
hsa-miR-595	1	0	1	1	1	1	FOXF2	forkhead box F2
hsa-miR-595	0	0	1	0	1	1	FMO2	flavin containing monooxygenase 2 (non-functional)
hsa-miR-595	0	0	1	1	0	0	AARS	alanyl-tRNA synthetase
hsa-miR-595	1	0	1	0	1	1	ARNT	aryl hydrocarbon receptor nuclear translocator
hsa-miR-595	0	0	1	1	1	1	ATP12A	ATPase, H+/K+ transporting, nongastric, alpha polypeptide
hsa-miR-595	1	0	1	1	1	1	KLF5	Kruppel-like factor 5 (intestinal)
hsa-miR-595	1	0	1	1	1	1	CDH11	cadherin 11, type 2, OB-cadherin (osteoblast)
hsa-miR-595	0	0	1	1	1	1	CKS1B	CDC28 protein kinase regulatory subunit 1B
hsa-miR-595	1	0	1	1	1	1	CLCN4	chloride channel, voltage-sensitive 4
hsa-miR-595	1	0	1	1	1	1	COL4A6	collagen, type IV, alpha 6
hsa-miR-595	1	0	1	1	1	1	SLC31A1	solute carrier family 31 (copper transporters), member 1
hsa-miR-595	1	0	1	1	1	1	CSNK2A1	casein kinase 2, alpha 1 polypeptide
hsa-miR-595	0	0	1	1	1	1	DPT	dermatopontin
hsa-miR-595	0	0	1	1	0	0	EIF5A	eukaryotic translation initiation factor 5A
hsa-miR-595	1	0	1	1	1	1	EPB49	erythrocyte membrane protein band 4.9 (dematin)
hsa-miR-595	1	0	1	1	1	1	FGF9	fibroblast growth factor 9 (glia-activating factor)
hsa-miR-595	0	0	1	1	0	0	GLP1R	glucagon-like peptide 1 receptor
hsa-miR-595	0	0	1	1	1	1	GNAQ	guanine nucleotide binding protein (G protein), q polypeptide
hsa-miR-595	0	0	1	1	1	1	GNB1	guanine nucleotide binding protein (G protein), beta polypeptide 1
hsa-miR-595	0	0	1	1	1	1	IFNA14	interferon, alpha 14
hsa-miR-595	1	0	1	0	1	1	IRF2	interferon regulatory factor 2
hsa-miR-595	1	0	1	1	1	1	ITPR2	inositol 1,4,5-trisphosphate receptor, type 2
hsa-miR-595	1	0	1	1	1	1	KCNA3	potassium voltage-gated channel, shaker-related subfamily, member 3
hsa-miR-595	1	0	1	0	1	1	LAMC1	laminin, gamma 1 (formerly LAMB2)
hsa-miR-595	1	0	1	1	1	1	MN1	meningioma (disrupted in balanced translocation) 1
hsa-miR-595	1	0	1	1	1	1	NDN	necdin homolog (mouse)
hsa-miR-595	1	0	1	1	1	1	NPAS2	neuronal PAS domain protein 2
hsa-miR-595	1	0	1	1	1	1	NPAT	nuclear protein, ataxia-telangiectasia locus
hsa-miR-595	0	0	1	0	1	1	OPHN1	oligophrenin 1
hsa-miR-595	1	0	1	0	1	1	CDK17	cyclin-dependent kinase 17
hsa-miR-595	1	0	1	1	0	0	PDGFB	platelet-derived growth factor beta polypeptide
hsa-miR-595	1	0	1	1	1	1	PLAGL2	pleiomorphic adenoma gene-like 2
hsa-miR-595	0	0	1	1	1	1	POLR2G	polymerase (RNA) II (DNA directed) polypeptide G
hsa-miR-595	0	0	1	1	0	0	POU5F1	POU class 5 homeobox 1
hsa-miR-595	1	0	1	1	1	1	PPP1CC	protein phosphatase 1, catalytic subunit, gamma isozyme
hsa-miR-595	0	0	1	1	1	1	PREP	prolyl endopeptidase
hsa-miR-595	1	0	1	1	1	1	PRKAR2B	protein kinase, cAMP-dependent, regulatory, type II, beta
hsa-miR-595	1	0	1	0	1	1	MAPK4	mitogen-activated protein kinase 4
hsa-miR-595	0	0	1	1	1	1	MAPK9	mitogen-activated protein kinase 9
hsa-miR-595	1	0	1	1	1	1	PTX3	pentraxin 3, long
hsa-miR-595	0	0	1	0	1	1	RAB3B	RAB3B, member RAS oncogene family
hsa-miR-595	1	0	1	1	1	1	RAD23B	RAD23 homolog B (S. cerevisiae)
hsa-miR-595	1	0	1	1	1	1	RASA1	RAS p21 protein activator (GTPase activating protein) 1
hsa-miR-595	1	0	1	0	1	1	SORT1	sortilin 1
hsa-miR-595	1	0	1	1	1	1	SNX2	sorting nexin 2
hsa-miR-595	1	0	1	0	1	1	STC1	stanniocalcin 1
hsa-miR-595	0	0	1	0	1	1	TCEB3	transcription elongation factor B (SIII), polypeptide 3 (110kDa, elongin A)
hsa-miR-595	1	0	1	1	1	1	NR2E1	nuclear receptor subfamily 2, group E, member 1
hsa-miR-595	0	0	1	1	1	1	TRAF3	TNF receptor-associated factor 3
hsa-miR-595	1	0	1	0	1	1	YWHAB	tyrosine 3-monooxygenase/tryptophan 5-monooxygenase activation protein, beta polypeptide
hsa-miR-595	0	0	1	1	1	1	ZNF137P	zinc finger protein 137, pseudogene
hsa-miR-595	0	0	1	1	1	1	ZNF143	zinc finger protein 143
hsa-miR-595	1	0	1	1	1	1	PAX8	paired box 8
hsa-miR-595	1	0	1	1	1	1	CUL5	cullin 5
hsa-miR-595	1	0	1	1	1	1	HMGA2	high mobility group AT-hook 2
hsa-miR-595	1	0	1	1	1	1	DYRK2	dual-specificity tyrosine-(Y)-phosphorylation regulated kinase 2
hsa-miR-595	0	0	1	1	0	0	EIF3F	eukaryotic translation initiation factor 3, subunit F
hsa-miR-595	1	0	1	1	1	1	NRP2	neuropilin 2
hsa-miR-595	0	0	1	1	1	1	HERC1	HECT and RLD domain containing E3 ubiquitin protein ligase family member 1
hsa-miR-595	1	0	1	0	1	1	WASL	Wiskott-Aldrich syndrome-like
hsa-miR-595	0	0	1	0	1	1	RHOB	ras homolog family member B
hsa-miR-595	1	0	1	1	1	1	FGF12	fibroblast growth factor 12
hsa-miR-595	0	0	1	0	1	1	HABP2	hyaluronan binding protein 2
hsa-miR-595	1	0	1	0	1	1	SLC1A2	solute carrier family 1 (glial high affinity glutamate transporter), member 2
hsa-miR-595	0	0	1	1	1	1	CHST2	carbohydrate (N-acetylglucosamine-6-O) sulfotransferase 2
hsa-miR-595	1	0	1	0	1	1	AKAP6	A kinase (PRKA) anchor protein 6
hsa-miR-595	1	0	1	1	1	1	BNIP2	BCL2/adenovirus E1B 19kDa interacting protein 2
hsa-miR-595	1	0	1	1	1	1	EPHB3	EPH receptor B3
hsa-miR-595	1	0	1	0	1	1	ACSL4	acyl-CoA synthetase long-chain family member 4
hsa-miR-595	0	0	1	1	1	1	GPC5	glypican 5
hsa-miR-595	1	0	1	1	1	1	ONECUT1	one cut homeobox 1
hsa-miR-595	1	0	1	1	1	1	LRP2	low density lipoprotein receptor-related protein 2
hsa-miR-595	1	0	1	0	1	1	USP9Y	ubiquitin specific peptidase 9, Y-linked
hsa-miR-595	1	0	1	1	1	1	XPR1	xenotropic and polytropic retrovirus receptor 1
hsa-miR-595	1	0	1	1	1	1	LARGE	like-glycosyltransferase
hsa-miR-595	1	0	1	1	1	1	KIF3B	kinesin family member 3B
hsa-miR-595	0	0	1	1	1	1	EIF2AK3	eukaryotic translation initiation factor 2-alpha kinase 3
hsa-miR-595	1	0	1	0	1	1	ROCK2	Rho-associated, coiled-coil containing protein kinase 2
hsa-miR-595	1	0	1	1	1	1	ONECUT2	one cut homeobox 2
hsa-miR-595	1	0	1	0	1	1	SPTLC2	serine palmitoyltransferase, long chain base subunit 2
hsa-miR-595	1	0	1	1	1	1	ZFP36L1	zinc finger protein 36, C3H type-like 1
hsa-miR-595	0	0	1	1	1	1	CDH6	cadherin 6, type 2, K-cadherin (fetal kidney)
hsa-miR-595	1	0	1	1	1	1	GABRE	gamma-aminobutyric acid (GABA) A receptor, epsilon
hsa-miR-595	1	0	1	0	1	1	SEL1L	sel-1 suppressor of lin-12-like (C. elegans)
hsa-miR-595	1	0	1	1	0	0	HCFC1	host cell factor C1 (VP16-accessory protein)
hsa-miR-595	0	0	1	1	1	1	ITGAD	integrin, alpha D
hsa-miR-595	0	0	1	1	1	1	PPP1R3C	protein phosphatase 1, regulatory subunit 3C
hsa-miR-595	0	0	1	1	1	1	MALL	mal, T-cell differentiation protein-like
hsa-miR-595	0	0	1	1	1	1	FOSL1	FOS-like antigen 1
hsa-miR-595	1	0	1	1	1	1	ABCA1	ATP-binding cassette, sub-family A (ABC1), member 1
hsa-miR-595	0	0	1	1	1	1	ING1	inhibitor of growth family, member 1
hsa-miR-595	1	0	1	1	1	1	LAMP1	lysosomal-associated membrane protein 1
hsa-miR-595	0	0	1	0	1	1	LCP2	lymphocyte cytosolic protein 2 (SH2 domain containing leukocyte protein of 76kDa)
hsa-miR-595	1	0	1	1	1	1	LPP	LIM domain containing preferred translocation partner in lipoma
hsa-miR-595	0	0	1	1	1	1	MKRN3	makorin ring finger protein 3
hsa-miR-595	1	0	1	1	1	1	UST	uronyl-2-sulfotransferase
hsa-miR-595	1	0	1	1	1	1	NAMPT	nicotinamide phosphoribosyltransferase
hsa-miR-595	0	0	1	0	1	1	CD96	CD96 molecule
hsa-miR-595	1	0	1	0	1	1	SPRY3	sprouty homolog 3 (Drosophila)
hsa-miR-595	1	0	1	1	1	1	MAT2A	methionine adenosyltransferase II, alpha
hsa-miR-595	1	0	1	0	1	1	HDAC4	histone deacetylase 4
hsa-miR-595	1	0	1	1	1	1	SEMA3A	sema domain, immunoglobulin domain (Ig), short basic domain, secreted, (semaphorin) 3A
hsa-miR-595	1	0	1	1	1	1	DAGLA	diacylglycerol lipase, alpha
hsa-miR-595	0	0	1	1	1	1	NTS	neurotensin
hsa-miR-595	1	0	1	1	1	1	POU4F1	POU class 4 homeobox 1
hsa-miR-595	0	0	1	1	1	1	PRKCH	protein kinase C, eta
hsa-miR-595	0	0	1	1	1	1	TYRO3	TYRO3 protein tyrosine kinase
hsa-miR-595	1	0	1	1	1	1	SMC1A	structural maintenance of chromosomes 1A
hsa-miR-595	1	0	1	1	1	1	TIMM17A	translocase of inner mitochondrial membrane 17 homolog A (yeast)
hsa-miR-595	0	0	1	0	0	0	CREB3	cAMP responsive element binding protein 3
hsa-miR-595	1	0	1	1	1	1	NEBL	nebulette
hsa-miR-595	0	0	1	1	0	0	SAA4	serum amyloid A4, constitutive
hsa-miR-595	0	0	1	0	1	1	SLC16A2	solute carrier family 16, member 2 (thyroid hormone transporter)
hsa-miR-595	1	0	1	1	1	1	RBBP9	retinoblastoma binding protein 9
hsa-miR-595	0	0	1	1	1	1	LYVE1	lymphatic vessel endothelial hyaluronan receptor 1
hsa-miR-595	1	0	1	1	1	1	DIAPH2	diaphanous homolog 2 (Drosophila)
hsa-miR-595	1	0	1	1	1	1	HIVEP2	human immunodeficiency virus type I enhancer binding protein 2
hsa-miR-595	1	0	1	1	1	1	ZBTB33	zinc finger and BTB domain containing 33
hsa-miR-595	1	0	1	1	1	1	RAB35	RAB35, member RAS oncogene family
hsa-miR-595	1	0	1	1	1	1	CD86	CD86 molecule
hsa-miR-595	0	0	1	1	1	1	HOXA7	homeobox A7
hsa-miR-595	0	0	1	1	1	1	HOXD3	homeobox D3
hsa-miR-595	0	0	1	0	1	1	PSG1	pregnancy specific beta-1-glycoprotein 1
hsa-miR-595	1	0	1	1	1	1	SCN1A	sodium channel, voltage-gated, type I, alpha subunit
hsa-miR-595	1	0	1	0	1	1	SLC2A3	solute carrier family 2 (facilitated glucose transporter), member 3
hsa-miR-595	1	0	1	1	1	1	HSPA13	heat shock protein 70kDa family, member 13
hsa-miR-595	0	0	1	1	1	1	TAF5	TAF5 RNA polymerase II, TATA box binding protein (TBP)-associated factor, 100kDa
hsa-miR-595	1	0	1	1	1	1	ABHD2	abhydrolase domain containing 2
hsa-miR-595	0	0	1	1	1	1	FAF1	Fas (TNFRSF6) associated factor 1
hsa-miR-595	1	0	1	1	1	1	ZNF81	zinc finger protein 81
hsa-miR-595	1	0	1	1	1	1	VEZF1	vascular endothelial zinc finger 1
hsa-miR-595	0	0	1	0	1	1	ZXDB	zinc finger, X-linked, duplicated B
hsa-miR-595	1	0	1	1	1	1	DUSP10	dual specificity phosphatase 10
hsa-miR-595	1	0	1	1	1	1	KLF12	Kruppel-like factor 12
hsa-miR-595	0	0	1	1	0	0	GPN1	GPN-loop GTPase 1
hsa-miR-595	1	0	1	1	1	1	PHLDA1	pleckstrin homology-like domain, family A, member 1
hsa-miR-595	1	0	1	1	1	1	ELL2	elongation factor, RNA polymerase II, 2
hsa-miR-595	0	0	1	1	1	1	AK5	adenylate kinase 5
hsa-miR-595	1	0	1	0	1	1	FZD4	frizzled family receptor 4
hsa-miR-595	1	0	1	1	1	1	MGEA5	meningioma expressed antigen 5 (hyaluronidase)
hsa-miR-595	0	0	1	1	1	1	RAB3GAP1	RAB3 GTPase activating protein subunit 1 (catalytic)
hsa-miR-595	1	0	1	1	1	1	RHOQ	ras homolog family member Q
hsa-miR-595	1	0	1	1	1	1	HEY2	hairy/enhancer-of-split related with YRPW motif 2
hsa-miR-595	1	0	1	1	1	1	NNT	nicotinamide nucleotide transhydrogenase
hsa-miR-595	0	0	1	0	1	1	TLL1	tolloid-like 1
hsa-miR-595	1	0	1	1	1	1	TLL2	tolloid-like 2
hsa-miR-595	1	0	1	0	1	1	FLRT2	fibronectin leucine rich transmembrane protein 2
hsa-miR-595	1	0	1	1	0	0	SNX15	sorting nexin 15
hsa-miR-595	1	0	1	1	1	1	NCKAP1	NCK-associated protein 1
hsa-miR-595	0	0	1	1	0	0	CNIH4	cornichon homolog 4 (Drosophila)
hsa-miR-595	0	0	1	0	1	1	SCN8A	sodium channel, voltage gated, type VIII, alpha subunit
hsa-miR-595	1	0	1	1	1	1	VAMP1	vesicle-associated membrane protein 1 (synaptobrevin 1)
hsa-miR-595	1	0	1	0	1	1	VAMP2	vesicle-associated membrane protein 2 (synaptobrevin 2)
hsa-miR-595	0	0	1	0	1	1	ADAMTS3	ADAM metallopeptidase with thrombospondin type 1 motif, 3
hsa-miR-595	1	0	1	1	1	1	C11orf58	chromosome 11 open reading frame 58
hsa-miR-595	1	0	1	1	1	1	MAPRE2	microtubule-associated protein, RP/EB family, member 2
hsa-miR-595	0	0	1	1	1	1	CAPN6	calpain 6
hsa-miR-595	1	0	1	1	1	1	SLC7A11	solute carrier family 7 (anionic amino acid transporter light chain, xc- system), member 11
hsa-miR-595	0	0	1	1	0	0	CLEC4E	C-type lectin domain family 4, member E
hsa-miR-595	1	0	1	0	1	1	DIEXF	digestive organ expansion factor homolog (zebrafish)
hsa-miR-595	1	0	1	1	1	1	AFF4	AF4/FMR2 family, member 4
hsa-miR-595	0	0	1	1	1	1	ARFGAP3	ADP-ribosylation factor GTPase activating protein 3
hsa-miR-595	0	0	1	1	1	1	EHD2	EH-domain containing 2
hsa-miR-595	1	0	1	1	1	1	HERC3	HECT and RLD domain containing E3 ubiquitin protein ligase 3
hsa-miR-595	1	0	1	1	1	1	RALGPS1	Ral GEF with PH domain and SH3 binding motif 1
hsa-miR-595	1	0	1	0	1	1	EDEM1	ER degradation enhancer, mannosidase alpha-like 1
hsa-miR-595	0	0	1	1	0	0	SETD1A	SET domain containing 1A
hsa-miR-595	1	0	1	1	1	1	ARHGAP32	Rho GTPase activating protein 32
hsa-miR-595	0	0	1	1	1	1	FRMPD4	FERM and PDZ domain containing 4
hsa-miR-595	1	0	1	0	1	1	SERTAD2	SERTA domain containing 2
hsa-miR-595	1	0	1	1	1	1	DAZAP2	DAZ associated protein 2
hsa-miR-595	1	0	1	0	1	1	KIAA0494	KIAA0494
hsa-miR-595	1	0	1	1	1	1	KIAA0753	KIAA0753
hsa-miR-595	0	0	1	0	1	1	EPM2AIP1	EPM2A (laforin) interacting protein 1
hsa-miR-595	1	0	1	0	1	1	ZBTB40	zinc finger and BTB domain containing 40
hsa-miR-595	1	0	1	0	1	1	ICK	intestinal cell (MAK-like) kinase
hsa-miR-595	1	0	1	1	1	1	SORCS3	sortilin-related VPS10 domain containing receptor 3
hsa-miR-595	1	0	1	0	1	1	WDFY3	WD repeat and FYVE domain containing 3
hsa-miR-595	1	0	1	0	1	1	GGA2	golgi-associated, gamma adaptin ear containing, ARF binding protein 2
hsa-miR-595	1	0	1	1	1	1	CSTF2T	cleavage stimulation factor, 3' pre-RNA, subunit 2, 64kDa, tau variant
hsa-miR-595	1	0	1	0	1	1	LPHN3	latrophilin 3
hsa-miR-595	1	0	1	0	1	1	LARP1	La ribonucleoprotein domain family, member 1
hsa-miR-595	1	0	1	1	1	1	MED13L	mediator complex subunit 13-like
hsa-miR-595	0	0	1	1	1	1	LEPROTL1	leptin receptor overlapping transcript-like 1
hsa-miR-595	1	0	1	1	1	1	PARM1	prostate androgen-regulated mucin-like protein 1
hsa-miR-595	1	0	1	1	1	1	ATL3	atlastin GTPase 3
hsa-miR-595	1	0	1	1	1	1	PNKD	paroxysmal nonkinesigenic dyskinesia
hsa-miR-595	1	0	1	1	1	1	LRRTM2	leucine rich repeat transmembrane neuronal 2
hsa-miR-595	1	0	1	1	1	1	SLITRK5	SLIT and NTRK-like family, member 5
hsa-miR-595	1	0	1	0	1	1	PPP1R16B	protein phosphatase 1, regulatory subunit 16B
hsa-miR-595	1	0	1	1	0	0	POLDIP2	polymerase (DNA-directed), delta interacting protein 2
hsa-miR-595	1	0	1	1	1	1	EPC2	enhancer of polycomb homolog 2 (Drosophila)
hsa-miR-595	0	0	1	1	1	1	TES	testis derived transcript (3 LIM domains)
hsa-miR-595	0	0	1	1	1	1	BRPF3	bromodomain and PHD finger containing, 3
hsa-miR-595	1	0	1	1	1	1	AZIN1	antizyme inhibitor 1
hsa-miR-595	0	0	1	1	1	1	RAB10	RAB10, member RAS oncogene family
hsa-miR-595	1	0	1	1	1	1	VGLL3	vestigial like 3 (Drosophila)
hsa-miR-595	1	0	1	1	1	1	NLK	nemo-like kinase
hsa-miR-595	0	0	1	1	1	1	HSD17B11	hydroxysteroid (17-beta) dehydrogenase 11
hsa-miR-595	1	0	1	1	1	1	RAB14	RAB14, member RAS oncogene family
hsa-miR-595	1	0	1	1	1	1	TRIAP1	TP53 regulated inhibitor of apoptosis 1
hsa-miR-595	0	0	1	1	0	0	ATP8A2	ATPase, aminophospholipid transporter, class I, type 8A, member 2
hsa-miR-595	1	0	1	0	1	1	RAB8B	RAB8B, member RAS oncogene family
hsa-miR-595	1	0	1	1	1	1	WAC	WW domain containing adaptor with coiled-coil
hsa-miR-595	1	0	1	1	1	1	GALNT7	UDP-N-acetyl-alpha-D-galactosamine:polypeptide N-acetylgalactosaminyltransferase 7 (GalNAc-T7)
hsa-miR-595	1	0	1	1	1	1	CPSF2	cleavage and polyadenylation specific factor 2, 100kDa
hsa-miR-595	1	0	1	1	1	1	ZC3H7B	zinc finger CCCH-type containing 7B
hsa-miR-595	0	0	1	1	1	1	DYM	dymeclin
hsa-miR-595	0	0	1	0	1	1	OTUB1	OTU domain, ubiquitin aldehyde binding 1
hsa-miR-595	1	0	1	1	1	1	ZNF3	zinc finger protein 3
hsa-miR-595	1	0	1	1	1	1	TBC1D8B	TBC1 domain family, member 8B (with GRAM domain)
hsa-miR-595	1	0	1	1	1	1	ALKBH5	alkB, alkylation repair homolog 5 (E. coli)
hsa-miR-595	0	0	1	1	1	1	WHSC1L1	Wolf-Hirschhorn syndrome candidate 1-like 1
hsa-miR-595	0	0	1	1	1	1	SOHLH2	spermatogenesis and oogenesis specific basic helix-loop-helix 2
hsa-miR-595	1	0	1	0	1	1	CCDC88A	coiled-coil domain containing 88A
hsa-miR-595	1	0	1	1	1	1	SPTLC3	serine palmitoyltransferase, long chain base subunit 3
hsa-miR-595	1	0	1	1	1	1	RSBN1	round spermatid basic protein 1
hsa-miR-595	0	0	1	1	0	0	DDX28	DEAD (Asp-Glu-Ala-Asp) box polypeptide 28
hsa-miR-595	0	0	1	1	1	1	STK32B	serine/threonine kinase 32B
hsa-miR-595	1	0	1	1	1	1	PAG1	phosphoprotein associated with glycosphingolipid microdomains 1
hsa-miR-595	0	0	1	1	1	1	CISD1	CDGSH iron sulfur domain 1
hsa-miR-595	1	0	1	1	1	1	CTTNBP2NL	CTTNBP2 N-terminal like
hsa-miR-595	1	0	1	1	1	1	AJAP1	adherens junctions associated protein 1
hsa-miR-595	0	0	1	0	1	1	ARL15	ADP-ribosylation factor-like 15
hsa-miR-595	1	0	1	1	1	1	LRRC8A	leucine rich repeat containing 8 family, member A
hsa-miR-595	1	0	1	1	1	1	WDR45L	WDR45-like
hsa-miR-595	1	0	1	1	1	1	C1GALT1	core 1 synthase, glycoprotein-N-acetylgalactosamine 3-beta-galactosyltransferase, 1
hsa-miR-595	1	0	1	1	1	1	ASPH	aspartate beta-hydroxylase
hsa-miR-595	1	0	1	1	1	1	C5orf15	chromosome 5 open reading frame 15
hsa-miR-595	0	0	1	1	1	1	PDSS2	prenyl (decaprenyl) diphosphate synthase, subunit 2
hsa-miR-595	1	0	1	0	1	1	EIF5A2	eukaryotic translation initiation factor 5A2
hsa-miR-595	0	0	1	1	0	0	LYRM4	LYR motif containing 4
hsa-miR-595	1	0	1	1	0	0	JPH2	junctophilin 2
hsa-miR-595	1	0	1	0	1	1	ADCY2	adenylate cyclase 2 (brain)
hsa-miR-595	0	0	1	1	1	1	TMEM27	transmembrane protein 27
hsa-miR-595	1	0	1	1	1	1	SLC24A3	solute carrier family 24 (sodium/potassium/calcium exchanger), member 3
hsa-miR-595	1	0	1	1	1	1	RANBP10	RAN binding protein 10
hsa-miR-595	1	0	1	1	1	1	TSHZ3	teashirt zinc finger homeobox 3
hsa-miR-595	1	0	1	1	1	1	ZFP14	zinc finger protein 14 homolog (mouse)
hsa-miR-595	1	0	1	0	1	1	RAP2A	RAP2A, member of RAS oncogene family
hsa-miR-595	0	0	1	1	0	0	IFNA7	interferon, alpha 7
hsa-miR-595	1	0	1	1	1	1	NEFH	neurofilament, heavy polypeptide
hsa-miR-595	1	0	1	1	1	1	SNX6	sorting nexin 6
hsa-miR-595	1	0	1	1	1	1	PRDM12	PR domain containing 12
hsa-miR-595	1	0	1	1	1	1	SLC22A3	solute carrier family 22 (extraneuronal monoamine transporter), member 3
hsa-miR-595	1	0	1	1	1	1	GPR88	G protein-coupled receptor 88
hsa-miR-595	1	0	1	1	1	1	ABCG4	ATP-binding cassette, sub-family G (WHITE), member 4
hsa-miR-595	0	0	1	1	1	1	GLIPR2	GLI pathogenesis-related 2
hsa-miR-595	1	0	1	1	1	1	ATL2	atlastin GTPase 2
hsa-miR-595	1	0	1	0	1	1	GREM2	gremlin 2
hsa-miR-595	0	0	1	1	1	1	HHIP	hedgehog interacting protein
hsa-miR-595	1	0	1	0	1	1	HOXC8	homeobox C8
hsa-miR-595	1	0	1	1	1	1	PRRX1	paired related homeobox 1
hsa-miR-595	1	0	1	1	1	1	MARCH7	membrane-associated ring finger (C3HC4) 7, E3 ubiquitin protein ligase
hsa-miR-595	0	0	1	1	1	1	METTL16	methyltransferase like 16
hsa-miR-595	1	0	1	0	1	1	NOTCH2	notch 2
hsa-miR-595	1	0	1	1	1	1	CCNJL	cyclin J-like
hsa-miR-595	1	0	1	1	1	1	DHX40	DEAH (Asp-Glu-Ala-His) box polypeptide 40
hsa-miR-595	0	0	1	1	1	1	TTLL7	tubulin tyrosine ligase-like family, member 7
hsa-miR-595	1	0	1	0	1	1	ZFHX4	zinc finger homeobox 4
hsa-miR-595	1	0	1	0	1	1	MOB3B	MOB kinase activator 3B
hsa-miR-595	1	0	1	1	1	1	CPED1	cadherin-like and PC-esterase domain containing 1
hsa-miR-595	1	0	1	1	1	1	NAA50	N(alpha)-acetyltransferase 50, NatE catalytic subunit
hsa-miR-595	0	0	1	1	1	1	COQ10B	coenzyme Q10 homolog B (S. cerevisiae)
hsa-miR-595	0	0	1	0	1	1	PDGFD	platelet derived growth factor D
hsa-miR-595	1	0	1	1	1	1	CYB5B	cytochrome b5 type B (outer mitochondrial membrane)
hsa-miR-595	1	0	1	0	1	1	SETD7	SET domain containing (lysine methyltransferase) 7
hsa-miR-595	1	0	1	1	1	1	NRBF2	nuclear receptor binding factor 2
hsa-miR-595	1	0	1	0	1	1	VOPP1	vesicular, overexpressed in cancer, prosurvival protein 1
hsa-miR-595	1	0	1	0	1	1	C1orf21	chromosome 1 open reading frame 21
hsa-miR-595	1	0	1	1	1	1	SNX27	sorting nexin family member 27
hsa-miR-595	1	0	1	1	1	1	PPP1R14C	protein phosphatase 1, regulatory (inhibitor) subunit 14C
hsa-miR-595	0	0	1	1	1	1	FCRL5	Fc receptor-like 5
hsa-miR-595	1	0	1	1	1	1	GABARAPL1	GABA(A) receptor-associated protein like 1
hsa-miR-595	1	0	1	1	1	1	ANO3	anoctamin 3
hsa-miR-595	1	0	1	0	1	1	TMEM47	transmembrane protein 47
hsa-miR-595	1	0	1	0	1	1	SH3BGRL2	SH3 domain binding glutamic acid-rich protein like 2
hsa-miR-595	1	0	1	0	1	1	FAM172A	family with sequence similarity 172, member A
hsa-miR-595	1	0	1	0	1	1	SRSF8	serine/arginine-rich splicing factor 8
hsa-miR-595	1	0	1	1	1	1	FAM175B	family with sequence similarity 175, member B
hsa-miR-595	1	0	1	1	1	1	ARID5B	AT rich interactive domain 5B (MRF1-like)
hsa-miR-595	1	0	1	1	1	1	LOXL4	lysyl oxidase-like 4
hsa-miR-595	1	0	1	0	1	1	PSD2	pleckstrin and Sec7 domain containing 2
hsa-miR-595	1	0	1	1	1	1	CAMKK1	calcium/calmodulin-dependent protein kinase kinase 1, alpha
hsa-miR-595	1	0	1	1	1	1	HOOK3	hook homolog 3 (Drosophila)
hsa-miR-595	0	0	1	1	1	1	PPIL3	peptidylprolyl isomerase (cyclophilin)-like 3
hsa-miR-595	0	0	1	1	1	1	FNDC1	fibronectin type III domain containing 1
hsa-miR-595	1	0	1	1	1	1	RBBP6	retinoblastoma binding protein 6
hsa-miR-595	1	0	1	0	1	1	INA	internexin neuronal intermediate filament protein, alpha
hsa-miR-595	1	0	1	0	1	1	UBASH3B	ubiquitin associated and SH3 domain containing B
hsa-miR-595	0	0	1	1	1	1	FBXL20	F-box and leucine-rich repeat protein 20
hsa-miR-595	0	0	1	1	1	1	TMEM241	transmembrane protein 241
hsa-miR-595	1	0	1	1	1	1	CASP2	caspase 2, apoptosis-related cysteine peptidase
hsa-miR-595	1	0	1	0	1	1	PURB	purine-rich element binding protein B
hsa-miR-595	0	0	1	1	1	1	EPSTI1	epithelial stromal interaction 1 (breast)
hsa-miR-595	1	0	1	1	1	1	CASP7	caspase 7, apoptosis-related cysteine peptidase
hsa-miR-595	0	0	1	1	1	1	CASP8	caspase 8, apoptosis-related cysteine peptidase
hsa-miR-595	1	0	1	1	1	1	MAL2	mal, T-cell differentiation protein 2 (gene/pseudogene)
hsa-miR-595	0	0	1	1	0	0	FAM46B	family with sequence similarity 46, member B
hsa-miR-595	0	0	1	1	0	0	DNTTIP1	deoxynucleotidyltransferase, terminal, interacting protein 1
hsa-miR-595	1	0	1	1	1	1	MED12L	mediator complex subunit 12-like
hsa-miR-595	1	0	1	1	1	1	PFN2	profilin 2
hsa-miR-595	0	0	1	1	0	0	WFDC6	WAP four-disulfide core domain 6
hsa-miR-595	1	0	1	1	1	1	KLHL6	kelch-like 6 (Drosophila)
hsa-miR-595	0	0	1	1	1	1	PATE1	prostate and testis expressed 1
hsa-miR-595	0	0	1	0	0	0	AP5B1	adaptor-related protein complex 5, beta 1 subunit
hsa-miR-595	0	0	1	1	1	1	TMEM129	transmembrane protein 129
hsa-miR-595	1	0	1	1	1	1	MARS2	methionyl-tRNA synthetase 2, mitochondrial
hsa-miR-595	0	0	1	0	1	1	SP140L	SP140 nuclear body protein-like
hsa-miR-595	1	0	1	0	1	1	NUS1	nuclear undecaprenyl pyrophosphate synthase 1 homolog (S. cerevisiae)
hsa-miR-595	0	0	1	1	1	1	KCNC2	potassium voltage-gated channel, Shaw-related subfamily, member 2
hsa-miR-595	0	0	1	1	1	1	KCNH5	potassium voltage-gated channel, subfamily H (eag-related), member 5
hsa-miR-595	1	0	1	0	1	1	CNOT6L	CCR4-NOT transcription complex, subunit 6-like
hsa-miR-595	1	0	1	1	1	1	MAPK1IP1L	mitogen-activated protein kinase 1 interacting protein 1-like
hsa-miR-595	0	0	1	1	1	1	GTSF1	gametocyte specific factor 1
hsa-miR-595	0	0	1	1	0	0	MBD3L2	methyl-CpG binding domain protein 3-like 2
hsa-miR-595	1	0	1	1	1	1	TMEM182	transmembrane protein 182
hsa-miR-595	1	0	1	1	1	1	SAMD8	sterile alpha motif domain containing 8
hsa-miR-595	1	0	1	1	1	1	FAM91A1	family with sequence similarity 91, member A1
hsa-miR-595	1	0	1	1	1	1	SLC2A12	solute carrier family 2 (facilitated glucose transporter), member 12
hsa-miR-595	0	0	1	1	1	1	APOBEC3F	apolipoprotein B mRNA editing enzyme, catalytic polypeptide-like 3F
hsa-miR-595	1	0	1	1	1	1	LPIN1	lipin 1
hsa-miR-595	1	0	1	0	1	1	MTPN	myotrophin
hsa-miR-595	1	0	1	1	1	1	FAM110B	family with sequence similarity 110, member B
hsa-miR-595	0	0	1	1	1	1	CDYL2	chromodomain protein, Y-like 2
hsa-miR-595	0	0	1	1	1	1	EFCAB13	EF-hand calcium binding domain 13
hsa-miR-595	0	0	1	0	1	1	AFAP1L1	actin filament associated protein 1-like 1
hsa-miR-595	1	0	1	1	1	1	FAM123B	family with sequence similarity 123B
hsa-miR-595	0	0	1	1	1	1	C12orf66	chromosome 12 open reading frame 66
hsa-miR-595	1	0	1	1	1	1	SPRED1	sprouty-related, EVH1 domain containing 1
hsa-miR-595	1	0	1	0	1	1	TMEM154	transmembrane protein 154
hsa-miR-595	0	0	1	1	0	0	MS4A15	membrane-spanning 4-domains, subfamily A, member 15
hsa-miR-595	1	0	1	1	1	1	BEND6	BEN domain containing 6
hsa-miR-595	1	0	1	1	1	1	NXPH1	neurexophilin 1
hsa-miR-595	1	0	1	0	1	1	ST6GALNAC3	ST6 (alpha-N-acetyl-neuraminyl-2,3-beta-galactosyl-1,3)-N-acetylgalactosaminide alpha-2,6-sialyltransferase 3
hsa-miR-595	1	0	1	1	1	1	PRSS35	protease, serine, 35
hsa-miR-595	0	0	1	0	1	1	VGLL2	vestigial like 2 (Drosophila)
hsa-miR-595	1	0	1	1	1	1	FNDC5	fibronectin type III domain containing 5
hsa-miR-595	0	0	1	1	1	1	REXO1L1	REX1, RNA exonuclease 1 homolog (S. cerevisiae)-like 1
hsa-miR-595	0	0	1	1	0	0	C3orf24	chromosome 3 open reading frame 24
hsa-miR-595	0	0	1	1	1	1	FAM163A	family with sequence similarity 163, member A
hsa-miR-595	1	0	1	1	1	1	CNKSR3	CNKSR family member 3
hsa-miR-595	1	0	1	0	1	1	PGM2L1	phosphoglucomutase 2-like 1
hsa-miR-595	0	0	1	1	1	1	C17orf78	chromosome 17 open reading frame 78
hsa-miR-595	0	0	1	1	1	1	SIGLECL1	SIGLEC family like 1
hsa-miR-595	0	0	1	0	1	1	C5orf64	chromosome 5 open reading frame 64
hsa-miR-595	0	0	1	1	1	1	FAM133A	family with sequence similarity 133, member A
hsa-miR-595	1	0	1	0	1	1	DPY19L2	dpy-19-like 2 (C. elegans)
hsa-miR-595	1	0	1	0	1	1	SREK1IP1	SREK1-interacting protein 1
hsa-miR-595	1	0	1	1	1	1	RAB3IP	RAB3A interacting protein (rabin3)
hsa-miR-595	0	0	1	1	1	1	TUBB	tubulin, beta class I
hsa-miR-595	0	0	1	1	1	1	ZNF831	zinc finger protein 831
hsa-miR-595	0	0	1	1	1	1	SLC5A12	solute carrier family 5 (sodium/glucose cotransporter), member 12
hsa-miR-595	1	0	1	1	1	1	TMEM26	transmembrane protein 26
hsa-miR-595	0	0	1	0	1	1	KRT28	keratin 28
hsa-miR-595	0	0	1	0	1	1	PITPNC1	phosphatidylinositol transfer protein, cytoplasmic 1
hsa-miR-595	0	0	1	1	1	1	USP12	ubiquitin specific peptidase 12
hsa-miR-595	1	0	1	1	1	1	ISM2	isthmin 2 homolog (zebrafish)
hsa-miR-595	1	0	1	0	1	1	C12orf36	chromosome 12 open reading frame 36
hsa-miR-595	0	0	1	1	1	1	SKA2	spindle and kinetochore associated complex subunit 2
hsa-miR-595	0	0	1	0	1	1	EPHA3	EPH receptor A3
hsa-miR-595	1	0	1	1	1	1	CREM	cAMP responsive element modulator
hsa-miR-595	1	0	1	0	1	1	NRK	Nik related kinase
hsa-miR-595	0	0	1	1	1	1	KCTD1	potassium channel tetramerisation domain containing 1
hsa-miR-595	1	0	1	1	0	0	KAZN	kazrin, periplakin interacting protein
hsa-miR-595	1	0	1	1	1	1	E2F7	E2F transcription factor 7
hsa-miR-595	1	0	1	0	1	1	MBLAC2	metallo-beta-lactamase domain containing 2
hsa-miR-595	0	0	1	1	1	1	SERTM1	serine-rich and transmembrane domain containing 1
hsa-miR-595	1	0	1	1	1	1	MOG	myelin oligodendrocyte glycoprotein
hsa-miR-595	0	0	1	0	1	1	C11orf92	chromosome 11 open reading frame 92
hsa-miR-595	0	0	1	1	1	1	PATE2	prostate and testis expressed 2
hsa-miR-595	0	0	1	0	1	1	TMEM215	transmembrane protein 215
hsa-miR-595	1	0	1	1	1	1	XKRX	XK, Kell blood group complex subunit-related, X-linked
hsa-miR-595	0	0	1	0	0	0	SNORD4A	small nucleolar RNA, C/D box 4A
hsa-miR-595	0	0	1	0	0	0	TTTY15	testis-specific transcript, Y-linked 15 (non-protein coding)
hsa-miR-595	0	0	1	0	0	0	ATXN8OS	ATXN8 opposite strand (non-protein coding)
hsa-miR-595	0	0	1	0	0	0	TOP1P1	topoisomerase (DNA) I pseudogene 1
hsa-miR-595	0	0	1	0	0	0	HTR7P1	5-hydroxytryptamine (serotonin) receptor 7 pseudogene 1
hsa-miR-595	0	0	1	1	1	1	PEG3	paternally expressed 3
hsa-miR-595	0	0	1	1	1	1	RXRB	retinoid X receptor, beta
hsa-miR-595	0	0	0	1	1	1	DBNDD1	dysbindin (dystrobrevin binding protein 1) domain containing 1
hsa-miR-595	0	0	1	1	0	0	TSR3	TSR3, 20S rRNA accumulation, homolog (S. cerevisiae)
hsa-miR-595	1	0	1	1	1	1	NDUFAB1	NADH dehydrogenase (ubiquinone) 1, alpha/beta subcomplex, 1, 8kDa
hsa-miR-595	1	0	1	1	0	0	PLEKHG6	pleckstrin homology domain containing, family G (with RhoGef domain) member 6
hsa-miR-595	0	0	0	1	1	1	ABHD5	abhydrolase domain containing 5
hsa-miR-595	0	0	1	1	0	0	VDAC3	voltage-dependent anion channel 3
hsa-miR-595	0	0	0	1	1	1	NFE2L3	nuclear factor (erythroid-derived 2)-like 3
hsa-miR-595	0	0	1	1	0	0	GNA11	guanine nucleotide binding protein (G protein), alpha 11 (Gq class)
hsa-miR-595	0	0	1	1	1	1	AQR	aquarius homolog (mouse)
hsa-miR-595	0	0	1	1	0	0	NOX3	NADPH oxidase 3
hsa-miR-595	1	0	1	1	1	1	FGF4	fibroblast growth factor 4
hsa-miR-595	0	0	0	1	1	1	TIMM21	translocase of inner mitochondrial membrane 21 homolog (yeast)
hsa-miR-595	0	0	1	1	0	0	NEB	nebulin
hsa-miR-595	0	0	1	1	0	0	ADAM7	ADAM metallopeptidase domain 7
hsa-miR-595	1	0	1	1	1	1	DIMT1	DIM1 dimethyladenosine transferase 1 homolog (S. cerevisiae)
hsa-miR-595	0	0	0	1	0	0	C19orf21	chromosome 19 open reading frame 21
hsa-miR-595	0	0	1	1	0	0	CGRRF1	cell growth regulator with ring finger domain 1
hsa-miR-595	0	0	0	1	1	1	ARSD	arylsulfatase D
hsa-miR-595	0	0	1	1	0	0	TAF9	TAF9 RNA polymerase II, TATA box binding protein (TBP)-associated factor, 32kDa
hsa-miR-595	0	0	0	1	0	0	ACD	adrenocortical dysplasia homolog (mouse)
hsa-miR-595	1	0	1	1	1	1	HMOX2	heme oxygenase (decycling) 2
hsa-miR-595	0	0	1	1	0	0	SNAPC2	small nuclear RNA activating complex, polypeptide 2, 45kDa
hsa-miR-595	0	0	0	1	1	1	ZIM2	zinc finger, imprinted 2
hsa-miR-595	0	0	1	1	0	0	LGALS13	lectin, galactoside-binding, soluble, 13
hsa-miR-595	0	0	1	1	0	0	WDR83OS	WD repeat domain 83 opposite strand
hsa-miR-595	0	0	1	1	1	1	MPP6	membrane protein, palmitoylated 6 (MAGUK p55 subfamily member 6)
hsa-miR-595	1	0	1	1	1	1	AGR2	anterior gradient 2 homolog (Xenopus laevis)
hsa-miR-595	0	0	1	1	0	0	URGCP	upregulator of cell proliferation
hsa-miR-595	1	0	1	1	1	1	DDX5	DEAD (Asp-Glu-Ala-Asp) box helicase 5
hsa-miR-595	0	0	0	1	1	1	FAM20A	family with sequence similarity 20, member A
hsa-miR-595	0	0	1	1	0	0	FOXN1	forkhead box N1
hsa-miR-595	1	0	1	1	0	0	ACRBP	acrosin binding protein
hsa-miR-595	0	0	1	1	0	0	GPX5	glutathione peroxidase 5 (epididymal androgen-related protein)
hsa-miR-595	0	0	1	1	1	1	FBXL4	F-box and leucine-rich repeat protein 4
hsa-miR-595	0	0	1	1	0	0	MEP1A	meprin A, alpha (PABA peptide hydrolase)
hsa-miR-595	0	0	1	1	0	0	PKD2L2	polycystic kidney disease 2-like 2
hsa-miR-595	1	0	0	1	1	1	KIF20A	kinesin family member 20A
hsa-miR-595	1	0	1	1	1	1	HAND1	heart and neural crest derivatives expressed 1
hsa-miR-595	0	0	1	1	0	0	GRIN3B	glutamate receptor, ionotropic, N-methyl-D-aspartate 3B
hsa-miR-595	0	0	1	1	1	1	DDX55	DEAD (Asp-Glu-Ala-Asp) box polypeptide 55
hsa-miR-595	0	0	1	1	0	0	GSC	goosecoid homeobox
hsa-miR-595	0	0	0	1	0	0	ACOT2	acyl-CoA thioesterase 2
hsa-miR-595	0	0	0	1	0	0	COQ6	coenzyme Q6 homolog, monooxygenase (S. cerevisiae)
hsa-miR-595	0	0	0	1	1	1	PCDHB12	protocadherin beta 12
hsa-miR-595	0	0	0	1	0	0	ALG5	asparagine-linked glycosylation 5, dolichyl-phosphate beta-glucosyltransferase homolog (S. cerevisiae)
hsa-miR-595	0	0	1	1	1	1	CCDC53	coiled-coil domain containing 53
hsa-miR-595	0	0	0	1	0	0	GHSR	growth hormone secretagogue receptor
hsa-miR-595	0	0	1	1	1	1	DYNLL1	dynein, light chain, LC8-type 1
hsa-miR-595	0	0	1	1	1	1	EBPL	emopamil binding protein-like
hsa-miR-595	0	0	0	1	0	0	BATF3	basic leucine zipper transcription factor, ATF-like 3
hsa-miR-595	0	0	1	1	0	0	ABCC10	ATP-binding cassette, sub-family C (CFTR/MRP), member 10
hsa-miR-595	0	0	1	1	1	1	SNRPB2	small nuclear ribonucleoprotein polypeptide B
hsa-miR-595	0	0	0	1	1	1	STATH	statherin
hsa-miR-595	0	0	0	1	1	1	HTN1	histatin 1
hsa-miR-595	0	0	0	1	1	1	SDF2	stromal cell-derived factor 2
hsa-miR-595	0	0	1	1	1	1	TSPAN8	tetraspanin 8
hsa-miR-595	0	0	1	1	0	0	SPINK2	serine peptidase inhibitor, Kazal type 2 (acrosin-trypsin inhibitor)
hsa-miR-595	0	0	1	1	1	1	PMPCB	peptidase (mitochondrial processing) beta
hsa-miR-595	0	0	1	1	0	0	CCL4	chemokine (C-C motif) ligand 4
hsa-miR-595	0	0	0	1	0	0	LILRA2	leukocyte immunoglobulin-like receptor, subfamily A (with TM domain), member 2
hsa-miR-595	0	0	1	1	1	1	ALG13	asparagine-linked glycosylation 13 homolog (S. cerevisiae)
hsa-miR-595	1	0	1	1	1	1	PVRL2	poliovirus receptor-related 2 (herpesvirus entry mediator B)
hsa-miR-595	0	0	0	1	0	0	USHBP1	Usher syndrome 1C binding protein 1
hsa-miR-595	0	0	0	1	0	0	C20orf151	chromosome 20 open reading frame 151
hsa-miR-595	0	0	1	1	0	0	BPIFA2	BPI fold containing family A, member 2
hsa-miR-595	1	0	0	1	1	1	ZNF700	zinc finger protein 700
hsa-miR-595	0	0	1	1	0	0	RAMP1	receptor (G protein-coupled) activity modifying protein 1
hsa-miR-595	0	0	0	1	1	1	SLC52A1	solute carrier family 52, riboflavin transporter, member 1
hsa-miR-595	0	0	1	1	1	1	GIMAP4	GTPase, IMAP family member 4
hsa-miR-595	0	0	0	1	0	0	CARS2	cysteinyl-tRNA synthetase 2, mitochondrial (putative)
hsa-miR-595	0	0	1	1	1	1	OASL	2'-5'-oligoadenylate synthetase-like
hsa-miR-595	0	0	1	1	1	1	KIAA1009	KIAA1009
hsa-miR-595	0	0	0	1	1	1	DYSF	dysferlin, limb girdle muscular dystrophy 2B (autosomal recessive)
hsa-miR-595	0	0	1	1	1	1	ACTL6A	actin-like 6A
hsa-miR-595	0	0	0	1	0	0	FXYD2	FXYD domain containing ion transport regulator 2
hsa-miR-595	1	0	1	1	1	1	EPT1	ethanolaminephosphotransferase 1 (CDP-ethanolamine-specific)
hsa-miR-595	0	0	0	1	1	1	LRPPRC	leucine-rich pentatricopeptide repeat containing
hsa-miR-595	0	0	0	1	1	1	CYP2C9	cytochrome P450, family 2, subfamily C, polypeptide 9
hsa-miR-595	0	0	1	1	1	1	CHRNA1	cholinergic receptor, nicotinic, alpha 1 (muscle)
hsa-miR-595	0	0	0	1	0	0	WDR12	WD repeat domain 12
hsa-miR-595	0	0	1	1	1	1	DIRC2	disrupted in renal carcinoma 2
hsa-miR-595	0	0	1	1	1	1	SLC16A7	solute carrier family 16, member 7 (monocarboxylic acid transporter 2)
hsa-miR-595	0	0	1	1	0	0	SNW1	SNW domain containing 1
hsa-miR-595	0	0	0	1	1	1	PALB2	partner and localizer of BRCA2
hsa-miR-595	0	0	1	1	1	1	CDK2AP1	cyclin-dependent kinase 2 associated protein 1
hsa-miR-595	0	0	0	1	0	0	C14orf166	chromosome 14 open reading frame 166
hsa-miR-595	1	0	1	1	0	0	LOXL1	lysyl oxidase-like 1
hsa-miR-595	1	0	1	1	1	1	ZDHHC2	zinc finger, DHHC-type containing 2
hsa-miR-595	1	0	1	1	1	1	CEP76	centrosomal protein 76kDa
hsa-miR-595	0	0	0	1	0	0	LMF1	lipase maturation factor 1
hsa-miR-595	0	0	1	1	0	0	HAGH	hydroxyacylglutathione hydrolase
hsa-miR-595	1	0	1	1	1	1	ZMYND8	zinc finger, MYND-type containing 8
hsa-miR-595	1	0	1	1	1	1	CSE1L	CSE1 chromosome segregation 1-like (yeast)
hsa-miR-595	0	0	1	1	0	0	ASPA	aspartoacylase
hsa-miR-595	0	0	1	1	0	0	UFD1L	ubiquitin fusion degradation 1 like (yeast)
hsa-miR-595	0	0	1	1	1	1	LY9	lymphocyte antigen 9
hsa-miR-595	0	0	1	1	0	0	ASB3	ankyrin repeat and SOCS box containing 3
hsa-miR-595	0	0	1	1	0	0	CAD	carbamoyl-phosphate synthetase 2, aspartate transcarbamylase, and dihydroorotase
hsa-miR-595	0	0	1	1	1	1	CLDN16	claudin 16
hsa-miR-595	0	0	0	1	0	0	PPAP2A	phosphatidic acid phosphatase type 2A
hsa-miR-595	0	0	1	1	1	1	ICAM1	intercellular adhesion molecule 1
hsa-miR-595	1	0	1	1	1	1	SIDT1	SID1 transmembrane family, member 1
hsa-miR-595	0	0	1	1	1	1	NUP54	nucleoporin 54kDa
hsa-miR-595	0	0	1	1	1	1	ATP6V0E1	ATPase, H+ transporting, lysosomal 9kDa, V0 subunit e1
hsa-miR-595	0	0	0	1	0	0	TRPV5	transient receptor potential cation channel, subfamily V, member 5
hsa-miR-595	0	0	1	1	0	0	KIF9	kinesin family member 9
hsa-miR-595	1	0	1	1	1	1	SRI	sorcin
hsa-miR-595	0	0	1	1	0	0	ITIH4	inter-alpha-trypsin inhibitor heavy chain family, member 4
hsa-miR-595	0	0	0	1	0	0	CD27	CD27 molecule
hsa-miR-595	0	0	1	1	1	1	METTL21C	methyltransferase like 21C
hsa-miR-595	0	0	1	1	0	0	ADAM21	ADAM metallopeptidase domain 21
hsa-miR-595	0	0	1	1	1	1	BCL2A1	BCL2-related protein A1
hsa-miR-595	0	0	1	1	1	1	WDR61	WD repeat domain 61
hsa-miR-595	1	0	1	1	1	1	IGF1R	insulin-like growth factor 1 receptor
hsa-miR-595	0	0	0	1	0	0	ADAD2	adenosine deaminase domain containing 2
hsa-miR-595	0	0	0	1	1	1	ZNF174	zinc finger protein 174
hsa-miR-595	0	0	0	1	1	1	MYO19	myosin XIX
hsa-miR-595	0	0	1	1	0	0	CCDC40	coiled-coil domain containing 40
hsa-miR-595	0	0	1	1	0	0	WTIP	Wilms tumor 1 interacting protein
hsa-miR-595	0	0	0	1	0	0	KIAA1751	KIAA1751
hsa-miR-595	0	0	1	1	1	1	TMEM177	transmembrane protein 177
hsa-miR-595	0	0	1	1	0	0	PLA1A	phospholipase A1 member A
hsa-miR-595	1	0	1	1	1	1	BOD1L1	biorientation of chromosomes in cell division 1-like 1
hsa-miR-595	1	0	0	1	1	1	IGFBP1	insulin-like growth factor binding protein 1
hsa-miR-595	0	0	1	1	1	1	TERF1	telomeric repeat binding factor (NIMA-interacting) 1
hsa-miR-595	0	0	0	1	1	1	IFNA1	interferon, alpha 1
hsa-miR-595	1	0	1	1	1	1	FADS1	fatty acid desaturase 1
hsa-miR-595	0	0	1	1	0	0	FADS3	fatty acid desaturase 3
hsa-miR-595	0	0	0	1	1	1	AIP	aryl hydrocarbon receptor interacting protein
hsa-miR-595	0	0	1	1	0	0	TM7SF2	transmembrane 7 superfamily member 2
hsa-miR-595	0	0	1	1	0	0	PIH1D2	PIH1 domain containing 2
hsa-miR-595	0	0	0	1	1	1	SPC25	SPC25, NDC80 kinetochore complex component, homolog (S. cerevisiae)
hsa-miR-595	0	0	0	1	0	0	RASSF3	Ras association (RalGDS/AF-6) domain family member 3
hsa-miR-595	0	0	1	1	1	1	PLA2R1	phospholipase A2 receptor 1, 180kDa
hsa-miR-595	0	0	0	1	1	1	SERPINB4	serpin peptidase inhibitor, clade B (ovalbumin), member 4
hsa-miR-595	1	0	1	1	1	1	ENAH	enabled homolog (Drosophila)
hsa-miR-595	1	0	1	1	1	1	PDLIM3	PDZ and LIM domain 3
hsa-miR-595	0	0	0	1	0	0	MED7	mediator complex subunit 7
hsa-miR-595	0	0	0	1	1	1	NAT2	N-acetyltransferase 2 (arylamine N-acetyltransferase)
hsa-miR-595	0	0	0	1	1	1	NDUFAF6	NADH dehydrogenase (ubiquinone) complex I, assembly factor 6
hsa-miR-595	0	0	1	1	1	1	SLC28A1	solute carrier family 28 (sodium-coupled nucleoside transporter), member 1
hsa-miR-595	0	0	1	1	1	1	NSMCE2	non-SMC element 2, MMS21 homolog (S. cerevisiae)
hsa-miR-595	0	0	1	1	0	0	WNT9B	wingless-type MMTV integration site family, member 9B
hsa-miR-595	0	0	0	1	0	0	TFF2	trefoil factor 2
hsa-miR-595	0	0	0	1	0	0	TFF1	trefoil factor 1
hsa-miR-595	0	0	0	1	0	0	GPSM1	G-protein signaling modulator 1
hsa-miR-595	0	0	0	1	0	0	ZSCAN21	zinc finger and SCAN domain containing 21
hsa-miR-595	0	0	1	1	0	0	FOXH1	forkhead box H1
hsa-miR-595	0	0	1	1	1	1	C5orf45	chromosome 5 open reading frame 45
hsa-miR-595	0	0	1	1	1	1	IWS1	IWS1 homolog (S. cerevisiae)
hsa-miR-595	1	0	1	1	1	1	STK36	serine/threonine kinase 36
hsa-miR-595	0	0	1	1	1	1	PF4	platelet factor 4
hsa-miR-595	0	0	1	1	1	1	MRPL33	mitochondrial ribosomal protein L33
hsa-miR-595	0	0	1	1	0	0	CCDC51	coiled-coil domain containing 51
hsa-miR-595	0	0	1	1	0	0	APEH	N-acylaminoacyl-peptide hydrolase
hsa-miR-595	0	0	0	1	1	1	PRDM9	PR domain containing 9
hsa-miR-595	1	0	1	1	1	1	HSPA9	heat shock 70kDa protein 9 (mortalin)
hsa-miR-595	1	0	0	1	1	1	SOX17	SRY (sex determining region Y)-box 17
hsa-miR-595	0	0	0	1	1	1	SBSPON	somatomedin B and thrombospondin, type 1 domain containing
hsa-miR-595	0	0	0	1	0	0	PHKG1	phosphorylase kinase, gamma 1 (muscle)
hsa-miR-595	0	0	1	1	0	0	TMC1	transmembrane channel-like 1
hsa-miR-595	0	0	0	1	1	1	FRMD7	FERM domain containing 7
hsa-miR-595	0	0	0	1	0	0	STK32C	serine/threonine kinase 32C
hsa-miR-595	0	0	1	1	1	1	TTLL5	tubulin tyrosine ligase-like family, member 5
hsa-miR-595	0	0	1	1	1	1	PDZRN4	PDZ domain containing ring finger 4
hsa-miR-595	0	0	1	1	1	1	GPR176	G protein-coupled receptor 176
hsa-miR-595	0	0	0	1	0	0	C16orf78	chromosome 16 open reading frame 78
hsa-miR-595	0	0	1	1	1	1	NETO1	neuropilin (NRP) and tolloid (TLL)-like 1
hsa-miR-595	0	0	0	1	0	0	OR2D2	olfactory receptor, family 2, subfamily D, member 2
hsa-miR-595	0	0	1	1	0	0	PEX11A	peroxisomal biogenesis factor 11 alpha
hsa-miR-595	0	0	1	1	1	1	ZNF85	zinc finger protein 85
hsa-miR-595	1	0	1	1	1	1	RNF214	ring finger protein 214
hsa-miR-595	0	0	0	1	0	0	GNG8	guanine nucleotide binding protein (G protein), gamma 8
hsa-miR-595	0	0	0	1	0	0	PRR25	proline rich 25
hsa-miR-595	0	0	1	1	1	1	SCARA5	scavenger receptor class A, member 5 (putative)
hsa-miR-595	0	0	1	1	1	1	FGA	fibrinogen alpha chain
hsa-miR-595	0	0	1	1	1	1	MPHOSPH9	M-phase phosphoprotein 9
hsa-miR-595	0	0	0	1	0	0	OR10J1	olfactory receptor, family 10, subfamily J, member 1
hsa-miR-595	1	0	1	1	1	1	PTGER4	prostaglandin E receptor 4 (subtype EP4)
hsa-miR-595	0	0	0	1	0	0	OR6Y1	olfactory receptor, family 6, subfamily Y, member 1
hsa-miR-595	0	0	0	1	0	0	KCNJ4	potassium inwardly-rectifying channel, subfamily J, member 4
hsa-miR-595	0	0	0	1	1	1	HINT1	histidine triad nucleotide binding protein 1
hsa-miR-595	0	0	1	1	1	1	SEC61A2	Sec61 alpha 2 subunit (S. cerevisiae)
hsa-miR-595	0	0	1	1	0	0	FSHR	follicle stimulating hormone receptor
hsa-miR-595	1	0	1	1	1	1	IL13	interleukin 13
hsa-miR-595	0	0	1	1	0	0	TRAPPC12	trafficking protein particle complex 12
hsa-miR-595	1	0	1	1	0	0	XPO6	exportin 6
hsa-miR-595	0	0	0	1	1	1	SLC9C1	solute carrier family 9, subfamily C (Na+-transporting carboxylic acid decarboxylase), member 1
hsa-miR-595	0	0	0	1	0	0	CENPN	centromere protein N
hsa-miR-595	0	0	1	1	1	1	HSPBAP1	HSPB (heat shock 27kDa) associated protein 1
hsa-miR-595	1	0	0	1	0	0	KISS1	KiSS-1 metastasis-suppressor
hsa-miR-595	0	0	0	1	1	1	LRRC45	leucine rich repeat containing 45
hsa-miR-595	0	0	1	1	1	1	MPLKIP	M-phase specific PLK1 interacting protein
hsa-miR-595	0	0	1	1	1	1	GLB1	galactosidase, beta 1
hsa-miR-595	1	0	1	1	1	1	KIAA1217	KIAA1217
hsa-miR-595	0	0	0	1	1	1	NAT1	N-acetyltransferase 1 (arylamine N-acetyltransferase)
hsa-miR-595	0	0	1	1	0	0	NUP93	nucleoporin 93kDa
hsa-miR-595	0	0	0	1	0	0	CLDN15	claudin 15
hsa-miR-595	0	0	0	1	0	0	PIGS	phosphatidylinositol glycan anchor biosynthesis, class S
hsa-miR-595	0	0	1	1	1	1	EPG5	ectopic P-granules autophagy protein 5 homolog (C. elegans)
hsa-miR-595	0	0	0	1	0	0	OR7D4	olfactory receptor, family 7, subfamily D, member 4
hsa-miR-595	0	0	1	1	0	0	SIPA1	signal-induced proliferation-associated 1
hsa-miR-595	0	0	1	1	1	1	KLRC4	killer cell lectin-like receptor subfamily C, member 4
hsa-miR-595	0	0	1	1	1	1	REP15	RAB15 effector protein
hsa-miR-595	0	0	1	1	1	1	TBC1D16	TBC1 domain family, member 16
hsa-miR-595	0	0	0	1	0	0	ACOT1	acyl-CoA thioesterase 1
hsa-miR-595	0	0	0	1	0	0	OR52W1	olfactory receptor, family 52, subfamily W, member 1
hsa-miR-595	0	0	0	1	1	1	DEPDC7	DEP domain containing 7
hsa-miR-595	1	0	0	1	0	0	RNF26	ring finger protein 26
hsa-miR-595	0	0	1	1	1	1	PLAC8	placenta-specific 8
hsa-miR-595	1	0	1	1	1	1	HOXB3	homeobox B3
hsa-miR-595	0	0	1	1	0	0	SSX5	synovial sarcoma, X breakpoint 5
hsa-miR-595	0	0	0	1	1	1	TLR8	toll-like receptor 8
hsa-miR-595	0	0	0	1	1	1	FBLIM1	filamin binding LIM protein 1
hsa-miR-595	0	0	0	1	1	1	FNDC9	fibronectin type III domain containing 9
hsa-miR-595	0	0	1	1	1	1	KCNRG	potassium channel regulator
hsa-miR-595	0	0	0	1	1	1	C15orf44	chromosome 15 open reading frame 44
hsa-miR-595	0	0	1	1	0	0	GRINA	glutamate receptor, ionotropic, N-methyl D-aspartate-associated protein 1 (glutamate binding)
hsa-miR-595	0	0	0	1	0	0	OR8K5	olfactory receptor, family 8, subfamily K, member 5
hsa-miR-595	0	0	1	1	0	0	AP4S1	adaptor-related protein complex 4, sigma 1 subunit
hsa-miR-595	0	0	0	1	1	1	CHAF1B	chromatin assembly factor 1, subunit B (p60)
hsa-miR-595	0	0	1	1	1	1	CCT6B	chaperonin containing TCP1, subunit 6B (zeta 2)
hsa-miR-595	0	0	1	1	1	1	PINX1	PIN2/TERF1 interacting, telomerase inhibitor 1
hsa-miR-595	0	0	1	1	1	1	TNIP2	TNFAIP3 interacting protein 2
hsa-miR-595	0	0	1	1	1	1	C9orf78	chromosome 9 open reading frame 78
hsa-miR-595	0	0	0	1	0	0	ZFAND2A	zinc finger, AN1-type domain 2A
hsa-miR-595	1	0	1	1	1	1	C12orf68	chromosome 12 open reading frame 68
hsa-miR-595	0	0	0	1	0	0	DEF6	differentially expressed in FDCP 6 homolog (mouse)
hsa-miR-595	0	0	0	1	1	1	ZNF559	zinc finger protein 559
hsa-miR-595	1	0	1	1	1	1	MAB21L2	mab-21-like 2 (C. elegans)
hsa-miR-595	0	0	0	1	0	0	DEFB124	defensin, beta 124
hsa-miR-595	0	0	0	1	1	1	MAGEF1	melanoma antigen family F, 1
hsa-miR-595	1	0	1	1	1	1	CC2D1A	coiled-coil and C2 domain containing 1A
hsa-miR-595	0	0	0	1	0	0	ZNF101	zinc finger protein 101
hsa-miR-595	0	0	0	1	1	1	EPS8L2	EPS8-like 2
hsa-miR-595	0	0	1	1	1	1	ALS2CL	ALS2 C-terminal like
hsa-miR-595	1	0	1	1	1	1	RARA	retinoic acid receptor, alpha
hsa-miR-595	1	0	1	1	0	0	UBASH3A	ubiquitin associated and SH3 domain containing A
hsa-miR-595	0	0	1	1	1	1	PCK1	phosphoenolpyruvate carboxykinase 1 (soluble)
hsa-miR-595	1	0	1	1	1	1	TFAP2A	transcription factor AP-2 alpha (activating enhancer binding protein 2 alpha)
hsa-miR-595	1	0	0	1	0	0	ST3GAL1	ST3 beta-galactoside alpha-2,3-sialyltransferase 1
hsa-miR-595	1	0	1	1	1	1	EZH2	enhancer of zeste homolog 2 (Drosophila)
hsa-miR-595	0	0	1	1	0	0	TSPY2	testis specific protein, Y-linked 2
hsa-miR-595	0	0	1	1	0	0	MUC20	mucin 20, cell surface associated
hsa-miR-595	0	0	1	1	1	1	CCDC33	coiled-coil domain containing 33
hsa-miR-595	0	0	1	1	1	1	PDE1C	phosphodiesterase 1C, calmodulin-dependent 70kDa
hsa-miR-595	0	0	0	1	0	0	FCRL6	Fc receptor-like 6
hsa-miR-595	0	0	1	1	1	1	DDX10	DEAD (Asp-Glu-Ala-Asp) box polypeptide 10
hsa-miR-595	0	0	1	1	1	1	DIO1	deiodinase, iodothyronine, type I
hsa-miR-595	0	0	1	1	1	1	RTBDN	retbindin
hsa-miR-595	0	0	1	1	0	0	CPSF3L	cleavage and polyadenylation specific factor 3-like
hsa-miR-595	0	0	0	1	0	0	MAP1S	microtubule-associated protein 1S
hsa-miR-595	0	0	1	1	0	0	PLSCR3	phospholipid scramblase 3
hsa-miR-595	0	0	1	1	0	0	ODF3	outer dense fiber of sperm tails 3
hsa-miR-595	0	0	0	1	0	0	KIR3DL2	killer cell immunoglobulin-like receptor, three domains, long cytoplasmic tail, 2
hsa-miR-595	0	0	0	1	0	0	COA3	cytochrome C oxidase assembly factor 3
hsa-miR-595	0	0	1	1	0	0	LRRC33	leucine rich repeat containing 33
hsa-miR-595	0	0	1	1	1	1	IP6K2	inositol hexakisphosphate kinase 2
hsa-miR-595	1	0	1	1	0	0	PTP4A3	protein tyrosine phosphatase type IVA, member 3
hsa-miR-595	1	0	1	1	1	1	IL25	interleukin 25
hsa-miR-595	0	0	0	1	0	0	MBD3L5	methyl-CpG binding domain protein 3-like 5
hsa-miR-595	0	0	1	1	0	0	IDH2	isocitrate dehydrogenase 2 (NADP+), mitochondrial
hsa-miR-595	0	0	1	1	0	0	EIF4ENIF1	eukaryotic translation initiation factor 4E nuclear import factor 1
hsa-miR-595	0	0	0	1	0	0	FEZF1	FEZ family zinc finger 1
hsa-miR-595	1	0	1	1	1	1	RAI2	retinoic acid induced 2
hsa-miR-595	0	0	1	1	1	1	UPP1	uridine phosphorylase 1
hsa-miR-595	0	0	0	1	1	1	SNAI3	snail homolog 3 (Drosophila)
hsa-miR-595	0	0	1	1	1	1	IGIP	IgA-inducing protein homolog (Bos taurus)
hsa-miR-595	0	0	1	1	0	0	EWSR1	Ewing sarcoma breakpoint region 1
hsa-miR-595	1	0	1	1	1	1	SPTY2D1	SPT2, Suppressor of Ty, domain containing 1 (S. cerevisiae)
hsa-miR-595	1	0	1	1	0	0	TNK2	tyrosine kinase, non-receptor, 2
hsa-miR-595	0	0	0	1	0	0	LSAMP	limbic system-associated membrane protein
hsa-miR-595	1	0	1	1	1	1	EFHC2	EF-hand domain (C-terminal) containing 2
hsa-miR-595	0	0	0	1	0	0	MBD3L3	methyl-CpG binding domain protein 3-like 3
hsa-miR-595	1	0	1	1	1	1	SPTBN1	spectrin, beta, non-erythrocytic 1
hsa-miR-595	0	0	0	1	0	0	PRODH	proline dehydrogenase (oxidase) 1
hsa-miR-595	1	0	1	1	1	1	RGS9BP	regulator of G protein signaling 9 binding protein
hsa-miR-595	0	0	1	1	1	1	INO80C	INO80 complex subunit C
hsa-miR-595	0	0	0	1	0	0	DEFB105A	defensin, beta 105A
hsa-miR-595	1	0	1	1	1	1	PDXDC1	pyridoxal-dependent decarboxylase domain containing 1
hsa-miR-595	0	0	0	1	0	0	OR10H1	olfactory receptor, family 10, subfamily H, member 1
hsa-miR-595	0	0	1	1	1	1	OR9Q1	olfactory receptor, family 9, subfamily Q, member 1
hsa-miR-595	0	0	0	1	0	0	DEFB105B	defensin, beta 105B
hsa-miR-595	0	0	1	1	1	1	ATPIF1	ATPase inhibitory factor 1
hsa-miR-595	0	0	1	1	1	1	PSPC1	paraspeckle component 1
hsa-miR-595	0	0	0	1	0	0	ST6GALNAC4	ST6 (alpha-N-acetyl-neuraminyl-2,3-beta-galactosyl-1,3)-N-acetylgalactosaminide alpha-2,6-sialyltransferase 4
hsa-miR-595	0	0	1	1	0	0	RGN	regucalcin (senescence marker protein-30)
hsa-miR-595	0	0	1	1	0	0	ARHGAP10	Rho GTPase activating protein 10
hsa-miR-595	0	0	1	1	1	1	BRIX1	BRX1, biogenesis of ribosomes, homolog (S. cerevisiae)
hsa-miR-595	0	0	0	1	0	0	ZNF224	zinc finger protein 224
hsa-miR-595	0	0	1	1	1	1	ARHGAP6	Rho GTPase activating protein 6
hsa-miR-595	0	0	0	1	0	0	DOM3Z	dom-3 homolog Z (C. elegans)
hsa-miR-595	0	0	0	1	0	0	TSPO	translocator protein (18kDa)
hsa-miR-595	0	0	0	1	0	0	FBLL1	fibrillarin-like 1
hsa-miR-595	0	0	0	1	0	0	SCNN1D	sodium channel, non-voltage-gated 1, delta subunit
hsa-miR-595	0	0	1	1	1	1	TMPRSS4	transmembrane protease, serine 4
hsa-miR-595	0	0	1	1	1	1	LRRC17	leucine rich repeat containing 17
hsa-miR-595	0	0	1	1	1	1	ERMP1	endoplasmic reticulum metallopeptidase 1
hsa-miR-595	0	0	1	1	0	0	STAMBP	STAM binding protein
hsa-miR-595	0	0	1	1	1	1	SLC26A3	solute carrier family 26, member 3
hsa-miR-595	0	0	1	1	0	0	LIPT1	lipoyltransferase 1
hsa-miR-595	0	0	1	1	1	1	SP100	SP100 nuclear antigen
hsa-miR-595	0	0	1	1	1	1	BTNL8	butyrophilin-like 8
hsa-miR-595	0	0	0	1	1	1	SERPINB3	serpin peptidase inhibitor, clade B (ovalbumin), member 3
hsa-miR-595	0	0	1	1	1	1	MSANTD1	Myb/SANT-like DNA-binding domain containing 1
hsa-miR-595	0	0	0	1	0	0	C2orf66	chromosome 2 open reading frame 66
hsa-miR-595	0	0	1	1	0	0	MXRA8	matrix-remodelling associated 8
hsa-miR-595	0	0	0	1	1	1	PROZ	protein Z, vitamin K-dependent plasma glycoprotein
hsa-miR-595	0	0	0	1	1	1	DOCK2	dedicator of cytokinesis 2
hsa-miR-595	0	0	1	1	0	0	SIGLEC6	sialic acid binding Ig-like lectin 6
hsa-miR-595	0	0	0	1	0	0	OR6C75	olfactory receptor, family 6, subfamily C, member 75
hsa-miR-595	0	0	0	1	0	0	ZBP1	Z-DNA binding protein 1
hsa-miR-595	0	0	1	1	1	1	TP53BP2	tumor protein p53 binding protein, 2
hsa-miR-595	0	0	1	1	1	1	P4HTM	prolyl 4-hydroxylase, transmembrane (endoplasmic reticulum)
hsa-miR-595	0	0	1	1	0	0	PPM1G	protein phosphatase, Mg2+/Mn2+ dependent, 1G
hsa-miR-595	0	0	1	1	0	0	CARD14	caspase recruitment domain family, member 14
hsa-miR-595	0	0	1	1	1	1	ICOSLG	inducible T-cell co-stimulator ligand
hsa-miR-595	0	0	1	1	0	0	RTN2	reticulon 2
hsa-miR-595	1	0	1	1	1	1	TPM4	tropomyosin 4
hsa-miR-595	0	0	1	1	0	0	BSPH1	binder of sperm protein homolog 1
hsa-miR-595	0	0	0	1	0	0	LTB4R	leukotriene B4 receptor
hsa-miR-595	0	0	0	1	0	0	C19orf48	chromosome 19 open reading frame 48
hsa-miR-595	0	0	0	1	0	0	MUC4	mucin 4, cell surface associated
hsa-miR-595	1	0	1	1	1	1	TOM1L1	target of myb1 (chicken)-like 1
hsa-miR-595	0	0	1	1	0	0	DOPEY1	dopey family member 1
hsa-miR-595	1	0	1	1	1	1	SLC12A9	solute carrier family 12 (potassium/chloride transporters), member 9
hsa-miR-595	0	0	0	1	1	1	NDUFV3	NADH dehydrogenase (ubiquinone) flavoprotein 3, 10kDa
hsa-miR-595	0	0	0	1	0	0	ZNF774	zinc finger protein 774
hsa-miR-595	0	0	1	1	0	0	CLEC9A	C-type lectin domain family 9, member A
hsa-miR-595	0	0	1	1	0	0	PAOX	polyamine oxidase (exo-N4-amino)
hsa-miR-595	0	0	1	1	0	0	PPIE	peptidylprolyl isomerase E (cyclophilin E)
hsa-miR-595	0	0	1	1	1	1	KIAA1841	KIAA1841
hsa-miR-595	0	0	0	1	1	1	ITGAL	integrin, alpha L (antigen CD11A (p180), lymphocyte function-associated antigen 1; alpha polypeptide)
hsa-miR-595	1	0	1	1	1	1	OSBPL6	oxysterol binding protein-like 6
hsa-miR-595	1	0	1	1	0	0	CCDC64	coiled-coil domain containing 64
hsa-miR-595	0	0	1	1	1	1	TOP3B	topoisomerase (DNA) III beta
hsa-miR-595	0	0	0	1	0	0	IFNA10	interferon, alpha 10
hsa-miR-595	0	0	1	1	1	1	AGBL2	ATP/GTP binding protein-like 2
hsa-miR-595	0	0	0	1	0	0	FAM223A	family with sequence similarity 223, member A (non-protein coding)
hsa-miR-595	0	0	0	1	1	1	DCLRE1C	DNA cross-link repair 1C
hsa-miR-595	1	0	0	1	1	1	C14orf102	chromosome 14 open reading frame 102
hsa-miR-595	0	0	1	1	1	1	ZNF100	zinc finger protein 100
hsa-miR-595	1	0	1	1	1	1	RUNX1	runt-related transcription factor 1
hsa-miR-595	0	0	1	1	1	1	HNRPLL	heterogeneous nuclear ribonucleoprotein L-like
hsa-miR-595	0	0	0	1	0	0	LOC729458	methyl-CpG-binding domain protein 3-like 2-like
hsa-miR-595	0	0	0	1	1	1	ZNF682	zinc finger protein 682
hsa-miR-595	0	0	0	1	0	0	AKAP4	A kinase (PRKA) anchor protein 4
hsa-miR-595	0	0	1	1	1	1	PRAME	preferentially expressed antigen in melanoma
hsa-miR-595	0	0	1	1	1	1	CNDP1	carnosine dipeptidase 1 (metallopeptidase M20 family)
hsa-miR-595	0	0	0	1	0	0	C1orf112	chromosome 1 open reading frame 112
hsa-miR-595	0	0	0	1	1	1	IFI16	interferon, gamma-inducible protein 16
hsa-miR-595	0	0	0	1	1	1	ZNF681	zinc finger protein 681
hsa-miR-595	0	0	1	1	0	0	KIR2DS4	killer cell immunoglobulin-like receptor, two domains, short cytoplasmic tail, 4
hsa-miR-595	0	0	0	1	0	0	KIR3DL3	killer cell immunoglobulin-like receptor, three domains, long cytoplasmic tail, 3
hsa-miR-595	0	0	1	1	0	0	KIR2DL3	killer cell immunoglobulin-like receptor, two domains, long cytoplasmic tail, 3
hsa-miR-595	0	0	0	1	1	1	KIR2DL1	killer cell immunoglobulin-like receptor, two domains, long cytoplasmic tail, 1
hsa-miR-595	0	0	0	1	0	0	DISP1	dispatched homolog 1 (Drosophila)
hsa-miR-595	0	0	1	1	1	1	ZNF460	zinc finger protein 460
hsa-miR-595	0	0	0	1	0	0	FABP12	fatty acid binding protein 12
hsa-miR-595	0	0	1	1	0	0	KRTAP26-1	keratin associated protein 26-1
hsa-miR-595	0	0	1	1	0	0	EIF3B	eukaryotic translation initiation factor 3, subunit B
hsa-miR-595	0	0	0	1	0	0	HAO2	hydroxyacid oxidase 2 (long chain)
hsa-miR-595	0	0	0	1	0	0	DUSP27	dual specificity phosphatase 27 (putative)
hsa-miR-595	0	0	0	1	1	1	CAMK1G	calcium/calmodulin-dependent protein kinase IG
hsa-miR-595	0	0	0	1	0	0	TEX28	testis expressed 28
hsa-miR-595	1	0	1	1	1	1	SORBS1	sorbin and SH3 domain containing 1
hsa-miR-595	0	0	1	1	1	1	ZNF830	zinc finger protein 830
hsa-miR-595	0	0	1	1	1	1	C1orf85	chromosome 1 open reading frame 85
hsa-miR-595	0	0	1	1	0	0	GNPAT	glyceronephosphate O-acyltransferase
hsa-miR-595	0	0	0	1	0	0	GPR31	G protein-coupled receptor 31
hsa-miR-595	0	0	0	1	1	1	TAF1A	TATA box binding protein (TBP)-associated factor, RNA polymerase I, A, 48kDa
hsa-miR-595	0	0	1	1	1	1	CD55	CD55 molecule, decay accelerating factor for complement (Cromer blood group)
hsa-miR-595	1	0	1	1	1	1	EZR	ezrin
hsa-miR-595	1	0	1	1	0	0	DYNLT1	dynein, light chain, Tctex-type 1
hsa-miR-595	0	0	1	1	1	1	SERAC1	serine active site containing 1
hsa-miR-595	0	0	0	1	0	0	TFB1M	transcription factor B1, mitochondrial
hsa-miR-595	0	0	0	1	0	0	PHLDA3	pleckstrin homology-like domain, family A, member 3
hsa-miR-595	0	0	0	1	0	0	TNNT2	troponin T type 2 (cardiac)
hsa-miR-595	0	0	1	1	1	1	PLA2G4A	phospholipase A2, group IVA (cytosolic, calcium-dependent)
hsa-miR-595	1	0	1	1	1	1	GLT25D2	glycosyltransferase 25 domain containing 2
hsa-miR-595	1	0	1	1	1	1	NPL	N-acetylneuraminate pyruvate lyase (dihydrodipicolinate synthase)
hsa-miR-595	0	0	1	1	0	0	ADCY10	adenylate cyclase 10 (soluble)
hsa-miR-595	0	0	1	1	0	0	NDUFS2	NADH dehydrogenase (ubiquinone) Fe-S protein 2, 49kDa (NADH-coenzyme Q reductase)
hsa-miR-595	1	0	1	1	1	1	B4GALT3	UDP-Gal:betaGlcNAc beta 1,4- galactosyltransferase, polypeptide 3
hsa-miR-595	0	0	1	1	1	1	UFC1	ubiquitin-fold modifier conjugating enzyme 1
hsa-miR-595	0	0	1	1	0	0	SLAMF9	SLAM family member 9
hsa-miR-595	1	0	1	1	1	1	PTPRK	protein tyrosine phosphatase, receptor type, K
hsa-miR-595	0	0	1	1	0	0	CCT3	chaperonin containing TCP1, subunit 3 (gamma)
hsa-miR-595	0	0	1	1	0	0	THBS3	thrombospondin 3
hsa-miR-595	0	0	0	1	1	1	MCM9	minichromosome maintenance complex component 9
hsa-miR-595	0	0	1	1	0	0	ZUFSP	zinc finger with UFM1-specific peptidase domain
hsa-miR-595	1	0	1	1	1	1	INPP5A	inositol polyphosphate-5-phosphatase, 40kDa
hsa-miR-595	0	0	1	1	0	0	CREB3L4	cAMP responsive element binding protein 3-like 4
hsa-miR-595	0	0	1	1	1	1	GLRX3	glutaredoxin 3
hsa-miR-595	1	0	1	1	1	1	ENSA	endosulfine alpha
hsa-miR-595	0	0	1	1	1	1	FAM204A	family with sequence similarity 204, member A
hsa-miR-595	0	0	1	1	0	0	AP4B1	adaptor-related protein complex 4, beta 1 subunit
hsa-miR-595	0	0	1	1	1	1	CGA	glycoprotein hormones, alpha polypeptide
hsa-miR-595	0	0	1	1	1	1	DENND2D	DENN/MADD domain containing 2D
hsa-miR-595	0	0	0	1	0	0	GSTM2	glutathione S-transferase mu 2 (muscle)
hsa-miR-595	0	0	1	1	1	1	CYP17A1	cytochrome P450, family 17, subfamily A, polypeptide 1
hsa-miR-595	0	0	1	1	1	1	IRAK1BP1	interleukin-1 receptor-associated kinase 1 binding protein 1
hsa-miR-595	0	0	0	1	0	0	C1orf194	chromosome 1 open reading frame 194
hsa-miR-595	0	0	1	1	1	1	NPM3	nucleophosmin/nucleoplasmin 3
hsa-miR-595	0	0	1	1	1	1	TRMT13	tRNA methyltransferase 13 homolog (S. cerevisiae)
hsa-miR-595	1	0	1	1	1	1	TLX1	T-cell leukemia homeobox 1
hsa-miR-595	0	0	1	1	1	1	CCDC18	coiled-coil domain containing 18
hsa-miR-595	0	0	0	1	0	0	OOEP	oocyte expressed protein
hsa-miR-595	0	0	1	1	0	0	KHDC1	KH homology domain containing 1
hsa-miR-595	0	0	0	1	0	0	KHDC1L	KH homology domain containing 1-like
hsa-miR-595	0	0	1	1	0	0	SLC25A28	solute carrier family 25 (mitochondrial iron transporter), member 28
hsa-miR-595	0	0	0	1	0	0	UTP14A	UTP14, U3 small nucleolar ribonucleoprotein, homolog A (yeast)
hsa-miR-595	0	0	0	1	0	0	CXorf64	chromosome X open reading frame 64
hsa-miR-595	0	0	0	1	1	1	C20orf85	chromosome 20 open reading frame 85
hsa-miR-595	0	0	1	1	1	1	DNTT	deoxynucleotidyltransferase, terminal
hsa-miR-595	0	0	0	1	0	0	CYP2C19	cytochrome P450, family 2, subfamily C, polypeptide 19
hsa-miR-595	1	0	1	1	1	1	EHMT1	euchromatic histone-lysine N-methyltransferase 1
hsa-miR-595	0	0	0	1	1	1	PDE6C	phosphodiesterase 6C, cGMP-specific, cone, alpha prime
hsa-miR-595	0	0	0	1	0	0	PNPLA7	patatin-like phospholipase domain containing 7
hsa-miR-595	0	0	0	1	1	1	IFIT1	interferon-induced protein with tetratricopeptide repeats 1
hsa-miR-595	0	0	1	1	1	1	STAMBPL1	STAM binding protein-like 1
hsa-miR-595	0	0	0	1	1	1	REXO4	REX4, RNA exonuclease 4 homolog (S. cerevisiae)
hsa-miR-595	1	0	1	1	1	1	RALGDS	ral guanine nucleotide dissociation stimulator
hsa-miR-595	1	0	1	1	1	1	KCNMA1	potassium large conductance calcium-activated channel, subfamily M, alpha member 1
hsa-miR-595	0	0	0	1	1	1	ZDHHC12	zinc finger, DHHC-type containing 12
hsa-miR-595	0	0	1	1	1	1	EPPIN	epididymal peptidase inhibitor
hsa-miR-595	0	0	0	1	0	0	SEMG2	semenogelin II
hsa-miR-595	0	0	1	1	1	1	PKIG	protein kinase (cAMP-dependent, catalytic) inhibitor gamma
hsa-miR-595	1	0	0	1	1	1	HNF4A	hepatocyte nuclear factor 4, alpha
hsa-miR-595	0	0	1	1	1	1	AKIRIN1	akirin 1
hsa-miR-595	0	0	1	1	1	1	PLA2G12B	phospholipase A2, group XIIB
hsa-miR-595	0	0	1	1	0	0	NCR2	natural cytotoxicity triggering receptor 2
hsa-miR-595	0	0	1	1	0	0	CSF3R	colony stimulating factor 3 receptor (granulocyte)
hsa-miR-595	0	0	1	1	0	0	TREML1	triggering receptor expressed on myeloid cells-like 1
hsa-miR-595	0	0	1	1	0	0	TTC16	tetratricopeptide repeat domain 16
hsa-miR-595	0	0	0	1	0	0	GPR35	G protein-coupled receptor 35
hsa-miR-595	0	0	0	1	0	0	DMRTC1-AS1	DMRTC1 antisense RNA 1
hsa-miR-595	1	0	1	1	1	1	COL16A1	collagen, type XVI, alpha 1
hsa-miR-595	0	0	1	1	1	1	CTNNA3	catenin (cadherin-associated protein), alpha 3
hsa-miR-595	0	0	1	1	1	1	ZNF365	zinc finger protein 365
hsa-miR-595	1	0	1	1	1	1	FKBP5	FK506 binding protein 5
hsa-miR-595	0	0	1	1	1	1	CHPF	chondroitin polymerizing factor
hsa-miR-595	0	0	0	1	0	0	SMPDL3B	sphingomyelin phosphodiesterase, acid-like 3B
hsa-miR-595	0	0	1	1	0	0	TMEM222	transmembrane protein 222
hsa-miR-595	0	0	0	1	0	0	CXorf65	chromosome X open reading frame 65
hsa-miR-595	0	0	1	1	0	0	PDZD11	PDZ domain containing 11
hsa-miR-595	1	0	1	1	0	0	SVEP1	sushi, von Willebrand factor type A, EGF and pentraxin domain containing 1
hsa-miR-595	0	0	0	1	1	1	RAB41	RAB41, member RAS oncogene family
hsa-miR-595	0	0	1	1	1	1	AGER	advanced glycosylation end product-specific receptor
hsa-miR-595	0	0	0	1	0	0	C20orf144	chromosome 20 open reading frame 144
hsa-miR-595	0	0	0	1	0	0	HSD17B3	hydroxysteroid (17-beta) dehydrogenase 3
hsa-miR-595	0	0	0	1	0	0	GRTP1	growth hormone regulated TBC protein 1
hsa-miR-595	0	0	0	1	0	0	PADI4	peptidyl arginine deiminase, type IV
hsa-miR-595	0	0	1	1	1	1	SLC35F2	solute carrier family 35, member F2
hsa-miR-595	1	0	1	1	1	1	AXIN2	axin 2
hsa-miR-595	0	0	1	1	1	1	KYNU	kynureninase
hsa-miR-595	0	0	0	1	0	0	LY6G5C	lymphocyte antigen 6 complex, locus G5C
hsa-miR-595	0	0	1	1	1	1	KDELC1	KDEL (Lys-Asp-Glu-Leu) containing 1
hsa-miR-595	0	0	1	1	0	0	FGF14	fibroblast growth factor 14
hsa-miR-595	0	0	1	1	0	0	PDSS1	prenyl (decaprenyl) diphosphate synthase, subunit 1
hsa-miR-595	0	0	1	1	0	0	PLP2	proteolipid protein 2 (colonic epithelium-enriched)
hsa-miR-595	0	0	1	1	1	1	GKAP1	G kinase anchoring protein 1
hsa-miR-595	1	0	1	1	0	0	TIMM17B	translocase of inner mitochondrial membrane 17 homolog B (yeast)
hsa-miR-595	1	0	1	1	1	1	DZIP1	DAZ interacting protein 1
hsa-miR-595	0	0	0	1	0	0	CST7	cystatin F (leukocystatin)
hsa-miR-595	0	0	1	1	1	1	SSX3	synovial sarcoma, X breakpoint 3
hsa-miR-595	0	0	1	1	1	1	SSX1	synovial sarcoma, X breakpoint 1
hsa-miR-595	0	0	1	1	0	0	ARAF	v-raf murine sarcoma 3611 viral oncogene homolog
hsa-miR-595	0	0	1	1	0	0	FUZ	fuzzy homolog (Drosophila)
hsa-miR-595	0	0	1	1	1	1	CD300LG	CD300 molecule-like family member g
hsa-miR-595	0	0	0	1	0	0	ZNF133	zinc finger protein 133
hsa-miR-595	0	0	0	1	0	0	CUBN	cubilin (intrinsic factor-cobalamin receptor)
hsa-miR-595	0	0	1	1	0	0	SPINK9	serine peptidase inhibitor, Kazal type 9
hsa-miR-595	0	0	1	1	0	0	C12orf42	chromosome 12 open reading frame 42
hsa-miR-595	0	0	1	1	0	0	HES5	hairy and enhancer of split 5 (Drosophila)
hsa-miR-595	0	0	0	1	0	0	LIG3	ligase III, DNA, ATP-dependent
hsa-miR-595	1	0	1	1	1	1	TAB3	TGF-beta activated kinase 1/MAP3K7 binding protein 3
hsa-miR-595	0	0	0	1	0	0	REXO1L5P	REX1, RNA exonuclease 1 homolog (S. cerevisiae)-like 5, pseudogene
hsa-miR-595	0	0	0	1	0	0	REXO1L3P	REX1, RNA exonuclease 1 homolog (S. cerevisiae)-like 3, pseudogene
hsa-miR-595	0	0	0	1	0	0	C1orf159	chromosome 1 open reading frame 159
hsa-miR-595	0	0	0	1	0	0	PRDX4	peroxiredoxin 4
hsa-miR-595	1	0	1	1	1	1	HIVEP1	human immunodeficiency virus type I enhancer binding protein 1
hsa-miR-595	1	0	1	1	1	1	ZNF827	zinc finger protein 827
hsa-miR-595	0	0	1	1	1	1	FAM179A	family with sequence similarity 179, member A
hsa-miR-595	0	0	1	1	0	0	TRPC4	transient receptor potential cation channel, subfamily C, member 4
hsa-miR-595	0	0	1	1	0	0	SGCE	sarcoglycan, epsilon
hsa-miR-595	0	0	1	1	1	1	ACO1	aconitase 1, soluble
hsa-miR-595	0	0	0	1	1	1	IFNA8	interferon, alpha 8
hsa-miR-595	0	0	0	1	1	1	IFNA2	interferon, alpha 2
hsa-miR-595	0	0	0	1	0	0	IFNA13	interferon, alpha 13
hsa-miR-595	0	0	0	1	0	0	IFNA5	interferon, alpha 5
hsa-miR-595	0	0	1	1	0	0	DDRGK1	DDRGK domain containing 1
hsa-miR-595	0	0	0	1	0	0	IFNA17	interferon, alpha 17
hsa-miR-595	0	0	0	1	0	0	IFNA16	interferon, alpha 16
hsa-miR-595	0	0	0	1	0	0	IFNA4	interferon, alpha 4
hsa-miR-595	0	0	1	1	1	1	IFNA21	interferon, alpha 21
hsa-miR-595	0	0	1	1	1	1	SLC22A23	solute carrier family 22, member 23
hsa-miR-595	0	0	1	1	0	0	NQO2	NAD(P)H dehydrogenase, quinone 2
hsa-miR-595	0	0	1	1	0	0	UMODL1	uromodulin-like 1
hsa-miR-595	0	0	1	1	0	0	FAM169A	family with sequence similarity 169, member A
hsa-miR-595	0	0	1	1	1	1	AKR1C1	aldo-keto reductase family 1, member C1 (dihydrodiol dehydrogenase 1; 20-alpha (3-alpha)-hydroxysteroid dehydrogenase)
hsa-miR-595	0	0	0	1	0	0	MBD3L4	methyl-CpG binding domain protein 3-like 4
hsa-miR-595	1	0	1	1	0	0	SNX18	sorting nexin 18
hsa-miR-595	1	0	0	1	1	1	MLANA	melan-A
hsa-miR-595	0	0	1	1	0	0	APOBEC3G	apolipoprotein B mRNA editing enzyme, catalytic polypeptide-like 3G
hsa-miR-595	0	0	1	1	1	1	SPATA6L	spermatogenesis associated 6-like
hsa-miR-595	0	1	0	1	0	0	FGF20	fibroblast growth factor 20
hsa-miR-595	1	0	1	1	1	1	DROSHA	drosha, ribonuclease type III
hsa-miR-595	0	0	0	1	0	0	DEFB136	defensin, beta 136
hsa-miR-595	0	0	0	1	0	0	MUC6	mucin 6, oligomeric mucus/gel-forming
hsa-miR-595	1	0	0	1	0	0	FBXL18	F-box and leucine-rich repeat protein 18
hsa-miR-595	0	0	1	1	0	0	PLA2G4F	phospholipase A2, group IVF
hsa-miR-595	0	0	0	1	0	0	TAS2R1	taste receptor, type 2, member 1
hsa-miR-595	0	0	1	1	1	1	HTRA3	HtrA serine peptidase 3
hsa-miR-595	0	0	0	1	1	1	RBMY1J	RNA binding motif protein, Y-linked, family 1, member J
hsa-miR-595	0	0	0	1	0	0	SLC7A4	solute carrier family 7 (orphan transporter), member 4
hsa-miR-595	0	0	1	1	0	0	TIGIT	T cell immunoreceptor with Ig and ITIM domains
hsa-miR-595	0	0	1	1	1	1	CSPG5	chondroitin sulfate proteoglycan 5 (neuroglycan C)
hsa-miR-595	0	0	0	1	0	0	FAM159B	family with sequence similarity 159, member B
hsa-miR-595	1	0	1	1	1	1	PPFIA1	protein tyrosine phosphatase, receptor type, f polypeptide (PTPRF), interacting protein (liprin), alpha 1
hsa-miR-595	0	0	0	1	0	0	GXYLT2	glucoside xylosyltransferase 2
hsa-miR-595	0	0	1	1	1	1	ZFP91-CNTF	ZFP91-CNTF readthrough (non-protein coding)
hsa-miR-595	0	0	1	1	1	1	CNTF	ciliary neurotrophic factor
hsa-miR-595	0	0	0	1	0	0	PRR22	proline rich 22
hsa-miR-595	0	0	0	1	0	0	TAS2R13	taste receptor, type 2, member 13
hsa-miR-595	0	0	0	1	0	0	TPTE2	transmembrane phosphoinositide 3-phosphatase and tensin homolog 2
hsa-miR-595	0	0	1	0	1	1	GNRHR	gonadotropin-releasing hormone receptor
hsa-miR-595	0	0	1	1	1	1	DCK	deoxycytidine kinase
hsa-miR-595	0	0	0	1	1	1	FPR2	formyl peptide receptor 2
hsa-miR-595	0	0	1	1	1	1	CLEC6A	C-type lectin domain family 6, member A
hsa-miR-595	0	0	0	0	1	1	FLJ46838	FLJ46838 protein
hsa-miR-595	1	0	1	1	1	1	ARHGAP28	Rho GTPase activating protein 28
hsa-miR-595	0	0	0	1	1	1	ZIK1	zinc finger protein interacting with K protein 1 homolog (mouse)
hsa-miR-595	0	0	0	1	1	1	DUXA	double homeobox A
hsa-miR-595	1	0	1	1	1	1	GLUL	glutamate-ammonia ligase
hsa-miR-595	1	0	0	1	1	1	CCNI2	cyclin I family, member 2
hsa-miR-595	0	0	1	1	1	1	MDH1B	malate dehydrogenase 1B, NAD (soluble)
hsa-miR-595	1	0	1	1	1	1	ECT2L	epithelial cell transforming sequence 2 oncogene-like
hsa-miR-595	1	0	1	1	1	1	UNK	unkempt homolog (Drosophila)
hsa-miR-595	0	0	0	1	1	1	MGAT2	mannosyl (alpha-1,6-)-glycoprotein beta-1,2-N-acetylglucosaminyltransferase
hsa-miR-595	0	0	0	0	1	1	PRELP	proline/arginine-rich end leucine-rich repeat protein
hsa-miR-595	0	0	1	1	1	1	PTHLH	parathyroid hormone-like hormone
hsa-miR-595	1	0	1	0	1	1	UBE2G2	ubiquitin-conjugating enzyme E2G 2
hsa-miR-595	0	0	1	1	1	1	USP4	ubiquitin specific peptidase 4 (proto-oncogene)
hsa-miR-595	0	0	1	0	1	1	ZNF134	zinc finger protein 134
hsa-miR-595	1	0	1	0	1	1	ZKSCAN1	zinc finger with KRAB and SCAN domains 1
hsa-miR-595	0	0	1	1	1	1	RGS5	regulator of G-protein signaling 5
hsa-miR-595	0	0	1	1	1	1	CREG1	cellular repressor of E1A-stimulated genes 1
hsa-miR-595	1	0	1	1	1	1	CDKL2	cyclin-dependent kinase-like 2 (CDC2-related kinase)
hsa-miR-595	1	0	0	0	1	1	ARHGAP1	Rho GTPase activating protein 1
hsa-miR-595	0	0	0	0	1	1	PTTG1IP	pituitary tumor-transforming 1 interacting protein
hsa-miR-595	0	0	1	1	1	1	CYP8B1	cytochrome P450, family 8, subfamily B, polypeptide 1
hsa-miR-595	1	0	1	1	1	1	USP6	ubiquitin specific peptidase 6 (Tre-2 oncogene)
hsa-miR-595	1	0	1	1	1	1	FOXK2	forkhead box K2
hsa-miR-595	1	0	1	1	1	1	H3F3B	H3 histone, family 3B (H3.3B)
hsa-miR-595	0	0	1	1	1	1	CXCL11	chemokine (C-X-C motif) ligand 11
hsa-miR-595	1	0	1	1	1	1	AFF1	AF4/FMR2 family, member 1
hsa-miR-595	0	0	1	1	1	1	ZNF138	zinc finger protein 138
hsa-miR-595	1	0	1	1	1	1	DDX52	DEAD (Asp-Glu-Ala-Asp) box polypeptide 52
hsa-miR-595	1	0	1	1	1	1	FBXL2	F-box and leucine-rich repeat protein 2
hsa-miR-595	0	0	1	1	1	1	MGAT4C	mannosyl (alpha-1,3-)-glycoprotein beta-1,4-N-acetylglucosaminyltransferase, isozyme C (putative)
hsa-miR-595	0	0	0	1	1	1	FLVCR1	feline leukemia virus subgroup C cellular receptor 1
hsa-miR-595	1	0	1	1	1	1	IL20RA	interleukin 20 receptor, alpha
hsa-miR-595	1	0	1	1	1	1	TOR1B	torsin family 1, member B (torsin B)
hsa-miR-595	1	0	0	1	1	1	TECPR2	tectonin beta-propeller repeat containing 2
hsa-miR-595	0	0	1	0	1	1	VASH1	vasohibin 1
hsa-miR-595	0	0	1	1	1	1	L3MBTL1	l(3)mbt-like 1 (Drosophila)
hsa-miR-595	0	0	1	1	1	1	SH3YL1	SH3 domain containing, Ysc84-like 1 (S. cerevisiae)
hsa-miR-595	1	0	1	1	1	1	NSFL1C	NSFL1 (p97) cofactor (p47)
hsa-miR-595	1	0	1	1	1	1	MTMR10	myotubularin related protein 10
hsa-miR-595	1	0	1	1	1	1	SLC35A5	solute carrier family 35, member A5
hsa-miR-595	1	0	1	0	1	1	TMEM106B	transmembrane protein 106B
hsa-miR-595	0	0	0	1	1	1	LSG1	large subunit GTPase 1 homolog (S. cerevisiae)
hsa-miR-595	0	0	1	1	1	1	UTP6	UTP6, small subunit (SSU) processome component, homolog (yeast)
hsa-miR-595	1	0	0	1	1	1	PLEKHA5	pleckstrin homology domain containing, family A member 5
hsa-miR-595	1	0	0	1	1	1	CHST7	carbohydrate (N-acetylglucosamine 6-O) sulfotransferase 7
hsa-miR-595	1	0	0	1	1	1	ABCC9	ATP-binding cassette, sub-family C (CFTR/MRP), member 9
hsa-miR-595	1	0	1	1	1	1	LYRM2	LYR motif containing 2
hsa-miR-595	0	0	1	1	1	1	TCL6	T-cell leukemia/lymphoma 6 (non-protein coding)
hsa-miR-595	0	0	1	1	1	1	DECR2	2,4-dienoyl CoA reductase 2, peroxisomal
hsa-miR-595	1	0	1	1	1	1	RNF150	ring finger protein 150
hsa-miR-595	0	0	0	0	1	1	KIAA1377	KIAA1377
hsa-miR-595	0	0	1	1	1	1	ZNF273	zinc finger protein 273
hsa-miR-595	0	0	0	1	1	1	ZNF708	zinc finger protein 708
hsa-miR-595	1	0	1	1	1	1	CEP85	centrosomal protein 85kDa
hsa-miR-595	1	0	1	0	1	1	USP46	ubiquitin specific peptidase 46
hsa-miR-595	0	0	1	1	1	1	MLF1IP	MLF1 interacting protein
hsa-miR-595	1	0	1	1	1	1	NAA40	N(alpha)-acetyltransferase 40, NatD catalytic subunit, homolog (S. cerevisiae)
hsa-miR-595	0	0	1	0	1	1	C5orf44	chromosome 5 open reading frame 44
hsa-miR-595	1	0	1	1	1	1	TMEM133	transmembrane protein 133
hsa-miR-595	1	0	1	1	1	1	DSEL	dermatan sulfate epimerase-like
hsa-miR-595	1	0	1	0	1	1	C15orf41	chromosome 15 open reading frame 41
hsa-miR-595	0	0	1	0	1	1	C1orf198	chromosome 1 open reading frame 198
hsa-miR-595	1	0	1	1	1	1	PCDH11X	protocadherin 11 X-linked
hsa-miR-595	1	0	1	1	1	1	PCDH11Y	protocadherin 11 Y-linked
hsa-miR-595	0	0	1	1	1	1	KCNG3	potassium voltage-gated channel, subfamily G, member 3
hsa-miR-595	0	0	1	1	1	1	ZNF431	zinc finger protein 431
hsa-miR-595	0	0	0	1	1	1	ADAMTS16	ADAM metallopeptidase with thrombospondin type 1 motif, 16
hsa-miR-595	1	0	1	0	1	1	ACVR1C	activin A receptor, type IC
hsa-miR-595	0	0	1	1	1	1	TTC30A	tetratricopeptide repeat domain 30A
hsa-miR-595	0	0	1	1	1	1	GORAB	golgin, RAB6-interacting
hsa-miR-595	1	0	0	1	1	1	FAM210A	family with sequence similarity 210, member A
hsa-miR-595	0	0	1	1	1	1	DCAF4L2	DDB1 and CUL4 associated factor 4-like 2
hsa-miR-595	1	0	0	1	1	1	FBXL14	F-box and leucine-rich repeat protein 14
hsa-miR-595	0	0	0	1	1	1	ZNF417	zinc finger protein 417
hsa-miR-595	1	0	1	1	1	1	HS6ST3	heparan sulfate 6-O-sulfotransferase 3
hsa-miR-595	1	0	1	1	1	1	LCORL	ligand dependent nuclear receptor corepressor-like
hsa-miR-595	1	0	0	0	1	1	CACNA2D4	calcium channel, voltage-dependent, alpha 2/delta subunit 4
hsa-miR-595	0	0	0	1	1	1	C22orf39	chromosome 22 open reading frame 39
hsa-miR-595	0	0	1	0	1	1	SLCO4C1	solute carrier organic anion transporter family, member 4C1
hsa-miR-595	0	0	0	1	1	1	C2orf50	chromosome 2 open reading frame 50
hsa-miR-595	0	0	0	1	1	1	RNF212	ring finger protein 212
hsa-miR-595	0	0	1	1	1	1	MMS22L	MMS22-like, DNA repair protein
hsa-miR-595	1	0	1	1	1	1	TPRG1	tumor protein p63 regulated 1
hsa-miR-595	0	0	1	1	1	1	GJB7	gap junction protein, beta 7, 25kDa
hsa-miR-595	1	0	1	1	1	1	WWP2	WW domain containing E3 ubiquitin protein ligase 2
hsa-miR-595	0	0	1	1	1	1	ZNF254	zinc finger protein 254
hsa-miR-595	0	0	0	0	1	1	NUS1P1	nuclear undecaprenyl pyrophosphate synthase 1 homolog (S. cerevisiae) pseudogene 1
hsa-miR-595	0	0	0	1	1	1	FLJ30403	uncharacterized LOC729975
hsa-miR-595	0	0	0	0	1	1	LOC340113	uncharacterized LOC340113
hsa-miR-595	0	0	0	0	1	1	LOC645086	chromosome 11 open reading frame 58 pseudogene
