# Supplementary material for: Profiling of Selected MicroRNAs in Proliferative Eutopic Endometrium of Women with Ovarian Endometriosis
Source: Biomed Res Int. 2015 Aug 20;2015:760698. doi: 10.1155/2015/760698 (PMC4558423; doi:10.1155/2015/760698)
Supplement: Supplementary file 1 — Table I: The names of miRNAs significantly differentially expressed between eutopic endometrium of patients with endometriosis vs eutopic endometrium of patients without endometriosis. Table II: The associations between miRNA and mRNA, which presents detailed results of the search of six major databases i.e targetscan, tarbase, miranda, mirbase, mirtarget2 and pictar. [file 760698.f1.zip › 760698.f1/Table II/hsa-miR-596.tsv]

miR	targetscan	tarbase	miranda	mirbase	mirtarget2	pictar	GeneSymbol	GeneName
hsa-miR-596	0	0	1	1	1	1	PEG3	paternally expressed 3
hsa-miR-596	1	0	1	1	1	1	SGSM2	small G protein signaling modulator 2
hsa-miR-596	1	0	1	0	1	1	MTSS1	metastasis suppressor 1
hsa-miR-596	0	0	1	1	0	0	ZNF862	zinc finger protein 862
hsa-miR-596	1	0	1	1	1	1	ARHGEF15	Rho guanine nucleotide exchange factor (GEF) 15
hsa-miR-596	0	0	1	1	1	1	MAN2B2	mannosidase, alpha, class 2B, member 2
hsa-miR-596	0	0	1	1	1	1	TBC1D30	TBC1 domain family, member 30
hsa-miR-596	1	0	1	1	0	0	IGSF9B	immunoglobulin superfamily, member 9B
hsa-miR-596	1	0	1	1	0	0	KIAA1045	KIAA1045
hsa-miR-596	1	0	1	1	1	1	SPIRE1	spire homolog 1 (Drosophila)
hsa-miR-596	1	0	1	0	1	1	GPR158	G protein-coupled receptor 158
hsa-miR-596	1	0	1	1	1	1	PCDH19	protocadherin 19
hsa-miR-596	1	0	1	0	1	1	IGDCC4	immunoglobulin superfamily, DCC subclass, member 4
hsa-miR-596	1	0	1	1	0	0	MAGI3	membrane associated guanylate kinase, WW and PDZ domain containing 3
hsa-miR-596	1	0	1	1	0	0	ARHGAP39	Rho GTPase activating protein 39
hsa-miR-596	1	0	1	1	1	1	PHF21A	PHD finger protein 21A
hsa-miR-596	0	0	1	1	1	1	BHLHB9	basic helix-loop-helix domain containing, class B, 9
hsa-miR-596	0	0	1	0	1	1	SETD5	SET domain containing 5
hsa-miR-596	0	0	1	1	1	1	UNC80	unc-80 homolog (C. elegans)
hsa-miR-596	1	0	1	1	1	1	CSRNP1	cysteine-serine-rich nuclear protein 1
hsa-miR-596	0	0	1	1	1	1	LENG8	leukocyte receptor cluster (LRC) member 8
hsa-miR-596	1	0	1	1	1	1	BCL2L11	BCL2-like 11 (apoptosis facilitator)
hsa-miR-596	0	0	1	0	0	0	NBLA00301	Nbla00301
hsa-miR-596	0	0	1	1	1	1	KIAA1967	KIAA1967
hsa-miR-596	1	0	1	1	1	1	SH3TC2	SH3 domain and tetratricopeptide repeats 2
hsa-miR-596	0	0	1	1	0	0	CIRH1A	cirrhosis, autosomal recessive 1A (cirhin)
hsa-miR-596	1	0	1	1	1	1	C11orf57	chromosome 11 open reading frame 57
hsa-miR-596	1	0	1	1	1	1	SPHK2	sphingosine kinase 2
hsa-miR-596	0	0	1	1	0	0	ERAP2	endoplasmic reticulum aminopeptidase 2
hsa-miR-596	1	0	1	1	1	1	VLDLR	very low density lipoprotein receptor
hsa-miR-596	1	0	1	0	1	1	PCDHA13	protocadherin alpha 13
hsa-miR-596	1	0	1	1	1	1	PCDHA4	protocadherin alpha 4
hsa-miR-596	0	0	1	1	0	0	KCNC3	potassium voltage-gated channel, Shaw-related subfamily, member 3
hsa-miR-596	1	0	1	1	1	1	RPS6KA3	ribosomal protein S6 kinase, 90kDa, polypeptide 3
hsa-miR-596	0	0	1	1	0	0	TNNI3K	TNNI3 interacting kinase
hsa-miR-596	1	0	1	1	0	0	ELN	elastin
hsa-miR-596	1	0	1	1	1	1	PML	promyelocytic leukemia
hsa-miR-596	1	0	1	1	1	1	NFYC	nuclear transcription factor Y, gamma
hsa-miR-596	1	0	1	1	0	0	GRIA1	glutamate receptor, ionotropic, AMPA 1
hsa-miR-596	1	0	1	0	1	1	MAML1	mastermind-like 1 (Drosophila)
hsa-miR-596	1	0	1	0	1	1	MPPED2	metallophosphoesterase domain containing 2
hsa-miR-596	1	0	1	1	0	0	TSPYL2	TSPY-like 2
hsa-miR-596	1	0	1	0	1	1	DPYSL2	dihydropyrimidinase-like 2
hsa-miR-596	1	0	1	1	0	0	SEMA3B	sema domain, immunoglobulin domain (Ig), short basic domain, secreted, (semaphorin) 3B
hsa-miR-596	1	0	1	1	1	1	TBX2	T-box 2
hsa-miR-596	0	0	1	1	0	0	CFLAR	CASP8 and FADD-like apoptosis regulator
hsa-miR-596	0	0	1	1	1	1	IL10RA	interleukin 10 receptor, alpha
hsa-miR-596	0	0	1	1	1	1	ELOVL5	ELOVL fatty acid elongase 5
hsa-miR-596	1	0	1	1	0	0	PPP2R5D	protein phosphatase 2, regulatory subunit B', delta
hsa-miR-596	0	0	1	1	0	0	MSH5	mutS homolog 5 (E. coli)
hsa-miR-596	1	0	1	0	1	1	PDE7B	phosphodiesterase 7B
hsa-miR-596	1	0	1	1	1	1	CBFA2T2	core-binding factor, runt domain, alpha subunit 2; translocated to, 2
hsa-miR-596	0	0	1	0	0	0	FP588	uncharacterized LOC92973
hsa-miR-596	1	0	1	1	1	1	MBNL2	muscleblind-like splicing regulator 2
hsa-miR-596	1	0	1	1	0	0	SLC44A2	solute carrier family 44, member 2
hsa-miR-596	0	0	1	1	1	1	CAPN10	calpain 10
hsa-miR-596	0	0	1	1	1	1	PLEKHB1	pleckstrin homology domain containing, family B (evectins) member 1
hsa-miR-596	0	0	1	1	1	1	BBS9	Bardet-Biedl syndrome 9
hsa-miR-596	0	0	1	1	1	1	FHL1	four and a half LIM domains 1
hsa-miR-596	0	0	1	1	1	1	IL18BP	interleukin 18 binding protein
hsa-miR-596	0	0	1	1	0	0	CALHM2	calcium homeostasis modulator 2
hsa-miR-596	0	0	1	0	1	1	CLEC5A	C-type lectin domain family 5, member A
hsa-miR-596	0	0	1	1	0	0	ADAMTS7	ADAM metallopeptidase with thrombospondin type 1 motif, 7
hsa-miR-596	1	0	1	0	1	1	SLC34A2	solute carrier family 34 (sodium phosphate), member 2
hsa-miR-596	0	0	1	1	0	0	SCMH1	sex comb on midleg homolog 1 (Drosophila)
hsa-miR-596	1	0	1	1	1	1	C3orf18	chromosome 3 open reading frame 18
hsa-miR-596	0	0	1	1	1	1	CD28	CD28 molecule
hsa-miR-596	0	0	1	1	1	1	FASTKD2	FAST kinase domains 2
hsa-miR-596	1	0	1	1	1	1	SNTB2	syntrophin, beta 2 (dystrophin-associated protein A1, 59kDa, basic component 2)
hsa-miR-596	1	0	1	1	0	0	LMO2	LIM domain only 2 (rhombotin-like 1)
hsa-miR-596	1	0	1	0	1	1	PARP11	poly (ADP-ribose) polymerase family, member 11
hsa-miR-596	0	0	1	1	0	0	ARL6IP4	ADP-ribosylation-like factor 6 interacting protein 4
hsa-miR-596	0	0	1	1	0	0	BCAT2	branched chain amino-acid transaminase 2, mitochondrial
hsa-miR-596	1	0	1	1	1	1	DDR1	discoidin domain receptor tyrosine kinase 1
hsa-miR-596	1	0	1	1	1	1	KCNIP2	Kv channel interacting protein 2
hsa-miR-596	0	0	1	1	1	1	PARK2	parkinson protein 2, E3 ubiquitin protein ligase (parkin)
hsa-miR-596	0	0	1	1	1	1	ORMDL1	ORM1-like 1 (S. cerevisiae)
hsa-miR-596	0	0	1	0	0	0	MYO15B	myosin XVB pseudogene
hsa-miR-596	1	0	1	1	1	1	ST3GAL3	ST3 beta-galactoside alpha-2,3-sialyltransferase 3
hsa-miR-596	1	0	1	1	1	1	RBFOX1	RNA binding protein, fox-1 homolog (C. elegans) 1
hsa-miR-596	1	0	1	1	0	0	FOXP2	forkhead box P2
hsa-miR-596	0	0	1	1	1	1	GNAS	GNAS complex locus
hsa-miR-596	1	0	1	1	1	1	NAV3	neuron navigator 3
hsa-miR-596	1	0	1	1	1	1	PPP3CB	protein phosphatase 3, catalytic subunit, beta isozyme
hsa-miR-596	0	0	1	1	1	1	PPARG	peroxisome proliferator-activated receptor gamma
hsa-miR-596	0	0	1	1	1	1	PHACTR3	phosphatase and actin regulator 3
hsa-miR-596	0	0	1	0	0	0	COL28A1	collagen, type XXVIII, alpha 1
hsa-miR-596	1	0	1	1	1	1	AKAP2	A kinase (PRKA) anchor protein 2
hsa-miR-596	0	0	1	0	0	0	TUG1	taurine upregulated 1 (non-protein coding)
hsa-miR-596	0	0	1	1	0	0	LOC100128398	uncharacterized LOC100128398
hsa-miR-596	0	0	1	0	0	0	RNF31	ring finger protein 31
hsa-miR-596	1	0	1	1	1	1	ARHGAP17	Rho GTPase activating protein 17
hsa-miR-596	1	0	1	1	0	0	SMUG1	single-strand-selective monofunctional uracil-DNA glycosylase 1
hsa-miR-596	0	0	1	1	0	0	CARD14	caspase recruitment domain family, member 14
hsa-miR-596	1	0	1	1	1	1	KLHDC8B	kelch domain containing 8B
hsa-miR-596	0	0	1	1	0	0	C17orf53	chromosome 17 open reading frame 53
hsa-miR-596	0	0	1	1	0	0	TRMT2B	tRNA methyltransferase 2 homolog B (S. cerevisiae)
hsa-miR-596	0	0	1	1	0	0	JMJD4	jumonji domain containing 4
hsa-miR-596	0	0	1	0	0	0	LINC00475	long intergenic non-protein coding RNA 475
hsa-miR-596	0	0	1	0	0	0	LOC284561	uncharacterized LOC284561
hsa-miR-596	0	0	1	0	1	1	FLJ14186	uncharacterized LOC401149
hsa-miR-596	0	0	1	0	0	0	LOC286059	tumor necrosis factor receptor superfamily, member 10d, decoy with truncated death domain pseudogene
hsa-miR-596	1	0	1	1	1	1	ZNF385A	zinc finger protein 385A
hsa-miR-596	0	0	1	0	0	0	IFFO2	intermediate filament family orphan 2
hsa-miR-596	0	0	1	1	1	1	GGNBP2	gametogenetin binding protein 2
hsa-miR-596	1	0	1	1	1	1	ABI3BP	ABI family, member 3 (NESH) binding protein
hsa-miR-596	0	0	1	0	1	1	HEMK1	HemK methyltransferase family member 1
hsa-miR-596	1	0	1	1	1	1	DCAF8	DDB1 and CUL4 associated factor 8
hsa-miR-596	0	0	1	1	0	0	C15orf23	chromosome 15 open reading frame 23
hsa-miR-596	1	0	1	0	1	1	ZKSCAN1	zinc finger with KRAB and SCAN domains 1
hsa-miR-596	0	0	1	0	0	0	LOC154092	uncharacterized LOC154092
hsa-miR-596	0	0	1	0	0	0	FLJ31104	uncharacterized LOC441072
hsa-miR-596	1	0	1	1	0	0	SH2D3C	SH2 domain containing 3C
hsa-miR-596	1	0	1	1	1	1	LMNA	lamin A/C
hsa-miR-596	1	0	1	1	1	1	SCAMP5	secretory carrier membrane protein 5
hsa-miR-596	1	0	1	1	1	1	SORBS2	sorbin and SH3 domain containing 2
hsa-miR-596	0	0	1	1	1	1	ZNF606	zinc finger protein 606
hsa-miR-596	0	0	1	1	1	1	IPO4	importin 4
hsa-miR-596	0	0	1	1	1	1	LNX1	ligand of numb-protein X 1, E3 ubiquitin protein ligase
hsa-miR-596	1	0	1	1	1	1	GABARAPL1	GABA(A) receptor-associated protein like 1
hsa-miR-596	0	0	1	1	0	0	RELT	RELT tumor necrosis factor receptor
hsa-miR-596	0	0	1	0	0	0	LOC100125918	uncharacterized LOC100125918
hsa-miR-596	1	0	1	0	1	1	NCAM1	neural cell adhesion molecule 1
hsa-miR-596	1	0	1	1	1	1	FAM102A	family with sequence similarity 102, member A
hsa-miR-596	1	0	1	1	1	1	PEAR1	platelet endothelial aggregation receptor 1
hsa-miR-596	1	0	1	1	1	1	HLF	hepatic leukemia factor
hsa-miR-596	1	0	1	1	1	1	BLCAP	bladder cancer associated protein
hsa-miR-596	1	0	1	0	1	1	RNF165	ring finger protein 165
hsa-miR-596	1	0	1	0	1	1	TPBG	trophoblast glycoprotein
hsa-miR-596	0	0	1	1	1	1	ITGBL1	integrin, beta-like 1 (with EGF-like repeat domains)
hsa-miR-596	1	0	1	1	1	1	UXS1	UDP-glucuronate decarboxylase 1
hsa-miR-596	0	0	1	1	1	1	CAMKV	CaM kinase-like vesicle-associated
hsa-miR-596	1	0	1	1	1	1	DPH1	DPH1 homolog (S. cerevisiae)
hsa-miR-596	1	0	1	1	1	1	ARIH2	ariadne homolog 2 (Drosophila)
hsa-miR-596	1	0	1	1	1	1	AMMECR1	Alport syndrome, mental retardation, midface hypoplasia and elliptocytosis chromosomal region gene 1
hsa-miR-596	1	0	1	1	1	1	IVNS1ABP	influenza virus NS1A binding protein
hsa-miR-596	1	0	1	0	1	1	CRTAP	cartilage associated protein
hsa-miR-596	0	0	1	1	1	1	AP5S1	adaptor-related protein complex 5, sigma 1 subunit
hsa-miR-596	0	0	1	1	1	1	SLC16A1	solute carrier family 16, member 1 (monocarboxylic acid transporter 1)
hsa-miR-596	0	0	1	0	0	0	CXXC1P1	CXXC finger protein 1 pseudogene 1
hsa-miR-596	0	0	1	1	0	0	NDUFA4L2	NADH dehydrogenase (ubiquinone) 1 alpha subcomplex, 4-like 2
hsa-miR-596	1	0	1	1	1	1	KCND1	potassium voltage-gated channel, Shal-related subfamily, member 1
hsa-miR-596	0	0	1	1	1	1	SLC9A3R1	solute carrier family 9, subfamily A (NHE3, cation proton antiporter 3), member 3 regulator 1
hsa-miR-596	0	0	1	1	1	1	SPOCK1	sparc/osteonectin, cwcv and kazal-like domains proteoglycan (testican) 1
hsa-miR-596	0	0	1	1	0	0	CYHR1	cysteine/histidine-rich 1
hsa-miR-596	1	0	1	1	1	1	SLC7A8	solute carrier family 7 (amino acid transporter light chain, L system), member 8
hsa-miR-596	0	0	1	0	0	0	LINC00340	long intergenic non-protein coding RNA 340
hsa-miR-596	0	0	1	1	0	0	CES4A	carboxylesterase 4A
hsa-miR-596	0	0	1	0	1	1	AGBL4	ATP/GTP binding protein-like 4
hsa-miR-596	0	0	1	1	0	0	PPOX	protoporphyrinogen oxidase
hsa-miR-596	1	0	1	1	1	1	LPPR2	lipid phosphate phosphatase-related protein type 2
hsa-miR-596	1	0	1	1	1	1	NDEL1	nudE nuclear distribution E homolog (A. nidulans)-like 1
hsa-miR-596	0	0	1	1	1	1	GPR115	G protein-coupled receptor 115
hsa-miR-596	0	0	1	1	1	1	SETD2	SET domain containing 2
hsa-miR-596	0	0	1	0	0	0	LOC730101	uncharacterized LOC730101
hsa-miR-596	1	0	1	1	1	1	EPB41L4A	erythrocyte membrane protein band 4.1 like 4A
hsa-miR-596	0	0	1	1	0	0	TRIM46	tripartite motif containing 46
hsa-miR-596	0	0	1	0	0	0	ZNF815P	zinc finger protein 815, pseudogene
hsa-miR-596	1	0	1	1	1	1	ETS2	v-ets erythroblastosis virus E26 oncogene homolog 2 (avian)
hsa-miR-596	1	0	1	1	1	1	STIM2	stromal interaction molecule 2
hsa-miR-596	1	0	1	1	1	1	KL	klotho
hsa-miR-596	0	0	1	0	0	0	LOC400680	uncharacterized LOC400680
hsa-miR-596	1	0	1	1	1	1	RAB11FIP4	RAB11 family interacting protein 4 (class II)
hsa-miR-596	0	0	1	1	1	1	PPFIBP2	PTPRF interacting protein, binding protein 2 (liprin beta 2)
hsa-miR-596	1	0	1	1	0	0	CFL1	cofilin 1 (non-muscle)
hsa-miR-596	0	0	1	1	0	0	PSAPL1	prosaposin-like 1 (gene/pseudogene)
hsa-miR-596	0	0	1	0	0	0	CECR7	cat eye syndrome chromosome region, candidate 7 (non-protein coding)
hsa-miR-596	0	0	1	1	1	1	RGS14	regulator of G-protein signaling 14
hsa-miR-596	0	0	1	1	1	1	ARFGAP2	ADP-ribosylation factor GTPase activating protein 2
hsa-miR-596	1	0	1	1	0	0	CACNB3	calcium channel, voltage-dependent, beta 3 subunit
hsa-miR-596	0	0	1	1	0	0	YSK4	YSK4 Sps1/Ste20-related kinase homolog (S. cerevisiae)
hsa-miR-596	0	0	1	1	0	0	MX2	myxovirus (influenza virus) resistance 2 (mouse)
hsa-miR-596	0	0	1	1	0	0	ZNF335	zinc finger protein 335
hsa-miR-596	0	0	1	1	1	1	FRMD5	FERM domain containing 5
hsa-miR-596	1	0	1	1	1	1	FGD5	FYVE, RhoGEF and PH domain containing 5
hsa-miR-596	0	0	1	1	1	1	PRRT1	proline-rich transmembrane protein 1
hsa-miR-596	0	0	1	0	0	0	LOC650368	asparagine-linked glycosylation 1-like pseudogene
hsa-miR-596	1	0	1	1	1	1	ADAMTS8	ADAM metallopeptidase with thrombospondin type 1 motif, 8
hsa-miR-596	1	0	1	0	1	1	WDR82	WD repeat domain 82
hsa-miR-596	0	0	1	0	0	0	LOC285043	uncharacterized LOC285043
hsa-miR-596	1	0	1	0	0	0	GPR137C	G protein-coupled receptor 137C
hsa-miR-596	0	0	1	1	0	0	C20orf27	chromosome 20 open reading frame 27
hsa-miR-596	1	0	1	0	1	1	DCUN1D4	DCN1, defective in cullin neddylation 1, domain containing 4 (S. cerevisiae)
hsa-miR-596	0	0	1	1	0	0	SH3BP1	SH3-domain binding protein 1
hsa-miR-596	1	0	1	1	1	1	VPS54	vacuolar protein sorting 54 homolog (S. cerevisiae)
hsa-miR-596	1	0	1	0	1	1	TTYH3	tweety homolog 3 (Drosophila)
hsa-miR-596	0	0	1	1	0	0	PMF1	polyamine-modulated factor 1
hsa-miR-596	1	0	1	1	1	1	CELF6	CUGBP, Elav-like family member 6
hsa-miR-596	1	0	1	0	0	0	MSL1	male-specific lethal 1 homolog (Drosophila)
hsa-miR-596	0	0	1	1	1	1	MYOM3	myomesin family, member 3
hsa-miR-596	1	0	1	1	0	0	PFKM	phosphofructokinase, muscle
hsa-miR-596	0	0	1	1	1	1	EPPIN	epididymal peptidase inhibitor
hsa-miR-596	1	0	1	1	0	0	ATXN7L3	ataxin 7-like 3
hsa-miR-596	0	0	1	0	1	1	LOC388942	uncharacterized LOC388942
hsa-miR-596	0	0	1	0	0	0	MIR143HG	MIR143 host gene (non-protein coding)
hsa-miR-596	1	0	1	1	0	0	TNK2	tyrosine kinase, non-receptor, 2
hsa-miR-596	0	0	1	1	0	0	CCDC88B	coiled-coil domain containing 88B
hsa-miR-596	1	0	1	1	1	1	KDM4B	lysine (K)-specific demethylase 4B
hsa-miR-596	0	0	1	1	1	1	MOBP	myelin-associated oligodendrocyte basic protein
hsa-miR-596	1	0	1	1	0	0	SLC30A3	solute carrier family 30 (zinc transporter), member 3
hsa-miR-596	0	0	1	0	0	0	LOC100128262	uncharacterized LOC100128262
hsa-miR-596	1	0	1	1	1	1	PLA2G15	phospholipase A2, group XV
hsa-miR-596	0	0	1	1	0	0	BPIFB1	BPI fold containing family B, member 1
hsa-miR-596	0	0	1	0	0	0	FAM71E2	family with sequence similarity 71, member E2
hsa-miR-596	0	0	1	0	0	0	EP400NL	EP400 N-terminal like
hsa-miR-596	1	0	1	1	1	1	KALRN	kalirin, RhoGEF kinase
hsa-miR-596	0	0	1	0	0	0	FLJ46361	deleted in malignant brain tumors 1 pseudogene
hsa-miR-596	0	0	1	0	0	0	LOC440993	uncharacterized LOC440993
hsa-miR-596	1	0	1	1	1	1	FRYL	FRY-like
hsa-miR-596	1	0	1	1	1	1	UPF1	UPF1 regulator of nonsense transcripts homolog (yeast)
hsa-miR-596	1	0	1	1	1	1	ADAMTS19	ADAM metallopeptidase with thrombospondin type 1 motif, 19
hsa-miR-596	1	0	1	0	1	1	CYB561D1	cytochrome b-561 domain containing 1
hsa-miR-596	1	0	1	1	1	1	RBM24	RNA binding motif protein 24
hsa-miR-596	0	0	1	0	0	0	LOC654433	uncharacterized LOC654433
hsa-miR-596	0	0	1	0	0	0	LOC494141	mitochondrial carrier triple repeat 1 pseudogene
hsa-miR-596	0	0	1	0	0	0	LOC390660	FLJ00317 protein
hsa-miR-596	1	0	1	1	1	1	SMAD7	SMAD family member 7
hsa-miR-596	0	0	1	1	1	1	SYPL2	synaptophysin-like 2
hsa-miR-596	0	0	1	1	0	0	C3orf20	chromosome 3 open reading frame 20
hsa-miR-596	1	0	1	1	1	1	BIN2	bridging integrator 2
hsa-miR-596	0	0	1	0	1	1	NEK1	NIMA (never in mitosis gene a)-related kinase 1
hsa-miR-596	0	0	1	1	0	0	KAT8	K(lysine) acetyltransferase 8
hsa-miR-596	0	0	1	0	0	0	POM121L9P	POM121 transmembrane nucleoporin-like 9, pseudogene
hsa-miR-596	0	0	1	0	0	0	POM121L8P	POM121 transmembrane nucleoporin-like 8 pseudogene
hsa-miR-596	0	0	1	1	0	0	SAPCD1	suppressor APC domain containing 1
hsa-miR-596	0	0	1	1	1	1	RHOT1	ras homolog family member T1
hsa-miR-596	1	0	1	0	1	1	GRIN3A	glutamate receptor, ionotropic, N-methyl-D-aspartate 3A
hsa-miR-596	0	0	1	1	1	1	ING3	inhibitor of growth family, member 3
hsa-miR-596	1	0	1	0	1	1	ZNF507	zinc finger protein 507
hsa-miR-596	1	0	1	1	1	1	YTHDF3	YTH domain family, member 3
hsa-miR-596	0	0	1	1	0	0	KRBA1	KRAB-A domain containing 1
hsa-miR-596	0	0	1	1	1	1	C10orf57	chromosome 10 open reading frame 57
hsa-miR-596	1	0	1	1	1	1	DNAJC10	DnaJ (Hsp40) homolog, subfamily C, member 10
hsa-miR-596	1	0	1	1	1	1	TMEM182	transmembrane protein 182
hsa-miR-596	1	0	1	1	1	1	SBF2	SET binding factor 2
hsa-miR-596	1	0	1	1	1	1	NRP1	neuropilin 1
hsa-miR-596	1	0	1	0	1	1	EXOC5	exocyst complex component 5
hsa-miR-596	1	0	1	0	0	0	NPEPL1	aminopeptidase-like 1
hsa-miR-596	1	0	1	1	1	1	MBD6	methyl-CpG binding domain protein 6
hsa-miR-596	1	0	1	0	1	1	JAZF1	JAZF zinc finger 1
hsa-miR-596	1	0	1	0	1	1	SMURF1	SMAD specific E3 ubiquitin protein ligase 1
hsa-miR-596	0	0	1	1	1	1	KLHL29	kelch-like 29 (Drosophila)
hsa-miR-596	1	0	1	0	1	1	KIF21B	kinesin family member 21B
hsa-miR-596	1	0	1	1	1	1	FBXL5	F-box and leucine-rich repeat protein 5
hsa-miR-596	1	0	1	0	1	1	BDNF	brain-derived neurotrophic factor
hsa-miR-596	0	0	1	0	0	0	KGFLP1	fibroblast growth factor 7 pseudogene
hsa-miR-596	1	0	1	1	1	1	KIAA0907	KIAA0907
hsa-miR-596	1	0	1	1	1	1	LUZP2	leucine zipper protein 2
hsa-miR-596	0	0	1	1	1	1	CEP41	centrosomal protein 41kDa
hsa-miR-596	0	0	1	1	0	0	DNAH1	dynein, axonemal, heavy chain 1
hsa-miR-596	0	0	1	1	1	1	IYD	iodotyrosine deiodinase
hsa-miR-596	0	0	1	0	1	1	ANKS1B	ankyrin repeat and sterile alpha motif domain containing 1B
hsa-miR-596	0	0	1	1	1	1	LINGO2	leucine rich repeat and Ig domain containing 2
hsa-miR-596	0	0	1	1	1	1	NYAP1	neuronal tyrosine-phosphorylated phosphoinositide-3-kinase adaptor 1
hsa-miR-596	0	0	1	1	1	1	POTEG	POTE ankyrin domain family, member G
hsa-miR-596	0	0	1	0	0	0	ZNFX1-AS1	ZNFX1 antisense RNA 1
hsa-miR-596	0	0	1	0	1	1	XKR5	XK, Kell blood group complex subunit-related family, member 5
hsa-miR-596	1	0	1	1	0	0	ADAM15	ADAM metallopeptidase domain 15
hsa-miR-596	1	0	1	1	1	1	CHRDL1	chordin-like 1
hsa-miR-596	0	0	1	1	1	1	HORMAD1	HORMA domain containing 1
hsa-miR-596	1	0	1	1	1	1	PLCH1	phospholipase C, eta 1
hsa-miR-596	0	0	1	1	1	1	AGER	advanced glycosylation end product-specific receptor
hsa-miR-596	1	0	1	1	1	1	NTNG1	netrin G1
hsa-miR-596	0	0	1	0	0	0	LOC100128076	protein tyrosine phosphatase pseudogene
hsa-miR-596	1	0	1	1	1	1	PCDH11X	protocadherin 11 X-linked
hsa-miR-596	1	0	1	1	0	0	PLXNB3	plexin B3
hsa-miR-596	0	0	1	1	0	0	SSPO	SCO-spondin homolog (Bos taurus)
hsa-miR-596	0	0	1	1	1	1	SLC6A2	solute carrier family 6 (neurotransmitter transporter, noradrenalin), member 2
hsa-miR-596	0	0	1	1	0	0	DDX49	DEAD (Asp-Glu-Ala-Asp) box polypeptide 49
hsa-miR-596	0	0	1	1	1	1	PAFAH1B2	platelet-activating factor acetylhydrolase 1b, catalytic subunit 2 (30kDa)
hsa-miR-596	0	0	1	1	1	1	B4GALT2	UDP-Gal:betaGlcNAc beta 1,4- galactosyltransferase, polypeptide 2
hsa-miR-596	0	0	1	1	1	1	WDR55	WD repeat domain 55
hsa-miR-596	1	0	1	1	1	1	NRGN	neurogranin (protein kinase C substrate, RC3)
hsa-miR-596	1	0	1	1	1	1	RIMS3	regulating synaptic membrane exocytosis 3
hsa-miR-596	0	0	1	1	1	1	BOD1	biorientation of chromosomes in cell division 1
hsa-miR-596	0	0	1	0	0	0	LOC93622	Morf4 family associated protein 1-like 1 pseudogene
hsa-miR-596	0	0	1	1	1	1	ACPP	acid phosphatase, prostate
hsa-miR-596	1	0	1	0	1	1	DDX3X	DEAD (Asp-Glu-Ala-Asp) box polypeptide 3, X-linked
hsa-miR-596	0	0	1	1	0	0	MYLK2	myosin light chain kinase 2
hsa-miR-596	1	0	1	1	1	1	CALM1	calmodulin 1 (phosphorylase kinase, delta)
hsa-miR-596	1	0	1	1	1	1	LMBR1L	limb region 1 homolog (mouse)-like
hsa-miR-596	1	0	1	1	1	1	HMGA1	high mobility group AT-hook 1
hsa-miR-596	1	0	1	1	1	1	GATAD2A	GATA zinc finger domain containing 2A
hsa-miR-596	1	0	1	1	1	1	RELL2	RELT-like 2
hsa-miR-596	1	0	1	1	0	0	SIGMAR1	sigma non-opioid intracellular receptor 1
hsa-miR-596	0	0	1	0	0	0	LRRC14	leucine rich repeat containing 14
hsa-miR-596	0	0	1	1	1	1	GNL3L	guanine nucleotide binding protein-like 3 (nucleolar)-like
hsa-miR-596	1	0	1	1	1	1	ZNF3	zinc finger protein 3
hsa-miR-596	1	0	1	1	1	1	CAP1	CAP, adenylate cyclase-associated protein 1 (yeast)
hsa-miR-596	0	0	1	1	0	0	C8orf44	chromosome 8 open reading frame 44
hsa-miR-596	0	0	1	0	0	0	MGC21881	uncharacterized locus MGC21881
hsa-miR-596	0	0	1	1	1	1	C8orf33	chromosome 8 open reading frame 33
hsa-miR-596	0	0	1	0	0	0	NUDT16P1	nudix (nucleoside diphosphate linked moiety X)-type motif 16 pseudogene 1
hsa-miR-596	0	0	1	0	1	1	ZNF37A	zinc finger protein 37A
hsa-miR-596	0	0	1	1	0	0	ZBTB32	zinc finger and BTB domain containing 32
hsa-miR-596	0	0	1	1	1	1	GLIPR2	GLI pathogenesis-related 2
hsa-miR-596	0	0	1	1	0	0	GAGE2D	G antigen 2D
hsa-miR-596	0	0	1	1	0	0	GAGE2E	G antigen 2E
hsa-miR-596	1	0	1	1	1	1	ARHGEF9	Cdc42 guanine nucleotide exchange factor (GEF) 9
hsa-miR-596	0	0	1	1	1	1	EXOC7	exocyst complex component 7
hsa-miR-596	1	0	1	1	1	1	KIAA1217	KIAA1217
hsa-miR-596	0	0	1	1	0	0	MAD1L1	MAD1 mitotic arrest deficient-like 1 (yeast)
hsa-miR-596	0	0	1	0	1	1	TMSB15B	thymosin beta 15B
hsa-miR-596	0	0	1	1	1	1	TMEM40	transmembrane protein 40
hsa-miR-596	0	0	1	1	1	1	HLA-G	major histocompatibility complex, class I, G
hsa-miR-596	0	0	1	0	0	0	NBR2	neighbor of BRCA1 gene 2 (non-protein coding)
hsa-miR-596	1	0	1	1	1	1	SPOCK2	sparc/osteonectin, cwcv and kazal-like domains proteoglycan (testican) 2
hsa-miR-596	0	0	1	1	0	0	PRRG2	proline rich Gla (G-carboxyglutamic acid) 2
hsa-miR-596	1	0	1	1	1	1	FAM131A	family with sequence similarity 131, member A
hsa-miR-596	0	0	1	0	0	0	ZBED3-AS1	ZBED3 antisense RNA 1
hsa-miR-596	1	0	1	1	1	1	RSPO2	R-spondin 2
hsa-miR-596	0	0	1	1	1	1	RNF32	ring finger protein 32
hsa-miR-596	1	0	1	1	1	1	TMEM127	transmembrane protein 127
hsa-miR-596	0	0	1	0	1	1	KIAA0895	KIAA0895
hsa-miR-596	1	0	1	1	1	1	HTR2C	5-hydroxytryptamine (serotonin) receptor 2C, G protein-coupled
hsa-miR-596	0	0	1	0	0	0	LOC145837	uncharacterized LOC145837
hsa-miR-596	1	0	1	0	1	1	PSMF1	proteasome (prosome, macropain) inhibitor subunit 1 (PI31)
hsa-miR-596	0	0	1	1	0	0	SWI5	SWI5 recombination repair homolog (yeast)
hsa-miR-596	0	0	1	0	1	1	FLJ25328	uncharacterized LOC148231
hsa-miR-596	0	0	1	0	0	0	CFL1P1	cofilin 1 (non-muscle) pseudogene 1
hsa-miR-596	0	0	1	0	1	1	PLEKHM1P	pleckstrin homology domain containing, family M (with RUN domain) member 1 pseudogene
hsa-miR-596	1	0	1	1	1	1	FGF1	fibroblast growth factor 1 (acidic)
hsa-miR-596	1	0	1	1	1	1	SIRPA	signal-regulatory protein alpha
hsa-miR-596	0	0	1	0	0	0	LINC00238	long intergenic non-protein coding RNA 238
hsa-miR-596	1	0	1	1	1	1	PCDHA5	protocadherin alpha 5
hsa-miR-596	1	0	1	0	1	1	KIF5A	kinesin family member 5A
hsa-miR-596	1	0	1	1	1	1	FBXL16	F-box and leucine-rich repeat protein 16
hsa-miR-596	1	0	1	1	1	1	RIC8B	resistance to inhibitors of cholinesterase 8 homolog B (C. elegans)
hsa-miR-596	0	0	1	1	1	1	EDA2R	ectodysplasin A2 receptor
hsa-miR-596	1	0	1	0	1	1	DDX3Y	DEAD (Asp-Glu-Ala-Asp) box polypeptide 3, Y-linked
hsa-miR-596	1	0	1	1	1	1	ZEB2	zinc finger E-box binding homeobox 2
hsa-miR-596	0	0	1	0	0	0	FLJ10661	family with sequence similarity 86, member A pseudogene
hsa-miR-596	0	0	1	1	1	1	SNAPC3	small nuclear RNA activating complex, polypeptide 3, 50kDa
hsa-miR-596	0	0	1	0	0	0	FAM201A	family with sequence similarity 201, member A
hsa-miR-596	1	0	1	1	1	1	MEIS1	Meis homeobox 1
hsa-miR-596	0	0	1	0	0	0	LOC652276	potassium channel tetramerisation domain containing 5 pseudogene
hsa-miR-596	1	0	1	0	1	1	NEGR1	neuronal growth regulator 1
hsa-miR-596	0	0	1	0	0	0	TMEM235	transmembrane protein 235
hsa-miR-596	1	0	1	1	0	0	TMEM131	transmembrane protein 131
hsa-miR-596	0	0	1	0	0	0	LOC284889	uncharacterized LOC284889
hsa-miR-596	0	0	1	1	0	0	FNTA	farnesyltransferase, CAAX box, alpha
hsa-miR-596	0	0	1	0	0	0	LOC283922	pyruvate dehydrogenase phosphatase regulatory subunit pseudogene
hsa-miR-596	0	0	1	1	0	0	LAG3	lymphocyte-activation gene 3
hsa-miR-596	1	0	1	1	0	0	CHD4	chromodomain helicase DNA binding protein 4
hsa-miR-596	0	0	1	0	0	0	FLJ36000	uncharacterized FLJ36000
hsa-miR-596	1	0	1	1	1	1	ULK2	unc-51-like kinase 2 (C. elegans)
hsa-miR-596	1	0	1	1	1	1	UNK	unkempt homolog (Drosophila)
hsa-miR-596	1	0	1	1	0	0	HES7	hairy and enhancer of split 7 (Drosophila)
hsa-miR-596	0	0	1	0	0	0	LOC339622	uncharacterized LOC339622
hsa-miR-596	0	0	1	1	1	1	ZFP90	zinc finger protein 90 homolog (mouse)
hsa-miR-596	0	0	1	0	1	1	TSLP	thymic stromal lymphopoietin
hsa-miR-596	0	0	1	0	0	0	LOC339240	keratin 17 pseudogene
hsa-miR-596	0	0	1	1	1	1	MDFIC	MyoD family inhibitor domain containing
hsa-miR-596	1	0	1	1	1	1	FAM123A	family with sequence similarity 123A
hsa-miR-596	0	0	1	1	0	0	COL9A2	collagen, type IX, alpha 2
hsa-miR-596	1	0	1	1	1	1	PRRG1	proline rich Gla (G-carboxyglutamic acid) 1
hsa-miR-596	1	0	1	1	1	1	CTIF	CBP80/20-dependent translation initiation factor
hsa-miR-596	0	0	1	0	0	0	MORF4L2-AS1	MORF4L2 antisense RNA 1
hsa-miR-596	1	0	1	1	1	1	AGAP3	ArfGAP with GTPase domain, ankyrin repeat and PH domain 3
hsa-miR-596	1	0	1	0	1	1	PSD3	pleckstrin and Sec7 domain containing 3
hsa-miR-596	0	0	1	1	1	1	NADKD1	NAD kinase domain containing 1
hsa-miR-596	0	0	1	1	1	1	MGC57346	uncharacterized LOC401884
hsa-miR-596	0	0	1	1	0	0	NIT1	nitrilase 1
hsa-miR-596	0	0	1	1	0	0	FOXJ1	forkhead box J1
hsa-miR-596	0	0	1	0	0	0	LOC339529	uncharacterized LOC339529
hsa-miR-596	1	0	1	1	1	1	SLC35G1	solute carrier family 35, member G1
hsa-miR-596	0	0	1	0	0	0	LOC348120	uncharacterized LOC348120
hsa-miR-596	1	0	1	1	1	1	TOMM40	translocase of outer mitochondrial membrane 40 homolog (yeast)
hsa-miR-596	0	0	1	1	0	0	MT3	metallothionein 3
hsa-miR-596	0	0	1	1	0	0	ENTPD8	ectonucleoside triphosphate diphosphohydrolase 8
hsa-miR-596	1	0	1	1	0	0	EIF2B5	eukaryotic translation initiation factor 2B, subunit 5 epsilon, 82kDa
hsa-miR-596	1	0	1	1	1	1	ZFP91	zinc finger protein 91 homolog (mouse)
hsa-miR-596	0	0	1	1	1	1	RAB3IL1	RAB3A interacting protein (rabin3)-like 1
hsa-miR-596	1	0	1	1	1	1	PCGF5	polycomb group ring finger 5
hsa-miR-596	0	0	1	0	0	0	AQP7P1	aquaporin 7 pseudogene 1
hsa-miR-596	1	0	1	1	1	1	ATP8B4	ATPase, class I, type 8B, member 4
hsa-miR-596	0	0	1	1	0	0	GRIN2C	glutamate receptor, ionotropic, N-methyl D-aspartate 2C
hsa-miR-596	0	0	1	1	1	1	P2RX6	purinergic receptor P2X, ligand-gated ion channel, 6
hsa-miR-596	1	0	1	1	1	1	NIPBL	Nipped-B homolog (Drosophila)
hsa-miR-596	0	0	1	0	0	0	FLJ35390	uncharacterized LOC255031
hsa-miR-596	1	0	1	1	1	1	ADCY6	adenylate cyclase 6
hsa-miR-596	0	0	1	1	1	1	ZNF189	zinc finger protein 189
hsa-miR-596	0	0	1	0	0	0	LINC00442	long intergenic non-protein coding RNA 442
hsa-miR-596	1	0	1	1	0	0	TMEM198	transmembrane protein 198
hsa-miR-596	0	0	1	0	0	0	GAGE7	G antigen 7
hsa-miR-596	0	0	1	1	0	0	GAGE12I	G antigen 12I
hsa-miR-596	0	0	1	1	0	0	GAGE12G	G antigen 12G
hsa-miR-596	0	0	1	1	0	0	GAGE12F	G antigen 12F
hsa-miR-596	0	0	1	1	0	0	RELA	v-rel reticuloendotheliosis viral oncogene homolog A (avian)
hsa-miR-596	0	0	1	1	0	0	GAGE2A	G antigen 2A
hsa-miR-596	0	0	1	1	0	0	CYP4F30P	cytochrome P450, family 4, subfamily F, polypeptide 30, pseudogene
hsa-miR-596	0	0	1	1	1	1	SLC11A1	solute carrier family 11 (proton-coupled divalent metal ion transporters), member 1
hsa-miR-596	1	0	1	1	1	1	RARG	retinoic acid receptor, gamma
hsa-miR-596	0	0	1	0	0	0	OAZ3	ornithine decarboxylase antizyme 3
hsa-miR-596	1	0	1	1	1	1	NTRK2	neurotrophic tyrosine kinase, receptor, type 2
hsa-miR-596	0	0	1	1	0	0	MASP2	mannan-binding lectin serine peptidase 2
hsa-miR-596	0	0	1	0	0	0	LINC00537	long intergenic non-protein coding RNA 537
hsa-miR-596	1	0	1	1	1	1	APBA2	amyloid beta (A4) precursor protein-binding, family A, member 2
hsa-miR-596	0	0	1	0	0	0	LOC554249	uncharacterized LOC554249
hsa-miR-596	0	0	1	1	1	1	MAPK13	mitogen-activated protein kinase 13
hsa-miR-596	1	0	1	1	1	1	GBF1	golgi brefeldin A resistant guanine nucleotide exchange factor 1
hsa-miR-596	1	0	1	1	1	1	ST8SIA2	ST8 alpha-N-acetyl-neuraminide alpha-2,8-sialyltransferase 2
hsa-miR-596	1	0	1	1	1	1	LRRC15	leucine rich repeat containing 15
hsa-miR-596	0	0	1	0	0	0	LOC441493	uncharacterized LOC441493
hsa-miR-596	0	0	1	0	0	0	FAM71F2	family with sequence similarity 71, member F2
hsa-miR-596	0	0	1	0	0	0	FBXL19-AS1	FBXL19 antisense RNA 1 (head to head)
hsa-miR-596	1	0	1	1	1	1	CERS6	ceramide synthase 6
hsa-miR-596	1	0	1	1	1	1	SP4	Sp4 transcription factor
hsa-miR-596	1	0	1	0	1	1	ATP8A1	ATPase, aminophospholipid transporter (APLT), class I, type 8A, member 1
hsa-miR-596	0	0	1	1	1	1	SMTNL2	smoothelin-like 2
hsa-miR-596	0	0	1	0	0	0	INTS4L1	integrator complex subunit 4-like 1
hsa-miR-596	1	0	1	1	1	1	SLK	STE20-like kinase
hsa-miR-596	0	0	1	0	0	0	LINC00310	long intergenic non-protein coding RNA 310
hsa-miR-596	0	0	1	1	0	0	RNF123	ring finger protein 123
hsa-miR-596	0	0	1	1	1	1	C9orf171	chromosome 9 open reading frame 171
hsa-miR-596	1	0	1	1	1	1	COLQ	collagen-like tail subunit (single strand of homotrimer) of asymmetric acetylcholinesterase
hsa-miR-596	0	0	1	1	0	0	KIF13A	kinesin family member 13A
hsa-miR-596	1	0	1	1	1	1	MACROD2	MACRO domain containing 2
hsa-miR-596	0	0	1	0	0	0	GAGE12B	G antigen 12B
hsa-miR-596	0	0	1	0	0	0	FAM225B	family with sequence similarity 225, member B (non-protein coding)
hsa-miR-596	0	0	1	0	0	0	LILRP2	leukocyte immunoglobulin-like receptor pseudogene 2
hsa-miR-596	1	0	1	0	1	1	FAM196A	family with sequence similarity 196, member A
hsa-miR-596	1	0	1	1	1	1	BTBD7	BTB (POZ) domain containing 7
hsa-miR-596	0	0	1	1	1	1	NCBP2	nuclear cap binding protein subunit 2, 20kDa
hsa-miR-596	0	0	1	1	1	1	C10orf82	chromosome 10 open reading frame 82
hsa-miR-596	0	0	1	1	1	1	AIG1	androgen-induced 1
hsa-miR-596	0	0	1	1	1	1	CRB1	crumbs homolog 1 (Drosophila)
hsa-miR-596	1	0	1	1	1	1	TGOLN2	trans-golgi network protein 2
hsa-miR-596	0	0	1	1	0	0	CDK5RAP2	CDK5 regulatory subunit associated protein 2
hsa-miR-596	1	0	1	1	1	1	NFASC	neurofascin
hsa-miR-596	1	0	1	1	1	1	PRDM2	PR domain containing 2, with ZNF domain
hsa-miR-596	0	0	1	1	1	1	B4GALT4	UDP-Gal:betaGlcNAc beta 1,4- galactosyltransferase, polypeptide 4
hsa-miR-596	0	0	1	1	1	1	MLIP	muscular LMNA-interacting protein
hsa-miR-596	0	0	1	1	0	0	ANKRD33	ankyrin repeat domain 33
hsa-miR-596	0	0	1	0	1	1	ANKRD36	ankyrin repeat domain 36
hsa-miR-596	1	0	1	1	1	1	KLHL2	kelch-like 2, Mayven (Drosophila)
hsa-miR-596	0	0	1	1	1	1	DUSP19	dual specificity phosphatase 19
hsa-miR-596	1	0	1	1	1	1	PHF3	PHD finger protein 3
hsa-miR-596	1	0	1	1	1	1	CORIN	corin, serine peptidase
hsa-miR-596	1	0	1	1	1	1	NFIB	nuclear factor I/B
hsa-miR-596	1	0	1	1	1	1	NAV1	neuron navigator 1
hsa-miR-596	1	0	1	1	1	1	CREB3L2	cAMP responsive element binding protein 3-like 2
hsa-miR-596	0	0	1	0	1	1	IDO1	indoleamine 2,3-dioxygenase 1
hsa-miR-596	0	0	1	1	0	0	H2AFY2	H2A histone family, member Y2
hsa-miR-596	0	0	1	1	1	1	KIAA0141	KIAA0141
hsa-miR-596	0	0	1	1	1	1	TBC1D10A	TBC1 domain family, member 10A
hsa-miR-596	0	0	1	1	1	1	GTPBP3	GTP binding protein 3 (mitochondrial)
hsa-miR-596	0	0	1	1	1	1	UMPS	uridine monophosphate synthetase
hsa-miR-596	0	0	1	0	0	0	AKR1A1	aldo-keto reductase family 1, member A1 (aldehyde reductase)
hsa-miR-596	0	0	1	1	1	1	TPRA1	transmembrane protein, adipocyte asscociated 1
hsa-miR-596	0	0	1	1	0	0	URM1	ubiquitin related modifier 1
hsa-miR-596	0	0	1	1	0	0	RBM28	RNA binding motif protein 28
hsa-miR-596	1	0	1	1	1	1	ATAT1	alpha tubulin acetyltransferase 1
hsa-miR-596	1	0	1	1	1	1	CNIH2	cornichon homolog 2 (Drosophila)
hsa-miR-596	0	0	1	0	0	0	ABCB5	ATP-binding cassette, sub-family B (MDR/TAP), member 5
hsa-miR-596	0	0	1	1	1	1	CYTH2	cytohesin 2
hsa-miR-596	1	1	1	1	0	0	EFNA3	ephrin-A3
hsa-miR-596	0	0	1	1	1	1	ATP5F1	ATP synthase, H+ transporting, mitochondrial Fo complex, subunit B1
hsa-miR-596	1	0	1	0	1	1	BNIP3L	BCL2/adenovirus E1B 19kDa interacting protein 3-like
hsa-miR-596	1	0	1	0	1	1	PTPLAD1	protein tyrosine phosphatase-like A domain containing 1
hsa-miR-596	0	0	1	1	1	1	SORD	sorbitol dehydrogenase
hsa-miR-596	0	0	1	1	1	1	ASCC2	activating signal cointegrator 1 complex subunit 2
hsa-miR-596	0	0	1	1	1	1	ELP5	elongator acetyltransferase complex subunit 5
hsa-miR-596	0	0	1	1	1	1	HMGB2	high mobility group box 2
hsa-miR-596	0	0	1	1	0	0	IKBKG	inhibitor of kappa light polypeptide gene enhancer in B-cells, kinase gamma
hsa-miR-596	1	0	1	1	1	1	PCTP	phosphatidylcholine transfer protein
hsa-miR-596	0	0	1	0	1	1	WASH3P	WAS protein family homolog 3 pseudogene
hsa-miR-596	1	0	1	1	1	1	LYPLA2	lysophospholipase II
hsa-miR-596	0	0	1	1	1	1	AHSA1	AHA1, activator of heat shock 90kDa protein ATPase homolog 1 (yeast)
hsa-miR-596	1	0	1	1	1	1	CCDC25	coiled-coil domain containing 25
hsa-miR-596	0	0	1	1	1	1	ATG4A	autophagy related 4A, cysteine peptidase
hsa-miR-596	0	0	1	0	0	0	LOC729059	uncharacterized LOC729059
hsa-miR-596	0	0	1	1	1	1	NARS	asparaginyl-tRNA synthetase
hsa-miR-596	1	0	1	1	1	1	PPP5C	protein phosphatase 5, catalytic subunit
hsa-miR-596	1	0	1	1	1	1	CUX1	cut-like homeobox 1
hsa-miR-596	0	0	1	1	0	0	C1orf122	chromosome 1 open reading frame 122
hsa-miR-596	0	0	1	1	0	0	SCRN2	secernin 2
hsa-miR-596	1	0	1	1	1	1	TIMP3	TIMP metallopeptidase inhibitor 3
hsa-miR-596	0	0	1	0	1	1	GINS3	GINS complex subunit 3 (Psf3 homolog)
hsa-miR-596	0	0	1	0	0	0	RPS16P10	ribosomal protein S16 pseudogene 10
hsa-miR-596	0	0	1	1	1	1	HOXC9	homeobox C9
hsa-miR-596	1	0	1	0	1	1	GRAMD1A	GRAM domain containing 1A
hsa-miR-596	1	0	1	1	0	0	CRELD1	cysteine-rich with EGF-like domains 1
hsa-miR-596	0	0	1	1	0	0	TUSC3	tumor suppressor candidate 3
hsa-miR-596	0	0	1	1	0	0	CD79B	CD79b molecule, immunoglobulin-associated beta
hsa-miR-596	1	0	1	1	1	1	ILK	integrin-linked kinase
hsa-miR-596	1	0	1	1	1	1	RALY	RNA binding protein, autoantigenic (hnRNP-associated with lethal yellow homolog (mouse))
hsa-miR-596	0	0	1	1	1	1	HS3ST2	heparan sulfate (glucosamine) 3-O-sulfotransferase 2
hsa-miR-596	1	0	1	1	1	1	HIGD1A	HIG1 hypoxia inducible domain family, member 1A
hsa-miR-596	1	0	1	1	0	0	CCM2	cerebral cavernous malformation 2
hsa-miR-596	0	0	1	0	0	0	NUDT18	nudix (nucleoside diphosphate linked moiety X)-type motif 18
hsa-miR-596	1	0	1	1	0	0	RUNDC3A	RUN domain containing 3A
hsa-miR-596	0	0	1	1	1	1	ZNF346	zinc finger protein 346
hsa-miR-596	0	0	1	1	1	1	CIRBP	cold inducible RNA binding protein
hsa-miR-596	0	0	1	1	0	0	ISG20	interferon stimulated exonuclease gene 20kDa
hsa-miR-596	1	0	1	1	1	1	LGALSL	lectin, galactoside-binding-like
hsa-miR-596	0	0	1	1	0	0	INO80B	INO80 complex subunit B
hsa-miR-596	0	0	1	1	1	1	C10orf2	chromosome 10 open reading frame 2
hsa-miR-596	0	0	1	0	0	0	LOC731789	uncharacterized LOC731789
hsa-miR-596	0	0	1	1	1	1	BDP1	B double prime 1, subunit of RNA polymerase III transcription initiation factor IIIB
hsa-miR-596	0	0	1	1	1	1	SYNE2	spectrin repeat containing, nuclear envelope 2
hsa-miR-596	0	0	1	0	0	0	C18orf63	chromosome 18 open reading frame 63
hsa-miR-596	0	0	1	0	0	0	LINC00661	long intergenic non-protein coding RNA 661
hsa-miR-596	1	0	1	1	1	1	KIAA2018	KIAA2018
hsa-miR-596	1	0	1	1	1	1	MAPK8IP3	mitogen-activated protein kinase 8 interacting protein 3
hsa-miR-596	0	0	1	0	0	0	LOC440518	golgin A2 pseudogene
hsa-miR-596	0	0	1	0	0	0	DANCR	differentiation antagonizing non-protein coding RNA
hsa-miR-596	1	0	1	1	1	1	MAN2A2	mannosidase, alpha, class 2A, member 2
hsa-miR-596	0	0	1	1	1	1	PTGS1	prostaglandin-endoperoxide synthase 1 (prostaglandin G/H synthase and cyclooxygenase)
hsa-miR-596	1	0	1	1	1	1	GLIS3	GLIS family zinc finger 3
hsa-miR-596	1	0	1	0	1	1	DAPP1	dual adaptor of phosphotyrosine and 3-phosphoinositides
hsa-miR-596	1	0	1	1	1	1	IRF1	interferon regulatory factor 1
hsa-miR-596	0	0	1	0	0	0	GPR144	G protein-coupled receptor 144
hsa-miR-596	0	0	1	1	1	1	ALDH3B1	aldehyde dehydrogenase 3 family, member B1
hsa-miR-596	1	0	1	1	1	1	MLL	myeloid/lymphoid or mixed-lineage leukemia (trithorax homolog, Drosophila)
hsa-miR-596	0	0	1	1	1	1	VDAC2	voltage-dependent anion channel 2
hsa-miR-596	1	0	1	1	1	1	GRM1	glutamate receptor, metabotropic 1
hsa-miR-596	1	0	1	0	1	1	BCL2	B-cell CLL/lymphoma 2
hsa-miR-596	0	0	1	0	0	0	PVT1	Pvt1 oncogene (non-protein coding)
hsa-miR-596	1	0	1	1	0	0	ADRB3	adrenoceptor beta 3
hsa-miR-596	0	0	1	1	1	1	ATP7A	ATPase, Cu++ transporting, alpha polypeptide
hsa-miR-596	0	0	1	1	0	0	CD40LG	CD40 ligand
hsa-miR-596	1	0	1	1	1	1	DMD	dystrophin
hsa-miR-596	0	0	1	1	1	1	MTR	5-methyltetrahydrofolate-homocysteine methyltransferase
hsa-miR-596	1	0	1	1	1	1	ATXN1	ataxin 1
hsa-miR-596	0	0	1	1	1	1	STS	steroid sulfatase (microsomal), isozyme S
hsa-miR-596	1	0	1	0	1	1	CYBB	cytochrome b-245, beta polypeptide
hsa-miR-596	0	0	1	1	1	1	IGF2	insulin-like growth factor 2 (somatomedin A)
hsa-miR-596	1	0	1	0	1	1	CACNA1E	calcium channel, voltage-dependent, R type, alpha 1E subunit
hsa-miR-596	1	0	1	1	0	0	GRIK3	glutamate receptor, ionotropic, kainate 3
hsa-miR-596	0	0	1	1	1	1	GRIN2B	glutamate receptor, ionotropic, N-methyl D-aspartate 2B
hsa-miR-596	1	0	1	0	1	1	KCNJ2	potassium inwardly-rectifying channel, subfamily J, member 2
hsa-miR-596	1	0	1	1	1	1	PPP3R1	protein phosphatase 3, regulatory subunit B, alpha
hsa-miR-596	1	0	1	1	1	1	RARB	retinoic acid receptor, beta
hsa-miR-596	0	0	1	1	1	1	C16orf87	chromosome 16 open reading frame 87
hsa-miR-596	0	0	1	1	1	1	FLJ45079	FLJ45079 protein
hsa-miR-596	0	0	1	0	1	1	C9orf170	chromosome 9 open reading frame 170
hsa-miR-596	1	0	1	1	1	1	MIR22HG	MIR22 host gene (non-protein coding)
hsa-miR-596	0	0	1	0	0	0	KLK2	kallikrein-related peptidase 2
hsa-miR-596	1	0	1	0	1	1	CACNA1I	calcium channel, voltage-dependent, T type, alpha 1I subunit
hsa-miR-596	0	0	1	1	0	0	MANBAL	mannosidase, beta A, lysosomal-like
hsa-miR-596	0	0	1	1	1	1	ZCCHC16	zinc finger, CCHC domain containing 16
hsa-miR-596	1	0	1	0	1	1	LRRC55	leucine rich repeat containing 55
hsa-miR-596	0	0	1	0	1	1	FLJ46347	uncharacterized LOC389064
hsa-miR-596	1	0	1	1	1	1	EDA	ectodysplasin A
hsa-miR-596	1	0	1	1	0	0	SDC1	syndecan 1
hsa-miR-596	1	0	1	1	1	1	IGF2BP2	insulin-like growth factor 2 mRNA binding protein 2
hsa-miR-596	0	0	1	1	0	0	DUSP13	dual specificity phosphatase 13
hsa-miR-596	1	0	1	1	1	1	TULP4	tubby like protein 4
hsa-miR-596	1	0	1	1	1	1	BCAP29	B-cell receptor-associated protein 29
hsa-miR-596	1	0	1	1	1	1	RBM33	RNA binding motif protein 33
hsa-miR-596	0	0	1	1	1	1	MXRA7	matrix-remodelling associated 7
hsa-miR-596	1	0	1	1	1	1	LPHN1	latrophilin 1
hsa-miR-596	0	0	1	1	1	1	SPIN3	spindlin family, member 3
hsa-miR-596	1	0	1	1	1	1	BCL2L15	BCL2-like 15
hsa-miR-596	0	0	1	1	1	1	SLC9A4	solute carrier family 9, subfamily A (NHE4, cation proton antiporter 4), member 4
hsa-miR-596	1	0	1	1	1	1	PABPC1L2A	poly(A) binding protein, cytoplasmic 1-like 2A
hsa-miR-596	0	0	1	1	1	1	LDLRAD2	low density lipoprotein receptor class A domain containing 2
hsa-miR-596	1	0	1	1	1	1	CA7	carbonic anhydrase VII
hsa-miR-596	1	0	1	1	1	1	NCDN	neurochondrin
hsa-miR-596	0	0	1	1	0	0	RTKN	rhotekin
hsa-miR-596	1	0	1	1	1	1	PFKFB2	6-phosphofructo-2-kinase/fructose-2,6-biphosphatase 2
hsa-miR-596	0	0	1	1	1	1	ZNF187	zinc finger protein 187
hsa-miR-596	1	0	1	0	1	1	RGAG4	retrotransposon gag domain containing 4
hsa-miR-596	1	0	1	1	1	1	CANX	calnexin
hsa-miR-596	1	0	1	0	1	1	BCL7A	B-cell CLL/lymphoma 7A
hsa-miR-596	1	0	1	0	1	1	TNRC6B	trinucleotide repeat containing 6B
hsa-miR-596	1	0	1	0	1	1	CELF2	CUGBP, Elav-like family member 2
hsa-miR-596	1	0	1	0	1	1	C3orf70	chromosome 3 open reading frame 70
hsa-miR-596	1	0	1	1	1	1	VEGFA	vascular endothelial growth factor A
hsa-miR-596	0	0	1	1	1	1	ARRDC2	arrestin domain containing 2
hsa-miR-596	1	0	1	1	1	1	KCTD21	potassium channel tetramerisation domain containing 21
hsa-miR-596	1	0	1	1	1	1	SRSF7	serine/arginine-rich splicing factor 7
hsa-miR-596	0	0	1	1	1	1	ASB9	ankyrin repeat and SOCS box containing 9
hsa-miR-596	1	0	1	0	1	1	SRGAP3	SLIT-ROBO Rho GTPase activating protein 3
hsa-miR-596	0	0	1	1	0	0	CALCA	calcitonin-related polypeptide alpha
hsa-miR-596	1	0	1	1	1	1	RUFY3	RUN and FYVE domain containing 3
hsa-miR-596	1	0	1	0	1	1	GK5	glycerol kinase 5 (putative)
hsa-miR-596	1	0	1	0	1	1	CCNL2	cyclin L2
hsa-miR-596	1	0	1	1	1	1	CBLN3	cerebellin 3 precursor
hsa-miR-596	1	0	1	1	1	1	ZNF384	zinc finger protein 384
hsa-miR-596	0	0	1	0	1	1	SCN3B	sodium channel, voltage-gated, type III, beta subunit
hsa-miR-596	1	0	1	1	1	1	NCALD	neurocalcin delta
hsa-miR-596	0	0	1	1	0	0	GAGE1	G antigen 1
hsa-miR-596	1	0	1	1	1	1	HMGCLL1	3-hydroxymethyl-3-methylglutaryl-CoA lyase-like 1
hsa-miR-596	1	0	1	1	1	1	ZC2HC1C	zinc finger, C2HC-type containing 1C
hsa-miR-596	1	0	1	1	1	1	SLC9A6	solute carrier family 9, subfamily A (NHE6, cation proton antiporter 6), member 6
hsa-miR-596	1	0	1	0	1	1	SRGAP2	SLIT-ROBO Rho GTPase activating protein 2
hsa-miR-596	1	0	1	0	1	1	TMEM237	transmembrane protein 237
hsa-miR-596	0	0	1	1	1	1	FAM22G	family with sequence similarity 22, member G
hsa-miR-596	1	0	1	0	1	1	SLC12A2	solute carrier family 12 (sodium/potassium/chloride transporters), member 2
hsa-miR-596	1	0	1	1	1	1	PDE11A	phosphodiesterase 11A
hsa-miR-596	1	0	1	1	1	1	ATG9A	autophagy related 9A
hsa-miR-596	0	0	1	1	0	0	VPS37D	vacuolar protein sorting 37 homolog D (S. cerevisiae)
hsa-miR-596	1	0	1	0	1	1	FAM127C	family with sequence similarity 127, member C
hsa-miR-596	1	0	1	0	1	1	FBXO41	F-box protein 41
hsa-miR-596	1	0	1	1	1	1	SHANK3	SH3 and multiple ankyrin repeat domains 3
hsa-miR-596	0	0	1	1	0	0	LMTK3	lemur tyrosine kinase 3
hsa-miR-596	1	0	1	1	1	1	ZNF697	zinc finger protein 697
hsa-miR-596	1	0	1	1	1	1	DGKG	diacylglycerol kinase, gamma 90kDa
hsa-miR-596	1	0	1	1	1	1	ADCYAP1	adenylate cyclase activating polypeptide 1 (pituitary)
hsa-miR-596	1	0	1	0	0	0	ACAN	aggrecan
hsa-miR-596	0	0	1	1	0	0	CLPTM1	cleft lip and palate associated transmembrane protein 1
hsa-miR-596	1	0	1	1	1	1	CELSR2	cadherin, EGF LAG seven-pass G-type receptor 2 (flamingo homolog, Drosophila)
hsa-miR-596	1	0	1	1	1	1	GPC4	glypican 4
hsa-miR-596	0	0	1	1	0	0	GAGE2C	G antigen 2C
hsa-miR-596	1	0	1	1	0	0	GDI1	GDP dissociation inhibitor 1
hsa-miR-596	0	0	1	1	1	1	IL13RA1	interleukin 13 receptor, alpha 1
hsa-miR-596	1	0	1	1	1	1	IRAK2	interleukin-1 receptor-associated kinase 2
hsa-miR-596	1	0	1	1	1	1	CDC25A	cell division cycle 25 homolog A (S. pombe)
hsa-miR-596	1	0	1	0	1	1	CEBPG	CCAAT/enhancer binding protein (C/EBP), gamma
hsa-miR-596	1	0	1	1	1	1	CLCN3	chloride channel, voltage-sensitive 3
hsa-miR-596	0	0	1	1	1	1	SLC31A2	solute carrier family 31 (copper transporters), member 2
hsa-miR-596	1	0	1	1	1	1	DPP4	dipeptidyl-peptidase 4
hsa-miR-596	0	0	1	1	1	1	DPT	dermatopontin
hsa-miR-596	1	0	1	1	1	1	E2F3	E2F transcription factor 3
hsa-miR-596	1	0	1	0	1	1	ETV6	ets variant 6
hsa-miR-596	1	0	1	1	1	1	FBN2	fibrillin 2
hsa-miR-596	0	0	1	1	0	0	FUT5	fucosyltransferase 5 (alpha (1,3) fucosyltransferase)
hsa-miR-596	1	0	1	1	1	1	KPNA4	karyopherin alpha 4 (importin alpha 3)
hsa-miR-596	0	0	1	1	1	1	KRT32	keratin 32
hsa-miR-596	1	0	1	1	1	1	LIF	leukemia inhibitory factor
hsa-miR-596	1	0	1	1	1	1	MYH9	myosin, heavy chain 9, non-muscle
hsa-miR-596	1	0	1	1	1	1	NGFR	nerve growth factor receptor
hsa-miR-596	0	0	1	0	1	1	OPHN1	oligophrenin 1
hsa-miR-596	1	0	1	0	1	1	PCDHGC3	protocadherin gamma subfamily C, 3
hsa-miR-596	0	0	1	1	1	1	PPP1R3A	protein phosphatase 1, regulatory subunit 3A
hsa-miR-596	0	0	1	1	0	0	PPP1R8	protein phosphatase 1, regulatory subunit 8
hsa-miR-596	0	0	1	0	1	1	PSMD3	proteasome (prosome, macropain) 26S subunit, non-ATPase, 3
hsa-miR-596	0	0	1	1	1	1	RAB3A	RAB3A, member RAS oncogene family
hsa-miR-596	0	0	1	1	1	1	RAF1	v-raf-1 murine leukemia viral oncogene homolog 1
hsa-miR-596	1	0	1	1	0	0	RFX1	regulatory factor X, 1 (influences HLA class II expression)
hsa-miR-596	1	0	1	0	1	1	SLC6A1	solute carrier family 6 (neurotransmitter transporter, GABA), member 1
hsa-miR-596	0	0	1	1	0	0	SLPI	secretory leukocyte peptidase inhibitor
hsa-miR-596	1	0	1	0	1	1	SOX4	SRY (sex determining region Y)-box 4
hsa-miR-596	1	0	1	1	1	1	SRF	serum response factor (c-fos serum response element-binding transcription factor)
hsa-miR-596	1	0	1	0	1	1	ZIC1	Zic family member 1
hsa-miR-596	1	0	1	0	1	1	SNN	stannin
hsa-miR-596	1	0	1	0	1	1	PCDHGA12	protocadherin gamma subfamily A, 12
hsa-miR-596	1	0	1	0	1	1	PCDHGB4	protocadherin gamma subfamily B, 4
hsa-miR-596	1	0	1	1	1	1	ALDH4A1	aldehyde dehydrogenase 4 family, member A1
hsa-miR-596	0	0	1	1	0	0	MATN4	matrilin 4
hsa-miR-596	1	0	1	1	1	1	BCL2L2	BCL2-like 2
hsa-miR-596	1	0	1	1	1	1	GDA	guanine deaminase
hsa-miR-596	1	0	1	0	1	1	ACVR1B	activin A receptor, type IB
hsa-miR-596	1	0	1	1	1	1	ARL3	ADP-ribosylation factor-like 3
hsa-miR-596	1	0	1	0	1	1	CEBPA	CCAAT/enhancer binding protein (C/EBP), alpha
hsa-miR-596	1	0	1	1	1	1	EPHB3	EPH receptor B3
hsa-miR-596	0	0	1	1	1	1	NFATC3	nuclear factor of activated T-cells, cytoplasmic, calcineurin-dependent 3
hsa-miR-596	0	0	1	1	1	1	RAB27A	RAB27A, member RAS oncogene family
hsa-miR-596	0	0	1	1	0	0	SFSWAP	splicing factor, suppressor of white-apricot homolog (Drosophila)
hsa-miR-596	1	0	1	0	1	1	MAPKAPK2	mitogen-activated protein kinase-activated protein kinase 2
hsa-miR-596	1	0	1	1	1	1	NREP	neuronal regeneration related protein homolog (rat)
hsa-miR-596	1	0	1	1	1	1	KIF3B	kinesin family member 3B
hsa-miR-596	1	0	1	1	1	1	SEC24C	SEC24 family, member C (S. cerevisiae)
hsa-miR-596	0	0	1	1	1	1	CD8B	CD8b molecule
hsa-miR-596	0	0	1	1	1	1	TRIM25	tripartite motif containing 25
hsa-miR-596	1	0	1	1	1	1	MED13	mediator complex subunit 13
hsa-miR-596	1	0	1	1	1	1	ACTC1	actin, alpha, cardiac muscle 1
hsa-miR-596	0	0	1	1	1	1	CSTA	cystatin A (stefin A)
hsa-miR-596	1	0	1	0	1	1	DLX6	distal-less homeobox 6
hsa-miR-596	1	0	1	0	1	1	RAPGEF1	Rap guanine nucleotide exchange factor (GEF) 1
hsa-miR-596	0	0	1	1	0	0	NCKAP1L	NCK-associated protein 1-like
hsa-miR-596	1	0	1	1	1	1	GABBR2	gamma-aminobutyric acid (GABA) B receptor, 2
hsa-miR-596	1	0	1	1	1	1	HCN4	hyperpolarization activated cyclic nucleotide-gated potassium channel 4
hsa-miR-596	1	0	1	0	0	0	FRAT1	frequently rearranged in advanced T-cell lymphomas
hsa-miR-596	1	0	1	1	1	1	ITGA3	integrin, alpha 3 (antigen CD49C, alpha 3 subunit of VLA-3 receptor)
hsa-miR-596	1	0	1	1	1	1	SCARB2	scavenger receptor class B, member 2
hsa-miR-596	0	0	1	1	1	1	HSD11B1	hydroxysteroid (11-beta) dehydrogenase 1
hsa-miR-596	1	0	1	1	1	1	DLL1	delta-like 1 (Drosophila)
hsa-miR-596	1	0	1	1	1	1	TMPRSS2	transmembrane protease, serine 2
hsa-miR-596	1	0	1	0	1	1	SPRY3	sprouty homolog 3 (Drosophila)
hsa-miR-596	1	0	1	1	1	1	MMP16	matrix metallopeptidase 16 (membrane-inserted)
hsa-miR-596	1	0	1	1	1	1	MTF1	metal-regulatory transcription factor 1
hsa-miR-596	1	0	1	1	1	1	DAGLA	diacylglycerol lipase, alpha
hsa-miR-596	1	0	1	1	1	1	LASP1	LIM and SH3 protein 1
hsa-miR-596	0	0	1	1	1	1	PPP2R5A	protein phosphatase 2, regulatory subunit B', alpha
hsa-miR-596	1	0	1	1	1	1	STK4	serine/threonine kinase 4
hsa-miR-596	0	0	1	1	1	1	TNFAIP2	tumor necrosis factor, alpha-induced protein 2
hsa-miR-596	1	0	1	1	1	1	NEBL	nebulette
hsa-miR-596	1	0	1	0	1	1	MXD4	MAX dimerization protein 4
hsa-miR-596	0	0	1	1	1	1	CD226	CD226 molecule
hsa-miR-596	1	0	1	0	1	1	GNA13	guanine nucleotide binding protein (G protein), alpha 13
hsa-miR-596	1	0	1	1	1	1	MMP24	matrix metallopeptidase 24 (membrane-inserted)
hsa-miR-596	0	0	1	1	0	0	DNAJB2	DnaJ (Hsp40) homolog, subfamily B, member 2
hsa-miR-596	0	0	1	1	1	1	SYPL1	synaptophysin-like 1
hsa-miR-596	1	0	1	1	1	1	BTG2	BTG family, member 2
hsa-miR-596	1	0	1	1	1	1	SRP72	signal recognition particle 72kDa
hsa-miR-596	1	0	1	0	1	1	WASF2	WAS protein family, member 2
hsa-miR-596	0	0	1	1	0	0	GUCA2B	guanylate cyclase activator 2B (uroguanylin)
hsa-miR-596	1	0	1	1	1	1	UBL3	ubiquitin-like 3
hsa-miR-596	1	0	1	1	1	1	TESK2	testis-specific kinase 2
hsa-miR-596	1	0	1	1	1	1	PALM2-AKAP2	PALM2-AKAP2 readthrough
hsa-miR-596	0	0	1	0	1	1	PNMA2	paraneoplastic Ma antigen 2
hsa-miR-596	0	0	1	1	1	1	ATF5	activating transcription factor 5
hsa-miR-596	0	0	1	1	0	0	GAGE8	G antigen 8
hsa-miR-596	1	0	1	1	1	1	RANBP6	RAN binding protein 6
hsa-miR-596	1	0	1	1	1	1	SF3B3	splicing factor 3b, subunit 3, 130kDa
hsa-miR-596	1	0	1	1	1	1	STAT5B	signal transducer and activator of transcription 5B
hsa-miR-596	0	0	1	1	0	0	ZDHHC8	zinc finger, DHHC-type containing 8
hsa-miR-596	0	0	1	1	1	1	ABT1	activator of basal transcription 1
hsa-miR-596	0	0	1	0	1	1	EMR2	egf-like module containing, mucin-like, hormone receptor-like 2
hsa-miR-596	1	0	1	1	1	1	WDR37	WD repeat domain 37
hsa-miR-596	0	0	1	1	1	1	ZNF318	zinc finger protein 318
hsa-miR-596	0	0	1	0	1	1	VPS41	vacuolar protein sorting 41 homolog (S. cerevisiae)
hsa-miR-596	1	0	1	1	1	1	CACNG4	calcium channel, voltage-dependent, gamma subunit 4
hsa-miR-596	1	0	1	1	1	1	SERP1	stress-associated endoplasmic reticulum protein 1
hsa-miR-596	0	0	1	1	0	0	LMCD1	LIM and cysteine-rich domains 1
hsa-miR-596	1	0	1	1	1	1	ZNF592	zinc finger protein 592
hsa-miR-596	1	0	1	1	1	1	PLEKHA6	pleckstrin homology domain containing, family A member 6
hsa-miR-596	0	0	1	1	1	1	FTSJD2	FtsJ methyltransferase domain containing 2
hsa-miR-596	1	0	1	1	1	1	HECW1	HECT, C2 and WW domain containing E3 ubiquitin protein ligase 1
hsa-miR-596	1	0	1	0	1	1	PEG10	paternally expressed 10
hsa-miR-596	1	0	1	1	1	1	RTF1	Rtf1, Paf1/RNA polymerase II complex component, homolog (S. cerevisiae)
hsa-miR-596	1	0	1	1	1	1	PLCB1	phospholipase C, beta 1 (phosphoinositide-specific)
hsa-miR-596	1	0	1	1	1	1	PDS5A	PDS5, regulator of cohesion maintenance, homolog A (S. cerevisiae)
hsa-miR-596	0	0	1	1	1	1	ANGEL1	angel homolog 1 (Drosophila)
hsa-miR-596	1	0	1	1	1	1	DSTYK	dual serine/threonine and tyrosine protein kinase
hsa-miR-596	1	0	1	1	1	1	CNRIP1	cannabinoid receptor interacting protein 1
hsa-miR-596	0	0	1	1	0	0	PTPN23	protein tyrosine phosphatase, non-receptor type 23
hsa-miR-596	0	0	1	1	0	0	TSKU	tsukushi small leucine rich proteoglycan homolog (Xenopus laevis)
hsa-miR-596	1	0	1	1	1	1	MAGI1	membrane associated guanylate kinase, WW and PDZ domain containing 1
hsa-miR-596	1	0	1	0	1	1	ERC2	ELKS/RAB6-interacting/CAST family member 2
hsa-miR-596	1	0	1	1	1	1	NSFL1C	NSFL1 (p97) cofactor (p47)
hsa-miR-596	1	0	1	1	1	1	VGLL3	vestigial like 3 (Drosophila)
hsa-miR-596	0	0	1	1	1	1	CENPF	centromere protein F, 350/400kDa (mitosin)
hsa-miR-596	0	0	1	1	0	0	FAM203A	family with sequence similarity 203, member A
hsa-miR-596	1	0	1	0	1	1	KLF3	Kruppel-like factor 3 (basic)
hsa-miR-596	0	0	1	0	1	1	GPR83	G protein-coupled receptor 83
hsa-miR-596	0	0	1	1	1	1	KDM3B	lysine (K)-specific demethylase 3B
hsa-miR-596	1	0	1	0	1	1	KLHL3	kelch-like 3 (Drosophila)
hsa-miR-596	1	0	1	1	1	1	HAO1	hydroxyacid oxidase (glycolate oxidase) 1
hsa-miR-596	1	0	1	1	1	1	INO80	INO80 homolog (S. cerevisiae)
hsa-miR-596	0	0	1	1	0	0	NDE1	nudE nuclear distribution E homolog 1 (A. nidulans)
hsa-miR-596	1	0	1	0	1	1	FAM46C	family with sequence similarity 46, member C
hsa-miR-596	0	0	1	1	0	0	CNTLN	centlein, centrosomal protein
hsa-miR-596	0	0	1	1	1	1	ACSM5	acyl-CoA synthetase medium-chain family member 5
hsa-miR-596	0	0	1	1	0	0	TRMT12	tRNA methyltransferase 12 homolog (S. cerevisiae)
hsa-miR-596	1	0	1	1	1	1	ATG2B	autophagy related 2B
hsa-miR-596	1	0	1	1	1	1	FIGN	fidgetin
hsa-miR-596	1	0	1	1	1	1	TMEM143	transmembrane protein 143
hsa-miR-596	1	0	1	1	1	1	PI4K2A	phosphatidylinositol 4-kinase type 2 alpha
hsa-miR-596	1	0	1	1	1	1	ETNK1	ethanolamine kinase 1
hsa-miR-596	1	0	1	0	1	1	PCDHAC1	protocadherin alpha subfamily C, 1
hsa-miR-596	1	0	1	0	1	1	PCDHAC2	protocadherin alpha subfamily C, 2
hsa-miR-596	1	0	1	1	1	1	PCDHA1	protocadherin alpha 1
hsa-miR-596	1	0	1	0	1	1	PCDHA10	protocadherin alpha 10
hsa-miR-596	1	0	1	0	1	1	PCDHA11	protocadherin alpha 11
hsa-miR-596	1	0	1	0	1	1	PCDHA12	protocadherin alpha 12
hsa-miR-596	1	0	1	1	1	1	PCDHA2	protocadherin alpha 2
hsa-miR-596	1	0	1	1	1	1	PCDHA3	protocadherin alpha 3
hsa-miR-596	1	0	1	1	1	1	PCDHA6	protocadherin alpha 6
hsa-miR-596	1	0	1	0	1	1	PCDHA7	protocadherin alpha 7
hsa-miR-596	1	0	1	1	1	1	PCDHA8	protocadherin alpha 8
hsa-miR-596	1	0	1	1	1	1	PCDHGA1	protocadherin gamma subfamily A, 1
hsa-miR-596	1	0	1	0	1	1	PCDHGA10	protocadherin gamma subfamily A, 10
hsa-miR-596	1	0	1	0	1	1	PCDHGA11	protocadherin gamma subfamily A, 11
hsa-miR-596	1	0	1	1	1	1	PCDHGA2	protocadherin gamma subfamily A, 2
hsa-miR-596	1	0	1	0	1	1	PCDHGA3	protocadherin gamma subfamily A, 3
hsa-miR-596	1	0	1	0	1	1	PCDHGA4	protocadherin gamma subfamily A, 4
hsa-miR-596	1	0	1	0	1	1	PCDHGA5	protocadherin gamma subfamily A, 5
hsa-miR-596	1	0	1	0	1	1	PCDHGA6	protocadherin gamma subfamily A, 6
hsa-miR-596	1	0	1	0	1	1	PCDHGA7	protocadherin gamma subfamily A, 7
hsa-miR-596	1	0	1	0	1	1	PCDHGA9	protocadherin gamma subfamily A, 9
hsa-miR-596	1	0	1	0	1	1	PCDHGB1	protocadherin gamma subfamily B, 1
hsa-miR-596	1	0	1	0	1	1	PCDHGB2	protocadherin gamma subfamily B, 2
hsa-miR-596	1	0	1	0	1	1	PCDHGB3	protocadherin gamma subfamily B, 3
hsa-miR-596	1	0	1	0	1	1	PCDHGB5	protocadherin gamma subfamily B, 5
hsa-miR-596	1	0	1	0	1	1	PCDHGB6	protocadherin gamma subfamily B, 6
hsa-miR-596	1	0	1	0	1	1	PCDHGB7	protocadherin gamma subfamily B, 7
hsa-miR-596	1	0	1	0	1	1	PCDHGC4	protocadherin gamma subfamily C, 4
hsa-miR-596	1	0	1	0	1	1	PCDHGC5	protocadherin gamma subfamily C, 5
hsa-miR-596	1	0	1	1	0	0	GPR173	G protein-coupled receptor 173
hsa-miR-596	1	0	1	0	1	1	UBFD1	ubiquitin family domain containing 1
hsa-miR-596	0	0	1	1	1	1	KLHL4	kelch-like 4 (Drosophila)
hsa-miR-596	0	0	1	1	0	0	CPXM1	carboxypeptidase X (M14 family), member 1
hsa-miR-596	1	0	1	1	1	1	MDM1	Mdm1 nuclear protein homolog (mouse)
hsa-miR-596	0	0	1	1	1	1	GRIPAP1	GRIP1 associated protein 1
hsa-miR-596	0	0	1	1	0	0	ENTPD7	ectonucleoside triphosphate diphosphohydrolase 7
hsa-miR-596	0	0	1	1	0	0	LYRM4	LYR motif containing 4
hsa-miR-596	1	0	1	0	1	1	DCUN1D1	DCN1, defective in cullin neddylation 1, domain containing 1 (S. cerevisiae)
hsa-miR-596	1	0	1	0	1	1	KCNS2	potassium voltage-gated channel, delayed-rectifier, subfamily S, member 2
hsa-miR-596	0	0	1	1	1	1	SHROOM4	shroom family member 4
hsa-miR-596	1	0	1	1	1	1	USP31	ubiquitin specific peptidase 31
hsa-miR-596	1	0	1	0	1	1	ALPK3	alpha-kinase 3
hsa-miR-596	1	0	1	1	1	1	SIPA1L2	signal-induced proliferation-associated 1 like 2
hsa-miR-596	1	0	1	0	1	1	WDFY1	WD repeat and FYVE domain containing 1
hsa-miR-596	1	0	1	1	1	1	CNTN3	contactin 3 (plasmacytoma associated)
hsa-miR-596	1	0	1	1	1	1	HCN3	hyperpolarization activated cyclic nucleotide-gated potassium channel 3
hsa-miR-596	0	0	1	1	1	1	PRX	periaxin
hsa-miR-596	0	0	1	1	1	1	LZTS1	leucine zipper, putative tumor suppressor 1
hsa-miR-596	1	0	1	1	1	1	ZNFX1	zinc finger, NFX1-type containing 1
hsa-miR-596	1	0	1	1	1	1	TMSB4X	thymosin beta 4, X-linked
hsa-miR-596	0	0	1	0	1	1	MS4A7	membrane-spanning 4-domains, subfamily A, member 7
hsa-miR-596	1	0	1	0	1	1	TP53INP2	tumor protein p53 inducible nuclear protein 2
hsa-miR-596	1	0	1	1	0	0	HLX	H2.0-like homeobox
hsa-miR-596	1	0	1	1	1	1	GIGYF1	GRB10 interacting GYF protein 1
hsa-miR-596	1	0	1	1	1	1	RMND5A	required for meiotic nuclear division 5 homolog A (S. cerevisiae)
hsa-miR-596	1	0	1	1	1	1	NEUROG2	neurogenin 2
hsa-miR-596	0	0	1	0	1	1	KXD1	KxDL motif containing 1
hsa-miR-596	1	0	1	0	1	1	NOTCH2	notch 2
hsa-miR-596	1	0	1	1	1	1	GCC1	GRIP and coiled-coil domain containing 1
hsa-miR-596	0	0	1	0	1	1	C1orf115	chromosome 1 open reading frame 115
hsa-miR-596	1	0	1	1	1	1	PIP4K2C	phosphatidylinositol-5-phosphate 4-kinase, type II, gamma
hsa-miR-596	0	0	1	1	1	1	PREX2	phosphatidylinositol-3,4,5-trisphosphate-dependent Rac exchange factor 2
hsa-miR-596	0	0	1	1	1	1	ZNF767	zinc finger family member 767
hsa-miR-596	1	0	1	1	1	1	HKDC1	hexokinase domain containing 1
hsa-miR-596	1	0	1	0	1	1	EDEM3	ER degradation enhancer, mannosidase alpha-like 3
hsa-miR-596	1	0	1	0	1	1	TET1	tet methylcytosine dioxygenase 1
hsa-miR-596	1	0	1	1	1	1	HOXA3	homeobox A3
hsa-miR-596	1	0	1	0	1	1	C1orf21	chromosome 1 open reading frame 21
hsa-miR-596	0	0	1	1	1	1	ST6GALNAC5	ST6 (alpha-N-acetyl-neuraminyl-2,3-beta-galactosyl-1,3)-N-acetylgalactosaminide alpha-2,6-sialyltransferase 5
hsa-miR-596	0	0	1	1	1	1	INHBE	inhibin, beta E
hsa-miR-596	1	0	1	1	1	1	PCDHA9	protocadherin alpha 9
hsa-miR-596	0	0	1	1	1	1	KCNA7	potassium voltage-gated channel, shaker-related subfamily, member 7
hsa-miR-596	1	0	1	0	1	1	PCDHGA8	protocadherin gamma subfamily A, 8
hsa-miR-596	1	0	1	1	1	1	PPP1R12B	protein phosphatase 1, regulatory subunit 12B
hsa-miR-596	1	0	1	1	1	1	ZNRF1	zinc and ring finger 1, E3 ubiquitin protein ligase
hsa-miR-596	0	0	1	0	1	1	LDOC1L	leucine zipper, down-regulated in cancer 1-like
hsa-miR-596	1	0	1	1	1	1	CAMKK1	calcium/calmodulin-dependent protein kinase kinase 1, alpha
hsa-miR-596	0	0	1	1	0	0	NICN1	nicolin 1
hsa-miR-596	1	0	1	1	1	1	BAZ1B	bromodomain adjacent to zinc finger domain, 1B
hsa-miR-596	0	0	1	1	1	1	JAGN1	jagunal homolog 1 (Drosophila)
hsa-miR-596	0	0	1	1	1	1	MAP1LC3A	microtubule-associated protein 1 light chain 3 alpha
hsa-miR-596	1	0	1	1	1	1	RBM17	RNA binding motif protein 17
hsa-miR-596	0	0	1	1	0	0	NXF5	nuclear RNA export factor 5
hsa-miR-596	1	0	1	1	1	1	PCDH11Y	protocadherin 11 Y-linked
hsa-miR-596	1	0	1	1	1	1	TP53INP1	tumor protein p53 inducible nuclear protein 1
hsa-miR-596	1	0	1	1	0	0	FCHSD1	FCH and double SH3 domains 1
hsa-miR-596	1	0	1	1	0	0	DISP2	dispatched homolog 2 (Drosophila)
hsa-miR-596	1	0	1	1	1	1	MAL2	mal, T-cell differentiation protein 2 (gene/pseudogene)
hsa-miR-596	1	0	1	1	1	1	GPRIN1	G protein regulated inducer of neurite outgrowth 1
hsa-miR-596	1	0	1	1	1	1	TRIM9	tripartite motif containing 9
hsa-miR-596	1	0	1	1	0	0	BRD4	bromodomain containing 4
hsa-miR-596	1	0	1	1	0	0	ADAMTS14	ADAM metallopeptidase with thrombospondin type 1 motif, 14
hsa-miR-596	0	0	1	0	1	1	SYNPO2	synaptopodin 2
hsa-miR-596	1	0	1	1	0	0	PYGO2	pygopus homolog 2 (Drosophila)
hsa-miR-596	0	0	1	0	0	0	AP5B1	adaptor-related protein complex 5, beta 1 subunit
hsa-miR-596	1	0	1	1	1	1	HAS3	hyaluronan synthase 3
hsa-miR-596	1	0	1	1	1	1	ZMAT2	zinc finger, matrin-type 2
hsa-miR-596	1	0	1	1	1	1	VTI1A	vesicle transport through interaction with t-SNAREs homolog 1A (yeast)
hsa-miR-596	0	0	1	1	0	0	EVI5L	ecotropic viral integration site 5-like
hsa-miR-596	0	0	1	1	1	1	FAM100A	family with sequence similarity 100, member A
hsa-miR-596	0	0	1	1	1	1	SCARF1	scavenger receptor class F, member 1
hsa-miR-596	1	0	1	0	1	1	NFAM1	NFAT activating protein with ITAM motif 1
hsa-miR-596	1	0	1	1	0	0	PPIL2	peptidylprolyl isomerase (cyclophilin)-like 2
hsa-miR-596	1	0	1	1	0	0	GAS2L1	growth arrest-specific 2 like 1
hsa-miR-596	0	0	1	1	0	0	MARCH10	membrane-associated ring finger (C3HC4) 10, E3 ubiquitin protein ligase
hsa-miR-596	0	0	1	1	1	1	METTL15	methyltransferase like 15
hsa-miR-596	0	0	1	1	1	1	CCER1	coiled-coil glutamate-rich protein 1
hsa-miR-596	0	0	1	1	1	1	ASPRV1	aspartic peptidase, retroviral-like 1
hsa-miR-596	1	0	1	1	1	1	TCEANC2	transcription elongation factor A (SII) N-terminal and central domain containing 2
hsa-miR-596	0	0	1	1	1	1	SLC22A7	solute carrier family 22 (organic anion transporter), member 7
hsa-miR-596	1	0	1	1	1	1	MSI2	musashi homolog 2 (Drosophila)
hsa-miR-596	1	0	1	0	1	1	KLHDC1	kelch domain containing 1
hsa-miR-596	0	0	1	1	1	1	REXO1L1	REX1, RNA exonuclease 1 homolog (S. cerevisiae)-like 1
hsa-miR-596	1	0	1	1	1	1	SMG7	smg-7 homolog, nonsense mediated mRNA decay factor (C. elegans)
hsa-miR-596	1	0	1	1	1	1	MOB1B	MOB kinase activator 1B
hsa-miR-596	0	0	1	1	0	0	SPACA3	sperm acrosome associated 3
hsa-miR-596	1	0	1	1	1	1	LDLRAD3	low density lipoprotein receptor class A domain containing 3
hsa-miR-596	0	0	1	1	0	0	SEC14L4	SEC14-like 4 (S. cerevisiae)
hsa-miR-596	0	0	1	1	1	1	GIMAP8	GTPase, IMAP family member 8
hsa-miR-596	1	0	1	1	1	1	SYT9	synaptotagmin IX
hsa-miR-596	1	0	1	1	1	1	OLIG3	oligodendrocyte transcription factor 3
hsa-miR-596	1	0	1	1	1	1	ZADH2	zinc binding alcohol dehydrogenase domain containing 2
hsa-miR-596	1	0	1	1	1	1	DCAF12L1	DDB1 and CUL4 associated factor 12-like 1
hsa-miR-596	1	0	1	1	1	1	MB21D2	Mab-21 domain containing 2
hsa-miR-596	0	0	1	1	1	1	KRTAP13-1	keratin associated protein 13-1
hsa-miR-596	0	0	1	0	1	1	HCG27	HLA complex group 27 (non-protein coding)
hsa-miR-596	1	0	1	1	1	1	SP8	Sp8 transcription factor
hsa-miR-596	1	0	1	0	1	1	RNF144B	ring finger protein 144B
hsa-miR-596	1	0	1	1	1	1	SUMF1	sulfatase modifying factor 1
hsa-miR-596	1	0	1	0	1	1	TMSB4XP8	thymosin beta 4, X-linked pseudogene 8
hsa-miR-596	1	0	1	1	1	1	SPTY2D1	SPT2, Suppressor of Ty, domain containing 1 (S. cerevisiae)
hsa-miR-596	1	0	1	1	1	1	PHLPP1	PH domain and leucine rich repeat protein phosphatase 1
hsa-miR-596	1	0	1	1	1	1	KCTD4	potassium channel tetramerisation domain containing 4
hsa-miR-596	1	0	1	0	1	1	PRICKLE2	prickle homolog 2 (Drosophila)
hsa-miR-596	1	0	1	1	1	1	NSUN4	NOP2/Sun domain family, member 4
hsa-miR-596	0	0	1	1	1	1	ARHGAP27	Rho GTPase activating protein 27
hsa-miR-596	1	0	1	1	0	0	KAZN	kazrin, periplakin interacting protein
hsa-miR-596	0	0	1	1	0	0	IER5L	immediate early response 5-like
hsa-miR-596	1	0	1	1	1	1	ENSA	endosulfine alpha
hsa-miR-596	1	0	1	1	1	1	GADL1	glutamate decarboxylase-like 1
hsa-miR-596	1	0	1	1	0	0	CD164L2	CD164 sialomucin-like 2
hsa-miR-596	0	0	1	1	1	1	CLEC4M	C-type lectin domain family 4, member M
hsa-miR-596	0	0	1	0	0	0	ESRRAP2	estrogen-related receptor alpha pseudogene 2
hsa-miR-596	0	0	1	0	0	0	PCDHB19P	protocadherin beta 19 pseudogene
hsa-miR-596	0	0	1	0	0	0	LYPLA2P1	lysophospholipase II pseudogene 1
hsa-miR-596	0	0	1	0	0	0	MIR155HG	MIR155 host gene (non-protein coding)
hsa-miR-596	0	0	1	0	0	0	TTTY2	testis-specific transcript, Y-linked 2 (non-protein coding)
hsa-miR-596	0	0	1	0	0	0	TTTY15	testis-specific transcript, Y-linked 15 (non-protein coding)
hsa-miR-596	0	0	1	0	0	0	FTH1P7	ferritin, heavy polypeptide 1 pseudogene 7
hsa-miR-596	0	0	1	0	0	0	HTR7P1	5-hydroxytryptamine (serotonin) receptor 7 pseudogene 1
hsa-miR-596	0	0	1	0	0	0	PER4	period homolog 3 (Drosophila) pseudogene
hsa-miR-596	0	0	1	0	0	0	RNF126P1	ring finger protein 126 pseudogene 1
hsa-miR-596	0	0	1	0	0	0	MALAT1	metastasis associated lung adenocarcinoma transcript 1 (non-protein coding)
hsa-miR-596	0	0	1	0	0	0	DUSP5P	dual specificity phosphatase 5 pseudogene
hsa-miR-596	0	0	1	0	0	0	HAS2-AS1	HAS2 antisense RNA 1
hsa-miR-596	0	0	1	0	0	0	PTPRVP	protein tyrosine phosphatase, receptor type, V, pseudogene
hsa-miR-596	0	0	1	0	0	0	SNX29P2	sorting nexin 29 pseudogene 2
hsa-miR-596	0	0	1	0	0	0	TCAM1P	testicular cell adhesion molecule 1 homolog (mouse), pseudogene
hsa-miR-596	0	0	1	0	0	0	HSP90B3P	heat shock protein 90kDa beta (Grp94), member 3, pseudogene
hsa-miR-596	0	0	1	0	0	0	GBP1P1	guanylate binding protein 1, interferon-inducible pseudogene 1
hsa-miR-596	0	0	1	0	0	0	SNORD115-7	small nucleolar RNA, C/D box 115-7
hsa-miR-596	0	0	1	1	0	0	SNRPN	small nuclear ribonucleoprotein polypeptide N
hsa-miR-596	0	0	1	1	0	0	GLP1R	glucagon-like peptide 1 receptor
hsa-miR-596	1	0	1	1	1	1	CTNNA1	catenin (cadherin-associated protein), alpha 1, 102kDa
hsa-miR-596	0	0	1	0	0	0	GAGE3	G antigen 3
hsa-miR-596	0	0	1	0	0	0	GAGE5	G antigen 5
hsa-miR-596	0	0	1	0	0	0	GAGE6	G antigen 6
hsa-miR-596	1	0	1	1	1	1	AKAP1	A kinase (PRKA) anchor protein 1
hsa-miR-596	1	0	1	1	1	1	KLF6	Kruppel-like factor 6
hsa-miR-596	0	0	1	1	0	0	EPX	eosinophil peroxidase
hsa-miR-596	1	0	1	1	1	1	HNRNPA1	heterogeneous nuclear ribonucleoprotein A1
hsa-miR-596	1	0	1	1	1	1	CUL5	cullin 5
hsa-miR-596	1	0	1	1	1	1	B4GALT7	xylosylprotein beta 1,4-galactosyltransferase, polypeptide 7
hsa-miR-596	0	0	0	1	1	1	MYOC	myocilin, trabecular meshwork inducible glucocorticoid response
hsa-miR-596	0	0	1	1	0	0	RTN4R	reticulon 4 receptor
hsa-miR-596	1	0	1	1	0	0	REXO1	REX1, RNA exonuclease 1 homolog (S. cerevisiae)
hsa-miR-596	0	0	0	1	0	0	RAPGEF3	Rap guanine nucleotide exchange factor (GEF) 3
hsa-miR-596	0	0	1	1	1	1	KEAP1	kelch-like ECH-associated protein 1
hsa-miR-596	0	0	0	1	0	0	GMIP	GEM interacting protein
hsa-miR-596	0	0	1	1	1	1	GNPTG	N-acetylglucosamine-1-phosphate transferase, gamma subunit
hsa-miR-596	0	0	0	1	0	0	TEKT2	tektin 2 (testicular)
hsa-miR-596	0	0	0	1	0	0	ATP5D	ATP synthase, H+ transporting, mitochondrial F1 complex, delta subunit
hsa-miR-596	0	0	1	1	1	1	TOMM22	translocase of outer mitochondrial membrane 22 homolog (yeast)
hsa-miR-596	0	0	0	1	0	0	RTDR1	rhabdoid tumor deletion region gene 1
hsa-miR-596	1	0	1	1	1	1	SUN2	Sad1 and UNC84 domain containing 2
hsa-miR-596	0	0	0	1	1	1	RHBDD3	rhomboid domain containing 3
hsa-miR-596	0	0	1	1	0	0	GSTZ1	glutathione S-transferase zeta 1
hsa-miR-596	1	0	1	1	0	0	ERH	enhancer of rudimentary homolog (Drosophila)
hsa-miR-596	0	0	1	1	0	0	BIRC7	baculoviral IAP repeat containing 7
hsa-miR-596	0	0	1	1	0	0	PIGU	phosphatidylinositol glycan anchor biosynthesis, class U
hsa-miR-596	0	0	0	1	0	0	RENBP	renin binding protein
hsa-miR-596	0	0	1	1	0	0	USP11	ubiquitin specific peptidase 11
hsa-miR-596	0	0	0	1	0	0	ACP5	acid phosphatase 5, tartrate resistant
hsa-miR-596	0	0	0	1	1	1	DHODH	dihydroorotate dehydrogenase (quinone)
hsa-miR-596	0	0	0	1	1	1	NME3	NME/NM23 nucleoside diphosphate kinase 3
hsa-miR-596	0	0	1	1	0	0	BCKDK	branched chain ketoacid dehydrogenase kinase
hsa-miR-596	1	0	1	1	1	1	EXTL3	exostoses (multiple)-like 3
hsa-miR-596	0	0	1	1	0	0	TULP2	tubby like protein 2
hsa-miR-596	0	0	1	1	0	0	PPP1R37	protein phosphatase 1, regulatory subunit 37
hsa-miR-596	1	0	1	1	0	0	DOT1L	DOT1-like, histone H3 methyltransferase (S. cerevisiae)
hsa-miR-596	0	0	1	1	0	0	LIM2	lens intrinsic membrane protein 2, 19kDa
hsa-miR-596	0	0	0	1	1	1	PIK3R2	phosphoinositide-3-kinase, regulatory subunit 2 (beta)
hsa-miR-596	1	0	1	1	1	1	ABCF2	ATP-binding cassette, sub-family F (GCN20), member 2
hsa-miR-596	0	0	1	1	1	1	UBE2D4	ubiquitin-conjugating enzyme E2D 4 (putative)
hsa-miR-596	0	0	0	1	1	1	CRHR2	corticotropin releasing hormone receptor 2
hsa-miR-596	0	0	0	1	0	0	CCL24	chemokine (C-C motif) ligand 24
hsa-miR-596	0	0	1	1	1	1	BCL7B	B-cell CLL/lymphoma 7B
hsa-miR-596	0	0	0	1	0	0	ZNF688	zinc finger protein 688
hsa-miR-596	0	0	0	1	1	1	ZNF785	zinc finger protein 785
hsa-miR-596	0	0	1	1	0	0	PITRM1	pitrilysin metallopeptidase 1
hsa-miR-596	1	0	0	1	1	1	WNT3	wingless-type MMTV integration site family, member 3
hsa-miR-596	0	0	1	1	0	0	PIGL	phosphatidylinositol glycan anchor biosynthesis, class L
hsa-miR-596	0	0	1	1	1	1	C1QBP	complement component 1, q subcomponent binding protein
hsa-miR-596	1	0	1	1	1	1	RND2	Rho family GTPase 2
hsa-miR-596	0	0	1	1	0	0	CACNG1	calcium channel, voltage-dependent, gamma subunit 1
hsa-miR-596	0	0	0	1	0	0	HDGFL1	hepatoma derived growth factor-like 1
hsa-miR-596	1	0	1	1	0	0	APBB3	amyloid beta (A4) precursor protein-binding, family B, member 3
hsa-miR-596	1	0	0	1	0	0	ABTB1	ankyrin repeat and BTB (POZ) domain containing 1
hsa-miR-596	0	0	0	1	0	0	NT5C1A	5'-nucleotidase, cytosolic IA
hsa-miR-596	0	0	1	1	1	1	ATP6V0B	ATPase, H+ transporting, lysosomal 21kDa, V0 subunit b
hsa-miR-596	0	0	1	1	1	1	C1orf129	chromosome 1 open reading frame 129
hsa-miR-596	0	0	0	1	1	1	NEUROG3	neurogenin 3
hsa-miR-596	0	0	1	1	0	0	STX10	syntaxin 10
hsa-miR-596	0	0	0	1	0	0	PEPD	peptidase D
hsa-miR-596	0	0	1	1	0	0	LIPE	lipase, hormone-sensitive
hsa-miR-596	0	0	1	1	0	0	PEX6	peroxisomal biogenesis factor 6
hsa-miR-596	1	0	1	1	1	1	GGA3	golgi-associated, gamma adaptin ear containing, ARF binding protein 3
hsa-miR-596	0	0	0	1	0	0	NT5C	5', 3'-nucleotidase, cytosolic
hsa-miR-596	0	0	0	1	0	0	PSPN	persephin
hsa-miR-596	0	0	0	1	0	0	TNFSF14	tumor necrosis factor (ligand) superfamily, member 14
hsa-miR-596	1	0	1	1	1	1	C20orf26	chromosome 20 open reading frame 26
hsa-miR-596	0	0	0	1	0	0	S1PR4	sphingosine-1-phosphate receptor 4
hsa-miR-596	0	0	0	1	0	0	SELO	selenoprotein O
hsa-miR-596	0	0	0	1	0	0	NCF4	neutrophil cytosolic factor 4, 40kDa
hsa-miR-596	1	0	1	1	0	0	HOXD9	homeobox D9
hsa-miR-596	0	0	1	1	0	0	CHAC1	ChaC, cation transport regulator homolog 1 (E. coli)
hsa-miR-596	1	0	1	1	0	0	HCN2	hyperpolarization activated cyclic nucleotide-gated potassium channel 2
hsa-miR-596	0	0	0	1	0	0	SLX1A	SLX1 structure-specific endonuclease subunit homolog A (S. cerevisiae)
hsa-miR-596	0	0	1	1	0	0	CERS4	ceramide synthase 4
hsa-miR-596	0	0	0	1	0	0	TYMP	thymidine phosphorylase
hsa-miR-596	0	0	0	1	1	1	ZNF193	zinc finger protein 193
hsa-miR-596	1	0	0	1	0	0	GADD45G	growth arrest and DNA-damage-inducible, gamma
hsa-miR-596	1	0	1	1	0	0	MLLT1	myeloid/lymphoid or mixed-lineage leukemia (trithorax homolog, Drosophila); translocated to, 1
hsa-miR-596	1	0	1	1	1	1	ARPC1B	actin related protein 2/3 complex, subunit 1B, 41kDa
hsa-miR-596	1	0	1	1	0	0	JUND	jun D proto-oncogene
hsa-miR-596	0	0	0	1	0	0	TMEM160	transmembrane protein 160
hsa-miR-596	1	0	1	1	0	0	MAP3K10	mitogen-activated protein kinase kinase kinase 10
hsa-miR-596	0	0	0	1	0	0	EIF3G	eukaryotic translation initiation factor 3, subunit G
hsa-miR-596	0	0	1	1	1	1	NOL11	nucleolar protein 11
hsa-miR-596	0	0	1	1	1	1	IMMT	inner membrane protein, mitochondrial
hsa-miR-596	0	0	1	1	0	0	RAMP1	receptor (G protein-coupled) activity modifying protein 1
hsa-miR-596	1	0	1	1	0	0	EEFSEC	eukaryotic elongation factor, selenocysteine-tRNA-specific
hsa-miR-596	0	0	0	1	1	1	ANKRD20A3	ankyrin repeat domain 20 family, member A3
hsa-miR-596	0	0	0	1	1	1	SLC52A1	solute carrier family 52, riboflavin transporter, member 1
hsa-miR-596	1	0	1	1	1	1	FAM104A	family with sequence similarity 104, member A
hsa-miR-596	0	0	1	1	1	1	PDE6B	phosphodiesterase 6B, cGMP-specific, rod, beta
hsa-miR-596	1	0	0	1	1	1	USP30	ubiquitin specific peptidase 30
hsa-miR-596	0	0	1	1	0	0	UPK3B	uroplakin 3B
hsa-miR-596	0	0	1	1	0	0	KRT84	keratin 84
hsa-miR-596	1	0	0	1	0	0	KCNH3	potassium voltage-gated channel, subfamily H (eag-related), member 3
hsa-miR-596	0	0	0	1	1	1	TACO1	translational activator of mitochondrially encoded cytochrome c oxidase I
hsa-miR-596	0	0	0	1	1	1	MRPL47	mitochondrial ribosomal protein L47
hsa-miR-596	0	0	1	1	0	0	ESRRB	estrogen-related receptor beta
hsa-miR-596	0	0	0	1	0	0	AP3B2	adaptor-related protein complex 3, beta 2 subunit
hsa-miR-596	0	0	1	1	0	0	ATP5B	ATP synthase, H+ transporting, mitochondrial F1 complex, beta polypeptide
hsa-miR-596	0	0	1	1	0	0	RGS9	regulator of G-protein signaling 9
hsa-miR-596	0	0	0	1	1	1	ATP2C2	ATPase, Ca++ transporting, type 2C, member 2
hsa-miR-596	0	0	1	1	1	1	PRDX1	peroxiredoxin 1
hsa-miR-596	0	0	0	1	1	1	LGALS3BP	lectin, galactoside-binding, soluble, 3 binding protein
hsa-miR-596	1	0	1	1	1	1	ELL	elongation factor RNA polymerase II
hsa-miR-596	1	0	0	1	0	0	CRTC1	CREB regulated transcription coactivator 1
hsa-miR-596	0	0	0	1	0	0	MPND	MPN domain containing
hsa-miR-596	0	0	0	1	0	0	TJP3	tight junction protein 3
hsa-miR-596	0	0	0	1	0	0	LIG1	ligase I, DNA, ATP-dependent
hsa-miR-596	0	0	0	1	0	0	HSD17B14	hydroxysteroid (17-beta) dehydrogenase 14
hsa-miR-596	0	0	1	1	1	1	NAPA	N-ethylmaleimide-sensitive factor attachment protein, alpha
hsa-miR-596	0	0	0	1	1	1	FOXRED1	FAD-dependent oxidoreductase domain containing 1
hsa-miR-596	0	0	1	1	1	1	MECR	mitochondrial trans-2-enoyl-CoA reductase
hsa-miR-596	0	0	1	1	1	1	DVL1	dishevelled, dsh homolog 1 (Drosophila)
hsa-miR-596	0	0	1	1	1	1	PKP1	plakophilin 1 (ectodermal dysplasia/skin fragility syndrome)
hsa-miR-596	0	0	1	1	1	1	GFM1	G elongation factor, mitochondrial 1
hsa-miR-596	1	0	1	1	1	1	KCNH4	potassium voltage-gated channel, subfamily H (eag-related), member 4
hsa-miR-596	0	0	0	1	0	0	AMBP	alpha-1-microglobulin/bikunin precursor
hsa-miR-596	0	0	1	1	1	1	DBF4	DBF4 homolog (S. cerevisiae)
hsa-miR-596	0	0	0	1	0	0	R3HCC1	R3H domain and coiled-coil containing 1
hsa-miR-596	0	0	0	1	0	0	ADAP1	ArfGAP with dual PH domains 1
hsa-miR-596	0	0	1	1	1	1	DEPDC5	DEP domain containing 5
hsa-miR-596	1	0	1	1	0	0	KIAA1644	KIAA1644
hsa-miR-596	1	0	1	1	0	0	CDH24	cadherin 24, type 2
hsa-miR-596	0	0	1	1	0	0	REM2	RAS (RAD and GEM)-like GTP binding 2
hsa-miR-596	0	0	0	1	0	0	CYP11A1	cytochrome P450, family 11, subfamily A, polypeptide 1
hsa-miR-596	0	0	0	1	0	0	RHCG	Rh family, C glycoprotein
hsa-miR-596	0	0	1	1	0	0	POLG	polymerase (DNA directed), gamma
hsa-miR-596	0	0	1	1	1	1	WDR93	WD repeat domain 93
hsa-miR-596	1	0	1	1	1	1	CRTC3	CREB regulated transcription coactivator 3
hsa-miR-596	0	0	1	1	1	1	NOL3	nucleolar protein 3 (apoptosis repressor with CARD domain)
hsa-miR-596	0	0	1	1	1	1	FN3KRP	fructosamine 3 kinase related protein
hsa-miR-596	0	0	0	1	0	0	SECTM1	secreted and transmembrane 1
hsa-miR-596	0	0	1	1	0	0	NT5C3L	5'-nucleotidase, cytosolic III-like
hsa-miR-596	0	0	1	1	1	1	CYP4F22	cytochrome P450, family 4, subfamily F, polypeptide 22
hsa-miR-596	1	0	1	1	1	1	MOB3C	MOB kinase activator 3C
hsa-miR-596	0	0	1	1	1	1	C1QL2	complement component 1, q subcomponent-like 2
hsa-miR-596	0	0	0	1	0	0	FRMPD3	FERM and PDZ domain containing 3
hsa-miR-596	0	0	1	1	0	0	FUOM	fucose mutarotase
hsa-miR-596	0	0	1	1	0	0	PAOX	polyamine oxidase (exo-N4-amino)
hsa-miR-596	0	0	1	1	0	0	WDR74	WD repeat domain 74
hsa-miR-596	0	0	0	1	0	0	NUDT22	nudix (nucleoside diphosphate linked moiety X)-type motif 22
hsa-miR-596	1	0	0	1	0	0	CDC42EP2	CDC42 effector protein (Rho GTPase binding) 2
hsa-miR-596	0	0	0	1	0	0	PLBD2	phospholipase B domain containing 2
hsa-miR-596	1	0	1	1	1	1	SETBP1	SET binding protein 1
hsa-miR-596	1	0	1	1	0	0	TCF7L1	transcription factor 7-like 1 (T-cell specific, HMG-box)
hsa-miR-596	0	0	0	1	1	1	UGT3A2	UDP glycosyltransferase 3 family, polypeptide A2
hsa-miR-596	0	0	1	1	1	1	PGM3	phosphoglucomutase 3
hsa-miR-596	1	0	1	1	0	0	FAM167A	family with sequence similarity 167, member A
hsa-miR-596	0	0	0	1	0	0	FAM161B	family with sequence similarity 161, member B
hsa-miR-596	1	0	1	1	0	0	DTNB	dystrobrevin, beta
hsa-miR-596	0	0	1	1	1	1	RHPN1	rhophilin, Rho GTPase binding protein 1
hsa-miR-596	0	0	1	1	0	0	GPR153	G protein-coupled receptor 153
hsa-miR-596	0	0	1	1	0	0	SLC45A1	solute carrier family 45, member 1
hsa-miR-596	0	0	0	1	0	0	OGFR	opioid growth factor receptor
hsa-miR-596	0	0	1	1	1	1	MCAT	malonyl CoA:ACP acyltransferase (mitochondrial)
hsa-miR-596	0	0	0	1	0	0	TRMU	tRNA 5-methylaminomethyl-2-thiouridylate methyltransferase
hsa-miR-596	0	0	1	1	0	0	SPON2	spondin 2, extracellular matrix protein
hsa-miR-596	0	0	1	1	0	0	CCDC58	coiled-coil domain containing 58
hsa-miR-596	0	0	0	1	0	0	CILP2	cartilage intermediate layer protein 2
hsa-miR-596	0	0	0	1	0	0	RRP1	ribosomal RNA processing 1 homolog (S. cerevisiae)
hsa-miR-596	0	0	1	1	0	0	C21orf33	chromosome 21 open reading frame 33
hsa-miR-596	0	0	0	1	1	1	LRRC3	leucine rich repeat containing 3
hsa-miR-596	0	0	0	1	0	0	C21orf58	chromosome 21 open reading frame 58
hsa-miR-596	0	0	0	1	1	1	PHLDB3	pleckstrin homology-like domain, family B, member 3
hsa-miR-596	0	0	0	1	0	0	MYL3	myosin, light chain 3, alkali; ventricular, skeletal, slow
hsa-miR-596	0	0	1	1	1	1	C5orf45	chromosome 5 open reading frame 45
hsa-miR-596	0	0	0	1	0	0	DCD	dermcidin
hsa-miR-596	0	0	1	1	1	1	ZNF653	zinc finger protein 653
hsa-miR-596	0	0	1	1	1	1	CCDC78	coiled-coil domain containing 78
hsa-miR-596	0	0	0	1	0	0	PTX4	pentraxin 4, long
hsa-miR-596	0	0	0	1	0	0	NTN3	netrin 3
hsa-miR-596	0	0	1	1	0	0	ZFPL1	zinc finger protein-like 1
hsa-miR-596	0	0	1	1	1	1	MEGF6	multiple EGF-like-domains 6
hsa-miR-596	0	0	0	1	0	0	ALPPL2	alkaline phosphatase, placental-like 2
hsa-miR-596	0	0	0	1	0	0	FEV	FEV (ETS oncogene family)
hsa-miR-596	0	0	1	1	1	1	RPP14	ribonuclease P/MRP 14kDa subunit
hsa-miR-596	0	0	1	1	0	0	MON1A	MON1 homolog A (yeast)
hsa-miR-596	0	0	1	1	0	0	RAD54L2	RAD54-like 2 (S. cerevisiae)
hsa-miR-596	0	0	1	1	1	1	TLX3	T-cell leukemia homeobox 3
hsa-miR-596	0	0	1	1	1	1	MRRF	mitochondrial ribosome recycling factor
hsa-miR-596	0	0	1	1	0	0	RAPSN	receptor-associated protein of the synapse
hsa-miR-596	0	0	0	1	0	0	PLEKHF1	pleckstrin homology domain containing, family F (with FYVE domain) member 1
hsa-miR-596	0	0	1	1	0	0	CRABP1	cellular retinoic acid binding protein 1
hsa-miR-596	0	0	1	1	1	1	TMEM41B	transmembrane protein 41B
hsa-miR-596	0	0	1	1	0	0	RRAD	Ras-related associated with diabetes
hsa-miR-596	1	0	1	1	1	1	SLC27A4	solute carrier family 27 (fatty acid transporter), member 4
hsa-miR-596	0	0	1	1	1	1	ENGASE	endo-beta-N-acetylglucosaminidase
hsa-miR-596	0	0	0	1	1	1	MYH14	myosin, heavy chain 14, non-muscle
hsa-miR-596	0	0	1	1	0	0	ANGPTL4	angiopoietin-like 4
hsa-miR-596	0	0	1	1	0	0	DDB1	damage-specific DNA binding protein 1, 127kDa
hsa-miR-596	0	0	0	1	0	0	ULK4	unc-51-like kinase 4 (C. elegans)
hsa-miR-596	0	0	1	1	0	0	PNOC	prepronociceptin
hsa-miR-596	0	0	0	1	0	0	VPREB1	pre-B lymphocyte 1
hsa-miR-596	0	0	1	1	1	1	MXD3	MAX dimerization protein 3
hsa-miR-596	0	0	1	1	0	0	PRELID1	PRELI domain containing 1
hsa-miR-596	0	0	1	1	0	0	VAV1	vav 1 guanine nucleotide exchange factor
hsa-miR-596	0	0	0	1	1	1	RDH14	retinol dehydrogenase 14 (all-trans/9-cis/11-cis)
hsa-miR-596	1	0	0	1	1	1	NT5C1B	5'-nucleotidase, cytosolic IB
hsa-miR-596	0	0	0	1	0	0	ECEL1	endothelin converting enzyme-like 1
hsa-miR-596	0	0	0	1	1	1	CXCR6	chemokine (C-X-C motif) receptor 6
hsa-miR-596	0	0	0	1	0	0	FPR1	formyl peptide receptor 1
hsa-miR-596	0	0	0	1	1	1	C22orf15	chromosome 22 open reading frame 15
hsa-miR-596	0	0	1	1	0	0	LAMB2	laminin, beta 2 (laminin S)
hsa-miR-596	0	0	0	1	0	0	DTYMK	deoxythymidylate kinase (thymidylate kinase)
hsa-miR-596	0	0	0	1	1	1	LRRC8E	leucine rich repeat containing 8 family, member E
hsa-miR-596	0	0	0	1	0	0	ZNF556	zinc finger protein 556
hsa-miR-596	0	0	0	1	0	0	THOP1	thimet oligopeptidase 1
hsa-miR-596	1	0	1	1	1	1	RAPH1	Ras association (RalGDS/AF-6) and pleckstrin homology domains 1
hsa-miR-596	0	0	0	1	0	0	ANKRD13D	ankyrin repeat domain 13 family, member D
hsa-miR-596	0	0	1	1	1	1	CSPG4	chondroitin sulfate proteoglycan 4
hsa-miR-596	0	0	0	1	0	0	ATAD3B	ATPase family, AAA domain containing 3B
hsa-miR-596	0	0	0	1	0	0	FBXW10	F-box and WD repeat domain containing 10
hsa-miR-596	0	0	1	1	0	0	CYP2W1	cytochrome P450, family 2, subfamily W, polypeptide 1
hsa-miR-596	0	0	1	1	0	0	CCDC106	coiled-coil domain containing 106
hsa-miR-596	0	0	1	1	0	0	SCUBE2	signal peptide, CUB domain, EGF-like 2
hsa-miR-596	0	0	0	1	1	1	LOC729317	voltage-dependent anion channel 2 pseudogene
hsa-miR-596	1	0	1	1	0	0	LRFN4	leucine rich repeat and fibronectin type III domain containing 4
hsa-miR-596	1	0	0	1	1	1	ELF3	E74-like factor 3 (ets domain transcription factor, epithelial-specific )
hsa-miR-596	0	0	0	1	1	1	PRLR	prolactin receptor
hsa-miR-596	0	0	1	1	0	0	LGI4	leucine-rich repeat LGI family, member 4
hsa-miR-596	0	0	1	1	1	1	NAA20	N(alpha)-acetyltransferase 20, NatB catalytic subunit
hsa-miR-596	0	0	1	1	0	0	RFNG	RFNG O-fucosylpeptide 3-beta-N-acetylglucosaminyltransferase
hsa-miR-596	0	0	0	1	1	1	TMEM52	transmembrane protein 52
hsa-miR-596	1	0	1	1	1	1	FAM49B	family with sequence similarity 49, member B
hsa-miR-596	0	0	1	1	0	0	GPR113	G protein-coupled receptor 113
hsa-miR-596	0	0	1	1	1	1	SNX31	sorting nexin 31
hsa-miR-596	1	0	1	1	0	0	MMP14	matrix metallopeptidase 14 (membrane-inserted)
hsa-miR-596	0	0	0	1	0	0	TSGA10IP	testis specific, 10 interacting protein
hsa-miR-596	0	0	1	1	0	0	MKS1	Meckel syndrome, type 1
hsa-miR-596	1	0	1	1	1	1	CSNK1D	casein kinase 1, delta
hsa-miR-596	1	0	1	1	0	0	PPP2R2D	protein phosphatase 2, regulatory subunit B, delta
hsa-miR-596	0	0	0	1	0	0	FARSA	phenylalanyl-tRNA synthetase, alpha subunit
hsa-miR-596	0	0	1	1	0	0	KCNH6	potassium voltage-gated channel, subfamily H (eag-related), member 6
hsa-miR-596	0	0	1	1	0	0	CALML3	calmodulin-like 3
hsa-miR-596	1	0	1	1	0	0	NEURL4	neuralized homolog 4 (Drosophila)
hsa-miR-596	0	0	1	1	0	0	WDR90	WD repeat domain 90
hsa-miR-596	0	0	0	1	1	1	ASB2	ankyrin repeat and SOCS box containing 2
hsa-miR-596	1	0	0	1	0	0	ARHGEF1	Rho guanine nucleotide exchange factor (GEF) 1
hsa-miR-596	0	0	1	1	0	0	RPS4X	ribosomal protein S4, X-linked
hsa-miR-596	0	0	1	1	0	0	PANK2	pantothenate kinase 2
hsa-miR-596	0	0	1	1	1	1	WHSC1L1	Wolf-Hirschhorn syndrome candidate 1-like 1
hsa-miR-596	0	0	0	1	1	1	MTG1	mitochondrial GTPase 1 homolog (S. cerevisiae)
hsa-miR-596	0	0	1	1	1	1	PCNXL4	pecanex-like 4 (Drosophila)
hsa-miR-596	0	0	0	1	1	1	TOM1L2	target of myb1-like 2 (chicken)
hsa-miR-596	0	0	1	1	0	0	PKD2L1	polycystic kidney disease 2-like 1
hsa-miR-596	0	0	0	1	0	0	C3orf22	chromosome 3 open reading frame 22
hsa-miR-596	0	0	0	1	0	0	CTXN1	cortexin 1
hsa-miR-596	0	0	1	1	1	1	ZNF771	zinc finger protein 771
hsa-miR-596	0	0	0	1	0	0	FGF8	fibroblast growth factor 8 (androgen-induced)
hsa-miR-596	1	0	1	1	1	1	SLC25A22	solute carrier family 25 (mitochondrial carrier: glutamate), member 22
hsa-miR-596	1	0	1	1	1	1	AKNA	AT-hook transcription factor
hsa-miR-596	0	0	1	1	1	1	MON1B	MON1 homolog B (yeast)
hsa-miR-596	0	0	1	1	0	0	D2HGDH	D-2-hydroxyglutarate dehydrogenase
hsa-miR-596	0	0	0	1	0	0	SEPT1	septin 1
hsa-miR-596	0	0	1	1	0	0	THAP4	THAP domain containing 4
hsa-miR-596	0	0	0	1	0	0	TPPP2	tubulin polymerization-promoting protein family member 2
hsa-miR-596	0	0	1	1	0	0	EFCAB4A	EF-hand calcium binding domain 4A
hsa-miR-596	0	0	0	1	0	0	FAM3A	family with sequence similarity 3, member A
hsa-miR-596	0	0	1	1	0	0	PNKP	polynucleotide kinase 3'-phosphatase
hsa-miR-596	0	0	0	1	0	0	LRRC61	leucine rich repeat containing 61
hsa-miR-596	0	0	0	1	0	0	SPHK1	sphingosine kinase 1
hsa-miR-596	0	0	1	1	0	0	PPIE	peptidylprolyl isomerase E (cyclophilin E)
hsa-miR-596	0	0	1	1	1	1	SLC34A1	solute carrier family 34 (sodium phosphate), member 1
hsa-miR-596	0	0	0	1	0	0	CHMP6	charged multivesicular body protein 6
hsa-miR-596	0	0	1	1	0	0	MMP25	matrix metallopeptidase 25
hsa-miR-596	0	0	0	1	1	1	C14orf177	chromosome 14 open reading frame 177
hsa-miR-596	0	0	0	1	1	1	UPB1	ureidopropionase, beta
hsa-miR-596	1	0	1	1	1	1	ITM2C	integral membrane protein 2C
hsa-miR-596	0	0	1	1	0	0	NR2F1	nuclear receptor subfamily 2, group F, member 1
hsa-miR-596	1	0	1	1	1	1	C16orf58	chromosome 16 open reading frame 58
hsa-miR-596	0	0	0	1	0	0	SERHL2	serine hydrolase-like 2
hsa-miR-596	0	0	1	1	0	0	GAS6	growth arrest-specific 6
hsa-miR-596	1	0	1	1	0	0	IGDCC3	immunoglobulin superfamily, DCC subclass, member 3
hsa-miR-596	0	0	0	1	0	0	RAB11B	RAB11B, member RAS oncogene family
hsa-miR-596	0	0	0	1	0	0	HSF1	heat shock transcription factor 1
hsa-miR-596	0	0	0	1	0	0	TNFRSF18	tumor necrosis factor receptor superfamily, member 18
hsa-miR-596	0	0	1	1	0	0	FES	feline sarcoma oncogene
hsa-miR-596	0	0	0	1	0	0	MAPK8IP2	mitogen-activated protein kinase 8 interacting protein 2
hsa-miR-596	0	0	0	1	0	0	CLDN5	claudin 5
hsa-miR-596	0	0	0	1	1	1	SLC52A2	solute carrier family 52, riboflavin transporter, member 2
hsa-miR-596	0	0	0	1	1	1	TMEM121	transmembrane protein 121
hsa-miR-596	0	0	1	1	0	0	SLX1B	SLX1 structure-specific endonuclease subunit homolog B (S. cerevisiae)
hsa-miR-596	1	0	1	1	1	1	GJC1	gap junction protein, gamma 1, 45kDa
hsa-miR-596	0	0	1	1	0	0	EPGN	epithelial mitogen homolog (mouse)
hsa-miR-596	0	0	0	1	1	1	EMILIN3	elastin microfibril interfacer 3
hsa-miR-596	0	0	0	1	0	0	CCR10	chemokine (C-C motif) receptor 10
hsa-miR-596	0	0	1	1	1	1	CMTM3	CKLF-like MARVEL transmembrane domain containing 3
hsa-miR-596	0	0	1	1	1	1	C11orf88	chromosome 11 open reading frame 88
hsa-miR-596	0	0	0	1	1	1	NR2C1	nuclear receptor subfamily 2, group C, member 1
hsa-miR-596	0	0	1	1	0	0	DGAT2L6	diacylglycerol O-acyltransferase 2-like 6
hsa-miR-596	0	0	0	1	0	0	MRPL40	mitochondrial ribosomal protein L40
hsa-miR-596	0	0	0	1	1	1	TRIM50	tripartite motif containing 50
hsa-miR-596	0	0	1	1	0	0	TAS1R1	taste receptor, type 1, member 1
hsa-miR-596	0	0	1	1	0	0	C6orf201	chromosome 6 open reading frame 201
hsa-miR-596	0	0	0	1	0	0	TAC4	tachykinin 4 (hemokinin)
hsa-miR-596	0	0	1	1	0	0	RPS19BP1	ribosomal protein S19 binding protein 1
hsa-miR-596	0	0	0	1	0	0	JMJD7-PLA2G4B	JMJD7-PLA2G4B readthrough
hsa-miR-596	0	0	0	1	0	0	C6orf1	chromosome 6 open reading frame 1
hsa-miR-596	1	0	1	1	0	0	LMO1	LIM domain only 1 (rhombotin 1)
hsa-miR-596	0	0	1	1	1	1	IFRD2	interferon-related developmental regulator 2
hsa-miR-596	0	0	0	1	0	0	STARD3	StAR-related lipid transfer (START) domain containing 3
hsa-miR-596	0	0	1	1	0	0	RGS12	regulator of G-protein signaling 12
hsa-miR-596	1	0	0	1	0	0	CIDEC	cell death-inducing DFFA-like effector c
hsa-miR-596	1	0	0	1	1	1	P2RX4	purinergic receptor P2X, ligand-gated ion channel, 4
hsa-miR-596	1	0	1	1	0	0	ZFYVE27	zinc finger, FYVE domain containing 27
hsa-miR-596	0	0	0	1	0	0	ZNF394	zinc finger protein 394
hsa-miR-596	0	0	1	1	0	0	YIF1B	Yip1 interacting factor homolog B (S. cerevisiae)
hsa-miR-596	1	0	1	1	0	0	ZBTB49	zinc finger and BTB domain containing 49
hsa-miR-596	0	0	1	1	0	0	ALDOA	aldolase A, fructose-bisphosphate
hsa-miR-596	1	0	1	1	1	1	CSMD2	CUB and Sushi multiple domains 2
hsa-miR-596	0	0	0	1	1	1	C11orf95	chromosome 11 open reading frame 95
hsa-miR-596	0	0	0	1	0	0	GJB5	gap junction protein, beta 5, 31.1kDa
hsa-miR-596	1	0	1	1	1	1	KLHL17	kelch-like 17 (Drosophila)
hsa-miR-596	0	0	1	1	1	1	SLC28A1	solute carrier family 28 (sodium-coupled nucleoside transporter), member 1
hsa-miR-596	0	0	0	1	0	0	NOSIP	nitric oxide synthase interacting protein
hsa-miR-596	1	0	1	1	0	0	CANT1	calcium activated nucleotidase 1
hsa-miR-596	1	0	1	1	1	1	BAHD1	bromo adjacent homology domain containing 1
hsa-miR-596	0	0	0	1	1	1	C21orf2	chromosome 21 open reading frame 2
hsa-miR-596	0	0	0	1	1	1	SDCBP2	syndecan binding protein (syntenin) 2
hsa-miR-596	0	0	1	1	1	1	PBX1	pre-B-cell leukemia homeobox 1
hsa-miR-596	0	0	0	1	1	1	PNCK	pregnancy up-regulated non-ubiquitously expressed CaM kinase
hsa-miR-596	0	0	1	1	0	0	TEX264	testis expressed 264
hsa-miR-596	0	0	0	1	0	0	WDR86	WD repeat domain 86
hsa-miR-596	0	0	0	1	0	0	TMEM179	transmembrane protein 179
hsa-miR-596	0	0	0	1	0	0	C19orf35	chromosome 19 open reading frame 35
hsa-miR-596	0	0	0	1	0	0	FAM22B	family with sequence similarity 22, member B
hsa-miR-596	0	0	1	1	0	0	ODF3	outer dense fiber of sperm tails 3
hsa-miR-596	0	0	0	1	0	0	THEG	theg spermatid protein
hsa-miR-596	0	0	1	1	1	1	ATP13A4	ATPase type 13A4
hsa-miR-596	0	0	0	1	1	1	CIDEA	cell death-inducing DFFA-like effector a
hsa-miR-596	1	0	1	1	1	1	CASKIN1	CASK interacting protein 1
hsa-miR-596	1	0	0	1	1	1	COL9A3	collagen, type IX, alpha 3
hsa-miR-596	0	0	0	1	0	0	FLT3LG	fms-related tyrosine kinase 3 ligand
hsa-miR-596	1	0	1	1	1	1	MLLT4	myeloid/lymphoid or mixed-lineage leukemia (trithorax homolog, Drosophila); translocated to, 4
hsa-miR-596	1	0	1	1	1	1	UNC79	unc-79 homolog (C. elegans)
hsa-miR-596	0	0	0	1	0	0	SDSL	serine dehydratase-like
hsa-miR-596	0	0	1	1	0	0	NISCH	nischarin
hsa-miR-596	0	0	1	1	0	0	UBE2J2	ubiquitin-conjugating enzyme E2, J2
hsa-miR-596	1	0	1	1	0	0	ZDHHC1	zinc finger, DHHC-type containing 1
hsa-miR-596	0	0	1	1	1	1	GMPR2	guanosine monophosphate reductase 2
hsa-miR-596	0	0	1	1	0	0	P2RY6	pyrimidinergic receptor P2Y, G-protein coupled, 6
hsa-miR-596	0	0	0	1	1	1	CPNE1	copine I
hsa-miR-596	1	0	0	1	0	0	NKX2-4	NK2 homeobox 4
hsa-miR-596	1	0	1	1	1	1	SLC24A4	solute carrier family 24 (sodium/potassium/calcium exchanger), member 4
hsa-miR-596	0	0	0	1	0	0	CD74	CD74 molecule, major histocompatibility complex, class II invariant chain
hsa-miR-596	1	0	1	1	1	1	SLC12A9	solute carrier family 12 (potassium/chloride transporters), member 9
hsa-miR-596	0	0	1	1	1	1	NUP214	nucleoporin 214kDa
hsa-miR-596	0	0	0	1	0	0	PCDHB11	protocadherin beta 11
hsa-miR-596	0	0	1	1	0	0	GPT	glutamic-pyruvate transaminase (alanine aminotransferase)
hsa-miR-596	0	0	1	1	0	0	INTS4	integrator complex subunit 4
hsa-miR-596	0	0	0	1	0	0	ENTPD2	ectonucleoside triphosphate diphosphohydrolase 2
hsa-miR-596	1	0	1	1	1	1	ANO1	anoctamin 1, calcium activated chloride channel
hsa-miR-596	0	0	0	1	0	0	MFSD12	major facilitator superfamily domain containing 12
hsa-miR-596	0	0	0	1	1	1	SULT1A3	sulfotransferase family, cytosolic, 1A, phenol-preferring, member 3
hsa-miR-596	0	0	1	1	1	1	RSL1D1	ribosomal L1 domain containing 1
hsa-miR-596	0	0	0	1	0	0	ZNF625	zinc finger protein 625
hsa-miR-596	0	0	1	1	1	1	MED24	mediator complex subunit 24
hsa-miR-596	0	0	0	1	1	1	PITPNM1	phosphatidylinositol transfer protein, membrane-associated 1
hsa-miR-596	1	0	1	1	0	0	PLD3	phospholipase D family, member 3
hsa-miR-596	0	0	1	1	0	0	DOK3	docking protein 3
hsa-miR-596	1	0	1	1	1	1	ACHE	acetylcholinesterase
hsa-miR-596	0	0	1	1	0	0	TRMT1	tRNA methyltransferase 1 homolog (S. cerevisiae)
hsa-miR-596	1	0	1	1	1	1	NIPAL3	NIPA-like domain containing 3
hsa-miR-596	1	0	0	1	0	0	RABEP2	rabaptin, RAB GTPase binding effector protein 2
hsa-miR-596	0	0	1	1	0	0	LINC00176	long intergenic non-protein coding RNA 176
hsa-miR-596	1	0	1	1	1	1	LFNG	LFNG O-fucosylpeptide 3-beta-N-acetylglucosaminyltransferase
hsa-miR-596	1	0	1	1	0	0	EFNA4	ephrin-A4
hsa-miR-596	0	0	1	1	0	0	BRMS1	breast cancer metastasis suppressor 1
hsa-miR-596	0	0	1	1	1	1	ATP2A3	ATPase, Ca++ transporting, ubiquitous
hsa-miR-596	1	0	1	1	1	1	ENTPD6	ectonucleoside triphosphate diphosphohydrolase 6 (putative)
hsa-miR-596	0	0	1	1	0	0	KIRREL	kin of IRRE like (Drosophila)
hsa-miR-596	1	0	0	1	0	0	TSTA3	tissue specific transplantation antigen P35B
hsa-miR-596	1	0	1	1	1	1	FGFR2	fibroblast growth factor receptor 2
hsa-miR-596	1	0	1	1	1	1	DAP	death-associated protein
hsa-miR-596	0	0	0	1	0	0	MMP17	matrix metallopeptidase 17 (membrane-inserted)
hsa-miR-596	1	0	1	1	1	1	PCGF2	polycomb group ring finger 2
hsa-miR-596	0	0	1	1	1	1	SOX10	SRY (sex determining region Y)-box 10
hsa-miR-596	0	0	0	1	0	0	ABP1	amiloride binding protein 1 (amine oxidase (copper-containing))
hsa-miR-596	0	0	1	1	0	0	TPM2	tropomyosin 2 (beta)
hsa-miR-596	1	0	1	1	1	1	RFWD3	ring finger and WD repeat domain 3
hsa-miR-596	0	0	0	1	0	0	GAGE12C	G antigen 12C
hsa-miR-596	0	0	0	1	0	0	GAGE12H	G antigen 12H
hsa-miR-596	0	0	0	1	1	1	GPR161	G protein-coupled receptor 161
hsa-miR-596	0	0	0	1	1	1	FAM63A	family with sequence similarity 63, member A
hsa-miR-596	1	0	1	1	0	0	DCTN1	dynactin 1
hsa-miR-596	0	0	1	1	0	0	C1orf95	chromosome 1 open reading frame 95
hsa-miR-596	0	0	1	1	0	0	REN	renin
hsa-miR-596	1	0	1	1	1	1	NR5A2	nuclear receptor subfamily 5, group A, member 2
hsa-miR-596	0	0	1	1	0	0	MR1	major histocompatibility complex, class I-related
hsa-miR-596	1	0	1	1	1	1	ATP1A2	ATPase, Na+/K+ transporting, alpha 2 polypeptide
hsa-miR-596	0	0	0	1	0	0	TTC24	tetratricopeptide repeat domain 24
hsa-miR-596	0	0	0	1	0	0	BGLAP	bone gamma-carboxyglutamate (gla) protein
hsa-miR-596	0	0	0	1	0	0	PRAP1	proline-rich acidic protein 1
hsa-miR-596	0	0	0	1	1	1	RSPH4A	radial spoke head 4 homolog A (Chlamydomonas)
hsa-miR-596	0	0	1	1	1	1	S100A3	S100 calcium binding protein A3
hsa-miR-596	1	0	1	1	1	1	SCML4	sex comb on midleg-like 4 (Drosophila)
hsa-miR-596	1	0	1	1	1	1	SV2A	synaptic vesicle glycoprotein 2A
hsa-miR-596	0	0	1	1	1	1	PDE4DIP	phosphodiesterase 4D interacting protein
hsa-miR-596	0	0	1	1	1	1	RBM20	RNA binding motif protein 20
hsa-miR-596	0	0	1	1	0	0	NEURL	neuralized homolog (Drosophila)
hsa-miR-596	0	0	0	1	1	1	PDCD11	programmed cell death 11
hsa-miR-596	0	0	0	1	1	1	TMEM187	transmembrane protein 187
hsa-miR-596	0	0	0	1	0	0	SRPK3	SRSF protein kinase 3
hsa-miR-596	0	0	0	1	0	0	HAUS7	HAUS augmin-like complex, subunit 7
hsa-miR-596	0	0	0	1	1	1	CHRNA4	cholinergic receptor, nicotinic, alpha 4 (neuronal)
hsa-miR-596	0	0	0	1	0	0	GATA5	GATA binding protein 5
hsa-miR-596	0	0	1	1	1	1	FPGT	fucose-1-phosphate guanylyltransferase
hsa-miR-596	0	0	1	1	0	0	FAM151A	family with sequence similarity 151, member A
hsa-miR-596	0	0	0	1	0	0	FAM65C	family with sequence similarity 65, member C
hsa-miR-596	0	0	0	1	0	0	C9orf142	chromosome 9 open reading frame 142
hsa-miR-596	0	0	1	1	0	0	PMPCA	peptidase (mitochondrial processing) alpha
hsa-miR-596	0	0	1	1	0	0	PAEP	progestagen-associated endometrial protein
hsa-miR-596	1	0	0	1	0	0	DMRTA2	DMRT-like family A2
hsa-miR-596	0	0	0	1	0	0	GBGT1	globoside alpha-1,3-N-acetylgalactosaminyltransferase 1
hsa-miR-596	1	0	1	1	1	1	OPN4	opsin 4
hsa-miR-596	0	0	0	1	0	0	PTCH2	patched 2
hsa-miR-596	0	0	1	1	0	0	MMP9	matrix metallopeptidase 9 (gelatinase B, 92kDa gelatinase, 92kDa type IV collagenase)
hsa-miR-596	0	0	1	1	1	1	TIE1	tyrosine kinase with immunoglobulin-like and EGF-like domains 1
hsa-miR-596	1	0	1	1	1	1	SLC2A1	solute carrier family 2 (facilitated glucose transporter), member 1
hsa-miR-596	1	0	1	1	1	1	ZNF691	zinc finger protein 691
hsa-miR-596	0	0	0	1	0	0	ENDOG	endonuclease G
hsa-miR-596	0	0	1	1	1	1	CNPY3	canopy 3 homolog (zebrafish)
hsa-miR-596	0	0	0	1	0	0	TDRG1	testis development related 1 (non-protein coding)
hsa-miR-596	1	0	1	1	1	1	FAM129B	family with sequence similarity 129, member B
hsa-miR-596	0	0	1	1	1	1	SLC2A8	solute carrier family 2 (facilitated glucose transporter), member 8
hsa-miR-596	1	0	1	1	1	1	RALGPS1	Ral GEF with PH domain and SH3 binding motif 1
hsa-miR-596	1	0	1	1	1	1	NR6A1	nuclear receptor subfamily 6, group A, member 1
hsa-miR-596	0	0	1	1	1	1	BAI2	brain-specific angiogenesis inhibitor 2
hsa-miR-596	0	0	1	1	0	0	NHSL2	NHS-like 2
hsa-miR-596	0	0	1	1	1	1	TTLL11	tubulin tyrosine ligase-like family, member 11
hsa-miR-596	1	0	0	1	1	1	CNTRL	centriolin
hsa-miR-596	0	0	0	1	0	0	TULP1	tubby like protein 1
hsa-miR-596	0	0	1	1	0	0	OGDHL	oxoglutarate dehydrogenase-like
hsa-miR-596	0	0	1	1	0	0	GPN2	GPN-loop GTPase 2
hsa-miR-596	0	0	1	1	1	1	AIM1L	absent in melanoma 1-like
hsa-miR-596	0	0	1	1	1	1	PTGR1	prostaglandin reductase 1
hsa-miR-596	0	0	1	1	0	0	ALOX5	arachidonate 5-lipoxygenase
hsa-miR-596	0	0	0	1	0	0	FXYD4	FXYD domain containing ion transport regulator 4
hsa-miR-596	1	0	1	1	0	0	ZBTB22	zinc finger and BTB domain containing 22
hsa-miR-596	1	0	1	1	1	1	EPHA8	EPH receptor A8
hsa-miR-596	1	0	0	1	0	0	PSMB8	proteasome (prosome, macropain) subunit, beta type, 8 (large multifunctional peptidase 7)
hsa-miR-596	0	0	0	1	1	1	TMCO4	transmembrane and coiled-coil domains 4
hsa-miR-596	0	0	0	1	1	1	TBXA2R	thromboxane A2 receptor
hsa-miR-596	0	0	0	1	0	0	SKIV2L	superkiller viralicidic activity 2-like (S. cerevisiae)
hsa-miR-596	0	0	0	1	1	1	MFAP2	microfibrillar-associated protein 2
hsa-miR-596	0	0	0	1	0	0	ZBTB17	zinc finger and BTB domain containing 17
hsa-miR-596	0	0	0	1	0	0	PYY3	peptide YY, 3 (pseudogene)
hsa-miR-596	0	0	0	1	0	0	GAGE12E	G antigen 12E
hsa-miR-596	0	0	1	1	1	1	APBB1IP	amyloid beta (A4) precursor protein-binding, family B, member 1 interacting protein
hsa-miR-596	0	0	0	1	0	0	CACNA1F	calcium channel, voltage-dependent, L type, alpha 1F subunit
hsa-miR-596	0	0	0	1	0	0	PRICKLE3	prickle homolog 3 (Drosophila)
hsa-miR-596	0	0	1	1	0	0	PTPRH	protein tyrosine phosphatase, receptor type, H
hsa-miR-596	1	0	0	1	1	1	PRAF2	PRA1 domain family, member 2
hsa-miR-596	1	0	1	1	1	1	CLCN6	chloride channel, voltage-sensitive 6
hsa-miR-596	0	0	1	1	0	0	MAD2L2	MAD2 mitotic arrest deficient-like 2 (yeast)
hsa-miR-596	0	0	0	1	1	1	TRIM15	tripartite motif containing 15
hsa-miR-596	1	0	1	1	1	1	HS6ST3	heparan sulfate 6-O-sulfotransferase 3
hsa-miR-596	0	0	1	1	0	0	UGGT2	UDP-glucose glycoprotein glucosyltransferase 2
hsa-miR-596	1	0	1	1	1	1	DZIP1	DAZ interacting protein 1
hsa-miR-596	0	0	1	1	1	1	ALDH1A1	aldehyde dehydrogenase 1 family, member A1
hsa-miR-596	0	0	1	1	0	0	GPAT2	glycerol-3-phosphate acyltransferase 2, mitochondrial
hsa-miR-596	0	0	0	1	0	0	CGB7	chorionic gonadotropin, beta polypeptide 7
hsa-miR-596	0	0	1	1	1	1	ANKRD20A1	ankyrin repeat domain 20 family, member A1
hsa-miR-596	0	0	1	1	1	1	CNTNAP3B	contactin associated protein-like 3B
hsa-miR-596	0	0	0	1	1	1	PYCRL	pyrroline-5-carboxylate reductase-like
hsa-miR-596	0	0	0	1	1	1	ANKRD20A2	ankyrin repeat domain 20 family, member A2
hsa-miR-596	0	0	1	1	0	0	TCTN1	tectonic family member 1
hsa-miR-596	1	0	1	1	1	1	SHB	Src homology 2 domain containing adaptor protein B
hsa-miR-596	0	0	0	1	0	0	CUBN	cubilin (intrinsic factor-cobalamin receptor)
hsa-miR-596	1	0	1	1	0	0	MEGF8	multiple EGF-like-domains 8
hsa-miR-596	0	0	1	1	1	1	EBPL	emopamil binding protein-like
hsa-miR-596	0	0	1	1	0	0	MORN1	MORN repeat containing 1
hsa-miR-596	0	0	1	1	0	0	C1orf86	chromosome 1 open reading frame 86
hsa-miR-596	1	0	1	1	0	0	PRKCZ	protein kinase C, zeta
hsa-miR-596	0	0	1	1	0	0	GABRD	gamma-aminobutyric acid (GABA) A receptor, delta
hsa-miR-596	0	0	0	1	1	1	GDF9	growth differentiation factor 9
hsa-miR-596	1	0	0	1	1	1	CCNI2	cyclin I family, member 2
hsa-miR-596	0	0	0	1	0	0	SDHAF1	succinate dehydrogenase complex assembly factor 1
hsa-miR-596	1	0	0	1	1	1	C10orf47	chromosome 10 open reading frame 47
hsa-miR-596	0	0	1	1	0	0	UBAP2	ubiquitin associated protein 2
hsa-miR-596	0	0	0	1	0	0	TNFRSF4	tumor necrosis factor receptor superfamily, member 4
hsa-miR-596	1	0	1	1	1	1	SAT1	spermidine/spermine N1-acetyltransferase 1
hsa-miR-596	0	0	0	1	0	0	C6orf52	chromosome 6 open reading frame 52
hsa-miR-596	0	0	0	1	0	0	KRTAP12-3	keratin associated protein 12-3
hsa-miR-596	0	0	0	1	1	1	KRTAP10-10	keratin associated protein 10-10
hsa-miR-596	0	0	0	1	0	0	KRTAP10-11	keratin associated protein 10-11
hsa-miR-596	0	0	1	1	1	1	ITPA	inosine triphosphatase (nucleoside triphosphate pyrophosphatase)
hsa-miR-596	0	0	0	1	0	0	HBG2	hemoglobin, gamma G
hsa-miR-596	0	0	0	1	0	0	EMILIN1	elastin microfibril interfacer 1
hsa-miR-596	0	0	1	1	1	1	PRPS2	phosphoribosyl pyrophosphate synthetase 2
hsa-miR-596	0	0	0	1	0	0	FAM116B	family with sequence similarity 116, member B
hsa-miR-596	0	0	1	1	1	1	AKAP17A	A kinase (PRKA) anchor protein 17A
hsa-miR-596	0	0	1	1	0	0	FAM22D	family with sequence similarity 22, member D
hsa-miR-596	0	0	0	1	0	0	GAGE4	G antigen 4
hsa-miR-596	0	0	0	1	0	0	FAM22A	family with sequence similarity 22, member A
hsa-miR-596	1	0	1	1	1	1	HMG20A	high mobility group 20A
hsa-miR-596	0	0	0	1	0	0	GAGE2B	G antigen 2B
hsa-miR-596	0	0	0	1	0	0	GAGE12D	G antigen 12D
hsa-miR-596	0	0	0	1	0	0	GAGE13	G antigen 13
hsa-miR-596	1	0	1	1	0	0	ZNF594	zinc finger protein 594
hsa-miR-596	0	0	0	1	0	0	GAGE10	G antigen 10
hsa-miR-596	1	0	1	1	0	0	SMARCA2	SWI/SNF related, matrix associated, actin dependent regulator of chromatin, subfamily a, member 2
hsa-miR-596	0	0	1	1	1	1	TPO	thyroid peroxidase
hsa-miR-596	0	0	0	1	1	1	BPY2C	basic charge, Y-linked, 2C
hsa-miR-596	0	0	1	1	1	1	DOCK8	dedicator of cytokinesis 8
hsa-miR-596	0	0	1	1	1	1	C21orf62	chromosome 21 open reading frame 62
hsa-miR-596	0	0	1	1	0	0	MBD1	methyl-CpG binding domain protein 1
hsa-miR-596	0	0	1	1	1	1	GNAI2	guanine nucleotide binding protein (G protein), alpha inhibiting activity polypeptide 2
hsa-miR-596	0	0	1	1	0	0	SDK2	sidekick cell adhesion molecule 2
hsa-miR-596	0	0	1	1	0	0	HNRNPL	heterogeneous nuclear ribonucleoprotein L
hsa-miR-596	0	0	1	1	0	0	TSNAXIP1	translin-associated factor X interacting protein 1
hsa-miR-596	0	0	0	1	0	0	CCDC57	coiled-coil domain containing 57
hsa-miR-596	1	0	1	1	1	1	SPTB	spectrin, beta, erythrocytic
hsa-miR-596	1	0	1	1	1	1	GABRB2	gamma-aminobutyric acid (GABA) A receptor, beta 2
hsa-miR-596	0	0	1	1	1	1	TSPYL6	TSPY-like 6
hsa-miR-596	1	0	1	0	1	1	FAM102B	family with sequence similarity 102, member B
hsa-miR-596	1	0	1	1	1	1	KDM5A	lysine (K)-specific demethylase 5A
hsa-miR-596	0	0	1	1	1	1	GLB1L3	galactosidase, beta 1-like 3
hsa-miR-596	1	0	1	0	1	1	HTT	huntingtin
hsa-miR-596	0	0	0	1	1	1	LDHC	lactate dehydrogenase C
hsa-miR-596	0	0	1	1	1	1	P2RY1	purinergic receptor P2Y, G-protein coupled, 1
hsa-miR-596	0	0	0	1	1	1	ZNF155	zinc finger protein 155
hsa-miR-596	0	0	1	1	1	1	PRPF18	PRP18 pre-mRNA processing factor 18 homolog (S. cerevisiae)
hsa-miR-596	0	0	1	1	1	1	COL8A2	collagen, type VIII, alpha 2
hsa-miR-596	1	0	0	1	1	1	EOMES	eomesodermin
hsa-miR-596	1	0	1	0	1	1	SMAD3	SMAD family member 3
hsa-miR-596	0	0	1	1	1	1	CXCL13	chemokine (C-X-C motif) ligand 13
hsa-miR-596	0	0	1	1	1	1	GLO1	glyoxalase I
hsa-miR-596	0	0	1	1	1	1	HNMT	histamine N-methyltransferase
hsa-miR-596	1	0	1	0	1	1	RAPGEF5	Rap guanine nucleotide exchange factor (GEF) 5
hsa-miR-596	0	0	1	1	1	1	PISD	phosphatidylserine decarboxylase
hsa-miR-596	1	0	1	0	1	1	HUNK	hormonally up-regulated Neu-associated kinase
hsa-miR-596	1	0	1	1	1	1	MRPS27	mitochondrial ribosomal protein S27
hsa-miR-596	1	0	1	1	1	1	ANKS1A	ankyrin repeat and sterile alpha motif domain containing 1A
hsa-miR-596	1	0	1	1	1	1	VPS39	vacuolar protein sorting 39 homolog (S. cerevisiae)
hsa-miR-596	1	0	1	1	1	1	NIP7	nuclear import 7 homolog (S. cerevisiae)
hsa-miR-596	1	0	1	1	1	1	POLA1	polymerase (DNA directed), alpha 1, catalytic subunit
hsa-miR-596	0	0	1	0	1	1	MREG	melanoregulin
hsa-miR-596	0	0	1	1	1	1	TMPRSS4	transmembrane protease, serine 4
hsa-miR-596	0	0	1	1	1	1	IFNK	interferon, kappa
hsa-miR-596	1	0	1	1	1	1	FEM1C	fem-1 homolog c (C. elegans)
hsa-miR-596	0	0	1	1	1	1	ZFYVE28	zinc finger, FYVE domain containing 28
hsa-miR-596	0	0	1	1	1	1	CD209	CD209 molecule
hsa-miR-596	0	0	1	1	1	1	SH2D4A	SH2 domain containing 4A
hsa-miR-596	1	0	1	1	1	1	NAPB	N-ethylmaleimide-sensitive factor attachment protein, beta
hsa-miR-596	1	0	1	1	1	1	TOR3A	torsin family 3, member A
hsa-miR-596	1	0	0	0	1	1	C19orf42	chromosome 19 open reading frame 42
hsa-miR-596	1	0	0	0	1	1	C22orf29	chromosome 22 open reading frame 29
hsa-miR-596	0	0	0	1	1	1	CES3	carboxylesterase 3
hsa-miR-596	0	0	1	0	1	1	DNAJC30	DnaJ (Hsp40) homolog, subfamily C, member 30
hsa-miR-596	1	0	0	1	1	1	SFT2D3	SFT2 domain containing 3
hsa-miR-596	0	0	1	1	1	1	C3orf15	chromosome 3 open reading frame 15
hsa-miR-596	0	0	1	1	1	1	COX15	COX15 homolog, cytochrome c oxidase assembly protein (yeast)
hsa-miR-596	1	0	1	1	1	1	C1orf216	chromosome 1 open reading frame 216
hsa-miR-596	0	0	1	1	1	1	BBS12	Bardet-Biedl syndrome 12
hsa-miR-596	1	0	1	1	1	1	NT5DC1	5'-nucleotidase domain containing 1
hsa-miR-596	1	0	1	0	1	1	KSR2	kinase suppressor of ras 2
hsa-miR-596	1	0	1	1	1	1	DIP2B	DIP2 disco-interacting protein 2 homolog B (Drosophila)
hsa-miR-596	1	0	1	1	1	1	RNF149	ring finger protein 149
hsa-miR-596	1	0	1	1	1	1	RAB43	RAB43, member RAS oncogene family
