# Supplementary material for: Profiling of Selected MicroRNAs in Proliferative Eutopic Endometrium of Women with Ovarian Endometriosis
Source: Biomed Res Int. 2015 Aug 20;2015:760698. doi: 10.1155/2015/760698 (PMC4558423; doi:10.1155/2015/760698)
Supplement: Supplementary file 1 — Table I: The names of miRNAs significantly differentially expressed between eutopic endometrium of patients with endometriosis vs eutopic endometrium of patients without endometriosis. Table II: The associations between miRNA and mRNA, which presents detailed results of the search of six major databases i.e targetscan, tarbase, miranda, mirbase, mirtarget2 and pictar. [file 760698.f1.zip › 760698.f1/Table II/hsa-miR-599.tsv]

miR	targetscan	tarbase	miranda	mirbase	mirtarget2	pictar	GeneSymbol	GeneName
hsa-miR-599	1	0	1	1	1	1	SMAD4	SMAD family member 4
hsa-miR-599	1	0	1	1	1	1	ACVR2B	activin A receptor, type IIB
hsa-miR-599	1	0	1	1	1	1	ICA1L	islet cell autoantigen 1,69kDa-like
hsa-miR-599	1	0	1	0	1	1	KIAA1147	KIAA1147
hsa-miR-599	1	0	1	0	1	1	VPS13D	vacuolar protein sorting 13 homolog D (S. cerevisiae)
hsa-miR-599	1	0	0	1	1	1	C14orf102	chromosome 14 open reading frame 102
hsa-miR-599	1	0	1	0	1	1	PAFAH1B1	platelet-activating factor acetylhydrolase 1b, regulatory subunit 1 (45kDa)
hsa-miR-599	1	0	1	0	1	1	PATL1	protein associated with topoisomerase II homolog 1 (yeast)
hsa-miR-599	1	0	1	1	1	1	BSDC1	BSD domain containing 1
hsa-miR-599	1	0	1	0	1	1	TMEM154	transmembrane protein 154
hsa-miR-599	1	0	1	0	1	1	TBL1XR1	transducin (beta)-like 1 X-linked receptor 1
hsa-miR-599	1	0	1	1	1	1	FAM123B	family with sequence similarity 123B
hsa-miR-599	1	0	1	1	0	0	ANKRD13B	ankyrin repeat domain 13B
hsa-miR-599	1	0	1	1	1	1	NFASC	neurofascin
hsa-miR-599	1	0	1	1	1	1	CYP26B1	cytochrome P450, family 26, subfamily B, polypeptide 1
hsa-miR-599	1	0	1	1	1	1	STX16	syntaxin 16
hsa-miR-599	1	0	1	1	1	1	ACTC1	actin, alpha, cardiac muscle 1
hsa-miR-599	1	0	1	1	1	1	FERMT2	fermitin family member 2
hsa-miR-599	1	0	1	1	1	1	LRRC4C	leucine rich repeat containing 4C
hsa-miR-599	1	0	1	1	1	1	BNC2	basonuclin 2
hsa-miR-599	1	0	0	1	0	0	INPP4B	inositol polyphosphate-4-phosphatase, type II, 105kDa
hsa-miR-599	1	0	1	1	1	1	PTPRD	protein tyrosine phosphatase, receptor type, D
hsa-miR-599	1	0	1	1	1	1	IGF1	insulin-like growth factor 1 (somatomedin C)
hsa-miR-599	1	0	1	1	1	1	CHCHD10	coiled-coil-helix-coiled-coil-helix domain containing 10
hsa-miR-599	1	0	1	1	1	1	METTL8	methyltransferase like 8
hsa-miR-599	1	0	1	1	0	0	C9orf41	chromosome 9 open reading frame 41
hsa-miR-599	1	0	1	1	1	1	RASL10B	RAS-like, family 10, member B
hsa-miR-599	1	0	1	1	1	1	ERBB3	v-erb-b2 erythroblastic leukemia viral oncogene homolog 3 (avian)
hsa-miR-599	1	0	1	1	1	1	TSHZ1	teashirt zinc finger homeobox 1
hsa-miR-599	1	0	1	1	1	1	IVNS1ABP	influenza virus NS1A binding protein
hsa-miR-599	1	0	1	0	1	1	CDK19	cyclin-dependent kinase 19
hsa-miR-599	1	0	1	1	1	1	NLGN1	neuroligin 1
hsa-miR-599	1	0	1	0	1	1	SETD7	SET domain containing (lysine methyltransferase) 7
hsa-miR-599	1	0	1	1	1	1	DLG2	discs, large homolog 2 (Drosophila)
hsa-miR-599	1	0	1	1	1	1	ABHD2	abhydrolase domain containing 2
hsa-miR-599	1	0	1	1	1	1	INPP5A	inositol polyphosphate-5-phosphatase, 40kDa
hsa-miR-599	1	0	0	1	1	1	MSI1	musashi homolog 1 (Drosophila)
hsa-miR-599	1	0	1	0	1	1	TNRC6B	trinucleotide repeat containing 6B
hsa-miR-599	1	0	1	1	1	1	VPS37A	vacuolar protein sorting 37 homolog A (S. cerevisiae)
hsa-miR-599	1	0	1	1	1	1	ZCCHC14	zinc finger, CCHC domain containing 14
hsa-miR-599	1	0	1	1	1	1	HNRNPF	heterogeneous nuclear ribonucleoprotein F
hsa-miR-599	1	0	1	1	1	1	TFAP2A	transcription factor AP-2 alpha (activating enhancer binding protein 2 alpha)
hsa-miR-599	1	0	1	1	0	0	NKIRAS2	NFKB inhibitor interacting Ras-like 2
hsa-miR-599	1	0	1	1	1	1	JMJD1C	jumonji domain containing 1C
hsa-miR-599	1	0	0	1	1	1	CLCC1	chloride channel CLIC-like 1
hsa-miR-599	1	0	1	1	1	1	PDPK1	3-phosphoinositide dependent protein kinase-1
hsa-miR-599	1	0	1	1	1	1	BRSK1	BR serine/threonine kinase 1
hsa-miR-599	1	0	1	0	1	1	NUFIP2	nuclear fragile X mental retardation protein interacting protein 2
hsa-miR-599	1	0	1	1	1	1	FOXO4	forkhead box O4
hsa-miR-599	1	0	1	1	1	1	BCL2L15	BCL2-like 15
hsa-miR-599	1	0	1	0	1	1	AP2B1	adaptor-related protein complex 2, beta 1 subunit
hsa-miR-599	1	0	1	1	1	1	GABBR2	gamma-aminobutyric acid (GABA) B receptor, 2
hsa-miR-599	1	0	1	0	1	1	ENC1	ectodermal-neural cortex 1 (with BTB-like domain)
hsa-miR-599	1	0	1	1	1	1	NEUROD2	neuronal differentiation 2
hsa-miR-599	1	0	1	1	0	0	SUSD5	sushi domain containing 5
hsa-miR-599	1	0	1	1	1	1	SENP6	SUMO1/sentrin specific peptidase 6
hsa-miR-599	1	0	1	1	1	1	FGFR1	fibroblast growth factor receptor 1
hsa-miR-599	1	0	1	1	1	1	PDLIM5	PDZ and LIM domain 5
hsa-miR-599	1	0	1	1	1	1	TEAD1	TEA domain family member 1 (SV40 transcriptional enhancer factor)
hsa-miR-599	1	0	1	1	0	0	PLXNA4	plexin A4
hsa-miR-599	1	0	0	1	1	1	PTRF	polymerase I and transcript release factor
hsa-miR-599	1	0	1	1	1	1	FAT2	FAT tumor suppressor homolog 2 (Drosophila)
hsa-miR-599	1	0	1	1	1	1	MOG	myelin oligodendrocyte glycoprotein
hsa-miR-599	1	0	1	1	1	1	BAIAP2	BAI1-associated protein 2
hsa-miR-599	1	0	1	0	1	1	GPR158	G protein-coupled receptor 158
hsa-miR-599	1	0	1	1	1	1	ADAMTSL1	ADAMTS-like 1
hsa-miR-599	1	0	1	0	1	1	LIMD1	LIM domains containing 1
hsa-miR-599	1	0	1	1	1	1	NKX2-1	NK2 homeobox 1
hsa-miR-599	1	0	1	1	1	1	MECP2	methyl CpG binding protein 2 (Rett syndrome)
hsa-miR-599	1	0	1	1	0	0	RFX1	regulatory factor X, 1 (influences HLA class II expression)
hsa-miR-599	1	0	1	1	1	1	C2orf69	chromosome 2 open reading frame 69
hsa-miR-599	1	0	1	1	1	1	EEA1	early endosome antigen 1
hsa-miR-599	1	0	1	0	1	1	BCL11B	B-cell CLL/lymphoma 11B (zinc finger protein)
hsa-miR-599	1	0	1	1	1	1	TXLNB	taxilin beta
hsa-miR-599	1	0	1	1	1	1	DYRK1A	dual-specificity tyrosine-(Y)-phosphorylation regulated kinase 1A
hsa-miR-599	1	0	1	1	1	1	AGAP2	ArfGAP with GTPase domain, ankyrin repeat and PH domain 2
hsa-miR-599	1	0	1	1	1	1	TCF20	transcription factor 20 (AR1)
hsa-miR-599	1	0	1	1	1	1	PDRG1	p53 and DNA-damage regulated 1
hsa-miR-599	1	0	1	0	1	1	PDE4D	phosphodiesterase 4D, cAMP-specific
hsa-miR-599	1	0	1	1	1	1	FGF7	fibroblast growth factor 7
hsa-miR-599	1	0	1	1	1	1	RALGAPB	Ral GTPase activating protein, beta subunit (non-catalytic)
hsa-miR-599	1	0	1	1	1	1	SET	SET nuclear oncogene
hsa-miR-599	1	0	1	1	1	1	MAF	v-maf musculoaponeurotic fibrosarcoma oncogene homolog (avian)
hsa-miR-599	1	0	1	1	1	1	ATRN	attractin
hsa-miR-599	1	0	1	1	1	1	CERS6	ceramide synthase 6
hsa-miR-599	1	0	1	1	1	1	FAM222B	family with sequence similarity 222, member B
hsa-miR-599	1	0	1	1	1	1	LRRC59	leucine rich repeat containing 59
hsa-miR-599	1	0	1	1	1	1	FAM219A	family with sequence similarity 219, member A
hsa-miR-599	1	0	1	1	1	1	ARHGAP30	Rho GTPase activating protein 30
hsa-miR-599	1	0	1	1	1	1	CXCL14	chemokine (C-X-C motif) ligand 14
hsa-miR-599	1	0	1	1	1	1	TCF12	transcription factor 12
hsa-miR-599	1	0	1	0	1	1	FOXO1	forkhead box O1
hsa-miR-599	1	0	1	1	1	1	VAPB	VAMP (vesicle-associated membrane protein)-associated protein B and C
hsa-miR-599	1	0	1	0	1	1	SOX12	SRY (sex determining region Y)-box 12
hsa-miR-599	1	0	1	1	1	1	RBFOX2	RNA binding protein, fox-1 homolog (C. elegans) 2
hsa-miR-599	1	0	1	1	1	1	BIRC6	baculoviral IAP repeat containing 6
hsa-miR-599	1	0	1	1	1	1	SNX27	sorting nexin family member 27
hsa-miR-599	1	0	1	0	1	1	DLEU7	deleted in lymphocytic leukemia, 7
hsa-miR-599	1	0	1	1	1	1	PTGER3	prostaglandin E receptor 3 (subtype EP3)
hsa-miR-599	1	0	1	1	1	1	MARCKS	myristoylated alanine-rich protein kinase C substrate
hsa-miR-599	1	0	1	1	1	1	ARHGEF9	Cdc42 guanine nucleotide exchange factor (GEF) 9
hsa-miR-599	1	0	1	1	0	0	ACOXL	acyl-CoA oxidase-like
hsa-miR-599	1	0	1	1	0	0	FOXO3	forkhead box O3
hsa-miR-599	1	0	1	1	1	1	PDE4B	phosphodiesterase 4B, cAMP-specific
hsa-miR-599	1	0	1	1	1	1	RPS6KA3	ribosomal protein S6 kinase, 90kDa, polypeptide 3
hsa-miR-599	1	0	1	0	0	0	ZNRF3	zinc and ring finger 3
hsa-miR-599	1	0	0	0	0	0	TMEM170B	transmembrane protein 170B
hsa-miR-599	1	0	1	0	1	1	CSNK1G1	casein kinase 1, gamma 1
hsa-miR-599	1	0	1	1	1	1	ZNF618	zinc finger protein 618
hsa-miR-599	1	0	1	1	0	0	INO80E	INO80 complex subunit E
hsa-miR-599	1	0	1	1	1	1	IRAK2	interleukin-1 receptor-associated kinase 2
hsa-miR-599	1	0	1	1	1	1	PDLIM2	PDZ and LIM domain 2 (mystique)
hsa-miR-599	1	0	1	1	1	1	DHX15	DEAH (Asp-Glu-Ala-His) box polypeptide 15
hsa-miR-599	1	0	1	1	1	1	BHLHE41	basic helix-loop-helix family, member e41
hsa-miR-599	1	0	1	1	1	1	CTNNBIP1	catenin, beta interacting protein 1
hsa-miR-599	1	0	1	1	1	1	GIGYF2	GRB10 interacting GYF protein 2
hsa-miR-599	1	0	0	1	1	1	CEP135	centrosomal protein 135kDa
hsa-miR-599	1	0	1	1	0	0	TET3	tet methylcytosine dioxygenase 3
hsa-miR-599	1	0	1	1	1	1	SORCS1	sortilin-related VPS10 domain containing receptor 1
hsa-miR-599	1	0	1	0	0	0	TANC2	tetratricopeptide repeat, ankyrin repeat and coiled-coil containing 2
hsa-miR-599	1	0	1	1	1	1	EVI5	ecotropic viral integration site 5
hsa-miR-599	1	0	1	0	1	1	ARL5B	ADP-ribosylation factor-like 5B
hsa-miR-599	1	0	1	0	1	1	SRC	v-src sarcoma (Schmidt-Ruppin A-2) viral oncogene homolog (avian)
hsa-miR-599	1	0	1	1	1	1	PAX8	paired box 8
hsa-miR-599	1	0	1	1	1	1	KAT6A	K(lysine) acetyltransferase 6A
hsa-miR-599	1	0	1	1	1	1	HIC2	hypermethylated in cancer 2
hsa-miR-599	1	0	1	1	0	0	PDE3A	phosphodiesterase 3A, cGMP-inhibited
hsa-miR-599	1	0	1	0	0	0	FAT3	FAT tumor suppressor homolog 3 (Drosophila)
hsa-miR-599	1	0	1	1	1	1	ZNF148	zinc finger protein 148
hsa-miR-599	1	0	1	1	1	1	UBTD2	ubiquitin domain containing 2
hsa-miR-599	1	0	1	1	1	1	LRP6	low density lipoprotein receptor-related protein 6
hsa-miR-599	1	0	1	1	1	1	OPN5	opsin 5
hsa-miR-599	1	0	1	0	1	1	HNRNPA3	heterogeneous nuclear ribonucleoprotein A3
hsa-miR-599	1	0	1	1	1	1	RANBP10	RAN binding protein 10
hsa-miR-599	1	0	1	0	1	1	C15orf41	chromosome 15 open reading frame 41
hsa-miR-599	1	0	1	0	1	1	HPCAL4	hippocalcin like 4
hsa-miR-599	1	0	1	1	1	1	ZNF280C	zinc finger protein 280C
hsa-miR-599	1	0	1	0	1	1	WDR72	WD repeat domain 72
hsa-miR-599	1	0	1	1	1	1	GPRIN3	GPRIN family member 3
hsa-miR-599	1	0	1	1	0	0	HIPK2	homeodomain interacting protein kinase 2
hsa-miR-599	1	0	1	1	1	1	CHD9	chromodomain helicase DNA binding protein 9
hsa-miR-599	1	0	1	1	1	1	PRUNE2	prune homolog 2 (Drosophila)
hsa-miR-599	1	0	1	1	1	1	DAAM2	dishevelled associated activator of morphogenesis 2
hsa-miR-599	1	0	1	0	1	1	PTPRT	protein tyrosine phosphatase, receptor type, T
hsa-miR-599	1	0	1	0	1	1	KIAA0408	KIAA0408
hsa-miR-599	1	0	1	0	1	1	MTSS1	metastasis suppressor 1
hsa-miR-599	1	0	1	1	1	1	ATMIN	ATM interactor
hsa-miR-599	1	0	1	0	1	1	CEP350	centrosomal protein 350kDa
hsa-miR-599	0	0	1	1	1	1	SPAG9	sperm associated antigen 9
hsa-miR-599	1	0	1	1	1	1	NRXN1	neurexin 1
hsa-miR-599	1	0	1	0	1	1	CHST15	carbohydrate (N-acetylgalactosamine 4-sulfate 6-O) sulfotransferase 15
hsa-miR-599	1	0	1	1	1	1	ANKRD17	ankyrin repeat domain 17
hsa-miR-599	0	0	1	1	0	0	ATP10B	ATPase, class V, type 10B
hsa-miR-599	1	0	1	0	1	1	DOCK4	dedicator of cytokinesis 4
hsa-miR-599	0	0	1	1	0	0	FAM169A	family with sequence similarity 169, member A
hsa-miR-599	0	0	1	1	1	1	MAU2	MAU2 chromatid cohesion factor homolog (C. elegans)
hsa-miR-599	1	0	1	1	1	1	NLGN4Y	neuroligin 4, Y-linked
hsa-miR-599	1	0	1	1	1	1	NTNG1	netrin G1
hsa-miR-599	1	0	1	1	1	1	RPGRIP1L	RPGRIP1-like
hsa-miR-599	1	0	1	0	1	1	ODZ2	odz, odd Oz/ten-m homolog 2 (Drosophila)
hsa-miR-599	1	0	1	1	0	0	KIAA1210	KIAA1210
hsa-miR-599	1	0	1	1	1	1	PCDH19	protocadherin 19
hsa-miR-599	1	0	1	1	1	1	HACE1	HECT domain and ankyrin repeat containing E3 ubiquitin protein ligase 1
hsa-miR-599	1	1	1	1	1	1	NFIA	nuclear factor I/A
hsa-miR-599	0	0	1	0	1	1	MUC3B	mucin 3B, cell surface associated
hsa-miR-599	1	0	1	1	0	0	ZSWIM5	zinc finger, SWIM-type containing 5
hsa-miR-599	1	0	1	1	1	1	USP28	ubiquitin specific peptidase 28
hsa-miR-599	1	0	1	0	1	1	LMO3	LIM domain only 3 (rhombotin-like 2)
hsa-miR-599	0	0	1	0	1	1	ZSWIM6	zinc finger, SWIM-type containing 6
hsa-miR-599	0	0	1	0	0	0	TTC28-AS1	TTC28 antisense RNA 1
hsa-miR-599	0	0	1	0	0	0	LOC440792	proline dehydrogenase (oxidase) 1 pseudogene
hsa-miR-599	1	0	1	1	1	1	LCOR	ligand dependent nuclear receptor corepressor
hsa-miR-599	0	0	1	1	0	0	FOCAD	focadhesin
hsa-miR-599	0	0	1	1	1	1	SLC11A2	solute carrier family 11 (proton-coupled divalent metal ion transporters), member 2
hsa-miR-599	1	0	1	1	1	1	HNRPDL	heterogeneous nuclear ribonucleoprotein D-like
hsa-miR-599	1	0	1	1	1	1	CSMD3	CUB and Sushi multiple domains 3
hsa-miR-599	1	0	1	1	1	1	POGZ	pogo transposable element with ZNF domain
hsa-miR-599	1	0	1	0	0	0	ZBTB34	zinc finger and BTB domain containing 34
hsa-miR-599	0	0	1	1	1	1	NELL1	NEL-like 1 (chicken)
hsa-miR-599	1	0	1	1	1	1	SMEK1	SMEK homolog 1, suppressor of mek1 (Dictyostelium)
hsa-miR-599	1	0	1	0	0	0	ZC3H12C	zinc finger CCCH-type containing 12C
hsa-miR-599	1	0	1	1	1	1	DAPK1	death-associated protein kinase 1
hsa-miR-599	1	0	1	1	1	1	SLC8A1	solute carrier family 8 (sodium/calcium exchanger), member 1
hsa-miR-599	1	0	1	1	1	1	DTNA	dystrobrevin, alpha
hsa-miR-599	1	0	1	1	1	1	ARFGEF1	ADP-ribosylation factor guanine nucleotide-exchange factor 1 (brefeldin A-inhibited)
hsa-miR-599	1	0	1	1	1	1	SATB2	SATB homeobox 2
hsa-miR-599	1	0	1	1	1	1	MAP4	microtubule-associated protein 4
hsa-miR-599	1	0	1	1	1	1	ANK1	ankyrin 1, erythrocytic
hsa-miR-599	1	0	1	1	1	1	GIT1	G protein-coupled receptor kinase interacting ArfGAP 1
hsa-miR-599	0	0	1	1	1	1	HLA-DQA1	major histocompatibility complex, class II, DQ alpha 1
hsa-miR-599	1	0	1	1	0	0	GRIN2A	glutamate receptor, ionotropic, N-methyl D-aspartate 2A
hsa-miR-599	1	0	1	1	1	1	HMGA2	high mobility group AT-hook 2
hsa-miR-599	1	0	1	1	1	1	ZFX	zinc finger protein, X-linked
hsa-miR-599	1	0	1	1	1	1	PHLDB2	pleckstrin homology-like domain, family B, member 2
hsa-miR-599	0	0	1	1	0	0	PLA1A	phospholipase A1 member A
hsa-miR-599	0	0	1	1	1	1	SH3GL3	SH3-domain GRB2-like 3
hsa-miR-599	1	0	1	1	1	1	MYT1L	myelin transcription factor 1-like
hsa-miR-599	1	0	1	1	1	1	SOCS2	suppressor of cytokine signaling 2
hsa-miR-599	1	0	1	1	1	1	MBNL2	muscleblind-like splicing regulator 2
hsa-miR-599	1	0	1	1	1	1	CBFA2T2	core-binding factor, runt domain, alpha subunit 2; translocated to, 2
hsa-miR-599	1	0	1	1	1	1	USP3	ubiquitin specific peptidase 3
hsa-miR-599	0	0	1	1	1	1	PLEKHB1	pleckstrin homology domain containing, family B (evectins) member 1
hsa-miR-599	0	0	1	1	1	1	BBS9	Bardet-Biedl syndrome 9
hsa-miR-599	1	0	1	0	1	1	MAP4K4	mitogen-activated protein kinase kinase kinase kinase 4
hsa-miR-599	1	0	1	1	1	1	CAB39	calcium binding protein 39
hsa-miR-599	1	0	1	1	1	1	TAOK3	TAO kinase 3
hsa-miR-599	0	0	1	0	1	1	PDP1	pyruvate dehyrogenase phosphatase catalytic subunit 1
hsa-miR-599	1	0	1	1	1	1	DNAJA4	DnaJ (Hsp40) homolog, subfamily A, member 4
hsa-miR-599	1	0	1	1	1	1	C3orf18	chromosome 3 open reading frame 18
hsa-miR-599	1	0	1	1	1	1	OGT	O-linked N-acetylglucosamine (GlcNAc) transferase
hsa-miR-599	0	0	1	0	0	0	TIGD7	tigger transposable element derived 7
hsa-miR-599	1	0	1	1	1	1	ELF2	E74-like factor 2 (ets domain transcription factor)
hsa-miR-599	1	0	1	1	1	1	RBM47	RNA binding motif protein 47
hsa-miR-599	1	0	1	1	1	1	SH3GLB1	SH3-domain GRB2-like endophilin B1
hsa-miR-599	1	0	1	0	1	1	TRPS1	trichorhinophalangeal syndrome I
hsa-miR-599	0	0	1	0	1	1	ERBB2IP	erbb2 interacting protein
hsa-miR-599	1	0	1	1	1	1	METTL10	methyltransferase like 10
hsa-miR-599	1	0	1	1	1	1	CHST9	carbohydrate (N-acetylgalactosamine 4-0) sulfotransferase 9
hsa-miR-599	0	0	1	1	0	0	TRO	trophinin
hsa-miR-599	1	0	1	0	1	1	USP32	ubiquitin specific peptidase 32
hsa-miR-599	0	0	1	1	1	1	MS4A4A	membrane-spanning 4-domains, subfamily A, member 4A
hsa-miR-599	0	0	1	0	1	1	MYO3B	myosin IIIB
hsa-miR-599	0	0	1	1	1	1	ORMDL1	ORM1-like 1 (S. cerevisiae)
hsa-miR-599	0	0	1	1	0	0	SNRPN	small nuclear ribonucleoprotein polypeptide N
hsa-miR-599	1	0	1	1	1	1	MAGI1	membrane associated guanylate kinase, WW and PDZ domain containing 1
hsa-miR-599	0	0	1	1	0	0	RASGEF1C	RasGEF domain family, member 1C
hsa-miR-599	1	0	1	1	1	1	ASB8	ankyrin repeat and SOCS box containing 8
hsa-miR-599	1	0	1	1	0	0	FOXP2	forkhead box P2
hsa-miR-599	0	0	1	1	1	1	BMP2K	BMP2 inducible kinase
hsa-miR-599	1	0	1	1	1	1	PTBP2	polypyrimidine tract binding protein 2
hsa-miR-599	0	0	1	1	1	1	ZNF638	zinc finger protein 638
hsa-miR-599	1	0	1	0	1	1	IL1RAP	interleukin 1 receptor accessory protein
hsa-miR-599	1	0	1	1	1	1	AFF2	AF4/FMR2 family, member 2
hsa-miR-599	1	0	1	0	1	1	MED14	mediator complex subunit 14
hsa-miR-599	0	0	1	1	1	1	HIRIP3	HIRA interacting protein 3
hsa-miR-599	0	0	1	1	1	1	GNAS	GNAS complex locus
hsa-miR-599	0	0	1	1	1	1	CLDND1	claudin domain containing 1
hsa-miR-599	0	0	1	1	0	0	TRERF1	transcriptional regulating factor 1
hsa-miR-599	0	0	1	1	1	1	RNASE7	ribonuclease, RNase A family, 7
hsa-miR-599	1	0	1	1	1	1	NRXN3	neurexin 3
hsa-miR-599	0	0	1	0	0	0	CASC2	cancer susceptibility candidate 2 (non-protein coding)
hsa-miR-599	0	0	1	1	1	1	ZNF248	zinc finger protein 248
hsa-miR-599	1	0	1	1	1	1	SYT14	synaptotagmin XIV
hsa-miR-599	0	0	1	1	1	1	SLC8A3	solute carrier family 8 (sodium/calcium exchanger), member 3
hsa-miR-599	1	0	1	1	1	1	PPP1R9A	protein phosphatase 1, regulatory subunit 9A
hsa-miR-599	0	0	1	1	1	1	ESRP1	epithelial splicing regulatory protein 1
hsa-miR-599	1	0	1	1	1	1	AKAP2	A kinase (PRKA) anchor protein 2
hsa-miR-599	0	0	1	1	1	1	OLFM4	olfactomedin 4
hsa-miR-599	0	0	1	1	0	0	EIF3C	eukaryotic translation initiation factor 3, subunit C
hsa-miR-599	1	0	1	1	1	1	ARGLU1	arginine and glutamate rich 1
hsa-miR-599	0	0	1	1	1	1	STOX2	storkhead box 2
hsa-miR-599	1	0	1	1	1	1	EIF2C1	eukaryotic translation initiation factor 2C, 1
hsa-miR-599	0	0	1	1	0	0	MTBP	Mdm2, transformed 3T3 cell double minute 2, p53 binding protein (mouse) binding protein, 104kDa
hsa-miR-599	1	0	1	1	1	1	SLCO5A1	solute carrier organic anion transporter family, member 5A1
hsa-miR-599	0	0	1	0	0	0	DUXAP10	double homeobox A pseudogene 10
hsa-miR-599	0	0	1	0	1	1	ARHGAP42	Rho GTPase activating protein 42
hsa-miR-599	0	0	1	0	0	0	LOC284561	uncharacterized LOC284561
hsa-miR-599	1	0	1	1	1	1	DERL1	derlin 1
hsa-miR-599	1	0	1	1	0	0	MEX3A	mex-3 homolog A (C. elegans)
hsa-miR-599	0	0	1	1	1	1	GGNBP2	gametogenetin binding protein 2
hsa-miR-599	1	0	1	0	1	1	ATP2B1	ATPase, Ca++ transporting, plasma membrane 1
hsa-miR-599	1	0	1	0	1	1	MYO5B	myosin VB
hsa-miR-599	1	0	1	1	1	1	KANK1	KN motif and ankyrin repeat domains 1
hsa-miR-599	1	0	1	1	1	1	YPEL5	yippee-like 5 (Drosophila)
hsa-miR-599	1	0	1	1	1	1	NAA30	N(alpha)-acetyltransferase 30, NatC catalytic subunit
hsa-miR-599	1	0	1	1	0	0	MAGI3	membrane associated guanylate kinase, WW and PDZ domain containing 3
hsa-miR-599	0	0	1	0	0	0	NEURL1B	neuralized homolog 1B (Drosophila)
hsa-miR-599	0	0	1	1	1	1	GPBP1L1	GC-rich promoter binding protein 1-like 1
hsa-miR-599	0	0	1	1	1	1	MINA	MYC induced nuclear antigen
hsa-miR-599	0	0	1	1	1	1	KDM2B	lysine (K)-specific demethylase 2B
hsa-miR-599	1	0	1	1	1	1	SLC38A1	solute carrier family 38, member 1
hsa-miR-599	1	0	1	1	1	1	GPD2	glycerol-3-phosphate dehydrogenase 2 (mitochondrial)
hsa-miR-599	1	0	1	1	1	1	RAP1GDS1	RAP1, GTP-GDP dissociation stimulator 1
hsa-miR-599	0	0	1	1	1	1	C8orf46	chromosome 8 open reading frame 46
hsa-miR-599	1	0	1	1	1	1	MBD5	methyl-CpG binding domain protein 5
hsa-miR-599	0	0	1	0	0	0	FLJ30838	uncharacterized LOC400955
hsa-miR-599	0	0	1	1	1	1	GLYATL1	glycine-N-acyltransferase-like 1
hsa-miR-599	1	0	1	0	1	1	RNF165	ring finger protein 165
hsa-miR-599	1	0	1	1	1	1	EXD2	exonuclease 3'-5' domain containing 2
hsa-miR-599	0	0	1	1	1	1	ANKRD36B	ankyrin repeat domain 36B
hsa-miR-599	0	0	1	1	1	1	PDE1C	phosphodiesterase 1C, calmodulin-dependent 70kDa
hsa-miR-599	1	0	1	1	1	1	CLCN5	chloride channel, voltage-sensitive 5
hsa-miR-599	1	0	1	1	1	1	APLP2	amyloid beta (A4) precursor-like protein 2
hsa-miR-599	1	0	1	0	1	1	NCAM1	neural cell adhesion molecule 1
hsa-miR-599	1	0	1	1	1	1	ANKRD49	ankyrin repeat domain 49
hsa-miR-599	0	0	1	1	1	1	A2ML1	alpha-2-macroglobulin-like 1
hsa-miR-599	0	0	1	0	1	1	CCDC68	coiled-coil domain containing 68
hsa-miR-599	0	0	1	0	1	1	UHMK1	U2AF homology motif (UHM) kinase 1
hsa-miR-599	1	0	1	1	1	1	HLF	hepatic leukemia factor
hsa-miR-599	1	0	1	1	1	1	CNOT4	CCR4-NOT transcription complex, subunit 4
hsa-miR-599	1	0	1	1	1	1	UBAP1	ubiquitin associated protein 1
hsa-miR-599	1	0	1	1	1	1	NOTCH2NL	notch 2 N-terminal like
hsa-miR-599	1	0	1	1	1	1	UXS1	UDP-glucuronate decarboxylase 1
hsa-miR-599	0	0	1	0	0	0	LOC643837	uncharacterized LOC643837
hsa-miR-599	0	0	1	1	1	1	MAPK10	mitogen-activated protein kinase 10
hsa-miR-599	0	0	1	1	0	0	CDK15	cyclin-dependent kinase 15
hsa-miR-599	0	0	1	0	1	1	TBX5-AS1	TBX5 antisense RNA 1
hsa-miR-599	1	0	1	1	1	1	FBXW2	F-box and WD repeat domain containing 2
hsa-miR-599	1	0	1	1	1	1	MAFK	v-maf musculoaponeurotic fibrosarcoma oncogene homolog K (avian)
hsa-miR-599	1	0	1	1	1	1	SARM1	sterile alpha and TIR motif containing 1
hsa-miR-599	1	0	1	0	0	0	SH3RF3	SH3 domain containing ring finger 3
hsa-miR-599	0	0	1	1	1	1	CYP11B1	cytochrome P450, family 11, subfamily B, polypeptide 1
hsa-miR-599	0	0	1	0	0	0	CXXC1P1	CXXC finger protein 1 pseudogene 1
hsa-miR-599	0	0	1	1	1	1	SPOCK1	sparc/osteonectin, cwcv and kazal-like domains proteoglycan (testican) 1
hsa-miR-599	0	0	1	1	0	0	C9orf24	chromosome 9 open reading frame 24
hsa-miR-599	0	0	1	1	1	1	MOBP	myelin-associated oligodendrocyte basic protein
hsa-miR-599	0	0	1	1	0	0	ZNF185	zinc finger protein 185 (LIM domain)
hsa-miR-599	0	0	1	1	1	1	MYO6	myosin VI
hsa-miR-599	1	0	1	0	1	1	UVRAG	UV radiation resistance associated gene
hsa-miR-599	1	0	1	1	1	1	SPATS2	spermatogenesis associated, serine-rich 2
hsa-miR-599	0	0	1	0	0	0	LOC284577	uncharacterized LOC284577
hsa-miR-599	1	0	1	1	1	1	PEA15	phosphoprotein enriched in astrocytes 15
hsa-miR-599	1	0	1	0	1	1	KIAA1737	KIAA1737
hsa-miR-599	1	0	1	0	1	1	THRB	thyroid hormone receptor, beta
hsa-miR-599	0	0	1	1	1	1	IL17RE	interleukin 17 receptor E
hsa-miR-599	1	0	1	1	1	1	CDV3	CDV3 homolog (mouse)
hsa-miR-599	0	0	1	1	0	0	TAF1C	TATA box binding protein (TBP)-associated factor, RNA polymerase I, C, 110kDa
hsa-miR-599	0	0	1	0	0	0	LOC401463	uncharacterized LOC401463
hsa-miR-599	1	0	1	1	1	1	EBF3	early B-cell factor 3
hsa-miR-599	0	0	1	0	0	0	LINC00293	long intergenic non-protein coding RNA 293
hsa-miR-599	0	0	1	1	0	0	C10orf68	chromosome 10 open reading frame 68
hsa-miR-599	0	0	1	1	0	0	STXBP2	syntaxin binding protein 2
hsa-miR-599	1	0	1	1	0	0	ENTPD1	ectonucleoside triphosphate diphosphohydrolase 1
hsa-miR-599	0	0	1	0	0	0	LOC100130954	uncharacterized LOC100130954
hsa-miR-599	0	0	1	0	0	0	ZBTB20-AS1	ZBTB20 antisense RNA 1
hsa-miR-599	0	0	1	1	1	1	VWA3B	von Willebrand factor A domain containing 3B
hsa-miR-599	1	0	1	0	1	1	UNC5D	unc-5 homolog D (C. elegans)
hsa-miR-599	1	0	1	1	1	1	ACSL6	acyl-CoA synthetase long-chain family member 6
hsa-miR-599	0	0	1	1	1	1	SLFN13	schlafen family member 13
hsa-miR-599	0	0	1	1	1	1	GPR128	G protein-coupled receptor 128
hsa-miR-599	0	0	1	1	0	0	KIAA0146	KIAA0146
hsa-miR-599	0	0	1	1	1	1	WDR64	WD repeat domain 64
hsa-miR-599	1	0	1	1	1	1	ZNF25	zinc finger protein 25
hsa-miR-599	0	0	1	1	0	0	SLC26A10	solute carrier family 26, member 10
hsa-miR-599	1	0	1	1	1	1	TPRG1	tumor protein p63 regulated 1
hsa-miR-599	0	0	1	0	1	1	CWC22	CWC22 spliceosome-associated protein homolog (S. cerevisiae)
hsa-miR-599	0	0	1	0	0	0	LOC650368	asparagine-linked glycosylation 1-like pseudogene
hsa-miR-599	0	0	1	1	0	0	NMI	N-myc (and STAT) interactor
hsa-miR-599	1	0	1	1	1	1	ABR	active BCR-related
hsa-miR-599	1	0	1	1	1	1	FAM122B	family with sequence similarity 122B
hsa-miR-599	0	0	1	1	1	1	IDS	iduronate 2-sulfatase
hsa-miR-599	0	0	1	1	1	1	GALNT11	UDP-N-acetyl-alpha-D-galactosamine:polypeptide N-acetylgalactosaminyltransferase 11 (GalNAc-T11)
hsa-miR-599	1	0	1	1	1	1	SGIP1	SH3-domain GRB2-like (endophilin) interacting protein 1
hsa-miR-599	1	0	1	1	1	1	SEPHS1	selenophosphate synthetase 1
hsa-miR-599	1	0	1	1	1	1	C11orf30	chromosome 11 open reading frame 30
hsa-miR-599	0	0	1	0	1	1	PRELID2	PRELI domain containing 2
hsa-miR-599	0	0	1	1	0	0	CUL9	cullin 9
hsa-miR-599	0	0	1	1	1	1	CTPS2	CTP synthase 2
hsa-miR-599	1	0	1	1	1	1	CCDC149	coiled-coil domain containing 149
hsa-miR-599	0	0	1	1	1	1	ZNF337	zinc finger protein 337
hsa-miR-599	1	0	1	1	1	1	DPY19L3	dpy-19-like 3 (C. elegans)
hsa-miR-599	0	0	1	1	1	1	RBM46	RNA binding motif protein 46
hsa-miR-599	0	0	1	1	0	0	FSIP2	fibrous sheath interacting protein 2
hsa-miR-599	1	0	1	1	1	1	IL16	interleukin 16
hsa-miR-599	1	0	1	1	0	0	MAN1B1	mannosidase, alpha, class 1B, member 1
hsa-miR-599	0	0	1	0	0	0	LOC100127955	uncharacterized LOC100127955
hsa-miR-599	1	0	1	1	1	1	ENAH	enabled homolog (Drosophila)
hsa-miR-599	0	0	1	1	0	0	IQUB	IQ motif and ubiquitin domain containing
hsa-miR-599	0	0	1	1	0	0	LOC100128682	uncharacterized LOC100128682
hsa-miR-599	0	0	1	1	0	0	FAM159A	family with sequence similarity 159, member A
hsa-miR-599	1	0	1	0	1	1	KPNA6	karyopherin alpha 6 (importin alpha 7)
hsa-miR-599	0	0	1	1	1	1	SHROOM3	shroom family member 3
hsa-miR-599	1	0	1	1	1	1	SYDE1	synapse defective 1, Rho GTPase, homolog 1 (C. elegans)
hsa-miR-599	1	0	1	1	1	1	CD200	CD200 molecule
hsa-miR-599	0	0	1	1	0	0	HEATR8	HEAT repeat containing 8
hsa-miR-599	1	0	1	0	1	1	ESRRG	estrogen-related receptor gamma
hsa-miR-599	1	0	1	1	1	1	MAP3K14	mitogen-activated protein kinase kinase kinase 14
hsa-miR-599	0	0	1	1	0	0	ZNF730	zinc finger protein 730
hsa-miR-599	1	0	1	1	1	1	TAP2	transporter 2, ATP-binding cassette, sub-family B (MDR/TAP)
hsa-miR-599	1	0	1	1	1	1	CYYR1	cysteine/tyrosine-rich 1
hsa-miR-599	0	0	1	1	1	1	CCKBR	cholecystokinin B receptor
hsa-miR-599	0	0	1	1	1	1	RABGAP1L	RAB GTPase activating protein 1-like
hsa-miR-599	0	0	1	1	1	1	PTPN20B	protein tyrosine phosphatase, non-receptor type 20B
hsa-miR-599	0	0	1	1	1	1	PTPN20A	protein tyrosine phosphatase, non-receptor type 20A
hsa-miR-599	0	0	1	1	0	0	NEK7	NIMA (never in mitosis gene a)-related kinase 7
hsa-miR-599	0	0	1	0	0	0	POM121L9P	POM121 transmembrane nucleoporin-like 9, pseudogene
hsa-miR-599	1	0	1	1	1	1	TAB2	TGF-beta activated kinase 1/MAP3K7 binding protein 2
hsa-miR-599	0	0	1	1	1	1	ARIH1	ariadne homolog, ubiquitin-conjugating enzyme E2 binding protein, 1 (Drosophila)
hsa-miR-599	1	0	1	0	1	1	DCDC2	doublecortin domain containing 2
hsa-miR-599	0	0	1	1	1	1	AQP6	aquaporin 6, kidney specific
hsa-miR-599	1	0	1	0	1	1	GPR85	G protein-coupled receptor 85
hsa-miR-599	1	0	1	0	1	1	CEP170	centrosomal protein 170kDa
hsa-miR-599	1	0	1	1	1	1	CTTNBP2NL	CTTNBP2 N-terminal like
hsa-miR-599	0	0	1	1	1	1	SLC30A10	solute carrier family 30, member 10
hsa-miR-599	0	0	1	1	1	1	IDH3A	isocitrate dehydrogenase 3 (NAD+) alpha
hsa-miR-599	0	0	1	1	1	1	ING3	inhibitor of growth family, member 3
hsa-miR-599	1	0	1	0	0	0	SYNPO	synaptopodin
hsa-miR-599	0	0	1	0	0	0	ZNF720	zinc finger protein 720
hsa-miR-599	1	0	1	1	0	0	USP24	ubiquitin specific peptidase 24
hsa-miR-599	0	0	1	1	1	1	CCDC132	coiled-coil domain containing 132
hsa-miR-599	0	0	1	0	1	1	PAPD4	PAP associated domain containing 4
hsa-miR-599	1	0	1	0	1	1	SLC25A37	solute carrier family 25 (mitochondrial iron transporter), member 37
hsa-miR-599	0	0	1	0	1	1	C3orf43	chromosome 3 open reading frame 43
hsa-miR-599	0	0	1	0	0	0	LOC286135	uncharacterized LOC286135
hsa-miR-599	1	0	1	1	1	1	ANKRD12	ankyrin repeat domain 12
hsa-miR-599	1	0	1	1	1	1	SLC24A4	solute carrier family 24 (sodium/potassium/calcium exchanger), member 4
hsa-miR-599	0	0	1	0	1	1	SRR	serine racemase
hsa-miR-599	1	0	1	1	1	1	IKZF2	IKAROS family zinc finger 2 (Helios)
hsa-miR-599	0	0	1	1	1	1	CCDC62	coiled-coil domain containing 62
hsa-miR-599	1	0	1	1	1	1	RCAN2	regulator of calcineurin 2
hsa-miR-599	0	0	1	0	0	0	LOC374443	C-type lectin domain family 2, member D pseudogene
hsa-miR-599	0	0	1	0	0	0	KGFLP1	fibroblast growth factor 7 pseudogene
hsa-miR-599	1	0	1	1	1	1	RFFL	ring finger and FYVE-like domain containing E3 ubiquitin protein ligase
hsa-miR-599	0	0	1	1	1	1	CYP4B1	cytochrome P450, family 4, subfamily B, polypeptide 1
hsa-miR-599	1	0	1	1	1	1	BCL11A	B-cell CLL/lymphoma 11A (zinc finger protein)
hsa-miR-599	1	0	1	1	1	1	PBRM1	polybromo 1
hsa-miR-599	0	0	1	1	1	1	RAD9B	RAD9 homolog B (S. pombe)
hsa-miR-599	1	0	1	1	1	1	LAMA3	laminin, alpha 3
hsa-miR-599	0	0	1	1	1	1	GCOM1	GRINL1A complex locus 1
hsa-miR-599	0	0	1	1	0	0	VSIG4	V-set and immunoglobulin domain containing 4
hsa-miR-599	0	0	1	1	1	1	GBP5	guanylate binding protein 5
hsa-miR-599	0	0	1	1	0	0	RAET1E	retinoic acid early transcript 1E
hsa-miR-599	1	0	1	1	1	1	FGD4	FYVE, RhoGEF and PH domain containing 4
hsa-miR-599	1	0	1	1	1	1	VPS45	vacuolar protein sorting 45 homolog (S. cerevisiae)
hsa-miR-599	0	0	1	1	1	1	PTPLA	protein tyrosine phosphatase-like (proline instead of catalytic arginine), member A
hsa-miR-599	0	0	1	1	1	1	POTEG	POTE ankyrin domain family, member G
hsa-miR-599	0	0	1	1	0	0	SH2D6	SH2 domain containing 6
hsa-miR-599	1	0	1	0	1	1	LRAT	lecithin retinol acyltransferase (phosphatidylcholine--retinol O-acyltransferase)
hsa-miR-599	0	0	1	0	1	1	RAB18	RAB18, member RAS oncogene family
hsa-miR-599	1	0	1	1	1	1	QKI	QKI, KH domain containing, RNA binding
hsa-miR-599	1	0	1	1	1	1	MYB	v-myb myeloblastosis viral oncogene homolog (avian)
hsa-miR-599	1	0	1	1	1	1	CD109	CD109 molecule
hsa-miR-599	1	0	1	1	1	1	SAT1	spermidine/spermine N1-acetyltransferase 1
hsa-miR-599	1	0	1	1	0	0	TAF4B	TAF4b RNA polymerase II, TATA box binding protein (TBP)-associated factor, 105kDa
hsa-miR-599	1	0	1	1	0	0	PLXNB3	plexin B3
hsa-miR-599	0	0	1	1	1	1	IL23R	interleukin 23 receptor
hsa-miR-599	0	0	1	1	0	0	C17orf53	chromosome 17 open reading frame 53
hsa-miR-599	0	0	1	1	1	1	FAM115A	family with sequence similarity 115, member A
hsa-miR-599	1	0	1	0	1	1	FAM46A	family with sequence similarity 46, member A
hsa-miR-599	1	0	1	1	1	1	ELOVL6	ELOVL fatty acid elongase 6
hsa-miR-599	0	0	1	1	1	1	RLIM	ring finger protein, LIM domain interacting
hsa-miR-599	1	0	1	1	1	1	SPRY2	sprouty homolog 2 (Drosophila)
hsa-miR-599	1	0	1	1	0	0	POLR3D	polymerase (RNA) III (DNA directed) polypeptide D, 44kDa
hsa-miR-599	1	0	1	0	1	1	CGGBP1	CGG triplet repeat binding protein 1
hsa-miR-599	1	0	1	1	1	1	MBNL1	muscleblind-like splicing regulator 1
hsa-miR-599	0	0	1	1	0	0	SCG5	secretogranin V (7B2 protein)
hsa-miR-599	0	0	1	1	1	1	LZIC	leucine zipper and CTNNBIP1 domain containing
hsa-miR-599	0	0	1	1	1	1	C1orf94	chromosome 1 open reading frame 94
hsa-miR-599	0	0	1	1	0	0	BARX1	BARX homeobox 1
hsa-miR-599	1	0	1	1	0	0	MARCH9	membrane-associated ring finger (C3HC4) 9
hsa-miR-599	1	0	1	0	1	1	MINOS1	mitochondrial inner membrane organizing system 1
hsa-miR-599	1	0	1	0	1	1	TMEM39A	transmembrane protein 39A
hsa-miR-599	0	0	1	1	1	1	TAGLN	transgelin
hsa-miR-599	1	0	1	1	1	1	TRIM2	tripartite motif containing 2
hsa-miR-599	0	0	1	1	1	1	GNL3L	guanine nucleotide binding protein-like 3 (nucleolar)-like
hsa-miR-599	1	0	1	1	1	1	SNCA	synuclein, alpha (non A4 component of amyloid precursor)
hsa-miR-599	0	0	1	1	1	1	PCNP	PEST proteolytic signal containing nuclear protein
hsa-miR-599	0	0	1	1	1	1	KLHL29	kelch-like 29 (Drosophila)
hsa-miR-599	1	0	1	1	0	0	CAPN12	calpain 12
hsa-miR-599	0	0	1	1	0	0	C8orf44	chromosome 8 open reading frame 44
hsa-miR-599	0	0	1	0	1	1	ZNF37A	zinc finger protein 37A
hsa-miR-599	1	0	1	1	1	1	ELF4	E74-like factor 4 (ets domain transcription factor)
hsa-miR-599	1	0	1	1	1	1	SCAF11	SR-related CTD-associated factor 11
hsa-miR-599	0	0	1	1	1	1	GLIPR2	GLI pathogenesis-related 2
hsa-miR-599	0	0	1	1	1	1	SRP19	signal recognition particle 19kDa
hsa-miR-599	1	0	1	1	1	1	ZMAT4	zinc finger, matrin-type 4
hsa-miR-599	0	0	1	0	1	1	TMSB15B	thymosin beta 15B
hsa-miR-599	1	0	1	0	1	1	ARHGAP26	Rho GTPase activating protein 26
hsa-miR-599	0	0	1	1	0	0	LYSMD2	LysM, putative peptidoglycan-binding, domain containing 2
hsa-miR-599	1	0	1	1	1	1	ZNF200	zinc finger protein 200
hsa-miR-599	0	0	1	1	0	0	GALNTL5	UDP-N-acetyl-alpha-D-galactosamine:polypeptide N-acetylgalactosaminyltransferase-like 5
hsa-miR-599	1	0	1	1	1	1	PELI3	pellino E3 ubiquitin protein ligase family member 3
hsa-miR-599	0	0	1	1	1	1	TRIM4	tripartite motif containing 4
hsa-miR-599	0	0	1	0	0	0	ZBED3-AS1	ZBED3 antisense RNA 1
hsa-miR-599	0	0	1	1	1	1	CKMT2	creatine kinase, mitochondrial 2 (sarcomeric)
hsa-miR-599	0	0	1	1	1	1	SEMA3D	sema domain, immunoglobulin domain (Ig), short basic domain, secreted, (semaphorin) 3D
hsa-miR-599	1	0	1	0	1	1	TFEC	transcription factor EC
hsa-miR-599	0	0	1	1	1	1	PIP5K1B	phosphatidylinositol-4-phosphate 5-kinase, type I, beta
hsa-miR-599	0	0	1	0	1	1	ERAP1	endoplasmic reticulum aminopeptidase 1
hsa-miR-599	1	0	1	1	1	1	ZPLD1	zona pellucida-like domain containing 1
hsa-miR-599	1	0	1	1	1	1	RCOR3	REST corepressor 3
hsa-miR-599	1	0	1	1	1	1	PDZD2	PDZ domain containing 2
hsa-miR-599	0	0	1	1	0	0	POLI	polymerase (DNA directed) iota
hsa-miR-599	1	0	1	1	1	1	ZNF439	zinc finger protein 439
hsa-miR-599	1	0	1	1	1	1	ZNF521	zinc finger protein 521
hsa-miR-599	1	0	1	1	1	1	FAM189B	family with sequence similarity 189, member B
hsa-miR-599	0	0	1	1	1	1	HRASLS5	HRAS-like suppressor family, member 5
hsa-miR-599	0	0	1	0	0	0	FAM66C	family with sequence similarity 66, member C
hsa-miR-599	1	0	1	0	1	1	PDE12	phosphodiesterase 12
hsa-miR-599	0	0	1	1	1	1	SNAPC3	small nuclear RNA activating complex, polypeptide 3, 50kDa
hsa-miR-599	0	0	1	1	1	1	CLEC12B	C-type lectin domain family 12, member B
hsa-miR-599	0	0	1	1	1	1	UBE3D	ubiquitin protein ligase E3D
hsa-miR-599	0	0	1	1	1	1	ATP1A4	ATPase, Na+/K+ transporting, alpha 4 polypeptide
hsa-miR-599	1	0	1	1	1	1	PEX5L	peroxisomal biogenesis factor 5-like
hsa-miR-599	1	0	1	0	1	1	CLDN12	claudin 12
hsa-miR-599	0	0	1	0	0	0	CYP4F35P	cytochrome P450, family 4, subfamily F, polypeptide 35, pseudogene
hsa-miR-599	0	0	1	1	1	1	FAM71F1	family with sequence similarity 71, member F1
hsa-miR-599	0	0	1	1	1	1	FAM71D	family with sequence similarity 71, member D
hsa-miR-599	0	0	1	0	0	0	CRYBB2P1	crystallin, beta B2 pseudogene 1
hsa-miR-599	0	0	1	1	1	1	C14orf118	chromosome 14 open reading frame 118
hsa-miR-599	0	0	1	0	0	0	LOC100134868	uncharacterized LOC100134868
hsa-miR-599	0	0	1	0	0	0	FLJ36000	uncharacterized FLJ36000
hsa-miR-599	0	0	1	1	1	1	VBP1	von Hippel-Lindau binding protein 1
hsa-miR-599	1	0	1	1	1	1	DOLPP1	dolichyl pyrophosphate phosphatase 1
hsa-miR-599	0	0	1	0	1	1	SRSF5	serine/arginine-rich splicing factor 5
hsa-miR-599	1	0	1	1	1	1	DACH2	dachshund homolog 2 (Drosophila)
hsa-miR-599	1	0	1	0	1	1	KIAA0430	KIAA0430
hsa-miR-599	1	0	1	1	1	1	EBF1	early B-cell factor 1
hsa-miR-599	1	0	1	1	1	1	ROCK1	Rho-associated, coiled-coil containing protein kinase 1
hsa-miR-599	0	0	1	0	0	0	LOC401176	uncharacterized LOC401176
hsa-miR-599	0	0	1	0	0	0	LINC00347	long intergenic non-protein coding RNA 347
hsa-miR-599	1	0	1	1	1	1	HLTF	helicase-like transcription factor
hsa-miR-599	1	0	1	1	1	1	SF3B1	splicing factor 3b, subunit 1, 155kDa
hsa-miR-599	0	0	1	1	0	0	IFIH1	interferon induced with helicase C domain 1
hsa-miR-599	0	0	1	1	1	1	EBP	emopamil binding protein (sterol isomerase)
hsa-miR-599	1	0	1	0	1	1	LYPD6	LY6/PLAUR domain containing 6
hsa-miR-599	0	0	1	0	0	0	ADAM5	ADAM metallopeptidase domain 5, pseudogene
hsa-miR-599	0	0	1	1	1	1	DDX4	DEAD (Asp-Glu-Ala-Asp) box polypeptide 4
hsa-miR-599	0	0	1	0	0	0	LOC348120	uncharacterized LOC348120
hsa-miR-599	0	0	1	0	1	1	LOC338758	uncharacterized LOC338758
hsa-miR-599	1	0	1	0	1	1	KDM2A	lysine (K)-specific demethylase 2A
hsa-miR-599	1	0	1	1	0	0	NCSTN	nicastrin
hsa-miR-599	0	0	1	1	1	1	INO80C	INO80 complex subunit C
hsa-miR-599	1	0	1	1	1	1	CLVS1	clavesin 1
hsa-miR-599	0	0	1	1	0	0	NLRC5	NLR family, CARD domain containing 5
hsa-miR-599	0	0	1	0	0	0	BMS1P6	BMS1 pseudogene 6
hsa-miR-599	0	0	1	1	1	1	LINC00086	long intergenic non-protein coding RNA 86
hsa-miR-599	0	0	1	1	1	1	LRRFIP2	leucine rich repeat (in FLII) interacting protein 2
hsa-miR-599	0	0	1	0	0	0	USP32P1	ubiquitin specific peptidase 32 pseudogene 1
hsa-miR-599	0	0	1	1	0	0	C8orf31	chromosome 8 open reading frame 31
hsa-miR-599	1	0	1	1	0	0	MANEAL	mannosidase, endo-alpha-like
hsa-miR-599	0	0	1	0	0	0	GNN	Grp94 neighboring nucleotidase pseudogene
hsa-miR-599	0	0	1	1	0	0	TMEM183A	transmembrane protein 183A
hsa-miR-599	0	0	1	0	0	0	ZNF66P	zinc finger protein 66, pseudogene
hsa-miR-599	1	0	1	1	1	1	SLC26A7	solute carrier family 26, member 7
hsa-miR-599	1	0	1	1	1	1	PHACTR4	phosphatase and actin regulator 4
hsa-miR-599	1	0	1	1	1	1	SULF1	sulfatase 1
hsa-miR-599	0	0	1	1	0	0	CYP4F30P	cytochrome P450, family 4, subfamily F, polypeptide 30, pseudogene
hsa-miR-599	0	0	1	1	0	0	SLAMF9	SLAM family member 9
hsa-miR-599	0	0	1	0	0	0	LOC100147773	uncharacterized LOC100147773
hsa-miR-599	0	0	1	1	0	0	PPIG	peptidylprolyl isomerase G (cyclophilin G)
hsa-miR-599	1	0	1	1	1	1	OPCML	opioid binding protein/cell adhesion molecule-like
hsa-miR-599	0	0	1	1	1	1	IRX5	iroquois homeobox 5
hsa-miR-599	0	0	1	0	0	0	AGAP9	ArfGAP with GTPase domain, ankyrin repeat and PH domain 9
hsa-miR-599	0	0	1	0	1	1	LOC389043	uncharacterized LOC389043
hsa-miR-599	1	0	1	1	1	1	ZMYND11	zinc finger, MYND-type containing 11
hsa-miR-599	1	0	1	1	1	1	PLXNA2	plexin A2
hsa-miR-599	0	0	1	0	0	0	FRG1B	FSHD region gene 1 family, member B
hsa-miR-599	0	0	1	0	0	0	ABCA11P	ATP-binding cassette, sub-family A (ABC1), member 11, pseudogene
hsa-miR-599	1	0	1	0	1	1	LRRTM4	leucine rich repeat transmembrane neuronal 4
hsa-miR-599	0	0	1	1	0	0	PPP1R14D	protein phosphatase 1, regulatory (inhibitor) subunit 14D
hsa-miR-599	0	0	1	1	1	1	XG	Xg blood group
hsa-miR-599	1	0	1	0	1	1	MYBL1	v-myb myeloblastosis viral oncogene homolog (avian)-like 1
hsa-miR-599	1	0	1	0	1	1	KCNT2	potassium channel, subfamily T, member 2
hsa-miR-599	1	0	1	1	1	1	GABRB2	gamma-aminobutyric acid (GABA) A receptor, beta 2
hsa-miR-599	1	0	1	1	1	1	ZNF763	zinc finger protein 763
hsa-miR-599	0	0	1	0	0	0	TPTEP1	transmembrane phosphatase with tensin homology pseudogene 1
hsa-miR-599	0	0	1	1	0	0	BTBD16	BTB (POZ) domain containing 16
hsa-miR-599	1	0	1	1	1	1	SP4	Sp4 transcription factor
hsa-miR-599	0	0	1	1	0	0	C1QTNF9B	C1q and tumor necrosis factor related protein 9B
hsa-miR-599	0	0	1	0	0	0	LINC00310	long intergenic non-protein coding RNA 310
hsa-miR-599	0	0	1	1	1	1	LRCH1	leucine-rich repeats and calponin homology (CH) domain containing 1
hsa-miR-599	0	0	1	1	0	0	CNTN6	contactin 6
hsa-miR-599	1	0	1	1	1	1	FAM59A	family with sequence similarity 59, member A
hsa-miR-599	0	0	1	0	0	0	LINC00266-1	long intergenic non-protein coding RNA 266-1
hsa-miR-599	1	0	1	1	1	1	CHIC1	cysteine-rich hydrophobic domain 1
hsa-miR-599	1	0	1	1	1	1	MLLT10	myeloid/lymphoid or mixed-lineage leukemia (trithorax homolog, Drosophila); translocated to, 10
hsa-miR-599	1	0	1	0	1	1	FAM196A	family with sequence similarity 196, member A
hsa-miR-599	1	0	1	0	1	1	VAMP3	vesicle-associated membrane protein 3 (cellubrevin)
hsa-miR-599	1	0	1	1	1	1	NUMB	numb homolog (Drosophila)
hsa-miR-599	0	0	1	0	0	0	LINC00643	long intergenic non-protein coding RNA 643
hsa-miR-599	0	0	1	1	1	1	NCBP2	nuclear cap binding protein subunit 2, 20kDa
hsa-miR-599	1	0	1	1	1	1	ATP2B4	ATPase, Ca++ transporting, plasma membrane 4
hsa-miR-599	1	0	1	1	1	1	RAB7A	RAB7A, member RAS oncogene family
hsa-miR-599	0	0	1	0	1	1	AP1S2	adaptor-related protein complex 1, sigma 2 subunit
hsa-miR-599	0	0	1	1	1	1	C10orf57	chromosome 10 open reading frame 57
hsa-miR-599	1	0	1	1	1	1	SGCD	sarcoglycan, delta (35kDa dystrophin-associated glycoprotein)
hsa-miR-599	1	0	1	0	1	1	CLASP2	cytoplasmic linker associated protein 2
hsa-miR-599	1	0	1	1	1	1	SLC35F1	solute carrier family 35, member F1
hsa-miR-599	1	0	1	1	0	0	CECR2	cat eye syndrome chromosome region, candidate 2
hsa-miR-599	0	0	1	1	1	1	NIPSNAP3B	nipsnap homolog 3B (C. elegans)
hsa-miR-599	1	0	1	1	1	1	FOXP1	forkhead box P1
hsa-miR-599	1	0	1	1	1	1	USP6	ubiquitin specific peptidase 6 (Tre-2 oncogene)
hsa-miR-599	1	0	1	1	1	1	RREB1	ras responsive element binding protein 1
hsa-miR-599	1	0	1	1	1	1	GTDC1	glycosyltransferase-like domain containing 1
hsa-miR-599	1	0	1	1	1	1	TC2N	tandem C2 domains, nuclear
hsa-miR-599	1	0	1	1	1	1	CYB5B	cytochrome b5 type B (outer mitochondrial membrane)
hsa-miR-599	0	0	1	0	0	0	TMEM232	transmembrane protein 232
hsa-miR-599	1	0	1	1	1	1	C5orf24	chromosome 5 open reading frame 24
hsa-miR-599	1	0	1	1	1	1	CACNB4	calcium channel, voltage-dependent, beta 4 subunit
hsa-miR-599	1	0	1	1	1	1	CALD1	caldesmon 1
hsa-miR-599	0	0	1	1	1	1	SSFA2	sperm specific antigen 2
hsa-miR-599	1	0	1	0	1	1	C1orf21	chromosome 1 open reading frame 21
hsa-miR-599	0	0	1	1	1	1	USP54	ubiquitin specific peptidase 54
hsa-miR-599	1	0	1	0	1	1	TTL	tubulin tyrosine ligase
hsa-miR-599	0	0	1	1	0	0	CSH1	chorionic somatomammotropin hormone 1 (placental lactogen)
hsa-miR-599	1	0	1	1	1	1	GPBP1	GC-rich promoter binding protein 1
hsa-miR-599	1	0	1	1	1	1	FUT9	fucosyltransferase 9 (alpha (1,3) fucosyltransferase)
hsa-miR-599	0	0	1	0	0	0	LOC400768	uncharacterized LOC400768
hsa-miR-599	0	0	1	1	1	1	COPS8	COP9 constitutive photomorphogenic homolog subunit 8 (Arabidopsis)
hsa-miR-599	0	0	1	1	1	1	ADK	adenosine kinase
hsa-miR-599	0	0	1	1	1	1	TASP1	taspase, threonine aspartase, 1
hsa-miR-599	1	0	1	1	1	1	CD9	CD9 molecule
hsa-miR-599	0	0	1	1	1	1	ABCD1	ATP-binding cassette, sub-family D (ALD), member 1
hsa-miR-599	1	0	1	1	0	0	NEK2	NIMA (never in mitosis gene a)-related kinase 2
hsa-miR-599	0	0	1	1	1	1	CCDC115	coiled-coil domain containing 115
hsa-miR-599	0	0	1	1	0	0	GPSM3	G-protein signaling modulator 3
hsa-miR-599	1	0	1	1	1	1	PCTP	phosphatidylcholine transfer protein
hsa-miR-599	0	0	1	1	0	0	STK19	serine/threonine kinase 19
hsa-miR-599	1	0	1	1	1	1	BAMBI	BMP and activin membrane-bound inhibitor homolog (Xenopus laevis)
hsa-miR-599	1	0	1	1	1	1	WIPF1	WAS/WASL interacting protein family, member 1
hsa-miR-599	1	0	1	1	1	1	RAB3IP	RAB3A interacting protein (rabin3)
hsa-miR-599	0	0	1	1	0	0	C11orf68	chromosome 11 open reading frame 68
hsa-miR-599	0	0	1	0	0	0	FLJ45248	FLJ45248 protein
hsa-miR-599	1	0	1	1	1	1	PEX2	peroxisomal biogenesis factor 2
hsa-miR-599	0	0	1	1	1	1	ZDHHC16	zinc finger, DHHC-type containing 16
hsa-miR-599	0	0	1	1	1	1	PEX19	peroxisomal biogenesis factor 19
hsa-miR-599	0	0	1	1	1	1	PDE4DIP	phosphodiesterase 4D interacting protein
hsa-miR-599	0	0	1	1	0	0	EXOSC8	exosome component 8
hsa-miR-599	0	0	1	1	1	1	CHEK1	checkpoint kinase 1
hsa-miR-599	0	0	1	1	1	1	NOLC1	nucleolar and coiled-body phosphoprotein 1
hsa-miR-599	1	0	1	1	1	1	BAALC	brain and acute leukemia, cytoplasmic
hsa-miR-599	0	0	1	1	1	1	HOXC9	homeobox C9
hsa-miR-599	0	0	1	1	1	1	DNAJC25	DnaJ (Hsp40) homolog, subfamily C , member 25
hsa-miR-599	0	0	1	1	0	0	CCDC107	coiled-coil domain containing 107
hsa-miR-599	1	0	1	1	1	1	RALY	RNA binding protein, autoantigenic (hnRNP-associated with lethal yellow homolog (mouse))
hsa-miR-599	1	0	1	1	1	1	RBPJ	recombination signal binding protein for immunoglobulin kappa J region
hsa-miR-599	0	0	1	1	1	1	ZNF346	zinc finger protein 346
hsa-miR-599	0	0	1	1	0	0	POLB	polymerase (DNA directed), beta
hsa-miR-599	1	0	1	1	1	1	MPP1	membrane protein, palmitoylated 1, 55kDa
hsa-miR-599	0	0	1	1	1	1	EPCAM	epithelial cell adhesion molecule
hsa-miR-599	1	0	1	1	1	1	SLC37A3	solute carrier family 37 (glycerol-3-phosphate transporter), member 3
hsa-miR-599	0	0	1	0	0	0	LOC731789	uncharacterized LOC731789
hsa-miR-599	0	0	1	1	1	1	SYNE2	spectrin repeat containing, nuclear envelope 2
hsa-miR-599	1	0	1	1	1	1	SLC39A10	solute carrier family 39 (zinc transporter), member 10
hsa-miR-599	1	0	1	0	1	1	CNTNAP2	contactin associated protein-like 2
hsa-miR-599	1	0	1	1	1	1	METAP1	methionyl aminopeptidase 1
hsa-miR-599	1	0	1	1	1	1	SP2	Sp2 transcription factor
hsa-miR-599	0	0	1	1	1	1	SLC39A14	solute carrier family 39 (zinc transporter), member 14
hsa-miR-599	0	0	1	1	1	1	FCAR	Fc fragment of IgA, receptor for
hsa-miR-599	1	0	1	1	1	1	RSPO1	R-spondin 1
hsa-miR-599	0	0	1	1	1	1	PTGS1	prostaglandin-endoperoxide synthase 1 (prostaglandin G/H synthase and cyclooxygenase)
hsa-miR-599	0	0	1	1	0	0	FAM58A	family with sequence similarity 58, member A
hsa-miR-599	1	0	1	0	1	1	DCBLD2	discoidin, CUB and LCCL domain containing 2
hsa-miR-599	0	0	1	1	0	0	CEACAM3	carcinoembryonic antigen-related cell adhesion molecule 3
hsa-miR-599	0	0	1	1	1	1	AKAP17A	A kinase (PRKA) anchor protein 17A
hsa-miR-599	1	0	1	0	1	1	BCL2	B-cell CLL/lymphoma 2
hsa-miR-599	0	0	1	0	1	1	TGFB2	transforming growth factor, beta 2
hsa-miR-599	0	0	1	0	0	0	HLA-DRB1	major histocompatibility complex, class II, DR beta 1
hsa-miR-599	1	0	1	0	1	1	ACVR2A	activin A receptor, type IIA
hsa-miR-599	0	0	1	1	1	1	ALDOB	aldolase B, fructose-bisphosphate
hsa-miR-599	0	0	1	1	1	1	CA2	carbonic anhydrase II
hsa-miR-599	1	0	1	1	1	1	COL4A3	collagen, type IV, alpha 3 (Goodpasture antigen)
hsa-miR-599	1	0	1	1	1	1	COL4A4	collagen, type IV, alpha 4
hsa-miR-599	0	0	1	0	1	1	CYP1B1	cytochrome P450, family 1, subfamily B, polypeptide 1
hsa-miR-599	1	0	1	1	1	1	KCNA1	potassium voltage-gated channel, shaker-related subfamily, member 1 (episodic ataxia with myokymia)
hsa-miR-599	1	0	1	1	1	1	LEP	leptin
hsa-miR-599	1	0	1	1	1	1	MET	met proto-oncogene (hepatocyte growth factor receptor)
hsa-miR-599	1	0	1	1	1	1	RB1	retinoblastoma 1
hsa-miR-599	1	0	1	0	1	1	TSC1	tuberous sclerosis 1
hsa-miR-599	1	0	1	0	1	1	COL5A2	collagen, type V, alpha 2
hsa-miR-599	0	0	1	0	1	1	GNRHR	gonadotropin-releasing hormone receptor
hsa-miR-599	0	0	1	1	1	1	LTBP2	latent transforming growth factor beta binding protein 2
hsa-miR-599	0	0	1	1	1	1	C7	complement component 7
hsa-miR-599	1	0	1	1	1	1	TNF	tumor necrosis factor
hsa-miR-599	0	0	1	0	1	1	ADRA2A	adrenoceptor alpha 2A
hsa-miR-599	0	0	1	1	1	1	ALDH1B1	aldehyde dehydrogenase 1 family, member B1
hsa-miR-599	1	0	1	1	1	1	GABRB3	gamma-aminobutyric acid (GABA) A receptor, beta 3
hsa-miR-599	1	0	1	1	1	1	GRM1	glutamate receptor, metabotropic 1
hsa-miR-599	1	0	1	1	1	1	PTGFR	prostaglandin F receptor (FP)
hsa-miR-599	1	0	1	1	1	1	RARB	retinoic acid receptor, beta
hsa-miR-599	1	0	1	0	1	1	SMAD5	SMAD family member 5
hsa-miR-599	0	0	1	1	1	1	CYP27C1	cytochrome P450, family 27, subfamily C, polypeptide 1
hsa-miR-599	1	0	1	0	1	1	ARHGEF37	Rho guanine nucleotide exchange factor (GEF) 37
hsa-miR-599	0	0	1	1	1	1	CC2D2B	coiled-coil and C2 domain containing 2B
hsa-miR-599	1	0	1	1	1	1	AFTPH	aftiphilin
hsa-miR-599	0	0	1	1	1	1	SMAD1	SMAD family member 1
hsa-miR-599	0	0	1	1	1	1	ALG11	asparagine-linked glycosylation 11, alpha-1,2-mannosyltransferase homolog (yeast)
hsa-miR-599	0	0	1	0	1	1	ZNF705A	zinc finger protein 705A
hsa-miR-599	1	0	1	1	1	1	PLCXD3	phosphatidylinositol-specific phospholipase C, X domain containing 3
hsa-miR-599	1	0	1	1	1	1	NFKBIZ	nuclear factor of kappa light polypeptide gene enhancer in B-cells inhibitor, zeta
hsa-miR-599	1	0	1	0	1	1	GOSR1	golgi SNAP receptor complex member 1
hsa-miR-599	1	0	1	1	1	1	L3MBTL3	l(3)mbt-like 3 (Drosophila)
hsa-miR-599	1	0	1	0	1	1	C18orf25	chromosome 18 open reading frame 25
hsa-miR-599	1	0	1	1	1	1	CTDSPL	CTD (carboxy-terminal domain, RNA polymerase II, polypeptide A) small phosphatase-like
hsa-miR-599	0	0	1	1	1	1	WDHD1	WD repeat and HMG-box DNA binding protein 1
hsa-miR-599	0	0	1	1	1	1	MXI1	MAX interactor 1
hsa-miR-599	0	0	1	1	1	1	GCSAM	germinal center-associated, signaling and motility
hsa-miR-599	1	0	1	0	1	1	ERMN	ermin, ERM-like protein
hsa-miR-599	1	0	1	1	1	1	SHE	Src homology 2 domain containing E
hsa-miR-599	1	0	1	0	1	1	PM20D2	peptidase M20 domain containing 2
hsa-miR-599	0	0	1	1	1	1	SAMD13	sterile alpha motif domain containing 13
hsa-miR-599	0	0	1	1	1	1	NCMAP	noncompact myelin associated protein
hsa-miR-599	1	0	1	0	1	1	CREB5	cAMP responsive element binding protein 5
hsa-miR-599	0	0	1	0	1	1	C12orf69	chromosome 12 open reading frame 69
hsa-miR-599	0	0	1	0	1	1	LINC00268	long intergenic non-protein coding RNA 268
hsa-miR-599	1	0	1	1	1	1	RUNX2	runt-related transcription factor 2
hsa-miR-599	1	0	1	1	1	1	TMCC1	transmembrane and coiled-coil domain family 1
hsa-miR-599	0	0	1	1	1	1	PGBD2	piggyBac transposable element derived 2
hsa-miR-599	0	0	1	1	1	1	CARD16	caspase recruitment domain family, member 16
hsa-miR-599	1	0	1	0	1	1	BRCC3	BRCA1/BRCA2-containing complex, subunit 3
hsa-miR-599	1	0	1	1	1	1	NTRK2	neurotrophic tyrosine kinase, receptor, type 2
hsa-miR-599	0	0	1	1	1	1	POLR2M	polymerase (RNA) II (DNA directed) polypeptide M
hsa-miR-599	1	0	1	1	1	1	IQCB1	IQ motif containing B1
hsa-miR-599	1	0	1	1	1	1	CANX	calnexin
hsa-miR-599	1	0	1	1	1	1	YIPF5	Yip1 domain family, member 5
hsa-miR-599	1	0	1	0	1	1	C3orf70	chromosome 3 open reading frame 70
hsa-miR-599	0	0	1	1	1	1	FAM24A	family with sequence similarity 24, member A
hsa-miR-599	1	0	1	1	1	1	ZNF704	zinc finger protein 704
hsa-miR-599	0	0	1	1	0	0	RGL3	ral guanine nucleotide dissociation stimulator-like 3
hsa-miR-599	0	0	1	1	1	1	ATAD3C	ATPase family, AAA domain containing 3C
hsa-miR-599	0	0	1	1	1	1	MAP9	microtubule-associated protein 9
hsa-miR-599	1	0	1	0	1	1	USP9X	ubiquitin specific peptidase 9, X-linked
hsa-miR-599	0	0	1	0	1	1	ZNF705D	zinc finger protein 705D
hsa-miR-599	1	0	1	0	1	1	CREBZF	CREB/ATF bZIP transcription factor
hsa-miR-599	0	0	1	1	0	0	ANGPTL4	angiopoietin-like 4
hsa-miR-599	1	0	1	1	1	1	CHN2	chimerin (chimaerin) 2
hsa-miR-599	0	0	1	1	1	1	SLC35A2	solute carrier family 35 (UDP-galactose transporter), member A2
hsa-miR-599	1	0	1	1	1	1	ZNF706	zinc finger protein 706
hsa-miR-599	1	0	1	1	1	1	C2orf88	chromosome 2 open reading frame 88
hsa-miR-599	1	0	1	1	1	1	FRS2	fibroblast growth factor receptor substrate 2
hsa-miR-599	1	0	1	1	1	1	ERBB4	v-erb-a erythroblastic leukemia viral oncogene homolog 4 (avian)
hsa-miR-599	1	0	1	1	1	1	RERE	arginine-glutamic acid dipeptide (RE) repeats
hsa-miR-599	0	0	1	1	1	1	SLC6A4	solute carrier family 6 (neurotransmitter transporter, serotonin), member 4
hsa-miR-599	1	0	1	1	1	1	CDC14B	CDC14 cell division cycle 14 homolog B (S. cerevisiae)
hsa-miR-599	0	0	1	1	1	1	PPCS	phosphopantothenoylcysteine synthetase
hsa-miR-599	1	0	1	1	1	1	SRSF1	serine/arginine-rich splicing factor 1
hsa-miR-599	1	0	1	1	1	1	FAM155A	family with sequence similarity 155, member A
hsa-miR-599	0	0	1	1	1	1	HSF5	heat shock transcription factor family member 5
hsa-miR-599	1	0	1	0	1	1	MEGF9	multiple EGF-like-domains 9
hsa-miR-599	0	0	1	0	1	1	ISCA1P1	iron-sulfur cluster assembly 1 homolog (S. cerevisiae) pseudogene 1
hsa-miR-599	1	0	1	0	1	1	PDE5A	phosphodiesterase 5A, cGMP-specific
hsa-miR-599	0	0	1	1	1	1	CRISP1	cysteine-rich secretory protein 1
hsa-miR-599	0	0	1	1	1	1	AMELX	amelogenin, X-linked
hsa-miR-599	0	0	1	1	1	1	AMELY	amelogenin, Y-linked
hsa-miR-599	0	0	1	1	1	1	ARHGDIB	Rho GDP dissociation inhibitor (GDI) beta
hsa-miR-599	1	0	1	1	1	1	EIF1AX	eukaryotic translation initiation factor 1A, X-linked
hsa-miR-599	1	0	1	1	0	0	EMP2	epithelial membrane protein 2
hsa-miR-599	1	0	1	1	1	1	EREG	epiregulin
hsa-miR-599	1	0	1	0	1	1	B4GALT1	UDP-Gal:betaGlcNAc beta 1,4- galactosyltransferase, polypeptide 1
hsa-miR-599	1	0	1	0	1	1	MPPED2	metallophosphoesterase domain containing 2
hsa-miR-599	0	0	1	1	0	0	APEH	N-acylaminoacyl-peptide hydrolase
hsa-miR-599	1	0	1	0	1	1	ARCN1	archain 1
hsa-miR-599	1	0	1	1	1	1	BTG1	B-cell translocation gene 1, anti-proliferative
hsa-miR-599	1	0	1	1	1	1	CBFB	core-binding factor, beta subunit
hsa-miR-599	1	0	1	1	1	1	CDC25A	cell division cycle 25 homolog A (S. pombe)
hsa-miR-599	0	0	1	1	1	1	CHGB	chromogranin B (secretogranin 1)
hsa-miR-599	0	0	1	1	0	0	CNTFR	ciliary neurotrophic factor receptor
hsa-miR-599	1	0	1	1	1	1	MASP1	mannan-binding lectin serine peptidase 1 (C4/C2 activating component of Ra-reactive factor)
hsa-miR-599	0	0	1	1	0	0	CSNK2A2	casein kinase 2, alpha prime polypeptide
hsa-miR-599	1	0	1	1	1	1	EIF4E	eukaryotic translation initiation factor 4E
hsa-miR-599	1	0	1	0	1	1	ETV6	ets variant 6
hsa-miR-599	0	0	1	1	0	0	GLP1R	glucagon-like peptide 1 receptor
hsa-miR-599	1	0	1	1	1	1	GNAZ	guanine nucleotide binding protein (G protein), alpha z polypeptide
hsa-miR-599	0	0	1	1	1	1	GNB1	guanine nucleotide binding protein (G protein), beta polypeptide 1
hsa-miR-599	0	0	1	1	1	1	IL12B	interleukin 12B (natural killer cell stimulatory factor 2, cytotoxic lymphocyte maturation factor 2, p40)
hsa-miR-599	1	0	1	1	1	1	ITGB8	integrin, beta 8
hsa-miR-599	1	0	1	1	1	1	ITPR2	inositol 1,4,5-trisphosphate receptor, type 2
hsa-miR-599	1	0	1	1	1	1	KPNA3	karyopherin alpha 3 (importin alpha 4)
hsa-miR-599	1	0	1	1	1	1	KPNA4	karyopherin alpha 4 (importin alpha 3)
hsa-miR-599	1	0	1	0	1	1	LAMC1	laminin, gamma 1 (formerly LAMB2)
hsa-miR-599	1	0	1	1	1	1	M6PR	mannose-6-phosphate receptor (cation dependent)
hsa-miR-599	1	0	1	0	1	1	MXD1	MAX dimerization protein 1
hsa-miR-599	1	0	1	1	1	1	ME1	malic enzyme 1, NADP(+)-dependent, cytosolic
hsa-miR-599	0	0	1	1	0	0	MNAT1	menage a trois homolog 1, cyclin H assembly factor (Xenopus laevis)
hsa-miR-599	1	0	1	1	1	1	NPAS2	neuronal PAS domain protein 2
hsa-miR-599	1	0	1	0	1	1	PAPPA	pregnancy-associated plasma protein A, pappalysin 1
hsa-miR-599	0	0	1	1	1	1	PF4V1	platelet factor 4 variant 1
hsa-miR-599	0	0	1	1	1	1	SEPT5	septin 5
hsa-miR-599	0	0	1	1	1	1	PPP1R3A	protein phosphatase 1, regulatory subunit 3A
hsa-miR-599	0	0	1	1	0	0	PPP1R8	protein phosphatase 1, regulatory subunit 8
hsa-miR-599	1	0	1	0	1	1	PRKCA	protein kinase C, alpha
hsa-miR-599	1	0	1	1	1	1	PRKD1	protein kinase D1
hsa-miR-599	1	0	1	1	1	1	PTPN4	protein tyrosine phosphatase, non-receptor type 4 (megakaryocyte)
hsa-miR-599	0	0	1	1	1	1	RARS	arginyl-tRNA synthetase
hsa-miR-599	1	0	1	1	1	1	RCN1	reticulocalbin 1, EF-hand calcium binding domain
hsa-miR-599	0	0	1	1	1	1	RFC3	replication factor C (activator 1) 3, 38kDa
hsa-miR-599	0	0	1	1	1	1	RING1	ring finger protein 1
hsa-miR-599	0	0	1	1	1	1	SDC2	syndecan 2
hsa-miR-599	1	0	1	1	1	1	SRSF3	serine/arginine-rich splicing factor 3
hsa-miR-599	1	0	1	1	1	1	SH3GL2	SH3-domain GRB2-like 2
hsa-miR-599	0	0	1	0	0	0	SLC18A2	solute carrier family 18 (vesicular monoamine), member 2
hsa-miR-599	1	0	1	0	1	1	SOX11	SRY (sex determining region Y)-box 11
hsa-miR-599	0	0	1	1	1	1	STIM1	stromal interaction molecule 1
hsa-miR-599	0	0	1	1	1	1	TAF2	TAF2 RNA polymerase II, TATA box binding protein (TBP)-associated factor, 150kDa
hsa-miR-599	1	0	1	0	1	1	THBS1	thrombospondin 1
hsa-miR-599	1	0	1	1	1	1	TIAM1	T-cell lymphoma invasion and metastasis 1
hsa-miR-599	1	0	1	1	1	1	NR2E1	nuclear receptor subfamily 2, group E, member 1
hsa-miR-599	1	0	1	0	1	1	UBE2D2	ubiquitin-conjugating enzyme E2D 2
hsa-miR-599	1	0	1	0	1	1	ZIC1	Zic family member 1
hsa-miR-599	0	0	1	1	1	1	ZNF137P	zinc finger protein 137, pseudogene
hsa-miR-599	0	0	1	1	1	1	STAM	signal transducing adaptor molecule (SH3 domain and ITAM motif) 1
hsa-miR-599	1	0	1	1	1	1	ADAM12	ADAM metallopeptidase domain 12
hsa-miR-599	0	0	1	1	1	1	CHST1	carbohydrate (keratan sulfate Gal-6) sulfotransferase 1
hsa-miR-599	1	0	1	1	1	1	CDC14A	CDC14 cell division cycle 14 homolog A (S. cerevisiae)
hsa-miR-599	0	0	1	1	1	1	UNC5C	unc-5 homolog C (C. elegans)
hsa-miR-599	1	0	1	0	1	1	TNKS	tankyrase, TRF1-interacting ankyrin-related ADP-ribose polymerase
hsa-miR-599	0	0	1	1	1	1	JRKL	jerky homolog-like (mouse)
hsa-miR-599	0	0	1	1	1	1	CREG1	cellular repressor of E1A-stimulated genes 1
hsa-miR-599	1	0	1	1	1	1	CDH12	cadherin 12, type 2 (N-cadherin 2)
hsa-miR-599	0	0	1	1	0	0	CDR1	cerebellar degeneration-related protein 1, 34kDa
hsa-miR-599	0	0	1	1	1	1	CRY1	cryptochrome 1 (photolyase-like)
hsa-miR-599	1	0	1	1	1	1	GMFB	glia maturation factor, beta
hsa-miR-599	1	0	1	0	1	1	CYTH3	cytohesin 3
hsa-miR-599	1	0	1	1	1	1	SOCS6	suppressor of cytokine signaling 6
hsa-miR-599	0	0	1	1	1	1	HOMER1	homer homolog 1 (Drosophila)
hsa-miR-599	1	0	1	0	1	1	AKAP6	A kinase (PRKA) anchor protein 6
hsa-miR-599	0	0	1	1	0	0	PIGL	phosphatidylinositol glycan anchor biosynthesis, class L
hsa-miR-599	0	0	1	1	1	1	CARTPT	CART prepropeptide
hsa-miR-599	0	0	1	1	1	1	BST1	bone marrow stromal cell antigen 1
hsa-miR-599	0	0	1	1	1	1	CDH1	cadherin 1, type 1, E-cadherin (epithelial)
hsa-miR-599	1	0	1	1	1	1	DAG1	dystroglycan 1 (dystrophin-associated glycoprotein 1)
hsa-miR-599	1	0	1	0	1	1	ETV5	ets variant 5
hsa-miR-599	1	0	1	0	1	1	FGF5	fibroblast growth factor 5
hsa-miR-599	1	0	1	1	0	0	HOXC6	homeobox C6
hsa-miR-599	1	0	1	1	1	1	FOXK2	forkhead box K2
hsa-miR-599	0	0	1	1	1	1	TK2	thymidine kinase 2, mitochondrial
hsa-miR-599	0	0	1	0	0	0	XKRY	XK, Kell blood group complex subunit-related, Y-linked
hsa-miR-599	1	0	1	1	1	1	B4GALT5	UDP-Gal:betaGlcNAc beta 1,4- galactosyltransferase, polypeptide 5
hsa-miR-599	1	0	1	1	1	1	KIF3B	kinesin family member 3B
hsa-miR-599	1	0	1	1	1	1	AKAP7	A kinase (PRKA) anchor protein 7
hsa-miR-599	1	0	1	1	1	1	ONECUT2	one cut homeobox 2
hsa-miR-599	1	0	1	1	1	1	ZFP36L1	zinc finger protein 36, C3H type-like 1
hsa-miR-599	1	0	1	1	1	1	BMI1	BMI1 polycomb ring finger oncogene
hsa-miR-599	0	0	1	1	1	1	CEBPB	CCAAT/enhancer binding protein (C/EBP), beta
hsa-miR-599	1	0	1	1	1	1	FOXN3	forkhead box N3
hsa-miR-599	0	0	1	1	1	1	MSTN	myostatin
hsa-miR-599	0	0	1	1	1	1	H1F0	H1 histone family, member 0
hsa-miR-599	0	0	1	1	1	1	SEPP1	selenoprotein P, plasma, 1
hsa-miR-599	1	0	1	1	1	1	PIGK	phosphatidylinositol glycan anchor biosynthesis, class K
hsa-miR-599	1	0	1	1	1	1	HOXA1	homeobox A1
hsa-miR-599	1	0	1	1	0	0	DPP3	dipeptidyl-peptidase 3
hsa-miR-599	1	0	1	1	1	1	SRRM1	serine/arginine repetitive matrix 1
hsa-miR-599	1	0	1	0	1	1	SPRY3	sprouty homolog 3 (Drosophila)
hsa-miR-599	1	0	1	1	1	1	SPRY1	sprouty homolog 1, antagonist of FGF signaling (Drosophila)
hsa-miR-599	1	0	1	0	1	1	MAP1B	microtubule-associated protein 1B
hsa-miR-599	1	0	1	1	1	1	MMP16	matrix metallopeptidase 16 (membrane-inserted)
hsa-miR-599	1	0	1	1	0	0	NAB2	NGFI-A binding protein 2 (EGR1 binding protein 2)
hsa-miR-599	0	0	1	1	1	1	TSC22D1	TSC22 domain family, member 1
hsa-miR-599	1	0	1	1	1	1	HS3ST4	heparan sulfate (glucosamine) 3-O-sulfotransferase 4
hsa-miR-599	1	0	1	1	1	1	NEFL	neurofilament, light polypeptide
hsa-miR-599	0	0	1	1	1	1	PA2G4	proliferation-associated 2G4, 38kDa
hsa-miR-599	0	0	1	1	0	0	PAX1	paired box 1
hsa-miR-599	1	0	1	1	0	0	PAX9	paired box 9
hsa-miR-599	1	0	1	1	1	1	PDGFRA	platelet-derived growth factor receptor, alpha polypeptide
hsa-miR-599	0	0	1	1	1	1	ZNF230	zinc finger protein 230
hsa-miR-599	1	0	1	1	1	1	SMC1A	structural maintenance of chromosomes 1A
hsa-miR-599	1	0	1	1	1	1	TIMM17A	translocase of inner mitochondrial membrane 17 homolog A (yeast)
hsa-miR-599	1	0	1	0	1	1	APPBP2	amyloid beta precursor protein (cytoplasmic tail) binding protein 2
hsa-miR-599	1	0	1	1	1	1	NEBL	nebulette
hsa-miR-599	1	0	1	0	1	1	API5	apoptosis inhibitor 5
hsa-miR-599	0	0	1	1	1	1	CLPX	ClpX caseinolytic peptidase X homolog (E. coli)
hsa-miR-599	0	0	1	1	1	1	TMED10	transmembrane emp24-like trafficking protein 10 (yeast)
hsa-miR-599	0	0	1	1	1	1	ASCC3	activating signal cointegrator 1 complex subunit 3
hsa-miR-599	0	0	1	1	1	1	HOXD3	homeobox D3
hsa-miR-599	0	0	1	0	1	1	PSG1	pregnancy specific beta-1-glycoprotein 1
hsa-miR-599	1	0	1	1	1	1	RIT1	Ras-like without CAAX 1
hsa-miR-599	1	0	1	1	1	1	WWP1	WW domain containing E3 ubiquitin protein ligase 1
hsa-miR-599	1	0	1	1	1	1	ADAMTS5	ADAM metallopeptidase with thrombospondin type 1 motif, 5
hsa-miR-599	0	0	1	1	1	1	DMC1	DMC1 dosage suppressor of mck1 homolog, meiosis-specific homologous recombination (yeast)
hsa-miR-599	1	0	1	1	1	1	SSR3	signal sequence receptor, gamma (translocon-associated protein gamma)
hsa-miR-599	1	0	1	1	1	1	UTRN	utrophin
hsa-miR-599	1	0	1	1	1	1	UTY	ubiquitously transcribed tetratricopeptide repeat gene, Y-linked
hsa-miR-599	1	0	1	1	1	1	ZNF81	zinc finger protein 81
hsa-miR-599	1	0	1	1	1	1	ERLIN2	ER lipid raft associated 2
hsa-miR-599	1	0	1	1	1	1	PALM2-AKAP2	PALM2-AKAP2 readthrough
hsa-miR-599	0	0	1	1	1	1	XPOT	exportin, tRNA (nuclear export receptor for tRNAs)
hsa-miR-599	1	0	1	1	1	1	PHLDA1	pleckstrin homology-like domain, family A, member 1
hsa-miR-599	0	0	1	1	1	1	FRAT2	frequently rearranged in advanced T-cell lymphomas 2
hsa-miR-599	0	0	1	1	0	0	STAP1	signal transducing adaptor family member 1
hsa-miR-599	0	0	1	1	1	1	MID2	midline 2
hsa-miR-599	1	0	1	1	1	1	HEY2	hairy/enhancer-of-split related with YRPW motif 2
hsa-miR-599	1	0	1	0	1	1	G3BP2	GTPase activating protein (SH3 domain) binding protein 2
hsa-miR-599	1	0	1	0	1	1	MYCBP	c-myc binding protein
hsa-miR-599	1	0	1	1	1	1	NNT	nicotinamide nucleotide transhydrogenase
hsa-miR-599	0	0	1	0	1	1	TLL1	tolloid-like 1
hsa-miR-599	1	0	1	1	1	1	TLL2	tolloid-like 2
hsa-miR-599	1	0	1	0	1	1	FLRT2	fibronectin leucine rich transmembrane protein 2
hsa-miR-599	0	0	1	1	1	1	N6AMT1	N-6 adenine-specific DNA methyltransferase 1 (putative)
hsa-miR-599	1	0	1	1	1	1	PPARGC1A	peroxisome proliferator-activated receptor gamma, coactivator 1 alpha
hsa-miR-599	0	0	1	0	1	1	LINC00312	long intergenic non-protein coding RNA 312
hsa-miR-599	1	0	1	1	1	1	AK2	adenylate kinase 2
hsa-miR-599	1	0	1	1	1	1	NCKAP1	NCK-associated protein 1
hsa-miR-599	0	0	1	0	1	1	EMR2	egf-like module containing, mucin-like, hormone receptor-like 2
hsa-miR-599	1	0	1	0	1	1	CLIC4	chloride intracellular channel 4
hsa-miR-599	1	0	1	1	1	1	NRG1	neuregulin 1
hsa-miR-599	1	0	1	0	1	1	VAMP2	vesicle-associated membrane protein 2 (synaptobrevin 2)
hsa-miR-599	0	0	1	0	1	1	ADAMTS3	ADAM metallopeptidase with thrombospondin type 1 motif, 3
hsa-miR-599	1	0	1	1	1	1	SLC7A11	solute carrier family 7 (anionic amino acid transporter light chain, xc- system), member 11
hsa-miR-599	0	0	1	1	1	1	KCNMB4	potassium large conductance calcium-activated channel, subfamily M, beta member 4
hsa-miR-599	0	0	1	1	0	0	LMCD1	LIM and cysteine-rich domains 1
hsa-miR-599	1	0	1	1	1	1	RASSF2	Ras association (RalGDS/AF-6) domain family member 2
hsa-miR-599	1	0	1	1	1	1	SPCS2	signal peptidase complex subunit 2 homolog (S. cerevisiae)
hsa-miR-599	0	0	1	1	0	0	PCNXL2	pecanex-like 2 (Drosophila)
hsa-miR-599	0	0	1	0	1	1	EPM2AIP1	EPM2A (laforin) interacting protein 1
hsa-miR-599	1	0	1	1	1	1	FAM20B	family with sequence similarity 20, member B
hsa-miR-599	1	0	1	1	1	1	MFN2	mitofusin 2
hsa-miR-599	1	0	1	1	1	1	JOSD1	Josephin domain containing 1
hsa-miR-599	1	0	1	1	1	1	SPAST	spastin
hsa-miR-599	1	0	1	0	1	1	WDFY3	WD repeat and FYVE domain containing 3
hsa-miR-599	1	0	1	0	1	1	PEG10	paternally expressed 10
hsa-miR-599	1	0	1	1	1	1	RTF1	Rtf1, Paf1/RNA polymerase II complex component, homolog (S. cerevisiae)
hsa-miR-599	1	0	1	1	1	1	PRRC2C	proline-rich coiled-coil 2C
hsa-miR-599	1	0	1	1	1	1	PLCB1	phospholipase C, beta 1 (phosphoinositide-specific)
hsa-miR-599	1	0	1	1	0	0	KIAA0556	KIAA0556
hsa-miR-599	1	0	1	1	1	1	NUDCD3	NudC domain containing 3
hsa-miR-599	1	0	1	1	1	1	MED13L	mediator complex subunit 13-like
hsa-miR-599	0	0	1	1	1	1	LEPROTL1	leptin receptor overlapping transcript-like 1
hsa-miR-599	0	0	1	1	0	0	ABHD14A	abhydrolase domain containing 14A
hsa-miR-599	1	0	1	1	1	1	RNF19A	ring finger protein 19A, E3 ubiquitin protein ligase
hsa-miR-599	1	0	1	1	1	1	CNRIP1	cannabinoid receptor interacting protein 1
hsa-miR-599	1	0	1	0	1	1	OSBPL3	oxysterol binding protein-like 3
hsa-miR-599	1	0	1	0	1	1	GLCE	glucuronic acid epimerase
hsa-miR-599	1	0	1	0	1	1	PPP1R16B	protein phosphatase 1, regulatory subunit 16B
hsa-miR-599	1	0	1	0	1	1	ERC2	ELKS/RAB6-interacting/CAST family member 2
hsa-miR-599	0	0	1	1	1	1	TRUB2	TruB pseudouridine (psi) synthase homolog 2 (E. coli)
hsa-miR-599	1	0	1	1	1	1	PLA2G3	phospholipase A2, group III
hsa-miR-599	1	0	1	1	1	1	ST8SIA3	ST8 alpha-N-acetyl-neuraminide alpha-2,8-sialyltransferase 3
hsa-miR-599	1	0	1	1	1	1	TXNDC12	thioredoxin domain containing 12 (endoplasmic reticulum)
hsa-miR-599	1	0	1	1	1	1	UBE2J1	ubiquitin-conjugating enzyme E2, J1
hsa-miR-599	0	0	1	1	1	1	MED31	mediator complex subunit 31
hsa-miR-599	1	0	1	1	1	1	RASD1	RAS, dexamethasone-induced 1
hsa-miR-599	1	0	1	1	1	1	SUFU	suppressor of fused homolog (Drosophila)
hsa-miR-599	1	0	1	1	1	1	CMPK1	cytidine monophosphate (UMP-CMP) kinase 1, cytosolic
hsa-miR-599	1	0	1	1	1	1	RAB14	RAB14, member RAS oncogene family
hsa-miR-599	1	0	1	0	1	1	RAB8B	RAB8B, member RAS oncogene family
hsa-miR-599	0	0	1	1	1	1	CHCHD8	coiled-coil-helix-coiled-coil-helix domain containing 8
hsa-miR-599	0	0	1	1	1	1	KDM3B	lysine (K)-specific demethylase 3B
hsa-miR-599	1	0	1	1	1	1	ZNF644	zinc finger protein 644
hsa-miR-599	1	0	1	1	1	1	ZAK	sterile alpha motif and leucine zipper containing kinase AZK
hsa-miR-599	1	0	1	1	1	1	SIX4	SIX homeobox 4
hsa-miR-599	0	0	1	1	0	0	MYH2	myosin, heavy chain 2, skeletal muscle, adult
hsa-miR-599	0	0	1	0	1	1	VEZT	vezatin, adherens junctions transmembrane protein
hsa-miR-599	1	0	1	0	1	1	EIF2C4	eukaryotic translation initiation factor 2C, 4
hsa-miR-599	0	0	1	0	1	1	GIPC2	GIPC PDZ domain containing family, member 2
hsa-miR-599	1	0	1	1	1	1	VPS13C	vacuolar protein sorting 13 homolog C (S. cerevisiae)
hsa-miR-599	0	0	1	1	1	1	WDR55	WD repeat domain 55
hsa-miR-599	0	0	1	1	1	1	QRICH1	glutamine-rich 1
hsa-miR-599	0	0	1	0	1	1	THUMPD1	THUMP domain containing 1
hsa-miR-599	1	0	1	0	1	1	DCAF16	DDB1 and CUL4 associated factor 16
hsa-miR-599	1	0	1	1	1	1	RNF125	ring finger protein 125, E3 ubiquitin protein ligase
hsa-miR-599	0	0	1	1	0	0	THG1L	tRNA-histidine guanylyltransferase 1-like (S. cerevisiae)
hsa-miR-599	1	0	1	1	1	1	LRRC8D	leucine rich repeat containing 8 family, member D
hsa-miR-599	1	0	1	1	1	1	FAM178A	family with sequence similarity 178, member A
hsa-miR-599	0	0	1	1	1	1	TMLHE	trimethyllysine hydroxylase, epsilon
hsa-miR-599	0	0	1	1	1	1	TRIM62	tripartite motif containing 62
hsa-miR-599	0	0	1	0	1	1	MOB1A	MOB kinase activator 1A
hsa-miR-599	1	0	1	0	1	1	FOXJ2	forkhead box J2
hsa-miR-599	0	0	1	1	1	1	STYK1	serine/threonine/tyrosine kinase 1
hsa-miR-599	0	0	1	1	1	1	BDP1	B double prime 1, subunit of RNA polymerase III transcription initiation factor IIIB
hsa-miR-599	0	0	1	1	1	1	NPAP1	nuclear pore associated protein 1
hsa-miR-599	0	0	1	1	1	1	KRT24	keratin 24
hsa-miR-599	0	0	1	1	0	0	RNF186	ring finger protein 186
hsa-miR-599	1	0	1	1	1	1	SEPT3	septin 3
hsa-miR-599	0	0	1	1	1	1	KLHL4	kelch-like 4 (Drosophila)
hsa-miR-599	1	0	1	1	1	1	KIAA1244	KIAA1244
hsa-miR-599	0	0	1	1	0	0	ENTPD7	ectonucleoside triphosphate diphosphohydrolase 7
hsa-miR-599	1	0	1	0	1	1	EIF5A2	eukaryotic translation initiation factor 5A2
hsa-miR-599	1	0	1	1	1	1	DSCAML1	Down syndrome cell adhesion molecule like 1
hsa-miR-599	1	0	1	1	0	0	CASKIN2	CASK interacting protein 2
hsa-miR-599	1	0	1	1	1	1	ARHGAP31	Rho GTPase activating protein 31
hsa-miR-599	0	0	1	1	1	1	ARRDC3	arrestin domain containing 3
hsa-miR-599	1	0	1	0	1	1	WDFY1	WD repeat and FYVE domain containing 1
hsa-miR-599	1	0	1	0	1	1	SH3RF1	SH3 domain containing ring finger 1
hsa-miR-599	0	0	1	1	1	1	PRX	periaxin
hsa-miR-599	1	0	1	0	1	1	RAP2A	RAP2A, member of RAS oncogene family
hsa-miR-599	1	0	1	1	1	1	NMB	neuromedin B
hsa-miR-599	1	0	1	1	1	1	ADCY1	adenylate cyclase 1 (brain)
hsa-miR-599	1	0	1	1	1	1	RTN1	reticulon 1
hsa-miR-599	0	0	1	1	1	1	VPS11	vacuolar protein sorting 11 homolog (S. cerevisiae)
hsa-miR-599	0	0	1	0	1	1	CFL2	cofilin 2 (muscle)
hsa-miR-599	1	0	1	1	1	1	GPR88	G protein-coupled receptor 88
hsa-miR-599	1	0	1	0	1	1	CERS2	ceramide synthase 2
hsa-miR-599	1	0	1	1	1	1	NDRG3	NDRG family member 3
hsa-miR-599	0	0	1	1	0	0	CSH2	chorionic somatomammotropin hormone 2
hsa-miR-599	1	0	1	1	1	1	PRRX1	paired related homeobox 1
hsa-miR-599	1	0	1	1	1	1	NEUROD6	neuronal differentiation 6
hsa-miR-599	1	0	1	1	1	1	YTHDC2	YTH domain containing 2
hsa-miR-599	1	0	1	1	1	1	RFX7	regulatory factor X, 7
hsa-miR-599	0	0	1	0	1	1	LRRC19	leucine rich repeat containing 19
hsa-miR-599	1	0	1	1	1	1	REEP1	receptor accessory protein 1
hsa-miR-599	0	0	1	1	1	1	WDR77	WD repeat domain 77
hsa-miR-599	0	0	1	1	1	1	LPAL2	lipoprotein, Lp(a)-like 2, pseudogene
hsa-miR-599	1	0	1	1	1	1	LRRC2	leucine rich repeat containing 2
hsa-miR-599	1	0	1	1	1	1	RNF128	ring finger protein 128, E3 ubiquitin protein ligase
hsa-miR-599	1	0	1	0	1	1	MOB3B	MOB kinase activator 3B
hsa-miR-599	0	0	1	1	1	1	WDR78	WD repeat domain 78
hsa-miR-599	1	0	1	1	1	1	NAA50	N(alpha)-acetyltransferase 50, NatE catalytic subunit
hsa-miR-599	1	0	1	0	1	1	EDEM3	ER degradation enhancer, mannosidase alpha-like 3
hsa-miR-599	1	0	1	1	1	1	TRIB1	tribbles homolog 1 (Drosophila)
hsa-miR-599	1	0	1	1	1	1	ANKRD13C	ankyrin repeat domain 13C
hsa-miR-599	0	0	1	1	1	1	ISCA1	iron-sulfur cluster assembly 1 homolog (S. cerevisiae)
hsa-miR-599	0	0	1	1	1	1	FCRL4	Fc receptor-like 4
hsa-miR-599	0	0	1	1	1	1	SLC41A2	solute carrier family 41, member 2
hsa-miR-599	1	0	1	1	1	1	DSEL	dermatan sulfate epimerase-like
hsa-miR-599	1	0	1	1	1	1	ANTXR1	anthrax toxin receptor 1
hsa-miR-599	1	0	1	0	1	1	PSD2	pleckstrin and Sec7 domain containing 2
hsa-miR-599	1	0	1	1	1	1	PPP1R9B	protein phosphatase 1, regulatory subunit 9B
hsa-miR-599	0	0	1	1	1	1	HAVCR2	hepatitis A virus cellular receptor 2
hsa-miR-599	0	0	1	0	1	1	CBR4	carbonyl reductase 4
hsa-miR-599	0	0	1	1	1	1	MICALCL	MICAL C-terminal like
hsa-miR-599	1	0	1	0	1	1	PURB	purine-rich element binding protein B
hsa-miR-599	1	0	1	1	1	1	SSH2	slingshot homolog 2 (Drosophila)
hsa-miR-599	1	0	1	1	1	1	LUZP1	leucine zipper protein 1
hsa-miR-599	0	0	1	1	1	1	PLEKHG4B	pleckstrin homology domain containing, family G (with RhoGef domain) member 4B
hsa-miR-599	1	0	1	1	1	1	SRSF10	serine/arginine-rich splicing factor 10
hsa-miR-599	0	0	1	1	1	1	WNT7B	wingless-type MMTV integration site family, member 7B
hsa-miR-599	1	0	1	1	0	0	BRD4	bromodomain containing 4
hsa-miR-599	0	0	1	1	1	1	ABCA10	ATP-binding cassette, sub-family A (ABC1), member 10
hsa-miR-599	0	0	1	1	0	0	XAGE2	X antigen family, member 2
hsa-miR-599	1	0	1	1	1	1	DCN	decorin
hsa-miR-599	0	0	1	1	1	1	RAD51B	RAD51 homolog B (S. cerevisiae)
hsa-miR-599	1	0	1	1	1	1	NUP35	nucleoporin 35kDa
hsa-miR-599	1	0	1	1	1	1	GLCCI1	glucocorticoid induced transcript 1
hsa-miR-599	1	0	1	1	1	1	PPTC7	PTC7 protein phosphatase homolog (S. cerevisiae)
hsa-miR-599	0	0	1	1	0	0	DCST2	DC-STAMP domain containing 2
hsa-miR-599	1	0	1	1	1	1	RFTN2	raftlin family member 2
hsa-miR-599	1	0	1	1	1	1	FAM91A1	family with sequence similarity 91, member A1
hsa-miR-599	1	0	1	1	1	1	UBQLNL	ubiquilin-like
hsa-miR-599	0	0	1	0	1	1	PIGM	phosphatidylinositol glycan anchor biosynthesis, class M
hsa-miR-599	0	0	1	1	1	1	OMA1	OMA1 zinc metallopeptidase homolog (S. cerevisiae)
hsa-miR-599	1	0	1	1	1	1	CCSAP	centriole, cilia and spindle-associated protein
hsa-miR-599	0	0	1	1	0	0	C10orf35	chromosome 10 open reading frame 35
hsa-miR-599	0	0	1	1	1	1	CRYZL1	crystallin, zeta (quinone reductase)-like 1
hsa-miR-599	1	0	1	1	1	1	BOD1L1	biorientation of chromosomes in cell division 1-like 1
hsa-miR-599	1	0	1	1	1	1	FAM81A	family with sequence similarity 81, member A
hsa-miR-599	0	0	1	1	1	1	CNIH3	cornichon homolog 3 (Drosophila)
hsa-miR-599	0	0	1	1	1	1	CXorf22	chromosome X open reading frame 22
hsa-miR-599	1	0	1	0	1	1	RWDD4	RWD domain containing 4
hsa-miR-599	1	0	1	0	1	1	C7orf41	chromosome 7 open reading frame 41
hsa-miR-599	1	0	1	0	1	1	ENPP6	ectonucleotide pyrophosphatase/phosphodiesterase 6
hsa-miR-599	1	0	1	0	1	1	ZCCHC24	zinc finger, CCHC domain containing 24
hsa-miR-599	0	0	1	1	1	1	TAF1L	TAF1 RNA polymerase II, TATA box binding protein (TBP)-associated factor, 210kDa-like
hsa-miR-599	0	0	1	1	1	1	REXO1L1	REX1, RNA exonuclease 1 homolog (S. cerevisiae)-like 1
hsa-miR-599	1	0	1	1	1	1	TTBK2	tau tubulin kinase 2
hsa-miR-599	0	0	1	1	1	1	C8orf47	chromosome 8 open reading frame 47
hsa-miR-599	1	0	1	0	1	1	RNF152	ring finger protein 152
hsa-miR-599	1	0	1	0	1	1	PGM2L1	phosphoglucomutase 2-like 1
hsa-miR-599	0	0	1	0	1	1	NKAIN3	Na+/K+ transporting ATPase interacting 3
hsa-miR-599	0	0	1	1	0	0	SPINT4	serine peptidase inhibitor, Kunitz type 4
hsa-miR-599	0	0	1	1	1	1	ZNF831	zinc finger protein 831
hsa-miR-599	0	0	1	1	1	1	SIRPD	signal-regulatory protein delta
hsa-miR-599	1	0	1	1	1	1	TMEM26	transmembrane protein 26
hsa-miR-599	0	0	1	0	1	1	ITGA1	integrin, alpha 1
hsa-miR-599	0	0	1	1	1	1	CCDC67	coiled-coil domain containing 67
hsa-miR-599	1	0	1	1	1	1	BCL9L	B-cell CLL/lymphoma 9-like
hsa-miR-599	1	0	1	0	1	1	C12orf36	chromosome 12 open reading frame 36
hsa-miR-599	0	0	1	1	1	1	C2orf48	chromosome 2 open reading frame 48
hsa-miR-599	1	0	1	1	1	1	ARRDC4	arrestin domain containing 4
hsa-miR-599	1	0	1	0	1	1	SLC16A9	solute carrier family 16, member 9 (monocarboxylic acid transporter 9)
hsa-miR-599	1	0	1	1	1	1	ZBTB41	zinc finger and BTB domain containing 41
hsa-miR-599	0	0	1	0	1	1	BTNL3	butyrophilin-like 3
hsa-miR-599	1	0	1	1	1	1	ASB7	ankyrin repeat and SOCS box containing 7
hsa-miR-599	0	0	1	0	0	0	MPZL3	myelin protein zero-like 3
hsa-miR-599	1	0	1	0	1	1	NRK	Nik related kinase
hsa-miR-599	1	0	1	1	1	1	PAQR9	progestin and adipoQ receptor family member IX
hsa-miR-599	1	0	1	0	1	1	ZC3H6	zinc finger CCCH-type containing 6
hsa-miR-599	0	0	1	1	1	1	PTHLH	parathyroid hormone-like hormone
hsa-miR-599	0	0	1	1	1	1	FAM5C	family with sequence similarity 5, member C
hsa-miR-599	0	0	1	1	1	1	MDFIC	MyoD family inhibitor domain containing
hsa-miR-599	0	0	1	1	1	1	ARHGAP27	Rho GTPase activating protein 27
hsa-miR-599	0	0	1	1	1	1	ILDR2	immunoglobulin-like domain containing receptor 2
hsa-miR-599	1	0	1	1	0	0	KAZN	kazrin, periplakin interacting protein
hsa-miR-599	1	0	1	1	1	1	GLYAT	glycine-N-acyltransferase
hsa-miR-599	1	0	1	1	1	1	FBXO33	F-box protein 33
hsa-miR-599	0	0	1	1	1	1	SHC4	SHC (Src homology 2 domain containing) family, member 4
hsa-miR-599	0	0	1	0	1	1	NPSR1-AS1	NPSR1 antisense RNA 1
hsa-miR-599	1	0	1	1	1	1	ATRNL1	attractin-like 1
hsa-miR-599	0	0	1	0	1	1	C1orf229	chromosome 1 open reading frame 229
hsa-miR-599	0	0	1	0	1	1	FSD1L	fibronectin type III and SPRY domain containing 1-like
hsa-miR-599	1	0	1	1	1	1	RAPH1	Ras association (RalGDS/AF-6) and pleckstrin homology domains 1
hsa-miR-599	0	0	1	0	0	0	PCDHB19P	protocadherin beta 19 pseudogene
hsa-miR-599	0	0	1	0	0	0	TTTY2	testis-specific transcript, Y-linked 2 (non-protein coding)
hsa-miR-599	0	0	1	0	0	0	TTTY15	testis-specific transcript, Y-linked 15 (non-protein coding)
hsa-miR-599	0	0	1	0	0	0	TPI1P2	triosephosphate isomerase 1 pseudogene 2
hsa-miR-599	0	0	1	0	0	0	SEPHS1P1	selenophosphate synthetase 1 pseudogene 1
hsa-miR-599	0	0	1	0	0	0	NEAT1	nuclear paraspeckle assembly transcript 1 (non-protein coding)
hsa-miR-599	0	0	1	0	0	0	RNF126P1	ring finger protein 126 pseudogene 1
hsa-miR-599	0	0	1	0	0	0	DUSP5P	dual specificity phosphatase 5 pseudogene
hsa-miR-599	0	0	1	0	0	0	TCAM1P	testicular cell adhesion molecule 1 homolog (mouse), pseudogene
hsa-miR-599	0	0	1	0	0	0	SNORA28	small nucleolar RNA, H/ACA box 28
hsa-miR-599	0	0	1	0	0	0	SNORA45	small nucleolar RNA, H/ACA box 45
hsa-miR-599	0	0	1	0	0	0	NBR2	neighbor of BRCA1 gene 2 (non-protein coding)
hsa-miR-599	0	0	1	0	0	0	GBP1P1	guanylate binding protein 1, interferon-inducible pseudogene 1
hsa-miR-599	0	0	1	1	1	1	INPP5F	inositol polyphosphate-5-phosphatase F
hsa-miR-599	0	0	0	1	1	1	FTSJ1	FtsJ RNA methyltransferase homolog 1 (E. coli)
hsa-miR-599	0	0	1	1	0	0	RTN4R	reticulon 4 receptor
hsa-miR-599	0	0	1	1	1	1	YIPF1	Yip1 domain family, member 1
hsa-miR-599	0	0	1	1	1	1	CREB3L3	cAMP responsive element binding protein 3-like 3
hsa-miR-599	1	0	1	1	1	1	QSER1	glutamine and serine rich 1
hsa-miR-599	1	0	1	1	1	1	FAM135B	family with sequence similarity 135, member B
hsa-miR-599	0	0	1	1	0	0	ROPN1	rhophilin associated tail protein 1
hsa-miR-599	0	0	0	1	0	0	IGSF9	immunoglobulin superfamily, member 9
hsa-miR-599	0	0	1	1	0	0	NME8	NME/NM23 family member 8
hsa-miR-599	0	0	0	1	0	0	FLT3LG	fms-related tyrosine kinase 3 ligand
hsa-miR-599	0	0	1	1	1	1	GNPTG	N-acetylglucosamine-1-phosphate transferase, gamma subunit
hsa-miR-599	0	0	1	1	1	1	ABCC6	ATP-binding cassette, sub-family C (CFTR/MRP), member 6
hsa-miR-599	0	0	1	1	1	1	CRISP2	cysteine-rich secretory protein 2
hsa-miR-599	0	0	0	1	0	0	IGFALS	insulin-like growth factor binding protein, acid labile subunit
hsa-miR-599	0	0	1	1	0	0	C22orf31	chromosome 22 open reading frame 31
hsa-miR-599	0	0	1	1	0	0	FKBP3	FK506 binding protein 3, 25kDa
hsa-miR-599	1	0	1	1	1	1	CHGA	chromogranin A (parathyroid secretory protein 1)
hsa-miR-599	0	0	1	1	1	1	PCK2	phosphoenolpyruvate carboxykinase 2 (mitochondrial)
hsa-miR-599	1	0	0	1	1	1	SALL4	sal-like 4 (Drosophila)
hsa-miR-599	0	0	1	1	1	1	RP1	retinitis pigmentosa 1 (autosomal dominant)
hsa-miR-599	0	0	1	1	0	0	HNRNPL	heterogeneous nuclear ribonucleoprotein L
hsa-miR-599	1	0	1	1	0	0	SLC25A39	solute carrier family 25, member 39
hsa-miR-599	1	0	1	1	1	1	RND2	Rho family GTPase 2
hsa-miR-599	0	0	0	1	1	1	SULT1E1	sulfotransferase family 1E, estrogen-preferring, member 1
hsa-miR-599	0	0	1	1	0	0	HIST1H3F	histone cluster 1, H3f
hsa-miR-599	1	0	1	1	0	0	TMSB10	thymosin beta 10
hsa-miR-599	1	0	1	1	1	1	ID2	inhibitor of DNA binding 2, dominant negative helix-loop-helix protein
hsa-miR-599	0	0	1	1	0	0	FKBP15	FK506 binding protein 15, 133kDa
hsa-miR-599	0	0	1	1	0	0	INSL4	insulin-like 4 (placenta)
hsa-miR-599	1	0	1	1	1	1	TEX14	testis expressed 14
hsa-miR-599	0	0	1	1	1	1	GJA3	gap junction protein, alpha 3, 46kDa
hsa-miR-599	0	0	0	1	0	0	ACTR5	ARP5 actin-related protein 5 homolog (yeast)
hsa-miR-599	1	0	1	1	1	1	EML2	echinoderm microtubule associated protein like 2
hsa-miR-599	0	0	1	1	0	0	DEFB129	defensin, beta 129
hsa-miR-599	0	0	0	1	0	0	TRAP1	TNF receptor-associated protein 1
hsa-miR-599	0	0	1	1	0	0	TAS2R16	taste receptor, type 2, member 16
hsa-miR-599	0	0	0	1	1	1	CCRL1	chemokine (C-C motif) receptor-like 1
hsa-miR-599	0	0	0	1	0	0	ZNF165	zinc finger protein 165
hsa-miR-599	1	0	1	1	1	1	XPO7	exportin 7
hsa-miR-599	0	0	0	1	1	1	BST2	bone marrow stromal cell antigen 2
hsa-miR-599	0	0	1	1	0	0	SAG	S-antigen; retina and pineal gland (arrestin)
hsa-miR-599	1	0	1	1	0	0	MAP3K10	mitogen-activated protein kinase kinase kinase 10
hsa-miR-599	0	0	1	1	0	0	RAMP2	receptor (G protein-coupled) activity modifying protein 2
hsa-miR-599	1	0	1	1	1	1	KDM6B	lysine (K)-specific demethylase 6B
hsa-miR-599	1	0	1	1	1	1	MATN2	matrilin 2
hsa-miR-599	0	0	0	1	1	1	HRASLS2	HRAS-like suppressor 2
hsa-miR-599	0	0	1	1	1	1	IMPA1	inositol(myo)-1(or 4)-monophosphatase 1
hsa-miR-599	0	0	1	1	0	0	PLEKHA8P1	pleckstrin homology domain containing, family A member 8 pseudogene 1
hsa-miR-599	0	0	1	1	1	1	ZCCHC11	zinc finger, CCHC domain containing 11
hsa-miR-599	0	0	1	1	0	0	GPR77	G protein-coupled receptor 77
hsa-miR-599	0	0	1	1	0	0	WNT10A	wingless-type MMTV integration site family, member 10A
hsa-miR-599	0	0	0	1	1	1	PGBD1	piggyBac transposable element derived 1
hsa-miR-599	0	0	0	1	1	1	FGFBP2	fibroblast growth factor binding protein 2
hsa-miR-599	0	0	1	1	0	0	GGH	gamma-glutamyl hydrolase (conjugase, folylpolygammaglutamyl hydrolase)
hsa-miR-599	0	0	1	1	1	1	MNS1	meiosis-specific nuclear structural 1
hsa-miR-599	0	0	0	1	1	1	COL8A1	collagen, type VIII, alpha 1
hsa-miR-599	0	0	1	1	0	0	CCDC54	coiled-coil domain containing 54
hsa-miR-599	1	0	1	1	1	1	MAN2A1	mannosidase, alpha, class 2A, member 1
hsa-miR-599	0	0	0	1	1	1	UTP20	UTP20, small subunit (SSU) processome component, homolog (yeast)
hsa-miR-599	0	0	1	1	1	1	BFAR	bifunctional apoptosis regulator
hsa-miR-599	1	0	0	1	1	1	ATF1	activating transcription factor 1
hsa-miR-599	0	0	0	1	1	1	CDH19	cadherin 19, type 2
hsa-miR-599	0	0	1	1	1	1	RHBDF1	rhomboid 5 homolog 1 (Drosophila)
hsa-miR-599	0	0	0	1	1	1	NUCB1	nucleobindin 1
hsa-miR-599	0	0	1	1	1	1	LY9	lymphocyte antigen 9
hsa-miR-599	0	0	1	1	0	0	TBXAS1	thromboxane A synthase 1 (platelet)
hsa-miR-599	0	0	0	1	0	0	ELANE	elastase, neutrophil expressed
hsa-miR-599	0	0	1	1	1	1	CHIC2	cysteine-rich hydrophobic domain 2
hsa-miR-599	1	0	1	1	1	1	GRIA3	glutamate receptor, ionotropic, AMPA 3
hsa-miR-599	0	0	0	1	0	0	NEIL3	nei endonuclease VIII-like 3 (E. coli)
hsa-miR-599	0	0	1	1	1	1	MTRR	5-methyltetrahydrofolate-homocysteine methyltransferase reductase
hsa-miR-599	0	0	1	1	1	1	F11	coagulation factor XI
hsa-miR-599	1	0	0	1	0	0	KLF1	Kruppel-like factor 1 (erythroid)
hsa-miR-599	0	0	1	1	0	0	MCM2	minichromosome maintenance complex component 2
hsa-miR-599	0	0	0	1	0	0	THOC3	THO complex 3
hsa-miR-599	1	0	1	1	1	1	LEF1	lymphoid enhancer-binding factor 1
hsa-miR-599	0	0	0	1	1	1	NME5	NME/NM23 family member 5
hsa-miR-599	0	0	0	1	0	0	SIL1	SIL1 homolog, endoplasmic reticulum chaperone (S. cerevisiae)
hsa-miR-599	0	0	1	1	1	1	TAX1BP1	Tax1 (human T-cell leukemia virus type I) binding protein 1
hsa-miR-599	1	0	1	1	1	1	ST7	suppression of tumorigenicity 7
hsa-miR-599	1	0	1	1	0	0	KIAA1549L	KIAA1549-like
hsa-miR-599	0	0	1	1	1	1	ADAM2	ADAM metallopeptidase domain 2
hsa-miR-599	0	0	1	1	1	1	SH2D4A	SH2 domain containing 4A
hsa-miR-599	0	0	1	1	1	1	REXO2	REX2, RNA exonuclease 2 homolog (S. cerevisiae)
hsa-miR-599	0	0	1	1	0	0	RBM6	RNA binding motif protein 6
hsa-miR-599	0	0	1	1	0	0	PLCZ1	phospholipase C, zeta 1
hsa-miR-599	0	0	1	1	1	1	KERA	keratocan
hsa-miR-599	0	0	1	1	0	0	SYCP3	synaptonemal complex protein 3
hsa-miR-599	1	0	1	1	1	1	TARBP2	TAR (HIV-1) RNA binding protein 2
hsa-miR-599	0	0	1	1	1	1	PTGR2	prostaglandin reductase 2
hsa-miR-599	1	0	1	1	1	1	IGF1R	insulin-like growth factor 1 receptor
hsa-miR-599	0	0	1	1	0	0	DPEP2	dipeptidase 2
hsa-miR-599	0	0	0	1	0	0	CACNG8	calcium channel, voltage-dependent, gamma subunit 8
hsa-miR-599	0	0	1	1	0	0	ZNF593	zinc finger protein 593
hsa-miR-599	0	0	0	1	0	0	ADAMTSL4	ADAMTS-like 4
hsa-miR-599	0	0	1	1	1	1	TMEM177	transmembrane protein 177
hsa-miR-599	1	0	1	1	1	1	SCD5	stearoyl-CoA desaturase 5
hsa-miR-599	1	0	1	1	1	1	GLRA3	glycine receptor, alpha 3
hsa-miR-599	0	0	0	1	0	0	CDH18	cadherin 18, type 2
hsa-miR-599	0	0	1	1	1	1	MAGEA4	melanoma antigen family A, 4
hsa-miR-599	0	0	1	1	0	0	RPS3	ribosomal protein S3
hsa-miR-599	0	0	0	1	0	0	ROM1	retinal outer segment membrane protein 1
hsa-miR-599	0	0	0	1	0	0	OR5M9	olfactory receptor, family 5, subfamily M, member 9
hsa-miR-599	0	0	1	1	1	1	TEX12	testis expressed 12
hsa-miR-599	0	0	0	1	0	0	TAKR	aldo-keto reductase, truncated
hsa-miR-599	0	0	0	1	1	1	ZNF256	zinc finger protein 256
hsa-miR-599	0	0	1	1	1	1	CCDC148	coiled-coil domain containing 148
hsa-miR-599	0	0	1	1	1	1	ACAA2	acetyl-CoA acyltransferase 2
hsa-miR-599	0	0	0	1	0	0	OR4K1	olfactory receptor, family 4, subfamily K, member 1
hsa-miR-599	0	0	0	1	0	0	XAGE2B	X antigen family, member 2B
hsa-miR-599	0	0	0	1	0	0	RBM45	RNA binding motif protein 45
hsa-miR-599	1	0	1	1	1	1	CASP10	caspase 10, apoptosis-related cysteine peptidase
hsa-miR-599	0	0	0	1	0	0	NAA11	N(alpha)-acetyltransferase 11, NatA catalytic subunit
hsa-miR-599	0	0	0	1	1	1	NTAN1	N-terminal asparagine amidase
hsa-miR-599	0	0	1	1	0	0	MX1	myxovirus (influenza virus) resistance 1, interferon-inducible protein p78 (mouse)
hsa-miR-599	1	0	1	1	1	1	SMAD6	SMAD family member 6
hsa-miR-599	0	0	1	1	0	0	ACTR1B	ARP1 actin-related protein 1 homolog B, centractin beta (yeast)
hsa-miR-599	0	0	1	1	1	1	NPC1L1	NPC1 (Niemann-Pick disease, type C1, gene)-like 1
hsa-miR-599	1	0	1	1	1	1	SIM2	single-minded homolog 2 (Drosophila)
hsa-miR-599	1	0	1	1	1	1	ZBTB7B	zinc finger and BTB domain containing 7B
hsa-miR-599	0	0	1	1	0	0	FGFR4	fibroblast growth factor receptor 4
hsa-miR-599	1	0	1	1	0	0	IER2	immediate early response 2
hsa-miR-599	0	0	0	1	0	0	ZNF251	zinc finger protein 251
hsa-miR-599	0	0	1	1	0	0	CCDC105	coiled-coil domain containing 105
hsa-miR-599	0	0	1	1	1	1	ZNF250	zinc finger protein 250
hsa-miR-599	0	0	0	1	0	0	LRWD1	leucine-rich repeats and WD repeat domain containing 1
hsa-miR-599	0	0	1	1	1	1	CCL16	chemokine (C-C motif) ligand 16
hsa-miR-599	0	0	0	1	0	0	CCL23	chemokine (C-C motif) ligand 23
hsa-miR-599	1	0	1	1	1	1	NXF1	nuclear RNA export factor 1
hsa-miR-599	0	0	1	1	1	1	NEXN	nexilin (F actin binding protein)
hsa-miR-599	0	0	0	1	1	1	GBP7	guanylate binding protein 7
hsa-miR-599	0	0	1	1	1	1	C2orf47	chromosome 2 open reading frame 47
hsa-miR-599	0	0	0	1	1	1	STPG2	sperm-tail PG-rich repeat containing 2
hsa-miR-599	0	0	1	1	1	1	IWS1	IWS1 homolog (S. cerevisiae)
hsa-miR-599	0	0	0	1	1	1	LOC375295	uncharacterized LOC375295
hsa-miR-599	0	0	0	1	0	0	RQCD1	RCD1 required for cell differentiation1 homolog (S. pombe)
hsa-miR-599	0	0	1	1	0	0	DPPA2	developmental pluripotency associated 2
hsa-miR-599	0	0	1	1	1	1	WDR52	WD repeat domain 52
hsa-miR-599	1	0	1	1	1	1	CDS1	CDP-diacylglycerol synthase (phosphatidate cytidylyltransferase) 1
hsa-miR-599	0	0	1	1	1	1	RSRC1	arginine/serine-rich coiled-coil 1
hsa-miR-599	0	0	1	1	1	1	MTMR14	myotubularin related protein 14
hsa-miR-599	0	0	1	1	0	0	GRM2	glutamate receptor, metabotropic 2
hsa-miR-599	0	0	1	1	1	1	ZNF474	zinc finger protein 474
hsa-miR-599	1	0	1	1	1	1	PGGT1B	protein geranylgeranyltransferase type I, beta subunit
hsa-miR-599	1	0	0	1	1	1	SLU7	SLU7 splicing factor homolog (S. cerevisiae)
hsa-miR-599	0	0	0	1	0	0	GPR101	G protein-coupled receptor 101
hsa-miR-599	0	0	1	1	1	1	SLC39A2	solute carrier family 39 (zinc transporter), member 2
hsa-miR-599	0	0	1	1	0	0	PACSIN3	protein kinase C and casein kinase substrate in neurons 3
hsa-miR-599	0	0	0	1	0	0	C12orf55	chromosome 12 open reading frame 55
hsa-miR-599	0	0	0	1	0	0	HPS6	Hermansky-Pudlak syndrome 6
hsa-miR-599	0	0	0	1	0	0	ZSCAN21	zinc finger and SCAN domain containing 21
hsa-miR-599	0	0	1	1	1	1	FAM96A	family with sequence similarity 96, member A
hsa-miR-599	0	0	1	1	1	1	ACSF2	acyl-CoA synthetase family member 2
hsa-miR-599	0	0	0	1	0	0	ZC3H18	zinc finger CCCH-type containing 18
hsa-miR-599	0	0	0	1	1	1	CYB5D2	cytochrome b5 domain containing 2
hsa-miR-599	0	0	0	1	0	0	E4F1	E4F transcription factor 1
hsa-miR-599	0	0	1	1	0	0	TTC21A	tetratricopeptide repeat domain 21A
hsa-miR-599	0	0	0	1	0	0	CCBL1	cysteine conjugate-beta lyase, cytoplasmic
hsa-miR-599	0	0	0	1	0	0	OR6Q1	olfactory receptor, family 6, subfamily Q, member 1
hsa-miR-599	0	0	1	1	1	1	DONSON	downstream neighbor of SON
hsa-miR-599	0	0	0	1	0	0	PRSS58	protease, serine, 58
hsa-miR-599	0	0	0	1	0	0	PTCRA	pre T-cell antigen receptor alpha
hsa-miR-599	0	0	0	1	1	1	CST5	cystatin D
hsa-miR-599	0	0	0	1	0	0	ASL	argininosuccinate lyase
hsa-miR-599	0	0	1	1	1	1	FAM178B	family with sequence similarity 178, member B
hsa-miR-599	0	0	1	1	0	0	SOX14	SRY (sex determining region Y)-box 14
hsa-miR-599	0	0	1	1	0	0	SLC22A25	solute carrier family 22, member 25
hsa-miR-599	0	0	0	1	0	0	MYEOV2	myeloma overexpressed 2
hsa-miR-599	1	0	1	1	0	0	ACOT12	acyl-CoA thioesterase 12
hsa-miR-599	0	0	1	1	1	1	APOF	apolipoprotein F
hsa-miR-599	0	0	1	1	0	0	PLG	plasminogen
hsa-miR-599	0	0	1	1	0	0	RLN2	relaxin 2
hsa-miR-599	1	0	1	1	1	1	LRRN3	leucine rich repeat neuronal 3
hsa-miR-599	1	0	1	1	0	0	ASPHD1	aspartate beta-hydroxylase domain containing 1
hsa-miR-599	0	0	0	1	0	0	OR10H5	olfactory receptor, family 10, subfamily H, member 5
hsa-miR-599	0	0	0	1	1	1	TLR1	toll-like receptor 1
hsa-miR-599	0	0	0	1	1	1	CRTAC1	cartilage acidic protein 1
hsa-miR-599	0	0	1	1	1	1	ATP6V1G3	ATPase, H+ transporting, lysosomal 13kDa, V1 subunit G3
hsa-miR-599	0	0	0	1	0	0	MRPL38	mitochondrial ribosomal protein L38
hsa-miR-599	0	0	0	1	0	0	OR1S1	olfactory receptor, family 1, subfamily S, member 1
hsa-miR-599	1	0	1	1	0	0	ATG4D	autophagy related 4D, cysteine peptidase
hsa-miR-599	1	0	1	1	1	1	ZNF654	zinc finger protein 654
hsa-miR-599	0	0	0	1	0	0	OR4B1	olfactory receptor, family 4, subfamily B, member 1
hsa-miR-599	0	0	1	1	1	1	INHBC	inhibin, beta C
hsa-miR-599	0	0	1	1	0	0	CARD14	caspase recruitment domain family, member 14
hsa-miR-599	0	0	0	1	0	0	STON1-GTF2A1L	STON1-GTF2A1L readthrough
hsa-miR-599	0	0	1	1	1	1	STON1	stonin 1
hsa-miR-599	0	0	1	1	1	1	WDR69	WD repeat domain 69
hsa-miR-599	0	0	1	1	1	1	CYP7B1	cytochrome P450, family 7, subfamily B, polypeptide 1
hsa-miR-599	0	0	1	1	0	0	FABP6	fatty acid binding protein 6, ileal
hsa-miR-599	0	0	0	1	0	0	GPR151	G protein-coupled receptor 151
hsa-miR-599	0	0	1	1	0	0	HRAS	v-Ha-ras Harvey rat sarcoma viral oncogene homolog
hsa-miR-599	1	0	1	1	1	1	COQ2	coenzyme Q2 homolog, prenyltransferase (yeast)
hsa-miR-599	0	0	0	1	1	1	RAG2	recombination activating gene 2
hsa-miR-599	0	0	1	1	0	0	FAM170B	family with sequence similarity 170, member B
hsa-miR-599	0	0	1	1	1	1	MSL3	male-specific lethal 3 homolog (Drosophila)
hsa-miR-599	0	0	0	1	0	0	NAGPA	N-acetylglucosamine-1-phosphodiester alpha-N-acetylglucosaminidase
hsa-miR-599	0	0	1	1	1	1	SART1	squamous cell carcinoma antigen recognized by T cells
hsa-miR-599	1	0	1	1	1	1	USP15	ubiquitin specific peptidase 15
hsa-miR-599	0	0	0	1	1	1	TACC3	transforming, acidic coiled-coil containing protein 3
hsa-miR-599	1	0	1	1	1	1	GALE	UDP-galactose-4-epimerase
hsa-miR-599	0	0	0	1	0	0	PUF60	poly-U binding splicing factor 60KDa
hsa-miR-599	0	0	1	1	1	1	CBWD5	COBW domain containing 5
hsa-miR-599	0	0	0	1	0	0	LINS	lines homolog (Drosophila)
hsa-miR-599	1	0	0	1	1	1	RECQL	RecQ protein-like (DNA helicase Q1-like)
hsa-miR-599	1	0	1	1	1	1	CLK4	CDC-like kinase 4
hsa-miR-599	1	0	1	1	1	1	ZBTB8A	zinc finger and BTB domain containing 8A
hsa-miR-599	1	0	0	1	1	1	HNF4A	hepatocyte nuclear factor 4, alpha
hsa-miR-599	0	0	0	1	0	0	PYCR2	pyrroline-5-carboxylate reductase family, member 2
hsa-miR-599	0	0	0	1	0	0	ZNF554	zinc finger protein 554
hsa-miR-599	1	0	1	1	1	1	GBA3	glucosidase, beta, acid 3 (cytosolic)
hsa-miR-599	1	0	1	1	1	1	MAB21L2	mab-21-like 2 (C. elegans)
hsa-miR-599	0	0	0	1	0	0	RRH	retinal pigment epithelium-derived rhodopsin homolog
hsa-miR-599	1	0	1	1	1	1	CC2D1A	coiled-coil and C2 domain containing 1A
hsa-miR-599	0	0	0	1	0	0	OR4F17	olfactory receptor, family 4, subfamily F, member 17
hsa-miR-599	0	0	1	1	1	1	RAB39A	RAB39A, member RAS oncogene family
hsa-miR-599	1	0	0	1	0	0	AKAP5	A kinase (PRKA) anchor protein 5
hsa-miR-599	0	0	1	1	0	0	PRPF31	PRP31 pre-mRNA processing factor 31 homolog (S. cerevisiae)
hsa-miR-599	0	0	0	1	0	0	OR51V1	olfactory receptor, family 51, subfamily V, member 1
hsa-miR-599	0	0	0	1	0	0	SLC25A41	solute carrier family 25, member 41
hsa-miR-599	0	0	1	1	1	1	HORMAD1	HORMA domain containing 1
hsa-miR-599	0	0	1	1	1	1	ZCCHC7	zinc finger, CCHC domain containing 7
hsa-miR-599	0	0	1	1	1	1	TMEM67	transmembrane protein 67
hsa-miR-599	0	0	1	1	0	0	CPT1C	carnitine palmitoyltransferase 1C
hsa-miR-599	0	0	0	1	0	0	ZNF687	zinc finger protein 687
hsa-miR-599	0	0	1	1	1	1	TCTEX1D2	Tctex1 domain containing 2
hsa-miR-599	0	0	1	1	1	1	MARVELD2	MARVEL domain containing 2
hsa-miR-599	1	0	1	1	1	1	RNF10	ring finger protein 10
hsa-miR-599	0	0	0	1	0	0	OR4F5	olfactory receptor, family 4, subfamily F, member 5
hsa-miR-599	0	0	0	1	1	1	FLII	flightless I homolog (Drosophila)
hsa-miR-599	0	0	1	1	1	1	FBLN1	fibulin 1
hsa-miR-599	0	0	1	1	1	1	SDHA	succinate dehydrogenase complex, subunit A, flavoprotein (Fp)
hsa-miR-599	0	0	0	1	1	1	CRELD2	cysteine-rich with EGF-like domains 2
hsa-miR-599	0	0	0	1	0	0	OR2V2	olfactory receptor, family 2, subfamily V, member 2
hsa-miR-599	0	0	0	1	0	0	TTTY8B	testis-specific transcript, Y-linked 8B (non-protein coding)
hsa-miR-599	0	0	0	1	1	1	MAGEA6	melanoma antigen family A, 6
hsa-miR-599	0	0	0	1	1	1	MAGEA2B	melanoma antigen family A, 2B
hsa-miR-599	0	0	1	1	1	1	CAV3	caveolin 3
hsa-miR-599	1	0	0	1	1	1	SUGP2	SURP and G patch domain containing 2
hsa-miR-599	0	0	1	1	0	0	USP51	ubiquitin specific peptidase 51
hsa-miR-599	0	0	1	1	0	0	LOC100131138	uncharacterized LOC100131138
hsa-miR-599	0	0	1	1	1	1	AKR1C2	aldo-keto reductase family 1, member C2 (dihydrodiol dehydrogenase 2; bile acid binding protein; 3-alpha hydroxysteroid dehydrogenase, type III)
hsa-miR-599	1	0	1	1	1	1	DSE	dermatan sulfate epimerase
hsa-miR-599	0	0	1	1	1	1	MXRA7	matrix-remodelling associated 7
hsa-miR-599	0	0	1	1	0	0	TRIML1	tripartite motif family-like 1
hsa-miR-599	0	0	0	1	1	1	ANO9	anoctamin 9
hsa-miR-599	0	0	0	1	0	0	OR1D5	olfactory receptor, family 1, subfamily D, member 5
hsa-miR-599	0	0	1	1	0	0	LENG9	leukocyte receptor cluster (LRC) member 9
hsa-miR-599	0	0	1	1	1	1	NSUN7	NOP2/Sun domain family, member 7
hsa-miR-599	0	0	1	1	1	1	PION	pigeon homolog (Drosophila)
hsa-miR-599	1	0	1	1	1	1	SREK1	splicing regulatory glutamine/lysine-rich protein 1
hsa-miR-599	0	0	0	1	0	0	SLC51B	solute carrier family 51, beta subunit
hsa-miR-599	0	0	0	1	0	0	OR10T2	olfactory receptor, family 10, subfamily T, member 2
hsa-miR-599	0	0	1	1	0	0	PSMB5	proteasome (prosome, macropain) subunit, beta type, 5
hsa-miR-599	0	0	0	1	1	1	GPATCH4	G patch domain containing 4
hsa-miR-599	0	0	0	1	0	0	OR4F4	olfactory receptor, family 4, subfamily F, member 4
hsa-miR-599	0	0	0	1	0	0	OR5D14	olfactory receptor, family 5, subfamily D, member 14
hsa-miR-599	0	0	0	1	0	0	LCE3A	late cornified envelope 3A
hsa-miR-599	0	0	1	1	0	0	TESK1	testis-specific kinase 1
hsa-miR-599	0	0	1	1	0	0	RNASEH2B	ribonuclease H2, subunit B
hsa-miR-599	0	0	1	1	1	1	ARHGAP6	Rho GTPase activating protein 6
hsa-miR-599	0	0	1	1	0	0	TTC8	tetratricopeptide repeat domain 8
hsa-miR-599	0	0	0	1	0	0	XAGE1C	X antigen family, member 1C
hsa-miR-599	1	0	1	1	1	1	ERAS	ES cell expressed Ras
hsa-miR-599	0	0	0	1	1	1	CLEC12A	C-type lectin domain family 12, member A
hsa-miR-599	1	0	1	1	1	1	NIPAL3	NIPA-like domain containing 3
hsa-miR-599	0	0	0	1	0	0	DUSP15	dual specificity phosphatase 15
hsa-miR-599	0	0	0	1	0	0	DNAJB13	DnaJ (Hsp40) homolog, subfamily B, member 13
hsa-miR-599	0	0	0	1	0	0	PDC	phosducin
hsa-miR-599	1	0	1	1	1	1	CPED1	cadherin-like and PC-esterase domain containing 1
hsa-miR-599	0	0	1	1	1	1	PBX1	pre-B-cell leukemia homeobox 1
hsa-miR-599	0	0	0	1	1	1	ZNF823	zinc finger protein 823
hsa-miR-599	0	0	0	1	1	1	AKD1	adenylate kinase domain containing 1
hsa-miR-599	0	0	1	1	0	0	SBSN	suprabasin
hsa-miR-599	0	0	1	1	1	1	CNTNAP3B	contactin associated protein-like 3B
hsa-miR-599	0	0	1	1	1	1	COX8C	cytochrome c oxidase subunit VIIIC
hsa-miR-599	0	0	1	1	0	0	NPR2	natriuretic peptide receptor B/guanylate cyclase B (atrionatriuretic peptide receptor B)
hsa-miR-599	0	0	0	1	0	0	SCGB1C1	secretoglobin, family 1C, member 1
hsa-miR-599	0	0	1	1	0	0	EVC2	Ellis van Creveld syndrome 2
hsa-miR-599	0	0	1	1	1	1	XAGE3	X antigen family, member 3
hsa-miR-599	0	0	1	1	1	1	KRCC1	lysine-rich coiled-coil 1
hsa-miR-599	0	0	1	1	1	1	CNTN1	contactin 1
hsa-miR-599	1	0	1	1	1	1	SENP7	SUMO1/sentrin specific peptidase 7
hsa-miR-599	0	0	1	1	1	1	GMPR2	guanosine monophosphate reductase 2
hsa-miR-599	1	0	1	1	1	1	PTBP1	polypyrimidine tract binding protein 1
hsa-miR-599	0	0	1	1	1	1	FSIP1	fibrous sheath interacting protein 1
hsa-miR-599	0	0	1	1	1	1	CDH26	cadherin 26
hsa-miR-599	1	0	1	1	1	1	FADS1	fatty acid desaturase 1
hsa-miR-599	0	0	1	1	0	0	FADS3	fatty acid desaturase 3
hsa-miR-599	0	0	1	1	1	1	ATP2A3	ATPase, Ca++ transporting, ubiquitous
hsa-miR-599	0	0	1	1	1	1	POTEA	POTE ankyrin domain family, member A
hsa-miR-599	1	0	1	1	1	1	NAMPT	nicotinamide phosphoribosyltransferase
hsa-miR-599	0	0	1	1	0	0	BPIFA1	BPI fold containing family A, member 1
hsa-miR-599	0	0	0	1	1	1	TRIM16	tripartite motif containing 16
hsa-miR-599	1	0	1	1	1	1	CDRT1	CMT1A duplicated region transcript 1
hsa-miR-599	1	0	1	1	1	1	TCF4	transcription factor 4
hsa-miR-599	1	0	1	1	0	0	CKAP5	cytoskeleton associated protein 5
hsa-miR-599	0	0	0	1	1	1	NEIL1	nei endonuclease VIII-like 1 (E. coli)
hsa-miR-599	0	0	1	1	1	1	TTC30A	tetratricopeptide repeat domain 30A
hsa-miR-599	0	0	1	1	1	1	DBI	diazepam binding inhibitor (GABA receptor modulator, acyl-CoA binding protein)
hsa-miR-599	0	0	1	1	0	0	EFCAB6	EF-hand calcium binding domain 6
hsa-miR-599	0	0	1	1	1	1	KPNA5	karyopherin alpha 5 (importin alpha 6)
hsa-miR-599	0	0	1	1	0	0	FAM149A	family with sequence similarity 149, member A
hsa-miR-599	0	0	1	1	1	1	CBWD1	COBW domain containing 1
hsa-miR-599	0	0	1	1	1	1	UHRF1BP1L	UHRF1 binding protein 1-like
hsa-miR-599	1	0	1	1	1	1	FBXO8	F-box protein 8
hsa-miR-599	1	0	1	1	1	1	MOV10	Mov10, Moloney leukemia virus 10, homolog (mouse)
hsa-miR-599	0	0	0	1	0	0	ARID5A	AT rich interactive domain 5A (MRF1-like)
hsa-miR-599	0	0	1	1	1	1	SPSB1	splA/ryanodine receptor domain and SOCS box containing 1
hsa-miR-599	1	0	1	1	1	1	ZBTB44	zinc finger and BTB domain containing 44
hsa-miR-599	0	0	0	1	0	0	ZNF799	zinc finger protein 799
hsa-miR-599	1	0	1	1	1	1	GRIK2	glutamate receptor, ionotropic, kainate 2
hsa-miR-599	0	0	0	1	1	1	CBWD2	COBW domain containing 2
hsa-miR-599	1	0	1	1	1	1	FZD6	frizzled family receptor 6
hsa-miR-599	0	0	0	1	1	1	AASS	aminoadipate-semialdehyde synthase
hsa-miR-599	1	0	1	1	1	1	AGAP3	ArfGAP with GTPase domain, ankyrin repeat and PH domain 3
hsa-miR-599	0	0	0	1	1	1	OBSCN	obscurin, cytoskeletal calmodulin and titin-interacting RhoGEF
hsa-miR-599	1	0	0	1	1	1	AK3	adenylate kinase 3
hsa-miR-599	0	0	1	1	1	1	SERHL	serine hydrolase-like
hsa-miR-599	0	0	1	1	1	1	CBWD3	COBW domain containing 3
hsa-miR-599	0	0	1	1	1	1	ZNF460	zinc finger protein 460
hsa-miR-599	0	0	1	1	1	1	BBS1	Bardet-Biedl syndrome 1
hsa-miR-599	0	0	1	1	0	0	TWF2	twinfilin, actin-binding protein, homolog 2 (Drosophila)
hsa-miR-599	0	0	0	1	0	0	TLR9	toll-like receptor 9
hsa-miR-599	0	0	0	1	0	0	OR10A3	olfactory receptor, family 10, subfamily A, member 3
hsa-miR-599	0	0	1	1	1	1	TRDN	triadin
hsa-miR-599	0	0	1	1	1	1	MEPE	matrix extracellular phosphoglycoprotein
hsa-miR-599	0	0	1	1	1	1	TCEA2	transcription elongation factor A (SII), 2
hsa-miR-599	0	0	0	1	0	0	DNASE2B	deoxyribonuclease II beta
hsa-miR-599	0	0	1	1	1	1	FAM9B	family with sequence similarity 9, member B
hsa-miR-599	0	0	1	1	1	1	GCSAML	germinal center-associated, signaling and motility-like
hsa-miR-599	0	0	1	1	1	1	HEATR1	HEAT repeat containing 1
hsa-miR-599	0	0	1	1	1	1	ACTA1	actin, alpha 1, skeletal muscle
hsa-miR-599	0	0	1	1	1	1	PARP1	poly (ADP-ribose) polymerase 1
hsa-miR-599	1	0	1	1	1	1	NSL1	NSL1, MIND kinetochore complex component, homolog (S. cerevisiae)
hsa-miR-599	0	0	1	1	1	1	PLA2G4A	phospholipase A2, group IVA (cytosolic, calcium-dependent)
hsa-miR-599	0	0	1	1	1	1	TSEN15	tRNA splicing endonuclease 15 homolog (S. cerevisiae)
hsa-miR-599	1	0	1	1	1	1	ANGPTL1	angiopoietin-like 1
hsa-miR-599	1	0	1	1	0	0	ZBTB37	zinc finger and BTB domain containing 37
hsa-miR-599	0	0	1	1	1	1	XCL1	chemokine (C motif) ligand 1
hsa-miR-599	0	0	0	1	1	1	GPR161	G protein-coupled receptor 161
hsa-miR-599	0	0	1	1	1	1	RGS5	regulator of G-protein signaling 5
hsa-miR-599	0	0	1	1	1	1	CD244	CD244 molecule, natural killer cell receptor 2B4
hsa-miR-599	0	0	1	1	1	1	SAMD3	sterile alpha motif domain containing 3
hsa-miR-599	0	0	1	1	0	0	S100A12	S100 calcium binding protein A12
hsa-miR-599	0	0	1	1	0	0	LCE2A	late cornified envelope 2A
hsa-miR-599	0	0	1	1	0	0	MRPL9	mitochondrial ribosomal protein L9
hsa-miR-599	0	0	1	1	0	0	FAM24B	family with sequence similarity 24, member B
hsa-miR-599	1	0	1	1	1	1	ENSA	endosulfine alpha
hsa-miR-599	0	0	1	1	0	0	AP4B1	adaptor-related protein complex 4, beta 1 subunit
hsa-miR-599	0	0	1	1	1	1	DENND2D	DENN/MADD domain containing 2D
hsa-miR-599	1	0	1	1	1	1	KCNA2	potassium voltage-gated channel, shaker-related subfamily, member 2
hsa-miR-599	0	0	1	1	1	1	C10orf32	chromosome 10 open reading frame 32
hsa-miR-599	0	0	1	1	1	1	CYP17A1	cytochrome P450, family 17, subfamily A, polypeptide 1
hsa-miR-599	0	0	0	1	0	0	HAUS7	HAUS augmin-like complex, subunit 7
hsa-miR-599	0	0	0	1	1	1	MAGEA3	melanoma antigen family A, 3
hsa-miR-599	0	0	0	1	0	0	KHDC1L	KH homology domain containing 1-like
hsa-miR-599	0	0	1	1	0	0	KHDC1	KH homology domain containing 1
hsa-miR-599	0	0	1	1	0	0	MTMR1	myotubularin related protein 1
hsa-miR-599	0	0	1	1	0	0	HFM1	HFM1, ATP-dependent DNA helicase homolog (S. cerevisiae)
hsa-miR-599	0	0	1	1	1	1	CUTC	cutC copper transporter homolog (E. coli)
hsa-miR-599	0	0	0	1	0	0	CXorf66	chromosome X open reading frame 66
hsa-miR-599	1	0	0	1	1	1	BAG2	BCL2-associated athanogene 2
hsa-miR-599	1	0	0	1	1	1	MMS19	MMS19 nucleotide excision repair homolog (S. cerevisiae)
hsa-miR-599	0	0	1	1	0	0	LRRIQ3	leucine-rich repeats and IQ motif containing 3
hsa-miR-599	0	0	0	1	0	0	UBE2U	ubiquitin-conjugating enzyme E2U (putative)
hsa-miR-599	0	0	1	1	1	1	TTC4	tetratricopeptide repeat domain 4
hsa-miR-599	1	0	1	1	1	1	EHMT1	euchromatic histone-lysine N-methyltransferase 1
hsa-miR-599	1	0	1	1	1	1	NELF	nasal embryonic LHRH factor
hsa-miR-599	0	0	0	1	0	0	TCTE1	t-complex-associated-testis-expressed 1
hsa-miR-599	0	0	0	1	0	0	C9orf141	chromosome 9 open reading frame 141
hsa-miR-599	0	0	1	1	1	1	SURF6	surfeit 6
hsa-miR-599	0	0	1	1	0	0	MMP9	matrix metallopeptidase 9 (gelatinase B, 92kDa gelatinase, 92kDa type IV collagenase)
hsa-miR-599	1	0	1	1	1	1	KCNMA1	potassium large conductance calcium-activated channel, subfamily M, alpha member 1
hsa-miR-599	1	0	1	1	1	1	SNX21	sorting nexin family member 21
hsa-miR-599	0	0	1	1	0	0	IL1RAPL2	interleukin 1 receptor accessory protein-like 2
hsa-miR-599	0	0	0	1	1	1	H2BFWT	H2B histone family, member W, testis-specific
hsa-miR-599	0	0	1	1	1	1	WBP5	WW domain binding protein 5
hsa-miR-599	0	0	0	1	0	0	ZNF642	zinc finger protein 642
hsa-miR-599	0	0	1	1	1	1	CNPY3	canopy 3 homolog (zebrafish)
hsa-miR-599	0	0	1	1	1	1	FUT11	fucosyltransferase 11 (alpha (1,3) fucosyltransferase)
hsa-miR-599	0	0	1	1	1	1	TAF8	TAF8 RNA polymerase II, TATA box binding protein (TBP)-associated factor, 43kDa
hsa-miR-599	0	0	1	1	1	1	IFT52	intraflagellar transport 52 homolog (Chlamydomonas)
hsa-miR-599	0	0	1	1	1	1	APOOL	apolipoprotein O-like
hsa-miR-599	1	0	1	1	1	1	CDK9	cyclin-dependent kinase 9
hsa-miR-599	0	0	1	1	1	1	SLC2A8	solute carrier family 2 (facilitated glucose transporter), member 8
hsa-miR-599	0	0	1	1	0	0	CXorf26	chromosome X open reading frame 26
hsa-miR-599	0	0	0	1	1	1	GJB3	gap junction protein, beta 3, 31kDa
hsa-miR-599	1	0	0	1	0	0	LMX1B	LIM homeobox transcription factor 1, beta
hsa-miR-599	0	0	1	1	1	1	RABEPK	Rab9 effector protein with kelch motifs
hsa-miR-599	0	0	1	1	1	1	HDAC8	histone deacetylase 8
hsa-miR-599	0	0	1	1	1	1	TTLL11	tubulin tyrosine ligase-like family, member 11
hsa-miR-599	0	0	0	1	0	0	EYA3	eyes absent homolog 3 (Drosophila)
hsa-miR-599	0	0	1	1	0	0	OGDHL	oxoglutarate dehydrogenase-like
hsa-miR-599	0	0	1	1	0	0	C9orf43	chromosome 9 open reading frame 43
hsa-miR-599	0	0	1	1	0	0	PPYR1	pancreatic polypeptide receptor 1
hsa-miR-599	0	0	1	1	1	1	KLF8	Kruppel-like factor 8
hsa-miR-599	0	0	1	1	1	1	DDOST	dolichyl-diphosphooligosaccharide--protein glycosyltransferase
hsa-miR-599	0	0	1	1	1	1	AGER	advanced glycosylation end product-specific receptor
hsa-miR-599	0	0	0	1	1	1	C9orf156	chromosome 9 open reading frame 156
hsa-miR-599	0	0	0	1	0	0	XPA	xeroderma pigmentosum, complementation group A
hsa-miR-599	0	0	0	1	1	1	TMCO4	transmembrane and coiled-coil domains 4
hsa-miR-599	0	0	0	1	0	0	XAGE1B	X antigen family, member 1B
hsa-miR-599	0	0	1	1	0	0	XAGE1D	X antigen family, member 1D
hsa-miR-599	1	0	1	1	1	1	MCF2L	MCF.2 cell line derived transforming sequence-like
hsa-miR-599	0	0	0	1	0	0	XAGE1E	X antigen family, member 1E
hsa-miR-599	0	0	0	1	0	0	XAGE1A	X antigen family, member 1A
hsa-miR-599	0	0	1	1	1	1	C6orf48	chromosome 6 open reading frame 48
hsa-miR-599	0	0	0	1	0	0	TEX29	testis expressed 29
hsa-miR-599	0	0	0	1	0	0	AKAP4	A kinase (PRKA) anchor protein 4
hsa-miR-599	1	0	1	1	1	1	GID4	GID complex subunit 4, VID24 homolog (S. cerevisiae)
hsa-miR-599	0	0	0	1	0	0	NME1-NME2	NME1-NME2 readthrough
hsa-miR-599	0	0	1	1	0	0	NME1	NME/NM23 nucleoside diphosphate kinase 1
hsa-miR-599	0	0	0	1	0	0	NME2	NME/NM23 nucleoside diphosphate kinase 2
hsa-miR-599	0	0	0	1	1	1	MDC1	mediator of DNA-damage checkpoint 1
hsa-miR-599	0	0	0	1	1	1	C10orf67	chromosome 10 open reading frame 67
hsa-miR-599	1	0	0	1	0	0	TBC1D8	TBC1 domain family, member 8 (with GRAM domain)
hsa-miR-599	0	0	1	1	1	1	SSX3	synovial sarcoma, X breakpoint 3
hsa-miR-599	1	0	1	1	1	1	FAM108B1	family with sequence similarity 108, member B1
hsa-miR-599	0	0	1	1	0	0	UBD	ubiquitin D
hsa-miR-599	1	0	1	1	1	1	C20orf26	chromosome 20 open reading frame 26
hsa-miR-599	0	0	0	1	0	0	CBWD6	COBW domain containing 6
hsa-miR-599	0	0	0	1	1	1	UTS2	urotensin 2
hsa-miR-599	1	0	1	1	1	1	PER3	period homolog 3 (Drosophila)
hsa-miR-599	0	0	0	1	0	0	CBWD7	COBW domain containing 7
hsa-miR-599	0	0	1	1	1	1	CNTNAP3	contactin associated protein-like 3
hsa-miR-599	1	0	1	1	1	1	KLF12	Kruppel-like factor 12
hsa-miR-599	0	0	0	1	0	0	IGFBPL1	insulin-like growth factor binding protein-like 1
hsa-miR-599	0	0	1	1	1	1	SNX5	sorting nexin 5
hsa-miR-599	0	0	0	1	0	0	ASB10	ankyrin repeat and SOCS box containing 10
hsa-miR-599	1	0	1	1	1	1	CKAP2	cytoskeleton associated protein 2
hsa-miR-599	1	0	1	1	1	1	CASK	calcium/calmodulin-dependent serine protein kinase (MAGUK family)
hsa-miR-599	0	0	1	1	0	0	CDNF	cerebral dopamine neurotrophic factor
hsa-miR-599	0	0	0	1	0	0	LIG3	ligase III, DNA, ATP-dependent
hsa-miR-599	0	0	0	1	1	1	UQCRQ	ubiquinol-cytochrome c reductase, complex III subunit VII, 9.5kDa
hsa-miR-599	0	0	1	1	0	0	WDR62	WD repeat domain 62
hsa-miR-599	0	0	1	1	0	0	PDK3	pyruvate dehydrogenase kinase, isozyme 3
hsa-miR-599	0	0	1	1	0	0	UBAP2	ubiquitin associated protein 2
hsa-miR-599	0	0	0	1	0	0	TNFRSF18	tumor necrosis factor receptor superfamily, member 18
hsa-miR-599	0	0	1	1	0	0	LOC100129995	uncharacterized LOC100129995
hsa-miR-599	0	0	1	1	0	0	IFT74	intraflagellar transport 74 homolog (Chlamydomonas)
hsa-miR-599	0	0	0	1	0	0	IZUMO3	IZUMO family member 3
hsa-miR-599	1	0	1	1	1	1	GDI2	GDP dissociation inhibitor 2
hsa-miR-599	0	0	1	1	1	1	FAM50B	family with sequence similarity 50, member B
hsa-miR-599	0	0	0	1	0	0	AKR1C4	aldo-keto reductase family 1, member C4 (chlordecone reductase; 3-alpha hydroxysteroid dehydrogenase, type I; dihydrodiol dehydrogenase 4)
hsa-miR-599	0	0	1	1	1	1	FAM154A	family with sequence similarity 154, member A
hsa-miR-599	1	0	0	1	1	1	SLC46A3	solute carrier family 46, member 3
hsa-miR-599	0	0	1	1	1	1	AKR1C1	aldo-keto reductase family 1, member C1 (dihydrodiol dehydrogenase 1; 20-alpha (3-alpha)-hydroxysteroid dehydrogenase)
hsa-miR-599	0	0	0	1	0	0	EIF3CL	eukaryotic translation initiation factor 3, subunit C-like
hsa-miR-599	0	0	1	1	0	0	FREM1	FRAS1 related extracellular matrix 1
hsa-miR-599	0	0	1	1	1	1	ALB	albumin
hsa-miR-599	0	0	1	1	1	1	C2orf43	chromosome 2 open reading frame 43
hsa-miR-599	0	0	1	1	1	1	TMC5	transmembrane channel-like 5
hsa-miR-599	1	0	1	1	0	0	CDK8	cyclin-dependent kinase 8
hsa-miR-599	1	0	1	1	1	1	HOXA10	homeobox A10
hsa-miR-599	0	0	1	1	1	1	KLRC3	killer cell lectin-like receptor subfamily C, member 3
hsa-miR-599	0	0	1	1	0	0	SEC14L4	SEC14-like 4 (S. cerevisiae)
hsa-miR-599	0	0	1	1	1	1	C1QTNF9	C1q and tumor necrosis factor related protein 9
hsa-miR-599	0	0	1	1	0	0	SGCZ	sarcoglycan, zeta
hsa-miR-599	1	0	1	1	1	1	VLDLR	very low density lipoprotein receptor
hsa-miR-599	0	0	1	1	1	1	DMRT2	doublesex and mab-3 related transcription factor 2
hsa-miR-599	0	0	1	1	1	1	DEFB125	defensin, beta 125
hsa-miR-599	0	0	0	1	1	1	N6AMT2	N-6 adenine-specific DNA methyltransferase 2 (putative)
hsa-miR-599	0	0	0	1	0	0	ABP1	amiloride binding protein 1 (amine oxidase (copper-containing))
hsa-miR-599	0	0	1	1	1	1	PRIM2	primase, DNA, polypeptide 2 (58kDa)
hsa-miR-599	0	0	1	1	1	1	CP	ceruloplasmin (ferroxidase)
hsa-miR-599	1	0	0	1	1	1	SGCG	sarcoglycan, gamma (35kDa dystrophin-associated glycoprotein)
hsa-miR-599	0	0	1	0	1	1	MTTP	microsomal triglyceride transfer protein
hsa-miR-599	1	0	1	1	1	1	SOX9	SRY (sex determining region Y)-box 9
hsa-miR-599	0	0	1	1	1	1	FCGR1A	Fc fragment of IgG, high affinity Ia, receptor (CD64)
hsa-miR-599	0	0	1	0	1	1	IFNAR1	interferon (alpha, beta and omega) receptor 1
hsa-miR-599	1	0	1	1	1	1	LUZP2	leucine zipper protein 2
hsa-miR-599	1	0	1	0	1	1	MTX3	metaxin 3
hsa-miR-599	1	0	1	0	1	1	DNAJC21	DnaJ (Hsp40) homolog, subfamily C, member 21
hsa-miR-599	1	0	1	1	1	1	SORBS3	sorbin and SH3 domain containing 3
hsa-miR-599	1	0	1	1	1	1	PODXL	podocalyxin-like
hsa-miR-599	0	0	1	1	1	1	CD276	CD276 molecule
hsa-miR-599	0	0	1	1	1	1	ZNF451	zinc finger protein 451
hsa-miR-599	1	0	1	1	1	1	MYCL1	v-myc myelocytomatosis viral oncogene homolog 1, lung carcinoma derived (avian)
hsa-miR-599	1	0	1	1	1	1	AP1S3	adaptor-related protein complex 1, sigma 3 subunit
hsa-miR-599	0	0	1	0	1	1	STEAP2	STEAP family member 2, metalloreductase
hsa-miR-599	1	0	1	1	1	1	GDAP1	ganglioside induced differentiation associated protein 1
hsa-miR-599	0	0	1	1	1	1	GBAS	glioblastoma amplified sequence
hsa-miR-599	1	0	1	1	1	1	CAPN2	calpain 2, (m/II) large subunit
hsa-miR-599	0	0	1	1	1	1	OAS2	2'-5'-oligoadenylate synthetase 2, 69/71kDa
hsa-miR-599	0	0	1	0	1	1	PMP2	peripheral myelin protein 2
hsa-miR-599	1	0	1	1	1	1	SPARC	secreted protein, acidic, cysteine-rich (osteonectin)
hsa-miR-599	0	0	1	0	1	1	ZNF134	zinc finger protein 134
hsa-miR-599	0	0	1	1	1	1	IL18R1	interleukin 18 receptor 1
hsa-miR-599	1	0	1	1	1	1	FOXL1	forkhead box L1
hsa-miR-599	0	0	1	1	1	1	STAT1	signal transducer and activator of transcription 1, 91kDa
hsa-miR-599	1	0	1	1	1	1	HNRNPH3	heterogeneous nuclear ribonucleoprotein H3 (2H9)
hsa-miR-599	1	0	1	1	1	1	PIP5K1C	phosphatidylinositol-4-phosphate 5-kinase, type I, gamma
hsa-miR-599	1	0	1	1	1	1	MKLN1	muskelin 1, intracellular mediator containing kelch motifs
hsa-miR-599	1	0	1	0	1	1	OSTM1	osteopetrosis associated transmembrane protein 1
hsa-miR-599	1	0	1	0	1	1	TFCP2L1	transcription factor CP2-like 1
hsa-miR-599	1	0	1	1	1	1	PDXDC1	pyridoxal-dependent decarboxylase domain containing 1
hsa-miR-599	1	0	1	1	1	1	NIP7	nuclear import 7 homolog (S. cerevisiae)
hsa-miR-599	0	0	1	0	1	1	GPR83	G protein-coupled receptor 83
hsa-miR-599	0	0	1	1	1	1	C1RL	complement component 1, r subcomponent-like
hsa-miR-599	0	0	1	1	1	1	MYOZ2	myozenin 2
hsa-miR-599	0	0	0	1	1	1	TBX22	T-box 22
hsa-miR-599	1	0	1	1	1	1	SLC48A1	solute carrier family 48 (heme transporter), member 1
hsa-miR-599	0	0	1	1	1	1	PINX1	PIN2/TERF1 interacting, telomerase inhibitor 1
hsa-miR-599	0	0	1	1	1	1	SLC47A1	solute carrier family 47, member 1
hsa-miR-599	1	0	1	1	1	1	SLC39A9	solute carrier family 39 (zinc transporter), member 9
hsa-miR-599	1	0	1	1	1	1	PAG1	phosphoprotein associated with glycosphingolipid microdomains 1
hsa-miR-599	0	0	0	1	1	1	FEM1A	fem-1 homolog a (C. elegans)
hsa-miR-599	1	0	1	0	1	1	MAML3	mastermind-like 3 (Drosophila)
hsa-miR-599	0	0	0	1	1	1	PCDHB3	protocadherin beta 3
hsa-miR-599	1	0	1	1	1	1	AGPAT4	1-acylglycerol-3-phosphate O-acyltransferase 4 (lysophosphatidic acid acyltransferase, delta)
hsa-miR-599	1	0	1	1	1	1	SETD8	SET domain containing (lysine methyltransferase) 8
hsa-miR-599	0	0	0	1	1	1	ABO	ABO blood group (transferase A, alpha 1-3-N-acetylgalactosaminyltransferase; transferase B, alpha 1-3-galactosyltransferase)
hsa-miR-599	1	0	1	1	1	1	DEPTOR	DEP domain containing MTOR-interacting protein
hsa-miR-599	1	0	1	1	1	1	SH3TC2	SH3 domain and tetratricopeptide repeats 2
hsa-miR-599	0	0	0	1	1	1	ULBP1	UL16 binding protein 1
hsa-miR-599	1	0	1	1	1	1	VMP1	vacuole membrane protein 1
hsa-miR-599	1	0	1	1	1	1	TMEM132B	transmembrane protein 132B
hsa-miR-599	0	0	1	1	1	1	BAX	BCL2-associated X protein
hsa-miR-599	0	0	1	1	1	1	VSTM4	V-set and transmembrane domain containing 4
hsa-miR-599	0	0	1	0	1	1	UBLCP1	ubiquitin-like domain containing CTD phosphatase 1
hsa-miR-599	0	0	1	0	1	1	MAB21L3	mab-21-like 3 (C. elegans)
hsa-miR-599	1	0	1	0	1	1	RNF182	ring finger protein 182
hsa-miR-599	0	0	1	0	1	1	KBTBD6	kelch repeat and BTB (POZ) domain containing 6
hsa-miR-599	0	0	1	0	1	1	LIX1	Lix1 homolog (chicken)
hsa-miR-599	0	0	1	1	1	1	DNAJC24	DnaJ (Hsp40) homolog, subfamily C, member 24
hsa-miR-599	1	0	1	1	1	1	AQP1	aquaporin 1 (Colton blood group)
hsa-miR-599	1	0	1	0	1	1	ACACA	acetyl-CoA carboxylase alpha
hsa-miR-599	0	0	0	1	1	1	FAM111B	family with sequence similarity 111, member B
hsa-miR-599	0	0	1	1	1	1	MED8	mediator complex subunit 8
hsa-miR-599	0	0	1	1	1	1	C11orf88	chromosome 11 open reading frame 88
hsa-miR-599	0	0	0	0	1	1	LOC150519	uncharacterized LOC150519
