# Supplementary material for: Profiling of Selected MicroRNAs in Proliferative Eutopic Endometrium of Women with Ovarian Endometriosis
Source: Biomed Res Int. 2015 Aug 20;2015:760698. doi: 10.1155/2015/760698 (PMC4558423; doi:10.1155/2015/760698)
Supplement: Supplementary file 1 — Table I: The names of miRNAs significantly differentially expressed between eutopic endometrium of patients with endometriosis vs eutopic endometrium of patients without endometriosis. Table II: The associations between miRNA and mRNA, which presents detailed results of the search of six major databases i.e targetscan, tarbase, miranda, mirbase, mirtarget2 and pictar. [file 760698.f1.zip › 760698.f1/Table II/hsa-miR-600.tsv]

miR	targetscan	tarbase	miranda	mirbase	mirtarget2	pictar	GeneSymbol	GeneName
hsa-miR-600	1	0	1	1	0	0	RAPGEF2	Rap guanine nucleotide exchange factor (GEF) 2
hsa-miR-600	1	0	1	1	1	1	ABCC5	ATP-binding cassette, sub-family C (CFTR/MRP), member 5
hsa-miR-600	1	0	1	0	1	1	PTPRT	protein tyrosine phosphatase, receptor type, T
hsa-miR-600	0	0	1	1	1	1	C2CD2L	C2CD2-like
hsa-miR-600	0	0	1	1	1	1	PEG3	paternally expressed 3
hsa-miR-600	1	0	1	0	1	1	KIAA0408	KIAA0408
hsa-miR-600	1	0	1	1	1	1	NUPL1	nucleoporin like 1
hsa-miR-600	1	0	1	0	1	1	MTSS1	metastasis suppressor 1
hsa-miR-600	0	0	1	1	1	1	PREPL	prolyl endopeptidase-like
hsa-miR-600	1	0	1	1	1	1	CDC42BPA	CDC42 binding protein kinase alpha (DMPK-like)
hsa-miR-600	1	0	1	0	1	1	VPS13D	vacuolar protein sorting 13 homolog D (S. cerevisiae)
hsa-miR-600	1	0	1	0	1	1	CEP350	centrosomal protein 350kDa
hsa-miR-600	0	0	1	1	1	1	NEU3	sialidase 3 (membrane sialidase)
hsa-miR-600	1	0	1	0	1	1	CHST15	carbohydrate (N-acetylgalactosamine 4-sulfate 6-O) sulfotransferase 15
hsa-miR-600	1	0	1	0	1	1	MFAP3L	microfibrillar-associated protein 3-like
hsa-miR-600	1	0	1	1	1	1	HIPK1	homeodomain interacting protein kinase 1
hsa-miR-600	1	0	1	1	1	1	ANKRD17	ankyrin repeat domain 17
hsa-miR-600	1	0	1	0	1	1	MAGI2	membrane associated guanylate kinase, WW and PDZ domain containing 2
hsa-miR-600	0	0	1	1	0	0	PAN2	PAN2 poly(A) specific ribonuclease subunit homolog (S. cerevisiae)
hsa-miR-600	1	0	1	1	1	1	TP63	tumor protein p63
hsa-miR-600	1	0	1	0	1	1	RBM12	RNA binding motif protein 12
hsa-miR-600	1	0	1	1	1	1	DNM3	dynamin 3
hsa-miR-600	1	0	1	1	1	1	CPEB3	cytoplasmic polyadenylation element binding protein 3
hsa-miR-600	1	0	1	1	1	1	PALLD	palladin, cytoskeletal associated protein
hsa-miR-600	0	0	1	0	1	1	TP53TG3	TP53 target 3
hsa-miR-600	0	0	1	0	0	0	TP53TG3B	TP53 target 3B
hsa-miR-600	1	0	1	1	1	1	SMARCAD1	SWI/SNF-related, matrix-associated actin-dependent regulator of chromatin, subfamily a, containing DEAD/H box 1
hsa-miR-600	1	0	1	0	1	1	GPR158	G protein-coupled receptor 158
hsa-miR-600	0	0	1	1	0	0	ZC4H2	zinc finger, C4H2 domain containing
hsa-miR-600	1	0	1	1	0	0	ATAD2B	ATPase family, AAA domain containing 2B
hsa-miR-600	1	0	1	1	1	1	MKL2	MKL/myocardin-like 2
hsa-miR-600	0	0	1	0	0	0	MTA3	metastasis associated 1 family, member 3
hsa-miR-600	1	0	1	1	1	1	RALGDS	ral guanine nucleotide dissociation stimulator
hsa-miR-600	0	0	1	1	1	1	KLHL13	kelch-like 13 (Drosophila)
hsa-miR-600	1	0	1	1	1	1	PCDH19	protocadherin 19
hsa-miR-600	1	0	1	0	1	1	KCTD16	potassium channel tetramerisation domain containing 16
hsa-miR-600	1	1	1	1	1	1	NFIA	nuclear factor I/A
hsa-miR-600	0	0	1	0	0	0	NYAP2	neuronal tyrosine-phosphorylated phosphoinositide-3-kinase adaptor 2
hsa-miR-600	1	0	1	1	1	1	FRAS1	Fraser syndrome 1
hsa-miR-600	1	0	1	1	1	1	INADL	InaD-like (Drosophila)
hsa-miR-600	1	0	1	1	1	1	PPP6R3	protein phosphatase 6, regulatory subunit 3
hsa-miR-600	1	0	1	1	0	0	NCKAP5L	NCK-associated protein 5-like
hsa-miR-600	1	0	1	1	1	1	ZNF532	zinc finger protein 532
hsa-miR-600	1	0	1	1	1	1	ITPRIP	inositol 1,4,5-trisphosphate receptor interacting protein
hsa-miR-600	1	0	1	1	1	1	IKZF4	IKAROS family zinc finger 4 (Eos)
hsa-miR-600	1	0	1	1	1	1	CDK13	cyclin-dependent kinase 13
hsa-miR-600	1	0	1	1	1	1	LCOR	ligand dependent nuclear receptor corepressor
hsa-miR-600	1	0	1	1	1	1	MAT2B	methionine adenosyltransferase II, beta
hsa-miR-600	1	0	1	1	1	1	TET2	tet methylcytosine dioxygenase 2
hsa-miR-600	1	0	1	1	0	0	ZNF292	zinc finger protein 292
hsa-miR-600	1	0	1	1	0	0	ADC	arginine decarboxylase
hsa-miR-600	0	0	1	1	0	0	GOLT1A	golgi transport 1A
hsa-miR-600	0	0	1	1	1	1	NELL1	NEL-like 1 (chicken)
hsa-miR-600	0	0	1	1	1	1	MCF2	MCF.2 cell line derived transforming sequence
hsa-miR-600	1	0	1	1	1	1	UBR3	ubiquitin protein ligase E3 component n-recognin 3 (putative)
hsa-miR-600	0	0	1	1	0	0	ERAP2	endoplasmic reticulum aminopeptidase 2
hsa-miR-600	0	0	1	1	0	0	SSPO	SCO-spondin homolog (Bos taurus)
hsa-miR-600	1	0	1	1	1	1	UBE3A	ubiquitin protein ligase E3A
hsa-miR-600	1	0	1	1	1	1	CCNF	cyclin F
hsa-miR-600	1	0	1	0	1	1	PCDHA13	protocadherin alpha 13
hsa-miR-600	1	0	1	1	1	1	PCDHA4	protocadherin alpha 4
hsa-miR-600	1	0	1	1	1	1	RPS6KA3	ribosomal protein S6 kinase, 90kDa, polypeptide 3
hsa-miR-600	0	0	1	1	1	1	STAT4	signal transducer and activator of transcription 4
hsa-miR-600	0	0	1	1	1	1	MAZ	MYC-associated zinc finger protein (purine-binding transcription factor)
hsa-miR-600	1	0	1	1	1	1	SYNCRIP	synaptotagmin binding, cytoplasmic RNA interacting protein
hsa-miR-600	1	0	1	1	1	1	DTNA	dystrobrevin, alpha
hsa-miR-600	1	0	1	0	1	1	PLAG1	pleiomorphic adenoma gene 1
hsa-miR-600	1	0	1	1	1	1	FMR1	fragile X mental retardation 1
hsa-miR-600	1	0	1	0	1	1	ETV1	ets variant 1
hsa-miR-600	1	0	1	1	1	1	ZNF207	zinc finger protein 207
hsa-miR-600	1	0	1	1	1	1	ABI1	abl-interactor 1
hsa-miR-600	1	0	1	1	1	1	ARFGEF1	ADP-ribosylation factor guanine nucleotide-exchange factor 1 (brefeldin A-inhibited)
hsa-miR-600	1	0	1	1	1	1	EPHA5	EPH receptor A5
hsa-miR-600	1	0	1	1	1	1	AEBP2	AE binding protein 2
hsa-miR-600	1	0	1	1	1	1	NEO1	neogenin 1
hsa-miR-600	1	0	1	1	1	1	ANK1	ankyrin 1, erythrocytic
hsa-miR-600	1	0	1	1	1	1	MYO5A	myosin VA (heavy chain 12, myoxin)
hsa-miR-600	1	0	1	1	1	1	LIMA1	LIM domain and actin binding 1
hsa-miR-600	1	0	1	1	1	1	HNRNPK	heterogeneous nuclear ribonucleoprotein K
hsa-miR-600	1	0	1	1	1	1	SATB1	SATB homeobox 1
hsa-miR-600	0	0	1	1	0	0	MBD1	methyl-CpG binding domain protein 1
hsa-miR-600	0	0	1	1	1	1	ELOVL5	ELOVL fatty acid elongase 5
hsa-miR-600	1	0	1	1	1	1	TEAD1	TEA domain family member 1 (SV40 transcriptional enhancer factor)
hsa-miR-600	0	0	1	1	0	0	TRIM27	tripartite motif containing 27
hsa-miR-600	0	0	1	1	0	0	MSH5	mutS homolog 5 (E. coli)
hsa-miR-600	0	0	1	1	1	1	PLD1	phospholipase D1, phosphatidylcholine-specific
hsa-miR-600	1	0	1	1	1	1	APC	adenomatous polyposis coli
hsa-miR-600	0	0	1	0	0	0	LOC646813	DEAH (Asp-Glu-Ala-His) box polypeptide 9 pseudogene
hsa-miR-600	0	0	1	0	0	0	MIAT	myocardial infarction associated transcript (non-protein coding)
hsa-miR-600	0	0	1	0	1	1	PARG	poly (ADP-ribose) glycohydrolase
hsa-miR-600	1	0	1	1	1	1	TTC39A	tetratricopeptide repeat domain 39A
hsa-miR-600	1	0	1	1	1	1	SYNJ1	synaptojanin 1
hsa-miR-600	1	0	1	1	1	1	DLGAP2	discs, large (Drosophila) homolog-associated protein 2
hsa-miR-600	1	0	1	0	1	1	MLL2	myeloid/lymphoid or mixed-lineage leukemia 2
hsa-miR-600	1	0	1	1	1	1	SLC4A4	solute carrier family 4, sodium bicarbonate cotransporter, member 4
hsa-miR-600	1	0	1	0	1	1	PDE4D	phosphodiesterase 4D, cAMP-specific
hsa-miR-600	0	0	1	1	1	1	PPEF2	protein phosphatase, EF-hand calcium binding domain 2
hsa-miR-600	1	0	1	1	1	1	MYT1L	myelin transcription factor 1-like
hsa-miR-600	1	0	1	0	1	1	CELF2	CUGBP, Elav-like family member 2
hsa-miR-600	1	0	1	1	1	1	MRAS	muscle RAS oncogene homolog
hsa-miR-600	0	0	1	1	1	1	CD84	CD84 molecule
hsa-miR-600	0	0	1	1	1	1	CYP4F3	cytochrome P450, family 4, subfamily F, polypeptide 3
hsa-miR-600	1	0	1	1	1	1	SHOC2	soc-2 suppressor of clear homolog (C. elegans)
hsa-miR-600	0	0	1	1	1	1	ZNF33A	zinc finger protein 33A
hsa-miR-600	0	0	1	1	1	1	SC5DL	sterol-C5-desaturase (ERG3 delta-5-desaturase homolog, S. cerevisiae)-like
hsa-miR-600	1	0	1	1	0	0	ASPHD1	aspartate beta-hydroxylase domain containing 1
hsa-miR-600	1	0	1	1	1	1	PDE4A	phosphodiesterase 4A, cAMP-specific
hsa-miR-600	1	0	1	1	1	1	USP3	ubiquitin specific peptidase 3
hsa-miR-600	0	0	1	1	1	1	FHL1	four and a half LIM domains 1
hsa-miR-600	0	0	1	1	1	1	SH2D1A	SH2 domain containing 1A
hsa-miR-600	1	0	1	1	1	1	SLMAP	sarcolemma associated protein
hsa-miR-600	0	0	1	1	0	0	RBM5	RNA binding motif protein 5
hsa-miR-600	0	0	1	1	1	1	DMRT2	doublesex and mab-3 related transcription factor 2
hsa-miR-600	0	0	1	1	1	1	FGFR1OP2	FGFR1 oncogene partner 2
hsa-miR-600	1	0	1	1	1	1	USP25	ubiquitin specific peptidase 25
hsa-miR-600	0	0	1	1	0	0	GLT8D1	glycosyltransferase 8 domain containing 1
hsa-miR-600	0	0	1	0	1	1	CLDN2	claudin 2
hsa-miR-600	1	0	1	0	1	1	KLHL3	kelch-like 3 (Drosophila)
hsa-miR-600	1	0	1	1	1	1	FAM49B	family with sequence similarity 49, member B
hsa-miR-600	1	0	1	1	1	1	SYDE1	synapse defective 1, Rho GTPase, homolog 1 (C. elegans)
hsa-miR-600	0	0	1	1	1	1	CSNK1A1	casein kinase 1, alpha 1
hsa-miR-600	0	0	1	1	1	1	CD28	CD28 molecule
hsa-miR-600	1	0	1	1	0	0	TDRKH	tudor and KH domain containing
hsa-miR-600	1	0	1	1	1	1	DESI2	desumoylating isopeptidase 2
hsa-miR-600	0	0	1	0	0	0	URB1	URB1 ribosome biogenesis 1 homolog (S. cerevisiae)
hsa-miR-600	1	0	1	1	1	1	CALD1	caldesmon 1
hsa-miR-600	0	0	1	1	1	1	NKX3-1	NK3 homeobox 1
hsa-miR-600	0	0	1	1	1	1	IFT81	intraflagellar transport 81 homolog (Chlamydomonas)
hsa-miR-600	1	0	1	1	1	1	ELF2	E74-like factor 2 (ets domain transcription factor)
hsa-miR-600	1	0	1	1	1	1	ABI2	abl-interactor 2
hsa-miR-600	1	0	1	1	1	1	SH3GLB1	SH3-domain GRB2-like endophilin B1
hsa-miR-600	1	0	1	0	1	1	TRPS1	trichorhinophalangeal syndrome I
hsa-miR-600	0	0	1	1	0	0	RNF17	ring finger protein 17
hsa-miR-600	1	0	1	1	1	1	TMUB2	transmembrane and ubiquitin-like domain containing 2
hsa-miR-600	0	0	1	1	1	1	LRTOMT	leucine rich transmembrane and 0-methyltransferase domain containing
hsa-miR-600	1	0	1	1	1	1	DCLRE1B	DNA cross-link repair 1B
hsa-miR-600	0	0	1	0	1	1	KANSL3	KAT8 regulatory NSL complex subunit 3
hsa-miR-600	1	0	1	1	1	1	LETMD1	LETM1 domain containing 1
hsa-miR-600	1	0	1	1	1	1	CPEB1	cytoplasmic polyadenylation element binding protein 1
hsa-miR-600	0	0	1	1	0	0	ZAN	zonadhesin
hsa-miR-600	0	0	1	1	1	1	SLC6A15	solute carrier family 6 (neutral amino acid transporter), member 15
hsa-miR-600	1	0	1	1	1	1	BBC3	BCL2 binding component 3
hsa-miR-600	1	0	1	1	1	1	RGS10	regulator of G-protein signaling 10
hsa-miR-600	1	0	1	1	1	1	CALCOCO1	calcium binding and coiled-coil domain 1
hsa-miR-600	1	0	1	1	1	1	SON	SON DNA binding protein
hsa-miR-600	0	0	1	0	1	1	MYO3B	myosin IIIB
hsa-miR-600	0	0	1	1	0	0	SNRPN	small nuclear ribonucleoprotein polypeptide N
hsa-miR-600	1	0	1	1	1	1	MAGI1	membrane associated guanylate kinase, WW and PDZ domain containing 1
hsa-miR-600	0	0	1	1	1	1	SPSB1	splA/ryanodine receptor domain and SOCS box containing 1
hsa-miR-600	0	0	1	1	0	0	CNKSR2	connector enhancer of kinase suppressor of Ras 2
hsa-miR-600	1	0	1	1	0	0	YTHDF2	YTH domain family, member 2
hsa-miR-600	1	0	1	1	1	1	SLC35A4	solute carrier family 35, member A4
hsa-miR-600	1	0	1	1	1	1	RBFOX1	RNA binding protein, fox-1 homolog (C. elegans) 1
hsa-miR-600	1	0	1	1	1	1	CACNB2	calcium channel, voltage-dependent, beta 2 subunit
hsa-miR-600	1	0	1	1	1	1	WAPAL	wings apart-like homolog (Drosophila)
hsa-miR-600	0	0	1	1	1	1	CHODL	chondrolectin
hsa-miR-600	1	0	1	1	1	1	PTBP2	polypyrimidine tract binding protein 2
hsa-miR-600	0	0	1	1	1	1	ZNF638	zinc finger protein 638
hsa-miR-600	1	0	1	1	1	1	GPR64	G protein-coupled receptor 64
hsa-miR-600	1	0	1	1	1	1	AFF2	AF4/FMR2 family, member 2
hsa-miR-600	1	0	1	0	1	1	CACNA1C	calcium channel, voltage-dependent, L type, alpha 1C subunit
hsa-miR-600	0	0	1	1	1	1	DMRTC1	DMRT-like family C1
hsa-miR-600	0	0	1	1	0	0	DMRTC1B	DMRT-like family C1B
hsa-miR-600	0	0	1	0	1	1	SRPK1	SRSF protein kinase 1
hsa-miR-600	1	0	1	1	1	1	PPP3CB	protein phosphatase 3, catalytic subunit, beta isozyme
hsa-miR-600	1	0	1	1	1	1	MYB	v-myb myeloblastosis viral oncogene homolog (avian)
hsa-miR-600	1	0	1	1	1	1	PPP1R9A	protein phosphatase 1, regulatory subunit 9A
hsa-miR-600	1	0	1	0	1	1	NFAT5	nuclear factor of activated T-cells 5, tonicity-responsive
hsa-miR-600	1	0	1	1	1	1	SIK2	salt-inducible kinase 2
hsa-miR-600	1	0	1	1	1	1	TANC1	tetratricopeptide repeat, ankyrin repeat and coiled-coil containing 1
hsa-miR-600	0	0	1	0	0	0	TUG1	taurine upregulated 1 (non-protein coding)
hsa-miR-600	1	0	1	1	1	1	PTBP3	polypyrimidine tract binding protein 3
hsa-miR-600	1	0	1	1	1	1	SLC38A2	solute carrier family 38, member 2
hsa-miR-600	1	0	1	1	1	1	MBD5	methyl-CpG binding domain protein 5
hsa-miR-600	1	0	1	1	1	1	INSIG2	insulin induced gene 2
hsa-miR-600	0	0	1	1	1	1	CCPG1	cell cycle progression 1
hsa-miR-600	1	0	1	1	1	1	SUN1	Sad1 and UNC84 domain containing 1
hsa-miR-600	1	0	1	1	1	1	MON2	MON2 homolog (S. cerevisiae)
hsa-miR-600	0	0	1	0	0	0	DUXAP10	double homeobox A pseudogene 10
hsa-miR-600	1	0	1	1	1	1	SMEK2	SMEK homolog 2, suppressor of mek1 (Dictyostelium)
hsa-miR-600	1	0	1	1	1	1	MACF1	microtubule-actin crosslinking factor 1
hsa-miR-600	0	0	1	0	0	0	MIRLET7BHG	MIRLET7B host gene (non-protein coding)
hsa-miR-600	0	0	1	0	1	1	ARHGAP42	Rho GTPase activating protein 42
hsa-miR-600	1	0	1	1	1	1	PHF20L1	PHD finger protein 20-like 1
hsa-miR-600	0	0	1	0	0	0	LOC284561	uncharacterized LOC284561
hsa-miR-600	0	0	1	1	1	1	IPP	intracisternal A particle-promoted polypeptide
hsa-miR-600	0	0	1	1	1	1	NSUN7	NOP2/Sun domain family, member 7
hsa-miR-600	0	0	1	0	0	0	LOC286059	tumor necrosis factor receptor superfamily, member 10d, decoy with truncated death domain pseudogene
hsa-miR-600	0	0	1	1	1	1	SIGLEC1	sialic acid binding Ig-like lectin 1, sialoadhesin
hsa-miR-600	0	0	1	0	0	0	IFFO2	intermediate filament family orphan 2
hsa-miR-600	1	0	1	0	1	1	STK40	serine/threonine kinase 40
hsa-miR-600	0	0	1	1	1	1	MUC12	mucin 12, cell surface associated
hsa-miR-600	0	0	1	0	0	0	FLJ21408	uncharacterized LOC400512
hsa-miR-600	0	0	1	1	0	0	UBR4	ubiquitin protein ligase E3 component n-recognin 4
hsa-miR-600	1	0	1	1	1	1	ABI3BP	ABI family, member 3 (NESH) binding protein
hsa-miR-600	0	0	1	1	0	0	EIF4ENIF1	eukaryotic translation initiation factor 4E nuclear import factor 1
hsa-miR-600	1	0	1	1	1	1	DLC1	deleted in liver cancer 1
hsa-miR-600	0	0	1	1	0	0	STPG1	sperm-tail PG-rich repeat containing 1
hsa-miR-600	0	0	1	1	0	0	EWSR1	Ewing sarcoma breakpoint region 1
hsa-miR-600	1	0	1	1	0	0	UBXN7	UBX domain protein 7
hsa-miR-600	1	0	1	1	1	1	ITGA9	integrin, alpha 9
hsa-miR-600	0	0	1	0	1	1	ZCCHC8	zinc finger, CCHC domain containing 8
hsa-miR-600	1	0	1	0	1	1	TOX3	TOX high mobility group box family member 3
hsa-miR-600	1	0	1	1	1	1	LRP4	low density lipoprotein receptor-related protein 4
hsa-miR-600	1	0	1	1	1	1	GORASP2	golgi reassembly stacking protein 2, 55kDa
hsa-miR-600	0	0	1	1	1	1	DUSP14	dual specificity phosphatase 14
hsa-miR-600	0	0	1	1	1	1	SPRTN	SprT-like N-terminal domain
hsa-miR-600	0	0	1	1	1	1	KDM2B	lysine (K)-specific demethylase 2B
hsa-miR-600	1	0	1	1	1	1	MARK1	MAP/microtubule affinity-regulating kinase 1
hsa-miR-600	1	0	1	1	0	0	SLC44A2	solute carrier family 44, member 2
hsa-miR-600	0	0	1	0	0	0	JAKMIP2-AS1	JAKMIP2 antisense RNA 1
hsa-miR-600	0	0	1	0	1	1	TWSG1	twisted gastrulation homolog 1 (Drosophila)
hsa-miR-600	1	0	1	1	1	1	TMEM2	transmembrane protein 2
hsa-miR-600	0	0	1	1	1	1	STMN1	stathmin 1
hsa-miR-600	0	0	1	1	0	0	FAM153B	family with sequence similarity 153, member B
hsa-miR-600	1	0	1	1	1	1	SGK1	serum/glucocorticoid regulated kinase 1
hsa-miR-600	0	0	1	1	1	1	TOX2	TOX high mobility group box family member 2
hsa-miR-600	1	0	1	1	1	1	TPM1	tropomyosin 1 (alpha)
hsa-miR-600	1	0	1	1	0	0	SPEG	SPEG complex locus
hsa-miR-600	0	0	1	1	1	1	OPTN	optineurin
hsa-miR-600	0	0	1	0	0	0	SNHG11	small nucleolar RNA host gene 11 (non-protein coding)
hsa-miR-600	0	0	1	0	0	0	LOC149684	uncharacterized LOC149684
hsa-miR-600	0	0	1	0	0	0	LOC157273	uncharacterized LOC157273
hsa-miR-600	1	0	1	1	0	0	SH2D3C	SH2 domain containing 3C
hsa-miR-600	1	0	1	0	1	1	FSTL4	follistatin-like 4
hsa-miR-600	0	0	1	1	1	1	TP53I11	tumor protein p53 inducible protein 11
hsa-miR-600	1	0	1	1	1	1	ZIC4	Zic family member 4
hsa-miR-600	0	0	1	0	1	1	FAM70A	family with sequence similarity 70, member A
hsa-miR-600	0	0	1	0	0	0	FLJ12825	uncharacterized LOC440101
hsa-miR-600	0	0	1	0	0	0	LOC441204	uncharacterized LOC441204
hsa-miR-600	0	0	1	1	0	0	DNAH3	dynein, axonemal, heavy chain 3
hsa-miR-600	1	0	1	1	1	1	CLCN5	chloride channel, voltage-sensitive 5
hsa-miR-600	1	0	1	1	1	1	SORBS2	sorbin and SH3 domain containing 2
hsa-miR-600	0	0	1	1	1	1	DST	dystonin
hsa-miR-600	0	0	1	1	1	1	COQ10A	coenzyme Q10 homolog A (S. cerevisiae)
hsa-miR-600	0	0	1	0	0	0	LOC100125918	uncharacterized LOC100125918
hsa-miR-600	0	0	1	1	0	0	NXF2	nuclear RNA export factor 2
hsa-miR-600	0	0	1	1	1	1	RANBP17	RAN binding protein 17
hsa-miR-600	0	0	1	1	1	1	SEC61A2	Sec61 alpha 2 subunit (S. cerevisiae)
hsa-miR-600	1	0	1	1	1	1	ANKRD29	ankyrin repeat domain 29
hsa-miR-600	0	0	1	0	0	0	LINC00637	long intergenic non-protein coding RNA 637
hsa-miR-600	0	0	1	1	1	1	ZNF385B	zinc finger protein 385B
hsa-miR-600	0	0	1	1	1	1	FXC1	fracture callus 1 homolog (rat)
hsa-miR-600	0	0	1	1	1	1	ZBTB26	zinc finger and BTB domain containing 26
hsa-miR-600	0	0	1	0	0	0	FLJ25363	uncharacterized LOC401082
hsa-miR-600	0	0	1	0	1	1	UHMK1	U2AF homology motif (UHM) kinase 1
hsa-miR-600	1	0	1	1	1	1	PEAR1	platelet endothelial aggregation receptor 1
hsa-miR-600	0	0	1	0	0	0	C10orf105	chromosome 10 open reading frame 105
hsa-miR-600	1	0	1	1	1	1	ZNF449	zinc finger protein 449
hsa-miR-600	0	0	1	0	1	1	CDHR3	cadherin-related family member 3
hsa-miR-600	1	0	1	1	1	1	PRRT2	proline-rich transmembrane protein 2
hsa-miR-600	0	0	1	1	1	1	GALNT6	UDP-N-acetyl-alpha-D-galactosamine:polypeptide N-acetylgalactosaminyltransferase 6 (GalNAc-T6)
hsa-miR-600	1	0	1	1	1	1	UXS1	UDP-glucuronate decarboxylase 1
hsa-miR-600	1	0	1	0	1	1	SLC25A37	solute carrier family 25 (mitochondrial iron transporter), member 37
hsa-miR-600	0	0	1	0	0	0	LOC152225	uncharacterized LOC152225
hsa-miR-600	1	0	1	1	1	1	TLK1	tousled-like kinase 1
hsa-miR-600	0	0	1	0	0	0	LOC643837	uncharacterized LOC643837
hsa-miR-600	0	0	1	1	0	0	ACOT11	acyl-CoA thioesterase 11
hsa-miR-600	1	0	1	1	1	1	ARIH2	ariadne homolog 2 (Drosophila)
hsa-miR-600	0	0	1	1	1	1	BBS9	Bardet-Biedl syndrome 9
hsa-miR-600	1	0	1	1	1	1	FRY	furry homolog (Drosophila)
hsa-miR-600	1	0	1	1	1	1	AMMECR1	Alport syndrome, mental retardation, midface hypoplasia and elliptocytosis chromosomal region gene 1
hsa-miR-600	0	0	1	0	0	0	LOC440910	uncharacterized LOC440910
hsa-miR-600	1	0	1	1	1	1	TSN	translin
hsa-miR-600	0	0	1	1	1	1	HNRNPH1	heterogeneous nuclear ribonucleoprotein H1 (H)
hsa-miR-600	0	0	1	1	1	1	NRCAM	neuronal cell adhesion molecule
hsa-miR-600	0	0	1	1	1	1	WT1	Wilms tumor 1
hsa-miR-600	0	0	1	1	1	1	SLC16A1	solute carrier family 16, member 1 (monocarboxylic acid transporter 1)
hsa-miR-600	0	0	1	0	0	0	CXXC1P1	CXXC finger protein 1 pseudogene 1
hsa-miR-600	1	0	1	1	1	1	RCN1	reticulocalbin 1, EF-hand calcium binding domain
hsa-miR-600	0	0	1	0	0	0	PART1	prostate androgen-regulated transcript 1 (non-protein coding)
hsa-miR-600	1	0	1	0	1	1	GATAD2B	GATA zinc finger domain containing 2B
hsa-miR-600	0	0	1	1	0	0	IL11RA	interleukin 11 receptor, alpha
hsa-miR-600	0	0	1	0	0	0	LOC285500	uncharacterized LOC285500
hsa-miR-600	0	0	1	1	1	1	SPAG16	sperm associated antigen 16
hsa-miR-600	0	0	1	0	0	0	FLJ37798	uncharacterized LOC401264
hsa-miR-600	0	0	1	1	1	1	MOBP	myelin-associated oligodendrocyte basic protein
hsa-miR-600	0	0	1	0	0	0	LOC730101	uncharacterized LOC730101
hsa-miR-600	0	0	1	1	1	1	FUT11	fucosyltransferase 11 (alpha (1,3) fucosyltransferase)
hsa-miR-600	0	0	1	1	1	1	SIRPB2	signal-regulatory protein beta 2
hsa-miR-600	1	0	1	0	1	1	FAM129A	family with sequence similarity 129, member A
hsa-miR-600	1	0	1	1	1	1	FAM222B	family with sequence similarity 222, member B
hsa-miR-600	1	0	1	1	1	1	SPATS2	spermatogenesis associated, serine-rich 2
hsa-miR-600	1	0	1	1	1	1	PEA15	phosphoprotein enriched in astrocytes 15
hsa-miR-600	1	0	1	1	1	1	ACSL1	acyl-CoA synthetase long-chain family member 1
hsa-miR-600	0	0	1	1	1	1	ZMYM1	zinc finger, MYM-type 1
hsa-miR-600	0	0	1	0	0	0	ZNF815P	zinc finger protein 815, pseudogene
hsa-miR-600	1	0	1	1	0	0	FBRS	fibrosin
hsa-miR-600	1	0	1	0	1	1	KIAA1737	KIAA1737
hsa-miR-600	1	0	1	0	1	1	THRB	thyroid hormone receptor, beta
hsa-miR-600	1	0	1	1	1	1	SYT6	synaptotagmin VI
hsa-miR-600	1	0	1	1	1	1	CA12	carbonic anhydrase XII
hsa-miR-600	0	0	1	0	0	0	LOC400680	uncharacterized LOC400680
hsa-miR-600	1	0	1	1	1	1	TMEM185A	transmembrane protein 185A
hsa-miR-600	0	0	1	0	0	0	LOC100128560	uncharacterized LOC100128560
hsa-miR-600	0	0	1	1	1	1	TEX35	testis expressed 35
hsa-miR-600	0	0	1	0	0	0	LOC284385	uncharacterized LOC284385
hsa-miR-600	1	0	1	1	1	1	CHD6	chromodomain helicase DNA binding protein 6
hsa-miR-600	0	0	1	1	0	0	ZNF283	zinc finger protein 283
hsa-miR-600	0	0	1	0	0	0	LOC100130954	uncharacterized LOC100130954
hsa-miR-600	0	0	1	0	1	1	LOC155060	AI894139 pseudogene
hsa-miR-600	1	0	1	0	1	1	UNC5D	unc-5 homolog D (C. elegans)
hsa-miR-600	1	0	1	1	1	1	WEE1	WEE1 homolog (S. pombe)
hsa-miR-600	0	0	1	1	1	1	SCLT1	sodium channel and clathrin linker 1
hsa-miR-600	0	0	1	1	1	1	RNF103	ring finger protein 103
hsa-miR-600	0	0	1	1	1	1	ARHGEF26	Rho guanine nucleotide exchange factor (GEF) 26
hsa-miR-600	0	0	1	0	1	1	PATE4	prostate and testis expressed 4
hsa-miR-600	0	0	1	0	1	1	FLJ41200	uncharacterized LOC401492
hsa-miR-600	1	0	1	1	1	1	PLEKHH1	pleckstrin homology domain containing, family H (with MyTH4 domain) member 1
hsa-miR-600	0	0	1	1	1	1	EXOC6	exocyst complex component 6
hsa-miR-600	0	0	1	1	1	1	SLC13A3	solute carrier family 13 (sodium-dependent dicarboxylate transporter), member 3
hsa-miR-600	1	0	1	0	1	1	KCNK2	potassium channel, subfamily K, member 2
hsa-miR-600	1	0	1	0	1	1	WDR82	WD repeat domain 82
hsa-miR-600	1	0	1	0	0	0	GPR137C	G protein-coupled receptor 137C
hsa-miR-600	1	0	1	1	1	1	MBTD1	mbt domain containing 1
hsa-miR-600	1	0	1	0	1	1	DCUN1D4	DCN1, defective in cullin neddylation 1, domain containing 4 (S. cerevisiae)
hsa-miR-600	1	0	1	1	1	1	DAB2IP	DAB2 interacting protein
hsa-miR-600	0	0	1	1	1	1	KANSL1L	KAT8 regulatory NSL complex subunit 1-like
hsa-miR-600	1	0	1	1	1	1	C11orf30	chromosome 11 open reading frame 30
hsa-miR-600	1	0	1	1	0	0	GXYLT1	glucoside xylosyltransferase 1
hsa-miR-600	1	0	1	1	1	1	CTGF	connective tissue growth factor
hsa-miR-600	0	0	1	1	0	0	RUSC1	RUN and SH3 domain containing 1
hsa-miR-600	0	0	1	1	1	1	ZNF337	zinc finger protein 337
hsa-miR-600	1	0	1	1	1	1	ATP11C	ATPase, class VI, type 11C
hsa-miR-600	0	0	1	1	1	1	RBM46	RNA binding motif protein 46
hsa-miR-600	1	0	1	1	1	1	TP53INP1	tumor protein p53 inducible nuclear protein 1
hsa-miR-600	1	0	1	1	0	0	UBN2	ubinuclein 2
hsa-miR-600	0	0	1	1	0	0	C20orf141	chromosome 20 open reading frame 141
hsa-miR-600	0	0	1	1	1	1	RBM39	RNA binding motif protein 39
hsa-miR-600	1	0	1	1	1	1	PIK3R1	phosphoinositide-3-kinase, regulatory subunit 1 (alpha)
hsa-miR-600	0	0	1	1	1	1	PLEKHS1	pleckstrin homology domain containing, family S member 1
hsa-miR-600	0	0	1	1	1	1	SPICE1	spindle and centriole associated protein 1
hsa-miR-600	0	0	1	1	1	1	SZT2	seizure threshold 2 homolog (mouse)
hsa-miR-600	0	0	1	0	0	0	RPL23AP53	ribosomal protein L23a pseudogene 53
hsa-miR-600	0	0	1	1	1	1	KLC4	kinesin light chain 4
hsa-miR-600	1	0	1	1	1	1	ENAH	enabled homolog (Drosophila)
hsa-miR-600	1	0	1	1	1	1	CXorf23	chromosome X open reading frame 23
hsa-miR-600	1	0	1	0	1	1	FNDC3B	fibronectin type III domain containing 3B
hsa-miR-600	0	0	1	1	1	1	WDR69	WD repeat domain 69
hsa-miR-600	1	0	1	0	1	1	YOD1	YOD1 OTU deubiquinating enzyme 1 homolog (S. cerevisiae)
hsa-miR-600	1	0	1	1	1	1	SLC12A6	solute carrier family 12 (potassium/chloride transporters), member 6
hsa-miR-600	1	0	1	0	1	1	KDM2A	lysine (K)-specific demethylase 2A
hsa-miR-600	1	0	1	0	1	1	NBR1	neighbor of BRCA1 gene 1
hsa-miR-600	0	0	1	0	0	0	LOC100129940	uncharacterized LOC100129940
hsa-miR-600	1	0	1	1	1	1	MRFAP1	Morf4 family associated protein 1
hsa-miR-600	0	0	1	0	0	0	FLJ26245	uncharacterized LOC400533
hsa-miR-600	0	0	1	1	1	1	TBX19	T-box 19
hsa-miR-600	0	0	1	1	1	1	G3BP1	GTPase activating protein (SH3 domain) binding protein 1
hsa-miR-600	0	0	1	1	0	0	HEATR8	HEAT repeat containing 8
hsa-miR-600	0	0	1	1	1	1	ANXA6	annexin A6
hsa-miR-600	0	0	1	0	0	0	LOC494141	mitochondrial carrier triple repeat 1 pseudogene
hsa-miR-600	1	0	1	1	1	1	RNF111	ring finger protein 111
hsa-miR-600	1	0	1	1	1	1	LRRK2	leucine-rich repeat kinase 2
hsa-miR-600	1	0	1	1	1	1	MAP2K4	mitogen-activated protein kinase kinase 4
hsa-miR-600	0	0	1	0	0	0	AGAP9	ArfGAP with GTPase domain, ankyrin repeat and PH domain 9
hsa-miR-600	1	0	1	1	1	1	TAP2	transporter 2, ATP-binding cassette, sub-family B (MDR/TAP)
hsa-miR-600	0	0	1	1	1	1	MSH2	mutS homolog 2, colon cancer, nonpolyposis type 1 (E. coli)
hsa-miR-600	1	0	1	1	1	1	ATL2	atlastin GTPase 2
hsa-miR-600	1	0	1	1	1	1	MEAF6	MYST/Esa1-associated factor 6
hsa-miR-600	1	0	1	1	1	1	PHTF2	putative homeodomain transcription factor 2
hsa-miR-600	0	0	1	1	1	1	TIMMDC1	translocase of inner mitochondrial membrane domain containing 1
hsa-miR-600	1	0	1	1	1	1	LUC7L3	LUC7-like 3 (S. cerevisiae)
hsa-miR-600	1	0	1	1	1	1	SETX	senataxin
hsa-miR-600	1	0	1	1	1	1	NOVA1	neuro-oncological ventral antigen 1
hsa-miR-600	0	0	1	1	0	0	TRIM69	tripartite motif containing 69
hsa-miR-600	1	0	1	1	1	1	APBB2	amyloid beta (A4) precursor protein-binding, family B, member 2
hsa-miR-600	1	0	1	1	1	1	NECAP1	NECAP endocytosis associated 1
hsa-miR-600	1	0	1	1	1	1	RIF1	RAP1 interacting factor homolog (yeast)
hsa-miR-600	1	0	1	1	1	1	TAB2	TGF-beta activated kinase 1/MAP3K7 binding protein 2
hsa-miR-600	1	0	1	1	1	1	ARF6	ADP-ribosylation factor 6
hsa-miR-600	0	0	1	1	1	1	KIDINS220	kinase D-interacting substrate, 220kDa
hsa-miR-600	0	0	1	0	0	0	DNAJC5B	DnaJ (Hsp40) homolog, subfamily C, member 5 beta
hsa-miR-600	0	0	1	1	1	1	ZNF280D	zinc finger protein 280D
hsa-miR-600	1	0	1	1	1	1	SECISBP2	SECIS binding protein 2
hsa-miR-600	1	0	1	1	1	1	NBEA	neurobeachin
hsa-miR-600	1	0	1	0	1	1	GPR85	G protein-coupled receptor 85
hsa-miR-600	1	0	1	0	1	1	GRIN3A	glutamate receptor, ionotropic, N-methyl-D-aspartate 3A
hsa-miR-600	1	0	1	1	0	0	FAM108C1	family with sequence similarity 108, member C1
hsa-miR-600	1	0	1	1	1	1	PKNOX2	PBX/knotted 1 homeobox 2
hsa-miR-600	0	0	1	1	1	1	HNRPLL	heterogeneous nuclear ribonucleoprotein L-like
hsa-miR-600	1	0	1	1	1	1	DENND1B	DENN/MADD domain containing 1B
hsa-miR-600	1	0	1	1	1	1	KDM6A	lysine (K)-specific demethylase 6A
hsa-miR-600	0	0	1	1	0	0	THADA	thyroid adenoma associated
hsa-miR-600	0	0	1	1	1	1	BEND7	BEN domain containing 7
hsa-miR-600	0	0	1	0	0	0	ZNF720	zinc finger protein 720
hsa-miR-600	1	0	1	0	1	1	HNRNPA3	heterogeneous nuclear ribonucleoprotein A3
hsa-miR-600	1	0	1	1	1	1	DNAJC10	DnaJ (Hsp40) homolog, subfamily C, member 10
hsa-miR-600	0	0	1	1	1	1	U2AF1	U2 small nuclear RNA auxiliary factor 1
hsa-miR-600	1	0	1	1	1	1	FAM126A	family with sequence similarity 126, member A
hsa-miR-600	0	0	1	1	1	1	C12orf50	chromosome 12 open reading frame 50
hsa-miR-600	1	0	1	1	1	1	BPTF	bromodomain PHD finger transcription factor
hsa-miR-600	1	0	1	1	1	1	CEP164	centrosomal protein 164kDa
hsa-miR-600	0	0	1	0	0	0	ADCY10P1	adenylate cyclase 10 (soluble) pseudogene 1
hsa-miR-600	1	0	1	1	1	1	PRPF38B	PRP38 pre-mRNA processing factor 38 (yeast) domain containing B
hsa-miR-600	0	0	1	1	1	1	SLC35F2	solute carrier family 35, member F2
hsa-miR-600	1	0	1	1	1	1	ANKRD12	ankyrin repeat domain 12
hsa-miR-600	0	0	1	1	0	0	SCAF4	SR-related CTD-associated factor 4
hsa-miR-600	1	0	1	1	1	1	RICTOR	RPTOR independent companion of MTOR, complex 2
hsa-miR-600	0	0	1	1	1	1	KLHL29	kelch-like 29 (Drosophila)
hsa-miR-600	1	0	1	0	1	1	KIF21B	kinesin family member 21B
hsa-miR-600	1	0	1	1	1	1	BOLL	bol, boule-like (Drosophila)
hsa-miR-600	1	0	1	1	1	1	FAM76B	family with sequence similarity 76, member B
hsa-miR-600	0	0	1	1	1	1	AMOTL1	angiomotin like 1
hsa-miR-600	1	0	1	1	1	1	PPP3CA	protein phosphatase 3, catalytic subunit, alpha isozyme
hsa-miR-600	1	0	1	1	1	1	RNF38	ring finger protein 38
hsa-miR-600	1	0	1	1	1	1	IKZF2	IKAROS family zinc finger 2 (Helios)
hsa-miR-600	0	0	1	1	1	1	GPRASP1	G protein-coupled receptor associated sorting protein 1
hsa-miR-600	0	0	1	0	0	0	KGFLP1	fibroblast growth factor 7 pseudogene
hsa-miR-600	1	0	1	1	1	1	ANGPT1	angiopoietin 1
hsa-miR-600	0	0	1	1	1	1	SHPRH	SNF2 histone linker PHD RING helicase, E3 ubiquitin protein ligase
hsa-miR-600	0	0	1	1	1	1	SYNE2	spectrin repeat containing, nuclear envelope 2
hsa-miR-600	0	0	1	1	1	1	CEP41	centrosomal protein 41kDa
hsa-miR-600	0	0	1	1	1	1	DNAJB14	DnaJ (Hsp40) homolog, subfamily B, member 14
hsa-miR-600	0	0	1	1	1	1	APTX	aprataxin
hsa-miR-600	0	0	1	0	0	0	MUC19	mucin 19, oligomeric
hsa-miR-600	0	0	1	1	1	1	GCOM1	GRINL1A complex locus 1
hsa-miR-600	0	0	1	1	1	1	MFAP5	microfibrillar associated protein 5
hsa-miR-600	0	0	1	0	0	0	FAM138C	family with sequence similarity 138, member C
hsa-miR-600	1	0	1	1	1	1	CAMTA1	calmodulin binding transcription activator 1
hsa-miR-600	0	0	1	1	0	0	FKBP7	FK506 binding protein 7
hsa-miR-600	0	0	1	1	1	1	IL20	interleukin 20
hsa-miR-600	0	0	1	1	1	1	KDELC2	KDEL (Lys-Asp-Glu-Leu) containing 2
hsa-miR-600	0	0	1	1	1	1	TNFRSF19	tumor necrosis factor receptor superfamily, member 19
hsa-miR-600	1	0	1	1	1	1	OPRM1	opioid receptor, mu 1
hsa-miR-600	1	0	1	0	1	1	NHS	Nance-Horan syndrome (congenital cataracts and dental anomalies)
hsa-miR-600	0	0	1	1	1	1	POTEG	POTE ankyrin domain family, member G
hsa-miR-600	0	0	1	1	1	1	HMBOX1	homeobox containing 1
hsa-miR-600	0	0	1	1	1	1	EHBP1	EH domain binding protein 1
hsa-miR-600	1	0	1	0	1	1	LRAT	lecithin retinol acyltransferase (phosphatidylcholine--retinol O-acyltransferase)
hsa-miR-600	1	0	1	1	0	0	ADAM15	ADAM metallopeptidase domain 15
hsa-miR-600	0	0	1	1	1	1	IL24	interleukin 24
hsa-miR-600	1	0	1	1	1	1	NTNG1	netrin G1
hsa-miR-600	1	0	1	1	1	1	QKI	QKI, KH domain containing, RNA binding
hsa-miR-600	1	0	1	1	1	1	PCDH11X	protocadherin 11 X-linked
hsa-miR-600	1	0	1	1	1	1	TBC1D22B	TBC1 domain family, member 22B
hsa-miR-600	1	0	1	1	1	1	CPSF6	cleavage and polyadenylation specific factor 6, 68kDa
hsa-miR-600	0	0	1	1	1	1	SNX11	sorting nexin 11
hsa-miR-600	0	0	1	1	1	1	PTDSS1	phosphatidylserine synthase 1
hsa-miR-600	0	0	1	1	1	1	RLIM	ring finger protein, LIM domain interacting
hsa-miR-600	0	0	1	1	1	1	TMOD1	tropomodulin 1
hsa-miR-600	1	0	1	0	0	0	VGLL4	vestigial like 4 (Drosophila)
hsa-miR-600	1	0	1	1	1	1	RIMS3	regulating synaptic membrane exocytosis 3
hsa-miR-600	1	0	1	1	1	1	PPP1R11	protein phosphatase 1, regulatory (inhibitor) subunit 11
hsa-miR-600	0	0	1	0	1	1	HAUS3	HAUS augmin-like complex, subunit 3
hsa-miR-600	1	0	1	1	1	1	SPRY2	sprouty homolog 2 (Drosophila)
hsa-miR-600	1	0	1	1	0	0	POLR3D	polymerase (RNA) III (DNA directed) polypeptide D, 44kDa
hsa-miR-600	1	0	1	0	1	1	CGGBP1	CGG triplet repeat binding protein 1
hsa-miR-600	1	0	1	1	0	0	ASRGL1	asparaginase like 1
hsa-miR-600	1	0	1	1	1	1	COL2A1	collagen, type II, alpha 1
hsa-miR-600	0	0	1	1	0	0	PRR11	proline rich 11
hsa-miR-600	1	0	1	1	1	1	B4GALT3	UDP-Gal:betaGlcNAc beta 1,4- galactosyltransferase, polypeptide 3
hsa-miR-600	1	0	1	1	1	1	TRIM2	tripartite motif containing 2
hsa-miR-600	1	0	1	0	1	1	MTMR2	myotubularin related protein 2
hsa-miR-600	1	0	1	1	1	1	GDAP2	ganglioside induced differentiation associated protein 2
hsa-miR-600	0	0	1	1	1	1	H2AFY	H2A histone family, member Y
hsa-miR-600	0	0	1	1	1	1	PCNP	PEST proteolytic signal containing nuclear protein
hsa-miR-600	1	0	1	1	1	1	YY1	YY1 transcription factor
hsa-miR-600	1	0	1	1	1	1	ETF1	eukaryotic translation termination factor 1
hsa-miR-600	0	0	1	1	0	0	C8orf44	chromosome 8 open reading frame 44
hsa-miR-600	0	0	1	0	1	1	ZNF37A	zinc finger protein 37A
hsa-miR-600	1	0	1	1	1	1	ELF4	E74-like factor 4 (ets domain transcription factor)
hsa-miR-600	0	0	1	1	0	0	ZDHHC6	zinc finger, DHHC-type containing 6
hsa-miR-600	0	0	1	0	0	0	LOC100144602	uncharacterized LOC100144602
hsa-miR-600	1	0	1	1	1	1	ZNF131	zinc finger protein 131
hsa-miR-600	1	0	1	1	1	1	SUZ12	suppressor of zeste 12 homolog (Drosophila)
hsa-miR-600	1	0	1	1	0	0	CSNK1G2	casein kinase 1, gamma 2
hsa-miR-600	1	0	1	1	1	1	KIAA1217	KIAA1217
hsa-miR-600	0	0	1	1	1	1	SNX22	sorting nexin 22
hsa-miR-600	1	0	1	1	1	1	FAM188A	family with sequence similarity 188, member A
hsa-miR-600	0	0	1	0	1	1	ZNF718	zinc finger protein 718
hsa-miR-600	0	0	1	1	0	0	CA5BP1	carbonic anhydrase VB pseudogene 1
hsa-miR-600	0	0	1	1	1	1	FMNL1	formin-like 1
hsa-miR-600	0	0	1	1	1	1	SRGN	serglycin
hsa-miR-600	1	0	1	1	1	1	LIMS1	LIM and senescent cell antigen-like domains 1
hsa-miR-600	0	0	1	1	1	1	ZCCHC10	zinc finger, CCHC domain containing 10
hsa-miR-600	1	0	1	1	1	1	SPRYD7	SPRY domain containing 7
hsa-miR-600	1	0	1	1	1	1	BEND6	BEN domain containing 6
hsa-miR-600	0	0	1	1	1	1	CDC42SE2	CDC42 small effector 2
hsa-miR-600	0	0	1	1	1	1	VRK3	vaccinia related kinase 3
hsa-miR-600	1	0	1	1	1	1	RACGAP1	Rac GTPase activating protein 1
hsa-miR-600	1	0	1	0	1	1	CDK19	cyclin-dependent kinase 19
hsa-miR-600	0	0	1	0	0	0	SNX29P2	sorting nexin 29 pseudogene 2
hsa-miR-600	0	0	1	0	0	0	ZBED3-AS1	ZBED3 antisense RNA 1
hsa-miR-600	0	0	1	1	1	1	WDR67	WD repeat domain 67
hsa-miR-600	0	0	1	1	1	1	MAP2	microtubule-associated protein 2
hsa-miR-600	0	0	1	1	1	1	ZNF589	zinc finger protein 589
hsa-miR-600	0	0	1	0	1	1	PAPOLG	poly(A) polymerase gamma
hsa-miR-600	1	0	1	0	0	0	KCNU1	potassium channel, subfamily U, member 1
hsa-miR-600	0	0	1	0	0	0	C3orf55	chromosome 3 open reading frame 55
hsa-miR-600	1	0	1	1	1	1	EYA4	eyes absent homolog 4 (Drosophila)
hsa-miR-600	1	0	1	1	1	1	ADARB1	adenosine deaminase, RNA-specific, B1
hsa-miR-600	1	0	1	1	1	1	ZNF518A	zinc finger protein 518A
hsa-miR-600	0	0	1	1	0	0	AHSA2	AHA1, activator of heat shock 90kDa protein ATPase homolog 2 (yeast)
hsa-miR-600	0	0	1	0	1	1	FLJ25328	uncharacterized LOC148231
hsa-miR-600	1	0	1	1	1	1	BZRAP1	benzodiazapine receptor (peripheral) associated protein 1
hsa-miR-600	1	0	1	1	1	1	ZNF282	zinc finger protein 282
hsa-miR-600	0	0	1	0	0	0	LOC96610	BMS1 homolog, ribosome assembly protein (yeast) pseudogene
hsa-miR-600	1	0	1	1	1	1	FAM189B	family with sequence similarity 189, member B
hsa-miR-600	1	0	1	1	1	1	PCDHA5	protocadherin alpha 5
hsa-miR-600	1	0	1	1	1	1	LPGAT1	lysophosphatidylglycerol acyltransferase 1
hsa-miR-600	1	0	1	1	1	1	CLK4	CDC-like kinase 4
hsa-miR-600	0	0	1	1	1	1	EDA2R	ectodysplasin A2 receptor
hsa-miR-600	1	0	1	1	1	1	FAM120A	family with sequence similarity 120A
hsa-miR-600	0	0	1	0	0	0	LOC144486	uncharacterized LOC144486
hsa-miR-600	0	0	1	1	1	1	CLCNKA	chloride channel, voltage-sensitive Ka
hsa-miR-600	0	0	1	0	1	1	FAM72A	family with sequence similarity 72, member A
hsa-miR-600	0	0	1	1	1	1	SEC24D	SEC24 family, member D (S. cerevisiae)
hsa-miR-600	0	0	1	0	0	0	C12orf77	chromosome 12 open reading frame 77
hsa-miR-600	0	0	1	0	0	0	FAM201A	family with sequence similarity 201, member A
hsa-miR-600	1	0	1	1	1	1	LHX8	LIM homeobox 8
hsa-miR-600	1	0	1	1	1	1	LMO7	LIM domain 7
hsa-miR-600	1	0	1	0	1	1	NEGR1	neuronal growth regulator 1
hsa-miR-600	0	0	1	1	1	1	ZNF141	zinc finger protein 141
hsa-miR-600	0	0	1	0	0	0	LOC284889	uncharacterized LOC284889
hsa-miR-600	0	0	1	0	0	0	LOC286184	uncharacterized LOC286184
hsa-miR-600	1	0	1	0	1	1	YAF2	YY1 associated factor 2
hsa-miR-600	1	0	1	1	1	1	SOX6	SRY (sex determining region Y)-box 6
hsa-miR-600	1	0	1	1	1	1	UBXN2A	UBX domain protein 2A
hsa-miR-600	1	0	1	1	1	1	C4orf19	chromosome 4 open reading frame 19
hsa-miR-600	1	0	1	1	1	1	WSCD2	WSC domain containing 2
hsa-miR-600	1	0	1	1	1	1	CMIP	c-Maf inducing protein
hsa-miR-600	1	0	1	1	1	1	DAAM1	dishevelled associated activator of morphogenesis 1
hsa-miR-600	0	0	1	0	0	0	LOC100134868	uncharacterized LOC100134868
hsa-miR-600	0	0	1	0	0	0	FLJ36000	uncharacterized FLJ36000
hsa-miR-600	0	0	1	0	0	0	LOC339622	uncharacterized LOC339622
hsa-miR-600	1	0	1	1	1	1	BVES	blood vessel epicardial substance
hsa-miR-600	1	0	1	1	1	1	DYNC2LI1	dynein, cytoplasmic 2, light intermediate chain 1
hsa-miR-600	0	0	1	0	0	0	LOC339240	keratin 17 pseudogene
hsa-miR-600	0	0	1	0	0	0	A1BG-AS1	A1BG antisense RNA 1
hsa-miR-600	0	0	1	1	1	1	PCMTD2	protein-L-isoaspartate (D-aspartate) O-methyltransferase domain containing 2
hsa-miR-600	0	0	1	0	0	0	SLC7A11-AS1	SLC7A11 antisense RNA 1
hsa-miR-600	1	0	1	0	1	1	HSPA12A	heat shock 70kDa protein 12A
hsa-miR-600	1	0	1	1	1	1	GNG2	guanine nucleotide binding protein (G protein), gamma 2
hsa-miR-600	0	0	1	1	0	0	FAM159A	family with sequence similarity 159, member A
hsa-miR-600	1	0	1	1	1	1	TNFSF4	tumor necrosis factor (ligand) superfamily, member 4
hsa-miR-600	0	0	1	1	1	1	RABGAP1L	RAB GTPase activating protein 1-like
hsa-miR-600	1	0	1	1	1	1	C12orf76	chromosome 12 open reading frame 76
hsa-miR-600	0	0	1	0	0	0	LINC00347	long intergenic non-protein coding RNA 347
hsa-miR-600	0	0	1	1	1	1	TMEM200A	transmembrane protein 200A
hsa-miR-600	1	0	1	1	1	1	PSIP1	PC4 and SFRS1 interacting protein 1
hsa-miR-600	1	0	1	1	1	1	AGAP3	ArfGAP with GTPase domain, ankyrin repeat and PH domain 3
hsa-miR-600	1	0	1	0	1	1	PSD3	pleckstrin and Sec7 domain containing 3
hsa-miR-600	0	0	1	1	1	1	MGC57346	uncharacterized LOC401884
hsa-miR-600	1	0	1	1	1	1	SF3B1	splicing factor 3b, subunit 1, 155kDa
hsa-miR-600	0	0	1	1	0	0	FAM72B	family with sequence similarity 72, member B
hsa-miR-600	1	0	1	0	1	1	LYPD6	LY6/PLAUR domain containing 6
hsa-miR-600	0	0	1	0	0	0	INHBA-AS1	INHBA antisense RNA 1
hsa-miR-600	1	0	1	1	1	1	BRD1	bromodomain containing 1
hsa-miR-600	1	0	1	1	1	1	KIF2A	kinesin heavy chain member 2A
hsa-miR-600	1	0	1	1	1	1	GATA2	GATA binding protein 2
hsa-miR-600	1	0	1	1	1	1	ZFP91	zinc finger protein 91 homolog (mouse)
hsa-miR-600	1	0	1	1	1	1	YWHAZ	tyrosine 3-monooxygenase/tryptophan 5-monooxygenase activation protein, zeta polypeptide
hsa-miR-600	1	0	1	1	1	1	PCGF5	polycomb group ring finger 5
hsa-miR-600	1	0	1	1	1	1	ATP8B4	ATPase, class I, type 8B, member 4
hsa-miR-600	0	0	1	1	0	0	ADAM7	ADAM metallopeptidase domain 7
hsa-miR-600	0	0	1	1	1	1	ZNF365	zinc finger protein 365
hsa-miR-600	0	0	1	1	0	0	WDR90	WD repeat domain 90
hsa-miR-600	1	0	1	1	1	1	PDGFRA	platelet-derived growth factor receptor, alpha polypeptide
hsa-miR-600	0	0	1	0	0	0	LOC158435	uncharacterized LOC158435
hsa-miR-600	1	0	1	1	1	1	EIF4G2	eukaryotic translation initiation factor 4 gamma, 2
hsa-miR-600	1	0	1	1	1	1	VTCN1	V-set domain containing T cell activation inhibitor 1
hsa-miR-600	0	0	1	1	1	1	SH2D1B	SH2 domain containing 1B
hsa-miR-600	1	0	1	1	1	1	C18orf1	chromosome 18 open reading frame 1
hsa-miR-600	1	0	1	0	1	1	MAGIX	MAGI family member, X-linked
hsa-miR-600	0	0	1	0	0	0	ZNF66P	zinc finger protein 66, pseudogene
hsa-miR-600	1	0	1	1	1	1	PDCD6IP	programmed cell death 6 interacting protein
hsa-miR-600	1	0	1	1	1	1	SLC26A7	solute carrier family 26, member 7
hsa-miR-600	1	0	1	1	1	1	SRPK2	SRSF protein kinase 2
hsa-miR-600	0	0	1	1	0	0	GPRC5C	G protein-coupled receptor, family C, group 5, member C
hsa-miR-600	0	0	1	0	0	0	C17orf69	chromosome 17 open reading frame 69
hsa-miR-600	0	0	1	1	0	0	RELA	v-rel reticuloendotheliosis viral oncogene homolog A (avian)
hsa-miR-600	0	0	1	1	0	0	KLK15	kallikrein-related peptidase 15
hsa-miR-600	0	0	1	1	0	0	CYP4F30P	cytochrome P450, family 4, subfamily F, polypeptide 30, pseudogene
hsa-miR-600	1	0	1	1	1	1	MED27	mediator complex subunit 27
hsa-miR-600	1	0	1	0	1	1	HMGB3	high mobility group box 3
hsa-miR-600	1	0	1	0	1	1	TGFBR1	transforming growth factor, beta receptor 1
hsa-miR-600	1	0	1	0	1	1	MAP4K3	mitogen-activated protein kinase kinase kinase kinase 3
hsa-miR-600	1	0	1	1	1	1	FARP1	FERM, RhoGEF (ARHGEF) and pleckstrin domain protein 1 (chondrocyte-derived)
hsa-miR-600	1	0	1	0	1	1	TMEM194A	transmembrane protein 194A
hsa-miR-600	0	0	1	0	0	0	JPX	JPX transcript, XIST activator (non-protein coding)
hsa-miR-600	1	0	1	1	0	0	PLEKHG3	pleckstrin homology domain containing, family G (with RhoGef domain) member 3
hsa-miR-600	1	0	1	1	1	1	WNT5A	wingless-type MMTV integration site family, member 5A
hsa-miR-600	0	0	1	0	0	0	LOC441259	PMS2 postmeiotic segregation increased 2 (S. cerevisiae)-like
hsa-miR-600	1	0	1	0	1	1	AMMECR1L	AMME chromosomal region gene 1-like
hsa-miR-600	0	0	1	0	0	0	TBC1D25	TBC1 domain family, member 25
hsa-miR-600	1	0	1	1	1	1	ZBTB7A	zinc finger and BTB domain containing 7A
hsa-miR-600	1	0	1	1	1	1	GIGYF2	GRB10 interacting GYF protein 2
hsa-miR-600	0	0	1	1	1	1	COBL	cordon-bleu homolog (mouse)
hsa-miR-600	1	0	1	1	1	1	PLXNA2	plexin A2
hsa-miR-600	1	0	1	1	1	1	ST8SIA2	ST8 alpha-N-acetyl-neuraminide alpha-2,8-sialyltransferase 2
hsa-miR-600	1	0	1	1	1	1	ACVR2B	activin A receptor, type IIB
hsa-miR-600	1	0	1	1	1	1	WNT10B	wingless-type MMTV integration site family, member 10B
hsa-miR-600	0	0	1	0	0	0	ABCA11P	ATP-binding cassette, sub-family A (ABC1), member 11, pseudogene
hsa-miR-600	0	0	1	1	0	0	EDDM3A	epididymal protein 3A
hsa-miR-600	1	0	1	0	1	1	ARPP19	cAMP-regulated phosphoprotein, 19kDa
hsa-miR-600	0	0	1	1	1	1	XG	Xg blood group
hsa-miR-600	0	0	1	0	0	0	CCDC163P	coiled-coil domain containing 163, pseudogene
hsa-miR-600	1	0	1	1	1	1	ARFIP1	ADP-ribosylation factor interacting protein 1
hsa-miR-600	1	0	1	1	1	1	PTPRD	protein tyrosine phosphatase, receptor type, D
hsa-miR-600	0	0	1	1	1	1	TTN	titin
hsa-miR-600	1	0	1	1	1	1	SUV420H1	suppressor of variegation 4-20 homolog 1 (Drosophila)
hsa-miR-600	1	0	1	0	1	1	BTBD3	BTB (POZ) domain containing 3
hsa-miR-600	0	0	1	1	1	1	RASAL2	RAS protein activator like 2
hsa-miR-600	0	0	1	0	0	0	LRRC37A11P	leucine rich repeat containing 37, member A11, pseudogene
hsa-miR-600	1	0	1	1	1	1	NR3C2	nuclear receptor subfamily 3, group C, member 2
hsa-miR-600	1	0	1	1	1	1	SHANK2	SH3 and multiple ankyrin repeat domains 2
hsa-miR-600	1	0	1	1	1	1	TNS1	tensin 1
hsa-miR-600	0	0	1	0	0	0	FAM27E3	family with sequence similarity 27, member E3
hsa-miR-600	0	0	1	0	0	0	LINC00486	long intergenic non-protein coding RNA 486
hsa-miR-600	0	0	1	0	0	0	LGALS17A	Charcot-Leyden crystal protein pseudogene
hsa-miR-600	0	0	1	1	0	0	SAFB	scaffold attachment factor B
hsa-miR-600	1	0	1	1	1	1	CHIC1	cysteine-rich hydrophobic domain 1
hsa-miR-600	1	0	1	1	1	1	MLLT10	myeloid/lymphoid or mixed-lineage leukemia (trithorax homolog, Drosophila); translocated to, 10
hsa-miR-600	0	0	1	0	0	0	FAM225B	family with sequence similarity 225, member B (non-protein coding)
hsa-miR-600	0	0	1	1	0	0	EPS15L1	epidermal growth factor receptor pathway substrate 15-like 1
hsa-miR-600	1	0	1	1	1	1	CADPS	Ca++-dependent secretion activator
hsa-miR-600	1	0	1	1	1	1	NUMB	numb homolog (Drosophila)
hsa-miR-600	0	0	1	1	1	1	CNIH	cornichon homolog (Drosophila)
hsa-miR-600	0	0	1	1	0	0	PSMB5	proteasome (prosome, macropain) subunit, beta type, 5
hsa-miR-600	0	0	1	1	1	1	IP6K2	inositol hexakisphosphate kinase 2
hsa-miR-600	1	0	1	1	1	1	RAB7A	RAB7A, member RAS oncogene family
hsa-miR-600	1	0	1	1	1	1	FZD6	frizzled family receptor 6
hsa-miR-600	0	0	1	1	1	1	AIG1	androgen-induced 1
hsa-miR-600	1	0	1	0	1	1	CLASP2	cytoplasmic linker associated protein 2
hsa-miR-600	0	0	1	0	1	1	THUMPD1	THUMP domain containing 1
hsa-miR-600	0	0	1	1	1	1	VCAN	versican
hsa-miR-600	0	0	1	1	1	1	PRR14L	proline rich 14-like
hsa-miR-600	1	0	1	1	1	1	PRDM2	PR domain containing 2, with ZNF domain
hsa-miR-600	0	0	1	1	1	1	MLIP	muscular LMNA-interacting protein
hsa-miR-600	1	0	1	1	1	1	S100PBP	S100P binding protein
hsa-miR-600	1	0	1	1	1	1	CYB5B	cytochrome b5 type B (outer mitochondrial membrane)
hsa-miR-600	0	0	1	1	1	1	CCNT2	cyclin T2
hsa-miR-600	1	0	1	1	1	1	PHF3	PHD finger protein 3
hsa-miR-600	0	0	1	1	1	1	DDX21	DEAD (Asp-Glu-Ala-Asp) box helicase 21
hsa-miR-600	1	0	1	1	1	1	GAP43	growth associated protein 43
hsa-miR-600	1	0	1	1	1	1	PTER	phosphotriesterase related
hsa-miR-600	1	0	1	0	1	1	TBL1XR1	transducin (beta)-like 1 X-linked receptor 1
hsa-miR-600	1	0	1	1	1	1	SGK3	serum/glucocorticoid regulated kinase family, member 3
hsa-miR-600	1	0	1	1	1	1	DLG5	discs, large homolog 5 (Drosophila)
hsa-miR-600	1	0	1	1	1	1	CREB3L2	cAMP responsive element binding protein 3-like 2
hsa-miR-600	1	0	1	0	1	1	TTL	tubulin tyrosine ligase
hsa-miR-600	1	0	1	1	1	1	HIC2	hypermethylated in cancer 2
hsa-miR-600	1	0	1	0	1	1	RNF144A	ring finger protein 144A
hsa-miR-600	0	0	1	1	1	1	HEXA	hexosaminidase A (alpha polypeptide)
hsa-miR-600	1	0	1	0	1	1	STX6	syntaxin 6
hsa-miR-600	1	0	1	0	0	0	IGLON5	IgLON family member 5
hsa-miR-600	0	0	1	0	0	0	LOC401127	WD repeat domain 5 pseudogene
hsa-miR-600	1	0	1	1	0	0	RAB24	RAB24, member RAS oncogene family
hsa-miR-600	0	0	1	0	0	0	FLJ30838	uncharacterized LOC400955
hsa-miR-600	0	0	1	0	0	0	LOC400768	uncharacterized LOC400768
hsa-miR-600	0	0	1	1	1	1	FBXO36	F-box protein 36
hsa-miR-600	1	0	1	1	1	1	C8orf58	chromosome 8 open reading frame 58
hsa-miR-600	1	0	1	1	1	1	ANXA2	annexin A2
hsa-miR-600	0	0	1	1	0	0	RPL11	ribosomal protein L11
hsa-miR-600	0	0	1	1	1	1	INCENP	inner centromere protein antigens 135/155kDa
hsa-miR-600	0	0	1	1	1	1	SDE2	SDE2 telomere maintenance homolog (S. pombe)
hsa-miR-600	1	0	1	1	1	1	SSR1	signal sequence receptor, alpha
hsa-miR-600	1	0	1	1	1	1	TPM4	tropomyosin 4
hsa-miR-600	0	0	1	0	1	1	CD99P1	CD99 molecule pseudogene 1
hsa-miR-600	1	0	1	1	1	1	UPF3A	UPF3 regulator of nonsense transcripts homolog A (yeast)
hsa-miR-600	0	0	1	1	0	0	TMEM183A	transmembrane protein 183A
hsa-miR-600	1	0	1	1	1	1	LYPLA2	lysophospholipase II
hsa-miR-600	0	0	1	1	1	1	XBP1	X-box binding protein 1
hsa-miR-600	0	0	1	1	1	1	ATG4A	autophagy related 4A, cysteine peptidase
hsa-miR-600	0	0	1	0	1	1	SRSF5	serine/arginine-rich splicing factor 5
hsa-miR-600	1	0	1	1	1	1	GPR137B	G protein-coupled receptor 137B
hsa-miR-600	0	0	1	1	1	1	PEX19	peroxisomal biogenesis factor 19
hsa-miR-600	1	0	1	0	1	1	C15orf41	chromosome 15 open reading frame 41
hsa-miR-600	0	0	1	0	1	1	VSTM2A	V-set and transmembrane domain containing 2A
hsa-miR-600	0	0	1	0	1	1	SUMO2	SMT3 suppressor of mif two 3 homolog 2 (S. cerevisiae)
hsa-miR-600	0	0	1	1	1	1	BEST3	bestrophin 3
hsa-miR-600	1	0	1	1	1	1	KCNS3	potassium voltage-gated channel, delayed-rectifier, subfamily S, member 3
hsa-miR-600	0	0	1	1	0	0	TBC1D7	TBC1 domain family, member 7
hsa-miR-600	0	0	1	1	0	0	EIF3I	eukaryotic translation initiation factor 3, subunit I
hsa-miR-600	1	0	1	1	1	1	F11R	F11 receptor
hsa-miR-600	0	0	1	1	1	1	STRAP	serine/threonine kinase receptor associated protein
hsa-miR-600	0	0	1	1	1	1	FAM18B1	family with sequence similarity 18, member B1
hsa-miR-600	1	0	1	0	1	1	MAP1B	microtubule-associated protein 1B
hsa-miR-600	1	0	1	1	1	1	MFSD2A	major facilitator superfamily domain containing 2A
hsa-miR-600	1	0	1	1	1	1	UBE2K	ubiquitin-conjugating enzyme E2K
hsa-miR-600	0	0	1	1	1	1	ZNF259	zinc finger protein 259
hsa-miR-600	1	0	1	0	1	1	CD47	CD47 molecule
hsa-miR-600	1	0	1	1	1	1	YWHAE	tyrosine 3-monooxygenase/tryptophan 5-monooxygenase activation protein, epsilon polypeptide
hsa-miR-600	0	0	1	1	0	0	TESK1	testis-specific kinase 1
hsa-miR-600	1	0	1	1	1	1	TIPRL	TIP41, TOR signaling pathway regulator-like (S. cerevisiae)
hsa-miR-600	0	0	1	1	1	1	BEX4	brain expressed, X-linked 4
hsa-miR-600	1	0	1	1	1	1	MAN1C1	mannosidase, alpha, class 1C, member 1
hsa-miR-600	0	0	1	1	1	1	NUDT21	nudix (nucleoside diphosphate linked moiety X)-type motif 21
hsa-miR-600	0	0	1	1	1	1	FAM118B	family with sequence similarity 118, member B
hsa-miR-600	1	0	1	1	1	1	LGALSL	lectin, galactoside-binding-like
hsa-miR-600	0	0	1	1	0	0	CD38	CD38 molecule
hsa-miR-600	1	0	1	0	1	1	KIAA0664	KIAA0664
hsa-miR-600	0	0	1	0	0	0	LOC731789	uncharacterized LOC731789
hsa-miR-600	1	0	1	1	1	1	FBXW7	F-box and WD repeat domain containing 7, E3 ubiquitin protein ligase
hsa-miR-600	0	0	1	1	1	1	ATG5	autophagy related 5
hsa-miR-600	1	0	1	1	1	1	KIAA2018	KIAA2018
hsa-miR-600	1	0	1	1	1	1	SLC39A10	solute carrier family 39 (zinc transporter), member 10
hsa-miR-600	1	0	1	0	1	1	CNTNAP2	contactin associated protein-like 2
hsa-miR-600	1	0	1	0	1	1	ZNF776	zinc finger protein 776
hsa-miR-600	1	0	1	1	1	1	RBPJ	recombination signal binding protein for immunoglobulin kappa J region
hsa-miR-600	0	0	1	1	1	1	SLC39A14	solute carrier family 39 (zinc transporter), member 14
hsa-miR-600	1	0	1	0	1	1	KLHDC10	kelch domain containing 10
hsa-miR-600	0	0	1	1	1	1	CEACAM1	carcinoembryonic antigen-related cell adhesion molecule 1 (biliary glycoprotein)
hsa-miR-600	1	0	1	0	1	1	CBX7	chromobox homolog 7
hsa-miR-600	1	0	1	1	1	1	KCNE3	potassium voltage-gated channel, Isk-related family, member 3
hsa-miR-600	0	0	1	0	0	0	POM121L8P	POM121 transmembrane nucleoporin-like 8 pseudogene
hsa-miR-600	1	0	1	1	1	1	BNC2	basonuclin 2
hsa-miR-600	1	0	1	0	1	1	RBBP5	retinoblastoma binding protein 5
hsa-miR-600	1	0	1	0	1	1	DCBLD2	discoidin, CUB and LCCL domain containing 2
hsa-miR-600	1	0	1	0	1	1	EPDR1	ependymin related protein 1 (zebrafish)
hsa-miR-600	1	0	1	1	1	1	SLC4A8	solute carrier family 4, sodium bicarbonate cotransporter, member 8
hsa-miR-600	0	0	1	1	1	1	ALDH3B1	aldehyde dehydrogenase 3 family, member B1
hsa-miR-600	1	0	1	1	1	1	MLL	myeloid/lymphoid or mixed-lineage leukemia (trithorax homolog, Drosophila)
hsa-miR-600	1	0	1	1	1	1	ATP2B2	ATPase, Ca++ transporting, plasma membrane 2
hsa-miR-600	1	0	1	0	1	1	STAT3	signal transducer and activator of transcription 3 (acute-phase response factor)
hsa-miR-600	0	0	1	0	1	1	OPRK1	opioid receptor, kappa 1
hsa-miR-600	1	0	1	1	1	1	RALBP1	ralA binding protein 1
hsa-miR-600	1	0	1	1	1	1	GRM1	glutamate receptor, metabotropic 1
hsa-miR-600	1	0	1	0	1	1	BCL2	B-cell CLL/lymphoma 2
hsa-miR-600	1	0	1	1	1	1	PLAU	plasminogen activator, urokinase
hsa-miR-600	0	0	1	1	1	1	CD55	CD55 molecule, decay accelerating factor for complement (Cromer blood group)
hsa-miR-600	0	0	1	0	0	0	PVT1	Pvt1 oncogene (non-protein coding)
hsa-miR-600	1	0	1	1	1	1	IGF1	insulin-like growth factor 1 (somatomedin C)
hsa-miR-600	0	0	1	1	0	0	ASPA	aspartoacylase
hsa-miR-600	0	0	1	1	1	1	ATP7A	ATPase, Cu++ transporting, alpha polypeptide
hsa-miR-600	1	0	1	1	1	1	COL4A3	collagen, type IV, alpha 3 (Goodpasture antigen)
hsa-miR-600	1	0	1	0	1	1	SLC26A2	solute carrier family 26 (sulfate transporter), member 2
hsa-miR-600	1	0	1	1	1	1	FBN1	fibrillin 1
hsa-miR-600	1	0	1	0	1	1	GLI3	GLI family zinc finger 3
hsa-miR-600	0	0	1	1	1	1	HPRT1	hypoxanthine phosphoribosyltransferase 1
hsa-miR-600	1	0	1	1	1	1	ITGA6	integrin, alpha 6
hsa-miR-600	1	0	1	0	1	1	ITGB3	integrin, beta 3 (platelet glycoprotein IIIa, antigen CD61)
hsa-miR-600	1	0	1	1	1	1	JAG1	jagged 1
hsa-miR-600	1	0	1	1	1	1	KCNA1	potassium voltage-gated channel, shaker-related subfamily, member 1 (episodic ataxia with myokymia)
hsa-miR-600	1	0	1	0	1	1	SGCB	sarcoglycan, beta (43kDa dystrophin-associated glycoprotein)
hsa-miR-600	0	0	1	1	0	0	NME1	NME/NM23 nucleoside diphosphate kinase 1
hsa-miR-600	1	0	1	1	1	1	SOX9	SRY (sex determining region Y)-box 9
hsa-miR-600	0	0	1	1	1	1	STS	steroid sulfatase (microsomal), isozyme S
hsa-miR-600	0	0	1	1	1	1	CASR	calcium-sensing receptor
hsa-miR-600	0	0	1	1	1	1	LTBP2	latent transforming growth factor beta binding protein 2
hsa-miR-600	1	0	1	0	1	1	PAFAH1B1	platelet-activating factor acetylhydrolase 1b, regulatory subunit 1 (45kDa)
hsa-miR-600	1	0	1	1	1	1	SLC26A4	solute carrier family 26, member 4
hsa-miR-600	1	0	1	1	1	1	APP	amyloid beta (A4) precursor protein
hsa-miR-600	1	0	1	1	1	1	AQP2	aquaporin 2 (collecting duct)
hsa-miR-600	1	0	1	1	1	1	HOXD13	homeobox D13
hsa-miR-600	0	0	1	1	1	1	WRN	Werner syndrome, RecQ helicase-like
hsa-miR-600	1	0	1	1	1	1	DCX	doublecortin
hsa-miR-600	0	0	1	1	1	1	FCGR1A	Fc fragment of IgG, high affinity Ia, receptor (CD64)
hsa-miR-600	0	0	1	1	1	1	IL2	interleukin 2
hsa-miR-600	1	0	1	1	1	1	TNF	tumor necrosis factor
hsa-miR-600	1	0	1	1	1	1	CHRM1	cholinergic receptor, muscarinic 1
hsa-miR-600	1	0	1	1	1	1	GABRB3	gamma-aminobutyric acid (GABA) A receptor, beta 3
hsa-miR-600	1	0	1	1	1	1	GAD1	glutamate decarboxylase 1 (brain, 67kDa)
hsa-miR-600	1	0	1	1	1	1	GRIA4	glutamate receptor, ionotropic, AMPA 4
hsa-miR-600	1	0	1	1	0	0	GRIN2A	glutamate receptor, ionotropic, N-methyl D-aspartate 2A
hsa-miR-600	1	0	1	0	1	1	KCNJ2	potassium inwardly-rectifying channel, subfamily J, member 2
hsa-miR-600	0	0	1	1	1	1	NPY2R	neuropeptide Y receptor Y2
hsa-miR-600	0	0	1	1	1	1	PON3	paraoxonase 3
hsa-miR-600	1	0	1	1	1	1	PPP3R1	protein phosphatase 3, regulatory subunit B, alpha
hsa-miR-600	1	0	1	1	1	1	PTGER4	prostaglandin E receptor 4 (subtype EP4)
hsa-miR-600	1	0	1	1	1	1	PTGFR	prostaglandin F receptor (FP)
hsa-miR-600	1	0	1	0	1	1	SPOPL	speckle-type POZ protein-like
hsa-miR-600	1	0	1	0	1	1	ARHGEF37	Rho guanine nucleotide exchange factor (GEF) 37
hsa-miR-600	1	0	1	0	1	1	PPARA	peroxisome proliferator-activated receptor alpha
hsa-miR-600	1	0	1	1	1	1	FAM13C	family with sequence similarity 13, member C
hsa-miR-600	0	0	1	0	0	0	KLK2	kallikrein-related peptidase 2
hsa-miR-600	1	0	1	1	1	1	LCLAT1	lysocardiolipin acyltransferase 1
hsa-miR-600	1	0	1	1	1	1	GATA3	GATA binding protein 3
hsa-miR-600	1	0	1	1	1	1	HMGXB4	HMG box domain containing 4
hsa-miR-600	1	0	1	1	1	1	RREB1	ras responsive element binding protein 1
hsa-miR-600	1	0	1	0	1	1	LIN28B	lin-28 homolog B (C. elegans)
hsa-miR-600	0	0	1	1	1	1	DBX2	developing brain homeobox 2
hsa-miR-600	1	0	1	0	1	1	YPEL2	yippee-like 2 (Drosophila)
hsa-miR-600	1	0	1	1	1	1	PLCXD3	phosphatidylinositol-specific phospholipase C, X domain containing 3
hsa-miR-600	1	0	1	1	1	1	EDA	ectodysplasin A
hsa-miR-600	0	0	1	0	1	1	TXLNG2P	taxilin gamma 2, pseudogene
hsa-miR-600	1	0	1	0	1	1	IP6K1	inositol hexakisphosphate kinase 1
hsa-miR-600	0	0	1	0	1	1	C8orf22	chromosome 8 open reading frame 22
hsa-miR-600	0	0	1	1	1	1	ERCC8	excision repair cross-complementing rodent repair deficiency, complementation group 8
hsa-miR-600	1	0	1	0	1	1	SS18	synovial sarcoma translocation, chromosome 18
hsa-miR-600	1	0	1	1	1	1	CTDSPL	CTD (carboxy-terminal domain, RNA polymerase II, polypeptide A) small phosphatase-like
hsa-miR-600	0	0	1	1	1	1	MXRA7	matrix-remodelling associated 7
hsa-miR-600	1	0	1	0	1	1	KIAA2022	KIAA2022
hsa-miR-600	1	0	1	1	1	1	FNIP1	folliculin interacting protein 1
hsa-miR-600	0	0	1	1	0	0	CCT3	chaperonin containing TCP1, subunit 3 (gamma)
hsa-miR-600	1	0	1	1	1	1	SHE	Src homology 2 domain containing E
hsa-miR-600	1	0	1	0	1	1	PM20D2	peptidase M20 domain containing 2
hsa-miR-600	0	0	1	1	1	1	NCMAP	noncompact myelin associated protein
hsa-miR-600	1	0	1	0	1	1	CREB5	cAMP responsive element binding protein 5
hsa-miR-600	0	0	1	1	0	0	SOHLH1	spermatogenesis and oogenesis specific basic helix-loop-helix 1
hsa-miR-600	0	0	1	0	1	1	LINC00596	long intergenic non-protein coding RNA 596
hsa-miR-600	0	0	1	1	1	1	BEX5	brain expressed, X-linked 5
hsa-miR-600	0	0	1	1	1	1	C9orf152	chromosome 9 open reading frame 152
hsa-miR-600	0	0	1	0	1	1	C12orf69	chromosome 12 open reading frame 69
hsa-miR-600	1	0	1	1	1	1	H3F3C	H3 histone, family 3C
hsa-miR-600	0	0	1	1	1	1	FLG2	filaggrin family member 2
hsa-miR-600	0	0	1	1	0	0	EMC6	ER membrane protein complex subunit 6
hsa-miR-600	1	0	1	1	1	1	KCNMA1	potassium large conductance calcium-activated channel, subfamily M, alpha member 1
hsa-miR-600	1	0	1	1	1	1	PHF6	PHD finger protein 6
hsa-miR-600	1	0	1	1	1	1	TMCC1	transmembrane and coiled-coil domain family 1
hsa-miR-600	1	0	1	1	1	1	VMA21	VMA21 vacuolar H+-ATPase homolog (S. cerevisiae)
hsa-miR-600	1	0	1	1	1	1	PFKFB2	6-phosphofructo-2-kinase/fructose-2,6-biphosphatase 2
hsa-miR-600	0	0	1	1	1	1	POLR2M	polymerase (RNA) II (DNA directed) polypeptide M
hsa-miR-600	0	0	1	1	1	1	NPIPL1	nuclear pore complex interacting protein-like 1
hsa-miR-600	0	0	1	1	1	1	NAE1	NEDD8 activating enzyme E1 subunit 1
hsa-miR-600	0	0	1	0	1	1	TM2D2	TM2 domain containing 2
hsa-miR-600	1	0	1	1	1	1	KALRN	kalirin, RhoGEF kinase
hsa-miR-600	1	0	1	0	1	1	TNRC6B	trinucleotide repeat containing 6B
hsa-miR-600	0	0	1	0	0	0	CSN1S1	casein alpha s1
hsa-miR-600	0	0	1	1	0	0	KLK3	kallikrein-related peptidase 3
hsa-miR-600	1	0	1	0	1	1	SAMD5	sterile alpha motif domain containing 5
hsa-miR-600	0	0	1	1	1	1	ATF3	activating transcription factor 3
hsa-miR-600	0	0	1	1	1	1	TP53BP2	tumor protein p53 binding protein, 2
hsa-miR-600	1	0	1	1	1	1	MAF	v-maf musculoaponeurotic fibrosarcoma oncogene homolog (avian)
hsa-miR-600	1	0	1	1	1	1	CSNK1G3	casein kinase 1, gamma 3
hsa-miR-600	0	0	1	0	1	1	STXBP1	syntaxin binding protein 1
hsa-miR-600	1	0	1	1	1	1	TMPO	thymopoietin
hsa-miR-600	1	0	1	1	1	1	UBE2V1	ubiquitin-conjugating enzyme E2 variant 1
hsa-miR-600	0	0	1	1	1	1	PLGLB1	plasminogen-like B1
hsa-miR-600	0	0	1	1	1	1	HNRNPH2	heterogeneous nuclear ribonucleoprotein H2 (H')
hsa-miR-600	1	0	1	0	1	1	SRGAP3	SLIT-ROBO Rho GTPase activating protein 3
hsa-miR-600	1	0	1	1	1	1	ZNF704	zinc finger protein 704
hsa-miR-600	0	0	1	1	1	1	TRAF5	TNF receptor-associated factor 5
hsa-miR-600	0	0	1	1	1	1	FAM134B	family with sequence similarity 134, member B
hsa-miR-600	0	0	1	1	0	0	PARL	presenilin associated, rhomboid-like
hsa-miR-600	1	0	1	0	1	1	CDC42SE1	CDC42 small effector 1
hsa-miR-600	0	0	1	0	0	0	FER1L6	fer-1-like 6 (C. elegans)
hsa-miR-600	0	0	1	1	1	1	ATAD3C	ATPase family, AAA domain containing 3C
hsa-miR-600	1	0	1	0	1	1	GK5	glycerol kinase 5 (putative)
hsa-miR-600	1	0	1	1	1	1	AP1S3	adaptor-related protein complex 1, sigma 3 subunit
hsa-miR-600	1	0	1	1	1	1	KREMEN1	kringle containing transmembrane protein 1
hsa-miR-600	1	0	1	0	1	1	USP9X	ubiquitin specific peptidase 9, X-linked
hsa-miR-600	1	0	1	1	1	1	CBLN3	cerebellin 3 precursor
hsa-miR-600	0	0	1	1	0	0	LOC643923	uncharacterized LOC643923
hsa-miR-600	1	0	1	1	1	1	C3orf65	chromosome 3 open reading frame 65
hsa-miR-600	0	0	1	1	1	1	ANKRD55	ankyrin repeat domain 55
hsa-miR-600	1	0	1	1	1	1	LFNG	LFNG O-fucosylpeptide 3-beta-N-acetylglucosaminyltransferase
hsa-miR-600	1	0	1	1	1	1	ZBTB8A	zinc finger and BTB domain containing 8A
hsa-miR-600	1	0	1	1	1	1	GDAP1	ganglioside induced differentiation associated protein 1
hsa-miR-600	0	0	1	1	1	1	MST4	serine/threonine protein kinase MST4
hsa-miR-600	1	0	1	1	1	1	C2orf88	chromosome 2 open reading frame 88
hsa-miR-600	1	0	1	1	1	1	ERBB4	v-erb-a erythroblastic leukemia viral oncogene homolog 4 (avian)
hsa-miR-600	0	0	1	1	1	1	TTC14	tetratricopeptide repeat domain 14
hsa-miR-600	1	0	1	1	1	1	KDM5A	lysine (K)-specific demethylase 5A
hsa-miR-600	1	0	1	1	1	1	RERE	arginine-glutamic acid dipeptide (RE) repeats
hsa-miR-600	1	0	1	1	1	1	PVRL2	poliovirus receptor-related 2 (herpesvirus entry mediator B)
hsa-miR-600	1	0	1	1	1	1	TPM3	tropomyosin 3
hsa-miR-600	1	0	1	0	1	1	SLC7A6	solute carrier family 7 (amino acid transporter light chain, y+L system), member 6
hsa-miR-600	1	0	1	1	1	1	CDC14B	CDC14 cell division cycle 14 homolog B (S. cerevisiae)
hsa-miR-600	1	0	1	1	1	1	HS6ST2	heparan sulfate 6-O-sulfotransferase 2
hsa-miR-600	1	0	1	1	1	1	ZNF436	zinc finger protein 436
hsa-miR-600	1	0	1	1	1	1	SREK1	splicing regulatory glutamine/lysine-rich protein 1
hsa-miR-600	1	0	1	1	1	1	PHF16	PHD finger protein 16
hsa-miR-600	0	0	1	1	1	1	VCAM1	vascular cell adhesion molecule 1
hsa-miR-600	0	0	1	0	0	0	TMEM183B	transmembrane protein 183B
hsa-miR-600	1	0	1	1	1	1	CREBBP	CREB binding protein
hsa-miR-600	1	0	1	1	1	1	VAV3	vav 3 guanine nucleotide exchange factor
hsa-miR-600	1	0	1	1	1	1	LDB3	LIM domain binding 3
hsa-miR-600	1	0	1	1	1	1	KDM6B	lysine (K)-specific demethylase 6B
hsa-miR-600	1	0	1	0	1	1	ODZ3	odz, odd Oz/ten-m homolog 3 (Drosophila)
hsa-miR-600	1	0	1	1	1	1	REPS2	RALBP1 associated Eps domain containing 2
hsa-miR-600	0	0	1	1	1	1	ADSS	adenylosuccinate synthase
hsa-miR-600	1	0	1	1	1	1	AFM	afamin
hsa-miR-600	0	0	1	1	0	0	ATP6AP1	ATPase, H+ transporting, lysosomal accessory protein 1
hsa-miR-600	1	0	1	0	1	1	BMPR2	bone morphogenetic protein receptor, type II (serine/threonine kinase)
hsa-miR-600	1	0	1	0	1	1	KLF9	Kruppel-like factor 9
hsa-miR-600	1	0	1	0	1	1	CDK6	cyclin-dependent kinase 6
hsa-miR-600	1	0	1	1	1	1	KLF6	Kruppel-like factor 6
hsa-miR-600	1	0	1	0	1	1	CPD	carboxypeptidase D
hsa-miR-600	1	0	1	1	1	1	DYRK1A	dual-specificity tyrosine-(Y)-phosphorylation regulated kinase 1A
hsa-miR-600	1	0	1	0	1	1	EFNB3	ephrin-B3
hsa-miR-600	1	0	1	0	1	1	ELAVL3	ELAV (embryonic lethal, abnormal vision, Drosophila)-like 3 (Hu antigen C)
hsa-miR-600	0	0	1	0	1	1	EMP1	epithelial membrane protein 1
hsa-miR-600	1	0	1	1	1	1	EP300	E1A binding protein p300
hsa-miR-600	1	0	1	1	1	1	EREG	epiregulin
hsa-miR-600	1	0	1	1	1	1	GCNT1	glucosaminyl (N-acetyl) transferase 1, core 2
hsa-miR-600	1	0	1	1	1	1	ID4	inhibitor of DNA binding 4, dominant negative helix-loop-helix protein
hsa-miR-600	1	0	1	1	1	1	ARL4D	ADP-ribosylation factor-like 4D
hsa-miR-600	1	0	1	0	1	1	ARNT	aryl hydrocarbon receptor nuclear translocator
hsa-miR-600	1	0	1	1	1	1	CBFB	core-binding factor, beta subunit
hsa-miR-600	1	0	1	1	1	1	CDC25A	cell division cycle 25 homolog A (S. pombe)
hsa-miR-600	0	0	1	1	1	1	CDO1	cysteine dioxygenase, type I
hsa-miR-600	0	0	1	1	1	1	CKS2	CDC28 protein kinase regulatory subunit 2
hsa-miR-600	1	0	1	1	1	1	CLCN4	chloride channel, voltage-sensitive 4
hsa-miR-600	1	0	1	1	1	1	SLC31A1	solute carrier family 31 (copper transporters), member 1
hsa-miR-600	0	0	1	0	0	0	CPE	carboxypeptidase E
hsa-miR-600	0	0	1	1	1	1	CPS1	carbamoyl-phosphate synthase 1, mitochondrial
hsa-miR-600	0	0	1	1	1	1	CTSE	cathepsin E
hsa-miR-600	0	0	1	1	0	0	EFNA5	ephrin-A5
hsa-miR-600	1	0	1	0	1	1	FOXO1	forkhead box O1
hsa-miR-600	0	0	1	1	1	1	FLI1	Friend leukemia virus integration 1
hsa-miR-600	1	0	1	1	1	1	GFPT1	glutamine--fructose-6-phosphate transaminase 1
hsa-miR-600	1	0	1	0	1	1	GNAI1	guanine nucleotide binding protein (G protein), alpha inhibiting activity polypeptide 1
hsa-miR-600	0	0	1	1	1	1	HMGCS1	3-hydroxy-3-methylglutaryl-CoA synthase 1 (soluble)
hsa-miR-600	0	0	1	1	1	1	HOXB5	homeobox B5
hsa-miR-600	0	0	1	1	0	0	ID3	inhibitor of DNA binding 3, dominant negative helix-loop-helix protein
hsa-miR-600	1	0	1	1	1	1	ITGB8	integrin, beta 8
hsa-miR-600	1	0	1	1	1	1	ITPKB	inositol-trisphosphate 3-kinase B
hsa-miR-600	1	0	1	1	1	1	ITPR2	inositol 1,4,5-trisphosphate receptor, type 2
hsa-miR-600	1	0	1	1	1	1	JUN	jun proto-oncogene
hsa-miR-600	0	0	1	1	1	1	KCNJ15	potassium inwardly-rectifying channel, subfamily J, member 15
hsa-miR-600	1	0	1	1	1	1	IPO5	importin 5
hsa-miR-600	0	0	1	1	0	0	LGALS3	lectin, galactoside-binding, soluble, 3
hsa-miR-600	1	0	1	1	1	1	LIF	leukemia inhibitory factor
hsa-miR-600	0	0	1	1	1	1	TACSTD2	tumor-associated calcium signal transducer 2
hsa-miR-600	1	0	1	1	1	1	NPAS2	neuronal PAS domain protein 2
hsa-miR-600	1	0	1	1	1	1	NPAT	nuclear protein, ataxia-telangiectasia locus
hsa-miR-600	1	0	1	1	1	1	TNFRSF11B	tumor necrosis factor receptor superfamily, member 11b
hsa-miR-600	1	0	1	1	1	1	OSBP	oxysterol binding protein
hsa-miR-600	1	0	1	1	1	1	FURIN	furin (paired basic amino acid cleaving enzyme)
hsa-miR-600	1	0	1	0	1	1	PAPPA	pregnancy-associated plasma protein A, pappalysin 1
hsa-miR-600	1	0	1	1	1	1	PCDH8	protocadherin 8
hsa-miR-600	1	0	1	0	1	1	PDK1	pyruvate dehydrogenase kinase, isozyme 1
hsa-miR-600	0	0	1	1	0	0	SERPINF1	serpin peptidase inhibitor, clade F (alpha-2 antiplasmin, pigment epithelium derived factor), member 1
hsa-miR-600	0	0	1	1	1	1	SERPINB8	serpin peptidase inhibitor, clade B (ovalbumin), member 8
hsa-miR-600	0	0	1	1	1	1	PIGF	phosphatidylinositol glycan anchor biosynthesis, class F
hsa-miR-600	1	0	1	1	1	1	PLAGL2	pleiomorphic adenoma gene-like 2
hsa-miR-600	0	0	1	1	1	1	PLGLB2	plasminogen-like B2
hsa-miR-600	0	0	1	1	1	1	PPP1R3A	protein phosphatase 1, regulatory subunit 3A
hsa-miR-600	1	0	1	1	1	1	PPP2CA	protein phosphatase 2, catalytic subunit, alpha isozyme
hsa-miR-600	0	0	1	1	0	0	PSMC6	proteasome (prosome, macropain) 26S subunit, ATPase, 6
hsa-miR-600	1	0	1	1	1	1	PTPN1	protein tyrosine phosphatase, non-receptor type 1
hsa-miR-600	1	0	1	1	1	1	PTX3	pentraxin 3, long
hsa-miR-600	0	0	1	1	1	1	RGS1	regulator of G-protein signaling 1
hsa-miR-600	0	0	1	1	1	1	RNASE4	ribonuclease, RNase A family, 4
hsa-miR-600	1	0	1	1	1	1	ROBO2	roundabout, axon guidance receptor, homolog 2 (Drosophila)
hsa-miR-600	0	0	1	1	1	1	CXCL6	chemokine (C-X-C motif) ligand 6 (granulocyte chemotactic protein 2)
hsa-miR-600	0	0	1	1	1	1	SDC4	syndecan 4
hsa-miR-600	1	0	1	1	1	1	SFRP4	secreted frizzled-related protein 4
hsa-miR-600	1	0	1	1	1	1	SRSF3	serine/arginine-rich splicing factor 3
hsa-miR-600	1	0	1	0	1	1	SLC6A1	solute carrier family 6 (neurotransmitter transporter, GABA), member 1
hsa-miR-600	1	0	1	1	1	1	SRF	serum response factor (c-fos serum response element-binding transcription factor)
hsa-miR-600	0	0	1	1	1	1	STAT5A	signal transducer and activator of transcription 5A
hsa-miR-600	1	0	1	0	1	1	STC1	stanniocalcin 1
hsa-miR-600	0	0	1	1	1	1	STIM1	stromal interaction molecule 1
hsa-miR-600	1	0	1	0	1	1	RPS6KB1	ribosomal protein S6 kinase, 70kDa, polypeptide 1
hsa-miR-600	0	0	1	1	1	1	STRN	striatin, calmodulin binding protein
hsa-miR-600	0	0	1	1	1	1	SULT2A1	sulfotransferase family, cytosolic, 2A, dehydroepiandrosterone (DHEA)-preferring, member 1
hsa-miR-600	1	0	1	0	1	1	TAL1	T-cell acute lymphocytic leukemia 1
hsa-miR-600	1	0	1	0	1	1	THBS1	thrombospondin 1
hsa-miR-600	1	0	1	0	1	1	SEC62	SEC62 homolog (S. cerevisiae)
hsa-miR-600	0	0	1	1	0	0	HIRA	HIR histone cell cycle regulation defective homolog A (S. cerevisiae)
hsa-miR-600	0	0	1	1	1	1	UBE2E1	ubiquitin-conjugating enzyme E2E 1
hsa-miR-600	0	0	1	1	0	0	UGCG	UDP-glucose ceramide glucosyltransferase
hsa-miR-600	0	0	1	1	1	1	ZNF345	zinc finger protein 345
hsa-miR-600	0	0	1	1	1	1	ZNF137P	zinc finger protein 137, pseudogene
hsa-miR-600	1	0	1	1	1	1	FZD5	frizzled family receptor 5
hsa-miR-600	1	0	1	1	1	1	FZD7	frizzled family receptor 7
hsa-miR-600	1	0	1	1	1	1	DYRK2	dual-specificity tyrosine-(Y)-phosphorylation regulated kinase 2
hsa-miR-600	0	0	1	1	1	1	CHST1	carbohydrate (keratan sulfate Gal-6) sulfotransferase 1
hsa-miR-600	0	0	1	1	1	1	AGPS	alkylglycerone phosphate synthase
hsa-miR-600	0	0	1	1	1	1	BLZF1	basic leucine zipper nuclear factor 1
hsa-miR-600	1	0	1	1	1	1	BHLHE40	basic helix-loop-helix family, member e40
hsa-miR-600	1	0	1	1	1	1	CDC14A	CDC14 cell division cycle 14 homolog A (S. cerevisiae)
hsa-miR-600	1	0	1	1	1	1	EXO1	exonuclease 1
hsa-miR-600	1	0	1	1	1	1	ALDH4A1	aldehyde dehydrogenase 4 family, member A1
hsa-miR-600	1	0	1	1	1	1	MBTPS1	membrane-bound transcription factor peptidase, site 1
hsa-miR-600	1	0	1	1	1	1	PEX11B	peroxisomal biogenesis factor 11 beta
hsa-miR-600	1	0	1	1	1	1	NRP2	neuropilin 2
hsa-miR-600	1	0	1	1	1	1	KAT2B	K(lysine) acetyltransferase 2B
hsa-miR-600	1	0	1	1	1	1	ALDH1A2	aldehyde dehydrogenase 1 family, member A2
hsa-miR-600	0	0	1	0	1	1	RHOB	ras homolog family member B
hsa-miR-600	1	0	1	1	1	1	BCL2L2	BCL2-like 2
hsa-miR-600	0	0	1	1	1	1	TIMM8A	translocase of inner mitochondrial membrane 8 homolog A (yeast)
hsa-miR-600	1	0	1	0	1	1	EIF2S1	eukaryotic translation initiation factor 2, subunit 1 alpha, 35kDa
hsa-miR-600	1	0	1	0	1	1	IREB2	iron-responsive element binding protein 2
hsa-miR-600	1	0	1	0	1	1	SLC1A2	solute carrier family 1 (glial high affinity glutamate transporter), member 2
hsa-miR-600	1	0	1	0	1	1	AKAP6	A kinase (PRKA) anchor protein 6
hsa-miR-600	1	0	1	0	1	1	GTPBP1	GTP binding protein 1
hsa-miR-600	1	0	1	0	1	1	ACVR1B	activin A receptor, type IB
hsa-miR-600	1	0	1	1	1	1	ARL3	ADP-ribosylation factor-like 3
hsa-miR-600	1	0	1	0	1	1	RUNX1T1	runt-related transcription factor 1; translocated to, 1 (cyclin D-related)
hsa-miR-600	0	0	1	1	1	1	CEACAM5	carcinoembryonic antigen-related cell adhesion molecule 5
hsa-miR-600	1	0	1	1	1	1	DUSP2	dual specificity phosphatase 2
hsa-miR-600	1	0	1	1	1	1	EFNA1	ephrin-A1
hsa-miR-600	1	0	1	1	1	1	EZH2	enhancer of zeste homolog 2 (Drosophila)
hsa-miR-600	1	0	1	0	1	1	SCN2B	sodium channel, voltage-gated, type II, beta subunit
hsa-miR-600	1	0	1	1	1	1	COIL	coilin
hsa-miR-600	1	0	1	1	1	1	MTMR6	myotubularin related protein 6
hsa-miR-600	1	0	1	1	1	1	STK17A	serine/threonine kinase 17a
hsa-miR-600	1	0	1	1	1	1	NREP	neuronal regeneration related protein homolog (rat)
hsa-miR-600	1	0	1	0	1	1	VAMP3	vesicle-associated membrane protein 3 (cellubrevin)
hsa-miR-600	1	0	1	1	1	1	NRXN3	neurexin 3
hsa-miR-600	0	0	1	0	1	1	ADIPOQ	adiponectin, C1Q and collagen domain containing
hsa-miR-600	1	0	1	1	1	1	KIF3B	kinesin family member 3B
hsa-miR-600	1	0	1	1	1	1	ONECUT2	one cut homeobox 2
hsa-miR-600	0	0	1	1	1	1	ITM2A	integral membrane protein 2A
hsa-miR-600	1	0	1	1	1	1	GABRE	gamma-aminobutyric acid (GABA) A receptor, epsilon
hsa-miR-600	0	0	1	1	1	1	JAK2	Janus kinase 2
hsa-miR-600	1	0	1	0	1	1	PRKX	protein kinase, X-linked
hsa-miR-600	1	0	1	0	1	1	SCD	stearoyl-CoA desaturase (delta-9-desaturase)
hsa-miR-600	1	0	1	1	0	0	ZMYM3	zinc finger, MYM-type 3
hsa-miR-600	1	0	1	0	1	1	NR1D2	nuclear receptor subfamily 1, group D, member 2
hsa-miR-600	1	0	1	1	1	1	CBL	Cbl proto-oncogene, E3 ubiquitin protein ligase
hsa-miR-600	1	0	1	1	1	1	FOXN3	forkhead box N3
hsa-miR-600	1	0	1	1	1	1	CRK	v-crk sarcoma virus CT10 oncogene homolog (avian)
hsa-miR-600	1	0	1	0	1	1	DLX6	distal-less homeobox 6
hsa-miR-600	1	0	1	1	1	1	ARID3A	AT rich interactive domain 3A (BRIGHT-like)
hsa-miR-600	1	0	1	1	1	1	ETS1	v-ets erythroblastosis virus E26 oncogene homolog 1 (avian)
hsa-miR-600	1	0	1	1	1	1	FOXG1	forkhead box G1
hsa-miR-600	1	0	1	1	1	1	H3F3B	H3 histone, family 3B (H3.3B)
hsa-miR-600	1	0	1	1	1	1	MYCL1	v-myc myelocytomatosis viral oncogene homolog 1, lung carcinoma derived (avian)
hsa-miR-600	1	0	1	0	1	1	PRKAB2	protein kinase, AMP-activated, beta 2 non-catalytic subunit
hsa-miR-600	1	0	1	0	1	1	PRKCE	protein kinase C, epsilon
hsa-miR-600	1	0	1	0	1	1	SRC	v-src sarcoma (Schmidt-Ruppin A-2) viral oncogene homolog (avian)
hsa-miR-600	0	0	1	1	1	1	ST5	suppression of tumorigenicity 5
hsa-miR-600	1	0	1	1	1	1	GABBR2	gamma-aminobutyric acid (GABA) B receptor, 2
hsa-miR-600	1	0	1	1	1	1	PIGK	phosphatidylinositol glycan anchor biosynthesis, class K
hsa-miR-600	1	0	1	1	1	1	SCARB2	scavenger receptor class B, member 2
hsa-miR-600	1	0	1	1	1	1	INSIG1	insulin induced gene 1
hsa-miR-600	1	0	1	1	1	1	IRS1	insulin receptor substrate 1
hsa-miR-600	0	0	1	1	1	1	LIMK2	LIM domain kinase 2
hsa-miR-600	1	0	1	1	1	1	LNPEP	leucyl/cystinyl aminopeptidase
hsa-miR-600	1	0	1	1	1	1	LPP	LIM domain containing preferred translocation partner in lipoma
hsa-miR-600	1	0	1	1	1	1	NHLH2	nescient helix loop helix 2
hsa-miR-600	0	0	1	1	1	1	CCL8	chemokine (C-C motif) ligand 8
hsa-miR-600	1	0	1	1	1	1	TERF2	telomeric repeat binding factor 2
hsa-miR-600	0	0	1	1	0	0	NR2F1	nuclear receptor subfamily 2, group F, member 1
hsa-miR-600	1	0	1	0	1	1	TSPAN2	tetraspanin 2
hsa-miR-600	1	0	1	1	1	1	LHFPL2	lipoma HMGIC fusion partner-like 2
hsa-miR-600	0	0	1	1	1	1	RNF41	ring finger protein 41
hsa-miR-600	0	0	1	1	1	1	PRG4	proteoglycan 4
hsa-miR-600	1	0	1	1	1	1	PRKD3	protein kinase D3
hsa-miR-600	1	0	1	1	1	1	SRRM1	serine/arginine repetitive matrix 1
hsa-miR-600	0	0	1	1	1	1	ZMPSTE24	zinc metallopeptidase STE24 homolog (S. cerevisiae)
hsa-miR-600	0	0	1	1	1	1	CD5L	CD5 molecule-like
hsa-miR-600	1	0	1	1	1	1	MAT2A	methionine adenosyltransferase II, alpha
hsa-miR-600	1	0	1	1	1	1	TSNAX	translin-associated factor X
hsa-miR-600	0	0	1	1	0	0	UQCRH	ubiquinol-cytochrome c reductase hinge protein
hsa-miR-600	0	0	1	1	0	0	RRAGB	Ras-related GTP binding B
hsa-miR-600	1	0	1	1	1	1	IRF9	interferon regulatory factor 9
hsa-miR-600	0	0	1	1	1	1	CSF2RA	colony stimulating factor 2 receptor, alpha, low-affinity (granulocyte-macrophage)
hsa-miR-600	1	0	1	1	1	1	DYNC1LI2	dynein, cytoplasmic 1, light intermediate chain 2
hsa-miR-600	1	0	1	1	1	1	NR4A2	nuclear receptor subfamily 4, group A, member 2
hsa-miR-600	0	0	1	1	0	0	PDE6H	phosphodiesterase 6H, cGMP-specific, cone, gamma
hsa-miR-600	1	0	1	1	1	1	PRKAB1	protein kinase, AMP-activated, beta 1 non-catalytic subunit
hsa-miR-600	1	0	1	1	1	1	PKN2	protein kinase N2
hsa-miR-600	1	0	1	1	1	1	STK4	serine/threonine kinase 4
hsa-miR-600	1	0	1	1	1	1	SMC1A	structural maintenance of chromosomes 1A
hsa-miR-600	1	0	1	1	1	1	NPEPPS	aminopeptidase puromycin sensitive
hsa-miR-600	0	0	1	1	1	1	SLC30A9	solute carrier family 30 (zinc transporter), member 9
hsa-miR-600	1	0	1	1	1	1	ZNF238	zinc finger protein 238
hsa-miR-600	1	0	1	1	1	1	VAT1	vesicle amine transport protein 1 homolog (T. californica)
hsa-miR-600	1	0	1	1	1	1	NEBL	nebulette
hsa-miR-600	0	0	1	1	1	1	CLCA2	chloride channel accessory 2
hsa-miR-600	1	0	1	1	1	1	USP20	ubiquitin specific peptidase 20
hsa-miR-600	1	0	1	1	1	1	MAN1A2	mannosidase, alpha, class 1A, member 2
hsa-miR-600	0	0	1	1	1	1	NUDT3	nudix (nucleoside diphosphate linked moiety X)-type motif 3
hsa-miR-600	0	0	1	0	1	1	SUB1	SUB1 homolog (S. cerevisiae)
hsa-miR-600	1	0	1	1	1	1	SPIN1	spindlin 1
hsa-miR-600	1	0	1	1	1	1	DIAPH2	diaphanous homolog 2 (Drosophila)
hsa-miR-600	1	0	1	1	1	1	HIVEP2	human immunodeficiency virus type I enhancer binding protein 2
hsa-miR-600	0	0	1	1	1	1	SSFA2	sperm specific antigen 2
hsa-miR-600	0	0	1	1	1	1	SYPL1	synaptophysin-like 1
hsa-miR-600	1	0	1	1	1	1	BTG2	BTG family, member 2
hsa-miR-600	1	0	1	1	1	1	KAT6A	K(lysine) acetyltransferase 6A
hsa-miR-600	1	0	1	1	1	1	ZBTB33	zinc finger and BTB domain containing 33
hsa-miR-600	0	0	1	1	1	1	MSL3	male-specific lethal 3 homolog (Drosophila)
hsa-miR-600	0	0	1	1	0	0	HNRNPA0	heterogeneous nuclear ribonucleoprotein A0
hsa-miR-600	1	0	1	1	1	1	SEC61B	Sec61 beta subunit
hsa-miR-600	0	0	1	1	1	1	ASCC3	activating signal cointegrator 1 complex subunit 3
hsa-miR-600	1	0	1	1	1	1	GLIPR1	GLI pathogenesis-related 1
hsa-miR-600	1	0	1	1	1	1	B3GNT1	UDP-GlcNAc:betaGal beta-1,3-N-acetylglucosaminyltransferase 1
hsa-miR-600	0	0	1	1	1	1	HOXD3	homeobox D3
hsa-miR-600	1	0	1	1	1	1	SKP1	S-phase kinase-associated protein 1
hsa-miR-600	1	0	1	0	1	1	SLC5A3	solute carrier family 5 (sodium/myo-inositol cotransporter), member 3
hsa-miR-600	1	0	1	0	1	1	SOX12	SRY (sex determining region Y)-box 12
hsa-miR-600	1	0	1	1	1	1	ADAMTS1	ADAM metallopeptidase with thrombospondin type 1 motif, 1
hsa-miR-600	1	0	1	1	1	1	RAPGEF4	Rap guanine nucleotide exchange factor (GEF) 4
hsa-miR-600	0	0	1	1	1	1	RPP14	ribonuclease P/MRP 14kDa subunit
hsa-miR-600	1	0	1	1	1	1	FSTL1	follistatin-like 1
hsa-miR-600	1	0	1	1	1	1	ZNF81	zinc finger protein 81
hsa-miR-600	0	0	1	1	1	1	WBP4	WW domain binding protein 4 (formin binding protein 21)
hsa-miR-600	0	0	1	1	1	1	AKAP10	A kinase (PRKA) anchor protein 10
hsa-miR-600	1	0	1	1	1	1	PDCD10	programmed cell death 10
hsa-miR-600	0	0	1	1	1	1	XPOT	exportin, tRNA (nuclear export receptor for tRNAs)
hsa-miR-600	0	0	1	0	1	1	PNMA2	paraneoplastic Ma antigen 2
hsa-miR-600	0	0	1	0	1	1	AP4E1	adaptor-related protein complex 4, epsilon 1 subunit
hsa-miR-600	1	0	1	1	1	1	CASC3	cancer susceptibility candidate 3
hsa-miR-600	0	0	1	1	1	1	FRAT2	frequently rearranged in advanced T-cell lymphomas 2
hsa-miR-600	1	0	1	1	1	1	ICOS	inducible T-cell co-stimulator
hsa-miR-600	0	0	1	1	1	1	EHF	ets homologous factor
hsa-miR-600	1	0	1	0	1	1	FZD4	frizzled family receptor 4
hsa-miR-600	1	0	1	1	1	1	RABGAP1	RAB GTPase activating protein 1
hsa-miR-600	0	0	1	1	1	1	HARS2	histidyl-tRNA synthetase 2, mitochondrial
hsa-miR-600	1	0	1	1	1	1	RYBP	RING1 and YY1 binding protein
hsa-miR-600	1	0	1	1	1	1	DKK1	dickkopf 1 homolog (Xenopus laevis)
hsa-miR-600	1	0	1	1	1	1	RHOQ	ras homolog family member Q
hsa-miR-600	1	0	1	1	1	1	KCND2	potassium voltage-gated channel, Shal-related subfamily, member 2
hsa-miR-600	1	0	1	0	1	1	RAPGEF5	Rap guanine nucleotide exchange factor (GEF) 5
hsa-miR-600	1	0	1	0	1	1	FBXL7	F-box and leucine-rich repeat protein 7
hsa-miR-600	1	0	1	1	1	1	MAPRE1	microtubule-associated protein, RP/EB family, member 1
hsa-miR-600	0	0	1	0	1	1	PIGN	phosphatidylinositol glycan anchor biosynthesis, class N
hsa-miR-600	1	0	1	1	1	1	ATP6V0A2	ATPase, H+ transporting, lysosomal V0 subunit a2
hsa-miR-600	0	0	1	0	1	1	TLL1	tolloid-like 1
hsa-miR-600	1	0	1	1	1	1	TLL2	tolloid-like 2
hsa-miR-600	1	0	1	0	1	1	FLRT2	fibronectin leucine rich transmembrane protein 2
hsa-miR-600	1	0	1	1	1	1	PPARGC1A	peroxisome proliferator-activated receptor gamma, coactivator 1 alpha
hsa-miR-600	1	0	1	1	0	0	SNX15	sorting nexin 15
hsa-miR-600	1	0	1	1	1	1	GREM1	gremlin 1
hsa-miR-600	0	0	1	1	1	1	UBQLN1	ubiquilin 1
hsa-miR-600	0	0	1	1	1	1	UBQLN2	ubiquilin 2
hsa-miR-600	0	0	1	0	1	1	EMR2	egf-like module containing, mucin-like, hormone receptor-like 2
hsa-miR-600	1	0	1	0	1	1	OSTM1	osteopetrosis associated transmembrane protein 1
hsa-miR-600	1	0	1	1	1	1	ZBTB44	zinc finger and BTB domain containing 44
hsa-miR-600	1	0	1	1	1	1	MAPRE2	microtubule-associated protein, RP/EB family, member 2
hsa-miR-600	1	0	1	1	1	1	NPTXR	neuronal pentraxin receptor
hsa-miR-600	0	0	1	1	1	1	HIBCH	3-hydroxyisobutyryl-CoA hydrolase
hsa-miR-600	1	0	1	1	1	1	AFF4	AF4/FMR2 family, member 4
hsa-miR-600	1	0	1	1	1	1	TNFRSF21	tumor necrosis factor receptor superfamily, member 21
hsa-miR-600	1	0	1	1	1	1	KLHL20	kelch-like 20 (Drosophila)
hsa-miR-600	1	0	1	1	1	1	CNOT2	CCR4-NOT transcription complex, subunit 2
hsa-miR-600	1	0	1	1	1	1	ERO1L	ERO1-like (S. cerevisiae)
hsa-miR-600	1	0	1	0	1	1	HUNK	hormonally up-regulated Neu-associated kinase
hsa-miR-600	0	0	1	1	1	1	EHD2	EH-domain containing 2
hsa-miR-600	1	0	1	1	1	1	ZNF592	zinc finger protein 592
hsa-miR-600	1	0	1	0	1	1	SH3PXD2A	SH3 and PX domains 2A
hsa-miR-600	1	0	1	1	1	1	RALGPS1	Ral GEF with PH domain and SH3 binding motif 1
hsa-miR-600	0	0	1	0	1	1	TTC37	tetratricopeptide repeat domain 37
hsa-miR-600	0	0	1	0	1	1	EPM2AIP1	EPM2A (laforin) interacting protein 1
hsa-miR-600	1	0	1	0	1	1	PJA2	praja ring finger 2, E3 ubiquitin protein ligase
hsa-miR-600	1	0	1	0	1	1	KBTBD11	kelch repeat and BTB (POZ) domain containing 11
hsa-miR-600	0	0	1	0	1	1	VASH1	vasohibin 1
hsa-miR-600	0	0	1	1	1	1	ADNP2	ADNP homeobox 2
hsa-miR-600	1	0	1	1	1	1	SORCS3	sortilin-related VPS10 domain containing receptor 3
hsa-miR-600	1	0	1	1	1	1	PHLPP2	PH domain and leucine rich repeat protein phosphatase 2
hsa-miR-600	1	0	1	0	1	1	PDS5B	PDS5, regulator of cohesion maintenance, homolog B (S. cerevisiae)
hsa-miR-600	1	0	1	1	1	1	TRAK2	trafficking protein, kinesin binding 2
hsa-miR-600	1	0	1	0	1	1	SNX13	sorting nexin 13
hsa-miR-600	0	0	1	1	0	0	NUP205	nucleoporin 205kDa
hsa-miR-600	1	0	1	0	1	1	LARP4B	La ribonucleoprotein domain family, member 4B
hsa-miR-600	1	0	1	0	1	1	KIAA1024	KIAA1024
hsa-miR-600	1	0	1	1	1	1	NUP160	nucleoporin 160kDa
hsa-miR-600	1	0	1	1	1	1	CUX2	cut-like homeobox 2
hsa-miR-600	1	0	1	1	1	1	ASXL1	additional sex combs like 1 (Drosophila)
hsa-miR-600	1	0	1	1	1	1	DCAF12	DDB1 and CUL4 associated factor 12
hsa-miR-600	1	0	1	0	1	1	MTMR9	myotubularin related protein 9
hsa-miR-600	1	0	1	1	1	1	NSL1	NSL1, MIND kinetochore complex component, homolog (S. cerevisiae)
hsa-miR-600	1	0	1	1	1	1	SLITRK5	SLIT and NTRK-like family, member 5
hsa-miR-600	1	0	1	1	1	1	EPC2	enhancer of polycomb homolog 2 (Drosophila)
hsa-miR-600	0	0	1	1	1	1	GIMAP2	GTPase, IMAP family member 2
hsa-miR-600	0	0	1	1	1	1	GLTSCR1	glioma tumor suppressor candidate region gene 1
hsa-miR-600	1	0	1	1	1	1	ST8SIA3	ST8 alpha-N-acetyl-neuraminide alpha-2,8-sialyltransferase 3
hsa-miR-600	0	0	1	1	1	1	PCF11	PCF11, cleavage and polyadenylation factor subunit, homolog (S. cerevisiae)
hsa-miR-600	1	0	1	0	1	1	TRIM33	tripartite motif containing 33
hsa-miR-600	1	0	1	1	1	1	TAF9B	TAF9B RNA polymerase II, TATA box binding protein (TBP)-associated factor, 31kDa
hsa-miR-600	0	0	1	1	1	1	SCCPDH	saccharopine dehydrogenase (putative)
hsa-miR-600	1	0	1	1	1	1	UBE2J1	ubiquitin-conjugating enzyme E2, J1
hsa-miR-600	0	0	1	1	1	1	ISOC1	isochorismatase domain containing 1
hsa-miR-600	0	0	1	1	1	1	CCDC53	coiled-coil domain containing 53
hsa-miR-600	1	0	1	1	1	1	GOLT1B	golgi transport 1B
hsa-miR-600	0	0	1	1	1	1	HDGFRP3	hepatoma-derived growth factor, related protein 3
hsa-miR-600	1	0	1	0	1	1	CNR1	cannabinoid receptor 1 (brain)
hsa-miR-600	0	0	1	1	1	1	RAB10	RAB10, member RAS oncogene family
hsa-miR-600	0	0	1	1	1	1	DYNC1LI1	dynein, cytoplasmic 1, light intermediate chain 1
hsa-miR-600	1	0	1	1	1	1	TMEFF2	transmembrane protein with EGF-like and two follistatin-like domains 2
hsa-miR-600	1	0	1	1	1	1	VGLL3	vestigial like 3 (Drosophila)
hsa-miR-600	0	0	1	0	1	1	FAM8A1	family with sequence similarity 8, member A1
hsa-miR-600	1	0	1	0	1	1	SELT	selenoprotein T
hsa-miR-600	1	0	1	0	1	1	CRIM1	cysteine rich transmembrane BMP regulator 1 (chordin-like)
hsa-miR-600	0	0	1	1	0	0	NCKIPSD	NCK interacting protein with SH3 domain
hsa-miR-600	0	0	1	1	1	1	AMBN	ameloblastin (enamel matrix protein)
hsa-miR-600	1	0	1	1	1	1	RAB6B	RAB6B, member RAS oncogene family
hsa-miR-600	1	0	1	1	1	1	SIX4	SIX homeobox 4
hsa-miR-600	1	0	1	1	1	1	GALNT7	UDP-N-acetyl-alpha-D-galactosamine:polypeptide N-acetylgalactosaminyltransferase 7 (GalNAc-T7)
hsa-miR-600	0	0	1	1	1	1	POLE3	polymerase (DNA directed), epsilon 3, accessory subunit
hsa-miR-600	1	0	1	0	1	1	ZRANB1	zinc finger, RAN-binding domain containing 1
hsa-miR-600	1	0	1	1	1	1	DIRAS2	DIRAS family, GTP-binding RAS-like 2
hsa-miR-600	1	0	1	0	1	1	KCTD9	potassium channel tetramerisation domain containing 9
hsa-miR-600	1	0	1	1	1	1	ZNF280C	zinc finger protein 280C
hsa-miR-600	1	0	1	1	1	1	UBE2R2	ubiquitin-conjugating enzyme E2R 2
hsa-miR-600	1	0	1	1	1	1	RNF125	ring finger protein 125, E3 ubiquitin protein ligase
hsa-miR-600	1	0	1	1	1	1	ZNHIT6	zinc finger, HIT-type containing 6
hsa-miR-600	1	0	1	1	1	1	ARGLU1	arginine and glutamate rich 1
hsa-miR-600	1	0	1	1	1	1	FAM178A	family with sequence similarity 178, member A
hsa-miR-600	0	0	1	0	1	1	TMEM57	transmembrane protein 57
hsa-miR-600	0	0	1	1	1	1	TRIM62	tripartite motif containing 62
hsa-miR-600	1	0	1	1	1	1	KIAA1598	KIAA1598
hsa-miR-600	1	0	1	1	1	1	AGPAT5	1-acylglycerol-3-phosphate O-acyltransferase 5 (lysophosphatidic acid acyltransferase, epsilon)
hsa-miR-600	1	0	1	0	1	1	LIN7C	lin-7 homolog C (C. elegans)
hsa-miR-600	1	0	1	1	1	1	RSBN1	round spermatid basic protein 1
hsa-miR-600	0	0	1	1	1	1	BEX1	brain expressed, X-linked 1
hsa-miR-600	1	0	1	1	1	1	ASH1L	ash1 (absent, small, or homeotic)-like (Drosophila)
hsa-miR-600	1	0	1	1	1	1	ETNK1	ethanolamine kinase 1
hsa-miR-600	0	0	1	1	0	0	SAGE1	sarcoma antigen 1
hsa-miR-600	1	0	1	1	1	1	MLL5	myeloid/lymphoid or mixed-lineage leukemia 5 (trithorax homolog, Drosophila)
hsa-miR-600	1	0	1	0	1	1	PCDHAC1	protocadherin alpha subfamily C, 1
hsa-miR-600	1	0	1	0	1	1	PCDHAC2	protocadherin alpha subfamily C, 2
hsa-miR-600	1	0	1	1	1	1	PCDHA1	protocadherin alpha 1
hsa-miR-600	1	0	1	0	1	1	PCDHA10	protocadherin alpha 10
hsa-miR-600	1	0	1	0	1	1	PCDHA11	protocadherin alpha 11
hsa-miR-600	1	0	1	0	1	1	PCDHA12	protocadherin alpha 12
hsa-miR-600	1	0	1	1	1	1	PCDHA2	protocadherin alpha 2
hsa-miR-600	1	0	1	1	1	1	PCDHA3	protocadherin alpha 3
hsa-miR-600	1	0	1	1	1	1	PCDHA6	protocadherin alpha 6
hsa-miR-600	1	0	1	0	1	1	PCDHA7	protocadherin alpha 7
hsa-miR-600	1	0	1	1	1	1	PCDHA8	protocadherin alpha 8
hsa-miR-600	1	0	1	1	1	1	HOXA10	homeobox A10
hsa-miR-600	0	0	1	1	1	1	NPAP1	nuclear pore associated protein 1
hsa-miR-600	0	0	1	1	1	1	TERF2IP	telomeric repeat binding factor 2, interacting protein
hsa-miR-600	1	0	1	1	1	1	KCTD5	potassium channel tetramerisation domain containing 5
hsa-miR-600	0	0	1	1	1	1	RIN2	Ras and Rab interactor 2
hsa-miR-600	1	0	1	0	1	1	FAM190B	family with sequence similarity 190, member B
hsa-miR-600	0	0	1	1	1	1	GNL3L	guanine nucleotide binding protein-like 3 (nucleolar)-like
hsa-miR-600	1	0	1	0	1	1	CCNJ	cyclin J
hsa-miR-600	1	0	1	1	1	1	SEPT3	septin 3
hsa-miR-600	1	0	1	0	1	1	UBFD1	ubiquitin family domain containing 1
hsa-miR-600	1	0	1	1	1	1	POLE4	polymerase (DNA-directed), epsilon 4, accessory subunit
hsa-miR-600	1	0	1	0	1	1	TM9SF3	transmembrane 9 superfamily member 3
hsa-miR-600	1	0	1	0	1	1	SLAMF8	SLAM family member 8
hsa-miR-600	1	0	1	1	1	1	C8orf4	chromosome 8 open reading frame 4
hsa-miR-600	1	0	1	1	0	0	C11orf75	chromosome 11 open reading frame 75
hsa-miR-600	0	0	1	1	1	1	PRTFDC1	phosphoribosyl transferase domain containing 1
hsa-miR-600	0	0	1	1	1	1	STOX2	storkhead box 2
hsa-miR-600	1	0	1	1	0	0	SLC17A7	solute carrier family 17 (sodium-dependent inorganic phosphate cotransporter), member 7
hsa-miR-600	1	0	1	0	1	1	SLC17A6	solute carrier family 17 (sodium-dependent inorganic phosphate cotransporter), member 6
hsa-miR-600	1	0	1	0	1	1	CNNM1	cyclin M1
hsa-miR-600	1	0	1	1	1	1	RAB22A	RAB22A, member RAS oncogene family
hsa-miR-600	0	0	1	1	1	1	SHROOM4	shroom family member 4
hsa-miR-600	1	0	1	1	1	1	USP31	ubiquitin specific peptidase 31
hsa-miR-600	1	0	1	1	0	0	CASKIN2	CASK interacting protein 2
hsa-miR-600	1	0	1	1	1	1	MIB1	mindbomb E3 ubiquitin protein ligase 1
hsa-miR-600	1	0	1	0	1	1	SYT4	synaptotagmin IV
hsa-miR-600	0	0	1	1	1	1	TXNDC16	thioredoxin domain containing 16
hsa-miR-600	1	0	1	1	1	1	NCEH1	neutral cholesterol ester hydrolase 1
hsa-miR-600	1	0	1	1	1	1	RANBP10	RAN binding protein 10
hsa-miR-600	1	0	1	1	1	1	ZBTB2	zinc finger and BTB domain containing 2
hsa-miR-600	0	0	1	1	1	1	BCOR	BCL6 corepressor
hsa-miR-600	1	0	1	1	1	1	VAT1L	vesicle amine transport protein 1 homolog (T. californica)-like
hsa-miR-600	0	0	1	1	1	1	EPG5	ectopic P-granules autophagy protein 5 homolog (C. elegans)
hsa-miR-600	0	0	1	1	1	1	GNAO1	guanine nucleotide binding protein (G protein), alpha activating activity polypeptide O
hsa-miR-600	1	0	1	1	1	1	SNTB1	syntrophin, beta 1 (dystrophin-associated protein A1, 59kDa, basic component 1)
hsa-miR-600	1	0	1	1	1	1	CLDN1	claudin 1
hsa-miR-600	1	0	1	0	1	1	TMX4	thioredoxin-related transmembrane protein 4
hsa-miR-600	0	0	1	0	1	1	SLC30A1	solute carrier family 30 (zinc transporter), member 1
hsa-miR-600	1	0	1	1	1	1	RPRD1B	regulation of nuclear pre-mRNA domain containing 1B
hsa-miR-600	1	0	1	1	1	1	NTN4	netrin 4
hsa-miR-600	1	0	1	1	1	1	FAM60A	family with sequence similarity 60, member A
hsa-miR-600	1	0	1	1	1	1	SENP2	SUMO1/sentrin/SMT3 specific peptidase 2
hsa-miR-600	0	0	1	1	0	0	ALOXE3	arachidonate lipoxygenase 3
hsa-miR-600	1	0	1	1	1	1	TMEM35	transmembrane protein 35
hsa-miR-600	1	0	1	1	1	1	TGIF2	TGFB-induced factor homeobox 2
hsa-miR-600	1	0	1	1	1	1	BACH2	BTB and CNC homology 1, basic leucine zipper transcription factor 2
hsa-miR-600	1	0	1	1	0	0	HLX	H2.0-like homeobox
hsa-miR-600	1	0	1	0	1	1	MCL1	myeloid cell leukemia sequence 1 (BCL2-related)
hsa-miR-600	1	0	1	1	1	1	SEC24A	SEC24 family, member A (S. cerevisiae)
hsa-miR-600	0	0	1	1	1	1	CHP2	calcineurin-like EF hand protein 2
hsa-miR-600	0	0	1	1	1	1	PERP	PERP, TP53 apoptosis effector
hsa-miR-600	0	0	1	1	1	1	NPVF	neuropeptide VF precursor
hsa-miR-600	0	0	1	1	1	1	TCTA	T-cell leukemia translocation altered
hsa-miR-600	1	0	1	1	1	1	HIF3A	hypoxia inducible factor 3, alpha subunit
hsa-miR-600	0	0	1	1	1	1	HHIP	hedgehog interacting protein
hsa-miR-600	1	0	1	1	1	1	GIGYF1	GRB10 interacting GYF protein 1
hsa-miR-600	0	0	1	1	1	1	IQCH	IQ motif containing H
hsa-miR-600	1	0	1	0	1	1	MAP1LC3B	microtubule-associated protein 1 light chain 3 beta
hsa-miR-600	1	0	1	0	1	1	BCL11B	B-cell CLL/lymphoma 11B (zinc finger protein)
hsa-miR-600	1	0	1	1	1	1	REEP1	receptor accessory protein 1
hsa-miR-600	1	0	1	1	0	0	UBE2Z	ubiquitin-conjugating enzyme E2Z
hsa-miR-600	1	0	1	1	1	1	GRAMD3	GRAM domain containing 3
hsa-miR-600	0	0	1	1	1	1	HTR5A	5-hydroxytryptamine (serotonin) receptor 5A, G protein-coupled
hsa-miR-600	1	0	1	1	1	1	HOXB8	homeobox B8
hsa-miR-600	1	0	1	1	1	1	GNPTAB	N-acetylglucosamine-1-phosphate transferase, alpha and beta subunits
hsa-miR-600	1	0	1	1	1	1	CDC73	cell division cycle 73, Paf1/RNA polymerase II complex component, homolog (S. cerevisiae)
hsa-miR-600	0	0	1	1	1	1	NAA16	N(alpha)-acetyltransferase 16, NatA auxiliary subunit
hsa-miR-600	0	0	1	1	1	1	AKIRIN1	akirin 1
hsa-miR-600	1	0	1	1	0	0	CCDC48	coiled-coil domain containing 48
hsa-miR-600	0	0	1	1	1	1	ZNF767	zinc finger family member 767
hsa-miR-600	0	0	1	1	0	0	TMEM156	transmembrane protein 156
hsa-miR-600	1	0	1	0	1	1	NAA25	N(alpha)-acetyltransferase 25, NatB auxiliary subunit
hsa-miR-600	1	0	1	1	1	1	OPA3	optic atrophy 3 (autosomal recessive, with chorea and spastic paraplegia)
hsa-miR-600	1	0	1	0	1	1	C1orf21	chromosome 1 open reading frame 21
hsa-miR-600	1	0	1	0	1	1	CSRNP2	cysteine-serine-rich nuclear protein 2
hsa-miR-600	1	0	1	1	1	1	PDRG1	p53 and DNA-damage regulated 1
hsa-miR-600	1	0	1	1	1	1	SNX27	sorting nexin family member 27
hsa-miR-600	1	0	1	1	1	1	TEX14	testis expressed 14
hsa-miR-600	0	0	1	1	1	1	COG3	component of oligomeric golgi complex 3
hsa-miR-600	1	0	1	0	1	1	TMEM47	transmembrane protein 47
hsa-miR-600	1	0	1	1	1	1	FAM103A1	family with sequence similarity 103, member A1
hsa-miR-600	0	0	1	1	1	1	CRISPLD2	cysteine-rich secretory protein LCCL domain containing 2
hsa-miR-600	1	0	1	0	1	1	ITCH	itchy E3 ubiquitin protein ligase
hsa-miR-600	1	0	1	1	1	1	PCDHA9	protocadherin alpha 9
hsa-miR-600	1	0	1	1	0	0	FZD8	frizzled family receptor 8
hsa-miR-600	1	0	1	1	1	1	PPP1R12B	protein phosphatase 1, regulatory subunit 12B
hsa-miR-600	0	0	1	1	1	1	MAGT1	magnesium transporter 1
hsa-miR-600	1	0	1	1	1	1	DSEL	dermatan sulfate epimerase-like
hsa-miR-600	1	0	1	1	1	1	FAM175B	family with sequence similarity 175, member B
hsa-miR-600	1	0	1	1	1	1	ARID5B	AT rich interactive domain 5B (MRF1-like)
hsa-miR-600	1	0	1	1	1	1	LOXL4	lysyl oxidase-like 4
hsa-miR-600	1	0	1	0	1	1	FAR1	fatty acyl CoA reductase 1
hsa-miR-600	0	0	1	1	0	0	NICN1	nicolin 1
hsa-miR-600	1	0	1	1	1	1	DNAJC14	DnaJ (Hsp40) homolog, subfamily C, member 14
hsa-miR-600	0	0	1	1	1	1	C5orf4	chromosome 5 open reading frame 4
hsa-miR-600	1	0	1	1	1	1	HIATL1	hippocampus abundant transcript-like 1
hsa-miR-600	1	0	1	0	1	1	INA	internexin neuronal intermediate filament protein, alpha
hsa-miR-600	0	0	1	0	1	1	TRIM52	tripartite motif containing 52
hsa-miR-600	0	0	1	1	1	1	FAM136A	family with sequence similarity 136, member A
hsa-miR-600	0	0	1	0	1	1	WDR73	WD repeat domain 73
hsa-miR-600	1	0	1	1	1	1	PCDH11Y	protocadherin 11 Y-linked
hsa-miR-600	1	0	1	1	1	1	TRIM5	tripartite motif containing 5
hsa-miR-600	0	0	1	1	1	1	SUCNR1	succinate receptor 1
hsa-miR-600	1	0	1	1	1	1	SLC45A3	solute carrier family 45, member 3
hsa-miR-600	0	0	1	1	1	1	ZIC5	Zic family member 5
hsa-miR-600	1	0	1	1	1	1	SURF4	surfeit 4
hsa-miR-600	1	0	1	1	1	1	C5orf30	chromosome 5 open reading frame 30
hsa-miR-600	1	0	1	0	1	1	PURB	purine-rich element binding protein B
hsa-miR-600	1	0	1	1	1	1	RASL10B	RAS-like, family 10, member B
hsa-miR-600	1	0	1	1	1	1	COL4A5	collagen, type IV, alpha 5
hsa-miR-600	0	0	1	1	0	0	RWDD2A	RWD domain containing 2A
hsa-miR-600	1	0	1	1	0	0	FCHSD1	FCH and double SH3 domains 1
hsa-miR-600	1	0	1	1	1	1	EPT1	ethanolaminephosphotransferase 1 (CDP-ethanolamine-specific)
hsa-miR-600	0	0	1	1	1	1	ARHGAP18	Rho GTPase activating protein 18
hsa-miR-600	1	0	1	1	1	1	BRWD1	bromodomain and WD repeat domain containing 1
hsa-miR-600	1	0	1	0	0	0	ANKRD40	ankyrin repeat domain 40
hsa-miR-600	0	0	1	1	1	1	ZNF830	zinc finger protein 830
hsa-miR-600	0	0	1	1	1	1	NACC1	nucleus accumbens associated 1, BEN and BTB (POZ) domain containing
hsa-miR-600	0	0	1	1	0	0	SIGLEC11	sialic acid binding Ig-like lectin 11
hsa-miR-600	1	0	1	1	1	1	SRSF10	serine/arginine-rich splicing factor 10
hsa-miR-600	0	0	1	1	1	1	MIA2	melanoma inhibitory activity 2
hsa-miR-600	1	0	1	1	1	1	NAA15	N(alpha)-acetyltransferase 15, NatA auxiliary subunit
hsa-miR-600	1	0	1	1	1	1	GCFC1	GC-rich sequence DNA-binding factor 1
hsa-miR-600	1	0	1	1	0	0	BRD4	bromodomain containing 4
hsa-miR-600	0	0	1	1	1	1	CDKN2B	cyclin-dependent kinase inhibitor 2B (p15, inhibits CDK4)
hsa-miR-600	0	0	1	1	1	1	ABCA10	ATP-binding cassette, sub-family A (ABC1), member 10
hsa-miR-600	0	0	1	1	1	1	CTCFL	CCCTC-binding factor (zinc finger protein)-like
hsa-miR-600	1	0	1	1	1	1	KCNE4	potassium voltage-gated channel, Isk-related family, member 4
hsa-miR-600	0	0	1	1	0	0	GGTLC1	gamma-glutamyltransferase light chain 1
hsa-miR-600	1	0	1	1	1	1	KLHL6	kelch-like 6 (Drosophila)
hsa-miR-600	1	0	1	1	1	1	BMPER	BMP binding endothelial regulator
hsa-miR-600	0	0	1	1	1	1	RAD51B	RAD51 homolog B (S. cerevisiae)
hsa-miR-600	1	0	1	1	1	1	ZAK	sterile alpha motif and leucine zipper containing kinase AZK
hsa-miR-600	1	0	1	1	1	1	SPTSSA	serine palmitoyltransferase, small subunit A
hsa-miR-600	1	0	1	1	0	0	PKDCC	protein kinase domain containing, cytoplasmic homolog (mouse)
hsa-miR-600	1	0	1	1	1	1	KCTD12	potassium channel tetramerisation domain containing 12
hsa-miR-600	1	0	1	0	1	1	SP1	Sp1 transcription factor
hsa-miR-600	0	0	1	1	1	1	C1orf213	chromosome 1 open reading frame 213
hsa-miR-600	0	0	1	0	1	1	PRELID2	PRELI domain containing 2
hsa-miR-600	0	0	1	1	1	1	PPIL4	peptidylprolyl isomerase (cyclophilin)-like 4
hsa-miR-600	0	0	1	1	0	0	SGCZ	sarcoglycan, zeta
hsa-miR-600	0	0	1	1	1	1	CASC5	cancer susceptibility candidate 5
hsa-miR-600	1	0	1	0	1	1	CNOT6L	CCR4-NOT transcription complex, subunit 6-like
hsa-miR-600	1	0	1	1	1	1	TEX261	testis expressed 261
hsa-miR-600	0	0	1	1	1	1	CYB5D1	cytochrome b5 domain containing 1
hsa-miR-600	0	0	1	1	0	0	CSNK1A1L	casein kinase 1, alpha 1-like
hsa-miR-600	0	0	1	1	1	1	C7orf45	chromosome 7 open reading frame 45
hsa-miR-600	1	0	1	1	1	1	CADM4	cell adhesion molecule 4
hsa-miR-600	0	0	1	1	1	1	APOBEC3F	apolipoprotein B mRNA editing enzyme, catalytic polypeptide-like 3F
hsa-miR-600	1	0	1	1	1	1	LPIN1	lipin 1
hsa-miR-600	1	0	1	1	1	1	SGMS1	sphingomyelin synthase 1
hsa-miR-600	1	0	1	1	1	1	FAM110B	family with sequence similarity 110, member B
hsa-miR-600	1	0	1	1	1	1	BOD1L1	biorientation of chromosomes in cell division 1-like 1
hsa-miR-600	0	0	1	1	1	1	LONRF1	LON peptidase N-terminal domain and ring finger 1
hsa-miR-600	1	0	1	1	1	1	POGLUT1	protein O-glucosyltransferase 1
hsa-miR-600	0	0	1	1	1	1	ERP27	endoplasmic reticulum protein 27
hsa-miR-600	1	0	1	1	1	1	FAM81A	family with sequence similarity 81, member A
hsa-miR-600	1	0	1	1	1	1	ZSCAN29	zinc finger and SCAN domain containing 29
hsa-miR-600	1	0	1	1	1	1	ZNF583	zinc finger protein 583
hsa-miR-600	1	0	1	0	1	1	TMTC2	transmembrane and tetratricopeptide repeat containing 2
hsa-miR-600	1	0	1	1	1	1	SPRED1	sprouty-related, EVH1 domain containing 1
hsa-miR-600	0	0	1	1	1	1	METTL15	methyltransferase like 15
hsa-miR-600	0	0	1	1	1	1	C6orf170	chromosome 6 open reading frame 170
hsa-miR-600	1	0	1	1	1	1	C17orf103	chromosome 17 open reading frame 103
hsa-miR-600	0	0	1	1	1	1	BEND2	BEN domain containing 2
hsa-miR-600	1	0	1	0	1	1	ZCCHC24	zinc finger, CCHC domain containing 24
hsa-miR-600	0	0	1	0	1	1	LNX2	ligand of numb-protein X 2
hsa-miR-600	1	0	1	1	1	1	LCORL	ligand dependent nuclear receptor corepressor-like
hsa-miR-600	1	0	1	1	1	1	MSI2	musashi homolog 2 (Drosophila)
hsa-miR-600	1	0	1	1	1	1	SMG7	smg-7 homolog, nonsense mediated mRNA decay factor (C. elegans)
hsa-miR-600	1	0	1	1	1	1	MMGT1	membrane magnesium transporter 1
hsa-miR-600	1	0	1	1	1	1	FAM117B	family with sequence similarity 117, member B
hsa-miR-600	1	0	1	0	1	1	C3orf58	chromosome 3 open reading frame 58
hsa-miR-600	1	0	1	0	1	1	KSR2	kinase suppressor of ras 2
hsa-miR-600	1	0	1	1	1	1	DIP2B	DIP2 disco-interacting protein 2 homolog B (Drosophila)
hsa-miR-600	1	0	1	1	1	1	XKR6	XK, Kell blood group complex subunit-related family, member 6
hsa-miR-600	1	0	1	1	1	1	RABL3	RAB, member of RAS oncogene family-like 3
hsa-miR-600	1	0	1	1	1	1	SYT9	synaptotagmin IX
hsa-miR-600	1	0	1	1	1	1	PRR15	proline rich 15
hsa-miR-600	0	0	1	0	1	1	C15orf37	chromosome 15 open reading frame 37
hsa-miR-600	0	0	1	1	0	0	CHMP4B	charged multivesicular body protein 4B
hsa-miR-600	1	0	1	1	1	1	STX12	syntaxin 12
hsa-miR-600	1	0	1	1	1	1	PPM1B	protein phosphatase, Mg2+/Mn2+ dependent, 1B
hsa-miR-600	0	0	1	1	1	1	SESTD1	SEC14 and spectrin domains 1
hsa-miR-600	0	0	1	1	0	0	LCE5A	late cornified envelope 5A
hsa-miR-600	1	0	1	0	1	1	ARL5B	ADP-ribosylation factor-like 5B
hsa-miR-600	0	0	1	1	0	0	APOBEC3H	apolipoprotein B mRNA editing enzyme, catalytic polypeptide-like 3H
hsa-miR-600	1	0	1	1	1	1	RPS6KA5	ribosomal protein S6 kinase, 90kDa, polypeptide 5
hsa-miR-600	0	0	1	1	1	1	ZNF804A	zinc finger protein 804A
hsa-miR-600	1	0	1	1	1	1	SPTY2D1	SPT2, Suppressor of Ty, domain containing 1 (S. cerevisiae)
hsa-miR-600	1	0	1	1	1	1	ZBTB41	zinc finger and BTB domain containing 41
hsa-miR-600	1	0	1	1	1	1	ADAMTS6	ADAM metallopeptidase with thrombospondin type 1 motif, 6
hsa-miR-600	1	0	1	1	1	1	GPRIN3	GPRIN family member 3
hsa-miR-600	1	0	1	0	1	1	FAM73A	family with sequence similarity 73, member A
hsa-miR-600	0	0	1	0	1	1	SIAH3	siah E3 ubiquitin protein ligase family member 3
hsa-miR-600	0	0	1	1	1	1	PTHLH	parathyroid hormone-like hormone
hsa-miR-600	0	0	1	1	1	1	TMEM189	transmembrane protein 189
hsa-miR-600	0	0	1	1	1	1	FAM173B	family with sequence similarity 173, member B
hsa-miR-600	1	0	1	1	1	1	TMEM189-UBE2V1	TMEM189-UBE2V1 readthrough
hsa-miR-600	1	0	1	1	1	1	FBXO33	F-box protein 33
hsa-miR-600	1	0	1	1	1	1	E2F7	E2F transcription factor 7
hsa-miR-600	0	0	1	1	1	1	C10orf129	chromosome 10 open reading frame 129
hsa-miR-600	0	0	1	1	0	0	LINC00176	long intergenic non-protein coding RNA 176
hsa-miR-600	0	0	1	0	1	1	C1orf229	chromosome 1 open reading frame 229
hsa-miR-600	1	0	1	1	1	1	TEX19	testis expressed 19
hsa-miR-600	1	0	1	1	1	1	MAP6	microtubule-associated protein 6
hsa-miR-600	0	0	1	0	0	0	TFAMP1	transcription factor A, mitochondrial pseudogene 1
hsa-miR-600	0	0	1	0	0	0	LYPLA2P1	lysophospholipase II pseudogene 1
hsa-miR-600	0	0	1	0	0	0	ANXA2P3	annexin A2 pseudogene 3
hsa-miR-600	0	0	1	0	0	0	MIR155HG	MIR155 host gene (non-protein coding)
hsa-miR-600	0	0	1	0	0	0	TTTY2	testis-specific transcript, Y-linked 2 (non-protein coding)
hsa-miR-600	0	0	1	0	0	0	TTTY15	testis-specific transcript, Y-linked 15 (non-protein coding)
hsa-miR-600	0	0	1	0	0	0	ANXA2P1	annexin A2 pseudogene 1
hsa-miR-600	0	0	1	0	0	0	H3F3AP4	H3 histone, family 3A, pseudogene 4
hsa-miR-600	0	0	1	0	0	0	PER4	period homolog 3 (Drosophila) pseudogene
hsa-miR-600	0	0	1	0	0	0	TREML5P	triggering receptor expressed on myeloid cells-like 5, pseudogene
hsa-miR-600	0	0	1	0	0	0	NEAT1	nuclear paraspeckle assembly transcript 1 (non-protein coding)
hsa-miR-600	0	0	1	0	0	0	TCAM1P	testicular cell adhesion molecule 1 homolog (mouse), pseudogene
hsa-miR-600	0	0	1	0	0	0	SNORA39	small nucleolar RNA, H/ACA box 39
hsa-miR-600	1	0	1	1	0	0	HOXC5	homeobox C5
hsa-miR-600	0	0	1	0	0	0	NBR2	neighbor of BRCA1 gene 2 (non-protein coding)
hsa-miR-600	0	0	1	0	0	0	SNORD116-29	small nucleolar RNA, C/D box 116-29
hsa-miR-600	0	0	1	0	0	0	PLGLA	plasminogen-like A
hsa-miR-600	1	0	1	1	0	0	DLGAP1	discs, large (Drosophila) homolog-associated protein 1
hsa-miR-600	1	0	1	1	1	1	HS3ST1	heparan sulfate (glucosamine) 3-O-sulfotransferase 1
hsa-miR-600	1	0	1	1	1	1	PPP5C	protein phosphatase 5, catalytic subunit
hsa-miR-600	0	0	1	1	1	1	PIGQ	phosphatidylinositol glycan anchor biosynthesis, class Q
hsa-miR-600	0	0	1	1	1	1	HEBP2	heme binding protein 2
hsa-miR-600	1	0	0	1	1	1	PIGV	phosphatidylinositol glycan anchor biosynthesis, class V
hsa-miR-600	1	0	1	1	1	1	PRSS22	protease, serine, 22
hsa-miR-600	0	0	0	1	0	0	TSPAN32	tetraspanin 32
hsa-miR-600	1	0	1	1	0	0	ITGB4	integrin, beta 4
hsa-miR-600	0	0	0	1	0	0	MZF1	myeloid zinc finger 1
hsa-miR-600	0	0	0	1	1	1	PLEK2	pleckstrin 2
hsa-miR-600	1	0	1	1	1	1	CEP128	centrosomal protein 128kDa
hsa-miR-600	1	0	1	1	1	1	ZFYVE21	zinc finger, FYVE domain containing 21
hsa-miR-600	1	0	0	1	1	1	SALL4	sal-like 4 (Drosophila)
hsa-miR-600	0	0	0	1	0	0	VPS18	vacuolar protein sorting 18 homolog (S. cerevisiae)
hsa-miR-600	0	0	1	1	1	1	OIP5	Opa interacting protein 5
hsa-miR-600	0	0	0	1	0	0	TNFRSF10A	tumor necrosis factor receptor superfamily, member 10a
hsa-miR-600	0	0	0	1	1	1	SGTA	small glutamine-rich tetratricopeptide repeat (TPR)-containing, alpha
hsa-miR-600	0	0	1	1	0	0	LIM2	lens intrinsic membrane protein 2, 19kDa
hsa-miR-600	0	0	0	1	0	0	SMG9	smg-9 homolog, nonsense mediated mRNA decay factor (C. elegans)
hsa-miR-600	0	0	0	1	0	0	ABHD11	abhydrolase domain containing 11
hsa-miR-600	0	0	0	1	0	0	EPHB6	EPH receptor B6
hsa-miR-600	0	0	0	1	0	0	MOGAT3	monoacylglycerol O-acyltransferase 3
hsa-miR-600	0	0	1	1	0	0	PLOD3	procollagen-lysine, 2-oxoglutarate 5-dioxygenase 3
hsa-miR-600	0	0	1	1	1	1	CYP26A1	cytochrome P450, family 26, subfamily A, polypeptide 1
hsa-miR-600	0	0	1	1	0	0	FBXL15	F-box and leucine-rich repeat protein 15
hsa-miR-600	1	0	1	1	1	1	PEX12	peroxisomal biogenesis factor 12
hsa-miR-600	0	0	0	1	0	0	HSD17B1	hydroxysteroid (17-beta) dehydrogenase 1
hsa-miR-600	0	0	1	1	1	1	RANGRF	RAN guanine nucleotide release factor
hsa-miR-600	0	0	0	1	0	0	SELPLG	selectin P ligand
hsa-miR-600	0	0	0	1	1	1	GPN3	GPN-loop GTPase 3
hsa-miR-600	0	0	0	1	0	0	MRPL51	mitochondrial ribosomal protein L51
hsa-miR-600	0	0	1	1	1	1	USP5	ubiquitin specific peptidase 5 (isopeptidase T)
hsa-miR-600	1	0	1	1	1	1	TBP	TATA box binding protein
hsa-miR-600	0	0	1	1	1	1	PRSS16	protease, serine, 16 (thymus)
hsa-miR-600	0	0	0	1	0	0	NPRL2	nitrogen permease regulator-like 2 (S. cerevisiae)
hsa-miR-600	0	0	0	1	0	0	SPCS1	signal peptidase complex subunit 1 homolog (S. cerevisiae)
hsa-miR-600	0	0	0	1	0	0	AZU1	azurocidin 1
hsa-miR-600	0	0	1	1	0	0	FAM82A1	family with sequence similarity 82, member A1
hsa-miR-600	0	0	0	1	0	0	ZNF643	zinc finger protein 643
hsa-miR-600	0	0	1	1	0	0	NDUFB3	NADH dehydrogenase (ubiquinone) 1 beta subcomplex, 3, 12kDa
hsa-miR-600	0	0	1	1	0	0	LIPF	lipase, gastric
hsa-miR-600	0	0	1	1	0	0	CHRNA2	cholinergic receptor, nicotinic, alpha 2 (neuronal)
hsa-miR-600	1	0	1	1	1	1	KCNJ8	potassium inwardly-rectifying channel, subfamily J, member 8
hsa-miR-600	0	0	1	1	0	0	OCM	oncomodulin
hsa-miR-600	0	0	1	1	0	0	RRP36	ribosomal RNA processing 36 homolog (S. cerevisiae)
hsa-miR-600	0	0	0	1	0	0	OR2B6	olfactory receptor, family 2, subfamily B, member 6
hsa-miR-600	0	0	0	1	0	0	TNFSF14	tumor necrosis factor (ligand) superfamily, member 14
hsa-miR-600	0	0	1	1	1	1	NSRP1	nuclear speckle splicing regulatory protein 1
hsa-miR-600	0	0	0	1	0	0	TAS2R4	taste receptor, type 2, member 4
hsa-miR-600	1	0	1	1	0	0	SDF2L1	stromal cell-derived factor 2-like 1
hsa-miR-600	1	0	1	1	0	0	HOXD9	homeobox D9
hsa-miR-600	0	0	1	1	0	0	CD68	CD68 molecule
hsa-miR-600	0	0	1	1	0	0	CERS4	ceramide synthase 4
hsa-miR-600	0	0	0	1	1	1	ZKSCAN3	zinc finger with KRAB and SCAN domains 3
hsa-miR-600	0	0	0	1	0	0	GAMT	guanidinoacetate N-methyltransferase
hsa-miR-600	0	0	0	1	0	0	EXOC3L2	exocyst complex component 3-like 2
hsa-miR-600	0	0	1	1	1	1	PGPEP1	pyroglutamyl-peptidase I
hsa-miR-600	0	0	1	1	0	0	MRPL4	mitochondrial ribosomal protein L4
hsa-miR-600	0	0	0	1	1	1	PRDM9	PR domain containing 9
hsa-miR-600	0	0	0	1	0	0	PODNL1	podocan-like 1
hsa-miR-600	0	0	1	1	1	1	MYBBP1A	MYB binding protein (P160) 1a
hsa-miR-600	0	0	0	1	1	1	UTP3	UTP3, small subunit (SSU) processome component, homolog (S. cerevisiae)
hsa-miR-600	1	0	1	1	1	1	MBD2	methyl-CpG binding domain protein 2
hsa-miR-600	0	0	0	1	1	1	TRPM1	transient receptor potential cation channel, subfamily M, member 1
hsa-miR-600	0	0	1	1	1	1	OCM2	oncomodulin 2
hsa-miR-600	0	0	1	1	1	1	NUPL2	nucleoporin like 2
hsa-miR-600	0	0	0	1	1	1	PGBD1	piggyBac transposable element derived 1
hsa-miR-600	0	0	1	1	1	1	THUMPD2	THUMP domain containing 2
hsa-miR-600	0	0	1	1	0	0	PLCE1	phospholipase C, epsilon 1
hsa-miR-600	0	0	0	1	0	0	WDR12	WD repeat domain 12
hsa-miR-600	1	0	0	1	1	1	ABCC9	ATP-binding cassette, sub-family C (CFTR/MRP), member 9
hsa-miR-600	0	0	1	1	1	1	HS3ST2	heparan sulfate (glucosamine) 3-O-sulfotransferase 2
hsa-miR-600	0	0	1	1	0	0	ENOX1	ecto-NOX disulfide-thiol exchanger 1
hsa-miR-600	1	0	1	1	1	1	ARL1	ADP-ribosylation factor-like 1
hsa-miR-600	1	0	1	1	1	1	RAI1	retinoic acid induced 1
hsa-miR-600	0	0	1	1	1	1	ERP29	endoplasmic reticulum protein 29
hsa-miR-600	1	0	1	1	1	1	RHEB	Ras homolog enriched in brain
hsa-miR-600	0	0	0	1	0	0	LMF1	lipase maturation factor 1
hsa-miR-600	1	0	1	1	1	1	CCNE1	cyclin E1
hsa-miR-600	0	0	1	1	0	0	CSF2RB	colony stimulating factor 2 receptor, beta, low-affinity (granulocyte-macrophage)
hsa-miR-600	0	0	1	1	1	1	ARPC1A	actin related protein 2/3 complex, subunit 1A, 41kDa
hsa-miR-600	0	0	0	1	1	1	CDC45	cell division cycle 45 homolog (S. cerevisiae)
hsa-miR-600	0	0	1	1	0	0	FAM83E	family with sequence similarity 83, member E
hsa-miR-600	0	0	0	1	1	1	TYR	tyrosinase (oculocutaneous albinism IA)
hsa-miR-600	0	0	1	1	1	1	POLD3	polymerase (DNA-directed), delta 3, accessory subunit
hsa-miR-600	0	0	0	1	1	1	CLCA4	chloride channel accessory 4
hsa-miR-600	0	0	1	1	0	0	POPDC2	popeye domain containing 2
hsa-miR-600	0	0	0	1	1	1	MLPH	melanophilin
hsa-miR-600	0	0	1	1	1	1	F11	coagulation factor XI
hsa-miR-600	1	0	1	1	1	1	AHRR	aryl-hydrocarbon receptor repressor
hsa-miR-600	1	0	1	1	1	1	PDCD6	programmed cell death 6
hsa-miR-600	0	0	0	1	0	0	SCAP	SREBF chaperone
hsa-miR-600	0	0	1	1	1	1	REXO2	REX2, RNA exonuclease 2 homolog (S. cerevisiae)
hsa-miR-600	0	0	0	1	0	0	CD27	CD27 molecule
hsa-miR-600	0	0	0	1	0	0	ITGB7	integrin, beta 7
hsa-miR-600	0	0	0	1	0	0	DIABLO	diablo, IAP-binding mitochondrial protein
hsa-miR-600	0	0	0	1	1	1	RNF113B	ring finger protein 113B
hsa-miR-600	1	0	0	1	1	1	RAB20	RAB20, member RAS oncogene family
hsa-miR-600	0	0	0	1	0	0	FITM1	fat storage-inducing transmembrane protein 1
hsa-miR-600	0	0	1	1	1	1	FAM181A	family with sequence similarity 181, member A
hsa-miR-600	0	0	0	1	0	0	MAN2C1	mannosidase, alpha, class 2C, member 1
hsa-miR-600	0	0	1	1	1	1	FTO	fat mass and obesity associated
hsa-miR-600	1	0	1	1	0	0	G6PC3	glucose 6 phosphatase, catalytic, 3
hsa-miR-600	0	0	0	1	0	0	PPAP2C	phosphatidic acid phosphatase type 2C
hsa-miR-600	0	0	0	1	0	0	SSBP4	single stranded DNA binding protein 4
hsa-miR-600	0	0	1	1	0	0	SLC44A3	solute carrier family 44, member 3
hsa-miR-600	1	0	1	1	1	1	ETAA1	Ewing tumor-associated antigen 1
hsa-miR-600	0	0	1	1	1	1	MMS22L	MMS22-like, DNA repair protein
hsa-miR-600	0	0	1	1	0	0	CLVS2	clavesin 2
hsa-miR-600	1	0	0	1	1	1	IGFBP1	insulin-like growth factor binding protein 1
hsa-miR-600	0	0	1	1	1	1	CRH	corticotropin releasing hormone
hsa-miR-600	0	0	1	1	0	0	PRDM14	PR domain containing 14
hsa-miR-600	0	0	0	1	0	0	PNPLA7	patatin-like phospholipase domain containing 7
hsa-miR-600	0	0	1	1	1	1	CHEK1	checkpoint kinase 1
hsa-miR-600	0	0	0	1	1	1	C11orf53	chromosome 11 open reading frame 53
hsa-miR-600	0	0	0	1	1	1	JMY	junction mediating and regulatory protein, p53 cofactor
hsa-miR-600	0	0	0	1	1	1	UGT3A2	UDP glycosyltransferase 3 family, polypeptide A2
hsa-miR-600	1	0	1	1	1	1	RMND5A	required for meiotic nuclear division 5 homolog A (S. cerevisiae)
hsa-miR-600	0	0	0	1	1	1	KCNJ16	potassium inwardly-rectifying channel, subfamily J, member 16
hsa-miR-600	1	0	1	1	1	1	GDPD1	glycerophosphodiester phosphodiesterase domain containing 1
hsa-miR-600	0	0	0	1	1	1	UCHL1	ubiquitin carboxyl-terminal esterase L1 (ubiquitin thiolesterase)
hsa-miR-600	0	0	0	1	0	0	FAM161B	family with sequence similarity 161, member B
hsa-miR-600	0	0	1	1	0	0	CCT8	chaperonin containing TCP1, subunit 8 (theta)
hsa-miR-600	0	0	0	1	0	0	COX6A2	cytochrome c oxidase subunit VIa polypeptide 2
hsa-miR-600	0	0	1	1	1	1	HYDIN	HYDIN, axonemal central pair apparatus protein
hsa-miR-600	0	0	0	1	1	1	COQ5	coenzyme Q5 homolog, methyltransferase (S. cerevisiae)
hsa-miR-600	0	0	0	1	0	0	CDH15	cadherin 15, type 1, M-cadherin (myotubule)
hsa-miR-600	0	0	1	1	0	0	VWA5B1	von Willebrand factor A domain containing 5B1
hsa-miR-600	0	0	1	1	0	0	GFRA4	GDNF family receptor alpha 4
hsa-miR-600	0	0	1	1	0	0	CCDC142	coiled-coil domain containing 142
hsa-miR-600	0	0	0	1	0	0	C21orf58	chromosome 21 open reading frame 58
hsa-miR-600	0	0	0	1	0	0	TONSL	tonsoku-like, DNA repair protein
hsa-miR-600	0	0	1	1	1	1	C5orf45	chromosome 5 open reading frame 45
hsa-miR-600	0	0	0	1	0	0	GLB1L	galactosidase, beta 1-like
hsa-miR-600	0	0	1	1	1	1	GTPBP8	GTP-binding protein 8 (putative)
hsa-miR-600	1	0	1	1	1	1	PPM1K	protein phosphatase, Mg2+/Mn2+ dependent, 1K
hsa-miR-600	0	0	0	1	1	1	CLRN1	clarin 1
hsa-miR-600	0	0	1	1	0	0	TMEM41A	transmembrane protein 41A
hsa-miR-600	0	0	0	1	1	1	LSM6	LSM6 homolog, U6 small nuclear RNA associated (S. cerevisiae)
hsa-miR-600	0	0	1	1	0	0	DCBLD1	discoidin, CUB and LCCL domain containing 1
hsa-miR-600	0	0	0	1	0	0	RSPH10B2	radial spoke head 10 homolog B2 (Chlamydomonas)
hsa-miR-600	0	0	1	1	1	1	STOX1	storkhead box 1
hsa-miR-600	0	0	1	1	1	1	RNASE7	ribonuclease, RNase A family, 7
hsa-miR-600	0	0	1	1	0	0	METTL3	methyltransferase like 3
hsa-miR-600	0	0	1	1	1	1	FAM35A	family with sequence similarity 35, member A
hsa-miR-600	0	0	1	1	1	1	OTOGL	otogelin-like
hsa-miR-600	0	0	0	1	1	1	NLRP14	NLR family, pyrin domain containing 14
hsa-miR-600	0	0	1	1	0	0	CTDP1	CTD (carboxy-terminal domain, RNA polymerase II, polypeptide A) phosphatase, subunit 1
hsa-miR-600	0	0	1	1	1	1	FAM96A	family with sequence similarity 96, member A
hsa-miR-600	0	0	1	1	0	0	MESP1	mesoderm posterior 1 homolog (mouse)
hsa-miR-600	1	0	1	1	1	1	DCTN5	dynactin 5 (p25)
hsa-miR-600	0	0	0	1	0	0	OR4D6	olfactory receptor, family 4, subfamily D, member 6
hsa-miR-600	0	0	1	1	0	0	MS4A5	membrane-spanning 4-domains, subfamily A, member 5
hsa-miR-600	0	0	0	1	0	0	TRPM2	transient receptor potential cation channel, subfamily M, member 2
hsa-miR-600	0	0	0	1	0	0	TMIGD2	transmembrane and immunoglobulin domain containing 2
hsa-miR-600	0	0	1	1	0	0	TMC8	transmembrane channel-like 8
hsa-miR-600	0	0	0	1	0	0	VWCE	von Willebrand factor C and EGF domains
hsa-miR-600	0	0	0	1	0	0	PRSS27	protease, serine 27
hsa-miR-600	0	0	1	1	0	0	PRELID1	PRELI domain containing 1
hsa-miR-600	0	0	1	1	0	0	BTD	biotinidase
hsa-miR-600	1	0	1	1	1	1	PCBP1	poly(rC) binding protein 1
hsa-miR-600	1	0	1	1	1	1	ODF2	outer dense fiber of sperm tails 2
hsa-miR-600	0	0	1	1	0	0	HIST1H2AE	histone cluster 1, H2ae
hsa-miR-600	0	0	1	1	1	1	C15orf40	chromosome 15 open reading frame 40
hsa-miR-600	0	0	0	1	1	1	VASN	vasorin
hsa-miR-600	0	0	0	1	0	0	FPR1	formyl peptide receptor 1
hsa-miR-600	0	0	1	1	1	1	SPATA5L1	spermatogenesis associated 5-like 1
hsa-miR-600	0	0	1	1	1	1	FAM98B	family with sequence similarity 98, member B
hsa-miR-600	0	0	1	1	1	1	SMOX	spermine oxidase
hsa-miR-600	0	0	1	1	1	1	HSPBAP1	HSPB (heat shock 27kDa) associated protein 1
hsa-miR-600	0	0	1	1	0	0	HOXD4	homeobox D4
hsa-miR-600	0	0	1	1	0	0	ZNF692	zinc finger protein 692
hsa-miR-600	0	0	0	1	1	1	CDY1B	chromodomain protein, Y-linked, 1B
hsa-miR-600	0	0	0	1	1	1	COG7	component of oligomeric golgi complex 7
hsa-miR-600	0	0	0	1	0	0	ZNF556	zinc finger protein 556
hsa-miR-600	1	0	1	1	1	1	CTBP2	C-terminal binding protein 2
hsa-miR-600	0	0	1	1	1	1	PBLD	phenazine biosynthesis-like protein domain containing
hsa-miR-600	1	0	1	1	1	1	OLR1	oxidized low density lipoprotein (lectin-like) receptor 1
hsa-miR-600	0	0	1	1	1	1	KLK6	kallikrein-related peptidase 6
hsa-miR-600	1	0	0	1	1	1	FADS6	fatty acid desaturase domain family, member 6
hsa-miR-600	0	0	1	1	0	0	GP6	glycoprotein VI (platelet)
hsa-miR-600	0	0	1	1	1	1	REP15	RAB15 effector protein
hsa-miR-600	1	0	1	1	1	1	C10orf76	chromosome 10 open reading frame 76
hsa-miR-600	0	0	1	1	1	1	ATP5S	ATP synthase, H+ transporting, mitochondrial Fo complex, subunit s (factor B)
hsa-miR-600	0	0	1	1	0	0	CD7	CD7 molecule
hsa-miR-600	0	0	0	1	1	1	C17orf101	chromosome 17 open reading frame 101
hsa-miR-600	0	0	0	1	1	1	SLC15A1	solute carrier family 15 (oligopeptide transporter), member 1
hsa-miR-600	0	0	1	1	0	0	CCDC79	coiled-coil domain containing 79
hsa-miR-600	0	0	1	1	1	1	RMND5B	required for meiotic nuclear division 5 homolog B (S. cerevisiae)
hsa-miR-600	0	0	0	1	1	1	ZNF620	zinc finger protein 620
hsa-miR-600	0	0	1	1	0	0	CDPF1	cysteine-rich, DPF motif domain containing 1
hsa-miR-600	0	0	0	1	0	0	FARSA	phenylalanyl-tRNA synthetase, alpha subunit
hsa-miR-600	0	0	0	1	1	1	CCDC111	coiled-coil domain containing 111
hsa-miR-600	0	0	1	1	1	1	ABCD3	ATP-binding cassette, sub-family D (ALD), member 3
hsa-miR-600	0	0	1	1	1	1	KCND3	potassium voltage-gated channel, Shal-related subfamily, member 3
hsa-miR-600	0	0	1	1	0	0	DNAJC7	DnaJ (Hsp40) homolog, subfamily C, member 7
hsa-miR-600	0	0	0	1	1	1	ZNF559	zinc finger protein 559
hsa-miR-600	0	0	1	1	1	1	C8orf47	chromosome 8 open reading frame 47
hsa-miR-600	0	0	0	1	0	0	OR13D1	olfactory receptor, family 13, subfamily D, member 1
hsa-miR-600	0	0	1	1	0	0	DCTPP1	dCTP pyrophosphatase 1
hsa-miR-600	0	0	1	1	1	1	USP54	ubiquitin specific peptidase 54
hsa-miR-600	0	0	0	1	1	1	ZNF454	zinc finger protein 454
hsa-miR-600	0	0	0	1	0	0	FGF8	fibroblast growth factor 8 (androgen-induced)
hsa-miR-600	1	0	1	1	1	1	MAP4	microtubule-associated protein 4
hsa-miR-600	1	0	1	1	1	1	ZEB1	zinc finger E-box binding homeobox 1
hsa-miR-600	0	0	0	1	1	1	NUDC	nuclear distribution C homolog (A. nidulans)
hsa-miR-600	0	0	1	1	1	1	CCDC33	coiled-coil domain containing 33
hsa-miR-600	0	0	0	1	0	0	OR8D4	olfactory receptor, family 8, subfamily D, member 4
hsa-miR-600	1	0	1	1	1	1	YBX1	Y box binding protein 1
hsa-miR-600	0	0	0	1	0	0	GJD4	gap junction protein, delta 4, 40.1kDa
hsa-miR-600	0	0	0	1	0	0	TRIM72	tripartite motif containing 72
hsa-miR-600	1	0	1	1	1	1	NCL	nucleolin
hsa-miR-600	0	0	1	1	1	1	SERPINF2	serpin peptidase inhibitor, clade F (alpha-2 antiplasmin, pigment epithelium derived factor), member 2
hsa-miR-600	0	0	0	1	1	1	LIMS2	LIM and senescent cell antigen-like domains 2
hsa-miR-600	0	0	0	1	1	1	SIRT3	sirtuin 3
hsa-miR-600	0	0	0	1	1	1	CABP4	calcium binding protein 4
hsa-miR-600	0	0	1	1	1	1	CAST	calpastatin
hsa-miR-600	0	0	1	1	1	1	PRDM7	PR domain containing 7
hsa-miR-600	0	0	1	1	1	1	SLC4A1AP	solute carrier family 4 (anion exchanger), member 1, adaptor protein
hsa-miR-600	0	0	1	1	0	0	MMP12	matrix metallopeptidase 12 (macrophage elastase)
hsa-miR-600	1	0	1	1	1	1	EYA2	eyes absent homolog 2 (Drosophila)
hsa-miR-600	0	0	1	1	0	0	GAS6	growth arrest-specific 6
hsa-miR-600	1	0	1	1	1	1	C11orf9	chromosome 11 open reading frame 9
hsa-miR-600	0	0	1	1	0	0	PHF7	PHD finger protein 7
hsa-miR-600	0	0	1	1	0	0	NLRP7	NLR family, pyrin domain containing 7
hsa-miR-600	0	0	1	1	1	1	KCNN2	potassium intermediate/small conductance calcium-activated channel, subfamily N, member 2
hsa-miR-600	1	0	0	1	1	1	SIRT7	sirtuin 7
hsa-miR-600	0	0	1	1	0	0	GP1BA	glycoprotein Ib (platelet), alpha polypeptide
hsa-miR-600	0	0	1	1	0	0	HGS	hepatocyte growth factor-regulated tyrosine kinase substrate
hsa-miR-600	0	0	0	1	0	0	NKX2-5	NK2 homeobox 5
hsa-miR-600	0	0	0	1	0	0	OR56A3	olfactory receptor, family 56, subfamily A, member 3
hsa-miR-600	1	0	1	1	1	1	PEX26	peroxisomal biogenesis factor 26
hsa-miR-600	0	0	1	1	1	1	CAV3	caveolin 3
hsa-miR-600	0	0	0	1	0	0	NSUN5P1	NOP2/Sun domain family, member 5 pseudogene 1
hsa-miR-600	0	0	1	1	0	0	C12orf60	chromosome 12 open reading frame 60
hsa-miR-600	0	0	0	1	1	1	GLRX5	glutaredoxin 5
hsa-miR-600	0	0	1	1	1	1	SPRR3	small proline-rich protein 3
hsa-miR-600	0	0	1	1	1	1	LRRC16A	leucine rich repeat containing 16A
hsa-miR-600	0	0	1	1	0	0	GPR19	G protein-coupled receptor 19
hsa-miR-600	0	0	0	1	1	1	ANO9	anoctamin 9
hsa-miR-600	0	0	1	1	0	0	HIST1H2AJ	histone cluster 1, H2aj
hsa-miR-600	0	0	0	1	0	0	OR1D5	olfactory receptor, family 1, subfamily D, member 5
hsa-miR-600	0	0	0	1	1	1	METTL2A	methyltransferase like 2A
hsa-miR-600	0	0	0	1	1	1	CCBE1	collagen and calcium binding EGF domains 1
hsa-miR-600	0	0	0	1	0	0	ZNF347	zinc finger protein 347
hsa-miR-600	0	0	1	1	0	0	HLA-DQB1	major histocompatibility complex, class II, DQ beta 1
hsa-miR-600	0	0	1	1	1	1	CCK	cholecystokinin
hsa-miR-600	0	0	0	1	0	0	WDR25	WD repeat domain 25
hsa-miR-600	0	0	0	1	0	0	NME1-NME2	NME1-NME2 readthrough
hsa-miR-600	0	0	0	1	0	0	NME2	NME/NM23 nucleoside diphosphate kinase 2
hsa-miR-600	0	0	1	1	0	0	PPP2R2B	protein phosphatase 2, regulatory subunit B, beta
hsa-miR-600	0	0	1	1	0	0	SKAP1	src kinase associated phosphoprotein 1
hsa-miR-600	0	0	0	1	0	0	RSPH10B	radial spoke head 10 homolog B (Chlamydomonas)
hsa-miR-600	0	0	0	1	0	0	ZNF394	zinc finger protein 394
hsa-miR-600	1	0	1	1	1	1	PLS1	plastin 1
hsa-miR-600	1	0	1	1	1	1	SCHIP1	schwannomin interacting protein 1
hsa-miR-600	1	0	1	1	1	1	MYH9	myosin, heavy chain 9, non-muscle
hsa-miR-600	1	0	1	1	0	0	NRL	neural retina leucine zipper
hsa-miR-600	0	0	1	1	1	1	STAG3L1	stromal antigen 3-like 1
hsa-miR-600	0	0	0	1	0	0	PPP1R32	protein phosphatase 1, regulatory subunit 32
hsa-miR-600	1	0	1	1	1	1	MTSS1L	metastasis suppressor 1-like
hsa-miR-600	0	0	0	1	0	0	CATSPER4	cation channel, sperm associated 4
hsa-miR-600	1	0	1	1	1	1	NEK3	NIMA (never in mitosis gene a)-related kinase 3
hsa-miR-600	0	0	1	1	1	1	ANKRD6	ankyrin repeat domain 6
hsa-miR-600	0	0	1	1	0	0	HMX2	H6 family homeobox 2
hsa-miR-600	0	0	1	1	0	0	ARAP1	ArfGAP with RhoGAP domain, ankyrin repeat and PH domain 1
hsa-miR-600	0	0	0	1	0	0	LCN6	lipocalin 6
hsa-miR-600	0	0	1	1	1	1	LBX2	ladybird homeobox 2
hsa-miR-600	0	0	1	1	1	1	PRX	periaxin
hsa-miR-600	0	0	0	1	1	1	CTSL1	cathepsin L1
hsa-miR-600	1	0	1	1	0	0	CECR2	cat eye syndrome chromosome region, candidate 2
hsa-miR-600	0	0	1	1	1	1	SUSD4	sushi domain containing 4
hsa-miR-600	1	0	1	1	1	1	GPR135	G protein-coupled receptor 135
hsa-miR-600	0	0	0	1	0	0	TAF6	TAF6 RNA polymerase II, TATA box binding protein (TBP)-associated factor, 80kDa
hsa-miR-600	0	0	0	1	1	1	DUSP22	dual specificity phosphatase 22
hsa-miR-600	0	0	1	1	0	0	EFHB	EF-hand domain family, member B
hsa-miR-600	0	0	1	1	0	0	SLC28A2	solute carrier family 28 (sodium-coupled nucleoside transporter), member 2
hsa-miR-600	0	0	1	1	1	1	ALDH6A1	aldehyde dehydrogenase 6 family, member A1
hsa-miR-600	0	0	0	1	0	0	SULT1A1	sulfotransferase family, cytosolic, 1A, phenol-preferring, member 1
hsa-miR-600	1	0	1	1	1	1	ZC3H14	zinc finger CCCH-type containing 14
hsa-miR-600	0	0	1	1	1	1	RFPL1	ret finger protein-like 1
hsa-miR-600	0	0	0	1	1	1	TRIM16	tripartite motif containing 16
hsa-miR-600	1	0	1	1	1	1	CDRT1	CMT1A duplicated region transcript 1
hsa-miR-600	0	0	1	1	1	1	LRMP	lymphoid-restricted membrane protein
hsa-miR-600	0	0	1	1	1	1	MED23	mediator complex subunit 23
hsa-miR-600	0	0	1	1	1	1	ATG10	autophagy related 10
hsa-miR-600	0	0	1	1	0	0	NHP2L1	NHP2 non-histone chromosome protein 2-like 1 (S. cerevisiae)
hsa-miR-600	0	0	1	1	1	1	RSL1D1	ribosomal L1 domain containing 1
hsa-miR-600	0	0	1	1	1	1	CAB39L	calcium binding protein 39-like
hsa-miR-600	0	0	1	1	1	1	C13orf35	chromosome 13 open reading frame 35
hsa-miR-600	0	0	1	1	1	1	PXDNL	peroxidasin homolog (Drosophila)-like
hsa-miR-600	0	0	1	1	0	0	HEATR7A	HEAT repeat containing 7A
hsa-miR-600	0	0	1	1	0	0	ANKRD18A	ankyrin repeat domain 18A
hsa-miR-600	0	0	1	1	0	0	DZANK1	double zinc ribbon and ankyrin repeat domains 1
hsa-miR-600	0	0	1	1	1	1	PPA2	pyrophosphatase (inorganic) 2
hsa-miR-600	0	0	0	1	0	0	DNAJC22	DnaJ (Hsp40) homolog, subfamily C, member 22
hsa-miR-600	0	0	0	1	0	0	HIST1H4K	histone cluster 1, H4k
hsa-miR-600	1	0	1	1	1	1	PHTF1	putative homeodomain transcription factor 1
hsa-miR-600	0	0	0	1	1	1	PLOD1	procollagen-lysine, 2-oxoglutarate 5-dioxygenase 1
hsa-miR-600	0	0	0	1	1	1	SUSD2	sushi domain containing 2
hsa-miR-600	0	0	1	1	1	1	FAM150A	family with sequence similarity 150, member A
hsa-miR-600	0	0	1	1	0	0	UBL5	ubiquitin-like 5
hsa-miR-600	1	0	1	1	1	1	ENTPD4	ectonucleoside triphosphate diphosphohydrolase 4
hsa-miR-600	1	0	1	1	1	1	DIP2A	DIP2 disco-interacting protein 2 homolog A (Drosophila)
hsa-miR-600	1	0	1	1	0	0	C16orf5	chromosome 16 open reading frame 5
hsa-miR-600	0	0	0	1	0	0	OR6K2	olfactory receptor, family 6, subfamily K, member 2
hsa-miR-600	0	0	0	1	1	1	TYW1	tRNA-yW synthesizing protein 1 homolog (S. cerevisiae)
hsa-miR-600	0	0	1	1	0	0	PDSS1	prenyl (decaprenyl) diphosphate synthase, subunit 1
hsa-miR-600	0	0	1	1	1	1	DMBX1	diencephalon/mesencephalon homeobox 1
hsa-miR-600	0	0	0	1	1	1	SPN	sialophorin
hsa-miR-600	1	0	1	1	1	1	FGFR2	fibroblast growth factor receptor 2
hsa-miR-600	0	0	1	1	1	1	PRKAR1B	protein kinase, cAMP-dependent, regulatory, type I, beta
hsa-miR-600	0	0	0	1	0	0	MPEG1	macrophage expressed 1
hsa-miR-600	0	0	1	1	0	0	CCL28	chemokine (C-C motif) ligand 28
hsa-miR-600	0	0	0	1	0	0	MPHOSPH8	M-phase phosphoprotein 8
hsa-miR-600	0	0	0	1	0	0	PPEF1	protein phosphatase, EF-hand calcium binding domain 1
hsa-miR-600	0	0	1	1	0	0	AKR7A3	aldo-keto reductase family 7, member A3 (aflatoxin aldehyde reductase)
hsa-miR-600	0	0	1	1	0	0	WISP3	WNT1 inducible signaling pathway protein 3
hsa-miR-600	0	0	1	1	1	1	FAM111A	family with sequence similarity 111, member A
hsa-miR-600	0	0	1	1	1	1	ZNF277	zinc finger protein 277
hsa-miR-600	0	0	0	1	1	1	BNIPL	BCL2/adenovirus E1B 19kD interacting protein like
hsa-miR-600	1	0	1	1	1	1	CNST	consortin, connexin sorting protein
hsa-miR-600	1	0	1	1	1	1	ARID4B	AT rich interactive domain 4B (RBP1-like)
hsa-miR-600	1	0	1	1	1	1	KIAA1804	mixed lineage kinase 4
hsa-miR-600	0	0	0	1	1	1	H3F3A	H3 histone, family 3A
hsa-miR-600	0	0	0	1	0	0	EPRS	glutamyl-prolyl-tRNA synthetase
hsa-miR-600	0	0	0	1	1	1	RMND1	required for meiotic nuclear division 1 homolog (S. cerevisiae)
hsa-miR-600	0	0	0	1	1	1	NCF2	neutrophil cytosolic factor 2
hsa-miR-600	0	0	0	1	0	0	KIAA1614	KIAA1614
hsa-miR-600	0	0	1	1	0	0	IFNGR1	interferon gamma receptor 1
hsa-miR-600	1	0	1	1	1	1	TBPL1	TBP-like 1
hsa-miR-600	0	0	0	1	0	0	PRAP1	proline-rich acidic protein 1
hsa-miR-600	1	0	1	1	1	1	INPP5A	inositol polyphosphate-5-phosphatase, 40kDa
hsa-miR-600	0	0	0	1	0	0	MMP21	matrix metallopeptidase 21
hsa-miR-600	0	0	1	1	0	0	TARS2	threonyl-tRNA synthetase 2, mitochondrial (putative)
hsa-miR-600	0	0	0	1	0	0	ENO4	enolase family member 4
hsa-miR-600	0	0	0	1	1	1	C6orf165	chromosome 6 open reading frame 165
hsa-miR-600	0	0	1	1	0	0	WDR96	WD repeat domain 96
hsa-miR-600	1	0	1	1	1	1	CNNM2	cyclin M2
hsa-miR-600	0	0	0	1	0	0	TNFRSF6B	tumor necrosis factor receptor superfamily, member 6b, decoy
hsa-miR-600	0	0	1	1	0	0	RTEL1	regulator of telomere elongation helicase 1
hsa-miR-600	0	0	1	1	1	1	DPYD	dihydropyrimidine dehydrogenase
hsa-miR-600	1	0	1	1	1	1	MTF2	metal response element binding transcription factor 2
hsa-miR-600	0	0	0	1	0	0	BTBD8	BTB (POZ) domain containing 8
hsa-miR-600	0	0	0	1	0	0	KHDC1L	KH homology domain containing 1-like
hsa-miR-600	0	0	1	1	0	0	KHDC1	KH homology domain containing 1
hsa-miR-600	0	0	1	1	0	0	CPN1	carboxypeptidase N, polypeptide 1
hsa-miR-600	1	0	1	1	1	1	DDX26B	DEAD/H (Asp-Glu-Ala-Asp/His) box polypeptide 26B
hsa-miR-600	0	0	1	1	1	1	C1orf141	chromosome 1 open reading frame 141
hsa-miR-600	0	0	0	1	1	1	CPT2	carnitine palmitoyltransferase 2
hsa-miR-600	0	0	1	1	1	1	IL13RA1	interleukin 13 receptor, alpha 1
hsa-miR-600	0	0	0	1	0	0	EGFL7	EGF-like-domain, multiple 7
hsa-miR-600	0	0	0	1	0	0	SARDH	sarcosine dehydrogenase
hsa-miR-600	1	0	1	1	1	1	OPN4	opsin 4
hsa-miR-600	1	0	1	1	1	1	PIH1D3	PIH1 domain containing 3
hsa-miR-600	0	0	0	1	0	0	PRRX2	paired related homeobox 2
hsa-miR-600	0	0	0	1	0	0	PHYHD1	phytanoyl-CoA dioxygenase domain containing 1
hsa-miR-600	0	0	1	1	1	1	BEX2	brain expressed X-linked 2
hsa-miR-600	0	0	0	1	1	1	WFDC12	WAP four-disulfide core domain 12
hsa-miR-600	0	0	1	1	0	0	GNMT	glycine N-methyltransferase
hsa-miR-600	0	0	1	1	1	1	MRPS16	mitochondrial ribosomal protein S16
hsa-miR-600	0	0	1	1	0	0	FPGS	folylpolyglutamate synthase
hsa-miR-600	0	0	1	1	0	0	H2AFY2	H2A histone family, member Y2
hsa-miR-600	1	0	0	1	1	1	LPIN3	lipin 3
hsa-miR-600	1	0	1	1	1	1	MAFB	v-maf musculoaponeurotic fibrosarcoma oncogene homolog B (avian)
hsa-miR-600	0	0	0	1	1	1	TRAF3IP1	TNF receptor-associated factor 3 interacting protein 1
hsa-miR-600	0	0	0	1	0	0	CDX4	caudal type homeobox 4
hsa-miR-600	1	0	1	1	1	1	PABPC1L2A	poly(A) binding protein, cytoplasmic 1-like 2A
hsa-miR-600	0	0	1	1	1	1	PIN4	protein (peptidylprolyl cis/trans isomerase) NIMA-interacting, 4 (parvulin)
hsa-miR-600	0	0	1	1	1	1	MYPN	myopalladin
hsa-miR-600	1	0	1	1	1	1	PHACTR4	phosphatase and actin regulator 4
hsa-miR-600	1	0	0	1	1	1	CNTRL	centriolin
hsa-miR-600	0	0	0	1	0	0	CLPSL1	colipase-like 1
hsa-miR-600	0	0	0	1	1	1	FGR	Gardner-Rasheed feline sarcoma viral (v-fgr) oncogene homolog
hsa-miR-600	0	0	1	1	1	1	DEC1	deleted in esophageal cancer 1
hsa-miR-600	0	0	1	1	1	1	ATP6V1G1	ATPase, H+ transporting, lysosomal 13kDa, V1 subunit G1
hsa-miR-600	0	0	0	1	0	0	KIFC1	kinesin family member C1
hsa-miR-600	0	0	1	1	0	0	CDK15	cyclin-dependent kinase 15
hsa-miR-600	0	0	0	1	0	0	PDE6G	phosphodiesterase 6G, cGMP-specific, rod, gamma
hsa-miR-600	0	0	1	1	1	1	KLF8	Kruppel-like factor 8
hsa-miR-600	1	0	1	1	1	1	EIF4G3	eukaryotic translation initiation factor 4 gamma, 3
hsa-miR-600	0	0	1	1	0	0	PFKFB1	6-phosphofructo-2-kinase/fructose-2,6-biphosphatase 1
hsa-miR-600	1	0	0	1	0	0	SH2D5	SH2 domain containing 5
hsa-miR-600	0	0	1	1	1	1	DDOST	dolichyl-diphosphooligosaccharide--protein glycosyltransferase
hsa-miR-600	0	0	1	1	1	1	TRIM14	tripartite motif containing 14
hsa-miR-600	0	0	0	1	1	1	C9orf156	chromosome 9 open reading frame 156
hsa-miR-600	1	0	1	1	1	1	METTL8	methyltransferase like 8
hsa-miR-600	0	0	1	1	0	0	SLC44A4	solute carrier family 44, member 4
hsa-miR-600	1	0	1	1	1	1	MCF2L	MCF.2 cell line derived transforming sequence-like
hsa-miR-600	1	0	0	1	1	1	HSPA1B	heat shock 70kDa protein 1B
hsa-miR-600	0	0	0	1	0	0	LY6G6F	lymphocyte antigen 6 complex, locus G6F
hsa-miR-600	0	0	0	1	0	0	LY6G6D	lymphocyte antigen 6 complex, locus G6D
hsa-miR-600	0	0	1	1	1	1	SHC3	SHC (Src homology 2 domain containing) transforming protein 3
hsa-miR-600	0	0	0	1	1	1	LY6G5B	lymphocyte antigen 6 complex, locus G5B
hsa-miR-600	0	0	1	1	0	0	CSNK2B	casein kinase 2, beta polypeptide
hsa-miR-600	0	0	0	1	0	0	DAOA	D-amino acid oxidase activator
hsa-miR-600	0	0	1	1	1	1	MYO3A	myosin IIIA
hsa-miR-600	0	0	0	1	1	1	FLOT1	flotillin 1
hsa-miR-600	0	0	1	1	0	0	RPP21	ribonuclease P/MRP 21kDa subunit
hsa-miR-600	0	0	0	1	0	0	FBXO6	F-box protein 6
hsa-miR-600	0	0	1	1	0	0	TIMP1	TIMP metallopeptidase inhibitor 1
hsa-miR-600	0	0	0	1	0	0	ZNF133	zinc finger protein 133
hsa-miR-600	0	0	0	1	1	1	KRTAP4-8	keratin associated protein 4-8
hsa-miR-600	0	0	1	1	0	0	HIST1H2AC	histone cluster 1, H2ac
hsa-miR-600	0	0	1	1	1	1	ZNF673	zinc finger family member 673
hsa-miR-600	1	0	1	1	0	0	GBA2	glucosidase, beta (bile acid) 2
hsa-miR-600	0	0	1	1	1	1	ALG11	asparagine-linked glycosylation 11, alpha-1,2-mannosyltransferase homolog (yeast)
hsa-miR-600	0	0	0	1	0	0	AARD	alanine and arginine rich domain containing protein
hsa-miR-600	0	0	1	1	1	1	FAM213B	family with sequence similarity 213, member B
hsa-miR-600	0	0	1	1	0	0	KIF13A	kinesin family member 13A
hsa-miR-600	0	0	1	1	1	1	CAMK1D	calcium/calmodulin-dependent protein kinase ID
hsa-miR-600	0	0	0	1	1	1	C5orf56	chromosome 5 open reading frame 56
hsa-miR-600	0	0	0	1	0	0	ETV2	ets variant 2
hsa-miR-600	0	0	0	1	0	0	TTLL10	tubulin tyrosine ligase-like family, member 10
hsa-miR-600	0	0	1	1	1	1	SPDYA	speedy homolog A (Xenopus laevis)
hsa-miR-600	0	0	1	1	0	0	KATNB1	katanin p80 (WD repeat containing) subunit B 1
hsa-miR-600	1	0	1	1	1	1	PFKFB3	6-phosphofructo-2-kinase/fructose-2,6-biphosphatase 3
hsa-miR-600	1	0	0	1	1	1	PDHA1	pyruvate dehydrogenase (lipoamide) alpha 1
hsa-miR-600	0	0	1	1	1	1	SLC6A2	solute carrier family 6 (neurotransmitter transporter, noradrenalin), member 2
hsa-miR-600	1	0	1	1	1	1	MAB21L1	mab-21-like 1 (C. elegans)
hsa-miR-600	0	0	1	1	0	0	SLC4A11	solute carrier family 4, sodium borate transporter, member 11
hsa-miR-600	0	0	0	1	1	1	BRCA2	breast cancer 2, early onset
hsa-miR-600	0	0	0	1	0	0	S100G	S100 calcium binding protein G
hsa-miR-600	0	0	1	1	1	1	CTPS2	CTP synthase 2
hsa-miR-600	0	0	0	1	0	0	HBG2	hemoglobin, gamma G
hsa-miR-600	0	0	0	1	0	0	ZRSR2	zinc finger (CCCH type), RNA-binding motif and serine/arginine rich 2
hsa-miR-600	0	0	1	1	1	1	EPHX2	epoxide hydrolase 2, cytoplasmic
hsa-miR-600	0	0	1	1	0	0	PITRM1	pitrilysin metallopeptidase 1
hsa-miR-600	0	0	1	1	1	1	DNM1L	dynamin 1-like
hsa-miR-600	0	0	1	1	1	1	MRPS6	mitochondrial ribosomal protein S6
hsa-miR-600	0	0	1	1	0	0	POLR2B	polymerase (RNA) II (DNA directed) polypeptide B, 140kDa
hsa-miR-600	0	0	1	1	1	1	IL6ST	interleukin 6 signal transducer (gp130, oncostatin M receptor)
hsa-miR-600	0	0	0	1	0	0	CRLF2	cytokine receptor-like factor 2
hsa-miR-600	0	0	0	1	0	0	TPTE2P1	transmembrane phosphoinositide 3-phosphatase and tensin homolog 2 pseudogene 1
hsa-miR-600	0	0	1	1	1	1	SPATA6L	spermatogenesis associated 6-like
hsa-miR-600	0	0	0	1	1	1	RFPL3	ret finger protein-like 3
hsa-miR-600	0	0	1	1	1	1	PARP15	poly (ADP-ribose) polymerase family, member 15
hsa-miR-600	0	0	0	1	0	0	TMEM42	transmembrane protein 42
hsa-miR-600	0	0	1	1	1	1	AGPHD1	aminoglycoside phosphotransferase domain containing 1
hsa-miR-600	0	0	1	1	1	1	MGAM	maltase-glucoamylase (alpha-glucosidase)
hsa-miR-600	1	0	1	1	1	1	GRM7	glutamate receptor, metabotropic 7
hsa-miR-600	0	0	1	1	1	1	ZFP91-CNTF	ZFP91-CNTF readthrough (non-protein coding)
hsa-miR-600	0	0	1	1	1	1	CNTF	ciliary neurotrophic factor
hsa-miR-600	1	0	1	1	1	1	ALDH3A2	aldehyde dehydrogenase 3 family, member A2
hsa-miR-600	1	0	1	1	1	1	CFTR	cystic fibrosis transmembrane conductance regulator (ATP-binding cassette sub-family C, member 7)
hsa-miR-600	0	0	0	1	1	1	SFTPB	surfactant protein B
hsa-miR-600	1	0	1	0	1	1	PKP2	plakophilin 2
hsa-miR-600	1	0	1	0	1	1	KIAA0930	KIAA0930
hsa-miR-600	0	0	1	1	1	1	PTPLAD2	protein tyrosine phosphatase-like A domain containing 2
hsa-miR-600	0	0	1	1	1	1	ZNF833P	zinc finger protein 833, pseudogene
hsa-miR-600	1	0	1	1	1	1	CBFA2T2	core-binding factor, runt domain, alpha subunit 2; translocated to, 2
hsa-miR-600	0	0	1	1	1	1	TTC23	tetratricopeptide repeat domain 23
hsa-miR-600	0	0	1	1	1	1	LPAR1	lysophosphatidic acid receptor 1
hsa-miR-600	1	0	1	1	1	1	ALCAM	activated leukocyte cell adhesion molecule
hsa-miR-600	0	0	0	1	1	1	MKI67	antigen identified by monoclonal antibody Ki-67
hsa-miR-600	0	0	1	1	1	1	SRP19	signal recognition particle 19kDa
hsa-miR-600	0	0	1	1	1	1	NEK4	NIMA (never in mitosis gene a)-related kinase 4
hsa-miR-600	1	0	1	1	1	1	TCF12	transcription factor 12
hsa-miR-600	0	0	0	1	1	1	ZNF136	zinc finger protein 136
hsa-miR-600	0	0	1	1	1	1	CDKN1B	cyclin-dependent kinase inhibitor 1B (p27, Kip1)
hsa-miR-600	0	0	0	0	1	1	F2RL2	coagulation factor II (thrombin) receptor-like 2
hsa-miR-600	0	0	1	1	1	1	TMPRSS11D	transmembrane protease, serine 11D
hsa-miR-600	1	0	1	1	1	1	NRG1	neuregulin 1
hsa-miR-600	0	0	1	1	1	1	CDK2AP1	cyclin-dependent kinase 2 associated protein 1
hsa-miR-600	0	0	1	1	1	1	DIRAS3	DIRAS family, GTP-binding RAS-like 3
hsa-miR-600	0	0	1	0	1	1	CIAO1	cytosolic iron-sulfur protein assembly 1
hsa-miR-600	0	0	1	1	1	1	ABCD4	ATP-binding cassette, sub-family D (ALD), member 4
hsa-miR-600	1	0	1	1	1	1	ORC2	origin recognition complex, subunit 2
hsa-miR-600	1	0	1	1	1	1	IPO8	importin 8
hsa-miR-600	0	0	1	1	1	1	POLR3F	polymerase (RNA) III (DNA directed) polypeptide F, 39 kDa
hsa-miR-600	1	0	1	1	1	1	RBBP9	retinoblastoma binding protein 9
hsa-miR-600	1	0	1	1	1	1	SLC20A2	solute carrier family 20 (phosphate transporter), member 2
hsa-miR-600	1	0	1	1	1	1	FERMT2	fermitin family member 2
hsa-miR-600	1	0	1	1	1	1	TMF1	TATA element modulatory factor 1
hsa-miR-600	1	0	1	1	1	1	MGAT4A	mannosyl (alpha-1,3-)-glycoprotein beta-1,4-N-acetylglucosaminyltransferase, isozyme A
hsa-miR-600	0	0	0	1	1	1	FTSJ1	FtsJ RNA methyltransferase homolog 1 (E. coli)
hsa-miR-600	0	0	1	0	1	1	PRND	prion protein 2 (dublet)
hsa-miR-600	1	0	1	0	1	1	REPIN1	replication initiator 1
hsa-miR-600	1	0	1	1	1	1	AK2	adenylate kinase 2
hsa-miR-600	0	0	1	1	1	1	DDX58	DEAD (Asp-Glu-Ala-Asp) box polypeptide 58
hsa-miR-600	1	0	1	1	1	1	DIMT1	DIM1 dimethyladenosine transferase 1 homolog (S. cerevisiae)
hsa-miR-600	0	0	1	0	1	1	ZBTB24	zinc finger and BTB domain containing 24
hsa-miR-600	1	0	1	1	1	1	RHOBTB3	Rho-related BTB domain containing 3
hsa-miR-600	1	0	1	0	1	1	ATG14	autophagy related 14
hsa-miR-600	1	0	1	1	1	1	TBC1D9	TBC1 domain family, member 9 (with GRAM domain)
hsa-miR-600	0	0	1	1	1	1	PHLDB1	pleckstrin homology-like domain, family B, member 1
hsa-miR-600	0	0	1	1	1	1	DDHD2	DDHD domain containing 2
hsa-miR-600	0	0	1	1	1	1	ANAPC13	anaphase promoting complex subunit 13
hsa-miR-600	0	0	1	1	1	1	POMP	proteasome maturation protein
hsa-miR-600	0	0	1	1	1	1	KCTD3	potassium channel tetramerisation domain containing 3
hsa-miR-600	1	0	1	1	1	1	MYEF2	myelin expression factor 2
hsa-miR-600	0	0	0	1	1	1	CRBN	cereblon
hsa-miR-600	1	0	1	1	1	1	IMPAD1	inositol monophosphatase domain containing 1
hsa-miR-600	0	0	0	1	1	1	FAM206A	family with sequence similarity 206, member A
hsa-miR-600	0	0	0	1	1	1	TTC22	tetratricopeptide repeat domain 22
hsa-miR-600	0	0	1	1	1	1	C10orf118	chromosome 10 open reading frame 118
hsa-miR-600	0	0	1	0	1	1	SLC38A4	solute carrier family 38, member 4
hsa-miR-600	1	0	0	1	1	1	KLHDC8A	kelch domain containing 8A
hsa-miR-600	0	0	1	1	1	1	TMEM30A	transmembrane protein 30A
hsa-miR-600	0	0	1	1	1	1	ANKMY2	ankyrin repeat and MYND domain containing 2
hsa-miR-600	1	0	1	0	1	1	FAM40B	family with sequence similarity 40, member B
hsa-miR-600	1	0	1	1	1	1	WDR48	WD repeat domain 48
hsa-miR-600	1	0	1	1	1	1	STIM2	stromal interaction molecule 2
hsa-miR-600	1	0	1	1	1	1	FBXL17	F-box and leucine-rich repeat protein 17
hsa-miR-600	1	0	1	1	1	1	CEP97	centrosomal protein 97kDa
hsa-miR-600	0	0	0	1	1	1	THAP9	THAP domain containing 9
hsa-miR-600	1	0	1	1	1	1	CLIP4	CAP-GLY domain containing linker protein family, member 4
hsa-miR-600	0	0	1	1	1	1	CAMKMT	calmodulin-lysine N-methyltransferase
hsa-miR-600	0	0	1	1	1	1	FBXO17	F-box protein 17
hsa-miR-600	0	0	1	1	1	1	SLC25A21	solute carrier family 25 (mitochondrial oxoadipate carrier), member 21
hsa-miR-600	0	0	1	1	1	1	SLC2A10	solute carrier family 2 (facilitated glucose transporter), member 10
hsa-miR-600	0	0	0	1	1	1	C15orf44	chromosome 15 open reading frame 44
hsa-miR-600	0	0	1	1	1	1	ZNF323	zinc finger protein 323
hsa-miR-600	0	0	0	1	1	1	OR12D3	olfactory receptor, family 12, subfamily D, member 3
hsa-miR-600	0	0	1	0	1	1	C1QTNF7	C1q and tumor necrosis factor related protein 7
hsa-miR-600	0	0	1	1	1	1	DYDC2	DPY30 domain containing 2
hsa-miR-600	0	0	0	1	1	1	CARD6	caspase recruitment domain family, member 6
hsa-miR-600	0	0	0	1	1	1	RAX2	retina and anterior neural fold homeobox 2
hsa-miR-600	0	0	1	1	1	1	RHPN2	rhophilin, Rho GTPase binding protein 2
hsa-miR-600	0	0	1	1	1	1	C3orf15	chromosome 3 open reading frame 15
hsa-miR-600	0	0	0	1	1	1	TUBGCP5	tubulin, gamma complex associated protein 5
hsa-miR-600	0	0	1	1	1	1	TRUB1	TruB pseudouridine (psi) synthase homolog 1 (E. coli)
hsa-miR-600	1	0	1	1	1	1	ZNF25	zinc finger protein 25
hsa-miR-600	0	0	0	1	1	1	ZNF627	zinc finger protein 627
hsa-miR-600	1	0	1	1	1	1	ZNF396	zinc finger protein 396
hsa-miR-600	0	0	0	1	1	1	ZNF441	zinc finger protein 441
hsa-miR-600	1	0	1	1	1	1	HOXA9	homeobox A9
hsa-miR-600	1	0	1	1	1	1	CACUL1	CDK2-associated, cullin domain 1
hsa-miR-600	0	0	1	1	1	1	TRIM59	tripartite motif containing 59
hsa-miR-600	0	0	1	1	1	1	MPV17L	MPV17 mitochondrial membrane protein-like
hsa-miR-600	0	0	1	1	1	1	SELV	selenoprotein V
hsa-miR-600	1	0	1	0	1	1	LOC90462	zinc finger protein 605-like
hsa-miR-600	1	0	1	1	1	1	NAIF1	nuclear apoptosis inducing factor 1
hsa-miR-600	1	0	1	0	1	1	UBE2L3	ubiquitin-conjugating enzyme E2L 3
hsa-miR-600	0	0	1	1	1	1	TMEM17	transmembrane protein 17
hsa-miR-600	1	0	1	0	1	1	LONRF2	LON peptidase N-terminal domain and ring finger 2
hsa-miR-600	0	0	1	0	1	1	ANKRD45	ankyrin repeat domain 45
hsa-miR-600	1	0	1	0	1	1	DLEU7	deleted in lymphocytic leukemia, 7
hsa-miR-600	0	0	0	1	1	1	AMN1	antagonist of mitotic exit network 1 homolog (S. cerevisiae)
hsa-miR-600	0	0	0	1	1	1	PKD1L3	polycystic kidney disease 1-like 3
hsa-miR-600	0	0	0	0	1	1	C2orf74	chromosome 2 open reading frame 74
