# Supplementary material for: Profiling of Selected MicroRNAs in Proliferative Eutopic Endometrium of Women with Ovarian Endometriosis
Source: Biomed Res Int. 2015 Aug 20;2015:760698. doi: 10.1155/2015/760698 (PMC4558423; doi:10.1155/2015/760698)
Supplement: Supplementary file 1 — Table I: The names of miRNAs significantly differentially expressed between eutopic endometrium of patients with endometriosis vs eutopic endometrium of patients without endometriosis. Table II: The associations between miRNA and mRNA, which presents detailed results of the search of six major databases i.e targetscan, tarbase, miranda, mirbase, mirtarget2 and pictar. [file 760698.f1.zip › 760698.f1/Table II/hsa-miR-602.tsv]

miR	targetscan	tarbase	miranda	mirbase	mirtarget2	pictar	GeneSymbol	GeneName
hsa-miR-602	1	0	1	0	1	1	KIAA0355	KIAA0355
hsa-miR-602	0	0	1	1	1	1	PDE4DIP	phosphodiesterase 4D interacting protein
hsa-miR-602	1	0	1	1	1	1	GIGYF2	GRB10 interacting GYF protein 2
hsa-miR-602	1	0	1	1	1	1	AHCYL2	adenosylhomocysteinase-like 2
hsa-miR-602	1	0	1	0	0	0	DTX4	deltex homolog 4 (Drosophila)
hsa-miR-602	1	0	1	1	1	1	RGL1	ral guanine nucleotide dissociation stimulator-like 1
hsa-miR-602	0	0	1	1	0	0	RTEL1	regulator of telomere elongation helicase 1
hsa-miR-602	0	0	1	0	0	0	MTA3	metastasis associated 1 family, member 3
hsa-miR-602	1	0	1	0	0	0	ODZ4	odz, odd Oz/ten-m homolog 4 (Drosophila)
hsa-miR-602	1	0	1	0	0	0	PITPNM2	phosphatidylinositol transfer protein, membrane-associated 2
hsa-miR-602	0	0	1	1	1	1	NLGN3	neuroligin 3
hsa-miR-602	0	0	1	1	0	0	TMEM132A	transmembrane protein 132A
hsa-miR-602	1	0	1	1	1	1	ZNF532	zinc finger protein 532
hsa-miR-602	0	0	1	0	0	0	TTC28-AS1	TTC28 antisense RNA 1
hsa-miR-602	1	0	1	1	1	1	LCOR	ligand dependent nuclear receptor corepressor
hsa-miR-602	0	0	1	1	1	1	KIAA1967	KIAA1967
hsa-miR-602	0	0	1	1	0	0	SSPO	SCO-spondin homolog (Bos taurus)
hsa-miR-602	1	0	1	1	1	1	PRKACB	protein kinase, cAMP-dependent, catalytic, beta
hsa-miR-602	1	0	1	1	1	1	DMTF1	cyclin D binding myb-like transcription factor 1
hsa-miR-602	1	0	1	0	1	1	CHL1	cell adhesion molecule with homology to L1CAM (close homolog of L1)
hsa-miR-602	0	0	1	1	0	0	ASIC3	acid-sensing (proton-gated) ion channel 3
hsa-miR-602	1	0	1	1	0	0	EHMT2	euchromatic histone-lysine N-methyltransferase 2
hsa-miR-602	0	0	1	1	1	1	PPP1R12C	protein phosphatase 1, regulatory subunit 12C
hsa-miR-602	0	0	1	1	0	0	EIF4E2	eukaryotic translation initiation factor 4E family member 2
hsa-miR-602	1	0	1	1	1	1	ARHGEF3	Rho guanine nucleotide exchange factor (GEF) 3
hsa-miR-602	0	0	1	1	0	0	CDK10	cyclin-dependent kinase 10
hsa-miR-602	0	0	1	1	1	1	CELF1	CUGBP, Elav-like family member 1
hsa-miR-602	1	0	1	0	1	1	DDX3X	DEAD (Asp-Glu-Ala-Asp) box polypeptide 3, X-linked
hsa-miR-602	1	0	1	0	1	1	MLL2	myeloid/lymphoid or mixed-lineage leukemia 2
hsa-miR-602	1	0	1	1	1	1	PCDH17	protocadherin 17
hsa-miR-602	1	0	1	1	1	1	PFKFB3	6-phosphofructo-2-kinase/fructose-2,6-biphosphatase 3
hsa-miR-602	0	0	1	1	0	0	CARD10	caspase recruitment domain family, member 10
hsa-miR-602	1	0	1	1	1	1	VAPB	VAMP (vesicle-associated membrane protein)-associated protein B and C
hsa-miR-602	0	0	1	1	1	1	FHL1	four and a half LIM domains 1
hsa-miR-602	0	0	1	1	1	1	SH2D1A	SH2 domain containing 1A
hsa-miR-602	1	0	1	1	0	0	RASSF1	Ras association (RalGDS/AF-6) domain family member 1
hsa-miR-602	0	0	1	1	1	1	MSTO1	misato homolog 1 (Drosophila)
hsa-miR-602	0	0	1	1	1	1	MAP3K4	mitogen-activated protein kinase kinase kinase 4
hsa-miR-602	1	0	1	0	1	1	FAM19A5	family with sequence similarity 19 (chemokine (C-C motif)-like), member A5
hsa-miR-602	1	0	1	0	1	1	WDR82	WD repeat domain 82
hsa-miR-602	1	0	1	1	1	1	TAOK3	TAO kinase 3
hsa-miR-602	0	0	1	1	0	0	ADAMTS7	ADAM metallopeptidase with thrombospondin type 1 motif, 7
hsa-miR-602	1	0	1	1	1	1	ANKRD13A	ankyrin repeat domain 13A
hsa-miR-602	1	0	1	1	1	1	AGPAT3	1-acylglycerol-3-phosphate O-acyltransferase 3
hsa-miR-602	0	0	1	1	1	1	SLCO2B1	solute carrier organic anion transporter family, member 2B1
hsa-miR-602	0	0	1	1	0	0	SH2B1	SH2B adaptor protein 1
hsa-miR-602	1	0	1	1	1	1	ERGIC1	endoplasmic reticulum-golgi intermediate compartment (ERGIC) 1
hsa-miR-602	0	0	1	1	1	1	C21orf7	chromosome 21 open reading frame 7
hsa-miR-602	0	0	1	0	1	1	KANSL3	KAT8 regulatory NSL complex subunit 3
hsa-miR-602	1	0	1	1	1	1	LETMD1	LETM1 domain containing 1
hsa-miR-602	0	0	1	0	0	0	C17orf109	chromosome 17 open reading frame 109
hsa-miR-602	0	0	1	1	0	0	SNRPN	small nuclear ribonucleoprotein polypeptide N
hsa-miR-602	1	0	1	1	1	1	BRSK1	BR serine/threonine kinase 1
hsa-miR-602	0	0	1	1	0	0	MT1E	metallothionein 1E
hsa-miR-602	1	0	1	1	1	1	TRIP10	thyroid hormone receptor interactor 10
hsa-miR-602	0	0	1	1	1	1	PTK7	PTK7 protein tyrosine kinase 7
hsa-miR-602	1	0	1	1	1	1	SH2B3	SH2B adaptor protein 3
hsa-miR-602	0	0	1	0	0	0	CACNA2D3	calcium channel, voltage-dependent, alpha 2/delta subunit 3
hsa-miR-602	0	0	1	1	1	1	CD1E	CD1e molecule
hsa-miR-602	0	0	1	1	1	1	DMRTC1	DMRT-like family C1
hsa-miR-602	0	0	1	1	0	0	DMRTC1B	DMRT-like family C1B
hsa-miR-602	1	0	1	1	1	1	ARHGAP17	Rho GTPase activating protein 17
hsa-miR-602	1	0	1	1	1	1	RAB3IP	RAB3A interacting protein (rabin3)
hsa-miR-602	1	0	1	1	1	1	AKAP2	A kinase (PRKA) anchor protein 2
hsa-miR-602	1	0	1	1	1	1	RIC8B	resistance to inhibitors of cholinesterase 8 homolog B (C. elegans)
hsa-miR-602	1	0	1	1	1	1	SLC38A2	solute carrier family 38, member 2
hsa-miR-602	0	0	1	1	1	1	ARMC5	armadillo repeat containing 5
hsa-miR-602	0	0	1	1	1	1	TTC23	tetratricopeptide repeat domain 23
hsa-miR-602	0	0	1	1	1	1	C14orf118	chromosome 14 open reading frame 118
hsa-miR-602	1	0	1	1	1	1	PPFIA3	protein tyrosine phosphatase, receptor type, f polypeptide (PTPRF), interacting protein (liprin), alpha 3
hsa-miR-602	1	0	1	1	1	1	ARHGEF15	Rho guanine nucleotide exchange factor (GEF) 15
hsa-miR-602	1	0	1	1	1	1	SCAF1	SR-related CTD-associated factor 1
hsa-miR-602	1	0	1	1	1	1	TNRC6A	trinucleotide repeat containing 6A
hsa-miR-602	1	0	1	1	0	0	UBXN7	UBX domain protein 7
hsa-miR-602	1	0	1	1	1	1	RNF185	ring finger protein 185
hsa-miR-602	1	0	1	1	1	1	ZNF462	zinc finger protein 462
hsa-miR-602	0	0	1	1	1	1	TOX2	TOX high mobility group box family member 2
hsa-miR-602	1	0	1	1	1	1	DLGAP4	discs, large (Drosophila) homolog-associated protein 4
hsa-miR-602	0	0	1	0	0	0	LOC154092	uncharacterized LOC154092
hsa-miR-602	0	0	1	0	0	0	SNHG11	small nucleolar RNA host gene 11 (non-protein coding)
hsa-miR-602	1	0	1	0	1	1	RAB1A	RAB1A, member RAS oncogene family
hsa-miR-602	0	0	1	0	0	0	BTBD19	BTB (POZ) domain containing 19
hsa-miR-602	0	0	1	0	0	0	JPX	JPX transcript, XIST activator (non-protein coding)
hsa-miR-602	1	0	1	1	1	1	SCAMP5	secretory carrier membrane protein 5
hsa-miR-602	1	0	1	1	1	1	CLCN5	chloride channel, voltage-sensitive 5
hsa-miR-602	1	0	1	1	1	1	MGAT1	mannosyl (alpha-1,3-)-glycoprotein beta-1,2-N-acetylglucosaminyltransferase
hsa-miR-602	0	0	1	0	0	0	LOC100125918	uncharacterized LOC100125918
hsa-miR-602	0	0	1	1	1	1	ZNF385B	zinc finger protein 385B
hsa-miR-602	1	0	1	1	1	1	AKNA	AT-hook transcription factor
hsa-miR-602	0	0	1	1	0	0	TRIM41	tripartite motif containing 41
hsa-miR-602	1	0	1	1	1	1	FAM73B	family with sequence similarity 73, member B
hsa-miR-602	0	0	1	1	0	0	SYTL1	synaptotagmin-like 1
hsa-miR-602	0	0	1	0	0	0	C10orf105	chromosome 10 open reading frame 105
hsa-miR-602	1	0	1	0	1	1	CLASP1	cytoplasmic linker associated protein 1
hsa-miR-602	1	0	1	1	1	1	BLCAP	bladder cancer associated protein
hsa-miR-602	0	0	1	0	0	0	SDHAP2	succinate dehydrogenase complex, subunit A, flavoprotein pseudogene 2
hsa-miR-602	0	0	1	1	0	0	GHDC	GH3 domain containing
hsa-miR-602	0	0	1	1	1	1	CAMKV	CaM kinase-like vesicle-associated
hsa-miR-602	0	0	1	0	0	0	LOC643837	uncharacterized LOC643837
hsa-miR-602	0	0	1	1	0	0	CTNNBL1	catenin, beta like 1
hsa-miR-602	1	0	1	1	1	1	ARIH2	ariadne homolog 2 (Drosophila)
hsa-miR-602	0	0	1	0	0	0	SEC14L2	SEC14-like 2 (S. cerevisiae)
hsa-miR-602	1	0	1	1	1	1	FRY	furry homolog (Drosophila)
hsa-miR-602	1	0	1	0	1	1	RNF114	ring finger protein 114
hsa-miR-602	0	0	1	1	1	1	NRCAM	neuronal cell adhesion molecule
hsa-miR-602	1	0	1	1	1	1	GNG2	guanine nucleotide binding protein (G protein), gamma 2
hsa-miR-602	0	0	1	1	1	1	RASGRP2	RAS guanyl releasing protein 2 (calcium and DAG-regulated)
hsa-miR-602	0	0	1	1	0	0	SERPINH1	serpin peptidase inhibitor, clade H (heat shock protein 47), member 1, (collagen binding protein 1)
hsa-miR-602	0	0	1	0	0	0	CXXC1P1	CXXC finger protein 1 pseudogene 1
hsa-miR-602	0	0	1	1	0	0	WBP1	WW domain binding protein 1
hsa-miR-602	1	0	1	1	1	1	SNAP25	synaptosomal-associated protein, 25kDa
hsa-miR-602	1	0	1	1	1	1	KLC2	kinesin light chain 2
hsa-miR-602	0	0	1	1	1	1	RBM25	RNA binding motif protein 25
hsa-miR-602	1	0	1	1	1	1	LPPR2	lipid phosphate phosphatase-related protein type 2
hsa-miR-602	1	0	1	1	1	1	NDEL1	nudE nuclear distribution E homolog (A. nidulans)-like 1
hsa-miR-602	0	0	1	1	1	1	FUT11	fucosyltransferase 11 (alpha (1,3) fucosyltransferase)
hsa-miR-602	0	0	1	0	1	1	HDAC9	histone deacetylase 9
hsa-miR-602	1	0	1	1	1	1	AMT	aminomethyltransferase
hsa-miR-602	0	0	1	1	0	0	TRIM46	tripartite motif containing 46
hsa-miR-602	0	0	1	1	1	1	STAT1	signal transducer and activator of transcription 1, 91kDa
hsa-miR-602	1	0	1	1	1	1	SYT6	synaptotagmin VI
hsa-miR-602	0	0	1	1	1	1	IL17RE	interleukin 17 receptor E
hsa-miR-602	1	0	1	1	1	1	KL	klotho
hsa-miR-602	1	0	1	1	1	1	TMEM185A	transmembrane protein 185A
hsa-miR-602	1	0	1	1	1	1	RAB11FIP4	RAB11 family interacting protein 4 (class II)
hsa-miR-602	0	0	1	1	1	1	PPFIBP2	PTPRF interacting protein, binding protein 2 (liprin beta 2)
hsa-miR-602	1	0	1	1	1	1	LARP1B	La ribonucleoprotein domain family, member 1B
hsa-miR-602	1	0	1	1	1	1	THTPA	thiamine triphosphatase
hsa-miR-602	0	0	1	1	0	0	SLC14A2	solute carrier family 14 (urea transporter), member 2
hsa-miR-602	1	0	1	1	1	1	GRM4	glutamate receptor, metabotropic 4
hsa-miR-602	0	0	1	1	1	1	FRMPD2	FERM and PDZ domain containing 2
hsa-miR-602	0	0	1	0	0	0	C1orf132	chromosome 1 open reading frame 132
hsa-miR-602	0	0	1	0	0	0	SATB2-AS1	SATB2 antisense RNA 1
hsa-miR-602	0	0	1	0	0	0	LOC650368	asparagine-linked glycosylation 1-like pseudogene
hsa-miR-602	0	0	1	1	0	0	C20orf27	chromosome 20 open reading frame 27
hsa-miR-602	0	0	1	1	1	1	QDPR	quinoid dihydropteridine reductase
hsa-miR-602	1	0	1	1	1	1	DAB2IP	DAB2 interacting protein
hsa-miR-602	0	0	1	1	1	1	C2orf91	chromosome 2 open reading frame 91
hsa-miR-602	1	0	1	1	1	1	RGMA	RGM domain family, member A
hsa-miR-602	0	0	1	1	0	0	LOC442075	uncharacterized LOC442075
hsa-miR-602	0	0	1	1	1	1	CYB5D1	cytochrome b5 domain containing 1
hsa-miR-602	0	0	1	1	1	1	EPPIN	epididymal peptidase inhibitor
hsa-miR-602	1	0	1	1	1	1	WWC2	WW and C2 domain containing 2
hsa-miR-602	1	0	1	1	0	0	ATXN7L3	ataxin 7-like 3
hsa-miR-602	0	0	1	1	0	0	NPIP	nuclear pore complex interacting protein
hsa-miR-602	1	0	1	1	1	1	MKRN1	makorin ring finger protein 1
hsa-miR-602	0	0	1	1	1	1	PNPLA5	patatin-like phospholipase domain containing 5
hsa-miR-602	0	0	1	1	1	1	DOCK9	dedicator of cytokinesis 9
hsa-miR-602	1	0	1	1	0	0	SLC30A3	solute carrier family 30 (zinc transporter), member 3
hsa-miR-602	1	0	1	1	1	1	NFYC	nuclear transcription factor Y, gamma
hsa-miR-602	0	0	1	0	0	0	LOC440993	uncharacterized LOC440993
hsa-miR-602	1	0	1	1	0	0	ATP2A1	ATPase, Ca++ transporting, cardiac muscle, fast twitch 1
hsa-miR-602	1	0	1	0	1	1	NBR1	neighbor of BRCA1 gene 1
hsa-miR-602	0	0	1	1	0	0	WFIKKN1	WAP, follistatin/kazal, immunoglobulin, kunitz and netrin domain containing 1
hsa-miR-602	0	0	1	0	0	0	PINLYP	phospholipase A2 inhibitor and LY6/PLAUR domain containing
hsa-miR-602	1	0	1	1	1	1	RBM24	RNA binding motif protein 24
hsa-miR-602	0	0	1	1	1	1	BRAT1	BRCA1-associated ATM activator 1
hsa-miR-602	0	0	1	0	0	0	LOC390660	FLJ00317 protein
hsa-miR-602	0	0	1	0	1	1	RUFY4	RUN and FYVE domain containing 4
hsa-miR-602	1	0	1	1	1	1	PPP2R5C	protein phosphatase 2, regulatory subunit B', gamma
hsa-miR-602	0	0	1	1	1	1	ARID1A	AT rich interactive domain 1A (SWI-like)
hsa-miR-602	1	0	1	1	1	1	RPS6KA4	ribosomal protein S6 kinase, 90kDa, polypeptide 4
hsa-miR-602	0	0	1	1	0	0	PCSK5	proprotein convertase subtilisin/kexin type 5
hsa-miR-602	1	0	1	1	0	0	PRRC2B	proline-rich coiled-coil 2B
hsa-miR-602	1	0	1	1	1	1	SMAP2	small ArfGAP2
hsa-miR-602	0	0	1	1	0	0	ODF3	outer dense fiber of sperm tails 3
hsa-miR-602	1	0	1	1	1	1	SECISBP2	SECIS binding protein 2
hsa-miR-602	1	0	1	0	1	1	DNAJC5	DnaJ (Hsp40) homolog, subfamily C, member 5
hsa-miR-602	0	0	1	1	1	1	SYNJ2	synaptojanin 2
hsa-miR-602	1	0	1	0	1	1	GPR85	G protein-coupled receptor 85
hsa-miR-602	0	0	1	1	1	1	COBL	cordon-bleu homolog (mouse)
hsa-miR-602	1	0	1	1	1	1	MAP4	microtubule-associated protein 4
hsa-miR-602	0	0	1	1	1	1	C10orf57	chromosome 10 open reading frame 57
hsa-miR-602	0	0	1	1	1	1	VWA3B	von Willebrand factor A domain containing 3B
hsa-miR-602	1	0	1	1	1	1	SBF2	SET binding factor 2
hsa-miR-602	0	0	1	1	0	0	LGI4	leucine-rich repeat LGI family, member 4
hsa-miR-602	0	0	1	1	1	1	CCDC132	coiled-coil domain containing 132
hsa-miR-602	0	0	1	0	1	1	SRR	serine racemase
hsa-miR-602	0	0	1	0	1	1	PSG1	pregnancy specific beta-1-glycoprotein 1
hsa-miR-602	1	0	1	1	1	1	RCAN2	regulator of calcineurin 2
hsa-miR-602	1	0	1	1	1	1	KIAA0907	KIAA0907
hsa-miR-602	0	0	1	1	0	0	LETM2	leucine zipper-EF-hand containing transmembrane protein 2
hsa-miR-602	0	0	1	1	0	0	CMTM1	CKLF-like MARVEL transmembrane domain containing 1
hsa-miR-602	0	0	1	1	1	1	IYD	iodotyrosine deiodinase
hsa-miR-602	1	0	1	1	1	1	OPRM1	opioid receptor, mu 1
hsa-miR-602	1	0	1	1	1	1	TMCC2	transmembrane and coiled-coil domain family 2
hsa-miR-602	0	0	1	1	1	1	ITGA10	integrin, alpha 10
hsa-miR-602	0	0	1	1	1	1	UGT2B4	UDP glucuronosyltransferase 2 family, polypeptide B4
hsa-miR-602	1	0	1	1	1	1	MECP2	methyl CpG binding protein 2 (Rett syndrome)
hsa-miR-602	0	0	1	1	0	0	PAOX	polyamine oxidase (exo-N4-amino)
hsa-miR-602	1	0	1	1	0	0	ADAM15	ADAM metallopeptidase domain 15
hsa-miR-602	0	0	1	0	1	1	RAB18	RAB18, member RAS oncogene family
hsa-miR-602	0	0	1	1	1	1	IL24	interleukin 24
hsa-miR-602	0	0	1	1	1	1	SMPD1	sphingomyelin phosphodiesterase 1, acid lysosomal
hsa-miR-602	1	0	1	1	1	1	NTNG1	netrin G1
hsa-miR-602	1	0	1	1	0	0	TAF4B	TAF4b RNA polymerase II, TATA box binding protein (TBP)-associated factor, 105kDa
hsa-miR-602	0	0	1	1	0	0	DHCR7	7-dehydrocholesterol reductase
hsa-miR-602	0	0	1	1	0	0	ISG20L2	interferon stimulated exonuclease gene 20kDa-like 2
hsa-miR-602	0	0	1	1	0	0	DDX49	DEAD (Asp-Glu-Ala-Asp) box polypeptide 49
hsa-miR-602	0	0	1	1	1	1	C20orf24	chromosome 20 open reading frame 24
hsa-miR-602	1	0	1	1	1	1	TSPAN14	tetraspanin 14
hsa-miR-602	1	0	1	1	0	0	STX1A	syntaxin 1A (brain)
hsa-miR-602	1	0	1	0	1	1	DCAF10	DDB1 and CUL4 associated factor 10
hsa-miR-602	0	0	1	1	1	1	PDXK	pyridoxal (pyridoxine, vitamin B6) kinase
hsa-miR-602	1	0	1	1	1	1	POU2F2	POU class 2 homeobox 2
hsa-miR-602	0	0	1	1	1	1	SEMG1	semenogelin I
hsa-miR-602	0	0	1	1	0	0	RBM14	RNA binding motif protein 14
hsa-miR-602	0	0	1	1	0	0	SPAG7	sperm associated antigen 7
hsa-miR-602	1	0	1	1	1	1	CALM1	calmodulin 1 (phosphorylase kinase, delta)
hsa-miR-602	1	0	1	0	1	1	TMEM39A	transmembrane protein 39A
hsa-miR-602	0	0	1	0	0	0	LRRC14	leucine rich repeat containing 14
hsa-miR-602	0	0	1	1	1	1	ZNF771	zinc finger protein 771
hsa-miR-602	1	0	1	1	1	1	DPH1	DPH1 homolog (S. cerevisiae)
hsa-miR-602	0	0	1	0	0	0	MGC21881	uncharacterized locus MGC21881
hsa-miR-602	0	0	1	1	0	0	PREB	prolactin regulatory element binding
hsa-miR-602	1	0	1	1	1	1	ORMDL3	ORM1-like 3 (S. cerevisiae)
hsa-miR-602	0	0	1	0	1	1	CD99P1	CD99 molecule pseudogene 1
hsa-miR-602	0	0	1	1	1	1	CCNE2	cyclin E2
hsa-miR-602	0	0	1	1	1	1	SNX17	sorting nexin 17
hsa-miR-602	0	0	1	0	0	0	TMEM208	transmembrane protein 208
hsa-miR-602	0	0	1	0	0	0	EEF1DP3	eukaryotic translation elongation factor 1 delta pseudogene 3
hsa-miR-602	0	0	1	0	0	0	AZGP1P1	alpha-2-glycoprotein 1, zinc-binding pseudogene 1
hsa-miR-602	0	0	1	0	0	0	SNX29P2	sorting nexin 29 pseudogene 2
hsa-miR-602	0	0	1	0	0	0	FLJ35390	uncharacterized LOC255031
hsa-miR-602	0	0	1	1	0	0	PRRG2	proline rich Gla (G-carboxyglutamic acid) 2
hsa-miR-602	1	0	1	1	1	1	RSPO2	R-spondin 2
hsa-miR-602	1	0	1	1	1	1	SENP6	SUMO1/sentrin specific peptidase 6
hsa-miR-602	0	0	1	0	0	0	BCAS3	breast carcinoma amplified sequence 3
hsa-miR-602	1	0	1	1	1	1	ADARB1	adenosine deaminase, RNA-specific, B1
hsa-miR-602	1	0	1	1	1	1	SULT4A1	sulfotransferase family 4A, member 1
hsa-miR-602	0	0	1	1	0	0	GLG1	golgi glycoprotein 1
hsa-miR-602	1	0	1	0	1	1	RNF4	ring finger protein 4
hsa-miR-602	1	0	1	1	1	1	SPATS2	spermatogenesis associated, serine-rich 2
hsa-miR-602	1	0	1	1	0	0	ANKRD13B	ankyrin repeat domain 13B
hsa-miR-602	1	0	1	1	1	1	SIRPA	signal-regulatory protein alpha
hsa-miR-602	0	0	1	1	0	0	HCRTR1	hypocretin (orexin) receptor 1
hsa-miR-602	0	0	1	1	0	0	FAM3B	family with sequence similarity 3, member B
hsa-miR-602	0	0	1	0	0	0	LOC652276	potassium channel tetramerisation domain containing 5 pseudogene
hsa-miR-602	1	0	1	0	1	1	RAG1	recombination activating gene 1
hsa-miR-602	1	0	1	0	1	1	CEP44	centrosomal protein 44kDa
hsa-miR-602	1	0	1	0	1	1	ARID2	AT rich interactive domain 2 (ARID, RFX-like)
hsa-miR-602	0	0	1	0	0	0	FLJ36000	uncharacterized FLJ36000
hsa-miR-602	0	0	1	0	0	0	LOC401074	uncharacterized LOC401074
hsa-miR-602	0	0	1	0	0	0	TOB1-AS1	TOB1 antisense RNA 1
hsa-miR-602	1	0	1	1	0	0	HES7	hairy and enhancer of split 7 (Drosophila)
hsa-miR-602	0	0	1	0	1	1	LINC00634	long intergenic non-protein coding RNA 634
hsa-miR-602	0	0	1	1	0	0	MTCH1	mitochondrial carrier 1
hsa-miR-602	0	0	1	1	0	0	SCAND1	SCAN domain containing 1
hsa-miR-602	0	0	1	0	1	1	FAM13B	family with sequence similarity 13, member B
hsa-miR-602	1	0	1	1	1	1	MAMDC2	MAM domain containing 2
hsa-miR-602	0	0	1	0	0	0	LOC283914	uncharacterized LOC283914
hsa-miR-602	0	0	1	1	1	1	ZNF589	zinc finger protein 589
hsa-miR-602	0	0	1	1	0	0	ENTPD8	ectonucleoside triphosphate diphosphohydrolase 8
hsa-miR-602	1	0	1	1	1	1	FNDC3A	fibronectin type III domain containing 3A
hsa-miR-602	1	0	1	0	1	1	SEMA4G	sema domain, immunoglobulin domain (Ig), transmembrane domain (TM) and short cytoplasmic domain, (semaphorin) 4G
hsa-miR-602	0	0	1	1	0	0	LY6H	lymphocyte antigen 6 complex, locus H
hsa-miR-602	0	0	1	1	0	0	GRIN2C	glutamate receptor, ionotropic, N-methyl D-aspartate 2C
hsa-miR-602	1	0	1	1	1	1	FNDC5	fibronectin type III domain containing 5
hsa-miR-602	0	0	1	1	0	0	WDR90	WD repeat domain 90
hsa-miR-602	0	0	1	0	0	0	CCDC150	coiled-coil domain containing 150
hsa-miR-602	0	0	1	1	0	0	C8orf31	chromosome 8 open reading frame 31
hsa-miR-602	1	0	1	1	1	1	ADCY6	adenylate cyclase 6
hsa-miR-602	1	0	1	1	1	1	LMO4	LIM domain only 4
hsa-miR-602	0	0	1	1	1	1	TAGLN	transgelin
hsa-miR-602	1	0	1	1	0	0	TMEM198	transmembrane protein 198
hsa-miR-602	0	0	1	1	0	0	KLK15	kallikrein-related peptidase 15
hsa-miR-602	1	0	1	0	1	1	HMGB3	high mobility group box 3
hsa-miR-602	1	0	1	1	1	1	FARP1	FERM, RhoGEF (ARHGEF) and pleckstrin domain protein 1 (chondrocyte-derived)
hsa-miR-602	0	0	1	0	0	0	LOC440416	uncharacterized LOC440416
hsa-miR-602	1	0	1	1	1	1	WBP1L	WW domain binding protein 1-like
hsa-miR-602	0	0	1	0	1	1	SH3RF2	SH3 domain containing ring finger 2
hsa-miR-602	0	0	1	0	0	0	LINC00537	long intergenic non-protein coding RNA 537
hsa-miR-602	0	0	1	1	0	0	DNHD1	dynein heavy chain domain 1
hsa-miR-602	0	0	1	0	0	0	LOC554249	uncharacterized LOC554249
hsa-miR-602	0	0	1	1	1	1	NELL1	NEL-like 1 (chicken)
hsa-miR-602	0	0	1	1	0	0	ADAMTS13	ADAM metallopeptidase with thrombospondin type 1 motif, 13
hsa-miR-602	0	0	1	0	0	0	LOC441493	uncharacterized LOC441493
hsa-miR-602	1	0	1	1	1	1	KLHL17	kelch-like 17 (Drosophila)
hsa-miR-602	1	0	1	1	1	1	TCF3	transcription factor 3 (E2A immunoglobulin enhancer binding factors E12/E47)
hsa-miR-602	1	0	1	0	1	1	MAP3K9	mitogen-activated protein kinase kinase kinase 9
hsa-miR-602	0	0	1	0	0	0	LRRC37A11P	leucine rich repeat containing 37, member A11, pseudogene
hsa-miR-602	1	0	1	1	0	0	MAPKBP1	mitogen-activated protein kinase binding protein 1
hsa-miR-602	1	0	1	1	1	1	FKBP1A	FK506 binding protein 1A, 12kDa
hsa-miR-602	0	0	1	1	0	0	SOCS7	suppressor of cytokine signaling 7
hsa-miR-602	0	0	1	0	0	0	MEG3	maternally expressed 3 (non-protein coding)
hsa-miR-602	0	0	1	0	0	0	FLJ39632	uncharacterized LOC642477
hsa-miR-602	1	0	1	1	0	0	RGS6	regulator of G-protein signaling 6
hsa-miR-602	0	0	1	1	1	1	IP6K2	inositol hexakisphosphate kinase 2
hsa-miR-602	1	0	1	1	1	1	TLN2	talin 2
hsa-miR-602	1	0	1	0	1	1	TTL	tubulin tyrosine ligase
hsa-miR-602	1	0	1	1	1	1	AAMP	angio-associated, migratory cell protein
hsa-miR-602	0	0	1	1	0	0	CSH1	chorionic somatomammotropin hormone 1 (placental lactogen)
hsa-miR-602	0	0	1	1	1	1	CAT	catalase
hsa-miR-602	0	0	1	1	0	0	H2AFY2	H2A histone family, member Y2
hsa-miR-602	0	0	1	1	0	0	EMX1	empty spiracles homeobox 1
hsa-miR-602	0	0	1	0	0	0	RPS16P10	ribosomal protein S16 pseudogene 10
hsa-miR-602	1	0	1	1	1	1	SYNGR2	synaptogyrin 2
hsa-miR-602	0	0	1	1	0	0	F2	coagulation factor II (thrombin)
hsa-miR-602	1	0	1	1	0	0	TSC22D4	TSC22 domain family, member 4
hsa-miR-602	0	0	1	1	0	0	PSG8	pregnancy specific beta-1-glycoprotein 8
hsa-miR-602	0	0	1	1	0	0	SIRT6	sirtuin 6
hsa-miR-602	0	0	1	1	0	0	CYGB	cytoglobin
hsa-miR-602	0	0	1	1	0	0	FXYD7	FXYD domain containing ion transport regulator 7
hsa-miR-602	1	0	1	1	1	1	POLR2D	polymerase (RNA) II (DNA directed) polypeptide D
hsa-miR-602	0	0	1	1	0	0	ASS1	argininosuccinate synthase 1
hsa-miR-602	0	0	1	1	1	1	HSPB8	heat shock 22kDa protein 8
hsa-miR-602	1	0	1	1	0	0	CRELD1	cysteine-rich with EGF-like domains 1
hsa-miR-602	0	0	1	1	1	1	BCL7B	B-cell CLL/lymphoma 7B
hsa-miR-602	0	0	1	1	0	0	C9orf16	chromosome 9 open reading frame 16
hsa-miR-602	1	0	1	1	1	1	MBNL1	muscleblind-like splicing regulator 1
hsa-miR-602	1	0	1	1	0	0	PNPLA6	patatin-like phospholipase domain containing 6
hsa-miR-602	0	0	1	1	1	1	ANKRD53	ankyrin repeat domain 53
hsa-miR-602	1	0	1	1	0	0	YPEL3	yippee-like 3 (Drosophila)
hsa-miR-602	0	0	1	1	0	0	B9D1	B9 protein domain 1
hsa-miR-602	0	0	1	0	0	0	LOC150568	uncharacterized LOC150568
hsa-miR-602	0	0	1	1	0	0	PIN1	peptidylprolyl cis/trans isomerase, NIMA-interacting 1
hsa-miR-602	0	0	1	1	1	1	SAP130	Sin3A-associated protein, 130kDa
hsa-miR-602	0	0	1	0	0	0	PGF	placental growth factor
hsa-miR-602	1	0	1	1	1	1	DPF2	D4, zinc and double PHD fingers family 2
hsa-miR-602	1	0	1	1	1	1	ATAT1	alpha tubulin acetyltransferase 1
hsa-miR-602	1	0	1	1	1	1	GOLGA7	golgin A7
hsa-miR-602	0	0	1	1	1	1	SLCO4A1	solute carrier organic anion transporter family, member 4A1
hsa-miR-602	0	0	1	1	1	1	HOXC9	homeobox C9
hsa-miR-602	0	0	1	1	1	1	NFKBIB	nuclear factor of kappa light polypeptide gene enhancer in B-cells inhibitor, beta
hsa-miR-602	1	0	1	0	1	1	MAP1B	microtubule-associated protein 1B
hsa-miR-602	1	0	1	1	0	0	CCM2	cerebral cavernous malformation 2
hsa-miR-602	0	0	1	1	0	0	CTSW	cathepsin W
hsa-miR-602	1	0	1	0	1	1	CD47	CD47 molecule
hsa-miR-602	0	0	1	1	1	1	INPP5K	inositol polyphosphate-5-phosphatase K
hsa-miR-602	0	0	1	1	0	0	TESK1	testis-specific kinase 1
hsa-miR-602	1	0	1	1	1	1	MYT1	myelin transcription factor 1
hsa-miR-602	0	0	1	1	0	0	TCTN1	tectonic family member 1
hsa-miR-602	0	0	1	1	0	0	ISG20	interferon stimulated exonuclease gene 20kDa
hsa-miR-602	0	0	1	1	0	0	IDH3G	isocitrate dehydrogenase 3 (NAD+) gamma
hsa-miR-602	0	0	1	1	0	0	TENC1	tensin like C1 domain containing phosphatase (tensin 2)
hsa-miR-602	1	0	1	1	1	1	METAP1	methionyl aminopeptidase 1
hsa-miR-602	1	0	1	1	1	1	SEC14L1	SEC14-like 1 (S. cerevisiae)
hsa-miR-602	0	0	1	1	1	1	P2RX7	purinergic receptor P2X, ligand-gated ion channel, 7
hsa-miR-602	0	0	1	1	0	0	SPATA6	spermatogenesis associated 6
hsa-miR-602	0	0	1	0	0	0	GPR144	G protein-coupled receptor 144
hsa-miR-602	1	0	1	1	0	0	PPARD	peroxisome proliferator-activated receptor delta
hsa-miR-602	0	0	1	1	0	0	HLA-DQB1	major histocompatibility complex, class II, DQ beta 1
hsa-miR-602	1	0	1	0	0	0	YLPM1	YLP motif containing 1
hsa-miR-602	1	0	1	1	1	1	GRM1	glutamate receptor, metabotropic 1
hsa-miR-602	1	0	1	0	1	1	BCL2	B-cell CLL/lymphoma 2
hsa-miR-602	0	0	1	1	0	0	COL6A2	collagen, type VI, alpha 2
hsa-miR-602	0	0	1	1	1	1	HLA-G	major histocompatibility complex, class I, G
hsa-miR-602	0	0	1	1	0	0	FANCA	Fanconi anemia, complementation group A
hsa-miR-602	0	0	1	1	1	1	GIPR	gastric inhibitory polypeptide receptor
hsa-miR-602	1	0	1	1	0	0	NOTCH3	notch 3
hsa-miR-602	1	0	1	0	1	1	PCSK1	proprotein convertase subtilisin/kexin type 1
hsa-miR-602	0	0	1	1	1	1	IGF2	insulin-like growth factor 2 (somatomedin A)
hsa-miR-602	0	0	1	1	1	1	BDKRB2	bradykinin receptor B2
hsa-miR-602	1	0	1	0	1	1	ABAT	4-aminobutyrate aminotransferase
hsa-miR-602	1	0	1	1	1	1	GRIA4	glutamate receptor, ionotropic, AMPA 4
hsa-miR-602	1	0	1	0	1	1	UBE2W	ubiquitin-conjugating enzyme E2W (putative)
hsa-miR-602	1	0	1	1	1	1	KCTD11	potassium channel tetramerisation domain containing 11
hsa-miR-602	1	0	1	1	1	1	ABLIM1	actin binding LIM protein 1
hsa-miR-602	1	0	1	1	1	1	TMEM200B	transmembrane protein 200B
hsa-miR-602	1	0	1	1	1	1	RREB1	ras responsive element binding protein 1
hsa-miR-602	0	0	1	1	1	1	DBX2	developing brain homeobox 2
hsa-miR-602	1	0	1	1	0	0	MAGED1	melanoma antigen family D, 1
hsa-miR-602	1	0	1	1	0	0	SDC1	syndecan 1
hsa-miR-602	1	0	1	1	1	1	ATN1	atrophin 1
hsa-miR-602	0	0	1	0	0	0	FSD2	fibronectin type III and SPRY domain containing 2
hsa-miR-602	1	0	1	1	1	1	IGF2BP2	insulin-like growth factor 2 mRNA binding protein 2
hsa-miR-602	1	0	1	0	1	1	FYTTD1	forty-two-three domain containing 1
hsa-miR-602	1	0	1	0	1	1	CREB5	cAMP responsive element binding protein 5
hsa-miR-602	1	0	1	0	1	1	FIGNL2	fidgetin-like 2
hsa-miR-602	0	0	1	1	0	0	LAT	linker for activation of T cells
hsa-miR-602	1	0	1	1	1	1	VMA21	VMA21 vacuolar H+-ATPase homolog (S. cerevisiae)
hsa-miR-602	1	0	1	1	1	1	SH3PXD2B	SH3 and PX domains 2B
hsa-miR-602	1	0	1	1	1	1	SERF2	small EDRK-rich factor 2
hsa-miR-602	1	0	1	0	1	1	TNRC6B	trinucleotide repeat containing 6B
hsa-miR-602	1	0	1	1	1	1	AFF3	AF4/FMR2 family, member 3
hsa-miR-602	0	0	1	1	1	1	ATF3	activating transcription factor 3
hsa-miR-602	0	0	1	0	1	1	STXBP1	syntaxin binding protein 1
hsa-miR-602	0	0	1	1	0	0	NGRN	neugrin, neurite outgrowth associated
hsa-miR-602	1	0	1	1	0	0	MTUS2	microtubule associated tumor suppressor candidate 2
hsa-miR-602	1	0	1	1	1	1	SMOC1	SPARC related modular calcium binding 1
hsa-miR-602	1	0	1	1	1	1	DPP6	dipeptidyl-peptidase 6
hsa-miR-602	1	0	1	1	1	1	KREMEN1	kringle containing transmembrane protein 1
hsa-miR-602	1	0	1	1	1	1	KCNC4	potassium voltage-gated channel, Shaw-related subfamily, member 4
hsa-miR-602	1	0	1	0	1	1	CCNL2	cyclin L2
hsa-miR-602	0	0	1	1	0	0	FAM83G	family with sequence similarity 83, member G
hsa-miR-602	1	0	1	0	1	1	CD83	CD83 molecule
hsa-miR-602	0	0	1	1	1	1	ZXDC	ZXD family zinc finger C
hsa-miR-602	1	0	1	1	1	1	SLC9A6	solute carrier family 9, subfamily A (NHE6, cation proton antiporter 6), member 6
hsa-miR-602	0	0	1	0	1	1	MPPED1	metallophosphoesterase domain containing 1
hsa-miR-602	1	0	1	1	1	1	ATG9A	autophagy related 9A
hsa-miR-602	1	0	1	1	1	1	PRR3	proline rich 3
hsa-miR-602	1	0	1	1	1	1	ALG9	asparagine-linked glycosylation 9, alpha-1,2-mannosyltransferase homolog (S. cerevisiae)
hsa-miR-602	1	0	1	1	1	1	VAV3	vav 3 guanine nucleotide exchange factor
hsa-miR-602	1	0	1	1	1	1	UNK	unkempt homolog (Drosophila)
hsa-miR-602	0	0	1	1	0	0	OVOS2	ovostatin 2
hsa-miR-602	1	0	1	1	1	1	THOC2	THO complex 2
hsa-miR-602	1	0	1	1	0	0	ASIC2	acid-sensing (proton-gated) ion channel 2
hsa-miR-602	1	0	1	1	1	1	ADAM10	ADAM metallopeptidase domain 10
hsa-miR-602	1	0	1	1	1	1	ADCYAP1	adenylate cyclase activating polypeptide 1 (pituitary)
hsa-miR-602	1	0	1	0	1	1	CDK6	cyclin-dependent kinase 6
hsa-miR-602	1	0	1	0	1	1	CPD	carboxypeptidase D
hsa-miR-602	1	0	1	1	1	1	S1PR1	sphingosine-1-phosphate receptor 1
hsa-miR-602	1	0	1	1	1	1	FOXC1	forkhead box C1
hsa-miR-602	1	0	1	1	0	0	GDI1	GDP dissociation inhibitor 1
hsa-miR-602	1	0	1	1	1	1	ADRBK1	adrenergic, beta, receptor kinase 1
hsa-miR-602	1	0	1	0	1	1	ATP1B2	ATPase, Na+/K+ transporting, beta 2 polypeptide
hsa-miR-602	1	0	1	1	1	1	SLC31A1	solute carrier family 31 (copper transporters), member 1
hsa-miR-602	1	0	1	1	1	1	HBEGF	heparin-binding EGF-like growth factor
hsa-miR-602	1	0	1	1	1	1	GRB2	growth factor receptor-bound protein 2
hsa-miR-602	1	0	1	0	1	1	HTT	huntingtin
hsa-miR-602	1	0	1	1	1	1	KCNA5	potassium voltage-gated channel, shaker-related subfamily, member 5
hsa-miR-602	0	0	1	0	1	1	KCNN1	potassium intermediate/small conductance calcium-activated channel, subfamily N, member 1
hsa-miR-602	1	0	1	0	1	1	KIF3C	kinesin family member 3C
hsa-miR-602	1	0	1	1	1	1	MAFG	v-maf musculoaponeurotic fibrosarcoma oncogene homolog G (avian)
hsa-miR-602	1	0	1	1	1	1	MAFK	v-maf musculoaponeurotic fibrosarcoma oncogene homolog K (avian)
hsa-miR-602	0	0	1	1	1	1	MAG	myelin associated glycoprotein
hsa-miR-602	1	0	1	1	1	1	MAX	MYC associated factor X
hsa-miR-602	1	0	1	1	1	1	ADAM11	ADAM metallopeptidase domain 11
hsa-miR-602	1	0	1	1	1	1	MN1	meningioma (disrupted in balanced translocation) 1
hsa-miR-602	1	0	1	1	1	1	MSR1	macrophage scavenger receptor 1
hsa-miR-602	1	0	1	1	1	1	NGFR	nerve growth factor receptor
hsa-miR-602	0	0	1	1	1	1	NID1	nidogen 1
hsa-miR-602	1	0	1	1	1	1	NPTX1	neuronal pentraxin I
hsa-miR-602	1	0	1	0	1	1	PCDHGC3	protocadherin gamma subfamily C, 3
hsa-miR-602	0	0	1	1	1	1	PITX1	paired-like homeodomain 1
hsa-miR-602	1	0	1	1	1	1	PLAGL2	pleiomorphic adenoma gene-like 2
hsa-miR-602	0	0	1	1	1	1	PSMA2	proteasome (prosome, macropain) subunit, alpha type, 2
hsa-miR-602	1	0	1	1	1	1	PTPN1	protein tyrosine phosphatase, non-receptor type 1
hsa-miR-602	1	0	1	1	1	1	PTPRS	protein tyrosine phosphatase, receptor type, S
hsa-miR-602	1	0	1	1	1	1	ARID4A	AT rich interactive domain 4A (RBP1-like)
hsa-miR-602	1	0	1	1	1	1	SHB	Src homology 2 domain containing adaptor protein B
hsa-miR-602	1	0	1	1	1	1	TAF4	TAF4 RNA polymerase II, TATA box binding protein (TBP)-associated factor, 135kDa
hsa-miR-602	1	0	1	0	1	1	TAL1	T-cell acute lymphocytic leukemia 1
hsa-miR-602	0	0	1	1	1	1	FAM193A	family with sequence similarity 193, member A
hsa-miR-602	1	0	1	0	1	1	PCDHGA12	protocadherin gamma subfamily A, 12
hsa-miR-602	1	0	1	0	1	1	PCDHGB4	protocadherin gamma subfamily B, 4
hsa-miR-602	1	0	1	1	1	1	ACOX1	acyl-CoA oxidase 1, palmitoyl
hsa-miR-602	1	0	1	1	1	1	SYT7	synaptotagmin VII
hsa-miR-602	0	0	1	1	0	0	CD101	CD101 molecule
hsa-miR-602	1	0	1	1	1	1	ARL3	ADP-ribosylation factor-like 3
hsa-miR-602	0	0	1	1	1	1	CSK	c-src tyrosine kinase
hsa-miR-602	1	0	1	1	1	1	DUSP5	dual specificity phosphatase 5
hsa-miR-602	1	0	1	0	1	1	ETV5	ets variant 5
hsa-miR-602	0	0	1	0	1	1	POU4F2	POU class 4 homeobox 2
hsa-miR-602	1	0	1	1	1	1	RAB7A	RAB7A, member RAS oncogene family
hsa-miR-602	0	0	1	1	1	1	PABPN1	poly(A) binding protein, nuclear 1
hsa-miR-602	1	0	1	1	1	1	SYNGR1	synaptogyrin 1
hsa-miR-602	1	0	1	1	1	1	KIF3B	kinesin family member 3B
hsa-miR-602	0	0	1	1	1	1	CDH6	cadherin 6, type 2, K-cadherin (fetal kidney)
hsa-miR-602	0	0	1	1	0	0	PFN1	profilin 1
hsa-miR-602	1	0	1	1	1	1	SIAH2	siah E3 ubiquitin protein ligase 2
hsa-miR-602	0	0	1	1	1	1	XYLB	xylulokinase homolog (H. influenzae)
hsa-miR-602	1	0	1	1	1	1	FOXN3	forkhead box N3
hsa-miR-602	1	0	1	1	1	1	CRK	v-crk sarcoma virus CT10 oncogene homolog (avian)
hsa-miR-602	1	0	1	1	1	1	FOXG1	forkhead box G1
hsa-miR-602	1	0	1	1	1	1	GPR6	G protein-coupled receptor 6
hsa-miR-602	1	0	1	1	1	1	MYCL1	v-myc myelocytomatosis viral oncogene homolog 1, lung carcinoma derived (avian)
hsa-miR-602	1	0	1	1	1	1	PIGK	phosphatidylinositol glycan anchor biosynthesis, class K
hsa-miR-602	0	0	1	1	0	0	S100A12	S100 calcium binding protein A12
hsa-miR-602	0	0	1	1	0	0	BCKDK	branched chain ketoacid dehydrogenase kinase
hsa-miR-602	1	0	1	1	1	1	MMP16	matrix metallopeptidase 16 (membrane-inserted)
hsa-miR-602	1	0	1	1	1	1	DAGLA	diacylglycerol lipase, alpha
hsa-miR-602	1	0	1	1	1	1	SMC1A	structural maintenance of chromosomes 1A
hsa-miR-602	1	0	1	0	1	1	MXD4	MAX dimerization protein 4
hsa-miR-602	1	0	1	1	1	1	B3GNT2	UDP-GlcNAc:betaGal beta-1,3-N-acetylglucosaminyltransferase 2
hsa-miR-602	1	0	1	1	1	1	DIAPH2	diaphanous homolog 2 (Drosophila)
hsa-miR-602	0	0	1	1	1	1	SERINC3	serine incorporator 3
hsa-miR-602	1	0	1	0	1	1	SOX12	SRY (sex determining region Y)-box 12
hsa-miR-602	1	0	1	1	1	1	ZNF81	zinc finger protein 81
hsa-miR-602	1	0	1	1	1	1	PALM2-AKAP2	PALM2-AKAP2 readthrough
hsa-miR-602	0	0	1	1	1	1	KLF8	Kruppel-like factor 8
hsa-miR-602	0	0	1	0	1	1	AP4E1	adaptor-related protein complex 4, epsilon 1 subunit
hsa-miR-602	1	0	1	0	1	1	EIF2C2	eukaryotic translation initiation factor 2C, 2
hsa-miR-602	0	0	1	1	0	0	TPSD1	tryptase delta 1
hsa-miR-602	0	0	1	1	1	1	RAB3GAP1	RAB3 GTPase activating protein subunit 1 (catalytic)
hsa-miR-602	1	0	1	1	1	1	TSPAN12	tetraspanin 12
hsa-miR-602	0	0	1	0	1	1	PLA2G2D	phospholipase A2, group IID
hsa-miR-602	0	0	1	1	1	1	H2AFV	H2A histone family, member V
hsa-miR-602	0	0	1	1	1	1	TIMM13	translocase of inner mitochondrial membrane 13 homolog (yeast)
hsa-miR-602	0	0	1	0	1	1	TLL1	tolloid-like 1
hsa-miR-602	0	0	1	1	1	1	N6AMT1	N-6 adenine-specific DNA methyltransferase 1 (putative)
hsa-miR-602	0	0	1	1	0	0	KCNJ14	potassium inwardly-rectifying channel, subfamily J, member 14
hsa-miR-602	0	0	1	1	0	0	ZDHHC8	zinc finger, DHHC-type containing 8
hsa-miR-602	1	0	1	1	1	1	NRG1	neuregulin 1
hsa-miR-602	1	0	1	0	1	1	VAMP2	vesicle-associated membrane protein 2 (synaptobrevin 2)
hsa-miR-602	1	0	1	0	1	1	ODZ1	odz, odd Oz/ten-m homolog 1 (Drosophila)
hsa-miR-602	0	0	1	1	1	1	C22orf28	chromosome 22 open reading frame 28
hsa-miR-602	0	0	1	1	1	1	DAPK2	death-associated protein kinase 2
hsa-miR-602	1	0	1	1	1	1	LHX6	LIM homeobox 6
hsa-miR-602	1	0	1	1	1	1	AFF4	AF4/FMR2 family, member 4
hsa-miR-602	0	0	1	1	1	1	SOX8	SRY (sex determining region Y)-box 8
hsa-miR-602	1	0	1	1	1	1	CDR2L	cerebellar degeneration-related protein 2-like
hsa-miR-602	1	0	1	1	1	1	ZNF592	zinc finger protein 592
hsa-miR-602	0	0	1	1	1	1	PHF14	PHD finger protein 14
hsa-miR-602	1	0	1	1	1	1	ULK2	unc-51-like kinase 2 (C. elegans)
hsa-miR-602	0	0	1	1	0	0	SETD1A	SET domain containing 1A
hsa-miR-602	1	0	1	1	1	1	KIAA0247	KIAA0247
hsa-miR-602	1	0	1	0	1	1	SERTAD2	SERTA domain containing 2
hsa-miR-602	0	0	1	1	0	0	PCNXL2	pecanex-like 2 (Drosophila)
hsa-miR-602	1	0	1	0	1	1	ZBTB40	zinc finger and BTB domain containing 40
hsa-miR-602	1	0	1	1	1	1	RNF44	ring finger protein 44
hsa-miR-602	0	0	1	1	1	1	MYO16	myosin XVI
hsa-miR-602	1	0	1	1	1	1	ERP44	endoplasmic reticulum protein 44
hsa-miR-602	0	0	1	1	1	1	KDM4C	lysine (K)-specific demethylase 4C
hsa-miR-602	1	0	1	0	1	1	LARP1	La ribonucleoprotein domain family, member 1
hsa-miR-602	0	0	1	0	1	1	ZDHHC17	zinc finger, DHHC-type containing 17
hsa-miR-602	1	0	1	1	1	1	CNOT6	CCR4-NOT transcription complex, subunit 6
hsa-miR-602	1	0	1	1	1	1	PLA2G3	phospholipase A2, group III
hsa-miR-602	1	0	1	1	0	0	CPA4	carboxypeptidase A4
hsa-miR-602	1	0	1	1	1	1	WAC	WW domain containing adaptor with coiled-coil
hsa-miR-602	1	0	1	0	1	1	KLHL3	kelch-like 3 (Drosophila)
hsa-miR-602	0	0	1	0	1	1	TRIM44	tripartite motif containing 44
hsa-miR-602	1	0	1	1	0	0	C17orf59	chromosome 17 open reading frame 59
hsa-miR-602	1	0	1	1	1	1	YTHDF1	YTH domain family, member 1
hsa-miR-602	0	0	1	1	1	1	RBM22	RNA binding motif protein 22
hsa-miR-602	0	0	1	1	1	1	NECAP2	NECAP endocytosis associated 2
hsa-miR-602	1	0	1	1	1	1	LRRC1	leucine rich repeat containing 1
hsa-miR-602	0	0	1	0	1	1	BLOC1S4	biogenesis of lysosomal organelles complex-1, subunit 4, cappuccino
hsa-miR-602	1	0	1	0	1	1	SMPD3	sphingomyelin phosphodiesterase 3, neutral membrane (neutral sphingomyelinase II)
hsa-miR-602	1	0	1	0	1	1	PCDHAC1	protocadherin alpha subfamily C, 1
hsa-miR-602	1	0	1	0	1	1	PCDHAC2	protocadherin alpha subfamily C, 2
hsa-miR-602	1	0	1	1	1	1	PCDHA1	protocadherin alpha 1
hsa-miR-602	1	0	1	0	1	1	PCDHA10	protocadherin alpha 10
hsa-miR-602	1	0	1	0	1	1	PCDHA11	protocadherin alpha 11
hsa-miR-602	1	0	1	0	1	1	PCDHA12	protocadherin alpha 12
hsa-miR-602	1	0	1	0	1	1	PCDHA13	protocadherin alpha 13
hsa-miR-602	1	0	1	1	1	1	PCDHA2	protocadherin alpha 2
hsa-miR-602	1	0	1	1	1	1	PCDHA3	protocadherin alpha 3
hsa-miR-602	1	0	1	1	1	1	PCDHA4	protocadherin alpha 4
hsa-miR-602	1	0	1	1	1	1	PCDHA5	protocadherin alpha 5
hsa-miR-602	1	0	1	1	1	1	PCDHA6	protocadherin alpha 6
hsa-miR-602	1	0	1	0	1	1	PCDHA7	protocadherin alpha 7
hsa-miR-602	1	0	1	1	1	1	PCDHA8	protocadherin alpha 8
hsa-miR-602	1	0	1	1	1	1	PCDHGA1	protocadherin gamma subfamily A, 1
hsa-miR-602	1	0	1	0	1	1	PCDHGA10	protocadherin gamma subfamily A, 10
hsa-miR-602	1	0	1	0	1	1	PCDHGA11	protocadherin gamma subfamily A, 11
hsa-miR-602	1	0	1	1	1	1	PCDHGA2	protocadherin gamma subfamily A, 2
hsa-miR-602	1	0	1	0	1	1	PCDHGA3	protocadherin gamma subfamily A, 3
hsa-miR-602	1	0	1	0	1	1	PCDHGA4	protocadherin gamma subfamily A, 4
hsa-miR-602	1	0	1	0	1	1	PCDHGA5	protocadherin gamma subfamily A, 5
hsa-miR-602	1	0	1	0	1	1	PCDHGA6	protocadherin gamma subfamily A, 6
hsa-miR-602	1	0	1	0	1	1	PCDHGA7	protocadherin gamma subfamily A, 7
hsa-miR-602	1	0	1	0	1	1	PCDHGA9	protocadherin gamma subfamily A, 9
hsa-miR-602	1	0	1	0	1	1	PCDHGB1	protocadherin gamma subfamily B, 1
hsa-miR-602	1	0	1	0	1	1	PCDHGB2	protocadherin gamma subfamily B, 2
hsa-miR-602	1	0	1	0	1	1	PCDHGB3	protocadherin gamma subfamily B, 3
hsa-miR-602	1	0	1	0	1	1	PCDHGB5	protocadherin gamma subfamily B, 5
hsa-miR-602	1	0	1	0	1	1	PCDHGB6	protocadherin gamma subfamily B, 6
hsa-miR-602	1	0	1	0	1	1	PCDHGB7	protocadherin gamma subfamily B, 7
hsa-miR-602	1	0	1	0	1	1	PCDHGC4	protocadherin gamma subfamily C, 4
hsa-miR-602	1	0	1	0	1	1	PCDHGC5	protocadherin gamma subfamily C, 5
hsa-miR-602	1	0	1	1	1	1	DLL4	delta-like 4 (Drosophila)
hsa-miR-602	0	0	1	1	1	1	TMEM167B	transmembrane protein 167B
hsa-miR-602	0	0	1	1	0	0	PDXP	pyridoxal (pyridoxine, vitamin B6) phosphatase
hsa-miR-602	1	0	1	1	1	1	NRIP3	nuclear receptor interacting protein 3
hsa-miR-602	1	0	1	1	1	1	SLC24A3	solute carrier family 24 (sodium/potassium/calcium exchanger), member 3
hsa-miR-602	0	0	1	1	0	0	ISY1	ISY1 splicing factor homolog (S. cerevisiae)
hsa-miR-602	1	0	1	1	1	1	SLC12A5	solute carrier family 12 (potassium/chloride transporter), member 5
hsa-miR-602	1	0	1	1	1	1	ZNF512B	zinc finger protein 512B
hsa-miR-602	1	0	1	1	1	1	HOMEZ	homeobox and leucine zipper encoding
hsa-miR-602	1	0	1	0	1	1	SH3RF1	SH3 domain containing ring finger 1
hsa-miR-602	0	0	1	1	0	0	MYL6	myosin, light chain 6, alkali, smooth muscle and non-muscle
hsa-miR-602	1	0	1	0	1	1	RAP2A	RAP2A, member of RAS oncogene family
hsa-miR-602	1	0	1	0	1	1	NMT1	N-myristoyltransferase 1
hsa-miR-602	1	0	1	1	1	1	FOXM1	forkhead box M1
hsa-miR-602	1	0	1	1	0	0	HAND2	heart and neural crest derivatives expressed 2
hsa-miR-602	1	0	1	0	1	1	CSNK1G1	casein kinase 1, gamma 1
hsa-miR-602	0	0	1	1	0	0	ABHD4	abhydrolase domain containing 4
hsa-miR-602	1	0	1	1	1	1	XYLT2	xylosyltransferase II
hsa-miR-602	0	0	1	1	0	0	EDDM3B	epididymal protein 3B
hsa-miR-602	1	0	1	1	1	1	NDRG3	NDRG family member 3
hsa-miR-602	1	0	1	1	1	1	PRRX1	paired related homeobox 1
hsa-miR-602	1	0	1	1	1	1	S100PBP	S100P binding protein
hsa-miR-602	0	0	1	1	1	1	OSBPL11	oxysterol binding protein-like 11
hsa-miR-602	1	0	1	1	1	1	AIDA	axin interactor, dorsalization associated
hsa-miR-602	1	0	1	1	1	1	HOXB8	homeobox B8
hsa-miR-602	1	0	1	1	1	1	EFHD2	EF-hand domain family, member D2
hsa-miR-602	1	0	1	1	0	0	ABHD8	abhydrolase domain containing 8
hsa-miR-602	0	0	1	1	1	1	CHPF	chondroitin polymerizing factor
hsa-miR-602	0	0	1	1	1	1	ZDHHC14	zinc finger, DHHC-type containing 14
hsa-miR-602	0	0	1	1	1	1	GLT25D1	glycosyltransferase 25 domain containing 1
hsa-miR-602	1	0	1	0	1	1	LIN28A	lin-28 homolog A (C. elegans)
hsa-miR-602	0	0	1	1	1	1	SNIP1	Smad nuclear interacting protein 1
hsa-miR-602	1	0	1	0	1	1	MAGIX	MAGI family member, X-linked
hsa-miR-602	0	0	1	1	1	1	ZNF767	zinc finger family member 767
hsa-miR-602	1	0	1	1	1	1	JHDM1D	jumonji C domain containing histone demethylase 1 homolog D (S. cerevisiae)
hsa-miR-602	1	0	1	1	1	1	RAI1	retinoic acid induced 1
hsa-miR-602	0	0	1	1	0	0	DCSTAMP	dendrocyte expressed seven transmembrane protein
hsa-miR-602	1	0	1	1	1	1	SGPP1	sphingosine-1-phosphate phosphatase 1
hsa-miR-602	1	0	1	0	1	1	C1orf21	chromosome 1 open reading frame 21
hsa-miR-602	1	0	1	0	1	1	LBH	limb bud and heart development homolog (mouse)
hsa-miR-602	1	0	1	1	0	0	PVRL4	poliovirus receptor-related 4
hsa-miR-602	1	0	1	1	1	1	RAB1B	RAB1B, member RAS oncogene family
hsa-miR-602	1	0	1	1	1	1	PCDHA9	protocadherin alpha 9
hsa-miR-602	1	0	1	0	1	1	PCDHGA8	protocadherin gamma subfamily A, 8
hsa-miR-602	1	0	1	1	1	1	ANTXR1	anthrax toxin receptor 1
hsa-miR-602	1	0	1	1	1	1	ZNRF1	zinc and ring finger 1, E3 ubiquitin protein ligase
hsa-miR-602	0	0	1	1	0	0	NICN1	nicolin 1
hsa-miR-602	0	0	1	1	1	1	FBXL20	F-box and leucine-rich repeat protein 20
hsa-miR-602	0	0	1	1	1	1	TMEM241	transmembrane protein 241
hsa-miR-602	1	0	1	1	1	1	RASL10B	RAS-like, family 10, member B
hsa-miR-602	1	0	1	1	1	1	CASP7	caspase 7, apoptosis-related cysteine peptidase
hsa-miR-602	1	0	1	1	1	1	SYS1	SYS1 Golgi-localized integral membrane protein homolog (S. cerevisiae)
hsa-miR-602	0	0	1	1	1	1	LENG8	leukocyte receptor cluster (LRC) member 8
hsa-miR-602	1	0	1	1	1	1	NAA15	N(alpha)-acetyltransferase 15, NatA auxiliary subunit
hsa-miR-602	0	0	1	1	0	0	BSND	Bartter syndrome, infantile, with sensorineural deafness (Barttin)
hsa-miR-602	1	0	1	1	1	1	GLCCI1	glucocorticoid induced transcript 1
hsa-miR-602	1	0	1	1	1	1	TRIOBP	TRIO and F-actin binding protein
hsa-miR-602	1	0	1	1	1	1	VANGL1	vang-like 1 (van gogh, Drosophila)
hsa-miR-602	1	0	1	1	1	1	BACE2	beta-site APP-cleaving enzyme 2
hsa-miR-602	1	0	1	1	0	0	GNAT1	guanine nucleotide binding protein (G protein), alpha transducing activity polypeptide 1
hsa-miR-602	0	0	1	1	0	0	LINC00477	long intergenic non-protein coding RNA 477
hsa-miR-602	1	0	1	1	1	1	ZMAT2	zinc finger, matrin-type 2
hsa-miR-602	1	0	1	0	1	1	CENPBD1	CENPB DNA-binding domains containing 1
hsa-miR-602	0	0	1	0	1	1	SPATA18	spermatogenesis associated 18
hsa-miR-602	0	0	1	1	1	1	RMI2	RMI2, RecQ mediated genome instability 2, homolog (S. cerevisiae)
hsa-miR-602	0	0	1	1	0	0	DOK6	docking protein 6
hsa-miR-602	1	0	1	0	1	1	N4BP1	NEDD4 binding protein 1
hsa-miR-602	0	0	1	1	0	0	ALDH16A1	aldehyde dehydrogenase 16 family, member A1
hsa-miR-602	1	0	1	1	0	0	TMEM86A	transmembrane protein 86A
hsa-miR-602	1	0	1	1	1	1	DIP2B	DIP2 disco-interacting protein 2 homolog B (Drosophila)
hsa-miR-602	0	0	1	0	1	1	C5orf64	chromosome 5 open reading frame 64
hsa-miR-602	1	0	1	1	1	1	RABL3	RAB, member of RAS oncogene family-like 3
hsa-miR-602	0	0	1	0	1	1	C15orf37	chromosome 15 open reading frame 37
hsa-miR-602	0	0	1	1	0	0	C2orf53	chromosome 2 open reading frame 53
hsa-miR-602	1	0	1	1	1	1	ISM2	isthmin 2 homolog (zebrafish)
hsa-miR-602	1	0	1	1	1	1	TMEM229B	transmembrane protein 229B
hsa-miR-602	0	0	1	1	1	1	CABP7	calcium binding protein 7
hsa-miR-602	1	0	1	0	0	0	RAB15	RAB15, member RAS oncogene family
hsa-miR-602	0	0	1	1	0	0	KRTAP10-4	keratin associated protein 10-4
hsa-miR-602	0	0	1	1	1	1	AMACR	alpha-methylacyl-CoA racemase
hsa-miR-602	0	0	1	1	0	0	SFTA2	surfactant associated 2
hsa-miR-602	1	0	1	1	1	1	TMEM132E	transmembrane protein 132E
hsa-miR-602	1	0	1	1	0	0	CD164L2	CD164 sialomucin-like 2
hsa-miR-602	0	0	1	0	0	0	FLJ43860	FLJ43860 protein
hsa-miR-602	0	0	1	0	0	0	SNORD46	small nucleolar RNA, C/D box 46
hsa-miR-602	0	0	1	0	0	0	ANXA2P3	annexin A2 pseudogene 3
hsa-miR-602	0	0	1	0	0	0	TTTY15	testis-specific transcript, Y-linked 15 (non-protein coding)
hsa-miR-602	0	0	1	0	0	0	TPI1P2	triosephosphate isomerase 1 pseudogene 2
hsa-miR-602	0	0	1	0	0	0	MSX2P1	msh homeobox 2 pseudogene 1
hsa-miR-602	0	0	1	0	0	0	TPTE2P6	transmembrane phosphoinositide 3-phosphatase and tensin homolog 2 pseudogene 6
hsa-miR-602	0	0	1	0	0	0	RNF126P1	ring finger protein 126 pseudogene 1
hsa-miR-602	0	0	1	0	0	0	SIGLEC16	sialic acid binding Ig-like lectin 16 (gene/pseudogene)
hsa-miR-602	0	0	1	0	0	0	SNORA39	small nucleolar RNA, H/ACA box 39
hsa-miR-602	0	0	1	0	0	0	SNORA60	small nucleolar RNA, H/ACA box 60
hsa-miR-602	1	0	1	1	1	1	AKAP1	A kinase (PRKA) anchor protein 1
hsa-miR-602	0	0	1	0	0	0	MUC5AC	mucin 5AC, oligomeric mucus/gel-forming
hsa-miR-602	0	0	1	1	0	0	RHBDD2	rhomboid domain containing 2
hsa-miR-602	0	0	1	1	0	0	TSR3	TSR3, 20S rRNA accumulation, homolog (S. cerevisiae)
hsa-miR-602	0	0	0	1	0	0	SCTR	secretin receptor
hsa-miR-602	1	0	1	1	0	0	SLC45A4	solute carrier family 45, member 4
hsa-miR-602	1	0	0	1	0	0	PLEKHO1	pleckstrin homology domain containing, family O member 1
hsa-miR-602	0	0	1	1	1	1	PIGQ	phosphatidylinositol glycan anchor biosynthesis, class Q
hsa-miR-602	0	0	0	1	0	0	FAM50A	family with sequence similarity 50, member A
hsa-miR-602	0	0	1	1	0	0	KIF22	kinesin family member 22
hsa-miR-602	0	0	0	1	0	0	TMEM161A	transmembrane protein 161A
hsa-miR-602	0	0	0	1	0	0	KRT14	keratin 14
hsa-miR-602	0	0	1	1	1	1	STK10	serine/threonine kinase 10
hsa-miR-602	0	0	0	1	0	0	HBQ1	hemoglobin, theta 1
hsa-miR-602	0	0	1	1	0	0	MT3	metallothionein 3
hsa-miR-602	0	0	0	1	0	0	CATSPERG	catsper channel auxiliary subunit gamma
hsa-miR-602	0	0	0	1	0	0	ATP5D	ATP synthase, H+ transporting, mitochondrial F1 complex, delta subunit
hsa-miR-602	0	0	1	1	0	0	MARCH2	membrane-associated ring finger (C3HC4) 2, E3 ubiquitin protein ligase
hsa-miR-602	0	0	0	1	0	0	SLC25A1	solute carrier family 25 (mitochondrial carrier; citrate transporter), member 1
hsa-miR-602	0	0	1	1	0	0	RBX1	ring-box 1, E3 ubiquitin protein ligase
hsa-miR-602	0	0	0	1	0	0	PMM1	phosphomannomutase 1
hsa-miR-602	0	0	0	1	0	0	RIN3	Ras and Rab interactor 3
hsa-miR-602	0	0	0	1	0	0	SRMS	src-related kinase lacking C-terminal regulatory tyrosine and N-terminal myristylation sites
hsa-miR-602	0	0	1	1	1	1	SLC25A14	solute carrier family 25 (mitochondrial carrier, brain), member 14
hsa-miR-602	0	0	1	1	0	0	USP11	ubiquitin specific peptidase 11
hsa-miR-602	1	0	1	1	0	0	FA2H	fatty acid 2-hydroxylase
hsa-miR-602	0	0	0	1	0	0	PDIA2	protein disulfide isomerase family A, member 2
hsa-miR-602	0	0	1	1	1	1	MAZ	MYC-associated zinc finger protein (purine-binding transcription factor)
hsa-miR-602	0	0	1	1	0	0	CTSH	cathepsin H
hsa-miR-602	0	0	0	1	0	0	SARS2	seryl-tRNA synthetase 2, mitochondrial
hsa-miR-602	0	0	0	1	0	0	C19orf53	chromosome 19 open reading frame 53
hsa-miR-602	0	0	1	1	1	1	FBL	fibrillarin
hsa-miR-602	0	0	1	1	0	0	TBCB	tubulin folding cofactor B
hsa-miR-602	0	0	1	1	0	0	CCDC9	coiled-coil domain containing 9
hsa-miR-602	0	0	0	1	1	1	TGFB1	transforming growth factor, beta 1
hsa-miR-602	0	0	1	1	0	0	CDC37	cell division cycle 37 homolog (S. cerevisiae)
hsa-miR-602	0	0	1	1	0	0	DBP	D site of albumin promoter (albumin D-box) binding protein
hsa-miR-602	0	0	1	1	1	1	RAB3A	RAB3A, member RAS oncogene family
hsa-miR-602	0	0	0	1	0	0	EVX1	even-skipped homeobox 1
hsa-miR-602	0	0	1	1	0	0	RBM28	RNA binding motif protein 28
hsa-miR-602	0	0	0	1	0	0	FIS1	fission 1 (mitochondrial outer membrane) homolog (S. cerevisiae)
hsa-miR-602	0	0	1	1	0	0	URGCP	upregulator of cell proliferation
hsa-miR-602	0	0	0	1	0	0	C8G	complement component 8, gamma polypeptide
hsa-miR-602	1	0	1	1	0	0	CCL3	chemokine (C-C motif) ligand 3
hsa-miR-602	0	0	0	1	0	0	HSD17B1	hydroxysteroid (17-beta) dehydrogenase 1
hsa-miR-602	0	0	0	1	0	0	RCVRN	recoverin
hsa-miR-602	1	0	1	1	0	0	ATG2A	autophagy related 2A
hsa-miR-602	0	0	1	1	0	0	MVK	mevalonate kinase
hsa-miR-602	0	0	0	1	1	1	CDCA3	cell division cycle associated 3
hsa-miR-602	1	0	1	1	1	1	PFKFB4	6-phosphofructo-2-kinase/fructose-2,6-biphosphatase 4
hsa-miR-602	0	0	0	1	0	0	CYB561D2	cytochrome b-561 domain containing 2
hsa-miR-602	1	0	1	1	1	1	NCK2	NCK adaptor protein 2
hsa-miR-602	0	0	0	1	1	1	DOK1	docking protein 1, 62kDa (downstream of tyrosine kinase 1)
hsa-miR-602	0	0	1	1	0	0	IGFBP2	insulin-like growth factor binding protein 2, 36kDa
hsa-miR-602	0	0	0	1	0	0	NEU2	sialidase 2 (cytosolic sialidase)
hsa-miR-602	0	0	0	1	0	0	ENO1	enolase 1, (alpha)
hsa-miR-602	1	0	0	1	0	0	PQLC2	PQ loop repeat containing 2
hsa-miR-602	0	0	0	1	0	0	ACTL8	actin-like 8
hsa-miR-602	0	0	1	1	1	1	ATP6V0B	ATPase, H+ transporting, lysosomal 21kDa, V0 subunit b
hsa-miR-602	1	0	1	1	0	0	CCDC92	coiled-coil domain containing 92
hsa-miR-602	0	0	1	1	0	0	GSC	goosecoid homeobox
hsa-miR-602	0	0	0	1	0	0	ADCK1	aarF domain containing kinase 1
hsa-miR-602	0	0	0	1	0	0	C10orf95	chromosome 10 open reading frame 95
hsa-miR-602	0	0	1	1	1	1	MAPK8IP1	mitogen-activated protein kinase 8 interacting protein 1
hsa-miR-602	0	0	0	1	0	0	GSTM2	glutathione S-transferase mu 2 (muscle)
hsa-miR-602	0	0	1	1	0	0	MYOG	myogenin (myogenic factor 4)
hsa-miR-602	0	0	1	1	0	0	FAAH	fatty acid amide hydrolase
hsa-miR-602	0	0	1	1	0	0	UBE2C	ubiquitin-conjugating enzyme E2C
hsa-miR-602	1	0	1	1	1	1	LYPD3	LY6/PLAUR domain containing 3
hsa-miR-602	0	0	1	1	0	0	C6orf130	chromosome 6 open reading frame 130
hsa-miR-602	0	0	0	1	0	0	NT5C	5', 3'-nucleotidase, cytosolic
hsa-miR-602	1	0	1	1	1	1	ZBTB46	zinc finger and BTB domain containing 46
hsa-miR-602	0	0	1	1	0	0	CFP	complement factor properdin
hsa-miR-602	1	0	1	1	0	0	PLEKHG3	pleckstrin homology domain containing, family G (with RhoGef domain) member 3
hsa-miR-602	0	0	1	1	0	0	CTAG2	cancer/testis antigen 2
hsa-miR-602	0	0	1	1	1	1	ZNF598	zinc finger protein 598
hsa-miR-602	0	0	1	1	0	0	HSPB1	heat shock 27kDa protein 1
hsa-miR-602	0	0	1	1	0	0	NEDD8	neural precursor cell expressed, developmentally down-regulated 8
hsa-miR-602	1	0	1	1	1	1	MAPK8IP3	mitogen-activated protein kinase 8 interacting protein 3
hsa-miR-602	0	0	1	1	1	1	CDADC1	cytidine and dCMP deaminase domain containing 1
hsa-miR-602	0	0	1	1	0	0	WDR18	WD repeat domain 18
hsa-miR-602	0	0	0	1	1	1	USP40	ubiquitin specific peptidase 40
hsa-miR-602	0	0	0	1	0	0	TYMP	thymidine phosphorylase
hsa-miR-602	0	0	0	1	1	1	FKBP6	FK506 binding protein 6, 36kDa
hsa-miR-602	1	0	1	1	0	0	JUND	jun D proto-oncogene
hsa-miR-602	0	0	0	1	0	0	CALY	calcyon neuron-specific vesicular protein
hsa-miR-602	1	0	1	1	1	1	PRDM12	PR domain containing 12
hsa-miR-602	0	0	1	1	0	0	GRWD1	glutamate-rich WD repeat containing 1
hsa-miR-602	1	0	1	1	1	1	NIP7	nuclear import 7 homolog (S. cerevisiae)
hsa-miR-602	1	0	1	1	0	0	CSNK1G2	casein kinase 1, gamma 2
hsa-miR-602	0	0	0	1	0	0	FAM189A2	family with sequence similarity 189, member A2
hsa-miR-602	0	0	0	1	0	0	CAMK2B	calcium/calmodulin-dependent protein kinase II beta
hsa-miR-602	0	0	1	1	0	0	IMP4	IMP4, U3 small nucleolar ribonucleoprotein, homolog (yeast)
hsa-miR-602	0	0	0	1	0	0	CAPN11	calpain 11
hsa-miR-602	0	0	1	1	0	0	PARP6	poly (ADP-ribose) polymerase family, member 6
hsa-miR-602	0	0	0	1	1	1	PSMC1	proteasome (prosome, macropain) 26S subunit, ATPase, 1
hsa-miR-602	0	0	0	1	0	0	GPR133	G protein-coupled receptor 133
hsa-miR-602	0	0	1	1	1	1	AACS	acetoacetyl-CoA synthetase
hsa-miR-602	0	0	1	1	0	0	PDGFRB	platelet-derived growth factor receptor, beta polypeptide
hsa-miR-602	1	0	1	1	1	1	SNX1	sorting nexin 1
hsa-miR-602	1	0	0	1	0	0	SERPINA3	serpin peptidase inhibitor, clade A (alpha-1 antiproteinase, antitrypsin), member 3
hsa-miR-602	0	0	0	1	0	0	MYOM2	myomesin (M-protein) 2, 165kDa
hsa-miR-602	0	0	1	1	0	0	KCNH2	potassium voltage-gated channel, subfamily H (eag-related), member 2
hsa-miR-602	1	0	1	1	1	1	CRISPLD1	cysteine-rich secretory protein LCCL domain containing 1
hsa-miR-602	0	0	1	1	0	0	PKMYT1	protein kinase, membrane associated tyrosine/threonine 1
hsa-miR-602	0	0	0	1	0	0	NUBP2	nucleotide binding protein 2
hsa-miR-602	0	0	1	1	0	0	HAGH	hydroxyacylglutathione hydrolase
hsa-miR-602	0	0	1	1	1	1	DHX8	DEAH (Asp-Glu-Ala-His) box polypeptide 8
hsa-miR-602	0	0	0	1	0	0	MOV10L1	Mov10l1, Moloney leukemia virus 10-like 1, homolog (mouse)
hsa-miR-602	0	0	0	1	0	0	XRCC1	X-ray repair complementing defective repair in Chinese hamster cells 1
hsa-miR-602	0	0	0	1	1	1	CABIN1	calcineurin binding protein 1
hsa-miR-602	0	0	1	1	0	0	HIRA	HIR histone cell cycle regulation defective homolog A (S. cerevisiae)
hsa-miR-602	0	0	0	1	1	1	NUCB1	nucleobindin 1
hsa-miR-602	0	0	1	1	1	1	GLTSCR1	glioma tumor suppressor candidate region gene 1
hsa-miR-602	1	0	1	1	0	0	OSBPL5	oxysterol binding protein-like 5
hsa-miR-602	0	0	1	1	0	0	PRDM11	PR domain containing 11
hsa-miR-602	1	0	1	1	1	1	TP53BP1	tumor protein p53 binding protein 1
hsa-miR-602	0	0	0	1	1	1	PET112	PET112 homolog (yeast)
hsa-miR-602	0	0	1	1	0	0	POPDC2	popeye domain containing 2
hsa-miR-602	0	0	1	1	1	1	MFSD1	major facilitator superfamily domain containing 1
hsa-miR-602	0	0	1	1	0	0	ALMS1	Alstrom syndrome 1
hsa-miR-602	0	0	1	1	0	0	PHRF1	PHD and ring finger domains 1
hsa-miR-602	0	0	0	1	0	0	FGF10	fibroblast growth factor 10
hsa-miR-602	1	0	0	1	1	1	MIER2	mesoderm induction early response 1, family member 2
hsa-miR-602	0	0	0	1	1	1	OLFM2	olfactomedin 2
hsa-miR-602	0	0	1	1	1	1	BST1	bone marrow stromal cell antigen 1
hsa-miR-602	0	0	0	1	0	0	SIL1	SIL1 homolog, endoplasmic reticulum chaperone (S. cerevisiae)
hsa-miR-602	0	0	0	1	0	0	ADAP1	ArfGAP with dual PH domains 1
hsa-miR-602	0	0	0	1	0	0	PRPF6	PRP6 pre-mRNA processing factor 6 homolog (S. cerevisiae)
hsa-miR-602	0	0	1	1	0	0	EIF2B2	eukaryotic translation initiation factor 2B, subunit 2 beta, 39kDa
hsa-miR-602	0	0	0	1	0	0	CD27	CD27 molecule
hsa-miR-602	0	0	0	1	0	0	RBP5	retinol binding protein 5, cellular
hsa-miR-602	1	0	1	1	1	1	TMPO	thymopoietin
hsa-miR-602	0	0	1	1	1	1	SETD1B	SET domain containing 1B
hsa-miR-602	1	0	1	1	0	0	CDH24	cadherin 24, type 2
hsa-miR-602	1	0	1	1	1	1	IGF1R	insulin-like growth factor 1 receptor
hsa-miR-602	1	0	1	1	1	1	FURIN	furin (paired basic amino acid cleaving enzyme)
hsa-miR-602	1	0	1	1	1	1	GAS8	growth arrest-specific 8
hsa-miR-602	0	0	1	1	0	0	COPS3	COP9 constitutive photomorphogenic homolog subunit 3 (Arabidopsis)
hsa-miR-602	0	0	1	1	0	0	NT5C3L	5'-nucleotidase, cytosolic III-like
hsa-miR-602	0	0	0	1	0	0	PNMT	phenylethanolamine N-methyltransferase
hsa-miR-602	0	0	1	1	0	0	FXYD1	FXYD domain containing ion transport regulator 1
hsa-miR-602	0	0	1	1	1	1	SLC6A3	solute carrier family 6 (neurotransmitter transporter, dopamine), member 3
hsa-miR-602	0	0	0	1	0	0	CACNG8	calcium channel, voltage-dependent, gamma subunit 8
hsa-miR-602	0	0	1	1	0	0	KLHDC4	kelch domain containing 4
hsa-miR-602	1	0	0	1	0	0	PGD	phosphogluconate dehydrogenase
hsa-miR-602	1	0	0	1	1	1	ARL8A	ADP-ribosylation factor-like 8A
hsa-miR-602	1	0	1	1	1	1	CASP10	caspase 10, apoptosis-related cysteine peptidase
hsa-miR-602	0	0	0	1	0	0	ITIH1	inter-alpha-trypsin inhibitor heavy chain 1
hsa-miR-602	1	0	1	1	1	1	RAB43	RAB43, member RAS oncogene family
hsa-miR-602	1	0	1	1	1	1	TRIM23	tripartite motif containing 23
hsa-miR-602	0	0	1	1	0	0	PNLDC1	poly(A)-specific ribonuclease (PARN)-like domain containing 1
hsa-miR-602	0	0	0	1	1	1	GINS4	GINS complex subunit 4 (Sld5 homolog)
hsa-miR-602	0	0	1	1	0	0	PRDM14	PR domain containing 14
hsa-miR-602	0	0	1	1	1	1	FAM83A	family with sequence similarity 83, member A
hsa-miR-602	0	0	1	1	0	0	OLFM1	olfactomedin 1
hsa-miR-602	0	0	1	1	0	0	PAEP	progestagen-associated endometrial protein
hsa-miR-602	0	0	0	1	0	0	PNPLA7	patatin-like phospholipase domain containing 7
hsa-miR-602	1	0	0	1	1	1	PPRC1	peroxisome proliferator-activated receptor gamma, coactivator-related 1
hsa-miR-602	0	0	0	1	1	1	CSRP2BP	CSRP2 binding protein
hsa-miR-602	0	0	1	1	1	1	TMEM138	transmembrane protein 138
hsa-miR-602	1	0	1	1	0	0	BSCL2	Berardinelli-Seip congenital lipodystrophy 2 (seipin)
hsa-miR-602	0	0	0	1	1	1	AIP	aryl hydrocarbon receptor interacting protein
hsa-miR-602	0	0	1	1	0	0	TBX6	T-box 6
hsa-miR-602	0	0	1	1	1	1	HIRIP3	HIRA interacting protein 3
hsa-miR-602	0	0	1	1	1	1	CCDC83	coiled-coil domain containing 83
hsa-miR-602	0	0	0	1	1	1	ACAD8	acyl-CoA dehydrogenase family, member 8
hsa-miR-602	1	0	0	1	1	1	NCAPD3	non-SMC condensin II complex, subunit D3
hsa-miR-602	0	0	1	1	1	1	FAM151B	family with sequence similarity 151, member B
hsa-miR-602	0	0	1	1	1	1	NEIL2	nei endonuclease VIII-like 2 (E. coli)
hsa-miR-602	0	0	0	1	0	0	CXXC1	CXXC finger protein 1
hsa-miR-602	1	0	1	1	1	1	PIEZO2	piezo-type mechanosensitive ion channel component 2
hsa-miR-602	0	0	1	1	1	1	AKR1B1	aldo-keto reductase family 1, member B1 (aldose reductase)
hsa-miR-602	0	0	1	1	0	0	OTOA	otoancorin
hsa-miR-602	0	0	1	1	0	0	DHRS1	dehydrogenase/reductase (SDR family) member 1
hsa-miR-602	0	0	0	1	0	0	PSMG3	proteasome (prosome, macropain) assembly chaperone 3
hsa-miR-602	0	0	0	1	0	0	TRMU	tRNA 5-methylaminomethyl-2-thiouridylate methyltransferase
hsa-miR-602	0	0	1	1	0	0	SPON2	spondin 2, extracellular matrix protein
hsa-miR-602	1	0	1	1	1	1	CTBP1	C-terminal binding protein 1
hsa-miR-602	0	0	1	1	0	0	CPAMD8	C3 and PZP-like, alpha-2-macroglobulin domain containing 8
hsa-miR-602	0	0	1	1	0	0	CRYAA	crystallin, alpha A
hsa-miR-602	0	0	0	1	0	0	AMICA1	adhesion molecule, interacts with CXADR antigen 1
hsa-miR-602	0	0	0	1	1	1	ANO10	anoctamin 10
hsa-miR-602	0	0	1	1	0	0	CCDC12	coiled-coil domain containing 12
hsa-miR-602	0	0	1	1	0	0	FGFR4	fibroblast growth factor receptor 4
hsa-miR-602	1	0	1	1	0	0	HK3	hexokinase 3 (white cell)
hsa-miR-602	0	0	1	1	0	0	PTCD1	pentatricopeptide repeat domain 1
hsa-miR-602	0	0	0	1	0	0	CCDC116	coiled-coil domain containing 116
hsa-miR-602	0	0	0	1	0	0	MSLNL	mesothelin-like
hsa-miR-602	0	0	0	1	0	0	SSTR5	somatostatin receptor 5
hsa-miR-602	1	0	1	1	1	1	NXF1	nuclear RNA export factor 1
hsa-miR-602	0	0	1	1	0	0	PDZK1IP1	PDZK1 interacting protein 1
hsa-miR-602	0	0	0	1	0	0	KCNF1	potassium voltage-gated channel, subfamily F, member 1
hsa-miR-602	0	0	1	1	1	1	PTPRN	protein tyrosine phosphatase, receptor type, N
hsa-miR-602	0	0	1	1	1	1	SLC23A3	solute carrier family 23 (nucleobase transporters), member 3
hsa-miR-602	0	0	0	1	0	0	HDAC11	histone deacetylase 11
hsa-miR-602	1	0	1	1	1	1	FBLN2	fibulin 2
hsa-miR-602	0	0	0	1	0	0	ITGB5	integrin, beta 5
hsa-miR-602	0	0	0	1	1	1	CCDC127	coiled-coil domain containing 127
hsa-miR-602	1	0	1	1	1	1	EN2	engrailed homeobox 2
hsa-miR-602	1	0	1	1	0	0	FASTK	Fas-activated serine/threonine kinase
hsa-miR-602	0	0	1	1	1	1	TMUB1	transmembrane and ubiquitin-like domain containing 1
hsa-miR-602	0	0	1	1	0	0	WBSCR27	Williams Beuren syndrome chromosome region 27
hsa-miR-602	0	0	1	1	0	0	FOXN4	forkhead box N4
hsa-miR-602	0	0	0	1	0	0	HPS6	Hermansky-Pudlak syndrome 6
hsa-miR-602	0	0	1	1	1	1	CDYL2	chromodomain protein, Y-like 2
hsa-miR-602	0	0	0	1	0	0	SLC38A8	solute carrier family 38, member 8
hsa-miR-602	1	0	1	1	1	1	HSP90B1	heat shock protein 90kDa beta (Grp94), member 1
hsa-miR-602	1	0	1	1	1	1	C16orf45	chromosome 16 open reading frame 45
hsa-miR-602	0	0	1	1	1	1	KIF7	kinesin family member 7
hsa-miR-602	0	0	1	1	1	1	INTS10	integrator complex subunit 10
hsa-miR-602	0	0	0	1	0	0	ZNF668	zinc finger protein 668
hsa-miR-602	0	0	0	1	0	0	PCSK4	proprotein convertase subtilisin/kexin type 4
hsa-miR-602	0	0	0	1	0	0	PIEZO1	piezo-type mechanosensitive ion channel component 1
hsa-miR-602	0	0	0	1	1	1	CYP2S1	cytochrome P450, family 2, subfamily S, polypeptide 1
hsa-miR-602	0	0	0	1	0	0	PPP1R14A	protein phosphatase 1, regulatory (inhibitor) subunit 14A
hsa-miR-602	0	0	0	1	0	0	UBXN6	UBX domain protein 6
hsa-miR-602	0	0	0	1	0	0	HSD11B1L	hydroxysteroid (11-beta) dehydrogenase 1-like
hsa-miR-602	0	0	1	1	0	0	CDK2AP2	cyclin-dependent kinase 2 associated protein 2
hsa-miR-602	1	0	1	1	1	1	UNKL	unkempt homolog (Drosophila)-like
hsa-miR-602	0	0	1	1	1	1	NUDT9	nudix (nucleoside diphosphate linked moiety X)-type motif 9
hsa-miR-602	0	0	0	1	0	0	FOXA3	forkhead box A3
hsa-miR-602	1	0	1	1	1	1	KCNAB1	potassium voltage-gated channel, shaker-related subfamily, beta member 1
hsa-miR-602	1	0	1	1	1	1	UMOD	uromodulin
hsa-miR-602	0	0	0	1	0	0	PRSS27	protease, serine 27
hsa-miR-602	0	0	0	1	0	0	STARD5	StAR-related lipid transfer (START) domain containing 5
hsa-miR-602	0	0	0	1	0	0	GSX1	GS homeobox 1
hsa-miR-602	0	0	1	1	1	1	CEBPB	CCAAT/enhancer binding protein (C/EBP), beta
hsa-miR-602	1	0	1	1	1	1	BRD3	bromodomain containing 3
hsa-miR-602	1	0	0	1	0	0	TRABD	TraB domain containing
hsa-miR-602	0	0	1	1	1	1	CHST11	carbohydrate (chondroitin 4) sulfotransferase 11
hsa-miR-602	0	0	1	1	0	0	PRKCDBP	protein kinase C, delta binding protein
hsa-miR-602	0	0	0	1	1	1	HINT1	histidine triad nucleotide binding protein 1
hsa-miR-602	0	0	1	1	0	0	SLC6A19	solute carrier family 6 (neutral amino acid transporter), member 19
hsa-miR-602	1	0	1	1	1	1	RNASE6	ribonuclease, RNase A family, k6
hsa-miR-602	0	0	1	1	1	1	C17orf28	chromosome 17 open reading frame 28
hsa-miR-602	1	0	1	1	1	1	GRM5	glutamate receptor, metabotropic 5
hsa-miR-602	0	0	0	1	0	0	OR1M1	olfactory receptor, family 1, subfamily M, member 1
hsa-miR-602	0	0	1	1	0	0	TWF2	twinfilin, actin-binding protein, homolog 2 (Drosophila)
hsa-miR-602	0	0	0	1	0	0	TLR9	toll-like receptor 9
hsa-miR-602	0	0	0	1	0	0	DEGS2	delta(4)-desaturase, sphingolipid 2
hsa-miR-602	0	0	1	1	1	1	SMOX	spermine oxidase
hsa-miR-602	0	0	1	1	1	1	HSPBAP1	HSPB (heat shock 27kDa) associated protein 1
hsa-miR-602	0	0	0	1	1	1	LRRC45	leucine rich repeat containing 45
hsa-miR-602	0	0	1	1	0	0	STRA13	stimulated by retinoic acid 13 homolog (mouse)
hsa-miR-602	0	0	0	1	0	0	RBFA	ribosome binding factor A (putative)
hsa-miR-602	0	0	1	1	0	0	TSNARE1	t-SNARE domain containing 1
hsa-miR-602	0	0	1	1	1	1	GLB1	galactosidase, beta 1
hsa-miR-602	0	0	1	1	0	0	DNAI2	dynein, axonemal, intermediate chain 2
hsa-miR-602	0	0	1	1	1	1	ATP9B	ATPase, class II, type 9B
hsa-miR-602	0	0	1	1	1	1	MRPS12	mitochondrial ribosomal protein S12
hsa-miR-602	0	0	1	1	1	1	FAM53A	family with sequence similarity 53, member A
hsa-miR-602	0	0	0	1	0	0	CLDN15	claudin 15
hsa-miR-602	0	0	0	1	1	1	LGR6	leucine-rich repeat containing G protein-coupled receptor 6
hsa-miR-602	1	0	0	1	0	0	AP1G2	adaptor-related protein complex 1, gamma 2 subunit
hsa-miR-602	0	0	1	1	0	0	SIPA1	signal-induced proliferation-associated 1
hsa-miR-602	0	0	1	1	1	1	ACAD9	acyl-CoA dehydrogenase family, member 9
hsa-miR-602	1	0	1	1	0	0	TNXB	tenascin XB
hsa-miR-602	1	0	0	1	0	0	EHBP1L1	EH domain binding protein 1-like 1
hsa-miR-602	0	0	1	1	0	0	FKBP2	FK506 binding protein 2, 13kDa
hsa-miR-602	0	0	0	1	0	0	LIME1	Lck interacting transmembrane adaptor 1
hsa-miR-602	1	0	1	1	0	0	LRFN4	leucine rich repeat and fibronectin type III domain containing 4
hsa-miR-602	0	0	1	1	0	0	CARD14	caspase recruitment domain family, member 14
hsa-miR-602	0	0	0	1	0	0	GSTM1	glutathione S-transferase mu 1
hsa-miR-602	0	0	0	1	0	0	MAL	mal, T-cell differentiation protein
hsa-miR-602	0	0	0	1	1	1	CCDC96	coiled-coil domain containing 96
hsa-miR-602	0	0	1	1	1	1	ZCCHC12	zinc finger, CCHC domain containing 12
hsa-miR-602	0	0	1	1	1	1	CHRD	chordin
hsa-miR-602	0	0	1	1	0	0	EVC2	Ellis van Creveld syndrome 2
hsa-miR-602	0	0	1	1	0	0	PARL	presenilin associated, rhomboid-like
hsa-miR-602	0	0	1	1	0	0	RIN1	Ras and Rab interactor 1
hsa-miR-602	1	0	1	1	1	1	MLC1	megalencephalic leukoencephalopathy with subcortical cysts 1
hsa-miR-602	0	0	0	1	1	1	USP36	ubiquitin specific peptidase 36
hsa-miR-602	0	0	0	1	0	0	NAGPA	N-acetylglucosamine-1-phosphodiester alpha-N-acetylglucosaminidase
hsa-miR-602	0	0	0	1	0	0	PODN	podocan
hsa-miR-602	0	0	1	1	1	1	GFM1	G elongation factor, mitochondrial 1
hsa-miR-602	0	0	0	1	1	1	C17orf101	chromosome 17 open reading frame 101
hsa-miR-602	0	0	0	1	0	0	UTS2R	urotensin 2 receptor
hsa-miR-602	0	0	1	1	0	0	SLC6A13	solute carrier family 6 (neurotransmitter transporter, GABA), member 13
hsa-miR-602	0	0	1	1	0	0	ZNF821	zinc finger protein 821
hsa-miR-602	1	0	1	1	0	0	PPP2R2D	protein phosphatase 2, regulatory subunit B, delta
hsa-miR-602	0	0	0	1	0	0	FARSA	phenylalanyl-tRNA synthetase, alpha subunit
hsa-miR-602	0	0	0	1	0	0	OR4P4	olfactory receptor, family 4, subfamily P, member 4
hsa-miR-602	1	0	1	1	1	1	USP20	ubiquitin specific peptidase 20
hsa-miR-602	0	0	0	1	0	0	MATK	megakaryocyte-associated tyrosine kinase
hsa-miR-602	0	0	1	1	0	0	ARL6IP4	ADP-ribosylation-like factor 6 interacting protein 4
hsa-miR-602	0	0	1	1	0	0	DNAJC7	DnaJ (Hsp40) homolog, subfamily C, member 7
hsa-miR-602	0	0	0	1	0	0	DEF6	differentially expressed in FDCP 6 homolog (mouse)
hsa-miR-602	0	0	1	1	1	1	VRK3	vaccinia related kinase 3
hsa-miR-602	0	0	1	1	0	0	STOML1	stomatin (EPB72)-like 1
hsa-miR-602	0	0	1	1	1	1	MSRA	methionine sulfoxide reductase A
hsa-miR-602	0	0	0	1	0	0	PGAM5	phosphoglycerate mutase family member 5
hsa-miR-602	0	0	0	1	0	0	FXYD2	FXYD domain containing ion transport regulator 2
hsa-miR-602	0	0	1	1	0	0	CCDC158	coiled-coil domain containing 158
hsa-miR-602	0	0	0	1	0	0	CHST13	carbohydrate (chondroitin 4) sulfotransferase 13
hsa-miR-602	0	0	0	1	0	0	LRRC37A3	leucine rich repeat containing 37, member A3
hsa-miR-602	0	0	0	1	0	0	DOCK6	dedicator of cytokinesis 6
hsa-miR-602	0	0	1	1	0	0	RNPS1	RNA binding protein S1, serine-rich domain
hsa-miR-602	0	0	1	1	0	0	STXBP2	syntaxin binding protein 2
hsa-miR-602	0	0	1	1	0	0	B3GNTL1	UDP-GlcNAc:betaGal beta-1,3-N-acetylglucosaminyltransferase-like 1
hsa-miR-602	0	0	0	1	0	0	HBA1	hemoglobin, alpha 1
hsa-miR-602	1	0	1	1	0	0	IGSF9B	immunoglobulin superfamily, member 9B
hsa-miR-602	0	0	0	1	0	0	OR6T1	olfactory receptor, family 6, subfamily T, member 1
hsa-miR-602	0	0	1	1	0	0	D2HGDH	D-2-hydroxyglutarate dehydrogenase
hsa-miR-602	0	0	0	1	1	1	RPP25	ribonuclease P/MRP 25kDa subunit
hsa-miR-602	0	0	0	1	0	0	SSNA1	Sjogren syndrome nuclear autoantigen 1
hsa-miR-602	0	0	1	1	0	0	RUVBL1	RuvB-like 1 (E. coli)
hsa-miR-602	0	0	1	1	0	0	POLR2A	polymerase (RNA) II (DNA directed) polypeptide A, 220kDa
hsa-miR-602	0	0	0	1	0	0	LRRC61	leucine rich repeat containing 61
hsa-miR-602	0	0	1	1	0	0	SPNS1	spinster homolog 1 (Drosophila)
hsa-miR-602	0	0	1	1	0	0	NUCB2	nucleobindin 2
hsa-miR-602	0	0	0	1	0	0	ANAPC2	anaphase promoting complex subunit 2
hsa-miR-602	1	0	1	1	1	1	SLC25A36	solute carrier family 25 (pyrimidine nucleotide carrier ), member 36
hsa-miR-602	0	0	0	1	0	0	WFDC11	WAP four-disulfide core domain 11
hsa-miR-602	0	0	1	1	0	0	GHRHR	growth hormone releasing hormone receptor
hsa-miR-602	0	0	1	1	1	1	SGSH	N-sulfoglucosamine sulfohydrolase
hsa-miR-602	1	0	0	1	0	0	GGT5	gamma-glutamyltransferase 5
hsa-miR-602	0	0	1	1	0	0	EFCAB4A	EF-hand calcium binding domain 4A
hsa-miR-602	1	0	0	1	0	0	KRT81	keratin 81
hsa-miR-602	0	0	1	1	1	1	SPSB1	splA/ryanodine receptor domain and SOCS box containing 1
hsa-miR-602	0	0	0	1	0	0	HSF1	heat shock transcription factor 1
hsa-miR-602	0	0	1	1	0	0	CIB1	calcium and integrin binding 1 (calmyrin)
hsa-miR-602	1	0	1	1	0	0	UNC5A	unc-5 homolog A (C. elegans)
hsa-miR-602	0	0	0	1	1	1	C14orf80	chromosome 14 open reading frame 80
hsa-miR-602	0	0	0	1	0	0	B4GALNT4	beta-1,4-N-acetyl-galactosaminyl transferase 4
hsa-miR-602	0	0	1	1	0	0	EIF4ENIF1	eukaryotic translation initiation factor 4E nuclear import factor 1
hsa-miR-602	0	0	1	1	1	1	GATSL3	GATS protein-like 3
hsa-miR-602	0	0	0	1	0	0	WDR4	WD repeat domain 4
hsa-miR-602	0	0	0	1	0	0	FAM132A	family with sequence similarity 132, member A
hsa-miR-602	0	0	0	1	0	0	DDX41	DEAD (Asp-Glu-Ala-Asp) box polypeptide 41
hsa-miR-602	0	0	0	1	0	0	TREX2	three prime repair exonuclease 2
hsa-miR-602	1	0	1	1	1	1	NOTUM	notum pectinacetylesterase homolog (Drosophila)
hsa-miR-602	0	0	0	1	1	1	IL3RA	interleukin 3 receptor, alpha (low affinity)
hsa-miR-602	0	0	1	1	1	1	P4HB	prolyl 4-hydroxylase, beta polypeptide
hsa-miR-602	0	0	1	1	0	0	PKP3	plakophilin 3
hsa-miR-602	0	0	1	1	1	1	SPRR3	small proline-rich protein 3
hsa-miR-602	0	0	0	1	1	1	C14orf180	chromosome 14 open reading frame 180
hsa-miR-602	0	0	1	1	1	1	LRRC16A	leucine rich repeat containing 16A
hsa-miR-602	0	0	0	1	0	0	MRGPRG	MAS-related GPR, member G
hsa-miR-602	0	0	0	1	1	1	ANO9	anoctamin 9
hsa-miR-602	1	0	1	1	1	1	FAM43B	family with sequence similarity 43, member B
hsa-miR-602	0	0	1	1	0	0	CKLF	chemokine-like factor
hsa-miR-602	0	0	1	1	1	1	WBSCR17	Williams-Beuren syndrome chromosome region 17
hsa-miR-602	0	0	0	1	0	0	C5orf38	chromosome 5 open reading frame 38
hsa-miR-602	0	0	1	1	0	0	PSMB5	proteasome (prosome, macropain) subunit, beta type, 5
hsa-miR-602	0	0	1	1	1	1	KLC1	kinesin light chain 1
hsa-miR-602	0	0	0	1	0	0	KRTAP22-1	keratin associated protein 22-1
hsa-miR-602	0	0	0	1	1	1	ZDHHC4	zinc finger, DHHC-type containing 4
hsa-miR-602	0	0	0	1	1	1	GSTM4	glutathione S-transferase mu 4
hsa-miR-602	0	0	1	1	1	1	TNNI1	troponin I type 1 (skeletal, slow)
hsa-miR-602	0	0	1	1	1	1	OGFOD1	2-oxoglutarate and iron-dependent oxygenase domain containing 1
hsa-miR-602	0	0	1	1	1	1	NLRP3	NLR family, pyrin domain containing 3
hsa-miR-602	0	0	0	1	0	0	STARD3	StAR-related lipid transfer (START) domain containing 3
hsa-miR-602	0	0	1	1	0	0	ARHGAP10	Rho GTPase activating protein 10
hsa-miR-602	0	0	0	1	1	1	OPRL1	opiate receptor-like 1
hsa-miR-602	0	0	0	1	1	1	SLMO1	slowmo homolog 1 (Drosophila)
hsa-miR-602	0	0	0	1	0	0	LRRC71	leucine rich repeat containing 71
hsa-miR-602	1	0	1	1	1	1	ATG4B	autophagy related 4B, cysteine peptidase
hsa-miR-602	1	0	1	1	1	1	DTX3	deltex homolog 3 (Drosophila)
hsa-miR-602	0	0	0	1	1	1	IL21R	interleukin 21 receptor
hsa-miR-602	0	0	1	1	1	1	FIBP	fibroblast growth factor (acidic) intracellular binding protein
hsa-miR-602	0	0	0	1	0	0	CDK5RAP3	CDK5 regulatory subunit associated protein 3
hsa-miR-602	1	0	1	1	1	1	NR4A3	nuclear receptor subfamily 4, group A, member 3
hsa-miR-602	0	0	1	1	1	1	PAX4	paired box 4
hsa-miR-602	0	0	1	1	1	1	HPS1	Hermansky-Pudlak syndrome 1
hsa-miR-602	0	0	1	1	1	1	ATP5G2	ATP synthase, H+ transporting, mitochondrial Fo complex, subunit C2 (subunit 9)
hsa-miR-602	0	0	1	1	0	0	TMEM120A	transmembrane protein 120A
hsa-miR-602	0	0	0	1	0	0	CATSPER4	cation channel, sperm associated 4
hsa-miR-602	0	0	0	1	0	0	C1QA	complement component 1, q subcomponent, A chain
hsa-miR-602	0	0	0	1	0	0	TAS1R3	taste receptor, type 1, member 3
hsa-miR-602	0	0	0	1	1	1	NCCRP1	non-specific cytotoxic cell receptor protein 1 homolog (zebrafish)
hsa-miR-602	0	0	0	1	1	1	SOX18	SRY (sex determining region Y)-box 18
hsa-miR-602	0	0	0	1	0	0	PRSS33	protease, serine, 33
hsa-miR-602	0	0	0	1	0	0	FAM25C	family with sequence similarity 25, member C
hsa-miR-602	0	0	0	1	0	0	FAM25B	family with sequence similarity 25, member B
hsa-miR-602	0	0	1	1	0	0	RNASE1	ribonuclease, RNase A family, 1 (pancreatic)
hsa-miR-602	0	0	0	1	0	0	BLOC1S3	biogenesis of lysosomal organelles complex-1, subunit 3
hsa-miR-602	0	0	1	1	1	1	MKNK1	MAP kinase interacting serine/threonine kinase 1
hsa-miR-602	0	0	1	1	0	0	STYXL1	serine/threonine/tyrosine interacting-like 1
hsa-miR-602	0	0	0	1	0	0	TMEM179	transmembrane protein 179
hsa-miR-602	0	0	0	1	0	0	C19orf35	chromosome 19 open reading frame 35
hsa-miR-602	0	0	0	1	1	1	SUMF2	sulfatase modifying factor 2
hsa-miR-602	0	0	0	1	0	0	CXXC11	CXXC finger protein 11
hsa-miR-602	0	0	1	1	1	1	TP53BP2	tumor protein p53 binding protein, 2
hsa-miR-602	0	0	1	1	0	0	SLC12A7	solute carrier family 12 (potassium/chloride transporters), member 7
hsa-miR-602	0	0	1	1	0	0	RBPJL	recombination signal binding protein for immunoglobulin kappa J region-like
hsa-miR-602	0	0	1	1	1	1	MED22	mediator complex subunit 22
hsa-miR-602	0	0	1	1	1	1	C20orf132	chromosome 20 open reading frame 132
hsa-miR-602	0	0	0	1	0	0	GLTPD1	glycolipid transfer protein domain containing 1
hsa-miR-602	0	0	1	1	1	1	COX19	COX19 cytochrome c oxidase assembly homolog (S. cerevisiae)
hsa-miR-602	1	0	1	1	1	1	STARD13	StAR-related lipid transfer (START) domain containing 13
hsa-miR-602	1	0	0	1	0	0	C7orf26	chromosome 7 open reading frame 26
hsa-miR-602	0	0	0	1	1	1	DUSP22	dual specificity phosphatase 22
hsa-miR-602	0	0	1	1	0	0	ANAPC11	anaphase promoting complex subunit 11
hsa-miR-602	0	0	1	1	1	1	LYPD1	LY6/PLAUR domain containing 1
hsa-miR-602	0	0	0	1	1	1	BRF1	BRF1 homolog, subunit of RNA polymerase III transcription initiation factor IIIB (S. cerevisiae)
hsa-miR-602	0	0	0	1	0	0	SDSL	serine dehydratase-like
hsa-miR-602	0	0	1	1	0	0	UBE2J2	ubiquitin-conjugating enzyme E2, J2
hsa-miR-602	0	0	1	1	1	1	POFUT2	protein O-fucosyltransferase 2
hsa-miR-602	0	0	0	1	0	0	CCDC37	coiled-coil domain containing 37
hsa-miR-602	0	0	1	1	0	0	MPI	mannose phosphate isomerase
hsa-miR-602	0	0	1	1	1	1	RIPK4	receptor-interacting serine-threonine kinase 4
hsa-miR-602	0	0	0	1	0	0	TH	tyrosine hydroxylase
hsa-miR-602	1	0	1	1	1	1	SLC12A9	solute carrier family 12 (potassium/chloride transporters), member 9
hsa-miR-602	0	0	0	1	0	0	HRCT1	histidine rich carboxyl terminus 1
hsa-miR-602	0	0	1	1	0	0	CUL9	cullin 9
hsa-miR-602	1	0	1	1	1	1	PDGFA	platelet-derived growth factor alpha polypeptide
hsa-miR-602	0	0	1	1	0	0	FAM82A1	family with sequence similarity 82, member A1
hsa-miR-602	0	0	1	1	1	1	MOBP	myelin-associated oligodendrocyte basic protein
hsa-miR-602	0	0	0	1	0	0	ACAP3	ArfGAP with coiled-coil, ankyrin repeat and PH domains 3
hsa-miR-602	0	0	0	1	0	0	CRYBA4	crystallin, beta A4
hsa-miR-602	0	0	1	1	0	0	NRD1	nardilysin (N-arginine dibasic convertase)
hsa-miR-602	0	0	1	1	0	0	MUSTN1	musculoskeletal, embryonic nuclear protein 1
hsa-miR-602	1	0	1	1	1	1	TMEM110	transmembrane protein 110
hsa-miR-602	0	0	0	1	0	0	CXorf40B	chromosome X open reading frame 40B
hsa-miR-602	0	0	0	1	0	0	TNFRSF6B	tumor necrosis factor receptor superfamily, member 6b, decoy
hsa-miR-602	0	0	1	1	0	0	MORN3	MORN repeat containing 3
hsa-miR-602	1	0	1	1	0	0	GRK6	G protein-coupled receptor kinase 6
hsa-miR-602	0	0	1	1	0	0	PRMT2	protein arginine methyltransferase 2
hsa-miR-602	0	0	1	1	1	1	PLGLB1	plasminogen-like B1
hsa-miR-602	0	0	0	1	1	1	GTF3C1	general transcription factor IIIC, polypeptide 1, alpha 220kDa
hsa-miR-602	0	0	1	1	1	1	MED24	mediator complex subunit 24
hsa-miR-602	1	0	1	1	1	1	KIAA0317	KIAA0317
hsa-miR-602	0	0	0	1	0	0	ORAI2	ORAI calcium release-activated calcium modulator 2
hsa-miR-602	0	0	0	1	1	1	MYOM1	myomesin 1, 185kDa
hsa-miR-602	0	0	1	1	0	0	PARVG	parvin, gamma
hsa-miR-602	1	0	1	1	1	1	PTBP1	polypyrimidine tract binding protein 1
hsa-miR-602	0	0	0	1	1	1	MCRS1	microspherule protein 1
hsa-miR-602	0	0	1	1	1	1	TOP3B	topoisomerase (DNA) III beta
hsa-miR-602	0	0	1	1	0	0	DOK3	docking protein 3
hsa-miR-602	0	0	1	1	1	1	MAP1LC3C	microtubule-associated protein 1 light chain 3 gamma
hsa-miR-602	0	0	0	1	0	0	C7orf50	chromosome 7 open reading frame 50
hsa-miR-602	1	0	1	1	1	1	PSAP	prosaposin
hsa-miR-602	0	0	0	1	0	0	FAM25G	family with sequence similarity 25, member G
hsa-miR-602	0	0	1	1	0	0	TP73	tumor protein p73
hsa-miR-602	0	0	0	1	0	0	LRRC8B	leucine rich repeat containing 8 family, member B
hsa-miR-602	1	0	1	1	1	1	RUNX1	runt-related transcription factor 1
hsa-miR-602	0	0	1	1	1	1	SLC8A3	solute carrier family 8 (sodium/calcium exchanger), member 3
hsa-miR-602	0	0	0	1	0	0	AKAP4	A kinase (PRKA) anchor protein 4
hsa-miR-602	0	0	1	1	1	1	PRAME	preferentially expressed antigen in melanoma
hsa-miR-602	0	0	1	1	0	0	KIAA2013	KIAA2013
hsa-miR-602	0	0	0	1	0	0	C17orf80	chromosome 17 open reading frame 80
hsa-miR-602	0	0	1	1	1	1	NLRC3	NLR family, CARD domain containing 3
hsa-miR-602	0	0	0	1	1	1	SLC25A29	solute carrier family 25 (mitochondrial carnitine/acylcarnitine carrier), member 29
hsa-miR-602	0	0	1	1	1	1	PLGLB2	plasminogen-like B2
hsa-miR-602	0	0	1	1	0	0	CALCA	calcitonin-related polypeptide alpha
hsa-miR-602	0	0	1	1	0	0	NPSR1	neuropeptide S receptor 1
hsa-miR-602	0	0	1	1	0	0	CTAG1B	cancer/testis antigen 1B
hsa-miR-602	0	0	0	1	0	0	PYY	peptide YY
hsa-miR-602	0	0	1	1	1	1	PRKAR1B	protein kinase, cAMP-dependent, regulatory, type I, beta
hsa-miR-602	0	0	0	1	0	0	TLE6	transducin-like enhancer of split 6 (E(sp1) homolog, Drosophila)
hsa-miR-602	0	0	0	1	1	1	SPRR2D	small proline-rich protein 2D
hsa-miR-602	0	0	1	1	1	1	CDC16	cell division cycle 16 homolog (S. cerevisiae)
hsa-miR-602	0	0	0	1	0	0	CTAG1A	cancer/testis antigen 1A
hsa-miR-602	0	0	0	1	0	0	TNNT3	troponin T type 3 (skeletal, fast)
hsa-miR-602	0	0	0	1	1	1	CCDC135	coiled-coil domain containing 135
hsa-miR-602	0	0	0	1	0	0	SHARPIN	SHANK-associated RH domain interactor
hsa-miR-602	0	0	1	1	1	1	MICU1	mitochondrial calcium uptake 1
hsa-miR-602	0	0	1	1	0	0	MAST2	microtubule associated serine/threonine kinase 2
hsa-miR-602	0	0	1	1	0	0	NSMCE1	non-SMC element 1 homolog (S. cerevisiae)
hsa-miR-602	0	0	0	1	0	0	PPP2R3B	protein phosphatase 2, regulatory subunit B'', beta
hsa-miR-602	0	0	1	1	0	0	MYH7	myosin, heavy chain 7, cardiac muscle, beta
hsa-miR-602	0	0	1	1	0	0	TXNRD2	thioredoxin reductase 2
hsa-miR-602	0	0	0	1	1	1	GPR161	G protein-coupled receptor 161
hsa-miR-602	1	0	1	1	1	1	SH3BP5L	SH3-binding domain protein 5-like
hsa-miR-602	0	0	1	1	0	0	HIST3H2A	histone cluster 3, H2a
hsa-miR-602	0	0	0	1	1	1	OBSCN	obscurin, cytoskeletal calmodulin and titin-interacting RhoGEF
hsa-miR-602	0	0	0	1	0	0	GPR31	G protein-coupled receptor 31
hsa-miR-602	1	0	1	1	1	1	AGPAT4	1-acylglycerol-3-phosphate O-acyltransferase 4 (lysophosphatidic acid acyltransferase, delta)
hsa-miR-602	0	0	0	1	0	0	KCNH1	potassium voltage-gated channel, subfamily H (eag-related), member 1
hsa-miR-602	0	0	0	1	0	0	LEMD1	LEM domain containing 1
hsa-miR-602	0	0	0	1	0	0	TMEM81	transmembrane protein 81
hsa-miR-602	0	0	0	1	1	1	RAB32	RAB32, member RAS oncogene family
hsa-miR-602	0	0	1	1	0	0	DHX9	DEAH (Asp-Glu-Ala-His) box polypeptide 9
hsa-miR-602	1	0	1	1	0	0	ABL2	v-abl Abelson murine leukemia viral oncogene homolog 2
hsa-miR-602	1	0	1	1	1	1	ASTN1	astrotactin 1
hsa-miR-602	0	0	1	1	1	1	NR1I3	nuclear receptor subfamily 1, group I, member 3
hsa-miR-602	0	0	1	1	0	0	KNDC1	kinase non-catalytic C-lobe domain (KIND) containing 1
hsa-miR-602	0	0	1	1	0	0	LOC399829	uncharacterized LOC399829
hsa-miR-602	0	0	0	1	0	0	TTC40	tetratricopeptide repeat domain 40
hsa-miR-602	0	0	1	1	1	1	SPRR2E	small proline-rich protein 2E
hsa-miR-602	0	0	1	1	0	0	SPRR2B	small proline-rich protein 2B
hsa-miR-602	1	0	1	1	1	1	KCNA2	potassium voltage-gated channel, shaker-related subfamily, member 2
hsa-miR-602	0	0	1	1	1	1	CYP17A1	cytochrome P450, family 17, subfamily A, polypeptide 1
hsa-miR-602	0	0	0	1	1	1	TMEM187	transmembrane protein 187
hsa-miR-602	0	0	0	1	1	1	PNCK	pregnancy up-regulated non-ubiquitously expressed CaM kinase
hsa-miR-602	0	0	0	1	1	1	KCNQ2	potassium voltage-gated channel, KQT-like subfamily, member 2
hsa-miR-602	1	0	1	1	1	1	LZTS2	leucine zipper, putative tumor suppressor 2
hsa-miR-602	0	0	1	1	1	1	SLC17A9	solute carrier family 17, member 9
hsa-miR-602	0	0	0	1	0	0	OOEP	oocyte expressed protein
hsa-miR-602	1	0	1	1	1	1	C20orf20	chromosome 20 open reading frame 20
hsa-miR-602	0	0	1	1	0	0	VGLL1	vestigial like 1 (Drosophila)
hsa-miR-602	0	0	1	1	0	0	TNNI3K	TNNI3 interacting kinase
hsa-miR-602	0	0	1	1	1	1	FPGT	fucose-1-phosphate guanylyltransferase
hsa-miR-602	1	0	1	1	1	1	SORBS1	sorbin and SH3 domain containing 1
hsa-miR-602	0	0	1	1	0	0	MCTS1	malignant T cell amplified sequence 1
hsa-miR-602	0	0	0	1	1	1	RBP4	retinol binding protein 4, plasma
hsa-miR-602	1	0	1	1	1	1	NELF	nasal embryonic LHRH factor
hsa-miR-602	0	0	1	1	0	0	PMPCA	peptidase (mitochondrial processing) alpha
hsa-miR-602	0	0	0	1	0	0	OBP2B	odorant binding protein 2B
hsa-miR-602	0	0	0	1	1	1	BEST4	bestrophin 4
hsa-miR-602	0	0	1	1	1	1	RNF220	ring finger protein 220
hsa-miR-602	0	0	1	1	1	1	PSMD10	proteasome (prosome, macropain) 26S subunit, non-ATPase, 10
hsa-miR-602	1	0	1	1	1	1	AIF1L	allograft inflammatory factor 1-like
hsa-miR-602	1	0	1	1	1	1	DLG5	discs, large homolog 5 (Drosophila)
hsa-miR-602	0	0	1	1	0	0	TJAP1	tight junction associated protein 1 (peripheral)
hsa-miR-602	0	0	0	1	0	0	LOC100128077	uncharacterized LOC100128077
hsa-miR-602	1	0	1	1	1	1	SNX21	sorting nexin family member 21
hsa-miR-602	1	0	1	1	1	1	RIMS3	regulating synaptic membrane exocytosis 3
hsa-miR-602	0	0	1	1	0	0	PPIE	peptidylprolyl isomerase E (cyclophilin E)
hsa-miR-602	0	0	1	1	0	0	SWI5	SWI5 recombination repair homolog (yeast)
hsa-miR-602	1	0	1	1	0	0	FRS3	fibroblast growth factor receptor substrate 3
hsa-miR-602	1	0	0	1	1	1	EPHA10	EPH receptor A10
hsa-miR-602	0	0	1	1	1	1	L3MBTL1	l(3)mbt-like 1 (Drosophila)
hsa-miR-602	0	0	0	1	1	1	TSPAN15	tetraspanin 15
hsa-miR-602	0	0	1	1	0	0	MAGEE2	melanoma antigen family E, 2
hsa-miR-602	0	0	1	1	1	1	FBXO36	F-box protein 36
hsa-miR-602	0	0	1	1	0	0	SLC4A3	solute carrier family 4, anion exchanger, member 3
hsa-miR-602	0	0	1	1	1	1	TTLL11	tubulin tyrosine ligase-like family, member 11
hsa-miR-602	0	0	0	1	1	1	LHFPL5	lipoma HMGIC fusion partner-like 5
hsa-miR-602	0	0	0	1	0	0	SLC18A3	solute carrier family 18 (vesicular acetylcholine), member 3
hsa-miR-602	0	0	1	1	1	1	FRMPDP2	FERM and PDZ domain containing 2 pseudogene 2
hsa-miR-602	1	0	1	1	1	1	RASSF4	Ras association (RalGDS/AF-6) domain family member 4
hsa-miR-602	1	0	1	1	0	0	ZBTB22	zinc finger and BTB domain containing 22
hsa-miR-602	0	0	1	1	1	1	RING1	ring finger protein 1
hsa-miR-602	0	0	0	1	0	0	SLC38A10	solute carrier family 38, member 10
hsa-miR-602	0	0	1	1	1	1	DYNLRB1	dynein, light chain, roadblock-type 1
hsa-miR-602	0	0	1	1	0	0	PFKFB1	6-phosphofructo-2-kinase/fructose-2,6-biphosphatase 1
hsa-miR-602	0	0	1	1	0	0	UBR4	ubiquitin protein ligase E3 component n-recognin 4
hsa-miR-602	0	0	1	1	0	0	LYZL2	lysozyme-like 2
hsa-miR-602	0	0	1	1	0	0	STK19	serine/threonine kinase 19
hsa-miR-602	0	0	0	1	0	0	FAM70B	family with sequence similarity 70, member B
hsa-miR-602	0	0	1	1	0	0	LYZL1	lysozyme-like 1
hsa-miR-602	0	0	0	1	0	0	RSG1	REM2 and RAB-like small GTPase 1
hsa-miR-602	1	0	1	1	1	1	MCF2L	MCF.2 cell line derived transforming sequence-like
hsa-miR-602	0	0	0	1	0	0	FAM131C	family with sequence similarity 131, member C
hsa-miR-602	0	0	1	1	0	0	LY6G6C	lymphocyte antigen 6 complex, locus G6C
hsa-miR-602	0	0	0	1	0	0	DAOA	D-amino acid oxidase activator
hsa-miR-602	0	0	1	1	1	1	AGTPBP1	ATP/GTP binding protein 1
hsa-miR-602	1	0	1	1	1	1	ID1	inhibitor of DNA binding 1, dominant negative helix-loop-helix protein
hsa-miR-602	0	0	0	1	0	0	PAGE1	P antigen family, member 1 (prostate associated)
hsa-miR-602	0	0	1	1	0	0	HLA-C	major histocompatibility complex, class I, C
hsa-miR-602	0	0	1	1	0	0	NPPA	natriuretic peptide A
hsa-miR-602	1	0	1	1	0	0	PIP4K2A	phosphatidylinositol-5-phosphate 4-kinase, type II, alpha
hsa-miR-602	0	0	0	1	0	0	FBXO6	F-box protein 6
hsa-miR-602	0	0	1	1	0	0	KLK13	kallikrein-related peptidase 13
hsa-miR-602	0	0	1	1	1	1	FLT4	fms-related tyrosine kinase 4
hsa-miR-602	0	0	1	1	0	0	TIMP1	TIMP metallopeptidase inhibitor 1
hsa-miR-602	0	0	1	1	1	1	DTD1	D-tyrosyl-tRNA deacylase 1 homolog (S. cerevisiae)
hsa-miR-602	0	0	1	1	0	0	KCNAB2	potassium voltage-gated channel, shaker-related subfamily, beta member 2
hsa-miR-602	0	0	1	1	1	1	NRG2	neuregulin 2
hsa-miR-602	0	0	0	1	1	1	LRRC47	leucine rich repeat containing 47
hsa-miR-602	0	0	1	1	0	0	CCL3L1	chemokine (C-C motif) ligand 3-like 1
hsa-miR-602	0	0	0	1	0	0	CCL3L3	chemokine (C-C motif) ligand 3-like 3
hsa-miR-602	1	0	1	1	1	1	FAM107B	family with sequence similarity 107, member B
hsa-miR-602	1	0	1	1	1	1	NRSN1	neurensin 1
hsa-miR-602	0	0	1	1	0	0	MORN1	MORN repeat containing 1
hsa-miR-602	0	0	1	1	0	0	C1orf86	chromosome 1 open reading frame 86
hsa-miR-602	1	0	1	1	1	1	FAM214B	family with sequence similarity 214, member B
hsa-miR-602	0	0	0	1	0	0	KIAA1751	KIAA1751
hsa-miR-602	0	0	0	1	0	0	UCMA	upper zone of growth plate and cartilage matrix associated
hsa-miR-602	0	0	1	1	0	0	MIB2	mindbomb E3 ubiquitin protein ligase 2
hsa-miR-602	0	0	1	1	1	1	ATAD3C	ATPase family, AAA domain containing 3C
hsa-miR-602	0	0	1	1	1	1	B3GALT6	UDP-Gal:betaGal beta 1,3-galactosyltransferase polypeptide 6
hsa-miR-602	0	0	0	1	0	0	TTLL10	tubulin tyrosine ligase-like family, member 10
hsa-miR-602	0	0	1	1	0	0	AQP7	aquaporin 7
hsa-miR-602	0	0	1	1	0	0	KATNB1	katanin p80 (WD repeat containing) subunit B 1
hsa-miR-602	0	0	0	1	1	1	CDKN2A	cyclin-dependent kinase inhibitor 2A
hsa-miR-602	0	0	0	1	0	0	CALML5	calmodulin-like 5
hsa-miR-602	0	0	0	1	0	0	GPS2	G protein pathway suppressor 2
hsa-miR-602	0	0	1	1	0	0	TAF9	TAF9 RNA polymerase II, TATA box binding protein (TBP)-associated factor, 32kDa
hsa-miR-602	0	0	1	1	1	1	IL4R	interleukin 4 receptor
hsa-miR-602	0	0	0	1	0	0	TSPAN32	tetraspanin 32
hsa-miR-602	0	0	0	1	0	0	ACOT6	acyl-CoA thioesterase 6
hsa-miR-602	1	0	1	1	0	0	KIAA1644	KIAA1644
hsa-miR-602	0	0	0	1	0	0	ZNF232	zinc finger protein 232
hsa-miR-602	1	0	1	1	1	1	WDR37	WD repeat domain 37
hsa-miR-602	0	0	1	1	0	0	SLC25A6	solute carrier family 25 (mitochondrial carrier; adenine nucleotide translocator), member 6
hsa-miR-602	0	0	0	1	0	0	MRPL23	mitochondrial ribosomal protein L23
hsa-miR-602	0	0	1	1	1	1	SERPINF2	serpin peptidase inhibitor, clade F (alpha-2 antiplasmin, pigment epithelium derived factor), member 2
hsa-miR-602	0	0	0	1	1	1	CDY1B	chromodomain protein, Y-linked, 1B
hsa-miR-602	0	0	1	1	0	0	TCP10	t-complex 10 homolog (mouse)
hsa-miR-602	0	0	0	1	0	0	CLCN7	chloride channel, voltage-sensitive 7
hsa-miR-602	0	0	0	1	0	0	SERPINB12	serpin peptidase inhibitor, clade B (ovalbumin), member 12
hsa-miR-602	0	0	1	1	1	1	PLEKHG4B	pleckstrin homology domain containing, family G (with RhoGef domain) member 4B
hsa-miR-602	1	0	1	1	1	1	WHSC1	Wolf-Hirschhorn syndrome candidate 1
hsa-miR-602	0	0	0	1	1	1	TXNRD3NB	thioredoxin reductase 3 neighbor
hsa-miR-602	0	0	1	1	1	1	LZTR1	leucine-zipper-like transcription regulator 1
hsa-miR-602	1	0	1	1	1	1	PPFIA1	protein tyrosine phosphatase, receptor type, f polypeptide (PTPRF), interacting protein (liprin), alpha 1
hsa-miR-602	1	0	1	1	1	1	CCDC149	coiled-coil domain containing 149
hsa-miR-602	0	0	0	1	0	0	CCDC57	coiled-coil domain containing 57
hsa-miR-602	1	0	1	1	1	1	CISD2	CDGSH iron sulfur domain 2
hsa-miR-602	0	0	0	1	1	1	DLGAP1-AS1	DLGAP1 antisense RNA 1
hsa-miR-602	0	0	0	1	1	1	C5AR1	complement component 5a receptor 1
hsa-miR-602	0	0	0	1	1	1	PDK4	pyruvate dehydrogenase kinase, isozyme 4
hsa-miR-602	0	0	0	1	1	1	RAX	retina and anterior neural fold homeobox
hsa-miR-602	1	0	0	1	1	1	HABP4	hyaluronan binding protein 4
hsa-miR-602	1	0	1	1	1	1	BCL2L13	BCL2-like 13 (apoptosis facilitator)
hsa-miR-602	0	0	1	1	1	1	ORMDL1	ORM1-like 1 (S. cerevisiae)
hsa-miR-602	1	0	1	0	1	1	KLHL24	kelch-like 24 (Drosophila)
hsa-miR-602	1	0	1	1	1	1	CNNM2	cyclin M2
hsa-miR-602	0	0	1	0	1	1	B3GNT9	UDP-GlcNAc:betaGal beta-1,3-N-acetylglucosaminyltransferase 9
hsa-miR-602	1	0	1	1	1	1	CREB3L2	cAMP responsive element binding protein 3-like 2
hsa-miR-602	0	0	1	1	1	1	C11orf88	chromosome 11 open reading frame 88
