# Supplementary material for: Profiling of Selected MicroRNAs in Proliferative Eutopic Endometrium of Women with Ovarian Endometriosis
Source: Biomed Res Int. 2015 Aug 20;2015:760698. doi: 10.1155/2015/760698 (PMC4558423; doi:10.1155/2015/760698)
Supplement: Supplementary file 1 — Table I: The names of miRNAs significantly differentially expressed between eutopic endometrium of patients with endometriosis vs eutopic endometrium of patients without endometriosis. Table II: The associations between miRNA and mRNA, which presents detailed results of the search of six major databases i.e targetscan, tarbase, miranda, mirbase, mirtarget2 and pictar. [file 760698.f1.zip › 760698.f1/Table II/hsa-miR-603.tsv]

miR	targetscan	tarbase	miranda	mirbase	mirtarget2	pictar	GeneSymbol	GeneName
hsa-miR-603	1	0	1	1	1	1	CHD9	chromodomain helicase DNA binding protein 9
hsa-miR-603	1	0	1	1	0	0	RAPGEF2	Rap guanine nucleotide exchange factor (GEF) 2
hsa-miR-603	1	0	1	1	1	1	FAM65B	family with sequence similarity 65, member B
hsa-miR-603	1	0	1	1	1	1	SGSM2	small G protein signaling modulator 2
hsa-miR-603	1	0	1	1	1	1	NUPL1	nucleoporin like 1
hsa-miR-603	1	0	1	0	1	1	VPS13D	vacuolar protein sorting 13 homolog D (S. cerevisiae)
hsa-miR-603	1	0	1	0	1	1	CEP350	centrosomal protein 350kDa
hsa-miR-603	1	0	1	1	1	1	RNGTT	RNA guanylyltransferase and 5'-phosphatase
hsa-miR-603	1	0	1	1	1	1	GPATCH8	G patch domain containing 8
hsa-miR-603	1	0	1	1	1	1	NRXN1	neurexin 1
hsa-miR-603	1	0	1	1	1	1	HIPK1	homeodomain interacting protein kinase 1
hsa-miR-603	1	0	1	1	1	1	GIGYF2	GRB10 interacting GYF protein 2
hsa-miR-603	1	0	1	1	1	1	ANKRD17	ankyrin repeat domain 17
hsa-miR-603	1	0	1	1	1	1	TP63	tumor protein p63
hsa-miR-603	0	0	1	1	1	1	XRCC4	X-ray repair complementing defective repair in Chinese hamster cells 4
hsa-miR-603	1	0	1	1	1	1	MATR3	matrin 3
hsa-miR-603	1	0	1	0	1	1	RBM12	RNA binding motif protein 12
hsa-miR-603	0	0	1	1	1	1	SEC31A	SEC31 homolog A (S. cerevisiae)
hsa-miR-603	1	0	1	1	1	1	DMXL2	Dmx-like 2
hsa-miR-603	1	0	1	1	1	1	UBR5	ubiquitin protein ligase E3 component n-recognin 5
hsa-miR-603	1	0	1	1	1	1	ARHGEF15	Rho guanine nucleotide exchange factor (GEF) 15
hsa-miR-603	1	0	1	1	1	1	UBE2K	ubiquitin-conjugating enzyme E2K
hsa-miR-603	0	0	1	1	1	1	MAN2B2	mannosidase, alpha, class 2B, member 2
hsa-miR-603	1	0	1	1	1	1	PALLD	palladin, cytoskeletal associated protein
hsa-miR-603	1	0	1	0	1	1	DIS3	DIS3 mitotic control homolog (S. cerevisiae)
hsa-miR-603	0	0	1	1	1	1	AGTPBP1	ATP/GTP binding protein 1
hsa-miR-603	1	0	1	1	1	1	NLGN1	neuroligin 1
hsa-miR-603	1	0	1	0	1	1	ZNF507	zinc finger protein 507
hsa-miR-603	1	0	1	0	1	1	ODZ2	odz, odd Oz/ten-m homolog 2 (Drosophila)
hsa-miR-603	1	0	1	1	1	1	SPIRE1	spire homolog 1 (Drosophila)
hsa-miR-603	0	0	1	1	0	0	ZC4H2	zinc finger, C4H2 domain containing
hsa-miR-603	1	0	1	1	1	1	NDRG4	NDRG family member 4
hsa-miR-603	1	0	1	1	1	1	RALGAPB	Ral GTPase activating protein, beta subunit (non-catalytic)
hsa-miR-603	0	0	1	1	0	0	ODF2L	outer dense fiber of sperm tails 2-like
hsa-miR-603	1	0	1	1	1	1	ASAP1	ArfGAP with SH3 domain, ankyrin repeat and PH domain 1
hsa-miR-603	1	0	1	0	1	1	ANKFY1	ankyrin repeat and FYVE domain containing 1
hsa-miR-603	0	0	1	1	1	1	FSTL5	follistatin-like 5
hsa-miR-603	0	0	1	1	1	1	KIF20B	kinesin family member 20B
hsa-miR-603	1	0	1	1	1	1	CASK	calcium/calmodulin-dependent serine protein kinase (MAGUK family)
hsa-miR-603	0	0	1	1	0	0	ISLR2	immunoglobulin superfamily containing leucine-rich repeat 2
hsa-miR-603	1	0	1	1	0	0	ZSWIM5	zinc finger, SWIM-type containing 5
hsa-miR-603	1	0	1	0	1	1	LMO3	LIM domain only 3 (rhombotin-like 2)
hsa-miR-603	1	0	1	1	1	1	FUT8	fucosyltransferase 8 (alpha (1,6) fucosyltransferase)
hsa-miR-603	0	0	1	0	0	0	TTC28-AS1	TTC28 antisense RNA 1
hsa-miR-603	1	0	1	1	1	1	PHF21A	PHD finger protein 21A
hsa-miR-603	0	0	1	1	1	1	BHLHB9	basic helix-loop-helix domain containing, class B, 9
hsa-miR-603	1	0	1	1	1	1	LCOR	ligand dependent nuclear receptor corepressor
hsa-miR-603	1	0	1	1	1	1	AHCTF1	AT hook containing transcription factor 1
hsa-miR-603	1	0	1	1	1	1	BCL2L11	BCL2-like 11 (apoptosis facilitator)
hsa-miR-603	1	0	1	1	1	1	SH3TC2	SH3 domain and tetratricopeptide repeats 2
hsa-miR-603	1	0	1	0	0	0	FAT3	FAT tumor suppressor homolog 3 (Drosophila)
hsa-miR-603	1	0	1	1	1	1	PGR	progesterone receptor
hsa-miR-603	0	0	1	0	1	1	RASSF8	Ras association (RalGDS/AF-6) domain family (N-terminal) member 8
hsa-miR-603	1	0	1	1	1	1	PAN3	PAN3 poly(A) specific ribonuclease subunit homolog (S. cerevisiae)
hsa-miR-603	0	0	1	1	0	0	SSPO	SCO-spondin homolog (Bos taurus)
hsa-miR-603	1	0	1	0	1	1	LIN54	lin-54 homolog (C. elegans)
hsa-miR-603	0	0	1	0	1	1	ACE2	angiotensin I converting enzyme (peptidyl-dipeptidase A) 2
hsa-miR-603	1	0	1	1	1	1	TRIM36	tripartite motif containing 36
hsa-miR-603	1	0	1	0	1	1	CCDC88A	coiled-coil domain containing 88A
hsa-miR-603	1	0	1	1	1	1	VLDLR	very low density lipoprotein receptor
hsa-miR-603	1	0	1	1	1	1	COL11A1	collagen, type XI, alpha 1
hsa-miR-603	1	0	1	1	1	1	NFYC	nuclear transcription factor Y, gamma
hsa-miR-603	1	0	1	1	1	1	MEF2A	myocyte enhancer factor 2A
hsa-miR-603	1	0	1	1	1	1	PHC1	polyhomeotic homolog 1 (Drosophila)
hsa-miR-603	1	0	1	1	0	0	GRIA1	glutamate receptor, ionotropic, AMPA 1
hsa-miR-603	1	0	1	1	1	1	DTNA	dystrobrevin, alpha
hsa-miR-603	1	0	1	0	1	1	PLAG1	pleiomorphic adenoma gene 1
hsa-miR-603	1	0	1	0	1	1	DPYSL2	dihydropyrimidinase-like 2
hsa-miR-603	1	0	1	1	1	1	SATB2	SATB homeobox 2
hsa-miR-603	1	0	1	1	1	1	AEBP2	AE binding protein 2
hsa-miR-603	1	0	1	0	1	1	CDON	Cdon homolog (mouse)
hsa-miR-603	1	0	1	1	1	1	NEO1	neogenin 1
hsa-miR-603	1	0	1	0	1	1	AKAP13	A kinase (PRKA) anchor protein 13
hsa-miR-603	1	0	1	1	1	1	GIT1	G protein-coupled receptor kinase interacting ArfGAP 1
hsa-miR-603	0	0	1	1	1	1	STAU1	staufen, RNA binding protein, homolog 1 (Drosophila)
hsa-miR-603	0	0	1	1	0	0	CFLAR	CASP8 and FADD-like apoptosis regulator
hsa-miR-603	1	0	1	1	1	1	EPB41	erythrocyte membrane protein band 4.1 (elliptocytosis 1, RH-linked)
hsa-miR-603	1	0	1	1	1	1	ARHGEF3	Rho guanine nucleotide exchange factor (GEF) 3
hsa-miR-603	1	0	1	1	1	1	SATB1	SATB homeobox 1
hsa-miR-603	1	0	1	0	1	1	ADD3	adducin 3 (gamma)
hsa-miR-603	0	0	1	1	1	1	MYO9A	myosin IXA
hsa-miR-603	1	0	1	1	1	1	TEAD1	TEA domain family member 1 (SV40 transcriptional enhancer factor)
hsa-miR-603	1	0	1	1	1	1	ZFX	zinc finger protein, X-linked
hsa-miR-603	1	0	1	1	1	1	PHLDB2	pleckstrin homology-like domain, family B, member 2
hsa-miR-603	1	0	1	0	1	1	PDE7B	phosphodiesterase 7B
hsa-miR-603	1	0	1	1	1	1	MEF2D	myocyte enhancer factor 2D
hsa-miR-603	1	0	1	0	1	1	DDX3X	DEAD (Asp-Glu-Ala-Asp) box polypeptide 3, X-linked
hsa-miR-603	1	0	1	1	1	1	STX16	syntaxin 16
hsa-miR-603	1	0	1	1	1	1	PCDH17	protocadherin 17
hsa-miR-603	0	0	1	1	1	1	SESN1	sestrin 1
hsa-miR-603	1	0	1	0	1	1	CELF2	CUGBP, Elav-like family member 2
hsa-miR-603	0	0	1	1	1	1	SLC11A2	solute carrier family 11 (proton-coupled divalent metal ion transporters), member 2
hsa-miR-603	1	0	1	1	1	1	CSE1L	CSE1 chromosome segregation 1-like (yeast)
hsa-miR-603	1	0	1	1	1	1	ZFAND6	zinc finger, AN1-type domain 6
hsa-miR-603	1	0	1	1	1	1	CTNND1	catenin (cadherin-associated protein), delta 1
hsa-miR-603	1	0	1	1	0	0	SLC44A2	solute carrier family 44, member 2
hsa-miR-603	1	0	1	1	1	1	DMTF1	cyclin D binding myb-like transcription factor 1
hsa-miR-603	1	0	1	0	1	1	CD164	CD164 molecule, sialomucin
hsa-miR-603	0	0	1	1	1	1	MAP3K4	mitogen-activated protein kinase kinase kinase 4
hsa-miR-603	1	0	1	0	1	1	WDR82	WD repeat domain 82
hsa-miR-603	1	0	1	1	1	1	C14orf129	chromosome 14 open reading frame 129
hsa-miR-603	1	0	1	1	1	1	ANKRD13A	ankyrin repeat domain 13A
hsa-miR-603	0	0	1	0	1	1	PDP1	pyruvate dehyrogenase phosphatase catalytic subunit 1
hsa-miR-603	1	0	1	1	1	1	DNAJA4	DnaJ (Hsp40) homolog, subfamily A, member 4
hsa-miR-603	0	0	1	0	0	0	BPESC1	blepharophimosis, epicanthus inversus and ptosis, candidate 1 (non-protein coding)
hsa-miR-603	1	0	1	1	1	1	TSC22D2	TSC22 domain family, member 2
hsa-miR-603	1	0	1	0	1	1	KLHL3	kelch-like 3 (Drosophila)
hsa-miR-603	1	0	1	1	1	1	OGT	O-linked N-acetylglucosamine (GlcNAc) transferase
hsa-miR-603	0	0	1	1	1	1	FASTKD2	FAST kinase domains 2
hsa-miR-603	1	0	1	1	0	0	TDRKH	tudor and KH domain containing
hsa-miR-603	1	0	1	1	1	1	C21orf91	chromosome 21 open reading frame 91
hsa-miR-603	0	0	1	1	1	1	CELF1	CUGBP, Elav-like family member 1
hsa-miR-603	1	0	1	1	0	0	LMO2	LIM domain only 2 (rhombotin-like 1)
hsa-miR-603	1	0	1	1	1	1	SH3GLB1	SH3-domain GRB2-like endophilin B1
hsa-miR-603	1	0	1	0	1	1	PARP11	poly (ADP-ribose) polymerase family, member 11
hsa-miR-603	1	0	1	0	1	1	TRPS1	trichorhinophalangeal syndrome I
hsa-miR-603	1	0	1	1	1	1	ERGIC1	endoplasmic reticulum-golgi intermediate compartment (ERGIC) 1
hsa-miR-603	0	0	1	0	1	1	ERBB2IP	erbb2 interacting protein
hsa-miR-603	0	0	1	0	1	1	ZNF302	zinc finger protein 302
hsa-miR-603	1	0	1	1	1	1	LETMD1	LETM1 domain containing 1
hsa-miR-603	1	0	1	1	1	1	LARP4	La ribonucleoprotein domain family, member 4
hsa-miR-603	1	0	1	1	1	1	SON	SON DNA binding protein
hsa-miR-603	0	0	1	0	0	0	CLRN1-AS1	CLRN1 antisense RNA 1
hsa-miR-603	1	0	1	1	1	1	NTRK2	neurotrophic tyrosine kinase, receptor, type 2
hsa-miR-603	0	0	1	1	0	0	CNKSR2	connector enhancer of kinase suppressor of Ras 2
hsa-miR-603	1	0	1	1	1	1	PSIP1	PC4 and SFRS1 interacting protein 1
hsa-miR-603	1	0	1	1	0	0	SEPT8	septin 8
hsa-miR-603	0	0	1	1	1	1	RNF32	ring finger protein 32
hsa-miR-603	1	0	1	1	1	1	RBFOX1	RNA binding protein, fox-1 homolog (C. elegans) 1
hsa-miR-603	0	0	1	1	0	0	RASGEF1C	RasGEF domain family, member 1C
hsa-miR-603	1	0	1	1	1	1	HNRNPU	heterogeneous nuclear ribonucleoprotein U (scaffold attachment factor A)
hsa-miR-603	1	0	1	1	1	1	CACNB2	calcium channel, voltage-dependent, beta 2 subunit
hsa-miR-603	1	0	1	1	1	1	WAPAL	wings apart-like homolog (Drosophila)
hsa-miR-603	0	0	1	1	1	1	RBM11	RNA binding motif protein 11
hsa-miR-603	1	0	1	1	1	1	AFF2	AF4/FMR2 family, member 2
hsa-miR-603	1	0	1	0	1	1	CACNA1C	calcium channel, voltage-dependent, L type, alpha 1C subunit
hsa-miR-603	0	0	1	1	0	0	SERGEF	secretion regulating guanine nucleotide exchange factor
hsa-miR-603	1	0	1	1	1	1	SUCO	SUN domain containing ossification factor
hsa-miR-603	1	0	1	1	1	1	CACNA2D2	calcium channel, voltage-dependent, alpha 2/delta subunit 2
hsa-miR-603	0	0	1	1	1	1	CD1E	CD1e molecule
hsa-miR-603	1	0	1	1	1	1	VAMP7	vesicle-associated membrane protein 7
hsa-miR-603	1	0	1	1	1	1	SLAMF6	SLAM family member 6
hsa-miR-603	1	0	1	1	1	1	PALM2	paralemmin 2
hsa-miR-603	1	0	1	1	1	1	NAV3	neuron navigator 3
hsa-miR-603	1	0	1	1	1	1	ARL4C	ADP-ribosylation factor-like 4C
hsa-miR-603	1	0	1	1	1	1	PPP1R9A	protein phosphatase 1, regulatory subunit 9A
hsa-miR-603	0	0	1	1	0	0	GPRC5C	G protein-coupled receptor, family C, group 5, member C
hsa-miR-603	1	0	1	1	1	1	AKAP2	A kinase (PRKA) anchor protein 2
hsa-miR-603	1	0	1	1	1	1	ENOX2	ecto-NOX disulfide-thiol exchanger 2
hsa-miR-603	1	0	1	1	1	1	SIK2	salt-inducible kinase 2
hsa-miR-603	0	0	1	1	0	0	VSIG2	V-set and immunoglobulin domain containing 2
hsa-miR-603	0	0	1	0	0	0	TUG1	taurine upregulated 1 (non-protein coding)
hsa-miR-603	1	0	1	1	1	1	ZC3H7A	zinc finger CCCH-type containing 7A
hsa-miR-603	1	0	1	1	1	1	NIP7	nuclear import 7 homolog (S. cerevisiae)
hsa-miR-603	1	0	1	1	1	1	HNRNPF	heterogeneous nuclear ribonucleoprotein F
hsa-miR-603	1	0	1	1	1	1	EIF2C1	eukaryotic translation initiation factor 2C, 1
hsa-miR-603	1	0	1	1	1	1	PTBP3	polypyrimidine tract binding protein 3
hsa-miR-603	1	0	1	1	0	0	CCDC120	coiled-coil domain containing 120
hsa-miR-603	0	0	1	1	1	1	PRPF39	PRP39 pre-mRNA processing factor 39 homolog (S. cerevisiae)
hsa-miR-603	1	0	1	1	1	1	ACER3	alkaline ceramidase 3
hsa-miR-603	0	0	1	1	1	1	MBNL3	muscleblind-like splicing regulator 3
hsa-miR-603	0	0	1	1	0	0	MLST8	MTOR associated protein, LST8 homolog (S. cerevisiae)
hsa-miR-603	1	0	1	0	1	1	UBP1	upstream binding protein 1 (LBP-1a)
hsa-miR-603	1	0	1	1	1	1	BAZ2A	bromodomain adjacent to zinc finger domain, 2A
hsa-miR-603	0	0	1	1	1	1	CXorf57	chromosome X open reading frame 57
hsa-miR-603	1	0	1	0	0	0	ZDBF2	zinc finger, DBF-type containing 2
hsa-miR-603	1	0	1	1	1	1	DYRK2	dual-specificity tyrosine-(Y)-phosphorylation regulated kinase 2
hsa-miR-603	1	0	1	0	1	1	ATP2B1	ATPase, Ca++ transporting, plasma membrane 1
hsa-miR-603	0	0	1	1	0	0	EIF4ENIF1	eukaryotic translation initiation factor 4E nuclear import factor 1
hsa-miR-603	0	0	1	0	1	1	ATXN1L	ataxin 1-like
hsa-miR-603	1	0	1	1	1	1	DLC1	deleted in liver cancer 1
hsa-miR-603	1	0	1	1	1	1	YPEL5	yippee-like 5 (Drosophila)
hsa-miR-603	0	0	1	1	1	1	CDH4	cadherin 4, type 1, R-cadherin (retinal)
hsa-miR-603	0	0	1	1	0	0	EWSR1	Ewing sarcoma breakpoint region 1
hsa-miR-603	0	0	1	1	0	0	NUDT7	nudix (nucleoside diphosphate linked moiety X)-type motif 7
hsa-miR-603	1	0	1	1	1	1	LRP4	low density lipoprotein receptor-related protein 4
hsa-miR-603	1	0	1	1	1	1	FAM53C	family with sequence similarity 53, member C
hsa-miR-603	0	0	1	1	1	1	RNF146	ring finger protein 146
hsa-miR-603	0	0	1	1	1	1	NETO2	neuropilin (NRP) and tolloid (TLL)-like 2
hsa-miR-603	1	0	1	1	1	1	STRBP	spermatid perinuclear RNA binding protein
hsa-miR-603	0	0	1	1	1	1	IGBP1	immunoglobulin (CD79A) binding protein 1
hsa-miR-603	0	0	1	1	1	1	C8orf46	chromosome 8 open reading frame 46
hsa-miR-603	1	0	1	0	1	1	AP1G1	adaptor-related protein complex 1, gamma 1 subunit
hsa-miR-603	1	0	1	1	1	1	DLGAP4	discs, large (Drosophila) homolog-associated protein 4
hsa-miR-603	0	0	1	1	1	1	GABRP	gamma-aminobutyric acid (GABA) A receptor, pi
hsa-miR-603	0	0	1	1	1	1	OPTN	optineurin
hsa-miR-603	1	0	1	1	1	1	FRMD6	FERM domain containing 6
hsa-miR-603	0	0	1	1	1	1	SLCO1B3	solute carrier organic anion transporter family, member 1B3
hsa-miR-603	0	0	1	1	0	0	ANXA11	annexin A11
hsa-miR-603	0	0	1	1	0	0	STRA6	stimulated by retinoic acid gene 6 homolog (mouse)
hsa-miR-603	0	0	1	1	0	0	BEAN1	brain expressed, associated with NEDD4, 1
hsa-miR-603	0	0	1	0	1	1	FAM70A	family with sequence similarity 70, member A
hsa-miR-603	1	0	1	1	1	1	SCAMP5	secretory carrier membrane protein 5
hsa-miR-603	0	0	1	0	0	0	LOC284600	uncharacterized LOC284600
hsa-miR-603	1	0	1	1	1	1	CLCN5	chloride channel, voltage-sensitive 5
hsa-miR-603	1	0	1	1	1	1	SORBS2	sorbin and SH3 domain containing 2
hsa-miR-603	0	0	1	1	1	1	ZNF606	zinc finger protein 606
hsa-miR-603	0	0	1	0	0	0	MAGI1-IT1	MAGI1 intronic transcript 1 (non-protein coding)
hsa-miR-603	0	0	1	1	1	1	PSME3	proteasome (prosome, macropain) activator subunit 3 (PA28 gamma; Ki)
hsa-miR-603	0	0	1	1	1	1	CCDC102B	coiled-coil domain containing 102B
hsa-miR-603	1	0	1	1	1	1	MPP7	membrane protein, palmitoylated 7 (MAGUK p55 subfamily member 7)
hsa-miR-603	1	0	1	0	1	1	PLEKHA1	pleckstrin homology domain containing, family A (phosphoinositide binding specific) member 1
hsa-miR-603	0	0	1	1	1	1	RANBP17	RAN binding protein 17
hsa-miR-603	1	0	1	0	1	1	NCAM1	neural cell adhesion molecule 1
hsa-miR-603	0	0	1	1	1	1	USPL1	ubiquitin specific peptidase like 1
hsa-miR-603	0	0	1	1	1	1	SEC61A2	Sec61 alpha 2 subunit (S. cerevisiae)
hsa-miR-603	0	0	1	0	1	1	CHURC1	churchill domain containing 1
hsa-miR-603	0	0	1	1	0	0	FAM156A	family with sequence similarity 156, member A
hsa-miR-603	1	0	1	1	1	1	C6orf89	chromosome 6 open reading frame 89
hsa-miR-603	0	0	1	1	0	0	GRIP2	glutamate receptor interacting protein 2
hsa-miR-603	1	0	1	1	1	1	HLF	hepatic leukemia factor
hsa-miR-603	0	0	1	1	1	1	HDAC8	histone deacetylase 8
hsa-miR-603	1	0	1	0	1	1	RNF165	ring finger protein 165
hsa-miR-603	1	0	1	0	1	1	TPBG	trophoblast glycoprotein
hsa-miR-603	1	0	1	1	1	1	SIRT1	sirtuin 1
hsa-miR-603	1	0	1	1	1	1	PAX6	paired box 6
hsa-miR-603	0	0	1	1	1	1	ALG2	asparagine-linked glycosylation 2, alpha-1,3-mannosyltransferase homolog (S. cerevisiae)
hsa-miR-603	0	0	1	1	1	1	CAMKV	CaM kinase-like vesicle-associated
hsa-miR-603	1	0	1	1	1	1	FAM73B	family with sequence similarity 73, member B
hsa-miR-603	0	0	1	0	1	1	CADM1	cell adhesion molecule 1
hsa-miR-603	1	0	1	1	1	1	STXBP5	syntaxin binding protein 5 (tomosyn)
hsa-miR-603	0	0	1	0	1	1	TMSB15B	thymosin beta 15B
hsa-miR-603	0	0	1	0	0	0	LOC643837	uncharacterized LOC643837
hsa-miR-603	0	0	1	1	1	1	DYNC1I1	dynein, cytoplasmic 1, intermediate chain 1
hsa-miR-603	0	0	1	0	0	0	SEC14L2	SEC14-like 2 (S. cerevisiae)
hsa-miR-603	1	0	1	1	1	1	RBMX	RNA binding motif protein, X-linked
hsa-miR-603	1	0	1	1	1	1	FBXW2	F-box and WD repeat domain containing 2
hsa-miR-603	1	0	1	0	1	1	TEF	thyrotrophic embryonic factor
hsa-miR-603	1	0	1	1	1	1	ZNF286A	zinc finger protein 286A
hsa-miR-603	1	0	1	1	1	1	GNG2	guanine nucleotide binding protein (G protein), gamma 2
hsa-miR-603	0	0	1	1	0	0	TRMT44	tRNA methyltransferase 44 homolog (S. cerevisiae)
hsa-miR-603	0	0	1	1	1	1	WT1	Wilms tumor 1
hsa-miR-603	0	0	1	0	0	0	LOC283887	uncharacterized LOC283887
hsa-miR-603	0	0	1	1	1	1	SLC16A1	solute carrier family 16, member 1 (monocarboxylic acid transporter 1)
hsa-miR-603	0	0	1	0	0	0	CXXC1P1	CXXC finger protein 1 pseudogene 1
hsa-miR-603	0	0	1	1	1	1	NSRP1	nuclear speckle splicing regulatory protein 1
hsa-miR-603	1	0	1	1	1	1	SIAH1	siah E3 ubiquitin protein ligase 1
hsa-miR-603	1	0	1	0	1	1	GATAD2B	GATA zinc finger domain containing 2B
hsa-miR-603	0	0	1	1	0	0	IL11RA	interleukin 11 receptor, alpha
hsa-miR-603	0	0	1	0	0	0	MYO1H	myosin IH
hsa-miR-603	0	0	1	1	1	1	WBSCR17	Williams-Beuren syndrome chromosome region 17
hsa-miR-603	1	0	1	1	1	1	GLT25D2	glycosyltransferase 25 domain containing 2
hsa-miR-603	1	0	1	1	1	1	RASGEF1A	RasGEF domain family, member 1A
hsa-miR-603	1	0	1	1	1	1	NDEL1	nudE nuclear distribution E homolog (A. nidulans)-like 1
hsa-miR-603	0	0	1	1	0	0	ZNF185	zinc finger protein 185 (LIM domain)
hsa-miR-603	1	0	1	1	1	1	EPHB1	EPH receptor B1
hsa-miR-603	0	0	1	0	1	1	NBPF3	neuroblastoma breakpoint family, member 3
hsa-miR-603	0	0	1	0	0	0	ZNF815P	zinc finger protein 815, pseudogene
hsa-miR-603	0	0	1	0	0	0	FAM66C	family with sequence similarity 66, member C
hsa-miR-603	0	0	1	0	0	0	OTUD1	OTU domain containing 1
hsa-miR-603	0	0	1	0	0	0	C1orf204	chromosome 1 open reading frame 204
hsa-miR-603	1	0	1	0	1	1	THRB	thyroid hormone receptor, beta
hsa-miR-603	1	0	1	0	1	1	KBTBD8	kelch repeat and BTB (POZ) domain containing 8
hsa-miR-603	1	0	1	1	1	1	SLC30A6	solute carrier family 30 (zinc transporter), member 6
hsa-miR-603	1	0	1	1	1	1	SNRNP70	small nuclear ribonucleoprotein 70kDa (U1)
hsa-miR-603	1	0	1	1	1	1	TMEM185A	transmembrane protein 185A
hsa-miR-603	0	0	1	1	1	1	CBWD5	COBW domain containing 5
hsa-miR-603	1	0	1	1	1	1	PIGA	phosphatidylinositol glycan anchor biosynthesis, class A
hsa-miR-603	1	0	1	1	1	1	ZCCHC2	zinc finger, CCHC domain containing 2
hsa-miR-603	0	0	1	1	0	0	DCBLD1	discoidin, CUB and LCCL domain containing 1
hsa-miR-603	0	0	1	1	1	1	ARFGAP2	ADP-ribosylation factor GTPase activating protein 2
hsa-miR-603	0	0	1	1	1	1	GRPEL1	GrpE-like 1, mitochondrial (E. coli)
hsa-miR-603	0	0	1	1	1	1	TRPM7	transient receptor potential cation channel, subfamily M, member 7
hsa-miR-603	0	0	1	0	0	0	LOC338579	ankyrin repeat domain-containing protein 30B pseudogene
hsa-miR-603	0	0	1	1	0	0	ALDOA	aldolase A, fructose-bisphosphate
hsa-miR-603	0	0	1	1	1	1	SLFN13	schlafen family member 13
hsa-miR-603	1	0	1	1	1	1	CRMP1	collapsin response mediator protein 1
hsa-miR-603	1	0	1	1	1	1	LMX1A	LIM homeobox transcription factor 1, alpha
hsa-miR-603	0	0	1	1	1	1	GPR128	G protein-coupled receptor 128
hsa-miR-603	1	0	1	1	1	1	GRM4	glutamate receptor, metabotropic 4
hsa-miR-603	1	0	1	1	0	0	CACNB3	calcium channel, voltage-dependent, beta 3 subunit
hsa-miR-603	1	0	1	1	1	1	PXN	paxillin
hsa-miR-603	0	0	1	0	1	1	PATE4	prostate and testis expressed 4
hsa-miR-603	1	0	1	1	0	0	KCNC1	potassium voltage-gated channel, Shaw-related subfamily, member 1
hsa-miR-603	0	0	1	0	1	1	FLJ41200	uncharacterized LOC401492
hsa-miR-603	1	0	1	1	1	1	PPFIA1	protein tyrosine phosphatase, receptor type, f polypeptide (PTPRF), interacting protein (liprin), alpha 1
hsa-miR-603	0	0	1	1	1	1	PRRT1	proline-rich transmembrane protein 1
hsa-miR-603	1	0	1	1	1	1	PHKB	phosphorylase kinase, beta
hsa-miR-603	1	0	1	1	1	1	FAM219A	family with sequence similarity 219, member A
hsa-miR-603	1	0	1	0	0	0	GPR137C	G protein-coupled receptor 137C
hsa-miR-603	0	0	1	1	0	0	C20orf27	chromosome 20 open reading frame 27
hsa-miR-603	1	0	1	1	1	1	ADIPOR1	adiponectin receptor 1
hsa-miR-603	1	0	1	1	1	1	FAM122B	family with sequence similarity 122B
hsa-miR-603	1	0	1	1	1	1	UBA2	ubiquitin-like modifier activating enzyme 2
hsa-miR-603	0	0	1	0	0	0	TMEM232	transmembrane protein 232
hsa-miR-603	1	0	1	1	0	0	GXYLT1	glucoside xylosyltransferase 1
hsa-miR-603	1	0	1	0	0	0	MSL1	male-specific lethal 1 homolog (Drosophila)
hsa-miR-603	1	0	1	0	1	1	HECTD1	HECT domain containing E3 ubiquitin protein ligase 1
hsa-miR-603	1	0	1	1	0	0	UBN2	ubinuclein 2
hsa-miR-603	0	0	1	1	0	0	C20orf141	chromosome 20 open reading frame 141
hsa-miR-603	1	0	1	1	0	0	ATXN7L3	ataxin 7-like 3
hsa-miR-603	0	0	1	1	1	1	RBM39	RNA binding motif protein 39
hsa-miR-603	1	0	1	1	1	1	PIK3R1	phosphoinositide-3-kinase, regulatory subunit 1 (alpha)
hsa-miR-603	1	0	1	1	1	1	SACM1L	SAC1 suppressor of actin mutations 1-like (yeast)
hsa-miR-603	1	0	1	1	1	1	NCAN	neurocan
hsa-miR-603	1	0	1	1	1	1	DMXL1	Dmx-like 1
hsa-miR-603	0	0	1	1	0	0	CCDC88B	coiled-coil domain containing 88B
hsa-miR-603	1	0	1	1	1	1	DLG2	discs, large homolog 2 (Drosophila)
hsa-miR-603	0	0	1	1	0	0	HS3ST5	heparan sulfate (glucosamine) 3-O-sulfotransferase 5
hsa-miR-603	1	0	1	1	1	1	C14orf28	chromosome 14 open reading frame 28
hsa-miR-603	1	0	1	1	0	0	SNX30	sorting nexin family member 30
hsa-miR-603	1	0	1	1	1	1	MKRN1	makorin ring finger protein 1
hsa-miR-603	1	0	1	0	1	1	ADIPOR2	adiponectin receptor 2
hsa-miR-603	1	0	1	0	1	1	N4BP3	NEDD4 binding protein 3
hsa-miR-603	1	0	1	1	1	1	CTNNA2	catenin (cadherin-associated protein), alpha 2
hsa-miR-603	1	0	1	0	1	1	FNDC3B	fibronectin type III domain containing 3B
hsa-miR-603	1	0	1	0	1	1	CAPRIN1	cell cycle associated protein 1
hsa-miR-603	1	0	1	0	1	1	YOD1	YOD1 OTU deubiquinating enzyme 1 homolog (S. cerevisiae)
hsa-miR-603	0	0	1	1	1	1	MCU	mitochondrial calcium uniporter
hsa-miR-603	0	0	1	1	0	0	TMEM136	transmembrane protein 136
hsa-miR-603	0	0	1	1	1	1	SLC35F2	solute carrier family 35, member F2
hsa-miR-603	1	0	1	1	1	1	KALRN	kalirin, RhoGEF kinase
hsa-miR-603	0	0	1	0	0	0	FLJ46361	deleted in malignant brain tumors 1 pseudogene
hsa-miR-603	1	0	1	0	1	1	KDM2A	lysine (K)-specific demethylase 2A
hsa-miR-603	0	0	1	1	1	1	SHROOM3	shroom family member 3
hsa-miR-603	1	0	1	1	1	1	DPY19L3	dpy-19-like 3 (C. elegans)
hsa-miR-603	0	0	1	0	0	0	PINLYP	phospholipase A2 inhibitor and LY6/PLAUR domain containing
hsa-miR-603	0	0	1	1	1	1	ADAM32	ADAM metallopeptidase domain 32
hsa-miR-603	0	0	1	1	1	1	TBX19	T-box 19
hsa-miR-603	0	0	1	0	0	0	LOC390660	FLJ00317 protein
hsa-miR-603	1	0	1	0	1	1	ESRRG	estrogen-related receptor gamma
hsa-miR-603	0	0	1	1	1	1	TMC5	transmembrane channel-like 5
hsa-miR-603	0	0	1	1	1	1	SLTM	SAFB-like, transcription modulator
hsa-miR-603	0	0	1	1	0	0	CYP4X1	cytochrome P450, family 4, subfamily X, polypeptide 1
hsa-miR-603	1	0	1	1	1	1	PPP2R5C	protein phosphatase 2, regulatory subunit B', gamma
hsa-miR-603	0	0	1	1	0	0	ZNF730	zinc finger protein 730
hsa-miR-603	1	0	1	1	1	1	MAP2K4	mitogen-activated protein kinase kinase 4
hsa-miR-603	1	0	1	0	1	1	ZNF607	zinc finger protein 607
hsa-miR-603	0	0	1	0	0	0	AGAP9	ArfGAP with GTPase domain, ankyrin repeat and PH domain 9
hsa-miR-603	0	0	1	0	1	1	PEX5	peroxisomal biogenesis factor 5
hsa-miR-603	1	0	1	1	1	1	ATL2	atlastin GTPase 2
hsa-miR-603	1	0	1	1	1	1	UBE2O	ubiquitin-conjugating enzyme E2O
hsa-miR-603	1	0	1	0	1	1	MGAT4B	mannosyl (alpha-1,3-)-glycoprotein beta-1,4-N-acetylglucosaminyltransferase, isozyme B
hsa-miR-603	1	0	1	0	1	1	MAP3K3	mitogen-activated protein kinase kinase kinase 3
hsa-miR-603	0	0	1	1	1	1	SERPINE2	serpin peptidase inhibitor, clade E (nexin, plasminogen activator inhibitor type 1), member 2
hsa-miR-603	1	0	1	1	1	1	ZNF655	zinc finger protein 655
hsa-miR-603	0	0	1	0	1	1	NEK1	NIMA (never in mitosis gene a)-related kinase 1
hsa-miR-603	0	0	1	1	0	0	CPNE6	copine VI (neuronal)
hsa-miR-603	0	0	1	1	1	1	TFDP2	transcription factor Dp-2 (E2F dimerization partner 2)
hsa-miR-603	1	0	1	1	1	1	SMAP2	small ArfGAP2
hsa-miR-603	0	0	1	0	0	0	KIAA0913	KIAA0913
hsa-miR-603	0	0	1	1	1	1	ZNF280D	zinc finger protein 280D
hsa-miR-603	0	0	1	1	1	1	RHOT1	ras homolog family member T1
hsa-miR-603	0	0	1	1	1	1	STAG3L1	stromal antigen 3-like 1
hsa-miR-603	0	0	1	0	0	0	JAKMIP3	Janus kinase and microtubule interacting protein 3
hsa-miR-603	0	0	1	1	0	0	DOPEY1	dopey family member 1
hsa-miR-603	1	0	1	0	1	1	GRIN3A	glutamate receptor, ionotropic, N-methyl-D-aspartate 3A
hsa-miR-603	1	0	1	1	0	0	CHTOP	chromatin target of PRMT1
hsa-miR-603	0	0	1	1	1	1	COBL	cordon-bleu homolog (mouse)
hsa-miR-603	1	0	1	1	0	0	FNIP2	folliculin interacting protein 2
hsa-miR-603	1	0	1	1	1	1	QTRTD1	queuine tRNA-ribosyltransferase domain containing 1
hsa-miR-603	1	0	1	0	1	1	HNRNPA3	heterogeneous nuclear ribonucleoprotein A3
hsa-miR-603	1	0	1	1	1	1	NFX1	nuclear transcription factor, X-box binding 1
hsa-miR-603	0	0	1	1	1	1	C10orf57	chromosome 10 open reading frame 57
hsa-miR-603	0	0	1	1	1	1	VWA3B	von Willebrand factor A domain containing 3B
hsa-miR-603	0	0	1	1	1	1	WHSC1L1	Wolf-Hirschhorn syndrome candidate 1-like 1
hsa-miR-603	1	0	1	0	1	1	MEF2C	myocyte enhancer factor 2C
hsa-miR-603	1	0	1	1	1	1	NRP1	neuropilin 1
hsa-miR-603	0	0	1	1	1	1	PCDH20	protocadherin 20
hsa-miR-603	1	0	1	1	1	1	IL17RD	interleukin 17 receptor D
hsa-miR-603	0	0	1	1	1	1	PCDH15	protocadherin-related 15
hsa-miR-603	1	0	1	1	1	1	HERC2	HECT and RLD domain containing E3 ubiquitin protein ligase 2
hsa-miR-603	1	0	1	0	1	1	JAZF1	JAZF zinc finger 1
hsa-miR-603	1	0	1	0	1	1	NR3C1	nuclear receptor subfamily 3, group C, member 1 (glucocorticoid receptor)
hsa-miR-603	1	0	1	1	1	1	FAM76B	family with sequence similarity 76, member B
hsa-miR-603	0	0	1	1	1	1	AMOTL1	angiomotin like 1
hsa-miR-603	1	0	1	1	1	1	RNF38	ring finger protein 38
hsa-miR-603	0	0	1	1	0	0	TMEM134	transmembrane protein 134
hsa-miR-603	1	0	1	1	1	1	IKZF2	IKAROS family zinc finger 2 (Helios)
hsa-miR-603	1	0	1	1	1	1	SYNCRIP	synaptotagmin binding, cytoplasmic RNA interacting protein
hsa-miR-603	0	0	1	1	1	1	CD209	CD209 molecule
hsa-miR-603	1	0	1	1	1	1	MIPOL1	mirror-image polydactyly 1
hsa-miR-603	0	0	1	1	1	1	CEP41	centrosomal protein 41kDa
hsa-miR-603	1	0	1	1	1	1	GCNT1	glucosaminyl (N-acetyl) transferase 1, core 2
hsa-miR-603	1	0	1	1	1	1	WDR26	WD repeat domain 26
hsa-miR-603	0	0	1	1	0	0	DNAH1	dynein, axonemal, heavy chain 1
hsa-miR-603	0	0	1	1	0	0	ZYG11A	zyg-11 homolog A (C. elegans)
hsa-miR-603	1	0	1	1	1	1	PBRM1	polybromo 1
hsa-miR-603	1	0	1	1	1	1	PNRC1	proline-rich nuclear receptor coactivator 1
hsa-miR-603	0	0	1	1	1	1	BCOR	BCL6 corepressor
hsa-miR-603	0	0	1	1	0	0	LRRC28	leucine rich repeat containing 28
hsa-miR-603	0	0	1	1	0	0	ART5	ADP-ribosyltransferase 5
hsa-miR-603	1	0	1	1	1	1	ECT2	epithelial cell transforming sequence 2 oncogene
hsa-miR-603	1	0	1	0	1	1	NHS	Nance-Horan syndrome (congenital cataracts and dental anomalies)
hsa-miR-603	0	0	1	1	1	1	DIDO1	death inducer-obliterator 1
hsa-miR-603	1	0	1	1	1	1	ARHGAP20	Rho GTPase activating protein 20
hsa-miR-603	0	0	1	0	0	0	ZNFX1-AS1	ZNFX1 antisense RNA 1
hsa-miR-603	1	0	1	1	1	1	MECP2	methyl CpG binding protein 2 (Rett syndrome)
hsa-miR-603	1	0	1	0	1	1	LRAT	lecithin retinol acyltransferase (phosphatidylcholine--retinol O-acyltransferase)
hsa-miR-603	0	0	1	1	1	1	PRPF4	PRP4 pre-mRNA processing factor 4 homolog (yeast)
hsa-miR-603	0	0	1	0	1	1	RAB18	RAB18, member RAS oncogene family
hsa-miR-603	0	0	1	1	0	0	USP27X	ubiquitin specific peptidase 27, X-linked
hsa-miR-603	1	0	1	1	1	1	NTNG1	netrin G1
hsa-miR-603	1	0	1	1	1	1	PRKACB	protein kinase, cAMP-dependent, catalytic, beta
hsa-miR-603	1	0	1	1	1	1	AMOT	angiomotin
hsa-miR-603	1	0	1	1	1	1	NOL4	nucleolar protein 4
hsa-miR-603	1	0	1	0	1	1	FAM46A	family with sequence similarity 46, member A
hsa-miR-603	0	0	1	1	1	1	ZCCHC17	zinc finger, CCHC domain containing 17
hsa-miR-603	0	0	1	1	1	1	C20orf24	chromosome 20 open reading frame 24
hsa-miR-603	0	0	1	1	1	1	RLIM	ring finger protein, LIM domain interacting
hsa-miR-603	0	0	1	1	1	1	WDR55	WD repeat domain 55
hsa-miR-603	1	0	1	1	1	1	TSPAN14	tetraspanin 14
hsa-miR-603	1	0	1	1	1	1	RIMS3	regulating synaptic membrane exocytosis 3
hsa-miR-603	0	0	1	1	0	0	RUSC1	RUN and SH3 domain containing 1
hsa-miR-603	1	0	1	0	0	0	TGFA	transforming growth factor, alpha
hsa-miR-603	1	0	1	0	1	1	VAMP4	vesicle-associated membrane protein 4
hsa-miR-603	0	0	1	1	0	0	AGBL5	ATP/GTP binding protein-like 5
hsa-miR-603	1	0	1	1	1	1	CALM1	calmodulin 1 (phosphorylase kinase, delta)
hsa-miR-603	0	0	1	1	1	1	TMEM30A	transmembrane protein 30A
hsa-miR-603	0	0	1	0	0	0	ATXN7L3B	ataxin 7-like 3B
hsa-miR-603	1	0	1	1	1	1	GSPT1	G1 to S phase transition 1
hsa-miR-603	1	0	1	1	1	1	GRIA2	glutamate receptor, ionotropic, AMPA 2
hsa-miR-603	0	0	1	1	0	0	WISP3	WNT1 inducible signaling pathway protein 3
hsa-miR-603	1	0	1	1	1	1	GAS2	growth arrest-specific 2
hsa-miR-603	1	0	1	1	1	1	SOX5	SRY (sex determining region Y)-box 5
hsa-miR-603	0	0	1	0	1	1	AHI1	Abelson helper integration site 1
hsa-miR-603	0	0	1	0	0	0	KLHL15	kelch-like 15 (Drosophila)
hsa-miR-603	0	0	1	0	1	1	ZNF37A	zinc finger protein 37A
hsa-miR-603	1	0	1	1	1	1	TMEM9B	TMEM9 domain family, member B
hsa-miR-603	1	0	1	1	0	0	ARMCX2	armadillo repeat containing, X-linked 2
hsa-miR-603	1	0	1	0	1	1	NR1D2	nuclear receptor subfamily 1, group D, member 2
hsa-miR-603	0	0	1	0	0	0	ABCC6P2	ATP-binding cassette, sub-family C, member 6 pseudogene 2
hsa-miR-603	1	0	1	1	1	1	FAM176A	family with sequence similarity 176, member A
hsa-miR-603	0	0	1	1	1	1	CMAS	cytidine monophosphate N-acetylneuraminic acid synthetase
hsa-miR-603	1	0	1	0	1	1	CYBRD1	cytochrome b reductase 1
hsa-miR-603	0	0	1	1	1	1	CSDE1	cold shock domain containing E1, RNA-binding
hsa-miR-603	1	0	1	1	1	1	SCAF11	SR-related CTD-associated factor 11
hsa-miR-603	1	0	1	1	1	1	ARHGEF9	Cdc42 guanine nucleotide exchange factor (GEF) 9
hsa-miR-603	0	0	1	0	0	0	ZNF720	zinc finger protein 720
hsa-miR-603	1	0	1	1	1	1	MID1IP1	MID1 interacting protein 1
hsa-miR-603	0	0	1	1	1	1	LRRK1	leucine-rich repeat kinase 1
hsa-miR-603	1	0	1	1	1	1	PRR7	proline rich 7 (synaptic)
hsa-miR-603	0	0	1	0	0	0	EEF1DP3	eukaryotic translation elongation factor 1 delta pseudogene 3
hsa-miR-603	0	0	1	0	0	0	LOC284260	uncharacterized LOC284260
hsa-miR-603	0	0	1	0	0	0	FAM92A1P2	family with sequence similarity 92, member A3
hsa-miR-603	1	0	1	1	1	1	LIMS1	LIM and senescent cell antigen-like domains 1
hsa-miR-603	0	0	1	1	1	1	CDC42SE2	CDC42 small effector 2
hsa-miR-603	1	0	1	0	1	1	CDK19	cyclin-dependent kinase 19
hsa-miR-603	0	0	1	1	1	1	TLR4	toll-like receptor 4
hsa-miR-603	0	0	1	1	0	0	MEI1	meiosis inhibitor 1
hsa-miR-603	1	0	1	1	1	1	ZDHHC5	zinc finger, DHHC-type containing 5
hsa-miR-603	1	0	1	1	1	1	RSPO2	R-spondin 2
hsa-miR-603	0	0	1	1	0	0	CASS4	Cas scaffolding protein family member 4
hsa-miR-603	1	0	1	1	1	1	APPL2	adaptor protein, phosphotyrosine interaction, PH domain and leucine zipper containing 2
hsa-miR-603	0	0	1	1	1	1	C1orf101	chromosome 1 open reading frame 101
hsa-miR-603	1	0	1	1	1	1	TMEM127	transmembrane protein 127
hsa-miR-603	0	0	1	1	1	1	ZNF611	zinc finger protein 611
hsa-miR-603	1	0	1	1	1	1	HTR2C	5-hydroxytryptamine (serotonin) receptor 2C, G protein-coupled
hsa-miR-603	0	0	1	0	0	0	LOC145837	uncharacterized LOC145837
hsa-miR-603	0	0	1	1	1	1	SEMA3D	sema domain, immunoglobulin domain (Ig), short basic domain, secreted, (semaphorin) 3D
hsa-miR-603	1	0	1	0	1	1	PSMF1	proteasome (prosome, macropain) inhibitor subunit 1 (PI31)
hsa-miR-603	0	0	1	1	1	1	PIK3AP1	phosphoinositide-3-kinase adaptor protein 1
hsa-miR-603	0	0	1	1	1	1	CD48	CD48 molecule
hsa-miR-603	0	0	1	1	1	1	TARP	TCR gamma alternate reading frame protein
hsa-miR-603	0	0	1	1	1	1	PIP5K1B	phosphatidylinositol-4-phosphate 5-kinase, type I, beta
hsa-miR-603	1	0	1	1	1	1	ADARB1	adenosine deaminase, RNA-specific, B1
hsa-miR-603	1	0	1	1	1	1	EPB41L4A	erythrocyte membrane protein band 4.1 like 4A
hsa-miR-603	1	0	1	1	1	1	ZPLD1	zona pellucida-like domain containing 1
hsa-miR-603	1	0	1	1	1	1	BZRAP1	benzodiazapine receptor (peripheral) associated protein 1
hsa-miR-603	0	0	1	1	0	0	ASIC4	acid-sensing (proton-gated) ion channel family member 4
hsa-miR-603	1	0	1	1	1	1	C5orf25	chromosome 5 open reading frame 25
hsa-miR-603	1	0	1	1	1	1	SF1	splicing factor 1
hsa-miR-603	0	0	1	1	1	1	UBXN1	UBX domain protein 1
hsa-miR-603	1	0	1	1	1	1	FGF1	fibroblast growth factor 1 (acidic)
hsa-miR-603	1	0	1	1	1	1	EPB41L5	erythrocyte membrane protein band 4.1 like 5
hsa-miR-603	1	0	1	1	1	1	SORL1	sortilin-related receptor, L(DLR class) A repeats containing
hsa-miR-603	1	0	1	1	1	1	ANO1	anoctamin 1, calcium activated chloride channel
hsa-miR-603	0	0	1	0	0	0	BCAS3	breast carcinoma amplified sequence 3
hsa-miR-603	1	0	1	1	1	1	NSG1	neuron specific gene family member 1
hsa-miR-603	1	0	1	1	1	1	CUL1	cullin 1
hsa-miR-603	0	0	1	1	1	1	ZNF337	zinc finger protein 337
hsa-miR-603	0	0	1	0	1	1	DKFZP434I0714	uncharacterized protein DKFZP434I0714
hsa-miR-603	1	0	1	1	1	1	FAM120A	family with sequence similarity 120A
hsa-miR-603	1	0	1	1	1	1	NKAIN2	Na+/K+ transporting ATPase interacting 2
hsa-miR-603	0	0	1	1	1	1	ZNF781	zinc finger protein 781
hsa-miR-603	0	0	1	1	1	1	C6	complement component 6
hsa-miR-603	0	0	1	1	1	1	CBLN2	cerebellin 2 precursor
hsa-miR-603	0	0	1	1	0	0	VPS8	vacuolar protein sorting 8 homolog (S. cerevisiae)
hsa-miR-603	1	0	1	1	1	1	IMPACT	Impact homolog (mouse)
hsa-miR-603	0	0	1	0	0	0	LOC284294	uncharacterized LOC284294
hsa-miR-603	1	0	1	1	1	1	LHX8	LIM homeobox 8
hsa-miR-603	1	0	1	1	1	1	MEIS1	Meis homeobox 1
hsa-miR-603	1	0	1	0	1	1	CPEB4	cytoplasmic polyadenylation element binding protein 4
hsa-miR-603	1	0	1	1	1	1	BNC2	basonuclin 2
hsa-miR-603	1	0	1	0	1	1	MMD2	monocyte to macrophage differentiation-associated 2
hsa-miR-603	1	0	1	1	1	1	CMIP	c-Maf inducing protein
hsa-miR-603	1	0	1	0	1	1	KIAA0930	KIAA0930
hsa-miR-603	0	0	1	0	0	0	USP32P1	ubiquitin specific peptidase 32 pseudogene 1
hsa-miR-603	1	0	1	1	1	1	FOSB	FBJ murine osteosarcoma viral oncogene homolog B
hsa-miR-603	1	0	1	1	1	1	DACH2	dachshund homolog 2 (Drosophila)
hsa-miR-603	0	0	1	1	1	1	ZFP90	zinc finger protein 90 homolog (mouse)
hsa-miR-603	0	0	1	1	1	1	PCMTD2	protein-L-isoaspartate (D-aspartate) O-methyltransferase domain containing 2
hsa-miR-603	1	0	1	1	1	1	FAM123A	family with sequence similarity 123A
hsa-miR-603	1	0	1	1	1	1	DOC2A	double C2-like domains, alpha
hsa-miR-603	1	0	1	0	1	1	TNFAIP3	tumor necrosis factor, alpha-induced protein 3
hsa-miR-603	0	0	1	1	1	1	MTHFD2L	methylenetetrahydrofolate dehydrogenase (NADP+ dependent) 2-like
hsa-miR-603	0	0	1	0	0	0	LOC157381	uncharacterized LOC157381
hsa-miR-603	0	0	1	0	0	0	MORF4L2-AS1	MORF4L2 antisense RNA 1
hsa-miR-603	1	0	1	0	1	1	PSD3	pleckstrin and Sec7 domain containing 3
hsa-miR-603	0	0	1	1	1	1	NADKD1	NAD kinase domain containing 1
hsa-miR-603	0	0	1	0	0	0	LOC283914	uncharacterized LOC283914
hsa-miR-603	1	0	1	1	1	1	SF3B1	splicing factor 3b, subunit 1, 155kDa
hsa-miR-603	0	0	1	0	1	1	FBXO42	F-box protein 42
hsa-miR-603	0	0	1	0	0	0	DPY19L2P4	dpy-19-like 2 pseudogene 4 (C. elegans)
hsa-miR-603	1	0	1	1	1	1	TOMM40	translocase of outer mitochondrial membrane 40 homolog (yeast)
hsa-miR-603	1	0	1	1	1	1	SMARCE1	SWI/SNF related, matrix associated, actin dependent regulator of chromatin, subfamily e, member 1
hsa-miR-603	1	0	1	1	1	1	RTKN2	rhotekin 2
hsa-miR-603	0	0	1	1	1	1	CDADC1	cytidine and dCMP deaminase domain containing 1
hsa-miR-603	0	0	1	1	1	1	ZNF589	zinc finger protein 589
hsa-miR-603	0	0	1	1	1	1	INO80C	INO80 complex subunit C
hsa-miR-603	1	0	1	0	1	1	ARHGAP5	Rho GTPase activating protein 5
hsa-miR-603	0	0	1	0	1	1	ITGA1	integrin, alpha 1
hsa-miR-603	0	0	1	0	0	0	AURKAPS1	aurora kinase A pseudogene 1
hsa-miR-603	0	0	1	1	0	0	SRP14	signal recognition particle 14kDa (homologous Alu RNA binding protein)
hsa-miR-603	0	0	1	0	0	0	BMS1P6	BMS1 pseudogene 6
hsa-miR-603	1	0	1	1	1	1	YWHAZ	tyrosine 3-monooxygenase/tryptophan 5-monooxygenase activation protein, zeta polypeptide
hsa-miR-603	1	0	1	1	1	1	PCGF5	polycomb group ring finger 5
hsa-miR-603	1	0	1	1	1	1	KDM5C	lysine (K)-specific demethylase 5C
hsa-miR-603	0	0	1	1	0	0	APOA1BP	apolipoprotein A-I binding protein
hsa-miR-603	1	0	1	1	1	1	ZFP161	zinc finger protein 161 homolog (mouse)
hsa-miR-603	0	0	1	1	1	1	ZNF365	zinc finger protein 365
hsa-miR-603	1	0	1	1	1	1	PRRG1	proline rich Gla (G-carboxyglutamic acid) 1
hsa-miR-603	1	0	1	1	1	1	GTDC1	glycosyltransferase-like domain containing 1
hsa-miR-603	0	0	1	1	1	1	CLEC2D	C-type lectin domain family 2, member D
hsa-miR-603	0	0	1	1	0	0	DHX30	DEAH (Asp-Glu-Ala-His) box polypeptide 30
hsa-miR-603	0	0	1	1	1	1	HSPBAP1	HSPB (heat shock 27kDa) associated protein 1
hsa-miR-603	0	0	1	1	1	1	PIM3	pim-3 oncogene
hsa-miR-603	1	0	1	1	1	1	UEVLD	UEV and lactate/malate dehyrogenase domains
hsa-miR-603	0	0	1	1	1	1	VNN2	vanin 2
hsa-miR-603	0	0	1	0	0	0	LOC158435	uncharacterized LOC158435
hsa-miR-603	0	0	1	1	1	1	SH2D1B	SH2 domain containing 1B
hsa-miR-603	1	0	1	1	1	1	NRSN1	neurensin 1
hsa-miR-603	1	0	1	1	0	0	TMEM198	transmembrane protein 198
hsa-miR-603	0	0	1	0	0	0	PTGER4P2	prostaglandin E receptor 4 (subtype EP4) pseudogene 2
hsa-miR-603	1	0	1	1	1	1	EED	embryonic ectoderm development
hsa-miR-603	0	0	1	1	0	0	TRIM46	tripartite motif containing 46
hsa-miR-603	1	0	1	1	1	1	SOCS2	suppressor of cytokine signaling 2
hsa-miR-603	0	0	1	1	1	1	CFHR3	complement factor H-related 3
hsa-miR-603	0	0	1	1	1	1	CTXN3	cortexin 3
hsa-miR-603	1	0	1	1	1	1	KDELR2	KDEL (Lys-Asp-Glu-Leu) endoplasmic reticulum protein retention receptor 2
hsa-miR-603	0	0	1	0	0	0	TRGV9	T cell receptor gamma variable 9
hsa-miR-603	1	0	1	1	0	0	PLEKHG3	pleckstrin homology domain containing, family G (with RhoGef domain) member 3
hsa-miR-603	1	0	1	0	1	1	AMMECR1L	AMME chromosomal region gene 1-like
hsa-miR-603	1	0	1	1	1	1	GRAMD4	GRAM domain containing 4
hsa-miR-603	1	0	1	1	1	1	APBA2	amyloid beta (A4) precursor protein-binding, family A, member 2
hsa-miR-603	1	0	1	1	1	1	ZMYND11	zinc finger, MYND-type containing 11
hsa-miR-603	1	0	1	1	1	1	C18orf34	chromosome 18 open reading frame 34
hsa-miR-603	1	0	1	1	1	1	ACVR2B	activin A receptor, type IIB
hsa-miR-603	1	0	1	0	1	1	ARPP19	cAMP-regulated phosphoprotein, 19kDa
hsa-miR-603	0	0	1	1	1	1	XG	Xg blood group
hsa-miR-603	1	0	1	1	1	1	ARFIP1	ADP-ribosylation factor interacting protein 1
hsa-miR-603	0	0	1	1	0	0	ANAPC11	anaphase promoting complex subunit 11
hsa-miR-603	1	0	1	1	1	1	GABRB2	gamma-aminobutyric acid (GABA) A receptor, beta 2
hsa-miR-603	0	0	1	1	1	1	MUC21	mucin 21, cell surface associated
hsa-miR-603	1	0	1	1	1	1	SUV420H1	suppressor of variegation 4-20 homolog 1 (Drosophila)
hsa-miR-603	0	0	1	0	0	0	LOC389765	kinesin family member 27 pseudogene
hsa-miR-603	1	0	1	0	1	1	DNAJC6	DnaJ (Hsp40) homolog, subfamily C, member 6
hsa-miR-603	1	0	1	1	1	1	SP4	Sp4 transcription factor
hsa-miR-603	1	0	1	0	1	1	BTBD3	BTB (POZ) domain containing 3
hsa-miR-603	1	0	1	1	1	1	TET2	tet methylcytosine dioxygenase 2
hsa-miR-603	1	0	1	1	1	1	UBE4A	ubiquitination factor E4A
hsa-miR-603	1	0	1	1	1	1	SLK	STE20-like kinase
hsa-miR-603	1	0	1	1	1	1	ST18	suppression of tumorigenicity 18 (breast carcinoma) (zinc finger protein)
hsa-miR-603	0	0	1	0	0	0	LINC00661	long intergenic non-protein coding RNA 661
hsa-miR-603	1	0	1	1	1	1	OTUD4	OTU domain containing 4
hsa-miR-603	0	0	1	0	0	0	FAM27E3	family with sequence similarity 27, member E3
hsa-miR-603	0	0	1	1	0	0	RGSL1	regulator of G-protein signaling like 1
hsa-miR-603	0	0	1	0	0	0	LGALS17A	Charcot-Leyden crystal protein pseudogene
hsa-miR-603	0	0	1	0	1	1	RBM44	RNA binding motif protein 44
hsa-miR-603	1	0	1	1	1	1	MEGF11	multiple EGF-like-domains 11
hsa-miR-603	1	0	1	0	1	1	LHFPL3	lipoma HMGIC fusion partner-like 3
hsa-miR-603	1	0	1	1	1	1	CADPS	Ca++-dependent secretion activator
hsa-miR-603	1	0	1	0	1	1	FAM196A	family with sequence similarity 196, member A
hsa-miR-603	0	0	1	1	1	1	TINF2	TERF1 (TRF1)-interacting nuclear factor 2
hsa-miR-603	0	0	1	0	0	0	FLJ39632	uncharacterized LOC642477
hsa-miR-603	0	0	1	1	1	1	PSPH	phosphoserine phosphatase
hsa-miR-603	0	0	1	1	1	1	RAD17	RAD17 homolog (S. pombe)
hsa-miR-603	0	0	1	1	1	1	DNAJB14	DnaJ (Hsp40) homolog, subfamily B, member 14
hsa-miR-603	0	0	1	0	0	0	DKFZp686D0853	uncharacterized LOC401613
hsa-miR-603	1	0	1	1	1	1	ATP2B4	ATPase, Ca++ transporting, plasma membrane 4
hsa-miR-603	0	0	1	0	1	1	FEZ2	fasciculation and elongation protein zeta 2 (zygin II)
hsa-miR-603	0	0	1	1	1	1	KBTBD12	kelch repeat and BTB (POZ) domain containing 12
hsa-miR-603	1	0	1	1	1	1	SGCD	sarcoglycan, delta (35kDa dystrophin-associated glycoprotein)
hsa-miR-603	1	0	1	0	1	1	MTX3	metaxin 3
hsa-miR-603	1	0	1	1	0	0	ABL2	v-abl Abelson murine leukemia viral oncogene homolog 2
hsa-miR-603	0	0	1	1	1	1	CRB1	crumbs homolog 1 (Drosophila)
hsa-miR-603	0	0	1	1	1	1	KLHL8	kelch-like 8 (Drosophila)
hsa-miR-603	1	0	1	1	1	1	C7orf31	chromosome 7 open reading frame 31
hsa-miR-603	1	0	1	1	1	1	SH3BP4	SH3-domain binding protein 4
hsa-miR-603	1	0	1	0	1	1	CPNE3	copine III
hsa-miR-603	1	0	1	1	1	1	CASP3	caspase 3, apoptosis-related cysteine peptidase
hsa-miR-603	0	0	1	1	0	0	PRKCQ	protein kinase C, theta
hsa-miR-603	1	0	1	1	1	1	EPS15	epidermal growth factor receptor pathway substrate 15
hsa-miR-603	1	0	1	1	1	1	DROSHA	drosha, ribonuclease type III
hsa-miR-603	1	0	1	1	1	1	DCAF5	DDB1 and CUL4 associated factor 5
hsa-miR-603	1	0	1	1	1	1	NEDD9	neural precursor cell expressed, developmentally down-regulated 9
hsa-miR-603	1	0	1	1	1	1	PDXDC1	pyridoxal-dependent decarboxylase domain containing 1
hsa-miR-603	1	0	1	1	1	1	ATP6V1C1	ATPase, H+ transporting, lysosomal 42kDa, V1 subunit C1
hsa-miR-603	1	0	1	1	1	1	LCA5	Leber congenital amaurosis 5
hsa-miR-603	0	0	1	0	0	0	LINC00338	long intergenic non-protein coding RNA 338
hsa-miR-603	1	0	1	1	1	1	NFIB	nuclear factor I/B
hsa-miR-603	1	0	1	1	1	1	GAP43	growth associated protein 43
hsa-miR-603	1	0	1	1	1	1	NAV1	neuron navigator 1
hsa-miR-603	1	0	1	0	1	1	KLHL24	kelch-like 24 (Drosophila)
hsa-miR-603	0	0	1	0	0	0	LOC286299	uncharacterized LOC286299
hsa-miR-603	1	0	1	1	1	1	C5orf24	chromosome 5 open reading frame 24
hsa-miR-603	1	0	1	1	1	1	PTER	phosphotriesterase related
hsa-miR-603	1	0	1	1	1	1	PGAP1	post-GPI attachment to proteins 1
hsa-miR-603	1	0	1	1	1	1	EOGT	EGF domain-specific O-linked N-acetylglucosamine (GlcNAc) transferase
hsa-miR-603	1	0	1	0	1	1	TTL	tubulin tyrosine ligase
hsa-miR-603	0	0	1	1	1	1	IPO11	importin 11
hsa-miR-603	1	0	1	1	1	1	SIN3A	SIN3 transcription regulator homolog A (yeast)
hsa-miR-603	0	0	1	1	0	0	MARCH11	membrane-associated ring finger (C3HC4) 11
hsa-miR-603	1	0	1	1	0	0	LAYN	layilin
hsa-miR-603	1	0	1	1	1	1	CLU	clusterin
hsa-miR-603	0	0	1	1	1	1	GTPBP3	GTP binding protein 3 (mitochondrial)
hsa-miR-603	0	0	1	0	0	0	GGTA1P	glycoprotein, alpha-galactosyltransferase 1 pseudogene
hsa-miR-603	1	0	1	1	1	1	EIF4B	eukaryotic translation initiation factor 4B
hsa-miR-603	0	0	1	1	0	0	TMEM62	transmembrane protein 62
hsa-miR-603	0	0	1	1	1	1	TPRA1	transmembrane protein, adipocyte asscociated 1
hsa-miR-603	1	0	1	0	1	1	OLA1	Obg-like ATPase 1
hsa-miR-603	0	0	1	1	1	1	SEC22C	SEC22 vesicle trafficking protein homolog C (S. cerevisiae)
hsa-miR-603	0	0	1	1	1	1	ATP1B3	ATPase, Na+/K+ transporting, beta 3 polypeptide
hsa-miR-603	0	0	1	1	1	1	COPS8	COP9 constitutive photomorphogenic homolog subunit 8 (Arabidopsis)
hsa-miR-603	0	0	1	1	1	1	KIAA0141	KIAA0141
hsa-miR-603	0	0	1	1	1	1	BPGM	2,3-bisphosphoglycerate mutase
hsa-miR-603	0	0	1	1	1	1	TASP1	taspase, threonine aspartase, 1
hsa-miR-603	1	0	1	1	1	1	ADM	adrenomedullin
hsa-miR-603	0	0	1	0	1	1	EMX2	empty spiracles homeobox 2
hsa-miR-603	1	0	1	1	1	1	NTM	neurotrimin
hsa-miR-603	0	0	1	1	0	0	TCP1	t-complex 1
hsa-miR-603	0	0	1	1	1	1	STON1	stonin 1
hsa-miR-603	1	0	1	1	1	1	PCTP	phosphatidylcholine transfer protein
hsa-miR-603	1	0	1	1	1	1	TMEM245	transmembrane protein 245
hsa-miR-603	0	0	1	1	0	0	ATRAID	all-trans retinoic acid-induced differentiation factor
hsa-miR-603	0	0	1	1	1	1	NFATC4	nuclear factor of activated T-cells, cytoplasmic, calcineurin-dependent 4
hsa-miR-603	0	0	1	1	0	0	NRSN2	neurensin 2
hsa-miR-603	0	0	1	1	1	1	CAPZB	capping protein (actin filament) muscle Z-line, beta
hsa-miR-603	0	0	1	1	0	0	NOX5	NADPH oxidase, EF-hand calcium binding domain 5
hsa-miR-603	0	0	1	1	0	0	TUSC3	tumor suppressor candidate 3
hsa-miR-603	1	0	1	1	1	1	LAMTOR3	late endosomal/lysosomal adaptor, MAPK and MTOR activator 3
hsa-miR-603	0	0	1	1	1	1	TFAM	transcription factor A, mitochondrial
hsa-miR-603	1	0	1	1	1	1	FOS	FBJ murine osteosarcoma viral oncogene homolog
hsa-miR-603	1	0	1	1	1	1	MRS2	MRS2 magnesium homeostasis factor homolog (S. cerevisiae)
hsa-miR-603	0	0	1	1	0	0	FABP1	fatty acid binding protein 1, liver
hsa-miR-603	0	0	1	1	1	1	PABPN1	poly(A) binding protein, nuclear 1
hsa-miR-603	1	0	1	1	1	1	ARL4A	ADP-ribosylation factor-like 4A
hsa-miR-603	1	0	1	1	1	1	PFN2	profilin 2
hsa-miR-603	0	0	1	0	0	0	LOC93622	Morf4 family associated protein 1-like 1 pseudogene
hsa-miR-603	1	0	1	1	1	1	NFYB	nuclear transcription factor Y, beta
hsa-miR-603	0	0	1	1	0	0	C9orf114	chromosome 9 open reading frame 114
hsa-miR-603	0	0	1	1	1	1	ZNF333	zinc finger protein 333
hsa-miR-603	0	0	1	1	1	1	DNAJC25	DnaJ (Hsp40) homolog, subfamily C , member 25
hsa-miR-603	1	0	1	1	1	1	RNF2	ring finger protein 2
hsa-miR-603	1	0	1	1	1	1	HMGN2	high mobility group nucleosomal binding domain 2
hsa-miR-603	0	0	1	1	1	1	TBRG1	transforming growth factor beta regulator 1
hsa-miR-603	1	0	1	1	0	0	STAG3L4	stromal antigen 3-like 4
hsa-miR-603	0	0	1	1	1	1	TSEN15	tRNA splicing endonuclease 15 homolog (S. cerevisiae)
hsa-miR-603	1	0	1	1	1	1	RBPJ	recombination signal binding protein for immunoglobulin kappa J region
hsa-miR-603	0	0	1	0	0	0	FAM92A1	family with sequence similarity 92, member A1
hsa-miR-603	0	0	1	0	0	0	CHEK2P2	checkpoint kinase 2 pseudogene 2
hsa-miR-603	1	0	1	1	1	1	ID2	inhibitor of DNA binding 2, dominant negative helix-loop-helix protein
hsa-miR-603	0	0	1	1	1	1	INPP5K	inositol polyphosphate-5-phosphatase K
hsa-miR-603	1	0	1	1	0	0	FOXO3	forkhead box O3
hsa-miR-603	1	0	1	1	1	1	PHF20L1	PHD finger protein 20-like 1
hsa-miR-603	0	0	1	0	1	1	TSPAN7	tetraspanin 7
hsa-miR-603	1	0	1	1	1	1	LGALSL	lectin, galactoside-binding-like
hsa-miR-603	1	0	1	1	1	1	SLC35A1	solute carrier family 35 (CMP-sialic acid transporter), member A1
hsa-miR-603	1	0	1	1	1	1	SERF2	small EDRK-rich factor 2
hsa-miR-603	0	0	1	1	1	1	ARFRP1	ADP-ribosylation factor related protein 1
hsa-miR-603	1	0	1	1	1	1	STAG2	stromal antigen 2
hsa-miR-603	0	0	1	1	1	1	BDP1	B double prime 1, subunit of RNA polymerase III transcription initiation factor IIIB
hsa-miR-603	0	0	1	0	0	0	LOC731789	uncharacterized LOC731789
hsa-miR-603	1	0	1	1	1	1	DNAJC16	DnaJ (Hsp40) homolog, subfamily C, member 16
hsa-miR-603	1	0	1	1	1	1	FBXW7	F-box and WD repeat domain containing 7, E3 ubiquitin protein ligase
hsa-miR-603	1	0	1	1	1	1	PHACTR2	phosphatase and actin regulator 2
hsa-miR-603	1	0	1	1	1	1	HECW2	HECT, C2 and WW domain containing E3 ubiquitin protein ligase 2
hsa-miR-603	1	0	1	0	1	1	MEGF10	multiple EGF-like-domains 10
hsa-miR-603	1	0	1	1	1	1	KIAA2018	KIAA2018
hsa-miR-603	1	0	1	0	1	1	PTP4A1	protein tyrosine phosphatase type IVA, member 1
hsa-miR-603	0	0	1	0	0	0	MUC19	mucin 19, oligomeric
hsa-miR-603	1	0	1	0	1	1	OSBPL8	oxysterol binding protein-like 8
hsa-miR-603	1	0	1	0	1	1	MCFD2	multiple coagulation factor deficiency 2
hsa-miR-603	1	0	1	1	1	1	SLC39A10	solute carrier family 39 (zinc transporter), member 10
hsa-miR-603	1	0	1	0	1	1	ZNF652	zinc finger protein 652
hsa-miR-603	1	0	1	1	1	1	MAN2A2	mannosidase, alpha, class 2A, member 2
hsa-miR-603	0	0	1	1	1	1	GPR34	G protein-coupled receptor 34
hsa-miR-603	0	0	1	1	0	0	SPATA20	spermatogenesis associated 20
hsa-miR-603	0	0	1	1	0	0	SLCO3A1	solute carrier organic anion transporter family, member 3A1
hsa-miR-603	1	0	1	1	1	1	LGR4	leucine-rich repeat containing G protein-coupled receptor 4
hsa-miR-603	0	0	1	1	1	1	PLCB4	phospholipase C, beta 4
hsa-miR-603	1	0	1	0	1	1	BCL2	B-cell CLL/lymphoma 2
hsa-miR-603	1	0	1	1	1	1	IGF1	insulin-like growth factor 1 (somatomedin C)
hsa-miR-603	0	0	1	1	1	1	GAD2	glutamate decarboxylase 2 (pancreatic islets and brain, 65kDa)
hsa-miR-603	1	0	1	0	1	1	ACVR2A	activin A receptor, type IIA
hsa-miR-603	0	0	1	1	0	0	BTD	biotinidase
hsa-miR-603	0	0	1	0	1	1	CYP1B1	cytochrome P450, family 1, subfamily B, polypeptide 1
hsa-miR-603	1	0	1	0	1	1	SLC26A2	solute carrier family 26 (sulfate transporter), member 2
hsa-miR-603	1	0	1	1	1	1	ESR1	estrogen receptor 1
hsa-miR-603	1	0	1	1	1	1	FBN1	fibrillin 1
hsa-miR-603	1	0	1	0	1	1	GCH1	GTP cyclohydrolase 1
hsa-miR-603	1	0	1	1	1	1	TBX5	T-box 5
hsa-miR-603	1	0	1	0	1	1	ITGB3	integrin, beta 3 (platelet glycoprotein IIIa, antigen CD61)
hsa-miR-603	0	0	1	0	1	1	KAL1	Kallmann syndrome 1 sequence
hsa-miR-603	0	0	1	1	1	1	KCNJ1	potassium inwardly-rectifying channel, subfamily J, member 1
hsa-miR-603	0	0	1	0	1	1	MYO7A	myosin VIIA
hsa-miR-603	1	0	1	1	1	1	ATXN1	ataxin 1
hsa-miR-603	1	0	1	1	1	1	TIMP3	TIMP metallopeptidase inhibitor 3
hsa-miR-603	1	0	1	0	1	1	TSC1	tuberous sclerosis 1
hsa-miR-603	0	0	1	1	1	1	SLC25A20	solute carrier family 25 (carnitine/acylcarnitine translocase), member 20
hsa-miR-603	1	0	1	1	1	1	HLCS	holocarboxylase synthetase (biotin-(proprionyl-CoA-carboxylase (ATP-hydrolysing)) ligase)
hsa-miR-603	0	0	1	1	1	1	LTBP2	latent transforming growth factor beta binding protein 2
hsa-miR-603	1	0	1	0	1	1	PAFAH1B1	platelet-activating factor acetylhydrolase 1b, regulatory subunit 1 (45kDa)
hsa-miR-603	1	0	1	0	1	1	PCSK1	proprotein convertase subtilisin/kexin type 1
hsa-miR-603	1	0	1	1	1	1	PLP1	proteolipid protein 1
hsa-miR-603	1	0	1	1	1	1	IL1A	interleukin 1, alpha
hsa-miR-603	0	0	1	1	1	1	HGF	hepatocyte growth factor (hepapoietin A; scatter factor)
hsa-miR-603	0	0	1	1	1	1	SELL	selectin L
hsa-miR-603	1	0	1	0	1	1	ALDH1A3	aldehyde dehydrogenase 1 family, member A3
hsa-miR-603	1	0	1	1	1	1	GABRB3	gamma-aminobutyric acid (GABA) A receptor, beta 3
hsa-miR-603	1	0	1	1	0	0	GRIN2A	glutamate receptor, ionotropic, N-methyl D-aspartate 2A
hsa-miR-603	1	0	1	1	1	1	PDE3B	phosphodiesterase 3B, cGMP-inhibited
hsa-miR-603	1	0	1	1	1	1	PTGDR	prostaglandin D2 receptor (DP)
hsa-miR-603	1	0	1	1	1	1	PTGER2	prostaglandin E receptor 2 (subtype EP2), 53kDa
hsa-miR-603	1	0	1	1	1	1	PTGFR	prostaglandin F receptor (FP)
hsa-miR-603	1	0	1	0	1	1	SPOPL	speckle-type POZ protein-like
hsa-miR-603	1	0	1	1	1	1	AFTPH	aftiphilin
hsa-miR-603	1	0	1	1	1	1	LCLAT1	lysocardiolipin acyltransferase 1
hsa-miR-603	1	0	1	0	1	1	CACNA1I	calcium channel, voltage-dependent, T type, alpha 1I subunit
hsa-miR-603	0	0	1	1	0	0	ATP5J	ATP synthase, H+ transporting, mitochondrial Fo complex, subunit F6
hsa-miR-603	0	0	1	0	1	1	ZNF705A	zinc finger protein 705A
hsa-miR-603	0	0	1	1	1	1	HMGN2P46	high mobility group nucleosomal binding domain 2 pseudogene 46
hsa-miR-603	1	0	1	1	1	1	AK4	adenylate kinase 4
hsa-miR-603	1	0	1	0	1	1	YPEL2	yippee-like 2 (Drosophila)
hsa-miR-603	1	0	1	1	1	1	ADAM9	ADAM metallopeptidase domain 9
hsa-miR-603	1	0	1	0	1	1	IP6K1	inositol hexakisphosphate kinase 1
hsa-miR-603	0	0	1	1	1	1	MAPKAP1	mitogen-activated protein kinase associated protein 1
hsa-miR-603	1	0	1	1	1	1	IGSF3	immunoglobulin superfamily, member 3
hsa-miR-603	1	0	1	1	1	1	EI24	etoposide induced 2.4 mRNA
hsa-miR-603	1	0	1	0	1	1	SS18	synovial sarcoma translocation, chromosome 18
hsa-miR-603	0	0	1	1	1	1	CCDC73	coiled-coil domain containing 73
hsa-miR-603	1	0	1	0	1	1	KIAA2022	KIAA2022
hsa-miR-603	0	0	1	1	1	1	FBXO47	F-box protein 47
hsa-miR-603	1	0	1	1	1	1	ZNF468	zinc finger protein 468
hsa-miR-603	1	0	1	1	1	1	CUL4A	cullin 4A
hsa-miR-603	1	0	1	1	1	1	FAM168B	family with sequence similarity 168, member B
hsa-miR-603	0	0	1	0	1	1	LPPR5	lipid phosphate phosphatase-related protein type 5
hsa-miR-603	0	0	1	1	1	1	ZMAT1	zinc finger, matrin-type 1
hsa-miR-603	1	0	1	0	1	1	DNAJC21	DnaJ (Hsp40) homolog, subfamily C, member 21
hsa-miR-603	1	0	1	0	1	1	RGMB	RGM domain family, member B
hsa-miR-603	1	0	1	1	1	1	DISC1	disrupted in schizophrenia 1
hsa-miR-603	1	0	1	0	1	1	ZKSCAN2	zinc finger with KRAB and SCAN domains 2
hsa-miR-603	1	0	1	1	1	1	SORCS1	sortilin-related VPS10 domain containing receptor 1
hsa-miR-603	1	0	1	1	1	1	C12orf68	chromosome 12 open reading frame 68
hsa-miR-603	0	0	1	1	0	0	SPRR2G	small proline-rich protein 2G
hsa-miR-603	1	0	1	1	1	1	LHX9	LIM homeobox 9
hsa-miR-603	1	0	1	1	1	1	PHF6	PHD finger protein 6
hsa-miR-603	1	0	1	1	1	1	TMCC1	transmembrane and coiled-coil domain family 1
hsa-miR-603	1	0	1	0	1	1	KCNK2	potassium channel, subfamily K, member 2
hsa-miR-603	1	0	1	1	1	1	SH3PXD2B	SH3 and PX domains 2B
hsa-miR-603	1	0	1	1	1	1	SERBP1	SERPINE1 mRNA binding protein 1
hsa-miR-603	0	0	1	1	1	1	NAE1	NEDD8 activating enzyme E1 subunit 1
hsa-miR-603	0	0	1	1	0	0	C1orf227	chromosome 1 open reading frame 227
hsa-miR-603	1	0	1	1	1	1	CANX	calnexin
hsa-miR-603	1	0	1	0	1	1	TNRC6B	trinucleotide repeat containing 6B
hsa-miR-603	1	0	1	1	1	1	TGFBR2	transforming growth factor, beta receptor II (70/80kDa)
hsa-miR-603	1	0	1	0	1	1	CLLU1	chronic lymphocytic leukemia up-regulated 1
hsa-miR-603	1	0	1	0	1	1	ANO6	anoctamin 6
hsa-miR-603	0	0	1	1	1	1	PGAM4	phosphoglycerate mutase family member 4
hsa-miR-603	1	0	1	1	1	1	KIAA0101	KIAA0101
hsa-miR-603	1	0	1	0	1	1	SAMD5	sterile alpha motif domain containing 5
hsa-miR-603	1	0	1	1	1	1	YTHDC1	YTH domain containing 1
hsa-miR-603	1	0	1	1	1	1	CSNK1G3	casein kinase 1, gamma 3
hsa-miR-603	0	0	1	0	1	1	STXBP1	syntaxin binding protein 1
hsa-miR-603	1	0	1	1	1	1	TMPO	thymopoietin
hsa-miR-603	1	0	1	1	1	1	UBE2V1	ubiquitin-conjugating enzyme E2 variant 1
hsa-miR-603	1	0	1	1	1	1	MAGI1	membrane associated guanylate kinase, WW and PDZ domain containing 1
hsa-miR-603	1	0	1	0	1	1	RYR2	ryanodine receptor 2 (cardiac)
hsa-miR-603	1	0	1	1	1	1	SCD5	stearoyl-CoA desaturase 5
hsa-miR-603	1	1	1	1	1	1	TRIM71	tripartite motif containing 71, E3 ubiquitin protein ligase
hsa-miR-603	1	0	1	0	1	1	USP9X	ubiquitin specific peptidase 9, X-linked
hsa-miR-603	1	0	1	1	1	1	CBLN3	cerebellin 3 precursor
hsa-miR-603	1	0	1	1	1	1	CDC42	cell division cycle 42 (GTP binding protein, 25kDa)
hsa-miR-603	1	0	1	1	1	1	ZNF384	zinc finger protein 384
hsa-miR-603	1	0	1	1	1	1	CHN2	chimerin (chimaerin) 2
hsa-miR-603	1	0	1	1	1	1	MLLT4	myeloid/lymphoid or mixed-lineage leukemia (trithorax homolog, Drosophila); translocated to, 4
hsa-miR-603	1	0	1	1	1	1	SCN2A	sodium channel, voltage-gated, type II, alpha subunit
hsa-miR-603	0	0	1	0	1	1	SCN3B	sodium channel, voltage-gated, type III, beta subunit
hsa-miR-603	0	0	1	0	1	1	ZNF765	zinc finger protein 765
hsa-miR-603	1	0	1	1	1	1	PAPD5	PAP associated domain containing 5
hsa-miR-603	1	0	1	0	1	1	DCUN1D4	DCN1, defective in cullin neddylation 1, domain containing 4 (S. cerevisiae)
hsa-miR-603	1	0	1	1	1	1	ZBTB8A	zinc finger and BTB domain containing 8A
hsa-miR-603	1	0	1	1	1	1	HMGCLL1	3-hydroxymethyl-3-methylglutaryl-CoA lyase-like 1
hsa-miR-603	0	0	1	1	1	1	GEMIN8	gem (nuclear organelle) associated protein 8
hsa-miR-603	1	0	1	1	1	1	DIAPH3	diaphanous homolog 3 (Drosophila)
hsa-miR-603	1	0	1	1	1	1	FRS2	fibroblast growth factor receptor substrate 2
hsa-miR-603	0	0	1	1	1	1	TRAK1	trafficking protein, kinesin binding 1
hsa-miR-603	1	0	1	0	1	1	TMEM237	transmembrane protein 237
hsa-miR-603	0	0	1	1	1	1	SLC6A4	solute carrier family 6 (neurotransmitter transporter, serotonin), member 4
hsa-miR-603	1	0	1	1	1	1	SLA	Src-like-adaptor
hsa-miR-603	1	0	1	1	1	1	NET1	neuroepithelial cell transforming 1
hsa-miR-603	0	0	1	0	1	1	TOP2A	topoisomerase (DNA) II alpha 170kDa
hsa-miR-603	1	0	1	0	1	1	SLC7A6	solute carrier family 7 (amino acid transporter light chain, y+L system), member 6
hsa-miR-603	1	0	1	1	1	1	METTL9	methyltransferase like 9
hsa-miR-603	1	0	1	1	1	1	SREK1	splicing regulatory glutamine/lysine-rich protein 1
hsa-miR-603	1	0	1	1	1	1	IRF2BP2	interferon regulatory factor 2 binding protein 2
hsa-miR-603	1	0	1	1	1	1	PNKD	paroxysmal nonkinesigenic dyskinesia
hsa-miR-603	0	0	1	1	1	1	ZNF586	zinc finger protein 586
hsa-miR-603	0	0	1	1	1	1	PPCS	phosphopantothenoylcysteine synthetase
hsa-miR-603	0	0	1	0	1	1	WTH3DI	RAB6C-like
hsa-miR-603	0	0	1	1	1	1	ABCC6	ATP-binding cassette, sub-family C (CFTR/MRP), member 6
hsa-miR-603	1	0	1	1	1	1	TMTC4	transmembrane and tetratricopeptide repeat containing 4
hsa-miR-603	1	0	1	1	1	1	CREBBP	CREB binding protein
hsa-miR-603	1	0	1	1	1	1	LDB3	LIM domain binding 3
hsa-miR-603	1	0	1	1	1	1	FAM155A	family with sequence similarity 155, member A
hsa-miR-603	1	0	1	0	1	1	FBXO41	F-box protein 41
hsa-miR-603	1	0	1	1	1	1	KDM6B	lysine (K)-specific demethylase 6B
hsa-miR-603	1	0	1	0	1	1	THSD7B	thrombospondin, type I, domain containing 7B
hsa-miR-603	0	0	1	1	1	1	TMEM202	transmembrane protein 202
hsa-miR-603	0	0	1	1	1	1	G6PC2	glucose-6-phosphatase, catalytic, 2
hsa-miR-603	1	0	1	0	1	1	XIAP	X-linked inhibitor of apoptosis
hsa-miR-603	1	0	1	1	1	1	PRDM1	PR domain containing 1, with ZNF domain
hsa-miR-603	1	0	1	0	1	1	KLF9	Kruppel-like factor 9
hsa-miR-603	1	0	1	1	1	1	CAMK2D	calcium/calmodulin-dependent protein kinase II delta
hsa-miR-603	0	0	1	1	1	1	TNFSF8	tumor necrosis factor (ligand) superfamily, member 8
hsa-miR-603	0	0	1	1	0	0	SIGLEC6	sialic acid binding Ig-like lectin 6
hsa-miR-603	1	0	1	0	1	1	CDK6	cyclin-dependent kinase 6
hsa-miR-603	0	0	1	1	1	1	CHI3L1	chitinase 3-like 1 (cartilage glycoprotein-39)
hsa-miR-603	0	0	1	1	0	0	CLK3	CDC-like kinase 3
hsa-miR-603	0	0	1	1	1	1	DPYS	dihydropyrimidinase
hsa-miR-603	1	0	1	1	1	1	DYRK1A	dual-specificity tyrosine-(Y)-phosphorylation regulated kinase 1A
hsa-miR-603	1	0	1	1	1	1	S1PR1	sphingosine-1-phosphate receptor 1
hsa-miR-603	1	0	1	1	1	1	ELAVL1	ELAV (embryonic lethal, abnormal vision, Drosophila)-like 1 (Hu antigen R)
hsa-miR-603	1	0	1	1	1	1	EN1	engrailed homeobox 1
hsa-miR-603	1	0	1	1	1	1	EN2	engrailed homeobox 2
hsa-miR-603	1	0	1	1	1	1	EXTL3	exostoses (multiple)-like 3
hsa-miR-603	0	0	1	1	0	0	FABP5	fatty acid binding protein 5 (psoriasis-associated)
hsa-miR-603	0	0	1	0	1	1	CXCL1	chemokine (C-X-C motif) ligand 1 (melanoma growth stimulating activity, alpha)
hsa-miR-603	1	0	1	1	1	1	AQP4	aquaporin 4
hsa-miR-603	1	0	1	1	1	1	ARF3	ADP-ribosylation factor 3
hsa-miR-603	1	0	1	0	1	1	ARNT	aryl hydrocarbon receptor nuclear translocator
hsa-miR-603	1	0	1	1	1	1	BCL6	B-cell CLL/lymphoma 6
hsa-miR-603	1	0	1	1	1	1	CALM2	calmodulin 2 (phosphorylase kinase, delta)
hsa-miR-603	1	0	1	1	1	1	CBFB	core-binding factor, beta subunit
hsa-miR-603	1	0	1	0	1	1	CCND2	cyclin D2
hsa-miR-603	0	0	1	1	1	1	CD1D	CD1d molecule
hsa-miR-603	0	0	1	1	0	0	CD19	CD19 molecule
hsa-miR-603	1	0	1	1	1	1	CDH2	cadherin 2, type 1, N-cadherin (neuronal)
hsa-miR-603	1	0	1	0	1	1	CEBPG	CCAAT/enhancer binding protein (C/EBP), gamma
hsa-miR-603	1	0	1	1	1	1	CLCN4	chloride channel, voltage-sensitive 4
hsa-miR-603	1	0	1	1	1	1	CNN3	calponin 3, acidic
hsa-miR-603	1	0	1	1	1	1	SLC31A1	solute carrier family 31 (copper transporters), member 1
hsa-miR-603	1	0	1	1	1	1	CSNK2A1	casein kinase 2, alpha 1 polypeptide
hsa-miR-603	1	0	1	1	1	1	DSC3	desmocollin 3
hsa-miR-603	0	0	1	1	1	1	DSG1	desmoglein 1
hsa-miR-603	1	0	1	1	1	1	DUSP6	dual specificity phosphatase 6
hsa-miR-603	1	0	1	1	1	1	E2F3	E2F transcription factor 3
hsa-miR-603	1	0	1	1	1	1	ENPEP	glutamyl aminopeptidase (aminopeptidase A)
hsa-miR-603	1	0	1	0	1	1	FUT4	fucosyltransferase 4 (alpha (1,3) fucosyltransferase, myeloid-specific)
hsa-miR-603	1	0	1	1	1	1	GOT2	glutamic-oxaloacetic transaminase 2, mitochondrial (aspartate aminotransferase 2)
hsa-miR-603	1	0	1	1	1	1	CXCL2	chemokine (C-X-C motif) ligand 2
hsa-miR-603	0	0	1	1	1	1	CXCL3	chemokine (C-X-C motif) ligand 3
hsa-miR-603	0	0	1	1	1	1	GYS1	glycogen synthase 1 (muscle)
hsa-miR-603	0	0	1	1	1	1	HMGCS1	3-hydroxy-3-methylglutaryl-CoA synthase 1 (soluble)
hsa-miR-603	1	0	1	1	1	1	IL13	interleukin 13
hsa-miR-603	1	0	1	1	1	1	ITGB8	integrin, beta 8
hsa-miR-603	1	0	1	1	1	1	KCNJ10	potassium inwardly-rectifying channel, subfamily J, member 10
hsa-miR-603	1	0	1	1	1	1	KPNB1	karyopherin (importin) beta 1
hsa-miR-603	1	0	1	1	1	1	KPNA3	karyopherin alpha 3 (importin alpha 4)
hsa-miR-603	1	0	1	1	1	1	KPNA4	karyopherin alpha 4 (importin alpha 3)
hsa-miR-603	1	0	1	0	1	1	MXD1	MAX dimerization protein 1
hsa-miR-603	0	0	1	0	1	1	CXCL9	chemokine (C-X-C motif) ligand 9
hsa-miR-603	1	0	1	1	1	1	NGFR	nerve growth factor receptor
hsa-miR-603	1	0	1	1	1	1	NPTX1	neuronal pentraxin I
hsa-miR-603	0	0	1	1	0	0	NTSR1	neurotensin receptor 1 (high affinity)
hsa-miR-603	0	0	1	0	1	1	OAZ2	ornithine decarboxylase antizyme 2
hsa-miR-603	1	0	1	1	1	1	OSBP	oxysterol binding protein
hsa-miR-603	1	0	1	0	1	1	PCDHGC3	protocadherin gamma subfamily C, 3
hsa-miR-603	1	0	1	0	1	1	CDK17	cyclin-dependent kinase 17
hsa-miR-603	1	0	1	1	0	0	PDGFB	platelet-derived growth factor beta polypeptide
hsa-miR-603	1	0	1	1	1	1	PGAM1	phosphoglycerate mutase 1 (brain)
hsa-miR-603	0	0	1	1	1	1	SERPINB8	serpin peptidase inhibitor, clade B (ovalbumin), member 8
hsa-miR-603	0	0	1	1	1	1	PIK3C2B	phosphatidylinositol-4-phosphate 3-kinase, catalytic subunit type 2 beta
hsa-miR-603	1	0	1	1	1	1	PLAGL2	pleiomorphic adenoma gene-like 2
hsa-miR-603	1	0	1	1	1	1	PPP1CB	protein phosphatase 1, catalytic subunit, beta isozyme
hsa-miR-603	1	0	1	0	1	1	PPP2R2A	protein phosphatase 2, regulatory subunit B, alpha
hsa-miR-603	1	0	1	1	1	1	PPP2R3A	protein phosphatase 2, regulatory subunit B'', alpha
hsa-miR-603	1	0	1	0	1	1	PRKCA	protein kinase C, alpha
hsa-miR-603	1	0	1	1	1	1	PRKD1	protein kinase D1
hsa-miR-603	1	0	1	1	1	1	PRPS1	phosphoribosyl pyrophosphate synthetase 1
hsa-miR-603	1	0	1	1	0	0	PSMD7	proteasome (prosome, macropain) 26S subunit, non-ATPase, 7
hsa-miR-603	0	0	1	1	0	0	PSMD11	proteasome (prosome, macropain) 26S subunit, non-ATPase, 11
hsa-miR-603	1	0	1	1	1	1	PTPN1	protein tyrosine phosphatase, non-receptor type 1
hsa-miR-603	1	0	1	0	1	1	RAB6A	RAB6A, member RAS oncogene family
hsa-miR-603	1	0	1	1	1	1	RAD23B	RAD23 homolog B (S. cerevisiae)
hsa-miR-603	1	0	1	1	1	1	ARID4A	AT rich interactive domain 4A (RBP1-like)
hsa-miR-603	1	0	1	1	0	0	CCL3	chemokine (C-C motif) ligand 3
hsa-miR-603	1	0	1	1	1	1	SRSF2	serine/arginine-rich splicing factor 2
hsa-miR-603	1	0	1	1	1	1	SH3GL2	SH3-domain GRB2-like 2
hsa-miR-603	1	0	1	1	1	1	SMARCC1	SWI/SNF related, matrix associated, actin dependent regulator of chromatin, subfamily c, member 1
hsa-miR-603	1	0	1	0	1	1	SOX4	SRY (sex determining region Y)-box 4
hsa-miR-603	1	0	1	0	1	1	SOX11	SRY (sex determining region Y)-box 11
hsa-miR-603	1	0	1	1	1	1	SRF	serum response factor (c-fos serum response element-binding transcription factor)
hsa-miR-603	1	0	1	1	1	1	SYN2	synapsin II
hsa-miR-603	1	0	1	0	1	1	TAL1	T-cell acute lymphocytic leukemia 1
hsa-miR-603	1	0	1	1	1	1	TFAP2C	transcription factor AP-2 gamma (activating enhancer binding protein 2 gamma)
hsa-miR-603	1	0	1	1	1	1	TRAPPC10	trafficking protein particle complex 10
hsa-miR-603	0	0	1	1	0	0	TNR	tenascin R
hsa-miR-603	1	0	1	1	1	1	TOP1	topoisomerase (DNA) I
hsa-miR-603	1	0	1	0	1	1	UBE2D2	ubiquitin-conjugating enzyme E2D 2
hsa-miR-603	0	0	1	1	0	0	VGF	VGF nerve growth factor inducible
hsa-miR-603	1	0	1	1	1	1	YWHAH	tyrosine 3-monooxygenase/tryptophan 5-monooxygenase activation protein, eta polypeptide
hsa-miR-603	0	0	1	1	1	1	ZNF143	zinc finger protein 143
hsa-miR-603	0	0	1	1	1	1	SCG2	secretogranin II
hsa-miR-603	1	0	1	1	1	1	DEK	DEK oncogene
hsa-miR-603	1	0	1	1	1	1	CUL5	cullin 5
hsa-miR-603	1	0	1	1	1	1	HMGA2	high mobility group AT-hook 2
hsa-miR-603	1	0	1	1	1	1	NRIP1	nuclear receptor interacting protein 1
hsa-miR-603	1	0	1	1	1	1	FZD7	frizzled family receptor 7
hsa-miR-603	1	0	1	1	1	1	PIP4K2B	phosphatidylinositol-5-phosphate 4-kinase, type II, beta
hsa-miR-603	1	0	1	0	1	1	VAPA	VAMP (vesicle-associated membrane protein)-associated protein A, 33kDa
hsa-miR-603	1	0	1	1	1	1	PPM1D	protein phosphatase, Mg2+/Mn2+ dependent, 1D
hsa-miR-603	0	0	1	1	1	1	AP3B1	adaptor-related protein complex 3, beta 1 subunit
hsa-miR-603	1	0	1	0	1	1	PCDHGA12	protocadherin gamma subfamily A, 12
hsa-miR-603	1	0	1	0	1	1	PCDHGB4	protocadherin gamma subfamily B, 4
hsa-miR-603	1	0	1	0	1	1	TNKS	tankyrase, TRF1-interacting ankyrin-related ADP-ribose polymerase
hsa-miR-603	1	0	1	0	1	1	IRS2	insulin receptor substrate 2
hsa-miR-603	0	0	1	1	0	0	KRT36	keratin 36
hsa-miR-603	0	0	1	1	1	1	CRADD	CASP2 and RIPK1 domain containing adaptor with death domain
hsa-miR-603	1	0	1	1	1	1	SNAP23	synaptosomal-associated protein, 23kDa
hsa-miR-603	0	0	1	1	1	1	SUCLA2	succinate-CoA ligase, ADP-forming, beta subunit
hsa-miR-603	1	0	1	0	1	1	CDK5R1	cyclin-dependent kinase 5, regulatory subunit 1 (p35)
hsa-miR-603	0	0	1	0	1	1	AP1S2	adaptor-related protein complex 1, sigma 2 subunit
hsa-miR-603	1	0	1	1	1	1	CDKL2	cyclin-dependent kinase-like 2 (CDC2-related kinase)
hsa-miR-603	1	0	1	1	1	1	BCL2L2	BCL2-like 2
hsa-miR-603	1	0	1	0	1	1	DGKB	diacylglycerol kinase, beta 90kDa
hsa-miR-603	1	0	1	1	1	1	GMFB	glia maturation factor, beta
hsa-miR-603	1	0	1	0	1	1	IREB2	iron-responsive element binding protein 2
hsa-miR-603	1	0	1	1	1	1	MYO9B	myosin IXB
hsa-miR-603	1	0	1	0	1	1	SLC1A2	solute carrier family 1 (glial high affinity glutamate transporter), member 2
hsa-miR-603	1	0	1	0	1	1	MED14	mediator complex subunit 14
hsa-miR-603	1	0	1	1	1	1	SOCS6	suppressor of cytokine signaling 6
hsa-miR-603	1	0	1	1	1	1	GDA	guanine deaminase
hsa-miR-603	1	0	1	0	1	1	ACVR1B	activin A receptor, type IB
hsa-miR-603	1	0	1	1	1	1	ASTN1	astrotactin 1
hsa-miR-603	1	0	1	1	1	1	DUSP1	dual specificity phosphatase 1
hsa-miR-603	1	0	1	1	1	1	DUSP2	dual specificity phosphatase 2
hsa-miR-603	1	0	1	1	1	1	EGR3	early growth response 3
hsa-miR-603	1	0	1	1	1	1	EPHB2	EPH receptor B2
hsa-miR-603	1	0	1	1	1	1	EPHB3	EPH receptor B3
hsa-miR-603	1	0	1	1	1	1	FLOT2	flotillin 2
hsa-miR-603	1	0	1	1	1	1	FOXK2	forkhead box K2
hsa-miR-603	1	0	1	1	1	1	MLLT3	myeloid/lymphoid or mixed-lineage leukemia (trithorax homolog, Drosophila); translocated to, 3
hsa-miR-603	1	0	1	0	1	1	PKNOX1	PBX/knotted 1 homeobox 1
hsa-miR-603	1	0	1	1	1	1	TCF15	transcription factor 15 (basic helix-loop-helix)
hsa-miR-603	1	0	1	1	1	1	MTMR6	myotubularin related protein 6
hsa-miR-603	0	0	1	1	1	1	MTA2	metastasis associated 1 family, member 2
hsa-miR-603	1	0	1	1	1	1	NRXN3	neurexin 3
hsa-miR-603	1	0	1	1	1	1	KIF3B	kinesin family member 3B
hsa-miR-603	0	0	1	1	0	0	TM9SF2	transmembrane 9 superfamily member 2
hsa-miR-603	1	0	1	0	1	1	CDYL	chromodomain protein, Y-like
hsa-miR-603	0	0	1	1	1	1	EIF2AK3	eukaryotic translation initiation factor 2-alpha kinase 3
hsa-miR-603	1	0	1	0	1	1	ARHGEF6	Rac/Cdc42 guanine nucleotide exchange factor (GEF) 6
hsa-miR-603	1	0	1	0	1	1	ROCK2	Rho-associated, coiled-coil containing protein kinase 2
hsa-miR-603	1	0	1	1	1	1	ONECUT2	one cut homeobox 2
hsa-miR-603	0	0	1	1	1	1	CDH6	cadherin 6, type 2, K-cadherin (fetal kidney)
hsa-miR-603	0	0	1	0	1	1	DSC2	desmocollin 2
hsa-miR-603	1	0	1	1	1	1	KCNA2	potassium voltage-gated channel, shaker-related subfamily, member 2
hsa-miR-603	0	0	1	1	1	1	NDUFA5	NADH dehydrogenase (ubiquinone) 1 alpha subcomplex, 5, 13kDa
hsa-miR-603	0	0	1	1	1	1	PTH2R	parathyroid hormone 2 receptor
hsa-miR-603	1	0	1	0	1	1	SCD	stearoyl-CoA desaturase (delta-9-desaturase)
hsa-miR-603	1	0	1	1	1	1	SIAH2	siah E3 ubiquitin protein ligase 2
hsa-miR-603	0	0	1	1	1	1	AKAP17A	A kinase (PRKA) anchor protein 17A
hsa-miR-603	1	0	1	1	0	0	ADAMTS4	ADAM metallopeptidase with thrombospondin type 1 motif, 4
hsa-miR-603	0	0	1	1	1	1	ABCD2	ATP-binding cassette, sub-family D (ALD), member 2
hsa-miR-603	1	0	1	1	1	1	CBL	Cbl proto-oncogene, E3 ubiquitin protein ligase
hsa-miR-603	1	0	1	1	1	1	FOXN3	forkhead box N3
hsa-miR-603	1	0	1	1	1	1	CRK	v-crk sarcoma virus CT10 oncogene homolog (avian)
hsa-miR-603	1	0	1	0	1	1	E2F1	E2F transcription factor 1
hsa-miR-603	1	0	1	1	1	1	H3F3B	H3 histone, family 3B (H3.3B)
hsa-miR-603	0	0	1	1	1	1	NFIL3	nuclear factor, interleukin 3 regulated
hsa-miR-603	1	0	1	0	1	1	PRKCE	protein kinase C, epsilon
hsa-miR-603	0	0	1	1	1	1	SLC20A1	solute carrier family 20 (phosphate transporter), member 1
hsa-miR-603	0	0	1	1	1	1	ST5	suppression of tumorigenicity 5
hsa-miR-603	1	0	1	1	1	1	WNT1	wingless-type MMTV integration site family, member 1
hsa-miR-603	0	0	1	1	0	0	ARHGEF5	Rho guanine nucleotide exchange factor (GEF) 5
hsa-miR-603	1	0	1	1	0	0	ZBTB22	zinc finger and BTB domain containing 22
hsa-miR-603	1	0	1	1	1	1	MAMLD1	mastermind-like domain containing 1
hsa-miR-603	1	0	1	1	1	1	INSIG1	insulin induced gene 1
hsa-miR-603	0	0	1	1	0	0	IVL	involucrin
hsa-miR-603	0	0	1	0	1	1	POU3F2	POU class 3 homeobox 2
hsa-miR-603	1	0	1	1	1	1	TERF2	telomeric repeat binding factor 2
hsa-miR-603	0	0	1	1	1	1	ACTR3	ARP3 actin-related protein 3 homolog (yeast)
hsa-miR-603	0	0	1	1	1	1	TSPAN3	tetraspanin 3
hsa-miR-603	1	0	1	1	1	1	ACTR1A	ARP1 actin-related protein 1 homolog A, centractin alpha (yeast)
hsa-miR-603	1	0	1	1	1	1	NAMPT	nicotinamide phosphoribosyltransferase
hsa-miR-603	0	0	1	1	1	1	RNF41	ring finger protein 41
hsa-miR-603	1	0	1	0	1	1	DCAF7	DDB1 and CUL4 associated factor 7
hsa-miR-603	0	0	1	0	1	1	CALCOCO2	calcium binding and coiled-coil domain 2
hsa-miR-603	1	0	1	0	1	1	SPRY3	sprouty homolog 3 (Drosophila)
hsa-miR-603	0	0	1	1	1	1	MFAP3	microfibrillar-associated protein 3
hsa-miR-603	1	0	1	1	1	1	FOXO4	forkhead box O4
hsa-miR-603	1	0	1	1	1	1	MTF1	metal-regulatory transcription factor 1
hsa-miR-603	0	0	1	1	1	1	MANF	mesencephalic astrocyte-derived neurotrophic factor
hsa-miR-603	1	0	1	0	1	1	SPATA2	spermatogenesis associated 2
hsa-miR-603	0	0	1	1	1	1	LANCL1	LanC lantibiotic synthetase component C-like 1 (bacterial)
hsa-miR-603	1	0	1	1	1	1	SPON1	spondin 1, extracellular matrix protein
hsa-miR-603	1	0	1	1	1	1	CAPZA2	capping protein (actin filament) muscle Z-line, alpha 2
hsa-miR-603	1	0	1	1	1	1	DNAJB1	DnaJ (Hsp40) homolog, subfamily B, member 1
hsa-miR-603	1	0	1	1	1	1	LASP1	LIM and SH3 protein 1
hsa-miR-603	1	0	1	1	1	1	NEFL	neurofilament, light polypeptide
hsa-miR-603	1	0	1	1	1	1	NR4A2	nuclear receptor subfamily 4, group A, member 2
hsa-miR-603	1	0	1	1	1	1	ORC2	origin recognition complex, subunit 2
hsa-miR-603	1	0	1	0	1	1	PITPNA	phosphatidylinositol transfer protein, alpha
hsa-miR-603	1	0	1	1	1	1	PRKAA1	protein kinase, AMP-activated, alpha 1 catalytic subunit
hsa-miR-603	0	0	1	1	1	1	PRKG2	protein kinase, cGMP-dependent, type II
hsa-miR-603	1	0	1	1	1	1	TACC1	transforming, acidic coiled-coil containing protein 1
hsa-miR-603	0	0	1	1	1	1	ZNF230	zinc finger protein 230
hsa-miR-603	0	0	1	1	1	1	PIBF1	progesterone immunomodulatory binding factor 1
hsa-miR-603	0	0	1	1	1	1	UBE2E3	ubiquitin-conjugating enzyme E2E 3
hsa-miR-603	1	0	1	0	1	1	APPBP2	amyloid beta precursor protein (cytoplasmic tail) binding protein 2
hsa-miR-603	1	0	1	1	1	1	NEBL	nebulette
hsa-miR-603	1	0	1	0	1	1	ARFGEF2	ADP-ribosylation factor guanine nucleotide-exchange factor 2 (brefeldin A-inhibited)
hsa-miR-603	0	0	1	1	0	0	DRAP1	DR1-associated protein 1 (negative cofactor 2 alpha)
hsa-miR-603	1	0	1	1	1	1	HEXIM1	hexamethylene bis-acetamide inducible 1
hsa-miR-603	1	0	1	0	1	1	GNAI3	guanine nucleotide binding protein (G protein), alpha inhibiting activity polypeptide 3
hsa-miR-603	1	0	1	0	1	1	IGF2BP1	insulin-like growth factor 2 mRNA binding protein 1
hsa-miR-603	1	0	1	1	1	1	KHDRBS1	KH domain containing, RNA binding, signal transduction associated 1
hsa-miR-603	1	0	1	1	1	1	CTCF	CCCTC-binding factor (zinc finger protein)
hsa-miR-603	1	0	1	1	1	1	RRAGA	Ras-related GTP binding A
hsa-miR-603	1	0	1	1	1	1	MAP3K2	mitogen-activated protein kinase kinase kinase 2
hsa-miR-603	1	0	1	1	1	1	PGRMC1	progesterone receptor membrane component 1
hsa-miR-603	0	0	1	1	1	1	CD300C	CD300c molecule
hsa-miR-603	1	0	1	0	1	1	SYNGAP1	synaptic Ras GTPase activating protein 1
hsa-miR-603	1	0	1	1	1	1	CBX1	chromobox homolog 1
hsa-miR-603	1	0	1	0	1	1	SLC2A3	solute carrier family 2 (facilitated glucose transporter), member 3
hsa-miR-603	1	0	1	1	1	1	NR4A3	nuclear receptor subfamily 4, group A, member 3
hsa-miR-603	1	0	1	1	1	1	ADAMTS1	ADAM metallopeptidase with thrombospondin type 1 motif, 1
hsa-miR-603	1	0	1	1	1	1	KAT7	K(lysine) acetyltransferase 7
hsa-miR-603	1	0	1	1	1	1	UBL3	ubiquitin-like 3
hsa-miR-603	1	0	1	1	1	1	TMF1	TATA element modulatory factor 1
hsa-miR-603	1	0	1	1	1	1	VEZF1	vascular endothelial zinc finger 1
hsa-miR-603	0	0	1	1	1	1	WIF1	WNT inhibitory factor 1
hsa-miR-603	1	0	1	1	1	1	PALM2-AKAP2	PALM2-AKAP2 readthrough
hsa-miR-603	1	0	1	1	1	1	DUSP10	dual specificity phosphatase 10
hsa-miR-603	1	0	1	1	1	1	RNF139	ring finger protein 139
hsa-miR-603	0	0	1	1	1	1	SLC6A14	solute carrier family 6 (amino acid transporter), member 14
hsa-miR-603	0	0	1	0	1	1	PNMA2	paraneoplastic Ma antigen 2
hsa-miR-603	0	0	1	1	1	1	STXBP3	syntaxin binding protein 3
hsa-miR-603	1	0	1	1	1	1	ZNF236	zinc finger protein 236
hsa-miR-603	0	0	1	0	1	1	AP4E1	adaptor-related protein complex 4, epsilon 1 subunit
hsa-miR-603	1	0	1	1	1	1	PADI2	peptidyl arginine deiminase, type II
hsa-miR-603	1	0	1	1	1	1	TARDBP	TAR DNA binding protein
hsa-miR-603	0	0	1	1	1	1	MIP	major intrinsic protein of lens fiber
hsa-miR-603	1	0	1	1	1	1	ELL2	elongation factor, RNA polymerase II, 2
hsa-miR-603	1	0	1	1	1	1	RHOQ	ras homolog family member Q
hsa-miR-603	1	0	1	1	1	1	HS2ST1	heparan sulfate 2-O-sulfotransferase 1
hsa-miR-603	1	0	1	1	1	1	KCNE1L	KCNE1-like
hsa-miR-603	1	0	1	0	1	1	GAB2	GRB2-associated binding protein 2
hsa-miR-603	1	0	1	1	1	1	FBXW11	F-box and WD repeat domain containing 11
hsa-miR-603	1	0	1	1	1	1	MAPRE1	microtubule-associated protein, RP/EB family, member 1
hsa-miR-603	1	0	1	0	1	1	MYO10	myosin X
hsa-miR-603	1	0	1	1	1	1	NNT	nicotinamide nucleotide transhydrogenase
hsa-miR-603	0	0	1	1	1	1	TTC33	tetratricopeptide repeat domain 33
hsa-miR-603	1	0	1	1	1	1	PITPNB	phosphatidylinositol transfer protein, beta
hsa-miR-603	0	0	1	0	1	1	TLL1	tolloid-like 1
hsa-miR-603	1	0	1	1	1	1	TLL2	tolloid-like 2
hsa-miR-603	1	0	1	0	1	1	FLRT2	fibronectin leucine rich transmembrane protein 2
hsa-miR-603	0	0	1	1	1	1	N6AMT1	N-6 adenine-specific DNA methyltransferase 1 (putative)
hsa-miR-603	1	0	1	1	1	1	CLCF1	cardiotrophin-like cytokine factor 1
hsa-miR-603	1	0	1	1	1	1	PPARGC1A	peroxisome proliferator-activated receptor gamma, coactivator 1 alpha
hsa-miR-603	1	0	1	1	1	1	AK2	adenylate kinase 2
hsa-miR-603	0	0	1	1	1	1	UBQLN1	ubiquilin 1
hsa-miR-603	0	0	1	1	1	1	UBQLN2	ubiquilin 2
hsa-miR-603	0	0	1	0	1	1	EMR2	egf-like module containing, mucin-like, hormone receptor-like 2
hsa-miR-603	0	0	1	1	1	1	CCDC113	coiled-coil domain containing 113
hsa-miR-603	0	0	1	1	0	0	NDUFA8	NADH dehydrogenase (ubiquinone) 1 alpha subcomplex, 8, 19kDa
hsa-miR-603	1	0	1	0	1	1	VAMP2	vesicle-associated membrane protein 2 (synaptobrevin 2)
hsa-miR-603	0	0	1	1	0	0	HSD17B8	hydroxysteroid (17-beta) dehydrogenase 8
hsa-miR-603	0	0	1	1	1	1	UBL4A	ubiquitin-like 4A
hsa-miR-603	0	0	1	1	0	0	EIF2B2	eukaryotic translation initiation factor 2B, subunit 2 beta, 39kDa
hsa-miR-603	1	0	1	0	1	1	ODZ1	odz, odd Oz/ten-m homolog 1 (Drosophila)
hsa-miR-603	1	0	1	1	1	1	YME1L1	YME1-like 1 (S. cerevisiae)
hsa-miR-603	0	0	1	1	0	0	OLFM1	olfactomedin 1
hsa-miR-603	1	0	1	1	1	1	TGDS	TDP-glucose 4,6-dehydratase
hsa-miR-603	1	0	1	1	1	1	SLC7A11	solute carrier family 7 (anionic amino acid transporter light chain, xc- system), member 11
hsa-miR-603	1	0	1	0	1	1	CNTN5	contactin 5
hsa-miR-603	1	0	1	1	0	0	SND1	staphylococcal nuclease and tudor domain containing 1
hsa-miR-603	1	0	1	1	1	1	AFF4	AF4/FMR2 family, member 4
hsa-miR-603	1	0	1	1	1	1	ERO1L	ERO1-like (S. cerevisiae)
hsa-miR-603	1	0	1	1	1	1	VSX1	visual system homeobox 1
hsa-miR-603	0	0	1	1	1	1	PSME4	proteasome (prosome, macropain) activator subunit 4
hsa-miR-603	1	0	1	1	1	1	ZNF592	zinc finger protein 592
hsa-miR-603	1	0	1	0	1	1	SH3PXD2A	SH3 and PX domains 2A
hsa-miR-603	0	0	1	0	1	1	LPIN2	lipin 2
hsa-miR-603	0	0	1	1	1	1	FAM53B	family with sequence similarity 53, member B
hsa-miR-603	1	0	1	1	1	1	KDM4A	lysine (K)-specific demethylase 4A
hsa-miR-603	1	0	1	1	1	1	ULK2	unc-51-like kinase 2 (C. elegans)
hsa-miR-603	1	0	1	0	1	1	MAML1	mastermind-like 1 (Drosophila)
hsa-miR-603	0	0	1	0	1	1	ZBTB24	zinc finger and BTB domain containing 24
hsa-miR-603	1	0	1	1	1	1	KIAA0753	KIAA0753
hsa-miR-603	1	0	1	0	1	1	KBTBD11	kelch repeat and BTB (POZ) domain containing 11
hsa-miR-603	1	0	1	1	1	1	ZBTB5	zinc finger and BTB domain containing 5
hsa-miR-603	0	0	1	0	1	1	PPM1E	protein phosphatase, Mg2+/Mn2+ dependent, 1E
hsa-miR-603	1	0	1	1	1	1	CHSY1	chondroitin sulfate synthase 1
hsa-miR-603	1	0	1	0	1	1	ICK	intestinal cell (MAK-like) kinase
hsa-miR-603	0	0	1	1	1	1	ENPP4	ectonucleotide pyrophosphatase/phosphodiesterase 4 (putative)
hsa-miR-603	1	0	1	0	1	1	PDS5B	PDS5, regulator of cohesion maintenance, homolog B (S. cerevisiae)
hsa-miR-603	0	0	1	1	1	1	FTSJD2	FtsJ methyltransferase domain containing 2
hsa-miR-603	1	0	1	0	1	1	PEG10	paternally expressed 10
hsa-miR-603	1	0	1	1	1	1	ZNF423	zinc finger protein 423
hsa-miR-603	1	0	1	0	1	1	SNX13	sorting nexin 13
hsa-miR-603	1	0	1	1	1	1	RTF1	Rtf1, Paf1/RNA polymerase II complex component, homolog (S. cerevisiae)
hsa-miR-603	1	0	1	1	1	1	GPD1L	glycerol-3-phosphate dehydrogenase 1-like
hsa-miR-603	1	0	1	1	1	1	PLCB1	phospholipase C, beta 1 (phosphoinositide-specific)
hsa-miR-603	1	0	1	1	1	1	PDS5A	PDS5, regulator of cohesion maintenance, homolog A (S. cerevisiae)
hsa-miR-603	1	0	1	0	1	1	KIAA1024	KIAA1024
hsa-miR-603	1	0	1	1	1	1	PHF15	PHD finger protein 15
hsa-miR-603	1	0	1	0	1	1	SRGAP2	SLIT-ROBO Rho GTPase activating protein 2
hsa-miR-603	1	0	1	1	1	1	ASXL1	additional sex combs like 1 (Drosophila)
hsa-miR-603	0	0	1	1	1	1	ADNP	activity-dependent neuroprotector homeobox
hsa-miR-603	1	0	1	1	1	1	MORC3	MORC family CW-type zinc finger 3
hsa-miR-603	1	0	1	1	1	1	DSTYK	dual serine/threonine and tyrosine protein kinase
hsa-miR-603	1	0	1	1	1	1	MOB4	MOB family member 4, phocein
hsa-miR-603	1	0	1	1	1	1	RNF19A	ring finger protein 19A, E3 ubiquitin protein ligase
hsa-miR-603	1	0	1	1	1	1	CNOT6	CCR4-NOT transcription complex, subunit 6
hsa-miR-603	1	0	1	1	1	1	CNRIP1	cannabinoid receptor interacting protein 1
hsa-miR-603	0	0	1	1	1	1	TMEM87A	transmembrane protein 87A
hsa-miR-603	0	0	1	1	0	0	PTCD1	pentatricopeptide repeat domain 1
hsa-miR-603	1	0	1	0	1	1	PPP1R16B	protein phosphatase 1, regulatory subunit 16B
hsa-miR-603	1	0	1	0	1	1	RRM2B	ribonucleotide reductase M2 B (TP53 inducible)
hsa-miR-603	1	0	1	1	1	1	ST8SIA3	ST8 alpha-N-acetyl-neuraminide alpha-2,8-sialyltransferase 3
hsa-miR-603	1	0	1	1	1	1	CDC40	cell division cycle 40 homolog (S. cerevisiae)
hsa-miR-603	1	0	1	0	1	1	CNR1	cannabinoid receptor 1 (brain)
hsa-miR-603	1	0	1	1	1	1	VGLL3	vestigial like 3 (Drosophila)
hsa-miR-603	1	0	1	1	1	1	SNX9	sorting nexin 9
hsa-miR-603	1	0	1	1	1	1	AKAP11	A kinase (PRKA) anchor protein 11
hsa-miR-603	0	0	1	0	1	1	FAM8A1	family with sequence similarity 8, member A1
hsa-miR-603	1	0	1	1	1	1	RAB14	RAB14, member RAS oncogene family
hsa-miR-603	1	0	1	1	1	1	ARID4B	AT rich interactive domain 4B (RBP1-like)
hsa-miR-603	1	0	1	0	1	1	RAB8B	RAB8B, member RAS oncogene family
hsa-miR-603	1	0	1	1	1	1	RAB6B	RAB6B, member RAS oncogene family
hsa-miR-603	1	0	1	1	1	1	MDM1	Mdm1 nuclear protein homolog (mouse)
hsa-miR-603	0	0	1	1	1	1	NKRF	NFKB repressing factor
hsa-miR-603	1	0	1	0	1	1	UBE2Q1	ubiquitin-conjugating enzyme E2Q family member 1
hsa-miR-603	1	0	1	1	1	1	ZC3H7B	zinc finger CCCH-type containing 7B
hsa-miR-603	1	0	1	1	1	1	DIRAS2	DIRAS family, GTP-binding RAS-like 2
hsa-miR-603	1	0	1	1	1	1	NOTCH1	notch 1
hsa-miR-603	0	0	1	1	1	1	DYM	dymeclin
hsa-miR-603	0	0	1	1	0	0	NUP62CL	nucleoporin 62kDa C-terminal like
hsa-miR-603	1	0	1	1	1	1	GDAP2	ganglioside induced differentiation associated protein 2
hsa-miR-603	1	0	1	0	1	1	FAM46C	family with sequence similarity 46, member C
hsa-miR-603	1	0	1	1	1	1	ZNF3	zinc finger protein 3
hsa-miR-603	1	0	1	1	1	1	ZDHHC7	zinc finger, DHHC-type containing 7
hsa-miR-603	1	0	1	1	1	1	ALKBH5	alkB, alkylation repair homolog 5 (E. coli)
hsa-miR-603	0	0	1	1	1	1	LRRC40	leucine rich repeat containing 40
hsa-miR-603	1	0	1	1	1	1	YTHDF1	YTH domain family, member 1
hsa-miR-603	1	0	1	1	1	1	UBE2R2	ubiquitin-conjugating enzyme E2R 2
hsa-miR-603	1	0	1	1	1	1	IMPAD1	inositol monophosphatase domain containing 1
hsa-miR-603	1	0	1	1	1	1	HIF1AN	hypoxia inducible factor 1, alpha subunit inhibitor
hsa-miR-603	0	0	1	1	1	1	IWS1	IWS1 homolog (S. cerevisiae)
hsa-miR-603	1	0	1	1	1	1	FIGN	fidgetin
hsa-miR-603	1	0	1	1	1	1	FAM178A	family with sequence similarity 178, member A
hsa-miR-603	1	0	1	1	1	1	RFWD3	ring finger and WD repeat domain 3
hsa-miR-603	0	0	1	1	1	1	MRPS10	mitochondrial ribosomal protein S10
hsa-miR-603	1	0	1	0	1	1	ARL8B	ADP-ribosylation factor-like 8B
hsa-miR-603	1	0	1	1	1	1	LRRC1	leucine rich repeat containing 1
hsa-miR-603	1	0	1	0	1	1	PARVA	parvin, alpha
hsa-miR-603	1	0	1	1	1	1	SPTLC3	serine palmitoyltransferase, long chain base subunit 3
hsa-miR-603	1	0	1	1	1	1	RSBN1	round spermatid basic protein 1
hsa-miR-603	1	0	1	1	1	1	PCDHGA1	protocadherin gamma subfamily A, 1
hsa-miR-603	1	0	1	0	1	1	PCDHGA10	protocadherin gamma subfamily A, 10
hsa-miR-603	1	0	1	0	1	1	PCDHGA11	protocadherin gamma subfamily A, 11
hsa-miR-603	1	0	1	1	1	1	PCDHGA2	protocadherin gamma subfamily A, 2
hsa-miR-603	1	0	1	0	1	1	PCDHGA3	protocadherin gamma subfamily A, 3
hsa-miR-603	1	0	1	0	1	1	PCDHGA4	protocadherin gamma subfamily A, 4
hsa-miR-603	1	0	1	0	1	1	PCDHGA5	protocadherin gamma subfamily A, 5
hsa-miR-603	1	0	1	0	1	1	PCDHGA6	protocadherin gamma subfamily A, 6
hsa-miR-603	1	0	1	0	1	1	PCDHGA7	protocadherin gamma subfamily A, 7
hsa-miR-603	1	0	1	0	1	1	PCDHGA9	protocadherin gamma subfamily A, 9
hsa-miR-603	1	0	1	0	1	1	PCDHGB1	protocadherin gamma subfamily B, 1
hsa-miR-603	1	0	1	0	1	1	PCDHGB2	protocadherin gamma subfamily B, 2
hsa-miR-603	1	0	1	0	1	1	PCDHGB3	protocadherin gamma subfamily B, 3
hsa-miR-603	1	0	1	0	1	1	PCDHGB5	protocadherin gamma subfamily B, 5
hsa-miR-603	1	0	1	0	1	1	PCDHGB6	protocadherin gamma subfamily B, 6
hsa-miR-603	1	0	1	0	1	1	PCDHGB7	protocadherin gamma subfamily B, 7
hsa-miR-603	1	0	1	0	1	1	PCDHGC4	protocadherin gamma subfamily C, 4
hsa-miR-603	1	0	1	0	1	1	PCDHGC5	protocadherin gamma subfamily C, 5
hsa-miR-603	1	0	1	0	1	1	CYCS	cytochrome c, somatic
hsa-miR-603	0	0	1	1	1	1	RIN2	Ras and Rab interactor 2
hsa-miR-603	1	0	1	0	1	1	CCDC93	coiled-coil domain containing 93
hsa-miR-603	1	0	1	1	1	1	DENND1B	DENN/MADD domain containing 1B
hsa-miR-603	1	0	1	1	1	1	EPB41L4B	erythrocyte membrane protein band 4.1 like 4B
hsa-miR-603	1	0	1	0	1	1	UBFD1	ubiquitin family domain containing 1
hsa-miR-603	1	0	1	1	1	1	CCBL2	cysteine conjugate-beta lyase 2
hsa-miR-603	0	0	1	1	1	1	FMN2	formin 2
hsa-miR-603	1	0	1	1	1	1	C1GALT1	core 1 synthase, glycoprotein-N-acetylgalactosamine 3-beta-galactosyltransferase, 1
hsa-miR-603	1	0	1	0	1	1	PMEPA1	prostate transmembrane protein, androgen induced 1
hsa-miR-603	0	0	1	1	1	1	ANKMY2	ankyrin repeat and MYND domain containing 2
hsa-miR-603	1	0	1	0	1	1	EIF5A2	eukaryotic translation initiation factor 5A2
hsa-miR-603	1	0	1	1	1	1	PTGFRN	prostaglandin F2 receptor negative regulator
hsa-miR-603	1	0	1	1	1	1	USP31	ubiquitin specific peptidase 31
hsa-miR-603	1	0	1	0	1	1	SYT4	synaptotagmin IV
hsa-miR-603	1	0	1	1	1	1	NCEH1	neutral cholesterol ester hydrolase 1
hsa-miR-603	0	0	1	0	1	1	TRMT5	tRNA methyltransferase 5 homolog (S. cerevisiae)
hsa-miR-603	0	0	1	0	1	1	SYT13	synaptotagmin XIII
hsa-miR-603	1	0	1	1	1	1	ZFP14	zinc finger protein 14 homolog (mouse)
hsa-miR-603	1	0	1	0	1	1	GPAM	glycerol-3-phosphate acyltransferase, mitochondrial
hsa-miR-603	0	0	1	1	0	0	CCL3L1	chemokine (C-C motif) ligand 3-like 1
hsa-miR-603	0	0	1	1	1	1	SSX3	synovial sarcoma, X breakpoint 3
hsa-miR-603	1	0	1	0	1	1	RAP2A	RAP2A, member of RAS oncogene family
hsa-miR-603	1	0	1	1	1	1	CLDN1	claudin 1
hsa-miR-603	1	0	1	1	1	1	CRY2	cryptochrome 2 (photolyase-like)
hsa-miR-603	0	0	1	1	1	1	RNASEL	ribonuclease L (2',5'-oligoisoadenylate synthetase-dependent)
hsa-miR-603	0	0	1	1	0	0	HOXD11	homeobox D11
hsa-miR-603	0	0	1	0	1	1	MS4A7	membrane-spanning 4-domains, subfamily A, member 7
hsa-miR-603	1	0	1	0	1	1	TP53INP2	tumor protein p53 inducible nuclear protein 2
hsa-miR-603	0	0	1	1	1	1	OSTC	oligosaccharyltransferase complex subunit
hsa-miR-603	1	0	1	1	1	1	NTN4	netrin 4
hsa-miR-603	1	0	1	1	1	1	FAM60A	family with sequence similarity 60, member A
hsa-miR-603	1	0	1	1	1	1	ZFYVE1	zinc finger, FYVE domain containing 1
hsa-miR-603	0	0	1	1	1	1	PRDM13	PR domain containing 13
hsa-miR-603	1	0	1	1	1	1	TMEM35	transmembrane protein 35
hsa-miR-603	1	0	1	1	1	1	TRIB2	tribbles homolog 2 (Drosophila)
hsa-miR-603	1	0	1	1	1	1	OTX2	orthodenticle homeobox 2
hsa-miR-603	1	0	1	1	1	1	BACH2	BTB and CNC homology 1, basic leucine zipper transcription factor 2
hsa-miR-603	1	0	1	0	1	1	MCL1	myeloid cell leukemia sequence 1 (BCL2-related)
hsa-miR-603	1	0	1	1	1	1	SEC24A	SEC24 family, member A (S. cerevisiae)
hsa-miR-603	1	0	1	0	1	1	CSNK1G1	casein kinase 1, gamma 1
hsa-miR-603	1	0	1	1	1	1	XPO4	exportin 4
hsa-miR-603	1	0	1	1	1	1	NEUROD6	neuronal differentiation 6
hsa-miR-603	0	0	1	1	1	1	OSBPL11	oxysterol binding protein-like 11
hsa-miR-603	1	0	1	1	1	1	PER2	period homolog 2 (Drosophila)
hsa-miR-603	1	0	1	1	1	1	YTHDC2	YTH domain containing 2
hsa-miR-603	0	0	1	1	1	1	METTL4	methyltransferase like 4
hsa-miR-603	1	0	1	1	1	1	REEP1	receptor accessory protein 1
hsa-miR-603	1	0	1	1	0	0	UBE2Z	ubiquitin-conjugating enzyme E2Z
hsa-miR-603	1	0	1	1	1	1	GID4	GID complex subunit 4, VID24 homolog (S. cerevisiae)
hsa-miR-603	0	0	1	0	1	1	TRPM8	transient receptor potential cation channel, subfamily M, member 8
hsa-miR-603	0	0	1	1	1	1	WDR77	WD repeat domain 77
hsa-miR-603	1	0	1	1	1	1	FAM134A	family with sequence similarity 134, member A
hsa-miR-603	1	0	1	1	1	1	EFHD2	EF-hand domain family, member D2
hsa-miR-603	1	0	1	1	1	1	ATP10A	ATPase, class V, type 10A
hsa-miR-603	0	0	1	1	1	1	NDNF	neuron-derived neurotrophic factor
hsa-miR-603	0	0	1	1	1	1	AKIRIN1	akirin 1
hsa-miR-603	0	0	1	1	1	1	SH3D21	SH3 domain containing 21
hsa-miR-603	0	0	1	1	1	1	BBS10	Bardet-Biedl syndrome 10
hsa-miR-603	0	0	1	1	1	1	SNIP1	Smad nuclear interacting protein 1
hsa-miR-603	0	0	1	0	1	1	C1orf115	chromosome 1 open reading frame 115
hsa-miR-603	1	0	1	0	1	1	ZFHX4	zinc finger homeobox 4
hsa-miR-603	1	0	1	0	1	1	MOB3B	MOB kinase activator 3B
hsa-miR-603	1	0	1	1	0	0	CNTD2	cyclin N-terminal domain containing 2
hsa-miR-603	1	0	1	0	1	1	NAA25	N(alpha)-acetyltransferase 25, NatB auxiliary subunit
hsa-miR-603	1	0	1	1	1	1	KLHL18	kelch-like 18 (Drosophila)
hsa-miR-603	1	0	1	0	1	1	VCPIP1	valosin containing protein (p97)/p47 complex interacting protein 1
hsa-miR-603	0	0	1	1	0	0	CENPT	centromere protein T
hsa-miR-603	1	0	1	1	1	1	RNF34	ring finger protein 34, E3 ubiquitin protein ligase
hsa-miR-603	1	0	1	1	1	1	HKDC1	hexokinase domain containing 1
hsa-miR-603	1	0	1	1	1	1	OPA3	optic atrophy 3 (autosomal recessive, with chorea and spastic paraplegia)
hsa-miR-603	1	0	1	1	1	1	PROSER1	proline and serine rich 1
hsa-miR-603	1	0	1	1	1	1	NAA50	N(alpha)-acetyltransferase 50, NatE catalytic subunit
hsa-miR-603	1	0	1	1	1	1	TNKS2	tankyrase, TRF1-interacting ankyrin-related ADP-ribose polymerase 2
hsa-miR-603	1	0	1	1	1	1	BTBD1	BTB (POZ) domain containing 1
hsa-miR-603	1	0	1	0	1	1	SRCIN1	SRC kinase signaling inhibitor 1
hsa-miR-603	1	0	1	1	1	1	JHDM1D	jumonji C domain containing histone demethylase 1 homolog D (S. cerevisiae)
hsa-miR-603	1	0	1	0	1	1	SETD7	SET domain containing (lysine methyltransferase) 7
hsa-miR-603	0	0	1	1	1	1	FCRL2	Fc receptor-like 2
hsa-miR-603	1	0	1	0	1	1	C1orf21	chromosome 1 open reading frame 21
hsa-miR-603	0	0	1	1	1	1	ISCA1	iron-sulfur cluster assembly 1 homolog (S. cerevisiae)
hsa-miR-603	0	0	1	1	1	1	SPACA1	sperm acrosome associated 1
hsa-miR-603	0	0	1	1	1	1	COG3	component of oligomeric golgi complex 3
hsa-miR-603	1	0	1	1	0	0	FZD8	frizzled family receptor 8
hsa-miR-603	1	0	1	0	1	1	PCDHGA8	protocadherin gamma subfamily A, 8
hsa-miR-603	0	0	1	0	1	1	RAB6C	RAB6C, member RAS oncogene family
hsa-miR-603	1	0	1	1	1	1	FBXO30	F-box protein 30
hsa-miR-603	1	0	1	1	1	1	DSEL	dermatan sulfate epimerase-like
hsa-miR-603	0	0	1	1	0	0	ATRIP	ATR interacting protein
hsa-miR-603	1	0	1	1	1	1	FAM175B	family with sequence similarity 175, member B
hsa-miR-603	1	0	1	1	1	1	ARID5B	AT rich interactive domain 5B (MRF1-like)
hsa-miR-603	1	0	1	1	1	1	ANTXR1	anthrax toxin receptor 1
hsa-miR-603	1	0	1	1	1	1	SLITRK6	SLIT and NTRK-like family, member 6
hsa-miR-603	1	0	1	1	1	1	SETD3	SET domain containing 3
hsa-miR-603	1	0	1	1	1	1	MEX3B	mex-3 homolog B (C. elegans)
hsa-miR-603	1	0	1	1	1	1	ZDHHC18	zinc finger, DHHC-type containing 18
hsa-miR-603	1	0	1	0	1	1	PSD2	pleckstrin and Sec7 domain containing 2
hsa-miR-603	1	0	1	1	1	1	POLDIP3	polymerase (DNA-directed), delta interacting protein 3
hsa-miR-603	0	0	1	1	0	0	NICN1	nicolin 1
hsa-miR-603	1	0	1	1	1	1	DDI2	DNA-damage inducible 1 homolog 2 (S. cerevisiae)
hsa-miR-603	1	0	1	1	1	1	BRMS1L	breast cancer metastasis-suppressor 1-like
hsa-miR-603	1	0	1	1	1	1	DCTN5	dynactin 5 (p25)
hsa-miR-603	1	0	1	1	1	1	TTBK1	tau tubulin kinase 1
hsa-miR-603	1	0	1	1	0	0	ORAI1	ORAI calcium release-activated calcium modulator 1
hsa-miR-603	1	0	1	1	1	1	ABHD13	abhydrolase domain containing 13
hsa-miR-603	1	0	1	0	1	1	UBASH3B	ubiquitin associated and SH3 domain containing B
hsa-miR-603	1	0	1	1	1	1	ARHGAP19	Rho GTPase activating protein 19
hsa-miR-603	1	0	1	1	1	1	RBM17	RNA binding motif protein 17
hsa-miR-603	1	0	1	1	1	1	PCDH10	protocadherin 10
hsa-miR-603	1	0	1	0	1	1	EAF1	ELL associated factor 1
hsa-miR-603	0	0	1	1	1	1	ZIC5	Zic family member 5
hsa-miR-603	1	0	1	1	1	1	C5orf30	chromosome 5 open reading frame 30
hsa-miR-603	1	0	1	0	1	1	PURB	purine-rich element binding protein B
hsa-miR-603	1	0	1	1	0	0	CAMK2N2	calcium/calmodulin-dependent protein kinase II inhibitor 2
hsa-miR-603	1	0	1	1	1	1	RASL10B	RAS-like, family 10, member B
hsa-miR-603	1	0	1	0	1	1	KRAS	v-Ki-ras2 Kirsten rat sarcoma viral oncogene homolog
hsa-miR-603	1	0	1	1	1	1	SSH2	slingshot homolog 2 (Drosophila)
hsa-miR-603	0	0	1	1	1	1	FBXO4	F-box protein 4
hsa-miR-603	1	0	1	1	1	1	EPT1	ethanolaminephosphotransferase 1 (CDP-ethanolamine-specific)
hsa-miR-603	1	0	1	1	1	1	BRWD1	bromodomain and WD repeat domain containing 1
hsa-miR-603	1	0	1	0	0	0	ANKRD40	ankyrin repeat domain 40
hsa-miR-603	1	0	1	1	1	1	STX1B	syntaxin 1B
hsa-miR-603	0	0	1	1	0	0	SIGLEC11	sialic acid binding Ig-like lectin 11
hsa-miR-603	1	0	1	1	1	1	MAL2	mal, T-cell differentiation protein 2 (gene/pseudogene)
hsa-miR-603	0	0	1	1	1	1	PLEKHG4B	pleckstrin homology domain containing, family G (with RhoGef domain) member 4B
hsa-miR-603	1	0	1	0	0	0	SMYD4	SET and MYND domain containing 4
hsa-miR-603	0	0	1	1	0	0	FAM46B	family with sequence similarity 46, member B
hsa-miR-603	1	0	1	1	0	0	ADAMTS14	ADAM metallopeptidase with thrombospondin type 1 motif, 14
hsa-miR-603	0	0	1	1	1	1	DTD1	D-tyrosyl-tRNA deacylase 1 homolog (S. cerevisiae)
hsa-miR-603	1	0	1	1	1	1	KLHL6	kelch-like 6 (Drosophila)
hsa-miR-603	0	0	1	1	0	0	RXFP2	relaxin/insulin-like family peptide receptor 2
hsa-miR-603	1	0	1	1	1	1	PRRC1	proline-rich coiled-coil 1
hsa-miR-603	1	0	1	1	0	0	UNC5A	unc-5 homolog A (C. elegans)
hsa-miR-603	1	0	1	1	1	1	FAM122A	family with sequence similarity 122A
hsa-miR-603	1	0	1	1	1	1	WDR92	WD repeat domain 92
hsa-miR-603	1	0	1	0	1	1	NUS1	nuclear undecaprenyl pyrophosphate synthase 1 homolog (S. cerevisiae)
hsa-miR-603	1	0	1	0	1	1	SP1	Sp1 transcription factor
hsa-miR-603	1	0	1	0	1	1	FCHO2	FCH domain only 2
hsa-miR-603	0	0	1	0	1	1	MYO3B	myosin IIIB
hsa-miR-603	1	0	1	1	1	1	DNER	delta/notch-like EGF repeat containing
hsa-miR-603	0	0	1	1	0	0	SGCZ	sarcoglycan, zeta
hsa-miR-603	1	0	1	0	1	1	CENPBD1	CENPB DNA-binding domains containing 1
hsa-miR-603	0	0	1	0	1	1	UBLCP1	ubiquitin-like domain containing CTD phosphatase 1
hsa-miR-603	1	0	1	1	1	1	VTI1A	vesicle transport through interaction with t-SNAREs homolog 1A (yeast)
hsa-miR-603	0	0	1	0	1	1	DDIT4L	DNA-damage-inducible transcript 4-like
hsa-miR-603	0	0	1	0	1	1	OSTCP1	oligosaccharyltransferase complex subunit pseudogene 1
hsa-miR-603	1	0	1	0	1	1	MTPN	myotrophin
hsa-miR-603	1	0	1	1	1	1	BOD1L1	biorientation of chromosomes in cell division 1-like 1
hsa-miR-603	0	0	1	1	1	1	LONRF1	LON peptidase N-terminal domain and ring finger 1
hsa-miR-603	0	0	1	1	1	1	CHMP4C	charged multivesicular body protein 4C
hsa-miR-603	0	0	1	1	1	1	RMI2	RMI2, RecQ mediated genome instability 2, homolog (S. cerevisiae)
hsa-miR-603	1	0	1	1	1	1	C1orf216	chromosome 1 open reading frame 216
hsa-miR-603	1	0	1	1	1	1	TBX15	T-box 15
hsa-miR-603	0	0	1	1	1	1	ZNF572	zinc finger protein 572
hsa-miR-603	0	0	1	0	1	1	HORMAD2	HORMA domain containing 2
hsa-miR-603	1	0	1	0	1	1	TMTC2	transmembrane and tetratricopeptide repeat containing 2
hsa-miR-603	0	0	1	1	1	1	FAM227B	family with sequence similarity 227, member B
hsa-miR-603	0	0	1	1	1	1	RALGPS2	Ral GEF with PH domain and SH3 binding motif 2
hsa-miR-603	0	0	1	1	0	0	MUC20	mucin 20, cell surface associated
hsa-miR-603	0	0	1	1	1	1	ZFP3	zinc finger protein 3 homolog (mouse)
hsa-miR-603	1	0	1	1	0	0	TMEM86A	transmembrane protein 86A
hsa-miR-603	1	0	1	0	1	1	ZCCHC24	zinc finger, CCHC domain containing 24
hsa-miR-603	0	0	1	0	1	1	VGLL2	vestigial like 2 (Drosophila)
hsa-miR-603	1	0	1	1	1	1	CREBRF	CREB3 regulatory factor
hsa-miR-603	1	0	1	1	1	1	NAP1L5	nucleosome assembly protein 1-like 5
hsa-miR-603	0	0	1	1	1	1	REXO1L1	REX1, RNA exonuclease 1 homolog (S. cerevisiae)-like 1
hsa-miR-603	1	0	1	1	1	1	SMG7	smg-7 homolog, nonsense mediated mRNA decay factor (C. elegans)
hsa-miR-603	0	0	1	1	0	0	SSX6	synovial sarcoma, X breakpoint 6 (pseudogene)
hsa-miR-603	1	0	1	1	1	1	MMGT1	membrane magnesium transporter 1
hsa-miR-603	0	0	1	1	1	1	C8orf47	chromosome 8 open reading frame 47
hsa-miR-603	1	0	1	0	1	1	PGM2L1	phosphoglucomutase 2-like 1
hsa-miR-603	0	0	1	1	1	1	CDRT4	CMT1A duplicated region transcript 4
hsa-miR-603	1	0	1	1	1	1	LDLRAD3	low density lipoprotein receptor class A domain containing 3
hsa-miR-603	0	0	1	1	1	1	GRIK1	glutamate receptor, ionotropic, kainate 1
hsa-miR-603	0	0	1	0	1	1	C15orf37	chromosome 15 open reading frame 37
hsa-miR-603	0	0	1	1	1	1	MRPL43	mitochondrial ribosomal protein L43
hsa-miR-603	0	0	1	1	0	0	HRAS	v-Ha-ras Harvey rat sarcoma viral oncogene homolog
hsa-miR-603	1	0	1	1	1	1	LRRTM3	leucine rich repeat transmembrane neuronal 3
hsa-miR-603	1	0	1	1	1	1	MARCH3	membrane-associated ring finger (C3HC4) 3, E3 ubiquitin protein ligase
hsa-miR-603	1	0	1	1	1	1	MB21D2	Mab-21 domain containing 2
hsa-miR-603	1	0	1	1	1	1	TMEM26	transmembrane protein 26
hsa-miR-603	1	0	1	0	1	1	ARL5B	ADP-ribosylation factor-like 5B
hsa-miR-603	0	0	1	1	1	1	SYT15	synaptotagmin XV
hsa-miR-603	1	0	1	1	1	1	SPRED2	sprouty-related, EVH1 domain containing 2
hsa-miR-603	0	0	1	0	1	1	BAGE5	B melanoma antigen family, member 5
hsa-miR-603	0	0	1	1	1	1	ZNF428	zinc finger protein 428
hsa-miR-603	1	0	1	1	1	1	BCL9L	B-cell CLL/lymphoma 9-like
hsa-miR-603	0	0	1	1	0	0	CCDC144B	coiled-coil domain containing 144B (pseudogene)
hsa-miR-603	1	0	1	0	1	1	SLC16A9	solute carrier family 16, member 9 (monocarboxylic acid transporter 9)
hsa-miR-603	1	0	1	1	1	1	ZBTB41	zinc finger and BTB domain containing 41
hsa-miR-603	1	0	1	1	1	1	ADAMTS6	ADAM metallopeptidase with thrombospondin type 1 motif, 6
hsa-miR-603	1	0	1	1	1	1	E2F6	E2F transcription factor 6
hsa-miR-603	0	0	1	1	0	0	TMEM173	transmembrane protein 173
hsa-miR-603	1	0	1	0	1	1	PTPLB	protein tyrosine phosphatase-like (proline instead of catalytic arginine), member b
hsa-miR-603	1	0	1	0	1	1	NRK	Nik related kinase
hsa-miR-603	0	0	1	1	1	1	LHFPL4	lipoma HMGIC fusion partner-like 4
hsa-miR-603	1	0	1	1	1	1	NAPEPLD	N-acyl phosphatidylethanolamine phospholipase D
hsa-miR-603	1	0	1	1	1	1	TMEM189-UBE2V1	TMEM189-UBE2V1 readthrough
hsa-miR-603	1	0	1	1	1	1	FBXO33	F-box protein 33
hsa-miR-603	1	0	1	1	1	1	RAPH1	Ras association (RalGDS/AF-6) and pleckstrin homology domains 1
hsa-miR-603	0	0	1	1	1	1	SERTM1	serine-rich and transmembrane domain containing 1
hsa-miR-603	0	0	1	1	1	1	TMIGD1	transmembrane and immunoglobulin domain containing 1
hsa-miR-603	1	0	1	0	1	1	NAALADL2	N-acetylated alpha-linked acidic dipeptidase-like 2
hsa-miR-603	1	0	1	1	1	1	FREM2	FRAS1 related extracellular matrix protein 2
hsa-miR-603	0	0	1	0	1	1	FSD1L	fibronectin type III and SPRY domain containing 1-like
hsa-miR-603	0	0	1	1	1	1	PATE2	prostate and testis expressed 2
hsa-miR-603	0	0	1	0	1	1	TMEM215	transmembrane protein 215
hsa-miR-603	0	0	1	1	1	1	ZNF543	zinc finger protein 543
hsa-miR-603	0	0	1	0	0	0	TOP1P2	topoisomerase (DNA) I pseudogene 2
hsa-miR-603	0	0	1	0	0	0	LOC339240	keratin 17 pseudogene
hsa-miR-603	0	0	1	0	0	0	SNORD38B	small nucleolar RNA, C/D box 38B
hsa-miR-603	0	0	1	0	0	0	MIR155HG	MIR155 host gene (non-protein coding)
hsa-miR-603	0	0	1	1	0	0	TTTY8	testis-specific transcript, Y-linked 8 (non-protein coding)
hsa-miR-603	0	0	1	0	0	0	TTTY15	testis-specific transcript, Y-linked 15 (non-protein coding)
hsa-miR-603	0	0	1	0	0	0	RBMXP3	RNA binding motif protein, X-linked pseudogene 3
hsa-miR-603	0	0	1	0	0	0	NXF4	nuclear RNA export factor 4 pseudogene
hsa-miR-603	0	0	1	0	0	0	TOP1P1	topoisomerase (DNA) I pseudogene 1
hsa-miR-603	0	0	1	0	0	0	HNRNPA3P1	heterogeneous nuclear ribonucleoprotein A3 pseudogene 1
hsa-miR-603	0	0	1	0	0	0	SNORD48	small nucleolar RNA, C/D box 48
hsa-miR-603	0	0	1	0	0	0	PER4	period homolog 3 (Drosophila) pseudogene
hsa-miR-603	0	0	1	0	0	0	TPTE2P3	transmembrane phosphoinositide 3-phosphatase and tensin homolog 2 pseudogene 3
hsa-miR-603	0	0	1	0	0	0	AQP7P1	aquaporin 7 pseudogene 1
hsa-miR-603	0	0	1	0	0	0	MALAT1	metastasis associated lung adenocarcinoma transcript 1 (non-protein coding)
hsa-miR-603	0	0	1	0	0	0	RNASEH2CP1	ribonuclease H2, subunit C pseudogene 1
hsa-miR-603	0	0	1	0	0	0	SNX29P2	sorting nexin 29 pseudogene 2
hsa-miR-603	0	0	1	0	0	0	SCARNA1	small Cajal body-specific RNA 1
hsa-miR-603	0	0	1	0	0	0	SNORD98	small nucleolar RNA, C/D box 98
hsa-miR-603	0	0	1	0	0	0	GBP1P1	guanylate binding protein 1, interferon-inducible pseudogene 1
hsa-miR-603	0	0	1	0	0	0	MYADML	myeloid-associated differentiation marker-like (pseudogene)
hsa-miR-603	0	0	1	0	0	0	SNORD114-11	small nucleolar RNA, C/D box 114-11
hsa-miR-603	0	0	1	1	0	0	TBL3	transducin (beta)-like 3
hsa-miR-603	1	0	1	1	0	0	KIAA1549L	KIAA1549-like
hsa-miR-603	1	0	1	1	1	1	KLF6	Kruppel-like factor 6
hsa-miR-603	0	0	1	1	1	1	CD84	CD84 molecule
hsa-miR-603	1	0	1	1	0	0	SLC45A4	solute carrier family 45, member 4
hsa-miR-603	1	0	1	1	1	1	B4GALT7	xylosylprotein beta 1,4-galactosyltransferase, polypeptide 7
hsa-miR-603	0	0	1	1	1	1	GRN	granulin
hsa-miR-603	1	0	1	1	1	1	PANX2	pannexin 2
hsa-miR-603	0	0	1	1	1	1	BCAR1	breast cancer anti-estrogen resistance 1
hsa-miR-603	0	0	1	1	1	1	P2RY10	purinergic receptor P2Y, G-protein coupled, 10
hsa-miR-603	1	0	1	1	1	1	TRMT6	tRNA methyltransferase 6 homolog (S. cerevisiae)
hsa-miR-603	0	0	0	1	1	1	SERPIND1	serpin peptidase inhibitor, clade D (heparin cofactor), member 1
hsa-miR-603	1	0	1	1	0	0	MMP11	matrix metallopeptidase 11 (stromelysin 3)
hsa-miR-603	0	0	1	1	0	0	MCM5	minichromosome maintenance complex component 5
hsa-miR-603	1	0	1	1	1	1	PHF5A	PHD finger protein 5A
hsa-miR-603	1	0	1	1	1	1	COCH	coagulation factor C homolog, cochlin (Limulus polyphemus)
hsa-miR-603	0	0	1	1	0	0	HTATSF1	HIV-1 Tat specific factor 1
hsa-miR-603	0	0	1	1	1	1	PIN4	protein (peptidylprolyl cis/trans isomerase) NIMA-interacting, 4 (parvulin)
hsa-miR-603	0	0	0	1	1	1	NTHL1	nth endonuclease III-like 1 (E. coli)
hsa-miR-603	0	0	1	1	0	0	STUB1	STIP1 homology and U-box containing protein 1, E3 ubiquitin protein ligase
hsa-miR-603	1	0	1	1	1	1	BRF2	BRF2, subunit of RNA polymerase III transcription initiation factor, BRF1-like
hsa-miR-603	1	0	1	1	0	0	DOT1L	DOT1-like, histone H3 methyltransferase (S. cerevisiae)
hsa-miR-603	0	0	1	1	0	0	RNASEH2A	ribonuclease H2, subunit A
hsa-miR-603	0	0	0	1	1	1	COMP	cartilage oligomeric matrix protein
hsa-miR-603	0	0	0	1	0	0	PON1	paraoxonase 1
hsa-miR-603	1	0	0	1	1	1	WNT3	wingless-type MMTV integration site family, member 3
hsa-miR-603	1	0	1	1	1	1	HNF1B	HNF1 homeobox B
hsa-miR-603	1	0	1	1	1	1	WFS1	Wolfram syndrome 1 (wolframin)
hsa-miR-603	0	0	1	1	1	1	SAYSD1	SAYSVFN motif domain containing 1
hsa-miR-603	1	0	0	1	0	0	PCDHB6	protocadherin beta 6
hsa-miR-603	1	0	0	1	0	0	ABTB1	ankyrin repeat and BTB (POZ) domain containing 1
hsa-miR-603	0	0	1	1	1	1	FANCL	Fanconi anemia, complementation group L
hsa-miR-603	0	0	0	1	0	0	NEU2	sialidase 2 (cytosolic sialidase)
hsa-miR-603	1	0	1	1	1	1	TBPL1	TBP-like 1
hsa-miR-603	0	0	1	1	1	1	STBD1	starch binding domain 1
hsa-miR-603	0	0	0	1	0	0	ACOT2	acyl-CoA thioesterase 2
hsa-miR-603	0	0	0	1	0	0	MTERFD3	MTERF domain containing 3
hsa-miR-603	0	0	1	1	1	1	TNFSF10	tumor necrosis factor (ligand) superfamily, member 10
hsa-miR-603	0	0	1	1	0	0	WFDC3	WAP four-disulfide core domain 3
hsa-miR-603	0	0	1	1	0	0	HIST1H4G	histone cluster 1, H4g
hsa-miR-603	0	0	1	1	0	0	C6orf130	chromosome 6 open reading frame 130
hsa-miR-603	0	0	1	1	1	1	PIWIL1	piwi-like 1 (Drosophila)
hsa-miR-603	1	0	1	1	1	1	C20orf26	chromosome 20 open reading frame 26
hsa-miR-603	1	0	1	1	0	0	KDM1A	lysine (K)-specific demethylase 1A
hsa-miR-603	1	0	1	1	1	1	EVI2A	ecotropic viral integration site 2A
hsa-miR-603	0	0	1	1	1	1	MON1B	MON1 homolog B (yeast)
hsa-miR-603	1	0	1	1	1	1	AAMP	angio-associated, migratory cell protein
hsa-miR-603	0	0	1	1	1	1	NAA38	N(alpha)-acetyltransferase 38, NatC auxiliary subunit
hsa-miR-603	0	0	1	1	1	1	MBD4	methyl-CpG binding domain protein 4
hsa-miR-603	0	0	0	1	0	0	CMA1	chymase 1, mast cell
hsa-miR-603	0	0	0	1	0	0	TTTY1B	testis-specific transcript, Y-linked 1B (non-protein coding)
hsa-miR-603	0	0	1	1	0	0	LILRA1	leukocyte immunoglobulin-like receptor, subfamily A (with TM domain), member 1
hsa-miR-603	0	0	1	1	0	0	TMCO6	transmembrane and coiled-coil domains 6
hsa-miR-603	0	0	0	1	0	0	EXOC3L2	exocyst complex component 3-like 2
hsa-miR-603	0	0	1	1	1	1	VIMP	VCP-interacting membrane protein
hsa-miR-603	0	0	1	1	1	1	HRSP12	heat-responsive protein 12
hsa-miR-603	0	0	1	1	0	0	EMC7	ER membrane protein complex subunit 7
hsa-miR-603	0	0	1	1	0	0	GPR77	G protein-coupled receptor 77
hsa-miR-603	0	0	0	1	1	1	MFSD9	major facilitator superfamily domain containing 9
hsa-miR-603	0	0	1	1	0	0	GPR45	G protein-coupled receptor 45
hsa-miR-603	1	0	1	1	0	0	CCM2	cerebral cavernous malformation 2
hsa-miR-603	0	0	1	1	1	1	MTHFS	5,10-methenyltetrahydrofolate synthetase (5-formyltetrahydrofolate cyclo-ligase)
hsa-miR-603	0	0	1	1	1	1	MGARP	mitochondria-localized glutamic acid-rich protein
hsa-miR-603	0	0	0	1	1	1	FDX1	ferredoxin 1
hsa-miR-603	0	0	1	1	1	1	LIN7A	lin-7 homolog A (C. elegans)
hsa-miR-603	1	0	1	1	1	1	PTPRB	protein tyrosine phosphatase, receptor type, B
hsa-miR-603	0	0	0	1	0	0	NUP133	nucleoporin 133kDa
hsa-miR-603	0	0	1	1	0	0	SGCA	sarcoglycan, alpha (50kDa dystrophin-associated glycoprotein)
hsa-miR-603	1	0	1	1	1	1	ANKRD12	ankyrin repeat domain 12
hsa-miR-603	0	0	0	1	1	1	ALG1	asparagine-linked glycosylation 1, beta-1,4-mannosyltransferase homolog (S. cerevisiae)
hsa-miR-603	0	0	0	1	1	1	GINS1	GINS complex subunit 1 (Psf1 homolog)
hsa-miR-603	0	0	0	1	0	0	RPL8	ribosomal protein L8
hsa-miR-603	0	0	0	1	1	1	BPI	bactericidal/permeability-increasing protein
hsa-miR-603	0	0	0	1	1	1	UQCR11	ubiquinol-cytochrome c reductase, complex III subunit XI
hsa-miR-603	0	0	0	1	1	1	MAP2K2	mitogen-activated protein kinase kinase 2
hsa-miR-603	0	0	1	1	1	1	ZNF330	zinc finger protein 330
hsa-miR-603	1	0	1	1	1	1	EEF2K	eukaryotic elongation factor-2 kinase
hsa-miR-603	0	0	1	1	0	0	NOVA2	neuro-oncological ventral antigen 2
hsa-miR-603	0	0	0	1	0	0	LIG1	ligase I, DNA, ATP-dependent
hsa-miR-603	0	0	1	1	0	0	IL1B	interleukin 1, beta
hsa-miR-603	0	0	1	1	0	0	TCF25	transcription factor 25 (basic helix-loop-helix)
hsa-miR-603	0	0	0	1	0	0	LXN	latexin
hsa-miR-603	0	0	1	1	1	1	AGPAT9	1-acylglycerol-3-phosphate O-acyltransferase 9
hsa-miR-603	0	0	1	1	0	0	MCM2	minichromosome maintenance complex component 2
hsa-miR-603	0	0	1	1	0	0	MARK2	MAP/microtubule affinity-regulating kinase 2
hsa-miR-603	1	0	1	1	1	1	SLC26A4	solute carrier family 26, member 4
hsa-miR-603	1	0	1	1	1	1	PRKAR2B	protein kinase, cAMP-dependent, regulatory, type II, beta
hsa-miR-603	0	0	0	1	1	1	SLC25A16	solute carrier family 25 (mitochondrial carrier; Graves disease autoantigen), member 16
hsa-miR-603	1	0	1	1	1	1	MMAB	methylmalonic aciduria (cobalamin deficiency) cblB type
hsa-miR-603	0	0	0	1	1	1	CCDC65	coiled-coil domain containing 65
hsa-miR-603	1	0	0	1	1	1	ACVRL1	activin A receptor type II-like 1
hsa-miR-603	0	0	1	1	1	1	BBS4	Bardet-Biedl syndrome 4
hsa-miR-603	1	0	0	1	0	0	UNC45A	unc-45 homolog A (C. elegans)
hsa-miR-603	0	0	0	1	0	0	ZNF581	zinc finger protein 581
hsa-miR-603	0	0	1	1	0	0	WRAP73	WD repeat containing, antisense to TP73
hsa-miR-603	0	0	0	1	0	0	TUBB8	tubulin, beta 8 class VIII
hsa-miR-603	0	0	0	1	1	1	METTL21A	methyltransferase like 21A
hsa-miR-603	1	0	1	1	1	1	TRPC1	transient receptor potential cation channel, subfamily C, member 1
hsa-miR-603	0	0	1	1	1	1	UCN2	urocortin 2
hsa-miR-603	0	0	0	1	1	1	SPATA5	spermatogenesis associated 5
hsa-miR-603	0	0	1	1	1	1	SYTL4	synaptotagmin-like 4
hsa-miR-603	0	0	1	1	0	0	TMX2	thioredoxin-related transmembrane protein 2
hsa-miR-603	0	0	1	1	0	0	RPS3	ribosomal protein S3
hsa-miR-603	0	0	0	1	1	1	ST14	suppression of tumorigenicity 14 (colon carcinoma)
hsa-miR-603	0	0	0	1	0	0	C20orf78	chromosome 20 open reading frame 78
hsa-miR-603	0	0	1	1	0	0	PIGT	phosphatidylinositol glycan anchor biosynthesis, class T
hsa-miR-603	0	0	1	1	1	1	MIA2	melanoma inhibitory activity 2
hsa-miR-603	0	0	0	1	1	1	C11orf53	chromosome 11 open reading frame 53
hsa-miR-603	0	0	1	1	0	0	ANKAR	ankyrin and armadillo repeat containing
hsa-miR-603	0	0	0	1	1	1	CCDC122	coiled-coil domain containing 122
hsa-miR-603	0	0	0	1	1	1	TUBGCP5	tubulin, gamma complex associated protein 5
hsa-miR-603	0	0	1	1	0	0	ASZ1	ankyrin repeat, SAM and basic leucine zipper domain containing 1
hsa-miR-603	0	0	0	1	0	0	MKI67IP	MKI67 (FHA domain) interacting nucleolar phosphoprotein
hsa-miR-603	0	0	1	1	1	1	DCK	deoxycytidine kinase
hsa-miR-603	0	0	1	1	0	0	C14orf2	chromosome 14 open reading frame 2
hsa-miR-603	0	0	1	1	1	1	UQCRB	ubiquinol-cytochrome c reductase binding protein
hsa-miR-603	0	0	1	1	1	1	TTLL3	tubulin tyrosine ligase-like family, member 3
hsa-miR-603	0	0	1	1	0	0	ARPC4	actin related protein 2/3 complex, subunit 4, 20kDa
hsa-miR-603	0	0	0	1	1	1	WDR66	WD repeat domain 66
hsa-miR-603	0	0	1	1	0	0	SCUBE1	signal peptide, CUB domain, EGF-like 1
hsa-miR-603	0	0	1	1	0	0	ATP6V0D1	ATPase, H+ transporting, lysosomal 38kDa, V0 subunit d1
hsa-miR-603	0	0	0	1	0	0	RSPH1	radial spoke head 1 homolog (Chlamydomonas)
hsa-miR-603	0	0	1	1	0	0	C21orf33	chromosome 21 open reading frame 33
hsa-miR-603	0	0	0	1	0	0	PKN3	protein kinase N3
hsa-miR-603	0	0	0	1	1	1	CCR2	chemokine (C-C motif) receptor 2
hsa-miR-603	0	0	1	1	0	0	RPL26	ribosomal protein L26
hsa-miR-603	0	0	1	1	1	1	PTPRN	protein tyrosine phosphatase, receptor type, N
hsa-miR-603	0	0	0	1	0	0	FEV	FEV (ETS oncogene family)
hsa-miR-603	0	0	0	1	0	0	GLB1L	galactosidase, beta 1-like
hsa-miR-603	0	0	1	1	1	1	GYG1	glycogenin 1
hsa-miR-603	0	0	0	1	1	1	WDR65	WD repeat domain 65
hsa-miR-603	0	0	1	1	0	0	PLXNB1	plexin B1
hsa-miR-603	0	0	0	1	1	1	F2RL1	coagulation factor II (thrombin) receptor-like 1
hsa-miR-603	0	0	0	1	1	1	DEFA6	defensin, alpha 6, Paneth cell-specific
hsa-miR-603	0	0	1	1	1	1	AKR1E2	aldo-keto reductase family 1, member E2
hsa-miR-603	0	0	1	1	0	0	SOHLH1	spermatogenesis and oogenesis specific basic helix-loop-helix 1
hsa-miR-603	0	0	0	1	0	0	ACAT1	acetyl-CoA acetyltransferase 1
hsa-miR-603	0	0	0	1	0	0	ZSCAN21	zinc finger and SCAN domain containing 21
hsa-miR-603	0	0	0	1	1	1	ZNF211	zinc finger protein 211
hsa-miR-603	0	0	1	1	0	0	PLK1	polo-like kinase 1
hsa-miR-603	0	0	0	1	0	0	COQ4	coenzyme Q4 homolog (S. cerevisiae)
hsa-miR-603	1	0	1	1	0	0	VKORC1	vitamin K epoxide reductase complex, subunit 1
hsa-miR-603	0	0	0	1	1	1	GLOD4	glyoxalase domain containing 4
hsa-miR-603	1	0	1	1	0	0	KIFC2	kinesin family member C2
hsa-miR-603	0	0	0	1	0	0	HSD11B1L	hydroxysteroid (11-beta) dehydrogenase 1-like
hsa-miR-603	0	0	0	1	1	1	CYB5D2	cytochrome b5 domain containing 2
hsa-miR-603	0	0	0	1	0	0	OR6F1	olfactory receptor, family 6, subfamily F, member 1
hsa-miR-603	0	0	0	1	0	0	OR5B2	olfactory receptor, family 5, subfamily B, member 2
hsa-miR-603	1	0	1	1	1	1	ANKRD49	ankyrin repeat domain 49
hsa-miR-603	1	0	1	1	0	0	LMAN2	lectin, mannose-binding 2
hsa-miR-603	0	0	1	1	0	0	POP7	processing of precursor 7, ribonuclease P/MRP subunit (S. cerevisiae)
hsa-miR-603	1	0	1	1	1	1	HOXC10	homeobox C10
hsa-miR-603	0	0	1	1	0	0	SLC6A19	solute carrier family 6 (neutral amino acid transporter), member 19
hsa-miR-603	0	0	0	1	1	1	TACR3	tachykinin receptor 3
hsa-miR-603	1	0	0	1	1	1	PWWP2B	PWWP domain containing 2B
hsa-miR-603	0	0	1	1	1	1	CCDC132	coiled-coil domain containing 132
hsa-miR-603	0	0	0	1	0	0	MGMT	O-6-methylguanine-DNA methyltransferase
hsa-miR-603	0	0	0	1	1	1	TMEM43	transmembrane protein 43
hsa-miR-603	1	0	1	1	1	1	USP42	ubiquitin specific peptidase 42
hsa-miR-603	0	0	0	1	1	1	AVEN	apoptosis, caspase activation inhibitor
hsa-miR-603	0	0	1	1	1	1	COMMD8	COMM domain containing 8
hsa-miR-603	1	0	1	1	1	1	SUPT3H	suppressor of Ty 3 homolog (S. cerevisiae)
hsa-miR-603	0	0	0	1	0	0	OR2AG1	olfactory receptor, family 2, subfamily AG, member 1
hsa-miR-603	0	0	0	1	0	0	SLC16A11	solute carrier family 16, member 11 (monocarboxylic acid transporter 11)
hsa-miR-603	0	0	0	1	0	0	C1orf100	chromosome 1 open reading frame 100
hsa-miR-603	0	0	0	1	1	1	PSMA8	proteasome (prosome, macropain) subunit, alpha type, 8
hsa-miR-603	0	0	0	1	1	1	TLR1	toll-like receptor 1
hsa-miR-603	1	0	1	1	0	0	TNXB	tenascin XB
hsa-miR-603	0	0	1	1	1	1	APITD1	apoptosis-inducing, TAF9-like domain 1
hsa-miR-603	0	0	1	1	1	1	CORT	cortistatin
hsa-miR-603	1	0	1	1	1	1	IQCA1	IQ motif containing with AAA domain 1
hsa-miR-603	0	0	1	1	1	1	CHST2	carbohydrate (N-acetylglucosamine-6-O) sulfotransferase 2
hsa-miR-603	0	0	1	1	1	1	IL20RB	interleukin 20 receptor beta
hsa-miR-603	0	0	0	1	0	0	ACOT1	acyl-CoA thioesterase 1
hsa-miR-603	0	0	0	1	0	0	VN1R4	vomeronasal 1 receptor 4
hsa-miR-603	0	0	1	1	1	1	PIK3R6	phosphoinositide-3-kinase, regulatory subunit 6
hsa-miR-603	0	0	1	1	1	1	ZC3HC1	zinc finger, C3HC-type containing 1
hsa-miR-603	0	0	1	1	0	0	RPS6KB2	ribosomal protein S6 kinase, 70kDa, polypeptide 2
hsa-miR-603	0	0	0	1	0	0	OR8K3	olfactory receptor, family 8, subfamily K, member 3
hsa-miR-603	0	0	1	1	1	1	MGAM	maltase-glucoamylase (alpha-glucosidase)
hsa-miR-603	1	0	1	1	1	1	NDFIP1	Nedd4 family interacting protein 1
hsa-miR-603	0	0	1	1	1	1	POC1B	POC1 centriolar protein homolog B (Chlamydomonas)
hsa-miR-603	0	0	1	1	0	0	TBC1D26	TBC1 domain family, member 26
hsa-miR-603	0	0	0	1	0	0	FARSA	phenylalanyl-tRNA synthetase, alpha subunit
hsa-miR-603	0	0	0	1	0	0	EXOC3	exocyst complex component 3
hsa-miR-603	0	0	0	1	1	1	ZNF354C	zinc finger protein 354C
hsa-miR-603	0	0	1	1	0	0	ELMOD3	ELMO/CED-12 domain containing 3
hsa-miR-603	0	0	1	1	0	0	SLC41A3	solute carrier family 41, member 3
hsa-miR-603	0	0	0	1	0	0	OR2AE1	olfactory receptor, family 2, subfamily AE, member 1
hsa-miR-603	1	0	1	1	1	1	PDCD6	programmed cell death 6
hsa-miR-603	1	0	1	1	1	1	AHRR	aryl-hydrocarbon receptor repressor
hsa-miR-603	0	0	1	1	1	1	AACS	acetoacetyl-CoA synthetase
hsa-miR-603	0	0	1	1	1	1	VRK3	vaccinia related kinase 3
hsa-miR-603	0	0	1	1	1	1	ALX1	ALX homeobox 1
hsa-miR-603	0	0	0	1	0	0	C3orf32	chromosome 3 open reading frame 32
hsa-miR-603	0	0	1	1	1	1	FRMD8	FERM domain containing 8
hsa-miR-603	0	0	1	1	0	0	INTS3	integrator complex subunit 3
hsa-miR-603	0	0	0	1	1	1	IL17RA	interleukin 17 receptor A
hsa-miR-603	0	0	0	1	0	0	OR6B3	olfactory receptor, family 6, subfamily B, member 3
hsa-miR-603	0	0	1	1	0	0	RPP40	ribonuclease P/MRP 40kDa subunit
hsa-miR-603	0	0	0	1	1	1	C16orf53	chromosome 16 open reading frame 53
hsa-miR-603	0	0	0	1	0	0	FOXC2	forkhead box C2 (MFH-1, mesenchyme forkhead 1)
hsa-miR-603	0	0	1	1	0	0	D2HGDH	D-2-hydroxyglutarate dehydrogenase
hsa-miR-603	1	0	1	1	0	0	CCDC71	coiled-coil domain containing 71
hsa-miR-603	0	0	0	1	1	1	POLR2L	polymerase (RNA) II (DNA directed) polypeptide L, 7.6kDa
hsa-miR-603	1	0	0	1	1	1	FAM210A	family with sequence similarity 210, member A
hsa-miR-603	1	0	0	1	1	1	GPR4	G protein-coupled receptor 4
hsa-miR-603	1	0	1	1	1	1	LCP1	lymphocyte cytosolic protein 1 (L-plastin)
hsa-miR-603	0	0	0	1	0	0	ACSS1	acyl-CoA synthetase short-chain family member 1
hsa-miR-603	0	0	1	1	1	1	BRD9	bromodomain containing 9
hsa-miR-603	0	0	0	1	0	0	HTR1A	5-hydroxytryptamine (serotonin) receptor 1A, G protein-coupled
hsa-miR-603	0	0	1	1	1	1	SLC34A1	solute carrier family 34 (sodium phosphate), member 1
hsa-miR-603	1	0	1	1	1	1	FRAS1	Fraser syndrome 1
hsa-miR-603	0	0	1	1	1	1	PEG3	paternally expressed 3
hsa-miR-603	0	0	0	1	1	1	ZIM2	zinc finger, imprinted 2
hsa-miR-603	1	0	0	1	1	1	MMS19	MMS19 nucleotide excision repair homolog (S. cerevisiae)
hsa-miR-603	0	0	1	1	1	1	DNAH8	dynein, axonemal, heavy chain 8
hsa-miR-603	0	0	1	1	0	0	BRAP	BRCA1 associated protein
hsa-miR-603	0	0	0	1	0	0	OTOL1	otolin 1
hsa-miR-603	0	0	0	1	0	0	OR8B8	olfactory receptor, family 8, subfamily B, member 8
hsa-miR-603	0	0	1	1	0	0	MUC1	mucin 1, cell surface associated
hsa-miR-603	0	0	0	1	0	0	ZNF775	zinc finger protein 775
hsa-miR-603	0	0	1	1	1	1	DCAF8L1	DDB1 and CUL4 associated factor 8-like 1
hsa-miR-603	0	0	1	1	1	1	CALHM1	calcium homeostasis modulator 1
hsa-miR-603	0	0	1	1	1	1	MOB2	MOB kinase activator 2
hsa-miR-603	0	0	0	1	1	1	TMEM121	transmembrane protein 121
hsa-miR-603	0	0	0	1	0	0	DDX24	DEAD (Asp-Glu-Ala-Asp) box polypeptide 24
hsa-miR-603	0	0	0	1	0	0	PDE6G	phosphodiesterase 6G, cGMP-specific, rod, gamma
hsa-miR-603	0	0	0	1	1	1	ZNF789	zinc finger protein 789
hsa-miR-603	0	0	1	1	0	0	OTOP2	otopetrin 2
hsa-miR-603	0	0	1	1	1	1	LIMK2	LIM domain kinase 2
hsa-miR-603	0	0	0	1	1	1	SNAI3	snail homolog 3 (Drosophila)
hsa-miR-603	0	0	1	1	0	0	ZNF283	zinc finger protein 283
hsa-miR-603	0	0	0	1	0	0	AMY1C	amylase, alpha 1C (salivary)
hsa-miR-603	0	0	0	1	1	1	FTSJ2	FtsJ RNA methyltransferase homolog 2 (E. coli)
hsa-miR-603	1	0	1	1	1	1	TMED9	transmembrane emp24 protein transport domain containing 9
hsa-miR-603	0	0	0	1	0	0	TAS2R60	taste receptor, type 2, member 60
hsa-miR-603	0	0	1	1	0	0	SMTN	smoothelin
hsa-miR-603	0	0	1	1	1	1	TM2D3	TM2 domain containing 3
hsa-miR-603	0	0	0	1	0	0	POLR2F	polymerase (RNA) II (DNA directed) polypeptide F
hsa-miR-603	0	0	0	1	1	1	TTC32	tetratricopeptide repeat domain 32
hsa-miR-603	0	0	0	1	0	0	LCE3C	late cornified envelope 3C
hsa-miR-603	0	0	1	1	0	0	TRIM7	tripartite motif containing 7
hsa-miR-603	0	0	0	1	0	0	KRTAP20-1	keratin associated protein 20-1
hsa-miR-603	0	0	1	1	1	1	TRAPPC11	trafficking protein particle complex 11
hsa-miR-603	1	0	1	1	1	1	BTBD7	BTB (POZ) domain containing 7
hsa-miR-603	0	0	0	1	0	0	OR10H1	olfactory receptor, family 10, subfamily H, member 1
hsa-miR-603	0	0	0	1	0	0	FAM183A	family with sequence similarity 183, member A
hsa-miR-603	0	0	0	1	1	1	ATP4B	ATPase, H+/K+ exchanging, beta polypeptide
hsa-miR-603	0	0	1	1	0	0	ARHGAP10	Rho GTPase activating protein 10
hsa-miR-603	0	0	0	1	0	0	CECR5	cat eye syndrome chromosome region, candidate 5
hsa-miR-603	0	0	1	1	0	0	GDPD5	glycerophosphodiester phosphodiesterase domain containing 5
hsa-miR-603	1	0	1	1	1	1	SNCA	synuclein, alpha (non A4 component of amyloid precursor)
hsa-miR-603	0	0	1	1	1	1	TRIM34	tripartite motif containing 34
hsa-miR-603	0	0	1	1	1	1	TRIM6	tripartite motif containing 6
hsa-miR-603	0	0	1	1	1	1	TRIM6-TRIM34	TRIM6-TRIM34 readthrough
hsa-miR-603	0	0	0	1	0	0	EEF1D	eukaryotic translation elongation factor 1 delta (guanine nucleotide exchange protein)
hsa-miR-603	0	0	1	1	0	0	TSPAN16	tetraspanin 16
hsa-miR-603	1	0	1	1	1	1	NUDCD3	NudC domain containing 3
hsa-miR-603	0	0	1	1	0	0	C9orf153	chromosome 9 open reading frame 153
hsa-miR-603	0	0	0	1	0	0	C11orf96	chromosome 11 open reading frame 96
hsa-miR-603	0	0	1	1	1	1	ESR2	estrogen receptor 2 (ER beta)
hsa-miR-603	0	0	1	1	1	1	MCOLN3	mucolipin 3
hsa-miR-603	0	0	0	1	1	1	SLC25A40	solute carrier family 25, member 40
hsa-miR-603	1	0	0	1	1	1	MGAT3	mannosyl (beta-1,4-)-glycoprotein beta-1,4-N-acetylglucosaminyltransferase
hsa-miR-603	0	0	1	1	1	1	ZDHHC14	zinc finger, DHHC-type containing 14
hsa-miR-603	0	0	0	1	1	1	SLC35B2	solute carrier family 35, member B2
hsa-miR-603	1	0	1	1	1	1	SAT1	spermidine/spermine N1-acetyltransferase 1
hsa-miR-603	0	0	1	1	1	1	C1orf162	chromosome 1 open reading frame 162
hsa-miR-603	0	0	1	1	1	1	GGA1	golgi-associated, gamma adaptin ear containing, ARF binding protein 1
hsa-miR-603	1	0	0	1	1	1	COL9A3	collagen, type IX, alpha 3
hsa-miR-603	0	0	0	1	1	1	FAM69C	family with sequence similarity 69, member C
hsa-miR-603	0	0	0	1	0	0	RASSF7	Ras association (RalGDS/AF-6) domain family (N-terminal) member 7
hsa-miR-603	1	0	1	1	0	0	USP7	ubiquitin specific peptidase 7 (herpes virus-associated)
hsa-miR-603	0	0	0	1	0	0	MRPL20	mitochondrial ribosomal protein L20
hsa-miR-603	0	0	1	1	1	1	EIF4G1	eukaryotic translation initiation factor 4 gamma, 1
hsa-miR-603	0	0	1	1	1	1	NFATC3	nuclear factor of activated T-cells, cytoplasmic, calcineurin-dependent 3
hsa-miR-603	0	0	1	1	1	1	CAB39L	calcium binding protein 39-like
hsa-miR-603	0	0	1	1	1	1	GPR114	G protein-coupled receptor 114
hsa-miR-603	0	0	1	1	0	0	P2RY6	pyrimidinergic receptor P2Y, G-protein coupled, 6
hsa-miR-603	1	0	1	1	1	1	IQCB1	IQ motif containing B1
hsa-miR-603	0	0	0	1	0	0	OR9A2	olfactory receptor, family 9, subfamily A, member 2
hsa-miR-603	0	0	1	1	1	1	LDHB	lactate dehydrogenase B
hsa-miR-603	0	0	1	1	1	1	ARPC5L	actin related protein 2/3 complex, subunit 5-like
hsa-miR-603	1	0	1	1	1	1	WHSC1	Wolf-Hirschhorn syndrome candidate 1
hsa-miR-603	1	0	1	1	1	1	MACROD2	MACRO domain containing 2
hsa-miR-603	0	0	1	1	1	1	GPX4	glutathione peroxidase 4
hsa-miR-603	0	0	1	1	1	1	TAP1	transporter 1, ATP-binding cassette, sub-family B (MDR/TAP)
hsa-miR-603	1	0	1	1	1	1	ARID1B	AT rich interactive domain 1B (SWI1-like)
hsa-miR-603	0	0	0	1	0	0	CRYBA4	crystallin, beta A4
hsa-miR-603	0	0	1	1	0	0	SLC38A6	solute carrier family 38, member 6
hsa-miR-603	1	0	1	1	1	1	SLC25A27	solute carrier family 25, member 27
hsa-miR-603	0	0	0	1	0	0	SHROOM1	shroom family member 1
hsa-miR-603	0	0	1	1	0	0	ZNF252P	zinc finger protein 252, pseudogene
hsa-miR-603	0	0	0	1	0	0	TNFRSF14	tumor necrosis factor receptor superfamily, member 14
hsa-miR-603	0	0	1	1	1	1	MXRA7	matrix-remodelling associated 7
hsa-miR-603	0	0	1	1	0	0	ATP5G1	ATP synthase, H+ transporting, mitochondrial Fo complex, subunit C1 (subunit 9)
hsa-miR-603	0	0	1	1	1	1	CDAN1	codanin 1
hsa-miR-603	0	0	0	1	1	1	SLC4A1	solute carrier family 4, anion exchanger, member 1 (erythrocyte membrane protein band 3, Diego blood group)
hsa-miR-603	0	0	0	1	1	1	PITPNM1	phosphatidylinositol transfer protein, membrane-associated 1
hsa-miR-603	0	0	0	1	0	0	HYLS1	hydrolethalus syndrome 1
hsa-miR-603	1	0	1	1	0	0	GPI	glucose-6-phosphate isomerase
hsa-miR-603	0	0	1	1	1	1	TPCN2	two pore segment channel 2
hsa-miR-603	0	0	1	1	0	0	MPV17	MpV17 mitochondrial inner membrane protein
hsa-miR-603	0	0	1	1	1	1	AGBL2	ATP/GTP binding protein-like 2
hsa-miR-603	0	0	0	1	0	0	HMX3	H6 family homeobox 3
hsa-miR-603	0	0	1	1	1	1	TUSC1	tumor suppressor candidate 1
hsa-miR-603	0	0	1	1	1	1	FCRL1	Fc receptor-like 1
hsa-miR-603	0	0	1	1	1	1	ATP5S	ATP synthase, H+ transporting, mitochondrial Fo complex, subunit s (factor B)
hsa-miR-603	1	0	1	1	1	1	TNFSF11	tumor necrosis factor (ligand) superfamily, member 11
hsa-miR-603	0	0	1	1	0	0	SCGB1D4	secretoglobin, family 1D, member 4
hsa-miR-603	0	0	0	1	0	0	OR13G1	olfactory receptor, family 13, subfamily G, member 1
hsa-miR-603	0	0	0	1	0	0	GRIP1	glutamate receptor interacting protein 1
hsa-miR-603	0	0	0	1	0	0	DDA1	DET1 and DDB1 associated 1
hsa-miR-603	0	0	1	1	1	1	GTPBP4	GTP binding protein 4
hsa-miR-603	0	0	0	1	0	0	ZMYND10	zinc finger, MYND-type containing 10
hsa-miR-603	0	0	1	1	1	1	C5orf45	chromosome 5 open reading frame 45
hsa-miR-603	0	0	1	1	1	1	POTEG	POTE ankyrin domain family, member G
hsa-miR-603	0	0	0	1	0	0	HAO2	hydroxyacid oxidase 2 (long chain)
hsa-miR-603	0	0	0	1	1	1	SLC26A11	solute carrier family 26, member 11
hsa-miR-603	0	0	1	1	1	1	VWA5A	von Willebrand factor A domain containing 5A
hsa-miR-603	0	0	0	1	1	1	TIFA	TRAF-interacting protein with forkhead-associated domain
hsa-miR-603	1	0	1	1	1	1	ENSA	endosulfine alpha
hsa-miR-603	0	0	0	1	1	1	ZNF670	zinc finger protein 670
hsa-miR-603	0	0	1	1	1	1	SRP9	signal recognition particle 9kDa
hsa-miR-603	1	0	1	1	1	1	MARK1	MAP/microtubule affinity-regulating kinase 1
hsa-miR-603	1	0	1	1	1	1	CR1	complement component (3b/4b) receptor 1 (Knops blood group)
hsa-miR-603	0	0	0	1	1	1	LAD1	ladinin 1
hsa-miR-603	0	0	1	1	1	1	ATP6V1G3	ATPase, H+ transporting, lysosomal 13kDa, V1 subunit G3
hsa-miR-603	1	0	1	1	1	1	SASH1	SAM and SH3 domain containing 1
hsa-miR-603	1	0	1	1	1	1	ARPC5	actin related protein 2/3 complex, subunit 5, 16kDa
hsa-miR-603	0	0	1	1	1	1	HEBP2	heme binding protein 2
hsa-miR-603	1	0	1	1	1	1	ATP8B2	ATPase, aminophospholipid transporter, class I, type 8B, member 2
hsa-miR-603	0	0	1	1	1	1	LHPP	phospholysine phosphohistidine inorganic pyrophosphate phosphatase
hsa-miR-603	1	0	1	1	1	1	SOBP	sine oculis binding protein homolog (Drosophila)
hsa-miR-603	1	0	1	1	1	1	TIAL1	TIA1 cytotoxic granule-associated RNA binding protein-like 1
hsa-miR-603	0	0	0	1	0	0	NBPF24	neuroblastoma breakpoint family, member 24
hsa-miR-603	0	0	0	1	0	0	MDN1	MDN1, midasin homolog (yeast)
hsa-miR-603	0	0	0	1	1	1	CD2	CD2 molecule
hsa-miR-603	0	0	1	1	1	1	LRIF1	ligand dependent nuclear receptor interacting factor 1
hsa-miR-603	0	0	0	1	0	0	GSTM2	glutathione S-transferase mu 2 (muscle)
hsa-miR-603	0	0	1	1	1	1	IMPG1	interphotoreceptor matrix proteoglycan 1
hsa-miR-603	0	0	0	1	0	0	AMY1B	amylase, alpha 1B (salivary)
hsa-miR-603	0	0	0	1	0	0	AMY1A	amylase, alpha 1A (salivary)
hsa-miR-603	0	0	0	1	0	0	SRPK3	SRSF protein kinase 3
hsa-miR-603	0	0	0	1	1	1	KCNQ2	potassium voltage-gated channel, KQT-like subfamily, member 2
hsa-miR-603	1	0	1	1	1	1	TMED5	transmembrane emp24 protein transport domain containing 5
hsa-miR-603	0	0	1	1	1	1	SLC17A9	solute carrier family 17, member 9
hsa-miR-603	0	0	1	1	1	1	GOT1	glutamic-oxaloacetic transaminase 1, soluble (aspartate aminotransferase 1)
hsa-miR-603	0	0	1	1	0	0	RPS21	ribosomal protein S21
hsa-miR-603	0	0	1	1	1	1	PRIM2	primase, DNA, polypeptide 2 (58kDa)
hsa-miR-603	0	0	1	1	1	1	ZNF451	zinc finger protein 451
hsa-miR-603	0	0	1	1	1	1	GSTA4	glutathione S-transferase alpha 4
hsa-miR-603	0	0	1	1	0	0	CT47A1	cancer/testis antigen family 47, member A1
hsa-miR-603	0	0	0	1	0	0	CT47A7	cancer/testis antigen family 47, member A7
hsa-miR-603	0	0	0	1	0	0	UBAC1	UBA domain containing 1
hsa-miR-603	0	0	1	1	0	0	BEND5	BEN domain containing 5
hsa-miR-603	0	0	0	1	1	1	BEST4	bestrophin 4
hsa-miR-603	0	0	1	1	1	1	KIF2C	kinesin family member 2C
hsa-miR-603	0	0	0	1	1	1	POLH	polymerase (DNA directed), eta
hsa-miR-603	1	0	1	1	1	1	KCNMA1	potassium large conductance calcium-activated channel, subfamily M, alpha member 1
hsa-miR-603	1	0	1	1	0	0	LRRC73	leucine rich repeat containing 73
hsa-miR-603	0	0	1	1	0	0	RIPPLY1	ripply1 homolog (zebrafish)
hsa-miR-603	0	0	0	1	0	0	ENDOG	endonuclease G
hsa-miR-603	0	0	1	1	0	0	TRMT2B	tRNA methyltransferase 2 homolog B (S. cerevisiae)
hsa-miR-603	0	0	0	1	0	0	NDUFS5	NADH dehydrogenase (ubiquinone) Fe-S protein 5, 15kDa (NADH-coenzyme Q reductase)
hsa-miR-603	0	0	0	1	0	0	UTP11L	UTP11-like, U3 small nucleolar ribonucleoprotein, (yeast)
hsa-miR-603	0	0	1	1	1	1	APOOL	apolipoprotein O-like
hsa-miR-603	0	0	1	1	1	1	RNF19B	ring finger protein 19B
hsa-miR-603	1	0	1	1	0	0	CCDC28B	coiled-coil domain containing 28B
hsa-miR-603	1	0	1	1	1	1	RABGAP1	RAB GTPase activating protein 1
hsa-miR-603	1	0	1	1	1	1	REEP3	receptor accessory protein 3
hsa-miR-603	1	0	1	1	1	1	ANK3	ankyrin 3, node of Ranvier (ankyrin G)
hsa-miR-603	1	0	0	1	1	1	CNTRL	centriolin
hsa-miR-603	0	0	0	1	0	0	CLPSL1	colipase-like 1
hsa-miR-603	0	0	1	1	1	1	PTGR1	prostaglandin reductase 1
hsa-miR-603	0	0	1	1	0	0	WDR46	WD repeat domain 46
hsa-miR-603	0	0	1	1	0	0	CELA3A	chymotrypsin-like elastase family, member 3A
hsa-miR-603	0	0	1	1	0	0	CELA3B	chymotrypsin-like elastase family, member 3B
hsa-miR-603	0	0	0	1	0	0	HLA-DMA	major histocompatibility complex, class II, DM alpha
hsa-miR-603	0	0	0	1	0	0	TMEM225	transmembrane protein 225
hsa-miR-603	1	0	1	1	1	1	CDC14B	CDC14 cell division cycle 14 homolog B (S. cerevisiae)
hsa-miR-603	1	0	0	1	0	0	ATP13A2	ATPase type 13A2
hsa-miR-603	0	0	1	1	1	1	ECM2	extracellular matrix protein 2, female organ and adipocyte specific
hsa-miR-603	1	0	1	1	1	1	C20orf112	chromosome 20 open reading frame 112
hsa-miR-603	1	0	1	1	1	1	GOLM1	golgi membrane protein 1
hsa-miR-603	0	0	1	1	0	0	LST1	leukocyte specific transcript 1
hsa-miR-603	0	0	1	1	0	0	ZNF814	zinc finger protein 814
hsa-miR-603	0	0	0	1	0	0	PSORS1C3	psoriasis susceptibility 1 candidate 3 (non-protein coding)
hsa-miR-603	0	0	1	1	0	0	NPPB	natriuretic peptide B
hsa-miR-603	0	0	0	1	0	0	ARMC3	armadillo repeat containing 3
hsa-miR-603	0	0	0	1	0	0	PUS1	pseudouridylate synthase 1
hsa-miR-603	0	0	1	1	1	1	GATA1	GATA binding protein 1 (globin transcription factor 1)
hsa-miR-603	0	0	0	1	0	0	ZNF157	zinc finger protein 157
hsa-miR-603	0	0	0	1	0	0	MAS1L	MAS1 oncogene-like
hsa-miR-603	0	0	1	1	0	0	FAM216A	family with sequence similarity 216, member A
hsa-miR-603	0	0	1	1	1	1	SNX5	sorting nexin 5
hsa-miR-603	0	0	0	1	1	1	ARHGEF35	Rho guanine nucleotide exchange factor (GEF) 35
hsa-miR-603	0	0	0	1	0	0	CCL3L3	chemokine (C-C motif) ligand 3-like 3
hsa-miR-603	0	0	1	1	1	1	PREPL	prolyl endopeptidase-like
hsa-miR-603	0	0	0	1	0	0	UCMA	upper zone of growth plate and cartilage matrix associated
hsa-miR-603	1	0	1	1	1	1	DMD	dystrophin
hsa-miR-603	0	0	1	1	1	1	IL7	interleukin 7
hsa-miR-603	0	0	0	1	1	1	C4orf46	chromosome 4 open reading frame 46
hsa-miR-603	0	0	1	1	1	1	LDHA	lactate dehydrogenase A
hsa-miR-603	1	0	1	1	1	1	ZNF827	zinc finger protein 827
hsa-miR-603	0	0	1	1	1	1	GCM2	glial cells missing homolog 2 (Drosophila)
hsa-miR-603	0	0	1	1	1	1	MICAL2	microtubule associated monoxygenase, calponin and LIM domain containing 2
hsa-miR-603	1	0	0	1	1	1	PDHA1	pyruvate dehydrogenase (lipoamide) alpha 1
hsa-miR-603	0	0	1	1	1	1	SMAD9	SMAD family member 9
hsa-miR-603	0	0	1	1	0	0	SLC4A11	solute carrier family 4, sodium borate transporter, member 11
hsa-miR-603	1	0	1	1	1	1	RBBP7	retinoblastoma binding protein 7
hsa-miR-603	0	0	0	1	0	0	IFNA6	interferon, alpha 6
hsa-miR-603	0	0	0	1	0	0	IFNA4	interferon, alpha 4
hsa-miR-603	0	0	1	1	0	0	HBG1	hemoglobin, gamma A
hsa-miR-603	0	0	0	1	0	0	FASTKD5	FAST kinase domains 5
hsa-miR-603	0	0	1	1	1	1	PLIN2	perilipin 2
hsa-miR-603	0	0	1	1	1	1	OFD1	oral-facial-digital syndrome 1
hsa-miR-603	1	0	1	1	1	1	PFKP	phosphofructokinase, platelet
hsa-miR-603	1	0	1	1	1	1	KIF2A	kinesin heavy chain member 2A
hsa-miR-603	1	0	0	1	1	1	NT5C1B	5'-nucleotidase, cytosolic IB
hsa-miR-603	0	0	0	1	1	1	RDH14	retinol dehydrogenase 14 (all-trans/9-cis/11-cis)
hsa-miR-603	0	0	1	1	1	1	SLC8A3	solute carrier family 8 (sodium/calcium exchanger), member 3
hsa-miR-603	1	0	1	1	1	1	GREB1	growth regulation by estrogen in breast cancer 1
hsa-miR-603	0	0	0	1	0	0	PP13004	uncharacterized LOC402481
hsa-miR-603	0	0	1	1	0	0	FAM22D	family with sequence similarity 22, member D
hsa-miR-603	0	0	1	1	1	1	C1QTNF3	C1q and tumor necrosis factor related protein 3
hsa-miR-603	0	0	1	1	1	1	AMACR	alpha-methylacyl-CoA racemase
hsa-miR-603	1	0	1	1	1	1	PPP2R2C	protein phosphatase 2, regulatory subunit B, gamma
hsa-miR-603	0	0	0	1	0	0	USP17L4	ubiquitin specific peptidase 17-like 4
hsa-miR-603	1	0	1	1	1	1	TMEM128	transmembrane protein 128
hsa-miR-603	1	0	1	1	1	1	RNMT	RNA (guanine-7-) methyltransferase
hsa-miR-603	1	0	1	1	0	0	SLAIN2	SLAIN motif family, member 2
hsa-miR-603	1	0	1	1	1	1	CC2D1A	coiled-coil and C2 domain containing 1A
hsa-miR-603	0	0	0	1	0	0	GXYLT2	glucoside xylosyltransferase 2
hsa-miR-603	0	0	0	1	0	0	CCL25	chemokine (C-C motif) ligand 25
hsa-miR-603	1	0	1	0	1	1	ATM	ataxia telangiectasia mutated
hsa-miR-603	0	0	1	1	1	1	F9	coagulation factor IX
hsa-miR-603	0	0	1	0	1	1	MBL2	mannose-binding lectin (protein C) 2, soluble
hsa-miR-603	1	0	1	0	1	1	SCN4A	sodium channel, voltage-gated, type IV, alpha subunit
hsa-miR-603	0	0	1	1	1	1	MC2R	melanocortin 2 receptor (adrenocorticotropic hormone)
hsa-miR-603	0	0	1	0	1	1	ITGAM	integrin, alpha M (complement component 3 receptor 3 subunit)
hsa-miR-603	0	0	1	1	1	1	CYP51A1	cytochrome P450, family 51, subfamily A, polypeptide 1
hsa-miR-603	1	0	1	1	1	1	PTGER4	prostaglandin E receptor 4 (subtype EP4)
hsa-miR-603	0	0	1	0	1	1	DNAJB3	DnaJ (Hsp40) homolog, subfamily B, member 3
hsa-miR-603	0	0	0	0	1	1	ZNF782	zinc finger protein 782
hsa-miR-603	1	0	1	1	1	1	ABLIM1	actin binding LIM protein 1
hsa-miR-603	1	0	1	1	1	1	PLCXD3	phosphatidylinositol-specific phospholipase C, X domain containing 3
hsa-miR-603	0	0	1	1	1	1	PKP4	plakophilin 4
hsa-miR-603	1	0	1	0	1	1	CPLX2	complexin 2
hsa-miR-603	1	0	1	0	1	1	ERMN	ermin, ERM-like protein
hsa-miR-603	1	0	1	1	1	1	SHE	Src homology 2 domain containing E
hsa-miR-603	1	0	1	0	1	1	CREB5	cAMP responsive element binding protein 5
hsa-miR-603	0	0	0	1	1	1	ANKRD20A3	ankyrin repeat domain 20 family, member A3
hsa-miR-603	0	0	0	1	1	1	ANKRD20A2	ankyrin repeat domain 20 family, member A2
hsa-miR-603	1	0	1	1	1	1	KATNAL1	katanin p60 subunit A-like 1
hsa-miR-603	1	0	1	1	1	1	BAALC	brain and acute leukemia, cytoplasmic
hsa-miR-603	1	0	1	1	1	1	SBK1	SH3-binding domain kinase 1
hsa-miR-603	0	0	1	1	1	1	ZNF197	zinc finger protein 197
hsa-miR-603	0	0	1	1	1	1	TAF5L	TAF5-like RNA polymerase II, p300/CBP-associated factor (PCAF)-associated factor, 65kDa
hsa-miR-603	1	0	1	0	1	1	AP2B1	adaptor-related protein complex 2, beta 1 subunit
hsa-miR-603	1	0	1	1	1	1	MAF	v-maf musculoaponeurotic fibrosarcoma oncogene homolog (avian)
hsa-miR-603	0	0	1	1	1	1	C6orf162	chromosome 6 open reading frame 162
hsa-miR-603	0	0	0	1	1	1	FGR	Gardner-Rasheed feline sarcoma viral (v-fgr) oncogene homolog
hsa-miR-603	0	0	1	1	1	1	STIL	SCL/TAL1 interrupting locus
hsa-miR-603	1	0	1	1	1	1	C5orf43	chromosome 5 open reading frame 43
hsa-miR-603	0	0	1	1	1	1	MED24	mediator complex subunit 24
hsa-miR-603	0	0	1	0	1	1	CAV2	caveolin 2
hsa-miR-603	1	0	1	1	1	1	CHD2	chromodomain helicase DNA binding protein 2
hsa-miR-603	1	0	0	0	1	1	SHROOM2	shroom family member 2
hsa-miR-603	1	0	1	0	1	1	COL19A1	collagen, type XIX, alpha 1
hsa-miR-603	1	0	1	1	1	1	FGF9	fibroblast growth factor 9 (glia-activating factor)
hsa-miR-603	1	0	1	1	1	1	KCNA4	potassium voltage-gated channel, shaker-related subfamily, member 4
hsa-miR-603	1	0	1	1	1	1	LBR	lamin B receptor
hsa-miR-603	1	0	1	0	1	1	PAK2	p21 protein (Cdc42/Rac)-activated kinase 2
hsa-miR-603	0	0	1	1	1	1	PPP1R3A	protein phosphatase 1, regulatory subunit 3A
hsa-miR-603	0	0	1	1	1	1	RAD51C	RAD51 homolog C (S. cerevisiae)
hsa-miR-603	1	0	1	0	1	1	RAP2B	RAP2B, member of RAS oncogene family
hsa-miR-603	1	0	1	1	1	1	SRI	sorcin
hsa-miR-603	1	0	1	1	1	1	NR2C2	nuclear receptor subfamily 2, group C, member 2
hsa-miR-603	1	0	1	0	1	1	ZIC1	Zic family member 1
hsa-miR-603	1	0	0	1	1	1	ZNF264	zinc finger protein 264
hsa-miR-603	0	0	1	0	1	1	GCM1	glial cells missing homolog 1 (Drosophila)
hsa-miR-603	1	0	1	1	1	1	IQGAP1	IQ motif containing GTPase activating protein 1
hsa-miR-603	1	0	1	0	1	1	SGPL1	sphingosine-1-phosphate lyase 1
hsa-miR-603	0	0	1	1	1	1	PRPF4B	PRP4 pre-mRNA processing factor 4 homolog B (yeast)
hsa-miR-603	1	0	1	1	1	1	GOSR2	golgi SNAP receptor complex member 2
hsa-miR-603	0	0	1	1	1	1	COX15	COX15 homolog, cytochrome c oxidase assembly protein (yeast)
hsa-miR-603	1	0	1	1	1	1	ACSL3	acyl-CoA synthetase long-chain family member 3
hsa-miR-603	1	0	1	0	1	1	KIF5C	kinesin family member 5C
hsa-miR-603	1	0	1	1	1	1	KIF11	kinesin family member 11
hsa-miR-603	0	0	1	1	1	1	EIF1AY	eukaryotic translation initiation factor 1A, Y-linked
hsa-miR-603	0	0	1	1	1	1	RGPD5	RANBP2-like and GRIP domain containing 5
hsa-miR-603	0	0	1	1	1	1	DNAJA3	DnaJ (Hsp40) homolog, subfamily A, member 3
hsa-miR-603	1	0	1	1	1	1	CTTN	cortactin
hsa-miR-603	1	0	1	1	1	1	NKTR	natural killer-tumor recognition sequence
hsa-miR-603	1	0	1	1	1	1	MLLT6	myeloid/lymphoid or mixed-lineage leukemia (trithorax homolog, Drosophila); translocated to, 6
hsa-miR-603	0	0	0	0	1	1	PROM1	prominin 1
hsa-miR-603	1	0	1	1	1	1	ATP9A	ATPase, class II, type 9A
hsa-miR-603	1	0	1	1	1	1	PLCL1	phospholipase C-like 1
hsa-miR-603	1	0	1	1	1	1	SEPT9	septin 9
hsa-miR-603	0	0	0	1	1	1	UGT2A1	UDP glucuronosyltransferase 2 family, polypeptide A1, complex locus
hsa-miR-603	1	0	1	0	1	1	SLC19A2	solute carrier family 19 (thiamine transporter), member 2
hsa-miR-603	1	0	1	1	1	1	CBX3	chromobox homolog 3
hsa-miR-603	0	0	1	1	1	1	ABCB10	ATP-binding cassette, sub-family B (MDR/TAP), member 10
hsa-miR-603	1	0	1	1	1	1	ARL2BP	ADP-ribosylation factor-like 2 binding protein
hsa-miR-603	1	0	1	0	1	1	CLDN12	claudin 12
hsa-miR-603	1	0	1	1	1	1	MGAT4A	mannosyl (alpha-1,3-)-glycoprotein beta-1,4-N-acetylglucosaminyltransferase, isozyme A
hsa-miR-603	1	0	1	1	1	1	SHANK2	SH3 and multiple ankyrin repeat domains 2
hsa-miR-603	1	0	1	1	1	1	TMEM2	transmembrane protein 2
hsa-miR-603	1	0	1	0	1	1	OSTM1	osteopetrosis associated transmembrane protein 1
hsa-miR-603	1	0	1	1	1	1	ARHGEF10	Rho guanine nucleotide exchange factor (GEF) 10
hsa-miR-603	1	0	1	1	1	1	GCC2	GRIP and coiled-coil domain containing 2
hsa-miR-603	1	0	1	0	1	1	KIAA0232	KIAA0232
hsa-miR-603	1	0	1	0	1	1	TOMM20	translocase of outer mitochondrial membrane 20 homolog (yeast)
hsa-miR-603	0	0	0	0	1	1	KIAA0319	KIAA0319
hsa-miR-603	1	0	1	1	1	1	SPG20	spastic paraplegia 20 (Troyer syndrome)
hsa-miR-603	1	0	1	1	1	1	PPIP5K2	diphosphoinositol pentakisphosphate kinase 2
hsa-miR-603	1	0	1	1	1	1	SUN2	Sad1 and UNC84 domain containing 2
hsa-miR-603	0	0	1	1	1	1	EP400	E1A binding protein p400
hsa-miR-603	1	0	1	0	1	1	MTMR9	myotubularin related protein 9
hsa-miR-603	1	0	1	1	1	1	PI15	peptidase inhibitor 15
hsa-miR-603	0	0	0	0	1	1	NOP16	NOP16 nucleolar protein homolog (yeast)
hsa-miR-603	0	0	0	1	1	1	TLR7	toll-like receptor 7
hsa-miR-603	0	0	1	1	1	1	MRPL35	mitochondrial ribosomal protein L35
hsa-miR-603	0	0	1	1	1	1	FANCI	Fanconi anemia, complementation group I
hsa-miR-603	1	0	1	1	1	1	ZNF654	zinc finger protein 654
hsa-miR-603	0	0	1	1	1	1	RFK	riboflavin kinase
hsa-miR-603	1	0	1	1	1	1	DEPDC1B	DEP domain containing 1B
hsa-miR-603	1	0	1	1	1	1	TBX4	T-box 4
hsa-miR-603	0	0	0	0	1	1	FAM212B	family with sequence similarity 212, member B
hsa-miR-603	1	0	1	1	1	1	KIAA1217	KIAA1217
hsa-miR-603	1	0	1	1	1	1	AGPAT4	1-acylglycerol-3-phosphate O-acyltransferase 4 (lysophosphatidic acid acyltransferase, delta)
hsa-miR-603	1	0	1	0	1	1	OTUD7B	OTU domain containing 7B
hsa-miR-603	1	0	1	1	1	1	EPHA8	EPH receptor A8
hsa-miR-603	0	0	0	1	1	1	ZNF529	zinc finger protein 529
hsa-miR-603	1	0	1	0	1	1	GPR107	G protein-coupled receptor 107
hsa-miR-603	0	0	1	1	1	1	EPG5	ectopic P-granules autophagy protein 5 homolog (C. elegans)
hsa-miR-603	1	0	1	1	1	1	KCNJ12	potassium inwardly-rectifying channel, subfamily J, member 12
hsa-miR-603	0	0	1	1	1	1	UTP14C	UTP14, U3 small nucleolar ribonucleoprotein, homolog C (yeast)
hsa-miR-603	0	0	0	0	1	1	HPS4	Hermansky-Pudlak syndrome 4
hsa-miR-603	1	0	1	0	1	1	NECAB1	N-terminal EF-hand calcium binding protein 1
hsa-miR-603	1	0	1	1	1	1	ZFP106	zinc finger protein 106 homolog (mouse)
hsa-miR-603	1	0	0	0	1	1	GZF1	GDNF-inducible zinc finger protein 1
hsa-miR-603	0	0	0	1	1	1	TMEM106C	transmembrane protein 106C
hsa-miR-603	1	0	0	1	1	1	CEP135	centrosomal protein 135kDa
hsa-miR-603	0	0	0	1	1	1	USP36	ubiquitin specific peptidase 36
hsa-miR-603	0	0	1	1	1	1	SLC19A3	solute carrier family 19, member 3
hsa-miR-603	0	0	1	1	1	1	ANKRD20A1	ankyrin repeat domain 20 family, member A1
hsa-miR-603	0	0	0	1	1	1	TMEM79	transmembrane protein 79
hsa-miR-603	0	0	1	1	1	1	TMEM101	transmembrane protein 101
hsa-miR-603	1	0	0	1	1	1	ELOF1	elongation factor 1 homolog (S. cerevisiae)
hsa-miR-603	0	0	1	0	1	1	MYO18B	myosin XVIIIB
hsa-miR-603	1	0	1	1	1	1	SLC35B4	solute carrier family 35, member B4
hsa-miR-603	0	0	1	1	1	1	C3orf15	chromosome 3 open reading frame 15
hsa-miR-603	0	0	1	1	1	1	KLHL13	kelch-like 13 (Drosophila)
hsa-miR-603	1	0	1	1	1	1	TMEM132B	transmembrane protein 132B
hsa-miR-603	0	0	1	1	1	1	CLIC6	chloride intracellular channel 6
hsa-miR-603	1	0	1	0	1	1	TMEM132D	transmembrane protein 132D
hsa-miR-603	1	0	1	1	1	1	FAM105B	family with sequence similarity 105, member B
hsa-miR-603	1	0	1	1	1	1	CABLES1	Cdk5 and Abl enzyme substrate 1
hsa-miR-603	0	0	1	1	1	1	OXNAD1	oxidoreductase NAD-binding domain containing 1
hsa-miR-603	0	0	0	1	1	1	VASN	vasorin
hsa-miR-603	0	0	0	0	1	1	NUDT16	nudix (nucleoside diphosphate linked moiety X)-type motif 16
hsa-miR-603	1	0	1	1	1	1	C7orf60	chromosome 7 open reading frame 60
hsa-miR-603	1	0	1	0	1	1	GPR26	G protein-coupled receptor 26
hsa-miR-603	1	0	1	1	1	1	SIK1	salt-inducible kinase 1
hsa-miR-603	1	0	1	1	1	1	ZDHHC23	zinc finger, DHHC-type containing 23
hsa-miR-603	1	0	0	1	1	1	CRB2	crumbs homolog 2 (Drosophila)
hsa-miR-603	0	0	1	1	1	1	ZDHHC22	zinc finger, DHHC-type containing 22
hsa-miR-603	0	0	1	1	1	1	GIMAP8	GTPase, IMAP family member 8
hsa-miR-603	1	0	1	1	1	1	STX12	syntaxin 12
hsa-miR-603	1	0	1	0	1	1	PDE12	phosphodiesterase 12
hsa-miR-603	0	0	1	1	1	1	LYRM7	Lyrm7 homolog (mouse)
hsa-miR-603	1	0	1	1	1	1	FAM101B	family with sequence similarity 101, member B
hsa-miR-603	0	0	1	1	1	1	MMS22L	MMS22-like, DNA repair protein
hsa-miR-603	0	0	1	1	1	1	MDFIC	MyoD family inhibitor domain containing
hsa-miR-603	0	0	1	1	1	1	DOCK8	dedicator of cytokinesis 8
hsa-miR-603	0	0	0	1	1	1	LINC00610	long intergenic non-protein coding RNA 610
hsa-miR-603	0	0	1	1	1	1	FAM177B	family with sequence similarity 177, member B
hsa-miR-603	0	0	1	0	1	1	FAM190A	family with sequence similarity 190, member A
[truncated: 12 more rows]
