# Supplementary material for: Profiling of Selected MicroRNAs in Proliferative Eutopic Endometrium of Women with Ovarian Endometriosis
Source: Biomed Res Int. 2015 Aug 20;2015:760698. doi: 10.1155/2015/760698 (PMC4558423; doi:10.1155/2015/760698)
Supplement: Supplementary file 1 — Table I: The names of miRNAs significantly differentially expressed between eutopic endometrium of patients with endometriosis vs eutopic endometrium of patients without endometriosis. Table II: The associations between miRNA and mRNA, which presents detailed results of the search of six major databases i.e targetscan, tarbase, miranda, mirbase, mirtarget2 and pictar. [file 760698.f1.zip › 760698.f1/Table II/hsa-miR-605.tsv]

miR	targetscan	tarbase	miranda	mirbase	mirtarget2	pictar	GeneSymbol	GeneName
hsa-miR-605	0	0	1	0	0	0	NOP14-AS1	NOP14 antisense RNA 1
hsa-miR-605	1	0	1	1	0	0	HUWE1	HECT, UBA and WWE domain containing 1, E3 ubiquitin protein ligase
hsa-miR-605	1	0	1	1	0	0	RAPGEF2	Rap guanine nucleotide exchange factor (GEF) 2
hsa-miR-605	1	0	1	0	1	1	RIMS1	regulating synaptic membrane exocytosis 1
hsa-miR-605	1	0	1	0	1	1	KIAA0355	KIAA0355
hsa-miR-605	0	0	1	1	1	1	C2CD2L	C2CD2-like
hsa-miR-605	1	0	1	1	1	1	RNGTT	RNA guanylyltransferase and 5'-phosphatase
hsa-miR-605	0	0	1	1	0	0	ZNF862	zinc finger protein 862
hsa-miR-605	1	0	1	1	1	1	GPATCH8	G patch domain containing 8
hsa-miR-605	1	0	1	0	1	1	CHST15	carbohydrate (N-acetylgalactosamine 4-sulfate 6-O) sulfotransferase 15
hsa-miR-605	1	0	1	1	1	1	HIPK1	homeodomain interacting protein kinase 1
hsa-miR-605	1	0	1	1	1	1	GIGYF2	GRB10 interacting GYF protein 2
hsa-miR-605	0	0	1	1	0	0	ARHGEF2	Rho/Rac guanine nucleotide exchange factor (GEF) 2
hsa-miR-605	1	0	1	1	1	1	ATG13	autophagy related 13
hsa-miR-605	0	0	1	1	0	0	FKBP15	FK506 binding protein 15, 133kDa
hsa-miR-605	1	0	1	1	1	1	ANKRD17	ankyrin repeat domain 17
hsa-miR-605	1	0	1	0	1	1	LPHN3	latrophilin 3
hsa-miR-605	0	0	1	1	1	1	MAN2B2	mannosidase, alpha, class 2B, member 2
hsa-miR-605	1	0	1	1	1	1	NLGN4Y	neuroligin 4, Y-linked
hsa-miR-605	1	0	1	1	1	1	C11orf9	chromosome 11 open reading frame 9
hsa-miR-605	1	0	1	1	1	1	RGL1	ral guanine nucleotide dissociation stimulator-like 1
hsa-miR-605	1	0	1	1	1	1	NTNG1	netrin G1
hsa-miR-605	1	0	1	1	1	1	PALLD	palladin, cytoskeletal associated protein
hsa-miR-605	1	0	1	1	1	1	RPGRIP1L	RPGRIP1-like
hsa-miR-605	1	0	1	1	0	0	KIAA1045	KIAA1045
hsa-miR-605	1	0	1	1	1	1	PLCL2	phospholipase C-like 2
hsa-miR-605	1	0	1	1	1	1	PHF8	PHD finger protein 8
hsa-miR-605	1	0	1	1	1	1	SMARCAD1	SWI/SNF-related, matrix-associated actin-dependent regulator of chromatin, subfamily a, containing DEAD/H box 1
hsa-miR-605	1	0	1	1	0	0	PPM1H	protein phosphatase, Mg2+/Mn2+ dependent, 1H
hsa-miR-605	0	0	1	1	0	0	ZC4H2	zinc finger, C4H2 domain containing
hsa-miR-605	1	0	1	1	1	1	RALGAPB	Ral GTPase activating protein, beta subunit (non-catalytic)
hsa-miR-605	1	0	1	1	1	1	ZMIZ1	zinc finger, MIZ-type containing 1
hsa-miR-605	1	0	1	0	0	0	NYNRIN	NYN domain and retroviral integrase containing
hsa-miR-605	1	0	1	1	1	1	FAM135A	family with sequence similarity 135, member A
hsa-miR-605	1	1	1	1	1	1	NFIA	nuclear factor I/A
hsa-miR-605	1	0	1	1	1	1	FRAS1	Fraser syndrome 1
hsa-miR-605	1	0	1	0	1	1	LMO3	LIM domain only 3 (rhombotin-like 2)
hsa-miR-605	0	0	1	0	1	1	FBRSL1	fibrosin-like 1
hsa-miR-605	1	0	1	1	1	1	PPP6R3	protein phosphatase 6, regulatory subunit 3
hsa-miR-605	0	0	1	0	1	1	ZSWIM6	zinc finger, SWIM-type containing 6
hsa-miR-605	0	0	1	0	0	0	TTC28-AS1	TTC28 antisense RNA 1
hsa-miR-605	0	0	1	1	1	1	KIAA1704	KIAA1704
hsa-miR-605	1	0	1	1	1	1	NPAS3	neuronal PAS domain protein 3
hsa-miR-605	1	0	1	1	1	1	IKZF4	IKAROS family zinc finger 4 (Eos)
hsa-miR-605	0	0	1	1	1	1	UNC80	unc-80 homolog (C. elegans)
hsa-miR-605	0	0	1	1	0	0	COL27A1	collagen, type XXVII, alpha 1
hsa-miR-605	0	0	1	1	1	1	SLC11A2	solute carrier family 11 (proton-coupled divalent metal ion transporters), member 2
hsa-miR-605	0	0	1	0	0	0	KIAA1908	uncharacterized LOC114796
hsa-miR-605	1	0	1	1	1	1	POGZ	pogo transposable element with ZNF domain
hsa-miR-605	1	0	1	1	1	1	SH3TC2	SH3 domain and tetratricopeptide repeats 2
hsa-miR-605	1	0	1	1	1	1	CDC20B	cell division cycle 20 homolog B (S. cerevisiae)
hsa-miR-605	1	0	1	0	0	0	ZBTB34	zinc finger and BTB domain containing 34
hsa-miR-605	1	0	1	1	1	1	ACBD5	acyl-CoA binding domain containing 5
hsa-miR-605	1	0	1	0	0	0	ZC3H12C	zinc finger CCCH-type containing 12C
hsa-miR-605	1	0	1	1	1	1	TRPM3	transient receptor potential cation channel, subfamily M, member 3
hsa-miR-605	1	0	1	1	1	1	PAN3	PAN3 poly(A) specific ribonuclease subunit homolog (S. cerevisiae)
hsa-miR-605	0	0	1	1	0	0	SSPO	SCO-spondin homolog (Bos taurus)
hsa-miR-605	1	0	1	0	1	1	LIN54	lin-54 homolog (C. elegans)
hsa-miR-605	1	0	1	0	1	1	BEND4	BEN domain containing 4
hsa-miR-605	1	0	1	1	1	1	FAT2	FAT tumor suppressor homolog 2 (Drosophila)
hsa-miR-605	0	0	1	0	0	0	TIFAB	TRAF-interacting protein with forkhead-associated domain, family member B
hsa-miR-605	0	0	1	1	0	0	ERAP2	endoplasmic reticulum aminopeptidase 2
hsa-miR-605	1	0	1	1	1	1	NRXN2	neurexin 2
hsa-miR-605	1	0	1	1	1	1	UBE3A	ubiquitin protein ligase E3A
hsa-miR-605	0	0	1	1	1	1	CAST	calpastatin
hsa-miR-605	1	0	1	0	1	1	LRBA	LPS-responsive vesicle trafficking, beach and anchor containing
hsa-miR-605	1	0	1	1	0	0	NDST2	N-deacetylase/N-sulfotransferase (heparan glucosaminyl) 2
hsa-miR-605	1	0	1	1	1	1	RPS6KA3	ribosomal protein S6 kinase, 90kDa, polypeptide 3
hsa-miR-605	1	0	1	1	1	1	PCCB	propionyl CoA carboxylase, beta polypeptide
hsa-miR-605	1	0	1	1	1	1	DTNA	dystrobrevin, alpha
hsa-miR-605	0	0	1	1	0	0	CASP9	caspase 9, apoptosis-related cysteine peptidase
hsa-miR-605	1	0	1	1	0	0	TSPYL2	TSPY-like 2
hsa-miR-605	1	0	1	0	1	1	ETV1	ets variant 1
hsa-miR-605	1	0	1	1	1	1	ARFGEF1	ADP-ribosylation factor guanine nucleotide-exchange factor 1 (brefeldin A-inhibited)
hsa-miR-605	0	0	1	1	1	1	GPM6B	glycoprotein M6B
hsa-miR-605	1	0	1	1	1	1	HNRNPK	heterogeneous nuclear ribonucleoprotein K
hsa-miR-605	1	0	1	0	1	1	TBL1X	transducin (beta)-like 1X-linked
hsa-miR-605	1	0	1	0	1	1	ADD3	adducin 3 (gamma)
hsa-miR-605	0	0	1	1	0	0	TRIM27	tripartite motif containing 27
hsa-miR-605	1	0	1	1	1	1	ZFX	zinc finger protein, X-linked
hsa-miR-605	1	0	1	0	1	1	PDE7B	phosphodiesterase 7B
hsa-miR-605	1	0	1	1	1	1	MEF2D	myocyte enhancer factor 2D
hsa-miR-605	1	0	1	1	1	1	PICALM	phosphatidylinositol binding clathrin assembly protein
hsa-miR-605	0	0	1	0	0	0	MIAT	myocardial infarction associated transcript (non-protein coding)
hsa-miR-605	0	0	1	0	0	0	ALOX12P2	arachidonate 12-lipoxygenase pseudogene 2
hsa-miR-605	1	0	1	1	1	1	PCDH17	protocadherin 17
hsa-miR-605	0	0	1	1	0	0	ITGA7	integrin, alpha 7
hsa-miR-605	1	0	1	1	1	1	MYT1L	myelin transcription factor 1-like
hsa-miR-605	0	0	1	1	0	0	SLC12A4	solute carrier family 12 (potassium/chloride transporters), member 4
hsa-miR-605	1	0	1	1	1	1	CTNND1	catenin (cadherin-associated protein), delta 1
hsa-miR-605	1	0	1	1	0	0	PAK1	p21 protein (Cdc42/Rac)-activated kinase 1
hsa-miR-605	1	0	1	1	1	1	PDE4A	phosphodiesterase 4A, cAMP-specific
hsa-miR-605	1	0	1	1	1	1	TP63	tumor protein p63
hsa-miR-605	0	0	1	1	1	1	PCF11	PCF11, cleavage and polyadenylation factor subunit, homolog (S. cerevisiae)
hsa-miR-605	1	0	1	1	1	1	VAPB	VAMP (vesicle-associated membrane protein)-associated protein B and C
hsa-miR-605	0	0	1	1	1	1	RER1	RER1 retention in endoplasmic reticulum 1 homolog (S. cerevisiae)
hsa-miR-605	1	0	1	1	1	1	GLS	glutaminase
hsa-miR-605	0	0	1	1	1	1	SH2D1A	SH2 domain containing 1A
hsa-miR-605	1	0	1	0	1	1	CD164	CD164 molecule, sialomucin
hsa-miR-605	1	0	1	1	1	1	KAT6B	K(lysine) acetyltransferase 6B
hsa-miR-605	1	0	1	1	1	1	LRRFIP1	leucine rich repeat (in FLII) interacting protein 1
hsa-miR-605	0	0	1	0	1	1	CLEC5A	C-type lectin domain family 5, member A
hsa-miR-605	0	0	1	1	1	1	CNPPD1	cyclin Pas1/PHO80 domain containing 1
hsa-miR-605	1	0	1	1	1	1	USP15	ubiquitin specific peptidase 15
hsa-miR-605	1	0	1	1	1	1	ZNF202	zinc finger protein 202
hsa-miR-605	0	0	1	0	1	1	ZDHHC17	zinc finger, DHHC-type containing 17
hsa-miR-605	1	0	1	1	1	1	SENP7	SUMO1/sentrin specific peptidase 7
hsa-miR-605	1	0	1	1	1	1	TSC22D2	TSC22 domain family, member 2
hsa-miR-605	1	0	1	1	1	1	KCNMB2	potassium large conductance calcium-activated channel, subfamily M, beta member 2
hsa-miR-605	0	0	1	1	1	1	CHRD	chordin
hsa-miR-605	1	0	1	1	1	1	SYDE1	synapse defective 1, Rho GTPase, homolog 1 (C. elegans)
hsa-miR-605	0	0	1	1	1	1	CSNK1A1	casein kinase 1, alpha 1
hsa-miR-605	0	0	1	1	0	0	DBNDD2	dysbindin (dystrobrevin binding protein 1) domain containing 2
hsa-miR-605	1	0	1	1	1	1	OGT	O-linked N-acetylglucosamine (GlcNAc) transferase
hsa-miR-605	0	0	1	1	0	0	SH2B1	SH2B adaptor protein 1
hsa-miR-605	0	0	1	0	0	0	URB1	URB1 ribosome biogenesis 1 homolog (S. cerevisiae)
hsa-miR-605	1	0	1	1	1	1	STRN3	striatin, calmodulin binding protein 3
hsa-miR-605	1	0	1	1	0	0	LMO2	LIM domain only 2 (rhombotin-like 1)
hsa-miR-605	1	0	1	1	1	1	ABI2	abl-interactor 2
hsa-miR-605	1	0	1	1	1	1	RBM47	RNA binding motif protein 47
hsa-miR-605	1	0	1	1	1	1	SH3GLB1	SH3-domain GRB2-like endophilin B1
hsa-miR-605	1	0	1	0	1	1	PARP11	poly (ADP-ribose) polymerase family, member 11
hsa-miR-605	1	0	1	1	1	1	NRP1	neuropilin 1
hsa-miR-605	0	0	1	1	1	1	LRTOMT	leucine rich transmembrane and 0-methyltransferase domain containing
hsa-miR-605	1	0	1	1	1	1	DCLRE1B	DNA cross-link repair 1B
hsa-miR-605	1	0	1	1	1	1	CHST9	carbohydrate (N-acetylgalactosamine 4-0) sulfotransferase 9
hsa-miR-605	1	0	1	1	1	1	CALU	calumenin
hsa-miR-605	0	0	1	1	1	1	SLC6A15	solute carrier family 6 (neutral amino acid transporter), member 15
hsa-miR-605	0	0	1	1	1	1	USP39	ubiquitin specific peptidase 39
hsa-miR-605	1	0	1	1	1	1	PBX3	pre-B-cell leukemia homeobox 3
hsa-miR-605	1	0	1	0	1	1	WIPF2	WAS/WASL interacting protein family, member 2
hsa-miR-605	0	0	1	0	0	0	NBPF10	neuroblastoma breakpoint family, member 10
hsa-miR-605	0	0	1	0	1	1	MYO3B	myosin IIIB
hsa-miR-605	0	0	1	1	0	0	SNRPN	small nuclear ribonucleoprotein polypeptide N
hsa-miR-605	1	0	1	1	1	1	MAGI1	membrane associated guanylate kinase, WW and PDZ domain containing 1
hsa-miR-605	1	0	1	1	1	1	ST3GAL3	ST3 beta-galactoside alpha-2,3-sialyltransferase 3
hsa-miR-605	0	0	1	0	0	0	RMST	rhabdomyosarcoma 2 associated transcript (non-protein coding)
hsa-miR-605	1	0	1	1	0	0	SAMD4A	sterile alpha motif domain containing 4A
hsa-miR-605	0	0	1	1	1	1	PPP1R1B	protein phosphatase 1, regulatory (inhibitor) subunit 1B
hsa-miR-605	1	0	1	1	1	1	F3	coagulation factor III (thromboplastin, tissue factor)
hsa-miR-605	0	0	1	1	1	1	ZNF638	zinc finger protein 638
hsa-miR-605	1	0	1	1	1	1	PLAGL1	pleiomorphic adenoma gene-like 1
hsa-miR-605	1	0	1	1	1	1	UBAP2L	ubiquitin associated protein 2-like
hsa-miR-605	1	0	1	1	1	1	PALM2	paralemmin 2
hsa-miR-605	0	0	1	0	0	0	CASC2	cancer susceptibility candidate 2 (non-protein coding)
hsa-miR-605	0	0	1	1	0	0	MBD1	methyl-CpG binding domain protein 1
hsa-miR-605	1	0	1	1	1	1	PPP1R9A	protein phosphatase 1, regulatory subunit 9A
hsa-miR-605	1	0	1	1	0	0	TRPM4	transient receptor potential cation channel, subfamily M, member 4
hsa-miR-605	1	0	1	1	1	1	ENOX2	ecto-NOX disulfide-thiol exchanger 2
hsa-miR-605	0	0	1	1	1	1	PARP16	poly (ADP-ribose) polymerase family, member 16
hsa-miR-605	0	0	1	0	0	0	TUG1	taurine upregulated 1 (non-protein coding)
hsa-miR-605	1	0	1	1	1	1	NIP7	nuclear import 7 homolog (S. cerevisiae)
hsa-miR-605	1	0	1	1	0	0	SALL2	sal-like 2 (Drosophila)
hsa-miR-605	0	0	1	1	0	0	RFWD2	ring finger and WD repeat domain 2, E3 ubiquitin protein ligase
hsa-miR-605	0	0	1	1	1	1	STOX2	storkhead box 2
hsa-miR-605	1	0	1	1	1	1	RIC8B	resistance to inhibitors of cholinesterase 8 homolog B (C. elegans)
hsa-miR-605	1	0	1	1	1	1	PTBP3	polypyrimidine tract binding protein 3
hsa-miR-605	1	0	1	1	1	1	WDTC1	WD and tetratricopeptide repeats 1
hsa-miR-605	1	0	1	1	1	1	MBD5	methyl-CpG binding domain protein 5
hsa-miR-605	1	0	1	1	1	1	ACER3	alkaline ceramidase 3
hsa-miR-605	0	0	1	0	0	0	LOC149134	uncharacterized LOC149134
hsa-miR-605	0	0	1	1	1	1	INPP5B	inositol polyphosphate-5-phosphatase, 75kDa
hsa-miR-605	1	0	1	1	1	1	S100PBP	S100P binding protein
hsa-miR-605	0	0	1	1	0	0	RPS15A	ribosomal protein S15a
hsa-miR-605	0	0	1	1	0	0	BUB1	budding uninhibited by benzimidazoles 1 homolog (yeast)
hsa-miR-605	0	0	1	0	0	0	LINC00475	long intergenic non-protein coding RNA 475
hsa-miR-605	1	0	1	1	0	0	ST6GALNAC6	ST6 (alpha-N-acetyl-neuraminyl-2,3-beta-galactosyl-1,3)-N-acetylgalactosaminide alpha-2,6-sialyltransferase 6
hsa-miR-605	0	0	1	0	1	1	ZNF766	zinc finger protein 766
hsa-miR-605	0	0	1	1	1	1	CXorf57	chromosome X open reading frame 57
hsa-miR-605	0	0	1	0	0	0	IFFO2	intermediate filament family orphan 2
hsa-miR-605	1	0	1	1	1	1	CLIP4	CAP-GLY domain containing linker protein family, member 4
hsa-miR-605	1	0	1	1	1	1	DYRK2	dual-specificity tyrosine-(Y)-phosphorylation regulated kinase 2
hsa-miR-605	0	0	1	0	0	0	FLJ21408	uncharacterized LOC400512
hsa-miR-605	0	0	1	1	0	0	EIF4ENIF1	eukaryotic translation initiation factor 4E nuclear import factor 1
hsa-miR-605	1	0	1	1	1	1	SUN1	Sad1 and UNC84 domain containing 1
hsa-miR-605	1	0	1	1	1	1	NAA30	N(alpha)-acetyltransferase 30, NatC catalytic subunit
hsa-miR-605	0	0	1	0	1	1	HEMK1	HemK methyltransferase family member 1
hsa-miR-605	1	0	1	1	0	0	UBXN7	UBX domain protein 7
hsa-miR-605	1	0	1	1	0	0	SLAIN2	SLAIN motif family, member 2
hsa-miR-605	1	0	1	1	1	1	DCAF8	DDB1 and CUL4 associated factor 8
hsa-miR-605	0	0	1	1	1	1	TGIF1	TGFB-induced factor homeobox 1
hsa-miR-605	1	0	1	1	1	1	RNF185	ring finger protein 185
hsa-miR-605	1	0	1	1	1	1	FOXP1	forkhead box P1
hsa-miR-605	1	0	1	1	1	1	SEC63	SEC63 homolog (S. cerevisiae)
hsa-miR-605	0	0	1	1	1	1	RNF146	ring finger protein 146
hsa-miR-605	1	0	1	0	1	1	ATP10D	ATPase, class V, type 10D
hsa-miR-605	1	0	1	1	1	1	TMEM2	transmembrane protein 2
hsa-miR-605	0	0	1	0	0	0	KIAA0664L3	KIAA0664-like 3
hsa-miR-605	1	0	1	1	1	1	PPM1L	protein phosphatase, Mg2+/Mn2+ dependent, 1L
hsa-miR-605	0	0	1	1	1	1	OPTN	optineurin
hsa-miR-605	1	0	1	0	0	0	PWWP2A	PWWP domain containing 2A
hsa-miR-605	1	0	1	0	1	1	RAB1A	RAB1A, member RAS oncogene family
hsa-miR-605	1	0	1	1	1	1	TMTC1	transmembrane and tetratricopeptide repeat containing 1
hsa-miR-605	1	0	1	1	1	1	ZNF664	zinc finger protein 664
hsa-miR-605	0	0	1	0	0	0	LOC440894	uncharacterized LOC440894
hsa-miR-605	0	0	1	1	0	0	BEAN1	brain expressed, associated with NEDD4, 1
hsa-miR-605	0	0	1	0	0	0	FLJ12825	uncharacterized LOC440101
hsa-miR-605	1	0	1	1	1	1	SCAMP5	secretory carrier membrane protein 5
hsa-miR-605	0	0	1	0	1	1	ZNF498	zinc finger protein 498
hsa-miR-605	0	0	1	1	1	1	SEC61A2	Sec61 alpha 2 subunit (S. cerevisiae)
hsa-miR-605	0	0	1	0	1	1	CHURC1	churchill domain containing 1
hsa-miR-605	1	0	1	1	1	1	IST1	increased sodium tolerance 1 homolog (yeast)
hsa-miR-605	0	0	1	1	1	1	GSG1	germ cell associated 1
hsa-miR-605	1	0	1	1	1	1	HLF	hepatic leukemia factor
hsa-miR-605	1	0	1	1	1	1	GANC	glucosidase, alpha; neutral C
hsa-miR-605	1	0	1	0	1	1	TPBG	trophoblast glycoprotein
hsa-miR-605	0	0	1	1	0	0	LGR5	leucine-rich repeat containing G protein-coupled receptor 5
hsa-miR-605	0	0	1	0	1	1	CADM1	cell adhesion molecule 1
hsa-miR-605	0	0	1	1	0	0	PIGO	phosphatidylinositol glycan anchor biosynthesis, class O
hsa-miR-605	0	0	1	1	0	0	CTNNBL1	catenin, beta like 1
hsa-miR-605	0	0	1	1	1	1	BBS9	Bardet-Biedl syndrome 9
hsa-miR-605	1	0	1	1	1	1	AMMECR1	Alport syndrome, mental retardation, midface hypoplasia and elliptocytosis chromosomal region gene 1
hsa-miR-605	0	0	1	0	1	1	TBX5-AS1	TBX5 antisense RNA 1
hsa-miR-605	1	0	1	1	1	1	FBXW2	F-box and WD repeat domain containing 2
hsa-miR-605	1	0	1	1	1	1	TSN	translin
hsa-miR-605	1	0	1	1	1	1	LUC7L2	LUC7-like 2 (S. cerevisiae)
hsa-miR-605	0	0	1	1	0	0	MSANTD3	Myb/SANT-like DNA-binding domain containing 3
hsa-miR-605	1	0	1	1	1	1	EPN2	epsin 2
hsa-miR-605	0	0	1	1	0	0	PLTP	phospholipid transfer protein
hsa-miR-605	1	0	1	1	1	1	IVNS1ABP	influenza virus NS1A binding protein
hsa-miR-605	1	0	1	1	1	1	GPD2	glycerol-3-phosphate dehydrogenase 2 (mitochondrial)
hsa-miR-605	0	0	1	1	1	1	PRKRA	protein kinase, interferon-inducible double stranded RNA dependent activator
hsa-miR-605	0	0	1	1	1	1	SLC16A1	solute carrier family 16, member 1 (monocarboxylic acid transporter 1)
hsa-miR-605	0	0	1	0	0	0	PART1	prostate androgen-regulated transcript 1 (non-protein coding)
hsa-miR-605	0	0	1	0	1	1	KANSL2	KAT8 regulatory NSL complex subunit 2
hsa-miR-605	1	0	1	1	1	1	NSG1	neuron specific gene family member 1
hsa-miR-605	0	0	1	0	0	0	ZNF806	zinc finger protein 806
hsa-miR-605	0	0	1	0	0	0	LINC00340	long intergenic non-protein coding RNA 340
hsa-miR-605	0	0	1	1	0	0	CES4A	carboxylesterase 4A
hsa-miR-605	1	0	1	1	1	1	RASGEF1A	RasGEF domain family, member 1A
hsa-miR-605	0	0	1	1	1	1	AES	amino-terminal enhancer of split
hsa-miR-605	0	0	1	1	1	1	RBM4B	RNA binding motif protein 4B
hsa-miR-605	1	0	1	1	1	1	ADCY3	adenylate cyclase 3
hsa-miR-605	0	0	1	1	1	1	LTBR	lymphotoxin beta receptor (TNFR superfamily, member 3)
hsa-miR-605	1	0	1	1	1	1	KCNIP3	Kv channel interacting protein 3, calsenilin
hsa-miR-605	1	0	1	1	1	1	FAM222B	family with sequence similarity 222, member B
hsa-miR-605	0	0	1	1	1	1	AIMP1	aminoacyl tRNA synthetase complex-interacting multifunctional protein 1
hsa-miR-605	1	0	1	1	1	1	ACSL1	acyl-CoA synthetase long-chain family member 1
hsa-miR-605	1	0	1	1	1	1	SLITRK2	SLIT and NTRK-like family, member 2
hsa-miR-605	1	0	1	1	1	1	CRTC2	CREB regulated transcription coactivator 2
hsa-miR-605	1	0	1	1	1	1	NPEPPS	aminopeptidase puromycin sensitive
hsa-miR-605	1	0	1	0	1	1	THRB	thyroid hormone receptor, beta
hsa-miR-605	1	0	1	0	0	0	PID1	phosphotyrosine interaction domain containing 1
hsa-miR-605	1	0	1	0	1	1	KBTBD8	kelch repeat and BTB (POZ) domain containing 8
hsa-miR-605	1	0	1	1	1	1	SNRNP70	small nuclear ribonucleoprotein 70kDa (U1)
hsa-miR-605	1	0	1	1	1	1	ETS2	v-ets erythroblastosis virus E26 oncogene homolog 2 (avian)
hsa-miR-605	1	0	1	1	1	1	EPB41L1	erythrocyte membrane protein band 4.1-like 1
hsa-miR-605	1	0	1	1	1	1	RAB11FIP4	RAB11 family interacting protein 4 (class II)
hsa-miR-605	0	0	1	1	1	1	PARP15	poly (ADP-ribose) polymerase family, member 15
hsa-miR-605	0	0	1	0	0	0	LOC285626	uncharacterized LOC285626
hsa-miR-605	1	0	1	1	1	1	VAV3	vav 3 guanine nucleotide exchange factor
hsa-miR-605	0	0	1	1	1	1	ATP9B	ATPase, class II, type 9B
hsa-miR-605	0	0	1	1	0	0	LUC7L	LUC7-like (S. cerevisiae)
hsa-miR-605	1	0	1	1	1	1	PIGA	phosphatidylinositol glycan anchor biosynthesis, class A
hsa-miR-605	1	0	1	1	1	1	ZCCHC2	zinc finger, CCHC domain containing 2
hsa-miR-605	0	0	1	1	0	0	TMEM150A	transmembrane protein 150A
hsa-miR-605	0	0	1	1	1	1	FAM76A	family with sequence similarity 76, member A
hsa-miR-605	1	0	1	1	1	1	THTPA	thiamine triphosphatase
hsa-miR-605	1	0	1	1	1	1	NDFIP2	Nedd4 family interacting protein 2
hsa-miR-605	1	0	1	1	0	0	FBXL19	F-box and leucine-rich repeat protein 19
hsa-miR-605	0	0	1	0	0	0	GTF2IP1	general transcription factor IIi, pseudogene 1
hsa-miR-605	0	0	1	1	1	1	GPR128	G protein-coupled receptor 128
hsa-miR-605	0	0	1	1	0	0	KIAA0146	KIAA0146
hsa-miR-605	0	0	1	1	0	0	PROKR1	prokineticin receptor 1
hsa-miR-605	0	0	1	1	0	0	CFP	complement factor properdin
hsa-miR-605	1	0	1	1	1	1	PXN	paxillin
hsa-miR-605	1	0	1	1	1	1	ZBTB4	zinc finger and BTB domain containing 4
hsa-miR-605	1	0	1	0	1	1	KCNK2	potassium channel, subfamily K, member 2
hsa-miR-605	0	0	1	1	1	1	FAM19A2	family with sequence similarity 19 (chemokine (C-C motif)-like), member A2
hsa-miR-605	0	0	1	0	0	0	LOC650368	asparagine-linked glycosylation 1-like pseudogene
hsa-miR-605	0	0	1	0	0	0	LOC285043	uncharacterized LOC285043
hsa-miR-605	0	0	1	0	0	0	DKFZP434H168	uncharacterized LOC26077
hsa-miR-605	1	0	1	1	0	0	KCNC1	potassium voltage-gated channel, Shaw-related subfamily, member 1
hsa-miR-605	0	0	1	1	1	1	IDS	iduronate 2-sulfatase
hsa-miR-605	0	0	1	1	1	1	ATE1	arginyltransferase 1
hsa-miR-605	0	0	1	1	0	0	PPP1R18	protein phosphatase 1, regulatory subunit 18
hsa-miR-605	0	0	1	1	1	1	C2orf91	chromosome 2 open reading frame 91
hsa-miR-605	1	0	1	1	1	1	C17orf85	chromosome 17 open reading frame 85
hsa-miR-605	0	0	1	1	1	1	MKX	mohawk homeobox
hsa-miR-605	1	0	1	0	0	0	ANKRD52	ankyrin repeat domain 52
hsa-miR-605	0	0	1	1	1	1	DENND5A	DENN/MADD domain containing 5A
hsa-miR-605	1	0	1	1	1	1	ATP11C	ATPase, class VI, type 11C
hsa-miR-605	1	0	1	1	1	1	KPNA1	karyopherin alpha 1 (importin alpha 5)
hsa-miR-605	1	0	1	0	0	0	MSL1	male-specific lethal 1 homolog (Drosophila)
hsa-miR-605	0	0	1	0	1	1	C17orf105	chromosome 17 open reading frame 105
hsa-miR-605	0	0	1	1	0	0	FSIP2	fibrous sheath interacting protein 2
hsa-miR-605	1	0	1	1	1	1	CSRNP3	cysteine-serine-rich nuclear protein 3
hsa-miR-605	1	0	1	1	1	1	DPY19L3	dpy-19-like 3 (C. elegans)
hsa-miR-605	1	0	1	1	1	1	PIK3R1	phosphoinositide-3-kinase, regulatory subunit 1 (alpha)
hsa-miR-605	1	0	1	1	1	1	SLC1A4	solute carrier family 1 (glutamate/neutral amino acid transporter), member 4
hsa-miR-605	1	0	1	1	1	1	LRIG1	leucine-rich repeats and immunoglobulin-like domains 1
hsa-miR-605	1	0	1	1	1	1	DLG2	discs, large homolog 2 (Drosophila)
hsa-miR-605	0	0	1	0	0	0	HNRNPKP3	heterogeneous nuclear ribonucleoprotein K pseudogene 3
hsa-miR-605	1	0	1	1	1	1	EIF4E3	eukaryotic translation initiation factor 4E family member 3
hsa-miR-605	1	0	1	0	1	1	ADIPOR2	adiponectin receptor 2
hsa-miR-605	1	0	1	1	1	1	PHF17	PHD finger protein 17
hsa-miR-605	1	0	1	0	1	1	KIAA0182	KIAA0182
hsa-miR-605	1	0	1	1	1	1	KANK4	KN motif and ankyrin repeat domains 4
hsa-miR-605	1	0	1	0	1	1	YAF2	YY1 associated factor 2
hsa-miR-605	1	0	1	1	1	1	ENAH	enabled homolog (Drosophila)
hsa-miR-605	1	0	1	1	1	1	CXorf23	chromosome X open reading frame 23
hsa-miR-605	0	0	1	1	0	0	AADACL3	arylacetamide deacetylase-like 3
hsa-miR-605	0	0	1	0	0	0	ERVFRD-2	endogenous retrovirus group FRD, member 2
hsa-miR-605	0	0	1	1	0	0	BPIFB1	BPI fold containing family B, member 1
hsa-miR-605	0	0	1	1	0	0	TMEM136	transmembrane protein 136
hsa-miR-605	0	0	1	0	0	0	FAM205B	transmembrane protein C9orf144B pseudogene
hsa-miR-605	1	0	1	1	1	1	WDR37	WD repeat domain 37
hsa-miR-605	1	0	1	1	0	0	C15orf39	chromosome 15 open reading frame 39
hsa-miR-605	0	0	1	1	0	0	C17orf107	chromosome 17 open reading frame 107
hsa-miR-605	1	0	1	1	1	1	BCAT1	branched chain amino-acid transaminase 1, cytosolic
hsa-miR-605	0	0	1	1	1	1	ZNF662	zinc finger protein 662
hsa-miR-605	0	0	1	0	0	0	EMBP1	embigin pseudogene 1
hsa-miR-605	1	0	1	1	1	1	ADAMTS19	ADAM metallopeptidase with thrombospondin type 1 motif, 19
hsa-miR-605	0	0	1	1	1	1	TMC5	transmembrane channel-like 5
hsa-miR-605	1	0	1	1	1	1	RNF111	ring finger protein 111
hsa-miR-605	0	0	1	1	0	0	ZNF730	zinc finger protein 730
hsa-miR-605	0	0	1	1	1	1	PDE2A	phosphodiesterase 2A, cGMP-stimulated
hsa-miR-605	0	0	1	1	0	0	FIZ1	FLT3-interacting zinc finger 1
hsa-miR-605	0	0	1	0	0	0	RRN3P2	RNA polymerase I transcription factor homolog (S. cerevisiae) pseudogene 2
hsa-miR-605	1	0	1	1	0	0	ABLIM3	actin binding LIM protein family, member 3
hsa-miR-605	1	0	1	1	1	1	COBLL1	COBL-like 1
hsa-miR-605	1	0	1	1	1	1	UPK1B	uroplakin 1B
hsa-miR-605	1	0	1	1	1	1	LUC7L3	LUC7-like 3 (S. cerevisiae)
hsa-miR-605	1	0	1	1	1	1	AHCYL1	adenosylhomocysteinase-like 1
hsa-miR-605	1	0	1	1	1	1	RIF1	RAP1 interacting factor homolog (yeast)
hsa-miR-605	0	0	1	1	1	1	TFDP2	transcription factor Dp-2 (E2F dimerization partner 2)
hsa-miR-605	0	0	1	1	0	0	OPLAH	5-oxoprolinase (ATP-hydrolysing)
hsa-miR-605	0	0	1	1	0	0	PLK1S1	polo-like kinase 1 substrate 1
hsa-miR-605	1	0	1	1	1	1	DVL3	dishevelled, dsh homolog 3 (Drosophila)
hsa-miR-605	1	0	1	1	1	1	ARF6	ADP-ribosylation factor 6
hsa-miR-605	1	0	1	1	1	1	SMAP2	small ArfGAP2
hsa-miR-605	0	0	1	1	1	1	KIDINS220	kinase D-interacting substrate, 220kDa
hsa-miR-605	1	0	1	1	1	1	PREX1	phosphatidylinositol-3,4,5-trisphosphate-dependent Rac exchange factor 1
hsa-miR-605	0	0	1	1	1	1	ZNF280D	zinc finger protein 280D
hsa-miR-605	0	0	1	1	1	1	RHOT1	ras homolog family member T1
hsa-miR-605	0	0	1	1	1	1	MYO9A	myosin IXA
hsa-miR-605	1	0	1	0	1	1	DNAJC5	DnaJ (Hsp40) homolog, subfamily C, member 5
hsa-miR-605	1	0	1	1	1	1	CTTNBP2NL	CTTNBP2 N-terminal like
hsa-miR-605	1	0	1	1	1	1	NEO1	neogenin 1
hsa-miR-605	0	0	1	1	1	1	SLC30A10	solute carrier family 30, member 10
hsa-miR-605	1	0	1	1	0	0	FAM108C1	family with sequence similarity 108, member C1
hsa-miR-605	0	0	1	0	0	0	FAM66D	family with sequence similarity 66, member D
hsa-miR-605	1	0	1	1	1	1	PKNOX2	PBX/knotted 1 homeobox 2
hsa-miR-605	1	0	1	1	1	1	LIMCH1	LIM and calponin homology domains 1
hsa-miR-605	0	0	1	1	1	1	BEND7	BEN domain containing 7
hsa-miR-605	1	0	1	1	1	1	FAM126B	family with sequence similarity 126, member B
hsa-miR-605	0	0	1	1	1	1	MYPN	myopalladin
hsa-miR-605	0	0	1	1	0	0	NEDD1	neural precursor cell expressed, developmentally down-regulated 1
hsa-miR-605	1	0	1	0	1	1	MPP5	membrane protein, palmitoylated 5 (MAGUK p55 subfamily member 5)
hsa-miR-605	1	0	1	1	1	1	EHMT1	euchromatic histone-lysine N-methyltransferase 1
hsa-miR-605	1	0	1	1	1	1	FAM126A	family with sequence similarity 126, member A
hsa-miR-605	0	0	1	1	1	1	TAF8	TAF8 RNA polymerase II, TATA box binding protein (TBP)-associated factor, 43kDa
hsa-miR-605	0	0	1	1	1	1	NFE2L1	nuclear factor (erythroid-derived 2)-like 1
hsa-miR-605	0	0	1	0	0	0	EPHA1-AS1	EPHA1 antisense RNA 1
hsa-miR-605	1	0	1	1	1	1	FAM63B	family with sequence similarity 63, member B
hsa-miR-605	1	0	1	1	1	1	MARCH7	membrane-associated ring finger (C3HC4) 7, E3 ubiquitin protein ligase
hsa-miR-605	1	0	1	1	1	1	ANKRD12	ankyrin repeat domain 12
hsa-miR-605	0	0	1	1	1	1	TEX2	testis expressed 2
hsa-miR-605	1	0	1	1	1	1	SET	SET nuclear oncogene
hsa-miR-605	1	0	1	1	1	1	TSHZ3	teashirt zinc finger homeobox 3
hsa-miR-605	1	0	1	1	1	1	PPP3CA	protein phosphatase 3, catalytic subunit, alpha isozyme
hsa-miR-605	1	0	1	1	1	1	RNF38	ring finger protein 38
hsa-miR-605	1	0	1	1	1	1	IKZF2	IKAROS family zinc finger 2 (Helios)
hsa-miR-605	1	0	1	1	1	1	GAL3ST3	galactose-3-O-sulfotransferase 3
hsa-miR-605	1	0	1	1	1	1	CLIC5	chloride intracellular channel 5
hsa-miR-605	0	0	1	1	1	1	ALS2CR8	amyotrophic lateral sclerosis 2 (juvenile) chromosome region, candidate 8
hsa-miR-605	0	0	1	1	1	1	CD209	CD209 molecule
hsa-miR-605	0	0	1	1	1	1	CRB1	crumbs homolog 1 (Drosophila)
hsa-miR-605	0	0	1	0	0	0	GRIK1-AS1	GRIK1 antisense RNA 1
hsa-miR-605	0	0	1	0	0	0	LOC374443	C-type lectin domain family 2, member D pseudogene
hsa-miR-605	1	0	1	1	1	1	KIAA0907	KIAA0907
hsa-miR-605	1	0	1	1	1	1	WDR26	WD repeat domain 26
hsa-miR-605	1	0	1	1	1	1	PNRC1	proline-rich nuclear receptor coactivator 1
hsa-miR-605	1	0	1	1	1	1	OPRM1	opioid receptor, mu 1
hsa-miR-605	1	0	1	1	1	1	TAB3	TGF-beta activated kinase 1/MAP3K7 binding protein 3
hsa-miR-605	0	0	1	1	0	0	LRRC28	leucine rich repeat containing 28
hsa-miR-605	1	0	1	1	1	1	NLGN4X	neuroligin 4, X-linked
hsa-miR-605	0	0	1	1	0	0	PDZD11	PDZ domain containing 11
hsa-miR-605	0	0	1	1	1	1	PTGR2	prostaglandin reductase 2
hsa-miR-605	0	0	1	1	0	0	SH2D6	SH2 domain containing 6
hsa-miR-605	1	0	1	1	1	1	MECP2	methyl CpG binding protein 2 (Rett syndrome)
hsa-miR-605	1	0	1	1	1	1	MOG	myelin oligodendrocyte glycoprotein
hsa-miR-605	0	0	1	1	1	1	DLEC1	deleted in lung and esophageal cancer 1
hsa-miR-605	1	0	1	1	1	1	PCDH11X	protocadherin 11 X-linked
hsa-miR-605	0	0	1	1	0	0	NBPF8	neuroblastoma breakpoint family, member 8
hsa-miR-605	1	0	1	1	1	1	ZNF282	zinc finger protein 282
hsa-miR-605	0	0	1	1	1	1	CDH6	cadherin 6, type 2, K-cadherin (fetal kidney)
hsa-miR-605	0	0	1	1	1	1	SLC6A2	solute carrier family 6 (neurotransmitter transporter, noradrenalin), member 2
hsa-miR-605	0	0	1	1	1	1	FAM115A	family with sequence similarity 115, member A
hsa-miR-605	0	0	1	1	1	1	RAD51C	RAD51 homolog C (S. cerevisiae)
hsa-miR-605	1	0	1	0	1	1	FAM46A	family with sequence similarity 46, member A
hsa-miR-605	1	0	1	1	1	1	ELOVL6	ELOVL fatty acid elongase 6
hsa-miR-605	1	0	1	1	1	1	MYCN	v-myc myelocytomatosis viral related oncogene, neuroblastoma derived (avian)
hsa-miR-605	0	0	1	1	1	1	TUFT1	tuftelin 1
hsa-miR-605	1	0	1	0	1	1	DCAF10	DDB1 and CUL4 associated factor 10
hsa-miR-605	0	0	1	1	0	0	SNRPB	small nuclear ribonucleoprotein polypeptides B and B1
hsa-miR-605	0	0	1	0	1	1	HAUS3	HAUS augmin-like complex, subunit 3
hsa-miR-605	1	0	1	1	0	0	DHDDS	dehydrodolichyl diphosphate synthase
hsa-miR-605	1	0	1	1	1	1	NUMA1	nuclear mitotic apparatus protein 1
hsa-miR-605	0	0	1	1	1	1	CHEK1	checkpoint kinase 1
hsa-miR-605	0	0	1	1	1	1	RABL5	RAB, member RAS oncogene family-like 5
hsa-miR-605	1	0	1	0	1	1	CGGBP1	CGG triplet repeat binding protein 1
hsa-miR-605	0	0	1	1	0	0	PNLIPRP1	pancreatic lipase-related protein 1
hsa-miR-605	0	0	1	1	1	1	PRMT5	protein arginine methyltransferase 5
hsa-miR-605	0	0	1	1	1	1	ZNF589	zinc finger protein 589
hsa-miR-605	0	0	1	1	0	0	RBM14	RNA binding motif protein 14
hsa-miR-605	0	0	1	1	1	1	DPYD	dihydropyrimidine dehydrogenase
hsa-miR-605	1	0	1	1	1	1	PLEKHO2	pleckstrin homology domain containing, family O member 2
hsa-miR-605	0	0	1	1	1	1	TMEM30A	transmembrane protein 30A
hsa-miR-605	1	0	1	1	0	0	WDR45	WD repeat domain 45
hsa-miR-605	1	0	1	1	1	1	B4GALT3	UDP-Gal:betaGlcNAc beta 1,4- galactosyltransferase, polypeptide 3
hsa-miR-605	1	0	1	1	1	1	SZRD1	SUZ RNA binding domain containing 1
hsa-miR-605	1	0	1	1	1	1	TRIM2	tripartite motif containing 2
hsa-miR-605	1	0	1	1	1	1	OTUD5	OTU domain containing 5
hsa-miR-605	0	0	1	1	1	1	KEAP1	kelch-like ECH-associated protein 1
hsa-miR-605	1	0	1	1	1	1	YY1	YY1 transcription factor
hsa-miR-605	1	0	1	1	1	1	PRDM2	PR domain containing 2, with ZNF domain
hsa-miR-605	1	0	1	0	1	1	NR1D2	nuclear receptor subfamily 1, group D, member 2
hsa-miR-605	0	0	1	1	1	1	CMAS	cytidine monophosphate N-acetylneuraminic acid synthetase
hsa-miR-605	1	0	1	1	1	1	ELF4	E74-like factor 4 (ets domain transcription factor)
hsa-miR-605	0	0	1	1	1	1	RDH11	retinol dehydrogenase 11 (all-trans/9-cis/11-cis)
hsa-miR-605	1	0	1	1	1	1	ARHGEF9	Cdc42 guanine nucleotide exchange factor (GEF) 9
hsa-miR-605	0	0	1	0	0	0	ZNF720	zinc finger protein 720
hsa-miR-605	0	0	1	0	0	0	WDFY3-AS2	WDFY3 antisense RNA 2
hsa-miR-605	1	0	1	1	1	1	WHSC1	Wolf-Hirschhorn syndrome candidate 1
hsa-miR-605	1	0	1	1	1	1	PRR7	proline rich 7 (synaptic)
hsa-miR-605	1	0	1	1	1	1	SCML4	sex comb on midleg-like 4 (Drosophila)
hsa-miR-605	0	0	1	0	0	0	TRAV20	T cell receptor alpha variable 20
hsa-miR-605	0	0	1	1	1	1	TRIM4	tripartite motif containing 4
hsa-miR-605	1	0	1	1	1	1	CNTN4	contactin 4
hsa-miR-605	0	0	1	0	0	0	EVPLL	envoplakin-like
hsa-miR-605	0	0	1	1	1	1	MAP2	microtubule-associated protein 2
hsa-miR-605	0	0	1	1	1	1	RHBDD1	rhomboid domain containing 1
hsa-miR-605	1	0	1	1	1	1	U2SURP	U2 snRNP-associated SURP domain containing
hsa-miR-605	1	0	1	1	1	1	HTR2C	5-hydroxytryptamine (serotonin) receptor 2C, G protein-coupled
hsa-miR-605	0	0	1	1	1	1	SEMA3D	sema domain, immunoglobulin domain (Ig), short basic domain, secreted, (semaphorin) 3D
hsa-miR-605	1	0	1	1	1	1	PPARGC1A	peroxisome proliferator-activated receptor gamma, coactivator 1 alpha
hsa-miR-605	0	0	1	1	1	1	PIK3AP1	phosphoinositide-3-kinase adaptor protein 1
hsa-miR-605	0	0	1	0	0	0	ZNF503-AS2	ZNF503 antisense RNA 2
hsa-miR-605	0	0	1	0	1	1	MYO7A	myosin VIIA
hsa-miR-605	0	0	1	0	0	0	C20orf62	chromosome 20 open reading frame 62
hsa-miR-605	0	0	1	1	1	1	PIP5K1B	phosphatidylinositol-4-phosphate 5-kinase, type I, beta
hsa-miR-605	0	0	1	1	0	0	AGBL3	ATP/GTP binding protein-like 3
hsa-miR-605	1	0	1	1	1	1	ADARB1	adenosine deaminase, RNA-specific, B1
hsa-miR-605	0	0	1	1	1	1	SLC22A2	solute carrier family 22 (organic cation transporter), member 2
hsa-miR-605	0	0	1	0	0	0	FAM86JP	family with sequence similarity 86, member A pseudogene
hsa-miR-605	1	0	1	1	1	1	FAM13A	family with sequence similarity 13, member A
hsa-miR-605	1	0	1	1	1	1	SIRPA	signal-regulatory protein alpha
hsa-miR-605	1	0	1	0	1	1	KIF5A	kinesin family member 5A
hsa-miR-605	0	0	1	1	1	1	ZNF337	zinc finger protein 337
hsa-miR-605	0	0	1	0	1	1	DKFZP434I0714	uncharacterized protein DKFZP434I0714
hsa-miR-605	0	0	1	1	1	1	KIF16B	kinesin family member 16B
hsa-miR-605	0	0	1	0	1	1	TMSB15B	thymosin beta 15B
hsa-miR-605	0	0	1	0	1	1	FAM72A	family with sequence similarity 72, member A
hsa-miR-605	1	0	1	1	1	1	CTDSPL2	CTD (carboxy-terminal domain, RNA polymerase II, polypeptide A) small phosphatase like 2
hsa-miR-605	0	0	1	1	1	1	SEC24D	SEC24 family, member D (S. cerevisiae)
hsa-miR-605	0	0	1	1	1	1	CLEC12B	C-type lectin domain family 12, member B
hsa-miR-605	0	0	1	1	1	1	UBE3D	ubiquitin protein ligase E3D
hsa-miR-605	1	0	1	1	1	1	SLC35G1	solute carrier family 35, member G1
hsa-miR-605	1	0	1	1	1	1	HECTD2	HECT domain containing E3 ubiquitin protein ligase 2
hsa-miR-605	1	0	1	0	1	1	CLDN12	claudin 12
hsa-miR-605	0	0	1	1	1	1	CELF1	CUGBP, Elav-like family member 1
hsa-miR-605	1	0	1	1	0	0	RASGEF1B	RasGEF domain family, member 1B
hsa-miR-605	1	0	1	1	0	0	EBF4	early B-cell factor 4
hsa-miR-605	1	0	1	1	1	1	UBXN2A	UBX domain protein 2A
hsa-miR-605	1	0	1	1	1	1	C4orf19	chromosome 4 open reading frame 19
hsa-miR-605	0	0	1	0	0	0	ZBED5	zinc finger, BED-type containing 5
hsa-miR-605	1	0	1	1	1	1	PRR16	proline rich 16
hsa-miR-605	1	0	1	1	1	1	PLS3	plastin 3
hsa-miR-605	1	0	1	0	0	0	CT62	cancer/testis antigen 62
hsa-miR-605	0	0	1	1	1	1	FBXL4	F-box and leucine-rich repeat protein 4
hsa-miR-605	0	0	1	0	1	1	SRSF5	serine/arginine-rich splicing factor 5
hsa-miR-605	1	0	1	1	1	1	IL16	interleukin 16
hsa-miR-605	1	0	1	1	1	1	LEF1	lymphoid enhancer-binding factor 1
hsa-miR-605	1	0	1	1	1	1	INTS6	integrator complex subunit 6
hsa-miR-605	0	0	1	0	0	0	MDS2	myelodysplastic syndrome 2 translocation associated
hsa-miR-605	1	0	1	1	1	1	TNFSF4	tumor necrosis factor (ligand) superfamily, member 4
hsa-miR-605	1	0	1	1	1	1	DOC2A	double C2-like domains, alpha
hsa-miR-605	1	0	1	0	1	1	TNFAIP3	tumor necrosis factor, alpha-induced protein 3
hsa-miR-605	1	0	1	1	1	1	CLOCK	clock homolog (mouse)
hsa-miR-605	0	0	1	1	1	1	SH3GL3	SH3-domain GRB2-like 3
hsa-miR-605	0	0	1	1	1	1	STARD4	StAR-related lipid transfer (START) domain containing 4
hsa-miR-605	0	0	1	0	0	0	LOC401176	uncharacterized LOC401176
hsa-miR-605	0	0	1	0	0	0	LINC00347	long intergenic non-protein coding RNA 347
hsa-miR-605	0	0	1	0	0	0	LOC339316	uncharacterized LOC339316
hsa-miR-605	0	0	1	0	0	0	MORF4L2-AS1	MORF4L2 antisense RNA 1
hsa-miR-605	0	0	1	0	0	0	LOC646168	uncharacterized LOC646168
hsa-miR-605	0	0	1	0	0	0	LOC338667	uncharacterized LOC338667
hsa-miR-605	1	0	1	1	1	1	HLTF	helicase-like transcription factor
hsa-miR-605	0	0	1	1	0	0	FAM72B	family with sequence similarity 72, member B
hsa-miR-605	1	0	1	0	1	1	LYPD6	LY6/PLAUR domain containing 6
hsa-miR-605	0	0	1	0	0	0	LOC348120	uncharacterized LOC348120
hsa-miR-605	0	0	1	1	0	0	FAM170B	family with sequence similarity 170, member B
hsa-miR-605	0	0	1	0	0	0	SUZ12P1	suppressor of zeste 12 homolog pseudogene 1
hsa-miR-605	0	0	1	1	0	0	FKBP11	FK506 binding protein 11, 19 kDa
hsa-miR-605	1	0	1	1	1	1	PTPRG	protein tyrosine phosphatase, receptor type, G
hsa-miR-605	0	0	1	0	1	1	ITGA1	integrin, alpha 1
hsa-miR-605	0	0	1	1	0	0	NISCH	nischarin
hsa-miR-605	1	0	1	0	1	1	SMURF2	SMAD specific E3 ubiquitin protein ligase 2
hsa-miR-605	1	0	1	1	1	1	MKRN1	makorin ring finger protein 1
hsa-miR-605	1	0	1	1	1	1	PCGF5	polycomb group ring finger 5
hsa-miR-605	1	0	1	1	1	1	SCUBE3	signal peptide, CUB domain, EGF-like 3
hsa-miR-605	1	0	1	1	1	1	NCOA5	nuclear receptor coactivator 5
hsa-miR-605	1	0	1	1	1	1	PRRG1	proline rich Gla (G-carboxyglutamic acid) 1
hsa-miR-605	1	0	1	1	1	1	GTDC1	glycosyltransferase-like domain containing 1
hsa-miR-605	0	0	1	1	1	1	GPATCH2	G patch domain containing 2
hsa-miR-605	0	0	1	1	0	0	C8orf31	chromosome 8 open reading frame 31
hsa-miR-605	1	0	1	1	1	1	VTCN1	V-set domain containing T cell activation inhibitor 1
hsa-miR-605	0	0	1	0	0	0	LINC00052	long intergenic non-protein coding RNA 52
hsa-miR-605	1	0	1	1	1	1	CUX1	cut-like homeobox 1
hsa-miR-605	0	0	1	1	1	1	SLAMF1	signaling lymphocytic activation molecule family member 1
hsa-miR-605	0	0	1	0	0	0	LEF1-AS1	LEF1 antisense RNA 1
hsa-miR-605	0	0	1	1	0	0	CELF3	CUGBP, Elav-like family member 3
hsa-miR-605	0	0	1	0	0	0	PABPC1P2	poly(A) binding protein, cytoplasmic 1 pseudogene 2
hsa-miR-605	1	0	1	1	1	1	PDCD6IP	programmed cell death 6 interacting protein
hsa-miR-605	0	0	1	0	0	0	C17orf69	chromosome 17 open reading frame 69
hsa-miR-605	0	0	1	1	1	1	C21orf62	chromosome 21 open reading frame 62
hsa-miR-605	0	0	1	1	0	0	CYP4F30P	cytochrome P450, family 4, subfamily F, polypeptide 30, pseudogene
hsa-miR-605	0	0	1	0	0	0	AQP7P2	aquaporin 7 pseudogene 2
hsa-miR-605	0	0	1	0	0	0	ULK4P1	unc-51-like kinase 4 (C. elegans) pseudogene 1
hsa-miR-605	0	0	1	1	0	0	RPS16	ribosomal protein S16
hsa-miR-605	0	0	1	0	0	0	JPX	JPX transcript, XIST activator (non-protein coding)
hsa-miR-605	0	0	1	1	0	0	TRIM41	tripartite motif containing 41
hsa-miR-605	0	0	1	0	0	0	LOC727849	golgin A2 pseudogene
hsa-miR-605	0	0	1	0	0	0	LOC727751	uncharacterized LOC727751
hsa-miR-605	0	0	1	0	0	0	AGSK1	golgin subfamily A member 2-like
hsa-miR-605	1	0	1	1	1	1	WNT5A	wingless-type MMTV integration site family, member 5A
hsa-miR-605	0	0	1	1	1	1	C3orf67	chromosome 3 open reading frame 67
hsa-miR-605	1	0	1	1	1	1	SAMD4B	sterile alpha motif domain containing 4B
hsa-miR-605	0	0	1	1	1	1	HOXD8	homeobox D8
hsa-miR-605	0	0	1	0	1	1	CCL4L2	chemokine (C-C motif) ligand 4-like 2
hsa-miR-605	0	0	1	1	1	1	CCL4L1	chemokine (C-C motif) ligand 4-like 1
hsa-miR-605	1	0	1	1	1	1	ARHGAP44	Rho GTPase activating protein 44
hsa-miR-605	1	0	1	0	1	1	PIK3R3	phosphoinositide-3-kinase, regulatory subunit 3 (gamma)
hsa-miR-605	1	0	1	1	1	1	ST8SIA2	ST8 alpha-N-acetyl-neuraminide alpha-2,8-sialyltransferase 2
hsa-miR-605	0	0	1	1	1	1	COL8A2	collagen, type VIII, alpha 2
hsa-miR-605	0	0	1	1	1	1	FUT11	fucosyltransferase 11 (alpha (1,3) fucosyltransferase)
hsa-miR-605	0	0	1	1	0	0	TMC1	transmembrane channel-like 1
hsa-miR-605	1	0	1	1	0	0	KIAA1644	KIAA1644
hsa-miR-605	0	0	1	0	0	0	FBXL19-AS1	FBXL19 antisense RNA 1 (head to head)
hsa-miR-605	1	0	1	1	1	1	NR2F2	nuclear receptor subfamily 2, group F, member 2
hsa-miR-605	0	0	1	1	0	0	BTBD16	BTB (POZ) domain containing 16
hsa-miR-605	0	0	1	1	0	0	STK19	serine/threonine kinase 19
hsa-miR-605	0	0	1	1	1	1	RASAL2	RAS protein activator like 2
hsa-miR-605	0	0	1	1	1	1	SMTNL2	smoothelin-like 2
hsa-miR-605	1	0	1	1	1	1	TMEM132B	transmembrane protein 132B
hsa-miR-605	0	0	1	1	1	1	ZNF621	zinc finger protein 621
hsa-miR-605	0	0	1	0	0	0	LGALS17A	Charcot-Leyden crystal protein pseudogene
hsa-miR-605	0	0	1	0	0	0	CCT6P1	chaperonin containing TCP1, subunit 6 (zeta) pseudogene 1
hsa-miR-605	0	0	1	0	1	1	GOLGA8G	golgin A8 family, member G
hsa-miR-605	1	0	1	0	1	1	LRCH2	leucine-rich repeats and calponin homology (CH) domain containing 2
hsa-miR-605	1	0	1	1	1	1	ZEB2	zinc finger E-box binding homeobox 2
hsa-miR-605	0	0	1	0	1	1	C20orf202	chromosome 20 open reading frame 202
hsa-miR-605	1	0	1	1	1	1	MLLT10	myeloid/lymphoid or mixed-lineage leukemia (trithorax homolog, Drosophila); translocated to, 10
hsa-miR-605	0	0	1	0	0	0	FAM225B	family with sequence similarity 225, member B (non-protein coding)
hsa-miR-605	1	0	1	0	1	1	NFAT5	nuclear factor of activated T-cells 5, tonicity-responsive
hsa-miR-605	0	0	1	0	0	0	LILRP2	leukocyte immunoglobulin-like receptor pseudogene 2
hsa-miR-605	1	0	1	1	1	1	CADPS	Ca++-dependent secretion activator
hsa-miR-605	0	0	1	1	1	1	PRKAR2A	protein kinase, cAMP-dependent, regulatory, type II, alpha
hsa-miR-605	0	0	1	1	0	0	NDRG2	NDRG family member 2
hsa-miR-605	0	0	1	0	0	0	FLJ39632	uncharacterized LOC642477
hsa-miR-605	1	0	1	1	0	0	RGS6	regulator of G-protein signaling 6
hsa-miR-605	1	0	1	1	1	1	LITAF	lipopolysaccharide-induced TNF factor
hsa-miR-605	0	0	1	1	1	1	DNAJB14	DnaJ (Hsp40) homolog, subfamily B, member 14
hsa-miR-605	1	0	1	1	1	1	MIER3	mesoderm induction early response 1, family member 3
hsa-miR-605	1	0	1	0	1	1	MTX3	metaxin 3
hsa-miR-605	0	0	1	1	1	1	APTX	aprataxin
hsa-miR-605	1	0	1	1	1	1	ETS1	v-ets erythroblastosis virus E26 oncogene homolog 1 (avian)
hsa-miR-605	0	0	1	1	1	1	AIG1	androgen-induced 1
hsa-miR-605	0	0	1	1	1	1	COL6A3	collagen, type VI, alpha 3
hsa-miR-605	0	0	1	1	1	1	IPCEF1	interaction protein for cytohesin exchange factors 1
hsa-miR-605	1	0	1	1	1	1	CGN	cingulin
hsa-miR-605	0	0	1	0	1	1	THAP6	THAP domain containing 6
hsa-miR-605	1	0	1	1	1	1	TC2N	tandem C2 domains, nuclear
hsa-miR-605	0	0	1	0	0	0	OVOS	ovostatin
hsa-miR-605	1	0	1	1	1	1	PDXDC1	pyridoxal-dependent decarboxylase domain containing 1
hsa-miR-605	0	0	1	1	0	0	SBSN	suprabasin
hsa-miR-605	1	0	1	1	1	1	ATP6V1C1	ATPase, H+ transporting, lysosomal 42kDa, V1 subunit C1
hsa-miR-605	1	0	1	1	1	1	GPR125	G protein-coupled receptor 125
hsa-miR-605	1	0	1	1	1	1	NFIB	nuclear factor I/B
hsa-miR-605	1	0	1	1	1	1	BZRAP1	benzodiazapine receptor (peripheral) associated protein 1
hsa-miR-605	1	0	1	1	1	1	HIF1A	hypoxia inducible factor 1, alpha subunit (basic helix-loop-helix transcription factor)
hsa-miR-605	0	0	1	1	1	1	SSFA2	sperm specific antigen 2
hsa-miR-605	0	0	1	1	1	1	USP54	ubiquitin specific peptidase 54
hsa-miR-605	1	0	1	1	1	1	DLG5	discs, large homolog 5 (Drosophila)
hsa-miR-605	1	0	1	1	1	1	CREB3L2	cAMP responsive element binding protein 3-like 2
hsa-miR-605	0	0	1	0	1	1	GINS3	GINS complex subunit 3 (Psf3 homolog)
hsa-miR-605	1	0	1	1	1	1	PGGT1B	protein geranylgeranyltransferase type I, beta subunit
hsa-miR-605	0	0	1	1	1	1	DUSP26	dual specificity phosphatase 26 (putative)
hsa-miR-605	0	0	1	1	1	1	KIAA0141	KIAA0141
hsa-miR-605	0	0	1	0	0	0	RPS16P10	ribosomal protein S16 pseudogene 10
hsa-miR-605	1	0	1	1	1	1	POU2F3	POU class 2 homeobox 3
hsa-miR-605	0	0	1	0	0	0	LOC400768	uncharacterized LOC400768
hsa-miR-605	0	0	1	1	1	1	FBXO36	F-box protein 36
hsa-miR-605	1	0	1	0	1	1	OLA1	Obg-like ATPase 1
hsa-miR-605	1	0	1	1	1	1	HNRNPC	heterogeneous nuclear ribonucleoprotein C (C1/C2)
hsa-miR-605	1	0	1	1	1	1	AP3S1	adaptor-related protein complex 3, sigma 1 subunit
hsa-miR-605	0	0	1	1	1	1	MMADHC	methylmalonic aciduria (cobalamin deficiency) cblD type, with homocystinuria
hsa-miR-605	1	0	1	1	1	1	RAP1A	RAP1A, member of RAS oncogene family
hsa-miR-605	0	0	1	1	1	1	PTGES3	prostaglandin E synthase 3 (cytosolic)
hsa-miR-605	0	0	1	1	0	0	CCNDBP1	cyclin D-type binding-protein 1
hsa-miR-605	0	0	1	1	1	1	HSPB8	heat shock 22kDa protein 8
hsa-miR-605	0	0	1	1	1	1	FAT1	FAT tumor suppressor homolog 1 (Drosophila)
hsa-miR-605	1	0	1	1	1	1	CD9	CD9 molecule
hsa-miR-605	1	0	1	1	0	0	STX5	syntaxin 5
hsa-miR-605	1	0	1	1	1	1	COPS2	COP9 constitutive photomorphogenic homolog subunit 2 (Arabidopsis)
hsa-miR-605	1	0	1	1	1	1	COPZ1	coatomer protein complex, subunit zeta 1
hsa-miR-605	0	0	1	1	1	1	GRAP2	GRB2-related adaptor protein 2
hsa-miR-605	1	0	1	0	1	1	RPS6KB1	ribosomal protein S6 kinase, 70kDa, polypeptide 1
hsa-miR-605	0	0	1	0	0	0	LOC643072	uncharacterized LOC643072
hsa-miR-605	1	0	1	1	1	1	PCTP	phosphatidylcholine transfer protein
hsa-miR-605	1	0	1	1	0	0	MAP3K10	mitogen-activated protein kinase kinase kinase 10
hsa-miR-605	1	0	1	1	1	1	STK38L	serine/threonine kinase 38 like
hsa-miR-605	0	0	1	1	0	0	IFT46	intraflagellar transport 46 homolog (Chlamydomonas)
hsa-miR-605	0	0	1	1	1	1	VPS16	vacuolar protein sorting 16 homolog (S. cerevisiae)
hsa-miR-605	0	0	1	1	1	1	HADHB	hydroxyacyl-CoA dehydrogenase/3-ketoacyl-CoA thiolase/enoyl-CoA hydratase (trifunctional protein), beta subunit
hsa-miR-605	0	0	1	1	1	1	C1orf88	chromosome 1 open reading frame 88
hsa-miR-605	1	0	1	1	1	1	KCNIP4	Kv channel interacting protein 4
hsa-miR-605	0	0	1	1	0	0	TUSC3	tumor suppressor candidate 3
hsa-miR-605	0	0	1	1	1	1	RPA2	replication protein A2, 32kDa
hsa-miR-605	0	0	1	1	1	1	ODC1	ornithine decarboxylase 1
hsa-miR-605	1	0	1	0	1	1	NLN	neurolysin (metallopeptidase M3 family)
hsa-miR-605	1	0	1	1	1	1	FUBP3	far upstream element (FUSE) binding protein 3
hsa-miR-605	0	0	1	1	1	1	MAEL	maelstrom homolog (Drosophila)
hsa-miR-605	1	0	1	1	1	1	ARL4A	ADP-ribosylation factor-like 4A
hsa-miR-605	1	0	1	1	1	1	BAALC	brain and acute leukemia, cytoplasmic
hsa-miR-605	1	0	1	1	1	1	ANAPC16	anaphase promoting complex subunit 16
hsa-miR-605	0	0	1	1	0	0	AATF	apoptosis antagonizing transcription factor
hsa-miR-605	0	0	1	1	0	0	PARD6A	par-6 partitioning defective 6 homolog alpha (C. elegans)
hsa-miR-605	1	0	1	1	1	1	HIGD1A	HIG1 hypoxia inducible domain family, member 1A
hsa-miR-605	1	0	1	1	0	0	SAP30BP	SAP30 binding protein
hsa-miR-605	1	0	1	0	1	1	CD47	CD47 molecule
hsa-miR-605	1	0	1	1	1	1	RUNX1	runt-related transcription factor 1
hsa-miR-605	0	0	1	1	1	1	INPP5K	inositol polyphosphate-5-phosphatase K
hsa-miR-605	1	0	1	1	0	0	FOXO3	forkhead box O3
hsa-miR-605	1	0	1	1	1	1	PHF20L1	PHD finger protein 20-like 1
hsa-miR-605	1	0	1	1	1	1	ATP5G3	ATP synthase, H+ transporting, mitochondrial Fo complex, subunit C3 (subunit 9)
hsa-miR-605	0	0	1	1	1	1	PSMD9	proteasome (prosome, macropain) 26S subunit, non-ATPase, 9
hsa-miR-605	1	0	1	1	1	1	MYT1	myelin transcription factor 1
hsa-miR-605	0	0	1	1	1	1	ANXA7	annexin A7
hsa-miR-605	1	0	1	1	1	1	MED1	mediator complex subunit 1
hsa-miR-605	0	0	1	1	1	1	CIRBP	cold inducible RNA binding protein
hsa-miR-605	1	0	1	0	1	1	KIAA0664	KIAA0664
hsa-miR-605	0	0	1	0	0	0	LOC731789	uncharacterized LOC731789
hsa-miR-605	1	0	1	1	1	1	PHACTR2	phosphatase and actin regulator 2
hsa-miR-605	0	0	1	1	1	1	ATG5	autophagy related 5
hsa-miR-605	0	0	1	0	0	0	LINC00661	long intergenic non-protein coding RNA 661
hsa-miR-605	1	0	1	0	1	1	SLC7A6	solute carrier family 7 (amino acid transporter light chain, y+L system), member 6
hsa-miR-605	0	0	1	1	1	1	ARMCX1	armadillo repeat containing, X-linked 1
hsa-miR-605	0	0	1	1	1	1	GLIPR2	GLI pathogenesis-related 2
hsa-miR-605	0	0	1	0	1	1	ZNF28	zinc finger protein 28
hsa-miR-605	1	0	1	1	1	1	ZFHX3	zinc finger homeobox 3
hsa-miR-605	1	0	1	1	1	1	METAP1	methionyl aminopeptidase 1
hsa-miR-605	1	0	1	1	1	1	SEC14L1	SEC14-like 1 (S. cerevisiae)
hsa-miR-605	0	0	1	1	0	0	SPINK5	serine peptidase inhibitor, Kazal type 5
hsa-miR-605	0	0	1	1	1	1	CD274	CD274 molecule
hsa-miR-605	0	0	1	1	0	0	GPR111	G protein-coupled receptor 111
hsa-miR-605	1	0	1	1	1	1	MOSPD1	motile sperm domain containing 1
hsa-miR-605	1	0	1	1	1	1	QKI	QKI, KH domain containing, RNA binding
hsa-miR-605	0	0	1	0	0	0	LOC728377	Rho guanine nucleotide exchange factor (GEF) 5 pseudogene
hsa-miR-605	0	0	1	1	1	1	PROS1	protein S (alpha)
hsa-miR-605	1	0	1	1	1	1	LGR4	leucine-rich repeat containing G protein-coupled receptor 4
hsa-miR-605	0	0	1	1	1	1	ALDH3B1	aldehyde dehydrogenase 3 family, member B1
hsa-miR-605	0	0	1	1	0	0	HLA-DQB1	major histocompatibility complex, class II, DQ beta 1
hsa-miR-605	1	0	1	1	1	1	RALBP1	ralA binding protein 1
hsa-miR-605	1	0	1	0	1	1	BCL2	B-cell CLL/lymphoma 2
hsa-miR-605	1	0	1	1	1	1	ELK1	ELK1, member of ETS oncogene family
hsa-miR-605	0	0	1	0	0	0	PVT1	Pvt1 oncogene (non-protein coding)
hsa-miR-605	1	0	1	1	1	1	IGF1	insulin-like growth factor 1 (somatomedin C)
hsa-miR-605	0	0	1	1	1	1	CNGA1	cyclic nucleotide gated channel alpha 1
hsa-miR-605	1	0	1	1	1	1	ADRB2	adrenoceptor beta 2, surface
hsa-miR-605	1	0	1	1	1	1	CYP19A1	cytochrome P450, family 19, subfamily A, polypeptide 1
hsa-miR-605	1	0	1	0	1	1	GCH1	GTP cyclohydrolase 1
hsa-miR-605	1	0	1	1	1	1	GJA1	gap junction protein, alpha 1, 43kDa
hsa-miR-605	1	0	1	0	1	1	GLI3	GLI family zinc finger 3
hsa-miR-605	1	0	1	1	1	1	KCNA1	potassium voltage-gated channel, shaker-related subfamily, member 1 (episodic ataxia with myokymia)
hsa-miR-605	1	0	1	1	1	1	OCRL	oculocerebrorenal syndrome of Lowe
hsa-miR-605	1	0	1	1	1	1	ATXN1	ataxin 1
hsa-miR-605	1	0	1	1	1	1	SOX9	SRY (sex determining region Y)-box 9
hsa-miR-605	0	0	1	1	0	0	TCOF1	Treacher Collins-Franceschetti syndrome 1
hsa-miR-605	0	0	1	1	1	1	TTR	transthyretin
hsa-miR-605	1	0	1	1	1	1	CHM	choroideremia (Rab escort protein 1)
hsa-miR-605	1	0	1	0	1	1	PAFAH1B1	platelet-activating factor acetylhydrolase 1b, regulatory subunit 1 (45kDa)
hsa-miR-605	1	0	1	0	1	1	RAG1	recombination activating gene 1
hsa-miR-605	0	0	1	1	1	1	CYP11B2	cytochrome P450, family 11, subfamily B, polypeptide 2
hsa-miR-605	1	0	1	1	1	1	PLP1	proteolipid protein 1
hsa-miR-605	1	0	1	1	1	1	DCX	doublecortin
hsa-miR-605	1	0	1	1	1	1	CR1	complement component (3b/4b) receptor 1 (Knops blood group)
hsa-miR-605	1	0	1	1	1	1	FASLG	Fas ligand (TNF superfamily, member 6)
hsa-miR-605	1	0	1	1	0	0	ADRA1B	adrenoceptor alpha 1B
hsa-miR-605	1	0	1	1	1	1	ADRA1A	adrenoceptor alpha 1A
hsa-miR-605	1	0	1	0	1	1	ADRB1	adrenoceptor beta 1
hsa-miR-605	0	0	1	1	1	1	ALDH1B1	aldehyde dehydrogenase 1 family, member B1
hsa-miR-605	1	0	1	0	1	1	CACNA1E	calcium channel, voltage-dependent, R type, alpha 1E subunit
hsa-miR-605	1	0	1	1	1	1	GABRB3	gamma-aminobutyric acid (GABA) A receptor, beta 3
hsa-miR-605	1	0	1	1	1	1	PDE3B	phosphodiesterase 3B, cGMP-inhibited
hsa-miR-605	1	0	1	1	1	1	PTGDR	prostaglandin D2 receptor (DP)
hsa-miR-605	0	0	1	1	1	1	PTGS2	prostaglandin-endoperoxide synthase 2 (prostaglandin G/H synthase and cyclooxygenase)
hsa-miR-605	1	0	1	1	1	1	REEP3	receptor accessory protein 3
hsa-miR-605	0	0	1	1	1	1	C16orf87	chromosome 16 open reading frame 87
hsa-miR-605	1	0	1	1	1	1	RORC	RAR-related orphan receptor C
hsa-miR-605	1	0	1	1	1	1	FARP1	FERM, RhoGEF (ARHGEF) and pleckstrin domain protein 1 (chondrocyte-derived)
hsa-miR-605	0	0	1	0	0	0	KLK2	kallikrein-related peptidase 2
hsa-miR-605	0	0	1	1	1	1	FCGR2B	Fc fragment of IgG, low affinity IIb, receptor (CD32)
hsa-miR-605	1	0	1	1	1	1	KCTD11	potassium channel tetramerisation domain containing 11
hsa-miR-605	0	0	1	1	1	1	TRIM6-TRIM34	TRIM6-TRIM34 readthrough
hsa-miR-605	0	0	1	1	1	1	TRIM34	tripartite motif containing 34
hsa-miR-605	1	0	1	1	0	0	NOMO3	NODAL modulator 3
hsa-miR-605	1	0	1	0	1	1	ZNF740	zinc finger protein 740
hsa-miR-605	0	0	1	1	1	1	ZCCHC16	zinc finger, CCHC domain containing 16
hsa-miR-605	1	0	1	0	1	1	LIN28B	lin-28 homolog B (C. elegans)
hsa-miR-605	0	0	1	0	1	1	ZNF705A	zinc finger protein 705A
hsa-miR-605	1	0	1	0	1	1	IP6K1	inositol hexakisphosphate kinase 1
hsa-miR-605	1	0	1	1	0	0	SDC1	syndecan 1
hsa-miR-605	1	0	1	0	1	1	GOSR1	golgi SNAP receptor complex member 1
hsa-miR-605	1	0	1	1	1	1	LMBRD2	LMBR1 domain containing 2
hsa-miR-605	1	0	1	0	1	1	KIAA2022	KIAA2022
hsa-miR-605	0	0	1	1	1	1	HRNR	hornerin
hsa-miR-605	1	0	1	0	1	1	ERMN	ermin, ERM-like protein
hsa-miR-605	0	0	1	1	0	0	RIPPLY2	ripply2 homolog (zebrafish)
hsa-miR-605	1	0	1	0	1	1	ZC3H12B	zinc finger CCCH-type containing 12B
hsa-miR-605	0	0	1	1	1	1	SERP2	stress-associated endoplasmic reticulum protein family member 2
hsa-miR-605	1	0	1	1	1	1	FAM171A1	family with sequence similarity 171, member A1
hsa-miR-605	0	0	1	1	1	1	SAMD13	sterile alpha motif domain containing 13
hsa-miR-605	0	0	1	0	1	1	GOLGA8E	golgin A8 family, member E
hsa-miR-605	1	0	1	1	1	1	SLC25A53	solute carrier family 25, member 53
hsa-miR-605	0	0	1	1	1	1	PLIN5	perilipin 5
hsa-miR-605	1	0	1	1	1	1	RUNX2	runt-related transcription factor 2
hsa-miR-605	1	0	1	1	1	1	PHF6	PHD finger protein 6
hsa-miR-605	1	0	1	1	1	1	TMCC1	transmembrane and coiled-coil domain family 1
hsa-miR-605	1	0	1	1	1	1	VMA21	VMA21 vacuolar H+-ATPase homolog (S. cerevisiae)
hsa-miR-605	1	0	1	1	1	1	GPHN	gephyrin
hsa-miR-605	0	0	1	1	1	1	LRRC66	leucine rich repeat containing 66
hsa-miR-605	1	0	1	0	1	1	BCL7A	B-cell CLL/lymphoma 7A
hsa-miR-605	1	0	1	0	1	1	TNRC6B	trinucleotide repeat containing 6B
hsa-miR-605	1	0	1	0	1	1	CLLU1	chronic lymphocytic leukemia up-regulated 1
hsa-miR-605	1	0	1	0	1	1	C3orf70	chromosome 3 open reading frame 70
hsa-miR-605	1	0	1	0	1	1	ANO6	anoctamin 6
hsa-miR-605	1	0	1	1	1	1	ARHGAP24	Rho GTPase activating protein 24
hsa-miR-605	1	0	1	1	1	1	SRSF7	serine/arginine-rich splicing factor 7
hsa-miR-605	1	0	1	1	1	1	CSNK1G3	casein kinase 1, gamma 3
hsa-miR-605	1	0	1	1	1	1	TFAP2A	transcription factor AP-2 alpha (activating enhancer binding protein 2 alpha)
hsa-miR-605	0	0	1	1	1	1	SLC35A2	solute carrier family 35 (UDP-galactose transporter), member A2
hsa-miR-605	1	0	1	1	1	1	STK24	serine/threonine kinase 24
hsa-miR-605	1	0	1	0	1	1	NPNT	nephronectin
hsa-miR-605	1	0	1	1	1	1	AMD1	adenosylmethionine decarboxylase 1
hsa-miR-605	1	0	1	1	1	1	MYCL1	v-myc myelocytomatosis viral oncogene homolog 1, lung carcinoma derived (avian)
hsa-miR-605	1	0	1	0	1	1	SRGAP3	SLIT-ROBO Rho GTPase activating protein 3
hsa-miR-605	0	0	1	1	0	0	CALCA	calcitonin-related polypeptide alpha
hsa-miR-605	1	0	1	0	1	1	RYR2	ryanodine receptor 2 (cardiac)
hsa-miR-605	0	0	1	1	1	1	CTLA4	cytotoxic T-lymphocyte-associated protein 4
hsa-miR-605	0	0	1	1	0	0	C17orf47	chromosome 17 open reading frame 47
hsa-miR-605	0	0	1	1	1	1	HEPACAM2	HEPACAM family member 2
hsa-miR-605	0	0	1	1	1	1	SIRPG	signal-regulatory protein gamma
hsa-miR-605	1	0	1	0	1	1	GK5	glycerol kinase 5 (putative)
hsa-miR-605	1	0	1	1	1	1	KREMEN1	kringle containing transmembrane protein 1
hsa-miR-605	0	0	1	0	1	1	ZNF705D	zinc finger protein 705D
hsa-miR-605	1	0	1	0	1	1	CREBZF	CREB/ATF bZIP transcription factor
hsa-miR-605	1	0	1	1	1	1	CDC42	cell division cycle 42 (GTP binding protein, 25kDa)
hsa-miR-605	1	0	1	1	1	1	FAM3C	family with sequence similarity 3, member C
hsa-miR-605	1	0	1	0	1	1	FAM133B	family with sequence similarity 133, member B
hsa-miR-605	1	0	1	1	1	1	MOSPD3	motile sperm domain containing 3
hsa-miR-605	1	0	1	1	1	1	MTMR12	myotubularin related protein 12
hsa-miR-605	0	0	1	1	0	0	FAM110A	family with sequence similarity 110, member A
hsa-miR-605	1	0	1	1	1	1	PPP4R1	protein phosphatase 4, regulatory subunit 1
hsa-miR-605	1	0	1	1	1	1	CEP85L	centrosomal protein 85kDa-like
hsa-miR-605	1	0	1	1	1	1	NSL1	NSL1, MIND kinetochore complex component, homolog (S. cerevisiae)
hsa-miR-605	1	0	1	1	1	1	ERBB4	v-erb-a erythroblastic leukemia viral oncogene homolog 4 (avian)
hsa-miR-605	1	0	1	1	1	1	KDM5A	lysine (K)-specific demethylase 5A
hsa-miR-605	1	0	1	0	1	1	SRGAP2	SLIT-ROBO Rho GTPase activating protein 2
hsa-miR-605	1	0	1	1	1	1	SLA	Src-like-adaptor
hsa-miR-605	1	0	1	0	1	1	SLC12A2	solute carrier family 12 (sodium/potassium/chloride transporters), member 2
hsa-miR-605	0	0	1	1	1	1	RCC1	regulator of chromosome condensation 1
hsa-miR-605	1	0	1	1	1	1	IRF2BP2	interferon regulatory factor 2 binding protein 2
hsa-miR-605	1	0	1	0	1	1	FAM127C	family with sequence similarity 127, member C
hsa-miR-605	0	0	1	1	1	1	FKTN	fukutin
hsa-miR-605	1	0	1	1	1	1	LDB3	LIM domain binding 3
hsa-miR-605	1	0	1	1	1	1	FAM155A	family with sequence similarity 155, member A
hsa-miR-605	1	0	1	1	1	1	SHANK3	SH3 and multiple ankyrin repeat domains 3
hsa-miR-605	1	0	1	0	1	1	UNC13A	unc-13 homolog A (C. elegans)
hsa-miR-605	0	0	1	1	1	1	HSF5	heat shock transcription factor family member 5
hsa-miR-605	1	0	1	1	1	1	DNA2	DNA replication helicase 2 homolog (yeast)
hsa-miR-605	1	0	1	0	1	1	ODZ3	odz, odd Oz/ten-m homolog 3 (Drosophila)
hsa-miR-605	1	0	1	1	1	1	MGA	MAX gene associated
hsa-miR-605	1	0	1	1	1	1	DGKG	diacylglycerol kinase, gamma 90kDa
hsa-miR-605	1	0	1	1	1	1	REPS2	RALBP1 associated Eps domain containing 2
hsa-miR-605	1	0	1	1	1	1	ASIC1	acid-sensing (proton-gated) ion channel 1
hsa-miR-605	1	0	1	0	1	1	XIAP	X-linked inhibitor of apoptosis
hsa-miR-605	0	0	1	1	1	1	AQP8	aquaporin 8
hsa-miR-605	0	0	1	1	0	0	AZGP1	alpha-2-glycoprotein 1, zinc-binding
hsa-miR-605	1	0	1	0	1	1	CDK6	cyclin-dependent kinase 6
hsa-miR-605	1	0	1	0	1	1	CPD	carboxypeptidase D
hsa-miR-605	1	0	1	1	1	1	DYRK1A	dual-specificity tyrosine-(Y)-phosphorylation regulated kinase 1A
hsa-miR-605	1	0	1	0	1	1	EIF2S3	eukaryotic translation initiation factor 2, subunit 3 gamma, 52kDa
hsa-miR-605	1	0	1	1	1	1	EP300	E1A binding protein p300
hsa-miR-605	0	0	1	1	1	1	B4GALNT1	beta-1,4-N-acetyl-galactosaminyl transferase 1
hsa-miR-605	1	0	1	0	1	1	B4GALT1	UDP-Gal:betaGlcNAc beta 1,4- galactosyltransferase, polypeptide 1
hsa-miR-605	1	0	1	1	1	1	NDST1	N-deacetylase/N-sulfotransferase (heparan glucosaminyl) 1
hsa-miR-605	0	0	1	1	0	0	ARAF	v-raf murine sarcoma 3611 viral oncogene homolog
hsa-miR-605	1	0	1	0	1	1	ARNT	aryl hydrocarbon receptor nuclear translocator
hsa-miR-605	1	0	1	1	1	1	BTG1	B-cell translocation gene 1, anti-proliferative
hsa-miR-605	1	0	1	1	1	1	CBFB	core-binding factor, beta subunit
hsa-miR-605	1	0	1	1	1	1	CDC25A	cell division cycle 25 homolog A (S. pombe)
hsa-miR-605	1	0	1	1	1	1	CDH2	cadherin 2, type 1, N-cadherin (neuronal)
hsa-miR-605	1	0	1	1	1	1	CDK2	cyclin-dependent kinase 2
hsa-miR-605	1	0	1	1	1	1	MASP1	mannan-binding lectin serine peptidase 1 (C4/C2 activating component of Ra-reactive factor)
hsa-miR-605	1	0	1	1	1	1	DR1	down-regulator of transcription 1, TBP-binding (negative cofactor 2)
hsa-miR-605	1	0	1	1	1	1	DSC3	desmocollin 3
hsa-miR-605	1	0	1	1	1	1	E2F3	E2F transcription factor 3
hsa-miR-605	1	0	1	1	1	1	EGR1	early growth response 1
hsa-miR-605	1	0	1	0	1	1	FOXO1	forkhead box O1
hsa-miR-605	0	0	1	1	1	1	FLI1	Friend leukemia virus integration 1
hsa-miR-605	1	0	1	1	1	1	FMOD	fibromodulin
hsa-miR-605	0	0	1	1	0	0	FTH1	ferritin, heavy polypeptide 1
hsa-miR-605	1	0	1	0	1	1	FUT4	fucosyltransferase 4 (alpha (1,3) fucosyltransferase, myeloid-specific)
hsa-miR-605	1	0	1	1	1	1	GBP1	guanylate binding protein 1, interferon-inducible
hsa-miR-605	0	0	1	0	1	1	GCLM	glutamate-cysteine ligase, modifier subunit
hsa-miR-605	1	0	1	1	0	0	GRK6	G protein-coupled receptor kinase 6
hsa-miR-605	1	0	1	1	1	1	HSPA4	heat shock 70kDa protein 4
hsa-miR-605	1	0	1	1	1	1	ISL1	ISL LIM homeobox 1
hsa-miR-605	1	0	1	1	1	1	KPNB1	karyopherin (importin) beta 1
hsa-miR-605	1	0	1	1	1	1	LIMK1	LIM domain kinase 1
hsa-miR-605	1	0	1	0	1	1	MXD1	MAX dimerization protein 1
hsa-miR-605	1	0	1	1	1	1	MN1	meningioma (disrupted in balanced translocation) 1
hsa-miR-605	0	0	1	1	1	1	MTRR	5-methyltetrahydrofolate-homocysteine methyltransferase reductase
hsa-miR-605	1	0	1	1	1	1	PPP1R12B	protein phosphatase 1, regulatory subunit 12B
hsa-miR-605	1	0	1	1	1	1	NEUROD1	neuronal differentiation 1
hsa-miR-605	1	0	1	1	1	1	NGFR	nerve growth factor receptor
hsa-miR-605	0	0	1	1	1	1	NID1	nidogen 1
hsa-miR-605	1	0	1	1	1	1	NPAT	nuclear protein, ataxia-telangiectasia locus
hsa-miR-605	0	0	1	1	1	1	PAFAH1B2	platelet-activating factor acetylhydrolase 1b, catalytic subunit 2 (30kDa)
hsa-miR-605	1	0	1	0	1	1	PAK2	p21 protein (Cdc42/Rac)-activated kinase 2
hsa-miR-605	1	0	1	0	1	1	PAPPA	pregnancy-associated plasma protein A, pappalysin 1
hsa-miR-605	0	0	1	1	0	0	PPP1R8	protein phosphatase 1, regulatory subunit 8
hsa-miR-605	1	0	1	0	1	1	PPP2R2A	protein phosphatase 2, regulatory subunit B, alpha
hsa-miR-605	0	0	1	1	1	1	PRKCB	protein kinase C, beta
hsa-miR-605	0	0	1	1	1	1	PTPRR	protein tyrosine phosphatase, receptor type, R
hsa-miR-605	1	0	1	1	1	1	PTX3	pentraxin 3, long
hsa-miR-605	1	0	1	1	1	1	RGS16	regulator of G-protein signaling 16
hsa-miR-605	0	0	1	1	1	1	RNASE4	ribonuclease, RNase A family, 4
hsa-miR-605	1	0	1	0	1	1	CCL22	chemokine (C-C motif) ligand 22
hsa-miR-605	0	0	1	0	1	1	CXCL5	chemokine (C-X-C motif) ligand 5
hsa-miR-605	0	0	1	1	1	1	SDC2	syndecan 2
hsa-miR-605	1	0	1	1	1	1	SRSF2	serine/arginine-rich splicing factor 2
hsa-miR-605	1	0	1	0	1	1	ST6GAL1	ST6 beta-galactosamide alpha-2,6-sialyltranferase 1
hsa-miR-605	1	0	1	1	1	1	SKI	v-ski sarcoma viral oncogene homolog (avian)
hsa-miR-605	1	0	1	0	1	1	SLC6A1	solute carrier family 6 (neurotransmitter transporter, GABA), member 1
hsa-miR-605	0	0	1	1	1	1	SNRPE	small nuclear ribonucleoprotein polypeptide E
hsa-miR-605	0	0	1	0	1	1	SNRPF	small nuclear ribonucleoprotein polypeptide F
hsa-miR-605	1	0	1	0	1	1	SOX11	SRY (sex determining region Y)-box 11
hsa-miR-605	1	0	1	1	1	1	SSR2	signal sequence receptor, beta (translocon-associated protein beta)
hsa-miR-605	1	0	1	0	1	1	TAL1	T-cell acute lymphocytic leukemia 1
hsa-miR-605	1	0	1	1	1	1	TFAP2B	transcription factor AP-2 beta (activating enhancer binding protein 2 beta)
hsa-miR-605	1	0	1	1	1	1	TFAP4	transcription factor AP-4 (activating enhancer binding protein 4)
hsa-miR-605	1	0	1	0	1	1	THBS1	thrombospondin 1
hsa-miR-605	0	0	1	1	1	1	TRAF3	TNF receptor-associated factor 3
hsa-miR-605	1	0	1	1	1	1	TRPC1	transient receptor potential cation channel, subfamily C, member 1
hsa-miR-605	1	0	1	1	1	1	UBE2D3	ubiquitin-conjugating enzyme E2D 3
hsa-miR-605	1	0	1	0	1	1	UBE2L3	ubiquitin-conjugating enzyme E2L 3
hsa-miR-605	1	0	1	1	1	1	UBE2N	ubiquitin-conjugating enzyme E2N
hsa-miR-605	1	0	1	0	1	1	YWHAB	tyrosine 3-monooxygenase/tryptophan 5-monooxygenase activation protein, beta polypeptide
hsa-miR-605	1	0	1	1	1	1	KCNAB1	potassium voltage-gated channel, shaker-related subfamily, beta member 1
hsa-miR-605	1	0	1	1	1	1	CUL5	cullin 5
hsa-miR-605	1	0	1	1	1	1	NRIP1	nuclear receptor interacting protein 1
hsa-miR-605	0	0	1	1	1	1	PEX3	peroxisomal biogenesis factor 3
hsa-miR-605	1	0	1	0	1	1	CNTNAP1	contactin associated protein 1
hsa-miR-605	1	0	1	0	1	1	TNKS	tankyrase, TRF1-interacting ankyrin-related ADP-ribose polymerase
hsa-miR-605	1	0	1	1	1	1	ALDH4A1	aldehyde dehydrogenase 4 family, member A1
hsa-miR-605	0	0	1	1	1	1	EIF3A	eukaryotic translation initiation factor 3, subunit A
hsa-miR-605	1	0	1	1	1	1	NR5A2	nuclear receptor subfamily 5, group A, member 2
hsa-miR-605	1	0	1	1	1	1	PEX11B	peroxisomal biogenesis factor 11 beta
hsa-miR-605	1	0	1	1	1	1	NRP2	neuropilin 2
hsa-miR-605	0	0	1	1	1	1	PRPF4B	PRP4 pre-mRNA processing factor 4 homolog B (yeast)
hsa-miR-605	0	0	1	0	1	1	RHOB	ras homolog family member B
hsa-miR-605	1	0	1	1	1	1	BCL2L2	BCL2-like 2
hsa-miR-605	1	0	1	1	1	1	CDH12	cadherin 12, type 2 (N-cadherin 2)
hsa-miR-605	1	0	1	1	1	1	FGF12	fibroblast growth factor 12
hsa-miR-605	0	0	1	1	0	0	FOXS1	forkhead box S1
hsa-miR-605	1	0	1	0	1	1	SLC1A2	solute carrier family 1 (glial high affinity glutamate transporter), member 2
hsa-miR-605	1	0	1	1	1	1	MFHAS1	malignant fibrous histiocytoma amplified sequence 1
hsa-miR-605	0	0	1	1	1	1	EFTUD2	elongation factor Tu GTP binding domain containing 2
hsa-miR-605	0	0	1	1	1	1	SEP15	15 kDa selenoprotein
hsa-miR-605	1	0	1	1	1	1	ASTN1	astrotactin 1
hsa-miR-605	1	0	1	1	1	1	BCL9	B-cell CLL/lymphoma 9
hsa-miR-605	1	0	1	0	1	1	RUNX1T1	runt-related transcription factor 1; translocated to, 1 (cyclin D-related)
hsa-miR-605	0	0	1	1	1	1	COL12A1	collagen, type XII, alpha 1
hsa-miR-605	1	0	1	1	1	1	CREB1	cAMP responsive element binding protein 1
hsa-miR-605	1	0	1	1	1	1	DUSP5	dual specificity phosphatase 5
hsa-miR-605	1	0	1	1	1	1	DUSP8	dual specificity phosphatase 8
hsa-miR-605	1	0	1	1	1	1	EPHB3	EPH receptor B3
hsa-miR-605	0	0	1	1	0	0	FRG1	FSHD region gene 1
hsa-miR-605	1	0	1	1	0	0	HOXC6	homeobox C6
hsa-miR-605	1	0	1	1	1	1	KIF11	kinesin family member 11
hsa-miR-605	1	0	1	1	1	1	MLLT3	myeloid/lymphoid or mixed-lineage leukemia (trithorax homolog, Drosophila); translocated to, 3
hsa-miR-605	1	0	1	0	1	1	SCN2B	sodium channel, voltage-gated, type II, beta subunit
hsa-miR-605	0	0	1	1	1	1	TK2	thymidine kinase 2, mitochondrial
hsa-miR-605	1	0	1	1	0	0	COX7A2L	cytochrome c oxidase subunit VIIa polypeptide 2 like
hsa-miR-605	0	0	1	1	1	1	PIWIL1	piwi-like 1 (Drosophila)
hsa-miR-605	1	0	1	1	1	1	NREP	neuronal regeneration related protein homolog (rat)
hsa-miR-605	1	0	1	1	1	1	B4GALT6	UDP-Gal:betaGlcNAc beta 1,4- galactosyltransferase, polypeptide 6
hsa-miR-605	1	0	1	1	1	1	AKAP7	A kinase (PRKA) anchor protein 7
hsa-miR-605	0	0	1	1	1	1	CLCA3P	chloride channel accessory 3, pseudogene
hsa-miR-605	0	0	1	1	1	1	CDKN2B	cyclin-dependent kinase inhibitor 2B (p15, inhibits CDK4)
hsa-miR-605	1	0	1	0	1	1	DOCK3	dedicator of cytokinesis 3
hsa-miR-605	0	0	1	0	1	1	DSC2	desmocollin 2
hsa-miR-605	0	0	1	1	1	1	JAK2	Janus kinase 2
hsa-miR-605	0	0	1	1	0	0	NDUFB8	NADH dehydrogenase (ubiquinone) 1 beta subcomplex, 8, 19kDa
hsa-miR-605	1	0	1	0	1	1	SCD	stearoyl-CoA desaturase (delta-9-desaturase)
hsa-miR-605	0	0	1	1	0	0	HR	hairless homolog (mouse)
hsa-miR-605	1	0	1	1	1	1	CBL	Cbl proto-oncogene, E3 ubiquitin protein ligase
hsa-miR-605	0	0	1	1	1	1	MSTN	myostatin
hsa-miR-605	0	0	1	1	1	1	H1F0	H1 histone family, member 0
hsa-miR-605	1	0	1	1	1	1	H3F3B	H3 histone, family 3B (H3.3B)
hsa-miR-605	1	0	1	1	1	1	HAS3	hyaluronan synthase 3
hsa-miR-605	1	0	1	1	1	1	NCL	nucleolin
hsa-miR-605	0	0	1	1	1	1	NUP98	nucleoporin 98kDa
hsa-miR-605	1	0	1	1	1	1	PHF2	PHD finger protein 2
hsa-miR-605	1	0	1	0	1	1	PRKAB2	protein kinase, AMP-activated, beta 2 non-catalytic subunit
hsa-miR-605	0	0	1	1	1	1	SLC20A1	solute carrier family 20 (phosphate transporter), member 1
hsa-miR-605	0	0	1	1	0	0	ARHGEF5	Rho guanine nucleotide exchange factor (GEF) 5
hsa-miR-605	1	0	1	0	1	1	CCDC6	coiled-coil domain containing 6
hsa-miR-605	0	0	1	1	1	1	FAIM3	Fas apoptotic inhibitory molecule 3
hsa-miR-605	1	0	1	1	1	1	GABBR2	gamma-aminobutyric acid (GABA) B receptor, 2
hsa-miR-605	1	0	1	1	1	1	PIGK	phosphatidylinositol glycan anchor biosynthesis, class K
hsa-miR-605	0	0	1	1	1	1	HSD11B1	hydroxysteroid (11-beta) dehydrogenase 1
hsa-miR-605	0	0	1	0	1	1	POU3F2	POU class 3 homeobox 2
hsa-miR-605	1	0	1	1	1	1	ST8SIA4	ST8 alpha-N-acetyl-neuraminide alpha-2,8-sialyltransferase 4
hsa-miR-605	0	0	1	1	1	1	ACTR3	ARP3 actin-related protein 3 homolog (yeast)
hsa-miR-605	0	0	1	1	1	1	TOB1	transducer of ERBB2, 1
hsa-miR-605	1	0	1	0	1	1	CLEC3A	C-type lectin domain family 3, member A
hsa-miR-605	0	0	1	1	1	1	RNF41	ring finger protein 41
hsa-miR-605	1	0	1	1	0	0	TRAIP	TRAF interacting protein
hsa-miR-605	1	0	1	1	1	1	FOXO4	forkhead box O4
hsa-miR-605	1	0	1	1	1	1	MTF1	metal-regulatory transcription factor 1
hsa-miR-605	1	0	1	1	0	0	NAB2	NGFI-A binding protein 2 (EGR1 binding protein 2)
hsa-miR-605	0	0	1	1	0	0	PPYR1	pancreatic polypeptide receptor 1
hsa-miR-605	0	0	1	1	1	1	MANF	mesencephalic astrocyte-derived neurotrophic factor
hsa-miR-605	1	0	1	1	1	1	LIPG	lipase, endothelial
hsa-miR-605	1	0	1	0	1	1	SPATA2	spermatogenesis associated 2
hsa-miR-605	1	0	1	0	1	1	SCML2	sex comb on midleg-like 2 (Drosophila)
hsa-miR-605	1	0	1	1	1	1	SPON1	spondin 1, extracellular matrix protein
hsa-miR-605	0	0	1	1	1	1	CD28	CD28 molecule
hsa-miR-605	1	0	1	1	1	1	DYNC1LI2	dynein, cytoplasmic 1, light intermediate chain 2
hsa-miR-605	0	0	1	1	1	1	NTF4	neurotrophin 4
hsa-miR-605	0	0	1	0	1	1	OAS3	2'-5'-oligoadenylate synthetase 3, 100kDa
hsa-miR-605	0	0	1	1	0	0	PNOC	prepronociceptin
hsa-miR-605	1	0	1	1	1	1	SMC1A	structural maintenance of chromosomes 1A
hsa-miR-605	1	0	1	0	1	1	APPBP2	amyloid beta precursor protein (cytoplasmic tail) binding protein 2
hsa-miR-605	0	0	1	1	0	0	IPO7	importin 7
hsa-miR-605	1	0	1	1	1	1	NEBL	nebulette
hsa-miR-605	1	0	1	1	1	1	CDC42EP3	CDC42 effector protein (Rho GTPase binding) 3
hsa-miR-605	1	0	1	0	1	1	IGF2BP1	insulin-like growth factor 2 mRNA binding protein 1
hsa-miR-605	1	0	1	0	1	1	MAP4K5	mitogen-activated protein kinase kinase kinase kinase 5
hsa-miR-605	1	0	1	1	1	1	MAN1A2	mannosidase, alpha, class 1A, member 2
hsa-miR-605	1	0	1	1	1	1	SPIN1	spindlin 1
hsa-miR-605	1	0	1	1	1	1	HIVEP2	human immunodeficiency virus type I enhancer binding protein 2
hsa-miR-605	1	0	1	1	1	1	PPP1R1A	protein phosphatase 1, regulatory (inhibitor) subunit 1A
hsa-miR-605	1	0	1	1	0	0	PSKH1	protein serine kinase H1
hsa-miR-605	0	0	1	1	1	1	SYPL1	synaptophysin-like 1
hsa-miR-605	1	0	1	1	1	1	BTG2	BTG family, member 2
hsa-miR-605	1	0	1	0	1	1	SYNGAP1	synaptic Ras GTPase activating protein 1
hsa-miR-605	1	0	1	1	1	1	SEC61B	Sec61 beta subunit
hsa-miR-605	0	0	1	1	1	1	TMED10	transmembrane emp24-like trafficking protein 10 (yeast)
hsa-miR-605	1	0	1	1	1	1	RP2	retinitis pigmentosa 2 (X-linked recessive)
hsa-miR-605	1	0	1	0	1	1	SLC5A3	solute carrier family 5 (sodium/myo-inositol cotransporter), member 3
hsa-miR-605	1	0	1	0	1	1	PAPD7	PAP associated domain containing 7
hsa-miR-605	1	0	1	1	1	1	DDX52	DEAD (Asp-Glu-Ala-Asp) box polypeptide 52
hsa-miR-605	1	0	1	1	1	1	ABHD2	abhydrolase domain containing 2
hsa-miR-605	1	0	1	1	1	1	SOX30	SRY (sex determining region Y)-box 30
hsa-miR-605	0	0	1	1	1	1	DNAJB4	DnaJ (Hsp40) homolog, subfamily B, member 4
hsa-miR-605	0	0	1	1	1	1	POLR3A	polymerase (RNA) III (DNA directed) polypeptide A, 155kDa
hsa-miR-605	0	0	1	1	1	1	PKIG	protein kinase (cAMP-dependent, catalytic) inhibitor gamma
hsa-miR-605	1	0	1	1	1	1	KAT7	K(lysine) acetyltransferase 7
hsa-miR-605	1	0	1	1	1	1	SSR3	signal sequence receptor, gamma (translocon-associated protein gamma)
hsa-miR-605	1	0	1	1	1	1	TMF1	TATA element modulatory factor 1
hsa-miR-605	1	0	1	1	1	1	TRIO	trio Rho guanine nucleotide exchange factor
hsa-miR-605	1	0	1	1	1	1	ZNF81	zinc finger protein 81
hsa-miR-605	1	0	1	1	1	1	VEZF1	vascular endothelial zinc finger 1
hsa-miR-605	1	0	1	1	1	1	PDCD10	programmed cell death 10
hsa-miR-605	0	0	1	1	1	1	XPOT	exportin, tRNA (nuclear export receptor for tRNAs)
hsa-miR-605	0	0	1	1	1	1	KLF8	Kruppel-like factor 8
hsa-miR-605	1	0	1	1	1	1	TARDBP	TAR DNA binding protein
hsa-miR-605	1	0	1	1	1	1	ICOS	inducible T-cell co-stimulator
hsa-miR-605	1	0	1	0	1	1	FZD4	frizzled family receptor 4
hsa-miR-605	0	0	1	1	1	1	SEPHS2	selenophosphate synthetase 2
hsa-miR-605	1	0	1	1	1	1	RHOQ	ras homolog family member Q
hsa-miR-605	1	0	1	0	1	1	ACAP2	ArfGAP with coiled-coil, ankyrin repeat and PH domains 2
hsa-miR-605	1	0	1	1	1	1	MAPRE1	microtubule-associated protein, RP/EB family, member 1
hsa-miR-605	1	0	1	1	1	1	TSPAN12	tetraspanin 12
hsa-miR-605	1	0	1	0	1	1	BLOC1S6	biogenesis of lysosomal organelles complex-1, subunit 6, pallidin
hsa-miR-605	0	0	1	0	1	1	PITPNC1	phosphatidylinositol transfer protein, cytoplasmic 1
hsa-miR-605	1	0	1	1	1	1	SF3B1	splicing factor 3b, subunit 1, 155kDa
hsa-miR-605	1	0	1	0	1	1	FLRT2	fibronectin leucine rich transmembrane protein 2
hsa-miR-605	0	0	1	1	0	0	LGALS13	lectin, galactoside-binding, soluble, 13
hsa-miR-605	1	0	1	0	1	1	RBM15B	RNA binding motif protein 15B
hsa-miR-605	1	0	1	1	1	1	LRP12	low density lipoprotein receptor-related protein 12
hsa-miR-605	0	0	1	0	1	1	EMR2	egf-like module containing, mucin-like, hormone receptor-like 2
hsa-miR-605	1	0	1	0	1	1	OSTM1	osteopetrosis associated transmembrane protein 1
hsa-miR-605	1	0	1	1	0	0	HOXD9	homeobox D9
hsa-miR-605	1	0	1	1	1	1	VAMP1	vesicle-associated membrane protein 1 (synaptobrevin 1)
hsa-miR-605	1	0	1	0	1	1	VAMP2	vesicle-associated membrane protein 2 (synaptobrevin 2)
hsa-miR-605	1	0	1	0	1	1	LIMD1	LIM domains containing 1
hsa-miR-605	0	0	1	1	0	0	NOMO1	NODAL modulator 1
hsa-miR-605	1	0	1	1	1	1	LEMD3	LEM domain containing 3
hsa-miR-605	1	0	1	1	1	1	PATZ1	POZ (BTB) and AT hook containing zinc finger 1
hsa-miR-605	1	0	1	1	1	1	SLC7A11	solute carrier family 7 (anionic amino acid transporter light chain, xc- system), member 11
hsa-miR-605	1	0	1	0	1	1	CNTN5	contactin 5
hsa-miR-605	0	0	1	0	0	0	SND1-IT1	SND1 intronic transcript 1 (non-protein coding)
hsa-miR-605	1	0	1	1	1	1	HERC3	HECT and RLD domain containing E3 ubiquitin protein ligase 3
hsa-miR-605	1	0	1	1	1	1	ZNF592	zinc finger protein 592
hsa-miR-605	1	0	1	1	1	1	KDM4A	lysine (K)-specific demethylase 4A
hsa-miR-605	1	0	1	1	1	1	ULK2	unc-51-like kinase 2 (C. elegans)
hsa-miR-605	1	0	1	0	1	1	TOX	thymocyte selection-associated high mobility group box
hsa-miR-605	1	0	1	0	1	1	MLEC	malectin
hsa-miR-605	1	0	1	1	1	1	KIAA0753	KIAA0753
hsa-miR-605	1	0	1	1	1	1	LRIG2	leucine-rich repeats and immunoglobulin-like domains 2
hsa-miR-605	1	0	1	1	1	1	TOMM70A	translocase of outer mitochondrial membrane 70 homolog A (S. cerevisiae)
hsa-miR-605	1	0	1	1	1	1	FCHSD2	FCH and double SH3 domains 2
hsa-miR-605	1	0	1	0	1	1	LPPR4	lipid phosphate phosphatase-related protein type 4
hsa-miR-605	1	0	1	1	1	1	NUAK1	NUAK family, SNF1-like kinase, 1
hsa-miR-605	1	0	1	1	1	1	RNF44	ring finger protein 44
hsa-miR-605	1	0	1	1	1	1	PLEKHA6	pleckstrin homology domain containing, family A member 6
hsa-miR-605	1	0	1	1	1	1	SPAST	spastin
hsa-miR-605	1	0	1	0	1	1	WDFY3	WD repeat and FYVE domain containing 3
hsa-miR-605	0	0	1	1	0	0	DOPEY1	dopey family member 1
hsa-miR-605	0	0	1	0	0	0	SMC5	structural maintenance of chromosomes 5
hsa-miR-605	1	0	1	1	1	1	TBC1D9	TBC1 domain family, member 9 (with GRAM domain)
hsa-miR-605	1	0	1	1	1	1	GPD1L	glycerol-3-phosphate dehydrogenase 1-like
hsa-miR-605	1	0	1	1	1	1	ZCCHC14	zinc finger, CCHC domain containing 14
hsa-miR-605	1	0	1	1	1	1	CUX2	cut-like homeobox 2
hsa-miR-605	0	0	1	1	1	1	ANGEL1	angel homolog 1 (Drosophila)
hsa-miR-605	1	0	1	0	1	1	ARHGEF12	Rho guanine nucleotide exchange factor (GEF) 12
hsa-miR-605	0	0	1	1	0	0	C22orf31	chromosome 22 open reading frame 31
hsa-miR-605	1	0	1	1	1	1	CCDC28A	coiled-coil domain containing 28A
hsa-miR-605	0	0	1	1	1	1	TMEM87A	transmembrane protein 87A
hsa-miR-605	1	0	1	1	1	1	SLITRK5	SLIT and NTRK-like family, member 5
hsa-miR-605	1	0	1	0	1	1	ERC2	ELKS/RAB6-interacting/CAST family member 2
hsa-miR-605	1	0	1	1	1	1	AZIN1	antizyme inhibitor 1
hsa-miR-605	0	0	1	1	1	1	RAB10	RAB10, member RAS oncogene family
hsa-miR-605	1	0	1	1	1	1	VGLL3	vestigial like 3 (Drosophila)
hsa-miR-605	1	0	1	1	1	1	NLK	nemo-like kinase
hsa-miR-605	1	0	1	1	1	1	GPRC5B	G protein-coupled receptor, family C, group 5, member B
hsa-miR-605	0	0	1	1	1	1	HSD17B11	hydroxysteroid (17-beta) dehydrogenase 11
hsa-miR-605	1	0	1	1	1	1	AKAP11	A kinase (PRKA) anchor protein 11
hsa-miR-605	0	0	1	1	1	1	CDH9	cadherin 9, type 2 (T1-cadherin)
hsa-miR-605	0	0	1	1	1	1	DNAJB11	DnaJ (Hsp40) homolog, subfamily B, member 11
hsa-miR-605	1	0	1	1	1	1	RAB14	RAB14, member RAS oncogene family
hsa-miR-605	0	0	1	1	1	1	ADAM22	ADAM metallopeptidase domain 22
hsa-miR-605	0	0	1	1	1	1	TCEB3B	transcription elongation factor B polypeptide 3B (elongin A2)
hsa-miR-605	1	0	1	0	1	1	RAB8B	RAB8B, member RAS oncogene family
hsa-miR-605	1	0	1	1	1	1	IER5	immediate early response 5
hsa-miR-605	0	0	1	1	1	1	KDM3B	lysine (K)-specific demethylase 3B
hsa-miR-605	1	0	1	1	1	1	MEX3C	mex-3 homolog C (C. elegans)
hsa-miR-605	1	0	1	1	1	1	SIX2	SIX homeobox 2
hsa-miR-605	1	0	1	1	1	1	SIX4	SIX homeobox 4
hsa-miR-605	1	0	1	1	1	1	GALNT7	UDP-N-acetyl-alpha-D-galactosamine:polypeptide N-acetylgalactosaminyltransferase 7 (GalNAc-T7)
hsa-miR-605	1	0	1	1	1	1	HAUS6	HAUS augmin-like complex, subunit 6
hsa-miR-605	0	0	1	1	1	1	MTMR8	myotubularin related protein 8
hsa-miR-605	0	0	1	1	1	1	ANKHD1	ankyrin repeat and KH domain containing 1
hsa-miR-605	0	0	1	1	1	1	NCAPG2	non-SMC condensin II complex, subunit G2
hsa-miR-605	1	0	1	1	1	1	IMPAD1	inositol monophosphatase domain containing 1
hsa-miR-605	1	0	1	0	1	1	MARCH5	membrane-associated ring finger (C3HC4) 5
hsa-miR-605	1	0	1	1	1	1	HIF1AN	hypoxia inducible factor 1, alpha subunit inhibitor
hsa-miR-605	1	0	1	0	1	1	CCDC88A	coiled-coil domain containing 88A
hsa-miR-605	0	0	1	1	1	1	THAP1	THAP domain containing, apoptosis associated protein 1
hsa-miR-605	0	0	1	1	0	0	CEP55	centrosomal protein 55kDa
hsa-miR-605	1	0	1	0	1	1	MSL2	male-specific lethal 2 homolog (Drosophila)
hsa-miR-605	1	0	1	1	1	1	RPRD1A	regulation of nuclear pre-mRNA domain containing 1A
hsa-miR-605	0	0	1	0	1	1	GOLPH3L	golgi phosphoprotein 3-like
hsa-miR-605	0	0	1	1	1	1	C1orf106	chromosome 1 open reading frame 106
hsa-miR-605	0	0	1	1	1	1	LAPTM4B	lysosomal protein transmembrane 4 beta
hsa-miR-605	1	0	1	1	1	1	PAG1	phosphoprotein associated with glycosphingolipid microdomains 1
hsa-miR-605	1	0	1	1	1	1	MLL5	myeloid/lymphoid or mixed-lineage leukemia 5 (trithorax homolog, Drosophila)
hsa-miR-605	0	0	1	1	1	1	DHTKD1	dehydrogenase E1 and transketolase domain containing 1
hsa-miR-605	1	0	1	0	1	1	ELMOD1	ELMO/CED-12 domain containing 1
hsa-miR-605	0	0	1	1	1	1	NPAP1	nuclear pore associated protein 1
hsa-miR-605	1	0	1	1	1	1	SASH3	SAM and SH3 domain containing 3
hsa-miR-605	1	0	1	0	1	1	FAM190B	family with sequence similarity 190, member B
hsa-miR-605	1	0	1	0	1	1	CCNJ	cyclin J
hsa-miR-605	1	0	1	1	1	1	EPB41L4B	erythrocyte membrane protein band 4.1 like 4B
hsa-miR-605	1	0	1	1	1	1	SERTAD4	SERTA domain containing 4
hsa-miR-605	0	0	1	1	0	0	LGALS14	lectin, galactoside-binding, soluble, 14
hsa-miR-605	0	0	1	1	1	1	GRIPAP1	GRIP1 associated protein 1
hsa-miR-605	0	0	1	1	1	1	BDH2	3-hydroxybutyrate dehydrogenase, type 2
hsa-miR-605	1	0	1	1	1	1	C5orf15	chromosome 5 open reading frame 15
hsa-miR-605	0	0	1	1	1	1	PRTFDC1	phosphoribosyl transferase domain containing 1
hsa-miR-605	1	0	1	0	1	1	OTUD7B	OTU domain containing 7B
hsa-miR-605	1	0	1	1	1	1	ANKRD50	ankyrin repeat domain 50
hsa-miR-605	0	0	1	0	0	0	CD177	CD177 molecule
hsa-miR-605	1	0	1	1	1	1	PTGFRN	prostaglandin F2 receptor negative regulator
hsa-miR-605	1	0	1	1	1	1	ATP8B2	ATPase, aminophospholipid transporter, class I, type 8B, member 2
hsa-miR-605	1	0	1	1	1	1	SLC24A3	solute carrier family 24 (sodium/potassium/calcium exchanger), member 3
hsa-miR-605	1	0	1	1	1	1	GALNTL1	UDP-N-acetyl-alpha-D-galactosamine:polypeptide N-acetylgalactosaminyltransferase-like 1
hsa-miR-605	1	0	1	1	1	1	USP31	ubiquitin specific peptidase 31
hsa-miR-605	1	0	1	1	1	1	NLGN2	neuroligin 2
hsa-miR-605	0	0	1	0	1	1	TRMT5	tRNA methyltransferase 5 homolog (S. cerevisiae)
hsa-miR-605	1	0	1	1	1	1	RANBP10	RAN binding protein 10
hsa-miR-605	1	0	1	1	1	1	KIAA1467	KIAA1467
hsa-miR-605	0	0	1	1	1	1	PRX	periaxin
hsa-miR-605	0	0	1	1	1	1	AQP9	aquaporin 9
hsa-miR-605	1	0	1	1	1	1	SNTB1	syntrophin, beta 1 (dystrophin-associated protein A1, 59kDa, basic component 1)
hsa-miR-605	1	0	1	1	1	1	CLDN1	claudin 1
hsa-miR-605	1	0	1	1	1	1	ADCY1	adenylate cyclase 1 (brain)
hsa-miR-605	0	0	1	1	0	0	TRIB3	tribbles homolog 3 (Drosophila)
hsa-miR-605	1	0	1	1	1	1	FAM60A	family with sequence similarity 60, member A
hsa-miR-605	1	0	1	1	1	1	SENP2	SUMO1/sentrin/SMT3 specific peptidase 2
hsa-miR-605	0	0	1	1	0	0	FCGR2A	Fc fragment of IgG, low affinity IIa, receptor (CD32)
hsa-miR-605	0	0	1	0	1	1	CFL2	cofilin 2 (muscle)
hsa-miR-605	1	0	1	1	1	1	FOXM1	forkhead box M1
hsa-miR-605	1	0	1	0	1	1	CSNK1G1	casein kinase 1, gamma 1
hsa-miR-605	1	0	1	1	1	1	MRPL17	mitochondrial ribosomal protein L17
hsa-miR-605	0	0	1	1	1	1	PERP	PERP, TP53 apoptosis effector
hsa-miR-605	1	0	1	1	1	1	ABCG4	ATP-binding cassette, sub-family G (WHITE), member 4
hsa-miR-605	1	0	1	0	1	1	ELOVL4	ELOVL fatty acid elongase 4
hsa-miR-605	1	0	1	0	1	1	BCL11B	B-cell CLL/lymphoma 11B (zinc finger protein)
hsa-miR-605	1	0	1	1	0	0	UBE2Z	ubiquitin-conjugating enzyme E2Z
hsa-miR-605	1	0	1	1	1	1	DLK2	delta-like 2 homolog (Drosophila)
hsa-miR-605	1	0	1	1	1	1	RASL11B	RAS-like, family 11, member B
hsa-miR-605	0	0	1	0	1	1	MRP63	mitochondrial ribosomal protein 63
hsa-miR-605	1	0	1	1	1	1	GID4	GID complex subunit 4, VID24 homolog (S. cerevisiae)
hsa-miR-605	1	0	1	0	1	1	NOTCH2	notch 2
hsa-miR-605	1	0	1	1	1	1	PSTPIP2	proline-serine-threonine phosphatase interacting protein 2
hsa-miR-605	1	0	1	1	1	1	HOXD1	homeobox D1
hsa-miR-605	1	0	1	1	1	1	GCC1	GRIP and coiled-coil domain containing 1
hsa-miR-605	1	0	1	1	1	1	RNF128	ring finger protein 128, E3 ubiquitin protein ligase
hsa-miR-605	1	0	1	1	1	1	CCNJL	cyclin J-like
hsa-miR-605	1	0	1	1	1	1	DHX40	DEAH (Asp-Glu-Ala-His) box polypeptide 40
hsa-miR-605	0	0	1	1	1	1	LRRK1	leucine-rich repeat kinase 1
hsa-miR-605	0	0	1	1	1	1	GLT25D1	glycosyltransferase 25 domain containing 1
hsa-miR-605	0	0	1	1	0	0	RNF122	ring finger protein 122
hsa-miR-605	1	0	1	1	0	0	SYNDIG1	synapse differentiation inducing 1
hsa-miR-605	0	0	1	1	0	0	TMEM156	transmembrane protein 156
hsa-miR-605	1	0	1	1	1	1	KLHL18	kelch-like 18 (Drosophila)
hsa-miR-605	1	0	1	0	1	1	VCPIP1	valosin containing protein (p97)/p47 complex interacting protein 1
hsa-miR-605	1	0	1	1	1	1	TNKS2	tankyrase, TRF1-interacting ankyrin-related ADP-ribose polymerase 2
hsa-miR-605	1	0	1	0	1	1	SRCIN1	SRC kinase signaling inhibitor 1
hsa-miR-605	1	0	1	1	1	1	CYB5B	cytochrome b5 type B (outer mitochondrial membrane)
hsa-miR-605	1	0	1	1	1	1	JHDM1D	jumonji C domain containing histone demethylase 1 homolog D (S. cerevisiae)
hsa-miR-605	1	0	1	1	1	1	TUBB1	tubulin, beta 1 class VI
hsa-miR-605	1	0	1	0	1	1	C1orf21	chromosome 1 open reading frame 21
hsa-miR-605	1	0	1	1	0	0	PVRL4	poliovirus receptor-related 4
hsa-miR-605	1	0	1	1	1	1	PPP1R14C	protein phosphatase 1, regulatory (inhibitor) subunit 14C
hsa-miR-605	0	0	1	1	1	1	SEH1L	SEH1-like (S. cerevisiae)
hsa-miR-605	0	0	1	1	1	1	FCRL4	Fc receptor-like 4
hsa-miR-605	1	0	1	1	1	1	GABARAPL1	GABA(A) receptor-associated protein like 1
hsa-miR-605	1	0	1	1	1	1	ANO3	anoctamin 3
hsa-miR-605	1	0	1	0	1	1	TMEM47	transmembrane protein 47
hsa-miR-605	1	0	1	1	1	1	GPR61	G protein-coupled receptor 61
hsa-miR-605	1	0	1	0	1	1	SRSF8	serine/arginine-rich splicing factor 8
hsa-miR-605	1	0	1	1	1	1	OTP	orthopedia homeobox
hsa-miR-605	0	0	1	1	1	1	MAGT1	magnesium transporter 1
hsa-miR-605	0	0	1	1	1	1	ANKRD27	ankyrin repeat domain 27 (VPS9 domain)
hsa-miR-605	1	0	1	1	1	1	ARID5B	AT rich interactive domain 5B (MRF1-like)
hsa-miR-605	1	0	1	0	1	1	FAR1	fatty acyl CoA reductase 1
hsa-miR-605	1	0	1	1	1	1	ZNRF1	zinc and ring finger 1, E3 ubiquitin protein ligase
hsa-miR-605	0	0	1	1	1	1	YIPF4	Yip1 domain family, member 4
hsa-miR-605	0	0	1	1	1	1	C5orf4	chromosome 5 open reading frame 4
hsa-miR-605	0	0	1	1	1	1	CYSTM1	cysteine-rich transmembrane module containing 1
hsa-miR-605	1	0	1	0	1	1	GLYR1	glyoxylate reductase 1 homolog (Arabidopsis)
hsa-miR-605	1	0	1	1	1	1	RSPO3	R-spondin 3
hsa-miR-605	1	0	1	1	1	1	ARHGEF39	Rho guanine nucleotide exchange factor (GEF) 39
hsa-miR-605	1	0	1	0	1	1	PPP1R15B	protein phosphatase 1, regulatory subunit 15B
hsa-miR-605	0	0	1	1	1	1	ALG10	asparagine-linked glycosylation 10, alpha-1,2-glucosyltransferase homolog (S. pombe)
hsa-miR-605	0	0	1	1	1	1	FBXL20	F-box and leucine-rich repeat protein 20
hsa-miR-605	1	0	1	0	1	1	C5orf62	chromosome 5 open reading frame 62
hsa-miR-605	1	0	1	1	1	1	PCDH11Y	protocadherin 11 Y-linked
hsa-miR-605	0	0	1	0	1	1	TSLP	thymic stromal lymphopoietin
hsa-miR-605	0	0	1	1	0	0	MUC13	mucin 13, cell surface associated
hsa-miR-605	1	0	1	0	1	1	EAF1	ELL associated factor 1
hsa-miR-605	1	0	1	1	1	1	C5orf30	chromosome 5 open reading frame 30
hsa-miR-605	1	0	1	1	1	1	RASL10B	RAS-like, family 10, member B
hsa-miR-605	1	0	1	1	0	0	FCHSD1	FCH and double SH3 domains 1
hsa-miR-605	0	0	1	1	1	1	ARHGAP18	Rho GTPase activating protein 18
hsa-miR-605	1	0	1	1	0	0	CCDC120	coiled-coil domain containing 120
hsa-miR-605	1	0	1	1	1	1	BRWD1	bromodomain and WD repeat domain containing 1
hsa-miR-605	0	0	1	1	1	1	PLEKHG4B	pleckstrin homology domain containing, family G (with RhoGef domain) member 4B
hsa-miR-605	1	0	1	1	1	1	SLITRK1	SLIT and NTRK-like family, member 1
hsa-miR-605	1	0	1	0	0	0	SMYD4	SET and MYND domain containing 4
hsa-miR-605	1	0	1	1	1	1	PTP4A2	protein tyrosine phosphatase type IVA, member 2
hsa-miR-605	1	0	1	1	1	1	SLC44A1	solute carrier family 44, member 1
hsa-miR-605	0	0	1	1	1	1	SLC32A1	solute carrier family 32 (GABA vesicular transporter), member 1
hsa-miR-605	0	0	1	1	1	1	MAG	myelin associated glycoprotein
hsa-miR-605	1	0	1	1	1	1	KCNE4	potassium voltage-gated channel, Isk-related family, member 4
hsa-miR-605	1	0	1	1	0	0	ADAMTS14	ADAM metallopeptidase with thrombospondin type 1 motif, 14
hsa-miR-605	1	0	1	0	1	1	SOCS4	suppressor of cytokine signaling 4
hsa-miR-605	1	0	1	1	1	1	KLHL6	kelch-like 6 (Drosophila)
hsa-miR-605	0	0	1	0	1	1	PAQR8	progestin and adipoQ receptor family member VIII
hsa-miR-605	1	0	1	1	0	0	UNC5A	unc-5 homolog A (C. elegans)
hsa-miR-605	0	0	1	1	1	1	PATE1	prostate and testis expressed 1
hsa-miR-605	1	0	1	1	1	1	PANK1	pantothenate kinase 1
hsa-miR-605	1	0	1	0	1	1	NUS1	nuclear undecaprenyl pyrophosphate synthase 1 homolog (S. cerevisiae)
hsa-miR-605	1	0	1	1	0	0	C11orf84	chromosome 11 open reading frame 84
hsa-miR-605	1	0	1	0	1	1	SP1	Sp1 transcription factor
hsa-miR-605	0	0	1	1	1	1	KCNC2	potassium voltage-gated channel, Shaw-related subfamily, member 2
hsa-miR-605	1	0	1	0	1	1	CNOT6L	CCR4-NOT transcription complex, subunit 6-like
hsa-miR-605	1	0	1	1	1	1	MBNL2	muscleblind-like splicing regulator 2
hsa-miR-605	0	0	1	1	1	1	ZFC3H1	zinc finger, C3H1-type containing
hsa-miR-605	1	0	1	1	1	1	UBQLNL	ubiquilin-like
hsa-miR-605	0	0	1	1	1	1	DACT3	dapper, antagonist of beta-catenin, homolog 3 (Xenopus laevis)
hsa-miR-605	0	0	1	0	1	1	PIGM	phosphatidylinositol glycan anchor biosynthesis, class M
hsa-miR-605	1	0	1	1	1	1	FAM84A	family with sequence similarity 84, member A
hsa-miR-605	0	0	1	1	0	0	CSNK1A1L	casein kinase 1, alpha 1-like
hsa-miR-605	1	0	1	1	1	1	CADM4	cell adhesion molecule 4
hsa-miR-605	1	0	1	1	1	1	SEPT6	septin 6
hsa-miR-605	1	0	1	0	1	1	MTPN	myotrophin
hsa-miR-605	1	0	1	1	1	1	SGMS1	sphingomyelin synthase 1
hsa-miR-605	1	0	1	1	1	1	BOD1L1	biorientation of chromosomes in cell division 1-like 1
hsa-miR-605	1	0	1	1	1	1	POGLUT1	protein O-glucosyltransferase 1
hsa-miR-605	1	0	1	1	1	1	C1orf216	chromosome 1 open reading frame 216
hsa-miR-605	1	0	1	1	1	1	FAM123B	family with sequence similarity 123B
hsa-miR-605	1	0	1	1	1	1	FAM81A	family with sequence similarity 81, member A
hsa-miR-605	1	0	1	1	1	1	ZNF362	zinc finger protein 362
hsa-miR-605	0	0	1	1	1	1	SNX31	sorting nexin 31
hsa-miR-605	1	0	1	0	1	1	ARID2	AT rich interactive domain 2 (ARID, RFX-like)
hsa-miR-605	1	0	1	1	1	1	HEPACAM	hepatic and glial cell adhesion molecule
hsa-miR-605	0	0	1	1	1	1	LINC00518	long intergenic non-protein coding RNA 518
hsa-miR-605	1	0	1	1	1	1	PDIK1L	PDLIM1 interacting kinase 1 like
hsa-miR-605	1	0	1	1	1	1	UHRF2	ubiquitin-like with PHD and ring finger domains 2, E3 ubiquitin protein ligase
hsa-miR-605	1	0	1	0	1	1	ST6GALNAC3	ST6 (alpha-N-acetyl-neuraminyl-2,3-beta-galactosyl-1,3)-N-acetylgalactosaminide alpha-2,6-sialyltransferase 3
hsa-miR-605	1	0	1	1	0	0	TMEM86A	transmembrane protein 86A
hsa-miR-605	1	0	1	1	1	1	HS6ST3	heparan sulfate 6-O-sulfotransferase 3
hsa-miR-605	1	0	1	1	1	1	CREBRF	CREB3 regulatory factor
hsa-miR-605	1	0	1	1	1	1	C2orf69	chromosome 2 open reading frame 69
hsa-miR-605	0	0	1	1	1	1	TEDDM1	transmembrane epididymal protein 1
hsa-miR-605	0	0	1	1	1	1	REXO1L1	REX1, RNA exonuclease 1 homolog (S. cerevisiae)-like 1
hsa-miR-605	1	0	1	1	1	1	FAM117B	family with sequence similarity 117, member B
hsa-miR-605	1	0	1	0	1	1	PGM2L1	phosphoglucomutase 2-like 1
hsa-miR-605	0	0	1	0	0	0	SLC39A5	solute carrier family 39 (metal ion transporter), member 5
hsa-miR-605	1	0	1	1	1	1	DIP2B	DIP2 disco-interacting protein 2 homolog B (Drosophila)
hsa-miR-605	0	0	1	1	0	0	NOMO2	NODAL modulator 2
hsa-miR-605	1	0	1	0	1	1	DPY19L2	dpy-19-like 2 (C. elegans)
hsa-miR-605	1	0	1	0	1	1	SREK1IP1	SREK1-interacting protein 1
hsa-miR-605	0	0	1	1	1	1	CCDC50	coiled-coil domain containing 50
hsa-miR-605	1	0	1	1	1	1	UBR1	ubiquitin protein ligase E3 component n-recognin 1
hsa-miR-605	0	0	1	1	1	1	FAM9A	family with sequence similarity 9, member A
hsa-miR-605	1	0	1	1	0	0	JPH2	junctophilin 2
hsa-miR-605	1	0	1	0	1	1	ZDHHC21	zinc finger, DHHC-type containing 21
hsa-miR-605	1	0	1	1	0	0	KCTD13	potassium channel tetramerisation domain containing 13
hsa-miR-605	0	0	1	1	1	1	NPAS4	neuronal PAS domain protein 4
hsa-miR-605	1	0	1	1	1	1	QSOX2	quiescin Q6 sulfhydryl oxidase 2
hsa-miR-605	0	0	1	1	0	0	BCDIN3D	BCDIN3 domain containing
hsa-miR-605	0	0	1	0	0	0	C1orf126	chromosome 1 open reading frame 126
hsa-miR-605	1	0	1	1	1	1	BCL9L	B-cell CLL/lymphoma 9-like
hsa-miR-605	1	0	1	0	1	1	C12orf36	chromosome 12 open reading frame 36
hsa-miR-605	1	0	1	0	1	1	RIMS4	regulating synaptic membrane exocytosis 4
hsa-miR-605	0	0	1	0	1	1	NBPF11	neuroblastoma breakpoint family, member 11
hsa-miR-605	1	0	1	1	1	1	ARRDC4	arrestin domain containing 4
hsa-miR-605	0	0	1	0	1	1	CLDN23	claudin 23
hsa-miR-605	1	0	1	1	1	1	TMEM65	transmembrane protein 65
hsa-miR-605	1	0	1	0	1	1	SLC16A9	solute carrier family 16, member 9 (monocarboxylic acid transporter 9)
hsa-miR-605	1	0	1	1	1	1	ZBTB41	zinc finger and BTB domain containing 41
hsa-miR-605	1	0	1	1	1	1	ADAMTS6	ADAM metallopeptidase with thrombospondin type 1 motif, 6
hsa-miR-605	1	0	1	1	1	1	ASB7	ankyrin repeat and SOCS box containing 7
hsa-miR-605	1	0	1	1	1	1	E2F6	E2F transcription factor 6
hsa-miR-605	1	0	1	0	1	1	PTPLB	protein tyrosine phosphatase-like (proline instead of catalytic arginine), member b
hsa-miR-605	1	0	1	1	1	1	PAQR9	progestin and adipoQ receptor family member IX
hsa-miR-605	0	0	1	1	0	0	SPATA21	spermatogenesis associated 21
hsa-miR-605	1	0	1	0	0	0	RAB15	RAB15, member RAS oncogene family
hsa-miR-605	1	0	1	1	1	1	PTGER3	prostaglandin E receptor 3 (subtype EP3)
hsa-miR-605	1	0	1	1	1	1	NSUN4	NOP2/Sun domain family, member 4
hsa-miR-605	1	0	1	1	1	1	FBXO33	F-box protein 33
hsa-miR-605	1	0	1	1	1	1	E2F7	E2F transcription factor 7
hsa-miR-605	1	0	1	0	1	1	MBLAC2	metallo-beta-lactamase domain containing 2
hsa-miR-605	0	0	1	1	1	1	EDN3	endothelin 3
hsa-miR-605	1	0	1	1	1	1	TMEM132E	transmembrane protein 132E
hsa-miR-605	0	0	1	1	1	1	CMPK2	cytidine monophosphate (UMP-CMP) kinase 2, mitochondrial
hsa-miR-605	0	0	1	1	1	1	C4orf50	chromosome 4 open reading frame 50
hsa-miR-605	0	0	1	1	0	0	TMPRSS11F	transmembrane protease, serine 11F
hsa-miR-605	0	0	1	0	0	0	ANXA2P3	annexin A2 pseudogene 3
hsa-miR-605	0	0	1	0	0	0	TTTY2	testis-specific transcript, Y-linked 2 (non-protein coding)
hsa-miR-605	0	0	1	0	0	0	TTTY15	testis-specific transcript, Y-linked 15 (non-protein coding)
hsa-miR-605	0	0	1	0	0	0	FTH1P7	ferritin, heavy polypeptide 1 pseudogene 7
hsa-miR-605	0	0	1	0	0	0	FTH1P8	ferritin, heavy polypeptide 1 pseudogene 8
hsa-miR-605	0	0	1	0	0	0	SNORA4	small nucleolar RNA, H/ACA box 4
hsa-miR-605	0	0	1	0	0	0	TRIM78P	tripartite motif containing 78, pseudogene
hsa-miR-605	0	0	1	0	0	0	MALAT1	metastasis associated lung adenocarcinoma transcript 1 (non-protein coding)
hsa-miR-605	0	0	1	0	0	0	SYS1-DBNDD2	SYS1-DBNDD2 readthrough (non-protein coding)
hsa-miR-605	0	0	1	0	0	0	SNORD113-6	small nucleolar RNA, C/D box 113-6
hsa-miR-605	0	0	1	0	0	0	SNORD116-28	small nucleolar RNA, C/D box 116-28
hsa-miR-605	1	0	1	0	1	1	NFIX	nuclear factor I/X (CCAAT-binding transcription factor)
hsa-miR-605	0	0	1	0	0	0	MST1P9	macrophage stimulating 1 (hepatocyte growth factor-like) pseudogene 9
hsa-miR-605	1	0	1	1	1	1	IFNAR2	interferon (alpha, beta and omega) receptor 2
hsa-miR-605	0	0	1	1	1	1	CACNG3	calcium channel, voltage-dependent, gamma subunit 3
hsa-miR-605	0	0	0	1	1	1	FTSJ1	FtsJ RNA methyltransferase homolog 1 (E. coli)
hsa-miR-605	0	0	0	1	0	0	SCTR	secretin receptor
hsa-miR-605	0	0	1	1	1	1	ST6GALNAC1	ST6 (alpha-N-acetyl-neuraminyl-2,3-beta-galactosyl-1,3)-N-acetylgalactosaminide alpha-2,6-sialyltransferase 1
hsa-miR-605	1	0	1	1	1	1	FGF4	fibroblast growth factor 4
hsa-miR-605	0	0	1	1	0	0	NEB	nebulin
hsa-miR-605	0	0	1	1	1	1	HEATR6	HEAT repeat containing 6
hsa-miR-605	0	0	1	1	0	0	UQCRC1	ubiquinol-cytochrome c reductase core protein I
hsa-miR-605	0	0	1	1	1	1	AMELY	amelogenin, Y-linked
hsa-miR-605	1	0	1	1	1	1	ASPHD2	aspartate beta-hydroxylase domain containing 2
hsa-miR-605	0	0	0	1	0	0	LMF2	lipase maturation factor 2
hsa-miR-605	0	0	1	1	1	1	RASL10A	RAS-like, family 10, member A
hsa-miR-605	1	0	1	1	1	1	NFKBIA	nuclear factor of kappa light polypeptide gene enhancer in B-cells inhibitor, alpha
hsa-miR-605	0	0	0	1	0	0	SRMS	src-related kinase lacking C-terminal regulatory tyrosine and N-terminal myristylation sites
hsa-miR-605	0	0	0	1	1	1	H2BFWT	H2B histone family, member W, testis-specific
hsa-miR-605	0	0	1	1	0	0	GUCY2F	guanylate cyclase 2F, retinal
hsa-miR-605	0	0	1	1	1	1	ORC6	origin recognition complex, subunit 6
hsa-miR-605	1	0	1	1	1	1	USB1	U6 snRNA biogenesis 1
hsa-miR-605	1	0	1	1	0	0	RASIP1	Ras interacting protein 1
hsa-miR-605	0	0	1	1	1	1	RAB3A	RAB3A, member RAS oncogene family
hsa-miR-605	0	0	1	1	1	1	TFPI2	tissue factor pathway inhibitor 2
hsa-miR-605	0	0	0	1	1	1	NOD1	nucleotide-binding oligomerization domain containing 1
hsa-miR-605	0	0	0	1	1	1	SUPT4H1	suppressor of Ty 4 homolog 1 (S. cerevisiae)
hsa-miR-605	0	0	1	1	1	1	PANX1	pannexin 1
hsa-miR-605	0	0	0	1	1	1	POU2AF1	POU class 2 associating factor 1
hsa-miR-605	0	0	1	1	1	1	TULP3	tubby like protein 3
hsa-miR-605	0	0	0	1	1	1	POLR3B	polymerase (RNA) III (DNA directed) polypeptide B
hsa-miR-605	0	0	1	1	0	0	IL23A	interleukin 23, alpha subunit p19
hsa-miR-605	0	0	0	1	0	0	TPI1	triosephosphate isomerase 1
hsa-miR-605	0	0	1	1	0	0	MLH1	mutL homolog 1, colon cancer, nonpolyposis type 2 (E. coli)
hsa-miR-605	0	0	0	1	1	1	AADAC	arylacetamide deacetylase
hsa-miR-605	0	0	1	1	0	0	IGFBP2	insulin-like growth factor binding protein 2, 36kDa
hsa-miR-605	0	0	0	1	1	1	IL1RL1	interleukin 1 receptor-like 1
hsa-miR-605	0	0	1	1	0	0	MIIP	migration and invasion inhibitory protein
hsa-miR-605	0	0	0	1	0	0	RPS25	ribosomal protein S25
hsa-miR-605	1	0	1	1	1	1	TGFB3	transforming growth factor, beta 3
hsa-miR-605	0	0	1	1	0	0	ADORA3	adenosine A3 receptor
hsa-miR-605	1	0	1	1	1	1	MTERFD2	MTERF domain containing 2
hsa-miR-605	0	0	0	1	0	0	SLC25A51	solute carrier family 25, member 51
hsa-miR-605	0	0	0	1	0	0	PKN1	protein kinase N1
hsa-miR-605	1	0	1	1	1	1	RALY	RNA binding protein, autoantigenic (hnRNP-associated with lethal yellow homolog (mouse))
hsa-miR-605	0	0	1	1	0	0	EPS15L1	epidermal growth factor receptor pathway substrate 15-like 1
hsa-miR-605	0	0	0	1	1	1	GDF2	growth differentiation factor 2
hsa-miR-605	0	0	1	1	0	0	CHRNA10	cholinergic receptor, nicotinic, alpha 10 (neuronal)
hsa-miR-605	1	0	1	1	1	1	DMXL2	Dmx-like 2
hsa-miR-605	0	0	1	1	1	1	RAF1	v-raf-1 murine leukemia viral oncogene homolog 1
hsa-miR-605	1	0	1	1	1	1	DPP6	dipeptidyl-peptidase 6
hsa-miR-605	0	0	1	1	0	0	FUT5	fucosyltransferase 5 (alpha (1,3) fucosyltransferase)
hsa-miR-605	0	0	0	1	0	0	BMP15	bone morphogenetic protein 15
hsa-miR-605	0	0	1	1	1	1	VIMP	VCP-interacting membrane protein
hsa-miR-605	0	0	1	1	1	1	RPA1	replication protein A1, 70kDa
hsa-miR-605	0	0	0	1	1	1	SLC52A1	solute carrier family 52, riboflavin transporter, member 1
hsa-miR-605	0	0	0	1	0	0	GUCY2D	guanylate cyclase 2D, membrane (retina-specific)
hsa-miR-605	0	0	1	1	0	0	BRD8	bromodomain containing 8
hsa-miR-605	0	0	0	1	0	0	SSTR4	somatostatin receptor 4
hsa-miR-605	0	0	1	1	1	1	PDE6A	phosphodiesterase 6A, cGMP-specific, rod, alpha
hsa-miR-605	0	0	1	1	0	0	AP4B1	adaptor-related protein complex 4, beta 1 subunit
hsa-miR-605	0	0	0	1	1	1	TMEM106C	transmembrane protein 106C
hsa-miR-605	0	0	1	1	0	0	MTNR1B	melatonin receptor 1B
hsa-miR-605	1	0	1	1	1	1	TRAFD1	TRAF-type zinc finger domain containing 1
hsa-miR-605	0	0	1	1	1	1	RINT1	RAD50 interactor 1
hsa-miR-605	0	0	1	1	1	1	AKIRIN2	akirin 2
hsa-miR-605	0	0	1	1	0	0	GDF11	growth differentiation factor 11
hsa-miR-605	0	0	1	1	1	1	EGR4	early growth response 4
hsa-miR-605	1	0	1	1	1	1	NDRG4	NDRG family member 4
hsa-miR-605	0	0	1	1	1	1	URB2	URB2 ribosome biogenesis 2 homolog (S. cerevisiae)
hsa-miR-605	0	0	0	1	1	1	SP110	SP110 nuclear body protein
hsa-miR-605	0	0	0	1	1	1	MRPL44	mitochondrial ribosomal protein L44
hsa-miR-605	0	0	0	1	1	1	TMBIM1	transmembrane BAX inhibitor motif containing 1
hsa-miR-605	1	0	0	1	1	1	USP44	ubiquitin specific peptidase 44
hsa-miR-605	0	0	1	1	0	0	SETDB2	SET domain, bifurcated 2
hsa-miR-605	0	0	1	1	0	0	KIF12	kinesin family member 12
hsa-miR-605	0	0	1	1	0	0	YIPF3	Yip1 domain family, member 3
hsa-miR-605	0	0	0	1	0	0	C6orf15	chromosome 6 open reading frame 15
hsa-miR-605	0	0	1	1	0	0	NOX5	NADPH oxidase, EF-hand calcium binding domain 5
hsa-miR-605	0	0	1	1	0	0	CALHM2	calcium homeostasis modulator 2
hsa-miR-605	0	0	1	1	1	1	DIRC2	disrupted in renal carcinoma 2
hsa-miR-605	0	0	1	1	1	1	TMCC3	transmembrane and coiled-coil domain family 3
hsa-miR-605	1	0	1	1	1	1	TMEM159	transmembrane protein 159
hsa-miR-605	1	0	1	1	1	1	HHAT	hedgehog acyltransferase
hsa-miR-605	1	0	1	1	1	1	ANKRD13A	ankyrin repeat domain 13A
hsa-miR-605	0	0	0	1	0	0	TRPV4	transient receptor potential cation channel, subfamily V, member 4
hsa-miR-605	1	0	1	1	1	1	ARHGAP28	Rho GTPase activating protein 28
hsa-miR-605	0	0	0	1	0	0	LPO	lactoperoxidase
hsa-miR-605	1	0	1	1	1	1	VMP1	vacuole membrane protein 1
hsa-miR-605	1	0	0	1	1	1	FAM86A	family with sequence similarity 86, member A
hsa-miR-605	0	0	1	1	1	1	DHX8	DEAH (Asp-Glu-Ala-His) box polypeptide 8
hsa-miR-605	0	0	0	1	1	1	SLC4A1	solute carrier family 4, anion exchanger, member 1 (erythrocyte membrane protein band 3, Diego blood group)
hsa-miR-605	0	0	1	1	1	1	INVS	inversin
hsa-miR-605	0	0	1	1	1	1	SIRPB1	signal-regulatory protein beta 1
hsa-miR-605	0	0	0	1	0	0	GNA15	guanine nucleotide binding protein (G protein), alpha 15 (Gq class)
hsa-miR-605	1	0	0	1	0	0	INPP4B	inositol polyphosphate-4-phosphatase, type II, 105kDa
hsa-miR-605	0	0	1	1	1	1	GIPR	gastric inhibitory polypeptide receptor
hsa-miR-605	0	0	0	1	0	0	CCDC61	coiled-coil domain containing 61
hsa-miR-605	0	0	1	1	1	1	NAPA	N-ethylmaleimide-sensitive factor attachment protein, alpha
hsa-miR-605	1	0	0	1	1	1	DDX25	DEAD (Asp-Glu-Ala-Asp) box helicase 25
hsa-miR-605	0	0	0	1	1	1	DCPS	decapping enzyme, scavenger
hsa-miR-605	1	0	1	1	1	1	CHMP3	charged multivesicular body protein 3
hsa-miR-605	0	0	1	1	1	1	FGFRL1	fibroblast growth factor receptor-like 1
hsa-miR-605	0	0	1	1	0	0	KIF9	kinesin family member 9
hsa-miR-605	0	0	1	1	0	0	EXOSC7	exosome component 7
hsa-miR-605	0	0	1	1	1	1	SLC25A13	solute carrier family 25 (aspartate/glutamate carrier), member 13
hsa-miR-605	0	0	1	1	0	0	ADAM18	ADAM metallopeptidase domain 18
hsa-miR-605	0	0	1	1	0	0	RBM6	RNA binding motif protein 6
hsa-miR-605	0	0	1	1	0	0	B4GALNT3	beta-1,4-N-acetyl-galactosaminyl transferase 3
hsa-miR-605	0	0	0	1	0	0	CYP11A1	cytochrome P450, family 11, subfamily A, polypeptide 1
hsa-miR-605	1	0	1	1	1	1	NKD1	naked cuticle homolog 1 (Drosophila)
hsa-miR-605	0	0	0	1	1	1	TXNL4B	thioredoxin-like 4B
hsa-miR-605	0	0	0	1	0	0	OR4D1	olfactory receptor, family 4, subfamily D, member 1
hsa-miR-605	0	0	0	1	0	0	EIF4A3	eukaryotic translation initiation factor 4A3
hsa-miR-605	0	0	1	1	0	0	NT5C3L	5'-nucleotidase, cytosolic III-like
hsa-miR-605	1	0	0	1	1	1	PRDM15	PR domain containing 15
hsa-miR-605	0	0	1	1	1	1	PGPEP1	pyroglutamyl-peptidase I
hsa-miR-605	0	0	0	1	0	0	IL19	interleukin 19
hsa-miR-605	0	0	1	1	1	1	SPIB	Spi-B transcription factor (Spi-1/PU.1 related)
hsa-miR-605	0	0	1	1	1	1	CNIH3	cornichon homolog 3 (Drosophila)
hsa-miR-605	0	0	1	1	1	1	GIN1	gypsy retrotransposon integrase 1
hsa-miR-605	0	0	0	1	1	1	SLC25A48	solute carrier family 25, member 48
hsa-miR-605	0	0	1	1	0	0	GLRA1	glycine receptor, alpha 1
hsa-miR-605	1	0	1	1	1	1	FGF18	fibroblast growth factor 18
hsa-miR-605	0	0	0	1	1	1	EPHA1	EPH receptor A1
hsa-miR-605	0	0	1	1	0	0	DOK2	docking protein 2, 56kDa
hsa-miR-605	1	0	1	1	0	0	TUT1	terminal uridylyl transferase 1, U6 snRNA-specific
hsa-miR-605	1	0	0	1	1	1	HMBS	hydroxymethylbilane synthase
hsa-miR-605	0	0	1	1	1	1	MS4A3	membrane-spanning 4-domains, subfamily A, member 3 (hematopoietic cell-specific)
hsa-miR-605	1	0	0	1	1	1	DHRS12	dehydrogenase/reductase (SDR family) member 12
hsa-miR-605	0	0	1	1	1	1	TKTL2	transketolase-like 2
hsa-miR-605	0	0	1	1	0	0	NARS2	asparaginyl-tRNA synthetase 2, mitochondrial (putative)
hsa-miR-605	0	0	1	1	1	1	INO80C	INO80 complex subunit C
hsa-miR-605	1	0	0	1	1	1	LPCAT1	lysophosphatidylcholine acyltransferase 1
hsa-miR-605	0	0	0	1	0	0	C16orf74	chromosome 16 open reading frame 74
hsa-miR-605	0	0	1	1	0	0	TBCEL	tubulin folding cofactor E-like
hsa-miR-605	0	0	0	1	1	1	MAGEC1	melanoma antigen family C, 1
hsa-miR-605	1	0	1	1	1	1	CD109	CD109 molecule
hsa-miR-605	0	0	1	1	1	1	FBXO32	F-box protein 32
hsa-miR-605	0	0	0	1	0	0	SLC38A10	solute carrier family 38, member 10
hsa-miR-605	0	0	1	1	1	1	RHBDL2	rhomboid, veinlet-like 2 (Drosophila)
hsa-miR-605	0	0	1	1	0	0	RAP1GAP	RAP1 GTPase activating protein
hsa-miR-605	0	0	1	1	1	1	MCAT	malonyl CoA:ACP acyltransferase (mitochondrial)
hsa-miR-605	0	0	1	1	0	0	SPON2	spondin 2, extracellular matrix protein
hsa-miR-605	0	0	0	1	0	0	ZNF613	zinc finger protein 613
hsa-miR-605	0	0	0	1	1	1	TBC1D24	TBC1 domain family, member 24
hsa-miR-605	0	0	0	1	0	0	ALPPL2	alkaline phosphatase, placental-like 2
hsa-miR-605	0	0	1	1	0	0	RNF25	ring finger protein 25
hsa-miR-605	0	0	0	1	0	0	FEV	FEV (ETS oncogene family)
hsa-miR-605	0	0	0	1	0	0	HDAC11	histone deacetylase 11
hsa-miR-605	0	0	1	1	1	1	WDR52	WD repeat domain 52
hsa-miR-605	0	0	1	1	0	0	TRIM54	tripartite motif containing 54
hsa-miR-605	0	0	1	1	1	1	PGRMC2	progesterone receptor membrane component 2
hsa-miR-605	0	0	0	1	0	0	POC1A	POC1 centriolar protein homolog A (Chlamydomonas)
hsa-miR-605	0	0	0	1	0	0	ANKRD33B	ankyrin repeat domain 33B
hsa-miR-605	0	0	0	1	0	0	DAGLB	diacylglycerol lipase, beta
hsa-miR-605	0	0	1	1	1	1	COG5	component of oligomeric golgi complex 5
hsa-miR-605	0	0	1	1	1	1	MED30	mediator complex subunit 30
hsa-miR-605	0	0	1	1	1	1	RPP25L	ribonuclease P/MRP 25kDa subunit-like
hsa-miR-605	0	0	1	1	0	0	RNF183	ring finger protein 183
hsa-miR-605	0	0	1	1	1	1	AKR1E2	aldo-keto reductase family 1, member E2
hsa-miR-605	0	0	1	1	1	1	PRPF18	PRP18 pre-mRNA processing factor 18 homolog (S. cerevisiae)
hsa-miR-605	0	0	1	1	1	1	RNASE7	ribonuclease, RNase A family, 7
hsa-miR-605	0	0	1	1	1	1	ISCA2	iron-sulfur cluster assembly 2 homolog (S. cerevisiae)
hsa-miR-605	0	0	0	1	0	0	HPS6	Hermansky-Pudlak syndrome 6
hsa-miR-605	0	0	1	1	1	1	MSS51	MSS51 mitochondrial translational activator homolog (S. cerevisiae)
hsa-miR-605	0	0	0	1	0	0	CDH16	cadherin 16, KSP-cadherin
hsa-miR-605	0	0	1	1	1	1	PDIA3	protein disulfide isomerase family A, member 3
hsa-miR-605	1	0	1	1	1	1	RRM1	ribonucleotide reductase M1
hsa-miR-605	1	0	0	1	1	1	MIDN	midnolin
hsa-miR-605	0	0	1	1	1	1	GRIK5	glutamate receptor, ionotropic, kainate 5
hsa-miR-605	0	0	0	1	0	0	C19orf33	chromosome 19 open reading frame 33
hsa-miR-605	0	0	1	1	0	0	VPS37C	vacuolar protein sorting 37 homolog C (S. cerevisiae)
hsa-miR-605	0	0	0	1	1	1	FADD	Fas (TNFRSF6)-associated via death domain
hsa-miR-605	0	0	0	1	0	0	LTBP3	latent transforming growth factor beta binding protein 3
hsa-miR-605	0	0	0	1	0	0	BATF2	basic leucine zipper transcription factor, ATF-like 2
hsa-miR-605	0	0	0	1	0	0	NXNL1	nucleoredoxin-like 1
hsa-miR-605	0	0	0	1	0	0	OR6F1	olfactory receptor, family 6, subfamily F, member 1
hsa-miR-605	0	0	0	1	0	0	VPREB1	pre-B lymphocyte 1
hsa-miR-605	1	0	1	1	0	0	CANT1	calcium activated nucleotidase 1
hsa-miR-605	0	0	0	1	0	0	ALKBH3	alkB, alkylation repair homolog 3 (E. coli)
hsa-miR-605	0	0	0	1	1	1	PDHB	pyruvate dehydrogenase (lipoamide) beta
hsa-miR-605	1	0	1	1	1	1	ZBTB46	zinc finger and BTB domain containing 46
hsa-miR-605	0	0	1	1	0	0	KCNK9	potassium channel, subfamily K, member 9
hsa-miR-605	0	0	0	1	1	1	TBL2	transducin (beta)-like 2
hsa-miR-605	0	0	0	1	1	1	KRT73	keratin 73
hsa-miR-605	0	0	1	1	0	0	HOXD12	homeobox D12
hsa-miR-605	0	0	0	1	1	1	PPIC	peptidylprolyl isomerase C (cyclophilin C)
hsa-miR-605	0	0	0	1	1	1	LRRC45	leucine rich repeat containing 45
hsa-miR-605	0	0	1	1	0	0	STRA13	stimulated by retinoic acid 13 homolog (mouse)
hsa-miR-605	0	0	0	1	1	1	LRRC8E	leucine rich repeat containing 8 family, member E
hsa-miR-605	1	0	1	1	1	1	INADL	InaD-like (Drosophila)
hsa-miR-605	0	0	1	1	1	1	C2orf54	chromosome 2 open reading frame 54
hsa-miR-605	0	0	0	1	0	0	RXFP1	relaxin/insulin-like family peptide receptor 1
hsa-miR-605	0	0	0	1	1	1	DDX23	DEAD (Asp-Glu-Ala-Asp) box polypeptide 23
hsa-miR-605	1	0	1	1	1	1	ANTXR1	anthrax toxin receptor 1
hsa-miR-605	0	0	1	1	0	0	PLG	plasminogen
hsa-miR-605	1	0	0	1	1	1	RBAK	RB-associated KRAB zinc finger
hsa-miR-605	0	0	1	1	1	1	PRKACA	protein kinase, cAMP-dependent, catalytic, alpha
hsa-miR-605	0	0	1	1	1	1	ACAD9	acyl-CoA dehydrogenase family, member 9
hsa-miR-605	1	0	1	1	0	0	PBXIP1	pre-B-cell leukemia homeobox interacting protein 1
hsa-miR-605	0	0	0	1	1	1	UGT2B15	UDP glucuronosyltransferase 2 family, polypeptide B15
hsa-miR-605	0	0	1	1	0	0	PPP1R14B	protein phosphatase 1, regulatory (inhibitor) subunit 14B
hsa-miR-605	0	0	1	1	0	0	VEGFB	vascular endothelial growth factor B
hsa-miR-605	0	0	0	1	1	1	KRT2	keratin 2
hsa-miR-605	0	0	1	1	1	1	C7orf10	chromosome 7 open reading frame 10
hsa-miR-605	0	0	1	1	1	1	CYP7B1	cytochrome P450, family 7, subfamily B, polypeptide 1
hsa-miR-605	0	0	1	1	1	1	RPL13	ribosomal protein L13
hsa-miR-605	0	0	0	1	0	0	CST6	cystatin E/M
hsa-miR-605	0	0	0	1	0	0	NFE2	nuclear factor (erythroid-derived 2), 45kDa
hsa-miR-605	0	0	0	1	0	0	OR4S2	olfactory receptor, family 4, subfamily S, member 2
hsa-miR-605	0	0	0	1	0	0	TNFRSF10C	tumor necrosis factor receptor superfamily, member 10c, decoy without an intracellular domain
hsa-miR-605	0	0	1	1	0	0	DHRS4	dehydrogenase/reductase (SDR family) member 4
hsa-miR-605	0	0	1	1	0	0	GRINA	glutamate receptor, ionotropic, N-methyl D-aspartate-associated protein 1 (glutamate binding)
hsa-miR-605	0	0	1	1	1	1	RMND5B	required for meiotic nuclear division 5 homolog B (S. cerevisiae)
hsa-miR-605	0	0	0	1	1	1	CHAF1B	chromatin assembly factor 1, subunit B (p60)
hsa-miR-605	0	0	0	1	0	0	ZNF575	zinc finger protein 575
hsa-miR-605	0	0	1	1	1	1	AQP6	aquaporin 6, kidney specific
hsa-miR-605	0	0	1	1	0	0	RPUSD2	RNA pseudouridylate synthase domain containing 2
hsa-miR-605	0	0	0	1	1	1	ZNF843	zinc finger protein 843
hsa-miR-605	0	0	0	1	1	1	ITGA11	integrin, alpha 11
hsa-miR-605	0	0	0	1	0	0	OS9	osteosarcoma amplified 9, endoplasmic reticulum lectin
hsa-miR-605	0	0	1	1	1	1	DOCK5	dedicator of cytokinesis 5
hsa-miR-605	0	0	1	1	1	1	SYTL2	synaptotagmin-like 2
hsa-miR-605	1	0	1	1	1	1	SHMT1	serine hydroxymethyltransferase 1 (soluble)
hsa-miR-605	1	0	0	1	1	1	LLGL1	lethal giant larvae homolog 1 (Drosophila)
hsa-miR-605	0	0	1	1	1	1	TRIM25	tripartite motif containing 25
hsa-miR-605	0	0	1	1	0	0	CCDC101	coiled-coil domain containing 101
hsa-miR-605	1	0	0	1	1	1	TUBB6	tubulin, beta 6 class V
hsa-miR-605	0	0	1	1	1	1	MRPL43	mitochondrial ribosomal protein L43
hsa-miR-605	0	0	1	1	0	0	AVL9	AVL9 homolog (S. cerevisiase)
hsa-miR-605	1	0	1	1	1	1	CTDNEP1	CTD nuclear envelope phosphatase 1
hsa-miR-605	1	0	0	1	1	1	TTC7A	tetratricopeptide repeat domain 7A
hsa-miR-605	0	0	1	1	1	1	TEX35	testis expressed 35
hsa-miR-605	0	0	0	1	0	0	OR4S1	olfactory receptor, family 4, subfamily S, member 1
hsa-miR-605	0	0	0	1	1	1	ZNF454	zinc finger protein 454
hsa-miR-605	0	0	0	1	0	0	ANKRD30B	ankyrin repeat domain 30B
hsa-miR-605	0	0	1	1	0	0	CLPTM1L	CLPTM1-like
hsa-miR-605	0	0	1	1	1	1	ATG16L2	autophagy related 16-like 2 (S. cerevisiae)
hsa-miR-605	1	0	1	1	1	1	YBX1	Y box binding protein 1
hsa-miR-605	0	0	0	1	0	0	OR51G1	olfactory receptor, family 51, subfamily G, member 1
hsa-miR-605	1	0	1	1	1	1	GCNT4	glucosaminyl (N-acetyl) transferase 4, core 2
hsa-miR-605	0	0	1	1	0	0	PLA2G16	phospholipase A2, group XVI
hsa-miR-605	1	0	1	1	1	1	ST7	suppression of tumorigenicity 7
hsa-miR-605	0	0	0	1	0	0	ZNF687	zinc finger protein 687
hsa-miR-605	0	0	1	1	0	0	PLSCR3	phospholipid scramblase 3
hsa-miR-605	0	0	1	1	1	1	FCAMR	Fc receptor, IgA, IgM, high affinity
hsa-miR-605	1	0	1	1	1	1	TOR1AIP1	torsin A interacting protein 1
hsa-miR-605	1	0	1	1	1	1	ZBTB33	zinc finger and BTB domain containing 33
hsa-miR-605	1	0	1	1	1	1	DKK3	dickkopf 3 homolog (Xenopus laevis)
hsa-miR-605	0	0	1	1	1	1	GALK2	galactokinase 2
hsa-miR-605	0	0	1	1	0	0	CCDC158	coiled-coil domain containing 158
hsa-miR-605	0	0	0	1	1	1	TNFAIP8L1	tumor necrosis factor, alpha-induced protein 8-like 1
hsa-miR-605	0	0	1	1	1	1	FBLN1	fibulin 1
hsa-miR-605	0	0	1	1	0	0	CXorf38	chromosome X open reading frame 38
hsa-miR-605	0	0	1	1	1	1	TUBB	tubulin, beta class I
hsa-miR-605	0	0	0	1	0	0	OTOL1	otolin 1
hsa-miR-605	1	0	1	1	0	0	IGDCC3	immunoglobulin superfamily, DCC subclass, member 3
hsa-miR-605	0	0	0	1	0	0	LGALS9C	lectin, galactoside-binding, soluble, 9C
hsa-miR-605	1	0	1	1	1	1	PTPN21	protein tyrosine phosphatase, non-receptor type 21
hsa-miR-605	0	0	0	1	0	0	GALR2	galanin receptor 2
hsa-miR-605	0	0	1	1	1	1	CMTM4	CKLF-like MARVEL transmembrane domain containing 4
hsa-miR-605	0	0	1	1	0	0	SOCS7	suppressor of cytokine signaling 7
hsa-miR-605	0	0	1	1	1	1	TAB1	TGF-beta activated kinase 1/MAP3K7 binding protein 1
hsa-miR-605	0	0	1	1	1	1	P4HB	prolyl 4-hydroxylase, beta polypeptide
hsa-miR-605	0	0	1	1	1	1	SPAG16	sperm associated antigen 16
hsa-miR-605	1	0	1	1	1	1	ACTG1	actin, gamma 1
hsa-miR-605	0	0	0	1	1	1	SNAI3	snail homolog 3 (Drosophila)
hsa-miR-605	0	0	1	1	1	1	ZNRD1	zinc ribbon domain containing 1
hsa-miR-605	0	0	0	1	1	1	ZNF501	zinc finger protein 501
hsa-miR-605	1	0	1	1	1	1	TMED9	transmembrane emp24 protein transport domain containing 9
hsa-miR-605	0	0	1	1	1	1	TMPRSS11B	transmembrane protease, serine 11B
hsa-miR-605	0	0	0	1	0	0	LCK	lymphocyte-specific protein tyrosine kinase
hsa-miR-605	0	0	1	1	1	1	CCDC172	coiled-coil domain containing 172
hsa-miR-605	0	0	1	1	0	0	PPFIA2	protein tyrosine phosphatase, receptor type, f polypeptide (PTPRF), interacting protein (liprin), alpha 2
hsa-miR-605	0	0	0	1	0	0	C5orf38	chromosome 5 open reading frame 38
hsa-miR-605	0	0	1	1	1	1	RALGAPA2	Ral GTPase activating protein, alpha subunit 2 (catalytic)
hsa-miR-605	0	0	0	1	0	0	HPDL	4-hydroxyphenylpyruvate dioxygenase-like
hsa-miR-605	0	0	1	1	1	1	TMPRSS11A	transmembrane protease, serine 11A
hsa-miR-605	1	0	0	1	1	1	HAUS8	HAUS augmin-like complex, subunit 8
hsa-miR-605	0	0	0	1	1	1	INTU	inturned planar cell polarity effector homolog (Drosophila)
hsa-miR-605	1	0	1	1	1	1	AGAP3	ArfGAP with GTPase domain, ankyrin repeat and PH domain 3
hsa-miR-605	0	0	0	1	0	0	LCE3A	late cornified envelope 3A
hsa-miR-605	0	0	1	1	0	0	LOXHD1	lipoxygenase homology domains 1
hsa-miR-605	0	0	1	1	1	1	KIAA0319L	KIAA0319-like
hsa-miR-605	1	0	1	1	1	1	ZFP36L1	zinc finger protein 36, C3H type-like 1
hsa-miR-605	0	0	0	1	0	0	NFKB2	nuclear factor of kappa light polypeptide gene enhancer in B-cells 2 (p49/p100)
hsa-miR-605	0	0	0	1	0	0	LTB4R2	leukotriene B4 receptor 2
hsa-miR-605	0	0	0	1	1	1	TRIM16	tripartite motif containing 16
hsa-miR-605	1	0	1	1	1	1	CDRT1	CMT1A duplicated region transcript 1
hsa-miR-605	0	0	1	1	0	0	C12orf44	chromosome 12 open reading frame 44
hsa-miR-605	0	0	1	1	1	1	IL17RE	interleukin 17 receptor E
hsa-miR-605	0	0	0	1	0	0	SEC13	SEC13 homolog (S. cerevisiae)
hsa-miR-605	0	0	0	1	1	1	ZFP112	zinc finger protein 112 homolog (mouse)
hsa-miR-605	0	0	0	1	0	0	FAM82A2	family with sequence similarity 82, member A2
hsa-miR-605	0	0	0	1	0	0	CMTM5	CKLF-like MARVEL transmembrane domain containing 5
hsa-miR-605	1	0	1	1	1	1	SRFBP1	serum response factor binding protein 1
hsa-miR-605	0	0	1	1	1	1	ADAM33	ADAM metallopeptidase domain 33
hsa-miR-605	0	0	0	1	1	1	FPR2	formyl peptide receptor 2
hsa-miR-605	0	0	1	1	0	0	ARHGAP9	Rho GTPase activating protein 9
hsa-miR-605	0	0	1	1	1	1	LCTL	lactase-like
hsa-miR-605	0	0	1	1	1	1	MESP2	mesoderm posterior 2 homolog (mouse)
hsa-miR-605	0	0	1	1	0	0	C6orf132	chromosome 6 open reading frame 132
hsa-miR-605	1	0	1	1	1	1	AUTS2	autism susceptibility candidate 2
hsa-miR-605	0	0	1	1	0	0	CFLAR	CASP8 and FADD-like apoptosis regulator
hsa-miR-605	0	0	0	1	1	1	TM7SF3	transmembrane 7 superfamily member 3
hsa-miR-605	0	0	1	1	0	0	DAP3	death associated protein 3
hsa-miR-605	0	0	1	1	0	0	FDX1L	ferredoxin 1-like
hsa-miR-605	0	0	1	1	0	0	OSGIN1	oxidative stress induced growth inhibitor 1
hsa-miR-605	0	0	0	1	1	1	FXYD3	FXYD domain containing ion transport regulator 3
hsa-miR-605	1	0	1	1	0	0	AKT1S1	AKT1 substrate 1 (proline-rich)
hsa-miR-605	0	0	0	1	0	0	OR2T27	olfactory receptor, family 2, subfamily T, member 27
hsa-miR-605	0	0	1	1	0	0	SLC2A11	solute carrier family 2 (facilitated glucose transporter), member 11
hsa-miR-605	0	0	0	1	1	1	TRADD	TNFRSF1A-associated via death domain
hsa-miR-605	1	0	1	1	1	1	TEK	TEK tyrosine kinase, endothelial
hsa-miR-605	1	0	0	1	1	1	AURKA	aurora kinase A
hsa-miR-605	0	0	1	1	0	0	UBE2J2	ubiquitin-conjugating enzyme E2, J2
hsa-miR-605	0	0	1	1	1	1	CDH26	cadherin 26
hsa-miR-605	1	0	1	1	1	1	MYNN	myoneurin
hsa-miR-605	0	0	1	1	0	0	C9orf9	chromosome 9 open reading frame 9
hsa-miR-605	1	0	0	1	0	0	SMPD4	sphingomyelin phosphodiesterase 4, neutral membrane (neutral sphingomyelinase-3)
hsa-miR-605	0	0	1	1	0	0	NFKBID	nuclear factor of kappa light polypeptide gene enhancer in B-cells inhibitor, delta
hsa-miR-605	1	0	1	1	1	1	IGSF11	immunoglobulin superfamily, member 11
hsa-miR-605	0	0	0	1	0	0	MYL4	myosin, light chain 4, alkali; atrial, embryonic
hsa-miR-605	0	0	0	1	1	1	H2BFM	H2B histone family, member M
hsa-miR-605	0	0	1	1	0	0	MED25	mediator complex subunit 25
hsa-miR-605	0	0	0	1	0	0	TRIM17	tripartite motif containing 17
hsa-miR-605	0	0	0	1	1	1	CLEC12A	C-type lectin domain family 12, member A
hsa-miR-605	0	0	0	1	0	0	SFXN4	sideroflexin 4
hsa-miR-605	0	0	1	1	1	1	GABBR1	gamma-aminobutyric acid (GABA) B receptor, 1
hsa-miR-605	0	0	0	1	0	0	ARSA	arylsulfatase A
hsa-miR-605	1	0	0	1	1	1	ZNF614	zinc finger protein 614
hsa-miR-605	0	0	0	1	0	0	ZNF432	zinc finger protein 432
hsa-miR-605	0	0	1	1	1	1	KPNA5	karyopherin alpha 5 (importin alpha 6)
hsa-miR-605	0	0	1	1	0	0	ACOX3	acyl-CoA oxidase 3, pristanoyl
hsa-miR-605	0	0	0	1	1	1	MYOM1	myomesin 1, 185kDa
hsa-miR-605	0	0	1	1	1	1	SPAG9	sperm associated antigen 9
hsa-miR-605	0	0	1	1	0	0	STOML2	stomatin (EPB72)-like 2
hsa-miR-605	0	0	0	1	1	1	ABCC11	ATP-binding cassette, sub-family C (CFTR/MRP), member 11
hsa-miR-605	1	0	1	1	1	1	C19orf6	chromosome 19 open reading frame 6
hsa-miR-605	0	0	0	1	1	1	PIK3R4	phosphoinositide-3-kinase, regulatory subunit 4
hsa-miR-605	1	0	1	1	1	1	TBC1D8B	TBC1 domain family, member 8B (with GRAM domain)
hsa-miR-605	1	0	1	1	1	1	FAM123A	family with sequence similarity 123A
hsa-miR-605	1	0	1	1	1	1	TSNAX	translin-associated factor X
hsa-miR-605	1	0	1	1	1	1	TMUB2	transmembrane and ubiquitin-like domain containing 2
hsa-miR-605	1	0	1	1	1	1	LRRC20	leucine rich repeat containing 20
hsa-miR-605	0	0	1	1	0	0	RTP2	receptor (chemosensory) transporter protein 2
hsa-miR-605	0	0	0	1	1	1	RPS6KL1	ribosomal protein S6 kinase-like 1
hsa-miR-605	1	0	1	1	1	1	POM121	POM121 transmembrane nucleoporin
hsa-miR-605	0	0	0	1	0	0	DUX4L3	double homeobox 4 like 3
hsa-miR-605	0	0	0	1	1	1	ZC3HAV1L	zinc finger CCCH-type, antiviral 1-like
hsa-miR-605	0	0	1	1	0	0	THNSL2	threonine synthase-like 2 (S. cerevisiae)
hsa-miR-605	1	0	1	1	0	0	C16orf5	chromosome 16 open reading frame 5
hsa-miR-605	0	0	1	1	0	0	CGB2	chorionic gonadotropin, beta polypeptide 2
hsa-miR-605	0	0	0	1	0	0	SLFNL1	schlafen-like 1
hsa-miR-605	0	0	1	1	0	0	DARC	Duffy blood group, chemokine receptor
hsa-miR-605	0	0	0	1	1	1	INPP5D	inositol polyphosphate-5-phosphatase, 145kDa
hsa-miR-605	1	0	1	1	0	0	EFNA4	ephrin-A4
hsa-miR-605	1	0	1	1	1	1	MDK	midkine (neurite growth-promoting factor 2)
hsa-miR-605	1	0	1	1	0	0	BRD4	bromodomain containing 4
hsa-miR-605	0	0	0	1	0	0	ARL9	ADP-ribosylation factor-like 9
hsa-miR-605	1	0	1	1	0	0	FOXP2	forkhead box P2
hsa-miR-605	0	0	0	1	0	0	CLPSL2	colipase-like 2
hsa-miR-605	0	0	1	1	0	0	EIF3B	eukaryotic translation initiation factor 3, subunit B
hsa-miR-605	0	0	1	1	0	0	ABHD14A	abhydrolase domain containing 14A
hsa-miR-605	1	0	1	1	1	1	TBX3	T-box 3
hsa-miR-605	1	0	1	1	1	1	DCAF12	DDB1 and CUL4 associated factor 12
hsa-miR-605	0	0	0	1	1	1	ZNF438	zinc finger protein 438
hsa-miR-605	0	0	0	1	0	0	ALPK2	alpha-kinase 2
hsa-miR-605	1	0	1	1	1	1	NTPCR	nucleoside-triphosphatase, cancer-related
hsa-miR-605	0	0	0	1	0	0	PRSS38	protease, serine, 38
hsa-miR-605	0	0	0	1	1	1	ADCK3	aarF domain containing kinase 3
hsa-miR-605	1	0	1	1	1	1	AGPAT4	1-acylglycerol-3-phosphate O-acyltransferase 4 (lysophosphatidic acid acyltransferase, delta)
hsa-miR-605	1	0	0	1	0	0	IKBKE	inhibitor of kappa light polypeptide gene enhancer in B-cells, kinase epsilon
hsa-miR-605	1	0	1	1	1	1	SLC45A3	solute carrier family 45, member 3
hsa-miR-605	1	0	1	1	1	1	NFASC	neurofascin
hsa-miR-605	0	0	1	1	1	1	PIK3C2B	phosphatidylinositol-4-phosphate 3-kinase, catalytic subunit type 2 beta
hsa-miR-605	1	0	0	1	1	1	SOX13	SRY (sex determining region Y)-box 13
hsa-miR-605	0	0	1	1	1	1	C6orf211	chromosome 6 open reading frame 211
hsa-miR-605	0	0	1	1	1	1	MTHFD1L	methylenetetrahydrofolate dehydrogenase (NADP+ dependent) 1-like
hsa-miR-605	0	0	0	1	0	0	SF3B5	splicing factor 3b, subunit 5, 10kDa
hsa-miR-605	1	0	1	1	1	1	MGST3	microsomal glutathione S-transferase 3
hsa-miR-605	0	0	1	1	1	1	DEDD	death effector domain containing
hsa-miR-605	0	0	1	1	0	0	VSIG8	V-set and immunoglobulin domain containing 8
hsa-miR-605	0	0	1	1	0	0	APOA1BP	apolipoprotein A-I binding protein
hsa-miR-605	0	0	0	1	0	0	TTC24	tetratricopeptide repeat domain 24
hsa-miR-605	0	0	0	1	0	0	LAMTOR2	late endosomal/lysosomal adaptor, MAPK and MTOR activator 2
hsa-miR-605	0	0	1	1	1	1	CENPW	centromere protein W
hsa-miR-605	1	0	1	1	1	1	NKAIN2	Na+/K+ transporting ATPase interacting 2
hsa-miR-605	0	0	1	1	0	0	CREB3L4	cAMP responsive element binding protein 3-like 4
hsa-miR-605	0	0	0	1	1	1	SNAPIN	SNAP-associated protein
hsa-miR-605	0	0	0	1	0	0	RPF2	ribosome production factor 2 homolog (S. cerevisiae)
hsa-miR-605	0	0	1	1	1	1	LYSMD1	LysM, putative peptidoglycan-binding, domain containing 1
hsa-miR-605	0	0	0	1	1	1	BNIPL	BCL2/adenovirus E1B 19kD interacting protein like
hsa-miR-605	1	0	1	1	1	1	TACC2	transforming, acidic coiled-coil containing protein 2
hsa-miR-605	0	0	1	1	0	0	PPAPDC1A	phosphatidic acid phosphatase type 2 domain containing 1A
hsa-miR-605	0	0	1	1	1	1	PRLHR	prolactin releasing hormone receptor
hsa-miR-605	0	0	1	1	1	1	FAM204A	family with sequence similarity 204, member A
hsa-miR-605	0	0	1	1	0	0	FAM19A3	family with sequence similarity 19 (chemokine (C-C motif)-like), member A3
hsa-miR-605	1	0	1	1	1	1	ST7L	suppression of tumorigenicity 7 like
hsa-miR-605	1	0	1	1	1	1	KCNA2	potassium voltage-gated channel, shaker-related subfamily, member 2
hsa-miR-605	0	0	0	1	0	0	GSTM2	glutathione S-transferase mu 2 (muscle)
hsa-miR-605	0	0	1	1	0	0	MTMR1	myotubularin related protein 1
hsa-miR-605	0	0	1	1	0	0	HPSE2	heparanase 2
hsa-miR-605	0	0	0	1	0	0	RPF1	ribosome production factor 1 homolog (S. cerevisiae)
hsa-miR-605	0	0	0	1	1	1	CRYZ	crystallin, zeta (quinone reductase)
hsa-miR-605	0	0	1	1	1	1	EXOSC1	exosome component 1
hsa-miR-605	1	0	1	1	1	1	IGSF1	immunoglobulin superfamily, member 1
hsa-miR-605	0	0	1	1	0	0	LSM14B	LSM14B, SCD6 homolog B (S. cerevisiae)
hsa-miR-605	0	0	1	1	0	0	DAB1	disabled homolog 1 (Drosophila)
hsa-miR-605	0	0	1	1	0	0	RAE1	RAE1 RNA export 1 homolog (S. pombe)
hsa-miR-605	0	0	1	1	1	1	MYOF	myoferlin
hsa-miR-605	0	0	0	1	0	0	FAM69B	family with sequence similarity 69, member B
hsa-miR-605	0	0	0	1	0	0	DNLZ	DNL-type zinc finger
hsa-miR-605	0	0	0	1	0	0	IFIT3	interferon-induced protein with tetratricopeptide repeats 3
hsa-miR-605	0	0	1	1	0	0	MAST2	microtubule associated serine/threonine kinase 2
hsa-miR-605	0	0	1	1	1	1	ATG4A	autophagy related 4A, cysteine peptidase
hsa-miR-605	0	0	0	1	0	0	PLAC9	placenta-specific 9
hsa-miR-605	0	0	1	1	0	0	PTPRF	protein tyrosine phosphatase, receptor type, F
hsa-miR-605	0	0	1	1	1	1	BEX4	brain expressed, X-linked 4
hsa-miR-605	0	0	1	1	1	1	SDC4	syndecan 4
hsa-miR-605	1	0	1	1	1	1	GLE1	GLE1 RNA export mediator homolog (yeast)
hsa-miR-605	0	0	1	1	0	0	RPL7L1	ribosomal protein L7-like 1
hsa-miR-605	0	0	0	1	1	1	TBCC	tubulin folding cofactor C
hsa-miR-605	0	0	0	1	0	0	KCNK16	potassium channel, subfamily K, member 16
hsa-miR-605	0	0	0	1	1	1	YARS	tyrosyl-tRNA synthetase
hsa-miR-605	1	0	1	1	1	1	NEK6	NIMA (never in mitosis gene a)-related kinase 6
hsa-miR-605	0	0	1	1	0	0	MANBAL	mannosidase, beta A, lysosomal-like
hsa-miR-605	1	0	1	1	1	1	EPB41	erythrocyte membrane protein band 4.1 (elliptocytosis 1, RH-linked)
hsa-miR-605	0	0	1	1	1	1	TAF12	TAF12 RNA polymerase II, TATA box binding protein (TBP)-associated factor, 20kDa
hsa-miR-605	1	0	0	1	1	1	CNTRL	centriolin
hsa-miR-605	0	0	1	1	1	1	ATP6V1G1	ATPase, H+ transporting, lysosomal 13kDa, V1 subunit G1
hsa-miR-605	0	0	1	1	0	0	RPS10	ribosomal protein S10
hsa-miR-605	0	0	1	1	0	0	GPN2	GPN-loop GTPase 2
hsa-miR-605	1	0	1	1	0	0	SNX30	sorting nexin family member 30
hsa-miR-605	0	0	0	1	1	1	SLC30A2	solute carrier family 30 (zinc transporter), member 2
hsa-miR-605	0	0	1	1	1	1	PTGR1	prostaglandin reductase 1
hsa-miR-605	1	0	1	1	0	0	LDLRAP1	low density lipoprotein receptor adaptor protein 1
hsa-miR-605	0	0	1	1	1	1	ZNF483	zinc finger protein 483
hsa-miR-605	0	0	1	1	0	0	GDPD2	glycerophosphodiester phosphodiesterase domain containing 2
hsa-miR-605	0	0	1	1	0	0	FRRS1L	ferric-chelate reductase 1-like
hsa-miR-605	1	0	1	1	1	1	CASP10	caspase 10, apoptosis-related cysteine peptidase
hsa-miR-605	0	0	1	1	1	1	RING1	ring finger protein 1
hsa-miR-605	0	0	1	1	0	0	FAAH2	fatty acid amide hydrolase 2
hsa-miR-605	0	0	1	1	0	0	GPSM3	G-protein signaling modulator 3
hsa-miR-605	0	0	1	1	0	0	UBR4	ubiquitin protein ligase E3 component n-recognin 4
hsa-miR-605	1	0	1	1	1	1	PTCH1	patched 1
hsa-miR-605	1	0	1	1	1	1	IQSEC2	IQ motif and Sec7 domain 2
hsa-miR-605	0	0	1	1	0	0	RDBP	RD RNA binding protein
hsa-miR-605	0	0	1	1	0	0	CFB	complement factor B
hsa-miR-605	1	0	1	1	1	1	C6orf47	chromosome 6 open reading frame 47
hsa-miR-605	0	0	1	1	1	1	AIF1	allograft inflammatory factor 1
hsa-miR-605	0	0	1	1	0	0	NFKBIL1	nuclear factor of kappa light polypeptide gene enhancer in B-cells inhibitor-like 1
hsa-miR-605	0	0	1	1	0	0	CCDC22	coiled-coil domain containing 22
hsa-miR-605	0	0	0	1	0	0	ZNF550	zinc finger protein 550
hsa-miR-605	0	0	1	1	1	1	TCF19	transcription factor 19
hsa-miR-605	0	0	0	1	1	1	DPCR1	diffuse panbronchiolitis critical region 1
hsa-miR-605	0	0	0	1	1	1	MDC1	mediator of DNA-damage checkpoint 1
hsa-miR-605	0	0	0	1	1	1	SLC15A1	solute carrier family 15 (oligopeptide transporter), member 1
hsa-miR-605	0	0	1	1	1	1	VPS13A	vacuolar protein sorting 13 homolog A (S. cerevisiae)
hsa-miR-605	0	0	0	1	1	1	BTNL9	butyrophilin-like 9
hsa-miR-605	0	0	1	1	0	0	YIF1A	Yip1 interacting factor homolog A (S. cerevisiae)
hsa-miR-605	0	0	0	1	0	0	C1orf127	chromosome 1 open reading frame 127
hsa-miR-605	0	0	1	1	0	0	USP11	ubiquitin specific peptidase 11
hsa-miR-605	0	0	0	1	0	0	OR5V1	olfactory receptor, family 5, subfamily V, member 1
hsa-miR-605	0	0	0	1	1	1	OR12D3	olfactory receptor, family 12, subfamily D, member 3
hsa-miR-605	0	0	0	1	0	0	CGB7	chorionic gonadotropin, beta polypeptide 7
hsa-miR-605	0	0	1	1	1	1	STAM	signal transducing adaptor molecule (SH3 domain and ITAM motif) 1
hsa-miR-605	0	0	0	1	0	0	KRTAP9-2	keratin associated protein 9-2
hsa-miR-605	0	0	0	1	1	1	KRTAP4-2	keratin associated protein 4-2
hsa-miR-605	0	0	1	1	0	0	GKN1	gastrokine 1
hsa-miR-605	0	0	0	1	1	1	ARHGEF35	Rho guanine nucleotide exchange factor (GEF) 35
hsa-miR-605	0	0	0	1	0	0	CXorf59	chromosome X open reading frame 59
hsa-miR-605	0	0	0	1	1	1	DHODH	dihydroorotate dehydrogenase (quinone)
hsa-miR-605	0	0	1	1	0	0	DHRS13	dehydrogenase/reductase (SDR family) member 13
hsa-miR-605	0	0	1	1	0	0	DCTN3	dynactin 3 (p22)
hsa-miR-605	0	0	0	1	0	0	C11orf91	chromosome 11 open reading frame 91
hsa-miR-605	0	0	1	1	0	0	PDK3	pyruvate dehydrogenase kinase, isozyme 3
hsa-miR-605	0	0	1	1	1	1	DNAJC15	DnaJ (Hsp40) homolog, subfamily C, member 15
hsa-miR-605	0	0	1	1	1	1	XDH	xanthine dehydrogenase
hsa-miR-605	1	0	1	1	1	1	SLC25A15	solute carrier family 25 (mitochondrial carrier; ornithine transporter) member 15
hsa-miR-605	0	0	1	1	1	1	MICAL2	microtubule associated monoxygenase, calponin and LIM domain containing 2
hsa-miR-605	0	0	1	1	1	1	STOML3	stomatin (EPB72)-like 3
hsa-miR-605	1	0	1	1	1	1	FRY	furry homolog (Drosophila)
hsa-miR-605	1	0	1	1	1	1	LHFPL2	lipoma HMGIC fusion partner-like 2
hsa-miR-605	0	0	1	1	1	1	ZNF768	zinc finger protein 768
hsa-miR-605	0	0	1	1	1	1	TUBAL3	tubulin, alpha-like 3
hsa-miR-605	0	0	0	1	0	0	TFF3	trefoil factor 3 (intestinal)
hsa-miR-605	0	0	0	1	1	1	TLR7	toll-like receptor 7
hsa-miR-605	0	0	1	1	0	0	PITRM1	pitrilysin metallopeptidase 1
hsa-miR-605	1	0	0	1	1	1	CDX2	caudal type homeobox 2
hsa-miR-605	0	0	1	1	1	1	CD99	CD99 molecule
hsa-miR-605	0	0	1	1	0	0	TMEM74B	transmembrane protein 74B
hsa-miR-605	1	0	1	1	1	1	NIN	ninein (GSK3B interacting protein)
hsa-miR-605	0	0	1	1	1	1	CLEC4D	C-type lectin domain family 4, member D
hsa-miR-605	0	0	0	1	0	0	ZNF316	zinc finger protein 316
hsa-miR-605	0	0	1	1	1	1	DEFB125	defensin, beta 125
hsa-miR-605	0	0	1	1	0	0	PXK	PX domain containing serine/threonine kinase
hsa-miR-605	0	0	0	1	1	1	LOC401052	uncharacterized LOC401052
hsa-miR-605	0	0	1	1	1	1	GPX1	glutathione peroxidase 1
hsa-miR-605	1	0	1	1	1	1	FOXI2	forkhead box I2
hsa-miR-605	0	0	1	1	0	0	C6orf163	chromosome 6 open reading frame 163
hsa-miR-605	1	0	1	1	0	0	C15orf27	chromosome 15 open reading frame 27
hsa-miR-605	1	0	1	1	1	1	MBTD1	mbt domain containing 1
hsa-miR-605	0	0	1	1	0	0	ADAL	adenosine deaminase-like
hsa-miR-605	1	0	1	0	1	1	SLC26A2	solute carrier family 26 (sulfate transporter), member 2
hsa-miR-605	0	0	1	1	1	1	TIMM50	translocase of inner mitochondrial membrane 50 homolog (S. cerevisiae)
hsa-miR-605	1	0	0	1	1	1	TRIM67	tripartite motif containing 67
hsa-miR-605	1	0	1	0	1	1	PKP2	plakophilin 2
hsa-miR-605	1	0	1	1	1	1	ACTR2	ARP2 actin-related protein 2 homolog (yeast)
hsa-miR-605	0	0	1	1	1	1	CLEC6A	C-type lectin domain family 6, member A
hsa-miR-605	1	0	1	1	1	1	SPOP	speckle-type POZ protein
hsa-miR-605	0	0	0	1	1	1	ZNF761	zinc finger protein 761
hsa-miR-605	0	0	1	1	1	1	GCSAM	germinal center-associated, signaling and motility
hsa-miR-605	1	0	1	1	1	1	ZNF468	zinc finger protein 468
hsa-miR-605	1	0	1	1	1	1	SSBP3	single stranded DNA binding protein 3
hsa-miR-605	1	0	1	1	1	1	ACER2	alkaline ceramidase 2
hsa-miR-605	1	0	1	1	1	1	SH3BP5	SH3-domain binding protein 5 (BTK-associated)
hsa-miR-605	0	0	1	1	1	1	GCOM1	GRINL1A complex locus 1
hsa-miR-605	0	0	1	1	1	1	POLR2M	polymerase (RNA) II (DNA directed) polypeptide M
hsa-miR-605	0	0	0	1	1	1	ZNF772	zinc finger protein 772
hsa-miR-605	0	0	1	1	1	1	ZNF197	zinc finger protein 197
hsa-miR-605	0	0	1	1	1	1	REP15	RAB15 effector protein
hsa-miR-605	0	0	1	1	1	1	C17orf104	chromosome 17 open reading frame 104
hsa-miR-605	1	0	1	1	1	1	MLLT4	myeloid/lymphoid or mixed-lineage leukemia (trithorax homolog, Drosophila); translocated to, 4
hsa-miR-605	0	0	1	0	1	1	ZNF765	zinc finger protein 765
hsa-miR-605	1	0	1	0	1	1	DCUN1D4	DCN1, defective in cullin neddylation 1, domain containing 4 (S. cerevisiae)
hsa-miR-605	0	0	1	1	1	1	ZNF586	zinc finger protein 586
hsa-miR-605	0	0	1	1	1	1	CAB39L	calcium binding protein 39-like
hsa-miR-605	1	0	1	1	1	1	AHR	aryl hydrocarbon receptor
hsa-miR-605	1	0	0	1	1	1	MSI1	musashi homolog 1 (Drosophila)
hsa-miR-605	0	0	1	1	1	1	SRP9	signal recognition particle 9kDa
hsa-miR-605	0	0	1	1	1	1	TMOD1	tropomodulin 1
hsa-miR-605	1	0	1	1	1	1	KDM5C	lysine (K)-specific demethylase 5C
hsa-miR-605	0	0	1	0	1	1	FOXE1	forkhead box E1 (thyroid transcription factor 2)
hsa-miR-605	1	0	1	0	1	1	TGFBR1	transforming growth factor, beta receptor 1
hsa-miR-605	1	0	1	1	1	1	SNRNP40	small nuclear ribonucleoprotein 40kDa (U5)
hsa-miR-605	1	0	1	1	1	1	SCAMP1	secretory carrier membrane protein 1
hsa-miR-605	1	0	1	0	1	1	KRAS	v-Ki-ras2 Kirsten rat sarcoma viral oncogene homolog
hsa-miR-605	0	0	1	1	1	1	LPAR4	lysophosphatidic acid receptor 4
hsa-miR-605	1	0	1	1	1	1	HSPA5	heat shock 70kDa protein 5 (glucose-regulated protein, 78kDa)
hsa-miR-605	0	0	1	1	1	1	IDH3A	isocitrate dehydrogenase 3 (NAD+) alpha
hsa-miR-605	0	0	1	0	1	1	CALCOCO2	calcium binding and coiled-coil domain 2
hsa-miR-605	0	0	1	1	1	1	CAP2	CAP, adenylate cyclase-associated protein, 2 (yeast)
hsa-miR-605	1	0	1	0	1	1	AKAP13	A kinase (PRKA) anchor protein 13
hsa-miR-605	0	0	0	1	1	1	BTN3A1	butyrophilin, subfamily 3, member A1
hsa-miR-605	1	0	1	1	1	1	TRAM2	translocation associated membrane protein 2
hsa-miR-605	1	0	0	1	1	1	FAIM2	Fas apoptotic inhibitory molecule 2
hsa-miR-605	1	0	1	0	1	1	ICMT	isoprenylcysteine carboxyl methyltransferase
hsa-miR-605	1	0	1	0	1	1	BTBD3	BTB (POZ) domain containing 3
hsa-miR-605	1	0	1	1	1	1	PIKFYVE	phosphoinositide kinase, FYVE finger containing
hsa-miR-605	1	0	1	1	1	1	TRAK2	trafficking protein, kinesin binding 2
hsa-miR-605	0	0	0	1	1	1	UFL1	UFM1-specific ligase 1
hsa-miR-605	0	0	1	1	1	1	LEPROTL1	leptin receptor overlapping transcript-like 1
hsa-miR-605	0	0	1	1	1	1	PELO	pelota homolog (Drosophila)
hsa-miR-605	1	0	1	1	1	1	RNF138	ring finger protein 138, E3 ubiquitin protein ligase
hsa-miR-605	1	0	1	1	1	1	GLTP	glycolipid transfer protein
hsa-miR-605	0	0	1	0	1	1	GDE1	glycerophosphodiester phosphodiesterase 1
hsa-miR-605	1	0	0	1	1	1	ATG16L1	autophagy related 16-like 1 (S. cerevisiae)
hsa-miR-605	1	0	1	0	1	1	IPO9	importin 9
hsa-miR-605	1	0	1	1	1	1	DRAM1	DNA-damage regulated autophagy modulator 1
hsa-miR-605	1	0	1	1	1	1	SLC39A9	solute carrier family 39 (zinc transporter), member 9
hsa-miR-605	0	0	1	1	1	1	NIPSNAP3B	nipsnap homolog 3B (C. elegans)
hsa-miR-605	0	0	0	1	1	1	FAM63A	family with sequence similarity 63, member A
hsa-miR-605	0	0	1	1	1	1	DSCR6	Down syndrome critical region gene 6
hsa-miR-605	0	0	0	1	1	1	FAM105A	family with sequence similarity 105, member A
hsa-miR-605	1	0	1	1	1	1	ERO1LB	ERO1-like beta (S. cerevisiae)
hsa-miR-605	0	0	0	1	1	1	C12orf5	chromosome 12 open reading frame 5
hsa-miR-605	1	0	1	1	1	1	LYRM1	LYR motif containing 1
hsa-miR-605	1	0	1	0	1	1	ANKFY1	ankyrin repeat and FYVE domain containing 1
hsa-miR-605	0	0	1	1	1	1	DIDO1	death inducer-obliterator 1
hsa-miR-605	1	0	1	0	1	1	EDAR	ectodysplasin A receptor
hsa-miR-605	0	0	1	0	1	1	ZC3HAV1	zinc finger CCCH-type, antiviral 1
hsa-miR-605	0	0	0	1	1	1	NOL10	nucleolar protein 10
hsa-miR-605	1	0	1	0	1	1	KIAA1715	KIAA1715
hsa-miR-605	1	0	1	0	1	1	PCDHGA7	protocadherin gamma subfamily A, 7
hsa-miR-605	1	0	1	1	1	1	GREB1	growth regulation by estrogen in breast cancer 1
hsa-miR-605	0	0	1	1	1	1	CYB5D1	cytochrome b5 domain containing 1
hsa-miR-605	0	0	1	1	1	1	DNAJC19	DnaJ (Hsp40) homolog, subfamily C, member 19
hsa-miR-605	1	0	1	1	1	1	ARHGEF7	Rho guanine nucleotide exchange factor (GEF) 7
hsa-miR-605	0	0	0	1	1	1	CCDC108	coiled-coil domain containing 108
hsa-miR-605	1	0	1	1	1	1	RBM24	RNA binding motif protein 24
hsa-miR-605	0	0	0	1	1	1	C6orf165	chromosome 6 open reading frame 165
hsa-miR-605	1	0	1	0	1	1	SRRM4	serine/arginine repetitive matrix 4
hsa-miR-605	1	0	1	1	1	1	FREM2	FRAS1 related extracellular matrix protein 2
hsa-miR-605	1	0	1	1	1	1	RGS9BP	regulator of G protein signaling 9 binding protein
hsa-miR-605	1	0	1	1	1	1	SLC16A12	solute carrier family 16, member 12 (monocarboxylic acid transporter 12)
hsa-miR-605	0	0	0	0	1	1	LOC439949	uncharacterized LOC439949
hsa-miR-605	0	0	0	1	1	1	ZNF860	zinc finger protein 860
hsa-miR-605	0	0	0	1	1	1	SRP9P1	signal recognition particle 9 pseudogene 1
hsa-miR-605	0	0	0	0	1	1	LOC653653	adaptor-related protein complex 1, sigma 2 subunit pseudogene
