# Supplementary material for: Profiling of Selected MicroRNAs in Proliferative Eutopic Endometrium of Women with Ovarian Endometriosis
Source: Biomed Res Int. 2015 Aug 20;2015:760698. doi: 10.1155/2015/760698 (PMC4558423; doi:10.1155/2015/760698)
Supplement: Supplementary file 1 — Table I: The names of miRNAs significantly differentially expressed between eutopic endometrium of patients with endometriosis vs eutopic endometrium of patients without endometriosis. Table II: The associations between miRNA and mRNA, which presents detailed results of the search of six major databases i.e targetscan, tarbase, miranda, mirbase, mirtarget2 and pictar. [file 760698.f1.zip › 760698.f1/Table II/hsa-miR-607.tsv]

miR	targetscan	tarbase	miranda	mirbase	mirtarget2	pictar	GeneSymbol	GeneName
hsa-miR-607	0	0	1	0	0	0	NOP14-AS1	NOP14 antisense RNA 1
hsa-miR-607	1	0	1	1	1	1	ZFYVE16	zinc finger, FYVE domain containing 16
hsa-miR-607	1	0	1	1	1	1	CHD9	chromodomain helicase DNA binding protein 9
hsa-miR-607	1	0	1	1	1	1	MCF2L	MCF.2 cell line derived transforming sequence-like
hsa-miR-607	1	0	1	0	1	1	PTPRT	protein tyrosine phosphatase, receptor type, T
hsa-miR-607	0	0	1	1	1	1	PEG3	paternally expressed 3
hsa-miR-607	1	0	1	1	1	1	ZHX3	zinc fingers and homeoboxes 3
hsa-miR-607	1	0	1	1	1	1	SGSM2	small G protein signaling modulator 2
hsa-miR-607	1	0	1	0	1	1	KIAA0408	KIAA0408
hsa-miR-607	1	0	1	0	1	1	MTSS1	metastasis suppressor 1
hsa-miR-607	1	0	1	1	1	1	PPIP5K2	diphosphoinositol pentakisphosphate kinase 2
hsa-miR-607	0	0	1	1	1	1	PREPL	prolyl endopeptidase-like
hsa-miR-607	0	0	1	0	1	1	KLHL21	kelch-like 21 (Drosophila)
hsa-miR-607	1	0	1	1	1	1	RNGTT	RNA guanylyltransferase and 5'-phosphatase
hsa-miR-607	1	0	1	1	1	1	GPATCH8	G patch domain containing 8
hsa-miR-607	1	0	1	1	0	0	PCLO	piccolo (presynaptic cytomatrix protein)
hsa-miR-607	1	0	1	1	1	1	NRXN1	neurexin 1
hsa-miR-607	1	0	1	1	0	0	TBC1D12	TBC1 domain family, member 12
hsa-miR-607	1	0	1	1	0	0	SMCHD1	structural maintenance of chromosomes flexible hinge domain containing 1
hsa-miR-607	0	0	1	1	0	0	ARHGEF2	Rho/Rac guanine nucleotide exchange factor (GEF) 2
hsa-miR-607	0	0	1	1	0	0	ATP10B	ATPase, class V, type 10B
hsa-miR-607	1	0	1	1	1	1	MATR3	matrin 3
hsa-miR-607	1	0	1	0	1	1	RBM12	RNA binding motif protein 12
hsa-miR-607	1	0	1	1	1	1	DNM3	dynamin 3
hsa-miR-607	1	0	1	1	1	1	LMO7	LIM domain 7
hsa-miR-607	0	0	1	1	0	0	FAM169A	family with sequence similarity 169, member A
hsa-miR-607	1	0	1	1	1	1	CDK12	cyclin-dependent kinase 12
hsa-miR-607	0	0	1	1	1	1	MAN2B2	mannosidase, alpha, class 2B, member 2
hsa-miR-607	1	0	1	0	0	0	DTX4	deltex homolog 4 (Drosophila)
hsa-miR-607	1	0	1	1	1	1	CIT	citron (rho-interacting, serine/threonine kinase 21)
hsa-miR-607	0	0	1	1	1	1	FASTKD2	FAST kinase domains 2
hsa-miR-607	1	0	1	1	1	1	RPGRIP1L	RPGRIP1-like
hsa-miR-607	1	0	1	1	0	0	STXBP5L	syntaxin binding protein 5-like
hsa-miR-607	1	0	1	1	0	0	FRMD4B	FERM domain containing 4B
hsa-miR-607	1	0	1	1	1	1	FOXJ3	forkhead box J3
hsa-miR-607	1	0	1	1	1	1	NLGN1	neuroligin 1
hsa-miR-607	1	0	1	0	1	1	ZNF507	zinc finger protein 507
hsa-miR-607	1	0	1	1	1	1	SMARCAD1	SWI/SNF-related, matrix-associated actin-dependent regulator of chromatin, subfamily a, containing DEAD/H box 1
hsa-miR-607	1	0	1	1	1	1	SPIRE1	spire homolog 1 (Drosophila)
hsa-miR-607	1	0	1	0	1	1	GPR158	G protein-coupled receptor 158
hsa-miR-607	1	0	1	0	1	1	SRGAP3	SLIT-ROBO Rho GTPase activating protein 3
hsa-miR-607	0	0	1	1	0	0	ZC4H2	zinc finger, C4H2 domain containing
hsa-miR-607	1	0	1	1	0	0	KIAA1210	KIAA1210
hsa-miR-607	1	0	1	1	1	1	KIAA1217	KIAA1217
hsa-miR-607	1	0	1	1	1	1	ZMIZ1	zinc finger, MIZ-type containing 1
hsa-miR-607	1	0	1	0	1	1	PPFIBP1	PTPRF interacting protein, binding protein 1 (liprin beta 1)
hsa-miR-607	1	0	1	1	0	0	ATAD2B	ATPase family, AAA domain containing 2B
hsa-miR-607	0	0	1	1	1	1	KIF20B	kinesin family member 20B
hsa-miR-607	1	0	1	1	1	1	PCDH19	protocadherin 19
hsa-miR-607	1	0	1	1	1	1	ATP2C1	ATPase, Ca++ transporting, type 2C, member 1
hsa-miR-607	1	0	1	1	1	1	LRRC7	leucine rich repeat containing 7
hsa-miR-607	1	0	1	1	1	1	UPF2	UPF2 regulator of nonsense transcripts homolog (yeast)
hsa-miR-607	1	1	1	1	1	1	NFIA	nuclear factor I/A
hsa-miR-607	1	0	1	1	0	0	KIAA1462	KIAA1462
hsa-miR-607	0	0	1	0	1	1	KIAA1468	KIAA1468
hsa-miR-607	0	0	1	0	0	0	NYAP2	neuronal tyrosine-phosphorylated phosphoinositide-3-kinase adaptor 2
hsa-miR-607	1	0	1	0	1	1	LMO3	LIM domain only 3 (rhombotin-like 2)
hsa-miR-607	1	0	1	1	1	1	PPP6R3	protein phosphatase 6, regulatory subunit 3
hsa-miR-607	1	0	1	1	1	1	ZNF532	zinc finger protein 532
hsa-miR-607	1	0	1	1	0	0	MAGI3	membrane associated guanylate kinase, WW and PDZ domain containing 3
hsa-miR-607	0	0	1	1	1	1	PBLD	phenazine biosynthesis-like protein domain containing
hsa-miR-607	1	0	1	1	1	1	PTBP2	polypyrimidine tract binding protein 2
hsa-miR-607	1	0	1	1	1	1	DDHD1	DDHD domain containing 1
hsa-miR-607	0	0	1	0	1	1	SETD5	SET domain containing 5
hsa-miR-607	1	0	1	0	1	1	RIMS1	regulating synaptic membrane exocytosis 1
hsa-miR-607	1	0	1	0	1	1	SLC25A25	solute carrier family 25 (mitochondrial carrier; phosphate carrier), member 25
hsa-miR-607	1	0	1	1	1	1	SH3TC2	SH3 domain and tetratricopeptide repeats 2
hsa-miR-607	1	0	1	0	0	0	FAT3	FAT tumor suppressor homolog 3 (Drosophila)
hsa-miR-607	1	0	1	0	0	0	ZBTB34	zinc finger and BTB domain containing 34
hsa-miR-607	0	0	1	1	1	1	DYNC2H1	dynein, cytoplasmic 2, heavy chain 1
hsa-miR-607	0	0	1	0	1	1	RASSF8	Ras association (RalGDS/AF-6) domain family (N-terminal) member 8
hsa-miR-607	0	0	1	1	0	0	ANKRD18A	ankyrin repeat domain 18A
hsa-miR-607	0	0	1	1	0	0	KRTAP24-1	keratin associated protein 24-1
hsa-miR-607	0	0	1	1	0	0	HELLS	helicase, lymphoid-specific
hsa-miR-607	1	0	1	1	1	1	PAN3	PAN3 poly(A) specific ribonuclease subunit homolog (S. cerevisiae)
hsa-miR-607	0	0	1	1	1	1	MICAL2	microtubule associated monoxygenase, calponin and LIM domain containing 2
hsa-miR-607	1	0	1	1	1	1	KCNMA1	potassium large conductance calcium-activated channel, subfamily M, alpha member 1
hsa-miR-607	1	0	1	0	1	1	BEND4	BEN domain containing 4
hsa-miR-607	0	0	1	1	1	1	BIRC5	baculoviral IAP repeat containing 5
hsa-miR-607	0	0	1	0	0	0	TIFAB	TRAF-interacting protein with forkhead-associated domain, family member B
hsa-miR-607	0	0	1	1	0	0	PTPRF	protein tyrosine phosphatase, receptor type, F
hsa-miR-607	0	0	1	0	1	1	ACE2	angiotensin I converting enzyme (peptidyl-dipeptidase A) 2
hsa-miR-607	0	0	1	1	0	0	HFM1	HFM1, ATP-dependent DNA helicase homolog (S. cerevisiae)
hsa-miR-607	1	0	1	1	1	1	AP3D1	adaptor-related protein complex 3, delta 1 subunit
hsa-miR-607	0	0	1	1	1	1	CAST	calpastatin
hsa-miR-607	1	0	1	1	1	1	VLDLR	very low density lipoprotein receptor
hsa-miR-607	1	0	1	1	1	1	COL11A1	collagen, type XI, alpha 1
hsa-miR-607	1	0	1	1	1	1	PLEKHH3	pleckstrin homology domain containing, family H (with MyTH4 domain) member 3
hsa-miR-607	1	0	1	1	1	1	PCCB	propionyl CoA carboxylase, beta polypeptide
hsa-miR-607	0	0	1	1	1	1	DNM1L	dynamin 1-like
hsa-miR-607	1	0	1	1	1	1	SLC8A1	solute carrier family 8 (sodium/calcium exchanger), member 1
hsa-miR-607	1	0	1	1	1	1	DTNA	dystrobrevin, alpha
hsa-miR-607	1	0	1	1	1	1	EIF4G3	eukaryotic translation initiation factor 4 gamma, 3
hsa-miR-607	1	0	1	0	1	1	PLAG1	pleiomorphic adenoma gene 1
hsa-miR-607	1	0	1	0	1	1	SLC6A6	solute carrier family 6 (neurotransmitter transporter, taurine), member 6
hsa-miR-607	1	0	1	1	0	0	TSPYL2	TSPY-like 2
hsa-miR-607	1	0	1	1	1	1	FMR1	fragile X mental retardation 1
hsa-miR-607	1	0	1	0	1	1	DPYSL2	dihydropyrimidinase-like 2
hsa-miR-607	1	0	1	1	1	1	DMTF1	cyclin D binding myb-like transcription factor 1
hsa-miR-607	0	0	1	0	1	1	NPY1R	neuropeptide Y receptor Y1
hsa-miR-607	0	0	1	1	1	1	TFRC	transferrin receptor (p90, CD71)
hsa-miR-607	1	0	1	1	1	1	ERF	Ets2 repressor factor
hsa-miR-607	1	0	1	0	1	1	CHL1	cell adhesion molecule with homology to L1CAM (close homolog of L1)
hsa-miR-607	1	0	1	1	1	1	SATB2	SATB homeobox 2
hsa-miR-607	1	0	1	1	1	1	AEBP2	AE binding protein 2
hsa-miR-607	1	0	1	0	1	1	CDON	Cdon homolog (mouse)
hsa-miR-607	1	0	1	1	1	1	NEO1	neogenin 1
hsa-miR-607	1	0	1	0	1	1	AKAP13	A kinase (PRKA) anchor protein 13
hsa-miR-607	0	0	1	1	1	1	ACO1	aconitase 1, soluble
hsa-miR-607	1	0	1	1	1	1	MYO5A	myosin VA (heavy chain 12, myoxin)
hsa-miR-607	1	0	1	1	1	1	LIMA1	LIM domain and actin binding 1
hsa-miR-607	1	0	1	1	1	1	PDLIM5	PDZ and LIM domain 5
hsa-miR-607	0	0	1	1	1	1	STAU1	staufen, RNA binding protein, homolog 1 (Drosophila)
hsa-miR-607	1	0	1	1	1	1	HNRNPK	heterogeneous nuclear ribonucleoprotein K
hsa-miR-607	0	0	1	1	0	0	HLA-DMB	major histocompatibility complex, class II, DM beta
hsa-miR-607	0	0	1	1	1	1	HLA-DQA1	major histocompatibility complex, class II, DQ alpha 1
hsa-miR-607	0	0	1	1	0	0	SLC22A8	solute carrier family 22 (organic anion transporter), member 8
hsa-miR-607	0	0	1	1	1	1	HNRNPM	heterogeneous nuclear ribonucleoprotein M
hsa-miR-607	0	0	1	1	1	1	ELOVL5	ELOVL fatty acid elongase 5
hsa-miR-607	1	0	1	0	1	1	ADD3	adducin 3 (gamma)
hsa-miR-607	0	0	1	0	1	1	TGFB2	transforming growth factor, beta 2
hsa-miR-607	1	0	1	1	1	1	TEAD1	TEA domain family member 1 (SV40 transcriptional enhancer factor)
hsa-miR-607	1	0	1	1	0	0	PPP2R5D	protein phosphatase 2, regulatory subunit B', delta
hsa-miR-607	0	0	1	1	0	0	TRIM27	tripartite motif containing 27
hsa-miR-607	1	0	1	1	1	1	GULP1	GULP, engulfment adaptor PTB domain containing 1
hsa-miR-607	1	0	1	1	1	1	ZFX	zinc finger protein, X-linked
hsa-miR-607	1	0	1	1	1	1	PHLDB2	pleckstrin homology-like domain, family B, member 2
hsa-miR-607	0	0	1	1	1	1	PLD1	phospholipase D1, phosphatidylcholine-specific
hsa-miR-607	0	0	1	1	1	1	SPP1	secreted phosphoprotein 1
hsa-miR-607	1	0	1	0	1	1	PDE7B	phosphodiesterase 7B
hsa-miR-607	1	0	1	1	1	1	APC	adenomatous polyposis coli
hsa-miR-607	1	0	1	1	1	1	PICALM	phosphatidylinositol binding clathrin assembly protein
hsa-miR-607	1	0	1	0	1	1	FYB	FYN binding protein
hsa-miR-607	1	0	1	1	1	1	SYNJ1	synaptojanin 1
hsa-miR-607	1	0	1	0	1	1	PDE4D	phosphodiesterase 4D, cAMP-specific
hsa-miR-607	0	0	1	1	1	1	MFSD11	major facilitator superfamily domain containing 11
hsa-miR-607	1	0	1	1	1	1	MYT1L	myelin transcription factor 1-like
hsa-miR-607	1	0	1	0	1	1	CELF2	CUGBP, Elav-like family member 2
hsa-miR-607	1	0	1	0	0	0	MAP3K1	mitogen-activated protein kinase kinase kinase 1, E3 ubiquitin protein ligase
hsa-miR-607	0	0	1	1	1	1	UBE4B	ubiquitination factor E4B
hsa-miR-607	0	0	1	1	1	1	SLC16A7	solute carrier family 16, member 7 (monocarboxylic acid transporter 2)
hsa-miR-607	0	0	1	1	1	1	SLIT2	slit homolog 2 (Drosophila)
hsa-miR-607	1	0	1	1	1	1	MBNL2	muscleblind-like splicing regulator 2
hsa-miR-607	1	0	1	1	1	1	ERLIN1	ER lipid raft associated 1
hsa-miR-607	0	0	1	1	1	1	LYPLA1	lysophospholipase I
hsa-miR-607	0	0	1	1	1	1	BBS9	Bardet-Biedl syndrome 9
hsa-miR-607	0	0	1	1	1	1	FHL1	four and a half LIM domains 1
hsa-miR-607	0	0	1	1	1	1	SH2D1A	SH2 domain containing 1A
hsa-miR-607	1	0	1	0	1	1	CD164	CD164 molecule, sialomucin
hsa-miR-607	0	0	1	1	0	0	RBM5	RNA binding motif protein 5
hsa-miR-607	1	0	1	1	1	1	LRRFIP1	leucine rich repeat (in FLII) interacting protein 1
hsa-miR-607	0	0	1	1	0	0	ABRACL	ABRA C-terminal like
hsa-miR-607	1	0	1	0	1	1	CDK14	cyclin-dependent kinase 14
hsa-miR-607	1	0	1	1	1	1	CAB39	calcium binding protein 39
hsa-miR-607	1	0	1	1	1	1	SORBS1	sorbin and SH3 domain containing 1
hsa-miR-607	1	0	1	1	1	1	AASDHPPT	aminoadipate-semialdehyde dehydrogenase-phosphopantetheinyl transferase
hsa-miR-607	0	0	1	0	1	1	CLEC5A	C-type lectin domain family 5, member A
hsa-miR-607	1	0	1	1	1	1	C14orf129	chromosome 14 open reading frame 129
hsa-miR-607	1	0	1	1	1	1	USP15	ubiquitin specific peptidase 15
hsa-miR-607	1	0	1	0	0	0	PRPF40A	PRP40 pre-mRNA processing factor 40 homolog A (S. cerevisiae)
hsa-miR-607	1	0	1	1	1	1	ANKRD13A	ankyrin repeat domain 13A
hsa-miR-607	0	0	1	0	1	1	PDP1	pyruvate dehyrogenase phosphatase catalytic subunit 1
hsa-miR-607	1	0	1	1	1	1	AGPAT3	1-acylglycerol-3-phosphate O-acyltransferase 3
hsa-miR-607	0	0	1	1	1	1	FAM114A2	family with sequence similarity 114, member A2
hsa-miR-607	1	0	1	1	1	1	TMEM242	transmembrane protein 242
hsa-miR-607	1	0	1	1	1	1	STXBP6	syntaxin binding protein 6 (amisyn)
hsa-miR-607	1	0	1	1	1	1	TLK2	tousled-like kinase 2
hsa-miR-607	0	0	1	1	0	0	GLT8D1	glycosyltransferase 8 domain containing 1
hsa-miR-607	1	0	1	1	1	1	BCL2L13	BCL2-like 13 (apoptosis facilitator)
hsa-miR-607	0	0	1	0	1	1	SLC38A4	solute carrier family 38, member 4
hsa-miR-607	0	0	1	0	0	0	BPESC1	blepharophimosis, epicanthus inversus and ptosis, candidate 1 (non-protein coding)
hsa-miR-607	1	0	1	1	1	1	CCNL1	cyclin L1
hsa-miR-607	1	0	1	1	1	1	EIF4A2	eukaryotic translation initiation factor 4A2
hsa-miR-607	1	0	1	1	1	1	KCNMB2	potassium large conductance calcium-activated channel, subfamily M, beta member 2
hsa-miR-607	0	0	1	1	1	1	ARHGAP15	Rho GTPase activating protein 15
hsa-miR-607	0	0	1	1	1	1	CD28	CD28 molecule
hsa-miR-607	1	0	1	1	1	1	C21orf91	chromosome 21 open reading frame 91
hsa-miR-607	1	0	1	1	1	1	CALD1	caldesmon 1
hsa-miR-607	0	0	1	1	1	1	DOCK10	dedicator of cytokinesis 10
hsa-miR-607	1	0	1	1	1	1	ELF2	E74-like factor 2 (ets domain transcription factor)
hsa-miR-607	1	0	1	0	1	1	PARP11	poly (ADP-ribose) polymerase family, member 11
hsa-miR-607	0	0	1	1	1	1	GOLGA6A	golgin A6 family, member A
hsa-miR-607	1	0	1	0	1	1	TRPS1	trichorhinophalangeal syndrome I
hsa-miR-607	0	0	1	1	1	1	ZNF331	zinc finger protein 331
hsa-miR-607	1	0	1	1	1	1	PUM2	pumilio homolog 2 (Drosophila)
hsa-miR-607	0	0	1	1	1	1	ASUN	asunder, spermatogenesis regulator homolog (Drosphila)
hsa-miR-607	0	0	1	0	1	1	ERBB2IP	erbb2 interacting protein
hsa-miR-607	1	0	1	1	1	1	VEGFA	vascular endothelial growth factor A
hsa-miR-607	1	0	1	1	1	1	CPEB1	cytoplasmic polyadenylation element binding protein 1
hsa-miR-607	0	0	1	1	0	0	TTTY7	testis-specific transcript, Y-linked 7 (non-protein coding)
hsa-miR-607	0	0	1	1	1	1	RERG	RAS-like, estrogen-regulated, growth inhibitor
hsa-miR-607	1	0	1	1	1	1	BIVM	basic, immunoglobulin-like variable motif containing
hsa-miR-607	0	0	1	1	1	1	MFSD1	major facilitator superfamily domain containing 1
hsa-miR-607	0	0	1	1	1	1	SLC6A15	solute carrier family 6 (neutral amino acid transporter), member 15
hsa-miR-607	1	0	1	1	1	1	ATAD1	ATPase family, AAA domain containing 1
hsa-miR-607	0	0	1	1	0	0	SPATA22	spermatogenesis associated 22
hsa-miR-607	1	0	1	0	1	1	WIPF2	WAS/WASL interacting protein family, member 2
hsa-miR-607	1	0	1	1	1	1	LARP4	La ribonucleoprotein domain family, member 4
hsa-miR-607	0	0	1	0	0	0	NBPF10	neuroblastoma breakpoint family, member 10
hsa-miR-607	0	0	1	1	1	1	PARK2	parkinson protein 2, E3 ubiquitin protein ligase (parkin)
hsa-miR-607	1	0	1	1	1	1	PDE8A	phosphodiesterase 8A
hsa-miR-607	0	0	1	0	1	1	MYO3B	myosin IIIB
hsa-miR-607	0	0	1	1	1	1	RAPGEF6	Rap guanine nucleotide exchange factor (GEF) 6
hsa-miR-607	1	0	1	1	1	1	MAGI1	membrane associated guanylate kinase, WW and PDZ domain containing 1
hsa-miR-607	0	0	1	0	0	0	MIR155HG	MIR155 host gene (non-protein coding)
hsa-miR-607	1	0	1	1	1	1	NTRK2	neurotrophic tyrosine kinase, receptor, type 2
hsa-miR-607	1	0	1	1	1	1	PSIP1	PC4 and SFRS1 interacting protein 1
hsa-miR-607	1	0	1	0	1	1	PPP1R12A	protein phosphatase 1, regulatory subunit 12A
hsa-miR-607	1	0	1	1	1	1	ASB8	ankyrin repeat and SOCS box containing 8
hsa-miR-607	1	0	1	1	0	0	FOXP2	forkhead box P2
hsa-miR-607	1	0	1	1	1	1	WAPAL	wings apart-like homolog (Drosophila)
hsa-miR-607	0	0	1	1	1	1	CHODL	chondrolectin
hsa-miR-607	0	0	1	1	0	0	SVIP	small VCP/p97-interacting protein
hsa-miR-607	1	0	1	0	1	1	IL1RAP	interleukin 1 receptor accessory protein
hsa-miR-607	0	0	1	1	1	1	ANKRD36B	ankyrin repeat domain 36B
hsa-miR-607	1	0	1	1	1	1	AFF2	AF4/FMR2 family, member 2
hsa-miR-607	1	0	1	0	1	1	DICER1	dicer 1, ribonuclease type III
hsa-miR-607	1	0	1	1	1	1	SUCO	SUN domain containing ossification factor
hsa-miR-607	1	0	1	1	1	1	PFKFB3	6-phosphofructo-2-kinase/fructose-2,6-biphosphatase 3
hsa-miR-607	1	0	1	1	1	1	SLAMF6	SLAM family member 6
hsa-miR-607	1	0	1	1	1	1	NRXN3	neurexin 3
hsa-miR-607	0	0	1	0	0	0	CASC2	cancer susceptibility candidate 2 (non-protein coding)
hsa-miR-607	1	0	1	1	1	1	EMID2	EMI domain containing 2
hsa-miR-607	0	0	1	1	1	1	TRDN	triadin
hsa-miR-607	0	0	1	1	1	1	PHACTR3	phosphatase and actin regulator 3
hsa-miR-607	1	0	1	1	1	1	SYT14	synaptotagmin XIV
hsa-miR-607	1	0	1	1	1	1	PPP1R9A	protein phosphatase 1, regulatory subunit 9A
hsa-miR-607	0	0	1	1	1	1	ESRP1	epithelial splicing regulatory protein 1
hsa-miR-607	1	0	1	0	1	1	NFAT5	nuclear factor of activated T-cells 5, tonicity-responsive
hsa-miR-607	0	0	1	1	1	1	PARP16	poly (ADP-ribose) polymerase family, member 16
hsa-miR-607	0	0	1	0	0	0	TUG1	taurine upregulated 1 (non-protein coding)
hsa-miR-607	0	0	1	1	1	1	BANK1	B-cell scaffold protein with ankyrin repeats 1
hsa-miR-607	1	0	1	1	1	1	BCAP29	B-cell receptor-associated protein 29
hsa-miR-607	0	0	1	1	0	0	AP4B1	adaptor-related protein complex 4, beta 1 subunit
hsa-miR-607	1	0	1	1	1	1	NIP7	nuclear import 7 homolog (S. cerevisiae)
hsa-miR-607	1	0	1	1	1	1	ARHGAP17	Rho GTPase activating protein 17
hsa-miR-607	0	0	1	1	1	1	STOX2	storkhead box 2
hsa-miR-607	1	0	1	1	1	1	RIC8B	resistance to inhibitors of cholinesterase 8 homolog B (C. elegans)
hsa-miR-607	1	0	1	1	1	1	EIF2C1	eukaryotic translation initiation factor 2C, 1
hsa-miR-607	1	0	1	1	1	1	PTBP3	polypyrimidine tract binding protein 3
hsa-miR-607	0	0	1	1	1	1	VPS52	vacuolar protein sorting 52 homolog (S. cerevisiae)
hsa-miR-607	1	0	1	0	1	1	SPATS2L	spermatogenesis associated, serine-rich 2-like
hsa-miR-607	1	0	1	1	1	1	ACER3	alkaline ceramidase 3
hsa-miR-607	0	0	1	1	1	1	EXOC6	exocyst complex component 6
hsa-miR-607	1	0	1	1	1	1	INSIG2	insulin induced gene 2
hsa-miR-607	1	0	1	1	1	1	C12orf23	chromosome 12 open reading frame 23
hsa-miR-607	1	0	1	1	1	1	NINL	ninein-like
hsa-miR-607	0	0	1	0	0	0	SOX2-OT	SOX2 overlapping transcript (non-protein coding)
hsa-miR-607	0	0	1	0	0	0	DUXAP10	double homeobox A pseudogene 10
hsa-miR-607	0	0	1	1	0	0	GMEB1	glucocorticoid modulatory element binding protein 1
hsa-miR-607	0	0	1	1	0	0	POLR3E	polymerase (RNA) III (DNA directed) polypeptide E (80kD)
hsa-miR-607	0	0	1	1	1	1	C5orf42	chromosome 5 open reading frame 42
hsa-miR-607	1	0	1	1	1	1	PHF20L1	PHD finger protein 20-like 1
hsa-miR-607	0	0	1	0	0	0	LOC284561	uncharacterized LOC284561
hsa-miR-607	1	0	1	1	1	1	RAB11FIP5	RAB11 family interacting protein 5 (class I)
hsa-miR-607	1	0	1	1	1	1	BAZ2A	bromodomain adjacent to zinc finger domain, 2A
hsa-miR-607	1	0	1	1	1	1	DERL1	derlin 1
hsa-miR-607	1	0	1	0	1	1	C14orf101	chromosome 14 open reading frame 101
hsa-miR-607	1	0	1	1	1	1	SLC35A3	solute carrier family 35 (UDP-N-acetylglucosamine (UDP-GlcNAc) transporter), member A3
hsa-miR-607	1	0	1	0	1	1	MYO5B	myosin VB
hsa-miR-607	0	0	1	1	1	1	CNOT8	CCR4-NOT transcription complex, subunit 8
hsa-miR-607	1	0	1	1	1	1	DLC1	deleted in liver cancer 1
hsa-miR-607	1	0	1	1	1	1	TNRC6A	trinucleotide repeat containing 6A
hsa-miR-607	1	0	1	1	1	1	YPEL5	yippee-like 5 (Drosophila)
hsa-miR-607	1	0	1	1	1	1	NAA30	N(alpha)-acetyltransferase 30, NatC catalytic subunit
hsa-miR-607	0	0	1	1	0	0	NDUFAF5	NADH dehydrogenase (ubiquinone) complex I, assembly factor 5
hsa-miR-607	0	0	1	1	1	1	DENND2D	DENN/MADD domain containing 2D
hsa-miR-607	0	0	1	0	0	0	LINC00340	long intergenic non-protein coding RNA 340
hsa-miR-607	0	0	1	1	1	1	ZBBX	zinc finger, B-box domain containing
hsa-miR-607	0	0	1	1	1	1	ADGB	androglobin
hsa-miR-607	1	0	1	1	1	1	RNF185	ring finger protein 185
hsa-miR-607	0	0	1	1	1	1	PLEKHS1	pleckstrin homology domain containing, family S member 1
hsa-miR-607	0	0	1	1	1	1	DUSP14	dual specificity phosphatase 14
hsa-miR-607	0	0	1	1	1	1	SPRTN	SprT-like N-terminal domain
hsa-miR-607	0	0	1	1	0	0	C15orf23	chromosome 15 open reading frame 23
hsa-miR-607	1	0	1	1	1	1	FAM53C	family with sequence similarity 53, member C
hsa-miR-607	0	0	1	1	1	1	RNF146	ring finger protein 146
hsa-miR-607	1	0	1	1	1	1	MARK1	MAP/microtubule affinity-regulating kinase 1
hsa-miR-607	0	0	1	1	1	1	VWDE	von Willebrand factor D and EGF domains
hsa-miR-607	0	0	1	0	1	1	TWSG1	twisted gastrulation homolog 1 (Drosophila)
hsa-miR-607	0	0	1	1	1	1	NETO2	neuropilin (NRP) and tolloid (TLL)-like 2
hsa-miR-607	0	0	1	1	1	1	DTL	denticleless E3 ubiquitin protein ligase homolog (Drosophila)
hsa-miR-607	1	0	1	1	1	1	SLC38A1	solute carrier family 38, member 1
hsa-miR-607	1	0	1	1	1	1	STRBP	spermatid perinuclear RNA binding protein
hsa-miR-607	1	0	1	1	1	1	SLAIN1	SLAIN motif family, member 1
hsa-miR-607	0	0	1	0	0	0	KIAA0664L3	KIAA0664-like 3
hsa-miR-607	0	0	1	1	1	1	PRR5L	proline rich 5 like
hsa-miR-607	0	0	1	1	1	1	C8orf46	chromosome 8 open reading frame 46
hsa-miR-607	1	0	1	0	1	1	AP1G1	adaptor-related protein complex 1, gamma 1 subunit
hsa-miR-607	1	0	1	1	1	1	HERPUD2	HERPUD family member 2
hsa-miR-607	0	0	1	1	1	1	AGXT2	alanine--glyoxylate aminotransferase 2
hsa-miR-607	0	0	1	1	1	1	SLCO1B3	solute carrier organic anion transporter family, member 1B3
hsa-miR-607	1	0	1	1	1	1	DHX15	DEAH (Asp-Glu-Ala-His) box polypeptide 15
hsa-miR-607	1	0	1	1	1	1	ZNF664	zinc finger protein 664
hsa-miR-607	0	0	1	0	0	0	JPX	JPX transcript, XIST activator (non-protein coding)
hsa-miR-607	1	0	1	1	1	1	CLCN5	chloride channel, voltage-sensitive 5
hsa-miR-607	1	0	1	1	1	1	TPM3	tropomyosin 3
hsa-miR-607	1	0	1	1	1	1	ZBTB10	zinc finger and BTB domain containing 10
hsa-miR-607	0	0	1	0	1	1	THAP6	THAP domain containing 6
hsa-miR-607	0	0	1	0	0	0	LOC100125918	uncharacterized LOC100125918
hsa-miR-607	1	0	1	1	1	1	MPP7	membrane protein, palmitoylated 7 (MAGUK p55 subfamily member 7)
hsa-miR-607	0	0	1	1	1	1	MS4A14	membrane-spanning 4-domains, subfamily A, member 14
hsa-miR-607	1	0	1	0	1	1	NCAM1	neural cell adhesion molecule 1
hsa-miR-607	0	0	1	0	1	1	CHURC1	churchill domain containing 1
hsa-miR-607	1	0	1	1	1	1	IST1	increased sodium tolerance 1 homolog (yeast)
hsa-miR-607	0	0	1	1	1	1	ZBTB26	zinc finger and BTB domain containing 26
hsa-miR-607	1	0	1	1	1	1	C6orf89	chromosome 6 open reading frame 89
hsa-miR-607	0	0	1	0	1	1	CCDC68	coiled-coil domain containing 68
hsa-miR-607	0	0	1	1	0	0	MRPL46	mitochondrial ribosomal protein L46
hsa-miR-607	1	0	1	1	1	1	BLCAP	bladder cancer associated protein
hsa-miR-607	0	0	1	1	1	1	PDZRN3	PDZ domain containing ring finger 3
hsa-miR-607	1	0	1	1	1	1	CNOT4	CCR4-NOT transcription complex, subunit 4
hsa-miR-607	1	0	1	1	1	1	MYO1B	myosin IB
hsa-miR-607	1	0	1	1	1	1	UXS1	UDP-glucuronate decarboxylase 1
hsa-miR-607	0	0	1	1	1	1	CAMKV	CaM kinase-like vesicle-associated
hsa-miR-607	0	0	1	1	0	0	LGR5	leucine-rich repeat containing G protein-coupled receptor 5
hsa-miR-607	0	0	1	0	1	1	CADM1	cell adhesion molecule 1
hsa-miR-607	1	0	1	1	1	1	STXBP5	syntaxin binding protein 5 (tomosyn)
hsa-miR-607	0	0	1	0	0	0	LOC152225	uncharacterized LOC152225
hsa-miR-607	0	0	1	1	1	1	STBD1	starch binding domain 1
hsa-miR-607	0	0	1	0	1	1	TMSB15B	thymosin beta 15B
hsa-miR-607	0	0	1	1	1	1	MAPK10	mitogen-activated protein kinase 10
hsa-miR-607	0	0	1	1	1	1	DYNC1I1	dynein, cytoplasmic 1, intermediate chain 1
hsa-miR-607	1	0	1	1	1	1	FRY	furry homolog (Drosophila)
hsa-miR-607	1	0	1	1	1	1	AMMECR1	Alport syndrome, mental retardation, midface hypoplasia and elliptocytosis chromosomal region gene 1
hsa-miR-607	1	0	1	1	1	1	SUPT16H	suppressor of Ty 16 homolog (S. cerevisiae)
hsa-miR-607	1	0	1	1	1	1	FBXW2	F-box and WD repeat domain containing 2
hsa-miR-607	0	0	1	1	1	1	PTGR1	prostaglandin reductase 1
hsa-miR-607	0	0	1	0	0	0	KIAA1430	KIAA1430
hsa-miR-607	1	0	1	1	1	1	GNG2	guanine nucleotide binding protein (G protein), gamma 2
hsa-miR-607	0	0	1	1	0	0	PLTP	phospholipid transfer protein
hsa-miR-607	0	0	1	1	0	0	APOBEC3G	apolipoprotein B mRNA editing enzyme, catalytic polypeptide-like 3G
hsa-miR-607	0	0	1	0	1	1	SSPN	sarcospan
hsa-miR-607	1	0	1	1	1	1	GCFC1	GC-rich sequence DNA-binding factor 1
hsa-miR-607	0	0	1	1	0	0	FNTB	farnesyltransferase, CAAX box, beta
hsa-miR-607	0	0	1	1	1	1	PRKRA	protein kinase, interferon-inducible double stranded RNA dependent activator
hsa-miR-607	1	0	1	1	1	1	DZIP1	DAZ interacting protein 1
hsa-miR-607	0	0	1	1	1	1	SLC16A1	solute carrier family 16, member 1 (monocarboxylic acid transporter 1)
hsa-miR-607	0	0	1	0	0	0	CXXC1P1	CXXC finger protein 1 pseudogene 1
hsa-miR-607	1	0	1	1	1	1	CTNNA1	catenin (cadherin-associated protein), alpha 1, 102kDa
hsa-miR-607	1	0	1	1	1	1	BANP	BTG3 associated nuclear protein
hsa-miR-607	1	0	1	1	1	1	C11orf57	chromosome 11 open reading frame 57
hsa-miR-607	1	0	1	1	1	1	RCN1	reticulocalbin 1, EF-hand calcium binding domain
hsa-miR-607	0	0	1	1	1	1	ACTR8	ARP8 actin-related protein 8 homolog (yeast)
hsa-miR-607	0	0	1	0	0	0	PART1	prostate androgen-regulated transcript 1 (non-protein coding)
hsa-miR-607	1	0	1	0	1	1	ARL6IP6	ADP-ribosylation-like factor 6 interacting protein 6
hsa-miR-607	0	0	1	1	1	1	RBM25	RNA binding motif protein 25
hsa-miR-607	0	0	1	1	1	1	NMD3	NMD3 homolog (S. cerevisiae)
hsa-miR-607	1	0	1	1	1	1	NMT2	N-myristoyltransferase 2
hsa-miR-607	0	0	1	1	1	1	TMEM170A	transmembrane protein 170A
hsa-miR-607	1	0	1	1	1	1	ARHGEF7	Rho guanine nucleotide exchange factor (GEF) 7
hsa-miR-607	0	0	1	1	1	1	MOBP	myelin-associated oligodendrocyte basic protein
hsa-miR-607	1	0	1	1	1	1	ANKRD46	ankyrin repeat domain 46
hsa-miR-607	1	0	1	1	1	1	CNEP1R1	CTD nuclear envelope phosphatase 1 regulatory subunit 1
hsa-miR-607	1	0	1	0	1	1	FAM129A	family with sequence similarity 129, member A
hsa-miR-607	0	0	1	0	1	1	NBPF3	neuroblastoma breakpoint family, member 3
hsa-miR-607	0	0	1	0	0	0	LOC284577	uncharacterized LOC284577
hsa-miR-607	0	0	1	0	0	0	LOC730101	uncharacterized LOC730101
hsa-miR-607	1	0	1	1	1	1	ZC3H11A	zinc finger CCCH-type containing 11A
hsa-miR-607	1	0	1	0	1	1	STC2	stanniocalcin 2
hsa-miR-607	0	0	1	1	1	1	CDKN2AIP	CDKN2A interacting protein
hsa-miR-607	0	0	1	1	1	1	ZMYM1	zinc finger, MYM-type 1
hsa-miR-607	1	0	1	1	1	1	GAPVD1	GTPase activating protein and VPS9 domains 1
hsa-miR-607	0	0	1	0	0	0	OTUD1	OTU domain containing 1
hsa-miR-607	0	0	1	1	0	0	ASCC1	activating signal cointegrator 1 complex subunit 1
hsa-miR-607	1	0	1	0	1	1	COL21A1	collagen, type XXI, alpha 1
hsa-miR-607	0	0	1	0	0	0	LOC643327	uncharacterized LOC643327
hsa-miR-607	1	0	1	0	1	1	THRB	thyroid hormone receptor, beta
hsa-miR-607	1	0	1	0	1	1	KBTBD8	kelch repeat and BTB (POZ) domain containing 8
hsa-miR-607	1	0	1	1	1	1	SLC30A6	solute carrier family 30 (zinc transporter), member 6
hsa-miR-607	0	0	1	1	0	0	NACA	nascent polypeptide-associated complex alpha subunit
hsa-miR-607	0	0	1	1	1	1	SC5DL	sterol-C5-desaturase (ERG3 delta-5-desaturase homolog, S. cerevisiae)-like
hsa-miR-607	0	0	1	1	1	1	EXTL2	exostoses (multiple)-like 2
hsa-miR-607	0	0	1	1	0	0	TCEANC	transcription elongation factor A (SII) N-terminal and central domain containing
hsa-miR-607	1	0	1	1	1	1	RPL22	ribosomal protein L22
hsa-miR-607	0	0	1	0	1	1	TNFAIP8	tumor necrosis factor, alpha-induced protein 8
hsa-miR-607	0	0	1	1	0	0	PRKRIP1	PRKR interacting protein 1 (IL11 inducible)
hsa-miR-607	1	0	1	1	1	1	KL	klotho
hsa-miR-607	0	0	1	0	0	0	LOC400680	uncharacterized LOC400680
hsa-miR-607	1	0	1	1	1	1	POU2F3	POU class 2 homeobox 3
hsa-miR-607	0	0	1	1	1	1	PPFIBP2	PTPRF interacting protein, binding protein 2 (liprin beta 2)
hsa-miR-607	1	0	1	1	1	1	GOLGA8B	golgin A8 family, member B
hsa-miR-607	0	0	1	0	1	1	GCFC2	GC-rich sequence DNA-binding factor 2
hsa-miR-607	0	0	1	1	1	1	CBWD5	COBW domain containing 5
hsa-miR-607	0	0	1	0	0	0	LOC284385	uncharacterized LOC284385
hsa-miR-607	1	0	1	1	1	1	ZCCHC2	zinc finger, CCHC domain containing 2
hsa-miR-607	1	0	1	1	0	0	ENTPD1	ectonucleoside triphosphate diphosphohydrolase 1
hsa-miR-607	0	0	1	1	1	1	FAM76A	family with sequence similarity 76, member A
hsa-miR-607	1	0	1	1	1	1	LARP1B	La ribonucleoprotein domain family, member 1B
hsa-miR-607	0	0	1	1	1	1	CPXCR1	CPX chromosome region, candidate 1
hsa-miR-607	0	0	1	0	0	0	GTF2IP1	general transcription factor IIi, pseudogene 1
hsa-miR-607	0	0	1	0	1	1	MYLK4	myosin light chain kinase family, member 4
hsa-miR-607	1	0	1	0	1	1	UNC5D	unc-5 homolog D (C. elegans)
hsa-miR-607	0	0	1	1	0	0	EFHB	EF-hand domain family, member B
hsa-miR-607	1	0	1	1	1	1	ZMAT3	zinc finger, matrin-type 3
hsa-miR-607	0	0	1	1	1	1	GPR128	G protein-coupled receptor 128
hsa-miR-607	0	0	1	1	0	0	KIAA0146	KIAA0146
hsa-miR-607	0	0	1	1	1	1	ZDHHC15	zinc finger, DHHC-type containing 15
hsa-miR-607	1	0	1	1	1	1	PXN	paxillin
hsa-miR-607	1	0	1	1	1	1	ZBTB4	zinc finger and BTB domain containing 4
hsa-miR-607	0	0	1	1	1	1	RNF103	ring finger protein 103
hsa-miR-607	0	0	1	1	1	1	DNAJC24	DnaJ (Hsp40) homolog, subfamily C, member 24
hsa-miR-607	1	0	1	1	1	1	MDGA2	MAM domain containing glycosylphosphatidylinositol anchor 2
hsa-miR-607	1	0	1	1	1	1	EGLN3	egl nine homolog 3 (C. elegans)
hsa-miR-607	0	0	1	0	0	0	MORN2	MORN repeat containing 2
hsa-miR-607	1	0	1	0	1	1	KCNK2	potassium channel, subfamily K, member 2
hsa-miR-607	0	0	1	1	1	1	EXD1	exonuclease 3'-5' domain containing 1
hsa-miR-607	0	0	1	1	1	1	TMEM59	transmembrane protein 59
hsa-miR-607	0	0	1	0	0	0	LGALS17A	Charcot-Leyden crystal protein pseudogene
hsa-miR-607	0	0	1	1	1	1	FAM19A2	family with sequence similarity 19 (chemokine (C-C motif)-like), member A2
hsa-miR-607	0	0	1	0	1	1	CWC22	CWC22 spliceosome-associated protein homolog (S. cerevisiae)
hsa-miR-607	0	0	1	0	0	0	LOC650368	asparagine-linked glycosylation 1-like pseudogene
hsa-miR-607	0	0	1	1	0	0	LIX1L	Lix1 homolog (mouse)-like
hsa-miR-607	1	0	1	1	1	1	EPAS1	endothelial PAS domain protein 1
hsa-miR-607	1	0	1	0	1	1	WDR82	WD repeat domain 82
hsa-miR-607	0	0	1	0	0	0	LOC100133029	sirtuin 5 pseudogene
hsa-miR-607	0	0	1	1	1	1	PKP4	plakophilin 4
hsa-miR-607	1	0	1	0	1	1	DCUN1D4	DCN1, defective in cullin neddylation 1, domain containing 4 (S. cerevisiae)
hsa-miR-607	1	0	1	1	1	1	FAM122B	family with sequence similarity 122B
hsa-miR-607	1	0	1	1	1	1	KIF21A	kinesin family member 21A
hsa-miR-607	1	0	1	1	1	1	XPO1	exportin 1 (CRM1 homolog, yeast)
hsa-miR-607	1	0	1	1	1	1	C17orf85	chromosome 17 open reading frame 85
hsa-miR-607	0	0	1	0	0	0	TMEM232	transmembrane protein 232
hsa-miR-607	0	0	1	1	0	0	GABRA2	gamma-aminobutyric acid (GABA) A receptor, alpha 2
hsa-miR-607	1	0	1	1	1	1	DENND5B	DENN/MADD domain containing 5B
hsa-miR-607	0	0	1	1	1	1	MKX	mohawk homeobox
hsa-miR-607	1	0	1	0	0	0	MSL1	male-specific lethal 1 homolog (Drosophila)
hsa-miR-607	0	0	1	1	1	1	PLOD2	procollagen-lysine, 2-oxoglutarate 5-dioxygenase 2
hsa-miR-607	0	0	1	1	0	0	ANKHD1-EIF4EBP3	ANKHD1-EIF4EBP3 readthrough
hsa-miR-607	0	0	1	1	0	0	UBR2	ubiquitin protein ligase E3 component n-recognin 2
hsa-miR-607	0	0	1	1	0	0	LOC440434	aminopeptidase puromycin sensitive pseudogene
hsa-miR-607	1	0	1	1	1	1	DPY19L3	dpy-19-like 3 (C. elegans)
hsa-miR-607	1	0	1	1	1	1	TP53INP1	tumor protein p53 inducible nuclear protein 1
hsa-miR-607	1	0	1	1	1	1	MACROD2	MACRO domain containing 2
hsa-miR-607	1	0	1	1	0	0	UBN2	ubinuclein 2
hsa-miR-607	1	0	1	1	1	1	DCTN4	dynactin 4 (p62)
hsa-miR-607	0	0	1	1	0	0	FSIP2	fibrous sheath interacting protein 2
hsa-miR-607	0	0	1	1	1	1	MORF4L2	mortality factor 4 like 2
hsa-miR-607	1	0	1	1	0	0	ATXN7L3	ataxin 7-like 3
hsa-miR-607	1	0	1	1	1	1	LIN9	lin-9 homolog (C. elegans)
hsa-miR-607	1	0	1	1	1	1	PLEKHB2	pleckstrin homology domain containing, family B (evectins) member 2
hsa-miR-607	1	0	1	1	1	1	SACM1L	SAC1 suppressor of actin mutations 1-like (yeast)
hsa-miR-607	0	0	1	1	1	1	C18orf54	chromosome 18 open reading frame 54
hsa-miR-607	0	0	1	1	1	1	ZFYVE28	zinc finger, FYVE domain containing 28
hsa-miR-607	1	0	1	1	1	1	DMXL1	Dmx-like 1
hsa-miR-607	1	0	1	1	1	1	LRP2BP	LRP2 binding protein
hsa-miR-607	0	0	1	1	1	1	PCDH15	protocadherin-related 15
hsa-miR-607	1	0	1	1	1	1	CLIP1	CAP-GLY domain containing linker protein 1
hsa-miR-607	1	0	1	1	1	1	CLTC	clathrin, heavy chain (Hc)
hsa-miR-607	1	0	1	1	0	0	MRVI1	murine retrovirus integration site 1 homolog
hsa-miR-607	1	0	1	1	1	1	CTNNA2	catenin (cadherin-associated protein), alpha 2
hsa-miR-607	0	0	1	1	0	0	GSTM5	glutathione S-transferase mu 5
hsa-miR-607	1	0	1	1	1	1	UBE3C	ubiquitin protein ligase E3C
hsa-miR-607	0	0	1	1	1	1	ERI2	ERI1 exoribonuclease family member 2
hsa-miR-607	0	0	1	1	1	1	PDIA6	protein disulfide isomerase family A, member 6
hsa-miR-607	1	0	1	1	1	1	SLC26A9	solute carrier family 26, member 9
hsa-miR-607	1	0	1	0	1	1	YAF2	YY1 associated factor 2
hsa-miR-607	0	0	1	1	1	1	PIN4	protein (peptidylprolyl cis/trans isomerase) NIMA-interacting, 4 (parvulin)
hsa-miR-607	1	0	1	1	1	1	CXorf23	chromosome X open reading frame 23
hsa-miR-607	1	0	1	1	1	1	R3HDM1	R3H domain containing 1
hsa-miR-607	0	0	1	0	0	0	ERVFRD-2	endogenous retrovirus group FRD, member 2
hsa-miR-607	1	0	1	1	1	1	MYO1D	myosin ID
hsa-miR-607	1	0	1	0	1	1	CAPRIN1	cell cycle associated protein 1
hsa-miR-607	0	0	1	0	0	0	SHISA6	shisa homolog 6 (Xenopus laevis)
hsa-miR-607	1	0	1	0	1	1	YOD1	YOD1 OTU deubiquinating enzyme 1 homolog (S. cerevisiae)
hsa-miR-607	0	0	1	0	0	0	FAM205B	transmembrane protein C9orf144B pseudogene
hsa-miR-607	1	0	1	1	1	1	KCTD12	potassium channel tetramerisation domain containing 12
hsa-miR-607	1	0	1	0	1	1	PLSCR4	phospholipid scramblase 4
hsa-miR-607	1	0	1	1	1	1	FRYL	FRY-like
hsa-miR-607	1	0	1	0	0	0	SP7	Sp7 transcription factor
hsa-miR-607	1	0	1	1	1	1	BCAT1	branched chain amino-acid transaminase 1, cytosolic
hsa-miR-607	1	0	1	0	1	1	KPNA6	karyopherin alpha 6 (importin alpha 7)
hsa-miR-607	1	0	1	1	0	0	NBEAL1	neurobeachin-like 1
hsa-miR-607	0	0	1	1	1	1	TPK1	thiamin pyrophosphokinase 1
hsa-miR-607	0	0	1	0	0	0	LOC100129940	uncharacterized LOC100129940
hsa-miR-607	0	0	1	0	0	0	EMBP1	embigin pseudogene 1
hsa-miR-607	0	0	1	0	0	0	PINLYP	phospholipase A2 inhibitor and LY6/PLAUR domain containing
hsa-miR-607	1	0	1	1	1	1	MRFAP1	Morf4 family associated protein 1
hsa-miR-607	0	0	1	1	0	0	HEATR8	HEAT repeat containing 8
hsa-miR-607	0	0	1	1	1	1	ENPP2	ectonucleotide pyrophosphatase/phosphodiesterase 2
hsa-miR-607	1	0	1	0	1	1	RXRA	retinoid X receptor, alpha
hsa-miR-607	0	0	1	1	1	1	ZNF680	zinc finger protein 680
hsa-miR-607	1	0	1	1	1	1	RNF111	ring finger protein 111
hsa-miR-607	1	0	1	0	1	1	FMNL2	formin-like 2
hsa-miR-607	0	0	1	1	1	1	SYPL2	synaptophysin-like 2
hsa-miR-607	0	0	1	1	0	0	ZNF730	zinc finger protein 730
hsa-miR-607	0	0	1	0	0	0	AGAP9	ArfGAP with GTPase domain, ankyrin repeat and PH domain 9
hsa-miR-607	0	0	1	1	1	1	XRN2	5'-3' exoribonuclease 2
hsa-miR-607	0	0	1	1	1	1	AKTIP	AKT interacting protein
hsa-miR-607	1	0	1	1	1	1	TAP2	transporter 2, ATP-binding cassette, sub-family B (MDR/TAP)
hsa-miR-607	1	0	1	0	1	1	TMEM106B	transmembrane protein 106B
hsa-miR-607	1	0	1	1	1	1	ATL2	atlastin GTPase 2
hsa-miR-607	1	0	1	1	1	1	TRPM6	transient receptor potential cation channel, subfamily M, member 6
hsa-miR-607	0	0	1	1	0	0	FERMT1	fermitin family member 1
hsa-miR-607	1	0	1	1	1	1	TBC1D15	TBC1 domain family, member 15
hsa-miR-607	1	0	1	0	1	1	MAP3K3	mitogen-activated protein kinase kinase kinase 3
hsa-miR-607	1	0	1	1	1	1	PHTF2	putative homeodomain transcription factor 2
hsa-miR-607	0	0	1	1	1	1	PUS7L	pseudouridylate synthase 7 homolog (S. cerevisiae)-like
hsa-miR-607	1	0	1	1	1	1	NCOA1	nuclear receptor coactivator 1
hsa-miR-607	0	0	1	1	1	1	PTPN20B	protein tyrosine phosphatase, non-receptor type 20B
hsa-miR-607	0	0	1	1	1	1	PTPN20A	protein tyrosine phosphatase, non-receptor type 20A
hsa-miR-607	1	0	1	1	0	0	PRRC2B	proline-rich coiled-coil 2B
hsa-miR-607	1	0	1	1	1	1	NECAP1	NECAP endocytosis associated 1
hsa-miR-607	0	0	1	0	1	1	NEK1	NIMA (never in mitosis gene a)-related kinase 1
hsa-miR-607	0	0	1	1	0	0	NEK7	NIMA (never in mitosis gene a)-related kinase 7
hsa-miR-607	1	0	1	1	1	1	RIF1	RAP1 interacting factor homolog (yeast)
hsa-miR-607	1	0	1	1	1	1	DVL3	dishevelled, dsh homolog 3 (Drosophila)
hsa-miR-607	1	0	1	1	1	1	TAB2	TGF-beta activated kinase 1/MAP3K7 binding protein 2
hsa-miR-607	1	0	1	1	1	1	ARF6	ADP-ribosylation factor 6
hsa-miR-607	0	0	1	1	1	1	ARIH1	ariadne homolog, ubiquitin-conjugating enzyme E2 binding protein, 1 (Drosophila)
hsa-miR-607	0	0	1	1	0	0	MSH5	mutS homolog 5 (E. coli)
hsa-miR-607	0	0	1	1	0	0	SAPCD1	suppressor APC domain containing 1
hsa-miR-607	1	0	1	1	1	1	SMAP2	small ArfGAP2
hsa-miR-607	0	0	1	1	1	1	ZNF280D	zinc finger protein 280D
hsa-miR-607	1	0	1	1	1	1	SLC25A36	solute carrier family 25 (pyrimidine nucleotide carrier ), member 36
hsa-miR-607	0	0	1	1	1	1	MYO9A	myosin IXA
hsa-miR-607	1	0	1	1	1	1	GOLGA8A	golgin A8 family, member A
hsa-miR-607	0	0	1	1	0	0	WDR11	WD repeat domain 11
hsa-miR-607	1	0	1	1	1	1	NBEA	neurobeachin
hsa-miR-607	1	0	1	1	1	1	KIAA1033	KIAA1033
hsa-miR-607	1	0	1	0	1	1	CEP170	centrosomal protein 170kDa
hsa-miR-607	1	0	1	1	1	1	TFE3	transcription factor binding to IGHM enhancer 3
hsa-miR-607	1	0	1	0	1	1	FAM19A1	family with sequence similarity 19 (chemokine (C-C motif)-like), member A1
hsa-miR-607	1	0	1	0	0	0	BAHCC1	BAH domain and coiled-coil containing 1
hsa-miR-607	0	0	1	1	1	1	ARL13B	ADP-ribosylation factor-like 13B
hsa-miR-607	1	0	1	1	1	1	SLC30A8	solute carrier family 30 (zinc transporter), member 8
hsa-miR-607	0	0	1	1	1	1	ZNF277	zinc finger protein 277
hsa-miR-607	1	0	1	1	1	1	YTHDF3	YTH domain family, member 3
hsa-miR-607	1	0	1	1	1	1	TMEFF1	transmembrane protein with EGF-like and two follistatin-like domains 1
hsa-miR-607	1	0	1	1	1	1	MIER1	mesoderm induction early response 1 homolog (Xenopus laevis)
hsa-miR-607	0	0	1	1	1	1	PDE4DIP	phosphodiesterase 4D interacting protein
hsa-miR-607	0	0	1	1	1	1	ZCCHC6	zinc finger, CCHC domain containing 6
hsa-miR-607	0	0	1	0	0	0	ZNF720	zinc finger protein 720
hsa-miR-607	1	0	1	1	1	1	QTRTD1	queuine tRNA-ribosyltransferase domain containing 1
hsa-miR-607	0	0	1	1	1	1	SRSF11	serine/arginine-rich splicing factor 11
hsa-miR-607	1	0	1	1	1	1	CHMP7	charged multivesicular body protein 7
hsa-miR-607	1	0	1	1	1	1	NFX1	nuclear transcription factor, X-box binding 1
hsa-miR-607	1	0	1	0	1	1	MPP5	membrane protein, palmitoylated 5 (MAGUK p55 subfamily member 5)
hsa-miR-607	0	0	1	1	1	1	YAP1	Yes-associated protein 1
hsa-miR-607	0	0	1	0	0	0	LOC387647	patched domain containing 3 pseudogene
hsa-miR-607	0	0	1	0	1	1	CEP95	centrosomal protein 95kDa
hsa-miR-607	0	0	1	1	1	1	AMIGO2	adhesion molecule with Ig-like domain 2
hsa-miR-607	0	0	1	1	1	1	CCDC132	coiled-coil domain containing 132
hsa-miR-607	1	0	1	1	1	1	ABI3BP	ABI family, member 3 (NESH) binding protein
hsa-miR-607	1	0	1	1	1	1	SOX6	SRY (sex determining region Y)-box 6
hsa-miR-607	0	0	1	1	1	1	NARG2	NMDA receptor regulated 2
hsa-miR-607	0	0	1	1	1	1	C12orf50	chromosome 12 open reading frame 50
hsa-miR-607	1	0	1	1	1	1	CAMK4	calcium/calmodulin-dependent protein kinase IV
hsa-miR-607	1	0	1	1	1	1	BPTF	bromodomain PHD finger transcription factor
hsa-miR-607	1	0	1	1	0	0	KIAA1109	KIAA1109
hsa-miR-607	0	0	1	1	1	1	NFE2L1	nuclear factor (erythroid-derived 2)-like 1
hsa-miR-607	1	0	1	1	1	1	ANO1	anoctamin 1, calcium activated chloride channel
hsa-miR-607	0	0	1	1	1	1	KIAA1841	KIAA1841
hsa-miR-607	1	0	1	1	1	1	NRP1	neuropilin 1
hsa-miR-607	0	0	1	0	0	0	ADCY10P1	adenylate cyclase 10 (soluble) pseudogene 1
hsa-miR-607	1	0	1	1	1	1	ANP32E	acidic (leucine-rich) nuclear phosphoprotein 32 family, member E
hsa-miR-607	0	0	1	1	1	1	PCDH20	protocadherin 20
hsa-miR-607	0	0	1	1	1	1	CAND1	cullin-associated and neddylation-dissociated 1
hsa-miR-607	1	0	1	1	1	1	IL17RD	interleukin 17 receptor D
hsa-miR-607	1	0	1	1	1	1	PRPF38B	PRP38 pre-mRNA processing factor 38 (yeast) domain containing B
hsa-miR-607	1	0	1	1	1	1	ANKRD49	ankyrin repeat domain 49
hsa-miR-607	1	0	1	1	1	1	RICTOR	RPTOR independent companion of MTOR, complex 2
hsa-miR-607	1	0	1	0	1	1	KIF21B	kinesin family member 21B
hsa-miR-607	1	0	1	0	1	1	PATL1	protein associated with topoisomerase II homolog 1 (yeast)
hsa-miR-607	1	0	1	1	1	1	SET	SET nuclear oncogene
hsa-miR-607	1	0	1	1	1	1	AP1AR	adaptor-related protein complex 1 associated regulatory protein
hsa-miR-607	1	0	1	0	1	1	APOLD1	apolipoprotein L domain containing 1
hsa-miR-607	1	0	1	1	1	1	FBXL5	F-box and leucine-rich repeat protein 5
hsa-miR-607	0	0	1	1	1	1	AMOTL1	angiomotin like 1
hsa-miR-607	1	0	1	1	1	1	WDR44	WD repeat domain 44
hsa-miR-607	1	0	1	1	1	1	RNF38	ring finger protein 38
hsa-miR-607	1	0	1	1	1	1	DUSP16	dual specificity phosphatase 16
hsa-miR-607	1	0	1	1	1	1	TACC1	transforming, acidic coiled-coil containing protein 1
hsa-miR-607	1	0	1	0	1	1	BDNF	brain-derived neurotrophic factor
hsa-miR-607	1	0	1	1	1	1	CKAP2	cytoskeleton associated protein 2
hsa-miR-607	1	0	1	1	1	1	RBBP6	retinoblastoma binding protein 6
hsa-miR-607	0	0	1	0	0	0	KGFLP1	fibroblast growth factor 7 pseudogene
hsa-miR-607	1	0	1	1	1	1	SULF1	sulfatase 1
hsa-miR-607	1	0	1	1	1	1	KIAA0907	KIAA0907
hsa-miR-607	0	0	1	1	1	1	NFXL1	nuclear transcription factor, X-box binding-like 1
hsa-miR-607	1	0	1	1	1	1	BCL11A	B-cell CLL/lymphoma 11A (zinc finger protein)
hsa-miR-607	0	0	1	1	1	1	IYD	iodotyrosine deiodinase
hsa-miR-607	1	0	1	1	1	1	PBRM1	polybromo 1
hsa-miR-607	1	0	1	1	1	1	NPL	N-acetylneuraminate pyruvate lyase (dihydrodipicolinate synthase)
hsa-miR-607	0	0	1	1	1	1	ATF7IP	activating transcription factor 7 interacting protein
hsa-miR-607	1	0	1	1	1	1	CAMTA1	calmodulin binding transcription activator 1
hsa-miR-607	0	0	1	1	1	1	GCOM1	GRINL1A complex locus 1
hsa-miR-607	1	0	1	1	1	1	IQGAP2	IQ motif containing GTPase activating protein 2
hsa-miR-607	0	0	1	1	1	1	IL20	interleukin 20
hsa-miR-607	0	0	1	1	1	1	PIGG	phosphatidylinositol glycan anchor biosynthesis, class G
hsa-miR-607	1	0	1	1	1	1	NLGN4X	neuroligin 4, X-linked
hsa-miR-607	0	0	1	1	1	1	TNFRSF19	tumor necrosis factor receptor superfamily, member 19
hsa-miR-607	1	0	1	1	1	1	FGD4	FYVE, RhoGEF and PH domain containing 4
hsa-miR-607	1	0	1	0	1	1	ANKRD28	ankyrin repeat domain 28
hsa-miR-607	0	0	1	1	1	1	PAQR5	progestin and adipoQ receptor family member V
hsa-miR-607	1	0	1	0	1	1	NHS	Nance-Horan syndrome (congenital cataracts and dental anomalies)
hsa-miR-607	0	0	1	1	1	1	POTEG	POTE ankyrin domain family, member G
hsa-miR-607	1	0	1	1	1	1	ARHGAP20	Rho GTPase activating protein 20
hsa-miR-607	0	0	1	1	1	1	EHBP1	EH domain binding protein 1
hsa-miR-607	0	0	1	0	1	1	XKR5	XK, Kell blood group complex subunit-related family, member 5
hsa-miR-607	1	0	1	1	1	1	MECP2	methyl CpG binding protein 2 (Rett syndrome)
hsa-miR-607	1	0	1	0	1	1	LRAT	lecithin retinol acyltransferase (phosphatidylcholine--retinol O-acyltransferase)
hsa-miR-607	0	0	1	0	1	1	RAB18	RAB18, member RAS oncogene family
hsa-miR-607	1	0	1	1	0	0	ZCCHC4	zinc finger, CCHC domain containing 4
hsa-miR-607	0	0	1	1	1	1	KANK2	KN motif and ankyrin repeat domains 2
hsa-miR-607	0	0	1	1	1	1	SMPD1	sphingomyelin phosphodiesterase 1, acid lysosomal
hsa-miR-607	1	0	1	1	1	1	TRIT1	tRNA isopentenyltransferase 1
hsa-miR-607	1	0	1	1	1	1	MAPT	microtubule-associated protein tau
hsa-miR-607	1	0	1	1	1	1	QKI	QKI, KH domain containing, RNA binding
hsa-miR-607	1	0	1	1	1	1	MYB	v-myb myeloblastosis viral oncogene homolog (avian)
hsa-miR-607	1	0	1	1	1	1	SAT1	spermidine/spermine N1-acetyltransferase 1
hsa-miR-607	1	0	1	1	1	1	PCDH11X	protocadherin 11 X-linked
hsa-miR-607	0	0	1	1	0	0	NBPF8	neuroblastoma breakpoint family, member 8
hsa-miR-607	1	0	1	1	1	1	NEK6	NIMA (never in mitosis gene a)-related kinase 6
hsa-miR-607	1	0	1	0	1	1	FAM46A	family with sequence similarity 46, member A
hsa-miR-607	1	0	1	1	1	1	CPSF6	cleavage and polyadenylation specific factor 6, 68kDa
hsa-miR-607	0	0	1	1	0	0	DDX49	DEAD (Asp-Glu-Ala-Asp) box polypeptide 49
hsa-miR-607	1	0	1	1	1	1	PAFAH2	platelet-activating factor acetylhydrolase 2, 40kDa
hsa-miR-607	0	0	1	1	1	1	PAFAH1B2	platelet-activating factor acetylhydrolase 1b, catalytic subunit 2 (30kDa)
hsa-miR-607	1	0	1	1	1	1	AZI2	5-azacytidine induced 2
hsa-miR-607	0	0	1	1	1	1	PTDSS1	phosphatidylserine synthase 1
hsa-miR-607	0	0	1	1	1	1	WDR55	WD repeat domain 55
hsa-miR-607	0	0	1	1	1	1	RAB7L1	RAB7, member RAS oncogene family-like 1
hsa-miR-607	0	0	1	1	1	1	CENPA	centromere protein A
hsa-miR-607	1	0	1	1	1	1	TSPAN14	tetraspanin 14
hsa-miR-607	1	0	1	1	1	1	NUMA1	nuclear mitotic apparatus protein 1
hsa-miR-607	1	0	1	1	1	1	SPRY2	sprouty homolog 2 (Drosophila)
hsa-miR-607	1	0	1	0	1	1	CGGBP1	CGG triplet repeat binding protein 1
hsa-miR-607	0	0	1	1	1	1	PRMT5	protein arginine methyltransferase 5
hsa-miR-607	0	0	1	1	0	0	CD58	CD58 molecule
hsa-miR-607	1	0	1	1	1	1	ATAT1	alpha tubulin acetyltransferase 1
hsa-miR-607	1	0	1	0	1	1	C15orf41	chromosome 15 open reading frame 41
hsa-miR-607	1	0	1	1	1	1	U2SURP	U2 snRNP-associated SURP domain containing
hsa-miR-607	1	0	1	0	1	1	FAXC	failed axon connections homolog (Drosophila)
hsa-miR-607	1	0	1	0	1	1	VAMP4	vesicle-associated membrane protein 4
hsa-miR-607	0	0	1	1	1	1	DYDC2	DPY30 domain containing 2
hsa-miR-607	0	0	1	1	0	0	AGBL5	ATP/GTP binding protein-like 5
hsa-miR-607	0	0	1	1	0	0	RBM14	RNA binding motif protein 14
hsa-miR-607	1	0	1	1	1	1	CALM1	calmodulin 1 (phosphorylase kinase, delta)
hsa-miR-607	1	0	1	1	1	1	SHOX2	short stature homeobox 2
hsa-miR-607	0	0	1	0	0	0	ATXN7L3B	ataxin 7-like 3B
hsa-miR-607	0	0	1	1	0	0	PANK2	pantothenate kinase 2
hsa-miR-607	0	0	1	1	1	1	WSCD1	WSC domain containing 1
hsa-miR-607	1	0	1	1	0	0	SIGMAR1	sigma non-opioid intracellular receptor 1
hsa-miR-607	0	0	1	1	0	0	ARHGAP8	Rho GTPase activating protein 8
hsa-miR-607	1	0	1	1	1	1	GRIA2	glutamate receptor, ionotropic, AMPA 2
hsa-miR-607	1	0	1	1	1	1	SZRD1	SUZ RNA binding domain containing 1
hsa-miR-607	1	0	1	1	1	1	TRIM2	tripartite motif containing 2
hsa-miR-607	0	0	1	1	1	1	GNL3L	guanine nucleotide binding protein-like 3 (nucleolar)-like
hsa-miR-607	0	0	1	0	0	0	GRAMD1B	GRAM domain containing 1B
hsa-miR-607	1	0	1	1	1	1	GDAP2	ganglioside induced differentiation associated protein 2
hsa-miR-607	1	0	1	1	1	1	SNCA	synuclein, alpha (non A4 component of amyloid precursor)
hsa-miR-607	0	0	1	1	1	1	H2AFY	H2A histone family, member Y
hsa-miR-607	0	0	1	1	0	0	RPL10A	ribosomal protein L10a
hsa-miR-607	0	0	1	1	1	1	PCNP	PEST proteolytic signal containing nuclear protein
hsa-miR-607	0	0	1	0	0	0	HAUS5	HAUS augmin-like complex, subunit 5
hsa-miR-607	0	0	1	0	0	0	MGC21881	uncharacterized locus MGC21881
hsa-miR-607	0	0	1	1	0	0	BEST1	bestrophin 1
hsa-miR-607	0	0	1	1	1	1	GIN1	gypsy retrotransposon integrase 1
hsa-miR-607	0	0	1	0	0	0	KLHL15	kelch-like 15 (Drosophila)
hsa-miR-607	1	0	1	1	1	1	ZBTB38	zinc finger and BTB domain containing 38
hsa-miR-607	1	0	1	0	1	1	NR1D2	nuclear receptor subfamily 1, group D, member 2
hsa-miR-607	1	0	1	1	1	1	FAM176A	family with sequence similarity 176, member A
hsa-miR-607	0	0	1	0	0	0	GNN	Grp94 neighboring nucleotidase pseudogene
hsa-miR-607	1	0	1	1	1	1	RAN	RAN, member RAS oncogene family
hsa-miR-607	1	0	1	1	1	1	FAM199X	family with sequence similarity 199, X-linked
hsa-miR-607	1	0	1	1	0	0	USP53	ubiquitin specific peptidase 53
hsa-miR-607	0	0	1	1	1	1	RDH11	retinol dehydrogenase 11 (all-trans/9-cis/11-cis)
hsa-miR-607	0	0	1	0	0	0	FAM200B	family with sequence similarity 200, member B
hsa-miR-607	1	0	1	1	1	1	SUZ12	suppressor of zeste 12 homolog (Drosophila)
hsa-miR-607	0	0	1	1	1	1	SRP19	signal recognition particle 19kDa
hsa-miR-607	0	0	1	0	1	1	TP53RK	TP53 regulating kinase
hsa-miR-607	1	0	1	1	1	1	WHSC1	Wolf-Hirschhorn syndrome candidate 1
hsa-miR-607	0	0	1	0	1	1	ZNF718	zinc finger protein 718
hsa-miR-607	1	0	1	0	1	1	BTF3L4	basic transcription factor 3-like 4
hsa-miR-607	1	0	1	0	1	1	ARHGAP26	Rho GTPase activating protein 26
hsa-miR-607	1	0	1	1	0	0	ACOXL	acyl-CoA oxidase-like
hsa-miR-607	1	0	1	1	1	1	LIMS1	LIM and senescent cell antigen-like domains 1
hsa-miR-607	0	0	1	1	1	1	CDC42SE2	CDC42 small effector 2
hsa-miR-607	1	0	1	1	1	1	ASPH	aspartate beta-hydroxylase
hsa-miR-607	0	0	1	0	0	0	LOC494141	mitochondrial carrier triple repeat 1 pseudogene
hsa-miR-607	1	0	1	1	1	1	CNTN4	contactin 4
hsa-miR-607	1	0	1	1	1	1	SPG20	spastic paraplegia 20 (Troyer syndrome)
hsa-miR-607	1	0	1	1	1	1	EPHA4	EPH receptor A4
hsa-miR-607	0	0	1	0	0	0	RNF216P1	ring finger protein 216 pseudogene 1
hsa-miR-607	1	0	1	1	1	1	RSPO2	R-spondin 2
hsa-miR-607	0	0	1	1	1	1	ZNF589	zinc finger protein 589
hsa-miR-607	1	0	1	1	1	1	HTR2C	5-hydroxytryptamine (serotonin) receptor 2C, G protein-coupled
hsa-miR-607	1	0	1	0	0	0	KCNU1	potassium channel, subfamily U, member 1
hsa-miR-607	1	0	1	1	1	1	GIGYF2	GRB10 interacting GYF protein 2
hsa-miR-607	0	0	1	1	1	1	SEMA3D	sema domain, immunoglobulin domain (Ig), short basic domain, secreted, (semaphorin) 3D
hsa-miR-607	1	0	1	1	1	1	PPARGC1A	peroxisome proliferator-activated receptor gamma, coactivator 1 alpha
hsa-miR-607	1	0	1	1	1	1	TIAL1	TIA1 cytotoxic granule-associated RNA binding protein-like 1
hsa-miR-607	1	0	1	0	1	1	GPR107	G protein-coupled receptor 107
hsa-miR-607	0	0	1	1	1	1	CCP110	centriolar coiled coil protein 110kDa
hsa-miR-607	0	0	1	1	1	1	CD48	CD48 molecule
hsa-miR-607	1	0	1	1	1	1	MLLT3	myeloid/lymphoid or mixed-lineage leukemia (trithorax homolog, Drosophila); translocated to, 3
hsa-miR-607	1	0	1	1	1	1	EYA4	eyes absent homolog 4 (Drosophila)
hsa-miR-607	1	0	1	1	1	1	TAF15	TAF15 RNA polymerase II, TATA box binding protein (TBP)-associated factor, 68kDa
hsa-miR-607	1	0	1	1	1	1	ELAVL2	ELAV (embryonic lethal, abnormal vision, Drosophila)-like 2 (Hu antigen B)
hsa-miR-607	1	0	1	1	1	1	GABRA1	gamma-aminobutyric acid (GABA) A receptor, alpha 1
hsa-miR-607	1	0	1	1	1	1	ZNF518A	zinc finger protein 518A
hsa-miR-607	1	0	1	1	1	1	PLS1	plastin 1
hsa-miR-607	0	0	1	1	1	1	TMEM67	transmembrane protein 67
hsa-miR-607	1	0	1	1	1	1	ZPLD1	zona pellucida-like domain containing 1
hsa-miR-607	1	0	1	1	1	1	RCOR3	REST corepressor 3
hsa-miR-607	1	0	1	0	1	1	RNF4	ring finger protein 4
hsa-miR-607	0	0	1	1	1	1	C7orf53	chromosome 7 open reading frame 53
hsa-miR-607	1	0	1	1	1	1	PDZD2	PDZ domain containing 2
hsa-miR-607	0	0	1	1	1	1	CEPT1	choline/ethanolamine phosphotransferase 1
hsa-miR-607	1	0	1	1	1	1	FGF1	fibroblast growth factor 1 (acidic)
hsa-miR-607	1	0	1	1	1	1	RAB5B	RAB5B, member RAS oncogene family
hsa-miR-607	1	0	1	1	1	1	RHOBTB1	Rho-related BTB domain containing 1
hsa-miR-607	1	0	1	1	1	1	ZNF521	zinc finger protein 521
hsa-miR-607	1	0	1	1	1	1	SECISBP2L	SECIS binding protein 2-like
hsa-miR-607	0	0	1	0	0	0	LOC96610	BMS1 homolog, ribosome assembly protein (yeast) pseudogene
hsa-miR-607	0	0	1	1	1	1	IL20RB	interleukin 20 receptor beta
hsa-miR-607	1	0	1	0	1	1	KCTD2	potassium channel tetramerisation domain containing 2
hsa-miR-607	0	0	1	1	0	0	FAM124A	family with sequence similarity 124A
hsa-miR-607	1	0	1	1	1	1	CLK4	CDC-like kinase 4
hsa-miR-607	0	0	1	0	0	0	FAM66C	family with sequence similarity 66, member C
hsa-miR-607	1	0	1	0	1	1	DDX3Y	DEAD (Asp-Glu-Ala-Asp) box polypeptide 3, Y-linked
hsa-miR-607	1	0	1	0	1	1	PDE12	phosphodiesterase 12
hsa-miR-607	0	0	1	1	1	1	KIF16B	kinesin family member 16B
hsa-miR-607	1	0	1	1	1	1	NKAIN2	Na+/K+ transporting ATPase interacting 2
hsa-miR-607	1	0	1	1	1	1	ZZZ3	zinc finger, ZZ-type containing 3
hsa-miR-607	1	0	1	1	0	0	CHST4	carbohydrate (N-acetylglucosamine 6-O) sulfotransferase 4
hsa-miR-607	1	0	1	1	1	1	RAP2C	RAP2C, member of RAS oncogene family
hsa-miR-607	1	0	1	1	1	1	CTDSPL2	CTD (carboxy-terminal domain, RNA polymerase II, polypeptide A) small phosphatase like 2
hsa-miR-607	1	0	1	1	0	0	ZNF440	zinc finger protein 440
hsa-miR-607	0	0	1	0	0	0	LOC339862	uncharacterized LOC339862
hsa-miR-607	0	0	1	0	0	0	C12orf77	chromosome 12 open reading frame 77
hsa-miR-607	0	0	1	1	1	1	UBE3D	ubiquitin protein ligase E3D
hsa-miR-607	1	0	1	1	1	1	IMPACT	Impact homolog (mouse)
hsa-miR-607	0	0	1	0	0	0	FAM201A	family with sequence similarity 201, member A
hsa-miR-607	1	0	1	1	1	1	SLC38A9	solute carrier family 38, member 9
hsa-miR-607	0	0	1	1	1	1	TADA1	transcriptional adaptor 1
hsa-miR-607	1	0	1	1	1	1	MEIS1	Meis homeobox 1
hsa-miR-607	1	0	1	0	1	1	NEGR1	neuronal growth regulator 1
hsa-miR-607	1	0	1	1	0	0	RASGEF1B	RasGEF domain family, member 1B
hsa-miR-607	1	0	1	0	1	1	CPEB4	cytoplasmic polyadenylation element binding protein 4
hsa-miR-607	1	0	1	1	1	1	CEP128	centrosomal protein 128kDa
hsa-miR-607	1	0	1	1	1	1	FAM135B	family with sequence similarity 135, member B
hsa-miR-607	1	0	1	1	1	1	SLC35F3	solute carrier family 35, member F3
hsa-miR-607	1	0	1	1	1	1	DAAM1	dishevelled associated activator of morphogenesis 1
hsa-miR-607	1	0	1	1	1	1	GALNT1	UDP-N-acetyl-alpha-D-galactosamine:polypeptide N-acetylgalactosaminyltransferase 1 (GalNAc-T1)
hsa-miR-607	1	0	1	1	1	1	DPP10	dipeptidyl-peptidase 10 (non-functional)
hsa-miR-607	0	0	1	1	1	1	TTC39B	tetratricopeptide repeat domain 39B
hsa-miR-607	1	0	1	0	1	1	ARID2	AT rich interactive domain 2 (ARID, RFX-like)
hsa-miR-607	1	0	1	1	1	1	PRR16	proline rich 16
hsa-miR-607	0	0	1	0	0	0	FLJ36000	uncharacterized FLJ36000
hsa-miR-607	0	0	1	0	0	0	LINC00326	long intergenic non-protein coding RNA 326
hsa-miR-607	0	0	1	0	0	0	DLGAP1-AS3	DLGAP1 antisense RNA 3
hsa-miR-607	0	0	1	1	1	1	SLTM	SAFB-like, transcription modulator
hsa-miR-607	1	0	1	0	1	1	G2E3	G2/M-phase specific E3 ubiquitin protein ligase
hsa-miR-607	0	0	1	0	1	1	SRSF5	serine/arginine-rich splicing factor 5
hsa-miR-607	1	0	1	1	1	1	DACH2	dachshund homolog 2 (Drosophila)
hsa-miR-607	1	0	1	1	1	1	PDPK1	3-phosphoinositide dependent protein kinase-1
hsa-miR-607	0	0	1	1	1	1	TMEM45A	transmembrane protein 45A
hsa-miR-607	1	0	1	1	1	1	INTS6	integrator complex subunit 6
hsa-miR-607	0	0	1	1	1	1	LRRC3B	leucine rich repeat containing 3B
hsa-miR-607	0	0	1	1	0	0	MTCH1	mitochondrial carrier 1
hsa-miR-607	0	0	1	1	1	1	PCMTD2	protein-L-isoaspartate (D-aspartate) O-methyltransferase domain containing 2
hsa-miR-607	0	0	1	0	0	0	SLC7A11-AS1	SLC7A11 antisense RNA 1
hsa-miR-607	1	0	1	0	1	1	KIAA0430	KIAA0430
hsa-miR-607	0	0	1	0	1	1	FAM13B	family with sequence similarity 13, member B
hsa-miR-607	1	0	1	1	1	1	FAM123A	family with sequence similarity 123A
hsa-miR-607	0	0	1	1	1	1	C17orf104	chromosome 17 open reading frame 104
hsa-miR-607	0	0	1	1	1	1	CARD8	caspase recruitment domain family, member 8
hsa-miR-607	1	0	1	1	1	1	DOC2A	double C2-like domains, alpha
hsa-miR-607	0	0	1	0	1	1	PDGFC	platelet derived growth factor C
hsa-miR-607	1	0	1	0	1	1	TNFAIP3	tumor necrosis factor, alpha-induced protein 3
hsa-miR-607	0	0	1	0	0	0	CDKL3	cyclin-dependent kinase-like 3
hsa-miR-607	0	0	1	1	1	1	GOLGA6L9	golgin A6 family-like 9
hsa-miR-607	0	0	1	1	1	1	C4orf32	chromosome 4 open reading frame 32
hsa-miR-607	0	0	1	1	0	0	C1orf87	chromosome 1 open reading frame 87
hsa-miR-607	0	0	1	0	0	0	LOC154822	uncharacterized LOC154822
hsa-miR-607	0	0	1	1	1	1	SH3GL3	SH3-domain GRB2-like 3
hsa-miR-607	1	0	1	1	1	1	TXNRD1	thioredoxin reductase 1
hsa-miR-607	0	0	1	0	0	0	LOC401176	uncharacterized LOC401176
hsa-miR-607	0	0	1	0	0	0	LINC00347	long intergenic non-protein coding RNA 347
hsa-miR-607	0	0	1	1	1	1	DGKH	diacylglycerol kinase, eta
hsa-miR-607	0	0	1	0	1	1	C12orf74	chromosome 12 open reading frame 74
hsa-miR-607	0	0	1	0	0	0	SLC8A1-AS1	SLC8A1 antisense RNA 1
hsa-miR-607	0	0	1	1	1	1	TMEM200A	transmembrane protein 200A
hsa-miR-607	1	0	1	1	1	1	HLTF	helicase-like transcription factor
hsa-miR-607	1	0	1	1	1	1	RNF145	ring finger protein 145
hsa-miR-607	1	0	1	0	1	1	PSD3	pleckstrin and Sec7 domain containing 3
hsa-miR-607	0	0	1	1	1	1	NADKD1	NAD kinase domain containing 1
hsa-miR-607	1	0	1	1	1	1	MAMDC2	MAM domain containing 2
hsa-miR-607	1	0	1	1	1	1	SENP1	SUMO1/sentrin specific peptidase 1
hsa-miR-607	1	0	1	1	1	1	HSDL2	hydroxysteroid dehydrogenase like 2
hsa-miR-607	0	0	1	0	1	1	FBXO42	F-box protein 42
hsa-miR-607	1	0	1	1	1	1	KIF2A	kinesin heavy chain member 2A
hsa-miR-607	1	0	1	1	1	1	RTKN2	rhotekin 2
hsa-miR-607	0	0	1	0	0	0	LOC255025	uncharacterized LOC255025
hsa-miR-607	1	0	1	1	1	1	PTPRG	protein tyrosine phosphatase, receptor type, G
hsa-miR-607	0	0	1	0	0	0	LOC283038	uncharacterized LOC283038
hsa-miR-607	1	0	1	1	1	1	CLVS1	clavesin 1
hsa-miR-607	1	0	1	1	1	1	PELI1	pellino E3 ubiquitin protein ligase 1
hsa-miR-607	1	0	1	0	1	1	ARHGAP5	Rho GTPase activating protein 5
hsa-miR-607	0	0	1	0	1	1	ITGA1	integrin, alpha 1
hsa-miR-607	0	0	1	1	1	1	FBXO38	F-box protein 38
hsa-miR-607	1	0	1	0	1	1	NUDT10	nudix (nucleoside diphosphate linked moiety X)-type motif 10
hsa-miR-607	1	0	1	1	1	1	FNDC3A	fibronectin type III domain containing 3A
hsa-miR-607	0	0	1	0	0	0	BMS1P6	BMS1 pseudogene 6
hsa-miR-607	1	0	1	1	1	1	PTPDC1	protein tyrosine phosphatase domain containing 1
hsa-miR-607	0	0	1	1	0	0	GPRASP2	G protein-coupled receptor associated sorting protein 2
hsa-miR-607	0	0	1	1	0	0	AGAP8	ArfGAP with GTPase domain, ankyrin repeat and PH domain 8
hsa-miR-607	1	0	1	1	1	1	ZFP91	zinc finger protein 91 homolog (mouse)
hsa-miR-607	1	0	1	1	1	1	YWHAZ	tyrosine 3-monooxygenase/tryptophan 5-monooxygenase activation protein, zeta polypeptide
hsa-miR-607	1	0	1	1	1	1	MKRN1	makorin ring finger protein 1
hsa-miR-607	0	0	1	1	1	1	COG2	component of oligomeric golgi complex 2
hsa-miR-607	0	0	1	1	1	1	PEX14	peroxisomal biogenesis factor 14
hsa-miR-607	1	0	1	1	1	1	PPP2R5E	protein phosphatase 2, regulatory subunit B', epsilon isoform
hsa-miR-607	0	0	1	1	1	1	MPP3	membrane protein, palmitoylated 3 (MAGUK p55 subfamily member 3)
hsa-miR-607	1	0	1	1	1	1	ATP8B4	ATPase, class I, type 8B, member 4
hsa-miR-607	1	0	1	1	1	1	KLHL28	kelch-like 28 (Drosophila)
hsa-miR-607	0	0	1	1	1	1	IDI1	isopentenyl-diphosphate delta isomerase 1
hsa-miR-607	0	0	1	1	1	1	ZNF365	zinc finger protein 365
hsa-miR-607	1	0	1	1	1	1	GTDC1	glycosyltransferase-like domain containing 1
hsa-miR-607	1	0	1	1	1	1	FNDC5	fibronectin type III domain containing 5
hsa-miR-607	0	0	1	1	0	0	AGAP4	ArfGAP with GTPase domain, ankyrin repeat and PH domain 4
hsa-miR-607	0	0	1	1	1	1	B4GALT4	UDP-Gal:betaGlcNAc beta 1,4- galactosyltransferase, polypeptide 4
hsa-miR-607	1	0	1	1	1	1	SCOC	short coiled-coil protein
hsa-miR-607	0	0	1	1	0	0	AGAP11	ankyrin repeat and GTPase domain Arf GTPase activating protein 11
hsa-miR-607	0	0	1	1	0	0	LRRIQ3	leucine-rich repeats and IQ motif containing 3
hsa-miR-607	1	0	1	1	1	1	ANXA4	annexin A4
hsa-miR-607	0	0	1	1	1	1	C1orf109	chromosome 1 open reading frame 109
hsa-miR-607	1	0	1	1	1	1	RANBP9	RAN binding protein 9
hsa-miR-607	1	0	1	1	1	1	NIPBL	Nipped-B homolog (Drosophila)
hsa-miR-607	0	0	1	1	1	1	VNN2	vanin 2
hsa-miR-607	1	0	1	1	1	1	MYLK	myosin light chain kinase
hsa-miR-607	0	0	1	1	1	1	STAG1	stromal antigen 1
hsa-miR-607	0	0	1	1	1	1	GORAB	golgin, RAB6-interacting
hsa-miR-607	1	0	1	1	1	1	EIF4G2	eukaryotic translation initiation factor 4 gamma, 2
hsa-miR-607	0	0	1	1	1	1	ZNF189	zinc finger protein 189
hsa-miR-607	0	0	1	1	1	1	RWDD3	RWD domain containing 3
hsa-miR-607	0	0	1	1	1	1	PSMD12	proteasome (prosome, macropain) 26S subunit, non-ATPase, 12
hsa-miR-607	1	0	1	1	1	1	ZNF449	zinc finger protein 449
hsa-miR-607	0	0	1	0	0	0	LINC00052	long intergenic non-protein coding RNA 52
hsa-miR-607	0	0	1	1	1	1	KCTD18	potassium channel tetramerisation domain containing 18
hsa-miR-607	0	0	1	1	1	1	SLAMF1	signaling lymphocytic activation molecule family member 1
hsa-miR-607	0	0	1	1	0	0	LNP1	leukemia NUP98 fusion partner 1
hsa-miR-607	0	0	1	0	0	0	PABPC1P2	poly(A) binding protein, cytoplasmic 1 pseudogene 2
hsa-miR-607	1	0	1	1	1	1	PDCD6IP	programmed cell death 6 interacting protein
hsa-miR-607	0	0	1	1	1	1	AQPEP	laeverin
hsa-miR-607	0	0	1	0	0	0	PTGER4P2	prostaglandin E receptor 4 (subtype EP4) pseudogene 2
hsa-miR-607	0	0	1	0	0	0	SPDYE8P	speedy homolog E8 (Xenopus laevis), pseudogene
hsa-miR-607	1	0	1	1	0	0	CHTOP	chromatin target of PRMT1
hsa-miR-607	1	0	1	0	1	1	TGFBR1	transforming growth factor, beta receptor 1
hsa-miR-607	1	0	1	1	1	1	USP47	ubiquitin specific peptidase 47
hsa-miR-607	1	0	1	1	1	1	FARP1	FERM, RhoGEF (ARHGEF) and pleckstrin domain protein 1 (chondrocyte-derived)
hsa-miR-607	1	0	1	0	1	1	TMEM194A	transmembrane protein 194A
hsa-miR-607	0	0	1	0	0	0	LOC100147773	uncharacterized LOC100147773
hsa-miR-607	0	0	1	0	0	0	LOC440416	uncharacterized LOC440416
hsa-miR-607	1	0	1	1	1	1	OPCML	opioid binding protein/cell adhesion molecule-like
hsa-miR-607	1	0	1	1	1	1	WNT5A	wingless-type MMTV integration site family, member 5A
hsa-miR-607	0	0	1	0	0	0	ABCC6P1	ATP-binding cassette, sub-family C, member 6 pseudogene 1
hsa-miR-607	0	0	1	1	1	1	C3orf67	chromosome 3 open reading frame 67
hsa-miR-607	0	0	1	0	0	0	LOC554249	uncharacterized LOC554249
hsa-miR-607	1	0	1	1	0	0	SLC45A4	solute carrier family 45, member 4
hsa-miR-607	0	0	1	1	1	1	SYNRG	synergin, gamma
hsa-miR-607	1	0	1	0	1	1	PIK3R3	phosphoinositide-3-kinase, regulatory subunit 3 (gamma)
hsa-miR-607	1	0	1	1	1	1	ST8SIA2	ST8 alpha-N-acetyl-neuraminide alpha-2,8-sialyltransferase 2
hsa-miR-607	1	0	1	1	1	1	ACVR2B	activin A receptor, type IIB
hsa-miR-607	1	0	1	0	1	1	LRRTM4	leucine rich repeat transmembrane neuronal 4
hsa-miR-607	1	0	1	1	1	1	KRIT1	KRIT1, ankyrin repeat containing
hsa-miR-607	0	0	1	1	1	1	PARPBP	PARP1 binding protein
hsa-miR-607	1	0	1	1	1	1	SLC36A2	solute carrier family 36 (proton/amino acid symporter), member 2
hsa-miR-607	1	0	1	0	1	1	MYBL1	v-myb myeloblastosis viral oncogene homolog (avian)-like 1
hsa-miR-607	1	0	1	0	1	1	KCNT2	potassium channel, subfamily T, member 2
hsa-miR-607	1	0	1	1	0	0	KIAA1644	KIAA1644
hsa-miR-607	0	0	1	0	0	0	C5orf49	chromosome 5 open reading frame 49
hsa-miR-607	0	0	1	1	1	1	CCDC126	coiled-coil domain containing 126
hsa-miR-607	1	0	1	1	1	1	GABRB2	gamma-aminobutyric acid (GABA) A receptor, beta 2
hsa-miR-607	1	0	1	1	1	1	NR2F2	nuclear receptor subfamily 2, group F, member 2
hsa-miR-607	1	0	1	1	1	1	PTPRD	protein tyrosine phosphatase, receptor type, D
hsa-miR-607	0	0	1	1	0	0	TMEM126B	transmembrane protein 126B
hsa-miR-607	0	0	1	1	1	1	ATG16L2	autophagy related 16-like 2 (S. cerevisiae)
hsa-miR-607	1	0	1	1	1	1	SP4	Sp4 transcription factor
hsa-miR-607	1	0	1	0	1	1	BTBD3	BTB (POZ) domain containing 3
hsa-miR-607	1	0	1	0	1	1	KIAA1715	KIAA1715
hsa-miR-607	1	0	1	1	1	1	TET2	tet methylcytosine dioxygenase 2
hsa-miR-607	1	0	1	1	1	1	SLK	STE20-like kinase
hsa-miR-607	1	0	1	0	1	1	ROBO1	roundabout, axon guidance receptor, homolog 1 (Drosophila)
hsa-miR-607	1	0	1	1	1	1	TMEM132B	transmembrane protein 132B
hsa-miR-607	0	0	1	1	1	1	FSHB	follicle stimulating hormone, beta polypeptide
hsa-miR-607	0	0	1	1	0	0	TMC1	transmembrane channel-like 1
hsa-miR-607	1	0	1	1	0	0	MAPKBP1	mitogen-activated protein kinase binding protein 1
hsa-miR-607	1	0	1	1	1	1	ST18	suppression of tumorigenicity 18 (breast carcinoma) (zinc finger protein)
hsa-miR-607	0	0	1	1	1	1	MYBPC1	myosin binding protein C, slow type
hsa-miR-607	0	0	1	1	0	0	RGS9	regulator of G-protein signaling 9
hsa-miR-607	1	0	1	0	1	1	PRDM10	PR domain containing 10
hsa-miR-607	0	0	1	1	1	1	LRCH1	leucine-rich repeats and calponin homology (CH) domain containing 1
hsa-miR-607	1	0	1	1	1	1	OTUD4	OTU domain containing 4
hsa-miR-607	0	0	1	1	0	0	RGSL1	regulator of G-protein signaling like 1
hsa-miR-607	0	0	1	0	1	1	GOLGA8G	golgin A8 family, member G
hsa-miR-607	1	0	1	0	1	1	LRCH2	leucine-rich repeats and calponin homology (CH) domain containing 2
hsa-miR-607	1	0	1	0	1	1	CAMSAP2	calmodulin regulated spectrin-associated protein family, member 2
hsa-miR-607	1	0	1	1	1	1	ANK2	ankyrin 2, neuronal
hsa-miR-607	1	0	1	1	1	1	ZMYM4	zinc finger, MYM-type 4
hsa-miR-607	0	0	1	1	1	1	HSF2	heat shock transcription factor 2
hsa-miR-607	1	0	1	0	1	1	LHFPL3	lipoma HMGIC fusion partner-like 3
hsa-miR-607	0	0	1	1	0	0	DZANK1	double zinc ribbon and ankyrin repeat domains 1
hsa-miR-607	0	0	1	1	0	0	AGAP6	ArfGAP with GTPase domain, ankyrin repeat and PH domain 6
hsa-miR-607	1	0	1	1	1	1	FRAS1	Fraser syndrome 1
hsa-miR-607	0	0	1	1	0	0	TCHH	trichohyalin
hsa-miR-607	1	0	1	1	1	1	NIPAL2	NIPA-like domain containing 2
hsa-miR-607	1	0	1	1	1	1	TMEM218	transmembrane protein 218
hsa-miR-607	1	0	1	1	1	1	BTBD7	BTB (POZ) domain containing 7
hsa-miR-607	0	0	1	0	0	0	FLJ39632	uncharacterized LOC642477
hsa-miR-607	1	0	1	1	1	1	EIF5	eukaryotic translation initiation factor 5
hsa-miR-607	0	0	1	1	1	1	RAD17	RAD17 homolog (S. pombe)
hsa-miR-607	0	0	1	1	1	1	IP6K2	inositol hexakisphosphate kinase 2
hsa-miR-607	1	0	1	1	1	1	ATP2B4	ATPase, Ca++ transporting, plasma membrane 4
hsa-miR-607	1	0	1	1	1	1	JPH1	junctophilin 1
hsa-miR-607	0	0	1	0	1	1	FEZ2	fasciculation and elongation protein zeta 2 (zygin II)
hsa-miR-607	1	0	1	1	1	1	MIER3	mesoderm induction early response 1, family member 3
hsa-miR-607	1	0	1	1	1	1	MTFR1	mitochondrial fission regulator 1
hsa-miR-607	1	0	1	1	1	1	HECTD2	HECT domain containing E3 ubiquitin protein ligase 2
hsa-miR-607	0	0	1	1	1	1	KBTBD12	kelch repeat and BTB (POZ) domain containing 12
hsa-miR-607	1	0	1	0	1	1	TNFRSF10B	tumor necrosis factor receptor superfamily, member 10b
hsa-miR-607	0	0	1	1	1	1	DSG3	desmoglein 3
hsa-miR-607	1	0	1	1	1	1	ETS1	v-ets erythroblastosis virus E26 oncogene homolog 1 (avian)
hsa-miR-607	1	0	1	0	1	1	CLASP2	cytoplasmic linker associated protein 2
hsa-miR-607	0	0	1	1	1	1	CRB1	crumbs homolog 1 (Drosophila)
hsa-miR-607	0	0	1	0	1	1	THUMPD1	THUMP domain containing 1
hsa-miR-607	1	0	1	0	1	1	FAM73A	family with sequence similarity 73, member A
hsa-miR-607	0	0	1	0	1	1	PRH2	proline-rich protein HaeIII subfamily 2
hsa-miR-607	1	0	1	1	1	1	PTPRB	protein tyrosine phosphatase, receptor type, B
hsa-miR-607	0	0	1	0	1	1	NHSL1	NHS-like 1
hsa-miR-607	0	0	1	1	1	1	IPCEF1	interaction protein for cytohesin exchange factors 1
hsa-miR-607	0	0	1	1	0	0	RPS24	ribosomal protein S24
hsa-miR-607	0	0	1	1	1	1	PRR14L	proline rich 14-like
hsa-miR-607	0	0	1	1	1	1	SCAPER	S-phase cyclin A-associated protein in the ER
hsa-miR-607	1	0	1	1	1	1	PRDM2	PR domain containing 2, with ZNF domain
hsa-miR-607	1	0	1	0	1	1	CPNE3	copine III
hsa-miR-607	1	0	1	1	0	0	RBM27	RNA binding motif protein 27
hsa-miR-607	1	0	1	1	0	0	CECR2	cat eye syndrome chromosome region, candidate 2
hsa-miR-607	1	0	1	1	0	0	KIAA0226	KIAA0226
hsa-miR-607	0	0	1	0	0	0	LINC00240	long intergenic non-protein coding RNA 240
hsa-miR-607	1	0	1	1	1	1	GABPA	GA binding protein transcription factor, alpha subunit 60kDa
hsa-miR-607	0	0	1	1	1	1	DUSP19	dual specificity phosphatase 19
hsa-miR-607	1	0	1	1	1	1	TC2N	tandem C2 domains, nuclear
hsa-miR-607	1	0	1	1	1	1	TSC22D3	TSC22 domain family, member 3
hsa-miR-607	0	0	1	1	0	0	PPP2R2B	protein phosphatase 2, regulatory subunit B, beta
hsa-miR-607	1	0	1	1	1	1	CYB5B	cytochrome b5 type B (outer mitochondrial membrane)
hsa-miR-607	0	0	1	0	1	1	B3GALTL	beta 1,3-galactosyltransferase-like
hsa-miR-607	1	0	1	1	1	1	PDXDC1	pyridoxal-dependent decarboxylase domain containing 1
hsa-miR-607	1	0	1	1	1	1	ATP6V1C1	ATPase, H+ transporting, lysosomal 42kDa, V1 subunit C1
hsa-miR-607	1	0	1	1	1	1	ZNF711	zinc finger protein 711
hsa-miR-607	0	0	1	1	1	1	CCNT2	cyclin T2
hsa-miR-607	1	0	1	1	1	1	PHF21A	PHD finger protein 21A
hsa-miR-607	0	0	1	1	1	1	DDX21	DEAD (Asp-Glu-Ala-Asp) box helicase 21
hsa-miR-607	1	0	1	0	1	1	PCGF3	polycomb group ring finger 3
hsa-miR-607	1	0	1	1	1	1	NFIB	nuclear factor I/B
hsa-miR-607	1	0	1	1	1	1	BCLAF1	BCL2-associated transcription factor 1
hsa-miR-607	1	0	1	1	1	1	PTER	phosphotriesterase related
hsa-miR-607	0	0	1	1	1	1	RBM20	RNA binding motif protein 20
hsa-miR-607	1	0	1	1	1	1	EDIL3	EGF-like repeats and discoidin I-like domains 3
hsa-miR-607	1	0	1	1	1	1	PGAP1	post-GPI attachment to proteins 1
hsa-miR-607	1	0	1	1	1	1	TMEM135	transmembrane protein 135
hsa-miR-607	0	0	1	0	0	0	ZNRD1-AS1	ZNRD1 antisense RNA 1
hsa-miR-607	1	0	1	1	1	1	EOGT	EGF domain-specific O-linked N-acetylglucosamine (GlcNAc) transferase
hsa-miR-607	0	0	1	1	1	1	SSFA2	sperm specific antigen 2
hsa-miR-607	0	0	1	1	0	0	NEB	nebulin
hsa-miR-607	1	0	1	1	1	1	CREB3L2	cAMP responsive element binding protein 3-like 2
hsa-miR-607	1	0	1	0	1	1	TTL	tubulin tyrosine ligase
hsa-miR-607	0	0	1	1	1	1	IPO11	importin 11
hsa-miR-607	0	0	1	1	1	1	TTLL5	tubulin tyrosine ligase-like family, member 5
hsa-miR-607	0	0	1	1	1	1	HPGD	hydroxyprostaglandin dehydrogenase 15-(NAD)
hsa-miR-607	1	0	1	0	1	1	RNF144A	ring finger protein 144A
hsa-miR-607	1	0	1	1	1	1	NAGA	N-acetylgalactosaminidase, alpha-
hsa-miR-607	0	0	1	1	1	1	CHEK1	checkpoint kinase 1
hsa-miR-607	0	0	1	1	0	0	SLC39A7	solute carrier family 39 (zinc transporter), member 7
hsa-miR-607	1	0	1	1	0	0	RAB24	RAB24, member RAS oncogene family
hsa-miR-607	0	0	1	1	0	0	CHCHD3	coiled-coil-helix-coiled-coil-helix domain containing 3
hsa-miR-607	0	0	1	1	0	0	ABCA6	ATP-binding cassette, sub-family A (ABC1), member 6
hsa-miR-607	1	0	1	1	1	1	FUT9	fucosyltransferase 9 (alpha (1,3) fucosyltransferase)
hsa-miR-607	0	0	1	1	1	1	TTC27	tetratricopeptide repeat domain 27
hsa-miR-607	0	0	1	1	1	1	UPRT	uracil phosphoribosyltransferase (FUR1) homolog (S. cerevisiae)
hsa-miR-607	0	0	1	1	0	0	NDUFS2	NADH dehydrogenase (ubiquinone) Fe-S protein 2, 49kDa (NADH-coenzyme Q reductase)
hsa-miR-607	0	0	1	0	0	0	LOC400768	uncharacterized LOC400768
hsa-miR-607	0	0	1	1	1	1	FBXO36	F-box protein 36
hsa-miR-607	0	0	1	0	0	0	COX4I2	cytochrome c oxidase subunit IV isoform 2 (lung)
hsa-miR-607	0	0	1	1	1	1	RTCA	RNA 3'-terminal phosphate cyclase
hsa-miR-607	0	0	1	1	1	1	COPS8	COP9 constitutive photomorphogenic homolog subunit 8 (Arabidopsis)
hsa-miR-607	1	0	1	1	1	1	SLC35D2	solute carrier family 35, member D2
hsa-miR-607	1	0	1	0	1	1	SLCO2A1	solute carrier organic anion transporter family, member 2A1
hsa-miR-607	1	0	1	1	1	1	PTN	pleiotrophin
hsa-miR-607	0	0	1	1	0	0	FCGRT	Fc fragment of IgG, receptor, transporter, alpha
hsa-miR-607	1	0	1	1	1	1	POLR2D	polymerase (RNA) II (DNA directed) polypeptide D
hsa-miR-607	0	0	1	0	1	1	BLM	Bloom syndrome, RecQ helicase-like
hsa-miR-607	1	0	1	1	1	1	HAPLN1	hyaluronan and proteoglycan link protein 1
hsa-miR-607	1	0	1	0	1	1	BNIP3L	BCL2/adenovirus E1B 19kDa interacting protein 3-like
hsa-miR-607	0	0	1	1	0	0	STOML2	stomatin (EPB72)-like 2
hsa-miR-607	0	0	1	1	1	1	BCL7B	B-cell CLL/lymphoma 7B
hsa-miR-607	0	0	1	1	1	1	FAT1	FAT tumor suppressor homolog 1 (Drosophila)
hsa-miR-607	0	0	1	1	1	1	INCENP	inner centromere protein antigens 135/155kDa
hsa-miR-607	1	0	1	1	0	0	STX5	syntaxin 5
hsa-miR-607	0	0	1	1	0	0	TFCP2	transcription factor CP2
hsa-miR-607	1	0	1	1	1	1	HMGN3	high mobility group nucleosomal binding domain 3
hsa-miR-607	0	0	1	1	1	1	FBXO4	F-box protein 4
hsa-miR-607	0	0	1	0	1	1	CD99P1	CD99 molecule pseudogene 1
hsa-miR-607	0	0	1	1	1	1	LRMP	lymphoid-restricted membrane protein
hsa-miR-607	1	0	1	1	1	1	TMED5	transmembrane emp24 protein transport domain containing 5
hsa-miR-607	1	0	1	1	1	1	HMGN1	high mobility group nucleosome binding domain 1
hsa-miR-607	1	0	1	1	1	1	FBXO9	F-box protein 9
hsa-miR-607	0	0	1	1	1	1	GGPS1	geranylgeranyl diphosphate synthase 1
hsa-miR-607	0	0	1	0	0	0	HMGN1P37	high mobility group nucleosome binding domain 1 pseudogene 37
hsa-miR-607	1	0	1	1	1	1	MBNL1	muscleblind-like splicing regulator 1
hsa-miR-607	0	0	1	1	1	1	CCDC115	coiled-coil domain containing 115
hsa-miR-607	1	0	1	1	1	1	METTL10	methyltransferase like 10
hsa-miR-607	1	0	1	0	1	1	RPS6KB1	ribosomal protein S6 kinase, 70kDa, polypeptide 1
hsa-miR-607	0	0	1	1	1	1	PSG2	pregnancy specific beta-1-glycoprotein 2
hsa-miR-607	1	0	1	1	1	1	TFAP2A	transcription factor AP-2 alpha (activating enhancer binding protein 2 alpha)
hsa-miR-607	0	0	1	1	1	1	CYP26A1	cytochrome P450, family 26, subfamily A, polypeptide 1
hsa-miR-607	1	0	1	1	1	1	PCTP	phosphatidylcholine transfer protein
hsa-miR-607	0	0	1	1	0	0	CXorf40A	chromosome X open reading frame 40A
hsa-miR-607	0	0	1	1	1	1	CHMP5	charged multivesicular body protein 5
hsa-miR-607	0	0	1	1	0	0	DOK5	docking protein 5
hsa-miR-607	1	0	1	1	1	1	WIPF1	WAS/WASL interacting protein family, member 1
hsa-miR-607	0	0	1	1	1	1	ATG4A	autophagy related 4A, cysteine peptidase
hsa-miR-607	0	0	1	1	1	1	TOX4	TOX high mobility group box family member 4
hsa-miR-607	1	0	1	1	1	1	DKK3	dickkopf 3 homolog (Xenopus laevis)
hsa-miR-607	0	0	1	1	1	1	TRIM38	tripartite motif containing 38
hsa-miR-607	0	0	1	0	0	0	FLJ45248	FLJ45248 protein
hsa-miR-607	0	0	1	1	1	1	BMPR1A	bone morphogenetic protein receptor, type IA
hsa-miR-607	0	0	1	0	0	0	LOC677759	uncharacterized LOC677759
hsa-miR-607	0	0	1	0	0	0	LOC645513	uncharacterized LOC645513
hsa-miR-607	1	0	1	1	0	0	FAT4	FAT tumor suppressor homolog 4 (Drosophila)
hsa-miR-607	1	0	1	1	1	1	ARNTL	aryl hydrocarbon receptor nuclear translocator-like
hsa-miR-607	0	0	1	1	1	1	PEX19	peroxisomal biogenesis factor 19
hsa-miR-607	1	0	1	1	1	1	TLE1	transducin-like enhancer of split 1 (E(sp1) homolog, Drosophila)
hsa-miR-607	1	0	1	1	1	1	FOS	FBJ murine osteosarcoma viral oncogene homolog
hsa-miR-607	0	0	1	1	1	1	P2RX5	purinergic receptor P2X, ligand-gated ion channel, 5
hsa-miR-607	0	0	1	1	1	1	TANK	TRAF family member-associated NFKB activator
hsa-miR-607	0	0	1	1	1	1	ODC1	ornithine decarboxylase 1
hsa-miR-607	1	0	1	0	1	1	NLN	neurolysin (metallopeptidase M3 family)
hsa-miR-607	0	0	1	0	1	1	RPL10	ribosomal protein L10
hsa-miR-607	0	0	1	1	1	1	PDLIM1	PDZ and LIM domain 1
hsa-miR-607	0	0	1	1	1	1	CD1C	CD1c molecule
hsa-miR-607	0	0	1	1	0	0	METTL5	methyltransferase like 5
hsa-miR-607	0	0	1	0	0	0	LOC93622	Morf4 family associated protein 1-like 1 pseudogene
hsa-miR-607	0	0	1	1	1	1	GFM1	G elongation factor, mitochondrial 1
hsa-miR-607	0	0	1	1	1	1	IL15	interleukin 15
hsa-miR-607	1	0	1	1	1	1	ARMC8	armadillo repeat containing 8
hsa-miR-607	0	0	1	1	1	1	AMACR	alpha-methylacyl-CoA racemase
hsa-miR-607	0	0	1	0	1	1	MAPKAPK5	mitogen-activated protein kinase-activated protein kinase 5
hsa-miR-607	1	0	1	1	1	1	RNF2	ring finger protein 2
hsa-miR-607	1	0	1	0	1	1	MAP1B	microtubule-associated protein 1B
hsa-miR-607	1	0	1	1	0	0	STAG3L4	stromal antigen 3-like 4
hsa-miR-607	0	0	1	1	1	1	TSEN15	tRNA splicing endonuclease 15 homolog (S. cerevisiae)
hsa-miR-607	1	0	1	1	1	1	SRSF2	serine/arginine-rich splicing factor 2
hsa-miR-607	0	0	1	1	1	1	LGI1	leucine-rich, glioma inactivated 1
hsa-miR-607	1	0	1	0	1	1	CD47	CD47 molecule
hsa-miR-607	1	0	1	1	1	1	RUNX1	runt-related transcription factor 1
hsa-miR-607	1	0	1	1	1	1	YWHAE	tyrosine 3-monooxygenase/tryptophan 5-monooxygenase activation protein, epsilon polypeptide
hsa-miR-607	0	0	1	1	0	0	HP	haptoglobin
hsa-miR-607	0	0	1	0	1	1	DENR	density-regulated protein
hsa-miR-607	0	0	1	1	0	0	RPS6KB2	ribosomal protein S6 kinase, 70kDa, polypeptide 2
hsa-miR-607	1	0	1	1	1	1	ID2	inhibitor of DNA binding 2, dominant negative helix-loop-helix protein
hsa-miR-607	1	0	1	1	1	1	ATPAF1	ATP synthase mitochondrial F1 complex assembly factor 1
hsa-miR-607	0	0	1	1	0	0	TUSC3	tumor suppressor candidate 3
hsa-miR-607	0	0	1	1	1	1	NUDT21	nudix (nucleoside diphosphate linked moiety X)-type motif 21
hsa-miR-607	1	0	1	1	1	1	LHX9	LIM homeobox 9
hsa-miR-607	1	0	1	1	1	1	LGALSL	lectin, galactoside-binding-like
hsa-miR-607	0	0	1	1	1	1	EPCAM	epithelial cell adhesion molecule
hsa-miR-607	0	0	1	1	1	1	C9orf3	chromosome 9 open reading frame 3
hsa-miR-607	1	0	1	0	1	1	KIAA0240	KIAA0240
hsa-miR-607	0	0	1	0	0	0	FAM47E	family with sequence similarity 47, member E
hsa-miR-607	0	0	1	1	1	1	BDP1	B double prime 1, subunit of RNA polymerase III transcription initiation factor IIIB
hsa-miR-607	0	0	1	0	0	0	LOC731789	uncharacterized LOC731789
hsa-miR-607	1	0	1	1	1	1	DNAJC16	DnaJ (Hsp40) homolog, subfamily C, member 16
hsa-miR-607	1	0	1	1	1	1	PHACTR2	phosphatase and actin regulator 2
hsa-miR-607	1	0	1	0	1	1	MEGF10	multiple EGF-like-domains 10
hsa-miR-607	1	0	1	0	1	1	XRN1	5'-3' exoribonuclease 1
hsa-miR-607	1	0	1	0	1	1	OSBPL8	oxysterol binding protein-like 8
hsa-miR-607	1	0	1	0	1	1	MCFD2	multiple coagulation factor deficiency 2
hsa-miR-607	1	0	1	1	1	1	SNRK	SNF related kinase
hsa-miR-607	1	0	1	1	1	1	TIPARP	TCDD-inducible poly(ADP-ribose) polymerase
hsa-miR-607	0	0	1	1	1	1	OAT	ornithine aminotransferase
hsa-miR-607	1	0	1	1	1	1	SLC39A10	solute carrier family 39 (zinc transporter), member 10
hsa-miR-607	1	0	1	0	1	1	CNTNAP2	contactin associated protein-like 2
hsa-miR-607	1	0	1	1	1	1	ADD1	adducin 1 (alpha)
hsa-miR-607	1	0	1	1	1	1	SLC30A7	solute carrier family 30 (zinc transporter), member 7
hsa-miR-607	1	0	1	1	1	1	METAP1	methionyl aminopeptidase 1
hsa-miR-607	1	0	1	1	1	1	PI15	peptidase inhibitor 15
hsa-miR-607	1	0	1	1	1	1	PRKG1	protein kinase, cGMP-dependent, type I
hsa-miR-607	1	0	1	1	1	1	RB1CC1	RB1-inducible coiled-coil 1
hsa-miR-607	0	0	1	1	1	1	GPR34	G protein-coupled receptor 34
hsa-miR-607	0	0	1	1	1	1	PTGS1	prostaglandin-endoperoxide synthase 1 (prostaglandin G/H synthase and cyclooxygenase)
hsa-miR-607	1	0	1	1	1	1	BTLA	B and T lymphocyte associated
hsa-miR-607	1	0	1	1	0	0	DPY19L1	dpy-19-like 1 (C. elegans)
hsa-miR-607	0	0	1	1	0	0	GPR111	G protein-coupled receptor 111
hsa-miR-607	1	0	1	1	1	1	MOSPD1	motile sperm domain containing 1
hsa-miR-607	1	0	1	1	0	0	LGSN	lengsin, lens protein with glutamine synthetase domain
hsa-miR-607	0	0	1	1	1	1	DHX36	DEAH (Asp-Glu-Ala-His) box polypeptide 36
hsa-miR-607	1	0	1	0	1	1	RBBP5	retinoblastoma binding protein 5
hsa-miR-607	0	0	1	1	1	1	PROS1	protein S (alpha)
hsa-miR-607	1	0	1	1	1	1	LGR4	leucine-rich repeat containing G protein-coupled receptor 4
hsa-miR-607	0	0	1	1	1	1	ADPRH	ADP-ribosylarginine hydrolase
hsa-miR-607	1	0	1	1	1	1	AFF1	AF4/FMR2 family, member 1
hsa-miR-607	1	0	1	1	1	1	RALBP1	ralA binding protein 1
hsa-miR-607	1	0	1	0	1	1	BCL2	B-cell CLL/lymphoma 2
hsa-miR-607	1	0	1	0	1	1	YES1	v-yes-1 Yamaguchi sarcoma viral oncogene homolog 1
hsa-miR-607	1	0	1	1	1	1	IGF1	insulin-like growth factor 1 (somatomedin C)
hsa-miR-607	0	0	1	1	1	1	PSG5	pregnancy specific beta-1-glycoprotein 5
hsa-miR-607	1	0	1	0	1	1	ACVR2A	activin A receptor, type IIA
hsa-miR-607	1	0	1	1	1	1	ADRB2	adrenoceptor beta 2, surface
hsa-miR-607	0	0	1	1	1	1	ALDOB	aldolase B, fructose-bisphosphate
hsa-miR-607	0	0	1	1	1	1	ATP7A	ATPase, Cu++ transporting, alpha polypeptide
hsa-miR-607	0	0	1	1	0	0	CD40LG	CD40 ligand
hsa-miR-607	1	0	1	1	1	1	COL1A2	collagen, type I, alpha 2
hsa-miR-607	1	0	1	1	1	1	COL4A3	collagen, type IV, alpha 3 (Goodpasture antigen)
hsa-miR-607	1	0	1	1	1	1	COL4A4	collagen, type IV, alpha 4
hsa-miR-607	1	0	1	1	1	1	DMD	dystrophin
hsa-miR-607	1	0	1	0	1	1	SLC26A2	solute carrier family 26 (sulfate transporter), member 2
hsa-miR-607	1	0	1	1	1	1	ESR1	estrogen receptor 1
hsa-miR-607	0	0	1	1	1	1	F5	coagulation factor V (proaccelerin, labile factor)
hsa-miR-607	1	0	1	0	1	1	G6PC	glucose-6-phosphatase, catalytic subunit
hsa-miR-607	0	0	1	0	1	1	GBE1	glucan (1,4-alpha-), branching enzyme 1
hsa-miR-607	1	0	1	1	1	1	GJA1	gap junction protein, alpha 1, 43kDa
hsa-miR-607	1	0	1	1	1	1	GK	glycerol kinase
hsa-miR-607	0	0	1	1	1	1	GLDC	glycine dehydrogenase (decarboxylating)
hsa-miR-607	1	0	1	1	1	1	HK2	hexokinase 2
hsa-miR-607	1	0	1	1	1	1	JAG1	jagged 1
hsa-miR-607	1	0	1	0	1	1	SGCB	sarcoglycan, beta (43kDa dystrophin-associated glycoprotein)
hsa-miR-607	0	0	1	1	1	1	LPL	lipoprotein lipase
hsa-miR-607	0	0	1	0	1	1	PGK1	phosphoglycerate kinase 1
hsa-miR-607	1	0	1	0	1	1	PKD2	polycystic kidney disease 2 (autosomal dominant)
hsa-miR-607	1	0	1	0	1	1	PTEN	phosphatase and tensin homolog
hsa-miR-607	0	0	1	1	1	1	PTS	6-pyruvoyltetrahydropterin synthase
hsa-miR-607	0	0	1	1	1	1	RS1	retinoschisin 1
hsa-miR-607	1	0	1	1	1	1	ATXN1	ataxin 1
hsa-miR-607	0	0	1	1	1	1	SLC5A1	solute carrier family 5 (sodium/glucose cotransporter), member 1
hsa-miR-607	0	0	1	1	1	1	STS	steroid sulfatase (microsomal), isozyme S
hsa-miR-607	1	0	1	1	1	1	CHM	choroideremia (Rab escort protein 1)
hsa-miR-607	1	0	1	0	1	1	CYBB	cytochrome b-245, beta polypeptide
hsa-miR-607	1	0	1	1	1	1	HLCS	holocarboxylase synthetase (biotin-(proprionyl-CoA-carboxylase (ATP-hydrolysing)) ligase)
hsa-miR-607	1	0	1	0	1	1	PAFAH1B1	platelet-activating factor acetylhydrolase 1b, regulatory subunit 1 (45kDa)
hsa-miR-607	1	0	1	1	1	1	SLC26A4	solute carrier family 26, member 4
hsa-miR-607	0	0	1	0	1	1	SLC10A2	solute carrier family 10 (sodium/bile acid cotransporter family), member 2
hsa-miR-607	0	0	1	1	1	1	UGT1A1	UDP glucuronosyltransferase 1 family, polypeptide A1
hsa-miR-607	1	0	1	1	1	1	ATRX	alpha thalassemia/mental retardation syndrome X-linked
hsa-miR-607	1	0	1	1	1	1	CFTR	cystic fibrosis transmembrane conductance regulator (ATP-binding cassette sub-family C, member 7)
hsa-miR-607	1	0	1	1	1	1	HOXD13	homeobox D13
hsa-miR-607	1	0	1	1	1	1	PLP1	proteolipid protein 1
hsa-miR-607	0	0	1	1	1	1	WRN	Werner syndrome, RecQ helicase-like
hsa-miR-607	1	0	1	1	1	1	DCX	doublecortin
hsa-miR-607	1	0	1	1	1	1	CD44	CD44 molecule (Indian blood group)
hsa-miR-607	0	0	1	1	1	1	IFNG	interferon, gamma
hsa-miR-607	0	0	1	1	1	1	GSR	glutathione reductase
hsa-miR-607	0	0	1	1	1	1	AGTR2	angiotensin II receptor, type 2
hsa-miR-607	1	0	1	0	1	1	ALDH1A3	aldehyde dehydrogenase 1 family, member A3
hsa-miR-607	1	0	1	1	1	1	CACNB4	calcium channel, voltage-dependent, beta 4 subunit
hsa-miR-607	1	0	1	0	1	1	GABRA4	gamma-aminobutyric acid (GABA) A receptor, alpha 4
hsa-miR-607	1	0	1	1	1	1	GABRG2	gamma-aminobutyric acid (GABA) A receptor, gamma 2
hsa-miR-607	1	0	1	1	1	1	GRIA4	glutamate receptor, ionotropic, AMPA 4
hsa-miR-607	0	0	1	1	1	1	IL12A	interleukin 12A (natural killer cell stimulatory factor 1, cytotoxic lymphocyte maturation factor 1, p35)
hsa-miR-607	1	0	1	0	1	1	KCNJ2	potassium inwardly-rectifying channel, subfamily J, member 2
hsa-miR-607	1	0	1	1	0	0	PDE3A	phosphodiesterase 3A, cGMP-inhibited
hsa-miR-607	1	0	1	1	1	1	PPP3R1	protein phosphatase 3, regulatory subunit B, alpha
hsa-miR-607	1	0	1	1	1	1	PTGDR	prostaglandin D2 receptor (DP)
hsa-miR-607	1	0	1	1	1	1	PTGER2	prostaglandin E receptor 2 (subtype EP2), 53kDa
hsa-miR-607	1	0	1	1	1	1	PTGER4	prostaglandin E receptor 4 (subtype EP4)
hsa-miR-607	1	0	1	1	1	1	REEP3	receptor accessory protein 3
hsa-miR-607	1	0	1	0	1	1	SMAD5	SMAD family member 5
hsa-miR-607	0	0	1	1	1	1	GALK2	galactokinase 2
hsa-miR-607	1	0	1	0	1	1	SPOPL	speckle-type POZ protein-like
hsa-miR-607	0	0	1	1	1	1	CC2D2B	coiled-coil and C2 domain containing 2B
hsa-miR-607	1	0	1	1	1	1	FAM13C	family with sequence similarity 13, member C
hsa-miR-607	0	0	1	1	1	1	EPSTI1	epithelial stromal interaction 1 (breast)
hsa-miR-607	0	0	1	1	1	1	FCGR2B	Fc fragment of IgG, low affinity IIb, receptor (CD32)
hsa-miR-607	1	0	1	0	1	1	SMAD2	SMAD family member 2
hsa-miR-607	1	0	1	1	1	1	HMGXB4	HMG box domain containing 4
hsa-miR-607	1	0	1	1	1	1	KLHL31	kelch-like 31 (Drosophila)
hsa-miR-607	1	0	1	1	1	1	RBMS3	RNA binding motif, single stranded interacting protein 3
hsa-miR-607	0	0	1	1	1	1	SP5	Sp5 transcription factor
hsa-miR-607	0	0	1	1	1	1	TSPYL6	TSPY-like 6
hsa-miR-607	0	0	1	1	1	1	ANXA13	annexin A13
hsa-miR-607	0	0	1	1	1	1	ALG11	asparagine-linked glycosylation 11, alpha-1,2-mannosyltransferase homolog (yeast)
hsa-miR-607	0	0	1	1	1	1	C1orf168	chromosome 1 open reading frame 168
hsa-miR-607	0	0	1	1	1	1	CCDC144NL	coiled-coil domain containing 144 family, N-terminal like
hsa-miR-607	0	0	1	1	1	1	ZCCHC16	zinc finger, CCHC domain containing 16
hsa-miR-607	1	0	1	0	1	1	LIN28B	lin-28 homolog B (C. elegans)
hsa-miR-607	0	0	1	1	1	1	MTHFD2L	methylenetetrahydrofolate dehydrogenase (NADP+ dependent) 2-like
hsa-miR-607	1	0	1	1	1	1	NCK2	NCK adaptor protein 2
hsa-miR-607	1	0	1	1	1	1	TRIM37	tripartite motif containing 37
hsa-miR-607	1	0	1	0	1	1	PKP2	plakophilin 2
hsa-miR-607	1	0	1	1	1	1	NFKBIZ	nuclear factor of kappa light polypeptide gene enhancer in B-cells inhibitor, zeta
hsa-miR-607	0	0	1	1	1	1	LINC00478	long intergenic non-protein coding RNA 478
hsa-miR-607	0	0	1	1	1	1	SUMO1	SMT3 suppressor of mif two 3 homolog 1 (S. cerevisiae)
hsa-miR-607	0	0	1	1	1	1	MAPKAP1	mitogen-activated protein kinase associated protein 1
hsa-miR-607	1	0	1	0	1	1	PDPN	podoplanin
hsa-miR-607	1	0	1	1	1	1	L3MBTL3	l(3)mbt-like 3 (Drosophila)
hsa-miR-607	0	0	1	1	1	1	IGIP	IgA-inducing protein homolog (Bos taurus)
hsa-miR-607	1	0	1	1	1	1	IGSF3	immunoglobulin superfamily, member 3
hsa-miR-607	1	0	1	1	1	1	TULP4	tubby like protein 4
hsa-miR-607	1	0	1	0	1	1	SS18	synovial sarcoma translocation, chromosome 18
hsa-miR-607	1	0	1	1	1	1	ZDHHC9	zinc finger, DHHC-type containing 9
hsa-miR-607	1	0	1	0	1	1	C18orf25	chromosome 18 open reading frame 25
hsa-miR-607	1	0	1	1	1	1	CTDSPL	CTD (carboxy-terminal domain, RNA polymerase II, polypeptide A) small phosphatase-like
hsa-miR-607	1	0	1	0	1	1	KIAA2022	KIAA2022
hsa-miR-607	0	0	1	1	1	1	MXI1	MAX interactor 1
hsa-miR-607	1	0	1	1	1	1	NUPL1	nucleoporin like 1
hsa-miR-607	1	0	1	1	1	1	FNIP1	folliculin interacting protein 1
hsa-miR-607	1	0	1	1	1	1	CUL4A	cullin 4A
hsa-miR-607	0	0	1	1	1	1	GEMIN2	gem (nuclear organelle) associated protein 2
hsa-miR-607	0	0	1	1	1	1	ZCCHC11	zinc finger, CCHC domain containing 11
hsa-miR-607	1	0	1	0	1	1	ERMN	ermin, ERM-like protein
hsa-miR-607	0	0	1	0	1	1	LPPR5	lipid phosphate phosphatase-related protein type 5
hsa-miR-607	0	0	1	1	1	1	SPIN3	spindlin family, member 3
hsa-miR-607	1	0	1	0	1	1	FAM102B	family with sequence similarity 102, member B
hsa-miR-607	1	0	1	0	1	1	ZC3H12B	zinc finger CCCH-type containing 12B
hsa-miR-607	0	0	1	1	1	1	C1QL3	complement component 1, q subcomponent-like 3
hsa-miR-607	1	0	1	1	1	1	BCL2L15	BCL2-like 15
hsa-miR-607	0	0	1	1	1	1	HGF	hepatocyte growth factor (hepapoietin A; scatter factor)
hsa-miR-607	1	0	1	1	1	1	ATP11C	ATPase, class VI, type 11C
hsa-miR-607	1	0	1	0	1	1	CREB5	cAMP responsive element binding protein 5
hsa-miR-607	1	0	1	0	1	1	FAM125B	family with sequence similarity 125, member B
hsa-miR-607	1	0	1	1	1	1	BTBD1	BTB (POZ) domain containing 1
hsa-miR-607	0	0	1	0	1	1	GOLGA8E	golgin A8 family, member E
hsa-miR-607	1	0	1	1	1	1	DISC1	disrupted in schizophrenia 1
hsa-miR-607	1	0	1	0	1	1	ZKSCAN2	zinc finger with KRAB and SCAN domains 2
hsa-miR-607	1	0	1	0	1	1	ZNF793	zinc finger protein 793
hsa-miR-607	0	0	1	0	0	0	LOC441956	uncharacterized LOC441956
hsa-miR-607	1	0	1	0	1	1	SYT14L	synaptotagmin XIV-like
hsa-miR-607	1	0	1	1	1	1	KATNAL1	katanin p60 subunit A-like 1
hsa-miR-607	1	0	1	1	1	1	RUNX2	runt-related transcription factor 2
hsa-miR-607	0	0	1	1	1	1	PURG	purine-rich element binding protein G
hsa-miR-607	1	0	1	1	1	1	TMCC1	transmembrane and coiled-coil domain family 1
hsa-miR-607	0	0	1	1	1	1	USP1	ubiquitin specific peptidase 1
hsa-miR-607	0	0	1	1	1	1	BTBD11	BTB (POZ) domain containing 11
hsa-miR-607	1	0	1	1	1	1	ZHX1	zinc fingers and homeoboxes 1
hsa-miR-607	0	0	1	0	1	1	TMEM30B	transmembrane protein 30B
hsa-miR-607	0	0	1	1	1	1	RAB28	RAB28, member RAS oncogene family
hsa-miR-607	1	0	1	1	1	1	VMA21	VMA21 vacuolar H+-ATPase homolog (S. cerevisiae)
hsa-miR-607	1	0	1	0	1	1	BRCC3	BRCA1/BRCA2-containing complex, subunit 3
hsa-miR-607	0	0	1	1	1	1	POLR2M	polymerase (RNA) II (DNA directed) polypeptide M
hsa-miR-607	0	0	1	1	1	1	FANCB	Fanconi anemia, complementation group B
hsa-miR-607	0	0	1	1	1	1	ZNF187	zinc finger protein 187
hsa-miR-607	1	0	1	1	1	1	GPHN	gephyrin
hsa-miR-607	0	0	1	0	1	1	TM2D2	TM2 domain containing 2
hsa-miR-607	1	0	1	0	1	1	BCL7A	B-cell CLL/lymphoma 7A
hsa-miR-607	1	0	1	0	1	1	TNRC6B	trinucleotide repeat containing 6B
hsa-miR-607	0	0	1	1	1	1	WASF1	WAS protein family, member 1
hsa-miR-607	1	0	1	1	1	1	YIPF5	Yip1 domain family, member 5
hsa-miR-607	1	0	1	1	1	1	FNBP1L	formin binding protein 1-like
hsa-miR-607	1	0	1	1	1	1	AFF3	AF4/FMR2 family, member 3
hsa-miR-607	1	0	1	0	1	1	C3orf70	chromosome 3 open reading frame 70
hsa-miR-607	1	0	1	0	1	1	RAB12	RAB12, member RAS oncogene family
hsa-miR-607	0	0	1	1	1	1	SPAG16	sperm associated antigen 16
hsa-miR-607	0	0	1	1	1	1	CELF1	CUGBP, Elav-like family member 1
hsa-miR-607	1	0	1	1	1	1	UGGT1	UDP-glucose glycoprotein glucosyltransferase 1
hsa-miR-607	0	0	1	1	1	1	SOWAHB	sosondowah ankyrin repeat domain family member B
hsa-miR-607	0	0	1	1	1	1	CIB4	calcium and integrin binding family member 4
hsa-miR-607	1	0	1	1	1	1	PLEKHG1	pleckstrin homology domain containing, family G (with RhoGef domain) member 1
hsa-miR-607	1	0	1	0	1	1	SAMD5	sterile alpha motif domain containing 5
hsa-miR-607	1	0	1	0	1	1	MSRB3	methionine sulfoxide reductase B3
hsa-miR-607	0	0	1	1	1	1	TP53BP2	tumor protein p53 binding protein, 2
hsa-miR-607	0	0	1	1	1	1	TRMT11	tRNA methyltransferase 11 homolog (S. cerevisiae)
hsa-miR-607	1	0	1	1	1	1	MAF	v-maf musculoaponeurotic fibrosarcoma oncogene homolog (avian)
hsa-miR-607	0	0	1	0	1	1	STXBP1	syntaxin binding protein 1
hsa-miR-607	1	0	1	1	1	1	KLF10	Kruppel-like factor 10
hsa-miR-607	1	0	1	1	1	1	UBE2V1	ubiquitin-conjugating enzyme E2 variant 1
hsa-miR-607	1	0	1	0	1	1	MINOS1	mitochondrial inner membrane organizing system 1
hsa-miR-607	1	0	1	1	1	1	AMD1	adenosylmethionine decarboxylase 1
hsa-miR-607	1	0	1	1	1	1	MYCL1	v-myc myelocytomatosis viral oncogene homolog 1, lung carcinoma derived (avian)
hsa-miR-607	1	0	1	1	1	1	SAR1B	SAR1 homolog B (S. cerevisiae)
hsa-miR-607	1	0	1	1	1	1	TMEM98	transmembrane protein 98
hsa-miR-607	1	0	1	1	1	1	PPM1B	protein phosphatase, Mg2+/Mn2+ dependent, 1B
hsa-miR-607	0	0	1	1	1	1	FAM134B	family with sequence similarity 134, member B
hsa-miR-607	1	0	1	1	1	1	VPS26A	vacuolar protein sorting 26 homolog A (S. pombe)
hsa-miR-607	1	0	1	1	1	1	AGAP1	ArfGAP with GTPase domain, ankyrin repeat and PH domain 1
hsa-miR-607	1	0	1	1	1	1	ACPL2	acid phosphatase-like 2
hsa-miR-607	1	0	1	0	1	1	ARL5A	ADP-ribosylation factor-like 5A
hsa-miR-607	0	0	1	1	1	1	CEP112	centrosomal protein 112kDa
hsa-miR-607	0	0	1	1	1	1	CTLA4	cytotoxic T-lymphocyte-associated protein 4
hsa-miR-607	1	0	1	1	1	1	NPM1	nucleophosmin (nucleolar phosphoprotein B23, numatrin)
hsa-miR-607	0	0	1	1	1	1	MARVELD2	MARVEL domain containing 2
hsa-miR-607	0	0	1	0	1	1	FER1L6-AS1	FER1L6 antisense RNA 1
hsa-miR-607	0	0	1	1	1	1	SPATA6L	spermatogenesis associated 6-like
hsa-miR-607	0	0	1	1	1	1	SKA1	spindle and kinetochore associated complex subunit 1
hsa-miR-607	1	0	1	0	1	1	GK5	glycerol kinase 5 (putative)
hsa-miR-607	1	0	1	1	1	1	AP1S3	adaptor-related protein complex 1, sigma 3 subunit
hsa-miR-607	1	0	1	1	1	1	SEC14L1	SEC14-like 1 (S. cerevisiae)
hsa-miR-607	1	0	1	0	1	1	CREBZF	CREB/ATF bZIP transcription factor
hsa-miR-607	1	0	1	1	1	1	CDC42	cell division cycle 42 (GTP binding protein, 25kDa)
hsa-miR-607	0	0	1	0	1	1	C15orf56	chromosome 15 open reading frame 56
hsa-miR-607	1	0	1	1	1	1	ZNF384	zinc finger protein 384
hsa-miR-607	1	0	1	1	1	1	MLLT4	myeloid/lymphoid or mixed-lineage leukemia (trithorax homolog, Drosophila); translocated to, 4
hsa-miR-607	1	0	1	1	1	1	TCERG1	transcription elongation regulator 1
hsa-miR-607	1	0	1	0	1	1	FAM133B	family with sequence similarity 133, member B
hsa-miR-607	0	0	1	1	1	1	SPOCK3	sparc/osteonectin, cwcv and kazal-like domains proteoglycan (testican) 3
hsa-miR-607	1	0	1	0	1	1	CD83	CD83 molecule
hsa-miR-607	1	0	1	1	1	1	PAPD5	PAP associated domain containing 5
hsa-miR-607	1	0	1	1	1	1	ZBTB8A	zinc finger and BTB domain containing 8A
hsa-miR-607	1	0	1	1	1	1	MTMR12	myotubularin related protein 12
hsa-miR-607	1	0	1	1	1	1	PRKAG2	protein kinase, AMP-activated, gamma 2 non-catalytic subunit
hsa-miR-607	1	0	1	1	1	1	CRCP	CGRP receptor component
hsa-miR-607	0	0	1	0	1	1	STEAP2	STEAP family member 2, metalloreductase
hsa-miR-607	0	0	1	1	1	1	SI	sucrase-isomaltase (alpha-glucosidase)
hsa-miR-607	1	0	1	1	1	1	HMGCLL1	3-hydroxymethyl-3-methylglutaryl-CoA lyase-like 1
hsa-miR-607	1	0	1	1	1	1	RUFY2	RUN and FYVE domain containing 2
hsa-miR-607	0	0	1	1	1	1	MST4	serine/threonine protein kinase MST4
hsa-miR-607	0	0	1	1	1	1	GEMIN8	gem (nuclear organelle) associated protein 8
hsa-miR-607	1	0	1	1	1	1	ZNF706	zinc finger protein 706
hsa-miR-607	1	0	1	1	1	1	C2orf88	chromosome 2 open reading frame 88
hsa-miR-607	1	0	1	1	1	1	SLC9A6	solute carrier family 9, subfamily A (NHE6, cation proton antiporter 6), member 6
hsa-miR-607	1	0	1	1	1	1	NSL1	NSL1, MIND kinetochore complex component, homolog (S. cerevisiae)
hsa-miR-607	1	0	1	1	1	1	FRS2	fibroblast growth factor receptor substrate 2
hsa-miR-607	1	0	1	1	1	1	ERBB4	v-erb-a erythroblastic leukemia viral oncogene homolog 4 (avian)
hsa-miR-607	0	0	1	1	1	1	TTC14	tetratricopeptide repeat domain 14
hsa-miR-607	0	0	1	1	1	1	TRAK1	trafficking protein, kinesin binding 1
hsa-miR-607	0	0	1	0	1	1	IQCJ	IQ motif containing J
hsa-miR-607	0	0	1	1	1	1	SEC24B	SEC24 family, member B (S. cerevisiae)
hsa-miR-607	1	0	1	0	1	1	TMEM237	transmembrane protein 237
hsa-miR-607	1	0	1	0	1	1	SLC12A2	solute carrier family 12 (sodium/potassium/chloride transporters), member 2
hsa-miR-607	1	0	1	1	1	1	NET1	neuroepithelial cell transforming 1
hsa-miR-607	1	0	1	1	1	1	MZT1	mitotic spindle organizing protein 1
hsa-miR-607	0	0	1	1	1	1	UGT1A6	UDP glucuronosyltransferase 1 family, polypeptide A6
hsa-miR-607	1	0	1	0	1	1	SLC7A6	solute carrier family 7 (amino acid transporter light chain, y+L system), member 6
hsa-miR-607	1	0	1	1	1	1	QSER1	glutamine and serine rich 1
hsa-miR-607	1	0	1	1	1	1	CDC14B	CDC14 cell division cycle 14 homolog B (S. cerevisiae)
hsa-miR-607	1	0	1	1	1	1	PDE11A	phosphodiesterase 11A
hsa-miR-607	1	0	1	1	1	1	IRF2BP2	interferon regulatory factor 2 binding protein 2
hsa-miR-607	1	0	1	1	1	1	PHF16	PHD finger protein 16
hsa-miR-607	1	0	1	1	1	1	PRR3	proline rich 3
hsa-miR-607	1	0	1	0	1	1	UBXN2B	UBX domain protein 2B
hsa-miR-607	0	0	1	0	0	0	AGAP7	ArfGAP with GTPase domain, ankyrin repeat and PH domain 7
hsa-miR-607	0	0	1	1	1	1	FKTN	fukutin
hsa-miR-607	1	0	1	1	1	1	OCIAD1	OCIA domain containing 1
hsa-miR-607	1	0	1	1	1	1	VAV3	vav 3 guanine nucleotide exchange factor
hsa-miR-607	0	0	1	1	1	1	CNGA3	cyclic nucleotide gated channel alpha 3
hsa-miR-607	1	0	1	1	1	1	DMP1	dentin matrix acidic phosphoprotein 1
hsa-miR-607	1	0	1	1	1	1	LDB3	LIM domain binding 3
hsa-miR-607	1	0	1	0	1	1	CCDC85A	coiled-coil domain containing 85A
hsa-miR-607	1	0	1	1	1	1	DNA2	DNA replication helicase 2 homolog (yeast)
hsa-miR-607	0	0	1	1	0	0	SLC35F4	solute carrier family 35, member F4
hsa-miR-607	1	0	1	1	1	1	MBOAT1	membrane bound O-acyltransferase domain containing 1
hsa-miR-607	1	0	1	0	1	1	MEGF9	multiple EGF-like-domains 9
hsa-miR-607	0	0	1	0	1	1	RBM44	RNA binding motif protein 44
hsa-miR-607	1	0	1	1	1	1	MGA	MAX gene associated
hsa-miR-607	1	0	1	1	1	1	REPS2	RALBP1 associated Eps domain containing 2
hsa-miR-607	1	0	1	0	1	1	SCN3A	sodium channel, voltage-gated, type III, alpha subunit
hsa-miR-607	1	0	1	0	1	1	PDE5A	phosphodiesterase 5A, cGMP-specific
hsa-miR-607	1	0	1	1	1	1	ADCY9	adenylate cyclase 9
hsa-miR-607	1	0	1	0	1	1	XIAP	X-linked inhibitor of apoptosis
hsa-miR-607	1	0	1	1	1	1	PRDM1	PR domain containing 1, with ZNF domain
hsa-miR-607	1	0	1	1	1	1	BMP3	bone morphogenetic protein 3
hsa-miR-607	1	0	1	0	1	1	BMPR2	bone morphogenetic protein receptor, type II (serine/threonine kinase)
hsa-miR-607	1	0	1	0	1	1	KLF9	Kruppel-like factor 9
hsa-miR-607	1	0	1	0	1	1	CDK6	cyclin-dependent kinase 6
hsa-miR-607	1	0	1	1	1	1	CHKA	choline kinase alpha
hsa-miR-607	0	0	1	1	1	1	CHUK	conserved helix-loop-helix ubiquitous kinase
hsa-miR-607	1	0	1	1	1	1	CLCN6	chloride channel, voltage-sensitive 6
hsa-miR-607	0	0	1	1	1	1	CLIC2	chloride intracellular channel 2
hsa-miR-607	1	0	1	0	1	1	CPD	carboxypeptidase D
hsa-miR-607	1	0	1	1	1	1	CREBL2	cAMP responsive element binding protein-like 2
hsa-miR-607	1	0	1	1	1	1	MAPK14	mitogen-activated protein kinase 14
hsa-miR-607	1	0	1	1	1	1	CTNND2	catenin (cadherin-associated protein), delta 2
hsa-miR-607	0	0	1	1	1	1	DARS	aspartyl-tRNA synthetase
hsa-miR-607	1	0	1	1	1	1	DYRK1A	dual-specificity tyrosine-(Y)-phosphorylation regulated kinase 1A
hsa-miR-607	1	0	1	0	1	1	EFNB3	ephrin-B3
hsa-miR-607	1	0	1	1	1	1	EIF1AX	eukaryotic translation initiation factor 1A, X-linked
hsa-miR-607	1	0	1	0	1	1	EIF2S3	eukaryotic translation initiation factor 2, subunit 3 gamma, 52kDa
hsa-miR-607	1	0	1	1	1	1	EN1	engrailed homeobox 1
hsa-miR-607	1	0	1	1	1	1	EREG	epiregulin
hsa-miR-607	1	0	1	1	1	1	FOXF1	forkhead box F1
hsa-miR-607	0	0	1	0	1	1	FMO2	flavin containing monooxygenase 2 (non-functional)
hsa-miR-607	1	0	1	1	1	1	GTF2B	general transcription factor IIB
hsa-miR-607	0	0	1	1	0	0	GUCY2F	guanylate cyclase 2F, retinal
hsa-miR-607	1	0	1	0	1	1	MPPED2	metallophosphoesterase domain containing 2
hsa-miR-607	0	0	1	1	0	0	AARS	alanyl-tRNA synthetase
hsa-miR-607	0	0	1	1	1	1	ARF4	ADP-ribosylation factor 4
hsa-miR-607	1	0	1	1	1	1	ATP6V1A	ATPase, H+ transporting, lysosomal 70kDa, V1 subunit A
hsa-miR-607	0	0	1	1	0	0	BICD1	bicaudal D homolog 1 (Drosophila)
hsa-miR-607	1	0	1	1	1	1	CBFB	core-binding factor, beta subunit
hsa-miR-607	1	0	1	0	1	1	CCND2	cyclin D2
hsa-miR-607	0	0	1	1	1	1	CD1D	CD1d molecule
hsa-miR-607	0	0	1	1	1	1	CDO1	cysteine dioxygenase, type I
hsa-miR-607	0	0	1	1	1	1	CEACAM8	carcinoembryonic antigen-related cell adhesion molecule 8
hsa-miR-607	1	0	1	1	1	1	CLCN4	chloride channel, voltage-sensitive 4
hsa-miR-607	0	0	1	1	0	0	CNTFR	ciliary neurotrophic factor receptor
hsa-miR-607	1	0	1	0	1	1	COL19A1	collagen, type XIX, alpha 1
hsa-miR-607	0	0	1	1	1	1	COX7B	cytochrome c oxidase subunit VIIb
hsa-miR-607	1	0	1	1	1	1	CREM	cAMP responsive element modulator
hsa-miR-607	0	0	1	1	1	1	CSN2	casein beta
hsa-miR-607	0	0	1	1	1	1	CTSE	cathepsin E
hsa-miR-607	0	0	1	1	1	1	GADD45A	growth arrest and DNA-damage-inducible, alpha
hsa-miR-607	0	0	1	1	1	1	DLAT	dihydrolipoamide S-acetyltransferase
hsa-miR-607	1	0	1	1	1	1	HBEGF	heparin-binding EGF-like growth factor
hsa-miR-607	1	0	1	1	1	1	E2F3	E2F transcription factor 3
hsa-miR-607	0	0	1	0	1	1	STX2	syntaxin 2
hsa-miR-607	1	0	1	1	1	1	FGF7	fibroblast growth factor 7
hsa-miR-607	1	0	1	0	1	1	FOXO1	forkhead box O1
hsa-miR-607	1	0	1	0	1	1	FUT4	fucosyltransferase 4 (alpha (1,3) fucosyltransferase, myeloid-specific)
hsa-miR-607	1	0	1	1	1	1	KDSR	3-ketodihydrosphingosine reductase
hsa-miR-607	1	0	1	1	1	1	GAB1	GRB2-associated binding protein 1
hsa-miR-607	1	0	1	1	1	1	GLRA2	glycine receptor, alpha 2
hsa-miR-607	1	0	1	0	1	1	GNAI1	guanine nucleotide binding protein (G protein), alpha inhibiting activity polypeptide 1
hsa-miR-607	0	0	1	1	1	1	GNB1	guanine nucleotide binding protein (G protein), beta polypeptide 1
hsa-miR-607	1	0	1	1	1	1	GOT2	glutamic-oxaloacetic transaminase 2, mitochondrial (aspartate aminotransferase 2)
hsa-miR-607	1	0	1	1	0	0	GYPC	glycophorin C (Gerbich blood group)
hsa-miR-607	1	0	1	1	1	1	HOXB3	homeobox B3
hsa-miR-607	0	0	1	1	1	1	FOXN2	forkhead box N2
hsa-miR-607	1	0	1	1	0	0	INHBB	inhibin, beta B
hsa-miR-607	1	0	1	0	1	1	IRF2	interferon regulatory factor 2
hsa-miR-607	1	0	1	1	1	1	ITGA2	integrin, alpha 2 (CD49B, alpha 2 subunit of VLA-2 receptor)
hsa-miR-607	0	0	1	0	1	1	ITGAV	integrin, alpha V
hsa-miR-607	1	0	1	1	1	1	ITGB8	integrin, beta 8
hsa-miR-607	1	0	1	1	1	1	JUN	jun proto-oncogene
hsa-miR-607	0	0	1	1	1	1	KCNJ6	potassium inwardly-rectifying channel, subfamily J, member 6
hsa-miR-607	1	0	1	1	1	1	KPNA4	karyopherin alpha 4 (importin alpha 3)
hsa-miR-607	1	0	1	1	1	1	IPO5	importin 5
hsa-miR-607	1	0	1	1	1	1	LBR	lamin B receptor
hsa-miR-607	1	0	1	1	1	1	LEPR	leptin receptor
hsa-miR-607	1	0	1	0	1	1	MXD1	MAX dimerization protein 1
hsa-miR-607	1	0	1	1	1	1	MAX	MYC associated factor X
hsa-miR-607	1	0	1	1	1	1	ME1	malic enzyme 1, NADP(+)-dependent, cytosolic
hsa-miR-607	0	0	1	0	1	1	CXCL9	chemokine (C-X-C motif) ligand 9
hsa-miR-607	0	0	1	1	1	1	MMP1	matrix metallopeptidase 1 (interstitial collagenase)
hsa-miR-607	1	0	1	1	1	1	MN1	meningioma (disrupted in balanced translocation) 1
hsa-miR-607	0	0	1	1	1	1	MRC1	mannose receptor, C type 1
hsa-miR-607	0	0	1	1	1	1	MSX1	msh homeobox 1
hsa-miR-607	1	0	1	1	1	1	PPP1R12B	protein phosphatase 1, regulatory subunit 12B
hsa-miR-607	1	0	1	1	1	1	NDN	necdin homolog (mouse)
hsa-miR-607	0	0	1	1	1	1	NID1	nidogen 1
hsa-miR-607	1	0	1	1	1	1	NPAT	nuclear protein, ataxia-telangiectasia locus
hsa-miR-607	1	0	1	1	1	1	OLR1	oxidized low density lipoprotein (lectin-like) receptor 1
hsa-miR-607	0	0	1	0	1	1	OPHN1	oligophrenin 1
hsa-miR-607	1	0	1	1	1	1	OSBP	oxysterol binding protein
hsa-miR-607	1	0	1	1	1	1	PBX2	pre-B-cell leukemia homeobox 2
hsa-miR-607	0	0	1	1	1	1	PDE7A	phosphodiesterase 7A
hsa-miR-607	0	0	1	1	1	1	SERPINB8	serpin peptidase inhibitor, clade B (ovalbumin), member 8
hsa-miR-607	1	0	1	1	1	1	PPP1CB	protein phosphatase 1, catalytic subunit, beta isozyme
hsa-miR-607	1	0	1	0	0	0	PPP1R10	protein phosphatase 1, regulatory subunit 10
hsa-miR-607	1	0	1	1	1	1	PPP2R1B	protein phosphatase 2, regulatory subunit A, beta
hsa-miR-607	0	0	1	1	1	1	PRKACA	protein kinase, cAMP-dependent, catalytic, alpha
hsa-miR-607	1	0	1	0	1	1	MAPK4	mitogen-activated protein kinase 4
hsa-miR-607	0	0	1	1	1	1	PSMD10	proteasome (prosome, macropain) 26S subunit, non-ATPase, 10
hsa-miR-607	1	0	1	1	1	1	PTPN2	protein tyrosine phosphatase, non-receptor type 2
hsa-miR-607	1	0	1	1	1	1	PTPN4	protein tyrosine phosphatase, non-receptor type 4 (megakaryocyte)
hsa-miR-607	0	0	1	1	1	1	PTPN12	protein tyrosine phosphatase, non-receptor type 12
hsa-miR-607	1	0	1	1	1	1	PTPRJ	protein tyrosine phosphatase, receptor type, J
hsa-miR-607	1	0	1	1	1	1	RAB2A	RAB2A, member RAS oncogene family
hsa-miR-607	1	0	1	0	1	1	RAP2B	RAP2B, member of RAS oncogene family
hsa-miR-607	1	0	1	1	1	1	ARID4A	AT rich interactive domain 4A (RBP1-like)
hsa-miR-607	1	0	1	0	1	1	SORT1	sortilin 1
hsa-miR-607	1	0	1	0	1	1	CCL22	chemokine (C-C motif) ligand 22
hsa-miR-607	0	0	1	1	1	1	SDC2	syndecan 2
hsa-miR-607	0	0	1	1	1	1	SH3BGRL	SH3 domain binding glutamic acid-rich protein like
hsa-miR-607	0	0	1	0	0	0	SLC18A2	solute carrier family 18 (vesicular monoamine), member 2
hsa-miR-607	1	0	1	1	1	1	SOX2	SRY (sex determining region Y)-box 2
hsa-miR-607	0	0	1	1	1	1	SQLE	squalene epoxidase
hsa-miR-607	0	0	1	1	1	1	SRP9	signal recognition particle 9kDa
hsa-miR-607	0	0	1	1	1	1	STAT5A	signal transducer and activator of transcription 5A
hsa-miR-607	1	0	1	0	1	1	STC1	stanniocalcin 1
hsa-miR-607	0	0	1	1	1	1	SUPT6H	suppressor of Ty 6 homolog (S. cerevisiae)
hsa-miR-607	1	0	1	1	1	1	SYN2	synapsin II
hsa-miR-607	1	0	1	0	1	1	TAL1	T-cell acute lymphocytic leukemia 1
hsa-miR-607	1	0	1	1	1	1	TDG	thymine-DNA glycosylase
hsa-miR-607	1	0	1	1	1	1	TFAP2C	transcription factor AP-2 gamma (activating enhancer binding protein 2 gamma)
hsa-miR-607	1	0	1	1	1	1	TIAM1	T-cell lymphoma invasion and metastasis 1
hsa-miR-607	0	0	1	1	1	1	TRAF3	TNF receptor-associated factor 3
hsa-miR-607	0	0	1	1	1	1	TTK	TTK protein kinase
hsa-miR-607	1	0	1	1	1	1	UBE2B	ubiquitin-conjugating enzyme E2B
hsa-miR-607	0	0	1	1	1	1	UBE2D1	ubiquitin-conjugating enzyme E2D 1
hsa-miR-607	1	0	1	0	1	1	UBE2D2	ubiquitin-conjugating enzyme E2D 2
hsa-miR-607	1	0	1	0	1	1	UBE2L3	ubiquitin-conjugating enzyme E2L 3
hsa-miR-607	1	0	1	1	1	1	UBE2N	ubiquitin-conjugating enzyme E2N
hsa-miR-607	1	0	1	1	1	1	UCP3	uncoupling protein 3 (mitochondrial, proton carrier)
hsa-miR-607	0	0	1	1	1	1	VRK1	vaccinia related kinase 1
hsa-miR-607	1	0	1	1	1	1	VSNL1	visinin-like 1
hsa-miR-607	1	0	1	0	1	1	YWHAB	tyrosine 3-monooxygenase/tryptophan 5-monooxygenase activation protein, beta polypeptide
hsa-miR-607	1	0	1	1	1	1	ZIC3	Zic family member 3
hsa-miR-607	1	0	1	1	1	1	FZD5	frizzled family receptor 5
hsa-miR-607	1	0	1	1	1	1	DEK	DEK oncogene
hsa-miR-607	1	0	1	1	1	1	PDHX	pyruvate dehydrogenase complex, component X
hsa-miR-607	1	0	1	1	1	1	NRIP1	nuclear receptor interacting protein 1
hsa-miR-607	0	0	1	1	1	1	PIP5K1A	phosphatidylinositol-4-phosphate 5-kinase, type I, alpha
hsa-miR-607	1	0	1	1	1	1	PIP4K2B	phosphatidylinositol-5-phosphate 4-kinase, type II, beta
hsa-miR-607	0	0	1	1	1	1	RGS5	regulator of G-protein signaling 5
hsa-miR-607	0	0	1	1	1	1	AGPS	alkylglycerone phosphate synthase
hsa-miR-607	1	0	1	1	1	1	CDC14A	CDC14 cell division cycle 14 homolog A (S. cerevisiae)
hsa-miR-607	0	0	1	1	1	1	PRPF18	PRP18 pre-mRNA processing factor 18 homolog (S. cerevisiae)
hsa-miR-607	0	0	1	1	1	1	KMO	kynurenine 3-monooxygenase (kynurenine 3-hydroxylase)
hsa-miR-607	1	0	1	1	1	1	EXO1	exonuclease 1
hsa-miR-607	0	0	1	1	1	1	UNC5C	unc-5 homolog C (C. elegans)
hsa-miR-607	1	0	1	1	1	1	MBTPS1	membrane-bound transcription factor peptidase, site 1
hsa-miR-607	1	0	1	1	1	1	URI1	URI1, prefoldin-like chaperone
hsa-miR-607	1	0	1	1	1	1	NR5A2	nuclear receptor subfamily 5, group A, member 2
hsa-miR-607	1	0	1	1	1	1	SNAP23	synaptosomal-associated protein, 23kDa
hsa-miR-607	1	0	1	1	1	1	SUCLG2	succinate-CoA ligase, GDP-forming, beta subunit
hsa-miR-607	0	0	1	1	1	1	SUCLA2	succinate-CoA ligase, ADP-forming, beta subunit
hsa-miR-607	0	0	1	1	1	1	IL18R1	interleukin 18 receptor 1
hsa-miR-607	1	0	1	1	1	1	NRP2	neuropilin 2
hsa-miR-607	0	0	1	1	0	0	GGH	gamma-glutamyl hydrolase (conjugase, folylpolygammaglutamyl hydrolase)
hsa-miR-607	1	0	1	0	1	1	CDK5R1	cyclin-dependent kinase 5, regulatory subunit 1 (p35)
hsa-miR-607	1	0	1	0	1	1	SGPL1	sphingosine-1-phosphate lyase 1
hsa-miR-607	0	0	1	1	1	1	PRPF4B	PRP4 pre-mRNA processing factor 4 homolog B (yeast)
hsa-miR-607	0	0	1	0	1	1	AP1S2	adaptor-related protein complex 1, sigma 2 subunit
hsa-miR-607	0	0	1	1	1	1	HERC1	HECT and RLD domain containing E3 ubiquitin protein ligase family member 1
hsa-miR-607	0	0	1	1	1	1	RNF8	ring finger protein 8, E3 ubiquitin protein ligase
hsa-miR-607	1	0	1	1	1	1	BCL2L2	BCL2-like 2
hsa-miR-607	1	0	1	1	1	1	CDH17	cadherin 17, LI cadherin (liver-intestine)
hsa-miR-607	0	0	1	1	0	0	CDR1	cerebellar degeneration-related protein 1, 34kDa
hsa-miR-607	0	0	1	1	1	1	CETN1	centrin, EF-hand protein, 1
hsa-miR-607	1	0	1	1	1	1	FGF12	fibroblast growth factor 12
hsa-miR-607	1	0	1	1	1	1	GMFB	glia maturation factor, beta
hsa-miR-607	1	0	1	1	1	1	HNF4G	hepatocyte nuclear factor 4, gamma
hsa-miR-607	1	0	1	1	1	1	SHMT1	serine hydroxymethyltransferase 1 (soluble)
hsa-miR-607	0	0	1	1	1	1	SLC1A1	solute carrier family 1 (neuronal/epithelial high affinity glutamate transporter, system Xag), member 1
hsa-miR-607	1	0	1	0	1	1	SLC1A2	solute carrier family 1 (glial high affinity glutamate transporter), member 2
hsa-miR-607	0	0	1	1	0	0	WNT2B	wingless-type MMTV integration site family, member 2B
hsa-miR-607	0	0	1	1	0	0	EBAG9	estrogen receptor binding site associated, antigen, 9
hsa-miR-607	1	0	1	1	1	1	STK17B	serine/threonine kinase 17b
hsa-miR-607	1	0	1	0	1	1	MED14	mediator complex subunit 14
hsa-miR-607	0	0	1	1	1	1	PRLHR	prolactin releasing hormone receptor
hsa-miR-607	0	0	1	1	1	1	SEP15	15 kDa selenoprotein
hsa-miR-607	1	0	1	0	1	1	AKAP6	A kinase (PRKA) anchor protein 6
hsa-miR-607	1	0	1	1	1	1	SLC25A27	solute carrier family 25, member 27
hsa-miR-607	1	0	1	1	1	1	GDA	guanine deaminase
hsa-miR-607	1	0	1	1	1	1	ARL3	ADP-ribosylation factor-like 3
hsa-miR-607	0	0	1	1	1	1	COPA	coatomer protein complex, subunit alpha
hsa-miR-607	1	0	1	1	1	1	CREB1	cAMP responsive element binding protein 1
hsa-miR-607	1	0	1	1	1	1	DACH1	dachshund homolog 1 (Drosophila)
hsa-miR-607	1	0	1	1	1	1	DDX5	DEAD (Asp-Glu-Ala-Asp) box helicase 5
hsa-miR-607	1	0	1	1	1	1	DUSP5	dual specificity phosphatase 5
hsa-miR-607	1	0	1	1	1	1	EPS8	epidermal growth factor receptor pathway substrate 8
hsa-miR-607	1	0	1	0	1	1	ETV5	ets variant 5
hsa-miR-607	1	0	1	0	1	1	ACSL4	acyl-CoA synthetase long-chain family member 4
hsa-miR-607	0	0	1	1	1	1	GPC5	glypican 5
hsa-miR-607	0	0	1	1	1	1	FOXA1	forkhead box A1
hsa-miR-607	1	0	1	1	1	1	ONECUT1	one cut homeobox 1
hsa-miR-607	1	0	1	1	1	1	FOXK2	forkhead box K2
hsa-miR-607	1	0	1	0	1	1	PKNOX1	PBX/knotted 1 homeobox 1
hsa-miR-607	0	0	1	0	1	1	POU4F2	POU class 4 homeobox 2
hsa-miR-607	0	0	1	1	1	1	RAB27A	RAB27A, member RAS oncogene family
hsa-miR-607	0	0	1	1	1	1	SMS	spermine synthase
hsa-miR-607	0	0	1	1	1	1	TRAF6	TNF receptor-associated factor 6, E3 ubiquitin protein ligase
hsa-miR-607	1	0	1	0	1	1	USP9Y	ubiquitin specific peptidase 9, Y-linked
hsa-miR-607	1	0	1	1	1	1	RAB11A	RAB11A, member RAS oncogene family
hsa-miR-607	0	0	1	1	1	1	LIN7A	lin-7 homolog A (C. elegans)
hsa-miR-607	1	0	1	1	1	1	MTMR4	myotubularin related protein 4
hsa-miR-607	1	0	1	1	0	0	COX7A2L	cytochrome c oxidase subunit VIIa polypeptide 2 like
hsa-miR-607	0	0	1	1	1	1	BUB3	budding uninhibited by benzimidazoles 3 homolog (yeast)
hsa-miR-607	1	0	1	1	1	1	NREP	neuronal regeneration related protein homolog (rat)
hsa-miR-607	1	0	1	0	1	1	VAMP3	vesicle-associated membrane protein 3 (cellubrevin)
hsa-miR-607	1	0	1	1	1	1	SNAP29	synaptosomal-associated protein, 29kDa
hsa-miR-607	1	0	1	1	1	1	KIF3B	kinesin family member 3B
hsa-miR-607	1	0	1	1	1	1	HOMER2	homer homolog 2 (Drosophila)
hsa-miR-607	1	0	1	1	1	1	AKAP7	A kinase (PRKA) anchor protein 7
hsa-miR-607	1	0	1	1	1	1	ONECUT2	one cut homeobox 2
hsa-miR-607	1	0	1	1	1	1	CXCL14	chemokine (C-X-C motif) ligand 14
hsa-miR-607	0	0	1	1	1	1	MRPL33	mitochondrial ribosomal protein L33
hsa-miR-607	0	0	1	1	0	0	PDIA4	protein disulfide isomerase family A, member 4
hsa-miR-607	1	0	1	0	1	1	DOCK3	dedicator of cytokinesis 3
hsa-miR-607	0	0	1	0	1	1	DSC2	desmocollin 2
hsa-miR-607	0	0	1	1	1	1	SERPINI1	serpin peptidase inhibitor, clade I (neuroserpin), member 1
hsa-miR-607	1	0	1	0	1	1	SCD	stearoyl-CoA desaturase (delta-9-desaturase)
hsa-miR-607	1	0	1	0	1	1	SEL1L	sel-1 suppressor of lin-12-like (C. elegans)
hsa-miR-607	1	0	1	1	1	1	SFPQ	splicing factor proline/glutamine-rich
hsa-miR-607	0	0	1	1	1	1	XYLB	xylulokinase homolog (H. influenzae)
hsa-miR-607	1	0	1	1	1	1	MED13	mediator complex subunit 13
hsa-miR-607	1	0	1	0	1	1	NUP153	nucleoporin 153kDa
hsa-miR-607	0	0	1	1	1	1	DOPEY2	dopey family member 2
hsa-miR-607	0	0	1	1	1	1	ATP5C1	ATP synthase, H+ transporting, mitochondrial F1 complex, gamma polypeptide 1
hsa-miR-607	1	0	1	1	1	1	BMI1	BMI1 polycomb ring finger oncogene
hsa-miR-607	0	0	1	1	1	1	CA3	carbonic anhydrase III, muscle specific
hsa-miR-607	1	0	1	1	1	1	CBL	Cbl proto-oncogene, E3 ubiquitin protein ligase
hsa-miR-607	1	0	1	0	1	1	CEBPD	CCAAT/enhancer binding protein (C/EBP), delta
hsa-miR-607	0	0	1	1	1	1	MSTN	myostatin
hsa-miR-607	1	0	1	1	1	1	GEM	GTP binding protein overexpressed in skeletal muscle
hsa-miR-607	1	0	1	1	1	1	GPM6A	glycoprotein M6A
hsa-miR-607	0	0	1	1	1	1	H1F0	H1 histone family, member 0
hsa-miR-607	1	0	1	1	1	1	NCL	nucleolin
hsa-miR-607	0	0	1	1	1	1	NUP98	nucleoporin 98kDa
hsa-miR-607	0	0	1	1	1	1	PPP1R3C	protein phosphatase 1, regulatory subunit 3C
hsa-miR-607	1	0	1	1	1	1	RALA	v-ral simian leukemia viral oncogene homolog A (ras related)
hsa-miR-607	1	0	1	0	1	1	CCDC6	coiled-coil domain containing 6
hsa-miR-607	1	0	1	1	1	1	MAFB	v-maf musculoaponeurotic fibrosarcoma oncogene homolog B (avian)
hsa-miR-607	1	0	1	1	1	1	AKT3	v-akt murine thymoma viral oncogene homolog 3 (protein kinase B, gamma)
hsa-miR-607	1	0	1	1	1	1	HCN4	hyperpolarization activated cyclic nucleotide-gated potassium channel 4
hsa-miR-607	1	0	1	1	1	1	PIGK	phosphatidylinositol glycan anchor biosynthesis, class K
hsa-miR-607	1	0	1	1	1	1	MAMLD1	mastermind-like domain containing 1
hsa-miR-607	1	0	1	1	1	1	ABCA1	ATP-binding cassette, sub-family A (ABC1), member 1
hsa-miR-607	1	0	1	1	1	1	GTF2E1	general transcription factor IIE, polypeptide 1, alpha 56kDa
hsa-miR-607	1	0	1	1	1	1	HOXA11	homeobox A11
hsa-miR-607	1	0	1	1	1	1	INSIG1	insulin induced gene 1
hsa-miR-607	1	0	1	1	1	1	LAMC2	laminin, gamma 2
hsa-miR-607	0	0	1	0	1	1	LCP2	lymphocyte cytosolic protein 2 (SH2 domain containing leukocyte protein of 76kDa)
hsa-miR-607	0	0	1	1	0	0	LMNB1	lamin B1
hsa-miR-607	1	0	1	1	1	1	MAB21L1	mab-21-like 1 (C. elegans)
hsa-miR-607	1	0	1	1	1	1	RGS4	regulator of G-protein signaling 4
hsa-miR-607	0	0	1	1	1	1	SOX3	SRY (sex determining region Y)-box 3
hsa-miR-607	0	0	1	1	1	1	MKRN3	makorin ring finger protein 3
hsa-miR-607	1	0	1	1	1	1	ST8SIA4	ST8 alpha-N-acetyl-neuraminide alpha-2,8-sialyltransferase 4
hsa-miR-607	1	0	1	1	1	1	ARPC5	actin related protein 2/3 complex, subunit 5, 16kDa
hsa-miR-607	0	0	1	1	1	1	ARPC3	actin related protein 2/3 complex, subunit 3, 21kDa
hsa-miR-607	0	0	1	1	1	1	ACTR3	ARP3 actin-related protein 3 homolog (yeast)
hsa-miR-607	0	0	1	1	1	1	TSPAN3	tetraspanin 3
hsa-miR-607	1	0	1	0	1	1	TSPAN2	tetraspanin 2
hsa-miR-607	1	0	1	1	1	1	NAMPT	nicotinamide phosphoribosyltransferase
hsa-miR-607	1	0	1	1	1	1	LHFP	lipoma HMGIC fusion partner
hsa-miR-607	0	0	1	1	1	1	RNF41	ring finger protein 41
hsa-miR-607	1	0	1	1	1	1	PRKD3	protein kinase D3
hsa-miR-607	1	0	1	0	1	1	SPRY3	sprouty homolog 3 (Drosophila)
hsa-miR-607	0	0	1	0	1	1	STAM2	signal transducing adaptor molecule (SH3 domain and ITAM motif) 2
hsa-miR-607	1	0	1	1	1	1	BET1	blocked early in transport 1 homolog (S. cerevisiae)
hsa-miR-607	0	0	1	1	1	1	SAP18	Sin3A-associated protein, 18kDa
hsa-miR-607	0	0	1	1	1	1	SF3A1	splicing factor 3a, subunit 1, 120kDa
hsa-miR-607	1	0	1	1	1	1	MAN1A1	mannosidase, alpha, class 1A, member 1
hsa-miR-607	1	0	1	1	1	1	MMP16	matrix metallopeptidase 16 (membrane-inserted)
hsa-miR-607	1	0	1	1	1	1	MTF1	metal-regulatory transcription factor 1
hsa-miR-607	1	0	1	0	1	1	NAB1	NGFI-A binding protein 1 (EGR1 binding protein 1)
hsa-miR-607	0	0	1	1	1	1	UQCRFS1	ubiquinol-cytochrome c reductase, Rieske iron-sulfur polypeptide 1
hsa-miR-607	1	0	1	1	1	1	ENDOU	endonuclease, polyU-specific
hsa-miR-607	1	0	1	1	1	1	LIPG	lipase, endothelial
hsa-miR-607	1	0	1	1	0	0	AGFG2	ArfGAP with FG repeats 2
hsa-miR-607	1	0	1	1	1	1	SEMA3A	sema domain, immunoglobulin domain (Ig), short basic domain, secreted, (semaphorin) 3A
hsa-miR-607	0	0	1	1	1	1	KRT1	keratin 1
hsa-miR-607	1	0	1	1	1	1	DYNC1LI2	dynein, cytoplasmic 1, light intermediate chain 2
hsa-miR-607	1	0	1	1	1	1	PCBP1	poly(rC) binding protein 1
hsa-miR-607	1	0	1	1	1	1	PFKFB2	6-phosphofructo-2-kinase/fructose-2,6-biphosphatase 2
hsa-miR-607	1	0	1	1	1	1	POU4F1	POU class 4 homeobox 1
hsa-miR-607	1	0	1	0	1	1	PPP1R2	protein phosphatase 1, regulatory (inhibitor) subunit 2
hsa-miR-607	1	0	1	1	1	1	PRKAA1	protein kinase, AMP-activated, alpha 1 catalytic subunit
hsa-miR-607	1	0	1	1	1	1	RANBP2	RAN binding protein 2
hsa-miR-607	1	0	1	1	1	1	SMC1A	structural maintenance of chromosomes 1A
hsa-miR-607	0	0	1	1	1	1	PGRMC2	progesterone receptor membrane component 2
hsa-miR-607	1	0	1	1	1	1	FBLN5	fibulin 5
hsa-miR-607	0	0	1	1	1	1	PIBF1	progesterone immunomodulatory binding factor 1
hsa-miR-607	1	0	1	1	1	1	SEC23A	Sec23 homolog A (S. cerevisiae)
hsa-miR-607	1	0	1	0	1	1	APPBP2	amyloid beta precursor protein (cytoplasmic tail) binding protein 2
hsa-miR-607	1	0	1	1	1	1	NEBL	nebulette
hsa-miR-607	0	0	1	1	1	1	TM9SF1	transmembrane 9 superfamily member 1
hsa-miR-607	0	0	1	1	1	1	CXCL13	chemokine (C-X-C motif) ligand 13
hsa-miR-607	1	0	1	0	1	1	ARFGEF2	ADP-ribosylation factor guanine nucleotide-exchange factor 2 (brefeldin A-inhibited)
hsa-miR-607	0	0	1	1	0	0	CCT2	chaperonin containing TCP1, subunit 2 (beta)
hsa-miR-607	1	0	1	1	1	1	CDC42EP3	CDC42 effector protein (Rho GTPase binding) 3
hsa-miR-607	1	0	1	0	1	1	IGF2BP1	insulin-like growth factor 2 mRNA binding protein 1
hsa-miR-607	1	0	1	1	1	1	KHDRBS1	KH domain containing, RNA binding, signal transduction associated 1
hsa-miR-607	1	0	1	1	1	1	CTCF	CCCTC-binding factor (zinc finger protein)
hsa-miR-607	1	0	1	1	1	1	B3GNT2	UDP-GlcNAc:betaGal beta-1,3-N-acetylglucosaminyltransferase 2
hsa-miR-607	0	0	1	1	1	1	POLD3	polymerase (DNA-directed), delta 3, accessory subunit
hsa-miR-607	1	0	1	0	1	1	API5	apoptosis inhibitor 5
hsa-miR-607	1	0	1	1	1	1	HSPA8	heat shock 70kDa protein 8
hsa-miR-607	1	0	1	1	1	1	MAP3K2	mitogen-activated protein kinase kinase kinase 2
hsa-miR-607	1	0	1	1	1	1	ZBTB6	zinc finger and BTB domain containing 6
hsa-miR-607	1	0	1	1	1	1	PGRMC1	progesterone receptor membrane component 1
hsa-miR-607	0	0	1	1	1	1	FGL2	fibrinogen-like 2
hsa-miR-607	1	0	1	1	1	1	MAN1A2	mannosidase, alpha, class 1A, member 2
hsa-miR-607	1	0	1	1	1	1	SPIN1	spindlin 1
hsa-miR-607	1	0	1	1	1	1	HIVEP2	human immunodeficiency virus type I enhancer binding protein 2
hsa-miR-607	1	0	1	1	1	1	SNTB2	syntrophin, beta 2 (dystrophin-associated protein A1, 59kDa, basic component 2)
hsa-miR-607	0	0	1	1	1	1	SYPL1	synaptophysin-like 1
hsa-miR-607	1	0	1	1	1	1	KAT6A	K(lysine) acetyltransferase 6A
hsa-miR-607	1	0	1	1	1	1	ZBTB33	zinc finger and BTB domain containing 33
hsa-miR-607	0	0	1	1	1	1	RAB40B	RAB40B, member RAS oncogene family
hsa-miR-607	0	0	1	1	1	1	PKIA	protein kinase (cAMP-dependent, catalytic) inhibitor alpha
hsa-miR-607	0	0	1	1	1	1	ASCC3	activating signal cointegrator 1 complex subunit 3
hsa-miR-607	0	0	1	1	1	1	HOXA7	homeobox A7
hsa-miR-607	0	0	1	1	1	1	HOXD3	homeobox D3
hsa-miR-607	1	0	1	1	1	1	PRRX1	paired related homeobox 1
hsa-miR-607	0	0	1	0	1	1	PSG1	pregnancy specific beta-1-glycoprotein 1
hsa-miR-607	1	0	1	1	1	1	RIT1	Ras-like without CAAX 1
hsa-miR-607	1	0	1	1	1	1	RP2	retinitis pigmentosa 2 (X-linked recessive)
hsa-miR-607	1	0	1	0	1	1	SLC2A3	solute carrier family 2 (facilitated glucose transporter), member 3
hsa-miR-607	1	0	1	1	1	1	HSPA13	heat shock protein 70kDa family, member 13
hsa-miR-607	1	0	1	1	1	1	NR4A3	nuclear receptor subfamily 4, group A, member 3
hsa-miR-607	1	0	1	1	1	1	CLDN10	claudin 10
hsa-miR-607	0	0	1	1	1	1	PAGE4	P antigen family, member 4 (prostate associated)
hsa-miR-607	0	0	1	1	0	0	ZPBP	zona pellucida binding protein
hsa-miR-607	1	0	1	1	1	1	DDX52	DEAD (Asp-Glu-Ala-Asp) box polypeptide 52
hsa-miR-607	1	0	1	1	1	1	ABHD2	abhydrolase domain containing 2
hsa-miR-607	1	0	1	1	1	1	WWP1	WW domain containing E3 ubiquitin protein ligase 1
hsa-miR-607	1	0	1	1	1	1	RAPGEF4	Rap guanine nucleotide exchange factor (GEF) 4
hsa-miR-607	1	0	1	1	1	1	ADAMTS5	ADAM metallopeptidase with thrombospondin type 1 motif, 5
hsa-miR-607	0	0	1	1	1	1	RPP14	ribonuclease P/MRP 14kDa subunit
hsa-miR-607	1	0	1	1	1	1	SOX21	SRY (sex determining region Y)-box 21
hsa-miR-607	1	0	1	1	1	1	TMF1	TATA element modulatory factor 1
hsa-miR-607	0	0	1	1	1	1	UGT1A4	UDP glucuronosyltransferase 1 family, polypeptide A4
hsa-miR-607	1	0	1	1	1	1	UTY	ubiquitously transcribed tetratricopeptide repeat gene, Y-linked
hsa-miR-607	1	0	1	1	1	1	ZIC2	Zic family member 2
hsa-miR-607	0	0	1	0	1	1	ZNF208	zinc finger protein 208
hsa-miR-607	0	0	1	0	0	0	ZXDA	zinc finger, X-linked, duplicated A
hsa-miR-607	0	0	1	0	1	1	ZXDB	zinc finger, X-linked, duplicated B
hsa-miR-607	1	0	1	0	1	1	PRSS23	protease, serine, 23
hsa-miR-607	1	0	1	1	1	1	ERLIN2	ER lipid raft associated 2
hsa-miR-607	1	0	1	1	1	1	PROSC	proline synthetase co-transcribed homolog (bacterial)
hsa-miR-607	1	0	1	1	1	1	HPS5	Hermansky-Pudlak syndrome 5
hsa-miR-607	1	0	1	1	1	1	RNF139	ring finger protein 139
hsa-miR-607	0	0	1	1	1	1	XPOT	exportin, tRNA (nuclear export receptor for tRNAs)
hsa-miR-607	1	0	1	1	1	1	KLF12	Kruppel-like factor 12
hsa-miR-607	1	0	1	1	1	1	RNF13	ring finger protein 13
hsa-miR-607	0	0	1	0	1	1	AP4E1	adaptor-related protein complex 4, epsilon 1 subunit
hsa-miR-607	0	0	1	0	1	1	PAXIP1	PAX interacting (with transcription-activation domain) protein 1
hsa-miR-607	0	0	1	1	1	1	MMRN1	multimerin 1
hsa-miR-607	1	0	1	1	1	1	TARDBP	TAR DNA binding protein
hsa-miR-607	0	0	1	1	1	1	FRAT2	frequently rearranged in advanced T-cell lymphomas 2
hsa-miR-607	1	0	1	1	1	1	ICOS	inducible T-cell co-stimulator
hsa-miR-607	1	0	1	1	1	1	APPL1	adaptor protein, phosphotyrosine interaction, PH domain and leucine zipper containing 1
hsa-miR-607	0	0	1	1	1	1	CHIC2	cysteine-rich hydrophobic domain 2
hsa-miR-607	1	0	1	0	1	1	FZD4	frizzled family receptor 4
hsa-miR-607	0	0	1	1	1	1	HARS2	histidyl-tRNA synthetase 2, mitochondrial
hsa-miR-607	1	0	1	1	1	1	MGAT4A	mannosyl (alpha-1,3-)-glycoprotein beta-1,4-N-acetylglucosaminyltransferase, isozyme A
hsa-miR-607	1	0	1	1	1	1	MGEA5	meningioma expressed antigen 5 (hyaluronidase)
hsa-miR-607	1	0	1	1	1	1	RYBP	RING1 and YY1 binding protein
hsa-miR-607	1	0	1	1	1	1	HS2ST1	heparan sulfate 2-O-sulfotransferase 1
hsa-miR-607	1	0	1	0	1	1	ACAP2	ArfGAP with coiled-coil, ankyrin repeat and PH domains 2
hsa-miR-607	1	0	1	0	1	1	FBXL7	F-box and leucine-rich repeat protein 7
hsa-miR-607	1	0	1	1	1	1	LDOC1	leucine zipper, down-regulated in cancer 1
hsa-miR-607	1	0	1	1	1	1	LSM5	LSM5 homolog, U6 small nuclear RNA associated (S. cerevisiae)
hsa-miR-607	1	0	1	1	1	1	MAPRE1	microtubule-associated protein, RP/EB family, member 1
hsa-miR-607	1	0	1	1	1	1	TSPAN12	tetraspanin 12
hsa-miR-607	1	0	1	1	1	1	NNT	nicotinamide nucleotide transhydrogenase
hsa-miR-607	0	0	1	0	1	1	PITPNC1	phosphatidylinositol transfer protein, cytoplasmic 1
hsa-miR-607	0	0	1	0	1	1	TLL1	tolloid-like 1
hsa-miR-607	1	0	1	1	1	1	TRPC5	transient receptor potential cation channel, subfamily C, member 5
hsa-miR-607	0	0	1	1	1	1	CD24	CD24 molecule
hsa-miR-607	1	0	1	0	1	1	FLRT2	fibronectin leucine rich transmembrane protein 2
hsa-miR-607	0	0	1	1	1	1	N6AMT1	N-6 adenine-specific DNA methyltransferase 1 (putative)
hsa-miR-607	1	0	1	0	1	1	TRHDE	thyrotropin-releasing hormone degrading enzyme
hsa-miR-607	1	0	1	1	1	1	SLC25A24	solute carrier family 25 (mitochondrial carrier; phosphate carrier), member 24
hsa-miR-607	1	0	1	1	1	1	NCKAP1	NCK-associated protein 1
hsa-miR-607	0	0	1	1	1	1	UBQLN2	ubiquilin 2
hsa-miR-607	0	0	1	0	1	1	EMR2	egf-like module containing, mucin-like, hormone receptor-like 2
hsa-miR-607	1	0	1	1	1	1	BAZ1A	bromodomain adjacent to zinc finger domain, 1A
hsa-miR-607	1	0	1	0	1	1	CLIC4	chloride intracellular channel 4
hsa-miR-607	1	0	1	1	1	1	LAMP2	lysosomal-associated membrane protein 2
hsa-miR-607	1	0	1	1	1	1	SOCS5	suppressor of cytokine signaling 5
hsa-miR-607	1	0	1	0	1	1	OSTM1	osteopetrosis associated transmembrane protein 1
hsa-miR-607	1	0	1	1	1	1	ASF1A	ASF1 anti-silencing function 1 homolog A (S. cerevisiae)
hsa-miR-607	0	0	1	1	1	1	MRPL42	mitochondrial ribosomal protein L42
hsa-miR-607	1	0	1	1	1	1	RGCC	regulator of cell cycle
hsa-miR-607	1	0	1	1	1	1	KLF15	Kruppel-like factor 15
hsa-miR-607	1	0	1	1	1	1	ZNF770	zinc finger protein 770
hsa-miR-607	1	0	1	0	1	1	ODZ1	odz, odd Oz/ten-m homolog 1 (Drosophila)
hsa-miR-607	1	0	1	1	1	1	CORO1C	coronin, actin binding protein, 1C
hsa-miR-607	1	0	1	1	1	1	SLC7A11	solute carrier family 7 (anionic amino acid transporter light chain, xc- system), member 11
hsa-miR-607	1	0	1	0	1	1	RNF11	ring finger protein 11
hsa-miR-607	0	0	1	1	0	0	NGFRAP1	nerve growth factor receptor (TNFRSF16) associated protein 1
hsa-miR-607	1	0	1	0	1	1	DIEXF	digestive organ expansion factor homolog (zebrafish)
hsa-miR-607	0	0	1	1	1	1	TSPAN13	tetraspanin 13
hsa-miR-607	1	0	1	1	1	1	ZBTB11	zinc finger and BTB domain containing 11
hsa-miR-607	1	0	1	1	1	1	DKK2	dickkopf 2 homolog (Xenopus laevis)
hsa-miR-607	1	0	1	1	1	1	AFF4	AF4/FMR2 family, member 4
hsa-miR-607	1	0	1	1	1	1	SERP1	stress-associated endoplasmic reticulum protein 1
hsa-miR-607	1	0	1	1	1	1	KLHL20	kelch-like 20 (Drosophila)
hsa-miR-607	0	0	1	1	1	1	ARFGAP3	ADP-ribosylation factor GTPase activating protein 3
hsa-miR-607	0	0	1	1	0	0	LMCD1	LIM and cysteine-rich domains 1
hsa-miR-607	1	0	1	1	1	1	ERO1L	ERO1-like (S. cerevisiae)
hsa-miR-607	1	0	1	1	1	1	ZNF592	zinc finger protein 592
hsa-miR-607	1	0	1	0	1	1	SH3PXD2A	SH3 and PX domains 2A
hsa-miR-607	1	0	1	1	1	1	RALGPS1	Ral GEF with PH domain and SH3 binding motif 1
hsa-miR-607	1	0	1	0	1	1	BZW1	basic leucine zipper and W2 domains 1
hsa-miR-607	1	0	1	0	1	1	EDEM1	ER degradation enhancer, mannosidase alpha-like 1
hsa-miR-607	1	0	1	1	1	1	ULK2	unc-51-like kinase 2 (C. elegans)
hsa-miR-607	1	0	1	1	1	1	ARHGAP32	Rho GTPase activating protein 32
hsa-miR-607	0	0	1	1	1	1	FRMPD4	FERM and PDZ domain containing 4
hsa-miR-607	1	0	1	0	1	1	TOX	thymocyte selection-associated high mobility group box
hsa-miR-607	1	0	1	0	1	1	MLEC	malectin
hsa-miR-607	1	0	1	1	1	1	KIAA0247	KIAA0247
hsa-miR-607	1	0	1	0	1	1	KIAA0232	KIAA0232
hsa-miR-607	1	0	1	1	1	1	SPCS2	signal peptidase complex subunit 2 homolog (S. cerevisiae)
hsa-miR-607	1	0	1	0	1	1	SERTAD2	SERTA domain containing 2
hsa-miR-607	1	0	1	1	1	1	DAZAP2	DAZ associated protein 2
hsa-miR-607	1	0	1	0	1	1	ARHGAP11A	Rho GTPase activating protein 11A
hsa-miR-607	1	0	1	1	1	1	JAKMIP2	janus kinase and microtubule interacting protein 2
hsa-miR-607	1	0	1	1	1	1	FCHSD2	FCH and double SH3 domains 2
hsa-miR-607	1	0	1	0	1	1	DDX46	DEAD (Asp-Glu-Ala-Asp) box polypeptide 46
hsa-miR-607	1	0	1	1	1	1	ZBTB39	zinc finger and BTB domain containing 39
hsa-miR-607	1	0	1	1	1	1	NUAK1	NUAK family, SNF1-like kinase, 1
hsa-miR-607	0	0	1	1	1	1	KIAA0196	KIAA0196
hsa-miR-607	1	0	1	0	1	1	KBTBD11	kelch repeat and BTB (POZ) domain containing 11
hsa-miR-607	1	0	1	0	1	1	PDAP1	PDGFA associated protein 1
hsa-miR-607	1	0	1	0	1	1	RAB11FIP2	RAB11 family interacting protein 2 (class I)
hsa-miR-607	0	0	1	1	1	1	ADNP2	ADNP homeobox 2
hsa-miR-607	1	0	1	0	1	1	ICK	intestinal cell (MAK-like) kinase
hsa-miR-607	1	0	1	1	1	1	SPAST	spastin
hsa-miR-607	1	0	1	0	1	1	ZBTB1	zinc finger and BTB domain containing 1
hsa-miR-607	1	0	1	1	1	1	RALGAPA1	Ral GTPase activating protein, alpha subunit 1 (catalytic)
hsa-miR-607	1	0	1	0	1	1	WDFY3	WD repeat and FYVE domain containing 3
hsa-miR-607	1	0	1	0	1	1	PDS5B	PDS5, regulator of cohesion maintenance, homolog B (S. cerevisiae)
hsa-miR-607	1	0	1	1	1	1	ERP44	endoplasmic reticulum protein 44
hsa-miR-607	1	0	1	1	1	1	HECW1	HECT, C2 and WW domain containing E3 ubiquitin protein ligase 1
hsa-miR-607	1	0	1	0	1	1	PEG10	paternally expressed 10
hsa-miR-607	1	0	1	1	1	1	ZNF423	zinc finger protein 423
hsa-miR-607	1	0	1	1	1	1	TBC1D9	TBC1 domain family, member 9 (with GRAM domain)
hsa-miR-607	1	0	1	1	1	1	RTF1	Rtf1, Paf1/RNA polymerase II complex component, homolog (S. cerevisiae)
hsa-miR-607	1	0	1	0	1	1	LARP4B	La ribonucleoprotein domain family, member 4B
hsa-miR-607	1	0	1	1	1	1	PRRC2C	proline-rich coiled-coil 2C
hsa-miR-607	1	0	1	1	1	1	PLCB1	phospholipase C, beta 1 (phosphoinositide-specific)
hsa-miR-607	1	0	1	0	1	1	KIAA1024	KIAA1024
hsa-miR-607	1	0	1	1	1	1	WDR7	WD repeat domain 7
hsa-miR-607	1	0	1	0	1	1	ARHGEF12	Rho guanine nucleotide exchange factor (GEF) 12
hsa-miR-607	1	0	1	1	1	1	MED13L	mediator complex subunit 13-like
hsa-miR-607	0	0	1	1	1	1	NBPF14	neuroblastoma breakpoint family, member 14
hsa-miR-607	0	0	1	1	1	1	ANAPC13	anaphase promoting complex subunit 13
hsa-miR-607	1	0	1	1	1	1	RNF19A	ring finger protein 19A, E3 ubiquitin protein ligase
hsa-miR-607	0	0	1	0	1	1	TMEM158	transmembrane protein 158 (gene/pseudogene)
hsa-miR-607	1	0	1	1	1	1	CNOT6	CCR4-NOT transcription complex, subunit 6
hsa-miR-607	1	0	1	0	1	1	MTMR9	myotubularin related protein 9
hsa-miR-607	0	0	1	1	1	1	NIPSNAP3A	nipsnap homolog 3A (C. elegans)
hsa-miR-607	0	0	1	1	1	1	TMEM87A	transmembrane protein 87A
hsa-miR-607	1	0	1	1	1	1	CLIP3	CAP-GLY domain containing linker protein 3
hsa-miR-607	1	0	1	1	1	1	LRRTM2	leucine rich repeat transmembrane neuronal 2
hsa-miR-607	1	0	1	1	1	1	LTN1	listerin E3 ubiquitin protein ligase 1
hsa-miR-607	1	0	1	1	1	1	SLITRK5	SLIT and NTRK-like family, member 5
hsa-miR-607	1	0	1	0	1	1	ERC2	ELKS/RAB6-interacting/CAST family member 2
hsa-miR-607	0	0	1	1	1	1	TES	testis derived transcript (3 LIM domains)
hsa-miR-607	1	0	1	1	1	1	GPX7	glutathione peroxidase 7
hsa-miR-607	1	0	1	0	1	1	RRM2B	ribonucleotide reductase M2 B (TP53 inducible)
hsa-miR-607	0	0	1	1	1	1	KRT76	keratin 76
hsa-miR-607	1	0	1	1	1	1	AZIN1	antizyme inhibitor 1
hsa-miR-607	1	0	1	1	1	1	HOOK1	hook homolog 1 (Drosophila)
hsa-miR-607	1	0	1	0	1	1	TRIM33	tripartite motif containing 33
hsa-miR-607	0	0	1	1	1	1	SNX7	sorting nexin 7
hsa-miR-607	1	0	1	1	1	1	UTP18	UTP18 small subunit (SSU) processome component homolog (yeast)
hsa-miR-607	0	0	1	1	1	1	SCCPDH	saccharopine dehydrogenase (putative)
hsa-miR-607	1	0	1	1	1	1	UBE2J1	ubiquitin-conjugating enzyme E2, J1
hsa-miR-607	1	0	1	1	1	1	SLMO2	slowmo homolog 2 (Drosophila)
hsa-miR-607	1	0	1	1	1	1	RRP15	ribosomal RNA processing 15 homolog (S. cerevisiae)
hsa-miR-607	1	0	1	1	1	1	GOLT1B	golgi transport 1B
hsa-miR-607	0	0	1	1	1	1	HDGFRP3	hepatoma-derived growth factor, related protein 3
hsa-miR-607	1	0	1	0	1	1	WNT16	wingless-type MMTV integration site family, member 16
hsa-miR-607	0	0	1	1	1	1	COMMD2	COMM domain containing 2
hsa-miR-607	0	0	1	1	1	1	ZFR	zinc finger RNA binding protein
hsa-miR-607	0	0	1	1	1	1	RAB10	RAB10, member RAS oncogene family
hsa-miR-607	1	0	1	1	1	1	TMEFF2	transmembrane protein with EGF-like and two follistatin-like domains 2
hsa-miR-607	1	0	1	1	1	1	VGLL3	vestigial like 3 (Drosophila)
hsa-miR-607	1	0	1	1	1	1	NLK	nemo-like kinase
hsa-miR-607	1	0	1	1	1	1	AKAP11	A kinase (PRKA) anchor protein 11
hsa-miR-607	1	0	1	1	1	1	BIRC6	baculoviral IAP repeat containing 6
hsa-miR-607	1	0	1	0	1	1	SELT	selenoprotein T
hsa-miR-607	0	0	1	1	1	1	RSL24D1	ribosomal L24 domain containing 1
hsa-miR-607	1	0	1	1	1	1	RAB14	RAB14, member RAS oncogene family
hsa-miR-607	1	0	1	1	1	1	PHF20	PHD finger protein 20
hsa-miR-607	1	0	1	1	1	1	C20orf111	chromosome 20 open reading frame 111
hsa-miR-607	1	0	1	0	1	1	RAB8B	RAB8B, member RAS oncogene family
hsa-miR-607	1	0	1	0	1	1	KLF3	Kruppel-like factor 3 (basic)
hsa-miR-607	1	0	1	1	1	1	GOLM1	golgi membrane protein 1
hsa-miR-607	1	0	1	1	1	1	RAB6B	RAB6B, member RAS oncogene family
hsa-miR-607	1	0	1	1	1	1	CYP39A1	cytochrome P450, family 39, subfamily A, polypeptide 1
hsa-miR-607	0	0	1	1	1	1	KDM3B	lysine (K)-specific demethylase 3B
hsa-miR-607	1	0	1	1	1	1	UFM1	ubiquitin-fold modifier 1
hsa-miR-607	0	0	1	1	1	1	PLAC8	placenta-specific 8
hsa-miR-607	1	0	1	1	1	1	ZNF644	zinc finger protein 644
hsa-miR-607	1	0	1	1	1	1	MEX3C	mex-3 homolog C (C. elegans)
hsa-miR-607	0	0	1	1	1	1	SMN2	survival of motor neuron 2, centromeric
hsa-miR-607	1	0	1	0	1	1	FZD3	frizzled family receptor 3
hsa-miR-607	0	0	1	0	1	1	APLN	apelin
hsa-miR-607	1	0	1	0	1	1	KLHL3	kelch-like 3 (Drosophila)
hsa-miR-607	1	0	1	1	1	1	SIX4	SIX homeobox 4
hsa-miR-607	1	0	1	1	1	1	MDM1	Mdm1 nuclear protein homolog (mouse)
hsa-miR-607	1	0	1	1	1	1	ARID1B	AT rich interactive domain 1B (SWI1-like)
hsa-miR-607	1	0	1	1	1	1	GRID1	glutamate receptor, ionotropic, delta 1
hsa-miR-607	1	0	1	0	1	1	UBE2Q1	ubiquitin-conjugating enzyme E2Q family member 1
hsa-miR-607	0	0	1	0	1	1	WDR5	WD repeat domain 5
hsa-miR-607	0	0	1	0	1	1	VEZT	vezatin, adherens junctions transmembrane protein
hsa-miR-607	0	0	1	0	1	1	GIPC2	GIPC PDZ domain containing family, member 2
hsa-miR-607	0	0	1	1	0	0	TEX10	testis expressed 10
hsa-miR-607	1	0	1	1	1	1	TBC1D8B	TBC1 domain family, member 8B (with GRAM domain)
hsa-miR-607	1	0	1	0	1	1	MARCH5	membrane-associated ring finger (C3HC4) 5
hsa-miR-607	1	0	1	1	1	1	RNF125	ring finger protein 125, E3 ubiquitin protein ligase
hsa-miR-607	0	0	1	1	1	1	SDHAF2	succinate dehydrogenase complex assembly factor 2
hsa-miR-607	0	0	1	1	1	1	ODAM	odontogenic, ameloblast asssociated
hsa-miR-607	0	0	1	1	1	1	C1orf56	chromosome 1 open reading frame 56
hsa-miR-607	1	0	1	1	0	0	LAMTOR1	late endosomal/lysosomal adaptor, MAPK and MTOR activator 1
hsa-miR-607	1	0	1	1	1	1	FBXO34	F-box protein 34
hsa-miR-607	0	0	1	1	1	1	FKBP14	FK506 binding protein 14, 22 kDa
hsa-miR-607	1	0	1	1	1	1	ARGLU1	arginine and glutamate rich 1
hsa-miR-607	1	0	1	1	1	1	WDYHV1	WDYHV motif containing 1
hsa-miR-607	0	0	1	1	1	1	GPATCH2	G patch domain containing 2
hsa-miR-607	1	0	1	1	1	1	FIGN	fidgetin
hsa-miR-607	1	0	1	1	0	0	GSPT2	G1 to S phase transition 2
hsa-miR-607	0	0	1	1	1	1	TMEM38B	transmembrane protein 38B
hsa-miR-607	0	0	1	1	1	1	TSR1	TSR1, 20S rRNA accumulation, homolog (S. cerevisiae)
hsa-miR-607	0	0	1	1	1	1	MRPS10	mitochondrial ribosomal protein S10
hsa-miR-607	0	0	1	1	0	0	SMG8	smg-8 homolog, nonsense mediated mRNA decay factor (C. elegans)
hsa-miR-607	0	0	1	1	1	1	NUDT11	nudix (nucleoside diphosphate linked moiety X)-type motif 11
hsa-miR-607	1	0	1	1	1	1	RPRD1A	regulation of nuclear pre-mRNA domain containing 1A
hsa-miR-607	0	0	1	1	1	1	RCBTB1	regulator of chromosome condensation (RCC1) and BTB (POZ) domain containing protein 1
hsa-miR-607	0	0	1	1	1	1	TMLHE	trimethyllysine hydroxylase, epsilon
hsa-miR-607	1	0	1	1	1	1	PI4K2B	phosphatidylinositol 4-kinase type 2 beta
hsa-miR-607	1	0	1	1	1	1	C9orf72	chromosome 9 open reading frame 72
hsa-miR-607	1	0	1	1	1	1	SPTLC3	serine palmitoyltransferase, long chain base subunit 3
hsa-miR-607	1	0	1	1	1	1	KIAA1598	KIAA1598
hsa-miR-607	1	0	1	1	1	1	AGPAT5	1-acylglycerol-3-phosphate O-acyltransferase 5 (lysophosphatidic acid acyltransferase, epsilon)
hsa-miR-607	1	0	1	1	1	1	RSBN1	round spermatid basic protein 1
hsa-miR-607	0	0	1	0	1	1	BLOC1S4	biogenesis of lysosomal organelles complex-1, subunit 4, cappuccino
hsa-miR-607	0	0	1	1	1	1	STK32B	serine/threonine kinase 32B
hsa-miR-607	1	0	1	1	1	1	EPB41L4B	erythrocyte membrane protein band 4.1 like 4B
hsa-miR-607	1	0	1	1	1	1	PAG1	phosphoprotein associated with glycosphingolipid microdomains 1
hsa-miR-607	0	0	1	1	1	1	HDAC8	histone deacetylase 8
hsa-miR-607	1	0	1	1	1	1	CAMK2N1	calcium/calmodulin-dependent protein kinase II inhibitor 1
hsa-miR-607	1	0	1	1	1	1	SLC16A10	solute carrier family 16, member 10 (aromatic amino acid transporter)
hsa-miR-607	0	0	1	1	1	1	GOLGA6B	golgin A6 family, member B
hsa-miR-607	1	0	1	1	1	1	KIAA1199	KIAA1199
hsa-miR-607	1	0	1	0	1	1	TMEM55A	transmembrane protein 55A
hsa-miR-607	1	0	1	1	1	1	GNG12	guanine nucleotide binding protein (G protein), gamma 12
hsa-miR-607	1	0	1	0	1	1	KLHL9	kelch-like 9 (Drosophila)
hsa-miR-607	0	0	1	1	0	0	MIS18A	MIS18 kinetochore protein homolog A (S. pombe)
hsa-miR-607	1	0	1	0	1	1	CYCS	cytochrome c, somatic
hsa-miR-607	0	0	1	1	1	1	GAR1	GAR1 ribonucleoprotein homolog (yeast)
hsa-miR-607	0	0	1	1	1	1	RIN2	Ras and Rab interactor 2
hsa-miR-607	1	0	1	0	1	1	FAM190B	family with sequence similarity 190, member B
hsa-miR-607	0	0	1	1	0	0	TOMM7	translocase of outer mitochondrial membrane 7 homolog (yeast)
hsa-miR-607	0	0	1	1	1	1	UGT1A10	UDP glucuronosyltransferase 1 family, polypeptide A10
hsa-miR-607	0	0	1	1	1	1	UGT1A8	UDP glucuronosyltransferase 1 family, polypeptide A8
hsa-miR-607	0	0	1	1	1	1	UGT1A7	UDP glucuronosyltransferase 1 family, polypeptide A7
hsa-miR-607	0	0	1	1	1	1	UGT1A5	UDP glucuronosyltransferase 1 family, polypeptide A5
hsa-miR-607	0	0	1	0	1	1	ARL15	ADP-ribosylation factor-like 15
hsa-miR-607	0	0	1	1	1	1	UGT1A3	UDP glucuronosyltransferase 1 family, polypeptide A3
hsa-miR-607	0	0	1	1	1	1	RPRM	reprimo, TP53 dependent G2 arrest mediator candidate
hsa-miR-607	1	0	1	1	1	1	CYP26B1	cytochrome P450, family 26, subfamily B, polypeptide 1
hsa-miR-607	0	0	1	0	1	1	ZC3HAV1	zinc finger CCCH-type, antiviral 1
hsa-miR-607	1	0	1	0	1	1	TM9SF3	transmembrane 9 superfamily member 3
hsa-miR-607	1	0	1	0	1	1	SLAMF8	SLAM family member 8
hsa-miR-607	1	0	1	1	1	1	C8orf4	chromosome 8 open reading frame 4
hsa-miR-607	1	0	1	1	0	0	C11orf75	chromosome 11 open reading frame 75
hsa-miR-607	1	0	1	0	1	1	PMEPA1	prostate transmembrane protein, androgen induced 1
hsa-miR-607	1	0	1	1	1	1	C5orf15	chromosome 5 open reading frame 15
hsa-miR-607	1	0	1	0	1	1	OTUD7B	OTU domain containing 7B
hsa-miR-607	1	0	1	1	0	0	SLC17A7	solute carrier family 17 (sodium-dependent inorganic phosphate cotransporter), member 7
hsa-miR-607	1	0	1	1	1	1	KIAA1244	KIAA1244
hsa-miR-607	1	0	1	0	1	1	EIF5A2	eukaryotic translation initiation factor 5A2
hsa-miR-607	1	0	1	1	1	1	PCDH9	protocadherin 9
hsa-miR-607	1	0	1	1	1	1	PTGFRN	prostaglandin F2 receptor negative regulator
hsa-miR-607	1	0	1	1	1	1	LYRM2	LYR motif containing 2
hsa-miR-607	1	0	1	0	1	1	DCUN1D1	DCN1, defective in cullin neddylation 1, domain containing 1 (S. cerevisiae)
hsa-miR-607	1	0	1	1	1	1	NRIP3	nuclear receptor interacting protein 3
hsa-miR-607	0	0	1	1	1	1	S100A14	S100 calcium binding protein A14
hsa-miR-607	1	0	1	1	1	1	RAB22A	RAB22A, member RAS oncogene family
hsa-miR-607	0	0	1	1	1	1	SHROOM4	shroom family member 4
hsa-miR-607	1	0	1	1	1	1	USP31	ubiquitin specific peptidase 31
hsa-miR-607	1	0	1	1	1	1	ZNF608	zinc finger protein 608
hsa-miR-607	1	0	1	1	1	1	ARHGAP31	Rho GTPase activating protein 31
hsa-miR-607	1	0	1	0	1	1	NUFIP2	nuclear fragile X mental retardation protein interacting protein 2
hsa-miR-607	1	0	1	1	1	1	MIB1	mindbomb E3 ubiquitin protein ligase 1
hsa-miR-607	1	0	1	0	1	1	ALPK3	alpha-kinase 3
hsa-miR-607	1	0	1	0	1	1	KLHDC5	kelch domain containing 5
hsa-miR-607	1	0	1	0	1	1	SYT4	synaptotagmin IV
hsa-miR-607	0	0	1	1	1	1	TXNDC16	thioredoxin domain containing 16
hsa-miR-607	1	0	1	1	1	1	NLGN2	neuroligin 2
hsa-miR-607	0	0	1	1	1	1	ARRDC3	arrestin domain containing 3
hsa-miR-607	0	0	1	1	1	1	ZNF319	zinc finger protein 319
hsa-miR-607	1	0	1	1	1	1	KIAA1467	KIAA1467
hsa-miR-607	1	0	1	1	1	1	TSHZ3	teashirt zinc finger homeobox 3
hsa-miR-607	1	0	1	1	1	1	ZBTB2	zinc finger and BTB domain containing 2
hsa-miR-607	1	0	1	1	1	1	CNTN3	contactin 3 (plasmacytoma associated)
hsa-miR-607	1	0	1	1	1	1	ZFP14	zinc finger protein 14 homolog (mouse)
hsa-miR-607	1	0	1	0	1	1	GPAM	glycerol-3-phosphate acyltransferase, mitochondrial
hsa-miR-607	0	0	1	1	1	1	BCOR	BCL6 corepressor
hsa-miR-607	0	0	1	1	1	1	GNAO1	guanine nucleotide binding protein (G protein), alpha activating activity polypeptide O
hsa-miR-607	0	0	1	1	1	1	UGT1A9	UDP glucuronosyltransferase 1 family, polypeptide A9
hsa-miR-607	1	0	1	0	1	1	RAP2A	RAP2A, member of RAS oncogene family
hsa-miR-607	1	0	1	1	1	1	HCN1	hyperpolarization activated cyclic nucleotide-gated potassium channel 1
hsa-miR-607	1	0	1	0	1	1	NMT1	N-myristoyltransferase 1
hsa-miR-607	1	0	1	1	1	1	CLDN1	claudin 1
hsa-miR-607	1	0	1	1	1	1	PMAIP1	phorbol-12-myristate-13-acetate-induced protein 1
hsa-miR-607	0	0	1	1	1	1	RNASEL	ribonuclease L (2',5'-oligoisoadenylate synthetase-dependent)
hsa-miR-607	1	0	1	0	1	1	TP53INP2	tumor protein p53 inducible nuclear protein 2
hsa-miR-607	1	0	1	1	1	1	NTN4	netrin 4
hsa-miR-607	1	0	1	1	1	1	FAM60A	family with sequence similarity 60, member A
hsa-miR-607	0	0	1	1	1	1	IL22RA1	interleukin 22 receptor, alpha 1
hsa-miR-607	1	0	1	1	1	1	SENP2	SUMO1/sentrin/SMT3 specific peptidase 2
hsa-miR-607	1	0	1	1	1	1	TMEM35	transmembrane protein 35
hsa-miR-607	1	0	1	0	1	1	TSPYL4	TSPY-like 4
hsa-miR-607	0	0	1	1	1	1	DNAJC12	DnaJ (Hsp40) homolog, subfamily C, member 12
hsa-miR-607	0	0	1	0	1	1	CFL2	cofilin 2 (muscle)
hsa-miR-607	0	0	1	0	1	1	SPCS3	signal peptidase complex subunit 3 homolog (S. cerevisiae)
hsa-miR-607	1	0	1	0	1	1	MCL1	myeloid cell leukemia sequence 1 (BCL2-related)
hsa-miR-607	1	0	1	1	0	0	HAND2	heart and neural crest derivatives expressed 2
hsa-miR-607	1	0	1	1	1	1	SLC22A3	solute carrier family 22 (extraneuronal monoamine transporter), member 3
hsa-miR-607	0	0	1	1	1	1	ITM2B	integral membrane protein 2B
hsa-miR-607	1	0	1	0	1	1	GAN	gigaxonin
hsa-miR-607	1	0	1	0	1	1	CSNK1G1	casein kinase 1, gamma 1
hsa-miR-607	1	0	1	1	1	1	GPR88	G protein-coupled receptor 88
hsa-miR-607	1	0	1	1	1	1	EGLN1	egl nine homolog 1 (C. elegans)
hsa-miR-607	1	0	1	1	1	1	SNX16	sorting nexin 16
hsa-miR-607	1	0	1	1	1	1	LRRC4	leucine rich repeat containing 4
hsa-miR-607	0	0	1	1	0	0	TFB2M	transcription factor B2, mitochondrial
hsa-miR-607	1	0	1	1	1	1	TMEM168	transmembrane protein 168
hsa-miR-607	1	0	1	1	1	1	SUDS3	suppressor of defective silencing 3 homolog (S. cerevisiae)
hsa-miR-607	0	0	1	1	1	1	PCNXL4	pecanex-like 4 (Drosophila)
hsa-miR-607	1	0	1	1	1	1	GIGYF1	GRB10 interacting GYF protein 1
hsa-miR-607	1	0	1	0	1	1	ELOVL4	ELOVL fatty acid elongase 4
hsa-miR-607	0	0	1	1	1	1	ACBD3	acyl-CoA binding domain containing 3
hsa-miR-607	1	0	1	1	1	1	S100PBP	S100P binding protein
hsa-miR-607	0	0	1	1	1	1	SFXN1	sideroflexin 1
hsa-miR-607	0	0	1	1	1	1	IQCH	IQ motif containing H
hsa-miR-607	1	0	1	1	1	1	FBXL17	F-box and leucine-rich repeat protein 17
hsa-miR-607	1	0	1	1	1	1	MARCH7	membrane-associated ring finger (C3HC4) 7, E3 ubiquitin protein ligase
hsa-miR-607	1	0	1	1	1	1	YTHDC2	YTH domain containing 2
hsa-miR-607	1	0	1	0	1	1	USP46	ubiquitin specific peptidase 46
[truncated: 1,027 more rows]
