# Supplementary material for: Profiling of Selected MicroRNAs in Proliferative Eutopic Endometrium of Women with Ovarian Endometriosis
Source: Biomed Res Int. 2015 Aug 20;2015:760698. doi: 10.1155/2015/760698 (PMC4558423; doi:10.1155/2015/760698)
Supplement: Supplementary file 1 — Table I: The names of miRNAs significantly differentially expressed between eutopic endometrium of patients with endometriosis vs eutopic endometrium of patients without endometriosis. Table II: The associations between miRNA and mRNA, which presents detailed results of the search of six major databases i.e targetscan, tarbase, miranda, mirbase, mirtarget2 and pictar. [file 760698.f1.zip › 760698.f1/Table II/hsa-miR-609.tsv]

miR	targetscan	tarbase	miranda	mirbase	mirtarget2	pictar	GeneSymbol	GeneName
hsa-miR-609	0	0	1	0	0	0	NOP14-AS1	NOP14 antisense RNA 1
hsa-miR-609	1	0	1	1	0	0	SRCAP	Snf2-related CREBBP activator protein
hsa-miR-609	1	0	1	0	1	1	CEP350	centrosomal protein 350kDa
hsa-miR-609	1	0	1	1	1	1	GREB1	growth regulation by estrogen in breast cancer 1
hsa-miR-609	1	0	1	0	1	1	MFAP3L	microfibrillar-associated protein 3-like
hsa-miR-609	1	0	1	1	1	1	GIGYF2	GRB10 interacting GYF protein 2
hsa-miR-609	0	0	1	1	0	0	ARHGEF2	Rho/Rac guanine nucleotide exchange factor (GEF) 2
hsa-miR-609	1	0	1	1	1	1	DMXL2	Dmx-like 2
hsa-miR-609	1	0	1	0	0	0	DTX4	deltex homolog 4 (Drosophila)
hsa-miR-609	1	0	1	1	1	1	CPEB3	cytoplasmic polyadenylation element binding protein 3
hsa-miR-609	1	0	1	1	1	1	NTNG1	netrin G1
hsa-miR-609	1	0	1	1	0	0	KIAA1045	KIAA1045
hsa-miR-609	1	0	1	1	1	1	PHF8	PHD finger protein 8
hsa-miR-609	1	0	1	1	0	0	SRGAP1	SLIT-ROBO Rho GTPase activating protein 1
hsa-miR-609	1	0	1	1	1	1	PCDH19	protocadherin 19
hsa-miR-609	1	0	1	1	1	1	UPF2	UPF2 regulator of nonsense transcripts homolog (yeast)
hsa-miR-609	1	0	1	0	0	0	PITPNM2	phosphatidylinositol transfer protein, membrane-associated 2
hsa-miR-609	0	0	1	1	0	0	ISLR2	immunoglobulin superfamily containing leucine-rich repeat 2
hsa-miR-609	0	0	1	1	1	1	AMBRA1	autophagy/beclin-1 regulator 1
hsa-miR-609	1	0	1	0	0	0	CDH23	cadherin-related 23
hsa-miR-609	1	0	1	1	1	1	SSH3	slingshot homolog 3 (Drosophila)
hsa-miR-609	1	0	1	1	1	1	PRDM16	PR domain containing 16
hsa-miR-609	1	0	1	1	1	1	RFX4	regulatory factor X, 4 (influences HLA class II expression)
hsa-miR-609	1	0	1	1	1	1	KCNMA1	potassium large conductance calcium-activated channel, subfamily M, alpha member 1
hsa-miR-609	1	1	1	1	1	1	BACE1	beta-site APP-cleaving enzyme 1
hsa-miR-609	1	0	1	1	1	1	NRXN2	neurexin 2
hsa-miR-609	1	0	1	1	1	1	ADARB1	adenosine deaminase, RNA-specific, B1
hsa-miR-609	1	0	1	1	1	1	SHC1	SHC (Src homology 2 domain containing) transforming protein 1
hsa-miR-609	0	0	1	1	0	0	KCNC3	potassium voltage-gated channel, Shaw-related subfamily, member 3
hsa-miR-609	1	0	1	1	1	1	MEF2A	myocyte enhancer factor 2A
hsa-miR-609	0	0	1	1	1	1	PTK2	PTK2 protein tyrosine kinase 2
hsa-miR-609	1	0	1	1	1	1	SLC8A1	solute carrier family 8 (sodium/calcium exchanger), member 1
hsa-miR-609	0	0	1	1	1	1	DGKI	diacylglycerol kinase, iota
hsa-miR-609	1	0	1	0	1	1	SLC6A6	solute carrier family 6 (neurotransmitter transporter, taurine), member 6
hsa-miR-609	1	0	1	1	1	1	ERF	Ets2 repressor factor
hsa-miR-609	1	0	1	1	1	1	TWF1	twinfilin, actin-binding protein, homolog 1 (Drosophila)
hsa-miR-609	1	0	1	1	1	1	SATB2	SATB homeobox 2
hsa-miR-609	0	0	1	1	1	1	RYR1	ryanodine receptor 1 (skeletal)
hsa-miR-609	0	0	1	1	0	0	EIF4E2	eukaryotic translation initiation factor 4E family member 2
hsa-miR-609	1	0	1	1	1	1	HNRNPK	heterogeneous nuclear ribonucleoprotein K
hsa-miR-609	0	0	1	1	0	0	MCM5	minichromosome maintenance complex component 5
hsa-miR-609	1	0	1	1	1	1	PTPRK	protein tyrosine phosphatase, receptor type, K
hsa-miR-609	0	0	1	1	0	0	SLC22A8	solute carrier family 22 (organic anion transporter), member 8
hsa-miR-609	1	0	1	1	0	0	PPP2R5D	protein phosphatase 2, regulatory subunit B', delta
hsa-miR-609	0	0	1	1	1	1	SGSH	N-sulfoglucosamine sulfohydrolase
hsa-miR-609	1	0	1	0	1	1	PDE7B	phosphodiesterase 7B
hsa-miR-609	1	0	1	1	0	0	TNPO2	transportin 2
hsa-miR-609	1	0	1	1	1	1	MYH10	myosin, heavy chain 10, non-muscle
hsa-miR-609	1	0	1	0	1	1	DDX3X	DEAD (Asp-Glu-Ala-Asp) box polypeptide 3, X-linked
hsa-miR-609	1	0	1	1	1	1	STX16	syntaxin 16
hsa-miR-609	1	0	1	0	1	1	PDE4D	phosphodiesterase 4D, cAMP-specific
hsa-miR-609	1	0	1	1	1	1	MBNL2	muscleblind-like splicing regulator 2
hsa-miR-609	0	0	1	1	1	1	RGS7	regulator of G-protein signaling 7
hsa-miR-609	1	0	1	0	1	1	CELF2	CUGBP, Elav-like family member 2
hsa-miR-609	0	0	1	1	1	1	BBS9	Bardet-Biedl syndrome 9
hsa-miR-609	1	0	1	0	1	1	SLC25A37	solute carrier family 25 (mitochondrial iron transporter), member 37
hsa-miR-609	1	0	1	1	1	1	ANKRD13A	ankyrin repeat domain 13A
hsa-miR-609	1	0	1	0	1	1	AMOTL2	angiomotin like 2
hsa-miR-609	0	0	1	1	1	1	SLC39A8	solute carrier family 39 (zinc transporter), member 8
hsa-miR-609	0	0	1	1	1	1	SLCO2B1	solute carrier organic anion transporter family, member 2B1
hsa-miR-609	0	0	1	1	1	1	CD28	CD28 molecule
hsa-miR-609	0	0	1	1	1	1	CELF1	CUGBP, Elav-like family member 1
hsa-miR-609	1	0	1	1	1	1	ELF2	E74-like factor 2 (ets domain transcription factor)
hsa-miR-609	1	0	1	1	1	1	ERGIC1	endoplasmic reticulum-golgi intermediate compartment (ERGIC) 1
hsa-miR-609	0	0	1	1	0	0	SNRPN	small nuclear ribonucleoprotein polypeptide N
hsa-miR-609	1	0	1	1	0	0	XRRA1	X-ray radiation resistance associated 1
hsa-miR-609	1	0	1	1	0	0	PPARGC1B	peroxisome proliferator-activated receptor gamma, coactivator 1 beta
hsa-miR-609	1	0	1	1	0	0	BRSK2	BR serine/threonine kinase 2
hsa-miR-609	1	0	1	1	1	1	AFF2	AF4/FMR2 family, member 2
hsa-miR-609	1	0	1	1	1	1	SH2B3	SH2B adaptor protein 3
hsa-miR-609	1	0	1	0	1	1	DICER1	dicer 1, ribonuclease type III
hsa-miR-609	0	0	1	1	1	1	CD1E	CD1e molecule
hsa-miR-609	1	0	1	1	1	1	SLAMF6	SLAM family member 6
hsa-miR-609	1	0	1	1	1	1	PALM2	paralemmin 2
hsa-miR-609	1	0	1	1	1	1	NRXN3	neurexin 3
hsa-miR-609	0	0	1	1	1	1	ABLIM2	actin binding LIM protein family, member 2
hsa-miR-609	0	0	1	1	0	0	ACSS2	acyl-CoA synthetase short-chain family member 2
hsa-miR-609	0	0	1	0	0	0	TUG1	taurine upregulated 1 (non-protein coding)
hsa-miR-609	0	0	1	0	0	0	RNF31	ring finger protein 31
hsa-miR-609	0	0	1	1	1	1	DONSON	downstream neighbor of SON
hsa-miR-609	1	0	1	1	1	1	EIF2C1	eukaryotic translation initiation factor 2C, 1
hsa-miR-609	0	0	1	1	0	0	KIRREL	kin of IRRE like (Drosophila)
hsa-miR-609	1	0	1	1	1	1	SLCO5A1	solute carrier organic anion transporter family, member 5A1
hsa-miR-609	0	0	1	1	1	1	AMACR	alpha-methylacyl-CoA racemase
hsa-miR-609	0	0	1	0	0	0	SOX2-OT	SOX2 overlapping transcript (non-protein coding)
hsa-miR-609	0	0	1	1	1	1	TTC23	tetratricopeptide repeat domain 23
hsa-miR-609	0	0	1	0	0	0	LOC286059	tumor necrosis factor receptor superfamily, member 10d, decoy with truncated death domain pseudogene
hsa-miR-609	1	0	1	1	1	1	ZNF385A	zinc finger protein 385A
hsa-miR-609	0	0	1	0	0	0	IFFO2	intermediate filament family orphan 2
hsa-miR-609	1	0	1	1	1	1	CLIP4	CAP-GLY domain containing linker protein family, member 4
hsa-miR-609	1	0	1	1	1	1	DLC1	deleted in liver cancer 1
hsa-miR-609	1	0	1	0	1	1	ZCCHC3	zinc finger, CCHC domain containing 3
hsa-miR-609	1	0	1	1	0	0	SLAIN2	SLAIN motif family, member 2
hsa-miR-609	0	0	1	0	0	0	LOC729852	uncharacterized LOC729852
hsa-miR-609	0	0	1	1	1	1	MINA	MYC induced nuclear antigen
hsa-miR-609	1	0	1	1	1	1	PPM1L	protein phosphatase, Mg2+/Mn2+ dependent, 1L
hsa-miR-609	1	0	1	1	1	1	TPM1	tropomyosin 1 (alpha)
hsa-miR-609	0	0	1	0	0	0	FLJ30838	uncharacterized LOC400955
hsa-miR-609	0	0	1	0	0	0	JPX	JPX transcript, XIST activator (non-protein coding)
hsa-miR-609	1	0	1	1	1	1	TMEM25	transmembrane protein 25
hsa-miR-609	1	0	1	1	1	1	SORBS2	sorbin and SH3 domain containing 2
hsa-miR-609	0	0	1	0	0	0	LOC255187	hCG1980447
hsa-miR-609	0	0	1	0	0	0	LOC100125918	uncharacterized LOC100125918
hsa-miR-609	0	0	1	0	0	0	UBE2QL1	ubiquitin-conjugating enzyme E2Q family-like 1
hsa-miR-609	0	0	1	0	0	0	LINC00637	long intergenic non-protein coding RNA 637
hsa-miR-609	0	0	1	1	1	1	ZBTB26	zinc finger and BTB domain containing 26
hsa-miR-609	1	0	1	1	1	1	ARID1B	AT rich interactive domain 1B (SWI1-like)
hsa-miR-609	0	0	1	1	1	1	ZFAND2B	zinc finger, AN1-type domain 2B
hsa-miR-609	1	0	1	1	1	1	SIRT1	sirtuin 1
hsa-miR-609	0	0	1	1	0	0	CPAMD8	C3 and PZP-like, alpha-2-macroglobulin domain containing 8
hsa-miR-609	1	0	1	1	1	1	CYP46A1	cytochrome P450, family 46, subfamily A, polypeptide 1
hsa-miR-609	0	0	1	0	1	1	TMSB15B	thymosin beta 15B
hsa-miR-609	0	0	1	0	0	0	LOC440910	uncharacterized LOC440910
hsa-miR-609	0	0	1	1	1	1	CD34	CD34 molecule
hsa-miR-609	1	0	1	1	1	1	GNG2	guanine nucleotide binding protein (G protein), gamma 2
hsa-miR-609	0	0	1	0	0	0	PMEL	premelanosome protein
hsa-miR-609	0	0	1	0	1	1	SSPN	sarcospan
hsa-miR-609	0	0	1	1	0	0	C6orf163	chromosome 6 open reading frame 163
hsa-miR-609	0	0	1	1	1	1	PRKRA	protein kinase, interferon-inducible double stranded RNA dependent activator
hsa-miR-609	0	0	1	1	1	1	CYP11B1	cytochrome P450, family 11, subfamily B, polypeptide 1
hsa-miR-609	0	0	1	0	0	0	PART1	prostate androgen-regulated transcript 1 (non-protein coding)
hsa-miR-609	0	0	1	0	0	0	LINC00340	long intergenic non-protein coding RNA 340
hsa-miR-609	0	0	1	1	0	0	ZNF185	zinc finger protein 185 (LIM domain)
hsa-miR-609	0	0	1	1	1	1	CHI3L1	chitinase 3-like 1 (cartilage glycoprotein-39)
hsa-miR-609	0	0	1	1	1	1	SIRPB2	signal-regulatory protein beta 2
hsa-miR-609	1	0	1	0	1	1	STC2	stanniocalcin 2
hsa-miR-609	0	0	1	1	0	0	TRIM46	tripartite motif containing 46
hsa-miR-609	0	0	1	0	0	0	FAM66C	family with sequence similarity 66, member C
hsa-miR-609	0	0	1	0	0	0	C1orf204	chromosome 1 open reading frame 204
hsa-miR-609	1	0	1	0	1	1	KIAA1737	KIAA1737
hsa-miR-609	1	0	1	1	1	1	SYT6	synaptotagmin VI
hsa-miR-609	1	0	1	1	1	1	SNRNP70	small nuclear ribonucleoprotein 70kDa (U1)
hsa-miR-609	0	0	1	1	1	1	IL17RE	interleukin 17 receptor E
hsa-miR-609	0	0	1	1	0	0	CHCHD5	coiled-coil-helix-coiled-coil-helix domain containing 5
hsa-miR-609	0	0	1	1	0	0	VPS37C	vacuolar protein sorting 37 homolog C (S. cerevisiae)
hsa-miR-609	0	0	1	0	0	0	LINC00293	long intergenic non-protein coding RNA 293
hsa-miR-609	0	0	1	1	1	1	TEX35	testis expressed 35
hsa-miR-609	0	0	1	1	1	1	ATP9B	ATPase, class II, type 9B
hsa-miR-609	0	0	1	1	1	1	FAM76A	family with sequence similarity 76, member A
hsa-miR-609	0	0	1	0	0	0	LOC338579	ankyrin repeat domain-containing protein 30B pseudogene
hsa-miR-609	1	0	1	1	0	0	FBXL19	F-box and leucine-rich repeat protein 19
hsa-miR-609	0	0	1	0	1	1	MYLK4	myosin light chain kinase family, member 4
hsa-miR-609	1	0	1	0	1	1	UNC5D	unc-5 homolog D (C. elegans)
hsa-miR-609	1	0	1	1	1	1	AGAP2	ArfGAP with GTPase domain, ankyrin repeat and PH domain 2
hsa-miR-609	1	0	1	1	1	1	SIK3	SIK family kinase 3
hsa-miR-609	0	0	1	1	1	1	DNAJC24	DnaJ (Hsp40) homolog, subfamily C, member 24
hsa-miR-609	0	0	1	0	1	1	FLJ41200	uncharacterized LOC401492
hsa-miR-609	1	0	1	1	1	1	MDGA2	MAM domain containing glycosylphosphatidylinositol anchor 2
hsa-miR-609	1	0	1	1	1	1	PPFIA1	protein tyrosine phosphatase, receptor type, f polypeptide (PTPRF), interacting protein (liprin), alpha 1
hsa-miR-609	0	0	1	0	0	0	TMPRSS11BNL	TMPRSS11B N terminal-like
hsa-miR-609	0	0	1	1	1	1	FAM19A2	family with sequence similarity 19 (chemokine (C-C motif)-like), member A2
hsa-miR-609	0	0	1	0	0	0	DKFZP434H168	uncharacterized LOC26077
hsa-miR-609	0	0	1	1	0	0	NPIP	nuclear pore complex interacting protein
hsa-miR-609	0	0	1	1	1	1	C2orf91	chromosome 2 open reading frame 91
hsa-miR-609	0	0	1	0	0	0	TMEM232	transmembrane protein 232
hsa-miR-609	1	0	1	0	0	0	ANKRD52	ankyrin repeat domain 52
hsa-miR-609	1	0	1	1	1	1	DCTN4	dynactin 4 (p62)
hsa-miR-609	0	0	1	1	0	0	FSIP2	fibrous sheath interacting protein 2
hsa-miR-609	0	0	1	1	1	1	MORF4L2	mortality factor 4 like 2
hsa-miR-609	0	0	1	0	1	1	LOC388942	uncharacterized LOC388942
hsa-miR-609	1	0	1	1	1	1	KDM4B	lysine (K)-specific demethylase 4B
hsa-miR-609	0	0	1	0	0	0	RPL23AP53	ribosomal protein L23a pseudogene 53
hsa-miR-609	0	0	1	1	1	1	KLC4	kinesin light chain 4
hsa-miR-609	0	0	1	1	1	1	USP4	ubiquitin specific peptidase 4 (proto-oncogene)
hsa-miR-609	1	0	1	1	0	0	MRVI1	murine retrovirus integration site 1 homolog
hsa-miR-609	1	0	1	1	1	1	PHF17	PHD finger protein 17
hsa-miR-609	1	0	1	0	1	1	SP6	Sp6 transcription factor
hsa-miR-609	0	0	1	0	0	0	FAM205B	transmembrane protein C9orf144B pseudogene
hsa-miR-609	1	0	1	1	1	1	FRYL	FRY-like
hsa-miR-609	1	0	1	0	1	1	NBR1	neighbor of BRCA1 gene 1
hsa-miR-609	1	0	1	1	1	1	DPY19L3	dpy-19-like 3 (C. elegans)
hsa-miR-609	0	0	1	1	1	1	LYPD1	LY6/PLAUR domain containing 1
hsa-miR-609	0	0	1	1	0	0	HEATR8	HEAT repeat containing 8
hsa-miR-609	0	0	1	1	0	0	EXOSC7	exosome component 7
hsa-miR-609	0	0	1	0	0	0	LOC390660	FLJ00317 protein
hsa-miR-609	0	0	1	0	1	1	RUFY4	RUN and FYVE domain containing 4
hsa-miR-609	0	0	1	1	1	1	NOTCH4	notch 4
hsa-miR-609	1	0	1	1	1	1	PPP2R5C	protein phosphatase 2, regulatory subunit B', gamma
hsa-miR-609	0	0	1	1	1	1	ZNF346	zinc finger protein 346
hsa-miR-609	0	0	1	1	0	0	DENND3	DENN/MADD domain containing 3
hsa-miR-609	0	0	1	0	0	0	AGAP9	ArfGAP with GTPase domain, ankyrin repeat and PH domain 9
hsa-miR-609	1	0	1	1	1	1	TAP2	transporter 2, ATP-binding cassette, sub-family B (MDR/TAP)
hsa-miR-609	0	0	1	1	1	1	ARID1A	AT rich interactive domain 1A (SWI-like)
hsa-miR-609	0	0	1	1	1	1	CRISP3	cysteine-rich secretory protein 3
hsa-miR-609	1	0	1	1	1	1	CYFIP2	cytoplasmic FMR1 interacting protein 2
hsa-miR-609	1	0	1	1	1	1	MEAF6	MYST/Esa1-associated factor 6
hsa-miR-609	1	0	1	1	1	1	PTPN2	protein tyrosine phosphatase, non-receptor type 2
hsa-miR-609	1	0	1	0	1	1	MAP3K3	mitogen-activated protein kinase kinase kinase 3
hsa-miR-609	0	0	1	1	1	1	CCKBR	cholecystokinin B receptor
hsa-miR-609	0	0	1	1	0	0	NEK7	NIMA (never in mitosis gene a)-related kinase 7
hsa-miR-609	1	0	1	1	1	1	TAB2	TGF-beta activated kinase 1/MAP3K7 binding protein 2
hsa-miR-609	0	0	1	1	1	1	ARIH1	ariadne homolog, ubiquitin-conjugating enzyme E2 binding protein, 1 (Drosophila)
hsa-miR-609	0	0	1	1	0	0	ODF3	outer dense fiber of sperm tails 3
hsa-miR-609	0	0	1	0	0	0	KIAA0913	KIAA0913
hsa-miR-609	0	0	1	1	0	0	DDX49	DEAD (Asp-Glu-Ala-Asp) box polypeptide 49
hsa-miR-609	1	0	1	1	1	1	GPBP1	GC-rich promoter binding protein 1
hsa-miR-609	1	0	1	0	1	1	GRIN3A	glutamate receptor, ionotropic, N-methyl-D-aspartate 3A
hsa-miR-609	1	0	1	1	1	1	SLC30A8	solute carrier family 30 (zinc transporter), member 8
hsa-miR-609	0	0	1	0	1	1	GAB3	GRB2-associated binding protein 3
hsa-miR-609	1	0	1	1	0	0	PTAR1	protein prenyltransferase alpha subunit repeat containing 1
hsa-miR-609	0	0	1	1	1	1	INPP5B	inositol polyphosphate-5-phosphatase, 75kDa
hsa-miR-609	1	0	1	0	1	1	MEF2C	myocyte enhancer factor 2C
hsa-miR-609	0	0	1	0	0	0	LOC286135	uncharacterized LOC286135
hsa-miR-609	1	0	1	1	1	1	IL17RD	interleukin 17 receptor D
hsa-miR-609	1	0	1	1	0	0	LRRC16B	leucine rich repeat containing 16B
hsa-miR-609	1	0	1	1	1	1	RICTOR	RPTOR independent companion of MTOR, complex 2
hsa-miR-609	1	0	1	1	1	1	PPP3CA	protein phosphatase 3, catalytic subunit, alpha isozyme
hsa-miR-609	1	0	1	1	1	1	IKZF2	IKAROS family zinc finger 2 (Helios)
hsa-miR-609	0	0	1	0	0	0	GRIK1-AS1	GRIK1 antisense RNA 1
hsa-miR-609	1	0	1	1	1	1	SORCS1	sortilin-related VPS10 domain containing receptor 1
hsa-miR-609	1	0	1	1	1	1	SULF1	sulfatase 1
hsa-miR-609	0	0	1	0	0	0	CR1L	complement component (3b/4b) receptor 1-like
hsa-miR-609	0	0	1	0	1	1	UNC5B	unc-5 homolog B (C. elegans)
hsa-miR-609	0	0	1	1	0	0	DNAH1	dynein, axonemal, heavy chain 1
hsa-miR-609	1	0	1	0	1	1	RAB11FIP1	RAB11 family interacting protein 1 (class I)
hsa-miR-609	1	0	1	1	1	1	OPRM1	opioid receptor, mu 1
hsa-miR-609	1	0	1	1	1	1	RAI14	retinoic acid induced 14
hsa-miR-609	0	0	1	1	1	1	GCOM1	GRINL1A complex locus 1
hsa-miR-609	0	0	1	1	0	0	EGFL8	EGF-like-domain, multiple 8
hsa-miR-609	0	0	1	1	1	1	PLD5	phospholipase D family, member 5
hsa-miR-609	0	0	1	1	1	1	POTEG	POTE ankyrin domain family, member G
hsa-miR-609	0	0	1	0	0	0	BDNF-AS	BDNF antisense RNA
hsa-miR-609	0	0	1	1	1	1	AICDA	activation-induced cytidine deaminase
hsa-miR-609	1	0	1	1	1	1	MECP2	methyl CpG binding protein 2 (Rett syndrome)
hsa-miR-609	0	0	1	1	1	1	ALB	albumin
hsa-miR-609	0	0	1	1	1	1	NR1I3	nuclear receptor subfamily 1, group I, member 3
hsa-miR-609	1	0	1	1	1	1	ITSN1	intersectin 1 (SH3 domain protein)
hsa-miR-609	0	0	1	1	1	1	FCRLB	Fc receptor-like B
hsa-miR-609	0	0	1	1	0	0	FAM170A	family with sequence similarity 170, member A
hsa-miR-609	1	0	1	1	1	1	MCHR1	melanin-concentrating hormone receptor 1
hsa-miR-609	1	0	1	1	1	1	RTN3	reticulon 3
hsa-miR-609	0	0	1	1	1	1	KCNJ13	potassium inwardly-rectifying channel, subfamily J, member 13
hsa-miR-609	1	0	1	1	1	1	TBC1D22B	TBC1 domain family, member 22B
hsa-miR-609	1	0	1	1	1	1	AMOT	angiomotin
hsa-miR-609	1	0	1	1	1	1	PDLIM3	PDZ and LIM domain 3
hsa-miR-609	0	0	1	1	1	1	BOD1	biorientation of chromosomes in cell division 1
hsa-miR-609	1	0	1	0	1	1	DCAF10	DDB1 and CUL4 associated factor 10
hsa-miR-609	0	0	1	1	1	1	FTO	fat mass and obesity associated
hsa-miR-609	0	0	1	0	0	0	MGC13053	uncharacterized MGC13053
hsa-miR-609	0	0	1	1	0	0	NFKBID	nuclear factor of kappa light polypeptide gene enhancer in B-cells inhibitor, delta
hsa-miR-609	0	0	1	1	0	0	WDR74	WD repeat domain 74
hsa-miR-609	1	0	1	1	1	1	SHOX2	short stature homeobox 2
hsa-miR-609	0	0	1	0	0	0	LOC400043	uncharacterized LOC400043
hsa-miR-609	1	0	1	1	1	1	SZRD1	SUZ RNA binding domain containing 1
hsa-miR-609	0	0	1	1	0	0	VAV1	vav 1 guanine nucleotide exchange factor
hsa-miR-609	1	0	1	1	1	1	ETF1	eukaryotic translation termination factor 1
hsa-miR-609	0	0	1	1	0	0	TMEM44	transmembrane protein 44
hsa-miR-609	0	0	1	1	0	0	CCDC36	coiled-coil domain containing 36
hsa-miR-609	1	0	1	1	1	1	ZBTB38	zinc finger and BTB domain containing 38
hsa-miR-609	1	0	1	1	1	1	FAM199X	family with sequence similarity 199, X-linked
hsa-miR-609	0	0	1	0	0	0	LOC100144602	uncharacterized LOC100144602
hsa-miR-609	0	0	1	1	0	0	PTPMT1	protein tyrosine phosphatase, mitochondrial 1
hsa-miR-609	0	0	1	1	1	1	CCNE2	cyclin E2
hsa-miR-609	0	0	1	0	0	0	NBR2	neighbor of BRCA1 gene 2 (non-protein coding)
hsa-miR-609	0	0	1	1	0	0	GALNTL5	UDP-N-acetyl-alpha-D-galactosamine:polypeptide N-acetylgalactosaminyltransferase-like 5
hsa-miR-609	0	0	1	1	0	0	GLS2	glutaminase 2 (liver, mitochondrial)
hsa-miR-609	1	0	1	1	1	1	CRKL	v-crk sarcoma virus CT10 oncogene homolog (avian)-like
hsa-miR-609	1	0	1	1	1	1	RSPO2	R-spondin 2
hsa-miR-609	0	0	1	1	1	1	SELP	selectin P (granule membrane protein 140kDa, antigen CD62)
hsa-miR-609	0	0	1	1	1	1	ZNF589	zinc finger protein 589
hsa-miR-609	0	0	1	0	1	1	KIAA0895	KIAA0895
hsa-miR-609	1	0	1	0	0	0	KCNU1	potassium channel, subfamily U, member 1
hsa-miR-609	1	0	1	0	1	1	SV2B	synaptic vesicle glycoprotein 2B
hsa-miR-609	1	0	1	1	1	1	GABRA1	gamma-aminobutyric acid (GABA) A receptor, alpha 1
hsa-miR-609	0	0	1	1	0	0	TRIM69	tripartite motif containing 69
hsa-miR-609	0	0	1	0	0	0	ATP8B5P	ATPase, class I, type 8B, member 5, pseudogene
hsa-miR-609	0	0	1	1	0	0	KIAA1324	KIAA1324
hsa-miR-609	0	0	1	1	0	0	TREM2	triggering receptor expressed on myeloid cells 2
hsa-miR-609	1	0	1	0	1	1	CCDC88A	coiled-coil domain containing 88A
hsa-miR-609	1	0	1	1	1	1	TTC39C	tetratricopeptide repeat domain 39C
hsa-miR-609	1	0	1	1	0	0	MRC2	mannose receptor, C type 2
hsa-miR-609	0	0	1	1	1	1	SNAP47	synaptosomal-associated protein, 47kDa
hsa-miR-609	1	0	1	1	1	1	SECISBP2L	SECIS binding protein 2-like
hsa-miR-609	1	0	1	0	1	1	THSD7B	thrombospondin, type I, domain containing 7B
hsa-miR-609	0	0	1	0	0	0	LOC415056	uncharacterized LOC415056
hsa-miR-609	1	0	1	1	1	1	PML	promyelocytic leukemia
hsa-miR-609	0	0	1	1	1	1	ZNF337	zinc finger protein 337
hsa-miR-609	0	0	1	1	0	0	HCRTR1	hypocretin (orexin) receptor 1
hsa-miR-609	1	0	1	1	0	0	INO80E	INO80 complex subunit E
hsa-miR-609	1	0	1	1	0	0	EGLN2	egl nine homolog 2 (C. elegans)
hsa-miR-609	0	0	1	0	0	0	LINC00642	long intergenic non-protein coding RNA 642
hsa-miR-609	1	0	1	1	1	1	BNC2	basonuclin 2
hsa-miR-609	0	0	1	0	0	0	CYP4F35P	cytochrome P450, family 4, subfamily F, polypeptide 35, pseudogene
hsa-miR-609	1	0	1	0	1	1	RAG1	recombination activating gene 1
hsa-miR-609	0	0	1	1	1	1	FAM71D	family with sequence similarity 71, member D
hsa-miR-609	1	0	1	1	1	1	CTBP2	C-terminal binding protein 2
hsa-miR-609	1	0	1	1	1	1	GALNT1	UDP-N-acetyl-alpha-D-galactosamine:polypeptide N-acetylgalactosaminyltransferase 1 (GalNAc-T1)
hsa-miR-609	0	0	1	0	0	0	FLJ36000	uncharacterized FLJ36000
hsa-miR-609	1	0	1	1	1	1	FGFR2	fibroblast growth factor receptor 2
hsa-miR-609	0	0	1	0	0	0	USP32P1	ubiquitin specific peptidase 32 pseudogene 1
hsa-miR-609	1	0	1	1	1	1	MARCKS	myristoylated alanine-rich protein kinase C substrate
hsa-miR-609	1	0	1	1	1	1	TIMP2	TIMP metallopeptidase inhibitor 2
hsa-miR-609	0	0	1	0	0	0	TOB1-AS1	TOB1 antisense RNA 1
hsa-miR-609	0	0	1	1	1	1	VBP1	von Hippel-Lindau binding protein 1
hsa-miR-609	1	0	1	1	1	1	FOSB	FBJ murine osteosarcoma viral oncogene homolog B
hsa-miR-609	1	0	1	1	1	1	DACH2	dachshund homolog 2 (Drosophila)
hsa-miR-609	1	0	1	1	1	1	PDPK1	3-phosphoinositide dependent protein kinase-1
hsa-miR-609	0	0	1	0	0	0	LOC339240	keratin 17 pseudogene
hsa-miR-609	1	0	1	1	1	1	ARPP21	cAMP-regulated phosphoprotein, 21kDa
hsa-miR-609	1	0	1	0	1	1	TNFAIP3	tumor necrosis factor, alpha-induced protein 3
hsa-miR-609	0	0	1	1	1	1	ZNF568	zinc finger protein 568
hsa-miR-609	0	0	1	0	0	0	LOC157381	uncharacterized LOC157381
hsa-miR-609	1	0	1	1	1	1	ARHGAP30	Rho GTPase activating protein 30
hsa-miR-609	0	0	1	0	0	0	FAM27E3	family with sequence similarity 27, member E3
hsa-miR-609	0	0	1	1	1	1	DOCK8	dedicator of cytokinesis 8
hsa-miR-609	1	0	1	1	1	1	SENP1	SUMO1/sentrin specific peptidase 1
hsa-miR-609	0	0	1	1	0	0	LILRA1	leukocyte immunoglobulin-like receptor, subfamily A (with TM domain), member 1
hsa-miR-609	1	0	1	0	1	1	LYPD6	LY6/PLAUR domain containing 6
hsa-miR-609	1	0	1	1	1	1	BRD1	bromodomain containing 1
hsa-miR-609	0	0	1	0	0	0	LOC283038	uncharacterized LOC283038
hsa-miR-609	1	0	1	1	1	1	CLVS1	clavesin 1
hsa-miR-609	1	0	1	1	1	1	KIF11	kinesin family member 11
hsa-miR-609	0	0	1	1	1	1	HLA-DQA1	major histocompatibility complex, class II, DQ alpha 1
hsa-miR-609	1	0	1	0	1	1	C14orf43	chromosome 14 open reading frame 43
hsa-miR-609	0	0	1	1	1	1	ZNF254	zinc finger protein 254
hsa-miR-609	1	0	1	1	1	1	NCOA5	nuclear receptor coactivator 5
hsa-miR-609	1	0	1	0	1	1	LYSMD3	LysM, putative peptidoglycan-binding, domain containing 3
hsa-miR-609	0	0	1	1	0	0	C8orf31	chromosome 8 open reading frame 31
hsa-miR-609	1	0	1	1	0	0	ASRGL1	asparaginase like 1
hsa-miR-609	1	0	1	1	1	1	SLC26A7	solute carrier family 26, member 7
hsa-miR-609	1	0	1	1	1	1	PHACTR4	phosphatase and actin regulator 4
hsa-miR-609	0	0	1	0	0	0	SPDYE8P	speedy homolog E8 (Xenopus laevis), pseudogene
hsa-miR-609	0	0	1	1	0	0	CYP4F30P	cytochrome P450, family 4, subfamily F, polypeptide 30, pseudogene
hsa-miR-609	1	0	1	1	0	0	CHTOP	chromatin target of PRMT1
hsa-miR-609	0	0	1	1	0	0	TMEM107	transmembrane protein 107
hsa-miR-609	1	0	1	0	1	1	TGFBR1	transforming growth factor, beta receptor 1
hsa-miR-609	1	0	1	1	1	1	OPCML	opioid binding protein/cell adhesion molecule-like
hsa-miR-609	0	0	1	0	0	0	LINC00537	long intergenic non-protein coding RNA 537
hsa-miR-609	0	0	1	0	0	0	GDF5OS	growth differentiation factor 5 opposite strand
hsa-miR-609	0	0	1	1	0	0	MTMR11	myotubularin related protein 11
hsa-miR-609	0	0	1	1	1	1	SPDYE2	speedy homolog E2 (Xenopus laevis)
hsa-miR-609	0	0	1	1	1	1	ZNF365	zinc finger protein 365
hsa-miR-609	1	0	1	0	1	1	CPEB2	cytoplasmic polyadenylation element binding protein 2
hsa-miR-609	1	0	1	1	0	0	KIAA1644	KIAA1644
hsa-miR-609	0	0	1	1	0	0	TRPV3	transient receptor potential cation channel, subfamily V, member 3
hsa-miR-609	0	0	1	0	0	0	LOC150577	uncharacterized LOC150577
hsa-miR-609	1	0	1	1	1	1	GABRB2	gamma-aminobutyric acid (GABA) A receptor, beta 2
hsa-miR-609	0	0	1	0	0	0	FAM71F2	family with sequence similarity 71, member F2
hsa-miR-609	0	0	1	1	1	1	PAX4	paired box 4
hsa-miR-609	0	0	1	1	1	1	TTN	titin
hsa-miR-609	1	0	1	1	1	1	TLR10	toll-like receptor 10
hsa-miR-609	0	0	1	1	1	1	MTRR	5-methyltetrahydrofolate-homocysteine methyltransferase reductase
hsa-miR-609	1	0	1	0	1	1	DNAJC6	DnaJ (Hsp40) homolog, subfamily C, member 6
hsa-miR-609	0	0	1	1	1	1	RASAL2	RAS protein activator like 2
hsa-miR-609	0	0	1	0	0	0	LRRC37A11P	leucine rich repeat containing 37, member A11, pseudogene
hsa-miR-609	0	0	1	0	0	0	POM121L9P	POM121 transmembrane nucleoporin-like 9, pseudogene
hsa-miR-609	1	0	1	1	1	1	PAX3	paired box 3
hsa-miR-609	1	0	1	1	1	1	TNS1	tensin 1
hsa-miR-609	1	0	1	1	1	1	GRIA3	glutamate receptor, ionotropic, AMPA 3
hsa-miR-609	1	0	1	1	1	1	FKBP1A	FK506 binding protein 1A, 12kDa
hsa-miR-609	0	0	1	0	0	0	OR1D4	olfactory receptor, family 1, subfamily D, member 4 (gene/pseudogene)
hsa-miR-609	0	0	1	0	0	0	LINC00266-1	long intergenic non-protein coding RNA 266-1
hsa-miR-609	0	0	1	0	0	0	EEF1DP3	eukaryotic translation elongation factor 1 delta pseudogene 3
hsa-miR-609	0	0	1	1	0	0	CROCC	ciliary rootlet coiled-coil, rootletin
hsa-miR-609	1	0	1	1	1	1	ZMYM4	zinc finger, MYM-type 4
hsa-miR-609	0	0	1	1	0	0	USP19	ubiquitin specific peptidase 19
hsa-miR-609	1	0	1	0	1	1	SEMA4G	sema domain, immunoglobulin domain (Ig), transmembrane domain (TM) and short cytoplasmic domain, (semaphorin) 4G
hsa-miR-609	0	0	1	0	1	1	PPIAL4G	peptidylprolyl isomerase A (cyclophilin A)-like 4G
hsa-miR-609	1	0	1	1	1	1	PTPRZ1	protein tyrosine phosphatase, receptor-type, Z polypeptide 1
hsa-miR-609	0	0	1	1	1	1	UCHL5	ubiquitin carboxyl-terminal hydrolase L5
hsa-miR-609	0	0	1	1	0	0	EFCAB11	EF-hand calcium binding domain 11
hsa-miR-609	0	0	1	1	0	0	NDRG2	NDRG family member 2
hsa-miR-609	1	0	1	1	1	1	BTBD7	BTB (POZ) domain containing 7
hsa-miR-609	1	0	1	1	1	1	DLST	dihydrolipoamide S-succinyltransferase (E2 component of 2-oxo-glutarate complex)
hsa-miR-609	1	0	1	1	1	1	LITAF	lipopolysaccharide-induced TNF factor
hsa-miR-609	1	0	1	1	0	0	KRT80	keratin 80
hsa-miR-609	1	0	1	1	1	1	ATP2B4	ATPase, Ca++ transporting, plasma membrane 4
hsa-miR-609	1	0	1	1	1	1	SGCD	sarcoglycan, delta (35kDa dystrophin-associated glycoprotein)
hsa-miR-609	1	0	1	0	1	1	MTX3	metaxin 3
hsa-miR-609	0	0	1	0	1	1	ZNF498	zinc finger protein 498
hsa-miR-609	0	0	1	1	1	1	CRB1	crumbs homolog 1 (Drosophila)
hsa-miR-609	1	0	1	1	1	1	SLC35F1	solute carrier family 35, member F1
hsa-miR-609	1	0	1	1	1	1	TGOLN2	trans-golgi network protein 2
hsa-miR-609	0	0	1	1	1	1	GTF3C2	general transcription factor IIIC, polypeptide 2, beta 110kDa
hsa-miR-609	0	0	1	0	1	1	PRH2	proline-rich protein HaeIII subfamily 2
hsa-miR-609	0	0	1	1	1	1	CC2D2A	coiled-coil and C2 domain containing 2A
hsa-miR-609	1	0	1	1	1	1	CGN	cingulin
hsa-miR-609	0	0	1	0	0	0	LINC00240	long intergenic non-protein coding RNA 240
hsa-miR-609	0	0	1	1	0	0	PRKCQ	protein kinase C, theta
hsa-miR-609	1	0	1	1	1	1	USP6	ubiquitin specific peptidase 6 (Tre-2 oncogene)
hsa-miR-609	1	0	1	1	1	1	ATP6V1C1	ATPase, H+ transporting, lysosomal 42kDa, V1 subunit C1
hsa-miR-609	1	0	1	1	1	1	DDAH1	dimethylarginine dimethylaminohydrolase 1
hsa-miR-609	1	0	1	1	1	1	SOGA2	SOGA family member 2
hsa-miR-609	1	0	1	1	1	1	AZI2	5-azacytidine induced 2
hsa-miR-609	0	0	1	1	1	1	RBM20	RNA binding motif protein 20
hsa-miR-609	0	0	1	1	1	1	THSD4	thrombospondin, type I, domain containing 4
hsa-miR-609	0	0	1	0	0	0	ZNRD1-AS1	ZNRD1 antisense RNA 1
hsa-miR-609	1	0	1	1	1	1	BZRAP1	benzodiazapine receptor (peripheral) associated protein 1
hsa-miR-609	1	0	1	0	1	1	C1orf21	chromosome 1 open reading frame 21
hsa-miR-609	0	0	1	0	0	0	DKFZp686K1684	uncharacterized LOC440034
hsa-miR-609	0	0	1	1	1	1	IPO11	importin 11
hsa-miR-609	1	0	1	1	1	1	HIC2	hypermethylated in cancer 2
hsa-miR-609	1	0	1	1	1	1	BSDC1	BSD domain containing 1
hsa-miR-609	0	0	1	0	0	0	LINC00341	long intergenic non-protein coding RNA 341
hsa-miR-609	1	0	1	0	1	1	RNF144A	ring finger protein 144A
hsa-miR-609	1	0	1	0	0	0	IGLON5	IgLON family member 5
hsa-miR-609	0	0	1	1	0	0	CHCHD3	coiled-coil-helix-coiled-coil-helix domain containing 3
hsa-miR-609	1	0	1	1	1	1	VIM	vimentin
hsa-miR-609	0	0	1	0	0	0	GGTA1P	glycoprotein, alpha-galactosyltransferase 1 pseudogene
hsa-miR-609	0	0	1	1	1	1	DGCR14	DiGeorge syndrome critical region gene 14
hsa-miR-609	0	0	1	0	0	0	LOC400768	uncharacterized LOC400768
hsa-miR-609	0	0	1	1	1	1	APH1A	anterior pharynx defective 1 homolog A (C. elegans)
hsa-miR-609	0	0	1	1	1	1	IER3	immediate early response 3
hsa-miR-609	1	0	1	1	1	1	FGF11	fibroblast growth factor 11
hsa-miR-609	0	0	1	1	0	0	NOP56	NOP56 ribonucleoprotein homolog (yeast)
hsa-miR-609	0	0	1	1	1	1	TCEA2	transcription elongation factor A (SII), 2
hsa-miR-609	1	0	1	1	1	1	E2F5	E2F transcription factor 5, p130-binding
hsa-miR-609	1	0	1	1	1	1	ADM	adrenomedullin
hsa-miR-609	0	0	1	1	1	1	ABCD1	ATP-binding cassette, sub-family D (ALD), member 1
hsa-miR-609	1	0	1	1	1	1	SMARCE1	SWI/SNF related, matrix associated, actin dependent regulator of chromatin, subfamily e, member 1
hsa-miR-609	0	0	1	1	1	1	ELP5	elongator acetyltransferase complex subunit 5
hsa-miR-609	0	0	1	1	1	1	HMGB2	high mobility group box 2
hsa-miR-609	1	0	1	1	1	1	METTL10	methyltransferase like 10
hsa-miR-609	1	0	1	0	1	1	RPS6KB1	ribosomal protein S6 kinase, 70kDa, polypeptide 1
hsa-miR-609	0	0	1	1	0	0	CCDC137	coiled-coil domain containing 137
hsa-miR-609	0	0	1	0	0	0	LOC150568	uncharacterized LOC150568
hsa-miR-609	0	0	1	1	1	1	NARS	asparaginyl-tRNA synthetase
hsa-miR-609	0	0	1	1	1	1	UCHL3	ubiquitin carboxyl-terminal esterase L3 (ubiquitin thiolesterase)
hsa-miR-609	1	0	1	1	1	1	NRN1	neuritin 1
hsa-miR-609	0	0	1	1	0	0	CCDC22	coiled-coil domain containing 22
hsa-miR-609	1	0	1	1	1	1	ARNTL	aryl hydrocarbon receptor nuclear translocator-like
hsa-miR-609	0	0	1	1	0	0	RGS9	regulator of G-protein signaling 9
hsa-miR-609	1	0	1	1	1	1	TIMP3	TIMP metallopeptidase inhibitor 3
hsa-miR-609	0	0	1	1	1	1	ATP1A1	ATPase, Na+/K+ transporting, alpha 1 polypeptide
hsa-miR-609	0	0	1	1	1	1	TCTN3	tectonic family member 3
hsa-miR-609	0	0	1	1	0	0	FADS3	fatty acid desaturase 3
hsa-miR-609	0	0	1	1	1	1	FAM18B1	family with sequence similarity 18, member B1
hsa-miR-609	0	0	1	0	0	0	ZNF674-AS1	ZNF674 antisense RNA 1
hsa-miR-609	1	0	1	1	1	1	HMGN2	high mobility group nucleosomal binding domain 2
hsa-miR-609	0	0	1	1	1	1	NCAPH	non-SMC condensin I complex, subunit H
hsa-miR-609	1	0	1	1	0	0	STAG3L4	stromal antigen 3-like 4
hsa-miR-609	0	0	1	1	1	1	UBE2A	ubiquitin-conjugating enzyme E2A
hsa-miR-609	1	0	1	1	1	1	ATPAF1	ATP synthase mitochondrial F1 complex assembly factor 1
hsa-miR-609	0	0	1	0	0	0	LOC100132984	uncharacterized LOC100132984
hsa-miR-609	0	0	1	1	0	0	FES	feline sarcoma oncogene
hsa-miR-609	1	0	1	0	1	1	NMT1	N-myristoyltransferase 1
hsa-miR-609	1	0	1	0	1	1	KIAA0240	KIAA0240
hsa-miR-609	1	0	1	1	0	0	SMCHD1	structural maintenance of chromosomes flexible hinge domain containing 1
hsa-miR-609	0	0	1	0	0	0	LOC731789	uncharacterized LOC731789
hsa-miR-609	1	0	1	0	1	1	BTRC	beta-transducin repeat containing E3 ubiquitin protein ligase
hsa-miR-609	1	0	1	1	1	1	PHACTR2	phosphatase and actin regulator 2
hsa-miR-609	1	0	1	0	1	1	PTP4A1	protein tyrosine phosphatase type IVA, member 1
hsa-miR-609	0	0	1	0	0	0	MUC19	mucin 19, oligomeric
hsa-miR-609	0	0	1	0	1	1	HDAC9	histone deacetylase 9
hsa-miR-609	1	0	1	1	0	0	POMGNT1	protein O-linked mannose beta1,2-N-acetylglucosaminyltransferase
hsa-miR-609	1	0	1	0	1	1	CNTNAP2	contactin associated protein-like 2
hsa-miR-609	0	0	1	1	0	0	SPINK5	serine peptidase inhibitor, Kazal type 5
hsa-miR-609	1	0	1	0	1	1	BCL2	B-cell CLL/lymphoma 2
hsa-miR-609	1	0	1	1	1	1	IGF1	insulin-like growth factor 1 (somatomedin C)
hsa-miR-609	0	0	1	1	1	1	NPR3	natriuretic peptide receptor C/guanylate cyclase C (atrionatriuretic peptide receptor C)
hsa-miR-609	0	0	1	1	1	1	HLA-G	major histocompatibility complex, class I, G
hsa-miR-609	0	0	1	1	1	1	ALDOB	aldolase B, fructose-bisphosphate
hsa-miR-609	1	0	1	1	1	1	COL1A1	collagen, type I, alpha 1
hsa-miR-609	1	0	1	1	1	1	CYP19A1	cytochrome P450, family 19, subfamily A, polypeptide 1
hsa-miR-609	1	0	1	1	1	1	GJA1	gap junction protein, alpha 1, 43kDa
hsa-miR-609	1	0	1	1	1	1	KCNA1	potassium voltage-gated channel, shaker-related subfamily, member 1 (episodic ataxia with myokymia)
hsa-miR-609	1	0	1	1	1	1	MET	met proto-oncogene (hepatocyte growth factor receptor)
hsa-miR-609	1	0	1	1	1	1	PTCH1	patched 1
hsa-miR-609	0	0	1	1	0	0	PCCA	propionyl CoA carboxylase, alpha polypeptide
hsa-miR-609	1	0	1	1	1	1	RB1	retinoblastoma 1
hsa-miR-609	1	0	1	1	1	1	ATXN1	ataxin 1
hsa-miR-609	1	0	1	0	1	1	CYBB	cytochrome b-245, beta polypeptide
hsa-miR-609	1	0	1	1	1	1	HLCS	holocarboxylase synthetase (biotin-(proprionyl-CoA-carboxylase (ATP-hydrolysing)) ligase)
hsa-miR-609	0	0	1	1	1	1	LTBP2	latent transforming growth factor beta binding protein 2
hsa-miR-609	1	0	1	1	1	1	HNF1B	HNF1 homeobox B
hsa-miR-609	1	0	1	1	1	1	IL1A	interleukin 1, alpha
hsa-miR-609	0	0	1	1	1	1	GPX1	glutathione peroxidase 1
hsa-miR-609	1	0	1	1	1	1	CD44	CD44 molecule (Indian blood group)
hsa-miR-609	1	0	1	1	1	1	GAD1	glutamate decarboxylase 1 (brain, 67kDa)
hsa-miR-609	1	0	1	0	1	1	SPOPL	speckle-type POZ protein-like
hsa-miR-609	0	0	1	1	1	1	CYP27C1	cytochrome P450, family 27, subfamily C, polypeptide 1
hsa-miR-609	0	0	1	1	1	1	MED11	mediator complex subunit 11
hsa-miR-609	0	0	1	0	0	0	KLK2	kallikrein-related peptidase 2
hsa-miR-609	1	0	1	1	1	1	RBMS3	RNA binding motif, single stranded interacting protein 3
hsa-miR-609	0	0	1	1	1	1	ALG11	asparagine-linked glycosylation 11, alpha-1,2-mannosyltransferase homolog (yeast)
hsa-miR-609	0	0	1	0	1	1	ZNF705A	zinc finger protein 705A
hsa-miR-609	0	0	1	1	0	0	FAM19A3	family with sequence similarity 19 (chemokine (C-C motif)-like), member A3
hsa-miR-609	0	0	1	1	1	1	HMGN2P46	high mobility group nucleosomal binding domain 2 pseudogene 46
hsa-miR-609	0	0	1	0	1	1	FLJ46347	uncharacterized LOC389064
hsa-miR-609	1	0	1	1	0	0	RPS6KA1	ribosomal protein S6 kinase, 90kDa, polypeptide 1
hsa-miR-609	0	0	1	1	1	1	SCP2	sterol carrier protein 2
hsa-miR-609	1	0	1	1	1	1	BRWD1	bromodomain and WD repeat domain containing 1
hsa-miR-609	1	0	1	0	1	1	CPLX2	complexin 2
hsa-miR-609	0	0	1	1	1	1	FAM154B	family with sequence similarity 154, member B
hsa-miR-609	1	0	1	0	1	1	KIAA2022	KIAA2022
hsa-miR-609	0	0	1	1	1	1	MXI1	MAX interactor 1
hsa-miR-609	0	0	1	1	1	1	GCSAM	germinal center-associated, signaling and motility
hsa-miR-609	0	0	1	0	1	1	ZNF648	zinc finger protein 648
hsa-miR-609	0	0	1	0	1	1	LPPR5	lipid phosphate phosphatase-related protein type 5
hsa-miR-609	0	0	1	1	1	1	SPIN3	spindlin family, member 3
hsa-miR-609	0	0	1	1	1	1	SAMD13	sterile alpha motif domain containing 13
hsa-miR-609	0	0	1	1	1	1	NCMAP	noncompact myelin associated protein
hsa-miR-609	1	0	1	1	1	1	CTNNBIP1	catenin, beta interacting protein 1
hsa-miR-609	0	0	1	1	1	1	AKTIP	AKT interacting protein
hsa-miR-609	1	0	1	1	1	1	FOXP4	forkhead box P4
hsa-miR-609	1	0	1	1	1	1	SLC25A53	solute carrier family 25, member 53
hsa-miR-609	0	0	1	0	1	1	LINC00268	long intergenic non-protein coding RNA 268
hsa-miR-609	0	0	1	1	1	1	FLG2	filaggrin family member 2
hsa-miR-609	1	0	1	1	0	0	USP21	ubiquitin specific peptidase 21
hsa-miR-609	0	0	1	1	1	1	ME3	malic enzyme 3, NADP(+)-dependent, mitochondrial
hsa-miR-609	1	0	1	1	1	1	NCDN	neurochondrin
hsa-miR-609	1	0	1	1	1	1	TMCC1	transmembrane and coiled-coil domain family 1
hsa-miR-609	1	0	1	0	1	1	GOPC	golgi-associated PDZ and coiled-coil motif containing
hsa-miR-609	0	0	1	1	1	1	BTBD11	BTB (POZ) domain containing 11
hsa-miR-609	1	0	1	1	1	1	GPHN	gephyrin
hsa-miR-609	1	0	1	1	1	1	FNBP1L	formin binding protein 1-like
hsa-miR-609	1	0	1	1	1	1	TPD52	tumor protein D52
hsa-miR-609	1	0	1	1	1	1	KCTD21	potassium channel tetramerisation domain containing 21
hsa-miR-609	0	0	1	1	0	0	PLAC8L1	PLAC8-like 1
hsa-miR-609	1	0	1	0	1	1	CYB5RL	cytochrome b5 reductase-like
hsa-miR-609	1	0	1	1	1	1	MAF	v-maf musculoaponeurotic fibrosarcoma oncogene homolog (avian)
hsa-miR-609	1	0	1	1	1	1	MASP1	mannan-binding lectin serine peptidase 1 (C4/C2 activating component of Ra-reactive factor)
hsa-miR-609	1	0	1	1	1	1	AMD1	adenosylmethionine decarboxylase 1
hsa-miR-609	0	0	1	1	1	1	ERP29	endoplasmic reticulum protein 29
hsa-miR-609	0	0	1	1	1	1	KCNIP1	Kv channel interacting protein 1
hsa-miR-609	0	0	1	1	1	1	EXOC4	exocyst complex component 4
hsa-miR-609	1	0	1	0	1	1	GK5	glycerol kinase 5 (putative)
hsa-miR-609	1	0	1	0	1	1	USP9X	ubiquitin specific peptidase 9, X-linked
hsa-miR-609	0	0	1	0	1	1	ZNF705D	zinc finger protein 705D
hsa-miR-609	1	0	1	0	1	1	CREBZF	CREB/ATF bZIP transcription factor
hsa-miR-609	1	0	1	1	1	1	CBLN3	cerebellin 3 precursor
hsa-miR-609	1	0	1	1	0	0	ANKRD34A	ankyrin repeat domain 34A
hsa-miR-609	1	0	1	1	1	1	MOSPD3	motile sperm domain containing 3
hsa-miR-609	0	0	1	0	1	1	STEAP2	STEAP family member 2, metalloreductase
hsa-miR-609	0	0	1	1	1	1	CARHSP1	calcium regulated heat stable protein 1, 24kDa
hsa-miR-609	0	0	1	1	1	1	FAM22G	family with sequence similarity 22, member G
hsa-miR-609	1	0	1	1	1	1	SLA	Src-like-adaptor
hsa-miR-609	1	0	1	1	1	1	IRF2BP2	interferon regulatory factor 2 binding protein 2
hsa-miR-609	1	0	1	1	1	1	PRR3	proline rich 3
hsa-miR-609	1	0	1	0	1	1	UBXN2B	UBX domain protein 2B
hsa-miR-609	1	0	1	1	1	1	VAV3	vav 3 guanine nucleotide exchange factor
hsa-miR-609	1	0	1	1	1	1	BEND3	BEN domain containing 3
hsa-miR-609	1	0	1	1	1	1	ZNF697	zinc finger protein 697
hsa-miR-609	1	0	1	1	1	1	MBOAT1	membrane bound O-acyltransferase domain containing 1
hsa-miR-609	0	0	1	1	1	1	ADSS	adenylosuccinate synthase
hsa-miR-609	1	0	1	0	1	1	KLF9	Kruppel-like factor 9
hsa-miR-609	1	0	1	0	1	1	CDK6	cyclin-dependent kinase 6
hsa-miR-609	0	0	1	1	1	1	CDKN2C	cyclin-dependent kinase inhibitor 2C (p18, inhibits CDK4)
hsa-miR-609	1	0	1	1	1	1	CHD1	chromodomain helicase DNA binding protein 1
hsa-miR-609	0	0	1	1	1	1	CLIC2	chloride intracellular channel 2
hsa-miR-609	1	0	1	0	1	1	CPD	carboxypeptidase D
hsa-miR-609	1	0	1	0	0	0	DLG4	discs, large homolog 4 (Drosophila)
hsa-miR-609	1	0	1	1	1	1	EIF1AX	eukaryotic translation initiation factor 1A, X-linked
hsa-miR-609	0	0	1	1	1	1	FRZB	frizzled-related protein
hsa-miR-609	0	0	1	1	0	0	FZD2	frizzled family receptor 2
hsa-miR-609	1	0	1	1	1	1	NDST1	N-deacetylase/N-sulfotransferase (heparan glucosaminyl) 1
hsa-miR-609	0	0	1	1	0	0	APOA2	apolipoprotein A-II
hsa-miR-609	1	0	1	0	1	1	ARNT	aryl hydrocarbon receptor nuclear translocator
hsa-miR-609	0	0	1	0	0	0	BAI1	brain-specific angiogenesis inhibitor 1
hsa-miR-609	0	0	1	1	0	0	BGN	biglycan
hsa-miR-609	1	0	1	0	1	1	CCND2	cyclin D2
hsa-miR-609	0	0	1	1	1	1	CD1D	CD1d molecule
hsa-miR-609	0	0	1	1	1	1	CNTN1	contactin 1
hsa-miR-609	1	0	1	0	1	1	COL19A1	collagen, type XIX, alpha 1
hsa-miR-609	0	0	1	1	0	0	GLP1R	glucagon-like peptide 1 receptor
hsa-miR-609	0	0	1	1	1	1	FOXN2	forkhead box N2
hsa-miR-609	0	0	1	1	1	1	IL12B	interleukin 12B (natural killer cell stimulatory factor 2, cytotoxic lymphocyte maturation factor 2, p40)
hsa-miR-609	0	0	1	0	1	1	ITGAV	integrin, alpha V
hsa-miR-609	0	0	1	1	0	0	KRT4	keratin 4
hsa-miR-609	1	0	1	1	1	1	MAX	MYC associated factor X
hsa-miR-609	0	0	1	0	1	1	CXCL9	chemokine (C-X-C motif) ligand 9
hsa-miR-609	0	0	1	1	0	0	MYOG	myogenin (myogenic factor 4)
hsa-miR-609	1	0	1	1	1	1	NDN	necdin homolog (mouse)
hsa-miR-609	1	0	1	1	1	1	OSBP	oxysterol binding protein
hsa-miR-609	1	0	1	0	0	0	PPP1R10	protein phosphatase 1, regulatory subunit 10
hsa-miR-609	0	0	1	1	1	1	SRGN	serglycin
hsa-miR-609	1	0	1	0	1	1	PRKCA	protein kinase C, alpha
hsa-miR-609	0	0	1	0	0	0	PSMB10	proteasome (prosome, macropain) subunit, beta type, 10
hsa-miR-609	1	0	1	1	1	1	PVALB	parvalbumin
hsa-miR-609	1	0	1	1	1	1	PVRL1	poliovirus receptor-related 1 (herpesvirus entry mediator C)
hsa-miR-609	0	0	1	1	1	1	RAB3A	RAB3A, member RAS oncogene family
hsa-miR-609	0	0	1	1	0	0	ROS1	c-ros oncogene 1 , receptor tyrosine kinase
hsa-miR-609	1	0	1	1	1	1	ST8SIA1	ST8 alpha-N-acetyl-neuraminide alpha-2,8-sialyltransferase 1
hsa-miR-609	1	0	1	1	1	1	SMARCC1	SWI/SNF related, matrix associated, actin dependent regulator of chromatin, subfamily c, member 1
hsa-miR-609	1	0	1	1	1	1	SPTBN1	spectrin, beta, non-erythrocytic 1
hsa-miR-609	0	0	1	1	0	0	SSX2	synovial sarcoma, X breakpoint 2
hsa-miR-609	1	0	1	0	1	1	TAL1	T-cell acute lymphocytic leukemia 1
hsa-miR-609	1	0	1	1	1	1	TDG	thymine-DNA glycosylase
hsa-miR-609	1	0	1	1	1	1	UBE2D3	ubiquitin-conjugating enzyme E2D 3
hsa-miR-609	0	0	1	1	1	1	BFSP2	beaded filament structural protein 2, phakinin
hsa-miR-609	1	0	1	1	1	1	EXO1	exonuclease 1
hsa-miR-609	0	0	1	1	1	1	SUCLA2	succinate-CoA ligase, ADP-forming, beta subunit
hsa-miR-609	1	0	1	1	1	1	KAT2B	K(lysine) acetyltransferase 2B
hsa-miR-609	1	0	1	1	1	1	BCL2L2	BCL2-like 2
hsa-miR-609	1	0	1	0	1	1	GTPBP1	GTP binding protein 1
hsa-miR-609	0	0	1	1	1	1	GCSH	glycine cleavage system protein H (aminomethyl carrier)
hsa-miR-609	1	0	1	1	1	1	ONECUT1	one cut homeobox 1
hsa-miR-609	0	0	1	1	0	0	SFSWAP	splicing factor, suppressor of white-apricot homolog (Drosophila)
hsa-miR-609	0	0	1	1	0	0	PRY	PTPN13-like, Y-linked
hsa-miR-609	0	0	1	0	1	1	ADIPOQ	adiponectin, C1Q and collagen domain containing
hsa-miR-609	1	0	1	1	1	1	FXR2	fragile X mental retardation, autosomal homolog 2
hsa-miR-609	0	0	1	1	1	1	ATP6V1G1	ATPase, H+ transporting, lysosomal 13kDa, V1 subunit G1
hsa-miR-609	1	0	1	0	1	1	DOCK3	dedicator of cytokinesis 3
hsa-miR-609	0	0	1	1	0	0	HR	hairless homolog (mouse)
hsa-miR-609	1	0	1	1	1	1	ETS1	v-ets erythroblastosis virus E26 oncogene homolog 1 (avian)
hsa-miR-609	1	0	1	1	1	1	ETV3	ets variant 3
hsa-miR-609	1	0	1	1	1	1	GEM	GTP binding protein overexpressed in skeletal muscle
hsa-miR-609	1	0	1	1	1	1	GPR3	G protein-coupled receptor 3
hsa-miR-609	1	0	1	1	0	0	HCFC1	host cell factor C1 (VP16-accessory protein)
hsa-miR-609	1	0	1	1	1	1	HIP1	huntingtin interacting protein 1
hsa-miR-609	1	0	1	0	1	1	PRKAB2	protein kinase, AMP-activated, beta 2 non-catalytic subunit
hsa-miR-609	1	0	1	1	1	1	GABBR2	gamma-aminobutyric acid (GABA) B receptor, 2
hsa-miR-609	0	0	1	1	1	1	INSL5	insulin-like 5
hsa-miR-609	1	0	1	1	1	1	SCARB2	scavenger receptor class B, member 2
hsa-miR-609	1	0	1	1	1	1	LPP	LIM domain containing preferred translocation partner in lipoma
hsa-miR-609	1	0	1	1	1	1	UST	uronyl-2-sulfotransferase
hsa-miR-609	1	0	1	1	1	1	ACTR1A	ARP1 actin-related protein 1 homolog A, centractin alpha (yeast)
hsa-miR-609	1	0	1	0	1	1	MAP1B	microtubule-associated protein 1B
hsa-miR-609	0	0	1	1	0	0	SPRR1A	small proline-rich protein 1A
hsa-miR-609	1	0	1	1	1	1	TSNAX	translin-associated factor X
hsa-miR-609	1	0	1	1	1	1	NEUROD2	neuronal differentiation 2
hsa-miR-609	0	0	1	0	1	1	OAS3	2'-5'-oligoadenylate synthetase 3, 100kDa
hsa-miR-609	1	0	1	1	1	1	CDK16	cyclin-dependent kinase 16
hsa-miR-609	1	0	1	1	1	1	PPP2R5E	protein phosphatase 2, regulatory subunit B', epsilon isoform
hsa-miR-609	1	0	1	1	1	1	SMC1A	structural maintenance of chromosomes 1A
hsa-miR-609	1	0	1	1	1	1	TRIM3	tripartite motif containing 3
hsa-miR-609	1	0	1	0	1	1	IGF2BP1	insulin-like growth factor 2 mRNA binding protein 1
hsa-miR-609	1	0	1	1	1	1	DIAPH2	diaphanous homolog 2 (Drosophila)
hsa-miR-609	0	0	1	1	1	1	TMED10	transmembrane emp24-like trafficking protein 10 (yeast)
hsa-miR-609	1	0	1	0	1	1	SOX12	SRY (sex determining region Y)-box 12
hsa-miR-609	1	0	1	1	1	1	ZIC2	Zic family member 2
hsa-miR-609	1	0	1	1	1	1	HPS5	Hermansky-Pudlak syndrome 5
hsa-miR-609	1	0	1	1	1	1	KLF12	Kruppel-like factor 12
hsa-miR-609	0	0	1	0	0	0	PHB2	prohibitin 2
hsa-miR-609	1	0	1	1	1	1	TUSC2	tumor suppressor candidate 2
hsa-miR-609	0	0	1	1	1	1	STAT1	signal transducer and activator of transcription 1, 91kDa
hsa-miR-609	1	0	1	1	0	0	GRIN1	glutamate receptor, ionotropic, N-methyl D-aspartate 1
hsa-miR-609	1	0	1	1	1	1	CASC3	cancer susceptibility candidate 3
hsa-miR-609	0	0	1	1	1	1	KLRK1	killer cell lectin-like receptor subfamily K, member 1
hsa-miR-609	1	0	1	1	1	1	ICOS	inducible T-cell co-stimulator
hsa-miR-609	1	0	1	1	1	1	HS2ST1	heparan sulfate 2-O-sulfotransferase 1
hsa-miR-609	1	0	1	0	1	1	PXDN	peroxidasin homolog (Drosophila)
hsa-miR-609	0	0	1	1	0	0	NTSR2	neurotensin receptor 2
hsa-miR-609	0	0	1	1	1	1	CD24	CD24 molecule
hsa-miR-609	0	0	1	1	1	1	N6AMT1	N-6 adenine-specific DNA methyltransferase 1 (putative)
hsa-miR-609	0	0	1	1	1	1	UBQLN1	ubiquilin 1
hsa-miR-609	1	0	1	1	1	1	BAZ1A	bromodomain adjacent to zinc finger domain, 1A
hsa-miR-609	1	0	1	0	1	1	C16orf72	chromosome 16 open reading frame 72
hsa-miR-609	0	0	1	1	0	0	NDUFA8	NADH dehydrogenase (ubiquinone) 1 alpha subcomplex, 8, 19kDa
hsa-miR-609	1	0	1	0	1	1	VAMP2	vesicle-associated membrane protein 2 (synaptobrevin 2)
hsa-miR-609	1	0	1	1	1	1	CELSR1	cadherin, EGF LAG seven-pass G-type receptor 1 (flamingo homolog, Drosophila)
hsa-miR-609	0	0	1	1	1	1	IL1RAPL1	interleukin 1 receptor accessory protein-like 1
hsa-miR-609	0	0	1	1	1	1	ZNF318	zinc finger protein 318
hsa-miR-609	1	0	1	1	0	0	SND1	staphylococcal nuclease and tudor domain containing 1
hsa-miR-609	0	0	1	1	0	0	S100A6	S100 calcium binding protein A6
hsa-miR-609	0	0	1	1	0	0	SLC25A44	solute carrier family 25, member 44
hsa-miR-609	1	0	1	0	1	1	SERTAD2	SERTA domain containing 2
hsa-miR-609	1	0	1	1	1	1	MRPL19	mitochondrial ribosomal protein L19
hsa-miR-609	1	0	1	0	1	1	KIAA0494	KIAA0494
hsa-miR-609	1	0	1	1	1	1	ZBTB39	zinc finger and BTB domain containing 39
hsa-miR-609	1	0	1	1	1	1	ARHGAP44	Rho GTPase activating protein 44
hsa-miR-609	0	0	1	0	1	1	PPM1E	protein phosphatase, Mg2+/Mn2+ dependent, 1E
hsa-miR-609	1	0	1	0	1	1	WDFY3	WD repeat and FYVE domain containing 3
hsa-miR-609	1	0	1	1	1	1	HECW1	HECT, C2 and WW domain containing E3 ubiquitin protein ligase 1
hsa-miR-609	0	0	1	1	1	1	VWA8	von Willebrand factor A domain containing 8
hsa-miR-609	1	0	1	1	1	1	RTF1	Rtf1, Paf1/RNA polymerase II complex component, homolog (S. cerevisiae)
hsa-miR-609	1	0	1	1	1	1	ZCCHC14	zinc finger, CCHC domain containing 14
hsa-miR-609	0	0	1	1	1	1	FBXO28	F-box protein 28
hsa-miR-609	1	0	1	0	1	1	LARP1	La ribonucleoprotein domain family, member 1
hsa-miR-609	1	0	1	1	1	1	PPP1R13B	protein phosphatase 1, regulatory subunit 13B
hsa-miR-609	1	0	1	1	1	1	FAM155B	family with sequence similarity 155, member B
hsa-miR-609	1	0	1	1	1	1	TAF9B	TAF9B RNA polymerase II, TATA box binding protein (TBP)-associated factor, 31kDa
hsa-miR-609	1	0	1	0	1	1	KLF13	Kruppel-like factor 13
hsa-miR-609	1	0	1	1	1	1	PALLD	palladin, cytoskeletal associated protein
hsa-miR-609	0	0	1	1	1	1	ZFR	zinc finger RNA binding protein
hsa-miR-609	1	0	1	1	1	1	RAB14	RAB14, member RAS oncogene family
hsa-miR-609	0	0	1	1	1	1	TCEB3B	transcription elongation factor B polypeptide 3B (elongin A2)
hsa-miR-609	1	0	1	1	1	1	UFM1	ubiquitin-fold modifier 1
hsa-miR-609	0	0	1	1	1	1	HYDIN	HYDIN, axonemal central pair apparatus protein
hsa-miR-609	1	0	1	1	0	0	C17orf59	chromosome 17 open reading frame 59
hsa-miR-609	1	0	1	0	1	1	DCAF16	DDB1 and CUL4 associated factor 16
hsa-miR-609	1	0	1	1	0	0	INO80D	INO80 complex subunit D
hsa-miR-609	0	0	1	1	1	1	TMEM70	transmembrane protein 70
hsa-miR-609	0	0	1	1	1	1	C2orf42	chromosome 2 open reading frame 42
hsa-miR-609	1	0	1	1	1	1	HIF1AN	hypoxia inducible factor 1, alpha subunit inhibitor
hsa-miR-609	1	0	1	1	1	1	LARP6	La ribonucleoprotein domain family, member 6
hsa-miR-609	1	0	1	1	1	1	PAG1	phosphoprotein associated with glycosphingolipid microdomains 1
hsa-miR-609	1	0	1	1	1	1	SLC16A10	solute carrier family 16, member 10 (aromatic amino acid transporter)
hsa-miR-609	1	0	1	1	1	1	GNG12	guanine nucleotide binding protein (G protein), gamma 12
hsa-miR-609	1	0	1	0	1	1	CCDC93	coiled-coil domain containing 93
hsa-miR-609	1	0	1	1	0	0	KCNQ5	potassium voltage-gated channel, KQT-like subfamily, member 5
hsa-miR-609	1	0	1	1	0	0	C11orf75	chromosome 11 open reading frame 75
hsa-miR-609	1	0	1	0	1	1	SLC17A6	solute carrier family 17 (sodium-dependent inorganic phosphate cotransporter), member 6
hsa-miR-609	0	0	1	1	0	0	FSCN3	fascin homolog 3, actin-bundling protein, testicular (Strongylocentrotus purpuratus)
hsa-miR-609	0	0	1	0	1	1	ZNF490	zinc finger protein 490
hsa-miR-609	1	0	1	1	1	1	SIPA1L2	signal-induced proliferation-associated 1 like 2
hsa-miR-609	1	0	1	0	1	1	WDFY1	WD repeat and FYVE domain containing 1
hsa-miR-609	1	0	1	1	1	1	KCNJ12	potassium inwardly-rectifying channel, subfamily J, member 12
hsa-miR-609	0	0	1	0	1	1	PPIA	peptidylprolyl isomerase A (cyclophilin A)
hsa-miR-609	1	0	1	1	1	1	GRIK2	glutamate receptor, ionotropic, kainate 2
hsa-miR-609	1	0	1	0	1	1	CSNK1G1	casein kinase 1, gamma 1
hsa-miR-609	0	0	1	1	0	0	ABHD4	abhydrolase domain containing 4
hsa-miR-609	0	0	1	1	1	1	CHP2	calcineurin-like EF hand protein 2
hsa-miR-609	0	0	1	1	1	1	TCTA	T-cell leukemia translocation altered
hsa-miR-609	1	0	1	0	1	1	EDAR	ectodysplasin A receptor
hsa-miR-609	1	0	1	0	1	1	MRPS25	mitochondrial ribosomal protein S25
hsa-miR-609	1	0	1	0	1	1	DNMT3A	DNA (cytosine-5-)-methyltransferase 3 alpha
hsa-miR-609	0	0	1	1	1	1	ACBD3	acyl-CoA binding domain containing 3
hsa-miR-609	1	0	1	1	1	1	S100PBP	S100P binding protein
hsa-miR-609	1	0	1	1	1	1	REEP1	receptor accessory protein 1
hsa-miR-609	0	0	1	1	1	1	C8orf33	chromosome 8 open reading frame 33
hsa-miR-609	1	0	1	1	1	1	GRAMD3	GRAM domain containing 3
hsa-miR-609	0	0	1	1	0	0	DCTN3	dynactin 3 (p22)
hsa-miR-609	1	0	1	1	1	1	PGBD5	piggyBac transposable element derived 5
hsa-miR-609	1	0	1	0	1	1	MOB3B	MOB kinase activator 3B
hsa-miR-609	0	0	1	1	1	1	TGS1	trimethylguanosine synthase 1
hsa-miR-609	1	0	1	1	1	1	CPED1	cadherin-like and PC-esterase domain containing 1
hsa-miR-609	1	0	1	0	1	1	NAA25	N(alpha)-acetyltransferase 25, NatB auxiliary subunit
hsa-miR-609	1	0	1	1	1	1	NRBF2	nuclear receptor binding factor 2
hsa-miR-609	1	0	1	1	1	1	FAM117A	family with sequence similarity 117, member A
hsa-miR-609	1	0	1	1	0	0	PVRL4	poliovirus receptor-related 4
hsa-miR-609	1	0	1	1	1	1	SNX27	sorting nexin family member 27
hsa-miR-609	0	0	1	1	0	0	MED25	mediator complex subunit 25
hsa-miR-609	0	0	1	1	1	1	FAHD1	fumarylacetoacetate hydrolase domain containing 1
hsa-miR-609	1	0	1	1	0	0	SCRT1	scratch homolog 1, zinc finger protein (Drosophila)
hsa-miR-609	0	0	1	0	1	1	LDOC1L	leucine zipper, down-regulated in cancer 1-like
hsa-miR-609	0	0	1	0	1	1	MIEN1	migration and invasion enhancer 1
hsa-miR-609	1	0	1	1	1	1	TTBK1	tau tubulin kinase 1
hsa-miR-609	1	0	1	1	1	1	PPP1R9B	protein phosphatase 1, regulatory subunit 9B
hsa-miR-609	1	0	1	1	1	1	RSPO3	R-spondin 3
hsa-miR-609	1	0	1	1	0	0	ZC3H10	zinc finger CCCH-type containing 10
hsa-miR-609	1	0	1	0	1	1	UBASH3B	ubiquitin associated and SH3 domain containing B
hsa-miR-609	0	0	1	1	1	1	ARHGEF4	Rho guanine nucleotide exchange factor (GEF) 4
hsa-miR-609	1	0	1	0	1	1	PURB	purine-rich element binding protein B
hsa-miR-609	1	0	1	1	1	1	EPT1	ethanolaminephosphotransferase 1 (CDP-ethanolamine-specific)
hsa-miR-609	1	0	1	1	1	1	STX1B	syntaxin 1B
hsa-miR-609	1	0	1	1	1	1	MBD6	methyl-CpG binding domain protein 6
hsa-miR-609	0	0	1	1	1	1	PLEKHG4B	pleckstrin homology domain containing, family G (with RhoGef domain) member 4B
hsa-miR-609	0	0	1	0	1	1	CLNK	cytokine-dependent hematopoietic cell linker
hsa-miR-609	1	0	1	1	1	1	SRSF10	serine/arginine-rich splicing factor 10
hsa-miR-609	1	0	1	0	1	1	ANTXR2	anthrax toxin receptor 2
hsa-miR-609	0	0	1	1	1	1	SLC32A1	solute carrier family 32 (GABA vesicular transporter), member 1
hsa-miR-609	0	0	1	1	1	1	ATP6V1G2	ATPase, H+ transporting, lysosomal 13kDa, V1 subunit G2
hsa-miR-609	0	0	1	1	0	0	RXFP2	relaxin/insulin-like family peptide receptor 2
hsa-miR-609	0	0	1	1	1	1	CASC4	cancer susceptibility candidate 4
hsa-miR-609	0	0	1	1	1	1	SLC25A46	solute carrier family 25, member 46
hsa-miR-609	0	0	1	0	0	0	TM4SF18	transmembrane 4 L six family member 18
hsa-miR-609	0	0	1	1	0	0	OTOA	otoancorin
hsa-miR-609	0	0	1	0	1	1	PIGM	phosphatidylinositol glycan anchor biosynthesis, class M
hsa-miR-609	0	0	1	1	0	0	CSNK1A1L	casein kinase 1, alpha 1-like
hsa-miR-609	0	0	1	1	1	1	APOBEC3F	apolipoprotein B mRNA editing enzyme, catalytic polypeptide-like 3F
hsa-miR-609	1	0	1	1	1	1	ZNF396	zinc finger protein 396
hsa-miR-609	1	0	1	1	1	1	SEPT6	septin 6
hsa-miR-609	1	0	1	1	1	1	SGMS1	sphingomyelin synthase 1
hsa-miR-609	0	0	1	0	1	1	CHKB	choline kinase beta
hsa-miR-609	1	0	1	0	1	1	SYT11	synaptotagmin XI
hsa-miR-609	1	0	1	1	1	1	LSM12	LSM12 homolog (S. cerevisiae)
hsa-miR-609	1	0	1	1	1	1	ZNF362	zinc finger protein 362
hsa-miR-609	0	0	1	1	1	1	DUSP18	dual specificity phosphatase 18
hsa-miR-609	0	0	1	1	1	1	ZNF746	zinc finger protein 746
hsa-miR-609	0	0	1	1	0	0	GGN	gametogenetin
hsa-miR-609	1	0	1	0	1	1	ST6GALNAC3	ST6 (alpha-N-acetyl-neuraminyl-2,3-beta-galactosyl-1,3)-N-acetylgalactosaminide alpha-2,6-sialyltransferase 3
hsa-miR-609	1	0	1	1	1	1	AEBP2	AE binding protein 2
hsa-miR-609	1	0	1	0	1	1	SEMA6D	sema domain, transmembrane domain (TM), and cytoplasmic domain, (semaphorin) 6D
hsa-miR-609	0	0	1	0	1	1	RTP1	receptor (chemosensory) transporter protein 1
hsa-miR-609	0	0	1	1	1	1	TAF1L	TAF1 RNA polymerase II, TATA box binding protein (TBP)-associated factor, 210kDa-like
hsa-miR-609	0	0	1	1	1	1	PSMD10	proteasome (prosome, macropain) 26S subunit, non-ATPase, 10
hsa-miR-609	1	0	1	1	1	1	RAB39B	RAB39B, member RAS oncogene family
hsa-miR-609	0	0	1	1	1	1	REXO1L1	REX1, RNA exonuclease 1 homolog (S. cerevisiae)-like 1
hsa-miR-609	1	0	1	0	1	1	KSR2	kinase suppressor of ras 2
hsa-miR-609	0	0	1	1	0	0	TMEM145	transmembrane protein 145
hsa-miR-609	0	0	1	1	0	0	DCBLD1	discoidin, CUB and LCCL domain containing 1
hsa-miR-609	1	0	1	1	1	1	ATG9B	autophagy related 9B
hsa-miR-609	1	0	1	0	1	1	SREK1IP1	SREK1-interacting protein 1
hsa-miR-609	1	0	1	1	1	1	LDLRAD3	low density lipoprotein receptor class A domain containing 3
hsa-miR-609	1	0	1	1	1	1	SCN4B	sodium channel, voltage-gated, type IV, beta subunit
hsa-miR-609	0	0	1	1	1	1	SPDYE1	speedy homolog E1 (Xenopus laevis)
hsa-miR-609	0	0	1	1	1	1	NLRP9	NLR family, pyrin domain containing 9
hsa-miR-609	1	0	1	1	1	1	FAM134C	family with sequence similarity 134, member C
hsa-miR-609	0	0	1	0	0	0	PPIAL4A	peptidylprolyl isomerase A (cyclophilin A)-like 4A
hsa-miR-609	1	0	1	1	1	1	RILPL1	Rab interacting lysosomal protein-like 1
hsa-miR-609	0	0	1	1	1	1	ZNF831	zinc finger protein 831
hsa-miR-609	1	0	1	1	1	1	MB21D2	Mab-21 domain containing 2
hsa-miR-609	0	0	1	1	0	0	C2orf53	chromosome 2 open reading frame 53
hsa-miR-609	0	0	1	1	0	0	PRDX2	peroxiredoxin 2
hsa-miR-609	0	0	1	1	1	1	USP12	ubiquitin specific peptidase 12
hsa-miR-609	1	0	1	1	1	1	FAM216B	family with sequence similarity 216, member B
hsa-miR-609	1	0	1	1	1	1	TMEM229B	transmembrane protein 229B
hsa-miR-609	0	0	1	1	1	1	ZNF326	zinc finger protein 326
hsa-miR-609	0	0	1	1	1	1	TMEM37	transmembrane protein 37
hsa-miR-609	1	0	1	0	1	1	HNRNPA3	heterogeneous nuclear ribonucleoprotein A3
hsa-miR-609	1	0	1	0	1	1	SLC16A9	solute carrier family 16, member 9 (monocarboxylic acid transporter 9)
hsa-miR-609	1	0	1	0	1	1	PTPLB	protein tyrosine phosphatase-like (proline instead of catalytic arginine), member b
hsa-miR-609	1	0	1	1	1	1	PTGER3	prostaglandin E receptor 3 (subtype EP3)
hsa-miR-609	0	0	1	0	1	1	SIAH3	siah E3 ubiquitin protein ligase family member 3
hsa-miR-609	1	0	1	0	1	1	LHFPL3	lipoma HMGIC fusion partner-like 3
hsa-miR-609	0	0	1	0	1	1	WASH3P	WAS protein family homolog 3 pseudogene
hsa-miR-609	1	0	1	1	1	1	E2F7	E2F transcription factor 7
hsa-miR-609	0	0	1	1	1	1	C5orf46	chromosome 5 open reading frame 46
hsa-miR-609	0	0	1	1	1	1	ZNF474	zinc finger protein 474
hsa-miR-609	0	0	1	0	0	0	C16orf47	chromosome 16 open reading frame 47
hsa-miR-609	0	0	1	0	1	1	ASB18	ankyrin repeat and SOCS box containing 18
hsa-miR-609	0	0	1	0	0	0	SNORD4A	small nucleolar RNA, C/D box 4A
hsa-miR-609	0	0	1	0	0	0	PPIAP29	peptidylprolyl isomerase A (cyclophilin A) pseudogene 29
hsa-miR-609	0	0	1	0	0	0	PCDHB19P	protocadherin beta 19 pseudogene
hsa-miR-609	0	0	1	0	0	0	TTTY4B	testis-specific transcript, Y-linked 4B (non-protein coding)
hsa-miR-609	0	0	1	0	0	0	TPI1P2	triosephosphate isomerase 1 pseudogene 2
hsa-miR-609	0	0	1	0	0	0	FTH1P7	ferritin, heavy polypeptide 1 pseudogene 7
hsa-miR-609	0	0	1	0	0	0	FTH1P12	ferritin, heavy polypeptide 1 pseudogene 12
hsa-miR-609	0	0	1	0	0	0	TPRXL	tetra-peptide repeat homeobox-like
hsa-miR-609	0	0	1	0	0	0	RPL23AP32	ribosomal protein L23a pseudogene 32
hsa-miR-609	0	0	1	0	0	0	HNRNPA3P1	heterogeneous nuclear ribonucleoprotein A3 pseudogene 1
hsa-miR-609	0	0	1	0	0	0	SNORD56	small nucleolar RNA, C/D box 56
hsa-miR-609	0	0	1	0	0	0	RNF126P1	ring finger protein 126 pseudogene 1
hsa-miR-609	0	0	1	0	0	0	MALAT1	metastasis associated lung adenocarcinoma transcript 1 (non-protein coding)
hsa-miR-609	0	0	1	0	0	0	SIGLEC16	sialic acid binding Ig-like lectin 16 (gene/pseudogene)
hsa-miR-609	0	0	1	0	0	0	SNORA22	small nucleolar RNA, H/ACA box 22
hsa-miR-609	0	0	1	0	0	0	SNORA53	small nucleolar RNA, H/ACA box 53
hsa-miR-609	0	0	1	0	0	0	CCT6P1	chaperonin containing TCP1, subunit 6 (zeta) pseudogene 1
hsa-miR-609	0	0	1	0	0	0	HSP90B3P	heat shock protein 90kDa beta (Grp94), member 3, pseudogene
hsa-miR-609	0	0	1	0	0	0	SNORD115-26	small nucleolar RNA, C/D box 115-26
hsa-miR-609	1	0	1	1	1	1	TRIO	trio Rho guanine nucleotide exchange factor
hsa-miR-609	0	0	1	1	1	1	PEG3	paternally expressed 3
hsa-miR-609	0	0	1	1	0	0	SPATA20	spermatogenesis associated 20
hsa-miR-609	0	0	0	1	0	0	QPCTL	glutaminyl-peptide cyclotransferase-like
hsa-miR-609	0	0	0	1	1	1	MRI1	methylthioribose-1-phosphate isomerase homolog (S. cerevisiae)
hsa-miR-609	0	0	0	1	1	1	UTS2	urotensin 2
hsa-miR-609	0	0	0	1	0	0	ADCK2	aarF domain containing kinase 2
hsa-miR-609	0	0	1	1	0	0	KCNQ1	potassium voltage-gated channel, KQT-like subfamily, member 1
hsa-miR-609	0	0	0	1	0	0	TRPM5	transient receptor potential cation channel, subfamily M, member 5
hsa-miR-609	0	0	1	1	1	1	ST6GALNAC1	ST6 (alpha-N-acetyl-neuraminyl-2,3-beta-galactosyl-1,3)-N-acetylgalactosaminide alpha-2,6-sialyltransferase 1
hsa-miR-609	0	0	0	1	1	1	KRT13	keratin 13
hsa-miR-609	1	0	1	1	1	1	SNAP91	synaptosomal-associated protein, 91kDa homolog (mouse)
hsa-miR-609	0	0	1	1	1	1	TDRD3	tudor domain containing 3
hsa-miR-609	0	0	0	1	0	0	GMIP	GEM interacting protein
hsa-miR-609	0	0	0	1	0	0	FGF22	fibroblast growth factor 22
hsa-miR-609	0	0	1	1	0	0	MORC2	MORC family CW-type zinc finger 2
hsa-miR-609	0	0	0	1	1	1	HMOX1	heme oxygenase (decycling) 1
hsa-miR-609	0	0	1	1	0	0	UPK3A	uroplakin 3A
hsa-miR-609	0	0	0	1	1	1	SLC10A1	solute carrier family 10 (sodium/bile acid cotransporter family), member 1
hsa-miR-609	0	0	1	1	1	1	PCK2	phosphoenolpyruvate carboxykinase 2 (mitochondrial)
hsa-miR-609	0	0	1	1	0	0	OXT	oxytocin, prepropeptide
hsa-miR-609	0	0	0	1	0	0	MAP7D3	MAP7 domain containing 3
hsa-miR-609	0	0	1	1	0	0	BCKDK	branched chain ketoacid dehydrogenase kinase
hsa-miR-609	0	0	0	1	1	1	PLAT	plasminogen activator, tissue
hsa-miR-609	0	0	1	1	1	1	FGL1	fibrinogen-like 1
hsa-miR-609	0	0	1	1	0	0	DKKL1	dickkopf-like 1
hsa-miR-609	0	0	0	1	0	0	C19orf53	chromosome 19 open reading frame 53
hsa-miR-609	1	0	1	1	0	0	FSD1	fibronectin type III and SPRY domain containing 1
hsa-miR-609	0	0	0	1	1	1	TGFB1	transforming growth factor, beta 1
hsa-miR-609	0	0	0	1	0	0	PLIN3	perilipin 3
hsa-miR-609	0	0	0	1	0	0	CAPS	calcyphosine
hsa-miR-609	0	0	0	1	0	0	EPOR	erythropoietin receptor
hsa-miR-609	0	0	1	1	0	0	WDR83OS	WD repeat domain 83 opposite strand
hsa-miR-609	0	0	1	1	0	0	RPL18A	ribosomal protein L18a
hsa-miR-609	0	0	0	1	0	0	SLC5A5	solute carrier family 5 (sodium iodide symporter), member 5
hsa-miR-609	0	0	0	1	0	0	GAPDHS	glyceraldehyde-3-phosphate dehydrogenase, spermatogenic
hsa-miR-609	0	0	1	1	0	0	RBM28	RNA binding motif protein 28
hsa-miR-609	1	0	1	1	0	0	SERPINE1	serpin peptidase inhibitor, clade E (nexin, plasminogen activator inhibitor type 1), member 1
hsa-miR-609	0	0	1	1	1	1	DRG2	developmentally regulated GTP binding protein 2
hsa-miR-609	0	0	1	1	1	1	TIMELESS	timeless homolog (Drosophila)
hsa-miR-609	0	0	0	1	1	1	GNB3	guanine nucleotide binding protein (G protein), beta polypeptide 3
hsa-miR-609	0	0	0	1	0	0	KIF6	kinesin family member 6
hsa-miR-609	0	0	1	1	1	1	BYSL	bystin-like
hsa-miR-609	0	0	0	1	1	1	HRH2	histamine receptor H2
hsa-miR-609	0	0	0	1	1	1	WNT6	wingless-type MMTV integration site family, member 6
hsa-miR-609	0	0	0	1	1	1	PASK	PAS domain containing serine/threonine kinase
hsa-miR-609	0	0	0	1	0	0	PROC	protein C (inactivator of coagulation factors Va and VIIIa)
hsa-miR-609	0	0	1	1	0	0	SARS	seryl-tRNA synthetase
hsa-miR-609	0	0	1	1	1	1	STMN1	stathmin 1
hsa-miR-609	0	0	1	1	1	1	TTR	transthyretin
hsa-miR-609	1	0	0	1	1	1	GLRX	glutaredoxin (thioltransferase)
hsa-miR-609	0	0	0	1	0	0	COQ6	coenzyme Q6 homolog, monooxygenase (S. cerevisiae)
hsa-miR-609	0	0	1	1	0	0	PFDN5	prefoldin subunit 5
hsa-miR-609	0	0	1	1	0	0	WFDC3	WAP four-disulfide core domain 3
hsa-miR-609	0	0	1	1	0	0	ABCC10	ATP-binding cassette, sub-family C (CFTR/MRP), member 10
hsa-miR-609	0	0	1	1	0	0	MEA1	male-enhanced antigen 1
hsa-miR-609	1	0	1	1	1	1	SOX9	SRY (sex determining region Y)-box 9
hsa-miR-609	0	0	0	1	0	0	S1PR4	sphingosine-1-phosphate receptor 4
hsa-miR-609	0	0	0	1	0	0	SLURP1	secreted LY6/PLAUR domain containing 1
hsa-miR-609	0	0	1	1	0	0	LRFN3	leucine rich repeat and fibronectin type III domain containing 3
hsa-miR-609	0	0	1	1	1	1	RRAS	related RAS viral (r-ras) oncogene homolog
hsa-miR-609	0	0	1	1	0	0	DNASE1	deoxyribonuclease I
hsa-miR-609	0	0	0	1	1	1	SDF2	stromal cell-derived factor 2
hsa-miR-609	1	0	1	1	0	0	ABHD8	abhydrolase domain containing 8
hsa-miR-609	0	0	0	1	0	0	TICAM1	toll-like receptor adaptor molecule 1
hsa-miR-609	0	0	0	1	0	0	SELO	selenoprotein O
hsa-miR-609	1	0	1	1	1	1	KCTD17	potassium channel tetramerisation domain containing 17
hsa-miR-609	0	0	1	1	0	0	HOXD11	homeobox D11
hsa-miR-609	0	0	1	1	0	0	CHAC1	ChaC, cation transport regulator homolog 1 (E. coli)
hsa-miR-609	0	0	1	1	0	0	CLN6	ceroid-lipofuscinosis, neuronal 6, late infantile, variant
hsa-miR-609	0	0	0	1	0	0	CMA1	chymase 1, mast cell
hsa-miR-609	0	0	0	1	0	0	TTTY1B	testis-specific transcript, Y-linked 1B (non-protein coding)
hsa-miR-609	1	0	1	1	1	1	KIAA1244	KIAA1244
hsa-miR-609	0	0	0	1	0	0	GAMT	guanidinoacetate N-methyltransferase
hsa-miR-609	0	0	0	1	0	0	GDF15	growth differentiation factor 15
hsa-miR-609	0	0	0	1	1	1	CYP2E1	cytochrome P450, family 2, subfamily E, polypeptide 1
hsa-miR-609	0	0	0	1	0	0	C20orf151	chromosome 20 open reading frame 151
hsa-miR-609	1	0	1	1	0	0	MAP3K10	mitogen-activated protein kinase kinase kinase 10
hsa-miR-609	0	0	0	1	1	1	TMEM204	transmembrane protein 204
hsa-miR-609	0	0	1	1	1	1	HSD17B7	hydroxysteroid (17-beta) dehydrogenase 7
hsa-miR-609	1	0	1	1	1	1	MTSS1L	metastasis suppressor 1-like
hsa-miR-609	0	0	1	1	0	0	NXT1	NTF2-like export factor 1
hsa-miR-609	1	0	1	1	1	1	NMUR2	neuromedin U receptor 2
hsa-miR-609	0	0	1	1	0	0	WNT2B	wingless-type MMTV integration site family, member 2B
hsa-miR-609	0	0	0	1	0	0	ERN2	endoplasmic reticulum to nucleus signaling 2
hsa-miR-609	0	0	1	1	1	1	HRK	harakiri, BCL2 interacting protein (contains only BH3 domain)
hsa-miR-609	0	0	1	1	0	0	ORC3	origin recognition complex, subunit 3
hsa-miR-609	1	0	1	1	1	1	HTRA2	HtrA serine peptidase 2
hsa-miR-609	0	0	1	1	0	0	CYP27A1	cytochrome P450, family 27, subfamily A, polypeptide 1
hsa-miR-609	0	0	0	1	0	0	PSORS1C1	psoriasis susceptibility 1 candidate 1
hsa-miR-609	0	0	1	1	1	1	ALKBH8	alkB, alkylation repair homolog 8 (E. coli)
hsa-miR-609	0	0	0	1	1	1	BCL2L10	BCL2-like 10 (apoptosis facilitator)
hsa-miR-609	1	0	1	1	0	0	CGREF1	cell growth regulator with EF-hand domain 1
hsa-miR-609	0	0	1	1	0	0	CALHM2	calcium homeostasis modulator 2
hsa-miR-609	0	0	0	1	1	1	PSMC1	proteasome (prosome, macropain) 26S subunit, ATPase, 1
hsa-miR-609	0	0	1	1	1	1	SPECC1	sperm antigen with calponin homology and coiled-coil domains 1
hsa-miR-609	0	0	1	1	0	0	ESRRB	estrogen-related receptor beta
hsa-miR-609	1	0	1	1	1	1	ALKBH5	alkB, alkylation repair homolog 5 (E. coli)
hsa-miR-609	0	0	1	1	1	1	SLC6A4	solute carrier family 6 (neurotransmitter transporter, serotonin), member 4
hsa-miR-609	0	0	0	1	0	0	FAH	fumarylacetoacetate hydrolase (fumarylacetoacetase)
hsa-miR-609	0	0	1	1	1	1	FLT4	fms-related tyrosine kinase 4
hsa-miR-609	0	0	1	1	1	1	PIK3C3	phosphatidylinositol 3-kinase, catalytic subunit type 3
hsa-miR-609	0	0	1	1	0	0	CD33	CD33 molecule
hsa-miR-609	0	0	1	1	1	1	SCPEP1	serine carboxypeptidase 1
hsa-miR-609	0	0	0	1	0	0	LPO	lactoperoxidase
hsa-miR-609	0	0	1	1	0	0	PRR11	proline rich 11
hsa-miR-609	0	0	1	1	0	0	PKMYT1	protein kinase, membrane associated tyrosine/threonine 1
hsa-miR-609	0	0	0	1	1	1	ATP2C2	ATPase, Ca++ transporting, type 2C, member 2
hsa-miR-609	0	0	1	1	1	1	MAG	myelin associated glycoprotein
hsa-miR-609	0	0	1	1	0	0	HPN	hepsin
hsa-miR-609	0	0	0	1	0	0	QRICH2	glutamine rich 2
hsa-miR-609	0	0	0	1	0	0	CCDC124	coiled-coil domain containing 124
hsa-miR-609	0	0	1	1	1	1	MSH4	mutS homolog 4 (E. coli)
hsa-miR-609	0	0	1	1	1	1	PDZRN3	PDZ domain containing ring finger 3
hsa-miR-609	1	0	1	1	1	1	DESI2	desumoylating isopeptidase 2
hsa-miR-609	0	0	0	1	1	1	PET112	PET112 homolog (yeast)
hsa-miR-609	0	0	1	1	0	0	UPK2	uroplakin 2
hsa-miR-609	0	0	0	1	0	0	IL18RAP	interleukin 18 receptor accessory protein
hsa-miR-609	0	0	1	1	1	1	ZNF638	zinc finger protein 638
hsa-miR-609	0	0	0	1	0	0	GZMM	granzyme M (lymphocyte met-ase 1)
hsa-miR-609	1	0	1	1	0	0	BMPR1B	bone morphogenetic protein receptor, type IB
hsa-miR-609	0	0	0	1	1	1	RAB17	RAB17, member RAS oncogene family
hsa-miR-609	0	0	0	1	1	1	MLPH	melanophilin
hsa-miR-609	0	0	1	1	0	0	GCKR	glucokinase (hexokinase 4) regulator
hsa-miR-609	0	0	1	1	1	1	CENPE	centromere protein E, 312kDa
hsa-miR-609	0	0	0	1	0	0	IQCG	IQ motif containing G
hsa-miR-609	0	0	1	1	0	0	KIF9	kinesin family member 9
hsa-miR-609	0	0	0	1	0	0	CLCN2	chloride channel, voltage-sensitive 2
hsa-miR-609	0	0	1	1	0	0	MLN	motilin
hsa-miR-609	1	0	1	1	1	1	GLIPR1	GLI pathogenesis-related 1
hsa-miR-609	1	0	1	1	1	1	PHLDA1	pleckstrin homology-like domain, family A, member 1
hsa-miR-609	0	0	0	1	0	0	ITGB7	integrin, beta 7
hsa-miR-609	0	0	0	1	0	0	RHCG	Rh family, C glycoprotein
hsa-miR-609	1	0	0	1	0	0	MYLK3	myosin light chain kinase 3
hsa-miR-609	0	0	1	1	0	0	DPEP2	dipeptidase 2
hsa-miR-609	0	0	1	1	0	0	B9D1	B9 protein domain 1
hsa-miR-609	0	0	1	1	0	0	KIF2B	kinesin family member 2B
hsa-miR-609	0	0	0	1	1	1	C17orf64	chromosome 17 open reading frame 64
hsa-miR-609	0	0	1	1	0	0	AZI1	5-azacytidine induced 1
hsa-miR-609	0	0	0	1	0	0	PNMT	phenylethanolamine N-methyltransferase
hsa-miR-609	0	0	0	1	0	0	SAMD1	sterile alpha motif domain containing 1
hsa-miR-609	0	0	0	1	1	1	NFIC	nuclear factor I/C (CCAAT-binding transcription factor)
hsa-miR-609	0	0	0	1	0	0	MED16	mediator complex subunit 16
hsa-miR-609	0	0	0	1	0	0	IL19	interleukin 19
hsa-miR-609	0	0	1	1	0	0	WTIP	Wilms tumor 1 interacting protein
hsa-miR-609	0	0	1	1	1	1	PLK4	polo-like kinase 4
hsa-miR-609	1	0	1	1	0	0	ADAM15	ADAM metallopeptidase domain 15
hsa-miR-609	0	0	1	1	0	0	REN	renin
hsa-miR-609	0	0	0	1	0	0	ITIH1	inter-alpha-trypsin inhibitor heavy chain 1
hsa-miR-609	0	0	1	1	1	1	MMS22L	MMS22-like, DNA repair protein
hsa-miR-609	0	0	0	1	0	0	FERD3L	Fer3-like (Drosophila)
hsa-miR-609	0	0	0	1	0	0	LYN	v-yes-1 Yamaguchi sarcoma viral related oncogene homolog
hsa-miR-609	0	0	1	1	0	0	FUOM	fucose mutarotase
hsa-miR-609	1	0	1	1	1	1	FADS1	fatty acid desaturase 1
hsa-miR-609	0	0	1	1	1	1	INCENP	inner centromere protein antigens 135/155kDa
hsa-miR-609	0	0	1	1	1	1	SLC25A4	solute carrier family 25 (mitochondrial carrier; adenine nucleotide translocator), member 4
hsa-miR-609	1	0	1	1	1	1	SETBP1	SET binding protein 1
hsa-miR-609	0	0	1	1	0	0	HAUS1	HAUS augmin-like complex, subunit 1
hsa-miR-609	1	0	0	1	1	1	ZFP36L2	zinc finger protein 36, C3H type-like 2
hsa-miR-609	1	0	1	1	1	1	SCOC	short coiled-coil protein
hsa-miR-609	0	0	0	1	0	0	GRAP	GRB2-related adaptor protein
hsa-miR-609	0	0	0	1	0	0	C16orf74	chromosome 16 open reading frame 74
hsa-miR-609	0	0	1	1	0	0	TRIM74	tripartite motif containing 74
hsa-miR-609	0	0	1	1	0	0	PDIA4	protein disulfide isomerase family A, member 4
hsa-miR-609	0	0	1	1	0	0	SLC26A10	solute carrier family 26, member 10
hsa-miR-609	0	0	1	1	1	1	ARHGEF25	Rho guanine nucleotide exchange factor (GEF) 25
hsa-miR-609	1	0	0	1	0	0	ANKRD9	ankyrin repeat domain 9
hsa-miR-609	0	0	0	1	0	0	TMED6	transmembrane emp24 protein transport domain containing 6
hsa-miR-609	0	0	0	1	0	0	IL34	interleukin 34
hsa-miR-609	0	0	0	1	0	0	PSMG3	proteasome (prosome, macropain) assembly chaperone 3
hsa-miR-609	0	0	1	1	1	1	CIB4	calcium and integrin binding family member 4
hsa-miR-609	0	0	1	1	1	1	PKD1L1	polycystic kidney disease 1 like 1
hsa-miR-609	0	0	0	1	0	0	CHRNB3	cholinergic receptor, nicotinic, beta 3 (neuronal)
hsa-miR-609	0	0	0	1	0	0	TMEM141	transmembrane protein 141
hsa-miR-609	0	0	0	1	0	0	KIAA1984	KIAA1984
hsa-miR-609	0	0	0	1	0	0	GJD2	gap junction protein, delta 2, 36kDa
hsa-miR-609	0	0	1	1	1	1	C2orf65	chromosome 2 open reading frame 65
hsa-miR-609	0	0	0	1	0	0	TGM7	transglutaminase 7
hsa-miR-609	0	0	0	1	0	0	CILP2	cartilage intermediate layer protein 2
hsa-miR-609	0	0	0	1	0	0	TFF3	trefoil factor 3 (intestinal)
hsa-miR-609	0	0	1	1	0	0	CRYAA	crystallin, alpha A
hsa-miR-609	0	0	1	1	0	0	C21orf33	chromosome 21 open reading frame 33
hsa-miR-609	0	0	0	1	0	0	AIRE	autoimmune regulator
hsa-miR-609	0	0	0	1	1	1	ANO10	anoctamin 10
hsa-miR-609	1	0	0	1	0	0	NBEAL2	neurobeachin-like 2
hsa-miR-609	1	0	1	1	0	0	IER2	immediate early response 2
hsa-miR-609	0	0	1	1	0	0	CCDC105	coiled-coil domain containing 105
hsa-miR-609	1	0	1	1	0	0	GRASP	GRP1 (general receptor for phosphoinositides 1)-associated scaffold protein
hsa-miR-609	0	0	1	1	1	1	TNFSF12	tumor necrosis factor (ligand) superfamily, member 12
hsa-miR-609	0	0	1	1	1	1	TNFSF12-TNFSF13	TNFSF12-TNFSF13 readthrough
hsa-miR-609	0	0	1	1	1	1	TNFSF13	tumor necrosis factor (ligand) superfamily, member 13
hsa-miR-609	0	0	1	1	0	0	PHF7	PHD finger protein 7
hsa-miR-609	1	0	1	1	0	0	C11orf84	chromosome 11 open reading frame 84
hsa-miR-609	0	0	1	1	0	0	BEND5	BEN domain containing 5
hsa-miR-609	0	0	0	1	1	1	RHCE	Rh blood group, CcEe antigens
hsa-miR-609	0	0	0	1	1	1	GBP7	guanylate binding protein 7
hsa-miR-609	0	0	1	1	1	1	C1orf74	chromosome 1 open reading frame 74
hsa-miR-609	0	0	0	1	0	0	HAAO	3-hydroxyanthranilate 3,4-dioxygenase
hsa-miR-609	0	0	1	1	1	1	CLHC1	clathrin heavy chain linker domain containing 1
hsa-miR-609	0	0	0	1	0	0	CCDC74A	coiled-coil domain containing 74A
hsa-miR-609	0	0	1	1	0	0	FLAD1	FAD1 flavin adenine dinucleotide synthetase homolog (S. cerevisiae)
hsa-miR-609	0	0	0	1	0	0	CCKAR	cholecystokinin A receptor
hsa-miR-609	0	0	1	1	1	1	THOC7	THO complex 7 homolog (Drosophila)
hsa-miR-609	1	0	1	1	0	0	CRELD1	cysteine-rich with EGF-like domains 1
hsa-miR-609	0	0	1	1	1	1	LEAP2	liver expressed antimicrobial peptide 2
hsa-miR-609	0	0	0	1	0	0	NOS3	nitric oxide synthase 3 (endothelial cell)
hsa-miR-609	0	0	0	1	0	0	ALDH7A1	aldehyde dehydrogenase 7 family, member A1
hsa-miR-609	0	0	1	1	0	0	PACSIN3	protein kinase C and casein kinase substrate in neurons 3
hsa-miR-609	0	0	1	1	1	1	GPR176	G protein-coupled receptor 176
hsa-miR-609	0	0	0	1	0	0	SPATA19	spermatogenesis associated 19
hsa-miR-609	0	0	1	1	0	0	FOXN4	forkhead box N4
hsa-miR-609	0	0	0	1	0	0	CDH16	cadherin 16, KSP-cadherin
hsa-miR-609	0	0	1	1	1	1	MMP3	matrix metallopeptidase 3 (stromelysin 1, progelatinase)
hsa-miR-609	0	0	1	1	0	0	LDHD	lactate dehydrogenase D
hsa-miR-609	0	0	0	1	0	0	GPR182	G protein-coupled receptor 182
hsa-miR-609	0	0	0	1	0	0	B4GALNT2	beta-1,4-N-acetyl-galactosaminyl transferase 2
hsa-miR-609	0	0	1	1	0	0	GNGT2	guanine nucleotide binding protein (G protein), gamma transducing activity polypeptide 2
hsa-miR-609	0	0	1	1	1	1	IGF2	insulin-like growth factor 2 (somatomedin A)
hsa-miR-609	0	0	0	1	0	0	ZNF668	zinc finger protein 668
hsa-miR-609	0	0	0	1	0	0	PCSK4	proprotein convertase subtilisin/kexin type 4
hsa-miR-609	0	0	0	1	0	0	ZNF524	zinc finger protein 524
hsa-miR-609	0	0	1	1	0	0	ANKRD33	ankyrin repeat domain 33
hsa-miR-609	0	0	0	1	0	0	TMIGD2	transmembrane and immunoglobulin domain containing 2
hsa-miR-609	0	0	0	1	0	0	ZNF560	zinc finger protein 560
hsa-miR-609	1	0	0	1	0	0	ITFG3	integrin alpha FG-GAP repeat containing 3
hsa-miR-609	0	0	0	1	0	0	SPSB3	splA/ryanodine receptor domain and SOCS box containing 3
hsa-miR-609	0	0	1	1	1	1	RAB3IL1	RAB3A interacting protein (rabin3)-like 1
hsa-miR-609	0	0	0	1	0	0	PRSS27	protease, serine 27
hsa-miR-609	0	0	0	1	0	0	AMDHD2	amidohydrolase domain containing 2
hsa-miR-609	0	0	1	1	1	1	LIMS3	LIM and senescent cell antigen-like domains 3
hsa-miR-609	0	0	1	1	0	0	SNRPB	small nuclear ribonucleoprotein polypeptides B and B1
hsa-miR-609	0	0	1	1	1	1	MXD3	MAX dimerization protein 3
hsa-miR-609	1	0	1	1	1	1	HCN1	hyperpolarization activated cyclic nucleotide-gated potassium channel 1
hsa-miR-609	1	0	0	1	1	1	SSH1	slingshot homolog 1 (Drosophila)
hsa-miR-609	0	0	0	1	0	0	KCNJ4	potassium inwardly-rectifying channel, subfamily J, member 4
hsa-miR-609	0	0	0	1	1	1	MRAP	melanocortin 2 receptor accessory protein
hsa-miR-609	0	0	1	1	0	0	LST1	leukocyte specific transcript 1
hsa-miR-609	0	0	0	1	1	1	ZNF296	zinc finger protein 296
hsa-miR-609	0	0	1	1	0	0	HSPB2	heat shock 27kDa protein 2
hsa-miR-609	0	0	1	1	0	0	SLC6A19	solute carrier family 6 (neutral amino acid transporter), member 19
hsa-miR-609	0	0	0	1	1	1	C8orf74	chromosome 8 open reading frame 74
hsa-miR-609	0	0	0	1	0	0	NFRKB	nuclear factor related to kappaB binding protein
hsa-miR-609	0	0	1	1	1	1	DSCAM	Down syndrome cell adhesion molecule
hsa-miR-609	0	0	1	1	0	0	TRAPPC12	trafficking protein particle complex 12
hsa-miR-609	1	0	0	1	1	1	TACR1	tachykinin receptor 1
hsa-miR-609	0	0	0	1	0	0	STX8	syntaxin 8
hsa-miR-609	0	0	1	1	0	0	ATP6V1E2	ATPase, H+ transporting, lysosomal 31kDa, V1 subunit E2
hsa-miR-609	1	0	0	1	1	1	SLC1A5	solute carrier family 1 (neutral amino acid transporter), member 5
hsa-miR-609	0	0	1	1	1	1	MPLKIP	M-phase specific PLK1 interacting protein
hsa-miR-609	0	0	1	1	0	0	HEXIM2	hexamethylene bis-acetamide inducible 2
hsa-miR-609	0	0	0	1	0	0	OR52K1	olfactory receptor, family 52, subfamily K, member 1
hsa-miR-609	0	0	0	1	1	1	SRP68	signal recognition particle 68kDa
hsa-miR-609	0	0	1	1	1	1	MRPS12	mitochondrial ribosomal protein S12
hsa-miR-609	0	0	0	1	0	0	RNASE8	ribonuclease, RNase A family, 8
hsa-miR-609	0	0	0	1	0	0	ADCK5	aarF domain containing kinase 5
hsa-miR-609	0	0	0	1	0	0	GLRXP3	glutaredoxin (thioltransferase) pseudogene 3
hsa-miR-609	0	0	1	1	0	0	EEF2	eukaryotic translation elongation factor 2
hsa-miR-609	0	0	1	1	0	0	KRT3	keratin 3
hsa-miR-609	0	0	0	1	1	1	TPMT	thiopurine S-methyltransferase
hsa-miR-609	0	0	0	1	0	0	CCDC74B	coiled-coil domain containing 74B
hsa-miR-609	1	0	1	1	1	1	NEFH	neurofilament, heavy polypeptide
hsa-miR-609	1	0	1	1	1	1	FGFR1	fibroblast growth factor receptor 1
hsa-miR-609	0	0	0	1	0	0	LEPREL2	leprecan-like 2
hsa-miR-609	0	0	1	1	0	0	GPR162	G protein-coupled receptor 162
hsa-miR-609	0	0	1	1	1	1	LSM1	LSM1 homolog, U6 small nuclear RNA associated (S. cerevisiae)
hsa-miR-609	0	0	0	1	1	1	RAG2	recombination activating gene 2
hsa-miR-609	0	0	0	1	0	0	GUK1	guanylate kinase 1
hsa-miR-609	0	0	0	1	0	0	LOC100129726	uncharacterized LOC100129726
hsa-miR-609	1	0	1	1	0	0	GPR137	G protein-coupled receptor 137
hsa-miR-609	0	0	1	1	1	1	C7	complement component 7
hsa-miR-609	0	0	0	1	1	1	GIMAP7	GTPase, IMAP family member 7
hsa-miR-609	0	0	1	1	0	0	FUZ	fuzzy homolog (Drosophila)
hsa-miR-609	0	0	1	1	0	0	TENC1	tensin like C1 domain containing phosphatase (tensin 2)
hsa-miR-609	0	0	0	1	0	0	SLC13A2	solute carrier family 13 (sodium-dependent dicarboxylate transporter), member 2
hsa-miR-609	0	0	0	1	1	1	ODF3L2	outer dense fiber of sperm tails 3-like 2
hsa-miR-609	0	0	1	1	0	0	YSK4	YSK4 Sps1/Ste20-related kinase homolog (S. cerevisiae)
hsa-miR-609	0	0	0	1	1	1	ITGA11	integrin, alpha 11
hsa-miR-609	1	0	1	1	1	1	PXT1	peroxisomal, testis specific 1
hsa-miR-609	1	0	1	1	1	1	C3orf45	chromosome 3 open reading frame 45
hsa-miR-609	0	0	1	1	1	1	BIN1	bridging integrator 1
hsa-miR-609	1	0	1	1	1	1	CCZ1B	CCZ1 vacuolar protein trafficking and biogenesis associated homolog B (S. cerevisiae)
hsa-miR-609	0	0	0	1	0	0	INSL3	insulin-like 3 (Leydig cell)
hsa-miR-609	0	0	0	1	1	1	JAK3	Janus kinase 3
hsa-miR-609	0	0	0	1	0	0	MAMDC4	MAM domain containing 4
hsa-miR-609	1	0	1	1	1	1	SIX5	SIX homeobox 5
hsa-miR-609	0	0	0	1	1	1	S100Z	S100 calcium binding protein Z
hsa-miR-609	0	0	0	1	1	1	HFE	hemochromatosis
hsa-miR-609	0	0	1	1	1	1	RECQL5	RecQ protein-like 5
hsa-miR-609	0	0	1	1	0	0	SFTPC	surfactant protein C
hsa-miR-609	0	0	1	1	1	1	SLC6A15	solute carrier family 6 (neutral amino acid transporter), member 15
hsa-miR-609	0	0	1	1	0	0	FAM211B	family with sequence similarity 211, member B
hsa-miR-609	1	0	1	1	1	1	C1orf131	chromosome 1 open reading frame 131
hsa-miR-609	0	0	1	1	0	0	INTS3	integrator complex subunit 3
hsa-miR-609	0	0	1	1	1	1	APITD1	apoptosis-inducing, TAF9-like domain 1
hsa-miR-609	0	0	1	1	1	1	CORT	cortistatin
hsa-miR-609	0	0	1	1	0	0	SPACA4	sperm acrosome associated 4
hsa-miR-609	0	0	0	1	0	0	OR51G1	olfactory receptor, family 51, subfamily G, member 1
hsa-miR-609	0	0	0	1	0	0	ROGDI	rogdi homolog (Drosophila)
hsa-miR-609	0	0	1	1	0	0	TYMS	thymidylate synthetase
hsa-miR-609	0	0	1	1	0	0	TRIM73	tripartite motif containing 73
hsa-miR-609	1	0	1	1	1	1	SIDT2	SID1 transmembrane family, member 2
hsa-miR-609	0	0	1	1	1	1	FAM153C	family with sequence similarity 153, member C, pseudogene
hsa-miR-609	0	0	1	1	1	1	MRPS33	mitochondrial ribosomal protein S33
hsa-miR-609	1	0	0	1	1	1	ANGPT2	angiopoietin 2
hsa-miR-609	0	0	1	1	0	0	CCZ1	CCZ1 vacuolar protein trafficking and biogenesis associated homolog (S. cerevisiae)
hsa-miR-609	0	0	0	1	1	1	UPB1	ureidopropionase, beta
hsa-miR-609	0	0	1	1	1	1	HSD11B2	hydroxysteroid (11-beta) dehydrogenase 2
hsa-miR-609	0	0	1	1	0	0	TMEM86B	transmembrane protein 86B
hsa-miR-609	0	0	1	1	1	1	NETO1	neuropilin (NRP) and tolloid (TLL)-like 1
hsa-miR-609	1	0	1	1	1	1	XKR4	XK, Kell blood group complex subunit-related family, member 4
hsa-miR-609	1	0	0	1	1	1	SLC25A18	solute carrier family 25 (glutamate carrier), member 18
hsa-miR-609	0	0	1	1	1	1	KCNN2	potassium intermediate/small conductance calcium-activated channel, subfamily N, member 2
hsa-miR-609	0	0	0	1	0	0	NLRP10	NLR family, pyrin domain containing 10
hsa-miR-609	0	0	1	1	0	0	PCP4	Purkinje cell protein 4
hsa-miR-609	1	0	1	1	1	1	SHMT2	serine hydroxymethyltransferase 2 (mitochondrial)
hsa-miR-609	0	0	0	1	0	0	C19orf71	chromosome 19 open reading frame 71
hsa-miR-609	0	0	0	1	1	1	WWOX	WW domain containing oxidoreductase
hsa-miR-609	0	0	1	1	0	0	MRPL11	mitochondrial ribosomal protein L11
hsa-miR-609	0	0	1	1	1	1	MOB2	MOB kinase activator 2
hsa-miR-609	0	0	1	1	0	0	IGLL1	immunoglobulin lambda-like polypeptide 1
hsa-miR-609	1	0	1	1	1	1	ZNF12	zinc finger protein 12
hsa-miR-609	0	0	1	1	0	0	LYPD4	LY6/PLAUR domain containing 4
hsa-miR-609	0	0	1	1	0	0	SGK223	homolog of rat pragma of Rnd2
hsa-miR-609	0	0	1	1	0	0	USP51	ubiquitin specific peptidase 51
hsa-miR-609	0	0	1	1	1	1	GLRX3	glutaredoxin 3
hsa-miR-609	0	0	1	1	0	0	DRG1	developmentally regulated GTP binding protein 1
hsa-miR-609	0	0	1	1	0	0	DGKA	diacylglycerol kinase, alpha 80kDa
hsa-miR-609	0	0	0	1	1	1	FTSJ2	FtsJ RNA methyltransferase homolog 2 (E. coli)
hsa-miR-609	0	0	1	1	0	0	STAC3	SH3 and cysteine rich domain 3
hsa-miR-609	0	0	1	1	1	1	UQCR10	ubiquinol-cytochrome c reductase, complex III subunit X
hsa-miR-609	0	0	0	1	1	1	CDHR1	cadherin-related family member 1
hsa-miR-609	0	0	1	1	1	1	C18orf21	chromosome 18 open reading frame 21
hsa-miR-609	0	0	0	1	0	0	AHNAK2	AHNAK nucleoprotein 2
hsa-miR-609	0	0	1	1	0	0	EWSR1	Ewing sarcoma breakpoint region 1
hsa-miR-609	0	0	1	1	0	0	USP27X	ubiquitin specific peptidase 27, X-linked
hsa-miR-609	0	0	0	1	0	0	TH	tyrosine hydroxylase
hsa-miR-609	0	0	1	1	0	0	ACTL7A	actin-like 7A
hsa-miR-609	0	0	0	1	0	0	OIT3	oncoprotein induced transcript 3
hsa-miR-609	0	0	0	1	1	1	USP16	ubiquitin specific peptidase 16
hsa-miR-609	0	0	1	1	1	1	C2orf76	chromosome 2 open reading frame 76
hsa-miR-609	0	0	1	1	0	0	ANKRD37	ankyrin repeat domain 37
hsa-miR-609	0	0	1	1	0	0	CDKN2D	cyclin-dependent kinase inhibitor 2D (p19, inhibits CDK4)
hsa-miR-609	0	0	1	1	1	1	TNNI1	troponin I type 1 (skeletal, slow)
hsa-miR-609	0	0	1	1	1	1	SPAG17	sperm associated antigen 17
hsa-miR-609	0	0	1	1	0	0	RGS12	regulator of G-protein signaling 12
hsa-miR-609	0	0	0	1	1	1	PKD1L2	polycystic kidney disease 1-like 2
hsa-miR-609	0	0	0	1	0	0	LRRC71	leucine rich repeat containing 71
hsa-miR-609	1	0	0	1	0	0	LRFN2	leucine rich repeat and fibronectin type III domain containing 2
hsa-miR-609	0	0	0	1	0	0	GJB5	gap junction protein, beta 5, 31.1kDa
hsa-miR-609	0	0	0	1	0	0	PPP1R32	protein phosphatase 1, regulatory subunit 32
hsa-miR-609	0	0	1	1	0	0	TPST2	tyrosylprotein sulfotransferase 2
hsa-miR-609	0	0	1	1	0	0	TMEM120A	transmembrane protein 120A
hsa-miR-609	1	0	1	1	0	0	EIF4EBP1	eukaryotic translation initiation factor 4E binding protein 1
hsa-miR-609	0	0	1	1	0	0	STAMBP	STAM binding protein
hsa-miR-609	1	0	1	1	1	1	RNF6	ring finger protein (C3H2C3 type) 6
hsa-miR-609	0	0	1	1	0	0	ELSPBP1	epididymal sperm binding protein 1
hsa-miR-609	0	0	1	1	0	0	HMX2	H6 family homeobox 2
hsa-miR-609	0	0	1	1	0	0	RNASE1	ribonuclease, RNase A family, 1 (pancreatic)
hsa-miR-609	0	0	0	1	1	1	POMT1	protein-O-mannosyltransferase 1
hsa-miR-609	0	0	0	1	1	1	FHIT	fragile histidine triad
hsa-miR-609	1	0	1	1	1	1	SAT1	spermidine/spermine N1-acetyltransferase 1
hsa-miR-609	0	0	0	1	0	0	THEG	theg spermatid protein
hsa-miR-609	1	0	1	1	1	1	AUTS2	autism susceptibility candidate 2
hsa-miR-609	1	0	1	1	1	1	ERBB4	v-erb-a erythroblastic leukemia viral oncogene homolog 4 (avian)
hsa-miR-609	1	0	1	1	1	1	DPY19L4	dpy-19-like 4 (C. elegans)
hsa-miR-609	0	0	0	1	0	0	RIBC2	RIB43A domain with coiled-coils 2
hsa-miR-609	0	0	1	1	0	0	SCNN1B	sodium channel, non-voltage-gated 1, beta subunit
hsa-miR-609	0	0	0	1	0	0	CXXC11	CXXC finger protein 11
hsa-miR-609	0	0	1	1	1	1	TFEB	transcription factor EB
hsa-miR-609	0	0	1	1	1	1	CRP	C-reactive protein, pentraxin-related
hsa-miR-609	1	0	1	1	1	1	UNC79	unc-79 homolog (C. elegans)
hsa-miR-609	1	0	1	1	0	0	NR1H3	nuclear receptor subfamily 1, group H, member 3
hsa-miR-609	0	0	0	1	0	0	MRPL20	mitochondrial ribosomal protein L20
hsa-miR-609	0	0	0	1	0	0	DHRS7B	dehydrogenase/reductase (SDR family) member 7B
hsa-miR-609	0	0	0	1	0	0	FCER2	Fc fragment of IgE, low affinity II, receptor for (CD23)
hsa-miR-609	1	0	1	1	0	0	ZDHHC1	zinc finger, DHHC-type containing 1
hsa-miR-609	0	0	1	1	1	1	HADH	hydroxyacyl-CoA dehydrogenase
hsa-miR-609	0	0	1	1	1	1	TAP1	transporter 1, ATP-binding cassette, sub-family B (MDR/TAP)
hsa-miR-609	0	0	1	1	0	0	BPIFA1	BPI fold containing family A, member 1
hsa-miR-609	0	0	0	1	1	1	RNH1	ribonuclease/angiogenin inhibitor 1
hsa-miR-609	0	0	1	1	0	0	CUL9	cullin 9
hsa-miR-609	0	0	0	1	0	0	H2AFB2	H2A histone family, member B2
hsa-miR-609	1	0	1	1	1	1	COL2A1	collagen, type II, alpha 1
hsa-miR-609	0	0	1	1	0	0	OCA2	oculocutaneous albinism II
hsa-miR-609	1	0	1	1	1	1	TWIST1	twist homolog 1 (Drosophila)
hsa-miR-609	0	0	1	1	0	0	INTS4	integrator complex subunit 4
hsa-miR-609	0	0	0	1	0	0	INCA1	inhibitor of CDK, cyclin A1 interacting protein 1
hsa-miR-609	0	0	0	1	1	1	ZNF565	zinc finger protein 565
hsa-miR-609	1	0	1	1	0	0	BEGAIN	brain-enriched guanylate kinase-associated homolog (rat)
hsa-miR-609	0	0	1	1	0	0	RTEL1	regulator of telomere elongation helicase 1
hsa-miR-609	0	0	0	1	0	0	TNFRSF6B	tumor necrosis factor receptor superfamily, member 6b, decoy
hsa-miR-609	0	0	1	1	0	0	KEL	Kell blood group, metallo-endopeptidase
hsa-miR-609	0	0	1	1	0	0	MORN3	MORN repeat containing 3
hsa-miR-609	0	0	0	1	0	0	SLC35E2	solute carrier family 35, member E2
hsa-miR-609	0	0	1	1	0	0	TMEM116	transmembrane protein 116
hsa-miR-609	1	0	0	1	0	0	CARD11	caspase recruitment domain family, member 11
hsa-miR-609	0	0	1	1	0	0	PDLIM7	PDZ and LIM domain 7 (enigma)
hsa-miR-609	0	0	0	1	0	0	MYOCD	myocardin
hsa-miR-609	1	0	1	1	1	1	ARIH2	ariadne homolog 2 (Drosophila)
hsa-miR-609	0	0	1	1	0	0	ACOX3	acyl-CoA oxidase 3, pristanoyl
hsa-miR-609	1	0	1	1	0	0	GPI	glucose-6-phosphate isomerase
hsa-miR-609	0	0	1	1	0	0	HP	haptoglobin
hsa-miR-609	0	0	0	1	1	1	ZNF23	zinc finger protein 23
hsa-miR-609	0	0	0	1	0	0	ARID5A	AT rich interactive domain 5A (MRF1-like)
hsa-miR-609	0	0	1	1	1	1	PSMG2	proteasome (prosome, macropain) assembly chaperone 2
hsa-miR-609	0	0	1	1	1	1	COPS5	COP9 constitutive photomorphogenic homolog subunit 5 (Arabidopsis)
hsa-miR-609	0	0	1	1	0	0	OXA1L	oxidase (cytochrome c) assembly 1-like
hsa-miR-609	0	0	1	1	1	1	HSD17B11	hydroxysteroid (17-beta) dehydrogenase 11
hsa-miR-609	0	0	1	1	1	1	HNRPLL	heterogeneous nuclear ribonucleoprotein L-like
hsa-miR-609	0	0	1	1	0	0	THNSL2	threonine synthase-like 2 (S. cerevisiae)
hsa-miR-609	0	0	1	1	0	0	SMTN	smoothelin
hsa-miR-609	0	0	1	1	0	0	C9orf169	chromosome 9 open reading frame 169
hsa-miR-609	0	0	0	1	0	0	ADAM29	ADAM metallopeptidase domain 29
hsa-miR-609	1	0	1	1	1	1	DDX42	DEAD (Asp-Glu-Ala-Asp) box polypeptide 42
hsa-miR-609	0	0	1	1	0	0	DARC	Duffy blood group, chemokine receptor
hsa-miR-609	0	0	1	1	0	0	TRAF3IP2	TRAF3 interacting protein 2
hsa-miR-609	0	0	1	1	0	0	CTAG1B	cancer/testis antigen 1B
hsa-miR-609	0	0	1	1	0	0	CCDC88B	coiled-coil domain containing 88B
hsa-miR-609	1	0	1	1	0	0	BRD4	bromodomain containing 4
hsa-miR-609	0	0	0	1	0	0	CLN3	ceroid-lipofuscinosis, neuronal 3
hsa-miR-609	0	0	1	1	1	1	SH2D1A	SH2 domain containing 1A
hsa-miR-609	1	0	0	1	0	0	TSTA3	tissue specific transplantation antigen P35B
hsa-miR-609	0	0	0	1	0	0	OR52M1	olfactory receptor, family 52, subfamily M, member 1
hsa-miR-609	0	0	0	1	0	0	CTAG1A	cancer/testis antigen 1A
hsa-miR-609	1	0	1	1	1	1	MAN2A2	mannosidase, alpha, class 2A, member 2
hsa-miR-609	0	0	1	1	0	0	NPSR1	neuropeptide S receptor 1
hsa-miR-609	0	0	1	1	0	0	ELMO3	engulfment and cell motility 3
hsa-miR-609	0	0	1	1	1	1	KIAA1704	KIAA1704
hsa-miR-609	0	0	1	1	1	1	EIF1AY	eukaryotic translation initiation factor 1A, Y-linked
hsa-miR-609	0	0	1	1	0	0	ALS2CR11	amyotrophic lateral sclerosis 2 (juvenile) chromosome region, candidate 11
hsa-miR-609	0	0	0	1	0	0	PPEF1	protein phosphatase, EF-hand calcium binding domain 1
hsa-miR-609	0	0	0	1	0	0	FICD	FIC domain containing
hsa-miR-609	0	0	1	1	1	1	EFCAB2	EF-hand calcium binding domain 2
hsa-miR-609	0	0	0	1	0	0	GNG4	guanine nucleotide binding protein (G protein), gamma 4
hsa-miR-609	0	0	0	1	1	1	DACT2	dapper, antagonist of beta-catenin, homolog 2 (Xenopus laevis)
hsa-miR-609	0	0	0	1	0	0	PYCR2	pyrroline-5-carboxylate reductase family, member 2
hsa-miR-609	0	0	0	1	0	0	TMEM81	transmembrane protein 81
hsa-miR-609	0	0	0	1	1	1	VIP	vasoactive intestinal peptide
hsa-miR-609	1	0	1	1	1	1	TROVE2	TROVE domain family, member 2
hsa-miR-609	1	0	0	1	1	1	SWT1	SWT1 RNA endoribonuclease homolog (S. cerevisiae)
hsa-miR-609	0	0	0	1	1	1	NPHS2	nephrosis 2, idiopathic, steroid-resistant (podocin)
hsa-miR-609	0	0	1	1	0	0	RFWD2	ring finger and WD repeat domain 2, E3 ubiquitin protein ligase
hsa-miR-609	0	0	1	1	1	1	RXRG	retinoid X receptor, gamma
hsa-miR-609	0	0	1	1	1	1	UFC1	ubiquitin-fold modifier conjugating enzyme 1
hsa-miR-609	0	0	1	1	0	0	SOGA3	SOGA family member 3
hsa-miR-609	0	0	1	1	1	1	NPR1	natriuretic peptide receptor A/guanylate cyclase A (atrionatriuretic peptide receptor A)
hsa-miR-609	0	0	0	1	0	0	LCE2C	late cornified envelope 2C
hsa-miR-609	0	0	1	1	0	0	MRPL9	mitochondrial ribosomal protein L9
hsa-miR-609	0	0	0	1	1	1	FIG4	FIG4 homolog, SAC1 lipid phosphatase domain containing (S. cerevisiae)
hsa-miR-609	1	0	1	1	1	1	SV2A	synaptic vesicle glycoprotein 2A
hsa-miR-609	0	0	0	1	0	0	H2AFB3	H2A histone family, member B3
hsa-miR-609	0	0	1	1	0	0	CD58	CD58 molecule
hsa-miR-609	1	0	1	1	1	1	SLC35A1	solute carrier family 35 (CMP-sialic acid transporter), member A1
hsa-miR-609	0	0	1	1	1	1	CCDC147	coiled-coil domain containing 147
hsa-miR-609	0	0	1	1	0	0	WDR96	WD repeat domain 96
hsa-miR-609	0	0	1	1	1	1	IRAK1BP1	interleukin-1 receptor-associated kinase 1 binding protein 1
hsa-miR-609	0	0	0	1	0	0	NFKB2	nuclear factor of kappa light polypeptide gene enhancer in B-cells 2 (p49/p100)
hsa-miR-609	0	0	0	1	1	1	PNCK	pregnancy up-regulated non-ubiquitously expressed CaM kinase
hsa-miR-609	0	0	1	1	1	1	ALG14	asparagine-linked glycosylation 14 homolog (S. cerevisiae)
hsa-miR-609	0	0	1	1	0	0	BIRC7	baculoviral IAP repeat containing 7
hsa-miR-609	0	0	0	1	1	1	ABCC2	ATP-binding cassette, sub-family C (CFTR/MRP), member 2
hsa-miR-609	0	0	1	1	0	0	VGLL1	vestigial like 1 (Drosophila)
hsa-miR-609	0	0	1	1	1	1	KCNG1	potassium voltage-gated channel, subfamily G, member 1
hsa-miR-609	0	0	1	1	1	1	CH25H	cholesterol 25-hydroxylase
hsa-miR-609	0	0	0	1	0	0	SURF2	surfeit 2
hsa-miR-609	0	0	0	1	1	1	TSPAN1	tetraspanin 1
hsa-miR-609	0	0	0	1	1	1	TMEM69	transmembrane protein 69
hsa-miR-609	0	0	1	1	1	1	TMEM164	transmembrane protein 164
hsa-miR-609	1	0	1	1	1	1	TSPAN14	tetraspanin 14
hsa-miR-609	0	0	0	1	0	0	IPO13	importin 13
hsa-miR-609	0	0	1	1	1	1	SZT2	seizure threshold 2 homolog (mouse)
hsa-miR-609	0	0	0	1	0	0	PRRX2	paired related homeobox 2
hsa-miR-609	0	0	1	1	1	1	PPCS	phosphopantothenoylcysteine synthetase
hsa-miR-609	0	0	1	1	0	0	TEX13A	testis expressed 13A
hsa-miR-609	0	0	1	1	0	0	CIZ1	CDKN1A interacting zinc finger protein 1
hsa-miR-609	0	0	1	1	1	1	RHBDL2	rhomboid, veinlet-like 2 (Drosophila)
hsa-miR-609	0	0	0	1	1	1	RPA4	replication protein A4, 30kDa
hsa-miR-609	0	0	1	1	1	1	KLHL4	kelch-like 4 (Drosophila)
hsa-miR-609	0	0	0	1	0	0	TSPO2	translocator protein 2
hsa-miR-609	0	0	1	1	0	0	KCNK17	potassium channel, subfamily K, member 17
hsa-miR-609	0	0	1	1	1	1	FTSJD2	FtsJ methyltransferase domain containing 2
hsa-miR-609	0	0	1	1	0	0	MTCH1	mitochondrial carrier 1
hsa-miR-609	1	0	0	1	0	0	FAM167B	family with sequence similarity 167, member B
hsa-miR-609	0	0	0	1	1	1	CXCR3	chemokine (C-X-C motif) receptor 3
hsa-miR-609	0	0	0	1	1	1	LHFPL5	lipoma HMGIC fusion partner-like 5
hsa-miR-609	1	0	1	1	1	1	ZNF618	zinc finger protein 618
hsa-miR-609	0	0	1	1	0	0	GPN2	GPN-loop GTPase 2
hsa-miR-609	0	0	1	1	0	0	C10orf128	chromosome 10 open reading frame 128
hsa-miR-609	0	0	0	1	1	1	B3GALT4	UDP-Gal:betaGlcNAc beta 1,3-galactosyltransferase, polypeptide 4
hsa-miR-609	0	0	1	1	0	0	RPS18	ribosomal protein S18
hsa-miR-609	1	0	1	1	1	1	CASP10	caspase 10, apoptosis-related cysteine peptidase
hsa-miR-609	1	0	1	1	1	1	NTM	neurotrimin
hsa-miR-609	0	0	1	1	1	1	HLA-DOA	major histocompatibility complex, class II, DO alpha
hsa-miR-609	0	0	1	1	1	1	AGER	advanced glycosylation end product-specific receptor
hsa-miR-609	0	0	1	1	0	0	CDA	cytidine deaminase
hsa-miR-609	0	0	0	1	1	1	AAED1	AhpC/TSA antioxidant enzyme domain containing 1
hsa-miR-609	0	0	1	1	0	0	LYZL2	lysozyme-like 2
hsa-miR-609	1	0	1	1	1	1	RCC2	regulator of chromosome condensation 2
hsa-miR-609	0	0	0	1	0	0	BPIFB3	BPI fold containing family B, member 3
hsa-miR-609	0	0	1	1	0	0	LYZL1	lysozyme-like 1
hsa-miR-609	0	0	1	1	1	1	LSM2	LSM2 homolog, U6 small nuclear RNA associated (S. cerevisiae)
hsa-miR-609	0	0	0	1	0	0	LY6G6F	lymphocyte antigen 6 complex, locus G6F
hsa-miR-609	0	0	0	1	0	0	LY6G6D	lymphocyte antigen 6 complex, locus G6D
hsa-miR-609	0	0	1	1	0	0	ABHD16A	abhydrolase domain containing 16A
hsa-miR-609	0	0	0	1	1	1	LY6G5B	lymphocyte antigen 6 complex, locus G5B
hsa-miR-609	0	0	1	1	0	0	CSNK2B	casein kinase 2, beta polypeptide
hsa-miR-609	0	0	1	1	1	1	DDX39B	DEAD (Asp-Glu-Ala-Asp) box polypeptide 39B
hsa-miR-609	1	0	1	1	0	0	MCCD1	mitochondrial coiled-coil domain 1
hsa-miR-609	0	0	1	1	0	0	ZNF814	zinc finger protein 814
hsa-miR-609	0	0	1	1	1	1	PRTFDC1	phosphoribosyl transferase domain containing 1
hsa-miR-609	1	0	0	1	1	1	PRAF2	PRA1 domain family, member 2
hsa-miR-609	0	0	1	1	1	1	HLA-A	major histocompatibility complex, class I, A
hsa-miR-609	0	0	1	1	1	1	COMMD3	COMM domain containing 3
hsa-miR-609	0	0	1	1	1	1	THBD	thrombomodulin
hsa-miR-609	1	0	1	1	1	1	FOXA2	forkhead box A2
hsa-miR-609	0	0	0	1	0	0	LOC100128059	uncharacterized LOC100128059
hsa-miR-609	0	0	1	1	1	1	POLR3F	polymerase (RNA) III (DNA directed) polypeptide F, 39 kDa
hsa-miR-609	0	0	1	1	0	0	HES3	hairy and enhancer of split 3 (Drosophila)
hsa-miR-609	0	0	1	1	0	0	BEST1	bestrophin 1
hsa-miR-609	0	0	0	1	1	1	DCLRE1C	DNA cross-link repair 1C
hsa-miR-609	0	0	1	1	1	1	CDADC1	cytidine and dCMP deaminase domain containing 1
hsa-miR-609	0	0	0	1	0	0	OR4A47	olfactory receptor, family 4, subfamily A, member 47
hsa-miR-609	0	0	0	1	0	0	DNAAF1	dynein, axonemal, assembly factor 1
hsa-miR-609	0	0	1	1	1	1	MED4	mediator complex subunit 4
hsa-miR-609	1	0	1	1	1	1	AFF4	AF4/FMR2 family, member 4
hsa-miR-609	0	0	0	1	0	0	C1orf222	chromosome 1 open reading frame 222
hsa-miR-609	0	0	0	1	1	1	SSU72	SSU72 RNA polymerase II CTD phosphatase homolog (S. cerevisiae)
hsa-miR-609	0	0	0	1	0	0	SLC10A5	solute carrier family 10 (sodium/bile acid cotransporter family), member 5
hsa-miR-609	0	0	1	1	1	1	ADTRP	androgen-dependent TFPI-regulating protein
hsa-miR-609	0	0	1	1	1	1	MUC17	mucin 17, cell surface associated
hsa-miR-609	1	0	1	1	1	1	MAB21L1	mab-21-like 1 (C. elegans)
hsa-miR-609	0	0	1	1	1	1	FAM50B	family with sequence similarity 50, member B
hsa-miR-609	0	0	1	1	0	0	APH1B	anterior pharynx defective 1 homolog B (C. elegans)
hsa-miR-609	0	0	1	1	0	0	SHBG	sex hormone-binding globulin
hsa-miR-609	1	0	1	1	1	1	ADRA1A	adrenoceptor alpha 1A
hsa-miR-609	0	0	1	1	0	0	PIN1	peptidylprolyl cis/trans isomerase, NIMA-interacting 1
hsa-miR-609	0	0	0	1	1	1	ADARB2	adenosine deaminase, RNA-specific, B2
hsa-miR-609	0	0	1	1	1	1	GGA1	golgi-associated, gamma adaptin ear containing, ARF binding protein 1
hsa-miR-609	0	0	0	1	1	1	LSP1	lymphocyte-specific protein 1
hsa-miR-609	0	0	0	1	0	0	LOC100131094	uncharacterized LOC100131094
hsa-miR-609	0	0	0	1	0	0	TPTE2P1	transmembrane phosphoinositide 3-phosphatase and tensin homolog 2 pseudogene 1
hsa-miR-609	0	0	1	1	1	1	SPATA6L	spermatogenesis associated 6-like
hsa-miR-609	0	0	0	1	0	0	MUC4	mucin 4, cell surface associated
hsa-miR-609	0	0	1	1	1	1	C1QTNF3	C1q and tumor necrosis factor related protein 3
hsa-miR-609	0	0	0	1	0	0	KCNV2	potassium channel, subfamily V, member 2
hsa-miR-609	0	0	0	1	0	0	C22orf42	chromosome 22 open reading frame 42
hsa-miR-609	0	0	0	1	0	0	MIPEP	mitochondrial intermediate peptidase
hsa-miR-609	0	0	1	1	1	1	GZMB	granzyme B (granzyme 2, cytotoxic T-lymphocyte-associated serine esterase 1)
hsa-miR-609	0	0	0	1	0	0	MRPL36	mitochondrial ribosomal protein L36
hsa-miR-609	0	0	0	1	0	0	HGFAC	HGF activator
hsa-miR-609	0	0	1	1	1	1	WHSC2	Wolf-Hirschhorn syndrome candidate 2
hsa-miR-609	0	0	1	1	1	1	LINC00478	long intergenic non-protein coding RNA 478
hsa-miR-609	0	0	1	1	1	1	OGG1	8-oxoguanine DNA glycosylase
hsa-miR-609	0	0	0	1	1	1	C16orf7	chromosome 16 open reading frame 7
hsa-miR-609	0	0	1	1	1	1	PRIM2	primase, DNA, polypeptide 2 (58kDa)
hsa-miR-609	0	0	0	1	1	1	NOS2	nitric oxide synthase 2, inducible
hsa-miR-609	0	0	1	1	1	1	ALDH1B1	aldehyde dehydrogenase 1 family, member B1
hsa-miR-609	1	0	0	1	1	1	TRIM67	tripartite motif containing 67
hsa-miR-609	0	0	1	0	1	1	TXLNG2P	taxilin gamma 2, pseudogene
hsa-miR-609	1	0	1	0	1	1	GOSR1	golgi SNAP receptor complex member 1
hsa-miR-609	1	0	1	0	1	1	SRGAP2	SLIT-ROBO Rho GTPase activating protein 2
hsa-miR-609	1	0	1	1	1	1	N4BP2L1	NEDD4 binding protein 2-like 1
hsa-miR-609	0	0	1	1	1	1	SP100	SP100 nuclear antigen
hsa-miR-609	1	0	1	0	1	1	UNC13A	unc-13 homolog A (C. elegans)
hsa-miR-609	1	0	1	1	1	1	ELAVL1	ELAV (embryonic lethal, abnormal vision, Drosophila)-like 1 (Hu antigen R)
hsa-miR-609	0	0	0	1	1	1	MGAT2	mannosyl (alpha-1,6-)-glycoprotein beta-1,2-N-acetylglucosaminyltransferase
hsa-miR-609	0	0	1	1	1	1	PPP1R3A	protein phosphatase 1, regulatory subunit 3A
hsa-miR-609	1	0	1	0	1	1	PRKCI	protein kinase C, iota
hsa-miR-609	0	0	1	1	1	1	SLC22A2	solute carrier family 22 (organic cation transporter), member 2
hsa-miR-609	0	0	1	1	1	1	TRDMT1	tRNA aspartic acid methyltransferase 1
hsa-miR-609	1	0	1	1	1	1	HDGF	hepatoma-derived growth factor
hsa-miR-609	1	0	1	1	1	1	SYNGR2	synaptogyrin 2
hsa-miR-609	1	0	1	1	1	1	GLUD1	glutamate dehydrogenase 1
hsa-miR-609	0	0	0	1	1	1	FXYD3	FXYD domain containing ion transport regulator 3
hsa-miR-609	1	0	1	1	1	1	FBXO9	F-box protein 9
hsa-miR-609	1	0	1	1	1	1	MKRN2	makorin ring finger protein 2
hsa-miR-609	0	0	0	1	1	1	UFL1	UFM1-specific ligase 1
hsa-miR-609	0	0	1	0	1	1	THUMPD1	THUMP domain containing 1
hsa-miR-609	1	0	1	1	1	1	PNRC2	proline-rich nuclear receptor coactivator 2
hsa-miR-609	1	0	1	1	1	1	DNAJC10	DnaJ (Hsp40) homolog, subfamily C, member 10
hsa-miR-609	0	0	1	0	1	1	MTRF1L	mitochondrial translational release factor 1-like
hsa-miR-609	1	0	1	1	1	1	KIAA1467	KIAA1467
hsa-miR-609	1	0	1	1	1	1	PRUNE	prune homolog (Drosophila)
hsa-miR-609	0	0	0	1	1	1	HAPLN4	hyaluronan and proteoglycan link protein 4
hsa-miR-609	1	0	0	1	1	1	CPSF7	cleavage and polyadenylation specific factor 7, 59kDa
hsa-miR-609	1	0	1	1	1	1	SETD3	SET domain containing 3
hsa-miR-609	1	0	1	1	1	1	FOPNL	FGFR1OP N-terminal like
hsa-miR-609	0	0	1	1	1	1	HSPB6	heat shock protein, alpha-crystallin-related, B6
hsa-miR-609	0	0	1	1	1	1	CCDC140	coiled-coil domain containing 140
hsa-miR-609	1	0	0	1	1	1	ZNF547	zinc finger protein 547
hsa-miR-609	0	0	1	1	1	1	BMP8A	bone morphogenetic protein 8a
hsa-miR-609	0	0	0	0	1	1	STARD9	StAR-related lipid transfer (START) domain containing 9
