# Supplementary material for: Profiling of Selected MicroRNAs in Proliferative Eutopic Endometrium of Women with Ovarian Endometriosis
Source: Biomed Res Int. 2015 Aug 20;2015:760698. doi: 10.1155/2015/760698 (PMC4558423; doi:10.1155/2015/760698)
Supplement: Supplementary file 1 — Table I: The names of miRNAs significantly differentially expressed between eutopic endometrium of patients with endometriosis vs eutopic endometrium of patients without endometriosis. Table II: The associations between miRNA and mRNA, which presents detailed results of the search of six major databases i.e targetscan, tarbase, miranda, mirbase, mirtarget2 and pictar. [file 760698.f1.zip › 760698.f1/Table II/hsa-miR-610.tsv]

miR	targetscan	tarbase	miranda	mirbase	mirtarget2	pictar	GeneSymbol	GeneName
hsa-miR-610	1	0	1	0	1	1	KIAA0355	KIAA0355
hsa-miR-610	1	0	1	1	1	1	PRUNE2	prune homolog 2 (Drosophila)
hsa-miR-610	1	0	1	0	1	1	PTPRT	protein tyrosine phosphatase, receptor type, T
hsa-miR-610	1	0	1	0	1	1	NEDD4L	neural precursor cell expressed, developmentally down-regulated 4-like, E3 ubiquitin protein ligase
hsa-miR-610	1	0	1	1	1	1	SLC4A7	solute carrier family 4, sodium bicarbonate cotransporter, member 7
hsa-miR-610	1	0	1	0	0	0	HECTD4	HECT domain containing E3 ubiquitin protein ligase 4
hsa-miR-610	1	0	1	0	1	1	MAGI2	membrane associated guanylate kinase, WW and PDZ domain containing 2
hsa-miR-610	1	0	1	1	1	1	TP63	tumor protein p63
hsa-miR-610	0	0	1	1	0	0	RAD51D	RAD51 homolog D (S. cerevisiae)
hsa-miR-610	1	0	1	0	1	1	RBM12	RNA binding motif protein 12
hsa-miR-610	1	0	1	1	1	1	UBR5	ubiquitin protein ligase E3 component n-recognin 5
hsa-miR-610	1	0	1	0	0	0	DTX4	deltex homolog 4 (Drosophila)
hsa-miR-610	1	0	1	1	1	1	CPEB3	cytoplasmic polyadenylation element binding protein 3
hsa-miR-610	1	0	1	1	1	1	CIT	citron (rho-interacting, serine/threonine kinase 21)
hsa-miR-610	1	0	1	1	1	1	PALLD	palladin, cytoskeletal associated protein
hsa-miR-610	1	0	1	1	1	1	FOXJ3	forkhead box J3
hsa-miR-610	1	0	1	1	1	1	PRRC2C	proline-rich coiled-coil 2C
hsa-miR-610	1	0	1	1	1	1	PHF8	PHD finger protein 8
hsa-miR-610	1	0	1	1	1	1	KIAA1217	KIAA1217
hsa-miR-610	1	0	1	1	1	1	ZMIZ1	zinc finger, MIZ-type containing 1
hsa-miR-610	1	0	1	1	1	1	ASAP1	ArfGAP with SH3 domain, ankyrin repeat and PH domain 1
hsa-miR-610	0	0	1	0	0	0	NYAP2	neuronal tyrosine-phosphorylated phosphoinositide-3-kinase adaptor 2
hsa-miR-610	1	0	1	1	1	1	ZNF532	zinc finger protein 532
hsa-miR-610	1	0	1	1	1	1	IKZF4	IKAROS family zinc finger 4 (Eos)
hsa-miR-610	0	0	1	1	1	1	SLC11A2	solute carrier family 11 (proton-coupled divalent metal ion transporters), member 2
hsa-miR-610	1	0	1	1	1	1	CSMD3	CUB and Sushi multiple domains 3
hsa-miR-610	0	0	1	0	0	0	NBLA00301	Nbla00301
hsa-miR-610	1	0	1	1	1	1	OXR1	oxidation resistance 1
hsa-miR-610	1	0	1	1	1	1	SH3TC2	SH3 domain and tetratricopeptide repeats 2
hsa-miR-610	1	0	1	0	0	0	RNF169	ring finger protein 169
hsa-miR-610	1	0	1	0	0	0	ZC3H12C	zinc finger CCCH-type containing 12C
hsa-miR-610	0	0	1	1	0	0	DDB2	damage-specific DNA binding protein 2, 48kDa
hsa-miR-610	1	0	1	1	1	1	PAN3	PAN3 poly(A) specific ribonuclease subunit homolog (S. cerevisiae)
hsa-miR-610	0	0	1	1	1	1	MICAL2	microtubule associated monoxygenase, calponin and LIM domain containing 2
hsa-miR-610	1	0	1	0	1	1	LIN54	lin-54 homolog (C. elegans)
hsa-miR-610	1	1	1	1	1	1	BACE1	beta-site APP-cleaving enzyme 1
hsa-miR-610	0	0	1	0	1	1	ACE2	angiotensin I converting enzyme (peptidyl-dipeptidase A) 2
hsa-miR-610	1	0	1	0	1	1	NFE2L2	nuclear factor (erythroid-derived 2)-like 2
hsa-miR-610	0	0	1	0	1	1	ITPR1	inositol 1,4,5-trisphosphate receptor, type 1
hsa-miR-610	1	0	1	1	1	1	BACH2	BTB and CNC homology 1, basic leucine zipper transcription factor 2
hsa-miR-610	0	0	1	1	1	1	NLRP3	NLR family, pyrin domain containing 3
hsa-miR-610	1	0	1	0	1	1	PCDHA13	protocadherin alpha 13
hsa-miR-610	1	0	1	1	1	1	PCDHA4	protocadherin alpha 4
hsa-miR-610	1	0	1	1	1	1	MEF2A	myocyte enhancer factor 2A
hsa-miR-610	1	0	1	1	1	1	SLC8A1	solute carrier family 8 (sodium/calcium exchanger), member 1
hsa-miR-610	1	0	1	1	1	1	RLF	rearranged L-myc fusion
hsa-miR-610	1	0	1	1	1	1	PRKACB	protein kinase, cAMP-dependent, catalytic, beta
hsa-miR-610	0	0	1	1	1	1	DGKE	diacylglycerol kinase, epsilon 64kDa
hsa-miR-610	1	0	1	1	1	1	AEBP2	AE binding protein 2
hsa-miR-610	1	0	1	0	1	1	CDON	Cdon homolog (mouse)
hsa-miR-610	0	0	1	1	1	1	KIF3A	kinesin family member 3A
hsa-miR-610	0	0	1	1	1	1	ELOVL5	ELOVL fatty acid elongase 5
hsa-miR-610	1	0	1	0	1	1	ADD3	adducin 3 (gamma)
hsa-miR-610	1	0	1	1	1	1	TEAD1	TEA domain family member 1 (SV40 transcriptional enhancer factor)
hsa-miR-610	0	0	1	1	1	1	SGSH	N-sulfoglucosamine sulfohydrolase
hsa-miR-610	1	0	1	1	1	1	MEF2D	myocyte enhancer factor 2D
hsa-miR-610	0	0	1	0	0	0	MIAT	myocardial infarction associated transcript (non-protein coding)
hsa-miR-610	1	0	1	1	1	1	DLGAP2	discs, large (Drosophila) homolog-associated protein 2
hsa-miR-610	0	0	1	1	1	1	PPEF2	protein phosphatase, EF-hand calcium binding domain 2
hsa-miR-610	1	0	1	0	1	1	CELF2	CUGBP, Elav-like family member 2
hsa-miR-610	0	0	1	1	0	0	BANF1	barrier to autointegration factor 1
hsa-miR-610	1	0	1	1	0	0	SH2D2A	SH2 domain containing 2A
hsa-miR-610	1	0	1	1	1	1	RBBP6	retinoblastoma binding protein 6
hsa-miR-610	0	0	1	1	1	1	ERAL1	Era G-protein-like 1 (E. coli)
hsa-miR-610	1	0	1	1	1	1	GLS	glutaminase
hsa-miR-610	0	0	1	1	0	0	RBM5	RNA binding motif protein 5
hsa-miR-610	1	0	1	0	1	1	FAM19A5	family with sequence similarity 19 (chemokine (C-C motif)-like), member A5
hsa-miR-610	1	0	1	1	1	1	USP15	ubiquitin specific peptidase 15
hsa-miR-610	0	0	1	1	1	1	FAM114A2	family with sequence similarity 114, member A2
hsa-miR-610	0	0	1	0	1	1	CLDN2	claudin 2
hsa-miR-610	0	0	1	0	1	1	SLC38A4	solute carrier family 38, member 4
hsa-miR-610	0	0	1	1	1	1	CD28	CD28 molecule
hsa-miR-610	0	0	1	0	0	0	TIGD7	tigger transposable element derived 7
hsa-miR-610	0	0	1	1	0	0	TRIM41	tripartite motif containing 41
hsa-miR-610	1	0	1	1	1	1	ABI2	abl-interactor 2
hsa-miR-610	0	0	1	1	1	1	GOLGA6A	golgin A6 family, member A
hsa-miR-610	0	0	1	0	0	0	HMG20B	high mobility group 20B
hsa-miR-610	1	0	1	1	1	1	CALU	calumenin
hsa-miR-610	1	0	1	1	1	1	KCNIP2	Kv channel interacting protein 2
hsa-miR-610	1	0	1	1	1	1	LARP4	La ribonucleoprotein domain family, member 4
hsa-miR-610	0	0	1	0	0	0	NBPF10	neuroblastoma breakpoint family, member 10
hsa-miR-610	0	0	1	1	1	1	PARK2	parkinson protein 2, E3 ubiquitin protein ligase (parkin)
hsa-miR-610	1	0	1	1	1	1	RCAN1	regulator of calcineurin 1
hsa-miR-610	1	0	1	1	1	1	ST3GAL3	ST3 beta-galactoside alpha-2,3-sialyltransferase 3
hsa-miR-610	0	0	1	0	1	1	LYPD6B	LY6/PLAUR domain containing 6B
hsa-miR-610	1	0	1	1	0	0	FOXP2	forkhead box P2
hsa-miR-610	0	0	1	1	1	1	CARD8	caspase recruitment domain family, member 8
hsa-miR-610	1	0	1	0	1	1	IL1RAP	interleukin 1 receptor accessory protein
hsa-miR-610	1	0	1	1	1	1	GPR64	G protein-coupled receptor 64
hsa-miR-610	1	0	1	1	1	1	AFF2	AF4/FMR2 family, member 2
hsa-miR-610	1	0	1	1	1	1	SH2B3	SH2B adaptor protein 3
hsa-miR-610	1	0	1	1	1	1	ZNF281	zinc finger protein 281
hsa-miR-610	0	0	1	1	1	1	RANBP17	RAN binding protein 17
hsa-miR-610	0	0	1	1	1	1	STK33	serine/threonine kinase 33
hsa-miR-610	1	0	1	1	1	1	NRXN3	neurexin 3
hsa-miR-610	0	0	1	1	1	1	TAF1	TAF1 RNA polymerase II, TATA box binding protein (TBP)-associated factor, 250kDa
hsa-miR-610	0	0	1	1	1	1	ESRP1	epithelial splicing regulatory protein 1
hsa-miR-610	1	0	1	0	1	1	NFAT5	nuclear factor of activated T-cells 5, tonicity-responsive
hsa-miR-610	0	0	1	0	0	0	TUG1	taurine upregulated 1 (non-protein coding)
hsa-miR-610	1	0	1	1	1	1	BCAP29	B-cell receptor-associated protein 29
hsa-miR-610	0	0	1	1	1	1	RNF220	ring finger protein 220
hsa-miR-610	1	0	1	1	1	1	EIF2C1	eukaryotic translation initiation factor 2C, 1
hsa-miR-610	1	0	1	1	1	1	SLC38A2	solute carrier family 38, member 2
hsa-miR-610	1	0	1	1	0	0	SMUG1	single-strand-selective monofunctional uracil-DNA glycosylase 1
hsa-miR-610	0	0	1	1	1	1	LRIF1	ligand dependent nuclear receptor interacting factor 1
hsa-miR-610	0	0	1	1	1	1	SNCAIP	synuclein, alpha interacting protein
hsa-miR-610	0	0	1	1	0	0	UBR4	ubiquitin protein ligase E3 component n-recognin 4
hsa-miR-610	1	0	1	1	1	1	MON2	MON2 homolog (S. cerevisiae)
hsa-miR-610	1	0	1	0	1	1	DCAF17	DDB1 and CUL4 associated factor 17
hsa-miR-610	1	0	1	1	1	1	USP33	ubiquitin specific peptidase 33
hsa-miR-610	0	0	1	0	0	0	IFFO2	intermediate filament family orphan 2
hsa-miR-610	1	0	1	1	1	1	DYRK2	dual-specificity tyrosine-(Y)-phosphorylation regulated kinase 2
hsa-miR-610	1	0	1	0	1	1	ATP2B1	ATPase, Ca++ transporting, plasma membrane 1
hsa-miR-610	1	0	1	0	1	1	MYO5B	myosin VB
hsa-miR-610	0	0	1	1	1	1	MYEOV	myeloma overexpressed (in a subset of t(11;14) positive multiple myelomas)
hsa-miR-610	1	0	1	1	0	0	UBXN7	UBX domain protein 7
hsa-miR-610	0	0	1	0	0	0	LOC729852	uncharacterized LOC729852
hsa-miR-610	1	0	1	1	1	1	LRP4	low density lipoprotein receptor-related protein 4
hsa-miR-610	0	0	1	1	1	1	MINA	MYC induced nuclear antigen
hsa-miR-610	0	0	1	1	1	1	CCDC14	coiled-coil domain containing 14
hsa-miR-610	1	0	1	1	1	1	GPD2	glycerol-3-phosphate dehydrogenase 2 (mitochondrial)
hsa-miR-610	1	0	1	1	1	1	STRBP	spermatid perinuclear RNA binding protein
hsa-miR-610	0	0	1	1	1	1	STMN1	stathmin 1
hsa-miR-610	1	0	1	1	1	1	SLAIN1	SLAIN motif family, member 1
hsa-miR-610	1	0	1	1	1	1	SGK1	serum/glucocorticoid regulated kinase 1
hsa-miR-610	0	0	1	0	0	0	LOC157273	uncharacterized LOC157273
hsa-miR-610	1	0	1	0	1	1	RNF165	ring finger protein 165
hsa-miR-610	1	0	1	1	1	1	SHISA5	shisa homolog 5 (Xenopus laevis)
hsa-miR-610	1	0	1	1	1	1	CLCN5	chloride channel, voltage-sensitive 5
hsa-miR-610	1	0	1	1	1	1	PCMTD1	protein-L-isoaspartate (D-aspartate) O-methyltransferase domain containing 1
hsa-miR-610	0	0	1	0	0	0	LOC100125918	uncharacterized LOC100125918
hsa-miR-610	1	0	1	0	1	1	PLEKHA1	pleckstrin homology domain containing, family A (phosphoinositide binding specific) member 1
hsa-miR-610	1	0	1	1	1	1	ANKRD29	ankyrin repeat domain 29
hsa-miR-610	0	0	1	1	1	1	ZBTB26	zinc finger and BTB domain containing 26
hsa-miR-610	0	0	1	0	1	1	CCDC68	coiled-coil domain containing 68
hsa-miR-610	0	0	1	0	1	1	UHMK1	U2AF homology motif (UHM) kinase 1
hsa-miR-610	1	0	1	1	1	1	PEAR1	platelet endothelial aggregation receptor 1
hsa-miR-610	1	0	1	1	1	1	STXBP5	syntaxin binding protein 5 (tomosyn)
hsa-miR-610	1	0	1	1	1	1	EGR2	early growth response 2
hsa-miR-610	1	0	1	1	1	1	AMMECR1	Alport syndrome, mental retardation, midface hypoplasia and elliptocytosis chromosomal region gene 1
hsa-miR-610	1	0	1	1	1	1	FBXW2	F-box and WD repeat domain containing 2
hsa-miR-610	1	0	1	1	1	1	EPN2	epsin 2
hsa-miR-610	1	0	1	1	1	1	GNG2	guanine nucleotide binding protein (G protein), gamma 2
hsa-miR-610	1	0	1	1	1	1	SLBP	stem-loop binding protein
hsa-miR-610	0	0	1	1	1	1	LZTFL1	leucine zipper transcription factor-like 1
hsa-miR-610	0	0	1	1	1	1	FRMD3	FERM domain containing 3
hsa-miR-610	0	0	1	1	1	1	SPOCK1	sparc/osteonectin, cwcv and kazal-like domains proteoglycan (testican) 1
hsa-miR-610	0	0	1	0	0	0	PART1	prostate androgen-regulated transcript 1 (non-protein coding)
hsa-miR-610	1	0	1	1	1	1	NSG1	neuron specific gene family member 1
hsa-miR-610	0	0	1	0	0	0	ZNF806	zinc finger protein 806
hsa-miR-610	0	0	1	0	1	1	AGBL4	ATP/GTP binding protein-like 4
hsa-miR-610	1	0	1	1	1	1	GLT25D2	glycosyltransferase 25 domain containing 2
hsa-miR-610	0	0	1	1	0	0	DPAGT1	dolichyl-phosphate (UDP-N-acetylglucosamine) N-acetylglucosaminephosphotransferase 1 (GlcNAc-1-P transferase)
hsa-miR-610	0	0	1	1	1	1	RBM4B	RNA binding motif protein 4B
hsa-miR-610	0	0	1	0	0	0	LINC00486	long intergenic non-protein coding RNA 486
hsa-miR-610	0	0	1	1	1	1	GPR115	G protein-coupled receptor 115
hsa-miR-610	0	0	1	0	0	0	LOC730101	uncharacterized LOC730101
hsa-miR-610	1	0	1	1	1	1	GREM1	gremlin 1
hsa-miR-610	1	0	1	1	1	1	GAPVD1	GTPase activating protein and VPS9 domains 1
hsa-miR-610	1	0	1	1	1	1	HDGF	hepatoma-derived growth factor
hsa-miR-610	1	0	1	0	1	1	KIAA1737	KIAA1737
hsa-miR-610	1	0	1	1	1	1	IGSF11	immunoglobulin superfamily, member 11
hsa-miR-610	1	0	1	1	1	1	UGDH	UDP-glucose 6-dehydrogenase
hsa-miR-610	0	0	1	1	0	0	DCBLD1	discoidin, CUB and LCCL domain containing 1
hsa-miR-610	1	0	1	1	1	1	NAP1L1	nucleosome assembly protein 1-like 1
hsa-miR-610	0	0	1	1	0	0	KIAA0146	KIAA0146
hsa-miR-610	0	0	1	1	1	1	WDR64	WD repeat domain 64
hsa-miR-610	1	0	1	1	0	0	KCNC1	potassium voltage-gated channel, Shaw-related subfamily, member 1
hsa-miR-610	0	0	1	0	0	0	C1orf132	chromosome 1 open reading frame 132
hsa-miR-610	1	0	1	1	1	1	EGLN3	egl nine homolog 3 (C. elegans)
hsa-miR-610	1	0	1	1	1	1	SH2D4B	SH2 domain containing 4B
hsa-miR-610	0	0	1	0	0	0	LOC100133029	sirtuin 5 pseudogene
hsa-miR-610	1	0	1	1	1	1	ESYT2	extended synaptotagmin-like protein 2
hsa-miR-610	1	0	1	1	1	1	GJC1	gap junction protein, gamma 1, 45kDa
hsa-miR-610	0	0	1	0	0	0	LOC728716	uncharacterized LOC728716
hsa-miR-610	0	0	1	1	0	0	GABRA2	gamma-aminobutyric acid (GABA) A receptor, alpha 2
hsa-miR-610	0	0	1	1	0	0	LOC100128239	uncharacterized LOC100128239
hsa-miR-610	0	0	1	0	1	1	RASGRP3	RAS guanyl releasing protein 3 (calcium and DAG-regulated)
hsa-miR-610	0	0	1	1	0	0	ANKHD1-EIF4EBP3	ANKHD1-EIF4EBP3 readthrough
hsa-miR-610	0	0	1	1	0	0	FSIP2	fibrous sheath interacting protein 2
hsa-miR-610	1	0	1	0	1	1	PLXNA1	plexin A1
hsa-miR-610	1	0	1	1	1	1	LIN9	lin-9 homolog (C. elegans)
hsa-miR-610	1	0	1	1	1	1	DLG2	discs, large homolog 2 (Drosophila)
hsa-miR-610	1	0	1	0	1	1	GPR180	G protein-coupled receptor 180
hsa-miR-610	0	0	1	1	1	1	ERI2	ERI1 exoribonuclease family member 2
hsa-miR-610	1	0	1	1	1	1	ENAH	enabled homolog (Drosophila)
hsa-miR-610	0	0	1	1	1	1	ZNF503	zinc finger protein 503
hsa-miR-610	1	0	1	1	1	1	CXorf23	chromosome X open reading frame 23
hsa-miR-610	1	0	1	0	1	1	FNDC3B	fibronectin type III domain containing 3B
hsa-miR-610	0	0	1	0	1	1	LOC401321	uncharacterized LOC401321
hsa-miR-610	0	0	1	1	0	0	RASA3	RAS p21 protein activator 3
hsa-miR-610	1	0	1	0	1	1	USP37	ubiquitin specific peptidase 37
hsa-miR-610	1	0	1	1	1	1	PUS7	pseudouridylate synthase 7 homolog (S. cerevisiae)
hsa-miR-610	0	0	1	0	0	0	FLJ26245	uncharacterized LOC400533
hsa-miR-610	0	0	1	1	1	1	ST8SIA5	ST8 alpha-N-acetyl-neuraminide alpha-2,8-sialyltransferase 5
hsa-miR-610	0	0	1	1	1	1	SLTM	SAFB-like, transcription modulator
hsa-miR-610	1	0	1	1	1	1	SMAD7	SMAD family member 7
hsa-miR-610	0	0	1	1	0	0	ZNF730	zinc finger protein 730
hsa-miR-610	0	0	1	0	0	0	AGAP9	ArfGAP with GTPase domain, ankyrin repeat and PH domain 9
hsa-miR-610	1	0	1	1	1	1	TAP2	transporter 2, ATP-binding cassette, sub-family B (MDR/TAP)
hsa-miR-610	1	0	1	0	1	1	TMEM106B	transmembrane protein 106B
hsa-miR-610	0	0	1	1	0	0	NEK7	NIMA (never in mitosis gene a)-related kinase 7
hsa-miR-610	0	0	1	1	1	1	GFAP	glial fibrillary acidic protein
hsa-miR-610	0	0	1	1	0	0	H2AFJ	H2A histone family, member J
hsa-miR-610	1	0	1	1	1	1	SLC25A36	solute carrier family 25 (pyrimidine nucleotide carrier ), member 36
hsa-miR-610	0	0	1	1	1	1	SLC30A10	solute carrier family 30, member 10
hsa-miR-610	1	0	1	1	1	1	RNF10	ring finger protein 10
hsa-miR-610	1	0	1	1	1	1	PKNOX2	PBX/knotted 1 homeobox 2
hsa-miR-610	1	0	1	1	1	1	MSANTD2	Myb/SANT-like DNA-binding domain containing 2
hsa-miR-610	1	0	1	1	1	1	SLC30A8	solute carrier family 30 (zinc transporter), member 8
hsa-miR-610	0	0	1	1	1	1	BEND7	BEN domain containing 7
hsa-miR-610	1	0	1	1	1	1	NFX1	nuclear transcription factor, X-box binding 1
hsa-miR-610	1	0	1	1	1	1	RNF180	ring finger protein 180
hsa-miR-610	0	0	1	1	1	1	YAP1	Yes-associated protein 1
hsa-miR-610	1	0	1	1	1	1	DNAJC10	DnaJ (Hsp40) homolog, subfamily C, member 10
hsa-miR-610	1	0	1	1	0	0	PTAR1	protein prenyltransferase alpha subunit repeat containing 1
hsa-miR-610	1	0	1	1	1	1	EHMT1	euchromatic histone-lysine N-methyltransferase 1
hsa-miR-610	1	0	1	1	1	1	POU6F1	POU class 6 homeobox 1
hsa-miR-610	0	0	1	0	0	0	DDX60L	DEAD (Asp-Glu-Ala-Asp) box polypeptide 60-like
hsa-miR-610	0	0	1	1	1	1	CCDC132	coiled-coil domain containing 132
hsa-miR-610	1	0	1	1	1	1	FAM126A	family with sequence similarity 126, member A
hsa-miR-610	0	0	1	1	1	1	NARG2	NMDA receptor regulated 2
hsa-miR-610	1	0	1	1	1	1	ANP32E	acidic (leucine-rich) nuclear phosphoprotein 32 family, member E
hsa-miR-610	1	0	1	1	1	1	IL17RD	interleukin 17 receptor D
hsa-miR-610	1	0	1	1	1	1	ANKRD12	ankyrin repeat domain 12
hsa-miR-610	1	0	1	0	1	1	JAZF1	JAZF zinc finger 1
hsa-miR-610	1	0	1	1	1	1	FBXL5	F-box and leucine-rich repeat protein 5
hsa-miR-610	1	0	1	1	1	1	RNF38	ring finger protein 38
hsa-miR-610	0	0	1	1	1	1	KLHL7	kelch-like 7 (Drosophila)
hsa-miR-610	1	0	1	1	1	1	TACC1	transforming, acidic coiled-coil containing protein 1
hsa-miR-610	0	0	1	0	0	0	GRIK1-AS1	GRIK1 antisense RNA 1
hsa-miR-610	0	0	1	1	1	1	SHPRH	SNF2 histone linker PHD RING helicase, E3 ubiquitin protein ligase
hsa-miR-610	0	0	1	1	1	1	DNAJB14	DnaJ (Hsp40) homolog, subfamily B, member 14
hsa-miR-610	1	0	1	1	1	1	WDR26	WD repeat domain 26
hsa-miR-610	0	0	1	1	1	1	CCDC83	coiled-coil domain containing 83
hsa-miR-610	0	0	1	1	1	1	IYD	iodotyrosine deiodinase
hsa-miR-610	1	0	1	0	1	1	RAB11FIP1	RAB11 family interacting protein 1 (class I)
hsa-miR-610	0	0	1	1	1	1	RAD9B	RAD9 homolog B (S. pombe)
hsa-miR-610	1	0	1	1	1	1	OPRM1	opioid receptor, mu 1
hsa-miR-610	1	0	1	1	1	1	TAB3	TGF-beta activated kinase 1/MAP3K7 binding protein 3
hsa-miR-610	0	0	1	1	1	1	LINGO2	leucine rich repeat and Ig domain containing 2
hsa-miR-610	0	0	1	1	0	0	VSIG4	V-set and immunoglobulin domain containing 4
hsa-miR-610	0	0	1	1	0	0	PDZD11	PDZ domain containing 11
hsa-miR-610	1	0	1	1	1	1	FGD4	FYVE, RhoGEF and PH domain containing 4
hsa-miR-610	1	0	1	0	1	1	ANKRD28	ankyrin repeat domain 28
hsa-miR-610	0	0	1	1	1	1	NYAP1	neuronal tyrosine-phosphorylated phosphoinositide-3-kinase adaptor 1
hsa-miR-610	1	0	1	0	1	1	NHS	Nance-Horan syndrome (congenital cataracts and dental anomalies)
hsa-miR-610	1	0	1	1	1	1	MECP2	methyl CpG binding protein 2 (Rett syndrome)
hsa-miR-610	1	0	1	0	1	1	LRAT	lecithin retinol acyltransferase (phosphatidylcholine--retinol O-acyltransferase)
hsa-miR-610	1	0	1	1	1	1	LAMP2	lysosomal-associated membrane protein 2
hsa-miR-610	0	0	1	0	1	1	RAB18	RAB18, member RAS oncogene family
hsa-miR-610	0	0	1	0	1	1	RASSF8	Ras association (RalGDS/AF-6) domain family (N-terminal) member 8
hsa-miR-610	1	0	1	1	1	1	PLCH1	phospholipase C, eta 1
hsa-miR-610	0	0	1	1	1	1	RHD	Rh blood group, D antigen
hsa-miR-610	1	0	1	1	0	0	TRPC3	transient receptor potential cation channel, subfamily C, member 3
hsa-miR-610	0	0	1	1	0	0	NBPF8	neuroblastoma breakpoint family, member 8
hsa-miR-610	0	0	1	1	1	1	SLC6A2	solute carrier family 6 (neurotransmitter transporter, noradrenalin), member 2
hsa-miR-610	1	0	1	0	1	1	FAM46A	family with sequence similarity 46, member A
hsa-miR-610	0	0	1	1	1	1	SNX11	sorting nexin 11
hsa-miR-610	0	0	1	1	0	0	ANXA5	annexin A5
hsa-miR-610	0	0	1	1	1	1	PAFAH1B2	platelet-activating factor acetylhydrolase 1b, catalytic subunit 2 (30kDa)
hsa-miR-610	1	0	1	1	1	1	RIMS3	regulating synaptic membrane exocytosis 3
hsa-miR-610	1	0	1	1	0	0	DHDDS	dehydrodolichyl diphosphate synthase
hsa-miR-610	0	0	1	0	0	0	DNM1P33	DNM1 pseudogene 33
hsa-miR-610	0	0	1	1	1	1	C1orf94	chromosome 1 open reading frame 94
hsa-miR-610	0	0	1	1	0	0	RBM14	RNA binding motif protein 14
hsa-miR-610	0	0	1	0	0	0	ATXN7L3B	ataxin 7-like 3B
hsa-miR-610	0	0	1	1	0	0	PANK2	pantothenate kinase 2
hsa-miR-610	1	0	1	1	0	0	MARCH9	membrane-associated ring finger (C3HC4) 9
hsa-miR-610	1	0	1	1	1	1	KCTD17	potassium channel tetramerisation domain containing 17
hsa-miR-610	1	0	1	0	1	1	TMEM39A	transmembrane protein 39A
hsa-miR-610	0	0	1	1	1	1	C9orf85	chromosome 9 open reading frame 85
hsa-miR-610	1	0	1	1	1	1	TRIM2	tripartite motif containing 2
hsa-miR-610	0	0	1	1	1	1	PCNP	PEST proteolytic signal containing nuclear protein
hsa-miR-610	0	0	1	0	1	1	AHI1	Abelson helper integration site 1
hsa-miR-610	1	0	1	1	1	1	RAN	RAN, member RAS oncogene family
hsa-miR-610	1	0	1	1	1	1	FAM199X	family with sequence similarity 199, X-linked
hsa-miR-610	0	0	1	0	0	0	FAM86DP	family with sequence similarity 86, member D, pseudogene
hsa-miR-610	1	0	1	0	1	1	CYBRD1	cytochrome b reductase 1
hsa-miR-610	0	0	1	0	0	0	ASH1L-AS1	ASH1L antisense RNA 1
hsa-miR-610	1	0	1	1	1	1	WWC2	WW and C2 domain containing 2
hsa-miR-610	0	0	1	0	0	0	ZNF720	zinc finger protein 720
hsa-miR-610	0	0	1	1	1	1	HIBADH	3-hydroxyisobutyrate dehydrogenase
hsa-miR-610	0	0	1	1	1	1	CDC42SE2	CDC42 small effector 2
hsa-miR-610	1	0	1	0	1	1	CDK19	cyclin-dependent kinase 19
hsa-miR-610	1	0	1	1	1	1	VASP	vasodilator-stimulated phosphoprotein
hsa-miR-610	1	0	1	1	1	1	CNTN4	contactin 4
hsa-miR-610	0	0	1	0	0	0	ZBED3-AS1	ZBED3 antisense RNA 1
hsa-miR-610	0	0	1	1	1	1	RHBDD1	rhomboid domain containing 1
hsa-miR-610	1	0	1	1	1	1	RSPO2	R-spondin 2
hsa-miR-610	1	0	1	1	1	1	HTR2C	5-hydroxytryptamine (serotonin) receptor 2C, G protein-coupled
hsa-miR-610	0	0	1	1	0	0	TOMM5	translocase of outer mitochondrial membrane 5 homolog (yeast)
hsa-miR-610	1	0	1	0	1	1	TFEC	transcription factor EC
hsa-miR-610	0	0	1	1	1	1	CCP110	centriolar coiled coil protein 110kDa
hsa-miR-610	0	0	1	1	1	1	CD48	CD48 molecule
hsa-miR-610	1	0	1	1	1	1	MLLT3	myeloid/lymphoid or mixed-lineage leukemia (trithorax homolog, Drosophila); translocated to, 3
hsa-miR-610	0	0	1	1	0	0	C7orf57	chromosome 7 open reading frame 57
hsa-miR-610	1	0	1	1	1	1	ZPLD1	zona pellucida-like domain containing 1
hsa-miR-610	1	0	1	1	1	1	PDZD2	PDZ domain containing 2
hsa-miR-610	0	0	1	0	1	1	MT1X	metallothionein 1X
hsa-miR-610	0	0	1	0	0	0	LOC643648	uncharacterized LOC643648
hsa-miR-610	0	0	1	0	0	0	FAM86JP	family with sequence similarity 86, member A pseudogene
hsa-miR-610	1	0	1	1	1	1	SIRPA	signal-regulatory protein alpha
hsa-miR-610	1	0	1	1	1	1	HMGCR	3-hydroxy-3-methylglutaryl-CoA reductase
hsa-miR-610	1	0	1	1	1	1	PCDHA5	protocadherin alpha 5
hsa-miR-610	0	0	1	0	1	1	DKFZP434I0714	uncharacterized protein DKFZP434I0714
hsa-miR-610	1	0	1	1	1	1	NKAIN2	Na+/K+ transporting ATPase interacting 2
hsa-miR-610	0	0	1	1	1	1	FAM171B	family with sequence similarity 171, member B
hsa-miR-610	1	0	1	1	1	1	MEIS1	Meis homeobox 1
hsa-miR-610	1	0	1	0	1	1	NEGR1	neuronal growth regulator 1
hsa-miR-610	0	0	1	1	1	1	CELF1	CUGBP, Elav-like family member 1
hsa-miR-610	1	0	1	1	1	1	RNMT	RNA (guanine-7-) methyltransferase
hsa-miR-610	0	0	1	1	1	1	CES5A	carboxylesterase 5A
hsa-miR-610	0	0	1	0	0	0	LOC401074	uncharacterized LOC401074
hsa-miR-610	1	0	1	1	1	1	FOSB	FBJ murine osteosarcoma viral oncogene homolog B
hsa-miR-610	0	0	1	1	1	1	ZFP90	zinc finger protein 90 homolog (mouse)
hsa-miR-610	1	0	1	1	1	1	ARPP21	cAMP-regulated phosphoprotein, 21kDa
hsa-miR-610	1	0	1	0	1	1	HSPA12A	heat shock 70kDa protein 12A
hsa-miR-610	0	0	1	1	1	1	GOLGA6L9	golgin A6 family-like 9
hsa-miR-610	0	0	1	0	0	0	LRRC37BP1	leucine rich repeat containing 37B pseudogene 1
hsa-miR-610	0	0	1	0	0	0	LOC339166	uncharacterized LOC339166
hsa-miR-610	0	0	1	0	0	0	LOC728342	uncharacterized LOC728342
hsa-miR-610	1	0	1	1	1	1	ZFAND4	zinc finger, AN1-type domain 4
hsa-miR-610	0	0	1	1	1	1	DOCK8	dedicator of cytokinesis 8
hsa-miR-610	1	0	1	1	1	1	SLC35G1	solute carrier family 35, member G1
hsa-miR-610	0	0	1	0	0	0	CRYBB2P1	crystallin, beta B2 pseudogene 1
hsa-miR-610	1	0	1	0	1	1	ZNF800	zinc finger protein 800
hsa-miR-610	1	0	1	1	1	1	SMARCE1	SWI/SNF related, matrix associated, actin dependent regulator of chromatin, subfamily e, member 1
hsa-miR-610	1	0	1	1	0	0	EIF2B5	eukaryotic translation initiation factor 2B, subunit 5 epsilon, 82kDa
hsa-miR-610	0	0	1	1	1	1	RHOT1	ras homolog family member T1
hsa-miR-610	1	0	1	1	1	1	PCGF5	polycomb group ring finger 5
hsa-miR-610	0	0	1	0	0	0	LINC00265	long intergenic non-protein coding RNA 265
hsa-miR-610	1	0	1	1	1	1	RCC2	regulator of chromosome condensation 2
hsa-miR-610	0	0	1	1	0	0	C20orf152	chromosome 20 open reading frame 152
hsa-miR-610	1	0	1	1	1	1	KLHL28	kelch-like 28 (Drosophila)
hsa-miR-610	0	0	1	0	1	1	GUCY1B3	guanylate cyclase 1, soluble, beta 3
hsa-miR-610	0	0	1	1	1	1	ABCA9	ATP-binding cassette, sub-family A (ABC1), member 9
hsa-miR-610	0	0	1	1	1	1	SNX5	sorting nexin 5
hsa-miR-610	0	0	1	1	0	0	DHX30	DEAH (Asp-Glu-Ala-His) box polypeptide 30
hsa-miR-610	1	0	1	1	0	0	MANEAL	mannosidase, endo-alpha-like
hsa-miR-610	0	0	1	1	1	1	ATP2A2	ATPase, Ca++ transporting, cardiac muscle, slow twitch 2
hsa-miR-610	1	0	1	1	1	1	ZNF449	zinc finger protein 449
hsa-miR-610	1	0	1	1	1	1	C18orf1	chromosome 18 open reading frame 1
hsa-miR-610	1	0	1	1	1	1	MAPKAPK3	mitogen-activated protein kinase-activated protein kinase 3
hsa-miR-610	1	0	1	1	1	1	TBX2	T-box 2
hsa-miR-610	1	0	1	0	1	1	HMGB3	high mobility group box 3
hsa-miR-610	1	0	1	0	1	1	MAP4K3	mitogen-activated protein kinase kinase kinase kinase 3
hsa-miR-610	1	0	1	1	1	1	RARG	retinoic acid receptor, gamma
hsa-miR-610	1	0	1	1	1	1	C18orf34	chromosome 18 open reading frame 34
hsa-miR-610	0	0	1	0	0	0	LOC150776	sphingomyelin phosphodiesterase 4, neutral membrane (neutral sphingomyelinase-3) pseudogene
hsa-miR-610	1	0	1	0	1	1	PIK3R3	phosphoinositide-3-kinase, regulatory subunit 3 (gamma)
hsa-miR-610	0	0	1	1	1	1	SPRR2A	small proline-rich protein 2A
hsa-miR-610	1	0	1	1	1	1	ACVR2B	activin A receptor, type IIB
hsa-miR-610	1	0	1	0	1	1	MYBL1	v-myb myeloblastosis viral oncogene homolog (avian)-like 1
hsa-miR-610	0	0	1	1	0	0	ECD	ecdysoneless homolog (Drosophila)
hsa-miR-610	1	0	1	0	1	1	VANGL2	vang-like 2 (van gogh, Drosophila)
hsa-miR-610	1	0	1	1	1	1	PTPRD	protein tyrosine phosphatase, receptor type, D
hsa-miR-610	1	0	1	1	1	1	PNISR	PNN-interacting serine/arginine-rich protein
hsa-miR-610	0	0	1	1	1	1	DET1	de-etiolated homolog 1 (Arabidopsis)
hsa-miR-610	0	0	1	1	1	1	TBRG1	transforming growth factor beta regulator 1
hsa-miR-610	1	0	1	0	1	1	BTBD3	BTB (POZ) domain containing 3
hsa-miR-610	0	0	1	0	0	0	FAM86C2P	family with sequence similarity 86, member A pseudogene
hsa-miR-610	1	0	1	1	1	1	HNRNPR	heterogeneous nuclear ribonucleoprotein R
hsa-miR-610	1	0	1	1	1	1	SLK	STE20-like kinase
hsa-miR-610	1	0	1	1	1	1	PAX3	paired box 3
hsa-miR-610	1	0	1	1	0	0	MAPKBP1	mitogen-activated protein kinase binding protein 1
hsa-miR-610	1	0	1	1	0	0	RASGEF1B	RasGEF domain family, member 1B
hsa-miR-610	1	0	1	0	1	1	LRCH2	leucine-rich repeats and calponin homology (CH) domain containing 2
hsa-miR-610	1	0	1	0	1	1	CAMSAP2	calmodulin regulated spectrin-associated protein family, member 2
hsa-miR-610	1	0	1	0	1	1	SEMA4G	sema domain, immunoglobulin domain (Ig), transmembrane domain (TM) and short cytoplasmic domain, (semaphorin) 4G
hsa-miR-610	0	0	1	1	0	0	MILR1	mast cell immunoglobulin-like receptor 1
hsa-miR-610	0	0	1	1	0	0	C5orf60	chromosome 5 open reading frame 60
hsa-miR-610	0	0	1	1	0	0	TCHH	trichohyalin
hsa-miR-610	0	0	1	1	1	1	AGPHD1	aminoglycoside phosphotransferase domain containing 1
hsa-miR-610	0	0	1	1	0	0	CCDC144A	coiled-coil domain containing 144A
hsa-miR-610	1	0	1	1	1	1	CCNK	cyclin K
hsa-miR-610	1	0	1	1	1	1	EIF5	eukaryotic translation initiation factor 5
hsa-miR-610	0	0	1	0	0	0	DKFZp686D0853	uncharacterized LOC401613
hsa-miR-610	0	0	1	0	1	1	AP1S2	adaptor-related protein complex 1, sigma 2 subunit
hsa-miR-610	0	0	1	1	1	1	DSG3	desmoglein 3
hsa-miR-610	1	0	1	0	1	1	C14orf101	chromosome 14 open reading frame 101
hsa-miR-610	0	0	1	0	1	1	THAP6	THAP domain containing 6
hsa-miR-610	1	0	1	1	1	1	KLHL2	kelch-like 2, Mayven (Drosophila)
hsa-miR-610	1	0	1	1	1	1	TSC22D3	TSC22 domain family, member 3
hsa-miR-610	1	0	1	1	1	1	BCLAF1	BCL2-associated transcription factor 1
hsa-miR-610	1	0	1	1	1	1	NAV1	neuron navigator 1
hsa-miR-610	0	0	1	1	1	1	DAZL	deleted in azoospermia-like
hsa-miR-610	1	0	1	1	1	1	PGAP1	post-GPI attachment to proteins 1
hsa-miR-610	0	0	1	0	0	0	ZNRD1-AS1	ZNRD1 antisense RNA 1
hsa-miR-610	0	0	1	1	0	0	NEB	nebulin
hsa-miR-610	1	0	1	1	1	1	LYST	lysosomal trafficking regulator
hsa-miR-610	1	0	1	1	1	1	CREB3L2	cAMP responsive element binding protein 3-like 2
hsa-miR-610	1	0	1	0	1	1	TTL	tubulin tyrosine ligase
hsa-miR-610	1	0	1	1	1	1	SIN3A	SIN3 transcription regulator homolog A (yeast)
hsa-miR-610	0	0	1	0	1	1	CD59	CD59 molecule, complement regulatory protein
hsa-miR-610	0	0	1	1	0	0	PPT2	palmitoyl-protein thioesterase 2
hsa-miR-610	1	0	1	0	1	1	STX6	syntaxin 6
hsa-miR-610	1	0	1	0	0	0	IGLON5	IgLON family member 5
hsa-miR-610	0	0	1	1	0	0	H2AFY2	H2A histone family, member Y2
hsa-miR-610	0	0	1	1	1	1	UPRT	uracil phosphoribosyltransferase (FUR1) homolog (S. cerevisiae)
hsa-miR-610	0	0	1	1	1	1	BTF3	basic transcription factor 3
hsa-miR-610	0	0	1	1	1	1	ADK	adenosine kinase
hsa-miR-610	0	0	1	1	1	1	HSPB8	heat shock 22kDa protein 8
hsa-miR-610	0	0	1	1	1	1	CCDC115	coiled-coil domain containing 115
hsa-miR-610	1	0	1	1	1	1	ADAM9	ADAM metallopeptidase domain 9
hsa-miR-610	0	0	1	1	0	0	WISP2	WNT1 inducible signaling pathway protein 2
hsa-miR-610	1	0	1	1	0	0	PNPLA6	patatin-like phospholipase domain containing 6
hsa-miR-610	1	0	1	1	1	1	KCNIP4	Kv channel interacting protein 4
hsa-miR-610	1	0	1	0	1	1	C15orf41	chromosome 15 open reading frame 41
hsa-miR-610	1	0	1	1	1	1	HN1	hematological and neurological expressed 1
hsa-miR-610	0	0	1	1	1	1	ODC1	ornithine decarboxylase 1
hsa-miR-610	0	0	1	1	1	1	CD1C	CD1c molecule
hsa-miR-610	1	0	1	1	1	1	PFN2	profilin 2
hsa-miR-610	1	0	1	1	1	1	SNX1	sorting nexin 1
hsa-miR-610	0	0	1	1	1	1	STRAP	serine/threonine kinase receptor associated protein
hsa-miR-610	1	0	1	1	0	0	ZCCHC4	zinc finger, CCHC domain containing 4
hsa-miR-610	0	0	1	1	0	0	CLEC1A	C-type lectin domain family 1, member A
hsa-miR-610	0	0	1	1	0	0	ORC3	origin recognition complex, subunit 3
hsa-miR-610	1	0	1	1	1	1	RUNX1	runt-related transcription factor 1
hsa-miR-610	0	0	1	0	1	1	SEPT7	septin 7
hsa-miR-610	0	0	1	1	1	1	ZNF75D	zinc finger protein 75D
hsa-miR-610	0	0	1	0	1	1	TSPAN7	tetraspanin 7
hsa-miR-610	1	0	1	1	1	1	LGALSL	lectin, galactoside-binding-like
hsa-miR-610	1	0	1	1	0	0	MMP11	matrix metallopeptidase 11 (stromelysin 3)
hsa-miR-610	1	0	1	1	1	1	GABPB2	GA binding protein transcription factor, beta subunit 2
hsa-miR-610	1	0	1	0	1	1	KIAA0240	KIAA0240
hsa-miR-610	0	0	1	0	0	0	FAM47E	family with sequence similarity 47, member E
hsa-miR-610	0	0	1	0	0	0	LOC731789	uncharacterized LOC731789
hsa-miR-610	1	0	1	0	1	1	BTRC	beta-transducin repeat containing E3 ubiquitin protein ligase
hsa-miR-610	0	0	1	1	1	1	ATG5	autophagy related 5
hsa-miR-610	1	0	1	0	1	1	XRN1	5'-3' exoribonuclease 1
hsa-miR-610	0	0	1	1	1	1	SDAD1	SDA1 domain containing 1
hsa-miR-610	1	0	1	1	1	1	SLC39A10	solute carrier family 39 (zinc transporter), member 10
hsa-miR-610	1	0	1	1	1	1	ZFHX3	zinc finger homeobox 3
hsa-miR-610	1	0	1	1	1	1	RBPJ	recombination signal binding protein for immunoglobulin kappa J region
hsa-miR-610	1	0	1	1	1	1	ITSN1	intersectin 1 (SH3 domain protein)
hsa-miR-610	0	0	1	0	0	0	POM121L8P	POM121 transmembrane nucleoporin-like 8 pseudogene
hsa-miR-610	0	0	1	1	1	1	SCIN	scinderin
hsa-miR-610	1	0	1	1	1	1	CDC27	cell division cycle 27 homolog (S. cerevisiae)
hsa-miR-610	1	0	1	1	1	1	DAPK1	death-associated protein kinase 1
hsa-miR-610	0	0	1	1	1	1	ADPRH	ADP-ribosylarginine hydrolase
hsa-miR-610	1	0	1	1	1	1	AFF1	AF4/FMR2 family, member 1
hsa-miR-610	1	0	1	0	1	1	BCL2	B-cell CLL/lymphoma 2
hsa-miR-610	1	0	1	1	1	1	IGF1	insulin-like growth factor 1 (somatomedin C)
hsa-miR-610	1	0	1	1	1	1	DMD	dystrophin
hsa-miR-610	0	0	1	1	1	1	DPYD	dihydropyrimidine dehydrogenase
hsa-miR-610	1	0	1	1	1	1	FBN1	fibrillin 1
hsa-miR-610	1	0	1	1	1	1	KCNA1	potassium voltage-gated channel, shaker-related subfamily, member 1 (episodic ataxia with myokymia)
hsa-miR-610	0	0	1	1	1	1	MAOA	monoamine oxidase A
hsa-miR-610	1	0	1	1	1	1	MITF	microphthalmia-associated transcription factor
hsa-miR-610	0	0	1	1	1	1	NDP	Norrie disease (pseudoglioma)
hsa-miR-610	1	0	1	1	1	1	TIMP3	TIMP metallopeptidase inhibitor 3
hsa-miR-610	0	0	1	0	1	1	GNRHR	gonadotropin-releasing hormone receptor
hsa-miR-610	1	0	1	0	1	1	PAFAH1B1	platelet-activating factor acetylhydrolase 1b, regulatory subunit 1 (45kDa)
hsa-miR-610	0	0	1	1	1	1	MC2R	melanocortin 2 receptor (adrenocorticotropic hormone)
hsa-miR-610	0	0	1	1	1	1	FCGR1A	Fc fragment of IgG, high affinity Ia, receptor (CD64)
hsa-miR-610	0	0	1	1	0	0	IL1B	interleukin 1, beta
hsa-miR-610	1	0	1	1	1	1	CD44	CD44 molecule (Indian blood group)
hsa-miR-610	0	0	1	1	1	1	ALDH1A1	aldehyde dehydrogenase 1 family, member A1
hsa-miR-610	1	0	1	1	1	1	CACNA2D1	calcium channel, voltage-dependent, alpha 2/delta subunit 1
hsa-miR-610	1	0	1	1	1	1	CACNB4	calcium channel, voltage-dependent, beta 4 subunit
hsa-miR-610	0	0	1	1	1	1	CGA	glycoprotein hormones, alpha polypeptide
hsa-miR-610	0	0	1	1	1	1	DIO1	deiodinase, iodothyronine, type I
hsa-miR-610	1	0	1	1	1	1	FKBP1A	FK506 binding protein 1A, 12kDa
hsa-miR-610	1	0	1	1	1	1	GABRG2	gamma-aminobutyric acid (GABA) A receptor, gamma 2
hsa-miR-610	1	0	1	1	1	1	GRM8	glutamate receptor, metabotropic 8
hsa-miR-610	0	0	1	1	1	1	PTGS2	prostaglandin-endoperoxide synthase 2 (prostaglandin G/H synthase and cyclooxygenase)
hsa-miR-610	1	0	1	0	1	1	SMAD5	SMAD family member 5
hsa-miR-610	1	0	1	1	0	0	AWAT2	acyl-CoA wax alcohol acyltransferase 2
hsa-miR-610	1	0	1	1	1	1	WNK3	WNK lysine deficient protein kinase 3
hsa-miR-610	0	0	1	1	1	1	POTEA	POTE ankyrin domain family, member A
hsa-miR-610	0	0	1	1	1	1	DBX2	developing brain homeobox 2
hsa-miR-610	0	0	1	1	1	1	FRG2	FSHD region gene 2
hsa-miR-610	1	0	1	1	1	1	NFKBIZ	nuclear factor of kappa light polypeptide gene enhancer in B-cells inhibitor, zeta
hsa-miR-610	1	0	1	1	0	0	RPS6KA1	ribosomal protein S6 kinase, 90kDa, polypeptide 1
hsa-miR-610	1	0	1	0	1	1	GOSR1	golgi SNAP receptor complex member 1
hsa-miR-610	1	0	1	1	1	1	BRWD1	bromodomain and WD repeat domain containing 1
hsa-miR-610	1	0	1	0	1	1	CPLX2	complexin 2
hsa-miR-610	1	0	1	1	1	1	RBM33	RNA binding motif protein 33
hsa-miR-610	0	0	1	1	1	1	GEMIN2	gem (nuclear organelle) associated protein 2
hsa-miR-610	1	0	1	0	1	1	ERMN	ermin, ERM-like protein
hsa-miR-610	0	0	1	1	1	1	MUC21	mucin 21, cell surface associated
hsa-miR-610	1	0	1	0	1	1	CREB5	cAMP responsive element binding protein 5
hsa-miR-610	0	0	1	1	1	1	C9orf152	chromosome 9 open reading frame 152
hsa-miR-610	1	0	1	1	1	1	KATNAL1	katanin p60 subunit A-like 1
hsa-miR-610	0	0	1	1	1	1	USP1	ubiquitin specific peptidase 1
hsa-miR-610	1	0	1	1	1	1	SH3PXD2B	SH3 and PX domains 2B
hsa-miR-610	1	0	1	1	1	1	NTRK2	neurotrophic tyrosine kinase, receptor, type 2
hsa-miR-610	0	0	1	1	1	1	MURC	muscle-related coiled-coil protein
hsa-miR-610	1	0	1	1	1	1	SBK1	SH3-binding domain kinase 1
hsa-miR-610	1	0	1	0	1	1	TNRC6B	trinucleotide repeat containing 6B
hsa-miR-610	0	0	1	1	1	1	WASF1	WAS protein family, member 1
hsa-miR-610	1	0	1	1	1	1	TPD52	tumor protein D52
hsa-miR-610	1	0	1	0	1	1	C3orf70	chromosome 3 open reading frame 70
hsa-miR-610	1	0	1	1	1	1	RGS7BP	regulator of G-protein signaling 7 binding protein
hsa-miR-610	1	0	1	1	1	1	SRSF7	serine/arginine-rich splicing factor 7
hsa-miR-610	0	0	1	0	1	1	STXBP1	syntaxin binding protein 1
hsa-miR-610	1	0	1	1	1	1	RCE1	RCE1 homolog, prenyl protein protease (S. cerevisiae)
hsa-miR-610	1	0	1	1	1	1	TFAP2A	transcription factor AP-2 alpha (activating enhancer binding protein 2 alpha)
hsa-miR-610	1	0	1	1	1	1	TMPO	thymopoietin
hsa-miR-610	1	0	1	1	1	1	UBE2V1	ubiquitin-conjugating enzyme E2 variant 1
hsa-miR-610	1	0	1	1	1	1	SAR1B	SAR1 homolog B (S. cerevisiae)
hsa-miR-610	1	0	1	1	1	1	TMEM98	transmembrane protein 98
hsa-miR-610	1	0	1	1	1	1	PPM1B	protein phosphatase, Mg2+/Mn2+ dependent, 1B
hsa-miR-610	1	0	1	1	1	1	KIAA0317	KIAA0317
hsa-miR-610	0	0	1	1	1	1	MAP9	microtubule-associated protein 9
hsa-miR-610	1	0	1	1	1	1	ZNF384	zinc finger protein 384
hsa-miR-610	1	0	1	0	1	1	FAM133B	family with sequence similarity 133, member B
hsa-miR-610	0	0	1	0	1	1	STEAP2	STEAP family member 2, metalloreductase
hsa-miR-610	1	0	1	1	1	1	GDAP1	ganglioside induced differentiation associated protein 1
hsa-miR-610	1	0	1	1	1	1	FRS2	fibroblast growth factor receptor substrate 2
hsa-miR-610	1	0	1	0	1	1	TMEM237	transmembrane protein 237
hsa-miR-610	1	0	1	1	1	1	QSER1	glutamine and serine rich 1
hsa-miR-610	1	0	1	1	1	1	ZNF436	zinc finger protein 436
hsa-miR-610	1	0	1	1	1	1	ATG9A	autophagy related 9A
hsa-miR-610	1	0	1	1	1	1	PHF16	PHD finger protein 16
hsa-miR-610	1	0	1	1	1	1	ZNF697	zinc finger protein 697
hsa-miR-610	0	0	1	0	1	1	RBM44	RNA binding motif protein 44
hsa-miR-610	1	0	1	1	1	1	ADAM10	ADAM metallopeptidase domain 10
hsa-miR-610	0	0	1	1	0	0	NUDT2	nudix (nucleoside diphosphate linked moiety X)-type motif 2
hsa-miR-610	1	0	1	0	1	1	BMPR2	bone morphogenetic protein receptor, type II (serine/threonine kinase)
hsa-miR-610	1	0	1	0	1	1	KLF9	Kruppel-like factor 9
hsa-miR-610	1	0	1	0	1	1	CPD	carboxypeptidase D
hsa-miR-610	1	0	1	1	1	1	CREBL2	cAMP responsive element binding protein-like 2
hsa-miR-610	0	0	1	0	1	1	EMP1	epithelial membrane protein 1
hsa-miR-610	1	0	1	0	1	1	B4GALT1	UDP-Gal:betaGlcNAc beta 1,4- galactosyltransferase, polypeptide 1
hsa-miR-610	0	0	1	1	0	0	ACRV1	acrosomal vesicle protein 1
hsa-miR-610	1	0	1	1	1	1	COL4A6	collagen, type IV, alpha 6
hsa-miR-610	1	0	1	1	1	1	CSNK2A1	casein kinase 2, alpha 1 polypeptide
hsa-miR-610	1	0	1	1	0	0	DES	desmin
hsa-miR-610	0	0	1	1	1	1	DLAT	dihydrolipoamide S-acetyltransferase
hsa-miR-610	1	0	1	1	1	1	GAB1	GRB2-associated binding protein 1
hsa-miR-610	1	0	1	0	1	1	GNAI1	guanine nucleotide binding protein (G protein), alpha inhibiting activity polypeptide 1
hsa-miR-610	0	0	1	1	0	0	IDH2	isocitrate dehydrogenase 2 (NADP+), mitochondrial
hsa-miR-610	1	0	1	1	1	1	INSM1	insulinoma-associated 1
hsa-miR-610	1	0	1	1	1	1	ITPKB	inositol-trisphosphate 3-kinase B
hsa-miR-610	1	0	1	1	1	1	ITPR2	inositol 1,4,5-trisphosphate receptor, type 2
hsa-miR-610	1	0	1	1	1	1	KCNA6	potassium voltage-gated channel, shaker-related subfamily, member 6
hsa-miR-610	1	0	1	1	1	1	MAN2A1	mannosidase, alpha, class 2A, member 1
hsa-miR-610	1	0	1	1	1	1	SCGB2A1	secretoglobin, family 2A, member 1
hsa-miR-610	1	0	1	1	0	0	SCGB2A2	secretoglobin, family 2A, member 2
hsa-miR-610	1	0	1	1	1	1	MSN	moesin
hsa-miR-610	1	0	1	1	1	1	NPTX1	neuronal pentraxin I
hsa-miR-610	1	0	1	0	1	1	CDK17	cyclin-dependent kinase 17
hsa-miR-610	1	0	1	1	1	1	PLAGL2	pleiomorphic adenoma gene-like 2
hsa-miR-610	0	0	1	0	0	0	PSMB10	proteasome (prosome, macropain) subunit, beta type, 10
hsa-miR-610	1	0	1	1	1	1	RBL1	retinoblastoma-like 1 (p107)
hsa-miR-610	0	0	1	1	1	1	RFC3	replication factor C (activator 1) 3, 38kDa
hsa-miR-610	0	0	1	1	1	1	RNASE4	ribonuclease, RNase A family, 4
hsa-miR-610	1	0	1	1	1	1	ROBO2	roundabout, axon guidance receptor, homolog 2 (Drosophila)
hsa-miR-610	1	0	1	0	1	1	SORT1	sortilin 1
hsa-miR-610	0	0	1	1	1	1	CXCL6	chemokine (C-X-C motif) ligand 6 (granulocyte chemotactic protein 2)
hsa-miR-610	0	0	1	1	1	1	SDC4	syndecan 4
hsa-miR-610	0	0	1	1	1	1	SELP	selectin P (granule membrane protein 140kDa, antigen CD62)
hsa-miR-610	1	0	1	0	1	1	SFRP1	secreted frizzled-related protein 1
hsa-miR-610	1	0	1	0	1	1	SLC6A1	solute carrier family 6 (neurotransmitter transporter, GABA), member 1
hsa-miR-610	1	0	1	1	1	1	SMARCC1	SWI/SNF related, matrix associated, actin dependent regulator of chromatin, subfamily c, member 1
hsa-miR-610	0	0	1	1	1	1	STRN	striatin, calmodulin binding protein
hsa-miR-610	0	0	1	1	1	1	SULT2A1	sulfotransferase family, cytosolic, 2A, dehydroepiandrosterone (DHEA)-preferring, member 1
hsa-miR-610	1	0	1	1	1	1	SVIL	supervillin
hsa-miR-610	0	0	1	1	1	1	TAF2	TAF2 RNA polymerase II, TATA box binding protein (TBP)-associated factor, 150kDa
hsa-miR-610	1	0	1	1	1	1	TAF4	TAF4 RNA polymerase II, TATA box binding protein (TBP)-associated factor, 135kDa
hsa-miR-610	1	0	1	1	1	1	NR2C2	nuclear receptor subfamily 2, group C, member 2
hsa-miR-610	0	0	1	1	1	1	UBE2D1	ubiquitin-conjugating enzyme E2D 1
hsa-miR-610	1	0	1	0	1	1	VCL	vinculin
hsa-miR-610	0	0	1	1	1	1	XPNPEP2	X-prolyl aminopeptidase (aminopeptidase P) 2, membrane-bound
hsa-miR-610	0	0	1	1	1	1	ZNF137P	zinc finger protein 137, pseudogene
hsa-miR-610	1	0	1	1	1	1	PDHX	pyruvate dehydrogenase complex, component X
hsa-miR-610	1	0	1	1	1	1	EEA1	early endosome antigen 1
hsa-miR-610	1	0	1	0	1	1	CNTNAP1	contactin associated protein 1
hsa-miR-610	1	0	1	1	1	1	BARX2	BARX homeobox 2
hsa-miR-610	0	0	1	1	1	1	FAM193A	family with sequence similarity 193, member A
hsa-miR-610	0	0	1	1	0	0	EIF4EBP3	eukaryotic translation initiation factor 4E binding protein 3
hsa-miR-610	1	0	1	0	1	1	TNKS	tankyrase, TRF1-interacting ankyrin-related ADP-ribose polymerase
hsa-miR-610	1	0	1	1	1	1	RIOK3	RIO kinase 3 (yeast)
hsa-miR-610	1	0	1	1	1	1	BCL2L2	BCL2-like 2
hsa-miR-610	1	0	1	0	1	1	PLK3	polo-like kinase 3
hsa-miR-610	1	0	1	0	1	1	DGKB	diacylglycerol kinase, beta 90kDa
hsa-miR-610	1	0	1	0	1	1	SLC1A2	solute carrier family 1 (glial high affinity glutamate transporter), member 2
hsa-miR-610	1	0	1	1	1	1	GDA	guanine deaminase
hsa-miR-610	1	0	1	1	1	1	ARL3	ADP-ribosylation factor-like 3
hsa-miR-610	1	0	1	1	1	1	BNIP2	BCL2/adenovirus E1B 19kDa interacting protein 2
hsa-miR-610	0	0	1	1	1	1	CBLN1	cerebellin 1 precursor
hsa-miR-610	1	0	1	1	1	1	DACH1	dachshund homolog 1 (Drosophila)
hsa-miR-610	1	0	1	1	1	1	DAG1	dystroglycan 1 (dystrophin-associated glycoprotein 1)
hsa-miR-610	0	0	1	1	1	1	GPC5	glypican 5
hsa-miR-610	1	0	1	1	1	1	ONECUT1	one cut homeobox 1
hsa-miR-610	1	0	1	0	1	1	PKNOX1	PBX/knotted 1 homeobox 1
hsa-miR-610	0	0	1	1	1	1	PABPN1	poly(A) binding protein, nuclear 1
hsa-miR-610	0	0	1	0	1	1	CXorf1	chromosome X open reading frame 1
hsa-miR-610	0	0	1	1	1	1	BUB3	budding uninhibited by benzimidazoles 3 homolog (yeast)
hsa-miR-610	1	0	1	1	1	1	STK17A	serine/threonine kinase 17a
hsa-miR-610	1	0	1	1	1	1	KCNB2	potassium voltage-gated channel, Shab-related subfamily, member 2
hsa-miR-610	1	0	1	1	1	1	GABRE	gamma-aminobutyric acid (GABA) A receptor, epsilon
hsa-miR-610	0	0	1	1	1	1	JAK2	Janus kinase 2
hsa-miR-610	1	0	1	0	1	1	KRAS	v-Ki-ras2 Kirsten rat sarcoma viral oncogene homolog
hsa-miR-610	1	0	1	1	1	1	ATXN3	ataxin 3
hsa-miR-610	0	0	1	1	0	0	NUCB2	nucleobindin 2
hsa-miR-610	1	0	1	1	1	1	KDM5A	lysine (K)-specific demethylase 5A
hsa-miR-610	1	0	1	0	1	1	SCD	stearoyl-CoA desaturase (delta-9-desaturase)
hsa-miR-610	1	0	1	0	1	1	SEL1L	sel-1 suppressor of lin-12-like (C. elegans)
hsa-miR-610	1	0	1	1	0	0	ZMYM3	zinc finger, MYM-type 3
hsa-miR-610	1	0	1	1	1	1	ELK3	ELK3, ETS-domain protein (SRF accessory protein 2)
hsa-miR-610	1	0	1	1	1	1	GAS2	growth arrest-specific 2
hsa-miR-610	1	0	1	0	1	1	CCDC6	coiled-coil domain containing 6
hsa-miR-610	1	0	1	1	1	1	SCARB2	scavenger receptor class B, member 2
hsa-miR-610	0	0	1	1	0	0	HMX2	H6 family homeobox 2
hsa-miR-610	1	0	1	1	1	1	HOXA1	homeobox A1
hsa-miR-610	1	0	1	1	1	1	HOXA11	homeobox A11
hsa-miR-610	1	0	1	1	1	1	LNPEP	leucyl/cystinyl aminopeptidase
hsa-miR-610	1	0	1	1	1	1	RGS4	regulator of G-protein signaling 4
hsa-miR-610	1	0	1	1	1	1	ST8SIA4	ST8 alpha-N-acetyl-neuraminide alpha-2,8-sialyltransferase 4
hsa-miR-610	0	0	1	1	1	1	GPR52	G protein-coupled receptor 52
hsa-miR-610	1	0	1	1	1	1	ARPC5	actin related protein 2/3 complex, subunit 5, 16kDa
hsa-miR-610	1	0	1	0	1	1	TSPAN2	tetraspanin 2
hsa-miR-610	1	0	1	1	1	1	NAMPT	nicotinamide phosphoribosyltransferase
hsa-miR-610	0	0	1	1	1	1	RNF41	ring finger protein 41
hsa-miR-610	1	0	1	1	1	1	SRRM1	serine/arginine repetitive matrix 1
hsa-miR-610	1	0	1	0	1	1	SPRY3	sprouty homolog 3 (Drosophila)
hsa-miR-610	1	0	1	1	1	1	EFS	embryonal Fyn-associated substrate
hsa-miR-610	1	0	1	0	1	1	NAB1	NGFI-A binding protein 1 (EGR1 binding protein 1)
hsa-miR-610	1	0	1	1	1	1	RNF6	ring finger protein (C3H2C3 type) 6
hsa-miR-610	1	0	1	1	1	1	TSNAX	translin-associated factor X
hsa-miR-610	0	0	1	1	1	1	KRT1	keratin 1
hsa-miR-610	1	0	1	1	1	1	CAPZA2	capping protein (actin filament) muscle Z-line, alpha 2
hsa-miR-610	0	0	1	0	1	1	OAS3	2'-5'-oligoadenylate synthetase 3, 100kDa
hsa-miR-610	1	0	1	0	1	1	PITPNA	phosphatidylinositol transfer protein, alpha
hsa-miR-610	1	0	1	1	1	1	PPP2R5E	protein phosphatase 2, regulatory subunit B', epsilon isoform
hsa-miR-610	1	0	1	1	1	1	BASP1	brain abundant, membrane attached signal protein 1
hsa-miR-610	1	0	1	0	1	1	APPBP2	amyloid beta precursor protein (cytoplasmic tail) binding protein 2
hsa-miR-610	1	0	1	1	1	1	PAIP1	poly(A) binding protein interacting protein 1
hsa-miR-610	0	0	1	0	1	1	SLC16A2	solute carrier family 16, member 2 (thyroid hormone transporter)
hsa-miR-610	1	0	1	1	1	1	DYNLT3	dynein, light chain, Tctex-type 3
hsa-miR-610	1	0	1	1	1	1	ELL	elongation factor RNA polymerase II
hsa-miR-610	1	0	1	0	1	1	IGF2BP1	insulin-like growth factor 2 mRNA binding protein 1
hsa-miR-610	0	0	1	1	1	1	TBR1	T-box, brain, 1
hsa-miR-610	1	0	1	1	1	1	MMP24	matrix metallopeptidase 24 (membrane-inserted)
hsa-miR-610	0	0	1	1	0	0	PIM2	pim-2 oncogene
hsa-miR-610	1	0	1	1	1	1	B3GNT1	UDP-GlcNAc:betaGal beta-1,3-N-acetylglucosaminyltransferase 1
hsa-miR-610	0	0	1	1	1	1	TAF5	TAF5 RNA polymerase II, TATA box binding protein (TBP)-associated factor, 100kDa
hsa-miR-610	1	0	1	0	1	1	WASF2	WAS protein family, member 2
hsa-miR-610	1	0	1	1	1	1	ZNF81	zinc finger protein 81
hsa-miR-610	0	0	1	0	1	1	ZXDB	zinc finger, X-linked, duplicated B
hsa-miR-610	1	0	1	0	1	1	PRSS23	protease, serine, 23
hsa-miR-610	1	0	1	0	1	1	CHP1	calcineurin-like EF hand protein 1
hsa-miR-610	1	0	1	1	1	1	KLF12	Kruppel-like factor 12
hsa-miR-610	0	0	1	1	1	1	ATF5	activating transcription factor 5
hsa-miR-610	1	0	1	1	1	1	ICOS	inducible T-cell co-stimulator
hsa-miR-610	1	0	1	1	1	1	APPL1	adaptor protein, phosphotyrosine interaction, PH domain and leucine zipper containing 1
hsa-miR-610	1	0	1	0	1	1	CASP8AP2	caspase 8 associated protein 2
hsa-miR-610	0	0	1	1	1	1	FAM50B	family with sequence similarity 50, member B
hsa-miR-610	1	0	1	1	1	1	RHOQ	ras homolog family member Q
hsa-miR-610	1	0	1	1	1	1	KCND2	potassium voltage-gated channel, Shal-related subfamily, member 2
hsa-miR-610	1	0	1	0	1	1	FBXL7	F-box and leucine-rich repeat protein 7
hsa-miR-610	0	0	1	0	1	1	PITPNC1	phosphatidylinositol transfer protein, cytoplasmic 1
hsa-miR-610	0	0	1	1	1	1	IFIT5	interferon-induced protein with tetratricopeptide repeats 5
hsa-miR-610	1	0	1	1	1	1	TLL2	tolloid-like 2
hsa-miR-610	0	0	1	1	1	1	CD24	CD24 molecule
hsa-miR-610	1	0	1	1	1	1	STK39	serine threonine kinase 39
hsa-miR-610	1	0	1	1	0	0	SNX15	sorting nexin 15
hsa-miR-610	0	0	1	0	1	1	EMR2	egf-like module containing, mucin-like, hormone receptor-like 2
hsa-miR-610	0	0	1	1	1	1	CCDC113	coiled-coil domain containing 113
hsa-miR-610	1	0	1	0	1	1	ODZ1	odz, odd Oz/ten-m homolog 1 (Drosophila)
hsa-miR-610	1	0	1	1	1	1	C11orf58	chromosome 11 open reading frame 58
hsa-miR-610	0	0	1	1	1	1	CAPN6	calpain 6
hsa-miR-610	0	0	1	0	1	1	VPS41	vacuolar protein sorting 41 homolog (S. cerevisiae)
hsa-miR-610	1	0	1	1	1	1	ZNF592	zinc finger protein 592
hsa-miR-610	1	0	1	1	1	1	RALGPS1	Ral GEF with PH domain and SH3 binding motif 1
hsa-miR-610	1	0	1	0	1	1	EDEM1	ER degradation enhancer, mannosidase alpha-like 1
hsa-miR-610	0	0	1	1	1	1	SART3	squamous cell carcinoma antigen recognized by T cells 3
hsa-miR-610	1	0	1	0	1	1	LPPR4	lipid phosphate phosphatase-related protein type 4
hsa-miR-610	1	0	1	1	1	1	NUAK1	NUAK family, SNF1-like kinase, 1
hsa-miR-610	0	0	1	0	1	1	PPM1E	protein phosphatase, Mg2+/Mn2+ dependent, 1E
hsa-miR-610	1	0	1	0	1	1	PDS5B	PDS5, regulator of cohesion maintenance, homolog B (S. cerevisiae)
hsa-miR-610	1	0	1	0	1	1	ZNF609	zinc finger protein 609
hsa-miR-610	0	0	1	1	1	1	ARL6IP1	ADP-ribosylation factor-like 6 interacting protein 1
hsa-miR-610	1	0	1	0	1	1	KIAA1024	KIAA1024
hsa-miR-610	0	0	1	1	1	1	NBPF14	neuroblastoma breakpoint family, member 14
hsa-miR-610	0	0	1	1	1	1	ZNF10	zinc finger protein 10
hsa-miR-610	1	0	1	0	1	1	RRM2B	ribonucleotide reductase M2 B (TP53 inducible)
hsa-miR-610	1	0	1	1	1	1	FGFR1	fibroblast growth factor receptor 1
hsa-miR-610	1	0	1	1	1	1	TAF9B	TAF9B RNA polymerase II, TATA box binding protein (TBP)-associated factor, 31kDa
hsa-miR-610	1	0	1	1	1	1	PHF20L1	PHD finger protein 20-like 1
hsa-miR-610	1	0	1	1	1	1	SLMO2	slowmo homolog 2 (Drosophila)
hsa-miR-610	1	0	1	1	1	1	NLK	nemo-like kinase
hsa-miR-610	0	0	1	1	1	1	TRAT1	T cell receptor associated transmembrane adaptor 1
hsa-miR-610	1	0	1	1	1	1	VTA1	Vps20-associated 1 homolog (S. cerevisiae)
hsa-miR-610	1	0	1	0	1	1	RAB8B	RAB8B, member RAS oncogene family
hsa-miR-610	1	0	1	1	1	1	SIX4	SIX homeobox 4
hsa-miR-610	1	0	1	1	1	1	GALNT7	UDP-N-acetyl-alpha-D-galactosamine:polypeptide N-acetylgalactosaminyltransferase 7 (GalNAc-T7)
hsa-miR-610	1	0	1	1	1	1	CPSF2	cleavage and polyadenylation specific factor 2, 100kDa
hsa-miR-610	0	0	1	0	1	1	GIPC2	GIPC PDZ domain containing family, member 2
hsa-miR-610	1	0	1	0	1	1	FAM46C	family with sequence similarity 46, member C
hsa-miR-610	0	0	1	0	1	1	THUMPD1	THUMP domain containing 1
hsa-miR-610	0	0	1	1	1	1	ACSM5	acyl-CoA synthetase medium-chain family member 5
hsa-miR-610	1	0	1	0	1	1	MSL2	male-specific lethal 2 homolog (Drosophila)
hsa-miR-610	0	0	1	1	1	1	NUDT11	nudix (nucleoside diphosphate linked moiety X)-type motif 11
hsa-miR-610	1	0	1	1	1	1	RPRD1A	regulation of nuclear pre-mRNA domain containing 1A
hsa-miR-610	0	0	1	0	1	1	FAM86C1	family with sequence similarity 86, member C1
hsa-miR-610	1	0	1	1	1	1	PI4K2B	phosphatidylinositol 4-kinase type 2 beta
hsa-miR-610	0	0	1	1	1	1	TMEM144	transmembrane protein 144
hsa-miR-610	1	0	1	0	1	1	LIN7C	lin-7 homolog C (C. elegans)
hsa-miR-610	1	0	1	1	1	1	RSBN1	round spermatid basic protein 1
hsa-miR-610	1	0	1	1	1	1	ACER3	alkaline ceramidase 3
hsa-miR-610	1	0	1	0	1	1	FOXJ2	forkhead box J2
hsa-miR-610	0	0	1	1	1	1	SLC22A15	solute carrier family 22, member 15
hsa-miR-610	0	0	1	1	1	1	GOLGA6B	golgin A6 family, member B
hsa-miR-610	1	0	1	1	1	1	CTTNBP2NL	CTTNBP2 N-terminal like
hsa-miR-610	0	0	1	1	1	1	DHTKD1	dehydrogenase E1 and transketolase domain containing 1
hsa-miR-610	1	0	1	0	1	1	PCDHAC1	protocadherin alpha subfamily C, 1
hsa-miR-610	1	0	1	0	1	1	PCDHAC2	protocadherin alpha subfamily C, 2
hsa-miR-610	1	0	1	1	1	1	PCDHA1	protocadherin alpha 1
hsa-miR-610	1	0	1	0	1	1	PCDHA10	protocadherin alpha 10
hsa-miR-610	1	0	1	0	1	1	PCDHA11	protocadherin alpha 11
hsa-miR-610	1	0	1	0	1	1	PCDHA12	protocadherin alpha 12
hsa-miR-610	1	0	1	1	1	1	PCDHA2	protocadherin alpha 2
hsa-miR-610	1	0	1	1	1	1	PCDHA3	protocadherin alpha 3
hsa-miR-610	1	0	1	1	1	1	PCDHA6	protocadherin alpha 6
hsa-miR-610	1	0	1	0	1	1	PCDHA7	protocadherin alpha 7
hsa-miR-610	1	0	1	1	1	1	PCDHA8	protocadherin alpha 8
hsa-miR-610	1	0	1	1	0	0	HOXB6	homeobox B6
hsa-miR-610	0	0	1	0	1	1	C11orf71	chromosome 11 open reading frame 71
hsa-miR-610	1	0	1	0	1	1	CCDC93	coiled-coil domain containing 93
hsa-miR-610	1	0	1	0	1	1	UBFD1	ubiquitin family domain containing 1
hsa-miR-610	1	0	1	1	1	1	SERTAD4	SERTA domain containing 4
hsa-miR-610	1	0	1	1	1	1	POLE4	polymerase (DNA-directed), epsilon 4, accessory subunit
hsa-miR-610	0	0	1	0	1	1	ZC3HAV1	zinc finger CCCH-type, antiviral 1
hsa-miR-610	1	0	1	1	1	1	FEM1C	fem-1 homolog c (C. elegans)
hsa-miR-610	1	0	1	1	1	1	CCDC47	coiled-coil domain containing 47
hsa-miR-610	1	0	1	0	1	1	MNT	MAX binding protein
hsa-miR-610	0	0	1	1	1	1	PDSS2	prenyl (decaprenyl) diphosphate synthase, subunit 2
hsa-miR-610	1	0	1	0	1	1	EIF5A2	eukaryotic translation initiation factor 5A2
hsa-miR-610	1	0	1	1	1	1	PTGFRN	prostaglandin F2 receptor negative regulator
hsa-miR-610	1	0	1	1	1	1	LYRM2	LYR motif containing 2
hsa-miR-610	1	0	1	0	1	1	DCUN1D1	DCN1, defective in cullin neddylation 1, domain containing 1 (S. cerevisiae)
hsa-miR-610	0	0	1	0	1	1	TWSG1	twisted gastrulation homolog 1 (Drosophila)
hsa-miR-610	1	0	1	1	0	0	JPH3	junctophilin 3
hsa-miR-610	0	0	1	0	1	1	ZNF490	zinc finger protein 490
hsa-miR-610	0	0	1	1	1	1	SHROOM4	shroom family member 4
hsa-miR-610	1	0	1	1	1	1	CNTN3	contactin 3 (plasmacytoma associated)
hsa-miR-610	1	0	1	1	1	1	FAM160B1	family with sequence similarity 160, member B1
hsa-miR-610	0	0	1	1	1	1	AQP9	aquaporin 9
hsa-miR-610	1	0	1	1	1	1	SNTB1	syntrophin, beta 1 (dystrophin-associated protein A1, 59kDa, basic component 1)
hsa-miR-610	1	0	1	0	1	1	RAP2A	RAP2A, member of RAS oncogene family
hsa-miR-610	1	0	1	1	1	1	ZNFX1	zinc finger, NFX1-type containing 1
hsa-miR-610	1	0	1	1	1	1	HCN1	hyperpolarization activated cyclic nucleotide-gated potassium channel 1
hsa-miR-610	1	0	1	1	1	1	MTMR3	myotubularin related protein 3
hsa-miR-610	0	0	1	0	1	1	MS4A7	membrane-spanning 4-domains, subfamily A, member 7
hsa-miR-610	1	0	1	0	1	1	TP53INP2	tumor protein p53 inducible nuclear protein 2
hsa-miR-610	1	0	1	1	1	1	SENP2	SUMO1/sentrin/SMT3 specific peptidase 2
hsa-miR-610	1	0	1	0	1	1	GAN	gigaxonin
hsa-miR-610	0	0	1	1	1	1	RAB38	RAB38, member RAS oncogene family
hsa-miR-610	1	0	1	1	1	1	NDRG3	NDRG family member 3
hsa-miR-610	0	0	1	1	1	1	ACBD3	acyl-CoA binding domain containing 3
hsa-miR-610	1	0	1	1	1	1	S100PBP	S100P binding protein
hsa-miR-610	1	0	1	1	1	1	RMND5A	required for meiotic nuclear division 5 homolog A (S. cerevisiae)
hsa-miR-610	0	0	1	0	1	1	FUNDC2	FUN14 domain containing 2
hsa-miR-610	1	0	1	1	1	1	EBF1	early B-cell factor 1
hsa-miR-610	0	0	1	1	1	1	PLA2G4A	phospholipase A2, group IVA (cytosolic, calcium-dependent)
hsa-miR-610	1	0	1	1	1	1	LRRC2	leucine rich repeat containing 2
hsa-miR-610	1	0	1	1	1	1	C10orf76	chromosome 10 open reading frame 76
hsa-miR-610	1	0	1	1	1	1	PANK3	pantothenate kinase 3
hsa-miR-610	0	0	1	1	1	1	GALNT12	UDP-N-acetyl-alpha-D-galactosamine:polypeptide N-acetylgalactosaminyltransferase 12 (GalNAc-T12)
hsa-miR-610	0	0	1	1	1	1	RPAP2	RNA polymerase II associated protein 2
hsa-miR-610	0	0	1	1	1	1	PYROXD1	pyridine nucleotide-disulphide oxidoreductase domain 1
hsa-miR-610	1	0	1	0	1	1	VCPIP1	valosin containing protein (p97)/p47 complex interacting protein 1
hsa-miR-610	0	0	1	1	1	1	CCDC170	coiled-coil domain containing 170
hsa-miR-610	1	0	1	1	1	1	CYB5B	cytochrome b5 type B (outer mitochondrial membrane)
hsa-miR-610	1	0	1	1	1	1	JHDM1D	jumonji C domain containing histone demethylase 1 homolog D (S. cerevisiae)
hsa-miR-610	0	0	1	1	1	1	CCDC34	coiled-coil domain containing 34
hsa-miR-610	1	0	1	0	1	1	VOPP1	vesicular, overexpressed in cancer, prosurvival protein 1
hsa-miR-610	1	0	1	1	1	1	MAP4	microtubule-associated protein 4
hsa-miR-610	1	0	1	1	0	0	PVRL4	poliovirus receptor-related 4
hsa-miR-610	1	0	1	1	1	1	SNX27	sorting nexin family member 27
hsa-miR-610	1	0	1	1	1	1	C6orf62	chromosome 6 open reading frame 62
hsa-miR-610	0	0	1	1	0	0	MRPL9	mitochondrial ribosomal protein L9
hsa-miR-610	1	0	1	0	1	1	TMEM47	transmembrane protein 47
hsa-miR-610	1	0	1	0	1	1	SH3BGRL2	SH3 domain binding glutamic acid-rich protein like 2
hsa-miR-610	1	0	1	1	1	1	PCDHA9	protocadherin alpha 9
hsa-miR-610	0	0	1	1	0	0	SLC4A11	solute carrier family 4, sodium borate transporter, member 11
hsa-miR-610	1	0	1	1	1	1	LOXL4	lysyl oxidase-like 4
hsa-miR-610	1	0	1	1	1	1	SYVN1	synovial apoptosis inhibitor 1, synoviolin
hsa-miR-610	1	0	1	0	1	1	ADO	2-aminoethanethiol (cysteamine) dioxygenase
hsa-miR-610	1	0	1	0	1	1	C5orf62	chromosome 5 open reading frame 62
hsa-miR-610	0	0	1	1	1	1	POLR2J2	polymerase (RNA) II (DNA directed) polypeptide J2
hsa-miR-610	1	0	1	1	1	1	NKD1	naked cuticle homolog 1 (Drosophila)
hsa-miR-610	1	0	1	1	1	1	C5orf30	chromosome 5 open reading frame 30
hsa-miR-610	1	0	1	1	1	1	COL4A5	collagen, type IV, alpha 5
hsa-miR-610	1	0	1	1	0	0	FCHSD1	FCH and double SH3 domains 1
hsa-miR-610	1	0	1	1	1	1	EPT1	ethanolaminephosphotransferase 1 (CDP-ethanolamine-specific)
hsa-miR-610	1	0	1	1	1	1	TSPYL5	TSPY-like 5
hsa-miR-610	1	0	1	1	1	1	GCFC1	GC-rich sequence DNA-binding factor 1
hsa-miR-610	0	0	1	1	1	1	CLEC4D	C-type lectin domain family 4, member D
hsa-miR-610	0	0	1	1	1	1	PABPC5	poly(A) binding protein, cytoplasmic 5
hsa-miR-610	0	0	1	0	1	1	PAQR8	progestin and adipoQ receptor family member VIII
hsa-miR-610	1	0	1	1	1	1	BMPER	BMP binding endothelial regulator
hsa-miR-610	1	0	1	1	1	1	SPTSSA	serine palmitoyltransferase, small subunit A
hsa-miR-610	1	0	1	0	1	1	NUS1	nuclear undecaprenyl pyrophosphate synthase 1 homolog (S. cerevisiae)
hsa-miR-610	1	0	1	0	1	1	SP1	Sp1 transcription factor
hsa-miR-610	1	0	1	0	1	1	FCHO2	FCH domain only 2
hsa-miR-610	0	0	1	1	0	0	ESAM	endothelial cell adhesion molecule
hsa-miR-610	1	0	1	1	1	1	FAM91A1	family with sequence similarity 91, member A1
hsa-miR-610	0	0	1	1	1	1	SLFN5	schlafen family member 5
hsa-miR-610	0	0	1	0	1	1	DDIT4L	DNA-damage-inducible transcript 4-like
hsa-miR-610	0	0	1	0	1	1	SPATA18	spermatogenesis associated 18
hsa-miR-610	1	0	1	0	1	1	MTPN	myotrophin
hsa-miR-610	1	0	1	1	1	1	UBTD2	ubiquitin domain containing 2
hsa-miR-610	1	0	1	0	1	1	SYT11	synaptotagmin XI
hsa-miR-610	0	0	1	1	1	1	RASEF	RAS and EF-hand domain containing
hsa-miR-610	1	0	1	0	1	1	DCP2	DCP2 decapping enzyme homolog (S. cerevisiae)
hsa-miR-610	0	0	1	1	1	1	CNPY4	canopy 4 homolog (zebrafish)
hsa-miR-610	0	0	1	0	0	0	FLJ32955	uncharacterized protein FLJ32955
hsa-miR-610	0	0	1	1	0	0	LIX1L	Lix1 homolog (mouse)-like
hsa-miR-610	1	0	1	1	1	1	CNTD1	cyclin N-terminal domain containing 1
hsa-miR-610	1	0	1	1	1	1	PIP5KL1	phosphatidylinositol-4-phosphate 5-kinase-like 1
hsa-miR-610	0	0	1	1	1	1	FAM163A	family with sequence similarity 163, member A
hsa-miR-610	1	0	1	0	1	1	C3orf58	chromosome 3 open reading frame 58
hsa-miR-610	1	0	1	0	1	1	KSR2	kinase suppressor of ras 2
hsa-miR-610	1	0	1	1	1	1	XKR6	XK, Kell blood group complex subunit-related family, member 6
hsa-miR-610	1	0	1	1	1	1	SCN4B	sodium channel, voltage-gated, type IV, beta subunit
hsa-miR-610	0	0	1	1	1	1	C1QTNF9	C1q and tumor necrosis factor related protein 9
hsa-miR-610	1	0	1	0	1	1	ARL5B	ADP-ribosylation factor-like 5B
hsa-miR-610	1	0	1	0	1	1	EFHA2	EF-hand domain family, member A2
hsa-miR-610	1	0	1	1	1	1	SPRED2	sprouty-related, EVH1 domain containing 2
hsa-miR-610	1	0	1	1	1	1	RPS6KA5	ribosomal protein S6 kinase, 90kDa, polypeptide 5
hsa-miR-610	1	0	1	0	1	1	WDR72	WD repeat domain 72
hsa-miR-610	0	0	1	0	1	1	NBPF11	neuroblastoma breakpoint family, member 11
hsa-miR-610	1	0	1	1	1	1	KIF1B	kinesin family member 1B
hsa-miR-610	1	0	1	0	1	1	HNRNPA3	heterogeneous nuclear ribonucleoprotein A3
hsa-miR-610	1	0	1	0	1	1	NRK	Nik related kinase
hsa-miR-610	1	0	1	0	1	1	ZC3H6	zinc finger CCCH-type containing 6
hsa-miR-610	1	0	1	1	1	1	PTGER3	prostaglandin E receptor 3 (subtype EP3)
hsa-miR-610	1	0	1	0	1	1	LHFPL3	lipoma HMGIC fusion partner-like 3
hsa-miR-610	1	0	1	1	1	1	TMEM189-UBE2V1	TMEM189-UBE2V1 readthrough
hsa-miR-610	0	0	1	1	0	0	FOXD4L4	forkhead box D4-like 4
hsa-miR-610	0	0	1	1	1	1	ILDR2	immunoglobulin-like domain containing receptor 2
hsa-miR-610	1	0	1	1	1	1	BLOC1S5	biogenesis of lysosomal organelles complex-1, subunit 5, muted
hsa-miR-610	0	0	1	1	1	1	SLC25A35	solute carrier family 25, member 35
hsa-miR-610	1	0	1	1	1	1	E2F7	E2F transcription factor 7
hsa-miR-610	1	0	1	1	1	1	FREM2	FRAS1 related extracellular matrix protein 2
hsa-miR-610	1	0	1	1	1	1	SKIDA1	SKI/DACH domain containing 1
hsa-miR-610	0	0	1	0	0	0	C16orf47	chromosome 16 open reading frame 47
hsa-miR-610	0	0	1	0	1	1	ASB18	ankyrin repeat and SOCS box containing 18
hsa-miR-610	1	0	1	1	1	1	XKRX	XK, Kell blood group complex subunit-related, X-linked
hsa-miR-610	0	0	1	0	0	0	RNY5	RNA, Ro-associated Y5
hsa-miR-610	0	0	1	0	0	0	DUSP5P	dual specificity phosphatase 5 pseudogene
hsa-miR-610	0	0	1	0	0	0	SNORD45C	small nucleolar RNA, C/D box 45C
hsa-miR-610	1	0	1	1	1	1	CASP2	caspase 2, apoptosis-related cysteine peptidase
hsa-miR-610	0	0	1	1	1	1	COL14A1	collagen, type XIV, alpha 1
hsa-miR-610	0	0	1	1	0	0	CCL26	chemokine (C-C motif) ligand 26
hsa-miR-610	0	0	0	1	1	1	MGST1	microsomal glutathione S-transferase 1
hsa-miR-610	0	0	0	1	1	1	MRI1	methylthioribose-1-phosphate isomerase homolog (S. cerevisiae)
hsa-miR-610	1	0	1	1	1	1	DCN	decorin
hsa-miR-610	0	0	0	1	1	1	BTN3A1	butyrophilin, subfamily 3, member A1
hsa-miR-610	0	0	1	1	1	1	AQR	aquarius homolog (mouse)
hsa-miR-610	0	0	1	1	0	0	NOX3	NADPH oxidase 3
hsa-miR-610	0	0	0	1	1	1	C12orf5	chromosome 12 open reading frame 5
hsa-miR-610	1	0	1	1	1	1	SLC25A3	solute carrier family 25 (mitochondrial carrier; phosphate carrier), member 3
hsa-miR-610	1	0	1	1	1	1	DIMT1	DIM1 dimethyladenosine transferase 1 homolog (S. cerevisiae)
hsa-miR-610	0	0	1	1	1	1	APOH	apolipoprotein H (beta-2-glycoprotein I)
hsa-miR-610	0	0	1	1	1	1	L3MBTL2	l(3)mbt-like 2 (Drosophila)
hsa-miR-610	0	0	1	1	1	1	ACO2	aconitase 2, mitochondrial
hsa-miR-610	0	0	1	1	1	1	SNAPC1	small nuclear RNA activating complex, polypeptide 1, 43kDa
hsa-miR-610	0	0	0	1	0	0	RIN3	Ras and Rab interactor 3
hsa-miR-610	0	0	1	1	1	1	C20orf118	chromosome 20 open reading frame 118
hsa-miR-610	0	0	1	1	1	1	MYL12A	myosin, light chain 12A, regulatory, non-sarcomeric
hsa-miR-610	0	0	1	1	1	1	PIN4	protein (peptidylprolyl cis/trans isomerase) NIMA-interacting, 4 (parvulin)
hsa-miR-610	0	0	1	1	0	0	WFDC1	WAP four-disulfide core domain 1
hsa-miR-610	1	0	0	1	1	1	C16orf88	chromosome 16 open reading frame 88
hsa-miR-610	1	0	1	1	1	1	DCTN6	dynactin 6
hsa-miR-610	0	0	1	1	1	1	CHMP5	charged multivesicular body protein 5
hsa-miR-610	0	0	0	1	1	1	ST6GALNAC2	ST6 (alpha-N-acetyl-neuraminyl-2,3-beta-galactosyl-1,3)-N-acetylgalactosaminide alpha-2,6-sialyltransferase 2
hsa-miR-610	0	0	1	1	0	0	ZNHIT3	zinc finger, HIT-type containing 3
hsa-miR-610	0	0	1	1	0	0	KRT37	keratin 37
hsa-miR-610	0	0	0	1	1	1	KAT2A	K(lysine) acetyltransferase 2A
hsa-miR-610	0	0	1	1	0	0	PPY	pancreatic polypeptide
hsa-miR-610	0	0	1	1	0	0	CD38	CD38 molecule
hsa-miR-610	0	0	1	1	1	1	PF4V1	platelet factor 4 variant 1
hsa-miR-610	1	0	0	1	1	1	SYT10	synaptotagmin X
hsa-miR-610	0	0	0	1	0	0	OGFOD2	2-oxoglutarate and iron-dependent oxygenase domain containing 2
hsa-miR-610	0	0	1	1	1	1	TIMELESS	timeless homolog (Drosophila)
hsa-miR-610	0	0	0	1	0	0	ACOT13	acyl-CoA thioesterase 13
hsa-miR-610	0	0	0	1	1	1	FIG4	FIG4 homolog, SAC1 lipid phosphatase domain containing (S. cerevisiae)
hsa-miR-610	0	0	1	1	1	1	BYSL	bystin-like
hsa-miR-610	0	0	1	1	0	0	COX7A2	cytochrome c oxidase subunit VIIa polypeptide 2 (liver)
hsa-miR-610	0	0	0	1	1	1	HRH2	histamine receptor H2
hsa-miR-610	0	0	1	1	1	1	SLC7A14	solute carrier family 7 (orphan transporter), member 14
hsa-miR-610	1	0	1	1	1	1	NKTR	natural killer-tumor recognition sequence
hsa-miR-610	0	0	0	1	0	0	SPCS1	signal peptidase complex subunit 1 homolog (S. cerevisiae)
hsa-miR-610	0	0	1	1	1	1	ARMC2	armadillo repeat containing 2
hsa-miR-610	0	0	1	1	1	1	RARRES1	retinoic acid receptor responder (tazarotene induced) 1
hsa-miR-610	0	0	0	1	0	0	C10orf95	chromosome 10 open reading frame 95
hsa-miR-610	0	0	0	1	0	0	MTERFD3	MTERF domain containing 3
hsa-miR-610	0	0	1	1	1	1	PLBD1	phospholipase B domain containing 1
hsa-miR-610	0	0	1	1	1	1	GJA3	gap junction protein, alpha 3, 46kDa
hsa-miR-610	0	0	1	1	0	0	MBOAT7	membrane bound O-acyltransferase domain containing 7
hsa-miR-610	1	0	1	1	1	1	C20orf26	chromosome 20 open reading frame 26
hsa-miR-610	0	0	0	1	0	0	IGFLR1	IGF-like family receptor 1
hsa-miR-610	0	0	0	1	0	0	SEBOX	SEBOX homeobox
hsa-miR-610	0	0	1	1	0	0	CTAG2	cancer/testis antigen 2
hsa-miR-610	0	0	1	1	0	0	MAGEC2	melanoma antigen family C, 2
hsa-miR-610	0	0	0	1	1	1	THAP10	THAP domain containing 10
hsa-miR-610	0	0	1	1	0	0	CCL4	chemokine (C-C motif) ligand 4
hsa-miR-610	0	0	0	1	0	0	AANAT	aralkylamine N-acetyltransferase
hsa-miR-610	0	0	1	1	1	1	MYO16	myosin XVI
hsa-miR-610	0	0	1	1	1	1	KRT12	keratin 12
hsa-miR-610	0	0	0	1	1	1	USP40	ubiquitin specific peptidase 40
hsa-miR-610	0	0	0	1	0	0	PSMG3	proteasome (prosome, macropain) assembly chaperone 3
hsa-miR-610	0	0	0	1	0	0	MAS1	MAS1 oncogene
hsa-miR-610	0	0	0	1	0	0	CCL25	chemokine (C-C motif) ligand 25
hsa-miR-610	0	0	1	1	1	1	VPS25	vacuolar protein sorting 25 homolog (S. cerevisiae)
hsa-miR-610	0	0	1	1	1	1	CHD1L	chromodomain helicase DNA binding protein 1-like
hsa-miR-610	0	0	1	1	1	1	NR0B2	nuclear receptor subfamily 0, group B, member 2
hsa-miR-610	0	0	0	1	1	1	UTP3	UTP3, small subunit (SSU) processome component, homolog (S. cerevisiae)
hsa-miR-610	0	0	0	1	1	1	PCBD2	pterin-4 alpha-carbinolamine dehydratase/dimerization cofactor of hepatocyte nuclear factor 1 alpha (TCF1) 2
hsa-miR-610	0	0	1	1	1	1	PDE6A	phosphodiesterase 6A, cGMP-specific, rod, alpha
hsa-miR-610	0	0	1	1	1	1	KIAA1009	KIAA1009
hsa-miR-610	0	0	1	1	0	0	KRT85	keratin 85
hsa-miR-610	0	0	0	1	1	1	KRT82	keratin 82
hsa-miR-610	0	0	0	1	0	0	MDM2	Mdm2, p53 E3 ubiquitin protein ligase homolog (mouse)
hsa-miR-610	0	0	0	1	1	1	SP110	SP110 nuclear body protein
hsa-miR-610	0	0	1	1	1	1	DOCK10	dedicator of cytokinesis 10
hsa-miR-610	0	0	0	1	1	1	TMBIM1	transmembrane BAX inhibitor motif containing 1
hsa-miR-610	1	0	0	1	1	1	USP44	ubiquitin specific peptidase 44
hsa-miR-610	0	0	0	1	0	0	DDX56	DEAD (Asp-Glu-Ala-Asp) box helicase 56
hsa-miR-610	0	0	1	1	0	0	CFC1	cripto, FRL-1, cryptic family 1
hsa-miR-610	1	0	1	1	0	0	HS6ST1	heparan sulfate 6-O-sulfotransferase 1
hsa-miR-610	0	0	1	1	1	1	C11orf1	chromosome 11 open reading frame 1
hsa-miR-610	1	0	1	1	1	1	CYP19A1	cytochrome P450, family 19, subfamily A, polypeptide 1
hsa-miR-610	0	0	0	1	0	0	CRYGB	crystallin, gamma B
hsa-miR-610	0	0	1	1	1	1	CHRNA1	cholinergic receptor, nicotinic, alpha 1 (muscle)
hsa-miR-610	0	0	1	1	0	0	IRAK3	interleukin-1 receptor-associated kinase 3
hsa-miR-610	0	0	1	1	1	1	CDK2AP1	cyclin-dependent kinase 2 associated protein 1
hsa-miR-610	0	0	0	1	0	0	AP3B2	adaptor-related protein complex 3, beta 2 subunit
hsa-miR-610	0	0	1	1	1	1	ANKHD1	ankyrin repeat and KH domain containing 1
hsa-miR-610	0	0	1	1	1	1	FLT4	fms-related tyrosine kinase 4
hsa-miR-610	0	0	1	1	1	1	PIK3C3	phosphatidylinositol 3-kinase, catalytic subunit type 3
hsa-miR-610	1	0	1	1	1	1	ARHGAP28	Rho GTPase activating protein 28
hsa-miR-610	0	0	0	1	0	0	NUBP2	nucleotide binding protein 2
hsa-miR-610	0	0	0	1	0	0	IL12RB2	interleukin 12 receptor, beta 2
hsa-miR-610	1	0	0	1	1	1	FAM86A	family with sequence similarity 86, member A
hsa-miR-610	0	0	1	1	1	1	SLC27A6	solute carrier family 27 (fatty acid transporter), member 6
hsa-miR-610	1	0	0	1	1	1	UHRF1	ubiquitin-like with PHD and ring finger domains 1
hsa-miR-610	0	0	1	1	1	1	METTL16	methyltransferase like 16
hsa-miR-610	0	0	1	1	1	1	KIF18A	kinesin family member 18A
hsa-miR-610	0	0	1	1	0	0	ZNF541	zinc finger protein 541
hsa-miR-610	0	0	1	1	0	0	LPXN	leupaxin
hsa-miR-610	0	0	0	1	1	1	GTF3C3	general transcription factor IIIC, polypeptide 3, 102kDa
hsa-miR-610	0	0	1	1	0	0	IFT46	intraflagellar transport 46 homolog (Chlamydomonas)
hsa-miR-610	0	0	1	1	1	1	ATF2	activating transcription factor 2
hsa-miR-610	1	0	1	1	1	1	OCIAD1	OCIA domain containing 1
hsa-miR-610	0	0	1	1	0	0	PHRF1	PHD and ring finger domains 1
hsa-miR-610	0	0	0	1	1	1	MLPH	melanophilin
hsa-miR-610	0	0	1	1	1	1	LRRC31	leucine rich repeat containing 31
hsa-miR-610	0	0	1	1	0	0	CAD	carbamoyl-phosphate synthetase 2, aspartate transcarbamylase, and dihydroorotase
hsa-miR-610	0	0	0	1	1	1	ASTE1	asteroid homolog 1 (Drosophila)
hsa-miR-610	0	0	0	1	0	0	THOC3	THO complex 3
hsa-miR-610	0	0	1	1	0	0	POR	P450 (cytochrome) oxidoreductase
hsa-miR-610	0	0	1	1	1	1	TJP2	tight junction protein 2
hsa-miR-610	0	0	1	1	1	1	CALB1	calbindin 1, 28kDa
hsa-miR-610	0	0	1	1	0	0	BLVRA	biliverdin reductase A
hsa-miR-610	1	0	1	1	0	0	KIAA1644	KIAA1644
hsa-miR-610	0	0	1	1	0	0	PLCZ1	phospholipase C, zeta 1
hsa-miR-610	0	0	1	1	1	1	KERA	keratocan
hsa-miR-610	0	0	1	1	0	0	NEDD1	neural precursor cell expressed, developmentally down-regulated 1
hsa-miR-610	1	0	1	1	1	1	RFX4	regulatory factor X, 4 (influences HLA class II expression)
hsa-miR-610	0	0	1	1	1	1	N4BP2L2	NEDD4 binding protein 2-like 2
hsa-miR-610	0	0	0	1	1	1	FANCM	Fanconi anemia, complementation group M
hsa-miR-610	0	0	0	1	0	0	RHCG	Rh family, C glycoprotein
hsa-miR-610	0	0	1	1	0	0	NUDT7	nudix (nucleoside diphosphate linked moiety X)-type motif 7
hsa-miR-610	0	0	1	1	0	0	LILRB4	leukocyte immunoglobulin-like receptor, subfamily B (with TM and ITIM domains), member 4
hsa-miR-610	0	0	1	1	0	0	CRNN	cornulin
hsa-miR-610	0	0	0	1	0	0	CAPN9	calpain 9
hsa-miR-610	1	0	0	1	1	1	SOX13	SRY (sex determining region Y)-box 13
hsa-miR-610	0	0	1	1	0	0	SLC4A3	solute carrier family 4, anion exchanger, member 3
hsa-miR-610	1	0	1	1	1	1	RBMS3	RNA binding motif, single stranded interacting protein 3
hsa-miR-610	0	0	1	1	1	1	GPR128	G protein-coupled receptor 128
hsa-miR-610	0	0	1	1	0	0	MYH15	myosin, heavy chain 15
hsa-miR-610	0	0	1	1	0	0	PLA1A	phospholipase A1 member A
hsa-miR-610	0	0	0	1	1	1	SPATA5	spermatogenesis associated 5
hsa-miR-610	0	0	1	1	1	1	MARCH1	membrane-associated ring finger (C3HC4) 1, E3 ubiquitin protein ligase
hsa-miR-610	0	0	1	1	1	1	C6orf170	chromosome 6 open reading frame 170
hsa-miR-610	0	0	1	1	0	0	CLVS2	clavesin 2
hsa-miR-610	1	0	1	1	1	1	SLC26A7	solute carrier family 26, member 7
hsa-miR-610	0	0	1	1	0	0	FUOM	fucose mutarotase
hsa-miR-610	0	0	1	1	0	0	FAU	Finkel-Biskis-Reilly murine sarcoma virus (FBR-MuSV) ubiquitously expressed
hsa-miR-610	0	0	1	1	1	1	NGLY1	N-glycanase 1
hsa-miR-610	0	0	1	1	0	0	CFC1B	cripto, FRL-1, cryptic family 1B
hsa-miR-610	0	0	0	1	0	0	ATP5A1	ATP synthase, H+ transporting, mitochondrial F1 complex, alpha subunit 1, cardiac muscle
hsa-miR-610	0	0	1	1	1	1	CETN3	centrin, EF-hand protein, 3
hsa-miR-610	0	0	1	1	1	1	INO80C	INO80 complex subunit C
hsa-miR-610	0	0	1	1	0	0	TBCEL	tubulin folding cofactor E-like
hsa-miR-610	1	0	1	1	1	1	PDLIM3	PDZ and LIM domain 3
hsa-miR-610	0	0	0	1	1	1	TMPRSS15	transmembrane protease, serine 15
hsa-miR-610	0	0	0	1	1	1	ALS2CR12	amyotrophic lateral sclerosis 2 (juvenile) chromosome region, candidate 12
hsa-miR-610	0	0	1	1	0	0	ALS2CR11	amyotrophic lateral sclerosis 2 (juvenile) chromosome region, candidate 11
hsa-miR-610	0	0	0	1	0	0	MED7	mediator complex subunit 7
hsa-miR-610	0	0	1	1	1	1	UQCRB	ubiquinol-cytochrome c reductase binding protein
hsa-miR-610	0	0	0	1	0	0	COX6A2	cytochrome c oxidase subunit VIa polypeptide 2
hsa-miR-610	0	0	1	1	1	1	PDE6D	phosphodiesterase 6D, cGMP-specific, rod, delta
hsa-miR-610	0	0	0	1	0	0	TSPY8	testis specific protein, Y-linked 8
hsa-miR-610	1	0	1	1	1	1	CACNA1D	calcium channel, voltage-dependent, L type, alpha 1D subunit
hsa-miR-610	1	0	1	1	1	1	PPP1R9A	protein phosphatase 1, regulatory subunit 9A
hsa-miR-610	0	0	1	1	1	1	WFDC8	WAP four-disulfide core domain 8
hsa-miR-610	0	0	1	1	0	0	C21orf59	chromosome 21 open reading frame 59
hsa-miR-610	0	0	0	1	0	0	TGM7	transglutaminase 7
hsa-miR-610	1	0	1	1	0	0	ISL2	ISL LIM homeobox 2
hsa-miR-610	1	0	1	1	1	1	CUX1	cut-like homeobox 1
hsa-miR-610	0	0	1	1	1	1	FBXO17	F-box protein 17
hsa-miR-610	0	0	0	1	1	1	FDXR	ferredoxin reductase
hsa-miR-610	1	0	1	1	0	0	KLHL10	kelch-like 10 (Drosophila)
hsa-miR-610	1	0	1	1	1	1	STAT5B	signal transducer and activator of transcription 5B
hsa-miR-610	0	0	0	1	0	0	ZNF613	zinc finger protein 613
hsa-miR-610	1	0	1	1	1	1	LAPTM5	lysosomal protein transmembrane 5
hsa-miR-610	0	0	0	1	1	1	GBP7	guanylate binding protein 7
hsa-miR-610	1	0	1	1	1	1	TDRD5	tudor domain containing 5
hsa-miR-610	0	0	0	1	0	0	TEKT4	tektin 4
hsa-miR-610	1	0	1	1	1	1	GNPDA2	glucosamine-6-phosphate deaminase 2
hsa-miR-610	0	0	1	1	0	0	STT3B	STT3, subunit of the oligosaccharyltransferase complex, homolog B (S. cerevisiae)
hsa-miR-610	1	0	1	1	1	1	HPS3	Hermansky-Pudlak syndrome 3
hsa-miR-610	0	0	1	1	0	0	TGM4	transglutaminase 4 (prostate)
hsa-miR-610	0	0	0	1	0	0	ITGB5	integrin, beta 5
hsa-miR-610	0	0	0	1	1	1	DNALI1	dynein, axonemal, light intermediate chain 1
hsa-miR-610	0	0	0	1	0	0	DUSP7	dual specificity phosphatase 7
hsa-miR-610	1	0	1	1	1	1	PGGT1B	protein geranylgeranyltransferase type I, beta subunit
hsa-miR-610	0	0	0	1	1	1	CCDC127	coiled-coil domain containing 127
hsa-miR-610	0	0	1	1	1	1	STOX1	storkhead box 1
hsa-miR-610	0	0	0	1	0	0	OR4K2	olfactory receptor, family 4, subfamily K, member 2
hsa-miR-610	0	0	0	1	0	0	IFI27L1	interferon, alpha-inducible protein 27-like 1
hsa-miR-610	0	0	1	1	0	0	CCT2	chaperonin containing TCP1, subunit 2 (beta)
hsa-miR-610	1	0	1	1	1	1	TAZ	tafazzin
hsa-miR-610	0	0	0	1	1	1	NLRP14	NLR family, pyrin domain containing 14
hsa-miR-610	0	0	1	1	0	0	C12orf52	chromosome 12 open reading frame 52
hsa-miR-610	1	0	1	1	1	1	UEVLD	UEV and lactate/malate dehyrogenase domains
hsa-miR-610	0	0	1	1	0	0	PLK1	polo-like kinase 1
hsa-miR-610	1	0	0	1	0	0	PGAP3	post-GPI attachment to proteins 3
hsa-miR-610	0	0	0	1	0	0	UBXN6	UBX domain protein 6
hsa-miR-610	0	0	1	1	1	1	SOAT2	sterol O-acyltransferase 2
hsa-miR-610	0	0	1	1	0	0	BEST1	bestrophin 1
hsa-miR-610	0	0	0	1	0	0	PYGO1	pygopus homolog 1 (Drosophila)
hsa-miR-610	0	0	0	1	1	1	RBKS	ribokinase
hsa-miR-610	0	0	0	1	0	0	MRGPRX1	MAS-related GPR, member X1
hsa-miR-610	0	0	1	1	1	1	MXD3	MAX dimerization protein 3
hsa-miR-610	0	0	1	1	1	1	GNB2	guanine nucleotide binding protein (G protein), beta polypeptide 2
hsa-miR-610	0	0	1	1	1	1	MMADHC	methylmalonic aciduria (cobalamin deficiency) cblD type, with homocystinuria
hsa-miR-610	0	0	1	1	0	0	BTD	biotinidase
hsa-miR-610	1	0	1	1	1	1	PCBP1	poly(rC) binding protein 1
hsa-miR-610	0	0	0	1	0	0	NFU1	NFU1 iron-sulfur cluster scaffold homolog (S. cerevisiae)
hsa-miR-610	0	0	1	1	0	0	TSPY3	testis specific protein, Y-linked 3
hsa-miR-610	0	0	1	1	0	0	HSPB2	heat shock 27kDa protein 2
hsa-miR-610	1	0	1	1	1	1	ZFX	zinc finger protein, X-linked
hsa-miR-610	0	0	0	1	0	0	OR2C1	olfactory receptor, family 2, subfamily C, member 1
hsa-miR-610	0	0	1	1	1	1	MUC12	mucin 12, cell surface associated
hsa-miR-610	0	0	1	1	0	0	ARMC4	armadillo repeat containing 4
hsa-miR-610	0	0	1	1	1	1	HDAC3	histone deacetylase 3
hsa-miR-610	1	0	1	1	0	0	HTR1E	5-hydroxytryptamine (serotonin) receptor 1E, G protein-coupled
hsa-miR-610	0	0	1	1	1	1	FEN1	flap structure-specific endonuclease 1
hsa-miR-610	0	0	1	1	0	0	DYNLRB2	dynein, light chain, roadblock-type 2
hsa-miR-610	0	0	1	1	1	1	TEFM	transcription elongation factor, mitochondrial
hsa-miR-610	0	0	0	1	0	0	PCDHB1	protocadherin beta 1
hsa-miR-610	0	0	1	1	1	1	MPLKIP	M-phase specific PLK1 interacting protein
hsa-miR-610	0	0	1	1	1	1	P4HA1	prolyl 4-hydroxylase, alpha polypeptide I
hsa-miR-610	0	0	0	1	1	1	COG7	component of oligomeric golgi complex 7
hsa-miR-610	0	0	1	1	0	0	HEXIM2	hexamethylene bis-acetamide inducible 2
hsa-miR-610	0	0	0	1	1	1	ZIK1	zinc finger protein interacting with K protein 1 homolog (mouse)
hsa-miR-610	1	0	1	1	0	0	ACOT12	acyl-CoA thioesterase 12
hsa-miR-610	0	0	0	1	1	1	C3AR1	complement component 3a receptor 1
hsa-miR-610	0	0	1	1	1	1	MRPS12	mitochondrial ribosomal protein S12
hsa-miR-610	0	0	0	1	1	1	LOC285299	FSHD region gene 2 family, member C-like
hsa-miR-610	0	0	0	1	0	0	OR6M1	olfactory receptor, family 6, subfamily M, member 1
hsa-miR-610	0	0	0	1	0	0	OR6X1	olfactory receptor, family 6, subfamily X, member 1
hsa-miR-610	0	0	0	1	0	0	OR4B1	olfactory receptor, family 4, subfamily B, member 1
hsa-miR-610	0	0	1	1	1	1	INHBC	inhibin, beta C
hsa-miR-610	0	0	0	1	0	0	STON1-GTF2A1L	STON1-GTF2A1L readthrough
hsa-miR-610	0	0	1	1	1	1	STON1	stonin 1
hsa-miR-610	0	0	0	1	1	1	CCDC96	coiled-coil domain containing 96
hsa-miR-610	0	0	1	1	0	0	C16orf91	chromosome 16 open reading frame 91
hsa-miR-610	0	0	0	1	0	0	CCDC74B	coiled-coil domain containing 74B
hsa-miR-610	1	0	1	1	1	1	DNAL1	dynein, axonemal, light chain 1
hsa-miR-610	0	0	1	1	1	1	P2RY2	purinergic receptor P2Y, G-protein coupled, 2
hsa-miR-610	0	0	1	1	0	0	HRAS	v-Ha-ras Harvey rat sarcoma viral oncogene homolog
hsa-miR-610	0	0	1	1	1	1	LSM1	LSM1 homolog, U6 small nuclear RNA associated (S. cerevisiae)
hsa-miR-610	0	0	1	1	0	0	FOLR1	folate receptor 1 (adult)
hsa-miR-610	0	0	0	1	0	0	OR4S2	olfactory receptor, family 4, subfamily S, member 2
hsa-miR-610	0	0	0	1	0	0	GJC3	gap junction protein, gamma 3, 30.2kDa
hsa-miR-610	0	0	0	1	0	0	OR8K5	olfactory receptor, family 8, subfamily K, member 5
hsa-miR-610	0	0	1	1	1	1	BBS10	Bardet-Biedl syndrome 10
hsa-miR-610	0	0	0	1	0	0	ZNF575	zinc finger protein 575
hsa-miR-610	1	0	1	1	1	1	ADAMTS6	ADAM metallopeptidase with thrombospondin type 1 motif, 6
hsa-miR-610	1	0	0	1	1	1	ZHX2	zinc fingers and homeoboxes 2
hsa-miR-610	0	0	0	1	0	0	IQCF1	IQ motif containing F1
hsa-miR-610	0	0	1	1	0	0	COPG1	coatomer protein complex, subunit gamma 1
hsa-miR-610	0	0	0	1	1	1	CCDC111	coiled-coil domain containing 111
hsa-miR-610	0	0	1	1	1	1	RNASEH1	ribonuclease H1
hsa-miR-610	0	0	1	1	1	1	MMP1	matrix metallopeptidase 1 (interstitial collagenase)
hsa-miR-610	0	0	0	1	1	1	ITGA11	integrin, alpha 11
hsa-miR-610	1	0	1	1	1	1	CALR	calreticulin
hsa-miR-610	0	0	1	1	0	0	TTC9C	tetratricopeptide repeat domain 9C
hsa-miR-610	0	0	0	1	0	0	OR52N1	olfactory receptor, family 52, subfamily N, member 1
hsa-miR-610	0	0	0	1	1	1	S100Z	S100 calcium binding protein Z
hsa-miR-610	0	0	1	1	1	1	RGS3	regulator of G-protein signaling 3
hsa-miR-610	0	0	1	1	0	0	TMEM11	transmembrane protein 11
hsa-miR-610	0	0	1	1	1	1	BAG1	BCL2-associated athanogene
hsa-miR-610	0	0	1	1	0	0	KDM5D	lysine (K)-specific demethylase 5D
hsa-miR-610	0	0	0	1	0	0	TMEM31	transmembrane protein 31
hsa-miR-610	0	0	0	1	0	0	KLK11	kallikrein-related peptidase 11
hsa-miR-610	1	0	1	1	0	0	KIAA1549L	KIAA1549-like
hsa-miR-610	1	0	1	1	0	0	ATAD5	ATPase family, AAA domain containing 5
hsa-miR-610	1	0	0	1	0	0	HIC1	hypermethylated in cancer 1
hsa-miR-610	0	0	0	1	1	1	TSFM	Ts translation elongation factor, mitochondrial
hsa-miR-610	0	0	0	1	0	0	B3GNT4	UDP-GlcNAc:betaGal beta-1,3-N-acetylglucosaminyltransferase 4
hsa-miR-610	0	0	1	1	1	1	YARS2	tyrosyl-tRNA synthetase 2, mitochondrial
hsa-miR-610	0	0	1	1	1	1	NUP98	nucleoporin 98kDa
hsa-miR-610	0	0	1	1	1	1	ENTHD1	ENTH domain containing 1
hsa-miR-610	0	0	1	1	1	1	C5orf22	chromosome 5 open reading frame 22
hsa-miR-610	0	0	1	1	1	1	ISCA1	iron-sulfur cluster assembly 1 homolog (S. cerevisiae)
hsa-miR-610	0	0	1	1	0	0	MMP12	matrix metallopeptidase 12 (macrophage elastase)
hsa-miR-610	0	0	0	1	0	0	TMIE	transmembrane inner ear
hsa-miR-610	0	0	1	1	0	0	PTPMT1	protein tyrosine phosphatase, mitochondrial 1
hsa-miR-610	1	0	1	1	1	1	PPP6R1	protein phosphatase 6, regulatory subunit 1
hsa-miR-610	0	0	1	1	0	0	BOLA3	bolA homolog 3 (E. coli)
hsa-miR-610	0	0	0	1	0	0	OR7A17	olfactory receptor, family 7, subfamily A, member 17
hsa-miR-610	0	0	1	1	0	0	BRAP	BRCA1 associated protein
hsa-miR-610	1	0	1	1	1	1	ADAMTSL1	ADAMTS-like 1
hsa-miR-610	1	0	1	1	1	1	ERMAP	erythroblast membrane-associated protein (Scianna blood group)
hsa-miR-610	0	0	1	1	0	0	HIST1H3I	histone cluster 1, H3i
hsa-miR-610	0	0	0	1	0	0	SPATA8	spermatogenesis associated 8
hsa-miR-610	1	0	1	1	1	1	DRD1	dopamine receptor D1
hsa-miR-610	1	0	1	1	0	0	FAM43A	family with sequence similarity 43, member A
hsa-miR-610	0	0	0	1	1	1	WDR5B	WD repeat domain 5B
hsa-miR-610	0	0	0	1	1	1	SLC37A4	solute carrier family 37 (glucose-6-phosphate transporter), member 4
hsa-miR-610	1	0	1	1	1	1	MTA1	metastasis associated 1
hsa-miR-610	0	0	1	1	1	1	BEST3	bestrophin 3
hsa-miR-610	1	0	1	1	0	0	GPR173	G protein-coupled receptor 173
hsa-miR-610	0	0	1	1	0	0	GH2	growth hormone 2
hsa-miR-610	0	0	1	1	1	1	CRADD	CASP2 and RIPK1 domain containing adaptor with death domain
hsa-miR-610	0	0	0	1	0	0	ACAA1	acetyl-CoA acyltransferase 1
hsa-miR-610	1	0	1	1	0	0	TNK2	tyrosine kinase, non-receptor, 2
hsa-miR-610	0	0	0	1	0	0	ZNF347	zinc finger protein 347
hsa-miR-610	0	0	0	1	0	0	GPR141	G protein-coupled receptor 141
hsa-miR-610	0	0	1	1	0	0	RLTPR	RGD motif, leucine rich repeats, tropomodulin domain and proline-rich containing
hsa-miR-610	0	0	0	1	0	0	KRTAP22-1	keratin associated protein 22-1
hsa-miR-610	1	0	1	1	1	1	C11orf30	chromosome 11 open reading frame 30
hsa-miR-610	0	0	1	1	1	1	RASSF6	Ras association (RalGDS/AF-6) domain family member 6
hsa-miR-610	0	0	1	1	1	1	KIR3DX1	killer cell immunoglobulin-like receptor, three domains, X1
hsa-miR-610	0	0	1	1	0	0	HTR3E	5-hydroxytryptamine (serotonin) receptor 3E, ionotropic
hsa-miR-610	0	0	1	1	1	1	ATP5C1	ATP synthase, H+ transporting, mitochondrial F1 complex, gamma polypeptide 1
hsa-miR-610	0	0	1	1	1	1	SLC6A16	solute carrier family 6, member 16
hsa-miR-610	0	0	1	1	1	1	STRADA	STE20-related kinase adaptor alpha
hsa-miR-610	0	0	0	1	1	1	ABHD12B	abhydrolase domain containing 12B
hsa-miR-610	1	0	1	1	1	1	NIPA2	non imprinted in Prader-Willi/Angelman syndrome 2
hsa-miR-610	0	0	0	1	1	1	ZNF420	zinc finger protein 420
hsa-miR-610	0	0	1	1	0	0	SLPI	secretory leukocyte peptidase inhibitor
hsa-miR-610	0	0	1	1	0	0	TREM2	triggering receptor expressed on myeloid cells 2
hsa-miR-610	0	0	1	1	1	1	ATP5G2	ATP synthase, H+ transporting, mitochondrial Fo complex, subunit C2 (subunit 9)
hsa-miR-610	1	0	1	1	1	1	TRIM9	tripartite motif containing 9
hsa-miR-610	0	0	1	1	0	0	STAMBP	STAM binding protein
hsa-miR-610	1	0	1	1	0	0	ZNF292	zinc finger protein 292
hsa-miR-610	0	0	1	1	0	0	PKD2L1	polycystic kidney disease 2-like 1
hsa-miR-610	0	0	0	1	0	0	TTC24	tetratricopeptide repeat domain 24
hsa-miR-610	0	0	1	1	1	1	BTNL8	butyrophilin-like 8
hsa-miR-610	0	0	1	1	0	0	CYB5A	cytochrome b5 type A (microsomal)
hsa-miR-610	1	0	1	1	1	1	CPED1	cadherin-like and PC-esterase domain containing 1
hsa-miR-610	0	0	1	1	1	1	PAPLN	papilin, proteoglycan-like sulfated glycoprotein
hsa-miR-610	0	0	1	1	1	1	FBLN1	fibulin 1
hsa-miR-610	0	0	0	1	1	1	SYCP2L	synaptonemal complex protein 2-like
hsa-miR-610	0	0	1	1	0	0	BRE	brain and reproductive organ-expressed (TNFRSF1A modulator)
hsa-miR-610	0	0	1	1	1	1	SMPD1	sphingomyelin phosphodiesterase 1, acid lysosomal
hsa-miR-610	0	0	0	1	0	0	ATP13A5	ATPase type 13A5
hsa-miR-610	0	0	1	1	0	0	EYS	eyes shut homolog (Drosophila)
hsa-miR-610	0	0	1	1	1	1	PLSCR1	phospholipid scramblase 1
hsa-miR-610	0	0	0	1	1	1	CIDEA	cell death-inducing DFFA-like effector a
hsa-miR-610	0	0	0	1	0	0	C12orf63	chromosome 12 open reading frame 63
hsa-miR-610	0	0	1	1	1	1	SUSD4	sushi domain containing 4
hsa-miR-610	0	0	0	1	1	1	PSG4	pregnancy specific beta-1-glycoprotein 4
hsa-miR-610	0	0	1	1	1	1	PSG5	pregnancy specific beta-1-glycoprotein 5
hsa-miR-610	0	0	1	1	0	0	CXorf67	chromosome X open reading frame 67
hsa-miR-610	0	0	1	1	0	0	DAP3	death associated protein 3
hsa-miR-610	1	0	1	1	1	1	EPB41	erythrocyte membrane protein band 4.1 (elliptocytosis 1, RH-linked)
hsa-miR-610	0	0	0	1	0	0	TMEM194B	transmembrane protein 194B
hsa-miR-610	0	0	1	1	0	0	INTS8	integrator complex subunit 8
hsa-miR-610	0	0	0	1	1	1	OR7D2	olfactory receptor, family 7, subfamily D, member 2
hsa-miR-610	0	0	0	1	0	0	CCDC38	coiled-coil domain containing 38
hsa-miR-610	1	0	1	1	1	1	NOVA1	neuro-oncological ventral antigen 1
hsa-miR-610	0	0	0	1	0	0	CPSF4L	cleavage and polyadenylation specific factor 4-like
hsa-miR-610	0	0	1	1	1	1	THSD4	thrombospondin, type I, domain containing 4
hsa-miR-610	0	0	1	1	1	1	GYG1	glycogenin 1
hsa-miR-610	0	0	0	1	0	0	BCAP31	B-cell receptor-associated protein 31
hsa-miR-610	0	0	0	1	1	1	DPPA3	developmental pluripotency associated 3
hsa-miR-610	0	0	0	1	1	1	F7	coagulation factor VII (serum prothrombin conversion accelerator)
hsa-miR-610	0	0	1	1	0	0	DOPEY1	dopey family member 1
hsa-miR-610	0	0	1	1	1	1	GPR114	G protein-coupled receptor 114
hsa-miR-610	1	0	1	1	1	1	KDM5C	lysine (K)-specific demethylase 5C
hsa-miR-610	1	0	1	1	0	0	HINFP	histone H4 transcription factor
hsa-miR-610	0	0	1	1	0	0	THBS4	thrombospondin 4
hsa-miR-610	0	0	1	1	0	0	MPI	mannose phosphate isomerase
hsa-miR-610	0	0	1	1	1	1	PLA2G4C	phospholipase A2, group IVC (cytosolic, calcium-independent)
hsa-miR-610	0	0	1	1	1	1	LRMP	lymphoid-restricted membrane protein
hsa-miR-610	0	0	1	1	0	0	GAGE1	G antigen 1
hsa-miR-610	0	0	0	1	1	1	ARSG	arylsulfatase G
hsa-miR-610	0	0	1	1	0	0	KEL	Kell blood group, metallo-endopeptidase
hsa-miR-610	1	0	1	1	1	1	AGK	acylglycerol kinase
hsa-miR-610	0	0	1	1	0	0	ADORA3	adenosine A3 receptor
hsa-miR-610	0	0	1	1	0	0	ERGIC3	ERGIC and golgi 3
hsa-miR-610	0	0	0	1	0	0	OR11L1	olfactory receptor, family 11, subfamily L, member 1
hsa-miR-610	1	0	1	1	1	1	LAMB3	laminin, beta 3
hsa-miR-610	1	0	1	1	0	0	APBB3	amyloid beta (A4) precursor protein-binding, family B, member 3
hsa-miR-610	0	0	1	1	1	1	PPP1R26	protein phosphatase 1, regulatory subunit 26
hsa-miR-610	0	0	1	1	0	0	RAET1E	retinoic acid early transcript 1E
hsa-miR-610	0	0	1	1	1	1	TRAPPC11	trafficking protein particle complex 11
hsa-miR-610	0	0	1	1	0	0	DHRS9	dehydrogenase/reductase (SDR family) member 9
hsa-miR-610	0	0	1	1	1	1	BCO2	beta-carotene oxygenase 2
hsa-miR-610	0	0	1	1	1	1	AQPEP	laeverin
hsa-miR-610	0	0	1	1	0	0	RGR	retinal G protein coupled receptor
hsa-miR-610	1	0	1	1	1	1	GRIK2	glutamate receptor, ionotropic, kainate 2
hsa-miR-610	1	0	1	1	1	1	PDE11A	phosphodiesterase 11A
hsa-miR-610	0	0	1	1	1	1	PCBP2	poly(rC) binding protein 2
hsa-miR-610	0	0	0	1	0	0	KRT78	keratin 78
hsa-miR-610	0	0	1	1	0	0	CTAG1B	cancer/testis antigen 1B
hsa-miR-610	0	0	1	1	0	0	CCT8L2	chaperonin containing TCP1, subunit 8 (theta)-like 2
hsa-miR-610	0	0	0	1	1	1	TXNRD3	thioredoxin reductase 3
hsa-miR-610	0	0	1	1	1	1	ACN9	ACN9 homolog (S. cerevisiae)
hsa-miR-610	0	0	0	1	0	0	CTAG1A	cancer/testis antigen 1A
hsa-miR-610	1	0	0	1	1	1	RBMS1	RNA binding motif, single stranded interacting protein 1
hsa-miR-610	1	0	1	1	0	0	ZNF219	zinc finger protein 219
hsa-miR-610	0	0	1	1	1	1	PAPSS2	3'-phosphoadenosine 5'-phosphosulfate synthase 2
hsa-miR-610	0	0	0	1	1	1	MAGEE1	melanoma antigen family E, 1
hsa-miR-610	0	0	1	1	0	0	EGFL8	EGF-like-domain, multiple 8
hsa-miR-610	1	0	1	1	1	1	ZFYVE9	zinc finger, FYVE domain containing 9
hsa-miR-610	0	0	1	1	1	1	NAA35	N(alpha)-acetyltransferase 35, NatC auxiliary subunit
hsa-miR-610	1	0	1	1	1	1	CD247	CD247 molecule
hsa-miR-610	1	0	1	1	1	1	GOLGA4	golgin A4
hsa-miR-610	0	0	1	1	1	1	CDY1	chromodomain protein, Y-linked, 1
hsa-miR-610	1	0	1	1	1	1	SMYD2	SET and MYND domain containing 2
hsa-miR-610	0	0	1	1	1	1	ATF3	activating transcription factor 3
hsa-miR-610	0	0	1	1	1	1	SERAC1	serine active site containing 1
hsa-miR-610	1	0	0	1	0	0	IKBKE	inhibitor of kappa light polypeptide gene enhancer in B-cells, kinase epsilon
hsa-miR-610	1	0	1	1	1	1	SYNE1	spectrin repeat containing, nuclear envelope 1
hsa-miR-610	0	0	1	1	1	1	UCHL5	ubiquitin carboxyl-terminal hydrolase L5
hsa-miR-610	0	0	0	1	1	1	NCF2	neutrophil cytosolic factor 2
hsa-miR-610	1	0	1	1	0	0	REPS1	RALBP1 associated Eps domain containing 1
hsa-miR-610	0	0	0	1	0	0	TAAR2	trace amine associated receptor 2
hsa-miR-610	1	0	1	1	0	0	USP21	ubiquitin specific peptidase 21
hsa-miR-610	0	0	0	1	0	0	IGSF8	immunoglobulin superfamily, member 8
hsa-miR-610	0	0	0	1	0	0	OR6K6	olfactory receptor, family 6, subfamily K, member 6
hsa-miR-610	0	0	0	1	0	0	OR10X1	olfactory receptor, family 10, subfamily X, member 1
hsa-miR-610	0	0	1	1	0	0	CCT3	chaperonin containing TCP1, subunit 3 (gamma)
hsa-miR-610	0	0	0	1	0	0	FRG2B	FSHD region gene 2 family, member B
hsa-miR-610	0	0	0	1	1	1	FAM26D	family with sequence similarity 26, member D
hsa-miR-610	0	0	1	1	0	0	TUBE1	tubulin, epsilon 1
hsa-miR-610	0	0	0	1	0	0	CLRN3	clarin 3
hsa-miR-610	0	0	1	1	1	1	SPRR2E	small proline-rich protein 2E
hsa-miR-610	0	0	0	1	1	1	SPRR2D	small proline-rich protein 2D
hsa-miR-610	0	0	1	1	1	1	S100A10	S100 calcium binding protein A10
hsa-miR-610	1	0	1	1	1	1	ENSA	endosulfine alpha
hsa-miR-610	0	0	1	1	1	1	GRK5	G protein-coupled receptor kinase 5
hsa-miR-610	0	0	0	1	0	0	LOC100129852	uncharacterized LOC100129852
hsa-miR-610	1	0	1	1	1	1	VTI1A	vesicle transport through interaction with t-SNAREs homolog 1A (yeast)
hsa-miR-610	0	0	0	1	0	0	REG4	regenerating islet-derived family, member 4
hsa-miR-610	0	0	0	1	1	1	GABRR1	gamma-aminobutyric acid (GABA) A receptor, rho 1
hsa-miR-610	1	0	1	1	1	1	MPP1	membrane protein, palmitoylated 1, 55kDa
hsa-miR-610	0	0	1	1	1	1	DKC1	dyskeratosis congenita 1, dyskerin
hsa-miR-610	1	0	1	1	1	1	SYNCRIP	synaptotagmin binding, cytoplasmic RNA interacting protein
hsa-miR-610	0	0	1	1	1	1	UBL4A	ubiquitin-like 4A
hsa-miR-610	0	0	1	1	0	0	PDZD7	PDZ domain containing 7
hsa-miR-610	0	0	1	1	1	1	SEP15	15 kDa selenoprotein
hsa-miR-610	1	0	1	1	1	1	ZIC3	Zic family member 3
hsa-miR-610	1	0	1	1	1	1	FUBP1	far upstream element (FUSE) binding protein 1
hsa-miR-610	0	0	1	1	1	1	MBNL3	muscleblind-like splicing regulator 3
hsa-miR-610	0	0	1	1	0	0	TNNI3K	TNNI3 interacting kinase
hsa-miR-610	0	0	1	1	1	1	FPGT	fucose-1-phosphate guanylyltransferase
hsa-miR-610	0	0	1	1	0	0	DAB1	disabled homolog 1 (Drosophila)
hsa-miR-610	0	0	1	1	1	1	TMEM59	transmembrane protein 59
hsa-miR-610	0	0	0	1	1	1	RBP4	retinol binding protein 4, plasma
hsa-miR-610	0	0	0	1	0	0	ECHDC2	enoyl CoA hydratase domain containing 2
hsa-miR-610	0	0	0	1	0	0	FAM65C	family with sequence similarity 65, member C
hsa-miR-610	0	0	1	1	1	1	DDX27	DEAD (Asp-Glu-Ala-Asp) box polypeptide 27
hsa-miR-610	1	0	1	1	1	1	CHRDL1	chordin-like 1
hsa-miR-610	0	0	0	1	0	0	CEL	carboxyl ester lipase (bile salt-stimulated lipase)
hsa-miR-610	0	0	1	1	0	0	GTF3C5	general transcription factor IIIC, polypeptide 5, 63kDa
hsa-miR-610	1	0	0	1	1	1	LRIT1	leucine-rich repeat, immunoglobulin-like and transmembrane domains 1
hsa-miR-610	0	0	0	1	0	0	GTF3C4	general transcription factor IIIC, polypeptide 4, 90kDa
hsa-miR-610	0	0	0	1	1	1	BEST4	bestrophin 4
hsa-miR-610	1	0	1	1	0	0	ELOVL1	ELOVL fatty acid elongase 1
hsa-miR-610	0	0	0	1	0	0	PRRX2	paired related homeobox 2
hsa-miR-610	1	0	1	1	0	0	ZSWIM1	zinc finger, SWIM-type containing 1
hsa-miR-610	0	0	1	1	1	1	EPPIN	epididymal peptidase inhibitor
hsa-miR-610	0	0	1	1	0	0	WFDC6	WAP four-disulfide core domain 6
hsa-miR-610	0	0	1	1	0	0	SPTAN1	spectrin, alpha, non-erythrocytic 1
hsa-miR-610	0	0	1	1	0	0	DBNDD2	dysbindin (dystrobrevin binding protein 1) domain containing 2
hsa-miR-610	0	0	1	1	0	0	GUCA1A	guanylate cyclase activator 1A (retina)
hsa-miR-610	0	0	1	1	1	1	TAF8	TAF8 RNA polymerase II, TATA box binding protein (TBP)-associated factor, 43kDa
hsa-miR-610	0	0	1	1	0	0	C1orf122	chromosome 1 open reading frame 122
hsa-miR-610	0	0	1	1	1	1	L3MBTL1	l(3)mbt-like 1 (Drosophila)
hsa-miR-610	0	0	1	1	1	1	APOOL	apolipoprotein O-like
hsa-miR-610	0	0	1	1	1	1	MAGT1	magnesium transporter 1
hsa-miR-610	0	0	0	1	1	1	GJB3	gap junction protein, beta 3, 31kDa
hsa-miR-610	0	0	0	1	0	0	HJURP	Holliday junction recognition protein
hsa-miR-610	0	0	0	1	1	1	LHFPL5	lipoma HMGIC fusion partner-like 5
hsa-miR-610	0	0	1	1	0	0	FRRS1L	ferric-chelate reductase 1-like
hsa-miR-610	0	0	0	1	0	0	OR13C5	olfactory receptor, family 13, subfamily C, member 5
hsa-miR-610	0	0	1	1	1	1	ZNF189	zinc finger protein 189
hsa-miR-610	0	0	0	1	0	0	OR10G8	olfactory receptor, family 10, subfamily G, member 8
hsa-miR-610	1	0	1	1	1	1	NCBP1	nuclear cap binding protein subunit 1, 80kDa
hsa-miR-610	1	0	1	1	1	1	ZAK	sterile alpha motif and leucine zipper containing kinase AZK
hsa-miR-610	0	0	1	1	1	1	C9orf3	chromosome 9 open reading frame 3
hsa-miR-610	0	0	0	1	0	0	KIF19	kinesin family member 19
hsa-miR-610	0	0	0	1	0	0	GPR142	G protein-coupled receptor 142
hsa-miR-610	1	0	1	1	1	1	WAC	WW domain containing adaptor with coiled-coil
hsa-miR-610	0	0	1	1	0	0	CSNK2B	casein kinase 2, beta polypeptide
hsa-miR-610	0	0	0	1	1	1	LY6G5B	lymphocyte antigen 6 complex, locus G5B
hsa-miR-610	0	0	1	1	1	1	CDSN	corneodesmosin
hsa-miR-610	1	0	1	1	0	0	WDR45	WD repeat domain 45
hsa-miR-610	0	0	1	1	0	0	UGGT2	UDP-glucose glycoprotein glucosyltransferase 2
hsa-miR-610	1	0	0	1	1	1	ZNF615	zinc finger protein 615
hsa-miR-610	0	0	0	1	1	1	BTNL9	butyrophilin-like 9
hsa-miR-610	0	0	0	1	0	0	NMS	neuromedin S
hsa-miR-610	0	0	1	1	0	0	TIMP1	TIMP metallopeptidase inhibitor 1
hsa-miR-610	0	0	0	1	0	0	OR2W1	olfactory receptor, family 2, subfamily W, member 1
hsa-miR-610	0	0	1	1	1	1	PLXDC2	plexin domain containing 2
hsa-miR-610	0	0	1	1	1	1	UBA1	ubiquitin-like modifier activating enzyme 1
hsa-miR-610	0	0	0	1	0	0	CA6	carbonic anhydrase VI
hsa-miR-610	0	0	0	1	1	1	ZNF658B	zinc finger protein 658B, pseudogene
hsa-miR-610	0	0	0	1	1	1	ZNF658	zinc finger protein 658
hsa-miR-610	1	0	1	1	1	1	HIF3A	hypoxia inducible factor 3, alpha subunit
hsa-miR-610	0	0	0	1	1	1	BORA	bora, aurora kinase A activator
hsa-miR-610	1	0	1	1	1	1	PCDH9	protocadherin 9
hsa-miR-610	0	0	0	1	0	0	GRXCR2	glutaredoxin, cysteine rich 2
hsa-miR-610	0	0	0	1	0	0	LOC100131726	HCC-related HCC-C11_v3
hsa-miR-610	1	0	1	1	1	1	ARHGEF39	Rho guanine nucleotide exchange factor (GEF) 39
hsa-miR-610	0	0	0	1	0	0	CD72	CD72 molecule
hsa-miR-610	0	0	0	1	0	0	PHYH	phytanoyl-CoA 2-hydroxylase
hsa-miR-610	0	0	0	1	0	0	LRRC63	leucine rich repeat containing 63
hsa-miR-610	0	0	1	1	0	0	C20orf196	chromosome 20 open reading frame 196
hsa-miR-610	0	0	0	1	0	0	ETV2	ets variant 2
hsa-miR-610	1	0	1	1	0	0	AEN	apoptosis enhancing nuclease
hsa-miR-610	0	0	1	1	1	1	VWA8	von Willebrand factor A domain containing 8
hsa-miR-610	0	0	1	1	1	1	PDE7A	phosphodiesterase 7A
hsa-miR-610	1	0	1	1	1	1	SMPX	small muscle protein, X-linked
hsa-miR-610	1	0	1	1	1	1	PFKFB3	6-phosphofructo-2-kinase/fructose-2,6-biphosphatase 3
hsa-miR-610	1	0	1	1	1	1	DSP	desmoplakin
hsa-miR-610	1	0	1	1	1	1	DCLK1	doublecortin-like kinase 1
hsa-miR-610	0	0	1	1	1	1	SMAGP	small cell adhesion glycoprotein
hsa-miR-610	0	0	0	1	0	0	IFNA5	interferon, alpha 5
hsa-miR-610	0	0	0	1	0	0	ASB11	ankyrin repeat and SOCS box containing 11
hsa-miR-610	0	0	1	1	0	0	TEX26	testis expressed 26
hsa-miR-610	0	0	1	1	0	0	CPXM1	carboxypeptidase X (M14 family), member 1
hsa-miR-610	0	0	0	1	1	1	SH3BGR	SH3 domain binding glutamic acid-rich protein
hsa-miR-610	1	0	1	1	1	1	PAQR3	progestin and adipoQ receptor family member III
hsa-miR-610	1	0	1	1	1	1	CDC20B	cell division cycle 20 homolog B (S. cerevisiae)
hsa-miR-610	0	0	1	1	1	1	SIRPB1	signal-regulatory protein beta 1
hsa-miR-610	1	0	1	1	1	1	HMG20A	high mobility group 20A
hsa-miR-610	1	0	1	1	0	0	ZNF594	zinc finger protein 594
hsa-miR-610	0	0	0	1	0	0	TPTE2P1	transmembrane phosphoinositide 3-phosphatase and tensin homolog 2 pseudogene 1
hsa-miR-610	0	0	1	1	0	0	TMEM74B	transmembrane protein 74B
hsa-miR-610	0	0	1	1	1	1	KLRC3	killer cell lectin-like receptor subfamily C, member 3
hsa-miR-610	0	0	1	1	1	1	RFX3	regulatory factor X, 3 (influences HLA class II expression)
hsa-miR-610	0	0	1	1	1	1	RSAD2	radical S-adenosyl methionine domain containing 2
hsa-miR-610	0	0	0	1	1	1	RBMY1E	RNA binding motif protein, Y-linked, family 1, member E
hsa-miR-610	0	0	0	1	1	1	RBMY1D	RNA binding motif protein, Y-linked, family 1, member D
hsa-miR-610	0	0	0	1	0	0	RPGRIP1	retinitis pigmentosa GTPase regulator interacting protein 1
hsa-miR-610	0	0	0	1	0	0	TSPY4	testis specific protein, Y-linked 4
hsa-miR-610	0	0	1	1	1	1	NEK11	NIMA (never in mitosis gene a)- related kinase 11
hsa-miR-610	0	0	0	1	1	1	C3orf37	chromosome 3 open reading frame 37
hsa-miR-610	0	0	1	1	0	0	GARS	glycyl-tRNA synthetase
hsa-miR-610	0	0	1	1	0	0	WDR90	WD repeat domain 90
hsa-miR-610	0	0	1	1	0	0	AHSA2	AHA1, activator of heat shock 90kDa protein ATPase homolog 2 (yeast)
hsa-miR-610	1	0	1	1	1	1	TEX14	testis expressed 14
hsa-miR-610	1	0	1	1	0	0	CCDC30	coiled-coil domain containing 30
hsa-miR-610	0	0	0	1	0	0	TAS2R20	taste receptor, type 2, member 20
hsa-miR-610	1	0	1	1	1	1	APC	adenomatous polyposis coli
hsa-miR-610	0	0	1	1	1	1	FANCC	Fanconi anemia, complementation group C
hsa-miR-610	0	0	1	1	1	1	GALK2	galactokinase 2
hsa-miR-610	1	0	1	1	1	1	CUL4A	cullin 4A
hsa-miR-610	0	0	0	1	1	1	ANKRD20A3	ankyrin repeat domain 20 family, member A3
hsa-miR-610	1	0	1	0	1	1	C2orf71	chromosome 2 open reading frame 71
hsa-miR-610	0	0	1	0	1	1	AIPL1	aryl hydrocarbon receptor interacting protein-like 1
hsa-miR-610	0	0	1	1	1	1	CENPA	centromere protein A
hsa-miR-610	1	0	1	1	1	1	SH3BP2	SH3-domain binding protein 2
hsa-miR-610	1	0	1	1	1	1	TRAPPC10	trafficking protein particle complex 10
hsa-miR-610	0	0	1	1	1	1	SDPR	serum deprivation response
hsa-miR-610	1	0	1	1	1	1	NUMBL	numb homolog (Drosophila)-like
hsa-miR-610	0	0	1	1	1	1	PRF1	perforin 1 (pore forming protein)
hsa-miR-610	1	0	1	1	1	1	GNE	glucosamine (UDP-N-acetyl)-2-epimerase/N-acetylmannosamine kinase
hsa-miR-610	1	0	1	1	1	1	BCAT1	branched chain amino-acid transaminase 1, cytosolic
hsa-miR-610	1	0	1	0	1	1	ACAP2	ArfGAP with coiled-coil, ankyrin repeat and PH domains 2
hsa-miR-610	0	0	1	1	1	1	GTPBP4	GTP binding protein 4
hsa-miR-610	0	0	1	1	1	1	TTC33	tetratricopeptide repeat domain 33
hsa-miR-610	1	0	1	1	1	1	ZNF215	zinc finger protein 215
hsa-miR-610	1	0	1	1	1	1	MKLN1	muskelin 1, intracellular mediator containing kelch motifs
hsa-miR-610	0	0	1	0	1	1	OGN	osteoglycin
hsa-miR-610	0	0	1	1	1	1	COMMD9	COMM domain containing 9
hsa-miR-610	1	0	1	1	1	1	MRPL19	mitochondrial ribosomal protein L19
hsa-miR-610	0	0	1	1	1	1	MRPL35	mitochondrial ribosomal protein L35
hsa-miR-610	0	0	1	1	1	1	GRAMD1C	GRAM domain containing 1C
hsa-miR-610	1	0	1	1	1	1	TET2	tet methylcytosine dioxygenase 2
hsa-miR-610	0	0	1	1	1	1	PAQR5	progestin and adipoQ receptor family member V
hsa-miR-610	1	0	1	0	1	1	MARCH5	membrane-associated ring finger (C3HC4) 5
hsa-miR-610	1	0	1	1	1	1	MAGOHB	mago-nashi homolog B (Drosophila)
hsa-miR-610	0	0	1	1	1	1	EDA2R	ectodysplasin A2 receptor
hsa-miR-610	1	0	1	0	1	1	NECAB1	N-terminal EF-hand calcium binding protein 1
hsa-miR-610	1	0	1	0	1	1	LMBR1	limb region 1 homolog (mouse)
hsa-miR-610	0	0	1	1	1	1	SYT15	synaptotagmin XV
hsa-miR-610	0	0	1	1	1	1	ANKRD20A1	ankyrin repeat domain 20 family, member A1
hsa-miR-610	1	0	1	1	1	1	HSDL2	hydroxysteroid dehydrogenase like 2
hsa-miR-610	0	0	1	0	1	1	MIEN1	migration and invasion enhancer 1
hsa-miR-610	0	0	0	0	1	1	GNG7	guanine nucleotide binding protein (G protein), gamma 7
hsa-miR-610	0	0	1	1	1	1	ZNF300	zinc finger protein 300
hsa-miR-610	0	0	0	1	1	1	CCBE1	collagen and calcium binding EGF domains 1
hsa-miR-610	0	0	1	1	1	1	MAP7D2	MAP7 domain containing 2
hsa-miR-610	0	0	1	1	1	1	CREG2	cellular repressor of E1A-stimulated genes 2
hsa-miR-610	0	0	1	0	1	1	XKR5	XK, Kell blood group complex subunit-related family, member 5
