# Supplementary material for: Profiling of Selected MicroRNAs in Proliferative Eutopic Endometrium of Women with Ovarian Endometriosis
Source: Biomed Res Int. 2015 Aug 20;2015:760698. doi: 10.1155/2015/760698 (PMC4558423; doi:10.1155/2015/760698)
Supplement: Supplementary file 1 — Table I: The names of miRNAs significantly differentially expressed between eutopic endometrium of patients with endometriosis vs eutopic endometrium of patients without endometriosis. Table II: The associations between miRNA and mRNA, which presents detailed results of the search of six major databases i.e targetscan, tarbase, miranda, mirbase, mirtarget2 and pictar. [file 760698.f1.zip › 760698.f1/Table II/hsa-miR-611.tsv]

miR	targetscan	tarbase	miranda	mirbase	mirtarget2	pictar	GeneSymbol	GeneName
hsa-miR-611	1	0	1	0	1	1	PTPRT	protein tyrosine phosphatase, receptor type, T
hsa-miR-611	1	0	1	1	0	0	SUSD5	sushi domain containing 5
hsa-miR-611	1	0	1	0	1	1	RBM12	RNA binding motif protein 12
hsa-miR-611	1	0	1	1	0	0	STXBP5L	syntaxin binding protein 5-like
hsa-miR-611	0	0	1	1	0	0	RTEL1	regulator of telomere elongation helicase 1
hsa-miR-611	1	0	1	1	1	1	PLCL2	phospholipase C-like 2
hsa-miR-611	0	0	1	0	0	0	MTA3	metastasis associated 1 family, member 3
hsa-miR-611	0	0	1	1	1	1	COPS7A	COP9 constitutive photomorphogenic homolog subunit 7A (Arabidopsis)
hsa-miR-611	1	0	1	0	0	0	ODZ4	odz, odd Oz/ten-m homolog 4 (Drosophila)
hsa-miR-611	0	0	1	1	1	1	NLGN3	neuroligin 3
hsa-miR-611	1	0	1	0	0	0	TANC2	tetratricopeptide repeat, ankyrin repeat and coiled-coil containing 2
hsa-miR-611	1	0	1	1	0	0	ARHGAP39	Rho GTPase activating protein 39
hsa-miR-611	0	0	1	1	0	0	COL27A1	collagen, type XXVII, alpha 1
hsa-miR-611	1	0	1	0	0	0	ZBTB34	zinc finger and BTB domain containing 34
hsa-miR-611	0	0	1	1	0	0	SSPO	SCO-spondin homolog (Bos taurus)
hsa-miR-611	1	0	1	1	1	1	MKNK2	MAP kinase interacting serine/threonine kinase 2
hsa-miR-611	1	0	1	1	1	1	DTNA	dystrobrevin, alpha
hsa-miR-611	1	0	1	1	0	0	CACNB1	calcium channel, voltage-dependent, beta 1 subunit
hsa-miR-611	0	0	1	1	1	1	RYR1	ryanodine receptor 1 (skeletal)
hsa-miR-611	0	0	1	1	0	0	EIF4E2	eukaryotic translation initiation factor 4E family member 2
hsa-miR-611	0	0	1	1	1	1	ELOVL5	ELOVL fatty acid elongase 5
hsa-miR-611	1	0	1	1	1	1	CRTAM	cytotoxic and regulatory T cell molecule
hsa-miR-611	1	0	1	1	1	1	MEF2D	myocyte enhancer factor 2D
hsa-miR-611	0	0	1	1	1	1	EIF4G1	eukaryotic translation initiation factor 4 gamma, 1
hsa-miR-611	1	0	1	0	1	1	DDX3X	DEAD (Asp-Glu-Ala-Asp) box polypeptide 3, X-linked
hsa-miR-611	1	0	1	1	1	1	RBBP6	retinoblastoma binding protein 6
hsa-miR-611	1	0	1	1	1	1	TMEM159	transmembrane protein 159
hsa-miR-611	0	0	1	1	1	1	RER1	RER1 retention in endoplasmic reticulum 1 homolog (S. cerevisiae)
hsa-miR-611	1	0	1	1	1	1	NF2	neurofibromin 2 (merlin)
hsa-miR-611	0	0	1	1	1	1	DMRT2	doublesex and mab-3 related transcription factor 2
hsa-miR-611	0	0	1	0	1	1	CLEC5A	C-type lectin domain family 5, member A
hsa-miR-611	0	0	1	1	1	1	CNPPD1	cyclin Pas1/PHO80 domain containing 1
hsa-miR-611	1	0	1	1	1	1	TLK2	tousled-like kinase 2
hsa-miR-611	0	0	1	0	0	0	TIGD7	tigger transposable element derived 7
hsa-miR-611	0	0	1	0	1	1	ERBB2IP	erbb2 interacting protein
hsa-miR-611	1	0	1	1	1	1	DCLRE1B	DNA cross-link repair 1B
hsa-miR-611	0	0	1	1	1	1	SEMA6C	sema domain, transmembrane domain (TM), and cytoplasmic domain, (semaphorin) 6C
hsa-miR-611	1	0	1	1	1	1	CALCOCO1	calcium binding and coiled-coil domain 1
hsa-miR-611	1	0	1	1	1	1	CD300LF	CD300 molecule-like family member f
hsa-miR-611	0	0	1	1	0	0	SNRPN	small nuclear ribonucleoprotein polypeptide N
hsa-miR-611	0	0	1	0	0	0	MYO15B	myosin XVB pseudogene
hsa-miR-611	1	0	1	1	1	1	ST3GAL3	ST3 beta-galactoside alpha-2,3-sialyltransferase 3
hsa-miR-611	1	0	1	1	1	1	ADARB1	adenosine deaminase, RNA-specific, B1
hsa-miR-611	0	0	1	1	1	1	GNAS	GNAS complex locus
hsa-miR-611	0	0	1	0	0	0	CACNA2D3	calcium channel, voltage-dependent, alpha 2/delta subunit 3
hsa-miR-611	1	0	1	1	1	1	NRXN3	neurexin 3
hsa-miR-611	1	0	1	1	1	1	EMID2	EMI domain containing 2
hsa-miR-611	0	0	1	1	1	1	DEPDC5	DEP domain containing 5
hsa-miR-611	1	0	1	1	0	0	TRPM4	transient receptor potential cation channel, subfamily M, member 4
hsa-miR-611	0	0	1	0	0	0	TUG1	taurine upregulated 1 (non-protein coding)
hsa-miR-611	0	0	1	1	1	1	SMOX	spermine oxidase
hsa-miR-611	0	0	1	0	0	0	TPTEP1	transmembrane phosphatase with tensin homology pseudogene 1
hsa-miR-611	0	0	1	1	1	1	FAM175A	family with sequence similarity 175, member A
hsa-miR-611	0	0	1	1	0	0	MLST8	MTOR associated protein, LST8 homolog (S. cerevisiae)
hsa-miR-611	1	0	1	1	0	0	UQCC	ubiquinol-cytochrome c reductase complex chaperone
hsa-miR-611	1	0	1	0	0	0	ZNRF3	zinc and ring finger 3
hsa-miR-611	0	0	1	1	1	1	CLEC4M	C-type lectin domain family 4, member M
hsa-miR-611	1	0	1	1	1	1	FAM131A	family with sequence similarity 131, member A
hsa-miR-611	1	0	1	1	1	1	MAPK8IP3	mitogen-activated protein kinase 8 interacting protein 3
hsa-miR-611	1	0	1	1	1	1	RNF185	ring finger protein 185
hsa-miR-611	1	0	1	1	1	1	KCTD15	potassium channel tetramerisation domain containing 15
hsa-miR-611	0	0	1	0	0	0	KIAA0664L3	KIAA0664-like 3
hsa-miR-611	1	0	1	1	1	1	PPM1L	protein phosphatase, Mg2+/Mn2+ dependent, 1L
hsa-miR-611	0	0	1	1	1	1	TOX2	TOX high mobility group box family member 2
hsa-miR-611	1	0	1	1	1	1	SFXN2	sideroflexin 2
hsa-miR-611	0	0	1	1	0	0	ANXA11	annexin A11
hsa-miR-611	0	0	1	1	1	1	MSTO1	misato homolog 1 (Drosophila)
hsa-miR-611	1	0	1	1	1	1	SCAMP5	secretory carrier membrane protein 5
hsa-miR-611	0	0	1	1	0	0	ZNF185	zinc finger protein 185 (LIM domain)
hsa-miR-611	1	0	1	1	0	0	SRL	sarcalumenin
hsa-miR-611	1	0	1	1	1	1	ANKRD29	ankyrin repeat domain 29
hsa-miR-611	0	0	1	1	0	0	CD37	CD37 molecule
hsa-miR-611	0	0	1	1	0	0	GRIP2	glutamate receptor interacting protein 2
hsa-miR-611	0	0	1	0	0	0	C10orf105	chromosome 10 open reading frame 105
hsa-miR-611	0	0	1	1	1	1	SLC52A3	solute carrier family 52, riboflavin transporter, member 3
hsa-miR-611	0	0	1	1	1	1	CAMKV	CaM kinase-like vesicle-associated
hsa-miR-611	0	0	1	1	1	1	TOR2A	torsin family 2, member A
hsa-miR-611	1	0	1	1	1	1	HHAT	hedgehog acyltransferase
hsa-miR-611	0	0	1	1	0	0	C6orf163	chromosome 6 open reading frame 163
hsa-miR-611	0	0	1	0	0	0	LOC550112	uncharacterized LOC550112
hsa-miR-611	0	0	1	0	0	0	LOC257358	uncharacterized LOC257358
hsa-miR-611	0	0	1	1	0	0	NADSYN1	NAD synthetase 1
hsa-miR-611	1	0	1	1	1	1	KCND1	potassium voltage-gated channel, Shal-related subfamily, member 1
hsa-miR-611	0	0	1	0	1	1	KANSL2	KAT8 regulatory NSL complex subunit 2
hsa-miR-611	0	0	1	1	1	1	HOGA1	4-hydroxy-2-oxoglutarate aldolase 1
hsa-miR-611	1	0	1	1	1	1	NDEL1	nudE nuclear distribution E homolog (A. nidulans)-like 1
hsa-miR-611	1	0	1	1	1	1	CTNNB1	catenin (cadherin-associated protein), beta 1, 88kDa
hsa-miR-611	1	0	1	0	1	1	NAA60	N(alpha)-acetyltransferase 60, NatF catalytic subunit
hsa-miR-611	0	0	1	1	0	0	MAP7D1	MAP7 domain containing 1
hsa-miR-611	0	0	1	1	0	0	TRIM46	tripartite motif containing 46
hsa-miR-611	0	0	1	0	0	0	C1orf204	chromosome 1 open reading frame 204
hsa-miR-611	0	0	1	1	1	1	RBM4	RNA binding motif protein 4
hsa-miR-611	0	0	1	1	0	0	PSAPL1	prosaposin-like 1 (gene/pseudogene)
hsa-miR-611	1	0	1	0	1	1	ZZEF1	zinc finger, ZZ-type with EF-hand domain 1
hsa-miR-611	0	0	1	1	1	1	SLC9A1	solute carrier family 9, subfamily A (NHE1, cation proton antiporter 1), member 1
hsa-miR-611	0	0	1	1	0	0	C20orf27	chromosome 20 open reading frame 27
hsa-miR-611	1	0	1	0	1	1	DCUN1D4	DCN1, defective in cullin neddylation 1, domain containing 4 (S. cerevisiae)
hsa-miR-611	0	0	1	1	0	0	CUL9	cullin 9
hsa-miR-611	0	0	1	1	0	0	LOC100131132	uncharacterized LOC100131132
hsa-miR-611	0	0	1	0	0	0	FAM95B1	family with sequence similarity 95, member B1
hsa-miR-611	0	0	1	1	1	1	RBM46	RNA binding motif protein 46
hsa-miR-611	1	0	1	1	1	1	MACROD2	MACRO domain containing 2
hsa-miR-611	1	0	1	1	0	0	UBN2	ubinuclein 2
hsa-miR-611	0	0	1	1	0	0	CCDC88B	coiled-coil domain containing 88B
hsa-miR-611	0	0	1	1	1	1	SZT2	seizure threshold 2 homolog (mouse)
hsa-miR-611	0	0	1	1	1	1	MOBP	myelin-associated oligodendrocyte basic protein
hsa-miR-611	0	0	1	0	0	0	LOC619207	scavenger receptor protein family member
hsa-miR-611	0	0	1	0	1	1	NPHP4	nephronophthisis 4
hsa-miR-611	0	0	1	1	0	0	RASA3	RAS p21 protein activator 3
hsa-miR-611	0	0	1	0	0	0	FAM205B	transmembrane protein C9orf144B pseudogene
hsa-miR-611	1	0	1	1	1	1	WDR37	WD repeat domain 37
hsa-miR-611	0	0	1	0	0	0	FLJ46361	deleted in malignant brain tumors 1 pseudogene
hsa-miR-611	0	0	1	1	0	0	C17orf107	chromosome 17 open reading frame 107
hsa-miR-611	1	0	1	1	1	1	AIF1L	allograft inflammatory factor 1-like
hsa-miR-611	1	0	1	0	1	1	ZKSCAN2	zinc finger with KRAB and SCAN domains 2
hsa-miR-611	1	0	1	1	1	1	PPP2R5C	protein phosphatase 2, regulatory subunit B', gamma
hsa-miR-611	0	0	1	1	0	0	ZNF730	zinc finger protein 730
hsa-miR-611	0	0	1	1	1	1	TBC1D3G	TBC1 domain family, member 3G
hsa-miR-611	1	0	1	1	1	1	EDN1	endothelin 1
hsa-miR-611	1	0	1	1	1	1	RIF1	RAP1 interacting factor homolog (yeast)
hsa-miR-611	0	0	1	1	1	1	PGAP2	post-GPI attachment to proteins 2
hsa-miR-611	0	0	1	1	0	0	ODF3	outer dense fiber of sperm tails 3
hsa-miR-611	0	0	1	0	0	0	KIAA0913	KIAA0913
hsa-miR-611	0	0	1	1	0	0	PCIF1	PDX1 C-terminal inhibiting factor 1
hsa-miR-611	0	0	1	0	0	0	FAM66D	family with sequence similarity 66, member D
hsa-miR-611	1	0	1	0	0	0	YLPM1	YLP motif containing 1
hsa-miR-611	0	0	1	1	0	0	TMEM91	transmembrane protein 91
hsa-miR-611	1	0	1	1	1	1	STXBP5	syntaxin binding protein 5 (tomosyn)
hsa-miR-611	1	0	1	0	1	1	BDNF	brain-derived neurotrophic factor
hsa-miR-611	0	0	1	1	1	1	GCOM1	GRINL1A complex locus 1
hsa-miR-611	0	0	1	0	1	1	ANKS1B	ankyrin repeat and sterile alpha motif domain containing 1B
hsa-miR-611	1	0	1	1	1	1	TMCC2	transmembrane and coiled-coil domain family 2
hsa-miR-611	0	0	1	1	0	0	RAET1E	retinoic acid early transcript 1E
hsa-miR-611	0	0	1	1	1	1	TIMM50	translocase of inner mitochondrial membrane 50 homolog (S. cerevisiae)
hsa-miR-611	1	0	1	1	0	0	ADAM15	ADAM metallopeptidase domain 15
hsa-miR-611	0	0	1	1	1	1	SMPD1	sphingomyelin phosphodiesterase 1, acid lysosomal
hsa-miR-611	0	0	1	1	1	1	WDR55	WD repeat domain 55
hsa-miR-611	1	0	1	1	1	1	NUMA1	nuclear mitotic apparatus protein 1
hsa-miR-611	1	0	1	1	1	1	POU2F2	POU class 2 homeobox 2
hsa-miR-611	1	0	1	1	1	1	SLC27A4	solute carrier family 27 (fatty acid transporter), member 4
hsa-miR-611	0	0	1	1	1	1	ATXN2L	ataxin 2-like
hsa-miR-611	1	0	1	0	1	1	RNF165	ring finger protein 165
hsa-miR-611	0	0	1	0	0	0	LOC201651	arylacetamide deacetylase (esterase) pseudogene
hsa-miR-611	1	0	1	1	0	0	FHL3	four and a half LIM domains 3
hsa-miR-611	0	0	1	1	1	1	TOMM40L	translocase of outer mitochondrial membrane 40 homolog (yeast)-like
hsa-miR-611	0	0	1	0	0	0	MGC21881	uncharacterized locus MGC21881
hsa-miR-611	0	0	1	1	1	1	FAM122C	family with sequence similarity 122C
hsa-miR-611	1	0	1	1	1	1	CMPK1	cytidine monophosphate (UMP-CMP) kinase 1, cytosolic
hsa-miR-611	0	0	1	1	1	1	PEX14	peroxisomal biogenesis factor 14
hsa-miR-611	0	0	1	1	0	0	TEAD2	TEA domain family member 2
hsa-miR-611	1	0	1	1	1	1	TM9SF4	transmembrane 9 superfamily protein member 4
hsa-miR-611	0	0	1	0	0	0	NBR2	neighbor of BRCA1 gene 2 (non-protein coding)
hsa-miR-611	1	0	1	1	1	1	C16orf45	chromosome 16 open reading frame 45
hsa-miR-611	1	0	1	0	1	1	CDK19	cyclin-dependent kinase 19
hsa-miR-611	0	0	1	1	0	0	GALNTL5	UDP-N-acetyl-alpha-D-galactosamine:polypeptide N-acetylgalactosaminyltransferase-like 5
hsa-miR-611	0	0	1	1	0	0	SPERT	spermatid associated
hsa-miR-611	0	0	1	1	1	1	SELP	selectin P (granule membrane protein 140kDa, antigen CD62)
hsa-miR-611	0	0	1	1	0	0	TSPAN16	tetraspanin 16
hsa-miR-611	0	0	1	1	0	0	FOLR3	folate receptor 3 (gamma)
hsa-miR-611	1	0	1	1	1	1	SF1	splicing factor 1
hsa-miR-611	1	0	1	1	1	1	FGF1	fibroblast growth factor 1 (acidic)
hsa-miR-611	1	0	1	1	1	1	PML	promyelocytic leukemia
hsa-miR-611	0	0	1	1	1	1	ZNF337	zinc finger protein 337
hsa-miR-611	1	0	1	0	1	1	DDX3Y	DEAD (Asp-Glu-Ala-Asp) box polypeptide 3, Y-linked
hsa-miR-611	1	0	1	1	1	1	ZZZ3	zinc finger, ZZ-type containing 3
hsa-miR-611	0	0	1	0	0	0	FAM201A	family with sequence similarity 201, member A
hsa-miR-611	1	0	1	1	0	0	PROSAPIP1	ProSAPiP1 protein
hsa-miR-611	1	0	1	1	1	1	UNK	unkempt homolog (Drosophila)
hsa-miR-611	1	0	1	1	1	1	DACH2	dachshund homolog 2 (Drosophila)
hsa-miR-611	1	0	1	1	0	0	RGL2	ral guanine nucleotide dissociation stimulator-like 2
hsa-miR-611	0	0	1	1	1	1	VPS35	vacuolar protein sorting 35 homolog (S. cerevisiae)
hsa-miR-611	0	0	1	1	0	0	PLB1	phospholipase B1
hsa-miR-611	0	0	1	0	0	0	LOC338579	ankyrin repeat domain-containing protein 30B pseudogene
hsa-miR-611	0	0	1	0	0	0	LOC157381	uncharacterized LOC157381
hsa-miR-611	0	0	1	0	0	0	LINC00347	long intergenic non-protein coding RNA 347
hsa-miR-611	0	0	1	0	0	0	LOC339260	uncharacterized LOC339260
hsa-miR-611	0	0	1	0	0	0	FAM27E3	family with sequence similarity 27, member E3
hsa-miR-611	0	0	1	1	1	1	MST1	macrophage stimulating 1 (hepatocyte growth factor-like)
hsa-miR-611	1	0	1	1	1	1	CARM1	coactivator-associated arginine methyltransferase 1
hsa-miR-611	0	0	1	1	0	0	LILRA1	leukocyte immunoglobulin-like receptor, subfamily A (with TM domain), member 1
hsa-miR-611	1	0	1	1	1	1	CLVS1	clavesin 1
hsa-miR-611	1	0	1	1	1	1	TMPO	thymopoietin
hsa-miR-611	1	0	1	1	1	1	FNDC3A	fibronectin type III domain containing 3A
hsa-miR-611	0	0	1	1	1	1	HLA-DQA1	major histocompatibility complex, class II, DQ alpha 1
hsa-miR-611	0	0	1	0	0	0	LINC00265	long intergenic non-protein coding RNA 265
hsa-miR-611	0	0	1	0	1	1	C17orf51	chromosome 17 open reading frame 51
hsa-miR-611	0	0	1	1	1	1	ELL3	elongation factor RNA polymerase II-like 3
hsa-miR-611	0	0	1	1	1	1	B4GALT4	UDP-Gal:betaGlcNAc beta 1,4- galactosyltransferase, polypeptide 4
hsa-miR-611	0	0	1	1	1	1	GPATCH2	G patch domain containing 2
hsa-miR-611	1	0	1	1	1	1	ADCY6	adenylate cyclase 6
hsa-miR-611	0	0	1	1	1	1	ZNF189	zinc finger protein 189
hsa-miR-611	1	0	1	1	1	1	ZNF449	zinc finger protein 449
hsa-miR-611	1	0	1	1	1	1	FAM129B	family with sequence similarity 129, member B
hsa-miR-611	1	0	1	1	1	1	LINGO1	leucine rich repeat and Ig domain containing 1
hsa-miR-611	1	0	1	1	0	0	TMEM198	transmembrane protein 198
hsa-miR-611	0	0	1	0	0	0	CHADL	chondroadherin-like
hsa-miR-611	0	0	1	0	0	0	LOC283070	uncharacterized LOC283070
hsa-miR-611	0	0	1	0	1	1	SH3RF2	SH3 domain containing ring finger 2
hsa-miR-611	0	0	1	1	0	0	FAM98C	family with sequence similarity 98, member C
hsa-miR-611	0	0	1	1	0	0	DNHD1	dynein heavy chain domain 1
hsa-miR-611	0	0	1	0	0	0	LOC554249	uncharacterized LOC554249
hsa-miR-611	0	0	1	1	0	0	ZNF703	zinc finger protein 703
hsa-miR-611	0	0	1	1	0	0	HERC2P3	hect domain and RLD 2 pseudogene 3
hsa-miR-611	0	0	1	1	0	0	EDDM3A	epididymal protein 3A
hsa-miR-611	0	0	1	1	0	0	TMC1	transmembrane channel-like 1
hsa-miR-611	1	0	1	0	1	1	BTBD3	BTB (POZ) domain containing 3
hsa-miR-611	1	0	1	1	1	1	OSBP2	oxysterol binding protein 2
hsa-miR-611	0	0	1	1	0	0	HSF4	heat shock transcription factor 4
hsa-miR-611	0	0	1	0	0	0	LILRP2	leukocyte immunoglobulin-like receptor pseudogene 2
hsa-miR-611	1	0	1	1	1	1	FOSB	FBJ murine osteosarcoma viral oncogene homolog B
hsa-miR-611	1	0	1	1	0	0	CECR2	cat eye syndrome chromosome region, candidate 2
hsa-miR-611	1	0	1	1	1	1	FOXP1	forkhead box P1
hsa-miR-611	1	0	1	1	1	1	GTDC1	glycosyltransferase-like domain containing 1
hsa-miR-611	0	0	1	0	0	0	OVOS	ovostatin
hsa-miR-611	1	0	1	1	1	1	PGAP1	post-GPI attachment to proteins 1
hsa-miR-611	0	0	1	1	1	1	PICK1	protein interacting with PRKCA 1
hsa-miR-611	0	0	1	1	1	1	POLR2H	polymerase (RNA) II (DNA directed) polypeptide H
hsa-miR-611	1	0	1	1	1	1	VIM	vimentin
hsa-miR-611	1	0	1	1	1	1	TOM1L1	target of myb1 (chicken)-like 1
hsa-miR-611	1	0	1	1	1	1	SYNGR1	synaptogyrin 1
hsa-miR-611	0	0	1	1	1	1	NR2C2AP	nuclear receptor 2C2-associated protein
hsa-miR-611	0	0	1	1	1	1	IER3	immediate early response 3
hsa-miR-611	0	0	1	1	0	0	PTOV1	prostate tumor overexpressed 1
hsa-miR-611	0	0	1	1	0	0	SRM	spermidine synthase
hsa-miR-611	0	0	1	1	0	0	FCGRT	Fc fragment of IgG, receptor, transporter, alpha
hsa-miR-611	0	0	1	1	1	1	CIRBP	cold inducible RNA binding protein
hsa-miR-611	0	0	1	1	1	1	APH1A	anterior pharynx defective 1 homolog A (C. elegans)
hsa-miR-611	0	0	1	1	0	0	NOP56	NOP56 ribonucleoprotein homolog (yeast)
hsa-miR-611	1	0	1	1	1	1	NTM	neurotrimin
hsa-miR-611	0	0	1	0	0	0	LOC729678	uncharacterized LOC729678
hsa-miR-611	1	0	1	1	1	1	TMEM248	transmembrane protein 248
hsa-miR-611	0	0	1	1	0	0	CXorf40A	chromosome X open reading frame 40A
hsa-miR-611	0	0	1	1	0	0	NDUFS7	NADH dehydrogenase (ubiquinone) Fe-S protein 7, 20kDa (NADH-coenzyme Q reductase)
hsa-miR-611	0	0	1	1	0	0	NRSN2	neurensin 2
hsa-miR-611	1	0	1	1	1	1	PPP5C	protein phosphatase 5, catalytic subunit
hsa-miR-611	0	0	1	1	0	0	NARF	nuclear prelamin A recognition factor
hsa-miR-611	0	0	1	1	0	0	RGS9	regulator of G-protein signaling 9
hsa-miR-611	0	0	1	1	0	0	GPR153	G protein-coupled receptor 153
hsa-miR-611	0	0	1	1	1	1	JMJD8	jumonji domain containing 8
hsa-miR-611	1	0	1	1	1	1	EIF1	eukaryotic translation initiation factor 1
hsa-miR-611	1	0	1	1	1	1	GOLGA7	golgin A7
hsa-miR-611	0	0	1	1	0	0	TUSC3	tumor suppressor candidate 3
hsa-miR-611	1	0	1	1	1	1	ARHGEF40	Rho guanine nucleotide exchange factor (GEF) 40
hsa-miR-611	0	0	1	0	1	1	DENR	density-regulated protein
hsa-miR-611	1	0	1	1	1	1	JUNB	jun B proto-oncogene
hsa-miR-611	0	0	1	0	0	0	LOC731789	uncharacterized LOC731789
hsa-miR-611	0	0	1	1	1	1	SLC25A26	solute carrier family 25 (S-adenosylmethionine carrier), member 26
hsa-miR-611	0	0	1	1	0	0	TENC1	tensin like C1 domain containing phosphatase (tensin 2)
hsa-miR-611	0	0	1	1	0	0	GSTT2	glutathione S-transferase theta 2
hsa-miR-611	0	0	1	1	1	1	AKAP17A	A kinase (PRKA) anchor protein 17A
hsa-miR-611	0	0	1	0	1	1	OPRK1	opioid receptor, kappa 1
hsa-miR-611	0	0	1	1	0	0	EMD	emerin
hsa-miR-611	1	0	1	1	1	1	LEP	leptin
hsa-miR-611	1	0	1	1	1	1	OCRL	oculocerebrorenal syndrome of Lowe
hsa-miR-611	1	0	1	1	0	0	PAX2	paired box 2
hsa-miR-611	1	0	1	1	1	1	AQP2	aquaporin 2 (collecting duct)
hsa-miR-611	0	0	1	1	1	1	IGF2	insulin-like growth factor 2 (somatomedin A)
hsa-miR-611	0	0	1	1	1	1	NOS1	nitric oxide synthase 1 (neuronal)
hsa-miR-611	1	0	1	1	1	1	DIO2	deiodinase, iodothyronine, type II
hsa-miR-611	0	0	1	1	1	1	ALG11	asparagine-linked glycosylation 11, alpha-1,2-mannosyltransferase homolog (yeast)
hsa-miR-611	1	0	1	1	1	1	EDA	ectodysplasin A
hsa-miR-611	1	0	1	1	1	1	ATN1	atrophin 1
hsa-miR-611	1	0	1	0	1	1	KIAA2022	KIAA2022
hsa-miR-611	0	0	1	0	1	1	ZNF648	zinc finger protein 648
hsa-miR-611	0	0	1	1	1	1	SAMD13	sterile alpha motif domain containing 13
hsa-miR-611	1	0	1	1	1	1	SLC25A53	solute carrier family 25, member 53
hsa-miR-611	1	0	1	1	1	1	PABPC1L2A	poly(A) binding protein, cytoplasmic 1-like 2A
hsa-miR-611	0	0	1	1	1	1	LDLRAD2	low density lipoprotein receptor class A domain containing 2
hsa-miR-611	1	0	1	1	1	1	SH3PXD2B	SH3 and PX domains 2B
hsa-miR-611	0	0	1	1	0	0	PIR	pirin (iron-binding nuclear protein)
hsa-miR-611	1	0	1	0	1	1	TNRC6B	trinucleotide repeat containing 6B
hsa-miR-611	0	0	1	1	0	0	BRMS1	breast cancer metastasis suppressor 1
hsa-miR-611	1	0	1	1	1	1	KCTD21	potassium channel tetramerisation domain containing 21
hsa-miR-611	1	0	1	1	1	1	UBE2V1	ubiquitin-conjugating enzyme E2 variant 1
hsa-miR-611	0	0	1	0	0	0	CEACAM16	carcinoembryonic antigen-related cell adhesion molecule 16
hsa-miR-611	0	0	1	1	1	1	MAP9	microtubule-associated protein 9
hsa-miR-611	1	0	1	0	1	1	CD83	CD83 molecule
hsa-miR-611	1	0	1	1	1	1	FRS2	fibroblast growth factor receptor substrate 2
hsa-miR-611	1	0	1	1	1	1	RERE	arginine-glutamic acid dipeptide (RE) repeats
hsa-miR-611	1	0	1	1	1	1	KDM6B	lysine (K)-specific demethylase 6B
hsa-miR-611	0	0	1	1	0	0	GSTT2B	glutathione S-transferase theta 2B (gene/pseudogene)
hsa-miR-611	0	0	1	1	0	0	C14orf166B	chromosome 14 open reading frame 166B
hsa-miR-611	0	0	1	1	1	1	G6PC2	glucose-6-phosphatase, catalytic, 2
hsa-miR-611	1	0	1	1	1	1	ASIC1	acid-sensing (proton-gated) ion channel 1
hsa-miR-611	1	0	1	0	0	0	ACAN	aggrecan
hsa-miR-611	0	0	1	1	1	1	AQP8	aquaporin 8
hsa-miR-611	1	0	1	1	1	1	CAMK2D	calcium/calmodulin-dependent protein kinase II delta
hsa-miR-611	1	0	1	1	1	1	CELSR3	cadherin, EGF LAG seven-pass G-type receptor 3 (flamingo homolog, Drosophila)
hsa-miR-611	1	0	1	1	1	1	ARF3	ADP-ribosylation factor 3
hsa-miR-611	0	0	1	1	0	0	CD38	CD38 molecule
hsa-miR-611	1	0	1	1	1	1	CLCN3	chloride channel, voltage-sensitive 3
hsa-miR-611	1	0	1	1	1	1	MASP1	mannan-binding lectin serine peptidase 1 (C4/C2 activating component of Ra-reactive factor)
hsa-miR-611	1	0	1	1	1	1	DPP4	dipeptidyl-peptidase 4
hsa-miR-611	0	0	1	1	0	0	GLP1R	glucagon-like peptide 1 receptor
hsa-miR-611	0	0	1	1	1	1	MTAP	methylthioadenosine phosphorylase
hsa-miR-611	0	0	1	0	1	1	OAZ2	ornithine decarboxylase antizyme 2
hsa-miR-611	0	0	1	1	1	1	PBX1	pre-B-cell leukemia homeobox 1
hsa-miR-611	1	0	1	1	1	1	PHF1	PHD finger protein 1
hsa-miR-611	0	0	1	1	1	1	PIM1	pim-1 oncogene
hsa-miR-611	1	0	1	1	1	1	PLAGL2	pleiomorphic adenoma gene-like 2
hsa-miR-611	0	0	1	1	1	1	PTPRC	protein tyrosine phosphatase, receptor type, C
hsa-miR-611	1	0	1	1	1	1	SMARCD2	SWI/SNF related, matrix associated, actin dependent regulator of chromatin, subfamily d, member 2
hsa-miR-611	0	0	1	1	1	1	SPAG1	sperm associated antigen 1
hsa-miR-611	1	0	1	1	1	1	TRAPPC10	trafficking protein particle complex 10
hsa-miR-611	0	0	1	1	1	1	TRAF3	TNF receptor-associated factor 3
hsa-miR-611	1	0	1	0	1	1	IRS2	insulin receptor substrate 2
hsa-miR-611	1	0	1	1	1	1	MAP7	microtubule-associated protein 7
hsa-miR-611	1	0	1	1	1	1	BCL2L2	BCL2-like 2
hsa-miR-611	1	0	1	1	1	1	ARL3	ADP-ribosylation factor-like 3
hsa-miR-611	0	0	1	1	0	0	CPT1B	carnitine palmitoyltransferase 1B (muscle)
hsa-miR-611	1	0	1	1	1	1	DUSP5	dual specificity phosphatase 5
hsa-miR-611	1	0	1	1	1	1	DUSP8	dual specificity phosphatase 8
hsa-miR-611	0	0	1	1	0	0	ASIC3	acid-sensing (proton-gated) ion channel 3
hsa-miR-611	1	0	1	1	1	1	KIF3B	kinesin family member 3B
hsa-miR-611	0	0	1	1	1	1	PRF1	perforin 1 (pore forming protein)
hsa-miR-611	1	0	1	0	1	1	SCD	stearoyl-CoA desaturase (delta-9-desaturase)
hsa-miR-611	1	0	1	1	1	1	APLNR	apelin receptor
hsa-miR-611	1	0	1	1	0	0	SALL2	sal-like 2 (Drosophila)
hsa-miR-611	0	0	1	1	1	1	FOSL1	FOS-like antigen 1
hsa-miR-611	1	0	1	1	1	1	AKT3	v-akt murine thymoma viral oncogene homolog 3 (protein kinase B, gamma)
hsa-miR-611	0	0	1	1	0	0	EBI3	Epstein-Barr virus induced 3
hsa-miR-611	0	0	1	1	1	1	RNF41	ring finger protein 41
hsa-miR-611	1	0	1	1	1	1	EFS	embryonal Fyn-associated substrate
hsa-miR-611	1	0	1	1	1	1	MAT2A	methionine adenosyltransferase II, alpha
hsa-miR-611	1	0	1	1	1	1	MTF1	metal-regulatory transcription factor 1
hsa-miR-611	1	0	1	1	1	1	ENDOU	endonuclease, polyU-specific
hsa-miR-611	1	0	1	1	1	1	DYNC1LI2	dynein, cytoplasmic 1, light intermediate chain 2
hsa-miR-611	1	0	1	1	1	1	NFATC1	nuclear factor of activated T-cells, cytoplasmic, calcineurin-dependent 1
hsa-miR-611	1	0	1	1	1	1	PRKCD	protein kinase C, delta
hsa-miR-611	1	0	1	1	1	1	SMC1A	structural maintenance of chromosomes 1A
hsa-miR-611	1	0	1	1	1	1	BTG2	BTG family, member 2
hsa-miR-611	1	0	1	1	1	1	RAB35	RAB35, member RAS oncogene family
hsa-miR-611	1	0	1	1	1	1	SYN1	synapsin I
hsa-miR-611	1	0	1	1	1	1	LDOC1	leucine zipper, down-regulated in cancer 1
hsa-miR-611	1	0	1	1	1	1	TLL2	tolloid-like 2
hsa-miR-611	0	0	1	1	1	1	SERTAD1	SERTA domain containing 1
hsa-miR-611	1	0	1	1	1	1	VAMP1	vesicle-associated membrane protein 1 (synaptobrevin 1)
hsa-miR-611	0	0	1	1	1	1	DAPK2	death-associated protein kinase 2
hsa-miR-611	1	0	1	1	1	1	EHD3	EH-domain containing 3
hsa-miR-611	0	0	1	1	0	0	S100A6	S100 calcium binding protein A6
hsa-miR-611	1	0	1	1	1	1	ZNF592	zinc finger protein 592
hsa-miR-611	1	0	1	1	1	1	RALGPS1	Ral GEF with PH domain and SH3 binding motif 1
hsa-miR-611	0	0	1	1	1	1	ZNF536	zinc finger protein 536
hsa-miR-611	0	0	1	1	1	1	TATDN2	TatD DNase domain containing 2
hsa-miR-611	1	0	1	0	1	1	TRIL	TLR4 interactor with leucine-rich repeats
hsa-miR-611	1	0	1	0	1	1	PDAP1	PDGFA associated protein 1
hsa-miR-611	1	0	1	1	1	1	PLEKHA6	pleckstrin homology domain containing, family A member 6
hsa-miR-611	1	0	1	0	1	1	KHNYN	KH and NYN domain containing
hsa-miR-611	1	0	1	0	1	1	LARP1	La ribonucleoprotein domain family, member 1
hsa-miR-611	1	0	1	0	1	1	SRGAP2	SLIT-ROBO Rho GTPase activating protein 2
hsa-miR-611	1	0	1	1	1	1	MED13L	mediator complex subunit 13-like
hsa-miR-611	1	0	1	1	1	1	RIMBP2	RIMS binding protein 2
hsa-miR-611	0	0	1	1	1	1	KRT23	keratin 23 (histone deacetylase inducible)
hsa-miR-611	1	0	1	1	1	1	CHD5	chromodomain helicase DNA binding protein 5
hsa-miR-611	1	0	1	0	1	1	PPP1R16B	protein phosphatase 1, regulatory subunit 16B
hsa-miR-611	1	0	1	1	1	1	WT1-AS	WT1 antisense RNA
hsa-miR-611	1	0	1	1	1	1	RAB14	RAB14, member RAS oncogene family
hsa-miR-611	0	0	1	1	0	0	SRRM2	serine/arginine repetitive matrix 2
hsa-miR-611	1	0	1	1	0	0	C17orf59	chromosome 17 open reading frame 59
hsa-miR-611	1	0	1	1	1	1	ZNF280C	zinc finger protein 280C
hsa-miR-611	1	0	1	1	1	1	ALKBH5	alkB, alkylation repair homolog 5 (E. coli)
hsa-miR-611	1	0	1	1	1	1	FBXO34	F-box protein 34
hsa-miR-611	0	0	1	1	1	1	TMLHE	trimethyllysine hydroxylase, epsilon
hsa-miR-611	0	0	1	1	1	1	HDAC8	histone deacetylase 8
hsa-miR-611	0	0	1	1	1	1	NPAP1	nuclear pore associated protein 1
hsa-miR-611	0	0	1	1	0	0	CD248	CD248 molecule, endosialin
hsa-miR-611	0	0	1	1	1	1	PLXDC1	plexin domain containing 1
hsa-miR-611	0	0	1	1	1	1	SHROOM4	shroom family member 4
hsa-miR-611	1	0	1	1	1	1	RGAG1	retrotransposon gag domain containing 1
hsa-miR-611	1	0	1	0	1	1	ALPK3	alpha-kinase 3
hsa-miR-611	1	0	1	0	1	1	KIAA1456	KIAA1456
hsa-miR-611	1	0	1	1	1	1	RANBP10	RAN binding protein 10
hsa-miR-611	0	0	1	1	0	0	MAGEA5	melanoma antigen family A, 5
hsa-miR-611	0	0	1	1	0	0	HOXD11	homeobox D11
hsa-miR-611	1	0	1	0	1	1	TP53INP2	tumor protein p53 inducible nuclear protein 2
hsa-miR-611	0	0	1	1	1	1	VPS11	vacuolar protein sorting 11 homolog (S. cerevisiae)
hsa-miR-611	0	0	1	1	0	0	TMSB15A	thymosin beta 15a
hsa-miR-611	1	0	1	1	0	0	SDF2L1	stromal cell-derived factor 2-like 1
hsa-miR-611	1	0	1	0	1	1	CSNK1G1	casein kinase 1, gamma 1
hsa-miR-611	1	0	1	1	1	1	LPPR2	lipid phosphate phosphatase-related protein type 2
hsa-miR-611	1	0	1	1	1	1	C16orf58	chromosome 16 open reading frame 58
hsa-miR-611	1	0	1	1	0	0	PHF23	PHD finger protein 23
hsa-miR-611	0	0	1	1	0	0	NOL12	nucleolar protein 12
hsa-miR-611	1	0	1	1	1	1	LRRC2	leucine rich repeat containing 2
hsa-miR-611	0	0	1	1	1	1	SH3D21	SH3 domain containing 21
hsa-miR-611	1	0	1	1	1	1	HKDC1	hexokinase domain containing 1
hsa-miR-611	1	0	1	1	1	1	TRIM8	tripartite motif containing 8
hsa-miR-611	0	0	1	1	1	1	FCRL4	Fc receptor-like 4
hsa-miR-611	1	0	1	1	1	1	C1QTNF2	C1q and tumor necrosis factor related protein 2
hsa-miR-611	1	0	1	1	1	1	FBXO30	F-box protein 30
hsa-miR-611	0	0	1	1	1	1	C4orf17	chromosome 4 open reading frame 17
hsa-miR-611	0	0	1	1	0	0	C9orf89	chromosome 9 open reading frame 89
hsa-miR-611	1	0	1	1	0	0	SLX4	SLX4 structure-specific endonuclease subunit homolog (S. cerevisiae)
hsa-miR-611	1	0	1	1	1	1	AJUBA	ajuba LIM protein
hsa-miR-611	1	0	1	1	1	1	EPT1	ethanolaminephosphotransferase 1 (CDP-ethanolamine-specific)
hsa-miR-611	0	0	1	1	0	0	CARD9	caspase recruitment domain family, member 9
hsa-miR-611	1	0	1	1	1	1	XKR4	XK, Kell blood group complex subunit-related family, member 4
hsa-miR-611	0	0	1	1	1	1	LENG8	leukocyte receptor cluster (LRC) member 8
hsa-miR-611	0	0	1	1	1	1	CLEC4D	C-type lectin domain family 4, member D
hsa-miR-611	1	0	1	1	1	1	WHSC1	Wolf-Hirschhorn syndrome candidate 1
hsa-miR-611	1	0	1	0	1	1	CENPBD1	CENPB DNA-binding domains containing 1
hsa-miR-611	0	0	1	1	0	0	IL27	interleukin 27
hsa-miR-611	1	0	1	1	1	1	C7orf60	chromosome 7 open reading frame 60
hsa-miR-611	0	0	1	1	1	1	DAND5	DAN domain family, member 5
hsa-miR-611	0	0	1	1	0	0	MUC20	mucin 20, cell surface associated
hsa-miR-611	0	0	1	1	0	0	PDILT	protein disulfide isomerase-like, testis expressed
hsa-miR-611	1	0	1	1	1	1	SYT9	synaptotagmin IX
hsa-miR-611	0	0	1	0	1	1	C15orf37	chromosome 15 open reading frame 37
hsa-miR-611	0	0	1	1	1	1	C16orf54	chromosome 16 open reading frame 54
hsa-miR-611	0	0	1	1	1	1	ATPIF1	ATPase inhibitory factor 1
hsa-miR-611	0	0	1	1	0	0	C2orf53	chromosome 2 open reading frame 53
hsa-miR-611	1	0	1	0	1	1	ZDHHC21	zinc finger, DHHC-type containing 21
hsa-miR-611	0	0	1	0	1	1	HCG27	HLA complex group 27 (non-protein coding)
hsa-miR-611	0	0	1	1	1	1	HTR3D	5-hydroxytryptamine (serotonin) receptor 3D, ionotropic
hsa-miR-611	1	0	1	1	1	1	PXMP4	peroxisomal membrane protein 4, 24kDa
hsa-miR-611	1	0	1	1	1	1	RBM38	RNA binding motif protein 38
hsa-miR-611	0	0	1	1	0	0	KLRG2	killer cell lectin-like receptor subfamily G, member 2
hsa-miR-611	0	0	1	1	1	1	LHFPL4	lipoma HMGIC fusion partner-like 4
hsa-miR-611	0	0	1	1	1	1	COL18A1-AS1	COL18A1 antisense RNA 1
hsa-miR-611	1	0	1	1	1	1	TMEM189-UBE2V1	TMEM189-UBE2V1 readthrough
hsa-miR-611	0	0	1	1	1	1	KCNRG	potassium channel regulator
hsa-miR-611	0	0	1	0	0	0	C16orf47	chromosome 16 open reading frame 47
hsa-miR-611	1	0	1	1	0	0	CD164L2	CD164 sialomucin-like 2
hsa-miR-611	0	0	1	1	1	1	DNAH10	dynein, axonemal, heavy chain 10
hsa-miR-611	1	0	1	1	1	1	TEX19	testis expressed 19
hsa-miR-611	1	0	1	1	1	1	C11orf87	chromosome 11 open reading frame 87
hsa-miR-611	0	0	1	0	0	0	NXF4	nuclear RNA export factor 4 pseudogene
hsa-miR-611	0	0	1	0	0	0	SLC25A3P1	solute carrier family 25 (mitochondrial carrier; phosphate carrier), member 3 pseudogene 1
hsa-miR-611	0	0	1	0	0	0	SNORA3	small nucleolar RNA, H/ACA box 3
hsa-miR-611	0	0	1	0	0	0	RNF126P1	ring finger protein 126 pseudogene 1
hsa-miR-611	0	0	1	0	0	0	SNORD116-22	small nucleolar RNA, C/D box 116-22
hsa-miR-611	1	0	1	0	1	1	NFIX	nuclear factor I/X (CCAAT-binding transcription factor)
hsa-miR-611	1	0	1	1	0	0	TNXB	tenascin XB
hsa-miR-611	1	0	1	1	1	1	ATF6B	activating transcription factor 6 beta
hsa-miR-611	0	0	1	1	0	0	STK19	serine/threonine kinase 19
hsa-miR-611	1	0	1	1	0	0	DTNB	dystrobrevin, beta
hsa-miR-611	0	0	1	1	0	0	SPATA20	spermatogenesis associated 20
hsa-miR-611	0	0	1	1	1	1	ARHGAP33	Rho GTPase activating protein 33
hsa-miR-611	0	0	1	1	1	1	SS18L2	synovial sarcoma translocation gene on chromosome 18-like 2
hsa-miR-611	0	0	0	1	0	0	SCTR	secretin receptor
hsa-miR-611	1	0	1	1	1	1	PSD	pleckstrin and Sec7 domain containing
hsa-miR-611	0	0	1	1	0	0	RTN4R	reticulon 4 receptor
hsa-miR-611	0	0	1	1	0	0	PSMA4	proteasome (prosome, macropain) subunit, alpha type, 4
hsa-miR-611	1	0	1	1	1	1	PRSS22	protease, serine, 22
hsa-miR-611	0	0	1	1	1	1	SPP2	secreted phosphoprotein 2, 24kDa
hsa-miR-611	1	0	1	1	0	0	REXO1	REX1, RNA exonuclease 1 homolog (S. cerevisiae)
hsa-miR-611	1	0	1	1	1	1	NGFR	nerve growth factor receptor
hsa-miR-611	0	0	0	1	0	0	TSPAN32	tetraspanin 32
hsa-miR-611	0	0	1	1	1	1	OXCT1	3-oxoacid CoA transferase 1
hsa-miR-611	1	0	1	1	0	0	ITGB4	integrin, beta 4
hsa-miR-611	0	0	1	1	1	1	SPG21	spastic paraplegia 21 (autosomal recessive, Mast syndrome)
hsa-miR-611	0	0	1	1	0	0	OCEL1	occludin/ELL domain containing 1
hsa-miR-611	0	0	0	1	0	0	IGFALS	insulin-like growth factor binding protein, acid labile subunit
hsa-miR-611	0	0	1	1	1	1	TIMM13	translocase of inner mitochondrial membrane 13 homolog (yeast)
hsa-miR-611	0	0	0	1	1	1	GADD45B	growth arrest and DNA-damage-inducible, beta
hsa-miR-611	1	0	1	1	0	0	MMP11	matrix metallopeptidase 11 (stromelysin 3)
hsa-miR-611	1	0	1	1	1	1	OSM	oncostatin M
hsa-miR-611	0	0	0	1	0	0	SLC25A1	solute carrier family 25 (mitochondrial carrier; citrate transporter), member 1
hsa-miR-611	0	0	1	1	0	0	PDXP	pyridoxal (pyridoxine, vitamin B6) phosphatase
hsa-miR-611	0	0	1	1	0	0	SH3BP1	SH3-domain binding protein 1
hsa-miR-611	1	0	1	1	1	1	ASPHD2	aspartate beta-hydroxylase domain containing 2
hsa-miR-611	0	0	0	1	0	0	POLR2F	polymerase (RNA) II (DNA directed) polypeptide F
hsa-miR-611	0	0	1	1	1	1	RASL10A	RAS-like, family 10, member A
hsa-miR-611	0	0	1	1	0	0	TTLL12	tubulin tyrosine ligase-like family, member 12
hsa-miR-611	0	0	1	1	1	1	TAB1	TGF-beta activated kinase 1/MAP3K7 binding protein 1
hsa-miR-611	0	0	1	1	1	1	LBP	lipopolysaccharide binding protein
hsa-miR-611	0	0	0	1	0	0	WDR13	WD repeat domain 13
hsa-miR-611	0	0	0	1	1	1	NME3	NME/NM23 nucleoside diphosphate kinase 3
hsa-miR-611	1	0	0	1	1	1	C16orf88	chromosome 16 open reading frame 88
hsa-miR-611	0	0	1	1	1	1	OIP5	Opa interacting protein 5
hsa-miR-611	0	0	0	1	0	0	SARS2	seryl-tRNA synthetase 2, mitochondrial
hsa-miR-611	1	0	1	1	1	1	SNRNP70	small nuclear ribonucleoprotein 70kDa (U1)
hsa-miR-611	0	0	1	1	0	0	CKM	creatine kinase, muscle
hsa-miR-611	0	0	0	1	0	0	SHD	Src homology 2 domain containing transforming protein D
hsa-miR-611	0	0	0	1	1	1	CACNG7	calcium channel, voltage-dependent, gamma subunit 7
hsa-miR-611	0	0	0	1	1	1	PIK3R2	phosphoinositide-3-kinase, regulatory subunit 2 (beta)
hsa-miR-611	0	0	0	1	0	0	GAPDHS	glyceraldehyde-3-phosphate dehydrogenase, spermatogenic
hsa-miR-611	0	0	1	1	1	1	OGDH	oxoglutarate (alpha-ketoglutarate) dehydrogenase (lipoamide)
hsa-miR-611	0	0	1	1	0	0	PLOD3	procollagen-lysine, 2-oxoglutarate 5-dioxygenase 3
hsa-miR-611	0	0	0	1	1	1	CSF3	colony stimulating factor 3 (granulocyte)
hsa-miR-611	0	0	1	1	1	1	CCL2	chemokine (C-C motif) ligand 2
hsa-miR-611	0	0	1	1	1	1	CCL8	chemokine (C-C motif) ligand 8
hsa-miR-611	0	0	0	1	1	1	POU2AF1	POU class 2 associating factor 1
hsa-miR-611	1	0	1	1	1	1	PRDM4	PR domain containing 4
hsa-miR-611	0	0	1	1	0	0	MVK	mevalonate kinase
hsa-miR-611	1	0	1	1	0	0	MYL2	myosin, light chain 2, regulatory, cardiac, slow
hsa-miR-611	0	0	1	1	1	1	PRSS16	protease, serine, 16 (thymus)
hsa-miR-611	0	0	0	1	0	0	REEP6	receptor accessory protein 6
hsa-miR-611	0	0	1	1	0	0	MIIP	migration and invasion inhibitory protein
hsa-miR-611	0	0	0	1	0	0	OSCP1	organic solute carrier partner 1
hsa-miR-611	0	0	1	1	1	1	ATP6V0B	ATPase, H+ transporting, lysosomal 21kDa, V0 subunit b
hsa-miR-611	0	0	0	1	1	1	TNN	tenascin N
hsa-miR-611	1	0	1	1	1	1	ACHE	acetylcholinesterase
hsa-miR-611	0	0	0	1	0	0	GSTM2	glutathione S-transferase mu 2 (muscle)
hsa-miR-611	0	0	0	1	1	1	UNG	uracil-DNA glycosylase
hsa-miR-611	0	0	1	1	0	0	FAAH	fatty acid amide hydrolase
hsa-miR-611	0	0	1	1	0	0	UBE2C	ubiquitin-conjugating enzyme E2C
hsa-miR-611	0	0	1	1	0	0	PI3	peptidase inhibitor 3, skin-derived
hsa-miR-611	1	0	1	1	1	1	SLC12A5	solute carrier family 12 (potassium/chloride transporter), member 5
hsa-miR-611	0	0	1	1	0	0	RRP36	ribosomal RNA processing 36 homolog (S. cerevisiae)
hsa-miR-611	0	0	1	1	0	0	ABCC10	ATP-binding cassette, sub-family C (CFTR/MRP), member 10
hsa-miR-611	0	0	1	1	1	1	UNC5CL	unc-5 homolog C (C. elegans)-like
hsa-miR-611	0	0	1	1	0	0	MBOAT7	membrane bound O-acyltransferase domain containing 7
hsa-miR-611	1	0	0	1	1	1	CLPP	ClpP caseinolytic peptidase, ATP-dependent, proteolytic subunit homolog (E. coli)
hsa-miR-611	0	0	0	1	0	0	S1PR4	sphingosine-1-phosphate receptor 4
hsa-miR-611	0	0	0	1	1	1	PCID2	PCI domain containing 2
hsa-miR-611	0	0	1	1	0	0	LRFN3	leucine rich repeat and fibronectin type III domain containing 3
hsa-miR-611	0	0	1	1	1	1	ZNF598	zinc finger protein 598
hsa-miR-611	0	0	0	1	0	0	TICAM1	toll-like receptor adaptor molecule 1
hsa-miR-611	0	0	0	1	0	0	TUBA4A	tubulin, alpha 4a
hsa-miR-611	0	0	1	1	1	1	CYTH4	cytohesin 4
hsa-miR-611	1	0	1	1	1	1	KCTD17	potassium channel tetramerisation domain containing 17
hsa-miR-611	0	0	0	1	0	0	KLK9	kallikrein-related peptidase 9
hsa-miR-611	0	0	1	1	1	1	C16orf62	chromosome 16 open reading frame 62
hsa-miR-611	0	0	0	1	0	0	DHX58	DEXH (Asp-Glu-X-His) box polypeptide 58
hsa-miR-611	0	0	1	1	0	0	GPR162	G protein-coupled receptor 162
hsa-miR-611	0	0	0	1	0	0	LEPREL2	leprecan-like 2
hsa-miR-611	0	0	0	1	0	0	TYMP	thymidine phosphorylase
hsa-miR-611	0	0	1	1	0	0	NDUFA2	NADH dehydrogenase (ubiquinone) 1 alpha subcomplex, 2, 8kDa
hsa-miR-611	0	0	0	1	0	0	KRT75	keratin 75
hsa-miR-611	0	0	0	1	0	0	ZSCAN10	zinc finger and SCAN domain containing 10
hsa-miR-611	0	0	1	1	1	1	APOE	apolipoprotein E
hsa-miR-611	0	0	0	1	0	0	INF2	inverted formin, FH2 and WH2 domain containing
hsa-miR-611	0	0	1	1	1	1	PGPEP1	pyroglutamyl-peptidase I
hsa-miR-611	0	0	0	1	0	0	CALY	calcyon neuron-specific vesicular protein
hsa-miR-611	0	0	1	1	1	1	EDA2R	ectodysplasin A2 receptor
hsa-miR-611	0	0	0	1	0	0	CCL25	chemokine (C-C motif) ligand 25
hsa-miR-611	0	0	1	1	0	0	HSH2D	hematopoietic SH2 domain containing
hsa-miR-611	0	0	1	1	1	1	VPS25	vacuolar protein sorting 25 homolog (S. cerevisiae)
hsa-miR-611	1	0	0	1	1	1	ZSWIM4	zinc finger, SWIM-type containing 4
hsa-miR-611	1	0	1	1	1	1	ADAMTS8	ADAM metallopeptidase with thrombospondin type 1 motif, 8
hsa-miR-611	0	0	1	1	1	1	HRK	harakiri, BCL2 interacting protein (contains only BH3 domain)
hsa-miR-611	0	0	0	1	1	1	CDK4	cyclin-dependent kinase 4
hsa-miR-611	1	0	0	1	1	1	TGFBRAP1	transforming growth factor, beta receptor associated protein 1
hsa-miR-611	0	0	0	1	0	0	CAMK2B	calcium/calmodulin-dependent protein kinase II beta
hsa-miR-611	0	0	0	1	0	0	CHAD	chondroadherin
hsa-miR-611	0	0	1	1	1	1	KLC4	kinesin light chain 4
hsa-miR-611	0	0	1	1	1	1	FGFBP1	fibroblast growth factor binding protein 1
hsa-miR-611	0	0	1	1	0	0	VWF	von Willebrand factor
hsa-miR-611	1	0	1	1	1	1	HERC2	HECT and RLD domain containing E3 ubiquitin protein ligase 2
hsa-miR-611	0	0	0	1	0	0	TNFRSF13B	tumor necrosis factor receptor superfamily, member 13B
hsa-miR-611	0	0	1	1	0	0	PSMD11	proteasome (prosome, macropain) 26S subunit, non-ATPase, 11
hsa-miR-611	0	0	0	1	0	0	AP3B2	adaptor-related protein complex 3, beta 2 subunit
hsa-miR-611	1	0	0	1	0	0	LHX5	LIM homeobox 5
hsa-miR-611	0	0	0	1	0	0	FAH	fumarylacetoacetate hydrolase (fumarylacetoacetase)
hsa-miR-611	0	0	1	1	1	1	PRPF40B	PRP40 pre-mRNA processing factor 40 homolog B (S. cerevisiae)
hsa-miR-611	1	0	1	1	1	1	NEO1	neogenin 1
hsa-miR-611	1	0	0	1	0	0	SERPINA3	serpin peptidase inhibitor, clade A (alpha-1 antiproteinase, antitrypsin), member 3
hsa-miR-611	0	0	1	1	0	0	ATP5B	ATP synthase, H+ transporting, mitochondrial F1 complex, beta polypeptide
hsa-miR-611	1	0	1	1	1	1	ZNF282	zinc finger protein 282
hsa-miR-611	0	0	1	1	0	0	ITGA2B	integrin, alpha 2b (platelet glycoprotein IIb of IIb/IIIa complex, antigen CD41)
hsa-miR-611	0	0	0	1	0	0	ATP4A	ATPase, H+/K+ exchanging, alpha polypeptide
hsa-miR-611	0	0	1	1	0	0	HPN	hepsin
hsa-miR-611	0	0	0	1	0	0	OVOL3	ovo-like 3 (Drosophila)
hsa-miR-611	0	0	1	1	1	1	PRDX1	peroxiredoxin 1
hsa-miR-611	0	0	1	1	0	0	PGS1	phosphatidylglycerophosphate synthase 1
hsa-miR-611	0	0	0	1	1	1	LGALS3BP	lectin, galactoside-binding, soluble, 3 binding protein
hsa-miR-611	1	0	1	1	1	1	ATP2B3	ATPase, Ca++ transporting, plasma membrane 3
hsa-miR-611	0	0	1	1	1	1	TFAP2E	transcription factor AP-2 epsilon (activating enhancer binding protein 2 epsilon)
hsa-miR-611	0	0	1	1	0	0	GNLY	granulysin
hsa-miR-611	1	0	1	1	1	1	VAMP8	vesicle-associated membrane protein 8 (endobrevin)
hsa-miR-611	0	0	1	1	0	0	IFT46	intraflagellar transport 46 homolog (Chlamydomonas)
hsa-miR-611	0	0	1	1	1	1	DGKD	diacylglycerol kinase, delta 130kDa
hsa-miR-611	0	0	0	1	0	0	GPR108	G protein-coupled receptor 108
hsa-miR-611	1	0	1	1	1	1	ASB1	ankyrin repeat and SOCS box containing 1
hsa-miR-611	0	0	0	1	0	0	KLKB1	kallikrein B, plasma (Fletcher factor) 1
hsa-miR-611	0	0	1	1	0	0	GCKR	glucokinase (hexokinase 4) regulator
hsa-miR-611	1	0	1	1	1	1	MAP4	microtubule-associated protein 4
hsa-miR-611	0	0	0	1	0	0	TMEM175	transmembrane protein 175
hsa-miR-611	1	0	1	1	1	1	MGAT4A	mannosyl (alpha-1,3-)-glycoprotein beta-1,4-N-acetylglucosaminyltransferase, isozyme A
hsa-miR-611	0	0	1	1	1	1	NPR3	natriuretic peptide receptor C/guanylate cyclase C (atrionatriuretic peptide receptor C)
hsa-miR-611	0	0	1	1	0	0	FAM188B	family with sequence similarity 188, member B
hsa-miR-611	0	0	1	1	1	1	TJP2	tight junction protein 2
hsa-miR-611	0	0	1	1	0	0	INTS9	integrator complex subunit 9
hsa-miR-611	0	0	1	1	1	1	PON3	paraoxonase 3
hsa-miR-611	0	0	1	1	1	1	MAPKAP1	mitogen-activated protein kinase associated protein 1
hsa-miR-611	0	0	0	1	0	0	PRPF6	PRP6 pre-mRNA processing factor 6 homolog (S. cerevisiae)
hsa-miR-611	1	0	1	1	1	1	TARBP2	TAR (HIV-1) RNA binding protein 2
hsa-miR-611	0	0	1	1	1	1	ZIC5	Zic family member 5
hsa-miR-611	1	0	1	1	0	0	CDH24	cadherin 24, type 2
hsa-miR-611	1	0	1	1	0	0	SCAMP2	secretory carrier membrane protein 2
hsa-miR-611	0	0	0	1	1	1	DEF8	differentially expressed in FDCP 8 homolog (mouse)
hsa-miR-611	1	0	1	1	1	1	GAS8	growth arrest-specific 8
hsa-miR-611	0	0	0	1	0	0	OR4D1	olfactory receptor, family 4, subfamily D, member 1
hsa-miR-611	1	0	1	1	0	0	G6PC3	glucose 6 phosphatase, catalytic, 3
hsa-miR-611	0	0	1	1	1	1	FN3KRP	fructosamine 3 kinase related protein
hsa-miR-611	0	0	0	1	0	0	SECTM1	secreted and transmembrane 1
hsa-miR-611	0	0	0	1	1	1	ERBB2	v-erb-b2 erythroblastic leukemia viral oncogene homolog 2, neuro/glioblastoma derived oncogene homolog (avian)
hsa-miR-611	1	0	1	1	1	1	IGFBP4	insulin-like growth factor binding protein 4
hsa-miR-611	0	0	0	1	0	0	CBLC	Cbl proto-oncogene, E3 ubiquitin protein ligase C
hsa-miR-611	0	0	1	1	1	1	SLC6A3	solute carrier family 6 (neurotransmitter transporter, dopamine), member 3
hsa-miR-611	0	0	1	1	0	0	EVI5L	ecotropic viral integration site 5-like
hsa-miR-611	1	0	1	1	1	1	PRUNE	prune homolog (Drosophila)
hsa-miR-611	1	0	1	1	1	1	GABRB2	gamma-aminobutyric acid (GABA) A receptor, beta 2
hsa-miR-611	0	0	1	1	1	1	NHP2	NHP2 ribonucleoprotein homolog (yeast)
hsa-miR-611	0	0	0	1	0	0	ANO7	anoctamin 7
hsa-miR-611	0	0	0	1	0	0	FRMPD3	FERM and PDZ domain containing 3
hsa-miR-611	0	0	1	1	0	0	DOK2	docking protein 2, 56kDa
hsa-miR-611	0	0	1	1	0	0	OLFM1	olfactomedin 1
hsa-miR-611	1	0	1	1	0	0	LAMTOR1	late endosomal/lysosomal adaptor, MAPK and MTOR activator 1
hsa-miR-611	0	0	1	1	0	0	WDR74	WD repeat domain 74
hsa-miR-611	0	0	1	1	0	0	VPS51	vacuolar protein sorting 51 homolog (S. cerevisiae)
hsa-miR-611	1	0	1	1	1	1	VEGFC	vascular endothelial growth factor C
hsa-miR-611	1	0	1	1	1	1	CEP128	centrosomal protein 128kDa
hsa-miR-611	1	0	0	1	1	1	NCAPD3	non-SMC condensin II complex, subunit D3
hsa-miR-611	1	0	1	1	1	1	GRIA4	glutamate receptor, ionotropic, AMPA 4
hsa-miR-611	1	0	0	1	0	0	FAM92B	family with sequence similarity 92, member B
hsa-miR-611	1	0	0	1	1	1	RHOC	ras homolog family member C
hsa-miR-611	1	0	1	1	1	1	FZD1	frizzled family receptor 1
hsa-miR-611	0	0	1	1	1	1	ZFAND2B	zinc finger, AN1-type domain 2B
hsa-miR-611	0	0	0	1	0	0	HTR6	5-hydroxytryptamine (serotonin) receptor 6, G protein-coupled
hsa-miR-611	0	0	1	1	0	0	SPATA2L	spermatogenesis associated 2-like
hsa-miR-611	1	0	1	1	1	1	ACTC1	actin, alpha, cardiac muscle 1
hsa-miR-611	0	0	1	1	0	0	ATP6V0D1	ATPase, H+ transporting, lysosomal 38kDa, V0 subunit d1
hsa-miR-611	0	0	1	1	1	1	ZNF714	zinc finger protein 714
hsa-miR-611	0	0	0	1	0	0	AMICA1	adhesion molecule, interacts with CXADR antigen 1
hsa-miR-611	0	0	1	1	0	0	TLCD1	TLC domain containing 1
hsa-miR-611	0	0	0	1	0	0	CCDC116	coiled-coil domain containing 116
hsa-miR-611	0	0	0	1	0	0	CDK3	cyclin-dependent kinase 3
hsa-miR-611	1	0	1	1	1	1	STAT5B	signal transducer and activator of transcription 5B
hsa-miR-611	0	0	0	1	0	0	SDR9C7	short chain dehydrogenase/reductase family 9C, member 7
hsa-miR-611	0	0	0	1	0	0	MSLNL	mesothelin-like
hsa-miR-611	0	0	0	1	0	0	NTN3	netrin 3
hsa-miR-611	0	0	0	1	0	0	C1orf159	chromosome 1 open reading frame 159
hsa-miR-611	0	0	0	1	1	1	ZNF496	zinc finger protein 496
hsa-miR-611	0	0	1	1	0	0	TMOD4	tropomodulin 4 (muscle)
hsa-miR-611	0	0	0	1	0	0	DRD3	dopamine receptor D3
hsa-miR-611	0	0	1	1	1	1	UVSSA	UV-stimulated scaffold protein A
hsa-miR-611	0	0	0	1	0	0	LRPAP1	low density lipoprotein receptor-related protein associated protein 1
hsa-miR-611	0	0	0	1	1	1	MFI2	antigen p97 (melanoma associated) identified by monoclonal antibodies 133.2 and 96.5
hsa-miR-611	0	0	1	1	0	0	PLXNB1	plexin B1
hsa-miR-611	0	0	0	1	0	0	PHOX2A	paired-like homeobox 2a
hsa-miR-611	1	0	1	1	1	1	HEPACAM	hepatic and glial cell adhesion molecule
hsa-miR-611	0	0	0	1	0	0	STK32C	serine/threonine kinase 32C
hsa-miR-611	0	0	1	1	0	0	RAPSN	receptor-associated protein of the synapse
hsa-miR-611	0	0	0	1	0	0	C16orf78	chromosome 16 open reading frame 78
hsa-miR-611	1	0	1	1	1	1	LARP6	La ribonucleoprotein domain family, member 6
hsa-miR-611	0	0	0	1	1	1	PCBD1	pterin-4 alpha-carbinolamine dehydratase/dimerization cofactor of hepatocyte nuclear factor 1 alpha
hsa-miR-611	1	0	1	1	1	1	ILK	integrin-linked kinase
hsa-miR-611	0	0	0	1	0	0	GPR182	G protein-coupled receptor 182
hsa-miR-611	0	0	1	1	1	1	ACSF2	acyl-CoA synthetase family member 2
hsa-miR-611	0	0	0	1	0	0	DAPK3	death-associated protein kinase 3
hsa-miR-611	0	0	0	1	0	0	MFSD3	major facilitator superfamily domain containing 3
hsa-miR-611	1	0	0	1	1	1	RCOR2	REST corepressor 2
hsa-miR-611	0	0	1	1	0	0	GHDC	GH3 domain containing
hsa-miR-611	0	0	0	1	0	0	NARFL	nuclear prelamin A recognition factor-like
hsa-miR-611	0	0	0	1	0	0	E4F1	E4F transcription factor 1
hsa-miR-611	0	0	1	1	0	0	C11orf85	chromosome 11 open reading frame 85
hsa-miR-611	0	0	0	1	1	1	RBKS	ribokinase
hsa-miR-611	0	0	1	1	1	1	MPHOSPH9	M-phase phosphoprotein 9
hsa-miR-611	0	0	1	1	0	0	KARS	lysyl-tRNA synthetase
hsa-miR-611	1	0	1	1	1	1	UBTF	upstream binding transcription factor, RNA polymerase I
hsa-miR-611	0	0	0	1	0	0	GSX1	GS homeobox 1
hsa-miR-611	0	0	1	1	1	1	CHST11	carbohydrate (chondroitin 4) sulfotransferase 11
hsa-miR-611	0	0	0	1	0	0	ECEL1	endothelin converting enzyme-like 1
hsa-miR-611	0	0	0	1	0	0	BHLHA9	basic helix-loop-helix family, member a9
hsa-miR-611	0	0	1	1	1	1	MUC12	mucin 12, cell surface associated
hsa-miR-611	0	0	1	1	1	1	HDAC3	histone deacetylase 3
hsa-miR-611	0	0	0	1	1	1	DDX54	DEAD (Asp-Glu-Ala-Asp) box polypeptide 54
hsa-miR-611	1	0	1	1	1	1	SOGA2	SOGA family member 2
hsa-miR-611	0	0	1	1	0	0	STRA13	stimulated by retinoic acid 13 homolog (mouse)
hsa-miR-611	0	0	0	1	0	0	FOXB1	forkhead box B1
hsa-miR-611	0	0	1	1	0	0	CNTNAP4	contactin associated protein-like 4
hsa-miR-611	0	0	0	1	0	0	AGXT	alanine-glyoxylate aminotransferase
hsa-miR-611	0	0	1	1	1	1	MRPS12	mitochondrial ribosomal protein S12
hsa-miR-611	1	0	1	1	0	0	BRSK2	BR serine/threonine kinase 2
hsa-miR-611	1	0	1	1	1	1	PDLIM2	PDZ and LIM domain 2 (mystique)
hsa-miR-611	0	0	0	1	0	0	ATAD3B	ATPase family, AAA domain containing 3B
hsa-miR-611	0	0	0	1	0	0	ALG10B	asparagine-linked glycosylation 10, alpha-1,2-glucosyltransferase homolog B (yeast)
hsa-miR-611	0	0	0	1	0	0	PHYHD1	phytanoyl-CoA dioxygenase domain containing 1
hsa-miR-611	0	0	1	1	0	0	CCDC106	coiled-coil domain containing 106
hsa-miR-611	0	0	1	1	1	1	ACAD9	acyl-CoA dehydrogenase family, member 9
hsa-miR-611	0	0	1	1	0	0	EEF2	eukaryotic translation elongation factor 2
hsa-miR-611	0	0	1	1	0	0	PPP1R14B	protein phosphatase 1, regulatory (inhibitor) subunit 14B
hsa-miR-611	0	0	0	1	0	0	LIME1	Lck interacting transmembrane adaptor 1
hsa-miR-611	0	0	1	1	0	0	CARD14	caspase recruitment domain family, member 14
hsa-miR-611	0	0	0	1	0	0	GSTM1	glutathione S-transferase mu 1
hsa-miR-611	1	0	1	1	0	0	ABLIM3	actin binding LIM protein family, member 3
hsa-miR-611	1	0	1	1	1	1	PLEKHM1	pleckstrin homology domain containing, family M (with RUN domain) member 1
hsa-miR-611	0	0	1	1	1	1	KLK6	kallikrein-related peptidase 6
hsa-miR-611	0	0	1	1	1	1	CCS	copper chaperone for superoxide dismutase
hsa-miR-611	1	0	0	1	1	1	CTSF	cathepsin F
hsa-miR-611	0	0	0	1	0	0	GPRC6A	G protein-coupled receptor, family C, group 6, member A
hsa-miR-611	1	0	1	1	1	1	B4GALT3	UDP-Gal:betaGlcNAc beta 1,4- galactosyltransferase, polypeptide 3
hsa-miR-611	0	0	0	1	1	1	DDX31	DEAD (Asp-Glu-Ala-Asp) box polypeptide 31
hsa-miR-611	1	0	0	1	1	1	SFT2D3	SFT2 domain containing 3
hsa-miR-611	0	0	1	1	0	0	MRPL11	mitochondrial ribosomal protein L11
hsa-miR-611	0	0	1	1	0	0	PARL	presenilin associated, rhomboid-like
hsa-miR-611	0	0	1	1	0	0	HRAS	v-Ha-ras Harvey rat sarcoma viral oncogene homolog
hsa-miR-611	1	0	1	1	0	0	MMP14	matrix metallopeptidase 14 (membrane-inserted)
hsa-miR-611	1	0	1	1	0	0	PRPF8	PRP8 pre-mRNA processing factor 8 homolog (S. cerevisiae)
hsa-miR-611	0	0	0	1	1	1	FAM63A	family with sequence similarity 63, member A
hsa-miR-611	0	0	1	1	0	0	TUBA3E	tubulin, alpha 3e
hsa-miR-611	1	0	1	1	1	1	DDN	dendrin
hsa-miR-611	0	0	1	1	0	0	ZNF821	zinc finger protein 821
hsa-miR-611	1	0	1	1	1	1	GLI2	GLI family zinc finger 2
hsa-miR-611	0	0	0	1	1	1	ZNF620	zinc finger protein 620
hsa-miR-611	0	0	0	1	0	0	OR4P4	olfactory receptor, family 4, subfamily P, member 4
hsa-miR-611	0	0	1	1	1	1	FAM71F1	family with sequence similarity 71, member F1
hsa-miR-611	1	0	1	1	0	0	DLGAP1	discs, large (Drosophila) homolog-associated protein 1
hsa-miR-611	0	0	1	1	0	0	LSM10	LSM10, U7 small nuclear RNA associated
hsa-miR-611	0	0	0	1	1	1	ASB2	ankyrin repeat and SOCS box containing 2
hsa-miR-611	1	0	0	1	0	0	ARHGEF1	Rho guanine nucleotide exchange factor (GEF) 1
hsa-miR-611	0	0	0	1	0	0	KCNG2	potassium voltage-gated channel, subfamily G, member 2
hsa-miR-611	1	0	1	1	0	0	MTX1	metaxin 1
hsa-miR-611	0	0	1	1	1	1	BIN1	bridging integrator 1
hsa-miR-611	1	0	0	1	0	0	APBA3	amyloid beta (A4) precursor protein-binding, family A, member 3
hsa-miR-611	0	0	0	1	0	0	FAM125A	family with sequence similarity 125, member A
hsa-miR-611	0	0	0	1	0	0	TRPT1	tRNA phosphotransferase 1
hsa-miR-611	0	0	0	1	1	1	CPNE1	copine I
hsa-miR-611	0	0	1	1	1	1	RECQL5	RecQ protein-like 5
hsa-miR-611	0	0	1	1	0	0	IL11RA	interleukin 11 receptor, alpha
hsa-miR-611	0	0	1	1	0	0	DGKZ	diacylglycerol kinase, zeta
hsa-miR-611	0	0	1	1	1	1	C5orf46	chromosome 5 open reading frame 46
hsa-miR-611	0	0	0	1	1	1	EPS8L2	EPS8-like 2
hsa-miR-611	0	0	1	1	0	0	RHBDD2	rhomboid domain containing 2
hsa-miR-611	0	0	1	1	1	1	MAP6D1	MAP6 domain containing 1
hsa-miR-611	0	0	1	1	1	1	B3GNT3	UDP-GlcNAc:betaGal beta-1,3-N-acetylglucosaminyltransferase 3
hsa-miR-611	1	0	1	1	1	1	HTR1F	5-hydroxytryptamine (serotonin) receptor 1F, G protein-coupled
hsa-miR-611	0	0	1	1	1	1	PDDC1	Parkinson disease 7 domain containing 1
hsa-miR-611	0	0	0	1	0	0	METRNL	meteorin, glial cell differentiation regulator-like
hsa-miR-611	0	0	0	1	1	1	SPPL2B	signal peptide peptidase like 2B
hsa-miR-611	0	0	0	1	0	0	SLC16A8	solute carrier family 16, member 8 (monocarboxylic acid transporter 3)
hsa-miR-611	0	0	0	1	0	0	HBA1	hemoglobin, alpha 1
hsa-miR-611	0	0	0	1	0	0	SLC25A41	solute carrier family 25, member 41
hsa-miR-611	0	0	1	1	0	0	THAP4	THAP domain containing 4
hsa-miR-611	0	0	1	1	0	0	EFCAB4A	EF-hand calcium binding domain 4A
hsa-miR-611	0	0	1	1	0	0	VARS2	valyl-tRNA synthetase 2, mitochondrial (putative)
hsa-miR-611	1	0	1	1	1	1	GPR62	G protein-coupled receptor 62
hsa-miR-611	0	0	0	1	0	0	SSNA1	Sjogren syndrome nuclear autoantigen 1
hsa-miR-611	0	0	1	1	0	0	POLR2A	polymerase (RNA) II (DNA directed) polypeptide A, 220kDa
hsa-miR-611	0	0	0	1	1	1	ZYX	zyxin
hsa-miR-611	0	0	1	1	0	0	FOXJ1	forkhead box J1
hsa-miR-611	0	0	1	1	1	1	LGALS8	lectin, galactoside-binding, soluble, 8
hsa-miR-611	0	0	0	1	0	0	OR2Z1	olfactory receptor, family 2, subfamily Z, member 1
hsa-miR-611	1	0	1	1	1	1	SLC25A36	solute carrier family 25 (pyrimidine nucleotide carrier ), member 36
hsa-miR-611	1	0	0	1	1	1	ADRBK2	adrenergic, beta, receptor kinase 2
hsa-miR-611	0	0	1	1	0	0	TRAPPC12	trafficking protein particle complex 12
hsa-miR-611	0	0	1	1	0	0	ADCK4	aarF domain containing kinase 4
hsa-miR-611	0	0	0	1	0	0	FER1L4	fer-1-like 4 (C. elegans) pseudogene
hsa-miR-611	0	0	1	1	0	0	RIC8A	resistance to inhibitors of cholinesterase 8 homolog A (C. elegans)
hsa-miR-611	0	0	0	1	0	0	GTPBP6	GTP binding protein 6 (putative)
hsa-miR-611	0	0	1	1	0	0	MARCO	macrophage receptor with collagenous structure
hsa-miR-611	0	0	1	1	0	0	CIB1	calcium and integrin binding 1 (calmyrin)
hsa-miR-611	0	0	1	1	1	1	TMIGD1	transmembrane and immunoglobulin domain containing 1
hsa-miR-611	0	0	0	1	1	1	C1S	complement component 1, s subcomponent
hsa-miR-611	1	0	1	1	0	0	PTP4A3	protein tyrosine phosphatase type IVA, member 3
hsa-miR-611	0	0	0	1	0	0	MAPK8IP2	mitogen-activated protein kinase 8 interacting protein 2
hsa-miR-611	0	0	0	1	0	0	C19orf71	chromosome 19 open reading frame 71
hsa-miR-611	0	0	0	1	1	1	C14orf80	chromosome 14 open reading frame 80
hsa-miR-611	0	0	1	1	0	0	WBSCR16	Williams-Beuren syndrome chromosome region 16
hsa-miR-611	0	0	1	1	0	0	FAM156A	family with sequence similarity 156, member A
hsa-miR-611	0	0	1	1	0	0	IDH2	isocitrate dehydrogenase 2 (NADP+), mitochondrial
hsa-miR-611	0	0	0	1	0	0	ACTL10	actin-like 10
hsa-miR-611	0	0	0	1	1	1	CXorf69	chromosome X open reading frame 69
hsa-miR-611	0	0	0	1	0	0	A3GALT2P	alpha 1,3-galactosyltransferase 2, pseudogene
hsa-miR-611	0	0	1	1	1	1	EP400	E1A binding protein p400
hsa-miR-611	0	0	0	1	0	0	DDX41	DEAD (Asp-Glu-Ala-Asp) box polypeptide 41
hsa-miR-611	0	0	0	1	0	0	NOC4L	nucleolar complex associated 4 homolog (S. cerevisiae)
hsa-miR-611	0	0	1	1	1	1	CMTM4	CKLF-like MARVEL transmembrane domain containing 4
hsa-miR-611	1	0	1	1	1	1	NOTUM	notum pectinacetylesterase homolog (Drosophila)
hsa-miR-611	1	0	1	1	0	0	PDGFB	platelet-derived growth factor beta polypeptide
hsa-miR-611	0	0	0	1	1	1	GLRX5	glutaredoxin 5
hsa-miR-611	0	0	1	1	0	0	KRBA2	KRAB-A domain containing 2
hsa-miR-611	0	0	1	1	0	0	C1orf186	chromosome 1 open reading frame 186
hsa-miR-611	1	0	1	1	1	1	MEIS3	Meis homeobox 3
hsa-miR-611	0	0	1	1	0	0	TEX34	testis expressed 34
hsa-miR-611	0	0	1	1	1	1	SPRR3	small proline-rich protein 3
hsa-miR-611	0	0	1	1	0	0	SOCS1	suppressor of cytokine signaling 1
hsa-miR-611	1	0	1	1	0	0	SCRT1	scratch homolog 1, zinc finger protein (Drosophila)
hsa-miR-611	0	0	0	1	1	1	TBX1	T-box 1
hsa-miR-611	0	0	1	1	0	0	STAC3	SH3 and cysteine rich domain 3
hsa-miR-611	0	0	1	1	0	0	SMTN	smoothelin
hsa-miR-611	0	0	1	1	0	0	TAS1R1	taste receptor, type 1, member 1
hsa-miR-611	0	0	0	1	0	0	ZNF804B	zinc finger protein 804B
hsa-miR-611	1	0	1	1	1	1	STAC2	SH3 and cysteine rich domain 2
hsa-miR-611	0	0	0	1	0	0	C5orf38	chromosome 5 open reading frame 38
hsa-miR-611	0	0	0	1	0	0	PRODH	proline dehydrogenase (oxidase) 1
hsa-miR-611	1	0	1	1	1	1	ZSCAN2	zinc finger and SCAN domain containing 2
hsa-miR-611	0	0	1	1	0	0	LINC00207	long intergenic non-protein coding RNA 207
hsa-miR-611	0	0	1	1	1	1	KDM4D	lysine (K)-specific demethylase 4D
hsa-miR-611	0	0	0	1	0	0	C17orf82	chromosome 17 open reading frame 82
hsa-miR-611	1	0	1	1	1	1	PIP5K1C	phosphatidylinositol-4-phosphate 5-kinase, type I, gamma
hsa-miR-611	0	0	1	1	1	1	OR9Q1	olfactory receptor, family 9, subfamily Q, member 1
hsa-miR-611	0	0	0	1	0	0	TNRC6C	trinucleotide repeat containing 6C
hsa-miR-611	1	0	1	1	0	0	LMO1	LIM domain only 1 (rhombotin 1)
hsa-miR-611	0	0	0	1	0	0	ZNF671	zinc finger protein 671
hsa-miR-611	0	0	0	1	0	0	ZNF446	zinc finger protein 446
hsa-miR-611	0	0	0	1	0	0	RASSF3	Ras association (RalGDS/AF-6) domain family member 3
hsa-miR-611	0	0	0	1	1	1	GSTM4	glutathione S-transferase mu 4
hsa-miR-611	0	0	1	1	0	0	SRA1	steroid receptor RNA activator 1
hsa-miR-611	0	0	1	1	1	1	PNPLA2	patatin-like phospholipase domain containing 2
hsa-miR-611	0	0	1	1	0	0	RGS12	regulator of G-protein signaling 12
hsa-miR-611	0	0	1	1	0	0	ANG	angiogenin, ribonuclease, RNase A family, 5
hsa-miR-611	0	0	0	1	0	0	HEXDC	hexosaminidase (glycosyl hydrolase family 20, catalytic domain) containing
hsa-miR-611	0	0	0	1	1	1	PKD1L2	polycystic kidney disease 1-like 2
hsa-miR-611	0	0	1	1	1	1	IL18BP	interleukin 18 binding protein
hsa-miR-611	0	0	1	1	0	0	TBC1D22A	TBC1 domain family, member 22A
hsa-miR-611	0	0	1	1	0	0	MUC1	mucin 1, cell surface associated
hsa-miR-611	1	0	1	1	1	1	SCHIP1	schwannomin interacting protein 1
hsa-miR-611	1	0	1	1	0	0	NRL	neural retina leucine zipper
hsa-miR-611	0	0	0	1	0	0	TMEM141	transmembrane protein 141
hsa-miR-611	0	0	0	1	0	0	KIAA1984	KIAA1984
hsa-miR-611	0	0	1	1	1	1	FIBP	fibroblast growth factor (acidic) intracellular binding protein
hsa-miR-611	1	0	1	1	1	1	NAA40	N(alpha)-acetyltransferase 40, NatD catalytic subunit, homolog (S. cerevisiae)
hsa-miR-611	0	0	0	1	0	0	SCNN1D	sodium channel, non-voltage-gated 1, delta subunit
hsa-miR-611	0	0	1	1	0	0	SYT3	synaptotagmin III
hsa-miR-611	0	0	0	1	0	0	FCRL6	Fc receptor-like 6
hsa-miR-611	0	0	0	1	1	1	VWA1	von Willebrand factor A domain containing 1
hsa-miR-611	1	0	1	1	1	1	LITAF	lipopolysaccharide-induced TNF factor
hsa-miR-611	0	0	1	1	0	0	PRMT7	protein arginine methyltransferase 7
hsa-miR-611	0	0	0	1	1	1	C21orf2	chromosome 21 open reading frame 2
hsa-miR-611	0	0	0	1	0	0	LOC100132581	putative speedy protein E8-like
hsa-miR-611	0	0	0	1	1	1	POMT1	protein-O-mannosyltransferase 1
hsa-miR-611	0	0	0	1	0	0	BLOC1S3	biogenesis of lysosomal organelles complex-1, subunit 3
hsa-miR-611	0	0	1	1	1	1	UPP1	uridine phosphorylase 1
hsa-miR-611	1	0	1	1	1	1	NASP	nuclear autoantigenic sperm protein (histone-binding)
hsa-miR-611	0	0	0	1	1	1	NANOS2	nanos homolog 2 (Drosophila)
hsa-miR-611	0	0	1	1	1	1	FAM163A	family with sequence similarity 163, member A
hsa-miR-611	0	0	1	1	0	0	C6orf132	chromosome 6 open reading frame 132
hsa-miR-611	0	0	1	1	1	1	BID	BH3 interacting domain death agonist
hsa-miR-611	0	0	0	1	0	0	BCKDHA	branched chain keto acid dehydrogenase E1, alpha polypeptide
hsa-miR-611	0	0	1	1	1	1	PTK2	PTK2 protein tyrosine kinase 2
hsa-miR-611	0	0	0	1	1	1	TBC1D3B	TBC1 domain family, member 3B
hsa-miR-611	1	0	1	1	1	1	DMPK	dystrophia myotonica-protein kinase
hsa-miR-611	0	0	0	1	0	0	CLRN2	clarin 2
hsa-miR-611	0	0	1	1	1	1	TFEB	transcription factor EB
hsa-miR-611	0	0	0	1	0	0	ZNF93	zinc finger protein 93
hsa-miR-611	0	0	0	1	1	1	OR7D2	olfactory receptor, family 7, subfamily D, member 2
hsa-miR-611	0	0	0	1	0	0	LARP7	La ribonucleoprotein domain family, member 7
hsa-miR-611	0	0	0	1	1	1	DTNBP1	dystrobrevin binding protein 1
hsa-miR-611	0	0	1	1	0	0	FZD9	frizzled family receptor 9
hsa-miR-611	0	0	1	1	0	0	DHRS2	dehydrogenase/reductase (SDR family) member 2
hsa-miR-611	0	0	0	1	1	1	BRF1	BRF1 homolog, subunit of RNA polymerase III transcription initiation factor IIIB (S. cerevisiae)
hsa-miR-611	0	0	1	1	0	0	NISCH	nischarin
hsa-miR-611	0	0	0	1	0	0	MUC4	mucin 4, cell surface associated
hsa-miR-611	1	0	1	1	1	1	ARID3B	AT rich interactive domain 3B (BRIGHT-like)
hsa-miR-611	0	0	0	1	0	0	C19orf57	chromosome 19 open reading frame 57
hsa-miR-611	0	0	1	1	1	1	TMPRSS6	transmembrane protease, serine 6
hsa-miR-611	1	0	1	1	1	1	MBTPS1	membrane-bound transcription factor peptidase, site 1
hsa-miR-611	0	0	1	1	1	1	GMPR2	guanosine monophosphate reductase 2
hsa-miR-611	0	0	1	1	0	0	C20orf152	chromosome 20 open reading frame 152
hsa-miR-611	0	0	1	1	0	0	ZAN	zonadhesin
hsa-miR-611	0	0	1	1	1	1	NXPH4	neurexophilin 4
hsa-miR-611	0	0	0	1	0	0	BPIFB6	BPI fold containing family B, member 6
hsa-miR-611	0	0	0	1	1	1	XRCC3	X-ray repair complementing defective repair in Chinese hamster cells 3
hsa-miR-611	0	0	1	1	0	0	CDK10	cyclin-dependent kinase 10
hsa-miR-611	0	0	0	1	0	0	CRYBA4	crystallin, beta A4
hsa-miR-611	0	0	0	1	0	0	MYL4	myosin, light chain 4, alkali; atrial, embryonic
hsa-miR-611	1	0	1	1	1	1	PTPRS	protein tyrosine phosphatase, receptor type, S
hsa-miR-611	0	0	0	1	1	1	SRP68	signal recognition particle 68kDa
hsa-miR-611	0	0	1	1	0	0	MORN3	MORN repeat containing 3
hsa-miR-611	1	0	1	1	1	1	WARS	tryptophanyl-tRNA synthetase
hsa-miR-611	0	0	0	1	0	0	PLEKHA4	pleckstrin homology domain containing, family A (phosphoinositide binding specific) member 4
hsa-miR-611	0	0	1	1	0	0	DPF1	D4, zinc and double PHD fingers family 1
hsa-miR-611	0	0	0	1	0	0	SPNS3	spinster homolog 3 (Drosophila)
hsa-miR-611	0	0	0	1	0	0	KIR3DL1	killer cell immunoglobulin-like receptor, three domains, long cytoplasmic tail, 1
hsa-miR-611	0	0	1	1	1	1	TTC30A	tetratricopeptide repeat domain 30A
hsa-miR-611	0	0	0	1	0	0	MMP23B	matrix metallopeptidase 23B
hsa-miR-611	1	0	1	1	1	1	ARHGAP32	Rho GTPase activating protein 32
hsa-miR-611	1	0	1	1	1	1	NF1	neurofibromin 1
hsa-miR-611	1	0	1	1	1	1	NCOR2	nuclear receptor corepressor 2
hsa-miR-611	0	0	0	1	1	1	PITPNM1	phosphatidylinositol transfer protein, membrane-associated 1
hsa-miR-611	1	0	1	1	0	0	APBB3	amyloid beta (A4) precursor protein-binding, family B, member 3
hsa-miR-611	0	0	1	1	0	0	DUOXA2	dual oxidase maturation factor 2
hsa-miR-611	0	0	0	1	1	1	ITGAL	integrin, alpha L (antigen CD11A (p180), lymphocyte function-associated antigen 1; alpha polypeptide)
hsa-miR-611	0	0	1	1	0	0	PARVG	parvin, gamma
hsa-miR-611	1	0	1	1	0	0	SAMD4A	sterile alpha motif domain containing 4A
hsa-miR-611	0	0	1	1	0	0	TRMT1	tRNA methyltransferase 1 homolog (S. cerevisiae)
hsa-miR-611	0	0	1	1	0	0	OXA1L	oxidase (cytochrome c) assembly 1-like
hsa-miR-611	0	0	1	1	0	0	ZNF646	zinc finger protein 646
hsa-miR-611	0	0	1	1	0	0	NIF3L1	NIF3 NGG1 interacting factor 3-like 1 (S. cerevisiae)
hsa-miR-611	1	0	1	1	1	1	CEACAM19	carcinoembryonic antigen-related cell adhesion molecule 19
hsa-miR-611	0	0	1	1	0	0	FAM3D	family with sequence similarity 3, member D
hsa-miR-611	1	0	0	1	1	1	CRB2	crumbs homolog 2 (Drosophila)
hsa-miR-611	0	0	0	1	0	0	TLE6	transducin-like enhancer of split 6 (E(sp1) homolog, Drosophila)
hsa-miR-611	0	0	1	1	0	0	NPSR1	neuropeptide S receptor 1
hsa-miR-611	0	0	1	1	0	0	STYXL1	serine/threonine/tyrosine interacting-like 1
hsa-miR-611	0	0	0	1	0	0	TNNT3	troponin T type 3 (skeletal, fast)
hsa-miR-611	0	0	0	1	0	0	PPP1R13L	protein phosphatase 1, regulatory subunit 13 like
hsa-miR-611	0	0	1	1	0	0	SLC34A3	solute carrier family 34 (sodium phosphate), member 3
hsa-miR-611	1	0	1	1	0	0	KAZN	kazrin, periplakin interacting protein
hsa-miR-611	1	0	1	1	1	1	FAM110B	family with sequence similarity 110, member B
hsa-miR-611	0	0	0	1	1	1	BCAN	brevican
hsa-miR-611	0	0	0	1	0	0	SLC25A47	solute carrier family 25, member 47
hsa-miR-611	0	0	1	1	1	1	GRM3	glutamate receptor, metabotropic 3
hsa-miR-611	0	0	1	1	0	0	TGFB1I1	transforming growth factor beta 1 induced transcript 1
hsa-miR-611	0	0	1	1	1	1	ZNF277	zinc finger protein 277
hsa-miR-611	0	0	1	1	1	1	SELM	selenoprotein M
hsa-miR-611	0	0	1	1	0	0	MCM7	minichromosome maintenance complex component 7
hsa-miR-611	0	0	1	1	1	1	EFCAB2	EF-hand calcium binding domain 2
hsa-miR-611	0	0	1	1	0	0	FAM89A	family with sequence similarity 89, member A
hsa-miR-611	1	0	1	1	1	1	DLL1	delta-like 1 (Drosophila)
hsa-miR-611	0	0	1	1	0	0	TLR5	toll-like receptor 5
hsa-miR-611	0	0	1	1	1	1	ATF3	activating transcription factor 3
hsa-miR-611	0	0	0	1	1	1	NENF	neudesin neurotrophic factor
hsa-miR-611	0	0	1	1	1	1	PIK3C2B	phosphatidylinositol-4-phosphate 3-kinase, catalytic subunit type 2 beta
hsa-miR-611	0	0	0	1	0	0	CHIT1	chitinase 1 (chitotriosidase)
hsa-miR-611	1	0	1	1	1	1	TOR3A	torsin family 3, member A
hsa-miR-611	0	0	1	1	1	1	COPA	coatomer protein complex, subunit alpha
hsa-miR-611	0	0	1	1	0	0	VSIG8	V-set and immunoglobulin domain containing 8
hsa-miR-611	0	0	0	1	0	0	TTC24	tetratricopeptide repeat domain 24
hsa-miR-611	0	0	1	1	1	1	C1orf85	chromosome 1 open reading frame 85
hsa-miR-611	0	0	1	1	1	1	ECHS1	enoyl CoA hydratase, short chain, 1, mitochondrial
hsa-miR-611	0	0	0	1	1	1	NUP210L	nucleoporin 210kDa-like
hsa-miR-611	1	0	1	1	0	0	TCERG1L	transcription elongation regulator 1-like
hsa-miR-611	0	0	1	1	1	1	BUB3	budding uninhibited by benzimidazoles 3 homolog (yeast)
hsa-miR-611	1	0	0	1	1	1	G6PD	glucose-6-phosphate dehydrogenase
hsa-miR-611	0	0	0	1	0	0	NPBWR2	neuropeptides B/W receptor 2
hsa-miR-611	1	0	1	1	1	1	SUFU	suppressor of fused homolog (Drosophila)
hsa-miR-611	0	0	0	1	0	0	HAUS7	HAUS augmin-like complex, subunit 7
hsa-miR-611	0	0	0	1	0	0	PNMA6B	paraneoplastic Ma antigen family member 6B
hsa-miR-611	0	0	0	1	0	0	BHLHE23	basic helix-loop-helix family, member e23
hsa-miR-611	0	0	1	1	0	0	FATE1	fetal and adult testis expressed 1
hsa-miR-611	0	0	0	1	0	0	CXorf40B	chromosome X open reading frame 40B
hsa-miR-611	0	0	1	1	0	0	LSM14B	LSM14B, SCD6 homolog B (S. cerevisiae)
hsa-miR-611	0	0	0	1	0	0	CTSZ	cathepsin Z
hsa-miR-611	1	0	1	1	1	1	NELF	nasal embryonic LHRH factor
hsa-miR-611	0	0	1	1	0	0	NDOR1	NADPH dependent diflavin oxidoreductase 1
hsa-miR-611	1	0	1	1	0	0	RABL6	RAB, member RAS oncogene family-like 6
hsa-miR-611	0	0	1	1	0	0	PMPCA	peptidase (mitochondrial processing) alpha
hsa-miR-611	0	0	0	1	0	0	C9orf116	chromosome 9 open reading frame 116
hsa-miR-611	1	0	1	1	1	1	WAPAL	wings apart-like homolog (Drosophila)
hsa-miR-611	0	0	1	1	0	0	MUTYH	mutY homolog (E. coli)
hsa-miR-611	1	0	1	1	1	1	MED27	mediator complex subunit 27
hsa-miR-611	0	0	0	1	0	0	PLAC9	placenta-specific 9
hsa-miR-611	0	0	1	1	0	0	HYI	hydroxypyruvate isomerase (putative)
hsa-miR-611	0	0	1	1	1	1	RBM41	RNA binding motif protein 41
hsa-miR-611	0	0	0	1	0	0	TNNC2	troponin C type 2 (fast)
hsa-miR-611	0	0	1	1	0	0	EDN2	endothelin 2
hsa-miR-611	0	0	1	1	1	1	NXF3	nuclear RNA export factor 3
hsa-miR-611	0	0	0	1	0	0	KCNK15	potassium channel, subfamily K, member 15
hsa-miR-611	1	0	0	1	1	1	EPHA10	EPH receptor A10
hsa-miR-611	0	0	1	1	0	0	KCNK17	potassium channel, subfamily K, member 17
hsa-miR-611	0	0	0	1	1	1	MSL3P1	male-specific lethal 3 homolog (Drosophila) pseudogene 1
hsa-miR-611	1	0	1	1	0	0	ADC	arginine decarboxylase
hsa-miR-611	0	0	1	1	0	0	PEF1	penta-EF-hand domain containing 1
hsa-miR-611	0	0	1	1	1	1	MAPK13	mitogen-activated protein kinase 13
hsa-miR-611	0	0	0	1	1	1	FGR	Gardner-Rasheed feline sarcoma viral (v-fgr) oncogene homolog
hsa-miR-611	0	0	1	1	0	0	GPN2	GPN-loop GTPase 2
hsa-miR-611	0	0	1	1	1	1	NIPSNAP3B	nipsnap homolog 3B (C. elegans)
hsa-miR-611	0	0	1	1	1	1	NIPSNAP3A	nipsnap homolog 3A (C. elegans)
hsa-miR-611	0	0	1	1	1	1	TRIM14	tripartite motif containing 14
hsa-miR-611	0	0	0	1	1	1	C9orf156	chromosome 9 open reading frame 156
hsa-miR-611	0	0	1	1	0	0	LLGL2	lethal giant larvae homolog 2 (Drosophila)
hsa-miR-611	1	0	1	1	1	1	PTCH1	patched 1
hsa-miR-611	0	0	0	1	0	0	PADI4	peptidyl arginine deiminase, type IV
hsa-miR-611	0	0	0	1	0	0	FAM156B	family with sequence similarity 156, member B
hsa-miR-611	0	0	1	1	1	1	KYNU	kynureninase
hsa-miR-611	0	0	1	1	0	0	FOXS1	forkhead box S1
hsa-miR-611	0	0	1	1	1	1	NALCN	sodium leak channel, non-selective
hsa-miR-611	0	0	0	1	0	0	CHRDL2	chordin-like 2
hsa-miR-611	1	0	0	1	1	1	PRAF2	PRA1 domain family, member 2
hsa-miR-611	0	0	0	1	0	0	KIR3DL3	killer cell immunoglobulin-like receptor, three domains, long cytoplasmic tail, 3
hsa-miR-611	0	0	1	1	0	0	KIR2DL3	killer cell immunoglobulin-like receptor, two domains, long cytoplasmic tail, 3
hsa-miR-611	0	0	1	1	0	0	KIR2DS4	killer cell immunoglobulin-like receptor, two domains, short cytoplasmic tail, 4
hsa-miR-611	0	0	0	1	1	1	KIR2DL1	killer cell immunoglobulin-like receptor, two domains, long cytoplasmic tail, 1
hsa-miR-611	0	0	1	1	1	1	SLC35A2	solute carrier family 35 (UDP-galactose transporter), member A2
hsa-miR-611	0	0	1	1	0	0	TTYH1	tweety homolog 1 (Drosophila)
hsa-miR-611	0	0	1	1	0	0	MAD2L2	MAD2 mitotic arrest deficient-like 2 (yeast)
hsa-miR-611	0	0	1	1	1	1	WAS	Wiskott-Aldrich syndrome
hsa-miR-611	0	0	0	1	0	0	HCG9	HLA complex group 9 (non-protein coding)
hsa-miR-611	0	0	0	1	1	1	NMNAT1	nicotinamide nucleotide adenylyltransferase 1
hsa-miR-611	0	0	0	1	1	1	HRH2	histamine receptor H2
hsa-miR-611	0	0	0	1	0	0	CBWD6	COBW domain containing 6
hsa-miR-611	0	0	0	1	0	0	LOC100132874	uncharacterized LOC100132874
hsa-miR-611	1	0	1	1	1	1	DPP6	dipeptidyl-peptidase 6
hsa-miR-611	0	0	1	1	0	0	KCNAB2	potassium voltage-gated channel, shaker-related subfamily, beta member 2
hsa-miR-611	0	0	1	1	0	0	SPIRE2	spire homolog 2 (Drosophila)
hsa-miR-611	1	0	1	1	0	0	SEPT8	septin 8
hsa-miR-611	0	0	1	1	1	1	SPDYE2	speedy homolog E2 (Xenopus laevis)
hsa-miR-611	0	0	0	1	0	0	PLEKHN1	pleckstrin homology domain containing, family N member 1
hsa-miR-611	0	0	0	1	0	0	SLC19A1	solute carrier family 19 (folate transporter), member 1
hsa-miR-611	1	0	0	1	1	1	TECPR2	tectonin beta-propeller repeat containing 2
hsa-miR-611	1	0	1	1	1	1	ACER2	alkaline ceramidase 2
hsa-miR-611	0	0	1	1	1	1	POMP	proteasome maturation protein
hsa-miR-611	0	0	1	1	0	0	IDH3B	isocitrate dehydrogenase 3 (NAD+) beta
hsa-miR-611	1	0	1	1	0	0	CCM2	cerebral cavernous malformation 2
hsa-miR-611	1	0	1	1	1	1	GABRB1	gamma-aminobutyric acid (GABA) A receptor, beta 1
hsa-miR-611	0	0	0	1	0	0	ANGPT4	angiopoietin 4
hsa-miR-611	0	0	0	1	0	0	TLR6	toll-like receptor 6
hsa-miR-611	0	0	0	1	0	0	LOC284009	uncharacterized LOC284009
hsa-miR-611	0	0	1	1	1	1	SERPINF2	serpin peptidase inhibitor, clade F (alpha-2 antiplasmin, pigment epithelium derived factor), member 2
hsa-miR-611	0	0	0	1	0	0	KRTAP5-2	keratin associated protein 5-2
hsa-miR-611	0	0	1	1	1	1	TOLLIP	toll interacting protein
hsa-miR-611	0	0	0	1	0	0	LRRC23	leucine rich repeat containing 23
hsa-miR-611	1	0	1	1	1	1	ABCC5	ATP-binding cassette, sub-family C (CFTR/MRP), member 5
hsa-miR-611	0	0	0	1	0	0	IFITM5	interferon induced transmembrane protein 5
hsa-miR-611	0	0	0	1	0	0	MSLN	mesothelin
hsa-miR-611	0	0	0	1	0	0	SLC7A4	solute carrier family 7 (orphan transporter), member 4
hsa-miR-611	0	0	0	1	0	0	TSPY4	testis specific protein, Y-linked 4
hsa-miR-611	0	0	1	1	0	0	SNRNP25	small nuclear ribonucleoprotein 25kDa (U11/U12)
hsa-miR-611	0	0	0	1	0	0	ESYT3	extended synaptotagmin-like protein 3
hsa-miR-611	1	0	1	1	1	1	SPIRE1	spire homolog 1 (Drosophila)
hsa-miR-611	0	0	1	1	0	0	INTS1	integrator complex subunit 1
hsa-miR-611	0	0	0	1	0	0	CCDC57	coiled-coil domain containing 57
hsa-miR-611	0	0	1	1	1	1	DMWD	dystrophia myotonica, WD repeat containing
hsa-miR-611	0	0	0	1	1	1	ABL1	c-abl oncogene 1, non-receptor tyrosine kinase
hsa-miR-611	0	0	0	1	1	1	NMUR1	neuromedin U receptor 1
hsa-miR-611	1	0	1	0	1	1	TRPS1	trichorhinophalangeal syndrome I
hsa-miR-611	0	0	1	1	1	1	DCAF4	DDB1 and CUL4 associated factor 4
hsa-miR-611	0	0	0	1	1	1	CECR1	cat eye syndrome chromosome region, candidate 1
hsa-miR-611	0	0	0	1	1	1	TTC38	tetratricopeptide repeat domain 38
hsa-miR-611	0	0	1	0	1	1	MTRF1L	mitochondrial translational release factor 1-like
hsa-miR-611	0	0	1	0	1	1	PPIA	peptidylprolyl isomerase A (cyclophilin A)
hsa-miR-611	0	0	1	1	1	1	R3HDM4	R3H domain containing 4
hsa-miR-611	1	0	1	1	1	1	NIPA1	non imprinted in Prader-Willi/Angelman syndrome 1
hsa-miR-611	1	0	1	0	1	1	N4BP1	NEDD4 binding protein 1
hsa-miR-611	0	0	0	0	1	1	ENDOV	endonuclease V
