# Supplementary material for: Profiling of Selected MicroRNAs in Proliferative Eutopic Endometrium of Women with Ovarian Endometriosis
Source: Biomed Res Int. 2015 Aug 20;2015:760698. doi: 10.1155/2015/760698 (PMC4558423; doi:10.1155/2015/760698)
Supplement: Supplementary file 1 — Table I: The names of miRNAs significantly differentially expressed between eutopic endometrium of patients with endometriosis vs eutopic endometrium of patients without endometriosis. Table II: The associations between miRNA and mRNA, which presents detailed results of the search of six major databases i.e targetscan, tarbase, miranda, mirbase, mirtarget2 and pictar. [file 760698.f1.zip › 760698.f1/Table II/hsa-miR-612.tsv]

miR	targetscan	tarbase	miranda	mirbase	mirtarget2	pictar	GeneSymbol	GeneName
hsa-miR-612	1	0	1	1	1	1	CHD9	chromodomain helicase DNA binding protein 9
hsa-miR-612	1	0	1	1	0	0	SRCAP	Snf2-related CREBBP activator protein
hsa-miR-612	1	0	1	1	0	0	HUWE1	HECT, UBA and WWE domain containing 1, E3 ubiquitin protein ligase
hsa-miR-612	1	0	1	0	1	1	PTPRT	protein tyrosine phosphatase, receptor type, T
hsa-miR-612	0	0	1	1	1	1	C2CD2L	C2CD2-like
hsa-miR-612	0	0	1	1	1	1	PEG3	paternally expressed 3
hsa-miR-612	1	0	1	1	1	1	SGSM2	small G protein signaling modulator 2
hsa-miR-612	1	0	1	0	1	1	MTSS1	metastasis suppressor 1
hsa-miR-612	0	0	1	1	0	0	RAP1GAP	RAP1 GTPase activating protein
hsa-miR-612	1	0	1	1	0	0	DENND4B	DENN/MADD domain containing 4B
hsa-miR-612	1	0	1	0	1	1	CEP350	centrosomal protein 350kDa
hsa-miR-612	0	0	1	1	1	1	NEU3	sialidase 3 (membrane sialidase)
hsa-miR-612	0	0	1	1	0	0	ZNF862	zinc finger protein 862
hsa-miR-612	1	0	1	1	1	1	GPATCH8	G patch domain containing 8
hsa-miR-612	1	0	1	1	0	0	MEGF8	multiple EGF-like-domains 8
hsa-miR-612	1	0	1	0	1	1	MFAP3L	microfibrillar-associated protein 3-like
hsa-miR-612	1	0	1	1	1	1	HIPK1	homeodomain interacting protein kinase 1
hsa-miR-612	0	0	1	1	0	0	AKAP8L	A kinase (PRKA) anchor protein 8-like
hsa-miR-612	0	0	1	1	0	0	ATP10B	ATPase, class V, type 10B
hsa-miR-612	0	0	1	1	1	1	SEC31A	SEC31 homolog A (S. cerevisiae)
hsa-miR-612	1	0	1	0	1	1	ATG14	autophagy related 14
hsa-miR-612	1	0	1	1	1	1	WWC1	WW and C2 domain containing 1
hsa-miR-612	1	0	1	1	1	1	ARHGEF15	Rho guanine nucleotide exchange factor (GEF) 15
hsa-miR-612	1	0	1	1	1	1	CALCR	calcitonin receptor
hsa-miR-612	0	0	1	1	1	1	MAN2B2	mannosidase, alpha, class 2B, member 2
hsa-miR-612	1	0	1	1	1	1	CPEB3	cytoplasmic polyadenylation element binding protein 3
hsa-miR-612	1	0	1	1	1	1	C11orf9	chromosome 11 open reading frame 9
hsa-miR-612	0	0	1	1	1	1	ANKRD6	ankyrin repeat domain 6
hsa-miR-612	1	0	1	1	0	0	KIAA1045	KIAA1045
hsa-miR-612	0	0	1	1	0	0	RTEL1	regulator of telomere elongation helicase 1
hsa-miR-612	1	0	1	1	1	1	PHF8	PHD finger protein 8
hsa-miR-612	1	0	1	1	1	1	SMARCAD1	SWI/SNF-related, matrix-associated actin-dependent regulator of chromatin, subfamily a, containing DEAD/H box 1
hsa-miR-612	1	0	1	0	1	1	ODZ2	odz, odd Oz/ten-m homolog 2 (Drosophila)
hsa-miR-612	1	0	1	0	1	1	SRGAP3	SLIT-ROBO Rho GTPase activating protein 3
hsa-miR-612	0	0	1	1	0	0	ZC4H2	zinc finger, C4H2 domain containing
hsa-miR-612	1	0	1	1	1	1	NDRG4	NDRG family member 4
hsa-miR-612	1	0	1	0	0	0	HEG1	HEG homolog 1 (zebrafish)
hsa-miR-612	1	0	1	1	0	0	ATAD2B	ATPase family, AAA domain containing 2B
hsa-miR-612	0	0	1	1	0	0	TNFRSF12A	tumor necrosis factor receptor superfamily, member 12A
hsa-miR-612	1	0	1	0	0	0	NYNRIN	NYN domain and retroviral integrase containing
hsa-miR-612	1	0	1	1	1	1	PCDH19	protocadherin 19
hsa-miR-612	1	0	1	1	0	0	CARNS1	carnosine synthase 1
hsa-miR-612	1	0	1	1	0	0	EBF4	early B-cell factor 4
hsa-miR-612	0	0	1	0	1	1	MUC3B	mucin 3B, cell surface associated
hsa-miR-612	0	0	1	1	0	0	ISLR2	immunoglobulin superfamily containing leucine-rich repeat 2
hsa-miR-612	0	0	1	0	0	0	NYAP2	neuronal tyrosine-phosphorylated phosphoinositide-3-kinase adaptor 2
hsa-miR-612	0	0	1	0	0	0	COL20A1	collagen, type XX, alpha 1
hsa-miR-612	1	0	1	1	0	0	ZSWIM5	zinc finger, SWIM-type containing 5
hsa-miR-612	1	0	1	1	1	1	KIAA1522	KIAA1522
hsa-miR-612	1	0	1	1	1	1	FAM214B	family with sequence similarity 214, member B
hsa-miR-612	1	0	1	0	1	1	LMO3	LIM domain only 3 (rhombotin-like 2)
hsa-miR-612	1	0	1	1	0	0	KIAA1549	KIAA1549
hsa-miR-612	0	0	1	1	0	0	TMEM132A	transmembrane protein 132A
hsa-miR-612	1	0	1	1	0	0	NCKAP5L	NCK-associated protein 5-like
hsa-miR-612	1	0	1	1	0	0	MAGI3	membrane associated guanylate kinase, WW and PDZ domain containing 3
hsa-miR-612	1	0	1	0	0	0	TANC2	tetratricopeptide repeat, ankyrin repeat and coiled-coil containing 2
hsa-miR-612	1	0	1	1	1	1	PTBP2	polypyrimidine tract binding protein 2
hsa-miR-612	1	0	1	1	1	1	PHF21A	PHD finger protein 21A
hsa-miR-612	1	0	1	1	0	0	SEMA4C	sema domain, immunoglobulin domain (Ig), transmembrane domain (TM) and short cytoplasmic domain, (semaphorin) 4C
hsa-miR-612	1	0	1	1	0	0	TMCO7	transmembrane and coiled-coil domains 7
hsa-miR-612	0	0	1	0	1	1	SETD5	SET domain containing 5
hsa-miR-612	1	0	1	0	1	1	RIMS1	regulating synaptic membrane exocytosis 1
hsa-miR-612	1	0	1	1	1	1	LCOR	ligand dependent nuclear receptor corepressor
hsa-miR-612	1	0	1	1	1	1	LZTS2	leucine zipper, putative tumor suppressor 2
hsa-miR-612	1	0	1	0	1	1	JPH4	junctophilin 4
hsa-miR-612	1	0	1	1	1	1	NAV2	neuron navigator 2
hsa-miR-612	1	0	1	1	1	1	CSRNP1	cysteine-serine-rich nuclear protein 1
hsa-miR-612	1	0	1	1	1	1	LSM14A	LSM14A, SCD6 homolog A (S. cerevisiae)
hsa-miR-612	1	0	1	1	1	1	SSH3	slingshot homolog 3 (Drosophila)
hsa-miR-612	1	0	1	0	1	1	KIF5C	kinesin family member 5C
hsa-miR-612	1	0	1	1	1	1	TET2	tet methylcytosine dioxygenase 2
hsa-miR-612	0	0	1	1	1	1	KIAA1967	KIAA1967
hsa-miR-612	1	0	1	1	1	1	SH3TC2	SH3 domain and tetratricopeptide repeats 2
hsa-miR-612	1	0	1	0	0	0	FAT3	FAT tumor suppressor homolog 3 (Drosophila)
hsa-miR-612	1	0	1	0	1	1	RNF43	ring finger protein 43
hsa-miR-612	1	0	1	0	0	0	RNF169	ring finger protein 169
hsa-miR-612	1	0	1	1	1	1	ACBD5	acyl-CoA binding domain containing 5
hsa-miR-612	0	0	1	1	1	1	MCF2	MCF.2 cell line derived transforming sequence
hsa-miR-612	1	0	1	1	1	1	PAM	peptidylglycine alpha-amidating monooxygenase
hsa-miR-612	0	0	1	1	0	0	FAM22D	family with sequence similarity 22, member D
hsa-miR-612	0	0	1	1	0	0	DDB2	damage-specific DNA binding protein 2, 48kDa
hsa-miR-612	1	0	1	1	1	1	PAN3	PAN3 poly(A) specific ribonuclease subunit homolog (S. cerevisiae)
hsa-miR-612	0	0	1	1	0	0	SSPO	SCO-spondin homolog (Bos taurus)
hsa-miR-612	1	0	1	1	1	1	FAT2	FAT tumor suppressor homolog 2 (Drosophila)
hsa-miR-612	0	0	1	0	0	0	TIFAB	TRAF-interacting protein with forkhead-associated domain, family member B
hsa-miR-612	1	1	1	1	1	1	BACE1	beta-site APP-cleaving enzyme 1
hsa-miR-612	0	0	1	1	0	0	MARK2	MAP/microtubule affinity-regulating kinase 2
hsa-miR-612	1	0	1	1	1	1	ADARB1	adenosine deaminase, RNA-specific, B1
hsa-miR-612	0	0	1	1	1	1	ING4	inhibitor of growth family, member 4
hsa-miR-612	0	0	1	1	0	0	DBP	D site of albumin promoter (albumin D-box) binding protein
hsa-miR-612	1	0	1	1	1	1	VLDLR	very low density lipoprotein receptor
hsa-miR-612	1	0	1	1	1	1	BACH2	BTB and CNC homology 1, basic leucine zipper transcription factor 2
hsa-miR-612	1	0	1	0	1	1	PCDHA13	protocadherin alpha 13
hsa-miR-612	1	0	1	1	1	1	PCDHA4	protocadherin alpha 4
hsa-miR-612	0	0	1	1	0	0	KCNC3	potassium voltage-gated channel, Shaw-related subfamily, member 3
hsa-miR-612	1	0	1	1	1	1	PLEKHH3	pleckstrin homology domain containing, family H (with MyTH4 domain) member 3
hsa-miR-612	1	0	1	1	1	1	PML	promyelocytic leukemia
hsa-miR-612	0	0	1	1	1	1	MAZ	MYC-associated zinc finger protein (purine-binding transcription factor)
hsa-miR-612	1	0	1	1	1	1	PHC1	polyhomeotic homolog 1 (Drosophila)
hsa-miR-612	1	0	1	1	1	1	RASSF5	Ras association (RalGDS/AF-6) domain family member 5
hsa-miR-612	1	0	1	0	1	1	SLC6A6	solute carrier family 6 (neurotransmitter transporter, taurine), member 6
hsa-miR-612	1	0	1	1	0	0	CACNB1	calcium channel, voltage-dependent, beta 1 subunit
hsa-miR-612	1	0	1	1	0	0	TSPYL2	TSPY-like 2
hsa-miR-612	1	0	1	0	1	1	DPYSL2	dihydropyrimidinase-like 2
hsa-miR-612	0	0	1	1	0	0	PPM1G	protein phosphatase, Mg2+/Mn2+ dependent, 1G
hsa-miR-612	1	0	1	1	1	1	ZNF207	zinc finger protein 207
hsa-miR-612	1	0	1	1	1	1	ERF	Ets2 repressor factor
hsa-miR-612	1	0	1	1	0	0	TNK2	tyrosine kinase, non-receptor, 2
hsa-miR-612	1	0	1	1	1	1	MTA1	metastasis associated 1
hsa-miR-612	1	0	1	1	1	1	SATB2	SATB homeobox 2
hsa-miR-612	1	0	1	1	1	1	TBX2	T-box 2
hsa-miR-612	0	0	1	1	0	0	ASIC3	acid-sensing (proton-gated) ion channel 3
hsa-miR-612	0	0	1	1	1	1	RYR1	ryanodine receptor 1 (skeletal)
hsa-miR-612	0	0	1	1	0	0	PSMB2	proteasome (prosome, macropain) subunit, beta type, 2
hsa-miR-612	0	0	1	1	0	0	EIF4E2	eukaryotic translation initiation factor 4E family member 2
hsa-miR-612	1	0	1	1	1	1	PDLIM5	PDZ and LIM domain 5
hsa-miR-612	0	0	1	1	0	0	EIF2B4	eukaryotic translation initiation factor 2B, subunit 4 delta, 67kDa
hsa-miR-612	0	0	1	1	0	0	CLK3	CDC-like kinase 3
hsa-miR-612	1	0	1	1	1	1	GIT1	G protein-coupled receptor kinase interacting ArfGAP 1
hsa-miR-612	0	0	1	1	0	0	ITGA2B	integrin, alpha 2b (platelet glycoprotein IIb of IIb/IIIa complex, antigen CD41)
hsa-miR-612	0	0	1	1	0	0	HLA-DMB	major histocompatibility complex, class II, DM beta
hsa-miR-612	0	0	1	1	0	0	BMP1	bone morphogenetic protein 1
hsa-miR-612	0	0	1	1	0	0	CFLAR	CASP8 and FADD-like apoptosis regulator
hsa-miR-612	0	0	1	1	1	1	ALDH3B1	aldehyde dehydrogenase 3 family, member B1
hsa-miR-612	1	0	1	1	1	1	CD40	CD40 molecule, TNF receptor superfamily member 5
hsa-miR-612	1	0	1	1	1	1	ARHGEF3	Rho guanine nucleotide exchange factor (GEF) 3
hsa-miR-612	0	0	1	1	0	0	SLC22A8	solute carrier family 22 (organic anion transporter), member 8
hsa-miR-612	1	0	1	1	1	1	TEAD1	TEA domain family member 1 (SV40 transcriptional enhancer factor)
hsa-miR-612	1	0	1	1	0	0	PPP2R5D	protein phosphatase 2, regulatory subunit B', delta
hsa-miR-612	1	0	1	1	1	1	PHLDB2	pleckstrin homology-like domain, family B, member 2
hsa-miR-612	1	0	1	0	1	1	CAV1	caveolin 1, caveolae protein, 22kDa
hsa-miR-612	1	0	1	1	1	1	MEF2D	myocyte enhancer factor 2D
hsa-miR-612	1	0	1	1	1	1	SDHC	succinate dehydrogenase complex, subunit C, integral membrane protein, 15kDa
hsa-miR-612	0	0	1	0	0	0	LOC646813	DEAH (Asp-Glu-Ala-His) box polypeptide 9 pseudogene
hsa-miR-612	0	0	1	1	1	1	CD55	CD55 molecule, decay accelerating factor for complement (Cromer blood group)
hsa-miR-612	0	0	1	0	0	0	MIAT	myocardial infarction associated transcript (non-protein coding)
hsa-miR-612	1	0	1	0	1	1	DDX3X	DEAD (Asp-Glu-Ala-Asp) box polypeptide 3, X-linked
hsa-miR-612	1	0	1	1	1	1	STX16	syntaxin 16
hsa-miR-612	1	0	1	1	1	1	CBFA2T2	core-binding factor, runt domain, alpha subunit 2; translocated to, 2
hsa-miR-612	1	0	1	1	0	0	GRIN1	glutamate receptor, ionotropic, N-methyl D-aspartate 1
hsa-miR-612	0	0	1	1	0	0	KIR2DL3	killer cell immunoglobulin-like receptor, two domains, long cytoplasmic tail, 3
hsa-miR-612	0	0	1	1	0	0	SPTBN2	spectrin, beta, non-erythrocytic 2
hsa-miR-612	1	0	1	1	1	1	MYT1L	myelin transcription factor 1-like
hsa-miR-612	1	0	1	0	1	1	CELF2	CUGBP, Elav-like family member 2
hsa-miR-612	1	0	1	1	1	1	MRAS	muscle RAS oncogene homolog
hsa-miR-612	0	0	1	0	0	0	FP588	uncharacterized LOC92973
hsa-miR-612	0	0	1	1	1	1	CD84	CD84 molecule
hsa-miR-612	1	0	1	1	1	1	MBNL2	muscleblind-like splicing regulator 2
hsa-miR-612	0	0	1	1	0	0	IKBKG	inhibitor of kappa light polypeptide gene enhancer in B-cells, kinase gamma
hsa-miR-612	1	0	1	1	1	1	CTNND1	catenin (cadherin-associated protein), delta 1
hsa-miR-612	0	0	1	1	1	1	NOL3	nucleolar protein 3 (apoptosis repressor with CARD domain)
hsa-miR-612	0	0	1	1	1	1	SC5DL	sterol-C5-desaturase (ERG3 delta-5-desaturase homolog, S. cerevisiae)-like
hsa-miR-612	0	0	1	1	0	0	SLC38A6	solute carrier family 38, member 6
hsa-miR-612	1	0	1	1	0	0	SLC44A2	solute carrier family 44, member 2
hsa-miR-612	1	0	1	1	0	0	PAK1	p21 protein (Cdc42/Rac)-activated kinase 1
hsa-miR-612	0	0	1	1	1	1	LYPLA1	lysophospholipase I
hsa-miR-612	0	0	1	1	1	1	ERAL1	Era G-protein-like 1 (E. coli)
hsa-miR-612	0	0	1	1	0	0	CARD10	caspase recruitment domain family, member 10
hsa-miR-612	0	0	1	1	1	1	RGS7	regulator of G-protein signaling 7
hsa-miR-612	0	0	1	1	1	1	RER1	RER1 retention in endoplasmic reticulum 1 homolog (S. cerevisiae)
hsa-miR-612	1	0	1	1	1	1	GLS	glutaminase
hsa-miR-612	0	0	1	1	1	1	IL18BP	interleukin 18 binding protein
hsa-miR-612	0	0	1	1	1	1	MSTO1	misato homolog 1 (Drosophila)
hsa-miR-612	1	0	1	0	0	0	PPME1	protein phosphatase methylesterase 1
hsa-miR-612	1	0	1	1	1	1	AASDHPPT	aminoadipate-semialdehyde dehydrogenase-phosphopantetheinyl transferase
hsa-miR-612	0	0	1	0	1	1	CLEC5A	C-type lectin domain family 5, member A
hsa-miR-612	0	0	1	1	0	0	ADAMTS7	ADAM metallopeptidase with thrombospondin type 1 motif, 7
hsa-miR-612	1	0	1	1	1	1	SCHIP1	schwannomin interacting protein 1
hsa-miR-612	0	0	1	0	1	1	PDP1	pyruvate dehyrogenase phosphatase catalytic subunit 1
hsa-miR-612	0	0	1	0	1	1	ZDHHC17	zinc finger, DHHC-type containing 17
hsa-miR-612	1	0	1	1	0	0	ZCCHC4	zinc finger, CCHC domain containing 4
hsa-miR-612	1	0	1	1	1	1	C16orf70	chromosome 16 open reading frame 70
hsa-miR-612	1	0	1	1	0	0	VKORC1	vitamin K epoxide reductase complex, subunit 1
hsa-miR-612	0	0	1	1	0	0	FXYD5	FXYD domain containing ion transport regulator 5
hsa-miR-612	1	0	1	1	1	1	ATP2C1	ATPase, Ca++ transporting, type 2C, member 1
hsa-miR-612	1	0	1	1	1	1	C3orf18	chromosome 3 open reading frame 18
hsa-miR-612	1	0	1	1	1	1	TSC22D2	TSC22 domain family, member 2
hsa-miR-612	0	0	1	1	1	1	SLCO2B1	solute carrier organic anion transporter family, member 2B1
hsa-miR-612	1	0	1	1	1	1	SYDE1	synapse defective 1, Rho GTPase, homolog 1 (C. elegans)
hsa-miR-612	0	0	1	1	1	1	FASTKD2	FAST kinase domains 2
hsa-miR-612	0	0	1	0	0	0	TIGD7	tigger transposable element derived 7
hsa-miR-612	0	0	1	1	0	0	HES6	hairy and enhancer of split 6 (Drosophila)
hsa-miR-612	0	0	1	1	1	1	GOLGA6A	golgin A6 family, member A
hsa-miR-612	1	0	1	0	1	1	TRPS1	trichorhinophalangeal syndrome I
hsa-miR-612	1	0	1	1	1	1	ERGIC1	endoplasmic reticulum-golgi intermediate compartment (ERGIC) 1
hsa-miR-612	0	0	1	1	1	1	CYP3A43	cytochrome P450, family 3, subfamily A, polypeptide 43
hsa-miR-612	0	0	1	1	1	1	LRTOMT	leucine rich transmembrane and 0-methyltransferase domain containing
hsa-miR-612	0	0	1	1	1	1	SLC4A5	solute carrier family 4, sodium bicarbonate cotransporter, member 5
hsa-miR-612	0	0	1	0	0	0	LOC645355	uncharacterized LOC645355
hsa-miR-612	0	0	1	0	1	1	ZNF302	zinc finger protein 302
hsa-miR-612	1	0	1	1	0	0	RAB34	RAB34, member RAS oncogene family
hsa-miR-612	1	0	1	1	1	1	LETMD1	LETM1 domain containing 1
hsa-miR-612	1	0	1	1	1	1	CPEB1	cytoplasmic polyadenylation element binding protein 1
hsa-miR-612	0	0	1	1	1	1	FCRL1	Fc receptor-like 1
hsa-miR-612	0	0	1	1	0	0	ZAN	zonadhesin
hsa-miR-612	1	0	1	1	1	1	ACHE	acetylcholinesterase
hsa-miR-612	0	0	1	1	1	1	SEMA6C	sema domain, transmembrane domain (TM), and cytoplasmic domain, (semaphorin) 6C
hsa-miR-612	1	0	1	0	1	1	USP32	ubiquitin specific peptidase 32
hsa-miR-612	1	0	1	1	1	1	PBX3	pre-B-cell leukemia homeobox 3
hsa-miR-612	0	0	1	1	0	0	FGFR4	fibroblast growth factor receptor 4
hsa-miR-612	1	0	1	1	1	1	NF2	neurofibromin 2 (merlin)
hsa-miR-612	1	0	1	0	1	1	WIPF2	WAS/WASL interacting protein family, member 2
hsa-miR-612	1	0	1	1	1	1	CD300LF	CD300 molecule-like family member f
hsa-miR-612	0	0	1	1	1	1	WBP2NL	WBP2 N-terminal like
hsa-miR-612	0	0	1	1	0	0	SNRPN	small nuclear ribonucleoprotein polypeptide N
hsa-miR-612	1	0	1	1	1	1	NTRK2	neurotrophic tyrosine kinase, receptor, type 2
hsa-miR-612	0	0	1	0	0	0	MYO15B	myosin XVB pseudogene
hsa-miR-612	1	0	1	1	1	1	ST3GAL3	ST3 beta-galactoside alpha-2,3-sialyltransferase 3
hsa-miR-612	1	0	1	1	0	0	SEPT8	septin 8
hsa-miR-612	1	0	1	1	1	1	SLC35A4	solute carrier family 35, member A4
hsa-miR-612	1	0	1	1	0	0	FOXP2	forkhead box P2
hsa-miR-612	1	0	1	1	1	1	BRSK1	BR serine/threonine kinase 1
hsa-miR-612	0	0	1	1	0	0	MT1E	metallothionein 1E
hsa-miR-612	0	0	1	1	1	1	AMPH	amphiphysin
hsa-miR-612	0	0	1	1	1	1	CARD8	caspase recruitment domain family, member 8
hsa-miR-612	1	0	1	1	0	0	ST3GAL4	ST3 beta-galactoside alpha-2,3-sialyltransferase 4
hsa-miR-612	0	0	1	1	1	1	PTK7	PTK7 protein tyrosine kinase 7
hsa-miR-612	0	0	1	1	0	0	TREML1	triggering receptor expressed on myeloid cells-like 1
hsa-miR-612	1	0	1	0	1	1	IL1RAP	interleukin 1 receptor accessory protein
hsa-miR-612	1	0	1	1	1	1	AFF2	AF4/FMR2 family, member 2
hsa-miR-612	1	0	1	1	1	1	PLAGL1	pleiomorphic adenoma gene-like 1
hsa-miR-612	0	0	1	1	1	1	GPR56	G protein-coupled receptor 56
hsa-miR-612	1	0	1	1	1	1	SH2B3	SH2B adaptor protein 3
hsa-miR-612	0	0	1	0	0	0	SNHG4	small nucleolar RNA host gene 4 (non-protein coding)
hsa-miR-612	0	0	1	1	1	1	GNAS	GNAS complex locus
hsa-miR-612	0	0	1	1	1	1	TCFL5	transcription factor-like 5 (basic helix-loop-helix)
hsa-miR-612	0	0	1	1	1	1	RANBP17	RAN binding protein 17
hsa-miR-612	0	0	1	1	1	1	CD1E	CD1e molecule
hsa-miR-612	0	0	1	1	1	1	DMRTC1	DMRT-like family C1
hsa-miR-612	0	0	1	1	0	0	DMRTC1B	DMRT-like family C1B
hsa-miR-612	0	0	1	0	0	0	CD177	CD177 molecule
hsa-miR-612	1	0	1	1	1	1	ARHGAP17	Rho GTPase activating protein 17
hsa-miR-612	1	0	1	1	1	1	NRXN3	neurexin 3
hsa-miR-612	1	0	1	1	1	1	PDE1B	phosphodiesterase 1B, calmodulin-dependent
hsa-miR-612	1	0	1	1	1	1	EMID2	EMI domain containing 2
hsa-miR-612	1	0	1	1	1	1	NFYA	nuclear transcription factor Y, alpha
hsa-miR-612	0	0	1	1	1	1	CCNB3	cyclin B3
hsa-miR-612	1	0	1	1	1	1	PPP3CB	protein phosphatase 3, catalytic subunit, beta isozyme
hsa-miR-612	0	0	1	1	1	1	ZNF248	zinc finger protein 248
hsa-miR-612	1	0	1	1	1	1	XIRP1	xin actin-binding repeat containing 1
hsa-miR-612	0	0	1	1	1	1	DEPDC5	DEP domain containing 5
hsa-miR-612	0	0	1	1	0	0	IL4I1	interleukin 4 induced 1
hsa-miR-612	0	0	1	1	0	0	ACSS2	acyl-CoA synthetase short-chain family member 2
hsa-miR-612	0	0	1	1	0	0	GPRC5C	G protein-coupled receptor, family C, group 5, member C
hsa-miR-612	1	0	1	1	1	1	AKAP2	A kinase (PRKA) anchor protein 2
hsa-miR-612	1	0	1	0	1	1	NFAT5	nuclear factor of activated T-cells 5, tonicity-responsive
hsa-miR-612	0	0	1	1	0	0	CYP2W1	cytochrome P450, family 2, subfamily W, polypeptide 1
hsa-miR-612	0	0	1	1	1	1	PARP16	poly (ADP-ribose) polymerase family, member 16
hsa-miR-612	0	0	1	1	1	1	UBE2Q2	ubiquitin-conjugating enzyme E2Q family member 2
hsa-miR-612	0	0	1	0	0	0	TUG1	taurine upregulated 1 (non-protein coding)
hsa-miR-612	0	0	1	1	1	1	PARPBP	PARP1 binding protein
hsa-miR-612	0	0	1	1	0	0	C19orf60	chromosome 19 open reading frame 60
hsa-miR-612	0	0	1	0	0	0	RNF31	ring finger protein 31
hsa-miR-612	0	0	1	1	1	1	RNF220	ring finger protein 220
hsa-miR-612	1	0	1	1	1	1	RIC8B	resistance to inhibitors of cholinesterase 8 homolog B (C. elegans)
hsa-miR-612	1	0	1	1	1	1	CADM3	cell adhesion molecule 3
hsa-miR-612	1	0	1	1	1	1	EIF2C1	eukaryotic translation initiation factor 2C, 1
hsa-miR-612	1	0	1	0	1	1	CLIC4	chloride intracellular channel 4
hsa-miR-612	1	0	1	1	1	1	WDTC1	WD and tetratricopeptide repeats 1
hsa-miR-612	0	0	1	1	1	1	CXXC5	CXXC finger protein 5
hsa-miR-612	0	0	1	1	1	1	GBP3	guanylate binding protein 3
hsa-miR-612	1	0	1	1	1	1	ACER3	alkaline ceramidase 3
hsa-miR-612	0	0	1	1	1	1	STAU2	staufen, RNA binding protein, homolog 2 (Drosophila)
hsa-miR-612	1	0	1	1	1	1	KLHDC8B	kelch domain containing 8B
hsa-miR-612	0	0	1	1	0	0	C17orf53	chromosome 17 open reading frame 53
hsa-miR-612	0	0	1	1	0	0	MLST8	MTOR associated protein, LST8 homolog (S. cerevisiae)
hsa-miR-612	0	0	1	1	0	0	ADCK4	aarF domain containing kinase 4
hsa-miR-612	1	0	1	1	0	0	YPEL3	yippee-like 3 (Drosophila)
hsa-miR-612	1	0	1	1	0	0	UQCC	ubiquinol-cytochrome c reductase complex chaperone
hsa-miR-612	1	0	1	1	1	1	SLCO5A1	solute carrier organic anion transporter family, member 5A1
hsa-miR-612	0	0	1	0	0	0	LOC149134	uncharacterized LOC149134
hsa-miR-612	1	0	1	1	0	0	DFNB31	deafness, autosomal recessive 31
hsa-miR-612	0	0	1	0	0	0	DUXAP10	double homeobox A pseudogene 10
hsa-miR-612	1	0	1	1	1	1	S100PBP	S100P binding protein
hsa-miR-612	0	0	1	1	1	1	ARMC5	armadillo repeat containing 5
hsa-miR-612	1	0	1	1	0	0	FASTK	Fas-activated serine/threonine kinase
hsa-miR-612	0	0	1	0	0	0	MIRLET7BHG	MIRLET7B host gene (non-protein coding)
hsa-miR-612	0	0	1	0	0	0	LINC00475	long intergenic non-protein coding RNA 475
hsa-miR-612	0	0	1	0	0	0	LOC284561	uncharacterized LOC284561
hsa-miR-612	1	0	1	1	1	1	DERL1	derlin 1
hsa-miR-612	1	0	1	1	1	1	PPFIA3	protein tyrosine phosphatase, receptor type, f polypeptide (PTPRF), interacting protein (liprin), alpha 3
hsa-miR-612	0	0	1	1	0	0	OBSL1	obscurin-like 1
hsa-miR-612	1	0	1	1	0	0	MEX3A	mex-3 homolog A (C. elegans)
hsa-miR-612	0	0	1	0	1	1	FLJ14186	uncharacterized LOC401149
hsa-miR-612	1	0	1	1	1	1	COPS7B	COP9 constitutive photomorphogenic homolog subunit 7B (Arabidopsis)
hsa-miR-612	0	0	1	0	0	0	LOC286059	tumor necrosis factor receptor superfamily, member 10d, decoy with truncated death domain pseudogene
hsa-miR-612	0	0	1	1	1	1	SIGLEC1	sialic acid binding Ig-like lectin 1, sialoadhesin
hsa-miR-612	1	0	1	1	1	1	ZMIZ1	zinc finger, MIZ-type containing 1
hsa-miR-612	0	0	1	1	0	0	SPON2	spondin 2, extracellular matrix protein
hsa-miR-612	1	0	1	0	1	1	STK40	serine/threonine kinase 40
hsa-miR-612	0	0	1	0	0	0	RASAL3	RAS protein activator like 3
hsa-miR-612	1	0	1	1	1	1	GBF1	golgi brefeldin A resistant guanine nucleotide exchange factor 1
hsa-miR-612	0	0	1	0	1	1	ATXN1L	ataxin 1-like
hsa-miR-612	1	0	1	1	1	1	ARFGEF1	ADP-ribosylation factor guanine nucleotide-exchange factor 1 (brefeldin A-inhibited)
hsa-miR-612	1	0	1	1	1	1	YPEL5	yippee-like 5 (Drosophila)
hsa-miR-612	1	0	1	0	1	1	ZCCHC3	zinc finger, CCHC domain containing 3
hsa-miR-612	0	0	1	0	1	1	HEMK1	HemK methyltransferase family member 1
hsa-miR-612	0	0	1	0	0	0	LINC00340	long intergenic non-protein coding RNA 340
hsa-miR-612	1	0	1	1	1	1	HPS3	Hermansky-Pudlak syndrome 3
hsa-miR-612	0	0	1	0	1	1	FLJ22763	uncharacterized LOC401081
hsa-miR-612	1	0	1	1	0	0	POMGNT1	protein O-linked mannose beta1,2-N-acetylglucosaminyltransferase
hsa-miR-612	0	0	1	1	0	0	ZNF276	zinc finger protein 276
hsa-miR-612	1	0	1	1	1	1	LRP4	low density lipoprotein receptor-related protein 4
hsa-miR-612	0	0	1	1	1	1	DUSP14	dual specificity phosphatase 14
hsa-miR-612	0	0	1	0	0	0	A1BG-AS1	A1BG antisense RNA 1
hsa-miR-612	1	0	1	1	1	1	FOXP1	forkhead box P1
hsa-miR-612	0	0	1	1	0	0	CCDC142	coiled-coil domain containing 142
hsa-miR-612	0	0	1	1	1	1	SPRTN	SprT-like N-terminal domain
hsa-miR-612	1	0	1	1	1	1	SEC63	SEC63 homolog (S. cerevisiae)
hsa-miR-612	1	0	1	1	1	1	FAM53C	family with sequence similarity 53, member C
hsa-miR-612	0	0	1	1	1	1	KDM2B	lysine (K)-specific demethylase 2B
hsa-miR-612	0	0	1	1	1	1	BCAR1	breast cancer anti-estrogen resistance 1
hsa-miR-612	0	0	1	1	1	1	BBS1	Bardet-Biedl syndrome 1
hsa-miR-612	1	0	1	1	1	1	EIF2C3	eukaryotic translation initiation factor 2C, 3
hsa-miR-612	1	0	1	1	1	1	TMEM2	transmembrane protein 2
hsa-miR-612	1	0	1	1	1	1	KCTD15	potassium channel tetramerisation domain containing 15
hsa-miR-612	0	0	1	1	0	0	HAGHL	hydroxyacylglutathione hydrolase-like
hsa-miR-612	1	0	1	1	0	0	C15orf27	chromosome 15 open reading frame 27
hsa-miR-612	0	0	1	0	0	0	LOC254559	uncharacterized LOC254559
hsa-miR-612	0	0	1	1	1	1	C8orf46	chromosome 8 open reading frame 46
hsa-miR-612	1	0	1	1	1	1	PPM1L	protein phosphatase, Mg2+/Mn2+ dependent, 1L
hsa-miR-612	0	0	1	1	1	1	TOX2	TOX high mobility group box family member 2
hsa-miR-612	0	0	1	0	0	0	LOC100131060	uncharacterized LOC100131060
hsa-miR-612	0	0	1	1	1	1	ZNF213	zinc finger protein 213
hsa-miR-612	0	0	1	0	0	0	FLJ30838	uncharacterized LOC400955
hsa-miR-612	0	0	1	1	1	1	CCND3	cyclin D3
hsa-miR-612	1	0	1	1	1	1	FRMD6	FERM domain containing 6
hsa-miR-612	1	0	1	1	1	1	PDLIM2	PDZ and LIM domain 2 (mystique)
hsa-miR-612	0	0	1	0	0	0	LOC219688	uncharacterized LOC219688
hsa-miR-612	0	0	1	0	0	0	FLJ31104	uncharacterized LOC441072
hsa-miR-612	1	0	1	1	1	1	HERPUD2	HERPUD family member 2
hsa-miR-612	0	0	1	1	1	1	GLYATL1	glycine-N-acyltransferase-like 1
hsa-miR-612	0	0	1	0	0	0	LOC201617	uncharacterized LOC201617
hsa-miR-612	1	0	1	1	0	0	SH2D3C	SH2 domain containing 3C
hsa-miR-612	0	0	1	0	0	0	LOC440894	uncharacterized LOC440894
hsa-miR-612	0	0	1	1	0	0	STRA6	stimulated by retinoic acid gene 6 homolog (mouse)
hsa-miR-612	0	0	1	1	0	0	BEAN1	brain expressed, associated with NEDD4, 1
hsa-miR-612	0	0	1	0	0	0	FLJ12825	uncharacterized LOC440101
hsa-miR-612	0	0	1	0	0	0	FLG-AS1	FLG antisense RNA 1
hsa-miR-612	1	0	1	1	1	1	SCAMP5	secretory carrier membrane protein 5
hsa-miR-612	1	0	1	1	1	1	PHF15	PHD finger protein 15
hsa-miR-612	0	0	1	1	1	1	BRD2	bromodomain containing 2
hsa-miR-612	1	0	1	1	1	1	SORBS2	sorbin and SH3 domain containing 2
hsa-miR-612	0	0	1	1	0	0	ACOT8	acyl-CoA thioesterase 8
hsa-miR-612	0	0	1	1	1	1	IPO4	importin 4
hsa-miR-612	0	0	1	1	1	1	GNB2	guanine nucleotide binding protein (G protein), beta polypeptide 2
hsa-miR-612	0	0	1	0	0	0	LOC157381	uncharacterized LOC157381
hsa-miR-612	0	0	1	1	0	0	RELT	RELT tumor necrosis factor receptor
hsa-miR-612	0	0	1	1	1	1	ZMIZ2	zinc finger, MIZ-type containing 2
hsa-miR-612	0	0	1	1	0	0	COMMD4	COMM domain containing 4
hsa-miR-612	1	0	1	1	1	1	MGAT1	mannosyl (alpha-1,3-)-glycoprotein beta-1,2-N-acetylglucosaminyltransferase
hsa-miR-612	0	0	1	1	1	1	VWA3B	von Willebrand factor A domain containing 3B
hsa-miR-612	0	0	1	1	1	1	C14orf79	chromosome 14 open reading frame 79
hsa-miR-612	1	0	1	1	1	1	MAP3K11	mitogen-activated protein kinase kinase kinase 11
hsa-miR-612	0	0	1	1	1	1	MYBPC1	myosin binding protein C, slow type
hsa-miR-612	0	0	1	0	0	0	FLJ32742	uncharacterized locus FLJ32742
hsa-miR-612	0	0	1	0	0	0	LOC147004	uncharacterized LOC147004
hsa-miR-612	1	0	1	1	1	1	MPP7	membrane protein, palmitoylated 7 (MAGUK p55 subfamily member 7)
hsa-miR-612	0	0	1	1	1	1	ELL3	elongation factor RNA polymerase II-like 3
hsa-miR-612	0	0	1	1	1	1	SEC61A2	Sec61 alpha 2 subunit (S. cerevisiae)
hsa-miR-612	1	0	1	1	1	1	SEC22A	SEC22 vesicle trafficking protein homolog A (S. cerevisiae)
hsa-miR-612	1	0	1	1	0	0	GBA2	glucosidase, beta (bile acid) 2
hsa-miR-612	0	0	1	0	1	1	CHURC1	churchill domain containing 1
hsa-miR-612	1	0	1	1	1	1	ANKRD49	ankyrin repeat domain 49
hsa-miR-612	1	0	1	1	1	1	ANKRD29	ankyrin repeat domain 29
hsa-miR-612	0	0	1	1	0	0	PTOV1	prostate tumor overexpressed 1
hsa-miR-612	0	0	1	1	1	1	A2ML1	alpha-2-macroglobulin-like 1
hsa-miR-612	0	0	1	1	1	1	FXC1	fracture callus 1 homolog (rat)
hsa-miR-612	0	0	1	1	0	0	CD37	CD37 molecule
hsa-miR-612	0	0	1	0	1	1	CCDC68	coiled-coil domain containing 68
hsa-miR-612	0	0	1	1	0	0	TRIM41	tripartite motif containing 41
hsa-miR-612	1	0	1	1	1	1	FAM73B	family with sequence similarity 73, member B
hsa-miR-612	0	0	1	1	0	0	GRIP2	glutamate receptor interacting protein 2
hsa-miR-612	1	0	1	0	1	1	RNF165	ring finger protein 165
hsa-miR-612	0	0	1	1	1	1	SLC52A3	solute carrier family 52, riboflavin transporter, member 3
hsa-miR-612	1	0	1	1	1	1	UBAP1	ubiquitin associated protein 1
hsa-miR-612	0	0	1	1	0	0	NISCH	nischarin
hsa-miR-612	1	0	1	1	0	0	B3GAT3	beta-1,3-glucuronyltransferase 3 (glucuronosyltransferase I)
hsa-miR-612	0	0	1	1	0	0	GHDC	GH3 domain containing
hsa-miR-612	0	0	1	1	1	1	CAMKV	CaM kinase-like vesicle-associated
hsa-miR-612	0	0	1	1	0	0	PIGO	phosphatidylinositol glycan anchor biosynthesis, class O
hsa-miR-612	1	0	1	1	1	1	DPH1	DPH1 homolog (S. cerevisiae)
hsa-miR-612	0	0	1	0	0	0	LOC727993	uncharacterized LOC727993
hsa-miR-612	1	0	1	1	1	1	CYP46A1	cytochrome P450, family 46, subfamily A, polypeptide 1
hsa-miR-612	0	0	1	1	1	1	STBD1	starch binding domain 1
hsa-miR-612	0	0	1	0	1	1	TMSB15B	thymosin beta 15B
hsa-miR-612	0	0	1	0	0	0	LOC643837	uncharacterized LOC643837
hsa-miR-612	0	0	1	1	0	0	ACOT11	acyl-CoA thioesterase 11
hsa-miR-612	0	0	1	1	0	0	CTNNBL1	catenin, beta like 1
hsa-miR-612	1	0	1	1	1	1	ARIH2	ariadne homolog 2 (Drosophila)
hsa-miR-612	1	0	1	1	1	1	AMMECR1	Alport syndrome, mental retardation, midface hypoplasia and elliptocytosis chromosomal region gene 1
hsa-miR-612	0	0	1	0	1	1	TBX5-AS1	TBX5 antisense RNA 1
hsa-miR-612	0	0	1	1	0	0	TRMT44	tRNA methyltransferase 44 homolog (S. cerevisiae)
hsa-miR-612	1	0	1	1	1	1	GPD2	glycerol-3-phosphate dehydrogenase 2 (mitochondrial)
hsa-miR-612	1	0	1	1	1	1	GCFC1	GC-rich sequence DNA-binding factor 1
hsa-miR-612	0	0	1	0	0	0	LOC283887	uncharacterized LOC283887
hsa-miR-612	1	0	1	1	1	1	SPTBN1	spectrin, beta, non-erythrocytic 1
hsa-miR-612	0	0	1	1	1	1	TGFBI	transforming growth factor, beta-induced, 68kDa
hsa-miR-612	0	0	1	0	0	0	CXXC1P1	CXXC finger protein 1 pseudogene 1
hsa-miR-612	1	0	1	1	1	1	CTNNA1	catenin (cadherin-associated protein), alpha 1, 102kDa
hsa-miR-612	0	0	1	1	1	1	C19orf47	chromosome 19 open reading frame 47
hsa-miR-612	0	0	1	1	0	0	WBP1	WW domain binding protein 1
hsa-miR-612	1	0	1	1	1	1	RNF121	ring finger protein 121
hsa-miR-612	1	0	1	1	1	1	SEPT4	septin 4
hsa-miR-612	1	0	1	1	1	1	KLC2	kinesin light chain 2
hsa-miR-612	0	0	1	0	0	0	ZNF806	zinc finger protein 806
hsa-miR-612	1	0	1	0	1	1	GATAD2B	GATA zinc finger domain containing 2B
hsa-miR-612	0	0	1	0	1	1	AGBL4	ATP/GTP binding protein-like 4
hsa-miR-612	1	0	1	1	1	1	PTPRU	protein tyrosine phosphatase, receptor type, U
hsa-miR-612	1	0	1	1	1	1	LPPR2	lipid phosphate phosphatase-related protein type 2
hsa-miR-612	0	0	1	0	0	0	MYO1H	myosin IH
hsa-miR-612	0	0	1	0	0	0	LOC285778	uncharacterized LOC285778
hsa-miR-612	1	0	1	1	1	1	TBC1D20	TBC1 domain family, member 20
hsa-miR-612	1	0	1	1	1	1	RASGEF1A	RasGEF domain family, member 1A
hsa-miR-612	1	0	1	1	1	1	NDEL1	nudE nuclear distribution E homolog (A. nidulans)-like 1
hsa-miR-612	1	0	1	1	1	1	CUL2	cullin 2
hsa-miR-612	1	0	1	1	1	1	CTNNB1	catenin (cadherin-associated protein), beta 1, 88kDa
hsa-miR-612	0	0	1	1	0	0	ZNF185	zinc finger protein 185 (LIM domain)
hsa-miR-612	1	0	1	0	1	1	UVRAG	UV radiation resistance associated gene
hsa-miR-612	0	0	1	1	1	1	AQP3	aquaporin 3 (Gill blood group)
hsa-miR-612	0	0	1	1	1	1	LTBR	lymphotoxin beta receptor (TNFR superfamily, member 3)
hsa-miR-612	0	0	1	1	1	1	FUT11	fucosyltransferase 11 (alpha (1,3) fucosyltransferase)
hsa-miR-612	0	0	1	1	1	1	SETD2	SET domain containing 2
hsa-miR-612	0	0	1	1	1	1	SIRPB2	signal-regulatory protein beta 2
hsa-miR-612	0	0	1	0	0	0	LOC100129858	uncharacterized LOC100129858
hsa-miR-612	1	0	1	1	1	1	SPATS2	spermatogenesis associated, serine-rich 2
hsa-miR-612	1	0	1	1	1	1	CECR6	cat eye syndrome chromosome region, candidate 6
hsa-miR-612	0	0	1	0	0	0	LOC284577	uncharacterized LOC284577
hsa-miR-612	0	0	1	1	1	1	ZNF341	zinc finger protein 341
hsa-miR-612	1	0	1	1	1	1	CS	citrate synthase
hsa-miR-612	1	0	1	1	1	1	ZC3H11A	zinc finger CCCH-type containing 11A
hsa-miR-612	1	0	1	1	1	1	LITAF	lipopolysaccharide-induced TNF factor
hsa-miR-612	1	0	1	1	1	1	AMT	aminomethyltransferase
hsa-miR-612	1	0	1	1	1	1	ACSL1	acyl-CoA synthetase long-chain family member 1
hsa-miR-612	0	0	1	1	0	0	TRIM46	tripartite motif containing 46
hsa-miR-612	1	0	1	1	1	1	FAM98A	family with sequence similarity 98, member A
hsa-miR-612	1	0	1	1	1	1	FADS1	fatty acid desaturase 1
hsa-miR-612	0	0	1	0	0	0	ZNF815P	zinc finger protein 815, pseudogene
hsa-miR-612	0	0	1	0	0	0	FAM66C	family with sequence similarity 66, member C
hsa-miR-612	0	0	1	0	1	1	FLJ39080	uncharacterized LOC441355
hsa-miR-612	0	0	1	1	0	0	ERGIC3	ERGIC and golgi 3
hsa-miR-612	0	0	1	0	0	0	C1orf204	chromosome 1 open reading frame 204
hsa-miR-612	1	0	1	0	1	1	THRB	thyroid hormone receptor, beta
hsa-miR-612	1	0	1	0	1	1	KBTBD8	kelch repeat and BTB (POZ) domain containing 8
hsa-miR-612	1	0	1	1	1	1	SYT6	synaptotagmin VI
hsa-miR-612	0	0	1	1	1	1	ZNF513	zinc finger protein 513
hsa-miR-612	0	0	1	1	1	1	CORO7	coronin 7
hsa-miR-612	1	0	1	0	1	1	YPEL2	yippee-like 2 (Drosophila)
hsa-miR-612	0	0	1	1	0	0	PRKRIP1	PRKR interacting protein 1 (IL11 inducible)
hsa-miR-612	0	0	1	0	0	0	LOC400680	uncharacterized LOC400680
hsa-miR-612	1	0	1	1	1	1	TMEM185A	transmembrane protein 185A
hsa-miR-612	1	0	1	1	1	1	RAB11FIP4	RAB11 family interacting protein 4 (class II)
hsa-miR-612	0	0	1	1	1	1	PPFIBP2	PTPRF interacting protein, binding protein 2 (liprin beta 2)
hsa-miR-612	0	0	1	0	0	0	LINC00293	long intergenic non-protein coding RNA 293
hsa-miR-612	0	0	1	0	0	0	LOC100128560	uncharacterized LOC100128560
hsa-miR-612	0	0	1	1	0	0	AHCY	adenosylhomocysteinase
hsa-miR-612	1	0	1	1	1	1	IGSF11	immunoglobulin superfamily, member 11
hsa-miR-612	0	0	1	1	0	0	KLHDC3	kelch domain containing 3
hsa-miR-612	1	0	1	1	1	1	ST7L	suppression of tumorigenicity 7 like
hsa-miR-612	0	0	1	1	0	0	HNRNPL	heterogeneous nuclear ribonucleoprotein L
hsa-miR-612	0	0	1	0	0	0	CECR7	cat eye syndrome chromosome region, candidate 7 (non-protein coding)
hsa-miR-612	1	0	1	1	1	1	PIGA	phosphatidylinositol glycan anchor biosynthesis, class A
hsa-miR-612	1	0	1	0	1	1	SQSTM1	sequestosome 1
hsa-miR-612	0	0	1	1	1	1	ANKZF1	ankyrin repeat and zinc finger domain containing 1
hsa-miR-612	1	0	1	1	1	1	THTPA	thiamine triphosphatase
hsa-miR-612	0	0	1	0	0	0	LOC338579	ankyrin repeat domain-containing protein 30B pseudogene
hsa-miR-612	1	0	1	1	0	0	FBXL19	F-box and leucine-rich repeat protein 19
hsa-miR-612	1	0	1	1	0	0	DGCR6	DiGeorge syndrome critical region gene 6
hsa-miR-612	0	0	1	1	0	0	GDPD5	glycerophosphodiester phosphodiesterase domain containing 5
hsa-miR-612	1	0	1	0	1	1	UNC5D	unc-5 homolog D (C. elegans)
hsa-miR-612	0	0	1	1	1	1	ABCC12	ATP-binding cassette, sub-family C (CFTR/MRP), member 12
hsa-miR-612	0	0	1	1	1	1	SLFN13	schlafen family member 13
hsa-miR-612	0	0	1	0	1	1	EML5	echinoderm microtubule associated protein like 5
hsa-miR-612	1	0	1	1	1	1	AGAP2	ArfGAP with GTPase domain, ankyrin repeat and PH domain 2
hsa-miR-612	1	0	1	1	1	1	WEE1	WEE1 homolog (S. pombe)
hsa-miR-612	1	0	1	1	0	0	CACNB3	calcium channel, voltage-dependent, beta 3 subunit
hsa-miR-612	0	0	1	1	0	0	MARS	methionyl-tRNA synthetase
hsa-miR-612	1	0	1	1	1	1	ZBTB4	zinc finger and BTB domain containing 4
hsa-miR-612	0	0	1	1	1	1	RNF103	ring finger protein 103
hsa-miR-612	0	0	1	1	0	0	SLC26A10	solute carrier family 26, member 10
hsa-miR-612	0	0	1	1	0	0	DCLK3	doublecortin-like kinase 3
hsa-miR-612	1	0	1	1	1	1	CBLB	Cbl proto-oncogene, E3 ubiquitin protein ligase B
hsa-miR-612	0	0	1	1	1	1	RGS3	regulator of G-protein signaling 3
hsa-miR-612	1	0	1	0	1	1	KCNK2	potassium channel, subfamily K, member 2
hsa-miR-612	0	0	1	0	0	0	LGALS17A	Charcot-Leyden crystal protein pseudogene
hsa-miR-612	0	0	1	0	0	0	LOC650368	asparagine-linked glycosylation 1-like pseudogene
hsa-miR-612	0	0	1	1	0	0	C16orf86	chromosome 16 open reading frame 86
hsa-miR-612	1	0	1	1	1	1	EPAS1	endothelial PAS domain protein 1
hsa-miR-612	0	0	1	1	0	0	C6orf201	chromosome 6 open reading frame 201
hsa-miR-612	0	0	1	0	0	0	DKFZP434H168	uncharacterized LOC26077
hsa-miR-612	0	0	1	1	1	1	CNPY3	canopy 3 homolog (zebrafish)
hsa-miR-612	0	0	1	1	1	1	SLC9A1	solute carrier family 9, subfamily A (NHE1, cation proton antiporter 1), member 1
hsa-miR-612	0	0	1	1	1	1	PKP4	plakophilin 4
hsa-miR-612	1	0	1	1	0	0	KCNC1	potassium voltage-gated channel, Shaw-related subfamily, member 1
hsa-miR-612	0	0	1	1	0	0	C20orf27	chromosome 20 open reading frame 27
hsa-miR-612	0	0	1	1	0	0	NPIP	nuclear pore complex interacting protein
hsa-miR-612	1	0	1	1	1	1	ABR	active BCR-related
hsa-miR-612	1	0	1	0	1	1	RHBDL3	rhomboid, veinlet-like 3 (Drosophila)
hsa-miR-612	1	0	1	1	1	1	DAB2IP	DAB2 interacting protein
hsa-miR-612	1	0	1	1	1	1	CORO2B	coronin, actin binding protein, 2B
hsa-miR-612	1	0	1	1	1	1	C11orf30	chromosome 11 open reading frame 30
hsa-miR-612	1	0	1	1	1	1	CTGF	connective tissue growth factor
hsa-miR-612	1	0	1	1	1	1	C15orf52	chromosome 15 open reading frame 52
hsa-miR-612	0	0	1	0	0	0	LOC613266	uncharacterized LOC613266
hsa-miR-612	0	0	1	1	1	1	C11orf45	chromosome 11 open reading frame 45
hsa-miR-612	0	0	1	0	1	1	CTBP1-AS1	CTBP1 antisense RNA 1
hsa-miR-612	0	0	1	1	0	0	UBR2	ubiquitin protein ligase E3 component n-recognin 2
hsa-miR-612	1	0	1	1	1	1	DPY19L3	dpy-19-like 3 (C. elegans)
hsa-miR-612	0	0	1	0	0	0	FAM75D4	family with sequence similarity 75, member D4
hsa-miR-612	0	0	1	0	0	0	FAM95B1	family with sequence similarity 95, member B1
hsa-miR-612	1	0	1	1	0	0	UBN2	ubinuclein 2
hsa-miR-612	0	0	1	1	0	0	C20orf141	chromosome 20 open reading frame 141
hsa-miR-612	1	0	1	1	0	0	ATXN7L3	ataxin 7-like 3
hsa-miR-612	1	0	1	1	1	1	IL16	interleukin 16
hsa-miR-612	1	0	1	1	1	1	SIKE1	suppressor of IKBKE 1
hsa-miR-612	1	0	1	1	1	1	PIK3R1	phosphoinositide-3-kinase, regulatory subunit 1 (alpha)
hsa-miR-612	0	0	1	1	1	1	PLEKHS1	pleckstrin homology domain containing, family S member 1
hsa-miR-612	0	0	1	1	0	0	CLDN4	claudin 4
hsa-miR-612	0	0	1	1	1	1	USP54	ubiquitin specific peptidase 54
hsa-miR-612	1	0	1	1	0	0	SPEG	SPEG complex locus
hsa-miR-612	0	0	1	1	1	1	SNX22	sorting nexin 22
hsa-miR-612	0	0	1	1	0	0	CCDC88B	coiled-coil domain containing 88B
hsa-miR-612	0	0	1	0	0	0	PLEKHD1	pleckstrin homology domain containing, family D (with coiled-coil domains) member 1
hsa-miR-612	1	0	1	1	1	1	DLG2	discs, large homolog 2 (Drosophila)
hsa-miR-612	1	0	1	1	1	1	IBTK	inhibitor of Bruton agammaglobulinemia tyrosine kinase
hsa-miR-612	1	0	1	0	1	1	GPR180	G protein-coupled receptor 180
hsa-miR-612	0	0	1	1	0	0	TMEM151B	transmembrane protein 151B
hsa-miR-612	1	0	1	1	1	1	CLIP1	CAP-GLY domain containing linker protein 1
hsa-miR-612	0	0	1	0	0	0	RPL23AP53	ribosomal protein L23a pseudogene 53
hsa-miR-612	1	0	1	1	0	0	MAN1B1	mannosidase, alpha, class 1B, member 1
hsa-miR-612	0	0	1	1	1	1	MOBP	myelin-associated oligodendrocyte basic protein
hsa-miR-612	0	0	1	1	1	1	LZTR1	leucine-zipper-like transcription regulator 1
hsa-miR-612	0	0	1	1	0	0	FAM54B	family with sequence similarity 54, member B
hsa-miR-612	0	0	1	1	1	1	PNPLA5	patatin-like phospholipase domain containing 5
hsa-miR-612	0	0	1	1	1	1	RALGAPA2	Ral GTPase activating protein, alpha subunit 2 (catalytic)
hsa-miR-612	0	0	1	1	1	1	ARHGAP33	Rho GTPase activating protein 33
hsa-miR-612	1	0	1	1	0	0	ST3GAL2	ST3 beta-galactoside alpha-2,3-sialyltransferase 2
hsa-miR-612	1	0	1	1	1	1	PHF17	PHD finger protein 17
hsa-miR-612	1	0	1	1	1	1	SLC26A9	solute carrier family 26, member 9
hsa-miR-612	1	0	1	1	1	1	RNF44	ring finger protein 44
hsa-miR-612	1	0	1	1	1	1	NFYC	nuclear transcription factor Y, gamma
hsa-miR-612	1	0	1	0	1	1	FNDC3B	fibronectin type III domain containing 3B
hsa-miR-612	0	0	1	0	0	0	ERVFRD-2	endogenous retrovirus group FRD, member 2
hsa-miR-612	0	0	1	1	0	0	C1orf86	chromosome 1 open reading frame 86
hsa-miR-612	1	0	1	0	1	1	YOD1	YOD1 OTU deubiquinating enzyme 1 homolog (S. cerevisiae)
hsa-miR-612	0	0	1	1	0	0	LOC100128682	uncharacterized LOC100128682
hsa-miR-612	0	0	1	0	0	0	FAM205B	transmembrane protein C9orf144B pseudogene
hsa-miR-612	1	0	1	1	0	0	C15orf39	chromosome 15 open reading frame 39
hsa-miR-612	1	0	1	0	1	1	KDM2A	lysine (K)-specific demethylase 2A
hsa-miR-612	0	0	1	0	0	0	LOC440993	uncharacterized LOC440993
hsa-miR-612	0	0	1	1	0	0	INTS1	integrator complex subunit 1
hsa-miR-612	1	0	1	1	1	1	FRYL	FRY-like
hsa-miR-612	0	0	1	1	1	1	ZNF662	zinc finger protein 662
hsa-miR-612	0	0	1	0	0	0	IDO2	indoleamine 2,3-dioxygenase 2
hsa-miR-612	0	0	1	1	0	0	WFIKKN1	WAP, follistatin/kazal, immunoglobulin, kunitz and netrin domain containing 1
hsa-miR-612	0	0	1	0	0	0	PINLYP	phospholipase A2 inhibitor and LY6/PLAUR domain containing
hsa-miR-612	1	0	1	1	1	1	RBM24	RNA binding motif protein 24
hsa-miR-612	0	0	1	1	1	1	MRPL49	mitochondrial ribosomal protein L49
hsa-miR-612	0	0	1	1	0	0	HEATR8	HEAT repeat containing 8
hsa-miR-612	0	0	1	0	0	0	LOC654433	uncharacterized LOC654433
hsa-miR-612	1	0	1	1	1	1	ARHGAP24	Rho GTPase activating protein 24
hsa-miR-612	0	0	1	0	0	0	FAM27A	family with sequence similarity 27, member A
hsa-miR-612	0	0	1	1	1	1	TMEM202	transmembrane protein 202
hsa-miR-612	0	0	1	1	1	1	TRIM28	tripartite motif containing 28
hsa-miR-612	0	0	1	0	0	0	LOC390660	FLJ00317 protein
hsa-miR-612	0	0	1	0	1	1	GALNT13	UDP-N-acetyl-alpha-D-galactosamine:polypeptide N-acetylgalactosaminyltransferase 13 (GalNAc-T13)
hsa-miR-612	0	0	1	1	1	1	TMC5	transmembrane channel-like 5
hsa-miR-612	0	0	1	0	1	1	RUFY4	RUN and FYVE domain containing 4
hsa-miR-612	0	0	1	0	0	0	LOC100124692	maltase-glucoamylase (alpha-glucosidase) pseudogene
hsa-miR-612	1	0	1	0	1	1	STK3	serine/threonine kinase 3
hsa-miR-612	1	0	1	1	1	1	PPP2R5C	protein phosphatase 2, regulatory subunit B', gamma
hsa-miR-612	1	0	1	1	1	1	WTAP	Wilms tumor 1 associated protein
hsa-miR-612	1	0	1	1	1	1	MAP3K14	mitogen-activated protein kinase kinase kinase 14
hsa-miR-612	0	0	1	1	1	1	RNF19B	ring finger protein 19B
hsa-miR-612	1	0	1	0	0	0	ASXL3	additional sex combs like 3 (Drosophila)
hsa-miR-612	0	0	1	1	1	1	ZNF346	zinc finger protein 346
hsa-miR-612	0	0	1	1	1	1	PDE2A	phosphodiesterase 2A, cGMP-stimulated
hsa-miR-612	0	0	1	0	0	0	LOC619207	scavenger receptor protein family member
hsa-miR-612	0	0	1	1	0	0	FIZ1	FLT3-interacting zinc finger 1
hsa-miR-612	1	0	1	1	1	1	SYS1	SYS1 Golgi-localized integral membrane protein homolog (S. cerevisiae)
hsa-miR-612	0	0	1	1	0	0	SCNN1A	sodium channel, non-voltage-gated 1 alpha subunit
hsa-miR-612	1	0	1	1	1	1	CTSA	cathepsin A
hsa-miR-612	0	0	1	1	0	0	ANAPC15	anaphase promoting complex subunit 15
hsa-miR-612	1	0	1	1	1	1	TAP2	transporter 2, ATP-binding cassette, sub-family B (MDR/TAP)
hsa-miR-612	1	0	1	1	1	1	CYYR1	cysteine/tyrosine-rich 1
hsa-miR-612	0	0	1	0	1	1	BCAS1	breast carcinoma amplified sequence 1
hsa-miR-612	1	0	1	1	1	1	CAMK2G	calcium/calmodulin-dependent protein kinase II gamma
hsa-miR-612	0	0	1	1	0	0	PCSK5	proprotein convertase subtilisin/kexin type 5
hsa-miR-612	1	0	1	0	1	1	MAP3K3	mitogen-activated protein kinase kinase kinase 3
hsa-miR-612	1	0	1	1	1	1	PHTF2	putative homeodomain transcription factor 2
hsa-miR-612	0	0	1	1	1	1	TBC1D3G	TBC1 domain family, member 3G
hsa-miR-612	1	0	1	1	1	1	NCOA1	nuclear receptor coactivator 1
hsa-miR-612	0	0	1	1	1	1	ENPP3	ectonucleotide pyrophosphatase/phosphodiesterase 3
hsa-miR-612	0	0	1	1	0	0	TRIM69	tripartite motif containing 69
hsa-miR-612	1	0	1	0	1	1	TEAD3	TEA domain family member 3
hsa-miR-612	1	0	1	1	1	1	DUSP3	dual specificity phosphatase 3
hsa-miR-612	0	0	1	1	1	1	SRP9	signal recognition particle 9kDa
hsa-miR-612	0	0	1	1	0	0	KAT8	K(lysine) acetyltransferase 8
hsa-miR-612	0	0	1	1	0	0	OPLAH	5-oxoprolinase (ATP-hydrolysing)
hsa-miR-612	0	0	1	0	0	0	POM121L9P	POM121 transmembrane nucleoporin-like 9, pseudogene
hsa-miR-612	1	0	1	1	1	1	TAB2	TGF-beta activated kinase 1/MAP3K7 binding protein 2
hsa-miR-612	0	0	1	0	0	0	POM121L8P	POM121 transmembrane nucleoporin-like 8 pseudogene
hsa-miR-612	0	0	1	1	0	0	RIMBP3	RIMS binding protein 3
hsa-miR-612	1	0	1	1	1	1	ARF6	ADP-ribosylation factor 6
hsa-miR-612	0	0	1	1	1	1	ARIH1	ariadne homolog, ubiquitin-conjugating enzyme E2 binding protein, 1 (Drosophila)
hsa-miR-612	1	0	1	1	1	1	SMAP2	small ArfGAP2
hsa-miR-612	0	0	1	1	0	0	H2AFJ	H2A histone family, member J
hsa-miR-612	0	0	1	0	0	0	KIAA0913	KIAA0913
hsa-miR-612	0	0	1	1	1	1	RHOT1	ras homolog family member T1
hsa-miR-612	1	0	1	0	1	1	DNAJC5	DnaJ (Hsp40) homolog, subfamily C, member 5
hsa-miR-612	0	0	1	1	1	1	AQP6	aquaporin 6, kidney specific
hsa-miR-612	1	0	1	1	1	1	NBEA	neurobeachin
hsa-miR-612	1	0	1	1	1	1	KIAA1033	KIAA1033
hsa-miR-612	1	0	1	0	1	1	GPR85	G protein-coupled receptor 85
hsa-miR-612	1	0	1	1	1	1	TFE3	transcription factor binding to IGHM enhancer 3
hsa-miR-612	0	0	1	1	0	0	DOPEY1	dopey family member 1
hsa-miR-612	1	0	1	1	1	1	NEO1	neogenin 1
hsa-miR-612	0	0	1	1	1	1	MESP2	mesoderm posterior 2 homolog (mouse)
hsa-miR-612	0	0	1	0	0	0	FAM66D	family with sequence similarity 66, member D
hsa-miR-612	1	0	1	1	1	1	PKNOX2	PBX/knotted 1 homeobox 2
hsa-miR-612	1	0	1	0	1	1	BRPF1	bromodomain and PHD finger containing, 1
hsa-miR-612	1	0	1	1	1	1	SLC30A8	solute carrier family 30 (zinc transporter), member 8
hsa-miR-612	1	0	1	0	0	0	SYNPO	synaptopodin
hsa-miR-612	1	0	1	1	1	1	KDM6A	lysine (K)-specific demethylase 6A
hsa-miR-612	0	0	1	0	1	1	GAB3	GRB2-associated binding protein 3
hsa-miR-612	0	0	1	1	0	0	THADA	thyroid adenoma associated
hsa-miR-612	1	0	1	1	1	1	LYPD3	LY6/PLAUR domain containing 3
hsa-miR-612	1	0	1	0	1	1	HNRNPA3	heterogeneous nuclear ribonucleoprotein A3
hsa-miR-612	0	0	1	1	1	1	RABEPK	Rab9 effector protein with kelch motifs
hsa-miR-612	1	0	1	1	1	1	CHMP7	charged multivesicular body protein 7
hsa-miR-612	1	0	1	1	1	1	NFX1	nuclear transcription factor, X-box binding 1
hsa-miR-612	1	0	1	1	0	0	USP24	ubiquitin specific peptidase 24
hsa-miR-612	0	0	1	1	1	1	MYPN	myopalladin
hsa-miR-612	0	0	1	1	1	1	YAP1	Yes-associated protein 1
hsa-miR-612	1	0	1	1	1	1	TMEM68	transmembrane protein 68
hsa-miR-612	1	0	1	1	1	1	SBF2	SET binding factor 2
hsa-miR-612	0	0	1	1	0	0	TMEM44	transmembrane protein 44
hsa-miR-612	0	0	1	1	1	1	CCDC132	coiled-coil domain containing 132
hsa-miR-612	1	0	1	0	1	1	MEF2C	myocyte enhancer factor 2C
hsa-miR-612	1	0	1	1	1	1	SOX6	SRY (sex determining region Y)-box 6
hsa-miR-612	0	0	1	0	1	1	PLEKHM1P	pleckstrin homology domain containing, family M (with RUN domain) member 1 pseudogene
hsa-miR-612	0	0	1	1	1	1	TAF8	TAF8 RNA polymerase II, TATA box binding protein (TBP)-associated factor, 43kDa
hsa-miR-612	0	0	1	1	1	1	NFE2L1	nuclear factor (erythroid-derived 2)-like 1
hsa-miR-612	0	0	1	1	0	0	LRRN2	leucine rich repeat neuronal 2
hsa-miR-612	0	0	1	0	0	0	EPHA1-AS1	EPHA1 antisense RNA 1
hsa-miR-612	1	0	1	1	1	1	NRP1	neuropilin 1
hsa-miR-612	1	0	1	1	1	1	FAM63B	family with sequence similarity 63, member B
hsa-miR-612	1	0	1	1	1	1	IL17RD	interleukin 17 receptor D
hsa-miR-612	1	0	1	1	1	1	CAPRIN2	caprin family member 2
hsa-miR-612	1	0	1	1	1	1	MBD6	methyl-CpG binding domain protein 6
hsa-miR-612	0	0	1	1	1	1	TEX2	testis expressed 2
hsa-miR-612	0	0	1	1	1	1	KLHL29	kelch-like 29 (Drosophila)
hsa-miR-612	1	0	1	0	1	1	COX18	COX18 cytochrome c oxidase assembly homolog (S. cerevisiae)
hsa-miR-612	1	0	1	0	1	1	KIF21B	kinesin family member 21B
hsa-miR-612	0	0	1	1	1	1	LMAN2L	lectin, mannose-binding 2-like
hsa-miR-612	1	0	1	0	1	1	PATL1	protein associated with topoisomerase II homolog 1 (yeast)
hsa-miR-612	0	0	1	1	1	1	TMEM130	transmembrane protein 130
hsa-miR-612	0	0	1	1	0	0	TMEM134	transmembrane protein 134
hsa-miR-612	1	0	1	1	1	1	IKZF2	IKAROS family zinc finger 2 (Helios)
hsa-miR-612	0	0	1	0	0	0	PMCHL2	pro-melanin-concentrating hormone-like 2, pseudogene
hsa-miR-612	1	0	1	1	1	1	GAL3ST3	galactose-3-O-sulfotransferase 3
hsa-miR-612	0	0	1	1	0	0	IL1F10	interleukin 1 family, member 10 (theta)
hsa-miR-612	1	0	1	1	1	1	RCAN2	regulator of calcineurin 2
hsa-miR-612	0	0	1	1	1	1	TSPAN17	tetraspanin 17
hsa-miR-612	1	0	1	1	1	1	DUSP16	dual specificity phosphatase 16
hsa-miR-612	0	0	1	1	1	1	FCAMR	Fc receptor, IgA, IgM, high affinity
hsa-miR-612	1	0	1	1	1	1	SORCS1	sortilin-related VPS10 domain containing receptor 1
hsa-miR-612	1	0	1	1	1	1	SULF1	sulfatase 1
hsa-miR-612	0	0	1	1	0	0	CRB3	crumbs homolog 3 (Drosophila)
hsa-miR-612	1	0	1	1	1	1	GGT7	gamma-glutamyltransferase 7
hsa-miR-612	0	0	1	1	1	1	CEP41	centrosomal protein 41kDa
hsa-miR-612	0	0	1	1	0	0	ESPN	espin
hsa-miR-612	0	0	1	1	0	0	DNAH1	dynein, axonemal, heavy chain 1
hsa-miR-612	1	0	1	1	1	1	BCL11A	B-cell CLL/lymphoma 11A (zinc finger protein)
hsa-miR-612	0	0	1	1	1	1	PINX1	PIN2/TERF1 interacting, telomerase inhibitor 1
hsa-miR-612	1	0	1	1	1	1	NELF	nasal embryonic LHRH factor
hsa-miR-612	1	0	1	1	1	1	PNRC1	proline-rich nuclear receptor coactivator 1
hsa-miR-612	0	0	1	1	0	0	CCL4	chemokine (C-C motif) ligand 4
hsa-miR-612	0	0	1	1	1	1	STAG3L3	stromal antigen 3-like 3
hsa-miR-612	0	0	1	0	0	0	MEG3	maternally expressed 3 (non-protein coding)
hsa-miR-612	0	0	1	1	0	0	MUC1	mucin 1, cell surface associated
hsa-miR-612	0	0	1	0	0	0	ZNFX1-AS1	ZNFX1 antisense RNA 1
hsa-miR-612	1	0	1	1	1	1	TMCC2	transmembrane and coiled-coil domain family 2
hsa-miR-612	0	0	1	1	1	1	ITGA10	integrin, alpha 10
hsa-miR-612	0	0	1	1	0	0	VSIG4	V-set and immunoglobulin domain containing 4
hsa-miR-612	0	0	1	1	1	1	GPR114	G protein-coupled receptor 114
hsa-miR-612	0	0	1	1	1	1	TMPRSS4	transmembrane protease, serine 4
hsa-miR-612	1	0	1	1	1	1	SUFU	suppressor of fused homolog (Drosophila)
hsa-miR-612	1	0	1	1	1	1	NLGN4X	neuroligin 4, X-linked
hsa-miR-612	0	0	1	1	0	0	RAET1E	retinoic acid early transcript 1E
hsa-miR-612	0	0	1	0	1	1	BRWD3	bromodomain and WD repeat domain containing 3
hsa-miR-612	0	0	1	1	0	0	SH2D6	SH2 domain containing 6
hsa-miR-612	0	0	1	1	1	1	SMYD1	SET and MYND domain containing 1
hsa-miR-612	0	0	1	0	1	1	XKR5	XK, Kell blood group complex subunit-related family, member 5
hsa-miR-612	1	0	1	1	1	1	MECP2	methyl CpG binding protein 2 (Rett syndrome)
hsa-miR-612	0	0	1	1	0	0	PAOX	polyamine oxidase (exo-N4-amino)
hsa-miR-612	0	0	1	1	0	0	ASB16	ankyrin repeat and SOCS box containing 16
hsa-miR-612	0	0	1	1	1	1	DIO1	deiodinase, iodothyronine, type I
hsa-miR-612	1	0	1	1	0	0	ADAM15	ADAM metallopeptidase domain 15
hsa-miR-612	1	0	1	1	1	1	MOG	myelin oligodendrocyte glycoprotein
hsa-miR-612	0	0	1	1	1	1	TMUB1	transmembrane and ubiquitin-like domain containing 1
hsa-miR-612	0	0	1	1	1	1	SMPD1	sphingomyelin phosphodiesterase 1, acid lysosomal
hsa-miR-612	0	0	1	1	1	1	FCRLB	Fc receptor-like B
hsa-miR-612	0	0	1	1	1	1	ILDR1	immunoglobulin-like domain containing receptor 1
hsa-miR-612	1	0	1	1	1	1	PLCH1	phospholipase C, eta 1
hsa-miR-612	1	0	1	1	1	1	RTN3	reticulon 3
hsa-miR-612	0	0	1	1	1	1	RHD	Rh blood group, D antigen
hsa-miR-612	1	0	1	1	1	1	PFKFB4	6-phosphofructo-2-kinase/fructose-2,6-biphosphatase 4
hsa-miR-612	0	0	1	0	1	1	CCL4L2	chemokine (C-C motif) ligand 4-like 2
hsa-miR-612	0	0	1	1	1	1	CCL4L1	chemokine (C-C motif) ligand 4-like 1
hsa-miR-612	1	0	1	1	1	1	PCDH11X	protocadherin 11 X-linked
hsa-miR-612	1	0	1	1	0	0	TAF4B	TAF4b RNA polymerase II, TATA box binding protein (TBP)-associated factor, 105kDa
hsa-miR-612	0	0	1	1	0	0	NBPF8	neuroblastoma breakpoint family, member 8
hsa-miR-612	0	0	1	1	1	1	CDK20	cyclin-dependent kinase 20
hsa-miR-612	1	0	1	1	1	1	TBC1D22B	TBC1 domain family, member 22B
hsa-miR-612	1	0	1	1	1	1	ZNF449	zinc finger protein 449
hsa-miR-612	0	0	1	1	1	1	IYD	iodotyrosine deiodinase
hsa-miR-612	0	0	1	1	1	1	CDH6	cadherin 6, type 2, K-cadherin (fetal kidney)
hsa-miR-612	1	0	1	1	0	0	FAM108A1	family with sequence similarity 108, member A1
hsa-miR-612	1	0	1	1	1	1	RPRD1A	regulation of nuclear pre-mRNA domain containing 1A
hsa-miR-612	0	0	1	0	1	1	MIS12	MIS12, MIND kinetochore complex component, homolog (S. pombe)
hsa-miR-612	0	0	1	1	1	1	SLC6A2	solute carrier family 6 (neurotransmitter transporter, noradrenalin), member 2
hsa-miR-612	1	0	1	0	1	1	FAM46A	family with sequence similarity 46, member A
hsa-miR-612	0	0	1	1	1	1	PAFAH1B2	platelet-activating factor acetylhydrolase 1b, catalytic subunit 2 (30kDa)
hsa-miR-612	0	0	1	1	1	1	WDR55	WD repeat domain 55
hsa-miR-612	1	0	1	1	1	1	HOXC13	homeobox C13
hsa-miR-612	1	0	1	1	1	1	NRGN	neurogranin (protein kinase C substrate, RC3)
hsa-miR-612	1	0	1	0	1	1	DPYSL5	dihydropyrimidinase-like 5
hsa-miR-612	1	0	1	1	0	0	STX1A	syntaxin 1A (brain)
hsa-miR-612	1	0	1	1	1	1	RIMS3	regulating synaptic membrane exocytosis 3
hsa-miR-612	0	0	1	1	1	1	BOD1	biorientation of chromosomes in cell division 1
hsa-miR-612	0	0	1	0	1	1	HAUS3	HAUS augmin-like complex, subunit 3
hsa-miR-612	1	0	1	1	0	0	DHDDS	dehydrodolichyl diphosphate synthase
hsa-miR-612	0	0	1	1	0	0	RUSC1	RUN and SH3 domain containing 1
hsa-miR-612	1	0	1	1	1	1	SMO	smoothened, frizzled family receptor
hsa-miR-612	1	0	1	1	0	0	POLR3D	polymerase (RNA) III (DNA directed) polypeptide D, 44kDa
hsa-miR-612	1	0	1	1	1	1	MBNL1	muscleblind-like splicing regulator 1
hsa-miR-612	0	0	1	1	1	1	PRMT5	protein arginine methyltransferase 5
hsa-miR-612	0	0	1	1	1	1	PDXK	pyridoxal (pyridoxine, vitamin B6) kinase
hsa-miR-612	1	0	1	1	1	1	POU2F2	POU class 2 homeobox 2
hsa-miR-612	1	0	1	1	0	0	EIF4A1	eukaryotic translation initiation factor 4A1
hsa-miR-612	0	0	1	1	1	1	SGK2	serum/glucocorticoid regulated kinase 2
hsa-miR-612	1	0	1	1	1	1	PCGF5	polycomb group ring finger 5
hsa-miR-612	0	0	1	1	1	1	ACPP	acid phosphatase, prostate
hsa-miR-612	1	0	1	1	1	1	TRIM39	tripartite motif containing 39
hsa-miR-612	0	0	1	1	0	0	SPAG7	sperm associated antigen 7
hsa-miR-612	1	0	1	1	1	1	PLEKHO2	pleckstrin homology domain containing, family O member 2
hsa-miR-612	0	0	1	0	0	0	ATXN7L3B	ataxin 7-like 3B
hsa-miR-612	0	0	1	0	0	0	LOC400043	uncharacterized LOC400043
hsa-miR-612	1	0	1	1	1	1	SLC50A1	solute carrier family 50 (sugar transporter), member 1
hsa-miR-612	1	0	1	0	1	1	TMEM39A	transmembrane protein 39A
hsa-miR-612	0	0	1	1	1	1	ATXN2L	ataxin 2-like
hsa-miR-612	1	0	1	1	0	0	FA2H	fatty acid 2-hydroxylase
hsa-miR-612	1	0	1	1	1	1	GRIA2	glutamate receptor, ionotropic, AMPA 2
hsa-miR-612	0	0	1	1	0	0	NDUFA3	NADH dehydrogenase (ubiquinone) 1 alpha subcomplex, 3, 9kDa
hsa-miR-612	1	0	1	0	1	1	CNP	2',3'-cyclic nucleotide 3' phosphodiesterase
hsa-miR-612	0	0	1	0	0	0	LRRC14	leucine rich repeat containing 14
hsa-miR-612	0	0	1	1	1	1	GNL3L	guanine nucleotide binding protein-like 3 (nucleolar)-like
hsa-miR-612	1	0	1	1	1	1	OTUD5	OTU domain containing 5
hsa-miR-612	0	0	1	0	0	0	GRAMD1B	GRAM domain containing 1B
hsa-miR-612	0	0	1	0	0	0	TPTEP1	transmembrane phosphatase with tensin homology pseudogene 1
hsa-miR-612	1	0	1	1	1	1	SNCA	synuclein, alpha (non A4 component of amyloid precursor)
hsa-miR-612	0	0	1	1	1	1	ATP5SL	ATP5S-like
hsa-miR-612	1	0	1	1	1	1	GAS2	growth arrest-specific 2
hsa-miR-612	0	0	1	1	1	1	DEDD2	death effector domain containing 2
hsa-miR-612	1	0	1	1	1	1	CAP1	CAP, adenylate cyclase-associated protein 1 (yeast)
hsa-miR-612	1	0	1	1	1	1	YY1	YY1 transcription factor
hsa-miR-612	1	0	1	1	1	1	ETF1	eukaryotic translation termination factor 1
hsa-miR-612	0	0	1	1	0	0	ITGB3BP	integrin beta 3 binding protein (beta3-endonexin)
hsa-miR-612	0	0	1	1	1	1	DLX4	distal-less homeobox 4
hsa-miR-612	1	0	1	1	0	0	FHL3	four and a half LIM domains 3
hsa-miR-612	0	0	1	1	1	1	C2orf65	chromosome 2 open reading frame 65
hsa-miR-612	0	0	1	1	0	0	USP19	ubiquitin specific peptidase 19
hsa-miR-612	0	0	1	0	1	1	AHI1	Abelson helper integration site 1
hsa-miR-612	0	0	1	0	0	0	MGC21881	uncharacterized locus MGC21881
hsa-miR-612	0	0	1	1	1	1	C8orf33	chromosome 8 open reading frame 33
hsa-miR-612	1	0	1	1	1	1	RIMKLB	ribosomal modification protein rimK-like family member B
hsa-miR-612	0	0	1	1	1	1	CMAS	cytidine monophosphate N-acetylneuraminic acid synthetase
hsa-miR-612	1	0	1	1	1	1	ORMDL3	ORM1-like 3 (S. cerevisiae)
hsa-miR-612	1	0	1	1	1	1	ELF4	E74-like factor 4 (ets domain transcription factor)
hsa-miR-612	0	0	1	1	0	0	ZBTB32	zinc finger and BTB domain containing 32
hsa-miR-612	0	0	1	1	1	1	PEX14	peroxisomal biogenesis factor 14
hsa-miR-612	0	0	1	0	0	0	TCP11L2	t-complex 11 (mouse)-like 2
hsa-miR-612	0	0	1	0	1	1	LOC646736	uncharacterized LOC646736
hsa-miR-612	1	0	1	1	1	1	WWC2	WW and C2 domain containing 2
hsa-miR-612	0	0	1	1	0	0	LRRC36	leucine rich repeat containing 36
hsa-miR-612	1	0	1	1	1	1	ARHGEF9	Cdc42 guanine nucleotide exchange factor (GEF) 9
hsa-miR-612	0	0	1	0	0	0	ZNF720	zinc finger protein 720
hsa-miR-612	0	0	1	1	1	1	EXOC7	exocyst complex component 7
hsa-miR-612	1	0	1	1	0	0	CSNK1G2	casein kinase 1, gamma 2
hsa-miR-612	1	0	1	1	1	1	MID1IP1	MID1 interacting protein 1
hsa-miR-612	0	0	1	1	1	1	PRMT3	protein arginine methyltransferase 3
hsa-miR-612	0	0	1	0	1	1	ZNF718	zinc finger protein 718
hsa-miR-612	0	0	1	0	0	0	DKFZP434K028	uncharacterized LOC26070
hsa-miR-612	0	0	1	0	0	0	KIAA0664L3	KIAA0664-like 3
hsa-miR-612	1	0	1	1	1	1	SCML4	sex comb on midleg-like 4 (Drosophila)
hsa-miR-612	0	0	1	1	0	0	CA5BP1	carbonic anhydrase VB pseudogene 1
hsa-miR-612	0	0	1	0	0	0	AZGP1P1	alpha-2-glycoprotein 1, zinc-binding pseudogene 1
hsa-miR-612	1	0	1	1	1	1	CNEP1R1	CTD nuclear envelope phosphatase 1 regulatory subunit 1
hsa-miR-612	0	0	1	1	1	1	CDC42SE2	CDC42 small effector 2
hsa-miR-612	0	0	1	1	0	0	ARL6	ADP-ribosylation factor-like 6
hsa-miR-612	1	0	1	0	1	1	CDK19	cyclin-dependent kinase 19
hsa-miR-612	0	0	1	0	0	0	SNX29P2	sorting nexin 29 pseudogene 2
hsa-miR-612	0	0	1	0	0	0	FLJ35390	uncharacterized LOC255031
hsa-miR-612	0	0	1	1	0	0	TBX6	T-box 6
hsa-miR-612	1	0	1	1	1	1	CNTN4	contactin 4
hsa-miR-612	1	0	1	1	1	1	FAM131A	family with sequence similarity 131, member A
hsa-miR-612	0	0	1	1	0	0	TRO	trophinin
hsa-miR-612	0	0	1	0	1	1	FHAD1	forkhead-associated (FHA) phosphopeptide binding domain 1
hsa-miR-612	1	0	1	1	1	1	RSPO2	R-spondin 2
hsa-miR-612	0	0	1	0	1	1	PAPOLG	poly(A) polymerase gamma
hsa-miR-612	1	0	1	0	0	0	KCNU1	potassium channel, subfamily U, member 1
hsa-miR-612	0	0	1	1	1	1	ASTN2	astrotactin 2
hsa-miR-612	0	0	1	1	0	0	TOMM5	translocase of outer mitochondrial membrane 5 homolog (yeast)
hsa-miR-612	0	0	1	0	0	0	LOC100130950	uncharacterized LOC100130950
hsa-miR-612	1	0	1	1	1	1	SYT9	synaptotagmin IX
hsa-miR-612	1	0	1	0	1	1	SV2B	synaptic vesicle glycoprotein 2B
hsa-miR-612	0	0	1	0	1	1	MYO7A	myosin VIIA
hsa-miR-612	0	0	1	1	1	1	STAG3L1	stromal antigen 3-like 1
hsa-miR-612	1	0	1	1	1	1	GABRA1	gamma-aminobutyric acid (GABA) A receptor, alpha 1
hsa-miR-612	0	0	1	1	1	1	SLC22A2	solute carrier family 22 (organic cation transporter), member 2
hsa-miR-612	0	0	1	0	1	1	FLJ25328	uncharacterized LOC148231
hsa-miR-612	1	0	1	1	1	1	RCOR3	REST corepressor 3
hsa-miR-612	0	0	1	1	1	1	C7orf53	chromosome 7 open reading frame 53
hsa-miR-612	1	0	1	1	1	1	BRD3	bromodomain containing 3
hsa-miR-612	0	0	1	1	1	1	SNX17	sorting nexin 17
hsa-miR-612	0	0	1	1	1	1	FBXO24	F-box protein 24
hsa-miR-612	0	0	1	0	0	0	LOC643648	uncharacterized LOC643648
hsa-miR-612	1	0	1	1	1	1	FGF1	fibroblast growth factor 1 (acidic)
hsa-miR-612	1	0	1	1	1	1	MAK	male germ cell-associated kinase
hsa-miR-612	0	0	1	1	0	0	RAB4B	RAB4B, member RAS oncogene family
hsa-miR-612	1	0	1	1	1	1	SIRPA	signal-regulatory protein alpha
hsa-miR-612	0	0	1	0	0	0	BCAS3	breast carcinoma amplified sequence 3
hsa-miR-612	1	0	1	1	1	1	HMGCR	3-hydroxy-3-methylglutaryl-CoA reductase
hsa-miR-612	1	0	1	1	1	1	PCDHA5	protocadherin alpha 5
hsa-miR-612	0	0	1	1	0	0	ADAP2	ArfGAP with dual PH domains 2
hsa-miR-612	1	0	1	1	0	0	GPR137	G protein-coupled receptor 137
hsa-miR-612	1	0	1	1	1	1	CUL1	cullin 1
hsa-miR-612	1	0	1	1	1	1	PAK4	p21 protein (Cdc42/Rac)-activated kinase 4
hsa-miR-612	0	0	1	1	1	1	ZNF337	zinc finger protein 337
hsa-miR-612	0	0	1	0	0	0	C9orf62	chromosome 9 open reading frame 62
hsa-miR-612	0	0	1	1	1	1	EDA2R	ectodysplasin A2 receptor
hsa-miR-612	0	0	1	1	0	0	CHERP	calcium homeostasis endoplasmic reticulum protein
hsa-miR-612	0	0	1	0	1	1	FAM72A	family with sequence similarity 72, member A
hsa-miR-612	0	0	1	0	0	0	FLJ10661	family with sequence similarity 86, member A pseudogene
hsa-miR-612	0	0	1	1	1	1	TMEM139	transmembrane protein 139
hsa-miR-612	0	0	1	0	0	0	HOXA-AS2	HOXA cluster antisense RNA 2
hsa-miR-612	0	0	1	1	1	1	UBE3D	ubiquitin protein ligase E3D
hsa-miR-612	1	0	1	1	1	1	IMPACT	Impact homolog (mouse)
hsa-miR-612	1	0	1	1	1	1	PEX5L	peroxisomal biogenesis factor 5-like
hsa-miR-612	0	0	1	0	0	0	FAM201A	family with sequence similarity 201, member A
hsa-miR-612	1	0	1	1	1	1	LHX8	LIM homeobox 8
hsa-miR-612	1	0	1	1	1	1	ELMO2	engulfment and cell motility 2
hsa-miR-612	0	0	1	0	0	0	LOC652276	potassium channel tetramerisation domain containing 5 pseudogene
hsa-miR-612	1	0	1	0	1	1	NEGR1	neuronal growth regulator 1
hsa-miR-612	0	0	1	0	0	0	SRGAP2C	SLIT-ROBO Rho GTPase activating protein 2C
hsa-miR-612	1	0	1	1	1	1	BNC2	basonuclin 2
hsa-miR-612	1	0	1	0	0	0	RAVER1	ribonucleoprotein, PTB-binding 1
hsa-miR-612	0	0	1	1	1	1	TPPP3	tubulin polymerization-promoting protein family member 3
hsa-miR-612	1	0	1	1	1	1	UBXN2A	UBX domain protein 2A
hsa-miR-612	0	0	1	0	0	0	INHBA-AS1	INHBA antisense RNA 1
hsa-miR-612	0	0	1	0	0	0	C4orf48	chromosome 4 open reading frame 48
hsa-miR-612	0	0	1	1	0	0	BLK	B lymphoid tyrosine kinase
hsa-miR-612	1	0	1	0	1	1	CEP44	centrosomal protein 44kDa
hsa-miR-612	0	0	1	0	0	0	LOC415056	uncharacterized LOC415056
hsa-miR-612	0	0	1	1	0	0	HSPA14	heat shock 70kDa protein 14
hsa-miR-612	0	0	1	0	0	0	LOC100134868	uncharacterized LOC100134868
hsa-miR-612	0	0	1	0	1	1	APOL6	apolipoprotein L, 6
hsa-miR-612	0	0	1	1	0	0	ZAP70	zeta-chain (TCR) associated protein kinase 70kDa
hsa-miR-612	0	0	1	0	0	0	USP32P1	ubiquitin specific peptidase 32 pseudogene 1
hsa-miR-612	0	0	1	0	0	0	LOC401074	uncharacterized LOC401074
hsa-miR-612	0	0	1	0	0	0	LOC388906	opioid growth factor receptor pseudogene
hsa-miR-612	0	0	1	0	0	0	DLGAP1-AS3	DLGAP1 antisense RNA 3
hsa-miR-612	0	0	1	1	1	1	SLC14A1	solute carrier family 14 (urea transporter), member 1 (Kidd blood group)
hsa-miR-612	0	0	1	0	1	1	LINC00634	long intergenic non-protein coding RNA 634
hsa-miR-612	1	0	1	1	1	1	DACH2	dachshund homolog 2 (Drosophila)
hsa-miR-612	0	0	1	0	0	0	LRRC48	leucine rich repeat containing 48
hsa-miR-612	0	0	1	0	0	0	LOC339622	uncharacterized LOC339622
hsa-miR-612	1	0	1	1	1	1	LEF1	lymphoid enhancer-binding factor 1
hsa-miR-612	0	0	1	0	1	1	TSLP	thymic stromal lymphopoietin
hsa-miR-612	0	0	1	0	0	0	LOC339240	keratin 17 pseudogene
hsa-miR-612	1	0	1	1	0	0	ZNF292	zinc finger protein 292
hsa-miR-612	0	0	1	0	0	0	SLC7A11-AS1	SLC7A11 antisense RNA 1
hsa-miR-612	0	0	1	0	1	1	FAM13B	family with sequence similarity 13, member B
hsa-miR-612	0	0	1	0	1	1	METTL12	methyltransferase like 12
hsa-miR-612	1	0	1	0	1	1	HSPA12A	heat shock 70kDa protein 12A
hsa-miR-612	0	0	1	0	0	0	LOC154822	uncharacterized LOC154822
hsa-miR-612	0	0	1	1	0	0	PTGDS	prostaglandin D2 synthase 21kDa (brain)
hsa-miR-612	0	0	1	1	1	1	C17orf104	chromosome 17 open reading frame 104
hsa-miR-612	0	0	1	1	0	0	FAM159A	family with sequence similarity 159, member A
hsa-miR-612	1	0	1	1	1	1	ARID3B	AT rich interactive domain 3B (BRIGHT-like)
hsa-miR-612	0	0	1	1	1	1	PIBF1	progesterone immunomodulatory binding factor 1
hsa-miR-612	1	0	1	1	1	1	CLOCK	clock homolog (mouse)
hsa-miR-612	0	0	1	1	1	1	COL22A1	collagen, type XXII, alpha 1
hsa-miR-612	0	0	1	0	0	0	MORF4L2-AS1	MORF4L2 antisense RNA 1
hsa-miR-612	0	0	1	0	0	0	DKFZp686O1327	uncharacterized LOC401014
hsa-miR-612	0	0	1	1	1	1	STRADA	STE20-related kinase adaptor alpha
hsa-miR-612	0	0	1	1	0	0	C12orf42	chromosome 12 open reading frame 42
hsa-miR-612	1	0	1	0	1	1	PSD3	pleckstrin and Sec7 domain containing 3
hsa-miR-612	1	0	1	1	1	1	MAMDC2	MAM domain containing 2
hsa-miR-612	0	0	1	1	1	1	MGC57346	uncharacterized LOC401884
hsa-miR-612	0	0	1	0	0	0	LOC283914	uncharacterized LOC283914
hsa-miR-612	1	0	1	1	1	1	PPP2R5B	protein phosphatase 2, regulatory subunit B', beta
hsa-miR-612	0	0	1	1	1	1	DOCK8	dedicator of cytokinesis 8
hsa-miR-612	1	0	1	1	1	1	SUPT7L	suppressor of Ty 7 (S. cerevisiae)-like
hsa-miR-612	0	0	1	1	0	0	ALDH1L1	aldehyde dehydrogenase 1 family, member L1
hsa-miR-612	0	0	1	1	0	0	NIT1	nitrilase 1
hsa-miR-612	0	0	1	1	0	0	FAM72B	family with sequence similarity 72, member B
hsa-miR-612	0	0	1	1	0	0	MON1A	MON1 homolog A (yeast)
hsa-miR-612	1	0	1	1	0	0	TTC9	tetratricopeptide repeat domain 9
hsa-miR-612	1	0	1	1	1	1	RTKN2	rhotekin 2
hsa-miR-612	0	0	1	1	0	0	CDA	cytidine deaminase
hsa-miR-612	0	0	1	1	1	1	ZNF589	zinc finger protein 589
hsa-miR-612	1	0	1	1	1	1	PTPRG	protein tyrosine phosphatase, receptor type, G
hsa-miR-612	1	0	1	1	0	0	EIF2B5	eukaryotic translation initiation factor 2B, subunit 5 epsilon, 82kDa
hsa-miR-612	0	0	1	0	0	0	AURKAPS1	aurora kinase A pseudogene 1
hsa-miR-612	1	0	1	0	1	1	SEMA4G	sema domain, immunoglobulin domain (Ig), transmembrane domain (TM) and short cytoplasmic domain, (semaphorin) 4G
hsa-miR-612	0	0	1	1	1	1	PPP1R7	protein phosphatase 1, regulatory subunit 7
hsa-miR-612	0	0	1	1	1	1	LINC00086	long intergenic non-protein coding RNA 86
hsa-miR-612	0	0	1	1	1	1	SLC25A35	solute carrier family 25, member 35
hsa-miR-612	1	0	1	1	1	1	SCUBE3	signal peptide, CUB domain, EGF-like 3
hsa-miR-612	0	0	1	1	0	0	LY6H	lymphocyte antigen 6 complex, locus H
hsa-miR-612	0	0	1	0	0	0	LINC00265	long intergenic non-protein coding RNA 265
hsa-miR-612	0	0	1	0	1	1	C17orf51	chromosome 17 open reading frame 51
hsa-miR-612	1	0	1	1	1	1	OLFML2A	olfactomedin-like 2A
hsa-miR-612	0	0	1	1	0	0	TINAG	tubulointerstitial nephritis antigen
hsa-miR-612	1	0	1	1	1	1	NCOA5	nuclear receptor coactivator 5
hsa-miR-612	0	0	1	0	0	0	ADAM5	ADAM metallopeptidase domain 5, pseudogene
hsa-miR-612	1	0	1	1	1	1	ZFP161	zinc finger protein 161 homolog (mouse)
hsa-miR-612	0	0	1	1	0	0	C20orf152	chromosome 20 open reading frame 152
hsa-miR-612	0	0	1	1	1	1	C17orf97	chromosome 17 open reading frame 97
hsa-miR-612	0	0	1	0	0	0	TMEM213	transmembrane protein 213
hsa-miR-612	0	0	1	1	0	0	GRIN2C	glutamate receptor, ionotropic, N-methyl D-aspartate 2C
hsa-miR-612	0	0	1	1	0	0	GMFG	glia maturation factor, gamma
hsa-miR-612	0	0	1	1	1	1	B4GALT4	UDP-Gal:betaGlcNAc beta 1,4- galactosyltransferase, polypeptide 4
hsa-miR-612	0	0	1	1	0	0	PRR19	proline rich 19
hsa-miR-612	0	0	1	1	1	1	CLEC2D	C-type lectin domain family 2, member D
hsa-miR-612	1	0	1	1	1	1	PDGFRA	platelet-derived growth factor receptor, alpha polypeptide
hsa-miR-612	0	0	1	1	0	0	C8orf31	chromosome 8 open reading frame 31
hsa-miR-612	0	0	1	1	1	1	ZNF333	zinc finger protein 333
hsa-miR-612	1	0	1	1	0	0	XRRA1	X-ray radiation resistance associated 1
hsa-miR-612	1	0	1	1	1	1	ADCY6	adenylate cyclase 6
hsa-miR-612	1	0	1	1	1	1	GANAB	glucosidase, alpha; neutral AB
hsa-miR-612	0	0	1	1	0	0	TTYH1	tweety homolog 1 (Drosophila)
hsa-miR-612	0	0	1	1	1	1	SH2D1B	SH2 domain containing 1B
hsa-miR-612	1	0	1	1	1	1	ASPH	aspartate beta-hydroxylase
hsa-miR-612	0	0	1	0	0	0	UBE2Q2P2	ubiquitin-conjugating enzyme E2Q family member 2 pseudogene 2
hsa-miR-612	1	0	1	1	1	1	FAM129B	family with sequence similarity 129, member B
hsa-miR-612	0	0	1	1	0	0	TMEM183A	transmembrane protein 183A
hsa-miR-612	0	0	1	0	0	0	LEF1-AS1	LEF1 antisense RNA 1
hsa-miR-612	1	0	1	1	1	1	PDCD6IP	programmed cell death 6 interacting protein
hsa-miR-612	1	0	1	1	1	1	MAPKAPK3	mitogen-activated protein kinase-activated protein kinase 3
hsa-miR-612	0	0	1	0	0	0	FLJ12334	uncharacterized LOC400946
hsa-miR-612	0	0	1	0	0	0	PTGER4P2	prostaglandin E receptor 4 (subtype EP4) pseudogene 2
hsa-miR-612	1	0	1	1	0	0	DCAF15	DDB1 and CUL4 associated factor 15
hsa-miR-612	1	0	1	1	0	0	CHTOP	chromatin target of PRMT1
hsa-miR-612	0	0	1	1	0	0	KCTD19	potassium channel tetramerisation domain containing 19
hsa-miR-612	1	0	1	0	1	1	HMGB3	high mobility group box 3
hsa-miR-612	0	0	1	1	1	1	SLC11A1	solute carrier family 11 (proton-coupled divalent metal ion transporters), member 1
hsa-miR-612	1	0	1	1	1	1	USP47	ubiquitin specific peptidase 47
hsa-miR-612	1	0	1	0	1	1	TMEM194A	transmembrane protein 194A
hsa-miR-612	0	0	1	0	0	0	LOC100147773	uncharacterized LOC100147773
hsa-miR-612	0	0	1	0	0	0	JPX	JPX transcript, XIST activator (non-protein coding)
hsa-miR-612	0	0	1	1	1	1	TNFSF12	tumor necrosis factor (ligand) superfamily, member 12
hsa-miR-612	0	0	1	0	0	0	LOC727849	golgin A2 pseudogene
hsa-miR-612	0	0	1	0	0	0	LOC727751	uncharacterized LOC727751
hsa-miR-612	0	0	1	0	0	0	AGSK1	golgin subfamily A member 2-like
hsa-miR-612	0	0	1	1	0	0	PER1	period homolog 1 (Drosophila)
hsa-miR-612	1	0	1	1	1	1	WBP1L	WW domain binding protein 1-like
hsa-miR-612	1	0	1	1	0	0	PLEKHG3	pleckstrin homology domain containing, family G (with RhoGef domain) member 3
hsa-miR-612	0	0	1	0	1	1	SH3RF2	SH3 domain containing ring finger 2
hsa-miR-612	0	0	1	0	0	0	AGAP9	ArfGAP with GTPase domain, ankyrin repeat and PH domain 9
hsa-miR-612	1	0	1	0	1	1	AMMECR1L	AMME chromosomal region gene 1-like
hsa-miR-612	0	0	1	1	0	0	MASP2	mannan-binding lectin serine peptidase 2
hsa-miR-612	0	0	1	0	0	0	LINC00537	long intergenic non-protein coding RNA 537
hsa-miR-612	0	0	1	0	0	0	TBC1D25	TBC1 domain family, member 25
hsa-miR-612	0	0	1	1	0	0	DNHD1	dynein heavy chain domain 1
hsa-miR-612	0	0	1	0	0	0	LOC554249	uncharacterized LOC554249
hsa-miR-612	0	0	1	1	1	1	MAPK13	mitogen-activated protein kinase 13
hsa-miR-612	0	0	1	1	0	0	TMEM222	transmembrane protein 222
hsa-miR-612	1	0	1	1	1	1	ESRRA	estrogen-related receptor alpha
hsa-miR-612	0	0	1	0	0	0	LOC150776	sphingomyelin phosphodiesterase 4, neutral membrane (neutral sphingomyelinase-3) pseudogene
hsa-miR-612	0	0	1	1	1	1	KLRF1	killer cell lectin-like receptor subfamily F, member 1
hsa-miR-612	1	0	1	0	1	1	LRRTM4	leucine rich repeat transmembrane neuronal 4
hsa-miR-612	0	0	1	0	0	0	FAM106A	family with sequence similarity 106, member A
hsa-miR-612	0	0	1	1	1	1	ZNF365	zinc finger protein 365
hsa-miR-612	0	0	1	1	0	0	RGL4	ral guanine nucleotide dissociation stimulator-like 4
hsa-miR-612	0	0	1	1	1	1	SPHKAP	SPHK1 interactor, AKAP domain containing
hsa-miR-612	0	0	1	1	0	0	ZNHIT3	zinc finger, HIT-type containing 3
hsa-miR-612	1	0	1	1	1	1	GABRB2	gamma-aminobutyric acid (GABA) A receptor, beta 2
hsa-miR-612	0	0	1	1	0	0	RIPPLY1	ripply1 homolog (zebrafish)
hsa-miR-612	0	0	1	1	1	1	MUC21	mucin 21, cell surface associated
hsa-miR-612	0	0	1	0	0	0	FBXL19-AS1	FBXL19 antisense RNA 1 (head to head)
hsa-miR-612	1	0	1	0	1	1	RBM23	RNA binding motif protein 23
hsa-miR-612	0	0	1	1	0	0	LEPRE1	leucine proline-enriched proteoglycan (leprecan) 1
hsa-miR-612	1	0	1	1	1	1	TBP	TATA box binding protein
hsa-miR-612	0	0	1	1	0	0	SLC17A4	solute carrier family 17 (sodium phosphate), member 4
hsa-miR-612	0	0	1	1	0	0	YDJC	YdjC homolog (bacterial)
hsa-miR-612	0	0	1	1	1	1	RBM25	RNA binding motif protein 25
hsa-miR-612	0	0	1	0	0	0	LRRC37A11P	leucine rich repeat containing 37, member A11, pseudogene
hsa-miR-612	1	0	1	1	1	1	NR3C2	nuclear receptor subfamily 3, group C, member 2
hsa-miR-612	0	0	1	1	0	0	PRAMEF10	PRAME family member 10
hsa-miR-612	0	0	1	1	0	0	RNF123	ring finger protein 123
hsa-miR-612	0	0	1	1	0	0	C14orf178	chromosome 14 open reading frame 178
hsa-miR-612	1	0	1	1	1	1	SLMAP	sarcolemma associated protein
hsa-miR-612	1	0	1	1	1	1	TNS1	tensin 1
hsa-miR-612	1	0	1	1	1	1	ST18	suppression of tumorigenicity 18 (breast carcinoma) (zinc finger protein)
hsa-miR-612	1	0	1	1	0	0	RASGEF1B	RasGEF domain family, member 1B
hsa-miR-612	0	0	1	1	0	0	SOCS7	suppressor of cytokine signaling 7
hsa-miR-612	0	0	1	0	0	0	LINC00486	long intergenic non-protein coding RNA 486
hsa-miR-612	0	0	1	1	0	0	PLCXD2	phosphatidylinositol-specific phospholipase C, X domain containing 2
hsa-miR-612	1	0	1	1	1	1	PIKFYVE	phosphoinositide kinase, FYVE finger containing
hsa-miR-612	0	0	1	1	0	0	C10orf68	chromosome 10 open reading frame 68
hsa-miR-612	0	0	1	0	0	0	KRT8P12	keratin 8 pseudogene 12
hsa-miR-612	1	0	1	1	1	1	ANK2	ankyrin 2, neuronal
hsa-miR-612	1	0	1	1	1	1	ZMYM4	zinc finger, MYM-type 4
hsa-miR-612	0	0	1	1	1	1	SFI1	Sfi1 homolog, spindle assembly associated (yeast)
hsa-miR-612	0	0	1	1	0	0	HSF4	heat shock transcription factor 4
hsa-miR-612	0	0	1	1	0	0	MILR1	mast cell immunoglobulin-like receptor 1
hsa-miR-612	1	0	1	1	0	0	CLASRP	CLK4-associating serine/arginine rich protein
hsa-miR-612	1	0	1	0	1	1	FAM196A	family with sequence similarity 196, member A
hsa-miR-612	0	0	1	1	0	0	TCHH	trichohyalin
hsa-miR-612	0	0	1	1	1	1	PRKAR2A	protein kinase, cAMP-dependent, regulatory, type II, alpha
hsa-miR-612	0	0	1	1	0	0	SYNE3	spectrin repeat containing, nuclear envelope family member 3
hsa-miR-612	1	0	1	1	1	1	DLST	dihydrolipoamide S-succinyltransferase (E2 component of 2-oxo-glutarate complex)
hsa-miR-612	0	0	1	0	0	0	FLJ39632	uncharacterized LOC642477
hsa-miR-612	0	0	1	0	0	0	DKFZp686D0853	uncharacterized LOC401613
hsa-miR-612	1	0	1	1	1	1	MIER3	mesoderm induction early response 1, family member 3
hsa-miR-612	1	0	1	1	1	1	ETS1	v-ets erythroblastosis virus E26 oncogene homolog 1 (avian)
hsa-miR-612	0	0	1	1	1	1	CRB1	crumbs homolog 1 (Drosophila)
hsa-miR-612	0	0	1	1	1	1	KLHL8	kelch-like 8 (Drosophila)
hsa-miR-612	1	0	1	1	1	1	MYCBP2	MYC binding protein 2, E3 ubiquitin protein ligase
hsa-miR-612	0	0	1	1	0	0	RPS24	ribosomal protein S24
hsa-miR-612	0	0	1	1	1	1	PRR14L	proline rich 14-like
hsa-miR-612	1	0	1	0	1	1	CPNE3	copine III
hsa-miR-612	1	0	1	1	1	1	CGN	cingulin
hsa-miR-612	0	0	1	1	0	0	SNAPC2	small nuclear RNA activating complex, polypeptide 2, 45kDa
hsa-miR-612	1	0	1	1	1	1	EPS15	epidermal growth factor receptor pathway substrate 15
hsa-miR-612	0	0	1	1	0	0	ANKRD33	ankyrin repeat domain 33
hsa-miR-612	1	0	1	1	1	1	STARD13	StAR-related lipid transfer (START) domain containing 13
hsa-miR-612	1	0	1	0	1	1	VPS36	vacuolar protein sorting 36 homolog (S. cerevisiae)
hsa-miR-612	1	0	1	1	1	1	TSC22D3	TSC22 domain family, member 3
hsa-miR-612	0	0	1	1	0	0	PPP2R2B	protein phosphatase 2, regulatory subunit B, beta
hsa-miR-612	0	0	1	0	0	0	OVOS	ovostatin
hsa-miR-612	0	0	1	1	1	1	ZNF250	zinc finger protein 250
hsa-miR-612	0	0	1	1	1	1	CCNT2	cyclin T2
hsa-miR-612	1	0	1	1	1	1	PTPN3	protein tyrosine phosphatase, non-receptor type 3
hsa-miR-612	1	0	1	1	1	1	GSTCD	glutathione S-transferase, C-terminal domain containing
hsa-miR-612	1	0	1	1	1	1	KLHL6	kelch-like 6 (Drosophila)
hsa-miR-612	1	0	1	1	1	1	NFIB	nuclear factor I/B
hsa-miR-612	1	0	1	1	1	1	NAV1	neuron navigator 1
hsa-miR-612	1	0	1	1	1	1	ZKSCAN5	zinc finger with KRAB and SCAN domains 5
hsa-miR-612	1	0	1	1	1	1	PGAP1	post-GPI attachment to proteins 1
hsa-miR-612	1	0	1	1	1	1	FAM179B	family with sequence similarity 179, member B
hsa-miR-612	0	0	1	0	0	0	ZNRD1-AS1	ZNRD1 antisense RNA 1
hsa-miR-612	0	0	1	0	0	0	DKFZp686K1684	uncharacterized LOC440034
hsa-miR-612	0	0	1	1	1	1	SPATA6L	spermatogenesis associated 6-like
hsa-miR-612	1	0	1	1	1	1	HIC2	hypermethylated in cancer 2
hsa-miR-612	1	0	1	1	1	1	AAMP	angio-associated, migratory cell protein
hsa-miR-612	0	0	1	1	1	1	HPGD	hydroxyprostaglandin dehydrogenase 15-(NAD)
hsa-miR-612	1	0	1	1	1	1	ARHGDIA	Rho GDP dissociation inhibitor (GDI) alpha
hsa-miR-612	0	0	1	1	0	0	CRIP2	cysteine-rich protein 2
hsa-miR-612	1	0	1	1	0	0	SLC10A3	solute carrier family 10 (sodium/bile acid cotransporter family), member 3
hsa-miR-612	0	0	1	1	0	0	PPT2	palmitoyl-protein thioesterase 2
hsa-miR-612	1	0	1	1	1	1	NAGA	N-acetylgalactosaminidase, alpha-
hsa-miR-612	1	0	1	1	1	1	RNF10	ring finger protein 10
hsa-miR-612	0	0	1	0	1	1	IDO1	indoleamine 2,3-dioxygenase 1
hsa-miR-612	1	0	1	0	1	1	STX6	syntaxin 6
hsa-miR-612	0	0	1	1	1	1	ARFGAP2	ADP-ribosylation factor GTPase activating protein 2
hsa-miR-612	0	0	1	1	0	0	SLC39A7	solute carrier family 39 (zinc transporter), member 7
hsa-miR-612	0	0	1	1	0	0	H2AFY2	H2A histone family, member Y2
hsa-miR-612	0	0	1	1	0	0	CDC37	cell division cycle 37 homolog (S. cerevisiae)
hsa-miR-612	0	0	1	1	1	1	CCS	copper chaperone for superoxide dismutase
hsa-miR-612	0	0	1	1	1	1	GTPBP3	GTP binding protein 3 (mitochondrial)
hsa-miR-612	0	0	1	1	0	0	SARS	seryl-tRNA synthetase
hsa-miR-612	1	0	1	1	0	0	CGREF1	cell growth regulator with EF-hand domain 1
hsa-miR-612	1	0	1	1	1	1	PCGF2	polycomb group ring finger 2
hsa-miR-612	0	0	1	1	0	0	TBC1D22A	TBC1 domain family, member 22A
hsa-miR-612	0	0	1	0	0	0	LOC400768	uncharacterized LOC400768
hsa-miR-612	0	0	1	1	0	0	URM1	ubiquitin related modifier 1
hsa-miR-612	0	0	1	1	0	0	RAD54L	RAD54-like (S. cerevisiae)
hsa-miR-612	1	0	1	1	1	1	ERI3	ERI1 exoribonuclease family member 3
hsa-miR-612	0	0	1	1	0	0	RAD23A	RAD23 homolog A (S. cerevisiae)
hsa-miR-612	1	0	1	1	0	0	TSC22D4	TSC22 domain family, member 4
hsa-miR-612	1	0	1	1	1	1	CLDN11	claudin 11
hsa-miR-612	0	0	1	1	1	1	SEC22C	SEC22 vesicle trafficking protein homolog C (S. cerevisiae)
hsa-miR-612	0	0	1	1	0	0	PPOX	protoporphyrinogen oxidase
hsa-miR-612	0	0	1	1	1	1	APBB1	amyloid beta (A4) precursor protein-binding, family B, member 1 (Fe65)
hsa-miR-612	0	0	1	1	0	0	SRM	spermidine synthase
hsa-miR-612	0	0	1	1	0	0	FCGRT	Fc fragment of IgG, receptor, transporter, alpha
hsa-miR-612	1	0	1	1	1	1	DOLPP1	dolichyl pyrophosphate phosphatase 1
hsa-miR-612	0	0	1	0	0	0	ARRDC1	arrestin domain containing 1
hsa-miR-612	0	0	1	1	0	0	FCHO1	FCH domain only 1
hsa-miR-612	0	0	1	1	1	1	CIRBP	cold inducible RNA binding protein
hsa-miR-612	1	1	1	1	0	0	EFNA3	ephrin-A3
hsa-miR-612	0	0	1	1	0	0	CD81	CD81 molecule
hsa-miR-612	0	0	1	1	1	1	HSPB8	heat shock 22kDa protein 8
hsa-miR-612	0	0	1	1	1	1	PLEKHA8	pleckstrin homology domain containing, family A (phosphoinositide binding specific) member 8
hsa-miR-612	0	0	1	1	1	1	INCENP	inner centromere protein antigens 135/155kDa
hsa-miR-612	1	0	1	1	1	1	CTDNEP1	CTD nuclear envelope phosphatase 1
hsa-miR-612	1	0	1	1	1	1	ADM	adrenomedullin
hsa-miR-612	0	0	1	1	0	0	TFCP2	transcription factor CP2
hsa-miR-612	0	0	1	1	0	0	DNAJB2	DnaJ (Hsp40) homolog, subfamily B, member 2
hsa-miR-612	0	0	1	0	1	1	CD99P1	CD99 molecule pseudogene 1
hsa-miR-612	1	0	1	1	1	1	EI24	etoposide induced 2.4 mRNA
hsa-miR-612	1	0	1	1	1	1	NTM	neurotrimin
hsa-miR-612	0	0	1	1	1	1	PCK2	phosphoenolpyruvate carboxykinase 2 (mitochondrial)
hsa-miR-612	0	0	1	1	0	0	FAM195A	family with sequence similarity 195, member A
hsa-miR-612	0	0	1	1	0	0	F10	coagulation factor X
hsa-miR-612	0	0	1	1	0	0	WISP2	WNT1 inducible signaling pathway protein 2
hsa-miR-612	0	0	1	1	0	0	FAM64A	family with sequence similarity 64, member A
hsa-miR-612	1	0	1	1	0	0	PNPLA6	patatin-like phospholipase domain containing 6
hsa-miR-612	0	0	1	1	1	1	GRAP2	GRB2-related adaptor protein 2
hsa-miR-612	0	0	1	1	0	0	KIAA0100	KIAA0100
hsa-miR-612	0	0	1	1	1	1	ANKRD53	ankyrin repeat domain 53
hsa-miR-612	0	0	1	1	0	0	MUS81	MUS81 endonuclease homolog (S. cerevisiae)
hsa-miR-612	0	0	1	1	1	1	C17orf76-AS1	C17orf76 antisense RNA 1
hsa-miR-612	1	0	1	1	1	1	EEF1A1	eukaryotic translation elongation factor 1 alpha 1
hsa-miR-612	0	0	1	1	1	1	TRIM68	tripartite motif containing 68
hsa-miR-612	0	0	1	1	0	0	CXorf40A	chromosome X open reading frame 40A
hsa-miR-612	1	0	1	1	1	1	LYPLA2	lysophospholipase II
hsa-miR-612	0	0	1	1	1	1	CDS2	CDP-diacylglycerol synthase (phosphatidate cytidylyltransferase) 2
hsa-miR-612	0	0	1	0	1	1	MMAA	methylmalonic aciduria (cobalamin deficiency) cblA type
hsa-miR-612	0	0	1	1	0	0	C20orf43	chromosome 20 open reading frame 43
hsa-miR-612	1	0	1	1	1	1	ARFIP2	ADP-ribosylation factor interacting protein 2
hsa-miR-612	1	0	1	1	1	1	PTBP1	polypyrimidine tract binding protein 1
hsa-miR-612	0	0	1	1	1	1	RGS14	regulator of G-protein signaling 14
hsa-miR-612	0	0	1	1	0	0	C11orf68	chromosome 11 open reading frame 68
hsa-miR-612	0	0	1	1	0	0	NRSN2	neurensin 2
hsa-miR-612	0	0	1	1	1	1	PDLIM1	PDZ and LIM domain 1
hsa-miR-612	1	0	1	1	1	1	PPP5C	protein phosphatase 5, catalytic subunit
hsa-miR-612	0	0	1	1	1	1	ZDHHC16	zinc finger, DHHC-type containing 16
hsa-miR-612	0	0	1	1	0	0	GMPPA	GDP-mannose pyrophosphorylase A
hsa-miR-612	0	0	1	0	0	0	LOC645513	uncharacterized LOC645513
hsa-miR-612	0	0	1	1	1	1	CD3E	CD3e molecule, epsilon (CD3-TCR complex)
hsa-miR-612	0	0	1	1	0	0	CCDC22	coiled-coil domain containing 22
hsa-miR-612	0	0	1	1	0	0	NUP205	nucleoporin 205kDa
hsa-miR-612	0	0	1	1	0	0	C1orf122	chromosome 1 open reading frame 122
hsa-miR-612	1	0	1	1	1	1	LAMTOR3	late endosomal/lysosomal adaptor, MAPK and MTOR activator 3
hsa-miR-612	0	0	1	0	0	0	SLC22A18	solute carrier family 22, member 18
hsa-miR-612	0	0	1	1	0	0	WDR43	WD repeat domain 43
hsa-miR-612	0	0	1	1	1	1	BTF3	basic transcription factor 3
hsa-miR-612	0	0	1	1	1	1	DEDD	death effector domain containing
hsa-miR-612	0	0	1	1	0	0	NARF	nuclear prelamin A recognition factor
hsa-miR-612	1	0	1	1	1	1	HN1	hematological and neurological expressed 1
hsa-miR-612	1	0	1	1	1	1	SLC39A1	solute carrier family 39 (zinc transporter), member 1
hsa-miR-612	0	0	1	0	1	1	RPL10	ribosomal protein L10
hsa-miR-612	0	0	1	1	1	1	BFAR	bifunctional apoptosis regulator
hsa-miR-612	0	0	1	1	1	1	SLC9A3R1	solute carrier family 9, subfamily A (NHE3, cation proton antiporter 3), member 3 regulator 1
hsa-miR-612	0	0	1	1	0	0	CD53	CD53 molecule
hsa-miR-612	1	0	1	1	1	1	ARL4A	ADP-ribosylation factor-like 4A
hsa-miR-612	0	0	1	1	0	0	STUB1	STIP1 homology and U-box containing protein 1, E3 ubiquitin protein ligase
hsa-miR-612	0	0	1	1	1	1	LYSMD4	LysM, putative peptidoglycan-binding, domain containing 4
hsa-miR-612	0	0	1	1	0	0	FAM57B	family with sequence similarity 57, member B
hsa-miR-612	1	0	1	1	1	1	ATAT1	alpha tubulin acetyltransferase 1
hsa-miR-612	0	0	1	1	1	1	TCTN3	tectonic family member 3
hsa-miR-612	0	0	1	1	0	0	C9orf114	chromosome 9 open reading frame 114
hsa-miR-612	1	0	1	0	1	1	GRAMD1A	GRAM domain containing 1A
hsa-miR-612	1	0	1	1	0	0	CRELD1	cysteine-rich with EGF-like domains 1
hsa-miR-612	0	0	1	1	0	0	YIPF3	Yip1 domain family, member 3
hsa-miR-612	1	0	1	1	1	1	RPUSD3	RNA pseudouridylate synthase domain containing 3
hsa-miR-612	1	0	1	1	0	0	LMAN2	lectin, mannose-binding 2
hsa-miR-612	1	0	1	1	0	0	INO80E	INO80 complex subunit E
hsa-miR-612	0	0	1	0	0	0	LOC100130954	uncharacterized LOC100130954
hsa-miR-612	0	0	1	0	0	0	ZNF674-AS1	ZNF674 antisense RNA 1
hsa-miR-612	0	0	1	1	0	0	OXA1L	oxidase (cytochrome c) assembly 1-like
hsa-miR-612	1	0	1	0	1	1	MAP1B	microtubule-associated protein 1B
hsa-miR-612	0	0	1	1	0	0	GPC3	glypican 3
hsa-miR-612	1	0	1	1	1	1	TMEM55B	transmembrane protein 55B
hsa-miR-612	1	0	1	1	1	1	RALY	RNA binding protein, autoantigenic (hnRNP-associated with lethal yellow homolog (mouse))
hsa-miR-612	0	0	1	1	0	0	PC	pyruvate carboxylase
hsa-miR-612	1	0	1	1	1	1	ACTN4	actinin, alpha 4
hsa-miR-612	1	0	1	0	1	1	SLC2A3	solute carrier family 2 (facilitated glucose transporter), member 3
hsa-miR-612	0	0	1	1	1	1	ZNF259	zinc finger protein 259
hsa-miR-612	1	0	1	1	0	0	CCM2	cerebral cavernous malformation 2
hsa-miR-612	0	0	1	1	1	1	RPE	ribulose-5-phosphate-3-epimerase
hsa-miR-612	1	0	1	1	1	1	RUNX1	runt-related transcription factor 1
hsa-miR-612	0	0	1	0	0	0	CHEK2P2	checkpoint kinase 2 pseudogene 2
hsa-miR-612	1	0	1	1	0	0	RUNDC3A	RUN domain containing 3A
hsa-miR-612	0	0	1	1	0	0	RPS6KB2	ribosomal protein S6 kinase, 70kDa, polypeptide 2
hsa-miR-612	0	0	1	1	0	0	SLC15A3	solute carrier family 15, member 3
hsa-miR-612	1	0	1	1	0	0	PPP4C	protein phosphatase 4, catalytic subunit
hsa-miR-612	0	0	1	1	1	1	CDKAL1	CDK5 regulatory subunit associated protein 1-like 1
hsa-miR-612	1	0	1	1	1	1	WIPI2	WD repeat domain, phosphoinositide interacting 2
hsa-miR-612	1	0	1	1	0	0	FOXO3	forkhead box O3
hsa-miR-612	0	0	1	1	0	0	TESK1	testis-specific kinase 1
hsa-miR-612	0	0	1	0	0	0	LOC100132984	uncharacterized LOC100132984
hsa-miR-612	0	0	1	1	0	0	NFKBIL1	nuclear factor of kappa light polypeptide gene enhancer in B-cells inhibitor-like 1
hsa-miR-612	0	0	1	0	1	1	UBA52	ubiquitin A-52 residue ribosomal protein fusion product 1
hsa-miR-612	1	0	1	1	1	1	MED1	mediator complex subunit 1
hsa-miR-612	1	0	1	1	1	1	JUNB	jun B proto-oncogene
hsa-miR-612	0	0	1	1	1	1	FAM118B	family with sequence similarity 118, member B
hsa-miR-612	0	0	1	1	0	0	ISG20	interferon stimulated exonuclease gene 20kDa
hsa-miR-612	1	0	1	0	1	1	DNMT3A	DNA (cytosine-5-)-methyltransferase 3 alpha
hsa-miR-612	0	0	1	1	1	1	C10orf2	chromosome 10 open reading frame 2
hsa-miR-612	0	0	1	1	0	0	IL11RA	interleukin 11 receptor, alpha
hsa-miR-612	1	0	1	1	1	1	SERF2	small EDRK-rich factor 2
hsa-miR-612	1	0	1	1	0	0	MMP11	matrix metallopeptidase 11 (stromelysin 3)
hsa-miR-612	1	0	1	1	1	1	PRSS22	protease, serine, 22
hsa-miR-612	0	0	1	0	1	1	SERF1A	small EDRK-rich factor 1A (telomeric)
hsa-miR-612	0	0	1	0	0	0	FAM47E	family with sequence similarity 47, member E
hsa-miR-612	1	0	1	0	0	0	RNF40	ring finger protein 40, E3 ubiquitin protein ligase
hsa-miR-612	0	0	1	0	0	0	LOC731789	uncharacterized LOC731789
hsa-miR-612	0	0	1	1	1	1	CCP110	centriolar coiled coil protein 110kDa
hsa-miR-612	1	0	1	0	1	1	BTRC	beta-transducin repeat containing E3 ubiquitin protein ligase
hsa-miR-612	1	0	1	1	1	1	PHACTR2	phosphatase and actin regulator 2
hsa-miR-612	0	0	1	0	0	0	LINC00661	long intergenic non-protein coding RNA 661
hsa-miR-612	1	0	1	1	1	1	HECW2	HECT, C2 and WW domain containing E3 ubiquitin protein ligase 2
hsa-miR-612	1	0	1	1	1	1	ANKS6	ankyrin repeat and sterile alpha motif domain containing 6
hsa-miR-612	1	0	1	0	1	1	SLC7A6	solute carrier family 7 (amino acid transporter light chain, y+L system), member 6
hsa-miR-612	0	0	1	0	0	0	MUC19	mucin 19, oligomeric
hsa-miR-612	1	0	1	1	1	1	MAPK8IP3	mitogen-activated protein kinase 8 interacting protein 3
hsa-miR-612	0	0	1	0	1	1	NWD1	NACHT and WD repeat domain containing 1
hsa-miR-612	0	0	1	0	0	0	DNAJC27-AS1	DNAJC27 antisense RNA 1
hsa-miR-612	1	0	1	1	1	1	BCL2L1	BCL2-like 1
hsa-miR-612	0	0	1	1	0	0	TENC1	tensin like C1 domain containing phosphatase (tensin 2)
hsa-miR-612	0	0	1	0	1	1	DNAH14	dynein, axonemal, heavy chain 14
hsa-miR-612	1	0	1	1	1	1	SLC30A7	solute carrier family 30 (zinc transporter), member 7
hsa-miR-612	0	0	1	1	0	0	STK25	serine/threonine kinase 25
hsa-miR-612	0	0	1	1	0	0	GSTT2	glutathione S-transferase theta 2
hsa-miR-612	1	0	1	1	1	1	ZFHX3	zinc finger homeobox 3
hsa-miR-612	0	0	1	1	1	1	TMEM41B	transmembrane protein 41B
hsa-miR-612	1	0	1	1	1	1	SP2	Sp2 transcription factor
hsa-miR-612	1	0	1	1	1	1	MAN2A2	mannosidase, alpha, class 2A, member 2
hsa-miR-612	1	0	1	1	1	1	RBPMS	RNA binding protein with multiple splicing
hsa-miR-612	0	0	1	1	1	1	PARP14	poly (ADP-ribose) polymerase family, member 14
hsa-miR-612	1	0	1	0	1	1	CBX7	chromobox homolog 7
hsa-miR-612	0	0	1	1	1	1	LTA	lymphotoxin alpha (TNF superfamily, member 1)
hsa-miR-612	0	0	1	1	0	0	PXK	PX domain containing serine/threonine kinase
hsa-miR-612	1	0	1	1	1	1	RSPO1	R-spondin 1
hsa-miR-612	1	0	1	1	1	1	KCNE3	potassium voltage-gated channel, Isk-related family, member 3
hsa-miR-612	1	0	1	1	1	1	TRIOBP	TRIO and F-actin binding protein
hsa-miR-612	0	0	1	1	0	0	SPATA20	spermatogenesis associated 20
hsa-miR-612	1	0	1	1	1	1	ITSN1	intersectin 1 (SH3 domain protein)
hsa-miR-612	0	0	1	1	1	1	P2RX7	purinergic receptor P2X, ligand-gated ion channel, 7
hsa-miR-612	1	0	1	1	0	0	LGSN	lengsin, lens protein with glutamine synthetase domain
hsa-miR-612	0	0	1	0	0	0	PILRB	paired immunoglobin-like type 2 receptor beta
hsa-miR-612	1	0	1	0	1	1	DCBLD2	discoidin, CUB and LCCL domain containing 2
hsa-miR-612	0	0	1	0	0	0	C1orf81	chromosome 1 open reading frame 81
hsa-miR-612	0	0	1	1	0	0	CEACAM3	carcinoembryonic antigen-related cell adhesion molecule 3
hsa-miR-612	0	0	1	0	0	0	GPR144	G protein-coupled receptor 144
hsa-miR-612	1	0	1	0	1	1	KCNB1	potassium voltage-gated channel, Shab-related subfamily, member 1
hsa-miR-612	1	0	1	1	1	1	MLL	myeloid/lymphoid or mixed-lineage leukemia (trithorax homolog, Drosophila)
hsa-miR-612	1	0	1	0	1	1	STAT3	signal transducer and activator of transcription 3 (acute-phase response factor)
hsa-miR-612	0	0	1	1	0	0	HLA-DQB1	major histocompatibility complex, class II, DQ beta 1
hsa-miR-612	1	0	1	1	1	1	GRM1	glutamate receptor, metabotropic 1
hsa-miR-612	0	0	1	1	0	0	INHBA	inhibin, beta A
hsa-miR-612	1	0	1	0	1	1	BCL2	B-cell CLL/lymphoma 2
hsa-miR-612	1	0	1	1	1	1	PLAU	plasminogen activator, urokinase
hsa-miR-612	0	0	1	1	1	1	HLA-G	major histocompatibility complex, class I, G
hsa-miR-612	1	0	1	0	1	1	ACVR2A	activin A receptor, type IIA
hsa-miR-612	1	0	1	1	0	0	ADRB3	adrenoceptor beta 3
hsa-miR-612	0	0	1	1	0	0	CD40LG	CD40 ligand
hsa-miR-612	1	0	1	1	1	1	COL1A1	collagen, type I, alpha 1
hsa-miR-612	1	0	1	1	1	1	COL5A1	collagen, type V, alpha 1
hsa-miR-612	0	0	1	1	1	1	CYP17A1	cytochrome P450, family 17, subfamily A, polypeptide 1
hsa-miR-612	0	0	1	1	1	1	EDN3	endothelin 3
hsa-miR-612	0	0	1	1	0	0	EMD	emerin
hsa-miR-612	0	0	1	1	1	1	FXN	frataxin
hsa-miR-612	1	0	1	1	1	1	FUT1	fucosyltransferase 1 (galactoside 2-alpha-L-fucosyltransferase, H blood group)
hsa-miR-612	1	0	1	1	1	1	GALC	galactosylceramidase
hsa-miR-612	0	0	1	1	0	0	GBA	glucosidase, beta, acid
hsa-miR-612	1	0	1	0	1	1	GLI3	GLI family zinc finger 3
hsa-miR-612	1	0	1	1	1	1	JAG1	jagged 1
hsa-miR-612	1	0	1	1	1	1	KCNA1	potassium voltage-gated channel, shaker-related subfamily, member 1 (episodic ataxia with myokymia)
hsa-miR-612	1	0	1	1	1	1	LEP	leptin
hsa-miR-612	0	0	1	1	0	0	KCNH2	potassium voltage-gated channel, subfamily H (eag-related), member 2
hsa-miR-612	1	0	1	1	1	1	PTCH1	patched 1
hsa-miR-612	1	0	1	1	1	1	NF1	neurofibromin 1
hsa-miR-612	1	0	1	1	0	0	PAX2	paired box 2
hsa-miR-612	1	0	1	0	1	1	PTEN	phosphatase and tensin homolog
hsa-miR-612	1	0	1	0	1	1	SCN4A	sodium channel, voltage-gated, type IV, alpha subunit
hsa-miR-612	0	0	1	1	1	1	STS	steroid sulfatase (microsomal), isozyme S
hsa-miR-612	0	0	1	1	0	0	ABCC8	ATP-binding cassette, sub-family C (CFTR/MRP), member 8
hsa-miR-612	1	0	1	1	1	1	TIMP3	TIMP metallopeptidase inhibitor 3
hsa-miR-612	0	0	1	1	1	1	CASR	calcium-sensing receptor
hsa-miR-612	0	0	1	1	1	1	LTBP2	latent transforming growth factor beta binding protein 2
hsa-miR-612	1	0	1	0	1	1	PAFAH1B1	platelet-activating factor acetylhydrolase 1b, regulatory subunit 1 (45kDa)
hsa-miR-612	0	0	1	1	1	1	CYP11B2	cytochrome P450, family 11, subfamily B, polypeptide 2
hsa-miR-612	1	0	1	1	1	1	HOXA13	homeobox A13
hsa-miR-612	1	0	1	1	1	1	DCX	doublecortin
hsa-miR-612	0	0	1	1	1	1	CRP	C-reactive protein, pentraxin-related
hsa-miR-612	0	0	1	1	1	1	IL1RN	interleukin 1 receptor antagonist
hsa-miR-612	0	0	1	1	1	1	IGF2	insulin-like growth factor 2 (somatomedin A)
hsa-miR-612	0	0	1	1	1	1	AGTR1	angiotensin II receptor, type 1
hsa-miR-612	0	0	1	1	0	0	AVPR1B	arginine vasopressin receptor 1B
hsa-miR-612	1	0	1	1	1	1	CHRM1	cholinergic receptor, muscarinic 1
hsa-miR-612	0	0	1	1	1	1	EPO	erythropoietin
hsa-miR-612	1	0	1	0	1	1	GABRA4	gamma-aminobutyric acid (GABA) A receptor, alpha 4
hsa-miR-612	0	0	1	1	1	1	GABRA5	gamma-aminobutyric acid (GABA) A receptor, alpha 5
hsa-miR-612	1	0	1	1	1	1	GABRB3	gamma-aminobutyric acid (GABA) A receptor, beta 3
hsa-miR-612	1	0	1	1	1	1	GABRG2	gamma-aminobutyric acid (GABA) A receptor, gamma 2
hsa-miR-612	1	0	1	1	1	1	GRIA4	glutamate receptor, ionotropic, AMPA 4
hsa-miR-612	1	0	1	1	0	0	GRIK3	glutamate receptor, ionotropic, kainate 3
hsa-miR-612	1	0	1	1	1	1	IGF1R	insulin-like growth factor 1 receptor
hsa-miR-612	1	0	1	0	1	1	KCNJ2	potassium inwardly-rectifying channel, subfamily J, member 2
hsa-miR-612	1	0	1	1	1	1	PDE3B	phosphodiesterase 3B, cGMP-inhibited
hsa-miR-612	0	0	1	1	1	1	SERPINF2	serpin peptidase inhibitor, clade F (alpha-2 antiplasmin, pigment epithelium derived factor), member 2
hsa-miR-612	1	0	1	1	1	1	PPP3R1	protein phosphatase 3, regulatory subunit B, alpha
hsa-miR-612	1	0	1	1	1	1	PTGDR	prostaglandin D2 receptor (DP)
hsa-miR-612	1	0	1	1	1	1	PTGFR	prostaglandin F receptor (FP)
hsa-miR-612	0	0	1	1	0	0	PTGIR	prostaglandin I2 (prostacyclin) receptor (IP)
hsa-miR-612	1	0	1	1	1	1	RARA	retinoic acid receptor, alpha
hsa-miR-612	0	0	1	1	1	1	BLOC1S2	biogenesis of lysosomal organelles complex-1, subunit 2
hsa-miR-612	1	0	1	1	1	1	ATP2B4	ATPase, Ca++ transporting, plasma membrane 4
hsa-miR-612	0	0	1	1	1	1	TBC1D3C	TBC1 domain family, member 3C
hsa-miR-612	1	0	1	0	1	1	ARHGEF37	Rho guanine nucleotide exchange factor (GEF) 37
hsa-miR-612	0	0	1	1	1	1	FLJ45079	FLJ45079 protein
hsa-miR-612	1	0	1	1	1	1	ATP1B1	ATPase, Na+/K+ transporting, beta 1 polypeptide
hsa-miR-612	0	0	1	1	1	1	C11orf49	chromosome 11 open reading frame 49
hsa-miR-612	1	0	1	1	1	1	HMGXB4	HMG box domain containing 4
hsa-miR-612	1	0	1	1	1	1	HNRNPD	heterogeneous nuclear ribonucleoprotein D (AU-rich element RNA binding protein 1, 37kDa)
hsa-miR-612	0	0	1	1	1	1	TRIM6-TRIM34	TRIM6-TRIM34 readthrough
hsa-miR-612	0	0	1	1	1	1	TRIM34	tripartite motif containing 34
hsa-miR-612	1	0	1	0	1	1	BMF	Bcl2 modifying factor
hsa-miR-612	0	0	1	1	1	1	DYRK3	dual-specificity tyrosine-(Y)-phosphorylation regulated kinase 3
hsa-miR-612	0	0	1	1	1	1	CCDC144NL	coiled-coil domain containing 144 family, N-terminal like
hsa-miR-612	0	0	1	1	1	1	ZCCHC16	zinc finger, CCHC domain containing 16
hsa-miR-612	1	0	1	0	1	1	LIN28B	lin-28 homolog B (C. elegans)
hsa-miR-612	0	0	1	1	0	0	PAPL	iron/zinc purple acid phosphatase-like protein
hsa-miR-612	0	0	1	0	1	1	ZNF705A	zinc finger protein 705A
hsa-miR-612	1	0	1	1	1	1	NCK2	NCK adaptor protein 2
hsa-miR-612	1	0	1	1	1	1	EBF3	early B-cell factor 3
hsa-miR-612	1	0	1	1	1	1	EDA	ectodysplasin A
hsa-miR-612	1	0	1	0	1	1	IP6K1	inositol hexakisphosphate kinase 1
hsa-miR-612	1	0	1	0	1	1	GOSR1	golgi SNAP receptor complex member 1
hsa-miR-612	0	0	1	0	0	0	FSD2	fibronectin type III and SPRY domain containing 2
hsa-miR-612	0	0	1	1	0	0	CARD17	caspase recruitment domain family, member 17
hsa-miR-612	1	0	1	1	1	1	IGSF3	immunoglobulin superfamily, member 3
hsa-miR-612	0	0	1	0	0	0	RWDD1	RWD domain containing 1
hsa-miR-612	1	0	1	1	1	1	TULP4	tubby like protein 4
hsa-miR-612	0	0	1	1	0	0	F8A3	coagulation factor VIII-associated 3
hsa-miR-612	0	0	1	0	1	1	C3orf56	chromosome 3 open reading frame 56
hsa-miR-612	1	0	1	0	1	1	SS18	synovial sarcoma translocation, chromosome 18
hsa-miR-612	1	0	1	0	1	1	CPLX2	complexin 2
hsa-miR-612	1	0	1	1	1	1	ZDHHC9	zinc finger, DHHC-type containing 9
hsa-miR-612	1	0	1	1	1	1	CNOT4	CCR4-NOT transcription complex, subunit 4
hsa-miR-612	1	0	1	0	1	1	C18orf25	chromosome 18 open reading frame 25
hsa-miR-612	1	0	1	0	1	1	KIAA2022	KIAA2022
hsa-miR-612	0	0	1	1	1	1	HRNR	hornerin
hsa-miR-612	1	0	1	0	1	1	ERMN	ermin, ERM-like protein
hsa-miR-612	0	0	1	1	0	0	C10orf62	chromosome 10 open reading frame 62
hsa-miR-612	1	0	1	1	1	1	SHE	Src homology 2 domain containing E
hsa-miR-612	0	0	1	1	1	1	SPIN3	spindlin family, member 3
hsa-miR-612	0	0	1	1	0	0	C10orf120	chromosome 10 open reading frame 120
hsa-miR-612	0	0	1	1	0	0	MYBPHL	myosin binding protein H-like
hsa-miR-612	1	0	1	1	1	1	FOXP4	forkhead box P4
hsa-miR-612	1	0	1	1	1	1	GOSR2	golgi SNAP receptor complex member 2
hsa-miR-612	0	0	1	1	0	0	RGR	retinal G protein coupled receptor
hsa-miR-612	1	0	1	0	1	1	RGMB	RGM domain family, member B
hsa-miR-612	1	0	1	1	1	1	DISC1	disrupted in schizophrenia 1
hsa-miR-612	1	0	1	0	1	1	ZKSCAN2	zinc finger with KRAB and SCAN domains 2
hsa-miR-612	0	0	1	1	1	1	C9orf152	chromosome 9 open reading frame 152
hsa-miR-612	1	0	1	1	1	1	C12orf68	chromosome 12 open reading frame 68
hsa-miR-612	0	0	1	0	0	0	LOC400707	uncharacterized LOC400707
hsa-miR-612	0	0	1	1	1	1	LDLRAD2	low density lipoprotein receptor class A domain containing 2
hsa-miR-612	0	0	1	0	1	1	C12orf69	chromosome 12 open reading frame 69
hsa-miR-612	1	0	1	1	1	1	H3F3C	H3 histone, family 3C
hsa-miR-612	0	0	1	0	1	1	LINC00268	long intergenic non-protein coding RNA 268
hsa-miR-612	1	0	1	1	0	0	USP21	ubiquitin specific peptidase 21
hsa-miR-612	0	0	1	1	0	0	LAT	linker for activation of T cells
hsa-miR-612	0	0	1	1	0	0	RTKN	rhotekin
hsa-miR-612	1	0	1	1	1	1	PHF6	PHD finger protein 6
hsa-miR-612	1	0	1	1	1	1	ZNF2	zinc finger protein 2
hsa-miR-612	0	0	1	1	1	1	BTBD11	BTB (POZ) domain containing 11
hsa-miR-612	0	0	1	1	1	1	DCAF8L1	DDB1 and CUL4 associated factor 8-like 1
hsa-miR-612	1	0	1	1	1	1	SH3PXD2B	SH3 and PX domains 2B
hsa-miR-612	1	0	1	0	1	1	TNRC6B	trinucleotide repeat containing 6B
hsa-miR-612	0	0	1	1	0	0	ARPC4	actin related protein 2/3 complex, subunit 4, 20kDa
hsa-miR-612	1	0	1	0	1	1	ADAR	adenosine deaminase, RNA-specific
hsa-miR-612	1	0	1	1	1	1	VEGFA	vascular endothelial growth factor A
hsa-miR-612	1	0	1	1	1	1	SLC35F1	solute carrier family 35, member F1
hsa-miR-612	0	0	1	1	1	1	RPS29	ribosomal protein S29
hsa-miR-612	1	0	1	0	1	1	MSRB3	methionine sulfoxide reductase B3
hsa-miR-612	1	0	1	1	1	1	CSNK1G3	casein kinase 1, gamma 3
hsa-miR-612	0	0	1	0	1	1	STXBP1	syntaxin binding protein 1
hsa-miR-612	1	0	1	1	1	1	TFAP2A	transcription factor AP-2 alpha (activating enhancer binding protein 2 alpha)
hsa-miR-612	0	0	1	1	1	1	PLGLB1	plasminogen-like B1
hsa-miR-612	1	0	1	1	1	1	MYCL1	v-myc myelocytomatosis viral oncogene homolog 1, lung carcinoma derived (avian)
hsa-miR-612	0	0	1	1	1	1	CSTF3	cleavage stimulation factor, 3' pre-RNA, subunit 3, 77kDa
hsa-miR-612	0	0	1	1	0	0	CALCA	calcitonin-related polypeptide alpha
hsa-miR-612	0	0	1	1	1	1	KCNIP1	Kv channel interacting protein 1
hsa-miR-612	1	0	1	1	1	1	SCD5	stearoyl-CoA desaturase 5
hsa-miR-612	0	0	1	1	1	1	ATAD3C	ATPase family, AAA domain containing 3C
hsa-miR-612	1	0	1	1	1	1	ELMO1	engulfment and cell motility 1
hsa-miR-612	0	0	1	1	1	1	SKA1	spindle and kinetochore associated complex subunit 1
hsa-miR-612	1	0	1	1	1	1	SEC14L1	SEC14-like 1 (S. cerevisiae)
hsa-miR-612	1	0	1	1	1	1	KCNC4	potassium voltage-gated channel, Shaw-related subfamily, member 4
hsa-miR-612	1	0	1	0	1	1	USP9X	ubiquitin specific peptidase 9, X-linked
hsa-miR-612	0	0	1	0	1	1	ZNF705D	zinc finger protein 705D
hsa-miR-612	1	0	1	1	1	1	C3orf65	chromosome 3 open reading frame 65
hsa-miR-612	1	0	1	1	1	1	ZNF384	zinc finger protein 384
hsa-miR-612	1	0	1	1	1	1	NCALD	neurocalcin delta
hsa-miR-612	1	0	1	1	1	1	PPP4R1	protein phosphatase 4, regulatory subunit 1
hsa-miR-612	1	0	1	1	1	1	SLC9A6	solute carrier family 9, subfamily A (NHE6, cation proton antiporter 6), member 6
hsa-miR-612	1	0	1	1	1	1	NSL1	NSL1, MIND kinetochore complex component, homolog (S. cerevisiae)
hsa-miR-612	1	0	1	1	1	1	FRS2	fibroblast growth factor receptor substrate 2
hsa-miR-612	1	0	1	1	1	1	KDM5A	lysine (K)-specific demethylase 5A
hsa-miR-612	1	0	1	1	1	1	SNX21	sorting nexin family member 21
hsa-miR-612	1	0	1	1	1	1	PVRL2	poliovirus receptor-related 2 (herpesvirus entry mediator B)
hsa-miR-612	1	0	1	0	1	1	SRGAP2	SLIT-ROBO Rho GTPase activating protein 2
hsa-miR-612	0	0	1	1	1	1	SLC6A4	solute carrier family 6 (neurotransmitter transporter, serotonin), member 4
hsa-miR-612	1	0	1	1	1	1	UBTF	upstream binding transcription factor, RNA polymerase I
hsa-miR-612	1	0	1	1	1	1	ZNF436	zinc finger protein 436
hsa-miR-612	1	0	1	1	1	1	PDE11A	phosphodiesterase 11A
hsa-miR-612	1	0	1	1	1	1	ATG9A	autophagy related 9A
hsa-miR-612	1	0	1	1	1	1	RNF214	ring finger protein 214
hsa-miR-612	1	0	1	1	1	1	NCOR2	nuclear receptor corepressor 2
hsa-miR-612	0	0	1	0	1	1	WTH3DI	RAB6C-like
hsa-miR-612	0	0	1	1	1	1	VCAM1	vascular cell adhesion molecule 1
hsa-miR-612	1	0	1	0	0	0	FAM127B	family with sequence similarity 127, member B
hsa-miR-612	1	0	1	0	1	1	FAM127C	family with sequence similarity 127, member C
hsa-miR-612	0	0	1	1	1	1	DIAPH1	diaphanous homolog 1 (Drosophila)
hsa-miR-612	1	0	1	1	1	1	HAP1	huntingtin-associated protein 1
hsa-miR-612	1	0	1	1	1	1	VAV3	vav 3 guanine nucleotide exchange factor
hsa-miR-612	1	0	1	0	1	1	FBXO41	F-box protein 41
hsa-miR-612	1	0	1	1	0	0	DLGAP3	discs, large (Drosophila) homolog-associated protein 3
hsa-miR-612	1	0	1	1	1	1	SHANK3	SH3 and multiple ankyrin repeat domains 3
hsa-miR-612	0	0	1	1	1	1	FTO	fat mass and obesity associated
hsa-miR-612	0	0	1	1	1	1	HSF5	heat shock transcription factor family member 5
hsa-miR-612	1	0	1	0	1	1	MEGF9	multiple EGF-like-domains 9
hsa-miR-612	1	0	1	1	1	1	MGA	MAX gene associated
hsa-miR-612	1	0	1	1	1	1	MYO1C	myosin IC
hsa-miR-612	0	0	1	1	0	0	GSTT2B	glutathione S-transferase theta 2B (gene/pseudogene)
hsa-miR-612	1	0	1	1	1	1	REPS2	RALBP1 associated Eps domain containing 2
hsa-miR-612	1	0	1	1	1	1	NXF1	nuclear RNA export factor 1
hsa-miR-612	0	0	1	1	1	1	G6PC2	glucose-6-phosphatase, catalytic, 2
hsa-miR-612	1	0	1	1	0	0	ASIC2	acid-sensing (proton-gated) ion channel 2
hsa-miR-612	1	0	1	1	1	1	ASIC1	acid-sensing (proton-gated) ion channel 1
hsa-miR-612	0	0	1	0	1	1	ALOX15	arachidonate 15-lipoxygenase
hsa-miR-612	1	0	1	0	1	1	BMPR2	bone morphogenetic protein receptor, type II (serine/threonine kinase)
hsa-miR-612	1	0	1	0	1	1	KLF9	Kruppel-like factor 9
hsa-miR-612	1	0	1	1	1	1	CASP10	caspase 10, apoptosis-related cysteine peptidase
hsa-miR-612	1	0	1	0	1	1	CDK6	cyclin-dependent kinase 6
hsa-miR-612	1	0	1	1	1	1	CHD2	chromodomain helicase DNA binding protein 2
hsa-miR-612	1	0	1	1	1	1	CNN1	calponin 1, basic, smooth muscle
hsa-miR-612	1	0	1	0	1	1	CPD	carboxypeptidase D
hsa-miR-612	0	0	1	1	1	1	DARS	aspartyl-tRNA synthetase
hsa-miR-612	1	0	1	1	1	1	DYRK1A	dual-specificity tyrosine-(Y)-phosphorylation regulated kinase 1A
hsa-miR-612	1	0	1	1	1	1	CELSR2	cadherin, EGF LAG seven-pass G-type receptor 2 (flamingo homolog, Drosophila)
hsa-miR-612	1	0	1	0	1	1	ELAVL3	ELAV (embryonic lethal, abnormal vision, Drosophila)-like 3 (Hu antigen C)
hsa-miR-612	1	0	1	1	0	0	EMP2	epithelial membrane protein 2
hsa-miR-612	0	0	1	1	1	1	B4GALNT1	beta-1,4-N-acetyl-galactosaminyl transferase 1
hsa-miR-612	0	0	1	1	0	0	GCKR	glucokinase (hexokinase 4) regulator
hsa-miR-612	1	0	1	1	1	1	GCNT1	glucosaminyl (N-acetyl) transferase 1, core 2
hsa-miR-612	1	0	1	1	0	0	GDI1	GDP dissociation inhibitor 1
hsa-miR-612	1	0	1	1	1	1	NDST1	N-deacetylase/N-sulfotransferase (heparan glucosaminyl) 1
hsa-miR-612	0	0	1	1	1	1	IL13RA1	interleukin 13 receptor, alpha 1
hsa-miR-612	0	0	1	0	0	0	INPP4A	inositol polyphosphate-4-phosphatase, type I, 107kDa
hsa-miR-612	1	0	1	1	1	1	ADD2	adducin 2 (beta)
hsa-miR-612	1	0	1	1	1	1	ARF3	ADP-ribosylation factor 3
hsa-miR-612	1	0	1	0	1	1	ARNT	aryl hydrocarbon receptor nuclear translocator
hsa-miR-612	1	0	1	1	1	1	ATP6V1A	ATPase, H+ transporting, lysosomal 70kDa, V1 subunit A
hsa-miR-612	0	0	1	1	0	0	CXCR5	chemokine (C-X-C motif) receptor 5
hsa-miR-612	1	0	1	1	1	1	BNC1	basonuclin 1
hsa-miR-612	1	0	1	0	1	1	BMP8B	bone morphogenetic protein 8b
hsa-miR-612	0	0	1	1	1	1	CALB2	calbindin 2
hsa-miR-612	0	0	1	1	1	1	CD1D	CD1d molecule
hsa-miR-612	0	0	1	1	0	0	CDKN2D	cyclin-dependent kinase inhibitor 2D (p19, inhibits CDK4)
hsa-miR-612	1	0	1	0	1	1	CHML	choroideremia-like (Rab escort protein 2)
hsa-miR-612	1	0	1	1	1	1	SLC31A1	solute carrier family 31 (copper transporters), member 1
hsa-miR-612	0	0	1	1	1	1	DLAT	dihydrolipoamide S-acetyltransferase
hsa-miR-612	1	0	1	1	1	1	DR1	down-regulator of transcription 1, TBP-binding (negative cofactor 2)
hsa-miR-612	0	0	1	1	1	1	DSG1	desmoglein 1
hsa-miR-612	1	0	1	1	1	1	HBEGF	heparin-binding EGF-like growth factor
hsa-miR-612	1	0	1	1	1	1	E2F3	E2F transcription factor 3
hsa-miR-612	1	0	1	1	1	1	EGR1	early growth response 1
hsa-miR-612	1	0	1	1	1	1	EPB49	erythrocyte membrane protein band 4.9 (dematin)
hsa-miR-612	1	0	1	1	1	1	FGF9	fibroblast growth factor 9 (glia-activating factor)
hsa-miR-612	1	0	1	1	1	1	FMOD	fibromodulin
hsa-miR-612	0	0	1	1	1	1	GFAP	glial fibrillary acidic protein
hsa-miR-612	0	0	1	1	0	0	GLP1R	glucagon-like peptide 1 receptor
hsa-miR-612	0	0	1	1	1	1	IL17A	interleukin 17A
hsa-miR-612	1	0	1	1	1	1	ITGA5	integrin, alpha 5 (fibronectin receptor, alpha polypeptide)
hsa-miR-612	1	0	1	1	1	1	JAG2	jagged 2
hsa-miR-612	1	0	1	1	1	1	JUN	jun proto-oncogene
hsa-miR-612	1	0	1	1	0	0	JUP	junction plakoglobin
hsa-miR-612	1	0	1	1	1	1	KCNA6	potassium voltage-gated channel, shaker-related subfamily, member 6
hsa-miR-612	1	0	1	1	1	1	KDR	kinase insert domain receptor (a type III receptor tyrosine kinase)
hsa-miR-612	0	0	1	1	0	0	KRT33B	keratin 33B
hsa-miR-612	0	0	1	1	0	0	LALBA	lactalbumin, alpha-
hsa-miR-612	0	0	1	1	1	1	TACSTD2	tumor-associated calcium signal transducer 2
hsa-miR-612	1	0	1	1	1	1	M6PR	mannose-6-phosphate receptor (cation dependent)
hsa-miR-612	1	0	1	1	1	1	MAP1A	microtubule-associated protein 1A
hsa-miR-612	1	0	1	1	1	1	MAX	MYC associated factor X
hsa-miR-612	1	0	1	1	1	1	ADAM11	ADAM metallopeptidase domain 11
hsa-miR-612	0	0	1	0	1	1	MFNG	MFNG O-fucosylpeptide 3-beta-N-acetylglucosaminyltransferase
hsa-miR-612	0	0	1	0	1	1	CXCL9	chemokine (C-X-C motif) ligand 9
hsa-miR-612	0	0	1	1	1	1	MMP19	matrix metallopeptidase 19
hsa-miR-612	1	0	1	1	1	1	MSN	moesin
hsa-miR-612	0	0	1	1	1	1	MTAP	methylthioadenosine phosphorylase
hsa-miR-612	0	0	1	1	0	0	MYBL2	v-myb myeloblastosis viral oncogene homolog (avian)-like 2
hsa-miR-612	1	0	1	1	1	1	NGFR	nerve growth factor receptor
hsa-miR-612	0	0	1	1	0	0	NOVA2	neuro-oncological ventral antigen 2
hsa-miR-612	0	0	1	0	1	1	OAZ2	ornithine decarboxylase antizyme 2
hsa-miR-612	0	0	1	1	1	1	OGDH	oxoglutarate (alpha-ketoglutarate) dehydrogenase (lipoamide)
hsa-miR-612	0	0	1	0	1	1	OPHN1	oligophrenin 1
hsa-miR-612	1	0	1	0	1	1	PAPPA	pregnancy-associated plasma protein A, pappalysin 1
hsa-miR-612	1	0	1	1	1	1	PBX2	pre-B-cell leukemia homeobox 2
hsa-miR-612	1	0	1	0	1	1	PCDHGC3	protocadherin gamma subfamily C, 3
hsa-miR-612	1	0	1	1	0	0	PDGFB	platelet-derived growth factor beta polypeptide
hsa-miR-612	1	0	1	1	1	1	PHF1	PHD finger protein 1
hsa-miR-612	1	0	1	1	1	1	PLAGL2	pleiomorphic adenoma gene-like 2
hsa-miR-612	1	0	1	1	1	1	PLCG1	phospholipase C, gamma 1
hsa-miR-612	0	0	1	1	1	1	PLGLB2	plasminogen-like B2
hsa-miR-612	1	0	1	1	1	1	PPP1CB	protein phosphatase 1, catalytic subunit, beta isozyme
hsa-miR-612	1	0	1	1	1	1	MAPK1	mitogen-activated protein kinase 1
hsa-miR-612	0	0	1	1	1	1	MAP2K1	mitogen-activated protein kinase kinase 1
hsa-miR-612	0	0	1	1	1	1	HTRA1	HtrA serine peptidase 1
hsa-miR-612	0	0	1	0	0	0	PSMB10	proteasome (prosome, macropain) subunit, beta type, 10
hsa-miR-612	0	0	1	0	1	1	PSMD3	proteasome (prosome, macropain) 26S subunit, non-ATPase, 3
hsa-miR-612	1	0	1	1	1	1	PVRL1	poliovirus receptor-related 1 (herpesvirus entry mediator C)
hsa-miR-612	1	0	1	0	1	1	RAB6A	RAB6A, member RAS oncogene family
hsa-miR-612	1	0	1	0	1	1	RAP2B	RAP2B, member of RAS oncogene family
hsa-miR-612	1	0	1	1	1	1	ARID4A	AT rich interactive domain 4A (RBP1-like)
hsa-miR-612	1	0	1	1	0	0	RFX1	regulatory factor X, 1 (influences HLA class II expression)
hsa-miR-612	0	0	1	1	1	1	MRPL12	mitochondrial ribosomal protein L12
hsa-miR-612	1	0	1	0	1	1	SORT1	sortilin 1
hsa-miR-612	1	0	1	1	0	0	CCL3	chemokine (C-C motif) ligand 3
hsa-miR-612	1	0	1	1	1	1	CCL21	chemokine (C-C motif) ligand 21
hsa-miR-612	1	0	1	0	1	1	CCL22	chemokine (C-C motif) ligand 22
hsa-miR-612	0	0	1	0	0	0	SEPW1	selenoprotein W, 1
hsa-miR-612	1	0	1	1	1	1	SHB	Src homology 2 domain containing adaptor protein B
hsa-miR-612	1	0	1	0	1	1	ST6GAL1	ST6 beta-galactosamide alpha-2,6-sialyltranferase 1
hsa-miR-612	1	0	1	1	1	1	SMARCD1	SWI/SNF related, matrix associated, actin dependent regulator of chromatin, subfamily d, member 1
hsa-miR-612	0	0	1	1	0	0	SNTA1	syntrophin, alpha 1
hsa-miR-612	1	0	1	0	1	1	SOX4	SRY (sex determining region Y)-box 4
hsa-miR-612	1	0	1	1	1	1	SRF	serum response factor (c-fos serum response element-binding transcription factor)
hsa-miR-612	1	0	1	1	1	1	SRPR	signal recognition particle receptor (docking protein)
hsa-miR-612	0	0	1	1	1	1	SUPT6H	suppressor of Ty 6 homolog (S. cerevisiae)
hsa-miR-612	1	0	1	1	1	1	SUV39H1	suppressor of variegation 3-9 homolog 1 (Drosophila)
hsa-miR-612	1	0	1	1	1	1	TEC	tec protein tyrosine kinase
hsa-miR-612	1	0	1	1	1	1	TFAP4	transcription factor AP-4 (activating enhancer binding protein 4)
hsa-miR-612	0	0	1	1	1	1	TPR	translocated promoter region, nuclear basket protein
hsa-miR-612	0	0	1	1	0	0	TUFM	Tu translation elongation factor, mitochondrial
hsa-miR-612	0	0	1	1	0	0	WNT9B	wingless-type MMTV integration site family, member 9B
hsa-miR-612	1	0	1	0	1	1	BSN	bassoon (presynaptic cytomatrix protein)
hsa-miR-612	1	0	1	1	1	1	PAX8	paired box 8
hsa-miR-612	1	0	1	1	1	1	KCNAB1	potassium voltage-gated channel, shaker-related subfamily, beta member 1
hsa-miR-612	1	0	1	1	1	1	ADAM12	ADAM metallopeptidase domain 12
hsa-miR-612	1	0	1	1	1	1	CUL5	cullin 5
hsa-miR-612	0	0	1	1	0	0	FOXN1	forkhead box N1
hsa-miR-612	0	0	1	1	1	1	RGS5	regulator of G-protein signaling 5
hsa-miR-612	1	0	1	1	1	1	BARX2	BARX homeobox 2
hsa-miR-612	1	0	1	1	0	0	TCAP	titin-cap (telethonin)
hsa-miR-612	0	0	1	1	1	1	SLC25A12	solute carrier family 25 (aspartate/glutamate carrier), member 12
hsa-miR-612	1	0	1	0	1	1	PCDHGA12	protocadherin gamma subfamily A, 12
hsa-miR-612	1	0	1	0	1	1	PCDHGB4	protocadherin gamma subfamily B, 4
hsa-miR-612	0	0	1	1	0	0	DCHS1	dachsous 1 (Drosophila)
hsa-miR-612	1	0	1	0	1	1	TNKS	tankyrase, TRF1-interacting ankyrin-related ADP-ribose polymerase
hsa-miR-612	1	0	1	1	1	1	NR5A2	nuclear receptor subfamily 5, group A, member 2
hsa-miR-612	0	0	1	1	0	0	SIGLEC5	sialic acid binding Ig-like lectin 5
hsa-miR-612	1	0	1	1	1	1	NRP2	neuropilin 2
hsa-miR-612	1	0	1	1	1	1	KAT2B	K(lysine) acetyltransferase 2B
hsa-miR-612	1	0	1	1	1	1	KALRN	kalirin, RhoGEF kinase
hsa-miR-612	0	0	1	1	0	0	CCRL2	chemokine (C-C motif) receptor-like 2
hsa-miR-612	0	0	1	1	1	1	PRC1	protein regulator of cytokinesis 1
hsa-miR-612	1	0	1	1	1	1	BCL2L2	BCL2-like 2
hsa-miR-612	1	0	1	0	1	1	E2F2	E2F transcription factor 2
hsa-miR-612	0	0	1	1	1	1	LBP	lipopolysaccharide binding protein
hsa-miR-612	1	0	1	0	1	1	SLC1A2	solute carrier family 1 (glial high affinity glutamate transporter), member 2
hsa-miR-612	1	0	1	1	1	1	SEMA3F	sema domain, immunoglobulin domain (Ig), short basic domain, secreted, (semaphorin) 3F
hsa-miR-612	1	0	1	0	1	1	MED14	mediator complex subunit 14
hsa-miR-612	0	0	1	1	1	1	HOMER1	homer homolog 1 (Drosophila)
hsa-miR-612	1	0	1	0	1	1	GTPBP1	GTP binding protein 1
hsa-miR-612	1	0	1	1	1	1	GDA	guanine deaminase
hsa-miR-612	1	0	1	1	1	1	TRAF4	TNF receptor-associated factor 4
hsa-miR-612	1	0	1	0	1	1	ACVR1B	activin A receptor, type IB
hsa-miR-612	0	0	1	1	1	1	CDH1	cadherin 1, type 1, E-cadherin (epithelial)
hsa-miR-612	1	0	1	1	1	1	DBN1	drebrin 1
hsa-miR-612	1	0	1	1	1	1	DTX1	deltex homolog 1 (Drosophila)
hsa-miR-612	1	0	1	1	1	1	DUSP5	dual specificity phosphatase 5
hsa-miR-612	1	0	1	1	1	1	EFNA1	ephrin-A1
hsa-miR-612	1	0	1	1	1	1	EFNB1	ephrin-B1
hsa-miR-612	1	0	1	1	1	1	EGR3	early growth response 3
hsa-miR-612	1	0	1	1	1	1	EPHA4	EPH receptor A4
hsa-miR-612	1	0	1	0	1	1	ACSL4	acyl-CoA synthetase long-chain family member 4
hsa-miR-612	1	0	1	1	0	0	HOXC6	homeobox C6
hsa-miR-612	1	0	1	1	1	1	NCAM2	neural cell adhesion molecule 2
hsa-miR-612	0	0	1	1	1	1	RAB27A	RAB27A, member RAS oncogene family
hsa-miR-612	1	0	1	0	1	1	SCN2B	sodium channel, voltage-gated, type II, beta subunit
hsa-miR-612	1	0	1	1	1	1	TCF15	transcription factor 15 (basic helix-loop-helix)
hsa-miR-612	0	0	1	0	1	1	TM4SF4	transmembrane 4 L six family member 4
hsa-miR-612	0	0	1	1	1	1	PABPN1	poly(A) binding protein, nuclear 1
hsa-miR-612	1	0	1	0	1	1	USP9Y	ubiquitin specific peptidase 9, Y-linked
hsa-miR-612	1	0	1	1	1	1	BAP1	BRCA1 associated protein-1 (ubiquitin carboxy-terminal hydrolase)
hsa-miR-612	0	0	1	0	1	1	BPY2	basic charge, Y-linked, 2
hsa-miR-612	0	0	1	1	0	0	PRPF3	PRP3 pre-mRNA processing factor 3 homolog (S. cerevisiae)
hsa-miR-612	0	0	1	0	1	1	CXorf1	chromosome X open reading frame 1
hsa-miR-612	0	0	1	1	1	1	MTA2	metastasis associated 1 family, member 2
hsa-miR-612	1	0	1	0	1	1	MAPKAPK2	mitogen-activated protein kinase-activated protein kinase 2
hsa-miR-612	0	0	1	0	1	1	ADIPOQ	adiponectin, C1Q and collagen domain containing
hsa-miR-612	1	0	1	1	1	1	KIF3B	kinesin family member 3B
hsa-miR-612	0	0	1	1	0	0	SLC22A14	solute carrier family 22, member 14
hsa-miR-612	1	0	1	1	1	1	HAND1	heart and neural crest derivatives expressed 1
hsa-miR-612	1	0	1	1	1	1	AKAP7	A kinase (PRKA) anchor protein 7
hsa-miR-612	0	0	1	1	1	1	CLCA3P	chloride channel accessory 3, pseudogene
hsa-miR-612	1	0	1	1	1	1	ZFP36L1	zinc finger protein 36, C3H type-like 1
hsa-miR-612	0	0	1	1	1	1	CALB1	calbindin 1, 28kDa
hsa-miR-612	0	0	1	1	1	1	CD8B	CD8b molecule
hsa-miR-612	1	0	1	0	1	1	DOCK3	dedicator of cytokinesis 3
hsa-miR-612	0	0	1	1	1	1	DSC1	desmocollin 1
hsa-miR-612	0	0	1	0	1	1	DSC2	desmocollin 2
hsa-miR-612	0	0	1	1	0	0	NR5A1	nuclear receptor subfamily 5, group A, member 1
hsa-miR-612	1	0	1	1	1	1	GABRE	gamma-aminobutyric acid (GABA) A receptor, epsilon
hsa-miR-612	0	0	1	1	1	1	GDF10	growth differentiation factor 10
hsa-miR-612	1	0	1	1	0	0	MMP14	matrix metallopeptidase 14 (membrane-inserted)
hsa-miR-612	1	0	1	1	1	1	MYO1E	myosin IE
hsa-miR-612	1	0	1	0	1	1	SCD	stearoyl-CoA desaturase (delta-9-desaturase)
hsa-miR-612	1	0	1	1	1	1	TLE1	transducin-like enhancer of split 1 (E(sp1) homolog, Drosophila)
hsa-miR-612	1	0	1	1	0	0	ZMYM3	zinc finger, MYM-type 3
hsa-miR-612	0	0	1	1	1	1	XYLB	xylulokinase homolog (H. influenzae)
hsa-miR-612	1	0	1	1	1	1	OXSR1	oxidative-stress responsive 1
hsa-miR-612	1	0	1	1	1	1	FGF19	fibroblast growth factor 19
hsa-miR-612	0	0	1	1	0	0	HR	hairless homolog (mouse)
hsa-miR-612	1	0	1	1	1	1	APLNR	apelin receptor
hsa-miR-612	1	0	1	0	1	1	CALM3	calmodulin 3 (phosphorylase kinase, delta)
hsa-miR-612	1	0	1	1	1	1	FOXN3	forkhead box N3
hsa-miR-612	0	0	1	0	1	1	FOSL2	FOS-like antigen 2
hsa-miR-612	1	0	1	1	1	1	GEM	GTP binding protein overexpressed in skeletal muscle
hsa-miR-612	0	0	1	1	1	1	LPAR4	lysophosphatidic acid receptor 4
hsa-miR-612	1	0	1	1	1	1	HAS2	hyaluronan synthase 2
hsa-miR-612	1	0	1	1	1	1	HIP1	huntingtin interacting protein 1
hsa-miR-612	1	0	1	1	0	0	NNAT	neuronatin
hsa-miR-612	1	0	1	1	1	1	PDCL	phosducin-like
hsa-miR-612	1	0	1	1	1	1	ROCK1	Rho-associated, coiled-coil containing protein kinase 1
hsa-miR-612	1	0	1	1	1	1	MLF2	myeloid leukemia factor 2
hsa-miR-612	1	0	1	1	1	1	RND2	Rho family GTPase 2
hsa-miR-612	0	0	1	1	1	1	FAIM3	Fas apoptotic inhibitory molecule 3
hsa-miR-612	1	0	1	1	1	1	GABBR2	gamma-aminobutyric acid (GABA) B receptor, 2
hsa-miR-612	0	0	1	1	1	1	GNPDA1	glucosamine-6-phosphate deaminase 1
hsa-miR-612	1	0	1	1	1	1	HCN4	hyperpolarization activated cyclic nucleotide-gated potassium channel 4
hsa-miR-612	1	0	1	1	1	1	HOXA1	homeobox A1
hsa-miR-612	0	0	1	1	1	1	ING1	inhibitor of growth family, member 1
hsa-miR-612	1	0	1	1	1	1	INSIG1	insulin induced gene 1
hsa-miR-612	1	0	1	1	0	0	LOXL1	lysyl oxidase-like 1
hsa-miR-612	1	0	1	1	1	1	LPP	LIM domain containing preferred translocation partner in lipoma
hsa-miR-612	0	0	1	1	1	1	BCAM	basal cell adhesion molecule (Lutheran blood group)
hsa-miR-612	1	0	1	1	1	1	SMAD6	SMAD family member 6
hsa-miR-612	0	0	1	1	1	1	ALDH6A1	aldehyde dehydrogenase 6 family, member A1
hsa-miR-612	1	0	1	1	1	1	RGS4	regulator of G-protein signaling 4
hsa-miR-612	0	0	1	1	0	0	SNURF	SNRPN upstream reading frame
hsa-miR-612	1	0	1	1	1	1	GIPC1	GIPC PDZ domain containing family, member 1
hsa-miR-612	0	0	1	1	0	0	EBI3	Epstein-Barr virus induced 3
hsa-miR-612	0	0	1	1	0	0	LPCAT3	lysophosphatidylcholine acyltransferase 3
hsa-miR-612	0	0	1	1	1	1	RNF41	ring finger protein 41
hsa-miR-612	1	0	1	0	1	1	DCAF7	DDB1 and CUL4 associated factor 7
hsa-miR-612	0	0	1	1	1	1	SLC17A2	solute carrier family 17 (sodium phosphate), member 2
hsa-miR-612	1	0	1	1	1	1	SRRM1	serine/arginine repetitive matrix 1
hsa-miR-612	1	0	1	0	1	1	SPRY3	sprouty homolog 3 (Drosophila)
hsa-miR-612	0	0	1	1	1	1	FSTL3	follistatin-like 3 (secreted glycoprotein)
hsa-miR-612	0	0	1	1	1	1	DSCR4	Down syndrome critical region gene 4
hsa-miR-612	1	0	1	1	0	0	TRAIP	TRAF interacting protein
hsa-miR-612	1	0	1	1	1	1	MMP16	matrix metallopeptidase 16 (membrane-inserted)
hsa-miR-612	1	0	1	1	1	1	MTF1	metal-regulatory transcription factor 1
hsa-miR-612	1	0	1	1	0	0	NAB2	NGFI-A binding protein 2 (EGR1 binding protein 2)
hsa-miR-612	1	0	1	1	1	1	SNAI1	snail homolog 1 (Drosophila)
hsa-miR-612	1	0	1	1	1	1	TSNAX	translin-associated factor X
hsa-miR-612	0	0	1	1	1	1	LANCL1	LanC lantibiotic synthetase component C-like 1 (bacterial)
hsa-miR-612	0	0	1	1	0	0	LAMC3	laminin, gamma 3
hsa-miR-612	0	0	1	1	1	1	SMYD5	SMYD family member 5
hsa-miR-612	1	0	1	1	1	1	SEMA3A	sema domain, immunoglobulin domain (Ig), short basic domain, secreted, (semaphorin) 3A
hsa-miR-612	1	0	1	1	1	1	DAGLA	diacylglycerol lipase, alpha
hsa-miR-612	1	0	1	1	1	1	CAPZA2	capping protein (actin filament) muscle Z-line, alpha 2
hsa-miR-612	0	0	1	1	1	1	CSF2RA	colony stimulating factor 2 receptor, alpha, low-affinity (granulocyte-macrophage)
hsa-miR-612	1	0	1	1	1	1	DYNC1LI2	dynein, cytoplasmic 1, light intermediate chain 2
hsa-miR-612	0	0	1	1	0	0	NEDD8	neural precursor cell expressed, developmentally down-regulated 8
hsa-miR-612	1	0	1	1	1	1	NEUROD2	neuronal differentiation 2
hsa-miR-612	0	0	1	1	1	1	NTF4	neurotrophin 4
hsa-miR-612	0	0	1	0	1	1	OAS3	2'-5'-oligoadenylate synthetase 3, 100kDa
hsa-miR-612	1	0	1	1	1	1	CDK16	cyclin-dependent kinase 16
hsa-miR-612	1	0	1	0	1	1	PITPNA	phosphatidylinositol transfer protein, alpha
hsa-miR-612	0	0	1	1	1	1	PPEF2	protein phosphatase, EF-hand calcium binding domain 2
hsa-miR-612	1	0	1	1	1	1	PRKAB1	protein kinase, AMP-activated, beta 1 non-catalytic subunit
hsa-miR-612	0	0	1	1	1	1	PRKCH	protein kinase C, eta
hsa-miR-612	1	0	1	1	1	1	STK4	serine/threonine kinase 4
hsa-miR-612	1	0	1	1	1	1	TSG101	tumor susceptibility gene 101
hsa-miR-612	1	0	1	1	1	1	ZER1	zer-1 homolog (C. elegans)
hsa-miR-612	0	0	1	1	1	1	SLC25A17	solute carrier family 25 (mitochondrial carrier; peroxisomal membrane protein, 34kDa), member 17
hsa-miR-612	0	0	1	1	1	1	LRRC41	leucine rich repeat containing 41
hsa-miR-612	1	0	1	1	1	1	VAT1	vesicle amine transport protein 1 homolog (T. californica)
hsa-miR-612	1	0	1	0	1	1	APPBP2	amyloid beta precursor protein (cytoplasmic tail) binding protein 2
hsa-miR-612	0	0	1	1	1	1	ARL6IP5	ADP-ribosylation-like factor 6 interacting protein 5
hsa-miR-612	0	0	1	1	0	0	RABAC1	Rab acceptor 1 (prenylated)
hsa-miR-612	1	0	1	1	1	1	TRIM3	tripartite motif containing 3
hsa-miR-612	0	0	1	1	0	0	ALX3	ALX homeobox 3
hsa-miR-612	0	0	1	0	1	1	SLC16A2	solute carrier family 16, member 2 (thyroid hormone transporter)
hsa-miR-612	1	0	1	0	1	1	IGF2BP1	insulin-like growth factor 2 mRNA binding protein 1
hsa-miR-612	1	0	1	1	1	1	CTCF	CCCTC-binding factor (zinc finger protein)
hsa-miR-612	0	0	1	1	1	1	PPP1R17	protein phosphatase 1, regulatory subunit 17
hsa-miR-612	1	0	1	1	1	1	PGRMC1	progesterone receptor membrane component 1
hsa-miR-612	1	0	1	1	1	1	TSPAN9	tetraspanin 9
hsa-miR-612	1	0	1	1	0	0	PSKH1	protein serine kinase H1
hsa-miR-612	1	0	1	1	1	1	SLC20A2	solute carrier family 20 (phosphate transporter), member 2
hsa-miR-612	0	0	1	1	0	0	UPK2	uroplakin 2
hsa-miR-612	1	0	1	1	1	1	BTG2	BTG family, member 2
hsa-miR-612	0	0	1	1	1	1	GCN1L1	GCN1 general control of amino-acid synthesis 1-like 1 (yeast)
hsa-miR-612	0	0	1	1	0	0	PIM2	pim-2 oncogene
hsa-miR-612	1	0	1	1	1	1	CD86	CD86 molecule
hsa-miR-612	0	0	1	1	1	1	CEACAM7	carcinoembryonic antigen-related cell adhesion molecule 7
hsa-miR-612	0	0	1	1	1	1	HOXA7	homeobox A7
hsa-miR-612	1	0	1	1	1	1	RIT1	Ras-like without CAAX 1
hsa-miR-612	1	0	1	0	1	1	SLC5A3	solute carrier family 5 (sodium/myo-inositol cotransporter), member 3
hsa-miR-612	1	0	1	0	1	1	SOX12	SRY (sex determining region Y)-box 12
hsa-miR-612	1	0	1	0	1	1	WASF2	WAS protein family, member 2
hsa-miR-612	1	0	1	0	1	1	PAPD7	PAP associated domain containing 7
hsa-miR-612	1	0	1	1	1	1	ABHD2	abhydrolase domain containing 2
hsa-miR-612	0	0	1	1	0	0	UBE2C	ubiquitin-conjugating enzyme E2C
hsa-miR-612	0	0	1	1	1	1	TMEM115	transmembrane protein 115
hsa-miR-612	1	0	1	1	1	1	PTPN21	protein tyrosine phosphatase, non-receptor type 21
hsa-miR-612	1	0	1	1	1	1	SSR3	signal sequence receptor, gamma (translocon-associated protein gamma)
hsa-miR-612	0	0	1	1	0	0	USF1	upstream transcription factor 1
hsa-miR-612	1	0	1	1	1	1	VCP	valosin containing protein
hsa-miR-612	1	0	1	1	1	1	ZNF81	zinc finger protein 81
hsa-miR-612	1	0	1	1	1	1	VEZF1	vascular endothelial zinc finger 1
hsa-miR-612	0	0	1	0	1	1	ZNF208	zinc finger protein 208
hsa-miR-612	1	0	1	0	1	1	PRSS23	protease, serine, 23
hsa-miR-612	1	0	1	1	1	1	C14orf1	chromosome 14 open reading frame 1
hsa-miR-612	1	0	1	1	1	1	PALM2-AKAP2	PALM2-AKAP2 readthrough
hsa-miR-612	0	0	1	1	1	1	HRH3	histamine receptor H3
hsa-miR-612	1	0	1	0	1	1	CHP1	calcineurin-like EF hand protein 1
hsa-miR-612	1	0	1	1	1	1	KLF12	Kruppel-like factor 12
hsa-miR-612	0	0	1	0	1	1	AP4E1	adaptor-related protein complex 4, epsilon 1 subunit
hsa-miR-612	1	0	1	1	1	1	PHLDA1	pleckstrin homology-like domain, family A, member 1
hsa-miR-612	1	0	1	1	1	1	CASC3	cancer susceptibility candidate 3
hsa-miR-612	0	0	1	1	0	0	SIX6	SIX homeobox 6
hsa-miR-612	1	0	1	1	1	1	HDHD1	haloacid dehalogenase-like hydrolase domain containing 1
hsa-miR-612	1	0	1	1	1	1	ICOS	inducible T-cell co-stimulator
hsa-miR-612	0	0	1	1	0	0	PRDX5	peroxiredoxin 5
hsa-miR-612	0	0	1	1	1	1	LMOD1	leiomodin 1 (smooth muscle)
hsa-miR-612	1	0	1	1	1	1	FBXL3	F-box and leucine-rich repeat protein 3
hsa-miR-612	1	0	1	0	1	1	FZD4	frizzled family receptor 4
hsa-miR-612	0	0	1	1	0	0	GNG3	guanine nucleotide binding protein (G protein), gamma 3
hsa-miR-612	0	0	1	1	0	0	TPSD1	tryptase delta 1
hsa-miR-612	1	0	1	1	1	1	RYBP	RING1 and YY1 binding protein
hsa-miR-612	0	0	1	1	1	1	SEPHS2	selenophosphate synthetase 2
hsa-miR-612	1	0	1	1	1	1	RHOQ	ras homolog family member Q
hsa-miR-612	1	0	1	0	1	1	G3BP2	GTPase activating protein (SH3 domain) binding protein 2
hsa-miR-612	1	0	1	0	1	1	FBXL7	F-box and leucine-rich repeat protein 7
hsa-miR-612	0	0	1	1	0	0	KIR2DS4	killer cell immunoglobulin-like receptor, two domains, short cytoplasmic tail, 4
hsa-miR-612	1	0	1	1	1	1	MAPRE1	microtubule-associated protein, RP/EB family, member 1
hsa-miR-612	1	0	1	1	1	1	PIP5K1C	phosphatidylinositol-4-phosphate 5-kinase, type I, gamma
hsa-miR-612	0	0	1	1	1	1	UCK2	uridine-cytidine kinase 2
hsa-miR-612	0	0	1	1	1	1	N6AMT1	N-6 adenine-specific DNA methyltransferase 1 (putative)
hsa-miR-612	0	0	1	1	0	0	NXT1	NTF2-like export factor 1
hsa-miR-612	0	0	1	1	1	1	TBK1	TANK-binding kinase 1
hsa-miR-612	0	0	1	1	0	0	PRSS50	protease, serine, 50
hsa-miR-612	1	0	1	1	1	1	FLRT3	fibronectin leucine rich transmembrane protein 3
hsa-miR-612	1	0	1	0	1	1	RBM15B	RNA binding motif protein 15B
hsa-miR-612	0	0	1	1	0	0	C2orf27A	chromosome 2 open reading frame 27A
hsa-miR-612	0	0	1	1	0	0	HILPDA	hypoxia inducible lipid droplet-associated
hsa-miR-612	1	0	1	1	1	1	PADI1	peptidyl arginine deiminase, type I
hsa-miR-612	0	0	1	1	1	1	UQCR10	ubiquinol-cytochrome c reductase, complex III subunit X
hsa-miR-612	0	0	1	0	1	1	EMR2	egf-like module containing, mucin-like, hormone receptor-like 2
hsa-miR-612	1	0	1	1	1	1	SOCS5	suppressor of cytokine signaling 5
hsa-miR-612	1	0	1	1	1	1	WDR37	WD repeat domain 37
hsa-miR-612	0	0	1	1	1	1	METTL7A	methyltransferase like 7A
hsa-miR-612	1	0	1	0	1	1	C16orf72	chromosome 16 open reading frame 72
hsa-miR-612	0	0	1	0	1	1	SCN8A	sodium channel, voltage gated, type VIII, alpha subunit
hsa-miR-612	1	0	1	0	1	1	VAMP2	vesicle-associated membrane protein 2 (synaptobrevin 2)
hsa-miR-612	0	0	1	1	0	0	EIF2B2	eukaryotic translation initiation factor 2B, subunit 2 beta, 39kDa
hsa-miR-612	1	0	1	0	1	1	ODZ1	odz, odd Oz/ten-m homolog 1 (Drosophila)
hsa-miR-612	0	0	1	1	1	1	IL1RAPL1	interleukin 1 receptor accessory protein-like 1
hsa-miR-612	0	0	1	1	0	0	OLFM1	olfactomedin 1
hsa-miR-612	1	0	1	1	1	1	PATZ1	POZ (BTB) and AT hook containing zinc finger 1
hsa-miR-612	1	0	1	1	1	1	SLC7A11	solute carrier family 7 (anionic amino acid transporter light chain, xc- system), member 11
hsa-miR-612	0	0	1	0	1	1	EID1	EP300 interacting inhibitor of differentiation 1
hsa-miR-612	0	0	1	1	0	0	CLEC4E	C-type lectin domain family 4, member E
hsa-miR-612	1	0	1	1	1	1	LHX6	LIM homeobox 6
hsa-miR-612	1	0	1	0	1	1	DIEXF	digestive organ expansion factor homolog (zebrafish)
hsa-miR-612	1	0	1	1	1	1	AFF4	AF4/FMR2 family, member 4
hsa-miR-612	0	0	1	1	0	0	GPR162	G protein-coupled receptor 162
hsa-miR-612	1	0	1	1	1	1	TNFRSF21	tumor necrosis factor receptor superfamily, member 21
hsa-miR-612	0	0	1	1	1	1	LSM1	LSM1 homolog, U6 small nuclear RNA associated (S. cerevisiae)
hsa-miR-612	0	0	1	1	1	1	SRPX2	sushi-repeat containing protein, X-linked 2
hsa-miR-612	0	0	1	1	1	1	ZNF330	zinc finger protein 330
hsa-miR-612	1	0	1	1	1	1	CNOT2	CCR4-NOT transcription complex, subunit 2
hsa-miR-612	1	0	1	0	1	1	HEYL	hairy/enhancer-of-split related with YRPW motif-like
hsa-miR-612	1	0	1	1	1	1	ZNF592	zinc finger protein 592
hsa-miR-612	1	0	1	1	0	0	TTLL4	tubulin tyrosine ligase-like family, member 4
hsa-miR-612	0	0	1	1	1	1	DZIP3	DAZ interacting protein 3, zinc finger
hsa-miR-612	1	0	1	1	1	1	KDM4A	lysine (K)-specific demethylase 4A
hsa-miR-612	1	0	1	0	1	1	BZW1	basic leucine zipper and W2 domains 1
hsa-miR-612	1	0	1	0	1	1	RAB11FIP3	RAB11 family interacting protein 3 (class II)
hsa-miR-612	1	0	1	1	1	1	TBKBP1	TBK1 binding protein 1
hsa-miR-612	1	0	1	0	1	1	SERTAD2	SERTA domain containing 2
hsa-miR-612	0	0	1	0	1	1	DHCR24	24-dehydrocholesterol reductase
hsa-miR-612	0	0	1	1	1	1	KIAA0141	KIAA0141
hsa-miR-612	1	0	1	1	1	1	KIAA0753	KIAA0753
hsa-miR-612	1	0	1	1	1	1	RUSC2	RUN and SH3 domain containing 2
hsa-miR-612	1	0	1	1	1	1	LRIG2	leucine-rich repeats and immunoglobulin-like domains 2
hsa-miR-612	1	0	1	0	1	1	TRIL	TLR4 interactor with leucine-rich repeats
hsa-miR-612	1	0	1	1	1	1	FCHSD2	FCH and double SH3 domains 2
hsa-miR-612	1	0	1	1	1	1	ZBTB39	zinc finger and BTB domain containing 39
hsa-miR-612	1	0	1	1	1	1	NUAK1	NUAK family, SNF1-like kinase, 1
hsa-miR-612	1	0	1	1	0	0	IQSEC1	IQ motif and Sec7 domain 1
hsa-miR-612	1	0	1	0	1	1	ZBTB40	zinc finger and BTB domain containing 40
hsa-miR-612	1	0	1	1	1	1	PLEKHA6	pleckstrin homology domain containing, family A member 6
hsa-miR-612	0	0	1	1	0	0	MORC2	MORC family CW-type zinc finger 2
hsa-miR-612	1	0	1	1	1	1	SPEN	spen homolog, transcriptional regulator (Drosophila)
hsa-miR-612	1	0	1	0	1	1	ZNF609	zinc finger protein 609
hsa-miR-612	1	0	1	1	1	1	ZNF423	zinc finger protein 423
hsa-miR-612	1	0	1	1	1	1	RTF1	Rtf1, Paf1/RNA polymerase II complex component, homolog (S. cerevisiae)
hsa-miR-612	1	0	1	1	1	1	RCOR1	REST corepressor 1
hsa-miR-612	1	0	1	1	1	1	PLCB1	phospholipase C, beta 1 (phosphoinositide-specific)
hsa-miR-612	0	0	1	1	1	1	ARC	activity-regulated cytoskeleton-associated protein
hsa-miR-612	1	0	1	1	0	0	KIAA0556	KIAA0556
hsa-miR-612	1	0	1	0	1	1	ARHGEF12	Rho guanine nucleotide exchange factor (GEF) 12
hsa-miR-612	1	0	1	0	1	1	LARP1	La ribonucleoprotein domain family, member 1
hsa-miR-612	1	0	1	1	0	0	SMG5	smg-5 homolog, nonsense mediated mRNA decay factor (C. elegans)
hsa-miR-612	1	0	1	1	1	1	NUDCD3	NudC domain containing 3
hsa-miR-612	1	0	1	1	1	1	ASXL1	additional sex combs like 1 (Drosophila)
hsa-miR-612	1	0	1	1	1	1	MOB4	MOB family member 4, phocein
hsa-miR-612	1	0	1	1	1	1	PARM1	prostate androgen-regulated mucin-like protein 1
hsa-miR-612	1	0	1	1	1	1	MYRIP	myosin VIIA and Rab interacting protein
hsa-miR-612	1	0	1	1	1	1	LTN1	listerin E3 ubiquitin protein ligase 1
hsa-miR-612	1	0	1	0	1	1	PPP1R16B	protein phosphatase 1, regulatory subunit 16B
hsa-miR-612	1	0	1	0	1	1	ERC2	ELKS/RAB6-interacting/CAST family member 2
hsa-miR-612	1	0	1	1	0	0	POLDIP2	polymerase (DNA-directed), delta interacting protein 2
hsa-miR-612	0	0	1	1	1	1	CCDC69	coiled-coil domain containing 69
hsa-miR-612	1	0	1	1	1	1	PHF19	PHD finger protein 19
hsa-miR-612	1	0	1	1	1	1	FAM155B	family with sequence similarity 155, member B
hsa-miR-612	0	0	1	1	1	1	BRPF3	bromodomain and PHD finger containing, 3
hsa-miR-612	1	0	1	0	1	1	RRM2B	ribonucleotide reductase M2 B (TP53 inducible)
hsa-miR-612	1	0	1	1	1	1	PLA2G3	phospholipase A2, group III
hsa-miR-612	0	0	1	1	0	0	ZNF593	zinc finger protein 593
hsa-miR-612	1	0	1	1	1	1	ST8SIA3	ST8 alpha-N-acetyl-neuraminide alpha-2,8-sialyltransferase 3
hsa-miR-612	1	0	1	1	1	1	CDC40	cell division cycle 40 homolog (S. cerevisiae)
hsa-miR-612	1	0	1	0	1	1	TRIM33	tripartite motif containing 33
hsa-miR-612	0	0	1	1	1	1	APH1A	anterior pharynx defective 1 homolog A (C. elegans)
hsa-miR-612	1	0	1	1	1	1	RRP15	ribosomal RNA processing 15 homolog (S. cerevisiae)
hsa-miR-612	1	0	1	1	1	1	CERCAM	cerebral endothelial cell adhesion molecule
hsa-miR-612	1	0	1	1	1	1	VGLL3	vestigial like 3 (Drosophila)
hsa-miR-612	0	0	1	1	1	1	CYB5R1	cytochrome b5 reductase 1
hsa-miR-612	1	0	1	0	1	1	HPCAL4	hippocalcin like 4
hsa-miR-612	0	0	1	1	0	0	VGLL1	vestigial like 1 (Drosophila)
hsa-miR-612	1	0	1	1	1	1	TOB2	transducer of ERBB2, 2
hsa-miR-612	1	0	1	1	1	1	RAPGEFL1	Rap guanine nucleotide exchange factor (GEF)-like 1
hsa-miR-612	1	0	1	1	0	0	CPA4	carboxypeptidase A4
hsa-miR-612	0	0	1	1	0	0	NCKIPSD	NCK interacting protein with SH3 domain
hsa-miR-612	0	0	1	1	0	0	FAM203A	family with sequence similarity 203, member A
hsa-miR-612	0	0	1	1	1	1	BET1L	blocked early in transport 1 homolog (S. cerevisiae)-like
hsa-miR-612	1	0	1	1	1	1	MEX3C	mex-3 homolog C (C. elegans)
hsa-miR-612	0	0	1	1	0	0	DLL3	delta-like 3 (Drosophila)
hsa-miR-612	1	0	1	1	0	0	DUOX1	dual oxidase 1
hsa-miR-612	1	0	1	1	1	1	PLXNA3	plexin A3
hsa-miR-612	1	0	1	1	1	1	INO80	INO80 homolog (S. cerevisiae)
hsa-miR-612	0	0	1	1	1	1	HYDIN	HYDIN, axonemal central pair apparatus protein
hsa-miR-612	0	0	1	1	0	0	FNDC8	fibronectin type III domain containing 8
hsa-miR-612	0	0	1	1	1	1	SMG6	smg-6 homolog, nonsense mediated mRNA decay factor (C. elegans)
hsa-miR-612	0	0	1	0	1	1	VEZT	vezatin, adherens junctions transmembrane protein
hsa-miR-612	1	0	1	1	0	0	C17orf59	chromosome 17 open reading frame 59
hsa-miR-612	0	0	1	1	1	1	LRRC16A	leucine rich repeat containing 16A
hsa-miR-612	0	0	1	0	1	1	OTUB1	OTU domain, ubiquitin aldehyde binding 1
hsa-miR-612	1	0	1	1	1	1	ZNF3	zinc finger protein 3
hsa-miR-612	1	0	1	0	1	1	UHRF1BP1	UHRF1 binding protein 1
hsa-miR-612	1	0	1	1	1	1	YTHDF1	YTH domain family, member 1
hsa-miR-612	0	0	1	1	1	1	ACSM5	acyl-CoA synthetase medium-chain family member 5
hsa-miR-612	1	0	1	1	1	1	HIF1AN	hypoxia inducible factor 1, alpha subunit inhibitor
hsa-miR-612	1	0	1	1	0	0	LAMTOR1	late endosomal/lysosomal adaptor, MAPK and MTOR activator 1
hsa-miR-612	1	0	1	0	1	1	NPLOC4	nuclear protein localization 4 homolog (S. cerevisiae)
hsa-miR-612	1	0	1	1	1	1	FIGN	fidgetin
hsa-miR-612	1	0	1	0	1	1	MSL2	male-specific lethal 2 homolog (Drosophila)
hsa-miR-612	1	0	1	1	1	1	LRRC20	leucine rich repeat containing 20
hsa-miR-612	0	0	1	1	1	1	TRIM62	tripartite motif containing 62
hsa-miR-612	0	0	1	1	0	0	THNSL2	threonine synthase-like 2 (S. cerevisiae)
hsa-miR-612	1	0	1	1	1	1	TMEM143	transmembrane protein 143
hsa-miR-612	1	0	1	1	1	1	SPTLC3	serine palmitoyltransferase, long chain base subunit 3
hsa-miR-612	0	0	1	1	1	1	STK32B	serine/threonine kinase 32B
hsa-miR-612	0	0	1	1	0	0	IL26	interleukin 26
hsa-miR-612	1	0	1	0	1	1	FOXJ2	forkhead box J2
hsa-miR-612	1	0	1	1	1	1	PI4K2A	phosphatidylinositol 4-kinase type 2 alpha
hsa-miR-612	0	0	1	1	1	1	HDAC8	histone deacetylase 8
hsa-miR-612	0	0	1	1	0	0	TMEM176A	transmembrane protein 176A
hsa-miR-612	1	0	1	1	1	1	LRRC59	leucine rich repeat containing 59
hsa-miR-612	1	0	1	1	1	1	CAMK2N1	calcium/calmodulin-dependent protein kinase II inhibitor 1
hsa-miR-612	1	0	1	1	1	1	ETNK1	ethanolamine kinase 1
hsa-miR-612	1	0	1	1	0	0	B3GAT1	beta-1,3-glucuronyltransferase 1 (glucuronosyltransferase P)
hsa-miR-612	0	0	1	1	1	1	GOLGA6B	golgin A6 family, member B
hsa-miR-612	1	0	1	1	1	1	GNG12	guanine nucleotide binding protein (G protein), gamma 12
hsa-miR-612	1	0	1	0	1	1	KLHL9	kelch-like 9 (Drosophila)
hsa-miR-612	1	0	1	0	1	1	PCDHAC1	protocadherin alpha subfamily C, 1
hsa-miR-612	1	0	1	0	1	1	PCDHAC2	protocadherin alpha subfamily C, 2
hsa-miR-612	1	0	1	1	1	1	PCDHA1	protocadherin alpha 1
hsa-miR-612	1	0	1	0	1	1	PCDHA10	protocadherin alpha 10
hsa-miR-612	1	0	1	0	1	1	PCDHA11	protocadherin alpha 11
hsa-miR-612	1	0	1	0	1	1	PCDHA12	protocadherin alpha 12
hsa-miR-612	1	0	1	1	1	1	PCDHA2	protocadherin alpha 2
hsa-miR-612	1	0	1	1	1	1	PCDHA3	protocadherin alpha 3
hsa-miR-612	1	0	1	1	1	1	PCDHA6	protocadherin alpha 6
hsa-miR-612	1	0	1	0	1	1	PCDHA7	protocadherin alpha 7
hsa-miR-612	1	0	1	1	1	1	PCDHA8	protocadherin alpha 8
hsa-miR-612	1	0	1	1	1	1	PCDHGA1	protocadherin gamma subfamily A, 1
hsa-miR-612	1	0	1	0	1	1	PCDHGA10	protocadherin gamma subfamily A, 10
hsa-miR-612	1	0	1	0	1	1	PCDHGA11	protocadherin gamma subfamily A, 11
hsa-miR-612	1	0	1	1	1	1	PCDHGA2	protocadherin gamma subfamily A, 2
hsa-miR-612	1	0	1	0	1	1	PCDHGA3	protocadherin gamma subfamily A, 3
hsa-miR-612	1	0	1	0	1	1	PCDHGA4	protocadherin gamma subfamily A, 4
hsa-miR-612	1	0	1	0	1	1	PCDHGA5	protocadherin gamma subfamily A, 5
hsa-miR-612	1	0	1	0	1	1	PCDHGA6	protocadherin gamma subfamily A, 6
hsa-miR-612	1	0	1	0	1	1	PCDHGA7	protocadherin gamma subfamily A, 7
hsa-miR-612	1	0	1	0	1	1	PCDHGA9	protocadherin gamma subfamily A, 9
hsa-miR-612	1	0	1	0	1	1	PCDHGB1	protocadherin gamma subfamily B, 1
hsa-miR-612	1	0	1	0	1	1	PCDHGB2	protocadherin gamma subfamily B, 2
hsa-miR-612	1	0	1	0	1	1	PCDHGB3	protocadherin gamma subfamily B, 3
hsa-miR-612	1	0	1	0	1	1	PCDHGB5	protocadherin gamma subfamily B, 5
hsa-miR-612	1	0	1	0	1	1	PCDHGB6	protocadherin gamma subfamily B, 6
hsa-miR-612	1	0	1	0	1	1	PCDHGB7	protocadherin gamma subfamily B, 7
hsa-miR-612	1	0	1	0	1	1	PCDHGC4	protocadherin gamma subfamily C, 4
hsa-miR-612	1	0	1	0	1	1	PCDHGC5	protocadherin gamma subfamily C, 5
hsa-miR-612	1	0	1	0	1	1	CYCS	cytochrome c, somatic
hsa-miR-612	1	0	1	1	1	1	HOXA10	homeobox A10
hsa-miR-612	0	0	1	1	0	0	GNMT	glycine N-methyltransferase
hsa-miR-612	1	0	1	1	1	1	KCTD5	potassium channel tetramerisation domain containing 5
hsa-miR-612	1	0	1	1	1	1	DLL4	delta-like 4 (Drosophila)
hsa-miR-612	0	0	1	1	1	1	TRMT13	tRNA methyltransferase 13 homolog (S. cerevisiae)
hsa-miR-612	1	0	1	0	1	1	UBFD1	ubiquitin family domain containing 1
hsa-miR-612	0	0	1	1	1	1	RPRM	reprimo, TP53 dependent G2 arrest mediator candidate
hsa-miR-612	1	0	1	1	1	1	CYP26B1	cytochrome P450, family 26, subfamily B, polypeptide 1
hsa-miR-612	1	0	1	1	1	1	SAR1A	SAR1 homolog A (S. cerevisiae)
hsa-miR-612	1	0	1	1	0	0	SEMA3G	sema domain, immunoglobulin domain (Ig), short basic domain, secreted, (semaphorin) 3G
hsa-miR-612	1	0	1	1	1	1	CNNM4	cyclin M4
hsa-miR-612	1	0	1	0	1	1	CNNM1	cyclin M1
hsa-miR-612	1	0	1	1	1	1	PITHD1	PITH (C-terminal proteasome-interacting domain of thioredoxin-like) domain containing 1
hsa-miR-612	0	0	1	0	1	1	TMEM63C	transmembrane protein 63C
hsa-miR-612	1	0	1	1	1	1	PTGFRN	prostaglandin F2 receptor negative regulator
hsa-miR-612	1	0	1	1	0	0	THAP11	THAP domain containing 11
hsa-miR-612	1	0	1	0	1	1	ADCY2	adenylate cyclase 2 (brain)
hsa-miR-612	0	0	1	1	1	1	TCL6	T-cell leukemia/lymphoma 6 (non-protein coding)
hsa-miR-612	1	0	1	1	1	1	RET	ret proto-oncogene
hsa-miR-612	1	0	1	1	1	1	RAB22A	RAB22A, member RAS oncogene family
hsa-miR-612	1	0	1	0	1	1	KCNS2	potassium voltage-gated channel, delayed-rectifier, subfamily S, member 2
hsa-miR-612	0	0	1	1	1	1	SHROOM4	shroom family member 4
hsa-miR-612	1	0	1	1	1	1	USP31	ubiquitin specific peptidase 31
hsa-miR-612	1	0	1	1	0	0	CASKIN2	CASK interacting protein 2
hsa-miR-612	1	0	1	1	1	1	RGAG1	retrotransposon gag domain containing 1
hsa-miR-612	1	0	1	0	1	1	KLHDC5	kelch domain containing 5
hsa-miR-612	1	0	1	1	1	1	NLGN2	neuroligin 2
hsa-miR-612	0	0	1	1	1	1	ARRDC3	arrestin domain containing 3
hsa-miR-612	0	0	1	0	1	1	SYT13	synaptotagmin XIII
hsa-miR-612	1	0	1	1	1	1	RANBP10	RAN binding protein 10
hsa-miR-612	1	0	1	0	1	1	SH3RF1	SH3 domain containing ring finger 1
hsa-miR-612	0	0	1	1	1	1	PRX	periaxin
hsa-miR-612	0	0	1	1	0	0	CCL3L1	chemokine (C-C motif) ligand 3-like 1
hsa-miR-612	1	0	1	0	1	1	RAP2A	RAP2A, member of RAS oncogene family
hsa-miR-612	0	0	1	1	0	0	DHH	desert hedgehog
hsa-miR-612	0	0	1	1	0	0	MAGEA5	melanoma antigen family A, 5
hsa-miR-612	1	0	1	1	1	1	NEFH	neurofilament, heavy polypeptide
hsa-miR-612	1	0	1	1	1	1	NMB	neuromedin B
hsa-miR-612	1	0	1	0	1	1	XK	X-linked Kx blood group (McLeod syndrome)
hsa-miR-612	1	0	1	1	1	1	MTMR3	myotubularin related protein 3
hsa-miR-612	0	0	1	1	0	0	SPINK2	serine peptidase inhibitor, Kazal type 2 (acrosin-trypsin inhibitor)
hsa-miR-612	0	0	1	1	0	0	TRIB3	tribbles homolog 3 (Drosophila)
hsa-miR-612	1	0	1	0	1	1	TP53INP2	tumor protein p53 inducible nuclear protein 2
hsa-miR-612	1	0	1	1	1	1	FAM60A	family with sequence similarity 60, member A
hsa-miR-612	0	0	1	1	1	1	IL22RA1	interleukin 22 receptor, alpha 1
hsa-miR-612	0	0	1	1	1	1	CHST6	carbohydrate (N-acetylglucosamine 6-O) sulfotransferase 6
hsa-miR-612	1	0	1	1	1	1	PRDM12	PR domain containing 12
hsa-miR-612	0	0	1	1	1	1	HRH4	histamine receptor H4
hsa-miR-612	0	0	1	1	1	1	VPS11	vacuolar protein sorting 11 homolog (S. cerevisiae)
hsa-miR-612	1	0	1	1	1	1	TGIF2	TGFB-induced factor homeobox 2
hsa-miR-612	1	0	1	0	1	1	ZNF70	zinc finger protein 70
hsa-miR-612	1	0	1	1	1	1	ZFAND3	zinc finger, AN1-type domain 3
hsa-miR-612	1	0	1	1	1	1	FOXM1	forkhead box M1
hsa-miR-612	1	0	1	0	1	1	CSNK1G1	casein kinase 1, gamma 1
hsa-miR-612	0	0	1	1	0	0	ABHD4	abhydrolase domain containing 4
hsa-miR-612	1	0	1	1	1	1	CLSTN2	calsyntenin 2
hsa-miR-612	0	0	1	1	0	0	PARVG	parvin, gamma
hsa-miR-612	1	0	1	1	1	1	ABCG4	ATP-binding cassette, sub-family G (WHITE), member 4
hsa-miR-612	0	0	1	1	0	0	KIF9	kinesin family member 9
hsa-miR-612	1	0	1	1	1	1	SUDS3	suppressor of defective silencing 3 homolog (S. cerevisiae)
hsa-miR-612	1	0	1	1	1	1	GIGYF1	GRB10 interacting GYF protein 1
hsa-miR-612	1	0	1	1	1	1	PRRX1	paired related homeobox 1
hsa-miR-612	1	0	1	1	1	1	FAM160B2	family with sequence similarity 160, member B2
hsa-miR-612	0	0	1	1	1	1	SFXN1	sideroflexin 1
hsa-miR-612	1	0	1	1	1	1	IL25	interleukin 25
hsa-miR-612	1	0	1	1	1	1	REEP1	receptor accessory protein 1
hsa-miR-612	0	0	1	1	1	1	SERF1B	small EDRK-rich factor 1B (centromeric)
hsa-miR-612	0	0	1	1	1	1	MARCKSL1	MARCKS-like 1
hsa-miR-612	0	0	1	1	0	0	PRAMEF2	PRAME family member 2
hsa-miR-612	0	0	1	1	1	1	METTL1	methyltransferase like 1
hsa-miR-612	1	0	1	1	0	0	UBE2Z	ubiquitin-conjugating enzyme E2Z
hsa-miR-612	1	0	1	1	1	1	C1orf116	chromosome 1 open reading frame 116
hsa-miR-612	1	0	1	1	1	1	GDAP1L1	ganglioside induced differentiation associated protein 1-like 1
hsa-miR-612	1	0	1	1	1	1	FAM134A	family with sequence similarity 134, member A
hsa-miR-612	1	0	1	1	1	1	EFHD2	EF-hand domain family, member D2
hsa-miR-612	1	0	1	1	1	1	IRF2BPL	interferon regulatory factor 2 binding protein-like
hsa-miR-612	1	0	1	1	1	1	HOXD1	homeobox D1
hsa-miR-612	0	0	1	1	0	0	ZBED2	zinc finger, BED-type containing 2
hsa-miR-612	1	0	1	1	1	1	LRRC2	leucine rich repeat containing 2
hsa-miR-612	1	0	1	1	1	1	NKAIN1	Na+/K+ transporting ATPase interacting 1
hsa-miR-612	1	0	1	1	1	1	C10orf76	chromosome 10 open reading frame 76
hsa-miR-612	1	0	1	1	1	1	CCNJL	cyclin J-like
hsa-miR-612	1	0	1	1	1	1	DHX40	DEAH (Asp-Glu-Ala-His) box polypeptide 40
hsa-miR-612	0	0	1	1	1	1	GALNT12	UDP-N-acetyl-alpha-D-galactosamine:polypeptide N-acetylgalactosaminyltransferase 12 (GalNAc-T12)
hsa-miR-612	0	0	1	1	1	1	GLT25D1	glycosyltransferase 25 domain containing 1
hsa-miR-612	0	0	1	1	1	1	TEFM	transcription elongation factor, mitochondrial
hsa-miR-612	0	0	1	1	1	1	SNIP1	Smad nuclear interacting protein 1
hsa-miR-612	0	0	1	0	1	1	C1orf115	chromosome 1 open reading frame 115
[truncated: 941 more rows]
