# Supplementary material for: Profiling of Selected MicroRNAs in Proliferative Eutopic Endometrium of Women with Ovarian Endometriosis
Source: Biomed Res Int. 2015 Aug 20;2015:760698. doi: 10.1155/2015/760698 (PMC4558423; doi:10.1155/2015/760698)
Supplement: Supplementary file 1 — Table I: The names of miRNAs significantly differentially expressed between eutopic endometrium of patients with endometriosis vs eutopic endometrium of patients without endometriosis. Table II: The associations between miRNA and mRNA, which presents detailed results of the search of six major databases i.e targetscan, tarbase, miranda, mirbase, mirtarget2 and pictar. [file 760698.f1.zip › 760698.f1/Table II/hsa-miR-613.tsv]

miR	targetscan	tarbase	miranda	mirbase	mirtarget2	pictar	GeneSymbol	GeneName
hsa-miR-613	1	0	1	0	0	0	XPNPEP3	X-prolyl aminopeptidase (aminopeptidase P) 3, putative
hsa-miR-613	1	0	1	1	1	1	VEGFA	vascular endothelial growth factor A
hsa-miR-613	1	0	1	1	1	1	FAM107B	family with sequence similarity 107, member B
hsa-miR-613	1	0	1	1	1	1	RARB	retinoic acid receptor, beta
hsa-miR-613	1	0	0	1	0	0	PIK3C2A	phosphatidylinositol-4-phosphate 3-kinase, catalytic subunit type 2 alpha
hsa-miR-613	1	0	1	1	1	1	TIGD6	tigger transposable element derived 6
hsa-miR-613	1	0	1	1	1	1	SLC35B4	solute carrier family 35, member B4
hsa-miR-613	1	0	1	1	1	1	MEIS1	Meis homeobox 1
hsa-miR-613	1	0	1	1	1	1	HIC2	hypermethylated in cancer 2
hsa-miR-613	1	0	1	1	0	0	SMARCA4	SWI/SNF related, matrix associated, actin dependent regulator of chromatin, subfamily a, member 4
hsa-miR-613	1	0	1	1	1	1	IGF1	insulin-like growth factor 1 (somatomedin C)
hsa-miR-613	1	0	1	1	1	1	ABHD2	abhydrolase domain containing 2
hsa-miR-613	1	0	1	1	1	1	TMX1	thioredoxin-related transmembrane protein 1
hsa-miR-613	1	0	1	1	1	1	NXT2	nuclear transport factor 2-like export factor 2
hsa-miR-613	1	0	1	1	1	1	PDRG1	p53 and DNA-damage regulated 1
hsa-miR-613	1	0	1	1	1	1	C12orf4	chromosome 12 open reading frame 4
hsa-miR-613	1	0	1	1	1	1	ARHGAP21	Rho GTPase activating protein 21
hsa-miR-613	1	0	1	0	0	0	TRANK1	tetratricopeptide repeat and ankyrin repeat containing 1
hsa-miR-613	1	0	1	1	1	1	MKL2	MKL/myocardin-like 2
hsa-miR-613	1	0	1	1	1	1	CCSAP	centriole, cilia and spindle-associated protein
hsa-miR-613	1	0	1	1	1	1	PDGFA	platelet-derived growth factor alpha polypeptide
hsa-miR-613	1	0	1	1	1	1	NAMPT	nicotinamide phosphoribosyltransferase
hsa-miR-613	1	0	1	1	1	1	ANP32E	acidic (leucine-rich) nuclear phosphoprotein 32 family, member E
hsa-miR-613	1	0	1	1	0	0	BSCL2	Berardinelli-Seip congenital lipodystrophy 2 (seipin)
hsa-miR-613	1	0	1	1	1	1	ADPGK	ADP-dependent glucokinase
hsa-miR-613	1	0	1	1	1	1	CAP1	CAP, adenylate cyclase-associated protein 1 (yeast)
hsa-miR-613	1	0	1	0	1	1	MAGI2	membrane associated guanylate kinase, WW and PDZ domain containing 2
hsa-miR-613	1	0	1	1	1	1	ASXL2	additional sex combs like 2 (Drosophila)
hsa-miR-613	1	0	0	1	1	1	CPSF7	cleavage and polyadenylation specific factor 7, 59kDa
hsa-miR-613	1	0	1	0	1	1	CEP44	centrosomal protein 44kDa
hsa-miR-613	1	0	1	1	1	1	SETBP1	SET binding protein 1
hsa-miR-613	1	0	1	1	0	0	PLXNA4	plexin A4
hsa-miR-613	1	0	1	0	1	1	C5orf51	chromosome 5 open reading frame 51
hsa-miR-613	1	0	1	1	1	1	FGD4	FYVE, RhoGEF and PH domain containing 4
hsa-miR-613	1	0	1	1	1	1	GLCCI1	glucocorticoid induced transcript 1
hsa-miR-613	1	0	1	1	0	0	TH1L	TH1-like (Drosophila)
hsa-miR-613	1	0	1	1	1	1	GPR125	G protein-coupled receptor 125
hsa-miR-613	1	0	1	0	1	1	CDK6	cyclin-dependent kinase 6
hsa-miR-613	1	0	1	0	1	1	C3orf70	chromosome 3 open reading frame 70
hsa-miR-613	1	0	1	1	1	1	ANP32B	acidic (leucine-rich) nuclear phosphoprotein 32 family, member B
hsa-miR-613	1	0	1	0	1	1	SLC7A6	solute carrier family 7 (amino acid transporter light chain, y+L system), member 6
hsa-miR-613	1	0	1	1	1	1	SLC31A1	solute carrier family 31 (copper transporters), member 1
hsa-miR-613	1	0	1	1	1	1	SLC25A22	solute carrier family 25 (mitochondrial carrier: glutamate), member 22
hsa-miR-613	1	0	1	1	1	1	TRAPPC3	trafficking protein particle complex 3
hsa-miR-613	1	0	1	1	1	1	SMG1	smg-1 homolog, phosphatidylinositol 3-kinase-related kinase (C. elegans)
hsa-miR-613	1	0	1	1	1	1	DLG2	discs, large homolog 2 (Drosophila)
hsa-miR-613	1	0	1	0	1	1	TTC7B	tetratricopeptide repeat domain 7B
hsa-miR-613	1	0	1	1	0	0	ANKIB1	ankyrin repeat and IBR domain containing 1
hsa-miR-613	1	0	1	0	1	1	THRB	thyroid hormone receptor, beta
hsa-miR-613	1	0	1	1	1	1	SP2	Sp2 transcription factor
hsa-miR-613	1	0	1	1	1	1	MYO15A	myosin XVA
hsa-miR-613	1	0	1	1	1	1	NCBP1	nuclear cap binding protein subunit 1, 80kDa
hsa-miR-613	1	0	1	0	1	1	GAN	gigaxonin
hsa-miR-613	1	0	1	1	1	1	UBE4A	ubiquitination factor E4A
hsa-miR-613	1	0	1	1	1	1	RASA1	RAS p21 protein activator (GTPase activating protein) 1
hsa-miR-613	1	0	1	1	1	1	NR4A2	nuclear receptor subfamily 4, group A, member 2
hsa-miR-613	1	0	1	1	1	1	HSPD1	heat shock 60kDa protein 1 (chaperonin)
hsa-miR-613	1	0	1	1	1	1	NAP1L5	nucleosome assembly protein 1-like 5
hsa-miR-613	1	0	1	1	0	0	KHSRP	KH-type splicing regulatory protein
hsa-miR-613	1	0	1	1	1	1	CREBL2	cAMP responsive element binding protein-like 2
hsa-miR-613	1	0	1	1	1	1	GDAP1L1	ganglioside induced differentiation associated protein 1-like 1
hsa-miR-613	1	0	1	1	1	1	HIAT1	hippocampus abundant transcript 1
hsa-miR-613	1	0	1	1	1	1	C20orf112	chromosome 20 open reading frame 112
hsa-miR-613	1	0	1	1	1	1	SCAF11	SR-related CTD-associated factor 11
hsa-miR-613	1	0	1	1	1	1	ZBTB8A	zinc finger and BTB domain containing 8A
hsa-miR-613	1	0	1	1	1	1	ATG13	autophagy related 13
hsa-miR-613	1	0	0	1	1	1	TACR1	tachykinin receptor 1
hsa-miR-613	1	0	1	1	0	0	HSPE1	heat shock 10kDa protein 1 (chaperonin 10)
hsa-miR-613	1	0	1	1	1	1	BACH2	BTB and CNC homology 1, basic leucine zipper transcription factor 2
hsa-miR-613	1	0	1	1	1	1	AGPAT1	1-acylglycerol-3-phosphate O-acyltransferase 1 (lysophosphatidic acid acyltransferase, alpha)
hsa-miR-613	1	0	1	1	1	1	ZMAT3	zinc finger, matrin-type 3
hsa-miR-613	1	0	1	1	1	1	SMARCC1	SWI/SNF related, matrix associated, actin dependent regulator of chromatin, subfamily c, member 1
hsa-miR-613	1	0	1	1	1	1	C3orf45	chromosome 3 open reading frame 45
hsa-miR-613	1	0	1	1	1	1	RNF44	ring finger protein 44
hsa-miR-613	1	0	1	0	0	0	MAP3K1	mitogen-activated protein kinase kinase kinase 1, E3 ubiquitin protein ligase
hsa-miR-613	1	0	1	0	1	1	PRKCE	protein kinase C, epsilon
hsa-miR-613	1	0	1	1	0	0	GAS2L1	growth arrest-specific 2 like 1
hsa-miR-613	1	0	1	0	1	1	SPATS2L	spermatogenesis associated, serine-rich 2-like
hsa-miR-613	1	0	1	1	1	1	ACER2	alkaline ceramidase 2
hsa-miR-613	1	0	1	1	1	1	PARM1	prostate androgen-regulated mucin-like protein 1
hsa-miR-613	1	0	1	0	1	1	CERS2	ceramide synthase 2
hsa-miR-613	1	0	1	1	1	1	SLC2A13	solute carrier family 2 (facilitated glucose transporter), member 13
hsa-miR-613	1	0	1	0	1	1	ARID2	AT rich interactive domain 2 (ARID, RFX-like)
hsa-miR-613	1	0	1	0	1	1	ZNF24	zinc finger protein 24
hsa-miR-613	1	0	1	0	0	0	SMYD4	SET and MYND domain containing 4
hsa-miR-613	1	0	1	1	1	1	UTRN	utrophin
hsa-miR-613	1	0	1	1	1	1	RCAN2	regulator of calcineurin 2
hsa-miR-613	1	0	1	1	1	1	ZFP91	zinc finger protein 91 homolog (mouse)
hsa-miR-613	1	0	1	0	1	1	GPR158	G protein-coupled receptor 158
hsa-miR-613	1	0	1	1	1	1	NRP1	neuropilin 1
hsa-miR-613	1	0	1	1	1	1	MECOM	MDS1 and EVI1 complex locus
hsa-miR-613	1	0	1	1	1	1	FNDC3A	fibronectin type III domain containing 3A
hsa-miR-613	1	0	0	1	1	1	TECPR2	tectonin beta-propeller repeat containing 2
hsa-miR-613	1	0	1	1	1	1	TGFBR3	transforming growth factor, beta receptor III
hsa-miR-613	1	0	1	1	1	1	MRAS	muscle RAS oncogene homolog
hsa-miR-613	1	0	1	1	1	1	NDRG3	NDRG family member 3
hsa-miR-613	1	0	0	1	1	1	HNF4A	hepatocyte nuclear factor 4, alpha
hsa-miR-613	1	0	1	1	1	1	SEC61A1	Sec61 alpha 1 subunit (S. cerevisiae)
hsa-miR-613	1	0	1	1	1	1	RNF38	ring finger protein 38
hsa-miR-613	1	0	1	1	0	0	SOD1	superoxide dismutase 1, soluble
hsa-miR-613	1	0	1	0	1	1	SLC7A2	solute carrier family 7 (cationic amino acid transporter, y+ system), member 2
hsa-miR-613	1	0	1	1	1	1	FAM168B	family with sequence similarity 168, member B
hsa-miR-613	1	0	1	1	1	1	BTAF1	BTAF1 RNA polymerase II, B-TFIID transcription factor-associated, 170kDa (Mot1 homolog, S. cerevisiae)
hsa-miR-613	1	0	1	1	1	1	MIPOL1	mirror-image polydactyly 1
hsa-miR-613	1	0	1	0	0	0	VGLL4	vestigial like 4 (Drosophila)
hsa-miR-613	1	0	1	1	1	1	SLC10A7	solute carrier family 10 (sodium/bile acid cotransporter family), member 7
hsa-miR-613	1	0	0	1	0	0	EML3	echinoderm microtubule associated protein like 3
hsa-miR-613	1	0	1	1	1	1	PDIK1L	PDLIM1 interacting kinase 1 like
hsa-miR-613	1	0	1	1	1	1	ZFP36L1	zinc finger protein 36, C3H type-like 1
hsa-miR-613	1	0	1	1	1	1	TIMP3	TIMP metallopeptidase inhibitor 3
hsa-miR-613	1	0	1	1	1	1	SLC44A1	solute carrier family 44, member 1
hsa-miR-613	1	0	1	1	1	1	MAN1C1	mannosidase, alpha, class 1C, member 1
hsa-miR-613	1	0	1	1	0	0	CPA4	carboxypeptidase A4
hsa-miR-613	1	0	1	1	1	1	ANKRD13C	ankyrin repeat domain 13C
hsa-miR-613	1	0	1	1	1	1	KDELR2	KDEL (Lys-Asp-Glu-Leu) endoplasmic reticulum protein retention receptor 2
hsa-miR-613	1	0	1	0	1	1	MTPN	myotrophin
hsa-miR-613	1	0	1	0	1	1	ACAP2	ArfGAP with coiled-coil, ankyrin repeat and PH domains 2
hsa-miR-613	1	0	1	1	1	1	TWF1	twinfilin, actin-binding protein, homolog 1 (Drosophila)
hsa-miR-613	1	0	1	1	1	1	EIF4E	eukaryotic translation initiation factor 4E
hsa-miR-613	1	0	1	1	0	0	PPIB	peptidylprolyl isomerase B (cyclophilin B)
hsa-miR-613	1	0	1	1	1	1	MATR3	matrin 3
hsa-miR-613	1	0	1	1	1	1	RNF138	ring finger protein 138, E3 ubiquitin protein ligase
hsa-miR-613	1	0	1	0	1	1	HDAC4	histone deacetylase 4
hsa-miR-613	1	0	1	1	1	1	WDR1	WD repeat domain 1
hsa-miR-613	1	0	1	1	1	1	SEPT2	septin 2
hsa-miR-613	1	0	1	1	1	1	OR2H1	olfactory receptor, family 2, subfamily H, member 1
hsa-miR-613	1	0	0	1	0	0	PGD	phosphogluconate dehydrogenase
hsa-miR-613	1	0	1	1	1	1	KANK4	KN motif and ankyrin repeat domains 4
hsa-miR-613	1	0	1	1	1	1	MCHR1	melanin-concentrating hormone receptor 1
hsa-miR-613	1	0	0	1	1	1	ZFP36L2	zinc finger protein 36, C3H type-like 2
hsa-miR-613	1	0	1	1	1	1	SH3TC2	SH3 domain and tetratricopeptide repeats 2
hsa-miR-613	1	0	1	0	1	1	BDNF	brain-derived neurotrophic factor
hsa-miR-613	1	0	1	1	1	1	GCLC	glutamate-cysteine ligase, catalytic subunit
hsa-miR-613	1	0	1	1	1	1	SERP1	stress-associated endoplasmic reticulum protein 1
hsa-miR-613	1	0	1	0	1	1	NAB1	NGFI-A binding protein 1 (EGR1 binding protein 1)
hsa-miR-613	1	0	1	0	1	1	GLYR1	glyoxylate reductase 1 homolog (Arabidopsis)
hsa-miR-613	1	0	1	1	1	1	MGAT4A	mannosyl (alpha-1,3-)-glycoprotein beta-1,4-N-acetylglucosaminyltransferase, isozyme A
hsa-miR-613	1	0	1	0	1	1	OSBPL8	oxysterol binding protein-like 8
hsa-miR-613	1	0	1	1	1	1	ZZZ3	zinc finger, ZZ-type containing 3
hsa-miR-613	1	0	1	1	1	1	EEF2K	eukaryotic elongation factor-2 kinase
hsa-miR-613	1	0	1	0	1	1	ERC1	ELKS/RAB6-interacting/CAST family member 1
hsa-miR-613	1	0	1	0	1	1	KLF13	Kruppel-like factor 13
hsa-miR-613	1	0	1	1	1	1	ACVR2B	activin A receptor, type IIB
hsa-miR-613	1	0	1	1	1	1	HMGN1	high mobility group nucleosome binding domain 1
hsa-miR-613	1	0	1	0	1	1	THBS1	thrombospondin 1
hsa-miR-613	1	0	1	1	0	0	OSTF1	osteoclast stimulating factor 1
hsa-miR-613	1	0	1	1	1	1	CREM	cAMP responsive element modulator
hsa-miR-613	1	0	1	1	1	1	MSANTD2	Myb/SANT-like DNA-binding domain containing 2
hsa-miR-613	1	0	1	0	1	1	BSN	bassoon (presynaptic cytomatrix protein)
hsa-miR-613	1	0	1	1	1	1	HMGCR	3-hydroxy-3-methylglutaryl-CoA reductase
hsa-miR-613	1	0	1	1	1	1	POLA1	polymerase (DNA directed), alpha 1, catalytic subunit
hsa-miR-613	1	0	1	1	1	1	MIER1	mesoderm induction early response 1 homolog (Xenopus laevis)
hsa-miR-613	1	0	1	1	1	1	FUBP1	far upstream element (FUSE) binding protein 1
hsa-miR-613	1	0	1	1	1	1	FRS2	fibroblast growth factor receptor substrate 2
hsa-miR-613	1	0	1	1	0	0	RAPGEF2	Rap guanine nucleotide exchange factor (GEF) 2
hsa-miR-613	1	0	1	1	1	1	ATP6V1A	ATPase, H+ transporting, lysosomal 70kDa, V1 subunit A
hsa-miR-613	1	0	1	0	1	1	TNS3	tensin 3
hsa-miR-613	1	0	1	1	0	0	HAND2	heart and neural crest derivatives expressed 2
hsa-miR-613	1	0	1	1	1	1	MAPK1	mitogen-activated protein kinase 1
hsa-miR-613	1	0	1	1	1	1	DAAM1	dishevelled associated activator of morphogenesis 1
hsa-miR-613	1	0	1	0	1	1	EML4	echinoderm microtubule associated protein like 4
hsa-miR-613	1	0	1	1	1	1	RSBN1	round spermatid basic protein 1
hsa-miR-613	1	0	1	1	1	1	OLFML2A	olfactomedin-like 2A
hsa-miR-613	1	0	1	1	1	1	GADL1	glutamate decarboxylase-like 1
hsa-miR-613	1	0	0	1	1	1	MKL1	megakaryoblastic leukemia (translocation) 1
hsa-miR-613	1	0	1	0	1	1	BCL7A	B-cell CLL/lymphoma 7A
hsa-miR-613	1	0	1	1	1	1	GMFB	glia maturation factor, beta
hsa-miR-613	1	0	1	1	1	1	DDX17	DEAD (Asp-Glu-Ala-Asp) box helicase 17
hsa-miR-613	1	0	1	1	1	1	TGIF2	TGFB-induced factor homeobox 2
hsa-miR-613	1	0	1	1	1	1	ETS1	v-ets erythroblastosis virus E26 oncogene homolog 1 (avian)
hsa-miR-613	1	0	1	1	1	1	ZNF148	zinc finger protein 148
hsa-miR-613	1	0	1	1	1	1	FOSB	FBJ murine osteosarcoma viral oncogene homolog B
hsa-miR-613	1	0	1	1	0	0	KCTD13	potassium channel tetramerisation domain containing 13
hsa-miR-613	1	0	1	1	1	1	CYB5B	cytochrome b5 type B (outer mitochondrial membrane)
hsa-miR-613	1	0	1	1	1	1	RNGTT	RNA guanylyltransferase and 5'-phosphatase
hsa-miR-613	1	0	0	1	0	0	TSPAN4	tetraspanin 4
hsa-miR-613	1	0	1	0	1	1	HS3ST3B1	heparan sulfate (glucosamine) 3-O-sulfotransferase 3B1
hsa-miR-613	1	0	1	1	1	1	C11orf57	chromosome 11 open reading frame 57
hsa-miR-613	1	0	1	1	1	1	KDM5C	lysine (K)-specific demethylase 5C
hsa-miR-613	1	0	1	1	0	0	MAPKBP1	mitogen-activated protein kinase binding protein 1
hsa-miR-613	1	0	1	1	1	1	FAM91A1	family with sequence similarity 91, member A1
hsa-miR-613	1	0	1	1	1	1	GIT1	G protein-coupled receptor kinase interacting ArfGAP 1
hsa-miR-613	1	0	1	1	1	1	CTBP2	C-terminal binding protein 2
hsa-miR-613	1	0	1	1	1	1	TRA2B	transformer 2 beta homolog (Drosophila)
hsa-miR-613	1	0	1	0	1	1	FAM46C	family with sequence similarity 46, member C
hsa-miR-613	1	0	1	1	1	1	EYA4	eyes absent homolog 4 (Drosophila)
hsa-miR-613	1	0	1	1	1	1	AIF1L	allograft inflammatory factor 1-like
hsa-miR-613	1	0	1	1	1	1	TPPP	tubulin polymerization promoting protein
hsa-miR-613	1	0	1	1	0	0	SPEG	SPEG complex locus
hsa-miR-613	1	0	1	0	1	1	GPR85	G protein-coupled receptor 85
hsa-miR-613	1	0	1	1	1	1	SMAP1	small ArfGAP 1
hsa-miR-613	1	0	1	1	1	1	HP1BP3	heterochromatin protein 1, binding protein 3
hsa-miR-613	1	0	1	1	1	1	TNKS2	tankyrase, TRF1-interacting ankyrin-related ADP-ribose polymerase 2
hsa-miR-613	1	0	1	1	1	1	ZNF217	zinc finger protein 217
hsa-miR-613	1	0	0	1	1	1	G6PD	glucose-6-phosphate dehydrogenase
hsa-miR-613	1	0	1	0	1	1	SP1	Sp1 transcription factor
hsa-miR-613	1	0	1	1	1	1	RSPO3	R-spondin 3
hsa-miR-613	1	0	1	1	1	1	MEX3C	mex-3 homolog C (C. elegans)
hsa-miR-613	1	0	1	1	1	1	UBE2H	ubiquitin-conjugating enzyme E2H
hsa-miR-613	1	0	1	1	1	1	POLDIP3	polymerase (DNA-directed), delta interacting protein 3
hsa-miR-613	1	0	1	1	1	1	DCAF12L1	DDB1 and CUL4 associated factor 12-like 1
hsa-miR-613	1	0	1	1	1	1	MAP1A	microtubule-associated protein 1A
hsa-miR-613	1	0	1	1	1	1	PPP1R3B	protein phosphatase 1, regulatory subunit 3B
hsa-miR-613	1	0	1	0	1	1	NFAT5	nuclear factor of activated T-cells 5, tonicity-responsive
hsa-miR-613	1	0	1	1	1	1	PICALM	phosphatidylinositol binding clathrin assembly protein
hsa-miR-613	1	0	1	0	1	1	TBC1D5	TBC1 domain family, member 5
hsa-miR-613	1	0	1	1	0	0	CASKIN2	CASK interacting protein 2
hsa-miR-613	1	0	1	1	1	1	BAIAP2	BAI1-associated protein 2
hsa-miR-613	1	0	1	0	1	1	MXD4	MAX dimerization protein 4
hsa-miR-613	1	0	1	1	1	1	TRIM2	tripartite motif containing 2
hsa-miR-613	1	0	1	1	1	1	PTPN1	protein tyrosine phosphatase, non-receptor type 1
hsa-miR-613	1	0	1	1	1	1	ANKRD23	ankyrin repeat domain 23
hsa-miR-613	1	0	1	1	1	1	SOX9	SRY (sex determining region Y)-box 9
hsa-miR-613	1	0	1	1	1	1	MET	met proto-oncogene (hepatocyte growth factor receptor)
hsa-miR-613	1	0	1	0	1	1	TMSB4XP8	thymosin beta 4, X-linked pseudogene 8
hsa-miR-613	1	0	1	1	1	1	PDCD10	programmed cell death 10
hsa-miR-613	1	0	1	0	1	1	SFRP1	secreted frizzled-related protein 1
hsa-miR-613	1	0	1	1	0	0	EHMT2	euchromatic histone-lysine N-methyltransferase 2
hsa-miR-613	1	0	1	1	1	1	TTC3	tetratricopeptide repeat domain 3
hsa-miR-613	1	0	1	1	1	1	SLC25A36	solute carrier family 25 (pyrimidine nucleotide carrier ), member 36
hsa-miR-613	1	0	1	1	1	1	PAX3	paired box 3
hsa-miR-613	1	0	1	0	1	1	MXD1	MAX dimerization protein 1
hsa-miR-613	1	0	1	1	1	1	OTUD5	OTU domain containing 5
hsa-miR-613	1	0	1	0	1	1	TAL1	T-cell acute lymphocytic leukemia 1
hsa-miR-613	1	0	1	0	1	1	FNDC3B	fibronectin type III domain containing 3B
hsa-miR-613	1	0	1	0	1	1	DICER1	dicer 1, ribonuclease type III
hsa-miR-613	1	0	1	1	1	1	OSBPL7	oxysterol binding protein-like 7
hsa-miR-613	1	0	1	1	1	1	MTMR12	myotubularin related protein 12
hsa-miR-613	1	0	0	1	0	0	ZNF516	zinc finger protein 516
hsa-miR-613	1	0	1	1	0	0	KIAA1045	KIAA1045
hsa-miR-613	1	0	1	1	1	1	UNC119B	unc-119 homolog B (C. elegans)
hsa-miR-613	1	0	1	0	1	1	RNF141	ring finger protein 141
hsa-miR-613	1	0	1	0	1	1	SRXN1	sulfiredoxin 1
hsa-miR-613	1	0	1	1	1	1	ARF3	ADP-ribosylation factor 3
hsa-miR-613	1	0	1	0	1	1	ARCN1	archain 1
hsa-miR-613	1	0	1	1	1	1	VMP1	vacuole membrane protein 1
hsa-miR-613	1	0	1	1	1	1	WNK3	WNK lysine deficient protein kinase 3
hsa-miR-613	1	0	1	0	1	1	KRAS	v-Ki-ras2 Kirsten rat sarcoma viral oncogene homolog
hsa-miR-613	1	0	1	1	1	1	RAB5A	RAB5A, member RAS oncogene family
hsa-miR-613	1	0	0	0	1	1	POGK	pogo transposable element with KRAB domain
hsa-miR-613	1	0	1	1	0	0	NR1H3	nuclear receptor subfamily 1, group H, member 3
hsa-miR-613	1	0	1	1	1	1	EDN1	endothelin 1
hsa-miR-613	1	0	1	1	1	1	PRADC1	protease-associated domain containing 1
hsa-miR-613	1	0	1	1	1	1	H3F3B	H3 histone, family 3B (H3.3B)
hsa-miR-613	1	0	0	0	1	1	CACNA2D4	calcium channel, voltage-dependent, alpha 2/delta subunit 4
hsa-miR-613	1	0	1	1	1	1	PFKFB2	6-phosphofructo-2-kinase/fructose-2,6-biphosphatase 2
hsa-miR-613	1	0	1	1	1	1	BET1	blocked early in transport 1 homolog (S. cerevisiae)
hsa-miR-613	1	0	1	0	1	1	SLC5A3	solute carrier family 5 (sodium/myo-inositol cotransporter), member 3
hsa-miR-613	1	0	1	0	1	1	SEC62	SEC62 homolog (S. cerevisiae)
hsa-miR-613	1	0	1	1	1	1	CNN3	calponin 3, acidic
hsa-miR-613	1	0	1	1	1	1	C19orf6	chromosome 19 open reading frame 6
hsa-miR-613	1	0	1	0	0	0	SLC16A3	solute carrier family 16, member 3 (monocarboxylic acid transporter 4)
hsa-miR-613	1	0	1	1	1	1	MAB21L1	mab-21-like 1 (C. elegans)
hsa-miR-613	1	0	1	1	1	1	FOXP1	forkhead box P1
hsa-miR-613	1	0	1	1	1	1	PNP	purine nucleoside phosphorylase
hsa-miR-613	1	0	1	0	1	1	CPLX2	complexin 2
hsa-miR-613	1	0	1	1	1	1	HACE1	HECT domain and ankyrin repeat containing E3 ubiquitin protein ligase 1
hsa-miR-613	1	0	1	1	1	1	MYLK	myosin light chain kinase
hsa-miR-613	1	0	1	0	1	1	LMBR1	limb region 1 homolog (mouse)
hsa-miR-613	1	0	1	1	1	1	HNRNPK	heterogeneous nuclear ribonucleoprotein K
hsa-miR-613	1	0	1	0	1	1	PLAG1	pleiomorphic adenoma gene 1
hsa-miR-613	1	0	0	1	1	1	LETM1	leucine zipper-EF-hand containing transmembrane protein 1
hsa-miR-613	1	0	1	0	1	1	TTPAL	tocopherol (alpha) transfer protein-like
hsa-miR-613	1	0	1	1	1	1	CALM2	calmodulin 2 (phosphorylase kinase, delta)
hsa-miR-613	1	0	1	1	0	0	NOTCH3	notch 3
hsa-miR-613	1	0	1	1	1	1	MYEF2	myelin expression factor 2
hsa-miR-613	1	0	1	1	1	1	UST	uronyl-2-sulfotransferase
hsa-miR-613	1	0	1	1	1	1	PHAX	phosphorylated adaptor for RNA export
hsa-miR-613	1	0	1	1	1	1	PLEKHA7	pleckstrin homology domain containing, family A member 7
hsa-miR-613	1	0	1	1	1	1	KIAA0528	KIAA0528
hsa-miR-613	1	0	1	1	1	1	GPD2	glycerol-3-phosphate dehydrogenase 2 (mitochondrial)
hsa-miR-613	1	0	1	1	1	1	DHX15	DEAH (Asp-Glu-Ala-His) box polypeptide 15
hsa-miR-613	1	0	1	1	0	0	GRK6	G protein-coupled receptor kinase 6
hsa-miR-613	1	0	1	1	1	1	QKI	QKI, KH domain containing, RNA binding
hsa-miR-613	1	0	1	1	1	1	WDR6	WD repeat domain 6
hsa-miR-613	1	0	1	1	1	1	ABI2	abl-interactor 2
hsa-miR-613	1	0	1	0	1	1	NAALADL2	N-acetylated alpha-linked acidic dipeptidase-like 2
hsa-miR-613	1	0	1	0	1	1	DCP2	DCP2 decapping enzyme homolog (S. cerevisiae)
hsa-miR-613	1	0	1	1	1	1	EPB41L1	erythrocyte membrane protein band 4.1-like 1
hsa-miR-613	1	0	1	1	1	1	UBR5	ubiquitin protein ligase E3 component n-recognin 5
hsa-miR-613	1	0	1	1	1	1	ANXA2	annexin A2
hsa-miR-613	1	0	1	1	1	1	PRRC1	proline-rich coiled-coil 1
hsa-miR-613	1	0	0	1	1	1	KCTD10	potassium channel tetramerisation domain containing 10
hsa-miR-613	1	0	1	0	1	1	CDK14	cyclin-dependent kinase 14
hsa-miR-613	1	0	1	1	1	1	HCN1	hyperpolarization activated cyclic nucleotide-gated potassium channel 1
hsa-miR-613	1	0	1	1	1	1	CAAP1	caspase activity and apoptosis inhibitor 1
hsa-miR-613	1	0	1	1	1	1	PHLPP2	PH domain and leucine rich repeat protein phosphatase 2
hsa-miR-613	1	0	1	1	1	1	VPS45	vacuolar protein sorting 45 homolog (S. cerevisiae)
hsa-miR-613	1	0	1	0	1	1	DNAJC5	DnaJ (Hsp40) homolog, subfamily C, member 5
hsa-miR-613	1	0	1	1	1	1	CPED1	cadherin-like and PC-esterase domain containing 1
hsa-miR-613	1	0	1	1	1	1	AZIN1	antizyme inhibitor 1
hsa-miR-613	1	0	0	1	0	0	PRSS21	protease, serine, 21 (testisin)
hsa-miR-613	1	0	1	0	1	1	CD2AP	CD2-associated protein
hsa-miR-613	1	0	1	1	1	1	ZMYND11	zinc finger, MYND-type containing 11
hsa-miR-613	1	0	1	0	1	1	BCL11B	B-cell CLL/lymphoma 11B (zinc finger protein)
hsa-miR-613	1	0	1	1	1	1	OTX2	orthodenticle homeobox 2
hsa-miR-613	1	0	1	0	1	1	VAMP4	vesicle-associated membrane protein 4
hsa-miR-613	1	0	1	1	1	1	EIF1AX	eukaryotic translation initiation factor 1A, X-linked
hsa-miR-613	1	0	1	1	1	1	SLC8A2	solute carrier family 8 (sodium/calcium exchanger), member 2
hsa-miR-613	1	0	1	1	0	0	XPO6	exportin 6
hsa-miR-613	1	0	1	1	1	1	BLCAP	bladder cancer associated protein
hsa-miR-613	1	0	1	1	1	1	RRBP1	ribosome binding protein 1 homolog 180kDa (dog)
hsa-miR-613	1	0	1	0	1	1	HNRNPA3	heterogeneous nuclear ribonucleoprotein A3
hsa-miR-613	1	0	1	0	1	1	ZFHX4	zinc finger homeobox 4
hsa-miR-613	1	0	1	0	1	1	STC2	stanniocalcin 2
hsa-miR-613	1	0	1	0	1	1	SRGAP2	SLIT-ROBO Rho GTPase activating protein 2
hsa-miR-613	1	0	1	1	1	1	SH3BGRL3	SH3 domain binding glutamic acid-rich protein like 3
hsa-miR-613	1	0	1	1	1	1	SEC63	SEC63 homolog (S. cerevisiae)
hsa-miR-613	1	0	1	1	1	1	RICTOR	RPTOR independent companion of MTOR, complex 2
hsa-miR-613	1	0	1	1	1	1	GATAD2A	GATA zinc finger domain containing 2A
hsa-miR-613	1	0	1	1	1	1	EIF2C1	eukaryotic translation initiation factor 2C, 1
hsa-miR-613	1	0	1	1	1	1	NMT2	N-myristoyltransferase 2
hsa-miR-613	1	0	1	1	1	1	COIL	coilin
hsa-miR-613	1	0	1	1	1	1	DDX5	DEAD (Asp-Glu-Ala-Asp) box helicase 5
hsa-miR-613	1	0	1	1	1	1	COL4A3	collagen, type IV, alpha 3 (Goodpasture antigen)
hsa-miR-613	1	0	1	1	1	1	LASP1	LIM and SH3 protein 1
hsa-miR-613	1	0	1	0	1	1	YPEL2	yippee-like 2 (Drosophila)
hsa-miR-613	1	0	1	1	1	1	SRSF1	serine/arginine-rich splicing factor 1
hsa-miR-613	1	0	1	1	0	0	JUND	jun D proto-oncogene
hsa-miR-613	1	0	1	1	1	1	PRKRIR	protein-kinase, interferon-inducible double stranded RNA dependent inhibitor, repressor of (P58 repressor)
hsa-miR-613	1	0	0	1	0	0	SAFB2	scaffold attachment factor B2
hsa-miR-613	1	0	1	1	1	1	FAM102A	family with sequence similarity 102, member A
hsa-miR-613	1	0	1	1	1	1	PEX2	peroxisomal biogenesis factor 2
hsa-miR-613	1	0	1	1	0	0	MTX1	metaxin 1
hsa-miR-613	1	0	1	1	1	1	ADAM12	ADAM metallopeptidase domain 12
hsa-miR-613	1	0	1	1	0	0	HIPK2	homeodomain interacting protein kinase 2
hsa-miR-613	1	0	1	1	1	1	GOLPH3	golgi phosphoprotein 3 (coat-protein)
hsa-miR-613	1	0	1	1	1	1	FRAS1	Fraser syndrome 1
hsa-miR-613	1	0	1	0	1	1	RNF213	ring finger protein 213
hsa-miR-613	1	0	1	1	1	1	ABCA1	ATP-binding cassette, sub-family A (ABC1), member 1
hsa-miR-613	1	0	1	1	1	1	ANO1	anoctamin 1, calcium activated chloride channel
hsa-miR-613	1	0	1	1	1	1	TAGLN2	transgelin 2
hsa-miR-613	1	0	1	1	1	1	PFN2	profilin 2
hsa-miR-613	1	0	1	1	1	1	DMPK	dystrophia myotonica-protein kinase
hsa-miR-613	1	0	1	0	1	1	CRIM1	cysteine rich transmembrane BMP regulator 1 (chordin-like)
hsa-miR-613	1	0	1	0	1	1	PAFAH1B1	platelet-activating factor acetylhydrolase 1b, regulatory subunit 1 (45kDa)
hsa-miR-613	1	0	1	1	1	1	WDR48	WD repeat domain 48
hsa-miR-613	1	0	1	1	1	1	SLC38A3	solute carrier family 38, member 3
hsa-miR-613	1	0	1	1	1	1	MARCKS	myristoylated alanine-rich protein kinase C substrate
hsa-miR-613	1	0	1	1	1	1	FAM84A	family with sequence similarity 84, member A
hsa-miR-613	1	0	1	1	1	1	MAL2	mal, T-cell differentiation protein 2 (gene/pseudogene)
hsa-miR-613	1	0	1	1	1	1	PDCD4	programmed cell death 4 (neoplastic transformation inhibitor)
hsa-miR-613	1	0	1	1	1	1	ARHGEF3	Rho guanine nucleotide exchange factor (GEF) 3
hsa-miR-613	1	0	1	0	1	1	KIAA2022	KIAA2022
hsa-miR-613	1	0	1	1	1	1	ZBTB4	zinc finger and BTB domain containing 4
hsa-miR-613	1	0	1	1	1	1	HNRNPU	heterogeneous nuclear ribonucleoprotein U (scaffold attachment factor A)
hsa-miR-613	1	0	1	0	1	1	IGFBP5	insulin-like growth factor binding protein 5
hsa-miR-613	1	0	0	1	1	1	ORAI3	ORAI calcium release-activated calcium modulator 3
hsa-miR-613	1	0	1	1	1	1	HIVEP2	human immunodeficiency virus type I enhancer binding protein 2
hsa-miR-613	1	0	1	1	1	1	HIGD1A	HIG1 hypoxia inducible domain family, member 1A
hsa-miR-613	1	0	1	1	1	1	JOSD1	Josephin domain containing 1
hsa-miR-613	1	0	1	1	1	1	LRRC8A	leucine rich repeat containing 8 family, member A
hsa-miR-613	1	0	1	1	1	1	NR4A3	nuclear receptor subfamily 4, group A, member 3
hsa-miR-613	1	0	1	0	1	1	SLC25A25	solute carrier family 25 (mitochondrial carrier; phosphate carrier), member 25
hsa-miR-613	1	0	1	1	1	1	UNC50	unc-50 homolog (C. elegans)
hsa-miR-613	1	0	1	0	1	1	VAPA	VAMP (vesicle-associated membrane protein)-associated protein A, 33kDa
hsa-miR-613	1	0	1	1	1	1	SEC23B	Sec23 homolog B (S. cerevisiae)
hsa-miR-613	1	0	1	0	1	1	IPO9	importin 9
hsa-miR-613	1	0	1	1	0	0	UBN2	ubinuclein 2
hsa-miR-613	1	0	1	0	1	1	KCNJ2	potassium inwardly-rectifying channel, subfamily J, member 2
hsa-miR-613	1	0	1	1	1	1	VEZF1	vascular endothelial zinc finger 1
hsa-miR-613	1	0	1	1	1	1	KCNIP3	Kv channel interacting protein 3, calsenilin
hsa-miR-613	1	0	1	1	1	1	SLC8A1	solute carrier family 8 (sodium/calcium exchanger), member 1
hsa-miR-613	1	0	1	1	0	0	WBP2	WW domain binding protein 2
hsa-miR-613	1	0	1	1	1	1	SPHK2	sphingosine kinase 2
hsa-miR-613	1	0	1	1	1	1	MLL5	myeloid/lymphoid or mixed-lineage leukemia 5 (trithorax homolog, Drosophila)
hsa-miR-613	1	0	1	1	1	1	ASH2L	ash2 (absent, small, or homeotic)-like (Drosophila)
hsa-miR-613	1	0	1	1	1	1	ZC3H7B	zinc finger CCCH-type containing 7B
hsa-miR-613	1	0	1	1	1	1	MEOX2	mesenchyme homeobox 2
hsa-miR-613	1	0	1	0	1	1	PIK3R3	phosphoinositide-3-kinase, regulatory subunit 3 (gamma)
hsa-miR-613	1	0	1	1	1	1	VAT1	vesicle amine transport protein 1 homolog (T. californica)
hsa-miR-613	1	0	1	0	1	1	PTPLAD1	protein tyrosine phosphatase-like A domain containing 1
hsa-miR-613	1	0	1	1	1	1	OSBP	oxysterol binding protein
hsa-miR-613	1	0	1	1	1	1	CALM1	calmodulin 1 (phosphorylase kinase, delta)
hsa-miR-613	1	0	1	1	1	1	H3F3C	H3 histone, family 3C
hsa-miR-613	1	0	1	1	1	1	MMD	monocyte to macrophage differentiation-associated
hsa-miR-613	1	0	1	1	1	1	TFE3	transcription factor binding to IGHM enhancer 3
hsa-miR-613	1	0	1	1	1	1	GTF2B	general transcription factor IIB
hsa-miR-613	1	0	1	1	0	0	GXYLT1	glucoside xylosyltransferase 1
hsa-miR-613	1	0	0	0	0	0	PIRT	phosphoinositide-interacting regulator of transient receptor potential channels
hsa-miR-613	1	0	1	0	1	1	NUP50	nucleoporin 50kDa
hsa-miR-613	1	0	1	0	1	1	LPPR4	lipid phosphate phosphatase-related protein type 4
hsa-miR-613	1	0	1	1	1	1	WBP1L	WW domain binding protein 1-like
hsa-miR-613	1	0	0	1	1	1	NADK	NAD kinase
hsa-miR-613	1	0	1	1	1	1	AMOT	angiomotin
hsa-miR-613	1	0	1	1	0	0	TNPO2	transportin 2
hsa-miR-613	1	0	1	1	1	1	SOX6	SRY (sex determining region Y)-box 6
hsa-miR-613	1	0	1	1	1	1	ZBTB6	zinc finger and BTB domain containing 6
hsa-miR-613	1	0	1	1	1	1	GPR6	G protein-coupled receptor 6
hsa-miR-613	1	0	1	1	1	1	SLC39A10	solute carrier family 39 (zinc transporter), member 10
hsa-miR-613	1	0	1	1	1	1	SRSF3	serine/arginine-rich splicing factor 3
hsa-miR-613	1	0	1	1	1	1	SLC23A2	solute carrier family 23 (nucleobase transporters), member 2
hsa-miR-613	1	0	1	1	1	1	RERE	arginine-glutamic acid dipeptide (RE) repeats
hsa-miR-613	1	0	1	1	1	1	BCL11A	B-cell CLL/lymphoma 11A (zinc finger protein)
hsa-miR-613	1	0	1	0	1	1	ZNF652	zinc finger protein 652
hsa-miR-613	1	0	1	0	1	1	SMAD2	SMAD family member 2
hsa-miR-613	1	0	1	1	1	1	CCDC141	coiled-coil domain containing 141
hsa-miR-613	1	0	0	1	0	0	SH3GL1	SH3-domain GRB2-like 1
hsa-miR-613	1	0	1	1	1	1	CLTC	clathrin, heavy chain (Hc)
hsa-miR-613	1	0	1	1	1	1	TOMM70A	translocase of outer mitochondrial membrane 70 homolog A (S. cerevisiae)
hsa-miR-613	1	0	1	1	1	1	DAP	death-associated protein
hsa-miR-613	1	0	1	0	1	1	CAPRIN1	cell cycle associated protein 1
hsa-miR-613	1	0	1	0	1	1	GDF6	growth differentiation factor 6
hsa-miR-613	1	0	1	1	1	1	PPP2R1B	protein phosphatase 2, regulatory subunit A, beta
hsa-miR-613	1	0	1	0	1	1	CDON	Cdon homolog (mouse)
hsa-miR-613	1	0	1	1	0	0	PEAK1	NKF3 kinase family member
hsa-miR-613	1	0	1	1	1	1	CORO1C	coronin, actin binding protein, 1C
hsa-miR-613	1	0	1	0	0	0	RNF40	ring finger protein 40, E3 ubiquitin protein ligase
hsa-miR-613	1	0	1	1	1	1	NCOA1	nuclear receptor coactivator 1
hsa-miR-613	1	0	1	1	0	0	PTAR1	protein prenyltransferase alpha subunit repeat containing 1
hsa-miR-613	1	0	1	0	1	1	CDC42SE1	CDC42 small effector 1
hsa-miR-613	1	0	1	1	1	1	ANXA4	annexin A4
hsa-miR-613	1	0	1	1	1	1	TBC1D15	TBC1 domain family, member 15
hsa-miR-613	1	0	1	1	1	1	MON2	MON2 homolog (S. cerevisiae)
hsa-miR-613	1	0	1	1	1	1	PLEKHM1	pleckstrin homology domain containing, family M (with RUN domain) member 1
hsa-miR-613	1	0	1	1	1	1	SRSF9	serine/arginine-rich splicing factor 9
hsa-miR-613	1	0	1	1	1	1	CITED2	Cbp/p300-interacting transactivator, with Glu/Asp-rich carboxy-terminal domain, 2
hsa-miR-613	1	0	1	0	1	1	SEMA6D	sema domain, transmembrane domain (TM), and cytoplasmic domain, (semaphorin) 6D
hsa-miR-613	1	0	1	0	1	1	SS18	synovial sarcoma translocation, chromosome 18
hsa-miR-613	1	0	1	1	1	1	SMAD4	SMAD family member 4
hsa-miR-613	1	0	1	0	1	1	GLCE	glucuronic acid epimerase
hsa-miR-613	1	0	1	0	1	1	CD164	CD164 molecule, sialomucin
hsa-miR-613	1	0	1	1	1	1	ASH1L	ash1 (absent, small, or homeotic)-like (Drosophila)
hsa-miR-613	1	0	1	1	0	0	ABL2	v-abl Abelson murine leukemia viral oncogene homolog 2
hsa-miR-613	1	0	1	1	1	1	SMG7	smg-7 homolog, nonsense mediated mRNA decay factor (C. elegans)
hsa-miR-613	1	0	0	1	1	1	ELOF1	elongation factor 1 homolog (S. cerevisiae)
hsa-miR-613	1	0	1	0	1	1	COL19A1	collagen, type XIX, alpha 1
hsa-miR-613	1	0	1	1	1	1	ZNF236	zinc finger protein 236
hsa-miR-613	1	0	1	1	1	1	JARID2	jumonji, AT rich interactive domain 2
hsa-miR-613	1	0	1	1	1	1	UBN1	ubinuclein 1
hsa-miR-613	1	0	1	1	1	1	GNPDA2	glucosamine-6-phosphate deaminase 2
hsa-miR-613	1	0	1	1	1	1	PCDH17	protocadherin 17
hsa-miR-613	1	0	1	0	1	1	SCD	stearoyl-CoA desaturase (delta-9-desaturase)
hsa-miR-613	1	0	1	1	0	0	WIZ	widely interspaced zinc finger motifs
hsa-miR-613	1	0	1	0	1	1	CREB5	cAMP responsive element binding protein 5
hsa-miR-613	1	0	1	0	1	1	ADAR	adenosine deaminase, RNA-specific
hsa-miR-613	1	0	1	1	1	1	CDK9	cyclin-dependent kinase 9
hsa-miR-613	1	0	1	0	1	1	MPP5	membrane protein, palmitoylated 5 (MAGUK p55 subfamily member 5)
hsa-miR-613	1	0	1	0	1	1	MNT	MAX binding protein
hsa-miR-613	1	0	1	1	1	1	PGAM1	phosphoglycerate mutase 1 (brain)
hsa-miR-613	1	0	1	1	1	1	SRI	sorcin
hsa-miR-613	1	0	1	0	1	1	API5	apoptosis inhibitor 5
hsa-miR-613	1	0	1	0	1	1	CCND2	cyclin D2
hsa-miR-613	1	0	1	0	0	0	DLG4	discs, large homolog 4 (Drosophila)
hsa-miR-613	1	0	1	1	1	1	USP33	ubiquitin specific peptidase 33
hsa-miR-613	1	0	1	1	1	1	PTBP1	polypyrimidine tract binding protein 1
hsa-miR-613	1	0	1	1	1	1	SKIDA1	SKI/DACH domain containing 1
hsa-miR-613	1	0	1	0	1	1	AMOTL2	angiomotin like 2
hsa-miR-613	1	0	1	0	1	1	LIN7C	lin-7 homolog C (C. elegans)
hsa-miR-613	1	0	1	0	1	1	STX6	syntaxin 6
hsa-miR-613	1	0	1	1	1	1	BPNT1	3'(2'), 5'-bisphosphate nucleotidase 1
hsa-miR-613	1	0	1	1	1	1	C4orf34	chromosome 4 open reading frame 34
hsa-miR-613	1	0	1	1	1	1	WSCD2	WSC domain containing 2
hsa-miR-613	1	0	1	1	1	1	PTPRG	protein tyrosine phosphatase, receptor type, G
hsa-miR-613	1	0	1	1	1	1	C7orf23	chromosome 7 open reading frame 23
hsa-miR-613	1	0	1	1	1	1	TMEM135	transmembrane protein 135
hsa-miR-613	1	0	1	1	1	1	MPZ	myelin protein zero
hsa-miR-613	1	0	1	0	1	1	RIMS4	regulating synaptic membrane exocytosis 4
hsa-miR-613	1	0	1	1	0	0	SLC44A2	solute carrier family 44, member 2
hsa-miR-613	1	0	1	1	1	1	FAM210B	family with sequence similarity 210, member B
hsa-miR-613	1	0	1	1	1	1	WIPI2	WD repeat domain, phosphoinositide interacting 2
hsa-miR-613	1	0	1	1	1	1	FAF2	Fas associated factor family member 2
hsa-miR-613	1	0	1	1	1	1	FBXW7	F-box and WD repeat domain containing 7, E3 ubiquitin protein ligase
hsa-miR-613	1	0	1	1	1	1	SPTLC3	serine palmitoyltransferase, long chain base subunit 3
hsa-miR-613	1	0	1	0	1	1	WIPF2	WAS/WASL interacting protein family, member 2
hsa-miR-613	1	0	1	0	1	1	FYB	FYN binding protein
hsa-miR-613	1	0	1	1	1	1	SLC37A3	solute carrier family 37 (glycerol-3-phosphate transporter), member 3
hsa-miR-613	1	0	0	1	1	1	RNF157	ring finger protein 157
hsa-miR-613	1	0	1	1	1	1	CPEB1	cytoplasmic polyadenylation element binding protein 1
hsa-miR-613	1	0	1	0	1	1	LRAT	lecithin retinol acyltransferase (phosphatidylcholine--retinol O-acyltransferase)
hsa-miR-613	1	0	1	1	1	1	VASP	vasodilator-stimulated phosphoprotein
hsa-miR-613	1	0	1	1	1	1	LARP4	La ribonucleoprotein domain family, member 4
hsa-miR-613	1	0	0	1	1	1	ADRBK2	adrenergic, beta, receptor kinase 2
hsa-miR-613	1	0	1	1	1	1	TMCC1	transmembrane and coiled-coil domain family 1
hsa-miR-613	1	0	1	1	1	1	HSP90B1	heat shock protein 90kDa beta (Grp94), member 1
hsa-miR-613	1	0	1	1	0	0	ISL2	ISL LIM homeobox 2
hsa-miR-613	1	0	1	1	1	1	NCL	nucleolin
hsa-miR-613	1	0	1	0	1	1	GNPNAT1	glucosamine-phosphate N-acetyltransferase 1
hsa-miR-613	1	0	1	1	1	1	RIT2	Ras-like without CAAX 2
hsa-miR-613	1	0	1	1	1	1	ASPH	aspartate beta-hydroxylase
hsa-miR-613	1	0	1	1	0	0	RPL21P44	ribosomal protein L21 pseudogene 44
hsa-miR-613	1	0	1	0	1	1	MAP4K3	mitogen-activated protein kinase kinase kinase kinase 3
hsa-miR-613	1	0	1	1	1	1	TAOK3	TAO kinase 3
hsa-miR-613	1	0	1	1	1	1	MUM1L1	melanoma associated antigen (mutated) 1-like 1
hsa-miR-613	1	0	1	0	0	0	TNPO1	transportin 1
hsa-miR-613	1	0	1	1	1	1	PIAS3	protein inhibitor of activated STAT, 3
hsa-miR-613	1	0	1	1	1	1	ZNF827	zinc finger protein 827
hsa-miR-613	1	0	1	1	1	1	TLK2	tousled-like kinase 2
hsa-miR-613	1	0	1	1	1	1	SGIP1	SH3-domain GRB2-like (endophilin) interacting protein 1
hsa-miR-613	1	0	1	1	1	1	C2orf69	chromosome 2 open reading frame 69
hsa-miR-613	1	0	1	1	1	1	SMEK2	SMEK homolog 2, suppressor of mek1 (Dictyostelium)
hsa-miR-613	1	0	1	1	1	1	FAM101B	family with sequence similarity 101, member B
hsa-miR-613	1	0	1	1	1	1	GNE	glucosamine (UDP-N-acetyl)-2-epimerase/N-acetylmannosamine kinase
hsa-miR-613	1	0	1	1	1	1	STARD7	StAR-related lipid transfer (START) domain containing 7
hsa-miR-613	1	0	1	1	1	1	AP3D1	adaptor-related protein complex 3, delta 1 subunit
hsa-miR-613	1	0	1	1	1	1	AKAP11	A kinase (PRKA) anchor protein 11
hsa-miR-613	1	0	1	0	1	1	YES1	v-yes-1 Yamaguchi sarcoma viral oncogene homolog 1
hsa-miR-613	1	0	1	1	1	1	ZC2HC1C	zinc finger, C2HC-type containing 1C
hsa-miR-613	1	0	1	1	1	1	FUBP3	far upstream element (FUSE) binding protein 3
hsa-miR-613	1	0	1	1	1	1	NBEA	neurobeachin
hsa-miR-613	1	0	1	0	0	0	GPR137C	G protein-coupled receptor 137C
hsa-miR-613	1	0	1	1	1	1	KIF2A	kinesin heavy chain member 2A
hsa-miR-613	1	0	1	1	1	1	RAP1A	RAP1A, member of RAS oncogene family
hsa-miR-613	1	0	1	1	1	1	LIFR	leukemia inhibitory factor receptor alpha
hsa-miR-613	1	0	1	1	1	1	NDFIP2	Nedd4 family interacting protein 2
hsa-miR-613	1	0	1	1	1	1	SNAP25	synaptosomal-associated protein, 25kDa
hsa-miR-613	1	0	1	0	1	1	MTSS1	metastasis suppressor 1
hsa-miR-613	1	0	1	1	1	1	HOXB4	homeobox B4
hsa-miR-613	1	0	0	1	0	0	DLG1	discs, large homolog 1 (Drosophila)
hsa-miR-613	1	0	1	1	1	1	RNF111	ring finger protein 111
hsa-miR-613	1	0	1	1	1	1	GABBR2	gamma-aminobutyric acid (GABA) B receptor, 2
hsa-miR-613	1	0	1	1	1	1	TSPAN9	tetraspanin 9
hsa-miR-613	1	0	1	1	1	1	E2F5	E2F transcription factor 5, p130-binding
hsa-miR-613	1	0	1	1	1	1	ZIC4	Zic family member 4
hsa-miR-613	1	0	1	1	1	1	SLC35F1	solute carrier family 35, member F1
hsa-miR-613	1	0	1	0	1	1	DDX3X	DEAD (Asp-Glu-Ala-Asp) box polypeptide 3, X-linked
hsa-miR-613	1	0	1	0	1	1	TRPS1	trichorhinophalangeal syndrome I
hsa-miR-613	1	0	1	1	1	1	EIF4E3	eukaryotic translation initiation factor 4E family member 3
hsa-miR-613	1	0	1	1	1	1	TBP	TATA box binding protein
hsa-miR-613	1	0	1	1	1	1	RTN3	reticulon 3
hsa-miR-613	1	0	1	1	1	1	CDC42	cell division cycle 42 (GTP binding protein, 25kDa)
hsa-miR-613	1	0	1	1	1	1	TMEM55B	transmembrane protein 55B
hsa-miR-613	1	0	1	1	1	1	SULF1	sulfatase 1
hsa-miR-613	1	0	0	1	1	1	SMARCB1	SWI/SNF related, matrix associated, actin dependent regulator of chromatin, subfamily b, member 1
hsa-miR-613	1	0	1	1	1	1	TMSB4X	thymosin beta 4, X-linked
hsa-miR-613	1	0	1	1	1	1	MED1	mediator complex subunit 1
hsa-miR-613	1	0	1	1	1	1	FAM155A	family with sequence similarity 155, member A
hsa-miR-613	1	0	1	1	0	0	PPP1R36	protein phosphatase 1, regulatory subunit 36
hsa-miR-613	1	0	1	1	1	1	SYT1	synaptotagmin I
hsa-miR-613	1	0	1	1	1	1	FZD7	frizzled family receptor 7
hsa-miR-613	1	0	1	1	1	1	DGKG	diacylglycerol kinase, gamma 90kDa
hsa-miR-613	1	0	1	1	1	1	STK39	serine threonine kinase 39
hsa-miR-613	1	0	1	1	1	1	RALGAPA1	Ral GTPase activating protein, alpha subunit 1 (catalytic)
hsa-miR-613	1	0	1	1	1	1	PEA15	phosphoprotein enriched in astrocytes 15
hsa-miR-613	1	0	1	1	1	1	NET1	neuroepithelial cell transforming 1
hsa-miR-613	1	0	1	1	1	1	SPRED1	sprouty-related, EVH1 domain containing 1
hsa-miR-613	1	0	1	1	1	1	GJA1	gap junction protein, alpha 1, 43kDa
hsa-miR-613	1	0	1	1	1	1	KCNA5	potassium voltage-gated channel, shaker-related subfamily, member 5
hsa-miR-613	1	0	1	1	1	1	RSBN1L	round spermatid basic protein 1-like
hsa-miR-613	1	0	1	0	1	1	G3BP2	GTPase activating protein (SH3 domain) binding protein 2
hsa-miR-613	1	0	1	1	1	1	ZNF580	zinc finger protein 580
hsa-miR-613	1	0	1	1	1	1	GLIS2	GLIS family zinc finger 2
hsa-miR-613	1	0	1	0	1	1	EIF1AD	eukaryotic translation initiation factor 1A domain containing
hsa-miR-613	1	0	1	1	1	1	TMEM178A	transmembrane protein 178A
hsa-miR-613	1	0	1	1	1	1	KTN1	kinectin 1 (kinesin receptor)
hsa-miR-613	1	0	1	0	1	1	MMD2	monocyte to macrophage differentiation-associated 2
hsa-miR-613	1	0	1	1	1	1	SNAI2	snail homolog 2 (Drosophila)
hsa-miR-613	1	0	1	0	1	1	ZNF295	zinc finger protein 295
hsa-miR-613	1	0	1	1	1	1	CLCN3	chloride channel, voltage-sensitive 3
hsa-miR-613	1	0	0	1	1	1	SNED1	sushi, nidogen and EGF-like domains 1
hsa-miR-613	1	0	1	1	0	0	ATP6V1B2	ATPase, H+ transporting, lysosomal 56/58kDa, V1 subunit B2
hsa-miR-613	1	0	1	1	1	1	FNBP1L	formin binding protein 1-like
hsa-miR-613	1	0	1	1	1	1	MOB3C	MOB kinase activator 3C
hsa-miR-613	1	0	1	1	1	1	PLEKHO2	pleckstrin homology domain containing, family O member 2
hsa-miR-613	1	0	1	1	1	1	ZBTB41	zinc finger and BTB domain containing 41
hsa-miR-613	1	0	1	1	0	0	BMPR1B	bone morphogenetic protein receptor, type IB
hsa-miR-613	1	0	1	0	1	1	G2E3	G2/M-phase specific E3 ubiquitin protein ligase
hsa-miR-613	1	0	1	1	1	1	GNPTAB	N-acetylglucosamine-1-phosphate transferase, alpha and beta subunits
hsa-miR-613	1	0	1	0	1	1	NECAB1	N-terminal EF-hand calcium binding protein 1
hsa-miR-613	1	0	1	1	1	1	NGFR	nerve growth factor receptor
hsa-miR-613	1	0	1	1	1	1	CBL	Cbl proto-oncogene, E3 ubiquitin protein ligase
hsa-miR-613	1	0	1	0	1	1	TSPYL4	TSPY-like 4
hsa-miR-613	1	0	1	1	1	1	MAPK3	mitogen-activated protein kinase 3
hsa-miR-613	1	0	1	1	1	1	SH3PXD2B	SH3 and PX domains 2B
hsa-miR-613	1	0	1	1	1	1	FAM63B	family with sequence similarity 63, member B
hsa-miR-613	1	0	1	0	1	1	SEC22B	SEC22 vesicle trafficking protein homolog B (S. cerevisiae) (gene/pseudogene)
hsa-miR-613	1	0	0	1	1	1	PRIC285	peroxisomal proliferator-activated receptor A interacting complex 285
hsa-miR-613	1	0	1	1	1	1	NCK2	NCK adaptor protein 2
hsa-miR-613	1	0	1	1	1	1	PTPRS	protein tyrosine phosphatase, receptor type, S
hsa-miR-613	1	0	1	0	1	1	CCND1	cyclin D1
hsa-miR-613	1	0	0	1	1	1	FBXL14	F-box and leucine-rich repeat protein 14
hsa-miR-613	1	0	1	1	1	1	EFNB2	ephrin-B2
hsa-miR-613	1	0	1	1	1	1	CTTNBP2NL	CTTNBP2 N-terminal like
hsa-miR-613	1	0	1	1	1	1	FBXO33	F-box protein 33
hsa-miR-613	1	0	1	1	1	1	MPP7	membrane protein, palmitoylated 7 (MAGUK p55 subfamily member 7)
hsa-miR-613	1	0	1	1	1	1	SNX2	sorting nexin 2
hsa-miR-613	1	0	1	1	1	1	RAB43	RAB43, member RAS oncogene family
hsa-miR-613	1	0	1	0	1	1	VAMP2	vesicle-associated membrane protein 2 (synaptobrevin 2)
hsa-miR-613	1	0	1	0	1	1	RNF165	ring finger protein 165
hsa-miR-613	1	0	1	1	1	1	YWHAZ	tyrosine 3-monooxygenase/tryptophan 5-monooxygenase activation protein, zeta polypeptide
hsa-miR-613	1	0	1	1	1	1	PREX1	phosphatidylinositol-3,4,5-trisphosphate-dependent Rac exchange factor 1
hsa-miR-613	1	0	1	1	1	1	RYBP	RING1 and YY1 binding protein
hsa-miR-613	1	0	1	1	1	1	BOLL	bol, boule-like (Drosophila)
hsa-miR-613	1	0	1	1	1	1	ABCC5	ATP-binding cassette, sub-family C (CFTR/MRP), member 5
hsa-miR-613	1	0	1	0	1	1	PTPRT	protein tyrosine phosphatase, receptor type, T
hsa-miR-613	1	0	1	1	1	1	NUPL1	nucleoporin like 1
hsa-miR-613	1	0	1	1	1	1	NRXN1	neurexin 1
hsa-miR-613	1	0	1	0	0	0	HECTD4	HECT domain containing E3 ubiquitin protein ligase 4
hsa-miR-613	1	0	1	1	1	1	HIPK1	homeodomain interacting protein kinase 1
hsa-miR-613	1	0	1	1	0	0	SMCHD1	structural maintenance of chromosomes flexible hinge domain containing 1
hsa-miR-613	1	0	1	1	1	1	RGL1	ral guanine nucleotide dissociation stimulator-like 1
hsa-miR-613	0	0	1	1	1	1	FASTKD2	FAST kinase domains 2
hsa-miR-613	1	0	1	1	1	1	NTNG1	netrin G1
hsa-miR-613	1	0	1	1	1	1	RPGRIP1L	RPGRIP1-like
hsa-miR-613	1	0	1	1	1	1	CNOT1	CCR4-NOT transcription complex, subunit 1
hsa-miR-613	1	0	1	1	1	1	FOXJ3	forkhead box J3
hsa-miR-613	1	0	1	0	1	1	ZNF507	zinc finger protein 507
hsa-miR-613	1	0	1	1	1	1	SPIRE1	spire homolog 1 (Drosophila)
hsa-miR-613	1	0	1	0	1	1	INTS2	integrator complex subunit 2
hsa-miR-613	0	0	1	1	1	1	TCF7L2	transcription factor 7-like 2 (T-cell specific, HMG-box)
hsa-miR-613	1	0	1	1	1	1	PCDH19	protocadherin 19
hsa-miR-613	1	0	1	0	1	1	KCTD16	potassium channel tetramerisation domain containing 16
hsa-miR-613	1	0	1	1	1	1	UPF2	UPF2 regulator of nonsense transcripts homolog (yeast)
hsa-miR-613	0	0	1	1	0	0	ISLR2	immunoglobulin superfamily containing leucine-rich repeat 2
hsa-miR-613	0	0	1	1	0	0	URGCP	upregulator of cell proliferation
hsa-miR-613	1	0	1	1	1	1	PPP6R3	protein phosphatase 6, regulatory subunit 3
hsa-miR-613	0	0	1	1	1	1	PBLD	phenazine biosynthesis-like protein domain containing
hsa-miR-613	1	0	1	1	1	1	LZTS2	leucine zipper, putative tumor suppressor 2
hsa-miR-613	1	0	1	0	1	1	JPH4	junctophilin 4
hsa-miR-613	0	0	1	1	1	1	UNC80	unc-80 homolog (C. elegans)
hsa-miR-613	1	0	1	1	1	1	BCL2L11	BCL2-like 11 (apoptosis facilitator)
hsa-miR-613	0	0	1	1	0	0	TPGS2	tubulin polyglutamylase complex subunit 2
hsa-miR-613	1	0	1	1	1	1	POGZ	pogo transposable element with ZNF domain
hsa-miR-613	1	0	1	0	0	0	FAT3	FAT tumor suppressor homolog 3 (Drosophila)
hsa-miR-613	1	0	1	0	0	0	ZBTB34	zinc finger and BTB domain containing 34
hsa-miR-613	0	0	1	0	1	1	RASSF8	Ras association (RalGDS/AF-6) domain family (N-terminal) member 8
hsa-miR-613	0	0	1	1	0	0	PTPRF	protein tyrosine phosphatase, receptor type, F
hsa-miR-613	0	0	1	1	1	1	DOCK8	dedicator of cytokinesis 8
hsa-miR-613	0	0	1	1	1	1	FN1	fibronectin 1
hsa-miR-613	0	0	1	1	0	0	DBP	D site of albumin promoter (albumin D-box) binding protein
hsa-miR-613	1	0	1	0	1	1	LRBA	LPS-responsive vesicle trafficking, beach and anchor containing
hsa-miR-613	0	0	1	1	0	0	GAK	cyclin G associated kinase
hsa-miR-613	1	0	1	1	0	0	NDST2	N-deacetylase/N-sulfotransferase (heparan glucosaminyl) 2
hsa-miR-613	0	0	1	1	0	0	STON2	stonin 2
hsa-miR-613	1	0	1	1	1	1	PHC1	polyhomeotic homolog 1 (Drosophila)
hsa-miR-613	0	0	1	1	1	1	DGKE	diacylglycerol kinase, epsilon 64kDa
hsa-miR-613	1	0	1	1	1	1	SATB2	SATB homeobox 2
hsa-miR-613	1	0	1	1	1	1	TBX2	T-box 2
hsa-miR-613	1	0	1	1	1	1	ANK1	ankyrin 1, erythrocytic
hsa-miR-613	0	0	1	1	0	0	IFT27	intraflagellar transport 27 homolog (Chlamydomonas)
hsa-miR-613	1	0	1	1	1	1	MINK1	misshapen-like kinase 1
hsa-miR-613	0	0	1	1	0	0	HLA-DMB	major histocompatibility complex, class II, DM beta
hsa-miR-613	1	0	1	1	0	0	SYN3	synapsin III
hsa-miR-613	1	0	1	1	1	1	NCOA3	nuclear receptor coactivator 3
hsa-miR-613	1	0	1	1	1	1	PHLDB2	pleckstrin homology-like domain, family B, member 2
hsa-miR-613	0	0	1	1	1	1	PLD1	phospholipase D1, phosphatidylcholine-specific
hsa-miR-613	1	0	1	1	1	1	APC	adenomatous polyposis coli
hsa-miR-613	1	0	1	1	1	1	STX16	syntaxin 16
hsa-miR-613	1	0	1	1	1	1	SLC4A4	solute carrier family 4, sodium bicarbonate cotransporter, member 4
hsa-miR-613	1	0	1	1	1	1	CSE1L	CSE1 chromosome segregation 1-like (yeast)
hsa-miR-613	1	0	1	1	1	1	MBNL2	muscleblind-like splicing regulator 2
hsa-miR-613	1	0	1	1	1	1	CTNND1	catenin (cadherin-associated protein), delta 1
hsa-miR-613	1	0	1	1	1	1	NUDT4	nudix (nucleoside diphosphate linked moiety X)-type motif 4
hsa-miR-613	0	0	1	1	1	1	LYPLA1	lysophospholipase I
hsa-miR-613	0	0	1	1	1	1	RGS7	regulator of G-protein signaling 7
hsa-miR-613	1	0	1	1	1	1	GLS	glutaminase
hsa-miR-613	1	0	1	1	1	1	LPHN2	latrophilin 2
hsa-miR-613	0	0	1	1	1	1	IL18BP	interleukin 18 binding protein
hsa-miR-613	0	0	1	1	0	0	EVL	Enah/Vasp-like
hsa-miR-613	0	0	1	0	1	1	CLEC5A	C-type lectin domain family 5, member A
hsa-miR-613	1	0	1	1	1	1	ZNF202	zinc finger protein 202
hsa-miR-613	0	0	1	1	1	1	SAP30L	SAP30-like
hsa-miR-613	1	0	1	1	1	1	KCNMB2	potassium large conductance calcium-activated channel, subfamily M, beta member 2
hsa-miR-613	0	0	1	1	1	1	SAMSN1	SAM domain, SH3 domain and nuclear localization signals 1
hsa-miR-613	0	0	1	1	1	1	CD28	CD28 molecule
hsa-miR-613	1	0	1	1	1	1	RBM47	RNA binding motif protein 47
hsa-miR-613	1	0	1	0	1	1	PARP11	poly (ADP-ribose) polymerase family, member 11
hsa-miR-613	1	0	1	1	1	1	PUM2	pumilio homolog 2 (Drosophila)
hsa-miR-613	1	0	1	1	1	1	CALN1	calneuron 1
hsa-miR-613	1	0	1	1	1	1	LETMD1	LETM1 domain containing 1
hsa-miR-613	0	0	1	1	1	1	SLC6A15	solute carrier family 6 (neutral amino acid transporter), member 15
hsa-miR-613	0	0	1	0	0	0	CLRN1-AS1	CLRN1 antisense RNA 1
hsa-miR-613	0	0	1	0	1	1	MYO3B	myosin IIIB
hsa-miR-613	0	0	1	1	1	1	ORMDL1	ORM1-like 1 (S. cerevisiae)
hsa-miR-613	1	0	1	1	1	1	SGMS2	sphingomyelin synthase 2
hsa-miR-613	1	0	1	1	1	1	ZC3H14	zinc finger CCCH-type containing 14
hsa-miR-613	0	0	1	1	0	0	HOPX	HOP homeobox
hsa-miR-613	1	0	1	0	1	1	IL1RAP	interleukin 1 receptor accessory protein
hsa-miR-613	1	0	1	1	1	1	GPR64	G protein-coupled receptor 64
hsa-miR-613	1	0	1	1	1	1	AFF2	AF4/FMR2 family, member 2
hsa-miR-613	1	0	1	1	1	1	VAMP7	vesicle-associated membrane protein 7
hsa-miR-613	1	0	1	1	1	1	NRXN3	neurexin 3
hsa-miR-613	1	0	1	1	1	1	NAV3	neuron navigator 3
hsa-miR-613	0	0	1	1	1	1	TAF1	TAF1 RNA polymerase II, TATA box binding protein (TBP)-associated factor, 250kDa
hsa-miR-613	0	0	1	1	0	0	C22orf24	chromosome 22 open reading frame 24
hsa-miR-613	1	0	1	1	1	1	PPP1R9A	protein phosphatase 1, regulatory subunit 9A
hsa-miR-613	0	0	1	1	1	1	ESRP1	epithelial splicing regulatory protein 1
hsa-miR-613	1	0	1	1	1	1	ENOX2	ecto-NOX disulfide-thiol exchanger 2
hsa-miR-613	0	0	1	0	0	0	TUG1	taurine upregulated 1 (non-protein coding)
hsa-miR-613	1	0	1	1	1	1	MYO9B	myosin IXB
hsa-miR-613	0	0	1	0	0	0	SOX2-OT	SOX2 overlapping transcript (non-protein coding)
hsa-miR-613	1	0	1	1	1	1	YME1L1	YME1-like 1 (S. cerevisiae)
hsa-miR-613	1	0	1	1	1	1	S100PBP	S100P binding protein
hsa-miR-613	0	0	1	1	1	1	C5orf42	chromosome 5 open reading frame 42
hsa-miR-613	0	0	1	1	1	1	CLEC4M	C-type lectin domain family 4, member M
hsa-miR-613	0	0	1	0	0	0	LOC284561	uncharacterized LOC284561
hsa-miR-613	1	0	1	1	1	1	BAZ2A	bromodomain adjacent to zinc finger domain, 2A
hsa-miR-613	0	0	1	1	1	1	CDKAL1	CDK5 regulatory subunit associated protein 1-like 1
hsa-miR-613	1	0	1	1	1	1	ABHD3	abhydrolase domain containing 3
hsa-miR-613	0	0	1	1	1	1	PION	pigeon homolog (Drosophila)
hsa-miR-613	1	0	1	1	1	1	RNF185	ring finger protein 185
hsa-miR-613	0	0	1	0	0	0	LOC729852	uncharacterized LOC729852
hsa-miR-613	0	0	1	1	1	1	ZNF277	zinc finger protein 277
hsa-miR-613	0	0	1	1	1	1	PLEKHS1	pleckstrin homology domain containing, family S member 1
hsa-miR-613	0	0	1	1	1	1	SPRTN	SprT-like N-terminal domain
hsa-miR-613	0	0	1	1	1	1	KDM2B	lysine (K)-specific demethylase 2B
hsa-miR-613	1	0	1	1	1	1	C7orf43	chromosome 7 open reading frame 43
hsa-miR-613	0	0	1	0	0	0	LOC254559	uncharacterized LOC254559
hsa-miR-613	1	0	1	0	1	1	AP1G1	adaptor-related protein complex 1, gamma 1 subunit
hsa-miR-613	0	0	1	1	1	1	GABRP	gamma-aminobutyric acid (GABA) A receptor, pi
hsa-miR-613	0	0	1	1	1	1	BCAR3	breast cancer anti-estrogen resistance 3
hsa-miR-613	0	0	1	0	0	0	FLJ31104	uncharacterized LOC441072
hsa-miR-613	0	0	1	0	0	0	LOC201617	uncharacterized LOC201617
hsa-miR-613	1	0	1	1	1	1	LMNA	lamin A/C
hsa-miR-613	0	0	1	1	0	0	CHRM3	cholinergic receptor, muscarinic 3
hsa-miR-613	1	0	1	1	1	1	SCAMP5	secretory carrier membrane protein 5
hsa-miR-613	0	0	1	1	1	1	DST	dystonin
hsa-miR-613	0	0	1	1	0	0	BTN2A3P	butyrophilin, subfamily 2, member A3, pseudogene
hsa-miR-613	1	0	1	1	1	1	TPM3	tropomyosin 3
hsa-miR-613	0	0	1	0	0	0	LOC145820	uncharacterized LOC145820
hsa-miR-613	0	0	1	1	0	0	NXF2	nuclear RNA export factor 2
hsa-miR-613	0	0	1	1	1	1	ZBTB26	zinc finger and BTB domain containing 26
hsa-miR-613	1	0	1	1	1	1	ANKRD29	ankyrin repeat domain 29
hsa-miR-613	0	0	1	0	0	0	LOC284014	uncharacterized LOC284014
hsa-miR-613	0	0	1	0	1	1	CCDC68	coiled-coil domain containing 68
hsa-miR-613	0	0	1	1	0	0	ANKAR	ankyrin and armadillo repeat containing
hsa-miR-613	0	0	1	1	0	0	CPAMD8	C3 and PZP-like, alpha-2-macroglobulin domain containing 8
hsa-miR-613	0	0	1	1	1	1	MTR	5-methyltetrahydrofolate-homocysteine methyltransferase
hsa-miR-613	0	0	1	0	0	0	LOC152225	uncharacterized LOC152225
hsa-miR-613	0	0	1	0	0	0	LOC643837	uncharacterized LOC643837
hsa-miR-613	0	0	1	1	1	1	CCDC102B	coiled-coil domain containing 102B
hsa-miR-613	1	0	1	1	1	1	CTTN	cortactin
hsa-miR-613	1	0	1	1	1	1	FBXW2	F-box and WD repeat domain containing 2
hsa-miR-613	0	0	1	1	1	1	WT1	Wilms tumor 1
hsa-miR-613	1	0	1	1	1	1	SPTBN1	spectrin, beta, non-erythrocytic 1
hsa-miR-613	0	0	1	1	1	1	SLC16A1	solute carrier family 16, member 1 (monocarboxylic acid transporter 1)
hsa-miR-613	1	0	1	1	1	1	MCMBP	minichromosome maintenance complex binding protein
hsa-miR-613	0	0	1	1	1	1	CYP11B1	cytochrome P450, family 11, subfamily B, polypeptide 1
hsa-miR-613	1	0	1	1	1	1	NSG1	neuron specific gene family member 1
hsa-miR-613	0	0	1	0	0	0	ZNF806	zinc finger protein 806
hsa-miR-613	1	0	1	1	1	1	GALNTL2	UDP-N-acetyl-alpha-D-galactosamine:polypeptide N-acetylgalactosaminyltransferase-like 2
hsa-miR-613	0	0	1	0	0	0	LOC285500	uncharacterized LOC285500
hsa-miR-613	0	0	1	1	1	1	MOBP	myelin-associated oligodendrocyte basic protein
hsa-miR-613	0	0	1	1	0	0	ZNF185	zinc finger protein 185 (LIM domain)
hsa-miR-613	0	0	1	1	1	1	FAM83A	family with sequence similarity 83, member A
hsa-miR-613	1	0	1	1	1	1	EPHB1	EPH receptor B1
hsa-miR-613	1	0	1	0	1	1	UVRAG	UV radiation resistance associated gene
hsa-miR-613	0	0	1	0	1	1	NBPF3	neuroblastoma breakpoint family, member 3
hsa-miR-613	0	0	1	1	0	0	KDM5D	lysine (K)-specific demethylase 5D
hsa-miR-613	1	0	1	1	1	1	AMT	aminomethyltransferase
hsa-miR-613	0	0	1	1	0	0	RPN2	ribophorin II
hsa-miR-613	1	0	1	1	1	1	LRP8	low density lipoprotein receptor-related protein 8, apolipoprotein e receptor
hsa-miR-613	0	0	1	0	0	0	C1orf204	chromosome 1 open reading frame 204
hsa-miR-613	1	0	1	1	1	1	SYT6	synaptotagmin VI
hsa-miR-613	0	0	1	1	0	0	RBM5	RNA binding motif protein 5
hsa-miR-613	0	0	1	0	0	0	DNAJB8-AS1	DNAJB8 antisense RNA 1
hsa-miR-613	0	0	1	1	0	0	CDC25C	cell division cycle 25 homolog C (S. pombe)
hsa-miR-613	1	0	1	1	0	0	ENTPD1	ectonucleoside triphosphate diphosphohydrolase 1
hsa-miR-613	1	0	1	1	1	1	LARP1B	La ribonucleoprotein domain family, member 1B
hsa-miR-613	0	0	1	0	0	0	LOC728095	uncharacterized LOC728095
hsa-miR-613	1	0	1	1	1	1	WEE1	WEE1 homolog (S. pombe)
hsa-miR-613	1	0	1	1	1	1	ABHD6	abhydrolase domain containing 6
hsa-miR-613	1	0	1	0	1	1	KCNK2	potassium channel, subfamily K, member 2
hsa-miR-613	1	0	1	1	1	1	MBTD1	mbt domain containing 1
hsa-miR-613	0	0	1	1	1	1	TMEM17	transmembrane protein 17
hsa-miR-613	0	0	1	0	0	0	DKFZP434H168	uncharacterized LOC26077
hsa-miR-613	0	0	1	0	0	0	LINC00282	long intergenic non-protein coding RNA 282
hsa-miR-613	0	0	1	1	1	1	C2orf91	chromosome 2 open reading frame 91
hsa-miR-613	0	0	1	1	0	0	FAM176C	family with sequence similarity 176, member C
hsa-miR-613	1	0	1	1	0	0	RANBP3	RAN binding protein 3
hsa-miR-613	0	0	1	1	1	1	MKX	mohawk homeobox
hsa-miR-613	0	0	1	1	0	0	LOC442075	uncharacterized LOC442075
hsa-miR-613	0	0	1	0	0	0	FAM95B1	family with sequence similarity 95, member B1
hsa-miR-613	1	0	1	1	1	1	KALRN	kalirin, RhoGEF kinase
hsa-miR-613	0	0	1	1	1	1	EPPIN	epididymal peptidase inhibitor
hsa-miR-613	0	0	1	1	1	1	MORF4L2	mortality factor 4 like 2
hsa-miR-613	0	0	1	1	1	1	BDH1	3-hydroxybutyrate dehydrogenase, type 1
hsa-miR-613	0	0	1	0	0	0	RPL23AP53	ribosomal protein L23a pseudogene 53
hsa-miR-613	0	0	1	1	1	1	CSPP1	centrosome and spindle pole associated protein 1
hsa-miR-613	1	0	1	1	1	1	CTNNA2	catenin (cadherin-associated protein), alpha 2
hsa-miR-613	0	0	1	0	1	1	NPHP4	nephronophthisis 4
hsa-miR-613	1	0	1	1	1	1	RALB	v-ral simian leukemia viral oncogene homolog B (ras related; GTP binding protein)
hsa-miR-613	1	0	1	1	1	1	CXorf23	chromosome X open reading frame 23
hsa-miR-613	0	0	1	0	0	0	TRAV20	T cell receptor alpha variable 20
hsa-miR-613	1	0	1	1	1	1	AFAP1	actin filament associated protein 1
hsa-miR-613	0	0	1	0	0	0	LRRC9	leucine rich repeat containing 9
hsa-miR-613	1	0	1	1	1	1	SLC12A6	solute carrier family 12 (potassium/chloride transporters), member 6
hsa-miR-613	0	0	1	1	0	0	TRIM46	tripartite motif containing 46
hsa-miR-613	1	0	1	1	1	1	FBXO3	F-box protein 3
hsa-miR-613	1	0	1	0	1	1	KPNA6	karyopherin alpha 6 (importin alpha 7)
hsa-miR-613	0	0	1	1	1	1	SHROOM3	shroom family member 3
hsa-miR-613	1	0	1	0	1	1	ESRRG	estrogen-related receptor gamma
hsa-miR-613	1	0	1	0	1	1	FMNL2	formin-like 2
hsa-miR-613	0	0	1	1	0	0	CYP4X1	cytochrome P450, family 4, subfamily X, polypeptide 1
hsa-miR-613	1	0	1	0	1	1	STK3	serine/threonine kinase 3
hsa-miR-613	1	0	1	1	1	1	RABGAP1	RAB GTPase activating protein 1
hsa-miR-613	0	0	1	1	0	0	DTHD1	death domain containing 1
hsa-miR-613	0	0	1	1	1	1	RGS3	regulator of G-protein signaling 3
hsa-miR-613	0	0	1	1	1	1	CRISP3	cysteine-rich secretory protein 3
hsa-miR-613	0	0	1	1	0	0	PCSK5	proprotein convertase subtilisin/kexin type 5
hsa-miR-613	0	0	1	1	0	0	HSPB11	heat shock protein family B (small), member 11
hsa-miR-613	1	0	1	1	1	1	LUC7L3	LUC7-like 3 (S. cerevisiae)
hsa-miR-613	0	0	1	1	0	0	TRIM69	tripartite motif containing 69
hsa-miR-613	1	0	1	1	1	1	RIF1	RAP1 interacting factor homolog (yeast)
hsa-miR-613	0	0	1	1	1	1	TTLL3	tubulin tyrosine ligase-like family, member 3
hsa-miR-613	1	0	1	1	1	1	ARF6	ADP-ribosylation factor 6
hsa-miR-613	0	0	1	1	0	0	FAM153B	family with sequence similarity 153, member B
hsa-miR-613	0	0	1	1	1	1	ARIH1	ariadne homolog, ubiquitin-conjugating enzyme E2 binding protein, 1 (Drosophila)
hsa-miR-613	0	0	1	1	1	1	KIDINS220	kinase D-interacting substrate, 220kDa
hsa-miR-613	0	0	1	0	0	0	DNAJC5B	DnaJ (Hsp40) homolog, subfamily C, member 5 beta
hsa-miR-613	0	0	1	1	1	1	ZNF280D	zinc finger protein 280D
hsa-miR-613	0	0	1	1	0	0	LRCH3	leucine-rich repeats and calponin homology (CH) domain containing 3
hsa-miR-613	0	0	1	0	0	0	JAKMIP3	Janus kinase and microtubule interacting protein 3
hsa-miR-613	0	0	1	1	1	1	AQP6	aquaporin 6, kidney specific
hsa-miR-613	1	0	1	0	1	1	CEP170	centrosomal protein 170kDa
hsa-miR-613	0	0	1	1	0	0	DOPEY1	dopey family member 1
hsa-miR-613	0	0	1	1	1	1	CD276	CD276 molecule
hsa-miR-613	0	0	1	0	0	0	RPL23AP82	ribosomal protein L23a pseudogene 82
hsa-miR-613	0	0	1	1	1	1	ARL13B	ADP-ribosylation factor-like 13B
hsa-miR-613	0	0	1	1	1	1	RABEPK	Rab9 effector protein with kelch motifs
hsa-miR-613	1	0	1	1	1	1	KANK1	KN motif and ankyrin repeat domains 1
hsa-miR-613	0	0	1	1	1	1	VWA3B	von Willebrand factor A domain containing 3B
hsa-miR-613	0	0	1	1	1	1	CCDC125	coiled-coil domain containing 125
hsa-miR-613	1	0	1	1	1	1	SBF2	SET binding factor 2
hsa-miR-613	0	0	1	0	1	1	FBXO42	F-box protein 42
hsa-miR-613	0	0	1	0	1	1	PLEKHM1P	pleckstrin homology domain containing, family M (with RUN domain) member 1 pseudogene
hsa-miR-613	0	0	1	1	1	1	CCDC66	coiled-coil domain containing 66
hsa-miR-613	0	0	1	1	0	0	CD37	CD37 molecule
hsa-miR-613	0	0	1	1	1	1	CAND1	cullin-associated and neddylation-dissociated 1
hsa-miR-613	1	0	1	1	1	1	PPM1K	protein phosphatase, Mg2+/Mn2+ dependent, 1K
hsa-miR-613	1	0	1	1	1	1	DIS3L2	DIS3 mitotic control homolog (S. cerevisiae)-like 2
hsa-miR-613	1	0	1	1	1	1	CADM2	cell adhesion molecule 2
hsa-miR-613	0	0	1	1	1	1	PNMAL1	paraneoplastic Ma antigen family-like 1
hsa-miR-613	0	0	1	0	1	1	SRR	serine racemase
hsa-miR-613	1	0	1	0	1	1	COX18	COX18 cytochrome c oxidase assembly homolog (S. cerevisiae)
hsa-miR-613	1	0	1	0	1	1	NR3C1	nuclear receptor subfamily 3, group C, member 1 (glucocorticoid receptor)
hsa-miR-613	1	0	1	0	1	1	PHYHIPL	phytanoyl-CoA 2-hydroxylase interacting protein-like
hsa-miR-613	1	0	1	1	1	1	PPP3CA	protein phosphatase 3, catalytic subunit, alpha isozyme
hsa-miR-613	0	0	1	0	0	0	LOC374443	C-type lectin domain family 2, member D pseudogene
hsa-miR-613	1	0	1	1	1	1	USF2	upstream transcription factor 2, c-fos interacting
hsa-miR-613	0	0	1	1	1	1	CYP4B1	cytochrome P450, family 4, subfamily B, polypeptide 1
hsa-miR-613	1	0	1	1	1	1	LUZP2	leucine zipper protein 2
hsa-miR-613	0	0	1	1	0	0	DNAH1	dynein, axonemal, heavy chain 1
hsa-miR-613	0	0	1	1	1	1	PINX1	PIN2/TERF1 interacting, telomerase inhibitor 1
hsa-miR-613	0	0	1	1	1	1	FAM181A	family with sequence similarity 181, member A
hsa-miR-613	1	0	1	1	1	1	LAMA3	laminin, alpha 3
hsa-miR-613	0	0	1	1	1	1	GCOM1	GRINL1A complex locus 1
hsa-miR-613	0	0	1	1	0	0	SNRPN	small nuclear ribonucleoprotein polypeptide N
hsa-miR-613	0	0	1	1	1	1	TNFSF15	tumor necrosis factor (ligand) superfamily, member 15
hsa-miR-613	1	0	1	1	1	1	LAMP2	lysosomal-associated membrane protein 2
hsa-miR-613	1	0	1	1	1	1	MOG	myelin oligodendrocyte glycoprotein
hsa-miR-613	1	0	1	1	1	1	HMGA2	high mobility group AT-hook 2
hsa-miR-613	0	0	1	1	1	1	ILDR1	immunoglobulin-like domain containing receptor 1
hsa-miR-613	0	0	1	0	1	1	KCNE1	potassium voltage-gated channel, Isk-related family, member 1
hsa-miR-613	0	0	1	1	0	0	NBPF8	neuroblastoma breakpoint family, member 8
hsa-miR-613	1	0	1	0	1	1	FAM46A	family with sequence similarity 46, member A
hsa-miR-613	1	0	1	0	1	1	BAG4	BCL2-associated athanogene 4
hsa-miR-613	0	0	1	1	0	0	DGUOK	deoxyguanosine kinase
hsa-miR-613	0	0	1	1	0	0	ANXA5	annexin A5
hsa-miR-613	1	0	1	1	1	1	MYCN	v-myc myelocytomatosis viral related oncogene, neuroblastoma derived (avian)
hsa-miR-613	0	0	1	1	1	1	TUFT1	tuftelin 1
hsa-miR-613	0	0	1	0	1	1	HAUS3	HAUS augmin-like complex, subunit 3
hsa-miR-613	0	0	1	1	1	1	ZNF146	zinc finger protein 146
hsa-miR-613	0	0	1	1	1	1	PRMT5	protein arginine methyltransferase 5
hsa-miR-613	1	0	1	1	0	0	ASRGL1	asparaginase like 1
hsa-miR-613	0	0	1	1	0	0	OBSL1	obscurin-like 1
hsa-miR-613	1	0	1	1	1	1	COCH	coagulation factor C homolog, cochlin (Limulus polyphemus)
hsa-miR-613	0	0	1	0	0	0	GLIS3-AS1	GLIS3 antisense RNA 1
hsa-miR-613	1	0	1	1	1	1	RSU1	Ras suppressor protein 1
hsa-miR-613	0	0	1	1	1	1	TMEM30A	transmembrane protein 30A
hsa-miR-613	1	0	1	1	1	1	GRIA2	glutamate receptor, ionotropic, AMPA 2
hsa-miR-613	1	0	1	1	1	1	SZRD1	SUZ RNA binding domain containing 1
hsa-miR-613	0	0	1	0	0	0	TPTEP1	transmembrane phosphatase with tensin homology pseudogene 1
hsa-miR-613	1	0	1	1	1	1	GDA	guanine deaminase
hsa-miR-613	1	0	1	1	0	0	LRFN1	leucine rich repeat and fibronectin type III domain containing 1
hsa-miR-613	0	0	1	1	1	1	C8orf33	chromosome 8 open reading frame 33
hsa-miR-613	0	0	1	0	0	0	KLHL15	kelch-like 15 (Drosophila)
hsa-miR-613	1	0	1	1	1	1	ZBTB38	zinc finger and BTB domain containing 38
hsa-miR-613	0	0	1	1	1	1	FAM122C	family with sequence similarity 122C
hsa-miR-613	1	0	1	1	1	1	VTI1A	vesicle transport through interaction with t-SNAREs homolog 1A (yeast)
hsa-miR-613	0	0	1	1	0	0	ZDHHC6	zinc finger, DHHC-type containing 6
hsa-miR-613	0	0	1	1	1	1	RDH11	retinol dehydrogenase 11 (all-trans/9-cis/11-cis)
hsa-miR-613	0	0	1	0	1	1	LOC646736	uncharacterized LOC646736
hsa-miR-613	0	0	1	0	0	0	FAM200B	family with sequence similarity 200, member B
hsa-miR-613	0	0	1	0	0	0	WDFY3-AS2	WDFY3 antisense RNA 2
hsa-miR-613	1	0	1	1	1	1	ZMAT4	zinc finger, matrin-type 4
hsa-miR-613	1	0	1	1	1	1	WHSC1	Wolf-Hirschhorn syndrome candidate 1
hsa-miR-613	0	0	1	0	0	0	NBR2	neighbor of BRCA1 gene 2 (non-protein coding)
hsa-miR-613	0	0	1	1	1	1	CDC42SE2	CDC42 small effector 2
hsa-miR-613	1	0	1	1	1	1	NIPA1	non imprinted in Prader-Willi/Angelman syndrome 1
hsa-miR-613	0	0	1	1	1	1	CDS2	CDP-diacylglycerol synthase (phosphatidate cytidylyltransferase) 2
hsa-miR-613	0	0	1	1	1	1	MAP2	microtubule-associated protein 2
hsa-miR-613	1	0	1	1	1	1	U2SURP	U2 snRNP-associated SURP domain containing
hsa-miR-613	0	0	1	1	1	1	ANKZF1	ankyrin repeat and zinc finger domain containing 1
hsa-miR-613	0	0	1	1	1	1	SLC51A	solute carrier family 51, alpha subunit
hsa-miR-613	1	0	1	1	1	1	PPARGC1A	peroxisome proliferator-activated receptor gamma, coactivator 1 alpha
hsa-miR-613	1	0	1	1	1	1	MRO	maestro
hsa-miR-613	0	0	1	1	0	0	SWI5	SWI5 recombination repair homolog (yeast)
hsa-miR-613	0	0	1	1	0	0	TMEM251	transmembrane protein 251
hsa-miR-613	0	0	1	1	1	1	CCP110	centriolar coiled coil protein 110kDa
hsa-miR-613	0	0	1	1	1	1	PIP5K1B	phosphatidylinositol-4-phosphate 5-kinase, type I, beta
hsa-miR-613	1	0	1	1	1	1	ELAVL2	ELAV (embryonic lethal, abnormal vision, Drosophila)-like 2 (Hu antigen B)
hsa-miR-613	1	0	1	1	1	1	BZRAP1	benzodiazapine receptor (peripheral) associated protein 1
hsa-miR-613	1	0	1	1	1	1	FGF1	fibroblast growth factor 1 (acidic)
hsa-miR-613	1	0	1	1	1	1	RAB5B	RAB5B, member RAS oncogene family
hsa-miR-613	1	0	1	1	1	1	SORL1	sortilin-related receptor, L(DLR class) A repeats containing
hsa-miR-613	1	0	1	1	1	1	SECISBP2L	SECIS binding protein 2-like
hsa-miR-613	0	0	1	1	1	1	ZNF337	zinc finger protein 337
hsa-miR-613	1	0	1	0	1	1	PDE12	phosphodiesterase 12
hsa-miR-613	0	0	1	0	0	0	TRAJ17	T cell receptor alpha joining 17
hsa-miR-613	0	0	1	0	1	1	FAM72A	family with sequence similarity 72, member A
hsa-miR-613	0	0	1	1	1	1	CLEC12B	C-type lectin domain family 12, member B
hsa-miR-613	1	0	1	1	1	1	ZNF618	zinc finger protein 618
hsa-miR-613	1	0	1	1	1	1	IMPACT	Impact homolog (mouse)
hsa-miR-613	0	0	1	0	0	0	FAM201A	family with sequence similarity 201, member A
hsa-miR-613	1	0	1	1	1	1	FAM135B	family with sequence similarity 135, member B
hsa-miR-613	0	0	1	0	0	0	LOC286184	uncharacterized LOC286184
hsa-miR-613	1	0	1	1	1	1	C4orf19	chromosome 4 open reading frame 19
hsa-miR-613	0	0	1	1	1	1	C14orf118	chromosome 14 open reading frame 118
hsa-miR-613	1	0	1	0	0	0	CT62	cancer/testis antigen 62
hsa-miR-613	0	0	1	0	0	0	LINC00326	long intergenic non-protein coding RNA 326
hsa-miR-613	0	0	1	0	0	0	LOC401074	uncharacterized LOC401074
hsa-miR-613	0	0	1	0	0	0	DLGAP1-AS3	DLGAP1 antisense RNA 3
hsa-miR-613	0	0	1	0	0	0	TRDV2	T cell receptor delta variable 2
hsa-miR-613	1	0	1	1	1	1	DACH2	dachshund homolog 2 (Drosophila)
hsa-miR-613	1	0	1	1	1	1	DYNC2LI1	dynein, cytoplasmic 2, light intermediate chain 1
hsa-miR-613	1	0	1	1	1	1	INTS6	integrator complex subunit 6
hsa-miR-613	0	0	1	0	1	1	TSLP	thymic stromal lymphopoietin
hsa-miR-613	0	0	1	0	1	1	METTL12	methyltransferase like 12
hsa-miR-613	1	0	1	1	1	1	ARPP21	cAMP-regulated phosphoprotein, 21kDa
hsa-miR-613	0	0	1	1	1	1	C17orf104	chromosome 17 open reading frame 104
hsa-miR-613	0	0	1	1	1	1	CARD8	caspase recruitment domain family, member 8
hsa-miR-613	0	0	1	0	1	1	PDGFC	platelet derived growth factor C
hsa-miR-613	1	0	1	1	1	1	C12orf76	chromosome 12 open reading frame 76
hsa-miR-613	0	0	1	1	1	1	SH3GL3	SH3-domain GRB2-like 3
hsa-miR-613	0	0	1	1	1	1	DGKH	diacylglycerol kinase, eta
hsa-miR-613	0	0	1	0	0	0	DKFZp686O1327	uncharacterized LOC401014
hsa-miR-613	1	0	1	1	1	1	PSIP1	PC4 and SFRS1 interacting protein 1
hsa-miR-613	1	0	1	1	1	1	RNF145	ring finger protein 145
hsa-miR-613	1	0	1	1	1	1	SENP1	SUMO1/sentrin specific peptidase 1
hsa-miR-613	0	0	1	1	0	0	FAM72B	family with sequence similarity 72, member B
hsa-miR-613	0	0	1	0	0	0	INHBA-AS1	INHBA antisense RNA 1
hsa-miR-613	0	0	1	0	0	0	LOC348120	uncharacterized LOC348120
hsa-miR-613	0	0	1	0	1	1	LOC401021	uncharacterized LOC401021
hsa-miR-613	1	0	1	0	1	1	ZNF800	zinc finger protein 800
hsa-miR-613	1	0	1	1	1	1	RTKN2	rhotekin 2
hsa-miR-613	1	0	1	1	1	1	WSB1	WD repeat and SOCS box containing 1
hsa-miR-613	0	0	1	0	0	0	LOC255025	uncharacterized LOC255025
hsa-miR-613	0	0	1	1	0	0	FKBP11	FK506 binding protein 11, 19 kDa
hsa-miR-613	0	0	1	1	1	1	ZNF589	zinc finger protein 589
hsa-miR-613	1	0	1	1	1	1	CLVS1	clavesin 1
hsa-miR-613	1	0	1	0	1	1	FAM131B	family with sequence similarity 131, member B
hsa-miR-613	0	0	1	1	0	0	NISCH	nischarin
hsa-miR-613	0	0	1	0	0	0	AURKAPS1	aurora kinase A pseudogene 1
hsa-miR-613	0	0	1	1	1	1	FKBP1B	FK506 binding protein 1B, 12.6 kDa
hsa-miR-613	1	0	1	1	1	1	SCUBE3	signal peptide, CUB domain, EGF-like 3
hsa-miR-613	0	0	1	1	0	0	PMS2P5	postmeiotic segregation increased 2 pseudogene 5
hsa-miR-613	1	0	1	0	1	1	C14orf43	chromosome 14 open reading frame 43
hsa-miR-613	1	0	1	1	1	1	ATP8B4	ATPase, class I, type 8B, member 4
hsa-miR-613	0	0	1	1	0	0	RPL12	ribosomal protein L12
hsa-miR-613	1	0	1	1	1	1	SOX5	SRY (sex determining region Y)-box 5
hsa-miR-613	1	0	1	1	1	1	PRRG1	proline rich Gla (G-carboxyglutamic acid) 1
hsa-miR-613	1	0	1	0	1	1	C7orf41	chromosome 7 open reading frame 41
hsa-miR-613	0	0	1	0	0	0	CCDC150	coiled-coil domain containing 150
hsa-miR-613	0	0	1	1	0	0	AGAP11	ankyrin repeat and GTPase domain Arf GTPase activating protein 11
hsa-miR-613	0	0	1	0	1	1	ASAP2	ArfGAP with SH3 domain, ankyrin repeat and PH domain 2
hsa-miR-613	0	0	1	0	0	0	TRA@	T cell receptor alpha locus
hsa-miR-613	0	0	1	1	1	1	C1orf109	chromosome 1 open reading frame 109
hsa-miR-613	1	0	1	1	1	1	ADCY6	adenylate cyclase 6
hsa-miR-613	1	0	1	1	1	1	RAB2B	RAB2B, member RAS oncogene family
hsa-miR-613	1	0	1	1	1	1	C5orf25	chromosome 5 open reading frame 25
hsa-miR-613	0	0	1	0	0	0	DPY19L2P1	dpy-19-like 2 pseudogene 1 (C. elegans)
hsa-miR-613	1	0	1	1	1	1	PHACTR4	phosphatase and actin regulator 4
hsa-miR-613	0	0	1	1	1	1	TTLL9	tubulin tyrosine ligase-like family, member 9
hsa-miR-613	1	0	1	0	1	1	TGFBR1	transforming growth factor, beta receptor 1
hsa-miR-613	0	0	1	0	0	0	ULK4P1	unc-51-like kinase 4 (C. elegans) pseudogene 1
hsa-miR-613	0	0	1	0	0	0	ULK4P3	unc-51-like kinase 4 (C. elegans) pseudogene 3
hsa-miR-613	0	0	1	0	0	0	LINC00152	long intergenic non-protein coding RNA 152
hsa-miR-613	0	0	1	1	0	0	TSPY3	testis specific protein, Y-linked 3
hsa-miR-613	0	0	1	0	0	0	LOC441259	PMS2 postmeiotic segregation increased 2 (S. cerevisiae)-like
hsa-miR-613	0	0	1	0	0	0	ABCC6P1	ATP-binding cassette, sub-family C, member 6 pseudogene 1
hsa-miR-613	1	0	1	0	1	1	AMMECR1L	AMME chromosomal region gene 1-like
hsa-miR-613	1	0	1	1	1	1	EIF2AK4	eukaryotic translation initiation factor 2 alpha kinase 4
hsa-miR-613	0	0	1	0	0	0	LINC00537	long intergenic non-protein coding RNA 537
hsa-miR-613	1	0	1	1	1	1	FMNL3	formin-like 3
hsa-miR-613	0	0	1	0	0	0	FAM106A	family with sequence similarity 106, member A
hsa-miR-613	0	0	1	0	0	0	TP53TG3B	TP53 target 3B
hsa-miR-613	0	0	1	0	1	1	TP53TG3	TP53 target 3
hsa-miR-613	1	0	1	1	1	1	ASXL1	additional sex combs like 1 (Drosophila)
hsa-miR-613	0	0	1	1	1	1	ZNF365	zinc finger protein 365
hsa-miR-613	1	0	1	1	1	1	ARFIP1	ADP-ribosylation factor interacting protein 1
hsa-miR-613	1	0	1	1	1	1	SLC35G1	solute carrier family 35, member G1
hsa-miR-613	0	0	1	1	0	0	HIST1H2BC	histone cluster 1, H2bc
hsa-miR-613	1	0	1	0	1	1	BTBD3	BTB (POZ) domain containing 3
hsa-miR-613	0	0	1	1	0	0	SH2D6	SH2 domain containing 6
hsa-miR-613	0	0	1	1	0	0	TMC2	transmembrane channel-like 2
hsa-miR-613	0	0	1	0	0	0	LRRC37A11P	leucine rich repeat containing 37, member A11, pseudogene
hsa-miR-613	0	0	1	1	0	0	ZNF430	zinc finger protein 430
hsa-miR-613	0	0	1	1	1	1	UNC13B	unc-13 homolog B (C. elegans)
hsa-miR-613	0	0	1	1	1	1	LRCH1	leucine-rich repeats and calponin homology (CH) domain containing 1
hsa-miR-613	1	0	1	1	1	1	ST18	suppression of tumorigenicity 18 (breast carcinoma) (zinc finger protein)
hsa-miR-613	0	0	1	0	0	0	LOC286094	uncharacterized LOC286094
hsa-miR-613	0	0	1	0	0	0	LGALS17A	Charcot-Leyden crystal protein pseudogene
hsa-miR-613	0	0	1	1	1	1	C9orf171	chromosome 9 open reading frame 171
hsa-miR-613	1	0	1	1	1	1	PIKFYVE	phosphoinositide kinase, FYVE finger containing
hsa-miR-613	1	0	1	0	1	1	LRCH2	leucine-rich repeats and calponin homology (CH) domain containing 2
hsa-miR-613	1	0	1	0	1	1	CAMSAP2	calmodulin regulated spectrin-associated protein family, member 2
hsa-miR-613	1	0	1	1	1	1	ZMYM4	zinc finger, MYM-type 4
hsa-miR-613	1	0	1	0	1	1	LHFPL3	lipoma HMGIC fusion partner-like 3
hsa-miR-613	0	0	1	1	0	0	TTC21A	tetratricopeptide repeat domain 21A
hsa-miR-613	0	0	1	1	0	0	EFCAB11	EF-hand calcium binding domain 11
hsa-miR-613	1	0	1	1	1	1	NUMB	numb homolog (Drosophila)
hsa-miR-613	1	0	1	1	1	1	LITAF	lipopolysaccharide-induced TNF factor
hsa-miR-613	1	0	1	0	1	1	CCDC88A	coiled-coil domain containing 88A
hsa-miR-613	0	0	1	1	0	0	NHLRC2	NHL repeat containing 2
hsa-miR-613	0	0	1	1	1	1	AIG1	androgen-induced 1
hsa-miR-613	0	0	1	1	1	1	CRB1	crumbs homolog 1 (Drosophila)
hsa-miR-613	0	0	1	1	1	1	PSMA2	proteasome (prosome, macropain) subunit, alpha type, 2
hsa-miR-613	0	0	1	1	1	1	COL6A3	collagen, type VI, alpha 3
hsa-miR-613	0	0	1	0	0	0	EML6	echinoderm microtubule associated protein like 6
hsa-miR-613	1	0	1	1	1	1	MYCBP2	MYC binding protein 2, E3 ubiquitin protein ligase
hsa-miR-613	1	0	1	1	1	1	CGN	cingulin
hsa-miR-613	0	0	1	1	1	1	ADH1B	alcohol dehydrogenase 1B (class I), beta polypeptide
hsa-miR-613	1	0	1	1	1	1	GABPA	GA binding protein transcription factor, alpha subunit 60kDa
hsa-miR-613	0	0	1	1	0	0	PPP2R2B	protein phosphatase 2, regulatory subunit B, beta
hsa-miR-613	0	0	1	1	0	0	TMEM41A	transmembrane protein 41A
hsa-miR-613	1	0	1	1	1	1	NEDD9	neural precursor cell expressed, developmentally down-regulated 9
hsa-miR-613	1	0	1	1	1	1	HDAC1	histone deacetylase 1
hsa-miR-613	0	0	1	1	1	1	DDX21	DEAD (Asp-Glu-Ala-Asp) box helicase 21
hsa-miR-613	1	0	1	1	1	1	NFIB	nuclear factor I/B
hsa-miR-613	1	0	1	1	1	1	SOGA2	SOGA family member 2
hsa-miR-613	1	0	1	1	1	1	NAV1	neuron navigator 1
hsa-miR-613	1	0	1	0	1	1	KLHL24	kelch-like 24 (Drosophila)
hsa-miR-613	1	0	1	1	1	1	RDX	radixin
hsa-miR-613	1	0	1	1	1	1	EOGT	EGF domain-specific O-linked N-acetylglucosamine (GlcNAc) transferase
hsa-miR-613	1	0	1	1	1	1	CREB3L2	cAMP responsive element binding protein 3-like 2
hsa-miR-613	0	0	1	0	0	0	LINC00341	long intergenic non-protein coding RNA 341
hsa-miR-613	0	0	1	1	0	0	CSH1	chorionic somatomammotropin hormone 1 (placental lactogen)
hsa-miR-613	0	0	1	1	1	1	CHEK1	checkpoint kinase 1
hsa-miR-613	0	0	1	1	0	0	CHCHD3	coiled-coil-helix-coiled-coil-helix domain containing 3
hsa-miR-613	0	0	1	1	1	1	TBC1D10A	TBC1 domain family, member 10A
hsa-miR-613	0	0	1	1	0	0	SARS	seryl-tRNA synthetase
hsa-miR-613	0	0	1	0	0	0	FLJ30838	uncharacterized LOC400955
hsa-miR-613	0	0	1	1	1	1	UPRT	uracil phosphoribosyltransferase (FUR1) homolog (S. cerevisiae)
hsa-miR-613	1	0	1	1	1	1	TARBP2	TAR (HIV-1) RNA binding protein 2
hsa-miR-613	0	0	1	0	0	0	LOC400768	uncharacterized LOC400768
hsa-miR-613	1	0	1	1	1	1	ATAT1	alpha tubulin acetyltransferase 1
hsa-miR-613	1	0	1	1	1	1	SLC35D2	solute carrier family 35, member D2
hsa-miR-613	0	0	1	1	0	0	MRPL37	mitochondrial ribosomal protein L37
hsa-miR-613	0	0	1	1	1	1	PTGES3	prostaglandin E synthase 3 (cytosolic)
hsa-miR-613	0	0	1	1	1	1	CCDC132	coiled-coil domain containing 132
hsa-miR-613	0	0	1	1	1	1	INCENP	inner centromere protein antigens 135/155kDa
hsa-miR-613	1	0	1	1	1	1	SSR1	signal sequence receptor, alpha
hsa-miR-613	0	0	1	1	0	0	METTL23	methyltransferase like 23
hsa-miR-613	0	0	1	0	0	0	HMGN1P37	high mobility group nucleosome binding domain 1 pseudogene 37
hsa-miR-613	0	0	1	1	1	1	GRAP2	GRB2-related adaptor protein 2
hsa-miR-613	0	0	1	1	0	0	TMEM183A	transmembrane protein 183A
hsa-miR-613	0	0	1	1	1	1	KCTD1	potassium channel tetramerisation domain containing 1
hsa-miR-613	1	0	1	1	1	1	STK38L	serine/threonine kinase 38 like
hsa-miR-613	1	0	1	1	1	1	MTCH2	mitochondrial carrier 2
hsa-miR-613	0	0	1	1	1	1	TOX4	TOX high mobility group box family member 4
hsa-miR-613	0	0	1	0	0	0	LOC150568	uncharacterized LOC150568
hsa-miR-613	0	0	1	0	0	0	FLJ45248	FLJ45248 protein
hsa-miR-613	0	0	1	1	0	0	GPN1	GPN-loop GTPase 1
hsa-miR-613	0	0	1	0	1	1	TMEM155	transmembrane protein 155
hsa-miR-613	0	0	1	1	0	0	CSHL1	chorionic somatomammotropin hormone-like 1
hsa-miR-613	1	0	1	1	1	1	ARNTL	aryl hydrocarbon receptor nuclear translocator-like
hsa-miR-613	1	0	1	1	1	1	PPP3CB	protein phosphatase 3, catalytic subunit, beta isozyme
hsa-miR-613	1	0	1	1	1	1	YWHAQ	tyrosine 3-monooxygenase/tryptophan 5-monooxygenase activation protein, theta polypeptide
hsa-miR-613	1	0	1	1	1	1	SYAP1	synapse associated protein 1
hsa-miR-613	0	0	1	1	0	0	GLT8D1	glycosyltransferase 8 domain containing 1
hsa-miR-613	0	0	1	1	0	0	WFDC1	WAP four-disulfide core domain 1
hsa-miR-613	0	0	1	1	0	0	CCDC107	coiled-coil domain containing 107
hsa-miR-613	0	0	1	1	1	1	PLAC8	placenta-specific 8
hsa-miR-613	1	0	1	0	1	1	CD47	CD47 molecule
hsa-miR-613	1	0	1	1	1	1	RUNX1	runt-related transcription factor 1
hsa-miR-613	1	0	1	1	1	1	ATPAF1	ATP synthase mitochondrial F1 complex assembly factor 1
hsa-miR-613	1	0	1	0	1	1	DNMT3A	DNA (cytosine-5-)-methyltransferase 3 alpha
hsa-miR-613	0	0	1	0	0	0	LOC731789	uncharacterized LOC731789
hsa-miR-613	0	0	1	1	1	1	BDP1	B double prime 1, subunit of RNA polymerase III transcription initiation factor IIIB
hsa-miR-613	1	0	1	0	1	1	BTRC	beta-transducin repeat containing E3 ubiquitin protein ligase
hsa-miR-613	0	0	1	0	0	0	LINC00661	long intergenic non-protein coding RNA 661
hsa-miR-613	1	0	1	1	1	1	CBFA2T2	core-binding factor, runt domain, alpha subunit 2; translocated to, 2
hsa-miR-613	0	0	1	1	1	1	OAT	ornithine aminotransferase
hsa-miR-613	1	0	1	1	1	1	BNC2	basonuclin 2
hsa-miR-613	1	0	1	1	1	1	ZFHX3	zinc finger homeobox 3
hsa-miR-613	1	0	1	0	1	1	IRF4	interferon regulatory factor 4
hsa-miR-613	1	0	1	1	1	1	RB1CC1	RB1-inducible coiled-coil 1
hsa-miR-613	0	0	1	0	0	0	61E3.4	nuclear pore complex interacting protein-like
hsa-miR-613	1	0	1	0	1	1	LONRF2	LON peptidase N-terminal domain and ring finger 2
hsa-miR-613	1	0	1	1	1	1	RSPO1	R-spondin 1
hsa-miR-613	0	0	1	1	1	1	PTGS1	prostaglandin-endoperoxide synthase 1 (prostaglandin G/H synthase and cyclooxygenase)
hsa-miR-613	0	0	1	1	0	0	SPATA20	spermatogenesis associated 20
hsa-miR-613	0	0	1	1	1	1	MARVELD2	MARVEL domain containing 2
hsa-miR-613	1	0	1	1	1	1	SLC4A8	solute carrier family 4, sodium bicarbonate cotransporter, member 8
hsa-miR-613	1	0	1	1	1	1	TROVE2	TROVE domain family, member 2
hsa-miR-613	1	0	1	0	0	0	YLPM1	YLP motif containing 1
hsa-miR-613	1	0	1	0	1	1	BCL2	B-cell CLL/lymphoma 2
hsa-miR-613	0	0	1	1	1	1	CD55	CD55 molecule, decay accelerating factor for complement (Cromer blood group)
hsa-miR-613	0	0	1	0	0	0	TSPY1	testis specific protein, Y-linked 1
hsa-miR-613	0	0	1	1	1	1	ATP7A	ATPase, Cu++ transporting, alpha polypeptide
hsa-miR-613	1	0	1	1	1	1	CYP19A1	cytochrome P450, family 19, subfamily A, polypeptide 1
hsa-miR-613	0	0	1	0	1	1	CYP1B1	cytochrome P450, family 1, subfamily B, polypeptide 1
hsa-miR-613	1	0	1	1	1	1	DLD	dihydrolipoamide dehydrogenase
hsa-miR-613	0	0	1	0	1	1	MS4A2	membrane-spanning 4-domains, subfamily A, member 2
hsa-miR-613	1	0	1	0	1	1	G6PC	glucose-6-phosphatase, catalytic subunit
hsa-miR-613	0	0	1	1	1	1	TTR	transthyretin
hsa-miR-613	1	0	1	1	1	1	CHM	choroideremia (Rab escort protein 1)
hsa-miR-613	0	0	1	1	1	1	PECAM1	platelet/endothelial cell adhesion molecule 1
hsa-miR-613	1	0	1	1	1	1	TWIST1	twist homolog 1 (Drosophila)
hsa-miR-613	0	0	1	1	1	1	CRX	cone-rod homeobox
hsa-miR-613	1	0	1	1	1	1	CD44	CD44 molecule (Indian blood group)
hsa-miR-613	0	0	1	1	1	1	ALDH1B1	aldehyde dehydrogenase 1 family, member B1
hsa-miR-613	1	0	1	0	1	1	GABRA4	gamma-aminobutyric acid (GABA) A receptor, alpha 4
hsa-miR-613	1	0	1	1	1	1	GABRG2	gamma-aminobutyric acid (GABA) A receptor, gamma 2
hsa-miR-613	1	0	1	1	1	1	GAD1	glutamate decarboxylase 1 (brain, 67kDa)
hsa-miR-613	0	0	1	1	1	1	GAD2	glutamate decarboxylase 2 (pancreatic islets and brain, 65kDa)
hsa-miR-613	0	0	1	1	0	0	PTGIR	prostaglandin I2 (prostacyclin) receptor (IP)
hsa-miR-613	0	0	1	1	1	1	PTGS2	prostaglandin-endoperoxide synthase 2 (prostaglandin G/H synthase and cyclooxygenase)
hsa-miR-613	1	0	1	0	1	1	SPOPL	speckle-type POZ protein-like
hsa-miR-613	1	0	1	1	1	1	ATP1B1	ATPase, Na+/K+ transporting, beta 1 polypeptide
hsa-miR-613	1	0	1	1	1	1	MIR22HG	MIR22 host gene (non-protein coding)
hsa-miR-613	1	0	1	1	1	1	TPD52L3	tumor protein D52-like 3
hsa-miR-613	0	0	1	1	0	0	BICD1	bicaudal D homolog 1 (Drosophila)
hsa-miR-613	1	0	1	0	1	1	BMF	Bcl2 modifying factor
hsa-miR-613	0	0	1	1	1	1	ANXA13	annexin A13
hsa-miR-613	0	0	1	1	1	1	ALG11	asparagine-linked glycosylation 11, alpha-1,2-mannosyltransferase homolog (yeast)
hsa-miR-613	0	0	1	1	1	1	ZCCHC16	zinc finger, CCHC domain containing 16
hsa-miR-613	0	0	1	1	1	1	AGMO	alkylglycerol monooxygenase
hsa-miR-613	0	0	1	1	1	1	PRR13	proline rich 13
hsa-miR-613	1	0	1	1	1	1	PLCXD3	phosphatidylinositol-specific phospholipase C, X domain containing 3
hsa-miR-613	1	0	1	1	1	1	EDA	ectodysplasin A
hsa-miR-613	0	0	1	1	1	1	IP6K2	inositol hexakisphosphate kinase 2
hsa-miR-613	0	0	1	1	1	1	MAPKAP1	mitogen-activated protein kinase associated protein 1
hsa-miR-613	0	0	1	1	1	1	TRIM13	tripartite motif containing 13
hsa-miR-613	0	0	1	1	1	1	WDHD1	WD repeat and HMG-box DNA binding protein 1
hsa-miR-613	0	0	1	1	1	1	CXCR4	chemokine (C-X-C motif) receptor 4
hsa-miR-613	1	0	1	0	1	1	RCHY1	ring finger and CHY zinc finger domain containing 1, E3 ubiquitin protein ligase
hsa-miR-613	0	0	1	1	1	1	HRNR	hornerin
hsa-miR-613	1	0	1	0	1	1	ERMN	ermin, ERM-like protein
hsa-miR-613	0	0	1	1	1	1	NCMAP	noncompact myelin associated protein
hsa-miR-613	0	0	1	0	1	1	C9orf106	chromosome 9 open reading frame 106
hsa-miR-613	1	0	1	1	1	1	SLC25A53	solute carrier family 25, member 53
hsa-miR-613	1	0	1	1	1	1	PABPC1L2A	poly(A) binding protein, cytoplasmic 1-like 2A
hsa-miR-613	0	0	1	1	1	1	C9orf152	chromosome 9 open reading frame 152
hsa-miR-613	1	0	1	1	1	1	SORCS1	sortilin-related VPS10 domain containing receptor 1
hsa-miR-613	0	0	1	1	1	1	CCNC	cyclin C
hsa-miR-613	1	0	1	0	1	1	ZNF793	zinc finger protein 793
hsa-miR-613	0	0	1	1	1	1	PURG	purine-rich element binding protein G
hsa-miR-613	1	0	1	1	1	1	PHF6	PHD finger protein 6
hsa-miR-613	1	0	1	1	1	1	VMA21	VMA21 vacuolar H+-ATPase homolog (S. cerevisiae)
hsa-miR-613	1	0	1	0	1	1	TFEC	transcription factor EC
hsa-miR-613	1	0	1	0	1	1	TNRC6B	trinucleotide repeat containing 6B
hsa-miR-613	1	0	1	1	1	1	TGFBR2	transforming growth factor, beta receptor II (70/80kDa)
hsa-miR-613	1	0	1	0	1	1	CELF2	CUGBP, Elav-like family member 2
hsa-miR-613	0	0	1	0	1	1	C6orf120	chromosome 6 open reading frame 120
hsa-miR-613	1	0	1	1	1	1	PLEKHG1	pleckstrin homology domain containing, family G (with RhoGef domain) member 1
hsa-miR-613	1	0	1	0	1	1	MSRB3	methionine sulfoxide reductase B3
hsa-miR-613	0	0	1	1	1	1	CALML4	calmodulin-like 4
hsa-miR-613	0	0	1	1	1	1	PLGLB1	plasminogen-like B1
hsa-miR-613	1	0	1	1	1	1	RRM1	ribonucleotide reductase M1
hsa-miR-613	1	0	1	1	1	1	MAGI1	membrane associated guanylate kinase, WW and PDZ domain containing 1
hsa-miR-613	1	0	1	0	1	1	SRGAP3	SLIT-ROBO Rho GTPase activating protein 3
hsa-miR-613	0	0	1	1	1	1	CEP112	centrosomal protein 112kDa
hsa-miR-613	0	0	1	1	1	1	C18orf62	chromosome 18 open reading frame 62
hsa-miR-613	1	0	1	1	1	1	PDE4B	phosphodiesterase 4B, cAMP-specific
hsa-miR-613	0	0	1	0	0	0	FER1L6	fer-1-like 6 (C. elegans)
hsa-miR-613	0	0	1	1	1	1	ATAD3C	ATPase family, AAA domain containing 3C
hsa-miR-613	1	0	1	1	1	1	ELMO1	engulfment and cell motility 1
hsa-miR-613	1	0	1	0	1	1	GK5	glycerol kinase 5 (putative)
hsa-miR-613	1	0	1	1	1	1	AP1S3	adaptor-related protein complex 1, sigma 3 subunit
hsa-miR-613	0	0	1	0	1	1	OPALIN	oligodendrocytic myelin paranodal and inner loop protein
hsa-miR-613	0	0	1	0	1	1	SCN3B	sodium channel, voltage-gated, type III, beta subunit
hsa-miR-613	0	0	1	1	1	1	MCHR2	melanin-concentrating hormone receptor 2
hsa-miR-613	1	0	1	1	1	1	PAPD5	PAP associated domain containing 5
hsa-miR-613	0	0	1	1	1	1	MTHFD2	methylenetetrahydrofolate dehydrogenase (NADP+ dependent) 2, methenyltetrahydrofolate cyclohydrolase
hsa-miR-613	0	0	1	1	1	1	ATF3	activating transcription factor 3
hsa-miR-613	1	0	1	1	1	1	NCALD	neurocalcin delta
hsa-miR-613	1	0	1	1	1	1	PABPC1L2B	poly(A) binding protein, cytoplasmic 1-like 2B
hsa-miR-613	0	0	1	1	1	1	RCC1	regulator of chromosome condensation 1
hsa-miR-613	1	0	1	1	1	1	QSER1	glutamine and serine rich 1
hsa-miR-613	1	0	1	1	1	1	PRR3	proline rich 3
hsa-miR-613	0	0	1	1	1	1	KLK10	kallikrein-related peptidase 10
hsa-miR-613	1	0	1	1	1	1	TMTC4	transmembrane and tetratricopeptide repeat containing 4
hsa-miR-613	0	0	1	1	1	1	FKTN	fukutin
hsa-miR-613	0	0	1	0	0	0	TMEM183B	transmembrane protein 183B
hsa-miR-613	0	0	1	1	1	1	DIAPH1	diaphanous homolog 1 (Drosophila)
hsa-miR-613	1	0	1	1	1	1	LDB3	LIM domain binding 3
hsa-miR-613	1	0	1	0	1	1	MEGF9	multiple EGF-like-domains 9
hsa-miR-613	0	0	1	1	1	1	TBX18	T-box 18
hsa-miR-613	0	0	1	0	1	1	CAV2	caveolin 2
hsa-miR-613	1	0	1	1	0	0	CSRP2	cysteine and glycine-rich protein 2
hsa-miR-613	1	0	1	1	1	1	CELSR3	cadherin, EGF LAG seven-pass G-type receptor 3 (flamingo homolog, Drosophila)
hsa-miR-613	0	0	1	0	1	1	EMP1	epithelial membrane protein 1
hsa-miR-613	0	0	1	1	1	1	FRZB	frizzled-related protein
hsa-miR-613	1	0	1	0	1	1	B4GALT1	UDP-Gal:betaGlcNAc beta 1,4- galactosyltransferase, polypeptide 1
hsa-miR-613	1	0	1	1	1	1	NDST1	N-deacetylase/N-sulfotransferase (heparan glucosaminyl) 1
hsa-miR-613	1	0	1	1	1	1	ID4	inhibitor of DNA binding 4, dominant negative helix-loop-helix protein
hsa-miR-613	0	0	1	1	1	1	ARF4	ADP-ribosylation factor 4
hsa-miR-613	1	0	1	1	1	1	BAAT	bile acid CoA: amino acid N-acyltransferase (glycine N-choloyltransferase)
hsa-miR-613	0	0	1	1	1	1	BTN1A1	butyrophilin, subfamily 1, member A1
hsa-miR-613	0	0	1	1	1	1	CD1D	CD1d molecule
hsa-miR-613	1	0	1	0	0	0	DRP2	dystrophin related protein 2
hsa-miR-613	1	0	1	0	1	1	ETV6	ets variant 6
hsa-miR-613	0	0	1	1	1	1	FLI1	Friend leukemia virus integration 1
hsa-miR-613	0	0	1	0	1	1	GYPA	glycophorin A (MNS blood group)
hsa-miR-613	0	0	1	1	1	1	HMGCS1	3-hydroxy-3-methylglutaryl-CoA synthase 1 (soluble)
hsa-miR-613	1	0	1	1	1	1	HNRNPA2B1	heterogeneous nuclear ribonucleoprotein A2/B1
hsa-miR-613	1	0	1	1	0	0	IHH	Indian hedgehog
hsa-miR-613	1	0	1	1	1	1	INSM1	insulinoma-associated 1
hsa-miR-613	0	0	1	1	0	0	EIF6	eukaryotic translation initiation factor 6
hsa-miR-613	1	0	1	1	1	1	JUN	jun proto-oncogene
hsa-miR-613	0	0	1	1	1	1	KCNJ15	potassium inwardly-rectifying channel, subfamily J, member 15
hsa-miR-613	1	0	1	1	1	1	KDR	kinase insert domain receptor (a type III receptor tyrosine kinase)
hsa-miR-613	1	0	1	0	1	1	KIF3C	kinesin family member 3C
hsa-miR-613	1	0	1	1	1	1	KPNA3	karyopherin alpha 3 (importin alpha 4)
hsa-miR-613	1	0	1	1	1	1	LRP1	low density lipoprotein receptor-related protein 1
hsa-miR-613	0	0	1	1	1	1	MTAP	methylthioadenosine phosphorylase
hsa-miR-613	1	0	1	1	1	1	NEUROD1	neuronal differentiation 1
hsa-miR-613	1	0	1	1	1	1	NPAS2	neuronal PAS domain protein 2
hsa-miR-613	0	0	1	0	1	1	OPHN1	oligophrenin 1
hsa-miR-613	1	0	1	1	1	1	PLCG1	phospholipase C, gamma 1
hsa-miR-613	0	0	1	1	1	1	PLGLB2	plasminogen-like B2
hsa-miR-613	1	0	1	0	0	0	PPP1R10	protein phosphatase 1, regulatory subunit 10
hsa-miR-613	1	0	1	0	1	1	MAPK4	mitogen-activated protein kinase 4
hsa-miR-613	0	0	1	1	1	1	MAPK13	mitogen-activated protein kinase 13
hsa-miR-613	1	0	1	1	1	1	PTPN9	protein tyrosine phosphatase, non-receptor type 9
hsa-miR-613	1	0	1	1	1	1	PTPRK	protein tyrosine phosphatase, receptor type, K
hsa-miR-613	0	0	1	1	0	0	ROS1	c-ros oncogene 1 , receptor tyrosine kinase
hsa-miR-613	0	0	1	0	1	1	CXCL5	chemokine (C-X-C motif) ligand 5
hsa-miR-613	0	0	1	1	1	1	SDC2	syndecan 2
hsa-miR-613	1	0	1	1	1	1	SFRP2	secreted frizzled-related protein 2
hsa-miR-613	1	0	1	1	1	1	SRSF2	serine/arginine-rich splicing factor 2
hsa-miR-613	0	0	1	1	1	1	SH3BGRL	SH3 domain binding glutamic acid-rich protein like
hsa-miR-613	1	0	1	0	1	1	ST6GAL1	ST6 beta-galactosamide alpha-2,6-sialyltranferase 1
hsa-miR-613	1	0	1	0	1	1	SOX11	SRY (sex determining region Y)-box 11
hsa-miR-613	0	0	1	0	1	1	TRIM21	tripartite motif containing 21
hsa-miR-613	1	0	1	1	1	1	SYN2	synapsin II
hsa-miR-613	1	0	1	1	1	1	TFAP2B	transcription factor AP-2 beta (activating enhancer binding protein 2 beta)
hsa-miR-613	1	0	1	1	1	1	UBE2B	ubiquitin-conjugating enzyme E2B
hsa-miR-613	1	0	1	0	1	1	UBE2D2	ubiquitin-conjugating enzyme E2D 2
hsa-miR-613	1	0	1	1	1	1	UBE2N	ubiquitin-conjugating enzyme E2N
hsa-miR-613	1	0	1	0	1	1	ZIC1	Zic family member 1
hsa-miR-613	1	0	1	1	1	1	PDHX	pyruvate dehydrogenase complex, component X
hsa-miR-613	1	0	1	1	1	1	TRRAP	transformation/transcription domain-associated protein
hsa-miR-613	1	0	1	1	1	1	DYRK2	dual-specificity tyrosine-(Y)-phosphorylation regulated kinase 2
hsa-miR-613	0	0	1	1	1	1	TPST1	tyrosylprotein sulfotransferase 1
hsa-miR-613	1	0	1	0	1	1	CNTNAP1	contactin associated protein 1
hsa-miR-613	1	0	1	1	1	1	EXO1	exonuclease 1
hsa-miR-613	1	0	1	0	1	1	TNKS	tankyrase, TRF1-interacting ankyrin-related ADP-ribose polymerase
hsa-miR-613	1	0	1	0	1	1	IRS2	insulin receptor substrate 2
hsa-miR-613	1	0	1	1	1	1	ALDH1A2	aldehyde dehydrogenase 1 family, member A2
hsa-miR-613	0	0	1	1	1	1	MPZL1	myelin protein zero-like 1
hsa-miR-613	1	0	1	1	1	1	SOCS3	suppressor of cytokine signaling 3
hsa-miR-613	0	0	1	1	1	1	UBA3	ubiquitin-like modifier activating enzyme 3
hsa-miR-613	1	0	1	1	1	1	BCL2L2	BCL2-like 2
hsa-miR-613	0	0	1	1	0	0	FGF14	fibroblast growth factor 14
hsa-miR-613	0	0	1	1	1	1	LBP	lipopolysaccharide binding protein
hsa-miR-613	1	0	1	0	1	1	SLC1A2	solute carrier family 1 (glial high affinity glutamate transporter), member 2
hsa-miR-613	0	0	1	1	0	0	EBAG9	estrogen receptor binding site associated, antigen, 9
hsa-miR-613	1	0	1	0	1	1	MED14	mediator complex subunit 14
hsa-miR-613	0	0	1	1	1	1	EFTUD2	elongation factor Tu GTP binding domain containing 2
hsa-miR-613	0	0	1	1	1	1	DDX10	DEAD (Asp-Glu-Ala-Asp) box polypeptide 10
hsa-miR-613	1	0	1	1	1	1	ENSA	endosulfine alpha
hsa-miR-613	1	0	1	1	1	1	ERG	v-ets erythroblastosis virus E26 oncogene homolog (avian)
hsa-miR-613	1	0	1	1	1	1	LRP2	low density lipoprotein receptor-related protein 2
hsa-miR-613	0	0	1	1	1	1	TK2	thymidine kinase 2, mitochondrial
hsa-miR-613	1	0	1	1	1	1	BAP1	BRCA1 associated protein-1 (ubiquitin carboxy-terminal hydrolase)
hsa-miR-613	1	0	1	1	1	1	RPS6KA5	ribosomal protein S6 kinase, 90kDa, polypeptide 5
hsa-miR-613	1	0	1	1	1	1	KIF3B	kinesin family member 3B
hsa-miR-613	1	0	1	1	1	1	TBPL1	TBP-like 1
hsa-miR-613	0	0	1	1	1	1	CD8B	CD8b molecule
hsa-miR-613	1	0	1	0	1	1	DOCK3	dedicator of cytokinesis 3
hsa-miR-613	0	0	1	1	1	1	PRCP	prolylcarboxypeptidase (angiotensinase C)
hsa-miR-613	0	0	1	1	0	0	CNGA2	cyclic nucleotide gated channel alpha 2
hsa-miR-613	1	0	1	1	1	1	FOXN3	forkhead box N3
hsa-miR-613	0	0	1	1	1	1	CSTA	cystatin A (stefin A)
hsa-miR-613	1	0	1	1	1	1	DCC	deleted in colorectal carcinoma
hsa-miR-613	1	0	1	1	1	1	DLX3	distal-less homeobox 3
hsa-miR-613	1	0	1	0	1	1	DLX6	distal-less homeobox 6
hsa-miR-613	1	0	1	1	1	1	GAS2	growth arrest-specific 2
hsa-miR-613	1	0	1	1	1	1	HAS3	hyaluronan synthase 3
hsa-miR-613	1	0	1	1	0	0	NNAT	neuronatin
hsa-miR-613	1	0	1	0	1	1	PRKAB2	protein kinase, AMP-activated, beta 2 non-catalytic subunit
hsa-miR-613	1	0	1	0	1	1	SRC	v-src sarcoma (Schmidt-Ruppin A-2) viral oncogene homolog (avian)
hsa-miR-613	1	0	1	0	1	1	CCDC6	coiled-coil domain containing 6
hsa-miR-613	1	0	1	1	1	1	SCARB2	scavenger receptor class B, member 2
hsa-miR-613	1	0	1	1	1	1	HOXA1	homeobox A1
hsa-miR-613	0	0	1	1	1	1	LMAN1	lectin, mannose-binding, 1
hsa-miR-613	0	0	1	0	1	1	POU3F2	POU class 3 homeobox 2
hsa-miR-613	1	0	1	1	1	1	TERF2	telomeric repeat binding factor 2
hsa-miR-613	1	0	1	1	1	1	EVI5	ecotropic viral integration site 5
hsa-miR-613	0	0	1	1	1	1	TAF1B	TATA box binding protein (TBP)-associated factor, RNA polymerase I, B, 63kDa
hsa-miR-613	1	0	1	1	1	1	ARPC5	actin related protein 2/3 complex, subunit 5, 16kDa
hsa-miR-613	0	0	1	1	1	1	ARPC3	actin related protein 2/3 complex, subunit 3, 21kDa
hsa-miR-613	0	0	1	1	1	1	TOB1	transducer of ERBB2, 1
hsa-miR-613	0	0	1	1	1	1	CEBPZ	CCAAT/enhancer binding protein (C/EBP), zeta
hsa-miR-613	1	0	1	1	1	1	PRKD3	protein kinase D3
hsa-miR-613	1	0	1	1	1	1	MAP3K5	mitogen-activated protein kinase kinase kinase 5
hsa-miR-613	0	0	1	1	0	0	MT1F	metallothionein 1F
hsa-miR-613	0	0	1	1	0	0	MT1G	metallothionein 1G
hsa-miR-613	0	0	1	1	0	0	MT1H	metallothionein 1H
hsa-miR-613	0	0	1	0	1	1	HCAR3	hydroxycarboxylic acid receptor 3
hsa-miR-613	1	0	1	1	1	1	HS3ST4	heparan sulfate (glucosamine) 3-O-sulfotransferase 4
hsa-miR-613	1	0	1	1	1	1	SEMA3A	sema domain, immunoglobulin domain (Ig), short basic domain, secreted, (semaphorin) 3A
hsa-miR-613	1	0	1	1	1	1	CAPZA1	capping protein (actin filament) muscle Z-line, alpha 1
hsa-miR-613	1	0	1	1	1	1	CAPZA2	capping protein (actin filament) muscle Z-line, alpha 2
hsa-miR-613	1	0	1	1	1	1	ORC2	origin recognition complex, subunit 2
hsa-miR-613	1	0	1	0	1	1	PITPNA	phosphatidylinositol transfer protein, alpha
hsa-miR-613	1	0	1	1	1	1	PKN2	protein kinase N2
hsa-miR-613	1	0	1	1	1	1	STK4	serine/threonine kinase 4
hsa-miR-613	0	0	1	1	1	1	TYRO3	TYRO3 protein tyrosine kinase
hsa-miR-613	1	0	1	1	1	1	NPEPPS	aminopeptidase puromycin sensitive
hsa-miR-613	0	0	1	1	1	1	SLC25A17	solute carrier family 25 (mitochondrial carrier; peroxisomal membrane protein, 34kDa), member 17
hsa-miR-613	0	0	1	1	1	1	SLCO1B1	solute carrier organic anion transporter family, member 1B1
hsa-miR-613	0	0	1	0	1	1	SLC16A2	solute carrier family 16, member 2 (thyroid hormone transporter)
hsa-miR-613	1	0	1	0	1	1	IGF2BP1	insulin-like growth factor 2 mRNA binding protein 1
hsa-miR-613	1	0	1	1	1	1	KHDRBS1	KH domain containing, RNA binding, signal transduction associated 1
hsa-miR-613	1	0	1	1	1	1	FUT9	fucosyltransferase 9 (alpha (1,3) fucosyltransferase)
hsa-miR-613	0	0	1	1	1	1	JTB	jumping translocation breakpoint
hsa-miR-613	0	0	1	1	1	1	INMT	indolethylamine N-methyltransferase
hsa-miR-613	1	0	1	1	1	1	FERMT2	fermitin family member 2
hsa-miR-613	1	0	1	1	1	1	RP2	retinitis pigmentosa 2 (X-linked recessive)
hsa-miR-613	0	0	1	1	1	1	RTN4	reticulon 4
hsa-miR-613	1	0	1	1	1	1	DDX52	DEAD (Asp-Glu-Ala-Asp) box polypeptide 52
hsa-miR-613	1	0	1	1	1	1	SOX30	SRY (sex determining region Y)-box 30
hsa-miR-613	1	0	1	1	1	1	FSTL1	follistatin-like 1
hsa-miR-613	1	0	1	1	1	1	UBL3	ubiquitin-like 3
hsa-miR-613	0	0	1	0	1	1	ZXDB	zinc finger, X-linked, duplicated B
hsa-miR-613	0	0	1	1	1	1	KLF8	Kruppel-like factor 8
hsa-miR-613	0	0	1	1	1	1	STXBP3	syntaxin binding protein 3
hsa-miR-613	0	0	1	1	1	1	ATF5	activating transcription factor 5
hsa-miR-613	1	0	1	1	1	1	APPL1	adaptor protein, phosphotyrosine interaction, PH domain and leucine zipper containing 1
hsa-miR-613	0	0	1	1	0	0	STAP1	signal transducing adaptor family member 1
hsa-miR-613	0	0	1	1	1	1	FOXI1	forkhead box I1
hsa-miR-613	1	0	1	1	1	1	HEY2	hairy/enhancer-of-split related with YRPW motif 2
hsa-miR-613	1	0	1	0	1	1	FBXL7	F-box and leucine-rich repeat protein 7
hsa-miR-613	1	0	1	0	1	1	MYO10	myosin X
hsa-miR-613	1	0	1	1	1	1	TLL2	tolloid-like 2
hsa-miR-613	1	0	1	1	1	1	ZNF215	zinc finger protein 215
hsa-miR-613	0	0	1	1	0	0	SLCO3A1	solute carrier organic anion transporter family, member 3A1
hsa-miR-613	0	0	1	1	1	1	SHPK	sedoheptulokinase
hsa-miR-613	0	0	1	1	0	0	FLRT1	fibronectin leucine rich transmembrane protein 1
hsa-miR-613	0	0	1	1	1	1	SNX10	sorting nexin 10
hsa-miR-613	0	0	1	1	0	0	KCNJ14	potassium inwardly-rectifying channel, subfamily J, member 14
hsa-miR-613	1	0	1	0	1	1	TRHDE	thyrotropin-releasing hormone degrading enzyme
hsa-miR-613	0	0	1	1	1	1	UBQLN1	ubiquilin 1
hsa-miR-613	0	0	1	0	1	1	EMR2	egf-like module containing, mucin-like, hormone receptor-like 2
hsa-miR-613	0	0	1	1	1	1	SNX24	sorting nexin 24
hsa-miR-613	1	0	1	0	1	1	CHMP2B	charged multivesicular body protein 2B
hsa-miR-613	0	0	1	1	1	1	TM4SF1	transmembrane 4 L six family member 1
hsa-miR-613	0	0	1	1	1	1	IL1RAPL1	interleukin 1 receptor accessory protein-like 1
hsa-miR-613	0	0	1	1	0	0	OLFM1	olfactomedin 1
hsa-miR-613	0	0	1	1	1	1	C22orf28	chromosome 22 open reading frame 28
hsa-miR-613	0	0	1	1	1	1	ORC6	origin recognition complex, subunit 6
hsa-miR-613	1	0	1	0	1	1	FJX1	four jointed box 1 (Drosophila)
hsa-miR-613	1	0	1	0	1	1	DIEXF	digestive organ expansion factor homolog (zebrafish)
hsa-miR-613	1	0	1	1	1	1	ZBTB11	zinc finger and BTB domain containing 11
hsa-miR-613	1	0	1	1	1	1	DKK2	dickkopf 2 homolog (Xenopus laevis)
hsa-miR-613	1	0	1	1	1	1	CNOT2	CCR4-NOT transcription complex, subunit 2
hsa-miR-613	0	0	1	1	1	1	TMOD2	tropomodulin 2 (neuronal)
hsa-miR-613	0	0	1	1	0	0	MEA1	male-enhanced antigen 1
hsa-miR-613	1	0	1	1	1	1	ZNF592	zinc finger protein 592
hsa-miR-613	1	0	1	1	1	1	RALGPS1	Ral GEF with PH domain and SH3 binding motif 1
hsa-miR-613	1	0	1	0	1	1	MLEC	malectin
hsa-miR-613	0	0	1	1	1	1	TATDN2	TatD DNase domain containing 2
hsa-miR-613	1	0	1	1	1	1	ZBTB39	zinc finger and BTB domain containing 39
hsa-miR-613	1	0	1	1	1	1	NUAK1	NUAK family, SNF1-like kinase, 1
hsa-miR-613	0	0	1	0	1	1	PPM1E	protein phosphatase, Mg2+/Mn2+ dependent, 1E
hsa-miR-613	1	0	1	1	1	1	CHSY1	chondroitin sulfate synthase 1
hsa-miR-613	0	0	1	1	0	0	KIFAP3	kinesin-associated protein 3
hsa-miR-613	1	0	1	1	1	1	DIP2C	DIP2 disco-interacting protein 2 homolog C (Drosophila)
hsa-miR-613	1	0	1	1	1	1	SPEN	spen homolog, transcriptional regulator (Drosophila)
hsa-miR-613	1	0	1	0	1	1	PDS5B	PDS5, regulator of cohesion maintenance, homolog B (S. cerevisiae)
hsa-miR-613	1	0	1	0	1	1	NMNAT2	nicotinamide nucleotide adenylyltransferase 2
hsa-miR-613	1	0	1	0	1	1	ZNF609	zinc finger protein 609
hsa-miR-613	1	0	1	1	1	1	ERP44	endoplasmic reticulum protein 44
hsa-miR-613	1	0	1	1	1	1	TBC1D9	TBC1 domain family, member 9 (with GRAM domain)
hsa-miR-613	1	0	1	1	1	1	PRRC2C	proline-rich coiled-coil 2C
hsa-miR-613	1	0	1	1	1	1	DNAJC13	DnaJ (Hsp40) homolog, subfamily C, member 13
hsa-miR-613	1	0	1	0	1	1	KHNYN	KH and NYN domain containing
hsa-miR-613	1	0	1	0	1	1	ARHGEF12	Rho guanine nucleotide exchange factor (GEF) 12
hsa-miR-613	0	0	1	1	1	1	TES	testis derived transcript (3 LIM domains)
hsa-miR-613	1	0	1	1	1	1	ABCA12	ATP-binding cassette, sub-family A (ABC1), member 12
hsa-miR-613	1	0	1	1	1	1	FAM155B	family with sequence similarity 155, member B
hsa-miR-613	1	0	1	1	1	1	HOOK1	hook homolog 1 (Drosophila)
hsa-miR-613	1	0	1	1	1	1	SLMO2	slowmo homolog 2 (Drosophila)
hsa-miR-613	0	0	1	1	0	0	SCFD1	sec1 family domain containing 1
hsa-miR-613	1	0	1	1	1	1	VGLL3	vestigial like 3 (Drosophila)
hsa-miR-613	0	0	1	1	1	1	HSD17B11	hydroxysteroid (17-beta) dehydrogenase 11
hsa-miR-613	0	0	1	1	1	1	CD244	CD244 molecule, natural killer cell receptor 2B4
hsa-miR-613	0	0	1	0	1	1	IGF2-AS	IGF2 antisense RNA
hsa-miR-613	0	0	1	0	0	0	CDKL3	cyclin-dependent kinase-like 3
hsa-miR-613	1	0	1	1	1	1	UFM1	ubiquitin-fold modifier 1
hsa-miR-613	1	0	1	0	1	1	KLHL3	kelch-like 3 (Drosophila)
hsa-miR-613	0	0	1	1	1	1	LRRC16A	leucine rich repeat containing 16A
hsa-miR-613	1	0	1	1	1	1	HAUS6	HAUS augmin-like complex, subunit 6
hsa-miR-613	1	0	1	1	1	1	ZNF280C	zinc finger protein 280C
hsa-miR-613	1	0	1	0	1	1	DCAF16	DDB1 and CUL4 associated factor 16
hsa-miR-613	0	0	1	1	1	1	COMMD8	COMM domain containing 8
hsa-miR-613	1	0	1	1	1	1	AGGF1	angiogenic factor with G patch and FHA domains 1
hsa-miR-613	0	0	1	0	1	1	WDR60	WD repeat domain 60
hsa-miR-613	0	0	1	1	1	1	NUDT11	nudix (nucleoside diphosphate linked moiety X)-type motif 11
hsa-miR-613	0	0	1	1	1	1	TRIM62	tripartite motif containing 62
hsa-miR-613	1	0	1	0	1	1	SEPT11	septin 11
hsa-miR-613	1	0	1	1	1	1	KIAA1598	KIAA1598
hsa-miR-613	0	0	1	1	1	1	TMEM144	transmembrane protein 144
hsa-miR-613	0	0	1	1	1	1	SYNJ2BP	synaptojanin 2 binding protein
hsa-miR-613	0	0	1	1	1	1	STK32B	serine/threonine kinase 32B
hsa-miR-613	0	0	1	1	1	1	STYK1	serine/threonine/tyrosine kinase 1
hsa-miR-613	1	0	1	0	1	1	TMEM55A	transmembrane protein 55A
hsa-miR-613	1	0	1	0	1	1	SLAMF8	SLAM family member 8
hsa-miR-613	1	0	1	1	1	1	C8orf4	chromosome 8 open reading frame 4
hsa-miR-613	1	0	1	1	1	1	C1GALT1	core 1 synthase, glycoprotein-N-acetylgalactosamine 3-beta-galactosyltransferase, 1
hsa-miR-613	0	0	1	1	1	1	ANKMY2	ankyrin repeat and MYND domain containing 2
hsa-miR-613	0	0	1	1	0	0	ENTPD7	ectonucleoside triphosphate diphosphohydrolase 7
hsa-miR-613	1	0	1	1	1	1	SCYL3	SCY1-like 3 (S. cerevisiae)
hsa-miR-613	0	0	1	0	1	1	TWSG1	twisted gastrulation homolog 1 (Drosophila)
hsa-miR-613	1	0	1	1	1	1	RAB22A	RAB22A, member RAS oncogene family
hsa-miR-613	0	0	1	0	1	1	ZNF490	zinc finger protein 490
hsa-miR-613	0	0	1	1	1	1	SHROOM4	shroom family member 4
hsa-miR-613	1	0	1	0	1	1	NUFIP2	nuclear fragile X mental retardation protein interacting protein 2
hsa-miR-613	1	0	1	0	1	1	ZNF398	zinc finger protein 398
hsa-miR-613	0	0	1	1	1	1	ARRDC3	arrestin domain containing 3
hsa-miR-613	1	0	1	1	1	1	KLHL14	kelch-like 14 (Drosophila)
hsa-miR-613	1	0	1	0	1	1	WDFY1	WD repeat and FYVE domain containing 1
hsa-miR-613	1	0	1	0	1	1	GPAM	glycerol-3-phosphate acyltransferase, mitochondrial
hsa-miR-613	1	0	1	1	1	1	VAT1L	vesicle amine transport protein 1 homolog (T. californica)-like
hsa-miR-613	0	0	1	1	1	1	GNAO1	guanine nucleotide binding protein (G protein), alpha activating activity polypeptide O
hsa-miR-613	1	0	1	1	1	1	TMEM35	transmembrane protein 35
hsa-miR-613	0	0	1	1	1	1	C2orf43	chromosome 2 open reading frame 43
hsa-miR-613	0	0	1	1	1	1	MS4A1	membrane-spanning 4-domains, subfamily A, member 1
hsa-miR-613	0	0	1	1	1	1	PGM5	phosphoglucomutase 5
hsa-miR-613	1	0	1	0	1	1	CSNK1G1	casein kinase 1, gamma 1
hsa-miR-613	0	0	1	1	1	1	SUSD1	sushi domain containing 1
hsa-miR-613	0	0	1	1	0	0	GH2	growth hormone 2
hsa-miR-613	0	0	1	1	0	0	GH1	growth hormone 1
hsa-miR-613	0	0	1	1	0	0	TSPY2	testis specific protein, Y-linked 2
hsa-miR-613	0	0	1	1	0	0	CSH2	chorionic somatomammotropin hormone 2
hsa-miR-613	1	0	1	1	1	1	PRRX1	paired related homeobox 1
hsa-miR-613	1	0	1	1	1	1	FAM160B2	family with sequence similarity 160, member B2
hsa-miR-613	1	0	1	1	1	1	RMND5A	required for meiotic nuclear division 5 homolog A (S. cerevisiae)
hsa-miR-613	1	0	1	1	1	1	SOWAHC	sosondowah ankyrin repeat domain family member C
hsa-miR-613	1	0	1	0	1	1	OTUB2	OTU domain, ubiquitin aldehyde binding 2
hsa-miR-613	1	0	1	0	1	1	NOTCH2	notch 2
hsa-miR-613	1	0	1	1	1	1	CDC73	cell division cycle 73, Paf1/RNA polymerase II complex component, homolog (S. cerevisiae)
hsa-miR-613	0	0	1	1	0	0	TNFAIP8L2	tumor necrosis factor, alpha-induced protein 8-like 2
hsa-miR-613	1	0	1	1	1	1	ARSJ	arylsulfatase family, member J
hsa-miR-613	0	0	1	1	1	1	LRRK1	leucine-rich repeat kinase 1
hsa-miR-613	0	0	1	0	1	1	C1orf115	chromosome 1 open reading frame 115
hsa-miR-613	1	0	1	0	1	1	MOB3B	MOB kinase activator 3B
hsa-miR-613	0	0	1	1	0	0	NRSN2	neurensin 2
hsa-miR-613	0	0	1	1	0	0	CCDC15	coiled-coil domain containing 15
hsa-miR-613	1	0	1	1	1	1	KLHL18	kelch-like 18 (Drosophila)
hsa-miR-613	1	0	1	0	1	1	EDEM3	ER degradation enhancer, mannosidase alpha-like 3
hsa-miR-613	0	0	1	1	1	1	ITIH5	inter-alpha-trypsin inhibitor heavy chain family, member 5
hsa-miR-613	0	0	1	1	0	0	DEFB126	defensin, beta 126
hsa-miR-613	1	0	1	1	1	1	ANO3	anoctamin 3
hsa-miR-613	1	0	1	0	1	1	TMEM47	transmembrane protein 47
hsa-miR-613	1	0	1	1	1	1	CRISPLD1	cysteine-rich secretory protein LCCL domain containing 1
hsa-miR-613	0	0	1	0	1	1	KRTAP1-5	keratin associated protein 1-5
hsa-miR-613	1	0	1	0	1	1	FAM172A	family with sequence similarity 172, member A
hsa-miR-613	1	0	1	1	1	1	ARID5B	AT rich interactive domain 5B (MRF1-like)
hsa-miR-613	1	0	1	1	1	1	ZNRF1	zinc and ring finger 1, E3 ubiquitin protein ligase
hsa-miR-613	0	0	1	1	0	0	NICN1	nicolin 1
hsa-miR-613	0	0	1	1	1	1	COG8	component of oligomeric golgi complex 8
hsa-miR-613	1	0	1	1	1	1	HOOK3	hook homolog 3 (Drosophila)
hsa-miR-613	0	0	1	1	1	1	HCAR1	hydroxycarboxylic acid receptor 1
hsa-miR-613	1	0	1	1	1	1	CGNL1	cingulin-like 1
hsa-miR-613	1	0	1	0	1	1	UBASH3B	ubiquitin associated and SH3 domain containing B
hsa-miR-613	0	0	1	1	1	1	FBXL20	F-box and leucine-rich repeat protein 20
hsa-miR-613	1	0	1	1	1	1	C5orf30	chromosome 5 open reading frame 30
hsa-miR-613	1	0	1	0	1	1	PURB	purine-rich element binding protein B
hsa-miR-613	1	0	1	1	0	0	FCHSD1	FCH and double SH3 domains 1
hsa-miR-613	1	0	1	1	1	1	BRWD1	bromodomain and WD repeat domain containing 1
hsa-miR-613	0	0	1	1	0	0	TSGA13	testis specific, 13
hsa-miR-613	0	0	1	1	1	1	IL22RA2	interleukin 22 receptor, alpha 2
hsa-miR-613	1	0	1	1	1	1	TRIM9	tripartite motif containing 9
hsa-miR-613	0	0	1	0	1	1	ZNF518B	zinc finger protein 518B
hsa-miR-613	1	0	1	1	1	1	SRSF10	serine/arginine-rich splicing factor 10
hsa-miR-613	1	0	1	0	1	1	ANTXR2	anthrax toxin receptor 2
hsa-miR-613	0	0	1	1	1	1	CLEC4D	C-type lectin domain family 4, member D
hsa-miR-613	0	0	1	1	1	1	CTCFL	CCCTC-binding factor (zinc finger protein)-like
hsa-miR-613	0	0	1	1	1	1	C14orf126	chromosome 14 open reading frame 126
hsa-miR-613	0	0	1	1	1	1	COLEC12	collectin sub-family member 12
hsa-miR-613	0	0	1	1	1	1	RAD51B	RAD51 homolog B (S. cerevisiae)
hsa-miR-613	1	0	1	1	1	1	SPTSSA	serine palmitoyltransferase, small subunit A
hsa-miR-613	1	0	1	1	1	1	KCTD12	potassium channel tetramerisation domain containing 12
hsa-miR-613	1	0	1	1	0	0	LIPH	lipase, member H
hsa-miR-613	0	0	1	1	1	1	PUS10	pseudouridylate synthase 10
hsa-miR-613	0	0	1	0	1	1	OSTCP1	oligosaccharyltransferase complex subunit pseudogene 1
hsa-miR-613	0	0	1	1	1	1	GLIS1	GLIS family zinc finger 1
hsa-miR-613	0	0	1	0	1	1	CHKB	choline kinase beta
hsa-miR-613	1	0	1	1	1	1	POGLUT1	protein O-glucosyltransferase 1
hsa-miR-613	0	0	1	1	1	1	ERP27	endoplasmic reticulum protein 27
hsa-miR-613	0	0	1	1	0	0	TEX26	testis expressed 26
hsa-miR-613	1	0	1	1	1	1	BHLHE22	basic helix-loop-helix family, member e22
hsa-miR-613	1	0	1	1	1	1	FAM123B	family with sequence similarity 123B
hsa-miR-613	0	0	1	0	1	1	HORMAD2	HORMA domain containing 2
hsa-miR-613	0	0	1	1	1	1	DUSP18	dual specificity phosphatase 18
hsa-miR-613	1	0	1	1	1	1	C7orf60	chromosome 7 open reading frame 60
hsa-miR-613	0	0	1	1	1	1	CCER1	coiled-coil glutamate-rich protein 1
hsa-miR-613	0	0	1	1	1	1	NANP	N-acetylneuraminic acid phosphatase
hsa-miR-613	1	0	1	0	1	1	RWDD4	RWD domain containing 4
hsa-miR-613	0	0	1	1	1	1	C6orf170	chromosome 6 open reading frame 170
hsa-miR-613	1	0	1	1	1	1	BEND6	BEN domain containing 6
hsa-miR-613	1	0	1	0	1	1	ZBTB9	zinc finger and BTB domain containing 9
hsa-miR-613	1	0	1	1	1	1	NXPH1	neurexophilin 1
hsa-miR-613	0	0	1	1	1	1	CNPY4	canopy 4 homolog (zebrafish)
hsa-miR-613	1	0	1	1	1	1	WTAP	Wilms tumor 1 associated protein
hsa-miR-613	1	0	1	0	1	1	ST6GALNAC3	ST6 (alpha-N-acetyl-neuraminyl-2,3-beta-galactosyl-1,3)-N-acetylgalactosaminide alpha-2,6-sialyltransferase 3
hsa-miR-613	0	0	1	0	1	1	LIX1	Lix1 homolog (chicken)
hsa-miR-613	1	0	1	1	1	1	TMEM151A	transmembrane protein 151A
hsa-miR-613	1	0	1	1	1	1	HS6ST3	heparan sulfate 6-O-sulfotransferase 3
hsa-miR-613	1	0	1	0	1	1	PLEKHH2	pleckstrin homology domain containing, family H (with MyTH4 domain) member 2
hsa-miR-613	0	0	1	1	0	0	KCNE2	potassium voltage-gated channel, Isk-related family, member 2
hsa-miR-613	0	0	1	1	1	1	REXO1L1	REX1, RNA exonuclease 1 homolog (S. cerevisiae)-like 1
hsa-miR-613	0	0	1	1	1	1	NFATC3	nuclear factor of activated T-cells, cytoplasmic, calcineurin-dependent 3
hsa-miR-613	1	0	1	1	1	1	RFX6	regulatory factor X, 6
hsa-miR-613	0	0	1	0	1	1	NBPF15	neuroblastoma breakpoint family, member 15
hsa-miR-613	0	0	1	1	1	1	MAGEB18	melanoma antigen family B, 18
hsa-miR-613	0	0	1	1	1	1	AQPEP	laeverin
hsa-miR-613	1	0	1	0	1	1	DPY19L2	dpy-19-like 2 (C. elegans)
hsa-miR-613	0	0	1	1	1	1	GRIK1	glutamate receptor, ionotropic, kainate 1
hsa-miR-613	1	0	1	1	1	1	EXOC8	exocyst complex component 8
hsa-miR-613	1	0	1	1	0	0	JPH2	junctophilin 2
hsa-miR-613	1	0	1	1	1	1	STX12	syntaxin 12
hsa-miR-613	1	0	1	1	1	1	TMEM26	transmembrane protein 26
hsa-miR-613	0	0	1	1	1	1	STXBP4	syntaxin binding protein 4
hsa-miR-613	1	0	1	0	1	1	ZDHHC21	zinc finger, DHHC-type containing 21
hsa-miR-613	1	0	1	1	1	1	MTDH	metadherin
hsa-miR-613	0	0	1	1	1	1	NPAS4	neuronal PAS domain protein 4
hsa-miR-613	1	0	1	1	1	1	ZSCAN22	zinc finger and SCAN domain containing 22
hsa-miR-613	0	0	1	1	0	0	MAGEB10	melanoma antigen family B, 10
hsa-miR-613	0	0	1	1	0	0	BPIFB4	BPI fold containing family B, member 4
hsa-miR-613	0	0	1	0	1	1	VSIG1	V-set and immunoglobulin domain containing 1
hsa-miR-613	1	0	1	1	1	1	SPTY2D1	SPT2, Suppressor of Ty, domain containing 1 (S. cerevisiae)
hsa-miR-613	1	0	1	0	1	1	SRRM4	serine/arginine repetitive matrix 4
hsa-miR-613	1	0	1	1	1	1	ADAMTS6	ADAM metallopeptidase with thrombospondin type 1 motif, 6
hsa-miR-613	0	0	1	1	0	0	KCTD8	potassium channel tetramerisation domain containing 8
hsa-miR-613	1	0	1	1	1	1	MIA3	melanoma inhibitory activity family, member 3
hsa-miR-613	0	0	1	0	1	1	ANKRD36	ankyrin repeat domain 36
hsa-miR-613	1	0	1	0	1	1	ZC3H6	zinc finger CCCH-type containing 6
hsa-miR-613	0	0	1	0	1	1	GYPE	glycophorin E (MNS blood group)
hsa-miR-613	0	0	1	1	1	1	COL25A1	collagen, type XXV, alpha 1
hsa-miR-613	1	0	1	0	1	1	PRICKLE2	prickle homolog 2 (Drosophila)
hsa-miR-613	0	0	1	1	0	0	LIPI	lipase, member I
hsa-miR-613	0	0	1	1	1	1	ILDR2	immunoglobulin-like domain containing receptor 2
hsa-miR-613	1	0	1	0	1	1	MBLAC2	metallo-beta-lactamase domain containing 2
hsa-miR-613	0	0	1	1	1	1	APOBEC4	apolipoprotein B mRNA editing enzyme, catalytic polypeptide-like 4 (putative)
hsa-miR-613	0	0	1	1	1	1	SPINK6	serine peptidase inhibitor, Kazal type 6
hsa-miR-613	1	0	1	1	1	1	ATRNL1	attractin-like 1
hsa-miR-613	0	0	1	1	1	1	ERICH1	glutamate-rich 1
hsa-miR-613	0	0	1	0	0	0	C16orf47	chromosome 16 open reading frame 47
hsa-miR-613	1	0	1	1	1	1	ADAMTSL3	ADAMTS-like 3
hsa-miR-613	0	0	1	0	0	0	TFAMP1	transcription factor A, mitochondrial pseudogene 1
hsa-miR-613	0	0	1	0	0	0	ANXA2P3	annexin A2 pseudogene 3
hsa-miR-613	0	0	1	0	0	0	MIR155HG	MIR155 host gene (non-protein coding)
hsa-miR-613	0	0	1	0	0	0	TTTY2	testis-specific transcript, Y-linked 2 (non-protein coding)
hsa-miR-613	0	0	1	0	0	0	TTTY22	testis-specific transcript, Y-linked 22 (non-protein coding)
hsa-miR-613	0	0	1	0	0	0	TTTY23	testis-specific transcript, Y-linked 23 (non-protein coding)
hsa-miR-613	0	0	1	0	0	0	TTTY15	testis-specific transcript, Y-linked 15 (non-protein coding)
hsa-miR-613	0	0	1	0	0	0	ANXA2P1	annexin A2 pseudogene 1
hsa-miR-613	0	0	1	0	0	0	TTTY6B	testis-specific transcript, Y-linked 6B (non-protein coding)
hsa-miR-613	0	0	1	0	0	0	OR7E91P	olfactory receptor, family 7, subfamily E, member 91 pseudogene
hsa-miR-613	0	0	1	0	0	0	NUDT4P1	nudix (nucleoside diphosphate linked moiety X)-type motif 4 pseudogene 1
hsa-miR-613	0	0	1	0	0	0	GABPAP	GA binding protein transcription factor, alpha subunit pseudogene
hsa-miR-613	0	0	1	0	0	0	HNRNPA3P1	heterogeneous nuclear ribonucleoprotein A3 pseudogene 1
hsa-miR-613	0	0	1	0	0	0	TPTE2P3	transmembrane phosphoinositide 3-phosphatase and tensin homolog 2 pseudogene 3
hsa-miR-613	0	0	1	0	0	0	NPHP3-AS1	NPHP3 antisense RNA 1
hsa-miR-613	0	0	1	0	0	0	TPTE2P6	transmembrane phosphoinositide 3-phosphatase and tensin homolog 2 pseudogene 6
hsa-miR-613	0	0	1	0	0	0	MALAT1	metastasis associated lung adenocarcinoma transcript 1 (non-protein coding)
hsa-miR-613	0	0	1	0	0	0	DUSP5P	dual specificity phosphatase 5 pseudogene
hsa-miR-613	0	0	1	0	0	0	SNORD116-1	small nucleolar RNA, C/D box 116-1
hsa-miR-613	0	0	1	0	0	0	SNORD116-2	small nucleolar RNA, C/D box 116-2
hsa-miR-613	0	0	1	0	0	0	SNORD116-4	small nucleolar RNA, C/D box 116-4
hsa-miR-613	0	0	1	0	0	0	SNORD116-6	small nucleolar RNA, C/D box 116-6
hsa-miR-613	0	0	1	0	0	0	SNORD116-7	small nucleolar RNA, C/D box 116-7
hsa-miR-613	0	0	1	0	0	0	SNORD116-8	small nucleolar RNA, C/D box 116-8
hsa-miR-613	0	0	1	0	0	0	SNORD116-9	small nucleolar RNA, C/D box 116-9
hsa-miR-613	0	0	1	0	0	0	SNORD116-13	small nucleolar RNA, C/D box 116-13
hsa-miR-613	0	0	1	0	0	0	SNORD116-14	small nucleolar RNA, C/D box 116-14
hsa-miR-613	0	0	1	0	0	0	SNORD116-17	small nucleolar RNA, C/D box 116-17
hsa-miR-613	0	0	1	0	0	0	SNORD116-18	small nucleolar RNA, C/D box 116-18
hsa-miR-613	0	0	1	0	0	0	SNORD116-20	small nucleolar RNA, C/D box 116-20
hsa-miR-613	0	0	1	0	0	0	SNORD116-21	small nucleolar RNA, C/D box 116-21
hsa-miR-613	0	0	1	0	1	1	DDX12P	DEAD/H (Asp-Glu-Ala-Asp/His) box polypeptide 12, pseudogene
hsa-miR-613	1	0	1	1	1	1	TRIO	trio Rho guanine nucleotide exchange factor
hsa-miR-613	0	0	1	1	1	1	BBS9	Bardet-Biedl syndrome 9
hsa-miR-613	0	0	1	0	0	0	TRAC	T cell receptor alpha constant
hsa-miR-613	1	0	1	1	1	1	NDUFAB1	NADH dehydrogenase (ubiquinone) 1, alpha/beta subcomplex, 1, 8kDa
hsa-miR-613	0	0	1	1	0	0	OTC	ornithine carbamoyltransferase
hsa-miR-613	1	0	1	1	1	1	PRDM1	PR domain containing 1, with ZNF domain
hsa-miR-613	0	0	1	1	0	0	KLK13	kallikrein-related peptidase 13
hsa-miR-613	0	0	0	1	0	0	ZNF8	zinc finger protein 8
hsa-miR-613	0	0	0	1	0	0	MYL6B	myosin, light chain 6B, alkali, smooth muscle and non-muscle
hsa-miR-613	0	0	1	1	0	0	PSMD8	proteasome (prosome, macropain) 26S subunit, non-ATPase, 8
hsa-miR-613	0	0	1	1	0	0	MARCH2	membrane-associated ring finger (C3HC4) 2, E3 ubiquitin protein ligase
hsa-miR-613	0	0	1	1	0	0	TRIB3	tribbles homolog 3 (Drosophila)
hsa-miR-613	0	0	0	1	1	1	TLR8	toll-like receptor 8
hsa-miR-613	0	0	1	1	1	1	ATP12A	ATPase, H+/K+ transporting, nongastric, alpha polypeptide
hsa-miR-613	0	0	1	1	0	0	CRYM	crystallin, mu
hsa-miR-613	0	0	1	1	0	0	CTSH	cathepsin H
hsa-miR-613	0	0	1	1	0	0	CPQ	carboxypeptidase Q
hsa-miR-613	0	0	1	1	0	0	CNOT3	CCR4-NOT transcription complex, subunit 3
hsa-miR-613	0	0	0	1	0	0	EXOSC5	exosome component 5
hsa-miR-613	0	0	1	1	0	0	HNRNPL	heterogeneous nuclear ribonucleoprotein L
hsa-miR-613	1	0	1	1	1	1	RAB3D	RAB3D, member RAS oncogene family
hsa-miR-613	0	0	1	1	1	1	CYP3A43	cytochrome P450, family 3, subfamily A, polypeptide 43
hsa-miR-613	0	0	0	1	0	0	MYL10	myosin, light chain 10, regulatory
hsa-miR-613	1	0	1	1	1	1	SEC61B	Sec61 beta subunit
hsa-miR-613	0	0	1	1	1	1	CCL2	chemokine (C-C motif) ligand 2
hsa-miR-613	1	0	1	1	1	1	TNFAIP1	tumor necrosis factor, alpha-induced protein 1 (endothelial)
hsa-miR-613	0	0	1	1	1	1	CWH43	cell wall biogenesis 43 C-terminal homolog (S. cerevisiae)
hsa-miR-613	1	0	1	1	1	1	HSPA8	heat shock 70kDa protein 8
hsa-miR-613	0	0	0	1	0	0	MYF6	myogenic factor 6 (herculin)
hsa-miR-613	0	0	0	1	1	1	GPN3	GPN-loop GTPase 3
hsa-miR-613	0	0	1	1	1	1	RAD51AP1	RAD51 associated protein 1
hsa-miR-613	1	0	1	1	1	1	ENDOU	endonuclease, polyU-specific
hsa-miR-613	0	0	1	1	1	1	IL5	interleukin 5 (colony-stimulating factor, eosinophil)
hsa-miR-613	0	0	1	1	0	0	RBP2	retinol binding protein 2, cellular
hsa-miR-613	0	0	0	1	1	1	PASK	PAS domain containing serine/threonine kinase
hsa-miR-613	0	0	0	1	0	0	PROC	protein C (inactivator of coagulation factors Va and VIIIa)
hsa-miR-613	0	0	1	1	0	0	MIIP	migration and invasion inhibitory protein
hsa-miR-613	0	0	1	1	0	0	EBNA1BP2	EBNA1 binding protein 2
hsa-miR-613	1	0	0	1	1	1	PIGZ	phosphatidylinositol glycan anchor biosynthesis, class Z
hsa-miR-613	0	0	1	1	1	1	EBPL	emopamil binding protein-like
hsa-miR-613	0	0	0	1	0	0	GCNT7	glucosaminyl (N-acetyl) transferase family member 7
hsa-miR-613	0	0	0	1	0	0	PEPD	peptidase D
hsa-miR-613	0	0	1	1	0	0	ABCC10	ATP-binding cassette, sub-family C (CFTR/MRP), member 10
hsa-miR-613	1	0	0	1	1	1	CLPP	ClpP caseinolytic peptidase, ATP-dependent, proteolytic subunit homolog (E. coli)
hsa-miR-613	0	0	1	1	0	0	SIX1	SIX homeobox 1
hsa-miR-613	1	0	1	1	0	0	ABHD8	abhydrolase domain containing 8
hsa-miR-613	0	0	0	1	0	0	TAS2R4	taste receptor, type 2, member 4
hsa-miR-613	0	0	1	1	1	1	GNG11	guanine nucleotide binding protein (G protein), gamma 11
hsa-miR-613	0	0	0	1	1	1	RFPL2	ret finger protein-like 2
hsa-miR-613	0	0	1	1	1	1	NALCN	sodium leak channel, non-selective
hsa-miR-613	0	0	1	1	0	0	ALOX12	arachidonate 12-lipoxygenase
hsa-miR-613	0	0	0	1	0	0	ADAMTS2	ADAM metallopeptidase with thrombospondin type 1 motif, 2
hsa-miR-613	0	0	0	1	0	0	DHX58	DEXH (Asp-Glu-X-His) box polypeptide 58
hsa-miR-613	0	0	0	1	0	0	PRKCSH	protein kinase C substrate 80K-H
hsa-miR-613	0	0	0	1	1	1	BST2	bone marrow stromal cell antigen 2
hsa-miR-613	0	0	0	1	1	1	ACSBG2	acyl-CoA synthetase bubblegum family member 2
hsa-miR-613	1	0	0	1	1	1	AKAP12	A kinase (PRKA) anchor protein 12
hsa-miR-613	0	0	1	1	0	0	HIGD1B	HIG1 hypoxia inducible domain family, member 1B
hsa-miR-613	0	0	1	1	1	1	TEX101	testis expressed 101
hsa-miR-613	0	0	0	1	0	0	ABCB7	ATP-binding cassette, sub-family B (MDR/TAP), member 7
hsa-miR-613	0	0	0	1	1	1	FMO5	flavin containing monooxygenase 5
hsa-miR-613	0	0	0	1	0	0	ZNF132	zinc finger protein 132
hsa-miR-613	0	0	0	1	1	1	GAS2L2	growth arrest-specific 2 like 2
hsa-miR-613	0	0	0	1	1	1	C14orf159	chromosome 14 open reading frame 159
hsa-miR-613	0	0	0	1	0	0	ANXA1	annexin A1
hsa-miR-613	0	0	1	1	1	1	AKIRIN2	akirin 2
hsa-miR-613	0	0	0	1	1	1	CDK4	cyclin-dependent kinase 4
hsa-miR-613	0	0	0	1	1	1	ESPL1	extra spindle pole bodies homolog 1 (S. cerevisiae)
hsa-miR-613	0	0	1	1	1	1	PWP1	PWP1 homolog (S. cerevisiae)
hsa-miR-613	0	0	1	1	1	1	IL6	interleukin 6 (interferon, beta 2)
hsa-miR-613	0	0	1	1	1	1	RSAD1	radical S-adenosyl methionine domain containing 1
hsa-miR-613	0	0	0	1	1	1	IL36B	interleukin 36, beta
hsa-miR-613	0	0	1	1	1	1	HEMGN	hemogen
hsa-miR-613	0	0	1	1	0	0	SIT1	signaling threshold regulating transmembrane adaptor 1
hsa-miR-613	1	0	1	1	1	1	RAB30	RAB30, member RAS oncogene family
hsa-miR-613	0	0	0	1	1	1	MRPL15	mitochondrial ribosomal protein L15
hsa-miR-613	0	0	1	1	0	0	C11orf70	chromosome 11 open reading frame 70
hsa-miR-613	0	0	1	1	0	0	BARD1	BRCA1 associated RING domain 1
hsa-miR-613	0	0	1	1	1	1	CHRNA1	cholinergic receptor, nicotinic, alpha 1 (muscle)
hsa-miR-613	0	0	1	1	1	1	GUCA1C	guanylate cyclase activator 1C
hsa-miR-613	0	0	0	1	1	1	COX10	COX10 homolog, cytochrome c oxidase assembly protein, heme A: farnesyltransferase (yeast)
hsa-miR-613	0	0	1	1	0	0	SGCA	sarcoglycan, alpha (50kDa dystrophin-associated glycoprotein)
hsa-miR-613	0	0	1	1	1	1	PIK3C3	phosphatidylinositol 3-kinase, catalytic subunit type 3
hsa-miR-613	0	0	1	1	0	0	ZNF839	zinc finger protein 839
hsa-miR-613	0	0	1	1	0	0	HAGH	hydroxyacylglutathione hydrolase
hsa-miR-613	0	0	1	1	0	0	RNF167	ring finger protein 167
hsa-miR-613	0	0	1	1	1	1	C16orf80	chromosome 16 open reading frame 80
hsa-miR-613	0	0	1	1	0	0	HPN	hepsin
hsa-miR-613	0	0	1	1	0	0	ASPA	aspartoacylase
hsa-miR-613	1	0	1	1	1	1	EP300	E1A binding protein p300
hsa-miR-613	0	0	0	1	0	0	ELANE	elastase, neutrophil expressed
hsa-miR-613	0	0	0	1	1	1	CLCA4	chloride channel accessory 4
hsa-miR-613	1	0	1	1	0	0	KIAA1211	KIAA1211
hsa-miR-613	0	0	1	1	1	1	TIMMDC1	translocase of inner mitochondrial membrane domain containing 1
hsa-miR-613	1	0	1	1	1	1	SNX25	sorting nexin 25
hsa-miR-613	0	0	1	1	0	0	GCKR	glucokinase (hexokinase 4) regulator
hsa-miR-613	0	0	1	1	1	1	NPR3	natriuretic peptide receptor C/guanylate cyclase C (atrionatriuretic peptide receptor C)
hsa-miR-613	0	0	1	1	0	0	RPL26L1	ribosomal protein L26-like 1
hsa-miR-613	0	0	1	1	1	1	CENPE	centromere protein E, 312kDa
hsa-miR-613	0	0	1	1	0	0	C12orf52	chromosome 12 open reading frame 52
hsa-miR-613	0	0	1	1	0	0	ADAM21	ADAM metallopeptidase domain 21
hsa-miR-613	0	0	0	1	0	0	ETFA	electron-transfer-flavoprotein, alpha polypeptide
hsa-miR-613	0	0	1	1	1	1	WDR61	WD repeat domain 61
hsa-miR-613	0	0	0	1	0	0	RHCG	Rh family, C glycoprotein
hsa-miR-613	0	0	1	1	0	0	UQCRC2	ubiquinol-cytochrome c reductase core protein II
hsa-miR-613	0	0	0	1	1	1	C17orf64	chromosome 17 open reading frame 64
hsa-miR-613	1	0	1	1	1	1	PIP4K2B	phosphatidylinositol-5-phosphate 4-kinase, type II, beta
hsa-miR-613	0	0	0	1	1	1	RNPEPL1	arginyl aminopeptidase (aminopeptidase B)-like 1
hsa-miR-613	0	0	1	1	1	1	CAPN10	calpain 10
hsa-miR-613	0	0	0	1	1	1	PROK1	prokineticin 1
hsa-miR-613	0	0	1	1	1	1	POU2F1	POU class 2 homeobox 1
hsa-miR-613	0	0	0	1	0	0	PKLR	pyruvate kinase, liver and RBC
hsa-miR-613	0	0	1	1	1	1	PDIA6	protein disulfide isomerase family A, member 6
hsa-miR-613	1	0	1	1	1	1	TAGLN3	transgelin 3
hsa-miR-613	0	0	1	1	1	1	EIF2A	eukaryotic translation initiation factor 2A, 65kDa
hsa-miR-613	0	0	1	1	1	1	TM4SF19	transmembrane 4 L six family member 19
hsa-miR-613	0	0	1	1	0	0	ROPN1L	rhophilin associated tail protein 1-like
hsa-miR-613	1	0	1	1	1	1	PLK2	polo-like kinase 2
hsa-miR-613	1	0	1	1	1	1	GABRA6	gamma-aminobutyric acid (GABA) A receptor, alpha 6
hsa-miR-613	0	0	1	1	1	1	FAM54A	family with sequence similarity 54, member A
hsa-miR-613	0	0	0	1	0	0	TTTY7B	testis-specific transcript, Y-linked 7B (non-protein coding)
hsa-miR-613	0	0	0	1	0	0	FAM75A3	family with sequence similarity 75, member A3
hsa-miR-613	1	0	0	1	1	1	PPRC1	peroxisome proliferator-activated receptor gamma, coactivator-related 1
hsa-miR-613	0	0	0	1	1	1	APIP	APAF1 interacting protein
hsa-miR-613	1	0	1	1	1	1	TMPRSS13	transmembrane protease, serine 13
hsa-miR-613	0	0	0	1	0	0	SPATA4	spermatogenesis associated 4
hsa-miR-613	0	0	1	1	1	1	PIGF	phosphatidylinositol glycan anchor biosynthesis, class F
hsa-miR-613	0	0	1	1	1	1	IFLTD1	intermediate filament tail domain containing 1
hsa-miR-613	0	0	0	1	0	0	SLC5A10	solute carrier family 5 (sodium/glucose cotransporter), member 10
hsa-miR-613	0	0	1	1	1	1	PPP1R3A	protein phosphatase 1, regulatory subunit 3A
hsa-miR-613	0	0	1	1	1	1	ACAA2	acetyl-CoA acyltransferase 2
hsa-miR-613	0	0	1	1	1	1	CCDC146	coiled-coil domain containing 146
hsa-miR-613	0	0	0	1	0	0	MED7	mediator complex subunit 7
hsa-miR-613	0	0	1	1	1	1	FBXO32	F-box protein 32
hsa-miR-613	0	0	1	1	1	1	C1orf27	chromosome 1 open reading frame 27
hsa-miR-613	0	0	0	1	1	1	PDF	peptide deformylase (mitochondrial)
hsa-miR-613	1	0	1	1	0	0	DTNB	dystrobrevin, beta
hsa-miR-613	0	0	1	1	0	0	WNT9B	wingless-type MMTV integration site family, member 9B
hsa-miR-613	0	0	1	1	0	0	C21orf59	chromosome 21 open reading frame 59
hsa-miR-613	0	0	1	1	1	1	CELA1	chymotrypsin-like elastase family, member 1
hsa-miR-613	0	0	1	1	0	0	PHF7	PHD finger protein 7
hsa-miR-613	0	0	1	1	0	0	BEND5	BEN domain containing 5
hsa-miR-613	0	0	1	1	1	1	IWS1	IWS1 homolog (S. cerevisiae)
hsa-miR-613	1	0	1	1	1	1	MERTK	c-mer proto-oncogene tyrosine kinase
hsa-miR-613	1	0	0	1	1	1	MRPS18C	mitochondrial ribosomal protein S18C
hsa-miR-613	0	0	0	1	0	0	RNPEP	arginyl aminopeptidase (aminopeptidase B)
hsa-miR-613	0	0	1	1	0	0	STK11IP	serine/threonine kinase 11 interacting protein
hsa-miR-613	0	0	1	1	1	1	PTPRN	protein tyrosine phosphatase, receptor type, N
hsa-miR-613	1	0	1	1	1	1	NEK10	NIMA (never in mitosis gene a)- related kinase 10
hsa-miR-613	0	0	0	1	0	0	GLB1L	galactosidase, beta 1-like
hsa-miR-613	1	0	1	1	1	1	FBLN2	fibulin 2
hsa-miR-613	0	0	1	1	0	0	CCDC36	coiled-coil domain containing 36
hsa-miR-613	1	0	1	1	1	1	TMEM184C	transmembrane protein 184C
hsa-miR-613	0	0	0	1	0	0	TLR3	toll-like receptor 3
hsa-miR-613	0	0	1	1	1	1	RGS20	regulator of G-protein signaling 20
hsa-miR-613	1	0	1	1	1	1	KIAA1429	KIAA1429
hsa-miR-613	0	0	1	1	1	1	FAM35A	family with sequence similarity 35, member A
hsa-miR-613	0	0	0	1	0	0	SERPINA4	serpin peptidase inhibitor, clade A (alpha-1 antiproteinase, antitrypsin), member 4
hsa-miR-613	0	0	1	1	0	0	PPP1R14D	protein phosphatase 1, regulatory (inhibitor) subunit 14D
hsa-miR-613	0	0	0	1	1	1	NLRP14	NLR family, pyrin domain containing 14
hsa-miR-613	0	0	1	1	0	0	CTDP1	CTD (carboxy-terminal domain, RNA polymerase II, polypeptide A) phosphatase, subunit 1
hsa-miR-613	0	0	1	1	0	0	MESP1	mesoderm posterior 1 homolog (mouse)
hsa-miR-613	0	0	1	1	1	1	GLYATL1	glycine-N-acyltransferase-like 1
hsa-miR-613	1	0	1	1	1	1	DPP8	dipeptidyl-peptidase 8
hsa-miR-613	0	0	1	1	1	1	ACSF2	acyl-CoA synthetase family member 2
hsa-miR-613	0	0	1	1	1	1	ENGASE	endo-beta-N-acetylglucosaminidase
hsa-miR-613	0	0	1	1	1	1	FGA	fibrinogen alpha chain
hsa-miR-613	0	0	0	1	0	0	OR4X2	olfactory receptor, family 4, subfamily X, member 2
hsa-miR-613	0	0	0	1	0	0	P2RY12	purinergic receptor P2Y, G-protein coupled, 12
hsa-miR-613	0	0	1	1	0	0	C20orf196	chromosome 20 open reading frame 196
hsa-miR-613	0	0	1	1	0	0	ZNF30	zinc finger protein 30
hsa-miR-613	0	0	1	1	1	1	CHST11	carbohydrate (chondroitin 4) sulfotransferase 11
hsa-miR-613	0	0	0	1	0	0	OR1A1	olfactory receptor, family 1, subfamily A, member 1
hsa-miR-613	1	0	1	1	1	1	HOMER2	homer homolog 2 (Drosophila)
hsa-miR-613	0	0	0	1	0	0	ETV3L	ets variant 3-like
hsa-miR-613	0	0	0	1	1	1	GUSB	glucuronidase, beta
hsa-miR-613	0	0	0	1	0	0	DEGS2	delta(4)-desaturase, sphingolipid 2
hsa-miR-613	0	0	0	1	0	0	OR10H2	olfactory receptor, family 10, subfamily H, member 2
hsa-miR-613	0	0	1	1	0	0	MTBP	Mdm2, transformed 3T3 cell double minute 2, p53 binding protein (mouse) binding protein, 104kDa
hsa-miR-613	0	0	1	1	0	0	SOX14	SRY (sex determining region Y)-box 14
hsa-miR-613	0	0	1	1	1	1	HSPBAP1	HSPB (heat shock 27kDa) associated protein 1
hsa-miR-613	0	0	0	1	1	1	MRPL13	mitochondrial ribosomal protein L13
hsa-miR-613	0	0	1	1	0	0	STRA13	stimulated by retinoic acid 13 homolog (mouse)
hsa-miR-613	0	0	1	1	1	1	MPLKIP	M-phase specific PLK1 interacting protein
hsa-miR-613	1	0	1	1	1	1	MLLT10	myeloid/lymphoid or mixed-lineage leukemia (trithorax homolog, Drosophila); translocated to, 10
hsa-miR-613	0	0	0	1	1	1	ADAT1	adenosine deaminase, tRNA-specific 1
hsa-miR-613	0	0	1	1	0	0	WFDC5	WAP four-disulfide core domain 5
hsa-miR-613	1	0	1	1	1	1	LRRN3	leucine rich repeat neuronal 3
hsa-miR-613	1	0	1	1	1	1	PHC3	polyhomeotic homolog 3 (Drosophila)
hsa-miR-613	0	0	0	1	1	1	TLR1	toll-like receptor 1
hsa-miR-613	0	0	1	1	0	0	C3orf77	chromosome 3 open reading frame 77
hsa-miR-613	0	0	0	1	0	0	GPRC6A	G protein-coupled receptor, family C, group 6, member A
hsa-miR-613	0	0	1	1	1	1	CARHSP1	calcium regulated heat stable protein 1, 24kDa
hsa-miR-613	0	0	1	1	1	1	A2ML1	alpha-2-macroglobulin-like 1
hsa-miR-613	0	0	1	1	0	0	TUFM	Tu translation elongation factor, mitochondrial
hsa-miR-613	0	0	0	1	0	0	CD163L1	CD163 molecule-like 1
hsa-miR-613	1	0	1	1	1	1	EPN2	epsin 2
hsa-miR-613	0	0	1	1	0	0	COPG1	coatomer protein complex, subunit gamma 1
hsa-miR-613	1	0	1	1	0	0	SH2D3C	SH2 domain containing 3C
hsa-miR-613	0	0	1	1	1	1	ST8SIA5	ST8 alpha-N-acetyl-neuraminide alpha-2,8-sialyltransferase 5
hsa-miR-613	0	0	1	1	0	0	YSK4	YSK4 Sps1/Ste20-related kinase homolog (S. cerevisiae)
hsa-miR-613	0	0	0	1	0	0	OR4K13	olfactory receptor, family 4, subfamily K, member 13
hsa-miR-613	0	0	1	1	1	1	HYDIN	HYDIN, axonemal central pair apparatus protein
hsa-miR-613	0	0	0	1	0	0	DEF6	differentially expressed in FDCP 6 homolog (mouse)
hsa-miR-613	0	0	1	1	1	1	VRK3	vaccinia related kinase 3
hsa-miR-613	1	0	1	1	1	1	AP3S1	adaptor-related protein complex 3, sigma 1 subunit
hsa-miR-613	0	0	1	1	1	1	ALX1	ALX homeobox 1
hsa-miR-613	1	0	1	1	1	1	PPP1R9B	protein phosphatase 1, regulatory subunit 9B
hsa-miR-613	0	0	1	1	0	0	CCDC101	coiled-coil domain containing 101
hsa-miR-613	0	0	0	1	0	0	STAG3	stromal antigen 3
hsa-miR-613	0	0	0	1	0	0	C3orf32	chromosome 3 open reading frame 32
hsa-miR-613	0	0	0	1	0	0	ZNF671	zinc finger protein 671
hsa-miR-613	1	0	1	1	1	1	MAB21L2	mab-21-like 2 (C. elegans)
hsa-miR-613	0	0	0	1	0	0	LOC100128310	uncharacterized LOC100128310
hsa-miR-613	0	0	0	1	0	0	FDCSP	follicular dendritic cell secreted protein
hsa-miR-613	0	0	1	1	1	1	CA8	carbonic anhydrase VIII
hsa-miR-613	0	0	0	1	0	0	TSTD1	thiosulfate sulfurtransferase (rhodanese)-like domain containing 1
hsa-miR-613	0	0	1	1	1	1	ZNF771	zinc finger protein 771
hsa-miR-613	1	0	1	1	1	1	PRR15	proline rich 15
hsa-miR-613	0	0	0	1	0	0	KLK11	kallikrein-related peptidase 11
hsa-miR-613	0	0	1	1	1	1	CASC1	cancer susceptibility candidate 1
hsa-miR-613	0	0	0	1	1	1	FAM82B	family with sequence similarity 82, member B
hsa-miR-613	1	0	1	1	0	0	KIF17	kinesin family member 17
hsa-miR-613	0	0	1	1	0	0	TMEM108	transmembrane protein 108
hsa-miR-613	0	0	0	1	0	0	ROGDI	rogdi homolog (Drosophila)
hsa-miR-613	1	0	1	1	1	1	IFT20	intraflagellar transport 20 homolog (Chlamydomonas)
hsa-miR-613	0	0	0	1	1	1	ZYX	zyxin
hsa-miR-613	0	0	0	1	0	0	SPHK1	sphingosine kinase 1
hsa-miR-613	0	0	1	1	1	1	CNTNAP3	contactin associated protein-like 3
hsa-miR-613	0	0	1	1	0	0	HKR1	HKR1, GLI-Kruppel zinc finger family member
hsa-miR-613	0	0	1	1	0	0	GHRHR	growth hormone releasing hormone receptor
hsa-miR-613	0	0	0	1	1	1	ZNF274	zinc finger protein 274
hsa-miR-613	0	0	0	1	0	0	SERHL2	serine hydrolase-like 2
hsa-miR-613	0	0	1	1	0	0	GPX5	glutathione peroxidase 5 (epididymal androgen-related protein)
hsa-miR-613	1	0	1	1	1	1	GRID1	glutamate receptor, ionotropic, delta 1
hsa-miR-613	0	0	1	1	1	1	RNF135	ring finger protein 135
hsa-miR-613	0	0	1	1	1	1	KCNN2	potassium intermediate/small conductance calcium-activated channel, subfamily N, member 2
hsa-miR-613	0	0	1	1	1	1	CAPS2	calcyphosine 2
hsa-miR-613	1	0	1	1	1	1	C11orf82	chromosome 11 open reading frame 82
hsa-miR-613	0	0	1	1	1	1	S100A7A	S100 calcium binding protein A7A
hsa-miR-613	0	0	1	1	0	0	NOP56	NOP56 ribonucleoprotein homolog (yeast)
hsa-miR-613	0	0	0	1	0	0	C11orf35	chromosome 11 open reading frame 35
hsa-miR-613	1	0	1	1	1	1	RBM12B	RNA binding motif protein 12B
hsa-miR-613	0	0	0	1	0	0	OR56A3	olfactory receptor, family 56, subfamily A, member 3
hsa-miR-613	0	0	0	1	0	0	GDF3	growth differentiation factor 3
hsa-miR-613	0	0	1	1	1	1	ZNF397	zinc finger protein 397
hsa-miR-613	0	0	0	1	1	1	NR2C1	nuclear receptor subfamily 2, group C, member 1
hsa-miR-613	0	0	0	1	1	1	WDR5B	WD repeat domain 5B
hsa-miR-613	1	0	1	1	1	1	ANKRD11	ankyrin repeat domain 11
hsa-miR-613	0	0	0	1	0	0	ADSSL1	adenylosuccinate synthase like 1
hsa-miR-613	0	0	0	1	0	0	KANK3	KN motif and ankyrin repeat domains 3
hsa-miR-613	0	0	0	1	1	1	IL3RA	interleukin 3 receptor, alpha (low affinity)
hsa-miR-613	0	0	1	1	0	0	ALYREF	Aly/REF export factor
hsa-miR-613	0	0	1	1	1	1	BEST3	bestrophin 3
hsa-miR-613	1	0	1	1	1	1	RAI2	retinoic acid induced 2
hsa-miR-613	0	0	1	1	0	0	EIF3C	eukaryotic translation initiation factor 3, subunit C
hsa-miR-613	0	0	0	1	1	1	NDUFA6	NADH dehydrogenase (ubiquinone) 1 alpha subcomplex, 6, 14kDa
hsa-miR-613	0	0	0	1	1	1	TBX1	T-box 1
hsa-miR-613	0	0	1	1	0	0	DGAT2L6	diacylglycerol O-acyltransferase 2-like 6
hsa-miR-613	0	0	0	1	0	0	C19orf59	chromosome 19 open reading frame 59
hsa-miR-613	0	0	0	1	1	1	SH3BGR	SH3 domain binding glutamic acid-rich protein
hsa-miR-613	0	0	0	1	0	0	C12orf56	chromosome 12 open reading frame 56
hsa-miR-613	0	0	1	1	1	1	TPH2	tryptophan hydroxylase 2
hsa-miR-613	1	0	1	1	0	0	PCLO	piccolo (presynaptic cytomatrix protein)
hsa-miR-613	0	0	1	1	0	0	DMRTC1B	DMRT-like family C1B
hsa-miR-613	0	0	0	1	0	0	NBPF6	neuroblastoma breakpoint family, member 6
hsa-miR-613	0	0	0	1	0	0	DEFB107A	defensin, beta 107A
hsa-miR-613	0	0	0	1	1	1	CDKN3	cyclin-dependent kinase inhibitor 3
hsa-miR-613	0	0	1	1	0	0	IGFN1	immunoglobulin-like and fibronectin type III domain containing 1
hsa-miR-613	0	0	0	1	0	0	FAM129C	family with sequence similarity 129, member C
hsa-miR-613	0	0	1	1	0	0	TRABD2A	TraB domain containing 2A
hsa-miR-613	0	0	1	1	1	1	SLC6A16	solute carrier family 6, member 16
hsa-miR-613	0	0	1	1	1	1	FGG	fibrinogen gamma chain
hsa-miR-613	0	0	1	1	0	0	RAD54B	RAD54 homolog B (S. cerevisiae)
hsa-miR-613	0	0	1	1	1	1	STRADA	STE20-related kinase adaptor alpha
hsa-miR-613	0	0	1	1	1	1	CHST5	carbohydrate (N-acetylglucosamine 6-O) sulfotransferase 5
hsa-miR-613	1	0	0	1	0	0	CIDEC	cell death-inducing DFFA-like effector c
hsa-miR-613	0	0	1	1	1	1	IL17RE	interleukin 17 receptor E
hsa-miR-613	0	0	1	1	1	1	AIF1	allograft inflammatory factor 1
hsa-miR-613	0	0	1	1	1	1	FAIM	Fas apoptotic inhibitory molecule
hsa-miR-613	0	0	0	1	1	1	SERPINA13	serpin peptidase inhibitor, clade A (alpha-1 antiproteinase, antitrypsin), member 13 (pseudogene)
hsa-miR-613	0	0	0	1	0	0	LRRC25	leucine rich repeat containing 25
hsa-miR-613	0	0	1	1	1	1	TMPRSS4	transmembrane protease, serine 4
hsa-miR-613	1	0	1	1	0	0	UBC	ubiquitin C
hsa-miR-613	0	0	0	1	1	1	MRAP	melanocortin 2 receptor accessory protein
hsa-miR-613	0	0	1	1	1	1	PPIL4	peptidylprolyl isomerase (cyclophilin)-like 4
hsa-miR-613	1	0	1	1	1	1	TC2N	tandem C2 domains, nuclear
hsa-miR-613	0	0	1	1	1	1	PAQR5	progestin and adipoQ receptor family member V
hsa-miR-613	1	0	1	1	1	1	PVRL1	poliovirus receptor-related 1 (herpesvirus entry mediator C)
hsa-miR-613	1	0	1	1	1	1	INSR	insulin receptor
hsa-miR-613	0	0	1	1	1	1	LRRC29	leucine rich repeat containing 29
hsa-miR-613	0	0	0	1	1	1	MYL1	myosin, light chain 1, alkali; skeletal, fast
hsa-miR-613	0	0	1	1	1	1	HEPACAM2	HEPACAM family member 2
hsa-miR-613	0	0	0	1	1	1	NFIC	nuclear factor I/C (CCAAT-binding transcription factor)
hsa-miR-613	0	0	1	1	1	1	CCDC62	coiled-coil domain containing 62
hsa-miR-613	1	0	1	1	1	1	HNRNPA1L2	heterogeneous nuclear ribonucleoprotein A1-like 2
hsa-miR-613	0	0	1	1	0	0	MXRA8	matrix-remodelling associated 8
hsa-miR-613	0	0	0	1	0	0	CLRN2	clarin 2
hsa-miR-613	1	0	1	1	1	1	GPR135	G protein-coupled receptor 135
hsa-miR-613	1	0	1	1	1	1	RIC3	resistance to inhibitors of cholinesterase 3 homolog (C. elegans)
hsa-miR-613	0	0	0	1	1	1	DOCK2	dedicator of cytokinesis 2
hsa-miR-613	0	0	0	1	1	1	ZNF34	zinc finger protein 34
hsa-miR-613	0	0	0	1	0	0	NKAPL	NFKB activating protein-like
hsa-miR-613	0	0	0	1	1	1	FXYD3	FXYD domain containing ion transport regulator 3
hsa-miR-613	0	0	1	1	1	1	C15orf48	chromosome 15 open reading frame 48
hsa-miR-613	0	0	1	1	0	0	KLRD1	killer cell lectin-like receptor subfamily D, member 1
hsa-miR-613	0	0	1	1	0	0	MLXIPL	MLX interacting protein-like
hsa-miR-613	0	0	1	1	1	1	IL23R	interleukin 23 receptor
hsa-miR-613	1	0	1	1	1	1	TOM1L1	target of myb1 (chicken)-like 1
hsa-miR-613	0	0	1	1	1	1	AGTR1	angiotensin II receptor, type 1
hsa-miR-613	1	0	1	1	1	1	ELFN2	extracellular leucine-rich repeat and fibronectin type III domain containing 2
hsa-miR-613	0	0	0	1	0	0	CPSF1	cleavage and polyadenylation specific factor 1, 160kDa
hsa-miR-613	0	0	0	1	0	0	DDT	D-dopachrome tautomerase
hsa-miR-613	1	0	1	1	0	0	SPATA16	spermatogenesis associated 16
hsa-miR-613	0	0	0	1	0	0	ADAMTS12	ADAM metallopeptidase with thrombospondin type 1 motif, 12
hsa-miR-613	0	0	0	1	1	1	POLR2K	polymerase (RNA) II (DNA directed) polypeptide K, 7.0kDa
hsa-miR-613	1	0	1	1	1	1	BCLAF1	BCL2-associated transcription factor 1
hsa-miR-613	0	0	0	1	0	0	ZNF774	zinc finger protein 774
hsa-miR-613	1	0	1	1	1	1	TCF4	transcription factor 4
hsa-miR-613	1	0	1	1	1	1	LTBP1	latent transforming growth factor beta binding protein 1
hsa-miR-613	1	0	1	1	1	1	WLS	wntless homolog (Drosophila)
hsa-miR-613	0	0	0	1	0	0	FAM75A7	family with sequence similarity 75, member A7
hsa-miR-613	1	0	1	1	1	1	CTNNA1	catenin (cadherin-associated protein), alpha 1, 102kDa
hsa-miR-613	1	0	1	1	0	0	PHIP	pleckstrin homology domain interacting protein
hsa-miR-613	1	0	1	1	1	1	MLL3	myeloid/lymphoid or mixed-lineage leukemia 3
hsa-miR-613	0	0	1	1	1	1	EFEMP1	EGF containing fibulin-like extracellular matrix protein 1
hsa-miR-613	0	0	1	1	0	0	TMEM116	transmembrane protein 116
hsa-miR-613	0	0	1	1	0	0	PDLIM7	PDZ and LIM domain 7 (enigma)
hsa-miR-613	0	0	1	1	0	0	DEFB107B	defensin, beta 107B
hsa-miR-613	0	0	1	1	0	0	SREBF1	sterol regulatory element binding transcription factor 1
hsa-miR-613	0	0	1	1	0	0	CLEC9A	C-type lectin domain family 9, member A
hsa-miR-613	0	0	1	1	0	0	TNFRSF25	tumor necrosis factor receptor superfamily, member 25
hsa-miR-613	0	0	1	1	1	1	ATP5C1	ATP synthase, H+ transporting, mitochondrial F1 complex, gamma polypeptide 1
hsa-miR-613	0	0	0	1	1	1	PIK3R4	phosphoinositide-3-kinase, regulatory subunit 4
hsa-miR-613	0	0	0	1	0	0	FAM75A5	family with sequence similarity 75, member A5
hsa-miR-613	0	0	1	1	1	1	GALP	galanin-like peptide
hsa-miR-613	0	0	1	1	0	0	ASNA1	arsA arsenite transporter, ATP-binding, homolog 1 (bacterial)
hsa-miR-613	0	0	1	1	0	0	FAM115C	family with sequence similarity 115, member C
hsa-miR-613	0	0	1	1	0	0	HIST1H2BB	histone cluster 1, H2bb
hsa-miR-613	0	0	1	1	1	1	SYNE2	spectrin repeat containing, nuclear envelope 2
hsa-miR-613	0	0	0	1	0	0	BCKDHA	branched chain keto acid dehydrogenase E1, alpha polypeptide
hsa-miR-613	0	0	1	1	0	0	TMEM91	transmembrane protein 91
hsa-miR-613	1	0	1	1	1	1	FAM73B	family with sequence similarity 73, member B
hsa-miR-613	0	0	1	1	1	1	APOL2	apolipoprotein L, 2
hsa-miR-613	0	0	0	1	0	0	AKAP4	A kinase (PRKA) anchor protein 4
hsa-miR-613	0	0	1	1	1	1	PRAME	preferentially expressed antigen in melanoma
hsa-miR-613	1	0	1	1	1	1	HELZ	helicase with zinc finger
hsa-miR-613	0	0	1	1	0	0	TRAPPC4	trafficking protein particle complex 4
hsa-miR-613	1	0	1	1	1	1	TRPM6	transient receptor potential cation channel, subfamily M, member 6
hsa-miR-613	0	0	1	1	0	0	CXorf40A	chromosome X open reading frame 40A
hsa-miR-613	0	0	1	1	0	0	PLCG2	phospholipase C, gamma 2 (phosphatidylinositol-specific)
hsa-miR-613	0	0	1	1	0	0	TRAF2	TNF receptor-associated factor 2
hsa-miR-613	0	0	1	1	0	0	NACA2	nascent polypeptide-associated complex alpha subunit 2
hsa-miR-613	0	0	1	1	0	0	AXDND1	axonemal dynein light chain domain containing 1
hsa-miR-613	1	0	1	1	1	1	CLIP3	CAP-GLY domain containing linker protein 3
hsa-miR-613	0	0	0	1	0	0	OR10S1	olfactory receptor, family 10, subfamily S, member 1
hsa-miR-613	0	0	1	1	1	1	HLA-DPB1	major histocompatibility complex, class II, DP beta 1
hsa-miR-613	0	0	0	1	0	0	ABP1	amiloride binding protein 1 (amine oxidase (copper-containing))
hsa-miR-613	0	0	0	1	0	0	PPP1R13L	protein phosphatase 1, regulatory subunit 13 like
hsa-miR-613	0	0	1	1	1	1	MICU1	mitochondrial calcium uptake 1
hsa-miR-613	1	0	1	1	1	1	CD300LF	CD300 molecule-like family member f
hsa-miR-613	0	0	1	1	1	1	CHAMP1	chromosome alignment maintaining phosphoprotein 1
hsa-miR-613	0	0	1	1	1	1	EIF1AY	eukaryotic translation initiation factor 1A, Y-linked
hsa-miR-613	0	0	0	1	0	0	FICD	FIC domain containing
hsa-miR-613	0	0	0	1	1	1	GPR161	G protein-coupled receptor 161
hsa-miR-613	1	0	1	1	1	1	ILF2	interleukin enhancer binding factor 2, 45kDa
hsa-miR-613	0	0	1	1	1	1	C1orf85	chromosome 1 open reading frame 85
hsa-miR-613	0	0	1	1	0	0	FBXO18	F-box protein, helicase, 18
hsa-miR-613	0	0	0	1	0	0	ZNF669	zinc finger protein 669
hsa-miR-613	0	0	1	1	1	1	LGALS8	lectin, galactoside-binding, soluble, 8
hsa-miR-613	0	0	0	1	1	1	B3GALNT2	beta-1,3-N-acetylgalactosaminyltransferase 2
hsa-miR-613	1	0	1	1	1	1	C1orf131	chromosome 1 open reading frame 131
hsa-miR-613	0	0	1	1	1	1	DYRK3	dual-specificity tyrosine-(Y)-phosphorylation regulated kinase 3
hsa-miR-613	1	0	1	1	1	1	SYNE1	spectrin repeat containing, nuclear envelope 1
hsa-miR-613	0	0	1	1	1	1	F13B	coagulation factor XIII, B polypeptide
hsa-miR-613	0	0	1	1	1	1	UCHL5	ubiquitin carboxyl-terminal hydrolase L5
hsa-miR-613	0	0	0	1	1	1	NCF2	neutrophil cytosolic factor 2
hsa-miR-613	0	0	1	1	1	1	TEX35	testis expressed 35
hsa-miR-613	0	0	1	1	1	1	CD1E	CD1e molecule
hsa-miR-613	0	0	0	1	1	1	GPATCH4	G patch domain containing 4
hsa-miR-613	0	0	0	1	1	1	RSPH4A	radial spoke head 4 homolog A (Chlamydomonas)
hsa-miR-613	1	0	1	1	1	1	VAX1	ventral anterior homeobox 1
hsa-miR-613	0	0	0	1	0	0	NBPF24	neuroblastoma breakpoint family, member 24
hsa-miR-613	0	0	1	1	1	1	ADAM30	ADAM metallopeptidase domain 30
hsa-miR-613	1	0	1	1	0	0	PHGDH	phosphoglycerate dehydrogenase
hsa-miR-613	0	0	0	1	1	1	C6orf165	chromosome 6 open reading frame 165
hsa-miR-613	1	0	1	1	1	1	CNNM2	cyclin M2
hsa-miR-613	0	0	1	1	1	1	NSDHL	NAD(P) dependent steroid dehydrogenase-like
hsa-miR-613	0	0	1	1	1	1	IDS	iduronate 2-sulfatase
hsa-miR-613	0	0	1	1	0	0	BARHL2	BarH-like homeobox 2
hsa-miR-613	0	0	1	1	1	1	SEP15	15 kDa selenoprotein
hsa-miR-613	0	0	1	1	1	1	LMBRD1	LMBR1 domain containing 1
hsa-miR-613	1	0	1	1	1	1	SSX2IP	synovial sarcoma, X breakpoint 2 interacting protein
hsa-miR-613	0	0	1	1	1	1	IFI44L	interferon-induced protein 44-like
hsa-miR-613	0	0	0	1	0	0	PSMA7	proteasome (prosome, macropain) subunit, alpha type, 7
hsa-miR-613	0	0	0	1	1	1	CRYZ	crystallin, zeta (quinone reductase)
hsa-miR-613	0	0	0	1	1	1	HHLA3	HERV-H LTR-associating 3
hsa-miR-613	0	0	0	1	0	0	CYP2C8	cytochrome P450, family 2, subfamily C, polypeptide 8
hsa-miR-613	0	0	0	1	1	1	PDE6C	phosphodiesterase 6C, cGMP-specific, cone, alpha prime
hsa-miR-613	0	0	0	1	1	1	GLT6D1	glycosyltransferase 6 domain containing 1
hsa-miR-613	0	0	1	1	1	1	LHFPL1	lipoma HMGIC fusion partner-like 1
hsa-miR-613	0	0	0	1	1	1	TSPAN1	tetraspanin 1
hsa-miR-613	0	0	1	1	0	0	MAST2	microtubule associated serine/threonine kinase 2
hsa-miR-613	0	0	1	1	0	0	PLTP	phospholipid transfer protein
hsa-miR-613	0	0	1	1	1	1	RBM41	RNA binding motif protein 41
hsa-miR-613	0	0	1	1	0	0	DOLK	dolichol kinase
hsa-miR-613	1	0	1	1	1	1	NFYC	nuclear transcription factor Y, gamma
hsa-miR-613	0	0	0	1	1	1	ZNF684	zinc finger protein 684
hsa-miR-613	0	0	0	1	0	0	CENPI	centromere protein I
hsa-miR-613	0	0	1	1	1	1	IFT52	intraflagellar transport 52 homolog (Chlamydomonas)
hsa-miR-613	0	0	1	1	1	1	PLA2G12B	phospholipase A2, group XIIB
hsa-miR-613	1	0	1	1	1	1	YRDC	yrdC domain containing (E. coli)
hsa-miR-613	0	0	1	1	1	1	SLC29A3	solute carrier family 29 (nucleoside transporters), member 3
hsa-miR-613	0	0	1	1	1	1	TFAP2E	transcription factor AP-2 epsilon (activating enhancer binding protein 2 epsilon)
hsa-miR-613	0	0	1	1	1	1	ZMYM6	zinc finger, MYM-type 6
hsa-miR-613	0	0	1	1	1	1	ZSCAN20	zinc finger and SCAN domain containing 20
hsa-miR-613	0	0	1	1	1	1	DMRTC1	DMRT-like family C1
hsa-miR-613	1	0	0	1	0	0	FAM167B	family with sequence similarity 167, member B
hsa-miR-613	1	0	1	1	1	1	NR6A1	nuclear receptor subfamily 6, group A, member 1
hsa-miR-613	0	0	0	1	0	0	OR5C1	olfactory receptor, family 5, subfamily C, member 1
hsa-miR-613	1	0	1	1	1	1	DBC1	deleted in bladder cancer 1
hsa-miR-613	0	0	1	1	0	0	C9orf43	chromosome 9 open reading frame 43
[truncated: 146 more rows]
