# Supplementary material for: Profiling of Selected MicroRNAs in Proliferative Eutopic Endometrium of Women with Ovarian Endometriosis
Source: Biomed Res Int. 2015 Aug 20;2015:760698. doi: 10.1155/2015/760698 (PMC4558423; doi:10.1155/2015/760698)
Supplement: Supplementary file 1 — Table I: The names of miRNAs significantly differentially expressed between eutopic endometrium of patients with endometriosis vs eutopic endometrium of patients without endometriosis. Table II: The associations between miRNA and mRNA, which presents detailed results of the search of six major databases i.e targetscan, tarbase, miranda, mirbase, mirtarget2 and pictar. [file 760698.f1.zip › 760698.f1/Table II/hsa-miR-614.tsv]

miR	targetscan	tarbase	miranda	mirbase	mirtarget2	pictar	GeneSymbol	GeneName
hsa-miR-614	1	0	1	1	0	0	SRCAP	Snf2-related CREBBP activator protein
hsa-miR-614	1	0	1	0	1	1	KIAA0355	KIAA0355
hsa-miR-614	1	0	1	0	1	1	GAS7	growth arrest-specific 7
hsa-miR-614	1	0	1	1	0	0	KIAA1045	KIAA1045
hsa-miR-614	0	0	1	1	1	1	FSTL5	follistatin-like 5
hsa-miR-614	0	0	1	1	1	1	COPS7A	COP9 constitutive photomorphogenic homolog subunit 7A (Arabidopsis)
hsa-miR-614	0	0	1	0	0	0	NYAP2	neuronal tyrosine-phosphorylated phosphoinositide-3-kinase adaptor 2
hsa-miR-614	0	0	1	1	1	1	BHLHB9	basic helix-loop-helix domain containing, class B, 9
hsa-miR-614	1	0	1	1	1	1	IKZF4	IKAROS family zinc finger 4 (Eos)
hsa-miR-614	0	0	1	1	0	0	COL27A1	collagen, type XXVII, alpha 1
hsa-miR-614	0	0	1	0	0	0	NBLA00301	Nbla00301
hsa-miR-614	0	0	1	1	0	0	DBP	D site of albumin promoter (albumin D-box) binding protein
hsa-miR-614	1	0	1	1	1	1	BACH2	BTB and CNC homology 1, basic leucine zipper transcription factor 2
hsa-miR-614	1	0	1	1	0	0	GRIN1	glutamate receptor, ionotropic, N-methyl D-aspartate 1
hsa-miR-614	1	0	1	1	1	1	PML	promyelocytic leukemia
hsa-miR-614	0	0	1	1	1	1	PTK2	PTK2 protein tyrosine kinase 2
hsa-miR-614	1	0	1	0	1	1	ADD3	adducin 3 (gamma)
hsa-miR-614	1	0	1	1	1	1	KAT6B	K(lysine) acetyltransferase 6B
hsa-miR-614	0	0	1	1	1	1	MPP6	membrane protein, palmitoylated 6 (MAGUK p55 subfamily member 6)
hsa-miR-614	0	0	1	1	1	1	SPAG11B	sperm associated antigen 11B
hsa-miR-614	0	0	1	1	0	0	STYXL1	serine/threonine/tyrosine interacting-like 1
hsa-miR-614	0	0	1	1	0	0	SH2B1	SH2B adaptor protein 1
hsa-miR-614	0	0	1	1	0	0	NYX	nyctalopin
hsa-miR-614	0	0	1	0	1	1	ERBB2IP	erbb2 interacting protein
hsa-miR-614	1	0	1	1	1	1	NRP1	neuropilin 1
hsa-miR-614	1	0	1	1	1	1	CALU	calumenin
hsa-miR-614	1	0	1	1	1	1	CABLES1	Cdk5 and Abl enzyme substrate 1
hsa-miR-614	0	0	1	1	1	1	SLC6A15	solute carrier family 6 (neutral amino acid transporter), member 15
hsa-miR-614	1	0	1	1	1	1	ST3GAL3	ST3 beta-galactoside alpha-2,3-sialyltransferase 3
hsa-miR-614	1	0	1	1	1	1	STX16	syntaxin 16
hsa-miR-614	0	0	1	1	1	1	PPP1R1B	protein phosphatase 1, regulatory (inhibitor) subunit 1B
hsa-miR-614	0	0	1	1	1	1	TTLL11	tubulin tyrosine ligase-like family, member 11
hsa-miR-614	1	0	1	1	1	1	NAV3	neuron navigator 3
hsa-miR-614	0	0	1	0	1	1	MUC15	mucin 15, cell surface associated
hsa-miR-614	0	0	1	1	1	1	ESRP1	epithelial splicing regulatory protein 1
hsa-miR-614	0	0	1	0	0	0	RNF31	ring finger protein 31
hsa-miR-614	0	0	1	1	1	1	STOX2	storkhead box 2
hsa-miR-614	1	0	1	0	1	1	VPS13D	vacuolar protein sorting 13 homolog D (S. cerevisiae)
hsa-miR-614	1	0	1	1	1	1	RIC8B	resistance to inhibitors of cholinesterase 8 homolog B (C. elegans)
hsa-miR-614	0	0	1	1	1	1	TTC23	tetratricopeptide repeat domain 23
hsa-miR-614	0	0	1	0	0	0	LOC286059	tumor necrosis factor receptor superfamily, member 10d, decoy with truncated death domain pseudogene
hsa-miR-614	0	0	1	1	1	1	SIGLEC1	sialic acid binding Ig-like lectin 1, sialoadhesin
hsa-miR-614	0	0	1	1	0	0	ZNF252P	zinc finger protein 252, pseudogene
hsa-miR-614	0	0	1	1	1	1	PRR5L	proline rich 5 like
hsa-miR-614	0	0	1	0	0	0	FLJ30838	uncharacterized LOC400955
hsa-miR-614	1	0	1	1	1	1	SULF1	sulfatase 1
hsa-miR-614	1	0	1	0	0	0	PWWP2A	PWWP domain containing 2A
hsa-miR-614	0	0	1	0	0	0	JPX	JPX transcript, XIST activator (non-protein coding)
hsa-miR-614	0	0	1	0	0	0	LOC654433	uncharacterized LOC654433
hsa-miR-614	0	0	1	1	1	1	BRD2	bromodomain containing 2
hsa-miR-614	0	0	1	1	1	1	C14orf79	chromosome 14 open reading frame 79
hsa-miR-614	1	0	1	1	0	0	ZFYVE27	zinc finger, FYVE domain containing 27
hsa-miR-614	0	0	1	1	1	1	ZBTB26	zinc finger and BTB domain containing 26
hsa-miR-614	0	0	1	1	0	0	ANKAR	ankyrin and armadillo repeat containing
hsa-miR-614	0	0	1	0	1	1	UHMK1	U2AF homology motif (UHM) kinase 1
hsa-miR-614	0	0	1	0	0	0	C10orf105	chromosome 10 open reading frame 105
hsa-miR-614	1	0	1	1	1	1	ARID1B	AT rich interactive domain 1B (SWI1-like)
hsa-miR-614	0	0	1	1	1	1	KBTBD4	kelch repeat and BTB (POZ) domain containing 4
hsa-miR-614	1	0	1	1	1	1	SUPT16H	suppressor of Ty 16 homolog (S. cerevisiae)
hsa-miR-614	0	0	1	0	0	0	LOC440910	uncharacterized LOC440910
hsa-miR-614	1	0	1	1	0	0	PRMT8	protein arginine methyltransferase 8
hsa-miR-614	1	0	1	1	1	1	DZIP1	DAZ interacting protein 1
hsa-miR-614	0	0	1	1	0	0	PPOX	protoporphyrinogen oxidase
hsa-miR-614	0	0	1	0	0	0	FLJ37798	uncharacterized LOC401264
hsa-miR-614	0	0	1	1	1	1	BAG1	BCL2-associated athanogene
hsa-miR-614	0	0	1	0	0	0	LOC643327	uncharacterized LOC643327
hsa-miR-614	1	0	1	1	1	1	SYT6	synaptotagmin VI
hsa-miR-614	1	0	1	1	1	1	CDV3	CDV3 homolog (mouse)
hsa-miR-614	0	0	1	1	1	1	PPFIBP2	PTPRF interacting protein, binding protein 2 (liprin beta 2)
hsa-miR-614	0	0	1	0	0	0	DNAJB8-AS1	DNAJB8 antisense RNA 1
hsa-miR-614	1	0	1	1	1	1	LZTS2	leucine zipper, putative tumor suppressor 2
hsa-miR-614	1	0	1	1	0	0	CACNB3	calcium channel, voltage-dependent, beta 3 subunit
hsa-miR-614	0	0	1	1	0	0	YSK4	YSK4 Sps1/Ste20-related kinase homolog (S. cerevisiae)
hsa-miR-614	0	0	1	1	0	0	CFP	complement factor properdin
hsa-miR-614	0	0	1	0	0	0	LOC644248	uncharacterized LOC644248
hsa-miR-614	1	0	1	1	1	1	C17orf85	chromosome 17 open reading frame 85
hsa-miR-614	1	0	1	1	1	1	SGSM2	small G protein signaling modulator 2
hsa-miR-614	0	0	1	0	1	1	RASGRP3	RAS guanyl releasing protein 3 (calcium and DAG-regulated)
hsa-miR-614	0	0	1	0	0	0	FAM95B1	family with sequence similarity 95, member B1
hsa-miR-614	1	0	1	1	0	0	UBN2	ubinuclein 2
hsa-miR-614	0	0	1	1	1	1	BDH1	3-hydroxybutyrate dehydrogenase, type 1
hsa-miR-614	1	0	1	1	1	1	DLG2	discs, large homolog 2 (Drosophila)
hsa-miR-614	0	0	1	1	1	1	MAP7D2	MAP7 domain containing 2
hsa-miR-614	1	0	1	0	1	1	N4BP3	NEDD4 binding protein 3
hsa-miR-614	1	0	1	1	1	1	PHC2	polyhomeotic homolog 2 (Drosophila)
hsa-miR-614	1	0	1	1	1	1	RABGAP1	RAB GTPase activating protein 1
hsa-miR-614	0	0	1	1	0	0	ZNF730	zinc finger protein 730
hsa-miR-614	0	0	1	0	0	0	AGAP9	ArfGAP with GTPase domain, ankyrin repeat and PH domain 9
hsa-miR-614	0	0	1	1	0	0	MSH5	mutS homolog 5 (E. coli)
hsa-miR-614	0	0	1	1	0	0	SAPCD1	suppressor APC domain containing 1
hsa-miR-614	0	0	1	1	1	1	AQP6	aquaporin 6, kidney specific
hsa-miR-614	0	0	1	0	0	0	PSMG4	proteasome (prosome, macropain) assembly chaperone 4
hsa-miR-614	0	0	1	0	0	0	FAM66D	family with sequence similarity 66, member D
hsa-miR-614	0	0	1	1	1	1	ZCCHC6	zinc finger, CCHC domain containing 6
hsa-miR-614	0	0	1	0	1	1	CEP95	centrosomal protein 95kDa
hsa-miR-614	1	0	1	0	1	1	GPCPD1	glycerophosphocholine phosphodiesterase GDE1 homolog (S. cerevisiae)
hsa-miR-614	0	0	1	1	1	1	CCDC132	coiled-coil domain containing 132
hsa-miR-614	1	0	1	1	1	1	SOX6	SRY (sex determining region Y)-box 6
hsa-miR-614	1	0	1	1	1	1	UHRF2	ubiquitin-like with PHD and ring finger domains 2, E3 ubiquitin protein ligase
hsa-miR-614	1	0	1	1	1	1	CEP164	centrosomal protein 164kDa
hsa-miR-614	0	0	1	1	1	1	LMAN2L	lectin, mannose-binding 2-like
hsa-miR-614	0	0	1	1	1	1	AMOTL1	angiomotin like 1
hsa-miR-614	1	0	1	1	1	1	IKZF2	IKAROS family zinc finger 2 (Helios)
hsa-miR-614	1	0	1	1	1	1	LUZP2	leucine zipper protein 2
hsa-miR-614	0	0	1	1	0	0	DNAH1	dynein, axonemal, heavy chain 1
hsa-miR-614	1	0	1	1	1	1	PNRC1	proline-rich nuclear receptor coactivator 1
hsa-miR-614	0	0	1	0	1	1	ANKS1B	ankyrin repeat and sterile alpha motif domain containing 1B
hsa-miR-614	1	0	1	1	1	1	NLGN4X	neuroligin 4, X-linked
hsa-miR-614	1	0	1	1	1	1	VPS45	vacuolar protein sorting 45 homolog (S. cerevisiae)
hsa-miR-614	1	0	1	1	1	1	MYB	v-myb myeloblastosis viral oncogene homolog (avian)
hsa-miR-614	1	0	1	1	1	1	PCDH11X	protocadherin 11 X-linked
hsa-miR-614	1	0	1	1	1	1	ELOVL6	ELOVL fatty acid elongase 6
hsa-miR-614	0	0	1	1	0	0	ZNF576	zinc finger protein 576
hsa-miR-614	0	0	1	1	1	1	FTO	fat mass and obesity associated
hsa-miR-614	0	0	1	1	1	1	RABL5	RAB, member RAS oncogene family-like 5
hsa-miR-614	0	0	1	1	0	0	RBM14	RNA binding motif protein 14
hsa-miR-614	1	0	1	1	1	1	CALM1	calmodulin 1 (phosphorylase kinase, delta)
hsa-miR-614	1	0	1	1	1	1	HMGA1	high mobility group AT-hook 1
hsa-miR-614	0	0	1	1	1	1	NUP98	nucleoporin 98kDa
hsa-miR-614	1	0	1	1	1	1	ETF1	eukaryotic translation termination factor 1
hsa-miR-614	0	0	1	0	0	0	KLHL15	kelch-like 15 (Drosophila)
hsa-miR-614	1	0	1	0	1	1	NECAB1	N-terminal EF-hand calcium binding protein 1
hsa-miR-614	0	0	1	1	1	1	CMAS	cytidine monophosphate N-acetylneuraminic acid synthetase
hsa-miR-614	0	0	1	1	1	1	NDUFB5	NADH dehydrogenase (ubiquinone) 1 beta subcomplex, 5, 16kDa
hsa-miR-614	1	0	1	1	1	1	MID1IP1	MID1 interacting protein 1
hsa-miR-614	0	0	1	0	0	0	NBR2	neighbor of BRCA1 gene 2 (non-protein coding)
hsa-miR-614	0	0	1	1	1	1	CDC42SE2	CDC42 small effector 2
hsa-miR-614	0	0	1	0	0	0	SNX29P2	sorting nexin 29 pseudogene 2
hsa-miR-614	0	0	1	0	0	0	EVPLL	envoplakin-like
hsa-miR-614	0	0	1	1	1	1	KIAA1755	KIAA1755
hsa-miR-614	0	0	1	1	1	1	SLC51A	solute carrier family 51, alpha subunit
hsa-miR-614	0	0	1	1	0	0	SWI5	SWI5 recombination repair homolog (yeast)
hsa-miR-614	1	0	1	1	1	1	MLLT3	myeloid/lymphoid or mixed-lineage leukemia (trithorax homolog, Drosophila); translocated to, 3
hsa-miR-614	0	0	1	1	0	0	C7orf57	chromosome 7 open reading frame 57
hsa-miR-614	1	0	1	1	1	1	GLUL	glutamate-ammonia ligase
hsa-miR-614	1	0	1	1	1	1	FGF1	fibroblast growth factor 1 (acidic)
hsa-miR-614	0	0	1	1	0	0	WASIR2	WASH and IL9R antisense RNA 2
hsa-miR-614	0	0	1	1	0	0	RAB4B	RAB4B, member RAS oncogene family
hsa-miR-614	1	0	1	1	1	1	ZEB2	zinc finger E-box binding homeobox 2
hsa-miR-614	0	0	1	0	0	0	FAM201A	family with sequence similarity 201, member A
hsa-miR-614	0	0	1	0	0	0	LINC00642	long intergenic non-protein coding RNA 642
hsa-miR-614	0	0	1	1	0	0	FAM3B	family with sequence similarity 3, member B
hsa-miR-614	1	0	1	1	1	1	LMO7	LIM domain 7
hsa-miR-614	1	0	1	1	1	1	ELMO2	engulfment and cell motility 2
hsa-miR-614	1	0	1	0	1	1	CPEB4	cytoplasmic polyadenylation element binding protein 4
hsa-miR-614	0	0	1	1	0	0	HSPA14	heat shock 70kDa protein 14
hsa-miR-614	1	0	1	0	1	1	GPR107	G protein-coupled receptor 107
hsa-miR-614	1	0	1	1	0	0	HES7	hairy and enhancer of split 7 (Drosophila)
hsa-miR-614	1	0	1	1	0	0	ZNF292	zinc finger protein 292
hsa-miR-614	0	0	1	1	0	0	FAM159A	family with sequence similarity 159, member A
hsa-miR-614	0	0	1	0	0	0	LOC338579	ankyrin repeat domain-containing protein 30B pseudogene
hsa-miR-614	0	0	1	1	1	1	PINX1	PIN2/TERF1 interacting, telomerase inhibitor 1
hsa-miR-614	1	0	1	1	1	1	CARM1	coactivator-associated arginine methyltransferase 1
hsa-miR-614	0	0	1	0	0	0	LOC339529	uncharacterized LOC339529
hsa-miR-614	1	0	1	0	1	1	KDM2A	lysine (K)-specific demethylase 2A
hsa-miR-614	0	0	1	0	0	0	LOC283038	uncharacterized LOC283038
hsa-miR-614	0	0	1	1	1	1	INO80C	INO80 complex subunit C
hsa-miR-614	1	0	1	1	1	1	PELI1	pellino E3 ubiquitin protein ligase 1
hsa-miR-614	1	0	1	1	0	0	KCNQ5	potassium voltage-gated channel, KQT-like subfamily, member 5
hsa-miR-614	0	0	1	1	1	1	RHOT1	ras homolog family member T1
hsa-miR-614	0	0	1	0	1	1	C17orf51	chromosome 17 open reading frame 51
hsa-miR-614	0	0	1	1	0	0	CUEDC1	CUE domain containing 1
hsa-miR-614	1	0	1	1	0	0	MANEAL	mannosidase, endo-alpha-like
hsa-miR-614	0	0	1	1	1	1	ZNF33B	zinc finger protein 33B
hsa-miR-614	0	0	1	1	1	1	ZNF189	zinc finger protein 189
hsa-miR-614	1	0	1	1	1	1	ACVR2B	activin A receptor, type IIB
hsa-miR-614	0	0	1	0	0	0	ABCA11P	ATP-binding cassette, sub-family A (ABC1), member 11, pseudogene
hsa-miR-614	0	0	1	1	1	1	XG	Xg blood group
hsa-miR-614	0	0	1	1	1	1	MUC21	mucin 21, cell surface associated
hsa-miR-614	1	0	1	1	1	1	CERS6	ceramide synthase 6
hsa-miR-614	0	0	1	1	1	1	SLC8A3	solute carrier family 8 (sodium/calcium exchanger), member 3
hsa-miR-614	0	0	1	0	0	0	KIAA0913	KIAA0913
hsa-miR-614	1	0	1	1	1	1	GRIA3	glutamate receptor, ionotropic, AMPA 3
hsa-miR-614	0	0	1	1	0	0	HOXD12	homeobox D12
hsa-miR-614	1	0	1	0	1	1	CAMSAP2	calmodulin regulated spectrin-associated protein family, member 2
hsa-miR-614	0	0	1	1	1	1	IP6K2	inositol hexakisphosphate kinase 2
hsa-miR-614	1	0	1	1	1	1	SLC35F1	solute carrier family 35, member F1
hsa-miR-614	0	0	1	0	0	0	SMG1P1	smg-1 homolog, phosphatidylinositol 3-kinase-related kinase pseudogene 1
hsa-miR-614	1	0	1	1	1	1	RREB1	ras responsive element binding protein 1
hsa-miR-614	1	0	1	0	1	1	EML4	echinoderm microtubule associated protein like 4
hsa-miR-614	1	0	1	1	1	1	C5orf24	chromosome 5 open reading frame 24
hsa-miR-614	1	0	1	1	1	1	PGAP1	post-GPI attachment to proteins 1
hsa-miR-614	1	0	1	0	1	1	TTL	tubulin tyrosine ligase
hsa-miR-614	0	0	1	1	0	0	ALDOA	aldolase A, fructose-bisphosphate
hsa-miR-614	0	0	1	0	0	0	DCTN2	dynactin 2 (p50)
hsa-miR-614	0	0	1	1	0	0	PPT2	palmitoyl-protein thioesterase 2
hsa-miR-614	1	0	1	1	1	1	CLU	clusterin
hsa-miR-614	0	0	1	1	0	0	H2AFY2	H2A histone family, member Y2
hsa-miR-614	0	0	1	1	0	0	GPX3	glutathione peroxidase 3 (plasma)
hsa-miR-614	1	0	1	1	1	1	FAM192A	family with sequence similarity 192, member A
hsa-miR-614	1	0	1	1	1	1	RAP1A	RAP1A, member of RAS oncogene family
hsa-miR-614	0	0	1	1	1	1	CD99	CD99 molecule
hsa-miR-614	1	0	1	0	1	1	PTPLAD1	protein tyrosine phosphatase-like A domain containing 1
hsa-miR-614	0	0	1	1	1	1	SNRNP27	small nuclear ribonucleoprotein 27kDa (U4/U6.U5)
hsa-miR-614	1	0	1	1	1	1	WDYHV1	WDYHV motif containing 1
hsa-miR-614	0	0	1	1	1	1	PROCR	protein C receptor, endothelial
hsa-miR-614	0	0	1	1	1	1	PCK2	phosphoenolpyruvate carboxykinase 2 (mitochondrial)
hsa-miR-614	0	0	1	1	0	0	CXorf40A	chromosome X open reading frame 40A
hsa-miR-614	1	0	1	1	1	1	MTCH2	mitochondrial carrier 2
hsa-miR-614	0	0	1	1	1	1	MAZ	MYC-associated zinc finger protein (purine-binding transcription factor)
hsa-miR-614	0	0	1	1	1	1	GLRX3	glutaredoxin 3
hsa-miR-614	1	0	1	1	1	1	TLK2	tousled-like kinase 2
hsa-miR-614	1	0	1	1	1	1	CAMK2A	calcium/calmodulin-dependent protein kinase II alpha
hsa-miR-614	1	0	1	1	1	1	GOLGA7	golgin A7
hsa-miR-614	0	0	1	0	0	0	C2CD4C	C2 calcium-dependent domain containing 4C
hsa-miR-614	0	0	1	1	1	1	ZNF333	zinc finger protein 333
hsa-miR-614	0	0	1	1	0	0	TUSC3	tumor suppressor candidate 3
hsa-miR-614	1	0	1	1	1	1	TMBIM6	transmembrane BAX inhibitor motif containing 6
hsa-miR-614	0	0	1	1	1	1	ZNF346	zinc finger protein 346
hsa-miR-614	0	0	1	1	1	1	CDKAL1	CDK5 regulatory subunit associated protein 1-like 1
hsa-miR-614	0	0	1	1	0	0	PRR11	proline rich 11
hsa-miR-614	1	0	1	0	1	1	DNMT3A	DNA (cytosine-5-)-methyltransferase 3 alpha
hsa-miR-614	0	0	1	1	1	1	C9orf3	chromosome 9 open reading frame 3
hsa-miR-614	1	0	1	0	1	1	KIAA0664	KIAA0664
hsa-miR-614	1	0	1	1	1	1	FBXW7	F-box and WD repeat domain containing 7, E3 ubiquitin protein ligase
hsa-miR-614	0	0	1	0	0	0	LINC00661	long intergenic non-protein coding RNA 661
hsa-miR-614	0	0	1	0	0	0	ZNFX1-AS1	ZNFX1 antisense RNA 1
hsa-miR-614	1	0	1	1	1	1	MAN2A2	mannosidase, alpha, class 2A, member 2
hsa-miR-614	0	0	1	0	0	0	61E3.4	nuclear pore complex interacting protein-like
hsa-miR-614	1	0	1	1	0	0	KIAA0226	KIAA0226
hsa-miR-614	1	0	1	0	1	1	KLHDC10	kelch domain containing 10
hsa-miR-614	1	0	1	1	1	1	ATP2B3	ATPase, Ca++ transporting, plasma membrane 3
hsa-miR-614	0	0	1	1	1	1	MARVELD2	MARVEL domain containing 2
hsa-miR-614	0	0	1	1	1	1	HOOK2	hook homolog 2 (Drosophila)
hsa-miR-614	0	0	1	0	0	0	C1orf81	chromosome 1 open reading frame 81
hsa-miR-614	1	0	1	0	1	1	BCL2	B-cell CLL/lymphoma 2
hsa-miR-614	1	0	1	1	1	1	IGF1	insulin-like growth factor 1 (somatomedin C)
hsa-miR-614	0	0	1	1	1	1	NPR3	natriuretic peptide receptor C/guanylate cyclase C (atrionatriuretic peptide receptor C)
hsa-miR-614	0	0	1	1	1	1	ELF1	E74-like factor 1 (ets domain transcription factor)
hsa-miR-614	1	0	1	0	1	1	GLI3	GLI family zinc finger 3
hsa-miR-614	1	0	1	0	1	1	ITGB3	integrin, beta 3 (platelet glycoprotein IIIa, antigen CD61)
hsa-miR-614	0	0	1	1	1	1	MTR	5-methyltetrahydrofolate-homocysteine methyltransferase
hsa-miR-614	1	0	1	1	1	1	OCRL	oculocerebrorenal syndrome of Lowe
hsa-miR-614	1	0	1	1	1	1	ATXN1	ataxin 1
hsa-miR-614	0	0	1	1	1	1	IGF2	insulin-like growth factor 2 (somatomedin A)
hsa-miR-614	1	0	1	1	0	0	ADRA1B	adrenoceptor alpha 1B
hsa-miR-614	1	0	1	1	1	1	GABRB3	gamma-aminobutyric acid (GABA) A receptor, beta 3
hsa-miR-614	0	0	1	1	1	1	GAD2	glutamate decarboxylase 2 (pancreatic islets and brain, 65kDa)
hsa-miR-614	1	0	1	1	1	1	GRM5	glutamate receptor, metabotropic 5
hsa-miR-614	1	0	1	1	1	1	HTR4	5-hydroxytryptamine (serotonin) receptor 4, G protein-coupled
hsa-miR-614	0	0	1	1	1	1	HTR7	5-hydroxytryptamine (serotonin) receptor 7, adenylate cyclase-coupled
hsa-miR-614	1	0	1	0	1	1	KCNJ2	potassium inwardly-rectifying channel, subfamily J, member 2
hsa-miR-614	1	0	1	0	1	1	UBE2W	ubiquitin-conjugating enzyme E2W (putative)
hsa-miR-614	0	0	1	0	0	0	KLK2	kallikrein-related peptidase 2
hsa-miR-614	0	0	1	1	1	1	STAG3L1	stromal antigen 3-like 1
hsa-miR-614	1	0	1	1	1	1	ATN1	atrophin 1
hsa-miR-614	1	0	1	0	1	1	SS18	synovial sarcoma translocation, chromosome 18
hsa-miR-614	1	0	1	0	1	1	ZC3H12B	zinc finger CCCH-type containing 12B
hsa-miR-614	0	0	1	1	0	0	KRTAP5-7	keratin associated protein 5-7
hsa-miR-614	0	0	1	1	1	1	C2orf68	chromosome 2 open reading frame 68
hsa-miR-614	1	0	1	0	1	1	BRCC3	BRCA1/BRCA2-containing complex, subunit 3
hsa-miR-614	1	0	1	1	1	1	PODXL	podocalyxin-like
hsa-miR-614	0	0	1	1	1	1	HNMT	histamine N-methyltransferase
hsa-miR-614	1	0	1	1	1	1	TPD52	tumor protein D52
hsa-miR-614	1	0	1	0	1	1	SAMD5	sterile alpha motif domain containing 5
hsa-miR-614	1	0	1	1	1	1	KLF10	Kruppel-like factor 10
hsa-miR-614	0	0	1	1	0	0	NGRN	neugrin, neurite outgrowth associated
hsa-miR-614	1	0	1	1	1	1	PDE11A	phosphodiesterase 11A
hsa-miR-614	0	0	1	1	0	0	FAM127A	family with sequence similarity 127, member A
hsa-miR-614	1	0	1	1	1	1	DMP1	dentin matrix acidic phosphoprotein 1
hsa-miR-614	1	0	1	0	1	1	THSD7B	thrombospondin, type I, domain containing 7B
hsa-miR-614	0	0	1	1	1	1	TBX18	T-box 18
hsa-miR-614	1	0	1	1	1	1	MGA	MAX gene associated
hsa-miR-614	1	0	1	0	1	1	XIAP	X-linked inhibitor of apoptosis
hsa-miR-614	1	0	1	1	1	1	CREBL2	cAMP responsive element binding protein-like 2
hsa-miR-614	1	0	1	1	1	1	CELSR3	cadherin, EGF LAG seven-pass G-type receptor 3 (flamingo homolog, Drosophila)
hsa-miR-614	1	0	1	0	1	1	MPPED2	metallophosphoesterase domain containing 2
hsa-miR-614	1	0	1	1	1	1	BTG1	B-cell translocation gene 1, anti-proliferative
hsa-miR-614	1	0	1	1	1	1	CBFB	core-binding factor, beta subunit
hsa-miR-614	1	0	1	1	1	1	DBT	dihydrolipoamide branched chain transacylase E2
hsa-miR-614	1	0	1	1	1	1	GRB2	growth factor receptor-bound protein 2
hsa-miR-614	0	0	1	1	0	0	IDH2	isocitrate dehydrogenase 2 (NADP+), mitochondrial
hsa-miR-614	1	0	1	1	1	1	ITGB8	integrin, beta 8
hsa-miR-614	1	0	1	1	1	1	LBR	lamin B receptor
hsa-miR-614	1	0	1	1	1	1	SCGB2A1	secretoglobin, family 2A, member 1
hsa-miR-614	0	0	1	1	1	1	MTAP	methylthioadenosine phosphorylase
hsa-miR-614	1	0	1	1	1	1	NPAT	nuclear protein, ataxia-telangiectasia locus
hsa-miR-614	0	0	1	1	1	1	OAS2	2'-5'-oligoadenylate synthetase 2, 69/71kDa
hsa-miR-614	0	0	1	0	1	1	OPHN1	oligophrenin 1
hsa-miR-614	1	0	1	1	1	1	ORC5	origin recognition complex, subunit 5
hsa-miR-614	0	0	1	1	0	0	PER1	period homolog 1 (Drosophila)
hsa-miR-614	0	0	1	1	1	1	PEX13	peroxisomal biogenesis factor 13
hsa-miR-614	1	0	1	1	1	1	PLAGL2	pleiomorphic adenoma gene-like 2
hsa-miR-614	1	0	1	0	1	1	SLC6A1	solute carrier family 6 (neurotransmitter transporter, GABA), member 1
hsa-miR-614	0	0	1	1	0	0	SLIT1	slit homolog 1 (Drosophila)
hsa-miR-614	0	0	1	1	0	0	SLPI	secretory leukocyte peptidase inhibitor
hsa-miR-614	1	0	1	1	1	1	FZD5	frizzled family receptor 5
hsa-miR-614	1	0	1	1	1	1	KCNAB1	potassium voltage-gated channel, shaker-related subfamily, beta member 1
hsa-miR-614	1	0	1	1	1	1	TNFSF11	tumor necrosis factor (ligand) superfamily, member 11
hsa-miR-614	0	0	1	1	1	1	TNFSF13	tumor necrosis factor (ligand) superfamily, member 13
hsa-miR-614	1	0	1	1	1	1	NR5A2	nuclear receptor subfamily 5, group A, member 2
hsa-miR-614	1	0	1	1	1	1	BTAF1	BTAF1 RNA polymerase II, B-TFIID transcription factor-associated, 170kDa (Mot1 homolog, S. cerevisiae)
hsa-miR-614	1	0	1	1	0	0	EIF4EBP1	eukaryotic translation initiation factor 4E binding protein 1
hsa-miR-614	1	0	1	1	1	1	FGF12	fibroblast growth factor 12
hsa-miR-614	1	0	1	0	1	1	FOXD1	forkhead box D1
hsa-miR-614	1	0	1	1	1	1	NAP1L1	nucleosome assembly protein 1-like 1
hsa-miR-614	1	0	1	1	1	1	XPR1	xenotropic and polytropic retrovirus receptor 1
hsa-miR-614	1	0	1	1	1	1	NRXN3	neurexin 3
hsa-miR-614	1	0	1	0	1	1	CDYL	chromodomain protein, Y-like
hsa-miR-614	1	0	1	1	1	1	FXR2	fragile X mental retardation, autosomal homolog 2
hsa-miR-614	0	0	1	1	1	1	NRG2	neuregulin 2
hsa-miR-614	1	0	1	1	1	1	MED13	mediator complex subunit 13
hsa-miR-614	1	0	1	1	1	1	CBL	Cbl proto-oncogene, E3 ubiquitin protein ligase
hsa-miR-614	1	0	1	1	1	1	AKT3	v-akt murine thymoma viral oncogene homolog 3 (protein kinase B, gamma)
hsa-miR-614	0	0	1	1	0	0	RTN2	reticulon 2
hsa-miR-614	1	0	1	1	1	1	EVI5	ecotropic viral integration site 5
hsa-miR-614	1	0	1	0	1	1	DCAF7	DDB1 and CUL4 associated factor 7
hsa-miR-614	1	0	1	0	1	1	SPRY3	sprouty homolog 3 (Drosophila)
hsa-miR-614	1	0	1	1	1	1	PURA	purine-rich element binding protein A
hsa-miR-614	1	0	1	1	1	1	FOXO4	forkhead box O4
hsa-miR-614	0	0	1	0	1	1	HCAR3	hydroxycarboxylic acid receptor 3
hsa-miR-614	1	0	1	1	1	1	CAPZA1	capping protein (actin filament) muscle Z-line, alpha 1
hsa-miR-614	1	0	1	1	1	1	NEFL	neurofilament, light polypeptide
hsa-miR-614	1	0	1	1	1	1	NEUROD2	neuronal differentiation 2
hsa-miR-614	1	0	1	0	1	1	IGF2BP1	insulin-like growth factor 2 mRNA binding protein 1
hsa-miR-614	1	0	1	1	1	1	PGRMC1	progesterone receptor membrane component 1
hsa-miR-614	0	0	1	0	1	1	SUB1	SUB1 homolog (S. cerevisiae)
hsa-miR-614	1	0	1	1	1	1	RAB35	RAB35, member RAS oncogene family
hsa-miR-614	1	0	1	1	1	1	KLF12	Kruppel-like factor 12
hsa-miR-614	0	0	1	1	0	0	LTB	lymphotoxin beta (TNF superfamily, member 3)
hsa-miR-614	1	0	1	1	1	1	ICOS	inducible T-cell co-stimulator
hsa-miR-614	1	0	1	0	1	1	FZD4	frizzled family receptor 4
hsa-miR-614	0	0	1	1	0	0	KCNJ14	potassium inwardly-rectifying channel, subfamily J, member 14
hsa-miR-614	1	0	1	1	1	1	BAZ1A	bromodomain adjacent to zinc finger domain, 1A
hsa-miR-614	1	0	1	1	1	1	SOCS5	suppressor of cytokine signaling 5
hsa-miR-614	1	0	1	1	1	1	CBX6	chromobox homolog 6
hsa-miR-614	0	0	1	1	1	1	TCL6	T-cell leukemia/lymphoma 6 (non-protein coding)
hsa-miR-614	1	0	1	0	1	1	SERTAD2	SERTA domain containing 2
hsa-miR-614	0	0	1	0	1	1	PPM1E	protein phosphatase, Mg2+/Mn2+ dependent, 1E
hsa-miR-614	1	0	1	1	1	1	TAB2	TGF-beta activated kinase 1/MAP3K7 binding protein 2
hsa-miR-614	1	0	1	1	1	1	PLCB1	phospholipase C, beta 1 (phosphoinositide-specific)
hsa-miR-614	0	0	1	1	1	1	POFUT2	protein O-fucosyltransferase 2
hsa-miR-614	1	0	1	0	1	1	ARHGEF12	Rho guanine nucleotide exchange factor (GEF) 12
hsa-miR-614	1	0	1	1	1	1	NUDCD3	NudC domain containing 3
hsa-miR-614	1	0	1	1	1	1	CCDC28A	coiled-coil domain containing 28A
hsa-miR-614	0	0	1	0	1	1	TMEM158	transmembrane protein 158 (gene/pseudogene)
hsa-miR-614	1	0	1	1	1	1	CNRIP1	cannabinoid receptor interacting protein 1
hsa-miR-614	0	0	1	0	1	1	OTUD6B	OTU domain containing 6B
hsa-miR-614	1	0	1	1	1	1	PHF20	PHD finger protein 20
hsa-miR-614	0	0	1	1	1	1	DEC1	deleted in esophageal cancer 1
hsa-miR-614	1	0	1	1	1	1	SIX4	SIX homeobox 4
hsa-miR-614	1	0	1	1	1	1	HIF1AN	hypoxia inducible factor 1, alpha subunit inhibitor
hsa-miR-614	1	0	1	0	1	1	KIF26B	kinesin family member 26B
hsa-miR-614	0	0	1	1	1	1	TSR1	TSR1, 20S rRNA accumulation, homolog (S. cerevisiae)
hsa-miR-614	1	0	1	1	1	1	CAMK2N1	calcium/calmodulin-dependent protein kinase II inhibitor 1
hsa-miR-614	1	0	1	0	1	1	SMPD3	sphingomyelin phosphodiesterase 3, neutral membrane (neutral sphingomyelinase II)
hsa-miR-614	0	0	1	1	1	1	NPAP1	nuclear pore associated protein 1
hsa-miR-614	1	0	1	1	1	1	SEPT3	septin 3
hsa-miR-614	1	0	1	1	1	1	SLC12A5	solute carrier family 12 (potassium/chloride transporter), member 5
hsa-miR-614	0	0	1	0	1	1	ZNF490	zinc finger protein 490
hsa-miR-614	0	0	1	1	1	1	SHROOM4	shroom family member 4
hsa-miR-614	1	0	1	0	1	1	CRAMP1L	Crm, cramped-like (Drosophila)
hsa-miR-614	1	0	1	1	1	1	NTN4	netrin 4
hsa-miR-614	1	0	1	1	1	1	FAM60A	family with sequence similarity 60, member A
hsa-miR-614	1	0	1	1	1	1	CDH22	cadherin 22, type 2
hsa-miR-614	1	0	1	1	1	1	OTX2	orthodenticle homeobox 2
hsa-miR-614	1	0	1	0	1	1	SLC4A10	solute carrier family 4, sodium bicarbonate transporter, member 10
hsa-miR-614	1	0	1	1	1	1	TMEM168	transmembrane protein 168
hsa-miR-614	1	0	1	1	1	1	DEPTOR	DEP domain containing MTOR-interacting protein
hsa-miR-614	1	0	1	1	1	1	GRAMD3	GRAM domain containing 3
hsa-miR-614	0	0	1	1	1	1	HTR5A	5-hydroxytryptamine (serotonin) receptor 5A, G protein-coupled
hsa-miR-614	1	0	1	1	1	1	NKAIN1	Na+/K+ transporting ATPase interacting 1
hsa-miR-614	0	0	1	1	1	1	SNIP1	Smad nuclear interacting protein 1
hsa-miR-614	0	0	1	1	1	1	ZNF767	zinc finger family member 767
hsa-miR-614	1	0	1	1	1	1	KLHL18	kelch-like 18 (Drosophila)
hsa-miR-614	0	0	1	1	1	1	DBF4B	DBF4 homolog B (S. cerevisiae)
hsa-miR-614	1	0	1	1	1	1	OPA3	optic atrophy 3 (autosomal recessive, with chorea and spastic paraplegia)
hsa-miR-614	1	0	1	1	1	1	NAA50	N(alpha)-acetyltransferase 50, NatE catalytic subunit
hsa-miR-614	1	0	1	1	1	1	PTPRO	protein tyrosine phosphatase, receptor type, O
hsa-miR-614	1	0	1	0	1	1	SH3BGRL2	SH3 domain binding glutamic acid-rich protein like 2
hsa-miR-614	1	0	1	1	1	1	FBXO30	F-box protein 30
hsa-miR-614	1	0	1	1	1	1	ZNRF1	zinc and ring finger 1, E3 ubiquitin protein ligase
hsa-miR-614	1	0	1	1	1	1	ZDHHC18	zinc finger, DHHC-type containing 18
hsa-miR-614	0	0	1	1	1	1	VPS25	vacuolar protein sorting 25 homolog (S. cerevisiae)
hsa-miR-614	1	0	1	1	1	1	PPP1R9B	protein phosphatase 1, regulatory subunit 9B
hsa-miR-614	1	0	1	0	1	1	INA	internexin neuronal intermediate filament protein, alpha
hsa-miR-614	1	0	1	0	1	1	PPP1R15B	protein phosphatase 1, regulatory subunit 15B
hsa-miR-614	0	0	1	1	1	1	POLR2J2	polymerase (RNA) II (DNA directed) polypeptide J2
hsa-miR-614	1	0	1	0	1	1	SCRT2	scratch homolog 2, zinc finger protein (Drosophila)
hsa-miR-614	1	0	1	1	0	0	CAMK2N2	calcium/calmodulin-dependent protein kinase II inhibitor 2
hsa-miR-614	1	0	1	1	1	1	TP53INP1	tumor protein p53 inducible nuclear protein 1
hsa-miR-614	1	0	1	1	0	0	CCDC120	coiled-coil domain containing 120
hsa-miR-614	0	0	1	0	1	1	CCDC97	coiled-coil domain containing 97
hsa-miR-614	0	0	1	1	1	1	MED8	mediator complex subunit 8
hsa-miR-614	1	0	1	0	1	1	CCND1	cyclin D1
hsa-miR-614	1	0	1	1	1	1	NAA15	N(alpha)-acetyltransferase 15, NatA auxiliary subunit
hsa-miR-614	1	0	1	0	1	1	NUS1	nuclear undecaprenyl pyrophosphate synthase 1 homolog (S. cerevisiae)
hsa-miR-614	0	0	1	1	1	1	TM4SF19	transmembrane 4 L six family member 19
hsa-miR-614	0	0	1	1	0	0	MAGEE2	melanoma antigen family E, 2
hsa-miR-614	0	0	1	1	1	1	SDR16C5	short chain dehydrogenase/reductase family 16C, member 5
hsa-miR-614	1	0	1	0	1	1	CNOT6L	CCR4-NOT transcription complex, subunit 6-like
hsa-miR-614	1	0	1	1	1	1	ANKRD23	ankyrin repeat domain 23
hsa-miR-614	0	0	1	0	1	1	PIGM	phosphatidylinositol glycan anchor biosynthesis, class M
hsa-miR-614	1	0	1	1	1	1	OSR1	odd-skipped related 1 (Drosophila)
hsa-miR-614	0	0	1	1	1	1	APOBEC3F	apolipoprotein B mRNA editing enzyme, catalytic polypeptide-like 3F
hsa-miR-614	0	0	1	1	1	1	CCER1	coiled-coil glutamate-rich protein 1
hsa-miR-614	1	0	1	1	1	1	RAB39B	RAB39B, member RAS oncogene family
hsa-miR-614	0	0	1	1	1	1	TNFSF12-TNFSF13	TNFSF12-TNFSF13 readthrough
hsa-miR-614	0	0	1	1	0	0	SLITRK4	SLIT and NTRK-like family, member 4
hsa-miR-614	1	0	1	1	1	1	CCDC117	coiled-coil domain containing 117
hsa-miR-614	1	0	1	1	1	1	IGSF22	immunoglobulin superfamily, member 22
hsa-miR-614	0	0	1	0	1	1	C5orf64	chromosome 5 open reading frame 64
hsa-miR-614	1	0	1	1	1	1	UBR1	ubiquitin protein ligase E3 component n-recognin 1
hsa-miR-614	1	0	1	1	1	1	SCN4B	sodium channel, voltage-gated, type IV, beta subunit
hsa-miR-614	0	0	1	1	1	1	FRMD3	FERM domain containing 3
hsa-miR-614	0	0	1	1	1	1	TUBB	tubulin, beta class I
hsa-miR-614	0	0	1	1	0	0	KRT25	keratin 25
hsa-miR-614	0	0	1	0	1	1	HCG27	HLA complex group 27 (non-protein coding)
hsa-miR-614	0	0	1	1	0	0	NUDT8	nudix (nucleoside diphosphate linked moiety X)-type motif 8
hsa-miR-614	1	0	1	1	1	1	RBM38	RNA binding motif protein 38
hsa-miR-614	0	0	1	0	0	0	TTTY1	testis-specific transcript, Y-linked 1 (non-protein coding)
hsa-miR-614	0	0	1	0	0	0	TPTEP1	transmembrane phosphatase with tensin homology pseudogene 1
hsa-miR-614	0	0	1	0	0	0	MALAT1	metastasis associated lung adenocarcinoma transcript 1 (non-protein coding)
hsa-miR-614	0	0	1	0	0	0	SNORA13	small nucleolar RNA, H/ACA box 13
hsa-miR-614	0	0	1	0	0	0	TUBA4B	tubulin, alpha 4b (pseudogene)
hsa-miR-614	0	0	1	1	0	0	CCL26	chemokine (C-C motif) ligand 26
hsa-miR-614	0	0	0	1	0	0	LRRC23	leucine rich repeat containing 23
hsa-miR-614	0	0	1	1	1	1	PIGQ	phosphatidylinositol glycan anchor biosynthesis, class Q
hsa-miR-614	0	0	0	1	1	1	MRI1	methylthioribose-1-phosphate isomerase homolog (S. cerevisiae)
hsa-miR-614	0	0	0	1	0	0	BEST2	bestrophin 2
hsa-miR-614	1	0	1	1	1	1	CLDN11	claudin 11
hsa-miR-614	0	0	1	1	0	0	CTDP1	CTD (carboxy-terminal domain, RNA polymerase II, polypeptide A) phosphatase, subunit 1
hsa-miR-614	0	0	0	1	0	0	KLK14	kallikrein-related peptidase 14
hsa-miR-614	1	0	1	1	1	1	KDM4B	lysine (K)-specific demethylase 4B
hsa-miR-614	1	0	1	1	1	1	FGF4	fibroblast growth factor 4
hsa-miR-614	0	0	0	1	0	0	GAL3ST2	galactose-3-O-sulfotransferase 2
hsa-miR-614	0	0	0	1	1	1	MOK	MOK protein kinase
hsa-miR-614	0	0	0	1	1	1	PLOD1	procollagen-lysine, 2-oxoglutarate 5-dioxygenase 1
hsa-miR-614	0	0	1	1	0	0	PILRA	paired immunoglobin-like type 2 receptor alpha
hsa-miR-614	1	0	1	1	0	0	ITGB4	integrin, beta 4
hsa-miR-614	0	0	1	1	0	0	REM1	RAS (RAD and GEM)-like GTP-binding 1
hsa-miR-614	1	0	1	1	1	1	MLF2	myeloid leukemia factor 2
hsa-miR-614	0	0	1	1	0	0	CBX5	chromobox homolog 5
hsa-miR-614	0	0	0	1	0	0	MZF1	myeloid zinc finger 1
hsa-miR-614	1	0	0	1	1	1	CDC34	cell division cycle 34 homolog (S. cerevisiae)
hsa-miR-614	0	0	1	1	0	0	TCN2	transcobalamin II
hsa-miR-614	0	0	0	1	0	0	HSCB	HscB iron-sulfur cluster co-chaperone homolog (E. coli)
hsa-miR-614	0	0	0	1	1	1	PNPLA3	patatin-like phospholipase domain containing 3
hsa-miR-614	0	0	0	1	0	0	PMM1	phosphomannomutase 1
hsa-miR-614	0	0	1	1	0	0	PTK6	PTK6 protein tyrosine kinase 6
hsa-miR-614	0	0	1	1	0	0	CHMP4B	charged multivesicular body protein 4B
hsa-miR-614	0	0	0	1	0	0	CCL17	chemokine (C-C motif) ligand 17
hsa-miR-614	0	0	1	1	1	1	CMC2	COX assembly mitochondrial protein 2 homolog (S. cerevisiae)
hsa-miR-614	1	0	1	1	1	1	SNRNP70	small nuclear ribonucleoprotein 70kDa (U1)
hsa-miR-614	0	0	1	1	0	0	PPP1R37	protein phosphatase 1, regulatory subunit 37
hsa-miR-614	0	0	1	1	0	0	RNASEH2A	ribonuclease H2, subunit A
hsa-miR-614	1	0	1	1	0	0	TBC1D17	TBC1 domain family, member 17
hsa-miR-614	0	0	0	1	1	1	SGTA	small glutamine-rich tetratricopeptide repeat (TPR)-containing, alpha
hsa-miR-614	0	0	1	1	0	0	SNAPC2	small nuclear RNA activating complex, polypeptide 2, 45kDa
hsa-miR-614	1	0	1	1	0	0	FSD1	fibronectin type III and SPRY domain containing 1
hsa-miR-614	0	0	0	1	0	0	PLIN3	perilipin 3
hsa-miR-614	0	0	1	1	1	1	ARRDC2	arrestin domain containing 2
hsa-miR-614	0	0	0	1	0	0	NUP88	nucleoporin 88kDa
hsa-miR-614	1	0	1	1	1	1	RND2	Rho family GTPase 2
hsa-miR-614	0	0	1	1	0	0	CACNG1	calcium channel, voltage-dependent, gamma subunit 1
hsa-miR-614	0	0	0	1	1	1	UNC93B1	unc-93 homolog B1 (C. elegans)
hsa-miR-614	0	0	0	1	1	1	GNB3	guanine nucleotide binding protein (G protein), beta polypeptide 3
hsa-miR-614	0	0	0	1	0	0	SPSB2	splA/ryanodine receptor domain and SOCS box containing 2
hsa-miR-614	0	0	1	1	0	0	C12orf57	chromosome 12 open reading frame 57
hsa-miR-614	0	0	1	1	1	1	GPR63	G protein-coupled receptor 63
hsa-miR-614	1	0	1	1	0	0	PPP2R5D	protein phosphatase 2, regulatory subunit B', delta
hsa-miR-614	0	0	0	1	0	0	POU4F3	POU class 4 homeobox 3
hsa-miR-614	1	0	1	1	1	1	HAND1	heart and neural crest derivatives expressed 1
hsa-miR-614	0	0	1	1	1	1	SLC11A1	solute carrier family 11 (proton-coupled divalent metal ion transporters), member 1
hsa-miR-614	0	0	0	1	0	0	PROC	protein C (inactivator of coagulation factors Va and VIIIa)
hsa-miR-614	0	0	0	1	0	0	OSCP1	organic solute carrier partner 1
hsa-miR-614	0	0	0	1	0	0	HOXC12	homeobox C12
hsa-miR-614	0	0	0	1	1	1	TNFAIP6	tumor necrosis factor, alpha-induced protein 6
hsa-miR-614	0	0	1	1	0	0	CD70	CD70 molecule
hsa-miR-614	1	0	1	1	1	1	EML2	echinoderm microtubule associated protein like 2
hsa-miR-614	0	0	0	1	0	0	GNRH2	gonadotropin-releasing hormone 2
hsa-miR-614	1	0	1	1	1	1	RALY	RNA binding protein, autoantigenic (hnRNP-associated with lethal yellow homolog (mouse))
hsa-miR-614	1	0	0	1	1	1	WNK4	WNK lysine deficient protein kinase 4
hsa-miR-614	0	0	0	1	1	1	MPV17L2	MPV17 mitochondrial membrane protein-like 2
hsa-miR-614	0	0	1	1	1	1	ZNF317	zinc finger protein 317
hsa-miR-614	1	0	1	1	1	1	AAMP	angio-associated, migratory cell protein
hsa-miR-614	0	0	1	1	0	0	TUBGCP6	tubulin, gamma complex associated protein 6
hsa-miR-614	1	0	1	1	1	1	IVD	isovaleryl-CoA dehydrogenase
hsa-miR-614	0	0	0	1	1	1	AP1M2	adaptor-related protein complex 1, mu 2 subunit
hsa-miR-614	0	0	1	1	0	0	NEDD8	neural precursor cell expressed, developmentally down-regulated 8
hsa-miR-614	0	0	1	1	0	0	EMR1	egf-like module containing, mucin-like, hormone receptor-like 1
hsa-miR-614	0	0	1	1	0	0	ZNF221	zinc finger protein 221
hsa-miR-614	0	0	1	1	0	0	KRT33B	keratin 33B
hsa-miR-614	0	0	0	1	0	0	DDX11	DEAD/H (Asp-Glu-Ala-Asp/His) box helicase 11
hsa-miR-614	0	0	0	1	1	1	TRMT2A	tRNA methyltransferase 2 homolog A (S. cerevisiae)
hsa-miR-614	0	0	0	1	1	1	ZKSCAN3	zinc finger with KRAB and SCAN domains 3
hsa-miR-614	0	0	1	1	1	1	KRT1	keratin 1
hsa-miR-614	1	0	0	1	0	0	GADD45G	growth arrest and DNA-damage-inducible, gamma
hsa-miR-614	1	0	1	1	0	0	ZC3H4	zinc finger CCCH-type containing 4
hsa-miR-614	1	0	1	1	1	1	DUSP9	dual specificity phosphatase 9
hsa-miR-614	1	0	1	1	1	1	SLC7A10	solute carrier family 7 (neutral amino acid transporter light chain, asc system), member 10
hsa-miR-614	0	0	1	1	1	1	NOL11	nucleolar protein 11
hsa-miR-614	0	0	1	1	1	1	TEX101	testis expressed 101
hsa-miR-614	0	0	0	1	0	0	GINS2	GINS complex subunit 2 (Psf2 homolog)
hsa-miR-614	0	0	0	1	0	0	CHIT1	chitinase 1 (chitotriosidase)
hsa-miR-614	0	0	1	1	0	0	HSPBP1	HSPA (heat shock 70kDa) binding protein, cytoplasmic cochaperone 1
hsa-miR-614	0	0	0	1	1	1	RARRES3	retinoic acid receptor responder (tazarotene induced) 3
hsa-miR-614	1	0	1	1	1	1	SBF2	SET binding factor 2
hsa-miR-614	0	0	1	1	1	1	IL5RA	interleukin 5 receptor, alpha
hsa-miR-614	0	0	1	1	0	0	SPOCD1	SPOC domain containing 1
hsa-miR-614	0	0	0	1	0	0	DHX34	DEAH (Asp-Glu-Ala-His) box polypeptide 34
hsa-miR-614	0	0	0	1	0	0	FAM189A2	family with sequence similarity 189, member A2
hsa-miR-614	1	0	0	1	1	1	USP30	ubiquitin specific peptidase 30
hsa-miR-614	1	0	1	1	1	1	TBX3	T-box 3
hsa-miR-614	1	0	1	1	1	1	PRRG4	proline rich Gla (G-carboxyglutamic acid) 4 (transmembrane)
hsa-miR-614	0	0	0	1	0	0	DDX56	DEAD (Asp-Glu-Ala-Asp) box helicase 56
hsa-miR-614	0	0	1	1	1	1	SKIL	SKI-like oncogene
hsa-miR-614	1	0	1	1	0	0	HS6ST1	heparan sulfate 6-O-sulfotransferase 1
hsa-miR-614	0	0	1	1	1	1	ARPC5L	actin related protein 2/3 complex, subunit 5-like
hsa-miR-614	0	0	1	1	0	0	GTF2H4	general transcription factor IIH, polypeptide 4, 52kDa
hsa-miR-614	0	0	1	1	1	1	HSD11B1	hydroxysteroid (11-beta) dehydrogenase 1
hsa-miR-614	0	0	0	1	0	0	MYOM2	myomesin (M-protein) 2, 165kDa
hsa-miR-614	0	0	0	1	1	1	MLYCD	malonyl-CoA decarboxylase
hsa-miR-614	0	0	0	1	0	0	PITPNM3	PITPNM family member 3
hsa-miR-614	1	0	1	1	0	0	ZC3H3	zinc finger CCCH-type containing 3
hsa-miR-614	1	0	1	1	1	1	CCNE1	cyclin E1
hsa-miR-614	1	0	1	1	1	1	CDH20	cadherin 20, type 2
hsa-miR-614	0	0	1	1	1	1	PRDX1	peroxiredoxin 1
hsa-miR-614	1	0	1	1	1	1	SEC14L1	SEC14-like 1 (S. cerevisiae)
hsa-miR-614	0	0	0	1	0	0	PIAS4	protein inhibitor of activated STAT, 4
hsa-miR-614	1	0	0	1	1	1	SMARCB1	SWI/SNF related, matrix associated, actin dependent regulator of chromatin, subfamily b, member 1
hsa-miR-614	1	0	0	1	1	1	ASF1B	ASF1 anti-silencing function 1 homolog B (S. cerevisiae)
hsa-miR-614	0	0	0	1	1	1	SGOL1	shugoshin-like 1 (S. pombe)
hsa-miR-614	1	0	1	1	1	1	FNBP4	formin binding protein 4
hsa-miR-614	0	0	1	1	0	0	ACCS	1-aminocyclopropane-1-carboxylate synthase homolog (Arabidopsis)(non-functional)
hsa-miR-614	0	0	1	1	0	0	NGEF	neuronal guanine nucleotide exchange factor
hsa-miR-614	0	0	1	1	0	0	MCOLN1	mucolipin 1
hsa-miR-614	0	0	1	1	0	0	POPDC2	popeye domain containing 2
hsa-miR-614	0	0	1	1	1	1	F11	coagulation factor XI
hsa-miR-614	1	0	1	1	0	0	RBM27	RNA binding motif protein 27
hsa-miR-614	0	0	1	1	1	1	PITX1	paired-like homeodomain 1
hsa-miR-614	0	0	1	1	0	0	EXOSC7	exosome component 7
hsa-miR-614	0	0	1	1	1	1	RBM48	RNA binding motif protein 48
hsa-miR-614	0	0	0	1	1	1	WBSCR22	Williams Beuren syndrome chromosome region 22
hsa-miR-614	0	0	1	1	0	0	SRP14	signal recognition particle 14kDa (homologous Alu RNA binding protein)
hsa-miR-614	0	0	0	1	0	0	MFGE8	milk fat globule-EGF factor 8 protein
hsa-miR-614	0	0	0	1	1	1	ZNF174	zinc finger protein 174
hsa-miR-614	0	0	1	1	0	0	COPS3	COP9 constitutive photomorphogenic homolog subunit 3 (Arabidopsis)
hsa-miR-614	0	0	0	1	1	1	ERBB2	v-erb-b2 erythroblastic leukemia viral oncogene homolog 2, neuro/glioblastoma derived oncogene homolog (avian)
hsa-miR-614	0	0	1	1	1	1	KRT10	keratin 10
hsa-miR-614	0	0	0	1	1	1	AKAP8	A kinase (PRKA) anchor protein 8
hsa-miR-614	0	0	1	1	0	0	NTN5	netrin 5
hsa-miR-614	0	0	1	1	0	0	WTIP	Wilms tumor 1 interacting protein
hsa-miR-614	0	0	1	1	1	1	FBN3	fibrillin 3
hsa-miR-614	0	0	0	1	0	0	ECSIT	ECSIT homolog (Drosophila)
hsa-miR-614	1	0	0	1	0	0	PGD	phosphogluconate dehydrogenase
hsa-miR-614	0	0	0	1	0	0	FAM176B	family with sequence similarity 176, member B
hsa-miR-614	0	0	0	1	1	1	GPR161	G protein-coupled receptor 161
hsa-miR-614	0	0	0	1	1	1	SCRN3	secernin 3
hsa-miR-614	0	0	0	1	0	0	ANKMY1	ankyrin repeat and MYND domain containing 1
hsa-miR-614	0	0	1	1	0	0	SLC4A3	solute carrier family 4, anion exchanger, member 3
hsa-miR-614	0	0	1	1	0	0	ALDH1L1	aldehyde dehydrogenase 1 family, member L1
hsa-miR-614	0	0	1	1	1	1	KLHL8	kelch-like 8 (Drosophila)
hsa-miR-614	1	0	1	1	1	1	TRIM23	tripartite motif containing 23
hsa-miR-614	0	0	1	1	1	1	ATG12	autophagy related 12
hsa-miR-614	0	0	0	1	0	0	DENND2A	DENN/MADD domain containing 2A
hsa-miR-614	0	0	1	1	0	0	PRDM14	PR domain containing 14
hsa-miR-614	0	0	1	1	0	0	SLC39A4	solute carrier family 39 (zinc transporter), member 4
hsa-miR-614	0	0	1	1	0	0	SAA4	serum amyloid A4, constitutive
hsa-miR-614	1	0	1	1	0	0	CCRN4L	CCR4 carbon catabolite repression 4-like (S. cerevisiae)
hsa-miR-614	0	0	0	1	0	0	CATSPER3	cation channel, sperm associated 3
hsa-miR-614	1	0	0	1	0	0	FAM92B	family with sequence similarity 92, member B
hsa-miR-614	0	0	0	1	0	0	C16orf74	chromosome 16 open reading frame 74
hsa-miR-614	1	0	1	1	1	1	TOMM70A	translocase of outer mitochondrial membrane 70 homolog A (S. cerevisiae)
hsa-miR-614	0	0	1	1	1	1	PDE1C	phosphodiesterase 1C, calmodulin-dependent 70kDa
hsa-miR-614	1	0	1	1	1	1	LSM11	LSM11, U7 small nuclear RNA associated
hsa-miR-614	0	0	1	1	1	1	SLC28A1	solute carrier family 28 (sodium-coupled nucleoside transporter), member 1
hsa-miR-614	0	0	0	1	0	0	NAA11	N(alpha)-acetyltransferase 11, NatA catalytic subunit
hsa-miR-614	0	0	1	1	1	1	CREB3L1	cAMP responsive element binding protein 3-like 1
hsa-miR-614	0	0	0	1	0	0	LRRC43	leucine rich repeat containing 43
hsa-miR-614	0	0	1	1	0	0	GPR153	G protein-coupled receptor 153
hsa-miR-614	0	0	1	1	1	1	HIST1H2BD	histone cluster 1, H2bd
hsa-miR-614	0	0	1	1	1	1	DERL3	derlin 3
hsa-miR-614	0	0	0	1	1	1	SSU72	SSU72 RNA polymerase II CTD phosphatase homolog (S. cerevisiae)
hsa-miR-614	0	0	0	1	0	0	TFF2	trefoil factor 2
hsa-miR-614	0	0	1	1	0	0	C21orf33	chromosome 21 open reading frame 33
hsa-miR-614	0	0	0	1	0	0	PKN3	protein kinase N3
hsa-miR-614	0	0	0	1	1	1	NLRP8	NLR family, pyrin domain containing 8
hsa-miR-614	0	0	0	1	1	1	PHLDB3	pleckstrin homology-like domain, family B, member 3
hsa-miR-614	0	0	0	1	0	0	PAQR6	progestin and adipoQ receptor family member VI
hsa-miR-614	0	0	1	1	1	1	RNF126	ring finger protein 126
hsa-miR-614	0	0	0	1	0	0	CCDC116	coiled-coil domain containing 116
hsa-miR-614	0	0	1	1	0	0	HBE1	hemoglobin, epsilon 1
hsa-miR-614	0	0	0	1	0	0	CDK3	cyclin-dependent kinase 3
hsa-miR-614	0	0	0	1	0	0	RDM1	RAD52 motif 1
hsa-miR-614	0	0	0	1	0	0	DCD	dermcidin
hsa-miR-614	0	0	1	1	0	0	SSRP1	structure specific recognition protein 1
hsa-miR-614	0	0	0	1	0	0	NPPC	natriuretic peptide C
hsa-miR-614	0	0	0	1	0	0	ITGB5	integrin, beta 5
hsa-miR-614	0	0	1	1	0	0	TMEM41A	transmembrane protein 41A
hsa-miR-614	0	0	1	1	1	1	RFT1	RFT1 homolog (S. cerevisiae)
hsa-miR-614	1	0	1	1	1	1	FAM208A	family with sequence similarity 208, member A
hsa-miR-614	0	0	1	1	1	1	PIGX	phosphatidylinositol glycan anchor biosynthesis, class X
hsa-miR-614	0	0	0	1	1	1	MFI2	antigen p97 (melanoma associated) identified by monoclonal antibodies 133.2 and 96.5
hsa-miR-614	0	0	1	1	0	0	APEH	N-acylaminoacyl-peptide hydrolase
hsa-miR-614	0	0	1	1	0	0	MON1A	MON1 homolog A (yeast)
hsa-miR-614	0	0	0	1	0	0	TLR3	toll-like receptor 3
hsa-miR-614	0	0	0	1	0	0	RSPH10B2	radial spoke head 10 homolog B2 (Chlamydomonas)
hsa-miR-614	0	0	0	1	0	0	ALDH7A1	aldehyde dehydrogenase 7 family, member A1
hsa-miR-614	0	0	0	1	0	0	GPR101	G protein-coupled receptor 101
hsa-miR-614	0	0	1	1	0	0	RAPSN	receptor-associated protein of the synapse
hsa-miR-614	0	0	0	1	0	0	AMN	amnionless homolog (mouse)
hsa-miR-614	1	0	1	1	0	0	TNXB	tenascin XB
hsa-miR-614	0	0	0	1	1	1	MARVELD3	MARVEL domain containing 3
hsa-miR-614	1	0	1	1	1	1	METTL21B	methyltransferase like 21B
hsa-miR-614	0	0	0	1	0	0	OR51B5	olfactory receptor, family 51, subfamily B, member 5
hsa-miR-614	0	0	1	1	1	1	VPS11	vacuolar protein sorting 11 homolog (S. cerevisiae)
hsa-miR-614	0	0	0	1	0	0	IZUMO4	IZUMO family member 4
hsa-miR-614	0	0	0	1	0	0	LILRA5	leukocyte immunoglobulin-like receptor, subfamily A (with TM domain), member 5
hsa-miR-614	1	0	0	1	1	1	CHAF1A	chromatin assembly factor 1, subunit A (p150)
hsa-miR-614	0	0	1	1	1	1	NTF4	neurotrophin 4
hsa-miR-614	0	0	1	1	0	0	SRRM2	serine/arginine repetitive matrix 2
hsa-miR-614	0	0	1	1	0	0	DDB1	damage-specific DNA binding protein 1, 127kDa
hsa-miR-614	0	0	1	1	0	0	ZNF467	zinc finger protein 467
hsa-miR-614	1	0	1	1	1	1	DDX19A	DEAD (Asp-Glu-Ala-Asp) box polypeptide 19A
hsa-miR-614	0	0	1	1	1	1	ZNF804A	zinc finger protein 804A
hsa-miR-614	1	0	0	1	1	1	KIF5B	kinesin family member 5B
hsa-miR-614	0	0	1	1	0	0	HMCN2	hemicentin 2
hsa-miR-614	1	0	1	1	1	1	INSR	insulin receptor
hsa-miR-614	0	0	1	1	1	1	ZNF561	zinc finger protein 561
hsa-miR-614	0	0	1	1	0	0	KCNK9	potassium channel, subfamily K, member 9
hsa-miR-614	0	0	1	1	1	1	MXD3	MAX dimerization protein 3
hsa-miR-614	0	0	0	1	1	1	MRAP	melanocortin 2 receptor accessory protein
hsa-miR-614	0	0	1	1	1	1	FRMPD4	FERM and PDZ domain containing 4
hsa-miR-614	0	0	1	1	1	1	C15orf40	chromosome 15 open reading frame 40
hsa-miR-614	0	0	0	1	0	0	GPR25	G protein-coupled receptor 25
hsa-miR-614	1	0	1	1	0	0	INO80E	INO80 complex subunit E
hsa-miR-614	1	0	1	1	1	1	RNASE6	ribonuclease, RNase A family, k6
hsa-miR-614	0	0	0	1	1	1	NECAB2	N-terminal EF-hand calcium binding protein 2
hsa-miR-614	0	0	1	1	0	0	NTSR2	neurotensin receptor 2
hsa-miR-614	0	0	0	1	0	0	TMEM223	transmembrane protein 223
hsa-miR-614	0	0	0	1	0	0	THOP1	thimet oligopeptidase 1
hsa-miR-614	0	0	1	1	1	1	FAM53A	family with sequence similarity 53, member A
hsa-miR-614	0	0	0	1	0	0	EVX2	even-skipped homeobox 2
hsa-miR-614	0	0	1	1	1	1	LINGO2	leucine rich repeat and Ig domain containing 2
hsa-miR-614	0	0	1	1	1	1	BTK	Bruton agammaglobulinemia tyrosine kinase
hsa-miR-614	0	0	1	1	1	1	CAST	calpastatin
hsa-miR-614	1	0	1	1	1	1	CDK13	cyclin-dependent kinase 13
hsa-miR-614	0	0	1	1	0	0	CCDC13	coiled-coil domain containing 13
hsa-miR-614	0	0	1	1	1	1	TTLL9	tubulin tyrosine ligase-like family, member 9
hsa-miR-614	1	0	0	1	0	0	RNF26	ring finger protein 26
hsa-miR-614	0	0	1	1	0	0	GPR113	G protein-coupled receptor 113
hsa-miR-614	0	0	1	1	1	1	A2ML1	alpha-2-macroglobulin-like 1
hsa-miR-614	0	0	1	1	1	1	ZNF323	zinc finger protein 323
hsa-miR-614	0	0	1	1	1	1	RNF32	ring finger protein 32
hsa-miR-614	1	0	1	1	1	1	ISCU	iron-sulfur cluster scaffold homolog (E. coli)
hsa-miR-614	0	0	1	1	0	0	KRI1	KRI1 homolog (S. cerevisiae)
hsa-miR-614	1	0	1	1	0	0	CSNK1G2	casein kinase 1, gamma 2
hsa-miR-614	0	0	1	1	0	0	GAK	cyclin G associated kinase
hsa-miR-614	0	0	1	1	0	0	ZNF777	zinc finger protein 777
hsa-miR-614	1	0	1	1	1	1	RHOT2	ras homolog family member T2
hsa-miR-614	0	0	1	1	1	1	MMP1	matrix metallopeptidase 1 (interstitial collagenase)
hsa-miR-614	0	0	1	1	0	0	RBP7	retinol binding protein 7, cellular
hsa-miR-614	0	0	0	1	1	1	ASB2	ankyrin repeat and SOCS box containing 2
hsa-miR-614	0	0	1	1	1	1	BIN1	bridging integrator 1
hsa-miR-614	0	0	1	1	0	0	STOML1	stomatin (EPB72)-like 1
hsa-miR-614	0	0	0	1	0	0	FAM125A	family with sequence similarity 125, member A
hsa-miR-614	1	0	1	1	1	1	HOXA3	homeobox A3
hsa-miR-614	0	0	1	1	1	1	MPPE1	metallophosphoesterase 1
hsa-miR-614	0	0	0	1	0	0	MAMDC4	MAM domain containing 4
hsa-miR-614	0	0	1	1	0	0	TMEM11	transmembrane protein 11
hsa-miR-614	0	0	0	1	0	0	ZNF101	zinc finger protein 101
hsa-miR-614	0	0	1	1	1	1	PAQR4	progestin and adipoQ receptor family member IV
hsa-miR-614	1	0	1	1	1	1	SYNGR1	synaptogyrin 1
hsa-miR-614	1	0	1	1	1	1	RALGPS1	Ral GEF with PH domain and SH3 binding motif 1
hsa-miR-614	1	0	1	1	0	0	UBASH3A	ubiquitin associated and SH3 domain containing A
hsa-miR-614	1	0	1	1	1	1	LEPREL1	leprecan-like 1
hsa-miR-614	0	0	0	1	0	0	ZNF48	zinc finger protein 48
hsa-miR-614	0	0	1	1	1	1	GALNT11	UDP-N-acetyl-alpha-D-galactosamine:polypeptide N-acetylgalactosaminyltransferase 11 (GalNAc-T11)
hsa-miR-614	0	0	0	1	0	0	ANKRD30B	ankyrin repeat domain 30B
hsa-miR-614	0	0	1	1	1	1	NCBP2	nuclear cap binding protein subunit 2, 20kDa
hsa-miR-614	1	0	1	1	1	1	BAIAP2	BAI1-associated protein 2
hsa-miR-614	0	0	0	1	0	0	P2RY11	purinergic receptor P2Y, G-protein coupled, 11
hsa-miR-614	0	0	0	1	0	0	PPAN	peter pan homolog (Drosophila)
hsa-miR-614	0	0	0	1	0	0	PPAN-P2RY11	PPAN-P2RY11 readthrough
hsa-miR-614	0	0	0	1	0	0	TRIM72	tripartite motif containing 72
hsa-miR-614	1	0	0	1	1	1	FAM210A	family with sequence similarity 210, member A
hsa-miR-614	0	0	0	1	0	0	SSNA1	Sjogren syndrome nuclear autoantigen 1
hsa-miR-614	0	0	1	1	0	0	CPSF3L	cleavage and polyadenylation specific factor 3-like
hsa-miR-614	0	0	0	1	0	0	SPHK1	sphingosine kinase 1
hsa-miR-614	0	0	1	1	0	0	CDC25C	cell division cycle 25 homolog C (S. pombe)
hsa-miR-614	1	0	1	1	1	1	GRHL1	grainyhead-like 1 (Drosophila)
hsa-miR-614	0	0	1	1	0	0	MIF4GD	MIF4G domain containing
hsa-miR-614	0	0	0	1	0	0	PLCB3	phospholipase C, beta 3 (phosphatidylinositol-specific)
hsa-miR-614	0	0	1	1	0	0	CYP4F8	cytochrome P450, family 4, subfamily F, polypeptide 8
hsa-miR-614	0	0	0	1	0	0	GTPBP6	GTP binding protein 6 (putative)
hsa-miR-614	0	0	1	1	0	0	PORCN	porcupine homolog (Drosophila)
hsa-miR-614	0	0	0	1	0	0	SPAG11A	sperm associated antigen 11A
hsa-miR-614	0	0	1	1	0	0	KLHDC3	kelch domain containing 3
hsa-miR-614	0	0	0	1	0	0	SSX10	synovial sarcoma, X breakpoint 10
hsa-miR-614	0	0	1	1	1	1	PARPBP	PARP1 binding protein
hsa-miR-614	0	0	1	1	0	0	PHF7	PHD finger protein 7
hsa-miR-614	0	0	0	1	0	0	LRRC14B	leucine rich repeat containing 14B
hsa-miR-614	1	0	0	1	0	0	BTBD9	BTB (POZ) domain containing 9
hsa-miR-614	0	0	0	1	0	0	KRTAP5-3	keratin associated protein 5-3
hsa-miR-614	1	0	0	1	0	0	FAM193B	family with sequence similarity 193, member B
hsa-miR-614	0	0	0	1	0	0	C2orf70	chromosome 2 open reading frame 70
hsa-miR-614	1	0	1	1	1	1	USP45	ubiquitin specific peptidase 45
hsa-miR-614	0	0	1	1	0	0	HBG1	hemoglobin, gamma A
hsa-miR-614	0	0	0	1	1	1	IL3RA	interleukin 3 receptor, alpha (low affinity)
hsa-miR-614	0	0	1	1	0	0	ALYREF	Aly/REF export factor
hsa-miR-614	0	0	0	1	0	0	ALG12	asparagine-linked glycosylation 12, alpha-1,6-mannosyltransferase homolog (S. cerevisiae)
hsa-miR-614	0	0	0	1	0	0	LCK	lymphocyte-specific protein tyrosine kinase
hsa-miR-614	0	0	1	1	1	1	NELL2	NEL-like 2 (chicken)
hsa-miR-614	0	0	0	1	1	1	SHOX	short stature homeobox
hsa-miR-614	0	0	1	1	0	0	LCE5A	late cornified envelope 5A
hsa-miR-614	0	0	0	1	0	0	SLC51B	solute carrier family 51, beta subunit
hsa-miR-614	1	0	1	1	1	1	GPR125	G protein-coupled receptor 125
hsa-miR-614	0	0	0	1	1	1	PDCD1	programmed cell death 1
hsa-miR-614	0	0	1	1	0	0	PGS1	phosphatidylglycerophosphate synthase 1
hsa-miR-614	0	0	1	1	1	1	EXOC7	exocyst complex component 7
hsa-miR-614	0	0	1	1	0	0	C2orf53	chromosome 2 open reading frame 53
hsa-miR-614	0	0	1	1	1	1	PSPC1	paraspeckle component 1
hsa-miR-614	0	0	1	1	1	1	NLRP3	NLR family, pyrin domain containing 3
hsa-miR-614	0	0	1	1	1	1	TBC1D3C	TBC1 domain family, member 3C
hsa-miR-614	0	0	1	1	1	1	GNL3L	guanine nucleotide binding protein-like 3 (nucleolar)-like
hsa-miR-614	0	0	1	1	0	0	IL1F10	interleukin 1 family, member 10 (theta)
hsa-miR-614	0	0	0	1	0	0	RSPH10B	radial spoke head 10 homolog B (Chlamydomonas)
hsa-miR-614	1	0	1	1	0	0	AP1S1	adaptor-related protein complex 1, sigma 1 subunit
hsa-miR-614	0	0	0	1	1	1	ZIM2	zinc finger, imprinted 2
hsa-miR-614	0	0	1	1	1	1	PEG3	paternally expressed 3
hsa-miR-614	0	0	0	1	0	0	CHCHD2P9	coiled-coil-helix-coiled-coil-helix domain containing 2 pseudogene 9
hsa-miR-614	1	0	1	1	1	1	ACACB	acetyl-CoA carboxylase beta
hsa-miR-614	0	0	1	1	1	1	PARK2	parkinson protein 2, E3 ubiquitin protein ligase (parkin)
hsa-miR-614	0	0	0	1	0	0	GJB5	gap junction protein, beta 5, 31.1kDa
hsa-miR-614	1	0	1	1	1	1	SLC25A15	solute carrier family 25 (mitochondrial carrier; ornithine transporter) member 15
hsa-miR-614	0	0	0	1	0	0	ZFP92	zinc finger protein 92 homolog (mouse)
hsa-miR-614	0	0	0	1	1	1	C21orf2	chromosome 21 open reading frame 2
hsa-miR-614	1	0	1	1	1	1	KCNJ11	potassium inwardly-rectifying channel, subfamily J, member 11
hsa-miR-614	0	0	1	1	1	1	C3orf33	chromosome 3 open reading frame 33
hsa-miR-614	0	0	1	1	0	0	ARHGAP9	Rho GTPase activating protein 9
hsa-miR-614	0	0	0	1	0	0	ANKRD20A4	ankyrin repeat domain 20 family, member A4
hsa-miR-614	0	0	0	1	0	0	ANKRD20A8P	ankyrin repeat domain 20 family, member A8, pseudogene
hsa-miR-614	0	0	0	1	0	0	ANKRD20A20P	ankyrin repeat domain 20 family, member A20, pseudogene
hsa-miR-614	1	0	1	1	1	1	KCNK10	potassium channel, subfamily K, member 10
hsa-miR-614	0	0	1	1	0	0	HM13	histocompatibility (minor) 13
hsa-miR-614	0	0	1	1	0	0	TEX264	testis expressed 264
hsa-miR-614	0	0	1	1	1	1	LBX2	ladybird homeobox 2
hsa-miR-614	1	0	1	1	1	1	ABCA1	ATP-binding cassette, sub-family A (ABC1), member 1
hsa-miR-614	0	0	0	1	0	0	PRY2	PTPN13-like, Y-linked 2
hsa-miR-614	0	0	0	1	1	1	ZNF167	zinc finger protein 167
hsa-miR-614	0	0	0	1	1	1	GPR179	G protein-coupled receptor 179
hsa-miR-614	0	0	1	1	0	0	D2HGDH	D-2-hydroxyglutarate dehydrogenase
hsa-miR-614	0	0	1	1	1	1	NEXN	nexilin (F actin binding protein)
hsa-miR-614	0	0	0	1	1	1	CIDEA	cell death-inducing DFFA-like effector a
hsa-miR-614	0	0	0	1	0	0	BSX	brain-specific homeobox
hsa-miR-614	0	0	1	1	0	0	SIGLEC6	sialic acid binding Ig-like lectin 6
hsa-miR-614	1	0	1	1	1	1	MKL2	MKL/myocardin-like 2
hsa-miR-614	0	0	0	1	1	1	WNT8B	wingless-type MMTV integration site family, member 8B
hsa-miR-614	0	0	0	1	0	0	P2RX2	purinergic receptor P2X, ligand-gated ion channel, 2
hsa-miR-614	0	0	1	1	1	1	ICOSLG	inducible T-cell co-stimulator ligand
hsa-miR-614	0	0	0	1	1	1	DTNBP1	dystrobrevin binding protein 1
hsa-miR-614	1	0	1	1	0	0	ENG	endoglin
hsa-miR-614	0	0	0	1	0	0	ZNF433	zinc finger protein 433
hsa-miR-614	0	0	1	1	0	0	GRIN2C	glutamate receptor, ionotropic, N-methyl D-aspartate 2C
hsa-miR-614	0	0	1	1	0	0	SLC28A2	solute carrier family 28 (sodium-coupled nucleoside transporter), member 2
hsa-miR-614	0	0	0	1	1	1	CCR6	chemokine (C-C motif) receptor 6
hsa-miR-614	0	0	1	1	1	1	ACPP	acid phosphatase, prostate
hsa-miR-614	1	0	1	1	1	1	SLC24A4	solute carrier family 24 (sodium/potassium/calcium exchanger), member 4
hsa-miR-614	0	0	0	1	1	1	XRCC3	X-ray repair complementing defective repair in Chinese hamster cells 3
hsa-miR-614	0	0	0	1	0	0	PSMD13	proteasome (prosome, macropain) 26S subunit, non-ATPase, 13
hsa-miR-614	0	0	1	1	0	0	ASS1	argininosuccinate synthase 1
hsa-miR-614	1	0	1	1	1	1	SORBS1	sorbin and SH3 domain containing 1
hsa-miR-614	1	0	1	1	0	0	ADAMTSL2	ADAMTS-like 2
hsa-miR-614	0	0	1	1	1	1	MED23	mediator complex subunit 23
hsa-miR-614	0	0	0	1	0	0	INCA1	inhibitor of CDK, cyclin A1 interacting protein 1
hsa-miR-614	0	0	1	1	0	0	ANKRD35	ankyrin repeat domain 35
hsa-miR-614	0	0	1	1	0	0	CEP250	centrosomal protein 250kDa
hsa-miR-614	0	0	0	1	1	1	ZNF675	zinc finger protein 675
hsa-miR-614	0	0	0	1	0	0	ARSA	arylsulfatase A
hsa-miR-614	0	0	0	1	0	0	CDK11B	cyclin-dependent kinase 11B
hsa-miR-614	0	0	1	1	0	0	STOML2	stomatin (EPB72)-like 2
hsa-miR-614	0	0	0	1	0	0	DNAJC22	DnaJ (Hsp40) homolog, subfamily C, member 22
hsa-miR-614	1	0	1	1	1	1	DLGAP2	discs, large (Drosophila) homolog-associated protein 2
hsa-miR-614	1	0	1	1	1	1	EHMT1	euchromatic histone-lysine N-methyltransferase 1
hsa-miR-614	0	0	1	1	1	1	RAD52	RAD52 homolog (S. cerevisiae)
hsa-miR-614	0	0	1	1	1	1	APOL2	apolipoprotein L, 2
hsa-miR-614	1	0	1	1	0	0	C16orf5	chromosome 16 open reading frame 5
hsa-miR-614	0	0	1	1	1	1	TMEM139	transmembrane protein 139
hsa-miR-614	0	0	0	1	0	0	OR1N1	olfactory receptor, family 1, subfamily N, member 1
hsa-miR-614	0	0	1	1	0	0	RGR	retinal G protein coupled receptor
hsa-miR-614	1	0	1	1	1	1	KLHL5	kelch-like 5 (Drosophila)
hsa-miR-614	0	0	1	1	1	1	RNF217	ring finger protein 217
hsa-miR-614	0	0	0	1	0	0	KANK3	KN motif and ankyrin repeat domains 3
hsa-miR-614	1	0	0	1	1	1	CRB2	crumbs homolog 2 (Drosophila)
hsa-miR-614	0	0	0	1	0	0	SYTL3	synaptotagmin-like 3
hsa-miR-614	0	0	1	1	1	1	FBXL22	F-box and leucine-rich repeat protein 22
hsa-miR-614	0	0	1	1	1	1	GSTM3	glutathione S-transferase mu 3 (brain)
hsa-miR-614	0	0	0	1	0	0	SHARPIN	SHANK-associated RH domain interactor
hsa-miR-614	0	0	1	1	0	0	NSMCE1	non-SMC element 1 homolog (S. cerevisiae)
hsa-miR-614	0	0	1	1	0	0	CNKSR1	connector enhancer of kinase suppressor of Ras 1
hsa-miR-614	1	0	1	1	1	1	RNF121	ring finger protein 121
hsa-miR-614	0	0	0	1	0	0	ZP4	zona pellucida glycoprotein 4
hsa-miR-614	0	0	1	1	0	0	GNPAT	glyceronephosphate O-acyltransferase
hsa-miR-614	0	0	1	1	1	1	IL20	interleukin 20
hsa-miR-614	0	0	0	1	0	0	LEMD1	LEM domain containing 1
hsa-miR-614	1	0	1	1	1	1	NFASC	neurofascin
hsa-miR-614	0	0	0	1	0	0	ULBP3	UL16 binding protein 3
hsa-miR-614	1	0	1	1	1	1	SASH1	SAM and SH3 domain containing 1
hsa-miR-614	1	0	1	1	1	1	TOR3A	torsin family 3, member A
hsa-miR-614	0	0	1	1	0	0	NDUFS2	NADH dehydrogenase (ubiquinone) Fe-S protein 2, 49kDa (NADH-coenzyme Q reductase)
hsa-miR-614	1	0	1	1	0	0	SH2D2A	SH2 domain containing 2A
hsa-miR-614	1	0	1	1	1	1	FAM189B	family with sequence similarity 189, member B
hsa-miR-614	0	0	1	1	0	0	LELP1	late cornified envelope-like proline-rich 1
hsa-miR-614	0	0	1	1	0	0	KPRP	keratinocyte proline-rich protein
hsa-miR-614	0	0	1	1	1	1	THEM5	thioesterase superfamily member 5
hsa-miR-614	1	0	1	1	1	1	SNX27	sorting nexin family member 27
hsa-miR-614	0	0	1	1	1	1	LHPP	phospholysine phosphohistidine inorganic pyrophosphate phosphatase
hsa-miR-614	1	0	1	1	1	1	SCML4	sex comb on midleg-like 4 (Drosophila)
hsa-miR-614	0	0	1	1	0	0	ECM1	extracellular matrix protein 1
hsa-miR-614	0	0	0	1	0	0	SFXN4	sideroflexin 4
hsa-miR-614	0	0	0	1	1	1	TDRD1	tudor domain containing 1
hsa-miR-614	0	0	1	1	1	1	RBM8A	RNA binding motif protein 8A
hsa-miR-614	0	0	1	1	1	1	RBM20	RNA binding motif protein 20
hsa-miR-614	0	0	1	1	0	0	AP4B1	adaptor-related protein complex 4, beta 1 subunit
hsa-miR-614	0	0	0	1	0	0	ABHD16B	abhydrolase domain containing 16B
hsa-miR-614	0	0	1	1	0	0	BARHL2	BarH-like homeobox 2
hsa-miR-614	0	0	0	1	0	0	LRRC8C	leucine rich repeat containing 8 family, member C
hsa-miR-614	0	0	1	1	1	1	KIAA1586	KIAA1586
hsa-miR-614	0	0	1	1	0	0	C1orf87	chromosome 1 open reading frame 87
hsa-miR-614	0	0	1	1	1	1	TACSTD2	tumor-associated calcium signal transducer 2
hsa-miR-614	0	0	0	1	0	0	PNPLA7	patatin-like phospholipase domain containing 7
hsa-miR-614	1	0	1	1	1	1	LONRF3	LON peptidase N-terminal domain and ring finger 3
hsa-miR-614	0	0	0	1	0	0	UBAC1	UBA domain containing 1
hsa-miR-614	1	0	1	1	1	1	COL5A1	collagen, type V, alpha 1
hsa-miR-614	1	0	0	1	0	0	DMRTA2	DMRT-like family A2
hsa-miR-614	0	0	0	1	1	1	REXO4	REX4, RNA exonuclease 4 homolog (S. cerevisiae)
hsa-miR-614	0	0	1	1	0	0	UCK1	uridine-cytidine kinase 1
hsa-miR-614	0	0	1	1	0	0	RPS8	ribosomal protein S8
hsa-miR-614	0	0	1	1	1	1	SZT2	seizure threshold 2 homolog (mouse)
hsa-miR-614	1	0	1	1	1	1	LRRC8A	leucine rich repeat containing 8 family, member A
hsa-miR-614	1	0	1	1	1	1	CAMK2G	calcium/calmodulin-dependent protein kinase II gamma
hsa-miR-614	0	0	1	1	1	1	TRUB2	TruB pseudouridine (psi) synthase homolog 2 (E. coli)
hsa-miR-614	0	0	1	1	1	1	DNAJC9	DnaJ (Hsp40) homolog, subfamily C, member 9
hsa-miR-614	1	0	1	1	1	1	PCDH19	protocadherin 19
hsa-miR-614	0	0	0	1	0	0	KCNK16	potassium channel, subfamily K, member 16
hsa-miR-614	0	0	0	1	1	1	FARP2	FERM, RhoGEF and pleckstrin domain protein 2
hsa-miR-614	0	0	0	1	0	0	TACR2	tachykinin receptor 2
hsa-miR-614	1	0	1	1	0	0	CCDC167	coiled-coil domain containing 167
hsa-miR-614	1	0	1	1	0	0	CCDC28B	coiled-coil domain containing 28B
hsa-miR-614	1	0	1	1	1	1	ANK3	ankyrin 3, node of Ranvier (ankyrin G)
hsa-miR-614	0	0	0	1	0	0	EYA3	eyes absent homolog 3 (Drosophila)
hsa-miR-614	0	0	1	1	0	0	OBSL1	obscurin-like 1
hsa-miR-614	0	0	1	1	0	0	TCP11	t-complex 11 homolog (mouse)
hsa-miR-614	1	0	1	1	0	0	DHDDS	dehydrodolichyl diphosphate synthase
hsa-miR-614	0	0	1	1	1	1	SUSD1	sushi domain containing 1
hsa-miR-614	0	0	1	1	0	0	STPG1	sperm-tail PG-rich repeat containing 1
hsa-miR-614	1	0	1	1	1	1	RAPH1	Ras association (RalGDS/AF-6) and pleckstrin homology domains 1
hsa-miR-614	0	0	1	1	1	1	RING1	ring finger protein 1
hsa-miR-614	1	0	1	1	1	1	MGAT5B	mannosyl (alpha-1,6-)-glycoprotein beta-1,6-N-acetyl-glucosaminyltransferase, isozyme B
hsa-miR-614	0	0	1	1	0	0	EGFL8	EGF-like-domain, multiple 8
hsa-miR-614	1	0	0	1	0	0	PQLC2	PQ loop repeat containing 2
hsa-miR-614	0	0	1	1	0	0	FBP2	fructose-1,6-bisphosphatase 2
hsa-miR-614	0	0	0	1	0	0	SKIV2L	superkiller viralicidic activity 2-like (S. cerevisiae)
hsa-miR-614	0	0	1	1	1	1	CCDC148	coiled-coil domain containing 148
hsa-miR-614	0	0	1	1	1	1	NFIL3	nuclear factor, interleukin 3 regulated
hsa-miR-614	1	0	1	1	1	1	SECISBP2	SECIS binding protein 2
hsa-miR-614	0	0	1	1	1	1	RAB3GAP1	RAB3 GTPase activating protein subunit 1 (catalytic)
hsa-miR-614	0	0	0	1	0	0	LY6G5C	lymphocyte antigen 6 complex, locus G5C
hsa-miR-614	1	0	1	1	1	1	ID1	inhibitor of DNA binding 1, dominant negative helix-loop-helix protein
hsa-miR-614	0	0	1	1	0	0	FGF14	fibroblast growth factor 14
hsa-miR-614	1	0	1	1	0	0	WDR45	WD repeat domain 45
hsa-miR-614	1	0	1	1	1	1	STK24	serine/threonine kinase 24
hsa-miR-614	0	0	1	1	0	0	UGGT2	UDP-glucose glycoprotein glucosyltransferase 2
hsa-miR-614	0	0	1	1	1	1	COMMD3	COMM domain containing 3
hsa-miR-614	0	0	0	1	0	0	ANXA1	annexin A1
hsa-miR-614	1	0	1	1	1	1	TRPM3	transient receptor potential cation channel, subfamily M, member 3
hsa-miR-614	0	0	1	1	1	1	PLXDC2	plexin domain containing 2
hsa-miR-614	0	0	0	1	0	0	LOC100128059	uncharacterized LOC100128059
hsa-miR-614	1	0	1	1	1	1	PHF13	PHD finger protein 13
hsa-miR-614	0	0	1	1	0	0	POLR1E	polymerase (RNA) I polypeptide E, 53kDa
hsa-miR-614	0	0	0	1	0	0	ACOT7	acyl-CoA thioesterase 7
hsa-miR-614	0	0	0	1	1	1	MYO19	myosin XIX
hsa-miR-614	0	0	1	1	0	0	PLCH2	phospholipase C, eta 2
hsa-miR-614	0	0	1	1	0	0	GABRD	gamma-aminobutyric acid (GABA) A receptor, delta
hsa-miR-614	0	0	0	1	0	0	ETV2	ets variant 2
hsa-miR-614	0	0	1	1	0	0	UBAP2	ubiquitin associated protein 2
hsa-miR-614	0	0	1	1	1	1	C15orf59	chromosome 15 open reading frame 59
hsa-miR-614	0	0	1	1	1	1	ACO1	aconitase 1, soluble
hsa-miR-614	0	0	1	1	1	1	ITPA	inosine triphosphatase (nucleoside triphosphate pyrophosphatase)
hsa-miR-614	0	0	0	1	0	0	HBG2	hemoglobin, gamma G
hsa-miR-614	0	0	0	1	0	0	LOC100132612	uncharacterized LOC100132612
hsa-miR-614	0	0	0	1	0	0	CALML5	calmodulin-like 5
hsa-miR-614	0	0	1	1	0	0	UMODL1	uromodulin-like 1
hsa-miR-614	1	0	1	1	1	1	ADRA1A	adrenoceptor alpha 1A
hsa-miR-614	0	0	1	1	1	1	FLT3	fms-related tyrosine kinase 3
hsa-miR-614	0	0	1	1	1	1	TECRL	trans-2,3-enoyl-CoA reductase-like
hsa-miR-614	1	0	1	1	1	1	TMEM165	transmembrane protein 165
hsa-miR-614	0	0	0	1	0	0	ENO3	enolase 3 (beta, muscle)
hsa-miR-614	1	0	1	1	1	1	DIP2C	DIP2 disco-interacting protein 2 homolog C (Drosophila)
hsa-miR-614	0	0	1	1	0	0	CATSPERD	catsper channel auxiliary subunit delta
hsa-miR-614	1	0	1	1	1	1	HOXA10	homeobox A10
hsa-miR-614	0	0	0	1	0	0	ANGPT4	angiopoietin 4
hsa-miR-614	0	0	0	1	1	1	EVC	Ellis van Creveld syndrome
hsa-miR-614	0	0	1	1	1	1	SERPINB5	serpin peptidase inhibitor, clade B (ovalbumin), member 5
hsa-miR-614	0	0	1	1	0	0	RGS12	regulator of G-protein signaling 12
hsa-miR-614	0	0	0	1	0	0	RPS3AP5	ribosomal protein S3A pseudogene 5
hsa-miR-614	0	0	1	1	1	1	NFKBIB	nuclear factor of kappa light polypeptide gene enhancer in B-cells inhibitor, beta
hsa-miR-614	1	0	1	0	1	1	KIAA0930	KIAA0930
hsa-miR-614	0	0	1	0	1	1	GYPA	glycophorin A (MNS blood group)
hsa-miR-614	1	0	1	0	1	1	TOMM20	translocase of outer mitochondrial membrane 20 homolog (yeast)
hsa-miR-614	1	0	1	1	1	1	EPB41L5	erythrocyte membrane protein band 4.1 like 5
hsa-miR-614	0	0	0	1	1	1	C14orf159	chromosome 14 open reading frame 159
