# Supplementary material for: Profiling of Selected MicroRNAs in Proliferative Eutopic Endometrium of Women with Ovarian Endometriosis
Source: Biomed Res Int. 2015 Aug 20;2015:760698. doi: 10.1155/2015/760698 (PMC4558423; doi:10.1155/2015/760698)
Supplement: Supplementary file 1 — Table I: The names of miRNAs significantly differentially expressed between eutopic endometrium of patients with endometriosis vs eutopic endometrium of patients without endometriosis. Table II: The associations between miRNA and mRNA, which presents detailed results of the search of six major databases i.e targetscan, tarbase, miranda, mirbase, mirtarget2 and pictar. [file 760698.f1.zip › 760698.f1/Table II/hsa-miR-615-3p.tsv]

miR	targetscan	tarbase	miranda	mirbase	mirtarget2	pictar	GeneSymbol	GeneName
hsa-miR-615-3p	1	0	1	1	1	1	SHANK3	SH3 and multiple ankyrin repeat domains 3
hsa-miR-615-3p	1	0	1	1	0	0	LRRC73	leucine rich repeat containing 73
hsa-miR-615-3p	1	0	1	1	1	1	GRIA4	glutamate receptor, ionotropic, AMPA 4
hsa-miR-615-3p	1	0	0	1	1	1	VSTM2L	V-set and transmembrane domain containing 2 like
hsa-miR-615-3p	1	0	1	1	0	0	SRCAP	Snf2-related CREBBP activator protein
hsa-miR-615-3p	1	0	1	1	1	1	MCF2L	MCF.2 cell line derived transforming sequence-like
hsa-miR-615-3p	0	0	1	1	1	1	BAI2	brain-specific angiogenesis inhibitor 2
hsa-miR-615-3p	1	0	1	1	0	0	SEC14L5	SEC14-like 5 (S. cerevisiae)
hsa-miR-615-3p	1	0	1	1	1	1	IQSEC2	IQ motif and Sec7 domain 2
hsa-miR-615-3p	0	0	1	1	0	0	ZNF862	zinc finger protein 862
hsa-miR-615-3p	1	0	1	1	1	1	ARHGEF15	Rho guanine nucleotide exchange factor (GEF) 15
hsa-miR-615-3p	1	0	1	1	1	1	BAHD1	bromo adjacent homology domain containing 1
hsa-miR-615-3p	1	0	1	1	1	1	C11orf9	chromosome 11 open reading frame 9
hsa-miR-615-3p	1	0	1	1	0	0	KIAA1045	KIAA1045
hsa-miR-615-3p	0	0	1	1	0	0	ZC4H2	zinc finger, C4H2 domain containing
hsa-miR-615-3p	1	0	1	0	1	1	IGDCC4	immunoglobulin superfamily, DCC subclass, member 4
hsa-miR-615-3p	1	0	1	1	1	1	PTBP2	polypyrimidine tract binding protein 2
hsa-miR-615-3p	1	0	1	1	0	0	SEMA4C	sema domain, immunoglobulin domain (Ig), transmembrane domain (TM) and short cytoplasmic domain, (semaphorin) 4C
hsa-miR-615-3p	1	0	1	1	1	1	LCOR	ligand dependent nuclear receptor corepressor
hsa-miR-615-3p	1	0	1	1	1	1	LZTS2	leucine zipper, putative tumor suppressor 2
hsa-miR-615-3p	1	0	1	1	1	1	SH3TC2	SH3 domain and tetratricopeptide repeats 2
hsa-miR-615-3p	1	0	1	0	0	0	ZBTB34	zinc finger and BTB domain containing 34
hsa-miR-615-3p	0	0	1	1	0	0	KREMEN2	kringle containing transmembrane protein 2
hsa-miR-615-3p	0	0	1	1	0	0	SSPO	SCO-spondin homolog (Bos taurus)
hsa-miR-615-3p	1	0	1	1	1	1	ADARB1	adenosine deaminase, RNA-specific, B1
hsa-miR-615-3p	1	0	1	1	1	1	VLDLR	very low density lipoprotein receptor
hsa-miR-615-3p	1	0	1	1	1	1	OSBPL7	oxysterol binding protein-like 7
hsa-miR-615-3p	0	0	1	1	0	0	KCNC3	potassium voltage-gated channel, Shaw-related subfamily, member 3
hsa-miR-615-3p	1	0	1	1	0	0	GRIA1	glutamate receptor, ionotropic, AMPA 1
hsa-miR-615-3p	1	0	1	0	1	1	ETV1	ets variant 1
hsa-miR-615-3p	0	0	1	1	1	1	TFRC	transferrin receptor (p90, CD71)
hsa-miR-615-3p	1	0	1	1	1	1	TBX2	T-box 2
hsa-miR-615-3p	1	0	1	1	1	1	SPTB	spectrin, beta, erythrocytic
hsa-miR-615-3p	0	0	1	1	0	0	EIF4E2	eukaryotic translation initiation factor 4E family member 2
hsa-miR-615-3p	0	0	1	1	0	0	SLC22A8	solute carrier family 22 (organic anion transporter), member 8
hsa-miR-615-3p	1	0	1	0	1	1	PDE7B	phosphodiesterase 7B
hsa-miR-615-3p	1	0	1	1	1	1	MDM4	Mdm4 p53 binding protein homolog (mouse)
hsa-miR-615-3p	1	0	1	1	1	1	CBFA2T2	core-binding factor, runt domain, alpha subunit 2; translocated to, 2
hsa-miR-615-3p	0	0	1	1	1	1	PCF11	PCF11, cleavage and polyadenylation factor subunit, homolog (S. cerevisiae)
hsa-miR-615-3p	1	0	1	0	1	1	CELF2	CUGBP, Elav-like family member 2
hsa-miR-615-3p	0	0	1	0	1	1	CLDN2	claudin 2
hsa-miR-615-3p	0	0	1	0	0	0	BPESC1	blepharophimosis, epicanthus inversus and ptosis, candidate 1 (non-protein coding)
hsa-miR-615-3p	0	0	1	0	0	0	IDI2-AS1	IDI2 antisense RNA 1
hsa-miR-615-3p	0	0	1	1	0	0	SH2B1	SH2B adaptor protein 1
hsa-miR-615-3p	1	0	1	1	1	1	C21orf91	chromosome 21 open reading frame 91
hsa-miR-615-3p	1	0	1	1	1	1	DCLRE1B	DNA cross-link repair 1B
hsa-miR-615-3p	1	0	1	1	1	1	FBXO31	F-box protein 31
hsa-miR-615-3p	0	0	1	1	0	0	TTTY7	testis-specific transcript, Y-linked 7 (non-protein coding)
hsa-miR-615-3p	0	0	1	0	0	0	NBPF10	neuroblastoma breakpoint family, member 10
hsa-miR-615-3p	0	0	1	1	0	0	SNRPN	small nuclear ribonucleoprotein polypeptide N
hsa-miR-615-3p	0	0	1	0	0	0	MYO15B	myosin XVB pseudogene
hsa-miR-615-3p	1	0	1	1	1	1	ST3GAL3	ST3 beta-galactoside alpha-2,3-sialyltransferase 3
hsa-miR-615-3p	0	0	1	1	1	1	PTK7	PTK7 protein tyrosine kinase 7
hsa-miR-615-3p	1	0	1	1	0	0	BRSK2	BR serine/threonine kinase 2
hsa-miR-615-3p	0	0	1	1	1	1	HIRIP3	HIRA interacting protein 3
hsa-miR-615-3p	1	0	1	1	1	1	NRXN3	neurexin 3
hsa-miR-615-3p	1	0	1	1	1	1	EMID2	EMI domain containing 2
hsa-miR-615-3p	0	0	1	0	0	0	TOMM6	translocase of outer mitochondrial membrane 6 homolog (yeast)
hsa-miR-615-3p	0	0	1	1	1	1	RNF220	ring finger protein 220
hsa-miR-615-3p	1	0	1	1	1	1	RIC8B	resistance to inhibitors of cholinesterase 8 homolog B (C. elegans)
hsa-miR-615-3p	1	0	1	1	1	1	EIF2C1	eukaryotic translation initiation factor 2C, 1
hsa-miR-615-3p	1	0	1	1	1	1	WDTC1	WD and tetratricopeptide repeats 1
hsa-miR-615-3p	1	0	1	1	1	1	KLHDC8B	kelch domain containing 8B
hsa-miR-615-3p	0	0	1	1	1	1	MBNL3	muscleblind-like splicing regulator 3
hsa-miR-615-3p	1	0	1	1	0	0	FASTK	Fas-activated serine/threonine kinase
hsa-miR-615-3p	0	0	1	1	1	1	SPATA5L1	spermatogenesis associated 5-like 1
hsa-miR-615-3p	1	0	1	1	1	1	PPFIA4	protein tyrosine phosphatase, receptor type, f polypeptide (PTPRF), interacting protein (liprin), alpha 4
hsa-miR-615-3p	0	0	1	0	0	0	LINC00085	long intergenic non-protein coding RNA 85
hsa-miR-615-3p	1	0	1	1	1	1	FAM131A	family with sequence similarity 131, member A
hsa-miR-615-3p	0	0	1	1	0	0	SPON2	spondin 2, extracellular matrix protein
hsa-miR-615-3p	0	0	1	0	0	0	RASAL3	RAS protein activator like 3
hsa-miR-615-3p	1	0	1	1	1	1	KANK1	KN motif and ankyrin repeat domains 1
hsa-miR-615-3p	0	0	1	0	1	1	HEMK1	HemK methyltransferase family member 1
hsa-miR-615-3p	1	0	1	1	1	1	ZNF462	zinc finger protein 462
hsa-miR-615-3p	1	0	1	0	1	1	AP1G1	adaptor-related protein complex 1, gamma 1 subunit
hsa-miR-615-3p	1	0	1	1	1	1	LMNA	lamin A/C
hsa-miR-615-3p	0	0	1	0	0	0	LOC284600	uncharacterized LOC284600
hsa-miR-615-3p	0	0	1	1	1	1	BRD2	bromodomain containing 2
hsa-miR-615-3p	1	0	1	0	1	1	PCGF3	polycomb group ring finger 3
hsa-miR-615-3p	0	0	1	1	1	1	ELL3	elongation factor RNA polymerase II-like 3
hsa-miR-615-3p	0	0	1	1	0	0	PTOV1	prostate tumor overexpressed 1
hsa-miR-615-3p	0	0	1	1	0	0	SYTL1	synaptotagmin-like 1
hsa-miR-615-3p	0	0	1	1	1	1	ZFAND2B	zinc finger, AN1-type domain 2B
hsa-miR-615-3p	0	0	1	1	1	1	GALNT6	UDP-N-acetyl-alpha-D-galactosamine:polypeptide N-acetylgalactosaminyltransferase 6 (GalNAc-T6)
hsa-miR-615-3p	0	0	1	1	0	0	LGR5	leucine-rich repeat containing G protein-coupled receptor 5
hsa-miR-615-3p	0	0	1	1	0	0	PIGO	phosphatidylinositol glycan anchor biosynthesis, class O
hsa-miR-615-3p	0	0	1	1	1	1	MTR	5-methyltetrahydrofolate-homocysteine methyltransferase
hsa-miR-615-3p	1	0	1	1	1	1	SUPT16H	suppressor of Ty 16 homolog (S. cerevisiae)
hsa-miR-615-3p	1	0	1	1	1	1	FBXW2	F-box and WD repeat domain containing 2
hsa-miR-615-3p	0	0	1	1	0	0	RUVBL1	RuvB-like 1 (E. coli)
hsa-miR-615-3p	0	0	1	1	0	0	MSANTD3	Myb/SANT-like DNA-binding domain containing 3
hsa-miR-615-3p	1	0	1	1	1	1	MAFK	v-maf musculoaponeurotic fibrosarcoma oncogene homolog K (avian)
hsa-miR-615-3p	0	0	1	0	0	0	LOC283887	uncharacterized LOC283887
hsa-miR-615-3p	1	0	1	1	1	1	MAP3K12	mitogen-activated protein kinase kinase kinase 12
hsa-miR-615-3p	0	0	1	1	1	1	FRMD3	FERM domain containing 3
hsa-miR-615-3p	0	0	1	1	0	0	WBP1	WW domain binding protein 1
hsa-miR-615-3p	1	0	1	1	1	1	KCND1	potassium voltage-gated channel, Shal-related subfamily, member 1
hsa-miR-615-3p	1	0	1	1	1	1	KLC2	kinesin light chain 2
hsa-miR-615-3p	1	0	1	1	1	1	GLT25D2	glycosyltransferase 25 domain containing 2
hsa-miR-615-3p	0	0	1	0	0	0	LINC00486	long intergenic non-protein coding RNA 486
hsa-miR-615-3p	0	0	1	1	1	1	FUT11	fucosyltransferase 11 (alpha (1,3) fucosyltransferase)
hsa-miR-615-3p	1	0	1	1	1	1	FADS1	fatty acid desaturase 1
hsa-miR-615-3p	0	0	1	0	0	0	ZNF815P	zinc finger protein 815, pseudogene
hsa-miR-615-3p	0	0	1	0	0	0	FAM66C	family with sequence similarity 66, member C
hsa-miR-615-3p	0	0	1	1	1	1	IL17RE	interleukin 17 receptor E
hsa-miR-615-3p	0	0	1	0	0	0	GOLGA6L5	golgin A6 family-like 5 (pseudogene)
hsa-miR-615-3p	0	0	1	0	0	0	KIRREL3-AS3	KIRREL3 antisense RNA 3
hsa-miR-615-3p	0	0	1	1	0	0	KIAA0146	KIAA0146
hsa-miR-615-3p	0	0	1	1	0	0	CFP	complement factor properdin
hsa-miR-615-3p	0	0	1	0	0	0	CLEC4GP1	C-type lectin domain family 4, member G pseudogene 1
hsa-miR-615-3p	0	0	1	1	1	1	FAM5B	family with sequence similarity 5, member B
hsa-miR-615-3p	0	0	1	1	0	0	KRT37	keratin 37
hsa-miR-615-3p	0	0	1	1	0	0	PMF1	polyamine-modulated factor 1
hsa-miR-615-3p	1	0	1	1	1	1	C15orf52	chromosome 15 open reading frame 52
hsa-miR-615-3p	0	0	1	0	0	0	FAM95B1	family with sequence similarity 95, member B1
hsa-miR-615-3p	1	0	1	1	1	1	TP53INP1	tumor protein p53 inducible nuclear protein 1
hsa-miR-615-3p	1	0	1	1	0	0	ATXN7L3	ataxin 7-like 3
hsa-miR-615-3p	0	0	1	1	0	0	CCDC88B	coiled-coil domain containing 88B
hsa-miR-615-3p	0	0	1	1	0	0	NPIP	nuclear pore complex interacting protein
hsa-miR-615-3p	1	0	1	1	1	1	KDM4B	lysine (K)-specific demethylase 4B
hsa-miR-615-3p	0	0	1	1	1	1	MOBP	myelin-associated oligodendrocyte basic protein
hsa-miR-615-3p	1	0	1	0	1	1	N4BP3	NEDD4 binding protein 3
hsa-miR-615-3p	1	0	1	1	1	1	PLA2G15	phospholipase A2, group XV
hsa-miR-615-3p	1	0	1	1	1	1	KCTD12	potassium channel tetramerisation domain containing 12
hsa-miR-615-3p	0	0	1	1	0	0	C17orf107	chromosome 17 open reading frame 107
hsa-miR-615-3p	1	0	1	1	1	1	ADAMTS19	ADAM metallopeptidase with thrombospondin type 1 motif, 19
hsa-miR-615-3p	0	0	1	1	0	0	WFIKKN1	WAP, follistatin/kazal, immunoglobulin, kunitz and netrin domain containing 1
hsa-miR-615-3p	0	0	1	1	1	1	PRAME	preferentially expressed antigen in melanoma
hsa-miR-615-3p	0	0	1	0	0	0	FAM27A	family with sequence similarity 27, member A
hsa-miR-615-3p	0	0	1	1	1	1	TMEM202	transmembrane protein 202
hsa-miR-615-3p	0	0	1	0	0	0	LOC494141	mitochondrial carrier triple repeat 1 pseudogene
hsa-miR-615-3p	0	0	1	1	0	0	HSH2D	hematopoietic SH2 domain containing
hsa-miR-615-3p	0	0	1	1	0	0	ISOC2	isochorismatase domain containing 2
hsa-miR-615-3p	1	0	1	1	1	1	RABGAP1	RAB GTPase activating protein 1
hsa-miR-615-3p	0	0	1	1	1	1	KAZALD1	Kazal-type serine peptidase inhibitor domain 1
hsa-miR-615-3p	0	0	1	1	0	0	NAT9	N-acetyltransferase 9 (GCN5-related, putative)
hsa-miR-615-3p	1	0	1	1	1	1	BIN2	bridging integrator 2
hsa-miR-615-3p	0	0	1	0	0	0	POM121L9P	POM121 transmembrane nucleoporin-like 9, pseudogene
hsa-miR-615-3p	0	0	1	1	0	0	NOL12	nucleolar protein 12
hsa-miR-615-3p	0	0	1	1	1	1	MESP2	mesoderm posterior 2 homolog (mouse)
hsa-miR-615-3p	0	0	1	0	0	0	FAM66D	family with sequence similarity 66, member D
hsa-miR-615-3p	1	0	1	1	0	0	SLC44A2	solute carrier family 44, member 2
hsa-miR-615-3p	0	0	1	0	0	0	LOC387647	patched domain containing 3 pseudogene
hsa-miR-615-3p	0	0	1	1	1	1	CCDC132	coiled-coil domain containing 132
hsa-miR-615-3p	0	0	1	1	0	0	LRRN2	leucine rich repeat neuronal 2
hsa-miR-615-3p	0	0	1	0	0	0	EPHA1-AS1	EPHA1 antisense RNA 1
hsa-miR-615-3p	1	0	1	1	1	1	FAM63B	family with sequence similarity 63, member B
hsa-miR-615-3p	1	0	1	0	0	0	NPEPL1	aminopeptidase-like 1
hsa-miR-615-3p	1	0	1	1	1	1	MBD6	methyl-CpG binding domain protein 6
hsa-miR-615-3p	0	0	1	1	0	0	ESPN	espin
hsa-miR-615-3p	0	0	1	1	0	0	GLYCTK	glycerate kinase
hsa-miR-615-3p	1	0	1	1	0	0	CLASRP	CLK4-associating serine/arginine rich protein
hsa-miR-615-3p	0	0	1	1	0	0	FETUB	fetuin B
hsa-miR-615-3p	1	0	1	1	0	0	USP7	ubiquitin specific peptidase 7 (herpes virus-associated)
hsa-miR-615-3p	0	0	1	1	1	1	TIMM50	translocase of inner mitochondrial membrane 50 homolog (S. cerevisiae)
hsa-miR-615-3p	0	0	1	1	1	1	POTEG	POTE ankyrin domain family, member G
hsa-miR-615-3p	1	0	1	1	1	1	HMGA2	high mobility group AT-hook 2
hsa-miR-615-3p	0	0	1	1	1	1	TMUB1	transmembrane and ubiquitin-like domain containing 1
hsa-miR-615-3p	1	0	1	1	1	1	MAPT	microtubule-associated protein tau
hsa-miR-615-3p	0	0	1	1	0	0	NBPF8	neuroblastoma breakpoint family, member 8
hsa-miR-615-3p	0	0	1	1	0	0	HNRNPL	heterogeneous nuclear ribonucleoprotein L
hsa-miR-615-3p	0	0	1	1	1	1	B4GALT2	UDP-Gal:betaGlcNAc beta 1,4- galactosyltransferase, polypeptide 2
hsa-miR-615-3p	1	0	1	1	1	1	NRGN	neurogranin (protein kinase C substrate, RC3)
hsa-miR-615-3p	0	0	1	1	0	0	SNRPB	small nuclear ribonucleoprotein polypeptides B and B1
hsa-miR-615-3p	0	0	1	1	1	1	ARFGAP1	ADP-ribosylation factor GTPase activating protein 1
hsa-miR-615-3p	0	0	1	0	0	0	LOC93622	Morf4 family associated protein 1-like 1 pseudogene
hsa-miR-615-3p	0	0	1	1	1	1	RBM19	RNA binding motif protein 19
hsa-miR-615-3p	0	0	1	1	0	0	MYLK2	myosin light chain kinase 2
hsa-miR-615-3p	0	0	1	1	1	1	ZMIZ2	zinc finger, MIZ-type containing 2
hsa-miR-615-3p	1	0	1	1	1	1	LMBR1L	limb region 1 homolog (mouse)-like
hsa-miR-615-3p	0	0	1	1	0	0	PANK2	pantothenate kinase 2
hsa-miR-615-3p	0	0	1	1	0	0	BARX1	BARX homeobox 1
hsa-miR-615-3p	1	0	1	1	1	1	SZRD1	SUZ RNA binding domain containing 1
hsa-miR-615-3p	0	0	1	0	0	0	LRRC14	leucine rich repeat containing 14
hsa-miR-615-3p	1	0	1	0	1	1	RNF165	ring finger protein 165
hsa-miR-615-3p	0	0	1	1	0	0	KLHDC3	kelch domain containing 3
hsa-miR-615-3p	0	0	1	1	0	0	HBE1	hemoglobin, epsilon 1
hsa-miR-615-3p	1	0	1	0	1	1	CYBRD1	cytochrome b reductase 1
hsa-miR-615-3p	0	0	1	1	0	0	ZBTB32	zinc finger and BTB domain containing 32
hsa-miR-615-3p	1	0	1	1	1	1	ADPGK	ADP-dependent glucokinase
hsa-miR-615-3p	1	0	1	1	1	1	ARHGEF9	Cdc42 guanine nucleotide exchange factor (GEF) 9
hsa-miR-615-3p	0	0	1	1	1	1	PTCD2	pentatricopeptide repeat domain 2
hsa-miR-615-3p	0	0	1	1	0	0	MAD1L1	MAD1 mitotic arrest deficient-like 1 (yeast)
hsa-miR-615-3p	0	0	1	1	0	0	DPF1	D4, zinc and double PHD fingers family 1
hsa-miR-615-3p	0	0	1	0	0	0	LOC728196	uncharacterized LOC728196
hsa-miR-615-3p	1	0	1	1	0	0	TMEM63B	transmembrane protein 63B
hsa-miR-615-3p	0	0	1	1	1	1	VWA3B	von Willebrand factor A domain containing 3B
hsa-miR-615-3p	1	0	1	1	1	1	UHRF2	ubiquitin-like with PHD and ring finger domains 2, E3 ubiquitin protein ligase
hsa-miR-615-3p	1	0	1	0	1	1	TFEC	transcription factor EC
hsa-miR-615-3p	0	0	1	1	1	1	CD48	CD48 molecule
hsa-miR-615-3p	1	0	1	1	1	1	SULT4A1	sulfotransferase family 4A, member 1
hsa-miR-615-3p	1	0	1	1	0	0	ADAMTS4	ADAM metallopeptidase with thrombospondin type 1 motif, 4
hsa-miR-615-3p	1	0	1	1	1	1	FAM160A2	family with sequence similarity 160, member A2
hsa-miR-615-3p	0	0	1	0	1	1	FLJ25328	uncharacterized LOC148231
hsa-miR-615-3p	0	0	1	0	1	1	PLEKHM1P	pleckstrin homology domain containing, family M (with RUN domain) member 1 pseudogene
hsa-miR-615-3p	1	0	1	1	1	1	SIRPA	signal-regulatory protein alpha
hsa-miR-615-3p	0	0	1	0	0	0	BCAS3	breast carcinoma amplified sequence 3
hsa-miR-615-3p	1	0	1	0	1	1	TBC1D2B	TBC1 domain family, member 2B
hsa-miR-615-3p	0	0	1	1	1	1	UBE3D	ubiquitin protein ligase E3D
hsa-miR-615-3p	0	0	1	0	0	0	FAM201A	family with sequence similarity 201, member A
hsa-miR-615-3p	0	0	1	0	0	0	LOC652276	potassium channel tetramerisation domain containing 5 pseudogene
hsa-miR-615-3p	1	0	1	1	1	1	FAM135B	family with sequence similarity 135, member B
hsa-miR-615-3p	0	0	1	1	0	0	FNTA	farnesyltransferase, CAAX box, alpha
hsa-miR-615-3p	1	0	1	1	1	1	SOX6	SRY (sex determining region Y)-box 6
hsa-miR-615-3p	0	0	1	0	0	0	CRYBB2P1	crystallin, beta B2 pseudogene 1
hsa-miR-615-3p	0	0	1	1	0	0	BLK	B lymphoid tyrosine kinase
hsa-miR-615-3p	0	0	1	0	1	1	LINC00634	long intergenic non-protein coding RNA 634
hsa-miR-615-3p	1	0	1	0	1	1	PACSIN1	protein kinase C and casein kinase substrate in neurons 1
hsa-miR-615-3p	0	0	1	1	1	1	MDFIC	MyoD family inhibitor domain containing
hsa-miR-615-3p	0	0	1	0	0	0	SLC7A11-AS1	SLC7A11 antisense RNA 1
hsa-miR-615-3p	1	0	1	1	1	1	PRRG1	proline rich Gla (G-carboxyglutamic acid) 1
hsa-miR-615-3p	0	0	1	0	0	0	C10orf108	chromosome 10 open reading frame 108
hsa-miR-615-3p	0	0	1	0	0	0	MORF4L2-AS1	MORF4L2 antisense RNA 1
hsa-miR-615-3p	0	0	1	0	0	0	DKFZp686O1327	uncharacterized LOC401014
hsa-miR-615-3p	1	0	1	1	1	1	AGAP3	ArfGAP with GTPase domain, ankyrin repeat and PH domain 3
hsa-miR-615-3p	0	0	1	1	1	1	EBP	emopamil binding protein (sterol isomerase)
hsa-miR-615-3p	0	0	1	0	0	0	LOC339529	uncharacterized LOC339529
hsa-miR-615-3p	0	0	1	0	0	0	SUZ12P1	suppressor of zeste 12 homolog pseudogene 1
hsa-miR-615-3p	0	0	1	1	1	1	ZNF589	zinc finger protein 589
hsa-miR-615-3p	1	0	1	1	1	1	TMPO	thymopoietin
hsa-miR-615-3p	0	0	1	1	1	1	FBXO38	F-box protein 38
hsa-miR-615-3p	0	0	1	1	0	0	NISCH	nischarin
hsa-miR-615-3p	1	0	1	0	1	1	SEMA4G	sema domain, immunoglobulin domain (Ig), transmembrane domain (TM) and short cytoplasmic domain, (semaphorin) 4G
hsa-miR-615-3p	0	0	1	0	0	0	TMEM213	transmembrane protein 213
hsa-miR-615-3p	0	0	1	1	0	0	WDR90	WD repeat domain 90
hsa-miR-615-3p	0	0	1	1	0	0	PRR19	proline rich 19
hsa-miR-615-3p	0	0	1	0	0	0	LOC727751	uncharacterized LOC727751
hsa-miR-615-3p	0	0	1	0	0	0	AGSK1	golgin subfamily A member 2-like
hsa-miR-615-3p	0	0	1	0	0	0	LOC727849	golgin A2 pseudogene
hsa-miR-615-3p	0	0	1	1	0	0	TTYH1	tweety homolog 1 (Drosophila)
hsa-miR-615-3p	0	0	1	0	0	0	UBE2Q2P2	ubiquitin-conjugating enzyme E2Q family member 2 pseudogene 2
hsa-miR-615-3p	0	0	1	1	0	0	CELF3	CUGBP, Elav-like family member 3
hsa-miR-615-3p	1	0	1	1	0	0	TMEM198	transmembrane protein 198
hsa-miR-615-3p	0	0	1	1	0	0	CYP4F30P	cytochrome P450, family 4, subfamily F, polypeptide 30, pseudogene
hsa-miR-615-3p	1	0	1	1	1	1	SOCS2	suppressor of cytokine signaling 2
hsa-miR-615-3p	0	0	1	1	1	1	SLC11A1	solute carrier family 11 (proton-coupled divalent metal ion transporters), member 1
hsa-miR-615-3p	0	0	1	1	1	1	TNFSF12	tumor necrosis factor (ligand) superfamily, member 12
hsa-miR-615-3p	0	0	1	0	0	0	ULK4P3	unc-51-like kinase 4 (C. elegans) pseudogene 3
hsa-miR-615-3p	1	0	1	1	1	1	RARG	retinoic acid receptor, gamma
hsa-miR-615-3p	1	0	1	1	1	1	WBP1L	WW domain binding protein 1-like
hsa-miR-615-3p	0	0	1	1	0	0	DNHD1	dynein heavy chain domain 1
hsa-miR-615-3p	1	0	1	1	1	1	ST8SIA2	ST8 alpha-N-acetyl-neuraminide alpha-2,8-sialyltransferase 2
hsa-miR-615-3p	0	0	1	1	0	0	HOXB1	homeobox B1
hsa-miR-615-3p	0	0	1	0	1	1	TCAIM	T cell activation inhibitor, mitochondrial
hsa-miR-615-3p	0	0	1	1	1	1	ATG16L2	autophagy related 16-like 2 (S. cerevisiae)
hsa-miR-615-3p	0	0	1	1	1	1	GOLGA2P5	golgin A2 pseudogene 5
hsa-miR-615-3p	0	0	1	1	1	1	FSHB	follicle stimulating hormone, beta polypeptide
hsa-miR-615-3p	0	0	1	1	0	0	SOCS7	suppressor of cytokine signaling 7
hsa-miR-615-3p	0	0	1	1	0	0	USP19	ubiquitin specific peptidase 19
hsa-miR-615-3p	0	0	1	1	0	0	HSF4	heat shock transcription factor 4
hsa-miR-615-3p	0	0	1	0	0	0	MEG3	maternally expressed 3 (non-protein coding)
hsa-miR-615-3p	1	0	1	1	0	0	RGS6	regulator of G-protein signaling 6
hsa-miR-615-3p	0	0	1	1	1	1	C10orf82	chromosome 10 open reading frame 82
hsa-miR-615-3p	0	0	1	1	0	0	CDK5RAP2	CDK5 regulatory subunit associated protein 2
hsa-miR-615-3p	0	0	1	1	1	1	GTF3C2	general transcription factor IIIC, polypeptide 2, beta 110kDa
hsa-miR-615-3p	0	0	1	1	0	0	RPS24	ribosomal protein S24
hsa-miR-615-3p	1	0	1	1	1	1	TLN2	talin 2
hsa-miR-615-3p	1	0	1	1	1	1	HIC2	hypermethylated in cancer 2
hsa-miR-615-3p	0	0	1	1	1	1	POLR2H	polymerase (RNA) II (DNA directed) polypeptide H
hsa-miR-615-3p	0	0	1	1	1	1	ARFGAP2	ADP-ribosylation factor GTPase activating protein 2
hsa-miR-615-3p	0	0	1	0	0	0	LOC401127	WD repeat domain 5 pseudogene
hsa-miR-615-3p	0	0	1	1	1	1	DGCR14	DiGeorge syndrome critical region gene 14
hsa-miR-615-3p	1	0	1	1	0	0	TSC22D4	TSC22 domain family, member 4
hsa-miR-615-3p	1	0	1	1	1	1	LETMD1	LETM1 domain containing 1
hsa-miR-615-3p	0	0	1	0	0	0	CMAHP	cytidine monophospho-N-acetylneuraminic acid hydroxylase, pseudogene
hsa-miR-615-3p	0	0	1	1	0	0	CYGB	cytoglobin
hsa-miR-615-3p	0	0	1	1	1	1	PISD	phosphatidylserine decarboxylase
hsa-miR-615-3p	1	0	1	1	1	1	RAP1A	RAP1A, member of RAS oncogene family
hsa-miR-615-3p	1	1	1	1	0	0	EFNA3	ephrin-A3
hsa-miR-615-3p	1	0	1	1	1	1	E2F3	E2F transcription factor 3
hsa-miR-615-3p	0	0	1	1	1	1	CHCHD4	coiled-coil-helix-coiled-coil-helix domain containing 4
hsa-miR-615-3p	0	0	1	1	1	1	COPS7A	COP9 constitutive photomorphogenic homolog subunit 7A (Arabidopsis)
hsa-miR-615-3p	0	0	1	1	1	1	C2orf62	chromosome 2 open reading frame 62
hsa-miR-615-3p	0	0	1	1	0	0	HCRTR1	hypocretin (orexin) receptor 1
hsa-miR-615-3p	0	0	1	1	0	0	NDUFS7	NADH dehydrogenase (ubiquinone) Fe-S protein 7, 20kDa (NADH-coenzyme Q reductase)
hsa-miR-615-3p	1	0	1	0	1	1	DCAF7	DDB1 and CUL4 associated factor 7
hsa-miR-615-3p	1	0	1	1	1	1	WIPF1	WAS/WASL interacting protein family, member 1
hsa-miR-615-3p	0	0	1	0	1	1	TMEM155	transmembrane protein 155
hsa-miR-615-3p	0	0	1	1	0	0	PTGDS	prostaglandin D2 synthase 21kDa (brain)
hsa-miR-615-3p	0	0	1	0	1	1	SRSF5	serine/arginine-rich splicing factor 5
hsa-miR-615-3p	0	0	1	1	0	0	C1orf122	chromosome 1 open reading frame 122
hsa-miR-615-3p	0	0	1	1	1	1	SERP2	stress-associated endoplasmic reticulum protein family member 2
hsa-miR-615-3p	1	0	1	1	1	1	CTDSPL	CTD (carboxy-terminal domain, RNA polymerase II, polypeptide A) small phosphatase-like
hsa-miR-615-3p	1	0	1	1	1	1	ARNTL	aryl hydrocarbon receptor nuclear translocator-like
hsa-miR-615-3p	0	0	1	1	1	1	P2RX5	purinergic receptor P2X, ligand-gated ion channel, 5
hsa-miR-615-3p	1	0	1	1	1	1	TIMP3	TIMP metallopeptidase inhibitor 3
hsa-miR-615-3p	0	0	1	1	1	1	IL15	interleukin 15
hsa-miR-615-3p	0	0	1	1	0	0	CCDC107	coiled-coil domain containing 107
hsa-miR-615-3p	0	0	1	0	1	1	ARMC10	armadillo repeat containing 10
hsa-miR-615-3p	0	0	1	1	1	1	UBE2A	ubiquitin-conjugating enzyme E2A
hsa-miR-615-3p	0	0	1	1	1	1	CDKAL1	CDK5 regulatory subunit associated protein 1-like 1
hsa-miR-615-3p	0	0	1	1	0	0	TESK1	testis-specific kinase 1
hsa-miR-615-3p	0	0	1	1	1	1	PSMD9	proteasome (prosome, macropain) 26S subunit, non-ATPase, 9
hsa-miR-615-3p	0	0	1	1	1	1	ARHGEF25	Rho guanine nucleotide exchange factor (GEF) 25
hsa-miR-615-3p	0	0	1	1	1	1	CIRBP	cold inducible RNA binding protein
hsa-miR-615-3p	1	0	1	1	1	1	JUNB	jun B proto-oncogene
hsa-miR-615-3p	0	0	1	1	0	0	RAE1	RAE1 RNA export 1 homolog (S. pombe)
hsa-miR-615-3p	0	0	1	1	0	0	ISG20	interferon stimulated exonuclease gene 20kDa
hsa-miR-615-3p	1	0	1	1	1	1	RND3	Rho family GTPase 3
hsa-miR-615-3p	1	0	1	0	1	1	KIAA0240	KIAA0240
hsa-miR-615-3p	1	0	1	1	1	1	MAPK8IP3	mitogen-activated protein kinase 8 interacting protein 3
hsa-miR-615-3p	0	0	1	0	0	0	LOC440518	golgin A2 pseudogene
hsa-miR-615-3p	1	0	1	1	1	1	SP2	Sp2 transcription factor
hsa-miR-615-3p	1	0	1	1	1	1	RBPMS	RNA binding protein with multiple splicing
hsa-miR-615-3p	0	0	1	1	0	0	SPATA20	spermatogenesis associated 20
hsa-miR-615-3p	1	0	1	1	1	1	SPHK2	sphingosine kinase 2
hsa-miR-615-3p	0	0	1	1	0	0	APOC1	apolipoprotein C-I
hsa-miR-615-3p	0	0	1	0	0	0	PVT1	Pvt1 oncogene (non-protein coding)
hsa-miR-615-3p	1	0	1	1	1	1	KCNA1	potassium voltage-gated channel, shaker-related subfamily, member 1 (episodic ataxia with myokymia)
hsa-miR-615-3p	1	0	1	1	1	1	MITF	microphthalmia-associated transcription factor
hsa-miR-615-3p	0	0	1	1	0	0	APOB	apolipoprotein B (including Ag(x) antigen)
hsa-miR-615-3p	1	0	1	1	1	1	MPZ	myelin protein zero
hsa-miR-615-3p	0	0	1	1	1	1	ALDH1B1	aldehyde dehydrogenase 1 family, member B1
hsa-miR-615-3p	1	0	1	1	1	1	CHRM1	cholinergic receptor, muscarinic 1
hsa-miR-615-3p	1	0	1	1	1	1	RARA	retinoic acid receptor, alpha
hsa-miR-615-3p	1	0	1	0	1	1	ARHGEF37	Rho guanine nucleotide exchange factor (GEF) 37
hsa-miR-615-3p	0	0	1	1	1	1	FLJ45079	FLJ45079 protein
hsa-miR-615-3p	0	0	1	0	1	1	C9orf170	chromosome 9 open reading frame 170
hsa-miR-615-3p	0	0	1	1	1	1	ALG11	asparagine-linked glycosylation 11, alpha-1,2-mannosyltransferase homolog (yeast)
hsa-miR-615-3p	0	0	1	1	1	1	DBX2	developing brain homeobox 2
hsa-miR-615-3p	0	0	1	1	1	1	LRRC18	leucine rich repeat containing 18
hsa-miR-615-3p	1	0	1	1	1	1	ATN1	atrophin 1
hsa-miR-615-3p	1	0	1	1	1	1	LPHN1	latrophilin 1
hsa-miR-615-3p	0	0	1	1	0	0	VSIG8	V-set and immunoglobulin domain containing 8
hsa-miR-615-3p	1	0	1	1	1	1	NCDN	neurochondrin
hsa-miR-615-3p	0	0	1	1	1	1	ARRDC2	arrestin domain containing 2
hsa-miR-615-3p	1	0	1	1	1	1	MAF	v-maf musculoaponeurotic fibrosarcoma oncogene homolog (avian)
hsa-miR-615-3p	1	0	1	0	1	1	SRGAP3	SLIT-ROBO Rho GTPase activating protein 3
hsa-miR-615-3p	1	0	1	1	1	1	KCNC4	potassium voltage-gated channel, Shaw-related subfamily, member 4
hsa-miR-615-3p	0	0	1	1	0	0	ANGPTL4	angiopoietin-like 4
hsa-miR-615-3p	1	0	1	1	1	1	NSL1	NSL1, MIND kinetochore complex component, homolog (S. cerevisiae)
hsa-miR-615-3p	1	0	1	1	1	1	SNX21	sorting nexin family member 21
hsa-miR-615-3p	0	0	1	1	1	1	FAM22G	family with sequence similarity 22, member G
hsa-miR-615-3p	1	0	1	1	1	1	ZNF436	zinc finger protein 436
hsa-miR-615-3p	1	0	1	0	1	1	FBXO41	F-box protein 41
hsa-miR-615-3p	1	0	1	0	0	0	CCDC159	coiled-coil domain containing 159
hsa-miR-615-3p	0	0	1	0	0	0	C16orf90	chromosome 16 open reading frame 90
hsa-miR-615-3p	1	0	1	1	1	1	DGKG	diacylglycerol kinase, gamma 90kDa
hsa-miR-615-3p	0	0	1	1	1	1	ARHGAP6	Rho GTPase activating protein 6
hsa-miR-615-3p	1	0	1	1	1	1	CNN1	calponin 1, basic, smooth muscle
hsa-miR-615-3p	1	0	1	1	1	1	DUSP4	dual specificity phosphatase 4
hsa-miR-615-3p	1	0	1	1	1	1	CELSR3	cadherin, EGF LAG seven-pass G-type receptor 3 (flamingo homolog, Drosophila)
hsa-miR-615-3p	1	0	1	1	1	1	CELSR2	cadherin, EGF LAG seven-pass G-type receptor 2 (flamingo homolog, Drosophila)
hsa-miR-615-3p	1	0	1	0	1	1	B4GALT1	UDP-Gal:betaGlcNAc beta 1,4- galactosyltransferase, polypeptide 1
hsa-miR-615-3p	0	0	1	1	1	1	AOAH	acyloxyacyl hydrolase (neutrophil)
hsa-miR-615-3p	1	0	1	1	1	1	CDC25A	cell division cycle 25 homolog A (S. pombe)
hsa-miR-615-3p	1	0	1	1	1	1	CDK2	cyclin-dependent kinase 2
hsa-miR-615-3p	0	0	1	1	1	1	HLA-DOA	major histocompatibility complex, class II, DO alpha
hsa-miR-615-3p	1	0	1	1	0	0	KCNN3	potassium intermediate/small conductance calcium-activated channel, subfamily N, member 3
hsa-miR-615-3p	1	0	1	0	1	1	POU3F1	POU class 3 homeobox 1
hsa-miR-615-3p	0	0	1	1	0	0	MAPK7	mitogen-activated protein kinase 7
hsa-miR-615-3p	1	0	1	1	1	1	PVRL2	poliovirus receptor-related 2 (herpesvirus entry mediator B)
hsa-miR-615-3p	1	0	1	1	1	1	SMARCD1	SWI/SNF related, matrix associated, actin dependent regulator of chromatin, subfamily d, member 1
hsa-miR-615-3p	1	0	1	1	1	1	SMARCD2	SWI/SNF related, matrix associated, actin dependent regulator of chromatin, subfamily d, member 2
hsa-miR-615-3p	0	0	1	1	1	1	STAT6	signal transducer and activator of transcription 6, interleukin-4 induced
hsa-miR-615-3p	0	0	1	1	1	1	STIM1	stromal interaction molecule 1
hsa-miR-615-3p	1	0	1	1	1	1	ADAM12	ADAM metallopeptidase domain 12
hsa-miR-615-3p	0	0	1	1	1	1	ITGA10	integrin, alpha 10
hsa-miR-615-3p	1	0	1	0	1	1	IRS2	insulin receptor substrate 2
hsa-miR-615-3p	1	0	1	1	1	1	EFNB2	ephrin-B2
hsa-miR-615-3p	0	0	1	1	1	1	ASCL1	achaete-scute complex homolog 1 (Drosophila)
hsa-miR-615-3p	1	0	1	1	1	1	ATF6B	activating transcription factor 6 beta
hsa-miR-615-3p	1	0	1	1	1	1	DBN1	drebrin 1
hsa-miR-615-3p	1	0	1	1	1	1	ENSA	endosulfine alpha
hsa-miR-615-3p	1	0	1	1	0	0	HOXC6	homeobox C6
hsa-miR-615-3p	1	0	1	1	1	1	WNT11	wingless-type MMTV integration site family, member 11
hsa-miR-615-3p	0	0	1	1	0	0	PRY	PTPN13-like, Y-linked
hsa-miR-615-3p	1	0	1	0	1	1	SCD	stearoyl-CoA desaturase (delta-9-desaturase)
hsa-miR-615-3p	0	0	1	1	0	0	ASCL2	achaete-scute complex homolog 2 (Drosophila)
hsa-miR-615-3p	0	0	1	1	0	0	CALML3	calmodulin-like 3
hsa-miR-615-3p	1	0	1	0	1	1	DLX6	distal-less homeobox 6
hsa-miR-615-3p	1	0	1	0	1	1	SRC	v-src sarcoma (Schmidt-Ruppin A-2) viral oncogene homolog (avian)
hsa-miR-615-3p	1	0	1	1	1	1	RND2	Rho family GTPase 2
hsa-miR-615-3p	0	0	1	1	1	1	FAIM3	Fas apoptotic inhibitory molecule 3
hsa-miR-615-3p	1	0	1	1	1	1	GABBR2	gamma-aminobutyric acid (GABA) B receptor, 2
hsa-miR-615-3p	1	0	1	1	1	1	LAMC2	laminin, gamma 2
hsa-miR-615-3p	1	0	1	1	1	1	DAGLA	diacylglycerol lipase, alpha
hsa-miR-615-3p	1	0	1	0	1	1	IGF2BP1	insulin-like growth factor 2 mRNA binding protein 1
hsa-miR-615-3p	0	0	1	1	1	1	PPP1R17	protein phosphatase 1, regulatory subunit 17
hsa-miR-615-3p	1	0	1	1	1	1	TSPAN9	tetraspanin 9
hsa-miR-615-3p	0	0	1	1	1	1	TMED2	transmembrane emp24 domain trafficking protein 2
hsa-miR-615-3p	1	0	1	0	1	1	SOX12	SRY (sex determining region Y)-box 12
hsa-miR-615-3p	0	0	1	1	1	1	TMEM115	transmembrane protein 115
hsa-miR-615-3p	1	0	1	1	1	1	ABCF2	ATP-binding cassette, sub-family F (GCN20), member 2
hsa-miR-615-3p	1	0	1	1	1	1	TUSC2	tumor suppressor candidate 2
hsa-miR-615-3p	1	0	1	0	1	1	GAB2	GRB2-associated binding protein 2
hsa-miR-615-3p	1	0	1	1	1	1	PIP5K1C	phosphatidylinositol-4-phosphate 5-kinase, type I, gamma
hsa-miR-615-3p	1	0	1	1	1	1	SERTAD3	SERTA domain containing 3
hsa-miR-615-3p	0	0	1	1	1	1	SERTAD1	SERTA domain containing 1
hsa-miR-615-3p	0	0	1	1	1	1	PRICKLE4	prickle homolog 4 (Drosophila)
hsa-miR-615-3p	0	0	1	1	1	1	CAPN6	calpain 6
hsa-miR-615-3p	1	0	1	1	1	1	CBX6	chromobox homolog 6
hsa-miR-615-3p	1	0	1	1	1	1	CACNG4	calcium channel, voltage-dependent, gamma subunit 4
hsa-miR-615-3p	1	0	1	1	1	1	RND1	Rho family GTPase 1
hsa-miR-615-3p	0	0	1	1	0	0	RHOD	ras homolog family member D
hsa-miR-615-3p	1	0	1	0	1	1	SH3PXD2A	SH3 and PX domains 2A
hsa-miR-615-3p	1	0	1	1	1	1	RALGPS1	Ral GEF with PH domain and SH3 binding motif 1
hsa-miR-615-3p	1	0	1	1	1	1	TBKBP1	TBK1 binding protein 1
hsa-miR-615-3p	1	0	1	1	1	1	FCHSD2	FCH and double SH3 domains 2
hsa-miR-615-3p	1	0	1	1	1	1	JOSD1	Josephin domain containing 1
hsa-miR-615-3p	1	0	1	0	1	1	ZNF609	zinc finger protein 609
hsa-miR-615-3p	1	0	1	1	1	1	MYO1D	myosin ID
hsa-miR-615-3p	1	0	1	0	1	1	KIAA1024	KIAA1024
hsa-miR-615-3p	1	0	1	0	1	1	KHNYN	KH and NYN domain containing
hsa-miR-615-3p	0	0	1	1	1	1	BRI3	brain protein I3
hsa-miR-615-3p	1	0	1	1	1	1	AZIN1	antizyme inhibitor 1
hsa-miR-615-3p	0	0	1	1	1	1	SNX7	sorting nexin 7
hsa-miR-615-3p	1	0	1	1	1	1	RAPGEFL1	Rap guanine nucleotide exchange factor (GEF)-like 1
hsa-miR-615-3p	1	0	1	0	1	1	CRIM1	cysteine rich transmembrane BMP regulator 1 (chordin-like)
hsa-miR-615-3p	1	0	1	1	1	1	INO80	INO80 homolog (S. cerevisiae)
hsa-miR-615-3p	1	0	1	0	1	1	UHRF1BP1	UHRF1 binding protein 1
hsa-miR-615-3p	0	0	1	1	0	0	TOMM7	translocase of outer mitochondrial membrane 7 homolog (yeast)
hsa-miR-615-3p	0	0	1	1	1	1	HES2	hairy and enhancer of split 2 (Drosophila)
hsa-miR-615-3p	1	0	1	1	1	1	ZNF512B	zinc finger protein 512B
hsa-miR-615-3p	1	0	1	1	1	1	NLGN2	neuroligin 2
hsa-miR-615-3p	1	0	1	1	1	1	SIPA1L2	signal-induced proliferation-associated 1 like 2
hsa-miR-615-3p	1	0	1	1	1	1	RANBP10	RAN binding protein 10
hsa-miR-615-3p	0	0	1	1	1	1	PRX	periaxin
hsa-miR-615-3p	1	0	1	0	1	1	TP53INP2	tumor protein p53 inducible nuclear protein 2
hsa-miR-615-3p	0	0	1	1	0	0	PLA2G2F	phospholipase A2, group IIF
hsa-miR-615-3p	1	0	1	1	1	1	HOXB4	homeobox B4
hsa-miR-615-3p	1	0	1	0	1	1	LIN28A	lin-28 homolog A (C. elegans)
hsa-miR-615-3p	1	0	1	1	0	0	UBTD1	ubiquitin domain containing 1
hsa-miR-615-3p	1	0	1	1	1	1	KLHL18	kelch-like 18 (Drosophila)
hsa-miR-615-3p	1	0	1	1	1	1	PDRG1	p53 and DNA-damage regulated 1
hsa-miR-615-3p	1	0	1	1	1	1	SESN2	sestrin 2
hsa-miR-615-3p	1	0	1	0	1	1	FAM172A	family with sequence similarity 172, member A
hsa-miR-615-3p	1	0	1	0	1	1	FAR1	fatty acyl CoA reductase 1
hsa-miR-615-3p	0	0	1	0	1	1	LDOC1L	leucine zipper, down-regulated in cancer 1-like
hsa-miR-615-3p	1	0	1	0	1	1	PSD2	pleckstrin and Sec7 domain containing 2
hsa-miR-615-3p	1	0	1	1	1	1	CAMKK1	calcium/calmodulin-dependent protein kinase kinase 1, alpha
hsa-miR-615-3p	1	0	1	1	1	1	NKD1	naked cuticle homolog 1 (Drosophila)
hsa-miR-615-3p	1	0	1	1	0	0	CAMK2N2	calcium/calmodulin-dependent protein kinase II inhibitor 2
hsa-miR-615-3p	1	0	1	1	1	1	ADAM19	ADAM metallopeptidase domain 19
hsa-miR-615-3p	1	0	1	1	0	0	FCHSD1	FCH and double SH3 domains 1
hsa-miR-615-3p	1	0	1	1	1	1	TRIM9	tripartite motif containing 9
hsa-miR-615-3p	1	0	1	1	0	0	PKDCC	protein kinase domain containing, cytoplasmic homolog (mouse)
hsa-miR-615-3p	1	0	1	1	0	0	LIPH	lipase, member H
hsa-miR-615-3p	1	0	1	1	1	1	ATRN	attractin
hsa-miR-615-3p	1	0	1	1	1	1	TEX261	testis expressed 261
hsa-miR-615-3p	1	0	1	1	1	1	MAX	MYC associated factor X
hsa-miR-615-3p	1	0	1	0	1	1	ZBTB47	zinc finger and BTB domain containing 47
hsa-miR-615-3p	1	0	1	1	1	1	ZNF362	zinc finger protein 362
hsa-miR-615-3p	0	0	1	1	1	1	C1orf177	chromosome 1 open reading frame 177
hsa-miR-615-3p	1	0	1	1	1	1	HEPACAM	hepatic and glial cell adhesion molecule
hsa-miR-615-3p	1	0	1	0	1	1	ZBTB9	zinc finger and BTB domain containing 9
hsa-miR-615-3p	1	0	1	1	0	0	TMEM86A	transmembrane protein 86A
hsa-miR-615-3p	0	0	1	1	1	1	CAMK1D	calcium/calmodulin-dependent protein kinase ID
hsa-miR-615-3p	1	0	1	1	1	1	IL28RA	interleukin 28 receptor, alpha (interferon, lambda receptor)
hsa-miR-615-3p	0	0	1	1	0	0	COL23A1	collagen, type XXIII, alpha 1
hsa-miR-615-3p	0	0	1	1	1	1	FAM163A	family with sequence similarity 163, member A
hsa-miR-615-3p	0	0	1	1	0	0	EFCAB4A	EF-hand calcium binding domain 4A
hsa-miR-615-3p	1	0	1	1	1	1	DIP2B	DIP2 disco-interacting protein 2 homolog B (Drosophila)
hsa-miR-615-3p	0	0	1	1	0	0	SPACA3	sperm acrosome associated 3
hsa-miR-615-3p	1	0	1	1	1	1	OLIG3	oligodendrocyte transcription factor 3
hsa-miR-615-3p	1	0	1	1	1	1	TMEM26	transmembrane protein 26
hsa-miR-615-3p	0	0	1	1	0	0	C7orf34	chromosome 7 open reading frame 34
hsa-miR-615-3p	0	0	1	1	0	0	BPIFB4	BPI fold containing family B, member 4
hsa-miR-615-3p	0	0	1	1	1	1	FLT4	fms-related tyrosine kinase 4
hsa-miR-615-3p	1	0	1	0	1	1	SRRM4	serine/arginine repetitive matrix 4
hsa-miR-615-3p	1	0	1	1	1	1	ADAMTS6	ADAM metallopeptidase with thrombospondin type 1 motif, 6
hsa-miR-615-3p	0	0	1	1	0	0	SPATC1	spermatogenesis and centriole associated 1
hsa-miR-615-3p	1	0	1	1	0	0	ENHO	energy homeostasis associated
hsa-miR-615-3p	1	0	1	0	1	1	PRICKLE2	prickle homolog 2 (Drosophila)
hsa-miR-615-3p	0	0	1	1	1	1	COL18A1-AS1	COL18A1 antisense RNA 1
hsa-miR-615-3p	0	0	1	0	0	0	FAM224B	family with sequence similarity 224, member B (non-protein coding)
hsa-miR-615-3p	0	0	1	0	0	0	FTH1P2	ferritin, heavy polypeptide 1 pseudogene 2
hsa-miR-615-3p	0	0	1	0	0	0	AOC4	amine oxidase, copper containing 3 (vascular adhesion protein 1) pseudogene
hsa-miR-615-3p	0	0	1	0	0	0	TPTE2P6	transmembrane phosphoinositide 3-phosphatase and tensin homolog 2 pseudogene 6
hsa-miR-615-3p	0	0	1	0	0	0	RNF126P1	ring finger protein 126 pseudogene 1
hsa-miR-615-3p	0	0	1	0	0	0	LILRP2	leukocyte immunoglobulin-like receptor pseudogene 2
hsa-miR-615-3p	1	0	1	1	0	0	HOXC5	homeobox C5
hsa-miR-615-3p	1	0	1	1	0	0	KIAA1549L	KIAA1549-like
hsa-miR-615-3p	1	0	1	1	1	1	CASP2	caspase 2, apoptosis-related cysteine peptidase
hsa-miR-615-3p	1	0	1	0	1	1	NFIX	nuclear factor I/X (CCAAT-binding transcription factor)
hsa-miR-615-3p	1	0	1	1	1	1	TRIO	trio Rho guanine nucleotide exchange factor
hsa-miR-615-3p	1	0	1	1	1	1	RALBP1	ralA binding protein 1
hsa-miR-615-3p	1	0	1	1	1	1	PSD	pleckstrin and Sec7 domain containing
hsa-miR-615-3p	1	0	1	1	1	1	B4GALT7	xylosylprotein beta 1,4-galactosyltransferase, polypeptide 7
hsa-miR-615-3p	0	0	1	1	0	0	RTN4R	reticulon 4 receptor
hsa-miR-615-3p	0	0	1	1	0	0	GNA11	guanine nucleotide binding protein (G protein), alpha 11 (Gq class)
hsa-miR-615-3p	0	0	0	1	0	0	GSC2	goosecoid homeobox 2
hsa-miR-615-3p	0	0	0	1	1	1	MBD3	methyl-CpG binding domain protein 3
hsa-miR-615-3p	0	0	0	1	0	0	ICAM3	intercellular adhesion molecule 3
hsa-miR-615-3p	1	0	1	1	1	1	PRSS22	protease, serine, 22
hsa-miR-615-3p	0	0	1	1	0	0	MEF2BNB-MEF2B	MEF2BNB-MEF2B readthrough
hsa-miR-615-3p	1	0	1	1	0	0	BCL3	B-cell CLL/lymphoma 3
hsa-miR-615-3p	1	0	1	1	1	1	PDZD4	PDZ domain containing 4
hsa-miR-615-3p	1	0	1	1	1	1	ACTN1	actinin, alpha 1
hsa-miR-615-3p	0	0	0	1	0	0	SULT2B1	sulfotransferase family, cytosolic, 2B, member 1
hsa-miR-615-3p	0	0	1	1	0	0	UQCRC1	ubiquinol-cytochrome c reductase core protein I
hsa-miR-615-3p	0	0	0	1	0	0	GMIP	GEM interacting protein
hsa-miR-615-3p	1	0	1	1	0	0	OSGEP	O-sialoglycoprotein endopeptidase
hsa-miR-615-3p	0	0	1	1	0	0	TGM1	transglutaminase 1 (K polypeptide epidermal type I, protein-glutamine-gamma-glutamyltransferase)
hsa-miR-615-3p	0	0	0	1	0	0	MZF1	myeloid zinc finger 1
hsa-miR-615-3p	0	0	1	1	0	0	C19orf26	chromosome 19 open reading frame 26
hsa-miR-615-3p	1	0	0	1	1	1	CDC34	cell division cycle 34 homolog (S. cerevisiae)
hsa-miR-615-3p	0	0	1	1	0	0	CRYBB3	crystallin, beta B3
hsa-miR-615-3p	0	0	1	1	0	0	LGALS1	lectin, galactoside-binding, soluble, 1
hsa-miR-615-3p	1	0	1	1	1	1	NPTXR	neuronal pentraxin receptor
hsa-miR-615-3p	0	0	1	1	0	0	HDAC10	histone deacetylase 10
hsa-miR-615-3p	0	0	0	1	0	0	RIN3	Ras and Rab interactor 3
hsa-miR-615-3p	1	0	1	1	0	0	ERH	enhancer of rudimentary homolog (Drosophila)
hsa-miR-615-3p	0	0	0	1	0	0	BDKRB1	bradykinin receptor B1
hsa-miR-615-3p	0	0	1	1	1	1	PABPC1L	poly(A) binding protein, cytoplasmic 1-like
hsa-miR-615-3p	0	0	1	1	0	0	BIRC7	baculoviral IAP repeat containing 7
hsa-miR-615-3p	0	0	1	1	0	0	COG4	component of oligomeric golgi complex 4
hsa-miR-615-3p	1	0	1	1	1	1	RASL12	RAS-like, family 12
hsa-miR-615-3p	0	0	1	1	0	0	TULP2	tubby like protein 2
hsa-miR-615-3p	1	0	1	1	0	0	DOT1L	DOT1-like, histone H3 methyltransferase (S. cerevisiae)
hsa-miR-615-3p	0	0	0	1	0	0	RETN	resistin
hsa-miR-615-3p	0	0	0	1	0	0	CCDC130	coiled-coil domain containing 130
hsa-miR-615-3p	0	0	1	1	0	0	CCDC9	coiled-coil domain containing 9
hsa-miR-615-3p	0	0	1	1	0	0	CEACAM4	carcinoembryonic antigen-related cell adhesion molecule 4
hsa-miR-615-3p	0	0	0	1	1	1	CACNG7	calcium channel, voltage-dependent, gamma subunit 7
hsa-miR-615-3p	1	0	1	1	0	0	CLIP2	CAP-GLY domain containing linker protein 2
hsa-miR-615-3p	0	0	1	1	1	1	RLN1	relaxin 1
hsa-miR-615-3p	0	0	0	1	0	0	OBFC1	oligonucleotide/oligosaccharide-binding fold containing 1
hsa-miR-615-3p	0	0	1	1	1	1	SLC25A11	solute carrier family 25 (mitochondrial carrier; oxoglutarate carrier), member 11
hsa-miR-615-3p	0	0	1	1	1	1	DRG2	developmentally regulated GTP binding protein 2
hsa-miR-615-3p	1	0	1	1	0	0	PRPF19	PRP19/PSO4 pre-mRNA processing factor 19 homolog (S. cerevisiae)
hsa-miR-615-3p	0	0	0	1	0	0	MRPL23	mitochondrial ribosomal protein L23
hsa-miR-615-3p	0	0	0	1	1	1	POLR3B	polymerase (RNA) III (DNA directed) polypeptide B
hsa-miR-615-3p	0	0	1	1	0	0	GLI1	GLI family zinc finger 1
hsa-miR-615-3p	0	0	1	1	1	1	BYSL	bystin-like
hsa-miR-615-3p	1	0	1	1	0	0	PPP2R5D	protein phosphatase 2, regulatory subunit B', delta
hsa-miR-615-3p	0	0	1	1	0	0	SLC4A9	solute carrier family 4, sodium bicarbonate cotransporter, member 9
hsa-miR-615-3p	0	0	1	1	0	0	INO80B	INO80 complex subunit B
hsa-miR-615-3p	0	0	1	1	0	0	IGFBP2	insulin-like growth factor binding protein 2, 36kDa
hsa-miR-615-3p	0	0	1	1	0	0	CCT4	chaperonin containing TCP1, subunit 4 (delta)
hsa-miR-615-3p	0	0	0	1	1	1	OPRD1	opioid receptor, delta 1
hsa-miR-615-3p	0	0	0	1	0	0	PRAMEF4	PRAME family member 4
hsa-miR-615-3p	0	0	1	1	1	1	ATP6V0B	ATPase, H+ transporting, lysosomal 21kDa, V0 subunit b
hsa-miR-615-3p	1	0	1	1	1	1	SLC8A2	solute carrier family 8 (sodium/calcium exchanger), member 2
hsa-miR-615-3p	0	0	1	1	0	0	ADH6	alcohol dehydrogenase 6 (class V)
hsa-miR-615-3p	1	0	1	1	1	1	IFIT2	interferon-induced protein with tetratricopeptide repeats 2
hsa-miR-615-3p	0	0	1	1	1	1	MAPK8IP1	mitogen-activated protein kinase 8 interacting protein 1
hsa-miR-615-3p	0	0	0	1	0	0	PEX16	peroxisomal biogenesis factor 16
hsa-miR-615-3p	0	0	1	1	0	0	SNRPA	small nuclear ribonucleoprotein polypeptide A
hsa-miR-615-3p	0	0	1	1	0	0	WFDC3	WAP four-disulfide core domain 3
hsa-miR-615-3p	0	0	0	1	1	1	AARS2	alanyl-tRNA synthetase 2, mitochondrial (putative)
hsa-miR-615-3p	1	0	1	1	1	1	GGA3	golgi-associated, gamma adaptin ear containing, ARF binding protein 3
hsa-miR-615-3p	0	0	0	1	0	0	PSD4	pleckstrin and Sec7 domain containing 4
hsa-miR-615-3p	1	0	0	1	1	1	CLPP	ClpP caseinolytic peptidase, ATP-dependent, proteolytic subunit homolog (E. coli)
hsa-miR-615-3p	1	0	1	1	1	1	RALY	RNA binding protein, autoantigenic (hnRNP-associated with lethal yellow homolog (mouse))
hsa-miR-615-3p	0	0	0	1	0	0	SLC35E2	solute carrier family 35, member E2
hsa-miR-615-3p	0	0	1	1	0	0	IFI35	interferon-induced protein 35
hsa-miR-615-3p	0	0	1	1	0	0	DDX49	DEAD (Asp-Glu-Ala-Asp) box polypeptide 49
hsa-miR-615-3p	0	0	1	1	0	0	ZNF777	zinc finger protein 777
hsa-miR-615-3p	0	0	1	1	0	0	STYXL1	serine/threonine/tyrosine interacting-like 1
hsa-miR-615-3p	0	0	0	1	0	0	SELO	selenoprotein O
hsa-miR-615-3p	0	0	0	1	0	0	DGCR6L	DiGeorge syndrome critical region gene 6-like
hsa-miR-615-3p	0	0	1	1	0	0	CDC42EP1	CDC42 effector protein (Rho GTPase binding) 1
hsa-miR-615-3p	0	0	0	1	0	0	CLEC11A	C-type lectin domain family 11, member A
hsa-miR-615-3p	1	0	1	1	1	1	KLF16	Kruppel-like factor 16
hsa-miR-615-3p	0	0	0	1	1	1	DOHH	deoxyhypusine hydroxylase/monooxygenase
hsa-miR-615-3p	0	0	1	1	1	1	TRPC4AP	transient receptor potential cation channel, subfamily C, member 4 associated protein
hsa-miR-615-3p	0	0	0	1	0	0	GAMT	guanidinoacetate N-methyltransferase
hsa-miR-615-3p	1	0	0	1	0	0	GADD45G	growth arrest and DNA-damage-inducible, gamma
hsa-miR-615-3p	0	0	0	1	0	0	KLHDC7B	kelch domain containing 7B
hsa-miR-615-3p	0	0	0	1	1	1	HIP1R	huntingtin interacting protein 1 related
hsa-miR-615-3p	0	0	0	1	0	0	FAM22F	family with sequence similarity 22, member F
hsa-miR-615-3p	0	0	1	1	0	0	C3orf20	chromosome 3 open reading frame 20
hsa-miR-615-3p	0	0	0	1	1	1	SLC52A1	solute carrier family 52, riboflavin transporter, member 1
hsa-miR-615-3p	0	0	1	1	0	0	BRD8	bromodomain containing 8
hsa-miR-615-3p	0	0	1	1	0	0	MATN4	matrilin 4
hsa-miR-615-3p	0	0	0	1	1	1	PRAM1	PML-RARA regulated adaptor molecule 1
hsa-miR-615-3p	1	0	1	1	1	1	SUV420H2	suppressor of variegation 4-20 homolog 2 (Drosophila)
hsa-miR-615-3p	1	0	1	1	0	0	CSNK1G2	casein kinase 1, gamma 2
hsa-miR-615-3p	0	0	0	1	1	1	VRTN	vertebrae development homolog (pig)
hsa-miR-615-3p	1	0	1	1	1	1	DTX1	deltex homolog 1 (Drosophila)
hsa-miR-615-3p	0	0	0	1	0	0	FBXL8	F-box and leucine-rich repeat protein 8
hsa-miR-615-3p	0	0	1	1	1	1	PIGC	phosphatidylinositol glycan anchor biosynthesis, class C
hsa-miR-615-3p	0	0	0	1	1	1	SP110	SP110 nuclear body protein
hsa-miR-615-3p	0	0	0	1	0	0	CHRND	cholinergic receptor, nicotinic, delta (muscle)
hsa-miR-615-3p	0	0	0	1	1	1	MFSD9	major facilitator superfamily domain containing 9
hsa-miR-615-3p	1	0	0	1	1	1	USP44	ubiquitin specific peptidase 44
hsa-miR-615-3p	0	0	1	1	0	0	TBRG4	transforming growth factor beta regulator 4
hsa-miR-615-3p	0	0	1	1	0	0	TTC5	tetratricopeptide repeat domain 5
hsa-miR-615-3p	0	0	0	1	0	0	GMPR	guanosine monophosphate reductase
hsa-miR-615-3p	0	0	1	1	1	1	GUCY2C	guanylate cyclase 2C (heat stable enterotoxin receptor)
hsa-miR-615-3p	0	0	1	1	1	1	TRIP4	thyroid hormone receptor interactor 4
hsa-miR-615-3p	1	0	1	1	1	1	RBL2	retinoblastoma-like 2 (p130)
hsa-miR-615-3p	0	0	0	1	0	0	NUBP2	nucleotide binding protein 2
hsa-miR-615-3p	1	0	1	1	1	1	GLIS2	GLIS family zinc finger 2
hsa-miR-615-3p	1	0	1	1	1	1	SLC46A1	solute carrier family 46 (folate transporter), member 1
hsa-miR-615-3p	0	0	1	1	1	1	DHX8	DEAH (Asp-Glu-Ala-His) box polypeptide 8
hsa-miR-615-3p	0	0	1	1	0	0	DNAH9	dynein, axonemal, heavy chain 9
hsa-miR-615-3p	1	0	1	1	1	1	ARHGAP44	Rho GTPase activating protein 44
hsa-miR-615-3p	0	0	0	1	0	0	PITPNM3	PITPNM family member 3
hsa-miR-615-3p	0	0	0	1	0	0	ATP4A	ATPase, H+/K+ exchanging, alpha polypeptide
hsa-miR-615-3p	1	0	1	1	1	1	SCN1B	sodium channel, voltage-gated, type I, beta subunit
hsa-miR-615-3p	1	0	1	1	1	1	CDH20	cadherin 20, type 2
hsa-miR-615-3p	0	0	1	1	0	0	KCNN4	potassium intermediate/small conductance calcium-activated channel, subfamily N, member 4
hsa-miR-615-3p	0	0	0	1	0	0	TJP3	tight junction protein 3
hsa-miR-615-3p	1	0	0	1	0	0	CNN2	calponin 2
hsa-miR-615-3p	0	0	0	1	1	1	NUCB1	nucleobindin 1
hsa-miR-615-3p	0	0	1	1	1	1	PRKCG	protein kinase C, gamma
hsa-miR-615-3p	0	0	1	1	1	1	TFAP2E	transcription factor AP-2 epsilon (activating enhancer binding protein 2 epsilon)
hsa-miR-615-3p	1	0	0	1	1	1	PARP12	poly (ADP-ribose) polymerase family, member 12
hsa-miR-615-3p	0	0	1	1	1	1	BARHL1	BarH-like homeobox 1
hsa-miR-615-3p	0	0	1	1	0	0	NGEF	neuronal guanine nucleotide exchange factor
hsa-miR-615-3p	1	0	1	1	1	1	EZH1	enhancer of zeste homolog 1 (Drosophila)
hsa-miR-615-3p	0	0	1	1	0	0	WDR70	WD repeat domain 70
hsa-miR-615-3p	0	0	0	1	0	0	SIL1	SIL1 homolog, endoplasmic reticulum chaperone (S. cerevisiae)
hsa-miR-615-3p	0	0	1	1	0	0	POR	P450 (cytochrome) oxidoreductase
hsa-miR-615-3p	0	0	1	1	1	1	PITX1	paired-like homeodomain 1
hsa-miR-615-3p	0	0	1	1	0	0	MLN	motilin
hsa-miR-615-3p	1	0	1	1	1	1	CHCHD10	coiled-coil-helix-coiled-coil-helix domain containing 10
hsa-miR-615-3p	0	0	1	1	1	1	MTFP1	mitochondrial fission process 1
hsa-miR-615-3p	0	0	1	1	1	1	AMDHD1	amidohydrolase domain containing 1
hsa-miR-615-3p	0	0	1	1	1	1	TINF2	TERF1 (TRF1)-interacting nuclear factor 2
hsa-miR-615-3p	1	0	1	1	1	1	ITPK1	inositol-tetrakisphosphate 1-kinase
hsa-miR-615-3p	0	0	0	1	0	0	GCNT3	glucosaminyl (N-acetyl) transferase 3, mucin type
hsa-miR-615-3p	0	0	1	1	0	0	PIF1	PIF1 5'-to-3' DNA helicase homolog (S. cerevisiae)
hsa-miR-615-3p	0	0	1	1	1	1	NOL3	nucleolar protein 3 (apoptosis repressor with CARD domain)
hsa-miR-615-3p	0	0	0	1	0	0	PIGS	phosphatidylinositol glycan anchor biosynthesis, class S
hsa-miR-615-3p	0	0	1	1	0	0	GFOD2	glucose-fructose oxidoreductase domain containing 2
hsa-miR-615-3p	1	0	1	1	1	1	SGSM2	small G protein signaling modulator 2
hsa-miR-615-3p	0	0	0	1	0	0	SECTM1	secreted and transmembrane 1
hsa-miR-615-3p	0	0	0	1	0	0	MED16	mediator complex subunit 16
hsa-miR-615-3p	0	0	1	1	0	0	WTIP	Wilms tumor 1 interacting protein
hsa-miR-615-3p	0	0	0	1	0	0	ZNF787	zinc finger protein 787
hsa-miR-615-3p	0	0	1	1	1	1	EPN1	epsin 1
hsa-miR-615-3p	0	0	0	1	0	0	RCN3	reticulocalbin 3, EF-hand calcium binding domain
hsa-miR-615-3p	0	0	1	1	0	0	ZNF593	zinc finger protein 593
hsa-miR-615-3p	0	0	0	1	1	1	GPR161	G protein-coupled receptor 161
hsa-miR-615-3p	0	0	0	1	1	1	C1orf35	chromosome 1 open reading frame 35
hsa-miR-615-3p	0	0	1	1	1	1	WNT9A	wingless-type MMTV integration site family, member 9A
hsa-miR-615-3p	0	0	0	1	0	0	ANKMY1	ankyrin repeat and MYND domain containing 1
hsa-miR-615-3p	0	0	1	1	0	0	SLC4A3	solute carrier family 4, anion exchanger, member 3
hsa-miR-615-3p	1	0	1	1	1	1	ABI3BP	ABI family, member 3 (NESH) binding protein
hsa-miR-615-3p	0	0	1	1	0	0	ALDH1L1	aldehyde dehydrogenase 1 family, member L1
hsa-miR-615-3p	1	0	1	1	1	1	PAM	peptidylglycine alpha-amidating monooxygenase
hsa-miR-615-3p	0	0	0	1	0	0	STRA8	stimulated by retinoic acid gene 8 homolog (mouse)
hsa-miR-615-3p	0	0	1	1	1	1	ADHFE1	alcohol dehydrogenase, iron containing, 1
hsa-miR-615-3p	1	0	1	1	0	0	NAPRT1	nicotinate phosphoribosyltransferase domain containing 1
hsa-miR-615-3p	0	0	1	1	0	0	FUOM	fucose mutarotase
hsa-miR-615-3p	0	0	0	1	1	1	ST14	suppression of tumorigenicity 14 (colon carcinoma)
hsa-miR-615-3p	0	0	1	1	0	0	LSM14B	LSM14B, SCD6 homolog B (S. cerevisiae)
hsa-miR-615-3p	0	0	0	1	0	0	PLCB3	phospholipase C, beta 3 (phosphatidylinositol-specific)
hsa-miR-615-3p	1	0	1	1	1	1	KCNE4	potassium voltage-gated channel, Isk-related family, member 4
hsa-miR-615-3p	1	0	1	1	1	1	OTX1	orthodenticle homeobox 1
hsa-miR-615-3p	0	0	1	1	1	1	FAM100A	family with sequence similarity 100, member A
hsa-miR-615-3p	1	0	1	1	1	1	ATP8B1	ATPase, aminophospholipid transporter, class I, type 8B, member 1
hsa-miR-615-3p	0	0	0	1	0	0	C16orf74	chromosome 16 open reading frame 74
hsa-miR-615-3p	1	0	1	1	1	1	FAM105B	family with sequence similarity 105, member B
hsa-miR-615-3p	0	0	0	1	1	1	FLCN	folliculin
hsa-miR-615-3p	0	0	0	1	0	0	SLC7A7	solute carrier family 7 (amino acid transporter light chain, y+L system), member 7
hsa-miR-615-3p	0	0	0	1	1	1	KDM8	lysine (K)-specific demethylase 8
hsa-miR-615-3p	0	0	1	1	0	0	SLC26A10	solute carrier family 26, member 10
hsa-miR-615-3p	0	0	1	1	0	0	BATF	basic leucine zipper transcription factor, ATF-like
hsa-miR-615-3p	1	0	1	1	1	1	PRKAG2	protein kinase, AMP-activated, gamma 2 non-catalytic subunit
hsa-miR-615-3p	1	0	1	1	1	1	SMAD6	SMAD family member 6
hsa-miR-615-3p	0	0	0	1	0	0	LRRC43	leucine rich repeat containing 43
hsa-miR-615-3p	0	0	1	1	0	0	FAM46B	family with sequence similarity 46, member B
hsa-miR-615-3p	0	0	1	1	0	0	GPR153	G protein-coupled receptor 153
hsa-miR-615-3p	0	0	0	1	0	0	HTR6	5-hydroxytryptamine (serotonin) receptor 6, G protein-coupled
hsa-miR-615-3p	0	0	0	1	0	0	TRMU	tRNA 5-methylaminomethyl-2-thiouridylate methyltransferase
hsa-miR-615-3p	1	0	1	1	0	0	SHF	Src homology 2 domain containing F
hsa-miR-615-3p	0	0	1	1	0	0	TNFRSF13C	tumor necrosis factor receptor superfamily, member 13C
hsa-miR-615-3p	0	0	0	1	0	0	CILP2	cartilage intermediate layer protein 2
hsa-miR-615-3p	0	0	1	1	0	0	ATP13A1	ATPase type 13A1
hsa-miR-615-3p	0	0	0	1	0	0	TFF3	trefoil factor 3 (intestinal)
hsa-miR-615-3p	0	0	0	1	0	0	RRP1	ribosomal RNA processing 1 homolog (S. cerevisiae)
hsa-miR-615-3p	0	0	0	1	0	0	GPSM1	G-protein signaling modulator 1
hsa-miR-615-3p	0	0	1	1	0	0	NLRX1	NLR family member X1
hsa-miR-615-3p	0	0	0	1	1	1	ANO10	anoctamin 10
hsa-miR-615-3p	0	0	1	1	0	0	CCDC12	coiled-coil domain containing 12
hsa-miR-615-3p	0	0	1	1	1	1	RNF126	ring finger protein 126
hsa-miR-615-3p	1	0	1	1	1	1	CUX1	cut-like homeobox 1
hsa-miR-615-3p	0	0	0	1	1	1	FDXR	ferredoxin reductase
hsa-miR-615-3p	0	0	0	1	0	0	RDM1	RAD52 motif 1
hsa-miR-615-3p	1	0	1	1	1	1	BCL6B	B-cell CLL/lymphoma 6, member B
hsa-miR-615-3p	0	0	0	1	1	1	NHLRC4	NHL repeat containing 4
hsa-miR-615-3p	0	0	0	1	0	0	SSTR5	somatostatin receptor 5
hsa-miR-615-3p	0	0	1	1	0	0	PDZK1IP1	PDZK1 interacting protein 1
hsa-miR-615-3p	0	0	0	1	0	0	NPPC	natriuretic peptide C
hsa-miR-615-3p	0	0	0	1	0	0	HDAC11	histone deacetylase 11
hsa-miR-615-3p	0	0	0	1	1	1	CAND2	cullin-associated and neddylation-dissociated 2 (putative)
hsa-miR-615-3p	0	0	1	1	1	1	ZDHHC19	zinc finger, DHHC-type containing 19
hsa-miR-615-3p	0	0	1	1	1	1	SLC51A	solute carrier family 51, alpha subunit
hsa-miR-615-3p	0	0	0	1	0	0	OTOP1	otopetrin 1
hsa-miR-615-3p	0	0	0	1	0	0	ANKRD33B	ankyrin repeat domain 33B
hsa-miR-615-3p	1	0	1	1	1	1	LMTK2	lemur tyrosine kinase 2
hsa-miR-615-3p	0	0	0	1	0	0	MICALL2	MICAL-like 2
hsa-miR-615-3p	0	0	1	1	0	0	C9orf24	chromosome 9 open reading frame 24
hsa-miR-615-3p	0	0	1	1	1	1	C9orf3	chromosome 9 open reading frame 3
hsa-miR-615-3p	1	0	1	1	1	1	ARF6	ADP-ribosylation factor 6
hsa-miR-615-3p	0	0	0	1	0	0	STK32C	serine/threonine kinase 32C
hsa-miR-615-3p	1	0	1	1	1	1	EHMT1	euchromatic histone-lysine N-methyltransferase 1
hsa-miR-615-3p	0	0	1	1	1	1	APBB1	amyloid beta (A4) precursor protein-binding, family B, member 1 (Fe65)
hsa-miR-615-3p	1	0	1	1	0	0	TNXB	tenascin XB
hsa-miR-615-3p	0	0	0	1	0	0	CDH16	cadherin 16, KSP-cadherin
hsa-miR-615-3p	0	0	1	1	1	1	KIF7	kinesin family member 7
hsa-miR-615-3p	0	0	1	1	0	0	PEX11A	peroxisomal biogenesis factor 11 alpha
hsa-miR-615-3p	1	0	1	1	1	1	PRRT2	proline-rich transmembrane protein 2
hsa-miR-615-3p	0	0	1	1	0	0	IRGQ	immunity-related GTPase family, Q
hsa-miR-615-3p	0	0	0	1	0	0	CYP2A6	cytochrome P450, family 2, subfamily A, polypeptide 6
hsa-miR-615-3p	0	0	1	1	0	0	ANKRD33	ankyrin repeat domain 33
hsa-miR-615-3p	0	0	1	1	1	1	LENG8	leukocyte receptor cluster (LRC) member 8
hsa-miR-615-3p	0	0	0	1	0	0	DAPK3	death-associated protein kinase 3
hsa-miR-615-3p	0	0	1	1	1	1	HDGFRP2	hepatoma-derived growth factor-related protein 2
hsa-miR-615-3p	0	0	0	1	0	0	NLRP4	NLR family, pyrin domain containing 4
hsa-miR-615-3p	0	0	0	1	0	0	MFSD3	major facilitator superfamily domain containing 3
hsa-miR-615-3p	1	0	1	1	0	0	KIFC2	kinesin family member C2
hsa-miR-615-3p	0	0	0	1	0	0	HSD11B1L	hydroxysteroid (11-beta) dehydrogenase 1-like
hsa-miR-615-3p	0	0	0	1	1	1	CYB5D2	cytochrome b5 domain containing 2
hsa-miR-615-3p	0	0	0	1	0	0	ULK4	unc-51-like kinase 4 (C. elegans)
hsa-miR-615-3p	0	0	0	1	0	0	LTBP3	latent transforming growth factor beta binding protein 3
hsa-miR-615-3p	0	0	1	1	0	0	IRX1	iroquois homeobox 1
hsa-miR-615-3p	0	0	1	1	0	0	IRF2BP1	interferon regulatory factor 2 binding protein 1
hsa-miR-615-3p	1	0	1	1	1	1	TRIM8	tripartite motif containing 8
hsa-miR-615-3p	0	0	0	1	0	0	C1QTNF4	C1q and tumor necrosis factor related protein 4
hsa-miR-615-3p	0	0	0	1	0	0	CCBL1	cysteine conjugate-beta lyase, cytoplasmic
hsa-miR-615-3p	0	0	1	1	0	0	CDK5R2	cyclin-dependent kinase 5, regulatory subunit 2 (p39)
hsa-miR-615-3p	0	0	1	1	1	1	GNB2	guanine nucleotide binding protein (G protein), beta polypeptide 2
hsa-miR-615-3p	1	0	1	1	0	0	RAB24	RAB24, member RAS oncogene family
hsa-miR-615-3p	0	0	0	1	1	1	CES3	carboxylesterase 3
hsa-miR-615-3p	1	0	1	1	1	1	ORMDL3	ORM1-like 3 (S. cerevisiae)
hsa-miR-615-3p	0	0	1	1	0	0	VAV1	vav 1 guanine nucleotide exchange factor
hsa-miR-615-3p	1	0	1	1	1	1	TTBK1	tau tubulin kinase 1
hsa-miR-615-3p	0	0	0	1	0	0	ANKS3	ankyrin repeat and sterile alpha motif domain containing 3
hsa-miR-615-3p	0	0	0	1	0	0	FPR1	formyl peptide receptor 1
hsa-miR-615-3p	0	0	0	1	1	1	NINJ2	ninjurin 2
hsa-miR-615-3p	0	0	1	1	0	0	LAMB2	laminin, beta 2 (laminin S)
hsa-miR-615-3p	0	0	0	1	0	0	SIGLEC7	sialic acid binding Ig-like lectin 7
hsa-miR-615-3p	0	0	0	1	1	1	KCNS1	potassium voltage-gated channel, delayed-rectifier, subfamily S, member 1
hsa-miR-615-3p	0	0	1	1	1	1	HTRA3	HtrA serine peptidase 3
hsa-miR-615-3p	0	0	1	1	0	0	CNTNAP4	contactin associated protein-like 4
hsa-miR-615-3p	0	0	0	1	0	0	THOP1	thimet oligopeptidase 1
hsa-miR-615-3p	0	0	1	1	0	0	CRB3	crumbs homolog 3 (Drosophila)
hsa-miR-615-3p	0	0	1	1	0	0	RLN2	relaxin 2
hsa-miR-615-3p	0	0	0	1	0	0	ATAD3B	ATPase family, AAA domain containing 3B
hsa-miR-615-3p	0	0	1	1	1	1	PSMD1	proteasome (prosome, macropain) 26S subunit, non-ATPase, 1
hsa-miR-615-3p	1	0	1	1	1	1	MAP3K11	mitogen-activated protein kinase kinase kinase 11
hsa-miR-615-3p	0	0	0	1	0	0	MRPL38	mitochondrial ribosomal protein L38
hsa-miR-615-3p	1	0	1	1	0	0	TCAP	titin-cap (telethonin)
hsa-miR-615-3p	1	0	0	1	1	1	CTSF	cathepsin F
hsa-miR-615-3p	0	0	1	1	0	0	ZDHHC24	zinc finger, DHHC-type containing 24
hsa-miR-615-3p	0	0	1	1	0	0	RFNG	RFNG O-fucosylpeptide 3-beta-N-acetylglucosaminyltransferase
hsa-miR-615-3p	1	0	1	1	0	0	PHOSPHO1	phosphatase, orphan 1
hsa-miR-615-3p	0	0	1	1	0	0	SPNS1	spinster homolog 1 (Drosophila)
hsa-miR-615-3p	1	0	1	1	0	0	RABL6	RAB, member RAS oncogene family-like 6
hsa-miR-615-3p	0	0	0	1	0	0	CST6	cystatin E/M
hsa-miR-615-3p	0	0	0	1	0	0	PARP10	poly (ADP-ribose) polymerase family, member 10
hsa-miR-615-3p	0	0	1	1	0	0	SLC29A1	solute carrier family 29 (nucleoside transporters), member 1
hsa-miR-615-3p	1	0	1	1	1	1	GALE	UDP-galactose-4-epimerase
hsa-miR-615-3p	0	0	0	1	0	0	FAM20C	family with sequence similarity 20, member C
hsa-miR-615-3p	0	0	0	1	0	0	FUT7	fucosyltransferase 7 (alpha (1,3) fucosyltransferase)
hsa-miR-615-3p	0	0	0	1	1	1	PHLDB3	pleckstrin homology-like domain, family B, member 3
hsa-miR-615-3p	0	0	0	1	0	0	SULT1A1	sulfotransferase family, cytosolic, 1A, phenol-preferring, member 1
hsa-miR-615-3p	0	0	1	1	0	0	C1QB	complement component 1, q subcomponent, B chain
hsa-miR-615-3p	0	0	0	1	0	0	RRP12	ribosomal RNA processing 12 homolog (S. cerevisiae)
hsa-miR-615-3p	0	0	0	1	0	0	GPS2	G protein pathway suppressor 2
hsa-miR-615-3p	0	0	0	1	1	1	ASB2	ankyrin repeat and SOCS box containing 2
hsa-miR-615-3p	0	0	0	1	0	0	ZFAND2A	zinc finger, AN1-type domain 2A
hsa-miR-615-3p	0	0	0	1	0	0	INSL3	insulin-like 3 (Leydig cell)
hsa-miR-615-3p	0	0	0	1	1	1	JAK3	Janus kinase 3
hsa-miR-615-3p	0	0	0	1	0	0	MAMDC4	MAM domain containing 4
hsa-miR-615-3p	0	0	0	1	0	0	PGAM5	phosphoglycerate mutase family member 5
hsa-miR-615-3p	0	0	0	1	1	1	S100Z	S100 calcium binding protein Z
hsa-miR-615-3p	0	0	0	1	0	0	FXYD2	FXYD domain containing ion transport regulator 2
hsa-miR-615-3p	0	0	1	1	0	0	MAMSTR	MEF2 activating motif and SAP domain containing transcriptional regulator
hsa-miR-615-3p	0	0	0	1	1	1	GRHPR	glyoxylate reductase/hydroxypyruvate reductase
hsa-miR-615-3p	0	0	1	1	1	1	HTR3C	5-hydroxytryptamine (serotonin) receptor 3C, ionotropic
hsa-miR-615-3p	0	0	1	1	0	0	SFTPC	surfactant protein C
hsa-miR-615-3p	0	0	1	1	1	1	ZNF771	zinc finger protein 771
hsa-miR-615-3p	0	0	0	1	0	0	CHST13	carbohydrate (chondroitin 4) sulfotransferase 13
hsa-miR-615-3p	1	0	1	1	1	1	TMUB2	transmembrane and ubiquitin-like domain containing 2
hsa-miR-615-3p	0	0	0	1	0	0	FGF8	fibroblast growth factor 8 (androgen-induced)
hsa-miR-615-3p	1	0	1	1	1	1	FOXL1	forkhead box L1
hsa-miR-615-3p	0	0	1	1	1	1	ASPRV1	aspartic peptidase, retroviral-like 1
hsa-miR-615-3p	0	0	0	1	0	0	GPS1	G protein pathway suppressor 1
hsa-miR-615-3p	0	0	1	1	0	0	CLPTM1L	CLPTM1-like
hsa-miR-615-3p	0	0	1	1	0	0	PRPF31	PRP31 pre-mRNA processing factor 31 homolog (S. cerevisiae)
hsa-miR-615-3p	1	0	1	1	1	1	BAIAP2	BAI1-associated protein 2
hsa-miR-615-3p	0	0	0	1	1	1	NUDC	nuclear distribution C homolog (A. nidulans)
hsa-miR-615-3p	1	0	0	1	0	0	FAM123C	family with sequence similarity 123C
hsa-miR-615-3p	0	0	1	1	1	1	PINK1	PTEN induced putative kinase 1
hsa-miR-615-3p	0	0	1	1	0	0	THAP4	THAP domain containing 4
hsa-miR-615-3p	0	0	1	1	0	0	C17orf47	chromosome 17 open reading frame 47
hsa-miR-615-3p	0	0	0	1	0	0	B3GNT8	UDP-GlcNAc:betaGal beta-1,3-N-acetylglucosaminyltransferase 8
hsa-miR-615-3p	0	0	1	1	0	0	SPACA4	sperm acrosome associated 4
hsa-miR-615-3p	0	0	0	1	0	0	ACBD4	acyl-CoA binding domain containing 4
hsa-miR-615-3p	0	0	1	1	0	0	VARS2	valyl-tRNA synthetase 2, mitochondrial (putative)
hsa-miR-615-3p	0	0	0	1	0	0	TRIM72	tripartite motif containing 72
hsa-miR-615-3p	0	0	0	1	0	0	ABHD11	abhydrolase domain containing 11
hsa-miR-615-3p	0	0	1	1	0	0	TMC6	transmembrane channel-like 6
hsa-miR-615-3p	0	0	1	1	1	1	GP5	glycoprotein V (platelet)
hsa-miR-615-3p	1	0	1	1	1	1	PRR7	proline rich 7 (synaptic)
hsa-miR-615-3p	0	0	1	1	0	0	CPT1C	carnitine palmitoyltransferase 1C
hsa-miR-615-3p	0	0	1	1	0	0	PLA2G16	phospholipase A2, group XVI
hsa-miR-615-3p	0	0	1	1	1	1	ZFP41	zinc finger protein 41 homolog (mouse)
hsa-miR-615-3p	0	0	0	1	0	0	GLI4	GLI family zinc finger 4
hsa-miR-615-3p	0	0	0	1	1	1	SIRT3	sirtuin 3
hsa-miR-615-3p	0	0	0	1	0	0	VIPR1	vasoactive intestinal peptide receptor 1
hsa-miR-615-3p	0	0	0	1	1	1	FBXW5	F-box and WD repeat domain containing 5
hsa-miR-615-3p	1	0	1	1	1	1	MLLT6	myeloid/lymphoid or mixed-lineage leukemia (trithorax homolog, Drosophila); translocated to, 6
hsa-miR-615-3p	0	0	0	1	0	0	NEU4	sialidase 4
hsa-miR-615-3p	0	0	1	1	0	0	HEATR7A	HEAT repeat containing 7A
hsa-miR-615-3p	0	0	0	1	1	1	FLII	flightless I homolog (Drosophila)
hsa-miR-615-3p	0	0	0	1	0	0	PRM3	protamine 3
hsa-miR-615-3p	1	0	1	1	1	1	EYA2	eyes absent homolog 2 (Drosophila)
hsa-miR-615-3p	0	0	0	1	0	0	SERHL2	serine hydrolase-like 2
hsa-miR-615-3p	0	0	1	1	0	0	RNF123	ring finger protein 123
hsa-miR-615-3p	0	0	1	1	0	0	GAS6	growth arrest-specific 6
hsa-miR-615-3p	0	0	1	1	1	1	FMNL1	formin-like 1
hsa-miR-615-3p	0	0	0	1	0	0	HSF1	heat shock transcription factor 1
hsa-miR-615-3p	0	0	0	1	1	1	ENPP7	ectonucleotide pyrophosphatase/phosphodiesterase 7
hsa-miR-615-3p	0	0	0	1	0	0	OTOP3	otopetrin 3
hsa-miR-615-3p	1	0	1	1	1	1	SYNGR1	synaptogyrin 1
hsa-miR-615-3p	0	0	0	1	0	0	DDX51	DEAD (Asp-Glu-Ala-Asp) box polypeptide 51
hsa-miR-615-3p	0	0	1	1	0	0	GP1BA	glycoprotein Ib (platelet), alpha polypeptide
hsa-miR-615-3p	0	0	0	1	0	0	C19orf71	chromosome 19 open reading frame 71
hsa-miR-615-3p	0	0	0	1	1	1	SLC52A2	solute carrier family 52, riboflavin transporter, member 2
hsa-miR-615-3p	1	0	1	1	0	0	SRL	sarcalumenin
hsa-miR-615-3p	0	0	0	1	0	0	PRAMEF15	PRAME family member 15
hsa-miR-615-3p	0	0	0	1	1	1	TMEM121	transmembrane protein 121
hsa-miR-615-3p	0	0	0	1	0	0	SAMD14	sterile alpha motif domain containing 14
hsa-miR-615-3p	0	0	1	1	1	1	PPP1R27	protein phosphatase 1, regulatory subunit 27
hsa-miR-615-3p	0	0	1	1	1	1	CMTM4	CKLF-like MARVEL transmembrane domain containing 4
hsa-miR-615-3p	0	0	1	1	1	1	GPIHBP1	glycosylphosphatidylinositol anchored high density lipoprotein binding protein 1
hsa-miR-615-3p	0	0	1	1	0	0	KRBA2	KRAB-A domain containing 2
hsa-miR-615-3p	0	0	0	1	0	0	C2orf82	chromosome 2 open reading frame 82
hsa-miR-615-3p	1	0	1	1	0	0	DGCR6	DiGeorge syndrome critical region gene 6
hsa-miR-615-3p	0	0	0	1	0	0	CLCNKB	chloride channel, voltage-sensitive Kb
hsa-miR-615-3p	0	0	0	1	0	0	SYNDIG1L	synapse differentiation inducing 1-like
hsa-miR-615-3p	1	0	1	1	1	1	DND1	dead end homolog 1 (zebrafish)
hsa-miR-615-3p	0	0	0	1	1	1	NDUFA6	NADH dehydrogenase (ubiquinone) 1 alpha subcomplex, 6, 14kDa
hsa-miR-615-3p	0	0	1	1	1	1	MRPL12	mitochondrial ribosomal protein L12
hsa-miR-615-3p	0	0	1	1	1	1	CMTM3	CKLF-like MARVEL transmembrane domain containing 3
hsa-miR-615-3p	0	0	0	1	1	1	ANO9	anoctamin 9
hsa-miR-615-3p	0	0	0	1	0	0	IZUMO1	izumo sperm-egg fusion 1
hsa-miR-615-3p	0	0	1	1	0	0	TAS1R1	taste receptor, type 1, member 1
hsa-miR-615-3p	1	0	1	1	1	1	C19orf6	chromosome 19 open reading frame 6
hsa-miR-615-3p	0	0	0	1	0	0	NPB	neuropeptide B
hsa-miR-615-3p	0	0	0	1	0	0	MAFA	v-maf musculoaponeurotic fibrosarcoma oncogene homolog A (avian)
hsa-miR-615-3p	0	0	0	1	0	0	H1FX	H1 histone family, member X
hsa-miR-615-3p	0	0	0	1	0	0	C5orf38	chromosome 5 open reading frame 38
hsa-miR-615-3p	1	0	0	1	0	0	EMID1	EMI domain containing 1
hsa-miR-615-3p	0	0	0	1	0	0	FGF3	fibroblast growth factor 3
hsa-miR-615-3p	1	0	1	1	1	1	RGS9BP	regulator of G protein signaling 9 binding protein
hsa-miR-615-3p	0	0	1	1	0	0	TRIM7	tripartite motif containing 7
hsa-miR-615-3p	0	0	0	1	0	0	NBPF6	neuroblastoma breakpoint family, member 6
hsa-miR-615-3p	0	0	0	1	1	1	C14orf80	chromosome 14 open reading frame 80
hsa-miR-615-3p	1	0	1	1	0	0	PPIL2	peptidylprolyl isomerase (cyclophilin)-like 2
hsa-miR-615-3p	0	0	0	1	0	0	JMJD7-PLA2G4B	JMJD7-PLA2G4B readthrough
hsa-miR-615-3p	0	0	0	1	0	0	C17orf82	chromosome 17 open reading frame 82
hsa-miR-615-3p	0	0	0	1	1	1	TESC	tescalcin
hsa-miR-615-3p	0	0	0	1	0	0	C6orf1	chromosome 6 open reading frame 1
hsa-miR-615-3p	0	0	0	1	0	0	TBX10	T-box 10
hsa-miR-615-3p	0	0	0	1	0	0	VWCE	von Willebrand factor C and EGF domains
hsa-miR-615-3p	0	0	0	1	0	0	GRK1	G protein-coupled receptor kinase 1
hsa-miR-615-3p	0	0	1	1	1	1	THEM6	thioesterase superfamily member 6
hsa-miR-615-3p	0	0	1	1	1	1	P2RX6	purinergic receptor P2X, ligand-gated ion channel, 6
hsa-miR-615-3p	0	0	0	1	0	0	STARD3	StAR-related lipid transfer (START) domain containing 3
hsa-miR-615-3p	1	0	0	1	1	1	IFFO1	intermediate filament family orphan 1
hsa-miR-615-3p	0	0	1	1	0	0	PDXP	pyridoxal (pyridoxine, vitamin B6) phosphatase
hsa-miR-615-3p	0	0	1	1	0	0	SH3BP1	SH3-domain binding protein 1
hsa-miR-615-3p	0	0	1	1	0	0	GDPD5	glycerophosphodiester phosphodiesterase domain containing 5
hsa-miR-615-3p	0	0	1	1	0	0	TBC1D22A	TBC1 domain family, member 22A
hsa-miR-615-3p	0	0	1	1	0	0	AVPR2	arginine vasopressin receptor 2
hsa-miR-615-3p	0	0	1	1	0	0	SIRT6	sirtuin 6
hsa-miR-615-3p	0	0	0	1	1	1	MEN1	multiple endocrine neoplasia I
hsa-miR-615-3p	0	0	1	1	0	0	MS4A15	membrane-spanning 4-domains, subfamily A, member 15
hsa-miR-615-3p	0	0	0	1	1	1	ELAC2	elaC homolog 2 (E. coli)
hsa-miR-615-3p	0	0	1	1	1	1	MAFF	v-maf musculoaponeurotic fibrosarcoma oncogene homolog F (avian)
hsa-miR-615-3p	0	0	0	1	1	1	C11orf95	chromosome 11 open reading frame 95
hsa-miR-615-3p	0	0	1	1	1	1	SLC28A1	solute carrier family 28 (sodium-coupled nucleoside transporter), member 1
hsa-miR-615-3p	1	0	1	1	1	1	ATP9A	ATPase, class II, type 9A
hsa-miR-615-3p	0	0	0	1	0	0	HELT	helt bHLH transcription factor
hsa-miR-615-3p	0	0	1	1	0	0	SYT3	synaptotagmin III
hsa-miR-615-3p	1	0	1	1	1	1	PHF20	PHD finger protein 20
hsa-miR-615-3p	0	0	0	1	0	0	NANOS3	nanos homolog 3 (Drosophila)
hsa-miR-615-3p	0	0	0	1	1	1	ABHD12	abhydrolase domain containing 12
hsa-miR-615-3p	0	0	1	1	0	0	UBE2J2	ubiquitin-conjugating enzyme E2, J2
hsa-miR-615-3p	0	0	0	1	0	0	GFI1B	growth factor independent 1B transcription repressor
hsa-miR-615-3p	1	0	1	1	1	1	NELF	nasal embryonic LHRH factor
hsa-miR-615-3p	1	0	1	1	1	1	KCNJ11	potassium inwardly-rectifying channel, subfamily J, member 11
hsa-miR-615-3p	0	0	0	1	0	0	TTC24	tetratricopeptide repeat domain 24
hsa-miR-615-3p	1	0	1	1	1	1	RNF207	ring finger protein 207
hsa-miR-615-3p	0	0	0	1	0	0	ZBP1	Z-DNA binding protein 1
hsa-miR-615-3p	0	0	0	1	1	1	PLEKHG5	pleckstrin homology domain containing, family G (with RhoGef domain) member 5
hsa-miR-615-3p	1	0	1	1	0	0	KAT5	K(lysine) acetyltransferase 5
hsa-miR-615-3p	0	0	1	1	0	0	CORO1B	coronin, actin binding protein, 1B
hsa-miR-615-3p	1	0	0	1	0	0	ATP13A2	ATPase type 13A2
hsa-miR-615-3p	1	0	1	1	1	1	ATP8B2	ATPase, aminophospholipid transporter, class I, type 8B, member 2
hsa-miR-615-3p	0	0	1	1	0	0	C7orf59	chromosome 7 open reading frame 59
hsa-miR-615-3p	0	0	1	1	1	1	CHRD	chordin
hsa-miR-615-3p	0	0	1	1	0	0	RGL3	ral guanine nucleotide dissociation stimulator-like 3
hsa-miR-615-3p	1	0	1	1	0	0	LRRC16B	leucine rich repeat containing 16B
hsa-miR-615-3p	0	0	0	1	1	1	CIDEA	cell death-inducing DFFA-like effector a
hsa-miR-615-3p	1	0	1	1	0	0	ST3GAL2	ST3 beta-galactoside alpha-2,3-sialyltransferase 2
hsa-miR-615-3p	0	0	1	1	0	0	SLC12A7	solute carrier family 12 (potassium/chloride transporters), member 7
hsa-miR-615-3p	0	0	0	1	0	0	PYCR2	pyrroline-5-carboxylate reductase family, member 2
hsa-miR-615-3p	1	0	1	1	0	0	TH1L	TH1-like (Drosophila)
hsa-miR-615-3p	0	0	0	1	0	0	SPINT1	serine peptidase inhibitor, Kunitz type 1
hsa-miR-615-3p	0	0	0	1	0	0	RASSF7	Ras association (RalGDS/AF-6) domain family (N-terminal) member 7
hsa-miR-615-3p	1	0	0	1	1	1	TMEM234	transmembrane protein 234
hsa-miR-615-3p	0	0	1	1	0	0	RTN2	reticulon 2
hsa-miR-615-3p	0	0	1	1	1	1	LYPD1	LY6/PLAUR domain containing 1
hsa-miR-615-3p	1	0	1	1	1	1	AP3D1	adaptor-related protein complex 3, delta 1 subunit
hsa-miR-615-3p	0	0	1	1	1	1	EIF4G1	eukaryotic translation initiation factor 4 gamma, 1
hsa-miR-615-3p	0	0	1	1	1	1	DDIT3	DNA-damage-inducible transcript 3
hsa-miR-615-3p	0	0	0	1	1	1	CRHR2	corticotropin releasing hormone receptor 2
hsa-miR-615-3p	0	0	0	1	0	0	GNAT2	guanine nucleotide binding protein (G protein), alpha transducing activity polypeptide 2
hsa-miR-615-3p	0	0	1	1	0	0	PPOX	protoporphyrinogen oxidase
hsa-miR-615-3p	0	0	0	1	0	0	CCDC37	coiled-coil domain containing 37
hsa-miR-615-3p	0	0	0	1	0	0	RHBDL1	rhomboid, veinlet-like 1 (Drosophila)
hsa-miR-615-3p	0	0	1	1	1	1	TEX9	testis expressed 9
hsa-miR-615-3p	1	0	1	1	1	1	RAI1	retinoic acid induced 1
hsa-miR-615-3p	1	0	1	1	1	1	SLC12A9	solute carrier family 12 (potassium/chloride transporters), member 9
hsa-miR-615-3p	0	0	1	1	1	1	GPX4	glutathione peroxidase 4
hsa-miR-615-3p	0	0	0	1	0	0	FGF16	fibroblast growth factor 16
hsa-miR-615-3p	0	0	0	1	0	0	ZBTB45	zinc finger and BTB domain containing 45
hsa-miR-615-3p	1	0	1	1	0	0	SND1	staphylococcal nuclease and tudor domain containing 1
hsa-miR-615-3p	0	0	1	1	0	0	GPT	glutamic-pyruvate transaminase (alanine aminotransferase)
hsa-miR-615-3p	0	0	1	1	1	1	NAT6	N-acetyltransferase 6 (GCN5-related)
hsa-miR-615-3p	0	0	0	1	0	0	MYL4	myosin, light chain 4, alkali; atrial, embryonic
hsa-miR-615-3p	1	0	1	1	1	1	LINGO1	leucine rich repeat and Ig domain containing 1
hsa-miR-615-3p	0	0	0	1	0	0	MFSD12	major facilitator superfamily domain containing 12
hsa-miR-615-3p	1	0	0	1	0	0	LMX1B	LIM homeobox transcription factor 1, beta
hsa-miR-615-3p	0	0	1	1	0	0	PRMT2	protein arginine methyltransferase 2
hsa-miR-615-3p	0	0	1	1	0	0	CCDC114	coiled-coil domain containing 114
hsa-miR-615-3p	0	0	1	1	1	1	CHCHD8	coiled-coil-helix-coiled-coil-helix domain containing 8
hsa-miR-615-3p	0	0	0	1	0	0	SFXN4	sideroflexin 4
hsa-miR-615-3p	0	0	0	1	0	0	TNFRSF14	tumor necrosis factor receptor superfamily, member 14
hsa-miR-615-3p	0	0	1	1	1	1	CYP20A1	cytochrome P450, family 20, subfamily A, polypeptide 1
hsa-miR-615-3p	0	0	0	1	1	1	PITPNM1	phosphatidylinositol transfer protein, membrane-associated 1
hsa-miR-615-3p	0	0	0	1	1	1	MYOM1	myomesin 1, 185kDa
hsa-miR-615-3p	1	0	1	1	0	0	GPI	glucose-6-phosphate isomerase
hsa-miR-615-3p	0	0	1	1	0	0	STOML2	stomatin (EPB72)-like 2
hsa-miR-615-3p	0	0	0	1	0	0	FAM163B	family with sequence similarity 163, member B
hsa-miR-615-3p	1	0	1	1	0	0	ADAM15	ADAM metallopeptidase domain 15
hsa-miR-615-3p	1	0	0	1	1	1	PTRF	polymerase I and transcript release factor
hsa-miR-615-3p	0	0	1	1	0	0	RAB4B	RAB4B, member RAS oncogene family
hsa-miR-615-3p	0	0	0	1	1	1	LCNL1	lipocalin-like 1
hsa-miR-615-3p	0	0	0	1	1	1	MCRS1	microspherule protein 1
hsa-miR-615-3p	0	0	1	1	0	0	CCRL2	chemokine (C-C motif) receptor-like 2
hsa-miR-615-3p	0	0	0	1	0	0	TRIM48	tripartite motif containing 48
hsa-miR-615-3p	0	0	1	1	1	1	AP1B1	adaptor-related protein complex 1, beta 1 subunit
hsa-miR-615-3p	0	0	1	1	0	0	HYAL2	hyaluronoglucosaminidase 2
hsa-miR-615-3p	0	0	0	1	0	0	LCN8	lipocalin 8
hsa-miR-615-3p	0	0	1	1	0	0	RTP2	receptor (chemosensory) transporter protein 2
hsa-miR-615-3p	1	0	1	1	1	1	AKT2	v-akt murine thymoma viral oncogene homolog 2
hsa-miR-615-3p	1	0	1	1	0	0	PTPN5	protein tyrosine phosphatase, non-receptor type 5 (striatum-enriched)
hsa-miR-615-3p	0	0	1	1	1	1	GTPBP3	GTP binding protein 3 (mitochondrial)
hsa-miR-615-3p	0	0	0	1	0	0	CCNB1IP1	cyclin B1 interacting protein 1, E3 ubiquitin protein ligase
hsa-miR-615-3p	0	0	1	1	0	0	EDC4	enhancer of mRNA decapping 4
hsa-miR-615-3p	0	0	0	1	1	1	S1PR5	sphingosine-1-phosphate receptor 5
hsa-miR-615-3p	0	0	1	1	0	0	PLAC1	placenta-specific 1
hsa-miR-615-3p	0	0	0	1	1	1	MB	myoglobin
hsa-miR-615-3p	0	0	0	1	0	0	PYY	peptide YY
hsa-miR-615-3p	0	0	1	1	1	1	CDH4	cadherin 4, type 1, R-cadherin (retinal)
hsa-miR-615-3p	0	0	0	1	0	0	MMP17	matrix metallopeptidase 17 (membrane-inserted)
hsa-miR-615-3p	0	0	1	1	0	0	NPSR1	neuropeptide S receptor 1
hsa-miR-615-3p	0	0	0	1	0	0	PARVB	parvin, beta
hsa-miR-615-3p	1	0	1	1	1	1	ARHGEF10L	Rho guanine nucleotide exchange factor (GEF) 10-like
hsa-miR-615-3p	0	0	0	1	0	0	SLC25A47	solute carrier family 25, member 47
hsa-miR-615-3p	0	0	0	1	0	0	TEX28	testis expressed 28
hsa-miR-615-3p	0	0	0	1	0	0	SHISA4	shisa homolog 4 (Xenopus laevis)
hsa-miR-615-3p	1	0	0	1	1	1	TRIM67	tripartite motif containing 67
hsa-miR-615-3p	0	0	1	1	1	1	GJC2	gap junction protein, gamma 2, 47kDa
hsa-miR-615-3p	0	0	1	1	0	0	DDR2	discoidin domain receptor tyrosine kinase 2
hsa-miR-615-3p	1	0	1	1	1	1	ATP1A2	ATPase, Na+/K+ transporting, alpha 2 polypeptide
hsa-miR-615-3p	0	0	1	1	0	0	NTRK1	neurotrophic tyrosine kinase, receptor, type 1
hsa-miR-615-3p	1	0	1	1	0	0	SMG5	smg-5 homolog, nonsense mediated mRNA decay factor (C. elegans)
hsa-miR-615-3p	0	0	0	1	0	0	BGLAP	bone gamma-carboxyglutamate (gla) protein
hsa-miR-615-3p	0	0	0	1	1	1	FABP7	fatty acid binding protein 7, brain
hsa-miR-615-3p	0	0	0	1	0	0	TDRD10	tudor domain containing 10
hsa-miR-615-3p	0	0	1	1	0	0	PAOX	polyamine oxidase (exo-N4-amino)
hsa-miR-615-3p	0	0	0	1	0	0	CALY	calcyon neuron-specific vesicular protein
hsa-miR-615-3p	0	0	1	1	0	0	LOC399829	uncharacterized LOC399829
hsa-miR-615-3p	0	0	1	1	1	1	NPR1	natriuretic peptide receptor A/guanylate cyclase A (atrionatriuretic peptide receptor A)
hsa-miR-615-3p	0	0	1	1	0	0	IVL	involucrin
hsa-miR-615-3p	0	0	1	1	0	0	TARS2	threonyl-tRNA synthetase 2, mitochondrial (putative)
hsa-miR-615-3p	0	0	1	1	0	0	HIST2H3C	histone cluster 2, H3c
hsa-miR-615-3p	1	0	1	1	1	1	VTCN1	V-set domain containing T cell activation inhibitor 1
hsa-miR-615-3p	1	0	1	1	1	1	PLXNA3	plexin A3
hsa-miR-615-3p	1	0	1	1	1	1	FAM40A	family with sequence similarity 40, member A
hsa-miR-615-3p	0	0	0	1	0	0	GSTM2	glutathione S-transferase mu 2 (muscle)
hsa-miR-615-3p	0	0	0	1	0	0	FLNA	filamin A, alpha
hsa-miR-615-3p	0	0	1	1	0	0	PITX3	paired-like homeodomain 3
hsa-miR-615-3p	0	0	1	1	0	0	DPCD	deleted in primary ciliary dyskinesia homolog (mouse)
hsa-miR-615-3p	1	0	1	1	1	1	DUSP9	dual specificity phosphatase 9
hsa-miR-615-3p	1	0	1	1	0	0	GRIN1	glutamate receptor, ionotropic, N-methyl D-aspartate 1
hsa-miR-615-3p	0	0	0	1	0	0	DPP7	dipeptidyl-peptidase 7
hsa-miR-615-3p	0	0	0	1	0	0	EDF1	endothelial differentiation-related factor 1
hsa-miR-615-3p	0	0	0	1	0	0	KIAA1984	KIAA1984
hsa-miR-615-3p	0	0	0	1	0	0	TMEM141	transmembrane protein 141
hsa-miR-615-3p	0	0	0	1	0	0	FAM69B	family with sequence similarity 69, member B
hsa-miR-615-3p	0	0	0	1	0	0	INPP5E	inositol polyphosphate-5-phosphatase, 72 kDa
hsa-miR-615-3p	0	0	1	1	0	0	PAEP	progestagen-associated endometrial protein
hsa-miR-615-3p	0	0	0	1	1	1	SURF1	surfeit 1
hsa-miR-615-3p	0	0	1	1	0	0	C10orf116	chromosome 10 open reading frame 116
hsa-miR-615-3p	0	0	0	1	0	0	CEL	carboxyl ester lipase (bile salt-stimulated lipase)
hsa-miR-615-3p	0	0	1	1	0	0	GTF3C5	general transcription factor IIIC, polypeptide 5, 63kDa
hsa-miR-615-3p	1	0	1	1	1	1	TSPAN14	tetraspanin 14
hsa-miR-615-3p	0	0	1	1	1	1	ATG4A	autophagy related 4A, cysteine peptidase
hsa-miR-615-3p	1	0	1	1	1	1	ZMIZ1	zinc finger, MIZ-type containing 1
hsa-miR-615-3p	1	0	1	1	1	1	PRPS1	phosphoribosyl pyrophosphate synthetase 1
hsa-miR-615-3p	0	0	1	1	0	0	ABCC10	ATP-binding cassette, sub-family C (CFTR/MRP), member 10
hsa-miR-615-3p	1	0	1	1	0	0	ZSWIM1	zinc finger, SWIM-type containing 1
hsa-miR-615-3p	0	0	1	1	0	0	WFDC10A	WAP four-disulfide core domain 10A
hsa-miR-615-3p	0	0	1	1	1	1	TAF8	TAF8 RNA polymerase II, TATA box binding protein (TBP)-associated factor, 43kDa
hsa-miR-615-3p	1	0	1	1	0	0	MDFI	MyoD family inhibitor
hsa-miR-615-3p	0	0	1	1	0	0	NCR2	natural cytotoxicity triggering receptor 2
hsa-miR-615-3p	0	0	0	1	0	0	TSPO2	translocator protein 2
hsa-miR-615-3p	1	0	1	1	0	0	ENG	endoglin
hsa-miR-615-3p	0	0	0	1	1	1	TSPAN15	tetraspanin 15
hsa-miR-615-3p	1	0	0	1	0	0	BTBD9	BTB (POZ) domain containing 9
hsa-miR-615-3p	0	0	1	1	0	0	NR5A1	nuclear receptor subfamily 5, group A, member 1
hsa-miR-615-3p	0	0	1	1	0	0	NHSL2	NHS-like 2
hsa-miR-615-3p	0	0	1	1	0	0	PEF1	penta-EF-hand domain containing 1
hsa-miR-615-3p	0	0	1	1	1	1	FABP3	fatty acid binding protein 3, muscle and heart (mammary-derived growth inhibitor)
hsa-miR-615-3p	0	0	1	1	1	1	TTLL11	tubulin tyrosine ligase-like family, member 11
hsa-miR-615-3p	1	0	1	1	1	1	DAB2IP	DAB2 interacting protein
hsa-miR-615-3p	0	0	0	1	0	0	RAB42	RAB42, member RAS oncogene family
hsa-miR-615-3p	1	0	1	1	1	1	PRKG1	protein kinase, cGMP-dependent, type I
hsa-miR-615-3p	0	0	1	1	0	0	COL27A1	collagen, type XXVII, alpha 1
hsa-miR-615-3p	0	0	1	1	0	0	GPN2	GPN-loop GTPase 2
hsa-miR-615-3p	0	0	1	1	1	1	SYT15	synaptotagmin XV
hsa-miR-615-3p	0	0	1	1	0	0	GDF5	growth differentiation factor 5
hsa-miR-615-3p	0	0	1	1	0	0	GDPD2	glycerophosphodiester phosphodiesterase domain containing 2
hsa-miR-615-3p	0	0	0	1	1	1	RAB41	RAB41, member RAS oncogene family
hsa-miR-615-3p	0	0	1	1	1	1	TAPBP	TAP binding protein (tapasin)
hsa-miR-615-3p	0	0	0	1	0	0	C1QA	complement component 1, q subcomponent, A chain
hsa-miR-615-3p	0	0	1	1	1	1	MAP1LC3A	microtubule-associated protein 1 light chain 3 alpha
hsa-miR-615-3p	1	0	0	1	0	0	PSMB8	proteasome (prosome, macropain) subunit, beta type, 8 (large multifunctional peptidase 7)
hsa-miR-615-3p	1	0	1	1	1	1	NUP35	nucleoporin 35kDa
hsa-miR-615-3p	0	0	0	1	0	0	ASIP	agouti signaling protein
hsa-miR-615-3p	0	0	1	1	1	1	TBC1D2	TBC1 domain family, member 2
hsa-miR-615-3p	0	0	0	1	0	0	PLA2G2E	phospholipase A2, group IIE
hsa-miR-615-3p	0	0	0	1	0	0	C20orf144	chromosome 20 open reading frame 144
hsa-miR-615-3p	0	0	1	1	1	1	TAGLN	transgelin
hsa-miR-615-3p	0	0	1	1	0	0	STK19	serine/threonine kinase 19
hsa-miR-615-3p	1	0	1	1	1	1	KDM5C	lysine (K)-specific demethylase 5C
hsa-miR-615-3p	0	0	0	1	0	0	GRTP1	growth hormone regulated TBC protein 1
hsa-miR-615-3p	0	0	0	1	0	0	LOC100130657	uncharacterized LOC100130657
hsa-miR-615-3p	0	0	0	1	1	1	SYK	spleen tyrosine kinase
hsa-miR-615-3p	1	0	0	1	0	0	PLEKHM2	pleckstrin homology domain containing, family M (with RUN domain) member 2
hsa-miR-615-3p	0	0	1	1	0	0	LTB	lymphotoxin beta (TNF superfamily, member 3)
hsa-miR-615-3p	1	0	1	1	1	1	TNF	tumor necrosis factor
hsa-miR-615-3p	0	0	1	1	0	0	PRAMEF9	PRAME family member 9
hsa-miR-615-3p	1	0	1	1	0	0	MCCD1	mitochondrial coiled-coil domain 1
hsa-miR-615-3p	0	0	1	1	1	1	IER3	immediate early response 3
hsa-miR-615-3p	0	0	1	1	0	0	TM9SF2	transmembrane 9 superfamily member 2
hsa-miR-615-3p	0	0	1	1	0	0	PQBP1	polyglutamine binding protein 1
hsa-miR-615-3p	0	0	1	1	0	0	MAD2L2	MAD2 mitotic arrest deficient-like 2 (yeast)
hsa-miR-615-3p	0	0	1	1	0	0	NUDT8	nudix (nucleoside diphosphate linked moiety X)-type motif 8
hsa-miR-615-3p	0	0	0	1	0	0	TRIM31	tripartite motif containing 31
hsa-miR-615-3p	0	0	0	1	0	0	FBXO6	F-box protein 6
hsa-miR-615-3p	0	0	0	1	1	1	FBXO44	F-box protein 44
hsa-miR-615-3p	0	0	1	1	0	0	NR1H2	nuclear receptor subfamily 1, group H, member 2
hsa-miR-615-3p	0	0	0	1	0	0	C1orf127	chromosome 1 open reading frame 127
hsa-miR-615-3p	1	0	1	1	1	1	FOXA2	forkhead box A2
hsa-miR-615-3p	0	0	1	1	1	1	RBM10	RNA binding motif protein 10
hsa-miR-615-3p	0	0	0	1	1	1	VIPR2	vasoactive intestinal peptide receptor 2
hsa-miR-615-3p	0	0	1	1	0	0	C11orf83	chromosome 11 open reading frame 83
hsa-miR-615-3p	1	0	1	1	1	1	TLN1	talin 1
hsa-miR-615-3p	0	0	1	1	1	1	ACSF3	acyl-CoA synthetase family member 3
hsa-miR-615-3p	1	0	1	1	1	1	ARHGEF39	Rho guanine nucleotide exchange factor (GEF) 39
hsa-miR-615-3p	0	0	1	1	0	0	HES5	hairy and enhancer of split 5 (Drosophila)
hsa-miR-615-3p	0	0	0	1	0	0	TP53I13	tumor protein p53 inducible protein 13
hsa-miR-615-3p	0	0	0	1	0	0	TMEM88B	transmembrane protein 88B
hsa-miR-615-3p	1	0	1	1	1	1	SARM1	sterile alpha and TIR motif containing 1
hsa-miR-615-3p	0	0	1	1	1	1	NFATC3	nuclear factor of activated T-cells, cytoplasmic, calcineurin-dependent 3
hsa-miR-615-3p	0	0	1	1	1	1	B3GALT6	UDP-Gal:betaGal beta 1,3-galactosyltransferase polypeptide 6
hsa-miR-615-3p	0	0	1	1	0	0	FAM65A	family with sequence similarity 65, member A
hsa-miR-615-3p	1	0	1	1	0	0	E2F4	E2F transcription factor 4, p107/p130-binding
hsa-miR-615-3p	0	0	1	1	1	1	MTRF1	mitochondrial translational release factor 1
hsa-miR-615-3p	1	0	1	1	1	1	TRIM36	tripartite motif containing 36
hsa-miR-615-3p	0	0	1	1	1	1	GPR56	G protein-coupled receptor 56
hsa-miR-615-3p	0	0	0	1	0	0	SKOR1	SKI family transcriptional corepressor 1
hsa-miR-615-3p	0	0	1	1	0	0	NABP2	nucleic acid binding protein 2
hsa-miR-615-3p	0	0	0	1	0	0	EMILIN1	elastin microfibril interfacer 1
hsa-miR-615-3p	0	0	1	1	1	1	ZNF768	zinc finger protein 768
hsa-miR-615-3p	0	0	1	1	1	1	VPS16	vacuolar protein sorting 16 homolog (S. cerevisiae)
hsa-miR-615-3p	1	0	1	1	0	0	ELN	elastin
hsa-miR-615-3p	0	0	1	1	1	1	CSF2RA	colony stimulating factor 2 receptor, alpha, low-affinity (granulocyte-macrophage)
hsa-miR-615-3p	0	0	1	1	1	1	MYBBP1A	MYB binding protein (P160) 1a
hsa-miR-615-3p	0	0	0	1	0	0	PLCXD1	phosphatidylinositol-specific phospholipase C, X domain containing 1
hsa-miR-615-3p	0	0	1	1	0	0	BAIAP2L2	BAI1-associated protein 2-like 2
hsa-miR-615-3p	0	0	1	1	0	0	SIX6	SIX homeobox 6
hsa-miR-615-3p	0	0	1	1	1	1	SPATA6L	spermatogenesis associated 6-like
hsa-miR-615-3p	0	0	0	1	0	0	TLR6	toll-like receptor 6
hsa-miR-615-3p	1	0	1	1	1	1	CCDC149	coiled-coil domain containing 149
hsa-miR-615-3p	1	0	1	1	1	1	TRA2B	transformer 2 beta homolog (Drosophila)
hsa-miR-615-3p	0	0	0	1	0	0	ZNF205	zinc finger protein 205
hsa-miR-615-3p	0	0	1	1	1	1	DOCK8	dedicator of cytokinesis 8
hsa-miR-615-3p	0	0	0	1	0	0	DNASE1L2	deoxyribonuclease I-like 2
hsa-miR-615-3p	0	0	1	1	1	1	SH3TC1	SH3 domain and tetratricopeptide repeats 1
hsa-miR-615-3p	0	0	1	1	0	0	TCP10	t-complex 10 homolog (mouse)
hsa-miR-615-3p	0	0	1	1	0	0	TPSD1	tryptase delta 1
hsa-miR-615-3p	0	0	1	1	0	0	ARHGDIG	Rho GDP dissociation inhibitor (GDI) gamma
hsa-miR-615-3p	0	0	1	1	1	1	MST1	macrophage stimulating 1 (hepatocyte growth factor-like)
hsa-miR-615-3p	0	0	0	1	0	0	TMEM42	transmembrane protein 42
hsa-miR-615-3p	1	0	1	1	1	1	FLNC	filamin C, gamma
hsa-miR-615-3p	0	0	0	1	0	0	CIITA	class II, major histocompatibility complex, transactivator
hsa-miR-615-3p	1	0	1	1	1	1	FOXI2	forkhead box I2
hsa-miR-615-3p	0	0	1	1	1	1	LRRC4B	leucine rich repeat containing 4B
hsa-miR-615-3p	0	0	0	1	0	0	ASPDH	aspartate dehydrogenase domain containing
hsa-miR-615-3p	0	0	0	1	0	0	PTCHD2	patched domain containing 2
hsa-miR-615-3p	0	0	0	1	0	0	NKX1-1	NK1 homeobox 1
hsa-miR-615-3p	0	0	0	1	0	0	PPP2R3B	protein phosphatase 2, regulatory subunit B'', beta
hsa-miR-615-3p	0	0	1	1	1	1	ZNF626	zinc finger protein 626
