# Supplementary material for: Profiling of Selected MicroRNAs in Proliferative Eutopic Endometrium of Women with Ovarian Endometriosis
Source: Biomed Res Int. 2015 Aug 20;2015:760698. doi: 10.1155/2015/760698 (PMC4558423; doi:10.1155/2015/760698)
Supplement: Supplementary file 1 — Table I: The names of miRNAs significantly differentially expressed between eutopic endometrium of patients with endometriosis vs eutopic endometrium of patients without endometriosis. Table II: The associations between miRNA and mRNA, which presents detailed results of the search of six major databases i.e targetscan, tarbase, miranda, mirbase, mirtarget2 and pictar. [file 760698.f1.zip › 760698.f1/Table II/hsa-miR-615-5p.tsv]

miR	targetscan	tarbase	miranda	mirbase	mirtarget2	pictar	GeneSymbol	GeneName
hsa-miR-615-5p	1	0	1	1	1	1	PLAU	plasminogen activator, urokinase
hsa-miR-615-5p	1	0	1	1	0	0	SRCAP	Snf2-related CREBBP activator protein
hsa-miR-615-5p	1	0	1	0	1	1	PTPRT	protein tyrosine phosphatase, receptor type, T
hsa-miR-615-5p	0	0	1	1	0	0	PLCH2	phospholipase C, eta 2
hsa-miR-615-5p	1	0	1	1	1	1	CDC42BPA	CDC42 binding protein kinase alpha (DMPK-like)
hsa-miR-615-5p	0	0	1	0	1	1	KLHL21	kelch-like 21 (Drosophila)
hsa-miR-615-5p	1	0	1	1	1	1	HIPK1	homeodomain interacting protein kinase 1
hsa-miR-615-5p	0	0	1	1	0	0	ARHGEF2	Rho/Rac guanine nucleotide exchange factor (GEF) 2
hsa-miR-615-5p	0	0	1	1	0	0	AKAP8L	A kinase (PRKA) anchor protein 8-like
hsa-miR-615-5p	1	0	1	0	0	0	DTX4	deltex homolog 4 (Drosophila)
hsa-miR-615-5p	1	0	1	1	1	1	CIT	citron (rho-interacting, serine/threonine kinase 21)
hsa-miR-615-5p	1	0	1	1	1	1	C11orf9	chromosome 11 open reading frame 9
hsa-miR-615-5p	0	0	1	1	0	0	RTEL1	regulator of telomere elongation helicase 1
hsa-miR-615-5p	1	0	1	1	1	1	PHF8	PHD finger protein 8
hsa-miR-615-5p	1	0	1	1	0	0	ATAD2B	ATPase family, AAA domain containing 2B
hsa-miR-615-5p	1	0	1	0	0	0	NYNRIN	NYN domain and retroviral integrase containing
hsa-miR-615-5p	1	0	1	1	0	0	EBF4	early B-cell factor 4
hsa-miR-615-5p	1	0	1	0	0	0	PITPNM2	phosphatidylinositol transfer protein, membrane-associated 2
hsa-miR-615-5p	0	0	1	1	1	1	NLGN3	neuroligin 3
hsa-miR-615-5p	0	0	1	0	1	1	ARHGAP23	Rho GTPase activating protein 23
hsa-miR-615-5p	0	0	1	0	0	0	COL20A1	collagen, type XX, alpha 1
hsa-miR-615-5p	1	0	1	1	0	0	NCKAP5L	NCK-associated protein 5-like
hsa-miR-615-5p	0	0	1	1	1	1	PRX	periaxin
hsa-miR-615-5p	0	0	1	1	0	0	CCDC40	coiled-coil domain containing 40
hsa-miR-615-5p	1	0	1	1	0	0	SEMA4C	sema domain, immunoglobulin domain (Ig), transmembrane domain (TM) and short cytoplasmic domain, (semaphorin) 4C
hsa-miR-615-5p	0	0	1	1	0	0	NTNG2	netrin G2
hsa-miR-615-5p	0	0	1	1	0	0	COL27A1	collagen, type XXVII, alpha 1
hsa-miR-615-5p	1	0	1	1	1	1	BCL2L11	BCL2-like 11 (apoptosis facilitator)
hsa-miR-615-5p	1	0	1	1	1	1	SH3TC2	SH3 domain and tetratricopeptide repeats 2
hsa-miR-615-5p	1	0	1	0	1	1	RNF43	ring finger protein 43
hsa-miR-615-5p	1	0	1	0	0	0	ZBTB34	zinc finger and BTB domain containing 34
hsa-miR-615-5p	0	0	1	1	0	0	KREMEN2	kringle containing transmembrane protein 2
hsa-miR-615-5p	0	0	1	1	0	0	UMODL1	uromodulin-like 1
hsa-miR-615-5p	0	0	1	1	1	1	ACPP	acid phosphatase, prostate
hsa-miR-615-5p	0	0	1	1	0	0	DDB2	damage-specific DNA binding protein 2, 48kDa
hsa-miR-615-5p	0	0	1	1	0	0	SSPO	SCO-spondin homolog (Bos taurus)
hsa-miR-615-5p	0	0	1	1	0	0	COLEC11	collectin sub-family member 11
hsa-miR-615-5p	1	1	1	1	1	1	BACE1	beta-site APP-cleaving enzyme 1
hsa-miR-615-5p	1	0	1	1	1	1	NRXN2	neurexin 2
hsa-miR-615-5p	1	0	1	1	1	1	ADARB1	adenosine deaminase, RNA-specific, B1
hsa-miR-615-5p	0	0	1	1	0	0	DBP	D site of albumin promoter (albumin D-box) binding protein
hsa-miR-615-5p	1	0	1	1	1	1	VLDLR	very low density lipoprotein receptor
hsa-miR-615-5p	1	0	1	1	1	1	SHC1	SHC (Src homology 2 domain containing) transforming protein 1
hsa-miR-615-5p	1	0	1	1	0	0	NDST2	N-deacetylase/N-sulfotransferase (heparan glucosaminyl) 2
hsa-miR-615-5p	1	0	1	0	1	1	PCDHA13	protocadherin alpha 13
hsa-miR-615-5p	1	0	1	1	1	1	PCDHA4	protocadherin alpha 4
hsa-miR-615-5p	0	0	1	1	0	0	KCNC3	potassium voltage-gated channel, Shaw-related subfamily, member 3
hsa-miR-615-5p	1	0	1	1	0	0	ELN	elastin
hsa-miR-615-5p	0	0	1	0	0	0	PIDD	p53-induced death domain protein
hsa-miR-615-5p	0	0	1	1	0	0	SMARCC2	SWI/SNF related, matrix associated, actin dependent regulator of chromatin, subfamily c, member 2
hsa-miR-615-5p	0	0	1	1	1	1	MAZ	MYC-associated zinc finger protein (purine-binding transcription factor)
hsa-miR-615-5p	1	0	1	1	0	0	CACNB1	calcium channel, voltage-dependent, beta 1 subunit
hsa-miR-615-5p	0	0	1	1	1	1	DVL1	dishevelled, dsh homolog 1 (Drosophila)
hsa-miR-615-5p	1	0	1	1	1	1	DMPK	dystrophia myotonica-protein kinase
hsa-miR-615-5p	1	0	1	1	1	1	TBX2	T-box 2
hsa-miR-615-5p	0	0	1	1	1	1	GTF2IRD1	GTF2I repeat domain containing 1
hsa-miR-615-5p	1	0	1	1	1	1	ANK1	ankyrin 1, erythrocytic
hsa-miR-615-5p	0	0	1	1	1	1	RYR1	ryanodine receptor 1 (skeletal)
hsa-miR-615-5p	1	0	1	1	1	1	MINK1	misshapen-like kinase 1
hsa-miR-615-5p	1	0	1	1	0	0	RGS6	regulator of G-protein signaling 6
hsa-miR-615-5p	0	0	1	1	0	0	IGFBP2	insulin-like growth factor binding protein 2, 36kDa
hsa-miR-615-5p	0	0	1	1	0	0	HLA-DMB	major histocompatibility complex, class II, DM beta
hsa-miR-615-5p	0	0	1	1	0	0	BMP1	bone morphogenetic protein 1
hsa-miR-615-5p	0	0	1	1	0	0	SLC22A8	solute carrier family 22 (organic anion transporter), member 8
hsa-miR-615-5p	0	0	1	1	0	0	TRIM27	tripartite motif containing 27
hsa-miR-615-5p	0	0	1	1	1	1	SGSH	N-sulfoglucosamine sulfohydrolase
hsa-miR-615-5p	1	0	1	1	0	0	TNPO2	transportin 2
hsa-miR-615-5p	0	0	1	0	0	0	MIAT	myocardial infarction associated transcript (non-protein coding)
hsa-miR-615-5p	0	0	1	1	1	1	BRCA1	breast cancer 1, early onset
hsa-miR-615-5p	1	0	1	1	1	1	MYT1L	myelin transcription factor 1-like
hsa-miR-615-5p	1	0	1	1	1	1	MRAS	muscle RAS oncogene homolog
hsa-miR-615-5p	0	0	1	1	1	1	MICAL2	microtubule associated monoxygenase, calponin and LIM domain containing 2
hsa-miR-615-5p	0	0	1	1	1	1	CYP4F3	cytochrome P450, family 4, subfamily F, polypeptide 3
hsa-miR-615-5p	1	0	1	1	1	1	RBBP6	retinoblastoma binding protein 6
hsa-miR-615-5p	0	0	1	1	1	1	ZNF33A	zinc finger protein 33A
hsa-miR-615-5p	1	0	1	1	1	1	ERLIN1	ER lipid raft associated 1
hsa-miR-615-5p	1	0	1	1	0	0	PAK1	p21 protein (Cdc42/Rac)-activated kinase 1
hsa-miR-615-5p	0	0	1	1	1	1	EPN1	epsin 1
hsa-miR-615-5p	1	0	1	1	0	0	PRRC2A	proline-rich coiled-coil 2A
hsa-miR-615-5p	1	0	1	1	1	1	TP63	tumor protein p63
hsa-miR-615-5p	0	0	1	1	1	1	CRYL1	crystallin, lambda 1
hsa-miR-615-5p	0	0	1	1	1	1	ERAL1	Era G-protein-like 1 (E. coli)
hsa-miR-615-5p	0	0	1	1	1	1	CAPN10	calpain 10
hsa-miR-615-5p	0	0	1	1	1	1	PLEKHB1	pleckstrin homology domain containing, family B (evectins) member 1
hsa-miR-615-5p	1	0	1	0	0	0	PPME1	protein phosphatase methylesterase 1
hsa-miR-615-5p	0	0	1	1	1	1	TMEM176B	transmembrane protein 176B
hsa-miR-615-5p	1	0	1	1	1	1	NF2	neurofibromin 2 (merlin)
hsa-miR-615-5p	0	0	1	1	1	1	ACIN1	apoptotic chromatin condensation inducer 1
hsa-miR-615-5p	1	0	1	1	1	1	TAOK3	TAO kinase 3
hsa-miR-615-5p	1	0	1	0	1	1	BECN1	beclin 1, autophagy related
hsa-miR-615-5p	1	0	1	1	1	1	ZNF202	zinc finger protein 202
hsa-miR-615-5p	1	0	1	1	1	1	STXBP6	syntaxin binding protein 6 (amisyn)
hsa-miR-615-5p	0	0	1	1	1	1	SCLY	selenocysteine lyase
hsa-miR-615-5p	0	0	1	0	1	1	CLDN2	claudin 2
hsa-miR-615-5p	1	0	1	1	1	1	SEPT9	septin 9
hsa-miR-615-5p	0	0	1	0	0	0	BPESC1	blepharophimosis, epicanthus inversus and ptosis, candidate 1 (non-protein coding)
hsa-miR-615-5p	0	0	1	1	1	1	SLCO2B1	solute carrier organic anion transporter family, member 2B1
hsa-miR-615-5p	0	0	1	1	1	1	CHRD	chordin
hsa-miR-615-5p	1	0	1	1	1	1	SYDE1	synapse defective 1, Rho GTPase, homolog 1 (C. elegans)
hsa-miR-615-5p	1	0	1	1	1	1	SNTB2	syntrophin, beta 2 (dystrophin-associated protein A1, 59kDa, basic component 2)
hsa-miR-615-5p	0	0	1	0	0	0	TIGD7	tigger transposable element derived 7
hsa-miR-615-5p	1	0	1	1	1	1	ERGIC1	endoplasmic reticulum-golgi intermediate compartment (ERGIC) 1
hsa-miR-615-5p	0	0	1	1	0	0	TCP11	t-complex 11 homolog (mouse)
hsa-miR-615-5p	0	0	1	1	0	0	KCNK6	potassium channel, subfamily K, member 6
hsa-miR-615-5p	0	0	1	0	0	0	LOC645355	uncharacterized LOC645355
hsa-miR-615-5p	1	0	1	1	1	1	TAGLN3	transgelin 3
hsa-miR-615-5p	0	0	1	1	0	0	STX4	syntaxin 4
hsa-miR-615-5p	0	0	1	1	0	0	TTTY7	testis-specific transcript, Y-linked 7 (non-protein coding)
hsa-miR-615-5p	0	0	1	1	1	1	SEMA6C	sema domain, transmembrane domain (TM), and cytoplasmic domain, (semaphorin) 6C
hsa-miR-615-5p	0	0	1	0	0	0	MT1JP	metallothionein 1J, pseudogene
hsa-miR-615-5p	1	0	1	1	1	1	KCNIP2	Kv channel interacting protein 2
hsa-miR-615-5p	1	0	1	0	1	1	WIPF2	WAS/WASL interacting protein family, member 2
hsa-miR-615-5p	1	0	1	1	1	1	CALCOCO1	calcium binding and coiled-coil domain 1
hsa-miR-615-5p	0	0	1	1	0	0	SNRPN	small nuclear ribonucleoprotein polypeptide N
hsa-miR-615-5p	0	0	1	1	1	1	SPSB1	splA/ryanodine receptor domain and SOCS box containing 1
hsa-miR-615-5p	1	0	1	1	1	1	NTRK2	neurotrophic tyrosine kinase, receptor, type 2
hsa-miR-615-5p	0	0	1	0	0	0	MYO15B	myosin XVB pseudogene
hsa-miR-615-5p	1	0	1	1	1	1	STX16	syntaxin 16
hsa-miR-615-5p	1	0	1	1	0	0	SAMD4A	sterile alpha motif domain containing 4A
hsa-miR-615-5p	1	0	1	1	0	0	XRRA1	X-ray radiation resistance associated 1
hsa-miR-615-5p	1	0	1	1	1	1	SCOC	short coiled-coil protein
hsa-miR-615-5p	1	0	1	1	1	1	BRSK1	BR serine/threonine kinase 1
hsa-miR-615-5p	1	0	1	1	1	1	TRIP10	thyroid hormone receptor interactor 10
hsa-miR-615-5p	1	0	1	1	0	0	ST3GAL4	ST3 beta-galactoside alpha-2,3-sialyltransferase 4
hsa-miR-615-5p	0	0	1	1	1	1	TTLL11	tubulin tyrosine ligase-like family, member 11
hsa-miR-615-5p	0	0	1	1	1	1	CDAN1	codanin 1
hsa-miR-615-5p	0	0	1	1	1	1	PTK7	PTK7 protein tyrosine kinase 7
hsa-miR-615-5p	0	0	1	1	1	1	TPO	thyroid peroxidase
hsa-miR-615-5p	1	0	1	1	0	0	BRSK2	BR serine/threonine kinase 2
hsa-miR-615-5p	0	0	1	0	0	0	SNHG4	small nucleolar RNA host gene 4 (non-protein coding)
hsa-miR-615-5p	0	0	1	1	1	1	GNAS	GNAS complex locus
hsa-miR-615-5p	1	0	1	1	1	1	UBAP2L	ubiquitin associated protein 2-like
hsa-miR-615-5p	0	0	1	1	0	0	SERGEF	secretion regulating guanine nucleotide exchange factor
hsa-miR-615-5p	0	0	1	1	1	1	DMRTC1	DMRT-like family C1
hsa-miR-615-5p	0	0	1	1	0	0	DMRTC1B	DMRT-like family C1B
hsa-miR-615-5p	0	0	1	0	0	0	CD177	CD177 molecule
hsa-miR-615-5p	1	0	1	1	1	1	NRXN3	neurexin 3
hsa-miR-615-5p	0	0	1	0	0	0	TOMM6	translocase of outer mitochondrial membrane 6 homolog (yeast)
hsa-miR-615-5p	0	0	1	0	1	1	AHI1	Abelson helper integration site 1
hsa-miR-615-5p	1	0	1	1	1	1	XIRP1	xin actin-binding repeat containing 1
hsa-miR-615-5p	0	0	1	1	0	0	GPRC5C	G protein-coupled receptor, family C, group 5, member C
hsa-miR-615-5p	1	0	1	1	1	1	AKAP2	A kinase (PRKA) anchor protein 2
hsa-miR-615-5p	0	0	1	0	0	0	TUG1	taurine upregulated 1 (non-protein coding)
hsa-miR-615-5p	0	0	1	0	0	0	RNF31	ring finger protein 31
hsa-miR-615-5p	1	0	1	1	1	1	CADM3	cell adhesion molecule 3
hsa-miR-615-5p	0	0	1	1	1	1	CXXC5	CXXC finger protein 5
hsa-miR-615-5p	0	0	1	0	0	0	LINC00284	long intergenic non-protein coding RNA 284
hsa-miR-615-5p	1	0	1	1	1	1	LRRN3	leucine rich repeat neuronal 3
hsa-miR-615-5p	1	0	1	1	1	1	ACER3	alkaline ceramidase 3
hsa-miR-615-5p	0	0	1	0	0	0	C17orf72	chromosome 17 open reading frame 72
hsa-miR-615-5p	1	0	1	1	1	1	GALNT14	UDP-N-acetyl-alpha-D-galactosamine:polypeptide N-acetylgalactosaminyltransferase 14 (GalNAc-T14)
hsa-miR-615-5p	1	0	1	1	0	0	DFNB31	deafness, autosomal recessive 31
hsa-miR-615-5p	0	0	1	1	1	1	ARMC5	armadillo repeat containing 5
hsa-miR-615-5p	1	0	1	1	0	0	FASTK	Fas-activated serine/threonine kinase
hsa-miR-615-5p	0	0	1	1	1	1	SPATA5L1	spermatogenesis associated 5-like 1
hsa-miR-615-5p	0	0	1	0	0	0	LOC284561	uncharacterized LOC284561
hsa-miR-615-5p	0	0	1	1	0	0	RAD54L2	RAD54-like 2 (S. cerevisiae)
hsa-miR-615-5p	1	0	1	1	1	1	BAZ2A	bromodomain adjacent to zinc finger domain, 2A
hsa-miR-615-5p	1	0	1	1	1	1	ARHGEF15	Rho guanine nucleotide exchange factor (GEF) 15
hsa-miR-615-5p	1	0	1	1	1	1	PAX8	paired box 8
hsa-miR-615-5p	1	0	1	1	0	0	ST6GALNAC6	ST6 (alpha-N-acetyl-neuraminyl-2,3-beta-galactosyl-1,3)-N-acetylgalactosaminide alpha-2,6-sialyltransferase 6
hsa-miR-615-5p	0	0	1	0	1	1	FLJ14186	uncharacterized LOC401149
hsa-miR-615-5p	1	0	1	1	1	1	ABI3BP	ABI family, member 3 (NESH) binding protein
hsa-miR-615-5p	0	0	1	0	1	1	HEMK1	HemK methyltransferase family member 1
hsa-miR-615-5p	0	0	1	1	0	0	ZNF276	zinc finger protein 276
hsa-miR-615-5p	1	0	1	1	0	0	PRMT8	protein arginine methyltransferase 8
hsa-miR-615-5p	1	0	1	1	1	1	FBXL12	F-box and leucine-rich repeat protein 12
hsa-miR-615-5p	1	0	1	1	1	1	RNF185	ring finger protein 185
hsa-miR-615-5p	1	0	1	1	1	1	KCTD15	potassium channel tetramerisation domain containing 15
hsa-miR-615-5p	0	0	1	0	0	0	KIAA0664L3	KIAA0664-like 3
hsa-miR-615-5p	0	0	1	0	0	0	LOC254559	uncharacterized LOC254559
hsa-miR-615-5p	0	0	1	1	1	1	TOX2	TOX high mobility group box family member 2
hsa-miR-615-5p	1	0	1	1	0	0	SPEG	SPEG complex locus
hsa-miR-615-5p	1	0	1	1	1	1	SFXN2	sideroflexin 2
hsa-miR-615-5p	1	0	1	1	1	1	MEIS2	Meis homeobox 2
hsa-miR-615-5p	0	0	1	1	0	0	BEAN1	brain expressed, associated with NEDD4, 1
hsa-miR-615-5p	1	0	1	1	1	1	LMNA	lamin A/C
hsa-miR-615-5p	1	0	1	1	0	0	SLC26A6	solute carrier family 26, member 6
hsa-miR-615-5p	0	0	1	1	1	1	SEPT5	septin 5
hsa-miR-615-5p	0	0	1	1	0	0	ATP13A1	ATPase type 13A1
hsa-miR-615-5p	1	0	1	1	1	1	SCAMP5	secretory carrier membrane protein 5
hsa-miR-615-5p	1	0	1	1	1	1	PHF15	PHD finger protein 15
hsa-miR-615-5p	0	0	1	1	1	1	BRD2	bromodomain containing 2
hsa-miR-615-5p	1	0	1	0	1	1	PCGF3	polycomb group ring finger 3
hsa-miR-615-5p	0	0	1	1	0	0	COMMD4	COMM domain containing 4
hsa-miR-615-5p	0	0	1	1	0	0	RGL3	ral guanine nucleotide dissociation stimulator-like 3
hsa-miR-615-5p	0	0	1	1	0	0	MEF2BNB-MEF2B	MEF2BNB-MEF2B readthrough
hsa-miR-615-5p	1	0	1	1	1	1	MAP3K11	mitogen-activated protein kinase kinase kinase 11
hsa-miR-615-5p	1	0	1	0	1	1	NCAM1	neural cell adhesion molecule 1
hsa-miR-615-5p	0	0	1	1	0	0	PTOV1	prostate tumor overexpressed 1
hsa-miR-615-5p	1	0	1	1	1	1	FAM73B	family with sequence similarity 73, member B
hsa-miR-615-5p	0	0	1	1	0	0	SYTL1	synaptotagmin-like 1
hsa-miR-615-5p	1	0	1	1	1	1	BLCAP	bladder cancer associated protein
hsa-miR-615-5p	1	0	1	0	1	1	GRAMD1A	GRAM domain containing 1A
hsa-miR-615-5p	0	0	1	1	0	0	NISCH	nischarin
hsa-miR-615-5p	1	0	1	1	1	1	NOTCH2NL	notch 2 N-terminal like
hsa-miR-615-5p	0	0	1	1	0	0	CPAMD8	C3 and PZP-like, alpha-2-macroglobulin domain containing 8
hsa-miR-615-5p	0	0	1	1	1	1	KDELR1	KDEL (Lys-Asp-Glu-Leu) endoplasmic reticulum protein retention receptor 1
hsa-miR-615-5p	0	0	1	1	0	0	LGR5	leucine-rich repeat containing G protein-coupled receptor 5
hsa-miR-615-5p	0	0	1	0	0	0	LOC643837	uncharacterized LOC643837
hsa-miR-615-5p	1	0	1	1	1	1	EGR2	early growth response 2
hsa-miR-615-5p	0	0	1	0	0	0	FLJ34208	uncharacterized LOC401106
hsa-miR-615-5p	0	0	1	0	0	0	LOC440910	uncharacterized LOC440910
hsa-miR-615-5p	0	0	1	1	1	1	CD34	CD34 molecule
hsa-miR-615-5p	1	0	1	0	1	1	TEF	thyrotrophic embryonic factor
hsa-miR-615-5p	1	0	1	0	0	0	SH3RF3	SH3 domain containing ring finger 3
hsa-miR-615-5p	0	0	1	0	0	0	CXXC1P1	CXXC finger protein 1 pseudogene 1
hsa-miR-615-5p	0	0	1	1	1	1	C19orf47	chromosome 19 open reading frame 47
hsa-miR-615-5p	1	0	1	1	1	1	KCND1	potassium voltage-gated channel, Shal-related subfamily, member 1
hsa-miR-615-5p	1	0	1	1	1	1	RNF121	ring finger protein 121
hsa-miR-615-5p	1	0	1	1	1	1	KLC2	kinesin light chain 2
hsa-miR-615-5p	0	0	1	1	0	0	PPOX	protoporphyrinogen oxidase
hsa-miR-615-5p	0	0	1	1	0	0	HPN	hepsin
hsa-miR-615-5p	1	0	1	0	1	1	SLC39A11	solute carrier family 39 (metal ion transporter), member 11
hsa-miR-615-5p	0	0	1	1	1	1	FUT11	fucosyltransferase 11 (alpha (1,3) fucosyltransferase)
hsa-miR-615-5p	0	0	1	0	0	0	LOC100129620	uncharacterized LOC100129620
hsa-miR-615-5p	1	0	1	1	1	1	SPATS2	spermatogenesis associated, serine-rich 2
hsa-miR-615-5p	0	0	1	0	0	0	LOC284577	uncharacterized LOC284577
hsa-miR-615-5p	0	0	1	1	0	0	MAP7D1	MAP7 domain containing 1
hsa-miR-615-5p	0	0	1	1	0	0	C11orf74	chromosome 11 open reading frame 74
hsa-miR-615-5p	0	0	1	1	1	1	BAG1	BCL2-associated athanogene
hsa-miR-615-5p	0	0	1	0	0	0	ZNF815P	zinc finger protein 815, pseudogene
hsa-miR-615-5p	1	0	1	0	1	1	KIAA1737	KIAA1737
hsa-miR-615-5p	1	0	1	1	1	1	SNRNP70	small nuclear ribonucleoprotein 70kDa (U1)
hsa-miR-615-5p	0	0	1	1	1	1	IL17RE	interleukin 17 receptor E
hsa-miR-615-5p	0	0	1	1	1	1	FGD2	FYVE, RhoGEF and PH domain containing 2
hsa-miR-615-5p	1	0	1	1	1	1	RAB11FIP4	RAB11 family interacting protein 4 (class II)
hsa-miR-615-5p	0	0	1	0	0	0	GOLGA6L5	golgin A6 family-like 5 (pseudogene)
hsa-miR-615-5p	0	0	1	0	0	0	LINC00293	long intergenic non-protein coding RNA 293
hsa-miR-615-5p	1	0	1	1	0	0	CFL1	cofilin 1 (non-muscle)
hsa-miR-615-5p	0	0	1	1	0	0	KLHDC3	kelch domain containing 3
hsa-miR-615-5p	0	0	1	1	0	0	HNRNPL	heterogeneous nuclear ribonucleoprotein L
hsa-miR-615-5p	0	0	1	1	0	0	TAPBPL	TAP binding protein-like
hsa-miR-615-5p	0	0	1	0	0	0	CECR7	cat eye syndrome chromosome region, candidate 7 (non-protein coding)
hsa-miR-615-5p	0	0	1	1	1	1	C10orf32	chromosome 10 open reading frame 32
hsa-miR-615-5p	0	0	1	0	0	0	LOC100130954	uncharacterized LOC100130954
hsa-miR-615-5p	1	0	1	1	0	0	FBXL19	F-box and leucine-rich repeat protein 19
hsa-miR-615-5p	1	0	1	1	1	1	DDX42	DEAD (Asp-Glu-Ala-Asp) box polypeptide 42
hsa-miR-615-5p	0	0	1	1	0	0	FBXO18	F-box protein, helicase, 18
hsa-miR-615-5p	1	0	1	1	1	1	AGAP2	ArfGAP with GTPase domain, ankyrin repeat and PH domain 2
hsa-miR-615-5p	1	0	1	1	0	0	WIZ	widely interspaced zinc finger motifs
hsa-miR-615-5p	1	0	1	1	0	0	CACNB3	calcium channel, voltage-dependent, beta 3 subunit
hsa-miR-615-5p	0	0	1	1	0	0	YSK4	YSK4 Sps1/Ste20-related kinase homolog (S. cerevisiae)
hsa-miR-615-5p	0	0	1	1	0	0	ZNF335	zinc finger protein 335
hsa-miR-615-5p	1	0	1	1	1	1	ZBTB4	zinc finger and BTB domain containing 4
hsa-miR-615-5p	0	0	1	1	1	1	FRMD5	FERM domain containing 5
hsa-miR-615-5p	0	0	1	1	1	1	ARHGEF26	Rho guanine nucleotide exchange factor (GEF) 26
hsa-miR-615-5p	0	0	1	0	1	1	PATE4	prostate and testis expressed 4
hsa-miR-615-5p	0	0	1	1	1	1	FAM5B	family with sequence similarity 5, member B
hsa-miR-615-5p	0	0	1	0	0	0	TMPRSS11BNL	TMPRSS11B N terminal-like
hsa-miR-615-5p	0	0	1	0	0	0	LOC650368	asparagine-linked glycosylation 1-like pseudogene
hsa-miR-615-5p	1	0	1	1	1	1	ADAMTS8	ADAM metallopeptidase with thrombospondin type 1 motif, 8
hsa-miR-615-5p	0	0	1	1	0	0	TTLL12	tubulin tyrosine ligase-like family, member 12
hsa-miR-615-5p	1	0	1	1	1	1	FAM219A	family with sequence similarity 219, member A
hsa-miR-615-5p	0	0	1	1	0	0	PTK6	PTK6 protein tyrosine kinase 6
hsa-miR-615-5p	1	0	1	1	1	1	GJC1	gap junction protein, gamma 1, 45kDa
hsa-miR-615-5p	0	0	1	1	0	0	C20orf27	chromosome 20 open reading frame 27
hsa-miR-615-5p	1	0	1	1	1	1	NECAB3	N-terminal EF-hand calcium binding protein 3
hsa-miR-615-5p	1	0	1	0	1	1	TTYH3	tweety homolog 3 (Drosophila)
hsa-miR-615-5p	0	0	1	1	1	1	C2orf91	chromosome 2 open reading frame 91
hsa-miR-615-5p	1	0	1	1	1	1	ATXN7	ataxin 7
hsa-miR-615-5p	1	0	1	1	1	1	RGMA	RGM domain family, member A
hsa-miR-615-5p	0	0	1	1	0	0	LOC100128239	uncharacterized LOC100128239
hsa-miR-615-5p	1	0	1	0	0	0	ANKRD52	ankyrin repeat domain 52
hsa-miR-615-5p	1	0	1	0	0	0	MSL1	male-specific lethal 1 homolog (Drosophila)
hsa-miR-615-5p	0	0	1	0	0	0	FAM95B1	family with sequence similarity 95, member B1
hsa-miR-615-5p	0	0	1	1	0	0	RPRD2	regulation of nuclear pre-mRNA domain containing 2
hsa-miR-615-5p	1	0	1	1	0	0	UBN2	ubinuclein 2
hsa-miR-615-5p	0	0	1	1	1	1	EPPIN	epididymal peptidase inhibitor
hsa-miR-615-5p	1	0	1	1	0	0	ATXN7L3	ataxin 7-like 3
hsa-miR-615-5p	1	0	1	1	1	1	PIK3R1	phosphoinositide-3-kinase, regulatory subunit 1 (alpha)
hsa-miR-615-5p	0	0	1	0	1	1	LOC388942	uncharacterized LOC388942
hsa-miR-615-5p	0	0	1	1	1	1	TGM2	transglutaminase 2 (C polypeptide, protein-glutamine-gamma-glutamyltransferase)
hsa-miR-615-5p	0	0	1	1	0	0	HSPG2	heparan sulfate proteoglycan 2
hsa-miR-615-5p	1	0	1	1	0	0	TNK2	tyrosine kinase, non-receptor, 2
hsa-miR-615-5p	0	0	1	1	0	0	CCDC88B	coiled-coil domain containing 88B
hsa-miR-615-5p	1	0	1	1	1	1	DLG2	discs, large homolog 2 (Drosophila)
hsa-miR-615-5p	0	0	1	1	0	0	TMEM151B	transmembrane protein 151B
hsa-miR-615-5p	1	0	1	1	1	1	MKRN1	makorin ring finger protein 1
hsa-miR-615-5p	1	0	1	0	1	1	N4BP3	NEDD4 binding protein 3
hsa-miR-615-5p	0	0	1	0	0	0	LOC619207	scavenger receptor protein family member
hsa-miR-615-5p	1	0	1	1	0	0	SLC30A3	solute carrier family 30 (zinc transporter), member 3
hsa-miR-615-5p	1	0	1	1	0	0	PTPN5	protein tyrosine phosphatase, non-receptor type 5 (striatum-enriched)
hsa-miR-615-5p	1	0	1	0	0	0	SLC16A3	solute carrier family 16, member 3 (monocarboxylic acid transporter 4)
hsa-miR-615-5p	0	0	1	1	1	1	CCDC78	coiled-coil domain containing 78
hsa-miR-615-5p	1	0	1	0	1	1	YAF2	YY1 associated factor 2
hsa-miR-615-5p	0	0	1	0	0	0	FAM71E2	family with sequence similarity 71, member E2
hsa-miR-615-5p	0	0	1	0	1	1	LOC401321	uncharacterized LOC401321
hsa-miR-615-5p	0	0	1	1	0	0	LOC100128682	uncharacterized LOC100128682
hsa-miR-615-5p	1	0	1	1	1	1	WDR37	WD repeat domain 37
hsa-miR-615-5p	0	0	1	1	1	1	RAB13	RAB13, member RAS oncogene family
hsa-miR-615-5p	0	0	1	0	0	0	EMBP1	embigin pseudogene 1
hsa-miR-615-5p	1	0	1	1	1	1	ADAMTS19	ADAM metallopeptidase with thrombospondin type 1 motif, 19
hsa-miR-615-5p	1	0	1	1	1	1	CD200	CD200 molecule
hsa-miR-615-5p	0	0	1	1	0	0	HEATR8	HEAT repeat containing 8
hsa-miR-615-5p	1	0	1	1	1	1	GPD1	glycerol-3-phosphate dehydrogenase 1 (soluble)
hsa-miR-615-5p	0	0	1	0	0	0	FAM27A	family with sequence similarity 27, member A
hsa-miR-615-5p	0	0	1	1	1	1	BRAT1	BRCA1-associated ATM activator 1
hsa-miR-615-5p	0	0	1	0	1	1	RUFY4	RUN and FYVE domain containing 4
hsa-miR-615-5p	0	0	1	1	0	0	ISOC2	isochorismatase domain containing 2
hsa-miR-615-5p	1	0	1	1	1	1	PPP2R5C	protein phosphatase 2, regulatory subunit B', gamma
hsa-miR-615-5p	0	0	1	1	1	1	PDE2A	phosphodiesterase 2A, cGMP-stimulated
hsa-miR-615-5p	0	0	1	1	1	1	NR4A1	nuclear receptor subfamily 4, group A, member 1
hsa-miR-615-5p	0	0	1	1	0	0	FIZ1	FLT3-interacting zinc finger 1
hsa-miR-615-5p	0	0	1	1	0	0	CNOT3	CCR4-NOT transcription complex, subunit 3
hsa-miR-615-5p	0	0	1	1	1	1	KAZALD1	Kazal-type serine peptidase inhibitor domain 1
hsa-miR-615-5p	1	0	1	1	1	1	RPS6KA4	ribosomal protein S6 kinase, 90kDa, polypeptide 4
hsa-miR-615-5p	0	0	1	0	1	1	PEX5	peroxisomal biogenesis factor 5
hsa-miR-615-5p	1	0	1	1	0	0	ZNF219	zinc finger protein 219
hsa-miR-615-5p	1	0	1	1	1	1	NCOA1	nuclear receptor coactivator 1
hsa-miR-615-5p	0	0	1	1	1	1	PRSS16	protease, serine, 16 (thymus)
hsa-miR-615-5p	0	0	1	1	0	0	TRIM69	tripartite motif containing 69
hsa-miR-615-5p	0	0	1	1	0	0	KAT8	K(lysine) acetyltransferase 8
hsa-miR-615-5p	1	0	1	1	0	0	MAN1B1	mannosidase, alpha, class 1B, member 1
hsa-miR-615-5p	0	0	1	0	0	0	POM121L9P	POM121 transmembrane nucleoporin-like 9, pseudogene
hsa-miR-615-5p	0	0	1	1	1	1	ARIH1	ariadne homolog, ubiquitin-conjugating enzyme E2 binding protein, 1 (Drosophila)
hsa-miR-615-5p	0	0	1	0	0	0	KIAA0913	KIAA0913
hsa-miR-615-5p	1	0	1	1	1	1	FAM107B	family with sequence similarity 107, member B
hsa-miR-615-5p	0	0	1	1	1	1	STAG3L1	stromal antigen 3-like 1
hsa-miR-615-5p	1	0	1	1	1	1	PKNOX2	PBX/knotted 1 homeobox 2
hsa-miR-615-5p	1	0	1	0	1	1	BRPF1	bromodomain and PHD finger containing, 1
hsa-miR-615-5p	1	0	1	0	1	1	FAM19A1	family with sequence similarity 19 (chemokine (C-C motif)-like), member A1
hsa-miR-615-5p	0	0	1	1	0	0	KRBA1	KRAB-A domain containing 1
hsa-miR-615-5p	0	0	1	1	1	1	ZFP41	zinc finger protein 41 homolog (mouse)
hsa-miR-615-5p	0	0	1	0	1	1	GAB3	GRB2-associated binding protein 3
hsa-miR-615-5p	0	0	1	1	1	1	SYTL4	synaptotagmin-like 4
hsa-miR-615-5p	0	0	1	0	0	0	FAM225A	family with sequence similarity 225, member A (non-protein coding)
hsa-miR-615-5p	1	0	1	1	1	1	SBF2	SET binding factor 2
hsa-miR-615-5p	1	0	1	0	1	1	MEF2C	myocyte enhancer factor 2C
hsa-miR-615-5p	1	0	1	1	1	1	MARCH7	membrane-associated ring finger (C3HC4) 7, E3 ubiquitin protein ligase
hsa-miR-615-5p	1	0	1	0	0	0	NPEPL1	aminopeptidase-like 1
hsa-miR-615-5p	1	0	1	1	0	0	LRRC16B	leucine rich repeat containing 16B
hsa-miR-615-5p	0	0	1	1	1	1	LMAN2L	lectin, mannose-binding 2-like
hsa-miR-615-5p	1	0	1	1	1	1	IKZF2	IKAROS family zinc finger 2 (Helios)
hsa-miR-615-5p	0	0	1	0	0	0	KGFLP1	fibroblast growth factor 7 pseudogene
hsa-miR-615-5p	0	0	1	1	0	0	CRB3	crumbs homolog 3 (Drosophila)
hsa-miR-615-5p	1	0	1	1	1	1	GGT7	gamma-glutamyltransferase 7
hsa-miR-615-5p	0	0	1	1	1	1	CYP4B1	cytochrome P450, family 4, subfamily B, polypeptide 1
hsa-miR-615-5p	1	0	1	1	1	1	LUZP2	leucine zipper protein 2
hsa-miR-615-5p	0	0	1	1	0	0	CMTM1	CKLF-like MARVEL transmembrane domain containing 1
hsa-miR-615-5p	0	0	1	1	0	0	ESPN	espin
hsa-miR-615-5p	0	0	1	1	0	0	DNAH1	dynein, axonemal, heavy chain 1
hsa-miR-615-5p	0	0	1	1	0	0	NIF3L1	NIF3 NGG1 interacting factor 3-like 1 (S. cerevisiae)
hsa-miR-615-5p	0	0	1	0	0	0	MEG3	maternally expressed 3 (non-protein coding)
hsa-miR-615-5p	1	0	1	1	1	1	GFRA2	GDNF family receptor alpha 2
hsa-miR-615-5p	0	0	1	1	0	0	PIGU	phosphatidylinositol glycan anchor biosynthesis, class U
hsa-miR-615-5p	0	0	1	0	0	0	FAM138C	family with sequence similarity 138, member C
hsa-miR-615-5p	1	0	1	1	1	1	TMCC2	transmembrane and coiled-coil domain family 2
hsa-miR-615-5p	0	0	1	1	1	1	GPR114	G protein-coupled receptor 114
hsa-miR-615-5p	0	0	1	1	1	1	TMPRSS4	transmembrane protease, serine 4
hsa-miR-615-5p	0	0	1	1	0	0	TMEM54	transmembrane protein 54
hsa-miR-615-5p	0	0	1	0	1	1	XKR5	XK, Kell blood group complex subunit-related family, member 5
hsa-miR-615-5p	1	0	1	1	1	1	MECP2	methyl CpG binding protein 2 (Rett syndrome)
hsa-miR-615-5p	0	0	1	1	0	0	PAOX	polyamine oxidase (exo-N4-amino)
hsa-miR-615-5p	1	0	1	1	0	0	ADAM15	ADAM metallopeptidase domain 15
hsa-miR-615-5p	0	0	1	1	1	1	TERF1	telomeric repeat binding factor (NIMA-interacting) 1
hsa-miR-615-5p	0	0	1	1	1	1	SMPD1	sphingomyelin phosphodiesterase 1, acid lysosomal
hsa-miR-615-5p	0	0	1	1	1	1	FCRLB	Fc receptor-like B
hsa-miR-615-5p	0	0	1	1	0	0	CLSTN3	calsyntenin 3
hsa-miR-615-5p	1	0	1	1	1	1	TBC1D22B	TBC1 domain family, member 22B
hsa-miR-615-5p	0	0	1	1	1	1	IL23R	interleukin 23 receptor
hsa-miR-615-5p	0	0	1	1	1	1	SLC6A2	solute carrier family 6 (neurotransmitter transporter, noradrenalin), member 2
hsa-miR-615-5p	0	0	1	1	1	1	SNX11	sorting nexin 11
hsa-miR-615-5p	1	0	1	1	1	1	PDLIM3	PDZ and LIM domain 3
hsa-miR-615-5p	1	0	1	1	1	1	PAFAH2	platelet-activating factor acetylhydrolase 2, 40kDa
hsa-miR-615-5p	1	0	1	0	1	1	DPYSL5	dihydropyrimidinase-like 5
hsa-miR-615-5p	0	0	1	1	0	0	ZNF576	zinc finger protein 576
hsa-miR-615-5p	1	0	1	1	1	1	RIMS3	regulating synaptic membrane exocytosis 3
hsa-miR-615-5p	0	0	1	1	0	0	RUSC1	RUN and SH3 domain containing 1
hsa-miR-615-5p	0	0	1	1	0	0	ZNF821	zinc finger protein 821
hsa-miR-615-5p	1	0	1	1	1	1	ATAT1	alpha tubulin acetyltransferase 1
hsa-miR-615-5p	0	0	1	0	0	0	LOC93622	Morf4 family associated protein 1-like 1 pseudogene
hsa-miR-615-5p	0	0	1	1	1	1	SGK2	serum/glucocorticoid regulated kinase 2
hsa-miR-615-5p	0	0	1	1	0	0	FAM195A	family with sequence similarity 195, member A
hsa-miR-615-5p	1	0	1	1	1	1	PCGF5	polycomb group ring finger 5
hsa-miR-615-5p	0	0	1	1	0	0	AGBL5	ATP/GTP binding protein-like 5
hsa-miR-615-5p	0	0	1	1	0	0	ALKBH6	alkB, alkylation repair homolog 6 (E. coli)
hsa-miR-615-5p	0	0	1	1	0	0	MYLK2	myosin light chain kinase 2
hsa-miR-615-5p	0	0	1	0	1	1	AIPL1	aryl hydrocarbon receptor interacting protein-like 1
hsa-miR-615-5p	1	0	1	1	1	1	SHMT2	serine hydroxymethyltransferase 2 (mitochondrial)
hsa-miR-615-5p	0	0	1	1	1	1	ZNF85	zinc finger protein 85
hsa-miR-615-5p	1	0	1	1	0	0	WDR45	WD repeat domain 45
hsa-miR-615-5p	0	0	1	1	0	0	PANK2	pantothenate kinase 2
hsa-miR-615-5p	0	0	1	1	0	0	BARX1	BARX homeobox 1
hsa-miR-615-5p	1	0	1	1	1	1	KCTD17	potassium channel tetramerisation domain containing 17
hsa-miR-615-5p	1	0	1	1	1	1	B4GALT3	UDP-Gal:betaGlcNAc beta 1,4- galactosyltransferase, polypeptide 3
hsa-miR-615-5p	0	0	1	1	0	0	FUZ	fuzzy homolog (Drosophila)
hsa-miR-615-5p	1	0	1	1	1	1	USB1	U6 snRNA biogenesis 1
hsa-miR-615-5p	0	0	1	1	1	1	GNL3L	guanine nucleotide binding protein-like 3 (nucleolar)-like
hsa-miR-615-5p	0	0	1	1	1	1	H2AFY	H2A histone family, member Y
hsa-miR-615-5p	1	0	1	1	1	1	MEIS3	Meis homeobox 3
hsa-miR-615-5p	1	0	1	1	0	0	LRFN1	leucine rich repeat and fibronectin type III domain containing 1
hsa-miR-615-5p	0	0	1	1	0	0	TMEM44	transmembrane protein 44
hsa-miR-615-5p	0	0	1	1	0	0	USP19	ubiquitin specific peptidase 19
hsa-miR-615-5p	0	0	1	1	0	0	UCK1	uridine-cytidine kinase 1
hsa-miR-615-5p	0	0	1	1	0	0	MAST2	microtubule associated serine/threonine kinase 2
hsa-miR-615-5p	1	0	1	1	1	1	FAM176A	family with sequence similarity 176, member A
hsa-miR-615-5p	0	0	1	1	0	0	ZBTB32	zinc finger and BTB domain containing 32
hsa-miR-615-5p	0	0	1	1	1	1	GLIPR2	GLI pathogenesis-related 2
hsa-miR-615-5p	1	0	1	1	1	1	ADPGK	ADP-dependent glucokinase
hsa-miR-615-5p	0	0	1	0	0	0	ZNF720	zinc finger protein 720
hsa-miR-615-5p	1	0	1	1	1	1	SLC25A22	solute carrier family 25 (mitochondrial carrier: glutamate), member 22
hsa-miR-615-5p	0	0	1	1	1	1	TMEM40	transmembrane protein 40
hsa-miR-615-5p	0	0	1	1	1	1	HLA-G	major histocompatibility complex, class I, G
hsa-miR-615-5p	1	0	1	1	1	1	PRR7	proline rich 7 (synaptic)
hsa-miR-615-5p	1	0	1	1	1	1	AIF1L	allograft inflammatory factor 1-like
hsa-miR-615-5p	0	0	1	1	1	1	C18orf32	chromosome 18 open reading frame 32
hsa-miR-615-5p	1	0	1	1	1	1	SPOCK2	sparc/osteonectin, cwcv and kazal-like domains proteoglycan (testican) 2
hsa-miR-615-5p	1	0	1	1	1	1	C16orf45	chromosome 16 open reading frame 45
hsa-miR-615-5p	1	0	1	1	1	1	VASP	vasodilator-stimulated phosphoprotein
hsa-miR-615-5p	0	0	1	1	1	1	HS1BP3	HCLS1 binding protein 3
hsa-miR-615-5p	0	0	1	1	0	0	PLSCR3	phospholipid scramblase 3
hsa-miR-615-5p	0	0	1	1	0	0	SYT3	synaptotagmin III
hsa-miR-615-5p	0	0	1	1	1	1	ASTN2	astrotactin 2
hsa-miR-615-5p	1	0	1	1	1	1	GIGYF2	GRB10 interacting GYF protein 2
hsa-miR-615-5p	0	0	1	1	0	0	GEMIN6	gem (nuclear organelle) associated protein 6
hsa-miR-615-5p	0	0	1	1	1	1	PIK3AP1	phosphoinositide-3-kinase adaptor protein 1
hsa-miR-615-5p	0	0	1	1	1	1	SH3TC1	SH3 domain and tetratricopeptide repeats 1
hsa-miR-615-5p	0	0	1	1	1	1	PIP5K1B	phosphatidylinositol-4-phosphate 5-kinase, type I, beta
hsa-miR-615-5p	0	0	1	1	1	1	LPAR1	lysophosphatidic acid receptor 1
hsa-miR-615-5p	0	0	1	0	1	1	FLJ25328	uncharacterized LOC148231
hsa-miR-615-5p	0	0	1	0	1	1	MT1X	metallothionein 1X
hsa-miR-615-5p	1	0	1	1	1	1	CCNG2	cyclin G2
hsa-miR-615-5p	1	0	1	1	0	0	ANKRD13B	ankyrin repeat domain 13B
hsa-miR-615-5p	1	0	1	1	1	1	DCLK2	doublecortin-like kinase 2
hsa-miR-615-5p	1	0	1	1	1	1	RAB5B	RAB5B, member RAS oncogene family
hsa-miR-615-5p	1	0	1	1	0	0	MRC2	mannose receptor, C type 2
hsa-miR-615-5p	0	0	1	1	0	0	WASIR2	WASH and IL9R antisense RNA 2
hsa-miR-615-5p	1	0	1	1	1	1	SIRPA	signal-regulatory protein alpha
hsa-miR-615-5p	0	0	1	0	0	0	BCAS3	breast carcinoma amplified sequence 3
hsa-miR-615-5p	0	0	1	1	1	1	IL20RB	interleukin 20 receptor beta
hsa-miR-615-5p	1	0	1	0	1	1	KCTD2	potassium channel tetramerisation domain containing 2
hsa-miR-615-5p	0	0	1	1	0	0	LINC00176	long intergenic non-protein coding RNA 176
hsa-miR-615-5p	1	0	1	1	1	1	PCDHA5	protocadherin alpha 5
hsa-miR-615-5p	0	0	1	0	1	1	DKFZP434I0714	uncharacterized protein DKFZP434I0714
hsa-miR-615-5p	0	0	1	1	1	1	KIF16B	kinesin family member 16B
hsa-miR-615-5p	1	0	1	1	0	0	TBC1D10C	TBC1 domain family, member 10C
hsa-miR-615-5p	0	0	1	1	1	1	POLM	polymerase (DNA directed), mu
hsa-miR-615-5p	1	0	1	1	1	1	ZNF618	zinc finger protein 618
hsa-miR-615-5p	0	0	1	0	0	0	FAM201A	family with sequence similarity 201, member A
hsa-miR-615-5p	0	0	1	0	0	0	LINC00642	long intergenic non-protein coding RNA 642
hsa-miR-615-5p	1	0	1	1	1	1	ELMO2	engulfment and cell motility 2
hsa-miR-615-5p	0	0	1	1	1	1	TADA1	transcriptional adaptor 1
hsa-miR-615-5p	0	0	1	1	0	0	PRMT2	protein arginine methyltransferase 2
hsa-miR-615-5p	0	0	1	0	0	0	FLJ36000	uncharacterized FLJ36000
hsa-miR-615-5p	0	0	1	0	0	0	RNASEK	ribonuclease, RNase K
hsa-miR-615-5p	0	0	1	0	1	1	LINC00634	long intergenic non-protein coding RNA 634
hsa-miR-615-5p	0	0	1	1	0	0	CNGA4	cyclic nucleotide gated channel alpha 4
hsa-miR-615-5p	0	0	1	1	0	0	SCAND1	SCAN domain containing 1
hsa-miR-615-5p	1	0	1	1	1	1	ARPP21	cAMP-regulated phosphoprotein, 21kDa
hsa-miR-615-5p	0	0	1	0	0	0	MDS2	myelodysplastic syndrome 2 translocation associated
hsa-miR-615-5p	0	0	1	1	0	0	FAM159A	family with sequence similarity 159, member A
hsa-miR-615-5p	0	0	1	0	0	0	ALOX12P2	arachidonate 12-lipoxygenase pseudogene 2
hsa-miR-615-5p	0	0	1	0	0	0	OR7E47P	olfactory receptor, family 7, subfamily E, member 47 pseudogene
hsa-miR-615-5p	0	0	1	0	0	0	LOC253044	uncharacterized LOC253044
hsa-miR-615-5p	0	0	1	0	1	1	OAZ1	ornithine decarboxylase antizyme 1
hsa-miR-615-5p	1	0	1	1	1	1	FKBP5	FK506 binding protein 5
hsa-miR-615-5p	0	0	1	1	1	1	MST1	macrophage stimulating 1 (hepatocyte growth factor-like)
hsa-miR-615-5p	0	0	1	1	0	0	TCTN1	tectonic family member 1
hsa-miR-615-5p	0	0	1	1	1	1	MGC57346	uncharacterized LOC401884
hsa-miR-615-5p	1	0	1	1	1	1	DIP2A	DIP2 disco-interacting protein 2 homolog A (Drosophila)
hsa-miR-615-5p	1	0	1	1	1	1	CARM1	coactivator-associated arginine methyltransferase 1
hsa-miR-615-5p	1	0	1	1	0	0	SFXN5	sideroflexin 5
hsa-miR-615-5p	0	0	1	1	1	1	P2RX6	purinergic receptor P2X, ligand-gated ion channel, 6
hsa-miR-615-5p	1	0	1	1	0	0	NCSTN	nicastrin
hsa-miR-615-5p	0	0	1	1	0	0	MT3	metallothionein 3
hsa-miR-615-5p	0	0	1	1	0	0	CDA	cytidine deaminase
hsa-miR-615-5p	1	0	1	1	1	1	PTPRG	protein tyrosine phosphatase, receptor type, G
hsa-miR-615-5p	1	0	1	1	1	1	CLVS1	clavesin 1
hsa-miR-615-5p	0	0	1	1	0	0	ENTPD8	ectonucleoside triphosphate diphosphohydrolase 8
hsa-miR-615-5p	0	0	1	0	0	0	AURKAPS1	aurora kinase A pseudogene 1
hsa-miR-615-5p	1	0	1	1	1	1	FNDC3A	fibronectin type III domain containing 3A
hsa-miR-615-5p	1	0	1	0	1	1	SEMA4G	sema domain, immunoglobulin domain (Ig), transmembrane domain (TM) and short cytoplasmic domain, (semaphorin) 4G
hsa-miR-615-5p	0	0	1	1	1	1	LINC00086	long intergenic non-protein coding RNA 86
hsa-miR-615-5p	1	0	1	1	1	1	LIMD2	LIM domain containing 2
hsa-miR-615-5p	0	0	1	1	1	1	HLA-DQA1	major histocompatibility complex, class II, DQ alpha 1
hsa-miR-615-5p	1	0	1	1	1	1	SCUBE3	signal peptide, CUB domain, EGF-like 3
hsa-miR-615-5p	0	0	1	1	1	1	GRIK5	glutamate receptor, ionotropic, kainate 5
hsa-miR-615-5p	1	0	1	0	1	1	C14orf43	chromosome 14 open reading frame 43
hsa-miR-615-5p	1	0	1	1	1	1	HP1BP3	heterochromatin protein 1, binding protein 3
hsa-miR-615-5p	0	0	1	1	0	0	LY6H	lymphocyte antigen 6 complex, locus H
hsa-miR-615-5p	1	0	1	1	0	0	ATG2A	autophagy related 2A
hsa-miR-615-5p	0	0	1	0	0	0	LINC00265	long intergenic non-protein coding RNA 265
hsa-miR-615-5p	0	0	1	1	1	1	ZNF254	zinc finger protein 254
hsa-miR-615-5p	0	0	1	1	0	0	CUEDC1	CUE domain containing 1
hsa-miR-615-5p	1	0	1	1	1	1	INPP5A	inositol polyphosphate-5-phosphatase, 40kDa
hsa-miR-615-5p	1	0	1	1	1	1	ZSCAN29	zinc finger and SCAN domain containing 29
hsa-miR-615-5p	0	0	1	1	0	0	SLC38A7	solute carrier family 38, member 7
hsa-miR-615-5p	1	0	1	1	1	1	PDGFRA	platelet-derived growth factor receptor, alpha polypeptide
hsa-miR-615-5p	0	0	1	1	0	0	C8orf31	chromosome 8 open reading frame 31
hsa-miR-615-5p	0	0	1	1	0	0	PRSS55	protease, serine, 55
hsa-miR-615-5p	1	0	1	1	1	1	ADCY6	adenylate cyclase 6
hsa-miR-615-5p	0	0	1	1	0	0	SPNS2	spinster homolog 2 (Drosophila)
hsa-miR-615-5p	0	0	1	1	0	0	TSNARE1	t-SNARE domain containing 1
hsa-miR-615-5p	1	0	1	1	1	1	LMO4	LIM domain only 4
hsa-miR-615-5p	1	0	1	1	1	1	C5orf25	chromosome 5 open reading frame 25
hsa-miR-615-5p	1	0	1	1	1	1	NRSN1	neurensin 1
hsa-miR-615-5p	1	0	1	1	1	1	FAM129B	family with sequence similarity 129, member B
hsa-miR-615-5p	1	0	1	1	1	1	FTL	ferritin, light polypeptide
hsa-miR-615-5p	1	0	1	0	1	1	MAGIX	MAGI family member, X-linked
hsa-miR-615-5p	0	0	1	0	0	0	ZNF66P	zinc finger protein 66, pseudogene
hsa-miR-615-5p	1	0	1	1	1	1	LINGO1	leucine rich repeat and Ig domain containing 1
hsa-miR-615-5p	0	0	1	1	1	1	AQPEP	laeverin
hsa-miR-615-5p	1	0	1	1	0	0	TMEM198	transmembrane protein 198
hsa-miR-615-5p	0	0	1	0	0	0	CHADL	chondroadherin-like
hsa-miR-615-5p	0	0	1	0	0	0	PTGER4P2	prostaglandin E receptor 4 (subtype EP4) pseudogene 2
hsa-miR-615-5p	1	0	1	1	0	0	DCAF15	DDB1 and CUL4 associated factor 15
hsa-miR-615-5p	0	0	1	0	1	1	LOC728228	uncharacterized LOC728228
hsa-miR-615-5p	0	0	1	1	0	0	TRIM46	tripartite motif containing 46
hsa-miR-615-5p	0	0	1	1	0	0	CYP4F30P	cytochrome P450, family 4, subfamily F, polypeptide 30, pseudogene
hsa-miR-615-5p	1	0	1	1	1	1	DDR1	discoidin domain receptor tyrosine kinase 1
hsa-miR-615-5p	0	0	1	1	1	1	SLC11A1	solute carrier family 11 (proton-coupled divalent metal ion transporters), member 1
hsa-miR-615-5p	0	0	1	0	0	0	ULK4P3	unc-51-like kinase 4 (C. elegans) pseudogene 3
hsa-miR-615-5p	0	0	1	1	0	0	TRIM41	tripartite motif containing 41
hsa-miR-615-5p	1	0	1	1	1	1	RARG	retinoic acid receptor, gamma
hsa-miR-615-5p	0	0	1	0	0	0	LINC00537	long intergenic non-protein coding RNA 537
hsa-miR-615-5p	1	0	1	1	1	1	CEACAM19	carcinoembryonic antigen-related cell adhesion molecule 19
hsa-miR-615-5p	1	0	1	1	0	0	TIMM17B	translocase of inner mitochondrial membrane 17 homolog B (yeast)
hsa-miR-615-5p	1	0	1	1	1	1	ESRRA	estrogen-related receptor alpha
hsa-miR-615-5p	0	0	1	0	0	0	GUSBP1	glucuronidase, beta pseudogene 1
hsa-miR-615-5p	0	0	1	0	0	0	FRG1B	FSHD region gene 1 family, member B
hsa-miR-615-5p	1	0	1	1	0	0	PLD3	phospholipase D family, member 3
hsa-miR-615-5p	0	1	1	1	0	0	PKM	pyruvate kinase, muscle
hsa-miR-615-5p	0	0	1	0	0	0	ABCA11P	ATP-binding cassette, sub-family A (ABC1), member 11, pseudogene
hsa-miR-615-5p	0	0	1	1	1	1	SLC39A2	solute carrier family 39 (zinc transporter), member 2
hsa-miR-615-5p	0	0	1	1	0	0	FBXO16	F-box protein 16
hsa-miR-615-5p	0	0	1	1	0	0	TMC1	transmembrane channel-like 1
hsa-miR-615-5p	1	0	1	1	1	1	ACHE	acetylcholinesterase
hsa-miR-615-5p	0	0	1	1	1	1	SLC25A35	solute carrier family 25, member 35
hsa-miR-615-5p	1	0	1	0	1	1	DNAJC6	DnaJ (Hsp40) homolog, subfamily C, member 6
hsa-miR-615-5p	0	0	1	1	0	0	SH2D6	SH2 domain containing 6
hsa-miR-615-5p	1	0	1	1	0	0	IER2	immediate early response 2
hsa-miR-615-5p	0	0	1	1	0	0	RELA	v-rel reticuloendotheliosis viral oncogene homolog A (avian)
hsa-miR-615-5p	1	0	1	0	1	1	MAP3K9	mitogen-activated protein kinase kinase kinase 9
hsa-miR-615-5p	0	0	1	1	1	1	UNC13B	unc-13 homolog B (C. elegans)
hsa-miR-615-5p	1	0	1	1	1	1	PPP6R1	protein phosphatase 6, regulatory subunit 1
hsa-miR-615-5p	0	0	1	1	0	0	C14orf178	chromosome 14 open reading frame 178
hsa-miR-615-5p	1	0	1	1	0	0	MAPKBP1	mitogen-activated protein kinase binding protein 1
hsa-miR-615-5p	0	0	1	1	0	0	RGS12	regulator of G-protein signaling 12
hsa-miR-615-5p	1	0	1	1	1	1	FKBP1A	FK506 binding protein 1A, 12kDa
hsa-miR-615-5p	0	0	1	1	0	0	SOCS7	suppressor of cytokine signaling 7
hsa-miR-615-5p	1	0	1	1	1	1	ZMYM4	zinc finger, MYM-type 4
hsa-miR-615-5p	0	0	1	1	0	0	HSF4	heat shock transcription factor 4
hsa-miR-615-5p	0	0	1	0	0	0	FAM225B	family with sequence similarity 225, member B (non-protein coding)
hsa-miR-615-5p	1	0	1	1	1	1	NIPAL2	NIPA-like domain containing 2
hsa-miR-615-5p	0	0	1	1	1	1	PDE6B	phosphodiesterase 6B, cGMP-specific, rod, beta
hsa-miR-615-5p	0	0	1	1	1	1	TINF2	TERF1 (TRF1)-interacting nuclear factor 2
hsa-miR-615-5p	1	0	1	1	0	0	KRT80	keratin 80
hsa-miR-615-5p	0	0	1	1	1	1	SLC12A8	solute carrier family 12 (potassium/chloride transporters), member 8
hsa-miR-615-5p	1	0	1	1	1	1	ETS1	v-ets erythroblastosis virus E26 oncogene homolog 1 (avian)
hsa-miR-615-5p	0	0	1	0	1	1	PRH2	proline-rich protein HaeIII subfamily 2
hsa-miR-615-5p	0	0	1	1	1	1	VPS35	vacuolar protein sorting 35 homolog (S. cerevisiae)
hsa-miR-615-5p	1	0	1	1	1	1	CGN	cingulin
hsa-miR-615-5p	0	0	1	1	1	1	C5orf45	chromosome 5 open reading frame 45
hsa-miR-615-5p	0	0	1	1	1	1	ADH1B	alcohol dehydrogenase 1B (class I), beta polypeptide
hsa-miR-615-5p	0	0	1	1	1	1	TTLL5	tubulin tyrosine ligase-like family, member 5
hsa-miR-615-5p	1	0	1	1	1	1	FOXP1	forkhead box P1
hsa-miR-615-5p	0	0	1	0	0	0	OVOS	ovostatin
hsa-miR-615-5p	1	0	1	1	1	1	ZNF711	zinc finger protein 711
hsa-miR-615-5p	1	0	1	1	1	1	KLHL6	kelch-like 6 (Drosophila)
hsa-miR-615-5p	1	0	1	1	1	1	BCLAF1	BCL2-associated transcription factor 1
hsa-miR-615-5p	1	0	1	1	1	1	NAV1	neuron navigator 1
hsa-miR-615-5p	1	0	1	1	1	1	PGAP1	post-GPI attachment to proteins 1
hsa-miR-615-5p	1	0	1	1	1	1	HIC2	hypermethylated in cancer 2
hsa-miR-615-5p	0	0	1	0	0	0	LINC00341	long intergenic non-protein coding RNA 341
hsa-miR-615-5p	0	0	1	1	0	0	PPT2	palmitoyl-protein thioesterase 2
hsa-miR-615-5p	0	0	1	1	1	1	SLC25A11	solute carrier family 25 (mitochondrial carrier; oxoglutarate carrier), member 11
hsa-miR-615-5p	1	0	1	1	1	1	NME4	NME/NM23 nucleoside diphosphate kinase 4
hsa-miR-615-5p	1	0	1	0	0	0	IGLON5	IgLON family member 5
hsa-miR-615-5p	1	0	1	1	0	0	INO80E	INO80 complex subunit E
hsa-miR-615-5p	0	0	1	1	1	1	RAB3GAP2	RAB3 GTPase activating protein subunit 2 (non-catalytic)
hsa-miR-615-5p	1	0	1	1	0	0	RAB24	RAB24, member RAS oncogene family
hsa-miR-615-5p	0	0	1	1	1	1	CCS	copper chaperone for superoxide dismutase
hsa-miR-615-5p	1	0	1	1	1	1	VIM	vimentin
hsa-miR-615-5p	1	0	1	1	1	1	PCGF2	polycomb group ring finger 2
hsa-miR-615-5p	1	0	1	1	1	1	SYNGR2	synaptogyrin 2
hsa-miR-615-5p	0	0	1	0	0	0	LOC400768	uncharacterized LOC400768
hsa-miR-615-5p	0	0	1	1	0	0	F2	coagulation factor II (thrombin)
hsa-miR-615-5p	1	0	1	1	1	1	ERI3	ERI1 exoribonuclease family member 3
hsa-miR-615-5p	0	0	1	1	0	0	RAD23A	RAD23 homolog A (S. cerevisiae)
hsa-miR-615-5p	1	0	1	1	0	0	TSC22D4	TSC22 domain family, member 4
hsa-miR-615-5p	1	0	1	1	1	1	LETMD1	LETM1 domain containing 1
hsa-miR-615-5p	1	0	1	1	1	1	SGSM2	small G protein signaling modulator 2
hsa-miR-615-5p	0	0	1	1	1	1	CYTH2	cytohesin 2
hsa-miR-615-5p	0	0	1	1	0	0	SRM	spermidine synthase
hsa-miR-615-5p	1	0	1	1	1	1	DOLPP1	dolichyl pyrophosphate phosphatase 1
hsa-miR-615-5p	0	0	1	0	0	0	ARRDC1	arrestin domain containing 1
hsa-miR-615-5p	1	1	1	1	0	0	EFNA3	ephrin-A3
hsa-miR-615-5p	1	0	1	1	1	1	NEU1	sialidase 1 (lysosomal sialidase)
hsa-miR-615-5p	0	0	1	1	0	0	CD81	CD81 molecule
hsa-miR-615-5p	1	0	1	1	1	1	FGF11	fibroblast growth factor 11
hsa-miR-615-5p	0	0	1	1	1	1	APH1A	anterior pharynx defective 1 homolog A (C. elegans)
hsa-miR-615-5p	0	0	1	1	1	1	HSPB8	heat shock 22kDa protein 8
hsa-miR-615-5p	1	0	1	1	1	1	E2F3	E2F transcription factor 3
hsa-miR-615-5p	0	0	1	1	0	0	WDR18	WD repeat domain 18
hsa-miR-615-5p	1	0	1	1	1	1	RASL12	RAS-like, family 12
hsa-miR-615-5p	0	0	1	1	1	1	COPS7A	COP9 constitutive photomorphogenic homolog subunit 7A (Arabidopsis)
hsa-miR-615-5p	0	0	1	1	0	0	TRAPPC4	trafficking protein particle complex 4
hsa-miR-615-5p	0	0	1	1	1	1	CD99	CD99 molecule
hsa-miR-615-5p	0	0	1	1	1	1	ABCD1	ATP-binding cassette, sub-family D (ALD), member 1
hsa-miR-615-5p	0	0	1	1	1	1	SNRNP27	small nuclear ribonucleoprotein 27kDa (U4/U6.U5)
hsa-miR-615-5p	1	0	1	1	1	1	CDK18	cyclin-dependent kinase 18
hsa-miR-615-5p	0	0	1	1	1	1	PLAUR	plasminogen activator, urokinase receptor
hsa-miR-615-5p	0	0	1	1	0	0	MFSD10	major facilitator superfamily domain containing 10
hsa-miR-615-5p	1	0	1	1	0	0	FSCN1	fascin homolog 1, actin-bundling protein (Strongylocentrotus purpuratus)
hsa-miR-615-5p	1	0	1	1	1	1	NTM	neurotrimin
hsa-miR-615-5p	1	0	1	1	1	1	PLEKHB2	pleckstrin homology domain containing, family B (evectins) member 2
hsa-miR-615-5p	0	0	1	1	0	0	IKBKG	inhibitor of kappa light polypeptide gene enhancer in B-cells, kinase gamma
hsa-miR-615-5p	0	0	1	1	0	0	MUS81	MUS81 endonuclease homolog (S. cerevisiae)
hsa-miR-615-5p	1	0	1	1	1	1	POU2F2	POU class 2 homeobox 2
hsa-miR-615-5p	0	0	1	1	0	0	HSPBP1	HSPA (heat shock 70kDa) binding protein, cytoplasmic cochaperone 1
hsa-miR-615-5p	0	0	1	0	1	1	FECH	ferrochelatase
hsa-miR-615-5p	1	0	1	1	1	1	LYPLA2	lysophospholipase II
hsa-miR-615-5p	0	0	1	1	0	0	PDK3	pyruvate dehydrogenase kinase, isozyme 3
hsa-miR-615-5p	1	0	1	0	1	1	MGRN1	mahogunin ring finger 1, E3 ubiquitin protein ligase
hsa-miR-615-5p	0	0	1	1	0	0	NDUFS7	NADH dehydrogenase (ubiquinone) Fe-S protein 7, 20kDa (NADH-coenzyme Q reductase)
hsa-miR-615-5p	0	0	1	1	1	1	PIGC	phosphatidylinositol glycan anchor biosynthesis, class C
hsa-miR-615-5p	0	0	1	1	1	1	POLR2G	polymerase (RNA) II (DNA directed) polypeptide G
hsa-miR-615-5p	0	0	1	1	0	0	C11orf68	chromosome 11 open reading frame 68
hsa-miR-615-5p	0	0	1	1	1	1	GLRX3	glutaredoxin 3
hsa-miR-615-5p	1	0	1	1	0	0	THY1	Thy-1 cell surface antigen
hsa-miR-615-5p	0	0	1	1	1	1	MPDU1	mannose-P-dolichol utilization defect 1
hsa-miR-615-5p	1	0	1	1	0	0	TBC1D17	TBC1 domain family, member 17
hsa-miR-615-5p	0	0	1	1	0	0	LILRB4	leukocyte immunoglobulin-like receptor, subfamily B (with TM and ITIM domains), member 4
hsa-miR-615-5p	1	0	1	1	1	1	PPP5C	protein phosphatase 5, catalytic subunit
hsa-miR-615-5p	0	0	1	1	0	0	PTGDS	prostaglandin D2 synthase 21kDa (brain)
hsa-miR-615-5p	1	0	1	1	1	1	ARNTL	aryl hydrocarbon receptor nuclear translocator-like
hsa-miR-615-5p	0	0	1	1	1	1	COMMD3	COMM domain containing 3
hsa-miR-615-5p	1	0	1	1	1	1	EIF4A2	eukaryotic translation initiation factor 4A2
hsa-miR-615-5p	1	0	1	1	1	1	TIMP3	TIMP metallopeptidase inhibitor 3
hsa-miR-615-5p	0	0	1	1	1	1	UBE2A	ubiquitin-conjugating enzyme E2A
hsa-miR-615-5p	0	0	1	1	0	0	FAM57B	family with sequence similarity 57, member B
hsa-miR-615-5p	0	0	1	1	1	1	SLCO4A1	solute carrier organic anion transporter family, member 4A1
hsa-miR-615-5p	0	0	1	1	0	0	AATF	apoptosis antagonizing transcription factor
hsa-miR-615-5p	0	0	1	1	0	0	GMNN	geminin, DNA replication inhibitor
hsa-miR-615-5p	1	0	1	1	1	1	SNX1	sorting nexin 1
hsa-miR-615-5p	0	0	1	1	0	0	CD79B	CD79b molecule, immunoglobulin-associated beta
hsa-miR-615-5p	1	0	1	0	1	1	GIT2	G protein-coupled receptor kinase interacting ArfGAP 2
hsa-miR-615-5p	0	0	1	1	0	0	CCDC107	coiled-coil domain containing 107
hsa-miR-615-5p	0	0	1	1	0	0	MRPL37	mitochondrial ribosomal protein L37
hsa-miR-615-5p	0	0	1	1	0	0	PCCA	propionyl CoA carboxylase, alpha polypeptide
hsa-miR-615-5p	1	0	1	1	1	1	ACTN4	actinin, alpha 4
hsa-miR-615-5p	0	0	1	0	0	0	PRMT1	protein arginine methyltransferase 1
hsa-miR-615-5p	1	0	1	1	0	0	PPP4C	protein phosphatase 4, catalytic subunit
hsa-miR-615-5p	1	0	1	1	0	0	FOXO3	forkhead box O3
hsa-miR-615-5p	0	0	1	1	0	0	ARVCF	armadillo repeat gene deleted in velocardiofacial syndrome
hsa-miR-615-5p	1	0	1	1	1	1	RALY	RNA binding protein, autoantigenic (hnRNP-associated with lethal yellow homolog (mouse))
hsa-miR-615-5p	0	0	1	1	0	0	TESK1	testis-specific kinase 1
hsa-miR-615-5p	0	0	1	1	1	1	RNF126	ring finger protein 126
hsa-miR-615-5p	0	0	1	1	1	1	SUGT1	SGT1, suppressor of G2 allele of SKP1 (S. cerevisiae)
hsa-miR-615-5p	0	0	1	1	1	1	LIMK2	LIM domain kinase 2
hsa-miR-615-5p	1	0	1	1	1	1	JUNB	jun B proto-oncogene
hsa-miR-615-5p	0	0	1	1	1	1	TOP3B	topoisomerase (DNA) III beta
hsa-miR-615-5p	0	0	1	1	0	0	INO80B	INO80 complex subunit B
hsa-miR-615-5p	0	0	1	1	1	1	C10orf2	chromosome 10 open reading frame 2
hsa-miR-615-5p	0	0	1	1	0	0	IL11RA	interleukin 11 receptor, alpha
hsa-miR-615-5p	1	0	1	0	0	0	RNF40	ring finger protein 40, E3 ubiquitin protein ligase
hsa-miR-615-5p	0	0	1	1	1	1	SYNE2	spectrin repeat containing, nuclear envelope 2
hsa-miR-615-5p	0	0	1	0	0	0	LINC00661	long intergenic non-protein coding RNA 661
hsa-miR-615-5p	0	0	1	0	1	1	STARD8	StAR-related lipid transfer (START) domain containing 8
hsa-miR-615-5p	0	0	1	0	0	0	MUC19	mucin 19, oligomeric
hsa-miR-615-5p	1	0	1	1	1	1	SLC39A10	solute carrier family 39 (zinc transporter), member 10
hsa-miR-615-5p	1	0	1	1	1	1	BNC2	basonuclin 2
hsa-miR-615-5p	0	0	1	1	0	0	TENC1	tensin like C1 domain containing phosphatase (tensin 2)
hsa-miR-615-5p	0	0	1	0	0	0	LOC440518	golgin A2 pseudogene
hsa-miR-615-5p	0	0	1	1	1	1	SLC39A14	solute carrier family 39 (zinc transporter), member 14
hsa-miR-615-5p	1	0	1	1	1	1	SEC14L1	SEC14-like 1 (S. cerevisiae)
hsa-miR-615-5p	0	0	1	1	0	0	HMGXB3	HMG box domain containing 3
hsa-miR-615-5p	0	0	1	1	1	1	LTA	lymphotoxin alpha (TNF superfamily, member 1)
hsa-miR-615-5p	0	0	1	1	1	1	PTGS1	prostaglandin-endoperoxide synthase 1 (prostaglandin G/H synthase and cyclooxygenase)
hsa-miR-615-5p	0	0	1	1	0	0	SPATA20	spermatogenesis associated 20
hsa-miR-615-5p	1	0	1	1	1	1	QKI	QKI, KH domain containing, RNA binding
hsa-miR-615-5p	0	0	1	1	1	1	PAX4	paired box 4
hsa-miR-615-5p	1	0	1	0	1	1	MAP2K7	mitogen-activated protein kinase kinase 7
hsa-miR-615-5p	0	0	1	1	1	1	MARVELD2	MARVEL domain containing 2
hsa-miR-615-5p	0	0	1	0	0	0	PILRB	paired immunoglobin-like type 2 receptor beta
hsa-miR-615-5p	0	0	1	1	0	0	SLCO3A1	solute carrier organic anion transporter family, member 3A1
hsa-miR-615-5p	1	0	1	1	1	1	CABP1	calcium binding protein 1
hsa-miR-615-5p	0	0	1	0	0	0	C1orf81	chromosome 1 open reading frame 81
hsa-miR-615-5p	0	0	1	1	0	0	CEACAM3	carcinoembryonic antigen-related cell adhesion molecule 3
hsa-miR-615-5p	0	0	1	0	0	0	GPR144	G protein-coupled receptor 144
hsa-miR-615-5p	0	0	1	1	1	1	ALDH3B1	aldehyde dehydrogenase 3 family, member B1
hsa-miR-615-5p	1	0	1	1	1	1	ELK1	ELK1, member of ETS oncogene family
hsa-miR-615-5p	0	0	1	1	0	0	APOC1	apolipoprotein C-I
hsa-miR-615-5p	0	0	1	0	0	0	PVT1	Pvt1 oncogene (non-protein coding)
hsa-miR-615-5p	0	0	1	1	1	1	HSD11B2	hydroxysteroid (11-beta) dehydrogenase 2
hsa-miR-615-5p	1	0	1	1	1	1	KCNA1	potassium voltage-gated channel, shaker-related subfamily, member 1 (episodic ataxia with myokymia)
hsa-miR-615-5p	1	0	1	1	1	1	LEP	leptin
hsa-miR-615-5p	1	0	1	1	1	1	PTCH1	patched 1
hsa-miR-615-5p	0	0	1	1	0	0	PEX6	peroxisomal biogenesis factor 6
hsa-miR-615-5p	1	0	1	1	0	0	NOTCH3	notch 3
hsa-miR-615-5p	0	0	1	1	1	1	PECAM1	platelet/endothelial cell adhesion molecule 1
hsa-miR-615-5p	0	0	1	1	1	1	PLEC	plectin
hsa-miR-615-5p	1	0	1	1	1	1	MPZ	myelin protein zero
hsa-miR-615-5p	1	0	1	0	1	1	IL6R	interleukin 6 receptor
hsa-miR-615-5p	1	0	1	1	1	1	IL1A	interleukin 1, alpha
hsa-miR-615-5p	0	0	1	1	1	1	IGF2	insulin-like growth factor 2 (somatomedin A)
hsa-miR-615-5p	0	0	1	1	1	1	NOS1	nitric oxide synthase 1 (neuronal)
hsa-miR-615-5p	0	0	1	1	1	1	GSR	glutathione reductase
hsa-miR-615-5p	1	0	1	1	0	0	ADRA1B	adrenoceptor alpha 1B
hsa-miR-615-5p	1	0	1	1	1	1	CHRM1	cholinergic receptor, muscarinic 1
hsa-miR-615-5p	1	0	1	1	1	1	CSF1	colony stimulating factor 1 (macrophage)
hsa-miR-615-5p	1	0	1	1	1	1	DRD2	dopamine receptor D2
hsa-miR-615-5p	1	0	1	1	1	1	GABRB3	gamma-aminobutyric acid (GABA) A receptor, beta 3
hsa-miR-615-5p	1	0	1	1	0	0	GRIN2D	glutamate receptor, ionotropic, N-methyl D-aspartate 2D
hsa-miR-615-5p	1	0	1	1	1	1	HTR4	5-hydroxytryptamine (serotonin) receptor 4, G protein-coupled
hsa-miR-615-5p	0	0	1	0	0	0	C10orf55	chromosome 10 open reading frame 55
hsa-miR-615-5p	1	0	1	1	1	1	GATA3	GATA binding protein 3
hsa-miR-615-5p	0	0	1	1	1	1	C11orf49	chromosome 11 open reading frame 49
hsa-miR-615-5p	1	0	1	1	1	1	HMGXB4	HMG box domain containing 4
hsa-miR-615-5p	1	0	1	1	1	1	BICD2	bicaudal D homolog 2 (Drosophila)
hsa-miR-615-5p	1	0	1	0	1	1	BMF	Bcl2 modifying factor
hsa-miR-615-5p	1	0	1	1	1	1	FBLN2	fibulin 2
hsa-miR-615-5p	0	0	1	1	1	1	TUSC1	tumor suppressor candidate 1
hsa-miR-615-5p	0	0	1	1	1	1	ALG11	asparagine-linked glycosylation 11, alpha-1,2-mannosyltransferase homolog (yeast)
hsa-miR-615-5p	1	0	1	0	1	1	ZNF740	zinc finger protein 740
hsa-miR-615-5p	0	0	1	1	1	1	CCDC144NL	coiled-coil domain containing 144 family, N-terminal like
hsa-miR-615-5p	0	0	1	0	0	0	C9orf173	chromosome 9 open reading frame 173
hsa-miR-615-5p	1	0	1	1	1	1	EDA	ectodysplasin A
hsa-miR-615-5p	1	0	1	0	1	1	IP6K1	inositol hexakisphosphate kinase 1
hsa-miR-615-5p	0	0	1	1	1	1	MAPKAP1	mitogen-activated protein kinase associated protein 1
hsa-miR-615-5p	1	0	1	1	0	0	RPS6KA1	ribosomal protein S6 kinase, 90kDa, polypeptide 1
hsa-miR-615-5p	1	0	1	1	1	1	ZDHHC9	zinc finger, DHHC-type containing 9
hsa-miR-615-5p	1	0	1	1	1	1	BCAP29	B-cell receptor-associated protein 29
hsa-miR-615-5p	1	0	1	1	1	1	LPHN1	latrophilin 1
hsa-miR-615-5p	0	0	1	1	1	1	C1QL3	complement component 1, q subcomponent-like 3
hsa-miR-615-5p	1	0	1	1	1	1	CTNNBIP1	catenin, beta interacting protein 1
hsa-miR-615-5p	1	0	1	1	1	1	FOXP4	forkhead box P4
hsa-miR-615-5p	1	0	1	1	1	1	SLC25A53	solute carrier family 25, member 53
hsa-miR-615-5p	0	0	1	0	0	0	LOC440157	uncharacterized LOC440157
hsa-miR-615-5p	0	0	1	1	0	0	RTKN	rhotekin
hsa-miR-615-5p	1	0	1	1	1	1	SORBS3	sorbin and SH3 domain containing 3
hsa-miR-615-5p	0	0	1	0	0	0	ADIG	adipogenin
hsa-miR-615-5p	1	0	1	0	1	1	RGAG4	retrotransposon gag domain containing 4
hsa-miR-615-5p	1	0	1	0	1	1	BCL7A	B-cell CLL/lymphoma 7A
hsa-miR-615-5p	1	0	1	0	1	1	CLLU1	chronic lymphocytic leukemia up-regulated 1
hsa-miR-615-5p	1	0	1	1	1	1	KCTD21	potassium channel tetramerisation domain containing 21
hsa-miR-615-5p	0	0	1	1	0	0	KLK3	kallikrein-related peptidase 3
hsa-miR-615-5p	0	0	1	1	1	1	VSTM4	V-set and transmembrane domain containing 4
hsa-miR-615-5p	1	0	1	1	1	1	MASP1	mannan-binding lectin serine peptidase 1 (C4/C2 activating component of Ra-reactive factor)
hsa-miR-615-5p	1	0	1	1	1	1	MYCL1	v-myc myelocytomatosis viral oncogene homolog 1, lung carcinoma derived (avian)
hsa-miR-615-5p	0	0	1	1	0	0	SSX4B	synovial sarcoma, X breakpoint 4B
hsa-miR-615-5p	1	0	1	1	1	1	SMOC1	SPARC related modular calcium binding 1
hsa-miR-615-5p	0	0	1	1	1	1	SIRPG	signal-regulatory protein gamma
hsa-miR-615-5p	0	0	1	1	1	1	MAP9	microtubule-associated protein 9
hsa-miR-615-5p	1	0	1	1	1	1	CHTF8	CTF8, chromosome transmission fidelity factor 8 homolog (S. cerevisiae)
hsa-miR-615-5p	1	0	1	1	1	1	CBLN3	cerebellin 3 precursor
hsa-miR-615-5p	1	0	1	1	1	1	SPTSSB	serine palmitoyltransferase, small subunit B
hsa-miR-615-5p	1	0	1	1	1	1	LFNG	LFNG O-fucosylpeptide 3-beta-N-acetylglucosaminyltransferase
hsa-miR-615-5p	1	0	1	1	1	1	MAPK8IP3	mitogen-activated protein kinase 8 interacting protein 3
hsa-miR-615-5p	1	0	1	1	1	1	CRCP	CGRP receptor component
hsa-miR-615-5p	1	0	1	1	1	1	C2orf88	chromosome 2 open reading frame 88
hsa-miR-615-5p	0	0	1	1	0	0	SPRED3	sprouty-related, EVH1 domain containing 3
hsa-miR-615-5p	1	0	1	1	1	1	NSL1	NSL1, MIND kinetochore complex component, homolog (S. cerevisiae)
hsa-miR-615-5p	1	0	1	1	1	1	PVRL2	poliovirus receptor-related 2 (herpesvirus entry mediator B)
hsa-miR-615-5p	1	0	1	1	1	1	TPM3	tropomyosin 3
hsa-miR-615-5p	0	0	1	1	1	1	SLC6A3	solute carrier family 6 (neurotransmitter transporter, dopamine), member 3
hsa-miR-615-5p	0	0	1	1	1	1	TUBG1	tubulin, gamma 1
hsa-miR-615-5p	1	0	1	1	1	1	UBTF	upstream binding transcription factor, RNA polymerase I
hsa-miR-615-5p	1	0	1	1	1	1	ZNF436	zinc finger protein 436
hsa-miR-615-5p	1	0	1	1	1	1	ATG9A	autophagy related 9A
hsa-miR-615-5p	0	0	1	1	1	1	KLK10	kallikrein-related peptidase 10
hsa-miR-615-5p	0	0	1	1	0	0	TMEM134	transmembrane protein 134
hsa-miR-615-5p	1	0	1	0	1	1	FBXO41	F-box protein 41
hsa-miR-615-5p	1	0	1	1	1	1	SHANK3	SH3 and multiple ankyrin repeat domains 3
hsa-miR-615-5p	0	0	1	1	0	0	LMTK3	lemur tyrosine kinase 3
hsa-miR-615-5p	0	0	1	1	0	0	WTIP	Wilms tumor 1 interacting protein
hsa-miR-615-5p	0	0	1	1	1	1	TMEM202	transmembrane protein 202
hsa-miR-615-5p	0	0	1	0	0	0	FBF1	Fas (TNFRSF6) binding factor 1
hsa-miR-615-5p	1	0	1	1	1	1	MYO1C	myosin IC
hsa-miR-615-5p	1	0	1	0	1	1	PDE5A	phosphodiesterase 5A, cGMP-specific
hsa-miR-615-5p	0	0	1	1	0	0	PLOD3	procollagen-lysine, 2-oxoglutarate 5-dioxygenase 3
hsa-miR-615-5p	1	0	1	1	0	0	ASIC2	acid-sensing (proton-gated) ion channel 2
hsa-miR-615-5p	0	0	1	0	1	1	CAV2	caveolin 2
hsa-miR-615-5p	0	0	1	1	1	1	CHI3L1	chitinase 3-like 1 (cartilage glycoprotein-39)
hsa-miR-615-5p	0	0	1	1	1	1	CHUK	conserved helix-loop-helix ubiquitous kinase
hsa-miR-615-5p	0	0	1	1	1	1	CCR1	chemokine (C-C motif) receptor 1
hsa-miR-615-5p	1	0	1	1	1	1	CNN1	calponin 1, basic, smooth muscle
hsa-miR-615-5p	1	0	1	1	1	1	MAPK14	mitogen-activated protein kinase 14
hsa-miR-615-5p	1	0	1	0	0	0	DLG4	discs, large homolog 4 (Drosophila)
hsa-miR-615-5p	1	0	1	1	1	1	DUSP4	dual specificity phosphatase 4
hsa-miR-615-5p	1	0	1	1	1	1	CELSR3	cadherin, EGF LAG seven-pass G-type receptor 3 (flamingo homolog, Drosophila)
hsa-miR-615-5p	1	0	1	1	1	1	CELSR2	cadherin, EGF LAG seven-pass G-type receptor 2 (flamingo homolog, Drosophila)
hsa-miR-615-5p	0	0	1	0	1	1	EMP1	epithelial membrane protein 1
hsa-miR-615-5p	1	0	1	0	1	1	B4GALT1	UDP-Gal:betaGlcNAc beta 1,4- galactosyltransferase, polypeptide 1
hsa-miR-615-5p	1	0	1	1	1	1	NDST1	N-deacetylase/N-sulfotransferase (heparan glucosaminyl) 1
hsa-miR-615-5p	0	0	1	1	0	0	APEH	N-acylaminoacyl-peptide hydrolase
hsa-miR-615-5p	1	0	1	1	1	1	ARF3	ADP-ribosylation factor 3
hsa-miR-615-5p	0	0	1	1	0	0	RHOG	ras homolog family member G
hsa-miR-615-5p	0	0	1	1	1	1	CD1D	CD1d molecule
hsa-miR-615-5p	1	0	1	0	1	1	CEBPG	CCAAT/enhancer binding protein (C/EBP), gamma
hsa-miR-615-5p	1	0	1	1	1	1	CENPB	centromere protein B, 80kDa
hsa-miR-615-5p	0	0	1	1	0	0	DDB1	damage-specific DNA binding protein 1, 127kDa
hsa-miR-615-5p	0	0	1	1	1	1	DSG1	desmoglein 1
hsa-miR-615-5p	0	0	1	1	1	1	GATA1	GATA binding protein 1 (globin transcription factor 1)
hsa-miR-615-5p	0	0	1	1	0	0	GML	glycosylphosphatidylinositol anchored molecule like protein
hsa-miR-615-5p	0	0	1	1	1	1	HLA-DOA	major histocompatibility complex, class II, DO alpha
hsa-miR-615-5p	1	0	1	1	1	1	IL13	interleukin 13
hsa-miR-615-5p	1	0	1	1	1	1	ITGA5	integrin, alpha 5 (fibronectin receptor, alpha polypeptide)
hsa-miR-615-5p	0	0	1	1	0	0	KCNK3	potassium channel, subfamily K, member 3
hsa-miR-615-5p	1	0	1	0	1	1	KIF3C	kinesin family member 3C
hsa-miR-615-5p	1	0	1	1	1	1	KPNB1	karyopherin (importin) beta 1
hsa-miR-615-5p	0	0	1	1	0	0	KRT33B	keratin 33B
hsa-miR-615-5p	0	0	1	1	0	0	LAMB2	laminin, beta 2 (laminin S)
hsa-miR-615-5p	1	0	1	1	1	1	LIFR	leukemia inhibitory factor receptor alpha
hsa-miR-615-5p	0	0	1	1	1	1	MTAP	methylthioadenosine phosphorylase
hsa-miR-615-5p	1	0	1	1	1	1	NGFR	nerve growth factor receptor
hsa-miR-615-5p	1	0	1	1	1	1	ORC5	origin recognition complex, subunit 5
hsa-miR-615-5p	1	0	1	1	1	1	FURIN	furin (paired basic amino acid cleaving enzyme)
hsa-miR-615-5p	1	0	1	1	0	0	PDGFB	platelet-derived growth factor beta polypeptide
hsa-miR-615-5p	0	0	1	1	0	0	PER1	period homolog 1 (Drosophila)
hsa-miR-615-5p	0	0	1	1	1	1	PIM1	pim-1 oncogene
hsa-miR-615-5p	1	0	1	1	1	1	PLAGL2	pleiomorphic adenoma gene-like 2
hsa-miR-615-5p	1	0	1	1	1	1	PPP6C	protein phosphatase 6, catalytic subunit
hsa-miR-615-5p	0	0	1	1	1	1	MAPK10	mitogen-activated protein kinase 10
hsa-miR-615-5p	1	0	1	1	1	1	PTPN9	protein tyrosine phosphatase, non-receptor type 9
hsa-miR-615-5p	1	0	1	1	0	0	RFX1	regulatory factor X, 1 (influences HLA class II expression)
hsa-miR-615-5p	1	0	1	0	1	1	SORT1	sortilin 1
hsa-miR-615-5p	1	0	1	1	1	1	CCL21	chemokine (C-C motif) ligand 21
hsa-miR-615-5p	1	0	1	0	0	0	CX3CL1	chemokine (C-X3-C motif) ligand 1
hsa-miR-615-5p	1	0	1	1	1	1	SRF	serum response factor (c-fos serum response element-binding transcription factor)
hsa-miR-615-5p	0	0	1	1	0	0	SSX2	synovial sarcoma, X breakpoint 2
hsa-miR-615-5p	1	0	1	0	1	1	STC1	stanniocalcin 1
hsa-miR-615-5p	1	0	1	1	1	1	TFAP2B	transcription factor AP-2 beta (activating enhancer binding protein 2 beta)
hsa-miR-615-5p	0	0	1	1	1	1	ZNF137P	zinc finger protein 137, pseudogene
hsa-miR-615-5p	1	0	1	1	1	1	PDHX	pyruvate dehydrogenase complex, component X
hsa-miR-615-5p	1	0	1	1	1	1	NRIP1	nuclear receptor interacting protein 1
hsa-miR-615-5p	1	0	1	1	1	1	BHLHE40	basic helix-loop-helix family, member e40
hsa-miR-615-5p	0	0	1	1	0	0	EIF3F	eukaryotic translation initiation factor 3, subunit F
hsa-miR-615-5p	1	0	1	1	1	1	KALRN	kalirin, RhoGEF kinase
hsa-miR-615-5p	0	0	1	0	0	0	ARRB1	arrestin, beta 1
hsa-miR-615-5p	1	0	1	1	1	1	BCL2L2	BCL2-like 2
hsa-miR-615-5p	0	0	1	0	1	1	FASN	fatty acid synthase
hsa-miR-615-5p	1	0	1	1	1	1	SYT7	synaptotagmin VII
hsa-miR-615-5p	0	0	1	1	0	0	COX6A1	cytochrome c oxidase subunit VIa polypeptide 1
hsa-miR-615-5p	0	0	1	1	1	1	CSK	c-src tyrosine kinase
hsa-miR-615-5p	1	0	1	1	1	1	DBN1	drebrin 1
hsa-miR-615-5p	1	0	1	1	1	1	DUSP8	dual specificity phosphatase 8
hsa-miR-615-5p	1	0	1	1	1	1	EPHB3	EPH receptor B3
hsa-miR-615-5p	0	0	1	1	1	1	FOXA1	forkhead box A1
hsa-miR-615-5p	1	0	1	1	0	0	HOXC6	homeobox C6
hsa-miR-615-5p	1	0	1	0	1	1	WNT7A	wingless-type MMTV integration site family, member 7A
hsa-miR-615-5p	1	0	1	1	1	1	WNT11	wingless-type MMTV integration site family, member 11
hsa-miR-615-5p	1	0	1	1	1	1	SF1	splicing factor 1
hsa-miR-615-5p	0	0	1	1	0	0	BCL7C	B-cell CLL/lymphoma 7C
hsa-miR-615-5p	0	0	1	0	0	0	CDK5	cyclin-dependent kinase 5
hsa-miR-615-5p	0	0	1	1	0	0	ASCL2	achaete-scute complex homolog 2 (Drosophila)
hsa-miR-615-5p	1	0	1	1	0	0	BCL3	B-cell CLL/lymphoma 3
hsa-miR-615-5p	1	0	1	1	1	1	DLX3	distal-less homeobox 3
hsa-miR-615-5p	1	0	1	0	1	1	DLX6	distal-less homeobox 6
hsa-miR-615-5p	1	0	1	1	1	1	NR2F6	nuclear receptor subfamily 2, group F, member 6
hsa-miR-615-5p	0	0	1	0	1	1	FOSL2	FOS-like antigen 2
hsa-miR-615-5p	1	0	1	1	1	1	HIP1	huntingtin interacting protein 1
hsa-miR-615-5p	1	0	1	1	1	1	PHF2	PHD finger protein 2
hsa-miR-615-5p	1	0	1	0	1	1	SRC	v-src sarcoma (Schmidt-Ruppin A-2) viral oncogene homolog (avian)
hsa-miR-615-5p	0	0	1	1	1	1	ST5	suppression of tumorigenicity 5
hsa-miR-615-5p	1	0	1	1	1	1	WNT1	wingless-type MMTV integration site family, member 1
hsa-miR-615-5p	1	0	1	1	1	1	MLF2	myeloid leukemia factor 2
hsa-miR-615-5p	1	0	1	1	1	1	RND2	Rho family GTPase 2
hsa-miR-615-5p	1	0	1	1	0	0	NOG	noggin
hsa-miR-615-5p	1	0	1	1	1	1	HCN4	hyperpolarization activated cyclic nucleotide-gated potassium channel 4
hsa-miR-615-5p	1	0	1	1	1	1	HOXA11	homeobox A11
hsa-miR-615-5p	1	0	1	1	1	1	LAMC2	laminin, gamma 2
hsa-miR-615-5p	1	0	1	1	1	1	RGS4	regulator of G-protein signaling 4
hsa-miR-615-5p	0	0	1	1	1	1	S100A11	S100 calcium binding protein A11
hsa-miR-615-5p	0	0	1	1	0	0	SSX4	synovial sarcoma, X breakpoint 4
hsa-miR-615-5p	1	0	1	1	0	0	TSPAN5	tetraspanin 5
hsa-miR-615-5p	1	0	1	1	1	1	ACTR1A	ARP1 actin-related protein 1 homolog A, centractin alpha (yeast)
hsa-miR-615-5p	0	0	1	1	1	1	ZNF263	zinc finger protein 263
hsa-miR-615-5p	0	0	1	1	1	1	SLC17A2	solute carrier family 17 (sodium phosphate), member 2
hsa-miR-615-5p	1	0	1	0	1	1	SPRY3	sprouty homolog 3 (Drosophila)
hsa-miR-615-5p	1	0	1	1	1	1	FOXO4	forkhead box O4
hsa-miR-615-5p	1	0	1	1	1	1	MTF1	metal-regulatory transcription factor 1
hsa-miR-615-5p	1	0	1	1	1	1	PRCC	papillary renal cell carcinoma (translocation-associated)
hsa-miR-615-5p	1	0	1	1	1	1	LIPG	lipase, endothelial
hsa-miR-615-5p	1	0	1	1	1	1	HS3ST4	heparan sulfate (glucosamine) 3-O-sulfotransferase 4
hsa-miR-615-5p	0	0	1	1	0	0	CCL26	chemokine (C-C motif) ligand 26
hsa-miR-615-5p	0	0	1	1	1	1	MICU1	mitochondrial calcium uptake 1
hsa-miR-615-5p	1	0	1	1	1	1	IRF9	interferon regulatory factor 9
hsa-miR-615-5p	1	0	1	1	1	1	DAGLA	diacylglycerol lipase, alpha
hsa-miR-615-5p	1	0	1	1	1	1	NEUROD2	neuronal differentiation 2
hsa-miR-615-5p	1	0	1	1	1	1	NEUROG1	neurogenin 1
hsa-miR-615-5p	0	0	1	1	1	1	NTF4	neurotrophin 4
hsa-miR-615-5p	0	0	1	0	1	1	OAS3	2'-5'-oligoadenylate synthetase 3, 100kDa
hsa-miR-615-5p	0	0	1	0	1	1	PSME1	proteasome (prosome, macropain) activator subunit 1 (PA28 alpha)
hsa-miR-615-5p	0	0	1	1	1	1	TYRO3	TYRO3 protein tyrosine kinase
hsa-miR-615-5p	1	0	1	1	1	1	SMC1A	structural maintenance of chromosomes 1A
hsa-miR-615-5p	0	0	1	1	1	1	SLC25A17	solute carrier family 25 (mitochondrial carrier; peroxisomal membrane protein, 34kDa), member 17
hsa-miR-615-5p	1	0	1	1	0	0	LBX1	ladybird homeobox 1
hsa-miR-615-5p	0	0	1	1	1	1	CLDN16	claudin 16
hsa-miR-615-5p	1	0	1	1	1	1	TSPAN9	tetraspanin 9
hsa-miR-615-5p	1	0	1	1	1	1	MMP24	matrix metallopeptidase 24 (membrane-inserted)
hsa-miR-615-5p	0	0	1	1	0	0	DNAJB2	DnaJ (Hsp40) homolog, subfamily B, member 2
hsa-miR-615-5p	1	0	1	0	1	1	SYNGAP1	synaptic Ras GTPase activating protein 1
hsa-miR-615-5p	0	0	1	1	1	1	TMED10	transmembrane emp24-like trafficking protein 10 (yeast)
hsa-miR-615-5p	0	0	1	1	0	0	PIM2	pim-2 oncogene
hsa-miR-615-5p	0	0	1	1	1	1	HOXD3	homeobox D3
hsa-miR-615-5p	1	0	1	1	0	0	RNF5	ring finger protein 5, E3 ubiquitin protein ligase
hsa-miR-615-5p	1	0	1	0	1	1	SOX12	SRY (sex determining region Y)-box 12
hsa-miR-615-5p	1	0	1	1	1	1	SYN1	synapsin I
hsa-miR-615-5p	1	0	1	0	1	1	WASF2	WAS protein family, member 2
hsa-miR-615-5p	0	0	1	1	0	0	TCEB2	transcription elongation factor B (SIII), polypeptide 2 (18kDa, elongin B)
hsa-miR-615-5p	1	0	1	1	1	1	PALM2-AKAP2	PALM2-AKAP2 readthrough
hsa-miR-615-5p	1	0	1	1	1	1	PHLDA1	pleckstrin homology-like domain, family A, member 1
hsa-miR-615-5p	0	0	1	1	0	0	SIX6	SIX homeobox 6
hsa-miR-615-5p	1	0	1	1	1	1	TARDBP	TAR DNA binding protein
hsa-miR-615-5p	0	0	1	1	0	0	LTB	lymphotoxin beta (TNF superfamily, member 3)
hsa-miR-615-5p	0	0	1	1	1	1	ATF5	activating transcription factor 5
hsa-miR-615-5p	0	0	1	1	0	0	DPF3	D4, zinc and double PHD fingers, family 3
hsa-miR-615-5p	0	0	1	1	0	0	TMEM59L	transmembrane protein 59-like
hsa-miR-615-5p	0	0	1	1	1	1	AHSA1	AHA1, activator of heat shock 90kDa protein ATPase homolog 1 (yeast)
hsa-miR-615-5p	1	0	1	0	1	1	FZD4	frizzled family receptor 4
hsa-miR-615-5p	1	0	1	1	1	1	RYBP	RING1 and YY1 binding protein
hsa-miR-615-5p	1	0	1	0	1	1	GAB2	GRB2-associated binding protein 2
hsa-miR-615-5p	1	0	1	1	1	1	MAPRE1	microtubule-associated protein, RP/EB family, member 1
hsa-miR-615-5p	1	0	1	1	1	1	TLL2	tolloid-like 2
hsa-miR-615-5p	0	0	1	1	1	1	UCK2	uridine-cytidine kinase 2
hsa-miR-615-5p	0	0	1	1	1	1	N6AMT1	N-6 adenine-specific DNA methyltransferase 1 (putative)
hsa-miR-615-5p	0	0	1	1	0	0	PCSK1N	proprotein convertase subtilisin/kexin type 1 inhibitor
hsa-miR-615-5p	1	0	1	1	0	0	ZDHHC1	zinc finger, DHHC-type containing 1
hsa-miR-615-5p	1	0	1	1	1	1	SERTAD3	SERTA domain containing 3
hsa-miR-615-5p	0	0	1	1	0	0	MACROD1	MACRO domain containing 1
hsa-miR-615-5p	0	0	1	0	1	1	SCN8A	sodium channel, voltage gated, type VIII, alpha subunit
hsa-miR-615-5p	0	0	1	0	1	1	AP2A1	adaptor-related protein complex 2, alpha 1 subunit
hsa-miR-615-5p	1	0	1	1	1	1	MAPRE2	microtubule-associated protein, RP/EB family, member 2
hsa-miR-615-5p	0	0	1	1	0	0	ADAMTS7	ADAM metallopeptidase with thrombospondin type 1 motif, 7
hsa-miR-615-5p	1	0	1	1	1	1	LHX6	LIM homeobox 6
hsa-miR-615-5p	1	0	1	1	0	0	SND1	staphylococcal nuclease and tudor domain containing 1
hsa-miR-615-5p	0	0	1	1	0	0	LMCD1	LIM and cysteine-rich domains 1
hsa-miR-615-5p	1	0	1	1	1	1	CDR2L	cerebellar degeneration-related protein 2-like
hsa-miR-615-5p	1	0	1	0	1	1	EDEM1	ER degradation enhancer, mannosidase alpha-like 1
hsa-miR-615-5p	0	0	1	1	0	0	SETD1A	SET domain containing 1A
hsa-miR-615-5p	0	0	1	1	1	1	FRMPD4	FERM and PDZ domain containing 4
hsa-miR-615-5p	1	0	1	1	1	1	RASSF2	Ras association (RalGDS/AF-6) domain family member 2
hsa-miR-615-5p	1	0	1	1	1	1	ARHGEF11	Rho guanine nucleotide exchange factor (GEF) 11
hsa-miR-615-5p	1	0	1	1	1	1	RUSC2	RUN and SH3 domain containing 2
hsa-miR-615-5p	1	0	1	1	1	1	SV2A	synaptic vesicle glycoprotein 2A
hsa-miR-615-5p	1	0	1	1	1	1	SORCS3	sortilin-related VPS10 domain containing receptor 3
hsa-miR-615-5p	1	0	1	1	1	1	FBXO21	F-box protein 21
hsa-miR-615-5p	1	0	1	0	1	1	ZNF609	zinc finger protein 609
hsa-miR-615-5p	1	0	1	1	1	1	TRAK2	trafficking protein, kinesin binding 2
hsa-miR-615-5p	0	0	1	1	1	1	KDM4C	lysine (K)-specific demethylase 4C
hsa-miR-615-5p	1	0	1	1	0	0	ZC3H3	zinc finger CCCH-type containing 3
hsa-miR-615-5p	1	0	1	1	0	0	CIC	capicua homolog (Drosophila)
hsa-miR-615-5p	1	0	1	1	1	1	RTF1	Rtf1, Paf1/RNA polymerase II complex component, homolog (S. cerevisiae)
hsa-miR-615-5p	1	0	1	0	1	1	KIAA1024	KIAA1024
hsa-miR-615-5p	0	0	1	1	1	1	POFUT2	protein O-fucosyltransferase 2
hsa-miR-615-5p	1	0	1	0	1	1	LPHN3	latrophilin 3
hsa-miR-615-5p	1	0	1	0	1	1	KHNYN	KH and NYN domain containing
hsa-miR-615-5p	1	0	1	0	1	1	LARP1	La ribonucleoprotein domain family, member 1
hsa-miR-615-5p	1	0	1	1	0	0	SMG5	smg-5 homolog, nonsense mediated mRNA decay factor (C. elegans)
hsa-miR-615-5p	1	0	1	1	1	1	PARM1	prostate androgen-regulated mucin-like protein 1
hsa-miR-615-5p	0	0	1	1	0	0	SPEF1	sperm flagellar 1
hsa-miR-615-5p	1	0	1	1	1	1	CLIP3	CAP-GLY domain containing linker protein 3
hsa-miR-615-5p	1	0	1	1	1	1	PHF19	PHD finger protein 19
hsa-miR-615-5p	1	0	1	1	1	1	FAM155B	family with sequence similarity 155, member B
hsa-miR-615-5p	1	0	1	1	0	0	COL5A3	collagen, type V, alpha 3
hsa-miR-615-5p	0	0	1	1	1	1	HMP19	HMP19 protein
hsa-miR-615-5p	1	0	1	1	1	1	SNX9	sorting nexin 9
hsa-miR-615-5p	1	0	1	1	1	1	TOB2	transducer of ERBB2, 2
hsa-miR-615-5p	1	0	1	1	1	1	RAPGEFL1	Rap guanine nucleotide exchange factor (GEF)-like 1
hsa-miR-615-5p	0	0	1	1	1	1	KDM3B	lysine (K)-specific demethylase 3B
hsa-miR-615-5p	1	0	1	0	1	1	KLHL3	kelch-like 3 (Drosophila)
hsa-miR-615-5p	0	0	1	1	1	1	PRKAG3	protein kinase, AMP-activated, gamma 3 non-catalytic subunit
hsa-miR-615-5p	0	0	1	1	0	0	UBQLN3	ubiquilin 3
hsa-miR-615-5p	1	0	1	1	1	1	INO80	INO80 homolog (S. cerevisiae)
hsa-miR-615-5p	0	0	1	1	1	1	SMG6	smg-6 homolog, nonsense mediated mRNA decay factor (C. elegans)
hsa-miR-615-5p	0	0	1	1	1	1	DYM	dymeclin
hsa-miR-615-5p	0	0	1	0	1	1	OTUB1	OTU domain, ubiquitin aldehyde binding 1
hsa-miR-615-5p	1	0	1	1	1	1	FRMD4A	FERM domain containing 4A
hsa-miR-615-5p	0	0	1	1	0	0	LUC7L	LUC7-like (S. cerevisiae)
hsa-miR-615-5p	1	0	1	1	1	1	RIC8B	resistance to inhibitors of cholinesterase 8 homolog B (C. elegans)
hsa-miR-615-5p	0	0	1	1	1	1	TMLHE	trimethyllysine hydroxylase, epsilon
hsa-miR-615-5p	0	0	1	1	1	1	TRIM62	tripartite motif containing 62
hsa-miR-615-5p	1	0	1	1	1	1	DRAM1	DNA-damage regulated autophagy modulator 1
hsa-miR-615-5p	1	0	1	0	1	1	FOXJ2	forkhead box J2
hsa-miR-615-5p	0	0	1	1	1	1	LENEP	lens epithelial protein
hsa-miR-615-5p	1	0	1	0	1	1	PCDHAC1	protocadherin alpha subfamily C, 1
hsa-miR-615-5p	1	0	1	0	1	1	PCDHAC2	protocadherin alpha subfamily C, 2
hsa-miR-615-5p	1	0	1	1	1	1	PCDHA1	protocadherin alpha 1
hsa-miR-615-5p	1	0	1	0	1	1	PCDHA10	protocadherin alpha 10
hsa-miR-615-5p	1	0	1	0	1	1	PCDHA11	protocadherin alpha 11
hsa-miR-615-5p	1	0	1	0	1	1	PCDHA12	protocadherin alpha 12
hsa-miR-615-5p	1	0	1	1	1	1	PCDHA2	protocadherin alpha 2
hsa-miR-615-5p	1	0	1	1	1	1	PCDHA3	protocadherin alpha 3
hsa-miR-615-5p	1	0	1	1	1	1	PCDHA6	protocadherin alpha 6
hsa-miR-615-5p	1	0	1	0	1	1	PCDHA7	protocadherin alpha 7
hsa-miR-615-5p	1	0	1	1	1	1	PCDHA8	protocadherin alpha 8
hsa-miR-615-5p	1	0	1	1	0	0	HOXC5	homeobox C5
hsa-miR-615-5p	0	0	1	1	0	0	SH3BP1	SH3-domain binding protein 1
hsa-miR-615-5p	0	0	1	1	1	1	NPAP1	nuclear pore associated protein 1
hsa-miR-615-5p	0	0	1	1	1	1	RIN2	Ras and Rab interactor 2
hsa-miR-615-5p	1	0	1	1	1	1	SEPT3	septin 3
hsa-miR-615-5p	0	0	1	1	0	0	NGEF	neuronal guanine nucleotide exchange factor
hsa-miR-615-5p	1	0	1	1	1	1	MDM1	Mdm1 nuclear protein homolog (mouse)
hsa-miR-615-5p	1	0	1	1	0	0	C11orf75	chromosome 11 open reading frame 75
hsa-miR-615-5p	1	0	1	1	1	1	CNNM4	cyclin M4
hsa-miR-615-5p	1	0	1	1	1	1	PRDM8	PR domain containing 8
hsa-miR-615-5p	1	0	1	0	1	1	EIF5A2	eukaryotic translation initiation factor 5A2
hsa-miR-615-5p	1	0	1	1	1	1	SLC24A3	solute carrier family 24 (sodium/potassium/calcium exchanger), member 3
hsa-miR-615-5p	1	0	1	1	1	1	RGAG1	retrotransposon gag domain containing 1
hsa-miR-615-5p	1	0	1	0	1	1	ALPK3	alpha-kinase 3
hsa-miR-615-5p	1	0	1	1	1	1	NLGN2	neuroligin 2
hsa-miR-615-5p	0	0	1	1	1	1	MARCH4	membrane-associated ring finger (C3HC4) 4, E3 ubiquitin protein ligase
hsa-miR-615-5p	0	0	1	1	1	1	SSX3	synovial sarcoma, X breakpoint 3
hsa-miR-615-5p	0	0	1	1	1	1	TLX3	T-cell leukemia homeobox 3
hsa-miR-615-5p	0	0	1	1	0	0	MAGEA5	melanoma antigen family A, 5
hsa-miR-615-5p	1	0	1	1	0	0	SLC5A6	solute carrier family 5 (sodium-dependent vitamin transporter), member 6
hsa-miR-615-5p	1	0	1	1	0	0	TMSB10	thymosin beta 10
hsa-miR-615-5p	0	0	1	1	0	0	HOXD11	homeobox D11
hsa-miR-615-5p	1	0	1	0	1	1	TP53INP2	tumor protein p53 inducible nuclear protein 2
hsa-miR-615-5p	1	0	1	1	1	1	CDH22	cadherin 22, type 2
hsa-miR-615-5p	1	0	1	1	1	1	ZFYVE1	zinc finger, FYVE domain containing 1
hsa-miR-615-5p	1	0	1	1	1	1	ATP2B3	ATPase, Ca++ transporting, plasma membrane 3
hsa-miR-615-5p	0	0	1	1	1	1	PGM5	phosphoglucomutase 5
hsa-miR-615-5p	1	0	1	1	0	0	HAND2	heart and neural crest derivatives expressed 2
hsa-miR-615-5p	1	0	1	1	1	1	XYLT2	xylosyltransferase II
hsa-miR-615-5p	1	0	1	1	1	1	ABCG4	ATP-binding cassette, sub-family G (WHITE), member 4
hsa-miR-615-5p	1	0	1	1	1	1	HIF3A	hypoxia inducible factor 3, alpha subunit
hsa-miR-615-5p	1	0	1	1	1	1	TMEM168	transmembrane protein 168
hsa-miR-615-5p	1	0	1	1	1	1	GIGYF1	GRB10 interacting GYF protein 1
hsa-miR-615-5p	1	0	1	1	1	1	FAM160B2	family with sequence similarity 160, member B2
hsa-miR-615-5p	1	0	1	1	1	1	FNDC4	fibronectin type III domain containing 4
hsa-miR-615-5p	0	0	1	1	1	1	MRPL34	mitochondrial ribosomal protein L34
hsa-miR-615-5p	1	0	1	1	1	1	GID4	GID complex subunit 4, VID24 homolog (S. cerevisiae)
hsa-miR-615-5p	0	0	1	0	1	1	TRPM8	transient receptor potential cation channel, subfamily M, member 8
hsa-miR-615-5p	1	0	1	1	1	1	FYCO1	FYVE and coiled-coil domain containing 1
hsa-miR-615-5p	1	0	1	1	0	0	ABHD8	abhydrolase domain containing 8
hsa-miR-615-5p	0	0	1	1	1	1	GLT25D1	glycosyltransferase 25 domain containing 1
hsa-miR-615-5p	1	0	1	0	1	1	LIN28A	lin-28 homolog A (C. elegans)
hsa-miR-615-5p	0	0	1	0	1	1	C1orf115	chromosome 1 open reading frame 115
hsa-miR-615-5p	0	0	1	1	1	1	PLEKHS1	pleckstrin homology domain containing, family S member 1
hsa-miR-615-5p	1	0	1	1	0	0	UBTD1	ubiquitin domain containing 1
hsa-miR-615-5p	1	0	1	0	1	1	SRCIN1	SRC kinase signaling inhibitor 1
hsa-miR-615-5p	0	0	1	1	1	1	BCL2L14	BCL2-like 14 (apoptosis facilitator)
hsa-miR-615-5p	1	0	1	0	1	1	CSRNP2	cysteine-serine-rich nuclear protein 2
hsa-miR-615-5p	1	0	1	1	1	1	PDRG1	p53 and DNA-damage regulated 1
hsa-miR-615-5p	1	0	1	1	1	1	TRIM8	tripartite motif containing 8
hsa-miR-615-5p	1	0	1	1	1	1	RAB1B	RAB1B, member RAS oncogene family
hsa-miR-615-5p	1	0	1	1	1	1	SOX7	SRY (sex determining region Y)-box 7
hsa-miR-615-5p	0	0	1	1	1	1	INHBE	inhibin, beta E
hsa-miR-615-5p	1	0	1	1	1	1	PCDHA9	protocadherin alpha 9
hsa-miR-615-5p	0	0	1	1	0	0	CACNG6	calcium channel, voltage-dependent, gamma subunit 6
hsa-miR-615-5p	1	0	1	1	1	1	PATZ1	POZ (BTB) and AT hook containing zinc finger 1
hsa-miR-615-5p	0	0	1	1	0	0	ATRIP	ATR interacting protein
hsa-miR-615-5p	1	0	1	1	1	1	ARID5B	AT rich interactive domain 5B (MRF1-like)
hsa-miR-615-5p	1	0	1	1	1	1	ANTXR1	anthrax toxin receptor 1
hsa-miR-615-5p	1	0	1	1	1	1	LOXL4	lysyl oxidase-like 4
hsa-miR-615-5p	1	0	1	1	1	1	ZNRF1	zinc and ring finger 1, E3 ubiquitin protein ligase
hsa-miR-615-5p	1	0	1	1	1	1	ZDHHC18	zinc finger, DHHC-type containing 18
hsa-miR-615-5p	1	0	1	1	1	1	CAMKK1	calcium/calmodulin-dependent protein kinase kinase 1, alpha
hsa-miR-615-5p	0	0	1	1	0	0	PCDH1	protocadherin 1
hsa-miR-615-5p	1	0	1	1	1	1	SYVN1	synovial apoptosis inhibitor 1, synoviolin
hsa-miR-615-5p	1	0	1	1	1	1	AJUBA	ajuba LIM protein
hsa-miR-615-5p	0	0	1	1	0	0	ACPT	acid phosphatase, testicular
hsa-miR-615-5p	1	0	1	0	1	1	SCRT2	scratch homolog 2, zinc finger protein (Drosophila)
hsa-miR-615-5p	1	0	1	1	0	0	CAMK2N2	calcium/calmodulin-dependent protein kinase II inhibitor 2
hsa-miR-615-5p	1	0	1	1	1	1	C19orf6	chromosome 19 open reading frame 6
hsa-miR-615-5p	0	0	1	1	0	0	HIST3H2A	histone cluster 3, H2a
hsa-miR-615-5p	1	0	1	1	0	0	FCHSD1	FCH and double SH3 domains 1
hsa-miR-615-5p	1	0	1	1	1	1	TSPYL5	TSPY-like 5
hsa-miR-615-5p	1	0	1	1	1	1	TPD52L3	tumor protein D52-like 3
hsa-miR-615-5p	1	0	1	1	0	0	CCDC120	coiled-coil domain containing 120
hsa-miR-615-5p	0	0	1	1	0	0	FAM46B	family with sequence similarity 46, member B
hsa-miR-615-5p	0	0	1	1	0	0	TNFRSF13C	tumor necrosis factor receptor superfamily, member 13C
hsa-miR-615-5p	0	0	1	1	1	1	PRDM7	PR domain containing 7
hsa-miR-615-5p	1	0	1	1	0	0	AP1S1	adaptor-related protein complex 1, sigma 1 subunit
hsa-miR-615-5p	0	0	1	1	0	0	COL6A2	collagen, type VI, alpha 2
hsa-miR-615-5p	1	0	1	1	1	1	C20orf112	chromosome 20 open reading frame 112
hsa-miR-615-5p	1	0	1	1	1	1	KCNE4	potassium voltage-gated channel, Isk-related family, member 4
hsa-miR-615-5p	1	0	1	1	0	0	ADAMTS14	ADAM metallopeptidase with thrombospondin type 1 motif, 14
hsa-miR-615-5p	0	0	1	1	0	0	WFDC10A	WAP four-disulfide core domain 10A
hsa-miR-615-5p	0	0	1	1	1	1	CHST14	carbohydrate (N-acetylgalactosamine 4-0) sulfotransferase 14
hsa-miR-615-5p	0	0	1	1	0	0	CITED4	Cbp/p300-interacting transactivator, with Glu/Asp-rich carboxy-terminal domain, 4
hsa-miR-615-5p	0	0	1	0	1	1	SYNPO2	synaptopodin 2
hsa-miR-615-5p	1	0	1	1	0	0	SYN3	synapsin III
hsa-miR-615-5p	0	0	1	1	1	1	RHOV	ras homolog family member V
hsa-miR-615-5p	0	0	1	1	0	0	C6orf25	chromosome 6 open reading frame 25
hsa-miR-615-5p	0	0	1	1	1	1	TMEM129	transmembrane protein 129
hsa-miR-615-5p	0	0	1	0	1	1	SP140L	SP140 nuclear body protein-like
hsa-miR-615-5p	0	0	1	1	1	1	C1orf213	chromosome 1 open reading frame 213
hsa-miR-615-5p	0	0	1	1	0	0	KLK15	kallikrein-related peptidase 15
hsa-miR-615-5p	0	0	1	1	0	0	PPP1R14B	protein phosphatase 1, regulatory (inhibitor) subunit 14B
hsa-miR-615-5p	1	0	1	1	1	1	ARX	aristaless related homeobox
hsa-miR-615-5p	0	0	1	1	1	1	MAPK9	mitogen-activated protein kinase 9
hsa-miR-615-5p	1	0	1	1	1	1	TEX261	testis expressed 261
hsa-miR-615-5p	0	0	1	1	1	1	C10orf82	chromosome 10 open reading frame 82
hsa-miR-615-5p	1	0	1	1	1	1	YPEL4	yippee-like 4 (Drosophila)
hsa-miR-615-5p	1	0	1	1	1	1	UBQLNL	ubiquilin-like
hsa-miR-615-5p	0	0	1	1	0	0	EVI5L	ecotropic viral integration site 5-like
hsa-miR-615-5p	0	0	1	1	1	1	FAM100A	family with sequence similarity 100, member A
hsa-miR-615-5p	0	0	1	1	1	1	APOBEC3F	apolipoprotein B mRNA editing enzyme, catalytic polypeptide-like 3F
hsa-miR-615-5p	0	0	1	1	0	0	TCEB3C	transcription elongation factor B polypeptide 3C (elongin A3)
hsa-miR-615-5p	1	0	1	1	0	0	ISL2	ISL LIM homeobox 2
hsa-miR-615-5p	0	0	1	1	0	0	KLK12	kallikrein-related peptidase 12
hsa-miR-615-5p	0	0	1	1	1	1	DMBX1	diencephalon/mesencephalon homeobox 1
hsa-miR-615-5p	0	0	1	0	1	1	CHKB	choline kinase beta
hsa-miR-615-5p	0	0	1	1	1	1	EFCAB13	EF-hand calcium binding domain 13
hsa-miR-615-5p	1	0	1	1	1	1	ZNF362	zinc finger protein 362
hsa-miR-615-5p	0	0	1	1	0	0	C2orf57	chromosome 2 open reading frame 57
hsa-miR-615-5p	1	0	1	0	1	1	TMEM154	transmembrane protein 154
hsa-miR-615-5p	1	0	1	1	1	1	ZCCHC5	zinc finger, CCHC domain containing 5
hsa-miR-615-5p	0	0	1	1	1	1	ASPRV1	aspartic peptidase, retroviral-like 1
hsa-miR-615-5p	1	0	1	0	1	1	C7orf41	chromosome 7 open reading frame 41
hsa-miR-615-5p	0	0	1	1	0	0	SCARF2	scavenger receptor class F, member 2
hsa-miR-615-5p	1	0	1	1	0	0	TMEM86A	transmembrane protein 86A
hsa-miR-615-5p	1	0	1	1	1	1	FBXL16	F-box and leucine-rich repeat protein 16
hsa-miR-615-5p	1	0	1	0	1	1	MDGA1	MAM domain containing glycosylphosphatidylinositol anchor 1
hsa-miR-615-5p	0	0	1	0	1	1	RTP1	receptor (chemosensory) transporter protein 1
hsa-miR-615-5p	0	0	1	1	0	0	MLX	MAX-like protein X
hsa-miR-615-5p	1	0	1	1	1	1	DAZAP1	DAZ associated protein 1
hsa-miR-615-5p	0	0	1	1	1	1	ZFP91-CNTF	ZFP91-CNTF readthrough (non-protein coding)
hsa-miR-615-5p	0	0	1	0	1	1	TUSC5	tumor suppressor candidate 5
hsa-miR-615-5p	0	0	1	1	1	1	KCNH5	potassium voltage-gated channel, subfamily H (eag-related), member 5
hsa-miR-615-5p	1	0	1	1	1	1	IL28RA	interleukin 28 receptor, alpha (interferon, lambda receptor)
hsa-miR-615-5p	0	0	1	1	0	0	SSX6	synovial sarcoma, X breakpoint 6 (pseudogene)
hsa-miR-615-5p	1	0	1	0	1	1	KSR2	kinase suppressor of ras 2
hsa-miR-615-5p	0	0	1	1	0	0	TMEM145	transmembrane protein 145
hsa-miR-615-5p	0	0	1	0	1	1	C5orf64	chromosome 5 open reading frame 64
hsa-miR-615-5p	0	0	1	1	1	1	CD300LB	CD300 molecule-like family member b
hsa-miR-615-5p	0	0	1	0	1	1	C17orf49	chromosome 17 open reading frame 49
hsa-miR-615-5p	1	0	1	1	1	1	SCN4B	sodium channel, voltage-gated, type IV, beta subunit
hsa-miR-615-5p	0	0	1	1	1	1	ZDHHC22	zinc finger, DHHC-type containing 22
hsa-miR-615-5p	0	0	1	1	0	0	C17orf74	chromosome 17 open reading frame 74
hsa-miR-615-5p	0	0	1	1	1	1	KRT79	keratin 79
hsa-miR-615-5p	1	0	1	0	1	1	CCDC71L	coiled-coil domain containing 71-like
hsa-miR-615-5p	0	0	1	1	1	1	C16orf54	chromosome 16 open reading frame 54
hsa-miR-615-5p	1	0	1	1	1	1	PPAP2B	phosphatidic acid phosphatase type 2B
hsa-miR-615-5p	0	0	1	1	0	0	TAS1R1	taste receptor, type 1, member 1
hsa-miR-615-5p	1	0	1	1	1	1	ASB6	ankyrin repeat and SOCS box containing 6
hsa-miR-615-5p	0	0	1	1	1	1	FBXO27	F-box protein 27
hsa-miR-615-5p	0	0	1	1	0	0	PRDX2	peroxiredoxin 2
hsa-miR-615-5p	1	0	1	1	1	1	TMEM229B	transmembrane protein 229B
hsa-miR-615-5p	1	0	1	0	1	1	RIMS4	regulating synaptic membrane exocytosis 4
hsa-miR-615-5p	1	0	1	0	1	1	SRRM4	serine/arginine repetitive matrix 4
hsa-miR-615-5p	0	0	1	1	1	1	DERL3	derlin 3
hsa-miR-615-5p	0	0	1	1	1	1	OLFML1	olfactomedin-like 1
hsa-miR-615-5p	0	0	1	1	0	0	ITIH6	inter-alpha-trypsin inhibitor heavy chain family, member 6
hsa-miR-615-5p	0	0	1	1	1	1	LHFPL4	lipoma HMGIC fusion partner-like 4
hsa-miR-615-5p	0	0	1	0	1	1	WASH3P	WAS protein family homolog 3 pseudogene
hsa-miR-615-5p	0	0	1	1	1	1	COL18A1-AS1	COL18A1 antisense RNA 1
hsa-miR-615-5p	0	0	1	0	1	1	SOGA1	suppressor of glucose, autophagy associated 1
hsa-miR-615-5p	1	0	1	1	1	1	THRA	thyroid hormone receptor, alpha
hsa-miR-615-5p	1	0	1	1	0	0	KAZN	kazrin, periplakin interacting protein
hsa-miR-615-5p	0	0	1	1	1	1	ELP5	elongator acetyltransferase complex subunit 5
hsa-miR-615-5p	0	0	1	1	0	0	IER5L	immediate early response 5-like
hsa-miR-615-5p	0	0	1	1	0	0	C19orf70	chromosome 19 open reading frame 70
hsa-miR-615-5p	1	0	1	1	1	1	METTL21B	methyltransferase like 21B
hsa-miR-615-5p	1	0	1	1	1	1	TEX19	testis expressed 19
hsa-miR-615-5p	0	0	1	0	0	0	ESRRAP2	estrogen-related receptor alpha pseudogene 2
hsa-miR-615-5p	0	0	1	0	0	0	CELP	carboxyl ester lipase pseudogene
hsa-miR-615-5p	0	0	1	0	0	0	PCDHB17	protocadherin beta 17 pseudogene
hsa-miR-615-5p	0	0	1	0	0	0	PCDHB19P	protocadherin beta 19 pseudogene
hsa-miR-615-5p	0	0	1	1	0	0	TTTY8	testis-specific transcript, Y-linked 8 (non-protein coding)
hsa-miR-615-5p	0	0	1	0	0	0	NXF4	nuclear RNA export factor 4 pseudogene
hsa-miR-615-5p	0	0	1	0	0	0	MSX2P1	msh homeobox 2 pseudogene 1
hsa-miR-615-5p	0	0	1	0	0	0	SLC25A3P1	solute carrier family 25 (mitochondrial carrier; phosphate carrier), member 3 pseudogene 1
hsa-miR-615-5p	0	0	1	0	0	0	HTR7P1	5-hydroxytryptamine (serotonin) receptor 7 pseudogene 1
hsa-miR-615-5p	0	0	1	0	0	0	SEPHS1P1	selenophosphate synthetase 1 pseudogene 1
hsa-miR-615-5p	0	0	1	0	0	0	HOXA11-AS	HOXA11 antisense RNA
hsa-miR-615-5p	0	0	1	0	0	0	LOC374443	C-type lectin domain family 2, member D pseudogene
hsa-miR-615-5p	0	0	1	0	0	0	SIGLEC16	sialic acid binding Ig-like lectin 16 (gene/pseudogene)
hsa-miR-615-5p	0	0	1	0	0	0	HAS2-AS1	HAS2 antisense RNA 1
hsa-miR-615-5p	0	0	1	0	0	0	CLEC4GP1	C-type lectin domain family 4, member G pseudogene 1
hsa-miR-615-5p	0	0	1	0	0	0	SNX29P2	sorting nexin 29 pseudogene 2
hsa-miR-615-5p	0	0	1	0	0	0	LOC285359	phosducin-like 3 pseudogene
hsa-miR-615-5p	0	0	1	0	0	0	LILRP2	leukocyte immunoglobulin-like receptor pseudogene 2
hsa-miR-615-5p	0	0	1	0	0	0	PYY2	peptide YY, 2 (pseudogene)
hsa-miR-615-5p	0	0	1	0	0	0	RNF5P1	ring finger protein 5, E3 ubiquitin protein ligase pseudogene 1
hsa-miR-615-5p	0	0	1	0	0	0	HSP90B3P	heat shock protein 90kDa beta (Grp94), member 3, pseudogene
hsa-miR-615-5p	0	0	1	0	0	0	SNORD115-7	small nucleolar RNA, C/D box 115-7
hsa-miR-615-5p	1	0	1	1	1	1	PDE4A	phosphodiesterase 4A, cAMP-specific
hsa-miR-615-5p	1	0	1	0	1	1	NFIX	nuclear factor I/X (CCAAT-binding transcription factor)
hsa-miR-615-5p	0	0	1	0	0	0	PLGLA	plasminogen-like A
hsa-miR-615-5p	1	0	1	1	1	1	TCF3	transcription factor 3 (E2A immunoglobulin enhancer binding factors E12/E47)
hsa-miR-615-5p	0	0	1	1	0	0	MUC1	mucin 1, cell surface associated
hsa-miR-615-5p	1	0	1	1	0	0	FGFR3	fibroblast growth factor receptor 3
hsa-miR-615-5p	0	0	1	0	0	0	MUC5AC	mucin 5AC, oligomeric mucus/gel-forming
hsa-miR-615-5p	0	0	1	1	0	0	GPR17	G protein-coupled receptor 17
hsa-miR-615-5p	0	0	0	1	1	1	DBNDD1	dysbindin (dystrobrevin binding protein 1) domain containing 1
hsa-miR-615-5p	0	0	1	1	0	0	USH1C	Usher syndrome 1C (autosomal recessive, severe)
hsa-miR-615-5p	0	0	0	1	0	0	CRLF1	cytokine receptor-like factor 1
hsa-miR-615-5p	1	0	1	1	1	1	OSBPL7	oxysterol binding protein-like 7
hsa-miR-615-5p	1	0	1	1	0	0	PLEKHG6	pleckstrin homology domain containing, family G (with RhoGef domain) member 6
hsa-miR-615-5p	0	0	1	1	1	1	PIGQ	phosphatidylinositol glycan anchor biosynthesis, class Q
hsa-miR-615-5p	1	0	1	1	1	1	B4GALT7	xylosylprotein beta 1,4-galactosyltransferase, polypeptide 7
hsa-miR-615-5p	0	0	1	1	1	1	GRN	granulin
hsa-miR-615-5p	0	0	1	1	1	1	CREB3L3	cAMP responsive element binding protein 3-like 3
hsa-miR-615-5p	0	0	0	1	0	0	FAM50A	family with sequence similarity 50, member A
hsa-miR-615-5p	1	0	1	1	0	0	ANO8	anoctamin 8
hsa-miR-615-5p	1	0	1	1	0	0	REXO1	REX1, RNA exonuclease 1 homolog (S. cerevisiae)
hsa-miR-615-5p	0	0	1	1	1	1	SLC9A3R2	solute carrier family 9, subfamily A (NHE3, cation proton antiporter 3), member 3 regulator 2
hsa-miR-615-5p	0	0	0	1	0	0	GAL3ST2	galactose-3-O-sulfotransferase 2
hsa-miR-615-5p	0	0	0	1	0	0	MRPL28	mitochondrial ribosomal protein L28
hsa-miR-615-5p	1	0	1	1	0	0	ITGB4	integrin, beta 4
hsa-miR-615-5p	0	0	1	1	0	0	REM1	RAS (RAD and GEM)-like GTP-binding 1
hsa-miR-615-5p	1	0	1	1	1	1	PPP1R13B	protein phosphatase 1, regulatory subunit 13B
hsa-miR-615-5p	0	0	1	1	0	0	LTBP4	latent transforming growth factor beta binding protein 4
hsa-miR-615-5p	1	0	1	1	0	0	YPEL3	yippee-like 3 (Drosophila)
hsa-miR-615-5p	0	0	0	1	0	0	CEBPE	CCAAT/enhancer binding protein (C/EBP), epsilon
hsa-miR-615-5p	1	0	1	1	0	0	OSGEP	O-sialoglycoprotein endopeptidase
hsa-miR-615-5p	0	0	0	1	0	0	MYL6B	myosin, light chain 6B, alkali, smooth muscle and non-muscle
hsa-miR-615-5p	0	0	1	1	0	0	OCEL1	occludin/ELL domain containing 1
hsa-miR-615-5p	0	0	0	1	0	0	EFNA2	ephrin-A2
hsa-miR-615-5p	0	0	1	1	0	0	MARCH2	membrane-associated ring finger (C3HC4) 2, E3 ubiquitin protein ligase
hsa-miR-615-5p	0	0	0	1	0	0	C19orf21	chromosome 19 open reading frame 21
hsa-miR-615-5p	0	0	0	1	0	0	POLRMT	polymerase (RNA) mitochondrial (DNA directed)
hsa-miR-615-5p	1	0	1	1	0	0	MAPK12	mitogen-activated protein kinase 12
hsa-miR-615-5p	0	0	1	1	0	0	MIF	macrophage migration inhibitory factor (glycosylation-inhibiting factor)
hsa-miR-615-5p	0	0	0	1	0	0	MIOX	myo-inositol oxygenase
hsa-miR-615-5p	0	0	1	1	1	1	RASL10A	RAS-like, family 10, member A
hsa-miR-615-5p	0	0	1	1	0	0	HDAC10	histone deacetylase 10
hsa-miR-615-5p	0	0	1	1	1	1	PABPC1L	poly(A) binding protein, cytoplasmic 1-like
hsa-miR-615-5p	0	0	0	1	0	0	RENBP	renin binding protein
hsa-miR-615-5p	0	0	0	1	0	0	ACP5	acid phosphatase 5, tartrate resistant
hsa-miR-615-5p	0	0	0	1	0	0	CCL17	chemokine (C-C motif) ligand 17
hsa-miR-615-5p	0	0	1	1	0	0	STUB1	STIP1 homology and U-box containing protein 1, E3 ubiquitin protein ligase
hsa-miR-615-5p	1	0	1	1	1	1	SOLH	small optic lobes homolog (Drosophila)
hsa-miR-615-5p	0	0	1	1	0	0	CTSH	cathepsin H
hsa-miR-615-5p	0	0	0	1	0	0	AMH	anti-Mullerian hormone
hsa-miR-615-5p	0	0	1	1	0	0	CCDC9	coiled-coil domain containing 9
hsa-miR-615-5p	0	0	0	1	1	1	TGFB1	transforming growth factor, beta 1
hsa-miR-615-5p	0	0	1	1	0	0	CEACAM4	carcinoembryonic antigen-related cell adhesion molecule 4
hsa-miR-615-5p	1	0	1	1	1	1	MLL4	myeloid/lymphoid or mixed-lineage leukemia 4
hsa-miR-615-5p	0	0	0	1	0	0	FKBP8	FK506 binding protein 8, 38kDa
hsa-miR-615-5p	1	0	1	1	0	0	GSK3A	glycogen synthase kinase 3 alpha
hsa-miR-615-5p	0	0	0	1	0	0	ZNF574	zinc finger protein 574
hsa-miR-615-5p	0	0	1	1	0	0	TFR2	transferrin receptor 2
hsa-miR-615-5p	0	0	0	1	0	0	MOGAT3	monoacylglycerol O-acyltransferase 3
hsa-miR-615-5p	0	0	0	1	0	0	ZNF688	zinc finger protein 688
hsa-miR-615-5p	0	0	0	1	1	1	ZNF785	zinc finger protein 785
hsa-miR-615-5p	0	0	0	1	0	0	EDF1	endothelial differentiation-related factor 1
hsa-miR-615-5p	0	0	1	1	0	0	FBXL15	F-box and leucine-rich repeat protein 15
hsa-miR-615-5p	0	0	0	1	1	1	ABI3	ABI family, member 3
hsa-miR-615-5p	0	0	1	1	0	0	FOXN1	forkhead box N1
hsa-miR-615-5p	0	0	0	1	1	1	UNC93B1	unc-93 homolog B1 (C. elegans)
hsa-miR-615-5p	0	0	1	1	1	1	CCDC86	coiled-coil domain containing 86
hsa-miR-615-5p	0	0	1	1	1	1	TIMELESS	timeless homolog (Drosophila)
hsa-miR-615-5p	0	0	1	1	1	1	USP5	ubiquitin specific peptidase 5 (isopeptidase T)
hsa-miR-615-5p	0	0	1	1	1	1	MCM3	minichromosome maintenance complex component 3
hsa-miR-615-5p	0	0	1	1	0	0	RBP2	retinol binding protein 2, cellular
hsa-miR-615-5p	0	0	1	1	0	0	RBP1	retinol binding protein 1, cellular
hsa-miR-615-5p	0	0	0	1	0	0	ACY1	aminoacylase 1
hsa-miR-615-5p	0	0	0	1	0	0	PRTN3	proteinase 3
hsa-miR-615-5p	0	0	1	1	0	0	MIIP	migration and invasion inhibitory protein
hsa-miR-615-5p	1	0	1	1	1	1	TEX14	testis expressed 14
hsa-miR-615-5p	0	0	1	1	1	1	FBXO24	F-box protein 24
hsa-miR-615-5p	0	0	1	1	1	1	HOXA7	homeobox A7
hsa-miR-615-5p	0	0	0	1	0	0	ACADS	acyl-CoA dehydrogenase, C-2 to C-3 short chain
hsa-miR-615-5p	0	0	1	1	0	0	STX10	syntaxin 10
hsa-miR-615-5p	1	0	1	1	0	0	C19orf43	chromosome 19 open reading frame 43
hsa-miR-615-5p	1	0	1	1	1	1	ATP7B	ATPase, Cu++ transporting, beta polypeptide
hsa-miR-615-5p	1	0	1	1	1	1	SLC12A5	solute carrier family 12 (potassium/chloride transporter), member 5
hsa-miR-615-5p	0	0	0	1	0	0	IL17C	interleukin 17C
hsa-miR-615-5p	0	0	1	1	1	1	CPNE5	copine V
hsa-miR-615-5p	0	0	1	1	0	0	MBOAT7	membrane bound O-acyltransferase domain containing 7
hsa-miR-615-5p	0	0	0	1	1	1	LILRB3	leukocyte immunoglobulin-like receptor, subfamily B (with TM and ITIM domains), member 3
hsa-miR-615-5p	0	0	0	1	0	0	SH2D3A	SH2 domain containing 3A
hsa-miR-615-5p	0	0	0	1	0	0	GNRH2	gonadotropin-releasing hormone 2
hsa-miR-615-5p	0	0	1	1	0	0	LRFN3	leucine rich repeat and fibronectin type III domain containing 3
hsa-miR-615-5p	0	0	0	1	0	0	IGFLR1	IGF-like family receptor 1
hsa-miR-615-5p	0	0	1	1	0	0	CAPNS1	calpain, small subunit 1
hsa-miR-615-5p	0	0	0	1	1	1	KRT13	keratin 13
hsa-miR-615-5p	1	0	1	1	0	0	BCL2L12	BCL2-like 12 (proline rich)
hsa-miR-615-5p	1	0	1	1	1	1	RAB40C	RAB40C, member RAS oncogene family
hsa-miR-615-5p	0	0	0	1	0	0	TICAM1	toll-like receptor adaptor molecule 1
hsa-miR-615-5p	1	0	1	1	1	1	AAMP	angio-associated, migratory cell protein
hsa-miR-615-5p	0	0	0	1	0	0	DGCR6L	DiGeorge syndrome critical region gene 6-like
hsa-miR-615-5p	0	0	0	1	1	1	RAC2	ras-related C3 botulinum toxin substrate 2 (rho family, small GTP binding protein Rac2)
hsa-miR-615-5p	0	0	1	1	0	0	SIRT2	sirtuin 2
hsa-miR-615-5p	1	0	1	1	0	0	HOXD9	homeobox D9
hsa-miR-615-5p	0	0	0	1	1	1	ARHGAP22	Rho GTPase activating protein 22
hsa-miR-615-5p	0	0	1	1	0	0	COPB1	coatomer protein complex, subunit beta 1
hsa-miR-615-5p	0	0	0	1	0	0	MRM1	mitochondrial rRNA methyltransferase 1 homolog (S. cerevisiae)
hsa-miR-615-5p	0	0	1	1	0	0	NEDD8	neural precursor cell expressed, developmentally down-regulated 8
hsa-miR-615-5p	1	0	1	1	1	1	KLF16	Kruppel-like factor 16
hsa-miR-615-5p	0	0	1	1	0	0	CERS4	ceramide synthase 4
hsa-miR-615-5p	0	0	1	1	0	0	KRT31	keratin 31
hsa-miR-615-5p	1	0	1	1	1	1	LDLR	low density lipoprotein receptor
hsa-miR-615-5p	0	0	0	1	0	0	PRKCSH	protein kinase C substrate 80K-H
hsa-miR-615-5p	0	0	0	1	0	0	NDUFA13	NADH dehydrogenase (ubiquinone) 1 alpha subcomplex, 13
hsa-miR-615-5p	0	0	0	1	1	1	ACSBG2	acyl-CoA synthetase bubblegum family member 2
hsa-miR-615-5p	1	0	1	1	0	0	MLLT1	myeloid/lymphoid or mixed-lineage leukemia (trithorax homolog, Drosophila); translocated to, 1
hsa-miR-615-5p	0	0	1	1	0	0	FCHO1	FCH domain only 1
hsa-miR-615-5p	0	0	1	1	1	1	PGPEP1	pyroglutamyl-peptidase I
hsa-miR-615-5p	1	0	1	1	0	0	JUND	jun D proto-oncogene
hsa-miR-615-5p	0	0	0	1	0	0	HBZ	hemoglobin, zeta
hsa-miR-615-5p	1	0	1	1	1	1	MNX1	motor neuron and pancreas homeobox 1
hsa-miR-615-5p	0	0	0	1	0	0	NPAS1	neuronal PAS domain protein 1
hsa-miR-615-5p	0	0	0	1	0	0	EIF3G	eukaryotic translation initiation factor 3, subunit G
hsa-miR-615-5p	0	0	0	1	0	0	FAM22F	family with sequence similarity 22, member F
hsa-miR-615-5p	0	0	1	1	1	1	DEFB118	defensin, beta 118
hsa-miR-615-5p	0	0	1	1	1	1	TRIM47	tripartite motif containing 47
hsa-miR-615-5p	0	0	0	1	1	1	SLC52A1	solute carrier family 52, riboflavin transporter, member 1
hsa-miR-615-5p	0	0	0	1	0	0	GUCY2D	guanylate cyclase 2D, membrane (retina-specific)
hsa-miR-615-5p	0	0	1	1	0	0	ACY3	aspartoacylase (aminocyclase) 3
hsa-miR-615-5p	0	0	0	1	0	0	PEMT	phosphatidylethanolamine N-methyltransferase
hsa-miR-615-5p	0	0	0	1	1	1	PRAM1	PML-RARA regulated adaptor molecule 1
hsa-miR-615-5p	1	0	0	1	1	1	TGFBRAP1	transforming growth factor, beta receptor associated protein 1
hsa-miR-615-5p	0	0	1	1	0	0	TBRG4	transforming growth factor beta regulator 4
hsa-miR-615-5p	1	0	1	1	0	0	NKX2-8	NK2 homeobox 8
hsa-miR-615-5p	0	0	1	1	0	0	BLK	B lymphoid tyrosine kinase
hsa-miR-615-5p	1	0	1	1	0	0	GYPC	glycophorin C (Gerbich blood group)
hsa-miR-615-5p	0	0	1	1	0	0	NOX5	NADPH oxidase, EF-hand calcium binding domain 5
hsa-miR-615-5p	0	0	1	1	0	0	PARP6	poly (ADP-ribose) polymerase family, member 6
hsa-miR-615-5p	1	0	1	1	1	1	ABI2	abl-interactor 2
hsa-miR-615-5p	1	0	1	1	1	1	BCAT1	branched chain amino-acid transaminase 1, cytosolic
hsa-miR-615-5p	0	0	1	1	0	0	ESRRB	estrogen-related receptor beta
hsa-miR-615-5p	0	0	0	1	0	0	DPEP1	dipeptidase 1 (renal)
hsa-miR-615-5p	0	0	0	1	0	0	TRPV4	transient receptor potential cation channel, subfamily V, member 4
hsa-miR-615-5p	0	0	1	1	0	0	PKMYT1	protein kinase, membrane associated tyrosine/threonine 1
hsa-miR-615-5p	1	0	1	1	1	1	TRAF4	TNF receptor-associated factor 4
hsa-miR-615-5p	0	0	0	1	1	1	SLC4A1	solute carrier family 4, anion exchanger, member 1 (erythrocyte membrane protein band 3, Diego blood group)
hsa-miR-615-5p	0	0	0	1	1	1	ATP2C2	ATPase, Ca++ transporting, type 2C, member 2
hsa-miR-615-5p	0	0	0	1	0	0	GLP2R	glucagon-like peptide 2 receptor
hsa-miR-615-5p	0	0	0	1	0	0	PITPNM3	PITPNM family member 3
hsa-miR-615-5p	0	0	0	1	0	0	CHST8	carbohydrate (N-acetylgalactosamine 4-0) sulfotransferase 8
hsa-miR-615-5p	0	0	0	1	0	0	ATP4A	ATPase, H+/K+ exchanging, alpha polypeptide
hsa-miR-615-5p	0	0	0	1	1	1	LGALS3BP	lectin, galactoside-binding, soluble, 3 binding protein
hsa-miR-615-5p	0	0	0	1	0	0	GNA15	guanine nucleotide binding protein (G protein), alpha 15 (Gq class)
hsa-miR-615-5p	0	0	0	1	0	0	CCDC94	coiled-coil domain containing 94
hsa-miR-615-5p	0	0	0	1	0	0	PIAS4	protein inhibitor of activated STAT, 4
hsa-miR-615-5p	0	0	0	1	1	1	NUCB1	nucleobindin 1
hsa-miR-615-5p	0	0	0	1	0	0	LIG1	ligase I, DNA, ATP-dependent
hsa-miR-615-5p	0	0	0	1	0	0	HSD17B14	hydroxysteroid (17-beta) dehydrogenase 14
hsa-miR-615-5p	0	0	1	1	1	1	GLTSCR1	glioma tumor suppressor candidate region gene 1
hsa-miR-615-5p	0	0	0	1	0	0	CCDC61	coiled-coil domain containing 61
hsa-miR-615-5p	1	0	0	1	1	1	PARP12	poly (ADP-ribose) polymerase family, member 12
hsa-miR-615-5p	0	0	1	1	0	0	LTK	leukocyte receptor tyrosine kinase
hsa-miR-615-5p	0	0	1	1	1	1	POLR1A	polymerase (RNA) I polypeptide A, 194kDa
hsa-miR-615-5p	0	0	0	1	0	0	GPR108	G protein-coupled receptor 108
hsa-miR-615-5p	0	0	0	1	0	0	GZMM	granzyme M (lymphocyte met-ase 1)
hsa-miR-615-5p	0	0	0	1	0	0	SHC2	SHC (Src homology 2 domain containing) transforming protein 2
hsa-miR-615-5p	0	0	0	1	0	0	KLKB1	kallikrein B, plasma (Fletcher factor) 1
hsa-miR-615-5p	0	0	0	1	1	1	POMC	proopiomelanocortin
hsa-miR-615-5p	0	0	0	1	0	0	LYL1	lymphoblastic leukemia derived sequence 1
hsa-miR-615-5p	0	0	1	1	1	1	COL12A1	collagen, type XII, alpha 1
hsa-miR-615-5p	0	0	1	1	1	1	MTFP1	mitochondrial fission process 1
hsa-miR-615-5p	0	0	1	1	0	0	B4GALNT3	beta-1,4-N-acetyl-galactosaminyl transferase 3
hsa-miR-615-5p	0	0	1	1	1	1	GOLGA2P5	golgin A2 pseudogene 5
hsa-miR-615-5p	0	0	1	1	0	0	FOXN4	forkhead box N4
hsa-miR-615-5p	1	0	1	1	0	0	DISP2	dispatched homolog 2 (Drosophila)
hsa-miR-615-5p	0	0	0	1	0	0	MAN2C1	mannosidase, alpha, class 2C, member 1
hsa-miR-615-5p	0	0	1	1	1	1	CCDC33	coiled-coil domain containing 33
hsa-miR-615-5p	0	0	0	1	0	0	SEPT12	septin 12
hsa-miR-615-5p	0	0	0	1	1	1	CPNE7	copine VII
hsa-miR-615-5p	0	0	1	1	0	0	GFOD2	glucose-fructose oxidoreductase domain containing 2
hsa-miR-615-5p	0	0	0	1	1	1	MYO19	myosin XIX
hsa-miR-615-5p	0	0	0	1	0	0	LOC113230	uncharacterized LOC113230
hsa-miR-615-5p	0	0	0	1	0	0	SLC39A3	solute carrier family 39 (zinc transporter), member 3
hsa-miR-615-5p	0	0	0	1	0	0	MED16	mediator complex subunit 16
hsa-miR-615-5p	0	0	0	1	0	0	ARMC6	armadillo repeat containing 6
hsa-miR-615-5p	0	0	0	1	0	0	SSBP4	single stranded DNA binding protein 4
hsa-miR-615-5p	0	0	1	1	0	0	FXYD1	FXYD domain containing ion transport regulator 1
hsa-miR-615-5p	0	0	1	1	0	0	FXYD7	FXYD domain containing ion transport regulator 7
hsa-miR-615-5p	0	0	0	1	0	0	CACNG8	calcium channel, voltage-dependent, gamma subunit 8
hsa-miR-615-5p	0	0	1	1	1	1	FBN3	fibrillin 3
hsa-miR-615-5p	0	0	1	1	1	1	TIMM44	translocase of inner mitochondrial membrane 44 homolog (yeast)
hsa-miR-615-5p	0	0	0	1	1	1	FAM71E1	family with sequence similarity 71, member E1
hsa-miR-615-5p	0	0	0	1	0	0	RCN3	reticulocalbin 3, EF-hand calcium binding domain
hsa-miR-615-5p	0	0	1	1	0	0	ZNF593	zinc finger protein 593
hsa-miR-615-5p	0	0	0	1	1	1	GPR161	G protein-coupled receptor 161
hsa-miR-615-5p	0	0	0	1	0	0	GDF7	growth differentiation factor 7
hsa-miR-615-5p	1	0	1	1	1	1	FAM134A	family with sequence similarity 134, member A
hsa-miR-615-5p	0	0	1	1	0	0	ALDH1L1	aldehyde dehydrogenase 1 family, member L1
hsa-miR-615-5p	0	0	0	1	0	0	KCNMB1	potassium large conductance calcium-activated channel, subfamily M, beta member 1
hsa-miR-615-5p	0	0	0	1	0	0	ANO7	anoctamin 7
hsa-miR-615-5p	0	0	0	1	0	0	WDR85	WD repeat domain 85
hsa-miR-615-5p	1	0	0	1	1	1	PPRC1	peroxisome proliferator-activated receptor gamma, coactivator-related 1
hsa-miR-615-5p	0	0	0	1	0	0	SYT8	synaptotagmin VIII
hsa-miR-615-5p	0	0	0	1	0	0	MYL9	myosin, light chain 9, regulatory
hsa-miR-615-5p	1	0	0	1	0	0	CDC42EP2	CDC42 effector protein (Rho GTPase binding) 2
hsa-miR-615-5p	0	0	0	1	0	0	C17orf50	chromosome 17 open reading frame 50
hsa-miR-615-5p	0	0	0	1	0	0	CXXC1	CXXC finger protein 1
hsa-miR-615-5p	0	0	1	1	0	0	BATF	basic leucine zipper transcription factor, ATF-like
hsa-miR-615-5p	0	0	1	1	0	0	BCKDK	branched chain ketoacid dehydrogenase kinase
hsa-miR-615-5p	0	0	0	1	0	0	LRRC43	leucine rich repeat containing 43
hsa-miR-615-5p	0	0	1	1	0	0	WNT9B	wingless-type MMTV integration site family, member 9B
hsa-miR-615-5p	0	0	1	1	0	0	ARAF	v-raf murine sarcoma 3611 viral oncogene homolog
hsa-miR-615-5p	1	0	1	1	1	1	ALDH4A1	aldehyde dehydrogenase 4 family, member A1
hsa-miR-615-5p	0	0	1	1	0	0	SPON2	spondin 2, extracellular matrix protein
hsa-miR-615-5p	0	0	1	1	0	0	PDE9A	phosphodiesterase 9A
hsa-miR-615-5p	1	0	0	1	1	1	G6PD	glucose-6-phosphate dehydrogenase
hsa-miR-615-5p	0	0	0	1	0	0	FAM207A	family with sequence similarity 207, member A
hsa-miR-615-5p	0	0	0	1	0	0	RDH13	retinol dehydrogenase 13 (all-trans/9-cis)
hsa-miR-615-5p	1	0	0	1	0	0	NBEAL2	neurobeachin-like 2
hsa-miR-615-5p	1	0	0	1	0	0	CPSF4	cleavage and polyadenylation specific factor 4, 30kDa
hsa-miR-615-5p	1	0	1	1	0	0	FAM108A1	family with sequence similarity 108, member A1
hsa-miR-615-5p	0	0	1	1	0	0	ABCF3	ATP-binding cassette, sub-family F (GCN20), member 3
hsa-miR-615-5p	0	0	1	1	0	0	GRIN2C	glutamate receptor, ionotropic, N-methyl D-aspartate 2C
hsa-miR-615-5p	0	0	0	1	0	0	CDK3	cyclin-dependent kinase 3
hsa-miR-615-5p	0	0	1	1	1	1	KRT8	keratin 8
hsa-miR-615-5p	1	0	1	1	1	1	PLEKHH3	pleckstrin homology domain containing, family H (with MyTH4 domain) member 3
hsa-miR-615-5p	0	0	0	1	0	0	SDR9C7	short chain dehydrogenase/reductase family 9C, member 7
hsa-miR-615-5p	1	0	1	1	0	0	GRASP	GRP1 (general receptor for phosphoinositides 1)-associated scaffold protein
hsa-miR-615-5p	0	0	0	1	0	0	NTN3	netrin 3
hsa-miR-615-5p	0	0	0	1	0	0	CABP2	calcium binding protein 2
hsa-miR-615-5p	0	0	1	1	0	0	TRIM54	tripartite motif containing 54
hsa-miR-615-5p	0	0	1	1	1	1	TPRA1	transmembrane protein, adipocyte asscociated 1
hsa-miR-615-5p	0	0	0	1	0	0	MST1R	macrophage stimulating 1 receptor (c-met-related tyrosine kinase)
hsa-miR-615-5p	0	0	0	1	0	0	DUSP7	dual specificity phosphatase 7
hsa-miR-615-5p	0	0	0	1	0	0	SLC6A18	solute carrier family 6, member 18
hsa-miR-615-5p	1	0	1	1	1	1	RELL2	RELT-like 2
hsa-miR-615-5p	0	0	0	1	0	0	SLC29A4	solute carrier family 29 (nucleoside transporters), member 4
hsa-miR-615-5p	0	0	1	1	1	1	RPP25L	ribonuclease P/MRP 25kDa subunit-like
hsa-miR-615-5p	0	0	0	1	0	0	ADAMTS15	ADAM metallopeptidase with thrombospondin type 1 motif, 15
hsa-miR-615-5p	0	0	1	1	0	0	NDUFB8	NADH dehydrogenase (ubiquinone) 1 beta subcomplex, 8, 19kDa
hsa-miR-615-5p	0	0	0	1	0	0	C16orf71	chromosome 16 open reading frame 71
hsa-miR-615-5p	1	0	1	1	1	1	TAZ	tafazzin
hsa-miR-615-5p	0	0	1	1	1	1	PPFIBP2	PTPRF interacting protein, binding protein 2 (liprin beta 2)
hsa-miR-615-5p	0	0	1	1	0	0	CYB5R2	cytochrome b5 reductase 2
hsa-miR-615-5p	0	0	1	1	1	1	MFAP4	microfibrillar-associated protein 4
hsa-miR-615-5p	0	0	1	1	0	0	LDHD	lactate dehydrogenase D
hsa-miR-615-5p	0	0	1	1	0	0	SCNN1G	sodium channel, non-voltage-gated 1, gamma subunit
hsa-miR-615-5p	0	0	0	1	0	0	PCSK4	proprotein convertase subtilisin/kexin type 4
hsa-miR-615-5p	0	0	0	1	0	0	JSRP1	junctional sarcoplasmic reticulum protein 1
hsa-miR-615-5p	0	0	1	1	1	1	RHEBL1	Ras homolog enriched in brain like 1
hsa-miR-615-5p	0	0	0	1	0	0	C19orf33	chromosome 19 open reading frame 33
hsa-miR-615-5p	0	0	0	1	0	0	LY6D	lymphocyte antigen 6 complex, locus D
hsa-miR-615-5p	0	0	0	1	0	0	DAPK3	death-associated protein kinase 3
hsa-miR-615-5p	1	0	1	1	0	0	KIFC2	kinesin family member C2
hsa-miR-615-5p	0	0	0	1	0	0	HSD11B1L	hydroxysteroid (11-beta) dehydrogenase 1-like
hsa-miR-615-5p	0	0	1	1	0	0	CGB1	chorionic gonadotropin, beta polypeptide 1
hsa-miR-615-5p	0	0	1	1	0	0	CGB2	chorionic gonadotropin, beta polypeptide 2
hsa-miR-615-5p	1	0	0	1	1	1	RCOR2	REST corepressor 2
hsa-miR-615-5p	0	0	1	1	0	0	IGFBP6	insulin-like growth factor binding protein 6
hsa-miR-615-5p	0	0	0	1	0	0	TNRC6C	trinucleotide repeat containing 6C
hsa-miR-615-5p	1	0	0	1	0	0	ITFG3	integrin alpha FG-GAP repeat containing 3
hsa-miR-615-5p	0	0	0	1	0	0	PRR25	proline rich 25
hsa-miR-615-5p	0	0	0	1	0	0	LTBP3	latent transforming growth factor beta binding protein 3
hsa-miR-615-5p	0	0	1	1	0	0	ZNF467	zinc finger protein 467
hsa-miR-615-5p	1	0	1	1	0	0	CANT1	calcium activated nucleotidase 1
hsa-miR-615-5p	0	0	0	1	0	0	C1QTNF4	C1q and tumor necrosis factor related protein 4
hsa-miR-615-5p	1	0	1	1	1	1	RFXANK	regulatory factor X-associated ankyrin-containing protein
hsa-miR-615-5p	0	0	1	1	0	0	POP7	processing of precursor 7, ribonuclease P/MRP subunit (S. cerevisiae)
hsa-miR-615-5p	0	0	1	1	1	1	MXD3	MAX dimerization protein 3
hsa-miR-615-5p	0	0	1	1	1	1	GNB2	guanine nucleotide binding protein (G protein), beta polypeptide 2
hsa-miR-615-5p	0	0	0	1	0	0	KCNJ4	potassium inwardly-rectifying channel, subfamily J, member 4
hsa-miR-615-5p	1	0	0	1	1	1	PWWP2B	PWWP domain containing 2B
hsa-miR-615-5p	0	0	1	1	0	0	TWF2	twinfilin, actin-binding protein, homolog 2 (Drosophila)
hsa-miR-615-5p	0	0	0	1	0	0	TLR9	toll-like receptor 9
hsa-miR-615-5p	0	0	0	1	0	0	DTYMK	deoxythymidylate kinase (thymidylate kinase)
hsa-miR-615-5p	1	0	1	1	1	1	CSDC2	cold shock domain containing C2, RNA binding
hsa-miR-615-5p	0	0	0	1	0	0	RLN3	relaxin 3
hsa-miR-615-5p	1	0	0	1	1	1	SLC1A5	solute carrier family 1 (neutral amino acid transporter), member 5
hsa-miR-615-5p	0	0	1	1	1	1	ASCC2	activating signal cointegrator 1 complex subunit 2
hsa-miR-615-5p	1	0	1	1	0	0	RAD9A	RAD9 homolog A (S. pombe)
hsa-miR-615-5p	0	0	0	1	0	0	EFEMP2	EGF containing fibulin-like extracellular matrix protein 2
hsa-miR-615-5p	0	0	1	1	1	1	DLEC1	deleted in lung and esophageal cancer 1
hsa-miR-615-5p	0	0	0	1	0	0	C1orf100	chromosome 1 open reading frame 100
hsa-miR-615-5p	0	0	0	1	0	0	SNX32	sorting nexin 32
hsa-miR-615-5p	0	0	0	1	0	0	CLDN15	claudin 15
hsa-miR-615-5p	0	0	1	1	0	0	CYP2W1	cytochrome P450, family 2, subfamily W, polypeptide 1
hsa-miR-615-5p	0	0	1	1	0	0	CCDC106	coiled-coil domain containing 106
hsa-miR-615-5p	1	0	0	1	0	0	EHBP1L1	EH domain binding protein 1-like 1
hsa-miR-615-5p	0	0	0	1	0	0	GSDMB	gasdermin B
hsa-miR-615-5p	0	0	0	1	1	1	ADORA1	adenosine A1 receptor
hsa-miR-615-5p	1	0	1	1	1	1	IQCA1	IQ motif containing with AAA domain 1
hsa-miR-615-5p	1	0	1	1	0	0	TCAP	titin-cap (telethonin)
hsa-miR-615-5p	0	0	1	1	0	0	LGI4	leucine-rich repeat LGI family, member 4
hsa-miR-615-5p	1	0	1	1	0	0	LRCH4	leucine-rich repeats and calponin homology (CH) domain containing 4
hsa-miR-615-5p	0	0	1	1	0	0	ZDHHC24	zinc finger, DHHC-type containing 24
hsa-miR-615-5p	0	0	1	1	0	0	SPNS1	spinster homolog 1 (Drosophila)
hsa-miR-615-5p	0	0	1	1	0	0	MARCH10	membrane-associated ring finger (C3HC4) 10, E3 ubiquitin protein ligase
hsa-miR-615-5p	0	0	0	1	0	0	TTC9B	tetratricopeptide repeat domain 9B
hsa-miR-615-5p	0	0	1	1	0	0	RIN1	Ras and Rab interactor 1
hsa-miR-615-5p	0	0	0	1	0	0	ATHL1	ATH1, acid trehalase-like 1 (yeast)
hsa-miR-615-5p	1	0	1	1	0	0	CCDC85B	coiled-coil domain containing 85B
hsa-miR-615-5p	1	0	1	1	1	1	GALE	UDP-galactose-4-epimerase
hsa-miR-615-5p	0	0	1	1	0	0	GAK	cyclin G associated kinase
hsa-miR-615-5p	0	0	0	1	0	0	FUT7	fucosyltransferase 7 (alpha (1,3) fucosyltransferase)
hsa-miR-615-5p	0	0	0	1	1	1	LILRB2	leukocyte immunoglobulin-like receptor, subfamily B (with TM and ITIM domains), member 2
hsa-miR-615-5p	1	0	1	1	1	1	TLN1	talin 1
hsa-miR-615-5p	1	0	1	1	0	0	LPCAT4	lysophosphatidylcholine acyltransferase 4
hsa-miR-615-5p	1	0	1	1	1	1	RHOT2	ras homolog family member T2
hsa-miR-615-5p	0	0	1	1	0	0	PRSS50	protease, serine, 50
hsa-miR-615-5p	0	0	0	1	0	0	MATK	megakaryocyte-associated tyrosine kinase
hsa-miR-615-5p	1	0	0	1	0	0	ARHGEF1	Rho guanine nucleotide exchange factor (GEF) 1
hsa-miR-615-5p	0	0	1	1	1	1	LILRB5	leukocyte immunoglobulin-like receptor, subfamily B (with TM and ITIM domains), member 5
hsa-miR-615-5p	0	0	1	1	0	0	SLC12A4	solute carrier family 12 (potassium/chloride transporters), member 4
hsa-miR-615-5p	0	0	0	1	0	0	DEF6	differentially expressed in FDCP 6 homolog (mouse)
hsa-miR-615-5p	1	0	0	1	0	0	APBA3	amyloid beta (A4) precursor protein-binding, family A, member 3
hsa-miR-615-5p	0	0	1	1	1	1	VRK3	vaccinia related kinase 3
hsa-miR-615-5p	0	0	1	1	1	1	MSRA	methionine sulfoxide reductase A
hsa-miR-615-5p	0	0	0	1	0	0	INSL3	insulin-like 3 (Leydig cell)
hsa-miR-615-5p	0	0	0	1	1	1	JAK3	Janus kinase 3
hsa-miR-615-5p	0	0	0	1	0	0	TRPT1	tRNA phosphotransferase 1
hsa-miR-615-5p	0	0	0	1	1	1	MTG1	mitochondrial GTPase 1 homolog (S. cerevisiae)
hsa-miR-615-5p	1	0	1	1	1	1	CC2D1A	coiled-coil and C2 domain containing 1A
hsa-miR-615-5p	0	0	1	1	0	0	DGKZ	diacylglycerol kinase, zeta
hsa-miR-615-5p	0	0	1	1	0	0	FAM211B	family with sequence similarity 211, member B
hsa-miR-615-5p	0	0	0	1	0	0	CTXN1	cortexin 1
hsa-miR-615-5p	1	0	0	1	0	0	TMEM184A	transmembrane protein 184A
hsa-miR-615-5p	0	0	1	1	0	0	NADSYN1	NAD synthetase 1
hsa-miR-615-5p	1	0	1	1	1	1	MYO9B	myosin IXB
hsa-miR-615-5p	1	0	1	1	1	1	FOXL1	forkhead box L1
hsa-miR-615-5p	0	0	1	1	1	1	C1orf172	chromosome 1 open reading frame 172
hsa-miR-615-5p	0	0	1	1	0	0	MUC20	mucin 20, cell surface associated
hsa-miR-615-5p	0	0	1	1	0	0	B3GNTL1	UDP-GlcNAc:betaGal beta-1,3-N-acetylglucosaminyltransferase-like 1
hsa-miR-615-5p	1	0	1	1	0	0	KIF17	kinesin family member 17
hsa-miR-615-5p	0	0	0	1	0	0	SHARPIN	SHANK-associated RH domain interactor
hsa-miR-615-5p	0	0	0	1	0	0	C10orf91	chromosome 10 open reading frame 91
hsa-miR-615-5p	0	0	0	1	0	0	SEPT1	septin 1
hsa-miR-615-5p	1	0	1	1	0	0	DUOX1	dual oxidase 1
hsa-miR-615-5p	0	0	0	1	0	0	SLC25A41	solute carrier family 25, member 41
hsa-miR-615-5p	1	0	1	1	0	0	CASKIN2	CASK interacting protein 2
hsa-miR-615-5p	1	0	1	1	1	1	TMEM132E	transmembrane protein 132E
hsa-miR-615-5p	0	0	0	1	0	0	P2RY11	purinergic receptor P2Y, G-protein coupled, 11
hsa-miR-615-5p	0	0	0	1	0	0	PPAN	peter pan homolog (Drosophila)
hsa-miR-615-5p	0	0	0	1	0	0	PPAN-P2RY11	PPAN-P2RY11 readthrough
hsa-miR-615-5p	1	0	1	1	0	0	CCDC71	coiled-coil domain containing 71
hsa-miR-615-5p	0	0	1	1	0	0	CD151	CD151 molecule (Raph blood group)
hsa-miR-615-5p	0	0	0	1	0	0	TRIM72	tripartite motif containing 72
hsa-miR-615-5p	0	0	1	1	0	0	MYPOP	Myb-related transcription factor, partner of profilin
hsa-miR-615-5p	0	0	0	1	0	0	SSNA1	Sjogren syndrome nuclear autoantigen 1
hsa-miR-615-5p	0	0	1	1	0	0	DYRK1B	dual-specificity tyrosine-(Y)-phosphorylation regulated kinase 1B
hsa-miR-615-5p	0	0	0	1	0	0	TMEM102	transmembrane protein 102
hsa-miR-615-5p	0	0	0	1	0	0	SPEM1	spermatid maturation 1
hsa-miR-615-5p	0	0	0	1	0	0	HMGB4	high mobility group box 4
hsa-miR-615-5p	0	0	1	1	0	0	STRA6	stimulated by retinoic acid gene 6 homolog (mouse)
hsa-miR-615-5p	0	0	1	1	1	1	C4orf50	chromosome 4 open reading frame 50
hsa-miR-615-5p	0	0	0	1	0	0	ACTL9	actin-like 9
hsa-miR-615-5p	0	0	1	1	0	0	ADCK4	aarF domain containing kinase 4
hsa-miR-615-5p	0	0	1	1	0	0	MRVI1-AS1	MRVI1 antisense RNA 1
hsa-miR-615-5p	0	0	0	1	0	0	CHMP6	charged multivesicular body protein 6
hsa-miR-615-5p	1	0	1	1	1	1	CUL1	cullin 1
hsa-miR-615-5p	0	0	0	1	1	1	FBXW5	F-box and WD repeat domain containing 5
hsa-miR-615-5p	0	0	1	1	1	1	KLHDC7A	kelch domain containing 7A
hsa-miR-615-5p	0	0	0	1	1	1	CABP4	calcium binding protein 4
hsa-miR-615-5p	0	0	1	1	0	0	MMP25	matrix metallopeptidase 25
hsa-miR-615-5p	0	0	0	1	0	0	PTPRCAP	protein tyrosine phosphatase, receptor type, C-associated protein
hsa-miR-615-5p	0	0	0	1	1	1	CDHR5	cadherin-related family member 5
hsa-miR-615-5p	1	0	0	1	0	0	ATP13A2	ATPase type 13A2
hsa-miR-615-5p	1	0	0	1	0	0	GGT5	gamma-glutamyltransferase 5
hsa-miR-615-5p	0	0	1	1	0	0	GAS6	growth arrest-specific 6
hsa-miR-615-5p	0	0	0	1	1	1	KCNK12	potassium channel, subfamily K, member 12
hsa-miR-615-5p	1	0	1	1	0	0	IGDCC3	immunoglobulin superfamily, DCC subclass, member 3
hsa-miR-615-5p	0	0	0	1	0	0	RAB11B	RAB11B, member RAS oncogene family
hsa-miR-615-5p	0	0	1	1	0	0	PHKG2	phosphorylase kinase, gamma 2 (testis)
hsa-miR-615-5p	0	0	0	1	0	0	TNFRSF18	tumor necrosis factor receptor superfamily, member 18
hsa-miR-615-5p	0	0	1	1	0	0	FES	feline sarcoma oncogene
hsa-miR-615-5p	0	0	0	1	0	0	CLEC4G	C-type lectin domain family 4, member G
hsa-miR-615-5p	0	0	1	1	1	1	TMIGD1	transmembrane and immunoglobulin domain containing 1
hsa-miR-615-5p	0	0	1	1	0	0	HGS	hepatocyte growth factor-regulated tyrosine kinase substrate
hsa-miR-615-5p	0	0	0	1	1	1	C17orf101	chromosome 17 open reading frame 101
hsa-miR-615-5p	1	0	1	1	0	0	PTP4A3	protein tyrosine phosphatase type IVA, member 3
hsa-miR-615-5p	0	0	0	1	0	0	CLDN5	claudin 5
hsa-miR-615-5p	0	0	0	1	1	1	SLC52A2	solute carrier family 52, riboflavin transporter, member 2
hsa-miR-615-5p	0	0	0	1	0	0	MRPL54	mitochondrial ribosomal protein L54
hsa-miR-615-5p	0	0	1	1	1	1	GATSL3	GATS protein-like 3
hsa-miR-615-5p	0	0	0	1	0	0	ACTL10	actin-like 10
hsa-miR-615-5p	0	0	0	1	0	0	FAM132A	family with sequence similarity 132, member A
hsa-miR-615-5p	0	0	1	1	1	1	RIPK4	receptor-interacting serine-threonine kinase 4
hsa-miR-615-5p	0	0	0	1	0	0	GLI4	GLI family zinc finger 4
hsa-miR-615-5p	0	0	0	1	0	0	TMEM89	transmembrane protein 89
hsa-miR-615-5p	0	0	0	1	1	1	SNX20	sorting nexin 20
hsa-miR-615-5p	1	0	1	1	0	0	INPP5J	inositol polyphosphate-5-phosphatase J
hsa-miR-615-5p	1	0	1	1	0	0	DGCR6	DiGeorge syndrome critical region gene 6
hsa-miR-615-5p	0	0	1	1	1	1	BMP8A	bone morphogenetic protein 8a
hsa-miR-615-5p	1	0	1	1	1	1	OLFML2A	olfactomedin-like 2A
hsa-miR-615-5p	0	0	1	1	1	1	MRPL12	mitochondrial ribosomal protein L12
hsa-miR-615-5p	0	0	0	1	1	1	TBX1	T-box 1
hsa-miR-615-5p	1	0	1	1	1	1	SLIT3	slit homolog 3 (Drosophila)
hsa-miR-615-5p	0	0	0	1	1	1	TRIM50	tripartite motif containing 50
hsa-miR-615-5p	0	0	0	1	0	0	NPB	neuropeptide B
hsa-miR-615-5p	0	0	0	1	0	0	WDR86	WD repeat domain 86
hsa-miR-615-5p	0	0	0	1	0	0	RTN4RL2	reticulon 4 receptor-like 2
hsa-miR-615-5p	0	0	0	1	0	0	C17orf82	chromosome 17 open reading frame 82
hsa-miR-615-5p	0	0	0	1	0	0	WDR25	WD repeat domain 25
hsa-miR-615-5p	1	0	1	1	1	1	PIP5K1C	phosphatidylinositol-4-phosphate 5-kinase, type I, gamma
hsa-miR-615-5p	1	0	1	1	1	1	SPTB	spectrin, beta, erythrocytic
hsa-miR-615-5p	0	0	1	1	1	1	IFRD2	interferon-related developmental regulator 2
hsa-miR-615-5p	0	0	1	1	0	0	ARHGAP10	Rho GTPase activating protein 10
hsa-miR-615-5p	0	0	1	1	1	1	PNPLA2	patatin-like phospholipase domain containing 2
hsa-miR-615-5p	0	0	0	1	0	0	ZNF444	zinc finger protein 444
hsa-miR-615-5p	0	0	0	1	0	0	SERPINA9	serpin peptidase inhibitor, clade A (alpha-1 antiproteinase, antitrypsin), member 9
hsa-miR-615-5p	0	0	1	1	0	0	AVPR2	arginine vasopressin receptor 2
hsa-miR-615-5p	0	0	1	1	0	0	SIRT6	sirtuin 6
hsa-miR-615-5p	1	0	1	1	0	0	SMUG1	single-strand-selective monofunctional uracil-DNA glycosylase 1
hsa-miR-615-5p	1	0	1	1	1	1	CA7	carbonic anhydrase VII
hsa-miR-615-5p	1	0	1	1	1	1	PALM	paralemmin
hsa-miR-615-5p	0	0	0	1	0	0	DPYSL4	dihydropyrimidinase-like 4
hsa-miR-615-5p	0	0	1	1	1	1	HPS1	Hermansky-Pudlak syndrome 1
hsa-miR-615-5p	1	0	1	1	1	1	KLHL17	kelch-like 17 (Drosophila)
hsa-miR-615-5p	0	0	0	1	0	0	TEKT3	tektin 3
hsa-miR-615-5p	0	0	1	1	0	0	TMEM120A	transmembrane protein 120A
hsa-miR-615-5p	0	0	0	1	0	0	TPSAB1	tryptase alpha/beta 1
hsa-miR-615-5p	0	0	0	1	0	0	NANOS3	nanos homolog 3 (Drosophila)
hsa-miR-615-5p	0	0	0	1	0	0	SFN	stratifin
hsa-miR-615-5p	0	0	0	1	0	0	TAS1R3	taste receptor, type 1, member 3
hsa-miR-615-5p	0	0	0	1	0	0	NUDT14	nudix (nucleoside diphosphate linked moiety X)-type motif 14
hsa-miR-615-5p	0	0	1	1	1	1	SLC13A3	solute carrier family 13 (sodium-dependent dicarboxylate transporter), member 3
hsa-miR-615-5p	0	0	1	1	0	0	DMKN	dermokine
hsa-miR-615-5p	0	0	0	1	1	1	C21orf2	chromosome 21 open reading frame 2
hsa-miR-615-5p	0	0	1	1	1	1	ETV7	ets variant 7
hsa-miR-615-5p	1	0	1	1	1	1	RNF207	ring finger protein 207
hsa-miR-615-5p	1	0	1	1	1	1	CPED1	cadherin-like and PC-esterase domain containing 1
hsa-miR-615-5p	0	0	0	1	1	1	PLEKHG5	pleckstrin homology domain containing, family G (with RhoGef domain) member 5
hsa-miR-615-5p	0	0	0	1	0	0	TMEM221	transmembrane protein 221
hsa-miR-615-5p	0	0	0	1	0	0	SERPINA6	serpin peptidase inhibitor, clade A (alpha-1 antiproteinase, antitrypsin), member 6
hsa-miR-615-5p	0	0	1	1	0	0	C7orf59	chromosome 7 open reading frame 59
hsa-miR-615-5p	0	0	1	1	0	0	GJA4	gap junction protein, alpha 4, 37kDa
hsa-miR-615-5p	0	0	0	1	0	0	PODXL2	podocalyxin-like 2
hsa-miR-615-5p	0	0	0	1	0	0	FAM22B	family with sequence similarity 22, member B
hsa-miR-615-5p	1	0	1	1	0	0	ST3GAL2	ST3 beta-galactoside alpha-2,3-sialyltransferase 2
hsa-miR-615-5p	1	0	1	1	1	1	CBX4	chromobox homolog 4
hsa-miR-615-5p	0	0	0	1	0	0	CXXC11	CXXC finger protein 11
hsa-miR-615-5p	0	0	1	1	0	0	OSGIN1	oxidative stress induced growth inhibitor 1
hsa-miR-615-5p	0	0	1	1	1	1	LRRC27	leucine rich repeat containing 27
hsa-miR-615-5p	0	0	1	1	0	0	LAMA1	laminin, alpha 1
hsa-miR-615-5p	1	0	0	1	1	1	TMEM234	transmembrane protein 234
hsa-miR-615-5p	0	0	1	1	0	0	FZD9	frizzled family receptor 9
hsa-miR-615-5p	1	0	1	1	0	0	USP7	ubiquitin specific peptidase 7 (herpes virus-associated)
hsa-miR-615-5p	0	0	0	1	0	0	IZUMO4	IZUMO family member 4
hsa-miR-615-5p	0	0	0	1	1	1	TRADD	TNFRSF1A-associated via death domain
hsa-miR-615-5p	0	0	0	1	0	0	C19orf48	chromosome 19 open reading frame 48
hsa-miR-615-5p	0	0	0	1	0	0	SDSL	serine dehydratase-like
hsa-miR-615-5p	0	0	1	1	0	0	RAD51D	RAD51 homolog D (S. cerevisiae)
hsa-miR-615-5p	0	0	1	1	1	1	EIF4G1	eukaryotic translation initiation factor 4 gamma, 1
hsa-miR-615-5p	1	0	0	1	0	0	TSPAN4	tetraspanin 4
hsa-miR-615-5p	0	0	1	1	1	1	CD5	CD5 molecule
hsa-miR-615-5p	0	0	1	1	1	1	NXPH4	neurexophilin 4
hsa-miR-615-5p	0	0	0	1	0	0	SAMM50	sorting and assembly machinery component 50 homolog (S. cerevisiae)
hsa-miR-615-5p	1	0	0	1	0	0	SMPD4	sphingomyelin phosphodiesterase 4, neutral membrane (neutral sphingomyelinase-3)
hsa-miR-615-5p	0	0	1	1	0	0	MPI	mannose phosphate isomerase
hsa-miR-615-5p	0	0	0	1	0	0	RHBDL1	rhomboid, veinlet-like 1 (Drosophila)
hsa-miR-615-5p	0	0	1	1	0	0	CDK10	cyclin-dependent kinase 10
hsa-miR-615-5p	1	0	1	1	1	1	SLC12A9	solute carrier family 12 (potassium/chloride transporters), member 9
hsa-miR-615-5p	0	0	0	1	1	1	MADCAM1	mucosal vascular addressin cell adhesion molecule 1
hsa-miR-615-5p	1	0	0	1	1	1	SYT5	synaptotagmin V
hsa-miR-615-5p	0	0	0	1	0	0	HRCT1	histidine rich carboxyl terminus 1
hsa-miR-615-5p	0	0	0	1	0	0	ATG7	autophagy related 7
hsa-miR-615-5p	0	0	1	1	0	0	CUL9	cullin 9
hsa-miR-615-5p	1	0	1	1	1	1	PTPRS	protein tyrosine phosphatase, receptor type, S
hsa-miR-615-5p	0	0	1	1	1	1	SEMA4A	sema domain, immunoglobulin domain (Ig), transmembrane domain (TM) and short cytoplasmic domain, (semaphorin) 4A
hsa-miR-615-5p	0	0	0	1	0	0	INCA1	inhibitor of CDK, cyclin A1 interacting protein 1
hsa-miR-615-5p	0	0	1	1	0	0	MORN3	MORN repeat containing 3
hsa-miR-615-5p	1	0	0	1	0	0	LMX1B	LIM homeobox transcription factor 1, beta
hsa-miR-615-5p	0	0	0	1	0	0	C2CD4A	C2 calcium-dependent domain containing 4A
hsa-miR-615-5p	0	0	0	1	0	0	SPNS3	spinster homolog 3 (Drosophila)
hsa-miR-615-5p	0	0	1	1	0	0	ANKRD35	ankyrin repeat domain 35
hsa-miR-615-5p	0	0	1	1	0	0	CCDC114	coiled-coil domain containing 114
hsa-miR-615-5p	0	0	0	1	0	0	SFXN4	sideroflexin 4
hsa-miR-615-5p	0	0	1	1	0	0	SREBF1	sterol regulatory element binding transcription factor 1
hsa-miR-615-5p	0	0	0	1	0	0	ZGPAT	zinc finger, CCCH-type with G patch domain
hsa-miR-615-5p	0	0	1	1	0	0	CEP250	centrosomal protein 250kDa
hsa-miR-615-5p	0	0	0	1	0	0	LIPC	lipase, hepatic
hsa-miR-615-5p	0	0	0	1	0	0	CDK11B	cyclin-dependent kinase 11B
hsa-miR-615-5p	1	0	1	1	1	1	SH3BP2	SH3-domain binding protein 2
hsa-miR-615-5p	0	0	0	1	1	1	PITPNM1	phosphatidylinositol transfer protein, membrane-associated 1
hsa-miR-615-5p	1	0	1	1	1	1	NRARP	NOTCH-regulated ankyrin repeat protein
hsa-miR-615-5p	0	0	1	1	0	0	MAVS	mitochondrial antiviral signaling protein
hsa-miR-615-5p	0	0	1	1	0	0	PDXP	pyridoxal (pyridoxine, vitamin B6) phosphatase
hsa-miR-615-5p	0	0	0	1	0	0	TPSB2	tryptase beta 2 (gene/pseudogene)
hsa-miR-615-5p	0	0	1	1	0	0	ANAPC11	anaphase promoting complex subunit 11
hsa-miR-615-5p	0	0	1	1	0	0	ARL6IP4	ADP-ribosylation-like factor 6 interacting protein 4
hsa-miR-615-5p	0	0	1	1	0	0	ASIC4	acid-sensing (proton-gated) ion channel family member 4
hsa-miR-615-5p	1	0	1	1	1	1	EPHB4	EPH receptor B4
hsa-miR-615-5p	1	0	1	1	1	1	PAK4	p21 protein (Cdc42/Rac)-activated kinase 4
hsa-miR-615-5p	0	0	0	1	1	1	SUSD2	sushi domain containing 2
hsa-miR-615-5p	0	0	0	1	0	0	LONP1	lon peptidase 1, mitochondrial
hsa-miR-615-5p	0	0	1	1	0	0	THNSL2	threonine synthase-like 2 (S. cerevisiae)
hsa-miR-615-5p	0	0	1	1	1	1	GTPBP3	GTP binding protein 3 (mitochondrial)
hsa-miR-615-5p	0	0	1	1	0	0	ZNF511	zinc finger protein 511
hsa-miR-615-5p	0	0	1	1	0	0	IL31RA	interleukin 31 receptor A
hsa-miR-615-5p	0	0	0	1	0	0	BCS1L	BCS1-like (S. cerevisiae)
hsa-miR-615-5p	0	0	1	1	0	0	ARAP1	ArfGAP with RhoGAP domain, ankyrin repeat and PH domain 1
hsa-miR-615-5p	0	0	1	1	0	0	SLC6A12	solute carrier family 6 (neurotransmitter transporter, betaine/GABA), member 12
hsa-miR-615-5p	0	0	0	1	0	0	KIAA1683	KIAA1683
hsa-miR-615-5p	0	0	1	1	1	1	RXRG	retinoid X receptor, gamma
hsa-miR-615-5p	0	0	0	1	0	0	LPPR3	lipid phosphate phosphatase-related protein type 3
hsa-miR-615-5p	0	0	1	1	0	0	ART5	ADP-ribosyltransferase 5
hsa-miR-615-5p	0	0	1	1	0	0	BRMS1	breast cancer metastasis suppressor 1
hsa-miR-615-5p	0	0	1	1	1	1	SDF4	stromal cell derived factor 4
hsa-miR-615-5p	0	0	0	1	0	0	PYY	peptide YY
hsa-miR-615-5p	1	0	0	1	0	0	TSTA3	tissue specific transplantation antigen P35B
hsa-miR-615-5p	0	0	0	1	0	0	ZMYND10	zinc finger, MYND-type containing 10
hsa-miR-615-5p	1	0	1	1	1	1	CUX1	cut-like homeobox 1
hsa-miR-615-5p	0	0	0	1	0	0	ARTN	artemin
hsa-miR-615-5p	1	0	1	1	1	1	COL4A2	collagen, type IV, alpha 2
hsa-miR-615-5p	0	0	1	1	1	1	PIM3	pim-3 oncogene
hsa-miR-615-5p	0	0	0	1	0	0	PARVB	parvin, beta
hsa-miR-615-5p	0	0	1	1	0	0	ABHD14A	abhydrolase domain containing 14A
hsa-miR-615-5p	0	0	0	1	0	0	ABP1	amiloride binding protein 1 (amine oxidase (copper-containing))
hsa-miR-615-5p	0	0	1	1	0	0	ISLR2	immunoglobulin superfamily containing leucine-rich repeat 2
hsa-miR-615-5p	0	0	1	1	1	1	CPZ	carboxypeptidase Z
hsa-miR-615-5p	0	0	0	1	0	0	HAO2	hydroxyacid oxidase 2 (long chain)
hsa-miR-615-5p	0	0	1	1	1	1	ABHD14B	abhydrolase domain containing 14B
hsa-miR-615-5p	1	0	1	1	1	1	CDC42BPB	CDC42 binding protein kinase beta (DMPK-like)
hsa-miR-615-5p	0	0	1	1	0	0	CTNNBL1	catenin, beta like 1
hsa-miR-615-5p	0	0	1	1	0	0	EGFL8	EGF-like-domain, multiple 8
hsa-miR-615-5p	0	0	1	1	1	1	ZNF695	zinc finger protein 695
hsa-miR-615-5p	0	0	0	1	1	1	NENF	neudesin neurotrophic factor
hsa-miR-615-5p	0	0	1	1	0	0	TMEM9	transmembrane protein 9
hsa-miR-615-5p	0	0	1	1	1	1	LY9	lymphocyte antigen 9
hsa-miR-615-5p	0	0	1	1	0	0	APOA1BP	apolipoprotein A-I binding protein
hsa-miR-615-5p	0	0	1	1	1	1	C1orf85	chromosome 1 open reading frame 85
hsa-miR-615-5p	0	0	0	1	0	0	CALY	calcyon neuron-specific vesicular protein
hsa-miR-615-5p	0	0	0	1	0	0	TTC40	tetratricopeptide repeat domain 40
hsa-miR-615-5p	0	0	1	1	0	0	TARS2	threonyl-tRNA synthetase 2, mitochondrial (putative)
hsa-miR-615-5p	0	0	0	1	0	0	FAM108A2	Abhydrolase domain-containing protein FAM108A2
hsa-miR-615-5p	0	0	1	1	0	0	CD101	CD101 molecule
hsa-miR-615-5p	0	0	0	1	0	0	FAM3A	family with sequence similarity 3, member A
hsa-miR-615-5p	0	0	0	1	0	0	CALHM3	calcium homeostasis modulator 3
hsa-miR-615-5p	0	0	0	1	0	0	GSTM2	glutathione S-transferase mu 2 (muscle)
hsa-miR-615-5p	0	0	1	1	0	0	CUEDC2	CUE domain containing 2
hsa-miR-615-5p	0	0	0	1	0	0	NFKB2	nuclear factor of kappa light polypeptide gene enhancer in B-cells 2 (p49/p100)
hsa-miR-615-5p	0	0	1	1	0	0	DPCD	deleted in primary ciliary dyskinesia homolog (mouse)
hsa-miR-615-5p	0	0	0	1	0	0	PNMA6B	paraneoplastic Ma antigen family member 6B
hsa-miR-615-5p	0	0	0	1	0	0	BHLHE23	basic helix-loop-helix family, member e23
hsa-miR-615-5p	0	0	1	1	0	0	BARHL2	BarH-like homeobox 2
hsa-miR-615-5p	0	0	1	1	0	0	NFATC2	nuclear factor of activated T-cells, cytoplasmic, calcineurin-dependent 2
hsa-miR-615-5p	0	0	0	1	0	0	NPDC1	neural proliferation, differentiation and control, 1
hsa-miR-615-5p	0	0	1	1	0	0	PHPT1	phosphohistidine phosphatase 1
hsa-miR-615-5p	1	0	1	1	0	0	RABL6	RAB, member RAS oncogene family-like 6
hsa-miR-615-5p	0	0	0	1	0	0	LCN8	lipocalin 8
hsa-miR-615-5p	0	0	0	1	0	0	AGPAT2	1-acylglycerol-3-phosphate O-acyltransferase 2 (lysophosphatidic acid acyltransferase, beta)
hsa-miR-615-5p	0	0	0	1	0	0	INPP5E	inositol polyphosphate-5-phosphatase, 72 kDa
hsa-miR-615-5p	0	0	1	1	0	0	PMPCA	peptidase (mitochondrial processing) alpha
hsa-miR-615-5p	0	0	0	1	0	0	UBAC1	UBA domain containing 1
hsa-miR-615-5p	0	0	0	1	0	0	IFIT3	interferon-induced protein with tetratricopeptide repeats 3
hsa-miR-615-5p	0	0	0	1	0	0	SARDH	sarcosine dehydrogenase
hsa-miR-615-5p	1	0	1	1	1	1	NCOA3	nuclear receptor coactivator 3
hsa-miR-615-5p	0	0	0	1	0	0	CEL	carboxyl ester lipase (bile salt-stimulated lipase)
hsa-miR-615-5p	0	0	0	1	0	0	PTCH2	patched 2
hsa-miR-615-5p	0	0	0	1	0	0	CCDC24	coiled-coil domain containing 24
hsa-miR-615-5p	0	0	1	1	0	0	PCIF1	PDX1 C-terminal inhibiting factor 1
hsa-miR-615-5p	1	0	1	1	1	1	PRPS1	phosphoribosyl pyrophosphate synthetase 1
hsa-miR-615-5p	0	0	1	1	0	0	PLTP	phospholipid transfer protein
hsa-miR-615-5p	0	0	0	1	0	0	PRRX2	paired related homeobox 2
hsa-miR-615-5p	0	0	0	1	0	0	KCNQ4	potassium voltage-gated channel, KQT-like subfamily, member 4
hsa-miR-615-5p	0	0	0	1	1	1	ZDHHC12	zinc finger, DHHC-type containing 12
hsa-miR-615-5p	0	0	1	1	0	0	DUSP13	dual specificity phosphatase 13
hsa-miR-615-5p	0	0	1	1	0	0	GUCA1A	guanylate cyclase activator 1A (retina)
hsa-miR-615-5p	0	0	1	1	0	0	C9orf16	chromosome 9 open reading frame 16
hsa-miR-615-5p	0	0	1	1	0	0	TREML1	triggering receptor expressed on myeloid cells-like 1
hsa-miR-615-5p	0	0	1	1	0	0	FPGS	folylpolyglutamate synthase
hsa-miR-615-5p	0	0	0	1	0	0	TACR2	tachykinin receptor 2
hsa-miR-615-5p	0	0	0	1	0	0	GPR35	G protein-coupled receptor 35
hsa-miR-615-5p	0	0	1	1	0	0	PEF1	penta-EF-hand domain containing 1
hsa-miR-615-5p	0	0	0	1	0	0	SERINC2	serine incorporator 2
hsa-miR-615-5p	1	0	1	1	0	0	DES	desmin
hsa-miR-615-5p	0	0	1	1	0	0	SPDEF	SAM pointed domain containing ets transcription factor
hsa-miR-615-5p	0	0	1	1	0	0	C9orf43	chromosome 9 open reading frame 43
hsa-miR-615-5p	1	0	1	1	1	1	TRIM63	tripartite motif containing 63, E3 ubiquitin protein ligase
hsa-miR-615-5p	0	0	1	1	0	0	GPRIN2	G protein regulated inducer of neurite outgrowth 2
hsa-miR-615-5p	0	0	1	1	0	0	GDPD2	glycerophosphodiester phosphodiesterase domain containing 2
hsa-miR-615-5p	0	0	0	1	1	1	LINC00619	long intergenic non-protein coding RNA 619
hsa-miR-615-5p	0	0	1	1	0	0	ID3	inhibitor of DNA binding 3, dominant negative helix-loop-helix protein
hsa-miR-615-5p	0	0	0	1	0	0	C1QA	complement component 1, q subcomponent, A chain
hsa-miR-615-5p	1	0	1	1	1	1	COL11A2	collagen, type XI, alpha 2
hsa-miR-615-5p	0	0	0	1	0	0	PDE6G	phosphodiesterase 6G, cGMP-specific, rod, gamma
hsa-miR-615-5p	0	0	0	1	0	0	HLA-DMA	major histocompatibility complex, class II, DM alpha
hsa-miR-615-5p	0	0	0	1	0	0	ASIP	agouti signaling protein
hsa-miR-615-5p	1	0	1	1	1	1	MGAT5B	mannosyl (alpha-1,6-)-glycoprotein beta-1,6-N-acetyl-glucosaminyltransferase, isozyme B
hsa-miR-615-5p	0	0	1	1	1	1	PLA2G5	phospholipase A2, group V
hsa-miR-615-5p	0	0	0	1	0	0	PLA2G2E	phospholipase A2, group IIE
hsa-miR-615-5p	0	0	1	1	1	1	H2AFX	H2A histone family, member X
hsa-miR-615-5p	0	0	1	1	1	1	FAM22G	family with sequence similarity 22, member G
hsa-miR-615-5p	0	0	0	1	0	0	SKIV2L	superkiller viralicidic activity 2-like (S. cerevisiae)
hsa-miR-615-5p	1	0	1	1	1	1	ARHGEF10L	Rho guanine nucleotide exchange factor (GEF) 10-like
hsa-miR-615-5p	0	0	0	1	1	1	SUSD3	sushi domain containing 3
hsa-miR-615-5p	0	0	0	1	1	1	MFAP2	microfibrillar-associated protein 2
hsa-miR-615-5p	0	0	0	1	0	0	TMEM82	transmembrane protein 82
hsa-miR-615-5p	1	0	0	1	0	0	PLEKHM2	pleckstrin homology domain containing, family M (with RUN domain) member 2
hsa-miR-615-5p	0	0	1	1	0	0	FOXS1	forkhead box S1
hsa-miR-615-5p	0	0	0	1	0	0	PYY3	peptide YY, 3 (pseudogene)
hsa-miR-615-5p	1	0	1	1	1	1	ID1	inhibitor of DNA binding 1, dominant negative helix-loop-helix protein
hsa-miR-615-5p	0	0	1	1	0	0	NFKBIL1	nuclear factor of kappa light polypeptide gene enhancer in B-cells inhibitor-like 1
hsa-miR-615-5p	0	0	1	1	0	0	CCDC22	coiled-coil domain containing 22
hsa-miR-615-5p	0	0	1	1	1	1	FRMD3	FERM domain containing 3
hsa-miR-615-5p	0	0	1	1	0	0	MAD2L2	MAD2 mitotic arrest deficient-like 2 (yeast)
hsa-miR-615-5p	0	0	0	1	1	1	TRIM15	tripartite motif containing 15
hsa-miR-615-5p	0	0	0	1	0	0	POLD1	polymerase (DNA directed), delta 1, catalytic subunit
hsa-miR-615-5p	0	0	0	1	1	1	MYH14	myosin, heavy chain 14, non-muscle
hsa-miR-615-5p	0	0	0	1	0	0	C1orf127	chromosome 1 open reading frame 127
hsa-miR-615-5p	1	0	1	1	1	1	CASZ1	castor zinc finger 1
hsa-miR-615-5p	0	0	0	1	1	1	IL31	interleukin 31
hsa-miR-615-5p	1	0	1	1	0	0	SLC25A39	solute carrier family 25, member 39
hsa-miR-615-5p	0	0	0	1	1	1	TMEM252	transmembrane protein 252
hsa-miR-615-5p	0	0	1	1	0	0	HES3	hairy and enhancer of split 3 (Drosophila)
hsa-miR-615-5p	1	0	1	1	0	0	MEGF8	multiple EGF-like-domains 8
hsa-miR-615-5p	0	0	1	1	1	1	EBPL	emopamil binding protein-like
hsa-miR-615-5p	0	0	0	1	0	0	C1orf222	chromosome 1 open reading frame 222
hsa-miR-615-5p	0	0	0	1	0	0	DKFZp779M0652	uncharacterized DKFZp779M0652
hsa-miR-615-5p	0	0	0	1	0	0	TP53I13	tumor protein p53 inducible protein 13
hsa-miR-615-5p	0	0	1	1	0	0	ACCSL	1-aminocyclopropane-1-carboxylate synthase homolog (Arabidopsis)(non-functional)-like
hsa-miR-615-5p	0	0	1	1	0	0	SYNE4	spectrin repeat containing, nuclear envelope family member 4
hsa-miR-615-5p	0	0	1	1	1	1	ARHGAP33	Rho GTPase activating protein 33
hsa-miR-615-5p	0	0	0	1	0	0	PUSL1	pseudouridylate synthase-like 1
hsa-miR-615-5p	0	0	1	1	1	1	B3GALT6	UDP-Gal:betaGal beta 1,3-galactosyltransferase polypeptide 6
hsa-miR-615-5p	0	0	0	1	0	0	SCGB2B2	secretoglobin, family 2B, member 2
hsa-miR-615-5p	0	0	0	1	1	1	TOM1L2	target of myb1-like 2 (chicken)
hsa-miR-615-5p	0	0	0	1	0	0	KIFC3	kinesin family member C3
hsa-miR-615-5p	0	0	1	1	1	1	LY86	lymphocyte antigen 86
hsa-miR-615-5p	0	0	1	1	1	1	RS1	retinoschisin 1
hsa-miR-615-5p	0	0	0	1	0	0	KRTAP12-3	keratin associated protein 12-3
hsa-miR-615-5p	0	0	0	1	1	1	KRTAP10-10	keratin associated protein 10-10
hsa-miR-615-5p	0	0	0	1	0	0	KRTAP10-11	keratin associated protein 10-11
hsa-miR-615-5p	0	0	0	1	1	1	ASGR1	asialoglycoprotein receptor 1
hsa-miR-615-5p	0	0	0	1	1	1	PDX1	pancreatic and duodenal homeobox 1
hsa-miR-615-5p	0	0	0	1	0	0	FAM22A	family with sequence similarity 22, member A
hsa-miR-615-5p	0	0	1	1	0	0	TMEM41A	transmembrane protein 41A
hsa-miR-615-5p	1	0	1	1	1	1	GATA4	GATA binding protein 4
hsa-miR-615-5p	0	0	0	1	0	0	GPR78	G protein-coupled receptor 78
hsa-miR-615-5p	0	0	1	1	0	0	SIGIRR	single immunoglobulin and toll-interleukin 1 receptor (TIR) domain
hsa-miR-615-5p	0	0	0	1	0	0	CLCN7	chloride channel, voltage-sensitive 7
hsa-miR-615-5p	0	0	1	1	0	0	TPSD1	tryptase delta 1
hsa-miR-615-5p	0	0	0	1	0	0	MSLN	mesothelin
hsa-miR-615-5p	0	0	0	1	0	0	SLC7A4	solute carrier family 7 (orphan transporter), member 4
hsa-miR-615-5p	0	0	0	1	0	0	PPP2R3B	protein phosphatase 2, regulatory subunit B'', beta
hsa-miR-615-5p	1	0	1	0	1	1	ADRA2B	adrenoceptor alpha 2B
hsa-miR-615-5p	1	0	1	0	1	1	CACNA1C	calcium channel, voltage-dependent, L type, alpha 1C subunit
hsa-miR-615-5p	1	0	1	0	1	1	RAB11FIP1	RAB11 family interacting protein 1 (class I)
hsa-miR-615-5p	0	0	1	1	1	1	TSPYL6	TSPY-like 6
hsa-miR-615-5p	0	0	0	1	1	1	DUXA	double homeobox A
hsa-miR-615-5p	1	0	1	1	1	1	GLIS3	GLIS family zinc finger 3
hsa-miR-615-5p	1	0	1	0	1	1	UNC13A	unc-13 homolog A (C. elegans)
hsa-miR-615-5p	0	0	1	1	1	1	FN1	fibronectin 1
hsa-miR-615-5p	0	0	1	1	1	1	TAPBP	TAP binding protein (tapasin)
hsa-miR-615-5p	0	0	0	1	1	1	GPAA1	glycosylphosphatidylinositol anchor attachment protein 1 homolog (yeast)
hsa-miR-615-5p	0	0	1	1	1	1	IL18R1	interleukin 18 receptor 1
hsa-miR-615-5p	0	0	1	1	1	1	CSRP1	cysteine and glycine-rich protein 1
hsa-miR-615-5p	0	0	1	1	1	1	MGAM	maltase-glucoamylase (alpha-glucosidase)
hsa-miR-615-5p	0	0	1	1	1	1	IL27RA	interleukin 27 receptor, alpha
hsa-miR-615-5p	0	0	1	1	1	1	SIX3	SIX homeobox 3
hsa-miR-615-5p	1	0	1	1	1	1	MLLT6	myeloid/lymphoid or mixed-lineage leukemia (trithorax homolog, Drosophila); translocated to, 6
hsa-miR-615-5p	1	0	1	1	1	1	SNAI1	snail homolog 1 (Drosophila)
hsa-miR-615-5p	1	0	1	1	1	1	FBLN5	fibulin 5
hsa-miR-615-5p	0	0	1	1	1	1	LZTR1	leucine-zipper-like transcription regulator 1
hsa-miR-615-5p	1	0	1	1	1	1	PTPN18	protein tyrosine phosphatase, non-receptor type 18 (brain-derived)
hsa-miR-615-5p	1	0	1	0	1	1	HUNK	hormonally up-regulated Neu-associated kinase
hsa-miR-615-5p	1	0	1	1	1	1	AUTS2	autism susceptibility candidate 2
hsa-miR-615-5p	1	0	1	1	1	1	ZBTB7A	zinc finger and BTB domain containing 7A
hsa-miR-615-5p	1	0	1	1	1	1	TMEM242	transmembrane protein 242
hsa-miR-615-5p	1	0	1	0	1	1	LRP1B	low density lipoprotein receptor-related protein 1B
hsa-miR-615-5p	1	0	1	0	1	1	PMEPA1	prostate transmembrane protein, androgen induced 1
hsa-miR-615-5p	1	0	1	1	1	1	SSH2	slingshot homolog 2 (Drosophila)
hsa-miR-615-5p	0	0	1	0	1	1	ZNF518B	zinc finger protein 518B
hsa-miR-615-5p	0	0	0	1	1	1	WFDC12	WAP four-disulfide core domain 12
hsa-miR-615-5p	1	0	1	1	1	1	KCTD12	potassium channel tetramerisation domain containing 12
hsa-miR-615-5p	1	0	1	1	1	1	ANKRD23	ankyrin repeat domain 23
hsa-miR-615-5p	1	0	1	1	1	1	NAGS	N-acetylglutamate synthase
hsa-miR-615-5p	0	0	1	0	1	1	C9orf91	chromosome 9 open reading frame 91
hsa-miR-615-5p	0	0	1	1	1	1	GPR115	G protein-coupled receptor 115
hsa-miR-615-5p	0	0	1	1	1	1	CABP7	calcium binding protein 7
hsa-miR-615-5p	1	0	1	1	1	1	STAC2	SH3 and cysteine rich domain 2
hsa-miR-615-5p	1	0	0	1	1	1	CLDN8	claudin 8
hsa-miR-615-5p	1	0	1	1	1	1	C12orf76	chromosome 12 open reading frame 76
hsa-miR-615-5p	0	0	1	0	1	1	FAM174B	family with sequence similarity 174, member B
hsa-miR-615-5p	0	0	0	1	1	1	C11orf95	chromosome 11 open reading frame 95
hsa-miR-615-5p	0	0	0	1	1	1	H2BFM	H2B histone family, member M
