# Supplementary material for: Profiling of Selected MicroRNAs in Proliferative Eutopic Endometrium of Women with Ovarian Endometriosis
Source: Biomed Res Int. 2015 Aug 20;2015:760698. doi: 10.1155/2015/760698 (PMC4558423; doi:10.1155/2015/760698)
Supplement: Supplementary file 1 — Table I: The names of miRNAs significantly differentially expressed between eutopic endometrium of patients with endometriosis vs eutopic endometrium of patients without endometriosis. Table II: The associations between miRNA and mRNA, which presents detailed results of the search of six major databases i.e targetscan, tarbase, miranda, mirbase, mirtarget2 and pictar. [file 760698.f1.zip › 760698.f1/Table II/hsa-miR-1179.tsv]

miR	targetscan	tarbase	miranda	mirbase	mirtarget2	pictar	GeneSymbol	GeneName
hsa-miR-1179	1	0	1	1	0	0	SRCAP	Snf2-related CREBBP activator protein
hsa-miR-1179	1	0	1	0	1	1	PTPRT	protein tyrosine phosphatase, receptor type, T
hsa-miR-1179	1	0	1	1	1	1	GLI2	GLI family zinc finger 2
hsa-miR-1179	1	0	1	1	1	1	AUTS2	autism susceptibility candidate 2
hsa-miR-1179	1	0	1	0	1	1	CEP350	centrosomal protein 350kDa
hsa-miR-1179	1	0	1	1	1	1	RNGTT	RNA guanylyltransferase and 5'-phosphatase
hsa-miR-1179	0	0	1	1	1	1	SPAG9	sperm associated antigen 9
hsa-miR-1179	1	0	1	1	1	1	BAI3	brain-specific angiogenesis inhibitor 3
hsa-miR-1179	1	0	1	1	1	1	HIPK1	homeodomain interacting protein kinase 1
hsa-miR-1179	1	0	1	0	1	1	LPHN3	latrophilin 3
hsa-miR-1179	1	0	1	1	1	1	DMXL2	Dmx-like 2
hsa-miR-1179	1	0	1	1	1	1	ARHGEF15	Rho guanine nucleotide exchange factor (GEF) 15
hsa-miR-1179	1	0	1	1	1	1	RNMT	RNA (guanine-7-) methyltransferase
hsa-miR-1179	1	0	1	1	1	1	CPEB3	cytoplasmic polyadenylation element binding protein 3
hsa-miR-1179	1	0	1	1	1	1	BAHD1	bromo adjacent homology domain containing 1
hsa-miR-1179	0	0	1	0	0	0	THSD7A	thrombospondin, type I, domain containing 7A
hsa-miR-1179	0	0	1	1	1	1	FASTKD2	FAST kinase domains 2
hsa-miR-1179	1	0	1	1	1	1	NTNG1	netrin G1
hsa-miR-1179	1	0	1	1	1	1	FOXJ3	forkhead box J3
hsa-miR-1179	1	0	1	0	1	1	ZNF507	zinc finger protein 507
hsa-miR-1179	1	0	1	1	1	1	PRRC2C	proline-rich coiled-coil 2C
hsa-miR-1179	1	0	1	1	1	1	SMARCAD1	SWI/SNF-related, matrix-associated actin-dependent regulator of chromatin, subfamily a, containing DEAD/H box 1
hsa-miR-1179	1	0	1	1	1	1	SPIRE1	spire homolog 1 (Drosophila)
hsa-miR-1179	1	0	1	1	0	0	KIAA1210	KIAA1210
hsa-miR-1179	1	0	1	1	1	1	ATXN7L1	ataxin 7-like 1
hsa-miR-1179	0	0	1	1	1	1	COPS7A	COP9 constitutive photomorphogenic homolog subunit 7A (Arabidopsis)
hsa-miR-1179	0	0	1	1	1	1	CA10	carbonic anhydrase X
hsa-miR-1179	1	0	1	1	1	1	PCDH19	protocadherin 19
hsa-miR-1179	1	0	1	1	1	1	LRRC7	leucine rich repeat containing 7
hsa-miR-1179	0	0	1	0	1	1	KIAA1468	KIAA1468
hsa-miR-1179	0	0	1	0	0	0	KRT19P2	keratin 19 pseudogene 2
hsa-miR-1179	0	0	1	0	0	0	LOC440792	proline dehydrogenase (oxidase) 1 pseudogene
hsa-miR-1179	0	0	1	1	1	1	KIAA1704	KIAA1704
hsa-miR-1179	0	0	1	0	1	1	SETD5	SET domain containing 5
hsa-miR-1179	1	0	1	1	1	1	DOCK7	dedicator of cytokinesis 7
hsa-miR-1179	1	0	1	1	1	1	NPAS3	neuronal PAS domain protein 3
hsa-miR-1179	1	0	1	1	1	1	LCOR	ligand dependent nuclear receptor corepressor
hsa-miR-1179	1	0	1	1	1	1	POGZ	pogo transposable element with ZNF domain
hsa-miR-1179	1	0	1	1	1	1	SH3TC2	SH3 domain and tetratricopeptide repeats 2
hsa-miR-1179	0	0	1	1	0	0	SLC22A10	solute carrier family 22, member 10
hsa-miR-1179	1	0	1	0	0	0	RNF169	ring finger protein 169
hsa-miR-1179	1	0	1	0	0	0	ZBTB34	zinc finger and BTB domain containing 34
hsa-miR-1179	1	0	1	1	1	1	ACBD5	acyl-CoA binding domain containing 5
hsa-miR-1179	0	0	1	1	1	1	NELL1	NEL-like 1 (chicken)
hsa-miR-1179	0	0	1	0	1	1	RASSF8	Ras association (RalGDS/AF-6) domain family (N-terminal) member 8
hsa-miR-1179	1	0	1	1	1	1	SMEK1	SMEK homolog 1, suppressor of mek1 (Dictyostelium)
hsa-miR-1179	1	0	1	1	1	1	C11orf57	chromosome 11 open reading frame 57
hsa-miR-1179	0	0	1	1	1	1	IL7	interleukin 7
hsa-miR-1179	1	0	1	1	1	1	PAN3	PAN3 poly(A) specific ribonuclease subunit homolog (S. cerevisiae)
hsa-miR-1179	1	0	1	0	1	1	CCDC88A	coiled-coil domain containing 88A
hsa-miR-1179	1	0	1	0	1	1	PCDHA13	protocadherin alpha 13
hsa-miR-1179	1	0	1	1	1	1	PCDHA4	protocadherin alpha 4
hsa-miR-1179	1	0	1	1	1	1	RPS6KA3	ribosomal protein S6 kinase, 90kDa, polypeptide 3
hsa-miR-1179	0	0	1	1	0	0	SMARCC2	SWI/SNF related, matrix associated, actin dependent regulator of chromatin, subfamily c, member 2
hsa-miR-1179	1	0	1	1	1	1	PML	promyelocytic leukemia
hsa-miR-1179	1	0	1	0	1	1	PLAG1	pleiomorphic adenoma gene 1
hsa-miR-1179	1	0	1	1	1	1	RASSF5	Ras association (RalGDS/AF-6) domain family member 5
hsa-miR-1179	0	0	1	1	1	1	DGKI	diacylglycerol kinase, iota
hsa-miR-1179	1	0	1	1	1	1	DHX57	DEAH (Asp-Glu-Ala-Asp/His) box polypeptide 57
hsa-miR-1179	1	0	1	1	1	1	EPHA7	EPH receptor A7
hsa-miR-1179	1	0	1	1	1	1	TBX2	T-box 2
hsa-miR-1179	1	0	1	1	1	1	ANK1	ankyrin 1, erythrocytic
hsa-miR-1179	0	0	1	1	0	0	IFT27	intraflagellar transport 27 homolog (Chlamydomonas)
hsa-miR-1179	0	0	1	1	0	0	PSMB2	proteasome (prosome, macropain) subunit, beta type, 2
hsa-miR-1179	1	0	1	1	1	1	MYO5A	myosin VA (heavy chain 12, myoxin)
hsa-miR-1179	1	0	1	1	1	1	PDLIM5	PDZ and LIM domain 5
hsa-miR-1179	0	0	1	1	0	0	BMP1	bone morphogenetic protein 1
hsa-miR-1179	0	0	1	1	1	1	IL10RA	interleukin 10 receptor, alpha
hsa-miR-1179	1	0	1	0	1	1	RPL28	ribosomal protein L28
hsa-miR-1179	1	0	1	1	1	1	ARHGEF3	Rho guanine nucleotide exchange factor (GEF) 3
hsa-miR-1179	1	0	1	1	0	0	SYN3	synapsin III
hsa-miR-1179	1	0	1	1	0	0	GRIN2A	glutamate receptor, ionotropic, N-methyl D-aspartate 2A
hsa-miR-1179	0	0	1	1	1	1	CHN1	chimerin (chimaerin) 1
hsa-miR-1179	1	0	1	0	1	1	ADD3	adducin 3 (gamma)
hsa-miR-1179	1	0	1	1	1	1	HMGA2	high mobility group AT-hook 2
hsa-miR-1179	1	0	1	1	1	1	OSBPL10	oxysterol binding protein-like 10
hsa-miR-1179	0	0	1	1	1	1	PLD1	phospholipase D1, phosphatidylcholine-specific
hsa-miR-1179	1	0	1	1	1	1	PICALM	phosphatidylinositol binding clathrin assembly protein
hsa-miR-1179	0	0	1	0	0	0	MIAT	myocardial infarction associated transcript (non-protein coding)
hsa-miR-1179	0	0	1	1	1	1	BRCA1	breast cancer 1, early onset
hsa-miR-1179	0	0	1	0	1	1	ZMYM2	zinc finger, MYM-type 2
hsa-miR-1179	0	0	1	1	0	0	PLA1A	phospholipase A1 member A
hsa-miR-1179	1	0	1	1	1	1	MYT1L	myelin transcription factor 1-like
hsa-miR-1179	1	0	1	1	1	1	SOCS2	suppressor of cytokine signaling 2
hsa-miR-1179	1	0	1	0	0	0	MAP3K1	mitogen-activated protein kinase kinase kinase 1, E3 ubiquitin protein ligase
hsa-miR-1179	1	0	1	1	1	1	SHOC2	soc-2 suppressor of clear homolog (C. elegans)
hsa-miR-1179	0	0	1	1	1	1	SLIT2	slit homolog 2 (Drosophila)
hsa-miR-1179	1	0	1	1	1	1	MBNL2	muscleblind-like splicing regulator 2
hsa-miR-1179	1	0	1	1	1	1	NUDT4	nudix (nucleoside diphosphate linked moiety X)-type motif 4
hsa-miR-1179	0	0	1	1	0	0	SLC38A6	solute carrier family 38, member 6
hsa-miR-1179	0	0	1	1	0	0	SGK223	homolog of rat pragma of Rnd2
hsa-miR-1179	0	0	1	1	1	1	LYPLA1	lysophospholipase I
hsa-miR-1179	1	0	1	1	1	1	AKAP9	A kinase (PRKA) anchor protein (yotiao) 9
hsa-miR-1179	0	0	1	1	1	1	MINPP1	multiple inositol-polyphosphate phosphatase 1
hsa-miR-1179	0	0	1	0	0	0	C3orf79	chromosome 3 open reading frame 79
hsa-miR-1179	1	0	1	1	1	1	SLMAP	sarcolemma associated protein
hsa-miR-1179	0	0	1	1	0	0	RBM5	RNA binding motif protein 5
hsa-miR-1179	0	0	1	1	0	0	COPB1	coatomer protein complex, subunit beta 1
hsa-miR-1179	1	0	1	1	1	1	KLF12	Kruppel-like factor 12
hsa-miR-1179	1	0	1	1	1	1	CAB39	calcium binding protein 39
hsa-miR-1179	0	0	1	1	1	1	HEPH	hephaestin
hsa-miR-1179	0	0	1	0	1	1	PDP1	pyruvate dehyrogenase phosphatase catalytic subunit 1
hsa-miR-1179	1	0	1	1	1	1	FAM49B	family with sequence similarity 49, member B
hsa-miR-1179	1	0	1	1	1	1	EIF4A2	eukaryotic translation initiation factor 4A2
hsa-miR-1179	0	0	1	1	1	1	LMBRD1	LMBR1 domain containing 1
hsa-miR-1179	1	0	1	1	1	1	C21orf91	chromosome 21 open reading frame 91
hsa-miR-1179	1	0	1	1	1	1	SNTB2	syntrophin, beta 2 (dystrophin-associated protein A1, 59kDa, basic component 2)
hsa-miR-1179	1	0	1	1	1	1	ABI2	abl-interactor 2
hsa-miR-1179	1	0	1	1	1	1	RBM47	RNA binding motif protein 47
hsa-miR-1179	1	0	1	1	1	1	SH3GLB1	SH3-domain GRB2-like endophilin B1
hsa-miR-1179	1	0	1	0	1	1	PARP11	poly (ADP-ribose) polymerase family, member 11
hsa-miR-1179	0	0	1	1	1	1	GOLGA6A	golgin A6 family, member A
hsa-miR-1179	1	0	1	0	1	1	TRPS1	trichorhinophalangeal syndrome I
hsa-miR-1179	1	0	1	1	1	1	CALU	calumenin
hsa-miR-1179	1	0	1	1	1	1	KCNIP2	Kv channel interacting protein 2
hsa-miR-1179	1	0	1	1	1	1	LARP4	La ribonucleoprotein domain family, member 4
hsa-miR-1179	0	0	1	1	0	0	SNRPN	small nuclear ribonucleoprotein polypeptide N
hsa-miR-1179	1	0	1	1	1	1	MAGI1	membrane associated guanylate kinase, WW and PDZ domain containing 1
hsa-miR-1179	0	0	1	0	0	0	RMST	rhabdomyosarcoma 2 associated transcript (non-protein coding)
hsa-miR-1179	0	0	1	1	1	1	C10orf90	chromosome 10 open reading frame 90
hsa-miR-1179	1	0	1	1	0	0	XRRA1	X-ray radiation resistance associated 1
hsa-miR-1179	1	0	1	1	0	0	SEPT8	septin 8
hsa-miR-1179	1	0	1	0	1	1	PPP1R12A	protein phosphatase 1, regulatory subunit 12A
hsa-miR-1179	1	0	1	1	1	1	HNRNPU	heterogeneous nuclear ribonucleoprotein U (scaffold attachment factor A)
hsa-miR-1179	1	0	1	1	1	1	CACNB2	calcium channel, voltage-dependent, beta 2 subunit
hsa-miR-1179	0	0	1	1	1	1	SAMD9L	sterile alpha motif domain containing 9-like
hsa-miR-1179	0	0	1	1	1	1	SLC2A14	solute carrier family 2 (facilitated glucose transporter), member 14
hsa-miR-1179	0	0	1	1	1	1	CARD8	caspase recruitment domain family, member 8
hsa-miR-1179	0	0	1	1	1	1	PTK7	PTK7 protein tyrosine kinase 7
hsa-miR-1179	0	0	1	1	1	1	ZNF638	zinc finger protein 638
hsa-miR-1179	1	0	1	0	1	1	IL1RAP	interleukin 1 receptor accessory protein
hsa-miR-1179	0	0	1	1	1	1	ANKRD36B	ankyrin repeat domain 36B
hsa-miR-1179	1	0	1	1	1	1	AFF2	AF4/FMR2 family, member 2
hsa-miR-1179	1	0	1	0	1	1	DICER1	dicer 1, ribonuclease type III
hsa-miR-1179	0	0	1	0	0	0	ADAM5	ADAM metallopeptidase domain 5, pseudogene
hsa-miR-1179	0	0	1	0	0	0	CACNA2D3	calcium channel, voltage-dependent, alpha 2/delta subunit 3
hsa-miR-1179	1	0	1	1	1	1	VAMP7	vesicle-associated membrane protein 7
hsa-miR-1179	1	0	1	1	1	1	RAB3IP	RAB3A interacting protein (rabin3)
hsa-miR-1179	1	0	1	1	1	1	NRXN3	neurexin 3
hsa-miR-1179	1	0	1	1	1	1	NAV3	neuron navigator 3
hsa-miR-1179	0	0	1	1	1	1	TRDN	triadin
hsa-miR-1179	0	0	1	1	1	1	ESRP1	epithelial splicing regulatory protein 1
hsa-miR-1179	1	0	1	0	1	1	NFAT5	nuclear factor of activated T-cells 5, tonicity-responsive
hsa-miR-1179	0	0	1	1	1	1	BANK1	B-cell scaffold protein with ankyrin repeats 1
hsa-miR-1179	1	0	1	1	0	0	SALL2	sal-like 2 (Drosophila)
hsa-miR-1179	1	0	1	1	1	1	MEIS2	Meis homeobox 2
hsa-miR-1179	1	0	1	1	1	1	SENP6	SUMO1/sentrin specific peptidase 6
hsa-miR-1179	1	0	1	1	1	1	RIC8B	resistance to inhibitors of cholinesterase 8 homolog B (C. elegans)
hsa-miR-1179	1	0	1	1	1	1	PTBP3	polypyrimidine tract binding protein 3
hsa-miR-1179	1	0	1	1	1	1	WDTC1	WD and tetratricopeptide repeats 1
hsa-miR-1179	1	0	1	1	1	1	PDCD6	programmed cell death 6
hsa-miR-1179	1	0	1	1	1	1	MBD5	methyl-CpG binding domain protein 5
hsa-miR-1179	1	0	1	1	1	1	KLHDC8B	kelch domain containing 8B
hsa-miR-1179	0	0	1	1	0	0	C17orf53	chromosome 17 open reading frame 53
hsa-miR-1179	1	0	1	1	1	1	INSIG2	insulin induced gene 2
hsa-miR-1179	0	0	1	1	1	1	RBM15	RNA binding motif protein 15
hsa-miR-1179	0	0	1	1	1	1	LRRN1	leucine rich repeat neuronal 1
hsa-miR-1179	0	0	1	1	1	1	CDKAL1	CDK5 regulatory subunit associated protein 1-like 1
hsa-miR-1179	1	0	1	0	1	1	ATP2B1	ATPase, Ca++ transporting, plasma membrane 1
hsa-miR-1179	1	0	1	1	1	1	SLC35A3	solute carrier family 35 (UDP-N-acetylglucosamine (UDP-GlcNAc) transporter), member A3
hsa-miR-1179	1	0	1	1	1	1	GBF1	golgi brefeldin A resistant guanine nucleotide exchange factor 1
hsa-miR-1179	0	0	1	0	1	1	ATXN1L	ataxin 1-like
hsa-miR-1179	1	0	1	1	1	1	TNRC6A	trinucleotide repeat containing 6A
hsa-miR-1179	1	0	1	1	1	1	NAA30	N(alpha)-acetyltransferase 30, NatC catalytic subunit
hsa-miR-1179	0	0	1	0	1	1	FLJ22447	uncharacterized LOC400221
hsa-miR-1179	0	0	1	1	0	0	DDAH2	dimethylarginine dimethylaminohydrolase 2
hsa-miR-1179	0	0	1	1	1	1	FAM124B	family with sequence similarity 124B
hsa-miR-1179	0	0	1	0	1	1	FLJ22763	uncharacterized LOC401081
hsa-miR-1179	1	0	1	1	0	0	MAGI3	membrane associated guanylate kinase, WW and PDZ domain containing 3
hsa-miR-1179	1	0	1	1	0	0	SLAIN2	SLAIN motif family, member 2
hsa-miR-1179	1	0	1	1	1	1	RNF185	ring finger protein 185
hsa-miR-1179	0	0	1	1	1	1	DTL	denticleless E3 ubiquitin protein ligase homolog (Drosophila)
hsa-miR-1179	1	0	1	0	1	1	CCNL2	cyclin L2
hsa-miR-1179	1	0	1	1	1	1	SLC38A1	solute carrier family 38, member 1
hsa-miR-1179	0	0	1	1	1	1	IGBP1	immunoglobulin (CD79A) binding protein 1
hsa-miR-1179	1	0	1	1	1	1	SLAIN1	SLAIN motif family, member 1
hsa-miR-1179	0	0	1	0	0	0	LOC283508	uncharacterized LOC283508
hsa-miR-1179	1	0	1	1	1	1	RAP1GDS1	RAP1, GTP-GDP dissociation stimulator 1
hsa-miR-1179	0	0	1	1	1	1	C8orf46	chromosome 8 open reading frame 46
hsa-miR-1179	1	0	1	1	1	1	PPM1L	protein phosphatase, Mg2+/Mn2+ dependent, 1L
hsa-miR-1179	1	0	1	1	0	0	SPEG	SPEG complex locus
hsa-miR-1179	1	0	1	1	1	1	DIXDC1	DIX domain containing 1
hsa-miR-1179	1	0	1	1	1	1	TMTC1	transmembrane and tetratricopeptide repeat containing 1
hsa-miR-1179	0	0	1	1	1	1	SDK1	sidekick cell adhesion molecule 1
hsa-miR-1179	1	0	1	0	1	1	RNF165	ring finger protein 165
hsa-miR-1179	1	0	1	1	0	0	SH2D3C	SH2 domain containing 3C
hsa-miR-1179	1	0	1	0	1	1	PTPRE	protein tyrosine phosphatase, receptor type, E
hsa-miR-1179	1	0	1	1	1	1	LMNA	lamin A/C
hsa-miR-1179	0	0	1	0	0	0	SEC14L2	SEC14-like 2 (S. cerevisiae)
hsa-miR-1179	0	0	1	0	0	0	JPX	JPX transcript, XIST activator (non-protein coding)
hsa-miR-1179	1	0	1	1	1	1	PPP1R3F	protein phosphatase 1, regulatory subunit 3F
hsa-miR-1179	0	0	1	1	0	0	ZNF185	zinc finger protein 185 (LIM domain)
hsa-miR-1179	1	0	1	1	1	1	CLCN5	chloride channel, voltage-sensitive 5
hsa-miR-1179	0	0	1	1	1	1	ZNF606	zinc finger protein 606
hsa-miR-1179	1	0	1	0	1	1	RABGEF1	RAB guanine nucleotide exchange factor (GEF) 1
hsa-miR-1179	0	0	1	1	0	0	RELT	RELT tumor necrosis factor receptor
hsa-miR-1179	1	0	1	1	1	1	MLLT6	myeloid/lymphoid or mixed-lineage leukemia (trithorax homolog, Drosophila); translocated to, 6
hsa-miR-1179	1	0	1	1	1	1	HMGB1	high mobility group box 1
hsa-miR-1179	1	0	1	1	1	1	TLE4	transducin-like enhancer of split 4 (E(sp1) homolog, Drosophila)
hsa-miR-1179	1	0	1	0	1	1	PLEKHA1	pleckstrin homology domain containing, family A (phosphoinositide binding specific) member 1
hsa-miR-1179	0	0	1	1	1	1	ELL3	elongation factor RNA polymerase II-like 3
hsa-miR-1179	0	0	1	0	0	0	TUG1	taurine upregulated 1 (non-protein coding)
hsa-miR-1179	1	0	1	1	1	1	ANKRD29	ankyrin repeat domain 29
hsa-miR-1179	0	0	1	1	0	0	PRSS54	protease, serine, 54
hsa-miR-1179	1	0	1	1	1	1	C6orf89	chromosome 6 open reading frame 89
hsa-miR-1179	1	0	1	1	0	0	HS6ST1	heparan sulfate 6-O-sulfotransferase 1
hsa-miR-1179	0	0	1	0	1	1	UHMK1	U2AF homology motif (UHM) kinase 1
hsa-miR-1179	0	0	1	1	0	0	SYTL1	synaptotagmin-like 1
hsa-miR-1179	0	0	1	1	1	1	HDAC8	histone deacetylase 8
hsa-miR-1179	0	0	1	1	1	1	PKIB	protein kinase (cAMP-dependent, catalytic) inhibitor beta
hsa-miR-1179	0	0	1	1	1	1	STBD1	starch binding domain 1
hsa-miR-1179	0	0	1	0	1	1	TBX5-AS1	TBX5 antisense RNA 1
hsa-miR-1179	0	0	1	1	1	1	GPATCH1	G patch domain containing 1
hsa-miR-1179	1	0	1	1	1	1	FBXW2	F-box and WD repeat domain containing 2
hsa-miR-1179	0	0	1	1	1	1	PTGR1	prostaglandin reductase 1
hsa-miR-1179	1	0	1	1	1	1	LUC7L2	LUC7-like 2 (S. cerevisiae)
hsa-miR-1179	1	0	1	1	1	1	HDAC2	histone deacetylase 2
hsa-miR-1179	0	0	1	1	1	1	NRCAM	neuronal cell adhesion molecule
hsa-miR-1179	0	0	1	1	1	1	NCBP2	nuclear cap binding protein subunit 2, 20kDa
hsa-miR-1179	1	0	1	1	1	1	GCFC1	GC-rich sequence DNA-binding factor 1
hsa-miR-1179	0	0	1	0	0	0	LOC283887	uncharacterized LOC283887
hsa-miR-1179	0	0	1	1	0	0	AXDND1	axonemal dynein light chain domain containing 1
hsa-miR-1179	1	0	1	1	1	1	SARM1	sterile alpha and TIR motif containing 1
hsa-miR-1179	0	0	1	0	0	0	LOC550112	uncharacterized LOC550112
hsa-miR-1179	1	0	1	1	1	1	SPTBN1	spectrin, beta, non-erythrocytic 1
hsa-miR-1179	0	0	1	1	1	1	TGFBI	transforming growth factor, beta-induced, 68kDa
hsa-miR-1179	0	0	1	1	1	1	SPOCK1	sparc/osteonectin, cwcv and kazal-like domains proteoglycan (testican) 1
hsa-miR-1179	0	0	1	0	1	1	RALYL	RALY RNA binding protein-like
hsa-miR-1179	1	0	1	1	1	1	SNAP25	synaptosomal-associated protein, 25kDa
hsa-miR-1179	0	0	1	0	0	0	ZNF806	zinc finger protein 806
hsa-miR-1179	0	0	1	1	1	1	NMD3	NMD3 homolog (S. cerevisiae)
hsa-miR-1179	1	0	1	1	1	1	GCLC	glutamate-cysteine ligase, catalytic subunit
hsa-miR-1179	0	0	1	1	1	1	GPT2	glutamic pyruvate transaminase (alanine aminotransferase) 2
hsa-miR-1179	0	0	1	1	0	0	HPN	hepsin
hsa-miR-1179	0	0	1	1	1	1	FUT11	fucosyltransferase 11 (alpha (1,3) fucosyltransferase)
hsa-miR-1179	1	0	1	1	1	1	SPATS2	spermatogenesis associated, serine-rich 2
hsa-miR-1179	0	0	1	0	0	0	LOC730101	uncharacterized LOC730101
hsa-miR-1179	1	0	1	1	1	1	CS	citrate synthase
hsa-miR-1179	1	0	1	1	1	1	ZC3H11A	zinc finger CCCH-type containing 11A
hsa-miR-1179	1	0	1	0	1	1	NUP50	nucleoporin 50kDa
hsa-miR-1179	1	0	1	1	1	1	ACSL1	acyl-CoA synthetase long-chain family member 1
hsa-miR-1179	0	0	1	0	1	1	C1orf198	chromosome 1 open reading frame 198
hsa-miR-1179	1	0	1	1	1	1	SLITRK2	SLIT and NTRK-like family, member 2
hsa-miR-1179	0	0	1	0	0	0	FAM66C	family with sequence similarity 66, member C
hsa-miR-1179	1	0	1	1	1	1	HDGF	hepatoma-derived growth factor
hsa-miR-1179	0	0	1	1	1	1	ZNF673	zinc finger family member 673
hsa-miR-1179	1	0	1	0	1	1	THRB	thyroid hormone receptor, beta
hsa-miR-1179	1	0	1	0	1	1	KBTBD8	kelch repeat and BTB (POZ) domain containing 8
hsa-miR-1179	1	0	1	1	1	1	CCDC141	coiled-coil domain containing 141
hsa-miR-1179	1	0	1	1	1	1	LCP1	lymphocyte cytosolic protein 1 (L-plastin)
hsa-miR-1179	0	0	1	0	0	0	LOC400680	uncharacterized LOC400680
hsa-miR-1179	1	0	1	1	1	1	GOLGA8B	golgin A8 family, member B
hsa-miR-1179	0	0	1	0	0	0	CECR7	cat eye syndrome chromosome region, candidate 7 (non-protein coding)
hsa-miR-1179	0	0	1	1	1	1	C10orf32	chromosome 10 open reading frame 32
hsa-miR-1179	1	0	1	1	1	1	ZCCHC2	zinc finger, CCHC domain containing 2
hsa-miR-1179	0	0	1	1	1	1	RP1	retinitis pigmentosa 1 (autosomal dominant)
hsa-miR-1179	1	0	1	1	1	1	LARP1B	La ribonucleoprotein domain family, member 1B
hsa-miR-1179	1	0	1	1	1	1	THTPA	thiamine triphosphatase
hsa-miR-1179	0	0	1	1	0	0	ALDOA	aldolase A, fructose-bisphosphate
hsa-miR-1179	0	0	1	1	1	1	SLFN13	schlafen family member 13
hsa-miR-1179	1	0	1	1	1	1	CRMP1	collapsin response mediator protein 1
hsa-miR-1179	1	0	1	1	1	1	WEE1	WEE1 homolog (S. pombe)
hsa-miR-1179	0	0	1	1	0	0	MX2	myxovirus (influenza virus) resistance 2 (mouse)
hsa-miR-1179	0	0	1	1	1	1	SLC13A3	solute carrier family 13 (sodium-dependent dicarboxylate transporter), member 3
hsa-miR-1179	1	0	1	1	1	1	ATG4B	autophagy related 4B, cysteine peptidase
hsa-miR-1179	0	0	1	1	1	1	FAM19A2	family with sequence similarity 19 (chemokine (C-C motif)-like), member A2
hsa-miR-1179	1	0	1	1	1	1	SH2D4B	SH2 domain containing 4B
hsa-miR-1179	0	0	1	1	1	1	ANKRD44	ankyrin repeat domain 44
hsa-miR-1179	1	0	1	1	1	1	SMAP1	small ArfGAP 1
hsa-miR-1179	1	0	1	1	1	1	VPS54	vacuolar protein sorting 54 homolog (S. cerevisiae)
hsa-miR-1179	1	0	1	1	1	1	KIF21A	kinesin family member 21A
hsa-miR-1179	0	0	1	1	1	1	KANSL1L	KAT8 regulatory NSL complex subunit 1-like
hsa-miR-1179	0	0	1	1	1	1	MKX	mohawk homeobox
hsa-miR-1179	1	0	1	1	1	1	SACS	spastic ataxia of Charlevoix-Saguenay (sacsin)
hsa-miR-1179	1	0	1	1	1	1	KTN1	kinectin 1 (kinesin receptor)
hsa-miR-1179	1	0	1	1	1	1	KPNA1	karyopherin alpha 1 (importin alpha 5)
hsa-miR-1179	0	0	1	1	0	0	UBR2	ubiquitin protein ligase E3 component n-recognin 2
hsa-miR-1179	0	0	1	0	1	1	C17orf105	chromosome 17 open reading frame 105
hsa-miR-1179	0	0	1	1	1	1	RBM46	RNA binding motif protein 46
hsa-miR-1179	1	0	1	1	1	1	FAM122B	family with sequence similarity 122B
hsa-miR-1179	0	0	1	1	0	0	C20orf141	chromosome 20 open reading frame 141
hsa-miR-1179	1	0	1	0	1	1	PLXNA1	plexin A1
hsa-miR-1179	0	0	1	1	1	1	MORF4L2	mortality factor 4 like 2
hsa-miR-1179	1	0	1	1	1	1	SIKE1	suppressor of IKBKE 1
hsa-miR-1179	1	0	1	0	1	1	ANO6	anoctamin 6
hsa-miR-1179	0	0	1	0	1	1	LOC388942	uncharacterized LOC388942
hsa-miR-1179	0	0	1	1	1	1	RHPN2	rhophilin, Rho GTPase binding protein 2
hsa-miR-1179	0	0	1	0	0	0	PLEKHD1	pleckstrin homology domain containing, family D (with coiled-coil domains) member 1
hsa-miR-1179	0	0	1	0	0	0	HNRNPKP3	heterogeneous nuclear ribonucleoprotein K pseudogene 3
hsa-miR-1179	1	0	1	1	1	1	LRP2BP	LRP2 binding protein
hsa-miR-1179	1	0	1	1	1	1	EIF4E3	eukaryotic translation initiation factor 4E family member 3
hsa-miR-1179	0	0	1	0	0	0	RPL23AP53	ribosomal protein L23a pseudogene 53
hsa-miR-1179	1	0	1	1	1	1	PHF17	PHD finger protein 17
hsa-miR-1179	1	0	1	1	1	1	ENAH	enabled homolog (Drosophila)
hsa-miR-1179	1	0	1	1	1	1	CXorf23	chromosome X open reading frame 23
hsa-miR-1179	1	0	1	1	1	1	EYA1	eyes absent homolog 1 (Drosophila)
hsa-miR-1179	1	0	1	0	1	1	FNDC3B	fibronectin type III domain containing 3B
hsa-miR-1179	1	0	1	1	1	1	PLA2G15	phospholipase A2, group XV
hsa-miR-1179	0	0	1	0	0	0	LRRC9	leucine rich repeat containing 9
hsa-miR-1179	0	0	1	1	0	0	TMEM136	transmembrane protein 136
hsa-miR-1179	1	0	1	1	1	1	NSUN4	NOP2/Sun domain family, member 4
hsa-miR-1179	1	0	1	1	1	1	SLC12A6	solute carrier family 12 (potassium/chloride transporters), member 6
hsa-miR-1179	0	0	1	1	0	0	TRIM46	tripartite motif containing 46
hsa-miR-1179	1	0	1	1	1	1	FRYL	FRY-like
hsa-miR-1179	1	0	1	0	1	1	USP37	ubiquitin specific peptidase 37
hsa-miR-1179	0	0	1	1	1	1	ATXN2	ataxin 2
hsa-miR-1179	0	0	1	1	1	1	SHROOM3	shroom family member 3
hsa-miR-1179	1	0	1	1	1	1	ADAMTSL1	ADAMTS-like 1
hsa-miR-1179	1	0	1	0	1	1	CYB561D1	cytochrome b-561 domain containing 1
hsa-miR-1179	0	0	1	1	1	1	G3BP1	GTPase activating protein (SH3 domain) binding protein 1
hsa-miR-1179	1	0	1	1	1	1	ARHGAP24	Rho GTPase activating protein 24
hsa-miR-1179	0	0	1	1	1	1	SLTM	SAFB-like, transcription modulator
hsa-miR-1179	1	0	1	1	0	0	FOXP2	forkhead box P2
hsa-miR-1179	0	0	1	1	1	1	FBN3	fibrillin 3
hsa-miR-1179	1	0	1	1	1	1	RNF111	ring finger protein 111
hsa-miR-1179	1	0	1	0	1	1	FMNL2	formin-like 2
hsa-miR-1179	0	0	1	0	0	0	LOC100124692	maltase-glucoamylase (alpha-glucosidase) pseudogene
hsa-miR-1179	0	0	1	1	1	1	RNF19B	ring finger protein 19B
hsa-miR-1179	1	0	1	1	1	1	LRRK2	leucine-rich repeat kinase 2
hsa-miR-1179	1	0	1	1	1	1	RPS6KA4	ribosomal protein S6 kinase, 90kDa, polypeptide 4
hsa-miR-1179	1	0	1	1	1	1	CYYR1	cysteine/tyrosine-rich 1
hsa-miR-1179	1	0	1	1	1	1	ATL2	atlastin GTPase 2
hsa-miR-1179	0	0	1	1	1	1	C5orf28	chromosome 5 open reading frame 28
hsa-miR-1179	1	0	1	1	1	1	UBE2O	ubiquitin-conjugating enzyme E2O
hsa-miR-1179	0	0	1	1	1	1	PDSS2	prenyl (decaprenyl) diphosphate synthase, subunit 2
hsa-miR-1179	1	0	1	1	1	1	WDR20	WD repeat domain 20
hsa-miR-1179	1	0	1	1	1	1	BIN2	bridging integrator 2
hsa-miR-1179	0	0	1	1	0	0	HSPB11	heat shock protein family B (small), member 11
hsa-miR-1179	1	0	1	1	1	1	LUC7L3	LUC7-like 3 (S. cerevisiae)
hsa-miR-1179	1	0	1	1	1	1	NCOA1	nuclear receptor coactivator 1
hsa-miR-1179	1	0	1	1	1	1	NOVA1	neuro-oncological ventral antigen 1
hsa-miR-1179	0	0	1	1	0	0	TRIM69	tripartite motif containing 69
hsa-miR-1179	1	0	1	1	0	0	PRRC2B	proline-rich coiled-coil 2B
hsa-miR-1179	0	0	1	1	0	0	NEK7	NIMA (never in mitosis gene a)-related kinase 7
hsa-miR-1179	0	0	1	1	1	1	TFDP2	transcription factor Dp-2 (E2F dimerization partner 2)
hsa-miR-1179	0	0	1	0	0	0	ANKRD34C	ankyrin repeat domain 34C
hsa-miR-1179	1	0	1	0	1	1	SLC2A3	solute carrier family 2 (facilitated glucose transporter), member 3
hsa-miR-1179	1	0	1	1	1	1	TAB2	TGF-beta activated kinase 1/MAP3K7 binding protein 2
hsa-miR-1179	1	0	1	1	1	1	ZNF608	zinc finger protein 608
hsa-miR-1179	0	0	1	0	0	0	DNAJC5B	DnaJ (Hsp40) homolog, subfamily C, member 5 beta
hsa-miR-1179	0	0	1	0	0	0	KIAA0913	KIAA0913
hsa-miR-1179	0	0	1	1	1	1	STAG3L1	stromal antigen 3-like 1
hsa-miR-1179	1	0	1	1	1	1	GOLGA8A	golgin A8 family, member A
hsa-miR-1179	0	0	1	1	0	0	DOPEY1	dopey family member 1
hsa-miR-1179	1	0	1	1	1	1	CTTNBP2NL	CTTNBP2 N-terminal like
hsa-miR-1179	1	0	1	0	1	1	GRIN3A	glutamate receptor, ionotropic, N-methyl-D-aspartate 3A
hsa-miR-1179	0	0	1	0	0	0	FAM66D	family with sequence similarity 66, member D
hsa-miR-1179	1	0	1	1	0	0	FNIP2	folliculin interacting protein 2
hsa-miR-1179	1	0	1	1	1	1	KDM6A	lysine (K)-specific demethylase 6A
hsa-miR-1179	0	0	1	0	0	0	ZNF720	zinc finger protein 720
hsa-miR-1179	1	0	1	1	1	1	CHMP7	charged multivesicular body protein 7
hsa-miR-1179	0	0	1	1	1	1	MYPN	myopalladin
hsa-miR-1179	1	0	1	0	1	1	MPP5	membrane protein, palmitoylated 5 (MAGUK p55 subfamily member 5)
hsa-miR-1179	1	0	1	1	1	1	RNF180	ring finger protein 180
hsa-miR-1179	0	0	1	1	1	1	YAP1	Yes-associated protein 1
hsa-miR-1179	0	0	1	1	1	1	CCDC132	coiled-coil domain containing 132
hsa-miR-1179	1	0	1	0	1	1	SLC25A37	solute carrier family 25 (mitochondrial iron transporter), member 37
hsa-miR-1179	1	0	1	0	1	1	MEF2C	myocyte enhancer factor 2C
hsa-miR-1179	0	0	1	1	1	1	NFE2L1	nuclear factor (erythroid-derived 2)-like 1
hsa-miR-1179	0	0	1	1	1	1	KIAA1841	KIAA1841
hsa-miR-1179	0	0	1	1	1	1	PCDH20	protocadherin 20
hsa-miR-1179	1	0	1	1	1	1	PRPF38B	PRP38 pre-mRNA processing factor 38 (yeast) domain containing B
hsa-miR-1179	1	0	1	1	1	1	STXBP5	syntaxin binding protein 5 (tomosyn)
hsa-miR-1179	1	0	1	0	1	1	JAZF1	JAZF zinc finger 1
hsa-miR-1179	1	0	1	1	1	1	CADM2	cell adhesion molecule 2
hsa-miR-1179	1	0	1	1	1	1	RICTOR	RPTOR independent companion of MTOR, complex 2
hsa-miR-1179	0	0	1	1	1	1	KLHL29	kelch-like 29 (Drosophila)
hsa-miR-1179	1	0	1	0	1	1	NR3C1	nuclear receptor subfamily 3, group C, member 1 (glucocorticoid receptor)
hsa-miR-1179	1	0	1	1	1	1	BOLL	bol, boule-like (Drosophila)
hsa-miR-1179	0	0	1	1	1	1	INTS7	integrator complex subunit 7
hsa-miR-1179	1	0	1	1	1	1	FAM76B	family with sequence similarity 76, member B
hsa-miR-1179	1	0	1	0	1	1	PATL1	protein associated with topoisomerase II homolog 1 (yeast)
hsa-miR-1179	1	0	1	1	1	1	FBXL5	F-box and leucine-rich repeat protein 5
hsa-miR-1179	1	0	1	1	1	1	RNF38	ring finger protein 38
hsa-miR-1179	1	0	1	1	1	1	IKZF2	IKAROS family zinc finger 2 (Helios)
hsa-miR-1179	1	0	1	0	1	1	BDNF	brain-derived neurotrophic factor
hsa-miR-1179	0	0	1	0	0	0	GRIK1-AS1	GRIK1 antisense RNA 1
hsa-miR-1179	0	0	1	0	0	0	KGFLP1	fibroblast growth factor 7 pseudogene
hsa-miR-1179	0	0	1	1	1	1	NFXL1	nuclear transcription factor, X-box binding-like 1
hsa-miR-1179	0	0	1	1	1	1	DNAJB14	DnaJ (Hsp40) homolog, subfamily B, member 14
hsa-miR-1179	1	0	1	1	1	1	BCL11A	B-cell CLL/lymphoma 11A (zinc finger protein)
hsa-miR-1179	1	0	1	1	1	1	PBRM1	polybromo 1
hsa-miR-1179	1	0	1	1	1	1	OPRM1	opioid receptor, mu 1
hsa-miR-1179	0	0	1	1	1	1	GCOM1	GRINL1A complex locus 1
hsa-miR-1179	1	0	1	1	1	1	CAMTA1	calmodulin binding transcription activator 1
hsa-miR-1179	0	0	1	0	1	1	ANKS1B	ankyrin repeat and sterile alpha motif domain containing 1B
hsa-miR-1179	1	0	1	1	1	1	SP3	Sp3 transcription factor
hsa-miR-1179	0	0	1	0	0	0	ZNFX1-AS1	ZNFX1 antisense RNA 1
hsa-miR-1179	0	0	1	1	1	1	EHBP1	EH domain binding protein 1
hsa-miR-1179	1	0	1	1	1	1	ALCAM	activated leukocyte cell adhesion molecule
hsa-miR-1179	1	0	1	1	0	0	CDK8	cyclin-dependent kinase 8
hsa-miR-1179	1	0	1	1	1	1	CD109	CD109 molecule
hsa-miR-1179	0	0	1	1	1	1	NOLC1	nucleolar and coiled-body phosphoprotein 1
hsa-miR-1179	1	0	1	1	1	1	PCDH11X	protocadherin 11 X-linked
hsa-miR-1179	0	0	1	1	1	1	IL23R	interleukin 23 receptor
hsa-miR-1179	0	0	1	1	1	1	IYD	iodotyrosine deiodinase
hsa-miR-1179	1	0	1	1	1	1	AMOT	angiomotin
hsa-miR-1179	0	0	1	1	1	1	TUBD1	tubulin, delta 1
hsa-miR-1179	0	0	1	1	0	0	TMEM116	transmembrane protein 116
hsa-miR-1179	1	0	1	1	1	1	ANKRD10	ankyrin repeat domain 10
hsa-miR-1179	0	0	1	1	1	1	B4GALT2	UDP-Gal:betaGlcNAc beta 1,4- galactosyltransferase, polypeptide 2
hsa-miR-1179	0	0	1	1	1	1	WDR55	WD repeat domain 55
hsa-miR-1179	1	0	1	1	1	1	TSPAN14	tetraspanin 14
hsa-miR-1179	1	0	1	1	1	1	NUMA1	nuclear mitotic apparatus protein 1
hsa-miR-1179	1	0	1	1	1	1	LEPREL1	leprecan-like 1
hsa-miR-1179	0	0	1	1	1	1	METTL17	methyltransferase like 17
hsa-miR-1179	0	0	1	1	1	1	ZNF146	zinc finger protein 146
hsa-miR-1179	0	0	1	1	0	0	SCG5	secretogranin V (7B2 protein)
hsa-miR-1179	0	0	1	1	0	0	NDUFB10	NADH dehydrogenase (ubiquinone) 1 beta subcomplex, 10, 22kDa
hsa-miR-1179	0	0	1	1	0	0	RBM14	RNA binding motif protein 14
hsa-miR-1179	1	0	1	1	1	1	TRIM39	tripartite motif containing 39
hsa-miR-1179	1	0	1	1	1	1	CALM1	calmodulin 1 (phosphorylase kinase, delta)
hsa-miR-1179	0	0	1	1	1	1	TMEM30A	transmembrane protein 30A
hsa-miR-1179	0	0	1	1	1	1	MLIP	muscular LMNA-interacting protein
hsa-miR-1179	0	0	1	0	0	0	ATXN7L3B	ataxin 7-like 3B
hsa-miR-1179	1	0	1	1	0	0	SIGMAR1	sigma non-opioid intracellular receptor 1
hsa-miR-1179	1	0	1	1	1	1	ATP6AP2	ATPase, H+ transporting, lysosomal accessory protein 2
hsa-miR-1179	1	0	1	1	1	1	LRRFIP1	leucine rich repeat (in FLII) interacting protein 1
hsa-miR-1179	1	0	1	1	1	1	ZFAND5	zinc finger, AN1-type domain 5
hsa-miR-1179	0	0	1	1	1	1	GNL3L	guanine nucleotide binding protein-like 3 (nucleolar)-like
hsa-miR-1179	1	0	1	1	1	1	GAS2	growth arrest-specific 2
hsa-miR-1179	0	0	1	1	1	1	RNF170	ring finger protein 170
hsa-miR-1179	0	0	1	1	1	1	TOMM40L	translocase of outer mitochondrial membrane 40 homolog (yeast)-like
hsa-miR-1179	0	0	1	0	0	0	MGC21881	uncharacterized locus MGC21881
hsa-miR-1179	0	0	1	0	0	0	KLHL15	kelch-like 15 (Drosophila)
hsa-miR-1179	1	0	1	1	1	1	ZBTB38	zinc finger and BTB domain containing 38
hsa-miR-1179	0	0	1	1	1	1	CMAS	cytidine monophosphate N-acetylneuraminic acid synthetase
hsa-miR-1179	0	0	1	1	1	1	CSDE1	cold shock domain containing E1, RNA-binding
hsa-miR-1179	0	0	1	1	1	1	PLA2G4C	phospholipase A2, group IVC (cytosolic, calcium-independent)
hsa-miR-1179	1	0	1	1	1	1	ARHGEF9	Cdc42 guanine nucleotide exchange factor (GEF) 9
hsa-miR-1179	1	0	1	0	1	1	SLC19A2	solute carrier family 19 (thiamine transporter), member 2
hsa-miR-1179	0	0	1	1	1	1	SNX22	sorting nexin 22
hsa-miR-1179	0	0	1	1	1	1	NELL2	NEL-like 2 (chicken)
hsa-miR-1179	0	0	1	0	1	1	ZNF718	zinc finger protein 718
hsa-miR-1179	1	0	1	0	1	1	ARHGAP26	Rho GTPase activating protein 26
hsa-miR-1179	1	0	1	1	1	1	SCML4	sex comb on midleg-like 4 (Drosophila)
hsa-miR-1179	1	0	1	1	1	1	TMEM71	transmembrane protein 71
hsa-miR-1179	0	0	1	1	1	1	ZCCHC10	zinc finger, CCHC domain containing 10
hsa-miR-1179	1	0	1	0	1	1	CDK19	cyclin-dependent kinase 19
hsa-miR-1179	0	0	1	1	1	1	TRIM4	tripartite motif containing 4
hsa-miR-1179	0	0	1	1	1	1	MAP2	microtubule-associated protein 2
hsa-miR-1179	0	0	1	1	0	0	ALPK1	alpha-kinase 1
hsa-miR-1179	0	0	1	0	1	1	KIAA0895	KIAA0895
hsa-miR-1179	1	0	1	1	1	1	HTR2C	5-hydroxytryptamine (serotonin) receptor 2C, G protein-coupled
hsa-miR-1179	0	0	1	1	1	1	SEMA3D	sema domain, immunoglobulin domain (Ig), short basic domain, secreted, (semaphorin) 3D
hsa-miR-1179	0	0	1	1	1	1	SLC51A	solute carrier family 51, alpha subunit
hsa-miR-1179	1	0	1	1	1	1	PPARGC1A	peroxisome proliferator-activated receptor gamma, coactivator 1 alpha
hsa-miR-1179	1	0	1	0	1	1	SV2B	synaptic vesicle glycoprotein 2B
hsa-miR-1179	0	0	1	1	0	0	AGBL3	ATP/GTP binding protein-like 3
hsa-miR-1179	1	0	1	1	1	1	ZNF518A	zinc finger protein 518A
hsa-miR-1179	0	0	1	0	1	1	ZDHHC17	zinc finger, DHHC-type containing 17
hsa-miR-1179	0	0	1	1	0	0	C7orf57	chromosome 7 open reading frame 57
hsa-miR-1179	0	0	1	1	1	1	C7orf53	chromosome 7 open reading frame 53
hsa-miR-1179	1	0	1	1	1	1	PDZD2	PDZ domain containing 2
hsa-miR-1179	0	0	1	1	1	1	FBXO24	F-box protein 24
hsa-miR-1179	1	0	1	0	1	1	LYPD6	LY6/PLAUR domain containing 6
hsa-miR-1179	0	0	1	0	1	1	TTC23L	tetratricopeptide repeat domain 23-like
hsa-miR-1179	1	0	1	1	1	1	SORL1	sortilin-related receptor, L(DLR class) A repeats containing
hsa-miR-1179	1	0	1	1	1	1	PPP2R2C	protein phosphatase 2, regulatory subunit B, gamma
hsa-miR-1179	1	0	1	1	1	1	SECISBP2L	SECIS binding protein 2-like
hsa-miR-1179	1	0	1	1	1	1	SIRPA	signal-regulatory protein alpha
hsa-miR-1179	0	0	1	1	1	1	IL20RB	interleukin 20 receptor beta
hsa-miR-1179	1	0	1	1	0	0	TMEM181	transmembrane protein 181
hsa-miR-1179	1	0	1	1	1	1	PCDHA5	protocadherin alpha 5
hsa-miR-1179	0	0	1	1	1	1	ZNF337	zinc finger protein 337
hsa-miR-1179	0	0	1	1	1	1	NUB1	negative regulator of ubiquitin-like proteins 1
hsa-miR-1179	0	0	1	0	1	1	DKFZP434I0714	uncharacterized protein DKFZP434I0714
hsa-miR-1179	0	0	1	1	1	1	EDA2R	ectodysplasin A2 receptor
hsa-miR-1179	0	0	1	0	0	0	BOD1L2	biorientation of chromosomes in cell division 1-like 2
hsa-miR-1179	1	0	1	1	1	1	NKAIN2	Na+/K+ transporting ATPase interacting 2
hsa-miR-1179	0	0	1	1	1	1	SLC39A12	solute carrier family 39 (zinc transporter), member 12
hsa-miR-1179	0	0	1	1	1	1	ZNF781	zinc finger protein 781
hsa-miR-1179	0	0	1	1	0	0	C2orf80	chromosome 2 open reading frame 80
hsa-miR-1179	0	0	1	1	1	1	ARHGAP6	Rho GTPase activating protein 6
hsa-miR-1179	0	0	1	1	0	0	VPS8	vacuolar protein sorting 8 homolog (S. cerevisiae)
hsa-miR-1179	1	0	1	1	1	1	IMPACT	Impact homolog (mouse)
hsa-miR-1179	1	0	1	1	1	1	LMO7	LIM domain 7
hsa-miR-1179	0	0	1	1	1	1	FAM171B	family with sequence similarity 171, member B
hsa-miR-1179	0	0	1	1	1	1	TADA1	transcriptional adaptor 1
hsa-miR-1179	1	0	1	0	1	1	NEGR1	neuronal growth regulator 1
hsa-miR-1179	0	0	1	0	0	0	SRGAP2C	SLIT-ROBO Rho GTPase activating protein 2C
hsa-miR-1179	1	0	1	1	1	1	FAM135B	family with sequence similarity 135, member B
hsa-miR-1179	0	0	1	1	1	1	ZNF138	zinc finger protein 138
hsa-miR-1179	1	0	1	1	1	1	SOX6	SRY (sex determining region Y)-box 6
hsa-miR-1179	1	0	1	1	1	1	DPP10	dipeptidyl-peptidase 10 (non-functional)
hsa-miR-1179	1	0	1	0	1	1	ARID2	AT rich interactive domain 2 (ARID, RFX-like)
hsa-miR-1179	1	0	1	1	1	1	PLS3	plastin 3
hsa-miR-1179	0	0	1	0	0	0	FLJ36000	uncharacterized FLJ36000
hsa-miR-1179	0	0	1	0	0	0	LOC401074	uncharacterized LOC401074
hsa-miR-1179	0	0	1	1	1	1	SLC14A1	solute carrier family 14 (urea transporter), member 1 (Kidd blood group)
hsa-miR-1179	0	0	1	1	0	0	CNGA4	cyclic nucleotide gated channel alpha 4
hsa-miR-1179	1	0	1	1	1	1	BVES	blood vessel epicardial substance
hsa-miR-1179	1	0	1	1	1	1	SOGA2	SOGA family member 2
hsa-miR-1179	0	0	1	1	1	1	PCMTD2	protein-L-isoaspartate (D-aspartate) O-methyltransferase domain containing 2
hsa-miR-1179	0	0	1	1	1	1	SIAE	sialic acid acetylesterase
hsa-miR-1179	0	0	1	0	0	0	SLC7A11-AS1	SLC7A11 antisense RNA 1
hsa-miR-1179	0	0	1	0	1	1	METTL12	methyltransferase like 12
hsa-miR-1179	1	0	1	1	1	1	FAM123A	family with sequence similarity 123A
hsa-miR-1179	1	0	1	1	1	1	TNFSF4	tumor necrosis factor (ligand) superfamily, member 4
hsa-miR-1179	1	0	1	1	1	1	CLOCK	clock homolog (mouse)
hsa-miR-1179	0	0	1	1	1	1	ZNF568	zinc finger protein 568
hsa-miR-1179	1	0	1	0	1	1	USP6NL	USP6 N-terminal like
hsa-miR-1179	0	0	1	0	0	0	LINC00347	long intergenic non-protein coding RNA 347
hsa-miR-1179	0	0	1	1	1	1	DGKH	diacylglycerol kinase, eta
hsa-miR-1179	0	0	1	0	0	0	DKFZp686O1327	uncharacterized LOC401014
hsa-miR-1179	1	0	1	1	1	1	PSIP1	PC4 and SFRS1 interacting protein 1
hsa-miR-1179	0	0	1	1	1	1	NADKD1	NAD kinase domain containing 1
hsa-miR-1179	0	0	1	1	1	1	MGC57346	uncharacterized LOC401884
hsa-miR-1179	1	0	1	1	1	1	ZFAND4	zinc finger, AN1-type domain 4
hsa-miR-1179	1	0	1	1	1	1	PPP2R5B	protein phosphatase 2, regulatory subunit B', beta
hsa-miR-1179	1	0	1	0	0	0	MICAL3	microtubule associated monoxygenase, calponin and LIM domain containing 3
hsa-miR-1179	1	0	1	1	0	0	SFXN5	sideroflexin 5
hsa-miR-1179	0	0	1	0	0	0	LOC339529	uncharacterized LOC339529
hsa-miR-1179	0	0	1	0	1	1	LOC338758	uncharacterized LOC338758
hsa-miR-1179	1	0	1	0	1	1	KDM2A	lysine (K)-specific demethylase 2A
hsa-miR-1179	1	0	1	1	1	1	PTPRG	protein tyrosine phosphatase, receptor type, G
hsa-miR-1179	0	0	1	1	1	1	INO80C	INO80 complex subunit C
hsa-miR-1179	1	0	1	1	1	1	CLVS1	clavesin 1
hsa-miR-1179	1	0	1	0	1	1	ARHGAP5	Rho GTPase activating protein 5
hsa-miR-1179	0	0	1	0	1	1	ITGA1	integrin, alpha 1
hsa-miR-1179	1	0	1	1	1	1	RECK	reversion-inducing-cysteine-rich protein with kazal motifs
hsa-miR-1179	0	0	1	1	1	1	FBXO38	F-box protein 38
hsa-miR-1179	0	0	1	1	0	0	NISCH	nischarin
hsa-miR-1179	1	0	1	0	1	1	SEMA4G	sema domain, immunoglobulin domain (Ig), transmembrane domain (TM) and short cytoplasmic domain, (semaphorin) 4G
hsa-miR-1179	1	0	1	0	1	1	SMURF2	SMAD specific E3 ubiquitin protein ligase 2
hsa-miR-1179	1	0	1	1	1	1	ZFP91	zinc finger protein 91 homolog (mouse)
hsa-miR-1179	0	0	1	1	1	1	RHOT1	ras homolog family member T1
hsa-miR-1179	0	0	1	1	1	1	HLA-DQA1	major histocompatibility complex, class II, DQ alpha 1
hsa-miR-1179	1	0	1	1	1	1	BZW2	basic leucine zipper and W2 domains 2
hsa-miR-1179	0	0	1	1	1	1	SLC25A35	solute carrier family 25, member 35
hsa-miR-1179	0	0	1	1	1	1	CDC42SE2	CDC42 small effector 2
hsa-miR-1179	1	0	1	1	1	1	ZEB2	zinc finger E-box binding homeobox 2
hsa-miR-1179	1	0	1	1	1	1	SCOC	short coiled-coil protein
hsa-miR-1179	1	0	1	1	1	1	MTMR10	myotubularin related protein 10
hsa-miR-1179	0	0	1	1	1	1	GPATCH2	G patch domain containing 2
hsa-miR-1179	1	0	1	1	1	1	ANXA4	annexin A4
hsa-miR-1179	0	0	1	1	1	1	C1orf109	chromosome 1 open reading frame 109
hsa-miR-1179	1	0	1	0	0	0	PRRT4	proline-rich transmembrane protein 4
hsa-miR-1179	0	0	1	1	1	1	SCLT1	sodium channel and clathrin linker 1
hsa-miR-1179	0	0	1	1	1	1	ZNF333	zinc finger protein 333
hsa-miR-1179	0	0	1	1	1	1	GORAB	golgin, RAB6-interacting
hsa-miR-1179	0	0	1	1	1	1	SGK2	serum/glucocorticoid regulated kinase 2
hsa-miR-1179	1	0	1	1	1	1	C5orf25	chromosome 5 open reading frame 25
hsa-miR-1179	0	0	1	0	0	0	PCP4L1	Purkinje cell protein 4 like 1
hsa-miR-1179	1	0	1	1	1	1	SLC26A7	solute carrier family 26, member 7
hsa-miR-1179	1	0	1	1	1	1	MAPKAPK3	mitogen-activated protein kinase-activated protein kinase 3
hsa-miR-1179	0	0	1	0	0	0	PTGER4P2	prostaglandin E receptor 4 (subtype EP4) pseudogene 2
hsa-miR-1179	0	0	1	0	0	0	FOXN3-AS2	FOXN3 antisense RNA 2
hsa-miR-1179	0	0	1	1	1	1	CFHR3	complement factor H-related 3
hsa-miR-1179	1	0	1	0	1	1	HMGB3	high mobility group box 3
hsa-miR-1179	1	0	1	1	1	1	USP47	ubiquitin specific peptidase 47
hsa-miR-1179	1	0	1	0	1	1	MAP4K3	mitogen-activated protein kinase kinase kinase kinase 3
hsa-miR-1179	1	0	1	0	1	1	TMEM194A	transmembrane protein 194A
hsa-miR-1179	0	0	1	1	0	0	C8orf31	chromosome 8 open reading frame 31
hsa-miR-1179	0	0	1	0	0	0	LINC00537	long intergenic non-protein coding RNA 537
hsa-miR-1179	1	0	1	1	0	0	SLC45A4	solute carrier family 45, member 4
hsa-miR-1179	1	0	1	1	1	1	C18orf34	chromosome 18 open reading frame 34
hsa-miR-1179	0	0	1	1	1	1	LIMS3	LIM and senescent cell antigen-like domains 3
hsa-miR-1179	0	0	1	1	0	0	APOBEC1	apolipoprotein B mRNA editing enzyme, catalytic polypeptide 1
hsa-miR-1179	1	0	1	1	1	1	ST8SIA2	ST8 alpha-N-acetyl-neuraminide alpha-2,8-sialyltransferase 2
hsa-miR-1179	1	0	1	1	1	1	ACVR2B	activin A receptor, type IIB
hsa-miR-1179	0	0	1	0	0	0	FAM106A	family with sequence similarity 106, member A
hsa-miR-1179	0	0	1	1	1	1	TMEM52B	transmembrane protein 52B
hsa-miR-1179	0	0	1	1	0	0	NUBP1	nucleotide binding protein 1
hsa-miR-1179	1	0	1	0	1	1	MYBL1	v-myb myeloblastosis viral oncogene homolog (avian)-like 1
hsa-miR-1179	1	0	1	1	1	1	ARFIP1	ADP-ribosylation factor interacting protein 1
hsa-miR-1179	1	0	1	0	1	1	CPEB2	cytoplasmic polyadenylation element binding protein 2
hsa-miR-1179	1	0	1	0	1	1	KCNT2	potassium channel, subfamily T, member 2
hsa-miR-1179	0	0	1	1	1	1	CCDC126	coiled-coil domain containing 126
hsa-miR-1179	0	0	1	1	1	1	SPHKAP	SPHK1 interactor, AKAP domain containing
hsa-miR-1179	1	0	1	1	1	1	GABRB2	gamma-aminobutyric acid (GABA) A receptor, beta 2
hsa-miR-1179	1	0	1	1	1	1	PTPRD	protein tyrosine phosphatase, receptor type, D
hsa-miR-1179	0	0	1	0	0	0	TPTEP1	transmembrane phosphatase with tensin homology pseudogene 1
hsa-miR-1179	0	0	1	1	0	0	C9orf153	chromosome 9 open reading frame 153
hsa-miR-1179	1	0	1	1	1	1	CERS6	ceramide synthase 6
hsa-miR-1179	1	0	1	1	1	1	TCF3	transcription factor 3 (E2A immunoglobulin enhancer binding factors E12/E47)
hsa-miR-1179	0	0	1	1	1	1	SMTNL2	smoothelin-like 2
hsa-miR-1179	0	0	1	1	1	1	RBM25	RNA binding motif protein 25
hsa-miR-1179	0	0	1	1	0	0	PRAMEF10	PRAME family member 10
hsa-miR-1179	1	0	1	1	1	1	TMEM132B	transmembrane protein 132B
hsa-miR-1179	1	0	1	1	1	1	ST18	suppression of tumorigenicity 18 (breast carcinoma) (zinc finger protein)
hsa-miR-1179	0	0	1	1	0	0	RGS9	regulator of G-protein signaling 9
hsa-miR-1179	1	0	1	0	1	1	PRDM10	PR domain containing 10
hsa-miR-1179	1	0	1	1	1	1	GRIA3	glutamate receptor, ionotropic, AMPA 3
hsa-miR-1179	1	0	1	1	1	1	OTUD4	OTU domain containing 4
hsa-miR-1179	0	0	1	0	1	1	GOLGA8G	golgin A8 family, member G
hsa-miR-1179	1	0	1	0	1	1	LRCH2	leucine-rich repeats and calponin homology (CH) domain containing 2
hsa-miR-1179	0	0	1	0	0	0	LINC00314	long intergenic non-protein coding RNA 314
hsa-miR-1179	1	0	1	1	1	1	CHIC1	cysteine-rich hydrophobic domain 1
hsa-miR-1179	0	0	1	1	1	1	HSF2	heat shock transcription factor 2
hsa-miR-1179	0	0	1	0	0	0	FAM225B	family with sequence similarity 225, member B (non-protein coding)
hsa-miR-1179	1	0	1	1	1	1	MECOM	MDS1 and EVI1 complex locus
hsa-miR-1179	0	0	1	1	1	1	UCHL5	ubiquitin carboxyl-terminal hydrolase L5
hsa-miR-1179	1	0	1	0	0	0	SDR39U1	short chain dehydrogenase/reductase family 39U, member 1
hsa-miR-1179	0	0	1	0	0	0	FUT8-AS1	FUT8 antisense RNA 1
hsa-miR-1179	1	0	1	1	1	1	NUMB	numb homolog (Drosophila)
hsa-miR-1179	0	0	1	1	1	1	CNIH	cornichon homolog (Drosophila)
hsa-miR-1179	0	0	1	0	0	0	LINC00643	long intergenic non-protein coding RNA 643
hsa-miR-1179	1	0	1	1	1	1	BTBD7	BTB (POZ) domain containing 7
hsa-miR-1179	1	0	1	1	1	1	ATP2B4	ATPase, Ca++ transporting, plasma membrane 4
hsa-miR-1179	1	0	1	1	1	1	MIER3	mesoderm induction early response 1, family member 3
hsa-miR-1179	1	0	1	1	1	1	TRIM37	tripartite motif containing 37
hsa-miR-1179	1	0	1	0	1	1	MTX3	metaxin 3
hsa-miR-1179	0	0	1	0	0	0	ZNF542	zinc finger protein 542
hsa-miR-1179	0	0	1	1	1	1	PDZRN4	PDZ domain containing ring finger 4
hsa-miR-1179	1	0	1	0	1	1	CLASP2	cytoplasmic linker associated protein 2
hsa-miR-1179	0	0	1	1	1	1	CRB1	crumbs homolog 1 (Drosophila)
hsa-miR-1179	1	0	1	1	1	1	SLC35F1	solute carrier family 35, member F1
hsa-miR-1179	1	0	1	1	1	1	MLLT10	myeloid/lymphoid or mixed-lineage leukemia (trithorax homolog, Drosophila); translocated to, 10
hsa-miR-1179	0	0	1	1	1	1	THSD4	thrombospondin, type I, domain containing 4
hsa-miR-1179	0	0	1	0	1	1	PRH2	proline-rich protein HaeIII subfamily 2
hsa-miR-1179	0	0	1	1	1	1	IPCEF1	interaction protein for cytohesin exchange factors 1
hsa-miR-1179	0	0	1	1	1	1	PRR14L	proline rich 14-like
hsa-miR-1179	1	0	1	1	1	1	CGN	cingulin
hsa-miR-1179	1	0	1	1	1	1	EPS15	epidermal growth factor receptor pathway substrate 15
hsa-miR-1179	1	0	1	1	1	1	FOXP1	forkhead box P1
hsa-miR-1179	0	0	1	0	1	1	ANKRD36	ankyrin repeat domain 36
hsa-miR-1179	1	0	1	1	1	1	GTDC1	glycosyltransferase-like domain containing 1
hsa-miR-1179	0	0	1	1	1	1	ARMCX3	armadillo repeat containing, X-linked 3
hsa-miR-1179	1	0	1	1	1	1	PTPRB	protein tyrosine phosphatase, receptor type, B
hsa-miR-1179	1	0	1	0	1	1	PCGF3	polycomb group ring finger 3
hsa-miR-1179	1	0	1	0	1	1	IGF2BP3	insulin-like growth factor 2 mRNA binding protein 3
hsa-miR-1179	1	0	1	1	1	1	ZKSCAN5	zinc finger with KRAB and SCAN domains 5
hsa-miR-1179	0	0	1	1	1	1	RBM20	RNA binding motif protein 20
hsa-miR-1179	0	0	1	1	1	1	DAZL	deleted in azoospermia-like
hsa-miR-1179	1	0	1	1	1	1	CALD1	caldesmon 1
hsa-miR-1179	0	0	1	1	1	1	SSFA2	sperm specific antigen 2
hsa-miR-1179	1	0	1	1	1	1	HIC2	hypermethylated in cancer 2
hsa-miR-1179	1	0	1	1	1	1	BSDC1	BSD domain containing 1
hsa-miR-1179	0	0	1	1	1	1	LRRC42	leucine rich repeat containing 42
hsa-miR-1179	0	0	1	1	0	0	CRIP2	cysteine-rich protein 2
hsa-miR-1179	0	0	1	1	0	0	MRPL48	mitochondrial ribosomal protein L48
hsa-miR-1179	0	0	1	1	1	1	SNRNP27	small nuclear ribonucleoprotein 27kDa (U4/U6.U5)
hsa-miR-1179	1	0	1	0	0	0	IGLON5	IgLON family member 5
hsa-miR-1179	0	0	1	1	1	1	SMYD5	SMYD family member 5
hsa-miR-1179	0	0	1	1	0	0	HSD3B1	hydroxy-delta-5-steroid dehydrogenase, 3 beta- and steroid delta-isomerase 1
hsa-miR-1179	1	0	1	1	1	1	FUT9	fucosyltransferase 9 (alpha (1,3) fucosyltransferase)
hsa-miR-1179	0	0	1	0	0	0	AKR1A1	aldo-keto reductase family 1, member A1 (aldehyde reductase)
hsa-miR-1179	1	0	1	1	1	1	MMAB	methylmalonic aciduria (cobalamin deficiency) cblB type
hsa-miR-1179	0	0	1	1	1	1	RABGGTB	Rab geranylgeranyltransferase, beta subunit
hsa-miR-1179	0	0	1	1	0	0	SRM	spermidine synthase
hsa-miR-1179	0	0	1	1	0	0	MIF4GD	MIF4G domain containing
hsa-miR-1179	1	0	1	1	1	1	FGF11	fibroblast growth factor 11
hsa-miR-1179	0	0	1	1	1	1	TUBA1A	tubulin, alpha 1a
hsa-miR-1179	1	0	1	1	1	1	ADM	adrenomedullin
hsa-miR-1179	0	0	1	1	0	0	TRAPPC4	trafficking protein particle complex 4
hsa-miR-1179	1	0	1	0	1	1	EIF4H	eukaryotic translation initiation factor 4H
hsa-miR-1179	1	0	1	1	1	1	TPM4	tropomyosin 4
hsa-miR-1179	0	0	1	0	1	1	CD99P1	CD99 molecule pseudogene 1
hsa-miR-1179	1	0	1	1	1	1	CCNE1	cyclin E1
hsa-miR-1179	0	0	1	1	1	1	PROCR	protein C receptor, endothelial
hsa-miR-1179	1	0	1	1	1	1	DRAM2	DNA-damage regulated autophagy modulator 2
hsa-miR-1179	0	0	1	1	0	0	NDUFV1	NADH dehydrogenase (ubiquinone) flavoprotein 1, 51kDa
hsa-miR-1179	0	0	1	1	0	0	MUSTN1	musculoskeletal, embryonic nuclear protein 1
hsa-miR-1179	1	0	1	1	1	1	TFDP1	transcription factor Dp-1
hsa-miR-1179	0	0	1	1	0	0	IKBKG	inhibitor of kappa light polypeptide gene enhancer in B-cells, kinase gamma
hsa-miR-1179	0	0	1	1	1	1	GRAP2	GRB2-related adaptor protein 2
hsa-miR-1179	0	0	1	1	1	1	STON1	stonin 1
hsa-miR-1179	0	0	1	1	1	1	TRIM68	tripartite motif containing 68
hsa-miR-1179	0	0	1	1	0	0	STK19	serine/threonine kinase 19
hsa-miR-1179	1	0	1	1	1	1	MTCH2	mitochondrial carrier 2
hsa-miR-1179	1	0	1	1	1	1	TMEM245	transmembrane protein 245
hsa-miR-1179	0	0	1	1	1	1	PSMA1	proteasome (prosome, macropain) subunit, alpha type, 1
hsa-miR-1179	1	0	1	1	1	1	DKK3	dickkopf 3 homolog (Xenopus laevis)
hsa-miR-1179	0	0	1	0	1	1	TMEM155	transmembrane protein 155
hsa-miR-1179	1	0	1	1	1	1	TMEM66	transmembrane protein 66
hsa-miR-1179	1	0	1	1	1	1	OSBPL9	oxysterol binding protein-like 9
hsa-miR-1179	1	0	1	1	1	1	KCNIP4	Kv channel interacting protein 4
hsa-miR-1179	0	0	1	1	0	0	NOX5	NADPH oxidase, EF-hand calcium binding domain 5
hsa-miR-1179	0	0	1	0	0	0	LOC100130353	hippocampus abundant transcript-like 1 pseudogene
hsa-miR-1179	0	0	1	1	1	1	SMNDC1	survival motor neuron domain containing 1
hsa-miR-1179	0	0	1	1	1	1	RPA2	replication protein A2, 32kDa
hsa-miR-1179	1	0	1	1	1	1	METAP2	methionyl aminopeptidase 2
hsa-miR-1179	1	0	1	1	1	1	RBBP7	retinoblastoma binding protein 7
hsa-miR-1179	1	0	1	1	1	1	EIF1	eukaryotic translation initiation factor 1
hsa-miR-1179	0	0	1	1	0	0	TUSC3	tumor suppressor candidate 3
hsa-miR-1179	0	0	1	1	1	1	DNAJC25	DnaJ (Hsp40) homolog, subfamily C , member 25
hsa-miR-1179	1	0	1	1	1	1	LAPTM4A	lysosomal protein transmembrane 4 alpha
hsa-miR-1179	0	0	1	1	0	0	CCNDBP1	cyclin D-type binding-protein 1
hsa-miR-1179	0	0	1	0	0	0	RNF115	ring finger protein 115
hsa-miR-1179	0	0	1	1	1	1	NCAPH	non-SMC condensin I complex, subunit H
hsa-miR-1179	1	0	1	0	1	1	CD47	CD47 molecule
hsa-miR-1179	1	0	1	1	1	1	RUNX1	runt-related transcription factor 1
hsa-miR-1179	1	0	1	1	1	1	ID2	inhibitor of DNA binding 2, dominant negative helix-loop-helix protein
hsa-miR-1179	0	0	1	1	0	0	TESK1	testis-specific kinase 1
hsa-miR-1179	1	0	1	1	1	1	MYT1	myelin transcription factor 1
hsa-miR-1179	1	0	1	1	1	1	LGALSL	lectin, galactoside-binding-like
hsa-miR-1179	0	0	1	0	0	0	LOC731789	uncharacterized LOC731789
hsa-miR-1179	0	0	1	1	1	1	CCP110	centriolar coiled coil protein 110kDa
hsa-miR-1179	0	0	1	1	1	1	SYNE2	spectrin repeat containing, nuclear envelope 2
hsa-miR-1179	0	0	1	0	1	1	STARD8	StAR-related lipid transfer (START) domain containing 8
hsa-miR-1179	1	0	1	0	1	1	PTP4A1	protein tyrosine phosphatase type IVA, member 1
hsa-miR-1179	0	0	1	0	1	1	HDAC9	histone deacetylase 9
hsa-miR-1179	0	0	1	1	1	1	SDAD1	SDA1 domain containing 1
hsa-miR-1179	1	0	1	0	1	1	TNS3	tensin 3
hsa-miR-1179	1	0	1	1	0	0	POMGNT1	protein O-linked mannose beta1,2-N-acetylglucosaminyltransferase
hsa-miR-1179	0	0	1	1	1	1	PTGS1	prostaglandin-endoperoxide synthase 1 (prostaglandin G/H synthase and cyclooxygenase)
hsa-miR-1179	1	0	1	1	1	1	ITSN1	intersectin 1 (SH3 domain protein)
hsa-miR-1179	0	0	1	0	0	0	POM121L8P	POM121 transmembrane nucleoporin-like 8 pseudogene
hsa-miR-1179	1	0	1	0	1	1	DAPP1	dual adaptor of phosphotyrosine and 3-phosphoinositides
hsa-miR-1179	0	0	1	1	0	0	SLCO3A1	solute carrier organic anion transporter family, member 3A1
hsa-miR-1179	1	0	1	1	1	1	TNFAIP1	tumor necrosis factor, alpha-induced protein 1 (endothelial)
hsa-miR-1179	1	0	1	1	1	1	CDC27	cell division cycle 27 homolog (S. cerevisiae)
hsa-miR-1179	0	0	1	1	1	1	ADPRH	ADP-ribosylarginine hydrolase
hsa-miR-1179	1	0	1	0	1	1	ACVR2A	activin A receptor, type IIA
hsa-miR-1179	1	0	1	1	0	0	ADRB3	adrenoceptor beta 3
hsa-miR-1179	1	0	1	1	1	1	AGL	amylo-alpha-1, 6-glucosidase, 4-alpha-glucanotransferase
hsa-miR-1179	0	0	1	1	1	1	ATP7A	ATPase, Cu++ transporting, alpha polypeptide
hsa-miR-1179	1	0	1	1	1	1	COL1A2	collagen, type I, alpha 2
hsa-miR-1179	1	0	1	1	1	1	COL4A3	collagen, type IV, alpha 3 (Goodpasture antigen)
hsa-miR-1179	1	0	1	1	1	1	COL4A4	collagen, type IV, alpha 4
hsa-miR-1179	0	0	1	0	1	1	CYP1B1	cytochrome P450, family 1, subfamily B, polypeptide 1
hsa-miR-1179	1	0	1	1	1	1	F13A1	coagulation factor XIII, A1 polypeptide
hsa-miR-1179	0	0	1	1	0	0	FSHR	follicle stimulating hormone receptor
hsa-miR-1179	1	0	1	0	1	1	GHR	growth hormone receptor
hsa-miR-1179	0	0	1	1	0	0	GJB1	gap junction protein, beta 1, 32kDa
hsa-miR-1179	1	0	1	1	1	1	GK	glycerol kinase
hsa-miR-1179	1	0	1	0	1	1	GLI3	GLI family zinc finger 3
hsa-miR-1179	1	0	1	0	1	1	ITGB3	integrin, beta 3 (platelet glycoprotein IIIa, antigen CD61)
hsa-miR-1179	1	0	1	1	1	1	KCNA1	potassium voltage-gated channel, shaker-related subfamily, member 1 (episodic ataxia with myokymia)
hsa-miR-1179	1	0	1	1	1	1	LAMB3	laminin, beta 3
hsa-miR-1179	1	0	1	0	1	1	SGCB	sarcoglycan, beta (43kDa dystrophin-associated glycoprotein)
hsa-miR-1179	0	0	1	1	1	1	LPL	lipoprotein lipase
hsa-miR-1179	1	0	1	1	1	1	MITF	microphthalmia-associated transcription factor
hsa-miR-1179	0	0	1	0	1	1	MYO7A	myosin VIIA
hsa-miR-1179	1	0	1	1	1	1	PTCH1	patched 1
hsa-miR-1179	1	0	1	0	1	1	PKD2	polycystic kidney disease 2 (autosomal dominant)
hsa-miR-1179	1	0	1	0	1	1	PTEN	phosphatase and tensin homolog
hsa-miR-1179	1	0	1	1	1	1	ATXN1	ataxin 1
hsa-miR-1179	0	0	1	1	1	1	TSHR	thyroid stimulating hormone receptor
hsa-miR-1179	0	0	1	1	1	1	SLC25A20	solute carrier family 25 (carnitine/acylcarnitine translocase), member 20
hsa-miR-1179	1	0	1	0	1	1	COL5A2	collagen, type V, alpha 2
hsa-miR-1179	1	0	1	0	1	1	CYBB	cytochrome b-245, beta polypeptide
hsa-miR-1179	0	0	1	1	1	1	LTBP2	latent transforming growth factor beta binding protein 2
hsa-miR-1179	1	0	1	1	1	1	RFX5	regulatory factor X, 5 (influences HLA class II expression)
hsa-miR-1179	1	0	1	1	1	1	APP	amyloid beta (A4) precursor protein
hsa-miR-1179	0	0	1	1	0	0	C1QB	complement component 1, q subcomponent, B chain
hsa-miR-1179	1	0	1	1	1	1	PLP1	proteolipid protein 1
hsa-miR-1179	1	0	1	1	1	1	DCX	doublecortin
hsa-miR-1179	0	0	1	1	1	1	IL1RN	interleukin 1 receptor antagonist
hsa-miR-1179	0	0	1	1	1	1	C7	complement component 7
hsa-miR-1179	1	0	1	1	1	1	TNF	tumor necrosis factor
hsa-miR-1179	1	0	1	1	1	1	FASLG	Fas ligand (TNF superfamily, member 6)
hsa-miR-1179	1	0	1	1	1	1	CACNA2D1	calcium channel, voltage-dependent, alpha 2/delta subunit 1
hsa-miR-1179	1	0	1	1	1	1	DIO2	deiodinase, iodothyronine, type II
hsa-miR-1179	1	0	1	1	1	1	GABRB3	gamma-aminobutyric acid (GABA) A receptor, beta 3
hsa-miR-1179	1	0	1	1	1	1	GABRG2	gamma-aminobutyric acid (GABA) A receptor, gamma 2
hsa-miR-1179	1	0	1	1	1	1	GRM8	glutamate receptor, metabotropic 8
hsa-miR-1179	1	0	1	0	1	1	KCNJ2	potassium inwardly-rectifying channel, subfamily J, member 2
hsa-miR-1179	0	0	1	1	1	1	BLOC1S2	biogenesis of lysosomal organelles complex-1, subunit 2
hsa-miR-1179	1	0	1	0	1	1	SMAD5	SMAD family member 5
hsa-miR-1179	1	0	1	1	1	1	RORC	RAR-related orphan receptor C
hsa-miR-1179	1	0	1	0	1	1	GDF6	growth differentiation factor 6
hsa-miR-1179	0	0	1	1	1	1	CYP27C1	cytochrome P450, family 27, subfamily C, polypeptide 1
hsa-miR-1179	1	0	1	0	1	1	ARHGEF37	Rho guanine nucleotide exchange factor (GEF) 37
hsa-miR-1179	1	0	1	0	1	1	FLJ33360	FLJ33360 protein
hsa-miR-1179	1	0	1	1	1	1	ATP1B1	ATPase, Na+/K+ transporting, beta 1 polypeptide
hsa-miR-1179	1	0	1	1	1	1	TPD52L3	tumor protein D52-like 3
hsa-miR-1179	1	0	1	1	1	1	WNK3	WNK lysine deficient protein kinase 3
hsa-miR-1179	1	0	1	1	1	1	HMGXB4	HMG box domain containing 4
hsa-miR-1179	0	0	1	1	1	1	SMAD1	SMAD family member 1
hsa-miR-1179	1	0	1	1	1	1	BICD2	bicaudal D homolog 2 (Drosophila)
hsa-miR-1179	0	0	1	0	1	1	ZNF705A	zinc finger protein 705A
hsa-miR-1179	0	0	1	1	1	1	DBX2	developing brain homeobox 2
hsa-miR-1179	0	0	1	0	0	0	FLJ42842	uncharacterized FLJ42842
hsa-miR-1179	0	0	1	1	1	1	SCP2	sterol carrier protein 2
hsa-miR-1179	1	0	1	1	1	1	IGF2BP2	insulin-like growth factor 2 mRNA binding protein 2
hsa-miR-1179	1	0	1	1	0	0	GEMIN7	gem (nuclear organelle) associated protein 7
hsa-miR-1179	1	0	1	1	1	1	CTDSPL	CTD (carboxy-terminal domain, RNA polymerase II, polypeptide A) small phosphatase-like
hsa-miR-1179	1	0	1	0	1	1	KIAA2022	KIAA2022
hsa-miR-1179	0	0	1	1	1	1	FBXO47	F-box protein 47
hsa-miR-1179	1	0	1	0	1	1	ERMN	ermin, ERM-like protein
hsa-miR-1179	1	0	1	1	1	1	ARHGAP28	Rho GTPase activating protein 28
hsa-miR-1179	1	0	1	1	1	1	SHE	Src homology 2 domain containing E
hsa-miR-1179	0	0	1	1	1	1	C1QL3	complement component 1, q subcomponent-like 3
hsa-miR-1179	0	0	1	1	1	1	HGF	hepatocyte growth factor (hepapoietin A; scatter factor)
hsa-miR-1179	1	0	1	0	1	1	CREB5	cAMP responsive element binding protein 5
hsa-miR-1179	0	0	1	1	0	0	PNLIPRP3	pancreatic lipase-related protein 3
hsa-miR-1179	0	0	1	0	1	1	GOLGA8E	golgin A8 family, member E
hsa-miR-1179	1	0	1	1	1	1	SORCS1	sortilin-related VPS10 domain containing receptor 1
hsa-miR-1179	0	0	1	1	1	1	C2orf68	chromosome 2 open reading frame 68
hsa-miR-1179	1	0	1	0	1	1	FIGNL2	fidgetin-like 2
hsa-miR-1179	0	0	1	0	1	1	LINC00268	long intergenic non-protein coding RNA 268
hsa-miR-1179	0	0	1	1	1	1	BTBD11	BTB (POZ) domain containing 11
hsa-miR-1179	1	0	1	1	1	1	VMA21	VMA21 vacuolar H+-ATPase homolog (S. cerevisiae)
hsa-miR-1179	1	0	1	0	1	1	BRCC3	BRCA1/BRCA2-containing complex, subunit 3
hsa-miR-1179	0	0	1	1	1	1	POLR2M	polymerase (RNA) II (DNA directed) polypeptide M
hsa-miR-1179	1	0	1	1	1	1	ABCC5	ATP-binding cassette, sub-family C (CFTR/MRP), member 5
hsa-miR-1179	1	0	1	1	1	1	GPHN	gephyrin
hsa-miR-1179	1	0	1	1	1	1	CANX	calnexin
hsa-miR-1179	1	0	1	0	1	1	TNRC6B	trinucleotide repeat containing 6B
hsa-miR-1179	1	0	1	1	1	1	TGFBR2	transforming growth factor, beta receptor II (70/80kDa)
hsa-miR-1179	0	0	1	1	1	1	WASF1	WAS protein family, member 1
hsa-miR-1179	1	0	1	1	1	1	YIPF5	Yip1 domain family, member 5
hsa-miR-1179	1	0	1	1	1	1	FNBP1L	formin binding protein 1-like
hsa-miR-1179	0	0	1	1	0	0	ABCF1	ATP-binding cassette, sub-family F (GCN20), member 1
hsa-miR-1179	0	0	1	0	1	1	STAG3L2	stromal antigen 3-like 2
hsa-miR-1179	1	0	1	1	1	1	FAM108B1	family with sequence similarity 108, member B1
hsa-miR-1179	1	0	1	0	1	1	C2orf71	chromosome 2 open reading frame 71
hsa-miR-1179	1	0	1	1	1	1	MAF	v-maf musculoaponeurotic fibrosarcoma oncogene homolog (avian)
hsa-miR-1179	1	0	1	1	1	1	STK24	serine/threonine kinase 24
hsa-miR-1179	1	0	1	1	1	1	AMD1	adenosylmethionine decarboxylase 1
hsa-miR-1179	1	0	1	1	1	1	MYCL1	v-myc myelocytomatosis viral oncogene homolog 1, lung carcinoma derived (avian)
hsa-miR-1179	1	0	1	1	1	1	GALNTL6	UDP-N-acetyl-alpha-D-galactosamine:polypeptide N-acetylgalactosaminyltransferase-like 6
hsa-miR-1179	1	0	1	1	1	1	PDE4B	phosphodiesterase 4B, cAMP-specific
hsa-miR-1179	0	0	1	1	1	1	HEPACAM2	HEPACAM family member 2
hsa-miR-1179	0	0	1	0	1	1	ZNF705D	zinc finger protein 705D
hsa-miR-1179	1	0	1	0	1	1	DCUN1D4	DCN1, defective in cullin neddylation 1, domain containing 4 (S. cerevisiae)
hsa-miR-1179	0	0	1	1	1	1	MTHFD2	methylenetetrahydrofolate dehydrogenase (NADP+ dependent) 2, methenyltetrahydrofolate cyclohydrolase
hsa-miR-1179	0	0	1	1	1	1	ATF3	activating transcription factor 3
hsa-miR-1179	1	0	1	1	1	1	ZNF706	zinc finger protein 706
hsa-miR-1179	1	0	1	1	1	1	SLC9A6	solute carrier family 9, subfamily A (NHE6, cation proton antiporter 6), member 6
hsa-miR-1179	1	0	1	1	1	1	ERBB4	v-erb-a erythroblastic leukemia viral oncogene homolog 4 (avian)
hsa-miR-1179	1	0	1	0	1	1	SRGAP2	SLIT-ROBO Rho GTPase activating protein 2
hsa-miR-1179	0	0	1	1	1	1	SLC6A3	solute carrier family 6 (neurotransmitter transporter, dopamine), member 3
hsa-miR-1179	1	0	1	1	1	1	NET1	neuroepithelial cell transforming 1
hsa-miR-1179	1	0	1	1	1	1	MZT1	mitotic spindle organizing protein 1
hsa-miR-1179	1	0	1	0	1	1	NCAM1	neural cell adhesion molecule 1
hsa-miR-1179	1	0	1	0	1	1	SLC7A6	solute carrier family 7 (amino acid transporter light chain, y+L system), member 6
hsa-miR-1179	1	0	1	1	1	1	CDC14B	CDC14 cell division cycle 14 homolog B (S. cerevisiae)
hsa-miR-1179	1	0	1	1	1	1	ZNF436	zinc finger protein 436
hsa-miR-1179	1	0	1	1	1	1	SREK1	splicing regulatory glutamine/lysine-rich protein 1
hsa-miR-1179	1	0	1	1	1	1	IRF2BP2	interferon regulatory factor 2 binding protein 2
hsa-miR-1179	1	0	1	0	1	1	UBXN2B	UBX domain protein 2B
hsa-miR-1179	1	0	1	1	1	1	SRSF1	serine/arginine-rich splicing factor 1
hsa-miR-1179	1	0	1	1	1	1	DACT1	dapper, antagonist of beta-catenin, homolog 1 (Xenopus laevis)
hsa-miR-1179	0	0	1	0	1	1	PAICS	phosphoribosylaminoimidazole carboxylase, phosphoribosylaminoimidazole succinocarboxamide synthetase
hsa-miR-1179	1	0	1	1	1	1	CREBBP	CREB binding protein
hsa-miR-1179	1	0	1	1	1	1	CUL4B	cullin 4B
hsa-miR-1179	1	0	1	0	1	1	CCDC85A	coiled-coil domain containing 85A
hsa-miR-1179	0	0	1	1	1	1	TMEM202	transmembrane protein 202
hsa-miR-1179	1	0	1	1	1	1	ZNF697	zinc finger protein 697
hsa-miR-1179	1	0	1	0	1	1	ODZ3	odz, odd Oz/ten-m homolog 3 (Drosophila)
hsa-miR-1179	1	0	1	0	1	1	MEGF9	multiple EGF-like-domains 9
hsa-miR-1179	0	0	1	0	0	0	VWC2L	von Willebrand factor C domain containing protein 2-like
hsa-miR-1179	0	0	1	1	1	1	TBX18	T-box 18
hsa-miR-1179	0	0	1	1	1	1	SNTN	sentan, cilia apical structure protein
hsa-miR-1179	1	0	1	1	1	1	MGA	MAX gene associated
hsa-miR-1179	1	0	1	1	1	1	REPS2	RALBP1 associated Eps domain containing 2
hsa-miR-1179	0	0	1	1	1	1	G6PC2	glucose-6-phosphatase, catalytic, 2
hsa-miR-1179	1	0	1	1	1	1	ADCYAP1	adenylate cyclase activating polypeptide 1 (pituitary)
hsa-miR-1179	1	0	1	1	1	1	BMP3	bone morphogenetic protein 3
hsa-miR-1179	1	0	1	0	1	1	CDK6	cyclin-dependent kinase 6
hsa-miR-1179	1	0	1	1	1	1	KLF6	Kruppel-like factor 6
hsa-miR-1179	0	0	1	1	1	1	CORT	cortistatin
hsa-miR-1179	1	0	1	0	1	1	CPD	carboxypeptidase D
hsa-miR-1179	1	0	1	1	1	1	CREBL2	cAMP responsive element binding protein-like 2
hsa-miR-1179	1	0	1	1	1	1	MAPK14	mitogen-activated protein kinase 14
hsa-miR-1179	0	0	1	1	1	1	DAD1	defender against cell death 1
hsa-miR-1179	1	0	1	1	1	1	CELSR3	cadherin, EGF LAG seven-pass G-type receptor 3 (flamingo homolog, Drosophila)
hsa-miR-1179	1	0	1	0	1	1	ELAVL3	ELAV (embryonic lethal, abnormal vision, Drosophila)-like 3 (Hu antigen C)
hsa-miR-1179	1	0	1	1	1	1	EN2	engrailed homeobox 2
hsa-miR-1179	1	0	1	1	1	1	EREG	epiregulin
hsa-miR-1179	1	0	1	1	1	1	ID4	inhibitor of DNA binding 4, dominant negative helix-loop-helix protein
hsa-miR-1179	1	0	1	0	1	1	MPPED2	metallophosphoesterase domain containing 2
hsa-miR-1179	0	0	1	0	0	0	BAI1	brain-specific angiogenesis inhibitor 1
hsa-miR-1179	1	0	1	1	1	1	BNC1	basonuclin 1
hsa-miR-1179	1	0	1	1	1	1	KLF5	Kruppel-like factor 5 (intestinal)
hsa-miR-1179	0	0	1	1	1	1	BTN1A1	butyrophilin, subfamily 1, member A1
hsa-miR-1179	0	0	1	1	0	0	C5	complement component 5
hsa-miR-1179	1	0	1	1	1	1	CDC25A	cell division cycle 25 homolog A (S. pombe)
hsa-miR-1179	1	0	1	1	1	1	CDK2	cyclin-dependent kinase 2
hsa-miR-1179	0	0	1	1	1	1	CHGB	chromogranin B (secretogranin 1)
hsa-miR-1179	1	0	1	1	1	1	CLCN4	chloride channel, voltage-sensitive 4
hsa-miR-1179	0	0	1	1	0	0	CLPS	colipase, pancreatic
hsa-miR-1179	0	0	1	0	0	0	CPE	carboxypeptidase E
hsa-miR-1179	1	0	1	1	1	1	CTNNB1	catenin (cadherin-associated protein), beta 1, 88kDa
hsa-miR-1179	1	0	1	1	1	1	DR1	down-regulator of transcription 1, TBP-binding (negative cofactor 2)
hsa-miR-1179	0	0	1	1	0	0	FCER1A	Fc fragment of IgE, high affinity I, receptor for; alpha polypeptide
hsa-miR-1179	0	0	1	1	1	1	FPR3	formyl peptide receptor 3
hsa-miR-1179	1	0	1	0	1	1	FUT4	fucosyltransferase 4 (alpha (1,3) fucosyltransferase, myeloid-specific)
hsa-miR-1179	0	0	1	0	1	1	GYPA	glycophorin A (MNS blood group)
hsa-miR-1179	1	0	1	0	1	1	HTT	huntingtin
hsa-miR-1179	0	0	1	1	1	1	FOXN2	forkhead box N2
hsa-miR-1179	0	0	1	1	1	1	IL12B	interleukin 12B (natural killer cell stimulatory factor 2, cytotoxic lymphocyte maturation factor 2, p40)
hsa-miR-1179	1	0	1	1	1	1	ISL1	ISL LIM homeobox 1
hsa-miR-1179	1	0	1	1	1	1	ITPR2	inositol 1,4,5-trisphosphate receptor, type 2
hsa-miR-1179	1	0	1	1	1	1	KPNA4	karyopherin alpha 4 (importin alpha 3)
hsa-miR-1179	1	0	1	0	1	1	LAMC1	laminin, gamma 1 (formerly LAMB2)
hsa-miR-1179	1	0	1	1	1	1	M6PR	mannose-6-phosphate receptor (cation dependent)
hsa-miR-1179	0	0	1	0	1	1	CXCL9	chemokine (C-X-C motif) ligand 9
hsa-miR-1179	0	0	1	1	1	1	MMP13	matrix metallopeptidase 13 (collagenase 3)
hsa-miR-1179	1	0	1	1	1	1	MN1	meningioma (disrupted in balanced translocation) 1
hsa-miR-1179	0	0	1	1	1	1	MTAP	methylthioadenosine phosphorylase
hsa-miR-1179	1	0	1	1	1	1	NCBP1	nuclear cap binding protein subunit 1, 80kDa
hsa-miR-1179	1	0	1	1	1	1	NGFR	nerve growth factor receptor
hsa-miR-1179	1	0	1	1	1	1	NPAS2	neuronal PAS domain protein 2
hsa-miR-1179	1	0	1	1	1	1	NPAT	nuclear protein, ataxia-telangiectasia locus
hsa-miR-1179	1	0	1	0	1	1	NRAS	neuroblastoma RAS viral (v-ras) oncogene homolog
hsa-miR-1179	1	0	1	1	1	1	PAWR	PRKC, apoptosis, WT1, regulator
hsa-miR-1179	1	0	1	1	1	1	PPP1CB	protein phosphatase 1, catalytic subunit, beta isozyme
hsa-miR-1179	0	0	1	1	1	1	PPP1R3A	protein phosphatase 1, regulatory subunit 3A
hsa-miR-1179	1	0	1	1	1	1	MAPK6	mitogen-activated protein kinase 6
hsa-miR-1179	1	0	1	1	1	1	PROX1	prospero homeobox 1
hsa-miR-1179	0	0	1	1	1	1	PTPRC	protein tyrosine phosphatase, receptor type, C
hsa-miR-1179	0	0	1	1	1	1	PTPRM	protein tyrosine phosphatase, receptor type, M
hsa-miR-1179	1	0	1	1	1	1	PTPRO	protein tyrosine phosphatase, receptor type, O
hsa-miR-1179	0	0	1	1	0	0	RBMS2	RNA binding motif, single stranded interacting protein 2
hsa-miR-1179	0	0	1	1	1	1	RGS2	regulator of G-protein signaling 2, 24kDa
hsa-miR-1179	1	0	1	1	1	1	SALL1	sal-like 1 (Drosophila)
hsa-miR-1179	1	0	1	1	0	0	SLN	sarcolipin
hsa-miR-1179	0	0	1	1	1	1	SP100	SP100 nuclear antigen
hsa-miR-1179	1	0	1	1	1	1	STAC	SH3 and cysteine rich domain
hsa-miR-1179	0	0	1	1	1	1	STAT6	signal transducer and activator of transcription 6, interleukin-4 induced
hsa-miR-1179	0	0	1	1	1	1	SULT2A1	sulfotransferase family, cytosolic, 2A, dehydroepiandrosterone (DHEA)-preferring, member 1
hsa-miR-1179	0	1	1	1	1	1	SYCP1	synaptonemal complex protein 1
hsa-miR-1179	1	0	1	0	1	1	TAL1	T-cell acute lymphocytic leukemia 1
hsa-miR-1179	1	0	1	1	1	1	TFAP2B	transcription factor AP-2 beta (activating enhancer binding protein 2 beta)
hsa-miR-1179	1	0	1	1	1	1	TFAP2C	transcription factor AP-2 gamma (activating enhancer binding protein 2 gamma)
hsa-miR-1179	1	0	1	1	1	1	NR2E1	nuclear receptor subfamily 2, group E, member 1
hsa-miR-1179	0	0	1	1	1	1	TPR	translocated promoter region, nuclear basket protein
hsa-miR-1179	1	0	1	0	1	1	TSPYL1	TSPY-like 1
hsa-miR-1179	1	0	1	0	1	1	ZIC1	Zic family member 1
hsa-miR-1179	1	0	1	1	1	1	ADAM12	ADAM metallopeptidase domain 12
hsa-miR-1179	1	0	1	1	1	1	CUL5	cullin 5
hsa-miR-1179	1	0	1	1	1	1	NRIP1	nuclear receptor interacting protein 1
hsa-miR-1179	1	0	1	1	1	1	EEA1	early endosome antigen 1
hsa-miR-1179	1	0	1	0	1	1	VAPA	VAMP (vesicle-associated membrane protein)-associated protein A, 33kDa
hsa-miR-1179	1	0	1	1	1	1	SUPT3H	suppressor of Ty 3 homolog (S. cerevisiae)
hsa-miR-1179	0	0	1	1	1	1	AGPS	alkylglycerone phosphate synthase
hsa-miR-1179	0	0	1	1	1	1	AP3B1	adaptor-related protein complex 3, beta 1 subunit
hsa-miR-1179	1	0	1	1	1	1	CDC14A	CDC14 cell division cycle 14 homolog A (S. cerevisiae)
hsa-miR-1179	0	0	1	1	1	1	SLC25A12	solute carrier family 25 (aspartate/glutamate carrier), member 12
hsa-miR-1179	1	0	1	1	1	1	VAMP8	vesicle-associated membrane protein 8 (endobrevin)
hsa-miR-1179	0	0	1	1	1	1	SNX4	sorting nexin 4
hsa-miR-1179	1	0	1	1	1	1	NRP2	neuropilin 2
hsa-miR-1179	0	0	1	1	0	0	TMEM11	transmembrane protein 11
hsa-miR-1179	1	0	1	1	1	1	KAT2B	K(lysine) acetyltransferase 2B
hsa-miR-1179	1	0	1	1	1	1	ALDH1A2	aldehyde dehydrogenase 1 family, member A2
hsa-miR-1179	0	0	1	1	1	1	LDB1	LIM domain binding 1
hsa-miR-1179	1	0	1	1	1	1	PHOX2B	paired-like homeobox 2b
hsa-miR-1179	1	0	1	0	1	1	ST13	suppression of tumorigenicity 13 (colon carcinoma) (Hsp70 interacting protein)
hsa-miR-1179	1	0	1	0	1	1	WASL	Wiskott-Aldrich syndrome-like
hsa-miR-1179	0	0	1	1	1	1	UBA3	ubiquitin-like modifier activating enzyme 3
hsa-miR-1179	1	0	1	1	1	1	MAP7	microtubule-associated protein 7
hsa-miR-1179	1	0	1	1	0	0	ATOX1	ATX1 antioxidant protein 1 homolog (yeast)
hsa-miR-1179	1	0	1	0	1	1	E2F2	E2F transcription factor 2
hsa-miR-1179	1	0	1	1	1	1	FGF12	fibroblast growth factor 12
hsa-miR-1179	1	0	1	0	1	1	SLC1A2	solute carrier family 1 (glial high affinity glutamate transporter), member 2
hsa-miR-1179	1	0	1	0	1	1	MED14	mediator complex subunit 14
hsa-miR-1179	1	0	1	1	1	1	MED17	mediator complex subunit 17
hsa-miR-1179	1	0	1	0	1	1	AKAP6	A kinase (PRKA) anchor protein 6
hsa-miR-1179	1	0	1	1	1	1	GDA	guanine deaminase
hsa-miR-1179	1	0	1	1	1	1	BCL9	B-cell CLL/lymphoma 9
hsa-miR-1179	0	0	1	1	1	1	COL12A1	collagen, type XII, alpha 1
hsa-miR-1179	1	0	1	1	1	1	DACH1	dachshund homolog 1 (Drosophila)
hsa-miR-1179	1	0	1	1	1	1	EPS8	epidermal growth factor receptor pathway substrate 8
hsa-miR-1179	1	0	1	1	1	1	FGD1	FYVE, RhoGEF and PH domain containing 1
hsa-miR-1179	1	0	1	0	1	1	ARHGAP35	Rho GTPase activating protein 35
hsa-miR-1179	1	0	1	1	1	1	SPARCL1	SPARC-like 1 (hevin)
hsa-miR-1179	1	0	1	1	1	1	SYNGR1	synaptogyrin 1
hsa-miR-1179	1	0	1	1	1	1	XPR1	xenotropic and polytropic retrovirus receptor 1
hsa-miR-1179	1	0	1	1	1	1	NREP	neuronal regeneration related protein homolog (rat)
hsa-miR-1179	1	0	1	1	1	1	B4GALT6	UDP-Gal:betaGlcNAc beta 1,4- galactosyltransferase, polypeptide 6
hsa-miR-1179	0	0	1	0	1	1	ADIPOQ	adiponectin, C1Q and collagen domain containing
hsa-miR-1179	1	0	1	1	1	1	AKAP7	A kinase (PRKA) anchor protein 7
hsa-miR-1179	1	0	1	1	1	1	ONECUT2	one cut homeobox 2
hsa-miR-1179	1	0	1	1	1	1	KIF23	kinesin family member 23
hsa-miR-1179	0	0	1	1	1	1	ITM2A	integral membrane protein 2A
hsa-miR-1179	1	0	1	0	1	1	DOCK3	dedicator of cytokinesis 3
hsa-miR-1179	1	0	1	0	1	1	KRAS	v-Ki-ras2 Kirsten rat sarcoma viral oncogene homolog
hsa-miR-1179	0	0	1	1	1	1	SERPINI1	serpin peptidase inhibitor, clade I (neuroserpin), member 1
hsa-miR-1179	1	0	1	1	1	1	RELN	reelin
hsa-miR-1179	1	0	1	1	1	1	OXSR1	oxidative-stress responsive 1
hsa-miR-1179	1	0	1	1	1	1	DCC	deleted in colorectal carcinoma
hsa-miR-1179	1	0	1	0	1	1	DLX6	distal-less homeobox 6
hsa-miR-1179	0	0	1	0	1	1	EPHA3	EPH receptor A3
hsa-miR-1179	1	0	1	1	1	1	GPM6A	glycoprotein M6A
hsa-miR-1179	1	0	1	1	1	1	GPR3	G protein-coupled receptor 3
hsa-miR-1179	0	0	1	1	1	1	GRPR	gastrin-releasing peptide receptor
hsa-miR-1179	1	0	1	1	1	1	PDCL	phosducin-like
hsa-miR-1179	0	0	1	1	1	1	PPP1R3C	protein phosphatase 1, regulatory subunit 3C
hsa-miR-1179	1	0	1	0	1	1	PRKAB2	protein kinase, AMP-activated, beta 2 non-catalytic subunit
hsa-miR-1179	0	0	1	1	1	1	SEPP1	selenoprotein P, plasma, 1
hsa-miR-1179	1	0	1	0	1	1	CCDC6	coiled-coil domain containing 6
hsa-miR-1179	1	0	1	1	1	1	PIGK	phosphatidylinositol glycan anchor biosynthesis, class K
hsa-miR-1179	0	0	1	1	1	1	DNAJB6	DnaJ (Hsp40) homolog, subfamily B, member 6
hsa-miR-1179	1	0	1	1	1	1	SCARB2	scavenger receptor class B, member 2
hsa-miR-1179	1	0	1	1	1	1	GTF2E1	general transcription factor IIE, polypeptide 1, alpha 56kDa
hsa-miR-1179	0	0	1	1	1	1	ING1	inhibitor of growth family, member 1
hsa-miR-1179	1	0	1	1	1	1	DLL1	delta-like 1 (Drosophila)
hsa-miR-1179	1	0	1	1	1	1	SYT1	synaptotagmin I
hsa-miR-1179	1	0	1	1	1	1	NAMPT	nicotinamide phosphoribosyltransferase
hsa-miR-1179	1	0	1	0	1	1	CLEC3A	C-type lectin domain family 3, member A
hsa-miR-1179	0	0	1	1	1	1	RNF41	ring finger protein 41
hsa-miR-1179	1	0	1	0	1	1	CALCRL	calcitonin receptor-like
hsa-miR-1179	1	0	1	0	1	1	NBR1	neighbor of BRCA1 gene 1
hsa-miR-1179	1	0	1	1	1	1	FOXO4	forkhead box O4
hsa-miR-1179	1	0	1	1	1	1	TBX3	T-box 3
hsa-miR-1179	1	0	1	0	1	1	HDAC4	histone deacetylase 4
hsa-miR-1179	0	0	1	1	0	0	RRAGB	Ras-related GTP binding B
hsa-miR-1179	1	0	1	1	1	1	SEMA3A	sema domain, immunoglobulin domain (Ig), short basic domain, secreted, (semaphorin) 3A
hsa-miR-1179	1	0	1	1	1	1	PKN2	protein kinase N2
hsa-miR-1179	0	0	1	0	1	1	ZNF192	zinc finger protein 192
hsa-miR-1179	1	0	1	1	1	1	SMC1A	structural maintenance of chromosomes 1A
hsa-miR-1179	1	0	1	1	1	1	ZNF238	zinc finger protein 238
hsa-miR-1179	1	0	1	0	1	1	APPBP2	amyloid beta precursor protein (cytoplasmic tail) binding protein 2
hsa-miR-1179	1	0	1	1	1	1	NEBL	nebulette
hsa-miR-1179	0	0	1	1	0	0	STAMBP	STAM binding protein
hsa-miR-1179	1	0	1	0	1	1	GNAI3	guanine nucleotide binding protein (G protein), alpha inhibiting activity polypeptide 3
hsa-miR-1179	0	0	1	0	1	1	SLC16A2	solute carrier family 16, member 2 (thyroid hormone transporter)
hsa-miR-1179	1	0	1	1	1	1	ELL	elongation factor RNA polymerase II
hsa-miR-1179	0	0	1	1	1	1	GLRX3	glutaredoxin 3
hsa-miR-1179	1	0	1	0	1	1	IGF2BP1	insulin-like growth factor 2 mRNA binding protein 1
hsa-miR-1179	0	0	1	1	1	1	KHDRBS3	KH domain containing, RNA binding, signal transduction associated 3
hsa-miR-1179	1	0	1	1	1	1	CTCF	CCCTC-binding factor (zinc finger protein)
hsa-miR-1179	1	0	1	1	1	1	RRAGA	Ras-related GTP binding A
hsa-miR-1179	1	0	1	0	1	1	API5	apoptosis inhibitor 5
hsa-miR-1179	1	0	1	1	1	1	SRSF10	serine/arginine-rich splicing factor 10
hsa-miR-1179	0	0	1	1	1	1	PPP1R17	protein phosphatase 1, regulatory subunit 17
hsa-miR-1179	0	0	1	1	1	1	LYVE1	lymphatic vessel endothelial hyaluronan receptor 1
hsa-miR-1179	1	0	1	1	1	1	ZBTB33	zinc finger and BTB domain containing 33
hsa-miR-1179	1	0	1	1	1	1	MORF4L1	mortality factor 4 like 1
hsa-miR-1179	0	0	1	1	1	1	TMED2	transmembrane emp24 domain trafficking protein 2
hsa-miR-1179	1	0	1	0	1	1	SLC5A3	solute carrier family 5 (sodium/myo-inositol cotransporter), member 3
hsa-miR-1179	1	0	1	1	1	1	DDX52	DEAD (Asp-Glu-Ala-Asp) box polypeptide 52
hsa-miR-1179	1	0	1	1	1	1	WWP1	WW domain containing E3 ubiquitin protein ligase 1
hsa-miR-1179	1	0	1	1	1	1	SSR3	signal sequence receptor, gamma (translocon-associated protein gamma)
hsa-miR-1179	1	0	1	1	1	1	UTRN	utrophin
hsa-miR-1179	1	0	1	1	1	1	UTY	ubiquitously transcribed tetratricopeptide repeat gene, Y-linked
hsa-miR-1179	1	0	1	1	1	1	ZIC2	Zic family member 2
hsa-miR-1179	1	0	1	0	1	1	PRSS23	protease, serine, 23
hsa-miR-1179	1	0	1	1	1	1	CA5B	carbonic anhydrase VB, mitochondrial
hsa-miR-1179	1	0	1	1	1	1	TUSC2	tumor suppressor candidate 2
hsa-miR-1179	0	0	1	1	0	0	TWF2	twinfilin, actin-binding protein, homolog 2 (Drosophila)
hsa-miR-1179	1	0	1	1	1	1	TARDBP	TAR DNA binding protein
hsa-miR-1179	0	0	1	1	0	0	DPF3	D4, zinc and double PHD fingers, family 3
hsa-miR-1179	0	0	1	1	1	1	EHF	ets homologous factor
hsa-miR-1179	1	0	1	1	1	1	FBXL3	F-box and leucine-rich repeat protein 3
hsa-miR-1179	1	0	1	1	1	1	RYBP	RING1 and YY1 binding protein
hsa-miR-1179	1	0	1	1	1	1	HEY2	hairy/enhancer-of-split related with YRPW motif 2
hsa-miR-1179	1	0	1	1	1	1	KCND2	potassium voltage-gated channel, Shal-related subfamily, member 2
hsa-miR-1179	1	0	1	0	1	1	FBXL7	F-box and leucine-rich repeat protein 7
hsa-miR-1179	1	0	1	1	1	1	MAPRE1	microtubule-associated protein, RP/EB family, member 1
hsa-miR-1179	1	0	1	1	1	1	RANBP6	RAN binding protein 6
hsa-miR-1179	0	0	1	1	1	1	CD24	CD24 molecule
hsa-miR-1179	1	0	1	1	1	1	STK39	serine threonine kinase 39
hsa-miR-1179	0	0	1	1	1	1	N6AMT1	N-6 adenine-specific DNA methyltransferase 1 (putative)
hsa-miR-1179	0	0	1	1	0	0	KCNJ14	potassium inwardly-rectifying channel, subfamily J, member 14
hsa-miR-1179	0	0	1	1	1	1	ABT1	activator of basal transcription 1
hsa-miR-1179	0	0	1	0	1	1	EMR2	egf-like module containing, mucin-like, hormone receptor-like 2
hsa-miR-1179	1	0	1	0	1	1	CLIC4	chloride intracellular channel 4
hsa-miR-1179	1	0	1	1	1	1	LAMP2	lysosomal-associated membrane protein 2
hsa-miR-1179	1	0	1	1	1	1	SOCS5	suppressor of cytokine signaling 5
hsa-miR-1179	1	0	1	0	1	1	OSTM1	osteopetrosis associated transmembrane protein 1
hsa-miR-1179	1	0	1	0	1	1	CHMP2B	charged multivesicular body protein 2B
hsa-miR-1179	1	0	1	0	1	1	C16orf72	chromosome 16 open reading frame 72
hsa-miR-1179	0	0	1	1	0	0	HSD17B8	hydroxysteroid (17-beta) dehydrogenase 8
hsa-miR-1179	1	0	1	1	1	1	RNF7	ring finger protein 7
hsa-miR-1179	1	0	1	0	1	1	ODZ1	odz, odd Oz/ten-m homolog 1 (Drosophila)
hsa-miR-1179	1	0	1	1	1	1	TGDS	TDP-glucose 4,6-dehydratase
hsa-miR-1179	0	0	1	1	1	1	APOL3	apolipoprotein L, 3
hsa-miR-1179	1	0	1	0	1	1	RNF11	ring finger protein 11
hsa-miR-1179	1	0	1	0	1	1	DIEXF	digestive organ expansion factor homolog (zebrafish)
hsa-miR-1179	1	0	1	1	1	1	SERP1	stress-associated endoplasmic reticulum protein 1
hsa-miR-1179	1	0	1	1	1	1	TNFRSF21	tumor necrosis factor receptor superfamily, member 21
hsa-miR-1179	1	0	1	0	1	1	HUNK	hormonally up-regulated Neu-associated kinase
hsa-miR-1179	0	0	1	1	1	1	PSME4	proteasome (prosome, macropain) activator subunit 4
hsa-miR-1179	1	0	1	1	1	1	ZNF592	zinc finger protein 592
hsa-miR-1179	1	0	1	0	1	1	SH3PXD2A	SH3 and PX domains 2A
hsa-miR-1179	1	0	1	1	1	1	KDM4A	lysine (K)-specific demethylase 4A
hsa-miR-1179	1	0	1	1	1	1	TBKBP1	TBK1 binding protein 1
hsa-miR-1179	1	0	1	1	1	1	MRPL19	mitochondrial ribosomal protein L19
hsa-miR-1179	1	0	1	0	1	1	TOMM20	translocase of outer mitochondrial membrane 20 homolog (yeast)
hsa-miR-1179	0	0	1	1	1	1	KIAA0141	KIAA0141
hsa-miR-1179	1	0	1	0	1	1	PJA2	praja ring finger 2, E3 ubiquitin protein ligase
hsa-miR-1179	1	0	1	1	1	1	NUAK1	NUAK family, SNF1-like kinase, 1
hsa-miR-1179	1	0	1	1	1	1	HELZ	helicase with zinc finger
hsa-miR-1179	1	0	1	0	1	1	ICK	intestinal cell (MAK-like) kinase
hsa-miR-1179	0	0	1	1	0	0	KIFAP3	kinesin-associated protein 3
hsa-miR-1179	1	0	1	1	1	1	FBXO21	F-box protein 21
hsa-miR-1179	1	0	1	0	1	1	GGA2	golgi-associated, gamma adaptin ear containing, ARF binding protein 2
hsa-miR-1179	1	0	1	1	1	1	TRAK2	trafficking protein, kinesin binding 2
hsa-miR-1179	1	0	1	1	1	1	HECW1	HECT, C2 and WW domain containing E3 ubiquitin protein ligase 1
hsa-miR-1179	1	0	1	0	1	1	PEG10	paternally expressed 10
hsa-miR-1179	1	0	1	1	1	1	TBC1D9	TBC1 domain family, member 9 (with GRAM domain)
hsa-miR-1179	1	0	1	1	1	1	RTF1	Rtf1, Paf1/RNA polymerase II complex component, homolog (S. cerevisiae)
hsa-miR-1179	1	0	1	1	0	0	RFTN1	raftlin, lipid raft linker 1
hsa-miR-1179	1	0	1	1	1	1	PLCB1	phospholipase C, beta 1 (phosphoinositide-specific)
hsa-miR-1179	1	0	1	0	1	1	KIAA1024	KIAA1024
hsa-miR-1179	0	0	1	1	1	1	ADNP	activity-dependent neuroprotector homeobox
hsa-miR-1179	1	0	1	1	1	1	DSTYK	dual serine/threonine and tyrosine protein kinase
hsa-miR-1179	1	0	1	1	1	1	PARM1	prostate androgen-regulated mucin-like protein 1
hsa-miR-1179	1	0	1	0	1	1	OSBPL3	oxysterol binding protein-like 3
hsa-miR-1179	1	0	1	0	1	1	ERC2	ELKS/RAB6-interacting/CAST family member 2
hsa-miR-1179	1	0	1	1	1	1	FAM155B	family with sequence similarity 155, member B
hsa-miR-1179	1	0	1	1	1	1	ST8SIA3	ST8 alpha-N-acetyl-neuraminide alpha-2,8-sialyltransferase 3
hsa-miR-1179	0	0	1	1	1	1	PCF11	PCF11, cleavage and polyadenylation factor subunit, homolog (S. cerevisiae)
hsa-miR-1179	1	0	1	0	1	1	TRIM33	tripartite motif containing 33
hsa-miR-1179	1	0	1	1	1	1	MEMO1	mediator of cell motility 1
hsa-miR-1179	1	0	1	1	1	1	PHF20L1	PHD finger protein 20-like 1
hsa-miR-1179	0	0	1	1	1	1	HDGFRP3	hepatoma-derived growth factor, related protein 3
hsa-miR-1179	1	0	1	0	1	1	CNR1	cannabinoid receptor 1 (brain)
hsa-miR-1179	1	0	1	1	1	1	MPC1	mitochondrial pyruvate carrier 1
hsa-miR-1179	0	0	1	1	1	1	COMMD10	COMM domain containing 10
hsa-miR-1179	1	0	1	1	1	1	SUFU	suppressor of fused homolog (Drosophila)
hsa-miR-1179	1	0	1	1	1	1	VGLL3	vestigial like 3 (Drosophila)
hsa-miR-1179	1	0	1	0	1	1	HECA	headcase homolog (Drosophila)
hsa-miR-1179	0	0	1	1	1	1	ACSL5	acyl-CoA synthetase long-chain family member 5
hsa-miR-1179	0	0	1	1	1	1	IMPG2	interphotoreceptor matrix proteoglycan 2
hsa-miR-1179	1	0	1	1	1	1	BIRC6	baculoviral IAP repeat containing 6
hsa-miR-1179	0	0	1	1	1	1	RAB23	RAB23, member RAS oncogene family
hsa-miR-1179	1	0	1	0	1	1	RAB8B	RAB8B, member RAS oncogene family
hsa-miR-1179	1	0	1	0	1	1	NT5DC3	5'-nucleotidase domain containing 3
hsa-miR-1179	1	0	1	1	1	1	RAB6B	RAB6B, member RAS oncogene family
hsa-miR-1179	1	0	1	1	1	1	ZNF644	zinc finger protein 644
hsa-miR-1179	1	0	1	1	1	1	MEX3C	mex-3 homolog C (C. elegans)
hsa-miR-1179	0	0	1	1	1	1	USP18	ubiquitin specific peptidase 18
hsa-miR-1179	1	0	1	0	1	1	KLHL3	kelch-like 3 (Drosophila)
hsa-miR-1179	0	0	1	1	1	1	POLE3	polymerase (DNA directed), epsilon 3, accessory subunit
hsa-miR-1179	0	0	1	1	1	1	NKRF	NFKB repressing factor
hsa-miR-1179	1	0	1	0	1	1	UBE2Q1	ubiquitin-conjugating enzyme E2Q family member 1
hsa-miR-1179	0	0	1	0	1	1	TRIM44	tripartite motif containing 44
hsa-miR-1179	0	0	1	1	1	1	BHMT2	betaine--homocysteine S-methyltransferase 2
hsa-miR-1179	1	0	1	1	1	1	GDAP2	ganglioside induced differentiation associated protein 2
hsa-miR-1179	0	0	1	0	1	1	THUMPD1	THUMP domain containing 1
hsa-miR-1179	1	0	1	0	1	1	DCAF16	DDB1 and CUL4 associated factor 16
hsa-miR-1179	1	0	1	1	1	1	LPPR1	lipid phosphate phosphatase-related protein type 1
hsa-miR-1179	1	0	1	1	1	1	ELOVL2	ELOVL fatty acid elongase 2
hsa-miR-1179	1	0	1	0	1	1	CMTM6	CKLF-like MARVEL transmembrane domain containing 6
hsa-miR-1179	0	0	1	1	1	1	RHBDL2	rhomboid, veinlet-like 2 (Drosophila)
hsa-miR-1179	1	0	1	1	1	1	RNF125	ring finger protein 125, E3 ubiquitin protein ligase
hsa-miR-1179	1	0	1	1	1	1	IFT57	intraflagellar transport 57 homolog (Chlamydomonas)
hsa-miR-1179	1	0	1	1	1	1	SOBP	sine oculis binding protein homolog (Drosophila)
hsa-miR-1179	1	0	1	1	1	1	FIGN	fidgetin
hsa-miR-1179	1	0	1	1	1	1	FAM178A	family with sequence similarity 178, member A
hsa-miR-1179	1	0	1	0	1	1	MSL2	male-specific lethal 2 homolog (Drosophila)
hsa-miR-1179	1	0	1	1	1	1	UBA6	ubiquitin-like modifier activating enzyme 6
hsa-miR-1179	0	0	1	1	1	1	AP5M1	adaptor-related protein complex 5, mu 1 subunit
hsa-miR-1179	1	0	1	1	1	1	CCAR1	cell division cycle and apoptosis regulator 1
hsa-miR-1179	1	0	1	1	1	1	SPTLC3	serine palmitoyltransferase, long chain base subunit 3
hsa-miR-1179	1	0	1	1	1	1	ACER3	alkaline ceramidase 3
hsa-miR-1179	1	0	1	0	1	1	FOXJ2	forkhead box J2
hsa-miR-1179	0	0	1	1	1	1	STYK1	serine/threonine/tyrosine kinase 1
hsa-miR-1179	1	0	1	1	1	1	PAG1	phosphoprotein associated with glycosphingolipid microdomains 1
hsa-miR-1179	1	0	1	1	1	1	CAMK2N1	calcium/calmodulin-dependent protein kinase II inhibitor 1
hsa-miR-1179	0	0	1	1	1	1	GOLGA6B	golgin A6 family, member B
hsa-miR-1179	1	0	1	0	1	1	PCDHAC1	protocadherin alpha subfamily C, 1
hsa-miR-1179	1	0	1	0	1	1	PCDHAC2	protocadherin alpha subfamily C, 2
hsa-miR-1179	1	0	1	1	1	1	PCDHA1	protocadherin alpha 1
hsa-miR-1179	1	0	1	0	1	1	PCDHA10	protocadherin alpha 10
hsa-miR-1179	1	0	1	0	1	1	PCDHA11	protocadherin alpha 11
hsa-miR-1179	1	0	1	0	1	1	PCDHA12	protocadherin alpha 12
hsa-miR-1179	1	0	1	1	1	1	PCDHA2	protocadherin alpha 2
hsa-miR-1179	1	0	1	1	1	1	PCDHA3	protocadherin alpha 3
hsa-miR-1179	1	0	1	1	1	1	PCDHA6	protocadherin alpha 6
hsa-miR-1179	1	0	1	0	1	1	PCDHA7	protocadherin alpha 7
hsa-miR-1179	1	0	1	1	1	1	PCDHA8	protocadherin alpha 8
hsa-miR-1179	0	0	1	1	1	1	NPAP1	nuclear pore associated protein 1
hsa-miR-1179	1	0	1	0	1	1	FAM190B	family with sequence similarity 190, member B
hsa-miR-1179	0	0	1	1	1	1	KRT24	keratin 24
hsa-miR-1179	1	0	1	0	1	1	CCNJ	cyclin J
hsa-miR-1179	1	0	1	1	1	1	SEPT3	septin 3
hsa-miR-1179	1	0	1	1	1	1	EPB41L4B	erythrocyte membrane protein band 4.1 like 4B
hsa-miR-1179	0	0	1	1	1	1	RNF20	ring finger protein 20, E3 ubiquitin protein ligase
hsa-miR-1179	1	0	1	1	1	1	LRRC8A	leucine rich repeat containing 8 family, member A
hsa-miR-1179	0	0	1	0	1	1	ZC3HAV1	zinc finger CCCH-type, antiviral 1
hsa-miR-1179	0	0	1	1	1	1	TMEM167B	transmembrane protein 167B
hsa-miR-1179	1	0	1	0	1	1	PMEPA1	prostate transmembrane protein, androgen induced 1
hsa-miR-1179	1	0	1	1	1	1	CCDC47	coiled-coil domain containing 47
hsa-miR-1179	0	0	1	0	1	1	TMEM63C	transmembrane protein 63C
hsa-miR-1179	1	0	1	0	1	1	DCUN1D1	DCN1, defective in cullin neddylation 1, domain containing 1 (S. cerevisiae)
hsa-miR-1179	1	0	1	1	1	1	RAB22A	RAB22A, member RAS oncogene family
hsa-miR-1179	1	0	1	0	1	1	KCNS2	potassium voltage-gated channel, delayed-rectifier, subfamily S, member 2
hsa-miR-1179	1	0	1	0	1	1	FAM40B	family with sequence similarity 40, member B
hsa-miR-1179	1	0	1	1	1	1	SLC12A5	solute carrier family 12 (potassium/chloride transporter), member 5
hsa-miR-1179	0	0	1	0	1	1	ZNF490	zinc finger protein 490
hsa-miR-1179	0	0	1	1	1	1	SHROOM4	shroom family member 4
hsa-miR-1179	1	0	1	1	1	1	RNF150	ring finger protein 150
hsa-miR-1179	1	0	1	1	1	1	ARHGAP31	Rho GTPase activating protein 31
hsa-miR-1179	0	0	1	0	1	1	SERINC1	serine incorporator 1
hsa-miR-1179	1	0	1	0	1	1	NUFIP2	nuclear fragile X mental retardation protein interacting protein 2
hsa-miR-1179	1	0	1	1	1	1	MIB1	mindbomb E3 ubiquitin protein ligase 1
hsa-miR-1179	1	0	1	0	1	1	ALPK3	alpha-kinase 3
hsa-miR-1179	0	0	1	1	1	1	ARRDC3	arrestin domain containing 3
hsa-miR-1179	1	0	1	1	1	1	SIPA1L2	signal-induced proliferation-associated 1 like 2
hsa-miR-1179	0	0	1	0	1	1	TRMT5	tRNA methyltransferase 5 homolog (S. cerevisiae)
hsa-miR-1179	1	0	1	1	1	1	VAT1L	vesicle amine transport protein 1 homolog (T. californica)-like
hsa-miR-1179	0	0	1	1	1	1	AQP9	aquaporin 9
hsa-miR-1179	0	0	1	1	1	1	B3GALT1	UDP-Gal:betaGlcNAc beta 1,3-galactosyltransferase, polypeptide 1
hsa-miR-1179	1	0	1	1	1	1	SNTB1	syntrophin, beta 1 (dystrophin-associated protein A1, 59kDa, basic component 1)
hsa-miR-1179	1	0	1	1	1	1	HCN1	hyperpolarization activated cyclic nucleotide-gated potassium channel 1
hsa-miR-1179	1	0	1	0	1	1	XK	X-linked Kx blood group (McLeod syndrome)
hsa-miR-1179	1	0	1	1	1	1	MTMR3	myotubularin related protein 3
hsa-miR-1179	1	0	1	1	1	1	CLDN1	claudin 1
hsa-miR-1179	0	0	1	1	1	1	RNASEL	ribonuclease L (2',5'-oligoisoadenylate synthetase-dependent)
hsa-miR-1179	1	0	1	1	1	1	RTN1	reticulon 1
hsa-miR-1179	1	0	1	1	1	1	FAM60A	family with sequence similarity 60, member A
hsa-miR-1179	0	0	1	1	0	0	MYOZ1	myozenin 1
hsa-miR-1179	1	0	1	1	1	1	SNX6	sorting nexin 6
hsa-miR-1179	0	0	1	1	1	1	CHST6	carbohydrate (N-acetylglucosamine 6-O) sulfotransferase 6
hsa-miR-1179	1	0	1	1	1	1	SENP2	SUMO1/sentrin/SMT3 specific peptidase 2
hsa-miR-1179	0	0	1	1	0	0	FCGR2A	Fc fragment of IgG, low affinity IIa, receptor (CD32)
hsa-miR-1179	1	0	1	1	1	1	CLCN6	chloride channel, voltage-sensitive 6
hsa-miR-1179	0	0	1	0	1	1	CFL2	cofilin 2 (muscle)
hsa-miR-1179	1	0	1	0	1	1	MCL1	myeloid cell leukemia sequence 1 (BCL2-related)
hsa-miR-1179	0	0	1	1	1	1	PGM5	phosphoglucomutase 5
hsa-miR-1179	1	0	1	1	0	0	SDF2L1	stromal cell-derived factor 2-like 1
hsa-miR-1179	0	0	1	1	0	0	KCNK13	potassium channel, subfamily K, member 13
hsa-miR-1179	1	0	1	1	1	1	XYLT1	xylosyltransferase I
hsa-miR-1179	0	0	1	1	1	1	HHIP	hedgehog interacting protein
hsa-miR-1179	1	0	1	1	1	1	C6orf106	chromosome 6 open reading frame 106
hsa-miR-1179	1	0	1	1	1	1	RMND5A	required for meiotic nuclear division 5 homolog A (S. cerevisiae)
hsa-miR-1179	1	0	1	1	1	1	REEP1	receptor accessory protein 1
hsa-miR-1179	1	0	1	1	0	0	UBE2Z	ubiquitin-conjugating enzyme E2Z
hsa-miR-1179	1	0	1	1	1	1	FGFR1	fibroblast growth factor receptor 1
hsa-miR-1179	1	0	1	1	1	1	C1orf116	chromosome 1 open reading frame 116
hsa-miR-1179	1	0	1	1	1	1	NEUROG2	neurogenin 2
hsa-miR-1179	1	0	1	1	1	1	GID4	GID complex subunit 4, VID24 homolog (S. cerevisiae)
hsa-miR-1179	0	0	1	0	1	1	TRPM8	transient receptor potential cation channel, subfamily M, member 8
hsa-miR-1179	0	0	1	1	1	1	PDYN	prodynorphin
hsa-miR-1179	0	0	1	1	1	1	CEP70	centrosomal protein 70kDa
hsa-miR-1179	0	0	1	1	1	1	LPAL2	lipoprotein, Lp(a)-like 2, pseudogene
hsa-miR-1179	1	0	1	1	1	1	IRF2BPL	interferon regulatory factor 2 binding protein-like
hsa-miR-1179	1	0	1	1	1	1	ARSJ	arylsulfatase family, member J
hsa-miR-1179	0	0	1	1	1	1	GALNT12	UDP-N-acetyl-alpha-D-galactosamine:polypeptide N-acetylgalactosaminyltransferase 12 (GalNAc-T12)
hsa-miR-1179	0	0	1	0	1	1	C14orf169	chromosome 14 open reading frame 169
hsa-miR-1179	1	0	1	1	1	1	CCDC82	coiled-coil domain containing 82
hsa-miR-1179	1	0	1	1	1	1	CLMP	CXADR-like membrane protein
hsa-miR-1179	0	0	1	1	1	1	PREX2	phosphatidylinositol-3,4,5-trisphosphate-dependent Rac exchange factor 2
hsa-miR-1179	1	0	1	1	0	0	SYNDIG1	synapse differentiation inducing 1
hsa-miR-1179	0	0	1	1	1	1	ZNF767	zinc finger family member 767
hsa-miR-1179	1	0	1	1	1	1	CPED1	cadherin-like and PC-esterase domain containing 1
hsa-miR-1179	0	0	1	1	1	1	GFM1	G elongation factor, mitochondrial 1
hsa-miR-1179	1	0	1	0	1	1	VCPIP1	valosin containing protein (p97)/p47 complex interacting protein 1
hsa-miR-1179	1	0	1	1	1	1	NAA50	N(alpha)-acetyltransferase 50, NatE catalytic subunit
hsa-miR-1179	1	0	1	1	1	1	TRIB1	tribbles homolog 1 (Drosophila)
hsa-miR-1179	0	0	1	1	1	1	ITIH5	inter-alpha-trypsin inhibitor heavy chain family, member 5
hsa-miR-1179	1	0	1	1	1	1	FAM117A	family with sequence similarity 117, member A
hsa-miR-1179	1	0	1	1	1	1	ANKRD13C	ankyrin repeat domain 13C
hsa-miR-1179	1	0	1	1	1	1	OR2H1	olfactory receptor, family 2, subfamily H, member 1
hsa-miR-1179	1	0	1	1	1	1	SNX27	sorting nexin family member 27
hsa-miR-1179	1	0	1	0	1	1	SPRY4	sprouty homolog 4 (Drosophila)
hsa-miR-1179	1	0	1	1	1	1	GABARAPL1	GABA(A) receptor-associated protein like 1
hsa-miR-1179	1	0	1	0	1	1	SH3BGRL2	SH3 domain binding glutamic acid-rich protein like 2
hsa-miR-1179	0	0	1	1	1	1	INHBE	inhibin, beta E
hsa-miR-1179	1	0	1	1	1	1	PCDHA9	protocadherin alpha 9
hsa-miR-1179	0	0	1	1	1	1	MAGT1	magnesium transporter 1
hsa-miR-1179	1	0	1	1	1	1	SLC10A7	solute carrier family 10 (sodium/bile acid cotransporter family), member 7
hsa-miR-1179	1	0	1	1	1	1	ARID5B	AT rich interactive domain 5B (MRF1-like)
hsa-miR-1179	1	0	1	1	1	1	LOXL4	lysyl oxidase-like 4
hsa-miR-1179	1	0	1	1	1	1	ZNRF1	zinc and ring finger 1, E3 ubiquitin protein ligase
hsa-miR-1179	1	0	1	1	1	1	CAMKK1	calcium/calmodulin-dependent protein kinase kinase 1, alpha
hsa-miR-1179	1	0	1	1	1	1	SYVN1	synovial apoptosis inhibitor 1, synoviolin
hsa-miR-1179	1	0	1	1	1	1	ABHD13	abhydrolase domain containing 13
hsa-miR-1179	1	0	1	0	1	1	UBASH3B	ubiquitin associated and SH3 domain containing B
hsa-miR-1179	1	0	1	1	1	1	ARHGAP19	Rho GTPase activating protein 19
hsa-miR-1179	0	0	1	0	1	1	PIGY	phosphatidylinositol glycan anchor biosynthesis, class Y
hsa-miR-1179	1	0	1	1	1	1	PCDH11Y	protocadherin 11 Y-linked
hsa-miR-1179	1	0	1	0	1	1	ZCCHC3	zinc finger, CCHC domain containing 3
hsa-miR-1179	0	0	1	1	1	1	UCN2	urocortin 2
hsa-miR-1179	1	0	1	1	1	1	C5orf30	chromosome 5 open reading frame 30
hsa-miR-1179	1	0	1	0	1	1	PURB	purine-rich element binding protein B
hsa-miR-1179	0	0	1	1	1	1	FBXO4	F-box protein 4
hsa-miR-1179	1	0	1	1	1	1	EPT1	ethanolaminephosphotransferase 1 (CDP-ethanolamine-specific)
hsa-miR-1179	0	0	1	1	1	1	ARHGAP18	Rho GTPase activating protein 18
hsa-miR-1179	1	0	1	1	1	1	LUZP1	leucine zipper protein 1
hsa-miR-1179	1	0	1	1	1	1	BRWD1	bromodomain and WD repeat domain containing 1
hsa-miR-1179	0	0	1	1	1	1	NALCN	sodium leak channel, non-selective
hsa-miR-1179	0	0	1	1	1	1	PLEKHG4B	pleckstrin homology domain containing, family G (with RhoGef domain) member 4B
hsa-miR-1179	1	0	1	0	1	1	TMEM123	transmembrane protein 123
hsa-miR-1179	0	0	1	1	0	0	APOA5	apolipoprotein A-V
hsa-miR-1179	1	0	1	1	1	1	NAA15	N(alpha)-acetyltransferase 15, NatA auxiliary subunit
hsa-miR-1179	0	0	1	1	1	1	ABCA9	ATP-binding cassette, sub-family A (ABC1), member 9
hsa-miR-1179	1	0	1	1	1	1	SLC44A1	solute carrier family 44, member 1
hsa-miR-1179	0	0	1	1	1	1	CBLN4	cerebellin 4 precursor
hsa-miR-1179	1	0	1	1	1	1	KCNE4	potassium voltage-gated channel, Isk-related family, member 4
hsa-miR-1179	0	0	1	1	1	1	PABPC5	poly(A) binding protein, cytoplasmic 5
hsa-miR-1179	0	0	1	0	1	1	CNTNAP5	contactin associated protein-like 5
hsa-miR-1179	0	0	1	1	0	0	XAGE5	X antigen family, member 5
hsa-miR-1179	0	0	1	1	1	1	PATE1	prostate and testis expressed 1
hsa-miR-1179	1	0	1	1	0	0	PYGO2	pygopus homolog 2 (Drosophila)
hsa-miR-1179	0	0	1	1	1	1	CASC4	cancer susceptibility candidate 4
hsa-miR-1179	1	0	1	0	1	1	NUS1	nuclear undecaprenyl pyrophosphate synthase 1 homolog (S. cerevisiae)
hsa-miR-1179	1	0	1	1	0	0	LIPH	lipase, member H
hsa-miR-1179	1	0	1	1	1	1	PPTC7	PTC7 protein phosphatase homolog (S. cerevisiae)
hsa-miR-1179	1	0	1	1	1	1	KCNH8	potassium voltage-gated channel, subfamily H (eag-related), member 8
hsa-miR-1179	0	0	1	1	0	0	OTOA	otoancorin
hsa-miR-1179	1	0	1	1	1	1	FAM91A1	family with sequence similarity 91, member A1
hsa-miR-1179	0	0	1	1	1	1	ZFC3H1	zinc finger, C3H1-type containing
hsa-miR-1179	0	0	1	1	1	1	NXPE3	neurexophilin and PC-esterase domain family, member 3
hsa-miR-1179	1	0	1	0	1	1	CENPBD1	CENPB DNA-binding domains containing 1
hsa-miR-1179	1	0	1	1	1	1	VTI1A	vesicle transport through interaction with t-SNAREs homolog 1A (yeast)
hsa-miR-1179	0	0	1	1	1	1	OMA1	OMA1 zinc metallopeptidase homolog (S. cerevisiae)
hsa-miR-1179	1	0	1	0	1	1	MTPN	myotrophin
hsa-miR-1179	1	0	1	1	1	1	FAM123B	family with sequence similarity 123B
hsa-miR-1179	0	0	1	1	1	1	C15orf43	chromosome 15 open reading frame 43
hsa-miR-1179	1	0	1	1	1	1	SPRED1	sprouty-related, EVH1 domain containing 1
hsa-miR-1179	1	0	1	0	1	1	FAM116A	family with sequence similarity 116, member A
hsa-miR-1179	1	0	1	1	1	1	HOXA9	homeobox A9
hsa-miR-1179	1	0	1	1	1	1	NXPH1	neurexophilin 1
hsa-miR-1179	1	0	1	1	1	1	PDIK1L	PDLIM1 interacting kinase 1 like
hsa-miR-1179	1	0	1	1	1	1	UHRF2	ubiquitin-like with PHD and ring finger domains 2, E3 ubiquitin protein ligase
hsa-miR-1179	1	0	1	0	1	1	ST6GALNAC3	ST6 (alpha-N-acetyl-neuraminyl-2,3-beta-galactosyl-1,3)-N-acetylgalactosaminide alpha-2,6-sialyltransferase 3
hsa-miR-1179	0	0	1	0	1	1	LIX1	Lix1 homolog (chicken)
hsa-miR-1179	1	0	1	1	1	1	TXLNB	taxilin beta
hsa-miR-1179	1	0	1	1	1	1	HS6ST3	heparan sulfate 6-O-sulfotransferase 3
hsa-miR-1179	1	0	1	1	1	1	CREBRF	CREB3 regulatory factor
hsa-miR-1179	1	0	1	1	1	1	ZNF367	zinc finger protein 367
hsa-miR-1179	1	0	1	1	1	1	PHF13	PHD finger protein 13
hsa-miR-1179	0	0	1	1	1	1	WFDC13	WAP four-disulfide core domain 13
hsa-miR-1179	0	0	1	1	1	1	CATSPER2	cation channel, sperm associated 2
hsa-miR-1179	0	0	1	1	1	1	REXO1L1	REX1, RNA exonuclease 1 homolog (S. cerevisiae)-like 1
hsa-miR-1179	0	0	1	1	0	0	CCDC105	coiled-coil domain containing 105
hsa-miR-1179	1	0	1	1	1	1	CCDC117	coiled-coil domain containing 117
hsa-miR-1179	1	0	1	1	1	1	FAM117B	family with sequence similarity 117, member B
hsa-miR-1179	0	0	1	1	1	1	APLF	aprataxin and PNKP like factor
hsa-miR-1179	1	0	1	0	1	1	C3orf58	chromosome 3 open reading frame 58
hsa-miR-1179	1	0	1	0	1	1	PGM2L1	phosphoglucomutase 2-like 1
hsa-miR-1179	0	0	1	1	1	1	OTOGL	otogelin-like
hsa-miR-1179	1	0	1	0	1	1	KSR2	kinase suppressor of ras 2
hsa-miR-1179	0	0	1	1	1	1	ZNF660	zinc finger protein 660
hsa-miR-1179	0	0	1	0	1	1	C5orf64	chromosome 5 open reading frame 64
hsa-miR-1179	1	0	1	1	1	1	RABL3	RAB, member of RAS oncogene family-like 3
hsa-miR-1179	1	0	1	1	1	1	LDLRAD3	low density lipoprotein receptor class A domain containing 3
hsa-miR-1179	1	0	1	0	1	1	TMEM167A	transmembrane protein 167A
hsa-miR-1179	1	0	1	1	1	1	SCN4B	sodium channel, voltage-gated, type IV, beta subunit
hsa-miR-1179	0	0	1	1	0	0	LYG2	lysozyme G-like 2
hsa-miR-1179	1	0	1	1	1	1	SOWAHA	sosondowah ankyrin repeat domain family member A
hsa-miR-1179	0	0	1	1	1	1	MRPL43	mitochondrial ribosomal protein L43
hsa-miR-1179	1	0	1	1	1	1	PPAP2B	phosphatidic acid phosphatase type 2B
hsa-miR-1179	1	0	1	1	1	1	PPM1B	protein phosphatase, Mg2+/Mn2+ dependent, 1B
hsa-miR-1179	1	0	1	1	1	1	GGT7	gamma-glutamyltransferase 7
hsa-miR-1179	0	0	1	1	1	1	HSD17B13	hydroxysteroid (17-beta) dehydrogenase 13
hsa-miR-1179	1	0	1	1	1	1	MARCH3	membrane-associated ring finger (C3HC4) 3, E3 ubiquitin protein ligase
hsa-miR-1179	0	0	1	0	1	1	GATS	GATS, stromal antigen 3 opposite strand
hsa-miR-1179	0	0	1	1	1	1	SLC9B2	solute carrier family 9, subfamily B (NHA2, cation proton antiporter 2), member 2
hsa-miR-1179	0	0	1	1	1	1	SYT15	synaptotagmin XV
hsa-miR-1179	0	0	1	0	1	1	SPATA12	spermatogenesis associated 12
hsa-miR-1179	1	0	1	1	1	1	ADAT2	adenosine deaminase, tRNA-specific 2
hsa-miR-1179	0	0	1	0	1	1	VSIG1	V-set and immunoglobulin domain containing 1
hsa-miR-1179	0	0	1	1	1	1	SKA2	spindle and kinetochore associated complex subunit 2
hsa-miR-1179	1	0	1	0	1	1	RIMS4	regulating synaptic membrane exocytosis 4
hsa-miR-1179	1	0	1	0	1	1	HNRNPA3	heterogeneous nuclear ribonucleoprotein A3
hsa-miR-1179	1	0	1	0	1	1	SRRM4	serine/arginine repetitive matrix 4
hsa-miR-1179	1	0	1	1	1	1	ZBTB41	zinc finger and BTB domain containing 41
hsa-miR-1179	0	0	1	0	1	1	BTNL3	butyrophilin-like 3
hsa-miR-1179	1	0	1	0	1	1	LYSMD3	LysM, putative peptidoglycan-binding, domain containing 3
hsa-miR-1179	1	0	1	1	1	1	GPRIN3	GPRIN family member 3
hsa-miR-1179	1	0	1	0	1	1	PTPLB	protein tyrosine phosphatase-like (proline instead of catalytic arginine), member b
hsa-miR-1179	1	0	1	1	1	1	PAQR9	progestin and adipoQ receptor family member IX
hsa-miR-1179	0	0	1	1	1	1	APITD1	apoptosis-inducing, TAF9-like domain 1
hsa-miR-1179	1	0	1	1	1	1	PTGER3	prostaglandin E receptor 3 (subtype EP3)
hsa-miR-1179	0	0	1	1	1	1	UBE3D	ubiquitin protein ligase E3D
hsa-miR-1179	1	0	1	0	1	1	SS18L1	synovial sarcoma translocation gene on chromosome 18-like 1
hsa-miR-1179	1	0	1	0	1	1	DLEU7	deleted in lymphocytic leukemia, 7
hsa-miR-1179	1	0	1	0	1	1	LHFPL3	lipoma HMGIC fusion partner-like 3
hsa-miR-1179	0	0	1	1	1	1	MDFIC	MyoD family inhibitor domain containing
hsa-miR-1179	0	0	1	1	1	1	KCNRG	potassium channel regulator
hsa-miR-1179	0	0	1	1	0	0	USP51	ubiquitin specific peptidase 51
hsa-miR-1179	0	0	1	1	1	1	H2AFV	H2A histone family, member V
hsa-miR-1179	1	0	1	1	1	1	RAPH1	Ras association (RalGDS/AF-6) and pleckstrin homology domains 1
hsa-miR-1179	1	0	1	1	1	1	E2F7	E2F transcription factor 7
hsa-miR-1179	0	0	1	0	1	1	NPSR1-AS1	NPSR1 antisense RNA 1
hsa-miR-1179	1	0	1	1	1	1	ATRNL1	attractin-like 1
hsa-miR-1179	0	0	1	1	1	1	ERICH1	glutamate-rich 1
hsa-miR-1179	0	0	1	1	1	1	C4orf50	chromosome 4 open reading frame 50
hsa-miR-1179	1	0	1	0	1	1	C17orf102	chromosome 17 open reading frame 102
hsa-miR-1179	0	0	1	0	0	0	ANXA2P3	annexin A2 pseudogene 3
hsa-miR-1179	0	0	1	0	0	0	MIR155HG	MIR155 host gene (non-protein coding)
hsa-miR-1179	0	0	1	0	0	0	TTTY23	testis-specific transcript, Y-linked 23 (non-protein coding)
hsa-miR-1179	0	0	1	0	0	0	TTTY15	testis-specific transcript, Y-linked 15 (non-protein coding)
hsa-miR-1179	0	0	1	0	0	0	DKFZP586I1420	uncharacterized protein DKFZp586I1420
hsa-miR-1179	0	0	1	0	0	0	GOLGA2P3Y	golgin A2 pseudogene 3, Y-linked
hsa-miR-1179	0	0	1	0	0	0	NUDT4P1	nudix (nucleoside diphosphate linked moiety X)-type motif 4 pseudogene 1
hsa-miR-1179	0	0	1	0	0	0	SNORA4	small nucleolar RNA, H/ACA box 4
hsa-miR-1179	0	0	1	0	0	0	HNRNPA3P1	heterogeneous nuclear ribonucleoprotein A3 pseudogene 1
hsa-miR-1179	0	0	1	0	0	0	TPTE2P6	transmembrane phosphoinositide 3-phosphatase and tensin homolog 2 pseudogene 6
hsa-miR-1179	0	0	1	0	0	0	AQP7P1	aquaporin 7 pseudogene 1
hsa-miR-1179	0	0	1	0	0	0	MALAT1	metastasis associated lung adenocarcinoma transcript 1 (non-protein coding)
hsa-miR-1179	0	0	1	0	0	0	SNORA14A	small nucleolar RNA, H/ACA box 14A
hsa-miR-1179	1	0	1	1	1	1	CTNNA1	catenin (cadherin-associated protein), alpha 1, 102kDa
hsa-miR-1179	0	0	1	1	0	0	TCP10	t-complex 10 homolog (mouse)
hsa-miR-1179	1	0	1	1	1	1	TRIO	trio Rho guanine nucleotide exchange factor
