# Supplementary material for: Profiling of Selected MicroRNAs in Proliferative Eutopic Endometrium of Women with Ovarian Endometriosis
Source: Biomed Res Int. 2015 Aug 20;2015:760698. doi: 10.1155/2015/760698 (PMC4558423; doi:10.1155/2015/760698)
Supplement: Supplementary file 1 — Table I: The names of miRNAs significantly differentially expressed between eutopic endometrium of patients with endometriosis vs eutopic endometrium of patients without endometriosis. Table II: The associations between miRNA and mRNA, which presents detailed results of the search of six major databases i.e targetscan, tarbase, miranda, mirbase, mirtarget2 and pictar. [file 760698.f1.zip › 760698.f1/Table II/hsa-miR-1180.tsv]

miR	targetscan	tarbase	miranda	mirbase	mirtarget2	pictar	GeneSymbol	GeneName
hsa-miR-1180	1	0	1	1	1	1	ABCC5	ATP-binding cassette, sub-family C (CFTR/MRP), member 5
hsa-miR-1180	1	0	1	0	1	1	LPHN3	latrophilin 3
hsa-miR-1180	1	0	1	1	1	1	RGL1	ral guanine nucleotide dissociation stimulator-like 1
hsa-miR-1180	1	0	1	1	0	0	KIAA1045	KIAA1045
hsa-miR-1180	1	0	1	1	1	1	PHF8	PHD finger protein 8
hsa-miR-1180	1	0	1	1	1	1	ZMIZ1	zinc finger, MIZ-type containing 1
hsa-miR-1180	0	0	1	0	1	1	ZSWIM6	zinc finger, SWIM-type containing 6
hsa-miR-1180	0	0	1	0	0	0	TTC28-AS1	TTC28 antisense RNA 1
hsa-miR-1180	0	0	1	1	1	1	MOB2	MOB kinase activator 2
hsa-miR-1180	1	0	1	1	1	1	SH3TC2	SH3 domain and tetratricopeptide repeats 2
hsa-miR-1180	1	0	1	1	1	1	UBE3A	ubiquitin protein ligase E3A
hsa-miR-1180	1	0	1	1	1	1	ADARB1	adenosine deaminase, RNA-specific, B1
hsa-miR-1180	1	0	1	1	1	1	LTBP1	latent transforming growth factor beta binding protein 1
hsa-miR-1180	1	0	1	1	1	1	MKNK2	MAP kinase interacting serine/threonine kinase 2
hsa-miR-1180	0	0	1	1	0	0	PPM1G	protein phosphatase, Mg2+/Mn2+ dependent, 1G
hsa-miR-1180	1	0	1	1	1	1	TBX2	T-box 2
hsa-miR-1180	1	0	1	1	1	1	ARHGEF3	Rho guanine nucleotide exchange factor (GEF) 3
hsa-miR-1180	1	0	1	1	1	1	TEAD1	TEA domain family member 1 (SV40 transcriptional enhancer factor)
hsa-miR-1180	0	0	1	1	1	1	SGSH	N-sulfoglucosamine sulfohydrolase
hsa-miR-1180	1	0	1	1	0	0	TNPO2	transportin 2
hsa-miR-1180	1	0	1	1	1	1	MDM4	Mdm4 p53 binding protein homolog (mouse)
hsa-miR-1180	1	0	1	1	1	1	DLGAP2	discs, large (Drosophila) homolog-associated protein 2
hsa-miR-1180	0	0	1	1	1	1	SAP30L	SAP30-like
hsa-miR-1180	0	0	1	1	0	0	EXOSC8	exosome component 8
hsa-miR-1180	0	0	1	0	1	1	KANSL3	KAT8 regulatory NSL complex subunit 3
hsa-miR-1180	0	0	1	1	1	1	ITPA	inosine triphosphatase (nucleoside triphosphate pyrophosphatase)
hsa-miR-1180	0	0	1	1	0	0	TRO	trophinin
hsa-miR-1180	0	0	1	1	1	1	RAPGEF6	Rap guanine nucleotide exchange factor (GEF) 6
hsa-miR-1180	0	0	1	0	0	0	MYO15B	myosin XVB pseudogene
hsa-miR-1180	1	0	1	1	1	1	ST3GAL3	ST3 beta-galactoside alpha-2,3-sialyltransferase 3
hsa-miR-1180	1	0	1	1	0	0	SEPT8	septin 8
hsa-miR-1180	1	0	1	1	1	1	CACNB2	calcium channel, voltage-dependent, beta 2 subunit
hsa-miR-1180	0	0	1	1	0	0	SERGEF	secretion regulating guanine nucleotide exchange factor
hsa-miR-1180	1	0	1	1	1	1	NRXN3	neurexin 3
hsa-miR-1180	1	0	1	1	1	1	NAV3	neuron navigator 3
hsa-miR-1180	0	0	1	1	0	0	MBD1	methyl-CpG binding domain protein 1
hsa-miR-1180	1	0	1	0	1	1	NFAT5	nuclear factor of activated T-cells 5, tonicity-responsive
hsa-miR-1180	0	0	1	1	1	1	PARP16	poly (ADP-ribose) polymerase family, member 16
hsa-miR-1180	0	0	1	0	0	0	TUG1	taurine upregulated 1 (non-protein coding)
hsa-miR-1180	1	0	1	1	1	1	KLHDC8B	kelch domain containing 8B
hsa-miR-1180	0	0	1	1	0	0	C17orf53	chromosome 17 open reading frame 53
hsa-miR-1180	0	0	1	0	0	0	LOC149134	uncharacterized LOC149134
hsa-miR-1180	1	0	1	1	1	1	ZNF385A	zinc finger protein 385A
hsa-miR-1180	0	0	1	0	0	0	RASAL3	RAS protein activator like 3
hsa-miR-1180	1	0	1	0	1	1	ZCCHC3	zinc finger, CCHC domain containing 3
hsa-miR-1180	1	0	1	1	1	1	RNF185	ring finger protein 185
hsa-miR-1180	0	0	1	1	0	0	CCDC142	coiled-coil domain containing 142
hsa-miR-1180	1	0	1	1	1	1	FAM53C	family with sequence similarity 53, member C
hsa-miR-1180	0	0	1	1	0	0	ADRM1	adhesion regulating molecule 1
hsa-miR-1180	1	0	1	1	1	1	FRMD6	FERM domain containing 6
hsa-miR-1180	1	0	1	1	1	1	PDLIM2	PDZ and LIM domain 2 (mystique)
hsa-miR-1180	0	0	1	0	0	0	LOC219688	uncharacterized LOC219688
hsa-miR-1180	0	0	1	0	0	0	FLG-AS1	FLG antisense RNA 1
hsa-miR-1180	1	0	1	1	1	1	SCAMP5	secretory carrier membrane protein 5
hsa-miR-1180	0	0	1	0	0	0	ERVV-1	endogenous retrovirus group V, member 1
hsa-miR-1180	1	0	1	1	1	1	APLP2	amyloid beta (A4) precursor-like protein 2
hsa-miR-1180	0	0	1	1	1	1	COQ10A	coenzyme Q10 homolog A (S. cerevisiae)
hsa-miR-1180	0	0	1	1	1	1	SEC61A2	Sec61 alpha 2 subunit (S. cerevisiae)
hsa-miR-1180	1	0	1	1	1	1	IST1	increased sodium tolerance 1 homolog (yeast)
hsa-miR-1180	0	0	1	0	0	0	LINC00637	long intergenic non-protein coding RNA 637
hsa-miR-1180	0	0	1	1	0	0	CD320	CD320 molecule
hsa-miR-1180	1	0	1	1	1	1	FAM102A	family with sequence similarity 102, member A
hsa-miR-1180	0	0	1	1	0	0	NISCH	nischarin
hsa-miR-1180	0	0	1	1	0	0	ATP6AP1	ATPase, H+ transporting, lysosomal accessory protein 1
hsa-miR-1180	0	0	1	0	1	1	TBX5-AS1	TBX5 antisense RNA 1
hsa-miR-1180	1	0	1	1	1	1	FBXW2	F-box and WD repeat domain containing 2
hsa-miR-1180	1	0	1	0	1	1	TEF	thyrotrophic embryonic factor
hsa-miR-1180	1	0	1	1	1	1	DEM1	defects in morphology 1 homolog (S. cerevisiae)
hsa-miR-1180	1	0	1	1	1	1	BANP	BTG3 associated nuclear protein
hsa-miR-1180	0	0	1	0	0	0	ZNF806	zinc finger protein 806
hsa-miR-1180	0	0	1	1	1	1	WDR67	WD repeat domain 67
hsa-miR-1180	1	0	1	1	1	1	KANSL1	KAT8 regulatory NSL complex subunit 1
hsa-miR-1180	1	0	1	1	1	1	EPHB1	EPH receptor B1
hsa-miR-1180	1	0	1	1	0	0	IGDCC3	immunoglobulin superfamily, DCC subclass, member 3
hsa-miR-1180	0	0	1	0	0	0	FAM66C	family with sequence similarity 66, member C
hsa-miR-1180	0	0	1	0	0	0	FLJ39534	uncharacterized FLJ39534
hsa-miR-1180	0	0	1	1	1	1	LRRC27	leucine rich repeat containing 27
hsa-miR-1180	0	0	1	0	0	0	KIRREL3-AS3	KIRREL3 antisense RNA 3
hsa-miR-1180	0	0	1	1	1	1	CBWD5	COBW domain containing 5
hsa-miR-1180	0	0	1	0	0	0	LOC284385	uncharacterized LOC284385
hsa-miR-1180	0	0	1	1	0	0	CORO1A	coronin, actin binding protein, 1A
hsa-miR-1180	0	0	1	0	0	0	LOC100130954	uncharacterized LOC100130954
hsa-miR-1180	0	0	1	0	0	0	LOC338579	ankyrin repeat domain-containing protein 30B pseudogene
hsa-miR-1180	0	0	1	1	0	0	KIAA0146	KIAA0146
hsa-miR-1180	1	0	1	1	1	1	AGAP2	ArfGAP with GTPase domain, ankyrin repeat and PH domain 2
hsa-miR-1180	1	0	1	1	0	0	WIZ	widely interspaced zinc finger motifs
hsa-miR-1180	0	0	1	1	1	1	ARHGEF26	Rho guanine nucleotide exchange factor (GEF) 26
hsa-miR-1180	0	0	1	1	0	0	SSPO	SCO-spondin homolog (Bos taurus)
hsa-miR-1180	0	0	1	0	0	0	LOC650368	asparagine-linked glycosylation 1-like pseudogene
hsa-miR-1180	0	0	1	0	0	0	LOC644248	uncharacterized LOC644248
hsa-miR-1180	0	0	1	1	0	0	C6orf201	chromosome 6 open reading frame 201
hsa-miR-1180	0	0	1	1	1	1	CNPY3	canopy 3 homolog (zebrafish)
hsa-miR-1180	0	0	1	1	0	0	C20orf27	chromosome 20 open reading frame 27
hsa-miR-1180	1	0	1	0	1	1	RHBDL3	rhomboid, veinlet-like 3 (Drosophila)
hsa-miR-1180	0	0	1	1	0	0	ANKHD1-EIF4EBP3	ANKHD1-EIF4EBP3 readthrough
hsa-miR-1180	0	0	1	1	0	0	FSIP2	fibrous sheath interacting protein 2
hsa-miR-1180	0	0	1	1	1	1	TGM2	transglutaminase 2 (C polypeptide, protein-glutamine-gamma-glutamyltransferase)
hsa-miR-1180	0	0	1	0	0	0	RPL23AP53	ribosomal protein L23a pseudogene 53
hsa-miR-1180	1	0	1	1	1	1	MKRN1	makorin ring finger protein 1
hsa-miR-1180	1	0	1	0	1	1	ADIPOR2	adiponectin receptor 2
hsa-miR-1180	1	0	1	1	1	1	FMNL3	formin-like 3
hsa-miR-1180	0	0	1	1	1	1	DOCK9	dedicator of cytokinesis 9
hsa-miR-1180	0	0	1	0	0	0	GRAMD1B	GRAM domain containing 1B
hsa-miR-1180	0	0	1	1	1	1	CCDC78	coiled-coil domain containing 78
hsa-miR-1180	0	0	1	1	1	1	PIN4	protein (peptidylprolyl cis/trans isomerase) NIMA-interacting, 4 (parvulin)
hsa-miR-1180	0	0	1	0	0	0	LOC100128262	uncharacterized LOC100128262
hsa-miR-1180	1	0	1	0	1	1	SP6	Sp6 transcription factor
hsa-miR-1180	0	0	1	1	1	1	PITX2	paired-like homeodomain 2
hsa-miR-1180	0	0	1	1	0	0	LOC100128682	uncharacterized LOC100128682
hsa-miR-1180	0	0	1	0	0	0	FAM205B	transmembrane protein C9orf144B pseudogene
hsa-miR-1180	0	0	1	1	1	1	MON1B	MON1 homolog B (yeast)
hsa-miR-1180	1	0	1	1	1	1	ADAMTS19	ADAM metallopeptidase with thrombospondin type 1 motif, 19
hsa-miR-1180	1	0	1	0	1	1	CYB561D1	cytochrome b-561 domain containing 1
hsa-miR-1180	0	0	1	1	1	1	SYPL2	synaptophysin-like 2
hsa-miR-1180	1	0	1	0	1	1	ZNF607	zinc finger protein 607
hsa-miR-1180	0	0	1	1	0	0	ZSCAN18	zinc finger and SCAN domain containing 18
hsa-miR-1180	1	0	1	1	1	1	SYS1	SYS1 Golgi-localized integral membrane protein homolog (S. cerevisiae)
hsa-miR-1180	0	0	1	1	1	1	XRN2	5'-3' exoribonuclease 2
hsa-miR-1180	0	0	1	1	1	1	KAZALD1	Kazal-type serine peptidase inhibitor domain 1
hsa-miR-1180	0	0	1	0	0	0	RRN3P2	RNA polymerase I transcription factor homolog (S. cerevisiae) pseudogene 2
hsa-miR-1180	0	0	1	1	0	0	NADSYN1	NAD synthetase 1
hsa-miR-1180	0	0	1	1	1	1	SERPINE2	serpin peptidase inhibitor, clade E (nexin, plasminogen activator inhibitor type 1), member 2
hsa-miR-1180	1	0	1	1	1	1	BIN2	bridging integrator 2
hsa-miR-1180	0	0	1	0	0	0	POM121L9P	POM121 transmembrane nucleoporin-like 9, pseudogene
hsa-miR-1180	0	0	1	0	0	0	KIAA0913	KIAA0913
hsa-miR-1180	0	0	1	1	0	0	DDX49	DEAD (Asp-Glu-Ala-Asp) box polypeptide 49
hsa-miR-1180	1	0	1	0	1	1	GRIN3A	glutamate receptor, ionotropic, N-methyl-D-aspartate 3A
hsa-miR-1180	0	0	1	0	1	1	GAB3	GRB2-associated binding protein 3
hsa-miR-1180	1	0	1	1	1	1	MLL3	myeloid/lymphoid or mixed-lineage leukemia 3
hsa-miR-1180	0	0	1	0	0	0	FAM225A	family with sequence similarity 225, member A (non-protein coding)
hsa-miR-1180	0	0	1	1	1	1	CCDC132	coiled-coil domain containing 132
hsa-miR-1180	0	0	1	1	1	1	TAF8	TAF8 RNA polymerase II, TATA box binding protein (TBP)-associated factor, 43kDa
hsa-miR-1180	0	0	1	0	0	0	EPHA1-AS1	EPHA1 antisense RNA 1
hsa-miR-1180	0	0	1	1	1	1	KIAA1841	KIAA1841
hsa-miR-1180	0	0	1	1	0	0	CD37	CD37 molecule
hsa-miR-1180	0	0	1	1	1	1	PCDH20	protocadherin 20
hsa-miR-1180	1	0	1	1	1	1	STXBP5	syntaxin binding protein 5 (tomosyn)
hsa-miR-1180	1	0	1	1	1	1	CAMTA1	calmodulin binding transcription activator 1
hsa-miR-1180	0	0	1	1	1	1	CEP41	centrosomal protein 41kDa
hsa-miR-1180	0	0	1	1	1	1	PINX1	PIN2/TERF1 interacting, telomerase inhibitor 1
hsa-miR-1180	0	0	1	1	0	0	GLYCTK	glycerate kinase
hsa-miR-1180	0	0	1	1	1	1	GCOM1	GRINL1A complex locus 1
hsa-miR-1180	0	0	1	1	0	0	SH2D6	SH2 domain containing 6
hsa-miR-1180	0	0	1	1	0	0	ASB16	ankyrin repeat and SOCS box containing 16
hsa-miR-1180	0	0	1	1	0	0	DHRS4	dehydrogenase/reductase (SDR family) member 4
hsa-miR-1180	0	0	1	1	1	1	SMPD1	sphingomyelin phosphodiesterase 1, acid lysosomal
hsa-miR-1180	0	0	1	1	0	0	NBPF8	neuroblastoma breakpoint family, member 8
hsa-miR-1180	1	0	1	1	1	1	AMOT	angiomotin
hsa-miR-1180	1	0	1	1	1	1	HOXC13	homeobox C13
hsa-miR-1180	1	0	1	1	1	1	TSPAN14	tetraspanin 14
hsa-miR-1180	1	0	1	1	1	1	PPP1R11	protein phosphatase 1, regulatory (inhibitor) subunit 11
hsa-miR-1180	1	0	1	1	1	1	SMO	smoothened, frizzled family receptor
hsa-miR-1180	0	0	1	1	1	1	ZNF589	zinc finger protein 589
hsa-miR-1180	1	0	1	0	1	1	FAXC	failed axon connections homolog (Drosophila)
hsa-miR-1180	0	0	1	1	0	0	ALKBH6	alkB, alkylation repair homolog 6 (E. coli)
hsa-miR-1180	0	0	1	0	1	1	AIPL1	aryl hydrocarbon receptor interacting protein-like 1
hsa-miR-1180	1	0	1	0	1	1	MINOS1	mitochondrial inner membrane organizing system 1
hsa-miR-1180	1	0	1	1	0	0	IQSEC1	IQ motif and Sec7 domain 1
hsa-miR-1180	0	0	1	1	0	0	ARHGAP8	Rho GTPase activating protein 8
hsa-miR-1180	0	0	1	0	0	0	LRRC14	leucine rich repeat containing 14
hsa-miR-1180	0	0	1	1	1	1	PTK7	PTK7 protein tyrosine kinase 7
hsa-miR-1180	1	0	1	1	0	0	LRFN1	leucine rich repeat and fibronectin type III domain containing 1
hsa-miR-1180	0	0	1	1	1	1	TOMM40L	translocase of outer mitochondrial membrane 40 homolog (yeast)-like
hsa-miR-1180	0	0	1	1	1	1	CUTC	cutC copper transporter homolog (E. coli)
hsa-miR-1180	1	0	1	1	1	1	ZBTB38	zinc finger and BTB domain containing 38
hsa-miR-1180	0	0	1	0	0	0	NUDT16P1	nudix (nucleoside diphosphate linked moiety X)-type motif 16 pseudogene 1
hsa-miR-1180	1	0	1	1	1	1	ZNF512	zinc finger protein 512
hsa-miR-1180	0	0	1	1	1	1	FAM122C	family with sequence similarity 122C
hsa-miR-1180	0	0	1	1	0	0	LRRC36	leucine rich repeat containing 36
hsa-miR-1180	0	0	1	1	1	1	FGA	fibrinogen alpha chain
hsa-miR-1180	0	0	1	0	0	0	LOC728196	uncharacterized LOC728196
hsa-miR-1180	0	0	1	0	0	0	FLJ35390	uncharacterized LOC255031
hsa-miR-1180	0	0	1	1	0	0	PRRG2	proline rich Gla (G-carboxyglutamic acid) 2
hsa-miR-1180	0	0	1	0	0	0	RNF216P1	ring finger protein 216 pseudogene 1
hsa-miR-1180	1	0	1	0	1	1	MAGIX	MAGI family member, X-linked
hsa-miR-1180	0	0	1	1	0	0	KIAA1324	KIAA1324
hsa-miR-1180	0	0	1	0	1	1	PLEKHM1P	pleckstrin homology domain containing, family M (with RUN domain) member 1 pseudogene
hsa-miR-1180	1	0	1	1	0	0	ANKRD13B	ankyrin repeat domain 13B
hsa-miR-1180	1	0	1	1	1	1	DCLK2	doublecortin-like kinase 2
hsa-miR-1180	0	0	1	0	0	0	BCAS3	breast carcinoma amplified sequence 3
hsa-miR-1180	0	0	1	0	0	0	NBR2	neighbor of BRCA1 gene 2 (non-protein coding)
hsa-miR-1180	0	0	1	1	0	0	TSNAXIP1	translin-associated factor X interacting protein 1
hsa-miR-1180	0	0	1	1	0	0	PGS1	phosphatidylglycerophosphate synthase 1
hsa-miR-1180	1	0	1	1	1	1	FAM135B	family with sequence similarity 135, member B
hsa-miR-1180	1	0	1	1	1	1	ITPK1	inositol-tetrakisphosphate 1-kinase
hsa-miR-1180	0	0	1	1	0	0	LAG3	lymphocyte-activation gene 3
hsa-miR-1180	0	0	1	1	1	1	C14orf118	chromosome 14 open reading frame 118
hsa-miR-1180	1	0	1	1	1	1	FOSB	FBJ murine osteosarcoma viral oncogene homolog B
hsa-miR-1180	1	0	1	1	1	1	DACH2	dachshund homolog 2 (Drosophila)
hsa-miR-1180	1	0	1	1	0	0	ZNF292	zinc finger protein 292
hsa-miR-1180	0	0	1	1	0	0	TMEM95	transmembrane protein 95
hsa-miR-1180	1	0	1	1	0	0	RGL2	ral guanine nucleotide dissociation stimulator-like 2
hsa-miR-1180	0	0	1	1	0	0	KIAA1432	KIAA1432
hsa-miR-1180	1	0	1	1	1	1	TNFRSF1B	tumor necrosis factor receptor superfamily, member 1B
hsa-miR-1180	0	0	1	0	1	1	OAZ1	ornithine decarboxylase antizyme 1
hsa-miR-1180	0	0	1	1	0	0	ZNF839	zinc finger protein 839
hsa-miR-1180	1	0	1	1	1	1	AGAP3	ArfGAP with GTPase domain, ankyrin repeat and PH domain 3
hsa-miR-1180	0	0	1	1	1	1	MST1	macrophage stimulating 1 (hepatocyte growth factor-like)
hsa-miR-1180	0	0	1	0	0	0	DPY19L2P4	dpy-19-like 2 pseudogene 4 (C. elegans)
hsa-miR-1180	1	0	1	1	1	1	SLC39A9	solute carrier family 39 (zinc transporter), member 9
hsa-miR-1180	0	0	1	0	0	0	SUZ12P1	suppressor of zeste 12 homolog pseudogene 1
hsa-miR-1180	1	0	1	1	1	1	PTPRG	protein tyrosine phosphatase, receptor type, G
hsa-miR-1180	1	0	1	1	1	1	TMPO	thymopoietin
hsa-miR-1180	0	0	1	1	1	1	FKBP1B	FK506 binding protein 1B, 12.6 kDa
hsa-miR-1180	0	0	1	1	0	0	SREBF2	sterol regulatory element binding transcription factor 2
hsa-miR-1180	0	0	1	1	0	0	MIF	macrophage migration inhibitory factor (glycosylation-inhibiting factor)
hsa-miR-1180	0	0	1	1	1	1	LINC00086	long intergenic non-protein coding RNA 86
hsa-miR-1180	0	0	1	0	0	0	LINC00265	long intergenic non-protein coding RNA 265
hsa-miR-1180	1	0	1	1	1	1	NCOA5	nuclear receptor coactivator 5
hsa-miR-1180	0	0	1	1	0	0	HP	haptoglobin
hsa-miR-1180	1	0	1	1	1	1	ZEB2	zinc finger E-box binding homeobox 2
hsa-miR-1180	0	0	1	0	0	0	UBE2Q2P2	ubiquitin-conjugating enzyme E2Q family member 2 pseudogene 2
hsa-miR-1180	1	0	1	0	1	1	DCP2	DCP2 decapping enzyme homolog (S. cerevisiae)
hsa-miR-1180	1	0	1	1	1	1	LINGO1	leucine rich repeat and Ig domain containing 1
hsa-miR-1180	0	0	1	1	1	1	TNFSF12	tumor necrosis factor (ligand) superfamily, member 12
hsa-miR-1180	0	0	1	1	0	0	TRIM41	tripartite motif containing 41
hsa-miR-1180	0	0	1	0	0	0	LINC00152	long intergenic non-protein coding RNA 152
hsa-miR-1180	0	0	1	0	1	1	TGFB2	transforming growth factor, beta 2
hsa-miR-1180	0	0	1	1	0	0	RIPPLY1	ripply1 homolog (zebrafish)
hsa-miR-1180	1	0	1	1	1	1	KLHL17	kelch-like 17 (Drosophila)
hsa-miR-1180	0	0	1	0	0	0	LRRC37A11P	leucine rich repeat containing 37, member A11, pseudogene
hsa-miR-1180	0	0	1	0	0	0	BTF3P11	basic transcription factor 3 pseudogene 11
hsa-miR-1180	0	0	1	1	0	0	SOCS7	suppressor of cytokine signaling 7
hsa-miR-1180	0	0	1	0	0	0	EEF1DP3	eukaryotic translation elongation factor 1 delta pseudogene 3
hsa-miR-1180	1	0	1	1	1	1	MACROD2	MACRO domain containing 2
hsa-miR-1180	0	0	1	0	0	0	FAM225B	family with sequence similarity 225, member B (non-protein coding)
hsa-miR-1180	0	0	1	0	0	0	FUT8-AS1	FUT8 antisense RNA 1
hsa-miR-1180	1	0	1	1	0	0	KRT80	keratin 80
hsa-miR-1180	1	0	1	1	1	1	SGCD	sarcoglycan, delta (35kDa dystrophin-associated glycoprotein)
hsa-miR-1180	0	0	1	1	1	1	IPCEF1	interaction protein for cytohesin exchange factors 1
hsa-miR-1180	1	0	1	1	0	0	CECR2	cat eye syndrome chromosome region, candidate 2
hsa-miR-1180	1	0	1	1	1	1	FOXP1	forkhead box P1
hsa-miR-1180	1	0	1	1	1	1	KLHL6	kelch-like 6 (Drosophila)
hsa-miR-1180	0	0	1	1	1	1	SSFA2	sperm specific antigen 2
hsa-miR-1180	1	0	1	0	1	1	TTL	tubulin tyrosine ligase
hsa-miR-1180	0	0	1	0	1	1	GINS3	GINS complex subunit 3 (Psf3 homolog)
hsa-miR-1180	0	0	1	1	1	1	SLC25A11	solute carrier family 25 (mitochondrial carrier; oxoglutarate carrier), member 11
hsa-miR-1180	0	0	1	1	0	0	STMN4	stathmin-like 4
hsa-miR-1180	1	0	1	0	1	1	RNF144A	ring finger protein 144A
hsa-miR-1180	0	0	1	1	0	0	H2AFY2	H2A histone family, member Y2
hsa-miR-1180	0	0	1	0	0	0	LOC100128988	uncharacterized LOC100128988
hsa-miR-1180	0	0	1	1	1	1	GTPBP3	GTP binding protein 3 (mitochondrial)
hsa-miR-1180	0	0	1	1	0	0	SLC25A33	solute carrier family 25 (pyrimidine nucleotide carrier), member 33
hsa-miR-1180	0	0	1	1	0	0	FXYD7	FXYD domain containing ion transport regulator 7
hsa-miR-1180	0	0	1	0	0	0	ARRDC1	arrestin domain containing 1
hsa-miR-1180	1	1	1	1	0	0	EFNA3	ephrin-A3
hsa-miR-1180	1	0	1	1	1	1	NEU1	sialidase 1 (lysosomal sialidase)
hsa-miR-1180	1	0	1	1	1	1	E2F3	E2F transcription factor 3
hsa-miR-1180	0	0	1	1	1	1	ATP5F1	ATP synthase, H+ transporting, mitochondrial Fo complex, subunit B1
hsa-miR-1180	0	0	1	1	1	1	BCL7B	B-cell CLL/lymphoma 7B
hsa-miR-1180	1	0	1	1	1	1	DIS3L2	DIS3 mitotic control homolog (S. cerevisiae)-like 2
hsa-miR-1180	0	0	1	1	0	0	MUS81	MUS81 endonuclease homolog (S. cerevisiae)
hsa-miR-1180	1	0	1	1	1	1	BAMBI	BMP and activin membrane-bound inhibitor homolog (Xenopus laevis)
hsa-miR-1180	0	0	1	1	0	0	SNRPA	small nuclear ribonucleoprotein polypeptide A
hsa-miR-1180	0	0	1	1	1	1	BMPR1A	bone morphogenetic protein receptor, type IA
hsa-miR-1180	0	0	1	0	0	0	LOC677759	uncharacterized LOC677759
hsa-miR-1180	0	0	1	1	1	1	RPUSD1	RNA pseudouridylate synthase domain containing 1
hsa-miR-1180	0	0	1	1	0	0	C1orf122	chromosome 1 open reading frame 122
hsa-miR-1180	0	0	1	0	0	0	LOC254559	uncharacterized LOC254559
hsa-miR-1180	0	0	1	1	0	0	STUB1	STIP1 homology and U-box containing protein 1, E3 ubiquitin protein ligase
hsa-miR-1180	1	0	1	1	1	1	EIF1	eukaryotic translation initiation factor 1
hsa-miR-1180	1	0	1	1	1	1	RALY	RNA binding protein, autoantigenic (hnRNP-associated with lethal yellow homolog (mouse))
hsa-miR-1180	0	0	1	0	1	1	ARMC10	armadillo repeat containing 10
hsa-miR-1180	1	0	1	1	1	1	TRAPPC3	trafficking protein particle complex 3
hsa-miR-1180	0	0	1	0	0	0	ALPP	alkaline phosphatase, placental
hsa-miR-1180	0	0	1	1	0	0	FAM216A	family with sequence similarity 216, member A
hsa-miR-1180	1	0	1	1	0	0	PPP4C	protein phosphatase 4, catalytic subunit
hsa-miR-1180	0	0	1	1	0	0	TESK1	testis-specific kinase 1
hsa-miR-1180	0	0	1	0	0	0	LOC100132984	uncharacterized LOC100132984
hsa-miR-1180	1	0	1	1	1	1	JUNB	jun B proto-oncogene
hsa-miR-1180	0	0	1	1	0	0	FAM3B	family with sequence similarity 3, member B
hsa-miR-1180	1	0	1	1	1	1	BSDC1	BSD domain containing 1
hsa-miR-1180	0	0	1	0	0	0	LOC731789	uncharacterized LOC731789
hsa-miR-1180	0	0	1	1	0	0	TENC1	tensin like C1 domain containing phosphatase (tensin 2)
hsa-miR-1180	0	0	1	0	0	0	LOC440518	golgin A2 pseudogene
hsa-miR-1180	0	0	1	1	1	1	PTGS1	prostaglandin-endoperoxide synthase 1 (prostaglandin G/H synthase and cyclooxygenase)
hsa-miR-1180	1	0	1	1	1	1	DMD	dystrophin
hsa-miR-1180	0	0	1	0	1	1	MS4A2	membrane-spanning 4-domains, subfamily A, member 2
hsa-miR-1180	1	0	1	1	1	1	PTCH1	patched 1
hsa-miR-1180	0	0	1	1	1	1	NDP	Norrie disease (pseudoglioma)
hsa-miR-1180	0	0	1	1	0	0	PLG	plasminogen
hsa-miR-1180	0	0	1	1	1	1	RHAG	Rh-associated glycoprotein
hsa-miR-1180	0	0	1	1	0	0	SAG	S-antigen; retina and pineal gland (arrestin)
hsa-miR-1180	0	0	1	1	1	1	CRX	cone-rod homeobox
hsa-miR-1180	1	0	1	0	1	1	IGFBP5	insulin-like growth factor binding protein 5
hsa-miR-1180	1	0	1	1	0	0	ADRA1B	adrenoceptor alpha 1B
hsa-miR-1180	1	0	1	1	0	0	GRIN2D	glutamate receptor, ionotropic, N-methyl D-aspartate 2D
hsa-miR-1180	1	0	1	1	0	0	AWAT2	acyl-CoA wax alcohol acyltransferase 2
hsa-miR-1180	1	0	1	1	1	1	RREB1	ras responsive element binding protein 1
hsa-miR-1180	1	0	1	0	1	1	BMF	Bcl2 modifying factor
hsa-miR-1180	0	0	1	1	1	1	ALG11	asparagine-linked glycosylation 11, alpha-1,2-mannosyltransferase homolog (yeast)
hsa-miR-1180	0	0	1	1	1	1	LRRC18	leucine rich repeat containing 18
hsa-miR-1180	0	0	1	1	1	1	TRIM13	tripartite motif containing 13
hsa-miR-1180	1	0	1	1	1	1	LPHN1	latrophilin 1
hsa-miR-1180	1	0	1	0	1	1	ZC3H12B	zinc finger CCCH-type containing 12B
hsa-miR-1180	0	0	1	1	1	1	HGF	hepatocyte growth factor (hepapoietin A; scatter factor)
hsa-miR-1180	0	0	1	1	0	0	DGKK	diacylglycerol kinase, kappa
hsa-miR-1180	1	0	1	0	1	1	BCL7A	B-cell CLL/lymphoma 7A
hsa-miR-1180	0	0	1	1	0	0	ARPC4	actin related protein 2/3 complex, subunit 4, 20kDa
hsa-miR-1180	1	0	1	1	1	1	AFF3	AF4/FMR2 family, member 3
hsa-miR-1180	0	0	1	1	1	1	C18orf62	chromosome 18 open reading frame 62
hsa-miR-1180	1	0	1	1	1	1	NPM1	nucleophosmin (nucleolar phosphoprotein B23, numatrin)
hsa-miR-1180	1	0	1	1	1	1	DLX1	distal-less homeobox 1
hsa-miR-1180	1	0	1	1	1	1	C3orf65	chromosome 3 open reading frame 65
hsa-miR-1180	1	0	1	1	1	1	SNX21	sorting nexin family member 21
hsa-miR-1180	1	0	1	1	1	1	NCOR2	nuclear receptor corepressor 2
hsa-miR-1180	1	0	1	1	1	1	PRR3	proline rich 3
hsa-miR-1180	1	0	1	1	1	1	MGA	MAX gene associated
hsa-miR-1180	1	0	1	1	1	1	REPS2	RALBP1 associated Eps domain containing 2
hsa-miR-1180	0	0	1	1	1	1	ARHGAP6	Rho GTPase activating protein 6
hsa-miR-1180	1	0	1	0	1	1	BMPR2	bone morphogenetic protein receptor, type II (serine/threonine kinase)
hsa-miR-1180	0	0	1	1	0	0	FZD2	frizzled family receptor 2
hsa-miR-1180	1	0	1	0	1	1	ETV6	ets variant 6
hsa-miR-1180	0	0	1	1	1	1	MMP13	matrix metallopeptidase 13 (collagenase 3)
hsa-miR-1180	0	0	1	1	0	0	P2RY4	pyrimidinergic receptor P2Y, G-protein coupled, 4
hsa-miR-1180	1	0	1	1	1	1	PCSK6	proprotein convertase subtilisin/kexin type 6
hsa-miR-1180	0	0	1	1	1	1	PDE2A	phosphodiesterase 2A, cGMP-stimulated
hsa-miR-1180	1	0	1	0	1	1	MAPK4	mitogen-activated protein kinase 4
hsa-miR-1180	0	0	1	1	1	1	MAPK9	mitogen-activated protein kinase 9
hsa-miR-1180	1	0	1	0	1	1	RAP2B	RAP2B, member of RAS oncogene family
hsa-miR-1180	1	0	1	1	1	1	SUV39H1	suppressor of variegation 3-9 homolog 1 (Drosophila)
hsa-miR-1180	0	0	1	1	0	0	VEGFB	vascular endothelial growth factor B
hsa-miR-1180	1	0	1	1	0	0	CLIP2	CAP-GLY domain containing linker protein 2
hsa-miR-1180	0	0	1	1	0	0	EIF4EBP3	eukaryotic translation initiation factor 4E binding protein 3
hsa-miR-1180	0	0	1	1	1	1	TNFSF13	tumor necrosis factor (ligand) superfamily, member 13
hsa-miR-1180	1	0	1	0	1	1	ACVR1B	activin A receptor, type IB
hsa-miR-1180	0	0	1	1	1	1	COL12A1	collagen, type XII, alpha 1
hsa-miR-1180	1	0	1	1	1	1	DUSP2	dual specificity phosphatase 2
hsa-miR-1180	1	0	1	1	1	1	EFNB1	ephrin-B1
hsa-miR-1180	1	0	1	1	1	1	EPS8	epidermal growth factor receptor pathway substrate 8
hsa-miR-1180	0	0	1	1	1	1	EXTL1	exostoses (multiple)-like 1
hsa-miR-1180	0	0	1	1	1	1	PABPN1	poly(A) binding protein, nuclear 1
hsa-miR-1180	1	0	1	1	1	1	WDR1	WD repeat domain 1
hsa-miR-1180	0	0	1	1	1	1	CA3	carbonic anhydrase III, muscle specific
hsa-miR-1180	1	0	1	1	1	1	FOXN3	forkhead box N3
hsa-miR-1180	1	0	1	1	1	1	ETS1	v-ets erythroblastosis virus E26 oncogene homolog 1 (avian)
hsa-miR-1180	1	0	1	1	1	1	HAS3	hyaluronan synthase 3
hsa-miR-1180	1	0	1	1	1	1	HIP1	huntingtin interacting protein 1
hsa-miR-1180	1	0	1	0	1	1	CCDC6	coiled-coil domain containing 6
hsa-miR-1180	1	0	1	0	0	0	FRAT1	frequently rearranged in advanced T-cell lymphomas
hsa-miR-1180	1	0	1	1	1	1	ITGA3	integrin, alpha 3 (antigen CD49C, alpha 3 subunit of VLA-3 receptor)
hsa-miR-1180	1	0	1	1	1	1	HOXA11	homeobox A11
hsa-miR-1180	1	0	1	1	0	0	MLLT1	myeloid/lymphoid or mixed-lineage leukemia (trithorax homolog, Drosophila); translocated to, 1
hsa-miR-1180	1	0	1	1	1	1	PPP2R5E	protein phosphatase 2, regulatory subunit B', epsilon isoform
hsa-miR-1180	1	0	1	1	1	1	CDRT1	CMT1A duplicated region transcript 1
hsa-miR-1180	0	0	1	1	0	0	KIF1C	kinesin family member 1C
hsa-miR-1180	0	0	1	1	0	0	BRD8	bromodomain containing 8
hsa-miR-1180	1	0	1	1	1	1	DIAPH2	diaphanous homolog 2 (Drosophila)
hsa-miR-1180	0	0	1	1	0	0	PIM2	pim-2 oncogene
hsa-miR-1180	1	0	1	0	1	1	SOX12	SRY (sex determining region Y)-box 12
hsa-miR-1180	1	0	1	1	1	1	ADAMTS1	ADAM metallopeptidase with thrombospondin type 1 motif, 1
hsa-miR-1180	1	0	1	0	1	1	PAPD7	PAP associated domain containing 7
hsa-miR-1180	1	0	1	1	1	1	FGFR1OP	FGFR1 oncogene partner
hsa-miR-1180	0	0	1	1	1	1	ZNF212	zinc finger protein 212
hsa-miR-1180	1	0	1	0	1	1	ACAP2	ArfGAP with coiled-coil, ankyrin repeat and PH domains 2
hsa-miR-1180	1	0	1	1	1	1	DNAJB9	DnaJ (Hsp40) homolog, subfamily B, member 9
hsa-miR-1180	1	0	1	0	1	1	MYO10	myosin X
hsa-miR-1180	0	0	1	0	1	1	EMR2	egf-like module containing, mucin-like, hormone receptor-like 2
hsa-miR-1180	1	0	1	0	1	1	ODZ1	odz, odd Oz/ten-m homolog 1 (Drosophila)
hsa-miR-1180	1	0	1	0	1	1	DIEXF	digestive organ expansion factor homolog (zebrafish)
hsa-miR-1180	1	0	1	1	1	1	RALGPS1	Ral GEF with PH domain and SH3 binding motif 1
hsa-miR-1180	1	0	1	1	1	1	KIAA0247	KIAA0247
hsa-miR-1180	0	0	1	0	1	1	PPM1E	protein phosphatase, Mg2+/Mn2+ dependent, 1E
hsa-miR-1180	1	0	1	1	0	0	KIAA0556	KIAA0556
hsa-miR-1180	1	0	1	1	1	1	MED13L	mediator complex subunit 13-like
hsa-miR-1180	0	0	1	0	0	0	TMA7	translational machinery associated 7 homolog (S. cerevisiae)
hsa-miR-1180	1	0	1	1	1	1	PALLD	palladin, cytoskeletal associated protein
hsa-miR-1180	0	0	1	1	1	1	ACSL5	acyl-CoA synthetase long-chain family member 5
hsa-miR-1180	1	0	1	0	1	1	HPCAL4	hippocalcin like 4
hsa-miR-1180	0	0	1	1	0	0	FAM203A	family with sequence similarity 203, member A
hsa-miR-1180	0	0	1	1	1	1	OGG1	8-oxoguanine DNA glycosylase
hsa-miR-1180	1	0	1	0	1	1	UBE2Q1	ubiquitin-conjugating enzyme E2Q family member 1
hsa-miR-1180	1	0	1	1	1	1	CASZ1	castor zinc finger 1
hsa-miR-1180	0	0	1	1	1	1	AIM1L	absent in melanoma 1-like
hsa-miR-1180	0	0	1	1	1	1	TRIM62	tripartite motif containing 62
hsa-miR-1180	1	0	1	1	1	1	ASH1L	ash1 (absent, small, or homeotic)-like (Drosophila)
hsa-miR-1180	0	0	1	1	1	1	DHTKD1	dehydrogenase E1 and transketolase domain containing 1
hsa-miR-1180	1	0	1	1	1	1	HOXA10	homeobox A10
hsa-miR-1180	0	0	1	1	1	1	RIN2	Ras and Rab interactor 2
hsa-miR-1180	1	0	1	1	1	1	DLL4	delta-like 4 (Drosophila)
hsa-miR-1180	1	0	1	1	1	1	LRRC8A	leucine rich repeat containing 8 family, member A
hsa-miR-1180	1	0	1	1	1	1	C5orf15	chromosome 5 open reading frame 15
hsa-miR-1180	1	0	1	0	1	1	OTUD7B	OTU domain containing 7B
hsa-miR-1180	0	0	1	1	1	1	ANKMY2	ankyrin repeat and MYND domain containing 2
hsa-miR-1180	1	0	1	1	1	1	EPHA8	EPH receptor A8
hsa-miR-1180	0	0	1	1	1	1	KIAA1161	KIAA1161
hsa-miR-1180	1	0	1	1	1	1	RANBP10	RAN binding protein 10
hsa-miR-1180	1	0	1	1	1	1	ZFP14	zinc finger protein 14 homolog (mouse)
hsa-miR-1180	0	0	1	0	0	0	HPR	haptoglobin-related protein
hsa-miR-1180	0	0	1	1	0	0	HOXD11	homeobox D11
hsa-miR-1180	0	0	1	1	0	0	FCGR2A	Fc fragment of IgG, low affinity IIa, receptor (CD32)
hsa-miR-1180	1	0	1	1	1	1	LPPR2	lipid phosphate phosphatase-related protein type 2
hsa-miR-1180	1	0	1	1	1	1	REEP1	receptor accessory protein 1
hsa-miR-1180	0	0	1	1	0	0	ZBED2	zinc finger, BED-type containing 2
hsa-miR-1180	1	0	1	1	1	1	KLHL18	kelch-like 18 (Drosophila)
hsa-miR-1180	1	0	1	1	1	1	NAA50	N(alpha)-acetyltransferase 50, NatE catalytic subunit
hsa-miR-1180	1	0	1	1	1	1	HOXA3	homeobox A3
hsa-miR-1180	1	0	1	0	1	1	C1orf21	chromosome 1 open reading frame 21
hsa-miR-1180	1	0	1	1	0	0	PVRL4	poliovirus receptor-related 4
hsa-miR-1180	1	0	1	0	1	1	SPRY4	sprouty homolog 4 (Drosophila)
hsa-miR-1180	1	0	1	1	1	1	SESN2	sestrin 2
hsa-miR-1180	1	0	1	0	1	1	SH3BGRL2	SH3 domain binding glutamic acid-rich protein like 2
hsa-miR-1180	1	0	1	1	1	1	UTP15	UTP15, U3 small nucleolar ribonucleoprotein, homolog (S. cerevisiae)
hsa-miR-1180	1	0	1	1	0	0	TRAF7	TNF receptor-associated factor 7, E3 ubiquitin protein ligase
hsa-miR-1180	1	0	1	1	0	0	MAF1	MAF1 homolog (S. cerevisiae)
hsa-miR-1180	1	0	1	1	1	1	ZDHHC18	zinc finger, DHHC-type containing 18
hsa-miR-1180	0	0	1	1	0	0	STK19	serine/threonine kinase 19
hsa-miR-1180	1	0	1	1	1	1	AJUBA	ajuba LIM protein
hsa-miR-1180	1	0	1	1	1	1	LUZP1	leucine zipper protein 1
hsa-miR-1180	0	0	1	1	0	0	TSGA13	testis specific, 13
hsa-miR-1180	0	0	1	1	1	1	PRDM7	PR domain containing 7
hsa-miR-1180	1	0	1	1	0	0	BRD4	bromodomain containing 4
hsa-miR-1180	0	0	1	1	1	1	SLC32A1	solute carrier family 32 (GABA vesicular transporter), member 1
hsa-miR-1180	0	0	1	1	0	0	CITED4	Cbp/p300-interacting transactivator, with Glu/Asp-rich carboxy-terminal domain, 4
hsa-miR-1180	0	0	1	1	1	1	TYW3	tRNA-yW synthesizing protein 3 homolog (S. cerevisiae)
hsa-miR-1180	0	0	1	1	1	1	KLF14	Kruppel-like factor 14
hsa-miR-1180	0	0	1	1	1	1	ZNF653	zinc finger protein 653
hsa-miR-1180	1	0	1	1	1	1	SAMD8	sterile alpha motif domain containing 8
hsa-miR-1180	1	0	1	0	1	1	CENPBD1	CENPB DNA-binding domains containing 1
hsa-miR-1180	0	0	1	0	1	1	UBLCP1	ubiquitin-like domain containing CTD phosphatase 1
hsa-miR-1180	0	0	1	1	1	1	APOBEC3F	apolipoprotein B mRNA editing enzyme, catalytic polypeptide-like 3F
hsa-miR-1180	1	0	1	1	1	1	SEPT6	septin 6
hsa-miR-1180	0	0	1	1	1	1	GLIS1	GLIS family zinc finger 1
hsa-miR-1180	1	0	1	0	1	1	SYT11	synaptotagmin XI
hsa-miR-1180	0	0	1	1	1	1	ELOVL3	ELOVL fatty acid elongase 3
hsa-miR-1180	1	0	1	0	1	1	TMTC2	transmembrane and tetratricopeptide repeat containing 2
hsa-miR-1180	0	0	1	1	0	0	FAM71A	family with sequence similarity 71, member A
hsa-miR-1180	0	0	1	1	1	1	TNFSF12-TNFSF13	TNFSF12-TNFSF13 readthrough
hsa-miR-1180	0	0	1	1	1	1	REXO1L1	REX1, RNA exonuclease 1 homolog (S. cerevisiae)-like 1
hsa-miR-1180	1	0	1	1	0	0	KCNH7	potassium voltage-gated channel, subfamily H (eag-related), member 7
hsa-miR-1180	0	0	1	1	0	0	COL23A1	collagen, type XXIII, alpha 1
hsa-miR-1180	0	0	1	1	0	0	PRSS36	protease, serine, 36
hsa-miR-1180	0	0	1	1	0	0	EFCAB3	EF-hand calcium binding domain 3
hsa-miR-1180	0	0	1	1	1	1	FNDC7	fibronectin type III domain containing 7
hsa-miR-1180	0	0	1	0	1	1	KRT18P55	keratin 18 pseudogene 55
hsa-miR-1180	0	0	1	1	0	0	TMEM145	transmembrane protein 145
hsa-miR-1180	0	0	1	0	0	0	NDUFA11	NADH dehydrogenase (ubiquinone) 1 alpha subcomplex, 11, 14.7kDa
hsa-miR-1180	0	0	1	1	0	0	C17orf74	chromosome 17 open reading frame 74
hsa-miR-1180	1	0	1	1	1	1	TMEM26	transmembrane protein 26
hsa-miR-1180	1	0	1	1	1	1	LRRTM1	leucine rich repeat transmembrane neuronal 1
hsa-miR-1180	0	0	1	0	1	1	C16orf82	chromosome 16 open reading frame 82
hsa-miR-1180	0	0	1	1	1	1	OASL	2'-5'-oligoadenylate synthetase-like
hsa-miR-1180	0	0	1	1	1	1	APOOL	apolipoprotein O-like
hsa-miR-1180	1	0	1	0	1	1	ZC3H6	zinc finger CCCH-type containing 6
hsa-miR-1180	0	0	1	1	0	0	C9orf169	chromosome 9 open reading frame 169
hsa-miR-1180	1	0	1	1	1	1	CXCL12	chemokine (C-X-C motif) ligand 12
hsa-miR-1180	1	0	1	1	1	1	MOG	myelin oligodendrocyte glycoprotein
hsa-miR-1180	0	0	1	1	1	1	CLEC4M	C-type lectin domain family 4, member M
hsa-miR-1180	0	0	1	0	0	0	TTTY15	testis-specific transcript, Y-linked 15 (non-protein coding)
hsa-miR-1180	0	0	1	0	0	0	ST13P4	suppression of tumorigenicity 13 (colon carcinoma) (Hsp70 interacting protein) pseudogene 4
hsa-miR-1180	0	0	1	0	0	0	TRPC2	transient receptor potential cation channel, subfamily C, member 2, pseudogene
hsa-miR-1180	0	0	1	0	0	0	DLEU2L	deleted in lymphocytic leukemia 2-like
hsa-miR-1180	0	0	1	0	0	0	HOXA11-AS	HOXA11 antisense RNA
hsa-miR-1180	0	0	1	0	0	0	SNORD65	small nucleolar RNA, C/D box 65
hsa-miR-1180	0	0	1	0	0	0	PYY2	peptide YY, 2 (pseudogene)
hsa-miR-1180	1	0	1	1	1	1	CASP2	caspase 2, apoptosis-related cysteine peptidase
hsa-miR-1180	1	0	1	0	1	1	NFIX	nuclear factor I/X (CCAAT-binding transcription factor)
hsa-miR-1180	1	0	1	1	1	1	TRIO	trio Rho guanine nucleotide exchange factor
hsa-miR-1180	0	0	1	1	1	1	CD6	CD6 molecule
hsa-miR-1180	1	0	1	1	1	1	FBN2	fibrillin 2
hsa-miR-1180	0	0	1	0	0	0	MUC5AC	mucin 5AC, oligomeric mucus/gel-forming
