# Supplementary material for: Profiling of Selected MicroRNAs in Proliferative Eutopic Endometrium of Women with Ovarian Endometriosis
Source: Biomed Res Int. 2015 Aug 20;2015:760698. doi: 10.1155/2015/760698 (PMC4558423; doi:10.1155/2015/760698)
Supplement: Supplementary file 1 — Table I: The names of miRNAs significantly differentially expressed between eutopic endometrium of patients with endometriosis vs eutopic endometrium of patients without endometriosis. Table II: The associations between miRNA and mRNA, which presents detailed results of the search of six major databases i.e targetscan, tarbase, miranda, mirbase, mirtarget2 and pictar. [file 760698.f1.zip › 760698.f1/Table II/hsa-miR-1181.tsv]

miR	targetscan	tarbase	miranda	mirbase	mirtarget2	pictar	GeneSymbol	GeneName
hsa-miR-1181	0	0	1	1	0	0	NTNG2	netrin G2
hsa-miR-1181	0	0	1	1	1	1	BIRC5	baculoviral IAP repeat containing 5
hsa-miR-1181	1	0	1	1	1	1	NRXN2	neurexin 2
hsa-miR-1181	1	0	1	1	1	1	VLDLR	very low density lipoprotein receptor
hsa-miR-1181	1	0	1	1	1	1	TBX2	T-box 2
hsa-miR-1181	0	0	1	1	1	1	RYR1	ryanodine receptor 1 (skeletal)
hsa-miR-1181	1	0	1	1	0	0	RGS6	regulator of G-protein signaling 6
hsa-miR-1181	0	0	1	1	0	0	BMP1	bone morphogenetic protein 1
hsa-miR-1181	0	0	1	1	1	1	ALDH3B1	aldehyde dehydrogenase 3 family, member B1
hsa-miR-1181	0	0	1	1	1	1	MFSD11	major facilitator superfamily domain containing 11
hsa-miR-1181	1	0	1	1	1	1	LRRFIP1	leucine rich repeat (in FLII) interacting protein 1
hsa-miR-1181	1	0	1	1	0	0	TH1L	TH1-like (Drosophila)
hsa-miR-1181	1	0	1	1	1	1	SNTB2	syntrophin, beta 2 (dystrophin-associated protein A1, 59kDa, basic component 2)
hsa-miR-1181	0	0	1	1	1	1	CKS1B	CDC28 protein kinase regulatory subunit 1B
hsa-miR-1181	1	0	1	1	1	1	ST3GAL3	ST3 beta-galactoside alpha-2,3-sialyltransferase 3
hsa-miR-1181	0	0	1	1	1	1	SLC37A1	solute carrier family 37 (glycerol-3-phosphate transporter), member 1
hsa-miR-1181	1	0	1	1	1	1	NRXN3	neurexin 3
hsa-miR-1181	0	0	1	0	0	0	TOMM6	translocase of outer mitochondrial membrane 6 homolog (yeast)
hsa-miR-1181	0	0	1	1	0	0	IL4I1	interleukin 4 induced 1
hsa-miR-1181	1	0	1	1	1	1	ACER3	alkaline ceramidase 3
hsa-miR-1181	1	0	1	1	1	1	SUN1	Sad1 and UNC84 domain containing 1
hsa-miR-1181	1	0	1	1	1	1	PPFIA3	protein tyrosine phosphatase, receptor type, f polypeptide (PTPRF), interacting protein (liprin), alpha 3
hsa-miR-1181	0	0	1	1	1	1	HDAC7	histone deacetylase 7
hsa-miR-1181	1	0	1	1	1	1	FOXP1	forkhead box P1
hsa-miR-1181	1	0	1	1	0	0	C15orf27	chromosome 15 open reading frame 27
hsa-miR-1181	0	0	1	1	1	1	TOX2	TOX high mobility group box family member 2
hsa-miR-1181	1	0	1	1	1	1	DLGAP4	discs, large (Drosophila) homolog-associated protein 4
hsa-miR-1181	0	0	1	0	0	0	LOC401242	uncharacterized LOC401242
hsa-miR-1181	0	0	1	0	0	0	LOC219688	uncharacterized LOC219688
hsa-miR-1181	0	0	1	1	0	0	ANXA11	annexin A11
hsa-miR-1181	0	0	1	0	0	0	AFG3L1P	AFG3 ATPase family gene 3-like 1 (S. cerevisiae), pseudogene
hsa-miR-1181	0	0	1	1	1	1	BRD2	bromodomain containing 2
hsa-miR-1181	0	0	1	1	1	1	LNX1	ligand of numb-protein X 1, E3 ubiquitin protein ligase
hsa-miR-1181	0	0	1	1	0	0	SLC39A4	solute carrier family 39 (zinc transporter), member 4
hsa-miR-1181	0	0	1	0	0	0	C6orf228	chromosome 6 open reading frame 228
hsa-miR-1181	0	0	1	1	0	0	SYTL1	synaptotagmin-like 1
hsa-miR-1181	0	0	1	1	1	1	SLC52A3	solute carrier family 52, riboflavin transporter, member 3
hsa-miR-1181	1	0	1	0	1	1	SLC25A37	solute carrier family 25 (mitochondrial iron transporter), member 37
hsa-miR-1181	0	0	1	1	0	0	ATP6AP1	ATPase, H+ transporting, lysosomal accessory protein 1
hsa-miR-1181	0	0	1	0	0	0	LOC440910	uncharacterized LOC440910
hsa-miR-1181	1	0	1	0	1	1	RNF114	ring finger protein 114
hsa-miR-1181	0	0	1	1	0	0	RUVBL1	RuvB-like 1 (E. coli)
hsa-miR-1181	0	0	1	0	1	1	SSPN	sarcospan
hsa-miR-1181	1	0	1	1	1	1	KLC2	kinesin light chain 2
hsa-miR-1181	1	0	1	1	1	1	ARHGEF7	Rho guanine nucleotide exchange factor (GEF) 7
hsa-miR-1181	1	0	1	1	1	1	SPATS2	spermatogenesis associated, serine-rich 2
hsa-miR-1181	0	0	1	0	0	0	LOC100133029	sirtuin 5 pseudogene
hsa-miR-1181	1	0	1	1	1	1	SNRNP70	small nuclear ribonucleoprotein 70kDa (U1)
hsa-miR-1181	0	0	1	0	0	0	KIRREL3-AS3	KIRREL3 antisense RNA 3
hsa-miR-1181	0	0	1	0	0	0	THAP7-AS1	THAP7 antisense RNA 1
hsa-miR-1181	0	0	1	1	0	0	TAPBPL	TAP binding protein-like
hsa-miR-1181	1	0	1	1	1	1	ZBTB4	zinc finger and BTB domain containing 4
hsa-miR-1181	1	0	1	0	1	1	DCUN1D4	DCN1, defective in cullin neddylation 1, domain containing 4 (S. cerevisiae)
hsa-miR-1181	1	0	1	1	1	1	NFYC	nuclear transcription factor Y, gamma
hsa-miR-1181	0	0	1	1	0	0	C17orf107	chromosome 17 open reading frame 107
hsa-miR-1181	1	0	1	1	1	1	ADAMTS19	ADAM metallopeptidase with thrombospondin type 1 motif, 19
hsa-miR-1181	0	0	1	1	0	0	WFIKKN1	WAP, follistatin/kazal, immunoglobulin, kunitz and netrin domain containing 1
hsa-miR-1181	0	0	1	1	0	0	PNLIPRP1	pancreatic lipase-related protein 1
hsa-miR-1181	1	0	1	1	0	0	ELN	elastin
hsa-miR-1181	0	0	1	1	1	1	PRSS16	protease, serine, 16 (thymus)
hsa-miR-1181	1	0	1	1	1	1	RIF1	RAP1 interacting factor homolog (yeast)
hsa-miR-1181	0	0	1	0	0	0	POM121L9P	POM121 transmembrane nucleoporin-like 9, pseudogene
hsa-miR-1181	0	0	1	1	1	1	FAM221A	family with sequence similarity 221, member A
hsa-miR-1181	0	0	1	1	0	0	YIF1B	Yip1 interacting factor homolog B (S. cerevisiae)
hsa-miR-1181	1	0	1	1	1	1	FAM63B	family with sequence similarity 63, member B
hsa-miR-1181	0	0	1	1	0	0	CD37	CD37 molecule
hsa-miR-1181	0	0	1	1	1	1	GCOM1	GRINL1A complex locus 1
hsa-miR-1181	1	0	1	1	0	0	CLASRP	CLK4-associating serine/arginine rich protein
hsa-miR-1181	0	0	1	1	1	1	TIMM50	translocase of inner mitochondrial membrane 50 homolog (S. cerevisiae)
hsa-miR-1181	0	0	1	1	0	0	PAOX	polyamine oxidase (exo-N4-amino)
hsa-miR-1181	1	0	1	1	1	1	HMGA2	high mobility group AT-hook 2
hsa-miR-1181	0	0	1	1	0	0	DHRS4	dehydrogenase/reductase (SDR family) member 4
hsa-miR-1181	1	0	1	1	1	1	HOXC13	homeobox C13
hsa-miR-1181	0	0	1	1	1	1	PDXK	pyridoxal (pyridoxine, vitamin B6) kinase
hsa-miR-1181	0	0	1	1	1	1	C9orf85	chromosome 9 open reading frame 85
hsa-miR-1181	0	0	1	0	0	0	LRRC14	leucine rich repeat containing 14
hsa-miR-1181	1	0	1	0	0	0	XPNPEP3	X-prolyl aminopeptidase (aminopeptidase P) 3, putative
hsa-miR-1181	1	0	1	0	1	1	FNDC3B	fibronectin type III domain containing 3B
hsa-miR-1181	0	0	1	1	1	1	KLHL29	kelch-like 29 (Drosophila)
hsa-miR-1181	0	0	1	1	0	0	HIST2H4A	histone cluster 2, H4a
hsa-miR-1181	0	0	1	1	0	0	HIST2H4B	histone cluster 2, H4b
hsa-miR-1181	0	0	1	1	1	1	CDC42SE2	CDC42 small effector 2
hsa-miR-1181	1	0	1	0	1	1	C14orf101	chromosome 14 open reading frame 101
hsa-miR-1181	0	0	1	1	1	1	CDS2	CDP-diacylglycerol synthase (phosphatidate cytidylyltransferase) 2
hsa-miR-1181	0	0	1	0	0	0	ANKRD19P	ankyrin repeat domain 19, pseudogene
hsa-miR-1181	0	0	1	1	1	1	CCP110	centriolar coiled coil protein 110kDa
hsa-miR-1181	0	0	1	1	1	1	SH3TC1	SH3 domain and tetratricopeptide repeats 1
hsa-miR-1181	1	0	1	1	1	1	EYA4	eyes absent homolog 4 (Drosophila)
hsa-miR-1181	0	0	1	0	0	0	LOC643648	uncharacterized LOC643648
hsa-miR-1181	1	0	1	1	1	1	UBXN2A	UBX domain protein 2A
hsa-miR-1181	0	0	1	1	0	0	VMO1	vitelline membrane outer layer 1 homolog (chicken)
hsa-miR-1181	1	0	1	1	1	1	FOSB	FBJ murine osteosarcoma viral oncogene homolog B
hsa-miR-1181	0	0	1	1	1	1	NOS1AP	nitric oxide synthase 1 (neuronal) adaptor protein
hsa-miR-1181	1	0	1	1	1	1	CTIF	CBP80/20-dependent translation initiation factor
hsa-miR-1181	0	0	1	0	1	1	OAZ1	ornithine decarboxylase antizyme 1
hsa-miR-1181	0	0	1	1	0	0	PTOV1	prostate tumor overexpressed 1
hsa-miR-1181	0	0	1	0	0	0	SUZ12P1	suppressor of zeste 12 homolog pseudogene 1
hsa-miR-1181	0	0	1	0	0	0	LOC255025	uncharacterized LOC255025
hsa-miR-1181	1	0	1	1	1	1	TMPO	thymopoietin
hsa-miR-1181	0	0	1	0	0	0	BMS1P6	BMS1 pseudogene 6
hsa-miR-1181	1	0	1	1	1	1	CRCP	CGRP receptor component
hsa-miR-1181	0	0	1	0	0	0	LINC00265	long intergenic non-protein coding RNA 265
hsa-miR-1181	1	0	1	1	1	1	FNDC5	fibronectin type III domain containing 5
hsa-miR-1181	0	0	1	1	1	1	ELL3	elongation factor RNA polymerase II-like 3
hsa-miR-1181	0	0	1	1	1	1	B4GALT4	UDP-Gal:betaGlcNAc beta 1,4- galactosyltransferase, polypeptide 4
hsa-miR-1181	0	0	1	0	0	0	KANSL1-AS1	KANSL1 antisense RNA 1
hsa-miR-1181	1	0	1	1	1	1	NRSN1	neurensin 1
hsa-miR-1181	1	0	1	1	1	1	PHACTR4	phosphatase and actin regulator 4
hsa-miR-1181	0	0	1	1	1	1	AQPEP	laeverin
hsa-miR-1181	0	0	1	0	0	0	LOC100147773	uncharacterized LOC100147773
hsa-miR-1181	0	0	1	0	0	0	ULK4P3	unc-51-like kinase 4 (C. elegans) pseudogene 3
hsa-miR-1181	0	0	1	0	0	0	AGAP9	ArfGAP with GTPase domain, ankyrin repeat and PH domain 9
hsa-miR-1181	0	0	1	1	0	0	HEATR8	HEAT repeat containing 8
hsa-miR-1181	1	0	1	1	1	1	WNT10B	wingless-type MMTV integration site family, member 10B
hsa-miR-1181	0	0	1	0	0	0	FBXL19-AS1	FBXL19 antisense RNA 1 (head to head)
hsa-miR-1181	0	0	1	1	0	0	ZNF276	zinc finger protein 276
hsa-miR-1181	0	0	1	0	0	0	CCT6P1	chaperonin containing TCP1, subunit 6 (zeta) pseudogene 1
hsa-miR-1181	0	0	1	0	0	0	FAM225B	family with sequence similarity 225, member B (non-protein coding)
hsa-miR-1181	0	0	1	1	0	0	EPS15L1	epidermal growth factor receptor pathway substrate 15-like 1
hsa-miR-1181	0	0	1	0	0	0	MEG3	maternally expressed 3 (non-protein coding)
hsa-miR-1181	0	0	1	1	1	1	DEPDC5	DEP domain containing 5
hsa-miR-1181	0	0	1	1	1	1	PICK1	protein interacting with PRKCA 1
hsa-miR-1181	0	0	1	1	1	1	POLR2H	polymerase (RNA) II (DNA directed) polypeptide H
hsa-miR-1181	1	0	1	1	0	0	TOE1	target of EGR1, member 1 (nuclear)
hsa-miR-1181	0	0	1	1	0	0	H2AFY2	H2A histone family, member Y2
hsa-miR-1181	0	0	1	1	1	1	NR2C2AP	nuclear receptor 2C2-associated protein
hsa-miR-1181	1	0	1	1	1	1	DPH1	DPH1 homolog (S. cerevisiae)
hsa-miR-1181	0	0	1	1	1	1	MRPS36	mitochondrial ribosomal protein S36
hsa-miR-1181	1	0	1	1	1	1	EI24	etoposide induced 2.4 mRNA
hsa-miR-1181	1	0	1	1	1	1	POU2F2	POU class 2 homeobox 2
hsa-miR-1181	0	0	1	1	1	1	BTF3	basic transcription factor 3
hsa-miR-1181	0	0	1	1	0	0	GPR153	G protein-coupled receptor 153
hsa-miR-1181	0	0	1	1	0	0	STUB1	STIP1 homology and U-box containing protein 1, E3 ubiquitin protein ligase
hsa-miR-1181	0	0	1	1	0	0	AATF	apoptosis antagonizing transcription factor
hsa-miR-1181	1	0	1	0	1	1	GRAMD1A	GRAM domain containing 1A
hsa-miR-1181	1	0	1	1	1	1	RALY	RNA binding protein, autoantigenic (hnRNP-associated with lethal yellow homolog (mouse))
hsa-miR-1181	0	0	1	0	1	1	ARMC10	armadillo repeat containing 10
hsa-miR-1181	0	0	1	1	0	0	FAM216A	family with sequence similarity 216, member A
hsa-miR-1181	1	0	1	1	0	0	PPP4C	protein phosphatase 4, catalytic subunit
hsa-miR-1181	0	0	1	0	0	0	LOC100132984	uncharacterized LOC100132984
hsa-miR-1181	1	0	1	1	0	0	SOD1	superoxide dismutase 1, soluble
hsa-miR-1181	1	0	1	1	1	1	MAPK8IP3	mitogen-activated protein kinase 8 interacting protein 3
hsa-miR-1181	0	0	1	0	0	0	61E3.4	nuclear pore complex interacting protein-like
hsa-miR-1181	0	0	1	0	0	0	GPR144	G protein-coupled receptor 144
hsa-miR-1181	0	0	1	0	0	0	PVT1	Pvt1 oncogene (non-protein coding)
hsa-miR-1181	1	0	1	1	0	0	PAX2	paired box 2
hsa-miR-1181	0	0	1	1	1	1	IGF2	insulin-like growth factor 2 (somatomedin A)
hsa-miR-1181	0	0	1	0	0	0	RNASEK	ribonuclease, RNase K
hsa-miR-1181	1	0	1	1	1	1	EDA	ectodysplasin A
hsa-miR-1181	1	0	1	0	1	1	CPLX2	complexin 2
hsa-miR-1181	0	0	1	1	1	1	IL4R	interleukin 4 receptor
hsa-miR-1181	1	0	1	1	1	1	C10orf114	chromosome 10 open reading frame 114
hsa-miR-1181	1	0	1	0	1	1	BCL7A	B-cell CLL/lymphoma 7A
hsa-miR-1181	1	0	1	0	1	1	TNRC6B	trinucleotide repeat containing 6B
hsa-miR-1181	0	0	1	1	1	1	MSANTD1	Myb/SANT-like DNA-binding domain containing 1
hsa-miR-1181	1	0	1	1	1	1	ATG9A	autophagy related 9A
hsa-miR-1181	0	0	1	0	0	0	BAI1	brain-specific angiogenesis inhibitor 1
hsa-miR-1181	0	0	1	1	1	1	PIM1	pim-1 oncogene
hsa-miR-1181	0	0	1	1	1	1	SEPT5	septin 5
hsa-miR-1181	1	0	1	1	1	1	ZIC3	Zic family member 3
hsa-miR-1181	0	0	1	1	0	0	RBP2	retinol binding protein 2, cellular
hsa-miR-1181	1	0	1	1	1	1	EGR3	early growth response 3
hsa-miR-1181	1	0	1	1	1	1	SF1	splicing factor 1
hsa-miR-1181	1	0	1	1	1	1	KIF3B	kinesin family member 3B
hsa-miR-1181	1	0	1	0	1	1	CALM3	calmodulin 3 (phosphorylase kinase, delta)
hsa-miR-1181	1	0	1	0	1	1	HDAC4	histone deacetylase 4
hsa-miR-1181	1	0	1	1	1	1	NEUROD2	neuronal differentiation 2
hsa-miR-1181	1	0	1	1	1	1	VAT1	vesicle amine transport protein 1 homolog (T. californica)
hsa-miR-1181	1	0	1	0	1	1	SOX12	SRY (sex determining region Y)-box 12
hsa-miR-1181	0	0	1	1	0	0	ZDHHC8	zinc finger, DHHC-type containing 8
hsa-miR-1181	1	0	1	0	1	1	LARP4B	La ribonucleoprotein domain family, member 4B
hsa-miR-1181	0	0	1	1	0	0	SPEF1	sperm flagellar 1
hsa-miR-1181	1	0	1	1	1	1	FAM155B	family with sequence similarity 155, member B
hsa-miR-1181	1	0	1	1	1	1	HOXA10	homeobox A10
hsa-miR-1181	0	0	1	1	0	0	LMAN1L	lectin, mannose-binding, 1 like
hsa-miR-1181	0	0	1	1	0	0	NICN1	nicolin 1
hsa-miR-1181	1	0	1	1	0	0	CAMK2N2	calcium/calmodulin-dependent protein kinase II inhibitor 2
hsa-miR-1181	0	0	1	1	0	0	CITED4	Cbp/p300-interacting transactivator, with Glu/Asp-rich carboxy-terminal domain, 4
hsa-miR-1181	0	0	1	1	0	0	TCEB3C	transcription elongation factor B polypeptide 3C (elongin A3)
hsa-miR-1181	0	0	1	1	1	1	SLC35G3	solute carrier family 35, member G3
hsa-miR-1181	0	0	1	1	1	1	SLC22A7	solute carrier family 22 (organic anion transporter), member 7
hsa-miR-1181	1	0	1	1	1	1	ADAT2	adenosine deaminase, tRNA-specific 2
hsa-miR-1181	0	0	1	0	1	1	WASH3P	WAS protein family homolog 3 pseudogene
hsa-miR-1181	0	0	1	0	0	0	PCDHB17	protocadherin beta 17 pseudogene
hsa-miR-1181	0	0	1	0	0	0	RNF126P1	ring finger protein 126 pseudogene 1
hsa-miR-1181	0	0	1	0	0	0	RNASEH2CP1	ribonuclease H2, subunit C pseudogene 1
hsa-miR-1181	0	0	1	0	0	0	SIGLEC16	sialic acid binding Ig-like lectin 16 (gene/pseudogene)
hsa-miR-1181	0	0	1	0	0	0	SNX29P2	sorting nexin 29 pseudogene 2
hsa-miR-1181	0	0	1	0	0	0	GBP1P1	guanylate binding protein 1, interferon-inducible pseudogene 1
hsa-miR-1181	1	0	1	1	1	1	CUL5	cullin 5
