# Supplementary material for: Profiling of Selected MicroRNAs in Proliferative Eutopic Endometrium of Women with Ovarian Endometriosis
Source: Biomed Res Int. 2015 Aug 20;2015:760698. doi: 10.1155/2015/760698 (PMC4558423; doi:10.1155/2015/760698)
Supplement: Supplementary file 1 — Table I: The names of miRNAs significantly differentially expressed between eutopic endometrium of patients with endometriosis vs eutopic endometrium of patients without endometriosis. Table II: The associations between miRNA and mRNA, which presents detailed results of the search of six major databases i.e targetscan, tarbase, miranda, mirbase, mirtarget2 and pictar. [file 760698.f1.zip › 760698.f1/Table II/hsa-miR-1182.tsv]

miR	targetscan	tarbase	miranda	mirbase	mirtarget2	pictar	GeneSymbol	GeneName
hsa-miR-1182	1	0	1	1	1	1	CHD9	chromodomain helicase DNA binding protein 9
hsa-miR-1182	1	0	1	1	0	0	SRCAP	Snf2-related CREBBP activator protein
hsa-miR-1182	0	0	1	1	0	0	SIPA1	signal-induced proliferation-associated 1
hsa-miR-1182	1	0	1	0	1	1	PTPRT	protein tyrosine phosphatase, receptor type, T
hsa-miR-1182	0	0	1	1	1	1	C2CD2L	C2CD2-like
hsa-miR-1182	0	0	1	1	0	0	PLXNB1	plexin B1
hsa-miR-1182	1	0	1	0	1	1	KIAA0408	KIAA0408
hsa-miR-1182	1	0	1	1	1	1	AUTS2	autism susceptibility candidate 2
hsa-miR-1182	0	0	1	1	0	0	PLCH2	phospholipase C, eta 2
hsa-miR-1182	0	0	1	0	1	1	KLHL21	kelch-like 21 (Drosophila)
hsa-miR-1182	0	0	1	1	0	0	RAP1GAP	RAP1 GTPase activating protein
hsa-miR-1182	1	0	1	1	1	1	IQSEC2	IQ motif and Sec7 domain 2
hsa-miR-1182	0	0	1	1	0	0	ZNF862	zinc finger protein 862
hsa-miR-1182	1	0	1	0	1	1	MFAP3L	microfibrillar-associated protein 3-like
hsa-miR-1182	1	0	1	1	1	1	HIPK1	homeodomain interacting protein kinase 1
hsa-miR-1182	0	0	1	1	1	1	PHLDB1	pleckstrin homology-like domain, family B, member 1
hsa-miR-1182	1	0	1	1	1	1	GIGYF2	GRB10 interacting GYF protein 2
hsa-miR-1182	0	0	1	1	0	0	AKAP8L	A kinase (PRKA) anchor protein 8-like
hsa-miR-1182	1	0	1	1	1	1	TP63	tumor protein p63
hsa-miR-1182	1	0	1	1	0	0	RIMS2	regulating synaptic membrane exocytosis 2
hsa-miR-1182	1	0	1	1	1	1	ARHGEF15	Rho guanine nucleotide exchange factor (GEF) 15
hsa-miR-1182	1	0	1	1	1	1	SEMA4F	sema domain, immunoglobulin domain (Ig), transmembrane domain (TM) and short cytoplasmic domain, (semaphorin) 4F
hsa-miR-1182	1	0	1	1	0	0	SEZ6L	seizure related 6 homolog (mouse)-like
hsa-miR-1182	1	0	1	0	0	0	DTX4	deltex homolog 4 (Drosophila)
hsa-miR-1182	1	0	1	1	1	1	CPEB3	cytoplasmic polyadenylation element binding protein 3
hsa-miR-1182	1	0	1	1	1	1	CIT	citron (rho-interacting, serine/threonine kinase 21)
hsa-miR-1182	1	0	1	1	1	1	NLGN4Y	neuroligin 4, Y-linked
hsa-miR-1182	1	0	1	1	1	1	NTNG1	netrin G1
hsa-miR-1182	1	0	1	1	1	1	FOXJ3	forkhead box J3
hsa-miR-1182	1	0	1	1	0	0	KIAA1045	KIAA1045
hsa-miR-1182	1	0	1	1	0	0	ZC3H4	zinc finger CCCH-type containing 4
hsa-miR-1182	1	0	1	1	1	1	PHF8	PHD finger protein 8
hsa-miR-1182	1	0	1	1	0	0	KIAA1210	KIAA1210
hsa-miR-1182	1	0	1	1	1	1	KIAA1217	KIAA1217
hsa-miR-1182	1	0	1	1	1	1	ATXN7L1	ataxin 7-like 1
hsa-miR-1182	1	0	1	1	1	1	RALGAPB	Ral GTPase activating protein, beta subunit (non-catalytic)
hsa-miR-1182	0	0	1	1	0	0	TNFRSF12A	tumor necrosis factor receptor superfamily, member 12A
hsa-miR-1182	1	0	1	1	1	1	PCDH19	protocadherin 19
hsa-miR-1182	1	0	1	1	1	1	TAOK1	TAO kinase 1
hsa-miR-1182	1	0	1	1	1	1	BAZ2B	bromodomain adjacent to zinc finger domain, 2B
hsa-miR-1182	1	0	1	1	1	1	FAM214B	family with sequence similarity 214, member B
hsa-miR-1182	0	0	1	0	0	0	KRT19P2	keratin 19 pseudogene 2
hsa-miR-1182	1	0	1	1	1	1	INADL	InaD-like (Drosophila)
hsa-miR-1182	1	0	1	1	0	0	NCKAP5L	NCK-associated protein 5-like
hsa-miR-1182	1	0	1	1	1	1	PHF21A	PHD finger protein 21A
hsa-miR-1182	0	0	1	1	1	1	AMBRA1	autophagy/beclin-1 regulator 1
hsa-miR-1182	1	0	1	1	1	1	IKZF4	IKAROS family zinc finger 4 (Eos)
hsa-miR-1182	0	0	1	1	1	1	UNC80	unc-80 homolog (C. elegans)
hsa-miR-1182	0	0	1	1	0	0	COL27A1	collagen, type XXVII, alpha 1
hsa-miR-1182	1	0	1	1	1	1	AFAP1L2	actin filament associated protein 1-like 2
hsa-miR-1182	0	0	1	0	0	0	NBLA00301	Nbla00301
hsa-miR-1182	1	0	1	1	0	0	ADC	arginine decarboxylase
hsa-miR-1182	0	0	1	1	1	1	KIAA1967	KIAA1967
hsa-miR-1182	0	0	1	1	0	0	CIRH1A	cirrhosis, autosomal recessive 1A (cirhin)
hsa-miR-1182	1	0	1	0	1	1	RNF43	ring finger protein 43
hsa-miR-1182	1	0	1	0	0	0	ZBTB34	zinc finger and BTB domain containing 34
hsa-miR-1182	1	0	1	1	1	1	RFX4	regulatory factor X, 4 (influences HLA class II expression)
hsa-miR-1182	0	0	1	1	0	0	KRTAP24-1	keratin associated protein 24-1
hsa-miR-1182	0	0	1	1	0	0	CNTNAP4	contactin associated protein-like 4
hsa-miR-1182	0	0	1	1	0	0	DDB2	damage-specific DNA binding protein 2, 48kDa
hsa-miR-1182	0	0	1	1	0	0	SSPO	SCO-spondin homolog (Bos taurus)
hsa-miR-1182	1	0	1	1	1	1	FAT2	FAT tumor suppressor homolog 2 (Drosophila)
hsa-miR-1182	0	0	1	1	0	0	DUSP23	dual specificity phosphatase 23
hsa-miR-1182	1	1	1	1	1	1	BACE1	beta-site APP-cleaving enzyme 1
hsa-miR-1182	0	0	1	1	1	1	FN1	fibronectin 1
hsa-miR-1182	0	0	1	1	1	1	ING4	inhibitor of growth family, member 4
hsa-miR-1182	0	0	1	1	0	0	DBP	D site of albumin promoter (albumin D-box) binding protein
hsa-miR-1182	1	0	1	0	1	1	PCDHA13	protocadherin alpha 13
hsa-miR-1182	1	0	1	1	1	1	PCDHA4	protocadherin alpha 4
hsa-miR-1182	0	0	1	1	0	0	KCNC3	potassium voltage-gated channel, Shaw-related subfamily, member 3
hsa-miR-1182	1	0	1	1	1	1	PLEKHH3	pleckstrin homology domain containing, family H (with MyTH4 domain) member 3
hsa-miR-1182	1	0	1	1	1	1	PML	promyelocytic leukemia
hsa-miR-1182	1	0	1	1	1	1	SYNCRIP	synaptotagmin binding, cytoplasmic RNA interacting protein
hsa-miR-1182	1	0	1	0	1	1	PLAG1	pleiomorphic adenoma gene 1
hsa-miR-1182	1	0	1	0	1	1	MPPED2	metallophosphoesterase domain containing 2
hsa-miR-1182	1	0	1	0	1	1	SLC6A6	solute carrier family 6 (neurotransmitter transporter, taurine), member 6
hsa-miR-1182	1	0	1	1	0	0	CACNB1	calcium channel, voltage-dependent, beta 1 subunit
hsa-miR-1182	1	0	1	1	0	0	TSPYL2	TSPY-like 2
hsa-miR-1182	1	0	1	0	1	1	AKAP13	A kinase (PRKA) anchor protein 13
hsa-miR-1182	1	0	1	1	1	1	SPTB	spectrin, beta, erythrocytic
hsa-miR-1182	1	0	1	1	1	1	MINK1	misshapen-like kinase 1
hsa-miR-1182	1	0	1	1	0	0	RGS6	regulator of G-protein signaling 6
hsa-miR-1182	0	0	1	1	1	1	ACO1	aconitase 1, soluble
hsa-miR-1182	0	0	1	1	0	0	EIF4E2	eukaryotic translation initiation factor 4E family member 2
hsa-miR-1182	1	0	1	1	1	1	PDLIM5	PDZ and LIM domain 5
hsa-miR-1182	1	0	1	1	1	1	GIT1	G protein-coupled receptor kinase interacting ArfGAP 1
hsa-miR-1182	0	0	1	1	0	0	HLA-DMB	major histocompatibility complex, class II, DM beta
hsa-miR-1182	0	0	1	1	0	0	BMP1	bone morphogenetic protein 1
hsa-miR-1182	0	0	1	1	0	0	CFLAR	CASP8 and FADD-like apoptosis regulator
hsa-miR-1182	0	0	1	1	0	0	SLC22A8	solute carrier family 22 (organic anion transporter), member 8
hsa-miR-1182	1	0	1	1	0	0	ARRB2	arrestin, beta 2
hsa-miR-1182	1	0	1	1	1	1	HMGA2	high mobility group AT-hook 2
hsa-miR-1182	0	0	1	1	0	0	MSH5	mutS homolog 5 (E. coli)
hsa-miR-1182	1	0	1	1	1	1	ZFX	zinc finger protein, X-linked
hsa-miR-1182	0	0	1	1	1	1	SGSH	N-sulfoglucosamine sulfohydrolase
hsa-miR-1182	1	0	1	1	1	1	ANPEP	alanyl (membrane) aminopeptidase
hsa-miR-1182	1	0	1	0	1	1	PDE7B	phosphodiesterase 7B
hsa-miR-1182	1	0	1	1	1	1	MYO9B	myosin IXB
hsa-miR-1182	1	0	1	1	1	1	MYH10	myosin, heavy chain 10, non-muscle
hsa-miR-1182	0	0	1	1	1	1	BRCA1	breast cancer 1, early onset
hsa-miR-1182	1	0	1	1	1	1	MDM4	Mdm4 p53 binding protein homolog (mouse)
hsa-miR-1182	1	0	1	1	1	1	SYNJ1	synaptojanin 1
hsa-miR-1182	1	0	1	0	1	1	MLL2	myeloid/lymphoid or mixed-lineage leukemia 2
hsa-miR-1182	1	0	1	1	1	1	PCDH17	protocadherin 17
hsa-miR-1182	0	0	1	0	0	0	ZNRD1-AS1	ZNRD1 antisense RNA 1
hsa-miR-1182	0	0	1	1	0	0	SLC12A4	solute carrier family 12 (potassium/chloride transporters), member 4
hsa-miR-1182	1	0	1	1	1	1	CTNND1	catenin (cadherin-associated protein), delta 1
hsa-miR-1182	1	0	1	1	1	1	CBFA2T2	core-binding factor, runt domain, alpha subunit 2; translocated to, 2
hsa-miR-1182	1	0	1	1	1	1	IVD	isovaleryl-CoA dehydrogenase
hsa-miR-1182	0	0	1	1	1	1	PCF11	PCF11, cleavage and polyadenylation factor subunit, homolog (S. cerevisiae)
hsa-miR-1182	1	0	1	0	1	1	DDX3X	DEAD (Asp-Glu-Ala-Asp) box polypeptide 3, X-linked
hsa-miR-1182	0	0	1	1	1	1	SH2D1A	SH2 domain containing 1A
hsa-miR-1182	1	0	1	1	0	0	RASSF1	Ras association (RalGDS/AF-6) domain family member 1
hsa-miR-1182	1	0	1	1	1	1	LPHN2	latrophilin 2
hsa-miR-1182	0	0	1	1	1	1	MSTO1	misato homolog 1 (Drosophila)
hsa-miR-1182	0	0	1	1	0	0	COPB1	coatomer protein complex, subunit beta 1
hsa-miR-1182	1	0	1	1	1	1	KAT6B	K(lysine) acetyltransferase 6B
hsa-miR-1182	0	0	1	1	1	1	TMEM176B	transmembrane protein 176B
hsa-miR-1182	0	0	1	1	1	1	DMRT2	doublesex and mab-3 related transcription factor 2
hsa-miR-1182	1	0	1	0	1	1	FAM19A5	family with sequence similarity 19 (chemokine (C-C motif)-like), member A5
hsa-miR-1182	1	0	1	1	1	1	TAOK3	TAO kinase 3
hsa-miR-1182	1	0	1	0	0	0	PRPF40A	PRP40 pre-mRNA processing factor 40 homolog A (S. cerevisiae)
hsa-miR-1182	0	0	1	0	1	1	CLDN2	claudin 2
hsa-miR-1182	0	0	1	1	0	0	FXYD5	FXYD domain containing ion transport regulator 5
hsa-miR-1182	1	0	1	1	0	0	ECE2	endothelin converting enzyme 2
hsa-miR-1182	1	0	1	0	1	1	KLHL3	kelch-like 3 (Drosophila)
hsa-miR-1182	1	0	1	1	1	1	KCNMB2	potassium large conductance calcium-activated channel, subfamily M, beta member 2
hsa-miR-1182	0	0	1	1	1	1	CD28	CD28 molecule
hsa-miR-1182	1	0	1	1	0	0	LMO2	LIM domain only 2 (rhombotin-like 1)
hsa-miR-1182	1	0	1	1	1	1	RBM47	RNA binding motif protein 47
hsa-miR-1182	0	0	1	1	0	0	TCP11	t-complex 11 homolog (mouse)
hsa-miR-1182	1	0	1	1	1	1	DCLRE1B	DNA cross-link repair 1B
hsa-miR-1182	1	0	1	1	1	1	RNF7	ring finger protein 7
hsa-miR-1182	0	0	1	1	1	1	FCRL1	Fc receptor-like 1
hsa-miR-1182	0	0	1	0	0	0	AFG3L1P	AFG3 ATPase family gene 3-like 1 (S. cerevisiae), pseudogene
hsa-miR-1182	0	0	1	1	0	0	ZAN	zonadhesin
hsa-miR-1182	1	0	1	1	1	1	ACHE	acetylcholinesterase
hsa-miR-1182	0	0	1	1	1	1	FCRL5	Fc receptor-like 5
hsa-miR-1182	1	0	1	1	1	1	KCNIP2	Kv channel interacting protein 2
hsa-miR-1182	0	0	1	0	0	0	NBPF10	neuroblastoma breakpoint family, member 10
hsa-miR-1182	0	0	1	0	0	0	CLRN1-AS1	CLRN1 antisense RNA 1
hsa-miR-1182	0	0	1	0	1	1	MYO3B	myosin IIIB
hsa-miR-1182	0	0	1	1	0	0	SNRPN	small nuclear ribonucleoprotein polypeptide N
hsa-miR-1182	0	0	1	0	0	0	MYO15B	myosin XVB pseudogene
hsa-miR-1182	0	0	1	1	1	1	PPP1R1B	protein phosphatase 1, regulatory (inhibitor) subunit 1B
hsa-miR-1182	1	0	1	1	0	0	SEPT8	septin 8
hsa-miR-1182	0	0	1	1	1	1	PSRC1	proline/serine-rich coiled-coil 1
hsa-miR-1182	0	0	1	1	0	0	RASGEF1C	RasGEF domain family, member 1C
hsa-miR-1182	1	0	1	1	0	0	PPARGC1B	peroxisome proliferator-activated receptor gamma, coactivator 1 beta
hsa-miR-1182	1	0	1	1	1	1	WAPAL	wings apart-like homolog (Drosophila)
hsa-miR-1182	1	0	1	1	1	1	F3	coagulation factor III (thromboplastin, tissue factor)
hsa-miR-1182	0	0	1	1	1	1	CARD8	caspase recruitment domain family, member 8
hsa-miR-1182	0	0	1	1	1	1	APITD1	apoptosis-inducing, TAF9-like domain 1
hsa-miR-1182	0	0	1	1	1	1	TTLL11	tubulin tyrosine ligase-like family, member 11
hsa-miR-1182	0	0	1	1	1	1	CDAN1	codanin 1
hsa-miR-1182	0	0	1	1	1	1	ZNF638	zinc finger protein 638
hsa-miR-1182	0	0	1	1	0	0	TREML1	triggering receptor expressed on myeloid cells-like 1
hsa-miR-1182	1	0	1	0	1	1	IL1RAP	interleukin 1 receptor accessory protein
hsa-miR-1182	0	0	1	1	1	1	GNAS	GNAS complex locus
hsa-miR-1182	0	0	1	0	0	0	CACNA2D3	calcium channel, voltage-dependent, alpha 2/delta subunit 3
hsa-miR-1182	0	0	1	1	1	1	DMRTC1	DMRT-like family C1
hsa-miR-1182	0	0	1	1	0	0	DMRTC1B	DMRT-like family C1B
hsa-miR-1182	0	0	1	0	0	0	CD177	CD177 molecule
hsa-miR-1182	1	0	1	1	1	1	PALM2	paralemmin 2
hsa-miR-1182	1	0	1	1	1	1	EMID2	EMI domain containing 2
hsa-miR-1182	0	0	1	0	0	0	TOMM6	translocase of outer mitochondrial membrane 6 homolog (yeast)
hsa-miR-1182	1	0	1	1	1	1	PPP3CB	protein phosphatase 3, catalytic subunit, beta isozyme
hsa-miR-1182	0	0	1	1	1	1	TRDN	triadin
hsa-miR-1182	1	0	1	1	1	1	NRXN3	neurexin 3
hsa-miR-1182	1	0	1	1	1	1	NOX4	NADPH oxidase 4
hsa-miR-1182	1	0	1	1	1	1	AKAP2	A kinase (PRKA) anchor protein 2
hsa-miR-1182	0	0	1	0	0	0	TUG1	taurine upregulated 1 (non-protein coding)
hsa-miR-1182	0	0	1	1	0	0	AP4B1	adaptor-related protein complex 4, beta 1 subunit
hsa-miR-1182	0	0	1	0	1	1	EBF2	early B-cell factor 2
hsa-miR-1182	1	0	1	1	0	0	SALL2	sal-like 2 (Drosophila)
hsa-miR-1182	1	0	1	1	1	1	MEIS2	Meis homeobox 2
hsa-miR-1182	1	0	1	1	1	1	RIC8B	resistance to inhibitors of cholinesterase 8 homolog B (C. elegans)
hsa-miR-1182	1	0	1	1	1	1	CADM3	cell adhesion molecule 3
hsa-miR-1182	1	0	1	1	1	1	ARMC8	armadillo repeat containing 8
hsa-miR-1182	0	0	1	1	1	1	GBP3	guanylate binding protein 3
hsa-miR-1182	1	0	1	1	1	1	ACER3	alkaline ceramidase 3
hsa-miR-1182	1	0	1	1	1	1	HNRNPUL1	heterogeneous nuclear ribonucleoprotein U-like 1
hsa-miR-1182	1	0	1	1	1	1	RIC3	resistance to inhibitors of cholinesterase 3 homolog (C. elegans)
hsa-miR-1182	1	0	1	1	1	1	C12orf23	chromosome 12 open reading frame 23
hsa-miR-1182	1	0	1	1	1	1	VASH2	vasohibin 2
hsa-miR-1182	1	0	1	1	0	0	UQCC	ubiquinol-cytochrome c reductase complex chaperone
hsa-miR-1182	0	0	1	1	0	0	TRMT2B	tRNA methyltransferase 2 homolog B (S. cerevisiae)
hsa-miR-1182	1	0	1	1	1	1	SLCO5A1	solute carrier organic anion transporter family, member 5A1
hsa-miR-1182	1	0	1	0	0	0	ZNRF3	zinc and ring finger 3
hsa-miR-1182	0	0	1	0	0	0	SOX2-OT	SOX2 overlapping transcript (non-protein coding)
hsa-miR-1182	0	0	1	0	0	0	DUXAP10	double homeobox A pseudogene 10
hsa-miR-1182	0	0	1	1	0	0	GMEB1	glucocorticoid modulatory element binding protein 1
hsa-miR-1182	1	0	1	1	1	1	SMEK2	SMEK homolog 2, suppressor of mek1 (Dictyostelium)
hsa-miR-1182	1	0	1	1	1	1	MACF1	microtubule-actin crosslinking factor 1
hsa-miR-1182	1	0	1	1	1	1	PHF20L1	PHD finger protein 20-like 1
hsa-miR-1182	0	0	1	0	0	0	LOC284561	uncharacterized LOC284561
hsa-miR-1182	1	0	1	1	1	1	BAZ2A	bromodomain adjacent to zinc finger domain, 2A
hsa-miR-1182	0	0	1	1	1	1	IPP	intracisternal A particle-promoted polypeptide
hsa-miR-1182	0	0	1	0	1	1	FLJ14186	uncharacterized LOC401149
hsa-miR-1182	1	0	1	1	1	1	COPS7B	COP9 constitutive photomorphogenic homolog subunit 7B (Arabidopsis)
hsa-miR-1182	1	0	1	1	1	1	ZNF385A	zinc finger protein 385A
hsa-miR-1182	0	0	1	1	1	1	HDAC7	histone deacetylase 7
hsa-miR-1182	0	0	1	1	1	1	SIGLEC1	sialic acid binding Ig-like lectin 1, sialoadhesin
hsa-miR-1182	0	0	1	0	0	0	IFFO2	intermediate filament family orphan 2
hsa-miR-1182	0	0	1	1	0	0	EIF4ENIF1	eukaryotic translation initiation factor 4E nuclear import factor 1
hsa-miR-1182	1	0	1	1	1	1	GBF1	golgi brefeldin A resistant guanine nucleotide exchange factor 1
hsa-miR-1182	0	0	1	1	0	0	TRAF3IP2	TRAF3 interacting protein 2
hsa-miR-1182	1	0	1	0	1	1	REPIN1	replication initiator 1
hsa-miR-1182	1	0	1	0	1	1	ZCCHC3	zinc finger, CCHC domain containing 3
hsa-miR-1182	0	0	1	0	1	1	HEMK1	HemK methyltransferase family member 1
hsa-miR-1182	0	0	1	1	0	0	PLEKHG2	pleckstrin homology domain containing, family G (with RhoGef domain) member 2
hsa-miR-1182	0	0	1	1	1	1	MYEOV	myeloma overexpressed (in a subset of t(11;14) positive multiple myelomas)
hsa-miR-1182	1	0	1	1	0	0	UBXN7	UBX domain protein 7
hsa-miR-1182	1	0	1	1	1	1	DCAF8	DDB1 and CUL4 associated factor 8
hsa-miR-1182	0	0	1	1	0	0	ZNF276	zinc finger protein 276
hsa-miR-1182	0	0	1	1	1	1	CCDC33	coiled-coil domain containing 33
hsa-miR-1182	1	0	1	1	1	1	FBXL12	F-box and leucine-rich repeat protein 12
hsa-miR-1182	1	0	1	1	1	1	RNF185	ring finger protein 185
hsa-miR-1182	1	0	1	1	1	1	FAM53C	family with sequence similarity 53, member C
hsa-miR-1182	1	0	1	1	1	1	NFASC	neurofascin
hsa-miR-1182	0	0	1	1	1	1	NETO2	neuropilin (NRP) and tolloid (TLL)-like 2
hsa-miR-1182	0	0	1	1	1	1	DTL	denticleless E3 ubiquitin protein ligase homolog (Drosophila)
hsa-miR-1182	1	0	1	1	1	1	SLAIN1	SLAIN motif family, member 1
hsa-miR-1182	0	0	1	0	0	0	KIAA0664L3	KIAA0664-like 3
hsa-miR-1182	0	0	1	1	0	0	FGGY	FGGY carbohydrate kinase domain containing
hsa-miR-1182	1	0	1	1	1	1	PPM1L	protein phosphatase, Mg2+/Mn2+ dependent, 1L
hsa-miR-1182	1	0	1	0	1	1	AP1G1	adaptor-related protein complex 1, gamma 1 subunit
hsa-miR-1182	0	0	1	1	1	1	TOX2	TOX high mobility group box family member 2
hsa-miR-1182	1	0	1	1	1	1	DLGAP4	discs, large (Drosophila) homolog-associated protein 4
hsa-miR-1182	0	0	1	1	1	1	KLC4	kinesin light chain 4
hsa-miR-1182	1	0	1	1	0	0	SPEG	SPEG complex locus
hsa-miR-1182	1	0	1	1	1	1	SULF1	sulfatase 1
hsa-miR-1182	0	0	1	1	0	0	USP11	ubiquitin specific peptidase 11
hsa-miR-1182	1	0	1	1	1	1	HERPUD2	HERPUD family member 2
hsa-miR-1182	1	0	1	0	1	1	RAB1A	RAB1A, member RAS oncogene family
hsa-miR-1182	0	0	1	1	1	1	PDE1C	phosphodiesterase 1C, calmodulin-dependent 70kDa
hsa-miR-1182	1	0	1	1	1	1	LMNA	lamin A/C
hsa-miR-1182	1	0	1	1	1	1	PHF15	PHD finger protein 15
hsa-miR-1182	0	0	1	1	0	0	FAM54B	family with sequence similarity 54, member B
hsa-miR-1182	0	0	1	0	0	0	ERVV-1	endogenous retrovirus group V, member 1
hsa-miR-1182	0	0	1	1	0	0	SLC25A28	solute carrier family 25 (mitochondrial iron transporter), member 28
hsa-miR-1182	0	0	1	1	1	1	DST	dystonin
hsa-miR-1182	0	0	1	1	0	0	SLC39A4	solute carrier family 39 (zinc transporter), member 4
hsa-miR-1182	1	0	1	1	1	1	PCMTD1	protein-L-isoaspartate (D-aspartate) O-methyltransferase domain containing 1
hsa-miR-1182	0	0	1	0	1	1	THAP6	THAP domain containing 6
hsa-miR-1182	0	0	1	1	0	0	MEF2BNB-MEF2B	MEF2BNB-MEF2B readthrough
hsa-miR-1182	0	0	1	1	1	1	PSME3	proteasome (prosome, macropain) activator subunit 3 (PA28 gamma; Ki)
hsa-miR-1182	0	0	1	0	0	0	FLJ32742	uncharacterized locus FLJ32742
hsa-miR-1182	0	0	1	0	1	1	ARHGAP42	Rho GTPase activating protein 42
hsa-miR-1182	0	0	1	1	1	1	TAF8	TAF8 RNA polymerase II, TATA box binding protein (TBP)-associated factor, 43kDa
hsa-miR-1182	0	0	1	1	0	0	NXF2	nuclear RNA export factor 2
hsa-miR-1182	0	0	1	1	0	0	TEX11	testis expressed 11
hsa-miR-1182	0	0	1	1	1	1	MS4A14	membrane-spanning 4-domains, subfamily A, member 14
hsa-miR-1182	0	0	1	0	0	0	LINC00637	long intergenic non-protein coding RNA 637
hsa-miR-1182	1	0	1	1	1	1	C6orf89	chromosome 6 open reading frame 89
hsa-miR-1182	0	0	1	0	1	1	CCDC68	coiled-coil domain containing 68
hsa-miR-1182	0	0	1	1	0	0	TRIM41	tripartite motif containing 41
hsa-miR-1182	1	0	1	1	1	1	FAM102A	family with sequence similarity 102, member A
hsa-miR-1182	1	0	1	1	1	1	FAM73B	family with sequence similarity 73, member B
hsa-miR-1182	1	0	1	1	1	1	ARID1B	AT rich interactive domain 1B (SWI1-like)
hsa-miR-1182	1	0	1	1	1	1	HLF	hepatic leukemia factor
hsa-miR-1182	0	0	1	0	0	0	CAPN13	calpain 13
hsa-miR-1182	1	0	1	0	1	1	RNF165	ring finger protein 165
hsa-miR-1182	0	0	1	0	0	0	SDHAP2	succinate dehydrogenase complex, subunit A, flavoprotein pseudogene 2
hsa-miR-1182	1	0	1	1	1	1	UBAP1	ubiquitin associated protein 1
hsa-miR-1182	0	0	1	1	0	0	NISCH	nischarin
hsa-miR-1182	0	0	1	1	0	0	CPAMD8	C3 and PZP-like, alpha-2-macroglobulin domain containing 8
hsa-miR-1182	1	0	1	1	0	0	B3GAT3	beta-1,3-glucuronyltransferase 3 (glucuronosyltransferase I)
hsa-miR-1182	0	0	1	1	1	1	CAMKV	CaM kinase-like vesicle-associated
hsa-miR-1182	1	0	1	0	1	1	SLC25A37	solute carrier family 25 (mitochondrial iron transporter), member 37
hsa-miR-1182	1	0	1	1	1	1	DPH1	DPH1 homolog (S. cerevisiae)
hsa-miR-1182	0	0	1	0	0	0	LOC643837	uncharacterized LOC643837
hsa-miR-1182	0	0	1	1	1	1	MAPK10	mitogen-activated protein kinase 10
hsa-miR-1182	1	0	1	1	1	1	AMMECR1	Alport syndrome, mental retardation, midface hypoplasia and elliptocytosis chromosomal region gene 1
hsa-miR-1182	0	0	1	0	0	0	LOC440910	uncharacterized LOC440910
hsa-miR-1182	1	0	1	1	1	1	FBXW2	F-box and WD repeat domain containing 2
hsa-miR-1182	0	0	1	1	1	1	CD34	CD34 molecule
hsa-miR-1182	0	0	1	1	1	1	PTGR1	prostaglandin reductase 1
hsa-miR-1182	1	0	1	1	1	1	GNG2	guanine nucleotide binding protein (G protein), gamma 2
hsa-miR-1182	1	0	1	1	1	1	IVNS1ABP	influenza virus NS1A binding protein
hsa-miR-1182	1	0	1	1	0	0	TOE1	target of EGR1, member 1 (nuclear)
hsa-miR-1182	0	0	1	0	0	0	LOC283887	uncharacterized LOC283887
hsa-miR-1182	1	0	1	1	1	1	SPTBN1	spectrin, beta, non-erythrocytic 1
hsa-miR-1182	0	0	1	0	0	0	CXXC1P1	CXXC finger protein 1 pseudogene 1
hsa-miR-1182	0	0	1	1	1	1	C19orf47	chromosome 19 open reading frame 47
hsa-miR-1182	0	0	1	1	1	1	SPOCK1	sparc/osteonectin, cwcv and kazal-like domains proteoglycan (testican) 1
hsa-miR-1182	1	0	1	1	1	1	KLC2	kinesin light chain 2
hsa-miR-1182	0	0	1	0	0	0	ZNF806	zinc finger protein 806
hsa-miR-1182	1	0	1	0	1	1	GATAD2B	GATA zinc finger domain containing 2B
hsa-miR-1182	0	0	1	1	0	0	IL11RA	interleukin 11 receptor, alpha
hsa-miR-1182	0	0	1	0	0	0	FLJ37505	uncharacterized LOC400087
hsa-miR-1182	0	0	1	1	0	0	PPOX	protoporphyrinogen oxidase
hsa-miR-1182	1	0	1	1	1	1	TBC1D20	TBC1 domain family, member 20
hsa-miR-1182	0	0	1	1	0	0	DPAGT1	dolichyl-phosphate (UDP-N-acetylglucosamine) N-acetylglucosaminephosphotransferase 1 (GlcNAc-1-P transferase)
hsa-miR-1182	0	0	1	1	1	1	MYBBP1A	MYB binding protein (P160) 1a
hsa-miR-1182	1	0	1	1	1	1	ANKRD46	ankyrin repeat domain 46
hsa-miR-1182	1	0	1	1	0	0	DOT1L	DOT1-like, histone H3 methyltransferase (S. cerevisiae)
hsa-miR-1182	0	0	1	1	1	1	MYO6	myosin VI
hsa-miR-1182	1	0	1	0	1	1	UVRAG	UV radiation resistance associated gene
hsa-miR-1182	1	0	1	0	1	1	UBXN4	UBX domain protein 4
hsa-miR-1182	0	0	1	1	1	1	LTBR	lymphotoxin beta receptor (TNFR superfamily, member 3)
hsa-miR-1182	0	0	1	1	1	1	SETD2	SET domain containing 2
hsa-miR-1182	0	0	1	1	1	1	SIRPB2	signal-regulatory protein beta 2
hsa-miR-1182	0	0	1	0	0	0	LOC100129620	uncharacterized LOC100129620
hsa-miR-1182	1	0	1	1	1	1	SPATS2	spermatogenesis associated, serine-rich 2
hsa-miR-1182	0	0	1	0	0	0	LOC730101	uncharacterized LOC730101
hsa-miR-1182	1	0	1	1	1	1	PEA15	phosphoprotein enriched in astrocytes 15
hsa-miR-1182	0	0	1	1	1	1	P4HB	prolyl 4-hydroxylase, beta polypeptide
hsa-miR-1182	0	0	1	1	0	0	MAP7D1	MAP7 domain containing 1
hsa-miR-1182	0	0	1	1	1	1	LRRC29	leucine rich repeat containing 29
hsa-miR-1182	0	0	1	0	0	0	FAM66C	family with sequence similarity 66, member C
hsa-miR-1182	1	0	1	1	0	0	FBRS	fibrosin
hsa-miR-1182	1	0	1	1	1	1	CRTC2	CREB regulated transcription coactivator 2
hsa-miR-1182	0	0	1	1	1	1	ZNF673	zinc finger family member 673
hsa-miR-1182	0	0	1	1	0	0	ERGIC3	ERGIC and golgi 3
hsa-miR-1182	0	0	1	1	1	1	ARMCX5	armadillo repeat containing, X-linked 5
hsa-miR-1182	1	0	1	1	1	1	SYT6	synaptotagmin VI
hsa-miR-1182	1	0	1	1	1	1	SNRNP70	small nuclear ribonucleoprotein 70kDa (U1)
hsa-miR-1182	0	0	1	1	0	0	TCEANC	transcription elongation factor A (SII) N-terminal and central domain containing
hsa-miR-1182	1	0	1	1	1	1	KL	klotho
hsa-miR-1182	0	0	1	0	0	0	LOC400680	uncharacterized LOC400680
hsa-miR-1182	0	0	1	1	1	1	PPFIBP2	PTPRF interacting protein, binding protein 2 (liprin beta 2)
hsa-miR-1182	0	0	1	0	0	0	LINC00293	long intergenic non-protein coding RNA 293
hsa-miR-1182	0	0	1	0	0	0	LOC284385	uncharacterized LOC284385
hsa-miR-1182	0	0	1	1	0	0	PSAPL1	prosaposin-like 1 (gene/pseudogene)
hsa-miR-1182	1	0	1	1	1	1	ST7L	suppression of tumorigenicity 7 like
hsa-miR-1182	0	0	1	1	0	0	CORO1A	coronin, actin binding protein, 1A
hsa-miR-1182	1	0	1	1	1	1	LZTS2	leucine zipper, putative tumor suppressor 2
hsa-miR-1182	1	0	1	0	1	1	LRBA	LPS-responsive vesicle trafficking, beach and anchor containing
hsa-miR-1182	1	0	1	0	1	1	SQSTM1	sequestosome 1
hsa-miR-1182	1	0	1	1	1	1	CHD6	chromodomain helicase DNA binding protein 6
hsa-miR-1182	0	0	1	1	1	1	GTF2IRD2	GTF2I repeat domain containing 2
hsa-miR-1182	0	0	1	1	1	1	ANKZF1	ankyrin repeat and zinc finger domain containing 1
hsa-miR-1182	0	0	1	1	1	1	ARFGAP2	ADP-ribosylation factor GTPase activating protein 2
hsa-miR-1182	0	0	1	1	0	0	ALDOA	aldolase A, fructose-bisphosphate
hsa-miR-1182	0	0	1	1	0	0	FBXO18	F-box protein, helicase, 18
hsa-miR-1182	1	0	1	1	1	1	WEE1	WEE1 homolog (S. pombe)
hsa-miR-1182	0	0	1	1	1	1	NFKB1	nuclear factor of kappa light polypeptide gene enhancer in B-cells 1
hsa-miR-1182	1	0	1	1	0	0	WIZ	widely interspaced zinc finger motifs
hsa-miR-1182	0	0	1	1	0	0	DGKA	diacylglycerol kinase, alpha 80kDa
hsa-miR-1182	1	0	1	1	1	1	KALRN	kalirin, RhoGEF kinase
hsa-miR-1182	1	0	1	1	1	1	CBLB	Cbl proto-oncogene, E3 ubiquitin protein ligase B
hsa-miR-1182	1	0	1	1	0	0	KCNC1	potassium voltage-gated channel, Shaw-related subfamily, member 1
hsa-miR-1182	0	0	1	1	1	1	RGS3	regulator of G-protein signaling 3
hsa-miR-1182	0	0	1	1	1	1	PCBP2	poly(rC) binding protein 2
hsa-miR-1182	0	0	1	0	1	1	CWC22	CWC22 spliceosome-associated protein homolog (S. cerevisiae)
hsa-miR-1182	1	0	1	1	1	1	SH2D4B	SH2 domain containing 4B
hsa-miR-1182	0	0	1	1	1	1	ANKRD44	ankyrin repeat domain 44
hsa-miR-1182	0	0	1	1	0	0	PTK6	PTK6 protein tyrosine kinase 6
hsa-miR-1182	1	0	1	1	1	1	SMAP1	small ArfGAP 1
hsa-miR-1182	1	0	1	1	1	1	DAB2IP	DAB2 interacting protein
hsa-miR-1182	0	0	1	1	1	1	IDS	iduronate 2-sulfatase
hsa-miR-1182	1	0	1	1	1	1	ERBB3	v-erb-b2 erythroblastic leukemia viral oncogene homolog 3 (avian)
hsa-miR-1182	1	0	1	1	1	1	CORO2B	coronin, actin binding protein, 2B
hsa-miR-1182	0	0	1	1	0	0	PPP1R18	protein phosphatase 1, regulatory subunit 18
hsa-miR-1182	0	0	1	1	1	1	C2orf91	chromosome 2 open reading frame 91
hsa-miR-1182	0	0	1	1	1	1	ATPBD4	ATP binding domain 4
hsa-miR-1182	1	0	1	1	1	1	C17orf85	chromosome 17 open reading frame 85
hsa-miR-1182	0	0	1	0	0	0	TMEM232	transmembrane protein 232
hsa-miR-1182	0	0	1	1	0	0	GABRA2	gamma-aminobutyric acid (GABA) A receptor, alpha 2
hsa-miR-1182	1	0	1	1	0	0	RANBP3	RAN binding protein 3
hsa-miR-1182	0	0	1	0	1	1	RASGRP3	RAS guanyl releasing protein 3 (calcium and DAG-regulated)
hsa-miR-1182	1	0	1	0	0	0	MSL1	male-specific lethal 1 homolog (Drosophila)
hsa-miR-1182	0	0	1	1	1	1	FAM54A	family with sequence similarity 54, member A
hsa-miR-1182	1	0	1	1	1	1	DPY19L3	dpy-19-like 3 (C. elegans)
hsa-miR-1182	0	0	1	0	0	0	FAM75D4	family with sequence similarity 75, member D4
hsa-miR-1182	0	0	1	0	0	0	FAM95B1	family with sequence similarity 95, member B1
hsa-miR-1182	0	0	1	1	0	0	RPRD2	regulation of nuclear pre-mRNA domain containing 2
hsa-miR-1182	0	0	1	1	0	0	FSIP2	fibrous sheath interacting protein 2
hsa-miR-1182	1	0	1	1	1	1	C15orf52	chromosome 15 open reading frame 52
hsa-miR-1182	0	0	1	1	0	0	CCDC88B	coiled-coil domain containing 88B
hsa-miR-1182	0	0	1	1	1	1	MOBP	myelin-associated oligodendrocyte basic protein
hsa-miR-1182	0	0	1	1	1	1	CSPP1	centrosome and spindle pole associated protein 1
hsa-miR-1182	1	0	1	0	1	1	ADIPOR2	adiponectin receptor 2
hsa-miR-1182	0	0	1	0	0	0	LOC619207	scavenger receptor protein family member
hsa-miR-1182	1	0	1	1	1	1	HYOU1	hypoxia up-regulated 1
hsa-miR-1182	0	0	1	0	0	0	GRAMD1B	GRAM domain containing 1B
hsa-miR-1182	1	0	1	0	1	1	SP6	Sp6 transcription factor
hsa-miR-1182	0	0	1	0	0	0	ERVFRD-2	endogenous retrovirus group FRD, member 2
hsa-miR-1182	1	0	1	1	1	1	PLA2G15	phospholipase A2, group XV
hsa-miR-1182	0	0	1	0	0	0	LOC100128098	uncharacterized LOC100128098
hsa-miR-1182	0	0	1	0	0	0	LRRC9	leucine rich repeat containing 9
hsa-miR-1182	1	0	1	1	1	1	SLC12A6	solute carrier family 12 (potassium/chloride transporters), member 6
hsa-miR-1182	1	0	1	0	1	1	KDM2A	lysine (K)-specific demethylase 2A
hsa-miR-1182	1	0	1	0	1	1	BLOC1S6	biogenesis of lysosomal organelles complex-1, subunit 6, pallidin
hsa-miR-1182	0	0	1	1	1	1	RAB13	RAB13, member RAS oncogene family
hsa-miR-1182	0	0	1	1	0	0	HEATR8	HEAT repeat containing 8
hsa-miR-1182	0	0	1	0	1	1	GALNT13	UDP-N-acetyl-alpha-D-galactosamine:polypeptide N-acetylgalactosaminyltransferase 13 (GalNAc-T13)
hsa-miR-1182	0	0	1	0	1	1	RUFY4	RUN and FYVE domain containing 4
hsa-miR-1182	0	0	1	1	0	0	DNASE1L3	deoxyribonuclease I-like 3
hsa-miR-1182	1	0	1	1	1	1	PPP2R5C	protein phosphatase 2, regulatory subunit B', gamma
hsa-miR-1182	0	0	1	1	1	1	SYPL2	synaptophysin-like 2
hsa-miR-1182	0	0	1	1	0	0	ZNF730	zinc finger protein 730
hsa-miR-1182	1	0	1	1	1	1	LRRK2	leucine-rich repeat kinase 2
hsa-miR-1182	0	0	1	1	1	1	PHF12	PHD finger protein 12
hsa-miR-1182	0	0	1	1	0	0	ZSCAN18	zinc finger and SCAN domain containing 18
hsa-miR-1182	1	0	1	1	1	1	SYS1	SYS1 Golgi-localized integral membrane protein homolog (S. cerevisiae)
hsa-miR-1182	0	0	1	1	1	1	AKTIP	AKT interacting protein
hsa-miR-1182	0	0	1	1	1	1	ARID1A	AT rich interactive domain 1A (SWI-like)
hsa-miR-1182	1	0	1	1	1	1	RPS6KA4	ribosomal protein S6 kinase, 90kDa, polypeptide 4
hsa-miR-1182	1	0	1	1	1	1	CYYR1	cysteine/tyrosine-rich 1
hsa-miR-1182	1	0	1	1	1	1	CYFIP2	cytoplasmic FMR1 interacting protein 2
hsa-miR-1182	1	0	1	1	1	1	MEAF6	MYST/Esa1-associated factor 6
hsa-miR-1182	1	0	1	1	1	1	CAMK2G	calcium/calmodulin-dependent protein kinase II gamma
hsa-miR-1182	1	0	1	0	1	1	MAP3K3	mitogen-activated protein kinase kinase kinase 3
hsa-miR-1182	0	0	1	1	1	1	RNF135	ring finger protein 135
hsa-miR-1182	1	0	1	1	1	1	NCOA1	nuclear receptor coactivator 1
hsa-miR-1182	1	0	1	1	1	1	NOVA1	neuro-oncological ventral antigen 1
hsa-miR-1182	0	0	1	1	0	0	TRIM69	tripartite motif containing 69
hsa-miR-1182	1	0	1	1	1	1	DUSP3	dual specificity phosphatase 3
hsa-miR-1182	1	0	1	1	1	1	NECAP1	NECAP endocytosis associated 1
hsa-miR-1182	0	0	1	1	0	0	CPNE6	copine VI (neuronal)
hsa-miR-1182	1	0	1	1	1	1	RIF1	RAP1 interacting factor homolog (yeast)
hsa-miR-1182	0	0	1	0	0	0	POM121L9P	POM121 transmembrane nucleoporin-like 9, pseudogene
hsa-miR-1182	1	0	1	1	1	1	TAB2	TGF-beta activated kinase 1/MAP3K7 binding protein 2
hsa-miR-1182	0	0	1	1	0	0	RIMBP3	RIMS binding protein 3
hsa-miR-1182	0	0	1	1	0	0	ODF3	outer dense fiber of sperm tails 3
hsa-miR-1182	0	0	1	0	0	0	KIAA0913	KIAA0913
hsa-miR-1182	0	0	1	1	1	1	STAG3L1	stromal antigen 3-like 1
hsa-miR-1182	1	0	1	0	1	1	GPR85	G protein-coupled receptor 85
hsa-miR-1182	1	0	1	0	1	1	CEP170	centrosomal protein 170kDa
hsa-miR-1182	1	0	1	1	1	1	NEO1	neogenin 1
hsa-miR-1182	0	0	1	0	0	0	FAM66D	family with sequence similarity 66, member D
hsa-miR-1182	1	0	1	1	1	1	PKNOX2	PBX/knotted 1 homeobox 2
hsa-miR-1182	1	0	1	1	1	1	MSANTD2	Myb/SANT-like DNA-binding domain containing 2
hsa-miR-1182	1	0	1	1	0	0	CHTOP	chromatin target of PRMT1
hsa-miR-1182	1	0	1	0	1	1	FAM19A1	family with sequence similarity 19 (chemokine (C-C motif)-like), member A1
hsa-miR-1182	0	0	1	1	0	0	KRBA1	KRAB-A domain containing 1
hsa-miR-1182	0	0	1	1	1	1	EGFLAM	EGF-like, fibronectin type III and laminin G domains
hsa-miR-1182	1	0	1	1	1	1	CHMP7	charged multivesicular body protein 7
hsa-miR-1182	1	0	1	1	0	0	CELF5	CUGBP, Elav-like family member 5
hsa-miR-1182	1	0	1	1	1	1	SH3TC2	SH3 domain and tetratricopeptide repeats 2
hsa-miR-1182	1	0	1	1	1	1	FBXO3	F-box protein 3
hsa-miR-1182	0	0	1	1	1	1	TMEM138	transmembrane protein 138
hsa-miR-1182	0	0	1	0	1	1	MYD88	myeloid differentiation primary response gene (88)
hsa-miR-1182	0	0	1	1	1	1	AMIGO2	adhesion molecule with Ig-like domain 2
hsa-miR-1182	0	0	1	1	0	0	TMEM91	transmembrane protein 91
hsa-miR-1182	1	0	1	0	1	1	MEF2C	myocyte enhancer factor 2C
hsa-miR-1182	0	0	1	1	1	1	NARG2	NMDA receptor regulated 2
hsa-miR-1182	0	0	1	1	0	0	FCRL3	Fc receptor-like 3
hsa-miR-1182	0	0	1	0	0	0	EPHA1-AS1	EPHA1 antisense RNA 1
hsa-miR-1182	0	0	1	1	1	1	KIAA1841	KIAA1841
hsa-miR-1182	1	0	1	1	1	1	FAM63B	family with sequence similarity 63, member B
hsa-miR-1182	0	0	1	1	0	0	CD37	CD37 molecule
hsa-miR-1182	0	0	1	1	1	1	SLC30A5	solute carrier family 30 (zinc transporter), member 5
hsa-miR-1182	1	0	1	1	1	1	IL17RD	interleukin 17 receptor D
hsa-miR-1182	1	0	1	0	0	0	NPEPL1	aminopeptidase-like 1
hsa-miR-1182	1	0	1	1	1	1	DIS3L2	DIS3 mitotic control homolog (S. cerevisiae)-like 2
hsa-miR-1182	1	0	1	1	1	1	MBD6	methyl-CpG binding domain protein 6
hsa-miR-1182	0	0	1	1	1	1	LMAN2L	lectin, mannose-binding 2-like
hsa-miR-1182	1	0	1	1	1	1	CLIC5	chloride intracellular channel 5
hsa-miR-1182	1	0	1	1	1	1	DUSP16	dual specificity phosphatase 16
hsa-miR-1182	1	0	1	0	1	1	BDNF	brain-derived neurotrophic factor
hsa-miR-1182	1	0	1	1	1	1	RBBP6	retinoblastoma binding protein 6
hsa-miR-1182	0	0	1	1	0	0	CRB3	crumbs homolog 3 (Drosophila)
hsa-miR-1182	1	0	1	1	1	1	KIAA0907	KIAA0907
hsa-miR-1182	0	0	1	0	0	0	CR1L	complement component (3b/4b) receptor 1-like
hsa-miR-1182	1	0	1	1	1	1	GGT7	gamma-glutamyltransferase 7
hsa-miR-1182	0	0	1	1	0	0	CMTM1	CKLF-like MARVEL transmembrane domain containing 1
hsa-miR-1182	1	0	1	1	1	1	VPS13B	vacuolar protein sorting 13 homolog B (yeast)
hsa-miR-1182	0	0	1	1	1	1	IYD	iodotyrosine deiodinase
hsa-miR-1182	1	0	1	1	1	1	TPP1	tripeptidyl peptidase I
hsa-miR-1182	0	0	1	0	0	0	MEG3	maternally expressed 3 (non-protein coding)
hsa-miR-1182	1	0	1	1	1	1	GFRA2	GDNF family receptor alpha 2
hsa-miR-1182	0	0	1	0	0	0	ZNFX1-AS1	ZNFX1 antisense RNA 1
hsa-miR-1182	1	0	1	1	1	1	CAMTA1	calmodulin binding transcription activator 1
hsa-miR-1182	1	0	1	1	1	1	LRRTM3	leucine rich repeat transmembrane neuronal 3
hsa-miR-1182	0	0	1	1	1	1	GPR114	G protein-coupled receptor 114
hsa-miR-1182	1	0	1	1	1	1	NLGN4X	neuroligin 4, X-linked
hsa-miR-1182	0	0	1	1	1	1	PTPRC	protein tyrosine phosphatase, receptor type, C
hsa-miR-1182	1	0	1	1	1	1	GLRA2	glycine receptor, alpha 2
hsa-miR-1182	0	0	1	1	1	1	TIMM50	translocase of inner mitochondrial membrane 50 homolog (S. cerevisiae)
hsa-miR-1182	0	0	1	1	1	1	POTEG	POTE ankyrin domain family, member G
hsa-miR-1182	0	0	1	0	1	1	BRWD3	bromodomain and WD repeat domain containing 3
hsa-miR-1182	1	0	1	1	1	1	MECP2	methyl CpG binding protein 2 (Rett syndrome)
hsa-miR-1182	0	0	1	1	0	0	PAOX	polyamine oxidase (exo-N4-amino)
hsa-miR-1182	0	0	1	1	0	0	ASB16	ankyrin repeat and SOCS box containing 16
hsa-miR-1182	0	0	1	1	1	1	PRPF4	PRP4 pre-mRNA processing factor 4 homolog (yeast)
hsa-miR-1182	0	0	1	1	1	1	HORMAD1	HORMA domain containing 1
hsa-miR-1182	0	0	1	1	1	1	SMPD1	sphingomyelin phosphodiesterase 1, acid lysosomal
hsa-miR-1182	1	0	1	1	1	1	MYB	v-myb myeloblastosis viral oncogene homolog (avian)
hsa-miR-1182	0	0	1	0	0	0	PTPRVP	protein tyrosine phosphatase, receptor type, V, pseudogene
hsa-miR-1182	1	0	1	1	1	1	PCDH11X	protocadherin 11 X-linked
hsa-miR-1182	1	0	1	1	0	0	TAF4B	TAF4b RNA polymerase II, TATA box binding protein (TBP)-associated factor, 105kDa
hsa-miR-1182	0	0	1	1	0	0	NBPF8	neuroblastoma breakpoint family, member 8
hsa-miR-1182	0	0	1	1	1	1	CDK20	cyclin-dependent kinase 20
hsa-miR-1182	0	0	1	1	0	0	KLK4	kallikrein-related peptidase 4
hsa-miR-1182	0	0	1	1	1	1	MTFP1	mitochondrial fission process 1
hsa-miR-1182	1	0	1	1	1	1	TBC1D22B	TBC1 domain family, member 22B
hsa-miR-1182	1	0	1	1	1	1	ZNF282	zinc finger protein 282
hsa-miR-1182	0	0	1	1	1	1	IL23R	interleukin 23 receptor
hsa-miR-1182	0	0	1	1	0	0	NPSR1	neuropeptide S receptor 1
hsa-miR-1182	1	0	1	1	1	1	AMOT	angiomotin
hsa-miR-1182	1	0	1	0	1	1	FAM46A	family with sequence similarity 46, member A
hsa-miR-1182	0	0	1	1	0	0	GFOD2	glucose-fructose oxidoreductase domain containing 2
hsa-miR-1182	0	0	1	1	1	1	C20orf24	chromosome 20 open reading frame 24
hsa-miR-1182	0	0	1	1	1	1	MRRF	mitochondrial ribosome recycling factor
hsa-miR-1182	0	0	1	1	1	1	TUFT1	tuftelin 1
hsa-miR-1182	0	0	1	1	0	0	SNRPB	small nuclear ribonucleoprotein polypeptides B and B1
hsa-miR-1182	1	0	1	1	1	1	SPRY2	sprouty homolog 2 (Drosophila)
hsa-miR-1182	1	0	1	1	1	1	VTA1	Vps20-associated 1 homolog (S. cerevisiae)
hsa-miR-1182	0	0	1	1	1	1	ARFGAP1	ADP-ribosylation factor GTPase activating protein 1
hsa-miR-1182	1	0	1	1	1	1	POU2F2	POU class 2 homeobox 2
hsa-miR-1182	1	0	1	0	1	1	C15orf41	chromosome 15 open reading frame 41
hsa-miR-1182	0	0	1	1	0	0	NFKBID	nuclear factor of kappa light polypeptide gene enhancer in B-cells inhibitor, delta
hsa-miR-1182	1	0	1	1	1	1	COL2A1	collagen, type II, alpha 1
hsa-miR-1182	0	0	1	1	0	0	FAM195A	family with sequence similarity 195, member A
hsa-miR-1182	1	0	1	1	0	0	SAP30BP	SAP30 binding protein
hsa-miR-1182	1	0	1	1	1	1	TRIM39	tripartite motif containing 39
hsa-miR-1182	0	0	1	1	1	1	DPYD	dihydropyrimidine dehydrogenase
hsa-miR-1182	0	0	1	0	1	1	TMEM169	transmembrane protein 169
hsa-miR-1182	0	0	1	1	0	0	SEC16B	SEC16 homolog B (S. cerevisiae)
hsa-miR-1182	0	0	1	0	0	0	ATXN7L3B	ataxin 7-like 3B
hsa-miR-1182	0	0	1	1	1	1	HMBOX1	homeobox containing 1
hsa-miR-1182	0	0	1	0	0	0	LOC400043	uncharacterized LOC400043
hsa-miR-1182	0	0	1	1	0	0	ARHGAP8	Rho GTPase activating protein 8
hsa-miR-1182	0	0	1	1	0	0	NDUFA3	NADH dehydrogenase (ubiquinone) 1 alpha subcomplex, 3, 9kDa
hsa-miR-1182	1	0	1	1	1	1	TRIM2	tripartite motif containing 2
hsa-miR-1182	0	0	1	1	0	0	TCN2	transcobalamin II
hsa-miR-1182	0	0	1	0	0	0	LRRC14	leucine rich repeat containing 14
hsa-miR-1182	0	0	1	1	0	0	CAPNS1	calpain, small subunit 1
hsa-miR-1182	0	0	1	0	0	0	CEACAM21	carcinoembryonic antigen-related cell adhesion molecule 21
hsa-miR-1182	1	0	1	1	1	1	SUPT16H	suppressor of Ty 16 homolog (S. cerevisiae)
hsa-miR-1182	0	0	1	1	1	1	KLF7	Kruppel-like factor 7 (ubiquitous)
hsa-miR-1182	0	0	1	1	1	1	KLHL29	kelch-like 29 (Drosophila)
hsa-miR-1182	1	0	1	1	1	1	YY1	YY1 transcription factor
hsa-miR-1182	0	0	1	1	1	1	PTK7	PTK7 protein tyrosine kinase 7
hsa-miR-1182	0	0	1	1	1	1	TOMM40L	translocase of outer mitochondrial membrane 40 homolog (yeast)-like
hsa-miR-1182	0	0	1	0	0	0	MGC21881	uncharacterized locus MGC21881
hsa-miR-1182	0	0	1	1	1	1	C8orf33	chromosome 8 open reading frame 33
hsa-miR-1182	0	0	1	0	0	0	DTX2P1-UPK3BP1-PMS2P11	DTX2P1-UPK3BP1-PMS2P11 readthrough (non-protein coding)
hsa-miR-1182	0	0	1	1	1	1	PARP9	poly (ADP-ribose) polymerase family, member 9
hsa-miR-1182	0	0	1	1	0	0	ZBTB32	zinc finger and BTB domain containing 32
hsa-miR-1182	1	0	1	1	1	1	ARHGEF9	Cdc42 guanine nucleotide exchange factor (GEF) 9
hsa-miR-1182	0	0	1	0	0	0	ZNF720	zinc finger protein 720
hsa-miR-1182	0	0	1	1	0	0	HIST2H4A	histone cluster 2, H4a
hsa-miR-1182	0	0	1	1	0	0	HIST2H4B	histone cluster 2, H4b
hsa-miR-1182	0	0	1	0	1	1	CD99P1	CD99 molecule pseudogene 1
hsa-miR-1182	0	0	1	0	1	1	TMSB15B	thymosin beta 15B
hsa-miR-1182	0	0	1	1	0	0	NTN5	netrin 5
hsa-miR-1182	1	0	1	1	1	1	SCML4	sex comb on midleg-like 4 (Drosophila)
hsa-miR-1182	0	0	1	0	0	0	LOC284260	uncharacterized LOC284260
hsa-miR-1182	1	0	1	1	0	0	TMEM63B	transmembrane protein 63B
hsa-miR-1182	0	0	1	1	1	1	RNF103	ring finger protein 103
hsa-miR-1182	1	0	1	1	1	1	SPOCK2	sparc/osteonectin, cwcv and kazal-like domains proteoglycan (testican) 2
hsa-miR-1182	0	0	1	1	0	0	C16orf91	chromosome 16 open reading frame 91
hsa-miR-1182	1	0	1	1	1	1	ZNF200	zinc finger protein 200
hsa-miR-1182	0	0	1	0	0	0	TRAV20	T cell receptor alpha variable 20
hsa-miR-1182	0	0	1	0	0	0	ZBED3-AS1	ZBED3 antisense RNA 1
hsa-miR-1182	1	0	1	1	1	1	ZDHHC5	zinc finger, DHHC-type containing 5
hsa-miR-1182	1	0	1	0	1	1	CERS3	ceramide synthase 3
hsa-miR-1182	1	0	1	1	1	1	APPL2	adaptor protein, phosphotyrosine interaction, PH domain and leucine zipper containing 2
hsa-miR-1182	0	0	1	1	0	0	SYT3	synaptotagmin III
hsa-miR-1182	1	0	1	1	1	1	TMEM127	transmembrane protein 127
hsa-miR-1182	1	0	1	1	1	1	HTR2C	5-hydroxytryptamine (serotonin) receptor 2C, G protein-coupled
hsa-miR-1182	0	0	1	1	1	1	SH3TC1	SH3 domain and tetratricopeptide repeats 1
hsa-miR-1182	0	0	1	1	1	1	PIP5K1B	phosphatidylinositol-4-phosphate 5-kinase, type I, beta
hsa-miR-1182	0	0	1	1	1	1	CTNNA3	catenin (cadherin-associated protein), alpha 3
hsa-miR-1182	0	0	1	1	0	0	FREM1	FRAS1 related extracellular matrix 1
hsa-miR-1182	1	0	1	1	1	1	BZRAP1	benzodiazapine receptor (peripheral) associated protein 1
hsa-miR-1182	0	0	1	0	1	1	B3GALTL	beta 1,3-galactosyltransferase-like
hsa-miR-1182	0	0	1	1	1	1	C7orf53	chromosome 7 open reading frame 53
hsa-miR-1182	1	0	1	1	1	1	TBC1D1	TBC1 (tre-2/USP6, BUB2, cdc16) domain family, member 1
hsa-miR-1182	0	0	1	1	0	0	TREM2	triggering receptor expressed on myeloid cells 2
hsa-miR-1182	1	0	1	1	1	1	PHF17	PHD finger protein 17
hsa-miR-1182	0	0	1	0	1	1	PLEKHM1P	pleckstrin homology domain containing, family M (with RUN domain) member 1 pseudogene
hsa-miR-1182	1	0	1	1	1	1	PMAIP1	phorbol-12-myristate-13-acetate-induced protein 1
hsa-miR-1182	1	0	1	1	1	1	TTC39C	tetratricopeptide repeat domain 39C
hsa-miR-1182	0	0	1	1	1	1	UBXN1	UBX domain protein 1
hsa-miR-1182	1	0	1	1	1	1	RAB5B	RAB5B, member RAS oncogene family
hsa-miR-1182	1	0	1	1	1	1	RHOBTB1	Rho-related BTB domain containing 1
hsa-miR-1182	0	0	1	0	1	1	TTC23L	tetratricopeptide repeat domain 23-like
hsa-miR-1182	1	0	1	1	1	1	SORL1	sortilin-related receptor, L(DLR class) A repeats containing
hsa-miR-1182	1	0	1	1	1	1	SIRPA	signal-regulatory protein alpha
hsa-miR-1182	0	0	1	0	0	0	BCAS3	breast carcinoma amplified sequence 3
hsa-miR-1182	1	0	1	0	1	1	KCTD2	potassium channel tetramerisation domain containing 2
hsa-miR-1182	0	0	1	1	1	1	C16orf89	chromosome 16 open reading frame 89
hsa-miR-1182	1	0	1	1	1	1	PCDHA5	protocadherin alpha 5
hsa-miR-1182	0	0	1	1	0	0	ADAP2	ArfGAP with dual PH domains 2
hsa-miR-1182	1	0	1	1	0	0	GPR137	G protein-coupled receptor 137
hsa-miR-1182	0	0	1	0	0	0	NBR2	neighbor of BRCA1 gene 2 (non-protein coding)
hsa-miR-1182	0	0	1	1	1	1	HEXA	hexosaminidase A (alpha polypeptide)
hsa-miR-1182	0	0	1	0	1	1	DKFZP434I0714	uncharacterized protein DKFZP434I0714
hsa-miR-1182	0	0	1	0	1	1	GPR155	G protein-coupled receptor 155
hsa-miR-1182	0	0	1	1	1	1	C6	complement component 6
hsa-miR-1182	1	0	1	1	1	1	ZNF618	zinc finger protein 618
hsa-miR-1182	0	0	1	1	1	1	DUSP28	dual specificity phosphatase 28
hsa-miR-1182	0	0	1	0	0	0	FAM201A	family with sequence similarity 201, member A
hsa-miR-1182	0	0	1	0	1	1	C9orf57	chromosome 9 open reading frame 57
hsa-miR-1182	1	0	1	1	1	1	SLC35G1	solute carrier family 35, member G1
hsa-miR-1182	1	0	1	1	1	1	MEIS1	Meis homeobox 1
hsa-miR-1182	0	0	1	1	1	1	SNX22	sorting nexin 22
hsa-miR-1182	1	0	1	0	1	1	NEGR1	neuronal growth regulator 1
hsa-miR-1182	0	0	1	0	0	0	SRGAP2C	SLIT-ROBO Rho GTPase activating protein 2C
hsa-miR-1182	0	0	1	0	0	0	LOC284889	uncharacterized LOC284889
hsa-miR-1182	1	0	1	1	1	1	BNC2	basonuclin 2
hsa-miR-1182	1	0	1	1	1	1	WDR48	WD repeat domain 48
hsa-miR-1182	0	0	1	0	0	0	CYP4F35P	cytochrome P450, family 4, subfamily F, polypeptide 35, pseudogene
hsa-miR-1182	1	0	1	0	1	1	YAF2	YY1 associated factor 2
hsa-miR-1182	1	0	1	1	1	1	SLC35F3	solute carrier family 35, member F3
hsa-miR-1182	0	0	1	0	0	0	INHBA-AS1	INHBA antisense RNA 1
hsa-miR-1182	1	0	1	1	1	1	WSCD2	WSC domain containing 2
hsa-miR-1182	1	0	1	1	0	0	CHD4	chromodomain helicase DNA binding protein 4
hsa-miR-1182	0	0	1	1	0	0	H2AFZ	H2A histone family, member Z
hsa-miR-1182	0	0	1	1	0	0	CCDC152	coiled-coil domain containing 152
hsa-miR-1182	1	0	1	1	1	1	FGFR2	fibroblast growth factor receptor 2
hsa-miR-1182	0	0	1	0	0	0	USP32P1	ubiquitin specific peptidase 32 pseudogene 1
hsa-miR-1182	0	0	1	0	0	0	DLGAP1-AS3	DLGAP1 antisense RNA 3
hsa-miR-1182	1	0	1	1	0	0	HES7	hairy and enhancer of split 7 (Drosophila)
hsa-miR-1182	1	0	1	1	1	1	FOSB	FBJ murine osteosarcoma viral oncogene homolog B
hsa-miR-1182	1	0	1	1	1	1	DPP8	dipeptidyl-peptidase 8
hsa-miR-1182	0	0	1	1	1	1	ZFP90	zinc finger protein 90 homolog (mouse)
hsa-miR-1182	1	0	1	1	1	1	KCNJ11	potassium inwardly-rectifying channel, subfamily J, member 11
hsa-miR-1182	0	0	1	1	0	0	TMEM95	transmembrane protein 95
hsa-miR-1182	0	0	1	0	0	0	SLC7A11-AS1	SLC7A11 antisense RNA 1
hsa-miR-1182	0	0	1	0	1	1	METTL12	methyltransferase like 12
hsa-miR-1182	1	0	1	1	1	1	ARPP21	cAMP-regulated phosphoprotein, 21kDa
hsa-miR-1182	1	0	1	1	0	0	INPP5J	inositol polyphosphate-5-phosphatase J
hsa-miR-1182	0	0	1	0	0	0	CDKL3	cyclin-dependent kinase-like 3
hsa-miR-1182	0	0	1	1	1	1	MTHFD2L	methylenetetrahydrofolate dehydrogenase (NADP+ dependent) 2-like
hsa-miR-1182	0	0	1	0	0	0	LOC338579	ankyrin repeat domain-containing protein 30B pseudogene
hsa-miR-1182	0	0	1	0	0	0	LOC157381	uncharacterized LOC157381
hsa-miR-1182	0	0	1	0	0	0	DKFZp686O1327	uncharacterized LOC401014
hsa-miR-1182	1	0	1	1	1	1	AGAP3	ArfGAP with GTPase domain, ankyrin repeat and PH domain 3
hsa-miR-1182	0	0	1	1	1	1	MST1	macrophage stimulating 1 (hepatocyte growth factor-like)
hsa-miR-1182	0	0	1	0	0	0	LOC283914	uncharacterized LOC283914
hsa-miR-1182	1	0	1	1	1	1	SF3B1	splicing factor 3b, subunit 1, 155kDa
hsa-miR-1182	1	0	1	1	1	1	CARM1	coactivator-associated arginine methyltransferase 1
hsa-miR-1182	0	0	1	1	0	0	LILRA1	leukocyte immunoglobulin-like receptor, subfamily A (with TM domain), member 1
hsa-miR-1182	1	0	1	0	1	1	LYPD6	LY6/PLAUR domain containing 6
hsa-miR-1182	0	0	1	0	0	0	DPY19L2P4	dpy-19-like 2 pseudogene 4 (C. elegans)
hsa-miR-1182	1	0	1	1	1	1	KIF2A	kinesin heavy chain member 2A
hsa-miR-1182	0	0	1	1	1	1	ZNF589	zinc finger protein 589
hsa-miR-1182	1	0	1	1	1	1	PTPRG	protein tyrosine phosphatase, receptor type, G
hsa-miR-1182	0	0	1	1	0	0	RFNG	RFNG O-fucosylpeptide 3-beta-N-acetylglucosaminyltransferase
hsa-miR-1182	0	0	1	1	0	0	NLRC5	NLR family, CARD domain containing 5
hsa-miR-1182	1	0	1	1	1	1	FNDC3A	fibronectin type III domain containing 3A
hsa-miR-1182	1	0	1	0	1	1	SEMA4G	sema domain, immunoglobulin domain (Ig), transmembrane domain (TM) and short cytoplasmic domain, (semaphorin) 4G
hsa-miR-1182	0	0	1	0	0	0	BMS1P6	BMS1 pseudogene 6
hsa-miR-1182	0	0	1	1	1	1	SLC25A35	solute carrier family 25, member 35
hsa-miR-1182	1	0	1	0	1	1	C14orf43	chromosome 14 open reading frame 43
hsa-miR-1182	0	0	1	0	0	0	LINC00265	long intergenic non-protein coding RNA 265
hsa-miR-1182	0	0	1	0	1	1	C17orf51	chromosome 17 open reading frame 51
hsa-miR-1182	1	0	1	1	1	1	OLFML2A	olfactomedin-like 2A
hsa-miR-1182	1	0	1	1	1	1	KDM5C	lysine (K)-specific demethylase 5C
hsa-miR-1182	0	0	1	1	0	0	ABHD1	abhydrolase domain containing 1
hsa-miR-1182	0	0	1	1	0	0	BCL7C	B-cell CLL/lymphoma 7C
hsa-miR-1182	1	0	1	1	1	1	ZEB2	zinc finger E-box binding homeobox 2
hsa-miR-1182	1	0	1	1	1	1	PDGFRA	platelet-derived growth factor receptor, alpha polypeptide
hsa-miR-1182	0	0	1	1	0	0	C8orf31	chromosome 8 open reading frame 31
hsa-miR-1182	0	0	1	0	0	0	SCAND2	SCAN domain containing 2 pseudogene
hsa-miR-1182	1	0	1	0	0	0	PRRT4	proline-rich transmembrane protein 4
hsa-miR-1182	0	0	1	1	0	0	CLIC1	chloride intracellular channel 1
hsa-miR-1182	1	0	1	1	1	1	ADCY6	adenylate cyclase 6
hsa-miR-1182	1	0	1	1	1	1	VTCN1	V-set domain containing T cell activation inhibitor 1
hsa-miR-1182	1	0	1	1	1	1	C5orf25	chromosome 5 open reading frame 25
hsa-miR-1182	1	0	1	1	1	1	NRSN1	neurensin 1
hsa-miR-1182	1	0	1	0	1	1	MAGIX	MAGI family member, X-linked
hsa-miR-1182	0	0	1	0	0	0	LINC00442	long intergenic non-protein coding RNA 442
hsa-miR-1182	0	0	1	1	0	0	CELF3	CUGBP, Elav-like family member 3
hsa-miR-1182	1	0	1	1	1	1	SLC26A7	solute carrier family 26, member 7
hsa-miR-1182	1	0	1	1	1	1	MAPKAPK3	mitogen-activated protein kinase-activated protein kinase 3
hsa-miR-1182	1	0	1	1	1	1	PHACTR4	phosphatase and actin regulator 4
hsa-miR-1182	1	0	1	1	1	1	SRPK2	SRSF protein kinase 2
hsa-miR-1182	1	0	1	1	0	0	TMEM198	transmembrane protein 198
hsa-miR-1182	1	0	1	1	1	1	EED	embryonic ectoderm development
hsa-miR-1182	1	0	1	0	1	1	SLC7A2	solute carrier family 7 (cationic amino acid transporter, y+ system), member 2
hsa-miR-1182	0	0	1	0	0	0	ZRANB2-AS1	ZRANB2 antisense RNA 1
hsa-miR-1182	1	0	1	0	1	1	TMEM194A	transmembrane protein 194A
hsa-miR-1182	0	0	1	0	0	0	LOC100147773	uncharacterized LOC100147773
hsa-miR-1182	0	0	1	0	0	0	JPX	JPX transcript, XIST activator (non-protein coding)
hsa-miR-1182	1	0	1	1	1	1	RARG	retinoic acid receptor, gamma
hsa-miR-1182	0	0	1	1	0	0	TRIM73	tripartite motif containing 73
hsa-miR-1182	0	0	1	0	1	1	SH3RF2	SH3 domain containing ring finger 2
hsa-miR-1182	1	0	1	1	1	1	OPCML	opioid binding protein/cell adhesion molecule-like
hsa-miR-1182	0	0	1	0	0	0	AGAP9	ArfGAP with GTPase domain, ankyrin repeat and PH domain 9
hsa-miR-1182	1	0	1	0	1	1	AMMECR1L	AMME chromosomal region gene 1-like
hsa-miR-1182	0	0	1	0	0	0	LOC554249	uncharacterized LOC554249
hsa-miR-1182	0	0	1	1	0	0	ZNF703	zinc finger protein 703
hsa-miR-1182	0	0	1	1	1	1	MAPK13	mitogen-activated protein kinase 13
hsa-miR-1182	1	0	1	1	1	1	HNRNPC	heterogeneous nuclear ribonucleoprotein C (C1/C2)
hsa-miR-1182	0	0	1	1	0	0	TMEM222	transmembrane protein 222
hsa-miR-1182	1	0	1	1	1	1	ZMYND11	zinc finger, MYND-type containing 11
hsa-miR-1182	0	0	1	0	1	1	CCL4L2	chemokine (C-C motif) ligand 4-like 2
hsa-miR-1182	0	0	1	1	1	1	CCL4L1	chemokine (C-C motif) ligand 4-like 1
hsa-miR-1182	1	0	1	1	1	1	STK38	serine/threonine kinase 38
hsa-miR-1182	1	0	1	1	1	1	ST8SIA2	ST8 alpha-N-acetyl-neuraminide alpha-2,8-sialyltransferase 2
hsa-miR-1182	0	0	1	1	0	0	RPS9	ribosomal protein S9
hsa-miR-1182	0	0	1	1	1	1	R3HCC1L	R3H domain and coiled-coil containing 1-like
hsa-miR-1182	0	0	1	1	1	1	C7orf10	chromosome 7 open reading frame 10
hsa-miR-1182	0	0	1	1	0	0	IDUA	iduronidase, alpha-L-
hsa-miR-1182	1	0	1	0	1	1	ARPP19	cAMP-regulated phosphoprotein, 19kDa
hsa-miR-1182	0	0	1	1	1	1	XG	Xg blood group
hsa-miR-1182	0	0	1	1	0	0	RGL4	ral guanine nucleotide dissociation stimulator-like 4
hsa-miR-1182	0	0	1	0	0	0	CCDC163P	coiled-coil domain containing 163, pseudogene
hsa-miR-1182	1	0	1	0	1	1	VANGL2	vang-like 2 (van gogh, Drosophila)
hsa-miR-1182	1	0	1	0	1	1	KCNT2	potassium channel, subfamily T, member 2
hsa-miR-1182	0	0	1	0	0	0	LOC150577	uncharacterized LOC150577
hsa-miR-1182	0	0	1	1	0	0	RIPPLY1	ripply1 homolog (zebrafish)
hsa-miR-1182	0	0	1	1	0	0	USP19	ubiquitin specific peptidase 19
hsa-miR-1182	1	0	1	1	1	1	PTPRD	protein tyrosine phosphatase, receptor type, D
hsa-miR-1182	1	0	1	1	1	1	PNISR	PNN-interacting serine/arginine-rich protein
hsa-miR-1182	1	0	1	1	1	1	USP34	ubiquitin specific peptidase 34
hsa-miR-1182	0	0	1	1	0	0	SLC17A4	solute carrier family 17 (sodium phosphate), member 4
hsa-miR-1182	1	0	1	1	1	1	SP4	Sp4 transcription factor
hsa-miR-1182	0	0	1	1	0	0	IL31RA	interleukin 31 receptor A
hsa-miR-1182	0	0	1	1	0	0	RELA	v-rel reticuloendotheliosis viral oncogene homolog A (avian)
hsa-miR-1182	0	0	1	1	0	0	TMC2	transmembrane channel-like 2
hsa-miR-1182	0	0	1	0	0	0	INTS4L1	integrator complex subunit 4-like 1
hsa-miR-1182	0	0	1	0	0	0	LRRC37A11P	leucine rich repeat containing 37, member A11, pseudogene
hsa-miR-1182	0	0	1	1	0	0	PRAMEF10	PRAME family member 10
hsa-miR-1182	0	0	1	1	0	0	RNF123	ring finger protein 123
hsa-miR-1182	1	0	1	1	1	1	TMEM132B	transmembrane protein 132B
hsa-miR-1182	0	0	1	1	0	0	THBS3	thrombospondin 3
hsa-miR-1182	0	0	1	1	0	0	C14orf178	chromosome 14 open reading frame 178
hsa-miR-1182	0	0	1	1	0	0	TMC1	transmembrane channel-like 1
hsa-miR-1182	0	0	1	1	1	1	C14orf105	chromosome 14 open reading frame 105
hsa-miR-1182	1	0	1	1	1	1	ZNF827	zinc finger protein 827
hsa-miR-1182	0	0	1	0	0	0	LRRC37BP1	leucine rich repeat containing 37B pseudogene 1
hsa-miR-1182	1	0	1	1	1	1	OSBP2	oxysterol binding protein 2
hsa-miR-1182	0	0	1	0	0	0	CCT6P1	chaperonin containing TCP1, subunit 6 (zeta) pseudogene 1
hsa-miR-1182	0	0	1	1	0	0	SOCS7	suppressor of cytokine signaling 7
hsa-miR-1182	0	0	1	1	0	0	PLCXD2	phosphatidylinositol-specific phospholipase C, X domain containing 2
hsa-miR-1182	0	0	1	0	0	0	EEF1DP3	eukaryotic translation elongation factor 1 delta pseudogene 3
hsa-miR-1182	0	0	1	0	0	0	KRT8P12	keratin 8 pseudogene 12
hsa-miR-1182	0	0	1	1	1	1	RNF14	ring finger protein 14
hsa-miR-1182	1	0	1	1	1	1	MEGF11	multiple EGF-like-domains 11
hsa-miR-1182	1	0	1	1	1	1	ZMYM4	zinc finger, MYM-type 4
hsa-miR-1182	0	0	1	1	0	0	KIF13A	kinesin family member 13A
hsa-miR-1182	0	0	1	1	1	1	SLC22A23	solute carrier family 22, member 23
hsa-miR-1182	0	0	1	1	0	0	HSF4	heat shock transcription factor 4
hsa-miR-1182	0	0	1	0	0	0	FAM225B	family with sequence similarity 225, member B (non-protein coding)
hsa-miR-1182	0	0	1	0	0	0	LILRP2	leukocyte immunoglobulin-like receptor pseudogene 2
hsa-miR-1182	0	0	1	1	0	0	TCHH	trichohyalin
hsa-miR-1182	0	0	1	1	1	1	PRKAR2A	protein kinase, cAMP-dependent, regulatory, type II, alpha
hsa-miR-1182	0	0	1	0	0	0	FUT8-AS1	FUT8 antisense RNA 1
hsa-miR-1182	0	0	1	1	1	1	TINF2	TERF1 (TRF1)-interacting nuclear factor 2
hsa-miR-1182	0	0	1	1	0	0	NDRG2	NDRG family member 2
hsa-miR-1182	0	0	1	1	1	1	RAD51B	RAD51 homolog B (S. cerevisiae)
hsa-miR-1182	0	0	1	1	1	1	CNIH	cornichon homolog (Drosophila)
hsa-miR-1182	0	0	1	1	0	0	C2	complement component 2
hsa-miR-1182	1	0	1	1	1	1	LITAF	lipopolysaccharide-induced TNF factor
hsa-miR-1182	1	0	1	1	0	0	KRT80	keratin 80
hsa-miR-1182	1	0	1	1	1	1	SGCD	sarcoglycan, delta (35kDa dystrophin-associated glycoprotein)
hsa-miR-1182	1	0	1	1	1	1	TRIM37	tripartite motif containing 37
hsa-miR-1182	1	0	1	1	1	1	SUN2	Sad1 and UNC84 domain containing 2
hsa-miR-1182	1	0	1	1	1	1	ETS1	v-ets erythroblastosis virus E26 oncogene homolog 1 (avian)
hsa-miR-1182	1	0	1	1	1	1	SLC35F1	solute carrier family 35, member F1
hsa-miR-1182	0	0	1	0	0	0	PCNXL3	pecanex-like 3 (Drosophila)
hsa-miR-1182	0	0	1	1	1	1	GTF3C2	general transcription factor IIIC, polypeptide 2, beta 110kDa
hsa-miR-1182	1	0	1	1	1	1	SH3BP4	SH3-domain binding protein 4
hsa-miR-1182	1	0	1	1	1	1	CGN	cingulin
hsa-miR-1182	0	0	1	1	0	0	SNAPC2	small nuclear RNA activating complex, polypeptide 2, 45kDa
hsa-miR-1182	0	0	1	0	1	1	GTF2H2D	general transcription factor IIH, polypeptide 2D
hsa-miR-1182	1	0	1	1	1	1	TC2N	tandem C2 domains, nuclear
hsa-miR-1182	1	0	1	1	1	1	DCAF5	DDB1 and CUL4 associated factor 5
hsa-miR-1182	1	0	1	1	1	1	NAV1	neuron navigator 1
hsa-miR-1182	1	0	1	1	1	1	RECK	reversion-inducing-cysteine-rich protein with kazal motifs
hsa-miR-1182	1	0	1	0	1	1	TBL1XR1	transducin (beta)-like 1 X-linked receptor 1
hsa-miR-1182	1	0	1	1	1	1	FAM208A	family with sequence similarity 208, member A
hsa-miR-1182	1	0	1	0	1	1	C1orf21	chromosome 1 open reading frame 21
hsa-miR-1182	0	0	1	0	0	0	DKFZp686K1684	uncharacterized LOC440034
hsa-miR-1182	1	0	1	1	1	1	DLG5	discs, large homolog 5 (Drosophila)
hsa-miR-1182	0	0	1	1	1	1	PLA2G4C	phospholipase A2, group IVC (cytosolic, calcium-independent)
hsa-miR-1182	1	0	1	1	1	1	ARHGDIA	Rho GDP dissociation inhibitor (GDI) alpha
hsa-miR-1182	0	0	1	1	0	0	TPM2	tropomyosin 2 (beta)
hsa-miR-1182	1	0	1	0	0	0	IGLON5	IgLON family member 5
hsa-miR-1182	0	0	1	1	0	0	SPATA6	spermatogenesis associated 6
hsa-miR-1182	0	0	1	1	1	1	SMYD5	SMYD family member 5
hsa-miR-1182	0	0	1	1	0	0	H2AFY2	H2A histone family, member Y2
hsa-miR-1182	0	0	1	1	1	1	KIAA0141	KIAA0141
hsa-miR-1182	0	0	1	0	0	0	LOC100128988	uncharacterized LOC100128988
hsa-miR-1182	1	0	1	1	1	1	FUT9	fucosyltransferase 9 (alpha (1,3) fucosyltransferase)
hsa-miR-1182	1	0	1	1	0	0	CGREF1	cell growth regulator with EF-hand domain 1
hsa-miR-1182	0	0	1	0	0	0	FLJ30838	uncharacterized LOC400955
hsa-miR-1182	0	0	1	1	1	1	UPRT	uracil phosphoribosyltransferase (FUR1) homolog (S. cerevisiae)
hsa-miR-1182	0	0	1	1	1	1	DGCR14	DiGeorge syndrome critical region gene 14
hsa-miR-1182	1	0	1	1	1	1	TARBP2	TAR (HIV-1) RNA binding protein 2
hsa-miR-1182	1	0	1	1	1	1	EIF4B	eukaryotic translation initiation factor 4B
hsa-miR-1182	0	0	1	1	0	0	URM1	ubiquitin related modifier 1
hsa-miR-1182	1	0	1	0	1	1	OLA1	Obg-like ATPase 1
hsa-miR-1182	0	0	1	1	1	1	APH1A	anterior pharynx defective 1 homolog A (C. elegans)
hsa-miR-1182	1	0	1	1	0	0	TSC22D4	TSC22 domain family, member 4
hsa-miR-1182	1	0	1	1	1	1	CLDN11	claudin 11
hsa-miR-1182	0	0	1	1	0	0	PTOV1	prostate tumor overexpressed 1
hsa-miR-1182	0	0	1	1	0	0	CYGB	cytoglobin
hsa-miR-1182	0	0	1	1	0	0	FXYD7	FXYD domain containing ion transport regulator 7
hsa-miR-1182	0	0	1	1	1	1	BTF3	basic transcription factor 3
hsa-miR-1182	0	0	1	1	0	0	FCGRT	Fc fragment of IgG, receptor, transporter, alpha
hsa-miR-1182	1	0	1	1	1	1	DOLPP1	dolichyl pyrophosphate phosphatase 1
hsa-miR-1182	0	0	1	1	0	0	FCHO1	FCH domain only 1
hsa-miR-1182	1	1	1	1	0	0	EFNA3	ephrin-A3
hsa-miR-1182	0	0	1	0	1	1	BLM	Bloom syndrome, RecQ helicase-like
hsa-miR-1182	1	0	1	1	1	1	FGF11	fibroblast growth factor 11
hsa-miR-1182	1	0	1	1	1	1	E2F3	E2F transcription factor 3
hsa-miR-1182	1	0	1	1	1	1	RASL12	RAS-like, family 12
hsa-miR-1182	0	0	1	1	1	1	COPS7A	COP9 constitutive photomorphogenic homolog subunit 7A (Arabidopsis)
hsa-miR-1182	1	0	1	1	1	1	SSR1	signal sequence receptor, alpha
hsa-miR-1182	0	0	1	1	1	1	BLZF1	basic leucine zipper nuclear factor 1
hsa-miR-1182	0	0	1	1	1	1	ABCD1	ATP-binding cassette, sub-family D (ALD), member 1
hsa-miR-1182	0	0	1	1	0	0	CGRRF1	cell growth regulator with ring finger domain 1
hsa-miR-1182	0	0	1	1	1	1	ZNF263	zinc finger protein 263
hsa-miR-1182	0	0	1	1	1	1	PCK2	phosphoenolpyruvate carboxykinase 2 (mitochondrial)
hsa-miR-1182	0	0	1	1	1	1	NAPA	N-ethylmaleimide-sensitive factor attachment protein, alpha
hsa-miR-1182	1	0	1	1	1	1	PLEKHB2	pleckstrin homology domain containing, family B (evectins) member 2
hsa-miR-1182	0	0	1	1	0	0	WISP2	WNT1 inducible signaling pathway protein 2
hsa-miR-1182	0	0	1	0	0	0	LOC654433	uncharacterized LOC654433
hsa-miR-1182	0	0	1	1	1	1	GRAP2	GRB2-related adaptor protein 2
hsa-miR-1182	0	0	1	1	1	1	ANKRD53	ankyrin repeat domain 53
hsa-miR-1182	1	0	1	1	0	0	YPEL3	yippee-like 3 (Drosophila)
hsa-miR-1182	1	0	1	1	0	0	MAP3K10	mitogen-activated protein kinase kinase kinase 10
hsa-miR-1182	0	0	1	1	0	0	CXorf40A	chromosome X open reading frame 40A
hsa-miR-1182	0	0	1	1	0	0	STK19	serine/threonine kinase 19
hsa-miR-1182	0	0	1	1	1	1	TOX4	TOX high mobility group box family member 4
hsa-miR-1182	1	0	1	1	1	1	DKK3	dickkopf 3 homolog (Xenopus laevis)
hsa-miR-1182	0	0	1	0	0	0	FLJ45248	FLJ45248 protein
hsa-miR-1182	1	0	1	1	0	0	THY1	Thy-1 cell surface antigen
hsa-miR-1182	0	0	1	1	1	1	CAPZB	capping protein (actin filament) muscle Z-line, beta
hsa-miR-1182	0	0	1	1	1	1	PDLIM1	PDZ and LIM domain 1
hsa-miR-1182	0	0	1	1	1	1	CHEK1	checkpoint kinase 1
hsa-miR-1182	1	0	1	1	1	1	MMP2	matrix metallopeptidase 2 (gelatinase A, 72kDa gelatinase, 72kDa type IV collagenase)
hsa-miR-1182	0	0	1	1	1	1	TMEM109	transmembrane protein 109
hsa-miR-1182	0	0	1	1	0	0	PTGDS	prostaglandin D2 synthase 21kDa (brain)
hsa-miR-1182	0	0	1	1	1	1	CD3E	CD3e molecule, epsilon (CD3-TCR complex)
hsa-miR-1182	0	0	1	1	0	0	CCDC22	coiled-coil domain containing 22
hsa-miR-1182	0	0	1	1	1	1	SAP130	Sin3A-associated protein, 130kDa
hsa-miR-1182	0	0	1	1	1	1	CPZ	carboxypeptidase Z
hsa-miR-1182	1	0	1	1	1	1	ARNTL	aryl hydrocarbon receptor nuclear translocator-like
hsa-miR-1182	0	0	1	1	1	1	PEX19	peroxisomal biogenesis factor 19
hsa-miR-1182	1	0	1	1	1	1	IMPA2	inositol(myo)-1(or 4)-monophosphatase 2
hsa-miR-1182	0	0	1	0	0	0	LOC254559	uncharacterized LOC254559
hsa-miR-1182	1	0	1	1	1	1	PRDM2	PR domain containing 2, with ZNF domain
hsa-miR-1182	0	0	1	1	1	1	BFAR	bifunctional apoptosis regulator
hsa-miR-1182	1	0	1	1	1	1	TIMP3	TIMP metallopeptidase inhibitor 3
hsa-miR-1182	0	0	1	1	0	0	EEF1A2	eukaryotic translation elongation factor 1 alpha 2
hsa-miR-1182	1	0	1	1	1	1	DPF2	D4, zinc and double PHD fingers family 2
hsa-miR-1182	0	0	1	1	0	0	TMEM120A	transmembrane protein 120A
hsa-miR-1182	0	0	1	1	0	0	FAM57B	family with sequence similarity 57, member B
hsa-miR-1182	0	0	1	1	1	1	XBP1	X-box binding protein 1
hsa-miR-1182	0	0	1	1	1	1	ACSF3	acyl-CoA synthetase family member 3
hsa-miR-1182	1	0	1	1	1	1	CNBP	CCHC-type zinc finger, nucleic acid binding protein
hsa-miR-1182	1	0	1	1	1	1	GOLGA7	golgin A7
hsa-miR-1182	1	0	1	1	0	0	ATP6V1B2	ATPase, H+ transporting, lysosomal 56/58kDa, V1 subunit B2
hsa-miR-1182	0	0	1	1	0	0	ZNF511	zinc finger protein 511
hsa-miR-1182	0	0	1	1	0	0	GMNN	geminin, DNA replication inhibitor
hsa-miR-1182	0	0	1	1	1	1	TMEM14C	transmembrane protein 14C
hsa-miR-1182	0	0	1	1	0	0	CD79B	CD79b molecule, immunoglobulin-associated beta
hsa-miR-1182	1	0	1	1	0	0	INO80E	INO80 complex subunit E
hsa-miR-1182	1	0	1	1	1	1	RNF2	ring finger protein 2
hsa-miR-1182	1	0	1	0	1	1	GIT2	G protein-coupled receptor kinase interacting ArfGAP 2
hsa-miR-1182	1	0	1	1	1	1	TAGLN2	transgelin 2
hsa-miR-1182	1	0	1	1	1	1	RALY	RNA binding protein, autoantigenic (hnRNP-associated with lethal yellow homolog (mouse))
hsa-miR-1182	0	0	1	1	1	1	HS3ST2	heparan sulfate (glucosamine) 3-O-sulfotransferase 2
hsa-miR-1182	0	0	1	1	1	1	PTGES	prostaglandin E synthase
hsa-miR-1182	1	0	1	1	1	1	ACTN4	actinin, alpha 4
hsa-miR-1182	1	0	1	1	0	0	CCM2	cerebral cavernous malformation 2
hsa-miR-1182	1	0	1	0	1	1	CD47	CD47 molecule
hsa-miR-1182	0	0	1	0	0	0	GNB2L1	guanine nucleotide binding protein (G protein), beta polypeptide 2-like 1
hsa-miR-1182	0	0	1	1	1	1	TNK1	tyrosine kinase, non-receptor, 1
hsa-miR-1182	0	0	1	1	1	1	PTMA	prothymosin, alpha
hsa-miR-1182	1	0	1	1	1	1	TIPRL	TIP41, TOR signaling pathway regulator-like (S. cerevisiae)
hsa-miR-1182	0	0	1	1	0	0	FES	feline sarcoma oncogene
hsa-miR-1182	0	0	1	1	1	1	ZFAND1	zinc finger, AN1-type domain 1
hsa-miR-1182	0	0	1	1	0	0	PCOLCE	procollagen C-endopeptidase enhancer
hsa-miR-1182	1	0	1	0	1	1	DNMT3A	DNA (cytosine-5-)-methyltransferase 3 alpha
hsa-miR-1182	0	0	1	1	0	0	PI16	peptidase inhibitor 16
hsa-miR-1182	1	0	1	0	1	1	KIAA0240	KIAA0240
hsa-miR-1182	0	0	1	0	0	0	FAM47E	family with sequence similarity 47, member E
hsa-miR-1182	0	0	1	0	0	0	LOC731789	uncharacterized LOC731789
hsa-miR-1182	0	0	1	1	1	1	CCP110	centriolar coiled coil protein 110kDa
hsa-miR-1182	1	0	1	0	1	1	BTRC	beta-transducin repeat containing E3 ubiquitin protein ligase
hsa-miR-1182	1	0	1	1	1	1	HECW2	HECT, C2 and WW domain containing E3 ubiquitin protein ligase 2
hsa-miR-1182	1	0	1	0	1	1	MCFD2	multiple coagulation factor deficiency 2
hsa-miR-1182	1	0	1	1	0	0	POMGNT1	protein O-linked mannose beta1,2-N-acetylglucosaminyltransferase
hsa-miR-1182	0	0	1	0	1	1	NWD1	NACHT and WD repeat domain containing 1
hsa-miR-1182	0	0	1	0	0	0	MIR143HG	MIR143 host gene (non-protein coding)
hsa-miR-1182	0	0	1	1	0	0	TENC1	tensin like C1 domain containing phosphatase (tensin 2)
hsa-miR-1182	1	0	1	1	1	1	MAN2A2	mannosidase, alpha, class 2A, member 2
hsa-miR-1182	1	0	1	0	1	1	LONRF2	LON peptidase N-terminal domain and ring finger 2
hsa-miR-1182	1	0	1	0	1	1	CBX7	chromobox homolog 7
hsa-miR-1182	0	0	1	1	1	1	LTA	lymphotoxin alpha (TNF superfamily, member 1)
hsa-miR-1182	0	0	1	1	0	0	SPINK5	serine peptidase inhibitor, Kazal type 5
hsa-miR-1182	0	0	1	1	1	1	PTGS1	prostaglandin-endoperoxide synthase 1 (prostaglandin G/H synthase and cyclooxygenase)
hsa-miR-1182	0	0	1	1	0	0	SPATA20	spermatogenesis associated 20
hsa-miR-1182	1	0	1	1	1	1	MOSPD1	motile sperm domain containing 1
hsa-miR-1182	0	0	1	0	0	0	POM121L8P	POM121 transmembrane nucleoporin-like 8 pseudogene
hsa-miR-1182	1	0	1	1	1	1	TNFAIP1	tumor necrosis factor, alpha-induced protein 1 (endothelial)
hsa-miR-1182	0	0	1	1	1	1	HOOK2	hook homolog 2 (Drosophila)
hsa-miR-1182	1	0	1	1	1	1	SLC4A8	solute carrier family 4, sodium bicarbonate cotransporter, member 8
hsa-miR-1182	0	0	1	1	1	1	AKAP17A	A kinase (PRKA) anchor protein 17A
hsa-miR-1182	1	0	1	1	1	1	GRM1	glutamate receptor, metabotropic 1
hsa-miR-1182	1	0	1	1	1	1	IGF1	insulin-like growth factor 1 (somatomedin C)
hsa-miR-1182	0	0	1	1	1	1	HLA-G	major histocompatibility complex, class I, G
hsa-miR-1182	1	0	1	1	1	1	ADRB2	adrenoceptor beta 2, surface
hsa-miR-1182	1	0	1	1	0	0	ADRB3	adrenoceptor beta 3
hsa-miR-1182	0	0	1	1	1	1	CA2	carbonic anhydrase II
hsa-miR-1182	1	0	1	0	0	0	CACNA1A	calcium channel, voltage-dependent, P/Q type, alpha 1A subunit
hsa-miR-1182	1	0	1	1	1	1	COL1A1	collagen, type I, alpha 1
hsa-miR-1182	1	0	1	1	1	1	FUT1	fucosyltransferase 1 (galactoside 2-alpha-L-fucosyltransferase, H blood group)
hsa-miR-1182	1	0	1	0	1	1	GHR	growth hormone receptor
hsa-miR-1182	1	0	1	1	1	1	TBX5	T-box 5
hsa-miR-1182	0	0	1	1	1	1	HSD11B2	hydroxysteroid (11-beta) dehydrogenase 2
hsa-miR-1182	1	0	1	1	1	1	KCNA1	potassium voltage-gated channel, shaker-related subfamily, member 1 (episodic ataxia with myokymia)
hsa-miR-1182	0	0	1	1	0	0	KCNH2	potassium voltage-gated channel, subfamily H (eag-related), member 2
hsa-miR-1182	0	0	1	1	1	1	NDP	Norrie disease (pseudoglioma)
hsa-miR-1182	0	0	1	1	1	1	PKP1	plakophilin 1 (ectodermal dysplasia/skin fragility syndrome)
hsa-miR-1182	0	0	1	1	0	0	ABCC8	ATP-binding cassette, sub-family C (CFTR/MRP), member 8
hsa-miR-1182	1	0	1	1	1	1	TAT	tyrosine aminotransferase
hsa-miR-1182	0	0	1	1	1	1	WAS	Wiskott-Aldrich syndrome
hsa-miR-1182	1	0	1	0	1	1	COL5A2	collagen, type V, alpha 2
hsa-miR-1182	0	0	1	1	1	1	PECAM1	platelet/endothelial cell adhesion molecule 1
hsa-miR-1182	1	0	1	0	1	1	RAG1	recombination activating gene 1
hsa-miR-1182	1	0	1	1	1	1	RFX5	regulatory factor X, 5 (influences HLA class II expression)
hsa-miR-1182	0	0	1	1	1	1	ALPL	alkaline phosphatase, liver/bone/kidney
hsa-miR-1182	0	0	1	1	0	0	HBD	hemoglobin, delta
hsa-miR-1182	1	0	1	1	1	1	MPZ	myelin protein zero
hsa-miR-1182	1	0	1	1	1	1	CD44	CD44 molecule (Indian blood group)
hsa-miR-1182	0	0	1	1	1	1	IGF2	insulin-like growth factor 2 (somatomedin A)
hsa-miR-1182	1	0	1	1	0	0	ADRA1B	adrenoceptor alpha 1B
hsa-miR-1182	1	0	1	0	1	1	CACNA1E	calcium channel, voltage-dependent, R type, alpha 1E subunit
hsa-miR-1182	1	0	1	1	1	1	CACNA2D1	calcium channel, voltage-dependent, alpha 2/delta subunit 1
hsa-miR-1182	1	0	1	1	1	1	CHRM1	cholinergic receptor, muscarinic 1
hsa-miR-1182	0	0	1	1	1	1	DIO1	deiodinase, iodothyronine, type I
hsa-miR-1182	1	0	1	1	1	1	DRD1	dopamine receptor D1
hsa-miR-1182	1	0	1	1	1	1	GABRB3	gamma-aminobutyric acid (GABA) A receptor, beta 3
hsa-miR-1182	1	0	1	1	1	1	GAD1	glutamate decarboxylase 1 (brain, 67kDa)
hsa-miR-1182	1	0	1	1	1	1	GRM5	glutamate receptor, metabotropic 5
hsa-miR-1182	1	0	1	1	1	1	GRM7	glutamate receptor, metabotropic 7
hsa-miR-1182	1	0	1	0	1	1	KCNJ2	potassium inwardly-rectifying channel, subfamily J, member 2
hsa-miR-1182	0	0	1	1	1	1	BLOC1S2	biogenesis of lysosomal organelles complex-1, subunit 2
hsa-miR-1182	1	0	1	1	0	0	SLC35E4	solute carrier family 35, member E4
hsa-miR-1182	1	0	1	0	1	1	ARHGEF37	Rho guanine nucleotide exchange factor (GEF) 37
hsa-miR-1182	0	0	1	1	1	1	C4orf3	chromosome 4 open reading frame 3
hsa-miR-1182	0	0	1	1	1	1	CC2D2B	coiled-coil and C2 domain containing 2B
hsa-miR-1182	1	0	1	1	1	1	TPD52L3	tumor protein D52-like 3
hsa-miR-1182	1	0	1	1	1	1	MTUS1	microtubule associated tumor suppressor 1
hsa-miR-1182	1	0	1	1	0	0	AWAT2	acyl-CoA wax alcohol acyltransferase 2
hsa-miR-1182	1	0	1	1	1	1	LCLAT1	lysocardiolipin acyltransferase 1
hsa-miR-1182	1	0	1	1	1	1	WNK3	WNK lysine deficient protein kinase 3
hsa-miR-1182	1	0	1	0	1	1	SMAD2	SMAD family member 2
hsa-miR-1182	1	0	1	1	1	1	KLHL31	kelch-like 31 (Drosophila)
hsa-miR-1182	1	0	1	1	1	1	BICD2	bicaudal D homolog 2 (Drosophila)
hsa-miR-1182	1	0	1	0	1	1	BMF	Bcl2 modifying factor
hsa-miR-1182	1	0	1	1	0	0	NOMO3	NODAL modulator 3
hsa-miR-1182	0	0	1	1	1	1	ALG11	asparagine-linked glycosylation 11, alpha-1,2-mannosyltransferase homolog (yeast)
hsa-miR-1182	0	0	1	1	1	1	C1orf168	chromosome 1 open reading frame 168
hsa-miR-1182	1	0	1	0	1	1	ZNF740	zinc finger protein 740
hsa-miR-1182	0	0	1	1	1	1	ZCCHC16	zinc finger, CCHC domain containing 16
hsa-miR-1182	1	0	1	0	1	1	LIN28B	lin-28 homolog B (C. elegans)
hsa-miR-1182	0	0	1	1	0	0	C7orf61	chromosome 7 open reading frame 61
hsa-miR-1182	1	0	1	0	1	1	PKP2	plakophilin 2
hsa-miR-1182	1	0	1	0	1	1	YPEL2	yippee-like 2 (Drosophila)
hsa-miR-1182	1	0	1	1	1	1	EBF3	early B-cell factor 3
hsa-miR-1182	1	0	1	1	1	1	EDA	ectodysplasin A
hsa-miR-1182	0	0	1	0	1	1	C8orf22	chromosome 8 open reading frame 22
hsa-miR-1182	1	0	1	1	1	1	IGSF3	immunoglobulin superfamily, member 3
hsa-miR-1182	1	0	1	1	1	1	BRWD1	bromodomain and WD repeat domain containing 1
hsa-miR-1182	0	0	1	1	1	1	TRIM13	tripartite motif containing 13
hsa-miR-1182	0	0	1	0	1	1	C3orf56	chromosome 3 open reading frame 56
hsa-miR-1182	0	0	1	1	0	0	C1orf186	chromosome 1 open reading frame 186
hsa-miR-1182	1	0	1	0	1	1	SS18	synovial sarcoma translocation, chromosome 18
hsa-miR-1182	1	0	1	0	1	1	CPLX2	complexin 2
hsa-miR-1182	1	0	1	1	1	1	CTDSPL	CTD (carboxy-terminal domain, RNA polymerase II, polypeptide A) small phosphatase-like
hsa-miR-1182	1	0	1	1	1	1	BCAP29	B-cell receptor-associated protein 29
hsa-miR-1182	1	0	1	1	1	1	RBM33	RNA binding motif protein 33
hsa-miR-1182	1	0	1	1	1	1	LPHN1	latrophilin 1
hsa-miR-1182	1	0	1	0	1	1	PM20D2	peptidase M20 domain containing 2
hsa-miR-1182	0	0	1	1	1	1	SPIN3	spindlin family, member 3
hsa-miR-1182	1	0	1	0	1	1	MTX3	metaxin 3
hsa-miR-1182	0	0	1	1	1	1	MUC21	mucin 21, cell surface associated
hsa-miR-1182	1	0	1	1	1	1	ATP11C	ATPase, class VI, type 11C
hsa-miR-1182	1	0	1	0	1	1	CREB5	cAMP responsive element binding protein 5
hsa-miR-1182	0	0	1	1	0	0	PNLIPRP3	pancreatic lipase-related protein 3
hsa-miR-1182	0	0	1	1	0	0	SOHLH1	spermatogenesis and oogenesis specific basic helix-loop-helix 1
hsa-miR-1182	1	0	1	1	1	1	FOXP4	forkhead box P4
hsa-miR-1182	0	0	1	1	1	1	SPIN4	spindlin family, member 4
hsa-miR-1182	1	0	1	1	1	1	SORCS1	sortilin-related VPS10 domain containing receptor 1
hsa-miR-1182	1	0	1	1	1	1	C12orf68	chromosome 12 open reading frame 68
hsa-miR-1182	0	0	1	0	0	0	LOC400707	uncharacterized LOC400707
hsa-miR-1182	0	0	1	0	1	1	LINC00268	long intergenic non-protein coding RNA 268
hsa-miR-1182	0	0	1	1	1	1	STAG3L3	stromal antigen 3-like 3
hsa-miR-1182	1	0	1	1	1	1	CA7	carbonic anhydrase VII
hsa-miR-1182	0	0	1	1	0	0	C1QTNF9B-AS1	C1QTNF9B antisense RNA 1
hsa-miR-1182	1	0	1	1	0	0	USP21	ubiquitin specific peptidase 21
hsa-miR-1182	1	0	1	1	1	1	ZNF2	zinc finger protein 2
hsa-miR-1182	0	0	1	1	1	1	BTBD11	BTB (POZ) domain containing 11
hsa-miR-1182	1	0	1	1	1	1	ZHX1	zinc fingers and homeoboxes 1
hsa-miR-1182	0	0	1	1	0	0	CCDC58	coiled-coil domain containing 58
hsa-miR-1182	1	0	1	1	1	1	TPM1	tropomyosin 1 (alpha)
hsa-miR-1182	1	0	1	1	1	1	NTRK2	neurotrophic tyrosine kinase, receptor, type 2
hsa-miR-1182	0	0	1	0	1	1	TM2D2	TM2 domain containing 2
hsa-miR-1182	1	0	1	1	1	1	SBK1	SH3-binding domain kinase 1
hsa-miR-1182	0	0	1	1	1	1	LRRC66	leucine rich repeat containing 66
hsa-miR-1182	1	0	1	0	1	1	BCL7A	B-cell CLL/lymphoma 7A
hsa-miR-1182	0	0	1	1	1	1	SC5DL	sterol-C5-desaturase (ERG3 delta-5-desaturase homolog, S. cerevisiae)-like
hsa-miR-1182	1	0	1	1	1	1	AFF3	AF4/FMR2 family, member 3
hsa-miR-1182	1	0	1	1	1	1	VEGFA	vascular endothelial growth factor A
hsa-miR-1182	0	0	1	1	1	1	RSPO4	R-spondin 4
hsa-miR-1182	0	0	1	1	1	1	PLAA	phospholipase A2-activating protein
hsa-miR-1182	1	0	1	1	1	1	MASP1	mannan-binding lectin serine peptidase 1 (C4/C2 activating component of Ra-reactive factor)
hsa-miR-1182	1	0	1	1	1	1	UBE2V1	ubiquitin-conjugating enzyme E2 variant 1
hsa-miR-1182	0	0	1	1	1	1	SLC35A2	solute carrier family 35 (UDP-galactose transporter), member A2
hsa-miR-1182	0	0	1	1	1	1	PLGLB1	plasminogen-like B1
hsa-miR-1182	1	0	1	0	1	1	SRGAP3	SLIT-ROBO Rho GTPase activating protein 3
hsa-miR-1182	0	0	1	1	1	1	FAM134B	family with sequence similarity 134, member B
hsa-miR-1182	1	0	1	1	1	1	AGAP1	ArfGAP with GTPase domain, ankyrin repeat and PH domain 1
hsa-miR-1182	1	0	1	0	1	1	CDC42SE1	CDC42 small effector 1
hsa-miR-1182	1	1	1	1	1	1	TRIM71	tripartite motif containing 71, E3 ubiquitin protein ligase
hsa-miR-1182	1	0	1	1	1	1	ATP6V1C2	ATPase, H+ transporting, lysosomal 42kDa, V1 subunit C2
hsa-miR-1182	0	0	1	1	1	1	SIRPG	signal-regulatory protein gamma
hsa-miR-1182	1	0	1	0	1	1	GK5	glycerol kinase 5 (putative)
hsa-miR-1182	1	0	1	1	1	1	KREMEN1	kringle containing transmembrane protein 1
hsa-miR-1182	1	0	1	1	1	1	CHTF8	CTF8, chromosome transmission fidelity factor 8 homolog (S. cerevisiae)
hsa-miR-1182	1	0	1	1	1	1	CBLN3	cerebellin 3 precursor
hsa-miR-1182	1	0	1	1	1	1	ZNF384	zinc finger protein 384
hsa-miR-1182	1	0	1	1	1	1	MTMR12	myotubularin related protein 12
hsa-miR-1182	0	0	1	1	1	1	METTL21D	methyltransferase like 21D
hsa-miR-1182	1	0	1	1	1	1	GDAP1	ganglioside induced differentiation associated protein 1
hsa-miR-1182	1	0	1	1	1	1	SNX21	sorting nexin family member 21
hsa-miR-1182	1	0	1	1	1	1	PVRL2	poliovirus receptor-related 2 (herpesvirus entry mediator B)
hsa-miR-1182	1	0	1	0	1	1	SRGAP2	SLIT-ROBO Rho GTPase activating protein 2
hsa-miR-1182	1	0	1	1	1	1	TPM3	tropomyosin 3
hsa-miR-1182	1	0	1	0	1	1	TMEM237	transmembrane protein 237
hsa-miR-1182	0	0	1	1	1	1	PRAMEF16	PRAME family member 16
hsa-miR-1182	0	0	1	1	0	0	SST	somatostatin
hsa-miR-1182	0	0	1	0	1	1	SSTR1	somatostatin receptor 1
hsa-miR-1182	1	0	1	0	1	1	SLC7A6	solute carrier family 7 (amino acid transporter light chain, y+L system), member 6
hsa-miR-1182	1	0	1	1	1	1	ZNF436	zinc finger protein 436
hsa-miR-1182	1	0	1	1	1	1	ATG9A	autophagy related 9A
hsa-miR-1182	0	0	1	1	1	1	MTMR14	myotubularin related protein 14
hsa-miR-1182	0	0	1	1	0	0	VPS37D	vacuolar protein sorting 37 homolog D (S. cerevisiae)
hsa-miR-1182	0	0	1	0	1	1	WTH3DI	RAB6C-like
hsa-miR-1182	1	0	1	1	1	1	ALG9	asparagine-linked glycosylation 9, alpha-1,2-mannosyltransferase homolog (S. cerevisiae)
hsa-miR-1182	0	0	1	1	0	0	FAM127A	family with sequence similarity 127, member A
hsa-miR-1182	1	0	1	0	0	0	FAM127B	family with sequence similarity 127, member B
hsa-miR-1182	1	0	1	0	1	1	FAM127C	family with sequence similarity 127, member C
hsa-miR-1182	0	0	1	1	0	0	TMEM134	transmembrane protein 134
hsa-miR-1182	1	0	1	1	1	1	OCIAD1	OCIA domain containing 1
hsa-miR-1182	1	0	1	1	1	1	VAV3	vav 3 guanine nucleotide exchange factor
hsa-miR-1182	1	0	1	1	1	1	LDB3	LIM domain binding 3
hsa-miR-1182	1	0	1	0	1	1	FBXO41	F-box protein 41
hsa-miR-1182	1	0	1	0	1	1	UNC13A	unc-13 homolog A (C. elegans)
hsa-miR-1182	1	0	1	1	1	1	BEND3	BEN domain containing 3
hsa-miR-1182	1	0	1	0	1	1	MEGF9	multiple EGF-like-domains 9
hsa-miR-1182	1	0	1	0	0	0	CCDC159	coiled-coil domain containing 159
hsa-miR-1182	0	0	1	1	1	1	TBX18	T-box 18
hsa-miR-1182	0	0	1	1	0	0	TSPAN11	tetraspanin 11
hsa-miR-1182	1	0	1	1	1	1	MGA	MAX gene associated
hsa-miR-1182	1	0	1	1	0	0	ASIC2	acid-sensing (proton-gated) ion channel 2
hsa-miR-1182	1	0	1	1	1	1	ASIC1	acid-sensing (proton-gated) ion channel 1
hsa-miR-1182	1	0	1	1	1	1	ADCYAP1	adenylate cyclase activating polypeptide 1 (pituitary)
hsa-miR-1182	1	0	1	0	1	1	XIAP	X-linked inhibitor of apoptosis
hsa-miR-1182	1	0	1	1	1	1	PRDM1	PR domain containing 1, with ZNF domain
hsa-miR-1182	0	0	1	1	1	1	CDC5L	CDC5 cell division cycle 5-like (S. pombe)
hsa-miR-1182	0	0	1	1	0	0	CDC6	cell division cycle 6 homolog (S. cerevisiae)
hsa-miR-1182	0	0	1	1	1	1	DARS	aspartyl-tRNA synthetase
hsa-miR-1182	0	0	1	1	1	1	DSCAM	Down syndrome cell adhesion molecule
hsa-miR-1182	1	0	1	1	1	1	DYRK1A	dual-specificity tyrosine-(Y)-phosphorylation regulated kinase 1A
hsa-miR-1182	1	0	1	1	1	1	CELSR3	cadherin, EGF LAG seven-pass G-type receptor 3 (flamingo homolog, Drosophila)
hsa-miR-1182	1	0	1	0	1	1	ELAVL3	ELAV (embryonic lethal, abnormal vision, Drosophila)-like 3 (Hu antigen C)
hsa-miR-1182	0	0	1	0	1	1	EMP1	epithelial membrane protein 1
hsa-miR-1182	1	0	1	1	0	0	FOXO3	forkhead box O3
hsa-miR-1182	0	0	1	1	1	1	B4GALNT1	beta-1,4-N-acetyl-galactosaminyl transferase 1
hsa-miR-1182	1	0	1	0	1	1	GCNT2	glucosaminyl (N-acetyl) transferase 2, I-branching enzyme (I blood group)
hsa-miR-1182	1	0	1	0	1	1	B4GALT1	UDP-Gal:betaGlcNAc beta 1,4- galactosyltransferase, polypeptide 1
hsa-miR-1182	1	0	1	1	1	1	NDST1	N-deacetylase/N-sulfotransferase (heparan glucosaminyl) 1
hsa-miR-1182	0	0	1	1	1	1	IL13RA1	interleukin 13 receptor, alpha 1
hsa-miR-1182	1	0	1	1	1	1	AHNAK	AHNAK nucleoprotein
hsa-miR-1182	1	0	1	1	1	1	AQP4	aquaporin 4
hsa-miR-1182	1	0	1	0	1	1	ARCN1	archain 1
hsa-miR-1182	1	0	1	1	1	1	ARF3	ADP-ribosylation factor 3
hsa-miR-1182	1	0	1	0	1	1	ATP1B2	ATPase, Na+/K+ transporting, beta 2 polypeptide
hsa-miR-1182	1	0	1	1	1	1	BAAT	bile acid CoA: amino acid N-acyltransferase (glycine N-choloyltransferase)
hsa-miR-1182	0	0	1	0	0	0	BAI1	brain-specific angiogenesis inhibitor 1
hsa-miR-1182	0	0	1	1	0	0	BICD1	bicaudal D homolog 1 (Drosophila)
hsa-miR-1182	1	0	1	0	1	1	BMP7	bone morphogenetic protein 7
hsa-miR-1182	1	0	1	1	1	1	BTG1	B-cell translocation gene 1, anti-proliferative
hsa-miR-1182	1	0	1	0	1	1	CCND2	cyclin D2
hsa-miR-1182	0	0	1	1	0	0	CEACAM3	carcinoembryonic antigen-related cell adhesion molecule 3
hsa-miR-1182	0	0	1	1	0	0	CNTFR	ciliary neurotrophic factor receptor
hsa-miR-1182	1	0	1	1	1	1	DUSP6	dual specificity phosphatase 6
hsa-miR-1182	0	0	1	1	0	0	EDN2	endothelin 2
hsa-miR-1182	1	0	1	1	1	1	EPB49	erythrocyte membrane protein band 4.9 (dematin)
hsa-miR-1182	1	0	1	0	1	1	FOXO1	forkhead box O1
hsa-miR-1182	1	0	1	1	1	1	GOLGA1	golgin A1
hsa-miR-1182	0	0	1	1	1	1	GYS1	glycogen synthase 1 (muscle)
hsa-miR-1182	0	0	1	1	1	1	H2AFX	H2A histone family, member X
hsa-miR-1182	0	0	1	1	1	1	HOXA4	homeobox A4
hsa-miR-1182	0	0	1	1	1	1	HOXB5	homeobox B5
hsa-miR-1182	1	0	1	1	1	1	ITGA3	integrin, alpha 3 (antigen CD49C, alpha 3 subunit of VLA-3 receptor)
hsa-miR-1182	1	0	1	1	1	1	ITGA5	integrin, alpha 5 (fibronectin receptor, alpha polypeptide)
hsa-miR-1182	1	0	1	1	1	1	JAG2	jagged 2
hsa-miR-1182	1	0	1	1	1	1	KCNJ10	potassium inwardly-rectifying channel, subfamily J, member 10
hsa-miR-1182	0	0	1	1	0	0	KCNK3	potassium channel, subfamily K, member 3
hsa-miR-1182	0	0	1	1	0	0	KRT4	keratin 4
hsa-miR-1182	0	0	1	1	0	0	KRT85	keratin 85
hsa-miR-1182	0	0	1	1	0	0	LALBA	lactalbumin, alpha-
hsa-miR-1182	1	0	1	0	1	1	LAMC1	laminin, gamma 1 (formerly LAMB2)
hsa-miR-1182	1	0	1	1	1	1	LIF	leukemia inhibitory factor
hsa-miR-1182	1	0	1	1	1	1	LRP1	low density lipoprotein receptor-related protein 1
hsa-miR-1182	1	0	1	1	1	1	M6PR	mannose-6-phosphate receptor (cation dependent)
hsa-miR-1182	0	0	1	1	1	1	MAG	myelin associated glycoprotein
hsa-miR-1182	1	0	1	1	1	1	MAP1A	microtubule-associated protein 1A
hsa-miR-1182	1	0	1	1	1	1	MAX	MYC associated factor X
hsa-miR-1182	1	0	1	1	1	1	ADAM11	ADAM metallopeptidase domain 11
hsa-miR-1182	1	0	1	1	0	0	SCGB2A2	secretoglobin, family 2A, member 2
hsa-miR-1182	0	0	1	0	1	1	CXCL9	chemokine (C-X-C motif) ligand 9
hsa-miR-1182	0	0	1	1	1	1	MMP19	matrix metallopeptidase 19
hsa-miR-1182	1	0	1	1	1	1	MSN	moesin
hsa-miR-1182	1	0	1	1	1	1	MSR1	macrophage scavenger receptor 1
hsa-miR-1182	0	0	1	1	0	0	MYBL2	v-myb myeloblastosis viral oncogene homolog (avian)-like 2
hsa-miR-1182	1	0	1	1	1	1	PPP1R12B	protein phosphatase 1, regulatory subunit 12B
hsa-miR-1182	0	0	1	1	1	1	CEACAM6	carcinoembryonic antigen-related cell adhesion molecule 6 (non-specific cross reacting antigen)
hsa-miR-1182	1	0	1	1	1	1	NPAS2	neuronal PAS domain protein 2
hsa-miR-1182	0	0	1	0	1	1	OPHN1	oligophrenin 1
hsa-miR-1182	1	0	1	1	1	1	OSBP	oxysterol binding protein
hsa-miR-1182	1	0	1	1	1	1	PBX2	pre-B-cell leukemia homeobox 2
hsa-miR-1182	1	0	1	1	0	0	PDGFB	platelet-derived growth factor beta polypeptide
hsa-miR-1182	0	0	1	1	0	0	PI3	peptidase inhibitor 3, skin-derived
hsa-miR-1182	0	0	1	1	1	1	PIM1	pim-1 oncogene
hsa-miR-1182	1	0	1	1	1	1	PLAGL2	pleiomorphic adenoma gene-like 2
hsa-miR-1182	0	0	1	1	0	0	PLCG2	phospholipase C, gamma 2 (phosphatidylinositol-specific)
hsa-miR-1182	0	0	1	1	1	1	PLGLB2	plasminogen-like B2
hsa-miR-1182	0	0	1	1	0	0	MAPK7	mitogen-activated protein kinase 7
hsa-miR-1182	1	0	1	1	1	1	PROX1	prospero homeobox 1
hsa-miR-1182	1	0	1	1	1	1	PRPS1	phosphoribosyl pyrophosphate synthetase 1
hsa-miR-1182	0	0	1	1	1	1	HTRA1	HtrA serine peptidase 1
hsa-miR-1182	1	0	1	1	0	0	PSMD7	proteasome (prosome, macropain) 26S subunit, non-ATPase, 7
hsa-miR-1182	1	0	1	1	1	1	PTPN9	protein tyrosine phosphatase, non-receptor type 9
hsa-miR-1182	1	0	1	0	1	1	RAB6A	RAB6A, member RAS oncogene family
hsa-miR-1182	1	0	1	1	1	1	RAD23B	RAD23 homolog B (S. cerevisiae)
hsa-miR-1182	1	0	1	1	1	1	RGS16	regulator of G-protein signaling 16
hsa-miR-1182	0	0	1	1	1	1	RNASE4	ribonuclease, RNase A family, 4
hsa-miR-1182	0	0	1	1	0	0	S100A5	S100 calcium binding protein A5
hsa-miR-1182	0	0	1	1	0	0	S100A7	S100 calcium binding protein A7
hsa-miR-1182	0	0	1	1	0	0	SLC22A4	solute carrier family 22 (organic cation/ergothioneine transporter), member 4
hsa-miR-1182	1	0	1	1	1	1	SMARCD1	SWI/SNF related, matrix associated, actin dependent regulator of chromatin, subfamily d, member 1
hsa-miR-1182	1	0	1	0	1	1	SOX11	SRY (sex determining region Y)-box 11
hsa-miR-1182	1	0	1	0	1	1	STC1	stanniocalcin 1
hsa-miR-1182	0	0	1	1	1	1	STIM1	stromal interaction molecule 1
hsa-miR-1182	0	0	1	1	1	1	SUPT6H	suppressor of Ty 6 homolog (S. cerevisiae)
hsa-miR-1182	1	0	1	0	1	1	TAL1	T-cell acute lymphocytic leukemia 1
hsa-miR-1182	1	0	1	1	1	1	TGFB3	transforming growth factor, beta 3
hsa-miR-1182	1	0	1	0	1	1	SEC62	SEC62 homolog (S. cerevisiae)
hsa-miR-1182	1	0	1	0	1	1	VCL	vinculin
hsa-miR-1182	0	0	1	1	0	0	HIST1H4I	histone cluster 1, H4i
hsa-miR-1182	0	0	1	1	0	0	HIST1H4A	histone cluster 1, H4a
hsa-miR-1182	0	0	1	0	0	0	HIST1H4E	histone cluster 1, H4e
hsa-miR-1182	1	0	1	1	1	1	PIP4K2B	phosphatidylinositol-5-phosphate 4-kinase, type II, beta
hsa-miR-1182	1	0	1	0	1	1	CNTNAP1	contactin associated protein 1
hsa-miR-1182	0	0	1	1	1	1	UNC5C	unc-5 homolog C (C. elegans)
hsa-miR-1182	1	0	1	1	1	1	VAMP8	vesicle-associated membrane protein 8 (endobrevin)
hsa-miR-1182	1	0	1	1	1	1	ALDH1A2	aldehyde dehydrogenase 1 family, member A2
hsa-miR-1182	1	0	1	1	1	1	SOCS3	suppressor of cytokine signaling 3
hsa-miR-1182	0	0	1	0	0	0	ARRB1	arrestin, beta 1
hsa-miR-1182	0	0	1	1	1	1	BYSL	bystin-like
hsa-miR-1182	1	0	1	1	1	1	CTSS	cathepsin S
hsa-miR-1182	0	0	1	0	1	1	EIF4EBP2	eukaryotic translation initiation factor 4E binding protein 2
hsa-miR-1182	1	0	1	1	1	1	GMFB	glia maturation factor, beta
hsa-miR-1182	1	0	1	1	1	1	SYT7	synaptotagmin VII
hsa-miR-1182	1	0	1	1	1	1	MFHAS1	malignant fibrous histiocytoma amplified sequence 1
hsa-miR-1182	0	0	1	1	1	1	PRLHR	prolactin releasing hormone receptor
hsa-miR-1182	0	0	1	1	1	1	SEP15	15 kDa selenoprotein
hsa-miR-1182	0	0	1	1	0	0	RIN1	Ras and Rab interactor 1
hsa-miR-1182	1	0	1	1	1	1	GDA	guanine deaminase
hsa-miR-1182	1	0	1	0	1	1	ACVR1B	activin A receptor, type IB
hsa-miR-1182	1	0	1	1	1	1	BCL9	B-cell CLL/lymphoma 9
hsa-miR-1182	1	0	1	1	1	1	EPHA2	EPH receptor A2
hsa-miR-1182	1	0	1	1	1	1	EPHB2	EPH receptor B2
hsa-miR-1182	1	0	1	1	1	1	FOXD2	forkhead box D2
hsa-miR-1182	0	0	1	1	0	0	GTF2A2	general transcription factor IIA, 2, 12kDa
hsa-miR-1182	1	0	1	1	0	0	HOXC6	homeobox C6
hsa-miR-1182	0	0	1	1	0	0	SFSWAP	splicing factor, suppressor of white-apricot homolog (Drosophila)
hsa-miR-1182	1	0	1	1	1	1	WNT11	wingless-type MMTV integration site family, member 11
hsa-miR-1182	0	0	1	1	0	0	PRY	PTPN13-like, Y-linked
hsa-miR-1182	1	0	1	1	1	1	SYNGR1	synaptogyrin 1
hsa-miR-1182	0	0	1	1	0	0	DYRK1B	dual-specificity tyrosine-(Y)-phosphorylation regulated kinase 1B
hsa-miR-1182	0	0	1	1	1	1	KCNAB3	potassium voltage-gated channel, shaker-related subfamily, beta member 3
hsa-miR-1182	1	0	1	1	1	1	DCLK1	doublecortin-like kinase 1
hsa-miR-1182	1	0	1	1	1	1	LARGE	like-glycosyltransferase
hsa-miR-1182	0	0	1	1	1	1	MMP20	matrix metallopeptidase 20
hsa-miR-1182	1	0	1	1	1	1	MED1	mediator complex subunit 1
hsa-miR-1182	0	0	1	1	1	1	TAOK2	TAO kinase 2
hsa-miR-1182	0	0	1	0	1	1	ADIPOQ	adiponectin, C1Q and collagen domain containing
hsa-miR-1182	1	0	1	1	1	1	KIF3B	kinesin family member 3B
hsa-miR-1182	1	0	1	1	1	1	ONECUT2	one cut homeobox 2
hsa-miR-1182	1	0	1	1	1	1	CXCL14	chemokine (C-X-C motif) ligand 14
hsa-miR-1182	1	0	1	0	1	1	SEC22B	SEC22 vesicle trafficking protein homolog B (S. cerevisiae) (gene/pseudogene)
hsa-miR-1182	1	0	1	1	1	1	SEC24C	SEC24 family, member C (S. cerevisiae)
hsa-miR-1182	0	0	1	1	1	1	CDH6	cadherin 6, type 2, K-cadherin (fetal kidney)
hsa-miR-1182	1	0	1	1	0	0	MMP14	matrix metallopeptidase 14 (membrane-inserted)
hsa-miR-1182	1	0	1	1	1	1	NDUFAB1	NADH dehydrogenase (ubiquinone) 1, alpha/beta subcomplex, 1, 8kDa
hsa-miR-1182	1	0	1	1	1	1	RELN	reelin
hsa-miR-1182	1	0	1	0	1	1	SCD	stearoyl-CoA desaturase (delta-9-desaturase)
hsa-miR-1182	1	0	1	0	1	1	SEL1L	sel-1 suppressor of lin-12-like (C. elegans)
hsa-miR-1182	0	0	1	1	1	1	XYLB	xylulokinase homolog (H. influenzae)
hsa-miR-1182	0	0	1	1	0	0	CNGA2	cyclic nucleotide gated channel alpha 2
hsa-miR-1182	1	0	1	1	0	0	BCL3	B-cell CLL/lymphoma 3
hsa-miR-1182	1	0	1	0	1	1	E2F1	E2F transcription factor 1
hsa-miR-1182	1	0	1	1	0	0	EFNA4	ephrin-A4
hsa-miR-1182	1	0	1	1	1	1	NR2F6	nuclear receptor subfamily 2, group F, member 6
hsa-miR-1182	0	0	1	0	1	1	FOSL2	FOS-like antigen 2
hsa-miR-1182	1	0	1	1	1	1	GEM	GTP binding protein overexpressed in skeletal muscle
hsa-miR-1182	1	0	1	1	1	1	GPR3	G protein-coupled receptor 3
hsa-miR-1182	0	0	1	1	1	1	GRK5	G protein-coupled receptor kinase 5
hsa-miR-1182	1	0	1	1	0	0	HCFC1	host cell factor C1 (VP16-accessory protein)
hsa-miR-1182	0	0	1	1	0	0	LIPE	lipase, hormone-sensitive
hsa-miR-1182	1	0	1	1	0	0	NNAT	neuronatin
hsa-miR-1182	1	0	1	0	1	1	SRC	v-src sarcoma (Schmidt-Ruppin A-2) viral oncogene homolog (avian)
hsa-miR-1182	0	0	1	1	1	1	ST5	suppression of tumorigenicity 5
hsa-miR-1182	1	0	1	0	1	1	CCDC6	coiled-coil domain containing 6
hsa-miR-1182	1	0	1	1	1	1	ABCA1	ATP-binding cassette, sub-family A (ABC1), member 1
hsa-miR-1182	1	0	1	1	1	1	LAMC2	laminin, gamma 2
hsa-miR-1182	1	0	1	1	0	0	LOXL1	lysyl oxidase-like 1
hsa-miR-1182	1	0	1	1	1	1	RGS4	regulator of G-protein signaling 4
hsa-miR-1182	0	0	1	1	1	1	MKRN3	makorin ring finger protein 3
hsa-miR-1182	1	0	1	1	0	0	TSPAN5	tetraspanin 5
hsa-miR-1182	1	0	1	1	1	1	ACTR1A	ARP1 actin-related protein 1 homolog A, centractin alpha (yeast)
hsa-miR-1182	1	0	1	1	1	1	NAMPT	nicotinamide phosphoribosyltransferase
hsa-miR-1182	1	0	1	1	1	1	GLYAT	glycine-N-acyltransferase
hsa-miR-1182	1	0	1	0	1	1	SPRY3	sprouty homolog 3 (Drosophila)
hsa-miR-1182	0	0	1	1	1	1	MFAP3	microfibrillar-associated protein 3
hsa-miR-1182	1	0	1	1	1	1	MTF1	metal-regulatory transcription factor 1
hsa-miR-1182	0	0	1	1	0	0	PPYR1	pancreatic polypeptide receptor 1
hsa-miR-1182	1	0	1	1	1	1	LIPG	lipase, endothelial
hsa-miR-1182	1	0	1	1	1	1	HS3ST4	heparan sulfate (glucosamine) 3-O-sulfotransferase 4
hsa-miR-1182	1	0	1	1	1	1	DAGLA	diacylglycerol lipase, alpha
hsa-miR-1182	1	0	1	1	1	1	DYNC1LI2	dynein, cytoplasmic 1, light intermediate chain 2
hsa-miR-1182	0	0	1	1	0	0	LGALS4	lectin, galactoside-binding, soluble, 4
hsa-miR-1182	1	0	1	1	1	1	NEFL	neurofilament, light polypeptide
hsa-miR-1182	1	0	1	1	1	1	NEUROD2	neuronal differentiation 2
hsa-miR-1182	0	0	1	0	1	1	OAS3	2'-5'-oligoadenylate synthetase 3, 100kDa
hsa-miR-1182	0	0	1	1	1	1	PA2G4	proliferation-associated 2G4, 38kDa
hsa-miR-1182	0	0	1	1	0	0	PAX1	paired box 1
hsa-miR-1182	1	0	1	1	1	1	CDK16	cyclin-dependent kinase 16
hsa-miR-1182	1	0	1	1	1	1	PRKAA1	protein kinase, AMP-activated, alpha 1 catalytic subunit
hsa-miR-1182	1	0	1	0	1	1	SRSF6	serine/arginine-rich splicing factor 6
hsa-miR-1182	1	0	1	1	1	1	SMC1A	structural maintenance of chromosomes 1A
hsa-miR-1182	1	0	1	1	1	1	TUBGCP3	tubulin, gamma complex associated protein 3
hsa-miR-1182	1	0	1	1	1	1	FBLN5	fibulin 5
hsa-miR-1182	1	0	1	1	1	1	ZER1	zer-1 homolog (C. elegans)
hsa-miR-1182	1	0	1	1	1	1	VAT1	vesicle amine transport protein 1 homolog (T. californica)
hsa-miR-1182	1	0	1	0	1	1	APPBP2	amyloid beta precursor protein (cytoplasmic tail) binding protein 2
hsa-miR-1182	0	0	1	1	0	0	CHERP	calcium homeostasis endoplasmic reticulum protein
hsa-miR-1182	1	0	1	1	1	1	NEBL	nebulette
hsa-miR-1182	1	0	1	0	1	1	GNAI3	guanine nucleotide binding protein (G protein), alpha inhibiting activity polypeptide 3
hsa-miR-1182	0	0	1	0	1	1	SLC16A2	solute carrier family 16, member 2 (thyroid hormone transporter)
hsa-miR-1182	1	0	1	0	1	1	API5	apoptosis inhibitor 5
hsa-miR-1182	1	0	1	1	1	1	MAP3K2	mitogen-activated protein kinase kinase kinase 2
hsa-miR-1182	0	0	1	1	1	1	PPP1R17	protein phosphatase 1, regulatory subunit 17
hsa-miR-1182	1	0	1	1	1	1	PGRMC1	progesterone receptor membrane component 1
hsa-miR-1182	0	0	1	1	1	1	CD300C	CD300c molecule
hsa-miR-1182	1	0	1	1	1	1	MMP24	matrix metallopeptidase 24 (membrane-inserted)
hsa-miR-1182	0	0	1	1	1	1	LYVE1	lymphatic vessel endothelial hyaluronan receptor 1
hsa-miR-1182	0	0	1	1	1	1	JTB	jumping translocation breakpoint
hsa-miR-1182	1	0	1	1	1	1	DIAPH2	diaphanous homolog 2 (Drosophila)
hsa-miR-1182	0	0	1	1	1	1	SYPL1	synaptophysin-like 1
hsa-miR-1182	1	0	1	1	1	1	BTG2	BTG family, member 2
hsa-miR-1182	1	0	1	1	1	1	KAT6A	K(lysine) acetyltransferase 6A
hsa-miR-1182	1	0	1	0	1	1	SYNGAP1	synaptic Ras GTPase activating protein 1
hsa-miR-1182	0	0	1	1	1	1	INMT	indolethylamine N-methyltransferase
hsa-miR-1182	1	0	1	1	1	1	PRDX3	peroxiredoxin 3
hsa-miR-1182	1	0	1	1	1	1	SF3A3	splicing factor 3a, subunit 3, 60kDa
hsa-miR-1182	1	0	1	1	1	1	CBX1	chromobox homolog 1
hsa-miR-1182	0	0	1	1	1	1	MLLT11	myeloid/lymphoid or mixed-lineage leukemia (trithorax homolog, Drosophila); translocated to, 11
hsa-miR-1182	1	0	1	1	1	1	RAB35	RAB35, member RAS oncogene family
hsa-miR-1182	0	0	1	1	0	0	IDH3B	isocitrate dehydrogenase 3 (NAD+) beta
hsa-miR-1182	1	0	1	0	1	1	SOX12	SRY (sex determining region Y)-box 12
hsa-miR-1182	1	0	1	1	1	1	NR4A3	nuclear receptor subfamily 4, group A, member 3
hsa-miR-1182	1	0	1	1	1	1	CLDN10	claudin 10
hsa-miR-1182	1	0	1	1	1	1	ABHD2	abhydrolase domain containing 2
hsa-miR-1182	0	0	1	1	0	0	USF1	upstream transcription factor 1
hsa-miR-1182	1	0	1	1	1	1	TESK2	testis-specific kinase 2
hsa-miR-1182	1	0	1	1	1	1	C14orf1	chromosome 14 open reading frame 1
hsa-miR-1182	1	0	1	1	1	1	PALM2-AKAP2	PALM2-AKAP2 readthrough
hsa-miR-1182	1	0	1	1	1	1	KLF12	Kruppel-like factor 12
hsa-miR-1182	1	0	1	1	1	1	CASC3	cancer susceptibility candidate 3
hsa-miR-1182	1	0	1	1	1	1	PADI2	peptidyl arginine deiminase, type II
hsa-miR-1182	1	0	1	1	1	1	TARDBP	TAR DNA binding protein
hsa-miR-1182	0	0	1	1	1	1	LMOD1	leiomodin 1 (smooth muscle)
hsa-miR-1182	0	0	1	1	1	1	HARS2	histidyl-tRNA synthetase 2, mitochondrial
hsa-miR-1182	1	0	1	1	1	1	MGAT4A	mannosyl (alpha-1,3-)-glycoprotein beta-1,4-N-acetylglucosaminyltransferase, isozyme A
hsa-miR-1182	1	0	1	1	1	1	RYBP	RING1 and YY1 binding protein
hsa-miR-1182	1	0	1	1	1	1	RHOQ	ras homolog family member Q
hsa-miR-1182	0	0	1	1	1	1	RRAS2	related RAS viral (r-ras) oncogene homolog 2
hsa-miR-1182	1	0	1	1	1	1	LAMP5	lysosomal-associated membrane protein family, member 5
hsa-miR-1182	1	0	1	1	1	1	KCND2	potassium voltage-gated channel, Shal-related subfamily, member 2
hsa-miR-1182	1	0	1	0	1	1	GAB2	GRB2-associated binding protein 2
hsa-miR-1182	1	0	1	0	1	1	FBXL7	F-box and leucine-rich repeat protein 7
hsa-miR-1182	1	0	1	0	1	1	MYO10	myosin X
hsa-miR-1182	1	0	1	1	1	1	STAT5B	signal transducer and activator of transcription 5B
hsa-miR-1182	0	0	1	0	1	1	TLL1	tolloid-like 1
hsa-miR-1182	0	0	1	1	0	0	TXN2	thioredoxin 2
hsa-miR-1182	0	0	1	1	1	1	DNAJC15	DnaJ (Hsp40) homolog, subfamily C, member 15
hsa-miR-1182	1	0	1	1	1	1	CLCF1	cardiotrophin-like cytokine factor 1
hsa-miR-1182	0	0	1	1	0	0	KCNJ14	potassium inwardly-rectifying channel, subfamily J, member 14
hsa-miR-1182	1	0	1	1	1	1	SERTAD3	SERTA domain containing 3
hsa-miR-1182	0	0	1	1	0	0	ZDHHC8	zinc finger, DHHC-type containing 8
hsa-miR-1182	0	0	1	1	1	1	UBQLN2	ubiquilin 2
hsa-miR-1182	1	0	1	1	1	1	NRG1	neuregulin 1
hsa-miR-1182	1	0	1	1	0	0	DEXI	Dexi homolog (mouse)
hsa-miR-1182	0	0	1	1	1	1	LRP10	low density lipoprotein receptor-related protein 10
hsa-miR-1182	0	0	1	1	1	1	MAGEH1	melanoma antigen family H, 1
hsa-miR-1182	1	0	1	1	1	1	ZBTB44	zinc finger and BTB domain containing 44
hsa-miR-1182	0	0	1	1	1	1	ORMDL2	ORM1-like 2 (S. cerevisiae)
hsa-miR-1182	1	0	1	1	0	0	HOXC11	homeobox C11
hsa-miR-1182	0	0	1	1	0	0	NOMO1	NODAL modulator 1
hsa-miR-1182	0	0	1	1	1	1	DAPK2	death-associated protein kinase 2
hsa-miR-1182	1	0	1	1	1	1	SLC7A11	solute carrier family 7 (anionic amino acid transporter light chain, xc- system), member 11
hsa-miR-1182	1	0	1	1	1	1	LHX6	LIM homeobox 6
hsa-miR-1182	1	0	1	0	1	1	DIEXF	digestive organ expansion factor homolog (zebrafish)
hsa-miR-1182	1	0	1	1	0	0	SND1	staphylococcal nuclease and tudor domain containing 1
hsa-miR-1182	0	0	1	1	0	0	DKKL1	dickkopf-like 1
hsa-miR-1182	0	0	1	1	0	0	GPR162	G protein-coupled receptor 162
hsa-miR-1182	1	0	1	1	1	1	TNFRSF21	tumor necrosis factor receptor superfamily, member 21
hsa-miR-1182	1	0	1	1	1	1	RND1	Rho family GTPase 1
hsa-miR-1182	0	0	1	1	1	1	MCAT	malonyl CoA:ACP acyltransferase (mitochondrial)
hsa-miR-1182	0	0	1	1	0	0	APOBEC3C	apolipoprotein B mRNA editing enzyme, catalytic polypeptide-like 3C
hsa-miR-1182	1	0	1	1	1	1	CNOT2	CCR4-NOT transcription complex, subunit 2
hsa-miR-1182	0	0	1	1	1	1	ZNRD1	zinc ribbon domain containing 1
hsa-miR-1182	1	0	1	1	1	1	CDR2L	cerebellar degeneration-related protein 2-like
hsa-miR-1182	0	0	1	1	0	0	MEA1	male-enhanced antigen 1
hsa-miR-1182	1	0	1	1	1	1	ZNF592	zinc finger protein 592
hsa-miR-1182	1	0	1	1	1	1	RALGPS1	Ral GEF with PH domain and SH3 binding motif 1
hsa-miR-1182	1	0	1	1	1	1	ULK2	unc-51-like kinase 2 (C. elegans)
hsa-miR-1182	0	0	1	1	0	0	SETD1A	SET domain containing 1A
hsa-miR-1182	0	0	1	1	1	1	FRMPD4	FERM and PDZ domain containing 4
hsa-miR-1182	1	0	1	1	1	1	RASSF2	Ras association (RalGDS/AF-6) domain family member 2
hsa-miR-1182	0	0	1	1	1	1	SNX19	sorting nexin 19
hsa-miR-1182	0	0	1	0	1	1	EPM2AIP1	EPM2A (laforin) interacting protein 1
hsa-miR-1182	1	0	1	1	1	1	FCHSD2	FCH and double SH3 domains 2
hsa-miR-1182	1	0	1	1	1	1	SV2A	synaptic vesicle glycoprotein 2A
hsa-miR-1182	1	0	1	1	1	1	MFN2	mitofusin 2
hsa-miR-1182	1	0	1	1	1	1	CHSY1	chondroitin sulfate synthase 1
hsa-miR-1182	1	0	1	0	1	1	ICK	intestinal cell (MAK-like) kinase
hsa-miR-1182	1	0	1	1	1	1	R3HDM2	R3H domain containing 2
hsa-miR-1182	1	0	1	1	1	1	SORCS3	sortilin-related VPS10 domain containing receptor 3
hsa-miR-1182	1	0	1	0	1	1	WDFY3	WD repeat and FYVE domain containing 3
hsa-miR-1182	1	0	1	1	1	1	RAB21	RAB21, member RAS oncogene family
hsa-miR-1182	1	0	1	1	1	1	SPEN	spen homolog, transcriptional regulator (Drosophila)
hsa-miR-1182	1	0	1	1	1	1	PHLPP2	PH domain and leucine rich repeat protein phosphatase 2
hsa-miR-1182	1	0	1	0	1	1	ZNF609	zinc finger protein 609
hsa-miR-1182	1	0	1	0	1	1	GGA2	golgi-associated, gamma adaptin ear containing, ARF binding protein 2
hsa-miR-1182	1	0	1	1	0	0	ZC3H3	zinc finger CCCH-type containing 3
hsa-miR-1182	1	0	1	1	0	0	CIC	capicua homolog (Drosophila)
hsa-miR-1182	1	0	1	0	1	1	SNX13	sorting nexin 13
hsa-miR-1182	1	0	1	0	1	1	LARP4B	La ribonucleoprotein domain family, member 4B
hsa-miR-1182	1	0	1	1	1	1	ANKS1A	ankyrin repeat and sterile alpha motif domain containing 1A
hsa-miR-1182	1	0	1	1	1	1	WDR7	WD repeat domain 7
hsa-miR-1182	1	0	1	0	1	1	LARP1	La ribonucleoprotein domain family, member 1
hsa-miR-1182	1	0	1	1	0	0	SMG5	smg-5 homolog, nonsense mediated mRNA decay factor (C. elegans)
hsa-miR-1182	1	0	1	1	1	1	PARM1	prostate androgen-regulated mucin-like protein 1
hsa-miR-1182	1	0	1	1	1	1	DCAF12	DDB1 and CUL4 associated factor 12
hsa-miR-1182	1	0	1	0	1	1	MTMR9	myotubularin related protein 9
hsa-miR-1182	0	0	1	1	1	1	SOSTDC1	sclerostin domain containing 1
hsa-miR-1182	1	0	1	1	1	1	PNKD	paroxysmal nonkinesigenic dyskinesia
hsa-miR-1182	0	0	1	1	1	1	TMEM87A	transmembrane protein 87A
hsa-miR-1182	0	0	1	1	1	1	MMACHC	methylmalonic aciduria (cobalamin deficiency) cblC type, with homocystinuria
hsa-miR-1182	1	0	1	1	1	1	CLIP3	CAP-GLY domain containing linker protein 3
hsa-miR-1182	1	0	1	0	1	1	OSBPL3	oxysterol binding protein-like 3
hsa-miR-1182	1	0	1	1	1	1	CHD5	chromodomain helicase DNA binding protein 5
hsa-miR-1182	1	0	1	0	1	1	PPP1R16B	protein phosphatase 1, regulatory subunit 16B
hsa-miR-1182	1	0	1	0	1	1	ERC2	ELKS/RAB6-interacting/CAST family member 2
hsa-miR-1182	1	0	1	1	0	0	POLDIP2	polymerase (DNA-directed), delta interacting protein 2
hsa-miR-1182	1	0	1	1	0	0	SENP3	SUMO1/sentrin/SMT3 specific peptidase 3
hsa-miR-1182	1	0	1	1	1	1	FAM155B	family with sequence similarity 155, member B
hsa-miR-1182	0	0	1	1	1	1	KRT76	keratin 76
hsa-miR-1182	1	0	1	0	1	1	KLF13	Kruppel-like factor 13
hsa-miR-1182	0	0	1	1	1	1	ISOC1	isochorismatase domain containing 1
hsa-miR-1182	0	0	1	1	0	0	CRNN	cornulin
hsa-miR-1182	1	0	1	1	1	1	VGLL3	vestigial like 3 (Drosophila)
hsa-miR-1182	1	0	1	1	1	1	AKAP11	A kinase (PRKA) anchor protein 11
hsa-miR-1182	1	0	1	1	1	1	RNF138	ring finger protein 138, E3 ubiquitin protein ligase
hsa-miR-1182	1	0	1	1	1	1	RAPGEFL1	Rap guanine nucleotide exchange factor (GEF)-like 1
hsa-miR-1182	0	0	1	1	1	1	ADAM22	ADAM metallopeptidase domain 22
hsa-miR-1182	0	0	1	1	0	0	FAM203A	family with sequence similarity 203, member A
hsa-miR-1182	1	0	1	0	1	1	RAB8B	RAB8B, member RAS oncogene family
hsa-miR-1182	1	0	1	1	1	1	RAB6B	RAB6B, member RAS oncogene family
hsa-miR-1182	1	0	1	1	1	1	SIX4	SIX homeobox 4
hsa-miR-1182	0	0	1	1	1	1	SPA17	sperm autoantigenic protein 17
hsa-miR-1182	1	0	1	1	0	0	DUOX1	dual oxidase 1
hsa-miR-1182	0	0	1	1	0	0	FNDC8	fibronectin type III domain containing 8
hsa-miR-1182	0	0	1	0	1	1	TRIM44	tripartite motif containing 44
hsa-miR-1182	1	0	1	0	1	1	KCTD9	potassium channel tetramerisation domain containing 9
hsa-miR-1182	1	0	1	1	1	1	HAUS6	HAUS augmin-like complex, subunit 6
hsa-miR-1182	1	0	1	1	1	1	CNNM2	cyclin M2
hsa-miR-1182	1	0	1	1	1	1	VPS13C	vacuolar protein sorting 13 homolog C (S. cerevisiae)
hsa-miR-1182	1	0	1	0	1	1	FAM46C	family with sequence similarity 46, member C
hsa-miR-1182	1	0	1	0	1	1	UHRF1BP1	UHRF1 binding protein 1
hsa-miR-1182	0	0	1	1	1	1	WHSC1L1	Wolf-Hirschhorn syndrome candidate 1-like 1
hsa-miR-1182	1	0	1	1	1	1	YTHDF1	YTH domain family, member 1
hsa-miR-1182	0	0	1	1	1	1	SOHLH2	spermatogenesis and oogenesis specific basic helix-loop-helix 2
hsa-miR-1182	0	0	1	1	1	1	TMEM70	transmembrane protein 70
hsa-miR-1182	0	0	1	1	1	1	C14orf119	chromosome 14 open reading frame 119
hsa-miR-1182	0	0	1	1	1	1	ANKHD1	ankyrin repeat and KH domain containing 1
hsa-miR-1182	0	0	1	1	1	1	WIPI1	WD repeat domain, phosphoinositide interacting 1
hsa-miR-1182	1	0	1	1	1	1	ARGLU1	arginine and glutamate rich 1
hsa-miR-1182	1	0	1	1	1	1	FRMD4A	FERM domain containing 4A
hsa-miR-1182	0	0	1	1	1	1	KDM4D	lysine (K)-specific demethylase 4D
hsa-miR-1182	1	0	1	1	1	1	FIGN	fidgetin
hsa-miR-1182	0	0	1	0	0	0	C19orf73	chromosome 19 open reading frame 73
hsa-miR-1182	1	0	1	1	1	1	FAM178A	family with sequence similarity 178, member A
hsa-miR-1182	0	0	1	0	1	1	GOLPH3L	golgi phosphoprotein 3-like
hsa-miR-1182	1	0	1	1	1	1	TBC1D13	TBC1 domain family, member 13
hsa-miR-1182	1	0	1	1	1	1	LRRC20	leucine rich repeat containing 20
hsa-miR-1182	0	0	1	1	1	1	C1orf106	chromosome 1 open reading frame 106
hsa-miR-1182	1	0	1	1	1	1	C9orf72	chromosome 9 open reading frame 72
hsa-miR-1182	1	0	1	1	1	1	SPTLC3	serine palmitoyltransferase, long chain base subunit 3
hsa-miR-1182	1	0	1	0	1	1	TMEM106B	transmembrane protein 106B
hsa-miR-1182	1	0	1	1	1	1	SLC39A9	solute carrier family 39 (zinc transporter), member 9
hsa-miR-1182	1	0	1	1	1	1	PI4K2A	phosphatidylinositol 4-kinase type 2 alpha
hsa-miR-1182	0	0	1	0	0	0	FAM45B	family with sequence similarity 45, member A pseudogene
hsa-miR-1182	1	0	1	1	1	1	STRADB	STE20-related kinase adaptor beta
hsa-miR-1182	1	0	1	1	1	1	GNG12	guanine nucleotide binding protein (G protein), gamma 12
hsa-miR-1182	1	0	1	0	1	1	PCDHAC1	protocadherin alpha subfamily C, 1
hsa-miR-1182	1	0	1	0	1	1	PCDHAC2	protocadherin alpha subfamily C, 2
hsa-miR-1182	1	0	1	1	1	1	PCDHA1	protocadherin alpha 1
hsa-miR-1182	1	0	1	0	1	1	PCDHA10	protocadherin alpha 10
hsa-miR-1182	1	0	1	0	1	1	PCDHA11	protocadherin alpha 11
hsa-miR-1182	1	0	1	0	1	1	PCDHA12	protocadherin alpha 12
hsa-miR-1182	1	0	1	1	1	1	PCDHA2	protocadherin alpha 2
hsa-miR-1182	1	0	1	1	1	1	PCDHA3	protocadherin alpha 3
hsa-miR-1182	1	0	1	1	1	1	PCDHA6	protocadherin alpha 6
hsa-miR-1182	1	0	1	0	1	1	PCDHA7	protocadherin alpha 7
hsa-miR-1182	1	0	1	1	1	1	PCDHA8	protocadherin alpha 8
hsa-miR-1182	0	0	1	1	1	1	GNL3L	guanine nucleotide binding protein-like 3 (nucleolar)-like
hsa-miR-1182	0	0	1	0	1	1	ARL15	ADP-ribosylation factor-like 15
hsa-miR-1182	1	0	1	0	1	1	UBFD1	ubiquitin family domain containing 1
hsa-miR-1182	1	0	1	1	1	1	CYP26B1	cytochrome P450, family 26, subfamily B, polypeptide 1
hsa-miR-1182	1	0	1	0	1	1	SLAMF8	SLAM family member 8
hsa-miR-1182	1	0	1	0	1	1	PMEPA1	prostate transmembrane protein, androgen induced 1
hsa-miR-1182	1	0	1	1	0	0	SLC17A7	solute carrier family 17 (sodium-dependent inorganic phosphate cotransporter), member 7
hsa-miR-1182	0	0	1	1	1	1	ZNF695	zinc finger protein 695
hsa-miR-1182	1	0	1	1	1	1	PTGFRN	prostaglandin F2 receptor negative regulator
hsa-miR-1182	1	0	1	1	1	1	RAB22A	RAB22A, member RAS oncogene family
hsa-miR-1182	1	0	1	1	1	1	SLC12A5	solute carrier family 12 (potassium/chloride transporter), member 5
hsa-miR-1182	0	0	1	1	1	1	SHROOM4	shroom family member 4
hsa-miR-1182	1	0	1	1	1	1	USP31	ubiquitin specific peptidase 31
hsa-miR-1182	1	0	1	1	1	1	ZNF608	zinc finger protein 608
hsa-miR-1182	0	0	1	0	1	1	XPO5	exportin 5
hsa-miR-1182	1	0	1	1	1	1	MIB1	mindbomb E3 ubiquitin protein ligase 1
hsa-miR-1182	1	0	1	0	1	1	ALPK3	alpha-kinase 3
hsa-miR-1182	1	0	1	1	1	1	NLGN2	neuroligin 2
hsa-miR-1182	1	0	1	1	1	1	SEMA6A	sema domain, transmembrane domain (TM), and cytoplasmic domain, (semaphorin) 6A
hsa-miR-1182	0	0	1	1	1	1	ARRDC3	arrestin domain containing 3
hsa-miR-1182	0	0	1	1	1	1	MARCH4	membrane-associated ring finger (C3HC4) 4, E3 ubiquitin protein ligase
hsa-miR-1182	1	0	1	1	1	1	HOMEZ	homeobox and leucine zipper encoding
hsa-miR-1182	1	0	1	1	1	1	KIAA1467	KIAA1467
hsa-miR-1182	1	0	1	1	1	1	CNTN3	contactin 3 (plasmacytoma associated)
hsa-miR-1182	1	0	1	1	1	1	ZFP14	zinc finger protein 14 homolog (mouse)
hsa-miR-1182	0	0	1	1	1	1	TLX3	T-cell leukemia homeobox 3
hsa-miR-1182	1	0	1	1	1	1	NEFH	neurofilament, heavy polypeptide
hsa-miR-1182	0	0	1	1	1	1	SLC15A2	solute carrier family 15 (H+/peptide transporter), member 2
hsa-miR-1182	1	0	1	1	0	0	TMSB10	thymosin beta 10
hsa-miR-1182	1	0	1	0	1	1	TP53INP2	tumor protein p53 inducible nuclear protein 2
hsa-miR-1182	1	0	1	1	1	1	FAM60A	family with sequence similarity 60, member A
hsa-miR-1182	0	0	1	1	1	1	IL22RA1	interleukin 22 receptor, alpha 1
hsa-miR-1182	0	0	1	1	1	1	NR1D1	nuclear receptor subfamily 1, group D, member 1
hsa-miR-1182	1	0	1	1	1	1	OTX2	orthodenticle homeobox 2
hsa-miR-1182	1	0	1	0	0	0	ALX4	ALX homeobox 4
hsa-miR-1182	0	0	1	1	1	1	CHP2	calcineurin-like EF hand protein 2
hsa-miR-1182	1	0	1	1	1	1	XYLT1	xylosyltransferase I
hsa-miR-1182	1	0	1	1	1	1	XYLT2	xylosyltransferase II
hsa-miR-1182	1	0	1	1	1	1	ABCG4	ATP-binding cassette, sub-family G (WHITE), member 4
hsa-miR-1182	0	0	1	1	1	1	TCTA	T-cell leukemia translocation altered
hsa-miR-1182	1	0	1	1	1	1	HIF3A	hypoxia inducible factor 3, alpha subunit
hsa-miR-1182	1	0	1	1	1	1	SUDS3	suppressor of defective silencing 3 homolog (S. cerevisiae)
hsa-miR-1182	1	0	1	1	1	1	GIGYF1	GRB10 interacting GYF protein 1
hsa-miR-1182	0	0	1	1	1	1	ACBD3	acyl-CoA binding domain containing 3
hsa-miR-1182	1	0	1	1	1	1	FAM160B2	family with sequence similarity 160, member B2
hsa-miR-1182	1	0	1	1	1	1	C1orf116	chromosome 1 open reading frame 116
hsa-miR-1182	1	0	1	1	1	1	NEUROG2	neurogenin 2
hsa-miR-1182	1	0	1	1	1	1	GID4	GID complex subunit 4, VID24 homolog (S. cerevisiae)
hsa-miR-1182	1	0	1	1	1	1	PSTPIP2	proline-serine-threonine phosphatase interacting protein 2
hsa-miR-1182	1	0	1	1	1	1	NKAIN1	Na+/K+ transporting ATPase interacting 1
hsa-miR-1182	1	0	1	1	1	1	GCC1	GRIP and coiled-coil domain containing 1
hsa-miR-1182	1	0	1	1	0	0	ABHD8	abhydrolase domain containing 8
hsa-miR-1182	1	0	1	1	1	1	CDC73	cell division cycle 73, Paf1/RNA polymerase II complex component, homolog (S. cerevisiae)
hsa-miR-1182	0	0	1	1	1	1	STEAP4	STEAP family member 4
hsa-miR-1182	1	0	1	1	0	0	VPS37B	vacuolar protein sorting 37 homolog B (S. cerevisiae)
hsa-miR-1182	1	0	1	0	1	1	LIN28A	lin-28 homolog A (C. elegans)
hsa-miR-1182	0	0	1	1	1	1	PLEKHS1	pleckstrin homology domain containing, family S member 1
hsa-miR-1182	0	0	1	1	1	1	DOCK5	dedicator of cytokinesis 5
hsa-miR-1182	1	0	1	0	1	1	NAA25	N(alpha)-acetyltransferase 25, NatB auxiliary subunit
hsa-miR-1182	0	0	1	1	0	0	NRSN2	neurensin 2
hsa-miR-1182	0	0	1	1	1	1	GFM1	G elongation factor, mitochondrial 1
hsa-miR-1182	1	0	1	0	1	1	EDEM3	ER degradation enhancer, mannosidase alpha-like 3
hsa-miR-1182	0	0	1	0	1	1	PDGFD	platelet derived growth factor D
hsa-miR-1182	1	0	1	1	1	1	PDRG1	p53 and DNA-damage regulated 1
hsa-miR-1182	1	0	1	0	1	1	LBH	limb bud and heart development homolog (mouse)
hsa-miR-1182	1	0	1	1	0	0	PVRL4	poliovirus receptor-related 4
hsa-miR-1182	1	0	1	1	1	1	SNX27	sorting nexin family member 27
hsa-miR-1182	0	0	1	1	1	1	PABPC3	poly(A) binding protein, cytoplasmic 3
hsa-miR-1182	0	0	1	1	0	0	TEX13B	testis expressed 13B
hsa-miR-1182	0	0	1	1	1	1	FCRL4	Fc receptor-like 4
hsa-miR-1182	1	0	1	1	0	0	TCF7L1	transcription factor 7-like 1 (T-cell specific, HMG-box)
hsa-miR-1182	1	0	1	1	0	0	SCRT1	scratch homolog 1, zinc finger protein (Drosophila)
hsa-miR-1182	1	0	1	1	1	1	MARK4	MAP/microtubule affinity-regulating kinase 4
hsa-miR-1182	0	0	1	1	1	1	INHBE	inhibin, beta E
hsa-miR-1182	1	0	1	1	1	1	PCDHA9	protocadherin alpha 9
hsa-miR-1182	1	0	1	1	0	0	FZD8	frizzled family receptor 8
hsa-miR-1182	0	0	1	1	1	1	FCAMR	Fc receptor, IgA, IgM, high affinity
hsa-miR-1182	0	0	1	1	0	0	SLC4A11	solute carrier family 4, sodium borate transporter, member 11
hsa-miR-1182	1	0	1	1	1	1	PATZ1	POZ (BTB) and AT hook containing zinc finger 1
hsa-miR-1182	1	0	1	1	1	1	OTP	orthopedia homeobox
hsa-miR-1182	0	0	1	0	1	1	RAB6C	RAB6C, member RAS oncogene family
hsa-miR-1182	1	0	1	1	1	1	ARID5B	AT rich interactive domain 5B (MRF1-like)
hsa-miR-1182	1	0	1	1	1	1	ANTXR1	anthrax toxin receptor 1
hsa-miR-1182	0	0	1	1	0	0	ELMOD3	ELMO/CED-12 domain containing 3
hsa-miR-1182	1	0	1	1	0	0	MAF1	MAF1 homolog (S. cerevisiae)
hsa-miR-1182	1	0	1	1	1	1	ZDHHC18	zinc finger, DHHC-type containing 18
hsa-miR-1182	0	0	1	1	0	0	C9orf89	chromosome 9 open reading frame 89
hsa-miR-1182	0	0	1	1	0	0	NICN1	nicolin 1
hsa-miR-1182	1	0	1	1	1	1	TTBK1	tau tubulin kinase 1
hsa-miR-1182	1	0	1	1	1	1	USP38	ubiquitin specific peptidase 38
hsa-miR-1182	0	0	1	1	0	0	KIF2B	kinesin family member 2B
hsa-miR-1182	1	0	1	1	1	1	ARHGEF39	Rho guanine nucleotide exchange factor (GEF) 39
hsa-miR-1182	1	0	1	0	1	1	UBASH3B	ubiquitin associated and SH3 domain containing B
hsa-miR-1182	1	0	1	1	1	1	RBM17	RNA binding motif protein 17
hsa-miR-1182	0	0	1	1	1	1	POLR2J2	polymerase (RNA) II (DNA directed) polypeptide J2
hsa-miR-1182	1	0	1	1	1	1	PCDH11Y	protocadherin 11 Y-linked
hsa-miR-1182	0	0	1	1	0	0	LMLN	leishmanolysin-like (metallopeptidase M8 family)
hsa-miR-1182	1	0	1	1	1	1	HIAT1	hippocampus abundant transcript 1
hsa-miR-1182	0	0	1	1	1	1	ZIC5	Zic family member 5
hsa-miR-1182	0	0	1	1	1	1	ABCC12	ATP-binding cassette, sub-family C (CFTR/MRP), member 12
hsa-miR-1182	1	0	1	1	1	1	RASL10B	RAS-like, family 10, member B
hsa-miR-1182	0	0	1	1	0	0	ZNF622	zinc finger protein 622
hsa-miR-1182	1	0	1	1	0	0	FCHSD1	FCH and double SH3 domains 1
hsa-miR-1182	1	0	1	1	1	1	EPT1	ethanolaminephosphotransferase 1 (CDP-ethanolamine-specific)
hsa-miR-1182	1	0	1	1	1	1	TSPYL5	TSPY-like 5
hsa-miR-1182	0	0	1	1	1	1	MYL12B	myosin, light chain 12B, regulatory
hsa-miR-1182	0	0	1	0	1	1	CCDC97	coiled-coil domain containing 97
hsa-miR-1182	1	0	1	1	1	1	STX1B	syntaxin 1B
hsa-miR-1182	0	0	1	1	0	0	PGLYRP2	peptidoglycan recognition protein 2
hsa-miR-1182	0	0	1	1	1	1	PLEKHG4B	pleckstrin homology domain containing, family G (with RhoGef domain) member 4B
hsa-miR-1182	0	0	1	1	1	1	LENG8	leukocyte receptor cluster (LRC) member 8
hsa-miR-1182	0	0	1	1	0	0	FAM46B	family with sequence similarity 46, member B
hsa-miR-1182	1	0	1	1	1	1	WDFY2	WD repeat and FYVE domain containing 2
hsa-miR-1182	0	0	1	1	1	1	PRDM7	PR domain containing 7
hsa-miR-1182	1	0	1	1	0	0	AP1S1	adaptor-related protein complex 1, sigma 1 subunit
hsa-miR-1182	0	0	1	1	1	1	CLEC4D	C-type lectin domain family 4, member D
hsa-miR-1182	0	0	1	1	0	0	S100A16	S100 calcium binding protein A16
hsa-miR-1182	1	0	1	1	1	1	SEPT4	septin 4
hsa-miR-1182	1	0	1	1	1	1	C20orf112	chromosome 20 open reading frame 112
hsa-miR-1182	0	0	1	1	1	1	CDKN2AIPNL	CDKN2A interacting protein N-terminal like
hsa-miR-1182	1	0	1	1	1	1	COL11A2	collagen, type XI, alpha 2
hsa-miR-1182	1	0	1	1	0	0	ADAMTS14	ADAM metallopeptidase with thrombospondin type 1 motif, 14
hsa-miR-1182	1	0	1	0	1	1	EDARADD	EDAR-associated death domain
hsa-miR-1182	0	0	1	1	1	1	ATP6V1G2	ATPase, H+ transporting, lysosomal 13kDa, V1 subunit G2
hsa-miR-1182	0	0	1	1	1	1	CHST14	carbohydrate (N-acetylgalactosamine 4-0) sulfotransferase 14
hsa-miR-1182	1	0	1	1	1	1	WHSC1	Wolf-Hirschhorn syndrome candidate 1
hsa-miR-1182	0	0	1	0	1	1	PAQR8	progestin and adipoQ receptor family member VIII
hsa-miR-1182	1	0	1	1	0	0	UNC5A	unc-5 homolog A (C. elegans)
hsa-miR-1182	1	0	1	1	1	1	BMPER	BMP binding endothelial regulator
hsa-miR-1182	0	0	1	0	1	1	SP140L	SP140 nuclear body protein-like
hsa-miR-1182	0	0	1	1	1	1	C1orf213	chromosome 1 open reading frame 213
hsa-miR-1182	1	0	1	1	1	1	BACE2	beta-site APP-cleaving enzyme 2
hsa-miR-1182	1	0	1	1	1	1	HLTF	helicase-like transcription factor
hsa-miR-1182	1	0	1	1	1	1	DNER	delta/notch-like EGF repeat containing
hsa-miR-1182	0	0	1	1	1	1	PPIL4	peptidylprolyl isomerase (cyclophilin)-like 4
hsa-miR-1182	0	0	1	1	0	0	KLK8	kallikrein-related peptidase 8
hsa-miR-1182	0	0	1	1	1	1	GTSF1	gametocyte specific factor 1
hsa-miR-1182	1	0	1	1	1	1	KCNH8	potassium voltage-gated channel, subfamily H (eag-related), member 8
hsa-miR-1182	0	0	1	1	0	0	OTOA	otoancorin
hsa-miR-1182	1	0	1	1	1	1	ZMAT2	zinc finger, matrin-type 2
hsa-miR-1182	0	0	1	1	1	1	DACT3	dapper, antagonist of beta-catenin, homolog 3 (Xenopus laevis)
hsa-miR-1182	1	0	1	0	1	1	DIRAS1	DIRAS family, GTP-binding RAS-like 1
hsa-miR-1182	0	0	1	1	1	1	FAM100A	family with sequence similarity 100, member A
hsa-miR-1182	0	0	1	1	1	1	CD300LG	CD300 molecule-like family member g
hsa-miR-1182	1	0	1	1	1	1	CADM4	cell adhesion molecule 4
hsa-miR-1182	0	0	1	1	1	1	APOBEC3F	apolipoprotein B mRNA editing enzyme, catalytic polypeptide-like 3F
hsa-miR-1182	0	0	1	1	1	1	SCARF1	scavenger receptor class F, member 1
hsa-miR-1182	0	0	1	1	0	0	TCEB3C	transcription elongation factor B polypeptide 3C (elongin A3)
hsa-miR-1182	0	0	1	1	0	0	TIGD3	tigger transposable element derived 3
hsa-miR-1182	1	0	1	1	1	1	ZNF396	zinc finger protein 396
hsa-miR-1182	1	0	1	1	1	1	SEPT6	septin 6
hsa-miR-1182	1	0	1	0	1	1	MTPN	myotrophin
hsa-miR-1182	0	0	1	0	1	1	CHKB	choline kinase beta
hsa-miR-1182	1	0	1	1	1	1	TBX15	T-box 15
hsa-miR-1182	1	0	1	1	1	1	FAM123B	family with sequence similarity 123B
hsa-miR-1182	1	0	1	1	1	1	ZNF362	zinc finger protein 362
hsa-miR-1182	0	0	1	0	1	1	HORMAD2	HORMA domain containing 2
hsa-miR-1182	1	0	1	1	1	1	PPM1K	protein phosphatase, Mg2+/Mn2+ dependent, 1K
hsa-miR-1182	1	0	1	1	0	0	ZNF579	zinc finger protein 579
hsa-miR-1182	0	0	1	1	0	0	C2orf57	chromosome 2 open reading frame 57
hsa-miR-1182	0	0	1	1	1	1	DAND5	DAN domain family, member 5
hsa-miR-1182	1	0	1	0	1	1	TMEM154	transmembrane protein 154
hsa-miR-1182	0	0	1	1	1	1	DNAJC18	DnaJ (Hsp40) homolog, subfamily C, member 18
hsa-miR-1182	0	0	1	1	1	1	CNPY4	canopy 4 homolog (zebrafish)
hsa-miR-1182	0	0	1	0	0	0	TCP11L2	t-complex 11 (mouse)-like 2
hsa-miR-1182	1	0	1	1	1	1	TCEANC2	transcription elongation factor A (SII) N-terminal and central domain containing 2
hsa-miR-1182	1	0	1	1	0	0	TMEM86A	transmembrane protein 86A
hsa-miR-1182	1	0	1	0	1	1	SEMA6D	sema domain, transmembrane domain (TM), and cytoplasmic domain, (semaphorin) 6D
hsa-miR-1182	1	0	1	1	1	1	ELMOD2	ELMO/CED-12 domain containing 2
hsa-miR-1182	1	0	1	1	1	1	FNDC5	fibronectin type III domain containing 5
hsa-miR-1182	1	0	1	1	1	1	DAZAP1	DAZ associated protein 1
hsa-miR-1182	1	0	1	1	1	1	MSI2	musashi homolog 2 (Drosophila)
hsa-miR-1182	1	0	1	1	1	1	RC3H1	ring finger and CCCH-type domains 1
hsa-miR-1182	0	0	1	1	1	1	TAPBP	TAP binding protein (tapasin)
hsa-miR-1182	1	0	1	0	1	1	RUNDC1	RUN domain containing 1
hsa-miR-1182	1	0	1	1	1	1	SMG7	smg-7 homolog, nonsense mediated mRNA decay factor (C. elegans)
hsa-miR-1182	0	0	1	1	1	1	CYP4F22	cytochrome P450, family 4, subfamily F, polypeptide 22
hsa-miR-1182	1	0	1	1	1	1	FAM117B	family with sequence similarity 117, member B
hsa-miR-1182	0	0	1	1	0	0	NOMO2	NODAL modulator 2
hsa-miR-1182	1	0	1	1	1	1	SLC9A9	solute carrier family 9, subfamily A (NHE9, cation proton antiporter 9), member 9
hsa-miR-1182	1	0	1	1	1	1	ATG9B	autophagy related 9B
hsa-miR-1182	0	0	1	1	1	1	FAM133A	family with sequence similarity 133, member A
hsa-miR-1182	1	0	1	1	1	1	PRTG	protogenin
hsa-miR-1182	1	0	1	1	1	1	LDLRAD3	low density lipoprotein receptor class A domain containing 3
hsa-miR-1182	0	0	1	1	1	1	CCDC50	coiled-coil domain containing 50
hsa-miR-1182	0	0	1	1	0	0	C17orf74	chromosome 17 open reading frame 74
hsa-miR-1182	0	0	1	1	1	1	C16orf54	chromosome 16 open reading frame 54
hsa-miR-1182	1	0	1	1	0	0	JPH2	junctophilin 2
hsa-miR-1182	0	0	1	1	1	1	RASSF6	Ras association (RalGDS/AF-6) domain family member 6
hsa-miR-1182	1	0	1	1	1	1	PRIMA1	proline rich membrane anchor 1
hsa-miR-1182	0	0	1	1	1	1	SESTD1	SEC14 and spectrin domains 1
hsa-miR-1182	0	0	1	1	1	1	TFAP2E	transcription factor AP-2 epsilon (activating enhancer binding protein 2 epsilon)
hsa-miR-1182	1	0	1	0	1	1	ZDHHC21	zinc finger, DHHC-type containing 21
hsa-miR-1182	0	0	1	1	1	1	FBXO27	F-box protein 27
hsa-miR-1182	0	0	1	1	1	1	NPAS4	neuronal PAS domain protein 4
hsa-miR-1182	0	0	1	0	1	1	PITPNC1	phosphatidylinositol transfer protein, cytoplasmic 1
hsa-miR-1182	0	0	1	1	0	0	KRTAP12-2	keratin associated protein 12-2
hsa-miR-1182	0	0	1	0	0	0	KRTAP12-1	keratin associated protein 12-1
hsa-miR-1182	1	0	1	1	1	1	ZSCAN2	zinc finger and SCAN domain containing 2
hsa-miR-1182	0	0	1	1	1	1	LRP5L	low density lipoprotein receptor-related protein 5-like
hsa-miR-1182	1	0	1	1	1	1	TMEM229B	transmembrane protein 229B
hsa-miR-1182	1	0	1	1	1	1	PLCB1	phospholipase C, beta 1 (phosphoinositide-specific)
hsa-miR-1182	1	0	1	0	1	1	RIMS4	regulating synaptic membrane exocytosis 4
hsa-miR-1182	0	0	1	0	1	1	NBPF11	neuroblastoma breakpoint family, member 11
hsa-miR-1182	1	0	1	1	1	1	RBM38	RNA binding motif protein 38
hsa-miR-1182	1	0	1	1	1	1	ADAMTS6	ADAM metallopeptidase with thrombospondin type 1 motif, 6
hsa-miR-1182	0	0	1	0	1	1	BTNL3	butyrophilin-like 3
hsa-miR-1182	0	0	1	1	1	1	OLFML1	olfactomedin-like 1
hsa-miR-1182	0	0	1	1	1	1	KIF7	kinesin family member 7
hsa-miR-1182	0	0	1	1	1	1	LHFPL4	lipoma HMGIC fusion partner-like 4
hsa-miR-1182	0	0	1	0	0	0	KRTAP12-4	keratin associated protein 12-4
hsa-miR-1182	0	0	1	0	1	1	SIAH3	siah E3 ubiquitin protein ligase family member 3
hsa-miR-1182	1	0	1	0	1	1	PRICKLE2	prickle homolog 2 (Drosophila)
hsa-miR-1182	1	0	1	1	1	1	CXCL12	chemokine (C-X-C motif) ligand 12
hsa-miR-1182	1	0	1	1	1	1	TMEM189-UBE2V1	TMEM189-UBE2V1 readthrough
hsa-miR-1182	1	0	1	1	1	1	THRA	thyroid hormone receptor, alpha
hsa-miR-1182	0	0	1	1	0	0	TMEM179B	transmembrane protein 179B
hsa-miR-1182	0	0	1	1	1	1	PFN4	profilin family, member 4
hsa-miR-1182	1	0	1	1	1	1	ADAMTS18	ADAM metallopeptidase with thrombospondin type 1 motif, 18
hsa-miR-1182	1	0	1	1	1	1	WARS2	tryptophanyl tRNA synthetase 2, mitochondrial
hsa-miR-1182	0	0	1	1	1	1	GPX1	glutathione peroxidase 1
hsa-miR-1182	0	0	1	1	1	1	SHC4	SHC (Src homology 2 domain containing) family, member 4
hsa-miR-1182	0	0	1	1	0	0	CXorf67	chromosome X open reading frame 67
hsa-miR-1182	0	0	1	1	1	1	ELP5	elongator acetyltransferase complex subunit 5
hsa-miR-1182	1	0	1	1	1	1	PPAPDC2	phosphatidic acid phosphatase type 2 domain containing 2
hsa-miR-1182	1	0	1	1	1	1	IGSF1	immunoglobulin superfamily, member 1
hsa-miR-1182	0	0	1	1	1	1	C10orf129	chromosome 10 open reading frame 129
hsa-miR-1182	1	0	1	1	0	0	TSEN54	tRNA splicing endonuclease 54 homolog (S. cerevisiae)
hsa-miR-1182	1	0	1	1	1	1	FREM2	FRAS1 related extracellular matrix protein 2
hsa-miR-1182	0	0	1	0	0	0	C16orf47	chromosome 16 open reading frame 47
hsa-miR-1182	0	0	1	1	1	1	FLJ45983	uncharacterized LOC399717
hsa-miR-1182	1	0	1	1	1	1	TEX19	testis expressed 19
hsa-miR-1182	0	0	1	1	0	0	BOLA3	bolA homolog 3 (E. coli)
hsa-miR-1182	0	0	1	0	0	0	ESRRAP2	estrogen-related receptor alpha pseudogene 2
hsa-miR-1182	0	0	1	0	0	0	CELP	carboxyl ester lipase pseudogene
hsa-miR-1182	0	0	1	0	0	0	MIR155HG	MIR155 host gene (non-protein coding)
hsa-miR-1182	0	0	1	1	0	0	TTTY8	testis-specific transcript, Y-linked 8 (non-protein coding)
hsa-miR-1182	0	0	1	0	0	0	RNY5	RNA, Ro-associated Y5
hsa-miR-1182	0	0	1	0	0	0	TTTY4B	testis-specific transcript, Y-linked 4B (non-protein coding)
hsa-miR-1182	0	0	1	0	0	0	DKFZP586I1420	uncharacterized protein DKFZp586I1420
hsa-miR-1182	0	0	1	0	0	0	SUMO1P1	SUMO1 pseudogene 1
hsa-miR-1182	0	0	1	0	0	0	MEIS3P1	Meis homeobox 3 pseudogene 1
hsa-miR-1182	0	0	1	0	0	0	NXF4	nuclear RNA export factor 4 pseudogene
hsa-miR-1182	0	0	1	0	0	0	RPL23AP32	ribosomal protein L23a pseudogene 32
hsa-miR-1182	0	0	1	0	0	0	MSX2P1	msh homeobox 2 pseudogene 1
hsa-miR-1182	0	0	1	0	0	0	LOC606724	coronin, actin binding protein, 1A pseudogene
hsa-miR-1182	0	0	1	0	0	0	DEFB122	defensin, beta 122 (pseudogene)
hsa-miR-1182	0	0	1	0	0	0	TOP1P1	topoisomerase (DNA) I pseudogene 1
hsa-miR-1182	0	0	1	0	0	0	HTR7P1	5-hydroxytryptamine (serotonin) receptor 7 pseudogene 1
hsa-miR-1182	0	0	1	0	0	0	RPL29P2	ribosomal protein L29 pseudogene 2
hsa-miR-1182	0	0	1	0	0	0	RPL13P5	ribosomal protein L13 pseudogene 5
hsa-miR-1182	0	0	1	0	0	0	LOC338799	uncharacterized LOC338799
hsa-miR-1182	0	0	1	0	0	0	TPTE2P6	transmembrane phosphoinositide 3-phosphatase and tensin homolog 2 pseudogene 6
hsa-miR-1182	0	0	1	0	0	0	MALAT1	metastasis associated lung adenocarcinoma transcript 1 (non-protein coding)
hsa-miR-1182	0	0	1	0	0	0	SIGLEC16	sialic acid binding Ig-like lectin 16 (gene/pseudogene)
hsa-miR-1182	0	0	1	0	0	0	HAS2-AS1	HAS2 antisense RNA 1
hsa-miR-1182	0	0	1	0	0	0	SNX29P2	sorting nexin 29 pseudogene 2
hsa-miR-1182	0	0	1	0	0	0	TCAM1P	testicular cell adhesion molecule 1 homolog (mouse), pseudogene
hsa-miR-1182	0	0	1	0	0	0	SNORA53	small nucleolar RNA, H/ACA box 53
hsa-miR-1182	1	0	1	1	0	0	HOXC5	homeobox C5
hsa-miR-1182	0	0	1	0	0	0	HSP90B3P	heat shock protein 90kDa beta (Grp94), member 3, pseudogene
hsa-miR-1182	0	0	1	0	0	0	HSP90AB2P	heat shock protein 90kDa alpha (cytosolic), class B member 2, pseudogene
hsa-miR-1182	0	0	1	0	0	0	GBP1P1	guanylate binding protein 1, interferon-inducible pseudogene 1
hsa-miR-1182	0	0	1	0	0	0	MYADML	myeloid-associated differentiation marker-like (pseudogene)
hsa-miR-1182	0	0	1	0	0	0	CDRT15P1	CMT1A duplicated region transcript 15 pseudogene 1
hsa-miR-1182	0	0	1	0	0	0	LOC729603	calcium binding protein P22 pseudogene
hsa-miR-1182	0	0	1	0	0	0	SNORD115-26	small nucleolar RNA, C/D box 115-26
hsa-miR-1182	1	0	1	1	1	1	CASP2	caspase 2, apoptosis-related cysteine peptidase
hsa-miR-1182	1	0	1	1	1	1	PDE4A	phosphodiesterase 4A, cAMP-specific
hsa-miR-1182	1	0	1	1	1	1	TRIO	trio Rho guanine nucleotide exchange factor
hsa-miR-1182	1	0	1	1	0	0	TNXB	tenascin XB
hsa-miR-1182	1	0	1	1	1	1	ATF6B	activating transcription factor 6 beta
hsa-miR-1182	1	0	1	1	1	1	TCF3	transcription factor 3 (E2A immunoglobulin enhancer binding factors E12/E47)
hsa-miR-1182	1	0	1	1	1	1	HNRNPA1	heterogeneous nuclear ribonucleoprotein A1
hsa-miR-1182	1	0	1	1	1	1	IFNAR2	interferon (alpha, beta and omega) receptor 2
hsa-miR-1182	0	0	1	1	0	0	KIR2DL4	killer cell immunoglobulin-like receptor, two domains, long cytoplasmic tail, 4
