# Supplementary material for: Profiling of Selected MicroRNAs in Proliferative Eutopic Endometrium of Women with Ovarian Endometriosis
Source: Biomed Res Int. 2015 Aug 20;2015:760698. doi: 10.1155/2015/760698 (PMC4558423; doi:10.1155/2015/760698)
Supplement: Supplementary file 1 — Table I: The names of miRNAs significantly differentially expressed between eutopic endometrium of patients with endometriosis vs eutopic endometrium of patients without endometriosis. Table II: The associations between miRNA and mRNA, which presents detailed results of the search of six major databases i.e targetscan, tarbase, miranda, mirbase, mirtarget2 and pictar. [file 760698.f1.zip › 760698.f1/Table II/hsa-miR-1183.tsv]

miR	targetscan	tarbase	miranda	mirbase	mirtarget2	pictar	GeneSymbol	GeneName
hsa-miR-1183	1	0	1	1	1	1	PLAU	plasminogen activator, urokinase
hsa-miR-1183	0	0	1	1	1	1	MKNK1	MAP kinase interacting serine/threonine kinase 1
hsa-miR-1183	1	0	1	1	0	0	SRCAP	Snf2-related CREBBP activator protein
hsa-miR-1183	1	0	1	1	1	1	DAAM2	dishevelled associated activator of morphogenesis 2
hsa-miR-1183	0	0	1	1	1	1	HSPH1	heat shock 105kDa/110kDa protein 1
hsa-miR-1183	1	0	1	1	1	1	ABCC5	ATP-binding cassette, sub-family C (CFTR/MRP), member 5
hsa-miR-1183	1	0	1	0	1	1	PTPRT	protein tyrosine phosphatase, receptor type, T
hsa-miR-1183	1	0	1	0	1	1	KIAA0408	KIAA0408
hsa-miR-1183	1	0	1	1	1	1	PPIP5K2	diphosphoinositol pentakisphosphate kinase 2
hsa-miR-1183	1	0	1	0	1	1	NEDD4L	neural precursor cell expressed, developmentally down-regulated 4-like, E3 ubiquitin protein ligase
hsa-miR-1183	1	0	1	1	1	1	CDC42BPA	CDC42 binding protein kinase alpha (DMPK-like)
hsa-miR-1183	0	0	1	0	0	0	FAM91A2	family with sequence similarity 91, member A2
hsa-miR-1183	0	0	1	1	1	1	NEU3	sialidase 3 (membrane sialidase)
hsa-miR-1183	1	0	1	1	1	1	RNGTT	RNA guanylyltransferase and 5'-phosphatase
hsa-miR-1183	1	0	1	1	1	1	IQSEC2	IQ motif and Sec7 domain 2
hsa-miR-1183	0	0	1	1	0	0	ZNF862	zinc finger protein 862
hsa-miR-1183	1	0	1	1	0	0	PCLO	piccolo (presynaptic cytomatrix protein)
hsa-miR-1183	1	0	1	1	1	1	HIPK1	homeodomain interacting protein kinase 1
hsa-miR-1183	1	0	1	1	1	1	GIGYF2	GRB10 interacting GYF protein 2
hsa-miR-1183	0	0	1	1	0	0	ARHGEF2	Rho/Rac guanine nucleotide exchange factor (GEF) 2
hsa-miR-1183	0	0	1	1	1	1	XYLB	xylulokinase homolog (H. influenzae)
hsa-miR-1183	0	0	1	1	1	1	MICAL2	microtubule associated monoxygenase, calponin and LIM domain containing 2
hsa-miR-1183	1	0	1	1	1	1	DNM3	dynamin 3
hsa-miR-1183	1	0	1	1	1	1	DMXL2	Dmx-like 2
hsa-miR-1183	1	0	1	1	1	1	ARHGEF15	Rho guanine nucleotide exchange factor (GEF) 15
hsa-miR-1183	1	0	1	1	1	1	CPEB3	cytoplasmic polyadenylation element binding protein 3
hsa-miR-1183	1	0	1	1	1	1	CIT	citron (rho-interacting, serine/threonine kinase 21)
hsa-miR-1183	1	0	1	1	1	1	NLGN4Y	neuroligin 4, Y-linked
hsa-miR-1183	0	0	1	0	0	0	THSD7A	thrombospondin, type I, domain containing 7A
hsa-miR-1183	0	0	1	1	1	1	FASTKD2	FAST kinase domains 2
hsa-miR-1183	1	0	1	1	1	1	RPGRIP1L	RPGRIP1-like
hsa-miR-1183	0	0	1	0	1	1	TP53TG3	TP53 target 3
hsa-miR-1183	0	0	1	0	0	0	TP53TG3B	TP53 target 3B
hsa-miR-1183	1	0	1	1	1	1	FOXJ3	forkhead box J3
hsa-miR-1183	1	0	1	1	0	0	KIAA1045	KIAA1045
hsa-miR-1183	1	0	1	1	1	1	NLGN1	neuroligin 1
hsa-miR-1183	1	0	1	0	1	1	ZNF507	zinc finger protein 507
hsa-miR-1183	1	0	1	1	1	1	PRRC2C	proline-rich coiled-coil 2C
hsa-miR-1183	1	0	1	0	1	1	GPR158	G protein-coupled receptor 158
hsa-miR-1183	1	0	1	1	0	0	KIAA1210	KIAA1210
hsa-miR-1183	1	0	1	1	1	1	ATXN7L1	ataxin 7-like 1
hsa-miR-1183	1	0	1	1	1	1	RALGAPB	Ral GTPase activating protein, beta subunit (non-catalytic)
hsa-miR-1183	1	0	1	1	1	1	ZMIZ1	zinc finger, MIZ-type containing 1
hsa-miR-1183	0	0	1	1	0	0	ODF2L	outer dense fiber of sperm tails 2-like
hsa-miR-1183	1	0	1	1	0	0	ATAD2B	ATPase family, AAA domain containing 2B
hsa-miR-1183	1	0	1	1	1	1	MKL2	MKL/myocardin-like 2
hsa-miR-1183	1	0	1	1	1	1	ASAP1	ArfGAP with SH3 domain, ankyrin repeat and PH domain 1
hsa-miR-1183	0	0	1	1	1	1	COPS7A	COP9 constitutive photomorphogenic homolog subunit 7A (Arabidopsis)
hsa-miR-1183	0	0	1	1	1	1	CA10	carbonic anhydrase X
hsa-miR-1183	1	0	1	1	1	1	PCDH19	protocadherin 19
hsa-miR-1183	1	0	1	1	1	1	TAOK1	TAO kinase 1
hsa-miR-1183	1	0	1	1	1	1	SEMA6A	sema domain, transmembrane domain (TM), and cytoplasmic domain, (semaphorin) 6A
hsa-miR-1183	1	0	1	1	1	1	UPF2	UPF2 regulator of nonsense transcripts homolog (yeast)
hsa-miR-1183	1	0	1	1	1	1	CASK	calcium/calmodulin-dependent serine protein kinase (MAGUK family)
hsa-miR-1183	1	0	1	0	0	0	PITPNM2	phosphatidylinositol transfer protein, membrane-associated 2
hsa-miR-1183	0	0	1	1	0	0	ISLR2	immunoglobulin superfamily containing leucine-rich repeat 2
hsa-miR-1183	0	0	1	0	1	1	KIAA1468	KIAA1468
hsa-miR-1183	0	0	1	1	1	1	NLGN3	neuroligin 3
hsa-miR-1183	1	0	1	1	0	0	ZSWIM5	zinc finger, SWIM-type containing 5
hsa-miR-1183	0	0	1	0	0	0	KRT19P2	keratin 19 pseudogene 2
hsa-miR-1183	0	0	1	1	0	0	TMEM132A	transmembrane protein 132A
hsa-miR-1183	1	0	1	0	0	0	TANC2	tetratricopeptide repeat, ankyrin repeat and coiled-coil containing 2
hsa-miR-1183	1	0	1	1	1	1	SNX3	sorting nexin 3
hsa-miR-1183	0	0	1	1	1	1	PBLD	phenazine biosynthesis-like protein domain containing
hsa-miR-1183	0	0	1	1	1	1	BHLHB9	basic helix-loop-helix domain containing, class B, 9
hsa-miR-1183	1	0	1	1	1	1	IKZF4	IKAROS family zinc finger 4 (Eos)
hsa-miR-1183	0	0	1	1	0	0	COL27A1	collagen, type XXVII, alpha 1
hsa-miR-1183	1	0	1	1	1	1	AHCTF1	AT hook containing transcription factor 1
hsa-miR-1183	1	0	1	1	1	1	NAV2	neuron navigator 2
hsa-miR-1183	1	0	1	1	1	1	CSMD3	CUB and Sushi multiple domains 3
hsa-miR-1183	0	0	1	1	0	0	FAM65A	family with sequence similarity 65, member A
hsa-miR-1183	1	0	1	1	1	1	LSM14A	LSM14A, SCD6 homolog A (S. cerevisiae)
hsa-miR-1183	1	0	1	1	1	1	MAT2B	methionine adenosyltransferase II, beta
hsa-miR-1183	1	0	1	1	1	1	OXR1	oxidation resistance 1
hsa-miR-1183	1	0	1	1	0	0	ZNF292	zinc finger protein 292
hsa-miR-1183	1	0	1	1	0	0	ADC	arginine decarboxylase
hsa-miR-1183	1	0	1	1	1	1	SH3TC2	SH3 domain and tetratricopeptide repeats 2
hsa-miR-1183	0	0	1	1	0	0	CIRH1A	cirrhosis, autosomal recessive 1A (cirhin)
hsa-miR-1183	1	0	1	0	1	1	RNF43	ring finger protein 43
hsa-miR-1183	1	0	1	0	0	0	RNF169	ring finger protein 169
hsa-miR-1183	1	0	1	0	0	0	ZBTB34	zinc finger and BTB domain containing 34
hsa-miR-1183	0	0	1	0	1	1	RASSF8	Ras association (RalGDS/AF-6) domain family (N-terminal) member 8
hsa-miR-1183	1	0	1	1	1	1	RFX4	regulatory factor X, 4 (influences HLA class II expression)
hsa-miR-1183	0	0	1	1	0	0	FAM208B	family with sequence similarity 208, member B
hsa-miR-1183	1	0	1	1	1	1	UBR3	ubiquitin protein ligase E3 component n-recognin 3 (putative)
hsa-miR-1183	1	0	1	0	0	0	ZC3H12C	zinc finger CCCH-type containing 12C
hsa-miR-1183	0	0	1	1	1	1	BCO2	beta-carotene oxygenase 2
hsa-miR-1183	1	0	1	0	1	1	LIN54	lin-54 homolog (C. elegans)
hsa-miR-1183	1	1	1	1	1	1	BACE1	beta-site APP-cleaving enzyme 1
hsa-miR-1183	0	0	1	0	1	1	ACE2	angiotensin I converting enzyme (peptidyl-dipeptidase A) 2
hsa-miR-1183	1	0	1	1	1	1	ADARB1	adenosine deaminase, RNA-specific, B1
hsa-miR-1183	0	0	1	0	1	1	ITPR1	inositol 1,4,5-trisphosphate receptor, type 1
hsa-miR-1183	0	0	1	1	0	0	CPT1C	carnitine palmitoyltransferase 1C
hsa-miR-1183	1	0	1	0	1	1	PCDHA13	protocadherin alpha 13
hsa-miR-1183	1	0	1	1	1	1	PCDHA4	protocadherin alpha 4
hsa-miR-1183	1	0	1	1	0	0	ELN	elastin
hsa-miR-1183	1	0	1	1	1	1	MEF2A	myocyte enhancer factor 2A
hsa-miR-1183	0	0	1	1	1	1	MAZ	MYC-associated zinc finger protein (purine-binding transcription factor)
hsa-miR-1183	1	0	1	1	1	1	PHC1	polyhomeotic homolog 1 (Drosophila)
hsa-miR-1183	1	0	1	1	1	1	MKNK2	MAP kinase interacting serine/threonine kinase 2
hsa-miR-1183	1	0	1	1	1	1	SLC8A1	solute carrier family 8 (sodium/calcium exchanger), member 1
hsa-miR-1183	1	0	1	1	1	1	SYNCRIP	synaptotagmin binding, cytoplasmic RNA interacting protein
hsa-miR-1183	1	0	1	1	1	1	DTNA	dystrobrevin, alpha
hsa-miR-1183	1	0	1	0	1	1	PLAG1	pleiomorphic adenoma gene 1
hsa-miR-1183	1	0	1	1	1	1	RASSF5	Ras association (RalGDS/AF-6) domain family member 5
hsa-miR-1183	1	0	1	0	1	1	MPPED2	metallophosphoesterase domain containing 2
hsa-miR-1183	1	0	1	1	0	0	CACNB1	calcium channel, voltage-dependent, beta 1 subunit
hsa-miR-1183	1	0	1	1	0	0	TSPYL2	TSPY-like 2
hsa-miR-1183	1	0	1	0	1	1	DPYSL2	dihydropyrimidinase-like 2
hsa-miR-1183	0	0	1	1	1	1	DDX39B	DEAD (Asp-Glu-Ala-Asp) box polypeptide 39B
hsa-miR-1183	0	0	1	1	1	1	TFRC	transferrin receptor (p90, CD71)
hsa-miR-1183	1	0	1	1	1	1	TWF1	twinfilin, actin-binding protein, homolog 1 (Drosophila)
hsa-miR-1183	1	0	1	1	1	1	DMPK	dystrophia myotonica-protein kinase
hsa-miR-1183	1	0	1	1	1	1	SATB2	SATB homeobox 2
hsa-miR-1183	1	0	1	1	1	1	AEBP2	AE binding protein 2
hsa-miR-1183	1	0	1	0	1	1	CDON	Cdon homolog (mouse)
hsa-miR-1183	1	0	1	1	1	1	SPTB	spectrin, beta, erythrocytic
hsa-miR-1183	0	0	1	1	0	0	IFT27	intraflagellar transport 27 homolog (Chlamydomonas)
hsa-miR-1183	1	0	1	1	1	1	MYO5A	myosin VA (heavy chain 12, myoxin)
hsa-miR-1183	0	0	1	1	0	0	EIF4E2	eukaryotic translation initiation factor 4E family member 2
hsa-miR-1183	0	0	1	1	1	1	STAU1	staufen, RNA binding protein, homolog 1 (Drosophila)
hsa-miR-1183	1	0	1	1	1	1	DDX17	DEAD (Asp-Glu-Ala-Asp) box helicase 17
hsa-miR-1183	0	0	1	1	0	0	CFLAR	CASP8 and FADD-like apoptosis regulator
hsa-miR-1183	1	0	1	1	1	1	IPO8	importin 8
hsa-miR-1183	0	0	1	1	1	1	HLA-DQA1	major histocompatibility complex, class II, DQ alpha 1
hsa-miR-1183	1	0	1	1	1	1	EPB41	erythrocyte membrane protein band 4.1 (elliptocytosis 1, RH-linked)
hsa-miR-1183	1	0	1	1	1	1	CD40	CD40 molecule, TNF receptor superfamily member 5
hsa-miR-1183	1	0	1	1	1	1	ARHGEF3	Rho guanine nucleotide exchange factor (GEF) 3
hsa-miR-1183	1	0	1	1	1	1	PTPRK	protein tyrosine phosphatase, receptor type, K
hsa-miR-1183	0	0	1	1	0	0	SLC22A8	solute carrier family 22 (organic anion transporter), member 8
hsa-miR-1183	1	0	1	1	1	1	CYP46A1	cytochrome P450, family 46, subfamily A, polypeptide 1
hsa-miR-1183	1	0	1	1	1	1	MLLT10	myeloid/lymphoid or mixed-lineage leukemia (trithorax homolog, Drosophila); translocated to, 10
hsa-miR-1183	1	0	1	0	1	1	ADD3	adducin 3 (gamma)
hsa-miR-1183	1	0	1	1	1	1	TLE1	transducin-like enhancer of split 1 (E(sp1) homolog, Drosophila)
hsa-miR-1183	1	0	1	1	0	0	PPP2R5D	protein phosphatase 2, regulatory subunit B', delta
hsa-miR-1183	1	0	1	1	1	1	ZFX	zinc finger protein, X-linked
hsa-miR-1183	1	0	1	1	1	1	ANPEP	alanyl (membrane) aminopeptidase
hsa-miR-1183	1	0	1	0	1	1	CAV1	caveolin 1, caveolae protein, 22kDa
hsa-miR-1183	1	0	1	0	1	1	PDE7B	phosphodiesterase 7B
hsa-miR-1183	1	0	1	1	1	1	APC	adenomatous polyposis coli
hsa-miR-1183	1	0	1	1	1	1	MEF2D	myocyte enhancer factor 2D
hsa-miR-1183	1	0	1	1	0	0	TNPO2	transportin 2
hsa-miR-1183	1	0	1	1	1	1	MYH10	myosin, heavy chain 10, non-muscle
hsa-miR-1183	1	0	1	0	1	1	DDX3X	DEAD (Asp-Glu-Ala-Asp) box polypeptide 3, X-linked
hsa-miR-1183	1	0	1	1	1	1	PDLIM3	PDZ and LIM domain 3
hsa-miR-1183	0	0	1	1	0	0	MUC3A	mucin 3A, cell surface associated
hsa-miR-1183	1	0	1	0	1	1	MLL2	myeloid/lymphoid or mixed-lineage leukemia 2
hsa-miR-1183	1	0	1	1	1	1	CBFA2T2	core-binding factor, runt domain, alpha subunit 2; translocated to, 2
hsa-miR-1183	0	0	1	0	0	0	ALOX12P2	arachidonate 12-lipoxygenase pseudogene 2
hsa-miR-1183	0	0	1	1	1	1	PPEF2	protein phosphatase, EF-hand calcium binding domain 2
hsa-miR-1183	1	0	1	1	1	1	PCDH17	protocadherin 17
hsa-miR-1183	1	0	1	1	1	1	MYT1L	myelin transcription factor 1-like
hsa-miR-1183	1	0	1	0	1	1	CELF2	CUGBP, Elav-like family member 2
hsa-miR-1183	1	0	1	0	0	0	MAP3K1	mitogen-activated protein kinase kinase kinase 1, E3 ubiquitin protein ligase
hsa-miR-1183	1	0	1	1	0	0	SH2D2A	SH2 domain containing 2A
hsa-miR-1183	0	0	1	1	1	1	CD84	CD84 molecule
hsa-miR-1183	1	0	1	1	1	1	SHOC2	soc-2 suppressor of clear homolog (C. elegans)
hsa-miR-1183	1	0	1	1	1	1	ZFAND6	zinc finger, AN1-type domain 6
hsa-miR-1183	1	0	1	1	1	1	ERLIN1	ER lipid raft associated 1
hsa-miR-1183	0	0	1	1	1	1	TEX30	testis expressed 30
hsa-miR-1183	1	0	1	1	1	1	TP63	tumor protein p63
hsa-miR-1183	0	0	1	1	1	1	RGS7	regulator of G-protein signaling 7
hsa-miR-1183	0	0	1	1	1	1	PCBP4	poly(rC) binding protein 4
hsa-miR-1183	0	0	1	1	1	1	FHL1	four and a half LIM domains 1
hsa-miR-1183	0	0	1	1	1	1	SH2D1A	SH2 domain containing 1A
hsa-miR-1183	1	0	1	1	0	0	RASSF1	Ras association (RalGDS/AF-6) domain family member 1
hsa-miR-1183	0	0	1	1	0	0	RBM5	RNA binding motif protein 5
hsa-miR-1183	1	0	1	0	0	0	PPME1	protein phosphatase methylesterase 1
hsa-miR-1183	1	0	1	1	1	1	PKN2	protein kinase N2
hsa-miR-1183	1	0	1	0	1	1	WDR82	WD repeat domain 82
hsa-miR-1183	1	0	1	1	1	1	SORBS1	sorbin and SH3 domain containing 1
hsa-miR-1183	1	0	1	1	1	1	AASDHPPT	aminoadipate-semialdehyde dehydrogenase-phosphopantetheinyl transferase
hsa-miR-1183	0	0	1	0	1	1	ZC3HAV1	zinc finger CCCH-type, antiviral 1
hsa-miR-1183	1	0	1	0	1	1	BECN1	beclin 1, autophagy related
hsa-miR-1183	1	0	1	1	1	1	HMG20A	high mobility group 20A
hsa-miR-1183	1	0	1	0	1	1	SLC34A2	solute carrier family 34 (sodium phosphate), member 2
hsa-miR-1183	1	0	1	1	1	1	C14orf129	chromosome 14 open reading frame 129
hsa-miR-1183	1	0	1	1	1	1	USP15	ubiquitin specific peptidase 15
hsa-miR-1183	0	0	1	0	1	1	PDP1	pyruvate dehyrogenase phosphatase catalytic subunit 1
hsa-miR-1183	0	0	1	1	1	1	NBPF14	neuroblastoma breakpoint family, member 14
hsa-miR-1183	0	0	1	0	1	1	CLDN2	claudin 2
hsa-miR-1183	1	0	1	1	1	1	C3orf18	chromosome 3 open reading frame 18
hsa-miR-1183	1	0	1	0	1	1	TAPT1	transmembrane anterior posterior transformation 1
hsa-miR-1183	0	0	1	0	1	1	SLC38A4	solute carrier family 38, member 4
hsa-miR-1183	0	0	1	1	1	1	CHPT1	choline phosphotransferase 1
hsa-miR-1183	1	0	1	1	1	1	CCNL1	cyclin L1
hsa-miR-1183	1	0	1	1	1	1	KCNMB2	potassium large conductance calcium-activated channel, subfamily M, beta member 2
hsa-miR-1183	0	0	1	1	1	1	SAMSN1	SAM domain, SH3 domain and nuclear localization signals 1
hsa-miR-1183	0	0	1	1	1	1	MFF	mitochondrial fission factor
hsa-miR-1183	0	0	1	1	0	0	SH2B1	SH2B adaptor protein 1
hsa-miR-1183	1	0	1	1	1	1	DESI2	desumoylating isopeptidase 2
hsa-miR-1183	1	0	1	1	1	1	C21orf91	chromosome 21 open reading frame 91
hsa-miR-1183	1	0	1	1	1	1	SNTB2	syntrophin, beta 2 (dystrophin-associated protein A1, 59kDa, basic component 2)
hsa-miR-1183	1	0	1	1	1	1	ELF2	E74-like factor 2 (ets domain transcription factor)
hsa-miR-1183	1	0	1	1	1	1	SH3GLB1	SH3-domain GRB2-like endophilin B1
hsa-miR-1183	1	0	1	0	1	1	TRPS1	trichorhinophalangeal syndrome I
hsa-miR-1183	1	0	1	1	1	1	ERGIC1	endoplasmic reticulum-golgi intermediate compartment (ERGIC) 1
hsa-miR-1183	0	0	1	1	1	1	ZNF331	zinc finger protein 331
hsa-miR-1183	1	0	1	1	1	1	PUM2	pumilio homolog 2 (Drosophila)
hsa-miR-1183	1	0	1	1	1	1	LDB3	LIM domain binding 3
hsa-miR-1183	1	0	1	1	1	1	NRP1	neuropilin 1
hsa-miR-1183	1	0	1	1	1	1	DCLRE1B	DNA cross-link repair 1B
hsa-miR-1183	1	0	1	1	1	1	CPEB1	cytoplasmic polyadenylation element binding protein 1
hsa-miR-1183	0	0	1	1	1	1	FCRL1	Fc receptor-like 1
hsa-miR-1183	1	0	1	1	1	1	CHST9	carbohydrate (N-acetylgalactosamine 4-0) sulfotransferase 9
hsa-miR-1183	1	0	1	1	1	1	BIVM	basic, immunoglobulin-like variable motif containing
hsa-miR-1183	1	0	1	1	1	1	CALU	calumenin
hsa-miR-1183	0	0	1	1	0	0	TRO	trophinin
hsa-miR-1183	1	0	1	1	1	1	PBX3	pre-B-cell leukemia homeobox 3
hsa-miR-1183	1	0	1	0	1	1	WIPF2	WAS/WASL interacting protein family, member 2
hsa-miR-1183	1	0	1	1	1	1	CALCOCO1	calcium binding and coiled-coil domain 1
hsa-miR-1183	0	0	1	0	0	0	NBPF10	neuroblastoma breakpoint family, member 10
hsa-miR-1183	1	0	1	1	1	1	SON	SON DNA binding protein
hsa-miR-1183	0	0	1	1	1	1	PARK2	parkinson protein 2, E3 ubiquitin protein ligase (parkin)
hsa-miR-1183	1	0	1	1	1	1	PDE8A	phosphodiesterase 8A
hsa-miR-1183	0	0	1	1	1	1	MAD2L1	MAD2 mitotic arrest deficient-like 1 (yeast)
hsa-miR-1183	0	0	1	1	0	0	SNRPN	small nuclear ribonucleoprotein polypeptide N
hsa-miR-1183	0	0	1	1	1	1	SPSB1	splA/ryanodine receptor domain and SOCS box containing 1
hsa-miR-1183	0	0	1	0	0	0	MYO15B	myosin XVB pseudogene
hsa-miR-1183	1	0	1	1	0	0	SEPT8	septin 8
hsa-miR-1183	0	0	1	1	1	1	PSRC1	proline/serine-rich coiled-coil 1
hsa-miR-1183	1	0	1	1	1	1	RBFOX1	RNA binding protein, fox-1 homolog (C. elegans) 1
hsa-miR-1183	0	0	1	1	0	0	RASGEF1C	RasGEF domain family, member 1C
hsa-miR-1183	0	0	1	0	1	1	EPM2A	epilepsy, progressive myoclonus type 2A, Lafora disease (laforin)
hsa-miR-1183	0	0	1	1	1	1	LGI1	leucine-rich, glioma inactivated 1
hsa-miR-1183	1	0	1	1	1	1	WAPAL	wings apart-like homolog (Drosophila)
hsa-miR-1183	0	0	1	1	1	1	AMPH	amphiphysin
hsa-miR-1183	1	0	1	1	0	0	ST3GAL4	ST3 beta-galactoside alpha-2,3-sialyltransferase 4
hsa-miR-1183	0	0	1	1	1	1	CDAN1	codanin 1
hsa-miR-1183	0	0	1	1	1	1	PTK7	PTK7 protein tyrosine kinase 7
hsa-miR-1183	1	0	1	0	1	1	IL1RAP	interleukin 1 receptor accessory protein
hsa-miR-1183	1	0	1	1	1	1	AFF2	AF4/FMR2 family, member 2
hsa-miR-1183	0	0	1	1	1	1	KCNJ13	potassium inwardly-rectifying channel, subfamily J, member 13
hsa-miR-1183	1	0	1	1	1	1	PLAGL1	pleiomorphic adenoma gene-like 1
hsa-miR-1183	0	0	1	1	0	0	ADAMTS13	ADAM metallopeptidase with thrombospondin type 1 motif, 13
hsa-miR-1183	1	0	1	1	1	1	SH2B3	SH2B adaptor protein 3
hsa-miR-1183	0	0	1	1	1	1	GNAS	GNAS complex locus
hsa-miR-1183	1	0	1	1	0	0	SEZ6L2	seizure related 6 homolog (mouse)-like 2
hsa-miR-1183	1	0	1	1	1	1	SUCO	SUN domain containing ossification factor
hsa-miR-1183	0	0	1	1	1	1	CLDND1	claudin domain containing 1
hsa-miR-1183	0	0	1	1	0	0	KIF13A	kinesin family member 13A
hsa-miR-1183	1	0	1	1	1	1	VAMP7	vesicle-associated membrane protein 7
hsa-miR-1183	0	0	1	1	1	1	WWTR1	WW domain containing transcription regulator 1
hsa-miR-1183	0	0	1	0	0	0	CD177	CD177 molecule
hsa-miR-1183	1	0	1	1	1	1	NRXN3	neurexin 3
hsa-miR-1183	1	0	1	1	1	1	NAV3	neuron navigator 3
hsa-miR-1183	0	0	1	1	1	1	TRDN	triadin
hsa-miR-1183	1	0	1	0	1	1	NAALADL2	N-acetylated alpha-linked acidic dipeptidase-like 2
hsa-miR-1183	0	0	1	1	1	1	PHACTR3	phosphatase and actin regulator 3
hsa-miR-1183	0	0	1	1	0	0	C22orf24	chromosome 22 open reading frame 24
hsa-miR-1183	0	0	1	1	1	1	SLC8A3	solute carrier family 8 (sodium/calcium exchanger), member 3
hsa-miR-1183	0	0	1	0	0	0	FLJ20021	uncharacterized LOC90024
hsa-miR-1183	0	0	1	1	0	0	ASAP3	ArfGAP with SH3 domain, ankyrin repeat and PH domain 3
hsa-miR-1183	1	0	1	1	1	1	AKAP2	A kinase (PRKA) anchor protein 2
hsa-miR-1183	1	0	1	0	1	1	NFAT5	nuclear factor of activated T-cells 5, tonicity-responsive
hsa-miR-1183	1	0	1	1	1	1	ENOX2	ecto-NOX disulfide-thiol exchanger 2
hsa-miR-1183	0	0	1	0	0	0	TUG1	taurine upregulated 1 (non-protein coding)
hsa-miR-1183	0	0	1	1	1	1	PARPBP	PARP1 binding protein
hsa-miR-1183	1	0	1	1	1	1	ARHGAP12	Rho GTPase activating protein 12
hsa-miR-1183	1	0	1	1	1	1	BCAP29	B-cell receptor-associated protein 29
hsa-miR-1183	1	0	1	1	1	1	ARHGAP17	Rho GTPase activating protein 17
hsa-miR-1183	0	0	1	1	1	1	SEMA5B	sema domain, seven thrombospondin repeats (type 1 and type 1-like), transmembrane domain (TM) and short cytoplasmic domain, (semaphorin) 5B
hsa-miR-1183	0	0	1	0	0	0	TPTEP1	transmembrane phosphatase with tensin homology pseudogene 1
hsa-miR-1183	0	0	1	1	1	1	STOX2	storkhead box 2
hsa-miR-1183	1	0	1	0	1	1	VPS13D	vacuolar protein sorting 13 homolog D (S. cerevisiae)
hsa-miR-1183	1	0	1	1	1	1	EIF2C1	eukaryotic translation initiation factor 2C, 1
hsa-miR-1183	1	0	1	1	1	1	PTBP3	polypyrimidine tract binding protein 3
hsa-miR-1183	1	0	1	1	1	1	SLC38A2	solute carrier family 38, member 2
hsa-miR-1183	1	0	1	1	1	1	LRRN3	leucine rich repeat neuronal 3
hsa-miR-1183	1	0	1	1	1	1	MKLN1	muskelin 1, intracellular mediator containing kelch motifs
hsa-miR-1183	1	0	1	1	1	1	ACER3	alkaline ceramidase 3
hsa-miR-1183	1	0	1	1	1	1	HNRNPUL1	heterogeneous nuclear ribonucleoprotein U-like 1
hsa-miR-1183	1	0	1	1	1	1	C12orf23	chromosome 12 open reading frame 23
hsa-miR-1183	0	0	1	1	0	0	UBR4	ubiquitin protein ligase E3 component n-recognin 4
hsa-miR-1183	1	0	1	1	1	1	SUN1	Sad1 and UNC84 domain containing 1
hsa-miR-1183	1	0	1	0	1	1	LIN28A	lin-28 homolog A (C. elegans)
hsa-miR-1183	1	0	1	1	0	0	UQCC	ubiquinol-cytochrome c reductase complex chaperone
hsa-miR-1183	0	0	1	0	0	0	DUXAP10	double homeobox A pseudogene 10
hsa-miR-1183	1	0	1	1	0	0	FASTK	Fas-activated serine/threonine kinase
hsa-miR-1183	0	0	1	1	1	1	LRRN1	leucine rich repeat neuronal 1
hsa-miR-1183	1	0	1	1	1	1	PPFIA4	protein tyrosine phosphatase, receptor type, f polypeptide (PTPRF), interacting protein (liprin), alpha 4
hsa-miR-1183	0	0	1	1	0	0	BUB1	budding uninhibited by benzimidazoles 1 homolog (yeast)
hsa-miR-1183	0	0	1	1	0	0	ACTR6	ARP6 actin-related protein 6 homolog (yeast)
hsa-miR-1183	0	0	1	1	1	1	CLEC4M	C-type lectin domain family 4, member M
hsa-miR-1183	1	0	1	1	1	1	POMT2	protein-O-mannosyltransferase 2
hsa-miR-1183	0	0	1	0	1	1	FLJ14186	uncharacterized LOC401149
hsa-miR-1183	1	0	1	1	1	1	COPS7B	COP9 constitutive photomorphogenic homolog subunit 7B (Arabidopsis)
hsa-miR-1183	1	0	1	0	0	0	ZDBF2	zinc finger, DBF-type containing 2
hsa-miR-1183	0	0	1	1	1	1	METTL7A	methyltransferase like 7A
hsa-miR-1183	1	0	1	1	1	1	DYRK2	dual-specificity tyrosine-(Y)-phosphorylation regulated kinase 2
hsa-miR-1183	1	0	1	0	1	1	ATP2B1	ATPase, Ca++ transporting, plasma membrane 1
hsa-miR-1183	0	0	1	1	1	1	PPFIBP2	PTPRF interacting protein, binding protein 2 (liprin beta 2)
hsa-miR-1183	0	0	1	0	1	1	ATXN1L	ataxin 1-like
hsa-miR-1183	0	0	1	1	1	1	CNOT8	CCR4-NOT transcription complex, subunit 8
hsa-miR-1183	1	0	1	1	1	1	DLC1	deleted in liver cancer 1
hsa-miR-1183	1	0	1	1	1	1	YPEL5	yippee-like 5 (Drosophila)
hsa-miR-1183	1	0	1	1	1	1	NAA30	N(alpha)-acetyltransferase 30, NatC catalytic subunit
hsa-miR-1183	1	0	1	1	0	0	NIPAL4	NIPA-like domain containing 4
hsa-miR-1183	0	0	1	0	0	0	LINC00340	long intergenic non-protein coding RNA 340
hsa-miR-1183	1	0	1	1	0	0	POMGNT1	protein O-linked mannose beta1,2-N-acetylglucosaminyltransferase
hsa-miR-1183	1	0	1	1	0	0	UBXN7	UBX domain protein 7
hsa-miR-1183	0	0	1	1	0	0	EXOC6B	exocyst complex component 6B
hsa-miR-1183	1	0	1	1	1	1	DCAF8	DDB1 and CUL4 associated factor 8
hsa-miR-1183	0	0	1	1	1	1	SUV39H2	suppressor of variegation 3-9 homolog 2 (Drosophila)
hsa-miR-1183	0	0	1	1	0	0	C15orf23	chromosome 15 open reading frame 23
hsa-miR-1183	1	0	1	1	1	1	FAM53C	family with sequence similarity 53, member C
hsa-miR-1183	1	0	1	1	1	1	MARK1	MAP/microtubule affinity-regulating kinase 1
hsa-miR-1183	1	0	1	1	1	1	NFASC	neurofascin
hsa-miR-1183	1	0	1	1	1	1	SLC38A1	solute carrier family 38, member 1
hsa-miR-1183	1	0	1	1	1	1	BZW2	basic leucine zipper and W2 domains 2
hsa-miR-1183	1	0	1	1	1	1	GPD2	glycerol-3-phosphate dehydrogenase 2 (mitochondrial)
hsa-miR-1183	1	0	1	1	1	1	ARHGAP36	Rho GTPase activating protein 36
hsa-miR-1183	0	0	1	1	0	0	IMPDH1	IMP (inosine 5'-monophosphate) dehydrogenase 1
hsa-miR-1183	1	0	1	0	1	1	ZKSCAN1	zinc finger with KRAB and SCAN domains 1
hsa-miR-1183	0	0	1	0	0	0	KIAA0664L3	KIAA0664-like 3
hsa-miR-1183	0	0	1	0	0	0	LOC254559	uncharacterized LOC254559
hsa-miR-1183	1	0	1	0	1	1	AP1G1	adaptor-related protein complex 1, gamma 1 subunit
hsa-miR-1183	0	0	1	0	0	0	CASC2	cancer susceptibility candidate 2 (non-protein coding)
hsa-miR-1183	0	0	1	1	1	1	GABRP	gamma-aminobutyric acid (GABA) A receptor, pi
hsa-miR-1183	0	0	1	0	1	1	HDX	highly divergent homeobox
hsa-miR-1183	0	0	1	0	0	0	FLJ30838	uncharacterized LOC400955
hsa-miR-1183	0	0	1	1	1	1	OPTN	optineurin
hsa-miR-1183	0	0	1	0	0	0	FLJ31104	uncharacterized LOC441072
hsa-miR-1183	0	0	1	1	1	1	SLCO1B3	solute carrier organic anion transporter family, member 1B3
hsa-miR-1183	1	0	1	1	1	1	DHX15	DEAH (Asp-Glu-Ala-His) box polypeptide 15
hsa-miR-1183	1	0	1	1	1	1	TMTC1	transmembrane and tetratricopeptide repeat containing 1
hsa-miR-1183	1	0	1	1	1	1	ZNF664	zinc finger protein 664
hsa-miR-1183	1	0	1	0	1	1	PTPRE	protein tyrosine phosphatase, receptor type, E
hsa-miR-1183	0	0	1	1	0	0	BEAN1	brain expressed, associated with NEDD4, 1
hsa-miR-1183	0	0	1	0	0	0	SEC14L2	SEC14-like 2 (S. cerevisiae)
hsa-miR-1183	1	0	1	1	1	1	LMNA	lamin A/C
hsa-miR-1183	1	0	1	1	1	1	SHISA5	shisa homolog 5 (Xenopus laevis)
hsa-miR-1183	1	0	1	1	1	1	AGPAT1	1-acylglycerol-3-phosphate O-acyltransferase 1 (lysophosphatidic acid acyltransferase, alpha)
hsa-miR-1183	0	0	1	0	1	1	FAM70A	family with sequence similarity 70, member A
hsa-miR-1183	1	0	1	1	1	1	SCAMP5	secretory carrier membrane protein 5
hsa-miR-1183	0	0	1	0	0	0	LOC441204	uncharacterized LOC441204
hsa-miR-1183	1	0	1	1	1	1	CLCN5	chloride channel, voltage-sensitive 5
hsa-miR-1183	0	0	1	1	1	1	GNB2	guanine nucleotide binding protein (G protein), beta polypeptide 2
hsa-miR-1183	0	0	1	1	1	1	DST	dystonin
hsa-miR-1183	1	0	1	1	1	1	TPM3	tropomyosin 3
hsa-miR-1183	0	0	1	0	1	1	THAP6	THAP domain containing 6
hsa-miR-1183	1	0	1	1	1	1	TLE4	transducin-like enhancer of split 4 (E(sp1) homolog, Drosophila)
hsa-miR-1183	0	0	1	0	0	0	LOC100125918	uncharacterized LOC100125918
hsa-miR-1183	1	0	1	1	1	1	MPP7	membrane protein, palmitoylated 7 (MAGUK p55 subfamily member 7)
hsa-miR-1183	0	0	1	0	1	1	ARHGAP42	Rho GTPase activating protein 42
hsa-miR-1183	0	0	1	1	0	0	HSD3B7	hydroxy-delta-5-steroid dehydrogenase, 3 beta- and steroid delta-isomerase 7
hsa-miR-1183	1	0	1	0	1	1	PLEKHA1	pleckstrin homology domain containing, family A (phosphoinositide binding specific) member 1
hsa-miR-1183	1	0	1	0	1	1	NCAM1	neural cell adhesion molecule 1
hsa-miR-1183	0	0	1	1	1	1	SEC61A2	Sec61 alpha 2 subunit (S. cerevisiae)
hsa-miR-1183	0	0	1	0	0	0	UBE2QL1	ubiquitin-conjugating enzyme E2Q family-like 1
hsa-miR-1183	1	0	1	1	1	1	IST1	increased sodium tolerance 1 homolog (yeast)
hsa-miR-1183	0	0	1	1	1	1	A2ML1	alpha-2-macroglobulin-like 1
hsa-miR-1183	0	0	1	1	1	1	ZBTB26	zinc finger and BTB domain containing 26
hsa-miR-1183	0	0	1	0	0	0	C8orf48	chromosome 8 open reading frame 48
hsa-miR-1183	0	0	1	0	0	0	C10orf105	chromosome 10 open reading frame 105
hsa-miR-1183	1	0	1	1	0	0	LRCH4	leucine-rich repeats and calponin homology (CH) domain containing 4
hsa-miR-1183	1	0	1	1	1	1	BLCAP	bladder cancer associated protein
hsa-miR-1183	1	0	1	1	1	1	CNOT4	CCR4-NOT transcription complex, subunit 4
hsa-miR-1183	1	0	1	0	1	1	TPBG	trophoblast glycoprotein
hsa-miR-1183	0	0	1	1	0	0	NISCH	nischarin
hsa-miR-1183	0	0	1	1	1	1	CAMKV	CaM kinase-like vesicle-associated
hsa-miR-1183	1	0	1	0	1	1	SLC25A37	solute carrier family 25 (mitochondrial iron transporter), member 37
hsa-miR-1183	0	0	1	1	0	0	LGR5	leucine-rich repeat containing G protein-coupled receptor 5
hsa-miR-1183	1	0	1	1	1	1	TTC13	tetratricopeptide repeat domain 13
hsa-miR-1183	1	0	1	1	1	1	TLK1	tousled-like kinase 1
hsa-miR-1183	0	0	1	1	1	1	STBD1	starch binding domain 1
hsa-miR-1183	0	0	1	1	0	0	CTNNBL1	catenin, beta like 1
hsa-miR-1183	1	0	1	1	1	1	SYN2	synapsin II
hsa-miR-1183	0	0	1	1	1	1	DYNC1I1	dynein, cytoplasmic 1, intermediate chain 1
hsa-miR-1183	0	0	1	1	1	1	BBS9	Bardet-Biedl syndrome 9
hsa-miR-1183	0	0	1	0	1	1	PIANP	PILR alpha associated neural protein
hsa-miR-1183	1	0	1	1	1	1	SUPT16H	suppressor of Ty 16 homolog (S. cerevisiae)
hsa-miR-1183	0	0	1	1	1	1	USP8	ubiquitin specific peptidase 8
hsa-miR-1183	0	0	1	1	1	1	HNRNPH1	heterogeneous nuclear ribonucleoprotein H1 (H)
hsa-miR-1183	1	0	1	1	1	1	GNG2	guanine nucleotide binding protein (G protein), gamma 2
hsa-miR-1183	0	0	1	1	0	0	PLTP	phospholipid transfer protein
hsa-miR-1183	1	0	1	1	1	1	MAFK	v-maf musculoaponeurotic fibrosarcoma oncogene homolog K (avian)
hsa-miR-1183	0	0	1	0	0	0	IDO2	indoleamine 2,3-dioxygenase 2
hsa-miR-1183	0	0	1	0	0	0	LOC550112	uncharacterized LOC550112
hsa-miR-1183	0	0	1	1	1	1	LZTFL1	leucine zipper transcription factor-like 1
hsa-miR-1183	1	0	1	1	1	1	SPTBN1	spectrin, beta, non-erythrocytic 1
hsa-miR-1183	1	0	1	1	1	1	DEM1	defects in morphology 1 homolog (S. cerevisiae)
hsa-miR-1183	0	0	1	0	0	0	CXXC1P1	CXXC finger protein 1 pseudogene 1
hsa-miR-1183	1	0	1	1	1	1	LRRC57	leucine rich repeat containing 57
hsa-miR-1183	1	0	1	1	1	1	CTNNA1	catenin (cadherin-associated protein), alpha 1, 102kDa
hsa-miR-1183	1	0	1	1	1	1	SSH3	slingshot homolog 3 (Drosophila)
hsa-miR-1183	0	0	1	1	0	0	WBP1	WW domain binding protein 1
hsa-miR-1183	1	0	1	1	1	1	KCND1	potassium voltage-gated channel, Shal-related subfamily, member 1
hsa-miR-1183	0	0	1	1	1	1	SPOCK1	sparc/osteonectin, cwcv and kazal-like domains proteoglycan (testican) 1
hsa-miR-1183	0	0	1	0	1	1	KANSL2	KAT8 regulatory NSL complex subunit 2
hsa-miR-1183	1	0	1	0	1	1	GATAD2B	GATA zinc finger domain containing 2B
hsa-miR-1183	1	0	1	0	1	1	NCOA7	nuclear receptor coactivator 7
hsa-miR-1183	0	0	1	0	0	0	FLJ37505	uncharacterized LOC400087
hsa-miR-1183	0	0	1	1	1	1	TMEM170A	transmembrane protein 170A
hsa-miR-1183	1	0	1	1	1	1	CPNE8	copine VIII
hsa-miR-1183	0	0	1	1	1	1	LRRC34	leucine rich repeat containing 34
hsa-miR-1183	1	0	1	1	1	1	ADCY3	adenylate cyclase 3
hsa-miR-1183	1	0	1	1	1	1	CUL2	cullin 2
hsa-miR-1183	1	0	1	1	1	1	ANKRD46	ankyrin repeat domain 46
hsa-miR-1183	0	0	1	1	0	0	ZNF185	zinc finger protein 185 (LIM domain)
hsa-miR-1183	0	0	1	1	1	1	MYO6	myosin VI
hsa-miR-1183	1	0	1	1	1	1	EPHB1	EPH receptor B1
hsa-miR-1183	0	0	1	0	0	0	LOC100129858	uncharacterized LOC100129858
hsa-miR-1183	1	0	1	1	1	1	FAM222B	family with sequence similarity 222, member B
hsa-miR-1183	1	0	1	1	1	1	SPATS2	spermatogenesis associated, serine-rich 2
hsa-miR-1183	0	0	1	1	1	1	CDK5RAP1	CDK5 regulatory subunit associated protein 1
hsa-miR-1183	1	0	1	0	1	1	NAA60	N(alpha)-acetyltransferase 60, NatF catalytic subunit
hsa-miR-1183	0	0	1	0	1	1	HDAC9	histone deacetylase 9
hsa-miR-1183	1	0	1	1	1	1	CS	citrate synthase
hsa-miR-1183	1	0	1	0	1	1	STC2	stanniocalcin 2
hsa-miR-1183	1	0	1	1	1	1	PEA15	phosphoprotein enriched in astrocytes 15
hsa-miR-1183	0	0	1	0	0	0	CCDC150	coiled-coil domain containing 150
hsa-miR-1183	0	0	1	1	0	0	TRIM46	tripartite motif containing 46
hsa-miR-1183	1	0	1	1	1	1	FADS1	fatty acid desaturase 1
hsa-miR-1183	0	0	1	0	0	0	FAM66C	family with sequence similarity 66, member C
hsa-miR-1183	0	0	1	1	0	0	ERGIC3	ERGIC and golgi 3
hsa-miR-1183	1	0	1	1	1	1	TCEANC2	transcription elongation factor A (SII) N-terminal and central domain containing 2
hsa-miR-1183	1	0	1	0	1	1	KIAA1737	KIAA1737
hsa-miR-1183	1	0	1	0	1	1	KBTBD8	kelch repeat and BTB (POZ) domain containing 8
hsa-miR-1183	1	0	1	1	1	1	SLC30A6	solute carrier family 30 (zinc transporter), member 6
hsa-miR-1183	1	0	1	1	1	1	SYT6	synaptotagmin VI
hsa-miR-1183	1	0	1	1	1	1	ETS2	v-ets erythroblastosis virus E26 oncogene homolog 2 (avian)
hsa-miR-1183	1	0	1	1	1	1	EPB41L1	erythrocyte membrane protein band 4.1-like 1
hsa-miR-1183	0	0	1	0	0	0	FLJ39534	uncharacterized FLJ39534
hsa-miR-1183	1	0	1	1	1	1	CDV3	CDV3 homolog (mouse)
hsa-miR-1183	0	0	1	1	1	1	EXTL2	exostoses (multiple)-like 2
hsa-miR-1183	0	0	1	1	0	0	KRI1	KRI1 homolog (S. cerevisiae)
hsa-miR-1183	0	0	1	1	0	0	VPS37C	vacuolar protein sorting 37 homolog C (S. cerevisiae)
hsa-miR-1183	1	0	1	1	1	1	KL	klotho
hsa-miR-1183	1	0	1	1	1	1	RAB11FIP4	RAB11 family interacting protein 4 (class II)
hsa-miR-1183	1	0	1	0	1	1	AGFG1	ArfGAP with FG repeats 1
hsa-miR-1183	0	0	1	0	0	0	DNAJB8-AS1	DNAJB8 antisense RNA 1
hsa-miR-1183	0	0	1	0	0	0	LOC100128560	uncharacterized LOC100128560
hsa-miR-1183	0	0	1	1	1	1	FAM9B	family with sequence similarity 9, member B
hsa-miR-1183	1	0	1	1	1	1	NSUN4	NOP2/Sun domain family, member 4
hsa-miR-1183	1	0	1	1	1	1	IGSF11	immunoglobulin superfamily, member 11
hsa-miR-1183	0	0	1	0	0	0	LOC284385	uncharacterized LOC284385
hsa-miR-1183	0	0	1	1	0	0	PSAPL1	prosaposin-like 1 (gene/pseudogene)
hsa-miR-1183	0	0	1	1	1	1	LRRC49	leucine rich repeat containing 49
hsa-miR-1183	0	0	1	1	1	1	ATP9B	ATPase, class II, type 9B
hsa-miR-1183	0	0	1	1	1	1	CKAP2L	cytoskeleton associated protein 2-like
hsa-miR-1183	0	0	1	1	0	0	CORO1A	coronin, actin binding protein, 1A
hsa-miR-1183	1	0	1	1	0	0	DNM2	dynamin 2
hsa-miR-1183	1	0	1	1	1	1	LZTS2	leucine zipper, putative tumor suppressor 2
hsa-miR-1183	0	0	1	0	0	0	LINC00514	long intergenic non-protein coding RNA 514
hsa-miR-1183	0	0	1	1	0	0	TAPBPL	TAP binding protein-like
hsa-miR-1183	1	0	1	0	1	1	LRBA	LPS-responsive vesicle trafficking, beach and anchor containing
hsa-miR-1183	1	0	1	1	1	1	ZCCHC2	zinc finger, CCHC domain containing 2
hsa-miR-1183	1	0	1	1	1	1	CHD6	chromodomain helicase DNA binding protein 6
hsa-miR-1183	0	0	1	1	0	0	ZNF283	zinc finger protein 283
hsa-miR-1183	0	0	1	1	1	1	GTF2IRD2	GTF2I repeat domain containing 2
hsa-miR-1183	0	0	1	1	1	1	FAM76A	family with sequence similarity 76, member A
hsa-miR-1183	0	0	1	1	1	1	ARFGAP2	ADP-ribosylation factor GTPase activating protein 2
hsa-miR-1183	0	0	1	0	0	0	LOC728095	uncharacterized LOC728095
hsa-miR-1183	1	0	1	1	0	0	DGCR6	DiGeorge syndrome critical region gene 6
hsa-miR-1183	0	0	1	0	0	0	GTF2IP1	general transcription factor IIi, pseudogene 1
hsa-miR-1183	1	0	1	1	1	1	NAP1L1	nucleosome assembly protein 1-like 1
hsa-miR-1183	0	0	1	1	0	0	FBXO18	F-box protein, helicase, 18
hsa-miR-1183	1	0	1	1	1	1	HBP1	HMG-box transcription factor 1
hsa-miR-1183	0	0	1	1	0	0	KIAA0146	KIAA0146
hsa-miR-1183	1	0	1	1	1	1	AGAP2	ArfGAP with GTPase domain, ankyrin repeat and PH domain 2
hsa-miR-1183	1	0	1	1	1	1	WEE1	WEE1 homolog (S. pombe)
hsa-miR-1183	0	0	1	1	0	0	PRICKLE1	prickle homolog 1 (Drosophila)
hsa-miR-1183	1	0	1	1	0	0	CACNB3	calcium channel, voltage-dependent, beta 3 subunit
hsa-miR-1183	0	0	1	1	0	0	MX2	myxovirus (influenza virus) resistance 2 (mouse)
hsa-miR-1183	0	0	1	1	0	0	MARS	methionyl-tRNA synthetase
hsa-miR-1183	0	0	1	1	0	0	SLC26A10	solute carrier family 26, member 10
hsa-miR-1183	0	0	1	1	1	1	FRMPD2	FERM and PDZ domain containing 2
hsa-miR-1183	0	0	1	0	1	1	PATE4	prostate and testis expressed 4
hsa-miR-1183	1	0	1	1	1	1	KALRN	kalirin, RhoGEF kinase
hsa-miR-1183	0	0	1	1	1	1	DNAJC24	DnaJ (Hsp40) homolog, subfamily C, member 24
hsa-miR-1183	1	0	1	1	1	1	CBLB	Cbl proto-oncogene, E3 ubiquitin protein ligase B
hsa-miR-1183	1	0	1	1	1	1	PDZD4	PDZ domain containing 4
hsa-miR-1183	1	0	1	1	1	1	MDGA2	MAM domain containing glycosylphosphatidylinositol anchor 2
hsa-miR-1183	1	0	1	0	1	1	KCNK2	potassium channel, subfamily K, member 2
hsa-miR-1183	0	0	1	0	0	0	LGALS17A	Charcot-Leyden crystal protein pseudogene
hsa-miR-1183	0	0	1	1	1	1	FAM19A2	family with sequence similarity 19 (chemokine (C-C motif)-like), member A2
hsa-miR-1183	0	0	1	0	0	0	LOC650368	asparagine-linked glycosylation 1-like pseudogene
hsa-miR-1183	1	0	1	1	1	1	PHKB	phosphorylase kinase, beta
hsa-miR-1183	1	0	1	1	1	1	IPPK	inositol 1,3,4,5,6-pentakisphosphate 2-kinase
hsa-miR-1183	1	0	1	1	1	1	ADAMTS8	ADAM metallopeptidase with thrombospondin type 1 motif, 8
hsa-miR-1183	0	0	1	1	1	1	SLC27A2	solute carrier family 27 (fatty acid transporter), member 2
hsa-miR-1183	1	0	1	0	0	0	GPR137C	G protein-coupled receptor 137C
hsa-miR-1183	1	0	1	1	1	1	SH2D4B	SH2 domain containing 4B
hsa-miR-1183	1	0	1	1	1	1	OSBPL9	oxysterol binding protein-like 9
hsa-miR-1183	0	0	1	0	0	0	DKFZP434H168	uncharacterized LOC26077
hsa-miR-1183	1	0	1	1	1	1	VPS54	vacuolar protein sorting 54 homolog (S. cerevisiae)
hsa-miR-1183	0	0	1	1	0	0	NPIP	nuclear pore complex interacting protein
hsa-miR-1183	1	0	1	1	1	1	ERBB3	v-erb-b2 erythroblastic leukemia viral oncogene homolog 3 (avian)
hsa-miR-1183	1	0	1	1	1	1	CORO2B	coronin, actin binding protein, 2B
hsa-miR-1183	1	0	1	1	1	1	UBA2	ubiquitin-like modifier activating enzyme 2
hsa-miR-1183	0	0	1	1	0	0	PPP1R18	protein phosphatase 1, regulatory subunit 18
hsa-miR-1183	1	0	1	1	1	1	SGIP1	SH3-domain GRB2-like (endophilin) interacting protein 1
hsa-miR-1183	1	0	1	1	1	1	C17orf85	chromosome 17 open reading frame 85
hsa-miR-1183	1	0	1	1	1	1	SEPHS1	selenophosphate synthetase 1
hsa-miR-1183	1	0	1	1	1	1	C11orf30	chromosome 11 open reading frame 30
hsa-miR-1183	1	0	1	1	1	1	ATXN7	ataxin 7
hsa-miR-1183	1	0	1	1	0	0	GXYLT1	glucoside xylosyltransferase 1
hsa-miR-1183	1	0	1	1	1	1	DENND5B	DENN/MADD domain containing 5B
hsa-miR-1183	0	0	1	1	1	1	MKX	mohawk homeobox
hsa-miR-1183	1	0	1	0	0	0	ANKRD52	ankyrin repeat domain 52
hsa-miR-1183	0	0	1	1	1	1	DENND5A	DENN/MADD domain containing 5A
hsa-miR-1183	1	0	1	1	1	1	KPNA1	karyopherin alpha 1 (importin alpha 5)
hsa-miR-1183	0	0	1	1	1	1	C11orf45	chromosome 11 open reading frame 45
hsa-miR-1183	1	0	1	0	1	1	HECTD1	HECT domain containing E3 ubiquitin protein ligase 1
hsa-miR-1183	1	0	1	1	1	1	DPY19L3	dpy-19-like 3 (C. elegans)
hsa-miR-1183	0	0	1	1	1	1	RBM46	RNA binding motif protein 46
hsa-miR-1183	1	0	1	1	1	1	TP53INP1	tumor protein p53 inducible nuclear protein 1
hsa-miR-1183	1	0	1	1	1	1	MACROD2	MACRO domain containing 2
hsa-miR-1183	0	0	1	1	1	1	MYOM3	myomesin family, member 3
hsa-miR-1183	1	0	1	1	1	1	DCTN4	dynactin 4 (p62)
hsa-miR-1183	1	0	1	1	0	0	PFKM	phosphofructokinase, muscle
hsa-miR-1183	0	0	1	1	1	1	EPPIN	epididymal peptidase inhibitor
hsa-miR-1183	1	0	1	1	1	1	SIKE1	suppressor of IKBKE 1
hsa-miR-1183	1	0	1	0	1	1	ANO6	anoctamin 6
hsa-miR-1183	0	0	1	1	1	1	CCDC132	coiled-coil domain containing 132
hsa-miR-1183	0	0	1	1	0	0	HSPG2	heparan sulfate proteoglycan 2
hsa-miR-1183	1	0	1	1	1	1	NCAN	neurocan
hsa-miR-1183	0	0	1	1	0	0	SPATS1	spermatogenesis associated, serine-rich 1
hsa-miR-1183	0	0	1	1	1	1	STRC	stereocilin
hsa-miR-1183	1	0	1	1	1	1	DMXL1	Dmx-like 1
hsa-miR-1183	1	0	1	1	1	1	DLG2	discs, large homolog 2 (Drosophila)
hsa-miR-1183	0	0	1	0	0	0	HNRNPKP3	heterogeneous nuclear ribonucleoprotein K pseudogene 3
hsa-miR-1183	0	0	1	1	0	0	TMEM151B	transmembrane protein 151B
hsa-miR-1183	0	0	1	1	1	1	SPICE1	spindle and centriole associated protein 1
hsa-miR-1183	0	0	1	0	0	0	RPL23AP53	ribosomal protein L23a pseudogene 53
hsa-miR-1183	1	0	1	1	0	0	MAN1B1	mannosidase, alpha, class 1B, member 1
hsa-miR-1183	0	0	1	1	1	1	MOBP	myelin-associated oligodendrocyte basic protein
hsa-miR-1183	0	0	1	1	1	1	RAB37	RAB37, member RAS oncogene family
hsa-miR-1183	1	0	1	1	1	1	MFSD6	major facilitator superfamily domain containing 6
hsa-miR-1183	1	0	1	1	0	0	SLC30A3	solute carrier family 30 (zinc transporter), member 3
hsa-miR-1183	1	0	1	1	1	1	PHF17	PHD finger protein 17
hsa-miR-1183	0	0	1	0	1	1	NPHP4	nephronophthisis 4
hsa-miR-1183	1	0	1	0	1	1	KIAA0182	KIAA0182
hsa-miR-1183	0	0	1	1	1	1	ERI2	ERI1 exoribonuclease family member 2
hsa-miR-1183	1	0	1	1	1	1	SLC26A9	solute carrier family 26, member 9
hsa-miR-1183	1	0	1	1	1	1	RNF44	ring finger protein 44
hsa-miR-1183	1	0	1	0	1	1	SP6	Sp6 transcription factor
hsa-miR-1183	1	0	1	1	1	1	CXorf23	chromosome X open reading frame 23
hsa-miR-1183	1	0	1	0	1	1	FNDC3B	fibronectin type III domain containing 3B
hsa-miR-1183	0	0	1	1	0	0	AADACL3	arylacetamide deacetylase-like 3
hsa-miR-1183	0	0	1	0	0	0	ERVFRD-2	endogenous retrovirus group FRD, member 2
hsa-miR-1183	1	0	1	0	1	1	YOD1	YOD1 OTU deubiquinating enzyme 1 homolog (S. cerevisiae)
hsa-miR-1183	1	0	1	1	1	1	SLC12A6	solute carrier family 12 (potassium/chloride transporters), member 6
hsa-miR-1183	0	0	1	0	0	0	EP400NL	EP400 N-terminal like
hsa-miR-1183	0	0	1	0	0	0	FLJ46361	deleted in malignant brain tumors 1 pseudogene
hsa-miR-1183	1	0	1	1	0	0	SMCR7	Smith-Magenis syndrome chromosome region, candidate 7
hsa-miR-1183	0	0	1	1	1	1	CD160	CD160 molecule
hsa-miR-1183	1	0	1	0	1	1	PLSCR4	phospholipid scramblase 4
hsa-miR-1183	1	0	1	0	0	0	SP7	Sp7 transcription factor
hsa-miR-1183	1	0	1	1	1	1	BCAT1	branched chain amino-acid transaminase 1, cytosolic
hsa-miR-1183	0	0	1	1	1	1	GALNT11	UDP-N-acetyl-alpha-D-galactosamine:polypeptide N-acetylgalactosaminyltransferase 11 (GalNAc-T11)
hsa-miR-1183	0	0	1	1	1	1	ATXN2	ataxin 2
hsa-miR-1183	0	0	1	1	1	1	SLC11A2	solute carrier family 11 (proton-coupled divalent metal ion transporters), member 2
hsa-miR-1183	0	0	1	1	1	1	ZNF662	zinc finger protein 662
hsa-miR-1183	0	0	1	0	0	0	PINLYP	phospholipase A2 inhibitor and LY6/PLAUR domain containing
hsa-miR-1183	0	0	1	1	0	0	HEATR8	HEAT repeat containing 8
hsa-miR-1183	0	0	1	1	1	1	ANXA6	annexin A6
hsa-miR-1183	0	0	1	1	1	1	ENPP2	ectonucleotide pyrophosphatase/phosphodiesterase 2
hsa-miR-1183	0	0	1	1	1	1	TMEM202	transmembrane protein 202
hsa-miR-1183	0	0	1	0	0	0	LOC494141	mitochondrial carrier triple repeat 1 pseudogene
hsa-miR-1183	1	0	1	0	1	1	ESRRG	estrogen-related receptor gamma
hsa-miR-1183	1	0	1	1	0	0	FOXP2	forkhead box P2
hsa-miR-1183	0	0	1	0	0	0	LOC100133315	transient receptor potential cation channel, subfamily C, member 2-like
hsa-miR-1183	1	0	1	1	1	1	RNF111	ring finger protein 111
hsa-miR-1183	0	0	1	1	0	0	DNASE1L3	deoxyribonuclease I-like 3
hsa-miR-1183	0	0	1	1	1	1	SYPL2	synaptophysin-like 2
hsa-miR-1183	0	0	1	1	1	1	SLC36A3	solute carrier family 36 (proton/amino acid symporter), member 3
hsa-miR-1183	0	0	1	1	0	0	DTHD1	death domain containing 1
hsa-miR-1183	1	0	1	1	1	1	MAP2K4	mitogen-activated protein kinase kinase 4
hsa-miR-1183	0	0	1	0	0	0	LOC619207	scavenger receptor protein family member
hsa-miR-1183	0	0	1	1	1	1	PHF12	PHD finger protein 12
hsa-miR-1183	0	0	1	0	0	0	AGAP9	ArfGAP with GTPase domain, ankyrin repeat and PH domain 9
hsa-miR-1183	0	0	1	0	1	1	ATP6V0E2	ATPase, H+ transporting V0 subunit e2
hsa-miR-1183	1	0	1	1	1	1	CTSA	cathepsin A
hsa-miR-1183	0	0	1	1	1	1	XRN2	5'-3' exoribonuclease 2
hsa-miR-1183	0	0	1	1	1	1	KAZALD1	Kazal-type serine peptidase inhibitor domain 1
hsa-miR-1183	0	0	1	1	1	1	AKTIP	AKT interacting protein
hsa-miR-1183	0	0	1	1	1	1	CEACAM5	carcinoembryonic antigen-related cell adhesion molecule 5
hsa-miR-1183	1	0	1	0	1	1	TMEM106B	transmembrane protein 106B
hsa-miR-1183	0	0	1	1	1	1	ARID1A	AT rich interactive domain 1A (SWI-like)
hsa-miR-1183	1	0	1	1	0	0	ATP13A3	ATPase type 13A3
hsa-miR-1183	1	0	1	1	0	0	TDRKH	tudor and KH domain containing
hsa-miR-1183	1	0	1	1	1	1	ATL2	atlastin GTPase 2
hsa-miR-1183	0	0	1	1	0	0	FERMT1	fermitin family member 1
hsa-miR-1183	0	0	1	0	0	0	RRN3P2	RNA polymerase I transcription factor homolog (S. cerevisiae) pseudogene 2
hsa-miR-1183	1	0	1	1	1	1	CAMK2G	calcium/calmodulin-dependent protein kinase II gamma
hsa-miR-1183	1	0	1	1	1	1	PHTF2	putative homeodomain transcription factor 2
hsa-miR-1183	1	0	1	1	1	1	HSDL2	hydroxysteroid dehydrogenase like 2
hsa-miR-1183	1	0	1	1	1	1	APBB2	amyloid beta (A4) precursor protein-binding, family B, member 2
hsa-miR-1183	0	0	1	1	1	1	PTPN20B	protein tyrosine phosphatase, non-receptor type 20B
hsa-miR-1183	0	0	1	1	1	1	PTPN20A	protein tyrosine phosphatase, non-receptor type 20A
hsa-miR-1183	1	0	1	1	0	0	PRRC2B	proline-rich coiled-coil 2B
hsa-miR-1183	0	0	1	0	1	1	NEK1	NIMA (never in mitosis gene a)-related kinase 1
hsa-miR-1183	0	0	1	1	0	0	NEK7	NIMA (never in mitosis gene a)-related kinase 7
hsa-miR-1183	1	0	1	1	1	1	RIF1	RAP1 interacting factor homolog (yeast)
hsa-miR-1183	0	0	1	1	1	1	TFDP2	transcription factor Dp-2 (E2F dimerization partner 2)
hsa-miR-1183	0	0	1	0	0	0	ANKRD34C	ankyrin repeat domain 34C
hsa-miR-1183	0	0	1	0	0	0	POM121L9P	POM121 transmembrane nucleoporin-like 9, pseudogene
hsa-miR-1183	1	0	1	1	1	1	TAB2	TGF-beta activated kinase 1/MAP3K7 binding protein 2
hsa-miR-1183	0	0	1	1	0	0	FAM153B	family with sequence similarity 153, member B
hsa-miR-1183	0	0	1	1	1	1	ARIH1	ariadne homolog, ubiquitin-conjugating enzyme E2 binding protein, 1 (Drosophila)
hsa-miR-1183	1	0	1	1	1	1	SMAP2	small ArfGAP2
hsa-miR-1183	0	0	1	1	1	1	TTLL5	tubulin tyrosine ligase-like family, member 5
hsa-miR-1183	0	0	1	1	1	1	RHOT1	ras homolog family member T1
hsa-miR-1183	1	0	1	0	1	1	DNAJC5	DnaJ (Hsp40) homolog, subfamily C, member 5
hsa-miR-1183	0	0	1	1	0	0	LRCH3	leucine-rich repeats and calponin homology (CH) domain containing 3
hsa-miR-1183	0	0	1	1	0	0	DDX49	DEAD (Asp-Glu-Ala-Asp) box polypeptide 49
hsa-miR-1183	1	0	1	1	1	1	KIAA1033	KIAA1033
hsa-miR-1183	1	0	1	0	1	1	GRIN3A	glutamate receptor, ionotropic, N-methyl-D-aspartate 3A
hsa-miR-1183	0	0	1	0	0	0	FAM66D	family with sequence similarity 66, member D
hsa-miR-1183	1	0	1	0	1	1	BRPF1	bromodomain and PHD finger containing, 1
hsa-miR-1183	1	0	1	0	1	1	FAM19A1	family with sequence similarity 19 (chemokine (C-C motif)-like), member A1
hsa-miR-1183	1	0	1	1	1	1	SLC30A8	solute carrier family 30 (zinc transporter), member 8
hsa-miR-1183	1	0	1	1	1	1	YTHDF3	YTH domain family, member 3
hsa-miR-1183	1	0	1	0	0	0	SYNPO	synaptopodin
hsa-miR-1183	1	0	1	1	1	1	MAP4	microtubule-associated protein 4
hsa-miR-1183	0	0	1	0	1	1	GAB3	GRB2-associated binding protein 3
hsa-miR-1183	1	0	1	1	1	1	FAM126B	family with sequence similarity 126, member B
hsa-miR-1183	1	0	1	0	1	1	HNRNPA3	heterogeneous nuclear ribonucleoprotein A3
hsa-miR-1183	0	0	1	1	1	1	SRSF11	serine/arginine-rich splicing factor 11
hsa-miR-1183	1	0	1	1	1	1	CHMP7	charged multivesicular body protein 7
hsa-miR-1183	0	0	1	1	0	0	EFCAB11	EF-hand calcium binding domain 11
hsa-miR-1183	1	0	1	0	0	0	YLPM1	YLP motif containing 1
hsa-miR-1183	1	0	1	1	0	0	USP24	ubiquitin specific peptidase 24
hsa-miR-1183	0	0	1	1	1	1	C10orf57	chromosome 10 open reading frame 57
hsa-miR-1183	1	0	1	1	1	1	RNF180	ring finger protein 180
hsa-miR-1183	1	0	1	0	1	1	STYX	serine/threonine/tyrosine interacting protein
hsa-miR-1183	0	0	1	1	1	1	SYTL4	synaptotagmin-like 4
hsa-miR-1183	1	0	1	1	1	1	PRRC1	proline-rich coiled-coil 1
hsa-miR-1183	0	0	1	1	1	1	U2AF1	U2 small nuclear RNA auxiliary factor 1
hsa-miR-1183	0	0	1	1	1	1	INPP5B	inositol polyphosphate-5-phosphatase, 75kDa
hsa-miR-1183	1	0	1	0	1	1	GPCPD1	glycerophosphocholine phosphodiesterase GDE1 homolog (S. cerevisiae)
hsa-miR-1183	0	0	1	1	0	0	TMEM91	transmembrane protein 91
hsa-miR-1183	0	0	1	0	1	1	PAPD4	PAP associated domain containing 4
hsa-miR-1183	0	0	1	0	1	1	FBXO42	F-box protein 42
hsa-miR-1183	1	0	1	1	1	1	HMCN1	hemicentin 1
hsa-miR-1183	0	0	1	1	1	1	ZMYM6	zinc finger, MYM-type 6
hsa-miR-1183	0	0	1	1	1	1	NARG2	NMDA receptor regulated 2
hsa-miR-1183	1	0	1	1	1	1	BPTF	bromodomain PHD finger transcription factor
hsa-miR-1183	0	0	1	1	1	1	TAF8	TAF8 RNA polymerase II, TATA box binding protein (TBP)-associated factor, 43kDa
hsa-miR-1183	0	0	1	0	1	1	C3orf43	chromosome 3 open reading frame 43
hsa-miR-1183	0	0	1	0	0	0	LOC286135	uncharacterized LOC286135
hsa-miR-1183	0	0	1	0	0	0	EPHA1-AS1	EPHA1 antisense RNA 1
hsa-miR-1183	1	0	1	0	1	1	CNOT7	CCR4-NOT transcription complex, subunit 7
hsa-miR-1183	1	0	1	1	1	1	MARCH7	membrane-associated ring finger (C3HC4) 7, E3 ubiquitin protein ligase
hsa-miR-1183	1	0	1	1	1	1	IL17RD	interleukin 17 receptor D
hsa-miR-1183	1	0	1	1	1	1	PRPF38B	PRP38 pre-mRNA processing factor 38 (yeast) domain containing B
hsa-miR-1183	1	0	1	1	1	1	ANKRD49	ankyrin repeat domain 49
hsa-miR-1183	0	0	1	1	0	0	TTLL6	tubulin tyrosine ligase-like family, member 6
hsa-miR-1183	1	0	1	1	0	0	LRRC16B	leucine rich repeat containing 16B
hsa-miR-1183	1	0	1	1	1	1	MBD6	methyl-CpG binding domain protein 6
hsa-miR-1183	1	0	1	0	1	1	JAZF1	JAZF zinc finger 1
hsa-miR-1183	1	0	1	1	1	1	RICTOR	RPTOR independent companion of MTOR, complex 2
hsa-miR-1183	1	0	1	0	1	1	COX18	COX18 cytochrome c oxidase assembly homolog (S. cerevisiae)
hsa-miR-1183	0	0	1	1	1	1	LMAN2L	lectin, mannose-binding 2-like
hsa-miR-1183	1	0	1	1	1	1	FAM76B	family with sequence similarity 76, member B
hsa-miR-1183	1	0	1	0	1	1	PATL1	protein associated with topoisomerase II homolog 1 (yeast)
hsa-miR-1183	0	0	1	1	1	1	AMOTL1	angiomotin like 1
hsa-miR-1183	1	0	1	1	1	1	PPP3CA	protein phosphatase 3, catalytic subunit, alpha isozyme
hsa-miR-1183	0	0	1	1	1	1	TMEM130	transmembrane protein 130
hsa-miR-1183	1	0	1	1	1	1	IKZF2	IKAROS family zinc finger 2 (Helios)
hsa-miR-1183	1	0	1	1	1	1	GAL3ST3	galactose-3-O-sulfotransferase 3
hsa-miR-1183	1	0	1	1	1	1	CKAP2	cytoskeleton associated protein 2
hsa-miR-1183	0	0	1	0	0	0	LOC374443	C-type lectin domain family 2, member D pseudogene
hsa-miR-1183	0	0	1	0	0	0	CLCN1	chloride channel, voltage-sensitive 1
hsa-miR-1183	1	0	1	1	1	1	MARK4	MAP/microtubule affinity-regulating kinase 4
hsa-miR-1183	1	0	1	1	1	1	ANGPT1	angiopoietin 1
hsa-miR-1183	0	0	1	1	0	0	EIF5A	eukaryotic translation initiation factor 5A
hsa-miR-1183	1	0	1	1	1	1	PIH1D3	PIH1 domain containing 3
hsa-miR-1183	1	0	1	1	1	1	WDR26	WD repeat domain 26
hsa-miR-1183	1	0	1	1	1	1	BCL11A	B-cell CLL/lymphoma 11A (zinc finger protein)
hsa-miR-1183	1	0	1	1	1	1	MAEA	macrophage erythroblast attacher
hsa-miR-1183	0	0	1	1	1	1	RAD9B	RAD9 homolog B (S. pombe)
hsa-miR-1183	1	0	1	1	1	1	OPRM1	opioid receptor, mu 1
hsa-miR-1183	1	0	1	1	1	1	TAB3	TGF-beta activated kinase 1/MAP3K7 binding protein 3
hsa-miR-1183	0	0	1	1	1	1	ATF7IP	activating transcription factor 7 interacting protein
hsa-miR-1183	0	0	1	1	1	1	MFAP5	microfibrillar associated protein 5
hsa-miR-1183	0	0	1	0	0	0	FAM138C	family with sequence similarity 138, member C
hsa-miR-1183	1	0	1	1	1	1	CAMTA1	calmodulin binding transcription activator 1
hsa-miR-1183	0	0	1	1	0	0	LRRC28	leucine rich repeat containing 28
hsa-miR-1183	0	0	1	1	0	0	VSIG4	V-set and immunoglobulin domain containing 4
hsa-miR-1183	0	0	1	1	1	1	PIGG	phosphatidylinositol glycan anchor biosynthesis, class G
hsa-miR-1183	0	0	1	0	0	0	RSPRY1	ring finger and SPRY domain containing 1
hsa-miR-1183	0	0	1	1	0	0	GFRA3	GDNF family receptor alpha 3
hsa-miR-1183	1	0	1	1	0	0	USP7	ubiquitin specific peptidase 7 (herpes virus-associated)
hsa-miR-1183	0	0	1	1	1	1	TNFSF15	tumor necrosis factor (ligand) superfamily, member 15
hsa-miR-1183	0	0	1	1	1	1	TIMM50	translocase of inner mitochondrial membrane 50 homolog (S. cerevisiae)
hsa-miR-1183	0	0	1	1	0	0	ESRRB	estrogen-related receptor beta
hsa-miR-1183	1	0	1	1	1	1	VPS45	vacuolar protein sorting 45 homolog (S. cerevisiae)
hsa-miR-1183	0	0	1	1	1	1	HMBOX1	homeobox containing 1
hsa-miR-1183	1	0	1	1	1	1	MECP2	methyl CpG binding protein 2 (Rett syndrome)
hsa-miR-1183	1	0	1	1	1	1	RBM24	RNA binding motif protein 24
hsa-miR-1183	0	0	1	1	1	1	DIO1	deiodinase, iodothyronine, type I
hsa-miR-1183	1	0	1	1	0	0	ADAM15	ADAM metallopeptidase domain 15
hsa-miR-1183	1	0	1	1	1	1	MOG	myelin oligodendrocyte glycoprotein
hsa-miR-1183	0	0	1	0	1	1	RAB18	RAB18, member RAS oncogene family
hsa-miR-1183	0	0	1	1	1	1	IL24	interleukin 24
hsa-miR-1183	0	0	1	1	1	1	SMPD1	sphingomyelin phosphodiesterase 1, acid lysosomal
hsa-miR-1183	0	0	1	1	1	1	FCRLB	Fc receptor-like B
hsa-miR-1183	0	0	1	1	0	0	USP27X	ubiquitin specific peptidase 27, X-linked
hsa-miR-1183	0	0	1	1	1	1	RPAIN	RPA interacting protein
hsa-miR-1183	0	0	1	1	1	1	MSRA	methionine sulfoxide reductase A
hsa-miR-1183	1	0	1	1	1	1	PLCH1	phospholipase C, eta 1
hsa-miR-1183	1	0	1	1	1	1	TRIT1	tRNA isopentenyltransferase 1
hsa-miR-1183	0	0	1	1	0	0	C15orf61	chromosome 15 open reading frame 61
hsa-miR-1183	0	0	1	1	1	1	RHD	Rh blood group, D antigen
hsa-miR-1183	0	0	1	0	1	1	CCL4L2	chemokine (C-C motif) ligand 4-like 2
hsa-miR-1183	0	0	1	1	1	1	CCL4L1	chemokine (C-C motif) ligand 4-like 1
hsa-miR-1183	1	0	1	1	1	1	QKI	QKI, KH domain containing, RNA binding
hsa-miR-1183	1	0	1	1	1	1	MYB	v-myb myeloblastosis viral oncogene homolog (avian)
hsa-miR-1183	1	0	1	1	1	1	SAT1	spermidine/spermine N1-acetyltransferase 1
hsa-miR-1183	1	0	1	1	0	0	TAF4B	TAF4b RNA polymerase II, TATA box binding protein (TBP)-associated factor, 105kDa
hsa-miR-1183	0	0	1	1	0	0	NBPF8	neuroblastoma breakpoint family, member 8
hsa-miR-1183	1	0	1	1	1	1	ZNF449	zinc finger protein 449
hsa-miR-1183	0	0	1	1	1	1	IL23R	interleukin 23 receptor
hsa-miR-1183	1	0	1	1	1	1	NEK6	NIMA (never in mitosis gene a)-related kinase 6
hsa-miR-1183	1	0	1	1	1	1	RPRD1A	regulation of nuclear pre-mRNA domain containing 1A
hsa-miR-1183	0	0	1	1	1	1	PAFAH1B2	platelet-activating factor acetylhydrolase 1b, catalytic subunit 2 (30kDa)
hsa-miR-1183	1	0	1	1	1	1	PPP5C	protein phosphatase 5, catalytic subunit
hsa-miR-1183	1	0	1	1	1	1	AZI2	5-azacytidine induced 2
hsa-miR-1183	0	0	1	1	1	1	RLIM	ring finger protein, LIM domain interacting
hsa-miR-1183	0	0	1	1	1	1	WDR55	WD repeat domain 55
hsa-miR-1183	0	0	1	1	1	1	ATG3	autophagy related 3
hsa-miR-1183	1	0	1	0	1	1	DPYSL5	dihydropyrimidinase-like 5
hsa-miR-1183	0	0	1	1	1	1	TUFT1	tuftelin 1
hsa-miR-1183	1	0	1	0	0	0	VGLL4	vestigial like 4 (Drosophila)
hsa-miR-1183	0	0	1	1	1	1	BOD1	biorientation of chromosomes in cell division 1
hsa-miR-1183	0	0	1	1	1	1	FTO	fat mass and obesity associated
hsa-miR-1183	1	0	1	1	1	1	SPRY2	sprouty homolog 2 (Drosophila)
hsa-miR-1183	1	0	1	0	1	1	CGGBP1	CGG triplet repeat binding protein 1
hsa-miR-1183	1	0	1	0	1	1	C15orf41	chromosome 15 open reading frame 41
hsa-miR-1183	1	0	1	1	1	1	U2SURP	U2 snRNP-associated SURP domain containing
hsa-miR-1183	0	0	1	1	1	1	SGK2	serum/glucocorticoid regulated kinase 2
hsa-miR-1183	0	0	1	0	0	0	DNM1P33	DNM1 pseudogene 33
hsa-miR-1183	1	0	1	1	1	1	COL2A1	collagen, type II, alpha 1
hsa-miR-1183	0	0	1	1	0	0	AGBL5	ATP/GTP binding protein-like 5
hsa-miR-1183	0	0	1	1	0	0	NDUFB10	NADH dehydrogenase (ubiquinone) 1 beta subcomplex, 10, 22kDa
hsa-miR-1183	0	0	1	1	0	0	RBM14	RNA binding motif protein 14
hsa-miR-1183	0	0	1	1	1	1	ICA1	islet cell autoantigen 1, 69kDa
hsa-miR-1183	0	0	1	1	0	0	PRR11	proline rich 11
hsa-miR-1183	1	0	1	1	1	1	HMGA1	high mobility group AT-hook 1
hsa-miR-1183	0	0	1	1	1	1	MLIP	muscular LMNA-interacting protein
hsa-miR-1183	0	0	1	0	0	0	ATXN7L3B	ataxin 7-like 3B
hsa-miR-1183	0	0	1	1	0	0	SLC4A2	solute carrier family 4, anion exchanger, member 2 (erythrocyte membrane protein band 3-like 1)
hsa-miR-1183	0	0	1	1	0	0	BARX1	BARX homeobox 1
hsa-miR-1183	1	0	1	1	1	1	GSPT1	G1 to S phase transition 1
hsa-miR-1183	1	0	1	0	1	1	TMEM39A	transmembrane protein 39A
hsa-miR-1183	1	0	1	1	1	1	GRIA2	glutamate receptor, ionotropic, AMPA 2
hsa-miR-1183	1	0	1	1	1	1	ZFAND5	zinc finger, AN1-type domain 5
hsa-miR-1183	1	0	1	1	1	1	TRIM2	tripartite motif containing 2
hsa-miR-1183	0	0	1	1	1	1	ZNF587	zinc finger protein 587
hsa-miR-1183	1	0	1	1	1	1	DNAJB5	DnaJ (Hsp40) homolog, subfamily B, member 5
hsa-miR-1183	1	0	1	0	1	1	RNF165	ring finger protein 165
hsa-miR-1183	0	0	1	1	1	1	PLXDC2	plexin domain containing 2
hsa-miR-1183	1	0	1	1	1	1	SNCA	synuclein, alpha (non A4 component of amyloid precursor)
hsa-miR-1183	0	0	1	1	1	1	RNF170	ring finger protein 170
hsa-miR-1183	1	0	1	1	1	1	PRDM2	PR domain containing 2, with ZNF domain
hsa-miR-1183	1	0	1	1	0	0	LRFN1	leucine rich repeat and fibronectin type III domain containing 1
hsa-miR-1183	0	0	1	1	0	0	ACAD10	acyl-CoA dehydrogenase family, member 10
hsa-miR-1183	1	0	1	1	1	1	PAPOLA	poly(A) polymerase alpha
hsa-miR-1183	0	0	1	0	0	0	MGC21881	uncharacterized locus MGC21881
hsa-miR-1183	0	0	1	0	0	0	KLHL15	kelch-like 15 (Drosophila)
hsa-miR-1183	1	0	1	1	1	1	ZBTB38	zinc finger and BTB domain containing 38
hsa-miR-1183	1	0	1	1	1	1	ZNF512	zinc finger protein 512
hsa-miR-1183	0	0	1	0	1	1	ZNF37A	zinc finger protein 37A
hsa-miR-1183	1	0	1	0	1	1	NR1D2	nuclear receptor subfamily 1, group D, member 2
hsa-miR-1183	1	0	1	1	1	1	NUMBL	numb homolog (Drosophila)-like
hsa-miR-1183	1	0	1	0	1	1	NECAB1	N-terminal EF-hand calcium binding protein 1
hsa-miR-1183	1	0	1	1	1	1	SCAMP1	secretory carrier membrane protein 1
hsa-miR-1183	1	0	1	0	1	1	CYBRD1	cytochrome b reductase 1
hsa-miR-1183	1	0	1	1	1	1	VTI1A	vesicle transport through interaction with t-SNAREs homolog 1A (yeast)
hsa-miR-1183	0	0	1	0	0	0	ASH1L-AS1	ASH1L antisense RNA 1
hsa-miR-1183	1	0	1	1	0	0	USP53	ubiquitin specific peptidase 53
hsa-miR-1183	0	0	1	1	0	0	ZDHHC6	zinc finger, DHHC-type containing 6
hsa-miR-1183	0	0	1	1	1	1	RDH11	retinol dehydrogenase 11 (all-trans/9-cis/11-cis)
hsa-miR-1183	1	0	1	1	1	1	WWC2	WW and C2 domain containing 2
hsa-miR-1183	0	0	1	0	0	0	FAM200B	family with sequence similarity 200, member B
hsa-miR-1183	0	0	1	0	1	1	ZNF641	zinc finger protein 641
hsa-miR-1183	1	0	1	1	1	1	ARHGEF9	Cdc42 guanine nucleotide exchange factor (GEF) 9
hsa-miR-1183	1	0	1	1	1	1	SUZ12	suppressor of zeste 12 homolog (Drosophila)
hsa-miR-1183	0	0	1	0	1	1	TMSB15B	thymosin beta 15B
hsa-miR-1183	0	0	1	1	1	1	LRRK1	leucine-rich repeat kinase 1
hsa-miR-1183	1	0	1	0	1	1	BTF3L4	basic transcription factor 3-like 4
hsa-miR-1183	0	0	1	0	1	1	ZNF134	zinc finger protein 134
hsa-miR-1183	1	0	1	1	1	1	SCML4	sex comb on midleg-like 4 (Drosophila)
hsa-miR-1183	0	0	1	1	0	0	CA5BP1	carbonic anhydrase VB pseudogene 1
hsa-miR-1183	0	0	1	0	0	0	LOC284260	uncharacterized LOC284260
hsa-miR-1183	0	0	1	1	0	0	LYSMD2	LysM, putative peptidoglycan-binding, domain containing 2
hsa-miR-1183	1	0	1	1	1	1	LIMS1	LIM and senescent cell antigen-like domains 1
hsa-miR-1183	1	0	1	1	1	1	RACGAP1	Rac GTPase activating protein 1
hsa-miR-1183	0	0	1	1	0	0	GLS2	glutaminase 2 (liver, mitochondrial)
hsa-miR-1183	1	0	1	1	1	1	PELI3	pellino E3 ubiquitin protein ligase family member 3
hsa-miR-1183	0	0	1	1	1	1	HYAL1	hyaluronoglucosaminidase 1
hsa-miR-1183	1	0	1	1	1	1	FAM131A	family with sequence similarity 131, member A
hsa-miR-1183	0	0	1	0	0	0	ZBED3-AS1	ZBED3 antisense RNA 1
hsa-miR-1183	0	0	1	0	1	1	FHAD1	forkhead-associated (FHA) phosphopeptide binding domain 1
hsa-miR-1183	0	0	1	1	1	1	MAP2	microtubule-associated protein 2
hsa-miR-1183	1	0	1	1	1	1	APPL2	adaptor protein, phosphotyrosine interaction, PH domain and leucine zipper containing 2
hsa-miR-1183	1	0	1	1	1	1	B3GNT5	UDP-GlcNAc:betaGal beta-1,3-N-acetylglucosaminyltransferase 5
hsa-miR-1183	0	0	1	0	1	1	PAPOLG	poly(A) polymerase gamma
hsa-miR-1183	1	0	1	1	1	1	HTR2C	5-hydroxytryptamine (serotonin) receptor 2C, G protein-coupled
hsa-miR-1183	0	0	1	0	0	0	LOC145837	uncharacterized LOC145837
hsa-miR-1183	1	0	1	1	1	1	ALS2	amyotrophic lateral sclerosis 2 (juvenile)
hsa-miR-1183	0	0	1	1	0	0	GEMIN6	gem (nuclear organelle) associated protein 6
hsa-miR-1183	1	0	1	0	1	1	TFEC	transcription factor EC
hsa-miR-1183	0	0	1	1	0	0	SWI5	SWI5 recombination repair homolog (yeast)
hsa-miR-1183	0	0	1	0	0	0	BCAS3	breast carcinoma amplified sequence 3
hsa-miR-1183	1	0	1	1	1	1	TIAL1	TIA1 cytotoxic granule-associated RNA binding protein-like 1
hsa-miR-1183	0	0	1	1	0	0	TMEM251	transmembrane protein 251
hsa-miR-1183	0	0	1	0	1	1	MYO7A	myosin VIIA
hsa-miR-1183	0	0	1	1	1	1	PIP5K1B	phosphatidylinositol-4-phosphate 5-kinase, type I, beta
hsa-miR-1183	1	0	1	1	1	1	TAF15	TAF15 RNA polymerase II, TATA box binding protein (TBP)-associated factor, 68kDa
hsa-miR-1183	1	0	1	1	1	1	ELAVL2	ELAV (embryonic lethal, abnormal vision, Drosophila)-like 2 (Hu antigen B)
hsa-miR-1183	0	0	1	1	1	1	SLC22A2	solute carrier family 22 (organic cation transporter), member 2
hsa-miR-1183	0	0	1	1	1	1	IQCH	IQ motif containing H
hsa-miR-1183	0	0	1	1	0	0	TRIM69	tripartite motif containing 69
hsa-miR-1183	0	0	1	0	0	0	ATP8B5P	ATPase, class I, type 8B, member 5, pseudogene
hsa-miR-1183	1	0	1	1	1	1	PITPNB	phosphatidylinositol transfer protein, beta
hsa-miR-1183	1	0	1	1	1	1	RCOR3	REST corepressor 3
hsa-miR-1183	0	0	1	0	0	0	CFL1P1	cofilin 1 (non-muscle) pseudogene 1
hsa-miR-1183	1	0	1	1	1	1	ZNF282	zinc finger protein 282
hsa-miR-1183	0	0	1	1	0	0	ASIC4	acid-sensing (proton-gated) ion channel family member 4
hsa-miR-1183	0	0	1	0	0	0	LOC402779	uncharacterized LOC402779
hsa-miR-1183	1	0	1	0	1	1	RNF4	ring finger protein 4
hsa-miR-1183	1	0	1	1	1	1	RAB5B	RAB5B, member RAS oncogene family
hsa-miR-1183	1	0	1	1	1	1	RHOBTB1	Rho-related BTB domain containing 1
hsa-miR-1183	1	0	1	1	1	1	ZNF521	zinc finger protein 521
hsa-miR-1183	1	0	1	1	1	1	PPP2R2C	protein phosphatase 2, regulatory subunit B, gamma
hsa-miR-1183	1	0	1	1	1	1	MAK	male germ cell-associated kinase
hsa-miR-1183	1	0	1	1	1	1	CRKL	v-crk sarcoma virus CT10 oncogene homolog (avian)-like
hsa-miR-1183	0	0	1	1	1	1	IL20RB	interleukin 20 receptor beta
hsa-miR-1183	1	0	1	0	1	1	TBC1D2B	TBC1 domain family, member 2B
hsa-miR-1183	1	0	1	1	1	1	PCDHA5	protocadherin alpha 5
hsa-miR-1183	0	0	1	1	1	1	ZCCHC7	zinc finger, CCHC domain containing 7
hsa-miR-1183	1	0	1	1	1	1	RIC8B	resistance to inhibitors of cholinesterase 8 homolog B (C. elegans)
hsa-miR-1183	0	0	1	1	1	1	HEXA	hexosaminidase A (alpha polypeptide)
hsa-miR-1183	0	0	1	1	1	1	ZNF337	zinc finger protein 337
hsa-miR-1183	1	0	1	1	1	1	LPGAT1	lysophosphatidylglycerol acyltransferase 1
hsa-miR-1183	0	0	1	0	0	0	C9orf62	chromosome 9 open reading frame 62
hsa-miR-1183	0	0	1	0	1	1	DKFZP434I0714	uncharacterized protein DKFZP434I0714
hsa-miR-1183	0	0	1	1	1	1	EDA2R	ectodysplasin A2 receptor
hsa-miR-1183	0	0	1	1	1	1	SLC6A16	solute carrier family 6, member 16
hsa-miR-1183	0	0	1	0	1	1	GPR155	G protein-coupled receptor 155
hsa-miR-1183	1	0	1	1	1	1	NKAIN2	Na+/K+ transporting ATPase interacting 2
hsa-miR-1183	0	0	1	0	0	0	TMPRSS12	transmembrane (C-terminal) protease, serine 12
hsa-miR-1183	0	0	1	1	1	1	TMEM144	transmembrane protein 144
hsa-miR-1183	0	0	1	1	0	0	VPS8	vacuolar protein sorting 8 homolog (S. cerevisiae)
hsa-miR-1183	0	0	1	1	1	1	CLEC12B	C-type lectin domain family 12, member B
hsa-miR-1183	0	0	1	1	1	1	DUSP28	dual specificity phosphatase 28
hsa-miR-1183	1	0	1	1	1	1	SLC38A9	solute carrier family 38, member 9
hsa-miR-1183	0	0	1	0	0	0	SPATA3	spermatogenesis associated 3
hsa-miR-1183	0	0	1	0	0	0	LINC00642	long intergenic non-protein coding RNA 642
hsa-miR-1183	1	0	1	1	1	1	LHX8	LIM homeobox 8
hsa-miR-1183	1	0	1	1	1	1	LMO7	LIM domain 7
hsa-miR-1183	1	0	1	1	1	1	HECTD2	HECT domain containing E3 ubiquitin protein ligase 2
hsa-miR-1183	1	0	1	1	1	1	MEIS1	Meis homeobox 1
hsa-miR-1183	0	0	1	1	1	1	CNTN1	contactin 1
hsa-miR-1183	1	0	1	0	1	1	CLDN12	claudin 12
hsa-miR-1183	1	0	1	0	1	1	NEGR1	neuronal growth regulator 1
hsa-miR-1183	0	0	1	1	1	1	CELF1	CUGBP, Elav-like family member 1
hsa-miR-1183	0	0	1	1	1	1	PLGRKT	plasminogen receptor, C-terminal lysine transmembrane protein
hsa-miR-1183	0	0	1	0	0	0	SRGAP2C	SLIT-ROBO Rho GTPase activating protein 2C
hsa-miR-1183	1	0	1	0	1	1	CPEB4	cytoplasmic polyadenylation element binding protein 4
hsa-miR-1183	1	0	1	1	1	1	BNC2	basonuclin 2
hsa-miR-1183	0	0	1	0	0	0	CYP4F35P	cytochrome P450, family 4, subfamily F, polypeptide 35, pseudogene
hsa-miR-1183	1	0	1	1	1	1	FAM135B	family with sequence similarity 135, member B
hsa-miR-1183	0	0	1	0	0	0	LOC286184	uncharacterized LOC286184
hsa-miR-1183	1	0	1	0	1	1	YAF2	YY1 associated factor 2
hsa-miR-1183	0	0	1	1	1	1	EFCAB13	EF-hand calcium binding domain 13
hsa-miR-1183	0	0	1	0	0	0	CRYBB2P1	crystallin, beta B2 pseudogene 1
hsa-miR-1183	0	0	1	1	0	0	LAG3	lymphocyte-activation gene 3
hsa-miR-1183	1	0	1	1	1	1	GALNT1	UDP-N-acetyl-alpha-D-galactosamine:polypeptide N-acetylgalactosaminyltransferase 1 (GalNAc-T1)
hsa-miR-1183	1	0	1	1	1	1	DPP10	dipeptidyl-peptidase 10 (non-functional)
hsa-miR-1183	1	0	1	0	1	1	ARID2	AT rich interactive domain 2 (ARID, RFX-like)
hsa-miR-1183	0	0	1	1	0	0	FAM162B	family with sequence similarity 162, member B
hsa-miR-1183	1	0	1	1	1	1	PLS3	plastin 3
hsa-miR-1183	0	0	1	0	0	0	FLJ36000	uncharacterized FLJ36000
hsa-miR-1183	1	0	1	1	1	1	NFYA	nuclear transcription factor Y, alpha
hsa-miR-1183	1	0	1	0	1	1	LPHN3	latrophilin 3
hsa-miR-1183	1	0	1	1	1	1	TIMP2	TIMP metallopeptidase inhibitor 2
hsa-miR-1183	1	0	1	1	1	1	IL16	interleukin 16
hsa-miR-1183	1	0	1	1	1	1	INTS6	integrator complex subunit 6
hsa-miR-1183	0	0	1	0	0	0	SLC7A11-AS1	SLC7A11 antisense RNA 1
hsa-miR-1183	1	0	1	1	1	1	ARPP21	cAMP-regulated phosphoprotein, 21kDa
hsa-miR-1183	1	0	1	0	1	1	HSPA12A	heat shock 70kDa protein 12A
hsa-miR-1183	0	0	1	1	0	0	AQP12B	aquaporin 12B
hsa-miR-1183	0	0	1	1	1	1	C17orf104	chromosome 17 open reading frame 104
hsa-miR-1183	1	0	1	1	1	1	CLOCK	clock homolog (mouse)
hsa-miR-1183	0	0	1	1	1	1	RABGAP1L	RAB GTPase activating protein 1-like
hsa-miR-1183	0	0	1	1	1	1	ZNF568	zinc finger protein 568
hsa-miR-1183	1	0	1	1	1	1	C12orf76	chromosome 12 open reading frame 76
hsa-miR-1183	0	0	1	0	0	0	OR7E47P	olfactory receptor, family 7, subfamily E, member 47 pseudogene
hsa-miR-1183	0	0	1	0	0	0	LRRC37BP1	leucine rich repeat containing 37B pseudogene 1
hsa-miR-1183	1	0	1	1	1	1	FKBP5	FK506 binding protein 5
hsa-miR-1183	0	0	1	0	0	0	LOC338579	ankyrin repeat domain-containing protein 30B pseudogene
hsa-miR-1183	1	0	1	1	1	1	ARHGAP30	Rho GTPase activating protein 30
hsa-miR-1183	0	0	1	1	1	1	CBWD5	COBW domain containing 5
hsa-miR-1183	0	0	1	1	1	1	STRADA	STE20-related kinase adaptor alpha
hsa-miR-1183	1	0	1	1	1	1	PSIP1	PC4 and SFRS1 interacting protein 1
hsa-miR-1183	1	0	1	1	1	1	HLTF	helicase-like transcription factor
hsa-miR-1183	1	0	1	1	1	1	RNF145	ring finger protein 145
hsa-miR-1183	0	0	1	1	1	1	MST1	macrophage stimulating 1 (hepatocyte growth factor-like)
hsa-miR-1183	1	0	1	0	1	1	PSD3	pleckstrin and Sec7 domain containing 3
hsa-miR-1183	0	0	1	1	1	1	MGC57346	uncharacterized LOC401884
hsa-miR-1183	1	0	1	1	1	1	SENP1	SUMO1/sentrin specific peptidase 1
hsa-miR-1183	1	0	1	1	0	0	SFXN5	sideroflexin 5
hsa-miR-1183	0	0	1	0	0	0	LOC339529	uncharacterized LOC339529
hsa-miR-1183	0	0	1	1	0	0	LILRA1	leukocyte immunoglobulin-like receptor, subfamily A (with TM domain), member 1
hsa-miR-1183	1	0	1	0	1	1	LYPD6	LY6/PLAUR domain containing 6
hsa-miR-1183	0	0	1	0	0	0	LOC348120	uncharacterized LOC348120
hsa-miR-1183	1	0	1	0	1	1	KDM2A	lysine (K)-specific demethylase 2A
hsa-miR-1183	1	0	1	1	1	1	RMND5A	required for meiotic nuclear division 5 homolog A (S. cerevisiae)
hsa-miR-1183	1	0	1	1	1	1	RTKN2	rhotekin 2
hsa-miR-1183	0	0	1	1	0	0	CDA	cytidine deaminase
hsa-miR-1183	1	0	1	1	1	1	DIXDC1	DIX domain containing 1
hsa-miR-1183	0	0	1	0	0	0	LOC283038	uncharacterized LOC283038
hsa-miR-1183	1	0	1	0	1	1	RNF182	ring finger protein 182
hsa-miR-1183	1	0	1	0	1	1	ARHGAP5	Rho GTPase activating protein 5
hsa-miR-1183	0	0	1	0	1	1	ITGA1	integrin, alpha 1
hsa-miR-1183	1	0	1	1	0	0	EIF2B5	eukaryotic translation initiation factor 2B, subunit 5 epsilon, 82kDa
hsa-miR-1183	1	0	1	1	1	1	MBNL1	muscleblind-like splicing regulator 1
hsa-miR-1183	1	0	1	1	1	1	FNDC3A	fibronectin type III domain containing 3A
hsa-miR-1183	1	0	1	0	1	1	SEMA4G	sema domain, immunoglobulin domain (Ig), transmembrane domain (TM) and short cytoplasmic domain, (semaphorin) 4G
hsa-miR-1183	0	0	1	0	0	0	BMS1P6	BMS1 pseudogene 6
hsa-miR-1183	1	0	1	1	1	1	ZFP91	zinc finger protein 91 homolog (mouse)
hsa-miR-1183	1	0	1	1	1	1	YWHAZ	tyrosine 3-monooxygenase/tryptophan 5-monooxygenase activation protein, zeta polypeptide
hsa-miR-1183	1	0	1	1	1	1	PCGF5	polycomb group ring finger 5
hsa-miR-1183	0	0	1	1	1	1	COG2	component of oligomeric golgi complex 2
hsa-miR-1183	0	0	1	1	1	1	SLC25A35	solute carrier family 25, member 35
hsa-miR-1183	1	0	1	1	1	1	SCUBE3	signal peptide, CUB domain, EGF-like 3
hsa-miR-1183	0	0	1	1	0	0	EDC4	enhancer of mRNA decapping 4
hsa-miR-1183	0	0	1	0	0	0	LINC00265	long intergenic non-protein coding RNA 265
hsa-miR-1183	0	0	1	1	0	0	TINAG	tubulointerstitial nephritis antigen
hsa-miR-1183	0	0	1	1	1	1	MPP3	membrane protein, palmitoylated 3 (MAGUK p55 subfamily member 3)
hsa-miR-1183	0	0	1	1	0	0	APOA1BP	apolipoprotein A-I binding protein
hsa-miR-1183	1	0	1	1	1	1	ZFP161	zinc finger protein 161 homolog (mouse)
hsa-miR-1183	1	0	1	1	1	1	KLHL28	kelch-like 28 (Drosophila)
hsa-miR-1183	1	0	1	0	1	1	LYSMD3	LysM, putative peptidoglycan-binding, domain containing 3
hsa-miR-1183	0	0	1	1	0	0	GRIN2C	glutamate receptor, ionotropic, N-methyl D-aspartate 2C
hsa-miR-1183	1	0	1	1	1	1	ZEB2	zinc finger E-box binding homeobox 2
hsa-miR-1183	1	0	1	1	1	1	PRRG1	proline rich Gla (G-carboxyglutamic acid) 1
hsa-miR-1183	1	0	1	1	1	1	GTDC1	glycosyltransferase-like domain containing 1
hsa-miR-1183	0	0	1	0	0	0	CISD3	CDGSH iron sulfur domain 3
hsa-miR-1183	1	0	1	1	1	1	INPP5A	inositol polyphosphate-5-phosphatase, 40kDa
hsa-miR-1183	0	0	1	1	0	0	LRRIQ3	leucine-rich repeats and IQ motif containing 3
hsa-miR-1183	0	0	1	1	0	0	PRR19	proline rich 19
hsa-miR-1183	1	0	1	1	1	1	ANXA4	annexin A4
hsa-miR-1183	0	0	1	1	1	1	ST6GALNAC1	ST6 (alpha-N-acetyl-neuraminyl-2,3-beta-galactosyl-1,3)-N-acetylgalactosaminide alpha-2,6-sialyltransferase 1
hsa-miR-1183	1	0	1	1	1	1	NIPBL	Nipped-B homolog (Drosophila)
hsa-miR-1183	1	0	1	1	1	1	UEVLD	UEV and lactate/malate dehyrogenase domains
hsa-miR-1183	1	0	1	1	1	1	IARS	isoleucyl-tRNA synthetase
hsa-miR-1183	1	0	1	1	1	1	STXBP5	syntaxin binding protein 5 (tomosyn)
hsa-miR-1183	0	0	1	0	0	0	KANSL1-AS1	KANSL1 antisense RNA 1
hsa-miR-1183	1	0	1	1	1	1	ASPH	aspartate beta-hydroxylase
hsa-miR-1183	1	0	1	1	1	1	NRSN1	neurensin 1
hsa-miR-1183	1	0	1	1	1	1	GRHL1	grainyhead-like 1 (Drosophila)
hsa-miR-1183	0	0	1	0	0	0	LEF1-AS1	LEF1 antisense RNA 1
hsa-miR-1183	0	0	1	0	0	0	PABPC1P2	poly(A) binding protein, cytoplasmic 1 pseudogene 2
hsa-miR-1183	1	0	1	1	0	0	TMEM198	transmembrane protein 198
hsa-miR-1183	0	0	1	0	0	0	PTGER4P2	prostaglandin E receptor 4 (subtype EP4) pseudogene 2
hsa-miR-1183	1	0	1	1	0	0	DCAF15	DDB1 and CUL4 associated factor 15
hsa-miR-1183	0	0	1	1	0	0	CYP4F30P	cytochrome P450, family 4, subfamily F, polypeptide 30, pseudogene
hsa-miR-1183	1	0	1	1	0	0	CHTOP	chromatin target of PRMT1
hsa-miR-1183	1	0	1	1	1	1	DNAJC10	DnaJ (Hsp40) homolog, subfamily C, member 10
hsa-miR-1183	1	0	1	1	1	1	SOCS2	suppressor of cytokine signaling 2
hsa-miR-1183	0	0	1	1	1	1	MSTO1	misato homolog 1 (Drosophila)
hsa-miR-1183	1	0	1	1	1	1	AHR	aryl hydrocarbon receptor
hsa-miR-1183	0	0	1	1	1	1	CFHR3	complement factor H-related 3
hsa-miR-1183	1	0	1	0	1	1	HMGB3	high mobility group box 3
hsa-miR-1183	1	0	1	0	1	1	TGFBR1	transforming growth factor, beta receptor 1
hsa-miR-1183	0	0	1	1	1	1	PCDH18	protocadherin 18
hsa-miR-1183	1	0	1	0	1	1	TMEM194A	transmembrane protein 194A
hsa-miR-1183	0	0	1	1	1	1	FRMPDP2	FERM and PDZ domain containing 2 pseudogene 2
hsa-miR-1183	0	0	1	1	1	1	FRMPD2P1	FERM and PDZ domain containing 2 pseudogene 1
hsa-miR-1183	0	0	1	0	0	0	LOC283070	uncharacterized LOC283070
hsa-miR-1183	1	0	1	1	1	1	WBP1L	WW domain binding protein 1-like
hsa-miR-1183	1	0	1	1	1	1	OPCML	opioid binding protein/cell adhesion molecule-like
hsa-miR-1183	1	0	1	1	1	1	WNT5A	wingless-type MMTV integration site family, member 5A
hsa-miR-1183	0	0	1	1	0	0	FAM21A	family with sequence similarity 21, member A
hsa-miR-1183	0	0	1	1	1	1	C3orf67	chromosome 3 open reading frame 67
hsa-miR-1183	0	0	1	0	0	0	LOC642846	DEAD/H (Asp-Glu-Ala-Asp/His) box polypeptide 11-like
hsa-miR-1183	1	0	1	0	1	1	AMMECR1L	AMME chromosomal region gene 1-like
hsa-miR-1183	0	0	1	1	0	0	DNHD1	dynein heavy chain domain 1
hsa-miR-1183	0	0	1	1	1	1	SH2D4A	SH2 domain containing 4A
hsa-miR-1183	0	0	1	1	0	0	ZNF703	zinc finger protein 703
hsa-miR-1183	1	0	1	0	1	1	MEST	mesoderm specific transcript homolog (mouse)
hsa-miR-1183	1	0	1	0	1	1	PIK3R3	phosphoinositide-3-kinase, regulatory subunit 3 (gamma)
hsa-miR-1183	1	0	1	1	1	1	ELOVL7	ELOVL fatty acid elongase 7
hsa-miR-1183	0	0	1	0	0	0	FRG1B	FSHD region gene 1 family, member B
hsa-miR-1183	0	0	1	1	1	1	NELL1	NEL-like 1 (chicken)
hsa-miR-1183	1	0	1	1	1	1	ACVR2B	activin A receptor, type IIB
hsa-miR-1183	0	0	1	1	1	1	KLRF1	killer cell lectin-like receptor subfamily F, member 1
hsa-miR-1183	0	0	1	1	1	1	TMEM52B	transmembrane protein 52B
hsa-miR-1183	1	0	1	0	1	1	ARPP19	cAMP-regulated phosphoprotein, 19kDa
hsa-miR-1183	0	0	1	1	1	1	ZNF365	zinc finger protein 365
hsa-miR-1183	1	0	1	1	1	1	SLC36A2	solute carrier family 36 (proton/amino acid symporter), member 2
hsa-miR-1183	0	0	1	1	0	0	RGL4	ral guanine nucleotide dissociation stimulator-like 4
hsa-miR-1183	0	0	1	1	0	0	PNMA5	paraneoplastic Ma antigen family member 5
hsa-miR-1183	1	0	1	0	1	1	MYBL1	v-myb myeloblastosis viral oncogene homolog (avian)-like 1
hsa-miR-1183	0	0	1	1	0	0	FBXO16	F-box protein 16
hsa-miR-1183	1	0	1	0	1	1	VANGL2	vang-like 2 (van gogh, Drosophila)
hsa-miR-1183	0	0	1	1	0	0	TMC1	transmembrane channel-like 1
hsa-miR-1183	0	0	1	0	0	0	GUSBP9	glucuronidase, beta pseudogene 9
hsa-miR-1183	0	0	1	1	1	1	CCDC126	coiled-coil domain containing 126
hsa-miR-1183	0	0	1	1	1	1	SPHKAP	SPHK1 interactor, AKAP domain containing
hsa-miR-1183	1	0	1	1	1	1	GABRB2	gamma-aminobutyric acid (GABA) A receptor, beta 2
hsa-miR-1183	0	0	1	1	1	1	MUC21	mucin 21, cell surface associated
hsa-miR-1183	1	0	1	1	1	1	PTPRD	protein tyrosine phosphatase, receptor type, D
hsa-miR-1183	1	0	1	1	1	1	SUV420H1	suppressor of variegation 4-20 homolog 1 (Drosophila)
hsa-miR-1183	1	0	1	1	1	1	TBP	TATA box binding protein
hsa-miR-1183	1	0	1	0	1	1	DNAJC6	DnaJ (Hsp40) homolog, subfamily C, member 6
hsa-miR-1183	1	0	1	1	1	1	CERS6	ceramide synthase 6
hsa-miR-1183	1	0	1	0	1	1	BTBD3	BTB (POZ) domain containing 3
hsa-miR-1183	0	0	1	1	0	0	YDJC	YdjC homolog (bacterial)
hsa-miR-1183	1	0	1	0	1	1	KIF5C	kinesin family member 5C
hsa-miR-1183	1	0	1	1	1	1	LARP1B	La ribonucleoprotein domain family, member 1B
hsa-miR-1183	0	0	1	1	0	0	TMC2	transmembrane channel-like 2
hsa-miR-1183	0	0	1	0	0	0	LRRC37A11P	leucine rich repeat containing 37, member A11, pseudogene
hsa-miR-1183	1	0	1	1	1	1	NR3C2	nuclear receptor subfamily 3, group C, member 2
hsa-miR-1183	1	0	1	1	1	1	CTSC	cathepsin C
hsa-miR-1183	1	0	1	1	1	1	ST18	suppression of tumorigenicity 18 (breast carcinoma) (zinc finger protein)
hsa-miR-1183	1	0	1	1	1	1	ZNF827	zinc finger protein 827
hsa-miR-1183	1	0	1	1	1	1	OSBP2	oxysterol binding protein 2
hsa-miR-1183	0	0	1	0	0	0	FAM27E3	family with sequence similarity 27, member E3
hsa-miR-1183	0	0	1	1	0	0	RGSL1	regulator of G-protein signaling like 1
hsa-miR-1183	0	0	1	0	0	0	LINC00486	long intergenic non-protein coding RNA 486
hsa-miR-1183	0	0	1	0	0	0	KRT8P12	keratin 8 pseudogene 12
hsa-miR-1183	0	0	1	0	1	1	GOLGA8G	golgin A8 family, member G
hsa-miR-1183	1	0	1	0	1	1	CAMSAP2	calmodulin regulated spectrin-associated protein family, member 2
hsa-miR-1183	0	0	1	1	1	1	KANSL1L	KAT8 regulatory NSL complex subunit 1-like
hsa-miR-1183	0	0	1	0	1	1	PIK3C2G	phosphatidylinositol-4-phosphate 3-kinase, catalytic subunit type 2 gamma
hsa-miR-1183	0	0	1	1	0	0	EPS15L1	epidermal growth factor receptor pathway substrate 15-like 1
hsa-miR-1183	0	0	1	0	0	0	LILRP2	leukocyte immunoglobulin-like receptor pseudogene 2
hsa-miR-1183	1	0	1	1	1	1	CADPS	Ca++-dependent secretion activator
hsa-miR-1183	1	0	1	1	1	1	PTPRZ1	protein tyrosine phosphatase, receptor-type, Z polypeptide 1
hsa-miR-1183	0	0	1	0	0	0	SMA4	glucuronidase, beta pseudogene
hsa-miR-1183	0	0	1	1	1	1	PRKAR2A	protein kinase, cAMP-dependent, regulatory, type II, alpha
hsa-miR-1183	0	0	1	1	1	1	TINF2	TERF1 (TRF1)-interacting nuclear factor 2
hsa-miR-1183	0	0	1	1	1	1	HAUS4	HAUS augmin-like complex, subunit 4
hsa-miR-1183	1	0	1	1	1	1	NUMB	numb homolog (Drosophila)
hsa-miR-1183	0	0	1	1	0	0	PSMB5	proteasome (prosome, macropain) subunit, beta type, 5
hsa-miR-1183	1	0	1	1	1	1	BTBD7	BTB (POZ) domain containing 7
hsa-miR-1183	0	0	1	0	0	0	FLJ39632	uncharacterized LOC642477
hsa-miR-1183	0	0	1	0	0	0	DKFZp686D0853	uncharacterized LOC401613
hsa-miR-1183	1	0	1	1	1	1	ATP2B4	ATPase, Ca++ transporting, plasma membrane 4
hsa-miR-1183	1	0	1	1	1	1	JPH1	junctophilin 1
hsa-miR-1183	0	0	1	0	1	1	FEZ2	fasciculation and elongation protein zeta 2 (zygin II)
hsa-miR-1183	1	0	1	1	1	1	MIER3	mesoderm induction early response 1, family member 3
hsa-miR-1183	1	0	1	1	1	1	MTFR1	mitochondrial fission regulator 1
hsa-miR-1183	0	0	1	1	0	0	CCDC171	coiled-coil domain containing 171
hsa-miR-1183	1	0	1	1	1	1	SGCD	sarcoglycan, delta (35kDa dystrophin-associated glycoprotein)
hsa-miR-1183	0	0	1	1	1	1	SLC12A8	solute carrier family 12 (potassium/chloride transporters), member 8
hsa-miR-1183	1	0	1	1	1	1	CCNG1	cyclin G1
hsa-miR-1183	1	0	1	1	0	0	ABL2	v-abl Abelson murine leukemia viral oncogene homolog 2
hsa-miR-1183	0	0	1	1	1	1	CRB1	crumbs homolog 1 (Drosophila)
hsa-miR-1183	1	0	1	1	1	1	SLC35F1	solute carrier family 35, member F1
hsa-miR-1183	1	0	1	1	1	1	TJP1	tight junction protein 1
hsa-miR-1183	1	0	1	1	1	1	RAB30	RAB30, member RAS oncogene family
hsa-miR-1183	1	0	1	1	1	1	RORB	RAR-related orphan receptor B
hsa-miR-1183	0	0	1	0	0	0	EML6	echinoderm microtubule associated protein like 6
hsa-miR-1183	1	0	1	1	1	1	MYCBP2	MYC binding protein 2, E3 ubiquitin protein ligase
hsa-miR-1183	1	0	1	1	1	1	MASP1	mannan-binding lectin serine peptidase 1 (C4/C2 activating component of Ra-reactive factor)
hsa-miR-1183	0	0	1	0	1	1	NHSL1	NHS-like 1
hsa-miR-1183	0	0	1	1	1	1	IPCEF1	interaction protein for cytohesin exchange factors 1
hsa-miR-1183	0	0	1	1	0	0	RPS24	ribosomal protein S24
hsa-miR-1183	0	0	1	1	1	1	PRR14L	proline rich 14-like
hsa-miR-1183	1	0	1	1	1	1	CGN	cingulin
hsa-miR-1183	1	0	1	1	1	1	CASP3	caspase 3, apoptosis-related cysteine peptidase
hsa-miR-1183	0	0	1	1	0	0	PRKCQ	protein kinase C, theta
hsa-miR-1183	0	0	1	0	1	1	TYW5	tRNA-yW synthesizing protein 5
hsa-miR-1183	1	0	1	1	1	1	FOXP1	forkhead box P1
hsa-miR-1183	1	0	1	1	1	1	GABPA	GA binding protein transcription factor, alpha subunit 60kDa
hsa-miR-1183	0	0	1	0	1	1	MYO3B	myosin IIIB
hsa-miR-1183	0	0	1	1	0	0	TMEM41A	transmembrane protein 41A
hsa-miR-1183	0	0	1	1	0	0	ELP3	elongator acetyltransferase complex subunit 3
hsa-miR-1183	1	0	1	1	1	1	PTPRB	protein tyrosine phosphatase, receptor type, B
hsa-miR-1183	1	0	1	1	1	1	PHF3	PHD finger protein 3
hsa-miR-1183	1	0	1	1	1	1	KLHL6	kelch-like 6 (Drosophila)
hsa-miR-1183	0	0	1	1	1	1	AP3M2	adaptor-related protein complex 3, mu 2 subunit
hsa-miR-1183	1	0	1	1	1	1	NFIB	nuclear factor I/B
hsa-miR-1183	1	0	1	1	1	1	NAV1	neuron navigator 1
hsa-miR-1183	1	0	1	0	1	1	IGF2BP3	insulin-like growth factor 2 mRNA binding protein 3
hsa-miR-1183	0	0	1	0	0	0	LOC286299	uncharacterized LOC286299
hsa-miR-1183	1	0	1	1	1	1	C5orf24	chromosome 5 open reading frame 24
hsa-miR-1183	1	0	1	1	1	1	PGAP1	post-GPI attachment to proteins 1
hsa-miR-1183	1	0	1	1	1	1	TMEM135	transmembrane protein 135
hsa-miR-1183	1	0	1	1	1	1	CALD1	caldesmon 1
hsa-miR-1183	0	0	1	1	1	1	SSFA2	sperm specific antigen 2
hsa-miR-1183	1	0	1	0	1	1	TBL1XR1	transducin (beta)-like 1 X-linked receptor 1
hsa-miR-1183	0	0	1	0	0	0	DKFZp686K1684	uncharacterized LOC440034
hsa-miR-1183	0	0	1	0	0	0	ANKRD62	ankyrin repeat domain 62
hsa-miR-1183	0	0	1	1	0	0	CNIH4	cornichon homolog 4 (Drosophila)
hsa-miR-1183	1	0	1	1	1	1	LYST	lysosomal trafficking regulator
hsa-miR-1183	1	0	1	1	1	1	SIN3A	SIN3 transcription regulator homolog A (yeast)
hsa-miR-1183	1	0	1	1	1	1	HIC2	hypermethylated in cancer 2
hsa-miR-1183	1	0	1	1	1	1	BSDC1	BSD domain containing 1
hsa-miR-1183	0	0	1	0	1	1	GINS3	GINS complex subunit 3 (Psf3 homolog)
hsa-miR-1183	0	0	1	0	1	1	CD59	CD59 molecule, complement regulatory protein
hsa-miR-1183	0	0	1	1	1	1	HPGD	hydroxyprostaglandin dehydrogenase 15-(NAD)
hsa-miR-1183	1	0	1	1	1	1	SEL1L3	sel-1 suppressor of lin-12-like 3 (C. elegans)
hsa-miR-1183	1	0	1	0	1	1	STX6	syntaxin 6
hsa-miR-1183	0	0	1	1	1	1	RIPK2	receptor-interacting serine-threonine kinase 2
hsa-miR-1183	0	0	1	1	1	1	PSG2	pregnancy specific beta-1-glycoprotein 2
hsa-miR-1183	0	0	1	1	1	1	TBC1D10A	TBC1 domain family, member 10A
hsa-miR-1183	1	0	1	1	1	1	VIM	vimentin
hsa-miR-1183	0	0	1	0	0	0	LOC400768	uncharacterized LOC400768
hsa-miR-1183	0	0	1	1	0	0	URM1	ubiquitin related modifier 1
hsa-miR-1183	1	0	1	1	1	1	ATAT1	alpha tubulin acetyltransferase 1
hsa-miR-1183	1	0	1	1	1	1	CNIH2	cornichon homolog 2 (Drosophila)
hsa-miR-1183	0	0	1	1	0	0	STAMBP	STAM binding protein
hsa-miR-1183	1	0	1	1	1	1	SGSM2	small G protein signaling modulator 2
hsa-miR-1183	0	0	1	1	1	1	APBB1	amyloid beta (A4) precursor protein-binding, family B, member 1 (Fe65)
hsa-miR-1183	0	0	1	1	0	0	CYGB	cytoglobin
hsa-miR-1183	0	0	1	1	1	1	BTF3	basic transcription factor 3
hsa-miR-1183	1	0	1	1	1	1	AP3S1	adaptor-related protein complex 3, sigma 1 subunit
hsa-miR-1183	0	0	1	0	0	0	ARRDC1	arrestin domain containing 1
hsa-miR-1183	1	0	1	1	1	1	FGF11	fibroblast growth factor 11
hsa-miR-1183	1	0	1	0	1	1	BNIP3L	BCL2/adenovirus E1B 19kDa interacting protein 3-like
hsa-miR-1183	1	0	1	1	0	0	ELOVL1	ELOVL fatty acid elongase 1
hsa-miR-1183	1	0	1	1	0	0	LOXL1	lysyl oxidase-like 1
hsa-miR-1183	0	0	1	1	1	1	BCL7B	B-cell CLL/lymphoma 7B
hsa-miR-1183	1	0	1	1	1	1	RASL12	RAS-like, family 12
hsa-miR-1183	0	0	1	1	1	1	INCENP	inner centromere protein antigens 135/155kDa
hsa-miR-1183	0	0	1	1	1	1	ABCD1	ATP-binding cassette, sub-family D (ALD), member 1
hsa-miR-1183	1	0	1	0	1	1	EIF4H	eukaryotic translation initiation factor 4H
hsa-miR-1183	1	0	1	1	1	1	SMARCE1	SWI/SNF related, matrix associated, actin dependent regulator of chromatin, subfamily e, member 1
hsa-miR-1183	1	0	1	1	1	1	CHTF8	CTF8, chromosome transmission fidelity factor 8 homolog (S. cerevisiae)
hsa-miR-1183	0	0	1	1	1	1	CCDC115	coiled-coil domain containing 115
hsa-miR-1183	0	0	1	1	1	1	MTCP1	mature T-cell proliferation 1
hsa-miR-1183	1	0	1	1	1	1	CDK18	cyclin-dependent kinase 18
hsa-miR-1183	0	0	1	1	1	1	PLAUR	plasminogen activator, urokinase receptor
hsa-miR-1183	1	0	1	1	1	1	COPS2	COP9 constitutive photomorphogenic homolog subunit 2 (Arabidopsis)
hsa-miR-1183	1	0	1	1	1	1	EI24	etoposide induced 2.4 mRNA
hsa-miR-1183	1	0	1	1	1	1	DCN	decorin
hsa-miR-1183	0	0	1	1	0	0	RAD54B	RAD54 homolog B (S. cerevisiae)
hsa-miR-1183	1	0	1	1	1	1	COPZ1	coatomer protein complex, subunit zeta 1
hsa-miR-1183	0	0	1	1	1	1	CYB5R3	cytochrome b5 reductase 3
hsa-miR-1183	0	0	1	1	1	1	CCDC91	coiled-coil domain containing 91
hsa-miR-1183	0	0	1	1	0	0	EMC7	ER membrane protein complex subunit 7
hsa-miR-1183	1	0	1	0	1	1	RPS6KB1	ribosomal protein S6 kinase, 70kDa, polypeptide 1
hsa-miR-1183	1	0	1	1	0	0	YPEL3	yippee-like 3 (Drosophila)
hsa-miR-1183	1	0	1	1	1	1	PCTP	phosphatidylcholine transfer protein
hsa-miR-1183	0	0	1	1	1	1	TRIM68	tripartite motif containing 68
hsa-miR-1183	0	0	1	1	1	1	XBP1	X-box binding protein 1
hsa-miR-1183	0	0	1	1	1	1	CHMP5	charged multivesicular body protein 5
hsa-miR-1183	1	0	1	1	1	1	NUP160	nucleoporin 160kDa
hsa-miR-1183	0	0	1	0	1	1	PSG11	pregnancy specific beta-1-glycoprotein 11
hsa-miR-1183	0	0	1	0	0	0	TMEM208	transmembrane protein 208
hsa-miR-1183	1	0	1	0	1	1	MGRN1	mahogunin ring finger 1, E3 ubiquitin protein ligase
hsa-miR-1183	1	0	1	1	1	1	BAMBI	BMP and activin membrane-bound inhibitor homolog (Xenopus laevis)
hsa-miR-1183	0	0	1	1	0	0	CD38	CD38 molecule
hsa-miR-1183	0	0	1	1	1	1	EIF3J	eukaryotic translation initiation factor 3, subunit J
hsa-miR-1183	0	0	1	1	0	0	BRE	brain and reproductive organ-expressed (TNFRSF1A modulator)
hsa-miR-1183	1	0	1	1	1	1	TMEM245	transmembrane protein 245
hsa-miR-1183	0	0	1	1	1	1	ATG4A	autophagy related 4A, cysteine peptidase
hsa-miR-1183	0	0	1	0	0	0	LOC150568	uncharacterized LOC150568
hsa-miR-1183	1	0	1	1	1	1	DKK3	dickkopf 3 homolog (Xenopus laevis)
hsa-miR-1183	0	0	1	0	0	0	FLJ45248	FLJ45248 protein
hsa-miR-1183	0	0	1	1	1	1	UIMC1	ubiquitin interaction motif containing 1
hsa-miR-1183	0	0	1	0	0	0	LOC677759	uncharacterized LOC677759
hsa-miR-1183	0	0	1	1	0	0	NOX5	NADPH oxidase, EF-hand calcium binding domain 5
hsa-miR-1183	1	0	1	1	1	1	NRN1	neuritin 1
hsa-miR-1183	0	0	1	0	1	1	SRSF5	serine/arginine-rich splicing factor 5
hsa-miR-1183	0	0	1	1	0	0	NUP205	nucleoporin 205kDa
hsa-miR-1183	0	0	1	1	1	1	SEC11A	SEC11 homolog A (S. cerevisiae)
hsa-miR-1183	0	0	1	1	1	1	CPZ	carboxypeptidase Z
hsa-miR-1183	0	0	1	1	1	1	TFAM	transcription factor A, mitochondrial
hsa-miR-1183	1	0	1	1	1	1	ARNTL	aryl hydrocarbon receptor nuclear translocator-like
hsa-miR-1183	0	0	1	1	0	0	MRPL4	mitochondrial ribosomal protein L4
hsa-miR-1183	0	0	1	1	1	1	TRMT61B	tRNA methyltransferase 61 homolog B (S. cerevisiae)
hsa-miR-1183	1	0	1	1	1	1	EIF4A2	eukaryotic translation initiation factor 4A2
hsa-miR-1183	1	0	1	1	1	1	RCL1	RNA terminal phosphate cyclase-like 1
hsa-miR-1183	0	0	1	0	1	1	VSTM2A	V-set and transmembrane domain containing 2A
hsa-miR-1183	0	0	1	1	1	1	JMJD8	jumonji domain containing 8
hsa-miR-1183	1	0	1	0	1	1	ANKH	ankylosis, progressive homolog (mouse)
hsa-miR-1183	0	0	1	1	1	1	RFT1	RFT1 homolog (S. cerevisiae)
hsa-miR-1183	0	0	1	1	1	1	CTSK	cathepsin K
hsa-miR-1183	0	0	1	1	1	1	UBE2A	ubiquitin-conjugating enzyme E2A
hsa-miR-1183	0	0	1	1	1	1	MAEL	maelstrom homolog (Drosophila)
hsa-miR-1183	1	0	1	1	1	1	ARL4A	ADP-ribosylation factor-like 4A
hsa-miR-1183	0	0	1	1	0	0	PHPT1	phosphohistidine phosphatase 1
hsa-miR-1183	1	0	1	1	1	1	BAALC	brain and acute leukemia, cytoplasmic
hsa-miR-1183	1	0	1	1	1	1	PFN2	profilin 2
hsa-miR-1183	0	0	1	1	1	1	FUS	fused in sarcoma
hsa-miR-1183	0	0	1	1	1	1	PSG5	pregnancy specific beta-1-glycoprotein 5
hsa-miR-1183	1	0	1	1	1	1	NFYB	nuclear transcription factor Y, beta
hsa-miR-1183	0	0	1	1	1	1	AMACR	alpha-methylacyl-CoA racemase
hsa-miR-1183	0	0	1	1	1	1	DNAJC25	DnaJ (Hsp40) homolog, subfamily C , member 25
hsa-miR-1183	0	0	1	1	1	1	TMEM14C	transmembrane protein 14C
hsa-miR-1183	0	0	1	0	0	0	ZNF674-AS1	ZNF674 antisense RNA 1
hsa-miR-1183	0	0	1	1	0	0	OXA1L	oxidase (cytochrome c) assembly 1-like
hsa-miR-1183	1	0	1	1	1	1	HSPD1	heat shock 60kDa protein 1 (chaperonin)
hsa-miR-1183	0	0	1	1	1	1	PTGES	prostaglandin E synthase
hsa-miR-1183	1	0	1	1	1	1	RBPJ	recombination signal binding protein for immunoglobulin kappa J region
hsa-miR-1183	0	0	1	1	0	0	HEBP1	heme binding protein 1
hsa-miR-1183	1	0	1	0	1	1	CD47	CD47 molecule
hsa-miR-1183	1	0	1	0	1	1	TSC1	tuberous sclerosis 1
hsa-miR-1183	0	0	1	1	1	1	SLC33A1	solute carrier family 33 (acetyl-CoA transporter), member 1
hsa-miR-1183	0	0	1	0	1	1	DENR	density-regulated protein
hsa-miR-1183	0	0	1	1	1	1	ZNF346	zinc finger protein 346
hsa-miR-1183	0	0	1	1	0	0	TESK1	testis-specific kinase 1
hsa-miR-1183	0	0	1	1	0	0	FCGR2A	Fc fragment of IgG, low affinity IIa, receptor (CD32)
hsa-miR-1183	1	0	1	1	1	1	MAN1C1	mannosidase, alpha, class 1C, member 1
hsa-miR-1183	0	0	1	1	1	1	NUDT21	nudix (nucleoside diphosphate linked moiety X)-type motif 21
hsa-miR-1183	0	0	1	1	1	1	FAM118B	family with sequence similarity 118, member B
hsa-miR-1183	1	0	1	1	1	1	LGALSL	lectin, galactoside-binding-like
hsa-miR-1183	0	0	1	1	1	1	TOP3B	topoisomerase (DNA) III beta
hsa-miR-1183	1	0	1	1	1	1	TARBP2	TAR (HIV-1) RNA binding protein 2
hsa-miR-1183	0	0	1	1	1	1	C9orf3	chromosome 9 open reading frame 3
hsa-miR-1183	0	0	1	1	0	0	IDH3G	isocitrate dehydrogenase 3 (NAD+) gamma
hsa-miR-1183	0	0	1	0	0	0	FAM47E	family with sequence similarity 47, member E
hsa-miR-1183	1	0	1	1	1	1	STAG2	stromal antigen 2
hsa-miR-1183	0	0	1	1	1	1	C22orf25	chromosome 22 open reading frame 25
hsa-miR-1183	0	0	1	1	1	1	CCP110	centriolar coiled coil protein 110kDa
hsa-miR-1183	1	0	1	1	1	1	FBXW7	F-box and WD repeat domain containing 7, E3 ubiquitin protein ligase
hsa-miR-1183	0	0	1	1	1	1	MRPL42	mitochondrial ribosomal protein L42
hsa-miR-1183	1	0	1	1	1	1	PHACTR2	phosphatase and actin regulator 2
hsa-miR-1183	0	0	1	1	1	1	ATG5	autophagy related 5
hsa-miR-1183	1	0	1	1	1	1	NKTR	natural killer-tumor recognition sequence
hsa-miR-1183	1	0	1	0	1	1	MEGF10	multiple EGF-like-domains 10
hsa-miR-1183	1	0	1	1	1	1	KIAA2018	KIAA2018
hsa-miR-1183	0	0	1	1	0	0	FMN1	formin 1
hsa-miR-1183	0	0	1	0	0	0	MUC19	mucin 19, oligomeric
hsa-miR-1183	1	0	1	0	1	1	OSBPL8	oxysterol binding protein-like 8
hsa-miR-1183	0	0	1	0	0	0	DNAJC27-AS1	DNAJC27 antisense RNA 1
hsa-miR-1183	1	0	1	0	1	1	ZNF652	zinc finger protein 652
hsa-miR-1183	0	0	1	0	1	1	SYNPR	synaptoporin
hsa-miR-1183	0	0	1	0	0	0	ZNFX1-AS1	ZNFX1 antisense RNA 1
hsa-miR-1183	0	0	1	1	1	1	MSS51	MSS51 mitochondrial translational activator homolog (S. cerevisiae)
hsa-miR-1183	1	0	1	1	1	1	ZFHX3	zinc finger homeobox 3
hsa-miR-1183	0	0	1	1	1	1	SLC39A14	solute carrier family 39 (zinc transporter), member 14
hsa-miR-1183	1	0	1	1	1	1	PRKG1	protein kinase, cGMP-dependent, type I
hsa-miR-1183	1	0	1	1	1	1	SEC14L1	SEC14-like 1 (S. cerevisiae)
hsa-miR-1183	1	0	1	0	1	1	IRF4	interferon regulatory factor 4
hsa-miR-1183	1	0	1	1	1	1	RBPMS	RNA binding protein with multiple splicing
hsa-miR-1183	1	0	1	0	1	1	KLHDC10	kelch domain containing 10
hsa-miR-1183	0	0	1	1	1	1	PTGS1	prostaglandin-endoperoxide synthase 1 (prostaglandin G/H synthase and cyclooxygenase)
hsa-miR-1183	0	0	1	0	0	0	LOC728377	Rho guanine nucleotide exchange factor (GEF) 5 pseudogene
hsa-miR-1183	0	0	1	1	0	0	NBPF9	neuroblastoma breakpoint family, member 9
hsa-miR-1183	0	0	1	1	1	1	PROS1	protein S (alpha)
hsa-miR-1183	1	0	1	0	1	1	EPDR1	ependymin related protein 1 (zebrafish)
hsa-miR-1183	1	0	1	1	1	1	SLC4A8	solute carrier family 4, sodium bicarbonate cotransporter, member 8
hsa-miR-1183	0	0	1	1	1	1	WISP1	WNT1 inducible signaling pathway protein 1
hsa-miR-1183	1	0	1	1	1	1	MLL	myeloid/lymphoid or mixed-lineage leukemia (trithorax homolog, Drosophila)
hsa-miR-1183	0	0	1	1	1	1	VDAC2	voltage-dependent anion channel 2
hsa-miR-1183	1	0	1	1	1	1	ATP2B2	ATPase, Ca++ transporting, plasma membrane 2
hsa-miR-1183	1	0	1	1	1	1	AFF1	AF4/FMR2 family, member 1
hsa-miR-1183	0	0	1	0	1	1	OPRK1	opioid receptor, kappa 1
hsa-miR-1183	0	0	1	1	0	0	HLA-DQB1	major histocompatibility complex, class II, DQ beta 1
hsa-miR-1183	0	0	1	1	1	1	PLCB4	phospholipase C, beta 4
hsa-miR-1183	1	0	1	1	1	1	GRM1	glutamate receptor, metabotropic 1
hsa-miR-1183	1	0	1	0	1	1	BCL2	B-cell CLL/lymphoma 2
hsa-miR-1183	1	0	1	1	1	1	DBT	dihydrolipoamide branched chain transacylase E2
hsa-miR-1183	0	0	1	1	1	1	CD55	CD55 molecule, decay accelerating factor for complement (Cromer blood group)
hsa-miR-1183	1	0	1	1	1	1	PML	promyelocytic leukemia
hsa-miR-1183	0	0	1	1	1	1	ATP7A	ATPase, Cu++ transporting, alpha polypeptide
hsa-miR-1183	0	0	1	1	1	1	BCHE	butyrylcholinesterase
hsa-miR-1183	0	0	1	1	0	0	CD40LG	CD40 ligand
hsa-miR-1183	0	0	1	1	1	1	ERCC8	excision repair cross-complementing rodent repair deficiency, complementation group 8
hsa-miR-1183	1	0	1	1	1	1	COL4A3	collagen, type IV, alpha 3 (Goodpasture antigen)
hsa-miR-1183	0	0	1	0	1	1	CYP1B1	cytochrome P450, family 1, subfamily B, polypeptide 1
hsa-miR-1183	1	0	1	1	1	1	DMD	dystrophin
hsa-miR-1183	0	0	1	1	1	1	DPYD	dihydropyrimidine dehydrogenase
hsa-miR-1183	1	0	1	1	1	1	F13A1	coagulation factor XIII, A1 polypeptide
hsa-miR-1183	1	0	1	1	1	1	FBN1	fibrillin 1
hsa-miR-1183	0	0	1	0	1	1	MS4A2	membrane-spanning 4-domains, subfamily A, member 2
hsa-miR-1183	1	0	1	1	1	1	FUCA1	fucosidase, alpha-L- 1, tissue
hsa-miR-1183	1	0	1	1	1	1	FUT1	fucosyltransferase 1 (galactoside 2-alpha-L-fucosyltransferase, H blood group)
hsa-miR-1183	1	0	1	0	1	1	G6PC	glucose-6-phosphatase, catalytic subunit
hsa-miR-1183	1	0	1	1	1	1	GALC	galactosylceramidase
hsa-miR-1183	1	0	1	0	1	1	GHR	growth hormone receptor
hsa-miR-1183	1	0	1	1	1	1	GJA1	gap junction protein, alpha 1, 43kDa
hsa-miR-1183	1	0	1	1	1	1	GK	glycerol kinase
hsa-miR-1183	1	0	1	0	1	1	GLI3	GLI family zinc finger 3
hsa-miR-1183	0	0	1	1	1	1	HPRT1	hypoxanthine phosphoribosyltransferase 1
hsa-miR-1183	0	0	1	0	1	1	KAL1	Kallmann syndrome 1 sequence
hsa-miR-1183	1	0	1	1	1	1	KCNA1	potassium voltage-gated channel, shaker-related subfamily, member 1 (episodic ataxia with myokymia)
hsa-miR-1183	0	0	1	1	0	0	KCNH2	potassium voltage-gated channel, subfamily H (eag-related), member 2
hsa-miR-1183	1	0	1	1	1	1	MITF	microphthalmia-associated transcription factor
hsa-miR-1183	0	0	1	1	1	1	MTR	5-methyltetrahydrofolate-homocysteine methyltransferase
hsa-miR-1183	1	0	1	1	1	1	PTCH1	patched 1
hsa-miR-1183	1	0	1	1	1	1	NF1	neurofibromin 1
hsa-miR-1183	1	0	1	1	1	1	PEX12	peroxisomal biogenesis factor 12
hsa-miR-1183	1	0	1	1	1	1	PMP22	peripheral myelin protein 22
hsa-miR-1183	1	0	1	0	1	1	PTEN	phosphatase and tensin homolog
hsa-miR-1183	1	0	1	1	1	1	ATXN1	ataxin 1
hsa-miR-1183	1	0	1	1	1	1	TIMP3	TIMP metallopeptidase inhibitor 3
hsa-miR-1183	1	1	1	1	1	1	CDKN1A	cyclin-dependent kinase inhibitor 1A (p21, Cip1)
hsa-miR-1183	0	0	1	0	1	1	GNRHR	gonadotropin-releasing hormone receptor
hsa-miR-1183	0	0	1	1	1	1	KRT10	keratin 10
hsa-miR-1183	1	0	1	0	1	1	PAFAH1B1	platelet-activating factor acetylhydrolase 1b, regulatory subunit 1 (45kDa)
hsa-miR-1183	1	0	1	1	1	1	KCNJ11	potassium inwardly-rectifying channel, subfamily J, member 11
hsa-miR-1183	1	0	1	1	1	1	PLP1	proteolipid protein 1
hsa-miR-1183	0	0	1	1	1	1	CRX	cone-rod homeobox
hsa-miR-1183	1	0	1	1	1	1	DCX	doublecortin
hsa-miR-1183	0	0	1	1	1	1	CRP	C-reactive protein, pentraxin-related
hsa-miR-1183	0	0	1	1	1	1	C7	complement component 7
hsa-miR-1183	1	0	1	1	1	1	TNF	tumor necrosis factor
hsa-miR-1183	1	0	1	0	1	1	IGFBP5	insulin-like growth factor binding protein 5
hsa-miR-1183	1	0	1	1	1	1	CXCL12	chemokine (C-X-C motif) ligand 12
hsa-miR-1183	0	0	1	1	1	1	IGF2	insulin-like growth factor 2 (somatomedin A)
hsa-miR-1183	0	0	1	1	1	1	NOS1	nitric oxide synthase 1 (neuronal)
hsa-miR-1183	1	0	1	0	1	1	ABAT	4-aminobutyrate aminotransferase
hsa-miR-1183	1	0	1	1	1	1	CACNA2D1	calcium channel, voltage-dependent, alpha 2/delta subunit 1
hsa-miR-1183	0	0	1	1	1	1	CGA	glycoprotein hormones, alpha polypeptide
hsa-miR-1183	1	0	1	1	1	1	DRD1	dopamine receptor D1
hsa-miR-1183	1	0	1	0	1	1	GABRA4	gamma-aminobutyric acid (GABA) A receptor, alpha 4
hsa-miR-1183	1	0	1	1	1	1	GABRB3	gamma-aminobutyric acid (GABA) A receptor, beta 3
hsa-miR-1183	1	0	1	1	1	1	GRIA4	glutamate receptor, ionotropic, AMPA 4
hsa-miR-1183	1	0	1	1	1	1	HTR1F	5-hydroxytryptamine (serotonin) receptor 1F, G protein-coupled
hsa-miR-1183	0	0	1	1	1	1	HTR7	5-hydroxytryptamine (serotonin) receptor 7, adenylate cyclase-coupled
hsa-miR-1183	1	0	1	1	1	1	IGF1R	insulin-like growth factor 1 receptor
hsa-miR-1183	1	0	1	0	1	1	KCNJ2	potassium inwardly-rectifying channel, subfamily J, member 2
hsa-miR-1183	1	0	1	1	1	1	MME	membrane metallo-endopeptidase
hsa-miR-1183	1	0	1	1	1	1	PTGDR	prostaglandin D2 receptor (DP)
hsa-miR-1183	1	0	1	1	1	1	PTGER2	prostaglandin E receptor 2 (subtype EP2), 53kDa
hsa-miR-1183	1	0	1	1	1	1	PTGER3	prostaglandin E receptor 3 (subtype EP3)
hsa-miR-1183	1	0	1	1	1	1	RARB	retinoic acid receptor, beta
hsa-miR-1183	1	0	1	1	1	1	REEP3	receptor accessory protein 3
hsa-miR-1183	0	0	1	0	1	1	DNAJB3	DnaJ (Hsp40) homolog, subfamily B, member 3
hsa-miR-1183	1	0	1	0	1	1	SMAD5	SMAD family member 5
hsa-miR-1183	1	0	1	0	1	1	UBE2W	ubiquitin-conjugating enzyme E2W (putative)
hsa-miR-1183	1	0	1	1	1	1	UGP2	UDP-glucose pyrophosphorylase 2
hsa-miR-1183	1	0	1	0	1	1	GDF6	growth differentiation factor 6
hsa-miR-1183	0	0	1	1	0	0	RNASE9	ribonuclease, RNase A family, 9 (non-active)
hsa-miR-1183	1	0	1	1	1	1	FARP1	FERM, RhoGEF (ARHGEF) and pleckstrin domain protein 1 (chondrocyte-derived)
hsa-miR-1183	0	0	1	1	1	1	CC2D2B	coiled-coil and C2 domain containing 2B
hsa-miR-1183	1	0	1	1	1	1	ATP1B1	ATPase, Na+/K+ transporting, beta 1 polypeptide
hsa-miR-1183	0	0	1	1	1	1	SUMO4	SMT3 suppressor of mif two 3 homolog 4 (S. cerevisiae)
hsa-miR-1183	1	0	1	1	1	1	WNK3	WNK lysine deficient protein kinase 3
hsa-miR-1183	0	0	1	0	0	0	OR8G1	olfactory receptor, family 8, subfamily G, member 1
hsa-miR-1183	1	0	1	1	1	1	C1orf173	chromosome 1 open reading frame 173
hsa-miR-1183	1	0	1	1	1	1	KCTD11	potassium channel tetramerisation domain containing 11
hsa-miR-1183	0	0	1	1	1	1	POTEA	POTE ankyrin domain family, member A
hsa-miR-1183	1	0	1	0	1	1	CACNA1I	calcium channel, voltage-dependent, T type, alpha 1I subunit
hsa-miR-1183	1	0	1	1	1	1	LEPR	leptin receptor
hsa-miR-1183	1	0	1	1	1	1	RREB1	ras responsive element binding protein 1
hsa-miR-1183	1	0	1	1	1	1	KLHL31	kelch-like 31 (Drosophila)
hsa-miR-1183	1	0	1	1	1	1	RBMS3	RNA binding motif, single stranded interacting protein 3
hsa-miR-1183	1	0	1	1	1	1	BICD2	bicaudal D homolog 2 (Drosophila)
hsa-miR-1183	0	0	1	1	1	1	TUSC1	tumor suppressor candidate 1
hsa-miR-1183	0	0	1	1	1	1	ALG11	asparagine-linked glycosylation 11, alpha-1,2-mannosyltransferase homolog (yeast)
hsa-miR-1183	1	0	1	0	1	1	ZNF740	zinc finger protein 740
hsa-miR-1183	0	0	1	1	1	1	CCDC144NL	coiled-coil domain containing 144 family, N-terminal like
hsa-miR-1183	0	0	1	1	1	1	ZCCHC16	zinc finger, CCHC domain containing 16
hsa-miR-1183	1	0	1	0	1	1	LIN28B	lin-28 homolog B (C. elegans)
hsa-miR-1183	0	0	1	0	1	1	ZNF705A	zinc finger protein 705A
hsa-miR-1183	1	0	1	0	1	1	LRRC55	leucine rich repeat containing 55
hsa-miR-1183	0	0	1	1	1	1	HMGN2P46	high mobility group nucleosomal binding domain 2 pseudogene 46
hsa-miR-1183	1	0	1	0	1	1	YPEL2	yippee-like 2 (Drosophila)
hsa-miR-1183	0	0	1	1	1	1	ZWINT	ZW10 interactor
hsa-miR-1183	1	0	1	1	1	1	EBF3	early B-cell factor 3
hsa-miR-1183	1	0	1	1	1	1	PLCXD3	phosphatidylinositol-specific phospholipase C, X domain containing 3
hsa-miR-1183	1	0	1	1	1	1	EDA	ectodysplasin A
hsa-miR-1183	0	0	1	1	1	1	SUMO1	SMT3 suppressor of mif two 3 homolog 1 (S. cerevisiae)
hsa-miR-1183	1	0	1	0	1	1	IP6K1	inositol hexakisphosphate kinase 1
hsa-miR-1183	0	0	1	1	1	1	MAPKAP1	mitogen-activated protein kinase associated protein 1
hsa-miR-1183	0	0	1	1	1	1	TCEAL6	transcription elongation factor A (SII)-like 6
hsa-miR-1183	0	0	1	1	1	1	SCP2	sterol carrier protein 2
hsa-miR-1183	1	0	1	1	1	1	L3MBTL3	l(3)mbt-like 3 (Drosophila)
hsa-miR-1183	0	0	1	1	1	1	TRIM13	tripartite motif containing 13
hsa-miR-1183	1	0	1	1	1	1	LMBRD2	LMBR1 domain containing 2
hsa-miR-1183	0	0	1	1	1	1	UACA	uveal autoantigen with coiled-coil domains and ankyrin repeats
hsa-miR-1183	1	0	1	1	1	1	CTDSPL	CTD (carboxy-terminal domain, RNA polymerase II, polypeptide A) small phosphatase-like
hsa-miR-1183	1	0	1	0	1	1	KIAA2022	KIAA2022
hsa-miR-1183	0	0	1	1	1	1	CXCR4	chemokine (C-X-C motif) receptor 4
hsa-miR-1183	0	0	1	1	1	1	MXI1	MAX interactor 1
hsa-miR-1183	1	0	1	1	1	1	LPHN1	latrophilin 1
hsa-miR-1183	1	0	1	1	1	1	FNIP1	folliculin interacting protein 1
hsa-miR-1183	0	0	1	1	1	1	SLC35D3	solute carrier family 35, member D3
hsa-miR-1183	0	0	1	1	1	1	ZCCHC11	zinc finger, CCHC domain containing 11
hsa-miR-1183	1	0	1	0	1	1	ERMN	ermin, ERM-like protein
hsa-miR-1183	1	0	1	1	1	1	FAM168B	family with sequence similarity 168, member B
hsa-miR-1183	1	0	1	1	1	1	SHE	Src homology 2 domain containing E
hsa-miR-1183	0	0	1	0	1	1	LPPR5	lipid phosphate phosphatase-related protein type 5
hsa-miR-1183	1	0	1	0	1	1	FAM102B	family with sequence similarity 102, member B
hsa-miR-1183	1	0	1	0	1	1	MTX3	metaxin 3
hsa-miR-1183	1	0	1	1	1	1	BCL2L15	BCL2-like 15
hsa-miR-1183	1	0	1	1	1	1	ATP11C	ATPase, class VI, type 11C
hsa-miR-1183	1	0	1	0	1	1	FYTTD1	forty-two-three domain containing 1
hsa-miR-1183	1	0	1	1	0	0	RPL21P44	ribosomal protein L21 pseudogene 44
hsa-miR-1183	1	0	1	0	1	1	CREB5	cAMP responsive element binding protein 5
hsa-miR-1183	0	0	1	1	0	0	XKR7	XK, Kell blood group complex subunit-related family, member 7
hsa-miR-1183	1	0	1	1	1	1	BTBD1	BTB (POZ) domain containing 1
hsa-miR-1183	0	0	1	0	1	1	GOLGA8E	golgin A8 family, member E
hsa-miR-1183	1	0	1	1	1	1	FOXP4	forkhead box P4
hsa-miR-1183	0	0	1	1	0	0	MYPOP	Myb-related transcription factor, partner of profilin
hsa-miR-1183	1	0	1	1	1	1	SLC25A53	solute carrier family 25, member 53
hsa-miR-1183	1	0	1	1	1	1	DISC1	disrupted in schizophrenia 1
hsa-miR-1183	0	0	1	1	1	1	SPIN4	spindlin family, member 4
hsa-miR-1183	0	0	1	1	0	0	TCEAL5	transcription elongation factor A (SII)-like 5
hsa-miR-1183	1	0	1	0	1	1	ZKSCAN2	zinc finger with KRAB and SCAN domains 2
hsa-miR-1183	1	0	1	1	1	1	SORCS1	sortilin-related VPS10 domain containing receptor 1
hsa-miR-1183	0	0	1	1	1	1	PAGE5	P antigen family, member 5 (prostate associated)
hsa-miR-1183	1	0	1	0	1	1	FIGNL2	fidgetin-like 2
hsa-miR-1183	0	0	1	1	1	1	LDLRAD2	low density lipoprotein receptor class A domain containing 2
hsa-miR-1183	0	0	1	1	1	1	FLG2	filaggrin family member 2
hsa-miR-1183	1	0	1	1	1	1	LHX9	LIM homeobox 9
hsa-miR-1183	1	0	1	1	1	1	KCNMA1	potassium large conductance calcium-activated channel, subfamily M, alpha member 1
hsa-miR-1183	1	0	1	1	1	1	NCDN	neurochondrin
hsa-miR-1183	1	0	1	1	1	1	TMCC1	transmembrane and coiled-coil domain family 1
hsa-miR-1183	1	0	1	0	1	1	GOPC	golgi-associated PDZ and coiled-coil motif containing
hsa-miR-1183	0	0	1	1	0	0	ALDH18A1	aldehyde dehydrogenase 18 family, member A1
hsa-miR-1183	1	0	1	1	1	1	ZHX1	zinc fingers and homeoboxes 1
hsa-miR-1183	0	0	1	1	1	1	RAB28	RAB28, member RAS oncogene family
hsa-miR-1183	1	0	1	1	1	1	VMA21	VMA21 vacuolar H+-ATPase homolog (S. cerevisiae)
hsa-miR-1183	0	0	1	1	1	1	ACTBL2	actin, beta-like 2
hsa-miR-1183	1	0	1	1	1	1	SH3PXD2B	SH3 and PX domains 2B
hsa-miR-1183	1	0	1	0	1	1	BRCC3	BRCA1/BRCA2-containing complex, subunit 3
hsa-miR-1183	1	0	1	1	1	1	NTRK2	neurotrophic tyrosine kinase, receptor, type 2
hsa-miR-1183	1	0	1	1	1	1	IQCB1	IQ motif containing B1
hsa-miR-1183	1	0	1	0	1	1	RGAG4	retrotransposon gag domain containing 4
hsa-miR-1183	0	0	1	1	1	1	RGPD1	RANBP2-like and GRIP domain containing 1
hsa-miR-1183	1	0	1	1	1	1	CANX	calnexin
hsa-miR-1183	1	0	1	0	1	1	TNRC6B	trinucleotide repeat containing 6B
hsa-miR-1183	1	0	1	1	1	1	FNBP1L	formin binding protein 1-like
hsa-miR-1183	1	0	1	0	1	1	ADAR	adenosine deaminase, RNA-specific
hsa-miR-1183	1	0	1	1	1	1	AFF3	AF4/FMR2 family, member 3
hsa-miR-1183	1	0	1	1	1	1	RGS7BP	regulator of G-protein signaling 7 binding protein
hsa-miR-1183	1	0	1	1	1	1	PLEKHG1	pleckstrin homology domain containing, family G (with RhoGef domain) member 1
hsa-miR-1183	1	0	1	1	1	1	CSNK1G3	casein kinase 1, gamma 3
hsa-miR-1183	0	0	1	0	1	1	STXBP1	syntaxin binding protein 1
hsa-miR-1183	1	0	1	1	1	1	KLF10	Kruppel-like factor 10
hsa-miR-1183	1	0	1	1	1	1	MAGI1	membrane associated guanylate kinase, WW and PDZ domain containing 1
hsa-miR-1183	1	0	1	1	1	1	MYCL1	v-myc myelocytomatosis viral oncogene homolog 1, lung carcinoma derived (avian)
hsa-miR-1183	1	0	1	1	1	1	SAR1B	SAR1 homolog B (S. cerevisiae)
hsa-miR-1183	1	0	1	1	1	1	TMEM98	transmembrane protein 98
hsa-miR-1183	0	0	1	1	1	1	CSTF3	cleavage stimulation factor, 3' pre-RNA, subunit 3, 77kDa
hsa-miR-1183	1	0	1	1	1	1	ZNF704	zinc finger protein 704
hsa-miR-1183	1	0	1	1	1	1	GALNTL6	UDP-N-acetyl-alpha-D-galactosamine:polypeptide N-acetylgalactosaminyltransferase-like 6
hsa-miR-1183	1	0	1	0	1	1	RYR3	ryanodine receptor 3
hsa-miR-1183	1	0	1	1	1	1	PDE4B	phosphodiesterase 4B, cAMP-specific
hsa-miR-1183	1	0	1	0	1	1	SCML1	sex comb on midleg-like 1 (Drosophila)
hsa-miR-1183	1	0	1	0	1	1	CDC42SE1	CDC42 small effector 1
hsa-miR-1183	1	0	1	1	1	1	ATP6V1C2	ATPase, H+ transporting, lysosomal 42kDa, V1 subunit C2
hsa-miR-1183	1	0	1	1	1	1	ELMO1	engulfment and cell motility 1
hsa-miR-1183	1	0	1	1	1	1	KIAA0317	KIAA0317
hsa-miR-1183	0	0	1	1	1	1	MAP9	microtubule-associated protein 9
hsa-miR-1183	1	0	1	0	1	1	USP9X	ubiquitin specific peptidase 9, X-linked
hsa-miR-1183	0	0	1	0	1	1	ZNF705D	zinc finger protein 705D
hsa-miR-1183	1	0	1	1	1	1	C3orf65	chromosome 3 open reading frame 65
hsa-miR-1183	1	0	1	1	1	1	CHN2	chimerin (chimaerin) 2
hsa-miR-1183	1	0	1	1	1	1	MLLT4	myeloid/lymphoid or mixed-lineage leukemia (trithorax homolog, Drosophila); translocated to, 4
hsa-miR-1183	0	0	1	1	1	1	MYH11	myosin, heavy chain 11, smooth muscle
hsa-miR-1183	1	0	1	1	1	1	SCN2A	sodium channel, voltage-gated, type II, alpha subunit
hsa-miR-1183	0	0	1	1	1	1	SERPINB7	serpin peptidase inhibitor, clade B (ovalbumin), member 7
hsa-miR-1183	1	0	1	1	1	1	PAPD5	PAP associated domain containing 5
hsa-miR-1183	0	0	1	1	1	1	MTHFD2	methylenetetrahydrofolate dehydrogenase (NADP+ dependent) 2, methenyltetrahydrofolate cyclohydrolase
hsa-miR-1183	1	0	1	1	1	1	NCALD	neurocalcin delta
hsa-miR-1183	0	0	1	1	0	0	GAGE1	G antigen 1
hsa-miR-1183	1	0	1	1	1	1	PPP4R1	protein phosphatase 4, regulatory subunit 1
hsa-miR-1183	1	0	1	1	1	1	HMGCLL1	3-hydroxymethyl-3-methylglutaryl-CoA lyase-like 1
hsa-miR-1183	1	0	1	1	1	1	GLIS3	GLIS family zinc finger 3
hsa-miR-1183	0	0	1	1	1	1	MST4	serine/threonine protein kinase MST4
hsa-miR-1183	0	0	1	1	1	1	GEMIN8	gem (nuclear organelle) associated protein 8
hsa-miR-1183	1	0	1	1	1	1	SLC9A6	solute carrier family 9, subfamily A (NHE6, cation proton antiporter 6), member 6
hsa-miR-1183	1	0	1	1	1	1	NSL1	NSL1, MIND kinetochore complex component, homolog (S. cerevisiae)
hsa-miR-1183	1	0	1	1	1	1	FRS2	fibroblast growth factor receptor substrate 2
hsa-miR-1183	1	0	1	1	1	1	KDM5A	lysine (K)-specific demethylase 5A
hsa-miR-1183	1	0	1	0	1	1	TMEM237	transmembrane protein 237
hsa-miR-1183	0	0	1	1	1	1	RCC1	regulator of chromosome condensation 1
hsa-miR-1183	1	0	1	1	1	1	C5orf43	chromosome 5 open reading frame 43
hsa-miR-1183	0	0	1	1	1	1	TOP2B	topoisomerase (DNA) II beta 180kDa
hsa-miR-1183	1	0	1	1	1	1	ZNF436	zinc finger protein 436
hsa-miR-1183	1	0	1	1	1	1	PDE11A	phosphodiesterase 11A
hsa-miR-1183	1	0	1	1	1	1	IRF2BP2	interferon regulatory factor 2 binding protein 2
hsa-miR-1183	0	0	1	1	0	0	EXOC3L4	exocyst complex component 3-like 4
hsa-miR-1183	1	0	1	0	1	1	UBXN2B	UBX domain protein 2B
hsa-miR-1183	1	0	1	1	1	1	ECT2L	epithelial cell transforming sequence 2 oncogene-like
hsa-miR-1183	1	0	1	1	1	1	SRSF1	serine/arginine-rich splicing factor 1
hsa-miR-1183	0	0	1	1	1	1	RGPD2	RANBP2-like and GRIP domain containing 2
hsa-miR-1183	1	0	1	1	1	1	DACT1	dapper, antagonist of beta-catenin, homolog 1 (Xenopus laevis)
hsa-miR-1183	1	0	1	1	1	1	HNRNPUL2	heterogeneous nuclear ribonucleoprotein U-like 2
hsa-miR-1183	1	0	1	1	1	1	TMTC4	transmembrane and tetratricopeptide repeat containing 4
hsa-miR-1183	0	0	1	1	1	1	DIAPH1	diaphanous homolog 1 (Drosophila)
hsa-miR-1183	1	0	1	1	1	1	ITGA6	integrin, alpha 6
hsa-miR-1183	1	0	1	1	1	1	CUL4B	cullin 4B
hsa-miR-1183	1	0	1	1	1	1	SHANK3	SH3 and multiple ankyrin repeat domains 3
hsa-miR-1183	1	0	1	0	1	1	CCDC85A	coiled-coil domain containing 85A
hsa-miR-1183	0	0	1	1	1	1	HSF5	heat shock transcription factor family member 5
hsa-miR-1183	0	0	1	0	1	1	EPHA6	EPH receptor A6
hsa-miR-1183	1	0	1	1	1	1	BEND3	BEN domain containing 3
hsa-miR-1183	1	0	1	0	1	1	ODZ3	odz, odd Oz/ten-m homolog 3 (Drosophila)
hsa-miR-1183	1	0	1	0	1	1	MEGF9	multiple EGF-like-domains 9
hsa-miR-1183	1	0	1	1	1	1	MGA	MAX gene associated
hsa-miR-1183	1	0	1	1	1	1	REPS2	RALBP1 associated Eps domain containing 2
hsa-miR-1183	1	0	1	1	1	1	NXF1	nuclear RNA export factor 1
hsa-miR-1183	1	0	1	0	1	1	SCN3A	sodium channel, voltage-gated, type III, alpha subunit
hsa-miR-1183	1	0	1	0	1	1	PDE5A	phosphodiesterase 5A, cGMP-specific
hsa-miR-1183	1	0	1	1	1	1	ADCYAP1	adenylate cyclase activating polypeptide 1 (pituitary)
hsa-miR-1183	0	0	1	1	1	1	ADSS	adenylosuccinate synthase
hsa-miR-1183	0	0	1	1	1	1	CRISP1	cysteine-rich secretory protein 1
hsa-miR-1183	0	0	1	1	1	1	SLC25A4	solute carrier family 25 (mitochondrial carrier; adenine nucleotide translocator), member 4
hsa-miR-1183	1	0	1	0	1	1	XIAP	X-linked inhibitor of apoptosis
hsa-miR-1183	1	0	1	0	1	1	CDK6	cyclin-dependent kinase 6
hsa-miR-1183	1	0	1	1	1	1	CHD2	chromodomain helicase DNA binding protein 2
hsa-miR-1183	0	0	1	1	1	1	CCR1	chemokine (C-C motif) receptor 1
hsa-miR-1183	1	0	1	0	1	1	CPD	carboxypeptidase D
hsa-miR-1183	1	0	1	1	1	1	MAPK14	mitogen-activated protein kinase 14
hsa-miR-1183	0	0	1	1	0	0	CSNK2B	casein kinase 2, beta polypeptide
hsa-miR-1183	0	0	1	1	1	1	DARS	aspartyl-tRNA synthetase
hsa-miR-1183	1	0	1	1	1	1	CELSR3	cadherin, EGF LAG seven-pass G-type receptor 3 (flamingo homolog, Drosophila)
hsa-miR-1183	1	0	1	1	1	1	ELAVL1	ELAV (embryonic lethal, abnormal vision, Drosophila)-like 1 (Hu antigen R)
hsa-miR-1183	1	0	1	1	1	1	EREG	epiregulin
hsa-miR-1183	1	0	1	1	1	1	FOXF2	forkhead box F2
hsa-miR-1183	1	0	1	1	1	1	FOXC1	forkhead box C1
hsa-miR-1183	1	0	1	1	0	0	GDI1	GDP dissociation inhibitor 1
hsa-miR-1183	0	0	1	1	0	0	DNAJA1	DnaJ (Hsp40) homolog, subfamily A, member 1
hsa-miR-1183	1	0	1	1	1	1	NDST1	N-deacetylase/N-sulfotransferase (heparan glucosaminyl) 1
hsa-miR-1183	1	0	1	1	1	1	IRAK2	interleukin-1 receptor-associated kinase 2
hsa-miR-1183	1	0	1	1	1	1	ADD2	adducin 2 (beta)
hsa-miR-1183	1	0	1	1	1	1	AQP4	aquaporin 4
hsa-miR-1183	1	0	1	0	1	1	ARNT	aryl hydrocarbon receptor nuclear translocator
hsa-miR-1183	0	0	1	1	1	1	ATP12A	ATPase, H+/K+ transporting, nongastric, alpha polypeptide
hsa-miR-1183	1	0	1	0	1	1	ATP1B2	ATPase, Na+/K+ transporting, beta 2 polypeptide
hsa-miR-1183	0	0	1	1	0	0	BICD1	bicaudal D homolog 1 (Drosophila)
hsa-miR-1183	1	0	1	1	1	1	KLF5	Kruppel-like factor 5 (intestinal)
hsa-miR-1183	0	0	1	1	1	1	BTN1A1	butyrophilin, subfamily 1, member A1
hsa-miR-1183	0	0	1	1	1	1	CALB2	calbindin 2
hsa-miR-1183	1	0	1	1	1	1	CBFB	core-binding factor, beta subunit
hsa-miR-1183	0	0	1	1	1	1	CD1D	CD1d molecule
hsa-miR-1183	0	0	1	1	0	0	CD33	CD33 molecule
hsa-miR-1183	1	0	1	1	1	1	CDH2	cadherin 2, type 1, N-cadherin (neuronal)
hsa-miR-1183	1	0	1	1	1	1	CDK2	cyclin-dependent kinase 2
hsa-miR-1183	0	0	1	1	0	0	CDKN2D	cyclin-dependent kinase inhibitor 2D (p19, inhibits CDK4)
hsa-miR-1183	1	0	1	0	1	1	CHML	choroideremia-like (Rab escort protein 2)
hsa-miR-1183	1	0	1	1	1	1	CNN3	calponin 3, acidic
hsa-miR-1183	1	0	1	0	1	1	COL19A1	collagen, type XIX, alpha 1
hsa-miR-1183	0	0	1	1	1	1	SLC31A2	solute carrier family 31 (copper transporters), member 2
hsa-miR-1183	1	0	1	1	1	1	CREM	cAMP responsive element modulator
hsa-miR-1183	0	0	1	1	1	1	CTSE	cathepsin E
hsa-miR-1183	0	0	1	1	1	1	DPT	dermatopontin
hsa-miR-1183	1	0	1	0	0	0	DRP2	dystrophin related protein 2
hsa-miR-1183	1	0	1	1	1	1	E2F3	E2F transcription factor 3
hsa-miR-1183	0	0	1	1	0	0	EFNA5	ephrin-A5
hsa-miR-1183	1	0	1	1	1	1	EIF4E	eukaryotic translation initiation factor 4E
hsa-miR-1183	1	0	1	1	1	1	FBN2	fibrillin 2
hsa-miR-1183	0	0	1	0	1	1	FGF2	fibroblast growth factor 2 (basic)
hsa-miR-1183	1	0	1	0	1	1	FUT4	fucosyltransferase 4 (alpha (1,3) fucosyltransferase, myeloid-specific)
hsa-miR-1183	1	0	1	1	1	1	GLRA2	glycine receptor, alpha 2
hsa-miR-1183	1	0	1	1	1	1	GOLGA1	golgin A1
hsa-miR-1183	1	0	1	1	0	0	GRK6	G protein-coupled receptor kinase 6
hsa-miR-1183	0	0	1	0	1	1	GYPA	glycophorin A (MNS blood group)
hsa-miR-1183	0	0	1	1	1	1	HLA-DOA	major histocompatibility complex, class II, DO alpha
hsa-miR-1183	0	0	1	1	1	1	HOXA4	homeobox A4
hsa-miR-1183	0	0	1	0	1	1	ITGAV	integrin, alpha V
hsa-miR-1183	0	0	1	1	1	1	ITGB1	integrin, beta 1 (fibronectin receptor, beta polypeptide, antigen CD29 includes MDF2, MSK12)
hsa-miR-1183	1	0	1	1	1	1	ITGB8	integrin, beta 8
hsa-miR-1183	1	0	1	1	1	1	ITPR2	inositol 1,4,5-trisphosphate receptor, type 2
hsa-miR-1183	1	0	1	1	1	1	KCNA3	potassium voltage-gated channel, shaker-related subfamily, member 3
hsa-miR-1183	1	0	1	1	1	1	KCNJ10	potassium inwardly-rectifying channel, subfamily J, member 10
hsa-miR-1183	0	0	1	1	0	0	LALBA	lactalbumin, alpha-
hsa-miR-1183	0	0	1	1	0	0	LGALS3	lectin, galactoside-binding, soluble, 3
hsa-miR-1183	1	0	1	1	1	1	LIF	leukemia inhibitory factor
hsa-miR-1183	1	0	1	1	1	1	LIFR	leukemia inhibitory factor receptor alpha
hsa-miR-1183	1	0	1	1	1	1	LIMK1	LIM domain kinase 1
hsa-miR-1183	1	0	1	1	1	1	LY75	lymphocyte antigen 75
hsa-miR-1183	1	0	1	1	1	1	MARCKS	myristoylated alanine-rich protein kinase C substrate
hsa-miR-1183	1	0	1	0	1	1	MXD1	MAX dimerization protein 1
hsa-miR-1183	1	0	1	1	1	1	MAP1A	microtubule-associated protein 1A
hsa-miR-1183	0	0	1	0	1	1	CXCL9	chemokine (C-X-C motif) ligand 9
hsa-miR-1183	1	0	1	1	1	1	MN1	meningioma (disrupted in balanced translocation) 1
hsa-miR-1183	1	0	1	1	1	1	MSN	moesin
hsa-miR-1183	0	0	1	1	1	1	MTAP	methylthioadenosine phosphorylase
hsa-miR-1183	0	0	1	1	1	1	MTRR	5-methyltetrahydrofolate-homocysteine methyltransferase reductase
hsa-miR-1183	1	0	1	1	1	1	MYH9	myosin, heavy chain 9, non-muscle
hsa-miR-1183	1	0	1	1	1	1	NEUROD1	neuronal differentiation 1
hsa-miR-1183	0	0	1	1	1	1	NID1	nidogen 1
hsa-miR-1183	0	0	1	1	1	1	NOV	nephroblastoma overexpressed
hsa-miR-1183	1	0	1	1	1	1	NPAT	nuclear protein, ataxia-telangiectasia locus
hsa-miR-1183	1	0	1	1	1	1	NTF3	neurotrophin 3
hsa-miR-1183	0	0	1	1	0	0	OAS1	2'-5'-oligoadenylate synthetase 1, 40/46kDa
hsa-miR-1183	0	0	1	1	1	1	OMG	oligodendrocyte myelin glycoprotein
hsa-miR-1183	1	0	1	1	1	1	ORC5	origin recognition complex, subunit 5
hsa-miR-1183	1	0	1	1	1	1	OSBP	oxysterol binding protein
hsa-miR-1183	1	0	1	0	1	1	PAK2	p21 protein (Cdc42/Rac)-activated kinase 2
hsa-miR-1183	1	0	1	0	1	1	CDK17	cyclin-dependent kinase 17
hsa-miR-1183	0	0	1	1	1	1	PDE6D	phosphodiesterase 6D, cGMP-specific, rod, delta
hsa-miR-1183	0	0	1	1	1	1	PEX13	peroxisomal biogenesis factor 13
hsa-miR-1183	0	0	1	1	0	0	PGM1	phosphoglucomutase 1
hsa-miR-1183	1	0	1	1	1	1	PHF1	PHD finger protein 1
hsa-miR-1183	1	0	1	1	1	1	PLAGL2	pleiomorphic adenoma gene-like 2
hsa-miR-1183	1	0	1	1	1	1	PPP1CB	protein phosphatase 1, catalytic subunit, beta isozyme
hsa-miR-1183	0	0	1	1	1	1	PPP1R3A	protein phosphatase 1, regulatory subunit 3A
hsa-miR-1183	0	0	1	1	0	0	PPP1R8	protein phosphatase 1, regulatory subunit 8
hsa-miR-1183	0	0	1	1	1	1	PREP	prolyl endopeptidase
hsa-miR-1183	1	0	1	0	1	1	PRKCA	protein kinase C, alpha
hsa-miR-1183	0	0	1	0	0	0	PSMB10	proteasome (prosome, macropain) subunit, beta type, 10
hsa-miR-1183	1	0	1	1	1	1	PTPN2	protein tyrosine phosphatase, non-receptor type 2
hsa-miR-1183	1	0	1	1	1	1	PTPN9	protein tyrosine phosphatase, non-receptor type 9
hsa-miR-1183	0	0	1	1	1	1	PTPN12	protein tyrosine phosphatase, non-receptor type 12
hsa-miR-1183	1	0	1	0	1	1	RAB6A	RAB6A, member RAS oncogene family
hsa-miR-1183	1	0	1	1	1	1	RAD23B	RAD23 homolog B (S. cerevisiae)
hsa-miR-1183	1	0	1	1	1	1	RASA1	RAS p21 protein activator (GTPase activating protein) 1
hsa-miR-1183	1	0	1	1	1	1	ARID4A	AT rich interactive domain 4A (RBP1-like)
hsa-miR-1183	1	0	1	0	1	1	CCL22	chemokine (C-C motif) ligand 22
hsa-miR-1183	0	0	1	0	1	1	CXCL5	chemokine (C-X-C motif) ligand 5
hsa-miR-1183	0	0	1	1	1	1	SDC2	syndecan 2
hsa-miR-1183	1	0	1	1	1	1	SFRP4	secreted frizzled-related protein 4
hsa-miR-1183	0	0	1	1	1	1	SH3BGRL	SH3 domain binding glutamic acid-rich protein like
hsa-miR-1183	1	0	1	1	1	1	SH3GL2	SH3-domain GRB2-like 2
hsa-miR-1183	1	0	1	1	1	1	SMARCC1	SWI/SNF related, matrix associated, actin dependent regulator of chromatin, subfamily c, member 1
hsa-miR-1183	0	0	1	1	1	1	SNRPB2	small nuclear ribonucleoprotein polypeptide B
hsa-miR-1183	1	0	1	0	1	1	SOX11	SRY (sex determining region Y)-box 11
hsa-miR-1183	0	0	1	1	1	1	SQLE	squalene epoxidase
hsa-miR-1183	1	0	1	1	1	1	SRPR	signal recognition particle receptor (docking protein)
hsa-miR-1183	0	0	1	1	1	1	SRY	sex determining region Y
hsa-miR-1183	0	0	1	1	1	1	SSBP1	single-stranded DNA binding protein 1, mitochondrial
hsa-miR-1183	1	0	1	0	1	1	STC1	stanniocalcin 1
hsa-miR-1183	0	0	1	1	1	1	STIM1	stromal interaction molecule 1
hsa-miR-1183	0	0	1	1	1	1	SULT2A1	sulfotransferase family, cytosolic, 2A, dehydroepiandrosterone (DHEA)-preferring, member 1
hsa-miR-1183	0	0	1	1	1	1	TAF2	TAF2 RNA polymerase II, TATA box binding protein (TBP)-associated factor, 150kDa
hsa-miR-1183	0	0	1	0	1	1	TCEB3	transcription elongation factor B (SIII), polypeptide 3 (110kDa, elongin A)
hsa-miR-1183	1	0	1	1	1	1	TDG	thymine-DNA glycosylase
hsa-miR-1183	1	0	1	1	1	1	TEC	tec protein tyrosine kinase
hsa-miR-1183	1	0	1	1	1	1	TFAP2B	transcription factor AP-2 beta (activating enhancer binding protein 2 beta)
hsa-miR-1183	1	0	1	0	1	1	SEC62	SEC62 homolog (S. cerevisiae)
hsa-miR-1183	1	0	1	1	1	1	NR2E1	nuclear receptor subfamily 2, group E, member 1
hsa-miR-1183	0	0	1	1	0	0	HIRA	HIR histone cell cycle regulation defective homolog A (S. cerevisiae)
hsa-miR-1183	1	0	1	1	1	1	UBE2B	ubiquitin-conjugating enzyme E2B
hsa-miR-1183	1	0	1	0	1	1	UBE2D2	ubiquitin-conjugating enzyme E2D 2
hsa-miR-1183	0	0	1	1	1	1	UBE2E1	ubiquitin-conjugating enzyme E2E 1
hsa-miR-1183	1	0	1	1	1	1	UBE2H	ubiquitin-conjugating enzyme E2H
hsa-miR-1183	1	0	1	0	1	1	UBE2L3	ubiquitin-conjugating enzyme E2L 3
hsa-miR-1183	1	0	1	1	1	1	UBE2N	ubiquitin-conjugating enzyme E2N
hsa-miR-1183	1	0	1	0	1	1	VCL	vinculin
hsa-miR-1183	1	0	1	0	1	1	YWHAB	tyrosine 3-monooxygenase/tryptophan 5-monooxygenase activation protein, beta polypeptide
hsa-miR-1183	1	0	1	1	1	1	YWHAH	tyrosine 3-monooxygenase/tryptophan 5-monooxygenase activation protein, eta polypeptide
hsa-miR-1183	1	0	1	1	1	1	ZIC3	Zic family member 3
hsa-miR-1183	1	0	1	1	1	1	FZD5	frizzled family receptor 5
hsa-miR-1183	1	0	1	1	1	1	DEK	DEK oncogene
hsa-miR-1183	1	0	1	1	1	1	CUL5	cullin 5
hsa-miR-1183	1	0	1	1	1	1	HMGA2	high mobility group AT-hook 2
hsa-miR-1183	1	0	1	1	1	1	NRIP1	nuclear receptor interacting protein 1
hsa-miR-1183	0	0	1	1	0	0	HIST1H4D	histone cluster 1, H4d
hsa-miR-1183	0	0	1	1	1	1	PIP5K1A	phosphatidylinositol-4-phosphate 5-kinase, type I, alpha
hsa-miR-1183	1	0	1	1	1	1	PIP4K2B	phosphatidylinositol-5-phosphate 4-kinase, type II, beta
hsa-miR-1183	1	0	1	0	1	1	VAPA	VAMP (vesicle-associated membrane protein)-associated protein A, 33kDa
hsa-miR-1183	1	0	1	0	1	1	CUL3	cullin 3
hsa-miR-1183	1	0	1	1	1	1	PPM1D	protein phosphatase, Mg2+/Mn2+ dependent, 1D
hsa-miR-1183	0	0	1	1	1	1	PEX3	peroxisomal biogenesis factor 3
hsa-miR-1183	0	0	1	1	1	1	SLC25A12	solute carrier family 25 (aspartate/glutamate carrier), member 12
hsa-miR-1183	1	0	1	0	1	1	TNKS	tankyrase, TRF1-interacting ankyrin-related ADP-ribose polymerase
hsa-miR-1183	1	0	1	1	1	1	VAMP8	vesicle-associated membrane protein 8 (endobrevin)
hsa-miR-1183	1	0	1	1	1	1	B3GALT2	UDP-Gal:betaGlcNAc beta 1,3-galactosyltransferase, polypeptide 2
hsa-miR-1183	0	0	1	1	1	1	CRADD	CASP2 and RIPK1 domain containing adaptor with death domain
hsa-miR-1183	0	0	1	1	1	1	ADAM20	ADAM metallopeptidase domain 20
hsa-miR-1183	1	0	1	1	1	1	NR5A2	nuclear receptor subfamily 5, group A, member 2
hsa-miR-1183	1	0	1	1	1	1	IQGAP1	IQ motif containing GTPase activating protein 1
hsa-miR-1183	1	0	1	0	1	1	WASL	Wiskott-Aldrich syndrome-like
hsa-miR-1183	0	0	1	1	1	1	ATP6V0E1	ATPase, H+ transporting, lysosomal 9kDa, V0 subunit e1
hsa-miR-1183	0	0	1	1	1	1	MPZL1	myelin protein zero-like 1
hsa-miR-1183	0	0	1	1	1	1	RNF8	ring finger protein 8, E3 ubiquitin protein ligase
hsa-miR-1183	1	0	1	1	1	1	BTAF1	BTAF1 RNA polymerase II, B-TFIID transcription factor-associated, 170kDa (Mot1 homolog, S. cerevisiae)
hsa-miR-1183	1	0	1	1	1	1	BCL2L2	BCL2-like 2
hsa-miR-1183	0	0	1	0	1	1	EIF4EBP2	eukaryotic translation initiation factor 4E binding protein 2
hsa-miR-1183	1	0	1	1	1	1	EYA4	eyes absent homolog 4 (Drosophila)
hsa-miR-1183	1	0	1	1	1	1	GMFB	glia maturation factor, beta
hsa-miR-1183	1	0	1	1	1	1	RAB5A	RAB5A, member RAS oncogene family
hsa-miR-1183	0	0	1	1	1	1	SLC1A1	solute carrier family 1 (neuronal/epithelial high affinity glutamate transporter, system Xag), member 1
hsa-miR-1183	1	0	1	0	1	1	SLC1A2	solute carrier family 1 (glial high affinity glutamate transporter), member 2
hsa-miR-1183	1	0	1	1	1	1	SEMA3F	sema domain, immunoglobulin domain (Ig), short basic domain, secreted, (semaphorin) 3F
hsa-miR-1183	1	0	1	1	1	1	MFHAS1	malignant fibrous histiocytoma amplified sequence 1
hsa-miR-1183	1	0	1	0	1	1	MED14	mediator complex subunit 14
hsa-miR-1183	0	0	1	1	1	1	SEP15	15 kDa selenoprotein
hsa-miR-1183	1	0	1	1	1	1	MED21	mediator complex subunit 21
hsa-miR-1183	1	0	1	0	1	1	AKAP6	A kinase (PRKA) anchor protein 6
hsa-miR-1183	0	0	1	0	1	1	CYTIP	cytohesin 1 interacting protein
hsa-miR-1183	1	0	1	1	1	1	GDA	guanine deaminase
hsa-miR-1183	1	0	1	1	1	1	ARL3	ADP-ribosylation factor-like 3
hsa-miR-1183	1	0	1	1	1	1	BCL9	B-cell CLL/lymphoma 9
hsa-miR-1183	0	0	1	1	1	1	CDH1	cadherin 1, type 1, E-cadherin (epithelial)
hsa-miR-1183	0	0	1	1	1	1	COL12A1	collagen, type XII, alpha 1
hsa-miR-1183	1	0	1	1	1	1	DACH1	dachshund homolog 1 (Drosophila)
hsa-miR-1183	1	0	1	1	1	1	DTX1	deltex homolog 1 (Drosophila)
hsa-miR-1183	1	0	1	1	1	1	DVL2	dishevelled, dsh homolog 2 (Drosophila)
hsa-miR-1183	1	0	1	1	1	1	EPHA4	EPH receptor A4
hsa-miR-1183	1	0	1	1	1	1	ACSL3	acyl-CoA synthetase long-chain family member 3
hsa-miR-1183	1	0	1	0	1	1	ACSL4	acyl-CoA synthetase long-chain family member 4
hsa-miR-1183	1	0	1	1	1	1	FGD1	FYVE, RhoGEF and PH domain containing 1
hsa-miR-1183	1	0	1	1	0	0	HOXC6	homeobox C6
hsa-miR-1183	1	0	1	1	1	1	LRP2	low density lipoprotein receptor-related protein 2
hsa-miR-1183	0	0	1	1	0	0	NDUFA1	NADH dehydrogenase (ubiquinone) 1 alpha subcomplex, 1, 7.5kDa
hsa-miR-1183	0	0	1	1	1	1	NDUFC2	NADH dehydrogenase (ubiquinone) 1, subcomplex unknown, 2, 14.5kDa
hsa-miR-1183	0	0	1	1	0	0	NPHS1	nephrosis 1, congenital, Finnish type (nephrin)
hsa-miR-1183	1	0	1	1	1	1	RAB11A	RAB11A, member RAS oncogene family
hsa-miR-1183	0	0	1	1	1	1	LIN7A	lin-7 homolog A (C. elegans)
hsa-miR-1183	1	0	1	1	1	1	MTMR6	myotubularin related protein 6
hsa-miR-1183	1	0	1	1	1	1	DCLK1	doublecortin-like kinase 1
hsa-miR-1183	1	0	1	1	1	1	LARGE	like-glycosyltransferase
hsa-miR-1183	1	0	1	1	1	1	RPS6KA5	ribosomal protein S6 kinase, 90kDa, polypeptide 5
hsa-miR-1183	1	0	1	1	1	1	BZRAP1	benzodiazapine receptor (peripheral) associated protein 1
hsa-miR-1183	0	0	1	1	1	1	MMP20	matrix metallopeptidase 20
hsa-miR-1183	1	0	1	1	0	0	TXNL1	thioredoxin-like 1
hsa-miR-1183	1	0	1	1	1	1	KIF3B	kinesin family member 3B
hsa-miR-1183	1	0	1	0	1	1	ROCK2	Rho-associated, coiled-coil containing protein kinase 2
hsa-miR-1183	1	0	1	1	1	1	ONECUT2	one cut homeobox 2
hsa-miR-1183	1	0	1	1	1	1	TBPL1	TBP-like 1
hsa-miR-1183	0	0	1	1	1	1	CDH6	cadherin 6, type 2, K-cadherin (fetal kidney)
hsa-miR-1183	1	0	1	0	1	1	DOCK3	dedicator of cytokinesis 3
hsa-miR-1183	0	0	1	0	1	1	DSC2	desmocollin 2
hsa-miR-1183	1	0	1	1	1	1	JARID2	jumonji, AT rich interactive domain 2
hsa-miR-1183	1	0	1	1	1	1	KCNA2	potassium voltage-gated channel, shaker-related subfamily, member 2
hsa-miR-1183	1	0	1	0	1	1	KRAS	v-Ki-ras2 Kirsten rat sarcoma viral oncogene homolog
hsa-miR-1183	1	0	1	1	1	1	RELN	reelin
hsa-miR-1183	1	0	1	0	1	1	SEL1L	sel-1 suppressor of lin-12-like (C. elegans)
hsa-miR-1183	1	0	1	1	1	1	MED13	mediator complex subunit 13
hsa-miR-1183	0	0	1	1	1	1	FGFBP1	fibroblast growth factor binding protein 1
hsa-miR-1183	1	0	1	1	1	1	ACTC1	actin, alpha, cardiac muscle 1
hsa-miR-1183	0	0	1	1	0	0	ASCL2	achaete-scute complex homolog 2 (Drosophila)
hsa-miR-1183	1	0	1	1	1	1	BMI1	BMI1 polycomb ring finger oncogene
hsa-miR-1183	1	0	1	0	1	1	CEBPD	CCAAT/enhancer binding protein (C/EBP), delta
hsa-miR-1183	1	0	1	1	1	1	DLX3	distal-less homeobox 3
hsa-miR-1183	1	0	1	1	1	1	ETS1	v-ets erythroblastosis virus E26 oncogene homolog 1 (avian)
hsa-miR-1183	0	0	1	1	1	1	MSTN	myostatin
hsa-miR-1183	1	0	1	1	1	1	GJA5	gap junction protein, alpha 5, 40kDa
hsa-miR-1183	1	0	1	1	1	1	H3F3B	H3 histone, family 3B (H3.3B)
hsa-miR-1183	1	0	1	1	1	1	PDCL	phosducin-like
hsa-miR-1183	0	0	1	1	1	1	PPP1R3C	protein phosphatase 1, regulatory subunit 3C
hsa-miR-1183	1	0	1	0	1	1	PRKAB2	protein kinase, AMP-activated, beta 2 non-catalytic subunit
hsa-miR-1183	1	0	1	0	1	1	PRKCE	protein kinase C, epsilon
hsa-miR-1183	1	0	1	1	1	1	RALA	v-ral simian leukemia viral oncogene homolog A (ras related)
hsa-miR-1183	0	0	1	1	1	1	SLC20A1	solute carrier family 20 (phosphate transporter), member 1
hsa-miR-1183	1	0	1	1	0	0	ZBTB22	zinc finger and BTB domain containing 22
hsa-miR-1183	1	0	1	1	1	1	GABBR2	gamma-aminobutyric acid (GABA) B receptor, 2
hsa-miR-1183	0	0	1	1	1	1	INSL5	insulin-like 5
hsa-miR-1183	1	0	1	1	1	1	ABCA1	ATP-binding cassette, sub-family A (ABC1), member 1
hsa-miR-1183	1	0	1	1	1	1	SCARB2	scavenger receptor class B, member 2
hsa-miR-1183	1	0	1	1	1	1	HOXA1	homeobox A1
hsa-miR-1183	1	0	1	1	1	1	HOXA11	homeobox A11
hsa-miR-1183	1	0	1	1	1	1	LPP	LIM domain containing preferred translocation partner in lipoma
hsa-miR-1183	1	0	1	1	1	1	NHLH2	nescient helix loop helix 2
hsa-miR-1183	0	0	1	1	1	1	SRSF4	serine/arginine-rich splicing factor 4
hsa-miR-1183	0	0	1	1	1	1	SSX1	synovial sarcoma, X breakpoint 1
hsa-miR-1183	1	0	1	1	1	1	TMPRSS2	transmembrane protease, serine 2
hsa-miR-1183	1	0	1	1	1	1	ST8SIA4	ST8 alpha-N-acetyl-neuraminide alpha-2,8-sialyltransferase 4
hsa-miR-1183	0	0	1	1	0	0	SNURF	SNRPN upstream reading frame
hsa-miR-1183	0	0	1	1	1	1	ACTR3	ARP3 actin-related protein 3 homolog (yeast)
hsa-miR-1183	1	0	1	1	0	0	TSPAN5	tetraspanin 5
hsa-miR-1183	1	0	1	0	1	1	TSPAN2	tetraspanin 2
hsa-miR-1183	1	0	1	1	1	1	NAMPT	nicotinamide phosphoribosyltransferase
hsa-miR-1183	0	0	1	1	1	1	TOB1	transducer of ERBB2, 1
hsa-miR-1183	1	0	1	1	1	1	PRKD3	protein kinase D3
hsa-miR-1183	1	0	1	0	1	1	SPRY3	sprouty homolog 3 (Drosophila)
hsa-miR-1183	0	0	1	0	1	1	STAM2	signal transducing adaptor molecule (SH3 domain and ITAM motif) 2
hsa-miR-1183	1	0	1	1	1	1	EFS	embryonal Fyn-associated substrate
hsa-miR-1183	0	0	1	1	1	1	EIF1B	eukaryotic translation initiation factor 1B
hsa-miR-1183	1	0	1	0	1	1	NBR1	neighbor of BRCA1 gene 1
hsa-miR-1183	1	0	1	1	1	1	MAN1A1	mannosidase, alpha, class 1A, member 1
hsa-miR-1183	1	0	1	1	1	1	MMP16	matrix metallopeptidase 16 (membrane-inserted)
hsa-miR-1183	1	0	1	0	1	1	NAB1	NGFI-A binding protein 1 (EGR1 binding protein 1)
hsa-miR-1183	0	0	1	1	0	0	SPRR1A	small proline-rich protein 1A
hsa-miR-1183	0	0	1	1	1	1	MANF	mesencephalic astrocyte-derived neurotrophic factor
hsa-miR-1183	1	0	1	0	1	1	SPATA2	spermatogenesis associated 2
hsa-miR-1183	1	0	1	1	1	1	HS3ST4	heparan sulfate (glucosamine) 3-O-sulfotransferase 4
hsa-miR-1183	0	0	1	1	1	1	LANCL1	LanC lantibiotic synthetase component C-like 1 (bacterial)
hsa-miR-1183	1	0	1	1	1	1	SEMA3A	sema domain, immunoglobulin domain (Ig), short basic domain, secreted, (semaphorin) 3A
hsa-miR-1183	1	0	1	0	1	1	SCML2	sex comb on midleg-like 2 (Drosophila)
hsa-miR-1183	1	0	1	1	1	1	DAGLA	diacylglycerol lipase, alpha
hsa-miR-1183	1	0	1	1	1	1	CAPZA1	capping protein (actin filament) muscle Z-line, alpha 1
hsa-miR-1183	0	0	1	1	1	1	CD28	CD28 molecule
hsa-miR-1183	1	0	1	1	1	1	LASP1	LIM and SH3 protein 1
hsa-miR-1183	1	0	1	1	1	1	NCK1	NCK adaptor protein 1
hsa-miR-1183	1	0	1	1	1	1	NEUROD2	neuronal differentiation 2
hsa-miR-1183	0	0	1	0	1	1	OAS3	2'-5'-oligoadenylate synthetase 3, 100kDa
hsa-miR-1183	1	0	1	1	1	1	ORC2	origin recognition complex, subunit 2
hsa-miR-1183	1	0	1	1	1	1	CDK16	cyclin-dependent kinase 16
hsa-miR-1183	0	0	1	1	0	0	PDE6H	phosphodiesterase 6H, cGMP-specific, cone, gamma
hsa-miR-1183	1	0	1	0	1	1	PITPNA	phosphatidylinositol transfer protein, alpha
hsa-miR-1183	1	0	1	1	1	1	PRKAB1	protein kinase, AMP-activated, beta 1 non-catalytic subunit
hsa-miR-1183	0	0	1	1	1	1	PRKG2	protein kinase, cGMP-dependent, type II
hsa-miR-1183	1	0	1	1	1	1	STK4	serine/threonine kinase 4
hsa-miR-1183	1	0	1	1	1	1	SMC1A	structural maintenance of chromosomes 1A
hsa-miR-1183	0	0	1	1	1	1	FST	follistatin
hsa-miR-1183	1	0	1	0	1	1	APPBP2	amyloid beta precursor protein (cytoplasmic tail) binding protein 2
hsa-miR-1183	1	0	1	1	1	1	NEBL	nebulette
hsa-miR-1183	1	0	1	1	1	1	SLC35A1	solute carrier family 35 (CMP-sialic acid transporter), member A1
hsa-miR-1183	0	0	1	1	1	1	COLEC10	collectin sub-family member 10 (C-type lectin)
hsa-miR-1183	1	0	1	1	1	1	CDC42EP3	CDC42 effector protein (Rho GTPase binding) 3
hsa-miR-1183	1	0	1	0	1	1	GNAI3	guanine nucleotide binding protein (G protein), alpha inhibiting activity polypeptide 3
hsa-miR-1183	0	0	1	0	1	1	SLC16A2	solute carrier family 16, member 2 (thyroid hormone transporter)
hsa-miR-1183	1	0	1	0	1	1	IGF2BP1	insulin-like growth factor 2 mRNA binding protein 1
hsa-miR-1183	0	0	1	1	0	0	CGRRF1	cell growth regulator with ring finger domain 1
hsa-miR-1183	1	0	1	0	1	1	MAP4K5	mitogen-activated protein kinase kinase kinase kinase 5
hsa-miR-1183	1	0	1	1	1	1	CORIN	corin, serine peptidase
hsa-miR-1183	0	0	1	1	0	0	SLC12A7	solute carrier family 12 (potassium/chloride transporters), member 7
hsa-miR-1183	1	0	1	1	1	1	MAP3K2	mitogen-activated protein kinase kinase kinase 2
hsa-miR-1183	1	0	1	1	1	1	PLK2	polo-like kinase 2
hsa-miR-1183	1	0	1	1	1	1	SRSF10	serine/arginine-rich splicing factor 10
hsa-miR-1183	0	0	1	1	1	1	CLPX	ClpX caseinolytic peptidase X homolog (E. coli)
hsa-miR-1183	1	0	1	1	1	1	PGRMC1	progesterone receptor membrane component 1
hsa-miR-1183	1	0	1	1	1	1	MMP24	matrix metallopeptidase 24 (membrane-inserted)
hsa-miR-1183	1	0	1	1	1	1	MAN1A2	mannosidase, alpha, class 1A, member 2
hsa-miR-1183	0	0	1	1	1	1	NUDT3	nudix (nucleoside diphosphate linked moiety X)-type motif 3
hsa-miR-1183	1	0	1	1	1	1	DIAPH2	diaphanous homolog 2 (Drosophila)
hsa-miR-1183	1	0	1	1	1	1	HIVEP2	human immunodeficiency virus type I enhancer binding protein 2
hsa-miR-1183	1	0	1	1	1	1	KAT6A	K(lysine) acetyltransferase 6A
hsa-miR-1183	0	0	1	1	0	0	HNRNPA0	heterogeneous nuclear ribonucleoprotein A0
hsa-miR-1183	0	0	1	1	1	1	RAB40B	RAB40B, member RAS oncogene family
hsa-miR-1183	1	0	1	1	1	1	RAB35	RAB35, member RAS oncogene family
hsa-miR-1183	0	0	1	1	1	1	CEACAM7	carcinoembryonic antigen-related cell adhesion molecule 7
hsa-miR-1183	0	0	1	1	1	1	HOXA7	homeobox A7
hsa-miR-1183	1	0	1	1	1	1	RIT1	Ras-like without CAAX 1
hsa-miR-1183	1	0	1	0	1	1	SLC5A3	solute carrier family 5 (sodium/myo-inositol cotransporter), member 3
hsa-miR-1183	1	0	1	0	1	1	SOX12	SRY (sex determining region Y)-box 12
hsa-miR-1183	1	0	1	0	1	1	WASF2	WAS protein family, member 2
hsa-miR-1183	1	0	1	0	1	1	PAPD7	PAP associated domain containing 7
hsa-miR-1183	1	0	1	1	1	1	ABHD2	abhydrolase domain containing 2
hsa-miR-1183	1	0	1	1	1	1	SOX30	SRY (sex determining region Y)-box 30
hsa-miR-1183	1	0	1	1	1	1	RAPGEF4	Rap guanine nucleotide exchange factor (GEF) 4
hsa-miR-1183	0	0	1	1	1	1	TMEM115	transmembrane protein 115
hsa-miR-1183	1	0	1	1	1	1	FSTL1	follistatin-like 1
hsa-miR-1183	1	0	1	1	1	1	UBL3	ubiquitin-like 3
hsa-miR-1183	1	0	1	1	1	1	SSR3	signal sequence receptor, gamma (translocon-associated protein gamma)
hsa-miR-1183	1	0	1	1	1	1	TMF1	TATA element modulatory factor 1
hsa-miR-1183	1	0	1	1	1	1	UTRN	utrophin
hsa-miR-1183	1	0	1	1	1	1	VCP	valosin containing protein
hsa-miR-1183	0	0	1	0	1	1	ZNF208	zinc finger protein 208
hsa-miR-1183	0	0	1	0	0	0	ZXDA	zinc finger, X-linked, duplicated A
hsa-miR-1183	0	0	1	0	1	1	ZXDB	zinc finger, X-linked, duplicated B
hsa-miR-1183	1	0	1	1	1	1	TESK2	testis-specific kinase 2
hsa-miR-1183	1	0	1	0	1	1	PRSS23	protease, serine, 23
hsa-miR-1183	1	0	1	1	1	1	C14orf1	chromosome 14 open reading frame 1
hsa-miR-1183	1	0	1	1	1	1	ABCF2	ATP-binding cassette, sub-family F (GCN20), member 2
hsa-miR-1183	1	0	1	1	1	1	PROSC	proline synthetase co-transcribed homolog (bacterial)
hsa-miR-1183	1	0	1	1	1	1	PALM2-AKAP2	PALM2-AKAP2 readthrough
hsa-miR-1183	1	0	1	1	1	1	CA5B	carbonic anhydrase VB, mitochondrial
hsa-miR-1183	1	0	1	1	1	1	KLF12	Kruppel-like factor 12
hsa-miR-1183	0	0	1	1	1	1	KLF8	Kruppel-like factor 8
hsa-miR-1183	0	0	1	0	0	0	PHB2	prohibitin 2
hsa-miR-1183	1	0	1	1	1	1	CASC3	cancer susceptibility candidate 3
hsa-miR-1183	1	0	1	1	1	1	TARDBP	TAR DNA binding protein
hsa-miR-1183	1	0	1	1	1	1	MGEA5	meningioma expressed antigen 5 (hyaluronidase)
hsa-miR-1183	1	0	1	1	1	1	HS2ST1	heparan sulfate 2-O-sulfotransferase 1
hsa-miR-1183	1	0	1	1	1	1	KCND2	potassium voltage-gated channel, Shal-related subfamily, member 2
hsa-miR-1183	1	0	1	0	1	1	G3BP2	GTPase activating protein (SH3 domain) binding protein 2
hsa-miR-1183	1	0	1	1	1	1	LSM5	LSM5 homolog, U6 small nuclear RNA associated (S. cerevisiae)
hsa-miR-1183	1	0	1	1	1	1	MAPRE1	microtubule-associated protein, RP/EB family, member 1
hsa-miR-1183	1	0	1	1	1	1	DNAJB9	DnaJ (Hsp40) homolog, subfamily B, member 9
hsa-miR-1183	1	0	1	0	1	1	MYO10	myosin X
hsa-miR-1183	1	0	1	1	1	1	RGS17	regulator of G-protein signaling 17
hsa-miR-1183	1	0	1	1	1	1	NPTN	neuroplastin
hsa-miR-1183	0	0	1	1	1	1	DNAJC15	DnaJ (Hsp40) homolog, subfamily C, member 15
hsa-miR-1183	0	0	1	1	1	1	C16orf80	chromosome 16 open reading frame 80
hsa-miR-1183	1	0	1	1	1	1	PPARGC1A	peroxisome proliferator-activated receptor gamma, coactivator 1 alpha
hsa-miR-1183	0	0	1	1	0	0	LGALS13	lectin, galactoside-binding, soluble, 13
hsa-miR-1183	1	0	1	1	1	1	SLC30A4	solute carrier family 30 (zinc transporter), member 4
hsa-miR-1183	0	0	1	1	0	0	TBX21	T-box 21
hsa-miR-1183	1	0	1	1	1	1	NCKAP1	NCK-associated protein 1
hsa-miR-1183	1	0	1	1	1	1	LRP12	low density lipoprotein receptor-related protein 12
hsa-miR-1183	1	0	1	1	1	1	BAZ1A	bromodomain adjacent to zinc finger domain, 1A
hsa-miR-1183	1	0	1	1	1	1	PAX8	paired box 8
hsa-miR-1183	1	0	1	1	1	1	LAMP2	lysosomal-associated membrane protein 2
hsa-miR-1183	1	0	1	1	1	1	SOCS5	suppressor of cytokine signaling 5
hsa-miR-1183	0	0	1	1	1	1	LRP10	low density lipoprotein receptor-related protein 10
hsa-miR-1183	0	0	1	1	1	1	CCDC113	coiled-coil domain containing 113
hsa-miR-1183	0	0	1	1	1	1	ORMDL2	ORM1-like 2 (S. cerevisiae)
hsa-miR-1183	1	0	1	1	0	0	HOXC11	homeobox C11
hsa-miR-1183	1	0	1	1	1	1	SLC25A15	solute carrier family 25 (mitochondrial carrier; ornithine transporter) member 15
hsa-miR-1183	1	0	1	0	1	1	ODZ1	odz, odd Oz/ten-m homolog 1 (Drosophila)
hsa-miR-1183	1	0	1	1	1	1	MAPRE2	microtubule-associated protein, RP/EB family, member 2
hsa-miR-1183	0	0	1	1	1	1	IL1RAPL1	interleukin 1 receptor accessory protein-like 1
hsa-miR-1183	0	0	1	1	1	1	CAPN6	calpain 6
hsa-miR-1183	0	0	1	1	1	1	TRAM1	translocation associated membrane protein 1
hsa-miR-1183	0	0	1	1	1	1	DDX58	DEAD (Asp-Glu-Ala-Asp) box polypeptide 58
hsa-miR-1183	1	0	1	1	1	1	LEMD3	LEM domain containing 3
hsa-miR-1183	1	0	1	1	1	1	SLC7A11	solute carrier family 7 (anionic amino acid transporter light chain, xc- system), member 11
hsa-miR-1183	1	0	1	1	1	1	LHX6	LIM homeobox 6
hsa-miR-1183	0	0	1	0	1	1	VPS41	vacuolar protein sorting 41 homolog (S. cerevisiae)
hsa-miR-1183	1	0	1	1	1	1	DKK2	dickkopf 2 homolog (Xenopus laevis)
hsa-miR-1183	1	0	1	1	1	1	AFF4	AF4/FMR2 family, member 4
hsa-miR-1183	1	0	1	1	1	1	TOR1B	torsin family 1, member B (torsin B)
hsa-miR-1183	1	0	1	1	1	1	PCDH11X	protocadherin 11 X-linked
hsa-miR-1183	1	0	1	1	1	1	SLC40A1	solute carrier family 40 (iron-regulated transporter), member 1
hsa-miR-1183	1	0	1	1	1	1	EHD3	EH-domain containing 3
hsa-miR-1183	1	0	1	1	1	1	HERC3	HECT and RLD domain containing E3 ubiquitin protein ligase 3
hsa-miR-1183	1	0	1	0	1	1	ATP11B	ATPase, class VI, type 11B
hsa-miR-1183	1	0	1	1	1	1	ZNF592	zinc finger protein 592
hsa-miR-1183	0	0	1	0	1	1	LPIN2	lipin 2
hsa-miR-1183	1	0	1	1	1	1	KDM4A	lysine (K)-specific demethylase 4A
hsa-miR-1183	1	0	1	1	1	1	ULK2	unc-51-like kinase 2 (C. elegans)
hsa-miR-1183	0	0	1	1	1	1	ZNF536	zinc finger protein 536
hsa-miR-1183	1	0	1	1	1	1	TBKBP1	TBK1 binding protein 1
hsa-miR-1183	1	0	1	0	1	1	KIAA0232	KIAA0232
hsa-miR-1183	1	0	1	0	1	1	SERTAD2	SERTA domain containing 2
hsa-miR-1183	1	0	1	0	1	1	SCRN1	secernin 1
hsa-miR-1183	0	0	1	0	1	1	EPM2AIP1	EPM2A (laforin) interacting protein 1
hsa-miR-1183	1	0	1	0	1	1	PJA2	praja ring finger 2, E3 ubiquitin protein ligase
hsa-miR-1183	1	0	1	0	1	1	LPPR4	lipid phosphate phosphatase-related protein type 4
hsa-miR-1183	1	0	1	1	1	1	NUAK1	NUAK family, SNF1-like kinase, 1
hsa-miR-1183	1	0	1	1	1	1	ZBTB5	zinc finger and BTB domain containing 5
hsa-miR-1183	1	0	1	1	1	1	JOSD1	Josephin domain containing 1
hsa-miR-1183	0	0	1	1	1	1	N4BP2L2	NEDD4 binding protein 2-like 2
hsa-miR-1183	1	0	1	0	1	1	RAB11FIP2	RAB11 family interacting protein 2 (class I)
hsa-miR-1183	0	0	1	0	1	1	PPM1E	protein phosphatase, Mg2+/Mn2+ dependent, 1E
hsa-miR-1183	1	0	1	1	1	1	SPAST	spastin
hsa-miR-1183	0	0	1	1	0	0	KIFAP3	kinesin-associated protein 3
hsa-miR-1183	1	0	1	1	1	1	SORCS3	sortilin-related VPS10 domain containing receptor 3
hsa-miR-1183	1	0	1	0	1	1	WDFY3	WD repeat and FYVE domain containing 3
hsa-miR-1183	0	0	1	1	1	1	MYO16	myosin XVI
hsa-miR-1183	1	0	1	1	1	1	PHLPP2	PH domain and leucine rich repeat protein phosphatase 2
hsa-miR-1183	1	0	1	1	1	1	TRAK2	trafficking protein, kinesin binding 2
hsa-miR-1183	1	0	1	0	1	1	PEG10	paternally expressed 10
hsa-miR-1183	1	0	1	1	1	1	ZNF423	zinc finger protein 423
hsa-miR-1183	1	0	1	1	1	1	SMG1	smg-1 homolog, phosphatidylinositol 3-kinase-related kinase (C. elegans)
hsa-miR-1183	1	0	1	0	1	1	SNX13	sorting nexin 13
hsa-miR-1183	1	0	1	1	1	1	RTF1	Rtf1, Paf1/RNA polymerase II complex component, homolog (S. cerevisiae)
hsa-miR-1183	0	0	1	0	0	0	SLC35D1	solute carrier family 35 (UDP-glucuronic acid/UDP-N-acetylgalactosamine dual transporter), member D1
hsa-miR-1183	1	0	1	1	1	1	GPD1L	glycerol-3-phosphate dehydrogenase 1-like
hsa-miR-1183	1	0	1	0	1	1	LARP4B	La ribonucleoprotein domain family, member 4B
hsa-miR-1183	1	0	1	1	1	1	RCOR1	REST corepressor 1
hsa-miR-1183	0	0	1	1	1	1	ARL6IP1	ADP-ribosylation factor-like 6 interacting protein 1
hsa-miR-1183	1	0	1	1	1	1	PDS5A	PDS5, regulator of cohesion maintenance, homolog A (S. cerevisiae)
hsa-miR-1183	1	0	1	0	1	1	KIAA1024	KIAA1024
hsa-miR-1183	1	0	1	1	1	1	CSTF2T	cleavage stimulation factor, 3' pre-RNA, subunit 2, 64kDa, tau variant
hsa-miR-1183	1	0	1	1	1	1	ANKS1A	ankyrin repeat and sterile alpha motif domain containing 1A
hsa-miR-1183	1	0	1	1	1	1	CUX2	cut-like homeobox 2
hsa-miR-1183	1	0	1	1	1	1	DNAJC13	DnaJ (Hsp40) homolog, subfamily C, member 13
hsa-miR-1183	1	0	1	0	1	1	ARHGEF12	Rho guanine nucleotide exchange factor (GEF) 12
hsa-miR-1183	1	0	1	0	1	1	SRGAP2	SLIT-ROBO Rho GTPase activating protein 2
hsa-miR-1183	1	0	1	1	0	0	SMG5	smg-5 homolog, nonsense mediated mRNA decay factor (C. elegans)
hsa-miR-1183	1	0	1	1	1	1	MED13L	mediator complex subunit 13-like
hsa-miR-1183	1	0	1	1	1	1	ASXL1	additional sex combs like 1 (Drosophila)
hsa-miR-1183	0	0	1	1	1	1	LEPROTL1	leptin receptor overlapping transcript-like 1
hsa-miR-1183	1	0	1	1	1	1	MOB4	MOB family member 4, phocein
hsa-miR-1183	1	0	1	1	1	1	PARM1	prostate androgen-regulated mucin-like protein 1
hsa-miR-1183	0	0	1	1	1	1	ZNF10	zinc finger protein 10
hsa-miR-1183	1	0	1	1	1	1	DCAF12	DDB1 and CUL4 associated factor 12
hsa-miR-1183	1	0	1	1	1	1	RNF19A	ring finger protein 19A, E3 ubiquitin protein ligase
hsa-miR-1183	1	0	1	0	1	1	MTMR9	myotubularin related protein 9
hsa-miR-1183	1	0	1	1	1	1	CNRIP1	cannabinoid receptor interacting protein 1
hsa-miR-1183	1	0	1	1	1	1	CLIP3	CAP-GLY domain containing linker protein 3
hsa-miR-1183	1	0	1	1	0	0	POLDIP2	polymerase (DNA-directed), delta interacting protein 2
hsa-miR-1183	1	0	1	1	1	1	FAM155B	family with sequence similarity 155, member B
hsa-miR-1183	0	0	1	1	1	1	BRPF3	bromodomain and PHD finger containing, 3
hsa-miR-1183	1	0	1	1	1	1	FGFR1	fibroblast growth factor receptor 1
hsa-miR-1183	1	0	1	1	1	1	AZIN1	antizyme inhibitor 1
hsa-miR-1183	1	0	1	1	1	1	ST8SIA3	ST8 alpha-N-acetyl-neuraminide alpha-2,8-sialyltransferase 3
hsa-miR-1183	1	0	1	0	1	1	TRIM33	tripartite motif containing 33
hsa-miR-1183	1	0	1	0	1	1	KLF13	Kruppel-like factor 13
hsa-miR-1183	1	0	1	1	1	1	SLMO2	slowmo homolog 2 (Drosophila)
hsa-miR-1183	1	0	1	1	1	1	GOLT1B	golgi transport 1B
hsa-miR-1183	1	0	1	0	1	1	CNR1	cannabinoid receptor 1 (brain)
hsa-miR-1183	0	0	1	1	1	1	ZFR	zinc finger RNA binding protein
hsa-miR-1183	1	0	1	1	1	1	VGLL3	vestigial like 3 (Drosophila)
hsa-miR-1183	0	0	1	1	1	1	VPS29	vacuolar protein sorting 29 homolog (S. cerevisiae)
hsa-miR-1183	0	0	1	1	1	1	ACSL5	acyl-CoA synthetase long-chain family member 5
hsa-miR-1183	0	0	1	1	1	1	EMCN	endomucin
hsa-miR-1183	1	0	1	0	1	1	HPCAL4	hippocalcin like 4
hsa-miR-1183	1	0	1	1	1	1	RNF138	ring finger protein 138, E3 ubiquitin protein ligase
hsa-miR-1183	1	0	1	1	1	1	TOB2	transducer of ERBB2, 2
hsa-miR-1183	0	0	1	1	1	1	RAB23	RAB23, member RAS oncogene family
hsa-miR-1183	1	0	1	1	1	1	RAB14	RAB14, member RAS oncogene family
hsa-miR-1183	0	0	1	1	1	1	CENPF	centromere protein F, 350/400kDa (mitosin)
hsa-miR-1183	1	0	1	1	1	1	ARID4B	AT rich interactive domain 4B (RBP1-like)
hsa-miR-1183	1	0	1	0	1	1	PTPLAD1	protein tyrosine phosphatase-like A domain containing 1
hsa-miR-1183	1	0	1	0	1	1	CRIM1	cysteine rich transmembrane BMP regulator 1 (chordin-like)
hsa-miR-1183	0	0	1	1	0	0	ATP8A2	ATPase, aminophospholipid transporter, class I, type 8A, member 2
hsa-miR-1183	0	0	1	1	1	1	OGG1	8-oxoguanine DNA glycosylase
hsa-miR-1183	1	0	1	0	1	1	FZD3	frizzled family receptor 3
hsa-miR-1183	1	0	1	0	1	1	KLHL3	kelch-like 3 (Drosophila)
hsa-miR-1183	0	0	1	1	1	1	ASIC5	acid-sensing (proton-gated) ion channel family member 5
hsa-miR-1183	1	0	1	1	1	1	GALNT7	UDP-N-acetyl-alpha-D-galactosamine:polypeptide N-acetylgalactosaminyltransferase 7 (GalNAc-T7)
hsa-miR-1183	0	0	1	1	1	1	PRKAG3	protein kinase, AMP-activated, gamma 3 non-catalytic subunit
hsa-miR-1183	1	0	1	0	1	1	ZRANB1	zinc finger, RAN-binding domain containing 1
hsa-miR-1183	1	0	1	0	1	1	UBE2Q1	ubiquitin-conjugating enzyme E2Q family member 1
hsa-miR-1183	1	0	1	1	1	1	DIRAS2	DIRAS family, GTP-binding RAS-like 2
hsa-miR-1183	0	0	1	0	1	1	VEZT	vezatin, adherens junctions transmembrane protein
hsa-miR-1183	1	0	1	1	0	0	C17orf59	chromosome 17 open reading frame 59
hsa-miR-1183	1	0	1	0	1	1	EIF2C4	eukaryotic translation initiation factor 2C, 4
hsa-miR-1183	0	0	1	0	1	1	OTUB1	OTU domain, ubiquitin aldehyde binding 1
hsa-miR-1183	0	0	1	1	1	1	MTMR8	myotubularin related protein 8
hsa-miR-1183	0	0	1	1	0	0	NUP62CL	nucleoporin 62kDa C-terminal like
hsa-miR-1183	1	0	1	1	1	1	SIDT1	SID1 transmembrane family, member 1
hsa-miR-1183	1	0	1	0	1	1	FAM46C	family with sequence similarity 46, member C
hsa-miR-1183	1	0	1	1	1	1	ZNF3	zinc finger protein 3
hsa-miR-1183	0	0	1	1	0	0	PALMD	palmdelphin
hsa-miR-1183	1	0	1	1	1	1	TBC1D8B	TBC1 domain family, member 8B (with GRAM domain)
hsa-miR-1183	1	0	1	1	1	1	ALKBH5	alkB, alkylation repair homolog 5 (E. coli)
hsa-miR-1183	1	0	1	1	0	0	INO80D	INO80 complex subunit D
hsa-miR-1183	1	0	1	0	1	1	CHD7	chromodomain helicase DNA binding protein 7
hsa-miR-1183	1	0	1	1	1	1	UBE2R2	ubiquitin-conjugating enzyme E2R 2
hsa-miR-1183	1	0	1	0	1	1	MARCH5	membrane-associated ring finger (C3HC4) 5
hsa-miR-1183	1	0	1	1	1	1	RNF125	ring finger protein 125, E3 ubiquitin protein ligase
hsa-miR-1183	0	0	1	1	1	1	C2orf42	chromosome 2 open reading frame 42
hsa-miR-1183	1	0	1	1	1	1	HIF1AN	hypoxia inducible factor 1, alpha subunit inhibitor
hsa-miR-1183	1	0	1	1	1	1	CDC37L1	cell division cycle 37 homolog (S. cerevisiae)-like 1
hsa-miR-1183	1	0	1	1	1	1	C9orf40	chromosome 9 open reading frame 40
hsa-miR-1183	1	0	1	1	1	1	SOBP	sine oculis binding protein homolog (Drosophila)
hsa-miR-1183	1	0	1	1	1	1	MAGOHB	mago-nashi homolog B (Drosophila)
hsa-miR-1183	1	0	1	1	1	1	FIGN	fidgetin
hsa-miR-1183	1	0	1	1	0	0	GSPT2	G1 to S phase transition 2
hsa-miR-1183	1	0	1	1	1	1	FAM178A	family with sequence similarity 178, member A
hsa-miR-1183	1	0	1	0	1	1	MSL2	male-specific lethal 2 homolog (Drosophila)
hsa-miR-1183	0	0	1	1	1	1	NUDT11	nudix (nucleoside diphosphate linked moiety X)-type motif 11
hsa-miR-1183	0	0	1	0	1	1	TMEM57	transmembrane protein 57
hsa-miR-1183	1	0	1	1	1	1	UBA6	ubiquitin-like modifier activating enzyme 6
hsa-miR-1183	1	0	1	0	1	1	SEPT11	septin 11
[truncated: 391 more rows]
