# Supplementary material for: Profiling of Selected MicroRNAs in Proliferative Eutopic Endometrium of Women with Ovarian Endometriosis
Source: Biomed Res Int. 2015 Aug 20;2015:760698. doi: 10.1155/2015/760698 (PMC4558423; doi:10.1155/2015/760698)
Supplement: Supplementary file 1 — Table I: The names of miRNAs significantly differentially expressed between eutopic endometrium of patients with endometriosis vs eutopic endometrium of patients without endometriosis. Table II: The associations between miRNA and mRNA, which presents detailed results of the search of six major databases i.e targetscan, tarbase, miranda, mirbase, mirtarget2 and pictar. [file 760698.f1.zip › 760698.f1/Table II/hsa-miR-1197.tsv]

miR	targetscan	tarbase	miranda	mirbase	mirtarget2	pictar	GeneSymbol	GeneName
hsa-miR-1197	1	0	1	1	0	0	RAPGEF2	Rap guanine nucleotide exchange factor (GEF) 2
hsa-miR-1197	1	0	1	0	1	1	KIAA0355	KIAA0355
hsa-miR-1197	1	0	1	1	1	1	DAAM2	dishevelled associated activator of morphogenesis 2
hsa-miR-1197	1	0	1	0	1	1	PTPRT	protein tyrosine phosphatase, receptor type, T
hsa-miR-1197	1	0	1	0	1	1	KIAA0408	KIAA0408
hsa-miR-1197	1	0	1	0	1	1	NEDD4L	neural precursor cell expressed, developmentally down-regulated 4-like, E3 ubiquitin protein ligase
hsa-miR-1197	0	0	1	1	1	1	PDE4DIP	phosphodiesterase 4D interacting protein
hsa-miR-1197	1	0	1	1	0	0	PCLO	piccolo (presynaptic cytomatrix protein)
hsa-miR-1197	1	0	1	1	1	1	GIGYF2	GRB10 interacting GYF protein 2
hsa-miR-1197	1	0	1	1	0	0	SMCHD1	structural maintenance of chromosomes flexible hinge domain containing 1
hsa-miR-1197	1	0	1	1	1	1	ANKRD17	ankyrin repeat domain 17
hsa-miR-1197	1	0	1	1	1	1	SMOC2	SPARC related modular calcium binding 2
hsa-miR-1197	1	0	1	1	0	0	RIMS2	regulating synaptic membrane exocytosis 2
hsa-miR-1197	1	0	1	0	1	1	RBM12	RNA binding motif protein 12
hsa-miR-1197	0	0	1	1	1	1	WDR47	WD repeat domain 47
hsa-miR-1197	1	0	1	1	1	1	CDK12	cyclin-dependent kinase 12
hsa-miR-1197	1	0	1	0	0	0	DTX4	deltex homolog 4 (Drosophila)
hsa-miR-1197	1	0	1	0	0	0	KIAA0947	KIAA0947
hsa-miR-1197	1	0	1	1	1	1	RGL1	ral guanine nucleotide dissociation stimulator-like 1
hsa-miR-1197	0	0	1	1	0	0	ZC4H2	zinc finger, C4H2 domain containing
hsa-miR-1197	1	0	1	1	1	1	ASAP1	ArfGAP with SH3 domain, ankyrin repeat and PH domain 1
hsa-miR-1197	0	0	1	0	0	0	MTA3	metastasis associated 1 family, member 3
hsa-miR-1197	0	0	1	1	1	1	CA10	carbonic anhydrase X
hsa-miR-1197	1	0	1	0	0	0	ODZ4	odz, odd Oz/ten-m homolog 4 (Drosophila)
hsa-miR-1197	0	0	1	0	1	1	MUC3B	mucin 3B, cell surface associated
hsa-miR-1197	1	0	1	1	0	0	ZSWIM5	zinc finger, SWIM-type containing 5
hsa-miR-1197	1	0	1	0	1	1	LMO3	LIM domain only 3 (rhombotin-like 2)
hsa-miR-1197	1	0	1	0	1	1	JPH4	junctophilin 4
hsa-miR-1197	1	0	1	1	1	1	NAV2	neuron navigator 2
hsa-miR-1197	1	0	1	1	1	1	HNRPDL	heterogeneous nuclear ribonucleoprotein D-like
hsa-miR-1197	1	0	1	1	1	1	BCL2L11	BCL2-like 11 (apoptosis facilitator)
hsa-miR-1197	1	0	1	0	1	1	SGSM1	small G protein signaling modulator 1
hsa-miR-1197	0	0	1	1	0	0	CIRH1A	cirrhosis, autosomal recessive 1A (cirhin)
hsa-miR-1197	1	0	1	0	0	0	RNF169	ring finger protein 169
hsa-miR-1197	1	0	1	0	0	0	ZC3H12C	zinc finger CCCH-type containing 12C
hsa-miR-1197	0	0	1	1	0	0	SSPO	SCO-spondin homolog (Bos taurus)
hsa-miR-1197	1	0	1	0	1	1	BEND4	BEN domain containing 4
hsa-miR-1197	1	0	1	1	1	1	UBE3A	ubiquitin protein ligase E3A
hsa-miR-1197	1	0	1	1	1	1	TRIM36	tripartite motif containing 36
hsa-miR-1197	1	0	1	0	1	1	CCDC88A	coiled-coil domain containing 88A
hsa-miR-1197	0	0	1	1	0	0	DBP	D site of albumin promoter (albumin D-box) binding protein
hsa-miR-1197	0	0	1	1	1	1	CAST	calpastatin
hsa-miR-1197	1	0	1	1	1	1	VLDLR	very low density lipoprotein receptor
hsa-miR-1197	0	0	1	0	1	1	ITPR1	inositol 1,4,5-trisphosphate receptor, type 1
hsa-miR-1197	1	0	1	1	1	1	RPS6KA3	ribosomal protein S6 kinase, 90kDa, polypeptide 3
hsa-miR-1197	0	0	1	0	0	0	PIDD	p53-induced death domain protein
hsa-miR-1197	1	0	1	1	1	1	NFYC	nuclear transcription factor Y, gamma
hsa-miR-1197	0	0	1	0	1	1	DCAF11	DDB1 and CUL4 associated factor 11
hsa-miR-1197	1	0	1	1	0	0	GRIA1	glutamate receptor, ionotropic, AMPA 1
hsa-miR-1197	1	0	1	1	1	1	DTNA	dystrobrevin, alpha
hsa-miR-1197	1	0	1	1	0	0	CACNB1	calcium channel, voltage-dependent, beta 1 subunit
hsa-miR-1197	1	0	1	1	1	1	PRKACB	protein kinase, cAMP-dependent, catalytic, beta
hsa-miR-1197	1	0	1	1	1	1	NEO1	neogenin 1
hsa-miR-1197	0	0	1	1	1	1	RYR1	ryanodine receptor 1 (skeletal)
hsa-miR-1197	0	0	1	1	0	0	ITGA2B	integrin, alpha 2b (platelet glycoprotein IIb of IIb/IIIa complex, antigen CD41)
hsa-miR-1197	0	0	1	1	1	1	HLA-DQA1	major histocompatibility complex, class II, DQ alpha 1
hsa-miR-1197	1	0	1	1	1	1	SATB1	SATB homeobox 1
hsa-miR-1197	1	0	1	0	1	1	ADD3	adducin 3 (gamma)
hsa-miR-1197	1	0	1	1	1	1	CRTAM	cytotoxic and regulatory T cell molecule
hsa-miR-1197	1	0	1	1	1	1	TEAD1	TEA domain family member 1 (SV40 transcriptional enhancer factor)
hsa-miR-1197	0	0	1	1	0	0	TRIM27	tripartite motif containing 27
hsa-miR-1197	0	0	1	1	0	0	MSH5	mutS homolog 5 (E. coli)
hsa-miR-1197	0	0	1	1	1	1	SGSH	N-sulfoglucosamine sulfohydrolase
hsa-miR-1197	1	0	1	0	1	1	PDE7B	phosphodiesterase 7B
hsa-miR-1197	1	0	1	1	1	1	MEF2D	myocyte enhancer factor 2D
hsa-miR-1197	1	0	1	1	1	1	PICALM	phosphatidylinositol binding clathrin assembly protein
hsa-miR-1197	0	0	1	0	0	0	MIAT	myocardial infarction associated transcript (non-protein coding)
hsa-miR-1197	0	0	1	0	1	1	ZMYM2	zinc finger, MYM-type 2
hsa-miR-1197	1	0	1	1	1	1	CBFA2T2	core-binding factor, runt domain, alpha subunit 2; translocated to, 2
hsa-miR-1197	1	0	1	1	1	1	PCDH17	protocadherin 17
hsa-miR-1197	0	0	1	1	0	0	ITGA7	integrin, alpha 7
hsa-miR-1197	1	0	1	1	1	1	MYT1L	myelin transcription factor 1-like
hsa-miR-1197	1	0	1	0	1	1	CELF2	CUGBP, Elav-like family member 2
hsa-miR-1197	1	0	1	0	0	0	MAP3K1	mitogen-activated protein kinase kinase kinase 1, E3 ubiquitin protein ligase
hsa-miR-1197	1	0	1	1	1	1	PFKFB3	6-phosphofructo-2-kinase/fructose-2,6-biphosphatase 3
hsa-miR-1197	1	0	1	1	1	1	CTNND1	catenin (cadherin-associated protein), delta 1
hsa-miR-1197	1	0	1	1	1	1	ERLIN1	ER lipid raft associated 1
hsa-miR-1197	0	0	1	1	1	1	SC5DL	sterol-C5-desaturase (ERG3 delta-5-desaturase homolog, S. cerevisiae)-like
hsa-miR-1197	1	0	1	1	1	1	TMEM159	transmembrane protein 159
hsa-miR-1197	1	0	1	1	0	0	PAK1	p21 protein (Cdc42/Rac)-activated kinase 1
hsa-miR-1197	0	0	1	1	1	1	SSBP2	single-stranded DNA binding protein 2
hsa-miR-1197	0	0	1	1	1	1	ERAL1	Era G-protein-like 1 (E. coli)
hsa-miR-1197	1	0	1	1	1	1	AKAP9	A kinase (PRKA) anchor protein (yotiao) 9
hsa-miR-1197	0	0	1	1	1	1	FHL1	four and a half LIM domains 1
hsa-miR-1197	0	0	1	1	1	1	SH2D1A	SH2 domain containing 1A
hsa-miR-1197	0	0	1	1	0	0	AVPR2	arginine vasopressin receptor 2
hsa-miR-1197	0	0	1	1	0	0	RBM5	RNA binding motif protein 5
hsa-miR-1197	0	0	1	1	1	1	MSTO1	misato homolog 1 (Drosophila)
hsa-miR-1197	1	0	1	0	0	0	PPME1	protein phosphatase methylesterase 1
hsa-miR-1197	1	0	1	1	1	1	KAT6B	K(lysine) acetyltransferase 6B
hsa-miR-1197	1	0	1	1	1	1	LRRFIP1	leucine rich repeat (in FLII) interacting protein 1
hsa-miR-1197	1	0	1	1	1	1	CAB39	calcium binding protein 39
hsa-miR-1197	1	0	1	1	1	1	HMG20A	high mobility group 20A
hsa-miR-1197	0	0	1	1	1	1	CNPPD1	cyclin Pas1/PHO80 domain containing 1
hsa-miR-1197	1	0	1	1	1	1	ANKRD13A	ankyrin repeat domain 13A
hsa-miR-1197	1	0	1	1	0	0	ZCCHC4	zinc finger, CCHC domain containing 4
hsa-miR-1197	1	0	1	1	1	1	SENP7	SUMO1/sentrin specific peptidase 7
hsa-miR-1197	0	0	1	1	1	1	SPG21	spastic paraplegia 21 (autosomal recessive, Mast syndrome)
hsa-miR-1197	0	0	1	1	1	1	CSNK1A1	casein kinase 1, alpha 1
hsa-miR-1197	0	0	1	1	1	1	RBM8A	RNA binding motif protein 8A
hsa-miR-1197	0	0	1	0	0	0	TIGD7	tigger transposable element derived 7
hsa-miR-1197	1	0	1	1	1	1	SH3GLB1	SH3-domain GRB2-like endophilin B1
hsa-miR-1197	1	0	1	0	1	1	TRPS1	trichorhinophalangeal syndrome I
hsa-miR-1197	0	0	1	1	1	1	RASD2	RASD family, member 2
hsa-miR-1197	1	0	1	1	1	1	NRP1	neuropilin 1
hsa-miR-1197	1	0	1	1	1	1	TAGLN3	transgelin 3
hsa-miR-1197	0	0	1	0	1	1	KANSL3	KAT8 regulatory NSL complex subunit 3
hsa-miR-1197	0	0	1	1	0	0	TTTY7	testis-specific transcript, Y-linked 7 (non-protein coding)
hsa-miR-1197	1	0	1	1	1	1	CALU	calumenin
hsa-miR-1197	0	0	1	1	1	1	SLC6A15	solute carrier family 6 (neutral amino acid transporter), member 15
hsa-miR-1197	1	0	1	1	1	1	ATAD1	ATPase family, AAA domain containing 1
hsa-miR-1197	1	0	1	1	1	1	KCNIP2	Kv channel interacting protein 2
hsa-miR-1197	1	0	1	1	1	1	CALCOCO1	calcium binding and coiled-coil domain 1
hsa-miR-1197	1	0	1	1	1	1	LARP4	La ribonucleoprotein domain family, member 4
hsa-miR-1197	0	0	1	1	1	1	ORMDL1	ORM1-like 1 (S. cerevisiae)
hsa-miR-1197	0	0	1	1	0	0	SNRPN	small nuclear ribonucleoprotein polypeptide N
hsa-miR-1197	0	0	1	1	1	1	CLEC7A	C-type lectin domain family 7, member A
hsa-miR-1197	1	0	1	1	1	1	SCOC	short coiled-coil protein
hsa-miR-1197	1	0	1	1	1	1	ADARB1	adenosine deaminase, RNA-specific, B1
hsa-miR-1197	1	0	1	1	1	1	AFF2	AF4/FMR2 family, member 2
hsa-miR-1197	0	0	1	1	1	1	MTHFR	methylenetetrahydrofolate reductase (NAD(P)H)
hsa-miR-1197	1	0	1	1	1	1	UBAP2L	ubiquitin associated protein 2-like
hsa-miR-1197	1	0	1	1	1	1	CACNA2D2	calcium channel, voltage-dependent, alpha 2/delta subunit 2
hsa-miR-1197	0	0	1	0	0	0	CACNA2D3	calcium channel, voltage-dependent, alpha 2/delta subunit 3
hsa-miR-1197	0	0	1	1	1	1	CD1E	CD1e molecule
hsa-miR-1197	0	0	1	0	1	1	COL13A1	collagen, type XIII, alpha 1
hsa-miR-1197	1	0	1	1	1	1	NRXN3	neurexin 3
hsa-miR-1197	0	0	1	1	1	1	TAF1	TAF1 RNA polymerase II, TATA box binding protein (TBP)-associated factor, 250kDa
hsa-miR-1197	0	0	1	1	0	0	MBD1	methyl-CpG binding domain protein 1
hsa-miR-1197	1	0	1	1	1	1	XIRP1	xin actin-binding repeat containing 1
hsa-miR-1197	1	0	1	1	1	1	PPP1R9A	protein phosphatase 1, regulatory subunit 9A
hsa-miR-1197	0	0	1	1	0	0	ASAP3	ArfGAP with SH3 domain, ankyrin repeat and PH domain 3
hsa-miR-1197	0	0	1	1	0	0	GPRC5C	G protein-coupled receptor, family C, group 5, member C
hsa-miR-1197	1	0	1	1	1	1	ENOX2	ecto-NOX disulfide-thiol exchanger 2
hsa-miR-1197	1	0	1	0	1	1	CLSTN1	calsyntenin 1
hsa-miR-1197	0	0	1	0	0	0	TUG1	taurine upregulated 1 (non-protein coding)
hsa-miR-1197	0	0	1	1	1	1	PARPBP	PARP1 binding protein
hsa-miR-1197	1	0	1	1	1	1	ARGLU1	arginine and glutamate rich 1
hsa-miR-1197	1	0	1	1	1	1	ARHGAP17	Rho GTPase activating protein 17
hsa-miR-1197	1	0	1	1	0	0	SALL2	sal-like 2 (Drosophila)
hsa-miR-1197	1	0	1	1	1	1	MEIS2	Meis homeobox 2
hsa-miR-1197	0	0	1	0	0	0	TPTEP1	transmembrane phosphatase with tensin homology pseudogene 1
hsa-miR-1197	0	0	1	1	1	1	RNF220	ring finger protein 220
hsa-miR-1197	1	0	1	0	1	1	VPS13D	vacuolar protein sorting 13 homolog D (S. cerevisiae)
hsa-miR-1197	1	0	1	1	1	1	RIC8B	resistance to inhibitors of cholinesterase 8 homolog B (C. elegans)
hsa-miR-1197	1	0	1	1	1	1	EIF2C1	eukaryotic translation initiation factor 2C, 1
hsa-miR-1197	1	0	1	0	1	1	LIN28A	lin-28 homolog A (C. elegans)
hsa-miR-1197	1	0	1	1	0	0	UQCC	ubiquinol-cytochrome c reductase complex chaperone
hsa-miR-1197	1	0	1	1	0	0	FASTK	Fas-activated serine/threonine kinase
hsa-miR-1197	0	0	1	1	1	1	TTC23	tetratricopeptide repeat domain 23
hsa-miR-1197	1	0	1	1	0	0	CCDC136	coiled-coil domain containing 136
hsa-miR-1197	0	0	1	1	0	0	BUB1	budding uninhibited by benzimidazoles 1 homolog (yeast)
hsa-miR-1197	0	0	1	1	1	1	SMYD3	SET and MYND domain containing 3
hsa-miR-1197	0	0	1	0	0	0	LOC284561	uncharacterized LOC284561
hsa-miR-1197	1	0	1	1	1	1	PPFIA3	protein tyrosine phosphatase, receptor type, f polypeptide (PTPRF), interacting protein (liprin), alpha 3
hsa-miR-1197	1	0	1	0	1	1	C14orf101	chromosome 14 open reading frame 101
hsa-miR-1197	0	0	1	1	0	0	EIF4ENIF1	eukaryotic translation initiation factor 4E nuclear import factor 1
hsa-miR-1197	1	0	1	1	1	1	TNRC6A	trinucleotide repeat containing 6A
hsa-miR-1197	0	0	1	0	1	1	HEMK1	HemK methyltransferase family member 1
hsa-miR-1197	0	0	1	0	1	1	FLJ22763	uncharacterized LOC401081
hsa-miR-1197	1	0	1	1	1	1	RNF185	ring finger protein 185
hsa-miR-1197	1	0	1	1	1	1	FAM53C	family with sequence similarity 53, member C
hsa-miR-1197	0	0	1	1	1	1	PAQR4	progestin and adipoQ receptor family member IV
hsa-miR-1197	1	0	1	1	1	1	PPM1L	protein phosphatase, Mg2+/Mn2+ dependent, 1L
hsa-miR-1197	1	0	1	0	1	1	AP1G1	adaptor-related protein complex 1, gamma 1 subunit
hsa-miR-1197	0	0	1	0	0	0	SNHG11	small nucleolar RNA host gene 11 (non-protein coding)
hsa-miR-1197	0	0	1	0	0	0	LOC149684	uncharacterized LOC149684
hsa-miR-1197	0	0	1	1	0	0	ANXA11	annexin A11
hsa-miR-1197	1	0	1	0	1	1	PTPRE	protein tyrosine phosphatase, receptor type, E
hsa-miR-1197	1	0	1	1	1	1	TMEM25	transmembrane protein 25
hsa-miR-1197	1	0	1	1	0	0	SRL	sarcalumenin
hsa-miR-1197	1	0	1	1	1	1	SORBS2	sorbin and SH3 domain containing 2
hsa-miR-1197	0	0	1	1	1	1	ZNF606	zinc finger protein 606
hsa-miR-1197	0	0	1	0	0	0	MAGI1-IT1	MAGI1 intronic transcript 1 (non-protein coding)
hsa-miR-1197	0	0	1	1	0	0	BTN2A3P	butyrophilin, subfamily 2, member A3, pseudogene
hsa-miR-1197	0	0	1	1	0	0	RELT	RELT tumor necrosis factor receptor
hsa-miR-1197	0	0	1	0	0	0	TUBA3FP	tubulin, alpha 3f, pseudogene
hsa-miR-1197	0	0	1	0	0	0	FLJ32742	uncharacterized locus FLJ32742
hsa-miR-1197	0	0	1	1	1	1	ELL3	elongation factor RNA polymerase II-like 3
hsa-miR-1197	1	0	1	1	1	1	ANKRD29	ankyrin repeat domain 29
hsa-miR-1197	0	0	1	1	0	0	PTOV1	prostate tumor overexpressed 1
hsa-miR-1197	0	0	1	0	0	0	LINC00637	long intergenic non-protein coding RNA 637
hsa-miR-1197	0	0	1	1	1	1	FXC1	fracture callus 1 homolog (rat)
hsa-miR-1197	0	0	1	1	0	0	CD37	CD37 molecule
hsa-miR-1197	0	0	1	1	1	1	GALNT6	UDP-N-acetyl-alpha-D-galactosamine:polypeptide N-acetylgalactosaminyltransferase 6 (GalNAc-T6)
hsa-miR-1197	1	0	1	1	1	1	PAX6	paired box 6
hsa-miR-1197	1	0	1	1	1	1	UBAP1	ubiquitin associated protein 1
hsa-miR-1197	0	0	1	1	1	1	KDELR1	KDEL (Lys-Asp-Glu-Leu) endoplasmic reticulum protein retention receptor 1
hsa-miR-1197	1	0	1	1	0	0	RELL1	RELT-like 1
hsa-miR-1197	0	0	1	1	1	1	TOR2A	torsin family 2, member A
hsa-miR-1197	0	0	1	1	1	1	STBD1	starch binding domain 1
hsa-miR-1197	0	0	1	1	1	1	MAPK10	mitogen-activated protein kinase 10
hsa-miR-1197	1	0	1	1	1	1	ARIH2	ariadne homolog 2 (Drosophila)
hsa-miR-1197	1	0	1	1	1	1	EGR2	early growth response 2
hsa-miR-1197	1	0	1	1	1	1	FBXW2	F-box and WD repeat domain containing 2
hsa-miR-1197	1	0	1	0	1	1	TEF	thyrotrophic embryonic factor
hsa-miR-1197	0	0	1	0	0	0	KIAA1430	KIAA1430
hsa-miR-1197	1	0	1	1	1	1	MAFK	v-maf musculoaponeurotic fibrosarcoma oncogene homolog K (avian)
hsa-miR-1197	0	0	1	1	0	0	CDC25B	cell division cycle 25 homolog B (S. pombe)
hsa-miR-1197	0	0	1	1	1	1	WT1	Wilms tumor 1
hsa-miR-1197	1	0	1	1	1	1	GCFC1	GC-rich sequence DNA-binding factor 1
hsa-miR-1197	1	0	1	1	0	0	TOE1	target of EGR1, member 1 (nuclear)
hsa-miR-1197	0	0	1	0	0	0	LOC283887	uncharacterized LOC283887
hsa-miR-1197	0	0	1	1	1	1	UBE2I	ubiquitin-conjugating enzyme E2I
hsa-miR-1197	1	0	1	1	0	0	PRMT8	protein arginine methyltransferase 8
hsa-miR-1197	0	0	1	1	1	1	CYP11B1	cytochrome P450, family 11, subfamily B, polypeptide 1
hsa-miR-1197	0	0	1	0	0	0	CXXC1P1	CXXC finger protein 1 pseudogene 1
hsa-miR-1197	0	0	1	1	1	1	SPOCK1	sparc/osteonectin, cwcv and kazal-like domains proteoglycan (testican) 1
hsa-miR-1197	1	0	1	1	1	1	SNAP25	synaptosomal-associated protein, 25kDa
hsa-miR-1197	1	0	1	0	1	1	GATAD2B	GATA zinc finger domain containing 2B
hsa-miR-1197	0	0	1	1	1	1	RBM25	RNA binding motif protein 25
hsa-miR-1197	1	0	1	0	1	1	IL1RAP	interleukin 1 receptor accessory protein
hsa-miR-1197	1	0	1	1	1	1	RASGEF1A	RasGEF domain family, member 1A
hsa-miR-1197	1	0	1	1	1	1	NDEL1	nudE nuclear distribution E homolog (A. nidulans)-like 1
hsa-miR-1197	0	0	1	1	1	1	MOBP	myelin-associated oligodendrocyte basic protein
hsa-miR-1197	1	0	1	1	1	1	CUL2	cullin 2
hsa-miR-1197	0	0	1	1	0	0	ZNF185	zinc finger protein 185 (LIM domain)
hsa-miR-1197	1	0	1	1	1	1	ATXN10	ataxin 10
hsa-miR-1197	1	0	1	0	1	1	UVRAG	UV radiation resistance associated gene
hsa-miR-1197	1	0	1	1	1	1	ZC3H11A	zinc finger CCCH-type containing 11A
hsa-miR-1197	0	0	1	0	0	0	LOC100133029	sirtuin 5 pseudogene
hsa-miR-1197	0	0	1	0	0	0	FAM66C	family with sequence similarity 66, member C
hsa-miR-1197	1	0	1	1	0	0	ITPRIPL2	inositol 1,4,5-trisphosphate receptor interacting protein-like 2
hsa-miR-1197	0	0	1	0	0	0	C1orf204	chromosome 1 open reading frame 204
hsa-miR-1197	1	0	1	0	1	1	KIAA1737	KIAA1737
hsa-miR-1197	1	0	1	0	1	1	THRB	thyroid hormone receptor, beta
hsa-miR-1197	0	0	1	1	1	1	IL17RE	interleukin 17 receptor E
hsa-miR-1197	1	0	1	1	1	1	CA12	carbonic anhydrase XII
hsa-miR-1197	1	0	1	1	1	1	EPB41L1	erythrocyte membrane protein band 4.1-like 1
hsa-miR-1197	0	0	1	1	1	1	FGD2	FYVE, RhoGEF and PH domain containing 2
hsa-miR-1197	0	0	1	0	0	0	LOC400680	uncharacterized LOC400680
hsa-miR-1197	0	0	1	0	0	0	LINC00293	long intergenic non-protein coding RNA 293
hsa-miR-1197	1	0	1	0	1	1	PRKAR1A	protein kinase, cAMP-dependent, regulatory, type I, alpha
hsa-miR-1197	0	0	1	1	0	0	PSAPL1	prosaposin-like 1 (gene/pseudogene)
hsa-miR-1197	1	0	1	1	1	1	LZTS2	leucine zipper, putative tumor suppressor 2
hsa-miR-1197	0	0	1	1	0	0	ZNF283	zinc finger protein 283
hsa-miR-1197	1	0	1	1	1	1	IL20RA	interleukin 20 receptor, alpha
hsa-miR-1197	0	0	1	0	1	1	LOC155060	AI894139 pseudogene
hsa-miR-1197	1	0	1	1	1	1	LARP1B	La ribonucleoprotein domain family, member 1B
hsa-miR-1197	0	0	1	1	0	0	PPAPDC1A	phosphatidic acid phosphatase type 2 domain containing 1A
hsa-miR-1197	0	0	1	0	0	0	LOC338579	ankyrin repeat domain-containing protein 30B pseudogene
hsa-miR-1197	0	0	1	0	0	0	LOC728095	uncharacterized LOC728095
hsa-miR-1197	1	0	1	0	1	1	LRRTM4	leucine rich repeat transmembrane neuronal 4
hsa-miR-1197	0	0	1	1	1	1	ABCC12	ATP-binding cassette, sub-family C (CFTR/MRP), member 12
hsa-miR-1197	0	0	1	1	1	1	SLFN13	schlafen family member 13
hsa-miR-1197	1	0	1	1	1	1	GRM4	glutamate receptor, metabotropic 4
hsa-miR-1197	1	0	1	1	0	0	WIZ	widely interspaced zinc finger motifs
hsa-miR-1197	1	0	1	1	0	0	CACNB3	calcium channel, voltage-dependent, beta 3 subunit
hsa-miR-1197	0	0	1	1	0	0	MX2	myxovirus (influenza virus) resistance 2 (mouse)
hsa-miR-1197	0	0	1	1	0	0	SLC26A10	solute carrier family 26, member 10
hsa-miR-1197	0	0	1	1	1	1	FRMPD2	FERM and PDZ domain containing 2
hsa-miR-1197	0	0	1	0	0	0	LGALS17A	Charcot-Leyden crystal protein pseudogene
hsa-miR-1197	0	0	1	1	1	1	BTN2A2	butyrophilin, subfamily 2, member A2
hsa-miR-1197	1	0	1	1	1	1	MBTD1	mbt domain containing 1
hsa-miR-1197	0	0	1	1	1	1	SLC9A1	solute carrier family 9, subfamily A (NHE1, cation proton antiporter 1), member 1
hsa-miR-1197	0	0	1	1	1	1	QDPR	quinoid dihydropteridine reductase
hsa-miR-1197	1	0	1	1	1	1	FAM122B	family with sequence similarity 122B
hsa-miR-1197	0	0	1	1	1	1	IDS	iduronate 2-sulfatase
hsa-miR-1197	1	0	1	0	1	1	HECTD1	HECT domain containing E3 ubiquitin protein ligase 1
hsa-miR-1197	1	0	1	1	1	1	TP53INP1	tumor protein p53 inducible nuclear protein 1
hsa-miR-1197	1	0	1	1	1	1	WWC2	WW and C2 domain containing 2
hsa-miR-1197	0	0	1	1	0	0	FSIP2	fibrous sheath interacting protein 2
hsa-miR-1197	0	0	1	1	1	1	RBM39	RNA binding motif protein 39
hsa-miR-1197	1	0	1	1	1	1	SIKE1	suppressor of IKBKE 1
hsa-miR-1197	0	0	1	1	0	0	CLDN4	claudin 4
hsa-miR-1197	1	0	1	1	0	0	SPEG	SPEG complex locus
hsa-miR-1197	1	0	1	1	1	1	NIPBL	Nipped-B homolog (Drosophila)
hsa-miR-1197	0	0	1	1	0	0	TMEM151B	transmembrane protein 151B
hsa-miR-1197	0	0	1	1	1	1	SPICE1	spindle and centriole associated protein 1
hsa-miR-1197	1	0	1	1	1	1	CLIP1	CAP-GLY domain containing linker protein 1
hsa-miR-1197	1	0	1	1	0	0	SNX30	sorting nexin family member 30
hsa-miR-1197	0	0	1	1	1	1	CSPP1	centrosome and spindle pole associated protein 1
hsa-miR-1197	1	0	1	1	1	1	CLTC	clathrin, heavy chain (Hc)
hsa-miR-1197	1	0	1	1	0	0	SLC30A3	solute carrier family 30 (zinc transporter), member 3
hsa-miR-1197	1	0	1	1	0	0	PTPN5	protein tyrosine phosphatase, non-receptor type 5 (striatum-enriched)
hsa-miR-1197	1	0	1	1	1	1	LSM14A	LSM14A, SCD6 homolog A (S. cerevisiae)
hsa-miR-1197	1	0	1	1	1	1	PLA2G15	phospholipase A2, group XV
hsa-miR-1197	0	0	1	0	0	0	FAM205B	transmembrane protein C9orf144B pseudogene
hsa-miR-1197	1	0	1	1	1	1	KCTD12	potassium channel tetramerisation domain containing 12
hsa-miR-1197	1	0	1	0	1	1	ZZEF1	zinc finger, ZZ-type with EF-hand domain 1
hsa-miR-1197	1	0	1	1	1	1	PHC2	polyhomeotic homolog 2 (Drosophila)
hsa-miR-1197	0	0	1	1	1	1	TBX19	T-box 19
hsa-miR-1197	1	0	1	1	1	1	GPD1	glycerol-3-phosphate dehydrogenase 1 (soluble)
hsa-miR-1197	0	0	1	1	1	1	ENPP2	ectonucleotide pyrophosphatase/phosphodiesterase 2
hsa-miR-1197	1	0	1	1	1	1	PPP2R5C	protein phosphatase 2, regulatory subunit B', gamma
hsa-miR-1197	0	0	1	1	0	0	SLCO6A1	solute carrier organic anion transporter family, member 6A1
hsa-miR-1197	1	0	1	0	0	0	ASXL3	additional sex combs like 3 (Drosophila)
hsa-miR-1197	0	0	1	1	0	0	ZNF730	zinc finger protein 730
hsa-miR-1197	1	0	1	1	1	1	MAP2K4	mitogen-activated protein kinase kinase 4
hsa-miR-1197	1	0	1	0	1	1	ZNF607	zinc finger protein 607
hsa-miR-1197	0	0	1	0	1	1	PEX5	peroxisomal biogenesis factor 5
hsa-miR-1197	1	0	1	1	1	1	CAMK2G	calcium/calmodulin-dependent protein kinase II gamma
hsa-miR-1197	0	0	1	1	1	1	PRSS16	protease, serine, 16 (thymus)
hsa-miR-1197	0	0	1	1	0	0	CPNE6	copine VI (neuronal)
hsa-miR-1197	0	0	1	0	0	0	POM121L9P	POM121 transmembrane nucleoporin-like 9, pseudogene
hsa-miR-1197	1	0	1	1	1	1	TAB2	TGF-beta activated kinase 1/MAP3K7 binding protein 2
hsa-miR-1197	1	0	1	0	1	1	DCDC2	doublecortin domain containing 2
hsa-miR-1197	0	0	1	1	1	1	MIOS	missing oocyte, meiosis regulator, homolog (Drosophila)
hsa-miR-1197	0	0	1	1	1	1	TAOK2	TAO kinase 2
hsa-miR-1197	1	0	1	1	1	1	NBEA	neurobeachin
hsa-miR-1197	1	0	1	0	1	1	CEP170	centrosomal protein 170kDa
hsa-miR-1197	0	0	1	0	0	0	FAM66D	family with sequence similarity 66, member D
hsa-miR-1197	0	0	1	0	0	0	ZBTB8B	zinc finger and BTB domain containing 8B
hsa-miR-1197	1	0	1	1	1	1	YTHDF3	YTH domain family, member 3
hsa-miR-1197	1	0	1	1	1	1	LYPD3	LY6/PLAUR domain containing 3
hsa-miR-1197	1	0	1	1	0	0	USP24	ubiquitin specific peptidase 24
hsa-miR-1197	1	0	1	1	1	1	MLL3	myeloid/lymphoid or mixed-lineage leukemia 3
hsa-miR-1197	0	0	1	1	1	1	YAP1	Yes-associated protein 1
hsa-miR-1197	0	0	1	0	0	0	FAM225A	family with sequence similarity 225, member A (non-protein coding)
hsa-miR-1197	0	0	1	1	1	1	VWA3B	von Willebrand factor A domain containing 3B
hsa-miR-1197	0	0	1	1	1	1	INPP5B	inositol polyphosphate-5-phosphatase, 75kDa
hsa-miR-1197	0	0	1	1	1	1	CEP192	centrosomal protein 192kDa
hsa-miR-1197	0	0	1	0	0	0	ADCY10P1	adenylate cyclase 10 (soluble) pseudogene 1
hsa-miR-1197	1	0	1	1	1	1	IL17RD	interleukin 17 receptor D
hsa-miR-1197	1	0	1	1	1	1	PRPF38B	PRP38 pre-mRNA processing factor 38 (yeast) domain containing B
hsa-miR-1197	1	0	1	0	0	0	NPEPL1	aminopeptidase-like 1
hsa-miR-1197	1	0	1	1	0	0	KIAA0895L	KIAA0895-like
hsa-miR-1197	1	0	1	1	1	1	HERC2	HECT and RLD domain containing E3 ubiquitin protein ligase 2
hsa-miR-1197	1	0	1	1	1	1	MBD6	methyl-CpG binding domain protein 6
hsa-miR-1197	0	0	1	1	1	1	TEX2	testis expressed 2
hsa-miR-1197	0	0	1	1	1	1	PNMAL1	paraneoplastic Ma antigen family-like 1
hsa-miR-1197	1	0	1	0	1	1	KIF21B	kinesin family member 21B
hsa-miR-1197	1	0	1	0	1	1	PATL1	protein associated with topoisomerase II homolog 1 (yeast)
hsa-miR-1197	1	0	1	1	1	1	AP1AR	adaptor-related protein complex 1 associated regulatory protein
hsa-miR-1197	1	0	1	1	1	1	PPP3CA	protein phosphatase 3, catalytic subunit, alpha isozyme
hsa-miR-1197	0	0	1	1	0	0	TMEM134	transmembrane protein 134
hsa-miR-1197	1	0	1	1	1	1	IKZF2	IKAROS family zinc finger 2 (Helios)
hsa-miR-1197	0	0	1	0	1	1	STEAP2	STEAP family member 2, metalloreductase
hsa-miR-1197	1	0	1	1	1	1	SYNCRIP	synaptotagmin binding, cytoplasmic RNA interacting protein
hsa-miR-1197	0	0	1	0	0	0	LOC374443	C-type lectin domain family 2, member D pseudogene
hsa-miR-1197	0	0	1	1	1	1	CYP4B1	cytochrome P450, family 4, subfamily B, polypeptide 1
hsa-miR-1197	0	0	1	1	0	0	NABP2	nucleic acid binding protein 2
hsa-miR-1197	1	0	1	1	1	1	TPP1	tripeptidyl peptidase I
hsa-miR-1197	1	0	1	1	1	1	TAB3	TGF-beta activated kinase 1/MAP3K7 binding protein 3
hsa-miR-1197	1	0	1	1	1	1	CAMTA1	calmodulin binding transcription activator 1
hsa-miR-1197	0	0	1	1	1	1	BRCA1	breast cancer 1, early onset
hsa-miR-1197	0	0	1	1	1	1	GPR114	G protein-coupled receptor 114
hsa-miR-1197	0	0	1	0	0	0	LINC00085	long intergenic non-protein coding RNA 85
hsa-miR-1197	1	0	1	0	1	1	ANKRD28	ankyrin repeat domain 28
hsa-miR-1197	1	0	1	0	1	1	CHRM2	cholinergic receptor, muscarinic 2
hsa-miR-1197	1	0	1	0	1	1	NHS	Nance-Horan syndrome (congenital cataracts and dental anomalies)
hsa-miR-1197	0	0	1	1	1	1	HMBOX1	homeobox containing 1
hsa-miR-1197	1	0	1	1	0	0	ADAM15	ADAM metallopeptidase domain 15
hsa-miR-1197	1	0	1	1	1	1	PLCH1	phospholipase C, eta 1
hsa-miR-1197	1	0	1	1	1	1	MCHR1	melanin-concentrating hormone receptor 1
hsa-miR-1197	1	0	1	1	1	1	RTN3	reticulon 3
hsa-miR-1197	1	0	1	1	1	1	QKI	QKI, KH domain containing, RNA binding
hsa-miR-1197	0	0	1	1	1	1	CDK20	cyclin-dependent kinase 20
hsa-miR-1197	0	0	1	1	1	1	SLC6A2	solute carrier family 6 (neurotransmitter transporter, noradrenalin), member 2
hsa-miR-1197	0	0	1	1	0	0	ISG20L2	interferon stimulated exonuclease gene 20kDa-like 2
hsa-miR-1197	0	0	1	1	1	1	PAFAH1B2	platelet-activating factor acetylhydrolase 1b, catalytic subunit 2 (30kDa)
hsa-miR-1197	1	0	1	1	1	1	TMUB2	transmembrane and ubiquitin-like domain containing 2
hsa-miR-1197	0	0	1	1	1	1	RAB7L1	RAB7, member RAS oncogene family-like 1
hsa-miR-1197	1	0	1	1	0	0	NCLN	nicalin
hsa-miR-1197	1	0	1	1	1	1	RIMS3	regulating synaptic membrane exocytosis 3
hsa-miR-1197	1	0	1	1	0	0	DHDDS	dehydrodolichyl diphosphate synthase
hsa-miR-1197	1	0	1	1	0	0	POLR3D	polymerase (RNA) III (DNA directed) polypeptide D, 44kDa
hsa-miR-1197	0	0	1	1	0	0	HDAC6	histone deacetylase 6
hsa-miR-1197	0	0	1	1	1	1	LZIC	leucine zipper and CTNNBIP1 domain containing
hsa-miR-1197	1	0	1	1	1	1	COL2A1	collagen, type II, alpha 1
hsa-miR-1197	0	0	1	1	0	0	RBM14	RNA binding motif protein 14
hsa-miR-1197	1	0	1	0	1	1	DDX3X	DEAD (Asp-Glu-Ala-Asp) box polypeptide 3, X-linked
hsa-miR-1197	1	0	1	1	1	1	CALM1	calmodulin 1 (phosphorylase kinase, delta)
hsa-miR-1197	0	0	1	1	1	1	DPYD	dihydropyrimidine dehydrogenase
hsa-miR-1197	0	0	1	1	1	1	ICA1	islet cell autoantigen 1, 69kDa
hsa-miR-1197	0	0	1	1	1	1	TMEM30A	transmembrane protein 30A
hsa-miR-1197	0	0	1	1	1	1	GNL3L	guanine nucleotide binding protein-like 3 (nucleolar)-like
hsa-miR-1197	0	0	1	1	1	1	PSEN1	presenilin 1
hsa-miR-1197	0	0	1	1	0	0	KLHDC3	kelch domain containing 3
hsa-miR-1197	1	0	1	1	1	1	TMEM185A	transmembrane protein 185A
hsa-miR-1197	1	0	1	1	1	1	ETF1	eukaryotic translation termination factor 1
hsa-miR-1197	0	0	1	0	0	0	LOC729013	uncharacterized LOC729013
hsa-miR-1197	1	0	1	1	0	0	FHL3	four and a half LIM domains 3
hsa-miR-1197	0	0	1	1	1	1	TOMM40L	translocase of outer mitochondrial membrane 40 homolog (yeast)-like
hsa-miR-1197	0	0	1	0	0	0	KLHL15	kelch-like 15 (Drosophila)
hsa-miR-1197	1	0	1	0	1	1	NECAB1	N-terminal EF-hand calcium binding protein 1
hsa-miR-1197	1	0	1	1	1	1	SCAMP1	secretory carrier membrane protein 1
hsa-miR-1197	0	0	1	1	1	1	RAB37	RAB37, member RAS oncogene family
hsa-miR-1197	0	0	1	0	0	0	FAM86DP	family with sequence similarity 86, member D, pseudogene
hsa-miR-1197	1	0	1	1	1	1	ELF4	E74-like factor 4 (ets domain transcription factor)
hsa-miR-1197	0	0	1	1	1	1	CSDE1	cold shock domain containing E1, RNA-binding
hsa-miR-1197	0	0	1	1	1	1	RDH11	retinol dehydrogenase 11 (all-trans/9-cis/11-cis)
hsa-miR-1197	0	0	1	0	0	0	FAM200B	family with sequence similarity 200, member B
hsa-miR-1197	1	0	1	1	1	1	ARHGEF9	Cdc42 guanine nucleotide exchange factor (GEF) 9
hsa-miR-1197	0	0	1	0	0	0	ZNF720	zinc finger protein 720
hsa-miR-1197	0	0	1	0	1	1	TP53RK	TP53 regulating kinase
hsa-miR-1197	0	0	1	1	0	0	TCEANC	transcription elongation factor A (SII) N-terminal and central domain containing
hsa-miR-1197	1	0	1	1	1	1	SPOCK2	sparc/osteonectin, cwcv and kazal-like domains proteoglycan (testican) 2
hsa-miR-1197	1	0	1	0	1	1	CDK19	cyclin-dependent kinase 19
hsa-miR-1197	0	0	1	0	0	0	JMJD7	jumonji domain containing 7
hsa-miR-1197	0	0	1	1	0	0	PRRG2	proline rich Gla (G-carboxyglutamic acid) 2
hsa-miR-1197	0	0	1	1	1	1	EXOC4	exocyst complex component 4
hsa-miR-1197	0	0	1	1	1	1	SEC61A2	Sec61 alpha 2 subunit (S. cerevisiae)
hsa-miR-1197	0	0	1	1	0	0	TRO	trophinin
hsa-miR-1197	0	0	1	0	1	1	FHAD1	forkhead-associated (FHA) phosphopeptide binding domain 1
hsa-miR-1197	0	0	1	1	1	1	MAP2	microtubule-associated protein 2
hsa-miR-1197	1	0	1	1	1	1	B3GNT5	UDP-GlcNAc:betaGal beta-1,3-N-acetylglucosaminyltransferase 5
hsa-miR-1197	1	0	1	1	1	1	CD300LF	CD300 molecule-like family member f
hsa-miR-1197	0	0	1	0	0	0	LOC400891	chromosome 14 open reading frame 166B pseudogene
hsa-miR-1197	1	0	1	1	1	1	TMEM127	transmembrane protein 127
hsa-miR-1197	1	0	1	1	1	1	HTR2C	5-hydroxytryptamine (serotonin) receptor 2C, G protein-coupled
hsa-miR-1197	0	0	1	0	0	0	LOC100130950	uncharacterized LOC100130950
hsa-miR-1197	1	0	1	1	1	1	SYT9	synaptotagmin IX
hsa-miR-1197	1	0	1	1	1	1	TIAL1	TIA1 cytotoxic granule-associated RNA binding protein-like 1
hsa-miR-1197	0	0	1	1	1	1	PIP5K1B	phosphatidylinositol-4-phosphate 5-kinase, type I, beta
hsa-miR-1197	0	0	1	1	1	1	APLF	aprataxin and PNKP like factor
hsa-miR-1197	0	0	1	1	0	0	GLG1	golgi glycoprotein 1
hsa-miR-1197	1	0	1	0	1	1	RNF4	ring finger protein 4
hsa-miR-1197	0	0	1	0	0	0	LINC00593	long intergenic non-protein coding RNA 593
hsa-miR-1197	1	0	1	1	1	1	SECISBP2L	SECIS binding protein 2-like
hsa-miR-1197	0	0	1	1	0	0	RAB4B	RAB4B, member RAS oncogene family
hsa-miR-1197	0	0	1	0	0	0	MGC45922	uncharacterized LOC284365
hsa-miR-1197	1	0	1	1	1	1	CRKL	v-crk sarcoma virus CT10 oncogene homolog (avian)-like
hsa-miR-1197	1	0	1	0	1	1	KCTD2	potassium channel tetramerisation domain containing 2
hsa-miR-1197	1	0	1	1	0	0	TMEM181	transmembrane protein 181
hsa-miR-1197	1	0	1	0	1	1	TBC1D2B	TBC1 domain family, member 2B
hsa-miR-1197	0	0	1	1	0	0	ADAP2	ArfGAP with dual PH domains 2
hsa-miR-1197	0	0	1	1	1	1	ZNF337	zinc finger protein 337
hsa-miR-1197	1	0	1	1	1	1	FAM120A	family with sequence similarity 120A
hsa-miR-1197	1	0	1	0	1	1	DDX3Y	DEAD (Asp-Glu-Ala-Asp) box polypeptide 3, Y-linked
hsa-miR-1197	1	0	1	1	1	1	NKAIN2	Na+/K+ transporting ATPase interacting 2
hsa-miR-1197	0	0	1	0	0	0	TMPRSS12	transmembrane (C-terminal) protease, serine 12
hsa-miR-1197	1	0	1	1	1	1	RAP2C	RAP2C, member of RAS oncogene family
hsa-miR-1197	0	0	1	0	0	0	LOC643529	hCG2024094
hsa-miR-1197	1	0	1	1	1	1	ZEB2	zinc finger E-box binding homeobox 2
hsa-miR-1197	1	0	1	1	1	1	CTDSPL2	CTD (carboxy-terminal domain, RNA polymerase II, polypeptide A) small phosphatase like 2
hsa-miR-1197	0	0	1	1	1	1	SEC24D	SEC24 family, member D (S. cerevisiae)
hsa-miR-1197	0	0	1	1	0	0	SNTG2	syntrophin, gamma 2
hsa-miR-1197	0	0	1	1	0	0	VPS8	vacuolar protein sorting 8 homolog (S. cerevisiae)
hsa-miR-1197	1	0	1	1	1	1	SLC38A9	solute carrier family 38, member 9
hsa-miR-1197	0	0	1	0	0	0	SPATA3	spermatogenesis associated 3
hsa-miR-1197	1	0	1	1	1	1	MACROD2	MACRO domain containing 2
hsa-miR-1197	1	0	1	1	1	1	LMO7	LIM domain 7
hsa-miR-1197	0	0	1	1	1	1	TADA1	transcriptional adaptor 1
hsa-miR-1197	0	0	1	0	0	0	LOC652276	potassium channel tetramerisation domain containing 5 pseudogene
hsa-miR-1197	0	0	1	1	1	1	CELF1	CUGBP, Elav-like family member 1
hsa-miR-1197	1	0	1	1	1	1	CEP128	centrosomal protein 128kDa
hsa-miR-1197	1	0	1	1	1	1	C4orf19	chromosome 4 open reading frame 19
hsa-miR-1197	1	0	1	0	1	1	ARID2	AT rich interactive domain 2 (ARID, RFX-like)
hsa-miR-1197	0	0	1	1	0	0	HSPA14	heat shock 70kDa protein 14
hsa-miR-1197	0	0	1	0	0	0	FLJ36000	uncharacterized FLJ36000
hsa-miR-1197	0	0	1	0	1	1	SRSF5	serine/arginine-rich splicing factor 5
hsa-miR-1197	0	0	1	0	0	0	LOC339622	uncharacterized LOC339622
hsa-miR-1197	1	0	1	1	1	1	SLITRK3	SLIT and NTRK-like family, member 3
hsa-miR-1197	0	0	1	1	0	0	MTCH1	mitochondrial carrier 1
hsa-miR-1197	0	0	1	0	0	0	A1BG-AS1	A1BG antisense RNA 1
hsa-miR-1197	0	0	1	1	0	0	KIAA1432	KIAA1432
hsa-miR-1197	0	0	1	0	1	1	METTL12	methyltransferase like 12
hsa-miR-1197	0	0	1	1	0	0	AQP12B	aquaporin 12B
hsa-miR-1197	0	0	1	1	1	1	MTHFD2L	methylenetetrahydrofolate dehydrogenase (NADP+ dependent) 2-like
hsa-miR-1197	0	0	1	0	1	1	C12orf74	chromosome 12 open reading frame 74
hsa-miR-1197	1	0	1	1	1	1	PPP2R5B	protein phosphatase 2, regulatory subunit B', beta
hsa-miR-1197	1	0	1	0	1	1	LYPD6	LY6/PLAUR domain containing 6
hsa-miR-1197	0	0	1	0	0	0	LOC348120	uncharacterized LOC348120
hsa-miR-1197	0	0	1	0	0	0	DPY19L2P4	dpy-19-like 2 pseudogene 4 (C. elegans)
hsa-miR-1197	1	0	1	0	1	1	KDM2A	lysine (K)-specific demethylase 2A
hsa-miR-1197	1	0	1	1	1	1	TOMM40	translocase of outer mitochondrial membrane 40 homolog (yeast)
hsa-miR-1197	1	0	1	1	1	1	CLVS1	clavesin 1
hsa-miR-1197	1	0	1	1	1	1	RECK	reversion-inducing-cysteine-rich protein with kazal motifs
hsa-miR-1197	0	0	1	1	1	1	NCMAP	noncompact myelin associated protein
hsa-miR-1197	0	0	1	1	0	0	NLRC5	NLR family, CARD domain containing 5
hsa-miR-1197	0	0	1	0	0	0	AURKAPS1	aurora kinase A pseudogene 1
hsa-miR-1197	1	0	1	1	1	1	PTPDC1	protein tyrosine phosphatase domain containing 1
hsa-miR-1197	0	0	1	1	1	1	RHOT1	ras homolog family member T1
hsa-miR-1197	1	0	1	0	1	1	HDAC5	histone deacetylase 5
hsa-miR-1197	1	0	1	1	1	1	PCGF5	polycomb group ring finger 5
hsa-miR-1197	1	0	1	0	1	1	C14orf43	chromosome 14 open reading frame 43
hsa-miR-1197	0	0	1	1	1	1	ZNF254	zinc finger protein 254
hsa-miR-1197	1	0	1	1	1	1	NCOA5	nuclear receptor coactivator 5
hsa-miR-1197	0	0	1	1	0	0	C20orf152	chromosome 20 open reading frame 152
hsa-miR-1197	0	0	1	1	0	0	GRIN2C	glutamate receptor, ionotropic, N-methyl D-aspartate 2C
hsa-miR-1197	1	0	1	1	1	1	FAM63B	family with sequence similarity 63, member B
hsa-miR-1197	0	0	1	0	1	1	GUCY1B3	guanylate cyclase 1, soluble, beta 3
hsa-miR-1197	0	0	1	0	0	0	LOC550643	uncharacterized LOC550643
hsa-miR-1197	0	0	1	1	1	1	C1orf109	chromosome 1 open reading frame 109
hsa-miR-1197	0	0	1	1	1	1	STAG1	stromal antigen 1
hsa-miR-1197	1	0	1	1	1	1	ADCY6	adenylate cyclase 6
hsa-miR-1197	1	0	1	1	1	1	LMO4	LIM domain only 4
hsa-miR-1197	1	0	1	1	1	1	ZNF449	zinc finger protein 449
hsa-miR-1197	1	0	1	1	1	1	CUX1	cut-like homeobox 1
hsa-miR-1197	1	0	1	1	1	1	AP3M1	adaptor-related protein complex 3, mu 1 subunit
hsa-miR-1197	1	0	1	1	1	1	FAM129B	family with sequence similarity 129, member B
hsa-miR-1197	0	0	1	0	0	0	RNF216P1	ring finger protein 216 pseudogene 1
hsa-miR-1197	0	0	1	0	0	0	PTGER4P2	prostaglandin E receptor 4 (subtype EP4) pseudogene 2
hsa-miR-1197	0	0	1	0	0	0	C17orf69	chromosome 17 open reading frame 69
hsa-miR-1197	1	0	1	0	1	1	TMEM194A	transmembrane protein 194A
hsa-miR-1197	1	0	1	1	1	1	HAUS6	HAUS augmin-like complex, subunit 6
hsa-miR-1197	0	0	1	1	0	0	RPS3	ribosomal protein S3
hsa-miR-1197	0	0	1	1	1	1	CTXN3	cortexin 3
hsa-miR-1197	0	0	1	1	0	0	TRIM41	tripartite motif containing 41
hsa-miR-1197	1	0	1	1	1	1	CTBP1	C-terminal binding protein 1
hsa-miR-1197	0	0	1	1	1	1	FRMPDP2	FERM and PDZ domain containing 2 pseudogene 2
hsa-miR-1197	0	0	1	1	1	1	FRMPD2P1	FERM and PDZ domain containing 2 pseudogene 1
hsa-miR-1197	0	0	1	0	0	0	LINC00152	long intergenic non-protein coding RNA 152
hsa-miR-1197	0	0	1	0	1	1	SH3RF2	SH3 domain containing ring finger 2
hsa-miR-1197	0	0	1	0	0	0	OAZ3	ornithine decarboxylase antizyme 3
hsa-miR-1197	1	0	1	1	1	1	OPCML	opioid binding protein/cell adhesion molecule-like
hsa-miR-1197	1	0	1	1	1	1	WNT5A	wingless-type MMTV integration site family, member 5A
hsa-miR-1197	0	0	1	1	1	1	C3orf67	chromosome 3 open reading frame 67
hsa-miR-1197	1	0	1	0	1	1	AMMECR1L	AMME chromosomal region gene 1-like
hsa-miR-1197	0	0	1	0	0	0	LINC00537	long intergenic non-protein coding RNA 537
hsa-miR-1197	0	0	1	1	0	0	DNHD1	dynein heavy chain domain 1
hsa-miR-1197	1	0	1	1	1	1	ESRRA	estrogen-related receptor alpha
hsa-miR-1197	1	0	1	0	1	1	PIK3R3	phosphoinositide-3-kinase, regulatory subunit 3 (gamma)
hsa-miR-1197	0	0	1	0	0	0	ABCA11P	ATP-binding cassette, sub-family A (ABC1), member 11, pseudogene
hsa-miR-1197	1	0	1	1	1	1	SYNJ1	synaptojanin 1
hsa-miR-1197	0	0	1	0	0	0	LOC441493	uncharacterized LOC441493
hsa-miR-1197	1	0	1	1	1	1	GABRB2	gamma-aminobutyric acid (GABA) A receptor, beta 2
hsa-miR-1197	0	0	1	1	1	1	SLC25A35	solute carrier family 25, member 35
hsa-miR-1197	1	0	1	1	1	1	USP34	ubiquitin specific peptidase 34
hsa-miR-1197	1	0	1	1	1	1	CERS6	ceramide synthase 6
hsa-miR-1197	1	0	1	1	1	1	SP4	Sp4 transcription factor
hsa-miR-1197	1	0	1	1	1	1	TET2	tet methylcytosine dioxygenase 2
hsa-miR-1197	1	0	1	1	1	1	UBE4A	ubiquitination factor E4A
hsa-miR-1197	0	0	1	1	1	1	SLC8A3	solute carrier family 8 (sodium/calcium exchanger), member 3
hsa-miR-1197	1	0	1	1	1	1	OTUD4	OTU domain containing 4
hsa-miR-1197	1	0	1	1	1	1	OSBP2	oxysterol binding protein 2
hsa-miR-1197	0	0	1	0	0	0	FAM27E3	family with sequence similarity 27, member E3
hsa-miR-1197	0	0	1	1	0	0	SOCS7	suppressor of cytokine signaling 7
hsa-miR-1197	0	0	1	0	0	0	FAM225B	family with sequence similarity 225, member B (non-protein coding)
hsa-miR-1197	0	0	1	1	0	0	CCDC144A	coiled-coil domain containing 144A
hsa-miR-1197	0	0	1	1	1	1	TINF2	TERF1 (TRF1)-interacting nuclear factor 2
hsa-miR-1197	1	0	1	1	1	1	NUMB	numb homolog (Drosophila)
hsa-miR-1197	1	0	1	1	1	1	EIF5	eukaryotic translation initiation factor 5
hsa-miR-1197	1	0	1	1	1	1	RBL2	retinoblastoma-like 2 (p130)
hsa-miR-1197	0	0	1	0	1	1	FEZ2	fasciculation and elongation protein zeta 2 (zygin II)
hsa-miR-1197	1	0	1	0	1	1	NFIX	nuclear factor I/X (CCAAT-binding transcription factor)
hsa-miR-1197	0	0	1	1	1	1	STAT2	signal transducer and activator of transcription 2, 113kDa
hsa-miR-1197	1	0	1	1	1	1	ETS1	v-ets erythroblastosis virus E26 oncogene homolog 1 (avian)
hsa-miR-1197	1	0	1	0	1	1	CLASP2	cytoplasmic linker associated protein 2
hsa-miR-1197	1	0	1	1	1	1	SLC35F1	solute carrier family 35, member F1
hsa-miR-1197	0	0	1	1	1	1	PSMA2	proteasome (prosome, macropain) subunit, alpha type, 2
hsa-miR-1197	1	0	1	1	1	1	MASP1	mannan-binding lectin serine peptidase 1 (C4/C2 activating component of Ra-reactive factor)
hsa-miR-1197	0	0	1	1	0	0	TKT	transketolase
hsa-miR-1197	0	0	1	1	1	1	PRR14L	proline rich 14-like
hsa-miR-1197	1	0	1	1	0	0	RBM27	RNA binding motif protein 27
hsa-miR-1197	1	0	1	1	1	1	CBX3	chromobox homolog 3
hsa-miR-1197	1	0	1	1	1	1	VPS26A	vacuolar protein sorting 26 homolog A (S. pombe)
hsa-miR-1197	1	0	1	1	1	1	GTDC1	glycosyltransferase-like domain containing 1
hsa-miR-1197	1	0	1	1	1	1	KLHL2	kelch-like 2, Mayven (Drosophila)
hsa-miR-1197	1	0	1	1	1	1	TC2N	tandem C2 domains, nuclear
hsa-miR-1197	1	0	1	1	1	1	TSC22D3	TSC22 domain family, member 3
hsa-miR-1197	0	0	1	1	0	0	TMEM41A	transmembrane protein 41A
hsa-miR-1197	0	0	1	0	1	1	B3GALTL	beta 1,3-galactosyltransferase-like
hsa-miR-1197	1	0	1	1	1	1	NEDD9	neural precursor cell expressed, developmentally down-regulated 9
hsa-miR-1197	1	0	1	1	1	1	NFIB	nuclear factor I/B
hsa-miR-1197	1	0	1	1	1	1	NAV1	neuron navigator 1
hsa-miR-1197	0	0	1	0	0	0	LOC286299	uncharacterized LOC286299
hsa-miR-1197	1	0	1	1	1	1	PTER	phosphotriesterase related
hsa-miR-1197	0	0	1	1	1	1	RBM20	RNA binding motif protein 20
hsa-miR-1197	1	0	1	1	1	1	PGAP1	post-GPI attachment to proteins 1
hsa-miR-1197	1	0	1	1	1	1	TMEM135	transmembrane protein 135
hsa-miR-1197	0	0	1	1	1	1	SSFA2	sperm specific antigen 2
hsa-miR-1197	0	0	1	0	0	0	LINC00341	long intergenic non-protein coding RNA 341
hsa-miR-1197	0	0	1	1	0	0	HNRNPAB	heterogeneous nuclear ribonucleoprotein A/B
hsa-miR-1197	0	0	1	1	1	1	POLR2H	polymerase (RNA) II (DNA directed) polypeptide H
hsa-miR-1197	1	0	1	1	1	1	PCMT1	protein-L-isoaspartate (D-aspartate) O-methyltransferase
hsa-miR-1197	0	0	1	0	0	0	LOC401127	WD repeat domain 5 pseudogene
hsa-miR-1197	0	0	1	1	1	1	KIAA0141	KIAA0141
hsa-miR-1197	1	0	1	1	1	1	VIM	vimentin
hsa-miR-1197	1	0	1	1	1	1	LETMD1	LETM1 domain containing 1
hsa-miR-1197	0	0	1	1	1	1	ATP1B3	ATPase, Na+/K+ transporting, beta 3 polypeptide
hsa-miR-1197	0	0	1	0	0	0	ARRDC1	arrestin domain containing 1
hsa-miR-1197	0	0	1	0	0	0	PRMT1	protein arginine methyltransferase 1
hsa-miR-1197	1	0	1	1	1	1	FGF11	fibroblast growth factor 11
hsa-miR-1197	0	0	1	1	1	1	CHCHD4	coiled-coil-helix-coiled-coil-helix domain containing 4
hsa-miR-1197	0	0	1	0	1	1	C17orf108	chromosome 17 open reading frame 108
hsa-miR-1197	1	0	1	1	1	1	COPS2	COP9 constitutive photomorphogenic homolog subunit 2 (Arabidopsis)
hsa-miR-1197	1	0	1	1	1	1	RALB	v-ral simian leukemia viral oncogene homolog B (ras related; GTP binding protein)
hsa-miR-1197	1	0	1	1	1	1	COPZ1	coatomer protein complex, subunit zeta 1
hsa-miR-1197	0	0	1	1	0	0	EMC7	ER membrane protein complex subunit 7
hsa-miR-1197	1	0	1	1	1	1	TFDP1	transcription factor Dp-1
hsa-miR-1197	0	0	1	1	1	1	DCTD	dCMP deaminase
hsa-miR-1197	0	0	1	1	1	1	PECR	peroxisomal trans-2-enoyl-CoA reductase
hsa-miR-1197	0	0	1	1	1	1	STON1	stonin 1
hsa-miR-1197	1	0	1	1	1	1	POU2F2	POU class 2 homeobox 2
hsa-miR-1197	1	0	1	1	0	0	YPEL3	yippee-like 3 (Drosophila)
hsa-miR-1197	0	0	1	1	1	1	TRIM68	tripartite motif containing 68
hsa-miR-1197	0	0	1	1	1	1	PGAP2	post-GPI attachment to proteins 2
hsa-miR-1197	0	0	1	1	0	0	CDK2AP2	cyclin-dependent kinase 2 associated protein 2
hsa-miR-1197	0	0	1	1	0	0	ATRAID	all-trans retinoic acid-induced differentiation factor
hsa-miR-1197	0	0	1	1	1	1	PSMA1	proteasome (prosome, macropain) subunit, alpha type, 1
hsa-miR-1197	0	0	1	0	0	0	LOC150568	uncharacterized LOC150568
hsa-miR-1197	0	0	1	0	1	1	TMEM155	transmembrane protein 155
hsa-miR-1197	0	0	1	1	1	1	VPS16	vacuolar protein sorting 16 homolog (S. cerevisiae)
hsa-miR-1197	0	0	1	1	1	1	BMPR1A	bone morphogenetic protein receptor, type IA
hsa-miR-1197	0	0	1	1	1	1	HADHB	hydroxyacyl-CoA dehydrogenase/3-ketoacyl-CoA thiolase/enoyl-CoA hydratase (trifunctional protein), beta subunit
hsa-miR-1197	0	0	1	0	0	0	LOC677759	uncharacterized LOC677759
hsa-miR-1197	0	0	1	1	0	0	PTGDS	prostaglandin D2 synthase 21kDa (brain)
hsa-miR-1197	1	0	1	1	1	1	TAGLN2	transgelin 2
hsa-miR-1197	1	0	1	1	1	1	EIF4A2	eukaryotic translation initiation factor 4A2
hsa-miR-1197	1	0	1	1	1	1	FUBP3	far upstream element (FUSE) binding protein 3
hsa-miR-1197	1	0	1	1	1	1	DPF2	D4, zinc and double PHD fingers family 2
hsa-miR-1197	0	0	1	1	1	1	MAPK8	mitogen-activated protein kinase 8
hsa-miR-1197	0	0	1	1	1	1	NOLC1	nucleolar and coiled-body phosphoprotein 1
hsa-miR-1197	1	0	1	1	1	1	BAALC	brain and acute leukemia, cytoplasmic
hsa-miR-1197	1	0	1	1	1	1	GOLGA7	golgin A7
hsa-miR-1197	0	0	1	1	0	0	ATP6V0C	ATPase, H+ transporting, lysosomal 16kDa, V0 subunit c
hsa-miR-1197	0	0	1	1	0	0	SLX1B	SLX1 structure-specific endonuclease subunit homolog B (S. cerevisiae)
hsa-miR-1197	0	0	1	1	1	1	GFM1	G elongation factor, mitochondrial 1
hsa-miR-1197	0	0	1	1	1	1	AMACR	alpha-methylacyl-CoA racemase
hsa-miR-1197	0	0	1	1	0	0	CD79B	CD79b molecule, immunoglobulin-associated beta
hsa-miR-1197	1	0	1	1	1	1	TMEM55B	transmembrane protein 55B
hsa-miR-1197	0	0	1	1	1	1	HS3ST2	heparan sulfate (glucosamine) 3-O-sulfotransferase 2
hsa-miR-1197	1	0	1	1	0	0	STAG3L4	stromal antigen 3-like 4
hsa-miR-1197	0	0	1	0	0	0	CHEK2P2	checkpoint kinase 2 pseudogene 2
hsa-miR-1197	1	0	1	1	0	0	FOXO3	forkhead box O3
hsa-miR-1197	1	0	1	1	1	1	PHF20L1	PHD finger protein 20-like 1
hsa-miR-1197	1	0	1	1	1	1	ATPAF1	ATP synthase mitochondrial F1 complex assembly factor 1
hsa-miR-1197	0	0	1	0	1	1	UBA52	ubiquitin A-52 residue ribosomal protein fusion product 1
hsa-miR-1197	0	0	1	1	1	1	EPCAM	epithelial cell adhesion molecule
hsa-miR-1197	1	0	1	1	1	1	SERF2	small EDRK-rich factor 2
hsa-miR-1197	0	0	1	1	0	0	IDH3G	isocitrate dehydrogenase 3 (NAD+) gamma
hsa-miR-1197	1	0	1	1	1	1	SLMAP	sarcolemma associated protein
hsa-miR-1197	1	0	1	0	1	1	KIAA0240	KIAA0240
hsa-miR-1197	1	0	1	0	1	1	KIAA0664	KIAA0664
hsa-miR-1197	0	0	1	0	0	0	FAM92A1	family with sequence similarity 92, member A1
hsa-miR-1197	0	0	1	0	1	1	C3orf17	chromosome 3 open reading frame 17
hsa-miR-1197	1	0	1	1	1	1	KIAA2018	KIAA2018
hsa-miR-1197	1	0	1	0	1	1	OSBPL8	oxysterol binding protein-like 8
hsa-miR-1197	0	0	1	1	1	1	SDAD1	SDA1 domain containing 1
hsa-miR-1197	1	0	1	0	1	1	CNTNAP2	contactin associated protein-like 2
hsa-miR-1197	0	0	1	1	0	0	TENC1	tensin like C1 domain containing phosphatase (tensin 2)
hsa-miR-1197	0	0	1	0	1	1	SYNPR	synaptoporin
hsa-miR-1197	0	0	1	1	0	0	GSTT2	glutathione S-transferase theta 2
hsa-miR-1197	1	0	1	1	1	1	ZFHX3	zinc finger homeobox 3
hsa-miR-1197	1	0	1	1	1	1	METAP1	methionyl aminopeptidase 1
hsa-miR-1197	0	0	1	1	1	1	PTGS1	prostaglandin-endoperoxide synthase 1 (prostaglandin G/H synthase and cyclooxygenase)
hsa-miR-1197	1	0	1	1	1	1	TRIOBP	TRIO and F-actin binding protein
hsa-miR-1197	0	0	1	0	0	0	C1orf81	chromosome 1 open reading frame 81
hsa-miR-1197	0	0	1	1	1	1	ALDH3B1	aldehyde dehydrogenase 3 family, member B1
hsa-miR-1197	0	0	1	1	1	1	ADPRH	ADP-ribosylarginine hydrolase
hsa-miR-1197	1	0	1	1	1	1	AFF1	AF4/FMR2 family, member 1
hsa-miR-1197	1	0	1	1	0	0	ADRB3	adrenoceptor beta 3
hsa-miR-1197	1	0	1	0	0	0	CACNA1A	calcium channel, voltage-dependent, P/Q type, alpha 1A subunit
hsa-miR-1197	0	0	1	1	1	1	CD3G	CD3g molecule, gamma (CD3-TCR complex)
hsa-miR-1197	1	0	1	1	1	1	FBN1	fibrillin 1
hsa-miR-1197	1	0	1	1	1	1	GALC	galactosylceramidase
hsa-miR-1197	1	0	1	1	1	1	GJA1	gap junction protein, alpha 1, 43kDa
hsa-miR-1197	1	0	1	1	1	1	GK	glycerol kinase
hsa-miR-1197	1	0	1	0	1	1	ITGB3	integrin, beta 3 (platelet glycoprotein IIIa, antigen CD61)
hsa-miR-1197	0	0	1	1	1	1	KCNJ1	potassium inwardly-rectifying channel, subfamily J, member 1
hsa-miR-1197	0	0	1	1	1	1	MAOA	monoamine oxidase A
hsa-miR-1197	0	0	1	1	0	0	OCA2	oculocutaneous albinism II
hsa-miR-1197	1	0	1	1	1	1	OCRL	oculocerebrorenal syndrome of Lowe
hsa-miR-1197	1	0	1	1	1	1	RB1	retinoblastoma 1
hsa-miR-1197	1	0	1	1	1	1	TIMP3	TIMP metallopeptidase inhibitor 3
hsa-miR-1197	1	1	1	1	1	1	CDKN1A	cyclin-dependent kinase inhibitor 1A (p21, Cip1)
hsa-miR-1197	1	0	1	1	1	1	HNF1B	HNF1 homeobox B
hsa-miR-1197	1	0	1	1	1	1	AQP2	aquaporin 2 (collecting duct)
hsa-miR-1197	1	0	1	1	1	1	HOXD13	homeobox D13
hsa-miR-1197	1	0	1	1	1	1	DCX	doublecortin
hsa-miR-1197	0	0	1	1	1	1	HGF	hepatocyte growth factor (hepapoietin A; scatter factor)
hsa-miR-1197	0	0	1	1	1	1	BDKRB2	bradykinin receptor B2
hsa-miR-1197	1	0	1	1	1	1	FASLG	Fas ligand (TNF superfamily, member 6)
hsa-miR-1197	1	0	1	0	1	1	ADRA2B	adrenoceptor alpha 2B
hsa-miR-1197	0	0	1	1	1	1	AGTR1	angiotensin II receptor, type 1
hsa-miR-1197	1	0	1	1	1	1	CACNA2D1	calcium channel, voltage-dependent, alpha 2/delta subunit 1
hsa-miR-1197	1	0	1	1	1	1	CHRM1	cholinergic receptor, muscarinic 1
hsa-miR-1197	1	0	1	1	1	1	DIO2	deiodinase, iodothyronine, type II
hsa-miR-1197	1	0	1	1	1	1	GABRG2	gamma-aminobutyric acid (GABA) A receptor, gamma 2
hsa-miR-1197	1	0	1	1	1	1	GAD1	glutamate decarboxylase 1 (brain, 67kDa)
hsa-miR-1197	1	0	1	1	1	1	GRM1	glutamate receptor, metabotropic 1
hsa-miR-1197	1	0	1	1	1	1	HTR4	5-hydroxytryptamine (serotonin) receptor 4, G protein-coupled
hsa-miR-1197	0	0	1	1	1	1	HTR7	5-hydroxytryptamine (serotonin) receptor 7, adenylate cyclase-coupled
hsa-miR-1197	1	0	1	1	1	1	IGF2R	insulin-like growth factor 2 receptor
hsa-miR-1197	1	0	1	1	1	1	PPP3R1	protein phosphatase 3, regulatory subunit B, alpha
hsa-miR-1197	0	0	1	0	0	0	PRIM1	primase, DNA, polypeptide 1 (49kDa)
hsa-miR-1197	1	0	1	1	1	1	RARB	retinoic acid receptor, beta
hsa-miR-1197	1	0	1	1	1	1	AFTPH	aftiphilin
hsa-miR-1197	0	0	1	0	0	0	OR8G1	olfactory receptor, family 8, subfamily G, member 1
hsa-miR-1197	1	0	1	1	1	1	ABLIM1	actin binding LIM protein 1
hsa-miR-1197	1	0	1	0	1	1	SMAD2	SMAD family member 2
hsa-miR-1197	1	0	1	1	1	1	KLHL31	kelch-like 31 (Drosophila)
hsa-miR-1197	0	0	1	1	1	1	ATP5S	ATP synthase, H+ transporting, mitochondrial Fo complex, subunit s (factor B)
hsa-miR-1197	1	0	1	1	1	1	HNRNPD	heterogeneous nuclear ribonucleoprotein D (AU-rich element RNA binding protein 1, 37kDa)
hsa-miR-1197	1	0	1	0	1	1	LIN28B	lin-28 homolog B (C. elegans)
hsa-miR-1197	0	0	1	1	1	1	DBX2	developing brain homeobox 2
hsa-miR-1197	1	0	1	0	1	1	LRRC55	leucine rich repeat containing 55
hsa-miR-1197	1	0	1	1	1	1	EBF3	early B-cell factor 3
hsa-miR-1197	1	0	1	1	1	1	PLCXD3	phosphatidylinositol-specific phospholipase C, X domain containing 3
hsa-miR-1197	0	0	1	1	1	1	WDR31	WD repeat domain 31
hsa-miR-1197	1	0	1	1	1	1	NTRK3	neurotrophic tyrosine kinase, receptor, type 3
hsa-miR-1197	0	0	1	0	1	1	C3orf56	chromosome 3 open reading frame 56
hsa-miR-1197	1	0	1	0	1	1	CPLX2	complexin 2
hsa-miR-1197	1	0	1	1	1	1	LPHN1	latrophilin 1
hsa-miR-1197	0	0	1	1	1	1	GCSAM	germinal center-associated, signaling and motility
hsa-miR-1197	1	0	1	1	1	1	CUL4A	cullin 4A
hsa-miR-1197	1	0	1	0	1	1	C6orf222	chromosome 6 open reading frame 222
hsa-miR-1197	1	0	1	1	1	1	BCL2L15	BCL2-like 15
hsa-miR-1197	1	0	1	1	1	1	FAM171A1	family with sequence similarity 171, member A1
hsa-miR-1197	1	0	1	1	1	1	ATP11C	ATPase, class VI, type 11C
hsa-miR-1197	1	0	1	0	1	1	CREB5	cAMP responsive element binding protein 5
hsa-miR-1197	0	0	1	1	0	0	SOHLH1	spermatogenesis and oogenesis specific basic helix-loop-helix 1
hsa-miR-1197	1	0	1	1	1	1	SLC25A53	solute carrier family 25, member 53
hsa-miR-1197	1	0	1	1	1	1	SORCS1	sortilin-related VPS10 domain containing receptor 1
hsa-miR-1197	0	0	1	1	1	1	C2orf68	chromosome 2 open reading frame 68
hsa-miR-1197	0	0	1	1	0	0	VSIG8	V-set and immunoglobulin domain containing 8
hsa-miR-1197	1	0	1	1	1	1	TMCC1	transmembrane and coiled-coil domain family 1
hsa-miR-1197	0	0	1	1	0	0	PIR	pirin (iron-binding nuclear protein)
hsa-miR-1197	1	0	1	1	1	1	SBK1	SH3-binding domain kinase 1
hsa-miR-1197	1	0	1	1	1	1	SH3KBP1	SH3-domain kinase binding protein 1
hsa-miR-1197	1	0	1	0	1	1	BCL7A	B-cell CLL/lymphoma 7A
hsa-miR-1197	1	0	1	0	1	1	TNRC6B	trinucleotide repeat containing 6B
hsa-miR-1197	1	0	1	1	1	1	FNBP1L	formin binding protein 1-like
hsa-miR-1197	1	0	1	0	1	1	RAB12	RAB12, member RAS oncogene family
hsa-miR-1197	0	0	1	1	1	1	ARRDC2	arrestin domain containing 2
hsa-miR-1197	0	0	1	1	0	0	KLK3	kallikrein-related peptidase 3
hsa-miR-1197	0	0	1	1	1	1	ATF3	activating transcription factor 3
hsa-miR-1197	1	0	1	0	1	1	SRGAP3	SLIT-ROBO Rho GTPase activating protein 3
hsa-miR-1197	0	0	1	1	1	1	FAM134B	family with sequence similarity 134, member B
hsa-miR-1197	1	0	1	1	1	1	SCD5	stearoyl-CoA desaturase 5
hsa-miR-1197	1	0	1	0	1	1	CDC42SE1	CDC42 small effector 1
hsa-miR-1197	0	0	1	1	0	0	SCNN1G	sodium channel, non-voltage-gated 1, gamma subunit
hsa-miR-1197	1	0	1	0	1	1	CREBZF	CREB/ATF bZIP transcription factor
hsa-miR-1197	1	0	1	1	0	0	ANKRD34A	ankyrin repeat domain 34A
hsa-miR-1197	1	0	1	1	1	1	ZNF384	zinc finger protein 384
hsa-miR-1197	1	0	1	1	1	1	SPTSSB	serine palmitoyltransferase, small subunit B
hsa-miR-1197	1	0	1	1	1	1	SCN2A	sodium channel, voltage-gated, type II, alpha subunit
hsa-miR-1197	1	0	1	1	1	1	PAPD5	PAP associated domain containing 5
hsa-miR-1197	1	0	1	1	1	1	PRKAG2	protein kinase, AMP-activated, gamma 2 non-catalytic subunit
hsa-miR-1197	0	0	1	1	1	1	ZXDC	ZXD family zinc finger C
hsa-miR-1197	1	0	1	1	1	1	CYLD	cylindromatosis (turban tumor syndrome)
hsa-miR-1197	1	0	1	1	1	1	ZC2HC1C	zinc finger, C2HC-type containing 1C
hsa-miR-1197	1	0	1	1	1	1	DIAPH3	diaphanous homolog 3 (Drosophila)
hsa-miR-1197	1	0	1	1	1	1	SLC9A6	solute carrier family 9, subfamily A (NHE6, cation proton antiporter 6), member 6
hsa-miR-1197	1	0	1	1	1	1	FRS2	fibroblast growth factor receptor substrate 2
hsa-miR-1197	1	0	1	1	1	1	CRTC3	CREB regulated transcription coactivator 3
hsa-miR-1197	0	0	1	1	1	1	TTC14	tetratricopeptide repeat domain 14
hsa-miR-1197	1	0	1	1	1	1	KDM5A	lysine (K)-specific demethylase 5A
hsa-miR-1197	1	0	1	1	1	1	RERE	arginine-glutamic acid dipeptide (RE) repeats
hsa-miR-1197	0	0	1	1	1	1	SLC6A3	solute carrier family 6 (neurotransmitter transporter, dopamine), member 3
hsa-miR-1197	0	0	1	1	1	1	KIR3DX1	killer cell immunoglobulin-like receptor, three domains, X1
hsa-miR-1197	0	0	1	1	1	1	SLC7A3	solute carrier family 7 (cationic amino acid transporter, y+ system), member 3
hsa-miR-1197	0	0	1	0	1	1	TOP2A	topoisomerase (DNA) II alpha 170kDa
hsa-miR-1197	1	0	1	1	1	1	HS6ST2	heparan sulfate 6-O-sulfotransferase 2
hsa-miR-1197	1	0	1	1	1	1	ZNF436	zinc finger protein 436
hsa-miR-1197	1	0	1	1	1	1	ATG9A	autophagy related 9A
hsa-miR-1197	1	0	1	1	1	1	SRSF1	serine/arginine-rich splicing factor 1
hsa-miR-1197	1	0	1	1	1	1	VAV3	vav 3 guanine nucleotide exchange factor
hsa-miR-1197	1	0	1	1	1	1	UNK	unkempt homolog (Drosophila)
hsa-miR-1197	0	0	1	1	1	1	LRRC4B	leucine rich repeat containing 4B
hsa-miR-1197	1	0	1	0	1	1	ODZ3	odz, odd Oz/ten-m homolog 3 (Drosophila)
hsa-miR-1197	1	0	1	0	1	1	MEGF9	multiple EGF-like-domains 9
hsa-miR-1197	0	0	1	0	1	1	ISCA1P1	iron-sulfur cluster assembly 1 homolog (S. cerevisiae) pseudogene 1
hsa-miR-1197	0	0	1	1	0	0	GSTT2B	glutathione S-transferase theta 2B (gene/pseudogene)
hsa-miR-1197	1	0	1	1	1	1	REPS2	RALBP1 associated Eps domain containing 2
hsa-miR-1197	1	0	1	0	1	1	PDE5A	phosphodiesterase 5A, cGMP-specific
hsa-miR-1197	1	0	1	1	1	1	ADAM10	ADAM metallopeptidase domain 10
hsa-miR-1197	1	0	1	1	1	1	ADCYAP1	adenylate cyclase activating polypeptide 1 (pituitary)
hsa-miR-1197	1	0	1	0	0	0	ACAN	aggrecan
hsa-miR-1197	0	0	1	1	1	1	AQP8	aquaporin 8
hsa-miR-1197	0	0	1	1	0	0	SIGLEC6	sialic acid binding Ig-like lectin 6
hsa-miR-1197	1	0	1	0	1	1	CDK6	cyclin-dependent kinase 6
hsa-miR-1197	0	0	1	1	0	0	CLK3	CDC-like kinase 3
hsa-miR-1197	1	0	1	1	1	1	MAPK14	mitogen-activated protein kinase 14
hsa-miR-1197	0	0	1	1	1	1	CXADR	coxsackie virus and adenovirus receptor
hsa-miR-1197	1	0	1	1	1	1	S1PR1	sphingosine-1-phosphate receptor 1
hsa-miR-1197	0	0	1	0	1	1	ELF5	E74-like factor 5 (ets domain transcription factor)
hsa-miR-1197	1	0	1	1	1	1	GPC4	glypican 4
hsa-miR-1197	1	0	1	1	1	1	GCNT1	glucosaminyl (N-acetyl) transferase 1, core 2
hsa-miR-1197	1	0	1	1	1	1	NDST1	N-deacetylase/N-sulfotransferase (heparan glucosaminyl) 1
hsa-miR-1197	0	0	1	1	1	1	IL13RA1	interleukin 13 receptor, alpha 1
hsa-miR-1197	1	0	1	1	1	1	ARL4D	ADP-ribosylation factor-like 4D
hsa-miR-1197	1	0	1	1	1	1	BCL6	B-cell CLL/lymphoma 6
hsa-miR-1197	0	0	1	1	1	1	CD1D	CD1d molecule
hsa-miR-1197	0	0	1	1	1	1	SLC31A2	solute carrier family 31 (copper transporters), member 2
hsa-miR-1197	1	0	1	1	1	1	HBEGF	heparin-binding EGF-like growth factor
hsa-miR-1197	1	0	1	1	1	1	DUSP6	dual specificity phosphatase 6
hsa-miR-1197	1	0	1	1	1	1	E2F3	E2F transcription factor 3
hsa-miR-1197	0	0	1	1	0	0	EDN2	endothelin 2
hsa-miR-1197	1	0	1	1	1	1	EPB49	erythrocyte membrane protein band 4.9 (dematin)
hsa-miR-1197	0	0	1	1	1	1	GFAP	glial fibrillary acidic protein
hsa-miR-1197	0	0	1	0	1	1	GCLM	glutamate-cysteine ligase, modifier subunit
hsa-miR-1197	1	0	1	1	1	1	GLRA2	glycine receptor, alpha 2
hsa-miR-1197	1	0	1	1	1	1	GNAZ	guanine nucleotide binding protein (G protein), alpha z polypeptide
hsa-miR-1197	0	0	1	1	1	1	HLA-DOA	major histocompatibility complex, class II, DO alpha
hsa-miR-1197	1	0	1	1	1	1	ITGA3	integrin, alpha 3 (antigen CD49C, alpha 3 subunit of VLA-3 receptor)
hsa-miR-1197	1	0	1	1	1	1	ITPR2	inositol 1,4,5-trisphosphate receptor, type 2
hsa-miR-1197	1	0	1	1	1	1	KDR	kinase insert domain receptor (a type III receptor tyrosine kinase)
hsa-miR-1197	1	0	1	1	1	1	MAP1A	microtubule-associated protein 1A
hsa-miR-1197	1	0	1	1	1	1	MAX	MYC associated factor X
hsa-miR-1197	0	0	1	1	1	1	MSMB	microseminoprotein, beta-
hsa-miR-1197	0	0	1	1	1	1	MTAP	methylthioadenosine phosphorylase
hsa-miR-1197	0	0	1	1	1	1	NID1	nidogen 1
hsa-miR-1197	1	0	1	1	1	1	NPAT	nuclear protein, ataxia-telangiectasia locus
hsa-miR-1197	1	0	1	1	1	1	NPTX1	neuronal pentraxin I
hsa-miR-1197	0	0	1	0	1	1	OAZ2	ornithine decarboxylase antizyme 2
hsa-miR-1197	0	0	1	0	1	1	OPHN1	oligophrenin 1
hsa-miR-1197	1	0	1	1	1	1	PLAGL2	pleiomorphic adenoma gene-like 2
hsa-miR-1197	1	0	1	1	1	1	PPP2R1B	protein phosphatase 2, regulatory subunit A, beta
hsa-miR-1197	1	0	1	0	1	1	PRKCA	protein kinase C, alpha
hsa-miR-1197	1	0	1	1	1	1	PTPN1	protein tyrosine phosphatase, non-receptor type 1
hsa-miR-1197	1	0	1	1	1	1	PTPN9	protein tyrosine phosphatase, non-receptor type 9
hsa-miR-1197	1	0	1	1	1	1	PTPRK	protein tyrosine phosphatase, receptor type, K
hsa-miR-1197	1	0	1	1	1	1	RAD23B	RAD23 homolog B (S. cerevisiae)
hsa-miR-1197	1	0	1	1	1	1	SRSF2	serine/arginine-rich splicing factor 2
hsa-miR-1197	1	0	1	1	1	1	SH3GL2	SH3-domain GRB2-like 2
hsa-miR-1197	1	0	1	1	0	0	SLN	sarcolipin
hsa-miR-1197	1	0	1	1	1	1	SNX2	sorting nexin 2
hsa-miR-1197	1	0	1	1	1	1	SRF	serum response factor (c-fos serum response element-binding transcription factor)
hsa-miR-1197	1	0	1	1	1	1	LEFTY2	left-right determination factor 2
hsa-miR-1197	1	0	1	0	1	1	SEC62	SEC62 homolog (S. cerevisiae)
hsa-miR-1197	1	0	1	1	1	1	UBE2H	ubiquitin-conjugating enzyme E2H
hsa-miR-1197	1	0	1	1	1	1	UBE2N	ubiquitin-conjugating enzyme E2N
hsa-miR-1197	0	0	1	1	1	1	UBE2V2	ubiquitin-conjugating enzyme E2 variant 2
hsa-miR-1197	1	0	1	0	1	1	VCL	vinculin
hsa-miR-1197	1	0	1	1	1	1	YWHAH	tyrosine 3-monooxygenase/tryptophan 5-monooxygenase activation protein, eta polypeptide
hsa-miR-1197	0	0	1	1	1	1	ZNF137P	zinc finger protein 137, pseudogene
hsa-miR-1197	0	0	1	1	1	1	SCG2	secretogranin II
hsa-miR-1197	1	0	1	0	1	1	VAPA	VAMP (vesicle-associated membrane protein)-associated protein A, 33kDa
hsa-miR-1197	1	0	1	1	1	1	PPM1D	protein phosphatase, Mg2+/Mn2+ dependent, 1D
hsa-miR-1197	1	0	1	1	1	1	BHLHE40	basic helix-loop-helix family, member e40
hsa-miR-1197	0	0	1	1	1	1	KMO	kynurenine 3-monooxygenase (kynurenine 3-hydroxylase)
hsa-miR-1197	1	0	1	0	1	1	TNKS	tankyrase, TRF1-interacting ankyrin-related ADP-ribose polymerase
hsa-miR-1197	0	0	1	1	1	1	SUCLA2	succinate-CoA ligase, ADP-forming, beta subunit
hsa-miR-1197	1	0	1	0	1	1	CDK5R1	cyclin-dependent kinase 5, regulatory subunit 1 (p35)
hsa-miR-1197	1	0	1	1	1	1	ALDH1A2	aldehyde dehydrogenase 1 family, member A2
hsa-miR-1197	0	0	1	0	1	1	EIF4EBP2	eukaryotic translation initiation factor 4E binding protein 2
hsa-miR-1197	1	0	1	1	1	1	HNF4G	hepatocyte nuclear factor 4, gamma
hsa-miR-1197	1	0	1	0	1	1	SLC1A2	solute carrier family 1 (glial high affinity glutamate transporter), member 2
hsa-miR-1197	0	0	1	1	0	0	WNT2B	wingless-type MMTV integration site family, member 2B
hsa-miR-1197	0	0	1	0	1	1	TMSB4Y	thymosin beta 4, Y-linked
hsa-miR-1197	1	0	1	0	1	1	MED14	mediator complex subunit 14
hsa-miR-1197	1	0	1	1	1	1	MED21	mediator complex subunit 21
hsa-miR-1197	0	0	1	1	1	1	HOMER1	homer homolog 1 (Drosophila)
hsa-miR-1197	0	0	1	0	1	1	CYTIP	cytohesin 1 interacting protein
hsa-miR-1197	1	0	1	1	1	1	GDA	guanine deaminase
hsa-miR-1197	1	0	1	1	1	1	BNIP2	BCL2/adenovirus E1B 19kDa interacting protein 2
hsa-miR-1197	0	0	1	1	1	1	COL12A1	collagen, type XII, alpha 1
hsa-miR-1197	0	0	1	1	1	1	DDX10	DEAD (Asp-Glu-Ala-Asp) box polypeptide 10
hsa-miR-1197	1	0	1	1	1	1	EPS8	epidermal growth factor receptor pathway substrate 8
hsa-miR-1197	0	0	1	1	1	1	EXTL1	exostoses (multiple)-like 1
hsa-miR-1197	1	0	1	1	1	1	LRP2	low density lipoprotein receptor-related protein 2
hsa-miR-1197	0	0	1	1	1	1	PIGH	phosphatidylinositol glycan anchor biosynthesis, class H
hsa-miR-1197	1	0	1	1	1	1	SF1	splicing factor 1
hsa-miR-1197	0	0	1	1	1	1	VNN1	vanin 1
hsa-miR-1197	1	0	1	1	1	1	MTMR4	myotubularin related protein 4
hsa-miR-1197	0	0	1	1	1	1	SLC16A6	solute carrier family 16, member 6 (monocarboxylic acid transporter 7)
hsa-miR-1197	1	0	1	1	1	1	RABEP1	rabaptin, RAB GTPase binding effector protein 1
hsa-miR-1197	0	0	1	1	1	1	MTA2	metastasis associated 1 family, member 2
hsa-miR-1197	0	0	1	1	0	0	ASIC3	acid-sensing (proton-gated) ion channel 3
hsa-miR-1197	0	0	1	1	0	0	TM9SF2	transmembrane 9 superfamily member 2
hsa-miR-1197	1	0	1	1	1	1	MED26	mediator complex subunit 26
hsa-miR-1197	1	0	1	1	1	1	ONECUT2	one cut homeobox 2
hsa-miR-1197	0	0	1	1	1	1	ITM2A	integral membrane protein 2A
hsa-miR-1197	0	0	1	1	1	1	CD8B	CD8b molecule
hsa-miR-1197	0	0	1	0	1	1	DSC2	desmocollin 2
hsa-miR-1197	0	0	1	1	1	1	JAK2	Janus kinase 2
hsa-miR-1197	1	0	1	1	1	1	KCNA2	potassium voltage-gated channel, shaker-related subfamily, member 2
hsa-miR-1197	1	0	1	1	1	1	KCNJ8	potassium inwardly-rectifying channel, subfamily J, member 8
hsa-miR-1197	0	0	1	1	1	1	PRCP	prolylcarboxypeptidase (angiotensinase C)
hsa-miR-1197	0	0	1	1	1	1	XYLB	xylulokinase homolog (H. influenzae)
hsa-miR-1197	1	0	1	1	1	1	GFPT2	glutamine-fructose-6-phosphate transaminase 2
hsa-miR-1197	1	0	1	1	1	1	CBL	Cbl proto-oncogene, E3 ubiquitin protein ligase
hsa-miR-1197	1	0	1	1	1	1	FOXN3	forkhead box N3
hsa-miR-1197	1	1	1	1	1	1	MAP3K8	mitogen-activated protein kinase kinase kinase 8
hsa-miR-1197	1	0	1	1	1	1	DCC	deleted in colorectal carcinoma
hsa-miR-1197	0	0	1	0	1	1	FOSL2	FOS-like antigen 2
hsa-miR-1197	1	0	1	1	1	1	GEM	GTP binding protein overexpressed in skeletal muscle
hsa-miR-1197	1	0	1	1	1	1	GPR6	G protein-coupled receptor 6
hsa-miR-1197	1	0	1	1	1	1	PHF2	PHD finger protein 2
hsa-miR-1197	1	0	1	1	1	1	RALA	v-ral simian leukemia viral oncogene homolog A (ras related)
hsa-miR-1197	1	0	1	0	1	1	CCDC6	coiled-coil domain containing 6
hsa-miR-1197	1	0	1	1	1	1	RND2	Rho family GTPase 2
hsa-miR-1197	0	0	1	1	1	1	FAIM3	Fas apoptotic inhibitory molecule 3
hsa-miR-1197	1	0	1	1	1	1	PIGK	phosphatidylinositol glycan anchor biosynthesis, class K
hsa-miR-1197	1	0	1	1	1	1	GTF2E1	general transcription factor IIE, polypeptide 1, alpha 56kDa
hsa-miR-1197	0	0	1	1	1	1	TSPAN3	tetraspanin 3
hsa-miR-1197	1	0	1	0	1	1	DCAF7	DDB1 and CUL4 associated factor 7
hsa-miR-1197	1	0	1	0	1	1	SPRY3	sprouty homolog 3 (Drosophila)
hsa-miR-1197	1	0	1	1	1	1	PURA	purine-rich element binding protein A
hsa-miR-1197	1	0	1	1	1	1	MAN1A1	mannosidase, alpha, class 1A, member 1
hsa-miR-1197	1	0	1	1	1	1	MAT2A	methionine adenosyltransferase II, alpha
hsa-miR-1197	1	0	1	1	1	1	MTF1	metal-regulatory transcription factor 1
hsa-miR-1197	1	0	1	1	0	0	AGFG2	ArfGAP with FG repeats 2
hsa-miR-1197	1	0	1	1	1	1	NFATC1	nuclear factor of activated T-cells, cytoplasmic, calcineurin-dependent 1
hsa-miR-1197	0	0	1	1	1	1	NTS	neurotensin
hsa-miR-1197	1	0	1	1	1	1	STK4	serine/threonine kinase 4
hsa-miR-1197	1	0	1	1	1	1	NPEPPS	aminopeptidase puromycin sensitive
hsa-miR-1197	0	0	1	1	1	1	SLC30A9	solute carrier family 30 (zinc transporter), member 9
hsa-miR-1197	0	0	1	1	0	0	CIB1	calcium and integrin binding 1 (calmyrin)
hsa-miR-1197	1	0	1	0	1	1	MXD4	MAX dimerization protein 4
hsa-miR-1197	0	0	1	1	0	0	YEATS4	YEATS domain containing 4
hsa-miR-1197	1	0	1	1	1	1	ELL	elongation factor RNA polymerase II
hsa-miR-1197	1	0	1	0	1	1	IGF2BP1	insulin-like growth factor 2 mRNA binding protein 1
hsa-miR-1197	1	0	1	1	1	1	RRAGA	Ras-related GTP binding A
hsa-miR-1197	1	0	1	1	1	1	MMP24	matrix metallopeptidase 24 (membrane-inserted)
hsa-miR-1197	0	0	1	1	1	1	GLO1	glyoxalase I
hsa-miR-1197	1	0	1	1	1	1	HIVEP2	human immunodeficiency virus type I enhancer binding protein 2
hsa-miR-1197	0	0	1	1	1	1	ASCC3	activating signal cointegrator 1 complex subunit 3
hsa-miR-1197	1	0	1	0	1	1	SLC5A3	solute carrier family 5 (sodium/myo-inositol cotransporter), member 3
hsa-miR-1197	1	0	1	1	1	1	SRP72	signal recognition particle 72kDa
hsa-miR-1197	0	0	1	1	0	0	RNF113A	ring finger protein 113A
hsa-miR-1197	1	0	1	1	1	1	NR4A3	nuclear receptor subfamily 4, group A, member 3
hsa-miR-1197	1	0	1	1	1	1	ABHD2	abhydrolase domain containing 2
hsa-miR-1197	0	0	1	1	0	0	USF1	upstream transcription factor 1
hsa-miR-1197	1	0	1	1	1	1	UTRN	utrophin
hsa-miR-1197	1	0	1	1	1	1	ZNF81	zinc finger protein 81
hsa-miR-1197	1	0	1	1	1	1	ERLIN2	ER lipid raft associated 2
hsa-miR-1197	0	0	1	1	1	1	GPR176	G protein-coupled receptor 176
hsa-miR-1197	1	0	1	1	1	1	KLF12	Kruppel-like factor 12
hsa-miR-1197	0	0	1	1	1	1	KLF8	Kruppel-like factor 8
hsa-miR-1197	1	0	1	1	1	1	RNF13	ring finger protein 13
hsa-miR-1197	0	0	1	0	1	1	AP4E1	adaptor-related protein complex 4, epsilon 1 subunit
hsa-miR-1197	1	0	1	1	1	1	PADI2	peptidyl arginine deiminase, type II
hsa-miR-1197	1	0	1	1	1	1	TARDBP	TAR DNA binding protein
hsa-miR-1197	1	0	1	0	1	1	EIF2C2	eukaryotic translation initiation factor 2C, 2
hsa-miR-1197	1	0	1	1	1	1	HEY2	hairy/enhancer-of-split related with YRPW motif 2
hsa-miR-1197	1	0	1	1	1	1	HS2ST1	heparan sulfate 2-O-sulfotransferase 1
hsa-miR-1197	1	0	1	0	1	1	GAB2	GRB2-associated binding protein 2
hsa-miR-1197	1	0	1	1	1	1	LDOC1	leucine zipper, down-regulated in cancer 1
hsa-miR-1197	1	0	1	0	1	1	BLOC1S6	biogenesis of lysosomal organelles complex-1, subunit 6, pallidin
hsa-miR-1197	0	0	1	0	1	1	TLL1	tolloid-like 1
hsa-miR-1197	1	0	1	1	1	1	ZNF215	zinc finger protein 215
hsa-miR-1197	1	0	1	1	1	1	PPARGC1A	peroxisome proliferator-activated receptor gamma, coactivator 1 alpha
hsa-miR-1197	0	0	1	1	1	1	PNMA3	paraneoplastic Ma antigen 3
hsa-miR-1197	1	0	1	1	1	1	SERTAD3	SERTA domain containing 3
hsa-miR-1197	0	0	1	1	0	0	ZDHHC8	zinc finger, DHHC-type containing 8
hsa-miR-1197	1	0	1	1	1	1	AK2	adenylate kinase 2
hsa-miR-1197	0	0	1	1	1	1	UBQLN1	ubiquilin 1
hsa-miR-1197	1	0	1	1	1	1	SOCS5	suppressor of cytokine signaling 5
hsa-miR-1197	1	0	1	1	1	1	WDR37	WD repeat domain 37
hsa-miR-1197	0	0	1	1	1	1	CCDC113	coiled-coil domain containing 113
hsa-miR-1197	0	0	1	1	0	0	UBE2T	ubiquitin-conjugating enzyme E2T (putative)
hsa-miR-1197	1	0	1	1	1	1	LGALSL	lectin, galactoside-binding-like
hsa-miR-1197	1	0	1	1	0	0	HOXC11	homeobox C11
hsa-miR-1197	0	0	1	1	0	0	EIF2B2	eukaryotic translation initiation factor 2B, subunit 2 beta, 39kDa
hsa-miR-1197	0	0	1	1	1	1	IL1RAPL1	interleukin 1 receptor accessory protein-like 1
hsa-miR-1197	1	0	1	1	1	1	PATZ1	POZ (BTB) and AT hook containing zinc finger 1
hsa-miR-1197	1	0	1	1	1	1	SLC7A11	solute carrier family 7 (anionic amino acid transporter light chain, xc- system), member 11
hsa-miR-1197	1	0	1	1	1	1	LHX6	LIM homeobox 6
hsa-miR-1197	1	0	1	1	1	1	AFF4	AF4/FMR2 family, member 4
hsa-miR-1197	1	0	1	1	1	1	EHD3	EH-domain containing 3
hsa-miR-1197	1	0	1	1	1	1	HERC3	HECT and RLD domain containing E3 ubiquitin protein ligase 3
hsa-miR-1197	1	0	1	1	1	1	ZNF592	zinc finger protein 592
hsa-miR-1197	1	0	1	0	1	1	SH3PXD2A	SH3 and PX domains 2A
hsa-miR-1197	1	0	1	0	1	1	BZW1	basic leucine zipper and W2 domains 1
hsa-miR-1197	1	0	1	1	1	1	DAZAP2	DAZ associated protein 2
hsa-miR-1197	1	0	1	0	1	1	TOMM20	translocase of outer mitochondrial membrane 20 homolog (yeast)
hsa-miR-1197	1	0	1	1	1	1	JAKMIP2	janus kinase and microtubule interacting protein 2
hsa-miR-1197	0	0	1	1	1	1	PPP1R26	protein phosphatase 1, regulatory subunit 26
hsa-miR-1197	1	0	1	0	1	1	TRIL	TLR4 interactor with leucine-rich repeats
hsa-miR-1197	1	0	1	1	1	1	FCHSD2	FCH and double SH3 domains 2
hsa-miR-1197	1	0	1	1	1	1	ZBTB39	zinc finger and BTB domain containing 39
hsa-miR-1197	1	0	1	0	1	1	WDFY3	WD repeat and FYVE domain containing 3
hsa-miR-1197	1	0	1	1	1	1	XPO7	exportin 7
hsa-miR-1197	1	0	1	0	1	1	NMNAT2	nicotinamide nucleotide adenylyltransferase 2
hsa-miR-1197	1	0	1	1	1	1	TRAK2	trafficking protein, kinesin binding 2
hsa-miR-1197	0	0	1	1	1	1	FTSJD2	FtsJ methyltransferase domain containing 2
hsa-miR-1197	1	0	1	1	1	1	SMG1	smg-1 homolog, phosphatidylinositol 3-kinase-related kinase (C. elegans)
hsa-miR-1197	1	0	1	1	1	1	TBC1D9	TBC1 domain family, member 9 (with GRAM domain)
hsa-miR-1197	1	0	1	1	1	1	RTF1	Rtf1, Paf1/RNA polymerase II complex component, homolog (S. cerevisiae)
hsa-miR-1197	1	0	1	1	1	1	PLCB1	phospholipase C, beta 1 (phosphoinositide-specific)
hsa-miR-1197	1	0	1	0	1	1	KHNYN	KH and NYN domain containing
hsa-miR-1197	0	0	1	1	1	1	ANGEL1	angel homolog 1 (Drosophila)
hsa-miR-1197	1	0	1	0	1	1	LARP1	La ribonucleoprotein domain family, member 1
hsa-miR-1197	1	0	1	1	1	1	MED13L	mediator complex subunit 13-like
hsa-miR-1197	0	0	1	1	1	1	LEPROTL1	leptin receptor overlapping transcript-like 1
hsa-miR-1197	0	0	1	1	1	1	ANAPC13	anaphase promoting complex subunit 13
hsa-miR-1197	1	0	1	1	1	1	PARM1	prostate androgen-regulated mucin-like protein 1
hsa-miR-1197	1	0	1	1	1	1	CNOT6	CCR4-NOT transcription complex, subunit 6
hsa-miR-1197	1	0	1	0	1	1	OSBPL3	oxysterol binding protein-like 3
hsa-miR-1197	1	0	1	1	1	1	LTN1	listerin E3 ubiquitin protein ligase 1
hsa-miR-1197	1	0	1	1	0	0	LDLRAP1	low density lipoprotein receptor adaptor protein 1
hsa-miR-1197	1	0	1	1	1	1	FAM155B	family with sequence similarity 155, member B
hsa-miR-1197	0	0	1	1	1	1	SNX7	sorting nexin 7
hsa-miR-1197	0	0	1	1	1	1	SBDS	Shwachman-Bodian-Diamond syndrome
hsa-miR-1197	0	0	1	1	0	0	SCFD1	sec1 family domain containing 1
hsa-miR-1197	1	0	1	1	1	1	NLK	nemo-like kinase
hsa-miR-1197	0	0	1	1	0	0	SRRM2	serine/arginine repetitive matrix 2
hsa-miR-1197	1	0	1	0	1	1	CRIM1	cysteine rich transmembrane BMP regulator 1 (chordin-like)
hsa-miR-1197	1	0	1	0	1	1	KLF3	Kruppel-like factor 3 (basic)
hsa-miR-1197	1	0	1	1	1	1	RAB6B	RAB6B, member RAS oncogene family
hsa-miR-1197	0	0	1	1	1	1	GNAS	GNAS complex locus
hsa-miR-1197	1	0	1	0	1	1	FZD3	frizzled family receptor 3
hsa-miR-1197	0	0	1	0	1	1	APLN	apelin
hsa-miR-1197	1	0	1	0	1	1	KLHL3	kelch-like 3 (Drosophila)
hsa-miR-1197	0	0	1	1	1	1	SPA17	sperm autoantigenic protein 17
hsa-miR-1197	1	0	1	1	1	1	HAO1	hydroxyacid oxidase (glycolate oxidase) 1
hsa-miR-1197	1	0	1	0	1	1	ZRANB1	zinc finger, RAN-binding domain containing 1
hsa-miR-1197	0	0	1	0	1	1	TRIM44	tripartite motif containing 44
hsa-miR-1197	1	0	1	1	1	1	DIRAS2	DIRAS family, GTP-binding RAS-like 2
hsa-miR-1197	1	0	1	0	1	1	EIF2C4	eukaryotic translation initiation factor 2C, 4
hsa-miR-1197	0	0	1	1	0	0	NDE1	nudE nuclear distribution E homolog 1 (A. nidulans)
hsa-miR-1197	1	0	1	1	1	1	ZNF3	zinc finger protein 3
hsa-miR-1197	1	0	1	1	1	1	ALKBH5	alkB, alkylation repair homolog 5 (E. coli)
hsa-miR-1197	1	0	1	0	1	1	FLVCR2	feline leukemia virus subgroup C cellular receptor family, member 2
hsa-miR-1197	1	0	1	1	1	1	RNF125	ring finger protein 125, E3 ubiquitin protein ligase
hsa-miR-1197	1	0	1	1	1	1	SLC48A1	solute carrier family 48 (heme transporter), member 1
hsa-miR-1197	1	0	1	1	1	1	VPS13B	vacuolar protein sorting 13 homolog B (yeast)
hsa-miR-1197	0	0	1	0	1	1	FAM86C1	family with sequence similarity 86, member C1
hsa-miR-1197	1	0	1	0	1	1	LGI2	leucine-rich repeat LGI family, member 2
hsa-miR-1197	1	0	1	1	1	1	TBC1D13	TBC1 domain family, member 13
hsa-miR-1197	1	0	1	1	1	1	SPTLC3	serine palmitoyltransferase, long chain base subunit 3
hsa-miR-1197	1	0	1	1	1	1	LARP6	La ribonucleoprotein domain family, member 6
hsa-miR-1197	1	0	1	0	1	1	LIN7C	lin-7 homolog C (C. elegans)
hsa-miR-1197	1	0	1	1	1	1	RSBN1	round spermatid basic protein 1
hsa-miR-1197	0	0	1	1	0	0	C17orf79	chromosome 17 open reading frame 79
hsa-miR-1197	1	0	1	0	1	1	FOXJ2	forkhead box J2
hsa-miR-1197	1	0	1	1	1	1	PAG1	phosphoprotein associated with glycosphingolipid microdomains 1
hsa-miR-1197	1	0	1	1	1	1	ETNK1	ethanolamine kinase 1
hsa-miR-1197	0	0	1	1	1	1	NPAP1	nuclear pore associated protein 1
hsa-miR-1197	0	0	1	1	1	1	RIN2	Ras and Rab interactor 2
hsa-miR-1197	1	0	1	0	1	1	UBFD1	ubiquitin family domain containing 1
hsa-miR-1197	1	0	1	1	1	1	LRRC8A	leucine rich repeat containing 8 family, member A
hsa-miR-1197	1	0	1	0	1	1	OTUD7B	OTU domain containing 7B
hsa-miR-1197	1	0	1	1	1	1	PITHD1	PITH (C-terminal proteasome-interacting domain of thioredoxin-like) domain containing 1
hsa-miR-1197	1	0	1	1	1	1	SLC12A5	solute carrier family 12 (potassium/chloride transporter), member 5
hsa-miR-1197	0	0	1	1	1	1	SHROOM4	shroom family member 4
hsa-miR-1197	1	0	1	0	1	1	SYT4	synaptotagmin IV
hsa-miR-1197	1	0	1	1	1	1	KLHL14	kelch-like 14 (Drosophila)
hsa-miR-1197	1	0	1	1	1	1	ALS2	amyotrophic lateral sclerosis 2 (juvenile)
hsa-miR-1197	0	0	1	1	0	0	SSX5	synovial sarcoma, X breakpoint 5
hsa-miR-1197	1	0	1	0	1	1	RAP2A	RAP2A, member of RAS oncogene family
hsa-miR-1197	1	0	1	1	1	1	CLDN1	claudin 1
hsa-miR-1197	1	0	1	1	1	1	TMSB4X	thymosin beta 4, X-linked
hsa-miR-1197	0	0	1	1	1	1	SELK	selenoprotein K
hsa-miR-1197	1	0	1	1	1	1	CDH22	cadherin 22, type 2
hsa-miR-1197	1	0	1	0	1	1	TSPYL4	TSPY-like 4
hsa-miR-1197	0	0	1	0	1	1	SPCS3	signal peptidase complex subunit 3 homolog (S. cerevisiae)
hsa-miR-1197	1	0	1	1	1	1	ZFAND3	zinc finger, AN1-type domain 3
hsa-miR-1197	0	0	1	1	0	0	TMSB15A	thymosin beta 15a
hsa-miR-1197	1	0	1	0	1	1	HOXC8	homeobox C8
hsa-miR-1197	1	0	1	1	1	1	PRRX1	paired related homeobox 1
hsa-miR-1197	0	0	1	1	1	1	ACBD3	acyl-CoA binding domain containing 3
hsa-miR-1197	0	0	1	1	1	1	UPF3B	UPF3 regulator of nonsense transcripts homolog B (yeast)
hsa-miR-1197	1	0	1	1	1	1	C1orf116	chromosome 1 open reading frame 116
hsa-miR-1197	0	0	1	1	1	1	HTR5A	5-hydroxytryptamine (serotonin) receptor 5A, G protein-coupled
hsa-miR-1197	0	0	1	1	1	1	METTL16	methyltransferase like 16
hsa-miR-1197	1	0	1	1	1	1	FAM134A	family with sequence similarity 134, member A
hsa-miR-1197	0	0	1	1	1	1	PDYN	prodynorphin
hsa-miR-1197	0	0	1	1	1	1	LPAL2	lipoprotein, Lp(a)-like 2, pseudogene
hsa-miR-1197	1	0	1	1	1	1	GCC1	GRIP and coiled-coil domain containing 1
hsa-miR-1197	0	0	1	1	1	1	SH3D21	SH3 domain containing 21
hsa-miR-1197	0	0	1	1	0	0	C10orf68	chromosome 10 open reading frame 68
hsa-miR-1197	0	0	1	1	1	1	SNIP1	Smad nuclear interacting protein 1
hsa-miR-1197	1	0	1	1	1	1	CLMP	CXADR-like membrane protein
hsa-miR-1197	1	0	1	0	1	1	VCPIP1	valosin containing protein (p97)/p47 complex interacting protein 1
hsa-miR-1197	1	0	1	1	1	1	NUBPL	nucleotide binding protein-like
hsa-miR-1197	0	0	1	1	1	1	ITIH5	inter-alpha-trypsin inhibitor heavy chain family, member 5
hsa-miR-1197	1	0	1	1	1	1	JHDM1D	jumonji C domain containing histone demethylase 1 homolog D (S. cerevisiae)
hsa-miR-1197	1	0	1	1	1	1	RAI1	retinoic acid induced 1
hsa-miR-1197	1	0	1	1	1	1	PTPRO	protein tyrosine phosphatase, receptor type, O
hsa-miR-1197	1	0	1	1	1	1	TUBB1	tubulin, beta 1 class VI
hsa-miR-1197	1	0	1	0	1	1	C1orf21	chromosome 1 open reading frame 21
hsa-miR-1197	1	0	1	0	1	1	CSRNP2	cysteine-serine-rich nuclear protein 2
hsa-miR-1197	1	0	1	1	1	1	PPP1R14C	protein phosphatase 1, regulatory (inhibitor) subunit 14C
hsa-miR-1197	1	0	1	0	1	1	SPRY4	sprouty homolog 4 (Drosophila)
hsa-miR-1197	1	0	1	1	1	1	RAB1B	RAB1B, member RAS oncogene family
hsa-miR-1197	1	0	1	1	1	1	TEX14	testis expressed 14
hsa-miR-1197	1	0	1	0	1	1	TMEM47	transmembrane protein 47
hsa-miR-1197	1	0	1	0	1	1	ITCH	itchy E3 ubiquitin protein ligase
hsa-miR-1197	1	0	1	0	1	1	SRSF8	serine/arginine-rich splicing factor 8
hsa-miR-1197	1	0	1	1	1	1	FBXO30	F-box protein 30
hsa-miR-1197	1	0	1	1	1	1	DSEL	dermatan sulfate epimerase-like
hsa-miR-1197	1	0	1	1	1	1	LOXL4	lysyl oxidase-like 4
hsa-miR-1197	1	0	1	0	1	1	FAR1	fatty acyl CoA reductase 1
hsa-miR-1197	1	0	1	1	0	0	TRAF7	TNF receptor-associated factor 7, E3 ubiquitin protein ligase
hsa-miR-1197	1	0	1	1	1	1	CAMKK1	calcium/calmodulin-dependent protein kinase kinase 1, alpha
hsa-miR-1197	1	0	1	1	1	1	BRMS1L	breast cancer metastasis-suppressor 1-like
hsa-miR-1197	0	0	1	1	0	0	C3orf26	chromosome 3 open reading frame 26
hsa-miR-1197	1	0	1	1	1	1	HOOK3	hook homolog 3 (Drosophila)
hsa-miR-1197	1	0	1	1	1	1	HIATL1	hippocampus abundant transcript-like 1
hsa-miR-1197	1	0	1	1	1	1	PPP1R9B	protein phosphatase 1, regulatory subunit 9B
hsa-miR-1197	1	0	1	1	0	0	ZC3H10	zinc finger CCCH-type containing 10
hsa-miR-1197	1	0	1	0	1	1	PPP1R15B	protein phosphatase 1, regulatory subunit 15B
hsa-miR-1197	1	0	1	1	1	1	SPRYD3	SPRY domain containing 3
hsa-miR-1197	1	0	1	0	1	1	UBASH3B	ubiquitin associated and SH3 domain containing B
hsa-miR-1197	0	0	1	1	1	1	POLR2J2	polymerase (RNA) II (DNA directed) polypeptide J2
hsa-miR-1197	0	0	1	1	0	0	MUC13	mucin 13, cell surface associated
hsa-miR-1197	1	0	1	1	1	1	TSPYL5	TSPY-like 5
hsa-miR-1197	1	0	1	1	1	1	BRWD1	bromodomain and WD repeat domain containing 1
hsa-miR-1197	1	0	1	1	1	1	XKR4	XK, Kell blood group complex subunit-related family, member 4
hsa-miR-1197	1	0	1	1	1	1	BTN2A1	butyrophilin, subfamily 2, member A1
hsa-miR-1197	0	0	1	0	1	1	SLC36A1	solute carrier family 36 (proton/amino acid symporter), member 1
hsa-miR-1197	0	0	1	1	0	0	C20orf141	chromosome 20 open reading frame 141
hsa-miR-1197	0	0	1	1	0	0	CST11	cystatin 11
hsa-miR-1197	1	0	1	0	1	1	STK35	serine/threonine kinase 35
hsa-miR-1197	1	0	1	1	1	1	SPSB4	splA/ryanodine receptor domain and SOCS box containing 4
hsa-miR-1197	0	0	1	1	0	0	ASB17	ankyrin repeat and SOCS box containing 17
hsa-miR-1197	1	0	1	1	0	0	MADD	MAP-kinase activating death domain
hsa-miR-1197	1	0	1	1	0	0	UNC5A	unc-5 homolog A (C. elegans)
hsa-miR-1197	0	0	1	1	0	0	CITED4	Cbp/p300-interacting transactivator, with Glu/Asp-rich carboxy-terminal domain, 4
hsa-miR-1197	1	0	1	1	1	1	ADAMTS19	ADAM metallopeptidase with thrombospondin type 1 motif, 19
hsa-miR-1197	1	0	1	1	1	1	NUP35	nucleoporin 35kDa
hsa-miR-1197	1	0	1	1	1	1	FAM105B	family with sequence similarity 105, member B
hsa-miR-1197	0	0	1	0	1	1	SP140L	SP140 nuclear body protein-like
hsa-miR-1197	1	0	1	1	1	1	GLCCI1	glucocorticoid induced transcript 1
hsa-miR-1197	1	0	1	0	1	1	NUS1	nuclear undecaprenyl pyrophosphate synthase 1 homolog (S. cerevisiae)
hsa-miR-1197	0	0	1	1	1	1	C1orf213	chromosome 1 open reading frame 213
hsa-miR-1197	0	0	1	1	0	0	KLK15	kallikrein-related peptidase 15
hsa-miR-1197	0	0	1	1	0	0	ESAM	endothelial cell adhesion molecule
hsa-miR-1197	1	0	1	1	1	1	BACE2	beta-site APP-cleaving enzyme 2
hsa-miR-1197	1	0	1	1	0	0	LIPH	lipase, member H
hsa-miR-1197	0	0	1	0	1	1	SLC17A8	solute carrier family 17 (sodium-dependent inorganic phosphate cotransporter), member 8
hsa-miR-1197	1	0	1	1	1	1	KCNH8	potassium voltage-gated channel, subfamily H (eag-related), member 8
hsa-miR-1197	0	0	1	1	1	1	PPM1M	protein phosphatase, Mg2+/Mn2+ dependent, 1M
hsa-miR-1197	0	0	1	1	0	0	PRKCDBP	protein kinase C, delta binding protein
hsa-miR-1197	1	0	1	1	1	1	UBQLNL	ubiquilin-like
hsa-miR-1197	0	0	1	0	1	1	DDIT4L	DNA-damage-inducible transcript 4-like
hsa-miR-1197	1	0	1	1	1	1	CADM4	cell adhesion molecule 4
hsa-miR-1197	0	0	1	1	1	1	APOBEC3F	apolipoprotein B mRNA editing enzyme, catalytic polypeptide-like 3F
hsa-miR-1197	1	0	1	1	1	1	SEPT6	septin 6
hsa-miR-1197	0	0	1	1	0	0	KLK12	kallikrein-related peptidase 12
hsa-miR-1197	1	0	1	0	1	1	SYT11	synaptotagmin XI
hsa-miR-1197	0	0	1	1	1	1	ZNF561	zinc finger protein 561
hsa-miR-1197	0	0	1	1	1	1	CDYL2	chromodomain protein, Y-like 2
hsa-miR-1197	1	0	1	1	1	1	TBX15	T-box 15
hsa-miR-1197	0	0	1	1	1	1	ZNF572	zinc finger protein 572
hsa-miR-1197	1	0	1	1	0	0	ZNF579	zinc finger protein 579
hsa-miR-1197	0	0	1	1	0	0	MUC20	mucin 20, cell surface associated
hsa-miR-1197	1	0	1	0	1	1	TMEM154	transmembrane protein 154
hsa-miR-1197	1	0	1	1	1	1	ZCCHC5	zinc finger, CCHC domain containing 5
hsa-miR-1197	0	0	1	1	0	0	MS4A15	membrane-spanning 4-domains, subfamily A, member 15
hsa-miR-1197	0	0	1	1	1	1	LINC00518	long intergenic non-protein coding RNA 518
hsa-miR-1197	1	0	1	1	1	1	NXPH1	neurexophilin 1
hsa-miR-1197	1	0	1	1	1	1	WTAP	Wilms tumor 1 associated protein
hsa-miR-1197	1	0	1	0	1	1	N4BP1	NEDD4 binding protein 1
hsa-miR-1197	0	0	1	1	1	1	BEND2	BEN domain containing 2
hsa-miR-1197	1	0	1	1	0	0	FAM43A	family with sequence similarity 43, member A
hsa-miR-1197	0	0	1	1	0	0	CSF3R	colony stimulating factor 3 receptor (granulocyte)
hsa-miR-1197	0	0	1	1	1	1	SIAE	sialic acid acetylesterase
hsa-miR-1197	1	0	1	1	1	1	ALDH4A1	aldehyde dehydrogenase 4 family, member A1
hsa-miR-1197	1	0	1	1	1	1	RAB39B	RAB39B, member RAS oncogene family
hsa-miR-1197	0	0	1	1	0	0	SSX6	synovial sarcoma, X breakpoint 6 (pseudogene)
hsa-miR-1197	1	0	1	1	1	1	CCDC117	coiled-coil domain containing 117
hsa-miR-1197	1	0	1	1	1	1	FAM117B	family with sequence similarity 117, member B
hsa-miR-1197	0	0	1	1	1	1	FNDC7	fibronectin type III domain containing 7
hsa-miR-1197	1	0	1	1	1	1	DIP2B	DIP2 disco-interacting protein 2 homolog B (Drosophila)
hsa-miR-1197	0	0	1	1	1	1	CDRT4	CMT1A duplicated region transcript 4
hsa-miR-1197	0	0	1	0	1	1	C5orf64	chromosome 5 open reading frame 64
hsa-miR-1197	1	0	1	0	1	1	SREK1IP1	SREK1-interacting protein 1
hsa-miR-1197	1	0	1	1	1	1	SLC41A1	solute carrier family 41, member 1
hsa-miR-1197	1	0	1	0	1	1	FAM84B	family with sequence similarity 84, member B
hsa-miR-1197	1	0	1	1	1	1	UBR1	ubiquitin protein ligase E3 component n-recognin 1
hsa-miR-1197	0	0	1	1	0	0	PDILT	protein disulfide isomerase-like, testis expressed
hsa-miR-1197	0	0	1	1	1	1	FRMD3	FERM domain containing 3
hsa-miR-1197	1	0	1	1	1	1	OLIG3	oligodendrocyte transcription factor 3
hsa-miR-1197	0	0	1	0	1	1	C15orf37	chromosome 15 open reading frame 37
hsa-miR-1197	1	0	1	1	1	1	ZADH2	zinc binding alcohol dehydrogenase domain containing 2
hsa-miR-1197	1	0	1	1	1	1	PPAP2B	phosphatidic acid phosphatase type 2B
hsa-miR-1197	0	0	1	1	0	0	TAS1R1	taste receptor, type 1, member 1
hsa-miR-1197	0	0	1	1	1	1	SESTD1	SEC14 and spectrin domains 1
hsa-miR-1197	0	0	1	1	1	1	ATPIF1	ATPase inhibitory factor 1
hsa-miR-1197	1	0	1	1	1	1	MB21D2	Mab-21 domain containing 2
hsa-miR-1197	0	0	1	1	0	0	C2orf53	chromosome 2 open reading frame 53
hsa-miR-1197	0	0	1	1	1	1	CMTM4	CKLF-like MARVEL transmembrane domain containing 4
hsa-miR-1197	1	0	1	1	1	1	CREM	cAMP responsive element modulator
hsa-miR-1197	0	0	1	1	1	1	LYRM7	Lyrm7 homolog (mouse)
hsa-miR-1197	0	0	1	1	0	0	PRDX2	peroxiredoxin 2
hsa-miR-1197	1	0	1	1	1	1	ZSCAN2	zinc finger and SCAN domain containing 2
hsa-miR-1197	1	0	1	1	1	1	DDX26B	DEAD/H (Asp-Glu-Ala-Asp/His) box polypeptide 26B
hsa-miR-1197	1	0	1	1	1	1	BCL9L	B-cell CLL/lymphoma 9-like
hsa-miR-1197	1	0	1	0	1	1	C12orf36	chromosome 12 open reading frame 36
hsa-miR-1197	1	0	1	1	1	1	GDPD1	glycerophosphodiester phosphodiesterase domain containing 1
hsa-miR-1197	1	0	1	1	1	1	ANKRD42	ankyrin repeat domain 42
hsa-miR-1197	1	0	1	1	1	1	SUMF1	sulfatase modifying factor 1
hsa-miR-1197	0	0	1	1	1	1	BIRC3	baculoviral IAP repeat containing 3
hsa-miR-1197	1	0	1	0	1	1	TMSB4XP8	thymosin beta 4, X-linked pseudogene 8
hsa-miR-1197	1	0	1	0	1	1	SLC16A9	solute carrier family 16, member 9 (monocarboxylic acid transporter 9)
hsa-miR-1197	1	0	1	1	1	1	ZBTB41	zinc finger and BTB domain containing 41
hsa-miR-1197	1	0	1	1	1	1	ADAMTS6	ADAM metallopeptidase with thrombospondin type 1 motif, 6
hsa-miR-1197	1	0	1	1	1	1	CPXM2	carboxypeptidase X (M14 family), member 2
hsa-miR-1197	0	0	1	0	1	1	TCF21	transcription factor 21
hsa-miR-1197	1	0	1	0	1	1	PTPLB	protein tyrosine phosphatase-like (proline instead of catalytic arginine), member b
hsa-miR-1197	0	0	1	1	1	1	LHFPL4	lipoma HMGIC fusion partner-like 4
hsa-miR-1197	1	0	1	0	1	1	ZC3H6	zinc finger CCCH-type containing 6
hsa-miR-1197	0	0	1	1	1	1	KCTD1	potassium channel tetramerisation domain containing 1
hsa-miR-1197	0	0	1	1	1	1	MDFIC	MyoD family inhibitor domain containing
hsa-miR-1197	0	0	1	1	1	1	COL18A1-AS1	COL18A1 antisense RNA 1
hsa-miR-1197	0	0	1	1	0	0	FOXD4L4	forkhead box D4-like 4
hsa-miR-1197	1	0	1	1	1	1	THRA	thyroid hormone receptor, alpha
hsa-miR-1197	1	0	1	1	1	1	ADAMTS18	ADAM metallopeptidase with thrombospondin type 1 motif, 18
hsa-miR-1197	1	0	1	1	1	1	RBM12B	RNA binding motif protein 12B
hsa-miR-1197	0	0	1	1	0	0	SFTA2	surfactant associated 2
hsa-miR-1197	1	0	1	1	1	1	CYP4V2	cytochrome P450, family 4, subfamily V, polypeptide 2
hsa-miR-1197	0	0	1	1	0	0	KIAA1211L	KIAA1211-like
hsa-miR-1197	0	0	1	1	0	0	AADACL2	arylacetamide deacetylase-like 2
hsa-miR-1197	1	0	1	1	1	1	SKIDA1	SKI/DACH domain containing 1
hsa-miR-1197	1	0	1	1	0	0	CD164L2	CD164 sialomucin-like 2
hsa-miR-1197	0	0	1	1	1	1	CLEC4M	C-type lectin domain family 4, member M
hsa-miR-1197	0	0	1	0	0	0	SNORD15B	small nucleolar RNA, C/D box 15B
hsa-miR-1197	0	0	1	0	0	0	ESRRAP2	estrogen-related receptor alpha pseudogene 2
hsa-miR-1197	0	0	1	0	0	0	LOC339240	keratin 17 pseudogene
hsa-miR-1197	0	0	1	0	0	0	LYPLA2P1	lysophospholipase II pseudogene 1
hsa-miR-1197	0	0	1	0	0	0	TTTY2	testis-specific transcript, Y-linked 2 (non-protein coding)
hsa-miR-1197	0	0	1	0	0	0	TPI1P2	triosephosphate isomerase 1 pseudogene 2
hsa-miR-1197	0	0	1	0	0	0	SNORA4	small nucleolar RNA, H/ACA box 4
hsa-miR-1197	0	0	1	0	0	0	SNORD10	small nucleolar RNA, C/D box 10
hsa-miR-1197	0	0	1	0	0	0	HNRNPA3P1	heterogeneous nuclear ribonucleoprotein A3 pseudogene 1
hsa-miR-1197	0	0	1	0	0	0	HTR7P1	5-hydroxytryptamine (serotonin) receptor 7 pseudogene 1
hsa-miR-1197	0	0	1	0	0	0	TPTE2P6	transmembrane phosphoinositide 3-phosphatase and tensin homolog 2 pseudogene 6
hsa-miR-1197	0	0	1	0	0	0	AQP7P1	aquaporin 7 pseudogene 1
hsa-miR-1197	0	0	1	0	0	0	SIGLEC16	sialic acid binding Ig-like lectin 16 (gene/pseudogene)
hsa-miR-1197	0	0	1	0	0	0	TCAM1P	testicular cell adhesion molecule 1 homolog (mouse), pseudogene
hsa-miR-1197	0	0	1	0	0	0	SNORA39	small nucleolar RNA, H/ACA box 39
hsa-miR-1197	1	0	1	1	0	0	KIAA1549L	KIAA1549-like
hsa-miR-1197	0	0	1	1	1	1	PEG3	paternally expressed 3
