# Supplementary material for: Profiling of Selected MicroRNAs in Proliferative Eutopic Endometrium of Women with Ovarian Endometriosis
Source: Biomed Res Int. 2015 Aug 20;2015:760698. doi: 10.1155/2015/760698 (PMC4558423; doi:10.1155/2015/760698)
Supplement: Supplementary file 1 — Table I: The names of miRNAs significantly differentially expressed between eutopic endometrium of patients with endometriosis vs eutopic endometrium of patients without endometriosis. Table II: The associations between miRNA and mRNA, which presents detailed results of the search of six major databases i.e targetscan, tarbase, miranda, mirbase, mirtarget2 and pictar. [file 760698.f1.zip › 760698.f1/Table II/hsa-miR-1200.tsv]

miR	targetscan	tarbase	miranda	mirbase	mirtarget2	pictar	GeneSymbol	GeneName
hsa-miR-1200	1	0	1	1	1	1	PLAU	plasminogen activator, urokinase
hsa-miR-1200	1	0	1	1	1	1	ZFYVE16	zinc finger, FYVE domain containing 16
hsa-miR-1200	0	0	1	1	1	1	PPIP5K1	diphosphoinositol pentakisphosphate kinase 1
hsa-miR-1200	1	0	1	1	1	1	ABCC5	ATP-binding cassette, sub-family C (CFTR/MRP), member 5
hsa-miR-1200	1	0	1	0	1	1	PTPRT	protein tyrosine phosphatase, receptor type, T
hsa-miR-1200	0	0	1	1	1	1	C2CD2L	C2CD2-like
hsa-miR-1200	1	0	1	1	1	1	SGSM2	small G protein signaling modulator 2
hsa-miR-1200	1	0	1	1	0	0	OTUD3	OTU domain containing 3
hsa-miR-1200	0	0	1	1	1	1	NEU3	sialidase 3 (membrane sialidase)
hsa-miR-1200	1	0	1	1	0	0	SUSD5	sushi domain containing 5
hsa-miR-1200	1	0	1	1	0	0	PCLO	piccolo (presynaptic cytomatrix protein)
hsa-miR-1200	1	0	1	1	1	1	SLC4A7	solute carrier family 4, sodium bicarbonate cotransporter, member 7
hsa-miR-1200	0	0	1	1	0	0	ATP10B	ATPase, class V, type 10B
hsa-miR-1200	1	0	1	1	1	1	CDK12	cyclin-dependent kinase 12
hsa-miR-1200	1	0	1	1	1	1	CALCR	calcitonin receptor
hsa-miR-1200	1	0	1	1	1	1	RPGRIP1L	RPGRIP1-like
hsa-miR-1200	1	0	1	1	1	1	PHF8	PHD finger protein 8
hsa-miR-1200	0	0	1	0	0	0	ELTD1	EGF, latrophilin and seven transmembrane domain containing 1
hsa-miR-1200	1	0	1	0	1	1	ODZ2	odz, odd Oz/ten-m homolog 2 (Drosophila)
hsa-miR-1200	0	0	1	1	0	0	ZC4H2	zinc finger, C4H2 domain containing
hsa-miR-1200	1	0	1	1	1	1	RIMKLB	ribosomal modification protein rimK-like family member B
hsa-miR-1200	0	0	1	1	1	1	FILIP1	filamin A interacting protein 1
hsa-miR-1200	1	0	1	1	1	1	FAM214B	family with sequence similarity 214, member B
hsa-miR-1200	0	0	1	0	1	1	ZSWIM6	zinc finger, SWIM-type containing 6
hsa-miR-1200	1	0	1	1	0	0	MAGI3	membrane associated guanylate kinase, WW and PDZ domain containing 3
hsa-miR-1200	1	0	1	0	0	0	TANC2	tetratricopeptide repeat, ankyrin repeat and coiled-coil containing 2
hsa-miR-1200	0	0	1	1	1	1	AMBRA1	autophagy/beclin-1 regulator 1
hsa-miR-1200	1	0	1	1	1	1	LCOR	ligand dependent nuclear receptor corepressor
hsa-miR-1200	1	0	1	0	0	0	RNF169	ring finger protein 169
hsa-miR-1200	0	0	1	1	0	0	FAM22D	family with sequence similarity 22, member D
hsa-miR-1200	1	0	1	1	1	1	UBR3	ubiquitin protein ligase E3 component n-recognin 3 (putative)
hsa-miR-1200	1	0	1	1	1	1	C11orf57	chromosome 11 open reading frame 57
hsa-miR-1200	1	0	1	1	1	1	TRPM3	transient receptor potential cation channel, subfamily M, member 3
hsa-miR-1200	1	0	1	1	1	1	PAN3	PAN3 poly(A) specific ribonuclease subunit homolog (S. cerevisiae)
hsa-miR-1200	0	0	1	1	0	0	SSPO	SCO-spondin homolog (Bos taurus)
hsa-miR-1200	1	0	1	1	1	1	KCNMA1	potassium large conductance calcium-activated channel, subfamily M, alpha member 1
hsa-miR-1200	1	0	1	0	1	1	BEND4	BEN domain containing 4
hsa-miR-1200	0	0	1	0	0	0	TIFAB	TRAF-interacting protein with forkhead-associated domain, family member B
hsa-miR-1200	1	1	1	1	1	1	BACE1	beta-site APP-cleaving enzyme 1
hsa-miR-1200	1	0	1	1	1	1	ARHGEF7	Rho guanine nucleotide exchange factor (GEF) 7
hsa-miR-1200	0	0	1	1	1	1	SYBU	syntabulin (syntaxin-interacting)
hsa-miR-1200	1	0	1	1	1	1	TRIM36	tripartite motif containing 36
hsa-miR-1200	0	0	1	1	1	1	GABBR1	gamma-aminobutyric acid (GABA) B receptor, 1
hsa-miR-1200	1	0	1	1	1	1	BACH2	BTB and CNC homology 1, basic leucine zipper transcription factor 2
hsa-miR-1200	0	0	1	1	0	0	KCNC3	potassium voltage-gated channel, Shaw-related subfamily, member 3
hsa-miR-1200	1	0	1	1	1	1	PML	promyelocytic leukemia
hsa-miR-1200	0	0	1	1	1	1	PTK2	PTK2 protein tyrosine kinase 2
hsa-miR-1200	1	0	1	1	1	1	RASSF5	Ras association (RalGDS/AF-6) domain family member 5
hsa-miR-1200	1	0	1	0	1	1	MPPED2	metallophosphoesterase domain containing 2
hsa-miR-1200	1	0	1	1	0	0	TSPYL2	TSPY-like 2
hsa-miR-1200	1	0	1	1	1	1	DMTF1	cyclin D binding myb-like transcription factor 1
hsa-miR-1200	1	0	1	1	1	1	ERF	Ets2 repressor factor
hsa-miR-1200	0	0	1	1	0	0	PSMB2	proteasome (prosome, macropain) subunit, beta type, 2
hsa-miR-1200	0	0	1	1	1	1	ACO1	aconitase 1, soluble
hsa-miR-1200	1	0	1	1	1	1	CTAGE5	CTAGE family, member 5
hsa-miR-1200	0	0	1	1	0	0	EIF2B4	eukaryotic translation initiation factor 2B, subunit 4 delta, 67kDa
hsa-miR-1200	0	0	1	1	0	0	HLA-DMB	major histocompatibility complex, class II, DM beta
hsa-miR-1200	0	0	1	1	0	0	BMP1	bone morphogenetic protein 1
hsa-miR-1200	1	0	1	1	1	1	EPB41	erythrocyte membrane protein band 4.1 (elliptocytosis 1, RH-linked)
hsa-miR-1200	1	0	1	1	1	1	ARHGEF3	Rho guanine nucleotide exchange factor (GEF) 3
hsa-miR-1200	1	0	1	1	1	1	COL24A1	collagen, type XXIV, alpha 1
hsa-miR-1200	1	0	1	1	1	1	MLLT10	myeloid/lymphoid or mixed-lineage leukemia (trithorax homolog, Drosophila); translocated to, 10
hsa-miR-1200	1	0	1	1	1	1	TEAD1	TEA domain family member 1 (SV40 transcriptional enhancer factor)
hsa-miR-1200	0	0	1	1	0	0	TRIM27	tripartite motif containing 27
hsa-miR-1200	0	0	1	0	0	0	TRPC2	transient receptor potential cation channel, subfamily C, member 2, pseudogene
hsa-miR-1200	1	0	1	0	1	1	PDE4D	phosphodiesterase 4D, cAMP-specific
hsa-miR-1200	1	0	1	0	0	0	MAP3K1	mitogen-activated protein kinase kinase kinase 1, E3 ubiquitin protein ligase
hsa-miR-1200	1	0	1	1	1	1	LDB2	LIM domain binding 2
hsa-miR-1200	0	0	1	1	1	1	CD84	CD84 molecule
hsa-miR-1200	1	0	1	1	1	1	MBNL2	muscleblind-like splicing regulator 2
hsa-miR-1200	1	0	1	1	0	0	PRRC2A	proline-rich coiled-coil 2A
hsa-miR-1200	0	0	1	1	0	0	CARD10	caspase recruitment domain family, member 10
hsa-miR-1200	0	0	1	1	0	0	RBM5	RNA binding motif protein 5
hsa-miR-1200	1	0	1	1	1	1	EDNRB	endothelin receptor type B
hsa-miR-1200	0	0	1	1	0	0	ABRACL	ABRA C-terminal like
hsa-miR-1200	0	0	1	1	1	1	HEPH	hephaestin
hsa-miR-1200	0	0	1	0	1	1	PDP1	pyruvate dehyrogenase phosphatase catalytic subunit 1
hsa-miR-1200	1	0	1	1	1	1	CHFR	checkpoint with forkhead and ring finger domains, E3 ubiquitin protein ligase
hsa-miR-1200	1	0	1	1	1	1	C16orf70	chromosome 16 open reading frame 70
hsa-miR-1200	0	0	1	1	1	1	SLC39A8	solute carrier family 39 (zinc transporter), member 8
hsa-miR-1200	0	0	1	1	1	1	SLCO2B1	solute carrier organic anion transporter family, member 2B1
hsa-miR-1200	1	0	1	1	0	0	TDRKH	tudor and KH domain containing
hsa-miR-1200	0	0	1	1	0	0	SH2B1	SH2B adaptor protein 1
hsa-miR-1200	1	0	1	1	1	1	DESI2	desumoylating isopeptidase 2
hsa-miR-1200	0	0	1	0	0	0	TIGD7	tigger transposable element derived 7
hsa-miR-1200	1	0	1	1	1	1	ABI2	abl-interactor 2
hsa-miR-1200	1	0	1	0	1	1	TRPS1	trichorhinophalangeal syndrome I
hsa-miR-1200	0	0	1	1	0	0	SLC4A9	solute carrier family 4, sodium bicarbonate cotransporter, member 9
hsa-miR-1200	1	0	1	1	1	1	LETMD1	LETM1 domain containing 1
hsa-miR-1200	1	0	1	1	1	1	ACHE	acetylcholinesterase
hsa-miR-1200	1	0	1	1	1	1	CALU	calumenin
hsa-miR-1200	1	0	1	1	1	1	BBC3	BCL2 binding component 3
hsa-miR-1200	1	0	1	1	1	1	KCNIP2	Kv channel interacting protein 2
hsa-miR-1200	1	0	1	1	1	1	RGS10	regulator of G-protein signaling 10
hsa-miR-1200	1	0	1	0	1	1	WIPF2	WAS/WASL interacting protein family, member 2
hsa-miR-1200	1	0	1	1	1	1	CALCOCO1	calcium binding and coiled-coil domain 1
hsa-miR-1200	0	0	1	0	0	0	NBPF10	neuroblastoma breakpoint family, member 10
hsa-miR-1200	0	0	1	0	1	1	MYO3B	myosin IIIB
hsa-miR-1200	1	0	1	1	1	1	RCAN1	regulator of calcineurin 1
hsa-miR-1200	0	0	1	1	0	0	SNRPN	small nuclear ribonucleoprotein polypeptide N
hsa-miR-1200	0	0	1	0	0	0	MYO15B	myosin XVB pseudogene
hsa-miR-1200	0	0	1	1	0	0	BRE	brain and reproductive organ-expressed (TNFRSF1A modulator)
hsa-miR-1200	1	0	1	1	1	1	ST3GAL3	ST3 beta-galactoside alpha-2,3-sialyltransferase 3
hsa-miR-1200	1	0	1	1	1	1	STX16	syntaxin 16
hsa-miR-1200	0	0	1	0	0	0	RMST	rhabdomyosarcoma 2 associated transcript (non-protein coding)
hsa-miR-1200	1	0	1	1	0	0	SEPT8	septin 8
hsa-miR-1200	1	0	1	1	1	1	ZC3H14	zinc finger CCCH-type containing 14
hsa-miR-1200	0	0	1	1	1	1	PTK7	PTK7 protein tyrosine kinase 7
hsa-miR-1200	0	0	1	1	0	0	NCR2	natural cytotoxicity triggering receptor 2
hsa-miR-1200	1	0	1	1	1	1	SUCO	SUN domain containing ossification factor
hsa-miR-1200	1	0	1	0	1	1	GRB10	growth factor receptor-bound protein 10
hsa-miR-1200	0	0	1	1	1	1	AKR7L	aldo-keto reductase family 7-like
hsa-miR-1200	0	0	1	1	1	1	RANBP17	RAN binding protein 17
hsa-miR-1200	0	0	1	1	1	1	CD1E	CD1e molecule
hsa-miR-1200	0	0	1	1	1	1	DMRTC1	DMRT-like family C1
hsa-miR-1200	0	0	1	1	0	0	DMRTC1B	DMRT-like family C1B
hsa-miR-1200	0	0	1	1	1	1	RNASE7	ribonuclease, RNase A family, 7
hsa-miR-1200	1	0	1	1	1	1	PALM2	paralemmin 2
hsa-miR-1200	1	0	1	1	1	1	NRXN3	neurexin 3
hsa-miR-1200	0	0	1	1	1	1	TAF1	TAF1 RNA polymerase II, TATA box binding protein (TBP)-associated factor, 250kDa
hsa-miR-1200	1	0	1	1	1	1	PPP1R9A	protein phosphatase 1, regulatory subunit 9A
hsa-miR-1200	0	0	1	1	0	0	ACSS2	acyl-CoA synthetase short-chain family member 2
hsa-miR-1200	0	0	1	1	0	0	ASAP3	ArfGAP with SH3 domain, ankyrin repeat and PH domain 3
hsa-miR-1200	1	0	1	1	1	1	AKAP2	A kinase (PRKA) anchor protein 2
hsa-miR-1200	1	0	1	1	0	0	SENP3	SUMO1/sentrin/SMT3 specific peptidase 3
hsa-miR-1200	0	0	1	0	0	0	RNF31	ring finger protein 31
hsa-miR-1200	0	0	1	1	0	0	AP4B1	adaptor-related protein complex 4, beta 1 subunit
hsa-miR-1200	0	0	1	1	1	1	STOX2	storkhead box 2
hsa-miR-1200	0	0	1	1	1	1	RNF220	ring finger protein 220
hsa-miR-1200	1	0	1	1	1	1	RIC8B	resistance to inhibitors of cholinesterase 8 homolog B (C. elegans)
hsa-miR-1200	1	0	1	1	1	1	PTBP3	polypyrimidine tract binding protein 3
hsa-miR-1200	1	0	1	1	1	1	ARMC8	armadillo repeat containing 8
hsa-miR-1200	1	0	1	1	1	1	WDTC1	WD and tetratricopeptide repeats 1
hsa-miR-1200	1	0	1	1	1	1	ACER3	alkaline ceramidase 3
hsa-miR-1200	0	0	1	1	1	1	MBNL3	muscleblind-like splicing regulator 3
hsa-miR-1200	0	0	1	1	0	0	MLST8	MTOR associated protein, LST8 homolog (S. cerevisiae)
hsa-miR-1200	1	0	1	1	1	1	C12orf23	chromosome 12 open reading frame 23
hsa-miR-1200	0	0	1	1	0	0	UBR4	ubiquitin protein ligase E3 component n-recognin 4
hsa-miR-1200	1	0	1	1	0	0	YPEL3	yippee-like 3 (Drosophila)
hsa-miR-1200	1	0	1	0	1	1	LIN28A	lin-28 homolog A (C. elegans)
hsa-miR-1200	1	0	1	0	0	0	ZNRF3	zinc and ring finger 3
hsa-miR-1200	0	0	1	0	0	0	SOX2-OT	SOX2 overlapping transcript (non-protein coding)
hsa-miR-1200	0	0	1	0	0	0	DUXAP10	double homeobox A pseudogene 10
hsa-miR-1200	1	0	1	1	1	1	S100PBP	S100P binding protein
hsa-miR-1200	0	0	1	1	0	0	JMJD4	jumonji domain containing 4
hsa-miR-1200	1	0	1	1	0	0	FASTK	Fas-activated serine/threonine kinase
hsa-miR-1200	0	0	1	0	0	0	MIRLET7BHG	MIRLET7B host gene (non-protein coding)
hsa-miR-1200	0	0	1	0	0	0	LOC284561	uncharacterized LOC284561
hsa-miR-1200	1	0	1	1	0	0	ST6GALNAC6	ST6 (alpha-N-acetyl-neuraminyl-2,3-beta-galactosyl-1,3)-N-acetylgalactosaminide alpha-2,6-sialyltransferase 6
hsa-miR-1200	0	0	1	0	1	1	FLJ14186	uncharacterized LOC401149
hsa-miR-1200	0	0	1	0	0	0	LOC286059	tumor necrosis factor receptor superfamily, member 10d, decoy with truncated death domain pseudogene
hsa-miR-1200	0	0	1	0	0	0	LINC00085	long intergenic non-protein coding RNA 85
hsa-miR-1200	0	0	1	1	1	1	HDAC7	histone deacetylase 7
hsa-miR-1200	0	0	1	1	1	1	SIGLEC1	sialic acid binding Ig-like lectin 1, sialoadhesin
hsa-miR-1200	0	0	1	1	0	0	SPON2	spondin 2, extracellular matrix protein
hsa-miR-1200	0	0	1	1	1	1	PPFIBP2	PTPRF interacting protein, binding protein 2 (liprin beta 2)
hsa-miR-1200	0	0	1	0	0	0	KIAA1671	KIAA1671
hsa-miR-1200	1	0	1	1	1	1	DLC1	deleted in liver cancer 1
hsa-miR-1200	1	0	1	1	1	1	ARFGEF1	ADP-ribosylation factor guanine nucleotide-exchange factor 1 (brefeldin A-inhibited)
hsa-miR-1200	1	0	1	1	1	1	TNRC6A	trinucleotide repeat containing 6A
hsa-miR-1200	1	0	1	0	1	1	ZCCHC3	zinc finger, CCHC domain containing 3
hsa-miR-1200	0	0	1	0	1	1	FLJ22447	uncharacterized LOC400221
hsa-miR-1200	0	0	1	1	1	1	MYEOV	myeloma overexpressed (in a subset of t(11;14) positive multiple myelomas)
hsa-miR-1200	1	0	1	0	0	0	DTX2	deltex homolog 2 (Drosophila)
hsa-miR-1200	0	0	1	0	1	1	FLJ22763	uncharacterized LOC401081
hsa-miR-1200	1	0	1	1	0	0	POMGNT1	protein O-linked mannose beta1,2-N-acetylglucosaminyltransferase
hsa-miR-1200	0	0	1	0	0	0	NEURL1B	neuralized homolog 1B (Drosophila)
hsa-miR-1200	0	0	1	1	1	1	GTF2H1	general transcription factor IIH, polypeptide 1, 62kDa
hsa-miR-1200	1	0	1	1	1	1	LRP4	low density lipoprotein receptor-related protein 4
hsa-miR-1200	0	0	1	1	1	1	KDM2B	lysine (K)-specific demethylase 2B
hsa-miR-1200	1	0	1	1	1	1	MARK1	MAP/microtubule affinity-regulating kinase 1
hsa-miR-1200	1	0	1	1	1	1	KCTD15	potassium channel tetramerisation domain containing 15
hsa-miR-1200	0	0	1	1	1	1	PAQR4	progestin and adipoQ receptor family member IV
hsa-miR-1200	0	0	1	1	1	1	SNAP47	synaptosomal-associated protein, 47kDa
hsa-miR-1200	0	0	1	0	0	0	KIAA0664L3	KIAA0664-like 3
hsa-miR-1200	0	0	1	1	1	1	PRR5L	proline rich 5 like
hsa-miR-1200	0	0	1	0	1	1	HDX	highly divergent homeobox
hsa-miR-1200	0	0	1	1	1	1	KLC4	kinesin light chain 4
hsa-miR-1200	1	0	1	1	0	0	SPEG	SPEG complex locus
hsa-miR-1200	0	0	1	0	0	0	FLJ30838	uncharacterized LOC400955
hsa-miR-1200	0	0	1	0	0	0	LOC201617	uncharacterized LOC201617
hsa-miR-1200	0	0	1	0	0	0	LOC157273	uncharacterized LOC157273
hsa-miR-1200	1	0	1	1	1	1	DIXDC1	DIX domain containing 1
hsa-miR-1200	1	0	1	1	1	1	LMNA	lamin A/C
hsa-miR-1200	1	0	1	1	0	0	SLC26A6	solute carrier family 26, member 6
hsa-miR-1200	0	0	1	0	0	0	FLJ12825	uncharacterized LOC440101
hsa-miR-1200	0	0	1	0	0	0	FLG-AS1	FLG antisense RNA 1
hsa-miR-1200	1	0	1	1	1	1	PHF15	PHD finger protein 15
hsa-miR-1200	0	0	1	0	0	0	LOC284600	uncharacterized LOC284600
hsa-miR-1200	1	0	1	1	1	1	CLCN5	chloride channel, voltage-sensitive 5
hsa-miR-1200	1	0	1	1	1	1	FOPNL	FGFR1OP N-terminal like
hsa-miR-1200	0	0	1	1	1	1	COQ10A	coenzyme Q10 homolog A (S. cerevisiae)
hsa-miR-1200	0	0	1	1	0	0	RELT	RELT tumor necrosis factor receptor
hsa-miR-1200	0	0	1	1	1	1	PSME3	proteasome (prosome, macropain) activator subunit 3 (PA28 gamma; Ki)
hsa-miR-1200	0	0	1	1	1	1	VWA3B	von Willebrand factor A domain containing 3B
hsa-miR-1200	1	0	1	1	1	1	MAP3K11	mitogen-activated protein kinase kinase kinase 11
hsa-miR-1200	0	0	1	0	0	0	LOC100125918	uncharacterized LOC100125918
hsa-miR-1200	0	0	1	0	0	0	LOC147004	uncharacterized LOC147004
hsa-miR-1200	0	0	1	0	0	0	TUG1	taurine upregulated 1 (non-protein coding)
hsa-miR-1200	1	0	1	1	1	1	ANKRD49	ankyrin repeat domain 49
hsa-miR-1200	1	0	1	1	1	1	IST1	increased sodium tolerance 1 homolog (yeast)
hsa-miR-1200	0	0	1	1	0	0	KRT86	keratin 86
hsa-miR-1200	0	0	1	1	1	1	FXC1	fracture callus 1 homolog (rat)
hsa-miR-1200	1	0	1	1	1	1	C6orf89	chromosome 6 open reading frame 89
hsa-miR-1200	0	0	1	1	0	0	CD37	CD37 molecule
hsa-miR-1200	0	0	1	0	0	0	LINC00301	long intergenic non-protein coding RNA 301
hsa-miR-1200	1	0	1	1	1	1	FAM73B	family with sequence similarity 73, member B
hsa-miR-1200	0	0	1	1	0	0	SYTL1	synaptotagmin-like 1
hsa-miR-1200	0	0	1	0	0	0	C10orf105	chromosome 10 open reading frame 105
hsa-miR-1200	1	0	1	1	1	1	SIRT1	sirtuin 1
hsa-miR-1200	0	0	1	1	1	1	KDELR1	KDEL (Lys-Asp-Glu-Leu) endoplasmic reticulum protein retention receptor 1
hsa-miR-1200	0	0	1	1	1	1	CAMKV	CaM kinase-like vesicle-associated
hsa-miR-1200	0	0	1	1	1	1	GSG1	germ cell associated 1
hsa-miR-1200	1	0	1	0	1	1	SLC25A37	solute carrier family 25 (mitochondrial iron transporter), member 37
hsa-miR-1200	0	0	1	1	0	0	LGR5	leucine-rich repeat containing G protein-coupled receptor 5
hsa-miR-1200	0	0	1	1	0	0	PIGO	phosphatidylinositol glycan anchor biosynthesis, class O
hsa-miR-1200	0	0	1	1	0	0	ATP6AP1	ATPase, H+ transporting, lysosomal accessory protein 1
hsa-miR-1200	0	0	1	0	1	1	TMSB15B	thymosin beta 15B
hsa-miR-1200	1	0	1	1	1	1	ARIH2	ariadne homolog 2 (Drosophila)
hsa-miR-1200	0	0	1	0	0	0	SEC14L2	SEC14-like 2 (S. cerevisiae)
hsa-miR-1200	0	0	1	0	1	1	PIANP	PILR alpha associated neural protein
hsa-miR-1200	1	0	1	1	1	1	FBXW2	F-box and WD repeat domain containing 2
hsa-miR-1200	1	0	1	1	1	1	GNG2	guanine nucleotide binding protein (G protein), gamma 2
hsa-miR-1200	0	0	1	1	0	0	C6orf163	chromosome 6 open reading frame 163
hsa-miR-1200	0	0	1	1	0	0	AXDND1	axonemal dynein light chain domain containing 1
hsa-miR-1200	1	0	1	1	1	1	MAP3K12	mitogen-activated protein kinase kinase kinase 12
hsa-miR-1200	0	0	1	1	0	0	MEI1	meiosis inhibitor 1
hsa-miR-1200	1	0	1	1	1	1	RNF121	ring finger protein 121
hsa-miR-1200	0	0	1	1	0	0	CYHR1	cysteine/histidine-rich 1
hsa-miR-1200	1	0	1	1	1	1	SLC7A8	solute carrier family 7 (amino acid transporter light chain, L system), member 8
hsa-miR-1200	0	0	1	0	0	0	LINC00340	long intergenic non-protein coding RNA 340
hsa-miR-1200	0	0	1	1	0	0	CES4A	carboxylesterase 4A
hsa-miR-1200	0	0	1	0	1	1	AGBL4	ATP/GTP binding protein-like 4
hsa-miR-1200	1	0	1	1	1	1	PTPRU	protein tyrosine phosphatase, receptor type, U
hsa-miR-1200	0	0	1	0	0	0	MYO1H	myosin IH
hsa-miR-1200	1	0	1	1	1	1	CTNNB1	catenin (cadherin-associated protein), beta 1, 88kDa
hsa-miR-1200	1	0	1	0	1	1	UVRAG	UV radiation resistance associated gene
hsa-miR-1200	1	0	1	1	1	1	KCNIP3	Kv channel interacting protein 3, calsenilin
hsa-miR-1200	1	0	1	1	1	1	SPATS2	spermatogenesis associated, serine-rich 2
hsa-miR-1200	0	0	1	0	0	0	LOC730101	uncharacterized LOC730101
hsa-miR-1200	1	0	1	1	1	1	ZC3H11A	zinc finger CCCH-type containing 11A
hsa-miR-1200	1	0	1	1	1	1	SYNPO2L	synaptopodin 2-like
hsa-miR-1200	1	0	1	0	1	1	CLIC4	chloride intracellular channel 4
hsa-miR-1200	0	0	1	1	1	1	BAG1	BCL2-associated athanogene
hsa-miR-1200	0	0	1	0	0	0	ZNF815P	zinc finger protein 815, pseudogene
hsa-miR-1200	0	0	1	0	0	0	FAM66C	family with sequence similarity 66, member C
hsa-miR-1200	1	0	1	0	1	1	COL21A1	collagen, type XXI, alpha 1
hsa-miR-1200	0	0	1	1	1	1	MPHOSPH9	M-phase phosphoprotein 9
hsa-miR-1200	1	0	1	0	1	1	THRB	thyroid hormone receptor, beta
hsa-miR-1200	1	0	1	0	1	1	KBTBD8	kelch repeat and BTB (POZ) domain containing 8
hsa-miR-1200	1	0	1	1	1	1	SNRNP70	small nuclear ribonucleoprotein 70kDa (U1)
hsa-miR-1200	1	0	1	1	1	1	CCDC141	coiled-coil domain containing 141
hsa-miR-1200	0	0	1	0	0	0	FLJ39534	uncharacterized FLJ39534
hsa-miR-1200	0	0	1	1	0	0	CHCHD5	coiled-coil-helix-coiled-coil-helix domain containing 5
hsa-miR-1200	0	0	1	1	1	1	CORO7	coronin 7
hsa-miR-1200	0	0	1	0	1	1	TNFAIP8	tumor necrosis factor, alpha-induced protein 8
hsa-miR-1200	0	0	1	0	0	0	LRRC69	leucine rich repeat containing 69
hsa-miR-1200	1	0	1	1	1	1	RAB11FIP4	RAB11 family interacting protein 4 (class II)
hsa-miR-1200	0	0	1	1	1	1	TEX35	testis expressed 35
hsa-miR-1200	0	0	1	1	1	1	RBM4	RNA binding motif protein 4
hsa-miR-1200	0	0	1	0	0	0	LOC284385	uncharacterized LOC284385
hsa-miR-1200	0	0	1	1	0	0	KLHDC3	kelch domain containing 3
hsa-miR-1200	0	0	1	1	1	1	HCCS	holocytochrome c synthase
hsa-miR-1200	1	0	1	1	1	1	ST7L	suppression of tumorigenicity 7 like
hsa-miR-1200	0	0	1	1	1	1	CKAP2L	cytoskeleton associated protein 2-like
hsa-miR-1200	0	0	1	1	1	1	POLR1D	polymerase (RNA) I polypeptide D, 16kDa
hsa-miR-1200	0	0	1	1	0	0	HNRNPL	heterogeneous nuclear ribonucleoprotein L
hsa-miR-1200	0	0	1	1	0	0	ZNF283	zinc finger protein 283
hsa-miR-1200	0	0	1	0	0	0	LOC100130954	uncharacterized LOC100130954
hsa-miR-1200	0	0	1	1	1	1	ARFGAP2	ADP-ribosylation factor GTPase activating protein 2
hsa-miR-1200	1	0	1	1	1	1	THTPA	thiamine triphosphatase
hsa-miR-1200	1	0	1	0	1	1	UNC5D	unc-5 homolog D (C. elegans)
hsa-miR-1200	0	0	1	1	0	0	ZACN	zinc activated ligand-gated ion channel
hsa-miR-1200	0	0	1	1	1	1	GPR128	G protein-coupled receptor 128
hsa-miR-1200	0	0	1	1	0	0	KIAA0146	KIAA0146
hsa-miR-1200	1	0	1	1	1	1	GRM4	glutamate receptor, metabotropic 4
hsa-miR-1200	0	0	1	1	0	0	PRICKLE1	prickle homolog 1 (Drosophila)
hsa-miR-1200	0	0	1	1	1	1	ZNF546	zinc finger protein 546
hsa-miR-1200	1	0	1	1	1	1	CBLB	Cbl proto-oncogene, E3 ubiquitin protein ligase B
hsa-miR-1200	1	0	1	1	0	0	RASIP1	Ras interacting protein 1
hsa-miR-1200	1	0	1	1	1	1	PLEKHH1	pleckstrin homology domain containing, family H (with MyTH4 domain) member 1
hsa-miR-1200	0	0	1	1	1	1	PRRT1	proline-rich transmembrane protein 1
hsa-miR-1200	0	0	1	1	1	1	TMEM59	transmembrane protein 59
hsa-miR-1200	0	0	1	1	1	1	FAM19A2	family with sequence similarity 19 (chemokine (C-C motif)-like), member A2
hsa-miR-1200	0	0	1	0	0	0	LOC650368	asparagine-linked glycosylation 1-like pseudogene
hsa-miR-1200	1	0	1	0	0	0	GPR137C	G protein-coupled receptor 137C
hsa-miR-1200	1	0	1	1	1	1	MBTD1	mbt domain containing 1
hsa-miR-1200	0	0	1	1	0	0	C6orf201	chromosome 6 open reading frame 201
hsa-miR-1200	1	0	1	1	1	1	PRDM2	PR domain containing 2, with ZNF domain
hsa-miR-1200	1	0	1	1	1	1	GJC1	gap junction protein, gamma 1, 45kDa
hsa-miR-1200	0	0	1	1	0	0	NPIP	nuclear pore complex interacting protein
hsa-miR-1200	1	0	1	1	1	1	KIF21A	kinesin family member 21A
hsa-miR-1200	1	0	1	1	1	1	ERBB3	v-erb-b2 erythroblastic leukemia viral oncogene homolog 3 (avian)
hsa-miR-1200	0	0	1	1	0	0	DOCK11	dedicator of cytokinesis 11
hsa-miR-1200	0	0	1	1	0	0	LOC100128239	uncharacterized LOC100128239
hsa-miR-1200	0	0	1	1	1	1	CCDC66	coiled-coil domain containing 66
hsa-miR-1200	1	0	1	1	1	1	ATP11C	ATPase, class VI, type 11C
hsa-miR-1200	1	0	1	0	1	1	RBM23	RNA binding motif protein 23
hsa-miR-1200	0	0	1	0	1	1	C17orf105	chromosome 17 open reading frame 105
hsa-miR-1200	0	0	1	0	0	0	FAM95B1	family with sequence similarity 95, member B1
hsa-miR-1200	0	0	1	1	1	1	RBM46	RNA binding motif protein 46
hsa-miR-1200	1	0	1	1	1	1	MACROD2	MACRO domain containing 2
hsa-miR-1200	1	0	1	1	0	0	UBN2	ubinuclein 2
hsa-miR-1200	1	0	1	1	1	1	COPS7B	COP9 constitutive photomorphogenic homolog subunit 7B (Arabidopsis)
hsa-miR-1200	0	0	1	1	1	1	C2orf65	chromosome 2 open reading frame 65
hsa-miR-1200	0	0	1	0	1	1	LOC388942	uncharacterized LOC388942
hsa-miR-1200	0	0	1	1	0	0	CLDN4	claudin 4
hsa-miR-1200	0	0	1	1	0	0	HSPG2	heparan sulfate proteoglycan 2
hsa-miR-1200	1	0	1	1	0	0	TNK2	tyrosine kinase, non-receptor, 2
hsa-miR-1200	1	0	1	1	1	1	DMXL1	Dmx-like 1
hsa-miR-1200	1	0	1	0	1	1	CLEC16A	C-type lectin domain family 16, member A
hsa-miR-1200	0	0	1	1	0	0	HS3ST5	heparan sulfate (glucosamine) 3-O-sulfotransferase 5
hsa-miR-1200	1	0	1	1	0	0	MAN1B1	mannosidase, alpha, class 1B, member 1
hsa-miR-1200	0	0	1	1	1	1	MOBP	myelin-associated oligodendrocyte basic protein
hsa-miR-1200	0	0	1	1	0	0	FAM54B	family with sequence similarity 54, member B
hsa-miR-1200	0	0	1	1	1	1	DOCK9	dedicator of cytokinesis 9
hsa-miR-1200	0	0	1	0	0	0	LOC619207	scavenger receptor protein family member
hsa-miR-1200	1	0	1	1	1	1	SLC26A9	solute carrier family 26, member 9
hsa-miR-1200	1	0	1	1	1	1	ENAH	enabled homolog (Drosophila)
hsa-miR-1200	0	0	1	1	1	1	C6orf136	chromosome 6 open reading frame 136
hsa-miR-1200	0	0	1	0	0	0	LOC100128262	uncharacterized LOC100128262
hsa-miR-1200	1	0	1	1	0	0	PPP1CA	protein phosphatase 1, catalytic subunit, alpha isozyme
hsa-miR-1200	1	0	1	1	1	1	RNF44	ring finger protein 44
hsa-miR-1200	0	0	1	1	0	0	IQUB	IQ motif and ubiquitin domain containing
hsa-miR-1200	1	0	1	0	1	1	FNDC3B	fibronectin type III domain containing 3B
hsa-miR-1200	0	0	1	0	0	0	ERVFRD-2	endogenous retrovirus group FRD, member 2
hsa-miR-1200	1	0	1	1	1	1	AFAP1	actin filament associated protein 1
hsa-miR-1200	0	0	1	1	0	0	BPIFB1	BPI fold containing family B, member 1
hsa-miR-1200	1	0	1	0	1	1	CAPRIN1	cell cycle associated protein 1
hsa-miR-1200	0	0	1	1	0	0	TRIM46	tripartite motif containing 46
hsa-miR-1200	1	0	1	1	1	1	WDR37	WD repeat domain 37
hsa-miR-1200	0	0	1	0	0	0	FLJ46361	deleted in malignant brain tumors 1 pseudogene
hsa-miR-1200	0	0	1	1	1	1	CD160	CD160 molecule
hsa-miR-1200	1	0	1	0	1	1	KPNA6	karyopherin alpha 6 (importin alpha 7)
hsa-miR-1200	0	0	1	1	1	1	SHROOM3	shroom family member 3
hsa-miR-1200	0	0	1	0	0	0	IDO2	indoleamine 2,3-dioxygenase 2
hsa-miR-1200	0	0	1	0	0	0	LOC100129940	uncharacterized LOC100129940
hsa-miR-1200	1	0	1	1	1	1	PHC2	polyhomeotic homolog 2 (Drosophila)
hsa-miR-1200	0	0	1	1	1	1	TBX19	T-box 19
hsa-miR-1200	0	0	1	1	0	0	HEATR8	HEAT repeat containing 8
hsa-miR-1200	1	0	1	0	1	1	ESRRG	estrogen-related receptor gamma
hsa-miR-1200	0	0	1	0	1	1	RUFY4	RUN and FYVE domain containing 4
hsa-miR-1200	0	0	1	1	1	1	FBN3	fibrillin 3
hsa-miR-1200	1	0	1	1	1	1	MAP3K14	mitogen-activated protein kinase kinase kinase 14
hsa-miR-1200	1	0	1	1	1	1	MAP2K4	mitogen-activated protein kinase kinase 4
hsa-miR-1200	0	0	1	0	0	0	AGAP9	ArfGAP with GTPase domain, ankyrin repeat and PH domain 9
hsa-miR-1200	0	0	1	0	1	1	ATP6V0E2	ATPase, H+ transporting V0 subunit e2
hsa-miR-1200	0	0	1	1	0	0	SCNN1A	sodium channel, non-voltage-gated 1 alpha subunit
hsa-miR-1200	0	0	1	1	0	0	ANAPC15	anaphase promoting complex subunit 15
hsa-miR-1200	1	0	1	1	1	1	GATA6	GATA binding protein 6
hsa-miR-1200	1	0	1	1	0	0	ATP13A3	ATPase type 13A3
hsa-miR-1200	0	0	1	0	1	1	PEX5	peroxisomal biogenesis factor 5
hsa-miR-1200	0	0	1	1	0	0	NADSYN1	NAD synthetase 1
hsa-miR-1200	1	0	1	1	1	1	CAMK2G	calcium/calmodulin-dependent protein kinase II gamma
hsa-miR-1200	1	0	1	0	1	1	MAP3K3	mitogen-activated protein kinase kinase kinase 3
hsa-miR-1200	0	0	1	0	0	0	PART1	prostate androgen-regulated transcript 1 (non-protein coding)
hsa-miR-1200	1	0	1	1	1	1	RIF1	RAP1 interacting factor homolog (yeast)
hsa-miR-1200	0	0	1	1	0	0	PLK1S1	polo-like kinase 1 substrate 1
hsa-miR-1200	0	0	1	0	0	0	POM121L9P	POM121 transmembrane nucleoporin-like 9, pseudogene
hsa-miR-1200	1	0	1	1	1	1	TAB2	TGF-beta activated kinase 1/MAP3K7 binding protein 2
hsa-miR-1200	0	0	1	1	1	1	ARIH1	ariadne homolog, ubiquitin-conjugating enzyme E2 binding protein, 1 (Drosophila)
hsa-miR-1200	0	0	1	0	0	0	TPTE2P6	transmembrane phosphoinositide 3-phosphatase and tensin homolog 2 pseudogene 6
hsa-miR-1200	0	0	1	1	1	1	WDR52	WD repeat domain 52
hsa-miR-1200	0	0	1	1	1	1	RHOT1	ras homolog family member T1
hsa-miR-1200	0	0	1	0	0	0	JAKMIP3	Janus kinase and microtubule interacting protein 3
hsa-miR-1200	1	0	1	1	1	1	KIAA1033	KIAA1033
hsa-miR-1200	0	0	1	1	0	0	DOPEY1	dopey family member 1
hsa-miR-1200	0	0	1	0	0	0	FAM66D	family with sequence similarity 66, member D
hsa-miR-1200	1	0	1	1	1	1	SLC30A8	solute carrier family 30 (zinc transporter), member 8
hsa-miR-1200	0	0	1	1	0	0	KRBA1	KRAB-A domain containing 1
hsa-miR-1200	0	0	1	0	0	0	ZNF720	zinc finger protein 720
hsa-miR-1200	1	0	1	1	0	0	USP24	ubiquitin specific peptidase 24
hsa-miR-1200	1	0	1	1	1	1	DNAJC10	DnaJ (Hsp40) homolog, subfamily C, member 10
hsa-miR-1200	0	0	1	0	0	0	FAM225A	family with sequence similarity 225, member A (non-protein coding)
hsa-miR-1200	0	0	1	1	0	0	TMEM44	transmembrane protein 44
hsa-miR-1200	0	0	1	1	1	1	CCDC132	coiled-coil domain containing 132
hsa-miR-1200	0	0	1	1	1	1	NARG2	NMDA receptor regulated 2
hsa-miR-1200	0	0	1	1	1	1	C12orf50	chromosome 12 open reading frame 50
hsa-miR-1200	1	0	1	1	1	1	CEP164	centrosomal protein 164kDa
hsa-miR-1200	0	0	1	1	1	1	KIAA1841	KIAA1841
hsa-miR-1200	1	0	1	1	1	1	NRP1	neuropilin 1
hsa-miR-1200	1	0	1	1	1	1	IL17RD	interleukin 17 receptor D
hsa-miR-1200	0	0	1	1	1	1	TDRD9	tudor domain containing 9
hsa-miR-1200	1	0	1	1	1	1	DIS3L2	DIS3 mitotic control homolog (S. cerevisiae)-like 2
hsa-miR-1200	0	0	1	1	1	1	PNMAL1	paraneoplastic Ma antigen family-like 1
hsa-miR-1200	0	0	1	1	1	1	KLHL29	kelch-like 29 (Drosophila)
hsa-miR-1200	1	0	1	1	1	1	SET	SET nuclear oncogene
hsa-miR-1200	1	0	1	0	1	1	APOLD1	apolipoprotein L domain containing 1
hsa-miR-1200	1	0	1	1	1	1	IKZF2	IKAROS family zinc finger 2 (Helios)
hsa-miR-1200	0	0	1	0	0	0	PMCHL1	pro-melanin-concentrating hormone-like 1, pseudogene
hsa-miR-1200	0	0	1	0	0	0	PMCHL2	pro-melanin-concentrating hormone-like 2, pseudogene
hsa-miR-1200	0	0	1	1	0	0	IL1F10	interleukin 1 family, member 10 (theta)
hsa-miR-1200	0	0	1	1	1	1	TSPAN17	tetraspanin 17
hsa-miR-1200	1	0	1	0	1	1	BDNF	brain-derived neurotrophic factor
hsa-miR-1200	0	0	1	1	0	0	CRB3	crumbs homolog 3 (Drosophila)
hsa-miR-1200	0	0	1	1	1	1	CYP4B1	cytochrome P450, family 4, subfamily B, polypeptide 1
hsa-miR-1200	0	0	1	1	1	1	SHPRH	SNF2 histone linker PHD RING helicase, E3 ubiquitin protein ligase
hsa-miR-1200	0	0	1	1	1	1	CEP41	centrosomal protein 41kDa
hsa-miR-1200	0	0	1	1	1	1	APTX	aprataxin
hsa-miR-1200	0	0	1	1	1	1	PINX1	PIN2/TERF1 interacting, telomerase inhibitor 1
hsa-miR-1200	0	0	1	1	1	1	IYD	iodotyrosine deiodinase
hsa-miR-1200	1	0	1	0	1	1	ZKSCAN1	zinc finger with KRAB and SCAN domains 1
hsa-miR-1200	1	0	1	1	1	1	TPP1	tripeptidyl peptidase I
hsa-miR-1200	0	0	1	1	0	0	CCL4	chemokine (C-C motif) ligand 4
hsa-miR-1200	1	0	1	1	1	1	RAI14	retinoic acid induced 14
hsa-miR-1200	1	0	1	1	1	1	LAMA3	laminin, alpha 3
hsa-miR-1200	0	0	1	1	0	0	PIGU	phosphatidylinositol glycan anchor biosynthesis, class U
hsa-miR-1200	0	0	1	0	0	0	FAM138C	family with sequence similarity 138, member C
hsa-miR-1200	1	0	1	1	1	1	CAMTA1	calmodulin binding transcription activator 1
hsa-miR-1200	0	0	1	1	0	0	LRRC28	leucine rich repeat containing 28
hsa-miR-1200	0	0	1	1	1	1	PAQR5	progestin and adipoQ receptor family member V
hsa-miR-1200	0	0	1	1	1	1	PTGR2	prostaglandin reductase 2
hsa-miR-1200	0	0	1	1	1	1	POTEG	POTE ankyrin domain family, member G
hsa-miR-1200	0	0	1	1	1	1	DIO1	deiodinase, iodothyronine, type I
hsa-miR-1200	1	0	1	1	1	1	HMGA2	high mobility group AT-hook 2
hsa-miR-1200	0	0	1	1	1	1	KANK2	KN motif and ankyrin repeat domains 2
hsa-miR-1200	0	0	1	1	1	1	IL24	interleukin 24
hsa-miR-1200	0	0	1	1	1	1	ILDR1	immunoglobulin-like domain containing receptor 1
hsa-miR-1200	1	0	1	0	1	1	MYO18A	myosin XVIIIA
hsa-miR-1200	1	0	1	1	1	1	MAPT	microtubule-associated protein tau
hsa-miR-1200	0	0	1	0	1	1	CCL4L2	chemokine (C-C motif) ligand 4-like 2
hsa-miR-1200	0	0	1	1	1	1	CCL4L1	chemokine (C-C motif) ligand 4-like 1
hsa-miR-1200	1	0	1	1	1	1	PCDH11X	protocadherin 11 X-linked
hsa-miR-1200	1	0	1	1	0	0	TAF4B	TAF4b RNA polymerase II, TATA box binding protein (TBP)-associated factor, 105kDa
hsa-miR-1200	0	0	1	1	0	0	NBPF8	neuroblastoma breakpoint family, member 8
hsa-miR-1200	0	0	1	1	1	1	CDK20	cyclin-dependent kinase 20
hsa-miR-1200	1	0	1	1	1	1	TBC1D22B	TBC1 domain family, member 22B
hsa-miR-1200	0	0	1	1	1	1	IL23R	interleukin 23 receptor
hsa-miR-1200	1	0	1	1	1	1	AMOT	angiomotin
hsa-miR-1200	0	0	1	1	0	0	GFOD2	glucose-fructose oxidoreductase domain containing 2
hsa-miR-1200	0	0	1	1	1	1	WDR55	WD repeat domain 55
hsa-miR-1200	1	0	1	1	1	1	RIMS3	regulating synaptic membrane exocytosis 3
hsa-miR-1200	0	0	1	1	0	0	SNRPB	small nuclear ribonucleoprotein polypeptides B and B1
hsa-miR-1200	0	0	1	0	1	1	HAUS3	HAUS augmin-like complex, subunit 3
hsa-miR-1200	1	0	1	1	1	1	NUMA1	nuclear mitotic apparatus protein 1
hsa-miR-1200	1	0	1	1	1	1	SMO	smoothened, frizzled family receptor
hsa-miR-1200	1	0	1	1	1	1	TSEN34	tRNA splicing endonuclease 34 homolog (S. cerevisiae)
hsa-miR-1200	0	0	1	1	1	1	ZNF146	zinc finger protein 146
hsa-miR-1200	1	0	1	0	1	1	CGGBP1	CGG triplet repeat binding protein 1
hsa-miR-1200	1	0	1	1	1	1	VTA1	Vps20-associated 1 homolog (S. cerevisiae)
hsa-miR-1200	0	0	1	0	0	0	LOC93622	Morf4 family associated protein 1-like 1 pseudogene
hsa-miR-1200	1	0	1	1	1	1	PCGF5	polycomb group ring finger 5
hsa-miR-1200	1	0	1	0	1	1	DDX3X	DEAD (Asp-Glu-Ala-Asp) box polypeptide 3, X-linked
hsa-miR-1200	1	0	1	1	1	1	CALM1	calmodulin 1 (phosphorylase kinase, delta)
hsa-miR-1200	1	0	1	1	1	1	LMBR1L	limb region 1 homolog (mouse)-like
hsa-miR-1200	0	0	1	1	0	0	PANK2	pantothenate kinase 2
hsa-miR-1200	1	0	1	1	1	1	RELL2	RELT-like 2
hsa-miR-1200	1	0	1	1	1	1	KCTD17	potassium channel tetramerisation domain containing 17
hsa-miR-1200	1	0	1	1	1	1	DPH1	DPH1 homolog (S. cerevisiae)
hsa-miR-1200	1	0	1	1	1	1	RBM7	RNA binding motif protein 7
hsa-miR-1200	0	0	1	1	1	1	DEDD2	death effector domain containing 2
hsa-miR-1200	0	0	1	1	0	0	PTPMT1	protein tyrosine phosphatase, mitochondrial 1
hsa-miR-1200	0	0	1	1	1	1	TOMM40L	translocase of outer mitochondrial membrane 40 homolog (yeast)-like
hsa-miR-1200	0	0	1	0	1	1	ZNF37A	zinc finger protein 37A
hsa-miR-1200	1	0	1	1	1	1	FAM199X	family with sequence similarity 199, X-linked
hsa-miR-1200	1	0	1	1	1	1	VTI1A	vesicle transport through interaction with t-SNAREs homolog 1A (yeast)
hsa-miR-1200	0	0	1	0	0	0	LOC100144602	uncharacterized LOC100144602
hsa-miR-1200	1	0	1	1	1	1	WWC2	WW and C2 domain containing 2
hsa-miR-1200	0	0	1	0	0	0	FAM200B	family with sequence similarity 200, member B
hsa-miR-1200	0	0	1	1	1	1	CCDC157	coiled-coil domain containing 157
hsa-miR-1200	1	0	1	1	1	1	ZMAT4	zinc finger, matrin-type 4
hsa-miR-1200	0	0	1	0	0	0	ENTPD5	ectonucleoside triphosphate diphosphohydrolase 5
hsa-miR-1200	1	0	1	1	1	1	TM9SF4	transmembrane 9 superfamily protein member 4
hsa-miR-1200	0	0	1	1	1	1	SRGN	serglycin
hsa-miR-1200	0	0	1	0	0	0	AZGP1P1	alpha-2-glycoprotein 1, zinc-binding pseudogene 1
hsa-miR-1200	0	0	1	1	1	1	CDC42SE2	CDC42 small effector 2
hsa-miR-1200	1	0	1	1	1	1	SPOCK2	sparc/osteonectin, cwcv and kazal-like domains proteoglycan (testican) 2
hsa-miR-1200	0	0	1	1	0	0	FAM89B	family with sequence similarity 89, member B
hsa-miR-1200	0	0	1	1	0	0	TBX6	T-box 6
hsa-miR-1200	1	0	1	1	1	1	CNTN4	contactin 4
hsa-miR-1200	0	0	1	0	0	0	EVPLL	envoplakin-like
hsa-miR-1200	1	0	1	0	1	1	CERS3	ceramide synthase 3
hsa-miR-1200	0	0	1	1	0	0	ALPK1	alpha-kinase 1
hsa-miR-1200	0	0	1	1	1	1	ZNF589	zinc finger protein 589
hsa-miR-1200	1	0	1	1	1	1	TMEM127	transmembrane protein 127
hsa-miR-1200	0	0	1	0	1	1	PAPOLG	poly(A) polymerase gamma
hsa-miR-1200	1	0	1	1	1	1	HTR2C	5-hydroxytryptamine (serotonin) receptor 2C, G protein-coupled
hsa-miR-1200	0	0	1	0	0	0	ANKRD19P	ankyrin repeat domain 19, pseudogene
hsa-miR-1200	0	0	1	1	1	1	LRMP	lymphoid-restricted membrane protein
hsa-miR-1200	0	0	1	1	0	0	TSPAN16	tetraspanin 16
hsa-miR-1200	0	0	1	1	0	0	TMEM251	transmembrane protein 251
hsa-miR-1200	0	0	1	1	1	1	SH3TC1	SH3 domain and tetratricopeptide repeats 1
hsa-miR-1200	0	0	1	1	1	1	TMEM117	transmembrane protein 117
hsa-miR-1200	1	0	1	1	1	1	ZPLD1	zona pellucida-like domain containing 1
hsa-miR-1200	1	0	1	1	1	1	PITPNB	phosphatidylinositol transfer protein, beta
hsa-miR-1200	0	0	1	1	0	0	ASIC4	acid-sensing (proton-gated) ion channel family member 4
hsa-miR-1200	1	0	1	0	1	1	RNF4	ring finger protein 4
hsa-miR-1200	0	0	1	1	1	1	C7orf53	chromosome 7 open reading frame 53
hsa-miR-1200	0	0	1	0	0	0	LOC643648	uncharacterized LOC643648
hsa-miR-1200	1	0	1	1	1	1	RAB5B	RAB5B, member RAS oncogene family
hsa-miR-1200	1	0	1	1	1	1	SECISBP2L	SECIS binding protein 2-like
hsa-miR-1200	1	0	1	1	1	1	SIRPA	signal-regulatory protein alpha
hsa-miR-1200	1	0	1	0	1	1	THSD7B	thrombospondin, type I, domain containing 7B
hsa-miR-1200	1	0	1	1	1	1	HMGCR	3-hydroxy-3-methylglutaryl-CoA reductase
hsa-miR-1200	1	0	1	1	1	1	CUL1	cullin 1
hsa-miR-1200	0	0	1	1	0	0	ADAMTS13	ADAM metallopeptidase with thrombospondin type 1 motif, 13
hsa-miR-1200	0	0	1	0	1	1	DKFZP434I0714	uncharacterized protein DKFZP434I0714
hsa-miR-1200	1	0	1	0	1	1	DDX3Y	DEAD (Asp-Glu-Ala-Asp) box polypeptide 3, Y-linked
hsa-miR-1200	0	0	1	1	1	1	KIF16B	kinesin family member 16B
hsa-miR-1200	1	0	1	1	1	1	ZEB2	zinc finger E-box binding homeobox 2
hsa-miR-1200	0	0	1	1	1	1	CBLN2	cerebellin 2 precursor
hsa-miR-1200	1	0	1	1	1	1	SLC35G1	solute carrier family 35, member G1
hsa-miR-1200	0	0	1	1	1	1	FAM171B	family with sequence similarity 171, member B
hsa-miR-1200	0	0	1	0	0	0	ANKRD30BP2	ankyrin repeat domain 30B pseudogene 2
hsa-miR-1200	0	0	1	1	1	1	ZNF141	zinc finger protein 141
hsa-miR-1200	0	0	1	1	1	1	C11orf1	chromosome 11 open reading frame 1
hsa-miR-1200	1	0	1	1	1	1	BNC2	basonuclin 2
hsa-miR-1200	0	0	1	1	1	1	MTHFD2L	methylenetetrahydrofolate dehydrogenase (NADP+ dependent) 2-like
hsa-miR-1200	1	0	1	1	1	1	SOX6	SRY (sex determining region Y)-box 6
hsa-miR-1200	0	0	1	1	1	1	EFCAB13	EF-hand calcium binding domain 13
hsa-miR-1200	0	0	1	0	0	0	INHBA-AS1	INHBA antisense RNA 1
hsa-miR-1200	0	0	1	0	0	0	LOC100134868	uncharacterized LOC100134868
hsa-miR-1200	0	0	1	1	0	0	H2AFZ	H2A histone family, member Z
hsa-miR-1200	0	0	1	0	0	0	USP32P1	ubiquitin specific peptidase 32 pseudogene 1
hsa-miR-1200	1	0	1	0	1	1	LPHN3	latrophilin 3
hsa-miR-1200	0	0	1	0	0	0	LOC401074	uncharacterized LOC401074
hsa-miR-1200	0	0	1	0	0	0	LOC100132735	uncharacterized LOC100132735
hsa-miR-1200	1	0	1	1	1	1	FOSB	FBJ murine osteosarcoma viral oncogene homolog B
hsa-miR-1200	1	0	1	1	1	1	DACH2	dachshund homolog 2 (Drosophila)
hsa-miR-1200	0	0	1	0	0	0	SNHG11	small nucleolar RNA host gene 11 (non-protein coding)
hsa-miR-1200	1	0	1	1	1	1	INTS6	integrator complex subunit 6
hsa-miR-1200	0	0	1	0	0	0	SLC7A11-AS1	SLC7A11 antisense RNA 1
hsa-miR-1200	1	0	1	1	1	1	ROCK1	Rho-associated, coiled-coil containing protein kinase 1
hsa-miR-1200	0	0	1	0	0	0	ALOX12P2	arachidonate 12-lipoxygenase pseudogene 2
hsa-miR-1200	0	0	1	1	1	1	RABGAP1L	RAB GTPase activating protein 1-like
hsa-miR-1200	0	0	1	0	0	0	LOC154822	uncharacterized LOC154822
hsa-miR-1200	0	0	1	0	0	0	C10orf108	chromosome 10 open reading frame 108
hsa-miR-1200	1	0	1	1	1	1	FKBP5	FK506 binding protein 5
hsa-miR-1200	0	0	1	0	0	0	MORF4L2-AS1	MORF4L2 antisense RNA 1
hsa-miR-1200	0	0	1	1	1	1	STRADA	STE20-related kinase adaptor alpha
hsa-miR-1200	1	0	1	0	0	0	XPNPEP3	X-prolyl aminopeptidase (aminopeptidase P) 3, putative
hsa-miR-1200	0	0	1	1	1	1	MGC57346	uncharacterized LOC401884
hsa-miR-1200	0	0	1	0	0	0	LOC283914	uncharacterized LOC283914
hsa-miR-1200	0	0	1	0	0	0	LOC339529	uncharacterized LOC339529
hsa-miR-1200	0	0	1	1	0	0	LILRA1	leukocyte immunoglobulin-like receptor, subfamily A (with TM domain), member 1
hsa-miR-1200	0	0	1	0	0	0	LOC348120	uncharacterized LOC348120
hsa-miR-1200	0	0	1	1	1	1	CDADC1	cytidine and dCMP deaminase domain containing 1
hsa-miR-1200	0	0	1	1	0	0	OXLD1	oxidoreductase-like domain containing 1
hsa-miR-1200	1	0	1	1	1	1	PELI1	pellino E3 ubiquitin protein ligase 1
hsa-miR-1200	0	0	1	1	0	0	NLRC5	NLR family, CARD domain containing 5
hsa-miR-1200	0	0	1	1	0	0	NISCH	nischarin
hsa-miR-1200	0	0	1	0	0	0	BMS1P6	BMS1 pseudogene 6
hsa-miR-1200	0	0	1	1	1	1	LINC00086	long intergenic non-protein coding RNA 86
hsa-miR-1200	0	0	1	1	1	1	RAB3IL1	RAB3A interacting protein (rabin3)-like 1
hsa-miR-1200	1	0	1	1	1	1	SCUBE3	signal peptide, CUB domain, EGF-like 3
hsa-miR-1200	0	0	1	1	0	0	SPTAN1	spectrin, alpha, non-erythrocytic 1
hsa-miR-1200	0	0	1	0	0	0	LINC00265	long intergenic non-protein coding RNA 265
hsa-miR-1200	0	0	1	0	1	1	C16orf52	chromosome 16 open reading frame 52
hsa-miR-1200	0	0	1	1	0	0	TINAG	tubulointerstitial nephritis antigen
hsa-miR-1200	1	0	1	1	1	1	KLHL28	kelch-like 28 (Drosophila)
hsa-miR-1200	1	0	1	1	1	1	FAM63B	family with sequence similarity 63, member B
hsa-miR-1200	0	0	1	1	0	0	AGAP11	ankyrin repeat and GTPase domain Arf GTPase activating protein 11
hsa-miR-1200	0	0	1	1	1	1	KIAA1009	KIAA1009
hsa-miR-1200	1	0	1	1	1	1	RANBP9	RAN binding protein 9
hsa-miR-1200	1	0	1	0	0	0	PRRT4	proline-rich transmembrane protein 4
hsa-miR-1200	0	0	1	0	0	0	GNN	Grp94 neighboring nucleotidase pseudogene
hsa-miR-1200	1	0	1	1	1	1	MYLK	myosin light chain kinase
hsa-miR-1200	0	0	1	0	0	0	LOC727751	uncharacterized LOC727751
hsa-miR-1200	0	0	1	0	0	0	AGSK1	golgin subfamily A member 2-like
hsa-miR-1200	0	0	1	0	0	0	LOC727849	golgin A2 pseudogene
hsa-miR-1200	1	0	1	1	1	1	AP3M1	adaptor-related protein complex 3, mu 1 subunit
hsa-miR-1200	0	0	1	0	0	0	LINC00442	long intergenic non-protein coding RNA 442
hsa-miR-1200	0	0	1	0	0	0	PABPC1P2	poly(A) binding protein, cytoplasmic 1 pseudogene 2
hsa-miR-1200	1	0	1	1	1	1	SLC26A7	solute carrier family 26, member 7
hsa-miR-1200	1	0	1	1	1	1	MAPKAPK3	mitogen-activated protein kinase-activated protein kinase 3
hsa-miR-1200	1	0	1	1	1	1	PHACTR4	phosphatase and actin regulator 4
hsa-miR-1200	1	0	1	1	1	1	LINGO1	leucine rich repeat and Ig domain containing 1
hsa-miR-1200	0	0	1	0	0	0	PTGER4P2	prostaglandin E receptor 4 (subtype EP4) pseudogene 2
hsa-miR-1200	0	0	1	1	0	0	NDUFAF2	NADH dehydrogenase (ubiquinone) complex I, assembly factor 2
hsa-miR-1200	1	0	1	0	1	1	TMEM194A	transmembrane protein 194A
hsa-miR-1200	0	0	1	0	0	0	ULK4P1	unc-51-like kinase 4 (C. elegans) pseudogene 1
hsa-miR-1200	0	0	1	0	0	0	JPX	JPX transcript, XIST activator (non-protein coding)
hsa-miR-1200	0	0	1	0	0	0	ULK4P3	unc-51-like kinase 4 (C. elegans) pseudogene 3
hsa-miR-1200	1	0	1	1	1	1	LOXL3	lysyl oxidase-like 3
hsa-miR-1200	0	0	1	1	1	1	ABHD14B	abhydrolase domain containing 14B
hsa-miR-1200	1	0	1	1	1	1	CTBP1	C-terminal binding protein 1
hsa-miR-1200	0	0	1	1	0	0	PER1	period homolog 1 (Drosophila)
hsa-miR-1200	0	0	1	1	1	1	GNG10	guanine nucleotide binding protein (G protein), gamma 10
hsa-miR-1200	1	0	1	1	1	1	C1orf173	chromosome 1 open reading frame 173
hsa-miR-1200	0	0	1	0	0	0	OAZ3	ornithine decarboxylase antizyme 3
hsa-miR-1200	0	0	1	1	0	0	D2HGDH	D-2-hydroxyglutarate dehydrogenase
hsa-miR-1200	1	0	1	0	1	1	AMMECR1L	AMME chromosomal region gene 1-like
hsa-miR-1200	0	0	1	0	0	0	LINC00537	long intergenic non-protein coding RNA 537
hsa-miR-1200	0	0	1	0	1	1	LOC389043	uncharacterized LOC389043
hsa-miR-1200	0	0	1	1	0	0	CCDC19	coiled-coil domain containing 19
hsa-miR-1200	1	0	1	1	1	1	PLXNA2	plexin A2
hsa-miR-1200	0	0	1	0	0	0	FRG1B	FSHD region gene 1 family, member B
hsa-miR-1200	0	0	1	1	1	1	SPRR2A	small proline-rich protein 2A
hsa-miR-1200	1	0	1	1	1	1	WNT10B	wingless-type MMTV integration site family, member 10B
hsa-miR-1200	1	0	1	1	1	1	FGD4	FYVE, RhoGEF and PH domain containing 4
hsa-miR-1200	0	0	1	1	1	1	COL8A2	collagen, type VIII, alpha 2
hsa-miR-1200	1	0	1	1	1	1	GTF2I	general transcription factor IIi
hsa-miR-1200	1	0	1	0	1	1	ARPP19	cAMP-regulated phosphoprotein, 19kDa
hsa-miR-1200	0	0	1	1	0	0	NUBP1	nucleotide binding protein 1
hsa-miR-1200	1	0	1	1	1	1	LRRC15	leucine rich repeat containing 15
hsa-miR-1200	1	0	1	1	0	0	KIAA1644	KIAA1644
hsa-miR-1200	0	0	1	0	0	0	GUSBP9	glucuronidase, beta pseudogene 9
hsa-miR-1200	0	0	1	0	1	1	C9orf91	chromosome 9 open reading frame 91
hsa-miR-1200	0	0	1	1	0	0	FMN1	formin 1
hsa-miR-1200	1	0	1	0	1	1	BTBD3	BTB (POZ) domain containing 3
hsa-miR-1200	0	0	1	0	0	0	LRRC37A11P	leucine rich repeat containing 37, member A11, pseudogene
hsa-miR-1200	0	0	1	1	0	0	PRY	PTPN13-like, Y-linked
hsa-miR-1200	1	0	1	1	1	1	TMEM64	transmembrane protein 64
hsa-miR-1200	1	0	1	1	1	1	KIAA1324L	KIAA1324-like
hsa-miR-1200	0	0	1	1	0	0	RGS12	regulator of G-protein signaling 12
hsa-miR-1200	1	0	1	1	1	1	OTUD4	OTU domain containing 4
hsa-miR-1200	0	0	1	0	0	0	FAM27E3	family with sequence similarity 27, member E3
hsa-miR-1200	1	0	1	0	1	1	CAMSAP2	calmodulin regulated spectrin-associated protein family, member 2
hsa-miR-1200	1	0	1	1	1	1	ANK2	ankyrin 2, neuronal
hsa-miR-1200	0	0	1	0	0	0	C1orf226	chromosome 1 open reading frame 226
hsa-miR-1200	0	0	1	1	0	0	DZANK1	double zinc ribbon and ankyrin repeat domains 1
hsa-miR-1200	0	0	1	0	1	1	PPIAL4G	peptidylprolyl isomerase A (cyclophilin A)-like 4G
hsa-miR-1200	0	0	1	1	0	0	MILR1	mast cell immunoglobulin-like receptor 1
hsa-miR-1200	0	0	1	0	0	0	FAM225B	family with sequence similarity 225, member B (non-protein coding)
hsa-miR-1200	1	0	1	0	1	1	NFAT5	nuclear factor of activated T-cells 5, tonicity-responsive
hsa-miR-1200	0	0	1	0	0	0	LILRP2	leukocyte immunoglobulin-like receptor pseudogene 2
hsa-miR-1200	0	0	1	0	0	0	SMA4	glucuronidase, beta pseudogene
hsa-miR-1200	0	0	1	1	1	1	ARG1	arginase, liver
hsa-miR-1200	0	0	1	1	1	1	PRKAR2A	protein kinase, cAMP-dependent, regulatory, type II, alpha
hsa-miR-1200	0	0	1	0	0	0	MEG3	maternally expressed 3 (non-protein coding)
hsa-miR-1200	0	0	1	1	1	1	TINF2	TERF1 (TRF1)-interacting nuclear factor 2
hsa-miR-1200	0	0	1	1	0	0	NDRG2	NDRG family member 2
hsa-miR-1200	0	0	1	0	0	0	LOC100133207	uncharacterized LOC100133207
hsa-miR-1200	0	0	1	1	0	0	PSMB5	proteasome (prosome, macropain) subunit, beta type, 5
hsa-miR-1200	0	0	1	0	0	0	LINC00643	long intergenic non-protein coding RNA 643
hsa-miR-1200	1	0	1	1	1	1	BTBD7	BTB (POZ) domain containing 7
hsa-miR-1200	0	0	1	0	0	0	RGPD4	RANBP2-like and GRIP domain containing 4
hsa-miR-1200	0	0	1	1	1	1	SLC12A8	solute carrier family 12 (potassium/chloride transporters), member 8
hsa-miR-1200	0	0	1	1	1	1	STAT2	signal transducer and activator of transcription 2, 113kDa
hsa-miR-1200	1	0	1	1	1	1	MYCBP2	MYC binding protein 2, E3 ubiquitin protein ligase
hsa-miR-1200	0	0	1	1	1	1	IPCEF1	interaction protein for cytohesin exchange factors 1
hsa-miR-1200	1	0	1	1	1	1	HMGB1	high mobility group box 1
hsa-miR-1200	0	0	1	1	1	1	PRR14L	proline rich 14-like
hsa-miR-1200	1	0	1	1	1	1	SLC39A13	solute carrier family 39 (zinc transporter), member 13
hsa-miR-1200	0	0	1	1	1	1	FAM9C	family with sequence similarity 9, member C
hsa-miR-1200	1	0	1	1	1	1	TLN2	talin 2
hsa-miR-1200	0	0	1	1	0	0	ANKRD33	ankyrin repeat domain 33
hsa-miR-1200	1	0	1	0	1	1	EML4	echinoderm microtubule associated protein like 4
hsa-miR-1200	0	0	1	0	1	1	B3GALTL	beta 1,3-galactosyltransferase-like
hsa-miR-1200	0	0	1	1	1	1	CCNT2	cyclin T2
hsa-miR-1200	1	0	1	1	1	1	PTPN3	protein tyrosine phosphatase, non-receptor type 3
hsa-miR-1200	1	0	1	1	1	1	PHF3	PHD finger protein 3
hsa-miR-1200	1	0	1	1	1	1	GSTCD	glutathione S-transferase, C-terminal domain containing
hsa-miR-1200	1	0	1	0	1	1	KLHL24	kelch-like 24 (Drosophila)
hsa-miR-1200	1	0	1	0	1	1	IGF2BP3	insulin-like growth factor 2 mRNA binding protein 3
hsa-miR-1200	1	0	1	1	1	1	RECK	reversion-inducing-cysteine-rich protein with kazal motifs
hsa-miR-1200	1	0	1	1	1	1	TMEM135	transmembrane protein 135
hsa-miR-1200	0	0	1	0	0	0	ZNRD1-AS1	ZNRD1 antisense RNA 1
hsa-miR-1200	1	0	1	1	1	1	BZRAP1	benzodiazapine receptor (peripheral) associated protein 1
hsa-miR-1200	0	0	1	0	1	1	CD59	CD59 molecule, complement regulatory protein
hsa-miR-1200	0	0	1	1	1	1	HPGD	hydroxyprostaglandin dehydrogenase 15-(NAD)
hsa-miR-1200	0	0	1	1	0	0	CSH1	chorionic somatomammotropin hormone 1 (placental lactogen)
hsa-miR-1200	0	0	1	1	0	0	PPT2	palmitoyl-protein thioesterase 2
hsa-miR-1200	0	0	1	1	1	1	CCDC86	coiled-coil domain containing 86
hsa-miR-1200	0	0	1	0	0	0	LOC401127	WD repeat domain 5 pseudogene
hsa-miR-1200	0	0	1	1	0	0	GPX3	glutathione peroxidase 3 (plasma)
hsa-miR-1200	0	0	1	1	1	1	PLSCR1	phospholipid scramblase 1
hsa-miR-1200	1	0	1	1	1	1	POU2F3	POU class 2 homeobox 3
hsa-miR-1200	1	0	1	0	1	1	SLCO2A1	solute carrier organic anion transporter family, member 2A1
hsa-miR-1200	1	0	1	1	1	1	RBM3	RNA binding motif (RNP1, RRM) protein 3
hsa-miR-1200	1	1	1	1	0	0	EFNA3	ephrin-A3
hsa-miR-1200	0	0	1	0	0	0	ZBED3-AS1	ZBED3 antisense RNA 1
hsa-miR-1200	1	0	1	1	1	1	FGF11	fibroblast growth factor 11
hsa-miR-1200	0	0	1	1	0	0	NOP56	NOP56 ribonucleoprotein homolog (yeast)
hsa-miR-1200	1	0	1	1	0	0	ELOVL1	ELOVL fatty acid elongase 1
hsa-miR-1200	0	0	1	1	1	1	COPS7A	COP9 constitutive photomorphogenic homolog subunit 7A (Arabidopsis)
hsa-miR-1200	1	0	1	1	1	1	ADM	adrenomedullin
hsa-miR-1200	1	0	1	1	1	1	SMARCE1	SWI/SNF related, matrix associated, actin dependent regulator of chromatin, subfamily e, member 1
hsa-miR-1200	1	0	1	0	1	1	PTPLAD1	protein tyrosine phosphatase-like A domain containing 1
hsa-miR-1200	0	0	1	1	1	1	MTCP1	mature T-cell proliferation 1
hsa-miR-1200	1	0	1	1	1	1	PLEKHB2	pleckstrin homology domain containing, family B (evectins) member 2
hsa-miR-1200	0	0	1	0	0	0	HMGN1P37	high mobility group nucleosome binding domain 1 pseudogene 37
hsa-miR-1200	0	0	1	1	0	0	KIAA0100	KIAA0100
hsa-miR-1200	0	0	1	1	1	1	C17orf76-AS1	C17orf76 antisense RNA 1
hsa-miR-1200	1	0	1	1	1	1	PCTP	phosphatidylcholine transfer protein
hsa-miR-1200	0	0	1	1	1	1	PGAP2	post-GPI attachment to proteins 2
hsa-miR-1200	1	0	1	1	1	1	LYPLA2	lysophospholipase II
hsa-miR-1200	0	0	1	1	0	0	C12orf52	chromosome 12 open reading frame 52
hsa-miR-1200	0	0	1	1	0	0	DDTL	D-dopachrome tautomerase-like
hsa-miR-1200	0	0	1	1	1	1	RGS14	regulator of G-protein signaling 14
hsa-miR-1200	0	0	1	1	0	0	C11orf68	chromosome 11 open reading frame 68
hsa-miR-1200	0	0	1	0	0	0	FLJ45248	FLJ45248 protein
hsa-miR-1200	0	0	1	0	1	1	TMEM155	transmembrane protein 155
hsa-miR-1200	0	0	1	1	1	1	MPDU1	mannose-P-dolichol utilization defect 1
hsa-miR-1200	0	0	1	1	0	0	CSHL1	chorionic somatomammotropin hormone-like 1
hsa-miR-1200	1	0	1	1	1	1	MMP2	matrix metallopeptidase 2 (gelatinase A, 72kDa gelatinase, 72kDa type IV collagenase)
hsa-miR-1200	0	0	1	1	0	0	LILRB4	leukocyte immunoglobulin-like receptor, subfamily B (with TM and ITIM domains), member 4
hsa-miR-1200	1	0	1	1	0	0	FAT4	FAT tumor suppressor homolog 4 (Drosophila)
hsa-miR-1200	0	0	1	1	0	0	CCDC22	coiled-coil domain containing 22
hsa-miR-1200	0	0	1	0	0	0	PGF	placental growth factor
hsa-miR-1200	0	0	1	1	1	1	CPZ	carboxypeptidase Z
hsa-miR-1200	1	0	1	1	1	1	ARNTL	aryl hydrocarbon receptor nuclear translocator-like
hsa-miR-1200	0	0	1	1	1	1	BTF3	basic transcription factor 3
hsa-miR-1200	0	0	1	1	1	1	RHEBL1	Ras homolog enriched in brain like 1
hsa-miR-1200	0	0	1	1	0	0	RGS9	regulator of G-protein signaling 9
hsa-miR-1200	0	0	1	1	1	1	TCTN3	tectonic family member 3
hsa-miR-1200	1	0	1	1	1	1	ANAPC16	anaphase promoting complex subunit 16
hsa-miR-1200	0	0	1	1	1	1	ACSF3	acyl-CoA synthetase family member 3
hsa-miR-1200	0	0	1	1	1	1	SLCO4A1	solute carrier organic anion transporter family, member 4A1
hsa-miR-1200	1	0	1	1	0	0	CRELD1	cysteine-rich with EGF-like domains 1
hsa-miR-1200	1	0	1	1	1	1	RPUSD3	RNA pseudouridylate synthase domain containing 3
hsa-miR-1200	0	0	1	1	0	0	OXA1L	oxidase (cytochrome c) assembly 1-like
hsa-miR-1200	0	0	1	1	0	0	CCDC107	coiled-coil domain containing 107
hsa-miR-1200	0	0	1	1	1	1	PLAC8	placenta-specific 8
hsa-miR-1200	1	0	1	1	1	1	ATPAF1	ATP synthase mitochondrial F1 complex assembly factor 1
hsa-miR-1200	0	0	1	0	0	0	LOC100132984	uncharacterized LOC100132984
hsa-miR-1200	1	0	1	1	1	1	MYT1	myelin transcription factor 1
hsa-miR-1200	0	0	1	1	0	0	CD2BP2	CD2 (cytoplasmic tail) binding protein 2
hsa-miR-1200	1	0	1	1	1	1	LGALSL	lectin, galactoside-binding-like
hsa-miR-1200	0	0	1	1	1	1	C10orf2	chromosome 10 open reading frame 2
hsa-miR-1200	1	0	1	1	0	0	MMP11	matrix metallopeptidase 11 (stromelysin 3)
hsa-miR-1200	1	0	1	1	1	1	GABPB2	GA binding protein transcription factor, beta subunit 2
hsa-miR-1200	0	0	1	1	1	1	C9orf3	chromosome 9 open reading frame 3
hsa-miR-1200	0	0	1	0	0	0	LOC731789	uncharacterized LOC731789
hsa-miR-1200	0	0	1	1	1	1	CCP110	centriolar coiled coil protein 110kDa
hsa-miR-1200	0	0	1	1	1	1	BDP1	B double prime 1, subunit of RNA polymerase III transcription initiation factor IIIB
hsa-miR-1200	0	0	1	0	0	0	LINC00661	long intergenic non-protein coding RNA 661
hsa-miR-1200	1	0	1	1	1	1	HECW2	HECT, C2 and WW domain containing E3 ubiquitin protein ligase 2
hsa-miR-1200	0	0	1	0	0	0	MUC19	mucin 19, oligomeric
hsa-miR-1200	1	0	1	0	1	1	OSBPL8	oxysterol binding protein-like 8
hsa-miR-1200	1	0	1	0	1	1	MCFD2	multiple coagulation factor deficiency 2
hsa-miR-1200	0	0	1	1	0	0	TENC1	tensin like C1 domain containing phosphatase (tensin 2)
hsa-miR-1200	0	0	1	0	0	0	ZNFX1-AS1	ZNFX1 antisense RNA 1
hsa-miR-1200	1	0	1	0	1	1	EFR3A	EFR3 homolog A (S. cerevisiae)
hsa-miR-1200	1	0	1	1	1	1	SEC14L1	SEC14-like 1 (S. cerevisiae)
hsa-miR-1200	0	0	1	1	1	1	ATF2	activating transcription factor 2
hsa-miR-1200	0	0	1	1	1	1	PTGS1	prostaglandin-endoperoxide synthase 1 (prostaglandin G/H synthase and cyclooxygenase)
hsa-miR-1200	0	0	1	1	0	0	SPATA20	spermatogenesis associated 20
hsa-miR-1200	1	0	1	1	1	1	BCL2L11	BCL2-like 11 (apoptosis facilitator)
hsa-miR-1200	0	0	1	0	0	0	PILRB	paired immunoglobin-like type 2 receptor beta
hsa-miR-1200	1	0	1	0	1	1	RBBP5	retinoblastoma binding protein 5
hsa-miR-1200	1	0	1	1	1	1	LGR4	leucine-rich repeat containing G protein-coupled receptor 4
hsa-miR-1200	0	0	1	1	1	1	HOOK2	hook homolog 2 (Drosophila)
hsa-miR-1200	0	0	1	1	1	1	ALDH3B1	aldehyde dehydrogenase 3 family, member B1
hsa-miR-1200	0	0	1	1	1	1	PLCB4	phospholipase C, beta 4
hsa-miR-1200	0	0	1	1	1	1	NPR3	natriuretic peptide receptor C/guanylate cyclase C (atrionatriuretic peptide receptor C)
hsa-miR-1200	1	0	1	0	1	1	ACVR2A	activin A receptor, type IIA
hsa-miR-1200	0	0	1	1	1	1	CD3G	CD3g molecule, gamma (CD3-TCR complex)
hsa-miR-1200	1	0	1	1	1	1	F13A1	coagulation factor XIII, A1 polypeptide
hsa-miR-1200	0	0	1	1	1	1	GSS	glutathione synthetase
hsa-miR-1200	0	0	1	1	1	1	HSD11B2	hydroxysteroid (11-beta) dehydrogenase 2
hsa-miR-1200	1	0	1	1	1	1	KCNA1	potassium voltage-gated channel, shaker-related subfamily, member 1 (episodic ataxia with myokymia)
hsa-miR-1200	0	0	1	1	1	1	KCNJ1	potassium inwardly-rectifying channel, subfamily J, member 1
hsa-miR-1200	0	0	1	1	0	0	KCNH2	potassium voltage-gated channel, subfamily H (eag-related), member 2
hsa-miR-1200	1	0	1	1	1	1	MET	met proto-oncogene (hepatocyte growth factor receptor)
hsa-miR-1200	1	0	1	1	1	1	RB1	retinoblastoma 1
hsa-miR-1200	0	0	1	1	1	1	SRD5A2	steroid-5-alpha-reductase, alpha polypeptide 2 (3-oxo-5 alpha-steroid delta 4-dehydrogenase alpha 2)
hsa-miR-1200	1	0	1	1	1	1	TAT	tyrosine aminotransferase
hsa-miR-1200	1	0	1	1	1	1	CHM	choroideremia (Rab escort protein 1)
hsa-miR-1200	1	0	1	0	1	1	CYBB	cytochrome b-245, beta polypeptide
hsa-miR-1200	1	0	1	1	1	1	HNF1B	HNF1 homeobox B
hsa-miR-1200	0	0	1	1	0	0	SAG	S-antigen; retina and pineal gland (arrestin)
hsa-miR-1200	0	0	1	1	1	1	IL1RN	interleukin 1 receptor antagonist
hsa-miR-1200	1	0	1	1	1	1	CXCL12	chemokine (C-X-C motif) ligand 12
hsa-miR-1200	0	0	1	1	1	1	IFNG	interferon, gamma
hsa-miR-1200	1	0	1	1	1	1	CSF1	colony stimulating factor 1 (macrophage)
hsa-miR-1200	1	0	1	0	0	0	CSF2	colony stimulating factor 2 (granulocyte-macrophage)
hsa-miR-1200	1	0	1	1	1	1	DIO2	deiodinase, iodothyronine, type II
hsa-miR-1200	1	0	1	1	0	0	GRIN2A	glutamate receptor, ionotropic, N-methyl D-aspartate 2A
hsa-miR-1200	1	0	1	1	1	1	HTR4	5-hydroxytryptamine (serotonin) receptor 4, G protein-coupled
hsa-miR-1200	0	0	1	1	1	1	HTR7	5-hydroxytryptamine (serotonin) receptor 7, adenylate cyclase-coupled
hsa-miR-1200	1	0	1	0	1	1	KCNJ2	potassium inwardly-rectifying channel, subfamily J, member 2
hsa-miR-1200	1	0	1	1	1	1	PDE3B	phosphodiesterase 3B, cGMP-inhibited
hsa-miR-1200	0	0	1	1	1	1	PTGS2	prostaglandin-endoperoxide synthase 2 (prostaglandin G/H synthase and cyclooxygenase)
hsa-miR-1200	1	0	1	1	1	1	REEP3	receptor accessory protein 3
hsa-miR-1200	0	0	1	1	1	1	C16orf87	chromosome 16 open reading frame 87
hsa-miR-1200	0	0	1	1	0	0	TM6SF2	transmembrane 6 superfamily member 2
hsa-miR-1200	1	0	1	0	1	1	ARHGEF37	Rho guanine nucleotide exchange factor (GEF) 37
hsa-miR-1200	0	0	1	0	1	1	C9orf170	chromosome 9 open reading frame 170
hsa-miR-1200	0	0	1	1	1	1	DDI1	DNA-damage inducible 1 homolog 1 (S. cerevisiae)
hsa-miR-1200	0	0	1	1	1	1	ATP5G2	ATP synthase, H+ transporting, mitochondrial Fo complex, subunit C2 (subunit 9)
hsa-miR-1200	0	0	1	0	0	0	KLK2	kallikrein-related peptidase 2
hsa-miR-1200	1	0	1	1	1	1	WNK3	WNK lysine deficient protein kinase 3
hsa-miR-1200	1	0	1	0	1	1	BMF	Bcl2 modifying factor
hsa-miR-1200	0	0	1	1	1	1	ALG11	asparagine-linked glycosylation 11, alpha-1,2-mannosyltransferase homolog (yeast)
hsa-miR-1200	0	0	1	1	1	1	ZCCHC16	zinc finger, CCHC domain containing 16
hsa-miR-1200	1	0	1	0	1	1	LIN28B	lin-28 homolog B (C. elegans)
hsa-miR-1200	0	0	1	0	0	0	FLJ42842	uncharacterized FLJ42842
hsa-miR-1200	1	0	1	1	1	1	PLCXD3	phosphatidylinositol-specific phospholipase C, X domain containing 3
hsa-miR-1200	1	0	1	0	1	1	IP6K1	inositol hexakisphosphate kinase 1
hsa-miR-1200	1	0	1	1	1	1	ATN1	atrophin 1
hsa-miR-1200	1	0	1	1	1	1	TULP4	tubby like protein 4
hsa-miR-1200	1	0	1	0	1	1	SS18	synovial sarcoma translocation, chromosome 18
hsa-miR-1200	1	0	1	1	1	1	ZDHHC9	zinc finger, DHHC-type containing 9
hsa-miR-1200	1	0	1	1	1	1	CTDSPL	CTD (carboxy-terminal domain, RNA polymerase II, polypeptide A) small phosphatase-like
hsa-miR-1200	1	0	1	1	1	1	BCAP29	B-cell receptor-associated protein 29
hsa-miR-1200	0	0	1	1	0	0	AKAP14	A kinase (PRKA) anchor protein 14
hsa-miR-1200	0	0	1	0	1	1	LPPR5	lipid phosphate phosphatase-related protein type 5
hsa-miR-1200	0	0	1	1	1	1	DSTN	destrin (actin depolymerizing factor)
hsa-miR-1200	1	0	1	0	1	1	CREB5	cAMP responsive element binding protein 5
hsa-miR-1200	1	0	1	1	1	1	FOXP4	forkhead box P4
hsa-miR-1200	0	0	1	1	0	0	RGR	retinal G protein coupled receptor
hsa-miR-1200	1	0	1	1	1	1	DISC1	disrupted in schizophrenia 1
hsa-miR-1200	1	0	1	0	1	1	ZKSCAN2	zinc finger with KRAB and SCAN domains 2
hsa-miR-1200	1	0	1	1	1	1	TRNP1	TMF1-regulated nuclear protein 1
hsa-miR-1200	1	0	1	0	1	1	FIGNL2	fidgetin-like 2
hsa-miR-1200	1	0	1	1	1	1	H3F3C	H3 histone, family 3C
hsa-miR-1200	1	0	1	1	1	1	PHF6	PHD finger protein 6
hsa-miR-1200	1	0	1	1	1	1	TMCC1	transmembrane and coiled-coil domain family 1
hsa-miR-1200	0	0	1	1	1	1	VPS13A	vacuolar protein sorting 13 homolog A (S. cerevisiae)
hsa-miR-1200	0	0	1	1	0	0	POLR3H	polymerase (RNA) III (DNA directed) polypeptide H (22.9kD)
hsa-miR-1200	0	0	1	1	1	1	SPRR2E	small proline-rich protein 2E
hsa-miR-1200	1	0	1	1	1	1	SBK1	SH3-binding domain kinase 1
hsa-miR-1200	1	0	1	0	1	1	BCL7A	B-cell CLL/lymphoma 7A
hsa-miR-1200	1	0	1	0	1	1	TNRC6B	trinucleotide repeat containing 6B
hsa-miR-1200	1	0	1	1	1	1	TGFBR2	transforming growth factor, beta receptor II (70/80kDa)
hsa-miR-1200	1	0	1	0	1	1	CELF2	CUGBP, Elav-like family member 2
hsa-miR-1200	1	0	1	0	1	1	ADAR	adenosine deaminase, RNA-specific
hsa-miR-1200	1	0	1	1	1	1	VEGFA	vascular endothelial growth factor A
hsa-miR-1200	0	0	1	1	1	1	COX19	COX19 cytochrome c oxidase assembly homolog (S. cerevisiae)
hsa-miR-1200	0	0	1	1	1	1	MS4A3	membrane-spanning 4-domains, subfamily A, member 3 (hematopoietic cell-specific)
hsa-miR-1200	1	0	1	1	1	1	RCE1	RCE1 homolog, prenyl protein protease (S. cerevisiae)
hsa-miR-1200	1	0	1	0	1	1	MINOS1	mitochondrial inner membrane organizing system 1
hsa-miR-1200	1	0	1	0	1	1	RYR2	ryanodine receptor 2 (cardiac)
hsa-miR-1200	1	0	1	0	1	1	ARL5A	ADP-ribosylation factor-like 5A
hsa-miR-1200	1	0	1	1	1	1	PDE4B	phosphodiesterase 4B, cAMP-specific
hsa-miR-1200	1	0	1	1	1	1	SCD5	stearoyl-CoA desaturase 5
hsa-miR-1200	0	0	1	1	1	1	CTLA4	cytotoxic T-lymphocyte-associated protein 4
hsa-miR-1200	1	0	1	1	1	1	DLX1	distal-less homeobox 1
hsa-miR-1200	0	0	1	1	1	1	ATAD3C	ATPase family, AAA domain containing 3C
hsa-miR-1200	1	0	1	1	1	1	KREMEN1	kringle containing transmembrane protein 1
hsa-miR-1200	1	0	1	0	1	1	USP9X	ubiquitin specific peptidase 9, X-linked
hsa-miR-1200	0	0	1	1	0	0	TNFRSF25	tumor necrosis factor receptor superfamily, member 25
hsa-miR-1200	0	0	1	0	1	1	OPALIN	oligodendrocytic myelin paranodal and inner loop protein
hsa-miR-1200	1	0	1	1	1	1	PAPD5	PAP associated domain containing 5
hsa-miR-1200	0	0	1	1	1	1	ZXDC	ZXD family zinc finger C
hsa-miR-1200	0	0	1	1	1	1	C10orf53	chromosome 10 open reading frame 53
hsa-miR-1200	1	0	1	1	1	1	ZNF706	zinc finger protein 706
hsa-miR-1200	1	0	1	1	1	1	NSL1	NSL1, MIND kinetochore complex component, homolog (S. cerevisiae)
hsa-miR-1200	1	0	1	1	1	1	FRS2	fibroblast growth factor receptor substrate 2
hsa-miR-1200	1	0	1	1	1	1	ERBB4	v-erb-a erythroblastic leukemia viral oncogene homolog 4 (avian)
hsa-miR-1200	1	0	1	1	1	1	KDM5A	lysine (K)-specific demethylase 5A
hsa-miR-1200	1	0	1	1	1	1	PVRL2	poliovirus receptor-related 2 (herpesvirus entry mediator B)
hsa-miR-1200	0	0	1	1	1	1	FAM22G	family with sequence similarity 22, member G
hsa-miR-1200	1	0	1	0	1	1	SLC7A6	solute carrier family 7 (amino acid transporter light chain, y+L system), member 6
hsa-miR-1200	1	0	1	1	1	1	QSER1	glutamine and serine rich 1
hsa-miR-1200	1	0	1	1	1	1	GRIA4	glutamate receptor, ionotropic, AMPA 4
hsa-miR-1200	1	0	1	1	1	1	IRF2BP2	interferon regulatory factor 2 binding protein 2
hsa-miR-1200	0	0	1	0	1	1	WTH3DI	RAB6C-like
hsa-miR-1200	1	0	1	1	1	1	ALG9	asparagine-linked glycosylation 9, alpha-1,2-mannosyltransferase homolog (S. cerevisiae)
hsa-miR-1200	0	0	1	1	0	0	TMEM134	transmembrane protein 134
hsa-miR-1200	0	0	1	1	1	1	TMEM202	transmembrane protein 202
hsa-miR-1200	0	0	1	0	1	1	WIPF3	WAS/WASL interacting protein family, member 3
hsa-miR-1200	1	0	1	1	1	1	MGA	MAX gene associated
hsa-miR-1200	0	0	1	1	0	0	PLOD3	procollagen-lysine, 2-oxoglutarate 5-dioxygenase 3
hsa-miR-1200	1	0	1	1	1	1	ADAM10	ADAM metallopeptidase domain 10
hsa-miR-1200	1	0	1	1	1	1	BMP2	bone morphogenetic protein 2
hsa-miR-1200	1	0	1	1	1	1	CDK9	cyclin-dependent kinase 9
hsa-miR-1200	0	0	1	1	1	1	CCR1	chemokine (C-C motif) receptor 1
hsa-miR-1200	1	0	1	1	1	1	CTNND2	catenin (cadherin-associated protein), delta 2
hsa-miR-1200	1	0	1	1	1	1	ELAVL1	ELAV (embryonic lethal, abnormal vision, Drosophila)-like 1 (Hu antigen R)
hsa-miR-1200	1	0	1	0	1	1	B4GALT1	UDP-Gal:betaGlcNAc beta 1,4- galactosyltransferase, polypeptide 1
hsa-miR-1200	1	0	1	1	1	1	NDST1	N-deacetylase/N-sulfotransferase (heparan glucosaminyl) 1
hsa-miR-1200	0	0	1	1	1	1	IL13RA1	interleukin 13 receptor, alpha 1
hsa-miR-1200	0	0	1	1	0	0	ACP2	acid phosphatase 2, lysosomal
hsa-miR-1200	0	0	1	1	1	1	AOAH	acyloxyacyl hydrolase (neutrophil)
hsa-miR-1200	1	0	1	0	1	1	ARCN1	archain 1
hsa-miR-1200	1	0	1	1	1	1	ARF3	ADP-ribosylation factor 3
hsa-miR-1200	0	0	1	1	1	1	AXL	AXL receptor tyrosine kinase
hsa-miR-1200	0	0	1	1	0	0	BMP6	bone morphogenetic protein 6
hsa-miR-1200	0	0	1	1	0	0	C5	complement component 5
hsa-miR-1200	0	0	1	1	1	1	CD1D	CD1d molecule
hsa-miR-1200	0	0	1	1	0	0	CD19	CD19 molecule
hsa-miR-1200	0	0	1	1	1	1	CD34	CD34 molecule
hsa-miR-1200	1	0	1	1	1	1	CDC25A	cell division cycle 25 homolog A (S. pombe)
hsa-miR-1200	0	0	1	1	0	0	CEACAM3	carcinoembryonic antigen-related cell adhesion molecule 3
hsa-miR-1200	1	0	1	1	1	1	SLC31A1	solute carrier family 31 (copper transporters), member 1
hsa-miR-1200	1	0	1	1	1	1	MASP1	mannan-binding lectin serine peptidase 1 (C4/C2 activating component of Ra-reactive factor)
hsa-miR-1200	1	0	1	1	0	0	DES	desmin
hsa-miR-1200	1	0	1	1	1	1	DPP4	dipeptidyl-peptidase 4
hsa-miR-1200	1	0	1	1	1	1	E2F3	E2F transcription factor 3
hsa-miR-1200	1	0	1	0	1	1	ETV6	ets variant 6
hsa-miR-1200	0	0	1	0	1	1	FGF2	fibroblast growth factor 2 (basic)
hsa-miR-1200	1	0	1	0	1	1	FUT4	fucosyltransferase 4 (alpha (1,3) fucosyltransferase, myeloid-specific)
hsa-miR-1200	1	0	1	1	1	1	GLRA2	glycine receptor, alpha 2
hsa-miR-1200	1	0	1	0	1	1	GNAI1	guanine nucleotide binding protein (G protein), alpha inhibiting activity polypeptide 1
hsa-miR-1200	1	0	1	0	1	1	HTT	huntingtin
hsa-miR-1200	0	0	1	0	0	0	HLA-DRB1	major histocompatibility complex, class II, DR beta 1
hsa-miR-1200	1	0	1	1	1	1	IL13	interleukin 13
hsa-miR-1200	1	0	1	0	1	1	IRF2	interferon regulatory factor 2
hsa-miR-1200	1	0	1	1	1	1	ITGA5	integrin, alpha 5 (fibronectin receptor, alpha polypeptide)
hsa-miR-1200	1	0	1	1	1	1	KCNJ10	potassium inwardly-rectifying channel, subfamily J, member 10
hsa-miR-1200	0	0	1	1	1	1	KLRC2	killer cell lectin-like receptor subfamily C, member 2
hsa-miR-1200	1	0	1	1	1	1	LIF	leukemia inhibitory factor
hsa-miR-1200	1	0	1	1	1	1	M6PR	mannose-6-phosphate receptor (cation dependent)
hsa-miR-1200	1	0	1	0	1	1	MXD1	MAX dimerization protein 1
hsa-miR-1200	0	0	1	1	1	1	MAG	myelin associated glycoprotein
hsa-miR-1200	0	0	1	1	1	1	MTAP	methylthioadenosine phosphorylase
hsa-miR-1200	0	0	1	1	0	0	MYBL2	v-myb myeloblastosis viral oncogene homolog (avian)-like 2
hsa-miR-1200	0	0	1	1	0	0	MYOG	myogenin (myogenic factor 4)
hsa-miR-1200	1	0	1	1	1	1	PPP1R12B	protein phosphatase 1, regulatory subunit 12B
hsa-miR-1200	0	0	1	1	1	1	NOV	nephroblastoma overexpressed
hsa-miR-1200	1	0	1	1	1	1	NTF3	neurotrophin 3
hsa-miR-1200	0	0	1	0	1	1	OAZ2	ornithine decarboxylase antizyme 2
hsa-miR-1200	0	0	1	0	1	1	OPHN1	oligophrenin 1
hsa-miR-1200	0	0	1	1	1	1	P2RY1	purinergic receptor P2Y, G-protein coupled, 1
hsa-miR-1200	1	0	1	0	1	1	PAPPA	pregnancy-associated plasma protein A, pappalysin 1
hsa-miR-1200	1	0	1	1	1	1	PBX2	pre-B-cell leukemia homeobox 2
hsa-miR-1200	1	0	1	1	1	1	PLAGL2	pleiomorphic adenoma gene-like 2
hsa-miR-1200	1	0	1	1	1	1	PLCG1	phospholipase C, gamma 1
hsa-miR-1200	0	0	1	1	1	1	MAP2K6	mitogen-activated protein kinase kinase 6
hsa-miR-1200	1	0	1	1	1	1	PTPN2	protein tyrosine phosphatase, non-receptor type 2
hsa-miR-1200	1	0	1	1	1	1	PTPN9	protein tyrosine phosphatase, non-receptor type 9
hsa-miR-1200	1	0	1	0	1	1	RAB6A	RAB6A, member RAS oncogene family
hsa-miR-1200	1	0	1	1	1	1	RAD23B	RAD23 homolog B (S. cerevisiae)
hsa-miR-1200	1	0	1	0	1	1	SORT1	sortilin 1
hsa-miR-1200	1	0	1	0	1	1	CCL22	chemokine (C-C motif) ligand 22
hsa-miR-1200	1	0	1	1	1	1	SH3GL2	SH3-domain GRB2-like 2
hsa-miR-1200	0	0	1	1	1	1	SLAMF1	signaling lymphocytic activation molecule family member 1
hsa-miR-1200	1	0	1	1	1	1	SMARCC1	SWI/SNF related, matrix associated, actin dependent regulator of chromatin, subfamily c, member 1
hsa-miR-1200	1	0	1	0	1	1	SOX11	SRY (sex determining region Y)-box 11
hsa-miR-1200	1	0	1	0	1	1	STC1	stanniocalcin 1
hsa-miR-1200	0	0	1	1	1	1	STIM1	stromal interaction molecule 1
hsa-miR-1200	0	0	1	1	1	1	SULT2A1	sulfotransferase family, cytosolic, 2A, dehydroepiandrosterone (DHEA)-preferring, member 1
hsa-miR-1200	1	0	1	1	1	1	SUV39H1	suppressor of variegation 3-9 homolog 1 (Drosophila)
hsa-miR-1200	1	0	1	1	0	0	SYP	synaptophysin
hsa-miR-1200	0	0	1	0	1	1	ZFY	zinc finger protein, Y-linked
hsa-miR-1200	1	0	1	0	1	1	ZIC1	Zic family member 1
hsa-miR-1200	1	0	1	1	1	1	ZIC3	Zic family member 3
hsa-miR-1200	0	0	1	1	1	1	ZNF137P	zinc finger protein 137, pseudogene
hsa-miR-1200	1	0	1	1	1	1	NRIP1	nuclear receptor interacting protein 1
hsa-miR-1200	0	0	1	1	1	1	PIP5K1A	phosphatidylinositol-4-phosphate 5-kinase, type I, alpha
hsa-miR-1200	1	0	1	0	1	1	CDK5R1	cyclin-dependent kinase 5, regulatory subunit 1 (p35)
hsa-miR-1200	1	0	1	1	1	1	ALDH1A2	aldehyde dehydrogenase 1 family, member A2
hsa-miR-1200	1	0	1	0	1	1	SGPL1	sphingosine-1-phosphate lyase 1
hsa-miR-1200	1	0	1	1	1	1	KALRN	kalirin, RhoGEF kinase
hsa-miR-1200	0	0	1	0	0	0	ARRB1	arrestin, beta 1
hsa-miR-1200	1	0	1	1	1	1	BCL2L2	BCL2-like 2
hsa-miR-1200	1	0	1	1	1	1	CDH17	cadherin 17, LI cadherin (liver-intestine)
hsa-miR-1200	0	0	1	1	0	0	CDR1	cerebellar degeneration-related protein 1, 34kDa
hsa-miR-1200	0	0	1	0	1	1	EIF4EBP2	eukaryotic translation initiation factor 4E binding protein 2
hsa-miR-1200	0	0	1	1	0	0	GIP	gastric inhibitory polypeptide
hsa-miR-1200	1	0	1	1	1	1	HNF4G	hepatocyte nuclear factor 4, gamma
hsa-miR-1200	1	0	1	0	1	1	SLC1A2	solute carrier family 1 (glial high affinity glutamate transporter), member 2
hsa-miR-1200	0	0	1	1	1	1	HOMER1	homer homolog 1 (Drosophila)
hsa-miR-1200	1	0	1	1	1	1	GDA	guanine deaminase
hsa-miR-1200	0	0	1	1	1	1	ACTL6A	actin-like 6A
hsa-miR-1200	1	0	1	0	1	1	CEBPA	CCAAT/enhancer binding protein (C/EBP), alpha
hsa-miR-1200	1	0	1	1	1	1	DAG1	dystroglycan 1 (dystrophin-associated glycoprotein 1)
hsa-miR-1200	1	0	1	1	1	1	DUSP5	dual specificity phosphatase 5
hsa-miR-1200	1	0	1	1	1	1	EPHB3	EPH receptor B3
hsa-miR-1200	1	0	1	0	1	1	FGF5	fibroblast growth factor 5
hsa-miR-1200	1	0	1	1	1	1	FOXD2	forkhead box D2
hsa-miR-1200	1	0	1	1	1	1	FLOT2	flotillin 2
hsa-miR-1200	0	0	1	1	1	1	FOXA1	forkhead box A1
hsa-miR-1200	1	0	1	0	1	1	SCN2B	sodium channel, voltage-gated, type II, beta subunit
hsa-miR-1200	1	0	1	1	1	1	BAP1	BRCA1 associated protein-1 (ubiquitin carboxy-terminal hydrolase)
hsa-miR-1200	1	0	1	1	1	1	LARGE	like-glycosyltransferase
hsa-miR-1200	0	0	1	1	1	1	GCM2	glial cells missing homolog 2 (Drosophila)
hsa-miR-1200	0	0	1	0	1	1	ADIPOQ	adiponectin, C1Q and collagen domain containing
hsa-miR-1200	1	0	1	1	1	1	KIF3B	kinesin family member 3B
hsa-miR-1200	1	0	1	1	1	1	MED26	mediator complex subunit 26
hsa-miR-1200	1	0	1	1	1	1	HOMER2	homer homolog 2 (Drosophila)
hsa-miR-1200	1	0	1	1	1	1	ONECUT2	one cut homeobox 2
hsa-miR-1200	1	0	1	0	1	1	DOCK3	dedicator of cytokinesis 3
hsa-miR-1200	1	0	1	1	0	0	MMP14	matrix metallopeptidase 14 (membrane-inserted)
hsa-miR-1200	1	0	1	0	1	1	SEL1L	sel-1 suppressor of lin-12-like (C. elegans)
hsa-miR-1200	0	0	1	1	1	1	SIM1	single-minded homolog 1 (Drosophila)
hsa-miR-1200	0	0	1	1	1	1	XYLB	xylulokinase homolog (H. influenzae)
hsa-miR-1200	1	0	1	1	1	1	DLX3	distal-less homeobox 3
hsa-miR-1200	1	0	1	1	1	1	GPR6	G protein-coupled receptor 6
hsa-miR-1200	1	0	1	1	1	1	H3F3B	H3 histone, family 3B (H3.3B)
hsa-miR-1200	1	0	1	1	0	0	HDLBP	high density lipoprotein binding protein
hsa-miR-1200	1	0	1	1	1	1	PHF2	PHD finger protein 2
hsa-miR-1200	1	0	1	0	1	1	SRC	v-src sarcoma (Schmidt-Ruppin A-2) viral oncogene homolog (avian)
hsa-miR-1200	0	0	1	1	1	1	FOSL1	FOS-like antigen 1
hsa-miR-1200	1	0	1	1	1	1	RND2	Rho family GTPase 2
hsa-miR-1200	1	0	1	1	1	1	GABBR2	gamma-aminobutyric acid (GABA) B receptor, 2
hsa-miR-1200	1	0	1	1	1	1	PIGK	phosphatidylinositol glycan anchor biosynthesis, class K
hsa-miR-1200	1	0	1	1	1	1	GTF2E1	general transcription factor IIE, polypeptide 1, alpha 56kDa
hsa-miR-1200	1	0	1	1	1	1	HOXA1	homeobox A1
hsa-miR-1200	1	0	1	1	1	1	LAMC2	laminin, gamma 2
hsa-miR-1200	1	0	1	1	1	1	LPP	LIM domain containing preferred translocation partner in lipoma
hsa-miR-1200	0	0	1	1	1	1	ALDH6A1	aldehyde dehydrogenase 6 family, member A1
hsa-miR-1200	1	0	1	1	1	1	UST	uronyl-2-sulfotransferase
hsa-miR-1200	0	0	1	1	1	1	RNF41	ring finger protein 41
hsa-miR-1200	0	0	1	0	1	1	CD96	CD96 molecule
hsa-miR-1200	1	0	1	0	1	1	SPRY3	sprouty homolog 3 (Drosophila)
hsa-miR-1200	0	0	1	1	1	1	CD5L	CD5 molecule-like
hsa-miR-1200	1	0	1	1	1	1	MEOX2	mesenchyme homeobox 2
hsa-miR-1200	0	0	1	1	1	1	MFAP3	microfibrillar-associated protein 3
hsa-miR-1200	1	0	1	1	1	1	FOXO4	forkhead box O4
hsa-miR-1200	1	0	1	1	1	1	MMP16	matrix metallopeptidase 16 (membrane-inserted)
hsa-miR-1200	1	0	1	1	0	0	NAB2	NGFI-A binding protein 2 (EGR1 binding protein 2)
hsa-miR-1200	0	0	1	1	1	1	UQCRFS1	ubiquinol-cytochrome c reductase, Rieske iron-sulfur polypeptide 1
hsa-miR-1200	0	0	1	0	1	1	HCAR3	hydroxycarboxylic acid receptor 3
hsa-miR-1200	0	0	1	1	1	1	TRDN	triadin
hsa-miR-1200	1	0	1	1	1	1	DAGLA	diacylglycerol lipase, alpha
hsa-miR-1200	1	0	1	1	1	1	NEFL	neurofilament, light polypeptide
hsa-miR-1200	1	0	1	1	1	1	PPP2R5E	protein phosphatase 2, regulatory subunit B', epsilon isoform
hsa-miR-1200	1	0	1	1	1	1	PRKAB1	protein kinase, AMP-activated, beta 1 non-catalytic subunit
hsa-miR-1200	1	0	1	1	1	1	PKN2	protein kinase N2
hsa-miR-1200	1	0	1	1	1	1	ITSN2	intersectin 2
hsa-miR-1200	1	0	1	1	1	1	STK4	serine/threonine kinase 4
hsa-miR-1200	0	0	1	1	1	1	TYRO3	TYRO3 protein tyrosine kinase
hsa-miR-1200	1	0	1	1	1	1	SMC1A	structural maintenance of chromosomes 1A
hsa-miR-1200	1	0	1	1	1	1	VAT1	vesicle amine transport protein 1 homolog (T. californica)
hsa-miR-1200	1	0	1	0	1	1	APPBP2	amyloid beta precursor protein (cytoplasmic tail) binding protein 2
hsa-miR-1200	1	0	1	1	1	1	SLC2A1	solute carrier family 2 (facilitated glucose transporter), member 1
hsa-miR-1200	1	0	1	1	1	1	MMP24	matrix metallopeptidase 24 (membrane-inserted)
hsa-miR-1200	0	0	1	1	1	1	LYVE1	lymphatic vessel endothelial hyaluronan receptor 1
hsa-miR-1200	0	0	1	1	0	0	DNAJB2	DnaJ (Hsp40) homolog, subfamily B, member 2
hsa-miR-1200	1	0	1	0	1	1	SYNGAP1	synaptic Ras GTPase activating protein 1
hsa-miR-1200	1	0	1	1	1	1	CBX1	chromobox homolog 1
hsa-miR-1200	0	0	1	1	1	1	ATF7	activating transcription factor 7
hsa-miR-1200	1	0	1	1	1	1	RP2	retinitis pigmentosa 2 (X-linked recessive)
hsa-miR-1200	1	0	1	0	1	1	SOX12	SRY (sex determining region Y)-box 12
hsa-miR-1200	1	0	1	0	1	1	WASF2	WAS protein family, member 2
hsa-miR-1200	1	0	1	1	1	1	SOX30	SRY (sex determining region Y)-box 30
hsa-miR-1200	1	0	1	1	1	1	KAT7	K(lysine) acetyltransferase 7
hsa-miR-1200	1	0	1	1	0	0	PTP4A3	protein tyrosine phosphatase type IVA, member 3
hsa-miR-1200	0	0	1	1	0	0	USF1	upstream transcription factor 1
hsa-miR-1200	1	0	1	1	1	1	ABCF2	ATP-binding cassette, sub-family F (GCN20), member 2
hsa-miR-1200	1	0	1	1	1	1	PALM2-AKAP2	PALM2-AKAP2 readthrough
hsa-miR-1200	0	0	1	1	1	1	SLC6A14	solute carrier family 6 (amino acid transporter), member 14
hsa-miR-1200	0	0	1	1	1	1	HRH3	histamine receptor H3
hsa-miR-1200	1	0	1	1	1	1	KLF12	Kruppel-like factor 12
hsa-miR-1200	1	0	1	1	1	1	ZNF236	zinc finger protein 236
hsa-miR-1200	0	0	1	0	1	1	AP4E1	adaptor-related protein complex 4, epsilon 1 subunit
hsa-miR-1200	1	0	1	1	1	1	TARDBP	TAR DNA binding protein
hsa-miR-1200	0	0	1	1	1	1	FRAT2	frequently rearranged in advanced T-cell lymphomas 2
hsa-miR-1200	1	0	1	1	1	1	APPL1	adaptor protein, phosphotyrosine interaction, PH domain and leucine zipper containing 1
hsa-miR-1200	1	0	1	1	0	0	CCRN4L	CCR4 carbon catabolite repression 4-like (S. cerevisiae)
hsa-miR-1200	0	0	1	1	1	1	LMOD1	leiomodin 1 (smooth muscle)
hsa-miR-1200	1	0	1	1	1	1	FBXL3	F-box and leucine-rich repeat protein 3
hsa-miR-1200	0	0	1	1	1	1	HARS2	histidyl-tRNA synthetase 2, mitochondrial
hsa-miR-1200	1	0	1	1	1	1	KIF4A	kinesin family member 4A
hsa-miR-1200	1	0	1	1	1	1	PIP5K1C	phosphatidylinositol-4-phosphate 5-kinase, type I, gamma
hsa-miR-1200	0	0	1	0	1	1	PITPNC1	phosphatidylinositol transfer protein, cytoplasmic 1
hsa-miR-1200	1	0	1	1	1	1	RGS17	regulator of G-protein signaling 17
hsa-miR-1200	1	0	1	1	1	1	TLL2	tolloid-like 2
hsa-miR-1200	1	0	1	1	1	1	ZNF281	zinc finger protein 281
hsa-miR-1200	1	0	1	1	1	1	ZNF215	zinc finger protein 215
hsa-miR-1200	0	0	1	1	0	0	KCNJ14	potassium inwardly-rectifying channel, subfamily J, member 14
hsa-miR-1200	0	0	1	1	1	1	UQCR10	ubiquinol-cytochrome c reductase, complex III subunit X
hsa-miR-1200	1	0	1	1	1	1	BAZ1A	bromodomain adjacent to zinc finger domain, 1A
hsa-miR-1200	1	0	1	0	1	1	C16orf72	chromosome 16 open reading frame 72
hsa-miR-1200	0	0	1	1	1	1	CCDC113	coiled-coil domain containing 113
hsa-miR-1200	0	0	1	1	0	0	HSD17B8	hydroxysteroid (17-beta) dehydrogenase 8
hsa-miR-1200	1	0	1	0	1	1	LIMD1	LIM domains containing 1
hsa-miR-1200	0	0	1	1	1	1	OPN3	opsin 3
hsa-miR-1200	1	0	1	1	1	1	LHX6	LIM homeobox 6
hsa-miR-1200	1	0	1	1	1	1	SERP1	stress-associated endoplasmic reticulum protein 1
hsa-miR-1200	0	0	1	1	0	0	SIT1	signaling threshold regulating transmembrane adaptor 1
hsa-miR-1200	0	0	1	1	1	1	ARFGAP3	ADP-ribosylation factor GTPase activating protein 3
hsa-miR-1200	0	0	1	1	0	0	LMCD1	LIM and cysteine-rich domains 1
hsa-miR-1200	1	0	1	0	1	1	SH3PXD2A	SH3 and PX domains 2A
hsa-miR-1200	1	0	1	1	1	1	GCC2	GRIP and coiled-coil domain containing 2
hsa-miR-1200	1	0	1	1	1	1	RALGPS1	Ral GEF with PH domain and SH3 binding motif 1
hsa-miR-1200	0	0	1	1	1	1	FAM53B	family with sequence similarity 53, member B
hsa-miR-1200	1	0	1	1	1	1	ULK2	unc-51-like kinase 2 (C. elegans)
hsa-miR-1200	0	0	1	1	0	0	ZNF646	zinc finger protein 646
hsa-miR-1200	0	0	1	1	1	1	VPRBP	Vpr (HIV-1) binding protein
hsa-miR-1200	1	0	1	1	1	1	ARHGAP32	Rho GTPase activating protein 32
hsa-miR-1200	0	0	1	1	1	1	FRMPD4	FERM and PDZ domain containing 4
hsa-miR-1200	1	0	1	0	1	1	TRIL	TLR4 interactor with leucine-rich repeats
hsa-miR-1200	1	0	1	1	1	1	JOSD1	Josephin domain containing 1
hsa-miR-1200	0	0	1	0	1	1	PPM1E	protein phosphatase, Mg2+/Mn2+ dependent, 1E
hsa-miR-1200	1	0	1	0	1	1	ICK	intestinal cell (MAK-like) kinase
hsa-miR-1200	1	0	1	1	1	1	USP33	ubiquitin specific peptidase 33
hsa-miR-1200	1	0	1	0	1	1	ZNF609	zinc finger protein 609
hsa-miR-1200	1	0	1	0	1	1	GGA2	golgi-associated, gamma adaptin ear containing, ARF binding protein 2
hsa-miR-1200	1	0	1	0	1	1	TBC1D2B	TBC1 domain family, member 2B
hsa-miR-1200	1	0	1	1	0	0	CIC	capicua homolog (Drosophila)
hsa-miR-1200	1	0	1	1	1	1	PDS5A	PDS5, regulator of cohesion maintenance, homolog A (S. cerevisiae)
hsa-miR-1200	1	0	1	1	1	1	AHCYL2	adenosylhomocysteinase-like 2
hsa-miR-1200	0	0	1	1	1	1	NBPF14	neuroblastoma breakpoint family, member 14
hsa-miR-1200	1	0	1	1	1	1	PARM1	prostate androgen-regulated mucin-like protein 1
hsa-miR-1200	1	0	1	1	1	1	FAM155B	family with sequence similarity 155, member B
hsa-miR-1200	1	0	1	1	1	1	FGFR1	fibroblast growth factor receptor 1
hsa-miR-1200	1	0	1	1	1	1	CDC40	cell division cycle 40 homolog (S. cerevisiae)
hsa-miR-1200	1	0	1	1	1	1	MEMO1	mediator of cell motility 1
hsa-miR-1200	1	0	1	1	0	0	YBX2	Y box binding protein 2
hsa-miR-1200	1	0	1	1	1	1	GOLT1B	golgi transport 1B
hsa-miR-1200	0	0	1	1	0	0	PKD2L1	polycystic kidney disease 2-like 1
hsa-miR-1200	0	0	1	1	0	0	CRNN	cornulin
hsa-miR-1200	1	0	1	1	1	1	CYB5R4	cytochrome b5 reductase 4
hsa-miR-1200	1	0	1	0	1	1	HPCAL4	hippocalcin like 4
hsa-miR-1200	1	0	1	1	1	1	CMPK1	cytidine monophosphate (UMP-CMP) kinase 1, cytosolic
hsa-miR-1200	1	0	1	1	1	1	RAPGEFL1	Rap guanine nucleotide exchange factor (GEF)-like 1
hsa-miR-1200	0	0	1	1	1	1	ADAM22	ADAM metallopeptidase domain 22
hsa-miR-1200	0	0	1	1	1	1	TCEB3B	transcription elongation factor B polypeptide 3B (elongin A2)
hsa-miR-1200	1	0	1	1	1	1	RAB6B	RAB6B, member RAS oncogene family
hsa-miR-1200	1	0	1	1	1	1	CYP39A1	cytochrome P450, family 39, subfamily A, polypeptide 1
hsa-miR-1200	0	0	1	1	1	1	OGG1	8-oxoguanine DNA glycosylase
hsa-miR-1200	0	0	1	1	1	1	POLE3	polymerase (DNA directed), epsilon 3, accessory subunit
hsa-miR-1200	1	0	1	0	1	1	ZRANB1	zinc finger, RAN-binding domain containing 1
hsa-miR-1200	0	0	1	0	1	1	TRIM44	tripartite motif containing 44
hsa-miR-1200	0	0	1	0	1	1	GIPC2	GIPC PDZ domain containing family, member 2
hsa-miR-1200	0	0	1	0	1	1	OTUB1	OTU domain, ubiquitin aldehyde binding 1
hsa-miR-1200	1	0	1	1	1	1	TBC1D8B	TBC1 domain family, member 8B (with GRAM domain)
hsa-miR-1200	0	0	1	1	1	1	WHSC1L1	Wolf-Hirschhorn syndrome candidate 1-like 1
hsa-miR-1200	1	0	1	0	1	1	CMTM6	CKLF-like MARVEL transmembrane domain containing 6
hsa-miR-1200	1	0	1	1	1	1	RNF125	ring finger protein 125, E3 ubiquitin protein ligase
hsa-miR-1200	0	0	1	0	1	1	MREG	melanoregulin
hsa-miR-1200	1	0	1	1	1	1	BCL11A	B-cell CLL/lymphoma 11A (zinc finger protein)
hsa-miR-1200	1	0	1	0	1	1	IPO9	importin 9
hsa-miR-1200	1	0	1	1	1	1	FIGN	fidgetin
hsa-miR-1200	1	0	1	0	1	1	ARMC1	armadillo repeat containing 1
hsa-miR-1200	1	0	1	1	1	1	FAM178A	family with sequence similarity 178, member A
hsa-miR-1200	1	0	1	1	1	1	RFWD3	ring finger and WD repeat domain 3
hsa-miR-1200	1	0	1	1	1	1	RPRD1A	regulation of nuclear pre-mRNA domain containing 1A
hsa-miR-1200	0	0	1	1	1	1	TRIM62	tripartite motif containing 62
hsa-miR-1200	0	0	1	1	0	0	CCDC87	coiled-coil domain containing 87
hsa-miR-1200	0	0	1	1	1	1	RBM41	RNA binding motif protein 41
hsa-miR-1200	1	0	1	1	1	1	SPTLC3	serine palmitoyltransferase, long chain base subunit 3
hsa-miR-1200	1	0	1	1	1	1	KIAA1598	KIAA1598
hsa-miR-1200	1	0	1	1	1	1	RSBN1	round spermatid basic protein 1
hsa-miR-1200	0	0	1	1	1	1	STYK1	serine/threonine/tyrosine kinase 1
hsa-miR-1200	1	0	1	1	1	1	EPB41L4B	erythrocyte membrane protein band 4.1 like 4B
hsa-miR-1200	1	0	1	1	1	1	PAG1	phosphoprotein associated with glycosphingolipid microdomains 1
hsa-miR-1200	0	0	1	1	1	1	HDAC8	histone deacetylase 8
hsa-miR-1200	1	0	1	0	1	1	TMEM55A	transmembrane protein 55A
hsa-miR-1200	1	0	1	1	1	1	GNG12	guanine nucleotide binding protein (G protein), gamma 12
hsa-miR-1200	1	0	1	0	1	1	KLHL9	kelch-like 9 (Drosophila)
hsa-miR-1200	0	0	1	1	0	0	SH3BP1	SH3-domain binding protein 1
hsa-miR-1200	1	0	1	1	1	1	SASH3	SAM and SH3 domain containing 3
hsa-miR-1200	1	0	1	1	1	1	DLL4	delta-like 4 (Drosophila)
hsa-miR-1200	1	0	1	1	1	1	CCBL2	cysteine conjugate-beta lyase 2
hsa-miR-1200	1	0	1	1	1	1	ERO1LB	ERO1-like beta (S. cerevisiae)
hsa-miR-1200	1	0	1	0	1	1	SLAMF8	SLAM family member 8
hsa-miR-1200	1	0	1	1	0	0	JPH2	junctophilin 2
hsa-miR-1200	0	0	1	1	1	1	S100A14	S100 calcium binding protein A14
hsa-miR-1200	1	0	1	1	1	1	RAB22A	RAB22A, member RAS oncogene family
hsa-miR-1200	1	0	1	1	1	1	MIB1	mindbomb E3 ubiquitin protein ligase 1
hsa-miR-1200	1	0	1	0	1	1	ALPK3	alpha-kinase 3
hsa-miR-1200	1	0	1	1	1	1	RANBP10	RAN binding protein 10
hsa-miR-1200	1	0	1	0	1	1	SH3RF1	SH3 domain containing ring finger 1
hsa-miR-1200	1	0	1	1	1	1	ALS2	amyotrophic lateral sclerosis 2 (juvenile)
hsa-miR-1200	0	0	1	1	1	1	PRX	periaxin
hsa-miR-1200	0	0	1	1	0	0	MYL6	myosin, light chain 6, alkali, smooth muscle and non-muscle
hsa-miR-1200	1	0	1	1	1	1	MTMR3	myotubularin related protein 3
hsa-miR-1200	1	0	1	1	0	0	SLC5A6	solute carrier family 5 (sodium-dependent vitamin transporter), member 6
hsa-miR-1200	1	0	1	1	1	1	PMAIP1	phorbol-12-myristate-13-acetate-induced protein 1
hsa-miR-1200	0	0	1	0	1	1	PPIA	peptidylprolyl isomerase A (cyclophilin A)
hsa-miR-1200	0	0	1	1	0	0	TRIB3	tribbles homolog 3 (Drosophila)
hsa-miR-1200	0	0	1	0	1	1	MS4A7	membrane-spanning 4-domains, subfamily A, member 7
hsa-miR-1200	1	0	1	0	1	1	TP53INP2	tumor protein p53 inducible nuclear protein 2
hsa-miR-1200	1	0	1	1	1	1	FAM60A	family with sequence similarity 60, member A
hsa-miR-1200	1	0	1	1	1	1	DMRT3	doublesex and mab-3 related transcription factor 3
hsa-miR-1200	0	0	1	1	1	1	CHST6	carbohydrate (N-acetylglucosamine 6-O) sulfotransferase 6
hsa-miR-1200	1	0	1	1	1	1	TGIF2	TGFB-induced factor homeobox 2
hsa-miR-1200	1	0	1	1	1	1	DHX35	DEAH (Asp-Glu-Ala-His) box polypeptide 35
hsa-miR-1200	1	0	1	1	0	0	HLX	H2.0-like homeobox
hsa-miR-1200	1	0	1	0	1	1	MCL1	myeloid cell leukemia sequence 1 (BCL2-related)
hsa-miR-1200	1	0	1	0	1	1	GAN	gigaxonin
hsa-miR-1200	1	0	1	0	1	1	CSNK1G1	casein kinase 1, gamma 1
hsa-miR-1200	0	0	1	1	1	1	NSUN3	NOP2/Sun domain family, member 3
hsa-miR-1200	0	0	1	1	1	1	PERP	PERP, TP53 apoptosis effector
hsa-miR-1200	1	0	1	1	1	1	LRRC4	leucine rich repeat containing 4
hsa-miR-1200	0	0	1	1	1	1	TCTA	T-cell leukemia translocation altered
hsa-miR-1200	0	0	1	1	1	1	POPDC3	popeye domain containing 3
hsa-miR-1200	1	0	1	1	1	1	HIF3A	hypoxia inducible factor 3, alpha subunit
hsa-miR-1200	0	0	1	1	1	1	SUSD1	sushi domain containing 1
hsa-miR-1200	0	0	1	1	0	0	GH2	growth hormone 2
hsa-miR-1200	0	0	1	1	0	0	GH1	growth hormone 1
hsa-miR-1200	0	0	1	1	0	0	CSH2	chorionic somatomammotropin hormone 2
hsa-miR-1200	1	0	1	1	1	1	FAM160B2	family with sequence similarity 160, member B2
hsa-miR-1200	1	0	1	1	1	1	GRAMD3	GRAM domain containing 3
hsa-miR-1200	0	0	1	1	1	1	KCTD14	potassium channel tetramerisation domain containing 14
hsa-miR-1200	0	0	1	0	1	1	TRPM8	transient receptor potential cation channel, subfamily M, member 8
hsa-miR-1200	0	0	1	1	0	0	DHRS11	dehydrogenase/reductase (SDR family) member 11
hsa-miR-1200	0	0	1	1	1	1	PDYN	prodynorphin
hsa-miR-1200	1	0	1	1	1	1	PSTPIP2	proline-serine-threonine phosphatase interacting protein 2
hsa-miR-1200	1	0	1	1	1	1	C10orf76	chromosome 10 open reading frame 76
hsa-miR-1200	1	0	1	1	1	1	CCNJL	cyclin J-like
hsa-miR-1200	1	0	1	0	1	1	ZFHX4	zinc finger homeobox 4
hsa-miR-1200	0	0	1	1	1	1	CCDC134	coiled-coil domain containing 134
hsa-miR-1200	1	0	1	1	1	1	GRHL2	grainyhead-like 2 (Drosophila)
hsa-miR-1200	0	0	1	1	0	0	TMEM156	transmembrane protein 156
hsa-miR-1200	1	0	1	1	1	1	KLHL18	kelch-like 18 (Drosophila)
hsa-miR-1200	1	0	1	1	1	1	FBXO11	F-box protein 11
hsa-miR-1200	0	0	1	1	1	1	COQ10B	coenzyme Q10 homolog B (S. cerevisiae)
hsa-miR-1200	1	0	1	1	1	1	JHDM1D	jumonji C domain containing histone demethylase 1 homolog D (S. cerevisiae)
hsa-miR-1200	0	0	1	1	0	0	SAA2	serum amyloid A2
hsa-miR-1200	1	0	1	1	1	1	TMX1	thioredoxin-related transmembrane protein 1
hsa-miR-1200	0	0	1	1	1	1	FCRL2	Fc receptor-like 2
hsa-miR-1200	1	0	1	0	1	1	C1orf21	chromosome 1 open reading frame 21
hsa-miR-1200	0	0	1	1	1	1	ISCA1	iron-sulfur cluster assembly 1 homolog (S. cerevisiae)
hsa-miR-1200	1	0	1	1	1	1	RAB1B	RAB1B, member RAS oncogene family
hsa-miR-1200	0	0	1	1	1	1	FCRL5	Fc receptor-like 5
hsa-miR-1200	1	0	1	1	1	1	ANO3	anoctamin 3
hsa-miR-1200	0	0	1	1	1	1	KCNA7	potassium voltage-gated channel, shaker-related subfamily, member 7
hsa-miR-1200	0	0	1	0	1	1	ENAM	enamelin
hsa-miR-1200	0	0	1	1	1	1	TSSK1B	testis-specific serine kinase 1B
hsa-miR-1200	0	0	1	1	0	0	SLC4A11	solute carrier family 4, sodium borate transporter, member 11
hsa-miR-1200	1	0	1	1	1	1	OTP	orthopedia homeobox
hsa-miR-1200	0	0	1	0	1	1	RAB6C	RAB6C, member RAS oncogene family
hsa-miR-1200	1	0	1	1	1	1	PHF20L1	PHD finger protein 20-like 1
hsa-miR-1200	1	0	1	1	1	1	LOXL4	lysyl oxidase-like 4
hsa-miR-1200	0	0	1	1	1	1	FAM96A	family with sequence similarity 96, member A
hsa-miR-1200	1	0	1	1	1	1	CAMKK1	calcium/calmodulin-dependent protein kinase kinase 1, alpha
hsa-miR-1200	0	0	1	1	0	0	NICN1	nicolin 1
hsa-miR-1200	1	0	1	1	1	1	BRMS1L	breast cancer metastasis-suppressor 1-like
hsa-miR-1200	1	0	1	1	1	1	TTBK1	tau tubulin kinase 1
hsa-miR-1200	1	0	1	1	1	1	JAM3	junctional adhesion molecule 3
hsa-miR-1200	1	0	1	1	1	1	ARHGEF39	Rho guanine nucleotide exchange factor (GEF) 39
hsa-miR-1200	1	0	1	0	1	1	UBASH3B	ubiquitin associated and SH3 domain containing B
hsa-miR-1200	0	0	1	1	0	0	NXF5	nuclear RNA export factor 5
hsa-miR-1200	1	0	1	1	1	1	PCDH11Y	protocadherin 11 Y-linked
hsa-miR-1200	0	0	1	1	1	1	TRIM4	tripartite motif containing 4
hsa-miR-1200	0	0	1	0	1	1	TSLP	thymic stromal lymphopoietin
hsa-miR-1200	1	0	1	0	1	1	EAF1	ELL associated factor 1
hsa-miR-1200	0	0	1	1	0	0	FATE1	fetal and adult testis expressed 1
hsa-miR-1200	1	0	1	1	1	1	SLC45A3	solute carrier family 45, member 3
hsa-miR-1200	1	0	1	0	1	1	PURB	purine-rich element binding protein B
hsa-miR-1200	1	0	1	1	1	1	ADAM19	ADAM metallopeptidase domain 19
hsa-miR-1200	1	0	1	1	1	1	RASL10B	RAS-like, family 10, member B
hsa-miR-1200	1	0	1	1	1	1	EPT1	ethanolaminephosphotransferase 1 (CDP-ethanolamine-specific)
hsa-miR-1200	1	0	1	1	1	1	LUZP1	leucine zipper protein 1
hsa-miR-1200	0	0	1	1	1	1	PLEKHG4B	pleckstrin homology domain containing, family G (with RhoGef domain) member 4B
hsa-miR-1200	1	0	1	1	1	1	ESCO1	establishment of cohesion 1 homolog 1 (S. cerevisiae)
hsa-miR-1200	1	0	1	0	1	1	TMEM123	transmembrane protein 123
hsa-miR-1200	1	0	1	0	1	1	FAM129A	family with sequence similarity 129, member A
hsa-miR-1200	1	0	1	1	1	1	NAA15	N(alpha)-acetyltransferase 15, NatA auxiliary subunit
hsa-miR-1200	1	0	1	1	0	0	BRD4	bromodomain containing 4
hsa-miR-1200	1	0	1	1	1	1	KCNE4	potassium voltage-gated channel, Isk-related family, member 4
hsa-miR-1200	1	0	1	1	0	0	ADAMTS14	ADAM metallopeptidase with thrombospondin type 1 motif, 14
hsa-miR-1200	0	0	1	1	1	1	DTD1	D-tyrosyl-tRNA deacylase 1 homolog (S. cerevisiae)
hsa-miR-1200	1	0	1	0	1	1	SOCS4	suppressor of cytokine signaling 4
hsa-miR-1200	0	0	1	1	1	1	CHST14	carbohydrate (N-acetylgalactosamine 4-0) sulfotransferase 14
hsa-miR-1200	1	0	1	1	1	1	PRRC1	proline-rich coiled-coil 1
hsa-miR-1200	0	0	1	0	1	1	PAQR8	progestin and adipoQ receptor family member VIII
hsa-miR-1200	1	0	1	1	1	1	SPTSSA	serine palmitoyltransferase, small subunit A
hsa-miR-1200	0	0	1	0	1	1	SP140L	SP140 nuclear body protein-like
hsa-miR-1200	1	0	1	0	1	1	SP1	Sp1 transcription factor
hsa-miR-1200	0	0	1	0	1	1	PRELID2	PRELI domain containing 2
hsa-miR-1200	1	0	1	1	0	0	LIPH	lipase, member H
hsa-miR-1200	0	0	1	1	0	0	CARS	cysteinyl-tRNA synthetase
hsa-miR-1200	0	0	1	0	0	0	CAPN13	calpain 13
hsa-miR-1200	1	0	1	1	1	1	TEX261	testis expressed 261
hsa-miR-1200	0	0	1	1	1	1	SGK494	uncharacterized serine/threonine-protein kinase SgK494
hsa-miR-1200	1	0	1	1	1	1	RFTN2	raftlin family member 2
hsa-miR-1200	1	0	1	1	1	1	KCNH8	potassium voltage-gated channel, subfamily H (eag-related), member 8
hsa-miR-1200	0	0	1	1	0	0	C4orf36	chromosome 4 open reading frame 36
hsa-miR-1200	0	0	1	1	0	0	LINC00477	long intergenic non-protein coding RNA 477
hsa-miR-1200	0	0	1	1	1	1	PUS10	pseudouridylate synthase 10
hsa-miR-1200	0	0	1	1	1	1	C6orf118	chromosome 6 open reading frame 118
hsa-miR-1200	1	0	1	1	1	1	YPEL4	yippee-like 4 (Drosophila)
hsa-miR-1200	0	0	1	1	1	1	NXPE3	neurexophilin and PC-esterase domain family, member 3
hsa-miR-1200	0	0	1	1	0	0	EVI5L	ecotropic viral integration site 5-like
hsa-miR-1200	1	0	1	1	1	1	ABTB2	ankyrin repeat and BTB (POZ) domain containing 2
hsa-miR-1200	0	0	1	1	1	1	IPMK	inositol polyphosphate multikinase
hsa-miR-1200	0	0	1	0	1	1	CHKB	choline kinase beta
hsa-miR-1200	1	0	1	1	1	1	TPM3	tropomyosin 3
hsa-miR-1200	1	0	1	0	1	1	SYT11	synaptotagmin XI
hsa-miR-1200	0	0	1	1	1	1	ZNF561	zinc finger protein 561
hsa-miR-1200	1	0	1	1	1	1	POGLUT1	protein O-glucosyltransferase 1
hsa-miR-1200	0	0	1	1	1	1	ERP27	endoplasmic reticulum protein 27
hsa-miR-1200	1	0	1	1	1	1	LSM12	LSM12 homolog (S. cerevisiae)
hsa-miR-1200	1	0	1	1	1	1	FAM123B	family with sequence similarity 123B
hsa-miR-1200	1	0	1	1	1	1	CEP128	centrosomal protein 128kDa
hsa-miR-1200	1	0	1	1	1	1	FAM81A	family with sequence similarity 81, member A
hsa-miR-1200	1	0	1	1	1	1	ZSCAN29	zinc finger and SCAN domain containing 29
hsa-miR-1200	1	0	1	1	1	1	SLC16A14	solute carrier family 16, member 14 (monocarboxylic acid transporter 14)
hsa-miR-1200	1	0	1	0	1	1	TMEM154	transmembrane protein 154
hsa-miR-1200	1	0	1	0	1	1	ZBTB9	zinc finger and BTB domain containing 9
hsa-miR-1200	1	0	1	1	1	1	NXPH1	neurexophilin 1
hsa-miR-1200	1	0	1	1	1	1	UHRF2	ubiquitin-like with PHD and ring finger domains 2, E3 ubiquitin protein ligase
hsa-miR-1200	1	0	1	1	1	1	C17orf103	chromosome 17 open reading frame 103
hsa-miR-1200	0	0	1	0	1	1	TMEM92	transmembrane protein 92
hsa-miR-1200	1	0	1	1	1	1	MAMDC2	MAM domain containing 2
hsa-miR-1200	1	0	1	0	1	1	ENPP6	ectonucleotide pyrophosphatase/phosphodiesterase 6
hsa-miR-1200	1	0	1	1	0	0	TMEM86A	transmembrane protein 86A
hsa-miR-1200	1	0	1	0	1	1	ZCCHC24	zinc finger, CCHC domain containing 24
hsa-miR-1200	1	0	1	1	1	1	HS6ST3	heparan sulfate 6-O-sulfotransferase 3
hsa-miR-1200	0	0	1	0	1	1	RTP1	receptor (chemosensory) transporter protein 1
hsa-miR-1200	1	0	1	1	1	1	CACUL1	CDK2-associated, cullin domain 1
hsa-miR-1200	0	0	1	1	1	1	CD46	CD46 molecule, complement regulatory protein
hsa-miR-1200	0	0	1	1	1	1	SIAE	sialic acid acetylesterase
hsa-miR-1200	0	0	1	1	1	1	CDY1	chromodomain protein, Y-linked, 1
hsa-miR-1200	1	0	1	1	1	1	RDH10	retinol dehydrogenase 10 (all-trans)
hsa-miR-1200	0	0	1	1	1	1	REXO1L1	REX1, RNA exonuclease 1 homolog (S. cerevisiae)-like 1
hsa-miR-1200	1	0	1	1	1	1	IL28RA	interleukin 28 receptor, alpha (interferon, lambda receptor)
hsa-miR-1200	1	0	1	1	1	1	CCDC117	coiled-coil domain containing 117
hsa-miR-1200	1	0	1	0	1	1	PGM2L1	phosphoglucomutase 2-like 1
hsa-miR-1200	1	0	1	0	1	1	KSR2	kinase suppressor of ras 2
hsa-miR-1200	1	0	1	1	1	1	DIP2B	DIP2 disco-interacting protein 2 homolog B (Drosophila)
hsa-miR-1200	0	0	1	0	1	1	C5orf64	chromosome 5 open reading frame 64
hsa-miR-1200	1	0	1	1	1	1	ATG9B	autophagy related 9B
hsa-miR-1200	1	0	1	1	1	1	SCN4B	sodium channel, voltage-gated, type IV, beta subunit
hsa-miR-1200	0	0	1	1	0	0	HRAS	v-Ha-ras Harvey rat sarcoma viral oncogene homolog
hsa-miR-1200	0	0	1	1	0	0	CCDC36	coiled-coil domain containing 36
hsa-miR-1200	0	0	1	0	0	0	PPIAL4A	peptidylprolyl isomerase A (cyclophilin A)-like 4A
hsa-miR-1200	0	0	1	1	1	1	STXBP4	syntaxin binding protein 4
hsa-miR-1200	0	0	1	1	1	1	CMTM4	CKLF-like MARVEL transmembrane domain containing 4
hsa-miR-1200	1	0	1	1	1	1	ZNF827	zinc finger protein 827
hsa-miR-1200	1	0	1	1	1	1	CREM	cAMP responsive element modulator
hsa-miR-1200	0	0	1	0	1	1	SPATA12	spermatogenesis associated 12
hsa-miR-1200	0	0	1	1	0	0	PRDX2	peroxiredoxin 2
hsa-miR-1200	1	0	1	1	1	1	DPY19L4	dpy-19-like 4 (C. elegans)
hsa-miR-1200	1	0	1	1	1	1	TMED7	transmembrane emp24 protein transport domain containing 7
hsa-miR-1200	1	0	1	1	1	1	UBE2D3	ubiquitin-conjugating enzyme E2D 3
hsa-miR-1200	0	0	1	1	1	1	HTR3D	5-hydroxytryptamine (serotonin) receptor 3D, ionotropic
hsa-miR-1200	0	0	1	0	1	1	FAM169B	family with sequence similarity 169, member B
hsa-miR-1200	1	0	1	0	1	1	RNF144B	ring finger protein 144B
hsa-miR-1200	0	0	1	0	1	1	C16orf82	chromosome 16 open reading frame 82
hsa-miR-1200	0	0	1	1	1	1	FLT4	fms-related tyrosine kinase 4
hsa-miR-1200	0	0	1	0	1	1	NBPF11	neuroblastoma breakpoint family, member 11
hsa-miR-1200	1	0	1	1	1	1	ARRDC4	arrestin domain containing 4
hsa-miR-1200	1	0	1	0	1	1	SRRM4	serine/arginine repetitive matrix 4
hsa-miR-1200	1	0	1	1	1	1	ZBTB41	zinc finger and BTB domain containing 41
hsa-miR-1200	0	0	1	1	0	0	FUOM	fucose mutarotase
hsa-miR-1200	1	0	1	0	0	0	RAB15	RAB15, member RAS oncogene family
hsa-miR-1200	1	0	1	1	1	1	PTGER3	prostaglandin E receptor 3 (subtype EP3)
hsa-miR-1200	0	0	1	1	0	0	SIGLEC6	sialic acid binding Ig-like lectin 6
hsa-miR-1200	0	0	1	1	1	1	UBE3D	ubiquitin protein ligase E3D
hsa-miR-1200	1	0	1	1	1	1	STAC2	SH3 and cysteine rich domain 2
hsa-miR-1200	1	0	1	1	1	1	NSUN4	NOP2/Sun domain family, member 4
hsa-miR-1200	1	0	1	1	0	0	KAZN	kazrin, periplakin interacting protein
hsa-miR-1200	0	0	1	1	0	0	TRIM7	tripartite motif containing 7
hsa-miR-1200	1	0	1	1	1	1	FBXO33	F-box protein 33
hsa-miR-1200	0	0	1	1	1	1	C5orf46	chromosome 5 open reading frame 46
hsa-miR-1200	0	0	1	0	1	1	NPSR1-AS1	NPSR1 antisense RNA 1
hsa-miR-1200	1	0	1	1	0	0	TSEN54	tRNA splicing endonuclease 54 homolog (S. cerevisiae)
hsa-miR-1200	0	0	1	0	0	0	C16orf47	chromosome 16 open reading frame 47
hsa-miR-1200	0	0	1	1	0	0	KRTDAP	keratinocyte differentiation-associated protein
hsa-miR-1200	1	0	1	1	1	1	C11orf87	chromosome 11 open reading frame 87
hsa-miR-1200	1	0	1	1	1	1	CAPN3	calpain 3, (p94)
hsa-miR-1200	1	0	1	0	1	1	STAT3	signal transducer and activator of transcription 3 (acute-phase response factor)
hsa-miR-1200	0	0	1	0	0	0	PPIAP29	peptidylprolyl isomerase A (cyclophilin A) pseudogene 29
hsa-miR-1200	0	0	1	0	0	0	CELP	carboxyl ester lipase pseudogene
hsa-miR-1200	0	0	1	0	0	0	SNORD107	small nucleolar RNA, C/D box 107
hsa-miR-1200	0	0	1	0	0	0	LYPLA2P1	lysophospholipase II pseudogene 1
hsa-miR-1200	0	0	1	0	0	0	TTTY6	testis-specific transcript, Y-linked 6 (non-protein coding)
hsa-miR-1200	0	0	1	1	0	0	TTTY8	testis-specific transcript, Y-linked 8 (non-protein coding)
hsa-miR-1200	0	0	1	0	0	0	TTTY15	testis-specific transcript, Y-linked 15 (non-protein coding)
hsa-miR-1200	0	0	1	0	0	0	OR7E91P	olfactory receptor, family 7, subfamily E, member 91 pseudogene
hsa-miR-1200	0	0	1	0	0	0	GOLGA2P3Y	golgin A2 pseudogene 3, Y-linked
hsa-miR-1200	0	0	1	0	0	0	GTF2IP1	general transcription factor IIi, pseudogene 1
hsa-miR-1200	0	0	1	0	0	0	CDH12P2	cadherin 12 (N-cadherin 2) pseudogene 2
hsa-miR-1200	0	0	1	0	0	0	NPY6R	neuropeptide Y receptor Y6 (pseudogene)
hsa-miR-1200	0	0	1	0	0	0	RPL29P2	ribosomal protein L29 pseudogene 2
hsa-miR-1200	0	0	1	0	0	0	HOXA11-AS	HOXA11 antisense RNA
hsa-miR-1200	0	0	1	0	0	0	MALAT1	metastasis associated lung adenocarcinoma transcript 1 (non-protein coding)
hsa-miR-1200	0	0	1	0	0	0	SNX29P2	sorting nexin 29 pseudogene 2
hsa-miR-1200	0	0	1	0	0	0	HSP90AB2P	heat shock protein 90kDa alpha (cytosolic), class B member 2, pseudogene
hsa-miR-1200	0	0	1	0	0	0	GMCL1P1	germ cell-less, spermatogenesis associated 1 pseudogene 1
hsa-miR-1200	0	0	1	0	0	0	LOC729603	calcium binding protein P22 pseudogene
hsa-miR-1200	0	0	1	0	0	0	GAGE3	G antigen 3
hsa-miR-1200	1	0	1	1	1	1	TRIO	trio Rho guanine nucleotide exchange factor
hsa-miR-1200	0	0	1	1	1	1	PEG3	paternally expressed 3
hsa-miR-1200	0	0	1	1	0	0	KIR2DL4	killer cell immunoglobulin-like receptor, two domains, long cytoplasmic tail, 4
