# Supplementary material for: Profiling of Selected MicroRNAs in Proliferative Eutopic Endometrium of Women with Ovarian Endometriosis
Source: Biomed Res Int. 2015 Aug 20;2015:760698. doi: 10.1155/2015/760698 (PMC4558423; doi:10.1155/2015/760698)
Supplement: Supplementary file 1 — Table I: The names of miRNAs significantly differentially expressed between eutopic endometrium of patients with endometriosis vs eutopic endometrium of patients without endometriosis. Table II: The associations between miRNA and mRNA, which presents detailed results of the search of six major databases i.e targetscan, tarbase, miranda, mirbase, mirtarget2 and pictar. [file 760698.f1.zip › 760698.f1/Table II/hsa-miR-1203.tsv]

miR	targetscan	tarbase	miranda	mirbase	mirtarget2	pictar	GeneSymbol	GeneName
hsa-miR-1203	1	0	1	1	0	0	SRCAP	Snf2-related CREBBP activator protein
hsa-miR-1203	1	0	1	1	1	1	GLI2	GLI family zinc finger 2
hsa-miR-1203	0	0	1	1	1	1	PHLDB1	pleckstrin homology-like domain, family B, member 1
hsa-miR-1203	0	0	1	1	1	1	TBC1D30	TBC1 domain family, member 30
hsa-miR-1203	1	0	1	1	1	1	PRRC2C	proline-rich coiled-coil 2C
hsa-miR-1203	0	0	1	0	0	0	C11orf21	chromosome 11 open reading frame 21
hsa-miR-1203	1	0	1	1	1	1	SPIRE1	spire homolog 1 (Drosophila)
hsa-miR-1203	1	0	1	1	1	1	RALGDS	ral guanine nucleotide dissociation stimulator
hsa-miR-1203	0	0	1	1	0	0	PQBP1	polyglutamine binding protein 1
hsa-miR-1203	1	0	1	1	1	1	LZTS2	leucine zipper, putative tumor suppressor 2
hsa-miR-1203	1	0	1	1	1	1	SSH3	slingshot homolog 3 (Drosophila)
hsa-miR-1203	0	0	1	1	1	1	KIAA1967	KIAA1967
hsa-miR-1203	0	0	1	1	0	0	KREMEN2	kringle containing transmembrane protein 2
hsa-miR-1203	0	0	1	1	0	0	DDB2	damage-specific DNA binding protein 2, 48kDa
hsa-miR-1203	0	0	1	1	0	0	PTPRF	protein tyrosine phosphatase, receptor type, F
hsa-miR-1203	0	0	1	1	1	1	ING4	inhibitor of growth family, member 4
hsa-miR-1203	1	0	1	1	0	0	NDST2	N-deacetylase/N-sulfotransferase (heparan glucosaminyl) 2
hsa-miR-1203	1	0	1	0	1	1	PCDHA13	protocadherin alpha 13
hsa-miR-1203	1	0	1	1	1	1	PCDHA4	protocadherin alpha 4
hsa-miR-1203	0	0	1	1	0	0	KCNC3	potassium voltage-gated channel, Shaw-related subfamily, member 3
hsa-miR-1203	0	0	1	1	1	1	MAZ	MYC-associated zinc finger protein (purine-binding transcription factor)
hsa-miR-1203	1	0	1	0	1	1	MAML1	mastermind-like 1 (Drosophila)
hsa-miR-1203	1	0	1	1	1	1	ANK1	ankyrin 1, erythrocytic
hsa-miR-1203	0	0	1	1	1	1	PPP1R12C	protein phosphatase 1, regulatory subunit 12C
hsa-miR-1203	0	0	1	1	0	0	ITGA2B	integrin, alpha 2b (platelet glycoprotein IIb of IIb/IIIa complex, antigen CD41)
hsa-miR-1203	1	0	1	1	0	0	TNPO2	transportin 2
hsa-miR-1203	0	0	1	1	1	1	UBE4B	ubiquitination factor E4B
hsa-miR-1203	0	0	1	0	1	1	SERF1A	small EDRK-rich factor 1A (telomeric)
hsa-miR-1203	1	0	1	1	1	1	VAPB	VAMP (vesicle-associated membrane protein)-associated protein B and C
hsa-miR-1203	1	0	1	1	1	1	TLK2	tousled-like kinase 2
hsa-miR-1203	0	0	1	1	0	0	MVK	mevalonate kinase
hsa-miR-1203	1	0	1	1	1	1	SNTB2	syntrophin, beta 2 (dystrophin-associated protein A1, 59kDa, basic component 2)
hsa-miR-1203	0	0	1	1	1	1	CLEC7A	C-type lectin domain family 7, member A
hsa-miR-1203	1	0	1	1	1	1	STX16	syntaxin 16
hsa-miR-1203	1	0	1	1	1	1	TRIP10	thyroid hormone receptor interactor 10
hsa-miR-1203	0	0	1	1	1	1	PTK7	PTK7 protein tyrosine kinase 7
hsa-miR-1203	1	0	1	1	1	1	AFF2	AF4/FMR2 family, member 2
hsa-miR-1203	0	0	1	0	0	0	ADAM5	ADAM metallopeptidase domain 5, pseudogene
hsa-miR-1203	0	0	1	0	0	0	SNHG4	small nucleolar RNA host gene 4 (non-protein coding)
hsa-miR-1203	1	0	1	1	1	1	RAB3IP	RAB3A interacting protein (rabin3)
hsa-miR-1203	1	0	1	1	1	1	NRXN3	neurexin 3
hsa-miR-1203	1	0	1	1	1	1	AKAP2	A kinase (PRKA) anchor protein 2
hsa-miR-1203	0	0	1	0	0	0	TUG1	taurine upregulated 1 (non-protein coding)
hsa-miR-1203	0	0	1	0	0	0	RNF31	ring finger protein 31
hsa-miR-1203	0	0	1	1	0	0	TRPV2	transient receptor potential cation channel, subfamily V, member 2
hsa-miR-1203	1	0	1	1	1	1	ACER3	alkaline ceramidase 3
hsa-miR-1203	0	0	1	1	1	1	STAU2	staufen, RNA binding protein, homolog 2 (Drosophila)
hsa-miR-1203	0	0	1	0	0	0	LOC149134	uncharacterized LOC149134
hsa-miR-1203	1	0	1	1	1	1	WDTC1	WD and tetratricopeptide repeats 1
hsa-miR-1203	1	0	1	1	0	0	FASTK	Fas-activated serine/threonine kinase
hsa-miR-1203	1	0	1	0	1	1	UBP1	upstream binding protein 1 (LBP-1a)
hsa-miR-1203	1	0	1	1	1	1	PPFIA3	protein tyrosine phosphatase, receptor type, f polypeptide (PTPRF), interacting protein (liprin), alpha 3
hsa-miR-1203	0	0	1	1	0	0	TBCEL	tubulin folding cofactor E-like
hsa-miR-1203	0	0	1	0	0	0	LINC00085	long intergenic non-protein coding RNA 85
hsa-miR-1203	0	0	1	1	1	1	METTL7A	methyltransferase like 7A
hsa-miR-1203	0	0	1	1	1	1	HDAC7	histone deacetylase 7
hsa-miR-1203	1	0	1	1	1	1	ZMIZ1	zinc finger, MIZ-type containing 1
hsa-miR-1203	0	0	1	0	1	1	HEMK1	HemK methyltransferase family member 1
hsa-miR-1203	0	0	1	0	0	0	LINC00340	long intergenic non-protein coding RNA 340
hsa-miR-1203	0	0	1	1	1	1	PAQR4	progestin and adipoQ receptor family member IV
hsa-miR-1203	0	0	1	1	0	0	IMPDH1	IMP (inosine 5'-monophosphate) dehydrogenase 1
hsa-miR-1203	1	0	1	1	0	0	C17orf70	chromosome 17 open reading frame 70
hsa-miR-1203	1	0	1	1	1	1	DLGAP4	discs, large (Drosophila) homolog-associated protein 4
hsa-miR-1203	0	0	1	1	1	1	TTC19	tetratricopeptide repeat domain 19
hsa-miR-1203	1	0	1	0	1	1	PTPRE	protein tyrosine phosphatase, receptor type, E
hsa-miR-1203	0	0	1	0	0	0	JPX	JPX transcript, XIST activator (non-protein coding)
hsa-miR-1203	0	0	1	0	0	0	LOC654433	uncharacterized LOC654433
hsa-miR-1203	1	0	1	1	1	1	PHF15	PHD finger protein 15
hsa-miR-1203	1	0	1	1	1	1	GABARAPL1	GABA(A) receptor-associated protein like 1
hsa-miR-1203	1	0	1	1	0	0	ZFYVE27	zinc finger, FYVE domain containing 27
hsa-miR-1203	0	0	1	1	0	0	PTOV1	prostate tumor overexpressed 1
hsa-miR-1203	0	0	1	0	0	0	LOC284014	uncharacterized LOC284014
hsa-miR-1203	0	0	1	1	0	0	TRIM41	tripartite motif containing 41
hsa-miR-1203	0	0	1	1	0	0	PIGO	phosphatidylinositol glycan anchor biosynthesis, class O
hsa-miR-1203	1	0	1	1	1	1	FAM73B	family with sequence similarity 73, member B
hsa-miR-1203	0	0	1	1	0	0	WDR83	WD repeat domain 83
hsa-miR-1203	0	0	1	1	0	0	NISCH	nischarin
hsa-miR-1203	1	0	1	1	1	1	CLIC5	chloride intracellular channel 5
hsa-miR-1203	1	0	1	1	0	0	MMP11	matrix metallopeptidase 11 (stromelysin 3)
hsa-miR-1203	0	0	1	0	0	0	LOC643837	uncharacterized LOC643837
hsa-miR-1203	1	0	1	1	1	1	GNG2	guanine nucleotide binding protein (G protein), gamma 2
hsa-miR-1203	0	0	1	0	1	1	SSPN	sarcospan
hsa-miR-1203	1	0	1	0	1	1	MAGIX	MAGI family member, X-linked
hsa-miR-1203	0	0	1	1	0	0	WBP1	WW domain binding protein 1
hsa-miR-1203	1	0	1	1	1	1	KCND1	potassium voltage-gated channel, Shal-related subfamily, member 1
hsa-miR-1203	1	0	1	0	1	1	GATAD2B	GATA zinc finger domain containing 2B
hsa-miR-1203	0	0	1	1	1	1	HOGA1	4-hydroxy-2-oxoglutarate aldolase 1
hsa-miR-1203	1	0	1	1	1	1	NDEL1	nudE nuclear distribution E homolog (A. nidulans)-like 1
hsa-miR-1203	0	0	1	0	0	0	LINC00486	long intergenic non-protein coding RNA 486
hsa-miR-1203	0	0	1	1	1	1	IL17RE	interleukin 17 receptor E
hsa-miR-1203	1	0	1	1	1	1	EPB41L1	erythrocyte membrane protein band 4.1-like 1
hsa-miR-1203	1	0	1	1	1	1	ERGIC1	endoplasmic reticulum-golgi intermediate compartment (ERGIC) 1
hsa-miR-1203	1	0	1	1	1	1	KL	klotho
hsa-miR-1203	0	0	1	1	1	1	PPFIBP2	PTPRF interacting protein, binding protein 2 (liprin beta 2)
hsa-miR-1203	0	0	1	0	0	0	KIRREL3-AS3	KIRREL3 antisense RNA 3
hsa-miR-1203	0	0	1	0	0	0	THAP7-AS1	THAP7 antisense RNA 1
hsa-miR-1203	0	0	1	1	0	0	LUC7L	LUC7-like (S. cerevisiae)
hsa-miR-1203	0	0	1	0	0	0	CECR7	cat eye syndrome chromosome region, candidate 7 (non-protein coding)
hsa-miR-1203	0	0	1	1	1	1	ANKZF1	ankyrin repeat and zinc finger domain containing 1
hsa-miR-1203	0	0	1	1	0	0	SLC14A2	solute carrier family 14 (urea transporter), member 2
hsa-miR-1203	0	0	1	1	1	1	GGA1	golgi-associated, gamma adaptin ear containing, ARF binding protein 1
hsa-miR-1203	0	0	1	1	0	0	MARS	methionyl-tRNA synthetase
hsa-miR-1203	1	0	1	1	1	1	PXN	paxillin
hsa-miR-1203	1	0	1	1	1	1	ZNF275	zinc finger protein 275
hsa-miR-1203	0	0	1	0	0	0	MYL5	myosin, light chain 5, regulatory
hsa-miR-1203	1	0	1	1	1	1	GJC1	gap junction protein, gamma 1, 45kDa
hsa-miR-1203	1	0	1	1	0	0	BCORL1	BCL6 corepressor-like 1
hsa-miR-1203	0	0	1	1	1	1	C2orf91	chromosome 2 open reading frame 91
hsa-miR-1203	0	0	1	1	0	0	LOC100128239	uncharacterized LOC100128239
hsa-miR-1203	0	0	1	1	0	0	TMC8	transmembrane channel-like 8
hsa-miR-1203	0	0	1	0	0	0	FAM95B1	family with sequence similarity 95, member B1
hsa-miR-1203	1	0	1	1	1	1	MACROD2	MACRO domain containing 2
hsa-miR-1203	0	0	1	1	0	0	C20orf141	chromosome 20 open reading frame 141
hsa-miR-1203	0	0	1	1	0	0	CLDN4	claudin 4
hsa-miR-1203	1	0	1	1	0	0	TNK2	tyrosine kinase, non-receptor, 2
hsa-miR-1203	1	0	1	1	0	0	MAN1B1	mannosidase, alpha, class 1B, member 1
hsa-miR-1203	0	0	1	0	0	0	LOC100127955	uncharacterized LOC100127955
hsa-miR-1203	0	0	1	1	1	1	PNPLA5	patatin-like phospholipase domain containing 5
hsa-miR-1203	0	0	1	0	0	0	LOC619207	scavenger receptor protein family member
hsa-miR-1203	0	0	1	1	1	1	CCDC78	coiled-coil domain containing 78
hsa-miR-1203	1	0	1	1	1	1	NFYC	nuclear transcription factor Y, gamma
hsa-miR-1203	1	0	1	1	1	1	PLA2G15	phospholipase A2, group XV
hsa-miR-1203	1	0	1	1	1	1	KALRN	kalirin, RhoGEF kinase
hsa-miR-1203	1	0	1	1	1	1	ADAMTS19	ADAM metallopeptidase with thrombospondin type 1 motif, 19
hsa-miR-1203	0	0	1	0	0	0	FLJ26245	uncharacterized LOC400533
hsa-miR-1203	0	0	1	1	0	0	HEATR8	HEAT repeat containing 8
hsa-miR-1203	0	0	1	0	0	0	FAM27A	family with sequence similarity 27, member A
hsa-miR-1203	1	0	1	1	1	1	MAP2K4	mitogen-activated protein kinase kinase 4
hsa-miR-1203	1	0	1	1	1	1	CTSA	cathepsin A
hsa-miR-1203	1	0	1	1	1	1	SMAP2	small ArfGAP2
hsa-miR-1203	0	0	1	0	0	0	FAM66D	family with sequence similarity 66, member D
hsa-miR-1203	0	0	1	1	1	1	ZFP41	zinc finger protein 41 homolog (mouse)
hsa-miR-1203	0	0	1	1	0	0	RPL9	ribosomal protein L9
hsa-miR-1203	1	0	1	1	1	1	NFX1	nuclear transcription factor, X-box binding 1
hsa-miR-1203	1	0	1	1	0	0	SLC44A2	solute carrier family 44, member 2
hsa-miR-1203	1	0	1	1	1	1	SH3TC2	SH3 domain and tetratricopeptide repeats 2
hsa-miR-1203	0	0	1	1	0	0	THNSL2	threonine synthase-like 2 (S. cerevisiae)
hsa-miR-1203	1	0	1	1	1	1	POU6F1	POU class 6 homeobox 1
hsa-miR-1203	0	0	1	1	0	0	TMEM44	transmembrane protein 44
hsa-miR-1203	0	0	1	1	1	1	INPP5B	inositol polyphosphate-5-phosphatase, 75kDa
hsa-miR-1203	0	0	1	1	0	0	HEATR7A	HEAT repeat containing 7A
hsa-miR-1203	1	0	1	1	1	1	MBD6	methyl-CpG binding domain protein 6
hsa-miR-1203	0	0	1	1	1	1	CD209	CD209 molecule
hsa-miR-1203	0	0	1	1	0	0	GPC2	glypican 2
hsa-miR-1203	0	0	1	1	0	0	DNAH1	dynein, axonemal, heavy chain 1
hsa-miR-1203	0	0	1	1	0	0	VSIG4	V-set and immunoglobulin domain containing 4
hsa-miR-1203	0	0	1	1	1	1	GPR114	G protein-coupled receptor 114
hsa-miR-1203	0	0	1	1	1	1	PIGG	phosphatidylinositol glycan anchor biosynthesis, class G
hsa-miR-1203	0	0	1	1	0	0	SNRPN	small nuclear ribonucleoprotein polypeptide N
hsa-miR-1203	0	0	1	1	1	1	TIMM50	translocase of inner mitochondrial membrane 50 homolog (S. cerevisiae)
hsa-miR-1203	1	0	1	1	1	1	MECP2	methyl CpG binding protein 2 (Rett syndrome)
hsa-miR-1203	0	0	1	1	0	0	PAOX	polyamine oxidase (exo-N4-amino)
hsa-miR-1203	0	0	1	1	1	1	NR1I3	nuclear receptor subfamily 1, group I, member 3
hsa-miR-1203	1	0	1	1	1	1	HMGA2	high mobility group AT-hook 2
hsa-miR-1203	0	0	1	1	1	1	SMPD1	sphingomyelin phosphodiesterase 1, acid lysosomal
hsa-miR-1203	1	0	1	1	0	0	TAF4B	TAF4b RNA polymerase II, TATA box binding protein (TBP)-associated factor, 105kDa
hsa-miR-1203	1	0	1	1	1	1	AMOT	angiomotin
hsa-miR-1203	1	0	1	1	1	1	RIMS3	regulating synaptic membrane exocytosis 3
hsa-miR-1203	1	0	1	1	1	1	PTMS	parathymosin
hsa-miR-1203	1	0	1	1	1	1	NXN	nucleoredoxin
hsa-miR-1203	0	0	1	1	0	0	BARX1	BARX homeobox 1
hsa-miR-1203	1	0	1	1	1	1	B4GALT3	UDP-Gal:betaGlcNAc beta 1,4- galactosyltransferase, polypeptide 3
hsa-miR-1203	0	0	1	1	1	1	PIGQ	phosphatidylinositol glycan anchor biosynthesis, class Q
hsa-miR-1203	0	0	1	0	0	0	GRAMD1B	GRAM domain containing 1B
hsa-miR-1203	0	0	1	1	1	1	TOMM40L	translocase of outer mitochondrial membrane 40 homolog (yeast)-like
hsa-miR-1203	0	0	1	0	0	0	MGC21881	uncharacterized locus MGC21881
hsa-miR-1203	0	0	1	1	1	1	C8orf33	chromosome 8 open reading frame 33
hsa-miR-1203	0	0	1	1	0	0	ZBTB32	zinc finger and BTB domain containing 32
hsa-miR-1203	0	0	1	0	0	0	LOC100144602	uncharacterized LOC100144602
hsa-miR-1203	1	0	1	1	1	1	ADPGK	ADP-dependent glucokinase
hsa-miR-1203	0	0	1	1	1	1	PTCD2	pentatricopeptide repeat domain 2
hsa-miR-1203	0	0	1	0	1	1	ZNF718	zinc finger protein 718
hsa-miR-1203	0	0	1	1	1	1	C10orf88	chromosome 10 open reading frame 88
hsa-miR-1203	0	0	1	0	0	0	NBR2	neighbor of BRCA1 gene 2 (non-protein coding)
hsa-miR-1203	0	0	1	1	1	1	SRGN	serglycin
hsa-miR-1203	1	0	1	0	1	1	C14orf101	chromosome 14 open reading frame 101
hsa-miR-1203	0	0	1	1	0	0	FAM89B	family with sequence similarity 89, member B
hsa-miR-1203	0	0	1	1	1	1	CDS2	CDP-diacylglycerol synthase (phosphatidate cytidylyltransferase) 2
hsa-miR-1203	0	0	1	1	1	1	HYAL1	hyaluronoglucosaminidase 1
hsa-miR-1203	1	0	1	1	1	1	TMEM127	transmembrane protein 127
hsa-miR-1203	0	0	1	0	0	0	LOC145837	uncharacterized LOC145837
hsa-miR-1203	1	0	1	0	1	1	SV2B	synaptic vesicle glycoprotein 2B
hsa-miR-1203	0	0	1	1	1	1	TMEM117	transmembrane protein 117
hsa-miR-1203	1	0	1	1	1	1	TAF15	TAF15 RNA polymerase II, TATA box binding protein (TBP)-associated factor, 68kDa
hsa-miR-1203	1	0	1	1	1	1	ZNF282	zinc finger protein 282
hsa-miR-1203	1	0	1	1	1	1	SPATS2	spermatogenesis associated, serine-rich 2
hsa-miR-1203	1	0	1	1	0	0	ANKRD13B	ankyrin repeat domain 13B
hsa-miR-1203	1	0	1	1	1	1	RAB5B	RAB5B, member RAS oncogene family
hsa-miR-1203	1	0	1	1	0	0	MRC2	mannose receptor, C type 2
hsa-miR-1203	0	0	1	1	0	0	IGFN1	immunoglobulin-like and fibronectin type III domain containing 1
hsa-miR-1203	1	0	1	0	1	1	KCTD2	potassium channel tetramerisation domain containing 2
hsa-miR-1203	1	0	1	1	1	1	PCDHA5	protocadherin alpha 5
hsa-miR-1203	0	0	1	1	0	0	ADAP2	ArfGAP with dual PH domains 2
hsa-miR-1203	0	0	1	0	0	0	HOXA-AS2	HOXA cluster antisense RNA 2
hsa-miR-1203	0	0	1	1	1	1	UBE3D	ubiquitin protein ligase E3D
hsa-miR-1203	0	0	1	0	0	0	SPATA3	spermatogenesis associated 3
hsa-miR-1203	1	0	1	1	1	1	SOX6	SRY (sex determining region Y)-box 6
hsa-miR-1203	0	0	1	1	1	1	C14orf118	chromosome 14 open reading frame 118
hsa-miR-1203	0	0	1	0	0	0	FLJ36000	uncharacterized FLJ36000
hsa-miR-1203	0	0	1	0	0	0	A1BG-AS1	A1BG antisense RNA 1
hsa-miR-1203	0	0	1	1	1	1	BCO2	beta-carotene oxygenase 2
hsa-miR-1203	0	0	1	0	0	0	LOC340094	uncharacterized LOC340094
hsa-miR-1203	0	0	1	0	0	0	LOC338579	ankyrin repeat domain-containing protein 30B pseudogene
hsa-miR-1203	0	0	1	0	0	0	LOC339260	uncharacterized LOC339260
hsa-miR-1203	1	0	1	1	1	1	AGAP3	ArfGAP with GTPase domain, ankyrin repeat and PH domain 3
hsa-miR-1203	0	0	1	1	1	1	MST1	macrophage stimulating 1 (hepatocyte growth factor-like)
hsa-miR-1203	1	0	1	1	1	1	MAMDC2	MAM domain containing 2
hsa-miR-1203	0	0	1	1	1	1	MGC57346	uncharacterized LOC401884
hsa-miR-1203	0	0	1	0	0	0	LOC348120	uncharacterized LOC348120
hsa-miR-1203	0	0	1	0	0	0	DPY19L2P4	dpy-19-like 2 pseudogene 4 (C. elegans)
hsa-miR-1203	1	0	1	1	1	1	CLVS1	clavesin 1
hsa-miR-1203	0	0	1	0	1	1	ITGA1	integrin, alpha 1
hsa-miR-1203	1	0	1	1	1	1	TMPO	thymopoietin
hsa-miR-1203	1	0	1	1	0	0	EIF2B5	eukaryotic translation initiation factor 2B, subunit 5 epsilon, 82kDa
hsa-miR-1203	1	0	1	0	1	1	SEMA4G	sema domain, immunoglobulin domain (Ig), transmembrane domain (TM) and short cytoplasmic domain, (semaphorin) 4G
hsa-miR-1203	1	0	1	1	1	1	SCUBE3	signal peptide, CUB domain, EGF-like 3
hsa-miR-1203	0	0	1	1	1	1	GRIK5	glutamate receptor, ionotropic, kainate 5
hsa-miR-1203	0	0	1	0	0	0	CISD3	CDGSH iron sulfur domain 3
hsa-miR-1203	0	0	1	0	0	0	LOC550643	uncharacterized LOC550643
hsa-miR-1203	0	0	1	1	0	0	CLIC1	chloride intracellular channel 1
hsa-miR-1203	0	0	1	1	0	0	TTYH1	tweety homolog 1 (Drosophila)
hsa-miR-1203	1	0	1	1	1	1	C5orf25	chromosome 5 open reading frame 25
hsa-miR-1203	1	0	1	1	1	1	GRHL1	grainyhead-like 1 (Drosophila)
hsa-miR-1203	0	0	1	1	0	0	TMEM183A	transmembrane protein 183A
hsa-miR-1203	0	0	1	1	0	0	CELF3	CUGBP, Elav-like family member 3
hsa-miR-1203	1	0	1	1	1	1	PHACTR4	phosphatase and actin regulator 4
hsa-miR-1203	1	0	1	1	1	1	TBX2	T-box 2
hsa-miR-1203	0	0	1	1	1	1	SLC11A1	solute carrier family 11 (proton-coupled divalent metal ion transporters), member 1
hsa-miR-1203	0	0	1	1	1	1	CTXN3	cortexin 3
hsa-miR-1203	1	0	1	1	1	1	RARG	retinoic acid receptor, gamma
hsa-miR-1203	1	0	1	1	1	1	GRAMD4	GRAM domain containing 4
hsa-miR-1203	0	0	1	0	0	0	LINC00537	long intergenic non-protein coding RNA 537
hsa-miR-1203	0	0	1	1	0	0	TMEM222	transmembrane protein 222
hsa-miR-1203	0	0	1	0	1	1	CCL4L2	chemokine (C-C motif) ligand 4-like 2
hsa-miR-1203	0	0	1	1	1	1	CCL4L1	chemokine (C-C motif) ligand 4-like 1
hsa-miR-1203	1	0	1	1	1	1	ESRRA	estrogen-related receptor alpha
hsa-miR-1203	1	0	1	1	1	1	WNT10B	wingless-type MMTV integration site family, member 10B
hsa-miR-1203	0	0	1	1	0	0	RPS9	ribosomal protein S9
hsa-miR-1203	1	0	1	0	1	1	VANGL2	vang-like 2 (van gogh, Drosophila)
hsa-miR-1203	0	0	1	0	0	0	FBXL19-AS1	FBXL19 antisense RNA 1 (head to head)
hsa-miR-1203	0	0	1	1	0	0	ZNF276	zinc finger protein 276
hsa-miR-1203	1	0	1	0	1	1	KIF5C	kinesin family member 5C
hsa-miR-1203	0	0	1	1	0	0	RNF123	ring finger protein 123
hsa-miR-1203	1	0	1	1	1	1	GRIA3	glutamate receptor, ionotropic, AMPA 3
hsa-miR-1203	0	0	1	0	0	0	FAM27E3	family with sequence similarity 27, member E3
hsa-miR-1203	0	0	1	1	0	0	SOCS7	suppressor of cytokine signaling 7
hsa-miR-1203	0	0	1	0	0	0	TUBA4B	tubulin, alpha 4b (pseudogene)
hsa-miR-1203	0	0	1	0	1	1	LOC646938	TBC1 domain family, member 2B pseudogene
hsa-miR-1203	0	0	1	0	0	0	FAM225B	family with sequence similarity 225, member B (non-protein coding)
hsa-miR-1203	0	0	1	1	1	1	COL6A3	collagen, type VI, alpha 3
hsa-miR-1203	1	0	1	1	1	1	SLC39A13	solute carrier family 39 (zinc transporter), member 13
hsa-miR-1203	1	0	1	1	1	1	SIN3A	SIN3 transcription regulator homolog A (yeast)
hsa-miR-1203	1	0	1	1	1	1	BSDC1	BSD domain containing 1
hsa-miR-1203	1	0	1	1	1	1	ARHGDIA	Rho GDP dissociation inhibitor (GDI) alpha
hsa-miR-1203	0	0	1	1	1	1	DEDD2	death effector domain containing 2
hsa-miR-1203	1	0	1	0	0	0	IGLON5	IgLON family member 5
hsa-miR-1203	1	0	1	1	1	1	ARF1	ADP-ribosylation factor 1
hsa-miR-1203	0	0	1	1	1	1	DGCR14	DiGeorge syndrome critical region gene 14
hsa-miR-1203	0	0	1	1	0	0	TBC1D22A	TBC1 domain family, member 22A
hsa-miR-1203	1	0	1	1	1	1	LETMD1	LETM1 domain containing 1
hsa-miR-1203	1	0	1	1	0	0	SHF	Src homology 2 domain containing F
hsa-miR-1203	1	1	1	1	0	0	EFNA3	ephrin-A3
hsa-miR-1203	1	0	1	1	1	1	NEU1	sialidase 1 (lysosomal sialidase)
hsa-miR-1203	0	0	1	1	0	0	CCNDBP1	cyclin D-type binding-protein 1
hsa-miR-1203	0	0	1	1	1	1	ATP5F1	ATP synthase, H+ transporting, mitochondrial Fo complex, subunit B1
hsa-miR-1203	0	0	1	1	1	1	BCL7B	B-cell CLL/lymphoma 7B
hsa-miR-1203	0	0	1	1	1	1	COPS7A	COP9 constitutive photomorphogenic homolog subunit 7A (Arabidopsis)
hsa-miR-1203	0	0	1	0	0	0	NBLA00301	Nbla00301
hsa-miR-1203	0	0	1	1	1	1	C2orf62	chromosome 2 open reading frame 62
hsa-miR-1203	0	0	1	1	0	0	HCRTR1	hypocretin (orexin) receptor 1
hsa-miR-1203	1	0	1	1	1	1	LYPLA2	lysophospholipase II
hsa-miR-1203	1	0	1	0	1	1	MGRN1	mahogunin ring finger 1, E3 ubiquitin protein ligase
hsa-miR-1203	0	0	1	1	0	0	NDUFS7	NADH dehydrogenase (ubiquinone) Fe-S protein 7, 20kDa (NADH-coenzyme Q reductase)
hsa-miR-1203	1	0	1	1	1	1	BAMBI	BMP and activin membrane-bound inhibitor homolog (Xenopus laevis)
hsa-miR-1203	0	0	1	1	0	0	C11orf68	chromosome 11 open reading frame 68
hsa-miR-1203	0	0	1	1	1	1	VPS16	vacuolar protein sorting 16 homolog (S. cerevisiae)
hsa-miR-1203	0	0	1	1	1	1	RPUSD1	RNA pseudouridylate synthase domain containing 1
hsa-miR-1203	0	0	1	1	0	0	C1orf122	chromosome 1 open reading frame 122
hsa-miR-1203	0	0	1	1	0	0	MRPS18A	mitochondrial ribosomal protein S18A
hsa-miR-1203	1	0	1	1	1	1	CAMK2A	calcium/calmodulin-dependent protein kinase II alpha
hsa-miR-1203	0	0	1	1	0	0	RGS9	regulator of G-protein signaling 9
hsa-miR-1203	0	0	1	1	1	1	JMJD8	jumonji domain containing 8
hsa-miR-1203	0	0	1	1	0	0	PHPT1	phosphohistidine phosphatase 1
hsa-miR-1203	0	0	1	1	1	1	ACSF3	acyl-CoA synthetase family member 3
hsa-miR-1203	1	0	1	1	0	0	INO80E	INO80 complex subunit E
hsa-miR-1203	0	0	1	1	0	0	OXA1L	oxidase (cytochrome c) assembly 1-like
hsa-miR-1203	0	0	1	1	1	1	APOPT1	apoptogenic 1, mitochondrial
hsa-miR-1203	0	0	1	1	0	0	TUBA8	tubulin, alpha 8
hsa-miR-1203	0	0	1	1	1	1	PAAF1	proteasomal ATPase-associated factor 1
hsa-miR-1203	0	0	1	1	1	1	CDKAL1	CDK5 regulatory subunit associated protein 1-like 1
hsa-miR-1203	0	0	1	1	0	0	FES	feline sarcoma oncogene
hsa-miR-1203	0	0	1	1	1	1	SUGT1	SGT1, suppressor of G2 allele of SKP1 (S. cerevisiae)
hsa-miR-1203	0	0	1	1	0	0	ISG20	interferon stimulated exonuclease gene 20kDa
hsa-miR-1203	0	0	1	1	0	0	INO80B	INO80 complex subunit B
hsa-miR-1203	0	0	1	0	0	0	LOC731789	uncharacterized LOC731789
hsa-miR-1203	1	0	1	1	1	1	MAPK8IP3	mitogen-activated protein kinase 8 interacting protein 3
hsa-miR-1203	0	0	1	0	0	0	MIR143HG	MIR143 host gene (non-protein coding)
hsa-miR-1203	0	0	1	1	0	0	SPATA20	spermatogenesis associated 20
hsa-miR-1203	0	0	1	1	1	1	LPL	lipoprotein lipase
hsa-miR-1203	0	0	1	1	0	0	PHKG2	phosphorylase kinase, gamma 2 (testis)
hsa-miR-1203	0	0	1	1	1	1	CASR	calcium-sensing receptor
hsa-miR-1203	1	0	1	0	1	1	CYBB	cytochrome b-245, beta polypeptide
hsa-miR-1203	1	0	1	1	1	1	MPZ	myelin protein zero
hsa-miR-1203	1	0	1	0	1	1	KCNJ2	potassium inwardly-rectifying channel, subfamily J, member 2
hsa-miR-1203	0	0	1	1	0	0	PTGIR	prostaglandin I2 (prostacyclin) receptor (IP)
hsa-miR-1203	1	0	1	0	1	1	ARHGEF37	Rho guanine nucleotide exchange factor (GEF) 37
hsa-miR-1203	0	0	1	0	0	0	C10orf55	chromosome 10 open reading frame 55
hsa-miR-1203	1	0	1	0	1	1	CACNA1I	calcium channel, voltage-dependent, T type, alpha 1I subunit
hsa-miR-1203	1	0	1	0	1	1	BMF	Bcl2 modifying factor
hsa-miR-1203	0	0	1	1	0	0	MARCH2	membrane-associated ring finger (C3HC4) 2, E3 ubiquitin protein ligase
hsa-miR-1203	0	0	1	1	1	1	RASL10A	RAS-like, family 10, member A
hsa-miR-1203	1	0	1	0	1	1	CPLX2	complexin 2
hsa-miR-1203	1	0	1	1	1	1	CTNNBIP1	catenin, beta interacting protein 1
hsa-miR-1203	1	0	1	1	1	1	SLC25A53	solute carrier family 25, member 53
hsa-miR-1203	1	0	1	1	1	1	C12orf68	chromosome 12 open reading frame 68
hsa-miR-1203	0	0	1	0	0	0	LOC400707	uncharacterized LOC400707
hsa-miR-1203	0	0	1	1	0	0	RTKN	rhotekin
hsa-miR-1203	0	0	1	1	0	0	ALDH18A1	aldehyde dehydrogenase 18 family, member A1
hsa-miR-1203	1	0	1	1	1	1	CANX	calnexin
hsa-miR-1203	1	0	1	1	1	1	SLC6A9	solute carrier family 6 (neurotransmitter transporter, glycine), member 9
hsa-miR-1203	0	0	1	1	1	1	MBP	myelin basic protein
hsa-miR-1203	1	0	1	1	1	1	ARHGAP24	Rho GTPase activating protein 24
hsa-miR-1203	0	0	1	1	0	0	GRB7	growth factor receptor-bound protein 7
hsa-miR-1203	1	0	1	1	1	1	MYCL1	v-myc myelocytomatosis viral oncogene homolog 1, lung carcinoma derived (avian)
hsa-miR-1203	1	0	1	1	0	0	MTUS2	microtubule associated tumor suppressor candidate 2
hsa-miR-1203	0	0	1	1	1	1	NHP2	NHP2 ribonucleoprotein homolog (yeast)
hsa-miR-1203	1	0	1	1	1	1	SNX21	sorting nexin family member 21
hsa-miR-1203	1	0	1	1	1	1	LDB3	LIM domain binding 3
hsa-miR-1203	1	0	1	1	0	0	ASIC2	acid-sensing (proton-gated) ion channel 2
hsa-miR-1203	1	0	1	1	1	1	CTNND2	catenin (cadherin-associated protein), delta 2
hsa-miR-1203	1	0	1	1	1	1	IGFBP4	insulin-like growth factor binding protein 4
hsa-miR-1203	1	0	1	1	1	1	IRAK2	interleukin-1 receptor-associated kinase 2
hsa-miR-1203	0	0	1	1	0	0	APEH	N-acylaminoacyl-peptide hydrolase
hsa-miR-1203	1	0	1	1	1	1	ARF3	ADP-ribosylation factor 3
hsa-miR-1203	0	0	1	1	0	0	ARL2	ADP-ribosylation factor-like 2
hsa-miR-1203	1	0	1	0	1	1	ATP1B2	ATPase, Na+/K+ transporting, beta 2 polypeptide
hsa-miR-1203	1	0	1	0	0	0	DRP2	dystrophin related protein 2
hsa-miR-1203	1	0	1	1	1	1	GOLGA4	golgin A4
hsa-miR-1203	0	0	1	1	1	1	HOXB5	homeobox B5
hsa-miR-1203	0	0	1	1	0	0	EIF6	eukaryotic translation initiation factor 6
hsa-miR-1203	1	0	1	0	1	1	KIF3C	kinesin family member 3C
hsa-miR-1203	0	0	1	1	0	0	KRT31	keratin 31
hsa-miR-1203	1	0	1	1	1	1	LIMK1	LIM domain kinase 1
hsa-miR-1203	1	0	1	0	1	1	MXD1	MAX dimerization protein 1
hsa-miR-1203	1	0	1	1	1	1	ADAM11	ADAM metallopeptidase domain 11
hsa-miR-1203	0	0	1	0	1	1	OPHN1	oligophrenin 1
hsa-miR-1203	0	0	1	1	0	0	PPY	pancreatic polypeptide
hsa-miR-1203	1	0	1	1	0	0	PSMD7	proteasome (prosome, macropain) 26S subunit, non-ATPase, 7
hsa-miR-1203	1	0	1	1	1	1	PTPN4	protein tyrosine phosphatase, non-receptor type 4 (megakaryocyte)
hsa-miR-1203	1	0	1	1	1	1	PVRL1	poliovirus receptor-related 1 (herpesvirus entry mediator C)
hsa-miR-1203	1	0	1	1	1	1	SFRP2	secreted frizzled-related protein 2
hsa-miR-1203	1	0	1	0	1	1	ST6GAL1	ST6 beta-galactosamide alpha-2,6-sialyltranferase 1
hsa-miR-1203	1	0	1	1	0	0	SLN	sarcolipin
hsa-miR-1203	1	0	1	1	1	1	SMARCC1	SWI/SNF related, matrix associated, actin dependent regulator of chromatin, subfamily c, member 1
hsa-miR-1203	1	0	1	0	1	1	SOX11	SRY (sex determining region Y)-box 11
hsa-miR-1203	1	0	1	1	1	1	SRF	serum response factor (c-fos serum response element-binding transcription factor)
hsa-miR-1203	0	0	1	1	1	1	UBE2I	ubiquitin-conjugating enzyme E2I
hsa-miR-1203	1	0	1	1	0	0	TCAP	titin-cap (telethonin)
hsa-miR-1203	1	0	1	1	1	1	BCL2L2	BCL2-like 2
hsa-miR-1203	0	0	1	1	1	1	LBP	lipopolysaccharide binding protein
hsa-miR-1203	1	0	1	0	1	1	SLC1A2	solute carrier family 1 (glial high affinity glutamate transporter), member 2
hsa-miR-1203	0	0	1	1	0	0	CPT1B	carnitine palmitoyltransferase 1B (muscle)
hsa-miR-1203	1	0	1	1	1	1	DUSP5	dual specificity phosphatase 5
hsa-miR-1203	1	0	1	1	1	1	EGR3	early growth response 3
hsa-miR-1203	1	0	1	1	1	1	WNT11	wingless-type MMTV integration site family, member 11
hsa-miR-1203	0	0	1	0	1	1	ADIPOQ	adiponectin, C1Q and collagen domain containing
hsa-miR-1203	1	0	1	1	1	1	DLX3	distal-less homeobox 3
hsa-miR-1203	0	0	1	0	1	1	FOSL2	FOS-like antigen 2
hsa-miR-1203	1	0	1	0	1	1	RAPGEF1	Rap guanine nucleotide exchange factor (GEF) 1
hsa-miR-1203	1	0	1	1	1	1	HIP1	huntingtin interacting protein 1
hsa-miR-1203	0	0	1	1	1	1	PPP1R3C	protein phosphatase 1, regulatory subunit 3C
hsa-miR-1203	1	0	1	0	1	1	SRC	v-src sarcoma (Schmidt-Ruppin A-2) viral oncogene homolog (avian)
hsa-miR-1203	1	0	1	1	1	1	RND2	Rho family GTPase 2
hsa-miR-1203	1	0	1	1	1	1	NR4A2	nuclear receptor subfamily 4, group A, member 2
hsa-miR-1203	0	0	1	1	1	1	RRAS	related RAS viral (r-ras) oncogene homolog
hsa-miR-1203	0	0	1	1	0	0	TESK1	testis-specific kinase 1
hsa-miR-1203	0	0	1	1	0	0	CIB1	calcium and integrin binding 1 (calmyrin)
hsa-miR-1203	1	0	1	1	1	1	SLC35A1	solute carrier family 35 (CMP-sialic acid transporter), member A1
hsa-miR-1203	0	0	1	1	1	1	CXCL13	chemokine (C-X-C motif) ligand 13
hsa-miR-1203	0	0	1	1	1	1	NPC2	Niemann-Pick disease, type C2
hsa-miR-1203	1	0	1	1	1	1	MAB21L2	mab-21-like 2 (C. elegans)
hsa-miR-1203	1	0	1	1	1	1	BTG2	BTG family, member 2
hsa-miR-1203	1	0	1	1	1	1	RAB35	RAB35, member RAS oncogene family
hsa-miR-1203	1	0	1	1	1	1	PRRX1	paired related homeobox 1
hsa-miR-1203	1	0	1	0	1	1	SLC2A3	solute carrier family 2 (facilitated glucose transporter), member 3
hsa-miR-1203	1	0	1	0	1	1	SOX12	SRY (sex determining region Y)-box 12
hsa-miR-1203	1	0	1	1	1	1	KAT7	K(lysine) acetyltransferase 7
hsa-miR-1203	0	0	1	0	1	1	ZXDB	zinc finger, X-linked, duplicated B
hsa-miR-1203	1	0	1	1	1	1	ABCF2	ATP-binding cassette, sub-family F (GCN20), member 2
hsa-miR-1203	1	0	1	1	1	1	PALM2-AKAP2	PALM2-AKAP2 readthrough
hsa-miR-1203	0	0	1	1	0	0	LTB	lymphotoxin beta (TNF superfamily, member 3)
hsa-miR-1203	0	0	1	1	1	1	HARS2	histidyl-tRNA synthetase 2, mitochondrial
hsa-miR-1203	0	0	1	1	1	1	SEPHS2	selenophosphate synthetase 2
hsa-miR-1203	1	0	1	1	1	1	KCNH4	potassium voltage-gated channel, subfamily H (eag-related), member 4
hsa-miR-1203	1	0	1	1	1	1	PIP5K1C	phosphatidylinositol-4-phosphate 5-kinase, type I, gamma
hsa-miR-1203	1	0	1	1	1	1	TLL2	tolloid-like 2
hsa-miR-1203	0	0	1	1	0	0	ZDHHC8	zinc finger, DHHC-type containing 8
hsa-miR-1203	1	0	1	1	1	1	NRG1	neuregulin 1
hsa-miR-1203	0	0	1	1	1	1	ORMDL2	ORM1-like 2 (S. cerevisiae)
hsa-miR-1203	0	0	1	1	1	1	UBL4A	ubiquitin-like 4A
hsa-miR-1203	1	0	1	1	1	1	LHX6	LIM homeobox 6
hsa-miR-1203	1	0	1	1	0	0	SND1	staphylococcal nuclease and tudor domain containing 1
hsa-miR-1203	1	0	1	1	1	1	RASSF2	Ras association (RalGDS/AF-6) domain family member 2
hsa-miR-1203	1	0	1	0	1	1	KHNYN	KH and NYN domain containing
hsa-miR-1203	1	0	1	0	1	1	ARHGEF12	Rho guanine nucleotide exchange factor (GEF) 12
hsa-miR-1203	0	0	1	1	1	1	NOL11	nucleolar protein 11
hsa-miR-1203	0	0	1	1	0	0	PTPN23	protein tyrosine phosphatase, non-receptor type 23
hsa-miR-1203	1	0	1	0	1	1	TRIM33	tripartite motif containing 33
hsa-miR-1203	0	0	1	1	1	1	RBM19	RNA binding motif protein 19
hsa-miR-1203	1	0	1	1	0	0	CPA4	carboxypeptidase A4
hsa-miR-1203	1	0	1	1	1	1	PLXNA3	plexin A3
hsa-miR-1203	0	0	1	1	0	0	CLN6	ceroid-lipofuscinosis, neuronal 6, late infantile, variant
hsa-miR-1203	1	0	1	1	1	1	HIF1AN	hypoxia inducible factor 1, alpha subunit inhibitor
hsa-miR-1203	0	0	1	1	0	0	GPN2	GPN-loop GTPase 2
hsa-miR-1203	0	0	1	1	1	1	NUDT11	nudix (nucleoside diphosphate linked moiety X)-type motif 11
hsa-miR-1203	1	0	1	1	1	1	TMEM184C	transmembrane protein 184C
hsa-miR-1203	1	0	1	1	1	1	KIAA1598	KIAA1598
hsa-miR-1203	0	0	1	1	0	0	TMEM176A	transmembrane protein 176A
hsa-miR-1203	1	0	1	0	1	1	PCDHAC1	protocadherin alpha subfamily C, 1
hsa-miR-1203	1	0	1	0	1	1	PCDHAC2	protocadherin alpha subfamily C, 2
hsa-miR-1203	1	0	1	1	1	1	PCDHA1	protocadherin alpha 1
hsa-miR-1203	1	0	1	0	1	1	PCDHA10	protocadherin alpha 10
hsa-miR-1203	1	0	1	0	1	1	PCDHA11	protocadherin alpha 11
hsa-miR-1203	1	0	1	0	1	1	PCDHA12	protocadherin alpha 12
hsa-miR-1203	1	0	1	1	1	1	PCDHA2	protocadherin alpha 2
hsa-miR-1203	1	0	1	1	1	1	PCDHA3	protocadherin alpha 3
hsa-miR-1203	1	0	1	1	1	1	PCDHA6	protocadherin alpha 6
hsa-miR-1203	1	0	1	0	1	1	PCDHA7	protocadherin alpha 7
hsa-miR-1203	1	0	1	1	1	1	PCDHA8	protocadherin alpha 8
hsa-miR-1203	1	0	1	1	0	0	HOXB6	homeobox B6
hsa-miR-1203	1	0	1	0	1	1	FAM190B	family with sequence similarity 190, member B
hsa-miR-1203	1	0	1	1	1	1	DLL4	delta-like 4 (Drosophila)
hsa-miR-1203	1	0	1	1	0	0	SEMA3G	sema domain, immunoglobulin domain (Ig), short basic domain, secreted, (semaphorin) 3G
hsa-miR-1203	1	0	1	1	1	1	SLC12A5	solute carrier family 12 (potassium/chloride transporter), member 5
hsa-miR-1203	1	0	1	1	1	1	ARHGAP31	Rho GTPase activating protein 31
hsa-miR-1203	1	0	1	1	1	1	CASKIN1	CASK interacting protein 1
hsa-miR-1203	1	0	1	0	1	1	NUFIP2	nuclear fragile X mental retardation protein interacting protein 2
hsa-miR-1203	1	0	1	1	1	1	RANBP10	RAN binding protein 10
hsa-miR-1203	0	0	1	1	1	1	CHST6	carbohydrate (N-acetylglucosamine 6-O) sulfotransferase 6
hsa-miR-1203	0	0	1	1	0	0	C12orf44	chromosome 12 open reading frame 44
hsa-miR-1203	1	0	1	1	1	1	ABCG4	ATP-binding cassette, sub-family G (WHITE), member 4
hsa-miR-1203	1	0	1	1	1	1	HIF3A	hypoxia inducible factor 3, alpha subunit
hsa-miR-1203	1	0	1	1	1	1	HOXD1	homeobox D1
hsa-miR-1203	0	0	1	1	1	1	GLT25D1	glycosyltransferase 25 domain containing 1
hsa-miR-1203	0	0	1	1	0	0	SLC44A4	solute carrier family 44, member 4
hsa-miR-1203	0	0	1	1	0	0	INTS5	integrator complex subunit 5
hsa-miR-1203	1	0	1	0	1	1	C1orf21	chromosome 1 open reading frame 21
hsa-miR-1203	1	0	1	1	0	0	PVRL4	poliovirus receptor-related 4
hsa-miR-1203	1	0	1	1	1	1	PCDHA9	protocadherin alpha 9
hsa-miR-1203	1	0	1	1	1	1	ZNRF1	zinc and ring finger 1, E3 ubiquitin protein ligase
hsa-miR-1203	1	0	1	1	0	0	MAF1	MAF1 homolog (S. cerevisiae)
hsa-miR-1203	0	0	1	1	0	0	NICN1	nicolin 1
hsa-miR-1203	1	0	1	1	1	1	ABHD13	abhydrolase domain containing 13
hsa-miR-1203	1	0	1	1	0	0	CAMK2N2	calcium/calmodulin-dependent protein kinase II inhibitor 2
hsa-miR-1203	1	0	1	1	1	1	TSPYL5	TSPY-like 5
hsa-miR-1203	0	0	1	0	0	0	CEACAM21	carcinoembryonic antigen-related cell adhesion molecule 21
hsa-miR-1203	1	0	1	1	1	1	SEPT4	septin 4
hsa-miR-1203	1	0	1	1	1	1	COL11A2	collagen, type XI, alpha 2
hsa-miR-1203	1	0	1	1	1	1	GLCCI1	glucocorticoid induced transcript 1
hsa-miR-1203	1	0	1	1	1	1	BACE2	beta-site APP-cleaving enzyme 2
hsa-miR-1203	1	0	1	1	1	1	ARX	aristaless related homeobox
hsa-miR-1203	1	0	1	1	1	1	ATRN	attractin
hsa-miR-1203	1	0	1	1	1	1	MAX	MYC associated factor X
hsa-miR-1203	0	0	1	1	0	0	NKX2-3	NK2 homeobox 3
hsa-miR-1203	0	0	1	1	0	0	TCEB3C	transcription elongation factor B polypeptide 3C (elongin A3)
hsa-miR-1203	1	0	1	1	1	1	TPM3	tropomyosin 3
hsa-miR-1203	0	0	1	1	1	1	CDYL2	chromodomain protein, Y-like 2
hsa-miR-1203	1	0	1	1	1	1	FAM123B	family with sequence similarity 123B
hsa-miR-1203	0	0	1	1	0	0	C2orf57	chromosome 2 open reading frame 57
hsa-miR-1203	1	0	1	1	0	0	TMEM86A	transmembrane protein 86A
hsa-miR-1203	1	0	1	1	1	1	LCORL	ligand dependent nuclear receptor corepressor-like
hsa-miR-1203	0	0	1	1	1	1	REXO1L1	REX1, RNA exonuclease 1 homolog (S. cerevisiae)-like 1
hsa-miR-1203	0	0	1	1	1	1	MRPL43	mitochondrial ribosomal protein L43
hsa-miR-1203	0	0	1	1	0	0	PAQR7	progestin and adipoQ receptor family member VII
hsa-miR-1203	0	0	1	0	0	0	PTH2	parathyroid hormone 2
hsa-miR-1203	0	0	1	0	1	1	HCG27	HLA complex group 27 (non-protein coding)
hsa-miR-1203	1	0	1	1	1	1	ZSCAN22	zinc finger and SCAN domain containing 22
hsa-miR-1203	0	0	1	1	0	0	GPX6	glutathione peroxidase 6 (olfactory)
hsa-miR-1203	1	0	1	0	1	1	RIMS4	regulating synaptic membrane exocytosis 4
hsa-miR-1203	0	0	1	1	0	0	NRN1L	neuritin 1-like
hsa-miR-1203	0	0	1	0	1	1	KLHL30	kelch-like 30 (Drosophila)
hsa-miR-1203	0	0	1	1	1	1	SLC25A35	solute carrier family 25, member 35
hsa-miR-1203	0	0	1	1	0	0	FAM27L	family with sequence similarity 27-like
hsa-miR-1203	0	0	1	1	0	0	IER5L	immediate early response 5-like
hsa-miR-1203	0	0	1	0	0	0	ESRRAP2	estrogen-related receptor alpha pseudogene 2
hsa-miR-1203	0	0	1	0	0	0	PCDHB17	protocadherin beta 17 pseudogene
hsa-miR-1203	0	0	1	0	0	0	PCDHB19P	protocadherin beta 19 pseudogene
hsa-miR-1203	0	0	1	0	0	0	DKFZP586I1420	uncharacterized protein DKFZp586I1420
hsa-miR-1203	0	0	1	0	0	0	SUMO1P1	SUMO1 pseudogene 1
hsa-miR-1203	0	0	1	0	0	0	GOLGA2P3Y	golgin A2 pseudogene 3, Y-linked
hsa-miR-1203	0	0	1	0	0	0	MSX2P1	msh homeobox 2 pseudogene 1
hsa-miR-1203	0	0	1	0	0	0	HOXA11-AS	HOXA11 antisense RNA
hsa-miR-1203	0	0	1	0	0	0	RNF126P1	ring finger protein 126 pseudogene 1
hsa-miR-1203	0	0	1	0	0	0	PTPRVP	protein tyrosine phosphatase, receptor type, V, pseudogene
hsa-miR-1203	0	0	1	0	0	0	USP32P1	ubiquitin specific peptidase 32 pseudogene 1
hsa-miR-1203	1	0	1	0	1	1	NFIX	nuclear factor I/X (CCAAT-binding transcription factor)
hsa-miR-1203	1	0	1	1	1	1	POU2F2	POU class 2 homeobox 2
hsa-miR-1203	1	0	1	1	1	1	CUL5	cullin 5
