# Supplementary material for: Profiling of Selected MicroRNAs in Proliferative Eutopic Endometrium of Women with Ovarian Endometriosis
Source: Biomed Res Int. 2015 Aug 20;2015:760698. doi: 10.1155/2015/760698 (PMC4558423; doi:10.1155/2015/760698)
Supplement: Supplementary file 1 — Table I: The names of miRNAs significantly differentially expressed between eutopic endometrium of patients with endometriosis vs eutopic endometrium of patients without endometriosis. Table II: The associations between miRNA and mRNA, which presents detailed results of the search of six major databases i.e targetscan, tarbase, miranda, mirbase, mirtarget2 and pictar. [file 760698.f1.zip › 760698.f1/Table II/hsa-miR-1204.tsv]

miR	targetscan	tarbase	miranda	mirbase	mirtarget2	pictar	GeneSymbol	GeneName
hsa-miR-1204	0	0	1	1	0	0	ALMS1	Alstrom syndrome 1
hsa-miR-1204	1	0	1	0	1	1	MTSS1	metastasis suppressor 1
hsa-miR-1204	0	0	1	1	0	0	PLCH2	phospholipase C, eta 2
hsa-miR-1204	0	0	1	1	0	0	RAP1GAP	RAP1 GTPase activating protein
hsa-miR-1204	0	0	1	1	0	0	ARHGEF2	Rho/Rac guanine nucleotide exchange factor (GEF) 2
hsa-miR-1204	1	0	1	1	1	1	PPP6R2	protein phosphatase 6, regulatory subunit 2
hsa-miR-1204	1	0	1	1	1	1	ANKRD17	ankyrin repeat domain 17
hsa-miR-1204	1	0	1	1	1	1	MATR3	matrin 3
hsa-miR-1204	1	0	1	1	1	1	WWC1	WW and C2 domain containing 1
hsa-miR-1204	1	0	1	1	1	1	SEMA4F	sema domain, immunoglobulin domain (Ig), transmembrane domain (TM) and short cytoplasmic domain, (semaphorin) 4F
hsa-miR-1204	1	0	1	0	1	1	ANKFY1	ankyrin repeat and FYVE domain containing 1
hsa-miR-1204	1	0	1	1	1	1	SEMA6A	sema domain, transmembrane domain (TM), and cytoplasmic domain, (semaphorin) 6A
hsa-miR-1204	1	0	1	1	0	0	EBF4	early B-cell factor 4
hsa-miR-1204	1	0	1	1	1	1	FRAS1	Fraser syndrome 1
hsa-miR-1204	1	0	1	1	1	1	CSGALNACT1	chondroitin sulfate N-acetylgalactosaminyltransferase 1
hsa-miR-1204	1	0	1	1	1	1	HIF3A	hypoxia inducible factor 3, alpha subunit
hsa-miR-1204	0	0	1	1	0	0	PTPRF	protein tyrosine phosphatase, receptor type, F
hsa-miR-1204	0	0	1	1	0	0	DBP	D site of albumin promoter (albumin D-box) binding protein
hsa-miR-1204	0	0	1	1	0	0	MPST	mercaptopyruvate sulfurtransferase
hsa-miR-1204	1	0	1	1	1	1	PLEKHH3	pleckstrin homology domain containing, family H (with MyTH4 domain) member 3
hsa-miR-1204	1	0	1	1	1	1	PML	promyelocytic leukemia
hsa-miR-1204	0	0	1	1	1	1	MAZ	MYC-associated zinc finger protein (purine-binding transcription factor)
hsa-miR-1204	1	0	1	1	1	1	MKNK2	MAP kinase interacting serine/threonine kinase 2
hsa-miR-1204	1	0	1	1	0	0	TSPYL2	TSPY-like 2
hsa-miR-1204	1	0	1	1	0	0	TNK2	tyrosine kinase, non-receptor, 2
hsa-miR-1204	0	0	1	1	0	0	ASIC3	acid-sensing (proton-gated) ion channel 3
hsa-miR-1204	0	0	1	1	0	0	EIF4E2	eukaryotic translation initiation factor 4E family member 2
hsa-miR-1204	0	0	1	1	0	0	EIF2B4	eukaryotic translation initiation factor 2B, subunit 4 delta, 67kDa
hsa-miR-1204	0	0	1	1	1	1	ZNF747	zinc finger protein 747
hsa-miR-1204	0	0	1	1	0	0	ITGA2B	integrin, alpha 2b (platelet glycoprotein IIb of IIb/IIIa complex, antigen CD41)
hsa-miR-1204	0	0	1	1	0	0	HLA-DMB	major histocompatibility complex, class II, DM beta
hsa-miR-1204	0	0	1	1	0	0	BMP1	bone morphogenetic protein 1
hsa-miR-1204	0	0	1	1	0	0	CFLAR	CASP8 and FADD-like apoptosis regulator
hsa-miR-1204	1	0	1	1	1	1	EPB41	erythrocyte membrane protein band 4.1 (elliptocytosis 1, RH-linked)
hsa-miR-1204	0	0	1	1	0	0	SLC22A8	solute carrier family 22 (organic anion transporter), member 8
hsa-miR-1204	0	0	1	1	0	0	MBD1	methyl-CpG binding domain protein 1
hsa-miR-1204	0	0	1	1	0	0	CDK10	cyclin-dependent kinase 10
hsa-miR-1204	1	0	1	1	1	1	STX16	syntaxin 16
hsa-miR-1204	0	0	1	1	0	0	ITGA7	integrin, alpha 7
hsa-miR-1204	1	0	1	1	1	1	RBBP6	retinoblastoma binding protein 6
hsa-miR-1204	0	0	1	1	1	1	ERAL1	Era G-protein-like 1 (E. coli)
hsa-miR-1204	0	0	1	1	1	1	SH2D1A	SH2 domain containing 1A
hsa-miR-1204	1	0	1	1	1	1	EDNRB	endothelin receptor type B
hsa-miR-1204	0	0	1	1	0	0	ADAMTS7	ADAM metallopeptidase with thrombospondin type 1 motif, 7
hsa-miR-1204	0	0	1	1	0	0	CNTROB	centrobin, centrosomal BRCA2 interacting protein
hsa-miR-1204	1	0	1	1	1	1	BCL2L13	BCL2-like 13 (apoptosis facilitator)
hsa-miR-1204	1	0	1	1	1	1	TSC22D2	TSC22 domain family, member 2
hsa-miR-1204	1	0	1	1	1	1	SNTB2	syntrophin, beta 2 (dystrophin-associated protein A1, 59kDa, basic component 2)
hsa-miR-1204	1	0	1	1	1	1	TMUB2	transmembrane and ubiquitin-like domain containing 2
hsa-miR-1204	0	0	1	1	0	0	TTTY7	testis-specific transcript, Y-linked 7 (non-protein coding)
hsa-miR-1204	1	0	1	1	1	1	TRIP10	thyroid hormone receptor interactor 10
hsa-miR-1204	1	0	1	1	0	0	ST3GAL4	ST3 beta-galactoside alpha-2,3-sialyltransferase 4
hsa-miR-1204	1	0	1	1	1	1	BAK1	BCL2-antagonist/killer 1
hsa-miR-1204	0	0	1	1	1	1	PTK7	PTK7 protein tyrosine kinase 7
hsa-miR-1204	0	0	1	1	1	1	HIRIP3	HIRA interacting protein 3
hsa-miR-1204	1	0	1	1	1	1	PALM2	paralemmin 2
hsa-miR-1204	1	0	1	1	1	1	NRXN3	neurexin 3
hsa-miR-1204	1	0	1	1	1	1	NAV3	neuron navigator 3
hsa-miR-1204	0	0	1	1	1	1	PHACTR3	phosphatase and actin regulator 3
hsa-miR-1204	0	0	1	1	0	0	IL4I1	interleukin 4 induced 1
hsa-miR-1204	1	0	1	1	1	1	AKAP2	A kinase (PRKA) anchor protein 2
hsa-miR-1204	0	0	1	0	0	0	TUG1	taurine upregulated 1 (non-protein coding)
hsa-miR-1204	1	0	1	1	1	1	ZC3H7A	zinc finger CCCH-type containing 7A
hsa-miR-1204	1	0	1	1	0	0	SENP3	SUMO1/sentrin/SMT3 specific peptidase 3
hsa-miR-1204	1	0	1	1	1	1	ZNF395	zinc finger protein 395
hsa-miR-1204	1	0	1	0	1	1	LIN28A	lin-28 homolog A (C. elegans)
hsa-miR-1204	1	0	1	1	1	1	WDTC1	WD and tetratricopeptide repeats 1
hsa-miR-1204	1	0	1	1	1	1	SMEK2	SMEK homolog 2, suppressor of mek1 (Dictyostelium)
hsa-miR-1204	0	0	1	1	1	1	SPATA5L1	spermatogenesis associated 5-like 1
hsa-miR-1204	1	0	1	0	1	1	UBP1	upstream binding protein 1 (LBP-1a)
hsa-miR-1204	1	0	1	1	1	1	POMT2	protein-O-mannosyltransferase 2
hsa-miR-1204	1	0	1	0	1	1	STK40	serine/threonine kinase 40
hsa-miR-1204	0	0	1	1	0	0	TRAF3IP2	TRAF3 interacting protein 2
hsa-miR-1204	0	0	1	0	1	1	HEMK1	HemK methyltransferase family member 1
hsa-miR-1204	1	0	1	1	0	0	C17orf70	chromosome 17 open reading frame 70
hsa-miR-1204	0	0	1	1	1	1	GNAS	GNAS complex locus
hsa-miR-1204	0	0	1	1	0	0	ADRM1	adhesion regulating molecule 1
hsa-miR-1204	1	0	1	1	1	1	PPM1L	protein phosphatase, Mg2+/Mn2+ dependent, 1L
hsa-miR-1204	0	0	1	1	0	0	BEAN1	brain expressed, associated with NEDD4, 1
hsa-miR-1204	0	0	1	1	1	1	BRD2	bromodomain containing 2
hsa-miR-1204	0	0	1	1	1	1	GNB2	guanine nucleotide binding protein (G protein), beta polypeptide 2
hsa-miR-1204	0	0	1	0	0	0	LOC255187	hCG1980447
hsa-miR-1204	1	0	1	0	1	1	RABGEF1	RAB guanine nucleotide exchange factor (GEF) 1
hsa-miR-1204	1	0	1	1	1	1	MAP3K11	mitogen-activated protein kinase kinase kinase 11
hsa-miR-1204	0	0	1	1	1	1	SEC61A2	Sec61 alpha 2 subunit (S. cerevisiae)
hsa-miR-1204	0	0	1	0	0	0	C6orf228	chromosome 6 open reading frame 228
hsa-miR-1204	1	0	1	1	1	1	PHF15	PHD finger protein 15
hsa-miR-1204	0	0	1	1	0	0	SYTL1	synaptotagmin-like 1
hsa-miR-1204	0	0	1	0	0	0	C10orf105	chromosome 10 open reading frame 105
hsa-miR-1204	1	0	1	0	1	1	GRAMD1A	GRAM domain containing 1A
hsa-miR-1204	1	0	1	1	1	1	UBAP1	ubiquitin associated protein 1
hsa-miR-1204	0	0	1	1	0	0	NISCH	nischarin
hsa-miR-1204	0	0	1	1	0	0	CPAMD8	C3 and PZP-like, alpha-2-macroglobulin domain containing 8
hsa-miR-1204	0	0	1	1	0	0	PIGO	phosphatidylinositol glycan anchor biosynthesis, class O
hsa-miR-1204	1	0	1	1	1	1	ARIH2	ariadne homolog 2 (Drosophila)
hsa-miR-1204	1	0	1	1	1	1	AMMECR1	Alport syndrome, mental retardation, midface hypoplasia and elliptocytosis chromosomal region gene 1
hsa-miR-1204	0	0	1	0	0	0	LOC440910	uncharacterized LOC440910
hsa-miR-1204	0	0	1	1	0	0	NDUFA4L2	NADH dehydrogenase (ubiquinone) 1 alpha subcomplex, 4-like 2
hsa-miR-1204	0	0	1	1	0	0	WBP1	WW domain binding protein 1
hsa-miR-1204	0	0	1	1	1	1	WDR67	WD repeat domain 67
hsa-miR-1204	1	0	1	0	1	1	GATAD2B	GATA zinc finger domain containing 2B
hsa-miR-1204	1	0	1	1	1	1	PTPRU	protein tyrosine phosphatase, receptor type, U
hsa-miR-1204	1	0	1	1	1	1	KCNIP3	Kv channel interacting protein 3, calsenilin
hsa-miR-1204	1	0	1	0	1	1	STC2	stanniocalcin 2
hsa-miR-1204	0	0	1	0	0	0	ZNF815P	zinc finger protein 815, pseudogene
hsa-miR-1204	0	0	1	1	1	1	GNAI2	guanine nucleotide binding protein (G protein), alpha inhibiting activity polypeptide 2
hsa-miR-1204	1	0	1	1	1	1	HDGF	hepatoma-derived growth factor
hsa-miR-1204	0	0	1	1	1	1	FGD2	FYVE, RhoGEF and PH domain containing 2
hsa-miR-1204	0	0	1	1	0	0	VPS37C	vacuolar protein sorting 37 homolog C (S. cerevisiae)
hsa-miR-1204	0	0	1	0	0	0	LOC100128560	uncharacterized LOC100128560
hsa-miR-1204	0	0	1	0	0	0	THAP7-AS1	THAP7 antisense RNA 1
hsa-miR-1204	0	0	1	1	0	0	CORO1A	coronin, actin binding protein, 1A
hsa-miR-1204	0	0	1	1	0	0	STXBP2	syntaxin binding protein 2
hsa-miR-1204	0	0	1	1	1	1	RP1	retinitis pigmentosa 1 (autosomal dominant)
hsa-miR-1204	0	0	1	1	0	0	FBXO16	F-box protein 16
hsa-miR-1204	1	0	1	1	0	0	FBXL19	F-box and leucine-rich repeat protein 19
hsa-miR-1204	1	0	1	1	1	1	BCL6B	B-cell CLL/lymphoma 6, member B
hsa-miR-1204	1	0	1	1	0	0	CACNB3	calcium channel, voltage-dependent, beta 3 subunit
hsa-miR-1204	0	0	1	0	0	0	LOC650368	asparagine-linked glycosylation 1-like pseudogene
hsa-miR-1204	0	0	1	0	0	0	DKFZP434H168	uncharacterized LOC26077
hsa-miR-1204	0	0	1	1	1	1	CNPY3	canopy 3 homolog (zebrafish)
hsa-miR-1204	0	0	1	1	1	1	SLC9A1	solute carrier family 9, subfamily A (NHE1, cation proton antiporter 1), member 1
hsa-miR-1204	0	0	1	1	0	0	SSPO	SCO-spondin homolog (Bos taurus)
hsa-miR-1204	1	0	1	1	1	1	CELF6	CUGBP, Elav-like family member 6
hsa-miR-1204	0	0	1	1	1	1	C2orf91	chromosome 2 open reading frame 91
hsa-miR-1204	0	0	1	1	1	1	CCDC66	coiled-coil domain containing 66
hsa-miR-1204	1	0	1	1	1	1	C15orf52	chromosome 15 open reading frame 52
hsa-miR-1204	1	0	1	1	1	1	KPNA1	karyopherin alpha 1 (importin alpha 5)
hsa-miR-1204	0	0	1	0	0	0	FAM95B1	family with sequence similarity 95, member B1
hsa-miR-1204	0	0	1	1	0	0	RPRD2	regulation of nuclear pre-mRNA domain containing 2
hsa-miR-1204	1	0	1	1	0	0	DYDC1	DPY30 domain containing 1
hsa-miR-1204	1	0	1	1	0	0	SPEG	SPEG complex locus
hsa-miR-1204	0	0	1	1	0	0	NPIP	nuclear pore complex interacting protein
hsa-miR-1204	0	0	1	1	1	1	SZT2	seizure threshold 2 homolog (mouse)
hsa-miR-1204	0	0	1	1	1	1	MOBP	myelin-associated oligodendrocyte basic protein
hsa-miR-1204	0	0	1	1	1	1	CCDC78	coiled-coil domain containing 78
hsa-miR-1204	1	0	1	1	1	1	RNF44	ring finger protein 44
hsa-miR-1204	1	0	1	1	1	1	NFYC	nuclear transcription factor Y, gamma
hsa-miR-1204	1	0	1	1	1	1	PLA2G15	phospholipase A2, group XV
hsa-miR-1204	0	0	1	1	0	0	BPIFB1	BPI fold containing family B, member 1
hsa-miR-1204	0	0	1	0	0	0	FAM71E2	family with sequence similarity 71, member E2
hsa-miR-1204	0	0	1	1	0	0	MIB2	mindbomb E3 ubiquitin protein ligase 2
hsa-miR-1204	1	0	1	1	0	0	C15orf39	chromosome 15 open reading frame 39
hsa-miR-1204	0	0	1	0	0	0	FLJ46361	deleted in malignant brain tumors 1 pseudogene
hsa-miR-1204	0	0	1	0	0	0	IDO2	indoleamine 2,3-dioxygenase 2
hsa-miR-1204	0	0	1	0	0	0	EMBP1	embigin pseudogene 1
hsa-miR-1204	0	0	1	1	0	0	IQCF2	IQ motif containing F2
hsa-miR-1204	1	0	1	1	1	1	RBM24	RNA binding motif protein 24
hsa-miR-1204	0	0	1	0	0	0	LOC390660	FLJ00317 protein
hsa-miR-1204	0	0	1	0	1	1	RUFY4	RUN and FYVE domain containing 4
hsa-miR-1204	0	0	1	1	0	0	MAMSTR	MEF2 activating motif and SAP domain containing transcriptional regulator
hsa-miR-1204	0	0	1	1	1	1	ZNF346	zinc finger protein 346
hsa-miR-1204	0	0	1	1	0	0	NAT9	N-acetyltransferase 9 (GCN5-related, putative)
hsa-miR-1204	0	0	1	1	0	0	NADSYN1	NAD synthetase 1
hsa-miR-1204	0	0	1	1	1	1	TIMMDC1	translocase of inner mitochondrial membrane domain containing 1
hsa-miR-1204	0	0	1	1	1	1	SRP9	signal recognition particle 9kDa
hsa-miR-1204	0	0	1	1	0	0	NEK7	NIMA (never in mitosis gene a)-related kinase 7
hsa-miR-1204	0	0	1	1	0	0	OPLAH	5-oxoprolinase (ATP-hydrolysing)
hsa-miR-1204	0	0	1	1	1	1	ENGASE	endo-beta-N-acetylglucosaminidase
hsa-miR-1204	0	0	1	1	1	1	KIDINS220	kinase D-interacting substrate, 220kDa
hsa-miR-1204	0	0	1	0	0	0	KIAA0913	KIAA0913
hsa-miR-1204	0	0	1	1	0	0	NXF2	nuclear RNA export factor 2
hsa-miR-1204	1	0	1	1	1	1	TFE3	transcription factor binding to IGHM enhancer 3
hsa-miR-1204	1	0	1	1	1	1	CTTNBP2NL	CTTNBP2 N-terminal like
hsa-miR-1204	0	0	1	0	0	0	FAM66D	family with sequence similarity 66, member D
hsa-miR-1204	0	0	1	1	1	1	HNRNPM	heterogeneous nuclear ribonucleoprotein M
hsa-miR-1204	1	0	1	1	1	1	MLL3	myeloid/lymphoid or mixed-lineage leukemia 3
hsa-miR-1204	0	0	1	1	1	1	U2AF1	U2 small nuclear RNA auxiliary factor 1
hsa-miR-1204	1	0	1	1	0	0	PTAR1	protein prenyltransferase alpha subunit repeat containing 1
hsa-miR-1204	1	0	1	1	1	1	SBF2	SET binding factor 2
hsa-miR-1204	0	0	1	1	1	1	INPP5B	inositol polyphosphate-5-phosphatase, 75kDa
hsa-miR-1204	1	0	1	1	1	1	FAM63B	family with sequence similarity 63, member B
hsa-miR-1204	0	0	1	1	1	1	KLHL29	kelch-like 29 (Drosophila)
hsa-miR-1204	0	0	1	1	1	1	TSPAN17	tetraspanin 17
hsa-miR-1204	0	0	1	1	0	0	TP73	tumor protein p73
hsa-miR-1204	1	0	1	1	1	1	USF2	upstream transcription factor 2, c-fos interacting
hsa-miR-1204	0	0	1	1	1	1	IYD	iodotyrosine deiodinase
hsa-miR-1204	0	0	1	1	1	1	AICDA	activation-induced cytidine deaminase
hsa-miR-1204	0	0	1	1	0	0	PAOX	polyamine oxidase (exo-N4-amino)
hsa-miR-1204	0	0	1	1	1	1	NR1I3	nuclear receptor subfamily 1, group I, member 3
hsa-miR-1204	0	0	1	1	0	0	DHRS4	dehydrogenase/reductase (SDR family) member 4
hsa-miR-1204	1	0	1	1	1	1	PLCH1	phospholipase C, eta 1
hsa-miR-1204	0	0	1	1	1	1	PTDSS1	phosphatidylserine synthase 1
hsa-miR-1204	1	0	1	1	0	0	STX1A	syntaxin 1A (brain)
hsa-miR-1204	0	0	1	1	0	0	SNRPB	small nuclear ribonucleoprotein polypeptides B and B1
hsa-miR-1204	0	0	1	0	0	0	LOC254896	uncharacterized LOC254896
hsa-miR-1204	1	0	1	1	1	1	VTA1	Vps20-associated 1 homolog (S. cerevisiae)
hsa-miR-1204	0	0	1	1	0	0	RBM14	RNA binding motif protein 14
hsa-miR-1204	0	0	1	1	1	1	ICA1	islet cell autoantigen 1, 69kDa
hsa-miR-1204	0	0	1	1	0	0	BARX1	BARX homeobox 1
hsa-miR-1204	1	0	1	1	1	1	SLC46A1	solute carrier family 46 (folate transporter), member 1
hsa-miR-1204	0	0	1	1	0	0	NDUFA3	NADH dehydrogenase (ubiquinone) 1 alpha subcomplex, 3, 9kDa
hsa-miR-1204	0	0	1	0	0	0	LRRC14	leucine rich repeat containing 14
hsa-miR-1204	1	0	1	1	1	1	OTUD5	OTU domain containing 5
hsa-miR-1204	0	0	1	1	0	0	KLHDC3	kelch domain containing 3
hsa-miR-1204	0	0	1	1	1	1	UCHL5	ubiquitin carboxyl-terminal hydrolase L5
hsa-miR-1204	0	0	1	0	0	0	NUDT16P1	nudix (nucleoside diphosphate linked moiety X)-type motif 16 pseudogene 1
hsa-miR-1204	0	0	1	1	0	0	MAST2	microtubule associated serine/threonine kinase 2
hsa-miR-1204	0	0	1	1	1	1	HIBADH	3-hydroxyisobutyrate dehydrogenase
hsa-miR-1204	0	0	1	0	0	0	ENTPD5	ectonucleoside triphosphate diphosphohydrolase 5
hsa-miR-1204	1	0	1	1	1	1	TM9SF4	transmembrane 9 superfamily protein member 4
hsa-miR-1204	0	0	1	0	0	0	LOC728196	uncharacterized LOC728196
hsa-miR-1204	0	0	1	0	1	1	FHAD1	forkhead-associated (FHA) phosphopeptide binding domain 1
hsa-miR-1204	0	0	1	1	1	1	MAP2	microtubule-associated protein 2
hsa-miR-1204	1	0	1	1	1	1	SMYD2	SET and MYND domain containing 2
hsa-miR-1204	1	0	1	1	1	1	ACACB	acetyl-CoA carboxylase beta
hsa-miR-1204	1	0	1	0	0	0	KCNU1	potassium channel, subfamily U, member 1
hsa-miR-1204	1	0	1	0	1	1	SV2B	synaptic vesicle glycoprotein 2B
hsa-miR-1204	0	0	1	0	1	1	MYO7A	myosin VIIA
hsa-miR-1204	1	0	1	1	1	1	FAM160A2	family with sequence similarity 160, member A2
hsa-miR-1204	0	0	1	0	1	1	FLJ25328	uncharacterized LOC148231
hsa-miR-1204	1	0	1	1	1	1	CCNG2	cyclin G2
hsa-miR-1204	0	0	1	0	0	0	LOC643648	uncharacterized LOC643648
hsa-miR-1204	1	0	1	1	1	1	DCLK2	doublecortin-like kinase 2
hsa-miR-1204	0	0	1	1	0	0	WASIR2	WASH and IL9R antisense RNA 2
hsa-miR-1204	0	0	1	1	0	0	IGFN1	immunoglobulin-like and fibronectin type III domain containing 1
hsa-miR-1204	0	0	1	0	0	0	BCAS3	breast carcinoma amplified sequence 3
hsa-miR-1204	0	0	1	1	1	1	SFI1	Sfi1 homolog, spindle assembly associated (yeast)
hsa-miR-1204	0	0	1	1	1	1	RPTOR	regulatory associated protein of MTOR, complex 1
hsa-miR-1204	0	0	1	0	1	1	DKFZP434I0714	uncharacterized protein DKFZP434I0714
hsa-miR-1204	0	0	1	1	0	0	HCRTR1	hypocretin (orexin) receptor 1
hsa-miR-1204	0	0	1	1	1	1	TMEM139	transmembrane protein 139
hsa-miR-1204	1	0	1	1	1	1	ELMO2	engulfment and cell motility 2
hsa-miR-1204	0	0	1	0	0	0	CYP4F35P	cytochrome P450, family 4, subfamily F, polypeptide 35, pseudogene
hsa-miR-1204	1	0	1	0	0	0	RAVER1	ribonucleoprotein, PTB-binding 1
hsa-miR-1204	1	0	1	1	1	1	WSCD2	WSC domain containing 2
hsa-miR-1204	1	0	1	0	1	1	CYB5RL	cytochrome b5 reductase-like
hsa-miR-1204	0	0	1	1	1	1	C14orf118	chromosome 14 open reading frame 118
hsa-miR-1204	0	0	1	0	0	0	USP32P1	ubiquitin specific peptidase 32 pseudogene 1
hsa-miR-1204	0	0	1	1	0	0	CNGA4	cyclic nucleotide gated channel alpha 4
hsa-miR-1204	1	0	1	1	1	1	PDPK1	3-phosphoinositide dependent protein kinase-1
hsa-miR-1204	0	0	1	0	0	0	LOC339240	keratin 17 pseudogene
hsa-miR-1204	0	0	1	1	0	0	SCAND1	SCAN domain containing 1
hsa-miR-1204	0	0	1	1	1	1	VPS35	vacuolar protein sorting 35 homolog (S. cerevisiae)
hsa-miR-1204	1	0	1	0	1	1	HSPA12A	heat shock 70kDa protein 12A
hsa-miR-1204	0	0	1	1	1	1	FAM90A1	family with sequence similarity 90, member A1
hsa-miR-1204	0	0	1	0	0	0	DKFZp686O1327	uncharacterized LOC401014
hsa-miR-1204	1	0	1	1	1	1	AGAP3	ArfGAP with GTPase domain, ankyrin repeat and PH domain 3
hsa-miR-1204	0	0	1	1	1	1	MST1	macrophage stimulating 1 (hepatocyte growth factor-like)
hsa-miR-1204	0	0	1	1	0	0	TCTN1	tectonic family member 1
hsa-miR-1204	1	0	1	1	1	1	KIF11	kinesin family member 11
hsa-miR-1204	0	0	1	1	0	0	RPS9	ribosomal protein S9
hsa-miR-1204	1	0	1	0	1	1	SEMA4G	sema domain, immunoglobulin domain (Ig), transmembrane domain (TM) and short cytoplasmic domain, (semaphorin) 4G
hsa-miR-1204	0	0	1	1	0	0	SREBF2	sterol regulatory element binding transcription factor 2
hsa-miR-1204	0	0	1	1	1	1	RAB3IL1	RAB3A interacting protein (rabin3)-like 1
hsa-miR-1204	1	0	1	1	1	1	KDM5C	lysine (K)-specific demethylase 5C
hsa-miR-1204	0	0	1	1	0	0	GRIN2C	glutamate receptor, ionotropic, N-methyl D-aspartate 2C
hsa-miR-1204	1	0	1	1	1	1	ZSCAN29	zinc finger and SCAN domain containing 29
hsa-miR-1204	0	0	1	0	0	0	FLJ35390	uncharacterized LOC255031
hsa-miR-1204	1	0	1	1	1	1	MYLK	myosin light chain kinase
hsa-miR-1204	0	0	1	1	1	1	IL1RN	interleukin 1 receptor antagonist
hsa-miR-1204	0	0	1	0	0	0	ZRANB2-AS1	ZRANB2 antisense RNA 1
hsa-miR-1204	1	0	1	1	1	1	USP47	ubiquitin specific peptidase 47
hsa-miR-1204	0	0	1	0	0	0	LOC100147773	uncharacterized LOC100147773
hsa-miR-1204	0	0	1	0	0	0	ULK4P3	unc-51-like kinase 4 (C. elegans) pseudogene 3
hsa-miR-1204	0	0	1	0	0	0	LOC727849	golgin A2 pseudogene
hsa-miR-1204	0	0	1	0	0	0	LOC727751	uncharacterized LOC727751
hsa-miR-1204	0	0	1	0	0	0	AGSK1	golgin subfamily A member 2-like
hsa-miR-1204	1	0	1	1	1	1	WNT5A	wingless-type MMTV integration site family, member 5A
hsa-miR-1204	0	0	1	0	0	0	CAPN1	calpain 1, (mu/I) large subunit
hsa-miR-1204	0	0	1	0	0	0	TBC1D25	TBC1 domain family, member 25
hsa-miR-1204	0	0	1	1	0	0	DNHD1	dynein heavy chain domain 1
hsa-miR-1204	1	0	1	1	1	1	APBA2	amyloid beta (A4) precursor protein-binding, family A, member 2
hsa-miR-1204	1	0	1	1	1	1	ZBTB7A	zinc finger and BTB domain containing 7A
hsa-miR-1204	1	0	1	1	0	0	SLC45A4	solute carrier family 45, member 4
hsa-miR-1204	0	0	1	1	1	1	ZNF365	zinc finger protein 365
hsa-miR-1204	0	0	1	1	0	0	RGL4	ral guanine nucleotide dissociation stimulator-like 4
hsa-miR-1204	1	0	1	1	0	0	KIAA1644	KIAA1644
hsa-miR-1204	0	0	1	0	0	0	FBXL19-AS1	FBXL19 antisense RNA 1 (head to head)
hsa-miR-1204	1	0	1	0	1	1	DNAJC6	DnaJ (Hsp40) homolog, subfamily C, member 6
hsa-miR-1204	1	0	1	0	1	1	MAP3K9	mitogen-activated protein kinase kinase kinase 9
hsa-miR-1204	1	0	1	1	1	1	NR3C2	nuclear receptor subfamily 3, group C, member 2
hsa-miR-1204	0	0	1	1	1	1	FSHB	follicle stimulating hormone, beta polypeptide
hsa-miR-1204	1	0	1	1	0	0	MAPKBP1	mitogen-activated protein kinase binding protein 1
hsa-miR-1204	0	0	1	1	0	0	WDR90	WD repeat domain 90
hsa-miR-1204	1	0	1	1	1	1	ANK2	ankyrin 2, neuronal
hsa-miR-1204	0	0	1	0	1	1	C20orf202	chromosome 20 open reading frame 202
hsa-miR-1204	0	0	1	0	0	0	FAM225B	family with sequence similarity 225, member B (non-protein coding)
hsa-miR-1204	0	0	1	1	1	1	TINF2	TERF1 (TRF1)-interacting nuclear factor 2
hsa-miR-1204	0	0	1	1	0	0	NDRG2	NDRG family member 2
hsa-miR-1204	1	0	1	1	1	1	CHGA	chromogranin A (parathyroid secretory protein 1)
hsa-miR-1204	1	0	1	1	1	1	MIER3	mesoderm induction early response 1, family member 3
hsa-miR-1204	1	0	1	1	1	1	FOXP1	forkhead box P1
hsa-miR-1204	1	0	1	1	1	1	GTDC1	glycosyltransferase-like domain containing 1
hsa-miR-1204	1	0	1	1	1	1	TSC22D3	TSC22 domain family, member 3
hsa-miR-1204	0	0	1	0	0	0	OVOS	ovostatin
hsa-miR-1204	1	0	1	1	1	1	KLHL6	kelch-like 6 (Drosophila)
hsa-miR-1204	0	0	1	1	0	0	CRIP2	cysteine-rich protein 2
hsa-miR-1204	0	0	1	1	0	0	H2AFY2	H2A histone family, member Y2
hsa-miR-1204	1	0	1	1	1	1	ARF1	ADP-ribosylation factor 1
hsa-miR-1204	1	0	1	1	1	1	CSNK1D	casein kinase 1, delta
hsa-miR-1204	0	0	1	1	0	0	TBC1D22A	TBC1 domain family, member 22A
hsa-miR-1204	0	0	1	0	0	0	LOC400768	uncharacterized LOC400768
hsa-miR-1204	0	0	1	1	0	0	TCEAL4	transcription elongation factor A (SII)-like 4
hsa-miR-1204	0	0	1	1	1	1	APH1A	anterior pharynx defective 1 homolog A (C. elegans)
hsa-miR-1204	1	0	1	1	1	1	LETMD1	LETM1 domain containing 1
hsa-miR-1204	0	0	1	1	0	0	FCGRT	Fc fragment of IgG, receptor, transporter, alpha
hsa-miR-1204	0	0	1	0	0	0	PRMT1	protein arginine methyltransferase 1
hsa-miR-1204	0	0	1	1	0	0	NOP56	NOP56 ribonucleoprotein homolog (yeast)
hsa-miR-1204	0	0	1	1	0	0	TFCP2	transcription factor CP2
hsa-miR-1204	1	0	1	1	0	0	CCM2	cerebral cavernous malformation 2
hsa-miR-1204	1	0	1	1	1	1	CCNE1	cyclin E1
hsa-miR-1204	0	0	1	1	1	1	C2orf62	chromosome 2 open reading frame 62
hsa-miR-1204	0	0	1	1	0	0	IKBKG	inhibitor of kappa light polypeptide gene enhancer in B-cells, kinase gamma
hsa-miR-1204	0	0	1	1	0	0	CCDC137	coiled-coil domain containing 137
hsa-miR-1204	0	0	1	1	1	1	RGS14	regulator of G-protein signaling 14
hsa-miR-1204	1	0	1	0	1	1	IP6K1	inositol hexakisphosphate kinase 1
hsa-miR-1204	0	0	1	1	0	0	CCDC22	coiled-coil domain containing 22
hsa-miR-1204	0	0	1	1	0	0	C1orf122	chromosome 1 open reading frame 122
hsa-miR-1204	0	0	1	1	1	1	SERP2	stress-associated endoplasmic reticulum protein family member 2
hsa-miR-1204	1	0	1	1	1	1	BCAP29	B-cell receptor-associated protein 29
hsa-miR-1204	0	0	1	1	1	1	JMJD8	jumonji domain containing 8
hsa-miR-1204	0	0	1	1	1	1	ATP1A1	ATPase, Na+/K+ transporting, alpha 1 polypeptide
hsa-miR-1204	0	0	1	1	0	0	STUB1	STIP1 homology and U-box containing protein 1, E3 ubiquitin protein ligase
hsa-miR-1204	0	0	1	1	0	0	AHSG	alpha-2-HS-glycoprotein
hsa-miR-1204	0	0	1	1	0	0	AATF	apoptosis antagonizing transcription factor
hsa-miR-1204	1	0	1	1	1	1	ARHGEF40	Rho guanine nucleotide exchange factor (GEF) 40
hsa-miR-1204	0	0	1	1	1	1	HS3ST2	heparan sulfate (glucosamine) 3-O-sulfotransferase 2
hsa-miR-1204	0	0	1	1	1	1	TBRG1	transforming growth factor beta regulator 1
hsa-miR-1204	0	0	1	1	1	1	LGI1	leucine-rich, glioma inactivated 1
hsa-miR-1204	0	0	1	0	0	0	ALPP	alkaline phosphatase, placental
hsa-miR-1204	0	0	1	1	0	0	RAMP2	receptor (G protein-coupled) activity modifying protein 2
hsa-miR-1204	1	0	1	1	0	0	RUNDC3A	RUN domain containing 3A
hsa-miR-1204	0	0	1	1	0	0	TESK1	testis-specific kinase 1
hsa-miR-1204	1	0	1	1	0	0	RAD9A	RAD9 homolog A (S. pombe)
hsa-miR-1204	0	0	1	1	1	1	PSMD9	proteasome (prosome, macropain) 26S subunit, non-ATPase, 9
hsa-miR-1204	0	0	1	1	1	1	RNF126	ring finger protein 126
hsa-miR-1204	1	0	1	1	1	1	MAN1C1	mannosidase, alpha, class 1C, member 1
hsa-miR-1204	1	0	1	1	1	1	CALR	calreticulin
hsa-miR-1204	1	0	1	1	0	0	MMP11	matrix metallopeptidase 11 (stromelysin 3)
hsa-miR-1204	0	0	1	1	1	1	UPRT	uracil phosphoribosyltransferase (FUR1) homolog (S. cerevisiae)
hsa-miR-1204	0	0	1	0	1	1	STARD8	StAR-related lipid transfer (START) domain containing 8
hsa-miR-1204	0	0	1	1	0	0	TENC1	tensin like C1 domain containing phosphatase (tensin 2)
hsa-miR-1204	1	0	1	1	1	1	SEC14L1	SEC14-like 1 (S. cerevisiae)
hsa-miR-1204	1	0	1	0	1	1	MAP2K7	mitogen-activated protein kinase kinase 7
hsa-miR-1204	0	0	1	0	0	0	PILRB	paired immunoglobin-like type 2 receptor beta
hsa-miR-1204	0	0	1	1	1	1	ALDH3B1	aldehyde dehydrogenase 3 family, member B1
hsa-miR-1204	0	0	1	1	1	1	AKAP17A	A kinase (PRKA) anchor protein 17A
hsa-miR-1204	0	0	1	1	1	1	RAD52	RAD52 homolog (S. cerevisiae)
hsa-miR-1204	1	0	1	1	1	1	COL4A3	collagen, type IV, alpha 3 (Goodpasture antigen)
hsa-miR-1204	0	0	1	1	1	1	GSS	glutathione synthetase
hsa-miR-1204	1	0	1	0	1	1	KIT	v-kit Hardy-Zuckerman 4 feline sarcoma viral oncogene homolog
hsa-miR-1204	1	0	1	1	1	1	LEP	leptin
hsa-miR-1204	1	0	1	1	1	1	MET	met proto-oncogene (hepatocyte growth factor receptor)
hsa-miR-1204	1	0	1	1	1	1	MITF	microphthalmia-associated transcription factor
hsa-miR-1204	1	0	1	0	1	1	PAFAH1B1	platelet-activating factor acetylhydrolase 1b, regulatory subunit 1 (45kDa)
hsa-miR-1204	1	0	1	1	1	1	MPZ	myelin protein zero
hsa-miR-1204	0	0	1	1	1	1	IGF2	insulin-like growth factor 2 (somatomedin A)
hsa-miR-1204	1	0	1	0	1	1	ADRA2B	adrenoceptor alpha 2B
hsa-miR-1204	1	0	1	1	0	0	GRIN2D	glutamate receptor, ionotropic, N-methyl D-aspartate 2D
hsa-miR-1204	1	0	1	1	0	0	PDE3A	phosphodiesterase 3A, cGMP-inhibited
hsa-miR-1204	1	0	1	1	1	1	GATA3	GATA binding protein 3
hsa-miR-1204	0	0	1	0	0	0	OR8G1	olfactory receptor, family 8, subfamily G, member 1
hsa-miR-1204	1	0	1	0	1	1	PKP2	plakophilin 2
hsa-miR-1204	1	0	1	1	1	1	EBF3	early B-cell factor 3
hsa-miR-1204	0	0	1	1	1	1	APOBEC3F	apolipoprotein B mRNA editing enzyme, catalytic polypeptide-like 3F
hsa-miR-1204	1	0	1	1	1	1	ATN1	atrophin 1
hsa-miR-1204	1	0	1	1	1	1	CUL4A	cullin 4A
hsa-miR-1204	1	0	1	1	1	1	C10orf114	chromosome 10 open reading frame 114
hsa-miR-1204	1	0	1	1	1	1	SORCS1	sortilin-related VPS10 domain containing receptor 1
hsa-miR-1204	0	0	1	1	1	1	LDLRAD2	low density lipoprotein receptor class A domain containing 2
hsa-miR-1204	1	0	1	1	1	1	SBK1	SH3-binding domain kinase 1
hsa-miR-1204	1	0	1	0	1	1	RGAG4	retrotransposon gag domain containing 4
hsa-miR-1204	1	0	1	0	1	1	BCL7A	B-cell CLL/lymphoma 7A
hsa-miR-1204	0	0	1	1	0	0	CES1	carboxylesterase 1
hsa-miR-1204	0	0	1	1	0	0	KPRP	keratinocyte proline-rich protein
hsa-miR-1204	1	0	1	0	1	1	C3orf70	chromosome 3 open reading frame 70
hsa-miR-1204	0	0	1	1	1	1	RSPO4	R-spondin 4
hsa-miR-1204	1	0	1	1	1	1	CTNS	cystinosin, lysosomal cystine transporter
hsa-miR-1204	1	0	1	1	0	0	CRELD1	cysteine-rich with EGF-like domains 1
hsa-miR-1204	1	0	1	0	1	1	SRGAP3	SLIT-ROBO Rho GTPase activating protein 3
hsa-miR-1204	1	0	1	1	1	1	DPP6	dipeptidyl-peptidase 6
hsa-miR-1204	0	0	1	1	0	0	TGFB1I1	transforming growth factor beta 1 induced transcript 1
hsa-miR-1204	1	0	1	1	1	1	PVRL2	poliovirus receptor-related 2 (herpesvirus entry mediator B)
hsa-miR-1204	1	0	1	0	1	1	SRGAP2	SLIT-ROBO Rho GTPase activating protein 2
hsa-miR-1204	1	0	1	0	1	1	TMEM237	transmembrane protein 237
hsa-miR-1204	0	0	1	1	1	1	FAM22G	family with sequence similarity 22, member G
hsa-miR-1204	1	0	1	1	1	1	ATG9A	autophagy related 9A
hsa-miR-1204	1	0	1	1	1	1	HAP1	huntingtin-associated protein 1
hsa-miR-1204	1	0	1	1	1	1	SHANK3	SH3 and multiple ankyrin repeat domains 3
hsa-miR-1204	1	0	1	0	1	1	UNC13A	unc-13 homolog A (C. elegans)
hsa-miR-1204	0	0	1	1	1	1	SHISA3	shisa homolog 3 (Xenopus laevis)
hsa-miR-1204	1	0	1	1	1	1	MYO1C	myosin IC
hsa-miR-1204	1	0	1	1	1	1	NXF1	nuclear RNA export factor 1
hsa-miR-1204	1	0	1	1	0	0	ASIC2	acid-sensing (proton-gated) ion channel 2
hsa-miR-1204	1	0	1	1	1	1	ASIC1	acid-sensing (proton-gated) ion channel 1
hsa-miR-1204	1	0	1	1	1	1	ADCY9	adenylate cyclase 9
hsa-miR-1204	1	0	1	0	1	1	KLF9	Kruppel-like factor 9
hsa-miR-1204	0	0	1	1	1	1	ENTPD3	ectonucleoside triphosphate diphosphohydrolase 3
hsa-miR-1204	1	0	1	1	1	1	CHD1	chromodomain helicase DNA binding protein 1
hsa-miR-1204	0	0	1	1	0	0	CLK3	CDC-like kinase 3
hsa-miR-1204	0	0	1	1	0	0	DIO3	deiodinase, iodothyronine, type III
hsa-miR-1204	1	0	1	0	1	1	EFNB3	ephrin-B3
hsa-miR-1204	1	0	1	1	1	1	ELAVL1	ELAV (embryonic lethal, abnormal vision, Drosophila)-like 1 (Hu antigen R)
hsa-miR-1204	1	0	1	0	1	1	ELAVL3	ELAV (embryonic lethal, abnormal vision, Drosophila)-like 3 (Hu antigen C)
hsa-miR-1204	0	0	1	0	0	0	BAI1	brain-specific angiogenesis inhibitor 1
hsa-miR-1204	0	0	1	1	1	1	CD34	CD34 molecule
hsa-miR-1204	1	0	1	0	1	1	CEBPG	CCAAT/enhancer binding protein (C/EBP), gamma
hsa-miR-1204	0	0	1	1	0	0	CNTFR	ciliary neurotrophic factor receptor
hsa-miR-1204	1	0	1	1	1	1	CSNK2A1	casein kinase 2, alpha 1 polypeptide
hsa-miR-1204	1	0	1	1	1	1	E2F3	E2F transcription factor 3
hsa-miR-1204	1	0	1	1	1	1	EPB49	erythrocyte membrane protein band 4.9 (dematin)
hsa-miR-1204	1	0	1	1	1	1	GRB2	growth factor receptor-bound protein 2
hsa-miR-1204	1	0	1	0	1	1	KIF3C	kinesin family member 3C
hsa-miR-1204	0	0	1	1	0	0	MYBL2	v-myb myeloblastosis viral oncogene homolog (avian)-like 2
hsa-miR-1204	1	0	1	1	1	1	PBX2	pre-B-cell leukemia homeobox 2
hsa-miR-1204	1	0	1	0	1	1	PCDHGC3	protocadherin gamma subfamily C, 3
hsa-miR-1204	1	0	1	0	1	1	POU3F1	POU class 3 homeobox 1
hsa-miR-1204	1	0	1	0	1	1	PRKCA	protein kinase C, alpha
hsa-miR-1204	1	0	1	1	1	1	PVRL1	poliovirus receptor-related 1 (herpesvirus entry mediator C)
hsa-miR-1204	1	0	1	0	1	1	PCDHGA12	protocadherin gamma subfamily A, 12
hsa-miR-1204	1	0	1	0	1	1	PCDHGB4	protocadherin gamma subfamily B, 4
hsa-miR-1204	0	0	1	1	0	0	MATN4	matrilin 4
hsa-miR-1204	0	0	1	0	1	1	AP1S2	adaptor-related protein complex 1, sigma 2 subunit
hsa-miR-1204	1	0	1	1	1	1	PHOX2B	paired-like homeobox 2b
hsa-miR-1204	0	0	1	1	1	1	FABP3	fatty acid binding protein 3, muscle and heart (mammary-derived growth inhibitor)
hsa-miR-1204	1	0	1	1	1	1	SEMA3F	sema domain, immunoglobulin domain (Ig), short basic domain, secreted, (semaphorin) 3F
hsa-miR-1204	0	0	1	0	1	1	TMSB4Y	thymosin beta 4, Y-linked
hsa-miR-1204	0	0	1	1	1	1	COPA	coatomer protein complex, subunit alpha
hsa-miR-1204	1	0	1	1	1	1	CREB1	cAMP responsive element binding protein 1
hsa-miR-1204	1	0	1	1	1	1	DVL2	dishevelled, dsh homolog 2 (Drosophila)
hsa-miR-1204	1	0	1	1	1	1	EFNA1	ephrin-A1
hsa-miR-1204	1	0	1	1	1	1	EGR3	early growth response 3
hsa-miR-1204	1	0	1	1	1	1	EPHB2	EPH receptor B2
hsa-miR-1204	1	0	1	0	1	1	ETV5	ets variant 5
hsa-miR-1204	1	0	1	1	1	1	BAP1	BRCA1 associated protein-1 (ubiquitin carboxy-terminal hydrolase)
hsa-miR-1204	0	0	1	1	0	0	ZW10	ZW10, kinetochore associated, homolog (Drosophila)
hsa-miR-1204	0	0	1	1	1	1	MTA2	metastasis associated 1 family, member 2
hsa-miR-1204	0	0	1	1	0	0	SLC22A14	solute carrier family 22, member 14
hsa-miR-1204	1	0	1	0	1	1	CDYL	chromodomain protein, Y-like
hsa-miR-1204	1	0	1	1	1	1	ONECUT2	one cut homeobox 2
hsa-miR-1204	1	0	1	1	1	1	SFPQ	splicing factor proline/glutamine-rich
hsa-miR-1204	1	0	1	1	1	1	TLE1	transducin-like enhancer of split 1 (E(sp1) homolog, Drosophila)
hsa-miR-1204	1	0	1	1	1	1	GPR3	G protein-coupled receptor 3
hsa-miR-1204	1	0	1	0	1	1	SRC	v-src sarcoma (Schmidt-Ruppin A-2) viral oncogene homolog (avian)
hsa-miR-1204	0	0	1	1	1	1	ST5	suppression of tumorigenicity 5
hsa-miR-1204	1	0	1	0	1	1	CCDC6	coiled-coil domain containing 6
hsa-miR-1204	1	0	1	1	1	1	HOXA11	homeobox A11
hsa-miR-1204	0	0	1	1	1	1	HES1	hairy and enhancer of split 1, (Drosophila)
hsa-miR-1204	1	0	1	1	1	1	INSIG1	insulin induced gene 1
hsa-miR-1204	1	0	1	0	1	1	SPRY3	sprouty homolog 3 (Drosophila)
hsa-miR-1204	1	0	1	1	0	0	TRAIP	TRAF interacting protein
hsa-miR-1204	1	0	1	0	1	1	MAP1B	microtubule-associated protein 1B
hsa-miR-1204	0	0	1	1	0	0	PPYR1	pancreatic polypeptide receptor 1
hsa-miR-1204	1	0	1	1	1	1	NEUROD2	neuronal differentiation 2
hsa-miR-1204	0	0	1	1	1	1	PPP1R3D	protein phosphatase 1, regulatory subunit 3D
hsa-miR-1204	1	0	1	1	1	1	PKN2	protein kinase N2
hsa-miR-1204	1	0	1	1	1	1	ZER1	zer-1 homolog (C. elegans)
hsa-miR-1204	1	0	1	0	1	1	IGF2BP1	insulin-like growth factor 2 mRNA binding protein 1
hsa-miR-1204	1	0	1	0	1	1	SYNGAP1	synaptic Ras GTPase activating protein 1
hsa-miR-1204	0	0	1	1	1	1	CLP1	CLP1, cleavage and polyadenylation factor I subunit, homolog (S. cerevisiae)
hsa-miR-1204	1	0	1	1	1	1	UTRN	utrophin
hsa-miR-1204	1	0	1	1	1	1	PALM2-AKAP2	PALM2-AKAP2 readthrough
hsa-miR-1204	1	0	1	1	1	1	KLF12	Kruppel-like factor 12
hsa-miR-1204	0	0	1	1	1	1	LMOD1	leiomodin 1 (smooth muscle)
hsa-miR-1204	1	0	1	1	1	1	RYBP	RING1 and YY1 binding protein
hsa-miR-1204	1	0	1	1	1	1	RHOQ	ras homolog family member Q
hsa-miR-1204	1	0	1	1	1	1	KIF4A	kinesin family member 4A
hsa-miR-1204	0	0	1	1	0	0	HILPDA	hypoxia inducible lipid droplet-associated
hsa-miR-1204	1	0	1	1	1	1	RGCC	regulator of cell cycle
hsa-miR-1204	0	0	1	1	1	1	CCDC113	coiled-coil domain containing 113
hsa-miR-1204	0	0	1	1	0	0	GNPAT	glyceronephosphate O-acyltransferase
hsa-miR-1204	0	0	1	1	1	1	ADAM28	ADAM metallopeptidase domain 28
hsa-miR-1204	1	0	1	1	0	0	RBMXL2	RNA binding motif protein, X-linked-like 2
hsa-miR-1204	1	0	1	1	1	1	RND1	Rho family GTPase 1
hsa-miR-1204	0	0	1	1	1	1	KCNMB4	potassium large conductance calcium-activated channel, subfamily M, beta member 4
hsa-miR-1204	1	0	1	1	1	1	FAF2	Fas associated factor family member 2
hsa-miR-1204	1	0	1	0	1	1	SH3PXD2A	SH3 and PX domains 2A
hsa-miR-1204	1	0	1	1	0	0	TTLL4	tubulin tyrosine ligase-like family, member 4
hsa-miR-1204	1	0	1	0	1	1	SCRN1	secernin 1
hsa-miR-1204	1	0	1	1	1	1	RUSC2	RUN and SH3 domain containing 2
hsa-miR-1204	0	0	1	1	1	1	TOX4	TOX high mobility group box family member 4
hsa-miR-1204	1	0	1	1	1	1	JOSD1	Josephin domain containing 1
hsa-miR-1204	1	0	1	0	1	1	PDAP1	PDGFA associated protein 1
hsa-miR-1204	1	0	1	1	1	1	SORCS3	sortilin-related VPS10 domain containing receptor 3
hsa-miR-1204	1	0	1	0	1	1	PEG10	paternally expressed 10
hsa-miR-1204	1	0	1	0	1	1	KHNYN	KH and NYN domain containing
hsa-miR-1204	1	0	1	1	1	1	PARM1	prostate androgen-regulated mucin-like protein 1
hsa-miR-1204	0	0	1	1	0	0	SPEF1	sperm flagellar 1
hsa-miR-1204	1	0	1	0	1	1	ERC2	ELKS/RAB6-interacting/CAST family member 2
hsa-miR-1204	1	0	1	1	1	1	WT1-AS	WT1 antisense RNA
hsa-miR-1204	1	0	1	1	1	1	CDC40	cell division cycle 40 homolog (S. cerevisiae)
hsa-miR-1204	1	0	1	0	1	1	KLF13	Kruppel-like factor 13
hsa-miR-1204	1	0	1	1	1	1	DERL2	derlin 2
hsa-miR-1204	1	0	1	1	1	1	MPC1	mitochondrial pyruvate carrier 1
hsa-miR-1204	0	0	1	1	0	0	FAM203A	family with sequence similarity 203, member A
hsa-miR-1204	0	0	1	1	1	1	COX16	COX16 cytochrome c oxidase assembly homolog (S. cerevisiae)
hsa-miR-1204	1	0	1	1	1	1	C20orf111	chromosome 20 open reading frame 111
hsa-miR-1204	0	0	1	0	1	1	GPR83	G protein-coupled receptor 83
hsa-miR-1204	0	0	1	1	1	1	USP18	ubiquitin specific peptidase 18
hsa-miR-1204	1	0	1	0	1	1	KLHL3	kelch-like 3 (Drosophila)
hsa-miR-1204	1	0	1	1	1	1	PLXNA3	plexin A3
hsa-miR-1204	0	0	1	1	0	0	FNDC8	fibronectin type III domain containing 8
hsa-miR-1204	0	0	1	0	1	1	OTUB1	OTU domain, ubiquitin aldehyde binding 1
hsa-miR-1204	1	0	1	1	1	1	UBE2R2	ubiquitin-conjugating enzyme E2R 2
hsa-miR-1204	0	0	1	1	1	1	AIM1L	absent in melanoma 1-like
hsa-miR-1204	1	0	1	1	1	1	WDYHV1	WDYHV motif containing 1
hsa-miR-1204	1	0	1	0	1	1	TMEM106B	transmembrane protein 106B
hsa-miR-1204	1	0	1	0	1	1	FOXJ2	forkhead box J2
hsa-miR-1204	1	0	1	1	1	1	ASH1L	ash1 (absent, small, or homeotic)-like (Drosophila)
hsa-miR-1204	1	0	1	1	1	1	PCDHGA1	protocadherin gamma subfamily A, 1
hsa-miR-1204	1	0	1	0	1	1	PCDHGA10	protocadherin gamma subfamily A, 10
hsa-miR-1204	1	0	1	0	1	1	PCDHGA11	protocadherin gamma subfamily A, 11
hsa-miR-1204	1	0	1	1	1	1	PCDHGA2	protocadherin gamma subfamily A, 2
hsa-miR-1204	1	0	1	0	1	1	PCDHGA3	protocadherin gamma subfamily A, 3
hsa-miR-1204	1	0	1	0	1	1	PCDHGA4	protocadherin gamma subfamily A, 4
hsa-miR-1204	1	0	1	0	1	1	PCDHGA5	protocadherin gamma subfamily A, 5
hsa-miR-1204	1	0	1	0	1	1	PCDHGA6	protocadherin gamma subfamily A, 6
hsa-miR-1204	1	0	1	0	1	1	PCDHGA7	protocadherin gamma subfamily A, 7
hsa-miR-1204	1	0	1	0	1	1	PCDHGA9	protocadherin gamma subfamily A, 9
hsa-miR-1204	1	0	1	0	1	1	PCDHGB1	protocadherin gamma subfamily B, 1
hsa-miR-1204	1	0	1	0	1	1	PCDHGB2	protocadherin gamma subfamily B, 2
hsa-miR-1204	1	0	1	0	1	1	PCDHGB3	protocadherin gamma subfamily B, 3
hsa-miR-1204	1	0	1	0	1	1	PCDHGB5	protocadherin gamma subfamily B, 5
hsa-miR-1204	1	0	1	0	1	1	PCDHGB6	protocadherin gamma subfamily B, 6
hsa-miR-1204	1	0	1	0	1	1	PCDHGB7	protocadherin gamma subfamily B, 7
hsa-miR-1204	1	0	1	0	1	1	PCDHGC4	protocadherin gamma subfamily C, 4
hsa-miR-1204	1	0	1	0	1	1	PCDHGC5	protocadherin gamma subfamily C, 5
hsa-miR-1204	0	0	1	1	1	1	GNL3L	guanine nucleotide binding protein-like 3 (nucleolar)-like
hsa-miR-1204	1	0	1	0	1	1	MNT	MAX binding protein
hsa-miR-1204	1	0	1	1	0	0	JPH2	junctophilin 2
hsa-miR-1204	1	0	1	1	1	1	SLC12A5	solute carrier family 12 (potassium/chloride transporter), member 5
hsa-miR-1204	1	0	1	1	1	1	MIB1	mindbomb E3 ubiquitin protein ligase 1
hsa-miR-1204	1	0	1	1	1	1	NLGN2	neuroligin 2
hsa-miR-1204	1	0	1	0	1	1	CRAMP1L	Crm, cramped-like (Drosophila)
hsa-miR-1204	1	0	1	1	1	1	RANBP10	RAN binding protein 10
hsa-miR-1204	1	0	1	0	1	1	TP53INP2	tumor protein p53 inducible nuclear protein 2
hsa-miR-1204	0	0	1	0	1	1	CFL2	cofilin 2 (muscle)
hsa-miR-1204	1	0	1	0	0	0	ALX4	ALX homeobox 4
hsa-miR-1204	1	0	1	1	1	1	ATP2B3	ATPase, Ca++ transporting, plasma membrane 3
hsa-miR-1204	1	0	1	0	1	1	MCL1	myeloid cell leukemia sequence 1 (BCL2-related)
hsa-miR-1204	1	0	1	0	1	1	CSNK1G1	casein kinase 1, gamma 1
hsa-miR-1204	1	0	1	1	1	1	GIGYF1	GRB10 interacting GYF protein 1
hsa-miR-1204	1	0	1	1	1	1	HOXB4	homeobox B4
hsa-miR-1204	1	0	1	1	1	1	GDAP1L1	ganglioside induced differentiation associated protein 1-like 1
hsa-miR-1204	0	0	1	1	1	1	NUDT9	nudix (nucleoside diphosphate linked moiety X)-type motif 9
hsa-miR-1204	1	0	1	1	1	1	EFHD2	EF-hand domain family, member D2
hsa-miR-1204	1	0	1	1	1	1	C10orf76	chromosome 10 open reading frame 76
hsa-miR-1204	1	0	1	0	1	1	MOB3B	MOB kinase activator 3B
hsa-miR-1204	1	0	1	0	1	1	VCPIP1	valosin containing protein (p97)/p47 complex interacting protein 1
hsa-miR-1204	1	0	1	0	1	1	DNAJC5	DnaJ (Hsp40) homolog, subfamily C, member 5
hsa-miR-1204	1	0	1	0	1	1	SETD7	SET domain containing (lysine methyltransferase) 7
hsa-miR-1204	1	0	1	1	1	1	PTPRO	protein tyrosine phosphatase, receptor type, O
hsa-miR-1204	0	0	1	1	0	0	SAA2	serum amyloid A2
hsa-miR-1204	0	0	1	1	0	0	HM13	histocompatibility (minor) 13
hsa-miR-1204	1	0	1	1	1	1	MAP4	microtubule-associated protein 4
hsa-miR-1204	1	0	1	1	1	1	PPP1R14C	protein phosphatase 1, regulatory (inhibitor) subunit 14C
hsa-miR-1204	0	0	1	1	1	1	CRISPLD2	cysteine-rich secretory protein LCCL domain containing 2
hsa-miR-1204	1	0	1	0	1	1	PCDHGA8	protocadherin gamma subfamily A, 8
hsa-miR-1204	1	0	1	1	1	1	ANTXR1	anthrax toxin receptor 1
hsa-miR-1204	1	0	1	1	0	0	ACRBP	acrosin binding protein
hsa-miR-1204	1	0	1	1	1	1	TTBK1	tau tubulin kinase 1
hsa-miR-1204	0	0	1	1	0	0	RRP36	ribosomal RNA processing 36 homolog (S. cerevisiae)
hsa-miR-1204	1	0	1	1	0	0	CAMK2N2	calcium/calmodulin-dependent protein kinase II inhibitor 2
hsa-miR-1204	1	0	1	1	1	1	SSH2	slingshot homolog 2 (Drosophila)
hsa-miR-1204	1	0	1	1	0	0	CCDC120	coiled-coil domain containing 120
hsa-miR-1204	1	0	1	1	1	1	STX1B	syntaxin 1B
hsa-miR-1204	0	0	1	1	0	0	STK11IP	serine/threonine kinase 11 interacting protein
hsa-miR-1204	0	0	1	1	1	1	RHPN1	rhophilin, Rho GTPase binding protein 1
hsa-miR-1204	0	0	1	1	1	1	FKBP1B	FK506 binding protein 1B, 12.6 kDa
hsa-miR-1204	0	0	1	1	1	1	VNN3	vanin 3
hsa-miR-1204	1	0	1	1	1	1	DYRK1A	dual-specificity tyrosine-(Y)-phosphorylation regulated kinase 1A
hsa-miR-1204	1	0	1	1	0	0	SYN3	synapsin III
hsa-miR-1204	0	0	1	1	1	1	C7orf29	chromosome 7 open reading frame 29
hsa-miR-1204	0	0	1	1	1	1	ZMYND19	zinc finger, MYND-type containing 19
hsa-miR-1204	1	0	1	1	1	1	MBOAT2	membrane bound O-acyltransferase domain containing 2
hsa-miR-1204	0	0	1	1	1	1	GALM	galactose mutarotase (aldose 1-epimerase)
hsa-miR-1204	0	0	1	1	1	1	ADAMTS17	ADAM metallopeptidase with thrombospondin type 1 motif, 17
hsa-miR-1204	1	0	1	1	1	1	TEX261	testis expressed 261
hsa-miR-1204	0	0	1	1	1	1	HSPB6	heat shock protein, alpha-crystallin-related, B6
hsa-miR-1204	0	0	1	1	0	0	DHRS13	dehydrogenase/reductase (SDR family) member 13
hsa-miR-1204	1	0	1	0	1	1	DIRAS1	DIRAS family, GTP-binding RAS-like 1
hsa-miR-1204	1	0	1	1	1	1	CCSAP	centriole, cilia and spindle-associated protein
hsa-miR-1204	0	0	1	1	0	0	NKX2-3	NK2 homeobox 3
hsa-miR-1204	0	0	1	1	0	0	TCEB3C	transcription elongation factor B polypeptide 3C (elongin A3)
hsa-miR-1204	0	0	1	1	1	1	GLIS1	GLIS family zinc finger 1
hsa-miR-1204	0	0	1	1	0	0	CCL28	chemokine (C-C motif) ligand 28
hsa-miR-1204	0	0	1	1	0	0	C19orf40	chromosome 19 open reading frame 40
hsa-miR-1204	0	0	1	1	1	1	TTC30A	tetratricopeptide repeat domain 30A
hsa-miR-1204	1	0	1	1	1	1	FAM123B	family with sequence similarity 123B
hsa-miR-1204	1	0	1	0	1	1	C7orf41	chromosome 7 open reading frame 41
hsa-miR-1204	1	0	1	1	1	1	TMEM151A	transmembrane protein 151A
hsa-miR-1204	1	0	1	1	1	1	FNDC5	fibronectin type III domain containing 5
hsa-miR-1204	0	0	1	1	1	1	C15orf26	chromosome 15 open reading frame 26
hsa-miR-1204	1	0	1	1	1	1	DIP2B	DIP2 disco-interacting protein 2 homolog B (Drosophila)
hsa-miR-1204	1	0	1	1	1	1	PRTG	protogenin
hsa-miR-1204	0	0	1	1	1	1	C16orf54	chromosome 16 open reading frame 54
hsa-miR-1204	0	0	1	1	1	1	CABP7	calcium binding protein 7
hsa-miR-1204	1	0	1	1	0	0	FAM100B	family with sequence similarity 100, member B
hsa-miR-1204	1	0	1	0	1	1	NRK	Nik related kinase
hsa-miR-1204	0	0	1	1	1	1	COL18A1-AS1	COL18A1 antisense RNA 1
hsa-miR-1204	1	0	1	1	1	1	BLOC1S5	biogenesis of lysosomal organelles complex-1, subunit 5, muted
hsa-miR-1204	0	0	1	1	0	0	LRRN4CL	LRRN4 C-terminal like
hsa-miR-1204	0	0	1	1	0	0	IER5L	immediate early response 5-like
hsa-miR-1204	1	0	1	1	1	1	TEX19	testis expressed 19
hsa-miR-1204	0	0	1	1	1	1	ADAMTSL5	ADAMTS-like 5
hsa-miR-1204	0	0	1	0	0	0	ESRRAP2	estrogen-related receptor alpha pseudogene 2
hsa-miR-1204	0	0	1	0	0	0	PCDHB17	protocadherin beta 17 pseudogene
hsa-miR-1204	0	0	1	0	0	0	PCDHB19P	protocadherin beta 19 pseudogene
hsa-miR-1204	0	0	1	0	0	0	TTTY19	testis-specific transcript, Y-linked 19 (non-protein coding)
hsa-miR-1204	0	0	1	0	0	0	CYCSP52	cytochrome c, somatic pseudogene 52
hsa-miR-1204	0	0	1	0	0	0	DKFZP586I1420	uncharacterized protein DKFZp586I1420
hsa-miR-1204	0	0	1	0	0	0	RPL23AP32	ribosomal protein L23a pseudogene 32
hsa-miR-1204	0	0	1	0	0	0	LOC606724	coronin, actin binding protein, 1A pseudogene
hsa-miR-1204	0	0	1	0	0	0	ALOX12P2	arachidonate 12-lipoxygenase pseudogene 2
hsa-miR-1204	0	0	1	0	0	0	LOC374443	C-type lectin domain family 2, member D pseudogene
hsa-miR-1204	0	0	1	0	0	0	RNF126P1	ring finger protein 126 pseudogene 1
hsa-miR-1204	0	0	1	0	0	0	SCARNA2	small Cajal body-specific RNA 2
hsa-miR-1204	0	0	1	0	0	0	PYY2	peptide YY, 2 (pseudogene)
hsa-miR-1204	0	0	1	0	0	0	GBP1P1	guanylate binding protein 1, interferon-inducible pseudogene 1
hsa-miR-1204	0	0	1	0	0	0	CDRT15P1	CMT1A duplicated region transcript 15 pseudogene 1
hsa-miR-1204	1	0	1	1	1	1	PDE4A	phosphodiesterase 4A, cAMP-specific
hsa-miR-1204	1	0	1	1	1	1	ESR1	estrogen receptor 1
hsa-miR-1204	0	0	1	1	0	0	GPR17	G protein-coupled receptor 17
