# Supplementary material for: Profiling of Selected MicroRNAs in Proliferative Eutopic Endometrium of Women with Ovarian Endometriosis
Source: Biomed Res Int. 2015 Aug 20;2015:760698. doi: 10.1155/2015/760698 (PMC4558423; doi:10.1155/2015/760698)
Supplement: Supplementary file 1 — Table I: The names of miRNAs significantly differentially expressed between eutopic endometrium of patients with endometriosis vs eutopic endometrium of patients without endometriosis. Table II: The associations between miRNA and mRNA, which presents detailed results of the search of six major databases i.e targetscan, tarbase, miranda, mirbase, mirtarget2 and pictar. [file 760698.f1.zip › 760698.f1/Table II/hsa-miR-1205.tsv]

miR	targetscan	tarbase	miranda	mirbase	mirtarget2	pictar	GeneSymbol	GeneName
hsa-miR-1205	0	0	1	1	1	1	MKNK1	MAP kinase interacting serine/threonine kinase 1
hsa-miR-1205	1	0	1	1	1	1	MCF2L	MCF.2 cell line derived transforming sequence-like
hsa-miR-1205	0	0	1	1	1	1	PPIP5K1	diphosphoinositol pentakisphosphate kinase 1
hsa-miR-1205	1	0	1	1	1	1	FAM65B	family with sequence similarity 65, member B
hsa-miR-1205	1	0	1	0	1	1	PTPRT	protein tyrosine phosphatase, receptor type, T
hsa-miR-1205	1	0	1	1	1	1	SGSM2	small G protein signaling modulator 2
hsa-miR-1205	1	0	1	0	1	1	MTSS1	metastasis suppressor 1
hsa-miR-1205	1	0	1	1	0	0	OTUD3	OTU domain containing 3
hsa-miR-1205	0	0	1	0	0	0	FAM91A2	family with sequence similarity 91, member A2
hsa-miR-1205	1	0	1	1	1	1	RNGTT	RNA guanylyltransferase and 5'-phosphatase
hsa-miR-1205	0	0	1	1	0	0	ZNF862	zinc finger protein 862
hsa-miR-1205	1	0	1	1	1	1	SLC4A7	solute carrier family 4, sodium bicarbonate cotransporter, member 7
hsa-miR-1205	0	0	1	1	1	1	L3MBTL1	l(3)mbt-like 1 (Drosophila)
hsa-miR-1205	1	0	1	1	1	1	ANKRD17	ankyrin repeat domain 17
hsa-miR-1205	1	0	1	0	1	1	MAGI2	membrane associated guanylate kinase, WW and PDZ domain containing 2
hsa-miR-1205	1	0	1	1	1	1	MATR3	matrin 3
hsa-miR-1205	1	0	1	1	1	1	LPHN2	latrophilin 2
hsa-miR-1205	1	0	1	1	1	1	DMXL2	Dmx-like 2
hsa-miR-1205	0	0	1	1	1	1	WDR47	WD repeat domain 47
hsa-miR-1205	1	0	1	1	1	1	ARHGEF15	Rho guanine nucleotide exchange factor (GEF) 15
hsa-miR-1205	1	0	1	1	1	1	SEMA4F	sema domain, immunoglobulin domain (Ig), transmembrane domain (TM) and short cytoplasmic domain, (semaphorin) 4F
hsa-miR-1205	1	0	1	1	1	1	RNMT	RNA (guanine-7-) methyltransferase
hsa-miR-1205	0	0	1	1	1	1	MAN2B2	mannosidase, alpha, class 2B, member 2
hsa-miR-1205	1	0	1	0	0	0	DTX4	deltex homolog 4 (Drosophila)
hsa-miR-1205	1	0	1	1	1	1	CIT	citron (rho-interacting, serine/threonine kinase 21)
hsa-miR-1205	0	0	1	1	1	1	FASTKD2	FAST kinase domains 2
hsa-miR-1205	0	0	1	1	1	1	TBC1D30	TBC1 domain family, member 30
hsa-miR-1205	1	0	1	1	1	1	RPGRIP1L	RPGRIP1-like
hsa-miR-1205	1	0	1	0	1	1	ZNF507	zinc finger protein 507
hsa-miR-1205	1	0	1	0	1	1	SRGAP3	SLIT-ROBO Rho GTPase activating protein 3
hsa-miR-1205	1	0	1	1	1	1	ATXN7L1	ataxin 7-like 1
hsa-miR-1205	1	0	1	1	1	1	ASAP1	ArfGAP with SH3 domain, ankyrin repeat and PH domain 1
hsa-miR-1205	0	0	1	1	1	1	FSTL5	follistatin-like 5
hsa-miR-1205	1	0	1	1	1	1	SEMA6A	sema domain, transmembrane domain (TM), and cytoplasmic domain, (semaphorin) 6A
hsa-miR-1205	0	0	1	0	1	1	MUC3B	mucin 3B, cell surface associated
hsa-miR-1205	0	0	1	1	1	1	NLGN3	neuroligin 3
hsa-miR-1205	1	0	1	1	1	1	FRAS1	Fraser syndrome 1
hsa-miR-1205	1	0	1	1	0	0	ZSWIM5	zinc finger, SWIM-type containing 5
hsa-miR-1205	0	0	1	1	0	0	DHX37	DEAH (Asp-Glu-Ala-His) box polypeptide 37
hsa-miR-1205	0	0	1	0	0	0	KRT19P2	keratin 19 pseudogene 2
hsa-miR-1205	0	0	1	1	0	0	TMEM132A	transmembrane protein 132A
hsa-miR-1205	1	0	1	0	0	0	TANC2	tetratricopeptide repeat, ankyrin repeat and coiled-coil containing 2
hsa-miR-1205	0	0	1	0	0	0	KIAA1671	KIAA1671
hsa-miR-1205	1	0	1	1	0	0	ARHGAP39	Rho GTPase activating protein 39
hsa-miR-1205	1	0	1	1	1	1	PHF21A	PHD finger protein 21A
hsa-miR-1205	1	0	1	1	1	1	ITPRIP	inositol 1,4,5-trisphosphate receptor interacting protein
hsa-miR-1205	1	0	1	0	1	1	RIMS1	regulating synaptic membrane exocytosis 1
hsa-miR-1205	1	0	1	0	1	1	JPH4	junctophilin 4
hsa-miR-1205	0	0	1	1	0	0	COL27A1	collagen, type XXVII, alpha 1
hsa-miR-1205	0	0	1	1	1	1	SLC11A2	solute carrier family 11 (proton-coupled divalent metal ion transporters), member 2
hsa-miR-1205	1	0	1	1	1	1	HNRPDL	heterogeneous nuclear ribonucleoprotein D-like
hsa-miR-1205	0	0	1	1	1	1	LENG8	leukocyte receptor cluster (LRC) member 8
hsa-miR-1205	1	0	1	1	1	1	LSM14A	LSM14A, SCD6 homolog A (S. cerevisiae)
hsa-miR-1205	1	0	1	1	1	1	BCL2L11	BCL2-like 11 (apoptosis facilitator)
hsa-miR-1205	1	0	1	1	0	0	ADC	arginine decarboxylase
hsa-miR-1205	1	0	1	1	1	1	AKNA	AT-hook transcription factor
hsa-miR-1205	1	0	1	1	1	1	SH3TC2	SH3 domain and tetratricopeptide repeats 2
hsa-miR-1205	1	0	1	0	0	0	FAT3	FAT tumor suppressor homolog 3 (Drosophila)
hsa-miR-1205	1	0	1	0	1	1	RNF43	ring finger protein 43
hsa-miR-1205	1	0	1	0	0	0	RNF169	ring finger protein 169
hsa-miR-1205	1	1	1	1	1	1	BACE1	beta-site APP-cleaving enzyme 1
hsa-miR-1205	0	0	1	1	0	0	KRTAP24-1	keratin associated protein 24-1
hsa-miR-1205	0	0	1	1	0	0	DDB2	damage-specific DNA binding protein 2, 48kDa
hsa-miR-1205	0	0	1	1	0	0	SSPO	SCO-spondin homolog (Bos taurus)
hsa-miR-1205	0	0	1	1	0	0	ERAP2	endoplasmic reticulum aminopeptidase 2
hsa-miR-1205	1	0	1	1	1	1	ADARB1	adenosine deaminase, RNA-specific, B1
hsa-miR-1205	0	0	1	1	0	0	DBP	D site of albumin promoter (albumin D-box) binding protein
hsa-miR-1205	0	0	1	1	0	0	CPT1C	carnitine palmitoyltransferase 1C
hsa-miR-1205	1	0	1	1	1	1	PLEKHH3	pleckstrin homology domain containing, family H (with MyTH4 domain) member 3
hsa-miR-1205	0	0	1	0	0	0	PIDD	p53-induced death domain protein
hsa-miR-1205	1	0	1	1	1	1	NFYC	nuclear transcription factor Y, gamma
hsa-miR-1205	1	0	1	1	1	1	MEF2A	myocyte enhancer factor 2A
hsa-miR-1205	1	0	1	1	1	1	HMGB1	high mobility group box 1
hsa-miR-1205	1	0	1	1	1	1	MKNK2	MAP kinase interacting serine/threonine kinase 2
hsa-miR-1205	1	0	1	1	1	1	DTNA	dystrobrevin, alpha
hsa-miR-1205	1	0	1	0	1	1	MAML1	mastermind-like 1 (Drosophila)
hsa-miR-1205	0	0	1	1	1	1	DGKI	diacylglycerol kinase, iota
hsa-miR-1205	1	0	1	0	1	1	SLC6A6	solute carrier family 6 (neurotransmitter transporter, taurine), member 6
hsa-miR-1205	1	0	1	0	1	1	DPYSL2	dihydropyrimidinase-like 2
hsa-miR-1205	0	0	1	0	1	1	NPY1R	neuropeptide Y receptor Y1
hsa-miR-1205	1	0	1	0	1	1	CHL1	cell adhesion molecule with homology to L1CAM (close homolog of L1)
hsa-miR-1205	1	0	1	0	1	1	AKAP13	A kinase (PRKA) anchor protein 13
hsa-miR-1205	0	0	1	1	1	1	RYR1	ryanodine receptor 1 (skeletal)
hsa-miR-1205	1	0	1	1	1	1	MINK1	misshapen-like kinase 1
hsa-miR-1205	1	0	1	1	1	1	MYO5A	myosin VA (heavy chain 12, myoxin)
hsa-miR-1205	0	0	1	1	0	0	EIF2B4	eukaryotic translation initiation factor 2B, subunit 4 delta, 67kDa
hsa-miR-1205	0	0	1	1	0	0	CLK3	CDC-like kinase 3
hsa-miR-1205	0	0	1	1	0	0	ITGA2B	integrin, alpha 2b (platelet glycoprotein IIb of IIb/IIIa complex, antigen CD41)
hsa-miR-1205	0	0	1	1	1	1	STAU1	staufen, RNA binding protein, homolog 1 (Drosophila)
hsa-miR-1205	0	0	1	1	0	0	BMP1	bone morphogenetic protein 1
hsa-miR-1205	1	0	1	1	1	1	EPB41	erythrocyte membrane protein band 4.1 (elliptocytosis 1, RH-linked)
hsa-miR-1205	0	0	1	1	0	0	SLC22A8	solute carrier family 22 (organic anion transporter), member 8
hsa-miR-1205	1	0	1	1	1	1	MLLT10	myeloid/lymphoid or mixed-lineage leukemia (trithorax homolog, Drosophila); translocated to, 10
hsa-miR-1205	1	0	1	1	1	1	SATB1	SATB homeobox 1
hsa-miR-1205	1	0	1	1	1	1	TLE1	transducin-like enhancer of split 1 (E(sp1) homolog, Drosophila)
hsa-miR-1205	1	0	1	1	1	1	TEAD1	TEA domain family member 1 (SV40 transcriptional enhancer factor)
hsa-miR-1205	1	0	1	1	0	0	PPP2R5D	protein phosphatase 2, regulatory subunit B', delta
hsa-miR-1205	0	0	1	1	1	1	SGSH	N-sulfoglucosamine sulfohydrolase
hsa-miR-1205	1	0	1	1	1	1	PHLDB2	pleckstrin homology-like domain, family B, member 2
hsa-miR-1205	0	0	1	0	0	0	MIAT	myocardial infarction associated transcript (non-protein coding)
hsa-miR-1205	1	0	1	1	1	1	STX16	syntaxin 16
hsa-miR-1205	1	0	1	1	1	1	DLGAP2	discs, large (Drosophila) homolog-associated protein 2
hsa-miR-1205	0	0	1	0	1	1	ZMYM2	zinc finger, MYM-type 2
hsa-miR-1205	0	0	1	1	1	1	PPEF2	protein phosphatase, EF-hand calcium binding domain 2
hsa-miR-1205	1	0	1	1	1	1	PCDH17	protocadherin 17
hsa-miR-1205	1	0	1	1	1	1	MYT1L	myelin transcription factor 1-like
hsa-miR-1205	0	0	1	1	1	1	UBE4B	ubiquitination factor E4B
hsa-miR-1205	0	0	1	1	0	0	SLC12A4	solute carrier family 12 (potassium/chloride transporters), member 4
hsa-miR-1205	0	0	1	1	1	1	CYP4F3	cytochrome P450, family 4, subfamily F, polypeptide 3
hsa-miR-1205	1	0	1	1	1	1	SHOC2	soc-2 suppressor of clear homolog (C. elegans)
hsa-miR-1205	1	0	1	1	1	1	MBNL2	muscleblind-like splicing regulator 2
hsa-miR-1205	1	0	1	1	1	1	RBBP6	retinoblastoma binding protein 6
hsa-miR-1205	1	0	1	1	1	1	ERLIN1	ER lipid raft associated 1
hsa-miR-1205	0	0	1	1	1	1	SC5DL	sterol-C5-desaturase (ERG3 delta-5-desaturase homolog, S. cerevisiae)-like
hsa-miR-1205	0	0	1	1	0	0	SGK223	homolog of rat pragma of Rnd2
hsa-miR-1205	1	0	1	1	1	1	TP63	tumor protein p63
hsa-miR-1205	0	0	1	1	1	1	PCBP4	poly(rC) binding protein 4
hsa-miR-1205	0	0	1	1	1	1	FHL1	four and a half LIM domains 1
hsa-miR-1205	0	0	1	1	0	0	RBM5	RNA binding motif protein 5
hsa-miR-1205	1	0	1	0	1	1	SLC25A37	solute carrier family 25 (mitochondrial iron transporter), member 37
hsa-miR-1205	1	0	1	1	1	1	LRRFIP1	leucine rich repeat (in FLII) interacting protein 1
hsa-miR-1205	1	0	1	1	1	1	NF2	neurofibromin 2 (merlin)
hsa-miR-1205	0	0	1	1	1	1	ACIN1	apoptotic chromatin condensation inducer 1
hsa-miR-1205	1	0	1	0	1	1	WDR82	WD repeat domain 82
hsa-miR-1205	1	0	1	1	1	1	TAOK3	TAO kinase 3
hsa-miR-1205	0	0	1	1	0	0	ANGPTL4	angiopoietin-like 4
hsa-miR-1205	1	0	1	1	1	1	ZNF202	zinc finger protein 202
hsa-miR-1205	0	0	1	1	1	1	FAM114A2	family with sequence similarity 114, member A2
hsa-miR-1205	1	0	1	1	1	1	TMEM242	transmembrane protein 242
hsa-miR-1205	0	0	1	1	1	1	NBPF14	neuroblastoma breakpoint family, member 14
hsa-miR-1205	0	0	1	1	1	1	LRRC29	leucine rich repeat containing 29
hsa-miR-1205	0	0	1	0	1	1	CLDN2	claudin 2
hsa-miR-1205	1	0	1	1	1	1	ATP2C1	ATPase, Ca++ transporting, type 2C, member 1
hsa-miR-1205	1	0	1	1	1	1	SNPH	syntaphilin
hsa-miR-1205	0	0	1	1	1	1	NPC1L1	NPC1 (Niemann-Pick disease, type C1, gene)-like 1
hsa-miR-1205	0	0	1	0	1	1	SLC38A4	solute carrier family 38, member 4
hsa-miR-1205	0	0	1	1	0	0	TXNRD2	thioredoxin reductase 2
hsa-miR-1205	0	0	1	1	1	1	CD28	CD28 molecule
hsa-miR-1205	0	0	1	1	1	1	MFF	mitochondrial fission factor
hsa-miR-1205	1	0	1	1	0	0	TDRKH	tudor and KH domain containing
hsa-miR-1205	1	0	1	1	1	1	SNTB2	syntrophin, beta 2 (dystrophin-associated protein A1, 59kDa, basic component 2)
hsa-miR-1205	1	0	1	1	0	0	LMO2	LIM domain only 2 (rhombotin-like 1)
hsa-miR-1205	1	0	1	1	1	1	ABI2	abl-interactor 2
hsa-miR-1205	1	0	1	1	1	1	SH3GLB1	SH3-domain GRB2-like endophilin B1
hsa-miR-1205	0	0	1	1	0	0	TCP11	t-complex 11 homolog (mouse)
hsa-miR-1205	1	0	1	1	1	1	CALN1	calneuron 1
hsa-miR-1205	0	0	1	0	0	0	HMG20B	high mobility group 20B
hsa-miR-1205	1	0	1	1	1	1	VEGFA	vascular endothelial growth factor A
hsa-miR-1205	1	0	1	1	1	1	LETMD1	LETM1 domain containing 1
hsa-miR-1205	0	0	1	1	1	1	FCRL1	Fc receptor-like 1
hsa-miR-1205	0	0	1	1	0	0	TTTY7	testis-specific transcript, Y-linked 7 (non-protein coding)
hsa-miR-1205	1	0	1	0	1	1	WIPF2	WAS/WASL interacting protein family, member 2
hsa-miR-1205	0	0	1	1	0	0	SPNS1	spinster homolog 1 (Drosophila)
hsa-miR-1205	0	0	1	0	0	0	NBPF10	neuroblastoma breakpoint family, member 10
hsa-miR-1205	0	0	1	1	1	1	CASP8	caspase 8, apoptosis-related cysteine peptidase
hsa-miR-1205	0	0	1	1	1	1	WBP2NL	WBP2 N-terminal like
hsa-miR-1205	1	0	1	1	1	1	RCAN1	regulator of calcineurin 1
hsa-miR-1205	0	0	1	0	0	0	MYO15B	myosin XVB pseudogene
hsa-miR-1205	0	0	1	0	1	1	NBPF15	neuroblastoma breakpoint family, member 15
hsa-miR-1205	1	0	1	1	1	1	ST3GAL3	ST3 beta-galactoside alpha-2,3-sialyltransferase 3
hsa-miR-1205	1	0	1	1	1	1	SLC35A4	solute carrier family 35, member A4
hsa-miR-1205	1	0	1	1	0	0	FOXP2	forkhead box P2
hsa-miR-1205	1	0	1	1	1	1	HNRNPU	heterogeneous nuclear ribonucleoprotein U (scaffold attachment factor A)
hsa-miR-1205	1	0	1	1	0	0	POLR2J3	polymerase (RNA) II (DNA directed) polypeptide J3
hsa-miR-1205	1	0	1	1	1	1	BRSK1	BR serine/threonine kinase 1
hsa-miR-1205	0	0	1	1	1	1	AMPH	amphiphysin
hsa-miR-1205	0	0	1	1	1	1	R3HCC1L	R3H domain and coiled-coil containing 1-like
hsa-miR-1205	0	0	1	1	1	1	PTK7	PTK7 protein tyrosine kinase 7
hsa-miR-1205	0	0	1	1	1	1	MBD4	methyl-CpG binding domain protein 4
hsa-miR-1205	1	0	1	1	0	0	BRSK2	BR serine/threonine kinase 2
hsa-miR-1205	0	0	1	1	1	1	ANKRD36B	ankyrin repeat domain 36B
hsa-miR-1205	1	0	1	1	1	1	AFF2	AF4/FMR2 family, member 2
hsa-miR-1205	1	0	1	1	1	1	PLAGL1	pleiomorphic adenoma gene-like 1
hsa-miR-1205	0	0	1	1	1	1	GPR56	G protein-coupled receptor 56
hsa-miR-1205	0	0	1	1	1	1	GNAS	GNAS complex locus
hsa-miR-1205	1	0	1	1	1	1	ILF3	interleukin enhancer binding factor 3, 90kDa
hsa-miR-1205	0	0	1	0	0	0	CACNA2D3	calcium channel, voltage-dependent, alpha 2/delta subunit 3
hsa-miR-1205	0	0	1	1	1	1	WWTR1	WW domain containing transcription regulator 1
hsa-miR-1205	0	0	1	0	0	0	CD177	CD177 molecule
hsa-miR-1205	1	0	1	1	1	1	SLAMF6	SLAM family member 6
hsa-miR-1205	1	0	1	1	1	1	PALM2	paralemmin 2
hsa-miR-1205	1	0	1	1	1	1	NRXN3	neurexin 3
hsa-miR-1205	1	0	1	1	1	1	EMID2	EMI domain containing 2
hsa-miR-1205	0	0	1	1	0	0	KIAA1324	KIAA1324
hsa-miR-1205	0	0	1	1	0	0	MBD1	methyl-CpG binding domain protein 1
hsa-miR-1205	1	0	1	1	1	1	ARL4C	ADP-ribosylation factor-like 4C
hsa-miR-1205	1	0	1	0	1	1	NAALADL2	N-acetylated alpha-linked acidic dipeptidase-like 2
hsa-miR-1205	1	0	1	1	1	1	XIRP1	xin actin-binding repeat containing 1
hsa-miR-1205	0	0	1	1	1	1	PPARG	peroxisome proliferator-activated receptor gamma
hsa-miR-1205	1	0	1	1	1	1	NOX4	NADPH oxidase 4
hsa-miR-1205	0	0	1	1	0	0	C22orf24	chromosome 22 open reading frame 24
hsa-miR-1205	1	0	1	0	1	1	NFAT5	nuclear factor of activated T-cells 5, tonicity-responsive
hsa-miR-1205	0	0	1	1	1	1	PIWIL2	piwi-like 2 (Drosophila)
hsa-miR-1205	0	0	1	1	0	0	VSIG2	V-set and immunoglobulin domain containing 2
hsa-miR-1205	0	0	1	0	0	0	RNF31	ring finger protein 31
hsa-miR-1205	0	0	1	1	1	1	DONSON	downstream neighbor of SON
hsa-miR-1205	0	0	1	1	1	1	STOX2	storkhead box 2
hsa-miR-1205	0	0	1	1	1	1	RNF220	ring finger protein 220
hsa-miR-1205	1	0	1	1	1	1	EIF2C1	eukaryotic translation initiation factor 2C, 1
hsa-miR-1205	1	0	1	1	1	1	PTBP3	polypyrimidine tract binding protein 3
hsa-miR-1205	0	0	1	1	1	1	VPS52	vacuolar protein sorting 52 homolog (S. cerevisiae)
hsa-miR-1205	1	0	1	1	0	0	CCDC120	coiled-coil domain containing 120
hsa-miR-1205	1	0	1	1	1	1	ACER3	alkaline ceramidase 3
hsa-miR-1205	1	0	1	1	1	1	KLHDC8B	kelch domain containing 8B
hsa-miR-1205	0	0	1	1	0	0	C17orf53	chromosome 17 open reading frame 53
hsa-miR-1205	1	0	1	1	1	1	RIC3	resistance to inhibitors of cholinesterase 3 homolog (C. elegans)
hsa-miR-1205	0	0	1	1	0	0	TMC6	transmembrane channel-like 6
hsa-miR-1205	1	0	1	1	1	1	C16orf70	chromosome 16 open reading frame 70
hsa-miR-1205	0	0	1	1	0	0	UBR4	ubiquitin protein ligase E3 component n-recognin 4
hsa-miR-1205	1	0	1	1	1	1	SUN1	Sad1 and UNC84 domain containing 1
hsa-miR-1205	1	0	1	1	1	1	MAEA	macrophage erythroblast attacher
hsa-miR-1205	1	0	1	1	0	0	UQCC	ubiquinol-cytochrome c reductase complex chaperone
hsa-miR-1205	0	0	1	0	0	0	SOX2-OT	SOX2 overlapping transcript (non-protein coding)
hsa-miR-1205	0	0	1	0	0	0	DUXAP10	double homeobox A pseudogene 10
hsa-miR-1205	1	0	1	1	1	1	S100PBP	S100P binding protein
hsa-miR-1205	0	0	1	1	0	0	JMJD4	jumonji domain containing 4
hsa-miR-1205	1	0	1	1	1	1	WDTC1	WD and tetratricopeptide repeats 1
hsa-miR-1205	1	0	1	0	1	1	DCAF17	DDB1 and CUL4 associated factor 17
hsa-miR-1205	1	0	1	1	1	1	MACF1	microtubule-actin crosslinking factor 1
hsa-miR-1205	0	0	1	1	1	1	AMFR	autocrine motility factor receptor, E3 ubiquitin protein ligase
hsa-miR-1205	1	0	1	0	1	1	C14orf101	chromosome 14 open reading frame 101
hsa-miR-1205	0	0	1	0	1	1	FLJ14186	uncharacterized LOC401149
hsa-miR-1205	1	0	1	1	1	1	COPS7B	COP9 constitutive photomorphogenic homolog subunit 7B (Arabidopsis)
hsa-miR-1205	0	0	1	1	1	1	METTL7A	methyltransferase like 7A
hsa-miR-1205	0	0	1	1	1	1	PDE4DIP	phosphodiesterase 4D interacting protein
hsa-miR-1205	0	0	1	0	0	0	RASAL3	RAS protein activator like 3
hsa-miR-1205	1	0	1	1	1	1	GBF1	golgi brefeldin A resistant guanine nucleotide exchange factor 1
hsa-miR-1205	1	0	1	0	1	1	MYO5B	myosin VB
hsa-miR-1205	0	0	1	0	1	1	ATXN1L	ataxin 1-like
hsa-miR-1205	0	0	1	1	1	1	CNOT8	CCR4-NOT transcription complex, subunit 8
hsa-miR-1205	1	0	1	1	1	1	DLC1	deleted in liver cancer 1
hsa-miR-1205	1	0	1	1	1	1	TNRC6A	trinucleotide repeat containing 6A
hsa-miR-1205	1	0	1	1	0	0	FBXO45	F-box protein 45
hsa-miR-1205	0	0	1	0	1	1	HEMK1	HemK methyltransferase family member 1
hsa-miR-1205	1	0	1	1	0	0	NIPAL4	NIPA-like domain containing 4
hsa-miR-1205	0	0	1	1	0	0	EXOC6B	exocyst complex component 6B
hsa-miR-1205	1	0	1	1	1	1	TAF7L	TAF7-like RNA polymerase II, TATA box binding protein (TBP)-associated factor, 50kDa
hsa-miR-1205	0	0	1	1	1	1	GTF2H1	general transcription factor IIH, polypeptide 1, 62kDa
hsa-miR-1205	1	0	1	1	1	1	RNF185	ring finger protein 185
hsa-miR-1205	1	0	1	1	1	1	FAM53C	family with sequence similarity 53, member C
hsa-miR-1205	1	0	1	1	1	1	NFASC	neurofascin
hsa-miR-1205	0	0	1	0	0	0	JAKMIP2-AS1	JAKMIP2 antisense RNA 1
hsa-miR-1205	1	0	1	1	1	1	TMEM2	transmembrane protein 2
hsa-miR-1205	1	0	1	1	1	1	KCTD15	potassium channel tetramerisation domain containing 15
hsa-miR-1205	0	0	1	1	1	1	PAQR4	progestin and adipoQ receptor family member IV
hsa-miR-1205	0	0	1	1	1	1	IGBP1	immunoglobulin (CD79A) binding protein 1
hsa-miR-1205	0	0	1	0	0	0	KIAA0664L3	KIAA0664-like 3
hsa-miR-1205	0	0	1	1	0	0	HAGHL	hydroxyacylglutathione hydrolase-like
hsa-miR-1205	0	0	1	1	0	0	ADRM1	adhesion regulating molecule 1
hsa-miR-1205	1	0	1	1	1	1	SGK1	serum/glucocorticoid regulated kinase 1
hsa-miR-1205	0	0	1	1	1	1	TOX2	TOX high mobility group box family member 2
hsa-miR-1205	0	0	1	0	0	0	LOC154092	uncharacterized LOC154092
hsa-miR-1205	0	0	1	0	0	0	FLJ30838	uncharacterized LOC400955
hsa-miR-1205	0	0	1	1	1	1	OPTN	optineurin
hsa-miR-1205	0	0	1	1	1	1	FAM107A	family with sequence similarity 107, member A
hsa-miR-1205	1	0	1	1	1	1	MAP3K7	mitogen-activated protein kinase kinase kinase 7
hsa-miR-1205	1	0	1	1	1	1	LMNA	lamin A/C
hsa-miR-1205	0	0	1	0	0	0	SEC14L2	SEC14-like 2 (S. cerevisiae)
hsa-miR-1205	1	0	1	1	1	1	TMEM25	transmembrane protein 25
hsa-miR-1205	1	0	1	1	1	1	SHISA5	shisa homolog 5 (Xenopus laevis)
hsa-miR-1205	0	0	1	0	0	0	LOC284600	uncharacterized LOC284600
hsa-miR-1205	0	0	1	1	1	1	BRD2	bromodomain containing 2
hsa-miR-1205	0	0	1	1	0	0	ZNF185	zinc finger protein 185 (LIM domain)
hsa-miR-1205	0	0	1	1	1	1	ZNF606	zinc finger protein 606
hsa-miR-1205	0	0	1	1	1	1	DST	dystonin
hsa-miR-1205	1	0	1	1	1	1	GABARAPL1	GABA(A) receptor-associated protein like 1
hsa-miR-1205	0	0	1	0	0	0	MAGI1-IT1	MAGI1 intronic transcript 1 (non-protein coding)
hsa-miR-1205	1	0	1	1	1	1	TPM3	tropomyosin 3
hsa-miR-1205	0	0	1	1	1	1	COQ10A	coenzyme Q10 homolog A (S. cerevisiae)
hsa-miR-1205	0	0	1	1	0	0	COMMD4	COMM domain containing 4
hsa-miR-1205	0	0	1	1	1	1	PSME3	proteasome (prosome, macropain) activator subunit 3 (PA28 gamma; Ki)
hsa-miR-1205	0	0	1	1	1	1	VWA3B	von Willebrand factor A domain containing 3B
hsa-miR-1205	0	0	1	0	0	0	LOC100125918	uncharacterized LOC100125918
hsa-miR-1205	0	0	1	0	1	1	ARHGAP42	Rho GTPase activating protein 42
hsa-miR-1205	0	0	1	1	0	0	NXF2	nuclear RNA export factor 2
hsa-miR-1205	0	0	1	1	1	1	RANBP17	RAN binding protein 17
hsa-miR-1205	0	0	1	1	1	1	SEC61A2	Sec61 alpha 2 subunit (S. cerevisiae)
hsa-miR-1205	1	0	1	1	0	0	GBA2	glucosidase, beta (bile acid) 2
hsa-miR-1205	0	0	1	0	0	0	TUG1	taurine upregulated 1 (non-protein coding)
hsa-miR-1205	0	0	1	1	0	0	KRT86	keratin 86
hsa-miR-1205	0	0	1	1	1	1	ZBTB26	zinc finger and BTB domain containing 26
hsa-miR-1205	1	0	1	1	1	1	C6orf89	chromosome 6 open reading frame 89
hsa-miR-1205	1	0	1	1	1	1	FAM102A	family with sequence similarity 102, member A
hsa-miR-1205	1	0	1	1	1	1	FAM73B	family with sequence similarity 73, member B
hsa-miR-1205	0	0	1	1	0	0	SYTL1	synaptotagmin-like 1
hsa-miR-1205	0	0	1	0	0	0	C10orf105	chromosome 10 open reading frame 105
hsa-miR-1205	0	0	1	1	0	0	NDOR1	NADPH dependent diflavin oxidoreductase 1
hsa-miR-1205	1	0	1	1	1	1	BLCAP	bladder cancer associated protein
hsa-miR-1205	1	0	1	1	1	1	CNOT4	CCR4-NOT transcription complex, subunit 4
hsa-miR-1205	0	0	1	0	0	0	SDHAP2	succinate dehydrogenase complex, subunit A, flavoprotein pseudogene 2
hsa-miR-1205	1	0	1	0	1	1	TPBG	trophoblast glycoprotein
hsa-miR-1205	1	0	1	0	1	1	MAP4K4	mitogen-activated protein kinase kinase kinase kinase 4
hsa-miR-1205	1	0	1	1	1	1	UBAP1	ubiquitin associated protein 1
hsa-miR-1205	0	0	1	1	0	0	NISCH	nischarin
hsa-miR-1205	0	0	1	1	1	1	CAMKV	CaM kinase-like vesicle-associated
hsa-miR-1205	0	0	1	1	1	1	TMED3	transmembrane emp24 protein transport domain containing 3
hsa-miR-1205	0	0	1	1	0	0	PIGO	phosphatidylinositol glycan anchor biosynthesis, class O
hsa-miR-1205	0	0	1	1	0	0	ATP6AP1	ATPase, H+ transporting, lysosomal accessory protein 1
hsa-miR-1205	0	0	1	1	1	1	STBD1	starch binding domain 1
hsa-miR-1205	0	0	1	0	0	0	LOC643837	uncharacterized LOC643837
hsa-miR-1205	1	0	1	1	1	1	AMMECR1	Alport syndrome, mental retardation, midface hypoplasia and elliptocytosis chromosomal region gene 1
hsa-miR-1205	0	0	1	0	0	0	LOC440910	uncharacterized LOC440910
hsa-miR-1205	1	0	1	1	1	1	FBXW2	F-box and WD repeat domain containing 2
hsa-miR-1205	0	0	1	1	1	1	SP100	SP100 nuclear antigen
hsa-miR-1205	1	0	1	1	1	1	LUC7L2	LUC7-like 2 (S. cerevisiae)
hsa-miR-1205	0	0	1	1	0	0	MSANTD3	Myb/SANT-like DNA-binding domain containing 3
hsa-miR-1205	1	0	1	1	1	1	MAFK	v-maf musculoaponeurotic fibrosarcoma oncogene homolog K (avian)
hsa-miR-1205	0	0	1	1	0	0	HYAL2	hyaluronoglucosaminidase 2
hsa-miR-1205	0	0	1	1	0	0	CDC25B	cell division cycle 25 homolog B (S. pombe)
hsa-miR-1205	1	0	1	1	0	0	TOE1	target of EGR1, member 1 (nuclear)
hsa-miR-1205	0	0	1	0	0	0	LOC283887	uncharacterized LOC283887
hsa-miR-1205	0	0	1	1	0	0	EIF3B	eukaryotic translation initiation factor 3, subunit B
hsa-miR-1205	1	0	1	0	0	0	SH3RF3	SH3 domain containing ring finger 3
hsa-miR-1205	0	0	1	1	1	1	CYP11B1	cytochrome P450, family 11, subfamily B, polypeptide 1
hsa-miR-1205	0	0	1	0	0	0	CXXC1P1	CXXC finger protein 1 pseudogene 1
hsa-miR-1205	1	0	1	1	1	1	SSH3	slingshot homolog 3 (Drosophila)
hsa-miR-1205	0	0	1	1	0	0	NDUFA4L2	NADH dehydrogenase (ubiquinone) 1 alpha subcomplex, 4-like 2
hsa-miR-1205	0	0	1	1	1	1	SPOCK1	sparc/osteonectin, cwcv and kazal-like domains proteoglycan (testican) 1
hsa-miR-1205	0	0	1	1	0	0	CYHR1	cysteine/histidine-rich 1
hsa-miR-1205	0	0	1	0	1	1	KANSL2	KAT8 regulatory NSL complex subunit 2
hsa-miR-1205	1	0	1	1	1	1	KLC2	kinesin light chain 2
hsa-miR-1205	0	0	1	0	0	0	FLJ37505	uncharacterized LOC400087
hsa-miR-1205	1	0	1	1	1	1	PTPRU	protein tyrosine phosphatase, receptor type, U
hsa-miR-1205	0	0	1	0	0	0	LOC147670	uncharacterized LOC147670
hsa-miR-1205	0	0	1	1	1	1	LTBR	lymphotoxin beta receptor (TNFR superfamily, member 3)
hsa-miR-1205	0	0	1	1	1	1	FUT11	fucosyltransferase 11 (alpha (1,3) fucosyltransferase)
hsa-miR-1205	0	0	1	0	0	0	LOC100129620	uncharacterized LOC100129620
hsa-miR-1205	0	0	1	0	0	0	LOC100129858	uncharacterized LOC100129858
hsa-miR-1205	1	0	1	1	1	1	SPATS2	spermatogenesis associated, serine-rich 2
hsa-miR-1205	1	0	1	0	1	1	STC2	stanniocalcin 2
hsa-miR-1205	0	0	1	1	1	1	FBLN1	fibulin 1
hsa-miR-1205	0	0	1	0	0	0	LOC100133029	sirtuin 5 pseudogene
hsa-miR-1205	1	0	1	1	1	1	ACSL1	acyl-CoA synthetase long-chain family member 1
hsa-miR-1205	0	0	1	1	0	0	TRIM46	tripartite motif containing 46
hsa-miR-1205	0	0	1	0	0	0	ZNF815P	zinc finger protein 815, pseudogene
hsa-miR-1205	0	0	1	0	0	0	FAM66C	family with sequence similarity 66, member C
hsa-miR-1205	0	0	1	1	0	0	ERGIC3	ERGIC and golgi 3
hsa-miR-1205	1	0	1	1	1	1	TCEANC2	transcription elongation factor A (SII) N-terminal and central domain containing 2
hsa-miR-1205	0	0	1	0	0	0	C1orf204	chromosome 1 open reading frame 204
hsa-miR-1205	1	0	1	1	0	0	CHD3	chromodomain helicase DNA binding protein 3
hsa-miR-1205	1	0	1	0	1	1	KIAA1737	KIAA1737
hsa-miR-1205	1	0	1	0	1	1	THRB	thyroid hormone receptor, beta
hsa-miR-1205	0	0	1	1	1	1	DNM1	dynamin 1
hsa-miR-1205	1	0	1	0	0	0	PID1	phosphotyrosine interaction domain containing 1
hsa-miR-1205	1	0	1	1	1	1	SYT6	synaptotagmin VI
hsa-miR-1205	1	0	1	1	1	1	CDV3	CDV3 homolog (mouse)
hsa-miR-1205	0	0	1	1	1	1	RNASEH1	ribonuclease H1
hsa-miR-1205	0	0	1	0	1	1	FLJ39639	uncharacterized protein FLJ39639
hsa-miR-1205	0	0	1	1	0	0	CHCHD5	coiled-coil-helix-coiled-coil-helix domain containing 5
hsa-miR-1205	0	0	1	1	1	1	CORO7	coronin 7
hsa-miR-1205	1	0	1	1	1	1	KL	klotho
hsa-miR-1205	0	0	1	0	0	0	LOC400680	uncharacterized LOC400680
hsa-miR-1205	1	0	1	1	1	1	RAB11FIP4	RAB11 family interacting protein 4 (class II)
hsa-miR-1205	0	0	1	0	0	0	LOC100128560	uncharacterized LOC100128560
hsa-miR-1205	0	0	1	0	0	0	KIRREL3-AS3	KIRREL3 antisense RNA 3
hsa-miR-1205	0	0	1	1	0	0	PSAPL1	prosaposin-like 1 (gene/pseudogene)
hsa-miR-1205	0	0	1	1	0	0	MEI1	meiosis inhibitor 1
hsa-miR-1205	0	0	1	1	0	0	TOM1	target of myb1 (chicken)
hsa-miR-1205	1	0	1	1	0	0	DNM2	dynamin 2
hsa-miR-1205	1	0	1	1	1	1	LZTS2	leucine zipper, putative tumor suppressor 2
hsa-miR-1205	0	0	1	1	0	0	TAPBPL	TAP binding protein-like
hsa-miR-1205	1	0	1	0	1	1	LRBA	LPS-responsive vesicle trafficking, beach and anchor containing
hsa-miR-1205	0	0	1	0	0	0	CECR7	cat eye syndrome chromosome region, candidate 7 (non-protein coding)
hsa-miR-1205	0	0	1	1	1	1	RP1	retinitis pigmentosa 1 (autosomal dominant)
hsa-miR-1205	0	0	1	1	1	1	ANKZF1	ankyrin repeat and zinc finger domain containing 1
hsa-miR-1205	0	0	1	1	1	1	ARFGAP2	ADP-ribosylation factor GTPase activating protein 2
hsa-miR-1205	1	0	1	1	1	1	SLC39A13	solute carrier family 39 (zinc transporter), member 13
hsa-miR-1205	0	0	1	0	0	0	ZBTB20-AS1	ZBTB20 antisense RNA 1
hsa-miR-1205	1	0	1	1	1	1	NDFIP2	Nedd4 family interacting protein 2
hsa-miR-1205	0	0	1	1	1	1	ABCC12	ATP-binding cassette, sub-family C (CFTR/MRP), member 12
hsa-miR-1205	1	0	1	1	1	1	GLUD1	glutamate dehydrogenase 1
hsa-miR-1205	0	0	1	1	0	0	KIAA0146	KIAA0146
hsa-miR-1205	0	0	1	1	1	1	SCLT1	sodium channel and clathrin linker 1
hsa-miR-1205	0	0	1	1	0	0	MX2	myxovirus (influenza virus) resistance 2 (mouse)
hsa-miR-1205	0	0	1	1	0	0	MARS	methionyl-tRNA synthetase
hsa-miR-1205	0	0	1	1	0	0	ZNF335	zinc finger protein 335
hsa-miR-1205	0	0	1	1	1	1	ARHGEF26	Rho guanine nucleotide exchange factor (GEF) 26
hsa-miR-1205	0	0	1	0	1	1	PATE4	prostate and testis expressed 4
hsa-miR-1205	0	0	1	1	1	1	DNAJC24	DnaJ (Hsp40) homolog, subfamily C, member 24
hsa-miR-1205	0	0	1	0	0	0	CLEC4GP1	C-type lectin domain family 4, member G pseudogene 1
hsa-miR-1205	1	0	1	1	0	0	KCNC1	potassium voltage-gated channel, Shaw-related subfamily, member 1
hsa-miR-1205	1	0	1	1	1	1	PLEKHH1	pleckstrin homology domain containing, family H (with MyTH4 domain) member 1
hsa-miR-1205	1	0	1	1	1	1	EGLN3	egl nine homolog 3 (C. elegans)
hsa-miR-1205	0	0	1	0	0	0	LOC650368	asparagine-linked glycosylation 1-like pseudogene
hsa-miR-1205	1	0	1	1	1	1	IPPK	inositol 1,3,4,5,6-pentakisphosphate 2-kinase
hsa-miR-1205	1	0	1	1	1	1	ADAMTS8	ADAM metallopeptidase with thrombospondin type 1 motif, 8
hsa-miR-1205	1	0	1	1	1	1	FAM219A	family with sequence similarity 219, member A
hsa-miR-1205	1	0	1	1	1	1	PRDM2	PR domain containing 2, with ZNF domain
hsa-miR-1205	0	0	1	1	0	0	NPIP	nuclear pore complex interacting protein
hsa-miR-1205	1	0	1	1	1	1	FAM118A	family with sequence similarity 118, member A
hsa-miR-1205	1	0	1	1	1	1	ATXN7	ataxin 7
hsa-miR-1205	1	0	1	1	0	0	GXYLT1	glucoside xylosyltransferase 1
hsa-miR-1205	0	0	1	1	0	0	FAM21B	family with sequence similarity 21, member B
hsa-miR-1205	0	0	1	1	0	0	CUL9	cullin 9
hsa-miR-1205	1	0	1	1	1	1	METAP2	methionyl aminopeptidase 2
hsa-miR-1205	0	0	1	1	1	1	MKX	mohawk homeobox
hsa-miR-1205	1	0	1	0	0	0	ANKRD52	ankyrin repeat domain 52
hsa-miR-1205	1	0	1	1	1	1	KTN1	kinectin 1 (kinesin receptor)
hsa-miR-1205	1	0	1	0	0	0	MSL1	male-specific lethal 1 homolog (Drosophila)
hsa-miR-1205	0	0	1	0	1	1	CTBP1-AS1	CTBP1 antisense RNA 1
hsa-miR-1205	1	0	1	0	1	1	HECTD1	HECT domain containing E3 ubiquitin protein ligase 1
hsa-miR-1205	1	0	1	1	1	1	SH3BP5L	SH3-binding domain protein 5-like
hsa-miR-1205	1	0	1	1	1	1	DPY19L3	dpy-19-like 3 (C. elegans)
hsa-miR-1205	0	0	1	1	0	0	LOC399829	uncharacterized LOC399829
hsa-miR-1205	0	0	1	0	0	0	FAM95B1	family with sequence similarity 95, member B1
hsa-miR-1205	0	0	1	1	1	1	RBM46	RNA binding motif protein 46
hsa-miR-1205	1	0	1	1	1	1	TP53INP1	tumor protein p53 inducible nuclear protein 1
hsa-miR-1205	1	0	1	1	0	0	UBN2	ubinuclein 2
hsa-miR-1205	1	0	1	1	1	1	DCTN4	dynactin 4 (p62)
hsa-miR-1205	1	0	1	1	1	1	CHD5	chromodomain helicase DNA binding protein 5
hsa-miR-1205	0	0	1	1	0	0	C20orf141	chromosome 20 open reading frame 141
hsa-miR-1205	1	0	1	1	1	1	CPNE2	copine II
hsa-miR-1205	0	0	1	1	1	1	RBM39	RNA binding motif protein 39
hsa-miR-1205	0	0	1	1	0	0	SPATS1	spermatogenesis associated, serine-rich 1
hsa-miR-1205	0	0	1	1	1	1	BDH1	3-hydroxybutyrate dehydrogenase, type 1
hsa-miR-1205	0	0	1	1	1	1	SZT2	seizure threshold 2 homolog (mouse)
hsa-miR-1205	0	0	1	0	0	0	RPL23AP53	ribosomal protein L23a pseudogene 53
hsa-miR-1205	0	0	1	1	1	1	MOBP	myelin-associated oligodendrocyte basic protein
hsa-miR-1205	1	0	1	1	1	1	TSHZ1	teashirt zinc finger homeobox 1
hsa-miR-1205	0	0	1	0	0	0	LOC100127955	uncharacterized LOC100127955
hsa-miR-1205	0	0	1	1	1	1	USP4	ubiquitin specific peptidase 4 (proto-oncogene)
hsa-miR-1205	1	0	1	1	1	1	CLTC	clathrin, heavy chain (Hc)
hsa-miR-1205	0	0	1	0	0	0	LOC619207	scavenger receptor protein family member
hsa-miR-1205	1	0	1	1	0	0	SLC30A3	solute carrier family 30 (zinc transporter), member 3
hsa-miR-1205	0	0	1	0	1	1	NPHP4	nephronophthisis 4
hsa-miR-1205	0	0	1	1	1	1	PIN4	protein (peptidylprolyl cis/trans isomerase) NIMA-interacting, 4 (parvulin)
hsa-miR-1205	0	0	1	0	0	0	LOC100128262	uncharacterized LOC100128262
hsa-miR-1205	0	0	1	1	0	0	SLC22A25	solute carrier family 22, member 25
hsa-miR-1205	1	0	1	0	1	1	SP6	Sp6 transcription factor
hsa-miR-1205	0	0	1	1	1	1	WDR69	WD repeat domain 69
hsa-miR-1205	1	0	1	1	1	1	PLA2G15	phospholipase A2, group XV
hsa-miR-1205	0	0	1	0	1	1	LOC401321	uncharacterized LOC401321
hsa-miR-1205	0	0	1	1	1	1	SLC35F2	solute carrier family 35, member F2
hsa-miR-1205	1	0	1	1	1	1	NSUN4	NOP2/Sun domain family, member 4
hsa-miR-1205	0	0	1	1	0	0	LOC100128682	uncharacterized LOC100128682
hsa-miR-1205	0	0	1	0	0	0	FAM205B	transmembrane protein C9orf144B pseudogene
hsa-miR-1205	1	0	1	1	1	1	FRYL	FRY-like
hsa-miR-1205	0	0	1	0	0	0	IDO2	indoleamine 2,3-dioxygenase 2
hsa-miR-1205	1	0	1	1	1	1	ADAMTSL1	ADAMTS-like 1
hsa-miR-1205	0	0	1	0	0	0	AFG3L1P	AFG3 ATPase family gene 3-like 1 (S. cerevisiae), pseudogene
hsa-miR-1205	0	0	1	1	0	0	HEATR8	HEAT repeat containing 8
hsa-miR-1205	0	0	1	0	0	0	LOC654433	uncharacterized LOC654433
hsa-miR-1205	0	0	1	0	1	1	KIF1A	kinesin family member 1A
hsa-miR-1205	0	0	1	1	1	1	BRAT1	BRCA1-associated ATM activator 1
hsa-miR-1205	0	0	1	0	1	1	GALNT13	UDP-N-acetyl-alpha-D-galactosamine:polypeptide N-acetylgalactosaminyltransferase 13 (GalNAc-T13)
hsa-miR-1205	0	0	1	0	1	1	RUFY4	RUN and FYVE domain containing 4
hsa-miR-1205	1	0	1	1	1	1	RNF111	ring finger protein 111
hsa-miR-1205	0	0	1	1	1	1	RNF19B	ring finger protein 19B
hsa-miR-1205	0	0	1	1	1	1	PDE2A	phosphodiesterase 2A, cGMP-stimulated
hsa-miR-1205	1	0	1	1	1	1	MAP2K4	mitogen-activated protein kinase kinase 4
hsa-miR-1205	0	0	1	1	1	1	KAZALD1	Kazal-type serine peptidase inhibitor domain 1
hsa-miR-1205	1	0	1	0	1	1	TMEM106B	transmembrane protein 106B
hsa-miR-1205	1	0	1	1	1	1	CYFIP2	cytoplasmic FMR1 interacting protein 2
hsa-miR-1205	1	0	1	0	1	1	SEZ6	seizure related 6 homolog (mouse)
hsa-miR-1205	0	0	1	1	1	1	VRK3	vaccinia related kinase 3
hsa-miR-1205	0	0	1	0	0	0	RRN3P2	RNA polymerase I transcription factor homolog (S. cerevisiae) pseudogene 2
hsa-miR-1205	1	0	1	1	1	1	PTPN2	protein tyrosine phosphatase, non-receptor type 2
hsa-miR-1205	1	0	1	1	1	1	CAMK2G	calcium/calmodulin-dependent protein kinase II gamma
hsa-miR-1205	0	0	1	1	0	0	PCSK5	proprotein convertase subtilisin/kexin type 5
hsa-miR-1205	1	0	1	0	1	1	MAP3K3	mitogen-activated protein kinase kinase kinase 3
hsa-miR-1205	0	0	1	1	1	1	RNF135	ring finger protein 135
hsa-miR-1205	0	0	1	1	1	1	MECR	mitochondrial trans-2-enoyl-CoA reductase
hsa-miR-1205	1	0	1	1	1	1	EDN1	endothelin 1
hsa-miR-1205	1	0	1	1	0	0	C20orf194	chromosome 20 open reading frame 194
hsa-miR-1205	1	0	1	1	1	1	AHCYL1	adenosylhomocysteinase-like 1
hsa-miR-1205	0	0	1	0	1	1	NEK1	NIMA (never in mitosis gene a)-related kinase 1
hsa-miR-1205	0	0	1	1	1	1	TFDP2	transcription factor Dp-2 (E2F dimerization partner 2)
hsa-miR-1205	0	0	1	0	0	0	POM121L9P	POM121 transmembrane nucleoporin-like 9, pseudogene
hsa-miR-1205	1	0	1	1	1	1	ARF6	ADP-ribosylation factor 6
hsa-miR-1205	0	0	1	1	0	0	MSH5	mutS homolog 5 (E. coli)
hsa-miR-1205	0	0	1	1	0	0	SAPCD1	suppressor APC domain containing 1
hsa-miR-1205	0	0	1	1	0	0	H2AFJ	H2A histone family, member J
hsa-miR-1205	0	0	1	1	0	0	ODF3	outer dense fiber of sperm tails 3
hsa-miR-1205	0	0	1	0	0	0	DNAJC5B	DnaJ (Hsp40) homolog, subfamily C, member 5 beta
hsa-miR-1205	0	0	1	0	0	0	KIAA0913	KIAA0913
hsa-miR-1205	0	0	1	1	1	1	MYO9A	myosin IXA
hsa-miR-1205	1	0	1	0	1	1	DNAJC5	DnaJ (Hsp40) homolog, subfamily C, member 5
hsa-miR-1205	0	0	1	1	1	1	STAG3L1	stromal antigen 3-like 1
hsa-miR-1205	1	0	1	0	1	1	GPR85	G protein-coupled receptor 85
hsa-miR-1205	1	0	1	1	1	1	TFE3	transcription factor binding to IGHM enhancer 3
hsa-miR-1205	1	0	1	1	1	1	NEO1	neogenin 1
hsa-miR-1205	0	0	1	1	1	1	SLC30A10	solute carrier family 30, member 10
hsa-miR-1205	0	0	1	1	1	1	MESP2	mesoderm posterior 2 homolog (mouse)
hsa-miR-1205	1	0	1	1	1	1	TRIM3	tripartite motif containing 3
hsa-miR-1205	0	0	1	0	0	0	FAM66D	family with sequence similarity 66, member D
hsa-miR-1205	1	0	1	1	1	1	PKNOX2	PBX/knotted 1 homeobox 2
hsa-miR-1205	0	0	1	1	1	1	ING3	inhibitor of growth family, member 3
hsa-miR-1205	1	0	1	0	0	0	SYNPO	synaptopodin
hsa-miR-1205	0	0	1	1	0	0	KRBA1	KRAB-A domain containing 1
hsa-miR-1205	0	0	1	1	1	1	ZFP41	zinc finger protein 41 homolog (mouse)
hsa-miR-1205	1	0	1	1	1	1	LYPD3	LY6/PLAUR domain containing 3
hsa-miR-1205	0	0	1	0	0	0	ZNF720	zinc finger protein 720
hsa-miR-1205	1	0	1	1	1	1	CHMP7	charged multivesicular body protein 7
hsa-miR-1205	1	0	1	1	1	1	MLL3	myeloid/lymphoid or mixed-lineage leukemia 3
hsa-miR-1205	1	0	1	1	0	0	CELF5	CUGBP, Elav-like family member 5
hsa-miR-1205	0	0	1	1	1	1	SYTL4	synaptotagmin-like 4
hsa-miR-1205	0	0	1	0	0	0	FAM225A	family with sequence similarity 225, member A (non-protein coding)
hsa-miR-1205	1	0	1	1	1	1	POU6F1	POU class 6 homeobox 1
hsa-miR-1205	1	0	1	1	1	1	SBF2	SET binding factor 2
hsa-miR-1205	0	0	1	1	0	0	TMEM44	transmembrane protein 44
hsa-miR-1205	0	0	1	1	1	1	INPP5B	inositol polyphosphate-5-phosphatase, 75kDa
hsa-miR-1205	0	0	1	1	1	1	CCDC132	coiled-coil domain containing 132
hsa-miR-1205	1	0	1	0	1	1	MEF2C	myocyte enhancer factor 2C
hsa-miR-1205	0	0	1	1	0	0	FCRL3	Fc receptor-like 3
hsa-miR-1205	1	0	1	1	0	0	KIAA1109	KIAA1109
hsa-miR-1205	0	0	1	0	0	0	LOC286135	uncharacterized LOC286135
hsa-miR-1205	1	0	1	1	1	1	CEP164	centrosomal protein 164kDa
hsa-miR-1205	1	0	1	0	1	1	CLINT1	clathrin interactor 1
hsa-miR-1205	0	0	1	1	1	1	PRKAR1B	protein kinase, cAMP-dependent, regulatory, type I, beta
hsa-miR-1205	1	0	1	1	1	1	NRP1	neuropilin 1
hsa-miR-1205	1	0	1	1	1	1	FAM63B	family with sequence similarity 63, member B
hsa-miR-1205	0	0	1	0	0	0	ADCY10P1	adenylate cyclase 10 (soluble) pseudogene 1
hsa-miR-1205	1	0	1	0	1	1	EXOC5	exocyst complex component 5
hsa-miR-1205	0	0	1	1	1	1	PCDH20	protocadherin 20
hsa-miR-1205	1	0	1	1	1	1	PRPF38B	PRP38 pre-mRNA processing factor 38 (yeast) domain containing B
hsa-miR-1205	1	0	1	1	1	1	DIS3L2	DIS3 mitotic control homolog (S. cerevisiae)-like 2
hsa-miR-1205	0	0	1	1	1	1	LMAN2L	lectin, mannose-binding 2-like
hsa-miR-1205	1	0	1	1	1	1	SET	SET nuclear oncogene
hsa-miR-1205	0	0	1	1	1	1	OSR2	odd-skipped related 2 (Drosophila)
hsa-miR-1205	0	0	1	1	0	0	TP73	tumor protein p73
hsa-miR-1205	1	0	1	1	1	1	SULF1	sulfatase 1
hsa-miR-1205	0	0	1	0	0	0	CR1L	complement component (3b/4b) receptor 1-like
hsa-miR-1205	1	0	1	1	1	1	MARK4	MAP/microtubule affinity-regulating kinase 4
hsa-miR-1205	0	0	1	1	1	1	MED19	mediator complex subunit 19
hsa-miR-1205	1	0	1	1	0	0	PPARGC1B	peroxisome proliferator-activated receptor gamma, coactivator 1 beta
hsa-miR-1205	1	0	1	0	1	1	SS18L1	synovial sarcoma translocation gene on chromosome 18-like 1
hsa-miR-1205	0	0	1	1	1	1	IYD	iodotyrosine deiodinase
hsa-miR-1205	0	0	1	1	0	0	GLYCTK	glycerate kinase
hsa-miR-1205	1	0	1	1	1	1	GFRA2	GDNF family receptor alpha 2
hsa-miR-1205	0	0	1	0	0	0	TAG	tumor antigen gene
hsa-miR-1205	0	0	1	1	1	1	GON4L	gon-4-like (C. elegans)
hsa-miR-1205	0	0	1	0	0	0	FAM138C	family with sequence similarity 138, member C
hsa-miR-1205	0	0	1	1	0	0	FKBP7	FK506 binding protein 7
hsa-miR-1205	1	0	1	1	1	1	TMCC2	transmembrane and coiled-coil domain family 2
hsa-miR-1205	0	0	1	1	1	1	IL20	interleukin 20
hsa-miR-1205	0	0	1	1	0	0	RAET1E	retinoic acid early transcript 1E
hsa-miR-1205	1	0	1	1	0	0	USP7	ubiquitin specific peptidase 7 (herpes virus-associated)
hsa-miR-1205	0	0	1	1	1	1	TIMM50	translocase of inner mitochondrial membrane 50 homolog (S. cerevisiae)
hsa-miR-1205	1	0	1	1	1	1	FAM120A	family with sequence similarity 120A
hsa-miR-1205	0	0	1	1	1	1	POTEG	POTE ankyrin domain family, member G
hsa-miR-1205	0	0	1	1	1	1	HMBOX1	homeobox containing 1
hsa-miR-1205	0	0	1	0	1	1	XKR5	XK, Kell blood group complex subunit-related family, member 5
hsa-miR-1205	1	0	1	1	1	1	MECP2	methyl CpG binding protein 2 (Rett syndrome)
hsa-miR-1205	0	0	1	1	0	0	PAOX	polyamine oxidase (exo-N4-amino)
hsa-miR-1205	0	0	1	1	0	0	ASB16	ankyrin repeat and SOCS box containing 16
hsa-miR-1205	0	0	1	1	1	1	DIO1	deiodinase, iodothyronine, type I
hsa-miR-1205	0	0	1	1	0	0	DHRS4	dehydrogenase/reductase (SDR family) member 4
hsa-miR-1205	0	0	1	1	1	1	IL24	interleukin 24
hsa-miR-1205	0	0	1	1	0	0	USP27X	ubiquitin specific peptidase 27, X-linked
hsa-miR-1205	1	0	1	1	1	1	PLCH1	phospholipase C, eta 1
hsa-miR-1205	0	0	1	1	0	0	SERPING1	serpin peptidase inhibitor, clade G (C1 inhibitor), member 1
hsa-miR-1205	1	0	1	1	1	1	RTN3	reticulon 3
hsa-miR-1205	1	0	1	1	1	1	QKI	QKI, KH domain containing, RNA binding
hsa-miR-1205	0	0	1	0	0	0	PTPRVP	protein tyrosine phosphatase, receptor type, V, pseudogene
hsa-miR-1205	1	0	1	1	0	0	TAF4B	TAF4b RNA polymerase II, TATA box binding protein (TBP)-associated factor, 105kDa
hsa-miR-1205	0	0	1	1	0	0	NBPF8	neuroblastoma breakpoint family, member 8
hsa-miR-1205	1	0	1	0	1	1	FAM46A	family with sequence similarity 46, member A
hsa-miR-1205	0	0	1	1	1	1	ZCCHC17	zinc finger, CCHC domain containing 17
hsa-miR-1205	0	0	1	1	1	1	PAFAH1B2	platelet-activating factor acetylhydrolase 1b, catalytic subunit 2 (30kDa)
hsa-miR-1205	0	0	1	1	0	0	RPL5	ribosomal protein L5
hsa-miR-1205	1	0	1	1	1	1	HOXC13	homeobox C13
hsa-miR-1205	0	0	1	1	1	1	MRRF	mitochondrial ribosome recycling factor
hsa-miR-1205	1	0	1	0	1	1	DPYSL5	dihydropyrimidinase-like 5
hsa-miR-1205	0	0	1	1	1	1	TUFT1	tuftelin 1
hsa-miR-1205	1	0	1	1	0	0	POLR3D	polymerase (RNA) III (DNA directed) polypeptide D, 44kDa
hsa-miR-1205	0	0	1	1	1	1	RABL5	RAB, member RAS oncogene family-like 5
hsa-miR-1205	1	0	1	1	0	0	SERPINE1	serpin peptidase inhibitor, clade E (nexin, plasminogen activator inhibitor type 1), member 1
hsa-miR-1205	1	0	1	1	1	1	POU2F2	POU class 2 homeobox 2
hsa-miR-1205	1	0	1	0	1	1	C15orf41	chromosome 15 open reading frame 41
hsa-miR-1205	0	0	1	0	0	0	DNM1P33	DNM1 pseudogene 33
hsa-miR-1205	1	0	1	1	1	1	PCGF5	polycomb group ring finger 5
hsa-miR-1205	0	0	1	1	0	0	AGBL5	ATP/GTP binding protein-like 5
hsa-miR-1205	0	0	1	1	0	0	RBM14	RNA binding motif protein 14
hsa-miR-1205	1	0	1	1	1	1	TRIM39	tripartite motif containing 39
hsa-miR-1205	1	0	1	1	1	1	CALM1	calmodulin 1 (phosphorylase kinase, delta)
hsa-miR-1205	0	0	1	1	1	1	ZNF85	zinc finger protein 85
hsa-miR-1205	1	0	1	1	0	0	WDR45	WD repeat domain 45
hsa-miR-1205	0	0	1	0	0	0	ATXN7L3B	ataxin 7-like 3B
hsa-miR-1205	0	0	1	1	0	0	SLC4A2	solute carrier family 4, anion exchanger, member 2 (erythrocyte membrane protein band 3-like 1)
hsa-miR-1205	1	0	1	1	0	0	SIGMAR1	sigma non-opioid intracellular receptor 1
hsa-miR-1205	1	0	1	1	1	1	GRIA2	glutamate receptor, ionotropic, AMPA 2
hsa-miR-1205	1	0	1	1	1	1	SZRD1	SUZ RNA binding domain containing 1
hsa-miR-1205	1	0	1	1	1	1	SLC46A1	solute carrier family 46 (folate transporter), member 1
hsa-miR-1205	1	0	1	1	1	1	ZFAND5	zinc finger, AN1-type domain 5
hsa-miR-1205	0	0	1	0	0	0	LRRC14	leucine rich repeat containing 14
hsa-miR-1205	1	0	1	0	0	0	XPNPEP3	X-prolyl aminopeptidase (aminopeptidase P) 3, putative
hsa-miR-1205	1	0	1	1	1	1	OTUD5	OTU domain containing 5
hsa-miR-1205	1	0	1	0	1	1	RNF165	ring finger protein 165
hsa-miR-1205	1	0	1	1	1	1	SUPT16H	suppressor of Ty 16 homolog (S. cerevisiae)
hsa-miR-1205	1	0	1	1	1	1	DPH1	DPH1 homolog (S. cerevisiae)
hsa-miR-1205	1	0	1	1	1	1	TMEM185A	transmembrane protein 185A
hsa-miR-1205	0	0	1	0	0	0	KLHL15	kelch-like 15 (Drosophila)
hsa-miR-1205	1	0	1	1	1	1	ZBTB38	zinc finger and BTB domain containing 38
hsa-miR-1205	0	0	1	1	1	1	RAB37	RAB37, member RAS oncogene family
hsa-miR-1205	0	0	1	0	0	0	FAM86DP	family with sequence similarity 86, member D, pseudogene
hsa-miR-1205	0	0	1	1	0	0	PREB	prolactin regulatory element binding
hsa-miR-1205	0	0	1	1	0	0	ZDHHC6	zinc finger, DHHC-type containing 6
hsa-miR-1205	0	0	1	1	0	0	ZBTB32	zinc finger and BTB domain containing 32
hsa-miR-1205	0	0	1	0	0	0	LOC100144602	uncharacterized LOC100144602
hsa-miR-1205	1	0	1	1	1	1	ARHGEF9	Cdc42 guanine nucleotide exchange factor (GEF) 9
hsa-miR-1205	0	0	1	1	1	1	EXOC7	exocyst complex component 7
hsa-miR-1205	0	0	1	1	1	1	PTCD2	pentatricopeptide repeat domain 2
hsa-miR-1205	0	0	1	1	0	0	MAD1L1	MAD1 mitotic arrest deficient-like 1 (yeast)
hsa-miR-1205	0	0	1	0	0	0	WDFY3-AS2	WDFY3 antisense RNA 2
hsa-miR-1205	0	0	1	1	1	1	LRRK1	leucine-rich repeat kinase 1
hsa-miR-1205	0	0	1	1	1	1	HLA-G	major histocompatibility complex, class I, G
hsa-miR-1205	1	0	1	0	1	1	BTF3L4	basic transcription factor 3-like 4
hsa-miR-1205	0	0	1	0	1	1	ZNF134	zinc finger protein 134
hsa-miR-1205	0	0	1	1	1	1	FMNL1	formin-like 1
hsa-miR-1205	0	0	1	0	0	0	LINC00488	long intergenic non-protein coding RNA 488
hsa-miR-1205	0	0	1	1	1	1	CDC42SE2	CDC42 small effector 2
hsa-miR-1205	0	0	1	1	1	1	ABCA8	ATP-binding cassette, sub-family A (ABC1), member 8
hsa-miR-1205	0	0	1	0	0	0	FLJ35390	uncharacterized LOC255031
hsa-miR-1205	0	0	1	0	0	0	JMJD7	jumonji domain containing 7
hsa-miR-1205	0	0	1	1	0	0	GALNTL5	UDP-N-acetyl-alpha-D-galactosamine:polypeptide N-acetylgalactosaminyltransferase-like 5
hsa-miR-1205	0	0	1	1	0	0	GLS2	glutaminase 2 (liver, mitochondrial)
hsa-miR-1205	1	0	1	1	1	1	PELI3	pellino E3 ubiquitin protein ligase family member 3
hsa-miR-1205	0	0	1	1	1	1	CDS2	CDP-diacylglycerol synthase (phosphatidate cytidylyltransferase) 2
hsa-miR-1205	1	0	1	1	0	0	NCLN	nicalin
hsa-miR-1205	1	0	1	1	1	1	VASP	vasodilator-stimulated phosphoprotein
hsa-miR-1205	1	0	1	1	1	1	FAM131A	family with sequence similarity 131, member A
hsa-miR-1205	0	0	1	0	1	1	FHAD1	forkhead-associated (FHA) phosphopeptide binding domain 1
hsa-miR-1205	0	0	1	1	1	1	HS1BP3	HCLS1 binding protein 3
hsa-miR-1205	0	0	1	1	1	1	SELP	selectin P (granule membrane protein 140kDa, antigen CD62)
hsa-miR-1205	0	0	1	1	1	1	ASTN2	astrotactin 2
hsa-miR-1205	0	0	1	1	1	1	LRMP	lymphoid-restricted membrane protein
hsa-miR-1205	1	0	1	1	1	1	GIGYF2	GRB10 interacting GYF protein 2
hsa-miR-1205	1	0	1	0	1	1	TFEC	transcription factor EC
hsa-miR-1205	0	0	1	1	1	1	LRRC27	leucine rich repeat containing 27
hsa-miR-1205	1	0	1	0	1	1	SV2B	synaptic vesicle glycoprotein 2B
hsa-miR-1205	0	0	1	0	1	1	MYO7A	myosin VIIA
hsa-miR-1205	0	0	1	1	1	1	SH3TC1	SH3 domain and tetratricopeptide repeats 1
hsa-miR-1205	1	0	1	1	1	1	ZNF518A	zinc finger protein 518A
hsa-miR-1205	1	0	1	1	0	0	FAM83F	family with sequence similarity 83, member F
hsa-miR-1205	0	0	1	0	0	0	LOC729307	uncharacterized LOC729307
hsa-miR-1205	0	0	1	0	1	1	B3GALTL	beta 1,3-galactosyltransferase-like
hsa-miR-1205	1	0	1	1	1	1	ZNF282	zinc finger protein 282
hsa-miR-1205	0	0	1	0	0	0	LOC402779	uncharacterized LOC402779
hsa-miR-1205	0	0	1	0	1	1	PLEKHM1P	pleckstrin homology domain containing, family M (with RUN domain) member 1 pseudogene
hsa-miR-1205	1	0	1	1	1	1	CCNG2	cyclin G2
hsa-miR-1205	1	0	1	1	1	1	TTC39C	tetratricopeptide repeat domain 39C
hsa-miR-1205	0	0	1	1	1	1	UBXN1	UBX domain protein 1
hsa-miR-1205	1	0	1	1	1	1	DCLK2	doublecortin-like kinase 2
hsa-miR-1205	1	0	1	1	1	1	RAB5B	RAB5B, member RAS oncogene family
hsa-miR-1205	0	0	1	0	0	0	FAM86JP	family with sequence similarity 86, member A pseudogene
hsa-miR-1205	1	0	1	1	1	1	ZNF521	zinc finger protein 521
hsa-miR-1205	1	0	1	1	1	1	SIRPA	signal-regulatory protein alpha
hsa-miR-1205	0	0	1	0	0	0	BCAS3	breast carcinoma amplified sequence 3
hsa-miR-1205	1	0	1	0	1	1	KCTD2	potassium channel tetramerisation domain containing 2
hsa-miR-1205	1	0	1	1	1	1	RNF207	ring finger protein 207
hsa-miR-1205	0	0	1	1	1	1	ZNF337	zinc finger protein 337
hsa-miR-1205	1	0	1	0	1	1	RHOBTB2	Rho-related BTB domain containing 2
hsa-miR-1205	1	0	1	0	1	1	ATP11A	ATPase, class VI, type 11A
hsa-miR-1205	0	0	1	1	0	0	TSNAXIP1	translin-associated factor X interacting protein 1
hsa-miR-1205	1	0	1	1	1	1	RAP2C	RAP2C, member of RAS oncogene family
hsa-miR-1205	1	0	1	1	1	1	PEX5L	peroxisomal biogenesis factor 5-like
hsa-miR-1205	0	0	1	1	1	1	DUSP28	dual specificity phosphatase 28
hsa-miR-1205	0	0	1	0	0	0	FAM201A	family with sequence similarity 201, member A
hsa-miR-1205	1	0	1	1	1	1	SLC38A9	solute carrier family 38, member 9
hsa-miR-1205	0	0	1	0	0	0	SPATA3	spermatogenesis associated 3
hsa-miR-1205	0	0	1	0	1	1	C9orf57	chromosome 9 open reading frame 57
hsa-miR-1205	0	0	1	0	0	0	LINC00642	long intergenic non-protein coding RNA 642
hsa-miR-1205	1	0	1	1	1	1	SMG7	smg-7 homolog, nonsense mediated mRNA decay factor (C. elegans)
hsa-miR-1205	1	0	1	1	1	1	ELMO2	engulfment and cell motility 2
hsa-miR-1205	1	0	1	1	1	1	MEIS1	Meis homeobox 1
hsa-miR-1205	1	0	1	0	1	1	CPEB4	cytoplasmic polyadenylation element binding protein 4
hsa-miR-1205	0	0	1	0	0	0	LOC284889	uncharacterized LOC284889
hsa-miR-1205	1	0	1	1	1	1	BNC2	basonuclin 2
hsa-miR-1205	1	0	1	1	1	1	WDR48	WD repeat domain 48
hsa-miR-1205	1	0	1	0	0	0	RAVER1	ribonucleoprotein, PTB-binding 1
hsa-miR-1205	1	0	1	1	1	1	SOX6	SRY (sex determining region Y)-box 6
hsa-miR-1205	1	0	1	1	1	1	GALNT1	UDP-N-acetyl-alpha-D-galactosamine:polypeptide N-acetylgalactosaminyltransferase 1 (GalNAc-T1)
hsa-miR-1205	0	0	1	1	0	0	VMO1	vitelline membrane outer layer 1 homolog (chicken)
hsa-miR-1205	1	0	1	1	0	0	CHD4	chromodomain helicase DNA binding protein 4
hsa-miR-1205	0	0	1	1	0	0	PRMT2	protein arginine methyltransferase 2
hsa-miR-1205	1	0	1	1	1	1	PRR16	proline rich 16
hsa-miR-1205	0	0	1	1	1	1	C1orf177	chromosome 1 open reading frame 177
hsa-miR-1205	0	0	1	1	0	0	ADAMTS13	ADAM metallopeptidase with thrombospondin type 1 motif, 13
hsa-miR-1205	0	0	1	0	0	0	LOC401074	uncharacterized LOC401074
hsa-miR-1205	0	0	1	0	0	0	LOC388906	opioid growth factor receptor pseudogene
hsa-miR-1205	1	0	1	0	1	1	GPR107	G protein-coupled receptor 107
hsa-miR-1205	0	0	1	0	0	0	RNASEK	ribonuclease, RNase K
hsa-miR-1205	1	0	1	1	1	1	DOLPP1	dolichyl pyrophosphate phosphatase 1
hsa-miR-1205	0	0	1	0	1	1	LINC00634	long intergenic non-protein coding RNA 634
hsa-miR-1205	0	0	1	1	0	0	CNGA4	cyclic nucleotide gated channel alpha 4
hsa-miR-1205	1	0	1	1	1	1	PDPK1	3-phosphoinositide dependent protein kinase-1
hsa-miR-1205	0	0	1	0	0	0	LOC339240	keratin 17 pseudogene
hsa-miR-1205	0	0	1	1	0	0	MTCH1	mitochondrial carrier 1
hsa-miR-1205	1	0	1	1	1	1	ARPP21	cAMP-regulated phosphoprotein, 21kDa
hsa-miR-1205	1	0	1	0	1	1	HSPA12A	heat shock 70kDa protein 12A
hsa-miR-1205	1	0	1	1	1	1	ARID3B	AT rich interactive domain 3B (BRIGHT-like)
hsa-miR-1205	0	0	1	0	0	0	LOC253044	uncharacterized LOC253044
hsa-miR-1205	0	0	1	0	1	1	OAZ1	ornithine decarboxylase antizyme 1
hsa-miR-1205	0	0	1	1	0	0	ZNF839	zinc finger protein 839
hsa-miR-1205	0	0	1	1	1	1	SH3GL3	SH3-domain GRB2-like 3
hsa-miR-1205	0	0	1	0	0	0	LOC340094	uncharacterized LOC340094
hsa-miR-1205	0	0	1	0	0	0	LOC338579	ankyrin repeat domain-containing protein 30B pseudogene
hsa-miR-1205	0	0	1	1	1	1	LDLRAD2	low density lipoprotein receptor class A domain containing 2
hsa-miR-1205	0	0	1	0	0	0	LOC339260	uncharacterized LOC339260
hsa-miR-1205	1	0	1	1	0	0	WNK1	WNK lysine deficient protein kinase 1
hsa-miR-1205	1	0	1	1	1	1	MAMDC2	MAM domain containing 2
hsa-miR-1205	0	0	1	0	0	0	LOC283914	uncharacterized LOC283914
hsa-miR-1205	1	0	1	1	1	1	CARM1	coactivator-associated arginine methyltransferase 1
hsa-miR-1205	1	0	1	1	0	0	SFXN5	sideroflexin 5
hsa-miR-1205	0	0	1	1	1	1	P2RX6	purinergic receptor P2X, ligand-gated ion channel, 6
hsa-miR-1205	0	0	1	0	0	0	INHBA-AS1	INHBA antisense RNA 1
hsa-miR-1205	0	0	1	0	0	0	LOC348120	uncharacterized LOC348120
hsa-miR-1205	1	0	1	0	1	1	KDM2A	lysine (K)-specific demethylase 2A
hsa-miR-1205	1	0	1	1	1	1	TOMM40	translocase of outer mitochondrial membrane 40 homolog (yeast)
hsa-miR-1205	0	0	1	1	0	0	MT3	metallothionein 3
hsa-miR-1205	1	0	1	1	1	1	UPF3A	UPF3 regulator of nonsense transcripts homolog A (yeast)
hsa-miR-1205	1	0	1	1	0	0	BMPR1B	bone morphogenetic protein receptor, type IB
hsa-miR-1205	0	0	1	0	0	0	WASH2P	WAS protein family homolog 2 pseudogene
hsa-miR-1205	1	0	1	1	1	1	CLVS1	clavesin 1
hsa-miR-1205	1	0	1	1	1	1	WASF3	WAS protein family, member 3
hsa-miR-1205	1	0	1	1	1	1	TMPO	thymopoietin
hsa-miR-1205	0	0	1	1	1	1	NCMAP	noncompact myelin associated protein
hsa-miR-1205	1	0	1	1	0	0	EIF2B5	eukaryotic translation initiation factor 2B, subunit 5 epsilon, 82kDa
hsa-miR-1205	0	0	1	1	0	0	NLRC5	NLR family, CARD domain containing 5
hsa-miR-1205	1	0	1	0	1	1	SEMA4G	sema domain, immunoglobulin domain (Ig), transmembrane domain (TM) and short cytoplasmic domain, (semaphorin) 4G
hsa-miR-1205	0	0	1	1	1	1	LINC00086	long intergenic non-protein coding RNA 86
hsa-miR-1205	1	0	1	1	1	1	LIMD2	LIM domain containing 2
hsa-miR-1205	0	0	1	1	1	1	RAB3IL1	RAB3A interacting protein (rabin3)-like 1
hsa-miR-1205	1	0	1	1	1	1	SCUBE3	signal peptide, CUB domain, EGF-like 3
hsa-miR-1205	1	0	1	0	1	1	C14orf43	chromosome 14 open reading frame 43
hsa-miR-1205	0	0	1	0	0	0	LINC00265	long intergenic non-protein coding RNA 265
hsa-miR-1205	0	0	1	1	0	0	TENC1	tensin like C1 domain containing phosphatase (tensin 2)
hsa-miR-1205	0	0	1	1	0	0	TINAG	tubulointerstitial nephritis antigen
hsa-miR-1205	0	0	1	1	0	0	ABHD1	abhydrolase domain containing 1
hsa-miR-1205	0	0	1	0	0	0	ADAM5	ADAM metallopeptidase domain 5, pseudogene
hsa-miR-1205	0	0	1	1	0	0	GRIN2C	glutamate receptor, ionotropic, N-methyl D-aspartate 2C
hsa-miR-1205	0	0	1	0	0	0	CISD3	CDGSH iron sulfur domain 3
hsa-miR-1205	0	0	1	1	0	0	WDR90	WD repeat domain 90
hsa-miR-1205	0	0	1	1	1	1	ELL3	elongation factor RNA polymerase II-like 3
hsa-miR-1205	1	0	1	0	1	1	PLEKHH2	pleckstrin homology domain containing, family H (with MyTH4 domain) member 2
hsa-miR-1205	0	0	1	0	0	0	USP32P1	ubiquitin specific peptidase 32 pseudogene 1
hsa-miR-1205	0	0	1	1	0	0	C8orf31	chromosome 8 open reading frame 31
hsa-miR-1205	0	0	1	0	0	0	SCAND2	SCAN domain containing 2 pseudogene
hsa-miR-1205	1	0	1	1	1	1	MGAT5B	mannosyl (alpha-1,6-)-glycoprotein beta-1,6-N-acetyl-glucosaminyltransferase, isozyme B
hsa-miR-1205	1	0	1	1	1	1	ADCY6	adenylate cyclase 6
hsa-miR-1205	1	0	1	1	1	1	C18orf1	chromosome 18 open reading frame 1
hsa-miR-1205	1	0	1	1	1	1	C5orf25	chromosome 5 open reading frame 25
hsa-miR-1205	1	0	1	1	1	1	FAM129B	family with sequence similarity 129, member B
hsa-miR-1205	0	0	1	1	1	1	IL1RN	interleukin 1 receptor antagonist
hsa-miR-1205	1	0	1	1	1	1	PDCD6IP	programmed cell death 6 interacting protein
hsa-miR-1205	0	0	1	1	1	1	TTLL9	tubulin tyrosine ligase-like family, member 9
hsa-miR-1205	0	0	1	0	0	0	PTGER4P2	prostaglandin E receptor 4 (subtype EP4) pseudogene 2
hsa-miR-1205	0	0	1	1	1	1	CBWD3	COBW domain containing 3
hsa-miR-1205	0	0	1	1	0	0	CYP4F30P	cytochrome P450, family 4, subfamily F, polypeptide 30, pseudogene
hsa-miR-1205	1	0	1	0	1	1	TMEM194A	transmembrane protein 194A
hsa-miR-1205	0	0	1	0	0	0	JPX	JPX transcript, XIST activator (non-protein coding)
hsa-miR-1205	0	0	1	1	0	0	TRIM41	tripartite motif containing 41
hsa-miR-1205	1	0	1	1	1	1	RARG	retinoic acid receptor, gamma
hsa-miR-1205	0	0	1	1	1	1	GNG10	guanine nucleotide binding protein (G protein), gamma 10
hsa-miR-1205	0	0	1	0	0	0	LINC00152	long intergenic non-protein coding RNA 152
hsa-miR-1205	0	0	1	1	0	0	ASIC4	acid-sensing (proton-gated) ion channel family member 4
hsa-miR-1205	1	0	1	1	1	1	NTRK2	neurotrophic tyrosine kinase, receptor, type 2
hsa-miR-1205	0	0	1	1	0	0	FAM21A	family with sequence similarity 21, member A
hsa-miR-1205	0	0	1	0	0	0	ABCC6P1	ATP-binding cassette, sub-family C, member 6 pseudogene 1
hsa-miR-1205	0	0	1	0	0	0	AGAP9	ArfGAP with GTPase domain, ankyrin repeat and PH domain 9
hsa-miR-1205	0	0	1	0	0	0	LOC642846	DEAD/H (Asp-Glu-Ala-Asp/His) box polypeptide 11-like
hsa-miR-1205	1	0	1	0	1	1	AMMECR1L	AMME chromosomal region gene 1-like
hsa-miR-1205	0	0	1	1	0	0	DNHD1	dynein heavy chain domain 1
hsa-miR-1205	1	0	1	1	1	1	ZMYND11	zinc finger, MYND-type containing 11
hsa-miR-1205	1	0	1	1	1	1	ESRRA	estrogen-related receptor alpha
hsa-miR-1205	1	0	1	0	1	1	PIK3R3	phosphoinositide-3-kinase, regulatory subunit 3 (gamma)
hsa-miR-1205	0	0	1	1	0	0	DNASE1	deoxyribonuclease I
hsa-miR-1205	0	0	1	0	0	0	FRG1B	FSHD region gene 1 family, member B
hsa-miR-1205	0	0	1	0	1	1	TGFB2	transforming growth factor, beta 2
hsa-miR-1205	1	0	1	1	1	1	ACVR2B	activin A receptor, type IIB
hsa-miR-1205	0	0	1	1	0	0	RPS9	ribosomal protein S9
hsa-miR-1205	0	0	1	0	0	0	FAM106A	family with sequence similarity 106, member A
hsa-miR-1205	0	0	1	1	0	0	RGL4	ral guanine nucleotide dissociation stimulator-like 4
hsa-miR-1205	0	0	1	0	0	0	MT1JP	metallothionein 1J, pseudogene
hsa-miR-1205	0	0	1	1	0	0	TMC1	transmembrane channel-like 1
hsa-miR-1205	0	0	1	0	0	0	GUSBP9	glucuronidase, beta pseudogene 9
hsa-miR-1205	0	0	1	1	1	1	SPHKAP	SPHK1 interactor, AKAP domain containing
hsa-miR-1205	0	0	1	1	0	0	USP19	ubiquitin specific peptidase 19
hsa-miR-1205	0	0	1	1	0	0	C1orf122	chromosome 1 open reading frame 122
hsa-miR-1205	1	0	1	0	1	1	BTBD3	BTB (POZ) domain containing 3
hsa-miR-1205	0	0	1	1	0	0	C1QTNF9B	C1q and tumor necrosis factor related protein 9B
hsa-miR-1205	0	0	1	1	1	1	STAU2	staufen, RNA binding protein, homolog 2 (Drosophila)
hsa-miR-1205	1	0	1	0	1	1	MAP3K9	mitogen-activated protein kinase kinase kinase 9
hsa-miR-1205	0	0	1	0	0	0	INTS4L1	integrator complex subunit 4-like 1
hsa-miR-1205	1	0	1	1	1	1	SLK	STE20-like kinase
hsa-miR-1205	0	0	1	1	0	0	RNF123	ring finger protein 123
hsa-miR-1205	1	0	1	1	0	0	GRIN2A	glutamate receptor, ionotropic, N-methyl D-aspartate 2A
hsa-miR-1205	1	0	1	1	1	1	GRIA3	glutamate receptor, ionotropic, AMPA 3
hsa-miR-1205	1	0	1	1	1	1	OSBP2	oxysterol binding protein 2
hsa-miR-1205	1	0	1	1	0	0	RASGEF1B	RasGEF domain family, member 1B
hsa-miR-1205	0	0	1	1	0	0	PLCXD2	phosphatidylinositol-specific phospholipase C, X domain containing 2
hsa-miR-1205	0	0	1	0	0	0	LGALS17A	Charcot-Leyden crystal protein pseudogene
hsa-miR-1205	1	0	1	1	1	1	ANK2	ankyrin 2, neuronal
hsa-miR-1205	1	0	1	1	1	1	COLQ	collagen-like tail subunit (single strand of homotrimer) of asymmetric acetylcholinesterase
hsa-miR-1205	0	0	1	0	0	0	H2BFS	H2B histone family, member S (pseudogene)
hsa-miR-1205	0	0	1	0	1	1	C20orf202	chromosome 20 open reading frame 202
hsa-miR-1205	0	0	1	0	0	0	FAM225B	family with sequence similarity 225, member B (non-protein coding)
hsa-miR-1205	1	0	1	1	1	1	MECOM	MDS1 and EVI1 complex locus
hsa-miR-1205	1	0	1	1	0	0	CLASRP	CLK4-associating serine/arginine rich protein
hsa-miR-1205	0	0	1	0	0	0	LILRP2	leukocyte immunoglobulin-like receptor pseudogene 2
hsa-miR-1205	0	0	1	0	0	0	FLJ38723	uncharacterized FLJ38723
hsa-miR-1205	0	0	1	0	0	0	SMA4	glucuronidase, beta pseudogene
hsa-miR-1205	1	0	1	0	0	0	SDR39U1	short chain dehydrogenase/reductase family 39U, member 1
hsa-miR-1205	1	0	1	1	1	1	EXD2	exonuclease 3'-5' domain containing 2
hsa-miR-1205	0	0	1	0	0	0	LINC00643	long intergenic non-protein coding RNA 643
hsa-miR-1205	0	0	1	0	0	0	FLJ39632	uncharacterized LOC642477
hsa-miR-1205	1	0	1	0	1	1	GNS	glucosamine (N-acetyl)-6-sulfatase
hsa-miR-1205	1	0	1	1	0	0	RGS6	regulator of G-protein signaling 6
hsa-miR-1205	0	0	1	1	1	1	IP6K2	inositol hexakisphosphate kinase 2
hsa-miR-1205	1	0	1	1	1	1	JPH1	junctophilin 1
hsa-miR-1205	0	0	1	1	1	1	KBTBD12	kelch repeat and BTB (POZ) domain containing 12
hsa-miR-1205	1	0	1	1	1	1	SGCD	sarcoglycan, delta (35kDa dystrophin-associated glycoprotein)
hsa-miR-1205	1	0	1	0	1	1	CCDC88A	coiled-coil domain containing 88A
hsa-miR-1205	0	0	1	1	1	1	APTX	aprataxin
hsa-miR-1205	0	0	1	1	1	1	STAT2	signal transducer and activator of transcription 2, 113kDa
hsa-miR-1205	1	0	1	1	0	0	CCDC30	coiled-coil domain containing 30
hsa-miR-1205	0	0	1	1	0	0	CDK5RAP2	CDK5 regulatory subunit associated protein 2
hsa-miR-1205	0	0	1	0	0	0	PCNXL3	pecanex-like 3 (Drosophila)
hsa-miR-1205	1	0	1	1	1	1	MASP1	mannan-binding lectin serine peptidase 1 (C4/C2 activating component of Ra-reactive factor)
hsa-miR-1205	0	0	1	1	1	1	IPCEF1	interaction protein for cytohesin exchange factors 1
hsa-miR-1205	0	0	1	1	1	1	PRR14L	proline rich 14-like
hsa-miR-1205	0	0	1	0	0	0	SMG1P1	smg-1 homolog, phosphatidylinositol 3-kinase-related kinase pseudogene 1
hsa-miR-1205	0	0	1	1	0	0	SNAPC2	small nuclear RNA activating complex, polypeptide 2, 45kDa
hsa-miR-1205	1	0	1	1	1	1	TLN2	talin 2
hsa-miR-1205	1	0	1	1	1	1	DROSHA	drosha, ribonuclease type III
hsa-miR-1205	1	0	1	1	1	1	VPS26A	vacuolar protein sorting 26 homolog A (S. pombe)
hsa-miR-1205	1	0	1	1	1	1	GTDC1	glycosyltransferase-like domain containing 1
hsa-miR-1205	0	0	1	1	1	1	ZNF92	zinc finger protein 92
hsa-miR-1205	0	0	1	0	0	0	OVOS	ovostatin
hsa-miR-1205	0	0	1	1	0	0	ELP3	elongator acetyltransferase complex subunit 3
hsa-miR-1205	1	0	1	1	1	1	DDAH1	dimethylarginine dimethylaminohydrolase 1
hsa-miR-1205	1	0	1	1	1	1	AKT1	v-akt murine thymoma viral oncogene homolog 1
hsa-miR-1205	1	0	1	1	1	1	NFIB	nuclear factor I/B
hsa-miR-1205	0	0	1	0	0	0	LOC286299	uncharacterized LOC286299
hsa-miR-1205	1	0	1	1	1	1	PGAP1	post-GPI attachment to proteins 1
hsa-miR-1205	0	0	1	0	0	0	ZNRD1-AS1	ZNRD1 antisense RNA 1
hsa-miR-1205	1	0	1	1	1	1	WLS	wntless homolog (Drosophila)
hsa-miR-1205	0	0	1	1	1	1	SSFA2	sperm specific antigen 2
hsa-miR-1205	1	0	1	1	1	1	ASB6	ankyrin repeat and SOCS box containing 6
hsa-miR-1205	1	0	1	0	1	1	C1orf21	chromosome 1 open reading frame 21
hsa-miR-1205	0	0	1	1	1	1	IPO11	importin 11
hsa-miR-1205	1	0	1	1	1	1	SIN3A	SIN3 transcription regulator homolog A (yeast)
hsa-miR-1205	0	0	1	1	1	1	PLA2G4C	phospholipase A2, group IVC (cytosolic, calcium-independent)
hsa-miR-1205	1	0	1	1	1	1	BSDC1	BSD domain containing 1
hsa-miR-1205	0	0	1	0	1	1	GINS3	GINS complex subunit 3 (Psf3 homolog)
hsa-miR-1205	0	0	1	1	0	0	PYCR1	pyrroline-5-carboxylate reductase 1
hsa-miR-1205	0	0	1	1	1	1	POLR2H	polymerase (RNA) II (DNA directed) polypeptide H
hsa-miR-1205	0	0	1	1	0	0	CSH1	chorionic somatomammotropin hormone 1 (placental lactogen)
hsa-miR-1205	0	0	1	1	1	1	SLC25A11	solute carrier family 25 (mitochondrial carrier; oxoglutarate carrier), member 11
hsa-miR-1205	1	0	1	1	1	1	NAGA	N-acetylgalactosaminidase, alpha-
hsa-miR-1205	1	0	1	0	0	0	IGLON5	IgLON family member 5
hsa-miR-1205	0	0	1	1	0	0	CDC37	cell division cycle 37 homolog (S. cerevisiae)
hsa-miR-1205	0	0	1	1	1	1	GTPBP3	GTP binding protein 3 (mitochondrial)
hsa-miR-1205	1	0	1	1	1	1	VIM	vimentin
hsa-miR-1205	1	0	1	1	1	1	PCGF2	polycomb group ring finger 2
hsa-miR-1205	0	0	1	1	1	1	DGCR14	DiGeorge syndrome critical region gene 14
hsa-miR-1205	0	0	1	0	0	0	LOC400768	uncharacterized LOC400768
hsa-miR-1205	0	0	1	1	0	0	TMEM62	transmembrane protein 62
hsa-miR-1205	0	0	1	1	0	0	URM1	ubiquitin related modifier 1
hsa-miR-1205	0	0	1	1	0	0	TCEAL4	transcription elongation factor A (SII)-like 4
hsa-miR-1205	1	0	1	1	1	1	CNIH2	cornichon homolog 2 (Drosophila)
hsa-miR-1205	0	0	1	1	1	1	COPS8	COP9 constitutive photomorphogenic homolog subunit 8 (Arabidopsis)
hsa-miR-1205	0	0	1	1	1	1	PISD	phosphatidylserine decarboxylase
hsa-miR-1205	1	0	1	1	1	1	POLR2D	polymerase (RNA) II (DNA directed) polypeptide D
hsa-miR-1205	0	0	1	1	0	0	CCNDBP1	cyclin D-type binding-protein 1
hsa-miR-1205	0	0	1	1	0	0	CD81	CD81 molecule
hsa-miR-1205	1	0	1	1	0	0	CRELD1	cysteine-rich with EGF-like domains 1
hsa-miR-1205	0	0	1	1	1	1	C2orf43	chromosome 2 open reading frame 43
hsa-miR-1205	1	0	1	1	1	1	CD9	CD9 molecule
hsa-miR-1205	0	0	1	1	1	1	INCENP	inner centromere protein antigens 135/155kDa
hsa-miR-1205	0	0	1	1	1	1	COPS7A	COP9 constitutive photomorphogenic homolog subunit 7A (Arabidopsis)
hsa-miR-1205	0	0	1	1	0	0	SLC3A2	solute carrier family 3 (activators of dibasic and neutral amino acid transport), member 2
hsa-miR-1205	0	0	1	0	0	0	NBLA00301	Nbla00301
hsa-miR-1205	1	0	1	1	1	1	CHTF8	CTF8, chromosome transmission fidelity factor 8 homolog (S. cerevisiae)
hsa-miR-1205	0	0	1	1	1	1	LZTR1	leucine-zipper-like transcription regulator 1
hsa-miR-1205	0	0	1	1	1	1	MTCP1	mature T-cell proliferation 1
hsa-miR-1205	0	0	1	0	1	1	CD99P1	CD99 molecule pseudogene 1
hsa-miR-1205	1	0	1	1	1	1	COPS2	COP9 constitutive photomorphogenic homolog subunit 2 (Arabidopsis)
hsa-miR-1205	1	0	1	1	1	1	EI24	etoposide induced 2.4 mRNA
hsa-miR-1205	0	0	1	1	1	1	ASCC2	activating signal cointegrator 1 complex subunit 2
hsa-miR-1205	0	0	1	1	1	1	IFNGR2	interferon gamma receptor 2 (interferon gamma transducer 1)
hsa-miR-1205	1	0	1	1	1	1	PLEKHB2	pleckstrin homology domain containing, family B (evectins) member 2
hsa-miR-1205	0	0	1	1	0	0	FAM64A	family with sequence similarity 64, member A
hsa-miR-1205	0	0	1	1	1	1	GRAP2	GRB2-related adaptor protein 2
hsa-miR-1205	0	0	1	1	0	0	TRMT44	tRNA methyltransferase 44 homolog (S. cerevisiae)
hsa-miR-1205	0	0	1	1	0	0	MUS81	MUS81 endonuclease homolog (S. cerevisiae)
hsa-miR-1205	1	0	1	1	0	0	YPEL3	yippee-like 3 (Drosophila)
hsa-miR-1205	1	0	1	1	1	1	TMEM248	transmembrane protein 248
hsa-miR-1205	0	0	1	0	1	1	WASH3P	WAS protein family homolog 3 pseudogene
hsa-miR-1205	1	0	1	1	1	1	LYPLA2	lysophospholipase II
hsa-miR-1205	0	0	1	0	0	0	C12orf75	chromosome 12 open reading frame 75
hsa-miR-1205	1	0	1	0	1	1	PLK3	polo-like kinase 3
hsa-miR-1205	0	0	1	1	1	1	ATG4A	autophagy related 4A, cysteine peptidase
hsa-miR-1205	0	0	1	0	0	0	LOC150568	uncharacterized LOC150568
hsa-miR-1205	0	0	1	0	0	0	FLJ45248	FLJ45248 protein
hsa-miR-1205	0	0	1	1	1	1	BMPR1A	bone morphogenetic protein receptor, type IA
hsa-miR-1205	0	0	1	1	1	1	PDLIM1	PDZ and LIM domain 1
hsa-miR-1205	0	0	1	1	1	1	UIMC1	ubiquitin interaction motif containing 1
hsa-miR-1205	0	0	1	0	0	0	LOC677759	uncharacterized LOC677759
hsa-miR-1205	1	0	1	1	0	0	TBC1D17	TBC1 domain family, member 17
hsa-miR-1205	1	0	1	1	1	1	CUX1	cut-like homeobox 1
hsa-miR-1205	0	0	1	1	0	0	PTGDS	prostaglandin D2 synthase 21kDa (brain)
hsa-miR-1205	0	0	1	1	1	1	SAP130	Sin3A-associated protein, 130kDa
hsa-miR-1205	0	0	1	1	1	1	CPZ	carboxypeptidase Z
hsa-miR-1205	1	0	1	1	1	1	ARNTL	aryl hydrocarbon receptor nuclear translocator-like
hsa-miR-1205	0	0	1	1	1	1	DEDD	death effector domain containing
hsa-miR-1205	0	0	1	0	1	1	RPL10	ribosomal protein L10
hsa-miR-1205	1	0	1	0	1	1	ANKH	ankylosis, progressive homolog (mouse)
hsa-miR-1205	1	0	1	1	1	1	ATAT1	alpha tubulin acetyltransferase 1
hsa-miR-1205	0	0	1	1	1	1	XBP1	X-box binding protein 1
hsa-miR-1205	1	0	1	1	1	1	GOLGA7	golgin A7
hsa-miR-1205	0	0	1	1	1	1	SLCO4A1	solute carrier organic anion transporter family, member 4A1
hsa-miR-1205	0	0	1	1	0	0	AATF	apoptosis antagonizing transcription factor
hsa-miR-1205	0	0	1	1	1	1	IL15	interleukin 15
hsa-miR-1205	0	0	1	1	0	0	FXYD1	FXYD domain containing ion transport regulator 1
hsa-miR-1205	0	0	1	1	1	1	DNAJC25	DnaJ (Hsp40) homolog, subfamily C , member 25
hsa-miR-1205	0	0	1	1	0	0	YIPF3	Yip1 domain family, member 3
hsa-miR-1205	1	0	1	1	1	1	ARHGEF40	Rho guanine nucleotide exchange factor (GEF) 40
hsa-miR-1205	1	0	1	1	0	0	INO80E	INO80 complex subunit E
hsa-miR-1205	0	0	1	1	0	0	OXA1L	oxidase (cytochrome c) assembly 1-like
hsa-miR-1205	0	0	1	1	0	0	BCKDK	branched chain ketoacid dehydrogenase kinase
hsa-miR-1205	1	0	1	1	0	0	STAG3L4	stromal antigen 3-like 4
hsa-miR-1205	1	0	1	0	1	1	CD47	CD47 molecule
hsa-miR-1205	0	0	1	0	0	0	NUDT18	nudix (nucleoside diphosphate linked moiety X)-type motif 18
hsa-miR-1205	0	0	1	0	0	0	GNB2L1	guanine nucleotide binding protein (G protein), beta polypeptide 2-like 1
hsa-miR-1205	0	0	1	1	0	0	TESK1	testis-specific kinase 1
hsa-miR-1205	0	0	1	0	0	0	LOC100132984	uncharacterized LOC100132984
hsa-miR-1205	0	0	1	1	1	1	ANXA7	annexin A7
hsa-miR-1205	0	0	1	1	0	0	FES	feline sarcoma oncogene
hsa-miR-1205	0	0	1	1	1	1	COPS4	COP9 constitutive photomorphogenic homolog subunit 4 (Arabidopsis)
hsa-miR-1205	0	0	1	1	0	0	PCOLCE	procollagen C-endopeptidase enhancer
hsa-miR-1205	0	0	1	1	1	1	TOP3B	topoisomerase (DNA) III beta
hsa-miR-1205	0	0	1	1	1	1	ZFAND2B	zinc finger, AN1-type domain 2B
hsa-miR-1205	0	0	1	1	0	0	INO80B	INO80 complex subunit B
hsa-miR-1205	1	0	1	0	1	1	NMT1	N-myristoyltransferase 1
hsa-miR-1205	1	0	1	1	1	1	TARBP2	TAR (HIV-1) RNA binding protein 2
hsa-miR-1205	0	0	1	1	1	1	C22orf25	chromosome 22 open reading frame 25
hsa-miR-1205	0	0	1	0	0	0	LOC731789	uncharacterized LOC731789
hsa-miR-1205	1	0	1	0	1	1	BTRC	beta-transducin repeat containing E3 ubiquitin protein ligase
hsa-miR-1205	1	0	1	1	1	1	PHACTR2	phosphatase and actin regulator 2
hsa-miR-1205	0	0	1	0	0	0	LINC00661	long intergenic non-protein coding RNA 661
hsa-miR-1205	1	0	1	0	1	1	MEGF10	multiple EGF-like-domains 10
hsa-miR-1205	0	0	1	1	0	0	FMN1	formin 1
hsa-miR-1205	0	0	1	0	1	1	USP10	ubiquitin specific peptidase 10
hsa-miR-1205	1	0	1	0	1	1	OSBPL8	oxysterol binding protein-like 8
hsa-miR-1205	1	0	1	1	0	0	XRRA1	X-ray radiation resistance associated 1
hsa-miR-1205	0	0	1	1	1	1	SLC25A26	solute carrier family 25 (S-adenosylmethionine carrier), member 26
hsa-miR-1205	1	0	1	1	1	1	SLC39A10	solute carrier family 39 (zinc transporter), member 10
hsa-miR-1205	1	0	1	1	1	1	BCL2L1	BCL2-like 1
hsa-miR-1205	0	0	1	1	1	1	ZMYM1	zinc finger, MYM-type 1
hsa-miR-1205	0	0	1	0	0	0	LOC440518	golgin A2 pseudogene
hsa-miR-1205	1	0	1	1	1	1	MAN2A2	mannosidase, alpha, class 2A, member 2
hsa-miR-1205	1	0	1	1	1	1	SEC14L1	SEC14-like 1 (S. cerevisiae)
hsa-miR-1205	0	0	1	1	0	0	HMGXB3	HMG box domain containing 3
hsa-miR-1205	1	0	1	1	1	1	RB1CC1	RB1-inducible coiled-coil 1
hsa-miR-1205	1	0	1	1	1	1	FAM168A	family with sequence similarity 168, member A
hsa-miR-1205	0	0	1	1	1	1	ATF2	activating transcription factor 2
hsa-miR-1205	0	0	1	1	1	1	MPV17L	MPV17 mitochondrial membrane protein-like
hsa-miR-1205	1	0	1	0	1	1	LONRF2	LON peptidase N-terminal domain and ring finger 2
hsa-miR-1205	0	0	1	1	0	0	SPATA20	spermatogenesis associated 20
hsa-miR-1205	0	0	1	1	1	1	IRF5	interferon regulatory factor 5
hsa-miR-1205	0	0	1	1	1	1	CD274	CD274 molecule
hsa-miR-1205	0	0	1	1	0	0	NBPF9	neuroblastoma breakpoint family, member 9
hsa-miR-1205	0	0	1	0	0	0	PILRB	paired immunoglobin-like type 2 receptor beta
hsa-miR-1205	1	0	1	1	1	1	TNFAIP1	tumor necrosis factor, alpha-induced protein 1 (endothelial)
hsa-miR-1205	0	0	1	1	0	0	CEACAM3	carcinoembryonic antigen-related cell adhesion molecule 3
hsa-miR-1205	0	0	1	0	0	0	GPR144	G protein-coupled receptor 144
hsa-miR-1205	0	0	1	1	1	1	AKAP17A	A kinase (PRKA) anchor protein 17A
hsa-miR-1205	1	0	1	1	1	1	MLL	myeloid/lymphoid or mixed-lineage leukemia (trithorax homolog, Drosophila)
hsa-miR-1205	0	0	1	1	1	1	VDAC2	voltage-dependent anion channel 2
hsa-miR-1205	0	0	1	0	1	1	OPRK1	opioid receptor, kappa 1
hsa-miR-1205	1	0	1	1	1	1	GRM1	glutamate receptor, metabotropic 1
hsa-miR-1205	1	0	1	1	1	1	PLAU	plasminogen activator, urokinase
hsa-miR-1205	0	0	1	1	1	1	HLA-DRB5	major histocompatibility complex, class II, DR beta 5
hsa-miR-1205	0	0	1	1	1	1	APOE	apolipoprotein E
hsa-miR-1205	0	0	1	1	0	0	CD40LG	CD40 ligand
hsa-miR-1205	1	0	1	1	1	1	COL4A4	collagen, type IV, alpha 4
hsa-miR-1205	0	0	1	0	1	1	TOR1A	torsin family 1, member A (torsin A)
hsa-miR-1205	1	0	1	1	1	1	F13A1	coagulation factor XIII, A1 polypeptide
hsa-miR-1205	1	0	1	1	1	1	FUT1	fucosyltransferase 1 (galactoside 2-alpha-L-fucosyltransferase, H blood group)
hsa-miR-1205	0	0	1	1	0	0	GALK1	galactokinase 1
hsa-miR-1205	1	0	1	0	1	1	GLI3	GLI family zinc finger 3
hsa-miR-1205	0	0	1	1	1	1	HSD11B2	hydroxysteroid (11-beta) dehydrogenase 2
hsa-miR-1205	1	0	1	0	1	1	ITGB3	integrin, beta 3 (platelet glycoprotein IIIa, antigen CD61)
hsa-miR-1205	1	0	1	1	1	1	KCNA1	potassium voltage-gated channel, shaker-related subfamily, member 1 (episodic ataxia with myokymia)
hsa-miR-1205	0	0	1	1	0	0	KCNH2	potassium voltage-gated channel, subfamily H (eag-related), member 2
hsa-miR-1205	1	0	1	1	1	1	MET	met proto-oncogene (hepatocyte growth factor receptor)
hsa-miR-1205	1	0	1	1	1	1	MITF	microphthalmia-associated transcription factor
hsa-miR-1205	0	0	1	1	1	1	NDP	Norrie disease (pseudoglioma)
hsa-miR-1205	1	0	1	1	1	1	NF1	neurofibromin 1
hsa-miR-1205	0	0	1	1	1	1	PKP1	plakophilin 1 (ectodermal dysplasia/skin fragility syndrome)
hsa-miR-1205	0	0	1	1	1	1	PRNP	prion protein
hsa-miR-1205	1	0	1	1	1	1	ATXN1	ataxin 1
hsa-miR-1205	1	0	1	0	1	1	TSC1	tuberous sclerosis 1
hsa-miR-1205	0	0	1	1	0	0	APOB	apolipoprotein B (including Ag(x) antigen)
hsa-miR-1205	1	1	1	1	1	1	CDKN1A	cyclin-dependent kinase inhibitor 1A (p21, Cip1)
hsa-miR-1205	1	0	1	0	1	1	PAFAH1B1	platelet-activating factor acetylhydrolase 1b, regulatory subunit 1 (45kDa)
hsa-miR-1205	1	0	1	1	0	0	NOTCH3	notch 3
hsa-miR-1205	1	0	1	1	1	1	RFX5	regulatory factor X, 5 (influences HLA class II expression)
hsa-miR-1205	1	0	1	1	1	1	APP	amyloid beta (A4) precursor protein
hsa-miR-1205	1	0	1	1	1	1	ATRX	alpha thalassemia/mental retardation syndrome X-linked
hsa-miR-1205	0	0	1	1	1	1	CYP11B2	cytochrome P450, family 11, subfamily B, polypeptide 2
hsa-miR-1205	1	0	1	1	1	1	PLP1	proteolipid protein 1
hsa-miR-1205	0	0	1	1	1	1	CRX	cone-rod homeobox
hsa-miR-1205	0	0	1	1	1	1	IGF2	insulin-like growth factor 2 (somatomedin A)
hsa-miR-1205	1	0	1	1	1	1	ADRA1A	adrenoceptor alpha 1A
hsa-miR-1205	1	0	1	0	1	1	CACNA1E	calcium channel, voltage-dependent, R type, alpha 1E subunit
hsa-miR-1205	0	0	1	1	1	1	CRAT	carnitine O-acetyltransferase
hsa-miR-1205	1	0	1	1	1	1	CSF1	colony stimulating factor 1 (macrophage)
hsa-miR-1205	1	0	1	1	1	1	GABRB3	gamma-aminobutyric acid (GABA) A receptor, beta 3
hsa-miR-1205	1	0	1	1	1	1	HTR4	5-hydroxytryptamine (serotonin) receptor 4, G protein-coupled
hsa-miR-1205	1	0	1	1	1	1	IGF2R	insulin-like growth factor 2 receptor
hsa-miR-1205	0	0	1	1	1	1	BLOC1S2	biogenesis of lysosomal organelles complex-1, subunit 2
hsa-miR-1205	1	0	1	1	1	1	CD44	CD44 molecule (Indian blood group)
hsa-miR-1205	1	0	1	0	1	1	UBE2W	ubiquitin-conjugating enzyme E2W (putative)
hsa-miR-1205	1	0	1	1	1	1	UGP2	UDP-glucose pyrophosphorylase 2
hsa-miR-1205	0	0	1	1	0	0	RNASE9	ribonuclease, RNase A family, 9 (non-active)
hsa-miR-1205	0	0	1	0	0	0	KLK2	kallikrein-related peptidase 2
hsa-miR-1205	1	0	1	1	1	1	LCLAT1	lysocardiolipin acyltransferase 1
hsa-miR-1205	1	0	1	1	1	1	GATA3	GATA binding protein 3
hsa-miR-1205	1	0	1	1	1	1	WNK3	WNK lysine deficient protein kinase 3
hsa-miR-1205	0	0	1	0	0	0	OR8G1	olfactory receptor, family 8, subfamily G, member 1
hsa-miR-1205	1	0	1	1	1	1	C1orf173	chromosome 1 open reading frame 173
hsa-miR-1205	1	0	1	0	1	1	SMAD2	SMAD family member 2
hsa-miR-1205	0	0	1	1	1	1	C11orf49	chromosome 11 open reading frame 49
hsa-miR-1205	0	0	1	1	1	1	SMAD1	SMAD family member 1
hsa-miR-1205	0	0	1	1	1	1	TSPYL6	TSPY-like 6
hsa-miR-1205	1	0	1	0	1	1	BMF	Bcl2 modifying factor
hsa-miR-1205	0	0	1	1	1	1	ALG11	asparagine-linked glycosylation 11, alpha-1,2-mannosyltransferase homolog (yeast)
hsa-miR-1205	0	0	1	1	1	1	CCDC144NL	coiled-coil domain containing 144 family, N-terminal like
hsa-miR-1205	0	0	1	1	1	1	ZCCHC16	zinc finger, CCHC domain containing 16
hsa-miR-1205	1	0	1	1	1	1	NCK2	NCK adaptor protein 2
hsa-miR-1205	1	0	1	0	1	1	YPEL2	yippee-like 2 (Drosophila)
hsa-miR-1205	0	0	1	1	1	1	LINC00478	long intergenic non-protein coding RNA 478
hsa-miR-1205	0	0	1	1	1	1	MAPKAP1	mitogen-activated protein kinase associated protein 1
hsa-miR-1205	0	0	1	1	1	1	SCP2	sterol carrier protein 2
hsa-miR-1205	1	0	1	1	1	1	IGF2BP2	insulin-like growth factor 2 mRNA binding protein 2
hsa-miR-1205	1	0	1	1	1	1	IGSF3	immunoglobulin superfamily, member 3
hsa-miR-1205	0	0	1	1	1	1	RASL10A	RAS-like, family 10, member A
hsa-miR-1205	0	0	1	1	0	0	HCST	hematopoietic cell signal transducer
hsa-miR-1205	1	0	1	1	1	1	ZDHHC9	zinc finger, DHHC-type containing 9
hsa-miR-1205	0	0	1	1	1	1	PIWIL3	piwi-like 3 (Drosophila)
hsa-miR-1205	1	0	1	0	1	1	KIAA2022	KIAA2022
hsa-miR-1205	1	0	1	1	1	1	EML1	echinoderm microtubule associated protein like 1
hsa-miR-1205	0	0	1	1	1	1	GCSAM	germinal center-associated, signaling and motility
hsa-miR-1205	0	0	1	1	0	0	CDKL4	cyclin-dependent kinase-like 4
hsa-miR-1205	0	0	1	1	1	1	PIK3R6	phosphoinositide-3-kinase, regulatory subunit 6
hsa-miR-1205	0	0	1	1	1	1	C1QL3	complement component 1, q subcomponent-like 3
hsa-miR-1205	1	0	1	0	1	1	GOLGA7B	golgin A7 family, member B
hsa-miR-1205	0	0	1	1	1	1	SLC9A4	solute carrier family 9, subfamily A (NHE4, cation proton antiporter 4), member 4
hsa-miR-1205	1	0	1	1	1	1	PCGF6	polycomb group ring finger 6
hsa-miR-1205	1	0	1	1	1	1	SLC25A53	solute carrier family 25, member 53
hsa-miR-1205	0	0	1	1	1	1	SPIN4	spindlin family, member 4
hsa-miR-1205	1	0	1	1	1	1	PABPC1L2A	poly(A) binding protein, cytoplasmic 1-like 2A
hsa-miR-1205	1	0	1	0	1	1	ZKSCAN2	zinc finger with KRAB and SCAN domains 2
hsa-miR-1205	1	0	1	1	1	1	FXR1	fragile X mental retardation, autosomal homolog 1
hsa-miR-1205	1	0	1	1	1	1	KATNAL1	katanin p60 subunit A-like 1
hsa-miR-1205	1	0	1	1	1	1	KCNMA1	potassium large conductance calcium-activated channel, subfamily M, alpha member 1
hsa-miR-1205	1	0	1	1	1	1	NCDN	neurochondrin
hsa-miR-1205	0	0	1	1	1	1	BTBD11	BTB (POZ) domain containing 11
hsa-miR-1205	1	0	1	1	1	1	ZHX1	zinc fingers and homeoboxes 1
hsa-miR-1205	0	0	1	1	1	1	GCOM1	GRINL1A complex locus 1
hsa-miR-1205	0	0	1	1	1	1	NPIPL1	nuclear pore complex interacting protein-like 1
hsa-miR-1205	1	0	1	1	1	1	IQCB1	IQ motif containing B1
hsa-miR-1205	1	0	1	1	1	1	GPHN	gephyrin
hsa-miR-1205	1	0	1	0	1	1	RGAG4	retrotransposon gag domain containing 4
hsa-miR-1205	1	0	1	1	1	1	CANX	calnexin
hsa-miR-1205	1	0	1	0	1	1	TNRC6B	trinucleotide repeat containing 6B
hsa-miR-1205	1	0	1	1	1	1	YIPF5	Yip1 domain family, member 5
hsa-miR-1205	0	0	1	1	0	0	ABCF1	ATP-binding cassette, sub-family F (GCN20), member 1
hsa-miR-1205	0	0	1	1	0	0	AHDC1	AT hook, DNA binding motif, containing 1
hsa-miR-1205	0	0	1	1	1	1	ATF3	activating transcription factor 3
hsa-miR-1205	0	0	1	1	1	1	LRRC17	leucine rich repeat containing 17
hsa-miR-1205	1	0	1	1	0	0	MANEAL	mannosidase, endo-alpha-like
hsa-miR-1205	1	0	1	1	1	1	NEK10	NIMA (never in mitosis gene a)- related kinase 10
hsa-miR-1205	1	0	1	1	1	1	MAF	v-maf musculoaponeurotic fibrosarcoma oncogene homolog (avian)
hsa-miR-1205	0	0	1	0	1	1	STXBP1	syntaxin binding protein 1
hsa-miR-1205	1	0	1	1	1	1	KLF10	Kruppel-like factor 10
hsa-miR-1205	1	0	1	1	1	1	MYCL1	v-myc myelocytomatosis viral oncogene homolog 1, lung carcinoma derived (avian)
hsa-miR-1205	1	0	1	1	1	1	GALNTL6	UDP-N-acetyl-alpha-D-galactosamine:polypeptide N-acetylgalactosaminyltransferase-like 6
hsa-miR-1205	0	0	1	1	1	1	FAM134B	family with sequence similarity 134, member B
hsa-miR-1205	1	0	1	0	1	1	CDC42SE1	CDC42 small effector 1
hsa-miR-1205	1	0	1	0	1	1	USP9X	ubiquitin specific peptidase 9, X-linked
hsa-miR-1205	1	0	1	1	1	1	CBLN3	cerebellin 3 precursor
hsa-miR-1205	1	0	1	1	0	0	ANKRD34A	ankyrin repeat domain 34A
hsa-miR-1205	1	0	1	1	1	1	CHN2	chimerin (chimaerin) 2
hsa-miR-1205	0	0	1	1	0	0	MLN	motilin
hsa-miR-1205	1	0	1	1	1	1	SCN2A	sodium channel, voltage-gated, type II, alpha subunit
hsa-miR-1205	1	0	1	1	0	0	TYSND1	trypsin domain containing 1
hsa-miR-1205	1	0	1	0	1	1	DCUN1D4	DCN1, defective in cullin neddylation 1, domain containing 4 (S. cerevisiae)
hsa-miR-1205	1	0	1	1	1	1	ASB1	ankyrin repeat and SOCS box containing 1
hsa-miR-1205	1	0	1	1	1	1	SLC2A4	solute carrier family 2 (facilitated glucose transporter), member 4
hsa-miR-1205	0	0	1	1	0	0	INS-IGF2	INS-IGF2 readthrough
hsa-miR-1205	1	0	1	1	1	1	ZC2HC1C	zinc finger, C2HC-type containing 1C
hsa-miR-1205	1	0	1	1	1	1	PABPC1L2B	poly(A) binding protein, cytoplasmic 1-like 2B
hsa-miR-1205	1	0	1	1	1	1	SNX21	sorting nexin family member 21
hsa-miR-1205	1	0	1	1	1	1	RERE	arginine-glutamic acid dipeptide (RE) repeats
hsa-miR-1205	1	0	1	1	1	1	UBTF	upstream binding transcription factor, RNA polymerase I
hsa-miR-1205	1	0	1	1	1	1	PDE11A	phosphodiesterase 11A
hsa-miR-1205	1	0	1	1	1	1	ATG9A	autophagy related 9A
hsa-miR-1205	1	0	1	1	1	1	IRF2BP2	interferon regulatory factor 2 binding protein 2
hsa-miR-1205	0	0	1	1	0	0	FAM127A	family with sequence similarity 127, member A
hsa-miR-1205	0	0	1	1	1	1	DIAPH1	diaphanous homolog 1 (Drosophila)
hsa-miR-1205	1	0	1	1	1	1	HAP1	huntingtin-associated protein 1
hsa-miR-1205	1	0	1	1	1	1	CUL4B	cullin 4B
hsa-miR-1205	1	0	1	1	1	1	UNK	unkempt homolog (Drosophila)
hsa-miR-1205	1	0	1	0	1	1	CCDC85A	coiled-coil domain containing 85A
hsa-miR-1205	0	0	1	1	1	1	IGSF5	immunoglobulin superfamily, member 5
hsa-miR-1205	1	0	1	1	1	1	BEND3	BEN domain containing 3
hsa-miR-1205	1	0	1	1	1	1	ZNF697	zinc finger protein 697
hsa-miR-1205	1	0	1	0	1	1	MEGF9	multiple EGF-like-domains 9
hsa-miR-1205	0	0	1	0	0	0	C16orf90	chromosome 16 open reading frame 90
hsa-miR-1205	0	0	1	1	0	0	NEURL3	neuralized homolog 3 (Drosophila) pseudogene
hsa-miR-1205	1	0	1	1	1	1	MGA	MAX gene associated
hsa-miR-1205	1	0	1	1	1	1	BMP2	bone morphogenetic protein 2
hsa-miR-1205	1	0	1	0	1	1	KLF9	Kruppel-like factor 9
hsa-miR-1205	0	0	1	1	1	1	ENTPD3	ectonucleoside triphosphate diphosphohydrolase 3
hsa-miR-1205	1	0	1	0	1	1	CDK6	cyclin-dependent kinase 6
hsa-miR-1205	0	0	1	1	1	1	CLIC2	chloride intracellular channel 2
hsa-miR-1205	1	0	1	1	1	1	KLF6	Kruppel-like factor 6
hsa-miR-1205	1	0	1	1	1	1	CREBL2	cAMP responsive element binding protein-like 2
hsa-miR-1205	0	0	1	1	0	0	CSNK2B	casein kinase 2, beta polypeptide
hsa-miR-1205	0	0	1	1	0	0	DNAH9	dynein, axonemal, heavy chain 9
hsa-miR-1205	1	0	1	1	1	1	CELSR3	cadherin, EGF LAG seven-pass G-type receptor 3 (flamingo homolog, Drosophila)
hsa-miR-1205	1	0	1	1	1	1	CELSR2	cadherin, EGF LAG seven-pass G-type receptor 2 (flamingo homolog, Drosophila)
hsa-miR-1205	1	0	1	1	1	1	EIF1AX	eukaryotic translation initiation factor 1A, X-linked
hsa-miR-1205	0	0	1	0	1	1	EMP1	epithelial membrane protein 1
hsa-miR-1205	1	0	1	1	1	1	GPC4	glypican 4
hsa-miR-1205	1	0	1	1	1	1	FOXC1	forkhead box C1
hsa-miR-1205	1	0	1	1	0	0	GDI1	GDP dissociation inhibitor 1
hsa-miR-1205	1	0	1	1	1	1	NDST1	N-deacetylase/N-sulfotransferase (heparan glucosaminyl) 1
hsa-miR-1205	1	0	1	1	1	1	IRAK2	interleukin-1 receptor-associated kinase 2
hsa-miR-1205	1	0	1	1	1	1	AHNAK	AHNAK nucleoprotein
hsa-miR-1205	0	0	1	1	0	0	RHOG	ras homolog family member G
hsa-miR-1205	0	0	1	1	1	1	ATP12A	ATPase, H+/K+ transporting, nongastric, alpha polypeptide
hsa-miR-1205	1	0	1	1	1	1	BCL6	B-cell CLL/lymphoma 6
hsa-miR-1205	1	0	1	1	1	1	BNC1	basonuclin 1
hsa-miR-1205	1	0	1	0	1	1	BMP8B	bone morphogenetic protein 8b
hsa-miR-1205	0	0	1	1	1	1	CALB2	calbindin 2
hsa-miR-1205	1	0	1	0	1	1	CCND2	cyclin D2
hsa-miR-1205	0	0	1	1	0	0	CDKN2D	cyclin-dependent kinase inhibitor 2D (p19, inhibits CDK4)
hsa-miR-1205	0	0	1	1	0	0	CNTFR	ciliary neurotrophic factor receptor
hsa-miR-1205	0	0	1	1	1	1	SLC31A2	solute carrier family 31 (copper transporters), member 2
hsa-miR-1205	1	0	1	1	1	1	CSNK2A1	casein kinase 2, alpha 1 polypeptide
hsa-miR-1205	1	0	1	0	1	1	ETV6	ets variant 6
hsa-miR-1205	1	0	1	0	1	1	FOXO1	forkhead box O1
hsa-miR-1205	1	0	1	0	1	1	FUT4	fucosyltransferase 4 (alpha (1,3) fucosyltransferase, myeloid-specific)
hsa-miR-1205	1	0	1	1	1	1	GAB1	GRB2-associated binding protein 1
hsa-miR-1205	0	0	1	1	0	0	GLP1R	glucagon-like peptide 1 receptor
hsa-miR-1205	1	0	1	0	1	1	GNAI1	guanine nucleotide binding protein (G protein), alpha inhibiting activity polypeptide 1
hsa-miR-1205	1	0	1	1	1	1	HOXB3	homeobox B3
hsa-miR-1205	1	0	1	1	1	1	INSM1	insulinoma-associated 1
hsa-miR-1205	1	0	1	1	1	1	ITGA3	integrin, alpha 3 (antigen CD49C, alpha 3 subunit of VLA-3 receptor)
hsa-miR-1205	1	0	1	1	1	1	ITGA5	integrin, alpha 5 (fibronectin receptor, alpha polypeptide)
hsa-miR-1205	1	0	1	1	1	1	ITGB8	integrin, beta 8
hsa-miR-1205	0	0	1	1	0	0	ITPKA	inositol-trisphosphate 3-kinase A
hsa-miR-1205	1	0	1	1	1	1	ITPR2	inositol 1,4,5-trisphosphate receptor, type 2
hsa-miR-1205	1	0	1	1	1	1	KCNA6	potassium voltage-gated channel, shaker-related subfamily, member 6
hsa-miR-1205	1	0	1	0	1	1	KIF3C	kinesin family member 3C
hsa-miR-1205	1	0	1	1	1	1	IPO5	importin 5
hsa-miR-1205	0	0	1	1	0	0	KRT4	keratin 4
hsa-miR-1205	0	0	1	1	0	0	KRT31	keratin 31
hsa-miR-1205	1	0	1	1	1	1	LIF	leukemia inhibitory factor
hsa-miR-1205	1	0	1	1	1	1	LIFR	leukemia inhibitory factor receptor alpha
hsa-miR-1205	1	0	1	1	1	1	LIMK1	LIM domain kinase 1
hsa-miR-1205	1	0	1	1	1	1	MAP1A	microtubule-associated protein 1A
hsa-miR-1205	0	0	1	1	1	1	MTAP	methylthioadenosine phosphorylase
hsa-miR-1205	0	0	1	1	0	0	MYBL2	v-myb myeloblastosis viral oncogene homolog (avian)-like 2
hsa-miR-1205	1	0	1	1	1	1	MYH9	myosin, heavy chain 9, non-muscle
hsa-miR-1205	1	0	1	1	1	1	PPP1R12B	protein phosphatase 1, regulatory subunit 12B
hsa-miR-1205	1	0	1	1	1	1	NDN	necdin homolog (mouse)
hsa-miR-1205	1	0	1	1	1	1	NPAT	nuclear protein, ataxia-telangiectasia locus
hsa-miR-1205	1	0	1	1	1	1	NPTX1	neuronal pentraxin I
hsa-miR-1205	1	0	1	1	1	1	ORC5	origin recognition complex, subunit 5
hsa-miR-1205	1	0	1	0	1	1	PAK2	p21 protein (Cdc42/Rac)-activated kinase 2
hsa-miR-1205	0	0	1	1	1	1	PDE6D	phosphodiesterase 6D, cGMP-specific, rod, delta
hsa-miR-1205	0	0	1	1	1	1	PEX13	peroxisomal biogenesis factor 13
hsa-miR-1205	1	0	1	1	1	1	PLAGL2	pleiomorphic adenoma gene-like 2
hsa-miR-1205	1	0	1	1	1	1	PLCG1	phospholipase C, gamma 1
hsa-miR-1205	1	0	1	0	1	1	POU3F1	POU class 3 homeobox 1
hsa-miR-1205	0	0	1	1	0	0	PPP1R8	protein phosphatase 1, regulatory subunit 8
hsa-miR-1205	1	0	1	0	1	1	MAPK4	mitogen-activated protein kinase 4
hsa-miR-1205	0	0	1	0	0	0	PSMB10	proteasome (prosome, macropain) subunit, beta type, 10
hsa-miR-1205	1	0	1	1	1	1	PTPN1	protein tyrosine phosphatase, non-receptor type 1
hsa-miR-1205	1	0	1	1	1	1	ARID4A	AT rich interactive domain 4A (RBP1-like)
hsa-miR-1205	1	0	1	1	1	1	RIT2	Ras-like without CAAX 2
hsa-miR-1205	0	0	1	1	0	0	S100A8	S100 calcium binding protein A8
hsa-miR-1205	0	0	1	1	1	1	CCL2	chemokine (C-C motif) ligand 2
hsa-miR-1205	1	0	1	0	1	1	CCL22	chemokine (C-C motif) ligand 22
hsa-miR-1205	0	0	1	1	1	1	SDC2	syndecan 2
hsa-miR-1205	0	0	1	1	1	1	SDHD	succinate dehydrogenase complex, subunit D, integral membrane protein
hsa-miR-1205	1	0	1	1	1	1	SFRP4	secreted frizzled-related protein 4
hsa-miR-1205	1	0	1	1	1	1	SH3GL2	SH3-domain GRB2-like 2
hsa-miR-1205	0	0	1	1	1	1	SLAMF1	signaling lymphocytic activation molecule family member 1
hsa-miR-1205	1	0	1	1	1	1	SMARCC1	SWI/SNF related, matrix associated, actin dependent regulator of chromatin, subfamily c, member 1
hsa-miR-1205	1	0	1	1	1	1	SMARCD2	SWI/SNF related, matrix associated, actin dependent regulator of chromatin, subfamily d, member 2
hsa-miR-1205	1	0	1	0	1	1	SOX11	SRY (sex determining region Y)-box 11
hsa-miR-1205	1	0	1	1	1	1	SRPR	signal recognition particle receptor (docking protein)
hsa-miR-1205	0	0	1	1	0	0	SSRP1	structure specific recognition protein 1
hsa-miR-1205	0	0	1	1	1	1	STAT6	signal transducer and activator of transcription 6, interleukin-4 induced
hsa-miR-1205	1	0	1	1	1	1	SVIL	supervillin
hsa-miR-1205	0	0	1	0	1	1	TCEB3	transcription elongation factor B (SIII), polypeptide 3 (110kDa, elongin A)
hsa-miR-1205	1	0	1	0	1	1	THBS1	thrombospondin 1
hsa-miR-1205	0	0	1	1	0	0	TIMP1	TIMP metallopeptidase inhibitor 1
hsa-miR-1205	0	0	1	1	0	0	TYROBP	TYRO protein tyrosine kinase binding protein
hsa-miR-1205	0	0	1	1	0	0	UBA7	ubiquitin-like modifier activating enzyme 7
hsa-miR-1205	1	0	1	1	1	1	UBE2H	ubiquitin-conjugating enzyme E2H
hsa-miR-1205	1	0	1	0	1	1	VCL	vinculin
hsa-miR-1205	0	0	1	1	0	0	VEGFB	vascular endothelial growth factor B
hsa-miR-1205	0	0	1	1	1	1	ZNF124	zinc finger protein 124
hsa-miR-1205	0	0	1	1	1	1	ZNF141	zinc finger protein 141
hsa-miR-1205	1	0	1	1	1	1	HMGA2	high mobility group AT-hook 2
hsa-miR-1205	1	0	1	1	1	1	NRIP1	nuclear receptor interacting protein 1
hsa-miR-1205	1	0	1	1	1	1	TNFSF11	tumor necrosis factor (ligand) superfamily, member 11
hsa-miR-1205	1	0	1	0	1	1	IRS2	insulin receptor substrate 2
hsa-miR-1205	1	0	1	1	1	1	B3GALT2	UDP-Gal:betaGlcNAc beta 1,3-galactosyltransferase, polypeptide 2
hsa-miR-1205	0	0	1	1	1	1	SUCLA2	succinate-CoA ligase, ADP-forming, beta subunit
hsa-miR-1205	1	0	1	1	1	1	NRP2	neuropilin 2
hsa-miR-1205	1	0	1	1	1	1	KAT2B	K(lysine) acetyltransferase 2B
hsa-miR-1205	1	0	1	0	1	1	CDK5R1	cyclin-dependent kinase 5, regulatory subunit 1 (p35)
hsa-miR-1205	0	0	1	1	1	1	PRPF4B	PRP4 pre-mRNA processing factor 4 homolog B (yeast)
hsa-miR-1205	1	0	1	1	1	1	KALRN	kalirin, RhoGEF kinase
hsa-miR-1205	0	0	1	1	1	1	MPZL1	myelin protein zero-like 1
hsa-miR-1205	1	0	1	1	1	1	BCL2L2	BCL2-like 2
hsa-miR-1205	1	0	1	1	0	0	EIF4EBP1	eukaryotic translation initiation factor 4E binding protein 1
hsa-miR-1205	1	0	1	1	1	1	EYA4	eyes absent homolog 4 (Drosophila)
hsa-miR-1205	1	0	1	1	1	1	GMFB	glia maturation factor, beta
hsa-miR-1205	0	0	1	0	1	1	HABP2	hyaluronan binding protein 2
hsa-miR-1205	0	0	1	0	1	1	TMSB4Y	thymosin beta 4, Y-linked
hsa-miR-1205	1	0	1	1	1	1	STK17B	serine/threonine kinase 17b
hsa-miR-1205	0	0	1	1	0	0	CD101	CD101 molecule
hsa-miR-1205	1	0	1	0	1	1	ACVR1B	activin A receptor, type IB
hsa-miR-1205	1	0	1	1	1	1	ASTN1	astrotactin 1
hsa-miR-1205	0	0	1	1	1	1	BST1	bone marrow stromal cell antigen 1
hsa-miR-1205	1	0	1	0	1	1	RUNX1T1	runt-related transcription factor 1; translocated to, 1 (cyclin D-related)
hsa-miR-1205	0	0	1	1	1	1	COL12A1	collagen, type XII, alpha 1
hsa-miR-1205	1	0	1	1	1	1	DAG1	dystroglycan 1 (dystrophin-associated glycoprotein 1)
hsa-miR-1205	1	0	1	1	1	1	DUSP5	dual specificity phosphatase 5
hsa-miR-1205	1	0	1	1	1	1	EFNB1	ephrin-B1
hsa-miR-1205	1	0	1	0	1	1	ACSL4	acyl-CoA synthetase long-chain family member 4
hsa-miR-1205	1	0	1	1	1	1	FOXD2	forkhead box D2
hsa-miR-1205	1	0	1	1	1	1	FLOT2	flotillin 2
hsa-miR-1205	0	0	1	1	1	1	GP5	glycoprotein V (platelet)
hsa-miR-1205	0	0	1	1	1	1	HOXB7	homeobox B7
hsa-miR-1205	0	0	1	1	1	1	PIGH	phosphatidylinositol glycan anchor biosynthesis, class H
hsa-miR-1205	1	0	1	1	1	1	WNT11	wingless-type MMTV integration site family, member 11
hsa-miR-1205	0	0	1	1	0	0	NPHS1	nephrosis 1, congenital, Finnish type (nephrin)
hsa-miR-1205	1	0	1	1	1	1	RAB11A	RAB11A, member RAS oncogene family
hsa-miR-1205	0	0	1	0	1	1	BPY2	basic charge, Y-linked, 2
hsa-miR-1205	1	0	1	1	1	1	DCLK1	doublecortin-like kinase 1
hsa-miR-1205	1	0	1	0	1	1	MAPKAPK2	mitogen-activated protein kinase-activated protein kinase 2
hsa-miR-1205	0	0	1	1	1	1	PIWIL1	piwi-like 1 (Drosophila)
hsa-miR-1205	0	0	1	1	1	1	MMP20	matrix metallopeptidase 20
hsa-miR-1205	1	0	1	1	1	1	KIF3B	kinesin family member 3B
hsa-miR-1205	1	0	1	1	1	1	ZFYVE9	zinc finger, FYVE domain containing 9
hsa-miR-1205	1	0	1	1	1	1	ONECUT2	one cut homeobox 2
hsa-miR-1205	1	0	1	1	1	1	CXCL14	chemokine (C-X-C motif) ligand 14
hsa-miR-1205	0	0	1	1	1	1	MRPL33	mitochondrial ribosomal protein L33
hsa-miR-1205	1	0	1	1	1	1	CTNS	cystinosin, lysosomal cystine transporter
hsa-miR-1205	1	0	1	0	1	1	DOCK3	dedicator of cytokinesis 3
hsa-miR-1205	0	0	1	1	0	0	NR5A1	nuclear receptor subfamily 5, group A, member 1
hsa-miR-1205	1	0	1	1	1	1	GABRE	gamma-aminobutyric acid (GABA) A receptor, epsilon
hsa-miR-1205	1	0	1	1	0	0	MMP14	matrix metallopeptidase 14 (membrane-inserted)
hsa-miR-1205	0	0	1	1	1	1	XYLB	xylulokinase homolog (H. influenzae)
hsa-miR-1205	0	0	1	1	1	1	FGFBP1	fibroblast growth factor binding protein 1
hsa-miR-1205	1	0	1	1	1	1	APLNR	apelin receptor
hsa-miR-1205	1	0	1	0	1	1	E2F1	E2F transcription factor 1
hsa-miR-1205	1	0	1	1	1	1	ETS1	v-ets erythroblastosis virus E26 oncogene homolog 1 (avian)
hsa-miR-1205	1	0	1	1	1	1	GJA5	gap junction protein, alpha 5, 40kDa
hsa-miR-1205	1	0	1	1	1	1	GPR3	G protein-coupled receptor 3
hsa-miR-1205	1	0	1	0	1	1	RAPGEF1	Rap guanine nucleotide exchange factor (GEF) 1
hsa-miR-1205	1	0	1	1	0	0	HCFC1	host cell factor C1 (VP16-accessory protein)
hsa-miR-1205	0	0	1	1	1	1	PPP1R3C	protein phosphatase 1, regulatory subunit 3C
hsa-miR-1205	1	0	1	0	1	1	PRKAB2	protein kinase, AMP-activated, beta 2 non-catalytic subunit
hsa-miR-1205	0	0	1	1	1	1	ST5	suppression of tumorigenicity 5
hsa-miR-1205	1	0	1	0	1	1	CCDC6	coiled-coil domain containing 6
hsa-miR-1205	1	0	1	1	0	0	ZBTB22	zinc finger and BTB domain containing 22
hsa-miR-1205	1	0	1	1	1	1	GABBR2	gamma-aminobutyric acid (GABA) B receptor, 2
hsa-miR-1205	1	0	1	1	1	1	PIGK	phosphatidylinositol glycan anchor biosynthesis, class K
hsa-miR-1205	1	0	1	1	1	1	HOXA1	homeobox A1
hsa-miR-1205	1	0	1	1	1	1	HOXA11	homeobox A11
hsa-miR-1205	1	0	1	1	1	1	LAMP1	lysosomal-associated membrane protein 1
hsa-miR-1205	1	0	1	1	0	0	LOXL1	lysyl oxidase-like 1
hsa-miR-1205	0	0	1	1	0	0	RTN2	reticulon 2
hsa-miR-1205	0	0	1	1	1	1	SRSF4	serine/arginine-rich splicing factor 4
hsa-miR-1205	1	0	1	0	1	1	REEP5	receptor accessory protein 5
hsa-miR-1205	1	0	1	1	0	0	TSPAN5	tetraspanin 5
hsa-miR-1205	1	0	1	1	1	1	ACTR1A	ARP1 actin-related protein 1 homolog A, centractin alpha (yeast)
hsa-miR-1205	1	0	1	0	1	1	SPRY3	sprouty homolog 3 (Drosophila)
hsa-miR-1205	0	0	1	1	1	1	FSTL3	follistatin-like 3 (secreted glycoprotein)
hsa-miR-1205	0	0	1	1	1	1	EIF1B	eukaryotic translation initiation factor 1B
hsa-miR-1205	1	0	1	1	1	1	MEOX2	mesenchyme homeobox 2
hsa-miR-1205	1	0	1	1	1	1	MMP16	matrix metallopeptidase 16 (membrane-inserted)
hsa-miR-1205	1	0	1	0	1	1	NAB1	NGFI-A binding protein 1 (EGR1 binding protein 1)
hsa-miR-1205	0	0	1	1	0	0	PPYR1	pancreatic polypeptide receptor 1
hsa-miR-1205	0	0	1	1	0	0	SPRR1A	small proline-rich protein 1A
hsa-miR-1205	0	0	1	1	1	1	LANCL1	LanC lantibiotic synthetase component C-like 1 (bacterial)
hsa-miR-1205	1	0	1	1	1	1	SPON1	spondin 1, extracellular matrix protein
hsa-miR-1205	1	0	1	1	1	1	DAGLA	diacylglycerol lipase, alpha
hsa-miR-1205	1	0	1	1	1	1	NEUROD2	neuronal differentiation 2
hsa-miR-1205	0	0	1	1	1	1	NTF4	neurotrophin 4
hsa-miR-1205	1	0	1	1	1	1	NR4A2	nuclear receptor subfamily 4, group A, member 2
hsa-miR-1205	0	0	1	0	1	1	OAS3	2'-5'-oligoadenylate synthetase 3, 100kDa
hsa-miR-1205	1	0	1	1	1	1	CDK16	cyclin-dependent kinase 16
hsa-miR-1205	0	0	1	1	1	1	PRKG2	protein kinase, cGMP-dependent, type II
hsa-miR-1205	1	0	1	1	1	1	SMC1A	structural maintenance of chromosomes 1A
hsa-miR-1205	1	0	1	1	1	1	FBLN5	fibulin 5
hsa-miR-1205	1	0	1	1	1	1	ANP32B	acidic (leucine-rich) nuclear phosphoprotein 32 family, member B
hsa-miR-1205	0	0	1	1	1	1	CXCL13	chemokine (C-X-C motif) ligand 13
hsa-miR-1205	0	0	1	1	0	0	ALX3	ALX homeobox 3
hsa-miR-1205	1	0	1	1	0	0	DYNLT1	dynein, light chain, Tctex-type 1
hsa-miR-1205	1	0	1	1	1	1	CORIN	corin, serine peptidase
hsa-miR-1205	1	0	1	1	1	1	MAP3K2	mitogen-activated protein kinase kinase kinase 2
hsa-miR-1205	1	0	1	1	1	1	PGRMC1	progesterone receptor membrane component 1
hsa-miR-1205	1	0	1	1	1	1	MAN1A2	mannosidase, alpha, class 1A, member 2
hsa-miR-1205	0	0	1	1	1	1	NUDT3	nudix (nucleoside diphosphate linked moiety X)-type motif 3
hsa-miR-1205	1	0	1	1	1	1	SLC20A2	solute carrier family 20 (phosphate transporter), member 2
hsa-miR-1205	1	0	1	1	1	1	LAPTM5	lysosomal protein transmembrane 5
hsa-miR-1205	1	0	1	1	1	1	CBX1	chromobox homolog 1
hsa-miR-1205	0	0	1	1	1	1	CEACAM7	carcinoembryonic antigen-related cell adhesion molecule 7
hsa-miR-1205	0	0	1	1	1	1	HOXD3	homeobox D3
hsa-miR-1205	1	0	1	1	1	1	RIT1	Ras-like without CAAX 1
hsa-miR-1205	1	0	1	0	1	1	SOX12	SRY (sex determining region Y)-box 12
hsa-miR-1205	1	0	1	1	1	1	NR4A3	nuclear receptor subfamily 4, group A, member 3
hsa-miR-1205	1	0	1	1	1	1	ADAMTS5	ADAM metallopeptidase with thrombospondin type 1 motif, 5
hsa-miR-1205	0	0	1	1	1	1	RPP14	ribonuclease P/MRP 14kDa subunit
hsa-miR-1205	0	0	1	1	0	0	USF1	upstream transcription factor 1
hsa-miR-1205	1	0	1	1	1	1	UTY	ubiquitously transcribed tetratricopeptide repeat gene, Y-linked
hsa-miR-1205	0	0	1	1	1	1	ZNF80	zinc finger protein 80
hsa-miR-1205	1	0	1	1	1	1	CA5B	carbonic anhydrase VB, mitochondrial
hsa-miR-1205	0	0	1	1	0	0	CYP4F8	cytochrome P450, family 4, subfamily F, polypeptide 8
hsa-miR-1205	0	0	1	0	1	1	PNMA2	paraneoplastic Ma antigen 2
hsa-miR-1205	1	0	1	1	1	1	TUSC2	tumor suppressor candidate 2
hsa-miR-1205	0	0	1	1	1	1	C3orf27	chromosome 3 open reading frame 27
hsa-miR-1205	0	0	1	1	0	0	STAP1	signal transducing adaptor family member 1
hsa-miR-1205	1	0	1	0	1	1	FZD4	frizzled family receptor 4
hsa-miR-1205	1	0	1	1	1	1	MGEA5	meningioma expressed antigen 5 (hyaluronidase)
hsa-miR-1205	0	0	1	1	1	1	SEPHS2	selenophosphate synthetase 2
hsa-miR-1205	0	0	1	1	1	1	TKTL1	transketolase-like 1
hsa-miR-1205	1	0	1	1	1	1	HEY2	hairy/enhancer-of-split related with YRPW motif 2
hsa-miR-1205	1	0	1	1	1	1	LAMP5	lysosomal-associated membrane protein family, member 5
hsa-miR-1205	1	0	1	1	1	1	KCND2	potassium voltage-gated channel, Shal-related subfamily, member 2
hsa-miR-1205	1	0	1	0	1	1	G3BP2	GTPase activating protein (SH3 domain) binding protein 2
hsa-miR-1205	0	0	1	0	1	1	PIGN	phosphatidylinositol glycan anchor biosynthesis, class N
hsa-miR-1205	1	0	1	1	1	1	PITPNB	phosphatidylinositol transfer protein, beta
hsa-miR-1205	0	0	1	0	1	1	PLA2G2D	phospholipase A2, group IID
hsa-miR-1205	0	0	1	1	1	1	TIMM13	translocase of inner mitochondrial membrane 13 homolog (yeast)
hsa-miR-1205	0	0	1	0	1	1	TLL1	tolloid-like 1
hsa-miR-1205	1	0	1	1	1	1	TLL2	tolloid-like 2
hsa-miR-1205	1	0	1	1	1	1	FLRT3	fibronectin leucine rich transmembrane protein 3
hsa-miR-1205	1	0	1	1	1	1	SLC30A4	solute carrier family 30 (zinc transporter), member 4
hsa-miR-1205	0	0	1	1	0	0	TIMM22	translocase of inner mitochondrial membrane 22 homolog (yeast)
hsa-miR-1205	0	0	1	1	0	0	KCNJ14	potassium inwardly-rectifying channel, subfamily J, member 14
hsa-miR-1205	0	0	1	1	1	1	ABT1	activator of basal transcription 1
hsa-miR-1205	0	0	1	0	1	1	EMR2	egf-like module containing, mucin-like, hormone receptor-like 2
hsa-miR-1205	0	0	1	1	0	0	MACROD1	MACRO domain containing 1
hsa-miR-1205	1	0	1	1	1	1	ATAD2	ATPase family, AAA domain containing 2
hsa-miR-1205	1	0	1	0	1	1	C16orf72	chromosome 16 open reading frame 72
hsa-miR-1205	0	0	1	1	1	1	DSPP	dentin sialophosphoprotein
hsa-miR-1205	1	0	1	1	0	0	HOXC11	homeobox C11
hsa-miR-1205	0	0	1	1	1	1	UBL4A	ubiquitin-like 4A
hsa-miR-1205	1	0	1	0	1	1	ODZ1	odz, odd Oz/ten-m homolog 1 (Drosophila)
hsa-miR-1205	0	0	1	1	1	1	IL1RAPL1	interleukin 1 receptor accessory protein-like 1
hsa-miR-1205	0	0	1	1	1	1	DAPK2	death-associated protein kinase 2
hsa-miR-1205	1	0	1	0	1	1	FJX1	four jointed box 1 (Drosophila)
hsa-miR-1205	1	0	1	0	1	1	DIEXF	digestive organ expansion factor homolog (zebrafish)
hsa-miR-1205	0	0	1	1	1	1	TSPAN13	tetraspanin 13
hsa-miR-1205	0	0	1	1	1	1	TAF5L	TAF5-like RNA polymerase II, p300/CBP-associated factor (PCAF)-associated factor, 65kDa
hsa-miR-1205	0	0	1	1	1	1	LSM3	LSM3 homolog, U6 small nuclear RNA associated (S. cerevisiae)
hsa-miR-1205	0	0	1	1	0	0	APOBEC3C	apolipoprotein B mRNA editing enzyme, catalytic polypeptide-like 3C
hsa-miR-1205	0	0	1	1	1	1	ARFGAP3	ADP-ribosylation factor GTPase activating protein 3
hsa-miR-1205	1	0	1	1	1	1	EHD3	EH-domain containing 3
hsa-miR-1205	1	0	1	1	1	1	CDR2L	cerebellar degeneration-related protein 2-like
hsa-miR-1205	0	0	1	1	1	1	PSME4	proteasome (prosome, macropain) activator subunit 4
hsa-miR-1205	1	0	1	1	1	1	ZNF592	zinc finger protein 592
hsa-miR-1205	1	0	1	0	1	1	SH3PXD2A	SH3 and PX domains 2A
hsa-miR-1205	1	0	1	1	1	1	RALGPS1	Ral GEF with PH domain and SH3 binding motif 1
hsa-miR-1205	0	0	1	1	0	0	SDC3	syndecan 3
hsa-miR-1205	0	0	1	1	1	1	FAM53B	family with sequence similarity 53, member B
hsa-miR-1205	1	0	1	0	1	1	EDEM1	ER degradation enhancer, mannosidase alpha-like 1
hsa-miR-1205	1	0	1	1	1	1	TBKBP1	TBK1 binding protein 1
hsa-miR-1205	1	0	1	0	1	1	MLEC	malectin
hsa-miR-1205	1	0	1	0	1	1	SERTAD2	SERTA domain containing 2
hsa-miR-1205	1	0	1	0	1	1	TOMM20	translocase of outer mitochondrial membrane 20 homolog (yeast)
hsa-miR-1205	1	0	1	0	1	1	SCRN1	secernin 1
hsa-miR-1205	1	0	1	1	1	1	JAKMIP2	janus kinase and microtubule interacting protein 2
hsa-miR-1205	0	0	1	0	1	1	EPM2AIP1	EPM2A (laforin) interacting protein 1
hsa-miR-1205	1	0	1	1	1	1	ZBTB39	zinc finger and BTB domain containing 39
hsa-miR-1205	1	0	1	1	1	1	FAM20B	family with sequence similarity 20, member B
hsa-miR-1205	1	0	1	1	1	1	PLEKHA6	pleckstrin homology domain containing, family A member 6
hsa-miR-1205	1	0	1	1	1	1	SPAST	spastin
hsa-miR-1205	1	0	1	0	1	1	NMNAT2	nicotinamide nucleotide adenylyltransferase 2
hsa-miR-1205	1	0	1	0	1	1	ZNF609	zinc finger protein 609
hsa-miR-1205	1	0	1	1	1	1	ERP44	endoplasmic reticulum protein 44
hsa-miR-1205	1	0	1	0	1	1	PEG10	paternally expressed 10
hsa-miR-1205	1	0	1	1	1	1	RTF1	Rtf1, Paf1/RNA polymerase II complex component, homolog (S. cerevisiae)
hsa-miR-1205	1	0	1	1	1	1	RCOR1	REST corepressor 1
hsa-miR-1205	1	0	1	1	1	1	PLCB1	phospholipase C, beta 1 (phosphoinositide-specific)
hsa-miR-1205	1	0	1	1	1	1	ANKS1A	ankyrin repeat and sterile alpha motif domain containing 1A
hsa-miR-1205	1	0	1	0	1	1	ARHGEF12	Rho guanine nucleotide exchange factor (GEF) 12
hsa-miR-1205	1	0	1	0	1	1	LARP1	La ribonucleoprotein domain family, member 1
hsa-miR-1205	1	0	1	1	0	0	SMG5	smg-5 homolog, nonsense mediated mRNA decay factor (C. elegans)
hsa-miR-1205	1	0	1	1	1	1	MED13L	mediator complex subunit 13-like
hsa-miR-1205	0	0	1	1	1	1	SOSTDC1	sclerostin domain containing 1
hsa-miR-1205	0	0	1	1	1	1	TMEM87A	transmembrane protein 87A
hsa-miR-1205	1	0	1	0	1	1	PPP1R16B	protein phosphatase 1, regulatory subunit 16B
hsa-miR-1205	1	0	1	1	1	1	WSB1	WD repeat and SOCS box containing 1
hsa-miR-1205	1	0	1	1	1	1	PHF19	PHD finger protein 19
hsa-miR-1205	0	0	1	1	1	1	C10orf12	chromosome 10 open reading frame 12
hsa-miR-1205	1	0	1	1	1	1	FAM155B	family with sequence similarity 155, member B
hsa-miR-1205	1	0	1	1	1	1	AZIN1	antizyme inhibitor 1
hsa-miR-1205	0	0	1	1	1	1	PCF11	PCF11, cleavage and polyadenylation factor subunit, homolog (S. cerevisiae)
hsa-miR-1205	1	0	1	1	1	1	EIF5B	eukaryotic translation initiation factor 5B
hsa-miR-1205	0	0	1	1	1	1	POLR1D	polymerase (RNA) I polypeptide D, 16kDa
hsa-miR-1205	0	0	1	1	1	1	HMP19	HMP19 protein
hsa-miR-1205	1	0	1	1	1	1	RRP15	ribosomal RNA processing 15 homolog (S. cerevisiae)
hsa-miR-1205	1	0	1	0	1	1	CNR1	cannabinoid receptor 1 (brain)
hsa-miR-1205	1	0	1	1	1	1	SUFU	suppressor of fused homolog (Drosophila)
hsa-miR-1205	1	0	1	1	1	1	CERCAM	cerebral endothelial cell adhesion molecule
hsa-miR-1205	0	0	1	1	1	1	EMCN	endomucin
hsa-miR-1205	1	0	1	1	1	1	TOB2	transducer of ERBB2, 2
hsa-miR-1205	1	0	1	1	1	1	RAPGEFL1	Rap guanine nucleotide exchange factor (GEF)-like 1
hsa-miR-1205	1	0	1	1	1	1	ARID4B	AT rich interactive domain 4B (RBP1-like)
hsa-miR-1205	1	0	1	1	1	1	PHF20	PHD finger protein 20
hsa-miR-1205	1	0	1	0	1	1	CRIM1	cysteine rich transmembrane BMP regulator 1 (chordin-like)
hsa-miR-1205	0	0	1	1	0	0	FAM203A	family with sequence similarity 203, member A
hsa-miR-1205	1	0	1	0	1	1	RAB8B	RAB8B, member RAS oncogene family
hsa-miR-1205	1	0	1	1	1	1	RAB6B	RAB6B, member RAS oncogene family
hsa-miR-1205	0	0	1	1	1	1	KDM3B	lysine (K)-specific demethylase 3B
hsa-miR-1205	1	0	1	1	1	1	PLXNA3	plexin A3
hsa-miR-1205	0	0	1	1	1	1	RAB39A	RAB39A, member RAS oncogene family
hsa-miR-1205	0	0	1	0	1	1	TRIM44	tripartite motif containing 44
hsa-miR-1205	1	0	1	0	1	1	EIF2C4	eukaryotic translation initiation factor 2C, 4
hsa-miR-1205	0	0	1	1	0	0	NDE1	nudE nuclear distribution E homolog 1 (A. nidulans)
hsa-miR-1205	0	0	1	1	0	0	NUP62CL	nucleoporin 62kDa C-terminal like
hsa-miR-1205	0	0	1	1	0	0	CNTLN	centlein, centrosomal protein
hsa-miR-1205	1	0	1	1	0	0	INO80D	INO80 complex subunit D
hsa-miR-1205	0	0	1	1	1	1	LRRC40	leucine rich repeat containing 40
hsa-miR-1205	0	0	1	1	1	1	WHSC1L1	Wolf-Hirschhorn syndrome candidate 1-like 1
hsa-miR-1205	1	0	1	0	1	1	CMTM6	CKLF-like MARVEL transmembrane domain containing 6
hsa-miR-1205	0	0	1	0	1	1	MREG	melanoregulin
hsa-miR-1205	1	0	1	1	1	1	ARGLU1	arginine and glutamate rich 1
hsa-miR-1205	1	0	1	1	1	1	BCL11A	B-cell CLL/lymphoma 11A (zinc finger protein)
hsa-miR-1205	0	0	1	1	1	1	KDM4D	lysine (K)-specific demethylase 4D
hsa-miR-1205	0	0	1	1	1	1	RBM22	RNA binding motif protein 22
hsa-miR-1205	0	0	1	1	0	0	GPN2	GPN-loop GTPase 2
hsa-miR-1205	0	0	1	0	1	1	FAM86C1	family with sequence similarity 86, member C1
hsa-miR-1205	1	0	1	1	1	1	TBC1D13	TBC1 domain family, member 13
hsa-miR-1205	0	0	1	0	1	1	TMEM57	transmembrane protein 57
hsa-miR-1205	1	0	1	1	1	1	LRRC20	leucine rich repeat containing 20
hsa-miR-1205	1	0	1	1	1	1	SPTLC3	serine palmitoyltransferase, long chain base subunit 3
hsa-miR-1205	1	0	1	0	1	1	LIN7C	lin-7 homolog C (C. elegans)
hsa-miR-1205	0	0	1	1	1	1	WDR33	WD repeat domain 33
hsa-miR-1205	0	0	1	0	0	0	KDM3A	lysine (K)-specific demethylase 3A
hsa-miR-1205	0	0	1	0	0	0	FAM45B	family with sequence similarity 45, member A pseudogene
hsa-miR-1205	1	0	1	1	1	1	HOXA10	homeobox A10
hsa-miR-1205	0	0	1	1	0	0	SNTG2	syntrophin, gamma 2
hsa-miR-1205	1	0	1	0	1	1	FAM190B	family with sequence similarity 190, member B
hsa-miR-1205	0	0	1	1	0	0	RNF186	ring finger protein 186
hsa-miR-1205	0	0	1	1	1	1	GNL3L	guanine nucleotide binding protein-like 3 (nucleolar)-like
hsa-miR-1205	1	0	1	0	1	1	CCNJ	cyclin J
hsa-miR-1205	1	0	1	1	1	1	SEPT3	septin 3
hsa-miR-1205	1	0	1	0	1	1	UBFD1	ubiquitin family domain containing 1
hsa-miR-1205	0	0	1	1	1	1	KLHL4	kelch-like 4 (Drosophila)
hsa-miR-1205	1	0	1	1	1	1	WDR45L	WDR45-like
hsa-miR-1205	1	0	1	0	1	1	KCMF1	potassium channel modulatory factor 1
hsa-miR-1205	1	0	1	0	1	1	TM9SF3	transmembrane 9 superfamily member 3
hsa-miR-1205	1	0	1	0	1	1	SLAMF8	SLAM family member 8
hsa-miR-1205	1	0	1	1	1	1	MDM1	Mdm1 nuclear protein homolog (mouse)
hsa-miR-1205	1	0	1	1	1	1	C8orf4	chromosome 8 open reading frame 4
hsa-miR-1205	0	0	1	1	1	1	GRIPAP1	GRIP1 associated protein 1
hsa-miR-1205	0	0	1	1	1	1	TMEM167B	transmembrane protein 167B
hsa-miR-1205	1	0	1	1	1	1	C5orf15	chromosome 5 open reading frame 15
hsa-miR-1205	1	0	1	0	1	1	SLC17A6	solute carrier family 17 (sodium-dependent inorganic phosphate cotransporter), member 6
hsa-miR-1205	1	0	1	0	1	1	EIF5A2	eukaryotic translation initiation factor 5A2
hsa-miR-1205	0	0	1	1	1	1	ZNF695	zinc finger protein 695
hsa-miR-1205	1	0	1	1	0	0	JPH2	junctophilin 2
hsa-miR-1205	1	0	1	1	1	1	PTGFRN	prostaglandin F2 receptor negative regulator
hsa-miR-1205	1	0	1	1	1	1	ATP8B2	ATPase, aminophospholipid transporter, class I, type 8B, member 2
hsa-miR-1205	1	0	1	1	1	1	EPHA8	EPH receptor A8
hsa-miR-1205	1	0	1	1	1	1	NRIP3	nuclear receptor interacting protein 3
hsa-miR-1205	0	0	1	1	1	1	SHROOM4	shroom family member 4
hsa-miR-1205	1	0	1	0	1	1	SYT4	synaptotagmin IV
hsa-miR-1205	1	0	1	1	1	1	NLGN2	neuroligin 2
hsa-miR-1205	0	0	1	0	1	1	SYT13	synaptotagmin XIII
hsa-miR-1205	1	0	1	1	1	1	RANBP10	RAN binding protein 10
hsa-miR-1205	1	0	1	0	1	1	GPAM	glycerol-3-phosphate acyltransferase, mitochondrial
hsa-miR-1205	0	0	1	1	1	1	B3GALT1	UDP-Gal:betaGlcNAc beta 1,3-galactosyltransferase, polypeptide 1
hsa-miR-1205	1	0	1	1	1	1	ZNFX1	zinc finger, NFX1-type containing 1
hsa-miR-1205	1	0	1	1	1	1	HCN1	hyperpolarization activated cyclic nucleotide-gated potassium channel 1
hsa-miR-1205	0	0	1	1	1	1	MRPS12	mitochondrial ribosomal protein S12
hsa-miR-1205	1	0	1	1	1	1	TMSB4X	thymosin beta 4, X-linked
hsa-miR-1205	0	0	1	1	1	1	RNASEL	ribonuclease L (2',5'-oligoisoadenylate synthetase-dependent)
hsa-miR-1205	1	0	1	0	1	1	TMX4	thioredoxin-related transmembrane protein 4
hsa-miR-1205	1	0	1	1	1	1	PELI2	pellino E3 ubiquitin protein ligase family member 2
hsa-miR-1205	0	0	1	1	1	1	IL22RA1	interleukin 22 receptor, alpha 1
hsa-miR-1205	0	0	1	1	0	0	MIIP	migration and invasion inhibitory protein
hsa-miR-1205	1	0	1	1	1	1	ZFAND3	zinc finger, AN1-type domain 3
hsa-miR-1205	1	0	1	1	1	1	FOXM1	forkhead box M1
hsa-miR-1205	1	0	1	0	1	1	GAN	gigaxonin
hsa-miR-1205	1	0	1	0	1	1	CSNK1G1	casein kinase 1, gamma 1
hsa-miR-1205	0	0	1	1	0	0	ABHD4	abhydrolase domain containing 4
hsa-miR-1205	1	0	1	1	1	1	CLSTN2	calsyntenin 2
hsa-miR-1205	1	0	1	1	1	1	LRRC4	leucine rich repeat containing 4
hsa-miR-1205	1	0	1	0	1	1	EIF4H	eukaryotic translation initiation factor 4H
hsa-miR-1205	0	0	1	1	1	1	TCTA	T-cell leukemia translocation altered
hsa-miR-1205	0	0	1	1	1	1	RAB38	RAB38, member RAS oncogene family
hsa-miR-1205	1	0	1	1	0	0	CDH24	cadherin 24, type 2
hsa-miR-1205	1	0	1	0	1	1	DNMT3A	DNA (cytosine-5-)-methyltransferase 3 alpha
hsa-miR-1205	1	0	1	1	1	1	GIGYF1	GRB10 interacting GYF protein 1
hsa-miR-1205	1	0	1	0	1	1	HOXC8	homeobox C8
hsa-miR-1205	1	0	1	1	1	1	FAM160B2	family with sequence similarity 160, member B2
hsa-miR-1205	0	0	1	1	1	1	SFXN1	sideroflexin 1
hsa-miR-1205	1	0	1	1	1	1	YTHDC2	YTH domain containing 2
hsa-miR-1205	1	0	1	1	1	1	RFX7	regulatory factor X, 7
hsa-miR-1205	0	0	1	0	1	1	NAIP	NLR family, apoptosis inhibitory protein
hsa-miR-1205	1	0	1	1	1	1	SOWAHC	sosondowah ankyrin repeat domain family member C
hsa-miR-1205	0	0	1	1	0	0	DCTPP1	dCTP pyrophosphatase 1
hsa-miR-1205	1	0	1	0	1	1	NOTCH2	notch 2
hsa-miR-1205	1	0	1	1	1	1	PSTPIP2	proline-serine-threonine phosphatase interacting protein 2
hsa-miR-1205	0	0	1	1	0	0	OCEL1	occludin/ELL domain containing 1
hsa-miR-1205	0	0	1	1	1	1	SNIP1	Smad nuclear interacting protein 1
hsa-miR-1205	0	0	1	0	1	1	C1orf115	chromosome 1 open reading frame 115
hsa-miR-1205	1	0	1	1	1	1	C15orf29	chromosome 15 open reading frame 29
hsa-miR-1205	1	0	1	0	1	1	MOB3B	MOB kinase activator 3B
hsa-miR-1205	1	0	1	1	0	0	SYNDIG1	synapse differentiation inducing 1
hsa-miR-1205	0	0	1	1	1	1	FBXO17	F-box protein 17
hsa-miR-1205	0	0	1	1	1	1	ZNF767	zinc finger family member 767
hsa-miR-1205	1	0	1	1	1	1	CPED1	cadherin-like and PC-esterase domain containing 1
hsa-miR-1205	1	0	1	1	1	1	KLHL18	kelch-like 18 (Drosophila)
hsa-miR-1205	1	0	1	0	1	1	SRCIN1	SRC kinase signaling inhibitor 1
hsa-miR-1205	1	0	1	1	1	1	JHDM1D	jumonji C domain containing histone demethylase 1 homolog D (S. cerevisiae)
hsa-miR-1205	1	0	1	0	1	1	VOPP1	vesicular, overexpressed in cancer, prosurvival protein 1
hsa-miR-1205	1	0	1	1	1	1	TRIM8	tripartite motif containing 8
hsa-miR-1205	1	0	1	0	1	1	LBH	limb bud and heart development homolog (mouse)
hsa-miR-1205	1	0	1	1	1	1	SNX27	sorting nexin family member 27
hsa-miR-1205	0	0	1	1	1	1	FCRL5	Fc receptor-like 5
hsa-miR-1205	0	0	1	1	1	1	FCRL4	Fc receptor-like 4
hsa-miR-1205	0	0	1	1	1	1	PUS3	pseudouridylate synthase 3
hsa-miR-1205	1	0	1	0	1	1	TMEM47	transmembrane protein 47
hsa-miR-1205	1	0	1	1	1	1	SESN2	sestrin 2
hsa-miR-1205	1	0	1	1	1	1	CRISPLD1	cysteine-rich secretory protein LCCL domain containing 1
hsa-miR-1205	1	0	1	0	1	1	SH3BGRL2	SH3 domain binding glutamic acid-rich protein like 2
hsa-miR-1205	0	0	1	1	1	1	KCNA7	potassium voltage-gated channel, shaker-related subfamily, member 7
hsa-miR-1205	1	0	1	0	1	1	SRSF8	serine/arginine-rich splicing factor 8
hsa-miR-1205	1	0	1	1	1	1	ANTXR1	anthrax toxin receptor 1
hsa-miR-1205	0	0	1	1	0	0	ELMOD3	ELMO/CED-12 domain containing 3
hsa-miR-1205	1	0	1	1	1	1	ZNRF1	zinc and ring finger 1, E3 ubiquitin protein ligase
hsa-miR-1205	0	0	1	0	1	1	LDOC1L	leucine zipper, down-regulated in cancer 1-like
hsa-miR-1205	0	0	1	1	1	1	YIPF4	Yip1 domain family, member 4
hsa-miR-1205	0	0	1	1	0	0	NICN1	nicolin 1
hsa-miR-1205	1	0	1	1	1	1	ING5	inhibitor of growth family, member 5
hsa-miR-1205	0	0	1	1	1	1	VPS25	vacuolar protein sorting 25 homolog (S. cerevisiae)
hsa-miR-1205	0	0	1	0	1	1	MAK16	MAK16 homolog (S. cerevisiae)
hsa-miR-1205	1	0	1	1	1	1	PPP1R9B	protein phosphatase 1, regulatory subunit 9B
hsa-miR-1205	0	0	1	0	1	1	TRIM52	tripartite motif containing 52
hsa-miR-1205	0	0	1	1	1	1	FAM136A	family with sequence similarity 136, member A
hsa-miR-1205	0	0	1	1	0	0	TNS4	tensin 4
hsa-miR-1205	1	0	1	1	1	1	ARHGAP19	Rho GTPase activating protein 19
hsa-miR-1205	0	0	1	1	1	1	POLR2J2	polymerase (RNA) II (DNA directed) polypeptide J2
hsa-miR-1205	1	0	1	1	0	0	DMRTB1	DMRT-like family B with proline-rich C-terminal, 1
hsa-miR-1205	1	0	1	0	1	1	EAF1	ELL associated factor 1
hsa-miR-1205	1	0	1	1	1	1	FGD3	FYVE, RhoGEF and PH domain containing 3
hsa-miR-1205	1	0	1	1	1	1	C19orf6	chromosome 19 open reading frame 6
hsa-miR-1205	1	0	1	1	0	0	FCHSD1	FCH and double SH3 domains 1
hsa-miR-1205	1	0	1	0	1	1	TMEM123	transmembrane protein 123
hsa-miR-1205	0	0	1	1	0	0	TSGA13	testis specific, 13
hsa-miR-1205	0	0	1	1	0	0	FAM46B	family with sequence similarity 46, member B
hsa-miR-1205	1	0	1	1	1	1	TRIM9	tripartite motif containing 9
hsa-miR-1205	1	0	1	1	0	0	FAM167A	family with sequence similarity 167, member A
hsa-miR-1205	0	0	1	1	1	1	FKBP1B	FK506 binding protein 1B, 12.6 kDa
hsa-miR-1205	0	0	1	1	1	1	VNN3	vanin 3
hsa-miR-1205	0	0	1	1	1	1	SLC32A1	solute carrier family 32 (GABA vesicular transporter), member 1
hsa-miR-1205	1	0	1	1	1	1	KCNE4	potassium voltage-gated channel, Isk-related family, member 4
hsa-miR-1205	0	0	1	1	0	0	CST11	cystatin 11
hsa-miR-1205	1	0	1	1	1	1	GPR62	G protein-coupled receptor 62
hsa-miR-1205	0	0	1	1	1	1	TOR2A	torsin family 2, member A
hsa-miR-1205	0	0	1	1	1	1	CHST14	carbohydrate (N-acetylgalactosamine 4-0) sulfotransferase 14
hsa-miR-1205	1	0	1	1	0	0	UNC5A	unc-5 homolog A (C. elegans)
hsa-miR-1205	1	0	1	1	1	1	ADAMTS19	ADAM metallopeptidase with thrombospondin type 1 motif, 19
hsa-miR-1205	0	0	1	1	0	0	C6orf25	chromosome 6 open reading frame 25
hsa-miR-1205	1	0	1	1	1	1	NUP35	nucleoporin 35kDa
hsa-miR-1205	0	0	1	1	1	1	PATE1	prostate and testis expressed 1
hsa-miR-1205	0	0	1	0	0	0	AP5B1	adaptor-related protein complex 5, beta 1 subunit
hsa-miR-1205	1	0	1	1	0	0	PKDCC	protein kinase domain containing, cytoplasmic homolog (mouse)
hsa-miR-1205	0	0	1	1	0	0	KIF12	kinesin family member 12
hsa-miR-1205	1	0	1	1	0	0	C11orf84	chromosome 11 open reading frame 84
hsa-miR-1205	0	0	1	1	0	0	KLK15	kallikrein-related peptidase 15
hsa-miR-1205	1	0	1	1	1	1	HAS3	hyaluronan synthase 3
hsa-miR-1205	0	0	1	1	1	1	SDR16C5	short chain dehydrogenase/reductase family 16C, member 5
hsa-miR-1205	0	0	1	1	0	0	CARS	cysteinyl-tRNA synthetase
hsa-miR-1205	0	0	1	1	0	0	CDC26	cell division cycle 26 homolog (S. cerevisiae)
hsa-miR-1205	0	0	1	0	0	0	CAPN13	calpain 13
hsa-miR-1205	1	0	1	1	1	1	KCNH8	potassium voltage-gated channel, subfamily H (eag-related), member 8
hsa-miR-1205	0	0	1	0	1	1	UBLCP1	ubiquitin-like domain containing CTD phosphatase 1
hsa-miR-1205	1	0	1	1	1	1	UBQLNL	ubiquilin-like
hsa-miR-1205	0	0	1	1	1	1	DACT3	dapper, antagonist of beta-catenin, homolog 3 (Xenopus laevis)
hsa-miR-1205	1	0	1	0	1	1	DIRAS1	DIRAS family, GTP-binding RAS-like 1
hsa-miR-1205	1	0	1	1	0	0	NAPRT1	nicotinate phosphoribosyltransferase domain containing 1
hsa-miR-1205	1	0	1	1	1	1	VTI1A	vesicle transport through interaction with t-SNAREs homolog 1A (yeast)
hsa-miR-1205	0	0	1	1	0	0	EVI5L	ecotropic viral integration site 5-like
hsa-miR-1205	0	0	1	1	0	0	NKX2-3	NK2 homeobox 3
hsa-miR-1205	0	0	1	1	1	1	C7orf33	chromosome 7 open reading frame 33
hsa-miR-1205	0	0	1	1	0	0	TCEB3C	transcription elongation factor B polypeptide 3C (elongin A3)
hsa-miR-1205	1	0	1	0	1	1	MTPN	myotrophin
hsa-miR-1205	1	0	1	1	1	1	CTSC	cathepsin C
hsa-miR-1205	1	0	1	1	0	0	GAS2L1	growth arrest-specific 2 like 1
hsa-miR-1205	0	0	1	0	1	1	CHKB	choline kinase beta
hsa-miR-1205	0	0	1	1	1	1	ERP27	endoplasmic reticulum protein 27
hsa-miR-1205	0	0	1	1	1	1	TARSL2	threonyl-tRNA synthetase-like 2
hsa-miR-1205	1	0	1	1	1	1	TBX15	T-box 15
hsa-miR-1205	1	0	1	1	1	1	GRPEL2	GrpE-like 2, mitochondrial (E. coli)
hsa-miR-1205	1	0	1	1	1	1	CEP128	centrosomal protein 128kDa
hsa-miR-1205	0	0	1	1	1	1	DUSP18	dual specificity phosphatase 18
hsa-miR-1205	1	0	1	1	1	1	SLC16A14	solute carrier family 16, member 14 (monocarboxylic acid transporter 14)
hsa-miR-1205	1	0	1	0	1	1	MOSPD2	motile sperm domain containing 2
hsa-miR-1205	1	0	1	0	1	1	TMTC2	transmembrane and tetratricopeptide repeat containing 2
hsa-miR-1205	0	0	1	1	0	0	DOK6	docking protein 6
hsa-miR-1205	0	0	1	0	0	0	C4orf22	chromosome 4 open reading frame 22
hsa-miR-1205	0	0	1	1	0	0	IGLL1	immunoglobulin lambda-like polypeptide 1
hsa-miR-1205	1	0	1	1	1	1	C17orf103	chromosome 17 open reading frame 103
hsa-miR-1205	1	0	1	0	1	1	ST6GALNAC3	ST6 (alpha-N-acetyl-neuraminyl-2,3-beta-galactosyl-1,3)-N-acetylgalactosaminide alpha-2,6-sialyltransferase 3
hsa-miR-1205	1	0	1	1	1	1	C15orf32	chromosome 15 open reading frame 32
hsa-miR-1205	1	0	1	1	1	1	AEBP2	AE binding protein 2
hsa-miR-1205	0	0	1	1	1	1	SLC22A7	solute carrier family 22 (organic anion transporter), member 7
hsa-miR-1205	1	0	1	1	0	0	TMEM86A	transmembrane protein 86A
hsa-miR-1205	0	0	1	1	1	1	FAM71C	family with sequence similarity 71, member C
hsa-miR-1205	1	0	1	0	1	1	SEMA6D	sema domain, transmembrane domain (TM), and cytoplasmic domain, (semaphorin) 6D
hsa-miR-1205	0	0	1	1	0	0	CPNE9	copine family member IX
hsa-miR-1205	1	0	1	1	1	1	PHF13	PHD finger protein 13
hsa-miR-1205	0	0	1	1	1	1	CREG2	cellular repressor of E1A-stimulated genes 2
hsa-miR-1205	0	0	1	1	0	0	CSF3R	colony stimulating factor 3 receptor (granulocyte)
hsa-miR-1205	1	0	1	1	1	1	MSI2	musashi homolog 2 (Drosophila)
hsa-miR-1205	0	0	1	1	1	1	PSMD10	proteasome (prosome, macropain) 26S subunit, non-ATPase, 10
hsa-miR-1205	0	0	1	1	0	0	GPR97	G protein-coupled receptor 97
hsa-miR-1205	1	0	1	1	1	1	RC3H1	ring finger and CCCH-type domains 1
hsa-miR-1205	0	0	1	1	1	1	REXO1L1	REX1, RNA exonuclease 1 homolog (S. cerevisiae)-like 1
hsa-miR-1205	1	0	1	1	1	1	IL28RA	interleukin 28 receptor, alpha (interferon, lambda receptor)
hsa-miR-1205	0	0	1	1	1	1	NFATC3	nuclear factor of activated T-cells, cytoplasmic, calcineurin-dependent 3
hsa-miR-1205	0	0	1	1	0	0	C3orf24	chromosome 3 open reading frame 24
hsa-miR-1205	1	0	1	1	1	1	DCUN1D3	DCN1, defective in cullin neddylation 1, domain containing 3 (S. cerevisiae)
hsa-miR-1205	0	0	1	1	1	1	FNDC7	fibronectin type III domain containing 7
hsa-miR-1205	0	0	1	1	1	1	CDRT4	CMT1A duplicated region transcript 4
hsa-miR-1205	1	0	1	1	1	1	XKR6	XK, Kell blood group complex subunit-related family, member 6
hsa-miR-1205	0	0	1	1	1	1	NSMCE2	non-SMC element 2, MMS21 homolog (S. cerevisiae)
hsa-miR-1205	0	0	1	1	1	1	ZCCHC12	zinc finger, CCHC domain containing 12
hsa-miR-1205	0	0	1	1	1	1	SCARA5	scavenger receptor class A, member 5 (putative)
hsa-miR-1205	0	0	1	0	1	1	C17orf49	chromosome 17 open reading frame 49
hsa-miR-1205	1	0	1	1	1	1	LDLRAD3	low density lipoprotein receptor class A domain containing 3
hsa-miR-1205	0	0	1	1	1	1	GRIK1	glutamate receptor, ionotropic, kainate 1
hsa-miR-1205	0	0	1	1	1	1	KRT79	keratin 79
hsa-miR-1205	0	0	1	1	1	1	CHSY3	chondroitin sulfate synthase 3
hsa-miR-1205	0	0	1	0	1	1	C15orf37	chromosome 15 open reading frame 37
hsa-miR-1205	1	0	1	1	1	1	ZADH2	zinc binding alcohol dehydrogenase domain containing 2
hsa-miR-1205	0	0	1	1	0	0	TAS1R1	taste receptor, type 1, member 1
hsa-miR-1205	1	0	1	1	1	1	RILPL1	Rab interacting lysosomal protein-like 1
hsa-miR-1205	0	0	1	1	1	1	ZNF831	zinc finger protein 831
hsa-miR-1205	1	0	1	0	1	1	ARL5B	ADP-ribosylation factor-like 5B
hsa-miR-1205	1	0	1	1	0	0	KCTD13	potassium channel tetramerisation domain containing 13
hsa-miR-1205	0	0	1	1	1	1	NPAS4	neuronal PAS domain protein 4
hsa-miR-1205	0	0	1	1	0	0	NUDT8	nudix (nucleoside diphosphate linked moiety X)-type motif 8
hsa-miR-1205	1	0	1	1	1	1	ZSCAN22	zinc finger and SCAN domain containing 22
hsa-miR-1205	0	0	1	1	1	1	TMPRSS11B	transmembrane protease, serine 11B
hsa-miR-1205	0	0	1	0	1	1	VSTM2A	V-set and transmembrane domain containing 2A
hsa-miR-1205	1	0	1	1	1	1	BCL9L	B-cell CLL/lymphoma 9-like
hsa-miR-1205	1	0	1	0	1	1	C12orf36	chromosome 12 open reading frame 36
hsa-miR-1205	0	0	1	1	1	1	THEM5	thioesterase superfamily member 5
hsa-miR-1205	0	0	1	1	0	0	GPX6	glutathione peroxidase 6 (olfactory)
hsa-miR-1205	1	0	1	0	1	1	TMSB4XP8	thymosin beta 4, X-linked pseudogene 8
hsa-miR-1205	1	0	1	1	1	1	RD3	retinal degeneration 3
hsa-miR-1205	1	0	1	1	1	1	ARRDC4	arrestin domain containing 4
hsa-miR-1205	1	0	1	1	1	1	PXMP4	peroxisomal membrane protein 4, 24kDa
hsa-miR-1205	0	0	1	1	0	0	RPS19BP1	ribosomal protein S19 binding protein 1
hsa-miR-1205	0	0	1	0	1	1	BTNL3	butyrophilin-like 3
hsa-miR-1205	0	0	1	1	0	0	DHRS4L2	dehydrogenase/reductase (SDR family) member 4 like 2
hsa-miR-1205	1	0	1	1	1	1	AQP1	aquaporin 1 (Colton blood group)
hsa-miR-1205	1	0	1	1	1	1	ASB7	ankyrin repeat and SOCS box containing 7
hsa-miR-1205	1	0	1	1	1	1	KLHL17	kelch-like 17 (Drosophila)
hsa-miR-1205	0	0	1	1	0	0	KCTD8	potassium channel tetramerisation domain containing 8
hsa-miR-1205	0	0	1	0	1	1	TCF21	transcription factor 21
hsa-miR-1205	0	0	1	1	1	1	DERL3	derlin 3
hsa-miR-1205	0	0	1	0	0	0	IGFL1	IGF-like family member 1
hsa-miR-1205	0	0	1	1	1	1	LHFPL4	lipoma HMGIC fusion partner-like 4
hsa-miR-1205	1	0	1	1	1	1	PTGER3	prostaglandin E receptor 3 (subtype EP3)
hsa-miR-1205	0	0	1	1	1	1	COL25A1	collagen, type XXV, alpha 1
hsa-miR-1205	0	0	1	0	1	1	SIAH3	siah E3 ubiquitin protein ligase family member 3
hsa-miR-1205	0	0	1	0	1	1	SOGA1	suppressor of glucose, autophagy associated 1
hsa-miR-1205	0	0	1	1	1	1	ARHGAP27	Rho GTPase activating protein 27
hsa-miR-1205	1	0	1	1	1	1	THRA	thyroid hormone receptor, alpha
hsa-miR-1205	0	0	1	1	0	0	TMEM179B	transmembrane protein 179B
hsa-miR-1205	0	0	1	1	1	1	SLC25A35	solute carrier family 25, member 35
hsa-miR-1205	1	0	1	1	0	0	KAZN	kazrin, periplakin interacting protein
hsa-miR-1205	0	0	1	1	1	1	ZNF321P	zinc finger protein 321, pseudogene
hsa-miR-1205	1	0	1	1	1	1	RBM12B	RNA binding motif protein 12B
hsa-miR-1205	0	0	1	1	1	1	SERTM1	serine-rich and transmembrane domain containing 1
hsa-miR-1205	1	0	1	1	1	1	TMEM132E	transmembrane protein 132E
hsa-miR-1205	0	0	1	1	1	1	SEPT14	septin 14
hsa-miR-1205	1	0	1	1	1	1	TNFAIP8L3	tumor necrosis factor, alpha-induced protein 8-like 3
hsa-miR-1205	0	0	1	0	0	0	C16orf47	chromosome 16 open reading frame 47
hsa-miR-1205	1	0	1	1	0	0	CD164L2	CD164 sialomucin-like 2
hsa-miR-1205	1	0	1	1	1	1	TEX19	testis expressed 19
hsa-miR-1205	1	0	1	1	1	1	CAPN3	calpain 3, (p94)
hsa-miR-1205	0	0	1	1	1	1	DFFA	DNA fragmentation factor, 45kDa, alpha polypeptide
hsa-miR-1205	0	0	1	1	1	1	ADAMTSL5	ADAMTS-like 5
hsa-miR-1205	0	0	1	1	1	1	CLEC4M	C-type lectin domain family 4, member M
hsa-miR-1205	0	0	1	0	0	0	ESRRAP2	estrogen-related receptor alpha pseudogene 2
hsa-miR-1205	0	0	1	0	0	0	RAB9BP1	RAB9B, member RAS oncogene family pseudogene 1
hsa-miR-1205	0	0	1	0	0	0	PCDHB19P	protocadherin beta 19 pseudogene
hsa-miR-1205	0	0	1	0	0	0	HLA-H	major histocompatibility complex, class I, H (pseudogene)
hsa-miR-1205	0	0	1	0	0	0	HLA-DPB2	major histocompatibility complex, class II, DP beta 2 (pseudogene)
hsa-miR-1205	0	0	1	0	0	0	LYPLA2P1	lysophospholipase II pseudogene 1
hsa-miR-1205	0	0	1	0	0	0	MIR155HG	MIR155 host gene (non-protein coding)
hsa-miR-1205	0	0	1	0	0	0	TTTY2	testis-specific transcript, Y-linked 2 (non-protein coding)
hsa-miR-1205	0	0	1	0	0	0	TPI1P2	triosephosphate isomerase 1 pseudogene 2
hsa-miR-1205	0	0	1	0	0	0	SUMO1P1	SUMO1 pseudogene 1
hsa-miR-1205	0	0	1	0	0	0	NXF4	nuclear RNA export factor 4 pseudogene
hsa-miR-1205	0	0	1	0	0	0	DPRXP4	divergent-paired related homeobox pseudogene 4
hsa-miR-1205	0	0	1	0	0	0	MSX2P1	msh homeobox 2 pseudogene 1
hsa-miR-1205	0	0	1	0	0	0	SLC25A3P1	solute carrier family 25 (mitochondrial carrier; phosphate carrier), member 3 pseudogene 1
hsa-miR-1205	0	0	1	0	0	0	HTR7P1	5-hydroxytryptamine (serotonin) receptor 7 pseudogene 1
hsa-miR-1205	0	0	1	0	0	0	HOXA11-AS	HOXA11 antisense RNA
hsa-miR-1205	0	0	1	0	0	0	NEAT1	nuclear paraspeckle assembly transcript 1 (non-protein coding)
hsa-miR-1205	0	0	1	0	0	0	RPL13P5	ribosomal protein L13 pseudogene 5
hsa-miR-1205	0	0	1	0	0	0	AQP7P1	aquaporin 7 pseudogene 1
hsa-miR-1205	0	0	1	0	0	0	MALAT1	metastasis associated lung adenocarcinoma transcript 1 (non-protein coding)
hsa-miR-1205	0	0	1	0	0	0	HERC2P8	hect domain and RLD 2 pseudogene 8
hsa-miR-1205	0	0	1	0	0	0	DUSP5P	dual specificity phosphatase 5 pseudogene
hsa-miR-1205	0	0	1	0	0	0	IGBP1P1	immunoglobulin (CD79A) binding protein 1 pseudogene 1
hsa-miR-1205	0	0	1	0	0	0	SNX29P2	sorting nexin 29 pseudogene 2
hsa-miR-1205	0	0	1	0	0	0	TCAM1P	testicular cell adhesion molecule 1 homolog (mouse), pseudogene
hsa-miR-1205	0	0	1	0	0	0	SCARNA2	small Cajal body-specific RNA 2
hsa-miR-1205	0	0	1	0	0	0	PYY2	peptide YY, 2 (pseudogene)
hsa-miR-1205	0	0	1	0	0	0	GBP1P1	guanylate binding protein 1, interferon-inducible pseudogene 1
hsa-miR-1205	0	0	1	0	0	0	LOC729603	calcium binding protein P22 pseudogene
hsa-miR-1205	0	0	1	1	0	0	TBL3	transducin (beta)-like 3
hsa-miR-1205	1	0	1	0	1	1	NFIX	nuclear factor I/X (CCAAT-binding transcription factor)
hsa-miR-1205	0	0	1	0	0	0	GAGE3	G antigen 3
hsa-miR-1205	1	0	1	1	1	1	ZNF238	zinc finger protein 238
hsa-miR-1205	1	0	1	1	1	1	TRIO	trio Rho guanine nucleotide exchange factor
hsa-miR-1205	0	0	1	0	0	0	PLGLA	plasminogen-like A
hsa-miR-1205	0	0	1	1	1	1	CD6	CD6 molecule
hsa-miR-1205	0	0	1	1	1	1	RXRB	retinoid X receptor, beta
hsa-miR-1205	0	0	1	1	1	1	SPIB	Spi-B transcription factor (Spi-1/PU.1 related)
hsa-miR-1205	0	0	1	1	0	0	KIR2DL4	killer cell immunoglobulin-like receptor, two domains, long cytoplasmic tail, 4
hsa-miR-1205	0	0	1	0	0	0	MUC5AC	mucin 5AC, oligomeric mucus/gel-forming
hsa-miR-1205	0	0	1	1	0	0	GPR17	G protein-coupled receptor 17
