# Supplementary material for: Profiling of Selected MicroRNAs in Proliferative Eutopic Endometrium of Women with Ovarian Endometriosis
Source: Biomed Res Int. 2015 Aug 20;2015:760698. doi: 10.1155/2015/760698 (PMC4558423; doi:10.1155/2015/760698)
Supplement: Supplementary file 1 — Table I: The names of miRNAs significantly differentially expressed between eutopic endometrium of patients with endometriosis vs eutopic endometrium of patients without endometriosis. Table II: The associations between miRNA and mRNA, which presents detailed results of the search of six major databases i.e targetscan, tarbase, miranda, mirbase, mirtarget2 and pictar. [file 760698.f1.zip › 760698.f1/Table II/hsa-miR-1206.tsv]

miR	targetscan	tarbase	miranda	mirbase	mirtarget2	pictar	GeneSymbol	GeneName
hsa-miR-1206	0	0	1	0	0	0	NOP14-AS1	NOP14 antisense RNA 1
hsa-miR-1206	1	0	1	0	1	1	PTPRT	protein tyrosine phosphatase, receptor type, T
hsa-miR-1206	1	0	1	1	1	1	NUPL1	nucleoporin like 1
hsa-miR-1206	1	0	1	1	1	1	PPIP5K2	diphosphoinositol pentakisphosphate kinase 2
hsa-miR-1206	1	0	1	0	1	1	NEDD4L	neural precursor cell expressed, developmentally down-regulated 4-like, E3 ubiquitin protein ligase
hsa-miR-1206	1	0	1	1	1	1	CDC42BPA	CDC42 binding protein kinase alpha (DMPK-like)
hsa-miR-1206	0	0	1	1	1	1	SPAG9	sperm associated antigen 9
hsa-miR-1206	1	0	1	1	1	1	BAI3	brain-specific angiogenesis inhibitor 3
hsa-miR-1206	0	0	1	1	0	0	ATP10B	ATPase, class V, type 10B
hsa-miR-1206	1	0	1	0	1	1	DOCK4	dedicator of cytokinesis 4
hsa-miR-1206	1	0	1	1	1	1	CAMKK2	calcium/calmodulin-dependent protein kinase kinase 2, beta
hsa-miR-1206	1	0	1	1	1	1	SEMA4F	sema domain, immunoglobulin domain (Ig), transmembrane domain (TM) and short cytoplasmic domain, (semaphorin) 4F
hsa-miR-1206	1	0	1	1	1	1	CALCR	calcitonin receptor
hsa-miR-1206	1	0	1	1	1	1	CPEB3	cytoplasmic polyadenylation element binding protein 3
hsa-miR-1206	1	0	1	1	1	1	NLGN4Y	neuroligin 4, Y-linked
hsa-miR-1206	0	0	1	0	0	0	THSD7A	thrombospondin, type I, domain containing 7A
hsa-miR-1206	0	0	1	1	0	0	FAM149B1	family with sequence similarity 149, member B1
hsa-miR-1206	1	0	1	1	1	1	PALLD	palladin, cytoskeletal associated protein
hsa-miR-1206	1	0	1	1	1	1	RPGRIP1L	RPGRIP1-like
hsa-miR-1206	0	0	1	1	1	1	AGTPBP1	ATP/GTP binding protein 1
hsa-miR-1206	1	0	1	1	1	1	FOXJ3	forkhead box J3
hsa-miR-1206	1	0	1	0	1	1	ZNF507	zinc finger protein 507
hsa-miR-1206	1	0	1	0	1	1	SRGAP3	SLIT-ROBO Rho GTPase activating protein 3
hsa-miR-1206	1	0	1	1	1	1	ZMIZ1	zinc finger, MIZ-type containing 1
hsa-miR-1206	1	0	1	1	1	1	RIMKLB	ribosomal modification protein rimK-like family member B
hsa-miR-1206	0	0	1	1	1	1	FSTL5	follistatin-like 5
hsa-miR-1206	0	0	1	1	1	1	KLHL13	kelch-like 13 (Drosophila)
hsa-miR-1206	0	0	1	1	1	1	IFT80	intraflagellar transport 80 homolog (Chlamydomonas)
hsa-miR-1206	1	0	1	1	1	1	FAM135A	family with sequence similarity 135, member A
hsa-miR-1206	1	0	1	1	1	1	FRAS1	Fraser syndrome 1
hsa-miR-1206	1	0	1	0	1	1	LMO3	LIM domain only 3 (rhombotin-like 2)
hsa-miR-1206	0	0	1	0	1	1	ZSWIM6	zinc finger, SWIM-type containing 6
hsa-miR-1206	1	0	1	1	1	1	PER3	period homolog 3 (Drosophila)
hsa-miR-1206	1	0	1	1	1	1	PHF21A	PHD finger protein 21A
hsa-miR-1206	0	0	1	1	0	0	GPR123	G protein-coupled receptor 123
hsa-miR-1206	1	0	1	1	1	1	AHCTF1	AT hook containing transcription factor 1
hsa-miR-1206	1	0	1	1	1	1	HNRPDL	heterogeneous nuclear ribonucleoprotein D-like
hsa-miR-1206	1	0	1	0	1	1	SLC25A25	solute carrier family 25 (mitochondrial carrier; phosphate carrier), member 25
hsa-miR-1206	1	0	1	1	1	1	ANKRD12	ankyrin repeat domain 12
hsa-miR-1206	1	0	1	1	1	1	POGZ	pogo transposable element with ZNF domain
hsa-miR-1206	1	0	1	1	0	0	ZNF292	zinc finger protein 292
hsa-miR-1206	1	0	1	1	1	1	SH3TC2	SH3 domain and tetratricopeptide repeats 2
hsa-miR-1206	1	0	1	0	0	0	ZBTB34	zinc finger and BTB domain containing 34
hsa-miR-1206	1	0	1	1	1	1	PAM	peptidylglycine alpha-amidating monooxygenase
hsa-miR-1206	1	0	1	1	1	1	UBR3	ubiquitin protein ligase E3 component n-recognin 3 (putative)
hsa-miR-1206	1	0	1	1	1	1	C11orf57	chromosome 11 open reading frame 57
hsa-miR-1206	0	0	1	1	1	1	IL7	interleukin 7
hsa-miR-1206	1	0	1	1	1	1	PAN3	PAN3 poly(A) specific ribonuclease subunit homolog (S. cerevisiae)
hsa-miR-1206	1	0	1	0	1	1	LIN54	lin-54 homolog (C. elegans)
hsa-miR-1206	0	0	1	1	0	0	ERAP2	endoplasmic reticulum aminopeptidase 2
hsa-miR-1206	1	0	1	1	1	1	UBE3A	ubiquitin protein ligase E3A
hsa-miR-1206	1	0	1	1	1	1	ADARB1	adenosine deaminase, RNA-specific, B1
hsa-miR-1206	0	0	1	1	1	1	ING4	inhibitor of growth family, member 4
hsa-miR-1206	0	0	1	0	1	1	ITPR1	inositol 1,4,5-trisphosphate receptor, type 1
hsa-miR-1206	1	0	1	1	1	1	DAPK1	death-associated protein kinase 1
hsa-miR-1206	0	0	1	1	0	0	KCNC3	potassium voltage-gated channel, Shaw-related subfamily, member 3
hsa-miR-1206	1	0	1	1	1	1	RPS6KA3	ribosomal protein S6 kinase, 90kDa, polypeptide 3
hsa-miR-1206	1	0	1	1	1	1	PCCB	propionyl CoA carboxylase, beta polypeptide
hsa-miR-1206	1	0	1	1	1	1	MKNK2	MAP kinase interacting serine/threonine kinase 2
hsa-miR-1206	1	0	1	1	1	1	SLC8A1	solute carrier family 8 (sodium/calcium exchanger), member 1
hsa-miR-1206	1	0	1	1	1	1	RLF	rearranged L-myc fusion
hsa-miR-1206	0	0	1	1	1	1	DGKI	diacylglycerol kinase, iota
hsa-miR-1206	1	0	1	0	1	1	SLC6A6	solute carrier family 6 (neurotransmitter transporter, taurine), member 6
hsa-miR-1206	1	0	1	1	0	0	TSPYL2	TSPY-like 2
hsa-miR-1206	1	0	1	1	1	1	FMR1	fragile X mental retardation 1
hsa-miR-1206	1	0	1	1	1	1	EPHA7	EPH receptor A7
hsa-miR-1206	0	0	1	1	0	0	HTATSF1	HIV-1 Tat specific factor 1
hsa-miR-1206	1	0	1	0	1	1	CHL1	cell adhesion molecule with homology to L1CAM (close homolog of L1)
hsa-miR-1206	1	0	1	1	1	1	EPHA5	EPH receptor A5
hsa-miR-1206	1	0	1	1	1	1	AEBP2	AE binding protein 2
hsa-miR-1206	1	0	1	0	1	1	CDON	Cdon homolog (mouse)
hsa-miR-1206	0	0	1	1	1	1	RYR1	ryanodine receptor 1 (skeletal)
hsa-miR-1206	1	0	1	1	1	1	PDLIM5	PDZ and LIM domain 5
hsa-miR-1206	0	0	1	1	1	1	HLA-DQA1	major histocompatibility complex, class II, DQ alpha 1
hsa-miR-1206	1	0	1	1	1	1	EPB41	erythrocyte membrane protein band 4.1 (elliptocytosis 1, RH-linked)
hsa-miR-1206	0	0	1	1	1	1	MYO9A	myosin IXA
hsa-miR-1206	1	0	1	1	1	1	HMGA2	high mobility group AT-hook 2
hsa-miR-1206	1	0	1	1	1	1	TEAD1	TEA domain family member 1 (SV40 transcriptional enhancer factor)
hsa-miR-1206	0	0	1	1	1	1	EIF4G1	eukaryotic translation initiation factor 4 gamma, 1
hsa-miR-1206	0	0	1	1	1	1	BRCA1	breast cancer 1, early onset
hsa-miR-1206	1	0	1	1	1	1	TTC39A	tetratricopeptide repeat domain 39A
hsa-miR-1206	1	0	1	0	1	1	MLL2	myeloid/lymphoid or mixed-lineage leukemia 2
hsa-miR-1206	1	0	1	1	1	1	SLC4A4	solute carrier family 4, sodium bicarbonate cotransporter, member 4
hsa-miR-1206	1	0	1	0	1	1	PDE4D	phosphodiesterase 4D, cAMP-specific
hsa-miR-1206	1	0	1	1	1	1	SOCS2	suppressor of cytokine signaling 2
hsa-miR-1206	1	0	1	1	1	1	MRAS	muscle RAS oncogene homolog
hsa-miR-1206	0	0	1	1	1	1	CD84	CD84 molecule
hsa-miR-1206	1	0	1	1	1	1	SHOC2	soc-2 suppressor of clear homolog (C. elegans)
hsa-miR-1206	1	0	1	1	1	1	CTNND1	catenin (cadherin-associated protein), delta 1
hsa-miR-1206	1	0	1	1	1	1	ERLIN1	ER lipid raft associated 1
hsa-miR-1206	0	0	1	1	1	1	ERAL1	Era G-protein-like 1 (E. coli)
hsa-miR-1206	0	0	1	1	1	1	CAPN10	calpain 10
hsa-miR-1206	0	0	1	1	1	1	PLEKHB1	pleckstrin homology domain containing, family B (evectins) member 1
hsa-miR-1206	0	0	1	1	1	1	FHL1	four and a half LIM domains 1
hsa-miR-1206	0	0	1	1	1	1	THOC7	THO complex 7 homolog (Drosophila)
hsa-miR-1206	1	0	1	0	1	1	CD164	CD164 molecule, sialomucin
hsa-miR-1206	0	0	1	1	1	1	TMEM176B	transmembrane protein 176B
hsa-miR-1206	0	0	1	1	1	1	DCAF6	DDB1 and CUL4 associated factor 6
hsa-miR-1206	1	0	1	1	1	1	NF2	neurofibromin 2 (merlin)
hsa-miR-1206	1	0	1	1	1	1	PRUNE	prune homolog (Drosophila)
hsa-miR-1206	1	0	1	1	1	1	SORBS1	sorbin and SH3 domain containing 1
hsa-miR-1206	0	0	1	0	1	1	ZC3HAV1	zinc finger CCCH-type, antiviral 1
hsa-miR-1206	0	0	1	1	1	1	AIG1	androgen-induced 1
hsa-miR-1206	1	0	1	1	1	1	STXBP6	syntaxin binding protein 6 (amisyn)
hsa-miR-1206	1	0	1	1	1	1	TACC2	transforming, acidic coiled-coil containing protein 2
hsa-miR-1206	0	0	1	0	1	1	CLDN2	claudin 2
hsa-miR-1206	1	0	1	1	1	1	SNPH	syntaphilin
hsa-miR-1206	1	0	1	1	1	1	TSC22D2	TSC22 domain family, member 2
hsa-miR-1206	0	0	1	1	1	1	CSNK1A1	casein kinase 1, alpha 1
hsa-miR-1206	0	0	1	1	1	1	CD28	CD28 molecule
hsa-miR-1206	1	0	1	1	1	1	DESI2	desumoylating isopeptidase 2
hsa-miR-1206	1	0	1	1	1	1	STRN3	striatin, calmodulin binding protein 3
hsa-miR-1206	0	0	1	1	1	1	DOCK10	dedicator of cytokinesis 10
hsa-miR-1206	0	0	1	1	0	0	ELMOD3	ELMO/CED-12 domain containing 3
hsa-miR-1206	1	0	1	0	1	1	TRPS1	trichorhinophalangeal syndrome I
hsa-miR-1206	0	0	1	1	1	1	C21orf7	chromosome 21 open reading frame 7
hsa-miR-1206	1	0	1	1	1	1	PCDH11Y	protocadherin 11 Y-linked
hsa-miR-1206	1	0	1	1	1	1	NRP1	neuropilin 1
hsa-miR-1206	0	0	1	0	0	0	LOC645355	uncharacterized LOC645355
hsa-miR-1206	0	0	1	1	1	1	TBC1D2	TBC1 domain family, member 2
hsa-miR-1206	0	0	1	1	1	1	FCRL1	Fc receptor-like 1
hsa-miR-1206	1	0	1	1	1	1	CALU	calumenin
hsa-miR-1206	1	0	1	0	1	1	USP32	ubiquitin specific peptidase 32
hsa-miR-1206	1	0	1	1	1	1	KLHL32	kelch-like 32 (Drosophila)
hsa-miR-1206	1	0	1	1	1	1	ATAD1	ATPase family, AAA domain containing 1
hsa-miR-1206	1	0	1	1	1	1	CALCOCO1	calcium binding and coiled-coil domain 1
hsa-miR-1206	0	0	1	0	1	1	ZNF268	zinc finger protein 268
hsa-miR-1206	0	0	1	0	1	1	MYO3B	myosin IIIB
hsa-miR-1206	1	0	1	1	0	0	SEPT8	septin 8
hsa-miR-1206	1	0	1	1	1	1	HNRNPU	heterogeneous nuclear ribonucleoprotein U (scaffold attachment factor A)
hsa-miR-1206	0	0	1	1	1	1	AMPH	amphiphysin
hsa-miR-1206	0	0	1	1	1	1	RBM11	RNA binding motif protein 11
hsa-miR-1206	1	0	1	0	1	1	IL1RAP	interleukin 1 receptor accessory protein
hsa-miR-1206	1	0	1	1	1	1	VPS37A	vacuolar protein sorting 37 homolog A (S. cerevisiae)
hsa-miR-1206	1	0	1	1	1	1	AFF2	AF4/FMR2 family, member 2
hsa-miR-1206	0	0	1	1	1	1	GNAS	GNAS complex locus
hsa-miR-1206	1	0	1	1	1	1	ILF3	interleukin enhancer binding factor 3, 90kDa
hsa-miR-1206	0	0	1	1	1	1	RNASE7	ribonuclease, RNase A family, 7
hsa-miR-1206	1	0	1	1	1	1	NRXN3	neurexin 3
hsa-miR-1206	0	0	1	0	1	1	SRPK1	SRSF protein kinase 1
hsa-miR-1206	1	0	1	1	1	1	NAV3	neuron navigator 3
hsa-miR-1206	1	0	1	1	1	1	NOX4	NADPH oxidase 4
hsa-miR-1206	0	0	1	1	1	1	ESRP1	epithelial splicing regulatory protein 1
hsa-miR-1206	1	0	1	0	1	1	NFAT5	nuclear factor of activated T-cells 5, tonicity-responsive
hsa-miR-1206	1	0	1	1	0	0	DUS2L	dihydrouridine synthase 2-like, SMM1 homolog (S. cerevisiae)
hsa-miR-1206	0	0	1	1	0	0	ENY2	enhancer of yellow 2 homolog (Drosophila)
hsa-miR-1206	1	0	1	1	1	1	ARHGAP12	Rho GTPase activating protein 12
hsa-miR-1206	0	0	1	0	0	0	MCM3AP-AS1	MCM3AP antisense RNA 1
hsa-miR-1206	1	0	1	1	1	1	SLC38A2	solute carrier family 38, member 2
hsa-miR-1206	0	0	1	1	1	1	MCOLN3	mucolipin 3
hsa-miR-1206	0	0	1	1	1	1	SNRNP200	small nuclear ribonucleoprotein 200kDa (U5)
hsa-miR-1206	0	0	1	1	0	0	CPSF3L	cleavage and polyadenylation specific factor 3-like
hsa-miR-1206	0	0	1	1	0	0	RPS15A	ribosomal protein S15a
hsa-miR-1206	1	0	1	0	1	1	DCAF17	DDB1 and CUL4 associated factor 17
hsa-miR-1206	0	0	1	1	1	1	TTC23	tetratricopeptide repeat domain 23
hsa-miR-1206	1	0	1	1	1	1	SRP72	signal recognition particle 72kDa
hsa-miR-1206	1	0	1	1	1	1	PPFIA3	protein tyrosine phosphatase, receptor type, f polypeptide (PTPRF), interacting protein (liprin), alpha 3
hsa-miR-1206	0	0	1	1	1	1	CXorf57	chromosome X open reading frame 57
hsa-miR-1206	1	0	1	1	1	1	ZNF385A	zinc finger protein 385A
hsa-miR-1206	1	0	1	1	1	1	SCAF1	SR-related CTD-associated factor 1
hsa-miR-1206	1	0	1	1	1	1	DYRK2	dual-specificity tyrosine-(Y)-phosphorylation regulated kinase 2
hsa-miR-1206	1	0	1	1	1	1	ABHD3	abhydrolase domain containing 3
hsa-miR-1206	1	0	1	0	1	1	MYO5B	myosin VB
hsa-miR-1206	0	0	1	1	1	1	PPFIBP2	PTPRF interacting protein, binding protein 2 (liprin beta 2)
hsa-miR-1206	1	0	1	1	1	1	DLC1	deleted in liver cancer 1
hsa-miR-1206	1	0	1	1	1	1	NAA30	N(alpha)-acetyltransferase 30, NatC catalytic subunit
hsa-miR-1206	0	0	1	0	1	1	HEMK1	HemK methyltransferase family member 1
hsa-miR-1206	1	0	1	1	1	1	LRP4	low density lipoprotein receptor-related protein 4
hsa-miR-1206	0	0	1	1	1	1	KDM2B	lysine (K)-specific demethylase 2B
hsa-miR-1206	1	0	1	1	1	1	MARK1	MAP/microtubule affinity-regulating kinase 1
hsa-miR-1206	1	0	1	1	1	1	NFASC	neurofascin
hsa-miR-1206	1	0	1	1	1	1	SLAIN1	SLAIN motif family, member 1
hsa-miR-1206	0	0	1	1	1	1	C8orf46	chromosome 8 open reading frame 46
hsa-miR-1206	1	0	1	0	1	1	AP1G1	adaptor-related protein complex 1, gamma 1 subunit
hsa-miR-1206	0	0	1	1	0	0	ABHD16A	abhydrolase domain containing 16A
hsa-miR-1206	0	0	1	1	1	1	BCAR3	breast cancer anti-estrogen resistance 3
hsa-miR-1206	0	0	1	0	0	0	FLJ31104	uncharacterized LOC441072
hsa-miR-1206	0	0	1	0	0	0	LOC201617	uncharacterized LOC201617
hsa-miR-1206	1	0	1	0	1	1	RAB1A	RAB1A, member RAS oncogene family
hsa-miR-1206	0	0	1	1	1	1	SDK1	sidekick cell adhesion molecule 1
hsa-miR-1206	0	0	1	1	1	1	ANKRD36B	ankyrin repeat domain 36B
hsa-miR-1206	0	0	1	1	0	0	BEAN1	brain expressed, associated with NEDD4, 1
hsa-miR-1206	0	0	1	0	0	0	SEC14L2	SEC14-like 2 (S. cerevisiae)
hsa-miR-1206	0	0	1	0	0	0	JPX	JPX transcript, XIST activator (non-protein coding)
hsa-miR-1206	1	0	1	1	1	1	CLCN5	chloride channel, voltage-sensitive 5
hsa-miR-1206	1	0	1	1	1	1	SORBS2	sorbin and SH3 domain containing 2
hsa-miR-1206	0	0	1	1	1	1	DST	dystonin
hsa-miR-1206	0	0	1	1	1	1	LNX1	ligand of numb-protein X 1, E3 ubiquitin protein ligase
hsa-miR-1206	0	0	1	1	0	0	NXF2	nuclear RNA export factor 2
hsa-miR-1206	1	0	1	0	1	1	PLEKHA1	pleckstrin homology domain containing, family A (phosphoinositide binding specific) member 1
hsa-miR-1206	1	0	1	0	1	1	NCAM1	neural cell adhesion molecule 1
hsa-miR-1206	0	0	1	1	1	1	SEC61A2	Sec61 alpha 2 subunit (S. cerevisiae)
hsa-miR-1206	0	0	1	0	1	1	CHURC1	churchill domain containing 1
hsa-miR-1206	0	0	1	0	0	0	TUG1	taurine upregulated 1 (non-protein coding)
hsa-miR-1206	1	0	1	1	1	1	ANKRD49	ankyrin repeat domain 49
hsa-miR-1206	0	0	1	0	0	0	UBE2QL1	ubiquitin-conjugating enzyme E2Q family-like 1
hsa-miR-1206	0	0	1	1	0	0	PTOV1	prostate tumor overexpressed 1
hsa-miR-1206	1	0	1	1	1	1	IST1	increased sodium tolerance 1 homolog (yeast)
hsa-miR-1206	0	0	1	1	1	1	A2ML1	alpha-2-macroglobulin-like 1
hsa-miR-1206	0	0	1	1	1	1	ZBTB26	zinc finger and BTB domain containing 26
hsa-miR-1206	1	0	1	1	1	1	PEAR1	platelet endothelial aggregation receptor 1
hsa-miR-1206	1	0	1	1	1	1	PHF15	PHD finger protein 15
hsa-miR-1206	1	0	1	1	1	1	HLF	hepatic leukemia factor
hsa-miR-1206	0	0	1	0	1	1	CDHR3	cadherin-related family member 3
hsa-miR-1206	1	0	1	0	1	1	TPBG	trophoblast glycoprotein
hsa-miR-1206	1	0	1	0	1	1	SLC25A37	solute carrier family 25 (mitochondrial iron transporter), member 37
hsa-miR-1206	0	0	1	1	0	0	LGR5	leucine-rich repeat containing G protein-coupled receptor 5
hsa-miR-1206	0	0	1	1	0	0	CTNNBL1	catenin, beta like 1
hsa-miR-1206	1	0	1	1	1	1	ARIH2	ariadne homolog 2 (Drosophila)
hsa-miR-1206	1	0	1	1	1	1	FBXW2	F-box and WD repeat domain containing 2
hsa-miR-1206	1	0	1	1	1	1	TSN	translin
hsa-miR-1206	0	0	1	1	1	1	NRCAM	neuronal cell adhesion molecule
hsa-miR-1206	1	0	1	1	1	1	GNG2	guanine nucleotide binding protein (G protein), gamma 2
hsa-miR-1206	0	0	1	1	1	1	STAMBPL1	STAM binding protein-like 1
hsa-miR-1206	1	0	1	1	1	1	DEM1	defects in morphology 1 homolog (S. cerevisiae)
hsa-miR-1206	0	0	1	0	0	0	CXXC1P1	CXXC finger protein 1 pseudogene 1
hsa-miR-1206	0	0	1	1	1	1	SPOCK1	sparc/osteonectin, cwcv and kazal-like domains proteoglycan (testican) 1
hsa-miR-1206	0	0	1	0	0	0	PART1	prostate androgen-regulated transcript 1 (non-protein coding)
hsa-miR-1206	0	0	1	0	0	0	ZNF806	zinc finger protein 806
hsa-miR-1206	1	0	1	0	1	1	GATAD2B	GATA zinc finger domain containing 2B
hsa-miR-1206	1	0	1	0	1	1	ARL6IP6	ADP-ribosylation-like factor 6 interacting protein 6
hsa-miR-1206	0	0	1	1	1	1	RBM25	RNA binding motif protein 25
hsa-miR-1206	0	0	1	1	1	1	TMEM170A	transmembrane protein 170A
hsa-miR-1206	1	0	1	1	1	1	ARHGEF7	Rho guanine nucleotide exchange factor (GEF) 7
hsa-miR-1206	1	0	1	1	1	1	TMEM100	transmembrane protein 100
hsa-miR-1206	0	0	1	1	1	1	LTBR	lymphotoxin beta receptor (TNFR superfamily, member 3)
hsa-miR-1206	1	0	1	1	1	1	CNEP1R1	CTD nuclear envelope phosphatase 1 regulatory subunit 1
hsa-miR-1206	1	0	1	0	1	1	FAM129A	family with sequence similarity 129, member A
hsa-miR-1206	1	0	1	0	1	1	STC2	stanniocalcin 2
hsa-miR-1206	1	0	1	1	1	1	PEA15	phosphoprotein enriched in astrocytes 15
hsa-miR-1206	1	0	1	1	1	1	EPB41L4A	erythrocyte membrane protein band 4.1 like 4A
hsa-miR-1206	0	0	1	0	0	0	ZNF815P	zinc finger protein 815, pseudogene
hsa-miR-1206	0	0	1	0	0	0	FAM66C	family with sequence similarity 66, member C
hsa-miR-1206	0	0	1	0	0	0	OTUD1	OTU domain containing 1
hsa-miR-1206	0	0	1	0	1	1	FLJ39080	uncharacterized LOC441355
hsa-miR-1206	1	0	1	0	1	1	KIAA1737	KIAA1737
hsa-miR-1206	1	0	1	0	1	1	THRB	thyroid hormone receptor, beta
hsa-miR-1206	1	0	1	1	1	1	SNRNP70	small nuclear ribonucleoprotein 70kDa (U1)
hsa-miR-1206	1	0	1	1	1	1	CDV3	CDV3 homolog (mouse)
hsa-miR-1206	0	0	1	1	1	1	EXTL2	exostoses (multiple)-like 2
hsa-miR-1206	1	0	1	1	1	1	SPARC	secreted protein, acidic, cysteine-rich (osteonectin)
hsa-miR-1206	0	0	1	0	0	0	LOC401463	uncharacterized LOC401463
hsa-miR-1206	1	0	1	1	1	1	POU2F3	POU class 2 homeobox 3
hsa-miR-1206	0	0	1	0	0	0	LINC00293	long intergenic non-protein coding RNA 293
hsa-miR-1206	1	0	1	1	1	1	NSUN4	NOP2/Sun domain family, member 4
hsa-miR-1206	0	0	1	0	0	0	LOC285626	uncharacterized LOC285626
hsa-miR-1206	0	0	1	0	0	0	CECR7	cat eye syndrome chromosome region, candidate 7 (non-protein coding)
hsa-miR-1206	1	0	1	1	1	1	PIGA	phosphatidylinositol glycan anchor biosynthesis, class A
hsa-miR-1206	1	0	1	1	1	1	GATM	glycine amidinotransferase (L-arginine:glycine amidinotransferase)
hsa-miR-1206	0	0	1	1	1	1	C10orf32	chromosome 10 open reading frame 32
hsa-miR-1206	1	0	1	1	1	1	IL20RA	interleukin 20 receptor, alpha
hsa-miR-1206	0	0	1	0	1	1	LOC155060	AI894139 pseudogene
hsa-miR-1206	0	0	1	1	1	1	CPXCR1	CPX chromosome region, candidate 1
hsa-miR-1206	1	0	1	1	1	1	WEE1	WEE1 homolog (S. pombe)
hsa-miR-1206	1	0	1	1	1	1	SIK3	SIK family kinase 3
hsa-miR-1206	0	0	1	1	0	0	PMFBP1	polyamine modulated factor 1 binding protein 1
hsa-miR-1206	1	0	1	1	1	1	ABHD6	abhydrolase domain containing 6
hsa-miR-1206	0	0	1	1	1	1	FRMPD2	FERM and PDZ domain containing 2
hsa-miR-1206	0	0	1	0	1	1	PATE4	prostate and testis expressed 4
hsa-miR-1206	1	0	1	1	1	1	KALRN	kalirin, RhoGEF kinase
hsa-miR-1206	1	0	1	1	1	1	EGLN3	egl nine homolog 3 (C. elegans)
hsa-miR-1206	0	0	1	0	0	0	LGALS17A	Charcot-Leyden crystal protein pseudogene
hsa-miR-1206	0	0	1	1	1	1	FAM19A2	family with sequence similarity 19 (chemokine (C-C motif)-like), member A2
hsa-miR-1206	0	0	1	0	0	0	LOC650368	asparagine-linked glycosylation 1-like pseudogene
hsa-miR-1206	1	0	1	1	1	1	EPAS1	endothelial PAS domain protein 1
hsa-miR-1206	1	0	1	0	0	0	GPR137C	G protein-coupled receptor 137C
hsa-miR-1206	1	0	1	1	1	1	SH2D4B	SH2 domain containing 4B
hsa-miR-1206	0	0	1	0	0	0	DKFZP434H168	uncharacterized LOC26077
hsa-miR-1206	1	0	1	1	1	1	PRDM2	PR domain containing 2, with ZNF domain
hsa-miR-1206	1	0	1	1	1	1	GJC1	gap junction protein, gamma 1, 45kDa
hsa-miR-1206	1	0	1	0	1	1	DCUN1D4	DCN1, defective in cullin neddylation 1, domain containing 4 (S. cerevisiae)
hsa-miR-1206	0	0	1	0	1	1	NAIP	NLR family, apoptosis inhibitory protein
hsa-miR-1206	0	0	1	1	1	1	CCDC66	coiled-coil domain containing 66
hsa-miR-1206	0	0	1	1	1	1	CTPS2	CTP synthase 2
hsa-miR-1206	0	0	1	1	1	1	ZNF337	zinc finger protein 337
hsa-miR-1206	1	0	1	1	1	1	SACS	spastic ataxia of Charlevoix-Saguenay (sacsin)
hsa-miR-1206	1	0	1	0	0	0	MSL1	male-specific lethal 1 homolog (Drosophila)
hsa-miR-1206	0	0	1	1	1	1	PLOD2	procollagen-lysine, 2-oxoglutarate 5-dioxygenase 2
hsa-miR-1206	0	0	1	0	1	1	C17orf105	chromosome 17 open reading frame 105
hsa-miR-1206	0	0	1	1	1	1	MYOM3	myomesin family, member 3
hsa-miR-1206	1	0	1	1	1	1	PIK3R1	phosphoinositide-3-kinase, regulatory subunit 1 (alpha)
hsa-miR-1206	1	0	1	1	1	1	ATP1A2	ATPase, Na+/K+ transporting, alpha 2 polypeptide
hsa-miR-1206	1	0	1	1	0	0	LRRC73	leucine rich repeat containing 73
hsa-miR-1206	0	0	1	1	1	1	SPICE1	spindle and centriole associated protein 1
hsa-miR-1206	1	0	1	1	1	1	PHF17	PHD finger protein 17
hsa-miR-1206	1	0	1	1	1	1	ENAH	enabled homolog (Drosophila)
hsa-miR-1206	1	0	1	0	1	1	FNDC3B	fibronectin type III domain containing 3B
hsa-miR-1206	0	0	1	0	0	0	FAM205B	transmembrane protein C9orf144B pseudogene
hsa-miR-1206	1	0	1	1	0	0	SMCR7	Smith-Magenis syndrome chromosome region, candidate 7
hsa-miR-1206	1	0	1	1	1	1	KCTD12	potassium channel tetramerisation domain containing 12
hsa-miR-1206	0	0	1	1	1	1	CD160	CD160 molecule
hsa-miR-1206	1	0	1	1	1	1	FRYL	FRY-like
hsa-miR-1206	0	0	1	1	1	1	ATXN2	ataxin 2
hsa-miR-1206	0	0	1	0	0	0	LOC100129940	uncharacterized LOC100129940
hsa-miR-1206	0	0	1	0	0	0	EMBP1	embigin pseudogene 1
hsa-miR-1206	1	0	1	1	1	1	ADAMTS19	ADAM metallopeptidase with thrombospondin type 1 motif, 19
hsa-miR-1206	1	0	1	0	1	1	ESRRG	estrogen-related receptor gamma
hsa-miR-1206	0	0	1	0	0	0	LOC100124692	maltase-glucoamylase (alpha-glucosidase) pseudogene
hsa-miR-1206	1	0	1	1	1	1	WTAP	Wilms tumor 1 associated protein
hsa-miR-1206	0	0	1	1	1	1	RNF19B	ring finger protein 19B
hsa-miR-1206	0	0	1	1	0	0	ZNF730	zinc finger protein 730
hsa-miR-1206	1	0	1	1	1	1	LRRK2	leucine-rich repeat kinase 2
hsa-miR-1206	1	0	1	1	1	1	MAP2K4	mitogen-activated protein kinase kinase 4
hsa-miR-1206	0	0	1	1	1	1	PHF12	PHD finger protein 12
hsa-miR-1206	1	0	1	1	1	1	CTSA	cathepsin A
hsa-miR-1206	0	0	1	1	1	1	CRISP3	cysteine-rich secretory protein 3
hsa-miR-1206	1	0	1	1	1	1	PHTF2	putative homeodomain transcription factor 2
hsa-miR-1206	1	0	1	1	1	1	EDN1	endothelin 1
hsa-miR-1206	1	0	1	1	1	1	NOVA1	neuro-oncological ventral antigen 1
hsa-miR-1206	1	0	1	1	1	1	MARCH7	membrane-associated ring finger (C3HC4) 7, E3 ubiquitin protein ligase
hsa-miR-1206	0	0	1	1	0	0	NEK7	NIMA (never in mitosis gene a)-related kinase 7
hsa-miR-1206	1	0	1	1	1	1	RIF1	RAP1 interacting factor homolog (yeast)
hsa-miR-1206	0	0	1	1	1	1	TFDP2	transcription factor Dp-2 (E2F dimerization partner 2)
hsa-miR-1206	1	0	1	1	1	1	TAB2	TGF-beta activated kinase 1/MAP3K7 binding protein 2
hsa-miR-1206	0	0	1	0	0	0	POM121L8P	POM121 transmembrane nucleoporin-like 8 pseudogene
hsa-miR-1206	1	0	1	1	1	1	ARF6	ADP-ribosylation factor 6
hsa-miR-1206	0	0	1	1	1	1	ARIH1	ariadne homolog, ubiquitin-conjugating enzyme E2 binding protein, 1 (Drosophila)
hsa-miR-1206	1	0	1	0	1	1	DCDC2	doublecortin domain containing 2
hsa-miR-1206	1	0	1	1	1	1	ARPP21	cAMP-regulated phosphoprotein, 21kDa
hsa-miR-1206	0	0	1	0	0	0	DNAJC5B	DnaJ (Hsp40) homolog, subfamily C, member 5 beta
hsa-miR-1206	0	0	1	1	1	1	GRAMD1C	GRAM domain containing 1C
hsa-miR-1206	0	0	1	1	1	1	RHOT1	ras homolog family member T1
hsa-miR-1206	1	0	1	1	1	1	DNAJC16	DnaJ (Hsp40) homolog, subfamily C, member 16
hsa-miR-1206	1	0	1	1	1	1	TFE3	transcription factor binding to IGHM enhancer 3
hsa-miR-1206	0	0	1	1	0	0	DOPEY1	dopey family member 1
hsa-miR-1206	1	0	1	0	1	1	GRIN3A	glutamate receptor, ionotropic, N-methyl-D-aspartate 3A
hsa-miR-1206	1	0	1	0	1	1	FAM19A1	family with sequence similarity 19 (chemokine (C-C motif)-like), member A1
hsa-miR-1206	1	0	1	1	1	1	TMEFF1	transmembrane protein with EGF-like and two follistatin-like domains 1
hsa-miR-1206	0	0	1	1	1	1	BEND7	BEN domain containing 7
hsa-miR-1206	1	0	1	1	1	1	QTRTD1	queuine tRNA-ribosyltransferase domain containing 1
hsa-miR-1206	1	0	1	1	1	1	MLL3	myeloid/lymphoid or mixed-lineage leukemia 3
hsa-miR-1206	0	0	1	1	1	1	VWA3B	von Willebrand factor A domain containing 3B
hsa-miR-1206	1	0	1	1	0	0	PTAR1	protein prenyltransferase alpha subunit repeat containing 1
hsa-miR-1206	1	0	1	1	1	1	TMEM182	transmembrane protein 182
hsa-miR-1206	0	0	1	1	0	0	TMEM44	transmembrane protein 44
hsa-miR-1206	0	0	1	1	1	1	ZMYM6	zinc finger, MYM-type 6
hsa-miR-1206	1	0	1	1	1	1	FAM126A	family with sequence similarity 126, member A
hsa-miR-1206	1	0	1	0	1	1	CLINT1	clathrin interactor 1
hsa-miR-1206	0	0	1	0	0	0	EPHA1-AS1	EPHA1 antisense RNA 1
hsa-miR-1206	0	0	1	1	1	1	KIAA1841	KIAA1841
hsa-miR-1206	1	0	1	1	1	1	C1orf131	chromosome 1 open reading frame 131
hsa-miR-1206	1	0	1	1	1	1	RICTOR	RPTOR independent companion of MTOR, complex 2
hsa-miR-1206	0	0	1	1	1	1	KLHL29	kelch-like 29 (Drosophila)
hsa-miR-1206	1	0	1	1	0	0	LRRC58	leucine rich repeat containing 58
hsa-miR-1206	0	0	1	1	1	1	SLAMF7	SLAM family member 7
hsa-miR-1206	1	0	1	1	1	1	FBXL5	F-box and leucine-rich repeat protein 5
hsa-miR-1206	1	0	1	1	1	1	PPP3CA	protein phosphatase 3, catalytic subunit, alpha isozyme
hsa-miR-1206	1	0	1	1	1	1	WDR44	WD repeat domain 44
hsa-miR-1206	1	0	1	1	1	1	RNF38	ring finger protein 38
hsa-miR-1206	1	0	1	1	1	1	IKZF2	IKAROS family zinc finger 2 (Helios)
hsa-miR-1206	1	0	1	0	1	1	BDNF	brain-derived neurotrophic factor
hsa-miR-1206	1	0	1	1	1	1	MIPOL1	mirror-image polydactyly 1
hsa-miR-1206	1	0	1	1	1	1	CKAP2	cytoskeleton associated protein 2
hsa-miR-1206	0	0	1	0	0	0	LINC00308	long intergenic non-protein coding RNA 308
hsa-miR-1206	0	0	1	0	0	0	LOC374443	C-type lectin domain family 2, member D pseudogene
hsa-miR-1206	0	0	1	1	1	1	NFXL1	nuclear transcription factor, X-box binding-like 1
hsa-miR-1206	1	0	1	1	1	1	GGT7	gamma-glutamyltransferase 7
hsa-miR-1206	1	0	1	0	1	1	SS18L1	synovial sarcoma translocation gene on chromosome 18-like 1
hsa-miR-1206	1	0	1	1	1	1	RIC8B	resistance to inhibitors of cholinesterase 8 homolog B (C. elegans)
hsa-miR-1206	0	0	1	1	0	0	DNAH1	dynein, axonemal, heavy chain 1
hsa-miR-1206	0	0	1	1	0	0	GLYCTK	glycerate kinase
hsa-miR-1206	1	0	1	1	1	1	TAB3	TGF-beta activated kinase 1/MAP3K7 binding protein 3
hsa-miR-1206	1	0	1	1	1	1	CAMTA1	calmodulin binding transcription activator 1
hsa-miR-1206	0	0	1	1	1	1	RPTN	repetin
hsa-miR-1206	0	0	1	1	1	1	TNFSF15	tumor necrosis factor (ligand) superfamily, member 15
hsa-miR-1206	1	0	1	0	1	1	NHS	Nance-Horan syndrome (congenital cataracts and dental anomalies)
hsa-miR-1206	0	0	1	1	1	1	POTEG	POTE ankyrin domain family, member G
hsa-miR-1206	1	0	1	1	1	1	MECP2	methyl CpG binding protein 2 (Rett syndrome)
hsa-miR-1206	1	0	1	0	1	1	LRAT	lecithin retinol acyltransferase (phosphatidylcholine--retinol O-acyltransferase)
hsa-miR-1206	0	0	1	1	1	1	DIO1	deiodinase, iodothyronine, type I
hsa-miR-1206	1	0	1	1	1	1	MOG	myelin oligodendrocyte glycoprotein
hsa-miR-1206	0	0	1	0	1	1	CCL4L2	chemokine (C-C motif) ligand 4-like 2
hsa-miR-1206	0	0	1	1	1	1	CCL4L1	chemokine (C-C motif) ligand 4-like 1
hsa-miR-1206	1	0	1	1	1	1	QKI	QKI, KH domain containing, RNA binding
hsa-miR-1206	1	0	1	1	1	1	MYB	v-myb myeloblastosis viral oncogene homolog (avian)
hsa-miR-1206	1	0	1	1	0	0	TAF4B	TAF4b RNA polymerase II, TATA box binding protein (TBP)-associated factor, 105kDa
hsa-miR-1206	0	0	1	1	1	1	IL23R	interleukin 23 receptor
hsa-miR-1206	1	0	1	1	1	1	AMOT	angiomotin
hsa-miR-1206	0	0	1	1	0	0	C20orf43	chromosome 20 open reading frame 43
hsa-miR-1206	0	0	1	1	1	1	MRRF	mitochondrial ribosome recycling factor
hsa-miR-1206	1	0	1	0	1	1	DCAF10	DDB1 and CUL4 associated factor 10
hsa-miR-1206	0	0	1	0	1	1	HAUS3	HAUS augmin-like complex, subunit 3
hsa-miR-1206	1	0	1	0	1	1	CGGBP1	CGG triplet repeat binding protein 1
hsa-miR-1206	0	0	1	1	0	0	HDAC6	histone deacetylase 6
hsa-miR-1206	1	0	1	1	1	1	POU2F2	POU class 2 homeobox 2
hsa-miR-1206	0	0	1	0	0	0	MGC13053	uncharacterized MGC13053
hsa-miR-1206	0	0	1	1	1	1	DYNLRB1	dynein, light chain, roadblock-type 1
hsa-miR-1206	1	0	1	1	1	1	RSU1	Ras suppressor protein 1
hsa-miR-1206	0	0	1	0	0	0	HIST1H2BN	histone cluster 1, H2bn
hsa-miR-1206	0	0	1	1	0	0	FPGS	folylpolyglutamate synthase
hsa-miR-1206	1	0	1	1	1	1	GRIA2	glutamate receptor, ionotropic, AMPA 2
hsa-miR-1206	0	0	1	0	0	0	GRAMD1B	GRAM domain containing 1B
hsa-miR-1206	0	0	1	1	1	1	C17orf76-AS1	C17orf76 antisense RNA 1
hsa-miR-1206	1	0	1	1	1	1	SNCA	synuclein, alpha (non A4 component of amyloid precursor)
hsa-miR-1206	0	0	1	1	1	1	PCNP	PEST proteolytic signal containing nuclear protein
hsa-miR-1206	0	0	1	1	0	0	C8orf44	chromosome 8 open reading frame 44
hsa-miR-1206	1	0	1	1	1	1	ZBTB38	zinc finger and BTB domain containing 38
hsa-miR-1206	1	0	1	1	1	1	NUMBL	numb homolog (Drosophila)-like
hsa-miR-1206	1	0	1	1	1	1	FAM199X	family with sequence similarity 199, X-linked
hsa-miR-1206	1	0	1	0	1	1	CYBRD1	cytochrome b reductase 1
hsa-miR-1206	0	0	1	1	0	0	SARNP	SAP domain containing ribonucleoprotein
hsa-miR-1206	1	0	1	1	1	1	DNAJC14	DnaJ (Hsp40) homolog, subfamily C, member 14
hsa-miR-1206	0	0	1	0	0	0	TCP11L2	t-complex 11 (mouse)-like 2
hsa-miR-1206	0	0	1	0	1	1	LOC646736	uncharacterized LOC646736
hsa-miR-1206	1	0	1	1	1	1	WWC2	WW and C2 domain containing 2
hsa-miR-1206	1	0	1	1	1	1	ARHGEF9	Cdc42 guanine nucleotide exchange factor (GEF) 9
hsa-miR-1206	0	0	1	0	0	0	WDFY3-AS2	WDFY3 antisense RNA 2
hsa-miR-1206	0	0	1	0	1	1	TMSB15B	thymosin beta 15B
hsa-miR-1206	0	0	1	1	1	1	SELL	selectin L
hsa-miR-1206	0	0	1	0	0	0	ENTPD5	ectonucleoside triphosphate diphosphohydrolase 5
hsa-miR-1206	1	0	1	0	1	1	ARHGAP26	Rho GTPase activating protein 26
hsa-miR-1206	1	0	1	1	1	1	SCML4	sex comb on midleg-like 4 (Drosophila)
hsa-miR-1206	0	0	1	1	1	1	ABCA8	ATP-binding cassette, sub-family A (ABC1), member 8
hsa-miR-1206	1	0	1	0	1	1	CDK19	cyclin-dependent kinase 19
hsa-miR-1206	0	0	1	0	0	0	SNX29P2	sorting nexin 29 pseudogene 2
hsa-miR-1206	1	0	1	1	1	1	URI1	URI1, prefoldin-like chaperone
hsa-miR-1206	0	0	1	0	1	1	FHAD1	forkhead-associated (FHA) phosphopeptide binding domain 1
hsa-miR-1206	0	0	1	1	1	1	MAP2	microtubule-associated protein 2
hsa-miR-1206	1	0	1	1	1	1	RSPO2	R-spondin 2
hsa-miR-1206	0	0	1	1	1	1	SELP	selectin P (granule membrane protein 140kDa, antigen CD62)
hsa-miR-1206	0	0	1	1	1	1	TFAM	transcription factor A, mitochondrial
hsa-miR-1206	1	0	1	1	1	1	TIAL1	TIA1 cytotoxic granule-associated RNA binding protein-like 1
hsa-miR-1206	0	0	1	1	0	0	TMEM251	transmembrane protein 251
hsa-miR-1206	0	0	1	1	1	1	TMEM117	transmembrane protein 117
hsa-miR-1206	0	0	1	1	0	0	AGBL3	ATP/GTP binding protein-like 3
hsa-miR-1206	1	0	1	1	1	1	GABRA1	gamma-aminobutyric acid (GABA) A receptor, alpha 1
hsa-miR-1206	1	0	1	1	0	0	ADAMTS4	ADAM metallopeptidase with thrombospondin type 1 motif, 4
hsa-miR-1206	1	0	1	1	1	1	PLS1	plastin 1
hsa-miR-1206	0	0	1	0	0	0	ATP8B5P	ATPase, class I, type 8B, member 5, pseudogene
hsa-miR-1206	1	0	1	1	0	0	MRC2	mannose receptor, C type 2
hsa-miR-1206	0	0	1	1	1	1	C5orf22	chromosome 5 open reading frame 22
hsa-miR-1206	1	0	1	1	1	1	SORL1	sortilin-related receptor, L(DLR class) A repeats containing
hsa-miR-1206	1	0	1	1	1	1	FAM13A	family with sequence similarity 13, member A
hsa-miR-1206	1	0	1	1	1	1	CRKL	v-crk sarcoma virus CT10 oncogene homolog (avian)-like
hsa-miR-1206	0	0	1	1	1	1	IL20RB	interleukin 20 receptor beta
hsa-miR-1206	0	0	1	0	1	1	GPR155	G protein-coupled receptor 155
hsa-miR-1206	0	0	1	1	1	1	SLC39A12	solute carrier family 39 (zinc transporter), member 12
hsa-miR-1206	0	0	1	1	0	0	TSNAXIP1	translin-associated factor X interacting protein 1
hsa-miR-1206	1	0	1	1	1	1	GRIA4	glutamate receptor, ionotropic, AMPA 4
hsa-miR-1206	1	0	1	1	0	0	INO80E	INO80 complex subunit E
hsa-miR-1206	1	0	1	1	1	1	CTDSPL2	CTD (carboxy-terminal domain, RNA polymerase II, polypeptide A) small phosphatase like 2
hsa-miR-1206	0	0	1	0	0	0	LOC339862	uncharacterized LOC339862
hsa-miR-1206	0	0	1	1	1	1	UBE3D	ubiquitin protein ligase E3D
hsa-miR-1206	0	0	1	1	1	1	DUSP28	dual specificity phosphatase 28
hsa-miR-1206	0	0	1	0	0	0	SPATA3	spermatogenesis associated 3
hsa-miR-1206	1	0	1	1	0	0	TMEM131	transmembrane protein 131
hsa-miR-1206	0	0	1	0	0	0	SRGAP2C	SLIT-ROBO Rho GTPase activating protein 2C
hsa-miR-1206	1	0	1	0	1	1	CPEB4	cytoplasmic polyadenylation element binding protein 4
hsa-miR-1206	1	0	1	1	1	1	BNC2	basonuclin 2
hsa-miR-1206	1	0	1	1	0	0	EBF4	early B-cell factor 4
hsa-miR-1206	1	0	1	0	1	1	YAF2	YY1 associated factor 2
hsa-miR-1206	1	0	1	1	1	1	SOX6	SRY (sex determining region Y)-box 6
hsa-miR-1206	1	0	1	0	1	1	ARID2	AT rich interactive domain 2 (ARID, RFX-like)
hsa-miR-1206	1	0	1	1	1	1	DPP8	dipeptidyl-peptidase 8
hsa-miR-1206	0	0	1	1	1	1	ZFP90	zinc finger protein 90 homolog (mouse)
hsa-miR-1206	1	0	1	1	1	1	SOGA2	SOGA family member 2
hsa-miR-1206	0	0	1	1	1	1	STAG1	stromal antigen 1
hsa-miR-1206	0	0	1	0	0	0	SLC7A11-AS1	SLC7A11 antisense RNA 1
hsa-miR-1206	0	0	1	0	1	1	FAM13B	family with sequence similarity 13, member B
hsa-miR-1206	1	0	1	1	1	1	FAM123A	family with sequence similarity 123A
hsa-miR-1206	0	0	1	1	0	0	AQP12B	aquaporin 12B
hsa-miR-1206	0	0	1	0	0	0	LOC154092	uncharacterized LOC154092
hsa-miR-1206	1	0	1	1	1	1	TNFSF4	tumor necrosis factor (ligand) superfamily, member 4
hsa-miR-1206	0	0	1	0	0	0	CDKL3	cyclin-dependent kinase-like 3
hsa-miR-1206	0	0	1	0	0	0	LRRC37BP1	leucine rich repeat containing 37B pseudogene 1
hsa-miR-1206	1	0	1	1	1	1	FKBP5	FK506 binding protein 5
hsa-miR-1206	0	0	1	1	1	1	SH3GL3	SH3-domain GRB2-like 3
hsa-miR-1206	0	0	1	0	0	0	LOC401176	uncharacterized LOC401176
hsa-miR-1206	0	0	1	0	0	0	DKFZp686O1327	uncharacterized LOC401014
hsa-miR-1206	0	0	1	1	1	1	MST1	macrophage stimulating 1 (hepatocyte growth factor-like)
hsa-miR-1206	1	0	1	1	1	1	MAMDC2	MAM domain containing 2
hsa-miR-1206	0	0	1	1	1	1	MGC57346	uncharacterized LOC401884
hsa-miR-1206	0	0	1	0	0	0	LOC283914	uncharacterized LOC283914
hsa-miR-1206	1	0	1	1	1	1	SENP1	SUMO1/sentrin specific peptidase 1
hsa-miR-1206	1	0	1	1	1	1	SF3B1	splicing factor 3b, subunit 1, 155kDa
hsa-miR-1206	0	0	1	1	0	0	FOXJ1	forkhead box J1
hsa-miR-1206	1	0	1	1	0	0	CELF5	CUGBP, Elav-like family member 5
hsa-miR-1206	0	0	1	1	0	0	MT3	metallothionein 3
hsa-miR-1206	1	0	1	1	1	1	RTKN2	rhotekin 2
hsa-miR-1206	1	0	1	1	1	1	CLVS1	clavesin 1
hsa-miR-1206	1	0	1	0	1	1	ARHGAP5	Rho GTPase activating protein 5
hsa-miR-1206	0	0	1	0	1	1	ITGA1	integrin, alpha 1
hsa-miR-1206	1	0	1	1	1	1	RECK	reversion-inducing-cysteine-rich protein with kazal motifs
hsa-miR-1206	1	0	1	1	1	1	ANKRD46	ankyrin repeat domain 46
hsa-miR-1206	0	0	1	1	0	0	NISCH	nischarin
hsa-miR-1206	1	0	1	1	1	1	FNDC3A	fibronectin type III domain containing 3A
hsa-miR-1206	0	0	1	1	0	0	MIF	macrophage migration inhibitory factor (glycosylation-inhibiting factor)
hsa-miR-1206	0	0	1	1	1	1	LINC00086	long intergenic non-protein coding RNA 86
hsa-miR-1206	1	0	1	1	1	1	YWHAZ	tyrosine 3-monooxygenase/tryptophan 5-monooxygenase activation protein, zeta polypeptide
hsa-miR-1206	1	0	1	1	1	1	SCUBE3	signal peptide, CUB domain, EGF-like 3
hsa-miR-1206	1	0	1	1	0	0	ATG2A	autophagy related 2A
hsa-miR-1206	0	0	1	1	0	0	TTC9C	tetratricopeptide repeat domain 9C
hsa-miR-1206	0	0	1	1	1	1	LRRFIP2	leucine rich repeat (in FLII) interacting protein 2
hsa-miR-1206	0	0	1	1	1	1	MPP3	membrane protein, palmitoylated 3 (MAGUK p55 subfamily member 3)
hsa-miR-1206	1	0	1	1	1	1	KLHL28	kelch-like 28 (Drosophila)
hsa-miR-1206	1	0	1	1	1	1	GTDC1	glycosyltransferase-like domain containing 1
hsa-miR-1206	0	0	1	0	1	1	ASAP2	ArfGAP with SH3 domain, ankyrin repeat and PH domain 2
hsa-miR-1206	0	0	1	1	1	1	GPATCH2	G patch domain containing 2
hsa-miR-1206	0	0	1	1	1	1	CAMLG	calcium modulating ligand
hsa-miR-1206	0	0	1	1	1	1	GORAB	golgin, RAB6-interacting
hsa-miR-1206	0	0	1	0	0	0	LOC158435	uncharacterized LOC158435
hsa-miR-1206	1	0	1	1	1	1	IARS	isoleucyl-tRNA synthetase
hsa-miR-1206	1	0	1	1	1	1	LMO4	LIM domain only 4
hsa-miR-1206	0	0	1	1	0	0	PLAC1	placenta-specific 1
hsa-miR-1206	1	0	1	1	1	1	C5orf25	chromosome 5 open reading frame 25
hsa-miR-1206	1	0	1	1	1	1	GRHL1	grainyhead-like 1 (Drosophila)
hsa-miR-1206	0	0	1	0	0	0	LINC00442	long intergenic non-protein coding RNA 442
hsa-miR-1206	0	0	1	0	0	0	PCP4L1	Purkinje cell protein 4 like 1
hsa-miR-1206	0	0	1	0	0	0	PTGER4P2	prostaglandin E receptor 4 (subtype EP4) pseudogene 2
hsa-miR-1206	1	0	1	1	1	1	AHR	aryl hydrocarbon receptor
hsa-miR-1206	1	0	1	0	1	1	TGFBR1	transforming growth factor, beta receptor 1
hsa-miR-1206	1	0	1	0	1	1	TMEM194A	transmembrane protein 194A
hsa-miR-1206	1	0	1	1	1	1	CTBP1	C-terminal binding protein 1
hsa-miR-1206	0	0	1	1	1	1	FRMPDP2	FERM and PDZ domain containing 2 pseudogene 2
hsa-miR-1206	0	0	1	1	1	1	FRMPD2P1	FERM and PDZ domain containing 2 pseudogene 1
hsa-miR-1206	0	0	1	0	0	0	LOC440416	uncharacterized LOC440416
hsa-miR-1206	0	0	1	1	1	1	C3orf67	chromosome 3 open reading frame 67
hsa-miR-1206	1	0	1	0	1	1	AMMECR1L	AMME chromosomal region gene 1-like
hsa-miR-1206	1	0	1	1	1	1	EIF2AK4	eukaryotic translation initiation factor 2 alpha kinase 4
hsa-miR-1206	0	0	1	1	0	0	DNHD1	dynein heavy chain domain 1
hsa-miR-1206	1	0	1	1	1	1	FMNL3	formin-like 3
hsa-miR-1206	1	0	1	1	1	1	ZMYND11	zinc finger, MYND-type containing 11
hsa-miR-1206	0	0	1	1	1	1	COBL	cordon-bleu homolog (mouse)
hsa-miR-1206	1	0	1	1	1	1	TRPM3	transient receptor potential cation channel, subfamily M, member 3
hsa-miR-1206	1	0	1	1	1	1	ACVR2B	activin A receptor, type IIB
hsa-miR-1206	0	0	1	1	1	1	KLRF1	killer cell lectin-like receptor subfamily F, member 1
hsa-miR-1206	0	0	1	0	0	0	FAM106A	family with sequence similarity 106, member A
hsa-miR-1206	1	0	1	0	1	1	ARPP19	cAMP-regulated phosphoprotein, 19kDa
hsa-miR-1206	0	0	1	1	1	1	FUT11	fucosyltransferase 11 (alpha (1,3) fucosyltransferase)
hsa-miR-1206	0	0	1	1	1	1	ATP13A4	ATPase type 13A4
hsa-miR-1206	1	0	1	1	1	1	ARFIP1	ADP-ribosylation factor interacting protein 1
hsa-miR-1206	1	0	1	0	1	1	CPEB2	cytoplasmic polyadenylation element binding protein 2
hsa-miR-1206	1	0	1	0	1	1	KCNT2	potassium channel, subfamily T, member 2
hsa-miR-1206	0	0	1	1	1	1	CCDC126	coiled-coil domain containing 126
hsa-miR-1206	0	0	1	1	0	0	ANAPC11	anaphase promoting complex subunit 11
hsa-miR-1206	1	0	1	1	1	1	GABRB2	gamma-aminobutyric acid (GABA) A receptor, beta 2
hsa-miR-1206	0	0	1	0	0	0	HIST2H2BA	histone cluster 2, H2ba (pseudogene)
hsa-miR-1206	0	0	1	0	1	1	C9orf91	chromosome 9 open reading frame 91
hsa-miR-1206	0	0	1	1	0	0	TMEM126B	transmembrane protein 126B
hsa-miR-1206	0	0	1	1	0	0	C9orf153	chromosome 9 open reading frame 153
hsa-miR-1206	1	0	1	1	1	1	TBP	TATA box binding protein
hsa-miR-1206	1	0	1	0	1	1	DNAJC6	DnaJ (Hsp40) homolog, subfamily C, member 6
hsa-miR-1206	1	0	1	1	1	1	SP4	Sp4 transcription factor
hsa-miR-1206	0	0	1	1	0	0	YDJC	YdjC homolog (bacterial)
hsa-miR-1206	1	0	1	1	1	1	LARP1B	La ribonucleoprotein domain family, member 1B
hsa-miR-1206	0	0	1	1	0	0	TMC2	transmembrane channel-like 2
hsa-miR-1206	0	0	1	0	0	0	INTS4L1	integrator complex subunit 4-like 1
hsa-miR-1206	1	0	1	1	1	1	SLK	STE20-like kinase
hsa-miR-1206	0	0	1	1	1	1	UNC13B	unc-13 homolog B (C. elegans)
hsa-miR-1206	0	0	1	0	0	0	LINC00310	long intergenic non-protein coding RNA 310
hsa-miR-1206	0	0	1	1	0	0	PRAMEF10	PRAME family member 10
hsa-miR-1206	1	0	1	0	1	1	ROBO1	roundabout, axon guidance receptor, homolog 1 (Drosophila)
hsa-miR-1206	0	0	1	1	1	1	FMN2	formin 2
hsa-miR-1206	1	0	1	1	1	1	TMEM132B	transmembrane protein 132B
hsa-miR-1206	0	0	1	0	0	0	BTF3P11	basic transcription factor 3 pseudogene 11
hsa-miR-1206	1	0	1	1	1	1	ST18	suppression of tumorigenicity 18 (breast carcinoma) (zinc finger protein)
hsa-miR-1206	0	0	1	1	1	1	LRCH1	leucine-rich repeats and calponin homology (CH) domain containing 1
hsa-miR-1206	0	0	1	0	0	0	KRT8P12	keratin 8 pseudogene 12
hsa-miR-1206	1	0	1	0	1	1	CAMSAP2	calmodulin regulated spectrin-associated protein family, member 2
hsa-miR-1206	1	0	1	1	1	1	MEGF11	multiple EGF-like-domains 11
hsa-miR-1206	1	0	1	1	1	1	JMJD1C	jumonji domain containing 1C
hsa-miR-1206	0	0	1	1	0	0	KIF13A	kinesin family member 13A
hsa-miR-1206	1	0	1	0	1	1	LHFPL3	lipoma HMGIC fusion partner-like 3
hsa-miR-1206	0	0	1	0	0	0	FAM225B	family with sequence similarity 225, member B (non-protein coding)
hsa-miR-1206	1	0	1	1	1	1	C18orf34	chromosome 18 open reading frame 34
hsa-miR-1206	1	0	1	1	1	1	PTPRZ1	protein tyrosine phosphatase, receptor-type, Z polypeptide 1
hsa-miR-1206	0	0	1	1	1	1	TINF2	TERF1 (TRF1)-interacting nuclear factor 2
hsa-miR-1206	1	0	1	1	1	1	CHGA	chromogranin A (parathyroid secretory protein 1)
hsa-miR-1206	0	0	1	1	1	1	CNIH	cornichon homolog (Drosophila)
hsa-miR-1206	0	0	1	0	0	0	ADCY10P1	adenylate cyclase 10 (soluble) pseudogene 1
hsa-miR-1206	1	0	1	1	1	1	JPH1	junctophilin 1
hsa-miR-1206	0	0	1	0	1	1	GPX8	glutathione peroxidase 8 (putative)
hsa-miR-1206	1	0	1	0	1	1	CCDC88A	coiled-coil domain containing 88A
hsa-miR-1206	1	0	1	1	1	1	CCNG1	cyclin G1
hsa-miR-1206	1	0	1	1	1	1	ETS1	v-ets erythroblastosis virus E26 oncogene homolog 1 (avian)
hsa-miR-1206	0	0	1	1	1	1	KLHL8	kelch-like 8 (Drosophila)
hsa-miR-1206	0	0	1	1	1	1	PSMA2	proteasome (prosome, macropain) subunit, alpha type, 2
hsa-miR-1206	0	0	1	1	1	1	MAP2K6	mitogen-activated protein kinase kinase 6
hsa-miR-1206	0	0	1	1	1	1	GTF3C2	general transcription factor IIIC, polypeptide 2, beta 110kDa
hsa-miR-1206	1	0	1	0	1	1	GALNT4	UDP-N-acetyl-alpha-D-galactosamine:polypeptide N-acetylgalactosaminyltransferase 4 (GalNAc-T4)
hsa-miR-1206	0	0	1	1	0	0	RPS24	ribosomal protein S24
hsa-miR-1206	1	0	1	1	0	0	RBM27	RNA binding motif protein 27
hsa-miR-1206	0	0	1	0	0	0	LINC00240	long intergenic non-protein coding RNA 240
hsa-miR-1206	0	0	1	1	1	1	NIPSNAP3B	nipsnap homolog 3B (C. elegans)
hsa-miR-1206	1	0	1	1	1	1	TLN2	talin 2
hsa-miR-1206	1	0	1	1	1	1	USP6	ubiquitin specific peptidase 6 (Tre-2 oncogene)
hsa-miR-1206	1	0	1	0	1	1	EML4	echinoderm microtubule associated protein like 4
hsa-miR-1206	1	0	1	1	1	1	KLHL2	kelch-like 2, Mayven (Drosophila)
hsa-miR-1206	1	0	1	1	1	1	TC2N	tandem C2 domains, nuclear
hsa-miR-1206	1	0	1	1	1	1	TSC22D3	TSC22 domain family, member 3
hsa-miR-1206	0	0	1	0	0	0	OVOS	ovostatin
hsa-miR-1206	0	0	1	1	0	0	LRR1	leucine rich repeat protein 1
hsa-miR-1206	1	0	1	1	1	1	PPFIA1	protein tyrosine phosphatase, receptor type, f polypeptide (PTPRF), interacting protein (liprin), alpha 1
hsa-miR-1206	1	0	1	1	1	1	PLEKHH1	pleckstrin homology domain containing, family H (with MyTH4 domain) member 1
hsa-miR-1206	1	0	1	1	1	1	PHF3	PHD finger protein 3
hsa-miR-1206	0	0	1	1	1	1	ATP2A2	ATPase, Ca++ transporting, cardiac muscle, slow twitch 2
hsa-miR-1206	1	0	1	1	1	1	NAV1	neuron navigator 1
hsa-miR-1206	1	0	1	0	1	1	KLHL24	kelch-like 24 (Drosophila)
hsa-miR-1206	0	0	1	0	0	0	LOC286299	uncharacterized LOC286299
hsa-miR-1206	1	0	1	1	1	1	C5orf24	chromosome 5 open reading frame 24
hsa-miR-1206	0	0	1	1	0	0	SAMD7	sterile alpha motif domain containing 7
hsa-miR-1206	1	0	1	1	1	1	RDX	radixin
hsa-miR-1206	1	0	1	1	1	1	PGAP1	post-GPI attachment to proteins 1
hsa-miR-1206	1	0	1	1	1	1	TMEM135	transmembrane protein 135
hsa-miR-1206	0	0	1	1	1	1	ABCD3	ATP-binding cassette, sub-family D (ALD), member 3
hsa-miR-1206	1	0	1	1	1	1	FAM179B	family with sequence similarity 179, member B
hsa-miR-1206	0	0	1	0	0	0	ZNRD1-AS1	ZNRD1 antisense RNA 1
hsa-miR-1206	1	0	1	1	1	1	WLS	wntless homolog (Drosophila)
hsa-miR-1206	1	0	1	1	1	1	SLC30A7	solute carrier family 30 (zinc transporter), member 7
hsa-miR-1206	1	0	1	0	1	1	TBL1XR1	transducin (beta)-like 1 X-linked receptor 1
hsa-miR-1206	0	0	1	1	1	1	SPATA6L	spermatogenesis associated 6-like
hsa-miR-1206	1	0	1	1	1	1	CREB3L2	cAMP responsive element binding protein 3-like 2
hsa-miR-1206	0	0	1	0	1	1	GINS3	GINS complex subunit 3 (Psf3 homolog)
hsa-miR-1206	0	0	1	0	1	1	CD59	CD59 molecule, complement regulatory protein
hsa-miR-1206	0	0	1	1	0	0	MARCH11	membrane-associated ring finger (C3HC4) 11
hsa-miR-1206	1	0	1	1	1	1	ARHGDIA	Rho GDP dissociation inhibitor (GDI) alpha
hsa-miR-1206	1	0	1	1	1	1	PCMT1	protein-L-isoaspartate (D-aspartate) O-methyltransferase
hsa-miR-1206	1	0	1	1	1	1	SEL1L3	sel-1 suppressor of lin-12-like 3 (C. elegans)
hsa-miR-1206	1	0	1	0	1	1	RNF144A	ring finger protein 144A
hsa-miR-1206	1	0	1	1	1	1	GPBP1	GC-rich promoter binding protein 1
hsa-miR-1206	0	0	1	1	1	1	TBC1D10A	TBC1 domain family, member 10A
hsa-miR-1206	1	0	1	1	1	1	NABP1	nucleic acid binding protein 1
hsa-miR-1206	0	0	1	1	1	1	CRISPLD2	cysteine-rich secretory protein LCCL domain containing 2
hsa-miR-1206	0	0	1	0	0	0	FLJ30838	uncharacterized LOC400955
hsa-miR-1206	1	0	1	1	1	1	ARPC1B	actin related protein 2/3 complex, subunit 1B, 41kDa
hsa-miR-1206	1	0	1	1	1	1	MMAB	methylmalonic aciduria (cobalamin deficiency) cblB type
hsa-miR-1206	1	0	1	1	1	1	LETMD1	LETM1 domain containing 1
hsa-miR-1206	0	0	1	1	1	1	CYTH2	cytohesin 2
hsa-miR-1206	0	0	1	1	1	1	BTF3	basic transcription factor 3
hsa-miR-1206	0	0	1	1	1	1	PTGES3	prostaglandin E synthase 3 (cytosolic)
hsa-miR-1206	0	0	1	1	0	0	CCNDBP1	cyclin D-type binding-protein 1
hsa-miR-1206	1	0	1	1	1	1	HAPLN1	hyaluronan and proteoglycan link protein 1
hsa-miR-1206	1	0	1	0	1	1	BNIP3L	BCL2/adenovirus E1B 19kDa interacting protein 3-like
hsa-miR-1206	0	0	1	1	1	1	FAT1	FAT tumor suppressor homolog 1 (Drosophila)
hsa-miR-1206	0	0	1	1	0	0	NGDN	neuroguidin, EIF4E binding protein
hsa-miR-1206	0	0	1	1	1	1	TCEA2	transcription elongation factor A (SII), 2
hsa-miR-1206	0	0	1	0	0	0	MYCT1	myc target 1
hsa-miR-1206	0	0	1	1	1	1	BLZF1	basic leucine zipper nuclear factor 1
hsa-miR-1206	0	0	1	1	0	0	TFCP2	transcription factor CP2
hsa-miR-1206	0	0	1	0	1	1	C17orf108	chromosome 17 open reading frame 108
hsa-miR-1206	1	0	1	1	1	1	NTM	neurotrimin
hsa-miR-1206	1	0	1	1	1	1	FBXO9	F-box protein 9
hsa-miR-1206	0	0	1	1	0	0	CDK1	cyclin-dependent kinase 1
hsa-miR-1206	0	0	1	1	0	0	EMC7	ER membrane protein complex subunit 7
hsa-miR-1206	0	0	1	1	1	1	CD55	CD55 molecule, decay accelerating factor for complement (Cromer blood group)
hsa-miR-1206	0	0	1	1	1	1	HMGB2	high mobility group box 2
hsa-miR-1206	0	0	1	1	1	1	ANKRD53	ankyrin repeat domain 53
hsa-miR-1206	0	0	1	1	1	1	PECR	peroxisomal trans-2-enoyl-CoA reductase
hsa-miR-1206	0	0	1	1	1	1	STON1	stonin 1
hsa-miR-1206	1	0	1	1	1	1	STK38L	serine/threonine kinase 38 like
hsa-miR-1206	0	0	1	1	0	0	ATRAID	all-trans retinoic acid-induced differentiation factor
hsa-miR-1206	1	0	1	1	1	1	WIPF1	WAS/WASL interacting protein family, member 1
hsa-miR-1206	0	0	1	1	1	1	ATG4A	autophagy related 4A, cysteine peptidase
hsa-miR-1206	1	0	1	1	1	1	DKK3	dickkopf 3 homolog (Xenopus laevis)
hsa-miR-1206	0	0	1	1	1	1	VPS16	vacuolar protein sorting 16 homolog (S. cerevisiae)
hsa-miR-1206	0	0	1	1	1	1	BMPR1A	bone morphogenetic protein receptor, type IA
hsa-miR-1206	0	0	1	1	1	1	CAPZB	capping protein (actin filament) muscle Z-line, beta
hsa-miR-1206	1	0	1	1	1	1	PEX2	peroxisomal biogenesis factor 2
hsa-miR-1206	0	0	1	1	1	1	KLHDC2	kelch domain containing 2
hsa-miR-1206	0	0	1	1	0	0	TUSC3	tumor suppressor candidate 3
hsa-miR-1206	1	0	1	1	1	1	ARNTL	aryl hydrocarbon receptor nuclear translocator-like
hsa-miR-1206	1	0	1	0	1	1	C15orf41	chromosome 15 open reading frame 41
hsa-miR-1206	1	0	1	1	1	1	PPP3CB	protein phosphatase 3, catalytic subunit, beta isozyme
hsa-miR-1206	0	0	1	1	1	1	MAEL	maelstrom homolog (Drosophila)
hsa-miR-1206	1	0	1	1	1	1	RBBP7	retinoblastoma binding protein 7
hsa-miR-1206	1	0	1	1	1	1	RAP1GDS1	RAP1, GTP-GDP dissociation stimulator 1
hsa-miR-1206	1	0	1	1	1	1	NFYB	nuclear transcription factor Y, beta
hsa-miR-1206	1	0	1	1	1	1	ZNF207	zinc finger protein 207
hsa-miR-1206	1	0	1	1	1	1	ARMC8	armadillo repeat containing 8
hsa-miR-1206	0	0	1	1	1	1	DNAJC25	DnaJ (Hsp40) homolog, subfamily C , member 25
hsa-miR-1206	1	0	1	1	1	1	RNF2	ring finger protein 2
hsa-miR-1206	1	0	1	1	1	1	UBE2K	ubiquitin-conjugating enzyme E2K
hsa-miR-1206	1	0	1	1	1	1	WIPI2	WD repeat domain, phosphoinositide interacting 2
hsa-miR-1206	1	0	1	1	1	1	ATPAF1	ATP synthase mitochondrial F1 complex assembly factor 1
hsa-miR-1206	0	0	1	1	1	1	ZFAND1	zinc finger, AN1-type domain 1
hsa-miR-1206	0	0	1	1	1	1	C10orf2	chromosome 10 open reading frame 2
hsa-miR-1206	0	0	1	1	1	1	BDH1	3-hydroxybutyrate dehydrogenase, type 1
hsa-miR-1206	0	0	1	0	0	0	FAM47E	family with sequence similarity 47, member E
hsa-miR-1206	1	0	1	1	1	1	FBXW7	F-box and WD repeat domain containing 7, E3 ubiquitin protein ligase
hsa-miR-1206	1	0	1	0	1	1	MEGF10	multiple EGF-like-domains 10
hsa-miR-1206	1	0	1	1	1	1	KIAA2018	KIAA2018
hsa-miR-1206	1	0	1	0	1	1	XRN1	5'-3' exoribonuclease 1
hsa-miR-1206	1	0	1	1	1	1	TIPARP	TCDD-inducible poly(ADP-ribose) polymerase
hsa-miR-1206	1	0	1	1	1	1	SLC39A10	solute carrier family 39 (zinc transporter), member 10
hsa-miR-1206	1	0	1	1	1	1	NAPEPLD	N-acyl phosphatidylethanolamine phospholipase D
hsa-miR-1206	1	0	1	1	1	1	ZFHX3	zinc finger homeobox 3
hsa-miR-1206	1	0	1	1	1	1	PI15	peptidase inhibitor 15
hsa-miR-1206	1	0	1	1	1	1	TTC3	tetratricopeptide repeat domain 3
hsa-miR-1206	1	0	1	0	1	1	LONRF2	LON peptidase N-terminal domain and ring finger 2
hsa-miR-1206	0	0	1	1	1	1	PTGS1	prostaglandin-endoperoxide synthase 1 (prostaglandin G/H synthase and cyclooxygenase)
hsa-miR-1206	0	0	1	1	1	1	MARVELD2	MARVEL domain containing 2
hsa-miR-1206	0	0	1	1	1	1	TNFSF10	tumor necrosis factor (ligand) superfamily, member 10
hsa-miR-1206	0	0	1	1	1	1	DHX36	DEAH (Asp-Glu-Ala-His) box polypeptide 36
hsa-miR-1206	0	0	1	1	1	1	PROS1	protein S (alpha)
hsa-miR-1206	1	0	1	0	1	1	KCNB1	potassium voltage-gated channel, Shab-related subfamily, member 1
hsa-miR-1206	1	0	1	1	1	1	MLL	myeloid/lymphoid or mixed-lineage leukemia (trithorax homolog, Drosophila)
hsa-miR-1206	1	0	1	1	1	1	AFF1	AF4/FMR2 family, member 1
hsa-miR-1206	0	0	1	1	0	0	COL6A2	collagen, type VI, alpha 2
hsa-miR-1206	1	0	1	1	1	1	CD44	CD44 molecule (Indian blood group)
hsa-miR-1206	1	0	1	0	1	1	ACVR2A	activin A receptor, type IIA
hsa-miR-1206	0	0	1	0	0	0	AR	androgen receptor
hsa-miR-1206	0	0	1	1	0	0	CD40LG	CD40 ligand
hsa-miR-1206	1	0	1	1	1	1	COL1A1	collagen, type I, alpha 1
hsa-miR-1206	1	0	1	1	1	1	COL4A4	collagen, type IV, alpha 4
hsa-miR-1206	0	0	1	0	1	1	CYP1B1	cytochrome P450, family 1, subfamily B, polypeptide 1
hsa-miR-1206	1	0	1	0	1	1	GCH1	GTP cyclohydrolase 1
hsa-miR-1206	1	0	1	0	1	1	GLI3	GLI family zinc finger 3
hsa-miR-1206	0	0	1	1	1	1	GSS	glutathione synthetase
hsa-miR-1206	1	0	1	1	1	1	TBX5	T-box 5
hsa-miR-1206	1	0	1	0	1	1	ITGB3	integrin, beta 3 (platelet glycoprotein IIIa, antigen CD61)
hsa-miR-1206	1	0	1	1	1	1	JAG1	jagged 1
hsa-miR-1206	1	0	1	1	1	1	KCNA1	potassium voltage-gated channel, shaker-related subfamily, member 1 (episodic ataxia with myokymia)
hsa-miR-1206	1	0	1	0	1	1	KIT	v-kit Hardy-Zuckerman 4 feline sarcoma viral oncogene homolog
hsa-miR-1206	1	0	1	0	1	1	SGCB	sarcoglycan, beta (43kDa dystrophin-associated glycoprotein)
hsa-miR-1206	1	0	1	1	1	1	MET	met proto-oncogene (hepatocyte growth factor receptor)
hsa-miR-1206	1	0	1	1	1	1	MITF	microphthalmia-associated transcription factor
hsa-miR-1206	1	0	1	1	1	1	RB1	retinoblastoma 1
hsa-miR-1206	0	0	1	1	1	1	RHAG	Rh-associated glycoprotein
hsa-miR-1206	1	0	1	1	1	1	ATXN1	ataxin 1
hsa-miR-1206	1	0	1	1	1	1	TIMP3	TIMP metallopeptidase inhibitor 3
hsa-miR-1206	0	0	1	1	0	0	IL2RA	interleukin 2 receptor, alpha
hsa-miR-1206	1	0	1	1	1	1	APP	amyloid beta (A4) precursor protein
hsa-miR-1206	1	0	1	1	1	1	DCX	doublecortin
hsa-miR-1206	1	0	1	1	1	1	CR1	complement component (3b/4b) receptor 1 (Knops blood group)
hsa-miR-1206	1	0	1	1	1	1	IL1A	interleukin 1, alpha
hsa-miR-1206	0	0	1	0	1	1	CCR5	chemokine (C-C motif) receptor 5 (gene/pseudogene)
hsa-miR-1206	1	0	1	1	1	1	FASLG	Fas ligand (TNF superfamily, member 6)
hsa-miR-1206	1	0	1	0	1	1	ABAT	4-aminobutyrate aminotransferase
hsa-miR-1206	1	0	1	0	1	1	GABRA4	gamma-aminobutyric acid (GABA) A receptor, alpha 4
hsa-miR-1206	1	0	1	1	1	1	GABRB3	gamma-aminobutyric acid (GABA) A receptor, beta 3
hsa-miR-1206	1	0	1	1	1	1	HTR4	5-hydroxytryptamine (serotonin) receptor 4, G protein-coupled
hsa-miR-1206	0	0	1	1	1	1	HTR7	5-hydroxytryptamine (serotonin) receptor 7, adenylate cyclase-coupled
hsa-miR-1206	1	0	1	1	1	1	IGF1R	insulin-like growth factor 1 receptor
hsa-miR-1206	0	0	1	1	1	1	IL12A	interleukin 12A (natural killer cell stimulatory factor 1, cytotoxic lymphocyte maturation factor 1, p35)
hsa-miR-1206	1	0	1	0	1	1	KCNJ2	potassium inwardly-rectifying channel, subfamily J, member 2
hsa-miR-1206	1	0	1	0	1	1	KITLG	KIT ligand
hsa-miR-1206	1	0	1	1	1	1	PPP3R1	protein phosphatase 3, regulatory subunit B, alpha
hsa-miR-1206	1	0	1	1	1	1	PTGDR	prostaglandin D2 receptor (DP)
hsa-miR-1206	0	0	1	1	1	1	PTGS2	prostaglandin-endoperoxide synthase 2 (prostaglandin G/H synthase and cyclooxygenase)
hsa-miR-1206	1	0	1	0	1	1	UBE2W	ubiquitin-conjugating enzyme E2W (putative)
hsa-miR-1206	1	0	1	1	1	1	RORC	RAR-related orphan receptor C
hsa-miR-1206	1	0	1	0	1	1	SPOPL	speckle-type POZ protein-like
hsa-miR-1206	1	0	1	0	1	1	ARHGEF37	Rho guanine nucleotide exchange factor (GEF) 37
hsa-miR-1206	1	0	1	1	1	1	TPD52L3	tumor protein D52-like 3
hsa-miR-1206	1	0	1	1	1	1	FAM13C	family with sequence similarity 13, member C
hsa-miR-1206	1	0	1	1	1	1	WNK3	WNK lysine deficient protein kinase 3
hsa-miR-1206	1	0	1	1	1	1	C1orf173	chromosome 1 open reading frame 173
hsa-miR-1206	1	0	1	1	1	1	HMGXB4	HMG box domain containing 4
hsa-miR-1206	1	0	1	1	1	1	RBMS3	RNA binding motif, single stranded interacting protein 3
hsa-miR-1206	1	0	1	1	1	1	HNRNPD	heterogeneous nuclear ribonucleoprotein D (AU-rich element RNA binding protein 1, 37kDa)
hsa-miR-1206	0	0	1	1	1	1	AGMO	alkylglycerol monooxygenase
hsa-miR-1206	0	0	1	1	1	1	CLEC2D	C-type lectin domain family 2, member D
hsa-miR-1206	1	0	1	0	1	1	LRRC55	leucine rich repeat containing 55
hsa-miR-1206	1	0	1	0	1	1	YPEL2	yippee-like 2 (Drosophila)
hsa-miR-1206	1	0	1	1	1	1	EBF3	early B-cell factor 3
hsa-miR-1206	1	0	1	1	1	1	PLCXD3	phosphatidylinositol-specific phospholipase C, X domain containing 3
hsa-miR-1206	1	0	1	1	1	1	EDA	ectodysplasin A
hsa-miR-1206	1	0	1	1	1	1	ADAM9	ADAM metallopeptidase domain 9
hsa-miR-1206	1	0	1	1	1	1	TCEAL1	transcription elongation factor A (SII)-like 1
hsa-miR-1206	0	0	1	1	1	1	CLEC6A	C-type lectin domain family 6, member A
hsa-miR-1206	0	0	1	1	1	1	SCP2	sterol carrier protein 2
hsa-miR-1206	1	0	1	1	1	1	L3MBTL3	l(3)mbt-like 3 (Drosophila)
hsa-miR-1206	1	0	1	1	1	1	NTRK3	neurotrophic tyrosine kinase, receptor, type 3
hsa-miR-1206	0	0	1	0	1	1	C8orf22	chromosome 8 open reading frame 22
hsa-miR-1206	1	0	1	1	1	1	BRWD1	bromodomain and WD repeat domain containing 1
hsa-miR-1206	1	0	1	0	1	1	SS18	synovial sarcoma translocation, chromosome 18
hsa-miR-1206	0	0	1	1	1	1	FAM154B	family with sequence similarity 154, member B
hsa-miR-1206	1	0	1	0	1	1	C18orf25	chromosome 18 open reading frame 25
hsa-miR-1206	1	0	1	0	1	1	KIAA2022	KIAA2022
hsa-miR-1206	1	0	1	1	1	1	LPHN1	latrophilin 1
hsa-miR-1206	0	0	1	1	1	1	CCDC147	coiled-coil domain containing 147
hsa-miR-1206	1	0	1	1	1	1	FNIP1	folliculin interacting protein 1
hsa-miR-1206	0	0	1	1	1	1	SLC35D3	solute carrier family 35, member D3
hsa-miR-1206	0	0	1	1	1	1	ZCCHC11	zinc finger, CCHC domain containing 11
hsa-miR-1206	1	0	1	0	1	1	ERMN	ermin, ERM-like protein
hsa-miR-1206	1	0	1	1	1	1	FAM168B	family with sequence similarity 168, member B
hsa-miR-1206	1	0	1	1	1	1	ARHGAP28	Rho GTPase activating protein 28
hsa-miR-1206	0	0	1	1	0	0	LELP1	late cornified envelope-like proline-rich 1
hsa-miR-1206	1	0	1	0	1	1	FAM102B	family with sequence similarity 102, member B
hsa-miR-1206	1	0	1	0	1	1	MTX3	metaxin 3
hsa-miR-1206	1	0	1	1	1	1	ATP11C	ATPase, class VI, type 11C
hsa-miR-1206	1	0	1	1	1	1	PCGF6	polycomb group ring finger 6
hsa-miR-1206	0	0	1	0	1	1	ERVMER61-1	endogenous retrovirus group MER61, member 1
hsa-miR-1206	1	0	1	1	1	1	SLC25A53	solute carrier family 25, member 53
hsa-miR-1206	0	0	1	1	1	1	CCNC	cyclin C
hsa-miR-1206	1	0	1	0	1	1	ZNF793	zinc finger protein 793
hsa-miR-1206	1	0	1	1	1	1	KCNMA1	potassium large conductance calcium-activated channel, subfamily M, alpha member 1
hsa-miR-1206	0	0	1	1	1	1	USP1	ubiquitin specific peptidase 1
hsa-miR-1206	1	0	1	0	1	1	KCNK2	potassium channel, subfamily K, member 2
hsa-miR-1206	1	0	1	1	1	1	NTRK2	neurotrophic tyrosine kinase, receptor, type 2
hsa-miR-1206	1	0	1	1	1	1	SERBP1	SERPINE1 mRNA binding protein 1
hsa-miR-1206	0	0	1	1	1	1	HNMT	histamine N-methyltransferase
hsa-miR-1206	1	0	1	1	1	1	SH3KBP1	SH3-domain kinase binding protein 1
hsa-miR-1206	1	0	1	0	1	1	BCL7A	B-cell CLL/lymphoma 7A
hsa-miR-1206	1	0	1	0	1	1	TNRC6B	trinucleotide repeat containing 6B
hsa-miR-1206	0	0	1	1	1	1	WASF1	WAS protein family, member 1
hsa-miR-1206	1	0	1	0	1	1	CLLU1	chronic lymphocytic leukemia up-regulated 1
hsa-miR-1206	1	0	1	1	1	1	TPD52	tumor protein D52
hsa-miR-1206	0	0	1	1	0	0	CCT8L1P	chaperonin containing TCP1, subunit 8 (theta)-like 1, pseudogene
hsa-miR-1206	0	0	1	1	1	1	FAM24A	family with sequence similarity 24, member A
hsa-miR-1206	1	0	1	0	1	1	MSRB3	methionine sulfoxide reductase B3
hsa-miR-1206	0	0	1	1	0	0	FDX1L	ferredoxin 1-like
hsa-miR-1206	1	0	1	1	1	1	MAF	v-maf musculoaponeurotic fibrosarcoma oncogene homolog (avian)
hsa-miR-1206	1	0	1	1	1	1	CSNK1G3	casein kinase 1, gamma 3
hsa-miR-1206	0	0	1	1	1	1	SLC35A2	solute carrier family 35 (UDP-galactose transporter), member A2
hsa-miR-1206	1	0	1	0	1	1	NPNT	nephronectin
hsa-miR-1206	1	0	1	1	1	1	AMD1	adenosylmethionine decarboxylase 1
hsa-miR-1206	1	0	1	1	1	1	MYCL1	v-myc myelocytomatosis viral oncogene homolog 1, lung carcinoma derived (avian)
hsa-miR-1206	1	0	1	0	1	1	RYR2	ryanodine receptor 2 (cardiac)
hsa-miR-1206	0	0	1	1	1	1	PRPS2	phosphoribosyl pyrophosphate synthetase 2
hsa-miR-1206	0	0	1	1	0	0	ATP6V1E1	ATPase, H+ transporting, lysosomal 31kDa, V1 subunit E1
hsa-miR-1206	1	0	1	1	1	1	AP1S3	adaptor-related protein complex 1, sigma 3 subunit
hsa-miR-1206	1	0	1	0	1	1	CCNL2	cyclin L2
hsa-miR-1206	0	0	1	1	1	1	MAP9	microtubule-associated protein 9
hsa-miR-1206	0	0	1	0	1	1	C15orf56	chromosome 15 open reading frame 56
hsa-miR-1206	1	0	1	1	1	1	TCERG1	transcription elongation regulator 1
hsa-miR-1206	0	0	1	0	1	1	OPALIN	oligodendrocytic myelin paranodal and inner loop protein
hsa-miR-1206	0	0	1	0	1	1	SCN3B	sodium channel, voltage-gated, type III, beta subunit
hsa-miR-1206	1	0	1	0	1	1	CEP44	centrosomal protein 44kDa
hsa-miR-1206	1	0	1	1	1	1	ZBTB8A	zinc finger and BTB domain containing 8A
hsa-miR-1206	1	0	1	1	1	1	PRKAG2	protein kinase, AMP-activated, gamma 2 non-catalytic subunit
hsa-miR-1206	0	0	1	0	1	1	STEAP2	STEAP family member 2, metalloreductase
hsa-miR-1206	1	0	1	1	1	1	GDAP1	ganglioside induced differentiation associated protein 1
hsa-miR-1206	1	0	1	1	1	1	FILIP1L	filamin A interacting protein 1-like
hsa-miR-1206	1	0	1	1	1	1	ZNF706	zinc finger protein 706
hsa-miR-1206	1	0	1	1	1	1	SLC9A6	solute carrier family 9, subfamily A (NHE6, cation proton antiporter 6), member 6
hsa-miR-1206	0	0	1	1	1	1	SMC2	structural maintenance of chromosomes 2
hsa-miR-1206	0	0	1	1	1	1	SEC24B	SEC24 family, member B (S. cerevisiae)
hsa-miR-1206	1	0	1	0	1	1	TMEM237	transmembrane protein 237
hsa-miR-1206	0	0	1	1	1	1	TUBG1	tubulin, gamma 1
hsa-miR-1206	1	0	1	1	1	1	ZNF436	zinc finger protein 436
hsa-miR-1206	1	0	1	1	1	1	IRF2BP2	interferon regulatory factor 2 binding protein 2
hsa-miR-1206	1	0	1	0	1	1	UBXN2B	UBX domain protein 2B
hsa-miR-1206	1	0	1	1	1	1	ALG9	asparagine-linked glycosylation 9, alpha-1,2-mannosyltransferase homolog (S. cerevisiae)
hsa-miR-1206	0	0	1	1	0	0	CFC1B	cripto, FRL-1, cryptic family 1B
hsa-miR-1206	0	0	1	1	1	1	FKTN	fukutin
hsa-miR-1206	1	0	1	1	1	1	HAP1	huntingtin-associated protein 1
hsa-miR-1206	1	0	1	0	1	1	THSD7B	thrombospondin, type I, domain containing 7B
hsa-miR-1206	0	0	1	1	1	1	TMEM202	transmembrane protein 202
hsa-miR-1206	0	0	1	0	0	0	CCDC150	coiled-coil domain containing 150
hsa-miR-1206	1	0	1	1	1	1	DGKG	diacylglycerol kinase, gamma 90kDa
hsa-miR-1206	1	0	1	0	1	1	SCN3A	sodium channel, voltage-gated, type III, alpha subunit
hsa-miR-1206	1	0	1	0	1	1	PDE5A	phosphodiesterase 5A, cGMP-specific
hsa-miR-1206	1	0	1	1	1	1	ADCYAP1	adenylate cyclase activating polypeptide 1 (pituitary)
hsa-miR-1206	1	0	1	0	1	1	BACH1	BTB and CNC homology 1, basic leucine zipper transcription factor 1
hsa-miR-1206	1	0	1	0	1	1	BMPR2	bone morphogenetic protein receptor, type II (serine/threonine kinase)
hsa-miR-1206	1	0	1	1	1	1	CHD1	chromodomain helicase DNA binding protein 1
hsa-miR-1206	1	0	1	1	1	1	CREBL2	cAMP responsive element binding protein-like 2
hsa-miR-1206	1	0	1	1	1	1	MAPK14	mitogen-activated protein kinase 14
hsa-miR-1206	1	0	1	1	1	1	CELSR2	cadherin, EGF LAG seven-pass G-type receptor 2 (flamingo homolog, Drosophila)
hsa-miR-1206	1	0	1	1	1	1	EIF1AX	eukaryotic translation initiation factor 1A, X-linked
hsa-miR-1206	1	0	1	1	1	1	ELAVL1	ELAV (embryonic lethal, abnormal vision, Drosophila)-like 1 (Hu antigen R)
hsa-miR-1206	0	0	1	0	1	1	ELF5	E74-like factor 5 (ets domain transcription factor)
hsa-miR-1206	1	0	1	1	1	1	EP300	E1A binding protein p300
hsa-miR-1206	0	0	1	1	1	1	IL13RA1	interleukin 13 receptor, alpha 1
hsa-miR-1206	1	0	1	1	1	1	BAAT	bile acid CoA: amino acid N-acyltransferase (glycine N-choloyltransferase)
hsa-miR-1206	1	0	1	1	1	1	KLF5	Kruppel-like factor 5 (intestinal)
hsa-miR-1206	0	0	1	1	0	0	C9	complement component 9
hsa-miR-1206	0	0	1	1	1	1	CD1D	CD1d molecule
hsa-miR-1206	0	0	1	1	1	1	CKS2	CDC28 protein kinase regulatory subunit 2
hsa-miR-1206	0	0	1	1	0	0	CLC	Charcot-Leyden crystal protein
hsa-miR-1206	1	0	1	0	1	1	COL19A1	collagen, type XIX, alpha 1
hsa-miR-1206	1	0	1	1	1	1	SLC31A1	solute carrier family 31 (copper transporters), member 1
hsa-miR-1206	0	0	1	1	1	1	CSN2	casein beta
hsa-miR-1206	1	0	1	1	1	1	CSNK2A1	casein kinase 2, alpha 1 polypeptide
hsa-miR-1206	1	0	1	1	1	1	E2F3	E2F transcription factor 3
hsa-miR-1206	1	0	1	1	1	1	FKBP4	FK506 binding protein 4, 59kDa
hsa-miR-1206	0	0	1	0	1	1	GCLM	glutamate-cysteine ligase, modifier subunit
hsa-miR-1206	0	0	1	0	1	1	GYPA	glycophorin A (MNS blood group)
hsa-miR-1206	1	0	1	1	1	1	HIVEP1	human immunodeficiency virus type I enhancer binding protein 1
hsa-miR-1206	0	0	1	1	1	1	HMGCS1	3-hydroxy-3-methylglutaryl-CoA synthase 1 (soluble)
hsa-miR-1206	1	0	1	1	1	1	HOXB3	homeobox B3
hsa-miR-1206	1	0	1	1	1	1	HOXD10	homeobox D10
hsa-miR-1206	0	0	1	1	1	1	IL6ST	interleukin 6 signal transducer (gp130, oncostatin M receptor)
hsa-miR-1206	0	0	1	1	1	1	IL12B	interleukin 12B (natural killer cell stimulatory factor 2, cytotoxic lymphocyte maturation factor 2, p40)
hsa-miR-1206	1	0	1	1	1	1	ITGA9	integrin, alpha 9
hsa-miR-1206	0	0	1	0	1	1	ITGAV	integrin, alpha V
hsa-miR-1206	1	0	1	1	1	1	JUN	jun proto-oncogene
hsa-miR-1206	1	0	1	1	1	1	KPNA3	karyopherin alpha 3 (importin alpha 4)
hsa-miR-1206	1	0	1	1	1	1	KPNA4	karyopherin alpha 4 (importin alpha 3)
hsa-miR-1206	1	0	1	1	1	1	ME1	malic enzyme 1, NADP(+)-dependent, cytosolic
hsa-miR-1206	1	0	1	1	1	1	NPAT	nuclear protein, ataxia-telangiectasia locus
hsa-miR-1206	1	0	1	1	1	1	NPTX1	neuronal pentraxin I
hsa-miR-1206	0	0	1	0	1	1	OAZ2	ornithine decarboxylase antizyme 2
hsa-miR-1206	1	0	1	0	1	1	PAK2	p21 protein (Cdc42/Rac)-activated kinase 2
hsa-miR-1206	0	0	1	1	1	1	SERPINB8	serpin peptidase inhibitor, clade B (ovalbumin), member 8
hsa-miR-1206	1	0	1	1	1	1	PLAGL2	pleiomorphic adenoma gene-like 2
hsa-miR-1206	1	0	1	1	1	1	PPP1CB	protein phosphatase 1, catalytic subunit, beta isozyme
hsa-miR-1206	0	0	1	1	1	1	PPP1R3A	protein phosphatase 1, regulatory subunit 3A
hsa-miR-1206	1	0	1	1	1	1	PPP2CA	protein phosphatase 2, catalytic subunit, alpha isozyme
hsa-miR-1206	1	0	1	0	1	1	PRKCA	protein kinase C, alpha
hsa-miR-1206	1	0	1	1	1	1	PRKD1	protein kinase D1
hsa-miR-1206	1	0	1	1	1	1	MAPK6	mitogen-activated protein kinase 6
hsa-miR-1206	0	0	1	1	1	1	RFC3	replication factor C (activator 1) 3, 38kDa
hsa-miR-1206	0	0	1	1	0	0	RPS27A	ribosomal protein S27a
hsa-miR-1206	1	0	1	0	1	1	SORT1	sortilin 1
hsa-miR-1206	1	0	1	0	1	1	CCL22	chemokine (C-C motif) ligand 22
hsa-miR-1206	0	0	1	1	1	1	XCL1	chemokine (C motif) ligand 1
hsa-miR-1206	0	0	1	1	1	1	SH3BGRL	SH3 domain binding glutamic acid-rich protein like
hsa-miR-1206	1	0	1	1	1	1	SH3GL2	SH3-domain GRB2-like 2
hsa-miR-1206	1	0	1	1	1	1	SRI	sorcin
hsa-miR-1206	0	0	1	0	1	1	TRIM21	tripartite motif containing 21
hsa-miR-1206	1	0	1	0	1	1	STC1	stanniocalcin 1
hsa-miR-1206	0	0	1	1	1	1	XCL2	chemokine (C motif) ligand 2
hsa-miR-1206	0	0	1	1	1	1	TAF2	TAF2 RNA polymerase II, TATA box binding protein (TBP)-associated factor, 150kDa
hsa-miR-1206	1	0	1	0	1	1	TAL1	T-cell acute lymphocytic leukemia 1
hsa-miR-1206	0	0	1	0	1	1	TCEA3	transcription elongation factor A (SII), 3
hsa-miR-1206	1	0	1	1	1	1	TDG	thymine-DNA glycosylase
hsa-miR-1206	1	0	1	1	1	1	TEC	tec protein tyrosine kinase
hsa-miR-1206	1	0	1	1	1	1	HSP90B1	heat shock protein 90kDa beta (Grp94), member 1
hsa-miR-1206	0	0	1	1	0	0	TYROBP	TYRO protein tyrosine kinase binding protein
hsa-miR-1206	1	0	1	1	1	1	UBE2B	ubiquitin-conjugating enzyme E2B
hsa-miR-1206	0	0	1	1	1	1	UBE2D1	ubiquitin-conjugating enzyme E2D 1
hsa-miR-1206	1	0	1	0	1	1	UBE2D2	ubiquitin-conjugating enzyme E2D 2
hsa-miR-1206	1	0	1	1	1	1	YY1	YY1 transcription factor
hsa-miR-1206	1	0	1	1	1	1	ZIC3	Zic family member 3
hsa-miR-1206	1	0	1	1	1	1	PAX8	paired box 8
hsa-miR-1206	1	0	1	1	1	1	KCNAB1	potassium voltage-gated channel, shaker-related subfamily, beta member 1
hsa-miR-1206	0	0	1	1	1	1	STAM	signal transducing adaptor molecule (SH3 domain and ITAM motif) 1
hsa-miR-1206	1	0	1	1	1	1	CUL5	cullin 5
hsa-miR-1206	1	0	1	1	1	1	AKAP1	A kinase (PRKA) anchor protein 1
hsa-miR-1206	0	0	1	1	1	1	PIP5K1B	phosphatidylinositol-4-phosphate 5-kinase, type I, beta
hsa-miR-1206	1	0	1	1	1	1	EEA1	early endosome antigen 1
hsa-miR-1206	1	0	1	0	1	1	VAPA	VAMP (vesicle-associated membrane protein)-associated protein A, 33kDa
hsa-miR-1206	0	0	1	1	1	1	AGPS	alkylglycerone phosphate synthase
hsa-miR-1206	0	0	1	1	1	1	SLC25A12	solute carrier family 25 (aspartate/glutamate carrier), member 12
hsa-miR-1206	0	0	1	1	1	1	EIF3A	eukaryotic translation initiation factor 3, subunit A
hsa-miR-1206	1	0	1	1	1	1	NR5A2	nuclear receptor subfamily 5, group A, member 2
hsa-miR-1206	1	0	1	1	1	1	SNAP23	synaptosomal-associated protein, 23kDa
hsa-miR-1206	1	0	1	1	1	1	RIOK3	RIO kinase 3 (yeast)
hsa-miR-1206	0	0	1	1	1	1	TRIM24	tripartite motif containing 24
hsa-miR-1206	1	0	1	1	1	1	FGF18	fibroblast growth factor 18
hsa-miR-1206	1	0	1	1	1	1	IQGAP1	IQ motif containing GTPase activating protein 1
hsa-miR-1206	1	0	1	1	1	1	NRP2	neuropilin 2
hsa-miR-1206	1	0	1	1	1	1	KAT2B	K(lysine) acetyltransferase 2B
hsa-miR-1206	0	0	1	1	1	1	HERC1	HECT and RLD domain containing E3 ubiquitin protein ligase family member 1
hsa-miR-1206	1	0	1	1	1	1	BTAF1	BTAF1 RNA polymerase II, B-TFIID transcription factor-associated, 170kDa (Mot1 homolog, S. cerevisiae)
hsa-miR-1206	1	0	1	1	1	1	MAP7	microtubule-associated protein 7
hsa-miR-1206	0	0	1	0	1	1	RHOB	ras homolog family member B
hsa-miR-1206	1	0	1	1	1	1	CTSS	cathepsin S
hsa-miR-1206	1	0	1	0	1	1	DGKB	diacylglycerol kinase, beta 90kDa
hsa-miR-1206	1	0	1	1	1	1	EFNB2	ephrin-B2
hsa-miR-1206	1	0	1	1	1	1	FGF12	fibroblast growth factor 12
hsa-miR-1206	1	0	1	1	1	1	PPP2CB	protein phosphatase 2, catalytic subunit, beta isozyme
hsa-miR-1206	1	0	1	0	1	1	SLC1A2	solute carrier family 1 (glial high affinity glutamate transporter), member 2
hsa-miR-1206	1	0	1	0	1	1	MED14	mediator complex subunit 14
hsa-miR-1206	1	0	1	1	1	1	TRIP11	thyroid hormone receptor interactor 11
hsa-miR-1206	0	0	1	1	0	0	CD101	CD101 molecule
hsa-miR-1206	1	0	1	1	1	1	GDA	guanine deaminase
hsa-miR-1206	1	0	1	1	1	1	ARL3	ADP-ribosylation factor-like 3
hsa-miR-1206	1	0	1	1	1	1	ASTN1	astrotactin 1
hsa-miR-1206	0	0	1	1	1	1	COL12A1	collagen, type XII, alpha 1
hsa-miR-1206	1	0	1	1	1	1	EGR3	early growth response 3
hsa-miR-1206	1	0	1	1	1	1	EPS8	epidermal growth factor receptor pathway substrate 8
hsa-miR-1206	1	0	1	1	1	1	FUT8	fucosyltransferase 8 (alpha (1,6) fucosyltransferase)
hsa-miR-1206	1	0	1	1	1	1	WNT11	wingless-type MMTV integration site family, member 11
hsa-miR-1206	0	0	1	1	1	1	PABPN1	poly(A) binding protein, nuclear 1
hsa-miR-1206	1	0	1	0	1	1	USP9Y	ubiquitin specific peptidase 9, Y-linked
hsa-miR-1206	1	0	1	1	0	0	COX7A2L	cytochrome c oxidase subunit VIIa polypeptide 2 like
hsa-miR-1206	0	0	1	1	1	1	KCNAB3	potassium voltage-gated channel, shaker-related subfamily, beta member 3
hsa-miR-1206	1	0	1	1	1	1	KCNB2	potassium voltage-gated channel, Shab-related subfamily, member 2
hsa-miR-1206	1	0	1	1	1	1	MED1	mediator complex subunit 1
hsa-miR-1206	0	0	1	1	1	1	TAOK2	TAO kinase 2
hsa-miR-1206	0	0	1	0	1	1	ADIPOQ	adiponectin, C1Q and collagen domain containing
hsa-miR-1206	0	0	1	1	0	0	TM9SF2	transmembrane 9 superfamily member 2
hsa-miR-1206	1	0	1	1	1	1	NRXN1	neurexin 1
hsa-miR-1206	1	0	1	1	1	1	ONECUT2	one cut homeobox 2
hsa-miR-1206	0	0	1	1	1	1	PIGB	phosphatidylinositol glycan anchor biosynthesis, class B
hsa-miR-1206	0	0	1	1	1	1	CDH6	cadherin 6, type 2, K-cadherin (fetal kidney)
hsa-miR-1206	0	0	1	1	1	1	DSC1	desmocollin 1
hsa-miR-1206	0	0	1	1	1	1	JAK2	Janus kinase 2
hsa-miR-1206	1	0	1	0	1	1	KRAS	v-Ki-ras2 Kirsten rat sarcoma viral oncogene homolog
hsa-miR-1206	0	0	1	1	1	1	PDE1A	phosphodiesterase 1A, calmodulin-dependent
hsa-miR-1206	1	0	1	0	1	1	SCD	stearoyl-CoA desaturase (delta-9-desaturase)
hsa-miR-1206	1	0	1	1	1	1	SFPQ	splicing factor proline/glutamine-rich
hsa-miR-1206	1	0	1	1	1	1	SIAH2	siah E3 ubiquitin protein ligase 2
hsa-miR-1206	0	0	1	1	1	1	XYLB	xylulokinase homolog (H. influenzae)
hsa-miR-1206	1	0	1	1	1	1	OXSR1	oxidative-stress responsive 1
hsa-miR-1206	1	0	1	0	1	1	NR1D2	nuclear receptor subfamily 1, group D, member 2
hsa-miR-1206	1	0	1	1	1	1	FOXN3	forkhead box N3
hsa-miR-1206	1	1	1	1	1	1	MAP3K8	mitogen-activated protein kinase kinase kinase 8
hsa-miR-1206	1	0	1	1	1	1	DLX3	distal-less homeobox 3
hsa-miR-1206	1	0	1	1	1	1	FOXG1	forkhead box G1
hsa-miR-1206	1	0	1	1	1	1	GABPB1	GA binding protein transcription factor, beta subunit 1
hsa-miR-1206	1	0	1	1	1	1	GEM	GTP binding protein overexpressed in skeletal muscle
hsa-miR-1206	0	0	1	1	1	1	GRPR	gastrin-releasing peptide receptor
hsa-miR-1206	0	0	1	1	1	1	ITGAD	integrin, alpha D
hsa-miR-1206	0	0	1	1	1	1	SEPP1	selenoprotein P, plasma, 1
hsa-miR-1206	1	0	1	1	1	1	WNT1	wingless-type MMTV integration site family, member 1
hsa-miR-1206	0	0	1	1	1	1	MALL	mal, T-cell differentiation protein-like
hsa-miR-1206	1	0	1	0	1	1	CCDC6	coiled-coil domain containing 6
hsa-miR-1206	1	0	1	1	1	1	RND2	Rho family GTPase 2
hsa-miR-1206	0	0	1	1	1	1	DNAJB6	DnaJ (Hsp40) homolog, subfamily B, member 6
hsa-miR-1206	1	0	1	1	1	1	HOXA1	homeobox A1
hsa-miR-1206	1	0	1	1	1	1	INSIG1	insulin induced gene 1
hsa-miR-1206	0	0	1	0	1	1	LCP2	lymphocyte cytosolic protein 2 (SH2 domain containing leukocyte protein of 76kDa)
hsa-miR-1206	1	0	1	1	1	1	NHLH2	nescient helix loop helix 2
hsa-miR-1206	0	0	1	0	1	1	POU3F2	POU class 3 homeobox 2
hsa-miR-1206	1	0	1	1	1	1	RGS4	regulator of G-protein signaling 4
hsa-miR-1206	1	0	1	1	1	1	EVI5	ecotropic viral integration site 5
hsa-miR-1206	1	0	1	1	1	1	ST8SIA4	ST8 alpha-N-acetyl-neuraminide alpha-2,8-sialyltransferase 4
hsa-miR-1206	1	0	1	1	1	1	ABCF2	ATP-binding cassette, sub-family F (GCN20), member 2
hsa-miR-1206	1	0	1	1	1	1	ARPC5	actin related protein 2/3 complex, subunit 5, 16kDa
hsa-miR-1206	1	0	1	0	1	1	TSPAN2	tetraspanin 2
hsa-miR-1206	1	0	1	1	1	1	PURA	purine-rich element binding protein A
hsa-miR-1206	1	0	1	1	1	1	MAT2A	methionine adenosyltransferase II, alpha
hsa-miR-1206	1	0	1	1	1	1	MMP16	matrix metallopeptidase 16 (membrane-inserted)
hsa-miR-1206	1	0	1	1	1	1	TSNAX	translin-associated factor X
hsa-miR-1206	0	0	1	1	0	0	UQCRH	ubiquinol-cytochrome c reductase hinge protein
hsa-miR-1206	0	0	1	1	0	0	CCL26	chemokine (C-C motif) ligand 26
hsa-miR-1206	0	0	1	1	1	1	TRDN	triadin
hsa-miR-1206	1	0	1	1	1	1	CITED2	Cbp/p300-interacting transactivator, with Glu/Asp-rich carboxy-terminal domain, 2
hsa-miR-1206	1	0	1	1	1	1	SEMA3A	sema domain, immunoglobulin domain (Ig), short basic domain, secreted, (semaphorin) 3A
hsa-miR-1206	1	0	1	1	1	1	TMEM50B	transmembrane protein 50B
hsa-miR-1206	1	0	1	1	1	1	CAPZA1	capping protein (actin filament) muscle Z-line, alpha 1
hsa-miR-1206	1	0	1	1	1	1	DYNC1LI2	dynein, cytoplasmic 1, light intermediate chain 2
hsa-miR-1206	1	0	1	1	1	1	LASP1	LIM and SH3 protein 1
hsa-miR-1206	1	0	1	1	1	1	NEFL	neurofilament, light polypeptide
hsa-miR-1206	1	0	1	1	1	1	PDGFRA	platelet-derived growth factor receptor, alpha polypeptide
hsa-miR-1206	0	0	1	1	1	1	PIK3CA	phosphatidylinositol-4,5-bisphosphate 3-kinase, catalytic subunit alpha
hsa-miR-1206	1	0	1	0	1	1	PPP1R2	protein phosphatase 1, regulatory (inhibitor) subunit 2
hsa-miR-1206	1	0	1	1	1	1	PRKAB1	protein kinase, AMP-activated, beta 1 non-catalytic subunit
hsa-miR-1206	1	0	1	1	1	1	PKN2	protein kinase N2
hsa-miR-1206	0	0	1	0	0	0	PTPN13	protein tyrosine phosphatase, non-receptor type 13 (APO-1/CD95 (Fas)-associated phosphatase)
hsa-miR-1206	1	0	1	1	1	1	SMC1A	structural maintenance of chromosomes 1A
hsa-miR-1206	1	0	1	1	1	1	ZNF238	zinc finger protein 238
hsa-miR-1206	1	0	1	1	1	1	SEC23A	Sec23 homolog A (S. cerevisiae)
hsa-miR-1206	1	0	1	1	1	1	HEXIM1	hexamethylene bis-acetamide inducible 1
hsa-miR-1206	1	0	1	1	1	1	DYNLT3	dynein, light chain, Tctex-type 3
hsa-miR-1206	0	0	1	1	1	1	CLCA2	chloride channel accessory 2
hsa-miR-1206	1	0	1	1	1	1	KHDRBS1	KH domain containing, RNA binding, signal transduction associated 1
hsa-miR-1206	1	0	1	1	1	1	CTCF	CCCTC-binding factor (zinc finger protein)
hsa-miR-1206	1	0	1	1	1	1	CORIN	corin, serine peptidase
hsa-miR-1206	1	0	1	0	1	1	API5	apoptosis inhibitor 5
hsa-miR-1206	1	0	1	1	1	1	ZBTB6	zinc finger and BTB domain containing 6
hsa-miR-1206	1	0	1	1	1	1	PGRMC1	progesterone receptor membrane component 1
hsa-miR-1206	1	0	1	1	1	1	MAN1A2	mannosidase, alpha, class 1A, member 2
hsa-miR-1206	1	0	1	1	1	1	HIVEP2	human immunodeficiency virus type I enhancer binding protein 2
hsa-miR-1206	1	0	1	1	1	1	KAT6A	K(lysine) acetyltransferase 6A
hsa-miR-1206	0	0	1	1	1	1	TMED10	transmembrane emp24-like trafficking protein 10 (yeast)
hsa-miR-1206	1	0	1	1	1	1	SCN1A	sodium channel, voltage-gated, type I, alpha subunit
hsa-miR-1206	1	0	1	1	1	1	SKP1	S-phase kinase-associated protein 1
hsa-miR-1206	1	0	1	0	1	1	SLC5A3	solute carrier family 5 (sodium/myo-inositol cotransporter), member 3
hsa-miR-1206	1	0	1	1	1	1	TRIO	trio Rho guanine nucleotide exchange factor
hsa-miR-1206	0	0	1	0	1	1	ZNF208	zinc finger protein 208
hsa-miR-1206	0	0	1	0	1	1	ZXDB	zinc finger, X-linked, duplicated B
hsa-miR-1206	0	0	1	1	1	1	WIF1	WNT inhibitory factor 1
hsa-miR-1206	0	0	1	1	1	1	SLC6A14	solute carrier family 6 (amino acid transporter), member 14
hsa-miR-1206	1	0	1	1	1	1	KLF12	Kruppel-like factor 12
hsa-miR-1206	0	0	1	1	1	1	STXBP3	syntaxin binding protein 3
hsa-miR-1206	0	0	1	0	1	1	FKBP9	FK506 binding protein 9, 63 kDa
hsa-miR-1206	0	0	1	0	1	1	AP4E1	adaptor-related protein complex 4, epsilon 1 subunit
hsa-miR-1206	1	0	1	0	1	1	CD2AP	CD2-associated protein
hsa-miR-1206	1	0	1	1	1	1	DKK1	dickkopf 1 homolog (Xenopus laevis)
hsa-miR-1206	1	0	1	1	1	1	RHOQ	ras homolog family member Q
hsa-miR-1206	1	0	1	1	1	1	HS2ST1	heparan sulfate 2-O-sulfotransferase 1
hsa-miR-1206	1	0	1	1	1	1	KCND2	potassium voltage-gated channel, Shal-related subfamily, member 2
hsa-miR-1206	1	0	1	0	1	1	ACAP2	ArfGAP with coiled-coil, ankyrin repeat and PH domains 2
hsa-miR-1206	1	0	1	0	1	1	G3BP2	GTPase activating protein (SH3 domain) binding protein 2
hsa-miR-1206	1	0	1	0	1	1	FBXL7	F-box and leucine-rich repeat protein 7
hsa-miR-1206	1	0	1	0	1	1	MYO10	myosin X
hsa-miR-1206	1	0	1	1	1	1	NNT	nicotinamide nucleotide transhydrogenase
hsa-miR-1206	1	0	1	1	1	1	RANBP6	RAN binding protein 6
hsa-miR-1206	1	0	1	1	1	1	TLL2	tolloid-like 2
hsa-miR-1206	0	0	1	1	1	1	DNAJC15	DnaJ (Hsp40) homolog, subfamily C, member 15
hsa-miR-1206	0	0	1	1	1	1	N6AMT1	N-6 adenine-specific DNA methyltransferase 1 (putative)
hsa-miR-1206	0	0	1	1	1	1	C16orf80	chromosome 16 open reading frame 80
hsa-miR-1206	1	0	1	1	1	1	PPARGC1A	peroxisome proliferator-activated receptor gamma, coactivator 1 alpha
hsa-miR-1206	0	0	1	0	1	1	LINC00312	long intergenic non-protein coding RNA 312
hsa-miR-1206	0	0	1	1	1	1	PURG	purine-rich element binding protein G
hsa-miR-1206	0	0	1	1	1	1	UQCR10	ubiquinol-cytochrome c reductase, complex III subunit X
hsa-miR-1206	1	0	1	1	1	1	LRP12	low density lipoprotein receptor-related protein 12
hsa-miR-1206	0	0	1	0	1	1	RCAN3	RCAN family member 3
hsa-miR-1206	1	0	1	1	1	1	BAZ1A	bromodomain adjacent to zinc finger domain, 1A
hsa-miR-1206	1	0	1	0	1	1	CLIC4	chloride intracellular channel 4
hsa-miR-1206	1	0	1	1	1	1	SOCS5	suppressor of cytokine signaling 5
hsa-miR-1206	1	0	1	0	1	1	C16orf72	chromosome 16 open reading frame 72
hsa-miR-1206	1	0	1	1	1	1	VAMP1	vesicle-associated membrane protein 1 (synaptobrevin 1)
hsa-miR-1206	1	0	1	0	1	1	ODZ1	odz, odd Oz/ten-m homolog 1 (Drosophila)
hsa-miR-1206	0	0	1	1	0	0	OLFM1	olfactomedin 1
hsa-miR-1206	0	0	1	1	1	1	TRAM1	translocation associated membrane protein 1
hsa-miR-1206	1	0	1	1	1	1	LEMD3	LEM domain containing 3
hsa-miR-1206	1	0	1	1	1	1	PATZ1	POZ (BTB) and AT hook containing zinc finger 1
hsa-miR-1206	1	0	1	1	1	1	SLC7A11	solute carrier family 7 (anionic amino acid transporter light chain, xc- system), member 11
hsa-miR-1206	0	0	1	0	1	1	EID1	EP300 interacting inhibitor of differentiation 1
hsa-miR-1206	0	0	1	1	1	1	TSPAN13	tetraspanin 13
hsa-miR-1206	0	0	1	1	0	0	CCT8L2	chaperonin containing TCP1, subunit 8 (theta)-like 2
hsa-miR-1206	0	0	1	1	1	1	TCL6	T-cell leukemia/lymphoma 6 (non-protein coding)
hsa-miR-1206	1	0	1	1	1	1	DKK2	dickkopf 2 homolog (Xenopus laevis)
hsa-miR-1206	1	0	1	1	1	1	AFF4	AF4/FMR2 family, member 4
hsa-miR-1206	1	0	1	1	1	1	SERP1	stress-associated endoplasmic reticulum protein 1
hsa-miR-1206	1	0	1	1	0	0	RBMXL2	RNA binding motif protein, X-linked-like 2
hsa-miR-1206	0	0	1	1	1	1	GOLIM4	golgi integral membrane protein 4
hsa-miR-1206	1	0	1	1	1	1	CNOT2	CCR4-NOT transcription complex, subunit 2
hsa-miR-1206	0	0	1	1	1	1	TMOD2	tropomodulin 2 (neuronal)
hsa-miR-1206	1	0	1	1	1	1	RALGPS1	Ral GEF with PH domain and SH3 binding motif 1
hsa-miR-1206	0	0	1	1	1	1	AQR	aquarius homolog (mouse)
hsa-miR-1206	1	0	1	1	1	1	TBKBP1	TBK1 binding protein 1
hsa-miR-1206	0	0	1	1	1	1	FRMPD4	FERM and PDZ domain containing 4
hsa-miR-1206	1	0	1	0	1	1	TOX	thymocyte selection-associated high mobility group box
hsa-miR-1206	1	0	1	0	1	1	KIAA0494	KIAA0494
hsa-miR-1206	0	0	1	1	1	1	PPP1R26	protein phosphatase 1, regulatory subunit 26
hsa-miR-1206	1	0	1	1	1	1	TOMM70A	translocase of outer mitochondrial membrane 70 homolog A (S. cerevisiae)
hsa-miR-1206	1	0	1	0	1	1	LPPR4	lipid phosphate phosphatase-related protein type 4
hsa-miR-1206	1	0	1	0	1	1	KBTBD11	kelch repeat and BTB (POZ) domain containing 11
hsa-miR-1206	1	0	1	1	1	1	ZBTB5	zinc finger and BTB domain containing 5
hsa-miR-1206	0	0	1	1	0	0	KIFAP3	kinesin-associated protein 3
hsa-miR-1206	1	0	1	1	1	1	FBXO21	F-box protein 21
hsa-miR-1206	1	0	1	0	1	1	ZNF609	zinc finger protein 609
hsa-miR-1206	0	0	1	1	1	1	EXPH5	exophilin 5
hsa-miR-1206	1	0	1	1	1	1	SIPA1L3	signal-induced proliferation-associated 1 like 3
hsa-miR-1206	1	0	1	1	1	1	SMG1	smg-1 homolog, phosphatidylinositol 3-kinase-related kinase (C. elegans)
hsa-miR-1206	1	0	1	0	1	1	SNX13	sorting nexin 13
hsa-miR-1206	1	0	1	1	1	1	RTF1	Rtf1, Paf1/RNA polymerase II complex component, homolog (S. cerevisiae)
hsa-miR-1206	1	0	1	1	1	1	PLCB1	phospholipase C, beta 1 (phosphoinositide-specific)
hsa-miR-1206	1	0	1	1	0	0	KIAA0556	KIAA0556
hsa-miR-1206	1	0	1	1	1	1	ANKS1A	ankyrin repeat and sterile alpha motif domain containing 1A
hsa-miR-1206	1	0	1	0	1	1	SRGAP2	SLIT-ROBO Rho GTPase activating protein 2
hsa-miR-1206	1	0	1	1	1	1	MED13L	mediator complex subunit 13-like
hsa-miR-1206	0	0	1	0	1	1	ZDHHC17	zinc finger, DHHC-type containing 17
hsa-miR-1206	1	0	1	1	1	1	ASXL1	additional sex combs like 1 (Drosophila)
hsa-miR-1206	0	0	1	0	1	1	TMEM158	transmembrane protein 158 (gene/pseudogene)
hsa-miR-1206	1	0	1	1	1	1	CNOT6	CCR4-NOT transcription complex, subunit 6
hsa-miR-1206	0	0	1	1	1	1	NOL11	nucleolar protein 11
hsa-miR-1206	0	0	1	1	1	1	SOSTDC1	sclerostin domain containing 1
hsa-miR-1206	0	0	1	1	1	1	KBTBD2	kelch repeat and BTB (POZ) domain containing 2
hsa-miR-1206	1	0	1	1	1	1	KIAA1429	KIAA1429
hsa-miR-1206	0	0	1	1	1	1	TMEM87A	transmembrane protein 87A
hsa-miR-1206	0	0	1	1	0	0	C2CD3	C2 calcium-dependent domain containing 3
hsa-miR-1206	1	0	1	1	1	1	ABCA12	ATP-binding cassette, sub-family A (ABC1), member 12
hsa-miR-1206	0	0	1	1	1	1	BRPF3	bromodomain and PHD finger containing, 3
hsa-miR-1206	1	0	1	0	1	1	TRIM33	tripartite motif containing 33
hsa-miR-1206	0	0	1	1	1	1	HMP19	HMP19 protein
hsa-miR-1206	1	0	1	1	1	1	PHF20L1	PHD finger protein 20-like 1
hsa-miR-1206	1	0	1	1	1	1	SLMO2	slowmo homolog 2 (Drosophila)
hsa-miR-1206	0	0	1	1	1	1	HDGFRP3	hepatoma-derived growth factor, related protein 3
hsa-miR-1206	0	0	1	1	0	0	CLEC4A	C-type lectin domain family 4, member A
hsa-miR-1206	1	0	1	1	1	1	VGLL3	vestigial like 3 (Drosophila)
hsa-miR-1206	1	0	1	1	1	1	SNX9	sorting nexin 9
hsa-miR-1206	0	0	1	1	1	1	HSD17B11	hydroxysteroid (17-beta) dehydrogenase 11
hsa-miR-1206	1	0	1	1	1	1	TOB2	transducer of ERBB2, 2
hsa-miR-1206	1	0	1	0	1	1	SELT	selenoprotein T
hsa-miR-1206	0	0	1	1	1	1	CD244	CD244 molecule, natural killer cell receptor 2B4
hsa-miR-1206	0	0	1	0	1	1	IGF2-AS	IGF2 antisense RNA
hsa-miR-1206	1	0	1	0	1	1	CRIM1	cysteine rich transmembrane BMP regulator 1 (chordin-like)
hsa-miR-1206	1	0	1	0	1	1	RAB8B	RAB8B, member RAS oncogene family
hsa-miR-1206	1	0	1	1	1	1	RAB6B	RAB6B, member RAS oncogene family
hsa-miR-1206	0	0	1	1	1	1	USP18	ubiquitin specific peptidase 18
hsa-miR-1206	1	0	1	1	1	1	SIX4	SIX homeobox 4
hsa-miR-1206	0	0	1	1	1	1	SPA17	sperm autoantigenic protein 17
hsa-miR-1206	0	0	1	1	1	1	PRKAG3	protein kinase, AMP-activated, gamma 3 non-catalytic subunit
hsa-miR-1206	1	0	1	1	1	1	TET2	tet methylcytosine dioxygenase 2
hsa-miR-1206	1	0	1	0	1	1	FAM46C	family with sequence similarity 46, member C
hsa-miR-1206	1	0	1	0	1	1	DCAF16	DDB1 and CUL4 associated factor 16
hsa-miR-1206	1	0	1	1	1	1	ELOVL2	ELOVL fatty acid elongase 2
hsa-miR-1206	0	0	1	1	1	1	WHSC1L1	Wolf-Hirschhorn syndrome candidate 1-like 1
hsa-miR-1206	1	0	1	0	1	1	MARCH5	membrane-associated ring finger (C3HC4) 5
hsa-miR-1206	1	0	1	1	1	1	WDYHV1	WDYHV motif containing 1
hsa-miR-1206	1	0	1	1	1	1	AGGF1	angiogenic factor with G patch and FHA domains 1
hsa-miR-1206	0	0	1	0	1	1	WDR60	WD repeat domain 60
hsa-miR-1206	1	0	1	1	1	1	FIGN	fidgetin
hsa-miR-1206	1	0	1	1	1	1	FAM178A	family with sequence similarity 178, member A
hsa-miR-1206	1	0	1	1	1	1	TMEM33	transmembrane protein 33
hsa-miR-1206	0	0	1	1	1	1	KLHL11	kelch-like 11 (Drosophila)
hsa-miR-1206	0	0	1	1	1	1	NUDT11	nudix (nucleoside diphosphate linked moiety X)-type motif 11
hsa-miR-1206	0	0	1	0	1	1	GOLPH3L	golgi phosphoprotein 3-like
hsa-miR-1206	1	0	1	1	1	1	UBA6	ubiquitin-like modifier activating enzyme 6
hsa-miR-1206	1	0	1	0	1	1	SEPT11	septin 11
hsa-miR-1206	1	0	1	1	1	1	C20orf20	chromosome 20 open reading frame 20
hsa-miR-1206	0	0	1	1	1	1	QRSL1	glutaminyl-tRNA synthase (glutamine-hydrolyzing)-like 1
hsa-miR-1206	1	0	1	1	1	1	ZNF654	zinc finger protein 654
hsa-miR-1206	1	0	1	1	1	1	TBC1D19	TBC1 domain family, member 19
hsa-miR-1206	1	0	1	1	1	1	PI4K2B	phosphatidylinositol 4-kinase type 2 beta
hsa-miR-1206	1	0	1	1	1	1	KIAA1598	KIAA1598
hsa-miR-1206	1	0	1	1	1	1	RSBN1	round spermatid basic protein 1
hsa-miR-1206	0	0	1	1	1	1	BDP1	B double prime 1, subunit of RNA polymerase III transcription initiation factor IIIB
hsa-miR-1206	1	0	1	0	1	1	LRP1B	low density lipoprotein receptor-related protein 1B
hsa-miR-1206	1	0	1	1	1	1	MLL5	myeloid/lymphoid or mixed-lineage leukemia 5 (trithorax homolog, Drosophila)
hsa-miR-1206	1	0	1	1	1	1	KIAA1199	KIAA1199
hsa-miR-1206	1	0	1	1	1	1	GNG12	guanine nucleotide binding protein (G protein), gamma 12
hsa-miR-1206	1	0	1	0	1	1	PCDHAC1	protocadherin alpha subfamily C, 1
hsa-miR-1206	1	0	1	0	1	1	PCDHAC2	protocadherin alpha subfamily C, 2
hsa-miR-1206	1	0	1	1	1	1	PCDHA1	protocadherin alpha 1
hsa-miR-1206	1	0	1	0	1	1	PCDHA10	protocadherin alpha 10
hsa-miR-1206	1	0	1	0	1	1	PCDHA11	protocadherin alpha 11
hsa-miR-1206	1	0	1	0	1	1	PCDHA12	protocadherin alpha 12
hsa-miR-1206	1	0	1	0	1	1	PCDHA13	protocadherin alpha 13
hsa-miR-1206	1	0	1	1	1	1	PCDHA2	protocadherin alpha 2
hsa-miR-1206	1	0	1	1	1	1	PCDHA3	protocadherin alpha 3
hsa-miR-1206	1	0	1	1	1	1	PCDHA4	protocadherin alpha 4
hsa-miR-1206	1	0	1	1	1	1	PCDHA5	protocadherin alpha 5
hsa-miR-1206	1	0	1	1	1	1	PCDHA6	protocadherin alpha 6
hsa-miR-1206	1	0	1	0	1	1	PCDHA7	protocadherin alpha 7
hsa-miR-1206	1	0	1	1	1	1	PCDHA8	protocadherin alpha 8
hsa-miR-1206	0	0	1	1	1	1	ERRFI1	ERBB receptor feedback inhibitor 1
hsa-miR-1206	0	0	1	1	1	1	GAR1	GAR1 ribonucleoprotein homolog (yeast)
hsa-miR-1206	1	0	1	0	1	1	TMX3	thioredoxin-related transmembrane protein 3
hsa-miR-1206	1	0	1	1	1	1	DENND1B	DENN/MADD domain containing 1B
hsa-miR-1206	1	0	1	1	1	1	DDIT4	DNA-damage-inducible transcript 4
hsa-miR-1206	0	0	1	1	1	1	GNL3L	guanine nucleotide binding protein-like 3 (nucleolar)-like
hsa-miR-1206	1	0	1	1	1	1	NDFIP2	Nedd4 family interacting protein 2
hsa-miR-1206	1	0	1	1	1	1	SEPT3	septin 3
hsa-miR-1206	1	0	1	1	1	1	SERTAD4	SERTA domain containing 4
hsa-miR-1206	1	0	1	1	0	0	KCNQ5	potassium voltage-gated channel, KQT-like subfamily, member 5
hsa-miR-1206	1	0	1	0	1	1	TM9SF3	transmembrane 9 superfamily member 3
hsa-miR-1206	0	0	1	1	1	1	GRIPAP1	GRIP1 associated protein 1
hsa-miR-1206	1	0	1	0	1	1	PAPOLB	poly(A) polymerase beta (testis specific)
hsa-miR-1206	1	0	1	1	1	1	SAR1A	SAR1 homolog A (S. cerevisiae)
hsa-miR-1206	1	0	1	1	1	1	C1GALT1	core 1 synthase, glycoprotein-N-acetylgalactosamine 3-beta-galactosyltransferase, 1
hsa-miR-1206	1	0	1	1	1	1	FEM1C	fem-1 homolog c (C. elegans)
hsa-miR-1206	1	0	1	1	1	1	CCDC47	coiled-coil domain containing 47
hsa-miR-1206	1	0	1	1	0	0	SLC17A7	solute carrier family 17 (sodium-dependent inorganic phosphate cotransporter), member 7
hsa-miR-1206	1	0	1	1	1	1	PAK7	p21 protein (Cdc42/Rac)-activated kinase 7
hsa-miR-1206	1	0	1	0	1	1	SLC17A6	solute carrier family 17 (sodium-dependent inorganic phosphate cotransporter), member 6
hsa-miR-1206	0	0	1	1	1	1	PDSS2	prenyl (decaprenyl) diphosphate synthase, subunit 2
hsa-miR-1206	1	0	1	0	1	1	EIF5A2	eukaryotic translation initiation factor 5A2
hsa-miR-1206	1	0	1	1	1	1	PTGFRN	prostaglandin F2 receptor negative regulator
hsa-miR-1206	1	0	1	1	1	1	RAB22A	RAB22A, member RAS oncogene family
hsa-miR-1206	1	0	1	1	1	1	DSCAML1	Down syndrome cell adhesion molecule like 1
hsa-miR-1206	1	0	1	0	1	1	KCNS2	potassium voltage-gated channel, delayed-rectifier, subfamily S, member 2
hsa-miR-1206	1	0	1	0	1	1	FAM40B	family with sequence similarity 40, member B
hsa-miR-1206	0	0	1	1	1	1	SHROOM4	shroom family member 4
hsa-miR-1206	1	0	1	1	1	1	USP31	ubiquitin specific peptidase 31
hsa-miR-1206	1	0	1	1	1	1	MIB1	mindbomb E3 ubiquitin protein ligase 1
hsa-miR-1206	0	0	1	1	1	1	ARRDC3	arrestin domain containing 3
hsa-miR-1206	0	0	1	0	1	1	SYT13	synaptotagmin XIII
hsa-miR-1206	1	0	1	0	1	1	SH3RF1	SH3 domain containing ring finger 1
hsa-miR-1206	1	0	1	1	1	1	CNTN3	contactin 3 (plasmacytoma associated)
hsa-miR-1206	1	0	1	1	1	1	ZFP14	zinc finger protein 14 homolog (mouse)
hsa-miR-1206	1	0	1	0	1	1	GPAM	glycerol-3-phosphate acyltransferase, mitochondrial
hsa-miR-1206	0	0	1	1	1	1	AQP9	aquaporin 9
hsa-miR-1206	1	0	1	0	1	1	RAP2A	RAP2A, member of RAS oncogene family
hsa-miR-1206	1	0	1	1	1	1	CLDN1	claudin 1
hsa-miR-1206	0	0	1	1	1	1	MRPS12	mitochondrial ribosomal protein S12
hsa-miR-1206	0	0	1	1	1	1	RNASEL	ribonuclease L (2',5'-oligoisoadenylate synthetase-dependent)
hsa-miR-1206	1	0	1	0	1	1	TMX4	thioredoxin-related transmembrane protein 4
hsa-miR-1206	0	0	1	1	1	1	INIP	INTS3 and NABP interacting protein
hsa-miR-1206	1	0	1	1	1	1	NTN4	netrin 4
hsa-miR-1206	1	0	1	1	1	1	FAM60A	family with sequence similarity 60, member A
hsa-miR-1206	0	0	1	1	1	1	PRDM13	PR domain containing 13
hsa-miR-1206	1	0	1	1	1	1	OTX2	orthodenticle homeobox 2
hsa-miR-1206	1	0	1	1	1	1	TGIF2	TGFB-induced factor homeobox 2
hsa-miR-1206	1	0	1	1	1	1	BACH2	BTB and CNC homology 1, basic leucine zipper transcription factor 2
hsa-miR-1206	1	0	1	0	1	1	ZNF70	zinc finger protein 70
hsa-miR-1206	0	0	1	1	1	1	MS4A1	membrane-spanning 4-domains, subfamily A, member 1
hsa-miR-1206	0	0	1	1	0	0	TMSB15A	thymosin beta 15a
hsa-miR-1206	1	0	1	1	1	1	GPR88	G protein-coupled receptor 88
hsa-miR-1206	0	0	1	1	1	1	NOD2	nucleotide-binding oligomerization domain containing 2
hsa-miR-1206	0	0	1	1	1	1	NSD1	nuclear receptor binding SET domain protein 1
hsa-miR-1206	1	0	1	1	1	1	NDRG3	NDRG family member 3
hsa-miR-1206	0	0	1	0	1	1	EBF2	early B-cell factor 2
hsa-miR-1206	1	0	1	1	1	1	PRRX1	paired related homeobox 1
hsa-miR-1206	0	0	1	0	1	1	LRRC19	leucine rich repeat containing 19
hsa-miR-1206	1	0	1	1	1	1	REEP1	receptor accessory protein 1
hsa-miR-1206	1	0	1	1	1	1	GID4	GID complex subunit 4, VID24 homolog (S. cerevisiae)
hsa-miR-1206	0	0	1	0	1	1	TRPM8	transient receptor potential cation channel, subfamily M, member 8
hsa-miR-1206	0	0	1	1	1	1	PLA2G4A	phospholipase A2, group IVA (cytosolic, calcium-dependent)
hsa-miR-1206	0	0	1	1	0	0	EPS8L3	EPS8-like 3
hsa-miR-1206	1	0	1	1	1	1	RNF128	ring finger protein 128, E3 ubiquitin protein ligase
hsa-miR-1206	0	0	1	1	1	1	NDNF	neuron-derived neurotrophic factor
hsa-miR-1206	0	0	1	1	1	1	OGFRL1	opioid growth factor receptor-like 1
hsa-miR-1206	1	0	1	1	1	1	DHX40	DEAH (Asp-Glu-Ala-His) box polypeptide 40
hsa-miR-1206	0	0	1	1	1	1	FN3KRP	fructosamine 3 kinase related protein
hsa-miR-1206	0	0	1	0	1	1	C14orf169	chromosome 14 open reading frame 169
hsa-miR-1206	0	0	1	1	1	1	BBS10	Bardet-Biedl syndrome 10
hsa-miR-1206	1	0	1	1	1	1	C15orf29	chromosome 15 open reading frame 29
hsa-miR-1206	1	0	1	1	1	1	TXNDC15	thioredoxin domain containing 15
hsa-miR-1206	0	0	1	1	1	1	LRRC31	leucine rich repeat containing 31
hsa-miR-1206	1	0	1	1	1	1	EIF2C3	eukaryotic translation initiation factor 2C, 3
hsa-miR-1206	1	0	1	1	1	1	CPED1	cadherin-like and PC-esterase domain containing 1
hsa-miR-1206	0	0	1	1	1	1	DOCK5	dedicator of cytokinesis 5
hsa-miR-1206	1	0	1	1	1	1	KLHL18	kelch-like 18 (Drosophila)
hsa-miR-1206	0	0	1	1	1	1	ZNF606	zinc finger protein 606
hsa-miR-1206	1	0	1	0	1	1	VCPIP1	valosin containing protein (p97)/p47 complex interacting protein 1
hsa-miR-1206	1	0	1	1	1	1	NAA50	N(alpha)-acetyltransferase 50, NatE catalytic subunit
hsa-miR-1206	1	0	1	1	1	1	NUBPL	nucleotide binding protein-like
hsa-miR-1206	0	0	1	0	1	1	PDGFD	platelet derived growth factor D
hsa-miR-1206	1	0	1	0	1	1	DNAJC5	DnaJ (Hsp40) homolog, subfamily C, member 5
hsa-miR-1206	1	0	1	1	1	1	TNKS2	tankyrase, TRF1-interacting ankyrin-related ADP-ribose polymerase 2
hsa-miR-1206	1	0	1	0	1	1	SETD7	SET domain containing (lysine methyltransferase) 7
hsa-miR-1206	1	0	1	1	1	1	HOXA3	homeobox A3
hsa-miR-1206	0	0	1	1	1	1	HMGN5	high mobility group nucleosome binding domain 5
hsa-miR-1206	0	0	1	1	1	1	BCL2L14	BCL2-like 14 (apoptosis facilitator)
hsa-miR-1206	1	0	1	1	1	1	FAM117A	family with sequence similarity 117, member A
hsa-miR-1206	1	0	1	0	1	1	C1orf21	chromosome 1 open reading frame 21
hsa-miR-1206	1	0	1	1	1	1	MAP4	microtubule-associated protein 4
hsa-miR-1206	0	0	1	1	0	0	TMEM163	transmembrane protein 163
hsa-miR-1206	0	0	1	1	1	1	TRMT1L	tRNA methyltransferase 1 homolog (S. cerevisiae)-like
hsa-miR-1206	1	0	1	1	1	1	PPP1R14C	protein phosphatase 1, regulatory (inhibitor) subunit 14C
hsa-miR-1206	1	0	1	1	1	1	ANO3	anoctamin 3
hsa-miR-1206	1	0	1	0	1	1	SH3BGRL2	SH3 domain binding glutamic acid-rich protein like 2
hsa-miR-1206	1	0	1	0	1	1	ITCH	itchy E3 ubiquitin protein ligase
hsa-miR-1206	1	0	1	1	1	1	PCDHA9	protocadherin alpha 9
hsa-miR-1206	0	0	1	1	0	0	KRTAP17-1	keratin associated protein 17-1
hsa-miR-1206	1	0	1	0	1	1	SRSF8	serine/arginine-rich splicing factor 8
hsa-miR-1206	0	0	1	1	1	1	MAGT1	magnesium transporter 1
hsa-miR-1206	0	0	1	1	1	1	KBTBD7	kelch repeat and BTB (POZ) domain containing 7
hsa-miR-1206	1	0	1	1	1	1	DSEL	dermatan sulfate epimerase-like
hsa-miR-1206	1	0	1	0	1	1	ATP11A	ATPase, class VI, type 11A
hsa-miR-1206	1	0	1	1	1	1	ANTXR1	anthrax toxin receptor 1
hsa-miR-1206	0	0	1	1	1	1	YIPF4	Yip1 domain family, member 4
hsa-miR-1206	1	0	1	1	1	1	ING5	inhibitor of growth family, member 5
hsa-miR-1206	0	0	1	0	1	1	MIEN1	migration and invasion enhancer 1
hsa-miR-1206	1	0	1	1	1	1	DCTN5	dynactin 5 (p25)
hsa-miR-1206	0	0	1	1	1	1	GNPTG	N-acetylglucosamine-1-phosphate transferase, gamma subunit
hsa-miR-1206	1	0	1	1	1	1	PARD6B	par-6 partitioning defective 6 homolog beta (C. elegans)
hsa-miR-1206	0	0	1	1	0	0	CFC1	cripto, FRL-1, cryptic family 1
hsa-miR-1206	0	0	1	1	1	1	EBPL	emopamil binding protein-like
hsa-miR-1206	0	0	1	1	1	1	C13orf33	chromosome 13 open reading frame 33
hsa-miR-1206	1	0	1	1	1	1	PCDH11X	protocadherin 11 X-linked
hsa-miR-1206	0	0	1	1	1	1	DMRTC1	DMRT-like family C1
hsa-miR-1206	1	0	1	1	1	1	HIAT1	hippocampus abundant transcript 1
hsa-miR-1206	1	0	1	1	1	1	TRIM55	tripartite motif containing 55
hsa-miR-1206	1	0	1	1	1	1	MAP6	microtubule-associated protein 6
hsa-miR-1206	1	0	1	1	0	0	DMRTB1	DMRT-like family B with proline-rich C-terminal, 1
hsa-miR-1206	1	0	1	0	1	1	PURB	purine-rich element binding protein B
hsa-miR-1206	1	0	1	1	1	1	TP53INP1	tumor protein p53 inducible nuclear protein 1
hsa-miR-1206	1	0	1	1	1	1	TANC1	tetratricopeptide repeat, ankyrin repeat and coiled-coil containing 1
hsa-miR-1206	1	0	1	1	1	1	C19orf6	chromosome 19 open reading frame 6
hsa-miR-1206	0	0	1	0	1	1	C9orf123	chromosome 9 open reading frame 123
hsa-miR-1206	1	0	1	1	1	1	TRIM9	tripartite motif containing 9
hsa-miR-1206	0	0	1	0	1	1	ZNF518B	zinc finger protein 518B
hsa-miR-1206	0	0	1	1	1	1	ABCA10	ATP-binding cassette, sub-family A (ABC1), member 10
hsa-miR-1206	0	0	1	1	1	1	MED30	mediator complex subunit 30
hsa-miR-1206	0	0	1	1	0	0	MSANTD3	Myb/SANT-like DNA-binding domain containing 3
hsa-miR-1206	0	0	1	1	1	1	C14orf126	chromosome 14 open reading frame 126
hsa-miR-1206	1	0	1	0	1	1	EDARADD	EDAR-associated death domain
hsa-miR-1206	1	0	1	0	1	1	SOCS4	suppressor of cytokine signaling 4
hsa-miR-1206	1	0	1	1	1	1	BMPER	BMP binding endothelial regulator
hsa-miR-1206	0	0	1	1	1	1	RAD51B	RAD51 homolog B (S. cerevisiae)
hsa-miR-1206	0	0	1	1	1	1	PATE1	prostate and testis expressed 1
hsa-miR-1206	1	0	1	1	1	1	PCSK6	proprotein convertase subtilisin/kexin type 6
hsa-miR-1206	1	0	1	1	0	0	PKDCC	protein kinase domain containing, cytoplasmic homolog (mouse)
hsa-miR-1206	0	0	1	0	1	1	SP140L	SP140 nuclear body protein-like
hsa-miR-1206	1	0	1	1	1	1	GLCCI1	glucocorticoid induced transcript 1
hsa-miR-1206	0	0	1	1	0	0	ESAM	endothelial cell adhesion molecule
hsa-miR-1206	1	0	1	0	1	1	CNOT6L	CCR4-NOT transcription complex, subunit 6-like
hsa-miR-1206	1	0	1	1	1	1	MAPK1IP1L	mitogen-activated protein kinase 1 interacting protein 1-like
hsa-miR-1206	1	0	1	1	1	1	CCDC43	coiled-coil domain containing 43
hsa-miR-1206	1	0	1	1	1	1	RFTN2	raftlin family member 2
hsa-miR-1206	1	0	1	1	1	1	KCNH8	potassium voltage-gated channel, subfamily H (eag-related), member 8
hsa-miR-1206	1	0	1	1	1	1	SAMD8	sterile alpha motif domain containing 8
hsa-miR-1206	0	0	1	1	1	1	SLFN5	schlafen family member 5
hsa-miR-1206	1	0	1	0	1	1	CENPBD1	CENPB DNA-binding domains containing 1
hsa-miR-1206	0	0	1	0	1	1	UBLCP1	ubiquitin-like domain containing CTD phosphatase 1
hsa-miR-1206	1	0	1	1	1	1	VTI1A	vesicle transport through interaction with t-SNAREs homolog 1A (yeast)
hsa-miR-1206	1	0	1	1	1	1	MRPL30	mitochondrial ribosomal protein L30
hsa-miR-1206	0	0	1	1	0	0	TMEM217	transmembrane protein 217
hsa-miR-1206	1	0	1	0	1	1	MTPN	myotrophin
hsa-miR-1206	1	0	1	1	1	1	FAM110B	family with sequence similarity 110, member B
hsa-miR-1206	0	0	1	1	1	1	WFDC9	WAP four-disulfide core domain 9
hsa-miR-1206	1	0	1	1	1	1	CTSC	cathepsin C
hsa-miR-1206	0	0	1	1	1	1	CHMP4C	charged multivesicular body protein 4C
hsa-miR-1206	1	0	1	1	1	1	LSM12	LSM12 homolog (S. cerevisiae)
hsa-miR-1206	0	0	1	0	1	1	MAB21L3	mab-21-like 3 (C. elegans)
hsa-miR-1206	1	0	1	1	1	1	FAM123B	family with sequence similarity 123B
hsa-miR-1206	0	0	1	1	1	1	PIWIL4	piwi-like 4 (Drosophila)
hsa-miR-1206	1	0	1	1	1	1	ZSCAN29	zinc finger and SCAN domain containing 29
hsa-miR-1206	1	0	1	1	1	1	C7orf60	chromosome 7 open reading frame 60
hsa-miR-1206	0	0	1	1	1	1	ZNF366	zinc finger protein 366
hsa-miR-1206	0	0	1	1	1	1	SNX31	sorting nexin 31
hsa-miR-1206	0	0	1	1	0	0	FAM24B	family with sequence similarity 24, member B
hsa-miR-1206	0	0	1	1	1	1	RALGPS2	Ral GEF with PH domain and SH3 binding motif 2
hsa-miR-1206	0	0	1	1	1	1	DNAJC18	DnaJ (Hsp40) homolog, subfamily C, member 18
hsa-miR-1206	0	0	1	1	1	1	KHDRBS2	KH domain containing, RNA binding, signal transduction associated 2
hsa-miR-1206	1	0	1	1	1	1	FAS	Fas (TNF receptor superfamily, member 6)
hsa-miR-1206	0	0	1	0	1	1	KBTBD6	kelch repeat and BTB (POZ) domain containing 6
hsa-miR-1206	1	0	1	0	1	1	ST6GALNAC3	ST6 (alpha-N-acetyl-neuraminyl-2,3-beta-galactosyl-1,3)-N-acetylgalactosaminide alpha-2,6-sialyltransferase 3
hsa-miR-1206	1	0	1	1	1	1	APCDD1	adenomatosis polyposis coli down-regulated 1
hsa-miR-1206	1	0	1	1	1	1	TCEANC2	transcription elongation factor A (SII) N-terminal and central domain containing 2
hsa-miR-1206	0	0	1	0	1	1	LIX1	Lix1 homolog (chicken)
hsa-miR-1206	1	0	1	1	0	0	TMEM86A	transmembrane protein 86A
hsa-miR-1206	1	0	1	1	1	1	HS6ST3	heparan sulfate 6-O-sulfotransferase 3
hsa-miR-1206	1	0	1	1	1	1	CACUL1	CDK2-associated, cullin domain 1
hsa-miR-1206	0	0	1	1	1	1	CREG2	cellular repressor of E1A-stimulated genes 2
hsa-miR-1206	0	0	1	1	1	1	WFDC13	WAP four-disulfide core domain 13
hsa-miR-1206	0	0	1	1	1	1	CATSPER2	cation channel, sperm associated 2
hsa-miR-1206	1	0	1	1	1	1	LSM11	LSM11, U7 small nuclear RNA associated
hsa-miR-1206	0	0	1	1	0	0	REM2	RAS (RAD and GEM)-like GTP binding 2
hsa-miR-1206	0	0	1	1	1	1	C8orf47	chromosome 8 open reading frame 47
hsa-miR-1206	1	0	1	0	1	1	RNF152	ring finger protein 152
hsa-miR-1206	1	0	1	1	1	1	DIP2B	DIP2 disco-interacting protein 2 homolog B (Drosophila)
hsa-miR-1206	0	0	1	0	1	1	C5orf64	chromosome 5 open reading frame 64
hsa-miR-1206	0	0	1	1	1	1	FAM133A	family with sequence similarity 133, member A
hsa-miR-1206	0	0	1	1	1	1	MAGEB18	melanoma antigen family B, 18
hsa-miR-1206	0	0	1	1	1	1	LYG1	lysozyme G-like 1
hsa-miR-1206	1	0	1	1	1	1	RAB3IP	RAB3A interacting protein (rabin3)
hsa-miR-1206	1	0	1	1	1	1	INADL	InaD-like (Drosophila)
hsa-miR-1206	1	0	1	1	1	1	PKHD1L1	polycystic kidney and hepatic disease 1 (autosomal recessive)-like 1
hsa-miR-1206	0	0	1	1	1	1	PRNT	prion protein (testis specific)
hsa-miR-1206	0	0	1	1	1	1	SESTD1	SEC14 and spectrin domains 1
hsa-miR-1206	0	0	1	1	1	1	HSD17B13	hydroxysteroid (17-beta) dehydrogenase 13
hsa-miR-1206	1	0	1	1	1	1	MB21D2	Mab-21 domain containing 2
hsa-miR-1206	0	0	1	1	1	1	STXBP4	syntaxin binding protein 4
hsa-miR-1206	1	0	1	0	1	1	ARL5B	ADP-ribosylation factor-like 5B
hsa-miR-1206	1	0	1	1	1	1	CREM	cAMP responsive element modulator
hsa-miR-1206	0	0	1	1	1	1	CCDC67	coiled-coil domain containing 67
hsa-miR-1206	0	0	1	1	1	1	DNAJC24	DnaJ (Hsp40) homolog, subfamily C, member 24
hsa-miR-1206	0	0	1	1	1	1	ZSWIM2	zinc finger, SWIM-type containing 2
hsa-miR-1206	1	0	1	0	1	1	C12orf36	chromosome 12 open reading frame 36
hsa-miR-1206	0	0	1	0	1	1	FAM169B	family with sequence similarity 169, member B
hsa-miR-1206	0	0	1	1	1	1	C15orf38	chromosome 15 open reading frame 38
hsa-miR-1206	0	0	1	1	1	1	SKA2	spindle and kinetochore associated complex subunit 2
hsa-miR-1206	0	0	1	1	1	1	C2orf48	chromosome 2 open reading frame 48
hsa-miR-1206	1	0	1	0	1	1	SRRM4	serine/arginine repetitive matrix 4
hsa-miR-1206	1	0	1	1	1	1	NAIF1	nuclear apoptosis inducing factor 1
hsa-miR-1206	1	0	1	1	1	1	C1orf52	chromosome 1 open reading frame 52
hsa-miR-1206	1	0	1	0	1	1	LYSMD3	LysM, putative peptidoglycan-binding, domain containing 3
hsa-miR-1206	0	0	1	1	0	0	VWC2	von Willebrand factor C domain containing 2
hsa-miR-1206	1	0	1	0	1	1	ZC3H6	zinc finger CCCH-type containing 6
hsa-miR-1206	1	0	1	1	1	1	PTGER3	prostaglandin E receptor 3 (subtype EP3)
hsa-miR-1206	0	0	1	1	1	1	COL25A1	collagen, type XXV, alpha 1
hsa-miR-1206	0	0	1	1	1	1	FAM5C	family with sequence similarity 5, member C
hsa-miR-1206	0	0	1	0	1	1	SOGA1	suppressor of glucose, autophagy associated 1
hsa-miR-1206	0	0	1	1	0	0	FOXD4L4	forkhead box D4-like 4
hsa-miR-1206	0	0	1	1	1	1	ILDR2	immunoglobulin-like domain containing receptor 2
hsa-miR-1206	1	0	1	1	1	1	WARS2	tryptophanyl tRNA synthetase 2, mitochondrial
hsa-miR-1206	0	0	1	1	1	1	SLC25A35	solute carrier family 25, member 35
hsa-miR-1206	1	0	1	1	1	1	GLYAT	glycine-N-acyltransferase
hsa-miR-1206	0	0	1	1	1	1	ZRANB2	zinc finger, RAN-binding domain containing 2
hsa-miR-1206	1	0	1	0	1	1	MBLAC2	metallo-beta-lactamase domain containing 2
hsa-miR-1206	0	0	1	1	1	1	APOBEC4	apolipoprotein B mRNA editing enzyme, catalytic polypeptide-like 4 (putative)
hsa-miR-1206	1	0	1	1	1	1	ATRNL1	attractin-like 1
hsa-miR-1206	1	0	1	1	1	1	TMEM132E	transmembrane protein 132E
hsa-miR-1206	0	0	1	0	1	1	CLEC17A	C-type lectin domain family 17, member A
hsa-miR-1206	1	0	1	1	1	1	CAPN3	calpain 3, (p94)
hsa-miR-1206	0	0	1	0	0	0	SNORD42A	small nucleolar RNA, C/D box 42A
hsa-miR-1206	0	0	1	0	0	0	CELP	carboxyl ester lipase pseudogene
hsa-miR-1206	0	0	1	0	0	0	LYPLA2P1	lysophospholipase II pseudogene 1
hsa-miR-1206	0	0	1	0	0	0	TTTY2	testis-specific transcript, Y-linked 2 (non-protein coding)
hsa-miR-1206	0	0	1	0	0	0	TTTY15	testis-specific transcript, Y-linked 15 (non-protein coding)
hsa-miR-1206	0	0	1	0	0	0	VENTXP1	VENT homeobox pseudogene 1
hsa-miR-1206	0	0	1	0	0	0	RBMXP3	RNA binding motif protein, X-linked pseudogene 3
hsa-miR-1206	0	0	1	0	0	0	SNORA6	small nucleolar RNA, H/ACA box 6
hsa-miR-1206	0	0	1	0	0	0	HYALP1	hyaluronoglucosaminidase pseudogene 1
hsa-miR-1206	0	0	1	0	0	0	SIGLEC16	sialic acid binding Ig-like lectin 16 (gene/pseudogene)
hsa-miR-1206	0	0	1	0	0	0	LOC285359	phosducin-like 3 pseudogene
hsa-miR-1206	0	0	1	0	0	0	SNORD112	small nucleolar RNA, C/D box 112
hsa-miR-1206	0	0	1	0	0	0	USP32P1	ubiquitin specific peptidase 32 pseudogene 1
hsa-miR-1206	1	0	1	0	1	1	NFIX	nuclear factor I/X (CCAAT-binding transcription factor)
hsa-miR-1206	1	0	1	1	1	1	KLF6	Kruppel-like factor 6
hsa-miR-1206	1	0	1	1	1	1	HNRNPA1	heterogeneous nuclear ribonucleoprotein A1
