# Supplementary material for: Profiling of Selected MicroRNAs in Proliferative Eutopic Endometrium of Women with Ovarian Endometriosis
Source: Biomed Res Int. 2015 Aug 20;2015:760698. doi: 10.1155/2015/760698 (PMC4558423; doi:10.1155/2015/760698)
Supplement: Supplementary file 1 — Table I: The names of miRNAs significantly differentially expressed between eutopic endometrium of patients with endometriosis vs eutopic endometrium of patients without endometriosis. Table II: The associations between miRNA and mRNA, which presents detailed results of the search of six major databases i.e targetscan, tarbase, miranda, mirbase, mirtarget2 and pictar. [file 760698.f1.zip › 760698.f1/Table II/hsa-miR-1207-3p.tsv]

miR	targetscan	tarbase	miranda	mirbase	mirtarget2	pictar	GeneSymbol	GeneName
hsa-miR-1207-3p	1	0	1	1	1	1	TMCC2	transmembrane and coiled-coil domain family 2
hsa-miR-1207-3p	1	0	1	1	0	0	HUWE1	HECT, UBA and WWE domain containing 1, E3 ubiquitin protein ligase
hsa-miR-1207-3p	1	0	1	1	0	0	RAPGEF2	Rap guanine nucleotide exchange factor (GEF) 2
hsa-miR-1207-3p	1	0	1	0	0	0	TRANK1	tetratricopeptide repeat and ankyrin repeat containing 1
hsa-miR-1207-3p	1	0	1	0	1	1	KIAA0355	KIAA0355
hsa-miR-1207-3p	1	0	1	1	1	1	MCF2L	MCF.2 cell line derived transforming sequence-like
hsa-miR-1207-3p	1	0	1	1	1	1	DAAM2	dishevelled associated activator of morphogenesis 2
hsa-miR-1207-3p	0	0	1	1	1	1	KIAA0391	KIAA0391
hsa-miR-1207-3p	1	0	1	0	1	1	PTPRT	protein tyrosine phosphatase, receptor type, T
hsa-miR-1207-3p	1	0	1	1	0	0	SEC14L5	SEC14-like 5 (S. cerevisiae)
hsa-miR-1207-3p	0	0	1	1	0	0	PCNXL2	pecanex-like 2 (Drosophila)
hsa-miR-1207-3p	1	0	1	0	1	1	CEP350	centrosomal protein 350kDa
hsa-miR-1207-3p	0	0	1	1	1	1	PHLDB1	pleckstrin homology-like domain, family B, member 1
hsa-miR-1207-3p	1	0	1	1	1	1	ATG13	autophagy related 13
hsa-miR-1207-3p	0	0	1	1	0	0	ATP10B	ATPase, class V, type 10B
hsa-miR-1207-3p	1	0	1	0	1	1	RBM12	RNA binding motif protein 12
hsa-miR-1207-3p	1	0	1	1	1	1	BAHD1	bromo adjacent homology domain containing 1
hsa-miR-1207-3p	1	0	1	1	1	1	CIT	citron (rho-interacting, serine/threonine kinase 21)
hsa-miR-1207-3p	1	0	1	1	1	1	C11orf9	chromosome 11 open reading frame 9
hsa-miR-1207-3p	0	0	1	1	1	1	TBC1D30	TBC1 domain family, member 30
hsa-miR-1207-3p	1	0	1	1	1	1	FOXJ3	forkhead box J3
hsa-miR-1207-3p	1	0	1	1	0	0	KIAA1045	KIAA1045
hsa-miR-1207-3p	1	0	1	1	1	1	PRRC2C	proline-rich coiled-coil 2C
hsa-miR-1207-3p	1	0	1	1	1	1	PHF8	PHD finger protein 8
hsa-miR-1207-3p	1	0	1	0	1	1	ODZ2	odz, odd Oz/ten-m homolog 2 (Drosophila)
hsa-miR-1207-3p	1	0	1	1	0	0	PPM1H	protein phosphatase, Mg2+/Mn2+ dependent, 1H
hsa-miR-1207-3p	1	0	1	1	0	0	KIAA1210	KIAA1210
hsa-miR-1207-3p	1	0	1	1	1	1	RALGAPB	Ral GTPase activating protein, beta subunit (non-catalytic)
hsa-miR-1207-3p	0	0	1	0	0	0	MTA3	metastasis associated 1 family, member 3
hsa-miR-1207-3p	0	0	1	1	1	1	COPS7A	COP9 constitutive photomorphogenic homolog subunit 7A (Arabidopsis)
hsa-miR-1207-3p	1	0	1	1	1	1	PCDH19	protocadherin 19
hsa-miR-1207-3p	1	0	1	0	1	1	KCTD16	potassium channel tetramerisation domain containing 16
hsa-miR-1207-3p	1	0	1	1	1	1	HACE1	HECT domain and ankyrin repeat containing E3 ubiquitin protein ligase 1
hsa-miR-1207-3p	1	0	1	1	1	1	TAOK1	TAO kinase 1
hsa-miR-1207-3p	0	0	1	0	0	0	COL20A1	collagen, type XX, alpha 1
hsa-miR-1207-3p	0	0	1	0	0	0	KRT19P2	keratin 19 pseudogene 2
hsa-miR-1207-3p	0	0	1	0	1	1	CDC42EP4	CDC42 effector protein (Rho GTPase binding) 4
hsa-miR-1207-3p	1	0	1	1	1	1	PPP6R3	protein phosphatase 6, regulatory subunit 3
hsa-miR-1207-3p	1	0	1	1	1	1	MOV10	Mov10, Moloney leukemia virus 10, homolog (mouse)
hsa-miR-1207-3p	1	0	1	1	1	1	PHF21A	PHD finger protein 21A
hsa-miR-1207-3p	0	0	1	1	1	1	BHLHB9	basic helix-loop-helix domain containing, class B, 9
hsa-miR-1207-3p	0	0	1	0	1	1	SETD5	SET domain containing 5
hsa-miR-1207-3p	0	0	1	1	0	0	PFDN5	prefoldin subunit 5
hsa-miR-1207-3p	1	0	1	1	1	1	LZTS2	leucine zipper, putative tumor suppressor 2
hsa-miR-1207-3p	0	0	1	1	0	0	COL27A1	collagen, type XXVII, alpha 1
hsa-miR-1207-3p	1	0	1	1	1	1	NAV2	neuron navigator 2
hsa-miR-1207-3p	1	0	1	1	1	1	CSRNP1	cysteine-serine-rich nuclear protein 1
hsa-miR-1207-3p	0	0	1	1	0	0	ERCC1	excision repair cross-complementing rodent repair deficiency, complementation group 1 (includes overlapping antisense sequence)
hsa-miR-1207-3p	1	0	1	1	1	1	SSH3	slingshot homolog 3 (Drosophila)
hsa-miR-1207-3p	1	0	1	0	1	1	KIF5C	kinesin family member 5C
hsa-miR-1207-3p	1	0	1	1	0	0	ADC	arginine decarboxylase
hsa-miR-1207-3p	1	0	1	1	1	1	SH3TC2	SH3 domain and tetratricopeptide repeats 2
hsa-miR-1207-3p	0	0	1	1	0	0	CIRH1A	cirrhosis, autosomal recessive 1A (cirhin)
hsa-miR-1207-3p	1	0	1	0	0	0	FAT3	FAT tumor suppressor homolog 3 (Drosophila)
hsa-miR-1207-3p	1	0	1	0	1	1	RNF43	ring finger protein 43
hsa-miR-1207-3p	0	0	1	1	1	1	NELL1	NEL-like 1 (chicken)
hsa-miR-1207-3p	1	0	1	0	0	0	ZC3H12C	zinc finger CCCH-type containing 12C
hsa-miR-1207-3p	0	0	1	1	0	0	SSPO	SCO-spondin homolog (Bos taurus)
hsa-miR-1207-3p	1	0	1	1	1	1	KCNMA1	potassium large conductance calcium-activated channel, subfamily M, alpha member 1
hsa-miR-1207-3p	1	1	1	1	1	1	BACE1	beta-site APP-cleaving enzyme 1
hsa-miR-1207-3p	1	0	1	1	1	1	NRXN2	neurexin 2
hsa-miR-1207-3p	1	0	1	1	1	1	ADARB1	adenosine deaminase, RNA-specific, B1
hsa-miR-1207-3p	0	0	1	1	0	0	DBP	D site of albumin promoter (albumin D-box) binding protein
hsa-miR-1207-3p	1	0	1	1	0	0	NDST2	N-deacetylase/N-sulfotransferase (heparan glucosaminyl) 2
hsa-miR-1207-3p	1	0	1	1	1	1	RPS6KA3	ribosomal protein S6 kinase, 90kDa, polypeptide 3
hsa-miR-1207-3p	1	0	1	1	1	1	PML	promyelocytic leukemia
hsa-miR-1207-3p	0	0	1	1	1	1	MAZ	MYC-associated zinc finger protein (purine-binding transcription factor)
hsa-miR-1207-3p	1	0	1	1	1	1	RASSF5	Ras association (RalGDS/AF-6) domain family member 5
hsa-miR-1207-3p	1	0	1	0	1	1	MPPED2	metallophosphoesterase domain containing 2
hsa-miR-1207-3p	1	0	1	1	0	0	CACNB1	calcium channel, voltage-dependent, beta 1 subunit
hsa-miR-1207-3p	1	0	1	0	1	1	DPYSL2	dihydropyrimidinase-like 2
hsa-miR-1207-3p	1	0	1	1	1	1	DMTF1	cyclin D binding myb-like transcription factor 1
hsa-miR-1207-3p	1	0	1	1	1	1	ERF	Ets2 repressor factor
hsa-miR-1207-3p	1	0	1	1	1	1	TBX2	T-box 2
hsa-miR-1207-3p	1	0	1	1	1	1	NEO1	neogenin 1
hsa-miR-1207-3p	1	0	1	1	1	1	SPTB	spectrin, beta, erythrocytic
hsa-miR-1207-3p	0	0	1	1	0	0	IFT27	intraflagellar transport 27 homolog (Chlamydomonas)
hsa-miR-1207-3p	0	0	1	1	0	0	PSMB2	proteasome (prosome, macropain) subunit, beta type, 2
hsa-miR-1207-3p	0	0	1	1	0	0	IGFBP2	insulin-like growth factor binding protein 2, 36kDa
hsa-miR-1207-3p	0	0	1	1	0	0	CLK3	CDC-like kinase 3
hsa-miR-1207-3p	0	0	1	1	1	1	ZNF747	zinc finger protein 747
hsa-miR-1207-3p	0	0	1	1	0	0	BMP1	bone morphogenetic protein 1
hsa-miR-1207-3p	0	0	1	1	0	0	CFLAR	CASP8 and FADD-like apoptosis regulator
hsa-miR-1207-3p	1	0	1	1	1	1	EPHB4	EPH receptor B4
hsa-miR-1207-3p	1	0	1	1	1	1	EPB41	erythrocyte membrane protein band 4.1 (elliptocytosis 1, RH-linked)
hsa-miR-1207-3p	0	0	1	1	0	0	SLC22A8	solute carrier family 22 (organic anion transporter), member 8
hsa-miR-1207-3p	0	0	1	1	1	1	SGSH	N-sulfoglucosamine sulfohydrolase
hsa-miR-1207-3p	1	0	1	0	1	1	PDE7B	phosphodiesterase 7B
hsa-miR-1207-3p	0	0	1	1	0	0	MUC3A	mucin 3A, cell surface associated
hsa-miR-1207-3p	1	0	1	1	1	1	DLGAP2	discs, large (Drosophila) homolog-associated protein 2
hsa-miR-1207-3p	1	0	1	0	1	1	MLL2	myeloid/lymphoid or mixed-lineage leukemia 2
hsa-miR-1207-3p	1	0	1	1	1	1	CBFA2T2	core-binding factor, runt domain, alpha subunit 2; translocated to, 2
hsa-miR-1207-3p	1	0	1	1	1	1	YME1L1	YME1-like 1 (S. cerevisiae)
hsa-miR-1207-3p	0	0	1	0	0	0	ALOX12P2	arachidonate 12-lipoxygenase pseudogene 2
hsa-miR-1207-3p	0	0	1	1	0	0	SPTBN2	spectrin, beta, non-erythrocytic 2
hsa-miR-1207-3p	1	0	1	1	1	1	MYT1L	myelin transcription factor 1-like
hsa-miR-1207-3p	0	0	1	1	1	1	SLC11A2	solute carrier family 11 (proton-coupled divalent metal ion transporters), member 2
hsa-miR-1207-3p	1	0	1	1	1	1	ERLIN1	ER lipid raft associated 1
hsa-miR-1207-3p	1	0	1	1	0	0	PAK1	p21 protein (Cdc42/Rac)-activated kinase 1
hsa-miR-1207-3p	0	0	1	1	1	1	LYPLA1	lysophospholipase I
hsa-miR-1207-3p	0	0	1	1	1	1	ERAL1	Era G-protein-like 1 (E. coli)
hsa-miR-1207-3p	0	0	1	1	1	1	PCBP4	poly(rC) binding protein 4
hsa-miR-1207-3p	0	0	1	1	1	1	BBS9	Bardet-Biedl syndrome 9
hsa-miR-1207-3p	0	0	1	1	0	0	RBM5	RNA binding motif protein 5
hsa-miR-1207-3p	1	0	1	0	0	0	PPME1	protein phosphatase methylesterase 1
hsa-miR-1207-3p	0	0	1	1	1	1	DMRT2	doublesex and mab-3 related transcription factor 2
hsa-miR-1207-3p	0	0	1	1	0	0	CALHM2	calcium homeostasis modulator 2
hsa-miR-1207-3p	0	0	1	1	0	0	ADAMTS7	ADAM metallopeptidase with thrombospondin type 1 motif, 7
hsa-miR-1207-3p	0	0	1	1	0	0	CNTROB	centrobin, centrosomal BRCA2 interacting protein
hsa-miR-1207-3p	0	0	1	0	1	1	CLDN2	claudin 2
hsa-miR-1207-3p	0	0	1	1	1	1	NPC1L1	NPC1 (Niemann-Pick disease, type C1, gene)-like 1
hsa-miR-1207-3p	0	0	1	1	1	1	SLCO2B1	solute carrier organic anion transporter family, member 2B1
hsa-miR-1207-3p	0	0	1	1	1	1	CSNK1A1	casein kinase 1, alpha 1
hsa-miR-1207-3p	1	0	1	1	1	1	DESI2	desumoylating isopeptidase 2
hsa-miR-1207-3p	0	0	1	1	1	1	BAX	BCL2-associated X protein
hsa-miR-1207-3p	1	0	1	0	1	1	PARP11	poly (ADP-ribose) polymerase family, member 11
hsa-miR-1207-3p	1	0	1	0	1	1	TRPS1	trichorhinophalangeal syndrome I
hsa-miR-1207-3p	0	0	1	1	0	0	GHRHR	growth hormone releasing hormone receptor
hsa-miR-1207-3p	1	0	1	1	1	1	TMUB2	transmembrane and ubiquitin-like domain containing 2
hsa-miR-1207-3p	0	0	1	0	0	0	LOC645355	uncharacterized LOC645355
hsa-miR-1207-3p	1	0	1	1	1	1	DCLRE1B	DNA cross-link repair 1B
hsa-miR-1207-3p	1	0	1	1	1	1	SPTBN4	spectrin, beta, non-erythrocytic 4
hsa-miR-1207-3p	1	0	1	1	1	1	CHST9	carbohydrate (N-acetylgalactosamine 4-0) sulfotransferase 9
hsa-miR-1207-3p	0	0	1	1	0	0	ZAN	zonadhesin
hsa-miR-1207-3p	0	0	1	1	1	1	RERG	RAS-like, estrogen-regulated, growth inhibitor
hsa-miR-1207-3p	1	0	1	1	1	1	CABLES1	Cdk5 and Abl enzyme substrate 1
hsa-miR-1207-3p	1	0	1	1	1	1	BBC3	BCL2 binding component 3
hsa-miR-1207-3p	0	0	1	1	0	0	FGFR4	fibroblast growth factor receptor 4
hsa-miR-1207-3p	1	0	1	1	1	1	NF2	neurofibromin 2 (merlin)
hsa-miR-1207-3p	0	0	1	0	0	0	CLRN1-AS1	CLRN1 antisense RNA 1
hsa-miR-1207-3p	1	0	1	1	1	1	NTRK2	neurotrophic tyrosine kinase, receptor, type 2
hsa-miR-1207-3p	0	0	1	0	0	0	MYO15B	myosin XVB pseudogene
hsa-miR-1207-3p	0	0	1	0	0	0	RMST	rhabdomyosarcoma 2 associated transcript (non-protein coding)
hsa-miR-1207-3p	0	0	1	1	0	0	TTC18	tetratricopeptide repeat domain 18
hsa-miR-1207-3p	0	0	1	1	1	1	PPP1R1B	protein phosphatase 1, regulatory (inhibitor) subunit 1B
hsa-miR-1207-3p	1	0	1	1	0	0	SEPT8	septin 8
hsa-miR-1207-3p	0	0	1	0	1	1	EPM2A	epilepsy, progressive myoclonus type 2A, Lafora disease (laforin)
hsa-miR-1207-3p	1	0	1	1	1	1	WAPAL	wings apart-like homolog (Drosophila)
hsa-miR-1207-3p	1	0	1	0	1	1	TXLNA	taxilin alpha
hsa-miR-1207-3p	0	0	1	1	1	1	R3HCC1L	R3H domain and coiled-coil containing 1-like
hsa-miR-1207-3p	0	0	1	1	1	1	PTK7	PTK7 protein tyrosine kinase 7
hsa-miR-1207-3p	1	0	1	1	0	0	PI4KB	phosphatidylinositol 4-kinase, catalytic, beta
hsa-miR-1207-3p	0	0	1	1	1	1	GNAS	GNAS complex locus
hsa-miR-1207-3p	0	0	1	1	1	1	MTHFR	methylenetetrahydrofolate reductase (NAD(P)H)
hsa-miR-1207-3p	0	0	1	1	0	0	SERGEF	secretion regulating guanine nucleotide exchange factor
hsa-miR-1207-3p	1	0	1	1	1	1	CACNA2D2	calcium channel, voltage-dependent, alpha 2/delta subunit 2
hsa-miR-1207-3p	0	0	1	1	1	1	CD28	CD28 molecule
hsa-miR-1207-3p	0	0	1	0	0	0	CD177	CD177 molecule
hsa-miR-1207-3p	0	0	1	1	0	0	MORN4	MORN repeat containing 4
hsa-miR-1207-3p	1	0	1	1	1	1	PALM2	paralemmin 2
hsa-miR-1207-3p	1	0	1	1	1	1	PDE1B	phosphodiesterase 1B, calmodulin-dependent
hsa-miR-1207-3p	0	0	1	1	1	1	ZNF248	zinc finger protein 248
hsa-miR-1207-3p	1	0	1	1	1	1	NRXN3	neurexin 3
hsa-miR-1207-3p	0	0	1	1	1	1	TAF1	TAF1 RNA polymerase II, TATA box binding protein (TBP)-associated factor, 250kDa
hsa-miR-1207-3p	1	0	1	1	1	1	ARL4C	ADP-ribosylation factor-like 4C
hsa-miR-1207-3p	1	0	1	0	1	1	NAALADL2	N-acetylated alpha-linked acidic dipeptidase-like 2
hsa-miR-1207-3p	1	0	1	1	1	1	XIRP1	xin actin-binding repeat containing 1
hsa-miR-1207-3p	0	0	1	1	1	1	PPARG	peroxisome proliferator-activated receptor gamma
hsa-miR-1207-3p	0	0	1	1	0	0	C22orf24	chromosome 22 open reading frame 24
hsa-miR-1207-3p	0	0	1	1	0	0	ACSS2	acyl-CoA synthetase short-chain family member 2
hsa-miR-1207-3p	1	0	1	1	1	1	SIK2	salt-inducible kinase 2
hsa-miR-1207-3p	0	0	1	1	1	1	PARP16	poly (ADP-ribose) polymerase family, member 16
hsa-miR-1207-3p	0	0	1	0	0	0	TUG1	taurine upregulated 1 (non-protein coding)
hsa-miR-1207-3p	0	0	1	1	0	0	C19orf60	chromosome 19 open reading frame 60
hsa-miR-1207-3p	1	0	1	1	0	0	SENP3	SUMO1/sentrin/SMT3 specific peptidase 3
hsa-miR-1207-3p	0	0	1	1	1	1	RBM10	RNA binding motif protein 10
hsa-miR-1207-3p	0	0	1	0	0	0	RNF31	ring finger protein 31
hsa-miR-1207-3p	0	0	1	1	1	1	STOX2	storkhead box 2
hsa-miR-1207-3p	1	0	1	1	1	1	EPN2	epsin 2
hsa-miR-1207-3p	1	0	1	1	1	1	CADM3	cell adhesion molecule 3
hsa-miR-1207-3p	1	0	1	1	1	1	EIF2C1	eukaryotic translation initiation factor 2C, 1
hsa-miR-1207-3p	0	0	1	1	1	1	CXXC5	CXXC finger protein 5
hsa-miR-1207-3p	1	0	1	1	1	1	ACER3	alkaline ceramidase 3
hsa-miR-1207-3p	0	0	1	1	0	0	C17orf53	chromosome 17 open reading frame 53
hsa-miR-1207-3p	1	0	1	1	0	0	UQCC	ubiquinol-cytochrome c reductase complex chaperone
hsa-miR-1207-3p	0	0	1	0	0	0	LOC149134	uncharacterized LOC149134
hsa-miR-1207-3p	1	0	1	1	1	1	S100PBP	S100P binding protein
hsa-miR-1207-3p	1	0	1	1	1	1	WDTC1	WD and tetratricopeptide repeats 1
hsa-miR-1207-3p	0	0	1	1	1	1	ARMC5	armadillo repeat containing 5
hsa-miR-1207-3p	1	0	1	1	0	0	FASTK	Fas-activated serine/threonine kinase
hsa-miR-1207-3p	0	0	1	1	0	0	POLR3E	polymerase (RNA) III (DNA directed) polypeptide E (80kD)
hsa-miR-1207-3p	0	0	1	1	1	1	SPATA5L1	spermatogenesis associated 5-like 1
hsa-miR-1207-3p	1	0	1	1	1	1	PPFIA4	protein tyrosine phosphatase, receptor type, f polypeptide (PTPRF), interacting protein (liprin), alpha 4
hsa-miR-1207-3p	1	0	1	1	1	1	CC2D1A	coiled-coil and C2 domain containing 1A
hsa-miR-1207-3p	0	0	1	0	0	0	LINC00475	long intergenic non-protein coding RNA 475
hsa-miR-1207-3p	1	0	1	1	1	1	PHF20L1	PHD finger protein 20-like 1
hsa-miR-1207-3p	0	0	1	1	1	1	CLEC4M	C-type lectin domain family 4, member M
hsa-miR-1207-3p	1	0	1	1	1	1	POMT2	protein-O-mannosyltransferase 2
hsa-miR-1207-3p	0	0	1	0	1	1	FLJ14186	uncharacterized LOC401149
hsa-miR-1207-3p	1	0	1	1	1	1	COPS7B	COP9 constitutive photomorphogenic homolog subunit 7B (Arabidopsis)
hsa-miR-1207-3p	0	0	1	0	0	0	IFFO2	intermediate filament family orphan 2
hsa-miR-1207-3p	0	0	1	0	0	0	RASAL3	RAS protein activator like 3
hsa-miR-1207-3p	0	0	1	0	1	1	ATXN1L	ataxin 1-like
hsa-miR-1207-3p	0	0	1	0	1	1	HEMK1	HemK methyltransferase family member 1
hsa-miR-1207-3p	0	0	1	0	0	0	LINC00340	long intergenic non-protein coding RNA 340
hsa-miR-1207-3p	0	0	1	1	1	1	FAM124B	family with sequence similarity 124B
hsa-miR-1207-3p	0	0	1	1	0	0	EXOC6B	exocyst complex component 6B
hsa-miR-1207-3p	1	0	1	1	1	1	DCAF8	DDB1 and CUL4 associated factor 8
hsa-miR-1207-3p	0	0	1	1	1	1	CCDC33	coiled-coil domain containing 33
hsa-miR-1207-3p	1	0	1	1	1	1	FBXL12	F-box and leucine-rich repeat protein 12
hsa-miR-1207-3p	1	0	1	1	1	1	RNF185	ring finger protein 185
hsa-miR-1207-3p	1	0	1	1	1	1	LRP4	low density lipoprotein receptor-related protein 4
hsa-miR-1207-3p	0	0	1	1	1	1	SPRTN	SprT-like N-terminal domain
hsa-miR-1207-3p	1	0	1	1	1	1	FAM53C	family with sequence similarity 53, member C
hsa-miR-1207-3p	1	0	1	1	1	1	HIF3A	hypoxia inducible factor 3, alpha subunit
hsa-miR-1207-3p	0	0	1	1	0	0	TMEM107	transmembrane protein 107
hsa-miR-1207-3p	0	0	1	0	0	0	KIAA0664L3	KIAA0664-like 3
hsa-miR-1207-3p	0	0	1	1	1	1	RAB37	RAB37, member RAS oncogene family
hsa-miR-1207-3p	1	0	1	1	0	0	C15orf27	chromosome 15 open reading frame 27
hsa-miR-1207-3p	0	0	1	1	1	1	PRR5L	proline rich 5 like
hsa-miR-1207-3p	1	0	1	1	1	1	FAM123A	family with sequence similarity 123A
hsa-miR-1207-3p	1	0	1	1	1	1	SGK1	serum/glucocorticoid regulated kinase 1
hsa-miR-1207-3p	0	0	1	1	1	1	THEM6	thioesterase superfamily member 6
hsa-miR-1207-3p	0	0	1	1	1	1	GABRP	gamma-aminobutyric acid (GABA) A receptor, pi
hsa-miR-1207-3p	0	0	1	1	0	0	C21orf59	chromosome 21 open reading frame 59
hsa-miR-1207-3p	0	0	1	0	0	0	FLJ30838	uncharacterized LOC400955
hsa-miR-1207-3p	0	0	1	1	1	1	OPTN	optineurin
hsa-miR-1207-3p	0	0	1	1	1	1	DECR2	2,4-dienoyl CoA reductase 2, peroxisomal
hsa-miR-1207-3p	0	0	1	1	1	1	CLHC1	clathrin heavy chain linker domain containing 1
hsa-miR-1207-3p	1	0	1	0	1	1	PTPRE	protein tyrosine phosphatase, receptor type, E
hsa-miR-1207-3p	0	0	1	0	0	0	JPX	JPX transcript, XIST activator (non-protein coding)
hsa-miR-1207-3p	1	0	1	1	1	1	LMNA	lamin A/C
hsa-miR-1207-3p	0	0	1	1	0	0	CHRM3	cholinergic receptor, muscarinic 3
hsa-miR-1207-3p	0	0	1	0	0	0	KIAA1257	KIAA1257
hsa-miR-1207-3p	0	0	1	0	1	1	FAM70A	family with sequence similarity 70, member A
hsa-miR-1207-3p	1	0	1	1	1	1	SCAMP5	secretory carrier membrane protein 5
hsa-miR-1207-3p	0	0	1	1	1	1	BRD2	bromodomain containing 2
hsa-miR-1207-3p	0	0	1	1	0	0	ZNF185	zinc finger protein 185 (LIM domain)
hsa-miR-1207-3p	1	0	1	1	1	1	CLCN5	chloride channel, voltage-sensitive 5
hsa-miR-1207-3p	1	0	1	1	1	1	TPM3	tropomyosin 3
hsa-miR-1207-3p	0	0	1	0	0	0	LOC157381	uncharacterized LOC157381
hsa-miR-1207-3p	0	0	1	1	0	0	RELT	RELT tumor necrosis factor receptor
hsa-miR-1207-3p	0	0	1	1	0	0	RGL3	ral guanine nucleotide dissociation stimulator-like 3
hsa-miR-1207-3p	1	0	1	1	1	1	MAP3K11	mitogen-activated protein kinase kinase kinase 11
hsa-miR-1207-3p	0	0	1	0	0	0	LOC100125918	uncharacterized LOC100125918
hsa-miR-1207-3p	1	0	1	0	1	1	BLOC1S6	biogenesis of lysosomal organelles complex-1, subunit 6, pallidin
hsa-miR-1207-3p	1	0	1	1	1	1	IST1	increased sodium tolerance 1 homolog (yeast)
hsa-miR-1207-3p	1	0	1	1	1	1	C6orf89	chromosome 6 open reading frame 89
hsa-miR-1207-3p	0	0	1	0	1	1	CCDC68	coiled-coil domain containing 68
hsa-miR-1207-3p	0	0	1	1	0	0	TRIM41	tripartite motif containing 41
hsa-miR-1207-3p	1	0	1	1	1	1	FAM73B	family with sequence similarity 73, member B
hsa-miR-1207-3p	1	0	1	1	1	1	BLCAP	bladder cancer associated protein
hsa-miR-1207-3p	1	0	1	0	1	1	RNF165	ring finger protein 165
hsa-miR-1207-3p	0	0	1	1	0	0	NISCH	nischarin
hsa-miR-1207-3p	0	0	1	1	0	0	GHDC	GH3 domain containing
hsa-miR-1207-3p	1	0	1	0	1	1	SLC25A37	solute carrier family 25 (mitochondrial iron transporter), member 37
hsa-miR-1207-3p	0	0	1	1	0	0	PIGO	phosphatidylinositol glycan anchor biosynthesis, class O
hsa-miR-1207-3p	0	0	1	1	0	0	ATP6AP1	ATPase, H+ transporting, lysosomal accessory protein 1
hsa-miR-1207-3p	0	0	1	0	1	1	TMSB15B	thymosin beta 15B
hsa-miR-1207-3p	0	0	1	1	0	0	ACOT11	acyl-CoA thioesterase 11
hsa-miR-1207-3p	1	0	1	1	1	1	ARIH2	ariadne homolog 2 (Drosophila)
hsa-miR-1207-3p	0	0	1	0	0	0	LOC440910	uncharacterized LOC440910
hsa-miR-1207-3p	1	0	1	1	1	1	FBXW2	F-box and WD repeat domain containing 2
hsa-miR-1207-3p	0	0	1	1	1	1	CD34	CD34 molecule
hsa-miR-1207-3p	0	0	1	1	1	1	PTGR1	prostaglandin reductase 1
hsa-miR-1207-3p	0	0	1	1	0	0	APOBEC3G	apolipoprotein B mRNA editing enzyme, catalytic polypeptide-like 3G
hsa-miR-1207-3p	0	0	1	1	1	1	RPL13	ribosomal protein L13
hsa-miR-1207-3p	0	0	1	0	0	0	LOC283887	uncharacterized LOC283887
hsa-miR-1207-3p	0	0	1	1	0	0	AXDND1	axonemal dynein light chain domain containing 1
hsa-miR-1207-3p	0	0	1	0	0	0	LOC550112	uncharacterized LOC550112
hsa-miR-1207-3p	0	0	1	1	0	0	EIF3B	eukaryotic translation initiation factor 3, subunit B
hsa-miR-1207-3p	0	0	1	0	0	0	CXXC1P1	CXXC finger protein 1 pseudogene 1
hsa-miR-1207-3p	0	0	1	1	1	1	FRMD3	FERM domain containing 3
hsa-miR-1207-3p	0	0	1	1	0	0	WBP1	WW domain binding protein 1
hsa-miR-1207-3p	1	0	1	1	1	1	KCND1	potassium voltage-gated channel, Shal-related subfamily, member 1
hsa-miR-1207-3p	1	0	1	1	1	1	KLC2	kinesin light chain 2
hsa-miR-1207-3p	0	0	1	1	1	1	CORO7	coronin 7
hsa-miR-1207-3p	1	0	1	0	1	1	GATAD2B	GATA zinc finger domain containing 2B
hsa-miR-1207-3p	0	0	1	1	1	1	HOGA1	4-hydroxy-2-oxoglutarate aldolase 1
hsa-miR-1207-3p	1	0	1	1	1	1	LPPR2	lipid phosphate phosphatase-related protein type 2
hsa-miR-1207-3p	0	0	1	1	0	0	DPAGT1	dolichyl-phosphate (UDP-N-acetylglucosamine) N-acetylglucosaminephosphotransferase 1 (GlcNAc-1-P transferase)
hsa-miR-1207-3p	0	0	1	1	0	0	HPN	hepsin
hsa-miR-1207-3p	0	0	1	1	1	1	MYO6	myosin VI
hsa-miR-1207-3p	0	0	1	1	1	1	FAM83A	family with sequence similarity 83, member A
hsa-miR-1207-3p	0	0	1	1	1	1	AQP3	aquaporin 3 (Gill blood group)
hsa-miR-1207-3p	0	0	1	1	1	1	GPR115	G protein-coupled receptor 115
hsa-miR-1207-3p	0	0	1	1	1	1	CDS2	CDP-diacylglycerol synthase (phosphatidate cytidylyltransferase) 2
hsa-miR-1207-3p	0	0	1	1	1	1	SIRPB2	signal-regulatory protein beta 2
hsa-miR-1207-3p	1	0	1	1	1	1	KCNIP3	Kv channel interacting protein 3, calsenilin
hsa-miR-1207-3p	1	0	1	1	1	1	CECR6	cat eye syndrome chromosome region, candidate 6
hsa-miR-1207-3p	0	0	1	1	1	1	FBLN1	fibulin 1
hsa-miR-1207-3p	0	0	1	1	1	1	BAG1	BCL2-associated athanogene
hsa-miR-1207-3p	0	0	1	1	0	0	TRIM46	tripartite motif containing 46
hsa-miR-1207-3p	1	0	1	1	1	1	GAPVD1	GTPase activating protein and VPS9 domains 1
hsa-miR-1207-3p	0	0	1	0	0	0	ZNF815P	zinc finger protein 815, pseudogene
hsa-miR-1207-3p	0	0	1	0	0	0	FAM66C	family with sequence similarity 66, member C
hsa-miR-1207-3p	0	0	1	0	0	0	OTUD1	OTU domain containing 1
hsa-miR-1207-3p	0	0	1	0	0	0	LOC643327	uncharacterized LOC643327
hsa-miR-1207-3p	1	0	1	1	1	1	SYT6	synaptotagmin VI
hsa-miR-1207-3p	1	0	1	1	1	1	EPB41L1	erythrocyte membrane protein band 4.1-like 1
hsa-miR-1207-3p	0	0	1	1	0	0	TCEANC	transcription elongation factor A (SII) N-terminal and central domain containing
hsa-miR-1207-3p	0	0	1	0	0	0	LOC401463	uncharacterized LOC401463
hsa-miR-1207-3p	0	0	1	1	1	1	FGD2	FYVE, RhoGEF and PH domain containing 2
hsa-miR-1207-3p	1	0	1	1	1	1	KL	klotho
hsa-miR-1207-3p	1	0	1	1	1	1	POU2F3	POU class 2 homeobox 3
hsa-miR-1207-3p	0	0	1	1	1	1	MED20	mediator complex subunit 20
hsa-miR-1207-3p	1	0	1	1	1	1	RAB11FIP4	RAB11 family interacting protein 4 (class II)
hsa-miR-1207-3p	0	0	1	0	0	0	LINC00293	long intergenic non-protein coding RNA 293
hsa-miR-1207-3p	0	0	1	1	0	0	AHCY	adenosylhomocysteinase
hsa-miR-1207-3p	0	0	1	1	0	0	PSAPL1	prosaposin-like 1 (gene/pseudogene)
hsa-miR-1207-3p	0	0	1	1	0	0	TOM1	target of myb1 (chicken)
hsa-miR-1207-3p	0	0	1	1	0	0	STXBP2	syntaxin binding protein 2
hsa-miR-1207-3p	0	0	1	0	0	0	CECR7	cat eye syndrome chromosome region, candidate 7 (non-protein coding)
hsa-miR-1207-3p	1	0	1	1	1	1	PIGA	phosphatidylinositol glycan anchor biosynthesis, class A
hsa-miR-1207-3p	1	0	1	0	1	1	SQSTM1	sequestosome 1
hsa-miR-1207-3p	1	0	1	1	1	1	ZCCHC2	zinc finger, CCHC domain containing 2
hsa-miR-1207-3p	0	0	1	1	1	1	GTF2IRD2	GTF2I repeat domain containing 2
hsa-miR-1207-3p	0	0	1	0	0	0	LOC728095	uncharacterized LOC728095
hsa-miR-1207-3p	1	0	1	1	0	0	DGCR6	DiGeorge syndrome critical region gene 6
hsa-miR-1207-3p	1	0	1	0	1	1	UNC5D	unc-5 homolog D (C. elegans)
hsa-miR-1207-3p	1	0	1	1	1	1	ZMAT3	zinc finger, matrin-type 3
hsa-miR-1207-3p	0	0	1	1	0	0	KIAA0146	KIAA0146
hsa-miR-1207-3p	0	0	1	1	1	1	NFKB1	nuclear factor of kappa light polypeptide gene enhancer in B-cells 1
hsa-miR-1207-3p	0	0	1	1	1	1	SCLT1	sodium channel and clathrin linker 1
hsa-miR-1207-3p	1	0	1	1	0	0	WIZ	widely interspaced zinc finger motifs
hsa-miR-1207-3p	0	0	1	1	1	1	GGA1	golgi-associated, gamma adaptin ear containing, ARF binding protein 1
hsa-miR-1207-3p	0	0	1	1	0	0	HDAC6	histone deacetylase 6
hsa-miR-1207-3p	0	0	1	1	0	0	CFP	complement factor properdin
hsa-miR-1207-3p	0	0	1	1	0	0	MARS	methionyl-tRNA synthetase
hsa-miR-1207-3p	1	0	1	1	1	1	ZBTB4	zinc finger and BTB domain containing 4
hsa-miR-1207-3p	0	0	1	1	1	1	FRMPD2	FERM and PDZ domain containing 2
hsa-miR-1207-3p	0	0	1	0	0	0	C1orf132	chromosome 1 open reading frame 132
hsa-miR-1207-3p	0	0	1	1	1	1	FAM5B	family with sequence similarity 5, member B
hsa-miR-1207-3p	1	0	1	1	1	1	SBF2	SET binding factor 2
hsa-miR-1207-3p	1	0	1	1	1	1	PHKB	phosphorylase kinase, beta
hsa-miR-1207-3p	1	0	1	1	1	1	IPPK	inositol 1,3,4,5,6-pentakisphosphate 2-kinase
hsa-miR-1207-3p	0	0	1	0	0	0	LOC285043	uncharacterized LOC285043
hsa-miR-1207-3p	1	0	1	1	0	0	KCNC1	potassium voltage-gated channel, Shaw-related subfamily, member 1
hsa-miR-1207-3p	0	0	1	0	0	0	LOC728716	uncharacterized LOC728716
hsa-miR-1207-3p	1	0	1	1	1	1	ERBB3	v-erb-b2 erythroblastic leukemia viral oncogene homolog 3 (avian)
hsa-miR-1207-3p	1	0	1	1	1	1	CELF6	CUGBP, Elav-like family member 6
hsa-miR-1207-3p	0	0	1	1	1	1	C2orf91	chromosome 2 open reading frame 91
hsa-miR-1207-3p	0	0	1	1	1	1	C3orf67	chromosome 3 open reading frame 67
hsa-miR-1207-3p	1	0	1	1	1	1	SLC44A1	solute carrier family 44, member 1
hsa-miR-1207-3p	0	0	1	0	0	0	LOC100132731	uncharacterized LOC100132731
hsa-miR-1207-3p	0	0	1	1	0	0	ANKHD1-EIF4EBP3	ANKHD1-EIF4EBP3 readthrough
hsa-miR-1207-3p	0	0	1	0	0	0	FAM95B1	family with sequence similarity 95, member B1
hsa-miR-1207-3p	1	0	1	1	1	1	MACROD2	MACRO domain containing 2
hsa-miR-1207-3p	1	0	1	1	1	1	CHD5	chromodomain helicase DNA binding protein 5
hsa-miR-1207-3p	0	0	1	1	0	0	FSIP2	fibrous sheath interacting protein 2
hsa-miR-1207-3p	1	0	1	1	1	1	CPNE2	copine II
hsa-miR-1207-3p	1	0	1	1	1	1	PIK3R1	phosphoinositide-3-kinase, regulatory subunit 1 (alpha)
hsa-miR-1207-3p	0	0	1	0	0	0	MIR143HG	MIR143 host gene (non-protein coding)
hsa-miR-1207-3p	0	0	1	1	0	0	CCDC88B	coiled-coil domain containing 88B
hsa-miR-1207-3p	0	0	1	0	0	0	PLEKHD1	pleckstrin homology domain containing, family D (with coiled-coil domains) member 1
hsa-miR-1207-3p	0	0	1	1	0	0	NPIP	nuclear pore complex interacting protein
hsa-miR-1207-3p	0	0	1	1	0	0	TMEM151B	transmembrane protein 151B
hsa-miR-1207-3p	0	0	1	1	1	1	SZT2	seizure threshold 2 homolog (mouse)
hsa-miR-1207-3p	0	0	1	0	0	0	RPL23AP53	ribosomal protein L23a pseudogene 53
hsa-miR-1207-3p	0	0	1	1	1	1	MOBP	myelin-associated oligodendrocyte basic protein
hsa-miR-1207-3p	0	0	1	1	0	0	FAM54B	family with sequence similarity 54, member B
hsa-miR-1207-3p	1	0	1	1	1	1	FMNL3	formin-like 3
hsa-miR-1207-3p	1	0	1	0	1	1	N4BP3	NEDD4 binding protein 3
hsa-miR-1207-3p	0	0	1	0	0	0	LOC619207	scavenger receptor protein family member
hsa-miR-1207-3p	0	0	1	1	1	1	ARHGAP33	Rho GTPase activating protein 33
hsa-miR-1207-3p	0	0	1	0	1	1	NPHP4	nephronophthisis 4
hsa-miR-1207-3p	1	0	1	1	1	1	RALGDS	ral guanine nucleotide dissociation stimulator
hsa-miR-1207-3p	0	0	1	0	0	0	LOC285812	uncharacterized LOC285812
hsa-miR-1207-3p	0	0	1	1	1	1	PIN4	protein (peptidylprolyl cis/trans isomerase) NIMA-interacting, 4 (parvulin)
hsa-miR-1207-3p	0	0	1	1	0	0	AADACL3	arylacetamide deacetylase-like 3
hsa-miR-1207-3p	0	0	1	1	0	0	BPIFB1	BPI fold containing family B, member 1
hsa-miR-1207-3p	0	0	1	1	0	0	C1orf86	chromosome 1 open reading frame 86
hsa-miR-1207-3p	1	0	1	1	0	0	SRCAP	Snf2-related CREBBP activator protein
hsa-miR-1207-3p	0	0	1	1	0	0	MIB2	mindbomb E3 ubiquitin protein ligase 2
hsa-miR-1207-3p	1	0	1	1	0	0	C15orf39	chromosome 15 open reading frame 39
hsa-miR-1207-3p	0	0	1	0	0	0	FLJ46361	deleted in malignant brain tumors 1 pseudogene
hsa-miR-1207-3p	0	0	1	1	0	0	FAM159A	family with sequence similarity 159, member A
hsa-miR-1207-3p	0	0	1	0	0	0	LOC100129940	uncharacterized LOC100129940
hsa-miR-1207-3p	0	0	1	0	0	0	EMBP1	embigin pseudogene 1
hsa-miR-1207-3p	0	0	1	1	0	0	WFIKKN1	WAP, follistatin/kazal, immunoglobulin, kunitz and netrin domain containing 1
hsa-miR-1207-3p	1	0	1	0	1	1	CYB561D1	cytochrome b-561 domain containing 1
hsa-miR-1207-3p	1	0	1	1	1	1	MRFAP1	Morf4 family associated protein 1
hsa-miR-1207-3p	1	0	1	1	1	1	RBM24	RNA binding motif protein 24
hsa-miR-1207-3p	0	0	1	1	0	0	HEATR8	HEAT repeat containing 8
hsa-miR-1207-3p	1	0	1	1	1	1	SEC14L1	SEC14-like 1 (S. cerevisiae)
hsa-miR-1207-3p	0	0	1	0	1	1	KIF1A	kinesin family member 1A
hsa-miR-1207-3p	1	0	1	1	1	1	MAP3K14	mitogen-activated protein kinase kinase kinase 14
hsa-miR-1207-3p	0	0	1	1	1	1	SYPL2	synaptophysin-like 2
hsa-miR-1207-3p	0	0	1	1	1	1	ZNF346	zinc finger protein 346
hsa-miR-1207-3p	0	0	1	1	0	0	C9orf96	chromosome 9 open reading frame 96
hsa-miR-1207-3p	1	0	1	0	1	1	ZNF607	zinc finger protein 607
hsa-miR-1207-3p	0	0	1	0	1	1	ATP6V0E2	ATPase, H+ transporting V0 subunit e2
hsa-miR-1207-3p	1	0	1	1	1	1	SYS1	SYS1 Golgi-localized integral membrane protein homolog (S. cerevisiae)
hsa-miR-1207-3p	1	0	1	1	1	1	CTSA	cathepsin A
hsa-miR-1207-3p	0	0	1	1	1	1	XRN2	5'-3' exoribonuclease 2
hsa-miR-1207-3p	0	0	1	1	1	1	KAZALD1	Kazal-type serine peptidase inhibitor domain 1
hsa-miR-1207-3p	0	0	1	1	0	0	ANAPC15	anaphase promoting complex subunit 15
hsa-miR-1207-3p	1	0	1	1	0	0	TDRKH	tudor and KH domain containing
hsa-miR-1207-3p	1	0	1	1	1	1	CAMK2G	calcium/calmodulin-dependent protein kinase II gamma
hsa-miR-1207-3p	1	0	1	1	1	1	NCOA1	nuclear receptor coactivator 1
hsa-miR-1207-3p	1	0	1	1	1	1	NOVA1	neuro-oncological ventral antigen 1
hsa-miR-1207-3p	1	0	1	0	1	1	TEAD3	TEA domain family member 3
hsa-miR-1207-3p	0	0	1	1	1	1	RABGAP1L	RAB GTPase activating protein 1-like
hsa-miR-1207-3p	0	0	1	1	1	1	TTLL3	tubulin tyrosine ligase-like family, member 3
hsa-miR-1207-3p	0	0	1	1	0	0	TBC1D10B	TBC1 domain family, member 10B
hsa-miR-1207-3p	0	0	1	1	1	1	ARIH1	ariadne homolog, ubiquitin-conjugating enzyme E2 binding protein, 1 (Drosophila)
hsa-miR-1207-3p	0	0	1	1	0	0	ODF3	outer dense fiber of sperm tails 3
hsa-miR-1207-3p	0	0	1	0	0	0	DNAJC5B	DnaJ (Hsp40) homolog, subfamily C, member 5 beta
hsa-miR-1207-3p	0	0	1	1	1	1	MYO9A	myosin IXA
hsa-miR-1207-3p	0	0	1	1	1	1	DDX60	DEAD (Asp-Glu-Ala-Asp) box polypeptide 60
hsa-miR-1207-3p	0	0	1	0	0	0	LOC643529	hCG2024094
hsa-miR-1207-3p	1	0	1	1	1	1	NBEA	neurobeachin
hsa-miR-1207-3p	0	0	1	1	0	0	DOPEY1	dopey family member 1
hsa-miR-1207-3p	1	0	1	0	1	1	GRIN3A	glutamate receptor, ionotropic, N-methyl-D-aspartate 3A
hsa-miR-1207-3p	0	0	1	0	0	0	FAM66D	family with sequence similarity 66, member D
hsa-miR-1207-3p	1	0	1	1	1	1	PKNOX2	PBX/knotted 1 homeobox 2
hsa-miR-1207-3p	0	0	1	1	0	0	KRBA1	KRAB-A domain containing 1
hsa-miR-1207-3p	0	0	1	1	1	1	EGFLAM	EGF-like, fibronectin type III and laminin G domains
hsa-miR-1207-3p	1	0	1	1	1	1	CHMP7	charged multivesicular body protein 7
hsa-miR-1207-3p	0	0	1	0	0	0	FAM225A	family with sequence similarity 225, member A (non-protein coding)
hsa-miR-1207-3p	0	0	1	1	1	1	USPL1	ubiquitin specific peptidase like 1
hsa-miR-1207-3p	0	0	1	1	1	1	CYR61	cysteine-rich, angiogenic inducer, 61
hsa-miR-1207-3p	0	0	1	1	0	0	LGI4	leucine-rich repeat LGI family, member 4
hsa-miR-1207-3p	0	0	1	1	1	1	INPP5B	inositol polyphosphate-5-phosphatase, 75kDa
hsa-miR-1207-3p	0	0	1	1	1	1	CCDC132	coiled-coil domain containing 132
hsa-miR-1207-3p	1	0	1	1	1	1	SOX6	SRY (sex determining region Y)-box 6
hsa-miR-1207-3p	0	0	1	1	0	0	YIF1B	Yip1 interacting factor homolog B (S. cerevisiae)
hsa-miR-1207-3p	0	0	1	0	0	0	EPHA1-AS1	EPHA1 antisense RNA 1
hsa-miR-1207-3p	0	0	1	1	1	1	SOAT1	sterol O-acyltransferase 1
hsa-miR-1207-3p	0	0	1	0	0	0	ADCY10P1	adenylate cyclase 10 (soluble) pseudogene 1
hsa-miR-1207-3p	1	0	1	1	1	1	IL17RD	interleukin 17 receptor D
hsa-miR-1207-3p	1	0	1	1	1	1	MBD6	methyl-CpG binding domain protein 6
hsa-miR-1207-3p	1	0	1	0	1	1	SMURF1	SMAD specific E3 ubiquitin protein ligase 1
hsa-miR-1207-3p	0	0	1	1	0	0	SCAF4	SR-related CTD-associated factor 4
hsa-miR-1207-3p	1	0	1	1	1	1	RICTOR	RPTOR independent companion of MTOR, complex 2
hsa-miR-1207-3p	1	0	1	0	1	1	NR3C1	nuclear receptor subfamily 3, group C, member 1 (glucocorticoid receptor)
hsa-miR-1207-3p	1	0	1	0	1	1	PATL1	protein associated with topoisomerase II homolog 1 (yeast)
hsa-miR-1207-3p	0	0	1	0	0	0	PMCHL1	pro-melanin-concentrating hormone-like 1, pseudogene
hsa-miR-1207-3p	0	0	1	0	0	0	PMCHL2	pro-melanin-concentrating hormone-like 2, pseudogene
hsa-miR-1207-3p	1	0	1	1	1	1	CLIC5	chloride intracellular channel 5
hsa-miR-1207-3p	0	0	1	1	1	1	CRB1	crumbs homolog 1 (Drosophila)
hsa-miR-1207-3p	0	0	1	1	1	1	GPRASP1	G protein-coupled receptor associated sorting protein 1
hsa-miR-1207-3p	1	0	1	1	1	1	SORCS1	sortilin-related VPS10 domain containing receptor 1
hsa-miR-1207-3p	1	0	1	1	1	1	SULF1	sulfatase 1
hsa-miR-1207-3p	1	0	1	1	1	1	USF2	upstream transcription factor 2, c-fos interacting
hsa-miR-1207-3p	0	0	1	0	1	1	ARMC10	armadillo repeat containing 10
hsa-miR-1207-3p	0	0	1	1	1	1	CEP41	centrosomal protein 41kDa
hsa-miR-1207-3p	0	0	1	1	0	0	DNAH1	dynein, axonemal, heavy chain 1
hsa-miR-1207-3p	0	0	1	1	1	1	CCDC83	coiled-coil domain containing 83
hsa-miR-1207-3p	0	0	1	0	0	0	FAM138C	family with sequence similarity 138, member C
hsa-miR-1207-3p	0	0	1	1	0	0	VSIG4	V-set and immunoglobulin domain containing 4
hsa-miR-1207-3p	0	0	1	1	1	1	GPR114	G protein-coupled receptor 114
hsa-miR-1207-3p	0	0	1	1	1	1	TNFRSF19	tumor necrosis factor receptor superfamily, member 19
hsa-miR-1207-3p	1	0	1	0	1	1	ANKRD28	ankyrin repeat domain 28
hsa-miR-1207-3p	1	0	1	1	1	1	MYNN	myoneurin
hsa-miR-1207-3p	0	0	1	1	1	1	HMBOX1	homeobox containing 1
hsa-miR-1207-3p	1	0	1	1	1	1	MECP2	methyl CpG binding protein 2 (Rett syndrome)
hsa-miR-1207-3p	0	0	1	1	0	0	ASB16	ankyrin repeat and SOCS box containing 16
hsa-miR-1207-3p	1	0	1	1	0	0	ADAM15	ADAM metallopeptidase domain 15
hsa-miR-1207-3p	0	0	1	1	1	1	IL24	interleukin 24
hsa-miR-1207-3p	1	0	1	1	1	1	BHLHE41	basic helix-loop-helix family, member e41
hsa-miR-1207-3p	0	0	1	1	1	1	ILDR1	immunoglobulin-like domain containing receptor 1
hsa-miR-1207-3p	1	0	1	1	1	1	PFKFB4	6-phosphofructo-2-kinase/fructose-2,6-biphosphatase 4
hsa-miR-1207-3p	1	0	1	1	1	1	NTNG1	netrin G1
hsa-miR-1207-3p	1	0	1	1	0	0	DGAT2	diacylglycerol O-acyltransferase 2
hsa-miR-1207-3p	1	0	1	1	1	1	QKI	QKI, KH domain containing, RNA binding
hsa-miR-1207-3p	0	0	1	0	0	0	LOC100128076	protein tyrosine phosphatase pseudogene
hsa-miR-1207-3p	1	0	1	1	1	1	TBC1D22B	TBC1 domain family, member 22B
hsa-miR-1207-3p	1	0	1	1	1	1	NOL4	nucleolar protein 4
hsa-miR-1207-3p	1	0	1	0	1	1	FAM46A	family with sequence similarity 46, member A
hsa-miR-1207-3p	0	0	1	1	1	1	ZCCHC17	zinc finger, CCHC domain containing 17
hsa-miR-1207-3p	0	0	1	1	0	0	GFOD2	glucose-fructose oxidoreductase domain containing 2
hsa-miR-1207-3p	1	0	1	1	0	0	STX1A	syntaxin 1A (brain)
hsa-miR-1207-3p	1	0	1	1	1	1	RIMS3	regulating synaptic membrane exocytosis 3
hsa-miR-1207-3p	0	0	1	1	0	0	RUSC1	RUN and SH3 domain containing 1
hsa-miR-1207-3p	1	0	1	1	1	1	POU2F2	POU class 2 homeobox 2
hsa-miR-1207-3p	0	0	1	1	0	0	LOC100132167	uncharacterized LOC100132167
hsa-miR-1207-3p	0	0	1	1	1	1	SGK2	serum/glucocorticoid regulated kinase 2
hsa-miR-1207-3p	0	0	1	0	0	0	DNM1P33	DNM1 pseudogene 33
hsa-miR-1207-3p	1	0	1	0	1	1	DDX3X	DEAD (Asp-Glu-Ala-Asp) box polypeptide 3, X-linked
hsa-miR-1207-3p	0	0	1	1	0	0	MYLK2	myosin light chain kinase 2
hsa-miR-1207-3p	1	0	1	1	1	1	CALM1	calmodulin 1 (phosphorylase kinase, delta)
hsa-miR-1207-3p	1	0	1	1	1	1	LMBR1L	limb region 1 homolog (mouse)-like
hsa-miR-1207-3p	0	0	1	0	0	0	ATXN7L3B	ataxin 7-like 3B
hsa-miR-1207-3p	1	0	1	1	0	0	AGFG2	ArfGAP with FG repeats 2
hsa-miR-1207-3p	1	0	1	1	0	0	MARCH9	membrane-associated ring finger (C3HC4) 9
hsa-miR-1207-3p	1	0	1	1	1	1	RELL2	RELT-like 2
hsa-miR-1207-3p	1	0	1	1	1	1	KCTD17	potassium channel tetramerisation domain containing 17
hsa-miR-1207-3p	0	0	1	0	0	0	LRRC14	leucine rich repeat containing 14
hsa-miR-1207-3p	1	0	1	1	1	1	OTUD5	OTU domain containing 5
hsa-miR-1207-3p	1	0	1	1	1	1	ZBTB7B	zinc finger and BTB domain containing 7B
hsa-miR-1207-3p	0	0	1	1	0	0	MLXIPL	MLX interacting protein-like
hsa-miR-1207-3p	0	0	1	1	1	1	H2AFY	H2A histone family, member Y
hsa-miR-1207-3p	0	0	1	1	0	0	VAV1	vav 1 guanine nucleotide exchange factor
hsa-miR-1207-3p	0	0	1	1	1	1	DEDD2	death effector domain containing 2
hsa-miR-1207-3p	1	0	1	1	1	1	YY1	YY1 transcription factor
hsa-miR-1207-3p	0	0	1	1	0	0	LCMT1	leucine carboxyl methyltransferase 1
hsa-miR-1207-3p	1	0	1	1	1	1	ETF1	eukaryotic translation termination factor 1
hsa-miR-1207-3p	0	0	1	1	0	0	USP19	ubiquitin specific peptidase 19
hsa-miR-1207-3p	0	0	1	1	1	1	C8orf33	chromosome 8 open reading frame 33
hsa-miR-1207-3p	1	0	1	1	1	1	ASH2L	ash2 (absent, small, or homeotic)-like (Drosophila)
hsa-miR-1207-3p	0	0	1	0	0	0	GNN	Grp94 neighboring nucleotidase pseudogene
hsa-miR-1207-3p	1	0	1	0	1	1	CYBRD1	cytochrome b reductase 1
hsa-miR-1207-3p	0	0	1	1	0	0	PREB	prolactin regulatory element binding
hsa-miR-1207-3p	1	0	1	1	1	1	NRF1	nuclear respiratory factor 1
hsa-miR-1207-3p	0	0	1	0	0	0	LOC441528	uncharacterized LOC441528
hsa-miR-1207-3p	0	0	1	1	0	0	ZBTB32	zinc finger and BTB domain containing 32
hsa-miR-1207-3p	0	0	1	1	0	0	GPT	glutamic-pyruvate transaminase (alanine aminotransferase)
hsa-miR-1207-3p	0	0	1	0	0	0	LOC100130776	uncharacterized LOC100130776
hsa-miR-1207-3p	0	0	1	0	0	0	WDFY3-AS2	WDFY3 antisense RNA 2
hsa-miR-1207-3p	1	0	1	1	1	1	WHSC1	Wolf-Hirschhorn syndrome candidate 1
hsa-miR-1207-3p	0	0	1	1	1	1	TMEM40	transmembrane protein 40
hsa-miR-1207-3p	0	0	1	0	0	0	NBR2	neighbor of BRCA1 gene 2 (non-protein coding)
hsa-miR-1207-3p	0	0	1	0	0	0	AZGP1P1	alpha-2-glycoprotein 1, zinc-binding pseudogene 1
hsa-miR-1207-3p	1	0	1	1	1	1	C16orf45	chromosome 16 open reading frame 45
hsa-miR-1207-3p	0	0	1	0	0	0	FLJ35390	uncharacterized LOC255031
hsa-miR-1207-3p	0	0	1	0	0	0	TRAV20	T cell receptor alpha variable 20
hsa-miR-1207-3p	0	0	1	1	0	0	TBX6	T-box 6
hsa-miR-1207-3p	0	0	1	1	0	0	TRO	trophinin
hsa-miR-1207-3p	0	0	1	0	1	1	FHAD1	forkhead-associated (FHA) phosphopeptide binding domain 1
hsa-miR-1207-3p	1	0	1	0	0	0	KCNU1	potassium channel, subfamily U, member 1
hsa-miR-1207-3p	0	0	1	1	1	1	KIAA1755	KIAA1755
hsa-miR-1207-3p	1	0	1	1	1	1	SYT9	synaptotagmin IX
hsa-miR-1207-3p	1	0	1	1	1	1	RCOR3	REST corepressor 3
hsa-miR-1207-3p	0	0	1	0	0	0	CFL1P1	cofilin 1 (non-muscle) pseudogene 1
hsa-miR-1207-3p	0	0	1	1	1	1	RBM42	RNA binding motif protein 42
hsa-miR-1207-3p	1	0	1	1	1	1	GLUL	glutamate-ammonia ligase
hsa-miR-1207-3p	1	0	1	1	1	1	SPATS2	spermatogenesis associated, serine-rich 2
hsa-miR-1207-3p	0	0	1	1	1	1	UBXN1	UBX domain protein 1
hsa-miR-1207-3p	1	0	1	1	1	1	PPP2R2C	protein phosphatase 2, regulatory subunit B, gamma
hsa-miR-1207-3p	1	0	1	1	1	1	SECISBP2L	SECIS binding protein 2-like
hsa-miR-1207-3p	1	0	1	1	1	1	MAK	male germ cell-associated kinase
hsa-miR-1207-3p	0	0	1	0	0	0	LOC96610	BMS1 homolog, ribosome assembly protein (yeast) pseudogene
hsa-miR-1207-3p	0	0	1	1	1	1	IL20RB	interleukin 20 receptor beta
hsa-miR-1207-3p	1	0	1	1	0	0	TMEM181	transmembrane protein 181
hsa-miR-1207-3p	0	0	1	1	1	1	C16orf89	chromosome 16 open reading frame 89
hsa-miR-1207-3p	1	0	1	1	1	1	FAM189B	family with sequence similarity 189, member B
hsa-miR-1207-3p	1	0	1	0	1	1	KIF5A	kinesin family member 5A
hsa-miR-1207-3p	0	0	1	0	0	0	LOC415056	uncharacterized LOC415056
hsa-miR-1207-3p	0	0	1	1	1	1	ZNF337	zinc finger protein 337
hsa-miR-1207-3p	0	0	1	1	0	0	PLA2G6	phospholipase A2, group VI (cytosolic, calcium-independent)
hsa-miR-1207-3p	1	0	1	1	1	1	ABCA1	ATP-binding cassette, sub-family A (ABC1), member 1
hsa-miR-1207-3p	1	0	1	0	1	1	DDX3Y	DEAD (Asp-Glu-Ala-Asp) box polypeptide 3, Y-linked
hsa-miR-1207-3p	1	0	1	1	1	1	SEC31B	SEC31 homolog B (S. cerevisiae)
hsa-miR-1207-3p	1	0	1	1	1	1	NKAIN2	Na+/K+ transporting ATPase interacting 2
hsa-miR-1207-3p	0	0	1	1	1	1	PAK6	p21 protein (Cdc42/Rac)-activated kinase 6
hsa-miR-1207-3p	0	0	1	1	0	0	PGS1	phosphatidylglycerophosphate synthase 1
hsa-miR-1207-3p	0	0	1	1	0	0	HCRTR1	hypocretin (orexin) receptor 1
hsa-miR-1207-3p	0	0	1	0	0	0	FLJ10661	family with sequence similarity 86, member A pseudogene
hsa-miR-1207-3p	0	0	1	0	0	0	LOC339862	uncharacterized LOC339862
hsa-miR-1207-3p	0	0	1	1	1	1	TMEM139	transmembrane protein 139
hsa-miR-1207-3p	1	0	1	1	1	1	ELMO2	engulfment and cell motility 2
hsa-miR-1207-3p	1	0	1	1	1	1	ACVR1	activin A receptor, type I
hsa-miR-1207-3p	0	0	1	0	0	0	LOC284889	uncharacterized LOC284889
hsa-miR-1207-3p	1	0	1	1	1	1	BNC2	basonuclin 2
hsa-miR-1207-3p	0	0	1	1	1	1	FAM71F1	family with sequence similarity 71, member F1
hsa-miR-1207-3p	1	0	1	1	1	1	FAM135B	family with sequence similarity 135, member B
hsa-miR-1207-3p	0	0	1	0	0	0	INHBA-AS1	INHBA antisense RNA 1
hsa-miR-1207-3p	1	0	1	1	1	1	PAIP2	poly(A) binding protein interacting protein 2
hsa-miR-1207-3p	0	0	1	0	0	0	USP32P1	ubiquitin specific peptidase 32 pseudogene 1
hsa-miR-1207-3p	0	0	1	0	0	0	TOB1-AS1	TOB1 antisense RNA 1
hsa-miR-1207-3p	1	0	1	1	1	1	FOSB	FBJ murine osteosarcoma viral oncogene homolog B
hsa-miR-1207-3p	0	0	1	0	0	0	LOC339622	uncharacterized LOC339622
hsa-miR-1207-3p	0	0	1	0	0	0	LOC339240	keratin 17 pseudogene
hsa-miR-1207-3p	0	0	1	1	0	0	MTCH1	mitochondrial carrier 1
hsa-miR-1207-3p	1	0	1	1	0	0	ZNF292	zinc finger protein 292
hsa-miR-1207-3p	0	0	1	1	1	1	MDFIC	MyoD family inhibitor domain containing
hsa-miR-1207-3p	0	0	1	0	0	0	A1BG-AS1	A1BG antisense RNA 1
hsa-miR-1207-3p	0	0	1	0	1	1	METTL12	methyltransferase like 12
hsa-miR-1207-3p	0	0	1	0	0	0	LOC154822	uncharacterized LOC154822
hsa-miR-1207-3p	1	0	1	1	1	1	PRRG1	proline rich Gla (G-carboxyglutamic acid) 1
hsa-miR-1207-3p	1	0	1	1	0	0	INPP5J	inositol polyphosphate-5-phosphatase J
hsa-miR-1207-3p	1	0	1	0	1	1	TNFAIP3	tumor necrosis factor, alpha-induced protein 3
hsa-miR-1207-3p	0	0	1	1	1	1	MTHFD2L	methylenetetrahydrofolate dehydrogenase (NADP+ dependent) 2-like
hsa-miR-1207-3p	0	0	1	0	0	0	LOC401176	uncharacterized LOC401176
hsa-miR-1207-3p	0	0	1	0	0	0	LOC339260	uncharacterized LOC339260
hsa-miR-1207-3p	0	0	1	0	0	0	DKFZp686O1327	uncharacterized LOC401014
hsa-miR-1207-3p	1	0	1	1	1	1	MAMDC2	MAM domain containing 2
hsa-miR-1207-3p	0	0	1	0	0	0	LOC283914	uncharacterized LOC283914
hsa-miR-1207-3p	1	0	1	1	1	1	PPP2R5B	protein phosphatase 2, regulatory subunit B', beta
hsa-miR-1207-3p	0	0	1	1	0	0	FAM165B	family with sequence similarity 165, member B
hsa-miR-1207-3p	0	0	1	1	1	1	P2RX6	purinergic receptor P2X, ligand-gated ion channel, 6
hsa-miR-1207-3p	1	0	1	1	0	0	CELF5	CUGBP, Elav-like family member 5
hsa-miR-1207-3p	0	0	1	0	0	0	LOC283038	uncharacterized LOC283038
hsa-miR-1207-3p	0	0	1	0	0	0	CCDC151	coiled-coil domain containing 151
hsa-miR-1207-3p	0	0	1	1	1	1	FBXO38	F-box protein 38
hsa-miR-1207-3p	1	0	1	1	1	1	MBNL1	muscleblind-like splicing regulator 1
hsa-miR-1207-3p	1	0	1	1	1	1	FNDC3A	fibronectin type III domain containing 3A
hsa-miR-1207-3p	0	0	1	1	0	0	SREBF2	sterol regulatory element binding transcription factor 2
hsa-miR-1207-3p	0	0	1	1	1	1	RAB3IL1	RAB3A interacting protein (rabin3)-like 1
hsa-miR-1207-3p	1	0	1	1	1	1	SCUBE3	signal peptide, CUB domain, EGF-like 3
hsa-miR-1207-3p	0	0	1	0	0	0	AQP7P1	aquaporin 7 pseudogene 1
hsa-miR-1207-3p	1	0	1	0	1	1	C14orf43	chromosome 14 open reading frame 43
hsa-miR-1207-3p	0	0	1	1	0	0	LY6H	lymphocyte antigen 6 complex, locus H
hsa-miR-1207-3p	0	0	1	0	0	0	LINC00265	long intergenic non-protein coding RNA 265
hsa-miR-1207-3p	0	0	1	1	0	0	TENC1	tensin like C1 domain containing phosphatase (tensin 2)
hsa-miR-1207-3p	0	0	1	1	0	0	ABHD1	abhydrolase domain containing 1
hsa-miR-1207-3p	0	0	1	0	0	0	LOC388436	uncharacterized LOC388436
hsa-miR-1207-3p	0	0	1	0	0	0	CCDC150	coiled-coil domain containing 150
hsa-miR-1207-3p	1	0	1	1	1	1	ZSCAN29	zinc finger and SCAN domain containing 29
hsa-miR-1207-3p	1	0	1	1	0	0	ANKRD13B	ankyrin repeat domain 13B
hsa-miR-1207-3p	1	0	1	1	1	1	GANAB	glucosidase, alpha; neutral AB
hsa-miR-1207-3p	0	0	1	1	1	1	AQP6	aquaporin 6, kidney specific
hsa-miR-1207-3p	1	0	1	1	1	1	IL15RA	interleukin 15 receptor, alpha
hsa-miR-1207-3p	1	0	1	1	1	1	VTCN1	V-set domain containing T cell activation inhibitor 1
hsa-miR-1207-3p	0	0	1	1	0	0	TTYH1	tweety homolog 1 (Drosophila)
hsa-miR-1207-3p	0	0	1	0	0	0	KANSL1-AS1	KANSL1 antisense RNA 1
hsa-miR-1207-3p	1	0	1	1	1	1	NRSN1	neurensin 1
hsa-miR-1207-3p	1	0	1	1	1	1	FTL	ferritin, light polypeptide
hsa-miR-1207-3p	0	0	1	0	0	0	ZNF66P	zinc finger protein 66, pseudogene
hsa-miR-1207-3p	1	0	1	1	0	0	SNX18	sorting nexin 18
hsa-miR-1207-3p	0	0	1	0	0	0	PTGER4P2	prostaglandin E receptor 4 (subtype EP4) pseudogene 2
hsa-miR-1207-3p	1	0	1	1	0	0	DCAF15	DDB1 and CUL4 associated factor 15
hsa-miR-1207-3p	0	0	1	1	0	0	CYP4F30P	cytochrome P450, family 4, subfamily F, polypeptide 30, pseudogene
hsa-miR-1207-3p	1	0	1	0	1	1	HMGB3	high mobility group box 3
hsa-miR-1207-3p	1	0	1	0	1	1	TGFBR1	transforming growth factor, beta receptor 1
hsa-miR-1207-3p	0	0	1	1	1	1	HEATR2	HEAT repeat containing 2
hsa-miR-1207-3p	0	0	1	1	0	0	TRIM73	tripartite motif containing 73
hsa-miR-1207-3p	1	0	1	1	1	1	WBP1L	WW domain binding protein 1-like
hsa-miR-1207-3p	1	0	1	1	1	1	OPCML	opioid binding protein/cell adhesion molecule-like
hsa-miR-1207-3p	0	0	1	0	0	0	AGAP9	ArfGAP with GTPase domain, ankyrin repeat and PH domain 9
hsa-miR-1207-3p	0	0	1	0	0	0	CAPN1	calpain 1, (mu/I) large subunit
hsa-miR-1207-3p	0	0	1	0	0	0	LOC642846	DEAD/H (Asp-Glu-Ala-Asp/His) box polypeptide 11-like
hsa-miR-1207-3p	1	0	1	0	1	1	AMMECR1L	AMME chromosomal region gene 1-like
hsa-miR-1207-3p	1	0	1	1	1	1	CEACAM19	carcinoembryonic antigen-related cell adhesion molecule 19
hsa-miR-1207-3p	0	0	1	1	0	0	PDLIM7	PDZ and LIM domain 7 (enigma)
hsa-miR-1207-3p	1	0	1	1	0	0	TIMM17B	translocase of inner mitochondrial membrane 17 homolog B (yeast)
hsa-miR-1207-3p	0	0	1	0	1	1	CCL4L2	chemokine (C-C motif) ligand 4-like 2
hsa-miR-1207-3p	0	0	1	1	1	1	CCL4L1	chemokine (C-C motif) ligand 4-like 1
hsa-miR-1207-3p	1	0	1	0	1	1	PIK3R3	phosphoinositide-3-kinase, regulatory subunit 3 (gamma)
hsa-miR-1207-3p	0	0	1	1	0	0	DNASE1	deoxyribonuclease I
hsa-miR-1207-3p	1	0	1	0	1	1	LRRTM4	leucine rich repeat transmembrane neuronal 4
hsa-miR-1207-3p	0	0	1	1	0	0	RGL4	ral guanine nucleotide dissociation stimulator-like 4
hsa-miR-1207-3p	0	0	1	1	1	1	TTLL9	tubulin tyrosine ligase-like family, member 9
hsa-miR-1207-3p	1	0	1	1	1	1	KLHL17	kelch-like 17 (Drosophila)
hsa-miR-1207-3p	0	0	1	1	0	0	BEAN1	brain expressed, associated with NEDD4, 1
hsa-miR-1207-3p	0	0	1	1	0	0	RELA	v-rel reticuloendotheliosis viral oncogene homolog A (avian)
hsa-miR-1207-3p	0	0	1	1	1	1	SMTNL2	smoothelin-like 2
hsa-miR-1207-3p	1	0	1	1	1	1	UBE4A	ubiquitination factor E4A
hsa-miR-1207-3p	0	0	1	1	0	0	TMC1	transmembrane channel-like 1
hsa-miR-1207-3p	1	0	1	1	0	0	MAPKBP1	mitogen-activated protein kinase binding protein 1
hsa-miR-1207-3p	1	0	1	1	1	1	ST18	suppression of tumorigenicity 18 (breast carcinoma) (zinc finger protein)
hsa-miR-1207-3p	1	0	1	1	1	1	ZNF827	zinc finger protein 827
hsa-miR-1207-3p	0	0	1	1	0	0	RGS12	regulator of G-protein signaling 12
hsa-miR-1207-3p	0	0	1	1	0	0	ANKLE1	ankyrin repeat and LEM domain containing 1
hsa-miR-1207-3p	1	0	1	1	0	0	RASGEF1B	RasGEF domain family, member 1B
hsa-miR-1207-3p	0	0	1	0	0	0	TUBA4B	tubulin, alpha 4b (pseudogene)
hsa-miR-1207-3p	0	0	1	0	0	0	LINC00266-1	long intergenic non-protein coding RNA 266-1
hsa-miR-1207-3p	0	0	1	0	0	0	EEF1DP3	eukaryotic translation elongation factor 1 delta pseudogene 3
hsa-miR-1207-3p	0	0	1	0	0	0	KRT8P12	keratin 8 pseudogene 12
hsa-miR-1207-3p	0	0	1	0	0	0	C3orf55	chromosome 3 open reading frame 55
hsa-miR-1207-3p	1	0	1	1	1	1	MEGF11	multiple EGF-like-domains 11
hsa-miR-1207-3p	1	0	1	1	1	1	ZMYM4	zinc finger, MYM-type 4
hsa-miR-1207-3p	1	0	1	1	1	1	RNF207	ring finger protein 207
hsa-miR-1207-3p	0	0	1	1	1	1	TPRN	taperin
hsa-miR-1207-3p	1	0	1	1	1	1	MLLT10	myeloid/lymphoid or mixed-lineage leukemia (trithorax homolog, Drosophila); translocated to, 10
hsa-miR-1207-3p	0	0	1	1	0	0	HSF4	heat shock transcription factor 4
hsa-miR-1207-3p	0	0	1	0	0	0	FAM225B	family with sequence similarity 225, member B (non-protein coding)
hsa-miR-1207-3p	1	0	1	0	1	1	FAM196A	family with sequence similarity 196, member A
hsa-miR-1207-3p	0	0	1	0	0	0	FUT8-AS1	FUT8 antisense RNA 1
hsa-miR-1207-3p	0	0	1	0	0	0	MEG3	maternally expressed 3 (non-protein coding)
hsa-miR-1207-3p	1	0	1	0	1	1	TTC7B	tetratricopeptide repeat domain 7B
hsa-miR-1207-3p	1	0	1	1	1	1	BTBD7	BTB (POZ) domain containing 7
hsa-miR-1207-3p	1	0	1	1	1	1	ERMAP	erythroblast membrane-associated protein (Scianna blood group)
hsa-miR-1207-3p	1	0	1	1	0	0	RGS6	regulator of G-protein signaling 6
hsa-miR-1207-3p	1	0	1	1	1	1	ATP2B4	ATPase, Ca++ transporting, plasma membrane 4
hsa-miR-1207-3p	1	0	1	0	1	1	NFIX	nuclear factor I/X (CCAAT-binding transcription factor)
hsa-miR-1207-3p	0	0	1	0	0	0	RGPD4	RANBP2-like and GRIP domain containing 4
hsa-miR-1207-3p	1	0	1	0	1	1	MTX3	metaxin 3
hsa-miR-1207-3p	1	0	1	1	1	1	ETS1	v-ets erythroblastosis virus E26 oncogene homolog 1 (avian)
hsa-miR-1207-3p	1	0	1	1	1	1	ST7L	suppression of tumorigenicity 7 like
hsa-miR-1207-3p	1	0	1	1	1	1	MASP1	mannan-binding lectin serine peptidase 1 (C4/C2 activating component of Ra-reactive factor)
hsa-miR-1207-3p	0	0	1	1	1	1	C5orf45	chromosome 5 open reading frame 45
hsa-miR-1207-3p	0	0	1	1	0	0	SNAPC2	small nuclear RNA activating complex, polypeptide 2, 45kDa
hsa-miR-1207-3p	1	0	1	1	1	1	GABPA	GA binding protein transcription factor, alpha subunit 60kDa
hsa-miR-1207-3p	1	0	1	1	1	1	TSC22D3	TSC22 domain family, member 3
hsa-miR-1207-3p	0	0	1	0	0	0	OVOS	ovostatin
hsa-miR-1207-3p	1	0	1	1	1	1	DCAF5	DDB1 and CUL4 associated factor 5
hsa-miR-1207-3p	1	0	1	1	1	1	NEDD9	neural precursor cell expressed, developmentally down-regulated 9
hsa-miR-1207-3p	1	0	1	1	1	1	PLEKHH1	pleckstrin homology domain containing, family H (with MyTH4 domain) member 1
hsa-miR-1207-3p	0	0	1	1	1	1	ZNF250	zinc finger protein 250
hsa-miR-1207-3p	0	0	1	1	0	0	FBXO7	F-box protein 7
hsa-miR-1207-3p	1	0	1	1	1	1	KLHL6	kelch-like 6 (Drosophila)
hsa-miR-1207-3p	1	0	1	1	1	1	NFIB	nuclear factor I/B
hsa-miR-1207-3p	1	0	1	1	1	1	PGAP1	post-GPI attachment to proteins 1
hsa-miR-1207-3p	0	0	1	1	1	1	ZCCHC11	zinc finger, CCHC domain containing 11
hsa-miR-1207-3p	1	0	1	0	1	1	TBL1XR1	transducin (beta)-like 1 X-linked receptor 1
hsa-miR-1207-3p	0	0	1	0	0	0	DKFZp686K1684	uncharacterized LOC440034
hsa-miR-1207-3p	1	0	1	1	1	1	CREB3L2	cAMP responsive element binding protein 3-like 2
hsa-miR-1207-3p	1	0	1	0	1	1	TTL	tubulin tyrosine ligase
hsa-miR-1207-3p	1	0	1	1	1	1	BSDC1	BSD domain containing 1
hsa-miR-1207-3p	1	0	1	1	0	0	GSK3B	glycogen synthase kinase 3 beta
hsa-miR-1207-3p	0	0	1	1	0	0	NCAPH2	non-SMC condensin II complex, subunit H2
hsa-miR-1207-3p	1	0	1	1	1	1	ENTPD6	ectonucleoside triphosphate diphosphohydrolase 6 (putative)
hsa-miR-1207-3p	1	0	1	0	0	0	IGLON5	IgLON family member 5
hsa-miR-1207-3p	0	0	1	1	0	0	H2AFY2	H2A histone family, member Y2
hsa-miR-1207-3p	1	0	1	1	1	1	ARF1	ADP-ribosylation factor 1
hsa-miR-1207-3p	0	0	1	1	0	0	EMX1	empty spiracles homeobox 1
hsa-miR-1207-3p	0	0	1	0	0	0	AKR1A1	aldo-keto reductase family 1, member A1 (aldehyde reductase)
hsa-miR-1207-3p	0	0	1	1	0	0	APOA1BP	apolipoprotein A-I binding protein
hsa-miR-1207-3p	1	0	1	1	1	1	TARBP2	TAR (HIV-1) RNA binding protein 2
hsa-miR-1207-3p	0	0	1	1	0	0	URM1	ubiquitin related modifier 1
hsa-miR-1207-3p	0	0	1	1	0	0	RAD54L	RAD54-like (S. cerevisiae)
hsa-miR-1207-3p	1	0	1	1	1	1	ERI3	ERI1 exoribonuclease family member 3
hsa-miR-1207-3p	0	0	1	1	1	1	NR2C2AP	nuclear receptor 2C2-associated protein
hsa-miR-1207-3p	0	0	1	1	1	1	IER3	immediate early response 3
hsa-miR-1207-3p	0	0	1	1	0	0	PPOX	protoporphyrinogen oxidase
hsa-miR-1207-3p	1	0	1	1	1	1	LETMD1	LETM1 domain containing 1
hsa-miR-1207-3p	0	0	1	1	1	1	DMWD	dystrophia myotonica, WD repeat containing
hsa-miR-1207-3p	0	0	1	1	0	0	ITGB3BP	integrin beta 3 binding protein (beta3-endonexin)
hsa-miR-1207-3p	0	0	1	1	0	0	SRM	spermidine synthase
hsa-miR-1207-3p	0	0	1	1	1	1	PISD	phosphatidylserine decarboxylase
hsa-miR-1207-3p	1	0	1	1	1	1	DOLPP1	dolichyl pyrophosphate phosphatase 1
hsa-miR-1207-3p	1	0	1	1	1	1	FGF11	fibroblast growth factor 11
hsa-miR-1207-3p	0	0	1	0	0	0	H19	H19, imprinted maternally expressed transcript (non-protein coding)
hsa-miR-1207-3p	1	0	1	1	0	0	STX5	syntaxin 5
hsa-miR-1207-3p	0	0	1	1	0	0	DNAJB2	DnaJ (Hsp40) homolog, subfamily B, member 2
hsa-miR-1207-3p	1	0	1	1	1	1	CCNE1	cyclin E1
hsa-miR-1207-3p	1	0	1	1	1	1	GALE	UDP-galactose-4-epimerase
hsa-miR-1207-3p	0	0	1	1	1	1	ASCC2	activating signal cointegrator 1 complex subunit 2
hsa-miR-1207-3p	0	0	1	1	1	1	ZNF263	zinc finger protein 263
hsa-miR-1207-3p	0	0	1	0	1	1	IGF2-AS	IGF2 antisense RNA
hsa-miR-1207-3p	0	0	1	1	0	0	WISP2	WNT1 inducible signaling pathway protein 2
hsa-miR-1207-3p	0	0	1	0	0	0	LOC654433	uncharacterized LOC654433
hsa-miR-1207-3p	0	0	1	1	0	0	IKBKG	inhibitor of kappa light polypeptide gene enhancer in B-cells, kinase gamma
hsa-miR-1207-3p	1	0	1	0	1	1	RPS6KB1	ribosomal protein S6 kinase, 70kDa, polypeptide 1
hsa-miR-1207-3p	0	0	1	1	1	1	STON1	stonin 1
hsa-miR-1207-3p	0	0	1	1	0	0	CXorf40A	chromosome X open reading frame 40A
hsa-miR-1207-3p	1	0	1	1	1	1	DDR1	discoidin domain receptor tyrosine kinase 1
hsa-miR-1207-3p	1	0	1	1	1	1	LYPLA2	lysophospholipase II
hsa-miR-1207-3p	1	0	1	1	0	0	RNF24	ring finger protein 24
hsa-miR-1207-3p	1	0	1	1	1	1	PPP2R4	protein phosphatase 2A activator, regulatory subunit 4
hsa-miR-1207-3p	0	0	1	0	0	0	TMEM208	transmembrane protein 208
hsa-miR-1207-3p	1	0	1	1	1	1	STK38L	serine/threonine kinase 38 like
hsa-miR-1207-3p	1	0	1	1	1	1	TMEM245	transmembrane protein 245
hsa-miR-1207-3p	1	0	1	1	1	1	WIPF1	WAS/WASL interacting protein family, member 1
hsa-miR-1207-3p	1	0	1	1	1	1	PTBP1	polypyrimidine tract binding protein 1
hsa-miR-1207-3p	0	0	1	1	1	1	NFATC4	nuclear factor of activated T-cells, cytoplasmic, calcineurin-dependent 4
hsa-miR-1207-3p	0	0	1	0	1	1	TMEM155	transmembrane protein 155
hsa-miR-1207-3p	0	0	1	1	0	0	CD7	CD7 molecule
hsa-miR-1207-3p	0	0	1	1	1	1	VPS16	vacuolar protein sorting 16 homolog (S. cerevisiae)
hsa-miR-1207-3p	0	0	1	1	1	1	MPDU1	mannose-P-dolichol utilization defect 1
hsa-miR-1207-3p	0	0	1	1	1	1	HPS1	Hermansky-Pudlak syndrome 1
hsa-miR-1207-3p	0	0	1	1	0	0	NOX5	NADPH oxidase, EF-hand calcium binding domain 5
hsa-miR-1207-3p	0	0	1	1	1	1	RPUSD1	RNA pseudouridylate synthase domain containing 1
hsa-miR-1207-3p	0	0	1	1	0	0	DOK2	docking protein 2, 56kDa
hsa-miR-1207-3p	0	0	1	1	1	1	CPZ	carboxypeptidase Z
hsa-miR-1207-3p	0	0	1	1	1	1	PEX19	peroxisomal biogenesis factor 19
hsa-miR-1207-3p	0	0	1	1	0	0	WDR43	WD repeat domain 43
hsa-miR-1207-3p	0	0	1	1	1	1	DEDD	death effector domain containing
hsa-miR-1207-3p	1	0	1	1	1	1	CAMK2A	calcium/calmodulin-dependent protein kinase II alpha
hsa-miR-1207-3p	0	0	1	1	1	1	RHEBL1	Ras homolog enriched in brain like 1
hsa-miR-1207-3p	0	0	1	1	1	1	PDLIM1	PDZ and LIM domain 1
hsa-miR-1207-3p	0	0	1	1	0	0	LGALS9	lectin, galactoside-binding, soluble, 9
hsa-miR-1207-3p	0	0	1	1	1	1	XBP1	X-box binding protein 1
hsa-miR-1207-3p	1	0	1	1	1	1	BAALC	brain and acute leukemia, cytoplasmic
hsa-miR-1207-3p	1	0	1	1	1	1	EIF1	eukaryotic translation initiation factor 1
hsa-miR-1207-3p	1	0	1	1	1	1	ZNF207	zinc finger protein 207
hsa-miR-1207-3p	0	0	1	1	1	1	SLCO4A1	solute carrier organic anion transporter family, member 4A1
hsa-miR-1207-3p	0	0	1	0	0	0	C2CD4C	C2 calcium-dependent domain containing 4C
hsa-miR-1207-3p	1	0	1	1	1	1	F11R	F11 receptor
hsa-miR-1207-3p	0	0	1	1	1	1	IL15	interleukin 15
hsa-miR-1207-3p	0	0	1	1	1	1	ZNF333	zinc finger protein 333
hsa-miR-1207-3p	1	0	1	1	0	0	CRELD1	cysteine-rich with EGF-like domains 1
hsa-miR-1207-3p	0	0	1	1	1	1	NGLY1	N-glycanase 1
hsa-miR-1207-3p	0	0	1	1	0	0	CD79B	CD79b molecule, immunoglobulin-associated beta
hsa-miR-1207-3p	1	0	1	1	1	1	RPUSD3	RNA pseudouridylate synthase domain containing 3
hsa-miR-1207-3p	1	0	1	1	1	1	PDCL	phosducin-like
hsa-miR-1207-3p	1	0	1	1	0	0	INO80E	INO80 complex subunit E
hsa-miR-1207-3p	1	0	1	1	1	1	RNF2	ring finger protein 2
hsa-miR-1207-3p	0	0	1	1	0	0	CCDC107	coiled-coil domain containing 107
hsa-miR-1207-3p	1	0	1	1	1	1	TAGLN2	transgelin 2
hsa-miR-1207-3p	1	0	1	1	1	1	MFSD2A	major facilitator superfamily domain containing 2A
hsa-miR-1207-3p	1	0	1	1	1	1	DNAJA2	DnaJ (Hsp40) homolog, subfamily A, member 2
hsa-miR-1207-3p	1	0	1	1	0	0	SAP30BP	SAP30 binding protein
hsa-miR-1207-3p	0	0	1	0	0	0	PRMT1	protein arginine methyltransferase 1
hsa-miR-1207-3p	0	0	1	1	1	1	TOR2A	torsin family 2, member A
hsa-miR-1207-3p	0	0	1	1	0	0	TESK1	testis-specific kinase 1
hsa-miR-1207-3p	0	0	1	1	0	0	FES	feline sarcoma oncogene
hsa-miR-1207-3p	0	0	1	1	0	0	IL11RA	interleukin 11 receptor, alpha
hsa-miR-1207-3p	1	0	1	1	0	0	MMP11	matrix metallopeptidase 11 (stromelysin 3)
hsa-miR-1207-3p	1	0	1	1	0	0	SMCHD1	structural maintenance of chromosomes flexible hinge domain containing 1
hsa-miR-1207-3p	0	0	1	1	1	1	UPRT	uracil phosphoribosyltransferase (FUR1) homolog (S. cerevisiae)
hsa-miR-1207-3p	0	0	1	1	1	1	ISX	intestine-specific homeobox
hsa-miR-1207-3p	0	0	1	0	0	0	LINC00661	long intergenic non-protein coding RNA 661
hsa-miR-1207-3p	1	0	1	1	1	1	KIAA2018	KIAA2018
hsa-miR-1207-3p	1	0	1	1	1	1	TIPARP	TCDD-inducible poly(ADP-ribose) polymerase
hsa-miR-1207-3p	1	0	1	1	0	0	POMGNT1	protein O-linked mannose beta1,2-N-acetylglucosaminyltransferase
hsa-miR-1207-3p	0	0	1	1	1	1	OAT	ornithine aminotransferase
hsa-miR-1207-3p	1	0	1	0	1	1	CNTNAP2	contactin associated protein-like 2
hsa-miR-1207-3p	0	0	1	1	1	1	APOBEC3B	apolipoprotein B mRNA editing enzyme, catalytic polypeptide-like 3B
hsa-miR-1207-3p	1	0	1	1	1	1	ZFHX3	zinc finger homeobox 3
hsa-miR-1207-3p	0	0	1	1	1	1	SLC39A14	solute carrier family 39 (zinc transporter), member 14
hsa-miR-1207-3p	1	0	1	1	1	1	MAN2A2	mannosidase, alpha, class 2A, member 2
hsa-miR-1207-3p	1	0	1	1	1	1	RBPMS	RNA binding protein with multiple splicing
hsa-miR-1207-3p	0	0	1	1	1	1	ATF2	activating transcription factor 2
hsa-miR-1207-3p	1	0	1	0	1	1	CBX7	chromobox homolog 7
hsa-miR-1207-3p	0	0	1	1	1	1	LTA	lymphotoxin alpha (TNF superfamily, member 1)
hsa-miR-1207-3p	1	0	1	1	1	1	RSPO1	R-spondin 1
hsa-miR-1207-3p	1	0	1	1	1	1	ATP2B3	ATPase, Ca++ transporting, plasma membrane 3
hsa-miR-1207-3p	0	0	1	1	0	0	GPR111	G protein-coupled receptor 111
hsa-miR-1207-3p	0	0	1	1	0	0	FAM58A	family with sequence similarity 58, member A
hsa-miR-1207-3p	0	0	1	0	0	0	PILRB	paired immunoglobin-like type 2 receptor beta
hsa-miR-1207-3p	0	0	1	0	0	0	FAM226A	family with sequence similarity 226, member A (non-protein coding)
hsa-miR-1207-3p	1	0	1	1	1	1	IRF1	interferon regulatory factor 1
hsa-miR-1207-3p	1	0	1	0	1	1	EPDR1	ependymin related protein 1 (zebrafish)
hsa-miR-1207-3p	0	0	1	1	0	0	CYP27B1	cytochrome P450, family 27, subfamily B, polypeptide 1
hsa-miR-1207-3p	0	0	1	1	1	1	ALDH3B1	aldehyde dehydrogenase 3 family, member B1
hsa-miR-1207-3p	1	0	1	1	1	1	MLL	myeloid/lymphoid or mixed-lineage leukemia (trithorax homolog, Drosophila)
hsa-miR-1207-3p	0	0	1	1	1	1	VDAC2	voltage-dependent anion channel 2
hsa-miR-1207-3p	0	0	1	1	1	1	RFC1	replication factor C (activator 1) 1, 145kDa
hsa-miR-1207-3p	0	0	1	1	0	0	HLA-DQB1	major histocompatibility complex, class II, DQ beta 1
hsa-miR-1207-3p	1	0	1	1	1	1	PLAU	plasminogen activator, urokinase
hsa-miR-1207-3p	1	0	1	1	1	1	IGF1	insulin-like growth factor 1 (somatomedin C)
hsa-miR-1207-3p	1	0	1	0	1	1	SLC26A2	solute carrier family 26 (sulfate transporter), member 2
hsa-miR-1207-3p	1	0	1	1	1	1	FBN1	fibrillin 1
hsa-miR-1207-3p	1	0	1	0	1	1	G6PC	glucose-6-phosphatase, catalytic subunit
hsa-miR-1207-3p	1	0	1	0	1	1	GLI3	GLI family zinc finger 3
hsa-miR-1207-3p	1	0	1	1	1	1	TBX5	T-box 5
hsa-miR-1207-3p	0	0	1	1	1	1	PKP1	plakophilin 1 (ectodermal dysplasia/skin fragility syndrome)
hsa-miR-1207-3p	0	0	1	1	1	1	RHAG	Rh-associated glycoprotein
hsa-miR-1207-3p	0	0	1	1	1	1	RLBP1	retinaldehyde binding protein 1
hsa-miR-1207-3p	0	0	1	1	1	1	SRD5A2	steroid-5-alpha-reductase, alpha polypeptide 2 (3-oxo-5 alpha-steroid delta 4-dehydrogenase alpha 2)
hsa-miR-1207-3p	1	0	1	0	1	1	TSC1	tuberous sclerosis 1
hsa-miR-1207-3p	1	0	1	1	1	1	CHM	choroideremia (Rab escort protein 1)
hsa-miR-1207-3p	1	0	1	0	1	1	CYBB	cytochrome b-245, beta polypeptide
hsa-miR-1207-3p	1	0	1	1	1	1	HLCS	holocarboxylase synthetase (biotin-(proprionyl-CoA-carboxylase (ATP-hydrolysing)) ligase)
hsa-miR-1207-3p	0	0	1	1	1	1	L1CAM	L1 cell adhesion molecule
hsa-miR-1207-3p	1	0	1	0	1	1	PAFAH1B1	platelet-activating factor acetylhydrolase 1b, regulatory subunit 1 (45kDa)
hsa-miR-1207-3p	0	0	1	1	1	1	CYP11B2	cytochrome P450, family 11, subfamily B, polypeptide 2
hsa-miR-1207-3p	0	0	1	1	1	1	RYR1	ryanodine receptor 1 (skeletal)
hsa-miR-1207-3p	0	0	1	1	1	1	CRX	cone-rod homeobox
hsa-miR-1207-3p	0	0	1	1	1	1	DIO1	deiodinase, iodothyronine, type I
hsa-miR-1207-3p	1	0	1	1	1	1	DIO2	deiodinase, iodothyronine, type II
hsa-miR-1207-3p	0	0	1	1	1	1	GAD2	glutamate decarboxylase 2 (pancreatic islets and brain, 65kDa)
hsa-miR-1207-3p	1	0	1	1	1	1	GRIA4	glutamate receptor, ionotropic, AMPA 4
hsa-miR-1207-3p	1	0	1	1	0	0	GRIK3	glutamate receptor, ionotropic, kainate 3
hsa-miR-1207-3p	1	0	1	1	1	1	IGF1R	insulin-like growth factor 1 receptor
hsa-miR-1207-3p	1	0	1	0	1	1	KCNJ2	potassium inwardly-rectifying channel, subfamily J, member 2
hsa-miR-1207-3p	0	0	1	1	1	1	MAOB	monoamine oxidase B
hsa-miR-1207-3p	1	0	1	1	1	1	PTGER2	prostaglandin E receptor 2 (subtype EP2), 53kDa
hsa-miR-1207-3p	1	0	1	1	1	1	PTGER4	prostaglandin E receptor 4 (subtype EP4)
hsa-miR-1207-3p	1	0	1	1	1	1	RARA	retinoic acid receptor, alpha
hsa-miR-1207-3p	0	0	1	1	1	1	CALHM1	calcium homeostasis modulator 1
hsa-miR-1207-3p	1	0	1	0	1	1	UBE2W	ubiquitin-conjugating enzyme E2W (putative)
hsa-miR-1207-3p	0	0	1	1	1	1	DDI1	DNA-damage inducible 1 homolog 1 (S. cerevisiae)
hsa-miR-1207-3p	0	0	1	0	0	0	C10orf55	chromosome 10 open reading frame 55
hsa-miR-1207-3p	0	0	1	0	0	0	KLK2	kallikrein-related peptidase 2
hsa-miR-1207-3p	1	0	1	1	1	1	HMGXB4	HMG box domain containing 4
hsa-miR-1207-3p	0	0	1	1	0	0	MANBAL	mannosidase, beta A, lysosomal-like
hsa-miR-1207-3p	1	0	1	0	1	1	BMF	Bcl2 modifying factor
hsa-miR-1207-3p	1	0	1	0	1	1	ZNF740	zinc finger protein 740
hsa-miR-1207-3p	0	0	1	1	1	1	DBX2	developing brain homeobox 2
hsa-miR-1207-3p	0	0	1	0	0	0	C9orf173	chromosome 9 open reading frame 173
hsa-miR-1207-3p	1	0	1	0	1	1	YPEL2	yippee-like 2 (Drosophila)
hsa-miR-1207-3p	1	0	1	1	1	1	EDA	ectodysplasin A
hsa-miR-1207-3p	0	0	1	1	1	1	IP6K2	inositol hexakisphosphate kinase 2
hsa-miR-1207-3p	1	0	1	0	1	1	IP6K1	inositol hexakisphosphate kinase 1
hsa-miR-1207-3p	1	0	1	0	1	1	PDPN	podoplanin
hsa-miR-1207-3p	0	0	1	1	1	1	SCP2	sterol carrier protein 2
hsa-miR-1207-3p	0	0	1	0	0	0	FSD2	fibronectin type III and SPRY domain containing 2
hsa-miR-1207-3p	1	0	1	1	1	1	IGSF3	immunoglobulin superfamily, member 3
hsa-miR-1207-3p	0	0	1	0	1	1	C3orf56	chromosome 3 open reading frame 56
hsa-miR-1207-3p	0	0	1	1	0	0	IRGQ	immunity-related GTPase family, Q
hsa-miR-1207-3p	1	0	1	1	1	1	CTDSPL	CTD (carboxy-terminal domain, RNA polymerase II, polypeptide A) small phosphatase-like
hsa-miR-1207-3p	0	0	1	1	1	1	MXRA7	matrix-remodelling associated 7
hsa-miR-1207-3p	1	0	1	0	1	1	KIAA2022	KIAA2022
hsa-miR-1207-3p	0	0	1	1	1	1	CXCR4	chemokine (C-X-C motif) receptor 4
hsa-miR-1207-3p	0	0	1	1	1	1	MXI1	MAX interactor 1
hsa-miR-1207-3p	1	0	1	1	1	1	NUPL1	nucleoporin like 1
hsa-miR-1207-3p	1	0	1	1	1	1	LPHN1	latrophilin 1
hsa-miR-1207-3p	0	0	1	1	1	1	GCSAM	germinal center-associated, signaling and motility
hsa-miR-1207-3p	0	0	1	1	1	1	SLC35D3	solute carrier family 35, member D3
hsa-miR-1207-3p	0	0	1	1	0	0	GTSF1L	gametocyte specific factor 1-like
hsa-miR-1207-3p	1	0	1	1	1	1	SHE	Src homology 2 domain containing E
hsa-miR-1207-3p	0	0	1	1	0	0	CLVS2	clavesin 2
hsa-miR-1207-3p	1	0	1	0	1	1	FYTTD1	forty-two-three domain containing 1
hsa-miR-1207-3p	1	0	1	0	1	1	CREB5	cAMP responsive element binding protein 5
hsa-miR-1207-3p	0	0	1	1	1	1	RNASE13	ribonuclease, RNase A family, 13 (non-active)
hsa-miR-1207-3p	0	0	1	1	0	0	SOHLH1	spermatogenesis and oogenesis specific basic helix-loop-helix 1
hsa-miR-1207-3p	1	0	1	0	1	1	ZKSCAN2	zinc finger with KRAB and SCAN domains 2
hsa-miR-1207-3p	0	0	1	1	1	1	CCNC	cyclin C
hsa-miR-1207-3p	1	0	1	1	1	1	TRNP1	TMF1-regulated nuclear protein 1
hsa-miR-1207-3p	0	0	1	1	1	1	LDLRAD2	low density lipoprotein receptor class A domain containing 2
hsa-miR-1207-3p	1	0	1	1	1	1	RUNX2	runt-related transcription factor 2
hsa-miR-1207-3p	1	0	1	1	1	1	ZNF2	zinc finger protein 2
hsa-miR-1207-3p	0	0	1	1	0	0	DAPL1	death associated protein-like 1
hsa-miR-1207-3p	1	0	1	1	1	1	TPM1	tropomyosin 1 (alpha)
hsa-miR-1207-3p	0	0	1	1	1	1	GCOM1	GRINL1A complex locus 1
hsa-miR-1207-3p	0	0	1	1	1	1	POLR2M	polymerase (RNA) II (DNA directed) polypeptide M
hsa-miR-1207-3p	1	0	1	0	1	1	RGAG4	retrotransposon gag domain containing 4
hsa-miR-1207-3p	0	0	1	1	1	1	VNN3	vanin 3
hsa-miR-1207-3p	1	0	1	1	1	1	SH3KBP1	SH3-domain kinase binding protein 1
hsa-miR-1207-3p	1	0	1	0	1	1	BCL7A	B-cell CLL/lymphoma 7A
hsa-miR-1207-3p	1	0	1	0	1	1	C3orf70	chromosome 3 open reading frame 70
hsa-miR-1207-3p	1	0	1	0	1	1	ANO6	anoctamin 6
hsa-miR-1207-3p	1	0	1	1	1	1	RGS7BP	regulator of G-protein signaling 7 binding protein
hsa-miR-1207-3p	0	0	1	1	0	0	GRB7	growth factor receptor-bound protein 7
hsa-miR-1207-3p	0	0	1	1	1	1	ATF3	activating transcription factor 3
hsa-miR-1207-3p	1	0	1	1	1	1	TMPO	thymopoietin
hsa-miR-1207-3p	0	0	1	1	1	1	PLGLB1	plasminogen-like B1
hsa-miR-1207-3p	1	0	1	0	1	1	NPNT	nephronectin
hsa-miR-1207-3p	1	0	1	1	1	1	MYCL1	v-myc myelocytomatosis viral oncogene homolog 1, lung carcinoma derived (avian)
hsa-miR-1207-3p	1	0	1	1	1	1	PPM1B	protein phosphatase, Mg2+/Mn2+ dependent, 1B
hsa-miR-1207-3p	0	0	1	1	1	1	DYX1C1	dyslexia susceptibility 1 candidate 1
hsa-miR-1207-3p	1	0	1	1	1	1	ZNF704	zinc finger protein 704
hsa-miR-1207-3p	1	0	1	1	1	1	GALNTL6	UDP-N-acetyl-alpha-D-galactosamine:polypeptide N-acetylgalactosaminyltransferase-like 6
hsa-miR-1207-3p	0	0	1	1	1	1	C18orf62	chromosome 18 open reading frame 62
hsa-miR-1207-3p	1	0	1	1	1	1	ATP6V1C2	ATPase, H+ transporting, lysosomal 42kDa, V1 subunit C2
hsa-miR-1207-3p	1	0	1	1	1	1	KIAA0317	KIAA0317
hsa-miR-1207-3p	1	0	1	1	1	1	KCNC4	potassium voltage-gated channel, Shaw-related subfamily, member 4
hsa-miR-1207-3p	1	0	1	0	1	1	CREBZF	CREB/ATF bZIP transcription factor
hsa-miR-1207-3p	1	0	1	1	1	1	CHTF8	CTF8, chromosome transmission fidelity factor 8 homolog (S. cerevisiae)
hsa-miR-1207-3p	0	0	1	1	1	1	MLH3	mutL homolog 3 (E. coli)
hsa-miR-1207-3p	1	0	1	1	1	1	SCN2A	sodium channel, voltage-gated, type II, alpha subunit
hsa-miR-1207-3p	0	0	1	0	1	1	SCN3B	sodium channel, voltage-gated, type III, beta subunit
hsa-miR-1207-3p	1	0	1	0	1	1	CD83	CD83 molecule
hsa-miR-1207-3p	0	0	1	1	0	0	DEFB107B	defensin, beta 107B
hsa-miR-1207-3p	1	0	1	1	1	1	HEY1	hairy/enhancer-of-split related with YRPW motif 1
hsa-miR-1207-3p	1	0	1	1	0	0	KIAA0895L	KIAA0895-like
hsa-miR-1207-3p	1	0	1	1	1	1	PPP4R1	protein phosphatase 4, regulatory subunit 1
hsa-miR-1207-3p	0	0	1	1	1	1	GEMIN8	gem (nuclear organelle) associated protein 8
hsa-miR-1207-3p	0	0	1	1	1	1	FRMPD2P1	FERM and PDZ domain containing 2 pseudogene 1
hsa-miR-1207-3p	1	0	1	1	1	1	ERBB4	v-erb-a erythroblastic leukemia viral oncogene homolog 4 (avian)
hsa-miR-1207-3p	1	0	1	1	1	1	KDM5A	lysine (K)-specific demethylase 5A
hsa-miR-1207-3p	0	0	1	1	1	1	SLC7A3	solute carrier family 7 (cationic amino acid transporter, y+ system), member 3
hsa-miR-1207-3p	1	0	1	1	1	1	ZNF436	zinc finger protein 436
hsa-miR-1207-3p	1	0	1	1	1	1	IRF2BP2	interferon regulatory factor 2 binding protein 2
hsa-miR-1207-3p	0	0	1	1	0	0	FAM127A	family with sequence similarity 127, member A
hsa-miR-1207-3p	1	0	1	1	1	1	DACT1	dapper, antagonist of beta-catenin, homolog 1 (Xenopus laevis)
hsa-miR-1207-3p	0	0	1	1	0	0	ARHGAP9	Rho GTPase activating protein 9
hsa-miR-1207-3p	1	0	1	0	1	1	FBXO41	F-box protein 41
hsa-miR-1207-3p	1	0	1	1	1	1	SHANK3	SH3 and multiple ankyrin repeat domains 3
hsa-miR-1207-3p	1	0	1	1	0	0	SNX29	sorting nexin 29
hsa-miR-1207-3p	1	0	1	1	1	1	MYO1C	myosin IC
hsa-miR-1207-3p	1	0	1	1	1	1	AFM	afamin
hsa-miR-1207-3p	1	0	1	0	1	1	BMPR2	bone morphogenetic protein receptor, type II (serine/threonine kinase)
hsa-miR-1207-3p	1	0	1	1	1	1	CASP10	caspase 10, apoptosis-related cysteine peptidase
hsa-miR-1207-3p	1	0	1	1	1	1	CCNA2	cyclin A2
hsa-miR-1207-3p	1	0	1	0	1	1	CDK6	cyclin-dependent kinase 6
hsa-miR-1207-3p	0	0	1	1	1	1	CDSN	corneodesmosin
hsa-miR-1207-3p	1	0	1	1	1	1	CNN1	calponin 1, basic, smooth muscle
hsa-miR-1207-3p	1	0	1	0	1	1	EFNB3	ephrin-B3
hsa-miR-1207-3p	0	0	1	0	1	1	EMP1	epithelial membrane protein 1
hsa-miR-1207-3p	1	0	1	1	1	1	NDST1	N-deacetylase/N-sulfotransferase (heparan glucosaminyl) 1
hsa-miR-1207-3p	1	0	1	1	1	1	IFIT2	interferon-induced protein with tetratricopeptide repeats 2
hsa-miR-1207-3p	0	0	1	1	0	0	APOA2	apolipoprotein A-II
hsa-miR-1207-3p	0	0	1	1	1	1	RHOA	ras homolog family member A
hsa-miR-1207-3p	1	0	1	1	1	1	BAAT	bile acid CoA: amino acid N-acyltransferase (glycine N-choloyltransferase)
hsa-miR-1207-3p	1	0	1	1	1	1	BNC1	basonuclin 1
hsa-miR-1207-3p	1	0	1	0	1	1	BMP8B	bone morphogenetic protein 8b
hsa-miR-1207-3p	1	0	1	1	1	1	CENPB	centromere protein B, 80kDa
hsa-miR-1207-3p	1	0	1	1	1	1	SLC31A1	solute carrier family 31 (copper transporters), member 1
hsa-miR-1207-3p	0	0	1	1	1	1	COX7B	cytochrome c oxidase subunit VIIb
hsa-miR-1207-3p	0	0	1	1	1	1	DPT	dermatopontin
hsa-miR-1207-3p	1	0	1	1	1	1	DR1	down-regulator of transcription 1, TBP-binding (negative cofactor 2)
hsa-miR-1207-3p	1	0	1	1	1	1	DUSP6	dual specificity phosphatase 6
hsa-miR-1207-3p	1	0	1	1	1	1	E2F3	E2F transcription factor 3
hsa-miR-1207-3p	0	0	1	1	0	0	EEF2	eukaryotic translation elongation factor 2
hsa-miR-1207-3p	1	0	1	1	1	1	EPB49	erythrocyte membrane protein band 4.9 (dematin)
hsa-miR-1207-3p	1	0	1	0	1	1	ETV6	ets variant 6
hsa-miR-1207-3p	1	0	1	1	1	1	FBN2	fibrillin 2
hsa-miR-1207-3p	1	0	1	0	1	1	FOXO1	forkhead box O1
hsa-miR-1207-3p	0	0	1	1	1	1	FYN	FYN oncogene related to SRC, FGR, YES
hsa-miR-1207-3p	0	0	1	1	1	1	GFAP	glial fibrillary acidic protein
hsa-miR-1207-3p	1	0	1	1	1	1	GNAZ	guanine nucleotide binding protein (G protein), alpha z polypeptide
hsa-miR-1207-3p	0	0	1	0	1	1	GYPE	glycophorin E (MNS blood group)
hsa-miR-1207-3p	1	0	1	1	0	0	INHBB	inhibin, beta B
hsa-miR-1207-3p	1	0	1	0	1	1	IRF2	interferon regulatory factor 2
hsa-miR-1207-3p	1	0	1	1	1	1	ITGA5	integrin, alpha 5 (fibronectin receptor, alpha polypeptide)
hsa-miR-1207-3p	0	0	1	1	0	0	KCNK3	potassium channel, subfamily K, member 3
hsa-miR-1207-3p	0	0	1	1	0	0	KRT4	keratin 4
hsa-miR-1207-3p	0	0	1	1	1	1	MAG	myelin associated glycoprotein
hsa-miR-1207-3p	1	0	1	1	1	1	MAP1A	microtubule-associated protein 1A
hsa-miR-1207-3p	1	0	1	1	1	1	MSN	moesin
hsa-miR-1207-3p	0	0	1	1	1	1	MTAP	methylthioadenosine phosphorylase
hsa-miR-1207-3p	0	0	1	1	0	0	MYBL2	v-myb myeloblastosis viral oncogene homolog (avian)-like 2
hsa-miR-1207-3p	1	0	1	1	1	1	FURIN	furin (paired basic amino acid cleaving enzyme)
hsa-miR-1207-3p	1	0	1	0	1	1	PAK2	p21 protein (Cdc42/Rac)-activated kinase 2
hsa-miR-1207-3p	1	0	1	0	1	1	PAPPA	pregnancy-associated plasma protein A, pappalysin 1
hsa-miR-1207-3p	0	0	1	1	1	1	PBX1	pre-B-cell leukemia homeobox 1
hsa-miR-1207-3p	0	0	1	1	1	1	PDE6D	phosphodiesterase 6D, cGMP-specific, rod, delta
hsa-miR-1207-3p	0	0	1	1	0	0	PER1	period homolog 1 (Drosophila)
hsa-miR-1207-3p	0	0	1	1	1	1	PLGLB2	plasminogen-like B2
hsa-miR-1207-3p	1	0	1	0	1	1	POU3F1	POU class 3 homeobox 1
hsa-miR-1207-3p	1	0	1	0	0	0	PPP1R10	protein phosphatase 1, regulatory subunit 10
hsa-miR-1207-3p	1	0	1	1	1	1	PTMS	parathymosin
hsa-miR-1207-3p	1	0	1	1	1	1	ARID4A	AT rich interactive domain 4A (RBP1-like)
hsa-miR-1207-3p	1	0	1	0	1	1	CCL22	chemokine (C-C motif) ligand 22
hsa-miR-1207-3p	0	0	1	1	1	1	SDC4	syndecan 4
hsa-miR-1207-3p	1	0	1	0	1	1	SLC6A1	solute carrier family 6 (neurotransmitter transporter, GABA), member 1
hsa-miR-1207-3p	0	0	1	1	0	0	SLPI	secretory leukocyte peptidase inhibitor
hsa-miR-1207-3p	1	0	1	1	1	1	SRF	serum response factor (c-fos serum response element-binding transcription factor)
hsa-miR-1207-3p	1	0	1	1	1	1	SRPR	signal recognition particle receptor (docking protein)
hsa-miR-1207-3p	0	0	1	1	1	1	STAT6	signal transducer and activator of transcription 6, interleukin-4 induced
hsa-miR-1207-3p	1	0	1	0	1	1	THBS1	thrombospondin 1
hsa-miR-1207-3p	0	0	1	1	1	1	UBE2V2	ubiquitin-conjugating enzyme E2 variant 2
hsa-miR-1207-3p	1	0	1	1	1	1	ZIC3	Zic family member 3
hsa-miR-1207-3p	0	0	1	1	1	1	ZNF137P	zinc finger protein 137, pseudogene
hsa-miR-1207-3p	1	0	1	1	1	1	HMGA2	high mobility group AT-hook 2
hsa-miR-1207-3p	1	0	1	0	1	1	CNTNAP1	contactin associated protein 1
hsa-miR-1207-3p	1	0	1	1	1	1	BARX2	BARX homeobox 2
hsa-miR-1207-3p	0	0	1	1	1	1	AGPS	alkylglycerone phosphate synthase
hsa-miR-1207-3p	1	0	1	1	1	1	BHLHE40	basic helix-loop-helix family, member e40
hsa-miR-1207-3p	0	0	1	1	1	1	KMO	kynurenine 3-monooxygenase (kynurenine 3-hydroxylase)
hsa-miR-1207-3p	0	0	1	1	0	0	EIF4EBP3	eukaryotic translation initiation factor 4E binding protein 3
hsa-miR-1207-3p	0	0	1	1	1	1	SNX4	sorting nexin 4
hsa-miR-1207-3p	1	0	1	1	1	1	URI1	URI1, prefoldin-like chaperone
hsa-miR-1207-3p	1	0	1	1	1	1	KAT2B	K(lysine) acetyltransferase 2B
hsa-miR-1207-3p	1	0	1	1	1	1	ALDH1A2	aldehyde dehydrogenase 1 family, member A2
hsa-miR-1207-3p	1	0	1	0	1	1	WASL	Wiskott-Aldrich syndrome-like
hsa-miR-1207-3p	1	0	1	1	1	1	MAP7	microtubule-associated protein 7
hsa-miR-1207-3p	0	0	1	1	1	1	PRC1	protein regulator of cytokinesis 1
hsa-miR-1207-3p	0	0	1	1	0	0	AP2S1	adaptor-related protein complex 2, sigma 1 subunit
hsa-miR-1207-3p	1	0	1	0	1	1	PLK3	polo-like kinase 3
hsa-miR-1207-3p	1	0	1	0	1	1	E2F2	E2F transcription factor 2
hsa-miR-1207-3p	0	0	1	1	1	1	ECHS1	enoyl CoA hydratase, short chain, 1, mitochondrial
hsa-miR-1207-3p	0	0	1	1	1	1	LBP	lipopolysaccharide binding protein
hsa-miR-1207-3p	1	0	1	0	1	1	SLC1A2	solute carrier family 1 (glial high affinity glutamate transporter), member 2
hsa-miR-1207-3p	0	0	1	1	1	1	LY86	lymphocyte antigen 86
hsa-miR-1207-3p	1	0	1	0	1	1	GTPBP1	GTP binding protein 1
hsa-miR-1207-3p	1	0	1	1	1	1	ARL3	ADP-ribosylation factor-like 3
hsa-miR-1207-3p	0	0	1	1	1	1	ASCL1	achaete-scute complex homolog 1 (Drosophila)
hsa-miR-1207-3p	1	0	1	0	1	1	RUNX1T1	runt-related transcription factor 1; translocated to, 1 (cyclin D-related)
hsa-miR-1207-3p	0	0	1	1	1	1	COL12A1	collagen, type XII, alpha 1
hsa-miR-1207-3p	1	0	1	1	1	1	DAG1	dystroglycan 1 (dystrophin-associated glycoprotein 1)
hsa-miR-1207-3p	1	0	1	1	1	1	DBN1	drebrin 1
hsa-miR-1207-3p	1	0	1	1	1	1	DVL2	dishevelled, dsh homolog 2 (Drosophila)
hsa-miR-1207-3p	1	0	1	1	1	1	EFNB1	ephrin-B1
hsa-miR-1207-3p	1	0	1	1	1	1	EGR3	early growth response 3
hsa-miR-1207-3p	1	0	1	1	1	1	EPHB3	EPH receptor B3
hsa-miR-1207-3p	1	0	1	0	1	1	ETV5	ets variant 5
hsa-miR-1207-3p	1	0	1	1	1	1	EZH2	enhancer of zeste homolog 2 (Drosophila)
hsa-miR-1207-3p	0	0	1	1	1	1	NDUFA10	NADH dehydrogenase (ubiquinone) 1 alpha subcomplex, 10, 42kDa
hsa-miR-1207-3p	1	0	1	1	1	1	BAP1	BRCA1 associated protein-1 (ubiquitin carboxy-terminal hydrolase)
hsa-miR-1207-3p	0	0	1	0	1	1	BPY2	basic charge, Y-linked, 2
hsa-miR-1207-3p	0	0	1	1	0	0	DYRK1B	dual-specificity tyrosine-(Y)-phosphorylation regulated kinase 1B
hsa-miR-1207-3p	0	0	1	1	1	1	TAOK2	TAO kinase 2
hsa-miR-1207-3p	1	0	1	1	1	1	SEC24C	SEC24 family, member C (S. cerevisiae)
hsa-miR-1207-3p	1	0	1	1	1	1	GABRE	gamma-aminobutyric acid (GABA) A receptor, epsilon
hsa-miR-1207-3p	0	0	1	1	1	1	PRF1	perforin 1 (pore forming protein)
hsa-miR-1207-3p	0	0	1	1	1	1	RGPD5	RANBP2-like and GRIP domain containing 5
hsa-miR-1207-3p	0	0	1	1	0	0	SLC12A4	solute carrier family 12 (potassium/chloride transporters), member 4
hsa-miR-1207-3p	1	0	1	1	0	0	ZMYM3	zinc finger, MYM-type 3
hsa-miR-1207-3p	1	0	1	1	1	1	OXSR1	oxidative-stress responsive 1
hsa-miR-1207-3p	1	0	1	0	1	1	CALM3	calmodulin 3 (phosphorylase kinase, delta)
hsa-miR-1207-3p	0	0	1	1	0	0	CALML3	calmodulin-like 3
hsa-miR-1207-3p	1	0	1	1	1	1	CBX2	chromobox homolog 2
hsa-miR-1207-3p	1	0	1	0	1	1	E2F1	E2F transcription factor 1
hsa-miR-1207-3p	1	0	1	1	1	1	GPR3	G protein-coupled receptor 3
hsa-miR-1207-3p	1	0	1	0	1	1	PRKCE	protein kinase C, epsilon
hsa-miR-1207-3p	0	0	1	1	1	1	PAPSS1	3'-phosphoadenosine 5'-phosphosulfate synthase 1
hsa-miR-1207-3p	1	0	1	1	1	1	GABBR2	gamma-aminobutyric acid (GABA) B receptor, 2
hsa-miR-1207-3p	1	0	1	0	0	0	FRAT1	frequently rearranged in advanced T-cell lymphomas
hsa-miR-1207-3p	1	0	1	1	1	1	LAMC2	laminin, gamma 2
hsa-miR-1207-3p	0	0	1	1	1	1	SOX3	SRY (sex determining region Y)-box 3
hsa-miR-1207-3p	0	0	1	1	1	1	SLC35A2	solute carrier family 35 (UDP-galactose transporter), member A2
hsa-miR-1207-3p	1	0	1	1	1	1	ST8SIA4	ST8 alpha-N-acetyl-neuraminide alpha-2,8-sialyltransferase 4
hsa-miR-1207-3p	0	0	1	1	0	0	SNURF	SNRPN upstream reading frame
hsa-miR-1207-3p	0	0	1	1	1	1	PDCD7	programmed cell death 7
hsa-miR-1207-3p	1	0	1	1	1	1	ACTR1A	ARP1 actin-related protein 1 homolog A, centractin alpha (yeast)
hsa-miR-1207-3p	0	0	1	1	0	0	CELA3A	chymotrypsin-like elastase family, member 3A
hsa-miR-1207-3p	1	0	1	1	0	0	NAB2	NGFI-A binding protein 2 (EGR1 binding protein 2)
hsa-miR-1207-3p	1	0	1	1	1	1	PRCC	papillary renal cell carcinoma (translocation-associated)
hsa-miR-1207-3p	1	0	1	1	1	1	LIPG	lipase, endothelial
hsa-miR-1207-3p	1	0	1	1	1	1	SPON1	spondin 1, extracellular matrix protein
hsa-miR-1207-3p	1	0	1	1	1	1	DAGLA	diacylglycerol lipase, alpha
hsa-miR-1207-3p	1	0	1	1	1	1	NEUROD2	neuronal differentiation 2
hsa-miR-1207-3p	0	0	1	1	1	1	NTF4	neurotrophin 4
hsa-miR-1207-3p	0	0	1	0	1	1	OAS3	2'-5'-oligoadenylate synthetase 3, 100kDa
hsa-miR-1207-3p	1	0	1	1	1	1	ORC2	origin recognition complex, subunit 2
hsa-miR-1207-3p	1	0	1	0	1	1	PITPNA	phosphatidylinositol transfer protein, alpha
hsa-miR-1207-3p	0	0	1	1	0	0	PNOC	prepronociceptin
hsa-miR-1207-3p	0	0	1	1	1	1	TNFAIP2	tumor necrosis factor, alpha-induced protein 2
hsa-miR-1207-3p	1	0	1	1	1	1	TSG101	tumor susceptibility gene 101
hsa-miR-1207-3p	0	0	1	0	1	1	ZNF192	zinc finger protein 192
hsa-miR-1207-3p	1	0	1	1	1	1	BASP1	brain abundant, membrane attached signal protein 1
hsa-miR-1207-3p	1	0	1	1	1	1	VAT1	vesicle amine transport protein 1 homolog (T. californica)
hsa-miR-1207-3p	1	0	1	0	1	1	IGF2BP1	insulin-like growth factor 2 mRNA binding protein 1
hsa-miR-1207-3p	1	0	1	0	1	1	GNA13	guanine nucleotide binding protein (G protein), alpha 13
hsa-miR-1207-3p	0	0	1	1	0	0	VAMP5	vesicle-associated membrane protein 5 (myobrevin)
hsa-miR-1207-3p	0	0	1	1	0	0	WNK2	WNK lysine deficient protein kinase 2
hsa-miR-1207-3p	0	0	1	1	0	0	NMU	neuromedin U
hsa-miR-1207-3p	1	0	1	1	1	1	MMP24	matrix metallopeptidase 24 (membrane-inserted)
hsa-miR-1207-3p	0	0	1	1	1	1	LYVE1	lymphatic vessel endothelial hyaluronan receptor 1
hsa-miR-1207-3p	0	0	1	1	0	0	STIP1	stress-induced-phosphoprotein 1
hsa-miR-1207-3p	0	0	1	1	1	1	HOXA7	homeobox A7
hsa-miR-1207-3p	1	0	1	1	1	1	SCN1A	sodium channel, voltage-gated, type I, alpha subunit
hsa-miR-1207-3p	1	0	1	0	1	1	SLC5A3	solute carrier family 5 (sodium/myo-inositol cotransporter), member 3
hsa-miR-1207-3p	1	0	1	0	1	1	SOX12	SRY (sex determining region Y)-box 12
hsa-miR-1207-3p	1	0	1	1	1	1	NR4A3	nuclear receptor subfamily 4, group A, member 3
hsa-miR-1207-3p	1	0	1	1	1	1	UTY	ubiquitously transcribed tetratricopeptide repeat gene, Y-linked
hsa-miR-1207-3p	0	0	1	1	1	1	HRH3	histamine receptor H3
hsa-miR-1207-3p	1	0	1	1	1	1	KLF12	Kruppel-like factor 12
hsa-miR-1207-3p	0	0	1	0	1	1	PAXIP1	PAX interacting (with transcription-activation domain) protein 1
hsa-miR-1207-3p	1	0	1	1	1	1	PHLDA1	pleckstrin homology-like domain, family A, member 1
hsa-miR-1207-3p	0	0	1	1	0	0	CELA3B	chymotrypsin-like elastase family, member 3B
hsa-miR-1207-3p	0	0	1	1	1	1	MIP	major intrinsic protein of lens fiber
hsa-miR-1207-3p	0	0	1	1	1	1	AHSA1	AHA1, activator of heat shock 90kDa protein ATPase homolog 1 (yeast)
hsa-miR-1207-3p	0	0	1	1	1	1	COPG2	coatomer protein complex, subunit gamma 2
hsa-miR-1207-3p	1	0	1	1	1	1	KCNH4	potassium voltage-gated channel, subfamily H (eag-related), member 4
hsa-miR-1207-3p	1	0	1	0	1	1	ACAP2	ArfGAP with coiled-coil, ankyrin repeat and PH domains 2
hsa-miR-1207-3p	1	0	1	0	1	1	PXDN	peroxidasin homolog (Drosophila)
hsa-miR-1207-3p	1	0	1	0	1	1	GAB2	GRB2-associated binding protein 2
hsa-miR-1207-3p	0	0	1	1	0	0	NTSR2	neurotensin receptor 2
hsa-miR-1207-3p	0	0	1	0	0	0	OR2F1	olfactory receptor, family 2, subfamily F, member 1
hsa-miR-1207-3p	1	0	1	1	1	1	TLL2	tolloid-like 2
hsa-miR-1207-3p	0	0	1	1	0	0	SLCO3A1	solute carrier organic anion transporter family, member 3A1
hsa-miR-1207-3p	0	0	1	1	0	0	TBX21	T-box 21
hsa-miR-1207-3p	0	0	1	0	1	1	EMR2	egf-like module containing, mucin-like, hormone receptor-like 2
hsa-miR-1207-3p	1	0	1	1	1	1	ZBTB43	zinc finger and BTB domain containing 43
hsa-miR-1207-3p	1	0	1	1	0	0	DEXI	Dexi homolog (mouse)
hsa-miR-1207-3p	0	0	1	1	1	1	COMMD9	COMM domain containing 9
hsa-miR-1207-3p	1	0	1	0	1	1	VAMP2	vesicle-associated membrane protein 2 (synaptobrevin 2)
hsa-miR-1207-3p	0	0	1	1	0	0	RBX1	ring-box 1, E3 ubiquitin protein ligase
hsa-miR-1207-3p	0	0	1	1	1	1	TRAM1	translocation associated membrane protein 1
hsa-miR-1207-3p	1	0	1	0	1	1	FJX1	four jointed box 1 (Drosophila)
hsa-miR-1207-3p	1	0	1	0	1	1	DIEXF	digestive organ expansion factor homolog (zebrafish)
hsa-miR-1207-3p	1	0	1	1	0	0	SND1	staphylococcal nuclease and tudor domain containing 1
hsa-miR-1207-3p	1	0	1	1	1	1	AFF4	AF4/FMR2 family, member 4
hsa-miR-1207-3p	1	0	1	0	1	1	HUNK	hormonally up-regulated Neu-associated kinase
hsa-miR-1207-3p	0	0	1	1	1	1	EHD2	EH-domain containing 2
hsa-miR-1207-3p	1	0	1	1	1	1	CDR2L	cerebellar degeneration-related protein 2-like
hsa-miR-1207-3p	1	0	1	1	1	1	FAF2	Fas associated factor family member 2
hsa-miR-1207-3p	0	0	1	1	1	1	PSME4	proteasome (prosome, macropain) activator subunit 4
hsa-miR-1207-3p	1	0	1	1	1	1	ZNF592	zinc finger protein 592
hsa-miR-1207-3p	1	0	1	1	1	1	GCC2	GRIP and coiled-coil domain containing 2
hsa-miR-1207-3p	1	0	1	1	1	1	KDM4A	lysine (K)-specific demethylase 4A
hsa-miR-1207-3p	1	0	1	0	1	1	MLEC	malectin
hsa-miR-1207-3p	1	0	1	0	1	1	KIAA0232	KIAA0232
hsa-miR-1207-3p	1	0	1	0	1	1	SERTAD2	SERTA domain containing 2
hsa-miR-1207-3p	0	0	1	0	1	1	ZBTB24	zinc finger and BTB domain containing 24
hsa-miR-1207-3p	1	0	1	1	1	1	RUSC2	RUN and SH3 domain containing 2
hsa-miR-1207-3p	1	0	1	1	1	1	ZBTB39	zinc finger and BTB domain containing 39
hsa-miR-1207-3p	1	0	1	1	1	1	NUAK1	NUAK family, SNF1-like kinase, 1
hsa-miR-1207-3p	1	0	1	0	1	1	RAB11FIP2	RAB11 family interacting protein 2 (class I)
hsa-miR-1207-3p	1	0	1	1	1	1	FBXO21	F-box protein 21
hsa-miR-1207-3p	1	0	1	0	1	1	PEG10	paternally expressed 10
hsa-miR-1207-3p	0	0	1	1	1	1	FBXO28	F-box protein 28
hsa-miR-1207-3p	1	0	1	1	1	1	MYO1D	myosin ID
hsa-miR-1207-3p	1	0	1	1	0	0	KIAA0556	KIAA0556
hsa-miR-1207-3p	1	0	1	1	1	1	NUP160	nucleoporin 160kDa
hsa-miR-1207-3p	1	0	1	1	1	1	CUX2	cut-like homeobox 2
hsa-miR-1207-3p	1	0	1	1	1	1	DNAJC13	DnaJ (Hsp40) homolog, subfamily C, member 13
hsa-miR-1207-3p	1	0	1	1	1	1	PHF15	PHD finger protein 15
hsa-miR-1207-3p	1	0	1	0	1	1	SRGAP2	SLIT-ROBO Rho GTPase activating protein 2
hsa-miR-1207-3p	1	0	1	1	0	0	SMG5	smg-5 homolog, nonsense mediated mRNA decay factor (C. elegans)
hsa-miR-1207-3p	1	0	1	1	1	1	AHCYL2	adenosylhomocysteinase-like 2
hsa-miR-1207-3p	1	0	1	1	1	1	NUDCD3	NudC domain containing 3
hsa-miR-1207-3p	1	0	1	0	1	1	PPP1R16B	protein phosphatase 1, regulatory subunit 16B
hsa-miR-1207-3p	1	0	1	1	0	0	POLDIP2	polymerase (DNA-directed), delta interacting protein 2
hsa-miR-1207-3p	1	0	1	1	1	1	EPC2	enhancer of polycomb homolog 2 (Drosophila)
hsa-miR-1207-3p	1	0	1	1	1	1	ABCA12	ATP-binding cassette, sub-family A (ABC1), member 12
hsa-miR-1207-3p	0	0	1	1	1	1	BRPF3	bromodomain and PHD finger containing, 3
hsa-miR-1207-3p	1	0	1	1	1	1	ST8SIA3	ST8 alpha-N-acetyl-neuraminide alpha-2,8-sialyltransferase 3
hsa-miR-1207-3p	0	0	1	1	1	1	HMP19	HMP19 protein
hsa-miR-1207-3p	1	0	1	1	1	1	DERL2	derlin 2
hsa-miR-1207-3p	1	0	1	1	1	1	RRP15	ribosomal RNA processing 15 homolog (S. cerevisiae)
hsa-miR-1207-3p	1	0	1	1	1	1	PALLD	palladin, cytoskeletal associated protein
hsa-miR-1207-3p	1	0	1	1	1	1	MPC1	mitochondrial pyruvate carrier 1
hsa-miR-1207-3p	0	0	1	1	1	1	PADI3	peptidyl arginine deiminase, type III
hsa-miR-1207-3p	0	0	1	1	1	1	EMCN	endomucin
hsa-miR-1207-3p	1	0	1	0	1	1	HPCAL4	hippocalcin like 4
hsa-miR-1207-3p	0	0	1	1	0	0	POLR3K	polymerase (RNA) III (DNA directed) polypeptide K, 12.3 kDa
hsa-miR-1207-3p	1	0	1	1	1	1	RAPGEFL1	Rap guanine nucleotide exchange factor (GEF)-like 1
hsa-miR-1207-3p	1	0	1	1	0	0	CPA4	carboxypeptidase A4
hsa-miR-1207-3p	1	0	1	0	1	1	CRIM1	cysteine rich transmembrane BMP regulator 1 (chordin-like)
hsa-miR-1207-3p	0	0	1	0	0	0	ANKRD39	ankyrin repeat domain 39
hsa-miR-1207-3p	0	0	1	1	1	1	KDM3B	lysine (K)-specific demethylase 3B
hsa-miR-1207-3p	1	0	1	1	1	1	SIX4	SIX homeobox 4
hsa-miR-1207-3p	0	0	1	1	1	1	PRKAG3	protein kinase, AMP-activated, gamma 3 non-catalytic subunit
hsa-miR-1207-3p	1	0	1	1	1	1	MDM1	Mdm1 nuclear protein homolog (mouse)
hsa-miR-1207-3p	0	0	1	0	1	1	TRIM44	tripartite motif containing 44
hsa-miR-1207-3p	1	0	1	0	1	1	KCTD9	potassium channel tetramerisation domain containing 9
hsa-miR-1207-3p	0	0	1	1	0	0	NDE1	nudE nuclear distribution E homolog 1 (A. nidulans)
hsa-miR-1207-3p	1	0	1	1	0	0	INO80D	INO80 complex subunit D
hsa-miR-1207-3p	1	0	1	1	1	1	IMPAD1	inositol monophosphatase domain containing 1
hsa-miR-1207-3p	0	0	1	1	1	1	THAP1	THAP domain containing, apoptosis associated protein 1
hsa-miR-1207-3p	1	0	1	1	1	1	RFWD3	ring finger and WD repeat domain 3
hsa-miR-1207-3p	0	0	1	1	1	1	TSR1	TSR1, 20S rRNA accumulation, homolog (S. cerevisiae)
hsa-miR-1207-3p	0	0	1	1	0	0	CEP55	centrosomal protein 55kDa
hsa-miR-1207-3p	0	0	1	1	1	1	MRPS10	mitochondrial ribosomal protein S10
hsa-miR-1207-3p	0	0	1	0	1	1	TMEM57	transmembrane protein 57
hsa-miR-1207-3p	1	0	1	1	1	1	LRRC20	leucine rich repeat containing 20
hsa-miR-1207-3p	1	0	1	0	1	1	PARVA	parvin, alpha
hsa-miR-1207-3p	1	0	1	1	1	1	UBA6	ubiquitin-like modifier activating enzyme 6
hsa-miR-1207-3p	0	0	1	1	0	0	THNSL2	threonine synthase-like 2 (S. cerevisiae)
hsa-miR-1207-3p	0	0	1	1	1	1	ABHD10	abhydrolase domain containing 10
hsa-miR-1207-3p	1	0	1	1	1	1	ASH1L	ash1 (absent, small, or homeotic)-like (Drosophila)
hsa-miR-1207-3p	1	0	1	1	1	1	CAMK2N1	calcium/calmodulin-dependent protein kinase II inhibitor 1
hsa-miR-1207-3p	0	0	1	1	1	1	LENEP	lens epithelial protein
hsa-miR-1207-3p	1	0	1	0	1	1	SMPD3	sphingomyelin phosphodiesterase 3, neutral membrane (neutral sphingomyelinase II)
hsa-miR-1207-3p	1	0	1	1	1	1	MLL5	myeloid/lymphoid or mixed-lineage leukemia 5 (trithorax homolog, Drosophila)
hsa-miR-1207-3p	1	0	1	1	1	1	SASH3	SAM and SH3 domain containing 3
hsa-miR-1207-3p	1	0	1	1	1	1	SEPT3	septin 3
hsa-miR-1207-3p	0	0	1	1	1	1	UBQLN4	ubiquilin 4
hsa-miR-1207-3p	0	0	1	1	1	1	PRTFDC1	phosphoribosyl transferase domain containing 1
hsa-miR-1207-3p	0	0	1	1	1	1	ZNF695	zinc finger protein 695
hsa-miR-1207-3p	0	0	1	1	0	0	CD248	CD248 molecule, endosialin
hsa-miR-1207-3p	0	0	1	1	1	1	PLXDC1	plexin domain containing 1
hsa-miR-1207-3p	0	0	1	1	1	1	S100A14	S100 calcium binding protein A14
hsa-miR-1207-3p	1	0	1	1	1	1	SLC24A3	solute carrier family 24 (sodium/potassium/calcium exchanger), member 3
hsa-miR-1207-3p	0	0	1	1	0	0	ISY1	ISY1 splicing factor homolog (S. cerevisiae)
hsa-miR-1207-3p	0	0	1	1	1	1	KIAA1161	KIAA1161
hsa-miR-1207-3p	1	0	1	1	1	1	DLG3	discs, large homolog 3 (Drosophila)
hsa-miR-1207-3p	0	0	1	0	1	1	SYT13	synaptotagmin XIII
hsa-miR-1207-3p	1	0	1	1	1	1	RANBP10	RAN binding protein 10
hsa-miR-1207-3p	1	0	1	1	1	1	KIAA1467	KIAA1467
hsa-miR-1207-3p	1	0	1	1	1	1	VAT1L	vesicle amine transport protein 1 homolog (T. californica)-like
hsa-miR-1207-3p	0	0	1	1	1	1	PRX	periaxin
hsa-miR-1207-3p	1	0	1	1	1	1	ZNFX1	zinc finger, NFX1-type containing 1
hsa-miR-1207-3p	0	0	1	1	0	0	TRIB3	tribbles homolog 3 (Drosophila)
hsa-miR-1207-3p	1	0	1	1	1	1	C6orf47	chromosome 6 open reading frame 47
hsa-miR-1207-3p	1	0	1	0	1	1	TP53INP2	tumor protein p53 inducible nuclear protein 2
hsa-miR-1207-3p	1	0	1	1	1	1	CDH22	cadherin 22, type 2
hsa-miR-1207-3p	1	0	1	0	1	1	TSPYL4	TSPY-like 4
hsa-miR-1207-3p	1	0	1	1	1	1	TGIF2	TGFB-induced factor homeobox 2
hsa-miR-1207-3p	0	0	1	1	0	0	LMAN1L	lectin, mannose-binding, 1 like
hsa-miR-1207-3p	0	0	1	1	1	1	GABBR1	gamma-aminobutyric acid (GABA) B receptor, 1
hsa-miR-1207-3p	0	0	1	0	1	1	CFL2	cofilin 2 (muscle)
hsa-miR-1207-3p	0	0	1	1	0	0	MIIP	migration and invasion inhibitory protein
hsa-miR-1207-3p	1	0	1	1	1	1	FOXM1	forkhead box M1
hsa-miR-1207-3p	0	0	1	1	1	1	SLC26A1	solute carrier family 26 (sulfate transporter), member 1
hsa-miR-1207-3p	1	0	1	0	1	1	CSNK1G1	casein kinase 1, gamma 1
hsa-miR-1207-3p	1	0	1	1	1	1	GPR88	G protein-coupled receptor 88
hsa-miR-1207-3p	0	0	1	1	1	1	NXF3	nuclear RNA export factor 3
hsa-miR-1207-3p	0	0	1	1	0	0	ABHD4	abhydrolase domain containing 4
hsa-miR-1207-3p	1	0	1	0	1	1	CERS2	ceramide synthase 2
hsa-miR-1207-3p	0	0	1	1	0	0	POPDC2	popeye domain containing 2
hsa-miR-1207-3p	0	0	1	1	1	1	NOD2	nucleotide-binding oligomerization domain containing 2
hsa-miR-1207-3p	1	0	1	0	1	1	GREM2	gremlin 2
hsa-miR-1207-3p	0	0	1	1	1	1	SUSD1	sushi domain containing 1
hsa-miR-1207-3p	1	0	1	1	1	1	FAM160B2	family with sequence similarity 160, member B2
hsa-miR-1207-3p	1	0	1	1	1	1	C6orf106	chromosome 6 open reading frame 106
hsa-miR-1207-3p	1	0	1	1	1	1	FNDC4	fibronectin type III domain containing 4
hsa-miR-1207-3p	1	0	1	1	0	0	CCDC71	coiled-coil domain containing 71
hsa-miR-1207-3p	1	0	1	1	0	0	UBE2Z	ubiquitin-conjugating enzyme E2Z
hsa-miR-1207-3p	1	0	1	1	1	1	DSC3	desmocollin 3
hsa-miR-1207-3p	1	0	1	1	1	1	HOXD1	homeobox D1
hsa-miR-1207-3p	0	0	1	1	1	1	LRRK1	leucine-rich repeat kinase 1
hsa-miR-1207-3p	0	0	1	1	1	1	GLT25D1	glycosyltransferase 25 domain containing 1
hsa-miR-1207-3p	0	0	1	1	0	0	RNF122	ring finger protein 122
hsa-miR-1207-3p	0	0	1	1	1	1	CCDC134	coiled-coil domain containing 134
hsa-miR-1207-3p	1	0	1	0	1	1	NAA60	N(alpha)-acetyltransferase 60, NatF catalytic subunit
hsa-miR-1207-3p	0	0	1	1	1	1	ESRP2	epithelial splicing regulatory protein 2
hsa-miR-1207-3p	1	0	1	1	0	0	UBTD1	ubiquitin domain containing 1
hsa-miR-1207-3p	1	0	1	1	1	1	KLHL18	kelch-like 18 (Drosophila)
hsa-miR-1207-3p	0	0	1	1	1	1	ARL14	ADP-ribosylation factor-like 14
hsa-miR-1207-3p	1	0	1	1	1	1	NAA50	N(alpha)-acetyltransferase 50, NatE catalytic subunit
hsa-miR-1207-3p	0	0	1	1	1	1	ANKRD36B	ankyrin repeat domain 36B
hsa-miR-1207-3p	0	0	1	1	0	0	BPIFB2	BPI fold containing family B, member 2
hsa-miR-1207-3p	1	0	1	0	1	1	SRCIN1	SRC kinase signaling inhibitor 1
hsa-miR-1207-3p	1	0	1	1	1	1	HOXA3	homeobox A3
hsa-miR-1207-3p	1	0	1	0	1	1	C1orf21	chromosome 1 open reading frame 21
hsa-miR-1207-3p	1	0	1	0	1	1	LBH	limb bud and heart development homolog (mouse)
hsa-miR-1207-3p	1	0	1	1	1	1	SNX27	sorting nexin family member 27
hsa-miR-1207-3p	1	0	1	1	1	1	RAB1B	RAB1B, member RAS oncogene family
hsa-miR-1207-3p	0	0	1	1	1	1	FCRL5	Fc receptor-like 5
hsa-miR-1207-3p	1	0	1	1	1	1	GABARAPL1	GABA(A) receptor-associated protein like 1
hsa-miR-1207-3p	1	0	1	1	1	1	MARK4	MAP/microtubule affinity-regulating kinase 4
hsa-miR-1207-3p	1	0	1	0	1	1	ITCH	itchy E3 ubiquitin protein ligase
hsa-miR-1207-3p	0	0	1	1	1	1	KCNA7	potassium voltage-gated channel, shaker-related subfamily, member 7
hsa-miR-1207-3p	1	0	1	1	1	1	GPR61	G protein-coupled receptor 61
hsa-miR-1207-3p	0	0	1	1	1	1	FCAMR	Fc receptor, IgA, IgM, high affinity
hsa-miR-1207-3p	1	0	1	1	1	1	SLC10A7	solute carrier family 10 (sodium/bile acid cotransporter family), member 7
hsa-miR-1207-3p	1	0	1	1	1	1	FAM175B	family with sequence similarity 175, member B
hsa-miR-1207-3p	1	0	1	1	1	1	ARID5B	AT rich interactive domain 5B (MRF1-like)
hsa-miR-1207-3p	1	0	1	0	1	1	FAR1	fatty acyl CoA reductase 1
hsa-miR-1207-3p	1	0	1	1	0	0	MAF1	MAF1 homolog (S. cerevisiae)
hsa-miR-1207-3p	1	0	1	1	1	1	ZDHHC18	zinc finger, DHHC-type containing 18
hsa-miR-1207-3p	1	0	1	0	1	1	PSD2	pleckstrin and Sec7 domain containing 2
hsa-miR-1207-3p	1	0	1	1	1	1	TTBK1	tau tubulin kinase 1
hsa-miR-1207-3p	0	0	1	0	1	1	TRIM52	tripartite motif containing 52
hsa-miR-1207-3p	1	0	1	0	1	1	ADO	2-aminoethanethiol (cysteamine) dioxygenase
hsa-miR-1207-3p	1	0	1	1	1	1	ARHGEF39	Rho guanine nucleotide exchange factor (GEF) 39
hsa-miR-1207-3p	1	0	1	1	1	1	FAM104A	family with sequence similarity 104, member A
hsa-miR-1207-3p	1	0	1	0	1	1	UBASH3B	ubiquitin associated and SH3 domain containing B
hsa-miR-1207-3p	1	0	1	0	1	1	C5orf62	chromosome 5 open reading frame 62
hsa-miR-1207-3p	1	0	1	1	1	1	CASP2	caspase 2, apoptosis-related cysteine peptidase
hsa-miR-1207-3p	0	0	1	1	1	1	TRIM4	tripartite motif containing 4
hsa-miR-1207-3p	0	0	1	1	0	0	MUC13	mucin 13, cell surface associated
hsa-miR-1207-3p	0	0	1	1	0	0	ACPT	acid phosphatase, testicular
hsa-miR-1207-3p	1	0	1	1	1	1	FGD3	FYVE, RhoGEF and PH domain containing 3
hsa-miR-1207-3p	1	0	1	0	1	1	PURB	purine-rich element binding protein B
hsa-miR-1207-3p	1	0	1	1	1	1	TP53INP1	tumor protein p53 inducible nuclear protein 1
hsa-miR-1207-3p	1	0	1	1	0	0	FCHSD1	FCH and double SH3 domains 1
hsa-miR-1207-3p	1	0	1	1	0	0	DISP2	dispatched homolog 2 (Drosophila)
hsa-miR-1207-3p	1	0	1	1	1	1	TPD52L3	tumor protein D52-like 3
hsa-miR-1207-3p	0	0	1	0	1	1	CCDC97	coiled-coil domain containing 97
hsa-miR-1207-3p	0	0	1	1	0	0	FAM46B	family with sequence similarity 46, member B
hsa-miR-1207-3p	1	0	1	1	1	1	SRSF10	serine/arginine-rich splicing factor 10
hsa-miR-1207-3p	0	0	1	1	0	0	COL6A2	collagen, type VI, alpha 2
hsa-miR-1207-3p	0	0	1	1	0	0	WNT8A	wingless-type MMTV integration site family, member 8A
hsa-miR-1207-3p	1	0	1	1	0	0	ADAMTS14	ADAM metallopeptidase with thrombospondin type 1 motif, 14
hsa-miR-1207-3p	0	0	1	0	0	0	AP5B1	adaptor-related protein complex 5, beta 1 subunit
hsa-miR-1207-3p	1	0	1	1	0	0	PKDCC	protein kinase domain containing, cytoplasmic homolog (mouse)
hsa-miR-1207-3p	1	0	1	1	1	1	GLCCI1	glucocorticoid induced transcript 1
hsa-miR-1207-3p	1	0	1	1	1	1	TRIOBP	TRIO and F-actin binding protein
hsa-miR-1207-3p	1	0	1	1	1	1	CD200R1	CD200 receptor 1
hsa-miR-1207-3p	0	0	1	1	0	0	ESAM	endothelial cell adhesion molecule
hsa-miR-1207-3p	1	0	1	1	1	1	PPTC7	PTC7 protein phosphatase homolog (S. cerevisiae)
hsa-miR-1207-3p	0	0	1	1	1	1	KCNH5	potassium voltage-gated channel, subfamily H (eag-related), member 5
hsa-miR-1207-3p	1	0	1	0	1	1	CNOT6L	CCR4-NOT transcription complex, subunit 6-like
hsa-miR-1207-3p	1	0	1	1	1	1	MBNL2	muscleblind-like splicing regulator 2
hsa-miR-1207-3p	1	0	1	1	1	1	UBQLNL	ubiquilin-like
hsa-miR-1207-3p	1	0	1	1	1	1	MAX	MYC associated factor X
hsa-miR-1207-3p	1	0	1	1	0	0	NAPRT1	nicotinate phosphoribosyltransferase domain containing 1
hsa-miR-1207-3p	0	0	1	1	0	0	CSNK1A1L	casein kinase 1, alpha 1-like
hsa-miR-1207-3p	1	0	1	1	1	1	CADM4	cell adhesion molecule 4
hsa-miR-1207-3p	0	0	1	1	1	1	APOBEC3F	apolipoprotein B mRNA editing enzyme, catalytic polypeptide-like 3F
hsa-miR-1207-3p	0	0	1	1	0	0	TCEB3C	transcription elongation factor B polypeptide 3C (elongin A3)
hsa-miR-1207-3p	0	0	1	1	1	1	APOBEC3A	apolipoprotein B mRNA editing enzyme, catalytic polypeptide-like 3A
hsa-miR-1207-3p	0	0	1	0	1	1	CHKB	choline kinase beta
hsa-miR-1207-3p	0	0	1	1	0	0	SPATA2L	spermatogenesis associated 2-like
hsa-miR-1207-3p	1	0	1	1	1	1	LSM12	LSM12 homolog (S. cerevisiae)
hsa-miR-1207-3p	1	0	1	0	1	1	UBXN10	UBX domain protein 10
hsa-miR-1207-3p	0	0	1	1	1	1	RDH12	retinol dehydrogenase 12 (all-trans/9-cis/11-cis)
hsa-miR-1207-3p	0	0	1	1	0	0	C19orf18	chromosome 19 open reading frame 18
hsa-miR-1207-3p	1	0	1	1	1	1	PPM1K	protein phosphatase, Mg2+/Mn2+ dependent, 1K
hsa-miR-1207-3p	0	0	1	1	0	0	WBSCR27	Williams Beuren syndrome chromosome region 27
hsa-miR-1207-3p	0	0	1	1	1	1	DAND5	DAN domain family, member 5
hsa-miR-1207-3p	0	0	1	1	1	1	RALGPS2	Ral GEF with PH domain and SH3 binding motif 2
hsa-miR-1207-3p	0	0	1	1	0	0	MS4A15	membrane-spanning 4-domains, subfamily A, member 15
hsa-miR-1207-3p	1	0	1	1	1	1	HEPACAM	hepatic and glial cell adhesion molecule
hsa-miR-1207-3p	0	0	1	1	0	0	GPC2	glypican 2
hsa-miR-1207-3p	1	0	1	1	1	1	ATXN7L1	ataxin 7-like 1
hsa-miR-1207-3p	0	0	1	1	0	0	CXorf58	chromosome X open reading frame 58
hsa-miR-1207-3p	1	0	1	0	1	1	ST6GALNAC3	ST6 (alpha-N-acetyl-neuraminyl-2,3-beta-galactosyl-1,3)-N-acetylgalactosaminide alpha-2,6-sialyltransferase 3
hsa-miR-1207-3p	1	0	1	0	1	1	MDGA1	MAM domain containing glycosylphosphatidylinositol anchor 1
hsa-miR-1207-3p	0	0	1	1	1	1	TAF1L	TAF1 RNA polymerase II, TATA box binding protein (TBP)-associated factor, 210kDa-like
hsa-miR-1207-3p	1	0	1	1	1	1	CSF1	colony stimulating factor 1 (macrophage)
hsa-miR-1207-3p	1	0	1	1	1	1	AQP11	aquaporin 11
hsa-miR-1207-3p	0	0	1	1	0	0	SLITRK4	SLIT and NTRK-like family, member 4
hsa-miR-1207-3p	1	0	1	1	1	1	SMG7	smg-7 homolog, nonsense mediated mRNA decay factor (C. elegans)
hsa-miR-1207-3p	1	0	1	1	1	1	DCUN1D3	DCN1, defective in cullin neddylation 1, domain containing 3 (S. cerevisiae)
hsa-miR-1207-3p	0	0	1	1	0	0	CCDC105	coiled-coil domain containing 105
hsa-miR-1207-3p	0	0	1	1	1	1	KLF17	Kruppel-like factor 17
hsa-miR-1207-3p	1	0	1	0	1	1	KSR2	kinase suppressor of ras 2
hsa-miR-1207-3p	0	0	1	0	1	1	KRT18P55	keratin 18 pseudogene 55
hsa-miR-1207-3p	0	0	1	0	1	1	C5orf64	chromosome 5 open reading frame 64
hsa-miR-1207-3p	0	0	1	1	1	1	NSMCE2	non-SMC element 2, MMS21 homolog (S. cerevisiae)
hsa-miR-1207-3p	0	0	1	1	0	0	TMEM86B	transmembrane protein 86B
hsa-miR-1207-3p	0	0	1	1	1	1	SCARA5	scavenger receptor class A, member 5 (putative)
hsa-miR-1207-3p	1	0	1	1	1	1	LDLRAD3	low density lipoprotein receptor class A domain containing 3
hsa-miR-1207-3p	0	0	1	1	0	0	SEC14L4	SEC14-like 4 (S. cerevisiae)
hsa-miR-1207-3p	1	0	1	1	0	0	KRTAP11-1	keratin associated protein 11-1
hsa-miR-1207-3p	1	0	1	1	1	1	PPAP2B	phosphatidic acid phosphatase type 2B
hsa-miR-1207-3p	0	0	1	1	0	0	TAS1R1	taste receptor, type 1, member 1
hsa-miR-1207-3p	0	0	1	0	1	1	SYT12	synaptotagmin XII
hsa-miR-1207-3p	1	0	1	1	1	1	ASB6	ankyrin repeat and SOCS box containing 6
hsa-miR-1207-3p	1	0	1	1	1	1	FAM134C	family with sequence similarity 134, member C
hsa-miR-1207-3p	0	0	1	1	0	0	PILRA	paired immunoglobin-like type 2 receptor alpha
hsa-miR-1207-3p	0	0	1	1	0	0	AGPAT6	1-acylglycerol-3-phosphate O-acyltransferase 6 (lysophosphatidic acid acyltransferase, zeta)
hsa-miR-1207-3p	1	0	1	1	0	0	KCTD13	potassium channel tetramerisation domain containing 13
hsa-miR-1207-3p	0	0	1	0	1	1	HCG27	HLA complex group 27 (non-protein coding)
hsa-miR-1207-3p	0	0	1	1	0	0	DCDC1	doublecortin domain containing 1
hsa-miR-1207-3p	1	0	1	1	1	1	RPS6KA5	ribosomal protein S6 kinase, 90kDa, polypeptide 5
hsa-miR-1207-3p	1	0	1	1	1	1	ISM2	isthmin 2 homolog (zebrafish)
hsa-miR-1207-3p	1	0	1	1	1	1	PLCB1	phospholipase C, beta 1 (phosphoinositide-specific)
hsa-miR-1207-3p	1	0	1	0	1	1	RNF144B	ring finger protein 144B
hsa-miR-1207-3p	1	0	1	0	1	1	SRRM4	serine/arginine repetitive matrix 4
hsa-miR-1207-3p	0	0	1	1	1	1	HIBCH	3-hydroxyisobutyryl-CoA hydrolase
hsa-miR-1207-3p	1	0	1	1	1	1	CPXM2	carboxypeptidase X (M14 family), member 2
hsa-miR-1207-3p	0	0	1	1	1	1	OASL	2'-5'-oligoadenylate synthetase-like
hsa-miR-1207-3p	1	0	1	0	1	1	PTPLB	protein tyrosine phosphatase-like (proline instead of catalytic arginine), member b
hsa-miR-1207-3p	1	0	1	0	1	1	NRK	Nik related kinase
hsa-miR-1207-3p	1	0	1	1	1	1	MIA3	melanoma inhibitory activity family, member 3
hsa-miR-1207-3p	1	0	1	0	1	1	ZC3H6	zinc finger CCCH-type containing 6
hsa-miR-1207-3p	0	0	1	1	0	0	KRTAP10-4	keratin associated protein 10-4
hsa-miR-1207-3p	0	0	1	1	0	0	KRTAP10-8	keratin associated protein 10-8
hsa-miR-1207-3p	1	0	1	1	1	1	PTGER3	prostaglandin E receptor 3 (subtype EP3)
hsa-miR-1207-3p	0	0	1	1	0	0	LENG9	leukocyte receptor cluster (LRC) member 9
hsa-miR-1207-3p	0	0	1	1	1	1	COL18A1-AS1	COL18A1 antisense RNA 1
hsa-miR-1207-3p	0	0	1	1	1	1	ARHGAP27	Rho GTPase activating protein 27
hsa-miR-1207-3p	1	0	1	1	1	1	ADAMTS18	ADAM metallopeptidase with thrombospondin type 1 motif, 18
hsa-miR-1207-3p	1	0	1	1	1	1	BLOC1S5	biogenesis of lysosomal organelles complex-1, subunit 5, muted
hsa-miR-1207-3p	0	0	1	1	1	1	GPX1	glutathione peroxidase 1
hsa-miR-1207-3p	1	0	1	1	1	1	FBXO33	F-box protein 33
hsa-miR-1207-3p	1	0	1	1	1	1	METTL21B	methyltransferase like 21B
hsa-miR-1207-3p	1	0	1	1	1	1	TMEM132E	transmembrane protein 132E
hsa-miR-1207-3p	0	0	1	0	0	0	C16orf47	chromosome 16 open reading frame 47
hsa-miR-1207-3p	1	0	1	1	0	0	CD164L2	CD164 sialomucin-like 2
hsa-miR-1207-3p	0	0	1	0	1	1	FAM174B	family with sequence similarity 174, member B
hsa-miR-1207-3p	0	0	1	0	1	1	C1orf220	chromosome 1 open reading frame 220
hsa-miR-1207-3p	1	0	1	1	1	1	C11orf87	chromosome 11 open reading frame 87
hsa-miR-1207-3p	0	0	1	0	1	1	TMEM215	transmembrane protein 215
hsa-miR-1207-3p	0	0	1	0	0	0	PCDHB17	protocadherin beta 17 pseudogene
hsa-miR-1207-3p	0	0	1	0	0	0	TFAMP1	transcription factor A, mitochondrial pseudogene 1
hsa-miR-1207-3p	0	0	1	0	0	0	LYPLA2P1	lysophospholipase II pseudogene 1
hsa-miR-1207-3p	0	0	1	0	0	0	MIR155HG	MIR155 host gene (non-protein coding)
hsa-miR-1207-3p	0	0	1	0	0	0	TTTY2	testis-specific transcript, Y-linked 2 (non-protein coding)
hsa-miR-1207-3p	0	0	1	0	0	0	TTTY15	testis-specific transcript, Y-linked 15 (non-protein coding)
hsa-miR-1207-3p	0	0	1	0	0	0	TTTY4B	testis-specific transcript, Y-linked 4B (non-protein coding)
hsa-miR-1207-3p	0	0	1	0	0	0	SUMO1P1	SUMO1 pseudogene 1
hsa-miR-1207-3p	0	0	1	0	0	0	CSPG4P2Y	chondroitin sulfate proteoglycan 4 pseudogene 2, Y-linked
hsa-miR-1207-3p	0	0	1	0	0	0	GABPAP	GA binding protein transcription factor, alpha subunit pseudogene
hsa-miR-1207-3p	0	0	1	0	0	0	AOC4	amine oxidase, copper containing 3 (vascular adhesion protein 1) pseudogene
hsa-miR-1207-3p	0	0	1	0	0	0	LOC256880	uncharacterized LOC256880
hsa-miR-1207-3p	0	0	1	0	0	0	MALAT1	metastasis associated lung adenocarcinoma transcript 1 (non-protein coding)
hsa-miR-1207-3p	0	0	1	0	0	0	DUSP5P	dual specificity phosphatase 5 pseudogene
hsa-miR-1207-3p	0	0	1	0	0	0	HAS2-AS1	HAS2 antisense RNA 1
hsa-miR-1207-3p	0	0	1	0	0	0	TCAM1P	testicular cell adhesion molecule 1 homolog (mouse), pseudogene
hsa-miR-1207-3p	0	0	1	0	0	0	SCARNA6	small Cajal body-specific RNA 6
hsa-miR-1207-3p	0	0	1	0	0	0	GBP1P1	guanylate binding protein 1, interferon-inducible pseudogene 1
hsa-miR-1207-3p	0	0	1	0	1	1	DDX12P	DEAD/H (Asp-Glu-Ala-Asp/His) box polypeptide 12, pseudogene
hsa-miR-1207-3p	1	0	1	1	1	1	TRIO	trio Rho guanine nucleotide exchange factor
hsa-miR-1207-3p	0	0	1	1	1	1	CD99	CD99 molecule
hsa-miR-1207-3p	0	0	1	1	0	0	STK19	serine/threonine kinase 19
