# Supplementary material for: Profiling of Selected MicroRNAs in Proliferative Eutopic Endometrium of Women with Ovarian Endometriosis
Source: Biomed Res Int. 2015 Aug 20;2015:760698. doi: 10.1155/2015/760698 (PMC4558423; doi:10.1155/2015/760698)
Supplement: Supplementary file 1 — Table I: The names of miRNAs significantly differentially expressed between eutopic endometrium of patients with endometriosis vs eutopic endometrium of patients without endometriosis. Table II: The associations between miRNA and mRNA, which presents detailed results of the search of six major databases i.e targetscan, tarbase, miranda, mirbase, mirtarget2 and pictar. [file 760698.f1.zip › 760698.f1/Table II/hsa-miR-1207-5p.tsv]

miR	targetscan	tarbase	miranda	mirbase	mirtarget2	pictar	GeneSymbol	GeneName
hsa-miR-1207-5p	1	0	1	1	1	1	PLAU	plasminogen activator, urokinase
hsa-miR-1207-5p	1	0	1	1	0	0	SRCAP	Snf2-related CREBBP activator protein
hsa-miR-1207-5p	1	0	1	1	0	0	HUWE1	HECT, UBA and WWE domain containing 1, E3 ubiquitin protein ligase
hsa-miR-1207-5p	1	0	1	1	0	0	RAPGEF2	Rap guanine nucleotide exchange factor (GEF) 2
hsa-miR-1207-5p	1	0	1	1	1	1	IGSF1	immunoglobulin superfamily, member 1
hsa-miR-1207-5p	1	0	1	1	1	1	ITM2C	integral membrane protein 2C
hsa-miR-1207-5p	1	0	1	1	1	1	ABCC5	ATP-binding cassette, sub-family C (CFTR/MRP), member 5
hsa-miR-1207-5p	1	0	1	0	1	1	PTPRT	protein tyrosine phosphatase, receptor type, T
hsa-miR-1207-5p	0	0	1	1	1	1	C2CD2L	C2CD2-like
hsa-miR-1207-5p	0	0	1	1	1	1	PEG3	paternally expressed 3
hsa-miR-1207-5p	1	0	1	1	1	1	SGSM2	small G protein signaling modulator 2
hsa-miR-1207-5p	0	0	1	1	0	0	PLXNB1	plexin B1
hsa-miR-1207-5p	0	0	1	1	0	0	RAP1GAP	RAP1 GTPase activating protein
hsa-miR-1207-5p	1	0	1	0	1	1	CEP350	centrosomal protein 350kDa
hsa-miR-1207-5p	1	0	1	1	1	1	IQSEC2	IQ motif and Sec7 domain 2
hsa-miR-1207-5p	1	0	1	1	1	1	GPATCH8	G patch domain containing 8
hsa-miR-1207-5p	1	0	1	0	1	1	MFAP3L	microfibrillar-associated protein 3-like
hsa-miR-1207-5p	1	0	1	1	1	1	HIPK1	homeodomain interacting protein kinase 1
hsa-miR-1207-5p	0	0	1	1	1	1	PHLDB1	pleckstrin homology-like domain, family B, member 1
hsa-miR-1207-5p	1	0	1	1	1	1	GIGYF2	GRB10 interacting GYF protein 2
hsa-miR-1207-5p	0	0	1	1	0	0	ARHGEF2	Rho/Rac guanine nucleotide exchange factor (GEF) 2
hsa-miR-1207-5p	1	0	1	1	1	1	ATG13	autophagy related 13
hsa-miR-1207-5p	1	0	1	0	1	1	MAGI2	membrane associated guanylate kinase, WW and PDZ domain containing 2
hsa-miR-1207-5p	0	0	1	1	0	0	AKAP8L	A kinase (PRKA) anchor protein 8-like
hsa-miR-1207-5p	1	0	1	1	0	0	ESYT1	extended synaptotagmin-like protein 1
hsa-miR-1207-5p	1	0	1	1	1	1	SOGA2	SOGA family member 2
hsa-miR-1207-5p	1	0	1	1	1	1	ARHGEF15	Rho guanine nucleotide exchange factor (GEF) 15
hsa-miR-1207-5p	0	0	1	1	1	1	MAN2B2	mannosidase, alpha, class 2B, member 2
hsa-miR-1207-5p	1	0	1	1	1	1	BAHD1	bromo adjacent homology domain containing 1
hsa-miR-1207-5p	1	0	1	1	1	1	CIT	citron (rho-interacting, serine/threonine kinase 21)
hsa-miR-1207-5p	1	0	1	1	1	1	NLGN4Y	neuroligin 4, Y-linked
hsa-miR-1207-5p	1	0	1	1	1	1	C11orf9	chromosome 11 open reading frame 9
hsa-miR-1207-5p	1	0	1	1	1	1	RPGRIP1L	RPGRIP1-like
hsa-miR-1207-5p	1	0	1	1	1	1	FOXJ3	forkhead box J3
hsa-miR-1207-5p	1	0	1	1	0	0	KIAA1045	KIAA1045
hsa-miR-1207-5p	1	0	1	1	1	1	PRRC2C	proline-rich coiled-coil 2C
hsa-miR-1207-5p	0	0	1	0	0	0	IQSEC3	IQ motif and Sec7 domain 3
hsa-miR-1207-5p	1	0	1	1	1	1	PHF8	PHD finger protein 8
hsa-miR-1207-5p	1	0	1	0	1	1	SRGAP3	SLIT-ROBO Rho GTPase activating protein 3
hsa-miR-1207-5p	0	0	1	1	0	0	ZC4H2	zinc finger, C4H2 domain containing
hsa-miR-1207-5p	1	0	1	1	1	1	RALGAPB	Ral GTPase activating protein, beta subunit (non-catalytic)
hsa-miR-1207-5p	1	0	1	1	1	1	MKL2	MKL/myocardin-like 2
hsa-miR-1207-5p	1	0	1	0	1	1	ANKFY1	ankyrin repeat and FYVE domain containing 1
hsa-miR-1207-5p	0	0	1	0	0	0	MTA3	metastasis associated 1 family, member 3
hsa-miR-1207-5p	0	0	1	1	1	1	COPS7A	COP9 constitutive photomorphogenic homolog subunit 7A (Arabidopsis)
hsa-miR-1207-5p	1	0	1	1	1	1	DKK2	dickkopf 2 homolog (Xenopus laevis)
hsa-miR-1207-5p	0	0	1	1	0	0	TNFRSF12A	tumor necrosis factor receptor superfamily, member 12A
hsa-miR-1207-5p	1	0	1	0	0	0	ODZ4	odz, odd Oz/ten-m homolog 4 (Drosophila)
hsa-miR-1207-5p	1	0	1	0	0	0	NYNRIN	NYN domain and retroviral integrase containing
hsa-miR-1207-5p	0	0	1	0	1	1	MUC3B	mucin 3B, cell surface associated
hsa-miR-1207-5p	1	0	1	1	0	0	BEGAIN	brain-enriched guanylate kinase-associated homolog (rat)
hsa-miR-1207-5p	1	0	1	0	0	0	PITPNM2	phosphatidylinositol transfer protein, membrane-associated 2
hsa-miR-1207-5p	1	0	1	1	0	0	KIAA1462	KIAA1462
hsa-miR-1207-5p	1	0	1	1	1	1	BAZ2B	bromodomain adjacent to zinc finger domain, 2B
hsa-miR-1207-5p	0	0	1	0	0	0	COL20A1	collagen, type XX, alpha 1
hsa-miR-1207-5p	1	0	1	1	0	0	ZSWIM5	zinc finger, SWIM-type containing 5
hsa-miR-1207-5p	0	0	1	1	0	0	DHX37	DEAH (Asp-Glu-Ala-His) box polypeptide 37
hsa-miR-1207-5p	1	0	1	1	1	1	KIAA1522	KIAA1522
hsa-miR-1207-5p	1	0	1	1	1	1	FAM214B	family with sequence similarity 214, member B
hsa-miR-1207-5p	0	0	1	1	0	0	PQBP1	polyglutamine binding protein 1
hsa-miR-1207-5p	1	0	1	1	0	0	NCKAP5L	NCK-associated protein 5-like
hsa-miR-1207-5p	1	0	1	1	0	0	MAGI3	membrane associated guanylate kinase, WW and PDZ domain containing 3
hsa-miR-1207-5p	1	0	1	1	0	0	ARHGAP39	Rho GTPase activating protein 39
hsa-miR-1207-5p	0	0	1	0	1	1	SETD5	SET domain containing 5
hsa-miR-1207-5p	1	0	1	0	1	1	JPH4	junctophilin 4
hsa-miR-1207-5p	0	0	1	1	1	1	UNC80	unc-80 homolog (C. elegans)
hsa-miR-1207-5p	1	0	1	1	1	1	NAV2	neuron navigator 2
hsa-miR-1207-5p	1	0	1	1	1	1	CSRNP1	cysteine-serine-rich nuclear protein 1
hsa-miR-1207-5p	0	0	1	1	1	1	LENG8	leukocyte receptor cluster (LRC) member 8
hsa-miR-1207-5p	1	0	1	1	1	1	BCL2L11	BCL2-like 11 (apoptosis facilitator)
hsa-miR-1207-5p	1	0	1	1	1	1	ANKRD12	ankyrin repeat domain 12
hsa-miR-1207-5p	1	0	1	1	1	1	POGZ	pogo transposable element with ZNF domain
hsa-miR-1207-5p	1	0	1	1	0	0	ADC	arginine decarboxylase
hsa-miR-1207-5p	0	0	1	1	0	0	SLC22A10	solute carrier family 22, member 10
hsa-miR-1207-5p	1	0	1	1	1	1	PRDM16	PR domain containing 16
hsa-miR-1207-5p	1	0	1	0	0	0	ZBTB34	zinc finger and BTB domain containing 34
hsa-miR-1207-5p	1	0	1	1	1	1	ACBD5	acyl-CoA binding domain containing 5
hsa-miR-1207-5p	0	0	1	1	1	1	NELL1	NEL-like 1 (chicken)
hsa-miR-1207-5p	0	0	1	1	0	0	KREMEN2	kringle containing transmembrane protein 2
hsa-miR-1207-5p	0	0	1	1	0	0	FAM22D	family with sequence similarity 22, member D
hsa-miR-1207-5p	1	0	1	1	1	1	C11orf57	chromosome 11 open reading frame 57
hsa-miR-1207-5p	0	0	1	1	0	0	KRTAP24-1	keratin associated protein 24-1
hsa-miR-1207-5p	0	0	1	1	1	1	ACPP	acid phosphatase, prostate
hsa-miR-1207-5p	0	0	1	1	0	0	SSPO	SCO-spondin homolog (Bos taurus)
hsa-miR-1207-5p	1	0	1	1	1	1	SLC43A2	solute carrier family 43, member 2
hsa-miR-1207-5p	1	0	1	0	1	1	BEND4	BEN domain containing 4
hsa-miR-1207-5p	0	0	1	1	1	1	BIRC5	baculoviral IAP repeat containing 5
hsa-miR-1207-5p	1	0	1	1	1	1	FAT2	FAT tumor suppressor homolog 2 (Drosophila)
hsa-miR-1207-5p	0	0	1	0	0	0	TIFAB	TRAF-interacting protein with forkhead-associated domain, family member B
hsa-miR-1207-5p	1	1	1	1	1	1	BACE1	beta-site APP-cleaving enzyme 1
hsa-miR-1207-5p	1	0	1	1	1	1	NRXN2	neurexin 2
hsa-miR-1207-5p	0	0	1	1	0	0	MARK2	MAP/microtubule affinity-regulating kinase 2
hsa-miR-1207-5p	0	0	1	1	1	1	FN1	fibronectin 1
hsa-miR-1207-5p	1	0	1	1	1	1	ADARB1	adenosine deaminase, RNA-specific, B1
hsa-miR-1207-5p	0	0	1	1	1	1	SYBU	syntabulin (syntaxin-interacting)
hsa-miR-1207-5p	1	0	1	1	1	1	VLDLR	very low density lipoprotein receptor
hsa-miR-1207-5p	0	0	1	1	0	0	MPST	mercaptopyruvate sulfurtransferase
hsa-miR-1207-5p	1	0	1	1	1	1	OSBPL7	oxysterol binding protein-like 7
hsa-miR-1207-5p	1	0	1	1	0	0	GRIN1	glutamate receptor, ionotropic, N-methyl D-aspartate 1
hsa-miR-1207-5p	0	0	1	1	0	0	KCNC3	potassium voltage-gated channel, Shaw-related subfamily, member 3
hsa-miR-1207-5p	1	0	1	1	0	0	ELN	elastin
hsa-miR-1207-5p	1	0	1	1	1	1	PML	promyelocytic leukemia
hsa-miR-1207-5p	0	0	1	1	1	1	MAZ	MYC-associated zinc finger protein (purine-binding transcription factor)
hsa-miR-1207-5p	1	0	1	1	1	1	PHC1	polyhomeotic homolog 1 (Drosophila)
hsa-miR-1207-5p	0	0	1	0	1	1	DCAF11	DDB1 and CUL4 associated factor 11
hsa-miR-1207-5p	1	0	1	1	1	1	SLC8A1	solute carrier family 8 (sodium/calcium exchanger), member 1
hsa-miR-1207-5p	0	0	1	1	1	1	DGKI	diacylglycerol kinase, iota
hsa-miR-1207-5p	1	0	1	1	0	0	CACNB1	calcium channel, voltage-dependent, beta 1 subunit
hsa-miR-1207-5p	1	0	1	1	0	0	TSPYL2	TSPY-like 2
hsa-miR-1207-5p	0	0	1	1	0	0	PPM1G	protein phosphatase, Mg2+/Mn2+ dependent, 1G
hsa-miR-1207-5p	1	0	1	1	1	1	ZNF207	zinc finger protein 207
hsa-miR-1207-5p	0	0	1	1	1	1	DDX39B	DEAD (Asp-Glu-Ala-Asp) box polypeptide 39B
hsa-miR-1207-5p	1	0	1	1	1	1	ERF	Ets2 repressor factor
hsa-miR-1207-5p	1	0	1	1	0	0	TNK2	tyrosine kinase, non-receptor, 2
hsa-miR-1207-5p	1	0	1	1	1	1	TBX2	T-box 2
hsa-miR-1207-5p	1	0	1	1	1	1	ANK1	ankyrin 1, erythrocytic
hsa-miR-1207-5p	0	0	1	1	0	0	IFT27	intraflagellar transport 27 homolog (Chlamydomonas)
hsa-miR-1207-5p	1	0	1	1	0	0	FGFR3	fibroblast growth factor receptor 3
hsa-miR-1207-5p	0	0	1	1	0	0	IGFBP2	insulin-like growth factor binding protein 2, 36kDa
hsa-miR-1207-5p	0	0	1	1	0	0	EIF4E2	eukaryotic translation initiation factor 4E family member 2
hsa-miR-1207-5p	1	0	1	1	1	1	PDLIM5	PDZ and LIM domain 5
hsa-miR-1207-5p	0	0	1	1	1	1	ZNF747	zinc finger protein 747
hsa-miR-1207-5p	0	0	1	1	0	0	BMP1	bone morphogenetic protein 1
hsa-miR-1207-5p	0	0	1	1	0	0	CFLAR	CASP8 and FADD-like apoptosis regulator
hsa-miR-1207-5p	0	0	1	1	1	1	IL10RA	interleukin 10 receptor, alpha
hsa-miR-1207-5p	1	0	1	1	1	1	CD40	CD40 molecule, TNF receptor superfamily member 5
hsa-miR-1207-5p	0	0	1	1	0	0	SLC22A8	solute carrier family 22 (organic anion transporter), member 8
hsa-miR-1207-5p	1	0	1	1	1	1	CYP46A1	cytochrome P450, family 46, subfamily A, polypeptide 1
hsa-miR-1207-5p	1	0	1	1	0	0	ARRB2	arrestin, beta 2
hsa-miR-1207-5p	0	0	1	1	0	0	MSH5	mutS homolog 5 (E. coli)
hsa-miR-1207-5p	1	0	1	1	1	1	ZFX	zinc finger protein, X-linked
hsa-miR-1207-5p	0	0	1	1	1	1	SGSH	N-sulfoglucosamine sulfohydrolase
hsa-miR-1207-5p	1	0	1	1	1	1	ANPEP	alanyl (membrane) aminopeptidase
hsa-miR-1207-5p	1	0	1	0	1	1	CAV1	caveolin 1, caveolae protein, 22kDa
hsa-miR-1207-5p	1	0	1	0	1	1	PDE7B	phosphodiesterase 7B
hsa-miR-1207-5p	1	0	1	1	1	1	MEF2D	myocyte enhancer factor 2D
hsa-miR-1207-5p	1	0	1	1	0	0	TNPO2	transportin 2
hsa-miR-1207-5p	0	0	1	0	1	1	PARG	poly (ADP-ribose) glycohydrolase
hsa-miR-1207-5p	1	0	1	1	1	1	TTC39A	tetratricopeptide repeat domain 39A
hsa-miR-1207-5p	1	0	1	0	1	1	MLL2	myeloid/lymphoid or mixed-lineage leukemia 2
hsa-miR-1207-5p	1	0	1	1	1	1	CBFA2T2	core-binding factor, runt domain, alpha subunit 2; translocated to, 2
hsa-miR-1207-5p	1	0	1	1	1	1	YME1L1	YME1-like 1 (S. cerevisiae)
hsa-miR-1207-5p	0	0	1	1	0	0	KIR2DL3	killer cell immunoglobulin-like receptor, two domains, long cytoplasmic tail, 3
hsa-miR-1207-5p	1	0	1	1	1	1	TMBIM6	transmembrane BAX inhibitor motif containing 6
hsa-miR-1207-5p	0	0	1	1	1	1	SESN1	sestrin 1
hsa-miR-1207-5p	1	0	1	0	1	1	CELF2	CUGBP, Elav-like family member 2
hsa-miR-1207-5p	0	0	1	0	0	0	FP588	uncharacterized LOC92973
hsa-miR-1207-5p	0	0	1	1	0	0	SLC12A4	solute carrier family 12 (potassium/chloride transporters), member 4
hsa-miR-1207-5p	0	0	1	1	1	1	CD84	CD84 molecule
hsa-miR-1207-5p	0	0	1	1	1	1	CREB3L1	cAMP responsive element binding protein 3-like 1
hsa-miR-1207-5p	1	0	1	1	1	1	CTNND1	catenin (cadherin-associated protein), delta 1
hsa-miR-1207-5p	1	0	1	1	1	1	RBBP6	retinoblastoma binding protein 6
hsa-miR-1207-5p	0	0	1	1	1	1	NOL3	nucleolar protein 3 (apoptosis repressor with CARD domain)
hsa-miR-1207-5p	1	0	1	1	1	1	TMEM159	transmembrane protein 159
hsa-miR-1207-5p	1	0	1	1	0	0	ASPHD1	aspartate beta-hydroxylase domain containing 1
hsa-miR-1207-5p	0	0	1	1	1	1	HLA-G	major histocompatibility complex, class I, G
hsa-miR-1207-5p	1	0	1	1	0	0	PAK1	p21 protein (Cdc42/Rac)-activated kinase 1
hsa-miR-1207-5p	1	0	1	1	1	1	PDE4A	phosphodiesterase 4A, cAMP-specific
hsa-miR-1207-5p	0	0	1	1	1	1	ERAL1	Era G-protein-like 1 (E. coli)
hsa-miR-1207-5p	1	0	1	1	1	1	ZNF236	zinc finger protein 236
hsa-miR-1207-5p	0	0	1	1	1	1	PCF11	PCF11, cleavage and polyadenylation factor subunit, homolog (S. cerevisiae)
hsa-miR-1207-5p	0	0	1	1	0	0	CARD10	caspase recruitment domain family, member 10
hsa-miR-1207-5p	0	0	1	0	0	0	C3orf79	chromosome 3 open reading frame 79
hsa-miR-1207-5p	0	0	1	1	1	1	PCBP4	poly(rC) binding protein 4
hsa-miR-1207-5p	0	0	1	1	1	1	PLEKHB1	pleckstrin homology domain containing, family B (evectins) member 1
hsa-miR-1207-5p	0	0	1	1	0	0	PIF1	PIF1 5'-to-3' DNA helicase homolog (S. cerevisiae)
hsa-miR-1207-5p	0	0	1	1	1	1	IL18BP	interleukin 18 binding protein
hsa-miR-1207-5p	1	0	1	0	0	0	PPME1	protein phosphatase methylesterase 1
hsa-miR-1207-5p	1	0	1	1	1	1	KAT6B	K(lysine) acetyltransferase 6B
hsa-miR-1207-5p	1	0	1	1	1	1	EDNRB	endothelin receptor type B
hsa-miR-1207-5p	1	0	1	1	1	1	LRRFIP1	leucine rich repeat (in FLII) interacting protein 1
hsa-miR-1207-5p	1	0	1	1	1	1	NF2	neurofibromin 2 (merlin)
hsa-miR-1207-5p	0	0	1	1	1	1	ACIN1	apoptotic chromatin condensation inducer 1
hsa-miR-1207-5p	1	0	1	1	1	1	AASDHPPT	aminoadipate-semialdehyde dehydrogenase-phosphopantetheinyl transferase
hsa-miR-1207-5p	1	0	1	1	1	1	HTRA2	HtrA serine peptidase 2
hsa-miR-1207-5p	1	0	1	1	1	1	HMG20A	high mobility group 20A
hsa-miR-1207-5p	0	0	1	1	1	1	FAM178B	family with sequence similarity 178, member B
hsa-miR-1207-5p	0	0	1	1	1	1	CNPPD1	cyclin Pas1/PHO80 domain containing 1
hsa-miR-1207-5p	1	0	1	1	1	1	C16orf70	chromosome 16 open reading frame 70
hsa-miR-1207-5p	0	0	1	0	1	1	CLDN2	claudin 2
hsa-miR-1207-5p	0	0	1	1	0	0	FXYD5	FXYD domain containing ion transport regulator 5
hsa-miR-1207-5p	1	0	1	1	1	1	C3orf18	chromosome 3 open reading frame 18
hsa-miR-1207-5p	1	0	1	1	0	0	ECE2	endothelin converting enzyme 2
hsa-miR-1207-5p	0	0	1	0	1	1	SLC38A4	solute carrier family 38, member 4
hsa-miR-1207-5p	0	0	1	0	0	0	BPESC1	blepharophimosis, epicanthus inversus and ptosis, candidate 1 (non-protein coding)
hsa-miR-1207-5p	0	0	1	1	0	0	NCOA6	nuclear receptor coactivator 6
hsa-miR-1207-5p	0	0	1	1	1	1	CHRD	chordin
hsa-miR-1207-5p	1	0	1	1	1	1	SYDE1	synapse defective 1, Rho GTPase, homolog 1 (C. elegans)
hsa-miR-1207-5p	0	0	1	1	0	0	STUB1	STIP1 homology and U-box containing protein 1, E3 ubiquitin protein ligase
hsa-miR-1207-5p	0	0	1	1	0	0	DBNDD2	dysbindin (dystrobrevin binding protein 1) domain containing 2
hsa-miR-1207-5p	0	0	1	1	1	1	CD28	CD28 molecule
hsa-miR-1207-5p	0	0	1	1	1	1	BET1L	blocked early in transport 1 homolog (S. cerevisiae)-like
hsa-miR-1207-5p	0	0	1	1	1	1	PGLYRP4	peptidoglycan recognition protein 4
hsa-miR-1207-5p	0	0	1	1	1	1	CELF1	CUGBP, Elav-like family member 1
hsa-miR-1207-5p	0	0	1	1	1	1	CTDSP1	CTD (carboxy-terminal domain, RNA polymerase II, polypeptide A) small phosphatase 1
hsa-miR-1207-5p	1	0	1	0	1	1	TRPS1	trichorhinophalangeal syndrome I
hsa-miR-1207-5p	1	0	1	1	1	1	ERGIC1	endoplasmic reticulum-golgi intermediate compartment (ERGIC) 1
hsa-miR-1207-5p	0	0	1	1	1	1	C21orf7	chromosome 21 open reading frame 7
hsa-miR-1207-5p	1	0	1	1	1	1	PUM2	pumilio homolog 2 (Drosophila)
hsa-miR-1207-5p	0	0	1	1	1	1	CYP3A43	cytochrome P450, family 3, subfamily A, polypeptide 43
hsa-miR-1207-5p	1	0	1	1	1	1	VPS39	vacuolar protein sorting 39 homolog (S. cerevisiae)
hsa-miR-1207-5p	1	0	1	1	1	1	TMUB2	transmembrane and ubiquitin-like domain containing 2
hsa-miR-1207-5p	0	0	1	1	1	1	LRTOMT	leucine rich transmembrane and 0-methyltransferase domain containing
hsa-miR-1207-5p	1	0	1	1	1	1	DCLRE1B	DNA cross-link repair 1B
hsa-miR-1207-5p	1	0	1	1	1	1	VEGFA	vascular endothelial growth factor A
hsa-miR-1207-5p	1	0	1	1	1	1	SPTBN4	spectrin, beta, non-erythrocytic 4
hsa-miR-1207-5p	1	0	1	1	0	0	RAB34	RAB34, member RAS oncogene family
hsa-miR-1207-5p	1	0	1	1	1	1	CPEB1	cytoplasmic polyadenylation element binding protein 1
hsa-miR-1207-5p	0	0	1	1	1	1	SEMA6C	sema domain, transmembrane domain (TM), and cytoplasmic domain, (semaphorin) 6C
hsa-miR-1207-5p	1	0	1	1	1	1	CALU	calumenin
hsa-miR-1207-5p	1	0	1	1	1	1	BBC3	BCL2 binding component 3
hsa-miR-1207-5p	0	0	1	1	1	1	RGS20	regulator of G-protein signaling 20
hsa-miR-1207-5p	1	0	1	1	1	1	KCNIP2	Kv channel interacting protein 2
hsa-miR-1207-5p	0	0	1	1	0	0	CTNNBL1	catenin, beta like 1
hsa-miR-1207-5p	1	0	1	0	1	1	WIPF2	WAS/WASL interacting protein family, member 2
hsa-miR-1207-5p	1	0	1	1	1	1	CALCOCO1	calcium binding and coiled-coil domain 1
hsa-miR-1207-5p	0	0	1	1	0	0	SPNS1	spinster homolog 1 (Drosophila)
hsa-miR-1207-5p	1	0	1	1	1	1	CD300LF	CD300 molecule-like family member f
hsa-miR-1207-5p	0	0	1	0	0	0	NBPF10	neuroblastoma breakpoint family, member 10
hsa-miR-1207-5p	0	0	1	1	0	0	SNRPN	small nuclear ribonucleoprotein polypeptide N
hsa-miR-1207-5p	0	0	1	0	0	0	MYO15B	myosin XVB pseudogene
hsa-miR-1207-5p	1	0	1	1	1	1	ST3GAL3	ST3 beta-galactoside alpha-2,3-sialyltransferase 3
hsa-miR-1207-5p	0	0	1	1	1	1	PPP1R1B	protein phosphatase 1, regulatory (inhibitor) subunit 1B
hsa-miR-1207-5p	0	0	1	0	0	0	RESP18	regulated endocrine-specific protein 18 homolog (rat)
hsa-miR-1207-5p	1	0	1	1	1	1	SLC35A4	solute carrier family 35, member A4
hsa-miR-1207-5p	0	0	1	1	1	1	PSRC1	proline/serine-rich coiled-coil 1
hsa-miR-1207-5p	0	0	1	1	0	0	RASGEF1C	RasGEF domain family, member 1C
hsa-miR-1207-5p	0	0	1	1	1	1	SAMD9L	sterile alpha motif domain containing 9-like
hsa-miR-1207-5p	0	0	1	1	1	1	SLC2A14	solute carrier family 2 (facilitated glucose transporter), member 14
hsa-miR-1207-5p	0	0	1	1	0	0	CLDN19	claudin 19
hsa-miR-1207-5p	0	0	1	1	1	1	AMPH	amphiphysin
hsa-miR-1207-5p	1	0	1	1	1	1	TRIP10	thyroid hormone receptor interactor 10
hsa-miR-1207-5p	1	0	1	1	0	0	ST3GAL4	ST3 beta-galactoside alpha-2,3-sialyltransferase 4
hsa-miR-1207-5p	0	0	1	1	1	1	CHODL	chondrolectin
hsa-miR-1207-5p	0	0	1	1	1	1	CDAN1	codanin 1
hsa-miR-1207-5p	1	0	1	1	0	0	BRSK2	BR serine/threonine kinase 2
hsa-miR-1207-5p	0	0	1	1	1	1	GPR56	G protein-coupled receptor 56
hsa-miR-1207-5p	1	0	1	0	1	1	DICER1	dicer 1, ribonuclease type III
hsa-miR-1207-5p	0	0	1	0	0	0	SNHG4	small nucleolar RNA host gene 4 (non-protein coding)
hsa-miR-1207-5p	0	0	1	1	1	1	GNAS	GNAS complex locus
hsa-miR-1207-5p	0	0	1	1	1	1	MTHFR	methylenetetrahydrofolate reductase (NAD(P)H)
hsa-miR-1207-5p	0	0	1	1	0	0	SERGEF	secretion regulating guanine nucleotide exchange factor
hsa-miR-1207-5p	0	0	1	1	1	1	C6orf48	chromosome 6 open reading frame 48
hsa-miR-1207-5p	1	0	1	1	1	1	CACNA2D2	calcium channel, voltage-dependent, alpha 2/delta subunit 2
hsa-miR-1207-5p	0	0	1	1	1	1	DMRTC1	DMRT-like family C1
hsa-miR-1207-5p	0	0	1	1	0	0	DMRTC1B	DMRT-like family C1B
hsa-miR-1207-5p	1	0	1	1	1	1	PALM2	paralemmin 2
hsa-miR-1207-5p	0	0	1	0	0	0	LY6G6E	lymphocyte antigen 6 complex, locus G6E (pseudogene)
hsa-miR-1207-5p	1	0	1	1	1	1	NRXN3	neurexin 3
hsa-miR-1207-5p	1	0	1	1	1	1	PDE1B	phosphodiesterase 1B, calmodulin-dependent
hsa-miR-1207-5p	1	0	1	1	1	1	EMID2	EMI domain containing 2
hsa-miR-1207-5p	1	0	1	1	1	1	NAV3	neuron navigator 3
hsa-miR-1207-5p	0	0	1	1	1	1	TFEB	transcription factor EB
hsa-miR-1207-5p	1	0	1	1	1	1	XIRP1	xin actin-binding repeat containing 1
hsa-miR-1207-5p	0	0	1	1	0	0	ACSS2	acyl-CoA synthetase short-chain family member 2
hsa-miR-1207-5p	0	0	1	1	1	1	ESRP1	epithelial splicing regulatory protein 1
hsa-miR-1207-5p	0	0	1	1	0	0	GPRC5C	G protein-coupled receptor, family C, group 5, member C
hsa-miR-1207-5p	1	0	1	1	1	1	TANC1	tetratricopeptide repeat, ankyrin repeat and coiled-coil containing 1
hsa-miR-1207-5p	1	0	1	1	0	0	DUS2L	dihydrouridine synthase 2-like, SMM1 homolog (S. cerevisiae)
hsa-miR-1207-5p	0	0	1	1	0	0	SLC39A4	solute carrier family 39 (zinc transporter), member 4
hsa-miR-1207-5p	1	0	1	1	1	1	SLC7A10	solute carrier family 7 (neutral amino acid transporter light chain, asc system), member 10
hsa-miR-1207-5p	0	0	1	0	0	0	RNF31	ring finger protein 31
hsa-miR-1207-5p	0	0	1	1	1	1	RNF220	ring finger protein 220
hsa-miR-1207-5p	1	0	1	1	1	1	CADM3	cell adhesion molecule 3
hsa-miR-1207-5p	0	0	1	1	1	1	ARAP3	ArfGAP with RhoGAP domain, ankyrin repeat and PH domain 3
hsa-miR-1207-5p	1	0	1	1	1	1	EIF2C1	eukaryotic translation initiation factor 2C, 1
hsa-miR-1207-5p	1	0	1	1	1	1	ARMC8	armadillo repeat containing 8
hsa-miR-1207-5p	1	0	1	1	1	1	WDTC1	WD and tetratricopeptide repeats 1
hsa-miR-1207-5p	0	0	1	1	1	1	CXXC5	CXXC finger protein 5
hsa-miR-1207-5p	1	0	1	1	0	0	SMUG1	single-strand-selective monofunctional uracil-DNA glycosylase 1
hsa-miR-1207-5p	1	0	1	0	1	1	SPATS2L	spermatogenesis associated, serine-rich 2-like
hsa-miR-1207-5p	1	0	1	1	1	1	HNRNPUL1	heterogeneous nuclear ribonucleoprotein U-like 1
hsa-miR-1207-5p	0	0	1	1	0	0	C17orf53	chromosome 17 open reading frame 53
hsa-miR-1207-5p	1	0	1	1	1	1	RIC3	resistance to inhibitors of cholinesterase 3 homolog (C. elegans)
hsa-miR-1207-5p	0	0	1	1	0	0	TFR2	transferrin receptor 2
hsa-miR-1207-5p	0	0	1	1	0	0	MLST8	MTOR associated protein, LST8 homolog (S. cerevisiae)
hsa-miR-1207-5p	1	0	1	1	0	0	PBXIP1	pre-B-cell leukemia homeobox interacting protein 1
hsa-miR-1207-5p	1	0	1	0	1	1	LIN28A	lin-28 homolog A (C. elegans)
hsa-miR-1207-5p	1	0	1	1	1	1	GALNT14	UDP-N-acetyl-alpha-D-galactosamine:polypeptide N-acetylgalactosaminyltransferase 14 (GalNAc-T14)
hsa-miR-1207-5p	0	0	1	0	0	0	DUXAP10	double homeobox A pseudogene 10
hsa-miR-1207-5p	0	0	1	1	0	0	JMJD4	jumonji domain containing 4
hsa-miR-1207-5p	0	0	1	1	1	1	ARMC5	armadillo repeat containing 5
hsa-miR-1207-5p	1	0	1	1	0	0	FASTK	Fas-activated serine/threonine kinase
hsa-miR-1207-5p	0	0	1	1	1	1	SPATA5L1	spermatogenesis associated 5-like 1
hsa-miR-1207-5p	0	0	1	1	1	1	C14orf118	chromosome 14 open reading frame 118
hsa-miR-1207-5p	0	0	1	1	1	1	NECAP2	NECAP endocytosis associated 2
hsa-miR-1207-5p	0	0	1	0	0	0	LINC00475	long intergenic non-protein coding RNA 475
hsa-miR-1207-5p	1	0	1	1	1	1	PHF20L1	PHD finger protein 20-like 1
hsa-miR-1207-5p	0	0	1	0	0	0	LOC284561	uncharacterized LOC284561
hsa-miR-1207-5p	1	0	1	1	1	1	BAZ2A	bromodomain adjacent to zinc finger domain, 2A
hsa-miR-1207-5p	1	0	1	1	1	1	PPFIA3	protein tyrosine phosphatase, receptor type, f polypeptide (PTPRF), interacting protein (liprin), alpha 3
hsa-miR-1207-5p	1	0	1	1	1	1	PAX8	paired box 8
hsa-miR-1207-5p	0	0	1	1	1	1	CWF19L1	CWF19-like 1, cell cycle control (S. pombe)
hsa-miR-1207-5p	1	0	1	1	0	0	MEX3A	mex-3 homolog A (C. elegans)
hsa-miR-1207-5p	0	0	1	0	1	1	FLJ14186	uncharacterized LOC401149
hsa-miR-1207-5p	1	0	1	1	1	1	FAM131A	family with sequence similarity 131, member A
hsa-miR-1207-5p	1	0	1	1	1	1	ZNF385A	zinc finger protein 385A
hsa-miR-1207-5p	0	0	1	1	1	1	METTL7A	methyltransferase like 7A
hsa-miR-1207-5p	1	0	1	1	1	1	SCAF1	SR-related CTD-associated factor 1
hsa-miR-1207-5p	0	0	1	1	0	0	SPON2	spondin 2, extracellular matrix protein
hsa-miR-1207-5p	0	0	1	1	1	1	MUC12	mucin 12, cell surface associated
hsa-miR-1207-5p	0	0	1	1	1	1	TADA3	transcriptional adaptor 3
hsa-miR-1207-5p	0	0	1	0	0	0	FLJ21408	uncharacterized LOC400512
hsa-miR-1207-5p	0	0	1	0	0	0	RASAL3	RAS protein activator like 3
hsa-miR-1207-5p	1	0	1	1	1	1	TNRC6A	trinucleotide repeat containing 6A
hsa-miR-1207-5p	1	0	1	0	1	1	ZCCHC3	zinc finger, CCHC domain containing 3
hsa-miR-1207-5p	0	0	1	1	0	0	STPG1	sperm-tail PG-rich repeat containing 1
hsa-miR-1207-5p	0	0	1	0	1	1	HEMK1	HemK methyltransferase family member 1
hsa-miR-1207-5p	0	0	1	1	1	1	DENND2D	DENN/MADD domain containing 2D
hsa-miR-1207-5p	0	0	1	1	1	1	MYEOV	myeloma overexpressed (in a subset of t(11;14) positive multiple myelomas)
hsa-miR-1207-5p	0	0	1	0	0	0	LINC00340	long intergenic non-protein coding RNA 340
hsa-miR-1207-5p	1	0	1	1	1	1	HPS3	Hermansky-Pudlak syndrome 3
hsa-miR-1207-5p	0	0	1	0	1	1	RASA4	RAS p21 protein activator 4
hsa-miR-1207-5p	0	0	1	1	0	0	NUDT7	nudix (nucleoside diphosphate linked moiety X)-type motif 7
hsa-miR-1207-5p	1	0	1	1	0	0	SLAIN2	SLAIN motif family, member 2
hsa-miR-1207-5p	1	0	1	1	1	1	DCAF8	DDB1 and CUL4 associated factor 8
hsa-miR-1207-5p	0	0	1	1	0	0	ZNF276	zinc finger protein 276
hsa-miR-1207-5p	1	0	1	1	1	1	RNF185	ring finger protein 185
hsa-miR-1207-5p	0	0	1	0	0	0	LOC729852	uncharacterized LOC729852
hsa-miR-1207-5p	1	0	1	1	1	1	LRP4	low density lipoprotein receptor-related protein 4
hsa-miR-1207-5p	1	0	1	1	1	1	GORASP2	golgi reassembly stacking protein 2, 55kDa
hsa-miR-1207-5p	0	0	1	1	1	1	SPRTN	SprT-like N-terminal domain
hsa-miR-1207-5p	1	0	1	1	1	1	FAM53C	family with sequence similarity 53, member C
hsa-miR-1207-5p	1	0	1	1	1	1	MARK1	MAP/microtubule affinity-regulating kinase 1
hsa-miR-1207-5p	1	0	1	1	0	0	SLC44A2	solute carrier family 44, member 2
hsa-miR-1207-5p	1	0	1	1	1	1	NFASC	neurofascin
hsa-miR-1207-5p	1	0	1	1	1	1	FAM40A	family with sequence similarity 40, member A
hsa-miR-1207-5p	0	0	1	1	1	1	IGBP1	immunoglobulin (CD79A) binding protein 1
hsa-miR-1207-5p	1	0	1	1	1	1	ARHGAP36	Rho GTPase activating protein 36
hsa-miR-1207-5p	0	0	1	1	0	0	IMPDH1	IMP (inosine 5'-monophosphate) dehydrogenase 1
hsa-miR-1207-5p	0	0	1	0	0	0	KIAA0664L3	KIAA0664-like 3
hsa-miR-1207-5p	0	0	1	0	0	0	LOC254559	uncharacterized LOC254559
hsa-miR-1207-5p	0	0	1	1	0	0	FAM153B	family with sequence similarity 153, member B
hsa-miR-1207-5p	1	0	1	0	1	1	AP1G1	adaptor-related protein complex 1, gamma 1 subunit
hsa-miR-1207-5p	1	0	1	1	1	1	DLGAP4	discs, large (Drosophila) homolog-associated protein 4
hsa-miR-1207-5p	0	0	1	1	1	1	KLC4	kinesin light chain 4
hsa-miR-1207-5p	1	0	1	1	0	0	DCTN1	dynactin 1
hsa-miR-1207-5p	1	0	1	1	0	0	SPEG	SPEG complex locus
hsa-miR-1207-5p	1	0	1	1	1	1	AGAP3	ArfGAP with GTPase domain, ankyrin repeat and PH domain 3
hsa-miR-1207-5p	0	0	1	0	0	0	SNHG11	small nucleolar RNA host gene 11 (non-protein coding)
hsa-miR-1207-5p	0	0	1	1	1	1	CCND3	cyclin D3
hsa-miR-1207-5p	1	0	1	1	1	1	PDLIM2	PDZ and LIM domain 2 (mystique)
hsa-miR-1207-5p	0	0	1	0	0	0	FLJ31104	uncharacterized LOC441072
hsa-miR-1207-5p	0	0	1	0	1	1	C17orf108	chromosome 17 open reading frame 108
hsa-miR-1207-5p	0	0	1	0	0	0	LOC201617	uncharacterized LOC201617
hsa-miR-1207-5p	0	0	1	0	0	0	LOC149684	uncharacterized LOC149684
hsa-miR-1207-5p	0	0	1	1	0	0	CENPT	centromere protein T
hsa-miR-1207-5p	0	0	1	1	0	0	ANXA11	annexin A11
hsa-miR-1207-5p	0	0	1	1	0	0	BEAN1	brain expressed, associated with NEDD4, 1
hsa-miR-1207-5p	0	0	1	0	0	0	BTBD19	BTB (POZ) domain containing 19
hsa-miR-1207-5p	0	0	1	0	0	0	SEC14L2	SEC14-like 2 (S. cerevisiae)
hsa-miR-1207-5p	1	0	1	1	1	1	LMNA	lamin A/C
hsa-miR-1207-5p	0	0	1	1	1	1	SEPT5	septin 5
hsa-miR-1207-5p	1	0	1	0	1	1	FSTL4	follistatin-like 4
hsa-miR-1207-5p	1	0	1	1	1	1	SHISA5	shisa homolog 5 (Xenopus laevis)
hsa-miR-1207-5p	1	0	1	1	1	1	AGPAT1	1-acylglycerol-3-phosphate O-acyltransferase 1 (lysophosphatidic acid acyltransferase, alpha)
hsa-miR-1207-5p	0	0	1	0	0	0	LOC654433	uncharacterized LOC654433
hsa-miR-1207-5p	1	0	1	1	1	1	SCAMP5	secretory carrier membrane protein 5
hsa-miR-1207-5p	1	0	1	1	1	1	PHF15	PHD finger protein 15
hsa-miR-1207-5p	0	0	1	0	0	0	LOC441204	uncharacterized LOC441204
hsa-miR-1207-5p	0	0	1	1	1	1	BRD2	bromodomain containing 2
hsa-miR-1207-5p	0	0	1	1	0	0	DNAH3	dynein, axonemal, heavy chain 3
hsa-miR-1207-5p	0	0	1	1	0	0	ZNF185	zinc finger protein 185 (LIM domain)
hsa-miR-1207-5p	1	0	1	1	1	1	CLCN5	chloride channel, voltage-sensitive 5
hsa-miR-1207-5p	0	0	1	0	0	0	LOC158376	uncharacterized LOC158376
hsa-miR-1207-5p	0	0	1	1	1	1	GNB2	guanine nucleotide binding protein (G protein), beta polypeptide 2
hsa-miR-1207-5p	0	0	1	0	1	1	SNRNP48	small nuclear ribonucleoprotein 48kDa (U11/U12)
hsa-miR-1207-5p	0	0	1	1	1	1	DST	dystonin
hsa-miR-1207-5p	0	0	1	1	0	0	HECTD3	HECT domain containing E3 ubiquitin protein ligase 3
hsa-miR-1207-5p	1	0	1	1	1	1	TPM3	tropomyosin 3
hsa-miR-1207-5p	0	0	1	1	1	1	COQ10A	coenzyme Q10 homolog A (S. cerevisiae)
hsa-miR-1207-5p	0	0	1	1	0	0	RELT	RELT tumor necrosis factor receptor
hsa-miR-1207-5p	1	0	1	1	0	0	SLC29A2	solute carrier family 29 (nucleoside transporters), member 2
hsa-miR-1207-5p	1	0	1	1	1	1	MLLT6	myeloid/lymphoid or mixed-lineage leukemia (trithorax homolog, Drosophila); translocated to, 6
hsa-miR-1207-5p	1	0	1	1	1	1	MGAT1	mannosyl (alpha-1,3-)-glycoprotein beta-1,2-N-acetylglucosaminyltransferase
hsa-miR-1207-5p	0	0	1	1	1	1	C14orf79	chromosome 14 open reading frame 79
hsa-miR-1207-5p	1	0	1	1	1	1	MAP3K11	mitogen-activated protein kinase kinase kinase 11
hsa-miR-1207-5p	0	0	1	0	0	0	LOC100125918	uncharacterized LOC100125918
hsa-miR-1207-5p	1	0	1	1	1	1	MPP7	membrane protein, palmitoylated 7 (MAGUK p55 subfamily member 7)
hsa-miR-1207-5p	0	0	1	1	0	0	NXF2	nuclear RNA export factor 2
hsa-miR-1207-5p	0	0	1	1	1	1	RANBP17	RAN binding protein 17
hsa-miR-1207-5p	0	0	1	0	1	1	CHURC1	churchill domain containing 1
hsa-miR-1207-5p	0	0	1	0	0	0	TUG1	taurine upregulated 1 (non-protein coding)
hsa-miR-1207-5p	0	0	1	0	0	0	INTS4L1	integrator complex subunit 4-like 1
hsa-miR-1207-5p	0	0	1	0	0	0	UBE2QL1	ubiquitin-conjugating enzyme E2Q family-like 1
hsa-miR-1207-5p	0	0	1	1	1	1	A2ML1	alpha-2-macroglobulin-like 1
hsa-miR-1207-5p	0	0	1	1	1	1	ZBTB26	zinc finger and BTB domain containing 26
hsa-miR-1207-5p	1	0	1	1	1	1	C6orf89	chromosome 6 open reading frame 89
hsa-miR-1207-5p	0	0	1	0	1	1	UHMK1	U2AF homology motif (UHM) kinase 1
hsa-miR-1207-5p	0	0	1	1	0	0	RHBDF2	rhomboid 5 homolog 2 (Drosophila)
hsa-miR-1207-5p	0	0	1	1	0	0	TRIM41	tripartite motif containing 41
hsa-miR-1207-5p	1	0	1	1	1	1	PEAR1	platelet endothelial aggregation receptor 1
hsa-miR-1207-5p	1	0	1	1	1	1	FAM73B	family with sequence similarity 73, member B
hsa-miR-1207-5p	0	0	1	1	0	0	GRIP2	glutamate receptor interacting protein 2
hsa-miR-1207-5p	0	0	1	1	0	0	SYTL1	synaptotagmin-like 1
hsa-miR-1207-5p	1	0	1	1	1	1	HLF	hepatic leukemia factor
hsa-miR-1207-5p	1	0	1	0	1	1	CLASP1	cytoplasmic linker associated protein 1
hsa-miR-1207-5p	0	0	1	0	1	1	CDHR3	cadherin-related family member 3
hsa-miR-1207-5p	1	0	1	1	1	1	BLCAP	bladder cancer associated protein
hsa-miR-1207-5p	0	0	1	1	0	0	WDR83	WD repeat domain 83
hsa-miR-1207-5p	0	0	1	1	1	1	SEC16A	SEC16 homolog A (S. cerevisiae)
hsa-miR-1207-5p	1	0	1	1	1	1	PRRT2	proline-rich transmembrane protein 2
hsa-miR-1207-5p	1	0	1	1	1	1	CNOT4	CCR4-NOT transcription complex, subunit 4
hsa-miR-1207-5p	1	0	1	1	0	0	APBB3	amyloid beta (A4) precursor protein-binding, family B, member 3
hsa-miR-1207-5p	1	0	1	1	1	1	UBAP1	ubiquitin associated protein 1
hsa-miR-1207-5p	0	0	1	1	0	0	NISCH	nischarin
hsa-miR-1207-5p	0	0	1	1	0	0	CPAMD8	C3 and PZP-like, alpha-2-macroglobulin domain containing 8
hsa-miR-1207-5p	0	0	1	1	1	1	CAMKV	CaM kinase-like vesicle-associated
hsa-miR-1207-5p	1	0	1	0	1	1	SLC25A37	solute carrier family 25 (mitochondrial iron transporter), member 37
hsa-miR-1207-5p	1	0	1	1	0	0	MMP11	matrix metallopeptidase 11 (stromelysin 3)
hsa-miR-1207-5p	0	0	1	1	0	0	PIGO	phosphatidylinositol glycan anchor biosynthesis, class O
hsa-miR-1207-5p	0	0	1	1	1	1	MTR	5-methyltetrahydrofolate-homocysteine methyltransferase
hsa-miR-1207-5p	1	0	1	1	1	1	DPH1	DPH1 homolog (S. cerevisiae)
hsa-miR-1207-5p	0	0	1	1	1	1	STBD1	starch binding domain 1
hsa-miR-1207-5p	0	0	1	0	1	1	TMSB15B	thymosin beta 15B
hsa-miR-1207-5p	0	0	1	0	0	0	LOC643837	uncharacterized LOC643837
hsa-miR-1207-5p	0	0	1	1	0	0	ACOT11	acyl-CoA thioesterase 11
hsa-miR-1207-5p	0	0	1	0	1	1	PIANP	PILR alpha associated neural protein
hsa-miR-1207-5p	1	0	1	1	1	1	SUPT16H	suppressor of Ty 16 homolog (S. cerevisiae)
hsa-miR-1207-5p	0	0	1	0	0	0	LOC440910	uncharacterized LOC440910
hsa-miR-1207-5p	1	0	1	1	1	1	FBXW2	F-box and WD repeat domain containing 2
hsa-miR-1207-5p	0	0	1	1	1	1	CD34	CD34 molecule
hsa-miR-1207-5p	0	0	1	1	0	0	TRMT44	tRNA methyltransferase 44 homolog (S. cerevisiae)
hsa-miR-1207-5p	0	0	1	1	0	0	HYAL2	hyaluronoglucosaminidase 2
hsa-miR-1207-5p	0	0	1	1	0	0	CDC25B	cell division cycle 25 homolog B (S. pombe)
hsa-miR-1207-5p	0	0	1	1	1	1	WT1	Wilms tumor 1
hsa-miR-1207-5p	1	0	1	1	1	1	GCFC1	GC-rich sequence DNA-binding factor 1
hsa-miR-1207-5p	1	0	1	1	0	0	PHGDH	phosphoglycerate dehydrogenase
hsa-miR-1207-5p	1	0	1	1	1	1	TIAM1	T-cell lymphoma invasion and metastasis 1
hsa-miR-1207-5p	0	0	1	0	0	0	LOC257358	uncharacterized LOC257358
hsa-miR-1207-5p	0	0	1	1	1	1	CYP11B1	cytochrome P450, family 11, subfamily B, polypeptide 1
hsa-miR-1207-5p	1	0	1	1	1	1	BANP	BTG3 associated nuclear protein
hsa-miR-1207-5p	0	0	1	0	1	1	PVR	poliovirus receptor
hsa-miR-1207-5p	1	0	1	1	1	1	MAP3K12	mitogen-activated protein kinase kinase kinase 12
hsa-miR-1207-5p	0	0	1	1	1	1	C19orf47	chromosome 19 open reading frame 47
hsa-miR-1207-5p	0	0	1	1	0	0	NDUFA4L2	NADH dehydrogenase (ubiquinone) 1 alpha subcomplex, 4-like 2
hsa-miR-1207-5p	0	0	1	1	0	0	WBP1	WW domain binding protein 1
hsa-miR-1207-5p	1	0	1	1	0	0	RABL6	RAB, member RAS oncogene family-like 6
hsa-miR-1207-5p	1	0	1	1	1	1	KCND1	potassium voltage-gated channel, Shal-related subfamily, member 1
hsa-miR-1207-5p	0	0	1	1	1	1	SLC9A3R1	solute carrier family 9, subfamily A (NHE3, cation proton antiporter 3), member 3 regulator 1
hsa-miR-1207-5p	0	0	1	1	1	1	SPOCK1	sparc/osteonectin, cwcv and kazal-like domains proteoglycan (testican) 1
hsa-miR-1207-5p	1	0	1	1	1	1	RNF121	ring finger protein 121
hsa-miR-1207-5p	0	0	1	0	0	0	PART1	prostate androgen-regulated transcript 1 (non-protein coding)
hsa-miR-1207-5p	1	0	1	1	1	1	SLC7A8	solute carrier family 7 (amino acid transporter light chain, L system), member 8
hsa-miR-1207-5p	1	0	1	1	1	1	KLC2	kinesin light chain 2
hsa-miR-1207-5p	1	0	1	0	1	1	GATAD2B	GATA zinc finger domain containing 2B
hsa-miR-1207-5p	1	0	1	1	1	1	GALNTL2	UDP-N-acetyl-alpha-D-galactosamine:polypeptide N-acetylgalactosaminyltransferase-like 2
hsa-miR-1207-5p	0	0	1	1	1	1	AIFM3	apoptosis-inducing factor, mitochondrion-associated, 3
hsa-miR-1207-5p	1	0	1	1	1	1	LPPR2	lipid phosphate phosphatase-related protein type 2
hsa-miR-1207-5p	1	0	1	1	1	1	TBC1D20	TBC1 domain family, member 20
hsa-miR-1207-5p	0	0	1	1	0	0	DPAGT1	dolichyl-phosphate (UDP-N-acetylglucosamine) N-acetylglucosaminephosphotransferase 1 (GlcNAc-1-P transferase)
hsa-miR-1207-5p	1	0	1	1	1	1	RASGEF1A	RasGEF domain family, member 1A
hsa-miR-1207-5p	1	0	1	1	1	1	NDEL1	nudE nuclear distribution E homolog (A. nidulans)-like 1
hsa-miR-1207-5p	1	0	1	1	0	0	DOT1L	DOT1-like, histone H3 methyltransferase (S. cerevisiae)
hsa-miR-1207-5p	1	0	1	1	1	1	ATXN10	ataxin 10
hsa-miR-1207-5p	1	0	1	0	1	1	UVRAG	UV radiation resistance associated gene
hsa-miR-1207-5p	0	0	1	1	1	1	AQP3	aquaporin 3 (Gill blood group)
hsa-miR-1207-5p	0	0	1	1	1	1	LTBR	lymphotoxin beta receptor (TNFR superfamily, member 3)
hsa-miR-1207-5p	0	0	1	1	1	1	CHI3L1	chitinase 3-like 1 (cartilage glycoprotein-39)
hsa-miR-1207-5p	0	0	1	1	1	1	SIRPB2	signal-regulatory protein beta 2
hsa-miR-1207-5p	1	0	1	1	1	1	KCNIP3	Kv channel interacting protein 3, calsenilin
hsa-miR-1207-5p	0	0	1	0	0	0	LOC100129620	uncharacterized LOC100129620
hsa-miR-1207-5p	1	0	1	1	1	1	FAM222B	family with sequence similarity 222, member B
hsa-miR-1207-5p	0	0	1	0	1	1	NBPF3	neuroblastoma breakpoint family, member 3
hsa-miR-1207-5p	0	0	1	0	0	0	LOC730101	uncharacterized LOC730101
hsa-miR-1207-5p	1	0	1	0	1	1	NAA60	N(alpha)-acetyltransferase 60, NatF catalytic subunit
hsa-miR-1207-5p	1	0	1	1	1	1	CS	citrate synthase
hsa-miR-1207-5p	1	0	1	1	1	1	PEA15	phosphoprotein enriched in astrocytes 15
hsa-miR-1207-5p	0	0	1	1	0	0	MAP7D1	MAP7 domain containing 1
hsa-miR-1207-5p	0	0	1	1	1	1	FBLN1	fibulin 1
hsa-miR-1207-5p	0	0	1	1	1	1	BAG1	BCL2-associated athanogene
hsa-miR-1207-5p	1	0	1	1	1	1	AMT	aminomethyltransferase
hsa-miR-1207-5p	0	0	1	0	1	1	C19orf66	chromosome 19 open reading frame 66
hsa-miR-1207-5p	0	0	1	1	0	0	TRIM46	tripartite motif containing 46
hsa-miR-1207-5p	1	0	1	1	1	1	FADS1	fatty acid desaturase 1
hsa-miR-1207-5p	0	0	1	1	1	1	GNAI2	guanine nucleotide binding protein (G protein), alpha inhibiting activity polypeptide 2
hsa-miR-1207-5p	1	0	1	1	0	0	FBRS	fibrosin
hsa-miR-1207-5p	0	0	1	1	0	0	ERGIC3	ERGIC and golgi 3
hsa-miR-1207-5p	0	0	1	0	0	0	C1orf204	chromosome 1 open reading frame 204
hsa-miR-1207-5p	0	0	1	0	0	0	LOC643327	uncharacterized LOC643327
hsa-miR-1207-5p	1	0	1	1	0	0	CHD3	chromodomain helicase DNA binding protein 3
hsa-miR-1207-5p	1	0	1	0	1	1	THRB	thyroid hormone receptor, beta
hsa-miR-1207-5p	1	0	1	1	1	1	SNRNP70	small nuclear ribonucleoprotein 70kDa (U1)
hsa-miR-1207-5p	0	0	1	1	1	1	IL17RE	interleukin 17 receptor E
hsa-miR-1207-5p	1	0	1	1	1	1	EPB41L1	erythrocyte membrane protein band 4.1-like 1
hsa-miR-1207-5p	0	0	1	0	0	0	FLJ39534	uncharacterized FLJ39534
hsa-miR-1207-5p	0	0	1	1	1	1	TMEM177	transmembrane protein 177
hsa-miR-1207-5p	0	0	1	1	1	1	EXTL2	exostoses (multiple)-like 2
hsa-miR-1207-5p	0	0	1	1	0	0	CHCHD5	coiled-coil-helix-coiled-coil-helix domain containing 5
hsa-miR-1207-5p	0	0	1	1	0	0	ECM1	extracellular matrix protein 1
hsa-miR-1207-5p	1	0	1	1	1	1	GATA4	GATA binding protein 4
hsa-miR-1207-5p	0	0	1	1	1	1	FGD2	FYVE, RhoGEF and PH domain containing 2
hsa-miR-1207-5p	0	0	1	1	1	1	TMEM214	transmembrane protein 214
hsa-miR-1207-5p	0	0	1	0	0	0	LOC400680	uncharacterized LOC400680
hsa-miR-1207-5p	1	0	1	1	1	1	POU2F3	POU class 2 homeobox 3
hsa-miR-1207-5p	1	0	1	0	0	0	CTSB	cathepsin B
hsa-miR-1207-5p	0	0	1	1	1	1	MED20	mediator complex subunit 20
hsa-miR-1207-5p	1	0	1	1	1	1	RAB11FIP4	RAB11 family interacting protein 4 (class II)
hsa-miR-1207-5p	0	0	1	0	0	0	DNAJB8-AS1	DNAJB8 antisense RNA 1
hsa-miR-1207-5p	0	0	1	0	0	0	LINC00293	long intergenic non-protein coding RNA 293
hsa-miR-1207-5p	0	0	1	1	1	1	TEX35	testis expressed 35
hsa-miR-1207-5p	1	0	1	1	1	1	NSUN4	NOP2/Sun domain family, member 4
hsa-miR-1207-5p	0	0	1	1	1	1	RBM4	RNA binding motif protein 4
hsa-miR-1207-5p	0	0	1	1	0	0	AHCY	adenosylhomocysteinase
hsa-miR-1207-5p	0	0	1	0	0	0	LOC284385	uncharacterized LOC284385
hsa-miR-1207-5p	1	0	1	1	0	0	CFL1	cofilin 1 (non-muscle)
hsa-miR-1207-5p	0	0	1	1	0	0	PSAPL1	prosaposin-like 1 (gene/pseudogene)
hsa-miR-1207-5p	0	0	1	1	0	0	KLHDC3	kelch domain containing 3
hsa-miR-1207-5p	0	0	1	1	1	1	PRSS16	protease, serine, 16 (thymus)
hsa-miR-1207-5p	0	0	1	1	0	0	CORO1A	coronin, actin binding protein, 1A
hsa-miR-1207-5p	0	0	1	1	1	1	POLR1D	polymerase (RNA) I polypeptide D, 16kDa
hsa-miR-1207-5p	0	0	1	1	0	0	HNRNPL	heterogeneous nuclear ribonucleoprotein L
hsa-miR-1207-5p	0	0	1	0	0	0	HLA-DQB2	major histocompatibility complex, class II, DQ beta 2
hsa-miR-1207-5p	0	0	1	0	0	0	CECR7	cat eye syndrome chromosome region, candidate 7 (non-protein coding)
hsa-miR-1207-5p	0	0	1	1	1	1	RGS14	regulator of G-protein signaling 14
hsa-miR-1207-5p	0	0	1	0	0	0	LOC100130954	uncharacterized LOC100130954
hsa-miR-1207-5p	0	0	1	1	1	1	ARFGAP2	ADP-ribosylation factor GTPase activating protein 2
hsa-miR-1207-5p	1	0	1	1	1	1	THTPA	thiamine triphosphatase
hsa-miR-1207-5p	1	0	1	1	0	0	FBXL19	F-box and leucine-rich repeat protein 19
hsa-miR-1207-5p	0	0	1	0	1	1	MYLK4	myosin light chain kinase family, member 4
hsa-miR-1207-5p	1	0	1	0	1	1	UNC5D	unc-5 homolog D (C. elegans)
hsa-miR-1207-5p	1	0	1	1	1	1	DDX42	DEAD (Asp-Glu-Ala-Asp) box polypeptide 42
hsa-miR-1207-5p	0	0	1	1	1	1	SLFN13	schlafen family member 13
hsa-miR-1207-5p	1	0	1	1	1	1	ZMAT3	zinc finger, matrin-type 3
hsa-miR-1207-5p	1	0	1	1	1	1	AGAP2	ArfGAP with GTPase domain, ankyrin repeat and PH domain 2
hsa-miR-1207-5p	1	0	1	1	1	1	GRM4	glutamate receptor, metabotropic 4
hsa-miR-1207-5p	0	0	1	1	1	1	ZDHHC15	zinc finger, DHHC-type containing 15
hsa-miR-1207-5p	1	0	1	1	0	0	CACNB3	calcium channel, voltage-dependent, beta 3 subunit
hsa-miR-1207-5p	0	0	1	1	0	0	HDAC6	histone deacetylase 6
hsa-miR-1207-5p	1	0	1	1	1	1	PXN	paxillin
hsa-miR-1207-5p	1	0	1	1	1	1	ZBTB4	zinc finger and BTB domain containing 4
hsa-miR-1207-5p	0	0	1	1	0	0	DGKA	diacylglycerol kinase, alpha 80kDa
hsa-miR-1207-5p	0	0	1	1	0	0	SLC26A10	solute carrier family 26, member 10
hsa-miR-1207-5p	1	0	1	1	1	1	ABHD6	abhydrolase domain containing 6
hsa-miR-1207-5p	0	0	1	1	0	0	ARHGAP10	Rho GTPase activating protein 10
hsa-miR-1207-5p	0	0	1	1	1	1	ARHGEF26	Rho guanine nucleotide exchange factor (GEF) 26
hsa-miR-1207-5p	0	0	1	0	0	0	C1orf132	chromosome 1 open reading frame 132
hsa-miR-1207-5p	1	0	1	1	1	1	EGLN3	egl nine homolog 3 (C. elegans)
hsa-miR-1207-5p	0	0	1	1	1	1	RGS3	regulator of G-protein signaling 3
hsa-miR-1207-5p	0	0	1	1	0	0	TJAP1	tight junction associated protein 1 (peripheral)
hsa-miR-1207-5p	0	0	1	1	1	1	TMEM59	transmembrane protein 59
hsa-miR-1207-5p	0	0	1	0	0	0	LGALS17A	Charcot-Leyden crystal protein pseudogene
hsa-miR-1207-5p	0	0	1	0	0	0	TMPRSS11BNL	TMPRSS11B N terminal-like
hsa-miR-1207-5p	0	0	1	0	0	0	SATB2-AS1	SATB2 antisense RNA 1
hsa-miR-1207-5p	0	0	1	0	0	0	LOC650368	asparagine-linked glycosylation 1-like pseudogene
hsa-miR-1207-5p	0	0	1	1	0	0	C16orf86	chromosome 16 open reading frame 86
hsa-miR-1207-5p	0	0	1	1	0	0	KRT37	keratin 37
hsa-miR-1207-5p	1	0	1	0	1	1	WDR82	WD repeat domain 82
hsa-miR-1207-5p	1	0	1	1	1	1	FAM219A	family with sequence similarity 219, member A
hsa-miR-1207-5p	0	0	1	0	0	0	LOC100133029	sirtuin 5 pseudogene
hsa-miR-1207-5p	1	0	1	1	1	1	PRDM2	PR domain containing 2, with ZNF domain
hsa-miR-1207-5p	0	0	1	1	1	1	SLC9A1	solute carrier family 9, subfamily A (NHE1, cation proton antiporter 1), member 1
hsa-miR-1207-5p	0	0	1	1	0	0	C20orf27	chromosome 20 open reading frame 27
hsa-miR-1207-5p	0	0	1	1	0	0	NPIP	nuclear pore complex interacting protein
hsa-miR-1207-5p	1	0	1	1	1	1	ABR	active BCR-related
hsa-miR-1207-5p	1	0	1	0	1	1	TTYH3	tweety homolog 3 (Drosophila)
hsa-miR-1207-5p	0	0	1	1	1	1	IDS	iduronate 2-sulfatase
hsa-miR-1207-5p	1	0	1	1	0	0	BCORL1	BCL6 corepressor-like 1
hsa-miR-1207-5p	1	0	1	1	1	1	PLEKHH1	pleckstrin homology domain containing, family H (with MyTH4 domain) member 1
hsa-miR-1207-5p	1	0	1	1	1	1	CELF6	CUGBP, Elav-like family member 6
hsa-miR-1207-5p	0	0	1	1	0	0	PPP1R18	protein phosphatase 1, regulatory subunit 18
hsa-miR-1207-5p	0	0	1	1	1	1	C2orf91	chromosome 2 open reading frame 91
hsa-miR-1207-5p	1	0	1	1	0	0	GXYLT1	glucoside xylosyltransferase 1
hsa-miR-1207-5p	1	0	1	1	1	1	PIAS3	protein inhibitor of activated STAT, 3
hsa-miR-1207-5p	0	0	1	1	0	0	GABRA2	gamma-aminobutyric acid (GABA) A receptor, alpha 2
hsa-miR-1207-5p	0	0	1	1	0	0	CUL9	cullin 9
hsa-miR-1207-5p	0	0	1	1	0	0	LOC100128239	uncharacterized LOC100128239
hsa-miR-1207-5p	1	0	1	1	1	1	C15orf52	chromosome 15 open reading frame 52
hsa-miR-1207-5p	1	0	1	0	0	0	ANKRD52	ankyrin repeat domain 52
hsa-miR-1207-5p	0	0	1	1	0	0	LOC399829	uncharacterized LOC399829
hsa-miR-1207-5p	0	0	1	0	0	0	FAM95B1	family with sequence similarity 95, member B1
hsa-miR-1207-5p	0	0	1	1	1	1	EPPIN	epididymal peptidase inhibitor
hsa-miR-1207-5p	0	0	1	1	0	0	C20orf141	chromosome 20 open reading frame 141
hsa-miR-1207-5p	1	0	1	0	1	1	PLXNA1	plexin A1
hsa-miR-1207-5p	1	0	1	1	0	0	ATXN7L3	ataxin 7-like 3
hsa-miR-1207-5p	1	0	1	1	1	1	CPNE2	copine II
hsa-miR-1207-5p	1	0	1	1	1	1	DPY19L3	dpy-19-like 3 (C. elegans)
hsa-miR-1207-5p	0	0	1	1	0	0	CLDN4	claudin 4
hsa-miR-1207-5p	0	0	1	1	1	1	USP54	ubiquitin specific peptidase 54
hsa-miR-1207-5p	0	0	1	1	0	0	SPATS1	spermatogenesis associated, serine-rich 1
hsa-miR-1207-5p	0	0	1	1	1	1	SNX22	sorting nexin 22
hsa-miR-1207-5p	0	0	1	1	0	0	CCDC88B	coiled-coil domain containing 88B
hsa-miR-1207-5p	1	0	1	1	1	1	DLG2	discs, large homolog 2 (Drosophila)
hsa-miR-1207-5p	1	0	1	0	1	1	GPR180	G protein-coupled receptor 180
hsa-miR-1207-5p	0	0	1	1	0	0	HS3ST5	heparan sulfate (glucosamine) 3-O-sulfotransferase 5
hsa-miR-1207-5p	1	0	1	1	1	1	FMNL3	formin-like 3
hsa-miR-1207-5p	1	0	1	1	0	0	MRVI1	murine retrovirus integration site 1 homolog
hsa-miR-1207-5p	1	0	1	0	1	1	N4BP3	NEDD4 binding protein 3
hsa-miR-1207-5p	1	0	1	1	1	1	UBE3B	ubiquitin protein ligase E3B
hsa-miR-1207-5p	0	0	1	1	1	1	ARHGAP33	Rho GTPase activating protein 33
hsa-miR-1207-5p	1	0	1	1	0	0	PTPN5	protein tyrosine phosphatase, non-receptor type 5 (striatum-enriched)
hsa-miR-1207-5p	0	0	1	0	0	0	LOC100128262	uncharacterized LOC100128262
hsa-miR-1207-5p	1	0	1	1	0	0	PPP1CA	protein phosphatase 1, catalytic subunit, alpha isozyme
hsa-miR-1207-5p	0	0	1	1	0	0	GRINA	glutamate receptor, ionotropic, N-methyl D-aspartate-associated protein 1 (glutamate binding)
hsa-miR-1207-5p	1	0	1	1	1	1	RNF44	ring finger protein 44
hsa-miR-1207-5p	1	0	1	1	1	1	R3HDM1	R3H domain containing 1
hsa-miR-1207-5p	0	0	1	1	0	0	AADACL3	arylacetamide deacetylase-like 3
hsa-miR-1207-5p	1	0	1	1	1	1	PLA2G15	phospholipase A2, group XV
hsa-miR-1207-5p	0	0	1	1	0	0	NCF1	neutrophil cytosolic factor 1
hsa-miR-1207-5p	0	0	1	0	0	0	LOC100128098	uncharacterized LOC100128098
hsa-miR-1207-5p	0	0	1	0	1	1	LOC401321	uncharacterized LOC401321
hsa-miR-1207-5p	1	0	1	1	1	1	SLC12A6	solute carrier family 12 (potassium/chloride transporters), member 6
hsa-miR-1207-5p	0	0	1	0	0	0	FAM205B	transmembrane protein C9orf144B pseudogene
hsa-miR-1207-5p	1	0	1	1	0	0	MAN1B1	mannosidase, alpha, class 1B, member 1
hsa-miR-1207-5p	1	0	1	0	1	1	KDM2A	lysine (K)-specific demethylase 2A
hsa-miR-1207-5p	1	0	1	1	0	0	SMCR7	Smith-Magenis syndrome chromosome region, candidate 7
hsa-miR-1207-5p	1	0	1	0	1	1	ZZEF1	zinc finger, ZZ-type with EF-hand domain 1
hsa-miR-1207-5p	1	0	1	1	1	1	FRYL	FRY-like
hsa-miR-1207-5p	1	0	1	0	0	0	SP7	Sp7 transcription factor
hsa-miR-1207-5p	1	0	1	1	1	1	AIF1L	allograft inflammatory factor 1-like
hsa-miR-1207-5p	0	0	1	0	0	0	VWA3A	von Willebrand factor A domain containing 3A
hsa-miR-1207-5p	1	0	1	0	1	1	KPNA6	karyopherin alpha 6 (importin alpha 7)
hsa-miR-1207-5p	0	0	1	0	0	0	EMBP1	embigin pseudogene 1
hsa-miR-1207-5p	0	0	1	1	0	0	WFIKKN1	WAP, follistatin/kazal, immunoglobulin, kunitz and netrin domain containing 1
hsa-miR-1207-5p	1	0	1	1	1	1	PHC2	polyhomeotic homolog 2 (Drosophila)
hsa-miR-1207-5p	0	0	1	0	0	0	PINLYP	phospholipase A2 inhibitor and LY6/PLAUR domain containing
hsa-miR-1207-5p	0	0	1	0	0	0	FLJ26245	uncharacterized LOC400533
hsa-miR-1207-5p	1	0	1	1	1	1	CD200	CD200 molecule
hsa-miR-1207-5p	0	0	1	1	1	1	TBX19	T-box 19
hsa-miR-1207-5p	0	0	1	1	0	0	HEATR8	HEAT repeat containing 8
hsa-miR-1207-5p	0	0	1	0	0	0	FAM27A	family with sequence similarity 27, member A
hsa-miR-1207-5p	0	0	1	1	1	1	BRAT1	BRCA1-associated ATM activator 1
hsa-miR-1207-5p	0	0	1	0	0	0	LOC390660	FLJ00317 protein
hsa-miR-1207-5p	1	0	1	0	1	1	ESRRG	estrogen-related receptor gamma
hsa-miR-1207-5p	0	0	1	1	1	1	CDIPT	CDP-diacylglycerol--inositol 3-phosphatidyltransferase
hsa-miR-1207-5p	0	0	1	0	1	1	RUFY4	RUN and FYVE domain containing 4
hsa-miR-1207-5p	0	0	1	1	0	0	ISOC2	isochorismatase domain containing 2
hsa-miR-1207-5p	0	0	1	1	1	1	RNF19B	ring finger protein 19B
hsa-miR-1207-5p	0	0	1	1	1	1	ZNF346	zinc finger protein 346
hsa-miR-1207-5p	0	0	1	1	1	1	PDE2A	phosphodiesterase 2A, cGMP-stimulated
hsa-miR-1207-5p	0	0	1	1	1	1	NR4A1	nuclear receptor subfamily 4, group A, member 1
hsa-miR-1207-5p	0	0	1	0	0	0	AGAP9	ArfGAP with GTPase domain, ankyrin repeat and PH domain 9
hsa-miR-1207-5p	0	0	1	1	0	0	ZSCAN18	zinc finger and SCAN domain containing 18
hsa-miR-1207-5p	0	0	1	1	0	0	FIZ1	FLT3-interacting zinc finger 1
hsa-miR-1207-5p	0	0	1	1	0	0	SCNN1A	sodium channel, non-voltage-gated 1 alpha subunit
hsa-miR-1207-5p	0	0	1	1	0	0	ANAPC15	anaphase promoting complex subunit 15
hsa-miR-1207-5p	1	0	1	1	1	1	TAP2	transporter 2, ATP-binding cassette, sub-family B (MDR/TAP)
hsa-miR-1207-5p	0	0	1	1	1	1	DHRS3	dehydrogenase/reductase (SDR family) member 3
hsa-miR-1207-5p	0	0	1	0	1	1	PEX5	peroxisomal biogenesis factor 5
hsa-miR-1207-5p	1	0	1	1	1	1	TRPM6	transient receptor potential cation channel, subfamily M, member 6
hsa-miR-1207-5p	0	0	1	0	1	1	BCAS1	breast carcinoma amplified sequence 1
hsa-miR-1207-5p	1	0	1	1	0	0	ABLIM3	actin binding LIM protein family, member 3
hsa-miR-1207-5p	1	0	1	1	1	1	CAMK2G	calcium/calmodulin-dependent protein kinase II gamma
hsa-miR-1207-5p	0	0	1	1	0	0	PCSK5	proprotein convertase subtilisin/kexin type 5
hsa-miR-1207-5p	1	0	1	1	1	1	ACTN1	actinin, alpha 1
hsa-miR-1207-5p	1	0	1	0	1	1	MAP3K3	mitogen-activated protein kinase kinase kinase 3
hsa-miR-1207-5p	1	0	1	1	0	0	ZNF219	zinc finger protein 219
hsa-miR-1207-5p	1	0	1	1	1	1	COBLL1	COBL-like 1
hsa-miR-1207-5p	0	0	1	1	1	1	TBC1D3G	TBC1 domain family, member 3G
hsa-miR-1207-5p	0	0	1	1	1	1	CCKBR	cholecystokinin B receptor
hsa-miR-1207-5p	0	0	1	1	1	1	RNF135	ring finger protein 135
hsa-miR-1207-5p	1	0	1	1	1	1	NCOA1	nuclear receptor coactivator 1
hsa-miR-1207-5p	1	0	1	0	1	1	TEAD3	TEA domain family member 3
hsa-miR-1207-5p	1	0	1	1	1	1	DUSP3	dual specificity phosphatase 3
hsa-miR-1207-5p	1	0	1	1	1	1	AHCYL1	adenosylhomocysteinase-like 1
hsa-miR-1207-5p	1	0	1	1	1	1	NECAP1	NECAP endocytosis associated 1
hsa-miR-1207-5p	0	0	1	1	1	1	TTLL3	tubulin tyrosine ligase-like family, member 3
hsa-miR-1207-5p	0	0	1	1	0	0	OPLAH	5-oxoprolinase (ATP-hydrolysing)
hsa-miR-1207-5p	1	0	1	0	1	1	SLC2A3	solute carrier family 2 (facilitated glucose transporter), member 3
hsa-miR-1207-5p	0	0	1	0	0	0	POM121L9P	POM121 transmembrane nucleoporin-like 9, pseudogene
hsa-miR-1207-5p	0	0	1	1	0	0	TBC1D10B	TBC1 domain family, member 10B
hsa-miR-1207-5p	0	0	1	0	0	0	POM121L8P	POM121 transmembrane nucleoporin-like 8 pseudogene
hsa-miR-1207-5p	0	0	1	1	0	0	RIMBP3	RIMS binding protein 3
hsa-miR-1207-5p	0	0	1	1	1	1	ARIH1	ariadne homolog, ubiquitin-conjugating enzyme E2 binding protein, 1 (Drosophila)
hsa-miR-1207-5p	0	0	1	0	0	0	TPTE2P6	transmembrane phosphoinositide 3-phosphatase and tensin homolog 2 pseudogene 6
hsa-miR-1207-5p	0	0	1	1	1	1	GFAP	glial fibrillary acidic protein
hsa-miR-1207-5p	1	0	1	1	1	1	SMAP2	small ArfGAP2
hsa-miR-1207-5p	1	0	1	1	1	1	FBXL17	F-box and leucine-rich repeat protein 17
hsa-miR-1207-5p	0	0	1	1	1	1	KIDINS220	kinase D-interacting substrate, 220kDa
hsa-miR-1207-5p	0	0	1	1	0	0	ODF3	outer dense fiber of sperm tails 3
hsa-miR-1207-5p	0	0	1	0	0	0	DNAJC5B	DnaJ (Hsp40) homolog, subfamily C, member 5 beta
hsa-miR-1207-5p	0	0	1	0	0	0	KIAA0913	KIAA0913
hsa-miR-1207-5p	0	0	1	0	1	1	TBC1D3F	TBC1 domain family, member 3F
hsa-miR-1207-5p	0	0	1	1	1	1	RHOT1	ras homolog family member T1
hsa-miR-1207-5p	0	0	1	1	0	0	PCIF1	PDX1 C-terminal inhibiting factor 1
hsa-miR-1207-5p	0	0	1	1	1	1	STAG3L1	stromal antigen 3-like 1
hsa-miR-1207-5p	1	0	1	1	1	1	ERI1	exoribonuclease 1
hsa-miR-1207-5p	0	0	1	1	0	0	DDX49	DEAD (Asp-Glu-Ala-Asp) box polypeptide 49
hsa-miR-1207-5p	0	0	1	1	1	1	ARFGAP1	ADP-ribosylation factor GTPase activating protein 1
hsa-miR-1207-5p	1	0	1	0	1	1	CEP170	centrosomal protein 170kDa
hsa-miR-1207-5p	1	0	1	1	1	1	TFE3	transcription factor binding to IGHM enhancer 3
hsa-miR-1207-5p	0	0	1	1	0	0	DOPEY1	dopey family member 1
hsa-miR-1207-5p	1	0	1	1	1	1	CTTNBP2NL	CTTNBP2 N-terminal like
hsa-miR-1207-5p	1	0	1	0	1	1	GRIN3A	glutamate receptor, ionotropic, N-methyl-D-aspartate 3A
hsa-miR-1207-5p	0	0	1	0	0	0	FAM66D	family with sequence similarity 66, member D
hsa-miR-1207-5p	1	0	1	1	1	1	PKNOX2	PBX/knotted 1 homeobox 2
hsa-miR-1207-5p	1	0	1	1	1	1	SLC30A8	solute carrier family 30 (zinc transporter), member 8
hsa-miR-1207-5p	1	0	1	1	1	1	DENND1B	DENN/MADD domain containing 1B
hsa-miR-1207-5p	0	0	1	1	0	0	KRBA1	KRAB-A domain containing 1
hsa-miR-1207-5p	0	0	1	1	1	1	BEND7	BEN domain containing 7
hsa-miR-1207-5p	0	0	1	1	0	0	LETM2	leucine zipper-EF-hand containing transmembrane protein 2
hsa-miR-1207-5p	0	0	1	1	1	1	EGFLAM	EGF-like, fibronectin type III and laminin G domains
hsa-miR-1207-5p	1	0	1	1	1	1	CHMP7	charged multivesicular body protein 7
hsa-miR-1207-5p	1	0	1	1	1	1	NFX1	nuclear transcription factor, X-box binding 1
hsa-miR-1207-5p	1	0	1	0	0	0	YLPM1	YLP motif containing 1
hsa-miR-1207-5p	1	0	1	1	0	0	USP24	ubiquitin specific peptidase 24
hsa-miR-1207-5p	0	0	1	1	1	1	MYPN	myopalladin
hsa-miR-1207-5p	1	0	1	1	1	1	MLL3	myeloid/lymphoid or mixed-lineage leukemia 3
hsa-miR-1207-5p	1	0	1	1	0	0	CELF5	CUGBP, Elav-like family member 5
hsa-miR-1207-5p	0	0	1	1	1	1	YAP1	Yes-associated protein 1
hsa-miR-1207-5p	1	0	1	1	0	0	FXYD6	FXYD domain containing ion transport regulator 6
hsa-miR-1207-5p	1	0	1	1	1	1	SBF2	SET binding factor 2
hsa-miR-1207-5p	0	0	1	1	1	1	INPP5B	inositol polyphosphate-5-phosphatase, 75kDa
hsa-miR-1207-5p	0	0	1	1	0	0	TMEM91	transmembrane protein 91
hsa-miR-1207-5p	0	0	1	1	1	1	NFE2L1	nuclear factor (erythroid-derived 2)-like 1
hsa-miR-1207-5p	0	0	1	1	0	0	LRRN2	leucine rich repeat neuronal 2
hsa-miR-1207-5p	0	0	1	1	0	0	PPIE	peptidylprolyl isomerase E (cyclophilin E)
hsa-miR-1207-5p	1	0	1	1	1	1	FAM63B	family with sequence similarity 63, member B
hsa-miR-1207-5p	0	0	1	1	0	0	TTLL6	tubulin tyrosine ligase-like family, member 6
hsa-miR-1207-5p	1	0	1	1	0	0	LRRC16B	leucine rich repeat containing 16B
hsa-miR-1207-5p	1	0	1	1	1	1	MBD6	methyl-CpG binding domain protein 6
hsa-miR-1207-5p	1	0	1	0	1	1	COX18	COX18 cytochrome c oxidase assembly homolog (S. cerevisiae)
hsa-miR-1207-5p	1	0	1	0	1	1	KIF21B	kinesin family member 21B
hsa-miR-1207-5p	1	0	1	1	1	1	SET	SET nuclear oncogene
hsa-miR-1207-5p	0	0	1	1	1	1	AMOTL1	angiomotin like 1
hsa-miR-1207-5p	1	0	1	1	1	1	IKZF2	IKAROS family zinc finger 2 (Helios)
hsa-miR-1207-5p	0	0	1	1	1	1	CRB1	crumbs homolog 1 (Drosophila)
hsa-miR-1207-5p	0	0	1	1	0	0	GPC2	glypican 2
hsa-miR-1207-5p	0	0	1	0	0	0	CLCN1	chloride channel, voltage-sensitive 1
hsa-miR-1207-5p	1	0	1	1	1	1	MARK4	MAP/microtubule affinity-regulating kinase 4
hsa-miR-1207-5p	0	0	1	1	0	0	EIF5A	eukaryotic translation initiation factor 5A
hsa-miR-1207-5p	1	0	1	1	1	1	GGT7	gamma-glutamyltransferase 7
hsa-miR-1207-5p	1	0	1	1	1	1	USF2	upstream transcription factor 2, c-fos interacting
hsa-miR-1207-5p	0	0	1	1	1	1	CYP4B1	cytochrome P450, family 4, subfamily B, polypeptide 1
hsa-miR-1207-5p	1	0	1	1	1	1	LUZP2	leucine zipper protein 2
hsa-miR-1207-5p	0	0	1	1	0	0	CMTM1	CKLF-like MARVEL transmembrane domain containing 1
hsa-miR-1207-5p	0	0	1	1	1	1	CEP41	centrosomal protein 41kDa
hsa-miR-1207-5p	1	0	1	1	1	1	RIC8B	resistance to inhibitors of cholinesterase 8 homolog B (C. elegans)
hsa-miR-1207-5p	0	0	1	1	0	0	ZSCAN30	zinc finger and SCAN domain containing 30
hsa-miR-1207-5p	1	0	1	1	1	1	TPP1	tripeptidyl peptidase I
hsa-miR-1207-5p	1	0	1	1	1	1	PNRC1	proline-rich nuclear receptor coactivator 1
hsa-miR-1207-5p	1	0	1	1	1	1	OPRM1	opioid receptor, mu 1
hsa-miR-1207-5p	0	0	1	0	0	0	MEG3	maternally expressed 3 (non-protein coding)
hsa-miR-1207-5p	1	0	1	1	1	1	GFRA2	GDNF family receptor alpha 2
hsa-miR-1207-5p	0	0	1	0	0	0	TAG	tumor antigen gene
hsa-miR-1207-5p	0	0	1	1	1	1	GCOM1	GRINL1A complex locus 1
hsa-miR-1207-5p	0	0	1	0	0	0	FAM138C	family with sequence similarity 138, member C
hsa-miR-1207-5p	0	0	1	1	1	1	SLC22A12	solute carrier family 22 (organic anion/urate transporter), member 12
hsa-miR-1207-5p	1	0	1	1	1	1	TMCC2	transmembrane and coiled-coil domain family 2
hsa-miR-1207-5p	0	0	1	1	0	0	VSIG4	V-set and immunoglobulin domain containing 4
hsa-miR-1207-5p	0	0	1	1	1	1	TMPRSS4	transmembrane protease, serine 4
hsa-miR-1207-5p	0	0	1	0	0	0	LINC00085	long intergenic non-protein coding RNA 85
hsa-miR-1207-5p	0	0	1	1	0	0	PDZD11	PDZ domain containing 11
hsa-miR-1207-5p	0	0	1	1	1	1	TNFRSF19	tumor necrosis factor receptor superfamily, member 19
hsa-miR-1207-5p	0	0	1	1	0	0	RAET1E	retinoic acid early transcript 1E
hsa-miR-1207-5p	0	0	1	1	1	1	RPTN	repetin
hsa-miR-1207-5p	0	0	1	1	1	1	TIMM50	translocase of inner mitochondrial membrane 50 homolog (S. cerevisiae)
hsa-miR-1207-5p	0	0	1	1	0	0	SH2D6	SH2 domain containing 6
hsa-miR-1207-5p	0	0	1	0	1	1	XKR5	XK, Kell blood group complex subunit-related family, member 5
hsa-miR-1207-5p	1	0	1	1	1	1	MECP2	methyl CpG binding protein 2 (Rett syndrome)
hsa-miR-1207-5p	0	0	1	1	0	0	PAOX	polyamine oxidase (exo-N4-amino)
hsa-miR-1207-5p	0	0	1	1	0	0	ASB16	ankyrin repeat and SOCS box containing 16
hsa-miR-1207-5p	1	0	1	1	0	0	ADAM15	ADAM metallopeptidase domain 15
hsa-miR-1207-5p	0	0	1	0	0	0	THOC1	THO complex 1
hsa-miR-1207-5p	0	0	1	1	0	0	DHRS4	dehydrogenase/reductase (SDR family) member 4
hsa-miR-1207-5p	0	0	1	1	1	1	IL24	interleukin 24
hsa-miR-1207-5p	0	0	1	1	1	1	SMPD1	sphingomyelin phosphodiesterase 1, acid lysosomal
hsa-miR-1207-5p	0	0	1	1	0	0	C15orf61	chromosome 15 open reading frame 61
hsa-miR-1207-5p	1	0	1	1	1	1	MAPT	microtubule-associated protein tau
hsa-miR-1207-5p	1	0	1	1	1	1	MCHR1	melanin-concentrating hormone receptor 1
hsa-miR-1207-5p	1	0	1	1	1	1	RTN3	reticulon 3
hsa-miR-1207-5p	1	0	1	1	1	1	PFKFB4	6-phosphofructo-2-kinase/fructose-2,6-biphosphatase 4
hsa-miR-1207-5p	1	0	1	1	0	0	DGAT2	diacylglycerol O-acyltransferase 2
hsa-miR-1207-5p	1	0	1	1	1	1	QKI	QKI, KH domain containing, RNA binding
hsa-miR-1207-5p	0	0	1	0	0	0	LOC100128076	protein tyrosine phosphatase pseudogene
hsa-miR-1207-5p	0	0	1	0	1	1	KCNE1	potassium voltage-gated channel, Isk-related family, member 1
hsa-miR-1207-5p	0	0	1	1	0	0	DMKN	dermokine
hsa-miR-1207-5p	1	0	1	1	0	0	TAF4B	TAF4b RNA polymerase II, TATA box binding protein (TBP)-associated factor, 105kDa
hsa-miR-1207-5p	0	0	1	1	0	0	NBPF8	neuroblastoma breakpoint family, member 8
hsa-miR-1207-5p	1	0	1	1	1	1	AMOT	angiomotin
hsa-miR-1207-5p	1	0	1	1	1	1	RPRD1A	regulation of nuclear pre-mRNA domain containing 1A
hsa-miR-1207-5p	0	0	1	1	1	1	SNX11	sorting nexin 11
hsa-miR-1207-5p	1	0	1	1	1	1	PDLIM3	PDZ and LIM domain 3
hsa-miR-1207-5p	0	0	1	0	0	0	VWA5B2	von Willebrand factor A domain containing 5B2
hsa-miR-1207-5p	1	0	1	1	0	0	PPP4C	protein phosphatase 4, catalytic subunit
hsa-miR-1207-5p	0	0	1	1	1	1	TFG	TRK-fused gene
hsa-miR-1207-5p	0	0	1	1	0	0	AAR2	AAR2 splicing factor homolog (S. cerevisiae)
hsa-miR-1207-5p	0	0	1	1	1	1	B4GALT2	UDP-Gal:betaGlcNAc beta 1,4- galactosyltransferase, polypeptide 2
hsa-miR-1207-5p	1	0	1	1	1	1	HOXC13	homeobox C13
hsa-miR-1207-5p	1	0	1	1	1	1	NRGN	neurogranin (protein kinase C substrate, RC3)
hsa-miR-1207-5p	1	0	1	0	1	1	DPYSL5	dihydropyrimidinase-like 5
hsa-miR-1207-5p	0	0	1	1	0	0	ZNF576	zinc finger protein 576
hsa-miR-1207-5p	1	0	1	1	0	0	STX1A	syntaxin 1A (brain)
hsa-miR-1207-5p	1	0	1	1	1	1	RIMS3	regulating synaptic membrane exocytosis 3
hsa-miR-1207-5p	1	0	1	1	1	1	NONO	non-POU domain containing, octamer-binding
hsa-miR-1207-5p	1	0	1	1	1	1	PPP1R11	protein phosphatase 1, regulatory (inhibitor) subunit 11
hsa-miR-1207-5p	0	0	1	1	0	0	SNRPB	small nuclear ribonucleoprotein polypeptides B and B1
hsa-miR-1207-5p	0	0	1	1	1	1	FTO	fat mass and obesity associated
hsa-miR-1207-5p	1	0	1	1	0	0	DHDDS	dehydrodolichyl diphosphate synthase
hsa-miR-1207-5p	0	0	1	1	0	0	RUSC1	RUN and SH3 domain containing 1
hsa-miR-1207-5p	1	0	1	1	1	1	SMO	smoothened, frizzled family receptor
hsa-miR-1207-5p	1	0	1	1	1	1	ZNF410	zinc finger protein 410
hsa-miR-1207-5p	0	0	1	1	0	0	ZNF821	zinc finger protein 821
hsa-miR-1207-5p	1	0	1	0	1	1	MAP2K7	mitogen-activated protein kinase kinase 7
hsa-miR-1207-5p	0	0	1	1	1	1	PRMT5	protein arginine methyltransferase 5
hsa-miR-1207-5p	1	0	1	1	1	1	POU2F2	POU class 2 homeobox 2
hsa-miR-1207-5p	0	0	1	1	0	0	LOC100132167	uncharacterized LOC100132167
hsa-miR-1207-5p	0	0	1	1	0	0	CBX5	chromobox homolog 5
hsa-miR-1207-5p	0	0	1	1	0	0	OBSL1	obscurin-like 1
hsa-miR-1207-5p	0	0	1	0	0	0	GLIS3-AS1	GLIS3 antisense RNA 1
hsa-miR-1207-5p	0	0	1	1	0	0	AGBL5	ATP/GTP binding protein-like 5
hsa-miR-1207-5p	0	0	1	1	0	0	ALKBH6	alkB, alkylation repair homolog 6 (E. coli)
hsa-miR-1207-5p	1	0	1	1	1	1	PTMS	parathymosin
hsa-miR-1207-5p	0	0	1	1	0	0	RBM14	RNA binding motif protein 14
hsa-miR-1207-5p	1	0	1	1	1	1	TRIM39	tripartite motif containing 39
hsa-miR-1207-5p	1	0	1	0	1	1	DDX3X	DEAD (Asp-Glu-Ala-Asp) box polypeptide 3, X-linked
hsa-miR-1207-5p	0	0	1	1	0	0	CCDC114	coiled-coil domain containing 114
hsa-miR-1207-5p	0	0	1	1	0	0	SPAG7	sperm associated antigen 7
hsa-miR-1207-5p	0	0	1	1	1	1	ICA1	islet cell autoantigen 1, 69kDa
hsa-miR-1207-5p	1	0	1	1	1	1	PLEKHO2	pleckstrin homology domain containing, family O member 2
hsa-miR-1207-5p	1	0	1	1	1	1	HMGA1	high mobility group AT-hook 1
hsa-miR-1207-5p	0	0	1	0	0	0	ATXN7L3B	ataxin 7-like 3B
hsa-miR-1207-5p	0	0	1	0	0	0	LOC400043	uncharacterized LOC400043
hsa-miR-1207-5p	1	0	1	1	0	0	MARCH9	membrane-associated ring finger (C3HC4) 9
hsa-miR-1207-5p	1	0	1	1	1	1	RELL2	RELT-like 2
hsa-miR-1207-5p	1	0	1	1	1	1	B4GALT3	UDP-Gal:betaGlcNAc beta 1,4- galactosyltransferase, polypeptide 3
hsa-miR-1207-5p	1	0	1	1	0	0	SIGMAR1	sigma non-opioid intracellular receptor 1
hsa-miR-1207-5p	0	0	1	1	1	1	ATXN2L	ataxin 2-like
hsa-miR-1207-5p	1	0	1	1	0	0	FA2H	fatty acid 2-hydroxylase
hsa-miR-1207-5p	0	0	1	1	0	0	ARHGAP8	Rho GTPase activating protein 8
hsa-miR-1207-5p	1	0	1	0	1	1	CNP	2',3'-cyclic nucleotide 3' phosphodiesterase
hsa-miR-1207-5p	1	0	1	1	1	1	OTUD5	OTU domain containing 5
hsa-miR-1207-5p	0	0	1	1	0	0	CAPNS1	calpain, small subunit 1
hsa-miR-1207-5p	0	0	1	0	0	0	GRAMD1B	GRAM domain containing 1B
hsa-miR-1207-5p	0	0	1	1	1	1	TAF12	TAF12 RNA polymerase II, TATA box binding protein (TBP)-associated factor, 20kDa
hsa-miR-1207-5p	0	0	1	0	0	0	TPTEP1	transmembrane phosphatase with tensin homology pseudogene 1
hsa-miR-1207-5p	0	0	1	1	1	1	NUP98	nucleoporin 98kDa
hsa-miR-1207-5p	0	0	1	1	0	0	MLXIPL	MLX interacting protein-like
hsa-miR-1207-5p	0	0	1	1	1	1	ATP5SL	ATP5S-like
hsa-miR-1207-5p	0	0	1	1	1	1	DEDD2	death effector domain containing 2
hsa-miR-1207-5p	1	0	1	1	1	1	CAP1	CAP, adenylate cyclase-associated protein 1 (yeast)
hsa-miR-1207-5p	0	0	1	1	1	1	KLHL29	kelch-like 29 (Drosophila)
hsa-miR-1207-5p	1	0	1	1	1	1	ETF1	eukaryotic translation termination factor 1
hsa-miR-1207-5p	0	0	1	1	1	1	DLX4	distal-less homeobox 4
hsa-miR-1207-5p	1	0	1	1	1	1	MEIS3	Meis homeobox 3
hsa-miR-1207-5p	1	0	1	1	0	0	LRFN1	leucine rich repeat and fibronectin type III domain containing 1
hsa-miR-1207-5p	0	0	1	1	0	0	USP19	ubiquitin specific peptidase 19
hsa-miR-1207-5p	1	0	1	1	1	1	PAPOLA	poly(A) polymerase alpha
hsa-miR-1207-5p	0	0	1	0	0	0	MGC21881	uncharacterized locus MGC21881
hsa-miR-1207-5p	0	0	1	1	1	1	C8orf33	chromosome 8 open reading frame 33
hsa-miR-1207-5p	0	0	1	0	0	0	NUDT16P1	nudix (nucleoside diphosphate linked moiety X)-type motif 16 pseudogene 1
hsa-miR-1207-5p	0	0	1	0	0	0	DTX2P1-UPK3BP1-PMS2P11	DTX2P1-UPK3BP1-PMS2P11 readthrough (non-protein coding)
hsa-miR-1207-5p	1	0	1	0	1	1	NR1D2	nuclear receptor subfamily 1, group D, member 2
hsa-miR-1207-5p	1	0	1	1	1	1	ASH2L	ash2 (absent, small, or homeotic)-like (Drosophila)
hsa-miR-1207-5p	1	0	1	1	1	1	NUMBL	numb homolog (Drosophila)-like
hsa-miR-1207-5p	0	0	1	1	1	1	RAB37	RAB37, member RAS oncogene family
hsa-miR-1207-5p	0	0	1	1	0	0	PREB	prolactin regulatory element binding
hsa-miR-1207-5p	1	0	1	1	1	1	NRF1	nuclear respiratory factor 1
hsa-miR-1207-5p	1	0	1	1	1	1	ORMDL3	ORM1-like 3 (S. cerevisiae)
hsa-miR-1207-5p	1	0	1	1	1	1	ELF4	E74-like factor 4 (ets domain transcription factor)
hsa-miR-1207-5p	0	0	1	1	0	0	ZBTB32	zinc finger and BTB domain containing 32
hsa-miR-1207-5p	0	0	1	0	0	0	LOC100144602	uncharacterized LOC100144602
hsa-miR-1207-5p	0	0	1	0	0	0	TCP11L2	t-complex 11 (mouse)-like 2
hsa-miR-1207-5p	0	0	1	1	1	1	NDUFB5	NADH dehydrogenase (ubiquinone) 1 beta subcomplex, 5, 16kDa
hsa-miR-1207-5p	0	0	1	1	1	1	GLIPR2	GLI pathogenesis-related 2
hsa-miR-1207-5p	0	0	1	1	1	1	PLA2G4C	phospholipase A2, group IVC (cytosolic, calcium-independent)
hsa-miR-1207-5p	1	0	1	1	1	1	ARHGEF9	Cdc42 guanine nucleotide exchange factor (GEF) 9
hsa-miR-1207-5p	0	0	1	1	1	1	EXOC7	exocyst complex component 7
hsa-miR-1207-5p	1	0	1	1	1	1	KIAA1217	KIAA1217
hsa-miR-1207-5p	1	0	1	1	1	1	MID1IP1	MID1 interacting protein 1
hsa-miR-1207-5p	0	0	1	1	0	0	CYP27B1	cytochrome P450, family 27, subfamily B, polypeptide 1
hsa-miR-1207-5p	0	0	1	0	1	1	ZNF718	zinc finger protein 718
hsa-miR-1207-5p	1	0	1	1	1	1	TM9SF4	transmembrane 9 superfamily protein member 4
hsa-miR-1207-5p	0	0	1	0	0	0	DKFZP434K028	uncharacterized LOC26070
hsa-miR-1207-5p	0	0	1	1	0	0	DPF1	D4, zinc and double PHD fingers family 1
hsa-miR-1207-5p	0	0	1	0	0	0	NBR2	neighbor of BRCA1 gene 2 (non-protein coding)
hsa-miR-1207-5p	0	0	1	1	1	1	COMMD7	COMM domain containing 7
hsa-miR-1207-5p	1	0	1	1	0	0	TMEM63B	transmembrane protein 63B
hsa-miR-1207-5p	1	0	1	1	1	1	SPOCK2	sparc/osteonectin, cwcv and kazal-like domains proteoglycan (testican) 2
hsa-miR-1207-5p	1	0	1	0	1	1	C14orf101	chromosome 14 open reading frame 101
hsa-miR-1207-5p	0	0	1	1	0	0	FAM89B	family with sequence similarity 89, member B
hsa-miR-1207-5p	0	0	1	0	0	0	SNX29P2	sorting nexin 29 pseudogene 2
hsa-miR-1207-5p	0	0	1	0	0	0	TRAV20	T cell receptor alpha variable 20
hsa-miR-1207-5p	0	0	1	1	1	1	HYAL1	hyaluronoglucosaminidase 1
hsa-miR-1207-5p	1	0	1	1	0	0	NCLN	nicalin
hsa-miR-1207-5p	1	0	1	1	1	1	VASP	vasodilator-stimulated phosphoprotein
hsa-miR-1207-5p	0	0	1	0	1	1	FHAD1	forkhead-associated (FHA) phosphopeptide binding domain 1
hsa-miR-1207-5p	0	0	1	1	0	0	SPERT	spermatid associated
hsa-miR-1207-5p	1	0	1	0	1	1	CERS3	ceramide synthase 3
hsa-miR-1207-5p	0	0	1	0	0	0	C11orf16	chromosome 11 open reading frame 16
hsa-miR-1207-5p	1	0	1	1	1	1	RSPO2	R-spondin 2
hsa-miR-1207-5p	0	0	1	0	0	0	TRGV7	T cell receptor gamma variable 7 (pseudogene)
hsa-miR-1207-5p	0	0	1	1	1	1	SELP	selectin P (granule membrane protein 140kDa, antigen CD62)
hsa-miR-1207-5p	0	0	1	1	0	0	PLSCR3	phospholipid scramblase 3
hsa-miR-1207-5p	0	0	1	1	1	1	RNF32	ring finger protein 32
hsa-miR-1207-5p	0	0	1	1	0	0	SYT3	synaptotagmin III
hsa-miR-1207-5p	1	0	1	1	1	1	TMEM127	transmembrane protein 127
hsa-miR-1207-5p	0	0	1	0	0	0	LOC145837	uncharacterized LOC145837
hsa-miR-1207-5p	0	0	1	1	1	1	KIAA1755	KIAA1755
hsa-miR-1207-5p	0	0	1	1	1	1	ASTN2	astrotactin 2
hsa-miR-1207-5p	0	0	1	1	1	1	LRMP	lymphoid-restricted membrane protein
hsa-miR-1207-5p	0	0	1	1	0	0	TMEM120A	transmembrane protein 120A
hsa-miR-1207-5p	0	0	1	1	0	0	GEMIN6	gem (nuclear organelle) associated protein 6
hsa-miR-1207-5p	1	0	1	0	1	1	SV2B	synaptic vesicle glycoprotein 2B
hsa-miR-1207-5p	0	0	1	1	1	1	CCP110	centriolar coiled coil protein 110kDa
hsa-miR-1207-5p	0	0	1	1	1	1	SH3TC1	SH3 domain and tetratricopeptide repeats 1
hsa-miR-1207-5p	0	0	1	1	1	1	MFSD1	major facilitator superfamily domain containing 1
hsa-miR-1207-5p	1	0	1	1	1	1	TAF15	TAF15 RNA polymerase II, TATA box binding protein (TBP)-associated factor, 68kDa
hsa-miR-1207-5p	0	0	1	1	1	1	SLC22A2	solute carrier family 22 (organic cation transporter), member 2
hsa-miR-1207-5p	1	0	1	1	0	0	FAM83F	family with sequence similarity 83, member F
hsa-miR-1207-5p	0	0	1	0	0	0	ATP8B5P	ATPase, class I, type 8B, member 5, pseudogene
hsa-miR-1207-5p	1	0	1	1	1	1	BZRAP1	benzodiazapine receptor (peripheral) associated protein 1
hsa-miR-1207-5p	0	0	1	0	0	0	CFL1P1	cofilin 1 (non-muscle) pseudogene 1
hsa-miR-1207-5p	0	0	1	1	1	1	RBM42	RNA binding motif protein 42
hsa-miR-1207-5p	1	0	1	0	1	1	RNF4	ring finger protein 4
hsa-miR-1207-5p	0	0	1	0	1	1	MT1X	metallothionein 1X
hsa-miR-1207-5p	0	0	1	1	0	0	TTC12	tetratricopeptide repeat domain 12
hsa-miR-1207-5p	1	0	1	1	1	1	SPATS2	spermatogenesis associated, serine-rich 2
hsa-miR-1207-5p	1	0	1	1	1	1	SF1	splicing factor 1
hsa-miR-1207-5p	1	0	1	1	1	1	DCLK2	doublecortin-like kinase 2
hsa-miR-1207-5p	1	0	1	1	1	1	RAB5B	RAB5B, member RAS oncogene family
hsa-miR-1207-5p	0	0	1	1	1	1	XAF1	XIAP associated factor 1
hsa-miR-1207-5p	0	0	1	1	1	1	C5orf22	chromosome 5 open reading frame 22
hsa-miR-1207-5p	0	0	1	1	0	0	RAB4B	RAB4B, member RAS oncogene family
hsa-miR-1207-5p	0	0	1	0	0	0	AKR1A1	aldo-keto reductase family 1, member A1 (aldehyde reductase)
hsa-miR-1207-5p	0	0	1	1	1	1	IL20RB	interleukin 20 receptor beta
hsa-miR-1207-5p	1	0	1	0	1	1	KCTD2	potassium channel tetramerisation domain containing 2
hsa-miR-1207-5p	0	0	1	0	0	0	HILS1	histone linker H1 domain, spermatid-specific 1, pseudogene
hsa-miR-1207-5p	0	0	1	1	0	0	ADAP2	ArfGAP with dual PH domains 2
hsa-miR-1207-5p	1	0	1	0	1	1	KIF5A	kinesin family member 5A
hsa-miR-1207-5p	0	0	1	1	0	0	TNMD	tenomodulin
hsa-miR-1207-5p	0	0	1	1	1	1	HEXA	hexosaminidase A (alpha polypeptide)
hsa-miR-1207-5p	1	0	1	1	1	1	PAK4	p21 protein (Cdc42/Rac)-activated kinase 4
hsa-miR-1207-5p	0	0	1	1	1	1	ZNF337	zinc finger protein 337
hsa-miR-1207-5p	0	0	1	0	0	0	C9orf62	chromosome 9 open reading frame 62
hsa-miR-1207-5p	0	0	1	0	1	1	DKFZP434I0714	uncharacterized protein DKFZP434I0714
hsa-miR-1207-5p	0	0	1	1	1	1	EDA2R	ectodysplasin A2 receptor
hsa-miR-1207-5p	1	0	1	1	1	1	FAM120A	family with sequence similarity 120A
hsa-miR-1207-5p	0	0	1	1	1	1	SLC6A16	solute carrier family 6, member 16
hsa-miR-1207-5p	1	0	1	1	1	1	THRA	thyroid hormone receptor, alpha
hsa-miR-1207-5p	1	0	1	1	0	0	CHST4	carbohydrate (N-acetylglucosamine 6-O) sulfotransferase 4
hsa-miR-1207-5p	0	0	1	0	1	1	KSR1	kinase suppressor of ras 1
hsa-miR-1207-5p	1	0	1	1	1	1	GRIA4	glutamate receptor, ionotropic, AMPA 4
hsa-miR-1207-5p	0	0	1	1	0	0	SNTG2	syntrophin, gamma 2
hsa-miR-1207-5p	0	0	1	0	0	0	LOC339862	uncharacterized LOC339862
hsa-miR-1207-5p	0	0	1	0	0	0	C12orf77	chromosome 12 open reading frame 77
hsa-miR-1207-5p	0	0	1	1	1	1	TMEM139	transmembrane protein 139
hsa-miR-1207-5p	0	0	1	0	0	0	HOXA-AS2	HOXA cluster antisense RNA 2
hsa-miR-1207-5p	0	0	1	1	0	0	VPS8	vacuolar protein sorting 8 homolog (S. cerevisiae)
hsa-miR-1207-5p	0	0	1	1	1	1	SNAPC3	small nuclear RNA activating complex, polypeptide 3, 50kDa
hsa-miR-1207-5p	1	0	1	1	1	1	ZNF618	zinc finger protein 618
hsa-miR-1207-5p	0	0	1	0	0	0	FAM201A	family with sequence similarity 201, member A
hsa-miR-1207-5p	1	0	1	1	1	1	LMO7	LIM domain 7
hsa-miR-1207-5p	1	0	1	1	1	1	ELMO2	engulfment and cell motility 2
hsa-miR-1207-5p	1	0	1	1	1	1	MEIS1	Meis homeobox 1
hsa-miR-1207-5p	1	0	1	1	1	1	GAS8	growth arrest-specific 8
hsa-miR-1207-5p	0	0	1	0	0	0	SRGAP2C	SLIT-ROBO Rho GTPase activating protein 2C
hsa-miR-1207-5p	1	0	1	0	1	1	CPEB4	cytoplasmic polyadenylation element binding protein 4
hsa-miR-1207-5p	0	0	1	0	0	0	CYP4F35P	cytochrome P450, family 4, subfamily F, polypeptide 35, pseudogene
hsa-miR-1207-5p	0	0	1	0	0	0	LOC286184	uncharacterized LOC286184
hsa-miR-1207-5p	1	0	1	0	0	0	RAVER1	ribonucleoprotein, PTB-binding 1
hsa-miR-1207-5p	1	0	1	1	0	0	EBF4	early B-cell factor 4
hsa-miR-1207-5p	0	0	1	1	1	1	TPPP3	tubulin polymerization-promoting protein family member 3
hsa-miR-1207-5p	1	0	1	1	1	1	GALNT1	UDP-N-acetyl-alpha-D-galactosamine:polypeptide N-acetylgalactosaminyltransferase 1 (GalNAc-T1)
hsa-miR-1207-5p	0	0	1	1	0	0	HSPA14	heat shock 70kDa protein 14
hsa-miR-1207-5p	0	0	1	1	0	0	COX4I1	cytochrome c oxidase subunit IV isoform 1
hsa-miR-1207-5p	0	0	1	1	0	0	CCDC152	coiled-coil domain containing 152
hsa-miR-1207-5p	0	0	1	0	0	0	FLJ36000	uncharacterized FLJ36000
hsa-miR-1207-5p	0	0	1	0	0	0	USP32P1	ubiquitin specific peptidase 32 pseudogene 1
hsa-miR-1207-5p	1	0	1	0	1	1	LPHN3	latrophilin 3
hsa-miR-1207-5p	0	0	1	0	0	0	DLGAP1-AS3	DLGAP1 antisense RNA 3
hsa-miR-1207-5p	1	0	1	1	1	1	UNK	unkempt homolog (Drosophila)
hsa-miR-1207-5p	1	0	1	1	1	1	TIMP2	TIMP metallopeptidase inhibitor 2
hsa-miR-1207-5p	1	0	1	1	1	1	FGD4	FYVE, RhoGEF and PH domain containing 4
hsa-miR-1207-5p	1	0	1	0	1	1	GPR107	G protein-coupled receptor 107
hsa-miR-1207-5p	1	0	1	1	0	0	HES7	hairy and enhancer of split 7 (Drosophila)
hsa-miR-1207-5p	1	0	1	1	1	1	DOLPP1	dolichyl pyrophosphate phosphatase 1
hsa-miR-1207-5p	0	0	1	0	1	1	LINC00634	long intergenic non-protein coding RNA 634
hsa-miR-1207-5p	1	0	1	1	1	1	FOSB	FBJ murine osteosarcoma viral oncogene homolog B
hsa-miR-1207-5p	0	0	1	0	1	1	TSLP	thymic stromal lymphopoietin
hsa-miR-1207-5p	1	0	1	1	1	1	KCNJ11	potassium inwardly-rectifying channel, subfamily J, member 11
hsa-miR-1207-5p	0	0	1	1	0	0	TMEM95	transmembrane protein 95
hsa-miR-1207-5p	0	0	1	1	1	1	FAM71F1	family with sequence similarity 71, member F1
hsa-miR-1207-5p	0	0	1	0	0	0	A1BG-AS1	A1BG antisense RNA 1
hsa-miR-1207-5p	0	0	1	0	1	1	METTL12	methyltransferase like 12
hsa-miR-1207-5p	1	0	1	1	1	1	FAM123A	family with sequence similarity 123A
hsa-miR-1207-5p	1	0	1	0	1	1	HSPA12A	heat shock 70kDa protein 12A
hsa-miR-1207-5p	0	0	1	1	0	0	AQP12B	aquaporin 12B
hsa-miR-1207-5p	0	0	1	1	0	0	PTGDS	prostaglandin D2 synthase 21kDa (brain)
hsa-miR-1207-5p	1	0	1	1	1	1	DOC2A	double C2-like domains, alpha
hsa-miR-1207-5p	1	0	1	1	1	1	ARID3B	AT rich interactive domain 3B (BRIGHT-like)
hsa-miR-1207-5p	0	0	1	0	0	0	LOC253044	uncharacterized LOC253044
hsa-miR-1207-5p	0	0	1	1	1	1	PGPEP1	pyroglutamyl-peptidase I
hsa-miR-1207-5p	1	0	1	1	0	0	PRRC2A	proline-rich coiled-coil 2A
hsa-miR-1207-5p	1	0	1	1	1	1	FKBP5	FK506 binding protein 5
hsa-miR-1207-5p	0	0	1	1	0	0	PLB1	phospholipase B1
hsa-miR-1207-5p	0	0	1	1	0	0	PTOV1	prostate tumor overexpressed 1
hsa-miR-1207-5p	0	0	1	0	0	0	LOC401176	uncharacterized LOC401176
hsa-miR-1207-5p	0	0	1	1	0	0	RLTPR	RGD motif, leucine rich repeats, tropomodulin domain and proline-rich containing
hsa-miR-1207-5p	0	0	1	0	0	0	LOC338579	ankyrin repeat domain-containing protein 30B pseudogene
hsa-miR-1207-5p	0	0	1	0	0	0	LOC157381	uncharacterized LOC157381
hsa-miR-1207-5p	1	0	1	1	1	1	ARHGAP30	Rho GTPase activating protein 30
hsa-miR-1207-5p	0	0	1	0	0	0	LOC339260	uncharacterized LOC339260
hsa-miR-1207-5p	0	0	1	0	0	0	DKFZp686O1327	uncharacterized LOC401014
hsa-miR-1207-5p	0	0	1	1	1	1	STRADA	STE20-related kinase adaptor alpha
hsa-miR-1207-5p	0	0	1	1	1	1	MICB	MHC class I polypeptide-related sequence B
hsa-miR-1207-5p	0	0	1	1	1	1	MST1	macrophage stimulating 1 (hepatocyte growth factor-like)
hsa-miR-1207-5p	1	0	1	1	1	1	MAMDC2	MAM domain containing 2
hsa-miR-1207-5p	0	0	1	1	1	1	MGC57346	uncharacterized LOC401884
hsa-miR-1207-5p	1	0	1	1	1	1	PPP2R5B	protein phosphatase 2, regulatory subunit B', beta
hsa-miR-1207-5p	0	0	1	1	1	1	DOCK8	dedicator of cytokinesis 8
hsa-miR-1207-5p	1	0	1	1	1	1	PCYT1B	phosphate cytidylyltransferase 1, choline, beta
hsa-miR-1207-5p	1	0	1	1	1	1	SENP1	SUMO1/sentrin specific peptidase 1
hsa-miR-1207-5p	0	0	1	1	0	0	NIT1	nitrilase 1
hsa-miR-1207-5p	1	0	1	1	1	1	CARM1	coactivator-associated arginine methyltransferase 1
hsa-miR-1207-5p	0	0	1	1	1	1	CHMP2A	charged multivesicular body protein 2A
hsa-miR-1207-5p	0	0	1	0	1	1	CADM1	cell adhesion molecule 1
hsa-miR-1207-5p	0	0	1	0	0	0	LOC348120	uncharacterized LOC348120
hsa-miR-1207-5p	1	0	1	1	1	1	TOMM40	translocase of outer mitochondrial membrane 40 homolog (yeast)
hsa-miR-1207-5p	0	0	1	1	0	0	MT3	metallothionein 3
hsa-miR-1207-5p	0	0	1	0	0	0	SUZ12P1	suppressor of zeste 12 homolog pseudogene 1
hsa-miR-1207-5p	1	0	1	1	1	1	PALD1	phosphatase domain containing, paladin 1
hsa-miR-1207-5p	0	0	1	1	0	0	FKBP11	FK506 binding protein 11, 19 kDa
hsa-miR-1207-5p	0	0	1	1	1	1	ZNF589	zinc finger protein 589
hsa-miR-1207-5p	1	0	1	1	1	1	PTPRG	protein tyrosine phosphatase, receptor type, G
hsa-miR-1207-5p	1	0	1	1	1	1	CLVS1	clavesin 1
hsa-miR-1207-5p	0	0	1	0	1	1	ITGA1	integrin, alpha 1
hsa-miR-1207-5p	1	0	1	0	1	1	CCNY	cyclin Y
hsa-miR-1207-5p	0	0	1	1	0	0	SLC38A6	solute carrier family 38, member 6
hsa-miR-1207-5p	1	0	1	0	1	1	FAM131B	family with sequence similarity 131, member B
hsa-miR-1207-5p	1	0	1	0	1	1	SEMA4G	sema domain, immunoglobulin domain (Ig), transmembrane domain (TM) and short cytoplasmic domain, (semaphorin) 4G
hsa-miR-1207-5p	0	0	1	1	1	1	LINC00086	long intergenic non-protein coding RNA 86
hsa-miR-1207-5p	1	0	1	1	1	1	ZFP91	zinc finger protein 91 homolog (mouse)
hsa-miR-1207-5p	1	0	1	1	1	1	LIMD2	LIM domain containing 2
hsa-miR-1207-5p	1	0	1	1	1	1	YWHAZ	tyrosine 3-monooxygenase/tryptophan 5-monooxygenase activation protein, zeta polypeptide
hsa-miR-1207-5p	0	0	1	1	1	1	HLA-DQA1	major histocompatibility complex, class II, DQ alpha 1
hsa-miR-1207-5p	1	0	1	1	1	1	SCUBE3	signal peptide, CUB domain, EGF-like 3
hsa-miR-1207-5p	1	0	1	0	1	1	C14orf43	chromosome 14 open reading frame 43
hsa-miR-1207-5p	0	0	1	1	0	0	LY6H	lymphocyte antigen 6 complex, locus H
hsa-miR-1207-5p	0	0	1	0	0	0	LINC00265	long intergenic non-protein coding RNA 265
hsa-miR-1207-5p	0	0	1	1	0	0	TENC1	tensin like C1 domain containing phosphatase (tensin 2)
hsa-miR-1207-5p	1	0	1	1	1	1	KDM5C	lysine (K)-specific demethylase 5C
hsa-miR-1207-5p	0	0	1	1	0	0	CYHR1	cysteine/histidine-rich 1
hsa-miR-1207-5p	0	0	1	1	1	1	MPP3	membrane protein, palmitoylated 3 (MAGUK p55 subfamily member 3)
hsa-miR-1207-5p	0	0	1	1	1	1	CDC42SE2	CDC42 small effector 2
hsa-miR-1207-5p	0	0	1	1	0	0	WDR62	WD repeat domain 62
hsa-miR-1207-5p	0	0	1	1	0	0	GRIN2C	glutamate receptor, ionotropic, N-methyl D-aspartate 2C
hsa-miR-1207-5p	1	0	1	1	1	1	PRRG1	proline rich Gla (G-carboxyglutamic acid) 1
hsa-miR-1207-5p	1	0	1	1	0	0	ANKRD13B	ankyrin repeat domain 13B
hsa-miR-1207-5p	0	0	1	1	0	0	PRR19	proline rich 19
hsa-miR-1207-5p	1	0	1	0	1	1	PLEKHH2	pleckstrin homology domain containing, family H (with MyTH4 domain) member 2
hsa-miR-1207-5p	0	0	1	1	1	1	GSTA4	glutathione S-transferase alpha 4
hsa-miR-1207-5p	0	0	1	1	0	0	C8orf31	chromosome 8 open reading frame 31
hsa-miR-1207-5p	0	0	1	1	0	0	DHX30	DEAH (Asp-Glu-Ala-His) box polypeptide 30
hsa-miR-1207-5p	1	0	1	0	0	0	PRRT4	proline-rich transmembrane protein 4
hsa-miR-1207-5p	0	0	1	0	0	0	GNN	Grp94 neighboring nucleotidase pseudogene
hsa-miR-1207-5p	0	0	1	1	0	0	UBOX5	U-box domain containing 5
hsa-miR-1207-5p	0	0	1	1	1	1	ZNF333	zinc finger protein 333
hsa-miR-1207-5p	0	0	1	1	1	1	STAG1	stromal antigen 1
hsa-miR-1207-5p	1	0	1	1	1	1	ADCY6	adenylate cyclase 6
hsa-miR-1207-5p	0	0	1	0	0	0	LOC158435	uncharacterized LOC158435
hsa-miR-1207-5p	0	0	1	1	0	0	TSNARE1	t-SNARE domain containing 1
hsa-miR-1207-5p	0	0	1	0	1	1	DDX12P	DEAD/H (Asp-Glu-Ala-Asp/His) box polypeptide 12, pseudogene
hsa-miR-1207-5p	1	0	1	1	1	1	IL15RA	interleukin 15 receptor, alpha
hsa-miR-1207-5p	1	0	1	1	1	1	VTCN1	V-set domain containing T cell activation inhibitor 1
hsa-miR-1207-5p	0	0	1	1	1	1	ZNF189	zinc finger protein 189
hsa-miR-1207-5p	1	0	1	1	1	1	FAM129B	family with sequence similarity 129, member B
hsa-miR-1207-5p	0	0	1	0	0	0	LINC00442	long intergenic non-protein coding RNA 442
hsa-miR-1207-5p	0	0	1	0	0	0	PCP4L1	Purkinje cell protein 4 like 1
hsa-miR-1207-5p	0	0	1	1	0	0	CELF3	CUGBP, Elav-like family member 3
hsa-miR-1207-5p	1	0	1	1	1	1	MAPKAPK3	mitogen-activated protein kinase-activated protein kinase 3
hsa-miR-1207-5p	1	0	1	1	1	1	PHACTR4	phosphatase and actin regulator 4
hsa-miR-1207-5p	1	0	1	1	1	1	LINGO1	leucine rich repeat and Ig domain containing 1
hsa-miR-1207-5p	1	0	1	1	0	0	TMEM198	transmembrane protein 198
hsa-miR-1207-5p	0	0	1	0	0	0	CHADL	chondroadherin-like
hsa-miR-1207-5p	0	0	1	0	0	0	PTGER4P2	prostaglandin E receptor 4 (subtype EP4) pseudogene 2
hsa-miR-1207-5p	1	0	1	1	0	0	DCAF15	DDB1 and CUL4 associated factor 15
hsa-miR-1207-5p	0	0	1	1	0	0	RELA	v-rel reticuloendotheliosis viral oncogene homolog A (avian)
hsa-miR-1207-5p	0	0	1	1	0	0	CYP4F30P	cytochrome P450, family 4, subfamily F, polypeptide 30, pseudogene
hsa-miR-1207-5p	1	0	1	1	0	0	CHTOP	chromatin target of PRMT1
hsa-miR-1207-5p	1	0	1	1	1	1	DDR1	discoidin domain receptor tyrosine kinase 1
hsa-miR-1207-5p	0	0	1	1	0	0	SLAMF9	SLAM family member 9
hsa-miR-1207-5p	0	0	1	0	0	0	AQP7P2	aquaporin 7 pseudogene 2
hsa-miR-1207-5p	1	0	1	0	1	1	TMEM194A	transmembrane protein 194A
hsa-miR-1207-5p	0	0	1	0	0	0	JPX	JPX transcript, XIST activator (non-protein coding)
hsa-miR-1207-5p	0	0	1	1	1	1	TNFSF12	tumor necrosis factor (ligand) superfamily, member 12
hsa-miR-1207-5p	0	0	1	0	0	0	ULK4P3	unc-51-like kinase 4 (C. elegans) pseudogene 3
hsa-miR-1207-5p	0	0	1	0	0	0	LOC727849	golgin A2 pseudogene
hsa-miR-1207-5p	0	0	1	0	0	0	LOC727751	uncharacterized LOC727751
hsa-miR-1207-5p	0	0	1	0	0	0	AGSK1	golgin subfamily A member 2-like
hsa-miR-1207-5p	0	0	1	0	0	0	LOC440416	uncharacterized LOC440416
hsa-miR-1207-5p	1	0	1	1	1	1	RARG	retinoic acid receptor, gamma
hsa-miR-1207-5p	0	0	1	1	1	1	PCED1B	PC-esterase domain containing 1B
hsa-miR-1207-5p	0	0	1	0	0	0	PHKA2-AS1	PHKA2 antisense RNA 1
hsa-miR-1207-5p	1	0	1	1	1	1	WBP1L	WW domain binding protein 1-like
hsa-miR-1207-5p	0	0	1	1	0	0	ASIC4	acid-sensing (proton-gated) ion channel family member 4
hsa-miR-1207-5p	1	0	1	1	1	1	OPCML	opioid binding protein/cell adhesion molecule-like
hsa-miR-1207-5p	0	0	1	1	1	1	C3orf67	chromosome 3 open reading frame 67
hsa-miR-1207-5p	0	0	1	0	0	0	LOC642846	DEAD/H (Asp-Glu-Ala-Asp/His) box polypeptide 11-like
hsa-miR-1207-5p	1	0	1	0	1	1	AMMECR1L	AMME chromosomal region gene 1-like
hsa-miR-1207-5p	0	0	1	0	0	0	LINC00537	long intergenic non-protein coding RNA 537
hsa-miR-1207-5p	1	0	1	1	1	1	SAMD4B	sterile alpha motif domain containing 4B
hsa-miR-1207-5p	0	0	1	1	0	0	DNHD1	dynein heavy chain domain 1
hsa-miR-1207-5p	0	0	1	0	0	0	LOC677759	uncharacterized LOC677759
hsa-miR-1207-5p	0	0	1	1	0	0	TMEM222	transmembrane protein 222
hsa-miR-1207-5p	1	0	1	1	1	1	GBF1	golgi brefeldin A resistant guanine nucleotide exchange factor 1
hsa-miR-1207-5p	0	0	1	1	1	1	VWA3B	von Willebrand factor A domain containing 3B
hsa-miR-1207-5p	0	0	1	0	0	0	FRG1B	FSHD region gene 1 family, member B
hsa-miR-1207-5p	1	0	1	1	1	1	ST8SIA2	ST8 alpha-N-acetyl-neuraminide alpha-2,8-sialyltransferase 2
hsa-miR-1207-5p	1	0	1	1	1	1	ACVR2B	activin A receptor, type IIB
hsa-miR-1207-5p	0	0	1	1	1	1	TMEM52B	transmembrane protein 52B
hsa-miR-1207-5p	0	0	1	1	1	1	ZNF365	zinc finger protein 365
hsa-miR-1207-5p	0	0	1	1	0	0	RGL4	ral guanine nucleotide dissociation stimulator-like 4
hsa-miR-1207-5p	0	0	1	0	0	0	CCDC163P	coiled-coil domain containing 163, pseudogene
hsa-miR-1207-5p	1	0	1	0	1	1	VANGL2	vang-like 2 (van gogh, Drosophila)
hsa-miR-1207-5p	1	0	1	0	1	1	CPEB2	cytoplasmic polyadenylation element binding protein 2
hsa-miR-1207-5p	0	0	1	1	1	1	TTLL9	tubulin tyrosine ligase-like family, member 9
hsa-miR-1207-5p	0	0	1	0	0	0	LOC441493	uncharacterized LOC441493
hsa-miR-1207-5p	1	0	1	1	1	1	PHKA1	phosphorylase kinase, alpha 1 (muscle)
hsa-miR-1207-5p	0	0	1	0	0	0	FAM71F2	family with sequence similarity 71, member F2
hsa-miR-1207-5p	0	0	1	0	0	0	FBXL19-AS1	FBXL19 antisense RNA 1 (head to head)
hsa-miR-1207-5p	1	0	1	1	1	1	NR2F2	nuclear receptor subfamily 2, group F, member 2
hsa-miR-1207-5p	0	0	1	1	1	1	PAX4	paired box 4
hsa-miR-1207-5p	1	0	1	1	1	1	TBP	TATA box binding protein
hsa-miR-1207-5p	1	0	1	0	1	1	DNAJC6	DnaJ (Hsp40) homolog, subfamily C, member 6
hsa-miR-1207-5p	0	0	1	1	0	0	STK19	serine/threonine kinase 19
hsa-miR-1207-5p	0	0	1	1	1	1	STAU2	staufen, RNA binding protein, homolog 2 (Drosophila)
hsa-miR-1207-5p	1	0	1	0	1	1	MAP3K9	mitogen-activated protein kinase kinase kinase 9
hsa-miR-1207-5p	0	0	1	1	1	1	UNC13B	unc-13 homolog B (C. elegans)
hsa-miR-1207-5p	0	0	1	0	0	0	LINC00310	long intergenic non-protein coding RNA 310
hsa-miR-1207-5p	0	0	1	1	0	0	RNF123	ring finger protein 123
hsa-miR-1207-5p	1	0	1	1	1	1	ITSN1	intersectin 1 (SH3 domain protein)
hsa-miR-1207-5p	1	0	1	1	1	1	ST18	suppression of tumorigenicity 18 (breast carcinoma) (zinc finger protein)
hsa-miR-1207-5p	0	0	1	0	0	0	LOC286094	uncharacterized LOC286094
hsa-miR-1207-5p	1	0	1	1	1	1	GRIA3	glutamate receptor, ionotropic, AMPA 3
hsa-miR-1207-5p	1	0	1	1	1	1	OSBP2	oxysterol binding protein 2
hsa-miR-1207-5p	0	0	1	1	0	0	SOCS7	suppressor of cytokine signaling 7
hsa-miR-1207-5p	0	0	1	1	0	0	WDR90	WD repeat domain 90
hsa-miR-1207-5p	0	0	1	1	1	1	C9orf171	chromosome 9 open reading frame 171
hsa-miR-1207-5p	0	0	1	0	0	0	KRT8P12	keratin 8 pseudogene 12
hsa-miR-1207-5p	1	0	1	0	1	1	CAMSAP2	calmodulin regulated spectrin-associated protein family, member 2
hsa-miR-1207-5p	0	0	1	0	0	0	FAM225B	family with sequence similarity 225, member B (non-protein coding)
hsa-miR-1207-5p	1	0	1	1	1	1	C18orf34	chromosome 18 open reading frame 34
hsa-miR-1207-5p	0	0	1	1	0	0	FBXL15	F-box and leucine-rich repeat protein 15
hsa-miR-1207-5p	1	0	1	0	1	1	NFAT5	nuclear factor of activated T-cells 5, tonicity-responsive
hsa-miR-1207-5p	0	0	1	1	0	0	EPS15L1	epidermal growth factor receptor pathway substrate 15-like 1
hsa-miR-1207-5p	0	0	1	0	0	0	LILRP2	leukocyte immunoglobulin-like receptor pseudogene 2
hsa-miR-1207-5p	1	0	1	0	1	1	FAM196A	family with sequence similarity 196, member A
hsa-miR-1207-5p	0	0	1	1	1	1	TINF2	TERF1 (TRF1)-interacting nuclear factor 2
hsa-miR-1207-5p	0	0	1	1	0	0	CHMP4A	charged multivesicular body protein 4A
hsa-miR-1207-5p	1	0	1	0	1	1	TTC7B	tetratricopeptide repeat domain 7B
hsa-miR-1207-5p	0	0	1	1	1	1	HAUS4	HAUS augmin-like complex, subunit 4
hsa-miR-1207-5p	0	0	1	0	0	0	TMED8	transmembrane emp24 protein transport domain containing 8
hsa-miR-1207-5p	0	0	1	0	0	0	FLJ39632	uncharacterized LOC642477
hsa-miR-1207-5p	0	0	1	1	0	0	C2	complement component 2
hsa-miR-1207-5p	1	0	1	1	1	1	LITAF	lipopolysaccharide-induced TNF factor
hsa-miR-1207-5p	0	0	1	1	1	1	IP6K2	inositol hexakisphosphate kinase 2
hsa-miR-1207-5p	1	0	1	1	0	0	KRT80	keratin 80
hsa-miR-1207-5p	1	0	1	1	1	1	ATP2B4	ATPase, Ca++ transporting, plasma membrane 4
hsa-miR-1207-5p	1	0	1	0	1	1	NFIX	nuclear factor I/X (CCAAT-binding transcription factor)
hsa-miR-1207-5p	0	0	1	1	1	1	DEPDC5	DEP domain containing 5
hsa-miR-1207-5p	1	0	1	1	1	1	TGOLN2	trans-golgi network protein 2
hsa-miR-1207-5p	0	0	1	1	0	0	CDK5RAP2	CDK5 regulatory subunit associated protein 2
hsa-miR-1207-5p	0	0	1	0	0	0	MGC23284	uncharacterized LOC197187
hsa-miR-1207-5p	0	0	1	1	1	1	COL6A3	collagen, type VI, alpha 3
hsa-miR-1207-5p	0	0	1	1	1	1	GTF3C2	general transcription factor IIIC, polypeptide 2, beta 110kDa
hsa-miR-1207-5p	0	0	1	0	1	1	PRH2	proline-rich protein HaeIII subfamily 2
hsa-miR-1207-5p	0	0	1	1	1	1	VPS35	vacuolar protein sorting 35 homolog (S. cerevisiae)
hsa-miR-1207-5p	0	0	1	1	1	1	IPCEF1	interaction protein for cytohesin exchange factors 1
hsa-miR-1207-5p	0	0	1	1	0	0	RPS24	ribosomal protein S24
hsa-miR-1207-5p	0	0	1	1	1	1	PRR14L	proline rich 14-like
hsa-miR-1207-5p	1	0	1	1	1	1	CGN	cingulin
hsa-miR-1207-5p	1	0	1	1	0	0	CECR2	cat eye syndrome chromosome region, candidate 2
hsa-miR-1207-5p	1	0	1	1	1	1	SLC39A13	solute carrier family 39 (zinc transporter), member 13
hsa-miR-1207-5p	0	0	1	1	1	1	NIPSNAP3B	nipsnap homolog 3B (C. elegans)
hsa-miR-1207-5p	1	0	1	1	1	1	TLN2	talin 2
hsa-miR-1207-5p	1	0	1	1	1	1	FOXP1	forkhead box P1
hsa-miR-1207-5p	1	0	1	1	1	1	RREB1	ras responsive element binding protein 1
hsa-miR-1207-5p	1	0	1	1	1	1	GTDC1	glycosyltransferase-like domain containing 1
hsa-miR-1207-5p	0	0	1	0	0	0	OVOS	ovostatin
hsa-miR-1207-5p	0	0	1	1	0	0	LRR1	leucine rich repeat protein 1
hsa-miR-1207-5p	1	0	1	1	1	1	NEDD9	neural precursor cell expressed, developmentally down-regulated 9
hsa-miR-1207-5p	1	0	1	1	1	1	DDAH1	dimethylarginine dimethylaminohydrolase 1
hsa-miR-1207-5p	1	0	1	1	1	1	PHF21A	PHD finger protein 21A
hsa-miR-1207-5p	0	0	1	1	1	1	DOCK5	dedicator of cytokinesis 5
hsa-miR-1207-5p	1	0	1	1	1	1	NFIB	nuclear factor I/B
hsa-miR-1207-5p	1	0	1	1	1	1	C5orf24	chromosome 5 open reading frame 24
hsa-miR-1207-5p	1	0	1	1	1	1	PGAP1	post-GPI attachment to proteins 1
hsa-miR-1207-5p	1	0	1	1	1	1	RECK	reversion-inducing-cysteine-rich protein with kazal motifs
hsa-miR-1207-5p	0	0	1	1	0	0	CEP152	centrosomal protein 152kDa
hsa-miR-1207-5p	0	0	1	1	1	1	KIAA1328	KIAA1328
hsa-miR-1207-5p	1	0	1	1	1	1	ASB6	ankyrin repeat and SOCS box containing 6
hsa-miR-1207-5p	1	0	1	0	1	1	TBL1XR1	transducin (beta)-like 1 X-linked receptor 1
hsa-miR-1207-5p	0	0	1	0	0	0	ANKRD62	ankyrin repeat domain 62
hsa-miR-1207-5p	1	0	1	1	1	1	LYST	lysosomal trafficking regulator
hsa-miR-1207-5p	1	0	1	1	1	1	HIC2	hypermethylated in cancer 2
hsa-miR-1207-5p	0	0	1	1	1	1	PICK1	protein interacting with PRKCA 1
hsa-miR-1207-5p	0	0	1	1	0	0	NDUFB11	NADH dehydrogenase (ubiquinone) 1 beta subcomplex, 11, 17.3kDa
hsa-miR-1207-5p	1	0	1	1	1	1	BSDC1	BSD domain containing 1
hsa-miR-1207-5p	0	0	1	0	1	1	CD59	CD59 molecule, complement regulatory protein
hsa-miR-1207-5p	1	0	1	1	1	1	AAMP	angio-associated, migratory cell protein
hsa-miR-1207-5p	1	0	1	1	1	1	MDK	midkine (neurite growth-promoting factor 2)
hsa-miR-1207-5p	0	0	1	1	1	1	POLR2H	polymerase (RNA) II (DNA directed) polypeptide H
hsa-miR-1207-5p	0	0	1	1	0	0	CSH1	chorionic somatomammotropin hormone 1 (placental lactogen)
hsa-miR-1207-5p	0	0	1	1	0	0	PPT2	palmitoyl-protein thioesterase 2
hsa-miR-1207-5p	0	0	1	1	1	1	SLC25A11	solute carrier family 25 (mitochondrial carrier; oxoglutarate carrier), member 11
hsa-miR-1207-5p	0	0	1	1	0	0	NHP2L1	NHP2 non-histone chromosome protein 2-like 1 (S. cerevisiae)
hsa-miR-1207-5p	1	0	1	1	0	0	SMARCA2	SWI/SNF related, matrix associated, actin dependent regulator of chromatin, subfamily a, member 2
hsa-miR-1207-5p	1	0	1	0	1	1	RNF144A	ring finger protein 144A
hsa-miR-1207-5p	1	0	1	0	0	0	IGLON5	IgLON family member 5
hsa-miR-1207-5p	0	0	1	1	1	1	SMYD5	SMYD family member 5
hsa-miR-1207-5p	0	0	1	1	0	0	SLC39A7	solute carrier family 39 (zinc transporter), member 7
hsa-miR-1207-5p	1	0	1	1	0	0	RAB24	RAB24, member RAS oncogene family
hsa-miR-1207-5p	0	0	1	1	0	0	CDC37	cell division cycle 37 homolog (S. cerevisiae)
hsa-miR-1207-5p	0	0	1	1	0	0	GPX3	glutathione peroxidase 3 (plasma)
hsa-miR-1207-5p	0	0	1	1	0	0	SARS	seryl-tRNA synthetase
hsa-miR-1207-5p	1	0	1	1	0	0	CGREF1	cell growth regulator with EF-hand domain 1
hsa-miR-1207-5p	0	0	1	0	0	0	RPS16P10	ribosomal protein S16 pseudogene 10
hsa-miR-1207-5p	1	0	1	1	1	1	PCGF2	polycomb group ring finger 2
hsa-miR-1207-5p	0	0	1	0	0	0	FLJ30838	uncharacterized LOC400955
hsa-miR-1207-5p	0	0	1	1	0	0	TBC1D22A	TBC1 domain family, member 22A
hsa-miR-1207-5p	1	0	1	1	1	1	TARBP2	TAR (HIV-1) RNA binding protein 2
hsa-miR-1207-5p	0	0	1	0	0	0	LOC400768	uncharacterized LOC400768
hsa-miR-1207-5p	0	0	1	1	0	0	URM1	ubiquitin related modifier 1
hsa-miR-1207-5p	0	0	1	1	0	0	F2	coagulation factor II (thrombin)
hsa-miR-1207-5p	1	0	1	1	0	0	TSC22D4	TSC22 domain family, member 4
hsa-miR-1207-5p	1	0	1	1	1	1	CNIH2	cornichon homolog 2 (Drosophila)
hsa-miR-1207-5p	0	0	1	1	1	1	IER3	immediate early response 3
hsa-miR-1207-5p	0	0	1	1	1	1	DMWD	dystrophia myotonica, WD repeat containing
hsa-miR-1207-5p	0	0	1	1	0	0	RPLP2	ribosomal protein, large, P2
hsa-miR-1207-5p	1	0	1	1	1	1	C8orf58	chromosome 8 open reading frame 58
hsa-miR-1207-5p	0	0	1	1	1	1	APBB1	amyloid beta (A4) precursor protein-binding, family B, member 1 (Fe65)
hsa-miR-1207-5p	0	0	1	1	0	0	SIRT6	sirtuin 6
hsa-miR-1207-5p	0	0	1	1	0	0	SRM	spermidine synthase
hsa-miR-1207-5p	0	0	1	1	0	0	FCGRT	Fc fragment of IgG, receptor, transporter, alpha
hsa-miR-1207-5p	1	0	1	1	1	1	ANXA2	annexin A2
hsa-miR-1207-5p	0	0	1	0	0	0	ARRDC1	arrestin domain containing 1
hsa-miR-1207-5p	0	0	1	1	0	0	FCHO1	FCH domain only 1
hsa-miR-1207-5p	1	1	1	1	0	0	EFNA3	ephrin-A3
hsa-miR-1207-5p	0	0	1	1	0	0	CD81	CD81 molecule
hsa-miR-1207-5p	0	0	1	1	1	1	HSPB8	heat shock 22kDa protein 8
hsa-miR-1207-5p	1	0	1	1	1	1	SIX5	SIX homeobox 5
hsa-miR-1207-5p	1	0	1	1	0	0	CRELD1	cysteine-rich with EGF-like domains 1
hsa-miR-1207-5p	0	0	1	1	0	0	NOP56	NOP56 ribonucleoprotein homolog (yeast)
hsa-miR-1207-5p	1	0	1	1	0	0	ELOVL1	ELOVL fatty acid elongase 1
hsa-miR-1207-5p	0	0	1	0	0	0	H19	H19, imprinted maternally expressed transcript (non-protein coding)
hsa-miR-1207-5p	0	0	1	1	1	1	BCL7B	B-cell CLL/lymphoma 7B
hsa-miR-1207-5p	0	0	1	1	1	1	INCENP	inner centromere protein antigens 135/155kDa
hsa-miR-1207-5p	1	0	1	1	0	0	STX5	syntaxin 5
hsa-miR-1207-5p	1	0	1	1	1	1	CTDNEP1	CTD nuclear envelope phosphatase 1
hsa-miR-1207-5p	1	0	1	1	1	1	CLTA	clathrin, light chain A
hsa-miR-1207-5p	0	0	1	1	0	0	DNAJB2	DnaJ (Hsp40) homolog, subfamily B, member 2
hsa-miR-1207-5p	0	0	1	1	1	1	ABCD1	ATP-binding cassette, sub-family D (ALD), member 1
hsa-miR-1207-5p	1	0	1	1	1	1	STARD3NL	STARD3 N-terminal like
hsa-miR-1207-5p	0	0	1	1	1	1	FBXO4	F-box protein 4
hsa-miR-1207-5p	0	0	1	1	0	0	MYL6	myosin, light chain 6, alkali, smooth muscle and non-muscle
hsa-miR-1207-5p	0	0	1	1	1	1	CCDC115	coiled-coil domain containing 115
hsa-miR-1207-5p	1	0	1	1	1	1	CDK18	cyclin-dependent kinase 18
hsa-miR-1207-5p	0	0	1	1	1	1	PLAUR	plasminogen activator, urokinase receptor
hsa-miR-1207-5p	1	0	1	1	1	1	EI24	etoposide induced 2.4 mRNA
hsa-miR-1207-5p	0	0	1	1	0	0	NSUN5P2	NOP2/Sun domain family, member 5 pseudogene 2
hsa-miR-1207-5p	1	0	1	1	1	1	HMGN1	high mobility group nucleosome binding domain 1
hsa-miR-1207-5p	0	0	1	0	1	1	IGF2-AS	IGF2 antisense RNA
hsa-miR-1207-5p	1	0	1	1	1	1	NTM	neurotrimin
hsa-miR-1207-5p	1	0	1	1	1	1	COPZ1	coatomer protein complex, subunit zeta 1
hsa-miR-1207-5p	0	0	1	1	1	1	ELP5	elongator acetyltransferase complex subunit 5
hsa-miR-1207-5p	0	0	1	0	0	0	HMGN1P37	high mobility group nucleosome binding domain 1 pseudogene 37
hsa-miR-1207-5p	1	0	1	1	0	0	PNPLA6	patatin-like phospholipase domain containing 6
hsa-miR-1207-5p	0	0	1	1	1	1	GRAP2	GRB2-related adaptor protein 2
hsa-miR-1207-5p	0	0	1	1	1	1	DRG2	developmentally regulated GTP binding protein 2
hsa-miR-1207-5p	0	0	1	1	0	0	GPSM3	G-protein signaling modulator 3
hsa-miR-1207-5p	0	0	1	1	1	1	ANKRD53	ankyrin repeat domain 53
hsa-miR-1207-5p	0	0	1	1	0	0	MUS81	MUS81 endonuclease homolog (S. cerevisiae)
hsa-miR-1207-5p	1	0	1	1	0	0	MAP3K10	mitogen-activated protein kinase kinase kinase 10
hsa-miR-1207-5p	0	0	1	1	0	0	PNKP	polynucleotide kinase 3'-phosphatase
hsa-miR-1207-5p	1	0	1	1	1	1	LYPLA2	lysophospholipase II
hsa-miR-1207-5p	0	0	1	1	0	0	NDUFS7	NADH dehydrogenase (ubiquinone) Fe-S protein 7, 20kDa (NADH-coenzyme Q reductase)
hsa-miR-1207-5p	1	0	1	1	1	1	ARFIP2	ADP-ribosylation factor interacting protein 2
hsa-miR-1207-5p	0	0	1	1	1	1	POLR2G	polymerase (RNA) II (DNA directed) polypeptide G
hsa-miR-1207-5p	1	0	1	0	1	1	PLK3	polo-like kinase 3
hsa-miR-1207-5p	0	0	1	1	0	0	CDK2AP2	cyclin-dependent kinase 2 associated protein 2
hsa-miR-1207-5p	1	0	1	1	1	1	WIPF1	WAS/WASL interacting protein family, member 1
hsa-miR-1207-5p	0	0	1	0	0	0	LOC150568	uncharacterized LOC150568
hsa-miR-1207-5p	0	0	1	1	0	0	C11orf68	chromosome 11 open reading frame 68
hsa-miR-1207-5p	1	0	1	1	1	1	SSBP3	single stranded DNA binding protein 3
hsa-miR-1207-5p	1	0	1	1	1	1	DKK3	dickkopf 3 homolog (Xenopus laevis)
hsa-miR-1207-5p	0	0	1	1	1	1	NFATC4	nuclear factor of activated T-cells, cytoplasmic, calcineurin-dependent 4
hsa-miR-1207-5p	0	0	1	0	0	0	FLJ45248	FLJ45248 protein
hsa-miR-1207-5p	0	0	1	1	0	0	CD7	CD7 molecule
hsa-miR-1207-5p	0	0	1	1	1	1	CAPZB	capping protein (actin filament) muscle Z-line, beta
hsa-miR-1207-5p	1	0	1	1	1	1	EIF2B1	eukaryotic translation initiation factor 2B, subunit 1 alpha, 26kDa
hsa-miR-1207-5p	1	0	1	0	1	1	IP6K1	inositol hexakisphosphate kinase 1
hsa-miR-1207-5p	0	0	1	1	1	1	HPS1	Hermansky-Pudlak syndrome 1
hsa-miR-1207-5p	1	0	1	1	0	0	TBC1D17	TBC1 domain family, member 17
hsa-miR-1207-5p	1	0	1	1	1	1	PPP5C	protein phosphatase 5, catalytic subunit
hsa-miR-1207-5p	0	0	1	1	0	0	GMPPA	GDP-mannose pyrophosphorylase A
hsa-miR-1207-5p	1	0	1	1	1	1	DOK4	docking protein 4
hsa-miR-1207-5p	0	0	1	1	0	0	TROAP	trophinin associated protein (tastin)
hsa-miR-1207-5p	0	0	1	1	1	1	CD3E	CD3e molecule, epsilon (CD3-TCR complex)
hsa-miR-1207-5p	0	0	1	0	0	0	LOC100130353	hippocampus abundant transcript-like 1 pseudogene
hsa-miR-1207-5p	1	0	1	1	1	1	TAGLN2	transgelin 2
hsa-miR-1207-5p	0	0	1	1	1	1	CPZ	carboxypeptidase Z
hsa-miR-1207-5p	0	0	1	1	1	1	PEX19	peroxisomal biogenesis factor 19
hsa-miR-1207-5p	0	0	1	1	1	1	DEDD	death effector domain containing
hsa-miR-1207-5p	1	0	1	1	1	1	SLC39A1	solute carrier family 39 (zinc transporter), member 1
hsa-miR-1207-5p	0	0	1	1	1	1	RDH11	retinol dehydrogenase 11 (all-trans/9-cis/11-cis)
hsa-miR-1207-5p	0	0	1	1	0	0	TMEM132A	transmembrane protein 132A
hsa-miR-1207-5p	1	0	1	1	1	1	TIMP3	TIMP metallopeptidase inhibitor 3
hsa-miR-1207-5p	1	0	1	1	0	0	WBP2	WW domain binding protein 2
hsa-miR-1207-5p	0	0	1	1	0	0	CD53	CD53 molecule
hsa-miR-1207-5p	0	0	1	1	1	1	PDLIM1	PDZ and LIM domain 1
hsa-miR-1207-5p	0	0	1	1	0	0	FAM57B	family with sequence similarity 57, member B
hsa-miR-1207-5p	0	0	1	1	1	1	XBP1	X-box binding protein 1
hsa-miR-1207-5p	0	0	1	1	1	1	ACSF3	acyl-CoA synthetase family member 3
hsa-miR-1207-5p	1	0	1	1	1	1	EIF1	eukaryotic translation initiation factor 1
hsa-miR-1207-5p	0	0	1	1	1	1	SLCO4A1	solute carrier organic anion transporter family, member 4A1
hsa-miR-1207-5p	0	0	1	1	0	0	ZNF511	zinc finger protein 511
hsa-miR-1207-5p	0	0	1	1	0	0	TUSC3	tumor suppressor candidate 3
hsa-miR-1207-5p	1	0	1	1	1	1	ARHGEF40	Rho guanine nucleotide exchange factor (GEF) 40
hsa-miR-1207-5p	1	0	1	1	1	1	RPUSD3	RNA pseudouridylate synthase domain containing 3
hsa-miR-1207-5p	1	0	1	1	0	0	INO80E	INO80 complex subunit E
hsa-miR-1207-5p	0	0	1	1	1	1	NFKBIB	nuclear factor of kappa light polypeptide gene enhancer in B-cells inhibitor, beta
hsa-miR-1207-5p	0	0	1	0	0	0	ZNF674-AS1	ZNF674 antisense RNA 1
hsa-miR-1207-5p	0	0	1	1	0	0	OXA1L	oxidase (cytochrome c) assembly 1-like
hsa-miR-1207-5p	1	0	1	0	1	1	MAP1B	microtubule-associated protein 1B
hsa-miR-1207-5p	0	0	1	1	0	0	BCKDK	branched chain ketoacid dehydrogenase kinase
hsa-miR-1207-5p	0	0	1	1	1	1	APOPT1	apoptogenic 1, mitochondrial
hsa-miR-1207-5p	0	0	1	1	1	1	NCAPH	non-SMC condensin I complex, subunit H
hsa-miR-1207-5p	0	0	1	1	1	1	TBRG1	transforming growth factor beta regulator 1
hsa-miR-1207-5p	0	0	1	1	1	1	PTGES	prostaglandin E synthase
hsa-miR-1207-5p	0	0	1	0	1	1	ARMC10	armadillo repeat containing 10
hsa-miR-1207-5p	1	0	1	1	1	1	TRAPPC3	trafficking protein particle complex 3
hsa-miR-1207-5p	1	0	1	1	1	1	MFSD2A	major facilitator superfamily domain containing 2A
hsa-miR-1207-5p	0	0	1	1	1	1	LGI1	leucine-rich, glioma inactivated 1
hsa-miR-1207-5p	0	0	1	1	1	1	ZNF259	zinc finger protein 259
hsa-miR-1207-5p	1	0	1	1	0	0	CCM2	cerebral cavernous malformation 2
hsa-miR-1207-5p	1	0	1	1	0	0	SAP30BP	SAP30 binding protein
hsa-miR-1207-5p	0	0	1	1	0	0	CTSW	cathepsin W
hsa-miR-1207-5p	1	0	1	0	1	1	CD47	CD47 molecule
hsa-miR-1207-5p	0	0	1	0	0	0	NUDT18	nudix (nucleoside diphosphate linked moiety X)-type motif 18
hsa-miR-1207-5p	0	0	1	1	1	1	LRRC38	leucine rich repeat containing 38
hsa-miR-1207-5p	0	0	1	1	1	1	INPP5K	inositol polyphosphate-5-phosphatase K
hsa-miR-1207-5p	0	0	1	1	0	0	CLK2	CDC-like kinase 2
hsa-miR-1207-5p	1	0	1	1	1	1	WIPI2	WD repeat domain, phosphoinositide interacting 2
hsa-miR-1207-5p	0	0	1	1	0	0	TESK1	testis-specific kinase 1
hsa-miR-1207-5p	1	0	1	1	1	1	ATPAF1	ATP synthase mitochondrial F1 complex assembly factor 1
hsa-miR-1207-5p	0	0	1	1	0	0	TTYH1	tweety homolog 1 (Drosophila)
hsa-miR-1207-5p	0	0	1	1	1	1	R3HDM4	R3H domain containing 4
hsa-miR-1207-5p	0	0	1	0	1	1	UBA52	ubiquitin A-52 residue ribosomal protein fusion product 1
hsa-miR-1207-5p	1	0	1	1	1	1	MED1	mediator complex subunit 1
hsa-miR-1207-5p	0	0	1	1	1	1	LIMK2	LIM domain kinase 2
hsa-miR-1207-5p	1	0	1	1	1	1	JUNB	jun B proto-oncogene
hsa-miR-1207-5p	0	0	1	1	0	0	PCOLCE	procollagen C-endopeptidase enhancer
hsa-miR-1207-5p	0	0	1	1	1	1	TOP3B	topoisomerase (DNA) III beta
hsa-miR-1207-5p	1	0	1	0	1	1	DNMT3A	DNA (cytosine-5-)-methyltransferase 3 alpha
hsa-miR-1207-5p	0	0	1	1	0	0	PI16	peptidase inhibitor 16
hsa-miR-1207-5p	0	0	1	1	1	1	C10orf2	chromosome 10 open reading frame 2
hsa-miR-1207-5p	0	0	1	1	0	0	IL11RA	interleukin 11 receptor, alpha
hsa-miR-1207-5p	1	0	1	0	1	1	NMT1	N-myristoyltransferase 1
hsa-miR-1207-5p	1	0	1	1	1	1	PRSS22	protease, serine, 22
hsa-miR-1207-5p	1	0	1	0	1	1	KIAA0240	KIAA0240
hsa-miR-1207-5p	0	0	1	0	0	0	FAM47E	family with sequence similarity 47, member E
hsa-miR-1207-5p	1	0	1	0	0	0	RNF40	ring finger protein 40, E3 ubiquitin protein ligase
hsa-miR-1207-5p	1	0	1	0	1	1	KIAA0664	KIAA0664
hsa-miR-1207-5p	0	0	1	0	0	0	LOC731789	uncharacterized LOC731789
hsa-miR-1207-5p	1	0	1	1	1	1	FBXW7	F-box and WD repeat domain containing 7, E3 ubiquitin protein ligase
hsa-miR-1207-5p	0	0	1	0	0	0	LINC00661	long intergenic non-protein coding RNA 661
hsa-miR-1207-5p	1	0	1	0	1	1	SLC7A6	solute carrier family 7 (amino acid transporter light chain, y+L system), member 6
hsa-miR-1207-5p	0	0	1	1	0	0	FMN1	formin 1
hsa-miR-1207-5p	1	0	1	1	0	0	POMGNT1	protein O-linked mannose beta1,2-N-acetylglucosaminyltransferase
hsa-miR-1207-5p	1	0	1	1	1	1	BNC2	basonuclin 2
hsa-miR-1207-5p	0	0	1	0	0	0	DNAJC27-AS1	DNAJC27 antisense RNA 1
hsa-miR-1207-5p	1	0	1	1	1	1	BCL2L1	BCL2-like 1
hsa-miR-1207-5p	0	0	1	0	0	0	LOC440518	golgin A2 pseudogene
hsa-miR-1207-5p	1	0	1	1	1	1	SP2	Sp2 transcription factor
hsa-miR-1207-5p	1	0	1	1	1	1	NKX2-1	NK2 homeobox 1
hsa-miR-1207-5p	1	0	1	1	1	1	MAN2A2	mannosidase, alpha, class 2A, member 2
hsa-miR-1207-5p	1	0	1	1	1	1	SEC14L1	SEC14-like 1 (S. cerevisiae)
hsa-miR-1207-5p	1	0	1	1	1	1	RBPMS	RNA binding protein with multiple splicing
hsa-miR-1207-5p	1	0	1	1	0	0	KIAA0226	KIAA0226
hsa-miR-1207-5p	1	0	1	0	1	1	KLHDC10	kelch domain containing 10
hsa-miR-1207-5p	1	0	1	1	1	1	PHYHIP	phytanoyl-CoA 2-hydroxylase interacting protein
hsa-miR-1207-5p	0	0	1	1	1	1	PARP14	poly (ADP-ribose) polymerase family, member 14
hsa-miR-1207-5p	0	0	1	1	1	1	LTA	lymphotoxin alpha (TNF superfamily, member 1)
hsa-miR-1207-5p	0	0	1	1	0	0	PXK	PX domain containing serine/threonine kinase
hsa-miR-1207-5p	0	0	1	1	1	1	PTGS1	prostaglandin-endoperoxide synthase 1 (prostaglandin G/H synthase and cyclooxygenase)
hsa-miR-1207-5p	1	0	1	1	1	1	KCNE3	potassium voltage-gated channel, Isk-related family, member 3
hsa-miR-1207-5p	0	0	1	1	0	0	SPATA20	spermatogenesis associated 20
hsa-miR-1207-5p	0	0	1	1	1	1	IRF5	interferon regulatory factor 5
hsa-miR-1207-5p	1	0	1	1	1	1	MOSPD1	motile sperm domain containing 1
hsa-miR-1207-5p	0	0	1	0	0	0	PILRB	paired immunoglobin-like type 2 receptor beta
hsa-miR-1207-5p	1	0	1	0	1	1	RBBP5	retinoblastoma binding protein 5
hsa-miR-1207-5p	1	0	1	1	1	1	TNFAIP1	tumor necrosis factor, alpha-induced protein 1 (endothelial)
hsa-miR-1207-5p	1	0	1	1	1	1	IRF1	interferon regulatory factor 1
hsa-miR-1207-5p	0	0	1	0	0	0	LCE6A	late cornified envelope 6A
hsa-miR-1207-5p	0	0	1	1	0	0	CEACAM3	carcinoembryonic antigen-related cell adhesion molecule 3
hsa-miR-1207-5p	0	0	1	0	0	0	GPR144	G protein-coupled receptor 144
hsa-miR-1207-5p	0	0	1	1	1	1	MORC4	MORC family CW-type zinc finger 4
hsa-miR-1207-5p	0	0	1	1	1	1	ALDH3B1	aldehyde dehydrogenase 3 family, member B1
hsa-miR-1207-5p	0	0	1	1	1	1	AKAP17A	A kinase (PRKA) anchor protein 17A
hsa-miR-1207-5p	1	0	1	1	1	1	MLL	myeloid/lymphoid or mixed-lineage leukemia (trithorax homolog, Drosophila)
hsa-miR-1207-5p	1	0	1	1	0	0	PPARD	peroxisome proliferator-activated receptor delta
hsa-miR-1207-5p	0	0	1	1	1	1	ADPRH	ADP-ribosylarginine hydrolase
hsa-miR-1207-5p	0	0	1	1	1	1	PCYT1A	phosphate cytidylyltransferase 1, choline, alpha
hsa-miR-1207-5p	1	0	1	0	1	1	STAT3	signal transducer and activator of transcription 3 (acute-phase response factor)
hsa-miR-1207-5p	0	0	1	1	0	0	HLA-DQB1	major histocompatibility complex, class II, DQ beta 1
hsa-miR-1207-5p	1	0	1	0	1	1	BCL2	B-cell CLL/lymphoma 2
hsa-miR-1207-5p	0	0	1	1	1	1	HLA-DRB5	major histocompatibility complex, class II, DR beta 5
hsa-miR-1207-5p	1	0	1	1	1	1	TPM1	tropomyosin 1 (alpha)
hsa-miR-1207-5p	1	0	1	1	1	1	ELK1	ELK1, member of ETS oncogene family
hsa-miR-1207-5p	1	0	1	1	1	1	IGF1	insulin-like growth factor 1 (somatomedin C)
hsa-miR-1207-5p	0	0	1	1	1	1	STIL	SCL/TAL1 interrupting locus
hsa-miR-1207-5p	0	0	1	1	1	1	ATP7A	ATPase, Cu++ transporting, alpha polypeptide
hsa-miR-1207-5p	0	0	1	1	0	0	CD40LG	CD40 ligand
hsa-miR-1207-5p	1	0	1	1	1	1	COL1A1	collagen, type I, alpha 1
hsa-miR-1207-5p	0	0	1	1	1	1	CYP17A1	cytochrome P450, family 17, subfamily A, polypeptide 1
hsa-miR-1207-5p	0	0	1	1	0	0	EMD	emerin
hsa-miR-1207-5p	0	0	1	0	1	1	MS4A2	membrane-spanning 4-domains, subfamily A, member 2
hsa-miR-1207-5p	0	0	1	1	1	1	GSS	glutathione synthetase
hsa-miR-1207-5p	1	0	1	0	1	1	ITGB3	integrin, beta 3 (platelet glycoprotein IIIa, antigen CD61)
hsa-miR-1207-5p	1	0	1	1	1	1	KCNA1	potassium voltage-gated channel, shaker-related subfamily, member 1 (episodic ataxia with myokymia)
hsa-miR-1207-5p	0	0	1	1	0	0	SCNN1B	sodium channel, non-voltage-gated 1, beta subunit
hsa-miR-1207-5p	0	0	1	1	1	1	SLC5A1	solute carrier family 5 (sodium/glucose cotransporter), member 1
hsa-miR-1207-5p	0	0	1	1	1	1	SRD5A2	steroid-5-alpha-reductase, alpha polypeptide 2 (3-oxo-5 alpha-steroid delta 4-dehydrogenase alpha 2)
hsa-miR-1207-5p	0	0	1	1	0	0	ABCC8	ATP-binding cassette, sub-family C (CFTR/MRP), member 8
hsa-miR-1207-5p	0	0	1	1	1	1	WAS	Wiskott-Aldrich syndrome
hsa-miR-1207-5p	1	1	1	1	1	1	CDKN1A	cyclin-dependent kinase inhibitor 1A (p21, Cip1)
hsa-miR-1207-5p	1	0	1	0	1	1	CYBB	cytochrome b-245, beta polypeptide
hsa-miR-1207-5p	0	0	1	1	1	1	LTBP2	latent transforming growth factor beta binding protein 2
hsa-miR-1207-5p	1	0	1	0	1	1	PAFAH1B1	platelet-activating factor acetylhydrolase 1b, regulatory subunit 1 (45kDa)
hsa-miR-1207-5p	1	0	1	1	0	0	NOTCH3	notch 3
hsa-miR-1207-5p	0	0	1	1	1	1	PECAM1	platelet/endothelial cell adhesion molecule 1
hsa-miR-1207-5p	1	0	1	0	1	1	RAG1	recombination activating gene 1
hsa-miR-1207-5p	1	0	1	1	1	1	HNF1B	HNF1 homeobox B
hsa-miR-1207-5p	0	0	1	1	0	0	AK1	adenylate kinase 1
hsa-miR-1207-5p	0	0	1	1	0	0	APOA4	apolipoprotein A-IV
hsa-miR-1207-5p	0	0	1	1	1	1	CYP11B2	cytochrome P450, family 11, subfamily B, polypeptide 2
hsa-miR-1207-5p	0	0	1	1	0	0	FBP1	fructose-1,6-bisphosphatase 1
hsa-miR-1207-5p	1	0	1	1	1	1	MPZ	myelin protein zero
hsa-miR-1207-5p	0	0	1	1	0	0	REN	renin
hsa-miR-1207-5p	1	0	1	1	1	1	DCX	doublecortin
hsa-miR-1207-5p	0	0	1	1	1	1	FCGR1A	Fc fragment of IgG, high affinity Ia, receptor (CD64)
hsa-miR-1207-5p	1	0	1	1	1	1	IL1A	interleukin 1, alpha
hsa-miR-1207-5p	0	0	1	1	1	1	IL1RN	interleukin 1 receptor antagonist
hsa-miR-1207-5p	0	0	1	1	1	1	GPX1	glutathione peroxidase 1
hsa-miR-1207-5p	1	0	1	1	1	1	TNF	tumor necrosis factor
hsa-miR-1207-5p	1	0	1	1	1	1	CXCL12	chemokine (C-X-C motif) ligand 12
hsa-miR-1207-5p	0	0	1	1	1	1	IGF2	insulin-like growth factor 2 (somatomedin A)
hsa-miR-1207-5p	0	0	1	1	1	1	BDKRB2	bradykinin receptor B2
hsa-miR-1207-5p	1	0	1	1	1	1	CACNA2D1	calcium channel, voltage-dependent, alpha 2/delta subunit 1
hsa-miR-1207-5p	1	0	1	1	1	1	CHRM1	cholinergic receptor, muscarinic 1
hsa-miR-1207-5p	1	0	1	1	1	1	CSF1	colony stimulating factor 1 (macrophage)
hsa-miR-1207-5p	0	0	1	1	0	0	FOLR1	folate receptor 1 (adult)
hsa-miR-1207-5p	1	0	1	1	1	1	HTR4	5-hydroxytryptamine (serotonin) receptor 4, G protein-coupled
hsa-miR-1207-5p	1	0	1	1	1	1	IGF1R	insulin-like growth factor 1 receptor
hsa-miR-1207-5p	1	0	1	1	1	1	IGF2R	insulin-like growth factor 2 receptor
hsa-miR-1207-5p	1	0	1	0	1	1	KCNJ2	potassium inwardly-rectifying channel, subfamily J, member 2
hsa-miR-1207-5p	0	0	1	1	1	1	MAOB	monoamine oxidase B
hsa-miR-1207-5p	0	0	1	1	1	1	SERPINF2	serpin peptidase inhibitor, clade F (alpha-2 antiplasmin, pigment epithelium derived factor), member 2
hsa-miR-1207-5p	0	0	1	1	0	0	POLR2A	polymerase (RNA) II (DNA directed) polypeptide A, 220kDa
hsa-miR-1207-5p	1	0	1	1	1	1	PTGFR	prostaglandin F receptor (FP)
hsa-miR-1207-5p	0	0	1	1	0	0	PTGIR	prostaglandin I2 (prostacyclin) receptor (IP)
hsa-miR-1207-5p	1	0	1	1	1	1	RARA	retinoic acid receptor, alpha
hsa-miR-1207-5p	0	0	1	1	1	1	TBC1D3C	TBC1 domain family, member 3C
hsa-miR-1207-5p	1	0	1	1	0	0	SLC35E4	solute carrier family 35, member E4
hsa-miR-1207-5p	0	0	1	1	0	0	SNCB	synuclein, beta
hsa-miR-1207-5p	0	0	1	0	0	0	KLK2	kallikrein-related peptidase 2
hsa-miR-1207-5p	0	0	1	1	1	1	FCGR2B	Fc fragment of IgG, low affinity IIb, receptor (CD32)
hsa-miR-1207-5p	1	0	1	0	1	1	CACNA1I	calcium channel, voltage-dependent, T type, alpha 1I subunit
hsa-miR-1207-5p	1	0	1	1	1	1	ABLIM1	actin binding LIM protein 1
hsa-miR-1207-5p	1	0	1	1	0	0	DLGAP1	discs, large (Drosophila) homolog-associated protein 1
hsa-miR-1207-5p	0	0	1	1	1	1	TSPYL6	TSPY-like 6
hsa-miR-1207-5p	1	0	1	0	1	1	BMF	Bcl2 modifying factor
hsa-miR-1207-5p	0	0	1	1	1	1	TUSC1	tumor suppressor candidate 1
hsa-miR-1207-5p	0	0	1	1	0	0	PAPL	iron/zinc purple acid phosphatase-like protein
hsa-miR-1207-5p	0	0	1	0	0	0	RNASEK	ribonuclease, RNase K
hsa-miR-1207-5p	0	0	1	1	1	1	MTHFD2L	methylenetetrahydrofolate dehydrogenase (NADP+ dependent) 2-like
hsa-miR-1207-5p	1	0	1	0	1	1	LRRC55	leucine rich repeat containing 55
hsa-miR-1207-5p	0	0	1	1	0	0	LRRC52	leucine rich repeat containing 52
hsa-miR-1207-5p	1	0	1	1	1	1	AK4	adenylate kinase 4
hsa-miR-1207-5p	0	0	1	1	1	1	PRR13	proline rich 13
hsa-miR-1207-5p	0	0	1	1	1	1	CR2	complement component (3d/Epstein Barr virus) receptor 2
hsa-miR-1207-5p	1	0	1	1	1	1	ATN1	atrophin 1
hsa-miR-1207-5p	0	0	1	1	1	1	SCP2	sterol carrier protein 2
hsa-miR-1207-5p	0	0	1	1	0	0	F8A3	coagulation factor VIII-associated 3
hsa-miR-1207-5p	0	0	1	0	1	1	C3orf56	chromosome 3 open reading frame 56
hsa-miR-1207-5p	1	0	1	0	1	1	CPLX2	complexin 2
hsa-miR-1207-5p	1	0	1	1	1	1	ZDHHC9	zinc finger, DHHC-type containing 9
hsa-miR-1207-5p	1	0	1	1	1	1	LPHN1	latrophilin 1
hsa-miR-1207-5p	0	0	1	1	0	0	ARMCX6	armadillo repeat containing, X-linked 6
hsa-miR-1207-5p	0	0	1	1	0	0	C10orf62	chromosome 10 open reading frame 62
hsa-miR-1207-5p	0	0	1	1	1	1	NCMAP	noncompact myelin associated protein
hsa-miR-1207-5p	0	0	1	1	0	0	PNLIPRP3	pancreatic lipase-related protein 3
hsa-miR-1207-5p	1	0	1	1	1	1	CTNNBIP1	catenin, beta interacting protein 1
hsa-miR-1207-5p	1	0	1	1	1	1	NTRK3	neurotrophic tyrosine kinase, receptor, type 3
hsa-miR-1207-5p	0	0	1	1	0	0	SOHLH1	spermatogenesis and oogenesis specific basic helix-loop-helix 1
hsa-miR-1207-5p	1	0	1	1	1	1	FOXP4	forkhead box P4
hsa-miR-1207-5p	0	0	1	0	1	1	U2AF2	U2 small nuclear RNA auxiliary factor 2
hsa-miR-1207-5p	0	0	1	1	0	0	RGR	retinal G protein coupled receptor
hsa-miR-1207-5p	1	0	1	0	1	1	RGMB	RGM domain family, member B
hsa-miR-1207-5p	1	0	1	1	1	1	SORCS1	sortilin-related VPS10 domain containing receptor 1
hsa-miR-1207-5p	0	0	1	0	0	0	LOC400707	uncharacterized LOC400707
hsa-miR-1207-5p	0	0	1	1	1	1	LDLRAD2	low density lipoprotein receptor class A domain containing 2
hsa-miR-1207-5p	0	0	1	0	0	0	LOC441956	uncharacterized LOC441956
hsa-miR-1207-5p	1	0	1	1	0	0	USP21	ubiquitin specific peptidase 21
hsa-miR-1207-5p	1	0	1	1	1	1	NCDN	neurochondrin
hsa-miR-1207-5p	0	0	1	1	0	0	RTKN	rhotekin
hsa-miR-1207-5p	1	0	1	1	1	1	TMCC1	transmembrane and coiled-coil domain family 1
hsa-miR-1207-5p	1	0	1	0	1	1	KCNK2	potassium channel, subfamily K, member 2
hsa-miR-1207-5p	0	0	1	1	1	1	BTBD11	BTB (POZ) domain containing 11
hsa-miR-1207-5p	1	0	1	1	1	1	VMA21	VMA21 vacuolar H+-ATPase homolog (S. cerevisiae)
hsa-miR-1207-5p	1	0	1	1	1	1	PFKFB2	6-phosphofructo-2-kinase/fructose-2,6-biphosphatase 2
hsa-miR-1207-5p	1	0	1	1	1	1	NTRK2	neurotrophic tyrosine kinase, receptor, type 2
hsa-miR-1207-5p	0	0	1	1	1	1	NARG2	NMDA receptor regulated 2
hsa-miR-1207-5p	0	0	1	1	1	1	NPIPL1	nuclear pore complex interacting protein-like 1
hsa-miR-1207-5p	1	0	1	1	1	1	SBK1	SH3-binding domain kinase 1
hsa-miR-1207-5p	1	0	1	1	1	1	CANX	calnexin
hsa-miR-1207-5p	1	0	1	1	1	1	SH3KBP1	SH3-domain kinase binding protein 1
hsa-miR-1207-5p	1	0	1	0	1	1	BCL7A	B-cell CLL/lymphoma 7A
hsa-miR-1207-5p	1	0	1	0	1	1	TNRC6B	trinucleotide repeat containing 6B
hsa-miR-1207-5p	1	0	1	1	1	1	SLC6A9	solute carrier family 6 (neurotransmitter transporter, glycine), member 9
hsa-miR-1207-5p	1	0	1	1	1	1	FNBP1L	formin binding protein 1-like
hsa-miR-1207-5p	0	0	1	1	0	0	KPRP	keratinocyte proline-rich protein
hsa-miR-1207-5p	1	0	1	1	1	1	SLC35F1	solute carrier family 35, member F1
hsa-miR-1207-5p	1	0	1	1	1	1	RGS7BP	regulator of G-protein signaling 7 binding protein
hsa-miR-1207-5p	0	0	1	1	0	0	AHDC1	AT hook, DNA binding motif, containing 1
hsa-miR-1207-5p	0	0	1	1	1	1	PGAM4	phosphoglycerate mutase family member 4
hsa-miR-1207-5p	0	0	1	1	0	0	KLK3	kallikrein-related peptidase 3
hsa-miR-1207-5p	0	0	1	1	1	1	ATF3	activating transcription factor 3
hsa-miR-1207-5p	1	0	1	0	1	1	CYB5RL	cytochrome b5 reductase-like
hsa-miR-1207-5p	0	0	1	0	1	1	STXBP1	syntaxin binding protein 1
hsa-miR-1207-5p	1	0	1	1	1	1	RCE1	RCE1 homolog, prenyl protein protease (S. cerevisiae)
hsa-miR-1207-5p	1	0	1	1	1	1	UBE2V1	ubiquitin-conjugating enzyme E2 variant 1
hsa-miR-1207-5p	0	0	1	1	1	1	PHF12	PHD finger protein 12
hsa-miR-1207-5p	1	0	1	1	1	1	ZNF704	zinc finger protein 704
hsa-miR-1207-5p	0	0	1	1	1	1	NHP2	NHP2 ribonucleoprotein homolog (yeast)
hsa-miR-1207-5p	1	0	1	1	1	1	SMOC1	SPARC related modular calcium binding 1
hsa-miR-1207-5p	1	0	1	1	1	1	SCN1B	sodium channel, voltage-gated, type I, beta subunit
hsa-miR-1207-5p	0	0	1	0	0	0	FER1L6	fer-1-like 6 (C. elegans)
hsa-miR-1207-5p	0	0	1	1	1	1	ATAD3C	ATPase family, AAA domain containing 3C
hsa-miR-1207-5p	1	0	1	1	1	1	ATP6V1C2	ATPase, H+ transporting, lysosomal 42kDa, V1 subunit C2
hsa-miR-1207-5p	1	0	1	1	1	1	ELMO1	engulfment and cell motility 1
hsa-miR-1207-5p	0	0	1	1	0	0	CD151	CD151 molecule (Raph blood group)
hsa-miR-1207-5p	0	0	1	1	1	1	SIRPG	signal-regulatory protein gamma
hsa-miR-1207-5p	1	0	1	1	1	1	KREMEN1	kringle containing transmembrane protein 1
hsa-miR-1207-5p	1	0	1	1	1	1	KCNC4	potassium voltage-gated channel, Shaw-related subfamily, member 4
hsa-miR-1207-5p	0	0	1	1	0	0	ANGPTL4	angiopoietin-like 4
hsa-miR-1207-5p	1	0	1	1	1	1	CHTF8	CTF8, chromosome transmission fidelity factor 8 homolog (S. cerevisiae)
hsa-miR-1207-5p	1	0	1	1	1	1	CBLN3	cerebellin 3 precursor
hsa-miR-1207-5p	1	0	1	1	1	1	STRN4	striatin, calmodulin binding protein 4
hsa-miR-1207-5p	0	0	1	0	0	0	C19orf55	chromosome 19 open reading frame 55
hsa-miR-1207-5p	1	0	1	1	1	1	ZNF384	zinc finger protein 384
hsa-miR-1207-5p	1	0	1	1	1	1	MOSPD3	motile sperm domain containing 3
hsa-miR-1207-5p	0	0	1	0	1	1	SCN3B	sodium channel, voltage-gated, type III, beta subunit
hsa-miR-1207-5p	1	0	1	1	1	1	MAPK8IP3	mitogen-activated protein kinase 8 interacting protein 3
hsa-miR-1207-5p	1	0	1	1	1	1	MTMR12	myotubularin related protein 12
hsa-miR-1207-5p	1	0	1	1	1	1	CRCP	CGRP receptor component
hsa-miR-1207-5p	0	0	1	1	1	1	METTL21D	methyltransferase like 21D
hsa-miR-1207-5p	1	0	1	1	0	0	BCL2L12	BCL2-like 12 (proline rich)
hsa-miR-1207-5p	1	0	1	1	1	1	HEY1	hairy/enhancer-of-split related with YRPW motif 1
hsa-miR-1207-5p	1	0	1	1	1	1	ZC2HC1C	zinc finger, C2HC-type containing 1C
hsa-miR-1207-5p	0	0	1	1	0	0	TGFB1I1	transforming growth factor beta 1 induced transcript 1
hsa-miR-1207-5p	0	0	1	1	0	0	TRAPPC5	trafficking protein particle complex 5
hsa-miR-1207-5p	0	0	1	1	1	1	GEMIN8	gem (nuclear organelle) associated protein 8
hsa-miR-1207-5p	1	0	1	1	1	1	CRTC3	CREB regulated transcription coactivator 3
hsa-miR-1207-5p	1	0	1	1	1	1	ERBB4	v-erb-a erythroblastic leukemia viral oncogene homolog 4 (avian)
hsa-miR-1207-5p	0	0	1	1	1	1	TRAK1	trafficking protein, kinesin binding 1
hsa-miR-1207-5p	1	0	1	1	1	1	RERE	arginine-glutamic acid dipeptide (RE) repeats
hsa-miR-1207-5p	1	0	1	1	1	1	PVRL2	poliovirus receptor-related 2 (herpesvirus entry mediator B)
hsa-miR-1207-5p	0	0	1	0	1	1	MPPED1	metallophosphoesterase domain containing 1
hsa-miR-1207-5p	0	0	1	1	1	1	FAM22G	family with sequence similarity 22, member G
hsa-miR-1207-5p	0	0	1	1	0	0	UBL5	ubiquitin-like 5
hsa-miR-1207-5p	0	0	1	1	1	1	TUBG1	tubulin, gamma 1
hsa-miR-1207-5p	0	0	1	1	0	0	SKAP1	src kinase associated phosphoprotein 1
hsa-miR-1207-5p	1	0	1	1	1	1	UBTF	upstream binding transcription factor, RNA polymerase I
hsa-miR-1207-5p	1	0	1	1	1	1	ATG9A	autophagy related 9A
hsa-miR-1207-5p	1	0	1	1	1	1	RNF214	ring finger protein 214
hsa-miR-1207-5p	1	0	1	1	1	1	NCOR2	nuclear receptor corepressor 2
hsa-miR-1207-5p	1	0	1	1	1	1	PRR3	proline rich 3
hsa-miR-1207-5p	0	0	1	1	1	1	KLK10	kallikrein-related peptidase 10
hsa-miR-1207-5p	0	0	1	1	0	0	VPS37D	vacuolar protein sorting 37 homolog D (S. cerevisiae)
hsa-miR-1207-5p	0	0	1	1	0	0	FAM127A	family with sequence similarity 127, member A
hsa-miR-1207-5p	1	0	1	0	0	0	FAM127B	family with sequence similarity 127, member B
hsa-miR-1207-5p	1	0	1	0	1	1	FAM127C	family with sequence similarity 127, member C
hsa-miR-1207-5p	1	0	1	1	1	1	HNRNPUL2	heterogeneous nuclear ribonucleoprotein U-like 2
hsa-miR-1207-5p	0	0	1	1	1	1	CAB39L	calcium binding protein 39-like
hsa-miR-1207-5p	0	0	1	1	1	1	DIAPH1	diaphanous homolog 1 (Drosophila)
hsa-miR-1207-5p	1	0	1	1	1	1	HAP1	huntingtin-associated protein 1
hsa-miR-1207-5p	1	0	1	1	1	1	KIAA0368	KIAA0368
hsa-miR-1207-5p	1	0	1	0	1	1	FBXO41	F-box protein 41
hsa-miR-1207-5p	1	0	1	1	0	0	DLGAP3	discs, large (Drosophila) homolog-associated protein 3
hsa-miR-1207-5p	1	0	1	1	1	1	SHANK3	SH3 and multiple ankyrin repeat domains 3
hsa-miR-1207-5p	1	0	1	1	1	1	KDM6B	lysine (K)-specific demethylase 6B
hsa-miR-1207-5p	1	0	1	0	1	1	MEGF9	multiple EGF-like-domains 9
hsa-miR-1207-5p	1	0	1	0	0	0	CCDC159	coiled-coil domain containing 159
hsa-miR-1207-5p	0	0	1	0	0	0	C16orf90	chromosome 16 open reading frame 90
hsa-miR-1207-5p	0	0	1	1	0	0	NEURL3	neuralized homolog 3 (Drosophila) pseudogene
hsa-miR-1207-5p	1	0	1	1	1	1	DGKG	diacylglycerol kinase, gamma 90kDa
hsa-miR-1207-5p	1	0	1	1	1	1	MYO1C	myosin IC
hsa-miR-1207-5p	1	0	1	1	1	1	REPS2	RALBP1 associated Eps domain containing 2
hsa-miR-1207-5p	0	0	1	1	0	0	PLOD3	procollagen-lysine, 2-oxoglutarate 5-dioxygenase 3
hsa-miR-1207-5p	0	0	1	1	1	1	ARHGAP6	Rho GTPase activating protein 6
hsa-miR-1207-5p	0	0	1	1	1	1	ARHGDIB	Rho GDP dissociation inhibitor (GDI) beta
hsa-miR-1207-5p	0	0	1	1	0	0	ARHGDIG	Rho GDP dissociation inhibitor (GDI) gamma
hsa-miR-1207-5p	0	0	1	1	0	0	AZGP1	alpha-2-glycoprotein 1, zinc-binding
hsa-miR-1207-5p	1	0	1	1	1	1	CASP10	caspase 10, apoptosis-related cysteine peptidase
hsa-miR-1207-5p	0	0	1	1	0	0	CLPTM1	cleft lip and palate associated transmembrane protein 1
hsa-miR-1207-5p	1	0	1	1	1	1	CNN1	calponin 1, basic, smooth muscle
hsa-miR-1207-5p	1	0	1	0	1	1	CPD	carboxypeptidase D
hsa-miR-1207-5p	0	0	1	1	1	1	DARS	aspartyl-tRNA synthetase
hsa-miR-1207-5p	1	0	1	0	0	0	DLG4	discs, large homolog 4 (Drosophila)
hsa-miR-1207-5p	1	0	1	1	1	1	S1PR1	sphingosine-1-phosphate receptor 1
hsa-miR-1207-5p	1	0	1	1	1	1	CELSR3	cadherin, EGF LAG seven-pass G-type receptor 3 (flamingo homolog, Drosophila)
hsa-miR-1207-5p	1	0	1	0	1	1	ELAVL3	ELAV (embryonic lethal, abnormal vision, Drosophila)-like 3 (Hu antigen C)
hsa-miR-1207-5p	0	0	1	0	1	1	EMP1	epithelial membrane protein 1
hsa-miR-1207-5p	1	0	1	1	1	1	FOXC1	forkhead box C1
hsa-miR-1207-5p	0	0	1	1	1	1	B4GALNT1	beta-1,4-N-acetyl-galactosaminyl transferase 1
hsa-miR-1207-5p	0	0	1	1	0	0	GCKR	glucokinase (hexokinase 4) regulator
hsa-miR-1207-5p	1	0	1	1	0	0	GDI1	GDP dissociation inhibitor 1
hsa-miR-1207-5p	1	0	1	1	1	1	NDST1	N-deacetylase/N-sulfotransferase (heparan glucosaminyl) 1
hsa-miR-1207-5p	1	0	1	1	1	1	IGFBP4	insulin-like growth factor binding protein 4
hsa-miR-1207-5p	0	0	1	1	0	0	ACRV1	acrosomal vesicle protein 1
hsa-miR-1207-5p	1	0	1	1	1	1	ADD2	adducin 2 (beta)
hsa-miR-1207-5p	0	0	1	1	1	1	AKR1B1	aldo-keto reductase family 1, member B1 (aldose reductase)
hsa-miR-1207-5p	1	0	1	0	1	1	ARCN1	archain 1
hsa-miR-1207-5p	1	0	1	1	1	1	ARF3	ADP-ribosylation factor 3
hsa-miR-1207-5p	0	0	1	1	0	0	RHOG	ras homolog family member G
hsa-miR-1207-5p	1	0	1	0	1	1	ARNT	aryl hydrocarbon receptor nuclear translocator
hsa-miR-1207-5p	1	0	1	0	1	1	ATP1B2	ATPase, Na+/K+ transporting, beta 2 polypeptide
hsa-miR-1207-5p	0	0	1	1	0	0	ATP5B	ATP synthase, H+ transporting, mitochondrial F1 complex, beta polypeptide
hsa-miR-1207-5p	0	0	1	1	0	0	CXCR5	chemokine (C-X-C motif) receptor 5
hsa-miR-1207-5p	0	0	1	1	1	1	BTN1A1	butyrophilin, subfamily 1, member A1
hsa-miR-1207-5p	0	0	1	1	1	1	CALB2	calbindin 2
hsa-miR-1207-5p	1	0	1	1	1	1	CDC25A	cell division cycle 25 homolog A (S. pombe)
hsa-miR-1207-5p	0	0	1	1	0	0	CDKN2D	cyclin-dependent kinase inhibitor 2D (p19, inhibits CDK4)
hsa-miR-1207-5p	1	0	1	1	1	1	CENPB	centromere protein B, 80kDa
hsa-miR-1207-5p	0	0	1	1	0	0	CNTFR	ciliary neurotrophic factor receptor
hsa-miR-1207-5p	1	0	1	1	1	1	COL4A6	collagen, type IV, alpha 6
hsa-miR-1207-5p	1	0	1	1	1	1	MASP1	mannan-binding lectin serine peptidase 1 (C4/C2 activating component of Ra-reactive factor)
hsa-miR-1207-5p	0	0	1	1	1	1	DPT	dermatopontin
hsa-miR-1207-5p	1	0	1	1	1	1	HBEGF	heparin-binding EGF-like growth factor
hsa-miR-1207-5p	0	0	1	1	0	0	EDN2	endothelin 2
hsa-miR-1207-5p	1	0	1	1	1	1	EGR1	early growth response 1
hsa-miR-1207-5p	1	0	1	1	1	1	EPB49	erythrocyte membrane protein band 4.9 (dematin)
hsa-miR-1207-5p	1	0	1	0	1	1	ETV6	ets variant 6
hsa-miR-1207-5p	1	0	1	1	1	1	FBN2	fibrillin 2
hsa-miR-1207-5p	1	0	1	0	1	1	FOXO1	forkhead box O1
hsa-miR-1207-5p	1	0	1	1	1	1	FMOD	fibromodulin
hsa-miR-1207-5p	1	0	1	0	1	1	FUT4	fucosyltransferase 4 (alpha (1,3) fucosyltransferase, myeloid-specific)
hsa-miR-1207-5p	0	0	1	1	0	0	FUT5	fucosyltransferase 5 (alpha (1,3) fucosyltransferase)
hsa-miR-1207-5p	0	0	1	1	0	0	GLP1R	glucagon-like peptide 1 receptor
hsa-miR-1207-5p	0	0	1	1	1	1	GNAQ	guanine nucleotide binding protein (G protein), q polypeptide
hsa-miR-1207-5p	0	0	1	0	1	1	GYPE	glycophorin E (MNS blood group)
hsa-miR-1207-5p	0	0	1	1	1	1	GYS1	glycogen synthase 1 (muscle)
hsa-miR-1207-5p	0	0	1	0	0	0	HLA-DRB1	major histocompatibility complex, class II, DR beta 1
hsa-miR-1207-5p	0	0	1	1	0	0	HRC	histidine rich calcium binding protein
hsa-miR-1207-5p	0	0	1	1	1	1	FOXN2	forkhead box N2
hsa-miR-1207-5p	1	0	1	1	1	1	INSM1	insulinoma-associated 1
hsa-miR-1207-5p	1	0	1	0	1	1	IRF2	interferon regulatory factor 2
hsa-miR-1207-5p	1	0	1	1	1	1	ITGA3	integrin, alpha 3 (antigen CD49C, alpha 3 subunit of VLA-3 receptor)
hsa-miR-1207-5p	1	0	1	1	1	1	ITGA5	integrin, alpha 5 (fibronectin receptor, alpha polypeptide)
hsa-miR-1207-5p	1	0	1	1	1	1	ITGB8	integrin, beta 8
hsa-miR-1207-5p	1	0	1	1	1	1	KCNA3	potassium voltage-gated channel, shaker-related subfamily, member 3
hsa-miR-1207-5p	1	0	1	1	1	1	KDR	kinase insert domain receptor (a type III receptor tyrosine kinase)
hsa-miR-1207-5p	1	0	1	0	1	1	KIF3C	kinesin family member 3C
hsa-miR-1207-5p	0	0	1	1	0	0	KRT4	keratin 4
hsa-miR-1207-5p	0	0	1	1	0	0	LALBA	lactalbumin, alpha-
hsa-miR-1207-5p	0	0	1	1	0	0	LAMB2	laminin, beta 2 (laminin S)
hsa-miR-1207-5p	1	0	1	1	1	1	LIMK1	LIM domain kinase 1
hsa-miR-1207-5p	1	0	1	1	1	1	LRP1	low density lipoprotein receptor-related protein 1
hsa-miR-1207-5p	1	0	1	1	1	1	MARCKS	myristoylated alanine-rich protein kinase C substrate
hsa-miR-1207-5p	0	0	1	1	1	1	MAG	myelin associated glycoprotein
hsa-miR-1207-5p	1	0	1	1	1	1	MAP1A	microtubule-associated protein 1A
hsa-miR-1207-5p	1	0	1	1	1	1	MAX	MYC associated factor X
hsa-miR-1207-5p	1	0	1	1	1	1	ADAM11	ADAM metallopeptidase domain 11
hsa-miR-1207-5p	1	0	1	1	1	1	MSN	moesin
hsa-miR-1207-5p	1	0	1	1	1	1	MSR1	macrophage scavenger receptor 1
hsa-miR-1207-5p	0	0	1	1	1	1	MTAP	methylthioadenosine phosphorylase
hsa-miR-1207-5p	1	0	1	1	1	1	MYH9	myosin, heavy chain 9, non-muscle
hsa-miR-1207-5p	1	0	1	1	1	1	NGF	nerve growth factor (beta polypeptide)
hsa-miR-1207-5p	1	0	1	1	1	1	NGFR	nerve growth factor receptor
hsa-miR-1207-5p	0	0	1	1	1	1	NID1	nidogen 1
hsa-miR-1207-5p	1	0	1	1	1	1	NPAS2	neuronal PAS domain protein 2
hsa-miR-1207-5p	1	0	1	1	1	1	NPTX1	neuronal pentraxin I
hsa-miR-1207-5p	0	0	1	0	1	1	OAZ2	ornithine decarboxylase antizyme 2
hsa-miR-1207-5p	1	0	1	1	1	1	OLR1	oxidized low density lipoprotein (lectin-like) receptor 1
hsa-miR-1207-5p	0	0	1	0	1	1	OPHN1	oligophrenin 1
hsa-miR-1207-5p	1	0	1	1	1	1	OSBP	oxysterol binding protein
hsa-miR-1207-5p	1	0	1	1	1	1	FURIN	furin (paired basic amino acid cleaving enzyme)
hsa-miR-1207-5p	0	0	1	1	1	1	PBX1	pre-B-cell leukemia homeobox 1
hsa-miR-1207-5p	1	0	1	1	1	1	PBX2	pre-B-cell leukemia homeobox 2
hsa-miR-1207-5p	0	0	1	1	1	1	PDE6D	phosphodiesterase 6D, cGMP-specific, rod, delta
hsa-miR-1207-5p	1	0	1	1	0	0	PDGFB	platelet-derived growth factor beta polypeptide
hsa-miR-1207-5p	0	0	1	1	0	0	PDGFRB	platelet-derived growth factor receptor, beta polypeptide
hsa-miR-1207-5p	1	0	1	1	1	1	PGAM1	phosphoglycerate mutase 1 (brain)
hsa-miR-1207-5p	1	0	1	1	1	1	PHF1	PHD finger protein 1
hsa-miR-1207-5p	0	0	1	1	1	1	PIM1	pim-1 oncogene
hsa-miR-1207-5p	1	0	1	1	1	1	PLAGL2	pleiomorphic adenoma gene-like 2
hsa-miR-1207-5p	1	0	1	1	1	1	PLCG1	phospholipase C, gamma 1
hsa-miR-1207-5p	1	0	1	0	1	1	POU3F1	POU class 3 homeobox 1
hsa-miR-1207-5p	0	0	1	1	1	1	MAP2K1	mitogen-activated protein kinase kinase 1
hsa-miR-1207-5p	0	0	1	1	1	1	MAP2K6	mitogen-activated protein kinase kinase 6
hsa-miR-1207-5p	0	0	1	0	0	0	PSMB10	proteasome (prosome, macropain) subunit, beta type, 10
hsa-miR-1207-5p	0	0	1	0	1	1	PSMD3	proteasome (prosome, macropain) 26S subunit, non-ATPase, 3
hsa-miR-1207-5p	1	0	1	1	1	1	PTPN9	protein tyrosine phosphatase, non-receptor type 9
hsa-miR-1207-5p	1	0	1	1	1	1	PTPRJ	protein tyrosine phosphatase, receptor type, J
hsa-miR-1207-5p	0	0	1	1	1	1	PTPRM	protein tyrosine phosphatase, receptor type, M
hsa-miR-1207-5p	1	0	1	1	1	1	PVALB	parvalbumin
hsa-miR-1207-5p	1	0	1	1	1	1	PVRL1	poliovirus receptor-related 1 (herpesvirus entry mediator C)
hsa-miR-1207-5p	1	0	1	1	0	0	PYGB	phosphorylase, glycogen; brain
hsa-miR-1207-5p	0	0	1	1	1	1	RAB3A	RAB3A, member RAS oncogene family
hsa-miR-1207-5p	0	0	1	0	1	1	RAB3B	RAB3B, member RAS oncogene family
hsa-miR-1207-5p	1	0	1	1	1	1	RAD23B	RAD23 homolog B (S. cerevisiae)
hsa-miR-1207-5p	1	0	1	0	1	1	RAP2B	RAP2B, member of RAS oncogene family
hsa-miR-1207-5p	0	0	1	1	0	0	RBMS2	RNA binding motif, single stranded interacting protein 2
hsa-miR-1207-5p	0	0	1	1	0	0	RDBP	RD RNA binding protein
hsa-miR-1207-5p	1	0	1	1	0	0	RFX1	regulatory factor X, 1 (influences HLA class II expression)
hsa-miR-1207-5p	1	0	1	0	1	1	SORT1	sortilin 1
hsa-miR-1207-5p	0	0	1	1	0	0	S100A5	S100 calcium binding protein A5
hsa-miR-1207-5p	1	0	1	1	1	1	CCL21	chemokine (C-C motif) ligand 21
hsa-miR-1207-5p	1	0	1	0	1	1	CCL22	chemokine (C-C motif) ligand 22
hsa-miR-1207-5p	0	0	1	1	1	1	XCL1	chemokine (C motif) ligand 1
hsa-miR-1207-5p	0	0	1	1	1	1	SDC2	syndecan 2
hsa-miR-1207-5p	1	0	1	1	1	1	SFRP2	secreted frizzled-related protein 2
hsa-miR-1207-5p	1	0	1	1	1	1	SHB	Src homology 2 domain containing adaptor protein B
hsa-miR-1207-5p	1	0	1	0	1	1	SLC6A1	solute carrier family 6 (neurotransmitter transporter, GABA), member 1
hsa-miR-1207-5p	1	0	1	1	1	1	SLC7A1	solute carrier family 7 (cationic amino acid transporter, y+ system), member 1
hsa-miR-1207-5p	1	0	1	1	1	1	SMARCD1	SWI/SNF related, matrix associated, actin dependent regulator of chromatin, subfamily d, member 1
hsa-miR-1207-5p	1	0	1	1	1	1	SMARCD2	SWI/SNF related, matrix associated, actin dependent regulator of chromatin, subfamily d, member 2
hsa-miR-1207-5p	0	0	1	1	0	0	SNTA1	syntrophin, alpha 1
hsa-miR-1207-5p	1	0	1	0	1	1	SOX11	SRY (sex determining region Y)-box 11
hsa-miR-1207-5p	1	0	1	1	1	1	SRF	serum response factor (c-fos serum response element-binding transcription factor)
hsa-miR-1207-5p	0	0	1	0	1	1	TRIM21	tripartite motif containing 21
hsa-miR-1207-5p	1	0	1	1	1	1	SSR2	signal sequence receptor, beta (translocon-associated protein beta)
hsa-miR-1207-5p	0	0	1	1	1	1	STAT6	signal transducer and activator of transcription 6, interleukin-4 induced
hsa-miR-1207-5p	1	0	1	0	1	1	STC1	stanniocalcin 1
hsa-miR-1207-5p	0	0	1	1	1	1	STIM1	stromal interaction molecule 1
hsa-miR-1207-5p	0	0	1	1	1	1	SUPT6H	suppressor of Ty 6 homolog (S. cerevisiae)
hsa-miR-1207-5p	0	0	1	1	1	1	XCL2	chemokine (C motif) ligand 2
hsa-miR-1207-5p	1	0	1	1	1	1	TAF4	TAF4 RNA polymerase II, TATA box binding protein (TBP)-associated factor, 135kDa
hsa-miR-1207-5p	1	0	1	0	1	1	TAL1	T-cell acute lymphocytic leukemia 1
hsa-miR-1207-5p	0	0	1	0	1	1	TCEB3	transcription elongation factor B (SIII), polypeptide 3 (110kDa, elongin A)
hsa-miR-1207-5p	0	0	1	0	1	1	TCF21	transcription factor 21
hsa-miR-1207-5p	1	0	1	1	1	1	TFAP2B	transcription factor AP-2 beta (activating enhancer binding protein 2 beta)
hsa-miR-1207-5p	1	0	1	1	1	1	TFAP4	transcription factor AP-4 (activating enhancer binding protein 4)
hsa-miR-1207-5p	1	0	1	1	0	0	TNP1	transition protein 1 (during histone to protamine replacement)
hsa-miR-1207-5p	0	0	1	1	1	1	TPP2	tripeptidyl peptidase II
hsa-miR-1207-5p	0	0	1	1	0	0	TTC1	tetratricopeptide repeat domain 1
hsa-miR-1207-5p	0	0	1	1	0	0	HIRA	HIR histone cell cycle regulation defective homolog A (S. cerevisiae)
hsa-miR-1207-5p	0	0	1	1	0	0	UBA7	ubiquitin-like modifier activating enzyme 7
hsa-miR-1207-5p	0	0	1	1	1	1	UBE2A	ubiquitin-conjugating enzyme E2A
hsa-miR-1207-5p	1	0	1	0	1	1	UBE2G2	ubiquitin-conjugating enzyme E2G 2
hsa-miR-1207-5p	1	0	1	0	1	1	VCL	vinculin
hsa-miR-1207-5p	0	0	1	1	1	1	WNT9A	wingless-type MMTV integration site family, member 9A
hsa-miR-1207-5p	1	0	1	0	1	1	ZIC1	Zic family member 1
hsa-miR-1207-5p	1	0	1	1	1	1	ZIC3	Zic family member 3
hsa-miR-1207-5p	1	0	1	0	1	1	BSN	bassoon (presynaptic cytomatrix protein)
hsa-miR-1207-5p	1	0	1	1	0	0	SLC30A3	solute carrier family 30 (zinc transporter), member 3
hsa-miR-1207-5p	1	0	1	1	1	1	HMGA2	high mobility group AT-hook 2
hsa-miR-1207-5p	1	0	1	1	1	1	FZD1	frizzled family receptor 1
hsa-miR-1207-5p	1	0	1	1	1	1	FZD7	frizzled family receptor 7
hsa-miR-1207-5p	0	0	1	1	1	1	HIST2H2BE	histone cluster 2, H2be
hsa-miR-1207-5p	0	0	1	1	1	1	PIP5K1A	phosphatidylinositol-4-phosphate 5-kinase, type I, alpha
hsa-miR-1207-5p	0	0	1	1	1	1	STX7	syntaxin 7
hsa-miR-1207-5p	1	0	1	0	1	1	CUL3	cullin 3
hsa-miR-1207-5p	0	0	1	1	1	1	TPST1	tyrosylprotein sulfotransferase 1
hsa-miR-1207-5p	1	0	1	0	1	1	CNTNAP1	contactin associated protein 1
hsa-miR-1207-5p	0	0	1	1	1	1	ITGA10	integrin, alpha 10
hsa-miR-1207-5p	0	0	1	1	1	1	CHST1	carbohydrate (keratan sulfate Gal-6) sulfotransferase 1
hsa-miR-1207-5p	0	0	1	1	0	0	CAMK1	calcium/calmodulin-dependent protein kinase I
hsa-miR-1207-5p	0	0	1	1	0	0	FCN3	ficolin (collagen/fibrinogen domain containing) 3 (Hakata antigen)
hsa-miR-1207-5p	1	0	1	1	1	1	BHLHE40	basic helix-loop-helix family, member e40
hsa-miR-1207-5p	0	0	1	1	0	0	DCHS1	dachsous 1 (Drosophila)
hsa-miR-1207-5p	0	0	1	1	0	0	KRT36	keratin 36
hsa-miR-1207-5p	1	0	1	1	1	1	NR5A2	nuclear receptor subfamily 5, group A, member 2
hsa-miR-1207-5p	1	0	1	1	1	1	KAT2B	K(lysine) acetyltransferase 2B
hsa-miR-1207-5p	1	0	1	0	1	1	CDK5R1	cyclin-dependent kinase 5, regulatory subunit 1 (p35)
hsa-miR-1207-5p	0	0	1	1	1	1	LDB1	LIM domain binding 1
hsa-miR-1207-5p	0	0	1	1	1	1	PRPF4B	PRP4 pre-mRNA processing factor 4 homolog B (yeast)
hsa-miR-1207-5p	1	0	1	1	1	1	UBE2M	ubiquitin-conjugating enzyme E2M
hsa-miR-1207-5p	1	0	1	1	0	0	PAX2	paired box 2
hsa-miR-1207-5p	1	0	1	1	1	1	BCL2L2	BCL2-like 2
hsa-miR-1207-5p	1	0	1	0	1	1	E2F2	E2F transcription factor 2
hsa-miR-1207-5p	1	0	1	1	0	0	EIF4EBP1	eukaryotic translation initiation factor 4E binding protein 1
hsa-miR-1207-5p	0	0	1	0	1	1	EIF4EBP2	eukaryotic translation initiation factor 4E binding protein 2
hsa-miR-1207-5p	0	0	1	1	1	1	FKBP1B	FK506 binding protein 1B, 12.6 kDa
hsa-miR-1207-5p	1	0	1	0	1	1	SLC1A2	solute carrier family 1 (glial high affinity glutamate transporter), member 2
hsa-miR-1207-5p	1	0	1	1	1	1	SEMA3F	sema domain, immunoglobulin domain (Ig), short basic domain, secreted, (semaphorin) 3F
hsa-miR-1207-5p	0	0	1	1	0	0	SLC6A5	solute carrier family 6 (neurotransmitter transporter, glycine), member 5
hsa-miR-1207-5p	1	0	1	0	1	1	MED14	mediator complex subunit 14
hsa-miR-1207-5p	0	0	1	1	0	0	ATP6V1F	ATPase, H+ transporting, lysosomal 14kDa, V1 subunit F
hsa-miR-1207-5p	1	0	1	0	1	1	AKAP6	A kinase (PRKA) anchor protein 6
hsa-miR-1207-5p	1	0	1	0	1	1	GTPBP1	GTP binding protein 1
hsa-miR-1207-5p	1	0	1	1	1	1	GDA	guanine deaminase
hsa-miR-1207-5p	1	0	1	0	1	1	ACVR1B	activin A receptor, type IB
hsa-miR-1207-5p	1	0	1	1	1	1	ARL3	ADP-ribosylation factor-like 3
hsa-miR-1207-5p	0	0	1	1	1	1	COL12A1	collagen, type XII, alpha 1
hsa-miR-1207-5p	1	0	1	1	1	1	DAG1	dystroglycan 1 (dystrophin-associated glycoprotein 1)
hsa-miR-1207-5p	1	0	1	1	1	1	DBN1	drebrin 1
hsa-miR-1207-5p	1	0	1	1	1	1	DUSP5	dual specificity phosphatase 5
hsa-miR-1207-5p	1	0	1	1	1	1	DUSP8	dual specificity phosphatase 8
hsa-miR-1207-5p	1	0	1	1	1	1	DVL2	dishevelled, dsh homolog 2 (Drosophila)
hsa-miR-1207-5p	1	0	1	1	1	1	EFNA1	ephrin-A1
hsa-miR-1207-5p	1	0	1	1	1	1	EFNB1	ephrin-B1
hsa-miR-1207-5p	1	0	1	1	1	1	EGR3	early growth response 3
hsa-miR-1207-5p	1	0	1	1	1	1	ENSA	endosulfine alpha
hsa-miR-1207-5p	1	0	1	1	1	1	EPHB2	EPH receptor B2
hsa-miR-1207-5p	1	0	1	0	1	1	ETV5	ets variant 5
hsa-miR-1207-5p	1	0	1	1	1	1	FOXD2	forkhead box D2
hsa-miR-1207-5p	1	0	1	1	1	1	FLOT2	flotillin 2
hsa-miR-1207-5p	0	0	1	1	1	1	FOXA1	forkhead box A1
hsa-miR-1207-5p	1	0	1	1	0	0	HOXC6	homeobox C6
hsa-miR-1207-5p	1	0	1	1	1	1	RAB4A	RAB4A, member RAS oncogene family
hsa-miR-1207-5p	0	0	1	0	0	0	RABGGTA	Rab geranylgeranyltransferase, alpha subunit
hsa-miR-1207-5p	1	0	1	0	1	1	SCN2B	sodium channel, voltage-gated, type II, beta subunit
hsa-miR-1207-5p	1	0	1	1	1	1	WNT11	wingless-type MMTV integration site family, member 11
hsa-miR-1207-5p	0	0	1	1	1	1	PABPN1	poly(A) binding protein, nuclear 1
hsa-miR-1207-5p	1	0	1	1	1	1	BAP1	BRCA1 associated protein-1 (ubiquitin carboxy-terminal hydrolase)
hsa-miR-1207-5p	0	0	1	1	1	1	SDPR	serum deprivation response
hsa-miR-1207-5p	0	0	1	1	0	0	PRPF3	PRP3 pre-mRNA processing factor 3 homolog (S. cerevisiae)
hsa-miR-1207-5p	0	0	1	1	0	0	DYRK1B	dual-specificity tyrosine-(Y)-phosphorylation regulated kinase 1B
hsa-miR-1207-5p	0	0	1	1	1	1	KCNAB3	potassium voltage-gated channel, shaker-related subfamily, beta member 3
hsa-miR-1207-5p	1	0	1	1	1	1	LARGE	like-glycosyltransferase
hsa-miR-1207-5p	0	0	1	1	1	1	MTA2	metastasis associated 1 family, member 2
hsa-miR-1207-5p	1	0	1	0	1	1	MAPKAPK2	mitogen-activated protein kinase-activated protein kinase 2
hsa-miR-1207-5p	1	0	1	1	1	1	B4GALT6	UDP-Gal:betaGlcNAc beta 1,4- galactosyltransferase, polypeptide 6
hsa-miR-1207-5p	0	0	1	1	1	1	TAOK2	TAO kinase 2
hsa-miR-1207-5p	1	0	1	1	1	1	KIF3B	kinesin family member 3B
hsa-miR-1207-5p	0	0	1	1	0	0	SLC22A14	solute carrier family 22, member 14
hsa-miR-1207-5p	1	0	1	0	1	1	CDYL	chromodomain protein, Y-like
hsa-miR-1207-5p	1	0	1	1	1	1	ONECUT2	one cut homeobox 2
hsa-miR-1207-5p	1	0	1	1	1	1	ZFP36L1	zinc finger protein 36, C3H type-like 1
hsa-miR-1207-5p	0	0	1	1	1	1	CDH6	cadherin 6, type 2, K-cadherin (fetal kidney)
hsa-miR-1207-5p	0	0	1	1	0	0	NR5A1	nuclear receptor subfamily 5, group A, member 1
hsa-miR-1207-5p	1	0	1	1	1	1	GABRE	gamma-aminobutyric acid (GABA) A receptor, epsilon
hsa-miR-1207-5p	1	0	1	1	0	0	MMP14	matrix metallopeptidase 14 (membrane-inserted)
hsa-miR-1207-5p	0	0	1	1	0	0	FXYD1	FXYD domain containing ion transport regulator 1
hsa-miR-1207-5p	0	0	1	1	0	0	RAPSN	receptor-associated protein of the synapse
hsa-miR-1207-5p	1	0	1	0	1	1	SEL1L	sel-1 suppressor of lin-12-like (C. elegans)
hsa-miR-1207-5p	1	0	1	1	0	0	ZMYM3	zinc finger, MYM-type 3
hsa-miR-1207-5p	1	0	1	1	0	0	ADAMTS4	ADAM metallopeptidase with thrombospondin type 1 motif, 4
hsa-miR-1207-5p	0	0	1	1	1	1	XYLB	xylulokinase homolog (H. influenzae)
hsa-miR-1207-5p	1	0	1	1	1	1	OXSR1	oxidative-stress responsive 1
hsa-miR-1207-5p	1	0	1	1	1	1	GFPT2	glutamine-fructose-6-phosphate transaminase 2
hsa-miR-1207-5p	1	0	1	0	1	1	NUP153	nucleoporin 153kDa
hsa-miR-1207-5p	0	0	1	1	1	1	SART1	squamous cell carcinoma antigen recognized by T cells
hsa-miR-1207-5p	0	0	1	1	0	0	ALDOC	aldolase C, fructose-bisphosphate
hsa-miR-1207-5p	0	0	1	1	0	0	ASCL2	achaete-scute complex homolog 2 (Drosophila)
hsa-miR-1207-5p	1	0	1	1	0	0	BCL3	B-cell CLL/lymphoma 3
hsa-miR-1207-5p	1	0	1	1	1	1	CBL	Cbl proto-oncogene, E3 ubiquitin protein ligase
hsa-miR-1207-5p	1	0	1	1	1	1	CRK	v-crk sarcoma virus CT10 oncogene homolog (avian)
hsa-miR-1207-5p	1	0	1	1	1	1	DLX3	distal-less homeobox 3
hsa-miR-1207-5p	1	0	1	1	1	1	ARID3A	AT rich interactive domain 3A (BRIGHT-like)
hsa-miR-1207-5p	1	0	1	0	1	1	E2F1	E2F transcription factor 1
hsa-miR-1207-5p	1	0	1	1	0	0	EFNA4	ephrin-A4
hsa-miR-1207-5p	0	0	1	0	1	1	FOSL2	FOS-like antigen 2
hsa-miR-1207-5p	1	0	1	1	1	1	GJA5	gap junction protein, alpha 5, 40kDa
hsa-miR-1207-5p	1	0	1	1	1	1	GPR3	G protein-coupled receptor 3
hsa-miR-1207-5p	1	0	1	1	1	1	HAS3	hyaluronan synthase 3
hsa-miR-1207-5p	1	0	1	1	0	0	HCFC1	host cell factor C1 (VP16-accessory protein)
hsa-miR-1207-5p	1	0	1	1	0	0	HDLBP	high density lipoprotein binding protein
hsa-miR-1207-5p	0	0	1	1	0	0	NCKAP1L	NCK-associated protein 1-like
hsa-miR-1207-5p	1	0	1	1	0	0	JUND	jun D proto-oncogene
hsa-miR-1207-5p	1	0	1	1	0	0	NNAT	neuronatin
hsa-miR-1207-5p	1	0	1	0	1	1	PRKAB2	protein kinase, AMP-activated, beta 2 non-catalytic subunit
hsa-miR-1207-5p	1	0	1	1	0	0	SALL2	sal-like 2 (Drosophila)
hsa-miR-1207-5p	1	0	1	0	1	1	SRC	v-src sarcoma (Schmidt-Ruppin A-2) viral oncogene homolog (avian)
hsa-miR-1207-5p	0	0	1	1	1	1	ST5	suppression of tumorigenicity 5
hsa-miR-1207-5p	1	0	1	1	1	1	WNT1	wingless-type MMTV integration site family, member 1
hsa-miR-1207-5p	0	0	1	1	1	1	FOSL1	FOS-like antigen 1
hsa-miR-1207-5p	1	0	1	1	1	1	MLF2	myeloid leukemia factor 2
hsa-miR-1207-5p	1	0	1	1	0	0	NOG	noggin
hsa-miR-1207-5p	1	0	1	1	1	1	GABBR2	gamma-aminobutyric acid (GABA) B receptor, 2
hsa-miR-1207-5p	1	0	1	1	1	1	HOXA11	homeobox A11
hsa-miR-1207-5p	1	0	1	1	1	1	LNPEP	leucyl/cystinyl aminopeptidase
hsa-miR-1207-5p	1	0	1	1	0	0	LOXL1	lysyl oxidase-like 1
hsa-miR-1207-5p	0	0	1	1	1	1	BCAM	basal cell adhesion molecule (Lutheran blood group)
hsa-miR-1207-5p	1	0	1	1	1	1	NHLH1	nescient helix loop helix 1
hsa-miR-1207-5p	0	0	1	1	1	1	S100A11	S100 calcium binding protein A11
hsa-miR-1207-5p	1	0	1	1	1	1	TCF20	transcription factor 20 (AR1)
hsa-miR-1207-5p	0	0	1	1	1	1	SLC35A2	solute carrier family 35 (UDP-galactose transporter), member A2
hsa-miR-1207-5p	0	0	1	1	0	0	SNURF	SNRPN upstream reading frame
hsa-miR-1207-5p	0	0	1	1	1	1	GPR52	G protein-coupled receptor 52
hsa-miR-1207-5p	1	0	1	1	1	1	GIPC1	GIPC PDZ domain containing family, member 1
hsa-miR-1207-5p	1	0	1	1	1	1	ACTR1A	ARP1 actin-related protein 1 homolog A, centractin alpha (yeast)
hsa-miR-1207-5p	0	0	1	1	1	1	RNF41	ring finger protein 41
hsa-miR-1207-5p	0	0	1	0	1	1	CD96	CD96 molecule
hsa-miR-1207-5p	1	0	1	1	1	1	GLYAT	glycine-N-acyltransferase
hsa-miR-1207-5p	1	0	1	0	1	1	SPRY3	sprouty homolog 3 (Drosophila)
hsa-miR-1207-5p	0	0	1	1	1	1	FSTL3	follistatin-like 3 (secreted glycoprotein)
hsa-miR-1207-5p	1	0	1	1	0	0	TRAIP	TRAF interacting protein
hsa-miR-1207-5p	0	0	1	1	1	1	MFAP3	microfibrillar-associated protein 3
hsa-miR-1207-5p	1	0	1	1	1	1	FOXO4	forkhead box O4
hsa-miR-1207-5p	1	0	1	1	1	1	MTF1	metal-regulatory transcription factor 1
hsa-miR-1207-5p	1	0	1	1	0	0	NAB2	NGFI-A binding protein 2 (EGR1 binding protein 2)
hsa-miR-1207-5p	0	0	1	1	0	0	PPYR1	pancreatic polypeptide receptor 1
hsa-miR-1207-5p	1	0	1	1	1	1	PRCC	papillary renal cell carcinoma (translocation-associated)
hsa-miR-1207-5p	0	0	1	1	1	1	S100A2	S100 calcium binding protein A2
hsa-miR-1207-5p	1	0	1	1	1	1	ENDOU	endonuclease, polyU-specific
hsa-miR-1207-5p	0	0	1	1	1	1	LANCL1	LanC lantibiotic synthetase component C-like 1 (bacterial)
hsa-miR-1207-5p	1	0	1	1	0	0	AGFG2	ArfGAP with FG repeats 2
hsa-miR-1207-5p	1	0	1	1	1	1	SPON1	spondin 1, extracellular matrix protein
hsa-miR-1207-5p	1	0	1	1	1	1	DAGLA	diacylglycerol lipase, alpha
hsa-miR-1207-5p	1	0	1	1	1	1	CAPZA1	capping protein (actin filament) muscle Z-line, alpha 1
hsa-miR-1207-5p	1	0	1	1	1	1	DYNC1LI2	dynein, cytoplasmic 1, light intermediate chain 2
hsa-miR-1207-5p	1	0	1	1	1	1	NEFL	neurofilament, light polypeptide
hsa-miR-1207-5p	1	0	1	1	1	1	NEUROD2	neuronal differentiation 2
hsa-miR-1207-5p	1	0	1	1	1	1	NFATC1	nuclear factor of activated T-cells, cytoplasmic, calcineurin-dependent 1
hsa-miR-1207-5p	0	0	1	0	1	1	OAS3	2'-5'-oligoadenylate synthetase 3, 100kDa
hsa-miR-1207-5p	0	0	1	1	1	1	PA2G4	proliferation-associated 2G4, 38kDa
hsa-miR-1207-5p	1	0	1	1	1	1	CDK16	cyclin-dependent kinase 16
hsa-miR-1207-5p	0	0	1	1	0	0	PNOC	prepronociceptin
hsa-miR-1207-5p	0	0	1	1	1	1	PPP2R5A	protein phosphatase 2, regulatory subunit B', alpha
hsa-miR-1207-5p	1	0	1	1	1	1	PRKCD	protein kinase C, delta
hsa-miR-1207-5p	1	0	1	1	1	1	RAD21	RAD21 homolog (S. pombe)
hsa-miR-1207-5p	1	0	1	1	1	1	TACC1	transforming, acidic coiled-coil containing protein 1
hsa-miR-1207-5p	1	0	1	1	1	1	TLN1	talin 1
hsa-miR-1207-5p	1	0	1	1	1	1	SMC1A	structural maintenance of chromosomes 1A
hsa-miR-1207-5p	1	0	1	1	1	1	TUBGCP3	tubulin, gamma complex associated protein 3
hsa-miR-1207-5p	1	0	1	1	1	1	TIMM17A	translocase of inner mitochondrial membrane 17 homolog A (yeast)
hsa-miR-1207-5p	1	0	1	1	1	1	ZER1	zer-1 homolog (C. elegans)
hsa-miR-1207-5p	1	0	1	1	1	1	ZNF238	zinc finger protein 238
hsa-miR-1207-5p	1	0	1	1	1	1	VAT1	vesicle amine transport protein 1 homolog (T. californica)
hsa-miR-1207-5p	1	0	1	1	1	1	NEBL	nebulette
hsa-miR-1207-5p	0	0	1	1	1	1	CXCL13	chemokine (C-X-C motif) ligand 13
hsa-miR-1207-5p	0	0	1	1	0	0	GNLY	granulysin
hsa-miR-1207-5p	1	0	1	1	0	0	PRPF8	PRP8 pre-mRNA processing factor 8 homolog (S. cerevisiae)
hsa-miR-1207-5p	1	0	1	1	1	1	TRIM3	tripartite motif containing 3
hsa-miR-1207-5p	0	0	1	1	0	0	ALX3	ALX homeobox 3
hsa-miR-1207-5p	0	0	1	0	1	1	SLC16A2	solute carrier family 16, member 2 (thyroid hormone transporter)
hsa-miR-1207-5p	0	0	1	1	0	0	MIA	melanoma inhibitory activity
hsa-miR-1207-5p	1	0	1	0	1	1	IGF2BP1	insulin-like growth factor 2 mRNA binding protein 1
hsa-miR-1207-5p	1	0	1	1	0	0	LBX1	ladybird homeobox 1
hsa-miR-1207-5p	1	0	1	1	1	1	B3GNT2	UDP-GlcNAc:betaGal beta-1,3-N-acetylglucosaminyltransferase 2
hsa-miR-1207-5p	0	0	1	1	1	1	TBR1	T-box, brain, 1
hsa-miR-1207-5p	1	0	1	1	1	1	MAP3K2	mitogen-activated protein kinase kinase kinase 2
hsa-miR-1207-5p	0	0	1	1	0	0	KIF1C	kinesin family member 1C
hsa-miR-1207-5p	1	0	1	1	1	1	MMP24	matrix metallopeptidase 24 (membrane-inserted)
hsa-miR-1207-5p	0	0	1	1	1	1	LYVE1	lymphatic vessel endothelial hyaluronan receptor 1
hsa-miR-1207-5p	0	0	1	1	1	1	NUDT3	nudix (nucleoside diphosphate linked moiety X)-type motif 3
hsa-miR-1207-5p	1	0	1	1	1	1	SPIN1	spindlin 1
hsa-miR-1207-5p	1	0	1	1	1	1	HIVEP2	human immunodeficiency virus type I enhancer binding protein 2
hsa-miR-1207-5p	1	0	1	1	0	0	PSKH1	protein serine kinase H1
hsa-miR-1207-5p	0	0	1	1	0	0	UPK2	uroplakin 2
hsa-miR-1207-5p	1	0	1	1	1	1	LAPTM5	lysosomal protein transmembrane 5
hsa-miR-1207-5p	1	0	1	1	1	1	BTG2	BTG family, member 2
hsa-miR-1207-5p	1	0	1	0	1	1	SYNGAP1	synaptic Ras GTPase activating protein 1
hsa-miR-1207-5p	1	0	1	1	1	1	ZBTB33	zinc finger and BTB domain containing 33
hsa-miR-1207-5p	0	0	1	1	0	0	HNRNPA0	heterogeneous nuclear ribonucleoprotein A0
hsa-miR-1207-5p	1	0	1	1	1	1	CBX1	chromobox homolog 1
hsa-miR-1207-5p	0	0	1	1	1	1	MLLT11	myeloid/lymphoid or mixed-lineage leukemia (trithorax homolog, Drosophila); translocated to, 11
hsa-miR-1207-5p	0	0	1	1	0	0	STIP1	stress-induced-phosphoprotein 1
hsa-miR-1207-5p	0	0	1	1	0	0	COPS6	COP9 constitutive photomorphogenic homolog subunit 6 (Arabidopsis)
hsa-miR-1207-5p	0	0	1	1	1	1	ATF7	activating transcription factor 7
hsa-miR-1207-5p	0	0	1	1	0	0	PIM2	pim-2 oncogene
hsa-miR-1207-5p	1	0	1	1	1	1	B3GNT1	UDP-GlcNAc:betaGal beta-1,3-N-acetylglucosaminyltransferase 1
hsa-miR-1207-5p	1	0	1	1	1	1	CD86	CD86 molecule
hsa-miR-1207-5p	0	0	1	1	0	0	SMTN	smoothelin
hsa-miR-1207-5p	1	0	1	0	1	1	SOX12	SRY (sex determining region Y)-box 12
hsa-miR-1207-5p	1	0	1	1	1	1	SYN1	synapsin I
hsa-miR-1207-5p	1	0	1	1	1	1	NR4A3	nuclear receptor subfamily 4, group A, member 3
hsa-miR-1207-5p	1	0	1	0	1	1	WASF2	WAS protein family, member 2
hsa-miR-1207-5p	1	0	1	1	1	1	ABHD2	abhydrolase domain containing 2
hsa-miR-1207-5p	0	0	1	1	1	1	TMEM115	transmembrane protein 115
hsa-miR-1207-5p	1	0	1	1	1	1	PTPN21	protein tyrosine phosphatase, non-receptor type 21
hsa-miR-1207-5p	0	0	1	1	1	1	RPP14	ribonuclease P/MRP 14kDa subunit
hsa-miR-1207-5p	1	0	1	1	1	1	KAT7	K(lysine) acetyltransferase 7
hsa-miR-1207-5p	1	0	1	1	1	1	SSR3	signal sequence receptor, gamma (translocon-associated protein gamma)
hsa-miR-1207-5p	1	0	1	1	1	1	TESK2	testis-specific kinase 2
hsa-miR-1207-5p	1	0	1	1	1	1	ABCF2	ATP-binding cassette, sub-family F (GCN20), member 2
hsa-miR-1207-5p	0	0	1	1	1	1	HRH3	histamine receptor H3
hsa-miR-1207-5p	1	0	1	0	1	1	CHP1	calcineurin-like EF hand protein 1
hsa-miR-1207-5p	1	0	1	1	1	1	KLF12	Kruppel-like factor 12
hsa-miR-1207-5p	1	0	1	1	1	1	TUSC2	tumor suppressor candidate 2
hsa-miR-1207-5p	0	0	1	1	0	0	GABARAP	GABA(A) receptor-associated protein
hsa-miR-1207-5p	1	0	1	1	1	1	CASC3	cancer susceptibility candidate 3
hsa-miR-1207-5p	0	0	1	1	1	1	KLRK1	killer cell lectin-like receptor subfamily K, member 1
hsa-miR-1207-5p	0	0	1	1	1	1	MIP	major intrinsic protein of lens fiber
hsa-miR-1207-5p	1	0	1	1	1	1	ELL2	elongation factor, RNA polymerase II, 2
hsa-miR-1207-5p	0	0	1	1	1	1	LMOD1	leiomodin 1 (smooth muscle)
hsa-miR-1207-5p	0	0	1	1	0	0	FBXO2	F-box protein 2
hsa-miR-1207-5p	0	0	1	1	0	0	GNG3	guanine nucleotide binding protein (G protein), gamma 3
hsa-miR-1207-5p	1	0	1	1	1	1	RHOQ	ras homolog family member Q
hsa-miR-1207-5p	1	0	1	1	1	1	LAMP5	lysosomal-associated membrane protein family, member 5
hsa-miR-1207-5p	1	0	1	1	1	1	HS2ST1	heparan sulfate 2-O-sulfotransferase 1
hsa-miR-1207-5p	1	0	1	1	1	1	KCNH4	potassium voltage-gated channel, subfamily H (eag-related), member 4
hsa-miR-1207-5p	1	0	1	0	1	1	GAB2	GRB2-associated binding protein 2
hsa-miR-1207-5p	0	0	1	1	0	0	KIR2DS4	killer cell immunoglobulin-like receptor, two domains, short cytoplasmic tail, 4
hsa-miR-1207-5p	1	0	1	1	1	1	LDOC1	leucine zipper, down-regulated in cancer 1
hsa-miR-1207-5p	0	0	1	1	1	1	MAFF	v-maf musculoaponeurotic fibrosarcoma oncogene homolog F (avian)
hsa-miR-1207-5p	1	0	1	1	1	1	MAPRE1	microtubule-associated protein, RP/EB family, member 1
hsa-miR-1207-5p	1	0	1	1	1	1	PITPNB	phosphatidylinositol transfer protein, beta
hsa-miR-1207-5p	1	0	1	1	1	1	STAT5B	signal transducer and activator of transcription 5B
hsa-miR-1207-5p	1	0	1	1	1	1	TLL2	tolloid-like 2
hsa-miR-1207-5p	1	0	1	1	1	1	TRPC5	transient receptor potential cation channel, subfamily C, member 5
hsa-miR-1207-5p	0	0	1	1	1	1	N6AMT1	N-6 adenine-specific DNA methyltransferase 1 (putative)
hsa-miR-1207-5p	1	0	1	1	1	1	CLCF1	cardiotrophin-like cytokine factor 1
hsa-miR-1207-5p	0	0	1	1	0	0	PRSS50	protease, serine, 50
hsa-miR-1207-5p	1	0	1	1	0	0	SNX15	sorting nexin 15
hsa-miR-1207-5p	0	0	1	1	0	0	GMPPB	GDP-mannose pyrophosphorylase B
hsa-miR-1207-5p	0	0	1	0	1	1	LINC00312	long intergenic non-protein coding RNA 312
hsa-miR-1207-5p	1	0	1	1	1	1	PADI1	peptidyl arginine deiminase, type I
hsa-miR-1207-5p	1	0	1	1	1	1	SERTAD3	SERTA domain containing 3
hsa-miR-1207-5p	0	0	1	1	0	0	ZDHHC8	zinc finger, DHHC-type containing 8
hsa-miR-1207-5p	1	0	1	1	1	1	NRG1	neuregulin 1
hsa-miR-1207-5p	0	0	1	1	0	0	CCDC22	coiled-coil domain containing 22
hsa-miR-1207-5p	1	0	1	1	0	0	DEXI	Dexi homolog (mouse)
hsa-miR-1207-5p	1	0	1	0	1	1	C16orf72	chromosome 16 open reading frame 72
hsa-miR-1207-5p	0	0	1	1	1	1	CCDC113	coiled-coil domain containing 113
[truncated: 582 more rows]
