# Supplementary material for: Profiling of Selected MicroRNAs in Proliferative Eutopic Endometrium of Women with Ovarian Endometriosis
Source: Biomed Res Int. 2015 Aug 20;2015:760698. doi: 10.1155/2015/760698 (PMC4558423; doi:10.1155/2015/760698)
Supplement: Supplementary file 1 — Table I: The names of miRNAs significantly differentially expressed between eutopic endometrium of patients with endometriosis vs eutopic endometrium of patients without endometriosis. Table II: The associations between miRNA and mRNA, which presents detailed results of the search of six major databases i.e targetscan, tarbase, miranda, mirbase, mirtarget2 and pictar. [file 760698.f1.zip › 760698.f1/Table II/hsa-miR-1208.tsv]

miR	targetscan	tarbase	miranda	mirbase	mirtarget2	pictar	GeneSymbol	GeneName
hsa-miR-1208	1	0	1	1	0	0	SRCAP	Snf2-related CREBBP activator protein
hsa-miR-1208	1	0	1	1	0	0	HUWE1	HECT, UBA and WWE domain containing 1, E3 ubiquitin protein ligase
hsa-miR-1208	1	0	1	0	1	1	KIAA0355	KIAA0355
hsa-miR-1208	1	0	1	1	1	1	DAAM2	dishevelled associated activator of morphogenesis 2
hsa-miR-1208	1	0	1	1	1	1	ABCC5	ATP-binding cassette, sub-family C (CFTR/MRP), member 5
hsa-miR-1208	0	0	1	1	1	1	C2CD2L	C2CD2-like
hsa-miR-1208	1	0	1	0	1	1	KIAA0408	KIAA0408
hsa-miR-1208	0	0	1	1	1	1	PREPL	prolyl endopeptidase-like
hsa-miR-1208	1	0	1	0	1	1	VPS13D	vacuolar protein sorting 13 homolog D (S. cerevisiae)
hsa-miR-1208	1	0	1	1	1	1	BAI3	brain-specific angiogenesis inhibitor 3
hsa-miR-1208	1	0	1	1	1	1	GPATCH8	G patch domain containing 8
hsa-miR-1208	1	0	1	1	1	1	HIPK1	homeodomain interacting protein kinase 1
hsa-miR-1208	0	0	1	1	0	0	PAN2	PAN2 poly(A) specific ribonuclease subunit homolog (S. cerevisiae)
hsa-miR-1208	0	0	1	1	0	0	ATP10B	ATPase, class V, type 10B
hsa-miR-1208	1	0	1	0	1	1	RBM12	RNA binding motif protein 12
hsa-miR-1208	1	0	1	0	1	1	LPHN3	latrophilin 3
hsa-miR-1208	1	0	1	1	1	1	ARHGEF15	Rho guanine nucleotide exchange factor (GEF) 15
hsa-miR-1208	1	0	1	1	1	1	UBE2K	ubiquitin-conjugating enzyme E2K
hsa-miR-1208	0	0	1	1	1	1	ST3GAL6	ST3 beta-galactoside alpha-2,3-sialyltransferase 6
hsa-miR-1208	1	0	1	1	1	1	RGL1	ral guanine nucleotide dissociation stimulator-like 1
hsa-miR-1208	0	0	1	1	0	0	FAM149B1	family with sequence similarity 149, member B1
hsa-miR-1208	1	0	1	1	0	0	KIAA1045	KIAA1045
hsa-miR-1208	1	0	1	0	1	1	ZNF507	zinc finger protein 507
hsa-miR-1208	0	0	1	0	0	0	ELTD1	EGF, latrophilin and seven transmembrane domain containing 1
hsa-miR-1208	0	0	1	1	0	0	ZC4H2	zinc finger, C4H2 domain containing
hsa-miR-1208	1	0	1	1	0	0	ATAD2B	ATPase family, AAA domain containing 2B
hsa-miR-1208	1	0	1	0	0	0	ODZ4	odz, odd Oz/ten-m homolog 4 (Drosophila)
hsa-miR-1208	1	0	1	0	0	0	NYNRIN	NYN domain and retroviral integrase containing
hsa-miR-1208	1	0	1	1	1	1	ATP2C1	ATPase, Ca++ transporting, type 2C, member 1
hsa-miR-1208	1	0	1	1	1	1	FAM135A	family with sequence similarity 135, member A
hsa-miR-1208	1	0	1	0	0	0	PITPNM2	phosphatidylinositol transfer protein, membrane-associated 2
hsa-miR-1208	1	0	1	1	1	1	BAZ2B	bromodomain adjacent to zinc finger domain, 2B
hsa-miR-1208	1	0	1	1	1	1	FRAS1	Fraser syndrome 1
hsa-miR-1208	0	0	1	0	1	1	CDC42EP4	CDC42 effector protein (Rho GTPase binding) 4
hsa-miR-1208	1	0	1	0	1	1	IGDCC4	immunoglobulin superfamily, DCC subclass, member 4
hsa-miR-1208	1	0	1	1	1	1	PHF21A	PHD finger protein 21A
hsa-miR-1208	1	0	1	0	1	1	JPH4	junctophilin 4
hsa-miR-1208	1	0	1	1	1	1	CSMD3	CUB and Sushi multiple domains 3
hsa-miR-1208	1	0	1	1	1	1	POGZ	pogo transposable element with ZNF domain
hsa-miR-1208	1	0	1	1	1	1	SH3TC2	SH3 domain and tetratricopeptide repeats 2
hsa-miR-1208	0	0	1	0	1	1	RASSF8	Ras association (RalGDS/AF-6) domain family (N-terminal) member 8
hsa-miR-1208	1	0	1	1	1	1	PAM	peptidylglycine alpha-amidating monooxygenase
hsa-miR-1208	0	0	1	1	0	0	KRTAP24-1	keratin associated protein 24-1
hsa-miR-1208	1	0	1	1	1	1	KCNMA1	potassium large conductance calcium-activated channel, subfamily M, alpha member 1
hsa-miR-1208	0	0	1	1	1	1	PCBP2	poly(rC) binding protein 2
hsa-miR-1208	0	0	1	0	1	1	ACE2	angiotensin I converting enzyme (peptidyl-dipeptidase A) 2
hsa-miR-1208	1	0	1	1	1	1	UBE3A	ubiquitin protein ligase E3A
hsa-miR-1208	1	0	1	0	1	1	CCDC88A	coiled-coil domain containing 88A
hsa-miR-1208	0	0	1	1	1	1	GABBR1	gamma-aminobutyric acid (GABA) B receptor, 1
hsa-miR-1208	1	0	1	1	1	1	LTBP1	latent transforming growth factor beta binding protein 1
hsa-miR-1208	1	0	1	1	1	1	VLDLR	very low density lipoprotein receptor
hsa-miR-1208	1	0	1	1	1	1	COL11A1	collagen, type XI, alpha 1
hsa-miR-1208	1	0	1	1	1	1	SYNCRIP	synaptotagmin binding, cytoplasmic RNA interacting protein
hsa-miR-1208	1	0	1	0	1	1	PLAG1	pleiomorphic adenoma gene 1
hsa-miR-1208	1	0	1	1	1	1	FMR1	fragile X mental retardation 1
hsa-miR-1208	1	0	1	0	1	1	DPYSL2	dihydropyrimidinase-like 2
hsa-miR-1208	0	0	1	1	1	1	TFRC	transferrin receptor (p90, CD71)
hsa-miR-1208	1	0	1	1	1	1	EPHA7	EPH receptor A7
hsa-miR-1208	0	0	1	1	1	1	RYR1	ryanodine receptor 1 (skeletal)
hsa-miR-1208	0	0	1	1	1	1	ACO1	aconitase 1, soluble
hsa-miR-1208	1	0	1	1	1	1	MYO5A	myosin VA (heavy chain 12, myoxin)
hsa-miR-1208	0	0	1	1	1	1	GPM6B	glycoprotein M6B
hsa-miR-1208	0	0	1	1	0	0	CLK3	CDC-like kinase 3
hsa-miR-1208	1	0	1	1	1	1	HNRNPK	heterogeneous nuclear ribonucleoprotein K
hsa-miR-1208	0	0	1	1	0	0	CFLAR	CASP8 and FADD-like apoptosis regulator
hsa-miR-1208	1	0	1	1	1	1	IPO8	importin 8
hsa-miR-1208	1	0	1	1	0	0	SYN3	synapsin III
hsa-miR-1208	1	0	1	1	1	1	SATB1	SATB homeobox 1
hsa-miR-1208	0	0	1	1	1	1	KIF3A	kinesin family member 3A
hsa-miR-1208	0	0	1	1	1	1	CHN1	chimerin (chimaerin) 1
hsa-miR-1208	0	0	1	1	1	1	ELOVL5	ELOVL fatty acid elongase 5
hsa-miR-1208	1	0	1	0	1	1	ADD3	adducin 3 (gamma)
hsa-miR-1208	1	0	1	1	1	1	PHLDB2	pleckstrin homology-like domain, family B, member 2
hsa-miR-1208	1	0	1	0	1	1	PDE7B	phosphodiesterase 7B
hsa-miR-1208	1	0	1	1	1	1	MYH10	myosin, heavy chain 10, non-muscle
hsa-miR-1208	1	0	1	1	1	1	SLC22A5	solute carrier family 22 (organic cation/carnitine transporter), member 5
hsa-miR-1208	1	0	1	1	1	1	TTC39A	tetratricopeptide repeat domain 39A
hsa-miR-1208	1	0	1	0	1	1	PDE4D	phosphodiesterase 4D, cAMP-specific
hsa-miR-1208	1	0	1	1	1	1	YME1L1	YME1-like 1 (S. cerevisiae)
hsa-miR-1208	1	0	1	1	1	1	TMBIM6	transmembrane BAX inhibitor motif containing 6
hsa-miR-1208	1	0	1	1	1	1	MYT1L	myelin transcription factor 1-like
hsa-miR-1208	1	0	1	1	1	1	NEMF	nuclear export mediator factor
hsa-miR-1208	1	0	1	1	1	1	SHOC2	soc-2 suppressor of clear homolog (C. elegans)
hsa-miR-1208	1	0	1	1	1	1	ERLIN1	ER lipid raft associated 1
hsa-miR-1208	1	0	1	1	1	1	NUDT4	nudix (nucleoside diphosphate linked moiety X)-type motif 4
hsa-miR-1208	1	0	1	1	1	1	TMEM159	transmembrane protein 159
hsa-miR-1208	1	0	1	1	1	1	TP63	tumor protein p63
hsa-miR-1208	1	0	1	0	1	1	CELF2	CUGBP, Elav-like family member 2
hsa-miR-1208	1	0	1	0	1	1	MAP4K4	mitogen-activated protein kinase kinase kinase kinase 4
hsa-miR-1208	1	0	1	1	1	1	GLS	glutaminase
hsa-miR-1208	0	0	1	1	1	1	FHL1	four and a half LIM domains 1
hsa-miR-1208	1	0	1	0	1	1	CD164	CD164 molecule, sialomucin
hsa-miR-1208	0	0	1	1	0	0	COPB1	coatomer protein complex, subunit beta 1
hsa-miR-1208	1	0	1	1	1	1	PRUNE	prune homolog (Drosophila)
hsa-miR-1208	0	0	1	1	1	1	CNPPD1	cyclin Pas1/PHO80 domain containing 1
hsa-miR-1208	0	0	1	0	1	1	PDP1	pyruvate dehyrogenase phosphatase catalytic subunit 1
hsa-miR-1208	0	0	1	1	1	1	SLC25A14	solute carrier family 25 (mitochondrial carrier, brain), member 14
hsa-miR-1208	1	0	1	0	1	1	AMOTL2	angiomotin like 2
hsa-miR-1208	0	0	1	0	1	1	CLDN2	claudin 2
hsa-miR-1208	0	0	1	1	1	1	CD28	CD28 molecule
hsa-miR-1208	1	0	1	1	1	1	OGT	O-linked N-acetylglucosamine (GlcNAc) transferase
hsa-miR-1208	0	0	1	1	1	1	MFF	mitochondrial fission factor
hsa-miR-1208	1	0	1	1	1	1	C21orf91	chromosome 21 open reading frame 91
hsa-miR-1208	1	0	1	1	1	1	STRN3	striatin, calmodulin binding protein 3
hsa-miR-1208	0	0	1	1	1	1	DOCK10	dedicator of cytokinesis 10
hsa-miR-1208	0	0	1	1	0	0	KCNK6	potassium channel, subfamily K, member 6
hsa-miR-1208	0	0	1	0	0	0	LOC645355	uncharacterized LOC645355
hsa-miR-1208	1	0	1	1	1	1	LARP4	La ribonucleoprotein domain family, member 4
hsa-miR-1208	0	0	1	0	1	1	MYO3B	myosin IIIB
hsa-miR-1208	1	0	1	1	1	1	ST3GAL3	ST3 beta-galactoside alpha-2,3-sialyltransferase 3
hsa-miR-1208	0	0	1	0	0	0	ANKRD30BP2	ankyrin repeat domain 30B pseudogene 2
hsa-miR-1208	1	0	1	1	0	0	YTHDF2	YTH domain family, member 2
hsa-miR-1208	1	0	1	1	0	0	XRRA1	X-ray radiation resistance associated 1
hsa-miR-1208	1	0	1	1	0	0	SEPT8	septin 8
hsa-miR-1208	1	0	1	1	1	1	ASB8	ankyrin repeat and SOCS box containing 8
hsa-miR-1208	1	0	1	1	0	0	POLR2J3	polymerase (RNA) II (DNA directed) polypeptide J3
hsa-miR-1208	1	0	1	1	1	1	GPR64	G protein-coupled receptor 64
hsa-miR-1208	0	0	1	1	0	0	KLRD1	killer cell lectin-like receptor subfamily D, member 1
hsa-miR-1208	1	0	1	1	1	1	FLNC	filamin C, gamma
hsa-miR-1208	1	0	1	1	1	1	CACNA2D2	calcium channel, voltage-dependent, alpha 2/delta subunit 2
hsa-miR-1208	0	0	1	1	1	1	CD1E	CD1e molecule
hsa-miR-1208	1	0	1	1	1	1	NRXN3	neurexin 3
hsa-miR-1208	0	0	1	0	1	1	SRPK1	SRSF protein kinase 1
hsa-miR-1208	0	0	1	0	0	0	CASC2	cancer susceptibility candidate 2 (non-protein coding)
hsa-miR-1208	1	0	1	1	1	1	NAV3	neuron navigator 3
hsa-miR-1208	0	0	1	1	1	1	ZNF248	zinc finger protein 248
hsa-miR-1208	1	0	1	1	1	1	ARL4C	ADP-ribosylation factor-like 4C
hsa-miR-1208	1	0	1	1	1	1	SYT14	synaptotagmin XIV
hsa-miR-1208	1	0	1	1	1	1	XIRP1	xin actin-binding repeat containing 1
hsa-miR-1208	0	0	1	1	1	1	SLC8A3	solute carrier family 8 (sodium/calcium exchanger), member 3
hsa-miR-1208	0	0	1	1	1	1	ESRP1	epithelial splicing regulatory protein 1
hsa-miR-1208	1	0	1	1	1	1	AKAP2	A kinase (PRKA) anchor protein 2
hsa-miR-1208	1	0	1	0	1	1	NFAT5	nuclear factor of activated T-cells 5, tonicity-responsive
hsa-miR-1208	0	0	1	1	1	1	UBE2Q2	ubiquitin-conjugating enzyme E2Q family member 2
hsa-miR-1208	0	0	1	0	0	0	TUG1	taurine upregulated 1 (non-protein coding)
hsa-miR-1208	1	0	1	1	1	1	ARHGAP12	Rho GTPase activating protein 12
hsa-miR-1208	0	0	1	1	0	0	ZCWPW1	zinc finger, CW type with PWWP domain 1
hsa-miR-1208	1	0	1	1	1	1	ARHGAP17	Rho GTPase activating protein 17
hsa-miR-1208	0	0	1	1	1	1	STOX2	storkhead box 2
hsa-miR-1208	1	0	1	1	1	1	RIC8B	resistance to inhibitors of cholinesterase 8 homolog B (C. elegans)
hsa-miR-1208	1	0	1	1	1	1	EIF2C1	eukaryotic translation initiation factor 2C, 1
hsa-miR-1208	1	0	1	1	1	1	SLC38A2	solute carrier family 38, member 2
hsa-miR-1208	0	0	1	1	1	1	CXXC5	CXXC finger protein 5
hsa-miR-1208	1	0	1	0	1	1	SPATS2L	spermatogenesis associated, serine-rich 2-like
hsa-miR-1208	0	0	1	1	1	1	INPP5B	inositol polyphosphate-5-phosphatase, 75kDa
hsa-miR-1208	1	0	1	1	1	1	S100PBP	S100P binding protein
hsa-miR-1208	0	0	1	1	1	1	ARMC5	armadillo repeat containing 5
hsa-miR-1208	1	0	1	1	1	1	PPFIA4	protein tyrosine phosphatase, receptor type, f polypeptide (PTPRF), interacting protein (liprin), alpha 4
hsa-miR-1208	0	0	1	1	1	1	CXorf57	chromosome X open reading frame 57
hsa-miR-1208	1	0	1	0	1	1	ATP2B1	ATPase, Ca++ transporting, plasma membrane 1
hsa-miR-1208	0	0	1	1	1	1	PDE4DIP	phosphodiesterase 4D interacting protein
hsa-miR-1208	0	0	1	1	0	0	EIF4ENIF1	eukaryotic translation initiation factor 4E nuclear import factor 1
hsa-miR-1208	1	0	1	1	1	1	GBF1	golgi brefeldin A resistant guanine nucleotide exchange factor 1
hsa-miR-1208	0	0	1	1	1	1	CC2D2A	coiled-coil and C2 domain containing 2A
hsa-miR-1208	1	0	1	1	1	1	ARFGEF1	ADP-ribosylation factor guanine nucleotide-exchange factor 1 (brefeldin A-inhibited)
hsa-miR-1208	0	0	1	0	1	1	HEMK1	HemK methyltransferase family member 1
hsa-miR-1208	1	0	1	1	1	1	RNF185	ring finger protein 185
hsa-miR-1208	0	0	1	1	1	1	DUSP14	dual specificity phosphatase 14
hsa-miR-1208	1	0	1	1	1	1	SLC38A1	solute carrier family 38, member 1
hsa-miR-1208	1	0	1	1	1	1	ZNF462	zinc finger protein 462
hsa-miR-1208	0	0	1	0	0	0	NBLA00301	Nbla00301
hsa-miR-1208	0	0	1	0	0	0	FAM185A	family with sequence similarity 185, member A
hsa-miR-1208	1	0	1	1	1	1	MBD5	methyl-CpG binding domain protein 5
hsa-miR-1208	1	0	1	1	1	1	PPM1L	protein phosphatase, Mg2+/Mn2+ dependent, 1L
hsa-miR-1208	1	0	1	0	1	1	AP1G1	adaptor-related protein complex 1, gamma 1 subunit
hsa-miR-1208	0	0	1	1	0	0	C21orf59	chromosome 21 open reading frame 59
hsa-miR-1208	0	0	1	1	1	1	OPTN	optineurin
hsa-miR-1208	1	0	1	1	1	1	FRMD6	FERM domain containing 6
hsa-miR-1208	1	0	1	1	1	1	HERPUD2	HERPUD family member 2
hsa-miR-1208	1	0	1	1	1	1	TMTC1	transmembrane and tetratricopeptide repeat containing 1
hsa-miR-1208	0	0	1	1	1	1	SDK1	sidekick cell adhesion molecule 1
hsa-miR-1208	0	0	1	0	0	0	LOC440894	uncharacterized LOC440894
hsa-miR-1208	0	0	1	1	0	0	BEAN1	brain expressed, associated with NEDD4, 1
hsa-miR-1208	1	0	1	1	1	1	PPP1R3F	protein phosphatase 1, regulatory subunit 3F
hsa-miR-1208	1	0	1	1	1	1	ZIC4	Zic family member 4
hsa-miR-1208	0	0	1	0	0	0	FLG-AS1	FLG antisense RNA 1
hsa-miR-1208	1	0	1	1	1	1	SORBS2	sorbin and SH3 domain containing 2
hsa-miR-1208	0	0	1	0	0	0	LOC255187	hCG1980447
hsa-miR-1208	0	0	1	1	0	0	MLF1	myeloid leukemia factor 1
hsa-miR-1208	1	0	1	1	1	1	TLE4	transducin-like enhancer of split 4 (E(sp1) homolog, Drosophila)
hsa-miR-1208	0	0	1	1	1	1	VWA3B	von Willebrand factor A domain containing 3B
hsa-miR-1208	0	0	1	0	0	0	LOC145820	uncharacterized LOC145820
hsa-miR-1208	1	0	1	1	1	1	MPP7	membrane protein, palmitoylated 7 (MAGUK p55 subfamily member 7)
hsa-miR-1208	0	0	1	1	0	0	NXF2	nuclear RNA export factor 2
hsa-miR-1208	0	0	1	0	0	0	LOC285074	anaphase promoting complex subunit 1 pseudogene
hsa-miR-1208	1	0	1	1	1	1	IST1	increased sodium tolerance 1 homolog (yeast)
hsa-miR-1208	0	0	1	1	1	1	ZNF385B	zinc finger protein 385B
hsa-miR-1208	0	0	1	1	0	0	PIGO	phosphatidylinositol glycan anchor biosynthesis, class O
hsa-miR-1208	1	0	1	1	1	1	TBCK	TBC1 domain containing kinase
hsa-miR-1208	0	0	1	0	1	1	CDHR3	cadherin-related family member 3
hsa-miR-1208	1	0	1	1	1	1	MYO1B	myosin IB
hsa-miR-1208	0	0	1	1	1	1	ITGBL1	integrin, beta-like 1 (with EGF-like repeat domains)
hsa-miR-1208	1	0	1	1	1	1	TLK1	tousled-like kinase 1
hsa-miR-1208	0	0	1	1	1	1	STBD1	starch binding domain 1
hsa-miR-1208	0	0	1	1	0	0	ACOT11	acyl-CoA thioesterase 11
hsa-miR-1208	1	0	1	1	1	1	SYN2	synapsin II
hsa-miR-1208	1	0	1	1	1	1	AMMECR1	Alport syndrome, mental retardation, midface hypoplasia and elliptocytosis chromosomal region gene 1
hsa-miR-1208	0	0	1	0	0	0	LOC440910	uncharacterized LOC440910
hsa-miR-1208	0	0	1	1	1	1	GPATCH1	G patch domain containing 1
hsa-miR-1208	0	0	1	0	0	0	KIAA1430	KIAA1430
hsa-miR-1208	1	0	1	1	1	1	LUC7L2	LUC7-like 2 (S. cerevisiae)
hsa-miR-1208	1	0	1	1	1	1	ZNF286A	zinc finger protein 286A
hsa-miR-1208	0	0	1	1	1	1	HNRNPH1	heterogeneous nuclear ribonucleoprotein H1 (H)
hsa-miR-1208	1	0	1	0	1	1	CRTAP	cartilage associated protein
hsa-miR-1208	0	0	1	1	0	0	WBP1	WW domain binding protein 1
hsa-miR-1208	1	0	1	1	1	1	SNAP25	synaptosomal-associated protein, 25kDa
hsa-miR-1208	1	0	1	0	1	1	GATAD2B	GATA zinc finger domain containing 2B
hsa-miR-1208	1	0	1	1	1	1	RASGEF1A	RasGEF domain family, member 1A
hsa-miR-1208	0	0	1	0	0	0	LINC00486	long intergenic non-protein coding RNA 486
hsa-miR-1208	0	0	1	1	1	1	CHRM5	cholinergic receptor, muscarinic 5
hsa-miR-1208	1	0	1	1	1	1	ANKRD46	ankyrin repeat domain 46
hsa-miR-1208	0	0	1	1	1	1	GPR115	G protein-coupled receptor 115
hsa-miR-1208	0	0	1	1	1	1	CHI3L1	chitinase 3-like 1 (cartilage glycoprotein-39)
hsa-miR-1208	0	0	1	1	1	1	SIRPB2	signal-regulatory protein beta 2
hsa-miR-1208	1	0	1	1	1	1	ALCAM	activated leukocyte cell adhesion molecule
hsa-miR-1208	1	0	1	1	1	1	B4GALT7	xylosylprotein beta 1,4-galactosyltransferase, polypeptide 7
hsa-miR-1208	1	0	1	1	1	1	GAPVD1	GTPase activating protein and VPS9 domains 1
hsa-miR-1208	1	0	1	1	1	1	SLITRK2	SLIT and NTRK-like family, member 2
hsa-miR-1208	0	0	1	0	0	0	C1orf204	chromosome 1 open reading frame 204
hsa-miR-1208	1	0	1	0	1	1	THRB	thyroid hormone receptor, beta
hsa-miR-1208	1	0	1	1	1	1	SYT6	synaptotagmin VI
hsa-miR-1208	1	0	1	1	1	1	EPB41L1	erythrocyte membrane protein band 4.1-like 1
hsa-miR-1208	0	0	1	1	1	1	COL4A3BP	collagen, type IV, alpha 3 (Goodpasture antigen) binding protein
hsa-miR-1208	1	0	1	1	1	1	CDV3	CDV3 homolog (mouse)
hsa-miR-1208	0	0	1	0	0	0	LINC00293	long intergenic non-protein coding RNA 293
hsa-miR-1208	1	0	1	1	1	1	UGDH	UDP-glucose 6-dehydrogenase
hsa-miR-1208	1	0	1	1	1	1	PIGA	phosphatidylinositol glycan anchor biosynthesis, class A
hsa-miR-1208	0	0	1	1	1	1	TRPM7	transient receptor potential cation channel, subfamily M, member 7
hsa-miR-1208	0	0	1	0	0	0	LOC338579	ankyrin repeat domain-containing protein 30B pseudogene
hsa-miR-1208	0	0	1	0	0	0	GTF2IP1	general transcription factor IIi, pseudogene 1
hsa-miR-1208	1	0	1	1	1	1	GLUD1	glutamate dehydrogenase 1
hsa-miR-1208	0	0	1	1	1	1	GPR128	G protein-coupled receptor 128
hsa-miR-1208	0	0	1	1	0	0	PROKR1	prokineticin receptor 1
hsa-miR-1208	0	0	1	1	0	0	MARS	methionyl-tRNA synthetase
hsa-miR-1208	1	0	1	1	1	1	KALRN	kalirin, RhoGEF kinase
hsa-miR-1208	0	0	1	1	1	1	DNAJC24	DnaJ (Hsp40) homolog, subfamily C, member 24
hsa-miR-1208	0	0	1	0	0	0	CLEC4GP1	C-type lectin domain family 4, member G pseudogene 1
hsa-miR-1208	0	0	1	1	0	0	CENPM	centromere protein M
hsa-miR-1208	0	0	1	0	0	0	LOC650368	asparagine-linked glycosylation 1-like pseudogene
hsa-miR-1208	1	0	1	0	0	0	GPR137C	G protein-coupled receptor 137C
hsa-miR-1208	1	0	1	1	0	0	KCNC1	potassium voltage-gated channel, Shaw-related subfamily, member 1
hsa-miR-1208	1	0	1	1	1	1	GJC1	gap junction protein, gamma 1, 45kDa
hsa-miR-1208	1	0	1	0	1	1	DCUN1D4	DCN1, defective in cullin neddylation 1, domain containing 4 (S. cerevisiae)
hsa-miR-1208	1	0	1	0	1	1	RHBDL3	rhomboid, veinlet-like 3 (Drosophila)
hsa-miR-1208	1	0	1	0	1	1	CNTN2	contactin 2 (axonal)
hsa-miR-1208	1	0	1	1	1	1	C17orf85	chromosome 17 open reading frame 85
hsa-miR-1208	0	0	1	0	0	0	TMEM232	transmembrane protein 232
hsa-miR-1208	1	0	1	1	1	1	ATXN7	ataxin 7
hsa-miR-1208	1	0	1	1	0	0	GXYLT1	glucoside xylosyltransferase 1
hsa-miR-1208	1	0	1	1	1	1	C15orf52	chromosome 15 open reading frame 52
hsa-miR-1208	0	0	1	1	1	1	ZNF337	zinc finger protein 337
hsa-miR-1208	1	0	1	1	1	1	KPNA1	karyopherin alpha 1 (importin alpha 5)
hsa-miR-1208	1	0	1	0	1	1	HECTD1	HECT domain containing E3 ubiquitin protein ligase 1
hsa-miR-1208	0	0	1	0	0	0	FAM95B1	family with sequence similarity 95, member B1
hsa-miR-1208	0	0	1	1	0	0	FSIP2	fibrous sheath interacting protein 2
hsa-miR-1208	0	0	1	1	1	1	CCDC132	coiled-coil domain containing 132
hsa-miR-1208	0	0	1	1	0	0	SPATS1	spermatogenesis associated, serine-rich 1
hsa-miR-1208	1	0	1	0	1	1	GPR180	G protein-coupled receptor 180
hsa-miR-1208	0	0	1	0	0	0	HNRNPKP3	heterogeneous nuclear ribonucleoprotein K pseudogene 3
hsa-miR-1208	1	0	1	1	0	0	MAN1B1	mannosidase, alpha, class 1B, member 1
hsa-miR-1208	1	0	1	1	1	1	CTNNA2	catenin (cadherin-associated protein), alpha 2
hsa-miR-1208	0	0	1	1	1	1	PDIA6	protein disulfide isomerase family A, member 6
hsa-miR-1208	1	0	1	0	1	1	YAF2	YY1 associated factor 2
hsa-miR-1208	1	0	1	1	1	1	CXorf23	chromosome X open reading frame 23
hsa-miR-1208	0	0	1	1	1	1	PITX2	paired-like homeodomain 2
hsa-miR-1208	0	0	1	0	0	0	FAM205B	transmembrane protein C9orf144B pseudogene
hsa-miR-1208	1	0	1	0	1	1	ZZEF1	zinc finger, ZZ-type with EF-hand domain 1
hsa-miR-1208	1	0	1	1	1	1	SDCBP	syndecan binding protein (syntenin)
hsa-miR-1208	0	0	1	1	1	1	ZNF662	zinc finger protein 662
hsa-miR-1208	0	0	1	0	0	0	PINLYP	phospholipase A2 inhibitor and LY6/PLAUR domain containing
hsa-miR-1208	0	0	1	0	0	0	FLJ26245	uncharacterized LOC400533
hsa-miR-1208	0	0	1	1	1	1	BRAT1	BRCA1-associated ATM activator 1
hsa-miR-1208	0	0	1	0	0	0	LOC100133315	transient receptor potential cation channel, subfamily C, member 2-like
hsa-miR-1208	0	0	1	1	1	1	SYPL2	synaptophysin-like 2
hsa-miR-1208	0	0	1	1	0	0	ZNF730	zinc finger protein 730
hsa-miR-1208	1	0	1	1	1	1	LRRK2	leucine-rich repeat kinase 2
hsa-miR-1208	1	0	1	1	1	1	SLC39A9	solute carrier family 39 (zinc transporter), member 9
hsa-miR-1208	1	0	1	1	1	1	CYYR1	cysteine/tyrosine-rich 1
hsa-miR-1208	0	0	1	1	1	1	DHRS3	dehydrogenase/reductase (SDR family) member 3
hsa-miR-1208	1	0	1	1	0	0	ATP13A3	ATPase type 13A3
hsa-miR-1208	1	0	1	1	1	1	NCOA1	nuclear receptor coactivator 1
hsa-miR-1208	1	0	1	1	1	1	AHCYL1	adenosylhomocysteinase-like 1
hsa-miR-1208	0	0	1	1	0	0	FAM149A	family with sequence similarity 149, member A
hsa-miR-1208	1	0	1	1	1	1	RIF1	RAP1 interacting factor homolog (yeast)
hsa-miR-1208	0	0	1	1	0	0	PLK1S1	polo-like kinase 1 substrate 1
hsa-miR-1208	0	0	1	0	0	0	POM121L9P	POM121 transmembrane nucleoporin-like 9, pseudogene
hsa-miR-1208	1	0	1	1	1	1	TAB2	TGF-beta activated kinase 1/MAP3K7 binding protein 2
hsa-miR-1208	1	0	1	1	1	1	ARF6	ADP-ribosylation factor 6
hsa-miR-1208	0	0	1	1	1	1	ARIH1	ariadne homolog, ubiquitin-conjugating enzyme E2 binding protein, 1 (Drosophila)
hsa-miR-1208	0	0	1	0	0	0	DNAJC5B	DnaJ (Hsp40) homolog, subfamily C, member 5 beta
hsa-miR-1208	0	0	1	0	0	0	KIAA0913	KIAA0913
hsa-miR-1208	0	0	1	1	1	1	ZNF280D	zinc finger protein 280D
hsa-miR-1208	0	0	1	1	1	1	RHOT1	ras homolog family member T1
hsa-miR-1208	0	0	1	1	1	1	STAG3L1	stromal antigen 3-like 1
hsa-miR-1208	0	0	1	1	1	1	UBE3D	ubiquitin protein ligase E3D
hsa-miR-1208	1	0	1	1	1	1	KIAA1033	KIAA1033
hsa-miR-1208	1	0	1	0	1	1	GPR85	G protein-coupled receptor 85
hsa-miR-1208	1	0	1	1	1	1	CTTNBP2NL	CTTNBP2 N-terminal like
hsa-miR-1208	1	0	1	0	1	1	GRIN3A	glutamate receptor, ionotropic, N-methyl-D-aspartate 3A
hsa-miR-1208	0	0	1	0	0	0	RPL23AP82	ribosomal protein L23a pseudogene 82
hsa-miR-1208	1	0	1	1	1	1	SLC30A8	solute carrier family 30 (zinc transporter), member 8
hsa-miR-1208	1	0	1	1	1	1	MIER1	mesoderm induction early response 1 homolog (Xenopus laevis)
hsa-miR-1208	0	0	1	1	1	1	BEND7	BEN domain containing 7
hsa-miR-1208	1	0	1	0	1	1	HNRNPA3	heterogeneous nuclear ribonucleoprotein A3
hsa-miR-1208	1	0	1	1	0	0	USP24	ubiquitin specific peptidase 24
hsa-miR-1208	1	0	1	1	0	0	CELF5	CUGBP, Elav-like family member 5
hsa-miR-1208	1	0	1	1	1	1	PRRC1	proline-rich coiled-coil 1
hsa-miR-1208	1	0	1	1	0	0	PTAR1	protein prenyltransferase alpha subunit repeat containing 1
hsa-miR-1208	0	0	1	0	1	1	CEP95	centrosomal protein 95kDa
hsa-miR-1208	1	0	1	1	1	1	EHMT1	euchromatic histone-lysine N-methyltransferase 1
hsa-miR-1208	1	0	1	1	1	1	POU6F1	POU class 6 homeobox 1
hsa-miR-1208	1	0	1	1	1	1	SBF2	SET binding factor 2
hsa-miR-1208	1	0	1	1	1	1	HMCN1	hemicentin 1
hsa-miR-1208	0	0	1	1	1	1	ZMYM6	zinc finger, MYM-type 6
hsa-miR-1208	0	0	1	1	1	1	KIAA1841	KIAA1841
hsa-miR-1208	1	0	1	1	1	1	CAPRIN2	caprin family member 2
hsa-miR-1208	1	0	1	1	1	1	MBD6	methyl-CpG binding domain protein 6
hsa-miR-1208	1	0	1	0	1	1	SMURF1	SMAD specific E3 ubiquitin protein ligase 1
hsa-miR-1208	1	0	1	1	1	1	CADM2	cell adhesion molecule 2
hsa-miR-1208	1	0	1	0	1	1	PHYHIPL	phytanoyl-CoA 2-hydroxylase interacting protein-like
hsa-miR-1208	0	0	1	0	1	1	USO1	USO1 vesicle docking protein homolog (yeast)
hsa-miR-1208	1	0	1	1	1	1	IKZF2	IKAROS family zinc finger 2 (Helios)
hsa-miR-1208	0	0	1	1	0	0	FAM176C	family with sequence similarity 176, member C
hsa-miR-1208	0	0	1	1	1	1	CRB1	crumbs homolog 1 (Drosophila)
hsa-miR-1208	1	0	1	0	1	1	BDNF	brain-derived neurotrophic factor
hsa-miR-1208	0	0	1	0	0	0	LOC374443	C-type lectin domain family 2, member D pseudogene
hsa-miR-1208	0	0	1	0	0	0	KGFLP1	fibroblast growth factor 7 pseudogene
hsa-miR-1208	1	0	1	1	1	1	KIAA0907	KIAA0907
hsa-miR-1208	0	0	1	1	1	1	SHPRH	SNF2 histone linker PHD RING helicase, E3 ubiquitin protein ligase
hsa-miR-1208	0	0	1	1	0	0	LETM2	leucine zipper-EF-hand containing transmembrane protein 2
hsa-miR-1208	1	0	1	1	1	1	WDR26	WD repeat domain 26
hsa-miR-1208	0	0	1	1	0	0	DNAH1	dynein, axonemal, heavy chain 1
hsa-miR-1208	1	0	1	1	1	1	TPP1	tripeptidyl peptidase I
hsa-miR-1208	1	0	1	1	1	1	TAB3	TGF-beta activated kinase 1/MAP3K7 binding protein 3
hsa-miR-1208	1	0	1	1	1	1	CAMTA1	calmodulin binding transcription activator 1
hsa-miR-1208	0	0	1	1	0	0	LRRC28	leucine rich repeat containing 28
hsa-miR-1208	0	0	1	1	0	0	ART5	ADP-ribosyltransferase 5
hsa-miR-1208	1	0	1	1	1	1	ECT2	epithelial cell transforming sequence 2 oncogene
hsa-miR-1208	1	0	1	1	1	1	SP3	Sp3 transcription factor
hsa-miR-1208	1	0	1	1	1	1	MYNN	myoneurin
hsa-miR-1208	0	0	1	1	1	1	AICDA	activation-induced cytidine deaminase
hsa-miR-1208	1	0	1	1	1	1	MECP2	methyl CpG binding protein 2 (Rett syndrome)
hsa-miR-1208	1	0	1	1	1	1	LAMP2	lysosomal-associated membrane protein 2
hsa-miR-1208	1	0	1	1	1	1	CHRDL1	chordin-like 1
hsa-miR-1208	0	0	1	1	0	0	DHRS4	dehydrogenase/reductase (SDR family) member 4
hsa-miR-1208	0	0	1	1	1	1	RHD	Rh blood group, D antigen
hsa-miR-1208	1	0	1	1	1	1	PFKFB4	6-phosphofructo-2-kinase/fructose-2,6-biphosphatase 4
hsa-miR-1208	1	0	1	1	0	0	TAF4B	TAF4b RNA polymerase II, TATA box binding protein (TBP)-associated factor, 105kDa
hsa-miR-1208	0	0	1	1	0	0	GFOD2	glucose-fructose oxidoreductase domain containing 2
hsa-miR-1208	1	0	1	1	1	1	PAFAH2	platelet-activating factor acetylhydrolase 2, 40kDa
hsa-miR-1208	1	0	1	0	1	1	VAMP4	vesicle-associated membrane protein 4
hsa-miR-1208	0	0	1	1	1	1	LZIC	leucine zipper and CTNNBIP1 domain containing
hsa-miR-1208	0	0	1	1	0	0	AGBL5	ATP/GTP binding protein-like 5
hsa-miR-1208	1	0	1	1	1	1	SHMT2	serine hydroxymethyltransferase 2 (mitochondrial)
hsa-miR-1208	1	0	1	0	1	1	CNP	2',3'-cyclic nucleotide 3' phosphodiesterase
hsa-miR-1208	0	0	1	0	0	0	LRRC14	leucine rich repeat containing 14
hsa-miR-1208	0	0	1	1	1	1	HDHD2	haloacid dehalogenase-like hydrolase domain containing 2
hsa-miR-1208	0	0	1	1	1	1	TAF12	TAF12 RNA polymerase II, TATA box binding protein (TBP)-associated factor, 20kDa
hsa-miR-1208	1	0	1	0	1	1	RNF165	ring finger protein 165
hsa-miR-1208	1	0	1	1	1	1	YY1	YY1 transcription factor
hsa-miR-1208	1	0	1	1	1	1	ZBTB38	zinc finger and BTB domain containing 38
hsa-miR-1208	0	0	1	1	1	1	FAM122C	family with sequence similarity 122C
hsa-miR-1208	1	0	1	0	1	1	CYBRD1	cytochrome b reductase 1
hsa-miR-1208	1	0	1	1	1	1	ELF4	E74-like factor 4 (ets domain transcription factor)
hsa-miR-1208	1	0	1	1	1	1	ARHGEF9	Cdc42 guanine nucleotide exchange factor (GEF) 9
hsa-miR-1208	0	0	1	1	1	1	EXOC7	exocyst complex component 7
hsa-miR-1208	0	0	1	0	1	1	CD99P1	CD99 molecule pseudogene 1
hsa-miR-1208	0	0	1	1	0	0	ANG	angiogenin, ribonuclease, RNase A family, 5
hsa-miR-1208	1	0	1	0	1	1	BTF3L4	basic transcription factor 3-like 4
hsa-miR-1208	0	0	1	1	1	1	C10orf88	chromosome 10 open reading frame 88
hsa-miR-1208	0	0	1	0	0	0	NBR2	neighbor of BRCA1 gene 2 (non-protein coding)
hsa-miR-1208	1	0	1	1	1	1	BEND6	BEN domain containing 6
hsa-miR-1208	1	0	1	1	1	1	CNTN4	contactin 4
hsa-miR-1208	0	0	1	0	0	0	LOC400891	chromosome 14 open reading frame 166B pseudogene
hsa-miR-1208	0	0	1	1	1	1	C1orf101	chromosome 1 open reading frame 101
hsa-miR-1208	0	0	1	1	1	1	LRMP	lymphoid-restricted membrane protein
hsa-miR-1208	0	0	1	1	1	1	SEMA3D	sema domain, immunoglobulin domain (Ig), short basic domain, secreted, (semaphorin) 3D
hsa-miR-1208	1	0	1	0	1	1	TFEC	transcription factor EC
hsa-miR-1208	0	0	1	0	0	0	BCAS3	breast carcinoma amplified sequence 3
hsa-miR-1208	1	0	1	0	1	1	SV2B	synaptic vesicle glycoprotein 2B
hsa-miR-1208	1	0	1	1	1	1	GCFC1	GC-rich sequence DNA-binding factor 1
hsa-miR-1208	1	0	1	1	1	1	EYA4	eyes absent homolog 4 (Drosophila)
hsa-miR-1208	1	0	1	1	1	1	ADARB1	adenosine deaminase, RNA-specific, B1
hsa-miR-1208	0	0	1	1	1	1	SLC22A2	solute carrier family 22 (organic cation transporter), member 2
hsa-miR-1208	0	0	1	0	1	1	FLJ25328	uncharacterized LOC148231
hsa-miR-1208	0	0	1	0	1	1	B3GALTL	beta 1,3-galactosyltransferase-like
hsa-miR-1208	1	0	1	1	1	1	RCOR3	REST corepressor 3
hsa-miR-1208	0	0	1	0	0	0	CFL1P1	cofilin 1 (non-muscle) pseudogene 1
hsa-miR-1208	1	0	1	1	1	1	ZNF282	zinc finger protein 282
hsa-miR-1208	1	0	1	0	1	1	RNF4	ring finger protein 4
hsa-miR-1208	1	0	1	1	0	0	ANKRD13B	ankyrin repeat domain 13B
hsa-miR-1208	1	0	1	1	1	1	SECISBP2L	SECIS binding protein 2-like
hsa-miR-1208	1	0	1	1	1	1	SIRPA	signal-regulatory protein alpha
hsa-miR-1208	1	0	1	1	1	1	CRKL	v-crk sarcoma virus CT10 oncogene homolog (avian)-like
hsa-miR-1208	0	0	1	1	1	1	IL20RB	interleukin 20 receptor beta
hsa-miR-1208	1	0	1	1	0	0	GPR137	G protein-coupled receptor 137
hsa-miR-1208	0	0	1	1	0	0	TNMD	tenomodulin
hsa-miR-1208	1	0	1	1	1	1	TTC26	tetratricopeptide repeat domain 26
hsa-miR-1208	1	0	1	1	1	1	ZZZ3	zinc finger, ZZ-type containing 3
hsa-miR-1208	0	0	1	1	1	1	TMEM139	transmembrane protein 139
hsa-miR-1208	0	0	1	1	0	0	VPS8	vacuolar protein sorting 8 homolog (S. cerevisiae)
hsa-miR-1208	0	0	1	1	1	1	DUSP28	dual specificity phosphatase 28
hsa-miR-1208	1	0	1	1	1	1	MEIS1	Meis homeobox 1
hsa-miR-1208	1	0	1	0	1	1	CPEB4	cytoplasmic polyadenylation element binding protein 4
hsa-miR-1208	0	0	1	1	1	1	ZNF138	zinc finger protein 138
hsa-miR-1208	1	0	1	1	1	1	SOX6	SRY (sex determining region Y)-box 6
hsa-miR-1208	0	0	1	0	0	0	CRYBB2P1	crystallin, beta B2 pseudogene 1
hsa-miR-1208	0	0	1	0	0	0	INHBA-AS1	INHBA antisense RNA 1
hsa-miR-1208	1	0	1	1	1	1	DAAM1	dishevelled associated activator of morphogenesis 1
hsa-miR-1208	0	0	1	0	0	0	LINC00264	long intergenic non-protein coding RNA 264
hsa-miR-1208	1	0	1	1	1	1	PAIP2	poly(A) binding protein interacting protein 2
hsa-miR-1208	0	0	1	1	1	1	VBP1	von Hippel-Lindau binding protein 1
hsa-miR-1208	0	0	1	1	1	1	SLC14A1	solute carrier family 14 (urea transporter), member 1 (Kidd blood group)
hsa-miR-1208	1	0	1	1	1	1	FOSB	FBJ murine osteosarcoma viral oncogene homolog B
hsa-miR-1208	0	0	1	0	0	0	LOC154822	uncharacterized LOC154822
hsa-miR-1208	1	0	1	1	1	1	CLOCK	clock homolog (mouse)
hsa-miR-1208	1	0	1	1	1	1	FKBP5	FK506 binding protein 5
hsa-miR-1208	1	0	1	0	1	1	USP6NL	USP6 N-terminal like
hsa-miR-1208	0	0	1	1	1	1	DGKH	diacylglycerol kinase, eta
hsa-miR-1208	1	0	1	1	1	1	RNF145	ring finger protein 145
hsa-miR-1208	0	0	1	1	1	1	DOCK8	dedicator of cytokinesis 8
hsa-miR-1208	1	0	1	0	1	1	LYPD6	LY6/PLAUR domain containing 6
hsa-miR-1208	0	0	1	0	0	0	DPY19L2P4	dpy-19-like 2 pseudogene 4 (C. elegans)
hsa-miR-1208	1	0	1	1	1	1	KIF2A	kinesin heavy chain member 2A
hsa-miR-1208	0	0	1	0	0	0	LOC729678	uncharacterized LOC729678
hsa-miR-1208	1	0	1	1	1	1	RTKN2	rhotekin 2
hsa-miR-1208	1	0	1	1	1	1	FNDC3A	fibronectin type III domain containing 3A
hsa-miR-1208	1	0	1	0	1	1	SEMA4G	sema domain, immunoglobulin domain (Ig), transmembrane domain (TM) and short cytoplasmic domain, (semaphorin) 4G
hsa-miR-1208	1	0	1	1	1	1	PPP2R5E	protein phosphatase 2, regulatory subunit B', epsilon isoform
hsa-miR-1208	1	0	1	1	1	1	KLHL28	kelch-like 28 (Drosophila)
hsa-miR-1208	1	0	1	0	1	1	LYSMD3	LysM, putative peptidoglycan-binding, domain containing 3
hsa-miR-1208	1	0	1	1	1	1	PRRG1	proline rich Gla (G-carboxyglutamic acid) 1
hsa-miR-1208	0	0	1	0	1	1	GUCY1B3	guanylate cyclase 1, soluble, beta 3
hsa-miR-1208	1	0	1	1	1	1	ZSCAN29	zinc finger and SCAN domain containing 29
hsa-miR-1208	1	0	1	1	1	1	MTMR10	myotubularin related protein 10
hsa-miR-1208	1	0	1	1	1	1	PDGFRA	platelet-derived growth factor receptor, alpha polypeptide
hsa-miR-1208	0	0	1	0	0	0	FLJ35390	uncharacterized LOC255031
hsa-miR-1208	0	0	1	1	1	1	ZNF33B	zinc finger protein 33B
hsa-miR-1208	0	0	1	0	0	0	LOC727751	uncharacterized LOC727751
hsa-miR-1208	0	0	1	0	0	0	AGSK1	golgin subfamily A member 2-like
hsa-miR-1208	0	0	1	0	0	0	LOC727849	golgin A2 pseudogene
hsa-miR-1208	1	0	1	1	1	1	ZNF449	zinc finger protein 449
hsa-miR-1208	1	0	1	1	1	1	NRSN1	neurensin 1
hsa-miR-1208	0	0	1	1	1	1	KCTD18	potassium channel tetramerisation domain containing 18
hsa-miR-1208	0	0	1	1	0	0	CELF3	CUGBP, Elav-like family member 3
hsa-miR-1208	0	0	1	0	0	0	PABPC1P2	poly(A) binding protein, cytoplasmic 1 pseudogene 2
hsa-miR-1208	1	0	1	1	1	1	PHACTR4	phosphatase and actin regulator 4
hsa-miR-1208	0	0	1	0	0	0	PTGER4P2	prostaglandin E receptor 4 (subtype EP4) pseudogene 2
hsa-miR-1208	0	0	1	1	0	0	CYP4F30P	cytochrome P450, family 4, subfamily F, polypeptide 30, pseudogene
hsa-miR-1208	1	0	1	1	1	1	ANLN	anillin, actin binding protein
hsa-miR-1208	1	0	1	0	1	1	TGFBR1	transforming growth factor, beta receptor 1
hsa-miR-1208	0	0	1	0	0	0	JPX	JPX transcript, XIST activator (non-protein coding)
hsa-miR-1208	0	0	1	1	1	1	BRCA1	breast cancer 1, early onset
hsa-miR-1208	0	0	1	0	0	0	LOC283070	uncharacterized LOC283070
hsa-miR-1208	0	0	1	1	1	1	C3orf67	chromosome 3 open reading frame 67
hsa-miR-1208	1	0	1	1	1	1	FMNL3	formin-like 3
hsa-miR-1208	1	0	1	1	1	1	GIGYF2	GRB10 interacting GYF protein 2
hsa-miR-1208	1	0	1	1	1	1	ST8SIA2	ST8 alpha-N-acetyl-neuraminide alpha-2,8-sialyltransferase 2
hsa-miR-1208	1	0	1	1	1	1	ACVR2B	activin A receptor, type IIB
hsa-miR-1208	1	0	1	1	1	1	SYNJ1	synaptojanin 1
hsa-miR-1208	0	0	1	1	1	1	TMEM52B	transmembrane protein 52B
hsa-miR-1208	1	0	1	0	1	1	ARPP19	cAMP-regulated phosphoprotein, 19kDa
hsa-miR-1208	1	0	1	1	1	1	HNRNPA1	heterogeneous nuclear ribonucleoprotein A1
hsa-miR-1208	1	0	1	0	1	1	CPEB2	cytoplasmic polyadenylation element binding protein 2
hsa-miR-1208	0	0	1	1	0	0	ZNHIT3	zinc finger, HIT-type containing 3
hsa-miR-1208	1	0	1	1	1	1	PNISR	PNN-interacting serine/arginine-rich protein
hsa-miR-1208	0	0	1	1	0	0	C1orf122	chromosome 1 open reading frame 122
hsa-miR-1208	1	0	1	0	1	1	DNAJC6	DnaJ (Hsp40) homolog, subfamily C, member 6
hsa-miR-1208	1	0	1	1	1	1	CERS6	ceramide synthase 6
hsa-miR-1208	1	0	1	0	1	1	BTBD3	BTB (POZ) domain containing 3
hsa-miR-1208	0	0	1	1	1	1	ZNF621	zinc finger protein 621
hsa-miR-1208	1	0	1	1	1	1	TMEM64	transmembrane protein 64
hsa-miR-1208	1	0	1	1	1	1	SHANK2	SH3 and multiple ankyrin repeat domains 2
hsa-miR-1208	0	0	1	0	0	0	BTF3P11	basic transcription factor 3 pseudogene 11
hsa-miR-1208	0	0	1	1	0	0	RGS12	regulator of G-protein signaling 12
hsa-miR-1208	0	0	1	0	0	0	FUT2	fucosyltransferase 2 (secretor status included)
hsa-miR-1208	1	0	1	0	1	1	CAMSAP2	calmodulin regulated spectrin-associated protein family, member 2
hsa-miR-1208	1	0	1	1	1	1	MEGF11	multiple EGF-like-domains 11
hsa-miR-1208	1	0	1	1	1	1	C18orf34	chromosome 18 open reading frame 34
hsa-miR-1208	1	0	1	1	1	1	TMEM218	transmembrane protein 218
hsa-miR-1208	0	0	1	1	1	1	CNTNAP3	contactin associated protein-like 3
hsa-miR-1208	0	0	1	1	1	1	ARG1	arginase, liver
hsa-miR-1208	0	0	1	0	0	0	LOC100133207	uncharacterized LOC100133207
hsa-miR-1208	0	0	1	0	0	0	LINC00643	long intergenic non-protein coding RNA 643
hsa-miR-1208	0	0	1	0	0	0	DKFZp686D0853	uncharacterized LOC401613
hsa-miR-1208	1	0	1	1	1	1	ATP2B4	ATPase, Ca++ transporting, plasma membrane 4
hsa-miR-1208	1	0	1	1	1	1	MIER3	mesoderm induction early response 1, family member 3
hsa-miR-1208	1	0	1	1	1	1	EPHA5	EPH receptor A5
hsa-miR-1208	0	0	1	1	1	1	CNTNAP3B	contactin associated protein-like 3B
hsa-miR-1208	0	0	1	1	1	1	DEPDC5	DEP domain containing 5
hsa-miR-1208	0	0	1	1	0	0	SLC35B1	solute carrier family 35, member B1
hsa-miR-1208	0	0	1	1	1	1	GTF3C2	general transcription factor IIIC, polypeptide 2, beta 110kDa
hsa-miR-1208	1	0	1	1	1	1	SMAD4	SMAD family member 4
hsa-miR-1208	1	0	1	1	1	1	CBX3	chromobox homolog 3
hsa-miR-1208	0	0	1	0	0	0	LINC00240	long intergenic non-protein coding RNA 240
hsa-miR-1208	0	0	1	0	1	1	ANKRD36	ankyrin repeat domain 36
hsa-miR-1208	1	0	1	1	1	1	TC2N	tandem C2 domains, nuclear
hsa-miR-1208	1	0	1	1	1	1	CYB5B	cytochrome b5 type B (outer mitochondrial membrane)
hsa-miR-1208	1	0	1	1	1	1	PDXDC1	pyridoxal-dependent decarboxylase domain containing 1
hsa-miR-1208	0	0	1	1	1	1	DDX21	DEAD (Asp-Glu-Ala-Asp) box helicase 21
hsa-miR-1208	1	0	1	1	1	1	NFIB	nuclear factor I/B
hsa-miR-1208	1	0	1	1	1	1	GAP43	growth associated protein 43
hsa-miR-1208	1	0	1	1	1	1	C5orf24	chromosome 5 open reading frame 24
hsa-miR-1208	1	0	1	1	1	1	PGAP1	post-GPI attachment to proteins 1
hsa-miR-1208	1	0	1	1	1	1	CALD1	caldesmon 1
hsa-miR-1208	1	0	1	1	1	1	HIC2	hypermethylated in cancer 2
hsa-miR-1208	0	0	1	1	1	1	HPGD	hydroxyprostaglandin dehydrogenase 15-(NAD)
hsa-miR-1208	1	0	1	0	1	1	STX6	syntaxin 6
hsa-miR-1208	0	0	1	1	0	0	SARS	seryl-tRNA synthetase
hsa-miR-1208	0	0	1	1	0	0	TCEAL4	transcription elongation factor A (SII)-like 4
hsa-miR-1208	1	0	1	1	1	1	CLDN11	claudin 11
hsa-miR-1208	0	0	1	1	1	1	BTF3	basic transcription factor 3
hsa-miR-1208	0	0	1	1	1	1	PISD	phosphatidylserine decarboxylase
hsa-miR-1208	1	0	1	1	1	1	RAP1A	RAP1A, member of RAS oncogene family
hsa-miR-1208	0	0	1	1	1	1	ERLEC1	endoplasmic reticulum lectin 1
hsa-miR-1208	0	0	1	1	1	1	APH1A	anterior pharynx defective 1 homolog A (C. elegans)
hsa-miR-1208	0	0	1	1	1	1	HSPB8	heat shock 22kDa protein 8
hsa-miR-1208	0	0	1	1	1	1	C2orf43	chromosome 2 open reading frame 43
hsa-miR-1208	0	0	1	1	1	1	BCL7B	B-cell CLL/lymphoma 7B
hsa-miR-1208	1	0	1	1	1	1	SSR1	signal sequence receptor, alpha
hsa-miR-1208	0	0	1	0	0	0	SBDSP1	Shwachman-Bodian-Diamond syndrome pseudogene 1
hsa-miR-1208	1	0	1	1	1	1	HMGN3	high mobility group nucleosomal binding domain 3
hsa-miR-1208	1	0	1	1	1	1	SMARCE1	SWI/SNF related, matrix associated, actin dependent regulator of chromatin, subfamily e, member 1
hsa-miR-1208	1	0	1	1	1	1	CDK18	cyclin-dependent kinase 18
hsa-miR-1208	0	0	1	0	0	0	LOC643837	uncharacterized LOC643837
hsa-miR-1208	1	0	1	1	1	1	COPS2	COP9 constitutive photomorphogenic homolog subunit 2 (Arabidopsis)
hsa-miR-1208	0	0	1	1	1	1	CD1B	CD1b molecule
hsa-miR-1208	1	0	1	1	1	1	TRA2B	transformer 2 beta homolog (Drosophila)
hsa-miR-1208	0	0	1	1	1	1	CYB5R3	cytochrome b5 reductase 3
hsa-miR-1208	1	0	1	1	1	1	PLEKHB2	pleckstrin homology domain containing, family B (evectins) member 2
hsa-miR-1208	0	0	1	0	1	1	PDCD5	programmed cell death 5
hsa-miR-1208	1	0	1	1	1	1	METTL10	methyltransferase like 10
hsa-miR-1208	1	0	1	1	1	1	NUP160	nucleoporin 160kDa
hsa-miR-1208	1	0	1	1	1	1	ARFIP2	ADP-ribosylation factor interacting protein 2
hsa-miR-1208	0	0	1	1	1	1	STXBP3	syntaxin binding protein 3
hsa-miR-1208	0	0	1	1	0	0	BRE	brain and reproductive organ-expressed (TNFRSF1A modulator)
hsa-miR-1208	0	0	1	1	0	0	FGB	fibrinogen beta chain
hsa-miR-1208	1	0	1	1	1	1	PTPN18	protein tyrosine phosphatase, non-receptor type 18 (brain-derived)
hsa-miR-1208	0	0	1	1	0	0	GMPPA	GDP-mannose pyrophosphorylase A
hsa-miR-1208	0	0	1	1	0	0	NOX5	NADPH oxidase, EF-hand calcium binding domain 5
hsa-miR-1208	0	0	1	1	1	1	SAP130	Sin3A-associated protein, 130kDa
hsa-miR-1208	1	0	1	1	1	1	CTDSPL	CTD (carboxy-terminal domain, RNA polymerase II, polypeptide A) small phosphatase-like
hsa-miR-1208	0	0	1	1	1	1	CHEK1	checkpoint kinase 1
hsa-miR-1208	1	0	1	1	1	1	DPF2	D4, zinc and double PHD fingers family 2
hsa-miR-1208	1	0	1	1	1	1	METAP2	methionyl aminopeptidase 2
hsa-miR-1208	1	0	1	1	1	1	ARL4A	ADP-ribosylation factor-like 4A
hsa-miR-1208	1	0	1	1	1	1	ATAT1	alpha tubulin acetyltransferase 1
hsa-miR-1208	0	0	1	1	0	0	TBC1D7	TBC1 domain family, member 7
hsa-miR-1208	1	0	1	1	1	1	NFYB	nuclear transcription factor Y, beta
hsa-miR-1208	1	0	1	1	1	1	ARMC8	armadillo repeat containing 8
hsa-miR-1208	0	0	1	1	1	1	DNAJC25	DnaJ (Hsp40) homolog, subfamily C , member 25
hsa-miR-1208	0	0	1	1	1	1	TMEM14C	transmembrane protein 14C
hsa-miR-1208	1	0	1	1	1	1	HMGN2	high mobility group nucleosomal binding domain 2
hsa-miR-1208	1	0	1	1	1	1	GDA	guanine deaminase
hsa-miR-1208	0	0	1	0	0	0	RNF115	ring finger protein 115
hsa-miR-1208	0	0	1	1	0	0	MAP2K5	mitogen-activated protein kinase kinase 5
hsa-miR-1208	1	0	1	0	1	1	EIF2S2	eukaryotic translation initiation factor 2, subunit 2 beta, 38kDa
hsa-miR-1208	1	0	1	0	1	1	CD47	CD47 molecule
hsa-miR-1208	1	0	1	1	1	1	RUNX1	runt-related transcription factor 1
hsa-miR-1208	1	0	1	1	0	0	FOXO3	forkhead box O3
hsa-miR-1208	0	0	1	1	0	0	TESK1	testis-specific kinase 1
hsa-miR-1208	1	0	1	1	1	1	TIPRL	TIP41, TOR signaling pathway regulator-like (S. cerevisiae)
hsa-miR-1208	0	0	1	1	0	0	FCGR2A	Fc fragment of IgG, low affinity IIa, receptor (CD32)
hsa-miR-1208	1	0	1	0	1	1	KIAA0240	KIAA0240
hsa-miR-1208	1	0	1	1	0	0	SMCHD1	structural maintenance of chromosomes flexible hinge domain containing 1
hsa-miR-1208	0	0	1	1	1	1	SYNE2	spectrin repeat containing, nuclear envelope 2
hsa-miR-1208	0	0	1	1	1	1	UPRT	uracil phosphoribosyltransferase (FUR1) homolog (S. cerevisiae)
hsa-miR-1208	0	0	1	1	1	1	ATG5	autophagy related 5
hsa-miR-1208	0	0	1	0	0	0	LINC00661	long intergenic non-protein coding RNA 661
hsa-miR-1208	1	0	1	0	1	1	SLC7A6	solute carrier family 7 (amino acid transporter light chain, y+L system), member 6
hsa-miR-1208	1	0	1	0	1	1	OSBPL8	oxysterol binding protein-like 8
hsa-miR-1208	1	0	1	0	1	1	MCFD2	multiple coagulation factor deficiency 2
hsa-miR-1208	0	0	1	1	1	1	ARMCX1	armadillo repeat containing, X-linked 1
hsa-miR-1208	1	0	1	1	1	1	SLC39A10	solute carrier family 39 (zinc transporter), member 10
hsa-miR-1208	1	0	1	0	1	1	ZNF776	zinc finger protein 776
hsa-miR-1208	1	0	1	1	1	1	SEC14L1	SEC14-like 1 (S. cerevisiae)
hsa-miR-1208	1	0	1	0	1	1	IRF4	interferon regulatory factor 4
hsa-miR-1208	1	0	1	1	1	1	RB1CC1	RB1-inducible coiled-coil 1
hsa-miR-1208	0	0	1	1	1	1	PTGS1	prostaglandin-endoperoxide synthase 1 (prostaglandin G/H synthase and cyclooxygenase)
hsa-miR-1208	1	0	1	1	1	1	KCNE3	potassium voltage-gated channel, Isk-related family, member 3
hsa-miR-1208	1	0	1	1	1	1	LGR4	leucine-rich repeat containing G protein-coupled receptor 4
hsa-miR-1208	1	0	1	1	1	1	CDC27	cell division cycle 27 homolog (S. cerevisiae)
hsa-miR-1208	0	0	1	1	1	1	ALDH3B1	aldehyde dehydrogenase 3 family, member B1
hsa-miR-1208	0	0	1	1	1	1	PRB4	proline-rich protein BstNI subfamily 4
hsa-miR-1208	0	0	1	1	1	1	ADPRH	ADP-ribosylarginine hydrolase
hsa-miR-1208	1	0	1	1	1	1	AFF1	AF4/FMR2 family, member 1
hsa-miR-1208	0	0	1	1	1	1	PLCB4	phospholipase C, beta 4
hsa-miR-1208	1	0	1	1	1	1	CCNG2	cyclin G2
hsa-miR-1208	0	0	1	1	1	1	GAD2	glutamate decarboxylase 2 (pancreatic islets and brain, 65kDa)
hsa-miR-1208	1	0	1	0	1	1	ACVR2A	activin A receptor, type IIA
hsa-miR-1208	0	0	1	1	1	1	ALDOB	aldolase B, fructose-bisphosphate
hsa-miR-1208	0	0	1	1	0	0	EMD	emerin
hsa-miR-1208	1	0	1	1	1	1	F13A1	coagulation factor XIII, A1 polypeptide
hsa-miR-1208	1	0	1	1	1	1	TBX5	T-box 5
hsa-miR-1208	1	0	1	1	1	1	ITGA6	integrin, alpha 6
hsa-miR-1208	1	0	1	1	1	1	JAG1	jagged 1
hsa-miR-1208	0	0	1	1	1	1	MTR	5-methyltetrahydrofolate-homocysteine methyltransferase
hsa-miR-1208	1	0	1	1	1	1	OCRL	oculocerebrorenal syndrome of Lowe
hsa-miR-1208	1	0	1	1	1	1	PTH	parathyroid hormone
hsa-miR-1208	1	0	1	1	1	1	ATXN1	ataxin 1
hsa-miR-1208	1	0	1	1	1	1	SOX9	SRY (sex determining region Y)-box 9
hsa-miR-1208	0	0	1	1	0	0	TCOF1	Treacher Collins-Franceschetti syndrome 1
hsa-miR-1208	1	0	1	0	1	1	PAFAH1B1	platelet-activating factor acetylhydrolase 1b, regulatory subunit 1 (45kDa)
hsa-miR-1208	0	0	1	1	1	1	CYP11B2	cytochrome P450, family 11, subfamily B, polypeptide 2
hsa-miR-1208	0	0	1	1	1	1	WRN	Werner syndrome, RecQ helicase-like
hsa-miR-1208	0	0	1	0	1	1	CCR5	chemokine (C-C motif) receptor 5 (gene/pseudogene)
hsa-miR-1208	1	0	1	1	1	1	CXCL12	chemokine (C-X-C motif) ligand 12
hsa-miR-1208	0	0	1	1	1	1	IGF2	insulin-like growth factor 2 (somatomedin A)
hsa-miR-1208	1	0	1	1	1	1	ADORA2B	adenosine A2b receptor
hsa-miR-1208	1	0	1	1	1	1	DIO2	deiodinase, iodothyronine, type II
hsa-miR-1208	1	0	1	1	1	1	GABRG2	gamma-aminobutyric acid (GABA) A receptor, gamma 2
hsa-miR-1208	1	0	1	1	1	1	IGF1R	insulin-like growth factor 1 receptor
hsa-miR-1208	1	0	1	1	0	0	PDE3A	phosphodiesterase 3A, cGMP-inhibited
hsa-miR-1208	1	0	1	1	1	1	PTGER2	prostaglandin E receptor 2 (subtype EP2), 53kDa
hsa-miR-1208	1	0	1	0	1	1	SPOPL	speckle-type POZ protein-like
hsa-miR-1208	0	0	1	0	0	0	KLK2	kallikrein-related peptidase 2
hsa-miR-1208	1	0	1	1	1	1	LCLAT1	lysocardiolipin acyltransferase 1
hsa-miR-1208	1	0	1	1	1	1	ABLIM1	actin binding LIM protein 1
hsa-miR-1208	1	0	1	1	1	1	BICD2	bicaudal D homolog 2 (Drosophila)
hsa-miR-1208	0	0	1	1	1	1	SP5	Sp5 transcription factor
hsa-miR-1208	1	0	1	0	1	1	BMF	Bcl2 modifying factor
hsa-miR-1208	0	0	1	1	1	1	ALG11	asparagine-linked glycosylation 11, alpha-1,2-mannosyltransferase homolog (yeast)
hsa-miR-1208	0	0	1	1	1	1	C1orf168	chromosome 1 open reading frame 168
hsa-miR-1208	1	0	1	0	1	1	LIN28B	lin-28 homolog B (C. elegans)
hsa-miR-1208	1	0	1	0	1	1	YPEL2	yippee-like 2 (Drosophila)
hsa-miR-1208	1	0	1	1	1	1	PLCXD3	phosphatidylinositol-specific phospholipase C, X domain containing 3
hsa-miR-1208	1	0	1	1	1	1	TCEAL1	transcription elongation factor A (SII)-like 1
hsa-miR-1208	1	0	1	0	1	1	GOSR1	golgi SNAP receptor complex member 1
hsa-miR-1208	1	0	1	1	1	1	IGF2BP2	insulin-like growth factor 2 mRNA binding protein 2
hsa-miR-1208	0	0	1	1	1	1	KLHDC9	kelch domain containing 9
hsa-miR-1208	1	0	1	1	1	1	BCAP29	B-cell receptor-associated protein 29
hsa-miR-1208	0	0	1	1	1	1	MXI1	MAX interactor 1
hsa-miR-1208	1	0	1	1	1	1	NUPL1	nucleoporin like 1
hsa-miR-1208	1	0	1	1	1	1	FNIP1	folliculin interacting protein 1
hsa-miR-1208	1	0	1	1	1	1	CUL4A	cullin 4A
hsa-miR-1208	0	0	1	1	1	1	GEMIN2	gem (nuclear organelle) associated protein 2
hsa-miR-1208	1	0	1	0	1	1	RCHY1	ring finger and CHY zinc finger domain containing 1, E3 ubiquitin protein ligase
hsa-miR-1208	1	0	1	0	1	1	PM20D2	peptidase M20 domain containing 2
hsa-miR-1208	1	0	1	0	1	1	ZC3H12B	zinc finger CCCH-type containing 12B
hsa-miR-1208	1	0	1	1	1	1	FAM171A1	family with sequence similarity 171, member A1
hsa-miR-1208	1	0	1	0	1	1	CREB5	cAMP responsive element binding protein 5
hsa-miR-1208	1	0	1	1	1	1	CENPP	centromere protein P
hsa-miR-1208	1	0	1	0	1	1	RGMB	RGM domain family, member B
hsa-miR-1208	1	0	1	0	1	1	SYT14L	synaptotagmin XIV-like
hsa-miR-1208	1	0	1	1	1	1	PHF6	PHD finger protein 6
hsa-miR-1208	1	0	1	1	1	1	TMCC1	transmembrane and coiled-coil domain family 1
hsa-miR-1208	1	0	1	0	1	1	KCNK2	potassium channel, subfamily K, member 2
hsa-miR-1208	1	0	1	1	1	1	VMA21	VMA21 vacuolar H+-ATPase homolog (S. cerevisiae)
hsa-miR-1208	1	0	1	1	1	1	SH3PXD2B	SH3 and PX domains 2B
hsa-miR-1208	1	0	1	1	1	1	SERBP1	SERPINE1 mRNA binding protein 1
hsa-miR-1208	0	0	1	1	1	1	NARG2	NMDA receptor regulated 2
hsa-miR-1208	1	0	1	1	1	1	SBK1	SH3-binding domain kinase 1
hsa-miR-1208	1	0	1	0	1	1	TNRC6B	trinucleotide repeat containing 6B
hsa-miR-1208	1	0	1	1	1	1	FNBP1L	formin binding protein 1-like
hsa-miR-1208	1	0	1	0	1	1	ADAR	adenosine deaminase, RNA-specific
hsa-miR-1208	1	0	1	1	1	1	AFF3	AF4/FMR2 family, member 3
hsa-miR-1208	1	0	1	0	1	1	ANO6	anoctamin 6
hsa-miR-1208	1	0	1	1	1	1	VEGFA	vascular endothelial growth factor A
hsa-miR-1208	1	0	1	1	1	1	MAF	v-maf musculoaponeurotic fibrosarcoma oncogene homolog (avian)
hsa-miR-1208	0	0	1	0	1	1	STXBP1	syntaxin binding protein 1
hsa-miR-1208	1	0	1	0	1	1	NPNT	nephronectin
hsa-miR-1208	1	0	1	0	1	1	SRGAP3	SLIT-ROBO Rho GTPase activating protein 3
hsa-miR-1208	1	0	1	1	1	1	PPM1B	protein phosphatase, Mg2+/Mn2+ dependent, 1B
hsa-miR-1208	0	0	1	1	0	0	SSX4B	synovial sarcoma, X breakpoint 4B
hsa-miR-1208	1	0	1	1	1	1	SCD5	stearoyl-CoA desaturase 5
hsa-miR-1208	1	0	1	1	1	1	DPP6	dipeptidyl-peptidase 6
hsa-miR-1208	0	0	1	1	1	1	HEPACAM2	HEPACAM family member 2
hsa-miR-1208	1	0	1	1	1	1	TCERG1	transcription elongation regulator 1
hsa-miR-1208	0	0	1	0	1	1	SCN3B	sodium channel, voltage-gated, type III, beta subunit
hsa-miR-1208	0	0	1	1	1	1	SPOCK3	sparc/osteonectin, cwcv and kazal-like domains proteoglycan (testican) 3
hsa-miR-1208	0	0	1	1	1	1	MCHR2	melanin-concentrating hormone receptor 2
hsa-miR-1208	1	0	1	1	1	1	PAPD5	PAP associated domain containing 5
hsa-miR-1208	1	0	1	1	1	1	ZBTB8A	zinc finger and BTB domain containing 8A
hsa-miR-1208	1	0	1	1	1	1	MTMR12	myotubularin related protein 12
hsa-miR-1208	0	0	1	0	1	1	STEAP2	STEAP family member 2, metalloreductase
hsa-miR-1208	1	0	1	1	1	1	CYLD	cylindromatosis (turban tumor syndrome)
hsa-miR-1208	0	0	1	1	1	1	TATDN3	TatD DNase domain containing 3
hsa-miR-1208	1	0	1	1	1	1	FRS2	fibroblast growth factor receptor substrate 2
hsa-miR-1208	1	0	1	0	1	1	TMEM237	transmembrane protein 237
hsa-miR-1208	0	0	1	0	1	1	TOP2A	topoisomerase (DNA) II alpha 170kDa
hsa-miR-1208	1	0	1	1	1	1	QSER1	glutamine and serine rich 1
hsa-miR-1208	1	0	1	1	1	1	PHF16	PHD finger protein 16
hsa-miR-1208	1	0	1	1	1	1	HNRNPUL2	heterogeneous nuclear ribonucleoprotein U-like 2
hsa-miR-1208	1	0	1	1	1	1	CUL4B	cullin 4B
hsa-miR-1208	1	0	1	1	1	1	LDB3	LIM domain binding 3
hsa-miR-1208	1	0	1	1	1	1	FAM155A	family with sequence similarity 155, member A
hsa-miR-1208	1	0	1	1	1	1	ZNF629	zinc finger protein 629
hsa-miR-1208	1	0	1	1	1	1	ZNF697	zinc finger protein 697
hsa-miR-1208	1	0	1	0	1	1	MEGF9	multiple EGF-like-domains 9
hsa-miR-1208	1	0	1	1	1	1	UNC119B	unc-119 homolog B (C. elegans)
hsa-miR-1208	1	0	1	1	1	1	DGKG	diacylglycerol kinase, gamma 90kDa
hsa-miR-1208	1	0	1	0	1	1	SCN3A	sodium channel, voltage-gated, type III, alpha subunit
hsa-miR-1208	1	0	1	1	1	1	CAMK2D	calcium/calmodulin-dependent protein kinase II delta
hsa-miR-1208	1	0	1	1	1	1	CTNND2	catenin (cadherin-associated protein), delta 2
hsa-miR-1208	1	0	1	1	1	1	DTNA	dystrobrevin, alpha
hsa-miR-1208	1	0	1	1	1	1	DYRK1A	dual-specificity tyrosine-(Y)-phosphorylation regulated kinase 1A
hsa-miR-1208	1	0	1	0	1	1	EIF2S3	eukaryotic translation initiation factor 2, subunit 3 gamma, 52kDa
hsa-miR-1208	0	0	1	0	1	1	EMP1	epithelial membrane protein 1
hsa-miR-1208	1	0	1	1	1	1	EREG	epiregulin
hsa-miR-1208	1	0	1	1	1	1	GPC4	glypican 4
hsa-miR-1208	1	0	1	1	1	1	ID4	inhibitor of DNA binding 4, dominant negative helix-loop-helix protein
hsa-miR-1208	1	0	1	1	1	1	AHR	aryl hydrocarbon receptor
hsa-miR-1208	0	0	1	1	0	0	ATP5B	ATP synthase, H+ transporting, mitochondrial F1 complex, beta polypeptide
hsa-miR-1208	0	0	1	1	0	0	C9	complement component 9
hsa-miR-1208	1	0	1	1	1	1	CBFB	core-binding factor, beta subunit
hsa-miR-1208	1	0	1	1	1	1	CD69	CD69 molecule
hsa-miR-1208	1	0	1	1	1	1	CDH2	cadherin 2, type 1, N-cadherin (neuronal)
hsa-miR-1208	1	0	1	0	1	1	CHML	choroideremia-like (Rab escort protein 2)
hsa-miR-1208	1	0	1	1	1	1	SLC31A1	solute carrier family 31 (copper transporters), member 1
hsa-miR-1208	1	0	1	1	1	1	DR1	down-regulator of transcription 1, TBP-binding (negative cofactor 2)
hsa-miR-1208	1	0	1	1	1	1	E2F3	E2F transcription factor 3
hsa-miR-1208	1	0	1	1	1	1	FBN2	fibrillin 2
hsa-miR-1208	1	0	1	1	1	1	FGF7	fibroblast growth factor 7
hsa-miR-1208	1	0	1	0	1	1	FOXO1	forkhead box O1
hsa-miR-1208	1	0	1	0	1	1	FUT4	fucosyltransferase 4 (alpha (1,3) fucosyltransferase, myeloid-specific)
hsa-miR-1208	1	0	1	1	1	1	GLRA2	glycine receptor, alpha 2
hsa-miR-1208	1	0	1	1	1	1	ITPR2	inositol 1,4,5-trisphosphate receptor, type 2
hsa-miR-1208	1	0	1	1	1	1	KCNJ10	potassium inwardly-rectifying channel, subfamily J, member 10
hsa-miR-1208	1	0	1	1	1	1	KPNA3	karyopherin alpha 3 (importin alpha 4)
hsa-miR-1208	1	0	1	1	1	1	LIF	leukemia inhibitory factor
hsa-miR-1208	1	0	1	1	1	1	NPTX1	neuronal pentraxin I
hsa-miR-1208	0	0	1	0	1	1	OPHN1	oligophrenin 1
hsa-miR-1208	1	0	1	1	1	1	PCSK6	proprotein convertase subtilisin/kexin type 6
hsa-miR-1208	1	0	1	0	1	1	PAPPA	pregnancy-associated plasma protein A, pappalysin 1
hsa-miR-1208	1	0	1	1	1	1	PCDH7	protocadherin 7
hsa-miR-1208	0	0	1	1	1	1	SERPINB8	serpin peptidase inhibitor, clade B (ovalbumin), member 8
hsa-miR-1208	0	0	1	1	1	1	PIM1	pim-1 oncogene
hsa-miR-1208	1	0	1	0	0	0	PPP1R10	protein phosphatase 1, regulatory subunit 10
hsa-miR-1208	0	0	1	1	1	1	PRKACA	protein kinase, cAMP-dependent, catalytic, alpha
hsa-miR-1208	0	0	1	1	1	1	RGS1	regulator of G-protein signaling 1
hsa-miR-1208	0	0	1	1	1	1	RGS2	regulator of G-protein signaling 2, 24kDa
hsa-miR-1208	1	0	1	1	1	1	ROBO2	roundabout, axon guidance receptor, homolog 2 (Drosophila)
hsa-miR-1208	1	0	1	1	1	1	SALL1	sal-like 1 (Drosophila)
hsa-miR-1208	0	0	1	1	1	1	SDC2	syndecan 2
hsa-miR-1208	1	0	1	1	1	1	SRSF3	serine/arginine-rich splicing factor 3
hsa-miR-1208	1	0	1	1	1	1	SLC9A2	solute carrier family 9, subfamily A (NHE2, cation proton antiporter 2), member 2
hsa-miR-1208	0	0	1	0	0	0	SLC18A2	solute carrier family 18 (vesicular monoamine), member 2
hsa-miR-1208	1	0	1	1	1	1	SMARCC1	SWI/SNF related, matrix associated, actin dependent regulator of chromatin, subfamily c, member 1
hsa-miR-1208	0	0	1	1	0	0	SSX2	synovial sarcoma, X breakpoint 2
hsa-miR-1208	1	0	1	1	1	1	STAC	SH3 and cysteine rich domain
hsa-miR-1208	0	0	1	1	1	1	STAT5A	signal transducer and activator of transcription 5A
hsa-miR-1208	1	0	1	0	1	1	STC1	stanniocalcin 1
hsa-miR-1208	0	0	1	1	1	1	SUPT6H	suppressor of Ty 6 homolog (S. cerevisiae)
hsa-miR-1208	1	0	1	1	1	1	TFAP2C	transcription factor AP-2 gamma (activating enhancer binding protein 2 gamma)
hsa-miR-1208	1	0	1	0	1	1	THBS1	thrombospondin 1
hsa-miR-1208	1	0	1	1	1	1	TOP1	topoisomerase (DNA) I
hsa-miR-1208	1	0	1	1	1	1	ZIC3	Zic family member 3
hsa-miR-1208	1	0	1	1	1	1	FZD5	frizzled family receptor 5
hsa-miR-1208	1	0	1	1	1	1	DEK	DEK oncogene
hsa-miR-1208	1	0	1	1	1	1	ADAM12	ADAM metallopeptidase domain 12
hsa-miR-1208	1	0	1	1	1	1	HMGA2	high mobility group AT-hook 2
hsa-miR-1208	1	0	1	1	1	1	NRIP1	nuclear receptor interacting protein 1
hsa-miR-1208	1	0	1	0	1	1	SNN	stannin
hsa-miR-1208	1	0	1	1	1	1	FZD7	frizzled family receptor 7
hsa-miR-1208	0	0	1	1	1	1	PIP5K1A	phosphatidylinositol-4-phosphate 5-kinase, type I, alpha
hsa-miR-1208	1	0	1	0	1	1	TNKS	tankyrase, TRF1-interacting ankyrin-related ADP-ribose polymerase
hsa-miR-1208	1	0	1	0	1	1	IRS2	insulin receptor substrate 2
hsa-miR-1208	0	0	1	1	1	1	JRKL	jerky homolog-like (mouse)
hsa-miR-1208	0	0	1	1	1	1	IL18R1	interleukin 18 receptor 1
hsa-miR-1208	1	0	1	1	1	1	KAT2B	K(lysine) acetyltransferase 2B
hsa-miR-1208	1	0	1	1	1	1	FUBP1	far upstream element (FUSE) binding protein 1
hsa-miR-1208	1	0	1	0	1	1	WASL	Wiskott-Aldrich syndrome-like
hsa-miR-1208	1	0	1	1	1	1	CDKL2	cyclin-dependent kinase-like 2 (CDC2-related kinase)
hsa-miR-1208	0	0	1	1	1	1	CH25H	cholesterol 25-hydroxylase
hsa-miR-1208	1	0	1	1	1	1	BCL2L2	BCL2-like 2
hsa-miR-1208	0	0	1	0	1	1	EIF4EBP2	eukaryotic translation initiation factor 4E binding protein 2
hsa-miR-1208	1	0	1	1	1	1	FGF13	fibroblast growth factor 13
hsa-miR-1208	1	0	1	1	1	1	GMFB	glia maturation factor, beta
hsa-miR-1208	1	0	1	1	1	1	PPP2CB	protein phosphatase 2, catalytic subunit, beta isozyme
hsa-miR-1208	0	0	1	1	1	1	RAB27B	RAB27B, member RAS oncogene family
hsa-miR-1208	1	0	1	0	1	1	SLC1A2	solute carrier family 1 (glial high affinity glutamate transporter), member 2
hsa-miR-1208	1	0	1	0	1	1	MED14	mediator complex subunit 14
hsa-miR-1208	0	0	1	1	1	1	HOMER1	homer homolog 1 (Drosophila)
hsa-miR-1208	1	0	1	1	1	1	ASTN1	astrotactin 1
hsa-miR-1208	1	0	1	1	1	1	COX11	COX11 cytochrome c oxidase assembly homolog (yeast)
hsa-miR-1208	1	0	1	1	1	1	DACH1	dachshund homolog 1 (Drosophila)
hsa-miR-1208	1	0	1	1	1	1	DAG1	dystroglycan 1 (dystrophin-associated glycoprotein 1)
hsa-miR-1208	1	0	1	1	1	1	DUSP8	dual specificity phosphatase 8
hsa-miR-1208	1	0	1	0	1	1	ETV5	ets variant 5
hsa-miR-1208	0	0	1	1	1	1	NFATC3	nuclear factor of activated T-cells, cytoplasmic, calcineurin-dependent 3
hsa-miR-1208	1	0	1	1	1	1	COIL	coilin
hsa-miR-1208	0	0	1	1	1	1	LIN7A	lin-7 homolog A (C. elegans)
hsa-miR-1208	0	0	1	0	0	0	XKRY	XK, Kell blood group complex subunit-related, Y-linked
hsa-miR-1208	1	0	1	1	1	1	DCLK1	doublecortin-like kinase 1
hsa-miR-1208	1	0	1	1	1	1	LARGE	like-glycosyltransferase
hsa-miR-1208	1	0	1	1	1	1	KCNB2	potassium voltage-gated channel, Shab-related subfamily, member 2
hsa-miR-1208	1	0	1	1	1	1	NREP	neuronal regeneration related protein homolog (rat)
hsa-miR-1208	1	0	1	1	1	1	KIF3B	kinesin family member 3B
hsa-miR-1208	1	0	1	0	1	1	ARHGEF6	Rac/Cdc42 guanine nucleotide exchange factor (GEF) 6
hsa-miR-1208	1	0	1	1	1	1	ONECUT2	one cut homeobox 2
hsa-miR-1208	1	0	1	0	1	1	SPTLC2	serine palmitoyltransferase, long chain base subunit 2
hsa-miR-1208	1	0	1	1	1	1	CXCL14	chemokine (C-X-C motif) ligand 14
hsa-miR-1208	0	0	1	1	1	1	ATP6V1G1	ATPase, H+ transporting, lysosomal 13kDa, V1 subunit G1
hsa-miR-1208	0	0	1	1	1	1	PRF1	perforin 1 (pore forming protein)
hsa-miR-1208	1	0	1	1	1	1	RELN	reelin
hsa-miR-1208	1	0	1	1	1	1	SIAH2	siah E3 ubiquitin protein ligase 2
hsa-miR-1208	1	0	1	1	1	1	TLE1	transducin-like enhancer of split 1 (E(sp1) homolog, Drosophila)
hsa-miR-1208	1	0	1	1	1	1	FOXN3	forkhead box N3
hsa-miR-1208	1	0	1	1	1	1	FOXG1	forkhead box G1
hsa-miR-1208	1	0	1	1	1	1	GPM6A	glycoprotein M6A
hsa-miR-1208	1	0	1	1	1	1	GPR6	G protein-coupled receptor 6
hsa-miR-1208	0	0	1	1	1	1	GPR22	G protein-coupled receptor 22
hsa-miR-1208	0	0	1	1	1	1	PDIA3	protein disulfide isomerase family A, member 3
hsa-miR-1208	1	0	1	1	0	0	NNAT	neuronatin
hsa-miR-1208	1	0	1	0	1	1	PRKCE	protein kinase C, epsilon
hsa-miR-1208	1	0	1	0	1	1	SRC	v-src sarcoma (Schmidt-Ruppin A-2) viral oncogene homolog (avian)
hsa-miR-1208	1	0	1	1	1	1	RND2	Rho family GTPase 2
hsa-miR-1208	1	0	1	1	0	0	ZBTB22	zinc finger and BTB domain containing 22
hsa-miR-1208	1	0	1	1	1	1	GABBR2	gamma-aminobutyric acid (GABA) B receptor, 2
hsa-miR-1208	1	0	1	1	1	1	GTF2E1	general transcription factor IIE, polypeptide 1, alpha 56kDa
hsa-miR-1208	1	0	1	1	1	1	HOXA11	homeobox A11
hsa-miR-1208	0	0	1	0	1	1	LCP2	lymphocyte cytosolic protein 2 (SH2 domain containing leukocyte protein of 76kDa)
hsa-miR-1208	1	0	1	1	1	1	LPP	LIM domain containing preferred translocation partner in lipoma
hsa-miR-1208	0	0	1	1	0	0	SSX4	synovial sarcoma, X breakpoint 4
hsa-miR-1208	1	0	1	1	1	1	TMPRSS2	transmembrane protease, serine 2
hsa-miR-1208	1	0	1	1	1	1	ST8SIA4	ST8 alpha-N-acetyl-neuraminide alpha-2,8-sialyltransferase 4
hsa-miR-1208	1	0	1	1	1	1	CTDSP2	CTD (carboxy-terminal domain, RNA polymerase II, polypeptide A) small phosphatase 2
hsa-miR-1208	0	0	1	1	1	1	ZNF263	zinc finger protein 263
hsa-miR-1208	1	0	1	0	1	1	SPRY3	sprouty homolog 3 (Drosophila)
hsa-miR-1208	0	0	1	1	1	1	ZMPSTE24	zinc metallopeptidase STE24 homolog (S. cerevisiae)
hsa-miR-1208	1	0	1	1	0	0	TRAIP	TRAF interacting protein
hsa-miR-1208	1	0	1	0	1	1	MAP1B	microtubule-associated protein 1B
hsa-miR-1208	1	0	1	1	1	1	MEOX2	mesenchyme homeobox 2
hsa-miR-1208	0	0	1	1	1	1	MFAP3	microfibrillar-associated protein 3
hsa-miR-1208	1	0	1	1	1	1	MMP16	matrix metallopeptidase 16 (membrane-inserted)
hsa-miR-1208	1	0	1	1	1	1	MTF1	metal-regulatory transcription factor 1
hsa-miR-1208	1	0	1	0	1	1	HDAC4	histone deacetylase 4
hsa-miR-1208	1	0	1	1	1	1	SEMA3A	sema domain, immunoglobulin domain (Ig), short basic domain, secreted, (semaphorin) 3A
hsa-miR-1208	1	0	1	1	1	1	BPNT1	3'(2'), 5'-bisphosphate nucleotidase 1
hsa-miR-1208	0	0	1	1	0	0	WFDC2	WAP four-disulfide core domain 2
hsa-miR-1208	0	0	1	1	1	1	IRF6	interferon regulatory factor 6
hsa-miR-1208	0	0	1	0	1	1	OAS3	2'-5'-oligoadenylate synthetase 3, 100kDa
hsa-miR-1208	1	0	1	1	1	1	ORC2	origin recognition complex, subunit 2
hsa-miR-1208	1	0	1	1	1	1	PCBP1	poly(rC) binding protein 1
hsa-miR-1208	1	0	1	0	1	1	PITPNA	phosphatidylinositol transfer protein, alpha
hsa-miR-1208	1	0	1	1	1	1	PRKAB1	protein kinase, AMP-activated, beta 1 non-catalytic subunit
hsa-miR-1208	1	0	1	1	1	1	PKN2	protein kinase N2
hsa-miR-1208	0	0	1	1	1	1	TYRO3	TYRO3 protein tyrosine kinase
hsa-miR-1208	1	0	1	1	1	1	TIMM17A	translocase of inner mitochondrial membrane 17 homolog A (yeast)
hsa-miR-1208	1	0	1	1	1	1	NEBL	nebulette
hsa-miR-1208	1	0	1	0	1	1	GNAI3	guanine nucleotide binding protein (G protein), alpha inhibiting activity polypeptide 3
hsa-miR-1208	1	0	1	1	1	1	DYNLT3	dynein, light chain, Tctex-type 3
hsa-miR-1208	1	0	1	1	1	1	MAN1A2	mannosidase, alpha, class 1A, member 2
hsa-miR-1208	0	0	1	1	1	1	SSFA2	sperm specific antigen 2
hsa-miR-1208	0	0	1	1	1	1	INMT	indolethylamine N-methyltransferase
hsa-miR-1208	0	0	1	1	1	1	RAB40B	RAB40B, member RAS oncogene family
hsa-miR-1208	1	0	1	0	1	1	SOX12	SRY (sex determining region Y)-box 12
hsa-miR-1208	1	0	1	0	1	1	WASF2	WAS protein family, member 2
hsa-miR-1208	1	0	1	1	1	1	ABHD2	abhydrolase domain containing 2
hsa-miR-1208	1	0	1	1	1	1	KAT7	K(lysine) acetyltransferase 7
hsa-miR-1208	1	0	1	1	1	1	UBL3	ubiquitin-like 3
hsa-miR-1208	1	0	1	1	1	1	VCP	valosin containing protein
hsa-miR-1208	1	0	1	1	1	1	PALM2-AKAP2	PALM2-AKAP2 readthrough
hsa-miR-1208	0	0	1	1	1	1	XPOT	exportin, tRNA (nuclear export receptor for tRNAs)
hsa-miR-1208	1	0	1	1	1	1	KLF12	Kruppel-like factor 12
hsa-miR-1208	0	0	1	0	0	0	PHB2	prohibitin 2
hsa-miR-1208	1	0	1	1	1	1	APPL1	adaptor protein, phosphotyrosine interaction, PH domain and leucine zipper containing 1
hsa-miR-1208	1	0	1	0	1	1	CASP8AP2	caspase 8 associated protein 2
hsa-miR-1208	1	0	1	1	1	1	RYBP	RING1 and YY1 binding protein
hsa-miR-1208	1	0	1	1	1	1	RHOQ	ras homolog family member Q
hsa-miR-1208	1	0	1	1	1	1	HS2ST1	heparan sulfate 2-O-sulfotransferase 1
hsa-miR-1208	1	0	1	1	1	1	KCND2	potassium voltage-gated channel, Shal-related subfamily, member 2
hsa-miR-1208	1	0	1	0	1	1	RAPGEF5	Rap guanine nucleotide exchange factor (GEF) 5
hsa-miR-1208	1	0	1	0	1	1	G3BP2	GTPase activating protein (SH3 domain) binding protein 2
hsa-miR-1208	1	0	1	0	1	1	BLOC1S6	biogenesis of lysosomal organelles complex-1, subunit 6, pallidin
hsa-miR-1208	1	0	1	1	1	1	RANBP6	RAN binding protein 6
hsa-miR-1208	1	0	1	1	1	1	TLL2	tolloid-like 2
hsa-miR-1208	1	0	1	1	1	1	CLCF1	cardiotrophin-like cytokine factor 1
hsa-miR-1208	0	0	1	1	0	0	SLCO3A1	solute carrier organic anion transporter family, member 3A1
hsa-miR-1208	0	0	1	1	0	0	FLRT1	fibronectin leucine rich transmembrane protein 1
hsa-miR-1208	0	0	1	1	0	0	TBX21	T-box 21
hsa-miR-1208	0	0	1	1	1	1	ABT1	activator of basal transcription 1
hsa-miR-1208	1	0	1	1	1	1	SOCS5	suppressor of cytokine signaling 5
hsa-miR-1208	1	0	1	0	1	1	OSTM1	osteopetrosis associated transmembrane protein 1
hsa-miR-1208	1	0	1	0	1	1	C16orf72	chromosome 16 open reading frame 72
hsa-miR-1208	1	0	1	1	1	1	CRIPT	cysteine-rich PDZ-binding protein
hsa-miR-1208	0	0	1	0	1	1	SCN8A	sodium channel, voltage gated, type VIII, alpha subunit
hsa-miR-1208	1	0	1	0	1	1	ODZ1	odz, odd Oz/ten-m homolog 1 (Drosophila)
hsa-miR-1208	0	0	1	1	1	1	DNAJC8	DnaJ (Hsp40) homolog, subfamily C, member 8
hsa-miR-1208	0	0	1	0	1	1	EID1	EP300 interacting inhibitor of differentiation 1
hsa-miR-1208	1	0	1	0	1	1	RNF11	ring finger protein 11
hsa-miR-1208	1	0	1	0	1	1	DIEXF	digestive organ expansion factor homolog (zebrafish)
hsa-miR-1208	1	0	1	1	0	0	RBMXL2	RNA binding motif protein, X-linked-like 2
hsa-miR-1208	1	0	1	1	1	1	ULK2	unc-51-like kinase 2 (C. elegans)
hsa-miR-1208	0	0	1	1	1	1	VPRBP	Vpr (HIV-1) binding protein
hsa-miR-1208	1	0	1	1	1	1	ARHGAP32	Rho GTPase activating protein 32
hsa-miR-1208	1	0	1	0	1	1	KIAA0513	KIAA0513
hsa-miR-1208	0	0	1	0	1	1	EPM2AIP1	EPM2A (laforin) interacting protein 1
hsa-miR-1208	1	0	1	1	1	1	FCHSD2	FCH and double SH3 domains 2
hsa-miR-1208	0	0	1	1	1	1	TOX4	TOX high mobility group box family member 4
hsa-miR-1208	1	0	1	1	1	1	ZBTB39	zinc finger and BTB domain containing 39
hsa-miR-1208	1	0	1	1	1	1	JOSD1	Josephin domain containing 1
hsa-miR-1208	1	0	1	1	1	1	CHSY1	chondroitin sulfate synthase 1
hsa-miR-1208	1	0	1	1	1	1	PLEKHA6	pleckstrin homology domain containing, family A member 6
hsa-miR-1208	1	0	1	1	1	1	SPAST	spastin
hsa-miR-1208	1	0	1	1	1	1	DIP2C	DIP2 disco-interacting protein 2 homolog C (Drosophila)
hsa-miR-1208	1	0	1	0	1	1	WDFY3	WD repeat and FYVE domain containing 3
hsa-miR-1208	1	0	1	0	1	1	PDS5B	PDS5, regulator of cohesion maintenance, homolog B (S. cerevisiae)
hsa-miR-1208	1	0	1	0	1	1	ZNF609	zinc finger protein 609
hsa-miR-1208	0	0	1	1	1	1	EXPH5	exophilin 5
hsa-miR-1208	1	0	1	0	1	1	PEG10	paternally expressed 10
hsa-miR-1208	1	0	1	1	1	1	SMG1	smg-1 homolog, phosphatidylinositol 3-kinase-related kinase (C. elegans)
hsa-miR-1208	1	0	1	1	1	1	RCOR1	REST corepressor 1
hsa-miR-1208	0	0	1	1	1	1	ARL6IP1	ADP-ribosylation factor-like 6 interacting protein 1
hsa-miR-1208	1	0	1	1	1	1	PRRC2C	proline-rich coiled-coil 2C
hsa-miR-1208	1	0	1	1	1	1	PLCB1	phospholipase C, beta 1 (phosphoinositide-specific)
hsa-miR-1208	1	0	1	1	1	1	CUX2	cut-like homeobox 2
hsa-miR-1208	1	0	1	0	1	1	SRGAP2	SLIT-ROBO Rho GTPase activating protein 2
hsa-miR-1208	1	0	1	1	1	1	MED13L	mediator complex subunit 13-like
hsa-miR-1208	1	0	1	1	1	1	RIMBP2	RIMS binding protein 2
hsa-miR-1208	1	0	1	1	1	1	DSTYK	dual serine/threonine and tyrosine protein kinase
hsa-miR-1208	1	0	1	1	1	1	CNOT6	CCR4-NOT transcription complex, subunit 6
hsa-miR-1208	1	0	1	0	1	1	ERC2	ELKS/RAB6-interacting/CAST family member 2
hsa-miR-1208	1	0	1	1	1	1	ABCA12	ATP-binding cassette, sub-family A (ABC1), member 12
hsa-miR-1208	1	0	1	0	1	1	RRM2B	ribonucleotide reductase M2 B (TP53 inducible)
hsa-miR-1208	1	0	1	1	1	1	FGFR1	fibroblast growth factor receptor 1
hsa-miR-1208	1	0	1	1	1	1	CDC40	cell division cycle 40 homolog (S. cerevisiae)
hsa-miR-1208	1	0	1	1	1	1	PHF20L1	PHD finger protein 20-like 1
hsa-miR-1208	1	0	1	1	1	1	UBE2J1	ubiquitin-conjugating enzyme E2, J1
hsa-miR-1208	1	0	1	1	1	1	RRP15	ribosomal RNA processing 15 homolog (S. cerevisiae)
hsa-miR-1208	0	0	1	1	1	1	PPIL1	peptidylprolyl isomerase (cyclophilin)-like 1
hsa-miR-1208	1	0	1	0	1	1	CNR1	cannabinoid receptor 1 (brain)
hsa-miR-1208	0	0	1	1	0	0	SCFD1	sec1 family domain containing 1
hsa-miR-1208	0	0	1	1	1	1	ZFR	zinc finger RNA binding protein
hsa-miR-1208	0	0	1	1	1	1	RAB10	RAB10, member RAS oncogene family
hsa-miR-1208	1	0	1	1	1	1	AKAP11	A kinase (PRKA) anchor protein 11
hsa-miR-1208	1	0	1	1	1	1	LUC7L3	LUC7-like 3 (S. cerevisiae)
hsa-miR-1208	1	0	1	0	1	1	RAB8B	RAB8B, member RAS oncogene family
hsa-miR-1208	1	0	1	1	1	1	WAC	WW domain containing adaptor with coiled-coil
hsa-miR-1208	1	0	1	1	1	1	GDAP2	ganglioside induced differentiation associated protein 2
hsa-miR-1208	1	0	1	0	1	1	FAM46C	family with sequence similarity 46, member C
hsa-miR-1208	1	0	1	1	1	1	ALKBH5	alkB, alkylation repair homolog 5 (E. coli)
hsa-miR-1208	1	0	1	0	1	1	MARCH5	membrane-associated ring finger (C3HC4) 5
hsa-miR-1208	0	0	1	1	1	1	C2orf42	chromosome 2 open reading frame 42
hsa-miR-1208	0	0	1	0	1	1	MREG	melanoregulin
hsa-miR-1208	1	0	1	1	1	1	BCL11A	B-cell CLL/lymphoma 11A (zinc finger protein)
hsa-miR-1208	1	0	1	1	1	1	ATG2B	autophagy related 2B
hsa-miR-1208	1	0	1	1	1	1	FAM178A	family with sequence similarity 178, member A
hsa-miR-1208	1	0	1	0	1	1	MSL2	male-specific lethal 2 homolog (Drosophila)
hsa-miR-1208	1	0	1	1	1	1	ZNF654	zinc finger protein 654
hsa-miR-1208	0	0	1	1	1	1	WDR33	WD repeat domain 33
hsa-miR-1208	1	0	1	1	1	1	PI4K2A	phosphatidylinositol 4-kinase type 2 alpha
hsa-miR-1208	1	0	1	1	1	1	PAG1	phosphoprotein associated with glycosphingolipid microdomains 1
hsa-miR-1208	1	0	1	0	1	1	BRK1	BRICK1, SCAR/WAVE actin-nucleating complex subunit
hsa-miR-1208	1	0	1	1	1	1	ETNK1	ethanolamine kinase 1
hsa-miR-1208	1	0	1	1	1	1	GNG12	guanine nucleotide binding protein (G protein), gamma 12
hsa-miR-1208	0	0	1	1	0	0	TOMM7	translocase of outer mitochondrial membrane 7 homolog (yeast)
hsa-miR-1208	1	0	1	1	1	1	SEPT3	septin 3
hsa-miR-1208	1	0	1	1	1	1	LRRC8A	leucine rich repeat containing 8 family, member A
hsa-miR-1208	1	0	1	1	1	1	MDM1	Mdm1 nuclear protein homolog (mouse)
hsa-miR-1208	1	0	1	1	1	1	FEM1C	fem-1 homolog c (C. elegans)
hsa-miR-1208	1	0	1	1	0	0	SLC17A7	solute carrier family 17 (sodium-dependent inorganic phosphate cotransporter), member 7
hsa-miR-1208	1	0	1	1	1	1	KIAA1244	KIAA1244
hsa-miR-1208	1	0	1	1	1	1	LYRM2	LYR motif containing 2
hsa-miR-1208	1	0	1	1	1	1	SLC24A3	solute carrier family 24 (sodium/potassium/calcium exchanger), member 3
hsa-miR-1208	0	0	1	0	1	1	ZNF490	zinc finger protein 490
hsa-miR-1208	1	0	1	1	1	1	DLG3	discs, large homolog 3 (Drosophila)
hsa-miR-1208	1	0	1	0	1	1	ZNF398	zinc finger protein 398
hsa-miR-1208	1	0	1	1	1	1	SIPA1L2	signal-induced proliferation-associated 1 like 2
hsa-miR-1208	0	0	1	0	1	1	TRMT5	tRNA methyltransferase 5 homolog (S. cerevisiae)
hsa-miR-1208	1	0	1	1	1	1	KIAA1467	KIAA1467
hsa-miR-1208	1	0	1	1	1	1	TSHZ3	teashirt zinc finger homeobox 3
hsa-miR-1208	1	0	1	0	1	1	SH3RF1	SH3 domain containing ring finger 1
hsa-miR-1208	1	0	1	0	1	1	GPAM	glycerol-3-phosphate acyltransferase, mitochondrial
hsa-miR-1208	0	0	1	1	1	1	SSX3	synovial sarcoma, X breakpoint 3
hsa-miR-1208	0	0	1	1	0	0	SSX5	synovial sarcoma, X breakpoint 5
hsa-miR-1208	0	0	1	1	0	0	TRIB3	tribbles homolog 3 (Drosophila)
hsa-miR-1208	1	0	1	1	1	1	C6orf47	chromosome 6 open reading frame 47
hsa-miR-1208	1	0	1	0	1	1	TP53INP2	tumor protein p53 inducible nuclear protein 2
hsa-miR-1208	1	0	1	1	1	1	RPRD1B	regulation of nuclear pre-mRNA domain containing 1B
hsa-miR-1208	1	0	1	1	1	1	NTN4	netrin 4
hsa-miR-1208	1	0	1	1	1	1	SNX6	sorting nexin 6
hsa-miR-1208	1	0	1	1	1	1	PELI2	pellino E3 ubiquitin protein ligase family member 2
hsa-miR-1208	1	0	1	1	1	1	SENP2	SUMO1/sentrin/SMT3 specific peptidase 2
hsa-miR-1208	1	0	1	1	1	1	OTX2	orthodenticle homeobox 2
hsa-miR-1208	0	0	1	1	1	1	VPS11	vacuolar protein sorting 11 homolog (S. cerevisiae)
hsa-miR-1208	0	0	1	1	0	0	POPDC2	popeye domain containing 2
hsa-miR-1208	1	0	1	1	1	1	XYLT1	xylosyltransferase I
hsa-miR-1208	0	0	1	1	0	0	TFB2M	transcription factor B2, mitochondrial
hsa-miR-1208	1	0	1	1	1	1	TMEM168	transmembrane protein 168
hsa-miR-1208	0	0	1	1	1	1	SUSD1	sushi domain containing 1
hsa-miR-1208	1	0	1	1	1	1	NEUROD6	neuronal differentiation 6
hsa-miR-1208	1	0	1	1	1	1	C6orf106	chromosome 6 open reading frame 106
hsa-miR-1208	0	0	1	1	1	1	METTL4	methyltransferase like 4
hsa-miR-1208	1	0	1	1	1	1	RFX7	regulatory factor X, 7
hsa-miR-1208	1	0	1	1	1	1	REEP1	receptor accessory protein 1
hsa-miR-1208	1	0	1	1	0	0	UBE2Z	ubiquitin-conjugating enzyme E2Z
hsa-miR-1208	1	0	1	1	0	0	C19orf43	chromosome 19 open reading frame 43
hsa-miR-1208	1	0	1	1	1	1	GID4	GID complex subunit 4, VID24 homolog (S. cerevisiae)
hsa-miR-1208	0	0	1	1	0	0	CHAC1	ChaC, cation transport regulator homolog 1 (E. coli)
hsa-miR-1208	1	0	1	1	1	1	GCC1	GRIP and coiled-coil domain containing 1
hsa-miR-1208	0	0	1	1	0	0	EPS8L3	EPS8-like 3
hsa-miR-1208	0	0	1	1	1	1	AKIRIN1	akirin 1
hsa-miR-1208	1	0	1	1	1	1	DHX40	DEAH (Asp-Glu-Ala-His) box polypeptide 40
hsa-miR-1208	0	0	1	0	1	1	ZYG11B	zyg-11 homolog B (C. elegans)
hsa-miR-1208	0	0	1	1	1	1	BBS10	Bardet-Biedl syndrome 10
hsa-miR-1208	0	0	1	0	1	1	C1orf115	chromosome 1 open reading frame 115
hsa-miR-1208	1	0	1	0	1	1	ZFHX4	zinc finger homeobox 4
hsa-miR-1208	1	0	1	0	1	1	MOB3B	MOB kinase activator 3B
hsa-miR-1208	0	0	1	1	1	1	BTNL8	butyrophilin-like 8
hsa-miR-1208	1	0	1	1	1	1	RNF34	ring finger protein 34, E3 ubiquitin protein ligase
hsa-miR-1208	1	0	1	1	1	1	FBXO11	F-box protein 11
hsa-miR-1208	1	0	1	1	1	1	TRIB1	tribbles homolog 1 (Drosophila)
hsa-miR-1208	0	0	1	1	1	1	TRMT1L	tRNA methyltransferase 1 homolog (S. cerevisiae)-like
hsa-miR-1208	0	0	1	1	1	1	PABPC3	poly(A) binding protein, cytoplasmic 3
hsa-miR-1208	1	0	1	1	1	1	SOX7	SRY (sex determining region Y)-box 7
hsa-miR-1208	1	0	1	1	1	1	FAM103A1	family with sequence similarity 103, member A1
hsa-miR-1208	1	0	1	1	1	1	PPP1R12B	protein phosphatase 1, regulatory subunit 12B
hsa-miR-1208	0	0	1	1	1	1	TEX35	testis expressed 35
hsa-miR-1208	0	0	1	0	1	1	LDOC1L	leucine zipper, down-regulated in cancer 1-like
hsa-miR-1208	1	0	1	1	1	1	DNAJC14	DnaJ (Hsp40) homolog, subfamily C, member 14
hsa-miR-1208	0	0	1	0	1	1	IMMP2L	IMP2 inner mitochondrial membrane peptidase-like (S. cerevisiae)
hsa-miR-1208	0	0	1	0	1	1	TRIM52	tripartite motif containing 52
hsa-miR-1208	1	0	1	1	1	1	TMEM25	transmembrane protein 25
hsa-miR-1208	1	0	1	1	1	1	SPRYD3	SPRY domain containing 3
hsa-miR-1208	1	0	1	1	1	1	ABHD13	abhydrolase domain containing 13
hsa-miR-1208	1	0	1	1	1	1	TRIM55	tripartite motif containing 55
hsa-miR-1208	1	0	1	1	0	0	DMRTB1	DMRT-like family B with proline-rich C-terminal, 1
hsa-miR-1208	1	0	1	0	1	1	PURB	purine-rich element binding protein B
hsa-miR-1208	0	0	1	1	1	1	SEC11C	SEC11 homolog C (S. cerevisiae)
hsa-miR-1208	1	0	1	1	1	1	TPD52L3	tumor protein D52-like 3
hsa-miR-1208	1	0	1	1	1	1	STX1B	syntaxin 1B
hsa-miR-1208	1	0	1	1	1	1	SLITRK1	SLIT and NTRK-like family, member 1
hsa-miR-1208	1	0	1	1	1	1	TRIM9	tripartite motif containing 9
hsa-miR-1208	0	0	1	1	1	1	ANKRD30A	ankyrin repeat domain 30A
hsa-miR-1208	0	0	1	0	1	1	ZNF518B	zinc finger protein 518B
hsa-miR-1208	0	0	1	1	0	0	THEM4	thioesterase superfamily member 4
hsa-miR-1208	1	0	1	1	1	1	NAA15	N(alpha)-acetyltransferase 15, NatA auxiliary subunit
hsa-miR-1208	0	0	1	1	1	1	CCNE2	cyclin E2
hsa-miR-1208	1	0	1	1	1	1	BTN2A1	butyrophilin, subfamily 2, member A1
hsa-miR-1208	0	0	1	1	1	1	VNN3	vanin 3
hsa-miR-1208	0	0	1	1	1	1	CLEC4D	C-type lectin domain family 4, member D
hsa-miR-1208	1	0	1	0	1	1	SOCS4	suppressor of cytokine signaling 4
hsa-miR-1208	0	0	1	1	1	1	COLEC12	collectin sub-family member 12
hsa-miR-1208	1	0	1	1	1	1	KLHL6	kelch-like 6 (Drosophila)
hsa-miR-1208	0	0	1	1	1	1	ATP6V1G2	ATPase, H+ transporting, lysosomal 13kDa, V1 subunit G2
hsa-miR-1208	0	0	1	1	1	1	RAD51B	RAD51 homolog B (S. cerevisiae)
hsa-miR-1208	1	0	1	1	1	1	NUP35	nucleoporin 35kDa
hsa-miR-1208	1	0	1	1	0	0	PYGO2	pygopus homolog 2 (Drosophila)
hsa-miR-1208	0	0	1	0	0	0	AP5B1	adaptor-related protein complex 5, beta 1 subunit
hsa-miR-1208	0	0	1	0	1	1	SP140L	SP140 nuclear body protein-like
hsa-miR-1208	1	0	1	0	1	1	NUS1	nuclear undecaprenyl pyrophosphate synthase 1 homolog (S. cerevisiae)
hsa-miR-1208	0	0	1	0	1	1	PRELID2	PRELI domain containing 2
hsa-miR-1208	1	0	1	1	1	1	HLTF	helicase-like transcription factor
hsa-miR-1208	1	0	1	1	1	1	RPIA	ribose 5-phosphate isomerase A
hsa-miR-1208	1	0	1	0	1	1	CNOT6L	CCR4-NOT transcription complex, subunit 6-like
hsa-miR-1208	1	0	1	1	1	1	TEX261	testis expressed 261
hsa-miR-1208	0	0	1	0	1	1	CHKB	choline kinase beta
hsa-miR-1208	0	0	1	1	1	1	TCEAL7	transcription elongation factor A (SII)-like 7
hsa-miR-1208	1	0	1	0	1	1	SYT11	synaptotagmin XI
hsa-miR-1208	0	0	1	1	1	1	DEPDC4	DEP domain containing 4
hsa-miR-1208	1	0	1	1	1	1	FAM123B	family with sequence similarity 123B
hsa-miR-1208	0	0	1	1	1	1	CCER1	coiled-coil glutamate-rich protein 1
hsa-miR-1208	1	0	1	1	1	1	HOXA9	homeobox A9
hsa-miR-1208	1	0	1	1	1	1	ATXN7L1	ataxin 7-like 1
hsa-miR-1208	1	0	1	0	1	1	C7orf41	chromosome 7 open reading frame 41
hsa-miR-1208	1	0	1	1	1	1	PDIK1L	PDLIM1 interacting kinase 1 like
hsa-miR-1208	1	0	1	1	1	1	FAS	Fas (TNF receptor superfamily, member 6)
hsa-miR-1208	1	0	1	0	1	1	ST6GALNAC3	ST6 (alpha-N-acetyl-neuraminyl-2,3-beta-galactosyl-1,3)-N-acetylgalactosaminide alpha-2,6-sialyltransferase 3
hsa-miR-1208	1	0	1	1	1	1	AEBP2	AE binding protein 2
hsa-miR-1208	1	0	1	1	1	1	PKHD1	polycystic kidney and hepatic disease 1 (autosomal recessive)
hsa-miR-1208	1	0	1	1	1	1	RDH10	retinol dehydrogenase 10 (all-trans)
hsa-miR-1208	1	0	1	0	1	1	PLEKHH2	pleckstrin homology domain containing, family H (with MyTH4 domain) member 2
hsa-miR-1208	0	0	1	1	1	1	KCNH5	potassium voltage-gated channel, subfamily H (eag-related), member 5
hsa-miR-1208	0	0	1	1	0	0	SSX6	synovial sarcoma, X breakpoint 6 (pseudogene)
hsa-miR-1208	1	0	1	1	1	1	MOB1B	MOB kinase activator 1B
hsa-miR-1208	1	0	1	1	1	1	CNTD1	cyclin N-terminal domain containing 1
hsa-miR-1208	1	0	1	1	1	1	CCDC117	coiled-coil domain containing 117
hsa-miR-1208	1	0	1	0	1	1	PGM2L1	phosphoglucomutase 2-like 1
hsa-miR-1208	1	0	1	1	1	1	DIP2B	DIP2 disco-interacting protein 2 homolog B (Drosophila)
hsa-miR-1208	0	0	1	0	1	1	KRT18P55	keratin 18 pseudogene 55
hsa-miR-1208	0	0	1	0	1	1	C5orf64	chromosome 5 open reading frame 64
hsa-miR-1208	1	0	1	1	1	1	ATG9B	autophagy related 9B
hsa-miR-1208	0	0	1	1	1	1	NSMCE2	non-SMC element 2, MMS21 homolog (S. cerevisiae)
hsa-miR-1208	0	0	1	1	1	1	FAM133A	family with sequence similarity 133, member A
hsa-miR-1208	1	0	1	1	1	1	LDLRAD3	low density lipoprotein receptor class A domain containing 3
hsa-miR-1208	0	0	1	1	1	1	FRMD3	FERM domain containing 3
hsa-miR-1208	1	0	1	1	1	1	INADL	InaD-like (Drosophila)
hsa-miR-1208	0	0	1	1	1	1	TUBB	tubulin, beta class I
hsa-miR-1208	1	0	1	1	1	1	RILPL1	Rab interacting lysosomal protein-like 1
hsa-miR-1208	1	0	1	1	1	1	MTDH	metadherin
hsa-miR-1208	1	0	1	0	1	1	ARL5B	ADP-ribosylation factor-like 5B
hsa-miR-1208	1	0	1	1	1	1	SPRED2	sprouty-related, EVH1 domain containing 2
hsa-miR-1208	0	0	1	1	0	0	POLN	polymerase (DNA directed) nu
hsa-miR-1208	1	0	1	1	1	1	FAM216B	family with sequence similarity 216, member B
hsa-miR-1208	1	0	1	0	1	1	WDR72	WD repeat domain 72
hsa-miR-1208	1	0	1	0	1	1	TMSB4XP8	thymosin beta 4, X-linked pseudogene 8
hsa-miR-1208	1	0	1	1	1	1	ARRDC4	arrestin domain containing 4
hsa-miR-1208	1	0	1	1	1	1	RALGAPA1	Ral GTPase activating protein, alpha subunit 1 (catalytic)
hsa-miR-1208	1	0	1	1	1	1	ZBTB41	zinc finger and BTB domain containing 41
hsa-miR-1208	0	0	1	0	1	1	BTNL3	butyrophilin-like 3
hsa-miR-1208	0	0	1	1	0	0	KCTD8	potassium channel tetramerisation domain containing 8
hsa-miR-1208	0	0	1	0	1	1	TCF21	transcription factor 21
hsa-miR-1208	0	0	1	1	1	1	FOXR2	forkhead box R2
hsa-miR-1208	1	0	1	0	1	1	NRK	Nik related kinase
hsa-miR-1208	1	0	1	1	1	1	RAB43	RAB43, member RAS oncogene family
hsa-miR-1208	1	0	1	1	1	1	PAQR9	progestin and adipoQ receptor family member IX
hsa-miR-1208	1	0	1	0	1	1	LHFPL3	lipoma HMGIC fusion partner-like 3
hsa-miR-1208	1	0	1	1	1	1	ADAMTS18	ADAM metallopeptidase with thrombospondin type 1 motif, 18
hsa-miR-1208	1	0	1	1	0	0	KAZN	kazrin, periplakin interacting protein
hsa-miR-1208	0	0	1	1	1	1	ZRANB2	zinc finger, RAN-binding domain containing 2
hsa-miR-1208	1	0	1	1	1	1	ATRNL1	attractin-like 1
hsa-miR-1208	0	0	1	1	1	1	C11orf88	chromosome 11 open reading frame 88
hsa-miR-1208	0	0	1	1	1	1	CLEC4M	C-type lectin domain family 4, member M
hsa-miR-1208	0	0	1	0	0	0	TOP1P2	topoisomerase (DNA) I pseudogene 2
hsa-miR-1208	0	0	1	0	0	0	MIR155HG	MIR155 host gene (non-protein coding)
hsa-miR-1208	0	0	1	0	0	0	LOC407835	mitogen-activated protein kinase kinase 2 pseudogene
hsa-miR-1208	0	0	1	0	0	0	DKFZP586I1420	uncharacterized protein DKFZp586I1420
hsa-miR-1208	0	0	1	0	0	0	NUDT4P1	nudix (nucleoside diphosphate linked moiety X)-type motif 4 pseudogene 1
hsa-miR-1208	0	0	1	0	0	0	PDIA3P	protein disulfide isomerase family A, member 3 pseudogene
hsa-miR-1208	0	0	1	0	0	0	TOP1P1	topoisomerase (DNA) I pseudogene 1
hsa-miR-1208	0	0	1	0	0	0	CPS1-IT1	CPS1 intronic transcript 1 (non-protein coding)
hsa-miR-1208	0	0	1	0	0	0	HNRNPA1P10	heterogeneous nuclear ribonucleoprotein A1 pseudogene 10
hsa-miR-1208	0	0	1	0	0	0	TCAM1P	testicular cell adhesion molecule 1 homolog (mouse), pseudogene
hsa-miR-1208	0	0	1	0	0	0	SNORA23	small nucleolar RNA, H/ACA box 23
hsa-miR-1208	0	0	1	0	0	0	SNORA56	small nucleolar RNA, H/ACA box 56
hsa-miR-1208	0	0	1	0	0	0	EIF3IP1	eukaryotic translation initiation factor 3, subunit I pseudogene 1
hsa-miR-1208	0	0	1	0	0	0	SNORD116-28	small nucleolar RNA, C/D box 116-28
hsa-miR-1208	0	0	1	1	0	0	SNRPN	small nuclear ribonucleoprotein polypeptide N
hsa-miR-1208	1	0	1	1	0	0	TNXB	tenascin XB
hsa-miR-1208	1	0	1	1	1	1	ATF6B	activating transcription factor 6 beta
hsa-miR-1208	0	0	1	1	1	1	PEG3	paternally expressed 3
hsa-miR-1208	0	0	1	1	0	0	KIR2DL4	killer cell immunoglobulin-like receptor, two domains, long cytoplasmic tail, 4
