# Supplementary material for: Profiling of Selected MicroRNAs in Proliferative Eutopic Endometrium of Women with Ovarian Endometriosis
Source: Biomed Res Int. 2015 Aug 20;2015:760698. doi: 10.1155/2015/760698 (PMC4558423; doi:10.1155/2015/760698)
Supplement: Supplementary file 1 — Table I: The names of miRNAs significantly differentially expressed between eutopic endometrium of patients with endometriosis vs eutopic endometrium of patients without endometriosis. Table II: The associations between miRNA and mRNA, which presents detailed results of the search of six major databases i.e targetscan, tarbase, miranda, mirbase, mirtarget2 and pictar. [file 760698.f1.zip › 760698.f1/Table II/hsa-miR-1224-3p.tsv]

miR	targetscan	tarbase	miranda	mirbase	mirtarget2	pictar	GeneSymbol	GeneName
hsa-miR-1224-3p	1	0	1	1	1	1	ABCC5	ATP-binding cassette, sub-family C (CFTR/MRP), member 5
hsa-miR-1224-3p	1	0	1	0	1	1	PTPRT	protein tyrosine phosphatase, receptor type, T
hsa-miR-1224-3p	0	0	1	1	1	1	C2CD2L	C2CD2-like
hsa-miR-1224-3p	1	0	1	0	1	1	KIAA0408	KIAA0408
hsa-miR-1224-3p	1	0	1	1	1	1	CDC42BPA	CDC42 binding protein kinase alpha (DMPK-like)
hsa-miR-1224-3p	1	0	1	1	1	1	TTC39A	tetratricopeptide repeat domain 39A
hsa-miR-1224-3p	0	0	1	1	1	1	PDE4DIP	phosphodiesterase 4D interacting protein
hsa-miR-1224-3p	0	0	1	1	0	0	RAP1GAP	RAP1 GTPase activating protein
hsa-miR-1224-3p	1	0	1	1	1	1	GREB1	growth regulation by estrogen in breast cancer 1
hsa-miR-1224-3p	1	0	1	1	1	1	TP63	tumor protein p63
hsa-miR-1224-3p	1	0	1	1	1	1	BAHD1	bromo adjacent homology domain containing 1
hsa-miR-1224-3p	1	0	1	1	1	1	CIT	citron (rho-interacting, serine/threonine kinase 21)
hsa-miR-1224-3p	1	0	1	1	1	1	C11orf9	chromosome 11 open reading frame 9
hsa-miR-1224-3p	0	0	1	1	1	1	TBC1D30	TBC1 domain family, member 30
hsa-miR-1224-3p	0	0	1	1	0	0	ZC4H2	zinc finger, C4H2 domain containing
hsa-miR-1224-3p	1	0	1	1	1	1	RALGAPB	Ral GTPase activating protein, beta subunit (non-catalytic)
hsa-miR-1224-3p	0	0	1	1	0	0	ODF2L	outer dense fiber of sperm tails 2-like
hsa-miR-1224-3p	1	0	1	1	1	1	RIMKLB	ribosomal modification protein rimK-like family member B
hsa-miR-1224-3p	1	0	1	1	0	0	ATAD2B	ATPase family, AAA domain containing 2B
hsa-miR-1224-3p	1	0	1	1	1	1	MKL2	MKL/myocardin-like 2
hsa-miR-1224-3p	1	0	1	1	1	1	ASAP1	ArfGAP with SH3 domain, ankyrin repeat and PH domain 1
hsa-miR-1224-3p	0	0	1	0	0	0	MTA3	metastasis associated 1 family, member 3
hsa-miR-1224-3p	0	0	1	1	1	1	COPS7A	COP9 constitutive photomorphogenic homolog subunit 7A (Arabidopsis)
hsa-miR-1224-3p	1	0	1	1	1	1	PCDH19	protocadherin 19
hsa-miR-1224-3p	0	0	1	1	1	1	OGG1	8-oxoguanine DNA glycosylase
hsa-miR-1224-3p	1	0	1	0	0	0	PITPNM2	phosphatidylinositol transfer protein, membrane-associated 2
hsa-miR-1224-3p	1	0	1	1	1	1	USP28	ubiquitin specific peptidase 28
hsa-miR-1224-3p	0	0	1	0	0	0	CHD8	chromodomain helicase DNA binding protein 8
hsa-miR-1224-3p	1	0	1	0	0	0	TANC2	tetratricopeptide repeat, ankyrin repeat and coiled-coil containing 2
hsa-miR-1224-3p	1	0	1	1	1	1	PHF21A	PHD finger protein 21A
hsa-miR-1224-3p	0	0	1	1	1	1	BHLHB9	basic helix-loop-helix domain containing, class B, 9
hsa-miR-1224-3p	1	0	1	1	0	0	SEMA4C	sema domain, immunoglobulin domain (Ig), transmembrane domain (TM) and short cytoplasmic domain, (semaphorin) 4C
hsa-miR-1224-3p	0	0	1	0	1	1	SETD5	SET domain containing 5
hsa-miR-1224-3p	1	0	1	1	1	1	LCOR	ligand dependent nuclear receptor corepressor
hsa-miR-1224-3p	1	0	1	0	1	1	JPH4	junctophilin 4
hsa-miR-1224-3p	1	0	1	1	1	1	NAV2	neuron navigator 2
hsa-miR-1224-3p	0	0	1	1	0	0	SEC16B	SEC16 homolog B (S. cerevisiae)
hsa-miR-1224-3p	1	0	1	1	0	0	ADC	arginine decarboxylase
hsa-miR-1224-3p	0	0	1	1	0	0	CIRH1A	cirrhosis, autosomal recessive 1A (cirhin)
hsa-miR-1224-3p	1	0	1	0	0	0	RNF169	ring finger protein 169
hsa-miR-1224-3p	1	0	1	1	1	1	FHOD3	formin homology 2 domain containing 3
hsa-miR-1224-3p	1	0	1	0	0	0	ZC3H12C	zinc finger CCCH-type containing 12C
hsa-miR-1224-3p	0	0	1	1	0	0	SSPO	SCO-spondin homolog (Bos taurus)
hsa-miR-1224-3p	1	0	1	0	1	1	BEND4	BEN domain containing 4
hsa-miR-1224-3p	0	0	1	0	0	0	TIFAB	TRAF-interacting protein with forkhead-associated domain, family member B
hsa-miR-1224-3p	1	1	1	1	1	1	BACE1	beta-site APP-cleaving enzyme 1
hsa-miR-1224-3p	1	0	1	1	1	1	NRXN2	neurexin 2
hsa-miR-1224-3p	0	0	1	1	1	1	ING4	inhibitor of growth family, member 4
hsa-miR-1224-3p	0	0	1	1	1	1	GABBR1	gamma-aminobutyric acid (GABA) B receptor, 1
hsa-miR-1224-3p	0	0	1	1	0	0	IGHMBP2	immunoglobulin mu binding protein 2
hsa-miR-1224-3p	0	0	1	1	0	0	DBP	D site of albumin promoter (albumin D-box) binding protein
hsa-miR-1224-3p	1	0	1	1	1	1	VLDLR	very low density lipoprotein receptor
hsa-miR-1224-3p	1	0	1	1	0	0	NDST2	N-deacetylase/N-sulfotransferase (heparan glucosaminyl) 2
hsa-miR-1224-3p	0	0	1	1	0	0	KCNC3	potassium voltage-gated channel, Shaw-related subfamily, member 3
hsa-miR-1224-3p	1	0	1	1	1	1	RPS6KA3	ribosomal protein S6 kinase, 90kDa, polypeptide 3
hsa-miR-1224-3p	1	0	1	1	0	0	ELN	elastin
hsa-miR-1224-3p	1	0	1	1	1	1	PML	promyelocytic leukemia
hsa-miR-1224-3p	1	0	1	1	1	1	PHC1	polyhomeotic homolog 1 (Drosophila)
hsa-miR-1224-3p	1	0	1	1	1	1	DTNA	dystrobrevin, alpha
hsa-miR-1224-3p	1	0	1	0	1	1	PLAG1	pleiomorphic adenoma gene 1
hsa-miR-1224-3p	1	0	1	0	1	1	MAML1	mastermind-like 1 (Drosophila)
hsa-miR-1224-3p	0	0	1	1	1	1	DGKI	diacylglycerol kinase, iota
hsa-miR-1224-3p	1	0	1	1	0	0	TSPYL2	TSPY-like 2
hsa-miR-1224-3p	1	0	1	0	1	1	ETV1	ets variant 1
hsa-miR-1224-3p	0	0	1	1	1	1	RXRB	retinoid X receptor, beta
hsa-miR-1224-3p	1	0	1	1	1	1	ERF	Ets2 repressor factor
hsa-miR-1224-3p	1	0	1	1	0	0	SEMA3B	sema domain, immunoglobulin domain (Ig), short basic domain, secreted, (semaphorin) 3B
hsa-miR-1224-3p	1	0	1	0	1	1	CDON	Cdon homolog (mouse)
hsa-miR-1224-3p	1	0	1	1	1	1	SPTB	spectrin, beta, erythrocytic
hsa-miR-1224-3p	0	0	1	1	0	0	IFT27	intraflagellar transport 27 homolog (Chlamydomonas)
hsa-miR-1224-3p	0	0	1	1	1	1	RYR1	ryanodine receptor 1 (skeletal)
hsa-miR-1224-3p	0	0	1	1	1	1	PPP1R12C	protein phosphatase 1, regulatory subunit 12C
hsa-miR-1224-3p	1	0	1	1	1	1	CTAGE5	CTAGE family, member 5
hsa-miR-1224-3p	0	0	1	1	0	0	EIF2B4	eukaryotic translation initiation factor 2B, subunit 4 delta, 67kDa
hsa-miR-1224-3p	1	0	1	1	1	1	GIT1	G protein-coupled receptor kinase interacting ArfGAP 1
hsa-miR-1224-3p	0	0	1	1	0	0	ITGA2B	integrin, alpha 2b (platelet glycoprotein IIb of IIb/IIIa complex, antigen CD41)
hsa-miR-1224-3p	1	0	1	1	1	1	HNRNPK	heterogeneous nuclear ribonucleoprotein K
hsa-miR-1224-3p	0	0	1	1	0	0	CFLAR	CASP8 and FADD-like apoptosis regulator
hsa-miR-1224-3p	1	0	1	1	1	1	EPB41	erythrocyte membrane protein band 4.1 (elliptocytosis 1, RH-linked)
hsa-miR-1224-3p	1	0	1	1	0	0	SYN3	synapsin III
hsa-miR-1224-3p	0	0	1	1	0	0	SLC22A8	solute carrier family 22 (organic anion transporter), member 8
hsa-miR-1224-3p	0	0	1	1	1	1	KIF3A	kinesin family member 3A
hsa-miR-1224-3p	1	0	1	1	0	0	KAT5	K(lysine) acetyltransferase 5
hsa-miR-1224-3p	1	0	1	1	0	0	PPP2R5D	protein phosphatase 2, regulatory subunit B', delta
hsa-miR-1224-3p	0	0	1	1	0	0	TRIM27	tripartite motif containing 27
hsa-miR-1224-3p	0	0	1	1	1	1	SGSH	N-sulfoglucosamine sulfohydrolase
hsa-miR-1224-3p	1	0	1	1	1	1	MEF2D	myocyte enhancer factor 2D
hsa-miR-1224-3p	1	0	1	1	0	0	TNPO2	transportin 2
hsa-miR-1224-3p	1	0	1	1	1	1	MYH10	myosin, heavy chain 10, non-muscle
hsa-miR-1224-3p	1	0	1	1	1	1	SDHC	succinate dehydrogenase complex, subunit C, integral membrane protein, 15kDa
hsa-miR-1224-3p	1	0	1	0	1	1	MLL2	myeloid/lymphoid or mixed-lineage leukemia 2
hsa-miR-1224-3p	1	0	1	1	1	1	CBFA2T2	core-binding factor, runt domain, alpha subunit 2; translocated to, 2
hsa-miR-1224-3p	0	0	1	1	0	0	ITGA7	integrin, alpha 7
hsa-miR-1224-3p	0	0	1	1	1	1	NAT6	N-acetyltransferase 6 (GCN5-related)
hsa-miR-1224-3p	1	0	1	1	1	1	MRAS	muscle RAS oncogene homolog
hsa-miR-1224-3p	0	0	1	0	0	0	FP588	uncharacterized LOC92973
hsa-miR-1224-3p	0	0	1	1	1	1	MICAL2	microtubule associated monoxygenase, calponin and LIM domain containing 2
hsa-miR-1224-3p	0	0	1	1	1	1	CYP4F3	cytochrome P450, family 4, subfamily F, polypeptide 3
hsa-miR-1224-3p	1	0	1	1	1	1	CTNND1	catenin (cadherin-associated protein), delta 1
hsa-miR-1224-3p	1	0	1	1	0	0	SLC44A2	solute carrier family 44, member 2
hsa-miR-1224-3p	1	0	1	1	0	0	PRRC2A	proline-rich coiled-coil 2A
hsa-miR-1224-3p	0	0	1	1	1	1	ERAL1	Era G-protein-like 1 (E. coli)
hsa-miR-1224-3p	0	0	1	1	1	1	PLEKHB1	pleckstrin homology domain containing, family B (evectins) member 1
hsa-miR-1224-3p	0	0	1	1	1	1	IL18BP	interleukin 18 binding protein
hsa-miR-1224-3p	1	0	1	1	1	1	EDNRB	endothelin receptor type B
hsa-miR-1224-3p	1	0	1	1	0	0	C16orf5	chromosome 16 open reading frame 5
hsa-miR-1224-3p	1	0	1	1	1	1	TAOK3	TAO kinase 3
hsa-miR-1224-3p	0	0	1	1	0	0	ADAMTS7	ADAM metallopeptidase with thrombospondin type 1 motif, 7
hsa-miR-1224-3p	1	0	1	1	1	1	HTRA2	HtrA serine peptidase 2
hsa-miR-1224-3p	0	0	1	1	1	1	CNPPD1	cyclin Pas1/PHO80 domain containing 1
hsa-miR-1224-3p	1	0	1	1	1	1	ZNF202	zinc finger protein 202
hsa-miR-1224-3p	0	0	1	1	1	1	SCLY	selenocysteine lyase
hsa-miR-1224-3p	0	0	1	0	0	0	BPESC1	blepharophimosis, epicanthus inversus and ptosis, candidate 1 (non-protein coding)
hsa-miR-1224-3p	0	0	1	1	1	1	CHRD	chordin
hsa-miR-1224-3p	1	0	1	1	1	1	SYDE1	synapse defective 1, Rho GTPase, homolog 1 (C. elegans)
hsa-miR-1224-3p	0	0	1	1	0	0	DBNDD2	dysbindin (dystrobrevin binding protein 1) domain containing 2
hsa-miR-1224-3p	0	0	1	1	1	1	CD28	CD28 molecule
hsa-miR-1224-3p	0	0	1	1	1	1	NKX3-1	NK3 homeobox 1
hsa-miR-1224-3p	1	0	1	1	1	1	ERGIC1	endoplasmic reticulum-golgi intermediate compartment (ERGIC) 1
hsa-miR-1224-3p	0	0	1	1	0	0	CSAG2	CSAG family, member 2
hsa-miR-1224-3p	0	0	1	0	0	0	CSAG3	CSAG family, member 3
hsa-miR-1224-3p	0	0	1	1	1	1	LRTOMT	leucine rich transmembrane and 0-methyltransferase domain containing
hsa-miR-1224-3p	1	0	1	1	1	1	DCLRE1B	DNA cross-link repair 1B
hsa-miR-1224-3p	1	0	1	1	1	1	VEGFA	vascular endothelial growth factor A
hsa-miR-1224-3p	1	0	1	1	1	1	LETMD1	LETM1 domain containing 1
hsa-miR-1224-3p	1	0	1	1	1	1	CPEB1	cytoplasmic polyadenylation element binding protein 1
hsa-miR-1224-3p	1	0	1	1	1	1	CALU	calumenin
hsa-miR-1224-3p	1	0	1	1	1	1	BBC3	BCL2 binding component 3
hsa-miR-1224-3p	1	0	1	1	1	1	KCNIP2	Kv channel interacting protein 2
hsa-miR-1224-3p	1	0	1	0	1	1	WIPF2	WAS/WASL interacting protein family, member 2
hsa-miR-1224-3p	1	0	1	1	1	1	CALCOCO1	calcium binding and coiled-coil domain 1
hsa-miR-1224-3p	1	0	1	1	1	1	LARP4	La ribonucleoprotein domain family, member 4
hsa-miR-1224-3p	1	0	1	1	1	1	CD300LF	CD300 molecule-like family member f
hsa-miR-1224-3p	0	0	1	1	1	1	PLEKHA8	pleckstrin homology domain containing, family A (phosphoinositide binding specific) member 8
hsa-miR-1224-3p	0	0	1	1	1	1	CASP8	caspase 8, apoptosis-related cysteine peptidase
hsa-miR-1224-3p	0	0	1	1	0	0	SNRPN	small nuclear ribonucleoprotein polypeptide N
hsa-miR-1224-3p	1	0	1	1	1	1	MAGI1	membrane associated guanylate kinase, WW and PDZ domain containing 1
hsa-miR-1224-3p	0	0	1	1	1	1	SPSB1	splA/ryanodine receptor domain and SOCS box containing 1
hsa-miR-1224-3p	0	0	1	1	1	1	PPP1R1B	protein phosphatase 1, regulatory (inhibitor) subunit 1B
hsa-miR-1224-3p	1	0	1	1	0	0	SEPT8	septin 8
hsa-miR-1224-3p	0	0	1	1	1	1	NUB1	negative regulator of ubiquitin-like proteins 1
hsa-miR-1224-3p	0	0	1	1	1	1	CSPG5	chondroitin sulfate proteoglycan 5 (neuroglycan C)
hsa-miR-1224-3p	1	0	1	1	1	1	WAPAL	wings apart-like homolog (Drosophila)
hsa-miR-1224-3p	1	0	1	1	1	1	BRSK1	BR serine/threonine kinase 1
hsa-miR-1224-3p	1	0	1	1	1	1	PTBP2	polypyrimidine tract binding protein 2
hsa-miR-1224-3p	0	0	1	1	0	0	KLRD1	killer cell lectin-like receptor subfamily D, member 1
hsa-miR-1224-3p	1	0	1	1	1	1	AFF2	AF4/FMR2 family, member 2
hsa-miR-1224-3p	1	0	1	1	1	1	SH2B3	SH2B adaptor protein 3
hsa-miR-1224-3p	0	0	1	1	1	1	GNAS	GNAS complex locus
hsa-miR-1224-3p	1	0	1	1	1	1	UBAP2L	ubiquitin associated protein 2-like
hsa-miR-1224-3p	1	0	1	1	1	1	SUCO	SUN domain containing ossification factor
hsa-miR-1224-3p	1	0	1	1	1	1	VAMP7	vesicle-associated membrane protein 7
hsa-miR-1224-3p	1	0	1	1	1	1	PALM2	paralemmin 2
hsa-miR-1224-3p	0	0	1	1	1	1	ZNF248	zinc finger protein 248
hsa-miR-1224-3p	1	0	1	1	1	1	XIRP1	xin actin-binding repeat containing 1
hsa-miR-1224-3p	0	0	1	1	1	1	DEPDC5	DEP domain containing 5
hsa-miR-1224-3p	0	0	1	1	0	0	IL4I1	interleukin 4 induced 1
hsa-miR-1224-3p	1	0	1	1	1	1	PPP1R9A	protein phosphatase 1, regulatory subunit 9A
hsa-miR-1224-3p	1	0	1	0	1	1	NFAT5	nuclear factor of activated T-cells 5, tonicity-responsive
hsa-miR-1224-3p	1	0	1	0	1	1	CLSTN1	calsyntenin 1
hsa-miR-1224-3p	0	0	1	1	1	1	TAX1BP3	Tax1 (human T-cell leukemia virus type I) binding protein 3
hsa-miR-1224-3p	0	0	1	1	1	1	RNF220	ring finger protein 220
hsa-miR-1224-3p	1	0	1	1	1	1	CADM3	cell adhesion molecule 3
hsa-miR-1224-3p	1	0	1	1	1	1	EIF2C1	eukaryotic translation initiation factor 2C, 1
hsa-miR-1224-3p	1	0	1	1	1	1	PTBP3	polypyrimidine tract binding protein 3
hsa-miR-1224-3p	1	0	1	1	0	0	SMUG1	single-strand-selective monofunctional uracil-DNA glycosylase 1
hsa-miR-1224-3p	0	0	1	1	1	1	RSRC2	arginine/serine-rich coiled-coil 2
hsa-miR-1224-3p	1	0	1	1	1	1	KLHDC8B	kelch domain containing 8B
hsa-miR-1224-3p	0	0	1	1	0	0	MLST8	MTOR associated protein, LST8 homolog (S. cerevisiae)
hsa-miR-1224-3p	0	0	1	1	0	0	CPSF3L	cleavage and polyadenylation specific factor 3-like
hsa-miR-1224-3p	0	0	1	1	0	0	KIRREL	kin of IRRE like (Drosophila)
hsa-miR-1224-3p	1	0	1	1	1	1	WDTC1	WD and tetratricopeptide repeats 1
hsa-miR-1224-3p	1	0	1	0	1	1	DCAF17	DDB1 and CUL4 associated factor 17
hsa-miR-1224-3p	0	0	1	1	1	1	VPRBP	Vpr (HIV-1) binding protein
hsa-miR-1224-3p	0	0	1	1	1	1	CLEC4M	C-type lectin domain family 4, member M
hsa-miR-1224-3p	0	0	1	0	0	0	LOC284561	uncharacterized LOC284561
hsa-miR-1224-3p	1	0	1	1	1	1	RAB11FIP5	RAB11 family interacting protein 5 (class I)
hsa-miR-1224-3p	1	0	1	1	1	1	BAZ2A	bromodomain adjacent to zinc finger domain, 2A
hsa-miR-1224-3p	1	0	1	1	1	1	PAX8	paired box 8
hsa-miR-1224-3p	1	0	1	1	0	0	MEX3A	mex-3 homolog A (C. elegans)
hsa-miR-1224-3p	1	0	1	1	1	1	COPS7B	COP9 constitutive photomorphogenic homolog subunit 7B (Arabidopsis)
hsa-miR-1224-3p	0	0	1	1	1	1	HDAC7	histone deacetylase 7
hsa-miR-1224-3p	0	0	1	1	1	1	SIGLEC1	sialic acid binding Ig-like lectin 1, sialoadhesin
hsa-miR-1224-3p	0	0	1	0	0	0	IFFO2	intermediate filament family orphan 2
hsa-miR-1224-3p	1	0	1	1	1	1	GBF1	golgi brefeldin A resistant guanine nucleotide exchange factor 1
hsa-miR-1224-3p	0	0	1	1	0	0	STPG1	sperm-tail PG-rich repeat containing 1
hsa-miR-1224-3p	0	0	1	0	1	1	HEMK1	HemK methyltransferase family member 1
hsa-miR-1224-3p	0	0	1	1	1	1	PQLC1	PQ loop repeat containing 1
hsa-miR-1224-3p	0	0	1	0	1	1	FLJ22447	uncharacterized LOC400221
hsa-miR-1224-3p	1	0	1	1	1	1	DCAF8	DDB1 and CUL4 associated factor 8
hsa-miR-1224-3p	0	0	1	1	1	1	USP48	ubiquitin specific peptidase 48
hsa-miR-1224-3p	1	0	1	1	1	1	FAM53C	family with sequence similarity 53, member C
hsa-miR-1224-3p	0	0	1	1	1	1	RNF146	ring finger protein 146
hsa-miR-1224-3p	1	0	1	1	1	1	FAM40A	family with sequence similarity 40, member A
hsa-miR-1224-3p	0	0	1	1	0	0	TMEM107	transmembrane protein 107
hsa-miR-1224-3p	1	0	1	1	1	1	SLC38A1	solute carrier family 38, member 1
hsa-miR-1224-3p	0	0	1	0	0	0	NBLA00301	Nbla00301
hsa-miR-1224-3p	1	0	1	1	1	1	ARHGAP36	Rho GTPase activating protein 36
hsa-miR-1224-3p	0	0	1	0	0	0	FAM185A	family with sequence similarity 185, member A
hsa-miR-1224-3p	0	0	1	1	0	0	FAM153B	family with sequence similarity 153, member B
hsa-miR-1224-3p	1	0	1	0	1	1	AP1G1	adaptor-related protein complex 1, gamma 1 subunit
hsa-miR-1224-3p	0	0	1	0	0	0	LOC154092	uncharacterized LOC154092
hsa-miR-1224-3p	0	0	1	1	1	1	KLC4	kinesin light chain 4
hsa-miR-1224-3p	1	0	1	1	0	0	SPEG	SPEG complex locus
hsa-miR-1224-3p	0	0	1	0	0	0	FLJ30838	uncharacterized LOC400955
hsa-miR-1224-3p	1	0	1	1	1	1	PDLIM2	PDZ and LIM domain 2 (mystique)
hsa-miR-1224-3p	0	0	1	0	0	0	FLJ31104	uncharacterized LOC441072
hsa-miR-1224-3p	1	0	1	1	0	0	MEPCE	methylphosphate capping enzyme
hsa-miR-1224-3p	0	0	1	1	1	1	ANKRD36B	ankyrin repeat domain 36B
hsa-miR-1224-3p	0	0	1	1	0	0	ANXA11	annexin A11
hsa-miR-1224-3p	0	0	1	1	0	0	BEAN1	brain expressed, associated with NEDD4, 1
hsa-miR-1224-3p	1	0	1	1	1	1	LMNA	lamin A/C
hsa-miR-1224-3p	0	0	1	0	0	0	BTBD19	BTB (POZ) domain containing 19
hsa-miR-1224-3p	0	0	1	0	0	0	SEC14L2	SEC14-like 2 (S. cerevisiae)
hsa-miR-1224-3p	1	0	1	1	1	1	PPP1R3F	protein phosphatase 1, regulatory subunit 3F
hsa-miR-1224-3p	1	0	1	1	1	1	SHISA5	shisa homolog 5 (Xenopus laevis)
hsa-miR-1224-3p	1	0	1	1	1	1	AGPAT1	1-acylglycerol-3-phosphate O-acyltransferase 1 (lysophosphatidic acid acyltransferase, alpha)
hsa-miR-1224-3p	1	0	1	1	1	1	SCAMP5	secretory carrier membrane protein 5
hsa-miR-1224-3p	0	0	1	1	1	1	BRD2	bromodomain containing 2
hsa-miR-1224-3p	1	0	1	1	1	1	CLCN5	chloride channel, voltage-sensitive 5
hsa-miR-1224-3p	0	0	1	1	1	1	ZNF606	zinc finger protein 606
hsa-miR-1224-3p	0	0	1	1	1	1	GNB2	guanine nucleotide binding protein (G protein), beta polypeptide 2
hsa-miR-1224-3p	1	0	1	1	1	1	APLP2	amyloid beta (A4) precursor-like protein 2
hsa-miR-1224-3p	0	0	1	1	0	0	RELT	RELT tumor necrosis factor receptor
hsa-miR-1224-3p	0	0	1	1	0	0	RGL3	ral guanine nucleotide dissociation stimulator-like 3
hsa-miR-1224-3p	1	0	1	1	1	1	MGAT1	mannosyl (alpha-1,3-)-glycoprotein beta-1,2-N-acetylglucosaminyltransferase
hsa-miR-1224-3p	0	0	1	1	0	0	UBAP2	ubiquitin associated protein 2
hsa-miR-1224-3p	0	0	1	1	0	0	KRT86	keratin 86
hsa-miR-1224-3p	0	0	1	0	0	0	LOC284014	uncharacterized LOC284014
hsa-miR-1224-3p	0	0	1	1	0	0	CD37	CD37 molecule
hsa-miR-1224-3p	0	0	1	1	0	0	RHBDF2	rhomboid 5 homolog 2 (Drosophila)
hsa-miR-1224-3p	1	0	1	1	1	1	AKNA	AT-hook transcription factor
hsa-miR-1224-3p	0	0	1	1	0	0	TRIM41	tripartite motif containing 41
hsa-miR-1224-3p	0	0	1	1	0	0	PIGO	phosphatidylinositol glycan anchor biosynthesis, class O
hsa-miR-1224-3p	0	0	1	1	0	0	GRIP2	glutamate receptor interacting protein 2
hsa-miR-1224-3p	0	0	1	0	1	1	CDHR3	cadherin-related family member 3
hsa-miR-1224-3p	1	0	1	1	1	1	BLCAP	bladder cancer associated protein
hsa-miR-1224-3p	1	0	1	0	1	1	RNF165	ring finger protein 165
hsa-miR-1224-3p	1	0	1	1	1	1	UBAP1	ubiquitin associated protein 1
hsa-miR-1224-3p	0	0	1	1	0	0	NISCH	nischarin
hsa-miR-1224-3p	0	0	1	1	1	1	CAMKV	CaM kinase-like vesicle-associated
hsa-miR-1224-3p	0	0	1	0	1	1	CADM1	cell adhesion molecule 1
hsa-miR-1224-3p	0	0	1	1	1	1	TMED3	transmembrane emp24 protein transport domain containing 3
hsa-miR-1224-3p	1	0	1	1	1	1	PIP4K2C	phosphatidylinositol-5-phosphate 4-kinase, type II, gamma
hsa-miR-1224-3p	0	0	1	0	0	0	LOC152225	uncharacterized LOC152225
hsa-miR-1224-3p	0	0	1	0	1	1	TMSB15B	thymosin beta 15B
hsa-miR-1224-3p	0	0	1	0	0	0	LOC643837	uncharacterized LOC643837
hsa-miR-1224-3p	1	0	1	1	1	1	EGR2	early growth response 2
hsa-miR-1224-3p	0	0	1	0	1	1	PIANP	PILR alpha associated neural protein
hsa-miR-1224-3p	0	0	1	0	1	1	TBX5-AS1	TBX5 antisense RNA 1
hsa-miR-1224-3p	0	0	1	0	0	0	LOC440910	uncharacterized LOC440910
hsa-miR-1224-3p	1	0	1	1	1	1	FBXW2	F-box and WD repeat domain containing 2
hsa-miR-1224-3p	0	0	1	1	1	1	CD34	CD34 molecule
hsa-miR-1224-3p	1	0	1	1	1	1	GNG2	guanine nucleotide binding protein (G protein), gamma 2
hsa-miR-1224-3p	0	0	1	1	0	0	CDC25B	cell division cycle 25 homolog B (S. pombe)
hsa-miR-1224-3p	0	0	1	1	1	1	NRBP1	nuclear receptor binding protein 1
hsa-miR-1224-3p	0	0	1	1	1	1	RASGRP2	RAS guanyl releasing protein 2 (calcium and DAG-regulated)
hsa-miR-1224-3p	1	0	1	1	1	1	IVNS1ABP	influenza virus NS1A binding protein
hsa-miR-1224-3p	1	0	1	1	1	1	RRBP1	ribosome binding protein 1 homolog 180kDa (dog)
hsa-miR-1224-3p	0	0	1	1	1	1	SLC16A1	solute carrier family 16, member 1 (monocarboxylic acid transporter 1)
hsa-miR-1224-3p	0	0	1	1	1	1	MARC1	mitochondrial amidoxime reducing component 1
hsa-miR-1224-3p	1	0	1	1	1	1	MAP3K12	mitogen-activated protein kinase kinase kinase 12
hsa-miR-1224-3p	0	0	1	0	1	1	KANSL2	KAT8 regulatory NSL complex subunit 2
hsa-miR-1224-3p	0	0	1	0	0	0	ZNF806	zinc finger protein 806
hsa-miR-1224-3p	1	0	1	0	1	1	GATAD2B	GATA zinc finger domain containing 2B
hsa-miR-1224-3p	0	0	1	0	0	0	LINC00340	long intergenic non-protein coding RNA 340
hsa-miR-1224-3p	1	0	1	1	1	1	LPPR2	lipid phosphate phosphatase-related protein type 2
hsa-miR-1224-3p	1	0	1	1	1	1	GLT25D2	glycosyltransferase 25 domain containing 2
hsa-miR-1224-3p	1	0	1	1	1	1	NDEL1	nudE nuclear distribution E homolog (A. nidulans)-like 1
hsa-miR-1224-3p	0	0	1	1	1	1	CHRM5	cholinergic receptor, muscarinic 5
hsa-miR-1224-3p	0	0	1	1	0	0	ZNF185	zinc finger protein 185 (LIM domain)
hsa-miR-1224-3p	0	0	1	1	1	1	GPR115	G protein-coupled receptor 115
hsa-miR-1224-3p	0	0	1	1	1	1	LTBR	lymphotoxin beta receptor (TNFR superfamily, member 3)
hsa-miR-1224-3p	0	0	1	0	0	0	LOC284577	uncharacterized LOC284577
hsa-miR-1224-3p	0	0	1	1	1	1	LOC284023	uncharacterized LOC284023
hsa-miR-1224-3p	1	0	1	1	1	1	PEA15	phosphoprotein enriched in astrocytes 15
hsa-miR-1224-3p	0	0	1	1	1	1	VDAC1	voltage-dependent anion channel 1
hsa-miR-1224-3p	0	0	1	1	1	1	BAG1	BCL2-associated athanogene
hsa-miR-1224-3p	1	0	1	1	0	0	FBRS	fibrosin
hsa-miR-1224-3p	1	0	1	1	0	0	ITPRIPL2	inositol 1,4,5-trisphosphate receptor interacting protein-like 2
hsa-miR-1224-3p	1	0	1	1	0	0	CHD3	chromodomain helicase DNA binding protein 3
hsa-miR-1224-3p	1	0	1	0	1	1	THRB	thyroid hormone receptor, beta
hsa-miR-1224-3p	1	0	1	1	1	1	SNRNP70	small nuclear ribonucleoprotein 70kDa (U1)
hsa-miR-1224-3p	1	0	1	1	1	1	ETS2	v-ets erythroblastosis virus E26 oncogene homolog 2 (avian)
hsa-miR-1224-3p	1	0	1	1	1	1	STIM2	stromal interaction molecule 2
hsa-miR-1224-3p	1	0	1	1	1	1	EPB41L1	erythrocyte membrane protein band 4.1-like 1
hsa-miR-1224-3p	0	0	1	1	0	0	TAF1C	TATA box binding protein (TBP)-associated factor, RNA polymerase I, C, 110kDa
hsa-miR-1224-3p	0	0	1	1	1	1	ITGAD	integrin, alpha D
hsa-miR-1224-3p	0	0	1	1	1	1	PIGG	phosphatidylinositol glycan anchor biosynthesis, class G
hsa-miR-1224-3p	1	0	1	1	1	1	KL	klotho
hsa-miR-1224-3p	0	0	1	0	0	0	LOC400680	uncharacterized LOC400680
hsa-miR-1224-3p	0	0	1	0	0	0	DNAJB8-AS1	DNAJB8 antisense RNA 1
hsa-miR-1224-3p	0	0	1	0	0	0	KIRREL3-AS3	KIRREL3 antisense RNA 3
hsa-miR-1224-3p	0	0	1	1	1	1	RBM4	RNA binding motif protein 4
hsa-miR-1224-3p	0	0	1	1	0	0	AHCY	adenosylhomocysteinase
hsa-miR-1224-3p	0	0	1	1	0	0	KLHDC3	kelch domain containing 3
hsa-miR-1224-3p	0	0	1	1	1	1	CKAP2L	cytoskeleton associated protein 2-like
hsa-miR-1224-3p	0	0	1	1	0	0	HNRNPL	heterogeneous nuclear ribonucleoprotein L
hsa-miR-1224-3p	0	0	1	0	0	0	CECR7	cat eye syndrome chromosome region, candidate 7 (non-protein coding)
hsa-miR-1224-3p	1	0	1	1	1	1	ZCCHC2	zinc finger, CCHC domain containing 2
hsa-miR-1224-3p	0	0	1	1	1	1	VIPAS39	VPS33B interacting protein, apical-basolateral polarity regulator, spe-39 homolog
hsa-miR-1224-3p	0	0	1	1	0	0	PPAPDC1A	phosphatidic acid phosphatase type 2 domain containing 1A
hsa-miR-1224-3p	1	0	1	1	0	0	FBXL19	F-box and leucine-rich repeat protein 19
hsa-miR-1224-3p	1	0	1	1	0	0	DGCR6	DiGeorge syndrome critical region gene 6
hsa-miR-1224-3p	1	0	1	1	1	1	LMX1A	LIM homeobox transcription factor 1, alpha
hsa-miR-1224-3p	1	0	1	1	1	1	AGAP2	ArfGAP with GTPase domain, ankyrin repeat and PH domain 2
hsa-miR-1224-3p	1	0	1	1	1	1	PXN	paxillin
hsa-miR-1224-3p	0	0	1	1	1	1	GFI1	growth factor independent 1 transcription repressor
hsa-miR-1224-3p	1	0	1	1	0	0	KCNC1	potassium voltage-gated channel, Shaw-related subfamily, member 1
hsa-miR-1224-3p	0	0	1	0	0	0	C1orf132	chromosome 1 open reading frame 132
hsa-miR-1224-3p	1	0	1	1	1	1	PDZD4	PDZ domain containing 4
hsa-miR-1224-3p	1	0	1	1	1	1	EGLN3	egl nine homolog 3 (C. elegans)
hsa-miR-1224-3p	1	0	1	0	1	1	KCNK2	potassium channel, subfamily K, member 2
hsa-miR-1224-3p	0	0	1	0	0	0	LOC650368	asparagine-linked glycosylation 1-like pseudogene
hsa-miR-1224-3p	1	0	1	1	1	1	IPPK	inositol 1,3,4,5,6-pentakisphosphate 2-kinase
hsa-miR-1224-3p	0	0	1	1	0	0	C16orf86	chromosome 16 open reading frame 86
hsa-miR-1224-3p	1	0	1	1	1	1	EPAS1	endothelial PAS domain protein 1
hsa-miR-1224-3p	1	0	1	0	1	1	WDR82	WD repeat domain 82
hsa-miR-1224-3p	1	0	1	1	1	1	FAM219A	family with sequence similarity 219, member A
hsa-miR-1224-3p	0	0	1	1	1	1	BTN2A2	butyrophilin, subfamily 2, member A2
hsa-miR-1224-3p	0	0	1	0	0	0	DKFZP434H168	uncharacterized LOC26077
hsa-miR-1224-3p	0	0	1	1	0	0	C20orf27	chromosome 20 open reading frame 27
hsa-miR-1224-3p	1	0	1	1	0	0	BCORL1	BCL6 corepressor-like 1
hsa-miR-1224-3p	1	0	1	1	1	1	C11orf30	chromosome 11 open reading frame 30
hsa-miR-1224-3p	0	0	1	1	0	0	LOC100128239	uncharacterized LOC100128239
hsa-miR-1224-3p	0	0	1	1	1	1	ZNF337	zinc finger protein 337
hsa-miR-1224-3p	0	0	1	1	1	1	CYB5D1	cytochrome b5 domain containing 1
hsa-miR-1224-3p	1	0	1	0	1	1	HECTD1	HECT domain containing E3 ubiquitin protein ligase 1
hsa-miR-1224-3p	0	0	1	0	0	0	FAM95B1	family with sequence similarity 95, member B1
hsa-miR-1224-3p	0	0	1	1	0	0	RPRD2	regulation of nuclear pre-mRNA domain containing 2
hsa-miR-1224-3p	1	0	1	1	1	1	MACROD2	MACRO domain containing 2
hsa-miR-1224-3p	1	0	1	1	0	0	PFKM	phosphofructokinase, muscle
hsa-miR-1224-3p	0	0	1	0	0	0	FER1L5	fer-1-like 5 (C. elegans)
hsa-miR-1224-3p	1	0	1	1	0	0	ATXN7L3	ataxin 7-like 3
hsa-miR-1224-3p	1	0	1	1	1	1	IL16	interleukin 16
hsa-miR-1224-3p	1	0	1	1	1	1	PIK3R1	phosphoinositide-3-kinase, regulatory subunit 1 (alpha)
hsa-miR-1224-3p	0	0	1	1	0	0	HSPG2	heparan sulfate proteoglycan 2
hsa-miR-1224-3p	0	0	1	1	1	1	BDH1	3-hydroxybutyrate dehydrogenase, type 1
hsa-miR-1224-3p	0	0	1	1	0	0	CCDC88B	coiled-coil domain containing 88B
hsa-miR-1224-3p	0	0	1	0	0	0	PLEKHD1	pleckstrin homology domain containing, family D (with coiled-coil domains) member 1
hsa-miR-1224-3p	1	0	1	1	1	1	DLG2	discs, large homolog 2 (Drosophila)
hsa-miR-1224-3p	0	0	1	1	0	0	NPIP	nuclear pore complex interacting protein
hsa-miR-1224-3p	0	0	1	0	0	0	HNRNPKP3	heterogeneous nuclear ribonucleoprotein K pseudogene 3
hsa-miR-1224-3p	0	0	1	1	0	0	HS3ST5	heparan sulfate (glucosamine) 3-O-sulfotransferase 5
hsa-miR-1224-3p	1	0	1	1	1	1	EIF4E3	eukaryotic translation initiation factor 4E family member 3
hsa-miR-1224-3p	0	0	1	1	1	1	USP4	ubiquitin specific peptidase 4 (proto-oncogene)
hsa-miR-1224-3p	0	0	1	1	0	0	FAM54B	family with sequence similarity 54, member B
hsa-miR-1224-3p	1	0	1	1	0	0	MRVI1	murine retrovirus integration site 1 homolog
hsa-miR-1224-3p	1	0	1	0	1	1	N4BP3	NEDD4 binding protein 3
hsa-miR-1224-3p	1	0	1	0	0	0	SLC16A3	solute carrier family 16, member 3 (monocarboxylic acid transporter 4)
hsa-miR-1224-3p	1	0	1	1	1	1	SLC26A9	solute carrier family 26, member 9
hsa-miR-1224-3p	0	0	1	1	1	1	C6orf136	chromosome 6 open reading frame 136
hsa-miR-1224-3p	0	0	1	1	1	1	PIN4	protein (peptidylprolyl cis/trans isomerase) NIMA-interacting, 4 (parvulin)
hsa-miR-1224-3p	0	0	1	1	1	1	ZNF503	zinc finger protein 503
hsa-miR-1224-3p	1	0	1	0	1	1	SP6	Sp6 transcription factor
hsa-miR-1224-3p	1	0	1	1	1	1	PLA2G15	phospholipase A2, group XV
hsa-miR-1224-3p	1	0	1	1	1	1	AHRR	aryl-hydrocarbon receptor repressor
hsa-miR-1224-3p	1	0	1	0	0	0	HK1	hexokinase 1
hsa-miR-1224-3p	0	0	1	1	0	0	FAM159A	family with sequence similarity 159, member A
hsa-miR-1224-3p	1	0	1	0	1	1	KDM2A	lysine (K)-specific demethylase 2A
hsa-miR-1224-3p	0	0	1	0	0	0	LOC440993	uncharacterized LOC440993
hsa-miR-1224-3p	1	0	1	0	1	1	KPNA6	karyopherin alpha 6 (importin alpha 7)
hsa-miR-1224-3p	1	0	1	1	1	1	UPF1	UPF1 regulator of nonsense transcripts homolog (yeast)
hsa-miR-1224-3p	1	0	1	0	1	1	CYB561D1	cytochrome b-561 domain containing 1
hsa-miR-1224-3p	1	0	1	1	1	1	CD200	CD200 molecule
hsa-miR-1224-3p	0	0	1	1	1	1	TBX19	T-box 19
hsa-miR-1224-3p	0	0	1	1	0	0	HEATR8	HEAT repeat containing 8
hsa-miR-1224-3p	0	0	1	0	1	1	GALNT13	UDP-N-acetyl-alpha-D-galactosamine:polypeptide N-acetylgalactosaminyltransferase 13 (GalNAc-T13)
hsa-miR-1224-3p	1	0	1	1	1	1	TTBK1	tau tubulin kinase 1
hsa-miR-1224-3p	1	0	1	1	1	1	MAP3K14	mitogen-activated protein kinase kinase kinase 14
hsa-miR-1224-3p	1	0	1	1	1	1	RABGAP1	RAB GTPase activating protein 1
hsa-miR-1224-3p	1	0	1	1	0	0	BRSK2	BR serine/threonine kinase 2
hsa-miR-1224-3p	0	0	1	1	1	1	NR4A1	nuclear receptor subfamily 4, group A, member 1
hsa-miR-1224-3p	0	0	1	0	0	0	AGAP9	ArfGAP with GTPase domain, ankyrin repeat and PH domain 9
hsa-miR-1224-3p	1	0	1	1	1	1	RPS6KA4	ribosomal protein S6 kinase, 90kDa, polypeptide 4
hsa-miR-1224-3p	1	0	1	1	1	1	CYYR1	cysteine/tyrosine-rich 1
hsa-miR-1224-3p	1	0	1	0	1	1	SEZ6	seizure related 6 homolog (mouse)
hsa-miR-1224-3p	0	0	1	0	1	1	PEX5	peroxisomal biogenesis factor 5
hsa-miR-1224-3p	1	0	1	1	0	0	TDRKH	tudor and KH domain containing
hsa-miR-1224-3p	1	0	1	1	1	1	CAMK2G	calcium/calmodulin-dependent protein kinase II gamma
hsa-miR-1224-3p	0	0	1	1	0	0	HSPB11	heat shock protein family B (small), member 11
hsa-miR-1224-3p	1	0	1	0	1	1	TEAD3	TEA domain family member 3
hsa-miR-1224-3p	0	0	1	1	0	0	KAT8	K(lysine) acetyltransferase 8
hsa-miR-1224-3p	0	0	1	1	1	1	TFDP2	transcription factor Dp-2 (E2F dimerization partner 2)
hsa-miR-1224-3p	0	0	1	1	1	1	TTLL3	tubulin tyrosine ligase-like family, member 3
hsa-miR-1224-3p	0	0	1	1	0	0	OPLAH	5-oxoprolinase (ATP-hydrolysing)
hsa-miR-1224-3p	0	0	1	0	0	0	POM121L9P	POM121 transmembrane nucleoporin-like 9, pseudogene
hsa-miR-1224-3p	0	0	1	0	0	0	POM121L8P	POM121 transmembrane nucleoporin-like 8 pseudogene
hsa-miR-1224-3p	0	0	1	1	1	1	ARIH1	ariadne homolog, ubiquitin-conjugating enzyme E2 binding protein, 1 (Drosophila)
hsa-miR-1224-3p	1	0	1	1	1	1	ARPP21	cAMP-regulated phosphoprotein, 21kDa
hsa-miR-1224-3p	0	0	1	0	0	0	DNAJC5B	DnaJ (Hsp40) homolog, subfamily C, member 5 beta
hsa-miR-1224-3p	0	0	1	1	1	1	GRAMD1C	GRAM domain containing 1C
hsa-miR-1224-3p	0	0	1	0	0	0	KIAA0913	KIAA0913
hsa-miR-1224-3p	0	0	1	1	1	1	MYO9A	myosin IXA
hsa-miR-1224-3p	0	0	1	1	1	1	STAG3L1	stromal antigen 3-like 1
hsa-miR-1224-3p	0	0	1	1	1	1	TAOK2	TAO kinase 2
hsa-miR-1224-3p	0	0	1	1	1	1	AQP6	aquaporin 6, kidney specific
hsa-miR-1224-3p	1	0	1	1	1	1	CTTNBP2NL	CTTNBP2 N-terminal like
hsa-miR-1224-3p	0	0	1	0	0	0	FAM66D	family with sequence similarity 66, member D
hsa-miR-1224-3p	0	0	1	1	0	0	HDAC10	histone deacetylase 10
hsa-miR-1224-3p	1	0	1	0	1	1	BRPF1	bromodomain and PHD finger containing, 1
hsa-miR-1224-3p	0	0	1	1	1	1	VWA3B	von Willebrand factor A domain containing 3B
hsa-miR-1224-3p	0	0	1	1	1	1	VIT	vitrin
hsa-miR-1224-3p	1	0	1	1	0	0	PTAR1	protein prenyltransferase alpha subunit repeat containing 1
hsa-miR-1224-3p	0	0	1	0	0	0	LOC387647	patched domain containing 3 pseudogene
hsa-miR-1224-3p	0	0	1	0	0	0	FAM225A	family with sequence similarity 225, member A (non-protein coding)
hsa-miR-1224-3p	0	0	1	1	0	0	TMEM44	transmembrane protein 44
hsa-miR-1224-3p	0	0	1	1	1	1	INPP5B	inositol polyphosphate-5-phosphatase, 75kDa
hsa-miR-1224-3p	0	0	1	0	1	1	PLEKHM1P	pleckstrin homology domain containing, family M (with RUN domain) member 1 pseudogene
hsa-miR-1224-3p	0	0	1	1	1	1	NFE2L1	nuclear factor (erythroid-derived 2)-like 1
hsa-miR-1224-3p	0	0	1	0	0	0	EPHA1-AS1	EPHA1 antisense RNA 1
hsa-miR-1224-3p	1	0	1	1	1	1	IL17RD	interleukin 17 receptor D
hsa-miR-1224-3p	1	0	1	1	1	1	PRPF38B	PRP38 pre-mRNA processing factor 38 (yeast) domain containing B
hsa-miR-1224-3p	0	0	1	1	1	1	PNMAL1	paraneoplastic Ma antigen family-like 1
hsa-miR-1224-3p	1	0	1	1	1	1	RICTOR	RPTOR independent companion of MTOR, complex 2
hsa-miR-1224-3p	1	0	1	0	1	1	PATL1	protein associated with topoisomerase II homolog 1 (yeast)
hsa-miR-1224-3p	0	0	1	1	1	1	TMEM130	transmembrane protein 130
hsa-miR-1224-3p	1	0	1	1	1	1	IKZF2	IKAROS family zinc finger 2 (Helios)
hsa-miR-1224-3p	1	0	1	0	1	1	BDNF	brain-derived neurotrophic factor
hsa-miR-1224-3p	0	0	1	1	0	0	EIF5A	eukaryotic translation initiation factor 5A
hsa-miR-1224-3p	0	0	1	1	0	0	GLYCTK	glycerate kinase
hsa-miR-1224-3p	1	0	1	1	1	1	OPRM1	opioid receptor, mu 1
hsa-miR-1224-3p	0	0	1	1	0	0	MUC1	mucin 1, cell surface associated
hsa-miR-1224-3p	0	0	1	1	0	0	PIGU	phosphatidylinositol glycan anchor biosynthesis, class U
hsa-miR-1224-3p	1	0	1	1	1	1	CAMTA1	calmodulin binding transcription activator 1
hsa-miR-1224-3p	0	0	1	1	1	1	LHFPL1	lipoma HMGIC fusion partner-like 1
hsa-miR-1224-3p	0	0	1	1	1	1	ITGA10	integrin, alpha 10
hsa-miR-1224-3p	0	0	1	1	1	1	NYAP1	neuronal tyrosine-phosphorylated phosphoinositide-3-kinase adaptor 1
hsa-miR-1224-3p	1	0	1	0	1	1	NHS	Nance-Horan syndrome (congenital cataracts and dental anomalies)
hsa-miR-1224-3p	0	0	1	1	1	1	PLD5	phospholipase D family, member 5
hsa-miR-1224-3p	0	0	1	0	1	1	XKR5	XK, Kell blood group complex subunit-related family, member 5
hsa-miR-1224-3p	1	0	1	1	1	1	MECP2	methyl CpG binding protein 2 (Rett syndrome)
hsa-miR-1224-3p	0	0	1	1	1	1	TERF1	telomeric repeat binding factor (NIMA-interacting) 1
hsa-miR-1224-3p	0	0	1	1	1	1	KANK2	KN motif and ankyrin repeat domains 2
hsa-miR-1224-3p	0	0	1	1	1	1	KLK7	kallikrein-related peptidase 7
hsa-miR-1224-3p	1	0	1	1	1	1	ADAMTS6	ADAM metallopeptidase with thrombospondin type 1 motif, 6
hsa-miR-1224-3p	1	0	1	1	1	1	MCHR1	melanin-concentrating hormone receptor 1
hsa-miR-1224-3p	0	0	1	1	0	0	CLSTN3	calsyntenin 3
hsa-miR-1224-3p	0	0	1	1	1	1	CEACAM1	carcinoembryonic antigen-related cell adhesion molecule 1 (biliary glycoprotein)
hsa-miR-1224-3p	1	0	1	1	1	1	PCDH11X	protocadherin 11 X-linked
hsa-miR-1224-3p	1	0	1	1	1	1	TBC1D22B	TBC1 domain family, member 22B
hsa-miR-1224-3p	1	0	1	1	1	1	TRAF4	TNF receptor-associated factor 4
hsa-miR-1224-3p	0	0	1	1	1	1	IYD	iodotyrosine deiodinase
hsa-miR-1224-3p	0	0	1	1	1	1	SLC6A2	solute carrier family 6 (neurotransmitter transporter, noradrenalin), member 2
hsa-miR-1224-3p	0	0	1	1	1	1	SNX11	sorting nexin 11
hsa-miR-1224-3p	0	0	1	1	1	1	PAFAH1B2	platelet-activating factor acetylhydrolase 1b, catalytic subunit 2 (30kDa)
hsa-miR-1224-3p	0	0	1	1	1	1	B4GALT2	UDP-Gal:betaGlcNAc beta 1,4- galactosyltransferase, polypeptide 2
hsa-miR-1224-3p	1	0	1	1	1	1	HOXC13	homeobox C13
hsa-miR-1224-3p	1	0	1	1	1	1	RIMS3	regulating synaptic membrane exocytosis 3
hsa-miR-1224-3p	0	0	1	1	0	0	DNAJC7	DnaJ (Hsp40) homolog, subfamily C, member 7
hsa-miR-1224-3p	1	0	1	1	1	1	GABPB1	GA binding protein transcription factor, beta subunit 1
hsa-miR-1224-3p	1	0	1	1	0	0	DHDDS	dehydrodolichyl diphosphate synthase
hsa-miR-1224-3p	1	0	1	1	1	1	SPRY2	sprouty homolog 2 (Drosophila)
hsa-miR-1224-3p	1	0	1	1	1	1	SMO	smoothened, frizzled family receptor
hsa-miR-1224-3p	1	0	1	1	0	0	SLC10A3	solute carrier family 10 (sodium/bile acid cotransporter family), member 3
hsa-miR-1224-3p	0	0	1	1	1	1	PRMT5	protein arginine methyltransferase 5
hsa-miR-1224-3p	0	0	1	1	1	1	PDXK	pyridoxal (pyridoxine, vitamin B6) kinase
hsa-miR-1224-3p	0	0	1	0	0	0	MGC13053	uncharacterized MGC13053
hsa-miR-1224-3p	1	0	1	1	0	0	EIF4A1	eukaryotic translation initiation factor 4A1
hsa-miR-1224-3p	1	0	1	1	1	1	U2SURP	U2 snRNP-associated SURP domain containing
hsa-miR-1224-3p	0	0	1	1	0	0	AGBL5	ATP/GTP binding protein-like 5
hsa-miR-1224-3p	0	0	1	1	1	1	ACPP	acid phosphatase, prostate
hsa-miR-1224-3p	1	0	1	1	1	1	PTMS	parathymosin
hsa-miR-1224-3p	0	0	1	1	0	0	RBM14	RNA binding motif protein 14
hsa-miR-1224-3p	0	0	1	1	0	0	SPAG7	sperm associated antigen 7
hsa-miR-1224-3p	1	0	1	1	1	1	CALM1	calmodulin 1 (phosphorylase kinase, delta)
hsa-miR-1224-3p	1	0	1	1	1	1	HMGA1	high mobility group AT-hook 1
hsa-miR-1224-3p	1	0	1	1	1	1	RELL2	RELT-like 2
hsa-miR-1224-3p	1	0	1	0	1	1	TMEM39A	transmembrane protein 39A
hsa-miR-1224-3p	0	0	1	1	0	0	FUZ	fuzzy homolog (Drosophila)
hsa-miR-1224-3p	1	0	1	1	0	0	SIGMAR1	sigma non-opioid intracellular receptor 1
hsa-miR-1224-3p	1	0	1	0	1	1	CNP	2',3'-cyclic nucleotide 3' phosphodiesterase
hsa-miR-1224-3p	0	0	1	1	1	1	GNL3L	guanine nucleotide binding protein-like 3 (nucleolar)-like
hsa-miR-1224-3p	1	0	1	1	1	1	OTUD5	OTU domain containing 5
hsa-miR-1224-3p	0	0	1	0	0	0	GRAMD1B	GRAM domain containing 1B
hsa-miR-1224-3p	0	0	1	1	1	1	H2AFY	H2A histone family, member Y
hsa-miR-1224-3p	0	0	1	1	1	1	DEDD2	death effector domain containing 2
hsa-miR-1224-3p	1	0	1	1	1	1	ZNF3	zinc finger protein 3
hsa-miR-1224-3p	1	0	1	1	1	1	TMEM185A	transmembrane protein 185A
hsa-miR-1224-3p	0	0	1	0	0	0	MGC20647	uncharacterized protein MGC20647
hsa-miR-1224-3p	1	0	1	1	1	1	MEIS3	Meis homeobox 3
hsa-miR-1224-3p	0	0	1	0	0	0	MGC21881	uncharacterized locus MGC21881
hsa-miR-1224-3p	0	0	1	1	1	1	UCHL5	ubiquitin carboxyl-terminal hydrolase L5
hsa-miR-1224-3p	0	0	1	0	1	1	ZNF37A	zinc finger protein 37A
hsa-miR-1224-3p	1	0	1	1	0	0	AKT1S1	AKT1 substrate 1 (proline-rich)
hsa-miR-1224-3p	1	0	1	1	1	1	FAM199X	family with sequence similarity 199, X-linked
hsa-miR-1224-3p	1	0	1	0	1	1	ZNF24	zinc finger protein 24
hsa-miR-1224-3p	0	0	1	1	1	1	RECQL5	RecQ protein-like 5
hsa-miR-1224-3p	0	0	1	1	1	1	GLIPR2	GLI pathogenesis-related 2
hsa-miR-1224-3p	1	0	1	1	1	1	ARHGEF9	Cdc42 guanine nucleotide exchange factor (GEF) 9
hsa-miR-1224-3p	0	0	1	1	1	1	EXOC7	exocyst complex component 7
hsa-miR-1224-3p	0	0	1	1	0	0	TEAD2	TEA domain family member 2
hsa-miR-1224-3p	0	0	1	1	1	1	TMEM40	transmembrane protein 40
hsa-miR-1224-3p	0	0	1	0	0	0	EEF1DP3	eukaryotic translation elongation factor 1 delta pseudogene 3
hsa-miR-1224-3p	1	0	1	1	0	0	TMEM63B	transmembrane protein 63B
hsa-miR-1224-3p	1	0	1	1	1	1	SPOCK2	sparc/osteonectin, cwcv and kazal-like domains proteoglycan (testican) 2
hsa-miR-1224-3p	0	0	1	1	1	1	TLR4	toll-like receptor 4
hsa-miR-1224-3p	1	0	1	1	1	1	CRKL	v-crk sarcoma virus CT10 oncogene homolog (avian)-like
hsa-miR-1224-3p	0	0	1	1	1	1	MAP2	microtubule-associated protein 2
hsa-miR-1224-3p	1	0	1	1	1	1	ACACB	acetyl-CoA carboxylase beta
hsa-miR-1224-3p	1	0	1	1	1	1	GIGYF2	GRB10 interacting GYF protein 2
hsa-miR-1224-3p	0	0	1	1	0	0	SWI5	SWI5 recombination repair homolog (yeast)
hsa-miR-1224-3p	1	0	1	1	1	1	TAF15	TAF15 RNA polymerase II, TATA box binding protein (TBP)-associated factor, 68kDa
hsa-miR-1224-3p	1	0	1	1	1	1	ADARB1	adenosine deaminase, RNA-specific, B1
hsa-miR-1224-3p	1	0	1	1	1	1	ZPLD1	zona pellucida-like domain containing 1
hsa-miR-1224-3p	1	0	1	1	1	1	GLUL	glutamate-ammonia ligase
hsa-miR-1224-3p	1	0	1	1	1	1	BRD3	bromodomain containing 3
hsa-miR-1224-3p	0	0	1	1	0	0	TREM2	triggering receptor expressed on myeloid cells 2
hsa-miR-1224-3p	1	0	1	1	1	1	PHF17	PHD finger protein 17
hsa-miR-1224-3p	1	0	1	1	1	1	SPATS2	spermatogenesis associated, serine-rich 2
hsa-miR-1224-3p	0	0	1	1	1	1	FBXO24	F-box protein 24
hsa-miR-1224-3p	0	0	1	0	0	0	LOC643648	uncharacterized LOC643648
hsa-miR-1224-3p	0	0	1	1	1	1	UBXN1	UBX domain protein 1
hsa-miR-1224-3p	1	0	1	1	0	0	MRC2	mannose receptor, C type 2
hsa-miR-1224-3p	1	0	1	1	1	1	RHOBTB1	Rho-related BTB domain containing 1
hsa-miR-1224-3p	1	0	1	1	1	1	SECISBP2L	SECIS binding protein 2-like
hsa-miR-1224-3p	0	0	1	1	0	0	IGFN1	immunoglobulin-like and fibronectin type III domain containing 1
hsa-miR-1224-3p	0	0	1	0	0	0	MYO15B	myosin XVB pseudogene
hsa-miR-1224-3p	1	0	1	0	1	1	KIF5A	kinesin family member 5A
hsa-miR-1224-3p	0	0	1	0	1	1	DKFZP434I0714	uncharacterized protein DKFZP434I0714
hsa-miR-1224-3p	1	0	1	0	1	1	PDE12	phosphodiesterase 12
hsa-miR-1224-3p	1	0	1	1	1	1	NKAIN2	Na+/K+ transporting ATPase interacting 2
hsa-miR-1224-3p	0	0	1	1	1	1	TMEM139	transmembrane protein 139
hsa-miR-1224-3p	0	0	1	1	1	1	SNAPC3	small nuclear RNA activating complex, polypeptide 3, 50kDa
hsa-miR-1224-3p	0	0	1	0	1	1	C9orf57	chromosome 9 open reading frame 57
hsa-miR-1224-3p	1	0	1	1	1	1	MEIS1	Meis homeobox 1
hsa-miR-1224-3p	0	0	1	0	0	0	LOC654433	uncharacterized LOC654433
hsa-miR-1224-3p	0	0	1	1	1	1	FAM71F1	family with sequence similarity 71, member F1
hsa-miR-1224-3p	0	0	1	1	1	1	EFCAB13	EF-hand calcium binding domain 13
hsa-miR-1224-3p	0	0	1	1	0	0	HSPA14	heat shock 70kDa protein 14
hsa-miR-1224-3p	1	0	1	0	0	0	MSL1	male-specific lethal 1 homolog (Drosophila)
hsa-miR-1224-3p	0	0	1	0	0	0	TOB1-AS1	TOB1 antisense RNA 1
hsa-miR-1224-3p	0	0	1	1	1	1	SLC14A1	solute carrier family 14 (urea transporter), member 1 (Kidd blood group)
hsa-miR-1224-3p	0	0	1	0	1	1	LINC00634	long intergenic non-protein coding RNA 634
hsa-miR-1224-3p	1	0	1	1	1	1	FOSB	FBJ murine osteosarcoma viral oncogene homolog B
hsa-miR-1224-3p	0	0	1	0	0	0	LOC339240	keratin 17 pseudogene
hsa-miR-1224-3p	0	0	1	1	0	0	MTCH1	mitochondrial carrier 1
hsa-miR-1224-3p	1	0	1	1	1	1	UNC13C	unc-13 homolog C (C. elegans)
hsa-miR-1224-3p	0	0	1	0	0	0	SLC7A11-AS1	SLC7A11 antisense RNA 1
hsa-miR-1224-3p	0	0	1	0	0	0	FAM86JP	family with sequence similarity 86, member A pseudogene
hsa-miR-1224-3p	0	0	1	0	1	1	METTL12	methyltransferase like 12
hsa-miR-1224-3p	0	0	1	0	0	0	OR7E47P	olfactory receptor, family 7, subfamily E, member 47 pseudogene
hsa-miR-1224-3p	1	0	1	1	1	1	TNFRSF1B	tumor necrosis factor receptor superfamily, member 1B
hsa-miR-1224-3p	1	0	1	0	1	1	USP6NL	USP6 N-terminal like
hsa-miR-1224-3p	0	0	1	0	0	0	MORC2-AS1	MORC2 antisense RNA 1
hsa-miR-1224-3p	0	0	1	0	0	0	LOC401176	uncharacterized LOC401176
hsa-miR-1224-3p	0	0	1	0	0	0	LOC338667	uncharacterized LOC338667
hsa-miR-1224-3p	0	0	1	1	1	1	STRADA	STE20-related kinase adaptor alpha
hsa-miR-1224-3p	1	0	1	1	1	1	RNF145	ring finger protein 145
hsa-miR-1224-3p	0	0	1	1	1	1	MGC57346	uncharacterized LOC401884
hsa-miR-1224-3p	0	0	1	0	0	0	LOC283914	uncharacterized LOC283914
hsa-miR-1224-3p	1	0	1	0	1	1	LYPD6	LY6/PLAUR domain containing 6
hsa-miR-1224-3p	0	0	1	0	0	0	LOC348120	uncharacterized LOC348120
hsa-miR-1224-3p	0	0	1	0	0	0	DPY19L2P4	dpy-19-like 2 pseudogene 4 (C. elegans)
hsa-miR-1224-3p	0	0	1	0	1	1	LOC338758	uncharacterized LOC338758
hsa-miR-1224-3p	1	0	1	1	1	1	BRD1	bromodomain containing 1
hsa-miR-1224-3p	0	0	1	0	1	1	LOC401021	uncharacterized LOC401021
hsa-miR-1224-3p	0	0	1	1	0	0	CCDC107	coiled-coil domain containing 107
hsa-miR-1224-3p	0	0	1	1	0	0	SREBF2	sterol regulatory element binding transcription factor 2
hsa-miR-1224-3p	0	0	1	1	0	0	HYAL3	hyaluronoglucosaminidase 3
hsa-miR-1224-3p	1	0	1	1	1	1	LIMD2	LIM domain containing 2
hsa-miR-1224-3p	1	0	1	1	1	1	PCGF5	polycomb group ring finger 5
hsa-miR-1224-3p	0	0	1	1	1	1	GRIK5	glutamate receptor, ionotropic, kainate 5
hsa-miR-1224-3p	0	0	1	1	0	0	TENC1	tensin like C1 domain containing phosphatase (tensin 2)
hsa-miR-1224-3p	1	0	1	1	0	0	DALRD3	DALR anticodon binding domain containing 3
hsa-miR-1224-3p	0	0	1	1	0	0	ABHD1	abhydrolase domain containing 1
hsa-miR-1224-3p	0	0	1	1	0	0	APOA1BP	apolipoprotein A-I binding protein
hsa-miR-1224-3p	1	0	1	1	1	1	ATP8B4	ATPase, class I, type 8B, member 4
hsa-miR-1224-3p	0	0	1	1	0	0	C20orf152	chromosome 20 open reading frame 152
hsa-miR-1224-3p	0	0	1	1	0	0	GRIN2C	glutamate receptor, ionotropic, N-methyl D-aspartate 2C
hsa-miR-1224-3p	0	0	1	1	0	0	WDR90	WD repeat domain 90
hsa-miR-1224-3p	0	0	1	1	1	1	ELL3	elongation factor RNA polymerase II-like 3
hsa-miR-1224-3p	1	0	1	0	1	1	C7orf41	chromosome 7 open reading frame 41
hsa-miR-1224-3p	0	0	1	1	0	0	ADORA3	adenosine A3 receptor
hsa-miR-1224-3p	0	0	1	1	0	0	PRSS55	protease, serine, 55
hsa-miR-1224-3p	0	0	1	1	1	1	PIM3	pim-3 oncogene
hsa-miR-1224-3p	0	0	1	0	0	0	FLJ35390	uncharacterized LOC255031
hsa-miR-1224-3p	1	0	1	1	1	1	ADCY6	adenylate cyclase 6
hsa-miR-1224-3p	0	0	1	1	1	1	ZNF33B	zinc finger protein 33B
hsa-miR-1224-3p	1	0	1	1	1	1	IL15RA	interleukin 15 receptor, alpha
hsa-miR-1224-3p	1	0	1	1	1	1	LMO4	LIM domain only 4
hsa-miR-1224-3p	1	0	1	1	1	1	CUX1	cut-like homeobox 1
hsa-miR-1224-3p	1	0	1	1	1	1	FAM129B	family with sequence similarity 129, member B
hsa-miR-1224-3p	1	0	1	0	1	1	MAGIX	MAGI family member, X-linked
hsa-miR-1224-3p	0	0	1	0	0	0	LEF1-AS1	LEF1 antisense RNA 1
hsa-miR-1224-3p	0	0	1	1	0	0	CELF3	CUGBP, Elav-like family member 3
hsa-miR-1224-3p	1	0	1	1	1	1	MAPKAPK3	mitogen-activated protein kinase-activated protein kinase 3
hsa-miR-1224-3p	1	0	1	1	0	0	TMEM198	transmembrane protein 198
hsa-miR-1224-3p	0	0	1	1	0	0	TRIM46	tripartite motif containing 46
hsa-miR-1224-3p	0	0	1	1	1	1	MSTO1	misato homolog 1 (Drosophila)
hsa-miR-1224-3p	0	0	1	1	0	0	NDUFAF2	NADH dehydrogenase (ubiquinone) complex I, assembly factor 2
hsa-miR-1224-3p	0	0	1	1	1	1	SLC11A1	solute carrier family 11 (proton-coupled divalent metal ion transporters), member 1
hsa-miR-1224-3p	1	0	1	0	1	1	TGFBR1	transforming growth factor, beta receptor 1
hsa-miR-1224-3p	1	0	1	0	1	1	TMEM194A	transmembrane protein 194A
hsa-miR-1224-3p	0	0	1	0	0	0	ULK4P3	unc-51-like kinase 4 (C. elegans) pseudogene 3
hsa-miR-1224-3p	0	0	1	1	0	0	S100A1	S100 calcium binding protein A1
hsa-miR-1224-3p	0	0	1	0	0	0	LOC727849	golgin A2 pseudogene
hsa-miR-1224-3p	0	0	1	0	0	0	LOC727751	uncharacterized LOC727751
hsa-miR-1224-3p	0	0	1	0	0	0	AGSK1	golgin subfamily A member 2-like
hsa-miR-1224-3p	1	0	1	1	1	1	RARG	retinoic acid receptor, gamma
hsa-miR-1224-3p	1	0	1	1	1	1	WBP1L	WW domain binding protein 1-like
hsa-miR-1224-3p	0	0	1	1	0	0	ASIC4	acid-sensing (proton-gated) ion channel family member 4
hsa-miR-1224-3p	1	0	1	1	1	1	OPCML	opioid binding protein/cell adhesion molecule-like
hsa-miR-1224-3p	0	0	1	1	1	1	C3orf67	chromosome 3 open reading frame 67
hsa-miR-1224-3p	1	0	1	0	1	1	DPYSL3	dihydropyrimidinase-like 3
hsa-miR-1224-3p	1	0	1	0	1	1	AMMECR1L	AMME chromosomal region gene 1-like
hsa-miR-1224-3p	0	0	1	0	0	0	LOC554249	uncharacterized LOC554249
hsa-miR-1224-3p	1	0	1	1	0	0	TIMM17B	translocase of inner mitochondrial membrane 17 homolog B (yeast)
hsa-miR-1224-3p	1	0	1	0	1	1	PIK3R3	phosphoinositide-3-kinase, regulatory subunit 3 (gamma)
hsa-miR-1224-3p	1	0	1	1	1	1	PLXNA2	plexin A2
hsa-miR-1224-3p	0	0	1	1	1	1	R3HCC1L	R3H domain and coiled-coil containing 1-like
hsa-miR-1224-3p	1	0	1	1	1	1	LRRC15	leucine rich repeat containing 15
hsa-miR-1224-3p	0	0	1	1	1	1	ZNF365	zinc finger protein 365
hsa-miR-1224-3p	1	0	1	1	1	1	IL28RA	interleukin 28 receptor, alpha (interferon, lambda receptor)
hsa-miR-1224-3p	1	0	1	0	1	1	VANGL2	vang-like 2 (van gogh, Drosophila)
hsa-miR-1224-3p	0	0	1	1	1	1	TTLL9	tubulin tyrosine ligase-like family, member 9
hsa-miR-1224-3p	0	0	1	0	0	0	LSAMP-AS3	LSAMP antisense RNA 3
hsa-miR-1224-3p	0	0	1	0	0	0	FAM71F2	family with sequence similarity 71, member F2
hsa-miR-1224-3p	0	0	1	1	1	1	MUC21	mucin 21, cell surface associated
hsa-miR-1224-3p	0	0	1	0	0	0	FBXL19-AS1	FBXL19 antisense RNA 1 (head to head)
hsa-miR-1224-3p	1	0	1	0	1	1	BTBD3	BTB (POZ) domain containing 3
hsa-miR-1224-3p	0	0	1	1	0	0	STK19	serine/threonine kinase 19
hsa-miR-1224-3p	1	0	1	1	1	1	TET2	tet methylcytosine dioxygenase 2
hsa-miR-1224-3p	0	0	1	1	1	1	LOC100499484-C9ORF174	LOC100499484-C9orf174 readthrough
hsa-miR-1224-3p	1	0	1	1	1	1	PAX3	paired box 3
hsa-miR-1224-3p	0	0	1	1	0	0	SPOCD1	SPOC domain containing 1
hsa-miR-1224-3p	1	0	1	1	1	1	SIDT2	SID1 transmembrane family, member 2
hsa-miR-1224-3p	0	0	1	1	1	1	MYBPC1	myosin binding protein C, slow type
hsa-miR-1224-3p	0	0	1	1	1	1	NAA35	N(alpha)-acetyltransferase 35, NatC auxiliary subunit
hsa-miR-1224-3p	1	0	1	1	1	1	OSBP2	oxysterol binding protein 2
hsa-miR-1224-3p	1	0	1	1	1	1	FKBP1A	FK506 binding protein 1A, 12kDa
hsa-miR-1224-3p	1	0	1	1	1	1	FAM59A	family with sequence similarity 59, member A
hsa-miR-1224-3p	1	0	1	1	1	1	ANK2	ankyrin 2, neuronal
hsa-miR-1224-3p	1	0	1	1	1	1	MEGF11	multiple EGF-like-domains 11
hsa-miR-1224-3p	0	0	1	1	0	0	ATPAF1-AS1	ATPAF1 antisense RNA 1
hsa-miR-1224-3p	1	0	1	1	1	1	COLQ	collagen-like tail subunit (single strand of homotrimer) of asymmetric acetylcholinesterase
hsa-miR-1224-3p	1	0	1	1	1	1	ZMYM4	zinc finger, MYM-type 4
hsa-miR-1224-3p	0	0	1	1	1	1	HSF2	heat shock transcription factor 2
hsa-miR-1224-3p	1	0	1	0	1	1	SEMA4G	sema domain, immunoglobulin domain (Ig), transmembrane domain (TM) and short cytoplasmic domain, (semaphorin) 4G
hsa-miR-1224-3p	0	0	1	0	0	0	FAM225B	family with sequence similarity 225, member B (non-protein coding)
hsa-miR-1224-3p	1	0	1	1	1	1	TDRD5	tudor domain containing 5
hsa-miR-1224-3p	1	0	1	1	1	1	PHC2	polyhomeotic homolog 2 (Drosophila)
hsa-miR-1224-3p	0	0	1	0	0	0	FUT8-AS1	FUT8 antisense RNA 1
hsa-miR-1224-3p	1	0	1	0	1	1	HMGB3	high mobility group box 3
hsa-miR-1224-3p	1	0	1	1	1	1	CCNG1	cyclin G1
hsa-miR-1224-3p	1	0	1	1	1	1	ETS1	v-ets erythroblastosis virus E26 oncogene homolog 1 (avian)
hsa-miR-1224-3p	1	0	1	1	0	0	MAPK12	mitogen-activated protein kinase 12
hsa-miR-1224-3p	1	0	1	1	1	1	SPPL3	signal peptide peptidase like 3
hsa-miR-1224-3p	0	0	1	1	1	1	GLIPR1L2	GLI pathogenesis-related 1 like 2
hsa-miR-1224-3p	1	0	1	1	1	1	MASP1	mannan-binding lectin serine peptidase 1 (C4/C2 activating component of Ra-reactive factor)
hsa-miR-1224-3p	0	0	1	1	1	1	PRR14L	proline rich 14-like
hsa-miR-1224-3p	1	0	1	1	0	0	RBM27	RNA binding motif protein 27
hsa-miR-1224-3p	1	0	1	1	0	0	CECR2	cat eye syndrome chromosome region, candidate 2
hsa-miR-1224-3p	1	0	1	1	1	1	SLC39A13	solute carrier family 39 (zinc transporter), member 13
hsa-miR-1224-3p	0	0	1	1	1	1	MLIP	muscular LMNA-interacting protein
hsa-miR-1224-3p	1	0	1	1	1	1	RREB1	ras responsive element binding protein 1
hsa-miR-1224-3p	0	0	1	1	1	1	ARMCX3	armadillo repeat containing, X-linked 3
hsa-miR-1224-3p	0	0	1	0	0	0	OVOS	ovostatin
hsa-miR-1224-3p	0	0	1	1	0	0	SBSN	suprabasin
hsa-miR-1224-3p	1	0	1	1	1	1	KLHL6	kelch-like 6 (Drosophila)
hsa-miR-1224-3p	0	0	1	0	0	0	LINC00338	long intergenic non-protein coding RNA 338
hsa-miR-1224-3p	1	0	1	1	1	1	PGAP1	post-GPI attachment to proteins 1
hsa-miR-1224-3p	1	0	1	1	1	1	WLS	wntless homolog (Drosophila)
hsa-miR-1224-3p	0	0	1	0	0	0	DKFZp686K1684	uncharacterized LOC440034
hsa-miR-1224-3p	1	0	1	1	1	1	HIC2	hypermethylated in cancer 2
hsa-miR-1224-3p	1	0	1	1	1	1	BSDC1	BSD domain containing 1
hsa-miR-1224-3p	0	0	1	1	0	0	HNRNPAB	heterogeneous nuclear ribonucleoprotein A/B
hsa-miR-1224-3p	0	0	1	0	1	1	CD59	CD59 molecule, complement regulatory protein
hsa-miR-1224-3p	1	0	1	1	1	1	AP2M1	adaptor-related protein complex 2, mu 1 subunit
hsa-miR-1224-3p	1	0	1	1	1	1	MDK	midkine (neurite growth-promoting factor 2)
hsa-miR-1224-3p	1	0	1	1	0	0	TOE1	target of EGR1, member 1 (nuclear)
hsa-miR-1224-3p	1	0	1	0	0	0	IGLON5	IgLON family member 5
hsa-miR-1224-3p	0	0	1	1	0	0	GPX3	glutathione peroxidase 3 (plasma)
hsa-miR-1224-3p	0	0	1	1	1	1	TBC1D10A	TBC1 domain family, member 10A
hsa-miR-1224-3p	0	0	1	1	1	1	DGCR14	DiGeorge syndrome critical region gene 14
hsa-miR-1224-3p	1	0	1	1	1	1	CSNK1D	casein kinase 1, delta
hsa-miR-1224-3p	0	0	1	1	1	1	APH1A	anterior pharynx defective 1 homolog A (C. elegans)
hsa-miR-1224-3p	1	0	1	1	1	1	SYNGR1	synaptogyrin 1
hsa-miR-1224-3p	1	0	1	1	1	1	CNIH2	cornichon homolog 2 (Drosophila)
hsa-miR-1224-3p	0	0	1	1	1	1	C1orf85	chromosome 1 open reading frame 85
hsa-miR-1224-3p	0	0	1	0	0	0	PRMT1	protein arginine methyltransferase 1
hsa-miR-1224-3p	1	1	1	1	0	0	EFNA3	ephrin-A3
hsa-miR-1224-3p	0	0	1	1	1	1	ATP5F1	ATP synthase, H+ transporting, mitochondrial Fo complex, subunit B1
hsa-miR-1224-3p	0	0	1	1	1	1	CHCHD4	coiled-coil-helix-coiled-coil-helix domain containing 4
hsa-miR-1224-3p	1	0	1	1	1	1	DIS3L2	DIS3 mitotic control homolog (S. cerevisiae)-like 2
hsa-miR-1224-3p	0	0	1	1	1	1	MRPS36	mitochondrial ribosomal protein S36
hsa-miR-1224-3p	1	0	1	1	1	1	CHTF8	CTF8, chromosome transmission fidelity factor 8 homolog (S. cerevisiae)
hsa-miR-1224-3p	1	0	1	0	1	1	ARL6IP6	ADP-ribosylation-like factor 6 interacting protein 6
hsa-miR-1224-3p	0	0	1	1	1	1	PROCR	protein C receptor, endothelial
hsa-miR-1224-3p	1	0	1	1	0	0	FSCN1	fascin homolog 1, actin-bundling protein (Strongylocentrotus purpuratus)
hsa-miR-1224-3p	1	0	1	1	1	1	COPZ1	coatomer protein complex, subunit zeta 1
hsa-miR-1224-3p	0	0	1	0	0	0	STK16	serine/threonine kinase 16
hsa-miR-1224-3p	0	0	1	1	1	1	GRAP2	GRB2-related adaptor protein 2
hsa-miR-1224-3p	1	0	1	1	0	0	MAP3K10	mitogen-activated protein kinase kinase kinase 10
hsa-miR-1224-3p	1	0	1	1	1	1	LYPLA2	lysophospholipase II
hsa-miR-1224-3p	0	0	1	1	1	1	EIF3J	eukaryotic translation initiation factor 3, subunit J
hsa-miR-1224-3p	1	0	1	1	1	1	WIPF1	WAS/WASL interacting protein family, member 1
hsa-miR-1224-3p	0	0	1	1	1	1	MAZ	MYC-associated zinc finger protein (purine-binding transcription factor)
hsa-miR-1224-3p	0	0	1	1	1	1	NFATC4	nuclear factor of activated T-cells, cytoplasmic, calcineurin-dependent 4
hsa-miR-1224-3p	0	0	1	0	0	0	FLJ45248	FLJ45248 protein
hsa-miR-1224-3p	0	0	1	1	1	1	VPS16	vacuolar protein sorting 16 homolog (S. cerevisiae)
hsa-miR-1224-3p	0	0	1	1	1	1	CAPZB	capping protein (actin filament) muscle Z-line, beta
hsa-miR-1224-3p	0	0	1	1	1	1	MPDU1	mannose-P-dolichol utilization defect 1
hsa-miR-1224-3p	1	0	1	1	1	1	PPP5C	protein phosphatase 5, catalytic subunit
hsa-miR-1224-3p	0	0	1	1	1	1	TMEM109	transmembrane protein 109
hsa-miR-1224-3p	0	0	1	1	1	1	SAP130	Sin3A-associated protein, 130kDa
hsa-miR-1224-3p	0	0	1	1	1	1	RPUSD1	RNA pseudouridylate synthase domain containing 1
hsa-miR-1224-3p	0	0	1	1	1	1	PEX19	peroxisomal biogenesis factor 19
hsa-miR-1224-3p	1	0	1	1	1	1	BIN3	bridging integrator 3
hsa-miR-1224-3p	0	0	1	1	1	1	WIBG	within bgcn homolog (Drosophila)
hsa-miR-1224-3p	1	0	1	1	1	1	TIMP3	TIMP metallopeptidase inhibitor 3
hsa-miR-1224-3p	0	0	1	1	0	0	FAM57B	family with sequence similarity 57, member B
hsa-miR-1224-3p	0	0	1	1	1	1	FUS	fused in sarcoma
hsa-miR-1224-3p	1	0	1	1	1	1	ARHGEF40	Rho guanine nucleotide exchange factor (GEF) 40
hsa-miR-1224-3p	0	0	1	1	1	1	STRAP	serine/threonine kinase receptor associated protein
hsa-miR-1224-3p	1	0	1	1	1	1	TMEM55B	transmembrane protein 55B
hsa-miR-1224-3p	1	0	1	1	1	1	RALY	RNA binding protein, autoantigenic (hnRNP-associated with lethal yellow homolog (mouse))
hsa-miR-1224-3p	1	0	1	1	1	1	ACTN4	actinin, alpha 4
hsa-miR-1224-3p	1	0	1	1	1	1	UBE2K	ubiquitin-conjugating enzyme E2K
hsa-miR-1224-3p	0	0	1	1	0	0	RAMP2	receptor (G protein-coupled) activity modifying protein 2
hsa-miR-1224-3p	1	0	1	0	1	1	CD47	CD47 molecule
hsa-miR-1224-3p	0	0	1	0	0	0	NUDT18	nudix (nucleoside diphosphate linked moiety X)-type motif 18
hsa-miR-1224-3p	0	0	1	1	1	1	SLC33A1	solute carrier family 33 (acetyl-CoA transporter), member 1
hsa-miR-1224-3p	0	0	1	1	1	1	ARHGEF25	Rho guanine nucleotide exchange factor (GEF) 25
hsa-miR-1224-3p	0	0	1	1	0	0	NFKBIL1	nuclear factor of kappa light polypeptide gene enhancer in B-cells inhibitor-like 1
hsa-miR-1224-3p	1	0	1	1	1	1	MED1	mediator complex subunit 1
hsa-miR-1224-3p	0	0	1	1	0	0	CORO1B	coronin, actin binding protein, 1B
hsa-miR-1224-3p	0	0	1	1	0	0	IL11RA	interleukin 11 receptor, alpha
hsa-miR-1224-3p	1	0	1	1	0	0	MMP11	matrix metallopeptidase 11 (stromelysin 3)
hsa-miR-1224-3p	1	0	1	1	1	1	RND3	Rho family GTPase 3
hsa-miR-1224-3p	0	0	1	1	1	1	C9orf3	chromosome 9 open reading frame 3
hsa-miR-1224-3p	0	0	1	0	0	0	LOC731789	uncharacterized LOC731789
hsa-miR-1224-3p	1	0	1	0	1	1	BTRC	beta-transducin repeat containing E3 ubiquitin protein ligase
hsa-miR-1224-3p	1	0	1	1	1	1	TIPARP	TCDD-inducible poly(ADP-ribose) polymerase
hsa-miR-1224-3p	1	0	1	1	1	1	MAPK8IP3	mitogen-activated protein kinase 8 interacting protein 3
hsa-miR-1224-3p	1	0	1	1	1	1	NAPEPLD	N-acyl phosphatidylethanolamine phospholipase D
hsa-miR-1224-3p	0	0	1	0	0	0	LOC440518	golgin A2 pseudogene
hsa-miR-1224-3p	1	0	1	1	1	1	MAN2A2	mannosidase, alpha, class 2A, member 2
hsa-miR-1224-3p	0	0	1	1	1	1	PTGS1	prostaglandin-endoperoxide synthase 1 (prostaglandin G/H synthase and cyclooxygenase)
hsa-miR-1224-3p	1	0	1	0	1	1	RBBP5	retinoblastoma binding protein 5
hsa-miR-1224-3p	1	0	1	0	1	1	DCBLD2	discoidin, CUB and LCCL domain containing 2
hsa-miR-1224-3p	0	0	1	1	1	1	PROS1	protein S (alpha)
hsa-miR-1224-3p	1	0	1	1	1	1	LGR4	leucine-rich repeat containing G protein-coupled receptor 4
hsa-miR-1224-3p	0	0	1	1	1	1	ALDH3B1	aldehyde dehydrogenase 3 family, member B1
hsa-miR-1224-3p	1	0	1	0	1	1	KCNB1	potassium voltage-gated channel, Shab-related subfamily, member 1
hsa-miR-1224-3p	1	0	1	1	1	1	MLL	myeloid/lymphoid or mixed-lineage leukemia (trithorax homolog, Drosophila)
hsa-miR-1224-3p	1	0	1	1	1	1	ATP2B2	ATPase, Ca++ transporting, plasma membrane 2
hsa-miR-1224-3p	0	0	1	1	0	0	COL6A2	collagen, type VI, alpha 2
hsa-miR-1224-3p	1	0	1	1	1	1	ARSB	arylsulfatase B
hsa-miR-1224-3p	0	0	1	1	1	1	ATP7A	ATPase, Cu++ transporting, alpha polypeptide
hsa-miR-1224-3p	0	0	1	1	0	0	CHRNE	cholinergic receptor, nicotinic, epsilon (muscle)
hsa-miR-1224-3p	1	0	1	0	1	1	SLC26A2	solute carrier family 26 (sulfate transporter), member 2
hsa-miR-1224-3p	0	0	1	1	0	0	EMD	emerin
hsa-miR-1224-3p	0	0	1	1	1	1	HSD11B2	hydroxysteroid (11-beta) dehydrogenase 2
hsa-miR-1224-3p	1	0	1	1	1	1	KCNA1	potassium voltage-gated channel, shaker-related subfamily, member 1 (episodic ataxia with myokymia)
hsa-miR-1224-3p	1	0	1	1	1	1	LEP	leptin
hsa-miR-1224-3p	0	0	1	1	0	0	KCNH2	potassium voltage-gated channel, subfamily H (eag-related), member 2
hsa-miR-1224-3p	1	0	1	1	1	1	NF2	neurofibromin 2 (merlin)
hsa-miR-1224-3p	1	0	1	1	1	1	PMP22	peripheral myelin protein 22
hsa-miR-1224-3p	1	0	1	1	1	1	ATXN1	ataxin 1
hsa-miR-1224-3p	0	0	1	1	0	0	TGM1	transglutaminase 1 (K polypeptide epidermal type I, protein-glutamine-gamma-glutamyltransferase)
hsa-miR-1224-3p	1	0	1	1	1	1	HNF1B	HNF1 homeobox B
hsa-miR-1224-3p	0	0	1	1	1	1	CRX	cone-rod homeobox
hsa-miR-1224-3p	1	0	1	1	1	1	DCX	doublecortin
hsa-miR-1224-3p	0	0	1	1	0	0	IL3	interleukin 3 (colony-stimulating factor, multiple)
hsa-miR-1224-3p	0	0	1	1	1	1	LTA	lymphotoxin alpha (TNF superfamily, member 1)
hsa-miR-1224-3p	0	0	1	1	1	1	IGF2	insulin-like growth factor 2 (somatomedin A)
hsa-miR-1224-3p	1	0	1	1	1	1	FASLG	Fas ligand (TNF superfamily, member 6)
hsa-miR-1224-3p	0	0	1	1	1	1	IL11	interleukin 11
hsa-miR-1224-3p	1	0	1	0	1	1	ADRA2B	adrenoceptor alpha 2B
hsa-miR-1224-3p	0	0	1	1	0	0	CA4	carbonic anhydrase IV
hsa-miR-1224-3p	1	0	1	1	1	1	CACNB4	calcium channel, voltage-dependent, beta 4 subunit
hsa-miR-1224-3p	1	0	1	1	1	1	CHRM1	cholinergic receptor, muscarinic 1
hsa-miR-1224-3p	1	0	1	0	0	0	CSF2	colony stimulating factor 2 (granulocyte-macrophage)
hsa-miR-1224-3p	1	0	1	1	1	1	GRIA4	glutamate receptor, ionotropic, AMPA 4
hsa-miR-1224-3p	1	0	1	1	0	0	GRIN2A	glutamate receptor, ionotropic, N-methyl D-aspartate 2A
hsa-miR-1224-3p	0	0	1	1	1	1	GRIN2B	glutamate receptor, ionotropic, N-methyl D-aspartate 2B
hsa-miR-1224-3p	1	0	1	0	1	1	KCNJ2	potassium inwardly-rectifying channel, subfamily J, member 2
hsa-miR-1224-3p	1	0	1	1	1	1	PPP3R1	protein phosphatase 3, regulatory subunit B, alpha
hsa-miR-1224-3p	1	0	1	1	1	1	PTGDR	prostaglandin D2 receptor (DP)
hsa-miR-1224-3p	1	0	1	1	1	1	RARA	retinoic acid receptor, alpha
hsa-miR-1224-3p	1	0	1	1	1	1	MTUS1	microtubule associated tumor suppressor 1
hsa-miR-1224-3p	0	0	1	0	0	0	KLK2	kallikrein-related peptidase 2
hsa-miR-1224-3p	1	0	1	1	1	1	KCTD11	potassium channel tetramerisation domain containing 11
hsa-miR-1224-3p	1	0	1	1	1	1	ABLIM1	actin binding LIM protein 1
hsa-miR-1224-3p	1	0	1	1	1	1	HMGXB4	HMG box domain containing 4
hsa-miR-1224-3p	0	0	1	1	1	1	SMAD1	SMAD family member 1
hsa-miR-1224-3p	1	0	1	1	1	1	RBMS3	RNA binding motif, single stranded interacting protein 3
hsa-miR-1224-3p	0	0	1	1	0	0	MANBAL	mannosidase, beta A, lysosomal-like
hsa-miR-1224-3p	1	0	1	0	1	1	ZNF740	zinc finger protein 740
hsa-miR-1224-3p	0	0	1	1	0	0	PAPL	iron/zinc purple acid phosphatase-like protein
hsa-miR-1224-3p	1	0	1	1	1	1	NRARP	NOTCH-regulated ankyrin repeat protein
hsa-miR-1224-3p	0	0	1	1	1	1	CLEC2D	C-type lectin domain family 2, member D
hsa-miR-1224-3p	0	0	1	1	0	0	LINGO4	leucine rich repeat and Ig domain containing 4
hsa-miR-1224-3p	1	0	1	0	1	1	LRRC55	leucine rich repeat containing 55
hsa-miR-1224-3p	1	0	1	0	1	1	YPEL2	yippee-like 2 (Drosophila)
hsa-miR-1224-3p	1	0	1	1	0	0	NEURL4	neuralized homolog 4 (Drosophila)
hsa-miR-1224-3p	1	0	1	0	1	1	IP6K1	inositol hexakisphosphate kinase 1
hsa-miR-1224-3p	0	0	1	1	0	0	NTRK1	neurotrophic tyrosine kinase, receptor, type 1
hsa-miR-1224-3p	0	0	1	1	0	0	REG3G	regenerating islet-derived 3 gamma
hsa-miR-1224-3p	1	0	1	1	1	1	LPHN1	latrophilin 1
hsa-miR-1224-3p	1	0	1	1	1	1	FNIP1	folliculin interacting protein 1
hsa-miR-1224-3p	1	0	1	0	1	1	ERMN	ermin, ERM-like protein
hsa-miR-1224-3p	1	0	1	1	1	1	SHE	Src homology 2 domain containing E
hsa-miR-1224-3p	0	0	1	1	1	1	SPIN3	spindlin family, member 3
hsa-miR-1224-3p	0	0	1	1	0	0	SOHLH1	spermatogenesis and oogenesis specific basic helix-loop-helix 1
hsa-miR-1224-3p	0	0	1	1	0	0	KRTAP5-7	keratin associated protein 5-7
hsa-miR-1224-3p	1	0	1	1	1	1	DISC1	disrupted in schizophrenia 1
hsa-miR-1224-3p	1	0	1	1	1	1	FXR1	fragile X mental retardation, autosomal homolog 1
hsa-miR-1224-3p	0	0	1	1	0	0	VSIG8	V-set and immunoglobulin domain containing 8
hsa-miR-1224-3p	1	0	1	1	1	1	CA7	carbonic anhydrase VII
hsa-miR-1224-3p	1	0	1	1	0	0	USP21	ubiquitin specific peptidase 21
hsa-miR-1224-3p	0	0	1	1	0	0	POLR3H	polymerase (RNA) III (DNA directed) polypeptide H (22.9kD)
hsa-miR-1224-3p	1	0	1	1	1	1	NTRK2	neurotrophic tyrosine kinase, receptor, type 2
hsa-miR-1224-3p	1	0	1	1	1	1	SERBP1	SERPINE1 mRNA binding protein 1
hsa-miR-1224-3p	0	0	1	1	0	0	S100A13	S100 calcium binding protein A13
hsa-miR-1224-3p	1	0	1	1	1	1	CANX	calnexin
hsa-miR-1224-3p	1	0	1	0	1	1	TNRC6B	trinucleotide repeat containing 6B
hsa-miR-1224-3p	1	0	1	1	1	1	SLC6A9	solute carrier family 6 (neurotransmitter transporter, glycine), member 9
hsa-miR-1224-3p	1	0	1	1	1	1	FNBP1L	formin binding protein 1-like
hsa-miR-1224-3p	0	0	1	1	0	0	ARPC4	actin related protein 2/3 complex, subunit 4, 20kDa
hsa-miR-1224-3p	1	0	1	0	1	1	CELF2	CUGBP, Elav-like family member 2
hsa-miR-1224-3p	0	0	1	0	1	1	STAG3L2	stromal antigen 3-like 2
hsa-miR-1224-3p	0	0	1	1	0	0	IRAK1	interleukin-1 receptor-associated kinase 1
hsa-miR-1224-3p	1	0	1	1	1	1	PLEKHG1	pleckstrin homology domain containing, family G (with RhoGef domain) member 1
hsa-miR-1224-3p	0	0	1	1	1	1	PLGLB1	plasminogen-like B1
hsa-miR-1224-3p	1	0	1	0	1	1	SRGAP3	SLIT-ROBO Rho GTPase activating protein 3
hsa-miR-1224-3p	1	0	1	1	1	1	SMOC1	SPARC related modular calcium binding 1
hsa-miR-1224-3p	1	0	1	1	1	1	SCN1B	sodium channel, voltage-gated, type I, beta subunit
hsa-miR-1224-3p	0	0	1	1	1	1	CTLA4	cytotoxic T-lymphocyte-associated protein 4
hsa-miR-1224-3p	0	0	1	1	1	1	ATAD3C	ATPase family, AAA domain containing 3C
hsa-miR-1224-3p	1	0	1	1	1	1	KREMEN1	kringle containing transmembrane protein 1
hsa-miR-1224-3p	1	0	1	0	1	1	CREBZF	CREB/ATF bZIP transcription factor
hsa-miR-1224-3p	0	0	1	1	0	0	TNFRSF25	tumor necrosis factor receptor superfamily, member 25
hsa-miR-1224-3p	1	0	1	1	1	1	CDC42	cell division cycle 42 (GTP binding protein, 25kDa)
hsa-miR-1224-3p	1	0	1	1	0	0	ANKRD34A	ankyrin repeat domain 34A
hsa-miR-1224-3p	1	0	1	1	1	1	LFNG	LFNG O-fucosylpeptide 3-beta-N-acetylglucosaminyltransferase
hsa-miR-1224-3p	1	0	1	1	1	1	PAPD5	PAP associated domain containing 5
hsa-miR-1224-3p	1	0	1	1	1	1	CRCP	CGRP receptor component
hsa-miR-1224-3p	0	0	1	1	0	0	FAM110A	family with sequence similarity 110, member A
hsa-miR-1224-3p	1	0	1	1	1	1	DIAPH3	diaphanous homolog 3 (Drosophila)
hsa-miR-1224-3p	1	0	1	1	1	1	SLC9A6	solute carrier family 9, subfamily A (NHE6, cation proton antiporter 6), member 6
hsa-miR-1224-3p	1	0	1	1	1	1	NSL1	NSL1, MIND kinetochore complex component, homolog (S. cerevisiae)
hsa-miR-1224-3p	0	0	1	1	1	1	TMEM8B	transmembrane protein 8B
hsa-miR-1224-3p	0	0	1	1	1	1	TTC14	tetratricopeptide repeat domain 14
hsa-miR-1224-3p	1	0	1	1	1	1	PVRL2	poliovirus receptor-related 2 (herpesvirus entry mediator B)
hsa-miR-1224-3p	1	0	1	0	1	1	SRGAP2	SLIT-ROBO Rho GTPase activating protein 2
hsa-miR-1224-3p	1	0	1	1	1	1	UBTF	upstream binding transcription factor, RNA polymerase I
hsa-miR-1224-3p	1	0	1	0	1	1	SLC7A6	solute carrier family 7 (amino acid transporter light chain, y+L system), member 6
hsa-miR-1224-3p	1	0	1	1	1	1	PDE11A	phosphodiesterase 11A
hsa-miR-1224-3p	1	0	1	1	1	1	ATG9A	autophagy related 9A
hsa-miR-1224-3p	1	0	1	1	1	1	NCOR2	nuclear receptor corepressor 2
hsa-miR-1224-3p	1	0	1	1	1	1	PRR3	proline rich 3
hsa-miR-1224-3p	0	0	1	1	0	0	VPS37D	vacuolar protein sorting 37 homolog D (S. cerevisiae)
hsa-miR-1224-3p	0	0	1	0	0	0	ECSCR	endothelial cell surface expressed chemotaxis and apoptosis regulator
hsa-miR-1224-3p	1	0	1	1	1	1	SRSF1	serine/arginine-rich splicing factor 1
hsa-miR-1224-3p	1	0	1	1	1	1	HNRNPUL2	heterogeneous nuclear ribonucleoprotein U-like 2
hsa-miR-1224-3p	1	0	1	1	1	1	HAP1	huntingtin-associated protein 1
hsa-miR-1224-3p	1	0	1	0	1	1	FBXO41	F-box protein 41
hsa-miR-1224-3p	1	0	1	1	0	0	DLGAP3	discs, large (Drosophila) homolog-associated protein 3
hsa-miR-1224-3p	1	0	1	1	1	1	SHANK3	SH3 and multiple ankyrin repeat domains 3
hsa-miR-1224-3p	1	0	1	0	1	1	UNC13A	unc-13 homolog A (C. elegans)
hsa-miR-1224-3p	1	0	1	0	1	1	ODZ3	odz, odd Oz/ten-m homolog 3 (Drosophila)
hsa-miR-1224-3p	0	0	1	0	1	1	TMEM150C	transmembrane protein 150C
hsa-miR-1224-3p	1	0	1	1	1	1	MYO1C	myosin IC
hsa-miR-1224-3p	0	0	1	1	0	0	C14orf166B	chromosome 14 open reading frame 166B
hsa-miR-1224-3p	1	0	1	1	1	1	NXF1	nuclear RNA export factor 1
hsa-miR-1224-3p	1	0	1	1	0	0	ASIC2	acid-sensing (proton-gated) ion channel 2
hsa-miR-1224-3p	1	0	1	1	1	1	ASIC1	acid-sensing (proton-gated) ion channel 1
hsa-miR-1224-3p	1	0	1	1	1	1	ADAM10	ADAM metallopeptidase domain 10
hsa-miR-1224-3p	0	0	1	1	0	0	CLPTM1	cleft lip and palate associated transmembrane protein 1
hsa-miR-1224-3p	1	0	1	1	1	1	KLF6	Kruppel-like factor 6
hsa-miR-1224-3p	0	0	1	1	0	0	DIO3	deiodinase, iodothyronine, type III
hsa-miR-1224-3p	1	0	1	0	0	0	DLG4	discs, large homolog 4 (Drosophila)
hsa-miR-1224-3p	0	0	1	1	0	0	DNAH9	dynein, axonemal, heavy chain 9
hsa-miR-1224-3p	0	0	1	1	1	1	DSCAM	Down syndrome cell adhesion molecule
hsa-miR-1224-3p	1	0	1	1	1	1	DYRK1A	dual-specificity tyrosine-(Y)-phosphorylation regulated kinase 1A
hsa-miR-1224-3p	1	0	1	0	1	1	EFNB3	ephrin-B3
hsa-miR-1224-3p	1	0	1	0	1	1	ELAVL3	ELAV (embryonic lethal, abnormal vision, Drosophila)-like 3 (Hu antigen C)
hsa-miR-1224-3p	0	0	1	0	1	1	EMP1	epithelial membrane protein 1
hsa-miR-1224-3p	1	0	1	1	1	1	FOXC1	forkhead box C1
hsa-miR-1224-3p	1	0	1	1	0	0	FOXO3	forkhead box O3
hsa-miR-1224-3p	1	0	1	1	0	0	GDI1	GDP dissociation inhibitor 1
hsa-miR-1224-3p	1	0	1	0	1	1	B4GALT1	UDP-Gal:betaGlcNAc beta 1,4- galactosyltransferase, polypeptide 1
hsa-miR-1224-3p	1	0	1	1	1	1	NDST1	N-deacetylase/N-sulfotransferase (heparan glucosaminyl) 1
hsa-miR-1224-3p	0	0	1	1	1	1	IL13RA1	interleukin 13 receptor, alpha 1
hsa-miR-1224-3p	0	0	1	1	0	0	ACP2	acid phosphatase 2, lysosomal
hsa-miR-1224-3p	1	0	1	1	1	1	AHNAK	AHNAK nucleoprotein
hsa-miR-1224-3p	1	0	1	1	1	1	ARF3	ADP-ribosylation factor 3
hsa-miR-1224-3p	1	0	1	0	1	1	ARNT	aryl hydrocarbon receptor nuclear translocator
hsa-miR-1224-3p	0	0	1	1	1	1	BTN1A1	butyrophilin, subfamily 1, member A1
hsa-miR-1224-3p	1	0	1	1	1	1	CDC25A	cell division cycle 25 homolog A (S. pombe)
hsa-miR-1224-3p	1	0	1	1	1	1	CDK2	cyclin-dependent kinase 2
hsa-miR-1224-3p	0	0	1	1	0	0	CDKN2D	cyclin-dependent kinase inhibitor 2D (p19, inhibits CDK4)
hsa-miR-1224-3p	0	0	1	1	1	1	CDR2	cerebellar degeneration-related protein 2, 62kDa
hsa-miR-1224-3p	1	0	1	1	1	1	CENPB	centromere protein B, 80kDa
hsa-miR-1224-3p	0	0	1	1	0	0	CNTFR	ciliary neurotrophic factor receptor
hsa-miR-1224-3p	1	0	1	1	1	1	COL4A6	collagen, type IV, alpha 6
hsa-miR-1224-3p	1	0	1	1	1	1	CSNK2A1	casein kinase 2, alpha 1 polypeptide
hsa-miR-1224-3p	0	0	1	1	0	0	DDB1	damage-specific DNA binding protein 1, 127kDa
hsa-miR-1224-3p	1	0	1	1	0	0	DES	desmin
hsa-miR-1224-3p	1	0	1	1	1	1	HBEGF	heparin-binding EGF-like growth factor
hsa-miR-1224-3p	1	0	1	0	1	1	ETV6	ets variant 6
hsa-miR-1224-3p	1	0	1	1	1	1	FKBP4	FK506 binding protein 4, 59kDa
hsa-miR-1224-3p	1	0	1	0	1	1	FOXO1	forkhead box O1
hsa-miR-1224-3p	0	0	1	1	1	1	FLI1	Friend leukemia virus integration 1
hsa-miR-1224-3p	0	0	1	1	1	1	GFAP	glial fibrillary acidic protein
hsa-miR-1224-3p	0	0	1	1	0	0	GLP1R	glucagon-like peptide 1 receptor
hsa-miR-1224-3p	0	0	1	1	1	1	GYS1	glycogen synthase 1 (muscle)
hsa-miR-1224-3p	0	0	1	1	1	1	HMGCS1	3-hydroxy-3-methylglutaryl-CoA synthase 1 (soluble)
hsa-miR-1224-3p	0	0	1	1	1	1	HOXB5	homeobox B5
hsa-miR-1224-3p	1	0	1	1	0	0	IHH	Indian hedgehog
hsa-miR-1224-3p	1	0	1	1	1	1	ITGA5	integrin, alpha 5 (fibronectin receptor, alpha polypeptide)
hsa-miR-1224-3p	1	0	1	1	1	1	KPNB1	karyopherin (importin) beta 1
hsa-miR-1224-3p	1	0	1	0	1	1	LAMC1	laminin, gamma 1 (formerly LAMB2)
hsa-miR-1224-3p	1	0	1	1	1	1	LIF	leukemia inhibitory factor
hsa-miR-1224-3p	1	0	1	1	1	1	LIMK1	LIM domain kinase 1
hsa-miR-1224-3p	1	0	1	1	1	1	LRP1	low density lipoprotein receptor-related protein 1
hsa-miR-1224-3p	1	0	1	1	1	1	MAP1A	microtubule-associated protein 1A
hsa-miR-1224-3p	1	0	1	1	1	1	MSR1	macrophage scavenger receptor 1
hsa-miR-1224-3p	1	0	1	1	1	1	PPP1R12B	protein phosphatase 1, regulatory subunit 12B
hsa-miR-1224-3p	1	0	1	1	1	1	NDN	necdin homolog (mouse)
hsa-miR-1224-3p	1	0	1	1	1	1	NGFR	nerve growth factor receptor
hsa-miR-1224-3p	1	0	1	1	1	1	NPTX1	neuronal pentraxin I
hsa-miR-1224-3p	1	0	1	1	1	1	FURIN	furin (paired basic amino acid cleaving enzyme)
hsa-miR-1224-3p	1	0	1	1	1	1	PBX2	pre-B-cell leukemia homeobox 2
hsa-miR-1224-3p	1	0	1	1	0	0	PDGFB	platelet-derived growth factor beta polypeptide
hsa-miR-1224-3p	0	0	1	1	0	0	PER1	period homolog 1 (Drosophila)
hsa-miR-1224-3p	1	0	1	1	1	1	PHB	prohibitin
hsa-miR-1224-3p	1	0	1	1	1	1	PHF1	PHD finger protein 1
hsa-miR-1224-3p	0	0	1	1	1	1	PIK3C2B	phosphatidylinositol-4-phosphate 3-kinase, catalytic subunit type 2 beta
hsa-miR-1224-3p	0	0	1	1	1	1	PIM1	pim-1 oncogene
hsa-miR-1224-3p	1	0	1	1	1	1	PLAGL2	pleiomorphic adenoma gene-like 2
hsa-miR-1224-3p	0	0	1	1	1	1	PLGLB2	plasminogen-like B2
hsa-miR-1224-3p	1	0	1	0	1	1	POU3F1	POU class 3 homeobox 1
hsa-miR-1224-3p	0	0	1	1	0	0	PPP1R8	protein phosphatase 1, regulatory subunit 8
hsa-miR-1224-3p	0	0	1	0	1	1	PSMD3	proteasome (prosome, macropain) 26S subunit, non-ATPase, 3
hsa-miR-1224-3p	0	0	1	1	1	1	PTK7	PTK7 protein tyrosine kinase 7
hsa-miR-1224-3p	1	0	1	1	1	1	PVRL1	poliovirus receptor-related 1 (herpesvirus entry mediator C)
hsa-miR-1224-3p	1	0	1	1	1	1	RAD23B	RAD23 homolog B (S. cerevisiae)
hsa-miR-1224-3p	1	0	1	1	0	0	RFX1	regulatory factor X, 1 (influences HLA class II expression)
hsa-miR-1224-3p	0	0	1	1	1	1	RGS2	regulator of G-protein signaling 2, 24kDa
hsa-miR-1224-3p	0	0	1	1	0	0	RNASE1	ribonuclease, RNase A family, 1 (pancreatic)
hsa-miR-1224-3p	1	0	1	0	1	1	SORT1	sortilin 1
hsa-miR-1224-3p	1	0	1	0	1	1	SCN9A	sodium channel, voltage-gated, type IX, alpha subunit
hsa-miR-1224-3p	1	0	1	0	1	1	CCL22	chemokine (C-C motif) ligand 22
hsa-miR-1224-3p	0	0	1	0	1	1	CXCL5	chemokine (C-X-C motif) ligand 5
hsa-miR-1224-3p	1	0	1	1	1	1	SHB	Src homology 2 domain containing adaptor protein B
hsa-miR-1224-3p	1	0	1	0	1	1	ST6GAL1	ST6 beta-galactosamide alpha-2,6-sialyltranferase 1
hsa-miR-1224-3p	1	0	1	0	1	1	SLC6A1	solute carrier family 6 (neurotransmitter transporter, GABA), member 1
hsa-miR-1224-3p	1	0	1	0	1	1	SOX11	SRY (sex determining region Y)-box 11
hsa-miR-1224-3p	1	0	1	1	1	1	SPTBN1	spectrin, beta, non-erythrocytic 1
hsa-miR-1224-3p	0	0	1	1	0	0	SSRP1	structure specific recognition protein 1
hsa-miR-1224-3p	1	0	1	1	1	1	STAC	SH3 and cysteine rich domain
hsa-miR-1224-3p	0	0	1	1	1	1	STAT5A	signal transducer and activator of transcription 5A
hsa-miR-1224-3p	1	0	1	0	1	1	STC1	stanniocalcin 1
hsa-miR-1224-3p	0	0	1	1	1	1	SULT2A1	sulfotransferase family, cytosolic, 2A, dehydroepiandrosterone (DHEA)-preferring, member 1
hsa-miR-1224-3p	0	0	1	1	1	1	SUPT6H	suppressor of Ty 6 homolog (S. cerevisiae)
hsa-miR-1224-3p	1	0	1	1	1	1	SYN2	synapsin II
hsa-miR-1224-3p	1	0	1	1	1	1	TFAP2B	transcription factor AP-2 beta (activating enhancer binding protein 2 beta)
hsa-miR-1224-3p	1	0	1	1	1	1	NR2E1	nuclear receptor subfamily 2, group E, member 1
hsa-miR-1224-3p	0	0	1	1	1	1	TRAF3	TNF receptor-associated factor 3
hsa-miR-1224-3p	0	0	1	1	0	0	HIRA	HIR histone cell cycle regulation defective homolog A (S. cerevisiae)
hsa-miR-1224-3p	1	0	1	0	1	1	UBE2D2	ubiquitin-conjugating enzyme E2D 2
hsa-miR-1224-3p	0	0	1	1	1	1	UBE2E1	ubiquitin-conjugating enzyme E2E 1
hsa-miR-1224-3p	1	0	1	1	0	0	SLC30A3	solute carrier family 30 (zinc transporter), member 3
hsa-miR-1224-3p	1	0	1	1	1	1	CUL5	cullin 5
hsa-miR-1224-3p	1	0	1	1	1	1	HMGA2	high mobility group AT-hook 2
hsa-miR-1224-3p	1	0	1	1	1	1	DYRK2	dual-specificity tyrosine-(Y)-phosphorylation regulated kinase 2
hsa-miR-1224-3p	0	0	1	1	1	1	DGKD	diacylglycerol kinase, delta 130kDa
hsa-miR-1224-3p	1	0	1	1	1	1	BARX2	BARX homeobox 2
hsa-miR-1224-3p	1	0	1	0	1	1	IRS2	insulin receptor substrate 2
hsa-miR-1224-3p	1	0	1	0	1	1	CDK5R1	cyclin-dependent kinase 5, regulatory subunit 1 (p35)
hsa-miR-1224-3p	1	0	1	1	1	1	BCL2L2	BCL2-like 2
hsa-miR-1224-3p	1	0	1	0	1	1	ACVR1B	activin A receptor, type IB
hsa-miR-1224-3p	1	0	1	1	1	1	ARL3	ADP-ribosylation factor-like 3
hsa-miR-1224-3p	1	0	1	1	1	1	BCL9	B-cell CLL/lymphoma 9
hsa-miR-1224-3p	1	0	1	1	1	1	COX11	COX11 cytochrome c oxidase assembly homolog (yeast)
hsa-miR-1224-3p	0	0	1	1	0	0	CPT1B	carnitine palmitoyltransferase 1B (muscle)
hsa-miR-1224-3p	1	0	1	1	1	1	ATF6B	activating transcription factor 6 beta
hsa-miR-1224-3p	1	0	1	1	1	1	DAG1	dystroglycan 1 (dystrophin-associated glycoprotein 1)
hsa-miR-1224-3p	1	0	1	1	1	1	EFNB1	ephrin-B1
hsa-miR-1224-3p	1	0	1	1	1	1	EGR3	early growth response 3
hsa-miR-1224-3p	1	0	1	1	1	1	ENSA	endosulfine alpha
hsa-miR-1224-3p	1	0	1	1	0	0	ERH	enhancer of rudimentary homolog (Drosophila)
hsa-miR-1224-3p	1	0	1	1	1	1	FOXD2	forkhead box D2
hsa-miR-1224-3p	0	0	1	1	1	1	TK2	thymidine kinase 2, mitochondrial
hsa-miR-1224-3p	0	0	1	1	1	1	PABPN1	poly(A) binding protein, nuclear 1
hsa-miR-1224-3p	0	0	1	0	0	0	XKRY	XK, Kell blood group complex subunit-related, Y-linked
hsa-miR-1224-3p	0	0	1	1	0	0	DYRK1B	dual-specificity tyrosine-(Y)-phosphorylation regulated kinase 1B
hsa-miR-1224-3p	1	0	1	1	1	1	LARGE	like-glycosyltransferase
hsa-miR-1224-3p	0	0	1	1	1	1	MTA2	metastasis associated 1 family, member 2
hsa-miR-1224-3p	1	0	1	1	1	1	BZRAP1	benzodiazapine receptor (peripheral) associated protein 1
hsa-miR-1224-3p	1	0	1	0	1	1	MAPKAPK2	mitogen-activated protein kinase-activated protein kinase 2
hsa-miR-1224-3p	1	0	1	1	1	1	NREP	neuronal regeneration related protein homolog (rat)
hsa-miR-1224-3p	1	0	1	1	1	1	NRXN3	neurexin 3
hsa-miR-1224-3p	1	0	1	1	1	1	KIF3B	kinesin family member 3B
hsa-miR-1224-3p	1	0	1	1	0	0	CHST10	carbohydrate sulfotransferase 10
hsa-miR-1224-3p	1	0	1	1	1	1	FXR2	fragile X mental retardation, autosomal homolog 2
hsa-miR-1224-3p	0	0	1	1	1	1	CDKN2B	cyclin-dependent kinase inhibitor 2B (p15, inhibits CDK4)
hsa-miR-1224-3p	1	0	1	1	1	1	GABRE	gamma-aminobutyric acid (GABA) A receptor, epsilon
hsa-miR-1224-3p	1	0	1	1	1	1	JARID2	jumonji, AT rich interactive domain 2
hsa-miR-1224-3p	0	0	1	1	0	0	MMP9	matrix metallopeptidase 9 (gelatinase B, 92kDa gelatinase, 92kDa type IV collagenase)
hsa-miR-1224-3p	1	0	1	1	0	0	MMP14	matrix metallopeptidase 14 (membrane-inserted)
hsa-miR-1224-3p	1	0	1	1	1	1	SLC23A2	solute carrier family 23 (nucleobase transporters), member 2
hsa-miR-1224-3p	1	0	1	1	1	1	MED13	mediator complex subunit 13
hsa-miR-1224-3p	0	0	1	1	1	1	GIF	gastric intrinsic factor (vitamin B synthesis)
hsa-miR-1224-3p	1	0	1	1	0	0	BCL3	B-cell CLL/lymphoma 3
hsa-miR-1224-3p	1	0	1	0	1	1	CALM3	calmodulin 3 (phosphorylase kinase, delta)
hsa-miR-1224-3p	1	0	1	1	1	1	DLX3	distal-less homeobox 3
hsa-miR-1224-3p	1	0	1	0	1	1	E2F1	E2F transcription factor 1
hsa-miR-1224-3p	0	0	1	0	1	1	FOSL2	FOS-like antigen 2
hsa-miR-1224-3p	0	0	1	1	1	1	H1F0	H1 histone family, member 0
hsa-miR-1224-3p	0	0	1	1	0	0	NCKAP1L	NCK-associated protein 1-like
hsa-miR-1224-3p	1	0	1	1	0	0	NNAT	neuronatin
hsa-miR-1224-3p	1	0	1	1	1	1	PHF2	PHD finger protein 2
hsa-miR-1224-3p	1	0	1	1	1	1	RALA	v-ral simian leukemia viral oncogene homolog A (ras related)
hsa-miR-1224-3p	1	0	1	0	1	1	CCDC6	coiled-coil domain containing 6
hsa-miR-1224-3p	1	0	1	1	1	1	RND2	Rho family GTPase 2
hsa-miR-1224-3p	0	0	1	1	1	1	MAPK8IP1	mitogen-activated protein kinase 8 interacting protein 1
hsa-miR-1224-3p	1	0	1	1	1	1	GABBR2	gamma-aminobutyric acid (GABA) B receptor, 2
hsa-miR-1224-3p	1	0	1	1	1	1	KCNE3	potassium voltage-gated channel, Isk-related family, member 3
hsa-miR-1224-3p	1	0	1	1	1	1	HCN4	hyperpolarization activated cyclic nucleotide-gated potassium channel 4
hsa-miR-1224-3p	0	0	1	1	1	1	CST8	cystatin 8 (cystatin-related epididymal specific)
hsa-miR-1224-3p	1	0	1	1	1	1	SCARB2	scavenger receptor class B, member 2
hsa-miR-1224-3p	1	0	1	1	1	1	GTF2E1	general transcription factor IIE, polypeptide 1, alpha 56kDa
hsa-miR-1224-3p	1	0	1	1	1	1	HOXA11	homeobox A11
hsa-miR-1224-3p	1	0	1	1	1	1	INSIG1	insulin induced gene 1
hsa-miR-1224-3p	0	0	1	1	0	0	LMNB1	lamin B1
hsa-miR-1224-3p	0	0	1	1	1	1	BCAM	basal cell adhesion molecule (Lutheran blood group)
hsa-miR-1224-3p	1	0	1	1	1	1	TCF20	transcription factor 20 (AR1)
hsa-miR-1224-3p	1	0	1	1	1	1	GIPC1	GIPC PDZ domain containing family, member 1
hsa-miR-1224-3p	0	0	1	1	1	1	ACTR3	ARP3 actin-related protein 3 homolog (yeast)
hsa-miR-1224-3p	1	0	1	1	1	1	ACTR1A	ARP1 actin-related protein 1 homolog A, centractin alpha (yeast)
hsa-miR-1224-3p	1	0	1	1	1	1	LHFP	lipoma HMGIC fusion partner
hsa-miR-1224-3p	0	0	1	1	1	1	RNF41	ring finger protein 41
hsa-miR-1224-3p	0	0	1	1	0	0	GDF11	growth differentiation factor 11
hsa-miR-1224-3p	1	0	1	0	1	1	SPRY3	sprouty homolog 3 (Drosophila)
hsa-miR-1224-3p	1	0	1	1	1	1	SPRY1	sprouty homolog 1, antagonist of FGF signaling (Drosophila)
hsa-miR-1224-3p	1	0	1	0	1	1	MAP1B	microtubule-associated protein 1B
hsa-miR-1224-3p	1	0	1	1	1	1	MMP16	matrix metallopeptidase 16 (membrane-inserted)
hsa-miR-1224-3p	1	0	1	1	1	1	MTF1	metal-regulatory transcription factor 1
hsa-miR-1224-3p	1	0	1	0	1	1	NAB1	NGFI-A binding protein 1 (EGR1 binding protein 1)
hsa-miR-1224-3p	1	0	1	1	1	1	SNAI1	snail homolog 1 (Drosophila)
hsa-miR-1224-3p	0	0	1	1	0	0	BMP1	bone morphogenetic protein 1
hsa-miR-1224-3p	1	0	1	1	1	1	DAGLA	diacylglycerol lipase, alpha
hsa-miR-1224-3p	1	0	1	1	1	1	DYNC1LI2	dynein, cytoplasmic 1, light intermediate chain 2
hsa-miR-1224-3p	1	0	1	1	1	1	NR4A2	nuclear receptor subfamily 4, group A, member 2
hsa-miR-1224-3p	1	0	1	1	1	1	CDK16	cyclin-dependent kinase 16
hsa-miR-1224-3p	1	0	1	0	1	1	PPP1R2	protein phosphatase 1, regulatory (inhibitor) subunit 2
hsa-miR-1224-3p	0	0	1	1	0	0	ANP32A	acidic (leucine-rich) nuclear phosphoprotein 32 family, member A
hsa-miR-1224-3p	1	0	1	1	1	1	SMC1A	structural maintenance of chromosomes 1A
hsa-miR-1224-3p	1	0	1	1	1	1	BASP1	brain abundant, membrane attached signal protein 1
hsa-miR-1224-3p	0	0	1	1	1	1	PGRMC2	progesterone receptor membrane component 2
hsa-miR-1224-3p	1	0	1	1	1	1	TIMM17A	translocase of inner mitochondrial membrane 17 homolog A (yeast)
hsa-miR-1224-3p	1	0	1	1	1	1	NEBL	nebulette
hsa-miR-1224-3p	1	0	1	0	1	1	ARFGEF2	ADP-ribosylation factor guanine nucleotide-exchange factor 2 (brefeldin A-inhibited)
hsa-miR-1224-3p	1	0	1	1	1	1	TRIM3	tripartite motif containing 3
hsa-miR-1224-3p	0	0	1	0	0	0	RELB	v-rel reticuloendotheliosis viral oncogene homolog B
hsa-miR-1224-3p	0	0	1	0	1	1	SLC16A2	solute carrier family 16, member 2 (thyroid hormone transporter)
hsa-miR-1224-3p	0	0	1	1	0	0	YEATS4	YEATS domain containing 4
hsa-miR-1224-3p	1	0	1	0	1	1	IGF2BP1	insulin-like growth factor 2 mRNA binding protein 1
hsa-miR-1224-3p	1	0	1	1	1	1	ZBTB6	zinc finger and BTB domain containing 6
hsa-miR-1224-3p	1	0	1	1	1	1	TSPAN9	tetraspanin 9
hsa-miR-1224-3p	1	0	1	1	1	1	MMP24	matrix metallopeptidase 24 (membrane-inserted)
hsa-miR-1224-3p	0	0	1	1	1	1	LYVE1	lymphatic vessel endothelial hyaluronan receptor 1
hsa-miR-1224-3p	0	0	1	1	1	1	JTB	jumping translocation breakpoint
hsa-miR-1224-3p	1	0	1	1	1	1	HIVEP2	human immunodeficiency virus type I enhancer binding protein 2
hsa-miR-1224-3p	0	0	1	1	0	0	DNAJB2	DnaJ (Hsp40) homolog, subfamily B, member 2
hsa-miR-1224-3p	1	0	1	1	0	0	PSKH1	protein serine kinase H1
hsa-miR-1224-3p	0	0	1	1	1	1	IFRD2	interferon-related developmental regulator 2
hsa-miR-1224-3p	1	0	1	0	1	1	SYNGAP1	synaptic Ras GTPase activating protein 1
hsa-miR-1224-3p	0	0	1	1	0	0	ZFPL1	zinc finger protein-like 1
hsa-miR-1224-3p	0	0	1	1	0	0	HNRNPA0	heterogeneous nuclear ribonucleoprotein A0
hsa-miR-1224-3p	1	0	1	1	1	1	CBX1	chromobox homolog 1
hsa-miR-1224-3p	0	0	1	1	0	0	STIP1	stress-induced-phosphoprotein 1
hsa-miR-1224-3p	1	0	1	1	1	1	FERMT2	fermitin family member 2
hsa-miR-1224-3p	1	0	1	1	1	1	RAB35	RAB35, member RAS oncogene family
hsa-miR-1224-3p	1	0	1	1	1	1	CD86	CD86 molecule
hsa-miR-1224-3p	1	0	1	1	1	1	RIT1	Ras-like without CAAX 1
hsa-miR-1224-3p	1	0	1	1	0	0	RNF5	ring finger protein 5, E3 ubiquitin protein ligase
hsa-miR-1224-3p	1	0	1	1	1	1	NR4A3	nuclear receptor subfamily 4, group A, member 3
hsa-miR-1224-3p	1	0	1	0	1	1	WASF2	WAS protein family, member 2
hsa-miR-1224-3p	1	0	1	1	1	1	ESM1	endothelial cell-specific molecule 1
hsa-miR-1224-3p	1	0	1	1	1	1	KAT7	K(lysine) acetyltransferase 7
hsa-miR-1224-3p	1	0	1	1	1	1	UTRN	utrophin
hsa-miR-1224-3p	1	0	1	1	1	1	VCP	valosin containing protein
hsa-miR-1224-3p	1	0	1	1	1	1	VEZF1	vascular endothelial zinc finger 1
hsa-miR-1224-3p	1	0	1	1	1	1	ERLIN2	ER lipid raft associated 2
hsa-miR-1224-3p	1	0	1	1	1	1	KLF12	Kruppel-like factor 12
hsa-miR-1224-3p	0	0	1	1	0	0	GABARAP	GABA(A) receptor-associated protein
hsa-miR-1224-3p	1	0	1	1	1	1	CASC3	cancer susceptibility candidate 3
hsa-miR-1224-3p	1	0	1	1	1	1	TARDBP	TAR DNA binding protein
hsa-miR-1224-3p	0	0	1	1	1	1	MIP	major intrinsic protein of lens fiber
hsa-miR-1224-3p	0	0	1	1	1	1	FRAT2	frequently rearranged in advanced T-cell lymphomas 2
hsa-miR-1224-3p	1	0	1	0	1	1	EIF2C2	eukaryotic translation initiation factor 2C, 2
hsa-miR-1224-3p	1	0	1	1	1	1	LAMP5	lysosomal-associated membrane protein family, member 5
hsa-miR-1224-3p	1	0	1	1	1	1	HS2ST1	heparan sulfate 2-O-sulfotransferase 1
hsa-miR-1224-3p	1	0	1	0	1	1	MYCBP	c-myc binding protein
hsa-miR-1224-3p	1	0	1	1	1	1	STK39	serine threonine kinase 39
hsa-miR-1224-3p	0	0	1	1	1	1	N6AMT1	N-6 adenine-specific DNA methyltransferase 1 (putative)
hsa-miR-1224-3p	1	0	1	0	1	1	VPS4A	vacuolar protein sorting 4 homolog A (S. cerevisiae)
hsa-miR-1224-3p	1	0	1	1	1	1	SERTAD3	SERTA domain containing 3
hsa-miR-1224-3p	0	0	1	1	1	1	ABT1	activator of basal transcription 1
hsa-miR-1224-3p	1	0	1	1	1	1	ZBTB43	zinc finger and BTB domain containing 43
hsa-miR-1224-3p	1	0	1	1	0	0	HOXC11	homeobox C11
hsa-miR-1224-3p	1	0	1	0	1	1	VAMP2	vesicle-associated membrane protein 2 (synaptobrevin 2)
hsa-miR-1224-3p	1	0	1	1	0	0	BRD4	bromodomain containing 4
hsa-miR-1224-3p	1	0	1	1	1	1	PATZ1	POZ (BTB) and AT hook containing zinc finger 1
hsa-miR-1224-3p	1	0	1	0	1	1	RNF11	ring finger protein 11
hsa-miR-1224-3p	1	0	1	0	1	1	DIEXF	digestive organ expansion factor homolog (zebrafish)
hsa-miR-1224-3p	0	0	1	1	1	1	TAF5L	TAF5-like RNA polymerase II, p300/CBP-associated factor (PCAF)-associated factor, 65kDa
hsa-miR-1224-3p	1	0	1	1	1	1	AFF4	AF4/FMR2 family, member 4
hsa-miR-1224-3p	1	0	1	1	1	1	RND1	Rho family GTPase 1
hsa-miR-1224-3p	0	0	1	1	0	0	APOBEC3C	apolipoprotein B mRNA editing enzyme, catalytic polypeptide-like 3C
hsa-miR-1224-3p	1	0	1	1	1	1	ZNF592	zinc finger protein 592
hsa-miR-1224-3p	1	0	1	1	1	1	RALGPS1	Ral GEF with PH domain and SH3 binding motif 1
hsa-miR-1224-3p	1	0	1	1	1	1	KDM4A	lysine (K)-specific demethylase 4A
hsa-miR-1224-3p	1	0	1	0	1	1	EDEM1	ER degradation enhancer, mannosidase alpha-like 1
hsa-miR-1224-3p	0	0	1	1	0	0	ZNF646	zinc finger protein 646
hsa-miR-1224-3p	0	0	1	1	0	0	SETD1A	SET domain containing 1A
hsa-miR-1224-3p	1	0	1	1	1	1	TBKBP1	TBK1 binding protein 1
hsa-miR-1224-3p	1	0	1	1	1	1	MLL4	myeloid/lymphoid or mixed-lineage leukemia 4
hsa-miR-1224-3p	1	0	1	1	1	1	RASSF2	Ras association (RalGDS/AF-6) domain family member 2
hsa-miR-1224-3p	1	0	1	1	1	1	ARHGEF11	Rho guanine nucleotide exchange factor (GEF) 11
hsa-miR-1224-3p	1	0	1	1	1	1	LRIG2	leucine-rich repeats and immunoglobulin-like domains 2
hsa-miR-1224-3p	1	0	1	0	1	1	LPPR4	lipid phosphate phosphatase-related protein type 4
hsa-miR-1224-3p	1	0	1	1	1	1	NUAK1	NUAK family, SNF1-like kinase, 1
hsa-miR-1224-3p	1	0	1	1	1	1	XPO7	exportin 7
hsa-miR-1224-3p	1	0	1	0	1	1	PDS5B	PDS5, regulator of cohesion maintenance, homolog B (S. cerevisiae)
hsa-miR-1224-3p	1	0	1	0	1	1	NMNAT2	nicotinamide nucleotide adenylyltransferase 2
hsa-miR-1224-3p	1	0	1	0	1	1	ZNF609	zinc finger protein 609
hsa-miR-1224-3p	0	0	1	1	1	1	FTSJD2	FtsJ methyltransferase domain containing 2
hsa-miR-1224-3p	1	0	1	1	1	1	SLC8A2	solute carrier family 8 (sodium/calcium exchanger), member 2
hsa-miR-1224-3p	0	0	1	1	1	1	FBXO28	F-box protein 28
hsa-miR-1224-3p	1	0	1	1	1	1	SIK2	salt-inducible kinase 2
hsa-miR-1224-3p	1	0	1	1	1	1	MYO1D	myosin ID
hsa-miR-1224-3p	1	0	1	0	1	1	KIAA1024	KIAA1024
hsa-miR-1224-3p	1	0	1	1	1	1	CSTF2T	cleavage stimulation factor, 3' pre-RNA, subunit 2, 64kDa, tau variant
hsa-miR-1224-3p	0	0	1	1	1	1	ICOSLG	inducible T-cell co-stimulator ligand
hsa-miR-1224-3p	1	0	1	1	1	1	PHF15	PHD finger protein 15
hsa-miR-1224-3p	1	0	1	0	1	1	LARP1	La ribonucleoprotein domain family, member 1
hsa-miR-1224-3p	1	0	1	1	1	1	MED13L	mediator complex subunit 13-like
hsa-miR-1224-3p	0	0	1	0	1	1	ZDHHC17	zinc finger, DHHC-type containing 17
hsa-miR-1224-3p	1	0	1	1	1	1	ASXL1	additional sex combs like 1 (Drosophila)
hsa-miR-1224-3p	0	0	1	1	1	1	BRI3	brain protein I3
hsa-miR-1224-3p	1	0	1	1	1	1	PARM1	prostate androgen-regulated mucin-like protein 1
hsa-miR-1224-3p	0	0	1	1	0	0	SPEF1	sperm flagellar 1
hsa-miR-1224-3p	1	0	1	0	1	1	PPP1R16B	protein phosphatase 1, regulatory subunit 16B
hsa-miR-1224-3p	0	0	1	1	1	1	CCDC69	coiled-coil domain containing 69
hsa-miR-1224-3p	1	0	1	1	1	1	PHF19	PHD finger protein 19
hsa-miR-1224-3p	1	0	1	1	1	1	ABCA12	ATP-binding cassette, sub-family A (ABC1), member 12
hsa-miR-1224-3p	0	0	1	1	0	0	GPKOW	G patch domain and KOW motifs
hsa-miR-1224-3p	1	0	1	1	1	1	PLA2G3	phospholipase A2, group III
hsa-miR-1224-3p	1	0	1	0	0	0	CD207	CD207 molecule, langerin
hsa-miR-1224-3p	1	0	1	1	1	1	ST8SIA3	ST8 alpha-N-acetyl-neuraminide alpha-2,8-sialyltransferase 3
hsa-miR-1224-3p	1	0	1	0	1	1	KLF13	Kruppel-like factor 13
hsa-miR-1224-3p	1	0	1	1	1	1	SNX9	sorting nexin 9
hsa-miR-1224-3p	0	0	1	1	1	1	ACSL5	acyl-CoA synthetase long-chain family member 5
hsa-miR-1224-3p	0	0	1	1	1	1	EMCN	endomucin
hsa-miR-1224-3p	1	0	1	1	1	1	RAPGEFL1	Rap guanine nucleotide exchange factor (GEF)-like 1
hsa-miR-1224-3p	1	0	1	1	1	1	RAB6B	RAB6B, member RAS oncogene family
hsa-miR-1224-3p	1	0	1	1	1	1	MEX3C	mex-3 homolog C (C. elegans)
hsa-miR-1224-3p	1	0	1	1	1	1	INO80	INO80 homolog (S. cerevisiae)
hsa-miR-1224-3p	1	0	1	0	1	1	UBE2Q1	ubiquitin-conjugating enzyme E2Q family member 1
hsa-miR-1224-3p	1	0	1	1	0	0	C17orf59	chromosome 17 open reading frame 59
hsa-miR-1224-3p	0	0	1	0	1	1	OTUB1	OTU domain, ubiquitin aldehyde binding 1
hsa-miR-1224-3p	1	0	1	0	1	1	DCAF16	DDB1 and CUL4 associated factor 16
hsa-miR-1224-3p	1	0	1	1	0	0	INO80D	INO80 complex subunit D
hsa-miR-1224-3p	0	0	1	1	1	1	NCAPG2	non-SMC condensin II complex, subunit G2
hsa-miR-1224-3p	1	0	1	1	1	1	HIF1AN	hypoxia inducible factor 1, alpha subunit inhibitor
hsa-miR-1224-3p	1	0	1	1	0	0	LAMTOR1	late endosomal/lysosomal adaptor, MAPK and MTOR activator 1
hsa-miR-1224-3p	0	0	1	1	1	1	C14orf119	chromosome 14 open reading frame 119
hsa-miR-1224-3p	1	0	1	1	1	1	C9orf40	chromosome 9 open reading frame 40
hsa-miR-1224-3p	1	0	1	1	1	1	PACS1	phosphofurin acidic cluster sorting protein 1
hsa-miR-1224-3p	1	0	1	1	1	1	SAMD4B	sterile alpha motif domain containing 4B
hsa-miR-1224-3p	1	0	1	0	1	1	MSL2	male-specific lethal 2 homolog (Drosophila)
hsa-miR-1224-3p	1	0	1	1	1	1	RPRD1A	regulation of nuclear pre-mRNA domain containing 1A
hsa-miR-1224-3p	0	0	1	1	1	1	TMLHE	trimethyllysine hydroxylase, epsilon
hsa-miR-1224-3p	1	0	1	1	1	1	LRRC20	leucine rich repeat containing 20
hsa-miR-1224-3p	0	0	1	1	1	1	QRSL1	glutaminyl-tRNA synthase (glutamine-hydrolyzing)-like 1
hsa-miR-1224-3p	1	0	1	1	1	1	KIAA1598	KIAA1598
hsa-miR-1224-3p	0	0	1	1	0	0	C17orf79	chromosome 17 open reading frame 79
hsa-miR-1224-3p	1	0	1	1	1	1	EPB41L4B	erythrocyte membrane protein band 4.1 like 4B
hsa-miR-1224-3p	0	0	1	1	1	1	VIMP	VCP-interacting membrane protein
hsa-miR-1224-3p	0	0	1	1	1	1	HDAC8	histone deacetylase 8
hsa-miR-1224-3p	1	0	1	1	1	1	ASH1L	ash1 (absent, small, or homeotic)-like (Drosophila)
hsa-miR-1224-3p	1	0	1	1	1	1	LRRC59	leucine rich repeat containing 59
hsa-miR-1224-3p	1	0	1	1	1	1	TAP2	transporter 2, ATP-binding cassette, sub-family B (MDR/TAP)
hsa-miR-1224-3p	1	0	1	0	1	1	CCDC93	coiled-coil domain containing 93
hsa-miR-1224-3p	1	0	1	1	1	1	DDIT4	DNA-damage-inducible transcript 4
hsa-miR-1224-3p	1	0	1	0	1	1	CCNJ	cyclin J
hsa-miR-1224-3p	1	0	1	1	1	1	SEPT3	septin 3
hsa-miR-1224-3p	0	0	1	1	1	1	RPRM	reprimo, TP53 dependent G2 arrest mediator candidate
hsa-miR-1224-3p	1	0	1	0	1	1	SLAMF8	SLAM family member 8
hsa-miR-1224-3p	1	0	1	1	1	1	C8orf4	chromosome 8 open reading frame 4
hsa-miR-1224-3p	0	0	1	1	1	1	TMEM167B	transmembrane protein 167B
hsa-miR-1224-3p	1	0	1	0	1	1	PMEPA1	prostate transmembrane protein, androgen induced 1
hsa-miR-1224-3p	1	0	1	1	1	1	CCDC47	coiled-coil domain containing 47
hsa-miR-1224-3p	1	0	1	0	1	1	MNT	MAX binding protein
hsa-miR-1224-3p	1	0	1	1	1	1	C1orf63	chromosome 1 open reading frame 63
hsa-miR-1224-3p	1	0	1	0	1	1	SLC17A6	solute carrier family 17 (sodium-dependent inorganic phosphate cotransporter), member 6
hsa-miR-1224-3p	1	0	1	1	1	1	PTGFRN	prostaglandin F2 receptor negative regulator
hsa-miR-1224-3p	1	0	1	1	1	1	ATP8B2	ATPase, aminophospholipid transporter, class I, type 8B, member 2
hsa-miR-1224-3p	1	0	1	1	0	0	THAP11	THAP domain containing 11
hsa-miR-1224-3p	0	0	1	1	1	1	S100A14	S100 calcium binding protein A14
hsa-miR-1224-3p	0	0	1	1	1	1	SHROOM4	shroom family member 4
hsa-miR-1224-3p	1	0	1	1	1	1	USP31	ubiquitin specific peptidase 31
hsa-miR-1224-3p	0	0	1	1	1	1	PRX	periaxin
hsa-miR-1224-3p	0	0	1	1	0	0	DHH	desert hedgehog
hsa-miR-1224-3p	1	0	1	1	1	1	NEFH	neurofilament, heavy polypeptide
hsa-miR-1224-3p	1	0	1	1	1	1	TMSB4X	thymosin beta 4, X-linked
hsa-miR-1224-3p	0	0	1	1	0	0	LMAN1L	lectin, mannose-binding, 1 like
hsa-miR-1224-3p	0	0	1	1	0	0	MIIP	migration and invasion inhibitory protein
hsa-miR-1224-3p	1	0	1	1	1	1	ZFAND3	zinc finger, AN1-type domain 3
hsa-miR-1224-3p	1	0	1	1	1	1	FOXM1	forkhead box M1
hsa-miR-1224-3p	1	0	1	0	1	1	MCL1	myeloid cell leukemia sequence 1 (BCL2-related)
hsa-miR-1224-3p	0	0	1	1	1	1	PGM5	phosphoglucomutase 5
hsa-miR-1224-3p	1	0	1	1	0	0	SDF2L1	stromal cell-derived factor 2-like 1
hsa-miR-1224-3p	1	0	1	1	1	1	LRRC4	leucine rich repeat containing 4
hsa-miR-1224-3p	0	0	1	1	0	0	BIRC7	baculoviral IAP repeat containing 7
hsa-miR-1224-3p	1	0	1	1	1	1	HIF3A	hypoxia inducible factor 3, alpha subunit
hsa-miR-1224-3p	1	0	1	0	1	1	GREM2	gremlin 2
hsa-miR-1224-3p	1	0	1	1	1	1	NDRG3	NDRG family member 3
hsa-miR-1224-3p	1	0	1	0	1	1	DNMT3A	DNA (cytosine-5-)-methyltransferase 3 alpha
hsa-miR-1224-3p	1	0	1	1	1	1	GIGYF1	GRB10 interacting GYF protein 1
hsa-miR-1224-3p	0	0	1	1	0	0	PLA2G2F	phospholipase A2, group IIF
hsa-miR-1224-3p	1	0	1	1	1	1	YTHDC2	YTH domain containing 2
hsa-miR-1224-3p	1	0	1	0	1	1	BCL11B	B-cell CLL/lymphoma 11B (zinc finger protein)
hsa-miR-1224-3p	1	0	1	1	0	0	CCDC71	coiled-coil domain containing 71
hsa-miR-1224-3p	0	0	1	1	1	1	MARCKSL1	MARCKS-like 1
hsa-miR-1224-3p	0	0	1	1	1	1	METTL1	methyltransferase like 1
hsa-miR-1224-3p	1	0	1	1	0	0	UBE2Z	ubiquitin-conjugating enzyme E2Z
hsa-miR-1224-3p	1	0	1	1	1	1	DLK2	delta-like 2 homolog (Drosophila)
hsa-miR-1224-3p	0	0	1	1	0	0	DDRGK1	DDRGK domain containing 1
hsa-miR-1224-3p	1	0	1	1	1	1	GID4	GID complex subunit 4, VID24 homolog (S. cerevisiae)
hsa-miR-1224-3p	0	0	1	1	0	0	PRRG3	proline rich Gla (G-carboxyglutamic acid) 3 (transmembrane)
hsa-miR-1224-3p	0	0	1	1	0	0	DHRS11	dehydrogenase/reductase (SDR family) member 11
hsa-miR-1224-3p	0	0	1	1	1	1	LPAL2	lipoprotein, Lp(a)-like 2, pseudogene
hsa-miR-1224-3p	1	0	1	1	1	1	HOXD1	homeobox D1
hsa-miR-1224-3p	0	0	1	1	1	1	CHPF	chondroitin polymerizing factor
hsa-miR-1224-3p	1	0	1	1	1	1	C10orf76	chromosome 10 open reading frame 76
hsa-miR-1224-3p	0	0	1	1	0	0	TNFAIP8L2	tumor necrosis factor, alpha-induced protein 8-like 2
hsa-miR-1224-3p	1	0	1	1	1	1	DHX40	DEAH (Asp-Glu-Ala-His) box polypeptide 40
hsa-miR-1224-3p	0	0	1	0	1	1	C14orf169	chromosome 14 open reading frame 169
hsa-miR-1224-3p	0	0	1	1	1	1	LRRK1	leucine-rich repeat kinase 1
hsa-miR-1224-3p	1	0	1	0	1	1	LIN28A	lin-28 homolog A (C. elegans)
hsa-miR-1224-3p	1	0	1	0	1	1	MOB3B	MOB kinase activator 3B
hsa-miR-1224-3p	0	0	1	1	0	0	RNF122	ring finger protein 122
hsa-miR-1224-3p	0	0	1	1	1	1	CCDC134	coiled-coil domain containing 134
hsa-miR-1224-3p	0	0	1	1	1	1	ZNF767	zinc finger family member 767
hsa-miR-1224-3p	0	0	1	1	0	0	TMEM156	transmembrane protein 156
hsa-miR-1224-3p	0	0	1	1	0	0	NRSN2	neurensin 2
hsa-miR-1224-3p	1	0	1	1	1	1	KLHL18	kelch-like 18 (Drosophila)
hsa-miR-1224-3p	1	0	1	1	1	1	ZC3H12A	zinc finger CCCH-type containing 12A
hsa-miR-1224-3p	0	0	1	0	1	1	PDGFD	platelet derived growth factor D
hsa-miR-1224-3p	1	0	1	0	1	1	SRCIN1	SRC kinase signaling inhibitor 1
hsa-miR-1224-3p	1	0	1	1	1	1	JHDM1D	jumonji C domain containing histone demethylase 1 homolog D (S. cerevisiae)
hsa-miR-1224-3p	0	0	1	1	0	0	HM13	histocompatibility (minor) 13
hsa-miR-1224-3p	1	0	1	1	1	1	FAM117A	family with sequence similarity 117, member A
hsa-miR-1224-3p	1	0	1	1	0	0	PVRL4	poliovirus receptor-related 4
hsa-miR-1224-3p	1	0	1	1	1	1	SNX27	sorting nexin family member 27
hsa-miR-1224-3p	1	0	1	1	1	1	PPP1R14C	protein phosphatase 1, regulatory (inhibitor) subunit 14C
hsa-miR-1224-3p	1	0	1	1	0	0	SCRT1	scratch homolog 1, zinc finger protein (Drosophila)
hsa-miR-1224-3p	1	0	1	1	1	1	GABARAPL1	GABA(A) receptor-associated protein like 1
hsa-miR-1224-3p	1	0	1	1	1	1	FBXO30	F-box protein 30
hsa-miR-1224-3p	0	0	1	1	0	0	ATRIP	ATR interacting protein
hsa-miR-1224-3p	1	0	1	1	1	1	CAMKK1	calcium/calmodulin-dependent protein kinase kinase 1, alpha
hsa-miR-1224-3p	1	0	1	1	1	1	POLDIP3	polymerase (DNA-directed), delta interacting protein 3
hsa-miR-1224-3p	0	0	1	1	0	0	NICN1	nicolin 1
hsa-miR-1224-3p	0	0	1	1	1	1	COG8	component of oligomeric golgi complex 8
hsa-miR-1224-3p	0	0	1	1	0	0	PCDH1	protocadherin 1
hsa-miR-1224-3p	0	0	1	1	1	1	MAP1LC3A	microtubule-associated protein 1 light chain 3 alpha
hsa-miR-1224-3p	1	0	1	1	1	1	TRIM63	tripartite motif containing 63, E3 ubiquitin protein ligase
hsa-miR-1224-3p	1	0	1	1	1	1	PPP1R9B	protein phosphatase 1, regulatory subunit 9B
hsa-miR-1224-3p	0	0	1	1	1	1	ADTRP	androgen-dependent TFPI-regulating protein
hsa-miR-1224-3p	0	0	1	1	1	1	RPUSD4	RNA pseudouridylate synthase domain containing 4
hsa-miR-1224-3p	1	0	1	1	1	1	AIFM2	apoptosis-inducing factor, mitochondrion-associated, 2
hsa-miR-1224-3p	1	0	1	0	1	1	UBASH3B	ubiquitin associated and SH3 domain containing B
hsa-miR-1224-3p	1	0	1	1	1	1	ARHGAP19	Rho GTPase activating protein 19
hsa-miR-1224-3p	0	0	1	1	1	1	TRIM4	tripartite motif containing 4
hsa-miR-1224-3p	1	0	1	1	1	1	FGD3	FYVE, RhoGEF and PH domain containing 3
hsa-miR-1224-3p	1	0	1	1	1	1	ADAM19	ADAM metallopeptidase domain 19
hsa-miR-1224-3p	1	0	1	1	1	1	RASL10B	RAS-like, family 10, member B
hsa-miR-1224-3p	0	0	1	1	1	1	CAV3	caveolin 3
hsa-miR-1224-3p	1	0	1	1	1	1	BRWD1	bromodomain and WD repeat domain containing 1
hsa-miR-1224-3p	1	0	1	1	1	1	MBD6	methyl-CpG binding domain protein 6
hsa-miR-1224-3p	0	0	1	1	0	0	FAM46B	family with sequence similarity 46, member B
hsa-miR-1224-3p	0	0	1	1	0	0	TNFRSF13C	tumor necrosis factor receptor superfamily, member 13C
hsa-miR-1224-3p	0	0	1	1	0	0	SCGB3A2	secretoglobin, family 3A, member 2
hsa-miR-1224-3p	1	0	1	1	0	0	AP1S1	adaptor-related protein complex 1, sigma 1 subunit
hsa-miR-1224-3p	1	0	1	1	1	1	BTN2A1	butyrophilin, subfamily 2, member A1
hsa-miR-1224-3p	0	0	1	0	1	1	SLC36A1	solute carrier family 36 (proton/amino acid symporter), member 1
hsa-miR-1224-3p	1	0	1	1	1	1	C20orf112	chromosome 20 open reading frame 112
hsa-miR-1224-3p	1	0	1	1	1	1	JDP2	Jun dimerization protein 2
hsa-miR-1224-3p	1	0	1	1	0	0	PYGO2	pygopus homolog 2 (Drosophila)
hsa-miR-1224-3p	0	0	1	0	0	0	AP5B1	adaptor-related protein complex 5, beta 1 subunit
hsa-miR-1224-3p	1	0	1	1	0	0	PKDCC	protein kinase domain containing, cytoplasmic homolog (mouse)
hsa-miR-1224-3p	1	0	1	1	1	1	KCTD12	potassium channel tetramerisation domain containing 12
hsa-miR-1224-3p	1	0	1	0	1	1	SP1	Sp1 transcription factor
hsa-miR-1224-3p	0	0	1	1	1	1	ALKBH8	alkB, alkylation repair homolog 8 (E. coli)
hsa-miR-1224-3p	1	0	1	1	1	1	PPTC7	PTC7 protein phosphatase homolog (S. cerevisiae)
hsa-miR-1224-3p	1	0	1	1	1	1	RPIA	ribose 5-phosphate isomerase A
hsa-miR-1224-3p	1	0	1	1	1	1	TEX261	testis expressed 261
hsa-miR-1224-3p	1	0	1	1	1	1	ZMAT2	zinc finger, matrin-type 2
hsa-miR-1224-3p	1	0	1	1	1	1	YPEL4	yippee-like 4 (Drosophila)
hsa-miR-1224-3p	1	0	1	0	1	1	DIRAS1	DIRAS family, GTP-binding RAS-like 1
hsa-miR-1224-3p	1	0	1	1	1	1	CADM4	cell adhesion molecule 4
hsa-miR-1224-3p	0	0	1	1	0	0	TIGD3	tigger transposable element derived 3
hsa-miR-1224-3p	0	0	1	1	1	1	MRPL27	mitochondrial ribosomal protein L27
hsa-miR-1224-3p	1	0	1	1	1	1	UBTD2	ubiquitin domain containing 2
hsa-miR-1224-3p	1	0	1	0	1	1	SYT11	synaptotagmin XI
hsa-miR-1224-3p	1	0	1	1	1	1	BHLHE22	basic helix-loop-helix family, member e22
hsa-miR-1224-3p	1	0	1	1	1	1	FAM123B	family with sequence similarity 123B
hsa-miR-1224-3p	1	0	1	1	1	1	ZSCAN29	zinc finger and SCAN domain containing 29
hsa-miR-1224-3p	1	0	1	1	1	1	ZNF362	zinc finger protein 362
hsa-miR-1224-3p	0	0	1	1	1	1	SNX31	sorting nexin 31
hsa-miR-1224-3p	0	0	1	1	0	0	FAM24B	family with sequence similarity 24, member B
hsa-miR-1224-3p	1	0	1	0	1	1	TMEM154	transmembrane protein 154
hsa-miR-1224-3p	0	0	1	1	0	0	GPC2	glypican 2
hsa-miR-1224-3p	0	0	1	1	1	1	CNPY4	canopy 4 homolog (zebrafish)
hsa-miR-1224-3p	1	0	1	0	1	1	ST6GALNAC3	ST6 (alpha-N-acetyl-neuraminyl-2,3-beta-galactosyl-1,3)-N-acetylgalactosaminide alpha-2,6-sialyltransferase 3
hsa-miR-1224-3p	0	0	1	0	1	1	TMEM92	transmembrane protein 92
hsa-miR-1224-3p	0	0	1	1	1	1	CAMK1D	calcium/calmodulin-dependent protein kinase ID
hsa-miR-1224-3p	0	0	1	0	1	1	RTP1	receptor (chemosensory) transporter protein 1
hsa-miR-1224-3p	1	0	1	1	1	1	RC3H1	ring finger and CCCH-type domains 1
hsa-miR-1224-3p	0	0	1	1	1	1	REXO1L1	REX1, RNA exonuclease 1 homolog (S. cerevisiae)-like 1
hsa-miR-1224-3p	0	0	1	0	1	1	CTAGE1	cutaneous T-cell lymphoma-associated antigen 1
hsa-miR-1224-3p	0	0	1	1	1	1	CDRT4	CMT1A duplicated region transcript 4
hsa-miR-1224-3p	0	0	1	1	1	1	FAM133A	family with sequence similarity 133, member A
hsa-miR-1224-3p	0	0	1	1	1	1	ZCCHC12	zinc finger, CCHC domain containing 12
hsa-miR-1224-3p	1	0	1	0	1	1	SREK1IP1	SREK1-interacting protein 1
hsa-miR-1224-3p	0	0	1	1	0	0	PDILT	protein disulfide isomerase-like, testis expressed
hsa-miR-1224-3p	0	0	1	1	0	0	SEC14L4	SEC14-like 4 (S. cerevisiae)
hsa-miR-1224-3p	1	0	1	1	0	0	EMC10	ER membrane protein complex subunit 10
hsa-miR-1224-3p	1	0	1	1	1	1	RAB3IP	RAB3A interacting protein (rabin3)
hsa-miR-1224-3p	0	0	1	1	0	0	CHMP4B	charged multivesicular body protein 4B
hsa-miR-1224-3p	1	0	1	1	1	1	LRRTM3	leucine rich repeat transmembrane neuronal 3
hsa-miR-1224-3p	1	0	1	1	1	1	PRIMA1	proline rich membrane anchor 1
hsa-miR-1224-3p	1	0	1	1	1	1	GGT7	gamma-glutamyltransferase 7
hsa-miR-1224-3p	1	0	1	1	1	1	FAM134C	family with sequence similarity 134, member C
hsa-miR-1224-3p	0	0	1	1	0	0	PAQR7	progestin and adipoQ receptor family member VII
hsa-miR-1224-3p	0	0	1	1	1	1	NPAS4	neuronal PAS domain protein 4
hsa-miR-1224-3p	0	0	1	1	1	1	WFDC8	WAP four-disulfide core domain 8
hsa-miR-1224-3p	0	0	1	0	1	1	HCG27	HLA complex group 27 (non-protein coding)
hsa-miR-1224-3p	0	0	1	1	1	1	ZNF428	zinc finger protein 428
hsa-miR-1224-3p	1	0	1	1	1	1	TMEM229B	transmembrane protein 229B
hsa-miR-1224-3p	0	0	1	1	1	1	CABP7	calcium binding protein 7
hsa-miR-1224-3p	1	0	1	1	1	1	BCL9L	B-cell CLL/lymphoma 9-like
hsa-miR-1224-3p	1	0	1	1	1	1	SUMF1	sulfatase modifying factor 1
hsa-miR-1224-3p	1	0	1	0	1	1	RIMS4	regulating synaptic membrane exocytosis 4
hsa-miR-1224-3p	1	0	1	0	1	1	TMSB4XP8	thymosin beta 4, X-linked pseudogene 8
hsa-miR-1224-3p	1	0	1	1	1	1	PXMP4	peroxisomal membrane protein 4, 24kDa
hsa-miR-1224-3p	0	0	1	0	1	1	TCF21	transcription factor 21
hsa-miR-1224-3p	0	0	1	1	1	1	FOXR2	forkhead box R2
hsa-miR-1224-3p	1	0	1	1	1	1	RAB43	RAB43, member RAS oncogene family
hsa-miR-1224-3p	0	0	1	0	1	1	ANKRD45	ankyrin repeat domain 45
hsa-miR-1224-3p	0	0	1	1	1	1	LHFPL4	lipoma HMGIC fusion partner-like 4
hsa-miR-1224-3p	1	0	1	1	0	0	ENHO	energy homeostasis associated
hsa-miR-1224-3p	1	0	1	1	1	1	PTGER3	prostaglandin E receptor 3 (subtype EP3)
hsa-miR-1224-3p	0	0	1	1	0	0	LENG9	leukocyte receptor cluster (LRC) member 9
hsa-miR-1224-3p	0	0	1	0	1	1	WASH3P	WAS protein family homolog 3 pseudogene
hsa-miR-1224-3p	0	0	1	1	1	1	COL18A1-AS1	COL18A1 antisense RNA 1
hsa-miR-1224-3p	0	0	1	1	0	0	C6orf108	chromosome 6 open reading frame 108
hsa-miR-1224-3p	1	0	1	1	1	1	VAMP1	vesicle-associated membrane protein 1 (synaptobrevin 1)
hsa-miR-1224-3p	0	0	1	1	0	0	USP51	ubiquitin specific peptidase 51
hsa-miR-1224-3p	1	0	1	1	0	0	KAZN	kazrin, periplakin interacting protein
hsa-miR-1224-3p	1	0	1	1	1	1	GLYAT	glycine-N-acyltransferase
hsa-miR-1224-3p	1	0	1	1	1	1	E2F7	E2F transcription factor 7
hsa-miR-1224-3p	0	0	1	1	1	1	CRIP3	cysteine-rich protein 3
hsa-miR-1224-3p	1	0	1	1	1	1	TMEM132E	transmembrane protein 132E
hsa-miR-1224-3p	1	0	1	1	1	1	FAM43B	family with sequence similarity 43, member B
hsa-miR-1224-3p	1	0	1	1	0	0	TSEN54	tRNA splicing endonuclease 54 homolog (S. cerevisiae)
hsa-miR-1224-3p	1	0	1	1	1	1	SKIDA1	SKI/DACH domain containing 1
hsa-miR-1224-3p	1	0	1	1	1	1	CAPN3	calpain 3, (p94)
hsa-miR-1224-3p	0	0	1	0	0	0	ESRRAP2	estrogen-related receptor alpha pseudogene 2
hsa-miR-1224-3p	0	0	1	0	0	0	LYPLA2P1	lysophospholipase II pseudogene 1
hsa-miR-1224-3p	0	0	1	1	0	0	TTTY8	testis-specific transcript, Y-linked 8 (non-protein coding)
hsa-miR-1224-3p	0	0	1	0	0	0	TTTY2	testis-specific transcript, Y-linked 2 (non-protein coding)
hsa-miR-1224-3p	0	0	1	0	0	0	TTTY15	testis-specific transcript, Y-linked 15 (non-protein coding)
hsa-miR-1224-3p	0	0	1	0	0	0	FAM224B	family with sequence similarity 224, member B (non-protein coding)
hsa-miR-1224-3p	0	0	1	0	0	0	CSNK2A1P	casein kinase 2, alpha 1 polypeptide pseudogene
hsa-miR-1224-3p	0	0	1	0	0	0	NXF4	nuclear RNA export factor 4 pseudogene
hsa-miR-1224-3p	0	0	1	0	0	0	HTR7P1	5-hydroxytryptamine (serotonin) receptor 7 pseudogene 1
hsa-miR-1224-3p	0	0	1	0	0	0	HOXA11-AS	HOXA11 antisense RNA
hsa-miR-1224-3p	0	0	1	0	0	0	AQP7P1	aquaporin 7 pseudogene 1
hsa-miR-1224-3p	0	0	1	0	0	0	MALAT1	metastasis associated lung adenocarcinoma transcript 1 (non-protein coding)
hsa-miR-1224-3p	0	0	1	0	0	0	RNASEH2CP1	ribonuclease H2, subunit C pseudogene 1
hsa-miR-1224-3p	0	0	1	0	0	0	PTPRVP	protein tyrosine phosphatase, receptor type, V, pseudogene
hsa-miR-1224-3p	0	0	1	0	0	0	SNX29P2	sorting nexin 29 pseudogene 2
hsa-miR-1224-3p	0	0	1	0	0	0	TCAM1P	testicular cell adhesion molecule 1 homolog (mouse), pseudogene
hsa-miR-1224-3p	0	0	1	0	0	0	SCARNA17	small Cajal body-specific RNA 17
hsa-miR-1224-3p	0	0	1	0	0	0	TUBA4B	tubulin, alpha 4b (pseudogene)
hsa-miR-1224-3p	1	0	1	1	0	0	HOXC5	homeobox C5
hsa-miR-1224-3p	0	0	1	0	0	0	NBR2	neighbor of BRCA1 gene 2 (non-protein coding)
hsa-miR-1224-3p	0	0	1	0	0	0	RNF5P1	ring finger protein 5, E3 ubiquitin protein ligase pseudogene 1
hsa-miR-1224-3p	0	0	1	0	0	0	HSP90B3P	heat shock protein 90kDa beta (Grp94), member 3, pseudogene
hsa-miR-1224-3p	0	0	1	0	0	0	HSP90AB2P	heat shock protein 90kDa alpha (cytosolic), class B member 2, pseudogene
hsa-miR-1224-3p	0	0	1	0	0	0	SYS1-DBNDD2	SYS1-DBNDD2 readthrough (non-protein coding)
hsa-miR-1224-3p	1	0	1	0	1	1	NFIX	nuclear factor I/X (CCAAT-binding transcription factor)
hsa-miR-1224-3p	1	0	1	1	0	0	TNXB	tenascin XB
hsa-miR-1224-3p	0	0	1	1	1	1	CD99	CD99 molecule
