# Supplementary material for: Profiling of Selected MicroRNAs in Proliferative Eutopic Endometrium of Women with Ovarian Endometriosis
Source: Biomed Res Int. 2015 Aug 20;2015:760698. doi: 10.1155/2015/760698 (PMC4558423; doi:10.1155/2015/760698)
Supplement: Supplementary file 1 — Table I: The names of miRNAs significantly differentially expressed between eutopic endometrium of patients with endometriosis vs eutopic endometrium of patients without endometriosis. Table II: The associations between miRNA and mRNA, which presents detailed results of the search of six major databases i.e targetscan, tarbase, miranda, mirbase, mirtarget2 and pictar. [file 760698.f1.zip › 760698.f1/Table II/hsa-miR-1224-5p.tsv]

miR	targetscan	tarbase	miranda	mirbase	mirtarget2	pictar	GeneSymbol	GeneName
hsa-miR-1224-5p	1	0	1	0	0	0	TRANK1	tetratricopeptide repeat and ankyrin repeat containing 1
hsa-miR-1224-5p	0	0	1	1	1	1	PPIP5K1	diphosphoinositol pentakisphosphate kinase 1
hsa-miR-1224-5p	1	0	1	1	1	1	ABCC5	ATP-binding cassette, sub-family C (CFTR/MRP), member 5
hsa-miR-1224-5p	1	0	1	0	1	1	PTPRT	protein tyrosine phosphatase, receptor type, T
hsa-miR-1224-5p	1	0	1	0	1	1	KIAA0408	KIAA0408
hsa-miR-1224-5p	1	0	1	1	0	0	SEC14L5	SEC14-like 5 (S. cerevisiae)
hsa-miR-1224-5p	1	0	1	0	1	1	NEDD4L	neural precursor cell expressed, developmentally down-regulated 4-like, E3 ubiquitin protein ligase
hsa-miR-1224-5p	0	0	1	1	1	1	PDE4DIP	phosphodiesterase 4D interacting protein
hsa-miR-1224-5p	0	0	1	1	0	0	ZNF862	zinc finger protein 862
hsa-miR-1224-5p	1	0	1	0	1	1	MFAP3L	microfibrillar-associated protein 3-like
hsa-miR-1224-5p	1	0	1	1	1	1	HIPK1	homeodomain interacting protein kinase 1
hsa-miR-1224-5p	1	0	1	1	1	1	GIGYF2	GRB10 interacting GYF protein 2
hsa-miR-1224-5p	1	0	1	1	0	0	KAZN	kazrin, periplakin interacting protein
hsa-miR-1224-5p	0	0	1	1	0	0	AKAP8L	A kinase (PRKA) anchor protein 8-like
hsa-miR-1224-5p	1	0	1	1	0	0	ESYT1	extended synaptotagmin-like protein 1
hsa-miR-1224-5p	1	0	1	1	0	0	RIMS2	regulating synaptic membrane exocytosis 2
hsa-miR-1224-5p	1	0	1	0	1	1	RBM12	RNA binding motif protein 12
hsa-miR-1224-5p	0	0	1	1	1	1	SEC31A	SEC31 homolog A (S. cerevisiae)
hsa-miR-1224-5p	1	0	1	0	0	0	DTX4	deltex homolog 4 (Drosophila)
hsa-miR-1224-5p	0	0	1	0	0	0	THSD7A	thrombospondin, type I, domain containing 7A
hsa-miR-1224-5p	0	0	1	1	1	1	FASTKD2	FAST kinase domains 2
hsa-miR-1224-5p	0	0	1	0	1	1	TP53TG3	TP53 target 3
hsa-miR-1224-5p	0	0	1	0	0	0	TP53TG3B	TP53 target 3B
hsa-miR-1224-5p	0	0	1	1	0	0	RTEL1	regulator of telomere elongation helicase 1
hsa-miR-1224-5p	1	0	1	1	1	1	SMARCAD1	SWI/SNF-related, matrix-associated actin-dependent regulator of chromatin, subfamily a, containing DEAD/H box 1
hsa-miR-1224-5p	1	0	1	1	1	1	RALGAPB	Ral GTPase activating protein, beta subunit (non-catalytic)
hsa-miR-1224-5p	1	0	1	0	1	1	ANKFY1	ankyrin repeat and FYVE domain containing 1
hsa-miR-1224-5p	0	0	1	1	1	1	COPS7A	COP9 constitutive photomorphogenic homolog subunit 7A (Arabidopsis)
hsa-miR-1224-5p	1	0	1	1	1	1	USP28	ubiquitin specific peptidase 28
hsa-miR-1224-5p	1	0	1	1	0	0	ARHGAP39	Rho GTPase activating protein 39
hsa-miR-1224-5p	0	0	1	1	1	1	CNTNAP3	contactin associated protein-like 3
hsa-miR-1224-5p	1	0	1	1	1	1	IKZF4	IKAROS family zinc finger 4 (Eos)
hsa-miR-1224-5p	1	0	1	1	1	1	ARHGEF7	Rho guanine nucleotide exchange factor (GEF) 7
hsa-miR-1224-5p	0	0	1	1	0	0	PTPRF	protein tyrosine phosphatase, receptor type, F
hsa-miR-1224-5p	0	0	1	1	0	0	DBP	D site of albumin promoter (albumin D-box) binding protein
hsa-miR-1224-5p	1	0	1	1	1	1	PML	promyelocytic leukemia
hsa-miR-1224-5p	0	0	1	1	1	1	NME7	NME/NM23 family member 7
hsa-miR-1224-5p	0	0	1	1	1	1	MAZ	MYC-associated zinc finger protein (purine-binding transcription factor)
hsa-miR-1224-5p	1	0	1	1	1	1	PHC1	polyhomeotic homolog 1 (Drosophila)
hsa-miR-1224-5p	0	0	1	0	1	1	DCAF11	DDB1 and CUL4 associated factor 11
hsa-miR-1224-5p	1	0	1	1	1	1	RASSF5	Ras association (RalGDS/AF-6) domain family member 5
hsa-miR-1224-5p	0	0	1	1	0	0	IFT27	intraflagellar transport 27 homolog (Chlamydomonas)
hsa-miR-1224-5p	0	0	1	1	0	0	EIF4E2	eukaryotic translation initiation factor 4E family member 2
hsa-miR-1224-5p	0	0	1	1	0	0	CFLAR	CASP8 and FADD-like apoptosis regulator
hsa-miR-1224-5p	1	0	1	1	1	1	SATB1	SATB homeobox 1
hsa-miR-1224-5p	1	0	1	1	1	1	HMGA2	high mobility group AT-hook 2
hsa-miR-1224-5p	0	0	1	1	1	1	DDX10	DEAD (Asp-Glu-Ala-Asp) box polypeptide 10
hsa-miR-1224-5p	0	0	1	1	0	0	MSH5	mutS homolog 5 (E. coli)
hsa-miR-1224-5p	1	0	1	1	1	1	PICALM	phosphatidylinositol binding clathrin assembly protein
hsa-miR-1224-5p	0	0	1	1	1	1	MFSD11	major facilitator superfamily domain containing 11
hsa-miR-1224-5p	1	0	1	1	1	1	CTNND1	catenin (cadherin-associated protein), delta 1
hsa-miR-1224-5p	1	0	1	1	1	1	RBBP6	retinoblastoma binding protein 6
hsa-miR-1224-5p	0	0	1	1	1	1	LYPLA1	lysophospholipase I
hsa-miR-1224-5p	1	0	1	1	1	1	VAPB	VAMP (vesicle-associated membrane protein)-associated protein B and C
hsa-miR-1224-5p	0	0	1	1	1	1	RER1	RER1 retention in endoplasmic reticulum 1 homolog (S. cerevisiae)
hsa-miR-1224-5p	0	0	1	1	1	1	PLEKHB1	pleckstrin homology domain containing, family B (evectins) member 1
hsa-miR-1224-5p	0	0	1	1	0	0	AVPR2	arginine vasopressin receptor 2
hsa-miR-1224-5p	0	0	1	1	0	0	RBM5	RNA binding motif protein 5
hsa-miR-1224-5p	0	0	1	1	0	0	COPB1	coatomer protein complex, subunit beta 1
hsa-miR-1224-5p	0	0	1	1	1	1	TMEM176B	transmembrane protein 176B
hsa-miR-1224-5p	0	0	1	1	1	1	DMRT2	doublesex and mab-3 related transcription factor 2
hsa-miR-1224-5p	1	0	1	1	1	1	SENP7	SUMO1/sentrin specific peptidase 7
hsa-miR-1224-5p	0	0	1	1	0	0	C3orf24	chromosome 3 open reading frame 24
hsa-miR-1224-5p	0	0	1	1	0	0	TRIM41	tripartite motif containing 41
hsa-miR-1224-5p	1	0	1	1	1	1	RBM47	RNA binding motif protein 47
hsa-miR-1224-5p	1	0	1	0	1	1	TRPS1	trichorhinophalangeal syndrome I
hsa-miR-1224-5p	0	0	1	0	1	1	ERBB2IP	erbb2 interacting protein
hsa-miR-1224-5p	1	0	1	1	1	1	TMUB2	transmembrane and ubiquitin-like domain containing 2
hsa-miR-1224-5p	0	0	1	1	1	1	LRTOMT	leucine rich transmembrane and 0-methyltransferase domain containing
hsa-miR-1224-5p	0	0	1	1	0	0	TTTY7	testis-specific transcript, Y-linked 7 (non-protein coding)
hsa-miR-1224-5p	0	0	1	1	0	0	ZAN	zonadhesin
hsa-miR-1224-5p	1	0	1	1	1	1	ACHE	acetylcholinesterase
hsa-miR-1224-5p	0	0	1	1	1	1	SEMA6C	sema domain, transmembrane domain (TM), and cytoplasmic domain, (semaphorin) 6C
hsa-miR-1224-5p	1	0	1	1	1	1	CD300LF	CD300 molecule-like family member f
hsa-miR-1224-5p	0	0	1	0	0	0	CLRN1-AS1	CLRN1 antisense RNA 1
hsa-miR-1224-5p	0	0	1	1	1	1	SPSB1	splA/ryanodine receptor domain and SOCS box containing 1
hsa-miR-1224-5p	0	0	1	1	1	1	PSRC1	proline/serine-rich coiled-coil 1
hsa-miR-1224-5p	1	0	1	1	1	1	RBFOX1	RNA binding protein, fox-1 homolog (C. elegans) 1
hsa-miR-1224-5p	1	0	1	1	1	1	HNRNPU	heterogeneous nuclear ribonucleoprotein U (scaffold attachment factor A)
hsa-miR-1224-5p	0	0	1	1	1	1	OSCAR	osteoclast associated, immunoglobulin-like receptor
hsa-miR-1224-5p	0	0	1	0	0	0	SNHG11	small nucleolar RNA host gene 11 (non-protein coding)
hsa-miR-1224-5p	1	0	1	0	1	1	IL1RAP	interleukin 1 receptor accessory protein
hsa-miR-1224-5p	0	0	1	1	1	1	GNAS	GNAS complex locus
hsa-miR-1224-5p	1	0	1	1	1	1	UBAP2L	ubiquitin associated protein 2-like
hsa-miR-1224-5p	1	0	1	1	1	1	SLAMF6	SLAM family member 6
hsa-miR-1224-5p	0	0	1	1	1	1	TRDN	triadin
hsa-miR-1224-5p	1	0	1	1	1	1	XIRP1	xin actin-binding repeat containing 1
hsa-miR-1224-5p	0	0	1	1	1	1	PPARG	peroxisome proliferator-activated receptor gamma
hsa-miR-1224-5p	1	0	1	1	1	1	NOX4	NADPH oxidase 4
hsa-miR-1224-5p	0	0	1	0	0	0	TUG1	taurine upregulated 1 (non-protein coding)
hsa-miR-1224-5p	0	0	1	1	1	1	OLFM4	olfactomedin 4
hsa-miR-1224-5p	0	0	1	1	1	1	STOX2	storkhead box 2
hsa-miR-1224-5p	1	0	1	1	1	1	PTBP3	polypyrimidine tract binding protein 3
hsa-miR-1224-5p	1	0	1	1	1	1	ACER3	alkaline ceramidase 3
hsa-miR-1224-5p	0	0	1	1	0	0	C17orf53	chromosome 17 open reading frame 53
hsa-miR-1224-5p	0	0	1	1	0	0	TMC6	transmembrane channel-like 6
hsa-miR-1224-5p	1	0	1	1	0	0	YPEL3	yippee-like 3 (Drosophila)
hsa-miR-1224-5p	0	0	1	0	0	0	LOC149134	uncharacterized LOC149134
hsa-miR-1224-5p	1	0	1	0	1	1	DCAF17	DDB1 and CUL4 associated factor 17
hsa-miR-1224-5p	0	0	1	0	0	0	LOC284561	uncharacterized LOC284561
hsa-miR-1224-5p	1	0	1	1	1	1	ARHGEF15	Rho guanine nucleotide exchange factor (GEF) 15
hsa-miR-1224-5p	0	0	1	0	1	1	FLJ14186	uncharacterized LOC401149
hsa-miR-1224-5p	1	0	1	1	1	1	COPS7B	COP9 constitutive photomorphogenic homolog subunit 7B (Arabidopsis)
hsa-miR-1224-5p	0	0	1	0	0	0	IFFO2	intermediate filament family orphan 2
hsa-miR-1224-5p	0	0	1	1	0	0	EIF4ENIF1	eukaryotic translation initiation factor 4E nuclear import factor 1
hsa-miR-1224-5p	1	0	1	0	1	1	MYO5B	myosin VB
hsa-miR-1224-5p	0	0	1	0	1	1	HEMK1	HemK methyltransferase family member 1
hsa-miR-1224-5p	0	0	1	0	0	0	LINC00340	long intergenic non-protein coding RNA 340
hsa-miR-1224-5p	1	0	1	1	1	1	RNF185	ring finger protein 185
hsa-miR-1224-5p	0	0	1	1	1	1	SPRTN	SprT-like N-terminal domain
hsa-miR-1224-5p	0	0	1	1	1	1	RNF146	ring finger protein 146
hsa-miR-1224-5p	1	0	1	1	1	1	NFASC	neurofascin
hsa-miR-1224-5p	0	0	1	1	1	1	PAQR4	progestin and adipoQ receptor family member IV
hsa-miR-1224-5p	1	0	1	0	1	1	ZKSCAN1	zinc finger with KRAB and SCAN domains 1
hsa-miR-1224-5p	0	0	1	0	0	0	KIAA0664L3	KIAA0664-like 3
hsa-miR-1224-5p	1	0	1	1	1	1	PPM1L	protein phosphatase, Mg2+/Mn2+ dependent, 1L
hsa-miR-1224-5p	1	0	1	1	1	1	DLGAP4	discs, large (Drosophila) homolog-associated protein 4
hsa-miR-1224-5p	0	0	1	0	0	0	FLJ31104	uncharacterized LOC441072
hsa-miR-1224-5p	0	0	1	0	1	1	C17orf108	chromosome 17 open reading frame 108
hsa-miR-1224-5p	0	0	1	1	0	0	IFT172	intraflagellar transport 172 homolog (Chlamydomonas)
hsa-miR-1224-5p	1	0	1	1	1	1	DIXDC1	DIX domain containing 1
hsa-miR-1224-5p	1	0	1	1	1	1	ZNF664	zinc finger protein 664
hsa-miR-1224-5p	0	0	1	1	1	1	ANKRD36B	ankyrin repeat domain 36B
hsa-miR-1224-5p	1	0	1	1	1	1	LMNA	lamin A/C
hsa-miR-1224-5p	0	0	1	0	0	0	FLJ12825	uncharacterized LOC440101
hsa-miR-1224-5p	1	0	1	1	1	1	SCAMP5	secretory carrier membrane protein 5
hsa-miR-1224-5p	0	0	1	1	1	1	BRD2	bromodomain containing 2
hsa-miR-1224-5p	1	0	1	1	1	1	CLCN5	chloride channel, voltage-sensitive 5
hsa-miR-1224-5p	0	0	1	1	1	1	ZNF606	zinc finger protein 606
hsa-miR-1224-5p	0	0	1	1	0	0	COMMD4	COMM domain containing 4
hsa-miR-1224-5p	1	0	1	1	1	1	MGAT1	mannosyl (alpha-1,3-)-glycoprotein beta-1,2-N-acetylglucosaminyltransferase
hsa-miR-1224-5p	0	0	1	1	1	1	TAF8	TAF8 RNA polymerase II, TATA box binding protein (TBP)-associated factor, 43kDa
hsa-miR-1224-5p	0	0	1	0	1	1	CHURC1	churchill domain containing 1
hsa-miR-1224-5p	0	0	1	1	0	0	FAM156A	family with sequence similarity 156, member A
hsa-miR-1224-5p	1	0	1	1	1	1	ANKRD49	ankyrin repeat domain 49
hsa-miR-1224-5p	1	0	1	1	1	1	FAM102A	family with sequence similarity 102, member A
hsa-miR-1224-5p	0	0	1	1	0	0	SYTL1	synaptotagmin-like 1
hsa-miR-1224-5p	0	0	1	0	0	0	C10orf105	chromosome 10 open reading frame 105
hsa-miR-1224-5p	1	0	1	1	0	0	LRCH4	leucine-rich repeats and calponin homology (CH) domain containing 4
hsa-miR-1224-5p	1	0	1	1	1	1	UBAP1	ubiquitin associated protein 1
hsa-miR-1224-5p	0	0	1	1	0	0	SHKBP1	SH3KBP1 binding protein 1
hsa-miR-1224-5p	0	0	1	1	1	1	CAMKV	CaM kinase-like vesicle-associated
hsa-miR-1224-5p	0	0	1	1	0	0	PIGO	phosphatidylinositol glycan anchor biosynthesis, class O
hsa-miR-1224-5p	0	0	1	1	0	0	PPP2R1A	protein phosphatase 2, regulatory subunit A, alpha
hsa-miR-1224-5p	0	0	1	0	1	1	TMSB15B	thymosin beta 15B
hsa-miR-1224-5p	0	0	1	1	1	1	MAPK10	mitogen-activated protein kinase 10
hsa-miR-1224-5p	0	0	1	1	0	0	ACOT11	acyl-CoA thioesterase 11
hsa-miR-1224-5p	1	0	1	1	1	1	AMMECR1	Alport syndrome, mental retardation, midface hypoplasia and elliptocytosis chromosomal region gene 1
hsa-miR-1224-5p	0	0	1	1	0	0	CDK15	cyclin-dependent kinase 15
hsa-miR-1224-5p	1	0	1	1	1	1	FBXW2	F-box and WD repeat domain containing 2
hsa-miR-1224-5p	1	0	1	1	1	1	LUC7L2	LUC7-like 2 (S. cerevisiae)
hsa-miR-1224-5p	1	0	1	1	1	1	GPD2	glycerol-3-phosphate dehydrogenase 2 (mitochondrial)
hsa-miR-1224-5p	1	0	1	1	0	0	TOE1	target of EGR1, member 1 (nuclear)
hsa-miR-1224-5p	0	0	1	0	0	0	LOC283887	uncharacterized LOC283887
hsa-miR-1224-5p	0	0	1	1	1	1	CYP11B1	cytochrome P450, family 11, subfamily B, polypeptide 1
hsa-miR-1224-5p	0	0	1	1	0	0	WBP1	WW domain binding protein 1
hsa-miR-1224-5p	1	0	1	1	1	1	KCND1	potassium voltage-gated channel, Shal-related subfamily, member 1
hsa-miR-1224-5p	0	0	1	1	0	0	HPN	hepsin
hsa-miR-1224-5p	0	0	1	0	0	0	LOC147670	uncharacterized LOC147670
hsa-miR-1224-5p	0	0	1	0	0	0	LOC284577	uncharacterized LOC284577
hsa-miR-1224-5p	0	0	1	1	1	1	CDK5RAP1	CDK5 regulatory subunit associated protein 1
hsa-miR-1224-5p	0	0	1	1	1	1	BAG1	BCL2-associated athanogene
hsa-miR-1224-5p	1	0	1	1	1	1	FADS1	fatty acid desaturase 1
hsa-miR-1224-5p	1	0	1	1	0	0	FBRS	fibrosin
hsa-miR-1224-5p	1	0	1	0	1	1	THRB	thyroid hormone receptor, beta
hsa-miR-1224-5p	1	0	1	1	1	1	SYT6	synaptotagmin VI
hsa-miR-1224-5p	1	0	1	1	1	1	EPB41L1	erythrocyte membrane protein band 4.1-like 1
hsa-miR-1224-5p	0	0	1	0	0	0	CCDC150	coiled-coil domain containing 150
hsa-miR-1224-5p	0	0	1	0	0	0	LINC00293	long intergenic non-protein coding RNA 293
hsa-miR-1224-5p	0	0	1	1	1	1	CBWD5	COBW domain containing 5
hsa-miR-1224-5p	0	0	1	0	0	0	LOC284385	uncharacterized LOC284385
hsa-miR-1224-5p	0	0	1	1	0	0	TMEM150A	transmembrane protein 150A
hsa-miR-1224-5p	0	0	1	1	0	0	ZNF283	zinc finger protein 283
hsa-miR-1224-5p	1	0	1	1	1	1	PCMT1	protein-L-isoaspartate (D-aspartate) O-methyltransferase
hsa-miR-1224-5p	1	0	1	1	0	0	TMEM131	transmembrane protein 131
hsa-miR-1224-5p	1	0	1	0	1	1	UNC5D	unc-5 homolog D (C. elegans)
hsa-miR-1224-5p	1	0	1	1	1	1	TRAFD1	TRAF-type zinc finger domain containing 1
hsa-miR-1224-5p	0	0	1	1	1	1	ABCC12	ATP-binding cassette, sub-family C (CFTR/MRP), member 12
hsa-miR-1224-5p	1	0	1	1	1	1	HBP1	HMG-box transcription factor 1
hsa-miR-1224-5p	0	0	1	1	1	1	GPR128	G protein-coupled receptor 128
hsa-miR-1224-5p	0	0	1	1	0	0	KIAA0146	KIAA0146
hsa-miR-1224-5p	0	0	1	1	0	0	MARS	methionyl-tRNA synthetase
hsa-miR-1224-5p	0	0	1	1	0	0	SLC26A10	solute carrier family 26, member 10
hsa-miR-1224-5p	1	0	1	1	1	1	ABHD6	abhydrolase domain containing 6
hsa-miR-1224-5p	0	0	1	1	1	1	ARHGEF26	Rho guanine nucleotide exchange factor (GEF) 26
hsa-miR-1224-5p	0	0	1	0	1	1	PATE4	prostate and testis expressed 4
hsa-miR-1224-5p	1	0	1	0	0	0	GPR137C	G protein-coupled receptor 137C
hsa-miR-1224-5p	1	0	1	1	1	1	SH2D4B	SH2 domain containing 4B
hsa-miR-1224-5p	0	0	1	1	0	0	C20orf27	chromosome 20 open reading frame 27
hsa-miR-1224-5p	1	0	1	0	1	1	DCUN1D4	DCN1, defective in cullin neddylation 1, domain containing 4 (S. cerevisiae)
hsa-miR-1224-5p	1	0	1	1	1	1	VPS54	vacuolar protein sorting 54 homolog (S. cerevisiae)
hsa-miR-1224-5p	0	0	1	1	0	0	CUL9	cullin 9
hsa-miR-1224-5p	1	0	1	1	1	1	CCDC149	coiled-coil domain containing 149
hsa-miR-1224-5p	1	0	1	1	1	1	KPNA1	karyopherin alpha 1 (importin alpha 5)
hsa-miR-1224-5p	1	0	1	0	0	0	MSL1	male-specific lethal 1 homolog (Drosophila)
hsa-miR-1224-5p	0	0	1	0	0	0	FAM95B1	family with sequence similarity 95, member B1
hsa-miR-1224-5p	1	0	1	1	0	0	KIAA1211	KIAA1211
hsa-miR-1224-5p	1	0	1	1	1	1	PTPRB	protein tyrosine phosphatase, receptor type, B
hsa-miR-1224-5p	0	0	1	1	0	0	CLDN4	claudin 4
hsa-miR-1224-5p	0	0	1	1	1	1	USP54	ubiquitin specific peptidase 54
hsa-miR-1224-5p	1	0	1	1	0	0	SNX30	sorting nexin family member 30
hsa-miR-1224-5p	1	0	1	1	1	1	MKRN1	makorin ring finger protein 1
hsa-miR-1224-5p	1	0	1	1	1	1	FMNL3	formin-like 3
hsa-miR-1224-5p	1	0	1	1	1	1	SLC26A9	solute carrier family 26, member 9
hsa-miR-1224-5p	1	0	1	0	1	1	FNDC3B	fibronectin type III domain containing 3B
hsa-miR-1224-5p	0	0	1	1	1	1	PITX2	paired-like homeodomain 2
hsa-miR-1224-5p	0	0	1	1	0	0	BPIFB1	BPI fold containing family B, member 1
hsa-miR-1224-5p	1	0	1	0	1	1	YOD1	YOD1 OTU deubiquinating enzyme 1 homolog (S. cerevisiae)
hsa-miR-1224-5p	0	0	1	1	0	0	FAM159A	family with sequence similarity 159, member A
hsa-miR-1224-5p	1	0	1	1	1	1	AIF1L	allograft inflammatory factor 1-like
hsa-miR-1224-5p	1	0	1	1	1	1	BCAT1	branched chain amino-acid transaminase 1, cytosolic
hsa-miR-1224-5p	1	0	1	0	1	1	KPNA6	karyopherin alpha 6 (importin alpha 7)
hsa-miR-1224-5p	0	0	1	0	0	0	PINLYP	phospholipase A2 inhibitor and LY6/PLAUR domain containing
hsa-miR-1224-5p	1	0	1	1	1	1	GPD1	glycerol-3-phosphate dehydrogenase 1 (soluble)
hsa-miR-1224-5p	0	0	1	0	1	1	GALNT13	UDP-N-acetyl-alpha-D-galactosamine:polypeptide N-acetylgalactosaminyltransferase 13 (GalNAc-T13)
hsa-miR-1224-5p	0	0	1	0	1	1	RUFY4	RUN and FYVE domain containing 4
hsa-miR-1224-5p	1	0	1	1	0	0	FOXP2	forkhead box P2
hsa-miR-1224-5p	0	0	1	1	1	1	ZNF346	zinc finger protein 346
hsa-miR-1224-5p	0	0	1	1	0	0	ZNF730	zinc finger protein 730
hsa-miR-1224-5p	0	0	1	1	1	1	CRISP3	cysteine-rich secretory protein 3
hsa-miR-1224-5p	0	0	1	0	1	1	PEX5	peroxisomal biogenesis factor 5
hsa-miR-1224-5p	1	0	1	1	0	0	ABLIM3	actin binding LIM protein family, member 3
hsa-miR-1224-5p	1	0	1	1	1	1	UPK1B	uroplakin 1B
hsa-miR-1224-5p	1	0	1	1	1	1	BIN2	bridging integrator 2
hsa-miR-1224-5p	0	0	1	1	1	1	PRSS16	protease, serine, 16 (thymus)
hsa-miR-1224-5p	1	0	1	1	1	1	NOVA1	neuro-oncological ventral antigen 1
hsa-miR-1224-5p	1	0	1	0	1	1	TEAD3	TEA domain family member 3
hsa-miR-1224-5p	0	0	1	1	1	1	PGAP2	post-GPI attachment to proteins 2
hsa-miR-1224-5p	0	0	1	0	0	0	POM121L9P	POM121 transmembrane nucleoporin-like 9, pseudogene
hsa-miR-1224-5p	0	0	1	1	0	0	SAPCD1	suppressor APC domain containing 1
hsa-miR-1224-5p	1	0	1	1	1	1	SMAP2	small ArfGAP2
hsa-miR-1224-5p	0	0	1	0	0	0	KIAA0913	KIAA0913
hsa-miR-1224-5p	0	0	1	1	0	0	PCIF1	PDX1 C-terminal inhibiting factor 1
hsa-miR-1224-5p	0	0	1	1	1	1	ARFGAP1	ADP-ribosylation factor GTPase activating protein 1
hsa-miR-1224-5p	0	0	1	1	0	0	MUS81	MUS81 endonuclease homolog (S. cerevisiae)
hsa-miR-1224-5p	1	0	1	0	1	1	GRIN3A	glutamate receptor, ionotropic, N-methyl-D-aspartate 3A
hsa-miR-1224-5p	1	0	1	1	1	1	SLC30A8	solute carrier family 30 (zinc transporter), member 8
hsa-miR-1224-5p	1	0	1	1	1	1	YTHDF3	YTH domain family, member 3
hsa-miR-1224-5p	1	0	1	1	0	0	CCDC30	coiled-coil domain containing 30
hsa-miR-1224-5p	1	0	1	0	1	1	HNRNPA3	heterogeneous nuclear ribonucleoprotein A3
hsa-miR-1224-5p	1	0	1	0	0	0	YLPM1	YLP motif containing 1
hsa-miR-1224-5p	1	0	1	1	0	0	USP24	ubiquitin specific peptidase 24
hsa-miR-1224-5p	0	0	1	1	1	1	CEP192	centrosomal protein 192kDa
hsa-miR-1224-5p	1	0	1	0	1	1	KIF21B	kinesin family member 21B
hsa-miR-1224-5p	0	0	1	0	1	1	SYNPO2	synaptopodin 2
hsa-miR-1224-5p	0	0	1	0	1	1	USO1	USO1 vesicle docking protein homolog (yeast)
hsa-miR-1224-5p	0	0	1	1	1	1	MOXD1	monooxygenase, DBH-like 1
hsa-miR-1224-5p	0	0	1	1	1	1	KLHL7	kelch-like 7 (Drosophila)
hsa-miR-1224-5p	0	0	1	0	0	0	CLCN1	chloride channel, voltage-sensitive 1
hsa-miR-1224-5p	1	0	1	1	1	1	LUZP2	leucine zipper protein 2
hsa-miR-1224-5p	1	0	1	1	1	1	RIC8B	resistance to inhibitors of cholinesterase 8 homolog B (C. elegans)
hsa-miR-1224-5p	1	0	1	1	1	1	TPP1	tripeptidyl peptidase I
hsa-miR-1224-5p	0	0	1	1	1	1	GCOM1	GRINL1A complex locus 1
hsa-miR-1224-5p	1	0	1	1	1	1	TMCC2	transmembrane and coiled-coil domain family 2
hsa-miR-1224-5p	1	0	1	0	1	1	CHRM2	cholinergic receptor, muscarinic 2
hsa-miR-1224-5p	1	0	1	1	1	1	MYNN	myoneurin
hsa-miR-1224-5p	0	0	1	1	1	1	HMBOX1	homeobox containing 1
hsa-miR-1224-5p	1	0	1	1	1	1	MECP2	methyl CpG binding protein 2 (Rett syndrome)
hsa-miR-1224-5p	0	0	1	0	0	0	LOC646743	uncharacterized LOC646743
hsa-miR-1224-5p	1	0	1	1	1	1	NIPA2	non imprinted in Prader-Willi/Angelman syndrome 2
hsa-miR-1224-5p	0	0	1	1	1	1	NOLC1	nucleolar and coiled-body phosphoprotein 1
hsa-miR-1224-5p	0	0	1	1	1	1	IYD	iodotyrosine deiodinase
hsa-miR-1224-5p	1	0	1	1	1	1	AMOT	angiomotin
hsa-miR-1224-5p	0	0	1	1	1	1	SLC6A2	solute carrier family 6 (neurotransmitter transporter, noradrenalin), member 2
hsa-miR-1224-5p	0	0	1	1	1	1	WDR55	WD repeat domain 55
hsa-miR-1224-5p	1	0	1	1	1	1	NUMA1	nuclear mitotic apparatus protein 1
hsa-miR-1224-5p	1	0	1	1	0	0	SLC10A3	solute carrier family 10 (sodium/bile acid cotransporter family), member 3
hsa-miR-1224-5p	0	0	1	1	1	1	ZNF589	zinc finger protein 589
hsa-miR-1224-5p	1	0	1	1	1	1	POU2F2	POU class 2 homeobox 2
hsa-miR-1224-5p	0	0	1	1	0	0	RBM14	RNA binding motif protein 14
hsa-miR-1224-5p	1	0	1	0	1	1	TMEM39A	transmembrane protein 39A
hsa-miR-1224-5p	1	0	1	1	0	0	SIGMAR1	sigma non-opioid intracellular receptor 1
hsa-miR-1224-5p	1	0	1	1	0	0	IQSEC1	IQ motif and Sec7 domain 1
hsa-miR-1224-5p	1	0	1	1	1	1	SLC46A1	solute carrier family 46 (folate transporter), member 1
hsa-miR-1224-5p	0	0	1	0	0	0	LRRC14	leucine rich repeat containing 14
hsa-miR-1224-5p	0	0	1	1	0	0	HDAC6	histone deacetylase 6
hsa-miR-1224-5p	0	0	1	1	1	1	PCNP	PEST proteolytic signal containing nuclear protein
hsa-miR-1224-5p	0	0	1	0	0	0	MGC21881	uncharacterized locus MGC21881
hsa-miR-1224-5p	0	0	1	1	1	1	UCHL5	ubiquitin carboxyl-terminal hydrolase L5
hsa-miR-1224-5p	0	0	1	0	0	0	KLHL15	kelch-like 15 (Drosophila)
hsa-miR-1224-5p	0	0	1	1	0	0	ZBTB32	zinc finger and BTB domain containing 32
hsa-miR-1224-5p	1	0	1	1	1	1	ARHGEF9	Cdc42 guanine nucleotide exchange factor (GEF) 9
hsa-miR-1224-5p	1	0	1	1	1	1	FAM222A	family with sequence similarity 222, member A
hsa-miR-1224-5p	1	0	1	1	1	1	SCML4	sex comb on midleg-like 4 (Drosophila)
hsa-miR-1224-5p	0	0	1	1	1	1	FMNL1	formin-like 1
hsa-miR-1224-5p	0	0	1	1	1	1	RNF103	ring finger protein 103
hsa-miR-1224-5p	0	0	1	0	0	0	EVPLL	envoplakin-like
hsa-miR-1224-5p	1	0	1	0	1	1	CERS3	ceramide synthase 3
hsa-miR-1224-5p	0	0	1	0	0	0	LOC400891	chromosome 14 open reading frame 166B pseudogene
hsa-miR-1224-5p	1	0	1	1	1	1	CASD1	CAS1 domain containing 1
hsa-miR-1224-5p	0	0	1	1	0	0	TSPAN16	tetraspanin 16
hsa-miR-1224-5p	0	0	1	1	1	1	PIP5K1B	phosphatidylinositol-4-phosphate 5-kinase, type I, beta
hsa-miR-1224-5p	1	0	1	1	1	1	ELAVL2	ELAV (embryonic lethal, abnormal vision, Drosophila)-like 2 (Hu antigen B)
hsa-miR-1224-5p	1	0	1	1	1	1	RCOR3	REST corepressor 3
hsa-miR-1224-5p	1	0	1	0	1	1	RNF4	ring finger protein 4
hsa-miR-1224-5p	0	0	1	0	1	1	PLEKHM1P	pleckstrin homology domain containing, family M (with RUN domain) member 1 pseudogene
hsa-miR-1224-5p	0	0	1	1	1	1	UBXN1	UBX domain protein 1
hsa-miR-1224-5p	1	0	1	1	1	1	FGF1	fibroblast growth factor 1 (acidic)
hsa-miR-1224-5p	0	0	1	1	0	0	LINC00176	long intergenic non-protein coding RNA 176
hsa-miR-1224-5p	0	0	1	1	1	1	C16orf89	chromosome 16 open reading frame 89
hsa-miR-1224-5p	0	0	1	1	1	1	ZNF337	zinc finger protein 337
hsa-miR-1224-5p	1	0	1	0	1	1	DDX3Y	DEAD (Asp-Glu-Ala-Asp) box polypeptide 3, Y-linked
hsa-miR-1224-5p	1	0	1	1	0	0	EGLN2	egl nine homolog 2 (C. elegans)
hsa-miR-1224-5p	1	0	1	0	1	1	NEGR1	neuronal growth regulator 1
hsa-miR-1224-5p	1	0	1	1	1	1	BNC2	basonuclin 2
hsa-miR-1224-5p	0	0	1	0	0	0	CYP4F35P	cytochrome P450, family 4, subfamily F, polypeptide 35, pseudogene
hsa-miR-1224-5p	1	0	1	0	1	1	RAG1	recombination activating gene 1
hsa-miR-1224-5p	0	0	1	1	1	1	ZNF138	zinc finger protein 138
hsa-miR-1224-5p	1	0	1	0	1	1	ARID2	AT rich interactive domain 2 (ARID, RFX-like)
hsa-miR-1224-5p	0	0	1	1	0	0	HSPA14	heat shock 70kDa protein 14
hsa-miR-1224-5p	1	0	1	1	0	0	PROSAPIP1	ProSAPiP1 protein
hsa-miR-1224-5p	0	0	1	0	0	0	FLJ36000	uncharacterized FLJ36000
hsa-miR-1224-5p	0	0	1	0	1	1	LINC00634	long intergenic non-protein coding RNA 634
hsa-miR-1224-5p	1	0	1	1	1	1	DACH2	dachshund homolog 2 (Drosophila)
hsa-miR-1224-5p	0	0	1	0	0	0	LINC00339	long intergenic non-protein coding RNA 339
hsa-miR-1224-5p	0	0	1	0	0	0	SLC7A11-AS1	SLC7A11 antisense RNA 1
hsa-miR-1224-5p	1	0	1	0	1	1	KIAA0430	KIAA0430
hsa-miR-1224-5p	0	0	1	0	1	1	METTL12	methyltransferase like 12
hsa-miR-1224-5p	1	0	1	0	1	1	HSPA12A	heat shock 70kDa protein 12A
hsa-miR-1224-5p	1	0	1	1	1	1	ARID3B	AT rich interactive domain 3B (BRIGHT-like)
hsa-miR-1224-5p	0	0	1	0	0	0	ALOX12P2	arachidonate 12-lipoxygenase pseudogene 2
hsa-miR-1224-5p	0	0	1	0	1	1	C11orf93	chromosome 11 open reading frame 93
hsa-miR-1224-5p	0	0	1	1	0	0	PLB1	phospholipase B1
hsa-miR-1224-5p	0	0	1	0	0	0	LOC339260	uncharacterized LOC339260
hsa-miR-1224-5p	0	0	1	0	0	0	DKFZp686O1327	uncharacterized LOC401014
hsa-miR-1224-5p	1	0	1	0	1	1	KDM2A	lysine (K)-specific demethylase 2A
hsa-miR-1224-5p	1	0	1	1	1	1	PTPRG	protein tyrosine phosphatase, receptor type, G
hsa-miR-1224-5p	1	0	1	0	1	1	ARHGAP5	Rho GTPase activating protein 5
hsa-miR-1224-5p	1	0	1	1	1	1	TMPO	thymopoietin
hsa-miR-1224-5p	0	0	1	1	0	0	NLRC5	NLR family, CARD domain containing 5
hsa-miR-1224-5p	0	0	1	1	1	1	SLC29A3	solute carrier family 29 (nucleoside transporters), member 3
hsa-miR-1224-5p	1	0	1	0	1	1	NUDT10	nudix (nucleoside diphosphate linked moiety X)-type motif 10
hsa-miR-1224-5p	1	0	1	0	1	1	SEMA4G	sema domain, immunoglobulin domain (Ig), transmembrane domain (TM) and short cytoplasmic domain, (semaphorin) 4G
hsa-miR-1224-5p	1	0	1	1	1	1	ZFP91	zinc finger protein 91 homolog (mouse)
hsa-miR-1224-5p	0	0	1	1	1	1	RAB3IL1	RAB3A interacting protein (rabin3)-like 1
hsa-miR-1224-5p	1	0	1	1	1	1	SCUBE3	signal peptide, CUB domain, EGF-like 3
hsa-miR-1224-5p	0	0	1	0	0	0	LINC00265	long intergenic non-protein coding RNA 265
hsa-miR-1224-5p	0	0	1	1	0	0	LYZL6	lysozyme-like 6
hsa-miR-1224-5p	1	0	1	1	1	1	KDM5C	lysine (K)-specific demethylase 5C
hsa-miR-1224-5p	1	0	1	1	1	1	ATP8B4	ATPase, class I, type 8B, member 4
hsa-miR-1224-5p	1	0	1	1	1	1	DHX57	DEAH (Asp-Glu-Ala-Asp/His) box polypeptide 57
hsa-miR-1224-5p	1	0	1	0	1	1	C7orf41	chromosome 7 open reading frame 41
hsa-miR-1224-5p	0	0	1	1	0	0	SLC38A7	solute carrier family 38, member 7
hsa-miR-1224-5p	0	0	1	0	0	0	USP32P1	ubiquitin specific peptidase 32 pseudogene 1
hsa-miR-1224-5p	1	0	1	1	1	1	MGAT5B	mannosyl (alpha-1,6-)-glycoprotein beta-1,6-N-acetyl-glucosaminyltransferase, isozyme B
hsa-miR-1224-5p	1	0	1	0	0	0	PRRT4	proline-rich transmembrane protein 4
hsa-miR-1224-5p	0	0	1	0	0	0	FLJ35390	uncharacterized LOC255031
hsa-miR-1224-5p	0	0	1	1	1	1	ZNF33B	zinc finger protein 33B
hsa-miR-1224-5p	1	0	1	1	1	1	EIF4G2	eukaryotic translation initiation factor 4 gamma, 2
hsa-miR-1224-5p	1	0	1	1	1	1	ZNF449	zinc finger protein 449
hsa-miR-1224-5p	1	0	1	0	1	1	MAGIX	MAGI family member, X-linked
hsa-miR-1224-5p	1	0	1	0	1	1	DCP2	DCP2 decapping enzyme homolog (S. cerevisiae)
hsa-miR-1224-5p	1	0	1	1	0	0	DCAF15	DDB1 and CUL4 associated factor 15
hsa-miR-1224-5p	1	0	1	0	1	1	MAP4K3	mitogen-activated protein kinase kinase kinase kinase 3
hsa-miR-1224-5p	0	0	1	1	1	1	CTXN3	cortexin 3
hsa-miR-1224-5p	1	0	1	1	1	1	WBP1L	WW domain binding protein 1-like
hsa-miR-1224-5p	0	0	1	1	0	0	ASIC4	acid-sensing (proton-gated) ion channel family member 4
hsa-miR-1224-5p	1	0	1	1	1	1	NTRK2	neurotrophic tyrosine kinase, receptor, type 2
hsa-miR-1224-5p	0	0	1	1	1	1	C3orf67	chromosome 3 open reading frame 67
hsa-miR-1224-5p	0	0	1	0	0	0	LINC00537	long intergenic non-protein coding RNA 537
hsa-miR-1224-5p	0	0	1	0	0	0	TBC1D25	TBC1 domain family, member 25
hsa-miR-1224-5p	1	0	1	1	1	1	NOTCH2NL	notch 2 N-terminal like
hsa-miR-1224-5p	0	0	1	1	0	0	HERC2P3	hect domain and RLD 2 pseudogene 3
hsa-miR-1224-5p	0	0	1	1	0	0	DNASE1	deoxyribonuclease I
hsa-miR-1224-5p	1	0	1	1	1	1	ACVR2B	activin A receptor, type IIB
hsa-miR-1224-5p	0	0	1	1	0	0	TMC1	transmembrane channel-like 1
hsa-miR-1224-5p	1	0	1	1	1	1	SLC35G1	solute carrier family 35, member G1
hsa-miR-1224-5p	0	0	1	1	0	0	ZNF276	zinc finger protein 276
hsa-miR-1224-5p	0	0	1	1	0	0	FMN1	formin 1
hsa-miR-1224-5p	0	0	1	1	0	0	SH2D6	SH2 domain containing 6
hsa-miR-1224-5p	0	0	1	1	0	0	YDJC	YdjC homolog (bacterial)
hsa-miR-1224-5p	0	0	1	1	1	1	UNC13B	unc-13 homolog B (C. elegans)
hsa-miR-1224-5p	0	0	1	1	0	0	ZNF630	zinc finger protein 630
hsa-miR-1224-5p	1	0	1	1	1	1	ITSN1	intersectin 1 (SH3 domain protein)
hsa-miR-1224-5p	1	0	1	1	1	1	KIAA1324L	KIAA1324-like
hsa-miR-1224-5p	0	0	1	0	0	0	LOC286094	uncharacterized LOC286094
hsa-miR-1224-5p	1	0	1	0	1	1	PRDM10	PR domain containing 10
hsa-miR-1224-5p	1	0	1	1	1	1	OSBP2	oxysterol binding protein 2
hsa-miR-1224-5p	0	0	1	1	0	0	AQP7	aquaporin 7
hsa-miR-1224-5p	0	0	1	1	1	1	SULT1C4	sulfotransferase family, cytosolic, 1C, member 4
hsa-miR-1224-5p	0	0	1	0	0	0	KRT8P12	keratin 8 pseudogene 12
hsa-miR-1224-5p	1	0	1	1	1	1	ANK2	ankyrin 2, neuronal
hsa-miR-1224-5p	0	0	1	0	0	0	FAM225B	family with sequence similarity 225, member B (non-protein coding)
hsa-miR-1224-5p	1	0	1	1	1	1	TMEM218	transmembrane protein 218
hsa-miR-1224-5p	1	0	1	1	1	1	PCM1	pericentriolar material 1
hsa-miR-1224-5p	1	0	1	0	0	0	SDR39U1	short chain dehydrogenase/reductase family 39U, member 1
hsa-miR-1224-5p	0	0	1	0	0	0	FUT8-AS1	FUT8 antisense RNA 1
hsa-miR-1224-5p	0	0	1	0	0	0	MEG3	maternally expressed 3 (non-protein coding)
hsa-miR-1224-5p	1	0	1	1	0	0	NRL	neural retina leucine zipper
hsa-miR-1224-5p	1	0	1	0	1	1	TTC7B	tetratricopeptide repeat domain 7B
hsa-miR-1224-5p	0	0	1	1	0	0	NDRG2	NDRG family member 2
hsa-miR-1224-5p	1	0	1	1	1	1	FOSB	FBJ murine osteosarcoma viral oncogene homolog B
hsa-miR-1224-5p	1	0	1	1	0	0	ABL2	v-abl Abelson murine leukemia viral oncogene homolog 2
hsa-miR-1224-5p	1	0	1	1	1	1	ETS1	v-ets erythroblastosis virus E26 oncogene homolog 1 (avian)
hsa-miR-1224-5p	0	0	1	1	1	1	CRB1	crumbs homolog 1 (Drosophila)
hsa-miR-1224-5p	0	0	1	1	0	0	CDK5RAP2	CDK5 regulatory subunit associated protein 2
hsa-miR-1224-5p	0	0	1	1	1	1	PRR14L	proline rich 14-like
hsa-miR-1224-5p	1	0	1	1	0	0	CECR2	cat eye syndrome chromosome region, candidate 2
hsa-miR-1224-5p	0	0	1	0	0	0	LINC00240	long intergenic non-protein coding RNA 240
hsa-miR-1224-5p	1	0	1	1	1	1	GTDC1	glycosyltransferase-like domain containing 1
hsa-miR-1224-5p	1	0	1	1	1	1	TSC22D3	TSC22 domain family, member 3
hsa-miR-1224-5p	0	0	1	0	1	1	B3GALTL	beta 1,3-galactosyltransferase-like
hsa-miR-1224-5p	1	0	1	1	1	1	NFIB	nuclear factor I/B
hsa-miR-1224-5p	1	0	1	1	1	1	PTER	phosphotriesterase related
hsa-miR-1224-5p	1	0	1	1	1	1	PGAP1	post-GPI attachment to proteins 1
hsa-miR-1224-5p	1	0	1	1	1	1	BZRAP1	benzodiazapine receptor (peripheral) associated protein 1
hsa-miR-1224-5p	0	0	1	1	1	1	SSFA2	sperm specific antigen 2
hsa-miR-1224-5p	1	0	1	1	1	1	DLG5	discs, large homolog 5 (Drosophila)
hsa-miR-1224-5p	1	0	1	1	1	1	BSDC1	BSD domain containing 1
hsa-miR-1224-5p	0	0	1	1	0	0	MRPL48	mitochondrial ribosomal protein L48
hsa-miR-1224-5p	1	0	1	0	1	1	STX6	syntaxin 6
hsa-miR-1224-5p	1	0	1	1	0	0	RAB24	RAB24, member RAS oncogene family
hsa-miR-1224-5p	1	0	1	1	1	1	TOM1L1	target of myb1 (chicken)-like 1
hsa-miR-1224-5p	0	0	1	1	1	1	UPRT	uracil phosphoribosyltransferase (FUR1) homolog (S. cerevisiae)
hsa-miR-1224-5p	0	0	1	1	0	0	TTC8	tetratricopeptide repeat domain 8
hsa-miR-1224-5p	1	0	1	1	1	1	TARBP2	TAR (HIV-1) RNA binding protein 2
hsa-miR-1224-5p	0	0	1	0	0	0	ARRDC1	arrestin domain containing 1
hsa-miR-1224-5p	0	0	1	1	1	1	APH1A	anterior pharynx defective 1 homolog A (C. elegans)
hsa-miR-1224-5p	0	0	1	1	0	0	NOP56	NOP56 ribonucleoprotein homolog (yeast)
hsa-miR-1224-5p	1	0	1	1	1	1	SMARCE1	SWI/SNF related, matrix associated, actin dependent regulator of chromatin, subfamily e, member 1
hsa-miR-1224-5p	1	0	1	1	1	1	PLEKHB2	pleckstrin homology domain containing, family B (evectins) member 2
hsa-miR-1224-5p	0	0	1	1	1	1	TRIM68	tripartite motif containing 68
hsa-miR-1224-5p	0	0	1	1	0	0	STK19	serine/threonine kinase 19
hsa-miR-1224-5p	1	0	1	1	1	1	LYPLA2	lysophospholipase II
hsa-miR-1224-5p	1	0	1	1	1	1	TMEM245	transmembrane protein 245
hsa-miR-1224-5p	0	0	1	1	1	1	TRIM38	tripartite motif containing 38
hsa-miR-1224-5p	1	0	1	1	0	0	MTX1	metaxin 1
hsa-miR-1224-5p	0	0	1	1	1	1	BMPR1A	bone morphogenetic protein receptor, type IA
hsa-miR-1224-5p	1	0	1	1	1	1	PEX2	peroxisomal biogenesis factor 2
hsa-miR-1224-5p	0	0	1	0	0	0	LOC677759	uncharacterized LOC677759
hsa-miR-1224-5p	0	0	1	1	0	0	TROAP	trophinin associated protein (tastin)
hsa-miR-1224-5p	1	0	1	1	1	1	TLE1	transducin-like enhancer of split 1 (E(sp1) homolog, Drosophila)
hsa-miR-1224-5p	0	0	1	1	0	0	GPR153	G protein-coupled receptor 153
hsa-miR-1224-5p	0	0	1	1	1	1	JMJD8	jumonji domain containing 8
hsa-miR-1224-5p	1	0	1	1	1	1	RBBP7	retinoblastoma binding protein 7
hsa-miR-1224-5p	0	0	1	1	1	1	CD1C	CD1c molecule
hsa-miR-1224-5p	1	0	1	1	1	1	EIF1	eukaryotic translation initiation factor 1
hsa-miR-1224-5p	0	0	1	1	1	1	SLCO4A1	solute carrier organic anion transporter family, member 4A1
hsa-miR-1224-5p	1	0	1	1	0	0	ATP6V1B2	ATPase, H+ transporting, lysosomal 56/58kDa, V1 subunit B2
hsa-miR-1224-5p	0	0	1	1	1	1	ZNF333	zinc finger protein 333
hsa-miR-1224-5p	1	0	1	1	0	0	CRELD1	cysteine-rich with EGF-like domains 1
hsa-miR-1224-5p	1	0	1	1	1	1	ARHGEF40	Rho guanine nucleotide exchange factor (GEF) 40
hsa-miR-1224-5p	1	0	1	1	1	1	RALY	RNA binding protein, autoantigenic (hnRNP-associated with lethal yellow homolog (mouse))
hsa-miR-1224-5p	0	0	1	1	1	1	HS3ST2	heparan sulfate (glucosamine) 3-O-sulfotransferase 2
hsa-miR-1224-5p	1	0	1	0	1	1	CD47	CD47 molecule
hsa-miR-1224-5p	1	0	1	1	0	0	FOXO3	forkhead box O3
hsa-miR-1224-5p	0	0	1	1	0	0	TESK1	testis-specific kinase 1
hsa-miR-1224-5p	1	0	1	1	1	1	ATPAF1	ATP synthase mitochondrial F1 complex assembly factor 1
hsa-miR-1224-5p	0	0	1	0	1	1	UBA52	ubiquitin A-52 residue ribosomal protein fusion product 1
hsa-miR-1224-5p	1	0	1	1	1	1	SERF2	small EDRK-rich factor 2
hsa-miR-1224-5p	1	0	1	1	1	1	RND3	Rho family GTPase 3
hsa-miR-1224-5p	1	0	1	0	1	1	KIAA0240	KIAA0240
hsa-miR-1224-5p	1	0	1	0	1	1	KIAA0664	KIAA0664
hsa-miR-1224-5p	0	0	1	0	0	0	LOC731789	uncharacterized LOC731789
hsa-miR-1224-5p	0	0	1	0	0	0	LINC00661	long intergenic non-protein coding RNA 661
hsa-miR-1224-5p	1	0	1	1	1	1	KIAA2018	KIAA2018
hsa-miR-1224-5p	0	0	1	1	1	1	SLC25A26	solute carrier family 25 (S-adenosylmethionine carrier), member 26
hsa-miR-1224-5p	1	0	1	1	1	1	SLC39A10	solute carrier family 39 (zinc transporter), member 10
hsa-miR-1224-5p	1	0	1	1	1	1	BCL2L1	BCL2-like 1
hsa-miR-1224-5p	0	0	1	0	1	1	SYNPR	synaptoporin
hsa-miR-1224-5p	1	0	1	1	1	1	METAP1	methionyl aminopeptidase 1
hsa-miR-1224-5p	0	0	1	1	0	0	HMGXB3	HMG box domain containing 3
hsa-miR-1224-5p	0	0	1	1	1	1	ATF2	activating transcription factor 2
hsa-miR-1224-5p	1	0	1	1	1	1	TRIOBP	TRIO and F-actin binding protein
hsa-miR-1224-5p	1	0	1	1	0	0	DPY19L1	dpy-19-like 1 (C. elegans)
hsa-miR-1224-5p	1	0	1	0	1	1	RBBP5	retinoblastoma binding protein 5
hsa-miR-1224-5p	0	0	1	1	1	1	ALDH3B1	aldehyde dehydrogenase 3 family, member B1
hsa-miR-1224-5p	1	0	1	1	1	1	MLL	myeloid/lymphoid or mixed-lineage leukemia (trithorax homolog, Drosophila)
hsa-miR-1224-5p	0	0	1	1	1	1	ADPRH	ADP-ribosylarginine hydrolase
hsa-miR-1224-5p	0	0	1	1	1	1	RFC1	replication factor C (activator 1) 1, 145kDa
hsa-miR-1224-5p	0	0	1	1	0	0	KIF22	kinesin family member 22
hsa-miR-1224-5p	1	0	1	0	1	1	STAT3	signal transducer and activator of transcription 3 (acute-phase response factor)
hsa-miR-1224-5p	0	0	1	1	0	0	EMD	emerin
hsa-miR-1224-5p	1	0	1	1	1	1	KCNA1	potassium voltage-gated channel, shaker-related subfamily, member 1 (episodic ataxia with myokymia)
hsa-miR-1224-5p	1	0	1	1	1	1	NF1	neurofibromin 1
hsa-miR-1224-5p	1	0	1	1	1	1	OCRL	oculocerebrorenal syndrome of Lowe
hsa-miR-1224-5p	0	0	1	1	1	1	WAS	Wiskott-Aldrich syndrome
hsa-miR-1224-5p	0	0	1	1	1	1	XDH	xanthine dehydrogenase
hsa-miR-1224-5p	1	0	1	1	1	1	AQP2	aquaporin 2 (collecting duct)
hsa-miR-1224-5p	1	0	1	1	1	1	HOXD13	homeobox D13
hsa-miR-1224-5p	1	0	1	1	1	1	MPZ	myelin protein zero
hsa-miR-1224-5p	1	0	1	1	1	1	CD44	CD44 molecule (Indian blood group)
hsa-miR-1224-5p	0	0	1	1	0	0	CA4	carbonic anhydrase IV
hsa-miR-1224-5p	1	0	1	0	1	1	CACNA1E	calcium channel, voltage-dependent, R type, alpha 1E subunit
hsa-miR-1224-5p	1	0	1	1	1	1	CHRM1	cholinergic receptor, muscarinic 1
hsa-miR-1224-5p	1	0	1	1	1	1	DIO2	deiodinase, iodothyronine, type II
hsa-miR-1224-5p	1	0	1	1	1	1	GAD1	glutamate decarboxylase 1 (brain, 67kDa)
hsa-miR-1224-5p	0	0	1	1	1	1	MAOB	monoamine oxidase B
hsa-miR-1224-5p	1	0	1	1	1	1	RARB	retinoic acid receptor, beta
hsa-miR-1224-5p	1	0	1	0	1	1	UBE2W	ubiquitin-conjugating enzyme E2W (putative)
hsa-miR-1224-5p	1	0	1	0	1	1	ARHGEF37	Rho guanine nucleotide exchange factor (GEF) 37
hsa-miR-1224-5p	1	0	1	0	1	1	CLDN18	claudin 18
hsa-miR-1224-5p	0	0	1	0	0	0	KLK2	kallikrein-related peptidase 2
hsa-miR-1224-5p	1	0	1	1	1	1	ABLIM1	actin binding LIM protein 1
hsa-miR-1224-5p	1	0	1	0	1	1	SMAD2	SMAD family member 2
hsa-miR-1224-5p	1	0	1	1	1	1	HMGXB4	HMG box domain containing 4
hsa-miR-1224-5p	1	0	1	1	1	1	TMEM200B	transmembrane protein 200B
hsa-miR-1224-5p	1	0	1	1	0	0	DLGAP1	discs, large (Drosophila) homolog-associated protein 1
hsa-miR-1224-5p	0	0	1	1	1	1	ALG11	asparagine-linked glycosylation 11, alpha-1,2-mannosyltransferase homolog (yeast)
hsa-miR-1224-5p	0	0	1	1	1	1	CCDC144NL	coiled-coil domain containing 144 family, N-terminal like
hsa-miR-1224-5p	0	0	1	0	1	1	ZNF705A	zinc finger protein 705A
hsa-miR-1224-5p	0	0	1	1	1	1	DBX2	developing brain homeobox 2
hsa-miR-1224-5p	1	0	1	1	1	1	PLCXD3	phosphatidylinositol-specific phospholipase C, X domain containing 3
hsa-miR-1224-5p	1	0	1	0	1	1	IP6K1	inositol hexakisphosphate kinase 1
hsa-miR-1224-5p	0	0	1	1	1	1	SCP2	sterol carrier protein 2
hsa-miR-1224-5p	0	0	1	1	1	1	TRIM13	tripartite motif containing 13
hsa-miR-1224-5p	0	0	1	0	1	1	C3orf56	chromosome 3 open reading frame 56
hsa-miR-1224-5p	0	0	1	1	0	0	C1orf186	chromosome 1 open reading frame 186
hsa-miR-1224-5p	1	0	1	0	1	1	CPLX2	complexin 2
hsa-miR-1224-5p	1	0	1	0	1	1	KIAA2022	KIAA2022
hsa-miR-1224-5p	1	0	1	0	1	1	RCHY1	ring finger and CHY zinc finger domain containing 1, E3 ubiquitin protein ligase
hsa-miR-1224-5p	1	0	1	1	1	1	SHE	Src homology 2 domain containing E
hsa-miR-1224-5p	1	0	1	0	1	1	ZC3H12B	zinc finger CCCH-type containing 12B
hsa-miR-1224-5p	1	0	1	1	1	1	BCL2L15	BCL2-like 15
hsa-miR-1224-5p	1	0	1	1	0	0	RPL21P44	ribosomal protein L21 pseudogene 44
hsa-miR-1224-5p	1	0	1	1	1	1	SORCS1	sortilin-related VPS10 domain containing receptor 1
hsa-miR-1224-5p	0	0	1	1	1	1	LDLRAD2	low density lipoprotein receptor class A domain containing 2
hsa-miR-1224-5p	1	0	1	1	1	1	PHF6	PHD finger protein 6
hsa-miR-1224-5p	1	0	1	1	1	1	ZHX1	zinc fingers and homeoboxes 1
hsa-miR-1224-5p	1	0	1	1	1	1	SH3PXD2B	SH3 and PX domains 2B
hsa-miR-1224-5p	1	0	1	0	1	1	GCH1	GTP cyclohydrolase 1
hsa-miR-1224-5p	0	0	1	0	1	1	TM2D2	TM2 domain containing 2
hsa-miR-1224-5p	1	0	1	0	1	1	TNRC6B	trinucleotide repeat containing 6B
hsa-miR-1224-5p	1	0	1	0	1	1	CELF2	CUGBP, Elav-like family member 2
hsa-miR-1224-5p	0	0	1	1	1	1	MBP	myelin basic protein
hsa-miR-1224-5p	0	0	1	1	0	0	IRAK1	interleukin-1 receptor-associated kinase 1
hsa-miR-1224-5p	1	0	1	1	1	1	VEGFA	vascular endothelial growth factor A
hsa-miR-1224-5p	1	0	1	1	1	1	KCTD21	potassium channel tetramerisation domain containing 21
hsa-miR-1224-5p	0	0	1	1	1	1	ATF3	activating transcription factor 3
hsa-miR-1224-5p	1	0	1	0	1	1	CYB5RL	cytochrome b5 reductase-like
hsa-miR-1224-5p	1	0	1	1	1	1	YTHDC1	YTH domain containing 1
hsa-miR-1224-5p	1	0	1	1	1	1	UBE2V1	ubiquitin-conjugating enzyme E2 variant 1
hsa-miR-1224-5p	1	0	1	1	1	1	AMD1	adenosylmethionine decarboxylase 1
hsa-miR-1224-5p	0	0	1	1	1	1	C18orf62	chromosome 18 open reading frame 62
hsa-miR-1224-5p	1	0	1	0	1	1	SCML1	sex comb on midleg-like 1 (Drosophila)
hsa-miR-1224-5p	0	0	1	1	1	1	SPATA6L	spermatogenesis associated 6-like
hsa-miR-1224-5p	1	0	1	1	1	1	SEC14L1	SEC14-like 1 (S. cerevisiae)
hsa-miR-1224-5p	0	0	1	0	1	1	ZNF705D	zinc finger protein 705D
hsa-miR-1224-5p	0	0	1	1	1	1	MDH1B	malate dehydrogenase 1B, NAD (soluble)
hsa-miR-1224-5p	0	0	1	1	1	1	SPOCK3	sparc/osteonectin, cwcv and kazal-like domains proteoglycan (testican) 3
hsa-miR-1224-5p	1	0	1	1	1	1	ZC2HC1C	zinc finger, C2HC-type containing 1C
hsa-miR-1224-5p	1	0	1	1	1	1	NSL1	NSL1, MIND kinetochore complex component, homolog (S. cerevisiae)
hsa-miR-1224-5p	0	0	1	1	1	1	TTC14	tetratricopeptide repeat domain 14
hsa-miR-1224-5p	0	0	1	1	0	0	SST	somatostatin
hsa-miR-1224-5p	0	0	1	1	1	1	ZNF493	zinc finger protein 493
hsa-miR-1224-5p	1	0	1	1	1	1	IRF2BP2	interferon regulatory factor 2 binding protein 2
hsa-miR-1224-5p	1	0	1	1	1	1	DACT1	dapper, antagonist of beta-catenin, homolog 1 (Xenopus laevis)
hsa-miR-1224-5p	1	0	1	1	1	1	CUL4B	cullin 4B
hsa-miR-1224-5p	1	0	1	1	1	1	LDB3	LIM domain binding 3
hsa-miR-1224-5p	1	0	1	1	1	1	KDM6B	lysine (K)-specific demethylase 6B
hsa-miR-1224-5p	1	0	1	1	1	1	REPS2	RALBP1 associated Eps domain containing 2
hsa-miR-1224-5p	1	0	1	1	1	1	ASIC1	acid-sensing (proton-gated) ion channel 1
hsa-miR-1224-5p	1	0	1	0	1	1	XIAP	X-linked inhibitor of apoptosis
hsa-miR-1224-5p	0	0	1	1	1	1	AQP8	aquaporin 8
hsa-miR-1224-5p	1	0	1	0	1	1	BMPR2	bone morphogenetic protein receptor, type II (serine/threonine kinase)
hsa-miR-1224-5p	1	0	1	1	1	1	CAMK2D	calcium/calmodulin-dependent protein kinase II delta
hsa-miR-1224-5p	1	0	1	0	1	1	CDK6	cyclin-dependent kinase 6
hsa-miR-1224-5p	1	0	1	1	1	1	CLCN6	chloride channel, voltage-sensitive 6
hsa-miR-1224-5p	0	0	1	1	1	1	DSCAM	Down syndrome cell adhesion molecule
hsa-miR-1224-5p	1	0	1	1	1	1	DYRK1A	dual-specificity tyrosine-(Y)-phosphorylation regulated kinase 1A
hsa-miR-1224-5p	1	0	1	0	1	1	EFNB3	ephrin-B3
hsa-miR-1224-5p	1	0	1	1	1	1	NDST1	N-deacetylase/N-sulfotransferase (heparan glucosaminyl) 1
hsa-miR-1224-5p	1	0	1	1	1	1	IRAK2	interleukin-1 receptor-associated kinase 2
hsa-miR-1224-5p	1	0	1	1	1	1	AQP4	aquaporin 4
hsa-miR-1224-5p	1	0	1	1	1	1	ARF3	ADP-ribosylation factor 3
hsa-miR-1224-5p	1	0	1	0	1	1	ARNT	aryl hydrocarbon receptor nuclear translocator
hsa-miR-1224-5p	0	0	1	1	1	1	AXL	AXL receptor tyrosine kinase
hsa-miR-1224-5p	1	0	1	1	1	1	BAAT	bile acid CoA: amino acid N-acyltransferase (glycine N-choloyltransferase)
hsa-miR-1224-5p	1	0	1	1	1	1	BCL6	B-cell CLL/lymphoma 6
hsa-miR-1224-5p	1	0	1	1	1	1	COL4A6	collagen, type IV, alpha 6
hsa-miR-1224-5p	1	0	1	1	1	1	MASP1	mannan-binding lectin serine peptidase 1 (C4/C2 activating component of Ra-reactive factor)
hsa-miR-1224-5p	1	0	1	1	1	1	HBEGF	heparin-binding EGF-like growth factor
hsa-miR-1224-5p	1	0	1	1	1	1	EGR1	early growth response 1
hsa-miR-1224-5p	1	0	1	1	1	1	FBN2	fibrillin 2
hsa-miR-1224-5p	1	0	1	0	1	1	FUT4	fucosyltransferase 4 (alpha (1,3) fucosyltransferase, myeloid-specific)
hsa-miR-1224-5p	0	0	1	1	1	1	FOXN2	forkhead box N2
hsa-miR-1224-5p	0	0	1	1	1	1	IL12B	interleukin 12B (natural killer cell stimulatory factor 2, cytotoxic lymphocyte maturation factor 2, p40)
hsa-miR-1224-5p	1	0	1	1	1	1	ITGA5	integrin, alpha 5 (fibronectin receptor, alpha polypeptide)
hsa-miR-1224-5p	0	0	1	0	1	1	ITGAV	integrin, alpha V
hsa-miR-1224-5p	1	0	1	1	1	1	ITGB8	integrin, beta 8
hsa-miR-1224-5p	1	0	1	1	1	1	KCNJ10	potassium inwardly-rectifying channel, subfamily J, member 10
hsa-miR-1224-5p	0	0	1	1	0	0	KCNK3	potassium channel, subfamily K, member 3
hsa-miR-1224-5p	1	0	1	1	1	1	MSN	moesin
hsa-miR-1224-5p	1	0	1	1	1	1	MSR1	macrophage scavenger receptor 1
hsa-miR-1224-5p	0	0	1	1	1	1	MTAP	methylthioadenosine phosphorylase
hsa-miR-1224-5p	1	0	1	1	1	1	MYH9	myosin, heavy chain 9, non-muscle
hsa-miR-1224-5p	0	0	1	1	1	1	NID1	nidogen 1
hsa-miR-1224-5p	1	0	1	0	1	1	NRAS	neuroblastoma RAS viral (v-ras) oncogene homolog
hsa-miR-1224-5p	0	0	1	0	1	1	OPHN1	oligophrenin 1
hsa-miR-1224-5p	1	0	1	1	1	1	FURIN	furin (paired basic amino acid cleaving enzyme)
hsa-miR-1224-5p	1	0	1	1	0	0	PDGFB	platelet-derived growth factor beta polypeptide
hsa-miR-1224-5p	1	0	1	1	1	1	PLAGL2	pleiomorphic adenoma gene-like 2
hsa-miR-1224-5p	0	0	1	0	1	1	PLN	phospholamban
hsa-miR-1224-5p	0	0	1	1	0	0	PPBP	pro-platelet basic protein (chemokine (C-X-C motif) ligand 7)
hsa-miR-1224-5p	0	0	1	1	1	1	PRKCB	protein kinase C, beta
hsa-miR-1224-5p	1	0	1	0	1	1	MAPK4	mitogen-activated protein kinase 4
hsa-miR-1224-5p	0	0	1	1	1	1	MAP2K6	mitogen-activated protein kinase kinase 6
hsa-miR-1224-5p	0	0	1	0	0	0	PSMB10	proteasome (prosome, macropain) subunit, beta type, 10
hsa-miR-1224-5p	0	0	1	1	0	0	PTPN6	protein tyrosine phosphatase, non-receptor type 6
hsa-miR-1224-5p	1	0	1	1	1	1	PTPN9	protein tyrosine phosphatase, non-receptor type 9
hsa-miR-1224-5p	0	0	1	1	1	1	PTPRC	protein tyrosine phosphatase, receptor type, C
hsa-miR-1224-5p	0	0	1	1	0	0	RNASE3	ribonuclease, RNase A family, 3
hsa-miR-1224-5p	0	0	1	0	1	1	CXCL5	chemokine (C-X-C motif) ligand 5
hsa-miR-1224-5p	1	0	1	1	1	1	SMARCC1	SWI/SNF related, matrix associated, actin dependent regulator of chromatin, subfamily c, member 1
hsa-miR-1224-5p	1	0	1	1	1	1	TRAPPC10	trafficking protein particle complex 10
hsa-miR-1224-5p	1	0	1	1	1	1	UBE2N	ubiquitin-conjugating enzyme E2N
hsa-miR-1224-5p	0	0	1	1	1	1	UBE2V2	ubiquitin-conjugating enzyme E2 variant 2
hsa-miR-1224-5p	0	0	1	1	1	1	ZNF141	zinc finger protein 141
hsa-miR-1224-5p	0	0	1	1	1	1	STX7	syntaxin 7
hsa-miR-1224-5p	0	0	1	1	1	1	BFSP2	beaded filament structural protein 2, phakinin
hsa-miR-1224-5p	1	0	1	0	1	1	CUL3	cullin 3
hsa-miR-1224-5p	0	0	1	1	0	0	SMARCA5	SWI/SNF related, matrix associated, actin dependent regulator of chromatin, subfamily a, member 5
hsa-miR-1224-5p	1	0	1	0	1	1	TNKS	tankyrase, TRF1-interacting ankyrin-related ADP-ribose polymerase
hsa-miR-1224-5p	1	0	1	1	1	1	VAMP8	vesicle-associated membrane protein 8 (endobrevin)
hsa-miR-1224-5p	0	0	1	1	1	1	PRPF4B	PRP4 pre-mRNA processing factor 4 homolog B (yeast)
hsa-miR-1224-5p	0	0	1	0	1	1	AP1S2	adaptor-related protein complex 1, sigma 2 subunit
hsa-miR-1224-5p	0	0	1	1	1	1	TIMELESS	timeless homolog (Drosophila)
hsa-miR-1224-5p	1	0	1	1	1	1	SOCS3	suppressor of cytokine signaling 3
hsa-miR-1224-5p	0	0	1	1	0	0	GPX5	glutathione peroxidase 5 (epididymal androgen-related protein)
hsa-miR-1224-5p	1	0	1	0	1	1	E2F2	E2F transcription factor 2
hsa-miR-1224-5p	1	0	1	1	1	1	EFNB2	ephrin-B2
hsa-miR-1224-5p	0	0	1	1	1	1	LBP	lipopolysaccharide binding protein
hsa-miR-1224-5p	1	0	1	0	1	1	SLC1A2	solute carrier family 1 (glial high affinity glutamate transporter), member 2
hsa-miR-1224-5p	0	0	1	1	1	1	LY86	lymphocyte antigen 86
hsa-miR-1224-5p	1	0	1	1	1	1	ARL3	ADP-ribosylation factor-like 3
hsa-miR-1224-5p	1	0	1	0	1	1	RUNX1T1	runt-related transcription factor 1; translocated to, 1 (cyclin D-related)
hsa-miR-1224-5p	1	0	1	1	1	1	CREB1	cAMP responsive element binding protein 1
hsa-miR-1224-5p	1	0	1	1	1	1	DAG1	dystroglycan 1 (dystrophin-associated glycoprotein 1)
hsa-miR-1224-5p	1	0	1	1	0	0	ERH	enhancer of rudimentary homolog (Drosophila)
hsa-miR-1224-5p	1	0	1	0	1	1	GALNT2	UDP-N-acetyl-alpha-D-galactosamine:polypeptide N-acetylgalactosaminyltransferase 2 (GalNAc-T2)
hsa-miR-1224-5p	1	0	1	1	1	1	LRP2	low density lipoprotein receptor-related protein 2
hsa-miR-1224-5p	0	0	1	1	1	1	NFATC3	nuclear factor of activated T-cells, cytoplasmic, calcineurin-dependent 3
hsa-miR-1224-5p	1	0	1	1	1	1	RABEP1	rabaptin, RAB GTPase binding effector protein 1
hsa-miR-1224-5p	1	0	1	1	1	1	DCLK1	doublecortin-like kinase 1
hsa-miR-1224-5p	1	0	1	1	1	1	RPS6KA5	ribosomal protein S6 kinase, 90kDa, polypeptide 5
hsa-miR-1224-5p	1	0	1	1	1	1	MED26	mediator complex subunit 26
hsa-miR-1224-5p	1	0	1	1	1	1	KCNC4	potassium voltage-gated channel, Shaw-related subfamily, member 4
hsa-miR-1224-5p	0	0	1	1	1	1	PRCP	prolylcarboxypeptidase (angiotensinase C)
hsa-miR-1224-5p	1	0	1	1	1	1	APLNR	apelin receptor
hsa-miR-1224-5p	1	0	1	1	1	1	GPR3	G protein-coupled receptor 3
hsa-miR-1224-5p	1	0	1	1	1	1	H3F3B	H3 histone, family 3B (H3.3B)
hsa-miR-1224-5p	0	0	1	1	1	1	FAIM3	Fas apoptotic inhibitory molecule 3
hsa-miR-1224-5p	1	0	1	1	1	1	GABBR2	gamma-aminobutyric acid (GABA) B receptor, 2
hsa-miR-1224-5p	1	0	1	1	1	1	AKT3	v-akt murine thymoma viral oncogene homolog 3 (protein kinase B, gamma)
hsa-miR-1224-5p	1	0	1	1	1	1	HCN4	hyperpolarization activated cyclic nucleotide-gated potassium channel 4
hsa-miR-1224-5p	0	0	1	1	0	0	S100A12	S100 calcium binding protein A12
hsa-miR-1224-5p	0	0	1	1	1	1	TSPAN3	tetraspanin 3
hsa-miR-1224-5p	1	0	1	1	1	1	ACTR1A	ARP1 actin-related protein 1 homolog A, centractin alpha (yeast)
hsa-miR-1224-5p	0	0	1	1	0	0	EBI3	Epstein-Barr virus induced 3
hsa-miR-1224-5p	1	0	1	1	1	1	MMP16	matrix metallopeptidase 16 (membrane-inserted)
hsa-miR-1224-5p	1	0	1	1	1	1	MTF1	metal-regulatory transcription factor 1
hsa-miR-1224-5p	0	0	1	1	0	0	VPS72	vacuolar protein sorting 72 homolog (S. cerevisiae)
hsa-miR-1224-5p	0	0	1	1	0	0	UQCRH	ubiquinol-cytochrome c reductase hinge protein
hsa-miR-1224-5p	1	0	1	1	1	1	ENDOU	endonuclease, polyU-specific
hsa-miR-1224-5p	0	0	1	1	1	1	LANCL1	LanC lantibiotic synthetase component C-like 1 (bacterial)
hsa-miR-1224-5p	1	0	1	0	1	1	SCML2	sex comb on midleg-like 2 (Drosophila)
hsa-miR-1224-5p	1	0	1	1	1	1	ORC2	origin recognition complex, subunit 2
hsa-miR-1224-5p	0	0	1	1	1	1	PPP2R5A	protein phosphatase 2, regulatory subunit B', alpha
hsa-miR-1224-5p	1	0	1	1	1	1	PKN2	protein kinase N2
hsa-miR-1224-5p	0	0	1	1	1	1	ZNF230	zinc finger protein 230
hsa-miR-1224-5p	1	0	1	1	1	1	SMC1A	structural maintenance of chromosomes 1A
hsa-miR-1224-5p	1	0	1	1	1	1	ZER1	zer-1 homolog (C. elegans)
hsa-miR-1224-5p	1	0	1	1	1	1	SEMA3C	sema domain, immunoglobulin domain (Ig), short basic domain, secreted, (semaphorin) 3C
hsa-miR-1224-5p	0	0	1	1	0	0	GNLY	granulysin
hsa-miR-1224-5p	1	0	1	1	1	1	ELL	elongation factor RNA polymerase II
hsa-miR-1224-5p	0	0	1	1	1	1	GLRX3	glutaredoxin 3
hsa-miR-1224-5p	1	0	1	0	1	1	IGF2BP1	insulin-like growth factor 2 mRNA binding protein 1
hsa-miR-1224-5p	1	0	1	1	0	0	FRS3	fibroblast growth factor receptor substrate 3
hsa-miR-1224-5p	1	0	1	1	1	1	DIAPH2	diaphanous homolog 2 (Drosophila)
hsa-miR-1224-5p	1	0	1	1	1	1	BTG2	BTG family, member 2
hsa-miR-1224-5p	0	0	1	1	1	1	ATF7	activating transcription factor 7
hsa-miR-1224-5p	0	0	1	1	1	1	HOXD3	homeobox D3
hsa-miR-1224-5p	1	0	1	1	1	1	SKP1	S-phase kinase-associated protein 1
hsa-miR-1224-5p	1	0	1	0	1	1	SOX12	SRY (sex determining region Y)-box 12
hsa-miR-1224-5p	1	0	1	1	1	1	VEZF1	vascular endothelial zinc finger 1
hsa-miR-1224-5p	1	0	1	1	1	1	KLF12	Kruppel-like factor 12
hsa-miR-1224-5p	1	0	1	1	1	1	RNF13	ring finger protein 13
hsa-miR-1224-5p	0	0	1	1	1	1	GABARAPL2	GABA(A) receptor-associated protein-like 2
hsa-miR-1224-5p	1	0	1	1	1	1	CASC3	cancer susceptibility candidate 3
hsa-miR-1224-5p	0	0	1	1	1	1	LMOD1	leiomodin 1 (smooth muscle)
hsa-miR-1224-5p	1	0	1	0	1	1	FZD4	frizzled family receptor 4
hsa-miR-1224-5p	1	0	1	1	1	1	MGAT4A	mannosyl (alpha-1,3-)-glycoprotein beta-1,4-N-acetylglucosaminyltransferase, isozyme A
hsa-miR-1224-5p	1	0	1	1	1	1	RHOQ	ras homolog family member Q
hsa-miR-1224-5p	1	0	1	1	1	1	HEY2	hairy/enhancer-of-split related with YRPW motif 2
hsa-miR-1224-5p	1	0	1	1	1	1	KCNE1L	KCNE1-like
hsa-miR-1224-5p	1	0	1	1	1	1	TRAM2	translocation associated membrane protein 2
hsa-miR-1224-5p	1	0	1	0	1	1	FBXL7	F-box and leucine-rich repeat protein 7
hsa-miR-1224-5p	1	0	1	1	1	1	KIF4A	kinesin family member 4A
hsa-miR-1224-5p	1	0	1	1	1	1	MMD	monocyte to macrophage differentiation-associated
hsa-miR-1224-5p	1	0	1	0	1	1	BLOC1S6	biogenesis of lysosomal organelles complex-1, subunit 6, pallidin
hsa-miR-1224-5p	0	0	1	1	1	1	N6AMT1	N-6 adenine-specific DNA methyltransferase 1 (putative)
hsa-miR-1224-5p	0	0	1	1	0	0	ZDHHC8	zinc finger, DHHC-type containing 8
hsa-miR-1224-5p	0	0	1	1	1	1	ABT1	activator of basal transcription 1
hsa-miR-1224-5p	0	0	1	0	1	1	EMR2	egf-like module containing, mucin-like, hormone receptor-like 2
hsa-miR-1224-5p	0	0	1	1	1	1	ORMDL2	ORM1-like 2 (S. cerevisiae)
hsa-miR-1224-5p	0	0	1	1	1	1	DDX58	DEAD (Asp-Glu-Ala-Asp) box polypeptide 58
hsa-miR-1224-5p	1	0	1	1	1	1	SLC7A11	solute carrier family 7 (anionic amino acid transporter light chain, xc- system), member 11
hsa-miR-1224-5p	1	0	1	0	1	1	DIEXF	digestive organ expansion factor homolog (zebrafish)
hsa-miR-1224-5p	1	0	1	1	0	0	SND1	staphylococcal nuclease and tudor domain containing 1
hsa-miR-1224-5p	0	0	1	1	1	1	TCL6	T-cell leukemia/lymphoma 6 (non-protein coding)
hsa-miR-1224-5p	1	0	1	1	1	1	AFF4	AF4/FMR2 family, member 4
hsa-miR-1224-5p	0	0	1	1	0	0	SIT1	signaling threshold regulating transmembrane adaptor 1
hsa-miR-1224-5p	0	0	1	1	1	1	ZNF330	zinc finger protein 330
hsa-miR-1224-5p	0	0	1	1	1	1	ARFGAP3	ADP-ribosylation factor GTPase activating protein 3
hsa-miR-1224-5p	1	0	1	1	1	1	VSX1	visual system homeobox 1
hsa-miR-1224-5p	0	0	1	1	1	1	PSME4	proteasome (prosome, macropain) activator subunit 4
hsa-miR-1224-5p	1	0	1	0	1	1	TOX	thymocyte selection-associated high mobility group box
hsa-miR-1224-5p	1	0	1	0	1	1	MLEC	malectin
hsa-miR-1224-5p	0	0	1	1	1	1	SNX19	sorting nexin 19
hsa-miR-1224-5p	1	0	1	1	1	1	ARHGEF11	Rho guanine nucleotide exchange factor (GEF) 11
hsa-miR-1224-5p	1	0	1	1	1	1	LRIG2	leucine-rich repeats and immunoglobulin-like domains 2
hsa-miR-1224-5p	1	0	1	1	1	1	NUAK1	NUAK family, SNF1-like kinase, 1
hsa-miR-1224-5p	1	0	1	1	1	1	SV2A	synaptic vesicle glycoprotein 2A
hsa-miR-1224-5p	1	0	1	0	1	1	PDAP1	PDGFA associated protein 1
hsa-miR-1224-5p	1	0	1	1	1	1	RHOBTB3	Rho-related BTB domain containing 3
hsa-miR-1224-5p	0	0	1	0	1	1	PPM1E	protein phosphatase, Mg2+/Mn2+ dependent, 1E
hsa-miR-1224-5p	1	0	1	0	1	1	KIAA1024	KIAA1024
hsa-miR-1224-5p	1	0	1	0	1	1	LARP1	La ribonucleoprotein domain family, member 1
hsa-miR-1224-5p	0	0	1	1	1	1	BRI3	brain protein I3
hsa-miR-1224-5p	0	0	1	1	1	1	ZNF10	zinc finger protein 10
hsa-miR-1224-5p	1	0	1	1	1	1	CNRIP1	cannabinoid receptor interacting protein 1
hsa-miR-1224-5p	0	0	1	1	0	0	PTPN23	protein tyrosine phosphatase, non-receptor type 23
hsa-miR-1224-5p	1	0	1	1	1	1	PNKD	paroxysmal nonkinesigenic dyskinesia
hsa-miR-1224-5p	0	0	1	1	0	0	TSKU	tsukushi small leucine rich proteoglycan homolog (Xenopus laevis)
hsa-miR-1224-5p	1	0	1	0	1	1	ERC2	ELKS/RAB6-interacting/CAST family member 2
hsa-miR-1224-5p	1	0	1	1	1	1	FAM155B	family with sequence similarity 155, member B
hsa-miR-1224-5p	1	0	1	1	1	1	FGFR1	fibroblast growth factor receptor 1
hsa-miR-1224-5p	1	0	1	1	1	1	WT1-AS	WT1 antisense RNA
hsa-miR-1224-5p	1	0	1	1	1	1	ST8SIA3	ST8 alpha-N-acetyl-neuraminide alpha-2,8-sialyltransferase 3
hsa-miR-1224-5p	0	0	1	1	1	1	SNX7	sorting nexin 7
hsa-miR-1224-5p	1	0	1	1	1	1	GOLT1B	golgi transport 1B
hsa-miR-1224-5p	0	0	1	1	0	0	CRNN	cornulin
hsa-miR-1224-5p	0	0	1	1	1	1	OGG1	8-oxoguanine DNA glycosylase
hsa-miR-1224-5p	1	0	1	0	1	1	FZD3	frizzled family receptor 3
hsa-miR-1224-5p	1	0	1	0	1	1	KLHL3	kelch-like 3 (Drosophila)
hsa-miR-1224-5p	1	0	1	1	1	1	SIX4	SIX homeobox 4
hsa-miR-1224-5p	1	0	1	1	1	1	ADD2	adducin 2 (beta)
hsa-miR-1224-5p	1	0	1	1	1	1	PLXNA3	plexin A3
hsa-miR-1224-5p	0	0	1	1	1	1	HYDIN	HYDIN, axonemal central pair apparatus protein
hsa-miR-1224-5p	1	0	1	0	1	1	EIF2C4	eukaryotic translation initiation factor 2C, 4
hsa-miR-1224-5p	0	0	1	0	1	1	OTUB1	OTU domain, ubiquitin aldehyde binding 1
hsa-miR-1224-5p	1	0	1	1	0	0	INO80D	INO80 complex subunit D
hsa-miR-1224-5p	1	0	1	1	1	1	RNF125	ring finger protein 125, E3 ubiquitin protein ligase
hsa-miR-1224-5p	0	0	1	1	1	1	TMEM70	transmembrane protein 70
hsa-miR-1224-5p	1	0	1	1	1	1	FBXO34	F-box protein 34
hsa-miR-1224-5p	0	0	1	1	1	1	RBM22	RNA binding motif protein 22
hsa-miR-1224-5p	0	0	1	1	1	1	TMLHE	trimethyllysine hydroxylase, epsilon
hsa-miR-1224-5p	1	0	1	1	1	1	LRRC20	leucine rich repeat containing 20
hsa-miR-1224-5p	0	0	1	1	1	1	C1orf106	chromosome 1 open reading frame 106
hsa-miR-1224-5p	0	0	1	1	1	1	RBM41	RNA binding motif protein 41
hsa-miR-1224-5p	0	0	1	1	1	1	HDAC8	histone deacetylase 8
hsa-miR-1224-5p	1	0	1	0	1	1	PCDHAC1	protocadherin alpha subfamily C, 1
hsa-miR-1224-5p	1	0	1	0	1	1	PCDHAC2	protocadherin alpha subfamily C, 2
hsa-miR-1224-5p	1	0	1	1	1	1	PCDHA1	protocadherin alpha 1
hsa-miR-1224-5p	1	0	1	0	1	1	PCDHA10	protocadherin alpha 10
hsa-miR-1224-5p	1	0	1	0	1	1	PCDHA11	protocadherin alpha 11
hsa-miR-1224-5p	1	0	1	0	1	1	PCDHA12	protocadherin alpha 12
hsa-miR-1224-5p	1	0	1	0	1	1	PCDHA13	protocadherin alpha 13
hsa-miR-1224-5p	1	0	1	1	1	1	PCDHA2	protocadherin alpha 2
hsa-miR-1224-5p	1	0	1	1	1	1	PCDHA3	protocadherin alpha 3
hsa-miR-1224-5p	1	0	1	1	1	1	PCDHA4	protocadherin alpha 4
hsa-miR-1224-5p	1	0	1	1	1	1	PCDHA5	protocadherin alpha 5
hsa-miR-1224-5p	1	0	1	1	1	1	PCDHA6	protocadherin alpha 6
hsa-miR-1224-5p	1	0	1	0	1	1	PCDHA7	protocadherin alpha 7
hsa-miR-1224-5p	1	0	1	1	1	1	PCDHA8	protocadherin alpha 8
hsa-miR-1224-5p	0	0	1	1	1	1	NPAP1	nuclear pore associated protein 1
hsa-miR-1224-5p	1	0	1	1	1	1	SASH3	SAM and SH3 domain containing 3
hsa-miR-1224-5p	0	0	1	0	1	1	ARL15	ADP-ribosylation factor-like 15
hsa-miR-1224-5p	1	0	1	0	1	1	CNGB3	cyclic nucleotide gated channel beta 3
hsa-miR-1224-5p	0	0	1	1	1	1	RPRM	reprimo, TP53 dependent G2 arrest mediator candidate
hsa-miR-1224-5p	1	0	1	0	1	1	SLAMF8	SLAM family member 8
hsa-miR-1224-5p	1	0	1	0	1	1	MNT	MAX binding protein
hsa-miR-1224-5p	0	0	1	1	1	1	ANKMY2	ankyrin repeat and MYND domain containing 2
hsa-miR-1224-5p	1	0	1	0	1	1	SLC17A6	solute carrier family 17 (sodium-dependent inorganic phosphate cotransporter), member 6
hsa-miR-1224-5p	0	0	1	1	1	1	CYSLTR2	cysteinyl leukotriene receptor 2
hsa-miR-1224-5p	1	0	1	0	1	1	ADCY2	adenylate cyclase 2 (brain)
hsa-miR-1224-5p	1	0	1	1	0	0	JPH3	junctophilin 3
hsa-miR-1224-5p	0	0	1	1	1	1	SHROOM4	shroom family member 4
hsa-miR-1224-5p	1	0	1	0	1	1	NUFIP2	nuclear fragile X mental retardation protein interacting protein 2
hsa-miR-1224-5p	1	0	1	0	1	1	ALPK3	alpha-kinase 3
hsa-miR-1224-5p	1	0	1	0	1	1	ZNF398	zinc finger protein 398
hsa-miR-1224-5p	1	0	1	0	1	1	SYT4	synaptotagmin IV
hsa-miR-1224-5p	1	0	1	1	1	1	NLGN2	neuroligin 2
hsa-miR-1224-5p	1	0	1	1	1	1	KLHL14	kelch-like 14 (Drosophila)
hsa-miR-1224-5p	1	0	1	1	1	1	RANBP10	RAN binding protein 10
hsa-miR-1224-5p	0	0	1	1	1	1	PPM1A	protein phosphatase, Mg2+/Mn2+ dependent, 1A
hsa-miR-1224-5p	1	0	1	0	1	1	RAP2A	RAP2A, member of RAS oncogene family
hsa-miR-1224-5p	1	0	1	1	0	0	SLC5A6	solute carrier family 5 (sodium-dependent vitamin transporter), member 6
hsa-miR-1224-5p	1	0	1	1	1	1	CRY2	cryptochrome 2 (photolyase-like)
hsa-miR-1224-5p	0	0	1	1	0	0	HOXD11	homeobox D11
hsa-miR-1224-5p	0	0	1	1	1	1	SELK	selenoprotein K
hsa-miR-1224-5p	1	0	1	1	1	1	CDH22	cadherin 22, type 2
hsa-miR-1224-5p	1	0	1	1	1	1	TRIB2	tribbles homolog 2 (Drosophila)
hsa-miR-1224-5p	1	0	1	1	1	1	PPP1R11	protein phosphatase 1, regulatory (inhibitor) subunit 11
hsa-miR-1224-5p	1	0	1	1	0	0	SDF2L1	stromal cell-derived factor 2-like 1
hsa-miR-1224-5p	1	0	1	0	1	1	CSNK1G1	casein kinase 1, gamma 1
hsa-miR-1224-5p	1	0	1	1	1	1	PRRX1	paired related homeobox 1
hsa-miR-1224-5p	1	0	1	1	1	1	C16orf58	chromosome 16 open reading frame 58
hsa-miR-1224-5p	1	0	1	1	1	1	RFX7	regulatory factor X, 7
hsa-miR-1224-5p	1	0	1	1	1	1	REEP1	receptor accessory protein 1
hsa-miR-1224-5p	0	0	1	0	1	1	ANKRA2	ankyrin repeat, family A (RFXANK-like), 2
hsa-miR-1224-5p	1	0	1	1	0	0	PHF23	PHD finger protein 23
hsa-miR-1224-5p	0	0	1	1	1	1	PDYN	prodynorphin
hsa-miR-1224-5p	1	0	1	1	1	1	DSC3	desmocollin 3
hsa-miR-1224-5p	1	0	1	1	1	1	PSTPIP2	proline-serine-threonine phosphatase interacting protein 2
hsa-miR-1224-5p	1	0	1	0	1	1	NAA25	N(alpha)-acetyltransferase 25, NatB auxiliary subunit
hsa-miR-1224-5p	1	0	1	1	1	1	RAI1	retinoic acid induced 1
hsa-miR-1224-5p	0	0	1	1	1	1	INHBE	inhibin, beta E
hsa-miR-1224-5p	1	0	1	1	1	1	PCDHA9	protocadherin alpha 9
hsa-miR-1224-5p	1	0	1	1	1	1	ZNRF1	zinc and ring finger 1, E3 ubiquitin protein ligase
hsa-miR-1224-5p	0	0	1	1	0	0	NICN1	nicolin 1
hsa-miR-1224-5p	1	0	1	1	1	1	DCTN5	dynactin 5 (p25)
hsa-miR-1224-5p	1	0	1	1	1	1	PPP1R9B	protein phosphatase 1, regulatory subunit 9B
hsa-miR-1224-5p	1	0	1	1	1	1	ARHGEF39	Rho guanine nucleotide exchange factor (GEF) 39
hsa-miR-1224-5p	1	0	1	0	1	1	C5orf62	chromosome 5 open reading frame 62
hsa-miR-1224-5p	0	0	1	1	1	1	EPSTI1	epithelial stromal interaction 1 (breast)
hsa-miR-1224-5p	1	0	1	1	0	0	FCHSD1	FCH and double SH3 domains 1
hsa-miR-1224-5p	0	0	1	1	0	0	PGLYRP2	peptidoglycan recognition protein 2
hsa-miR-1224-5p	1	0	1	0	0	0	SMYD4	SET and MYND domain containing 4
hsa-miR-1224-5p	0	0	1	0	1	1	SLC36A1	solute carrier family 36 (proton/amino acid symporter), member 1
hsa-miR-1224-5p	0	0	1	1	1	1	UBE2F	ubiquitin-conjugating enzyme E2F (putative)
hsa-miR-1224-5p	1	0	1	1	0	0	ADAMTS14	ADAM metallopeptidase with thrombospondin type 1 motif, 14
hsa-miR-1224-5p	1	0	1	1	1	1	WHSC1	Wolf-Hirschhorn syndrome candidate 1
hsa-miR-1224-5p	0	0	1	0	1	1	PAQR8	progestin and adipoQ receptor family member VIII
hsa-miR-1224-5p	1	0	1	1	1	1	BMPER	BMP binding endothelial regulator
hsa-miR-1224-5p	0	0	1	1	1	1	ZNF431	zinc finger protein 431
hsa-miR-1224-5p	0	0	1	1	1	1	POFUT2	protein O-fucosyltransferase 2
hsa-miR-1224-5p	1	0	1	1	1	1	PANK1	pantothenate kinase 1
hsa-miR-1224-5p	1	0	1	0	1	1	NUS1	nuclear undecaprenyl pyrophosphate synthase 1 homolog (S. cerevisiae)
hsa-miR-1224-5p	1	0	1	0	1	1	SP1	Sp1 transcription factor
hsa-miR-1224-5p	0	0	1	1	1	1	PGK2	phosphoglycerate kinase 2
hsa-miR-1224-5p	0	0	1	0	0	0	TM4SF18	transmembrane 4 L six family member 18
hsa-miR-1224-5p	0	0	1	1	1	1	MAPK9	mitogen-activated protein kinase 9
hsa-miR-1224-5p	0	0	1	1	0	0	BRD8	bromodomain containing 8
hsa-miR-1224-5p	0	0	1	1	1	1	MS4A6E	membrane-spanning 4-domains, subfamily A, member 6E
hsa-miR-1224-5p	0	0	1	1	1	1	PPM1M	protein phosphatase, Mg2+/Mn2+ dependent, 1M
hsa-miR-1224-5p	1	0	1	1	1	1	SAMD8	sterile alpha motif domain containing 8
hsa-miR-1224-5p	0	0	1	1	1	1	SLFN5	schlafen family member 5
hsa-miR-1224-5p	0	0	1	1	1	1	ZFC3H1	zinc finger, C3H1-type containing
hsa-miR-1224-5p	1	0	1	1	1	1	VTI1A	vesicle transport through interaction with t-SNAREs homolog 1A (yeast)
hsa-miR-1224-5p	0	0	1	1	0	0	TMEM217	transmembrane protein 217
hsa-miR-1224-5p	0	0	1	1	0	0	IL27	interleukin 27
hsa-miR-1224-5p	1	0	1	1	1	1	FAM110B	family with sequence similarity 110, member B
hsa-miR-1224-5p	0	0	1	0	1	1	CHKB	choline kinase beta
hsa-miR-1224-5p	0	0	1	1	1	1	TTC30A	tetratricopeptide repeat domain 30A
hsa-miR-1224-5p	0	0	1	0	1	1	AFAP1L1	actin filament associated protein 1-like 1
hsa-miR-1224-5p	1	0	1	1	0	0	C9orf41	chromosome 9 open reading frame 41
hsa-miR-1224-5p	1	0	1	1	1	1	FAM123B	family with sequence similarity 123B
hsa-miR-1224-5p	1	0	1	1	1	1	C7orf60	chromosome 7 open reading frame 60
hsa-miR-1224-5p	0	0	1	1	1	1	ASPRV1	aspartic peptidase, retroviral-like 1
hsa-miR-1224-5p	0	0	1	1	1	1	MS4A6A	membrane-spanning 4-domains, subfamily A, member 6A
hsa-miR-1224-5p	0	0	1	1	0	0	ODF4	outer dense fiber of sperm tails 4
hsa-miR-1224-5p	1	0	1	1	0	0	TMEM86A	transmembrane protein 86A
hsa-miR-1224-5p	1	0	1	1	1	1	HS6ST3	heparan sulfate 6-O-sulfotransferase 3
hsa-miR-1224-5p	1	0	1	0	1	1	SEMA6D	sema domain, transmembrane domain (TM), and cytoplasmic domain, (semaphorin) 6D
hsa-miR-1224-5p	1	0	1	1	1	1	FNDC5	fibronectin type III domain containing 5
hsa-miR-1224-5p	1	0	1	1	1	1	MSI2	musashi homolog 2 (Drosophila)
hsa-miR-1224-5p	0	0	1	1	1	1	ZFP91-CNTF	ZFP91-CNTF readthrough (non-protein coding)
hsa-miR-1224-5p	1	0	1	1	1	1	DCUN1D3	DCN1, defective in cullin neddylation 1, domain containing 3 (S. cerevisiae)
hsa-miR-1224-5p	0	0	1	1	1	1	FNDC7	fibronectin type III domain containing 7
hsa-miR-1224-5p	1	0	1	1	1	1	RNF149	ring finger protein 149
hsa-miR-1224-5p	1	0	1	1	1	1	ATG9B	autophagy related 9B
hsa-miR-1224-5p	0	0	1	1	1	1	FAM133A	family with sequence similarity 133, member A
hsa-miR-1224-5p	1	0	1	1	0	0	EMC10	ER membrane protein complex subunit 10
hsa-miR-1224-5p	0	0	1	1	1	1	KRTAP8-1	keratin associated protein 8-1
hsa-miR-1224-5p	1	0	1	1	1	1	ZADH2	zinc binding alcohol dehydrogenase domain containing 2
hsa-miR-1224-5p	0	0	1	1	1	1	MRPL43	mitochondrial ribosomal protein L43
hsa-miR-1224-5p	0	0	1	0	1	1	SYT12	synaptotagmin XII
hsa-miR-1224-5p	0	0	1	1	1	1	SESTD1	SEC14 and spectrin domains 1
hsa-miR-1224-5p	1	0	1	1	1	1	MB21D2	Mab-21 domain containing 2
hsa-miR-1224-5p	1	0	1	1	1	1	TCF20	transcription factor 20 (AR1)
hsa-miR-1224-5p	1	0	1	1	1	1	ZSCAN22	zinc finger and SCAN domain containing 22
hsa-miR-1224-5p	0	0	1	1	1	1	LRP5L	low density lipoprotein receptor-related protein 5-like
hsa-miR-1224-5p	1	0	1	1	1	1	FAM216B	family with sequence similarity 216, member B
hsa-miR-1224-5p	0	0	1	1	1	1	HTR3D	5-hydroxytryptamine (serotonin) receptor 3D, ionotropic
hsa-miR-1224-5p	1	0	1	1	1	1	PLCB1	phospholipase C, beta 1 (phosphoinositide-specific)
hsa-miR-1224-5p	1	0	1	1	1	1	FILIP1L	filamin A interacting protein 1-like
hsa-miR-1224-5p	0	0	1	0	1	1	BTNL3	butyrophilin-like 3
hsa-miR-1224-5p	0	0	1	1	0	0	KLRG2	killer cell lectin-like receptor subfamily G, member 2
hsa-miR-1224-5p	1	0	1	0	1	1	ZC3H6	zinc finger CCCH-type containing 6
hsa-miR-1224-5p	1	0	1	0	1	1	PRICKLE2	prickle homolog 2 (Drosophila)
hsa-miR-1224-5p	0	0	1	1	1	1	COL18A1-AS1	COL18A1 antisense RNA 1
hsa-miR-1224-5p	1	0	1	1	1	1	TMEM189-UBE2V1	TMEM189-UBE2V1 readthrough
hsa-miR-1224-5p	0	0	1	1	1	1	C5orf46	chromosome 5 open reading frame 46
hsa-miR-1224-5p	1	0	1	1	1	1	ENSA	endosulfine alpha
hsa-miR-1224-5p	0	0	1	0	1	1	NPSR1-AS1	NPSR1 antisense RNA 1
hsa-miR-1224-5p	1	0	1	0	1	1	NCKAP5	NCK-associated protein 5
hsa-miR-1224-5p	1	0	1	0	1	1	C17orf102	chromosome 17 open reading frame 102
hsa-miR-1224-5p	0	0	1	0	0	0	TMEM185B	transmembrane protein 185B
hsa-miR-1224-5p	0	0	1	0	0	0	PCDHB19P	protocadherin beta 19 pseudogene
hsa-miR-1224-5p	0	0	1	0	0	0	TFAMP1	transcription factor A, mitochondrial pseudogene 1
hsa-miR-1224-5p	0	0	1	0	0	0	MIR155HG	MIR155 host gene (non-protein coding)
hsa-miR-1224-5p	0	0	1	0	0	0	TTTY2	testis-specific transcript, Y-linked 2 (non-protein coding)
hsa-miR-1224-5p	0	0	1	0	0	0	TTTY6B	testis-specific transcript, Y-linked 6B (non-protein coding)
hsa-miR-1224-5p	0	0	1	0	0	0	TTTY4B	testis-specific transcript, Y-linked 4B (non-protein coding)
hsa-miR-1224-5p	0	0	1	0	0	0	PER4	period homolog 3 (Drosophila) pseudogene
hsa-miR-1224-5p	0	0	1	0	0	0	AQP7P1	aquaporin 7 pseudogene 1
hsa-miR-1224-5p	0	0	1	0	0	0	HAS2-AS1	HAS2 antisense RNA 1
hsa-miR-1224-5p	0	0	1	0	0	0	IGBP1P1	immunoglobulin (CD79A) binding protein 1 pseudogene 1
hsa-miR-1224-5p	0	0	1	0	0	0	SNX29P2	sorting nexin 29 pseudogene 2
hsa-miR-1224-5p	0	0	1	0	0	0	LOC285359	phosducin-like 3 pseudogene
hsa-miR-1224-5p	0	0	1	0	0	0	SCARNA6	small Cajal body-specific RNA 6
hsa-miR-1224-5p	1	0	1	1	0	0	KIAA1549L	KIAA1549-like
hsa-miR-1224-5p	1	0	1	0	1	1	NFIX	nuclear factor I/X (CCAAT-binding transcription factor)
