# Supplementary material for: Profiling of Selected MicroRNAs in Proliferative Eutopic Endometrium of Women with Ovarian Endometriosis
Source: Biomed Res Int. 2015 Aug 20;2015:760698. doi: 10.1155/2015/760698 (PMC4558423; doi:10.1155/2015/760698)
Supplement: Supplementary file 1 — Table I: The names of miRNAs significantly differentially expressed between eutopic endometrium of patients with endometriosis vs eutopic endometrium of patients without endometriosis. Table II: The associations between miRNA and mRNA, which presents detailed results of the search of six major databases i.e targetscan, tarbase, miranda, mirbase, mirtarget2 and pictar. [file 760698.f1.zip › 760698.f1/Table II/hsa-miR-1225-3p.tsv]

miR	targetscan	tarbase	miranda	mirbase	mirtarget2	pictar	GeneSymbol	GeneName
hsa-miR-1225-3p	1	0	1	1	1	1	PLAU	plasminogen activator, urokinase
hsa-miR-1225-3p	1	0	1	1	0	0	SRCAP	Snf2-related CREBBP activator protein
hsa-miR-1225-3p	1	0	1	1	1	1	MCF2L	MCF.2 cell line derived transforming sequence-like
hsa-miR-1225-3p	1	0	1	0	1	1	PTPRT	protein tyrosine phosphatase, receptor type, T
hsa-miR-1225-3p	0	0	1	1	1	1	C2CD2L	C2CD2-like
hsa-miR-1225-3p	0	0	1	1	0	0	PLCH2	phospholipase C, eta 2
hsa-miR-1225-3p	1	0	1	1	0	0	OTUD3	OTU domain containing 3
hsa-miR-1225-3p	1	0	1	1	1	1	IQSEC2	IQ motif and Sec7 domain 2
hsa-miR-1225-3p	1	0	1	1	1	1	GIGYF2	GRB10 interacting GYF protein 2
hsa-miR-1225-3p	0	0	1	1	0	0	AKAP8L	A kinase (PRKA) anchor protein 8-like
hsa-miR-1225-3p	1	0	1	1	1	1	ARHGEF15	Rho guanine nucleotide exchange factor (GEF) 15
hsa-miR-1225-3p	1	0	1	0	0	0	DTX4	deltex homolog 4 (Drosophila)
hsa-miR-1225-3p	1	0	1	1	1	1	BAHD1	bromo adjacent homology domain containing 1
hsa-miR-1225-3p	1	0	1	1	1	1	CIT	citron (rho-interacting, serine/threonine kinase 21)
hsa-miR-1225-3p	1	0	1	1	1	1	C11orf9	chromosome 11 open reading frame 9
hsa-miR-1225-3p	1	0	1	1	0	0	KIAA1045	KIAA1045
hsa-miR-1225-3p	1	0	1	1	1	1	CEP164	centrosomal protein 164kDa
hsa-miR-1225-3p	1	0	1	0	1	1	ZNF507	zinc finger protein 507
hsa-miR-1225-3p	0	0	1	1	0	0	ZC4H2	zinc finger, C4H2 domain containing
hsa-miR-1225-3p	1	0	1	1	1	1	NDRG4	NDRG family member 4
hsa-miR-1225-3p	1	0	1	1	1	1	KIAA1217	KIAA1217
hsa-miR-1225-3p	0	0	1	0	0	0	MTA3	metastasis associated 1 family, member 3
hsa-miR-1225-3p	0	0	1	1	0	0	TNFRSF12A	tumor necrosis factor receptor superfamily, member 12A
hsa-miR-1225-3p	1	0	1	1	1	1	UPF2	UPF2 regulator of nonsense transcripts homolog (yeast)
hsa-miR-1225-3p	1	0	1	0	0	0	PITPNM2	phosphatidylinositol transfer protein, membrane-associated 2
hsa-miR-1225-3p	1	0	1	0	1	1	SEMA6D	sema domain, transmembrane domain (TM), and cytoplasmic domain, (semaphorin) 6D
hsa-miR-1225-3p	0	0	1	0	0	0	COL20A1	collagen, type XX, alpha 1
hsa-miR-1225-3p	1	0	1	1	1	1	KIAA1522	KIAA1522
hsa-miR-1225-3p	1	0	1	1	1	1	PPP6R3	protein phosphatase 6, regulatory subunit 3
hsa-miR-1225-3p	0	0	1	0	1	1	ZSWIM6	zinc finger, SWIM-type containing 6
hsa-miR-1225-3p	1	0	1	0	0	0	TANC2	tetratricopeptide repeat, ankyrin repeat and coiled-coil containing 2
hsa-miR-1225-3p	1	0	1	1	1	1	ITPRIP	inositol 1,4,5-trisphosphate receptor interacting protein
hsa-miR-1225-3p	1	0	1	1	1	1	IKZF4	IKAROS family zinc finger 4 (Eos)
hsa-miR-1225-3p	1	0	1	1	1	1	LZTS2	leucine zipper, putative tumor suppressor 2
hsa-miR-1225-3p	0	0	1	1	0	0	COL27A1	collagen, type XXVII, alpha 1
hsa-miR-1225-3p	0	0	1	1	1	1	MOB2	MOB kinase activator 2
hsa-miR-1225-3p	0	0	1	1	0	0	SEC16B	SEC16 homolog B (S. cerevisiae)
hsa-miR-1225-3p	0	0	1	1	0	0	KREMEN2	kringle containing transmembrane protein 2
hsa-miR-1225-3p	0	0	1	1	0	0	FAM22D	family with sequence similarity 22, member D
hsa-miR-1225-3p	1	0	1	1	1	1	TRPM3	transient receptor potential cation channel, subfamily M, member 3
hsa-miR-1225-3p	0	0	1	1	0	0	DDB2	damage-specific DNA binding protein 2, 48kDa
hsa-miR-1225-3p	0	0	1	1	0	0	SSPO	SCO-spondin homolog (Bos taurus)
hsa-miR-1225-3p	0	0	1	0	0	0	TIFAB	TRAF-interacting protein with forkhead-associated domain, family member B
hsa-miR-1225-3p	0	0	1	1	0	0	PTPRF	protein tyrosine phosphatase, receptor type, F
hsa-miR-1225-3p	1	0	1	1	1	1	NRXN2	neurexin 2
hsa-miR-1225-3p	1	0	1	1	1	1	ADARB1	adenosine deaminase, RNA-specific, B1
hsa-miR-1225-3p	0	0	1	1	0	0	KCNC3	potassium voltage-gated channel, Shaw-related subfamily, member 3
hsa-miR-1225-3p	1	0	1	1	0	0	ELN	elastin
hsa-miR-1225-3p	0	0	1	0	0	0	PIDD	p53-induced death domain protein
hsa-miR-1225-3p	1	0	1	1	1	1	PML	promyelocytic leukemia
hsa-miR-1225-3p	1	0	1	1	1	1	PHC1	polyhomeotic homolog 1 (Drosophila)
hsa-miR-1225-3p	0	0	1	1	1	1	DNM1	dynamin 1
hsa-miR-1225-3p	1	0	1	1	0	0	CACNB1	calcium channel, voltage-dependent, beta 1 subunit
hsa-miR-1225-3p	1	0	1	1	0	0	TSPYL2	TSPY-like 2
hsa-miR-1225-3p	1	0	1	1	1	1	ERF	Ets2 repressor factor
hsa-miR-1225-3p	1	0	1	1	1	1	SATB2	SATB homeobox 2
hsa-miR-1225-3p	0	0	1	1	1	1	RYR1	ryanodine receptor 1 (skeletal)
hsa-miR-1225-3p	1	0	1	1	1	1	GIT1	G protein-coupled receptor kinase interacting ArfGAP 1
hsa-miR-1225-3p	0	0	1	1	1	1	ZNF747	zinc finger protein 747
hsa-miR-1225-3p	0	0	1	1	0	0	HLA-DMB	major histocompatibility complex, class II, DM beta
hsa-miR-1225-3p	0	0	1	1	0	0	BMP1	bone morphogenetic protein 1
hsa-miR-1225-3p	0	0	1	1	0	0	CFLAR	CASP8 and FADD-like apoptosis regulator
hsa-miR-1225-3p	1	0	1	1	1	1	IPO8	importin 8
hsa-miR-1225-3p	1	0	1	0	1	1	TBL1X	transducin (beta)-like 1X-linked
hsa-miR-1225-3p	1	0	1	1	1	1	EPB41	erythrocyte membrane protein band 4.1 (elliptocytosis 1, RH-linked)
hsa-miR-1225-3p	0	0	1	1	0	0	SLC22A8	solute carrier family 22 (organic anion transporter), member 8
hsa-miR-1225-3p	1	0	1	1	1	1	MLLT10	myeloid/lymphoid or mixed-lineage leukemia (trithorax homolog, Drosophila); translocated to, 10
hsa-miR-1225-3p	0	0	1	1	1	1	ELOVL5	ELOVL fatty acid elongase 5
hsa-miR-1225-3p	1	0	1	1	0	0	PPP2R5D	protein phosphatase 2, regulatory subunit B', delta
hsa-miR-1225-3p	1	0	1	0	1	1	CAV1	caveolin 1, caveolae protein, 22kDa
hsa-miR-1225-3p	1	0	1	1	1	1	MEF2D	myocyte enhancer factor 2D
hsa-miR-1225-3p	0	0	1	1	1	1	CELF1	CUGBP, Elav-like family member 1
hsa-miR-1225-3p	0	0	1	0	0	0	MIAT	myocardial infarction associated transcript (non-protein coding)
hsa-miR-1225-3p	0	0	1	1	1	1	HDAC3	histone deacetylase 3
hsa-miR-1225-3p	1	0	1	0	1	1	MLL2	myeloid/lymphoid or mixed-lineage leukemia 2
hsa-miR-1225-3p	0	0	1	0	1	1	ZMYM2	zinc finger, MYM-type 2
hsa-miR-1225-3p	1	0	1	1	1	1	MYT1L	myelin transcription factor 1-like
hsa-miR-1225-3p	1	0	1	0	0	0	MAP3K1	mitogen-activated protein kinase kinase kinase 1, E3 ubiquitin protein ligase
hsa-miR-1225-3p	1	0	1	1	1	1	CBFA2T2	core-binding factor, runt domain, alpha subunit 2; translocated to, 2
hsa-miR-1225-3p	0	0	1	1	1	1	PLEKHB1	pleckstrin homology domain containing, family B (evectins) member 1
hsa-miR-1225-3p	0	0	1	1	1	1	FHL1	four and a half LIM domains 1
hsa-miR-1225-3p	1	0	1	1	1	1	LRRFIP1	leucine rich repeat (in FLII) interacting protein 1
hsa-miR-1225-3p	0	0	1	1	0	0	ANGPTL4	angiopoietin-like 4
hsa-miR-1225-3p	0	0	1	0	1	1	ZDHHC17	zinc finger, DHHC-type containing 17
hsa-miR-1225-3p	1	0	1	1	1	1	C16orf70	chromosome 16 open reading frame 70
hsa-miR-1225-3p	0	0	1	1	0	0	FXYD5	FXYD domain containing ion transport regulator 5
hsa-miR-1225-3p	0	0	1	1	1	1	CHPT1	choline phosphotransferase 1
hsa-miR-1225-3p	1	0	1	1	1	1	SYDE1	synapse defective 1, Rho GTPase, homolog 1 (C. elegans)
hsa-miR-1225-3p	0	0	1	1	0	0	SH2B1	SH2B adaptor protein 1
hsa-miR-1225-3p	0	0	1	1	1	1	CKS1B	CDC28 protein kinase regulatory subunit 1B
hsa-miR-1225-3p	1	0	1	1	1	1	LDB3	LIM domain binding 3
hsa-miR-1225-3p	0	0	1	0	0	0	HMG20B	high mobility group 20B
hsa-miR-1225-3p	1	0	1	1	1	1	SPTBN4	spectrin, beta, non-erythrocytic 4
hsa-miR-1225-3p	1	0	1	1	1	1	ACHE	acetylcholinesterase
hsa-miR-1225-3p	0	0	1	1	1	1	SEMA6C	sema domain, transmembrane domain (TM), and cytoplasmic domain, (semaphorin) 6C
hsa-miR-1225-3p	1	0	1	1	1	1	BBC3	BCL2 binding component 3
hsa-miR-1225-3p	0	0	1	0	0	0	C17orf109	chromosome 17 open reading frame 109
hsa-miR-1225-3p	0	0	1	1	0	0	SPNS1	spinster homolog 1 (Drosophila)
hsa-miR-1225-3p	0	0	1	0	1	1	MYO3B	myosin IIIB
hsa-miR-1225-3p	0	0	1	0	0	0	MYO15B	myosin XVB pseudogene
hsa-miR-1225-3p	0	0	1	0	1	1	NBPF15	neuroblastoma breakpoint family, member 15
hsa-miR-1225-3p	1	0	1	1	1	1	RBFOX1	RNA binding protein, fox-1 homolog (C. elegans) 1
hsa-miR-1225-3p	1	0	1	1	1	1	WAPAL	wings apart-like homolog (Drosophila)
hsa-miR-1225-3p	1	0	1	1	1	1	BRSK1	BR serine/threonine kinase 1
hsa-miR-1225-3p	1	0	1	1	0	0	ST3GAL4	ST3 beta-galactoside alpha-2,3-sialyltransferase 4
hsa-miR-1225-3p	0	0	1	1	1	1	GNAS	GNAS complex locus
hsa-miR-1225-3p	1	0	1	1	1	1	CACNA2D2	calcium channel, voltage-dependent, alpha 2/delta subunit 2
hsa-miR-1225-3p	0	0	1	1	1	1	DMRTC1	DMRT-like family C1
hsa-miR-1225-3p	0	0	1	1	0	0	DMRTC1B	DMRT-like family C1B
hsa-miR-1225-3p	0	0	1	1	0	0	GFRA4	GDNF family receptor alpha 4
hsa-miR-1225-3p	1	0	1	1	1	1	PALM2	paralemmin 2
hsa-miR-1225-3p	1	0	1	1	1	1	NRXN3	neurexin 3
hsa-miR-1225-3p	1	0	1	1	1	1	PDE1B	phosphodiesterase 1B, calmodulin-dependent
hsa-miR-1225-3p	0	0	1	0	0	0	TOMM6	translocase of outer mitochondrial membrane 6 homolog (yeast)
hsa-miR-1225-3p	0	0	1	1	0	0	C22orf24	chromosome 22 open reading frame 24
hsa-miR-1225-3p	0	0	1	1	0	0	IL4I1	interleukin 4 induced 1
hsa-miR-1225-3p	0	0	1	1	1	1	PARP16	poly (ADP-ribose) polymerase family, member 16
hsa-miR-1225-3p	0	0	1	0	0	0	TUG1	taurine upregulated 1 (non-protein coding)
hsa-miR-1225-3p	0	0	1	0	0	0	RNF31	ring finger protein 31
hsa-miR-1225-3p	0	0	1	1	1	1	RNF220	ring finger protein 220
hsa-miR-1225-3p	1	0	1	1	1	1	RIC8B	resistance to inhibitors of cholinesterase 8 homolog B (C. elegans)
hsa-miR-1225-3p	1	0	1	1	1	1	CADM3	cell adhesion molecule 3
hsa-miR-1225-3p	1	0	1	1	1	1	HNRNPUL1	heterogeneous nuclear ribonucleoprotein U-like 1
hsa-miR-1225-3p	0	0	1	1	0	0	MLST8	MTOR associated protein, LST8 homolog (S. cerevisiae)
hsa-miR-1225-3p	0	0	1	0	0	0	C17orf72	chromosome 17 open reading frame 72
hsa-miR-1225-3p	1	0	1	1	1	1	GALNT14	UDP-N-acetyl-alpha-D-galactosamine:polypeptide N-acetylgalactosaminyltransferase 14 (GalNAc-T14)
hsa-miR-1225-3p	1	0	1	1	0	0	FASTK	Fas-activated serine/threonine kinase
hsa-miR-1225-3p	0	0	1	1	1	1	SPATA5L1	spermatogenesis associated 5-like 1
hsa-miR-1225-3p	1	0	1	1	1	1	MACF1	microtubule-actin crosslinking factor 1
hsa-miR-1225-3p	0	0	1	0	0	0	LOC284561	uncharacterized LOC284561
hsa-miR-1225-3p	1	0	1	1	1	1	BAZ2A	bromodomain adjacent to zinc finger domain, 2A
hsa-miR-1225-3p	1	0	1	1	0	0	MEX3A	mex-3 homolog A (C. elegans)
hsa-miR-1225-3p	0	0	1	0	1	1	FLJ14186	uncharacterized LOC401149
hsa-miR-1225-3p	1	0	1	1	1	1	COPS7B	COP9 constitutive photomorphogenic homolog subunit 7B (Arabidopsis)
hsa-miR-1225-3p	0	0	1	1	1	1	SIGLEC1	sialic acid binding Ig-like lectin 1, sialoadhesin
hsa-miR-1225-3p	0	0	1	0	0	0	IFFO2	intermediate filament family orphan 2
hsa-miR-1225-3p	0	0	1	1	1	1	MUC12	mucin 12, cell surface associated
hsa-miR-1225-3p	1	0	1	1	1	1	DISC1	disrupted in schizophrenia 1
hsa-miR-1225-3p	1	0	1	0	1	1	ZCCHC3	zinc finger, CCHC domain containing 3
hsa-miR-1225-3p	0	0	1	1	1	1	C12orf65	chromosome 12 open reading frame 65
hsa-miR-1225-3p	1	0	1	1	1	1	DCAF8	DDB1 and CUL4 associated factor 8
hsa-miR-1225-3p	1	0	1	1	1	1	GORASP2	golgi reassembly stacking protein 2, 55kDa
hsa-miR-1225-3p	0	0	1	1	1	1	HDC	histidine decarboxylase
hsa-miR-1225-3p	0	0	1	1	1	1	CRISPLD2	cysteine-rich secretory protein LCCL domain containing 2
hsa-miR-1225-3p	1	0	1	1	1	1	FAM53C	family with sequence similarity 53, member C
hsa-miR-1225-3p	1	0	1	1	1	1	HIF3A	hypoxia inducible factor 3, alpha subunit
hsa-miR-1225-3p	0	0	1	1	0	0	TMEM107	transmembrane protein 107
hsa-miR-1225-3p	1	0	1	1	1	1	KCTD15	potassium channel tetramerisation domain containing 15
hsa-miR-1225-3p	0	0	1	0	0	0	KIAA0664L3	KIAA0664-like 3
hsa-miR-1225-3p	0	0	1	1	0	0	HAGHL	hydroxyacylglutathione hydrolase-like
hsa-miR-1225-3p	1	0	1	1	1	1	PPM1L	protein phosphatase, Mg2+/Mn2+ dependent, 1L
hsa-miR-1225-3p	0	0	1	1	1	1	ZNF213	zinc finger protein 213
hsa-miR-1225-3p	1	0	1	1	0	0	SPEG	SPEG complex locus
hsa-miR-1225-3p	0	0	1	1	0	0	USP11	ubiquitin specific peptidase 11
hsa-miR-1225-3p	0	0	1	0	0	0	FLJ31104	uncharacterized LOC441072
hsa-miR-1225-3p	0	0	1	0	0	0	LOC157273	uncharacterized LOC157273
hsa-miR-1225-3p	1	0	1	0	1	1	RAB1A	RAB1A, member RAS oncogene family
hsa-miR-1225-3p	0	0	1	1	0	0	BEAN1	brain expressed, associated with NEDD4, 1
hsa-miR-1225-3p	1	0	1	1	1	1	SCAMP5	secretory carrier membrane protein 5
hsa-miR-1225-3p	0	0	1	0	0	0	LOC284600	uncharacterized LOC284600
hsa-miR-1225-3p	0	0	1	1	1	1	BRD2	bromodomain containing 2
hsa-miR-1225-3p	0	0	1	1	0	0	DNAH3	dynein, axonemal, heavy chain 3
hsa-miR-1225-3p	0	0	1	0	0	0	ERVV-1	endogenous retrovirus group V, member 1
hsa-miR-1225-3p	1	0	1	1	1	1	MLLT6	myeloid/lymphoid or mixed-lineage leukemia (trithorax homolog, Drosophila); translocated to, 6
hsa-miR-1225-3p	0	0	1	1	0	0	RGL3	ral guanine nucleotide dissociation stimulator-like 3
hsa-miR-1225-3p	1	0	1	1	1	1	MGAT1	mannosyl (alpha-1,3-)-glycoprotein beta-1,2-N-acetylglucosaminyltransferase
hsa-miR-1225-3p	0	0	1	1	0	0	TBC1D7	TBC1 domain family, member 7
hsa-miR-1225-3p	1	0	1	1	1	1	ISCU	iron-sulfur cluster scaffold homolog (E. coli)
hsa-miR-1225-3p	0	0	1	1	0	0	PTOV1	prostate tumor overexpressed 1
hsa-miR-1225-3p	0	0	1	1	0	0	KRT86	keratin 86
hsa-miR-1225-3p	1	0	1	1	1	1	C6orf89	chromosome 6 open reading frame 89
hsa-miR-1225-3p	0	0	1	1	0	0	TRIM41	tripartite motif containing 41
hsa-miR-1225-3p	1	0	1	1	1	1	FAM73B	family with sequence similarity 73, member B
hsa-miR-1225-3p	0	0	1	1	0	0	SYTL1	synaptotagmin-like 1
hsa-miR-1225-3p	0	0	1	1	1	1	ROBO4	roundabout, axon guidance receptor, homolog 4 (Drosophila)
hsa-miR-1225-3p	0	0	1	0	0	0	CAPN13	calpain 13
hsa-miR-1225-3p	1	0	1	1	1	1	PRRT2	proline-rich transmembrane protein 2
hsa-miR-1225-3p	0	0	1	1	1	1	GALNT6	UDP-N-acetyl-alpha-D-galactosamine:polypeptide N-acetylgalactosaminyltransferase 6 (GalNAc-T6)
hsa-miR-1225-3p	1	0	1	1	0	0	B3GAT3	beta-1,3-glucuronyltransferase 3 (glucuronosyltransferase I)
hsa-miR-1225-3p	0	0	1	1	1	1	KDELR1	KDEL (Lys-Asp-Glu-Leu) endoplasmic reticulum protein retention receptor 1
hsa-miR-1225-3p	0	0	1	1	1	1	CAMKV	CaM kinase-like vesicle-associated
hsa-miR-1225-3p	0	0	1	1	0	0	LGR5	leucine-rich repeat containing G protein-coupled receptor 5
hsa-miR-1225-3p	0	0	1	1	0	0	FAM115C	family with sequence similarity 115, member C
hsa-miR-1225-3p	0	0	1	0	1	1	TMSB15B	thymosin beta 15B
hsa-miR-1225-3p	0	0	1	0	0	0	LOC643837	uncharacterized LOC643837
hsa-miR-1225-3p	1	0	1	1	1	1	ARIH2	ariadne homolog 2 (Drosophila)
hsa-miR-1225-3p	0	0	1	0	1	1	PIANP	PILR alpha associated neural protein
hsa-miR-1225-3p	0	0	1	0	0	0	LOC440910	uncharacterized LOC440910
hsa-miR-1225-3p	1	0	1	0	1	1	TEF	thyrotrophic embryonic factor
hsa-miR-1225-3p	1	0	1	1	1	1	LUC7L2	LUC7-like 2 (S. cerevisiae)
hsa-miR-1225-3p	0	0	1	1	1	1	NRBP1	nuclear receptor binding protein 1
hsa-miR-1225-3p	1	0	1	1	1	1	SARM1	sterile alpha and TIR motif containing 1
hsa-miR-1225-3p	0	0	1	1	1	1	TGFBI	transforming growth factor, beta-induced, 68kDa
hsa-miR-1225-3p	0	0	1	0	0	0	CXXC1P1	CXXC finger protein 1 pseudogene 1
hsa-miR-1225-3p	1	0	1	0	1	1	MAGIX	MAGI family member, X-linked
hsa-miR-1225-3p	1	0	1	1	1	1	KCND1	potassium voltage-gated channel, Shal-related subfamily, member 1
hsa-miR-1225-3p	0	0	1	1	0	0	CYHR1	cysteine/histidine-rich 1
hsa-miR-1225-3p	1	0	1	1	1	1	KLC2	kinesin light chain 2
hsa-miR-1225-3p	0	0	1	1	1	1	HOGA1	4-hydroxy-2-oxoglutarate aldolase 1
hsa-miR-1225-3p	1	0	1	0	1	1	GRSF1	G-rich RNA sequence binding factor 1
hsa-miR-1225-3p	1	0	1	1	1	1	LPPR2	lipid phosphate phosphatase-related protein type 2
hsa-miR-1225-3p	1	0	1	1	1	1	NDEL1	nudE nuclear distribution E homolog (A. nidulans)-like 1
hsa-miR-1225-3p	0	0	1	0	0	0	LINC00486	long intergenic non-protein coding RNA 486
hsa-miR-1225-3p	0	0	1	1	1	1	AQP3	aquaporin 3 (Gill blood group)
hsa-miR-1225-3p	1	0	1	1	1	1	PEA15	phosphoprotein enriched in astrocytes 15
hsa-miR-1225-3p	0	0	1	1	0	0	TRIM46	tripartite motif containing 46
hsa-miR-1225-3p	1	0	1	1	0	0	FBRS	fibrosin
hsa-miR-1225-3p	0	0	1	1	0	0	ERGIC3	ERGIC and golgi 3
hsa-miR-1225-3p	1	0	1	0	1	1	KIAA1737	KIAA1737
hsa-miR-1225-3p	0	0	1	1	1	1	IL17RE	interleukin 17 receptor E
hsa-miR-1225-3p	0	0	1	1	1	1	FGD2	FYVE, RhoGEF and PH domain containing 2
hsa-miR-1225-3p	0	0	1	1	0	0	PRKRIP1	PRKR interacting protein 1 (IL11 inducible)
hsa-miR-1225-3p	0	0	1	0	0	0	LOC400680	uncharacterized LOC400680
hsa-miR-1225-3p	0	0	1	1	1	1	PPFIBP2	PTPRF interacting protein, binding protein 2 (liprin beta 2)
hsa-miR-1225-3p	0	0	1	0	0	0	KIRREL3-AS3	KIRREL3 antisense RNA 3
hsa-miR-1225-3p	0	0	1	0	0	0	LOC284385	uncharacterized LOC284385
hsa-miR-1225-3p	0	0	1	1	0	0	PSAPL1	prosaposin-like 1 (gene/pseudogene)
hsa-miR-1225-3p	0	0	1	1	0	0	KLHDC3	kelch domain containing 3
hsa-miR-1225-3p	0	0	1	0	0	0	CECR7	cat eye syndrome chromosome region, candidate 7 (non-protein coding)
hsa-miR-1225-3p	1	0	1	1	1	1	GRM4	glutamate receptor, metabotropic 4
hsa-miR-1225-3p	1	0	1	1	0	0	WIZ	widely interspaced zinc finger motifs
hsa-miR-1225-3p	1	0	1	1	1	1	ZBTB4	zinc finger and BTB domain containing 4
hsa-miR-1225-3p	0	0	1	1	1	1	FRMPD2	FERM and PDZ domain containing 2
hsa-miR-1225-3p	0	0	1	1	1	1	ARHGEF26	Rho guanine nucleotide exchange factor (GEF) 26
hsa-miR-1225-3p	0	0	1	0	1	1	PATE4	prostate and testis expressed 4
hsa-miR-1225-3p	1	0	1	1	1	1	CC2D1A	coiled-coil and C2 domain containing 1A
hsa-miR-1225-3p	1	0	1	1	0	0	KCNC1	potassium voltage-gated channel, Shaw-related subfamily, member 1
hsa-miR-1225-3p	0	0	1	1	0	0	TJAP1	tight junction associated protein 1 (peripheral)
hsa-miR-1225-3p	1	0	1	0	1	1	WDR82	WD repeat domain 82
hsa-miR-1225-3p	1	0	1	1	1	1	FAM219A	family with sequence similarity 219, member A
hsa-miR-1225-3p	0	0	1	1	1	1	SLC9A1	solute carrier family 9, subfamily A (NHE1, cation proton antiporter 1), member 1
hsa-miR-1225-3p	0	0	1	1	0	0	SH3BP1	SH3-domain binding protein 1
hsa-miR-1225-3p	0	0	1	1	0	0	NPIP	nuclear pore complex interacting protein
hsa-miR-1225-3p	0	0	1	1	1	1	C2orf91	chromosome 2 open reading frame 91
hsa-miR-1225-3p	1	0	1	1	1	1	PIAS3	protein inhibitor of activated STAT, 3
hsa-miR-1225-3p	0	0	1	1	0	0	LOC100128239	uncharacterized LOC100128239
hsa-miR-1225-3p	1	0	1	0	0	0	ANKRD52	ankyrin repeat domain 52
hsa-miR-1225-3p	0	0	1	1	1	1	C17orf28	chromosome 17 open reading frame 28
hsa-miR-1225-3p	1	0	1	0	0	0	MSL1	male-specific lethal 1 homolog (Drosophila)
hsa-miR-1225-3p	0	0	1	1	0	0	LOC399829	uncharacterized LOC399829
hsa-miR-1225-3p	0	0	1	1	0	0	RPRD2	regulation of nuclear pre-mRNA domain containing 2
hsa-miR-1225-3p	1	0	1	1	1	1	MACROD2	MACRO domain containing 2
hsa-miR-1225-3p	1	0	1	1	0	0	ATXN7L3	ataxin 7-like 3
hsa-miR-1225-3p	0	0	1	0	0	0	MIR143HG	MIR143 host gene (non-protein coding)
hsa-miR-1225-3p	0	0	1	0	0	0	PLEKHD1	pleckstrin homology domain containing, family D (with coiled-coil domains) member 1
hsa-miR-1225-3p	0	0	1	0	0	0	LOC619207	scavenger receptor protein family member
hsa-miR-1225-3p	0	0	1	1	1	1	ARHGAP33	Rho GTPase activating protein 33
hsa-miR-1225-3p	1	0	1	1	1	1	PHF17	PHD finger protein 17
hsa-miR-1225-3p	0	0	1	1	1	1	NT5C2	5'-nucleotidase, cytosolic II
hsa-miR-1225-3p	1	0	1	1	1	1	NFYC	nuclear transcription factor Y, gamma
hsa-miR-1225-3p	1	0	1	1	1	1	PLA2G15	phospholipase A2, group XV
hsa-miR-1225-3p	0	0	1	0	0	0	SHISA6	shisa homolog 6 (Xenopus laevis)
hsa-miR-1225-3p	1	0	1	1	0	0	MAN1B1	mannosidase, alpha, class 1B, member 1
hsa-miR-1225-3p	0	0	1	0	0	0	AFG3L1P	AFG3 ATPase family gene 3-like 1 (S. cerevisiae), pseudogene
hsa-miR-1225-3p	0	0	1	1	0	0	INTS1	integrator complex subunit 1
hsa-miR-1225-3p	1	0	1	1	1	1	BCR	breakpoint cluster region
hsa-miR-1225-3p	0	0	1	1	1	1	RAB13	RAB13, member RAS oncogene family
hsa-miR-1225-3p	0	0	1	1	0	0	GSG1L	GSG1-like
hsa-miR-1225-3p	0	0	1	1	0	0	WFIKKN1	WAP, follistatin/kazal, immunoglobulin, kunitz and netrin domain containing 1
hsa-miR-1225-3p	1	0	1	0	1	1	CYB561D1	cytochrome b-561 domain containing 1
hsa-miR-1225-3p	0	0	1	0	0	0	FLJ26245	uncharacterized LOC400533
hsa-miR-1225-3p	0	0	1	1	0	0	HEATR8	HEAT repeat containing 8
hsa-miR-1225-3p	0	0	1	0	1	1	KIF1A	kinesin family member 1A
hsa-miR-1225-3p	0	0	1	0	0	0	FAM27A	family with sequence similarity 27, member A
hsa-miR-1225-3p	0	0	1	0	1	1	RUFY4	RUN and FYVE domain containing 4
hsa-miR-1225-3p	0	0	1	1	0	0	ISOC2	isochorismatase domain containing 2
hsa-miR-1225-3p	1	0	1	1	1	1	RABGAP1	RAB GTPase activating protein 1
hsa-miR-1225-3p	1	0	1	1	0	0	BRSK2	BR serine/threonine kinase 2
hsa-miR-1225-3p	0	0	1	0	0	0	AGAP9	ArfGAP with GTPase domain, ankyrin repeat and PH domain 9
hsa-miR-1225-3p	1	0	1	1	1	1	CYYR1	cysteine/tyrosine-rich 1
hsa-miR-1225-3p	1	0	1	1	1	1	CAMK2G	calcium/calmodulin-dependent protein kinase II gamma
hsa-miR-1225-3p	0	0	1	1	0	0	PCSK5	proprotein convertase subtilisin/kexin type 5
hsa-miR-1225-3p	1	0	1	0	1	1	MAP3K3	mitogen-activated protein kinase kinase kinase 3
hsa-miR-1225-3p	1	0	1	1	1	1	ZNF655	zinc finger protein 655
hsa-miR-1225-3p	1	0	1	0	1	1	TEAD3	TEA domain family member 3
hsa-miR-1225-3p	0	0	1	1	0	0	FAAH	fatty acid amide hydrolase
hsa-miR-1225-3p	0	0	1	1	0	0	CPNE6	copine VI (neuronal)
hsa-miR-1225-3p	1	0	1	1	1	1	NPAS3	neuronal PAS domain protein 3
hsa-miR-1225-3p	0	0	1	1	0	0	OPLAH	5-oxoprolinase (ATP-hydrolysing)
hsa-miR-1225-3p	0	0	1	0	0	0	POM121L9P	POM121 transmembrane nucleoporin-like 9, pseudogene
hsa-miR-1225-3p	0	0	1	0	0	0	LOC643529	hCG2024094
hsa-miR-1225-3p	0	0	1	1	1	1	SLC30A10	solute carrier family 30, member 10
hsa-miR-1225-3p	1	0	1	0	1	1	GRIN3A	glutamate receptor, ionotropic, N-methyl-D-aspartate 3A
hsa-miR-1225-3p	0	0	1	0	0	0	FAM66D	family with sequence similarity 66, member D
hsa-miR-1225-3p	1	0	1	1	1	1	PKNOX2	PBX/knotted 1 homeobox 2
hsa-miR-1225-3p	1	0	1	1	0	0	FNIP2	folliculin interacting protein 2
hsa-miR-1225-3p	0	0	1	1	0	0	KRBA1	KRAB-A domain containing 1
hsa-miR-1225-3p	1	0	1	0	1	1	HNRNPA3	heterogeneous nuclear ribonucleoprotein A3
hsa-miR-1225-3p	1	0	1	1	1	1	CHMP7	charged multivesicular body protein 7
hsa-miR-1225-3p	1	0	1	1	1	1	RNF180	ring finger protein 180
hsa-miR-1225-3p	0	0	1	1	0	0	LGI4	leucine-rich repeat LGI family, member 4
hsa-miR-1225-3p	0	0	1	1	0	0	CD37	CD37 molecule
hsa-miR-1225-3p	1	0	1	1	1	1	IL17RD	interleukin 17 receptor D
hsa-miR-1225-3p	1	0	1	0	0	0	NPEPL1	aminopeptidase-like 1
hsa-miR-1225-3p	1	0	1	1	1	1	MBD6	methyl-CpG binding domain protein 6
hsa-miR-1225-3p	1	0	1	0	1	1	JAZF1	JAZF zinc finger 1
hsa-miR-1225-3p	0	0	1	1	1	1	TEX2	testis expressed 2
hsa-miR-1225-3p	0	0	1	1	0	0	TMEM134	transmembrane protein 134
hsa-miR-1225-3p	1	0	1	1	1	1	RCAN2	regulator of calcineurin 2
hsa-miR-1225-3p	0	0	1	1	1	1	CRB1	crumbs homolog 1 (Drosophila)
hsa-miR-1225-3p	0	0	1	0	0	0	TDH	L-threonine dehydrogenase
hsa-miR-1225-3p	1	0	1	1	1	1	GGT7	gamma-glutamyltransferase 7
hsa-miR-1225-3p	0	0	1	1	0	0	ESPN	espin
hsa-miR-1225-3p	1	0	1	1	1	1	OPRM1	opioid receptor, mu 1
hsa-miR-1225-3p	0	0	1	1	1	1	STAG3L3	stromal antigen 3-like 3
hsa-miR-1225-3p	1	0	1	1	1	1	GFRA2	GDNF family receptor alpha 2
hsa-miR-1225-3p	0	0	1	1	1	1	GCOM1	GRINL1A complex locus 1
hsa-miR-1225-3p	0	0	1	1	1	1	ASB9	ankyrin repeat and SOCS box containing 9
hsa-miR-1225-3p	0	0	1	1	1	1	NYAP1	neuronal tyrosine-phosphorylated phosphoinositide-3-kinase adaptor 1
hsa-miR-1225-3p	1	0	1	1	1	1	MECP2	methyl CpG binding protein 2 (Rett syndrome)
hsa-miR-1225-3p	0	0	1	1	0	0	PAOX	polyamine oxidase (exo-N4-amino)
hsa-miR-1225-3p	0	0	1	1	0	0	ASB16	ankyrin repeat and SOCS box containing 16
hsa-miR-1225-3p	1	0	1	1	0	0	ADAM15	ADAM metallopeptidase domain 15
hsa-miR-1225-3p	1	0	1	1	1	1	HMGA2	high mobility group AT-hook 2
hsa-miR-1225-3p	0	0	1	1	1	1	TMUB1	transmembrane and ubiquitin-like domain containing 1
hsa-miR-1225-3p	1	0	1	0	1	1	MYO18A	myosin XVIIIA
hsa-miR-1225-3p	1	0	1	1	1	1	QKI	QKI, KH domain containing, RNA binding
hsa-miR-1225-3p	1	0	1	1	1	1	TBC1D22B	TBC1 domain family, member 22B
hsa-miR-1225-3p	0	0	1	0	0	0	GBAP1	glucosidase, beta, acid pseudogene 1
hsa-miR-1225-3p	0	0	1	1	1	1	SNX11	sorting nexin 11
hsa-miR-1225-3p	0	0	1	1	0	0	AAR2	AAR2 splicing factor homolog (S. cerevisiae)
hsa-miR-1225-3p	0	0	1	1	1	1	B4GALT2	UDP-Gal:betaGlcNAc beta 1,4- galactosyltransferase, polypeptide 2
hsa-miR-1225-3p	0	0	1	1	1	1	WDR55	WD repeat domain 55
hsa-miR-1225-3p	1	0	1	0	1	1	DPYSL5	dihydropyrimidinase-like 5
hsa-miR-1225-3p	1	0	1	1	1	1	RIMS3	regulating synaptic membrane exocytosis 3
hsa-miR-1225-3p	1	0	1	1	1	1	PPP1R11	protein phosphatase 1, regulatory (inhibitor) subunit 11
hsa-miR-1225-3p	0	0	1	1	1	1	FTO	fat mass and obesity associated
hsa-miR-1225-3p	0	0	1	1	0	0	TMEM51	transmembrane protein 51
hsa-miR-1225-3p	0	0	1	1	1	1	ARFGAP1	ADP-ribosylation factor GTPase activating protein 1
hsa-miR-1225-3p	0	0	1	1	1	1	C1orf94	chromosome 1 open reading frame 94
hsa-miR-1225-3p	0	0	1	1	0	0	MYLK2	myosin light chain kinase 2
hsa-miR-1225-3p	1	0	1	1	1	1	PLEKHO2	pleckstrin homology domain containing, family O member 2
hsa-miR-1225-3p	1	0	1	1	0	0	NCLN	nicalin
hsa-miR-1225-3p	1	0	1	1	1	1	HMGA1	high mobility group AT-hook 1
hsa-miR-1225-3p	1	0	1	1	1	1	KCTD17	potassium channel tetramerisation domain containing 17
hsa-miR-1225-3p	0	0	1	1	0	0	FUZ	fuzzy homolog (Drosophila)
hsa-miR-1225-3p	0	0	1	0	0	0	LOC154761	family with sequence similarity 115, member C pseudogene
hsa-miR-1225-3p	0	0	1	1	1	1	ATXN2L	ataxin 2-like
hsa-miR-1225-3p	1	0	1	1	1	1	SLC46A1	solute carrier family 46 (folate transporter), member 1
hsa-miR-1225-3p	0	0	1	1	1	1	MED24	mediator complex subunit 24
hsa-miR-1225-3p	0	0	1	0	0	0	LRRC14	leucine rich repeat containing 14
hsa-miR-1225-3p	1	0	1	1	0	0	JUP	junction plakoglobin
hsa-miR-1225-3p	0	0	1	0	0	0	GRAMD1B	GRAM domain containing 1B
hsa-miR-1225-3p	1	0	1	0	1	1	RNF165	ring finger protein 165
hsa-miR-1225-3p	0	0	1	1	1	1	KLF7	Kruppel-like factor 7 (ubiquitous)
hsa-miR-1225-3p	0	0	1	1	0	0	VAV1	vav 1 guanine nucleotide exchange factor
hsa-miR-1225-3p	0	0	1	1	1	1	ACSM5	acyl-CoA synthetase medium-chain family member 5
hsa-miR-1225-3p	1	0	1	1	1	1	TMEM185A	transmembrane protein 185A
hsa-miR-1225-3p	1	0	1	1	1	1	PRDM2	PR domain containing 2, with ZNF domain
hsa-miR-1225-3p	0	0	1	1	1	1	PTK7	PTK7 protein tyrosine kinase 7
hsa-miR-1225-3p	0	0	1	0	0	0	MGC21881	uncharacterized locus MGC21881
hsa-miR-1225-3p	0	0	1	1	1	1	C8orf33	chromosome 8 open reading frame 33
hsa-miR-1225-3p	0	0	1	1	1	1	C1QTNF3	C1q and tumor necrosis factor related protein 3
hsa-miR-1225-3p	0	0	1	1	0	0	ZBTB32	zinc finger and BTB domain containing 32
hsa-miR-1225-3p	0	0	1	1	1	1	GLIPR2	GLI pathogenesis-related 2
hsa-miR-1225-3p	1	0	1	1	1	1	ARHGEF9	Cdc42 guanine nucleotide exchange factor (GEF) 9
hsa-miR-1225-3p	1	0	1	1	1	1	SLC25A22	solute carrier family 25 (mitochondrial carrier: glutamate), member 22
hsa-miR-1225-3p	0	0	1	1	0	0	C16orf91	chromosome 16 open reading frame 91
hsa-miR-1225-3p	0	0	1	0	0	0	SNX29P2	sorting nexin 29 pseudogene 2
hsa-miR-1225-3p	0	0	1	1	1	1	TLR4	toll-like receptor 4
hsa-miR-1225-3p	0	0	1	1	0	0	PRRG2	proline rich Gla (G-carboxyglutamic acid) 2
hsa-miR-1225-3p	1	0	1	1	1	1	FAM131A	family with sequence similarity 131, member A
hsa-miR-1225-3p	1	0	1	1	1	1	ZDHHC5	zinc finger, DHHC-type containing 5
hsa-miR-1225-3p	0	0	1	0	0	0	EVPLL	envoplakin-like
hsa-miR-1225-3p	1	0	1	0	1	1	CERS3	ceramide synthase 3
hsa-miR-1225-3p	0	0	1	1	1	1	PGPEP1	pyroglutamyl-peptidase I
hsa-miR-1225-3p	0	0	1	1	1	1	ZNF589	zinc finger protein 589
hsa-miR-1225-3p	0	0	1	1	0	0	SYT3	synaptotagmin III
hsa-miR-1225-3p	0	0	1	0	0	0	LOC145837	uncharacterized LOC145837
hsa-miR-1225-3p	0	0	1	1	0	0	GEMIN6	gem (nuclear organelle) associated protein 6
hsa-miR-1225-3p	1	0	1	1	1	1	SYT9	synaptotagmin IX
hsa-miR-1225-3p	0	0	1	1	0	0	ICAM5	intercellular adhesion molecule 5, telencephalin
hsa-miR-1225-3p	0	0	1	0	1	1	MYO7A	myosin VIIA
hsa-miR-1225-3p	0	0	1	1	1	1	CD48	CD48 molecule
hsa-miR-1225-3p	0	0	1	1	1	1	SH3TC1	SH3 domain and tetratricopeptide repeats 1
hsa-miR-1225-3p	1	0	1	1	1	1	BZRAP1	benzodiazapine receptor (peripheral) associated protein 1
hsa-miR-1225-3p	1	0	1	1	1	1	PFAS	phosphoribosylformylglycinamidine synthase
hsa-miR-1225-3p	1	0	1	1	1	1	RHOBTB1	Rho-related BTB domain containing 1
hsa-miR-1225-3p	1	0	1	1	0	0	DGCR6	DiGeorge syndrome critical region gene 6
hsa-miR-1225-3p	1	0	1	0	1	1	KCTD2	potassium channel tetramerisation domain containing 2
hsa-miR-1225-3p	1	0	1	1	1	1	ATF7IP2	activating transcription factor 7 interacting protein 2
hsa-miR-1225-3p	0	0	1	0	0	0	HOXA-AS2	HOXA cluster antisense RNA 2
hsa-miR-1225-3p	0	0	1	0	0	0	SPATA3	spermatogenesis associated 3
hsa-miR-1225-3p	0	0	1	0	0	0	LOC652276	potassium channel tetramerisation domain containing 5 pseudogene
hsa-miR-1225-3p	1	0	1	1	1	1	GAS8	growth arrest-specific 8
hsa-miR-1225-3p	0	0	1	0	0	0	TMEM235	transmembrane protein 235
hsa-miR-1225-3p	1	0	1	1	1	1	BNC2	basonuclin 2
hsa-miR-1225-3p	0	0	1	0	0	0	CYP4F35P	cytochrome P450, family 4, subfamily F, polypeptide 35, pseudogene
hsa-miR-1225-3p	0	0	1	1	1	1	MTHFD2L	methylenetetrahydrofolate dehydrogenase (NADP+ dependent) 2-like
hsa-miR-1225-3p	0	0	1	0	1	1	KSR1	kinase suppressor of ras 1
hsa-miR-1225-3p	0	0	1	0	0	0	INHBA-AS1	INHBA antisense RNA 1
hsa-miR-1225-3p	1	0	1	1	1	1	WSCD2	WSC domain containing 2
hsa-miR-1225-3p	1	0	1	0	1	1	KIAA0930	KIAA0930
hsa-miR-1225-3p	0	0	1	1	0	0	COX4I1	cytochrome c oxidase subunit IV isoform 1
hsa-miR-1225-3p	0	0	1	0	0	0	FLJ36000	uncharacterized FLJ36000
hsa-miR-1225-3p	0	0	1	0	0	0	LOC401074	uncharacterized LOC401074
hsa-miR-1225-3p	0	0	1	0	1	1	LINC00634	long intergenic non-protein coding RNA 634
hsa-miR-1225-3p	1	0	1	1	1	1	FOSB	FBJ murine osteosarcoma viral oncogene homolog B
hsa-miR-1225-3p	1	0	1	0	1	1	PACSIN1	protein kinase C and casein kinase substrate in neurons 1
hsa-miR-1225-3p	1	0	1	1	1	1	IL16	interleukin 16
hsa-miR-1225-3p	0	0	1	1	0	0	KIAA1432	KIAA1432
hsa-miR-1225-3p	1	0	1	0	1	1	KIAA0430	KIAA0430
hsa-miR-1225-3p	0	0	1	0	0	0	LOC154822	uncharacterized LOC154822
hsa-miR-1225-3p	0	0	1	1	0	0	AQP12B	aquaporin 12B
hsa-miR-1225-3p	1	0	1	1	0	0	PRRC2A	proline-rich coiled-coil 2A
hsa-miR-1225-3p	0	0	1	0	0	0	LINC00347	long intergenic non-protein coding RNA 347
hsa-miR-1225-3p	0	0	1	0	0	0	MORF4L2-AS1	MORF4L2 antisense RNA 1
hsa-miR-1225-3p	0	0	1	1	1	1	MGC57346	uncharacterized LOC401884
hsa-miR-1225-3p	0	0	1	1	0	0	NIT1	nitrilase 1
hsa-miR-1225-3p	0	0	1	1	0	0	TOM1	target of myb1 (chicken)
hsa-miR-1225-3p	0	0	1	0	0	0	LOC339529	uncharacterized LOC339529
hsa-miR-1225-3p	0	0	1	1	1	1	P2RX6	purinergic receptor P2X, ligand-gated ion channel, 6
hsa-miR-1225-3p	1	0	1	0	1	1	KDM2A	lysine (K)-specific demethylase 2A
hsa-miR-1225-3p	1	0	1	1	0	0	CELF5	CUGBP, Elav-like family member 5
hsa-miR-1225-3p	0	0	1	0	0	0	SUZ12P1	suppressor of zeste 12 homolog pseudogene 1
hsa-miR-1225-3p	1	0	1	1	0	0	TTC9	tetratricopeptide repeat domain 9
hsa-miR-1225-3p	1	0	1	1	1	1	PTPRG	protein tyrosine phosphatase, receptor type, G
hsa-miR-1225-3p	0	0	1	1	1	1	RANGAP1	Ran GTPase activating protein 1
hsa-miR-1225-3p	0	0	1	1	0	0	RPS9	ribosomal protein S9
hsa-miR-1225-3p	1	0	1	0	1	1	SMURF2	SMAD specific E3 ubiquitin protein ligase 2
hsa-miR-1225-3p	0	0	1	1	1	1	LINC00086	long intergenic non-protein coding RNA 86
hsa-miR-1225-3p	0	0	1	1	1	1	HLA-DQA1	major histocompatibility complex, class II, DQ alpha 1
hsa-miR-1225-3p	1	0	1	0	1	1	C14orf43	chromosome 14 open reading frame 43
hsa-miR-1225-3p	1	0	1	1	1	1	RCC2	regulator of chromosome condensation 2
hsa-miR-1225-3p	0	0	1	0	1	1	C17orf51	chromosome 17 open reading frame 51
hsa-miR-1225-3p	1	0	1	1	1	1	KDM5C	lysine (K)-specific demethylase 5C
hsa-miR-1225-3p	0	0	1	1	1	1	MPP3	membrane protein, palmitoylated 3 (MAGUK p55 subfamily member 3)
hsa-miR-1225-3p	1	0	1	1	1	1	NCOA5	nuclear receptor coactivator 5
hsa-miR-1225-3p	0	0	1	1	0	0	GRIN2C	glutamate receptor, ionotropic, N-methyl D-aspartate 2C
hsa-miR-1225-3p	1	0	1	1	1	1	DUSP9	dual specificity phosphatase 9
hsa-miR-1225-3p	1	0	1	0	1	1	C7orf41	chromosome 7 open reading frame 41
hsa-miR-1225-3p	0	0	1	1	0	0	C8orf31	chromosome 8 open reading frame 31
hsa-miR-1225-3p	0	0	1	1	1	1	CAMLG	calcium modulating ligand
hsa-miR-1225-3p	0	0	1	1	0	0	CERS4	ceramide synthase 4
hsa-miR-1225-3p	0	0	1	1	0	0	PRSS55	protease, serine, 55
hsa-miR-1225-3p	0	0	1	0	0	0	LOC158435	uncharacterized LOC158435
hsa-miR-1225-3p	0	0	1	1	0	0	TSNARE1	t-SNARE domain containing 1
hsa-miR-1225-3p	1	0	1	1	1	1	ZNF449	zinc finger protein 449
hsa-miR-1225-3p	0	0	1	0	0	0	LINC00052	long intergenic non-protein coding RNA 52
hsa-miR-1225-3p	0	0	1	0	0	0	UBE2Q2P2	ubiquitin-conjugating enzyme E2Q family member 2 pseudogene 2
hsa-miR-1225-3p	1	0	1	1	1	1	MAPKAPK3	mitogen-activated protein kinase-activated protein kinase 3
hsa-miR-1225-3p	0	0	1	0	0	0	SPDYE8P	speedy homolog E8 (Xenopus laevis), pseudogene
hsa-miR-1225-3p	0	0	1	1	1	1	SLC11A1	solute carrier family 11 (proton-coupled divalent metal ion transporters), member 1
hsa-miR-1225-3p	1	0	1	1	0	0	TNXB	tenascin XB
hsa-miR-1225-3p	0	0	1	1	0	0	RPS21	ribosomal protein S21
hsa-miR-1225-3p	0	0	1	0	0	0	LOC283070	uncharacterized LOC283070
hsa-miR-1225-3p	0	0	1	0	1	1	TNFRSF8	tumor necrosis factor receptor superfamily, member 8
hsa-miR-1225-3p	0	0	1	0	0	0	LOC441259	PMS2 postmeiotic segregation increased 2 (S. cerevisiae)-like
hsa-miR-1225-3p	1	0	1	0	1	1	DPYSL3	dihydropyrimidinase-like 3
hsa-miR-1225-3p	1	0	1	0	1	1	AMMECR1L	AMME chromosomal region gene 1-like
hsa-miR-1225-3p	0	0	1	0	0	0	LINC00537	long intergenic non-protein coding RNA 537
hsa-miR-1225-3p	1	0	1	1	1	1	SAMD4B	sterile alpha motif domain containing 4B
hsa-miR-1225-3p	0	0	1	1	0	0	ZNF703	zinc finger protein 703
hsa-miR-1225-3p	0	0	1	0	0	0	GUSBP1	glucuronidase, beta pseudogene 1
hsa-miR-1225-3p	1	0	1	0	1	1	ARPP19	cAMP-regulated phosphoprotein, 19kDa
hsa-miR-1225-3p	0	0	1	1	0	0	MTMR11	myotubularin related protein 11
hsa-miR-1225-3p	1	0	1	1	1	1	LRRC15	leucine rich repeat containing 15
hsa-miR-1225-3p	0	0	1	1	0	0	TMC1	transmembrane channel-like 1
hsa-miR-1225-3p	0	0	1	0	0	0	LOC441493	uncharacterized LOC441493
hsa-miR-1225-3p	0	0	1	1	0	0	RELA	v-rel reticuloendotheliosis viral oncogene homolog A (avian)
hsa-miR-1225-3p	0	0	1	0	0	0	INTS4L1	integrator complex subunit 4-like 1
hsa-miR-1225-3p	0	0	1	1	1	1	UNC13B	unc-13 homolog B (C. elegans)
hsa-miR-1225-3p	0	0	1	1	0	0	RNF123	ring finger protein 123
hsa-miR-1225-3p	0	0	1	1	1	1	LRCH1	leucine-rich repeats and calponin homology (CH) domain containing 1
hsa-miR-1225-3p	1	0	1	1	1	1	OSBP2	oxysterol binding protein 2
hsa-miR-1225-3p	0	0	1	0	0	0	FAM27E3	family with sequence similarity 27, member E3
hsa-miR-1225-3p	0	0	1	1	0	0	SOCS7	suppressor of cytokine signaling 7
hsa-miR-1225-3p	0	0	1	0	0	0	EEF1DP3	eukaryotic translation elongation factor 1 delta pseudogene 3
hsa-miR-1225-3p	0	0	1	0	0	0	FAM225B	family with sequence similarity 225, member B (non-protein coding)
hsa-miR-1225-3p	1	0	1	1	1	1	PHC2	polyhomeotic homolog 2 (Drosophila)
hsa-miR-1225-3p	0	0	1	0	0	0	MEG3	maternally expressed 3 (non-protein coding)
hsa-miR-1225-3p	0	0	1	1	0	0	NDRG2	NDRG family member 2
hsa-miR-1225-3p	1	0	1	1	0	0	RGS6	regulator of G-protein signaling 6
hsa-miR-1225-3p	0	0	1	1	1	1	STAT2	signal transducer and activator of transcription 2, 113kDa
hsa-miR-1225-3p	1	0	1	1	0	0	MAPK12	mitogen-activated protein kinase 12
hsa-miR-1225-3p	1	0	1	1	1	1	SPPL3	signal peptide peptidase like 3
hsa-miR-1225-3p	1	0	1	1	1	1	RORB	RAR-related orphan receptor B
hsa-miR-1225-3p	0	0	1	1	1	1	GTF3C2	general transcription factor IIIC, polypeptide 2, beta 110kDa
hsa-miR-1225-3p	1	0	1	1	1	1	TLN2	talin 2
hsa-miR-1225-3p	0	0	1	1	0	0	ANKRD33	ankyrin repeat domain 33
hsa-miR-1225-3p	1	0	1	1	1	1	TSC22D3	TSC22 domain family, member 3
hsa-miR-1225-3p	0	0	1	1	0	0	NDUFB11	NADH dehydrogenase (ubiquinone) 1 beta subcomplex, 11, 17.3kDa
hsa-miR-1225-3p	1	0	1	1	1	1	BSDC1	BSD domain containing 1
hsa-miR-1225-3p	0	0	1	0	1	1	CD59	CD59 molecule, complement regulatory protein
hsa-miR-1225-3p	1	0	1	1	1	1	MDK	midkine (neurite growth-promoting factor 2)
hsa-miR-1225-3p	0	0	1	1	1	1	POLR2H	polymerase (RNA) II (DNA directed) polypeptide H
hsa-miR-1225-3p	0	0	1	1	0	0	SREBF2	sterol regulatory element binding transcription factor 2
hsa-miR-1225-3p	0	0	1	1	0	0	STMN4	stathmin-like 4
hsa-miR-1225-3p	0	0	1	1	1	1	HEXA	hexosaminidase A (alpha polypeptide)
hsa-miR-1225-3p	1	0	1	1	1	1	NME4	NME/NM23 nucleoside diphosphate kinase 4
hsa-miR-1225-3p	0	0	1	1	1	1	SMYD5	SMYD family member 5
hsa-miR-1225-3p	0	0	1	0	0	0	AKR1A1	aldo-keto reductase family 1, member A1 (aldehyde reductase)
hsa-miR-1225-3p	0	0	1	1	0	0	RAD54L	RAD54-like (S. cerevisiae)
hsa-miR-1225-3p	1	0	1	1	0	0	PHGDH	phosphoglycerate dehydrogenase
hsa-miR-1225-3p	1	0	1	1	1	1	LETMD1	LETM1 domain containing 1
hsa-miR-1225-3p	0	0	1	1	1	1	CYTH2	cytohesin 2
hsa-miR-1225-3p	1	0	1	1	1	1	E2F3	E2F transcription factor 3
hsa-miR-1225-3p	1	0	1	1	1	1	CTDNEP1	CTD nuclear envelope phosphatase 1
hsa-miR-1225-3p	0	0	1	0	1	1	CD99P1	CD99 molecule pseudogene 1
hsa-miR-1225-3p	0	0	1	1	0	0	CGRRF1	cell growth regulator with ring finger domain 1
hsa-miR-1225-3p	0	0	1	1	1	1	PKP4	plakophilin 4
hsa-miR-1225-3p	0	0	1	1	0	0	KIAA0100	KIAA0100
hsa-miR-1225-3p	0	0	1	1	1	1	COPS7A	COP9 constitutive photomorphogenic homolog subunit 7A (Arabidopsis)
hsa-miR-1225-3p	0	0	1	1	1	1	XBP1	X-box binding protein 1
hsa-miR-1225-3p	0	0	1	1	0	0	NDUFS7	NADH dehydrogenase (ubiquinone) Fe-S protein 7, 20kDa (NADH-coenzyme Q reductase)
hsa-miR-1225-3p	0	0	1	1	1	1	STXBP3	syntaxin binding protein 3
hsa-miR-1225-3p	1	0	1	1	1	1	TMEM245	transmembrane protein 245
hsa-miR-1225-3p	0	0	1	1	1	1	TOX4	TOX high mobility group box family member 4
hsa-miR-1225-3p	0	0	1	1	0	0	C11orf68	chromosome 11 open reading frame 68
hsa-miR-1225-3p	0	0	1	0	0	0	FLJ45248	FLJ45248 protein
hsa-miR-1225-3p	0	0	1	1	1	1	CAPZB	capping protein (actin filament) muscle Z-line, beta
hsa-miR-1225-3p	0	0	1	1	1	1	MPDU1	mannose-P-dolichol utilization defect 1
hsa-miR-1225-3p	1	0	1	1	1	1	PPP5C	protein phosphatase 5, catalytic subunit
hsa-miR-1225-3p	0	0	1	1	1	1	C1orf88	chromosome 1 open reading frame 88
hsa-miR-1225-3p	0	0	1	1	0	0	PTGDS	prostaglandin D2 synthase 21kDa (brain)
hsa-miR-1225-3p	0	0	1	1	1	1	RPUSD1	RNA pseudouridylate synthase domain containing 1
hsa-miR-1225-3p	0	0	1	1	0	0	C1orf122	chromosome 1 open reading frame 122
hsa-miR-1225-3p	0	0	1	1	1	1	SERP2	stress-associated endoplasmic reticulum protein family member 2
hsa-miR-1225-3p	0	0	1	1	0	0	SCRN2	secernin 2
hsa-miR-1225-3p	1	0	1	1	1	1	ADPRHL2	ADP-ribosylhydrolase like 2
hsa-miR-1225-3p	1	0	1	1	1	1	ARNTL	aryl hydrocarbon receptor nuclear translocator-like
hsa-miR-1225-3p	0	0	1	1	1	1	WIBG	within bgcn homolog (Drosophila)
hsa-miR-1225-3p	0	0	1	1	0	0	GPR153	G protein-coupled receptor 153
hsa-miR-1225-3p	0	0	1	1	1	1	JMJD8	jumonji domain containing 8
hsa-miR-1225-3p	0	0	1	1	1	1	ACAD9	acyl-CoA dehydrogenase family, member 9
hsa-miR-1225-3p	0	0	1	1	1	1	UBE2A	ubiquitin-conjugating enzyme E2A
hsa-miR-1225-3p	0	0	1	1	0	0	TMEM120A	transmembrane protein 120A
hsa-miR-1225-3p	0	0	1	1	0	0	PHPT1	phosphohistidine phosphatase 1
hsa-miR-1225-3p	0	0	1	1	1	1	LYSMD4	LysM, putative peptidoglycan-binding, domain containing 4
hsa-miR-1225-3p	0	0	1	1	1	1	SLCO4A1	solute carrier organic anion transporter family, member 4A1
hsa-miR-1225-3p	1	0	1	1	1	1	TMEM55B	transmembrane protein 55B
hsa-miR-1225-3p	0	0	1	0	0	0	PRMT1	protein arginine methyltransferase 1
hsa-miR-1225-3p	0	0	1	1	0	0	SLC15A3	solute carrier family 15, member 3
hsa-miR-1225-3p	0	0	1	1	1	1	BEX4	brain expressed, X-linked 4
hsa-miR-1225-3p	0	0	1	1	0	0	FCGR2A	Fc fragment of IgG, low affinity IIa, receptor (CD32)
hsa-miR-1225-3p	1	0	1	1	1	1	JUNB	jun B proto-oncogene
hsa-miR-1225-3p	0	0	1	1	1	1	MECR	mitochondrial trans-2-enoyl-CoA reductase
hsa-miR-1225-3p	0	0	1	1	0	0	IL11RA	interleukin 11 receptor, alpha
hsa-miR-1225-3p	0	0	1	1	1	1	ARFRP1	ADP-ribosylation factor related protein 1
hsa-miR-1225-3p	0	0	1	0	0	0	MYSM1	Myb-like, SWIRM and MPN domains 1
hsa-miR-1225-3p	1	0	1	0	1	1	KIAA0240	KIAA0240
hsa-miR-1225-3p	0	0	1	0	0	0	MUC19	mucin 19, oligomeric
hsa-miR-1225-3p	0	0	1	1	1	1	SLC25A26	solute carrier family 25 (S-adenosylmethionine carrier), member 26
hsa-miR-1225-3p	0	0	1	0	0	0	DNAJC27-AS1	DNAJC27 antisense RNA 1
hsa-miR-1225-3p	0	0	1	1	1	1	LTA	lymphotoxin alpha (TNF superfamily, member 1)
hsa-miR-1225-3p	1	0	1	1	1	1	KCNE3	potassium voltage-gated channel, Isk-related family, member 3
hsa-miR-1225-3p	0	0	1	1	1	1	CD274	CD274 molecule
hsa-miR-1225-3p	1	0	1	1	1	1	ITSN1	intersectin 1 (SH3 domain protein)
hsa-miR-1225-3p	0	0	1	1	1	1	BBOX1	butyrobetaine (gamma), 2-oxoglutarate dioxygenase (gamma-butyrobetaine hydroxylase) 1
hsa-miR-1225-3p	0	0	1	0	0	0	POM121L8P	POM121 transmembrane nucleoporin-like 8 pseudogene
hsa-miR-1225-3p	0	0	1	0	0	0	LOC728377	Rho guanine nucleotide exchange factor (GEF) 5 pseudogene
hsa-miR-1225-3p	0	0	1	0	0	0	FAM226A	family with sequence similarity 226, member A (non-protein coding)
hsa-miR-1225-3p	0	0	1	0	0	0	GPR144	G protein-coupled receptor 144
hsa-miR-1225-3p	0	0	1	1	1	1	ALDH3B1	aldehyde dehydrogenase 3 family, member B1
hsa-miR-1225-3p	1	0	1	1	1	1	MLL	myeloid/lymphoid or mixed-lineage leukemia (trithorax homolog, Drosophila)
hsa-miR-1225-3p	1	0	1	1	1	1	COL4A4	collagen, type IV, alpha 4
hsa-miR-1225-3p	0	0	1	1	0	0	EMD	emerin
hsa-miR-1225-3p	0	0	1	1	0	0	GBA	glucosidase, beta, acid
hsa-miR-1225-3p	1	0	1	0	1	1	GLI3	GLI family zinc finger 3
hsa-miR-1225-3p	1	0	1	0	1	1	ITGB3	integrin, beta 3 (platelet glycoprotein IIIa, antigen CD61)
hsa-miR-1225-3p	1	0	1	1	1	1	LEP	leptin
hsa-miR-1225-3p	0	0	1	1	1	1	CYP11B2	cytochrome P450, family 11, subfamily B, polypeptide 2
hsa-miR-1225-3p	1	0	1	1	1	1	IL10	interleukin 10
hsa-miR-1225-3p	0	0	1	1	1	1	IL2	interleukin 2
hsa-miR-1225-3p	0	0	1	1	1	1	IGF2	insulin-like growth factor 2 (somatomedin A)
hsa-miR-1225-3p	1	0	1	0	1	1	ALDH1A3	aldehyde dehydrogenase 1 family, member A3
hsa-miR-1225-3p	0	0	1	1	1	1	EPO	erythropoietin
hsa-miR-1225-3p	0	0	1	0	0	0	GABRA3	gamma-aminobutyric acid (GABA) A receptor, alpha 3
hsa-miR-1225-3p	1	0	1	1	1	1	GABRB3	gamma-aminobutyric acid (GABA) A receptor, beta 3
hsa-miR-1225-3p	1	0	1	1	1	1	PTGFR	prostaglandin F receptor (FP)
hsa-miR-1225-3p	1	0	1	1	1	1	RARA	retinoic acid receptor, alpha
hsa-miR-1225-3p	1	0	1	1	0	0	SLC35E4	solute carrier family 35, member E4
hsa-miR-1225-3p	0	0	1	1	1	1	C4orf3	chromosome 4 open reading frame 3
hsa-miR-1225-3p	0	0	1	1	1	1	C11orf49	chromosome 11 open reading frame 49
hsa-miR-1225-3p	1	0	1	1	1	1	BICD2	bicaudal D homolog 2 (Drosophila)
hsa-miR-1225-3p	1	0	1	0	1	1	BMF	Bcl2 modifying factor
hsa-miR-1225-3p	0	0	1	0	0	0	RNASEK	ribonuclease, RNase K
hsa-miR-1225-3p	0	0	1	1	1	1	CLEC2D	C-type lectin domain family 2, member D
hsa-miR-1225-3p	1	0	1	0	1	1	LRRC55	leucine rich repeat containing 55
hsa-miR-1225-3p	1	0	1	1	1	1	EDA	ectodysplasin A
hsa-miR-1225-3p	1	0	1	1	0	0	RPS6KA1	ribosomal protein S6 kinase, 90kDa, polypeptide 1
hsa-miR-1225-3p	0	0	1	1	1	1	APOBEC3F	apolipoprotein B mRNA editing enzyme, catalytic polypeptide-like 3F
hsa-miR-1225-3p	1	0	1	1	1	1	L3MBTL3	l(3)mbt-like 3 (Drosophila)
hsa-miR-1225-3p	1	0	1	1	1	1	NTRK3	neurotrophic tyrosine kinase, receptor, type 3
hsa-miR-1225-3p	0	0	1	1	1	1	RASL10A	RAS-like, family 10, member A
hsa-miR-1225-3p	0	0	1	1	0	0	IRGQ	immunity-related GTPase family, Q
hsa-miR-1225-3p	0	0	1	1	0	0	NTRK1	neurotrophic tyrosine kinase, receptor, type 1
hsa-miR-1225-3p	1	0	1	0	1	1	CPLX2	complexin 2
hsa-miR-1225-3p	1	0	1	0	1	1	C18orf25	chromosome 18 open reading frame 25
hsa-miR-1225-3p	1	0	1	1	1	1	LPHN1	latrophilin 1
hsa-miR-1225-3p	0	0	1	1	1	1	GCSAM	germinal center-associated, signaling and motility
hsa-miR-1225-3p	0	0	1	1	0	0	ARMCX6	armadillo repeat containing, X-linked 6
hsa-miR-1225-3p	1	0	1	1	0	0	RPL21P44	ribosomal protein L21 pseudogene 44
hsa-miR-1225-3p	1	0	1	1	1	1	FOXP4	forkhead box P4
hsa-miR-1225-3p	1	0	1	1	1	1	SORCS1	sortilin-related VPS10 domain containing receptor 1
hsa-miR-1225-3p	0	0	1	1	0	0	TCTEX1D4	Tctex1 domain containing 4
hsa-miR-1225-3p	1	0	1	1	1	1	C12orf68	chromosome 12 open reading frame 68
hsa-miR-1225-3p	0	0	1	1	0	0	VSIG8	V-set and immunoglobulin domain containing 8
hsa-miR-1225-3p	0	0	1	1	1	1	LDLRAD2	low density lipoprotein receptor class A domain containing 2
hsa-miR-1225-3p	0	0	1	0	1	1	LINC00268	long intergenic non-protein coding RNA 268
hsa-miR-1225-3p	0	0	1	1	0	0	LAT	linker for activation of T cells
hsa-miR-1225-3p	0	0	1	1	0	0	RTKN	rhotekin
hsa-miR-1225-3p	1	0	1	1	1	1	SH3PXD2B	SH3 and PX domains 2B
hsa-miR-1225-3p	1	0	1	1	1	1	SERF2	small EDRK-rich factor 2
hsa-miR-1225-3p	1	0	1	0	1	1	BCL7A	B-cell CLL/lymphoma 7A
hsa-miR-1225-3p	1	0	1	1	1	1	CTNS	cystinosin, lysosomal cystine transporter
hsa-miR-1225-3p	1	0	1	1	1	1	MYCL1	v-myc myelocytomatosis viral oncogene homolog 1, lung carcinoma derived (avian)
hsa-miR-1225-3p	0	0	1	1	1	1	NHP2	NHP2 ribonucleoprotein homolog (yeast)
hsa-miR-1225-3p	1	0	1	1	1	1	SMOC1	SPARC related modular calcium binding 1
hsa-miR-1225-3p	0	0	1	1	1	1	ATAD3C	ATPase family, AAA domain containing 3C
hsa-miR-1225-3p	1	0	1	1	1	1	KCNC4	potassium voltage-gated channel, Shaw-related subfamily, member 4
hsa-miR-1225-3p	1	0	1	1	1	1	CHTF8	CTF8, chromosome transmission fidelity factor 8 homolog (S. cerevisiae)
hsa-miR-1225-3p	1	0	1	1	0	0	ANKRD34A	ankyrin repeat domain 34A
hsa-miR-1225-3p	0	0	1	1	1	1	ZXDC	ZXD family zinc finger C
hsa-miR-1225-3p	0	0	1	1	1	1	NUPR1	nuclear protein, transcriptional regulator, 1
hsa-miR-1225-3p	1	0	1	1	1	1	ZNF706	zinc finger protein 706
hsa-miR-1225-3p	0	0	1	1	1	1	FRMPD2P1	FERM and PDZ domain containing 2 pseudogene 1
hsa-miR-1225-3p	0	0	1	1	1	1	RCC1	regulator of chromosome condensation 1
hsa-miR-1225-3p	1	0	1	1	1	1	PDE11A	phosphodiesterase 11A
hsa-miR-1225-3p	0	0	1	1	0	0	VPS37D	vacuolar protein sorting 37 homolog D (S. cerevisiae)
hsa-miR-1225-3p	1	0	1	1	1	1	UBN1	ubinuclein 1
hsa-miR-1225-3p	1	0	1	1	1	1	HAP1	huntingtin-associated protein 1
hsa-miR-1225-3p	1	0	1	0	1	1	FBXO41	F-box protein 41
hsa-miR-1225-3p	1	0	1	1	0	0	DLGAP3	discs, large (Drosophila) homolog-associated protein 3
hsa-miR-1225-3p	0	0	1	1	0	0	WTIP	Wilms tumor 1 interacting protein
hsa-miR-1225-3p	1	0	1	1	1	1	MBOAT1	membrane bound O-acyltransferase domain containing 1
hsa-miR-1225-3p	0	0	1	0	0	0	C16orf90	chromosome 16 open reading frame 90
hsa-miR-1225-3p	1	0	1	1	1	1	NXF1	nuclear RNA export factor 1
hsa-miR-1225-3p	0	0	1	1	0	0	PLOD3	procollagen-lysine, 2-oxoglutarate 5-dioxygenase 3
hsa-miR-1225-3p	1	0	1	1	0	0	ASIC2	acid-sensing (proton-gated) ion channel 2
hsa-miR-1225-3p	1	0	1	1	1	1	ADCY9	adenylate cyclase 9
hsa-miR-1225-3p	0	0	1	1	1	1	ADSS	adenylosuccinate synthase
hsa-miR-1225-3p	0	0	1	1	1	1	ARHGAP6	Rho GTPase activating protein 6
hsa-miR-1225-3p	1	0	1	1	1	1	CTNND2	catenin (cadherin-associated protein), delta 2
hsa-miR-1225-3p	0	0	1	1	0	0	DIO3	deiodinase, iodothyronine, type III
hsa-miR-1225-3p	1	0	1	1	1	1	CELSR3	cadherin, EGF LAG seven-pass G-type receptor 3 (flamingo homolog, Drosophila)
hsa-miR-1225-3p	1	0	1	0	1	1	ELAVL3	ELAV (embryonic lethal, abnormal vision, Drosophila)-like 3 (Hu antigen C)
hsa-miR-1225-3p	1	0	1	1	1	1	EXTL3	exostoses (multiple)-like 3
hsa-miR-1225-3p	1	0	1	1	1	1	FOXC1	forkhead box C1
hsa-miR-1225-3p	1	0	1	1	1	1	NDST1	N-deacetylase/N-sulfotransferase (heparan glucosaminyl) 1
hsa-miR-1225-3p	0	0	1	1	0	0	ACP2	acid phosphatase 2, lysosomal
hsa-miR-1225-3p	1	0	1	1	1	1	ARF3	ADP-ribosylation factor 3
hsa-miR-1225-3p	0	0	1	1	0	0	RHOG	ras homolog family member G
hsa-miR-1225-3p	1	0	1	1	1	1	ATP6V1A	ATPase, H+ transporting, lysosomal 70kDa, V1 subunit A
hsa-miR-1225-3p	0	0	1	1	1	1	AXL	AXL receptor tyrosine kinase
hsa-miR-1225-3p	0	0	1	1	1	1	CALB2	calbindin 2
hsa-miR-1225-3p	0	0	1	1	1	1	CD34	CD34 molecule
hsa-miR-1225-3p	1	0	1	1	1	1	CDC25A	cell division cycle 25 homolog A (S. pombe)
hsa-miR-1225-3p	1	0	1	0	1	1	ETV6	ets variant 6
hsa-miR-1225-3p	0	0	1	1	0	0	IGFBP6	insulin-like growth factor binding protein 6
hsa-miR-1225-3p	0	0	1	1	0	0	KRT4	keratin 4
hsa-miR-1225-3p	1	0	1	1	1	1	LIMK1	LIM domain kinase 1
hsa-miR-1225-3p	1	0	1	1	1	1	M6PR	mannose-6-phosphate receptor (cation dependent)
hsa-miR-1225-3p	1	0	1	1	1	1	ADAM11	ADAM metallopeptidase domain 11
hsa-miR-1225-3p	0	0	1	0	1	1	MFNG	MFNG O-fucosylpeptide 3-beta-N-acetylglucosaminyltransferase
hsa-miR-1225-3p	1	0	1	1	1	1	NGFR	nerve growth factor receptor
hsa-miR-1225-3p	0	0	1	1	0	0	NOVA2	neuro-oncological ventral antigen 2
hsa-miR-1225-3p	1	0	1	1	1	1	NPTX1	neuronal pentraxin I
hsa-miR-1225-3p	0	0	1	0	1	1	OAZ2	ornithine decarboxylase antizyme 2
hsa-miR-1225-3p	1	0	1	1	1	1	FURIN	furin (paired basic amino acid cleaving enzyme)
hsa-miR-1225-3p	1	0	1	1	1	1	PLAGL2	pleiomorphic adenoma gene-like 2
hsa-miR-1225-3p	0	0	1	1	1	1	SEPT5	septin 5
hsa-miR-1225-3p	0	0	1	1	0	0	PRKACG	protein kinase, cAMP-dependent, catalytic, gamma
hsa-miR-1225-3p	0	0	1	1	0	0	PSMD2	proteasome (prosome, macropain) 26S subunit, non-ATPase, 2
hsa-miR-1225-3p	1	0	1	1	1	1	PTPN9	protein tyrosine phosphatase, non-receptor type 9
hsa-miR-1225-3p	1	0	1	1	1	1	PTPRJ	protein tyrosine phosphatase, receptor type, J
hsa-miR-1225-3p	1	0	1	1	1	1	PVRL1	poliovirus receptor-related 1 (herpesvirus entry mediator C)
hsa-miR-1225-3p	1	0	1	1	0	0	RFX1	regulatory factor X, 1 (influences HLA class II expression)
hsa-miR-1225-3p	1	0	1	0	1	1	CCL22	chemokine (C-C motif) ligand 22
hsa-miR-1225-3p	1	0	1	1	1	1	SRF	serum response factor (c-fos serum response element-binding transcription factor)
hsa-miR-1225-3p	0	0	1	1	1	1	XPNPEP2	X-prolyl aminopeptidase (aminopeptidase P) 2, membrane-bound
hsa-miR-1225-3p	1	0	1	0	1	1	ZIC1	Zic family member 1
hsa-miR-1225-3p	1	0	1	1	1	1	DEK	DEK oncogene
hsa-miR-1225-3p	1	0	1	0	1	1	SNN	stannin
hsa-miR-1225-3p	1	0	1	1	1	1	FZD1	frizzled family receptor 1
hsa-miR-1225-3p	0	0	1	1	1	1	ITGA10	integrin, alpha 10
hsa-miR-1225-3p	0	0	1	1	1	1	TNFRSF11A	tumor necrosis factor receptor superfamily, member 11a, NFKB activator
hsa-miR-1225-3p	1	0	1	1	1	1	KALRN	kalirin, RhoGEF kinase
hsa-miR-1225-3p	1	0	1	1	0	0	PAX2	paired box 2
hsa-miR-1225-3p	1	0	1	1	1	1	BCL2L2	BCL2-like 2
hsa-miR-1225-3p	1	0	1	0	1	1	PLK3	polo-like kinase 3
hsa-miR-1225-3p	1	0	1	0	1	1	E2F2	E2F transcription factor 2
hsa-miR-1225-3p	0	0	1	1	1	1	FKBP1B	FK506 binding protein 1B, 12.6 kDa
hsa-miR-1225-3p	1	0	1	1	1	1	RAB5A	RAB5A, member RAS oncogene family
hsa-miR-1225-3p	1	0	1	0	1	1	SLC1A2	solute carrier family 1 (glial high affinity glutamate transporter), member 2
hsa-miR-1225-3p	1	0	1	1	1	1	SEMA3F	sema domain, immunoglobulin domain (Ig), short basic domain, secreted, (semaphorin) 3F
hsa-miR-1225-3p	1	0	1	1	1	1	SYT7	synaptotagmin VII
hsa-miR-1225-3p	0	0	1	1	0	0	ATP6V1F	ATPase, H+ transporting, lysosomal 14kDa, V1 subunit F
hsa-miR-1225-3p	1	0	1	1	1	1	ARL3	ADP-ribosylation factor-like 3
hsa-miR-1225-3p	0	0	1	1	1	1	ASCL1	achaete-scute complex homolog 1 (Drosophila)
hsa-miR-1225-3p	1	0	1	1	1	1	DBN1	drebrin 1
hsa-miR-1225-3p	1	0	1	1	1	1	DUSP1	dual specificity phosphatase 1
hsa-miR-1225-3p	1	0	1	1	1	1	ENSA	endosulfine alpha
hsa-miR-1225-3p	1	0	1	1	1	1	FGD1	FYVE, RhoGEF and PH domain containing 1
hsa-miR-1225-3p	1	0	1	1	0	0	HOXC6	homeobox C6
hsa-miR-1225-3p	1	0	1	1	1	1	WNT11	wingless-type MMTV integration site family, member 11
hsa-miR-1225-3p	0	0	1	1	1	1	PABPN1	poly(A) binding protein, nuclear 1
hsa-miR-1225-3p	1	0	1	1	1	1	KIF3B	kinesin family member 3B
hsa-miR-1225-3p	1	0	1	1	1	1	SEC24C	SEC24 family, member C (S. cerevisiae)
hsa-miR-1225-3p	1	0	1	1	0	0	MMP14	matrix metallopeptidase 14 (membrane-inserted)
hsa-miR-1225-3p	1	0	1	1	1	1	APLNR	apelin receptor
hsa-miR-1225-3p	1	0	1	1	1	1	FOXN3	forkhead box N3
hsa-miR-1225-3p	1	0	1	0	1	1	E2F1	E2F transcription factor 1
hsa-miR-1225-3p	1	0	1	1	1	1	NR2F6	nuclear receptor subfamily 2, group F, member 6
hsa-miR-1225-3p	0	0	1	0	1	1	FOSL2	FOS-like antigen 2
hsa-miR-1225-3p	1	0	1	1	0	0	JUND	jun D proto-oncogene
hsa-miR-1225-3p	1	0	1	1	1	1	NEFM	neurofilament, medium polypeptide
hsa-miR-1225-3p	1	0	1	1	1	1	PHF2	PHD finger protein 2
hsa-miR-1225-3p	1	0	1	0	1	1	PRKAB2	protein kinase, AMP-activated, beta 2 non-catalytic subunit
hsa-miR-1225-3p	1	0	1	0	1	1	SRC	v-src sarcoma (Schmidt-Ruppin A-2) viral oncogene homolog (avian)
hsa-miR-1225-3p	1	0	1	0	1	1	CCDC6	coiled-coil domain containing 6
hsa-miR-1225-3p	1	0	1	0	0	0	FRAT1	frequently rearranged in advanced T-cell lymphomas
hsa-miR-1225-3p	0	0	1	1	1	1	HES1	hairy and enhancer of split 1, (Drosophila)
hsa-miR-1225-3p	1	0	1	1	1	1	NHLH1	nescient helix loop helix 1
hsa-miR-1225-3p	1	0	1	0	1	1	SPRY3	sprouty homolog 3 (Drosophila)
hsa-miR-1225-3p	1	0	1	1	1	1	EFS	embryonal Fyn-associated substrate
hsa-miR-1225-3p	1	0	1	1	1	1	FOXO4	forkhead box O4
hsa-miR-1225-3p	1	0	1	1	1	1	MTF1	metal-regulatory transcription factor 1
hsa-miR-1225-3p	1	0	1	1	1	1	PRCC	papillary renal cell carcinoma (translocation-associated)
hsa-miR-1225-3p	0	0	1	0	1	1	HCAR3	hydroxycarboxylic acid receptor 3
hsa-miR-1225-3p	1	0	1	1	1	1	HS3ST4	heparan sulfate (glucosamine) 3-O-sulfotransferase 4
hsa-miR-1225-3p	1	0	1	1	1	1	DAGLA	diacylglycerol lipase, alpha
hsa-miR-1225-3p	0	0	1	1	1	1	CSF2RA	colony stimulating factor 2 receptor, alpha, low-affinity (granulocyte-macrophage)
hsa-miR-1225-3p	1	0	1	1	1	1	NEUROD2	neuronal differentiation 2
hsa-miR-1225-3p	1	0	1	1	1	1	NFATC1	nuclear factor of activated T-cells, cytoplasmic, calcineurin-dependent 1
hsa-miR-1225-3p	0	0	1	1	0	0	POLR2J	polymerase (RNA) II (DNA directed) polypeptide J, 13.3kDa
hsa-miR-1225-3p	0	0	1	1	1	1	RRAS	related RAS viral (r-ras) oncogene homolog
hsa-miR-1225-3p	1	0	1	1	1	1	ITSN2	intersectin 2
hsa-miR-1225-3p	0	0	1	1	1	1	TNFAIP2	tumor necrosis factor, alpha-induced protein 2
hsa-miR-1225-3p	0	0	1	0	0	0	CREB3	cAMP responsive element binding protein 3
hsa-miR-1225-3p	1	0	1	0	1	1	MXD4	MAX dimerization protein 4
hsa-miR-1225-3p	1	0	1	1	1	1	SLC2A1	solute carrier family 2 (facilitated glucose transporter), member 1
hsa-miR-1225-3p	0	0	1	0	1	1	SLC16A2	solute carrier family 16, member 2 (thyroid hormone transporter)
hsa-miR-1225-3p	1	0	1	0	1	1	IGF2BP1	insulin-like growth factor 2 mRNA binding protein 1
hsa-miR-1225-3p	0	0	1	1	1	1	PPP1R17	protein phosphatase 1, regulatory subunit 17
hsa-miR-1225-3p	1	0	1	1	1	1	TSPAN9	tetraspanin 9
hsa-miR-1225-3p	1	0	1	0	1	1	SYNGAP1	synaptic Ras GTPase activating protein 1
hsa-miR-1225-3p	0	0	1	1	0	0	STIP1	stress-induced-phosphoprotein 1
hsa-miR-1225-3p	1	0	1	1	1	1	RAB35	RAB35, member RAS oncogene family
hsa-miR-1225-3p	1	0	1	0	1	1	WASF2	WAS protein family, member 2
hsa-miR-1225-3p	0	0	1	1	1	1	POLR3A	polymerase (RNA) III (DNA directed) polypeptide A, 155kDa
hsa-miR-1225-3p	0	0	1	1	0	0	USF1	upstream transcription factor 1
hsa-miR-1225-3p	0	0	1	1	1	1	KLF8	Kruppel-like factor 8
hsa-miR-1225-3p	0	0	1	1	0	0	GABARAP	GABA(A) receptor-associated protein
hsa-miR-1225-3p	0	0	1	1	1	1	LMOD1	leiomodin 1 (smooth muscle)
hsa-miR-1225-3p	1	0	1	0	1	1	FZD4	frizzled family receptor 4
hsa-miR-1225-3p	1	0	1	1	1	1	RHOQ	ras homolog family member Q
hsa-miR-1225-3p	0	0	1	1	1	1	ZNF212	zinc finger protein 212
hsa-miR-1225-3p	1	0	1	0	1	1	GAB2	GRB2-associated binding protein 2
hsa-miR-1225-3p	1	0	1	1	1	1	MAPRE1	microtubule-associated protein, RP/EB family, member 1
hsa-miR-1225-3p	0	0	1	1	0	0	KCNJ14	potassium inwardly-rectifying channel, subfamily J, member 14
hsa-miR-1225-3p	0	0	1	1	0	0	TBX21	T-box 21
hsa-miR-1225-3p	1	0	1	1	1	1	SERTAD3	SERTA domain containing 3
hsa-miR-1225-3p	0	0	1	1	1	1	CYTH4	cytohesin 4
hsa-miR-1225-3p	1	0	1	1	1	1	AK2	adenylate kinase 2
hsa-miR-1225-3p	1	0	1	1	1	1	GAD1	glutamate decarboxylase 1 (brain, 67kDa)
hsa-miR-1225-3p	0	0	1	0	1	1	EMR2	egf-like module containing, mucin-like, hormone receptor-like 2
hsa-miR-1225-3p	0	0	1	1	1	1	ORMDL2	ORM1-like 2 (S. cerevisiae)
hsa-miR-1225-3p	1	0	1	1	1	1	CBX6	chromobox homolog 6
hsa-miR-1225-3p	0	0	1	1	1	1	TRAM1	translocation associated membrane protein 1
hsa-miR-1225-3p	1	0	1	0	1	1	DIEXF	digestive organ expansion factor homolog (zebrafish)
hsa-miR-1225-3p	1	0	1	1	0	0	SND1	staphylococcal nuclease and tudor domain containing 1
hsa-miR-1225-3p	1	0	1	1	1	1	AFF4	AF4/FMR2 family, member 4
hsa-miR-1225-3p	0	0	1	1	0	0	GPR162	G protein-coupled receptor 162
hsa-miR-1225-3p	1	0	1	1	1	1	RALGPS1	Ral GEF with PH domain and SH3 binding motif 1
hsa-miR-1225-3p	0	0	1	1	1	1	FAM53B	family with sequence similarity 53, member B
hsa-miR-1225-3p	0	0	1	1	0	0	SETD1A	SET domain containing 1A
hsa-miR-1225-3p	1	0	1	1	1	1	TBKBP1	TBK1 binding protein 1
hsa-miR-1225-3p	1	0	1	1	1	1	MLL4	myeloid/lymphoid or mixed-lineage leukemia 4
hsa-miR-1225-3p	1	0	1	1	1	1	SV2A	synaptic vesicle glycoprotein 2A
hsa-miR-1225-3p	1	0	1	1	1	1	SORCS3	sortilin-related VPS10 domain containing receptor 3
hsa-miR-1225-3p	1	0	1	1	1	1	FBXO21	F-box protein 21
hsa-miR-1225-3p	1	0	1	0	1	1	ZNF609	zinc finger protein 609
hsa-miR-1225-3p	1	0	1	1	0	0	CIC	capicua homolog (Drosophila)
hsa-miR-1225-3p	1	0	1	1	1	1	GPD1L	glycerol-3-phosphate dehydrogenase 1-like
hsa-miR-1225-3p	1	0	1	1	1	1	PHF15	PHD finger protein 15
hsa-miR-1225-3p	0	0	1	1	1	1	ANGEL1	angel homolog 1 (Drosophila)
hsa-miR-1225-3p	0	0	1	1	1	1	ZNF10	zinc finger protein 10
hsa-miR-1225-3p	0	0	1	1	0	0	SPEF1	sperm flagellar 1
hsa-miR-1225-3p	1	0	1	1	1	1	PNKD	paroxysmal nonkinesigenic dyskinesia
hsa-miR-1225-3p	0	0	1	1	0	0	TSKU	tsukushi small leucine rich proteoglycan homolog (Xenopus laevis)
hsa-miR-1225-3p	1	0	1	1	1	1	MAGI1	membrane associated guanylate kinase, WW and PDZ domain containing 1
hsa-miR-1225-3p	1	0	1	0	1	1	PPP1R16B	protein phosphatase 1, regulatory subunit 16B
hsa-miR-1225-3p	1	0	1	1	1	1	FGFR1	fibroblast growth factor receptor 1
hsa-miR-1225-3p	1	0	1	1	1	1	RRP15	ribosomal RNA processing 15 homolog (S. cerevisiae)
hsa-miR-1225-3p	1	0	1	1	1	1	SNX9	sorting nexin 9
hsa-miR-1225-3p	0	0	1	1	1	1	EMCN	endomucin
hsa-miR-1225-3p	1	0	1	1	1	1	CMPK1	cytidine monophosphate (UMP-CMP) kinase 1, cytosolic
hsa-miR-1225-3p	1	0	1	1	1	1	RAPGEFL1	Rap guanine nucleotide exchange factor (GEF)-like 1
hsa-miR-1225-3p	1	0	1	1	1	1	PHF20	PHD finger protein 20
hsa-miR-1225-3p	0	0	1	0	1	1	ERAP1	endoplasmic reticulum aminopeptidase 1
hsa-miR-1225-3p	1	0	1	0	1	1	NT5DC3	5'-nucleotidase domain containing 3
hsa-miR-1225-3p	0	0	1	1	1	1	USP18	ubiquitin specific peptidase 18
hsa-miR-1225-3p	1	0	1	1	1	1	ARID1B	AT rich interactive domain 1B (SWI1-like)
hsa-miR-1225-3p	1	0	1	1	1	1	DIRAS2	DIRAS family, GTP-binding RAS-like 2
hsa-miR-1225-3p	0	0	1	0	1	1	OTUB1	OTU domain, ubiquitin aldehyde binding 1
hsa-miR-1225-3p	1	0	1	1	1	1	VPS13C	vacuolar protein sorting 13 homolog C (S. cerevisiae)
hsa-miR-1225-3p	1	0	1	1	1	1	ALKBH5	alkB, alkylation repair homolog 5 (E. coli)
hsa-miR-1225-3p	1	0	1	0	1	1	CHD7	chromodomain helicase DNA binding protein 7
hsa-miR-1225-3p	1	0	1	1	1	1	SLC48A1	solute carrier family 48 (heme transporter), member 1
hsa-miR-1225-3p	0	0	1	1	1	1	RBM22	RNA binding motif protein 22
hsa-miR-1225-3p	1	0	1	1	1	1	DLL4	delta-like 4 (Drosophila)
hsa-miR-1225-3p	1	0	1	0	1	1	CCNJ	cyclin J
hsa-miR-1225-3p	0	0	1	1	1	1	PRTFDC1	phosphoribosyl transferase domain containing 1
hsa-miR-1225-3p	1	0	1	0	1	1	EIF5A2	eukaryotic translation initiation factor 5A2
hsa-miR-1225-3p	0	0	1	1	0	0	LYRM4	LYR motif containing 4
hsa-miR-1225-3p	1	0	1	1	0	0	JPH2	junctophilin 2
hsa-miR-1225-3p	1	0	1	1	1	1	PTGFRN	prostaglandin F2 receptor negative regulator
hsa-miR-1225-3p	1	0	1	1	1	1	NRIP3	nuclear receptor interacting protein 3
hsa-miR-1225-3p	0	0	1	1	0	0	ISY1	ISY1 splicing factor homolog (S. cerevisiae)
hsa-miR-1225-3p	1	0	1	1	1	1	USP31	ubiquitin specific peptidase 31
hsa-miR-1225-3p	1	0	1	1	1	1	CASKIN1	CASK interacting protein 1
hsa-miR-1225-3p	1	0	1	1	1	1	NLGN2	neuroligin 2
hsa-miR-1225-3p	1	0	1	1	1	1	RANBP10	RAN binding protein 10
hsa-miR-1225-3p	0	0	1	1	1	1	PRX	periaxin
hsa-miR-1225-3p	0	0	1	1	0	0	POLD4	polymerase (DNA-directed), delta 4, accessory subunit
hsa-miR-1225-3p	0	0	1	1	1	1	CHST6	carbohydrate (N-acetylglucosamine 6-O) sulfotransferase 6
hsa-miR-1225-3p	0	0	1	1	1	1	GABBR1	gamma-aminobutyric acid (GABA) B receptor, 1
hsa-miR-1225-3p	1	0	1	1	1	1	ZFAND3	zinc finger, AN1-type domain 3
hsa-miR-1225-3p	0	0	1	1	0	0	ABHD4	abhydrolase domain containing 4
hsa-miR-1225-3p	0	0	1	1	0	0	RRAGC	Ras-related GTP binding C
hsa-miR-1225-3p	1	0	1	1	1	1	XYLT2	xylosyltransferase II
hsa-miR-1225-3p	1	0	1	1	1	1	ABCG4	ATP-binding cassette, sub-family G (WHITE), member 4
hsa-miR-1225-3p	1	0	1	0	1	1	EIF4H	eukaryotic translation initiation factor 4H
hsa-miR-1225-3p	0	0	1	1	1	1	RAB38	RAB38, member RAS oncogene family
hsa-miR-1225-3p	0	0	1	1	1	1	SUSD1	sushi domain containing 1
hsa-miR-1225-3p	1	0	1	1	1	1	C6orf106	chromosome 6 open reading frame 106
hsa-miR-1225-3p	1	0	1	1	0	0	ABHD8	abhydrolase domain containing 8
hsa-miR-1225-3p	0	0	1	1	1	1	LRRK1	leucine-rich repeat kinase 1
hsa-miR-1225-3p	1	0	1	0	1	1	LIN28A	lin-28 homolog A (C. elegans)
hsa-miR-1225-3p	0	0	1	1	1	1	SH3D21	SH3 domain containing 21
hsa-miR-1225-3p	1	0	1	1	1	1	KLHL18	kelch-like 18 (Drosophila)
hsa-miR-1225-3p	0	0	1	1	0	0	BAIAP2L2	BAI1-associated protein 2-like 2
hsa-miR-1225-3p	1	0	1	1	1	1	HOXA3	homeobox A3
hsa-miR-1225-3p	1	0	1	1	1	1	NRBF2	nuclear receptor binding factor 2
hsa-miR-1225-3p	1	0	1	0	1	1	CSRNP2	cysteine-serine-rich nuclear protein 2
hsa-miR-1225-3p	0	0	1	1	0	0	ATRIP	ATR interacting protein
hsa-miR-1225-3p	1	0	1	1	1	1	ZNRF1	zinc and ring finger 1, E3 ubiquitin protein ligase
hsa-miR-1225-3p	1	0	1	1	1	1	ZDHHC18	zinc finger, DHHC-type containing 18
hsa-miR-1225-3p	1	0	1	1	1	1	CAMKK1	calcium/calmodulin-dependent protein kinase kinase 1, alpha
hsa-miR-1225-3p	1	0	1	1	1	1	POLDIP3	polymerase (DNA-directed), delta interacting protein 3
hsa-miR-1225-3p	1	0	1	1	1	1	DNAJC14	DnaJ (Hsp40) homolog, subfamily C, member 14
hsa-miR-1225-3p	0	0	1	1	0	0	ZNF414	zinc finger protein 414
hsa-miR-1225-3p	1	0	1	1	1	1	SYVN1	synovial apoptosis inhibitor 1, synoviolin
hsa-miR-1225-3p	1	0	1	1	1	1	DCTN5	dynactin 5 (p25)
hsa-miR-1225-3p	1	0	1	1	1	1	PARD6B	par-6 partitioning defective 6 homolog beta (C. elegans)
hsa-miR-1225-3p	0	0	1	1	0	0	ACCS	1-aminocyclopropane-1-carboxylate synthase homolog (Arabidopsis)(non-functional)
hsa-miR-1225-3p	1	0	1	1	1	1	PPP1R9B	protein phosphatase 1, regulatory subunit 9B
hsa-miR-1225-3p	0	0	1	1	1	1	POLR2J2	polymerase (RNA) II (DNA directed) polypeptide J2
hsa-miR-1225-3p	0	0	1	1	1	1	SEC22C	SEC22 vesicle trafficking protein homolog C (S. cerevisiae)
hsa-miR-1225-3p	1	0	1	1	1	1	NKD1	naked cuticle homolog 1 (Drosophila)
hsa-miR-1225-3p	1	0	1	1	0	0	KCNH7	potassium voltage-gated channel, subfamily H (eag-related), member 7
hsa-miR-1225-3p	1	0	1	1	0	0	FCHSD1	FCH and double SH3 domains 1
hsa-miR-1225-3p	0	0	1	1	0	0	SIGLEC11	sialic acid binding Ig-like lectin 11
hsa-miR-1225-3p	0	0	1	1	0	0	FAM46B	family with sequence similarity 46, member B
hsa-miR-1225-3p	0	0	1	1	0	0	WFDC3	WAP four-disulfide core domain 3
hsa-miR-1225-3p	1	0	1	1	1	1	C20orf112	chromosome 20 open reading frame 112
hsa-miR-1225-3p	1	0	1	1	1	1	KCNE4	potassium voltage-gated channel, Isk-related family, member 4
hsa-miR-1225-3p	1	0	1	1	1	1	COL11A2	collagen, type XI, alpha 2
hsa-miR-1225-3p	1	0	1	1	0	0	ADAMTS14	ADAM metallopeptidase with thrombospondin type 1 motif, 14
hsa-miR-1225-3p	0	0	1	1	1	1	RAB3C	RAB3C, member RAS oncogene family
hsa-miR-1225-3p	0	0	1	1	0	0	MAGEE2	melanoma antigen family E, 2
hsa-miR-1225-3p	1	0	1	1	1	1	PPTC7	PTC7 protein phosphatase homolog (S. cerevisiae)
hsa-miR-1225-3p	0	0	1	1	0	0	KLK8	kallikrein-related peptidase 8
hsa-miR-1225-3p	1	0	1	1	1	1	TEX261	testis expressed 261
hsa-miR-1225-3p	1	0	1	1	1	1	KCNH8	potassium voltage-gated channel, subfamily H (eag-related), member 8
hsa-miR-1225-3p	1	0	1	1	1	1	ZMAT2	zinc finger, matrin-type 2
hsa-miR-1225-3p	1	0	1	1	1	1	FAM91A1	family with sequence similarity 91, member A1
hsa-miR-1225-3p	1	0	1	1	1	1	YPEL4	yippee-like 4 (Drosophila)
hsa-miR-1225-3p	1	0	1	1	1	1	MAX	MYC associated factor X
hsa-miR-1225-3p	1	0	1	1	1	1	VTI1A	vesicle transport through interaction with t-SNAREs homolog 1A (yeast)
hsa-miR-1225-3p	0	0	1	1	0	0	EVI5L	ecotropic viral integration site 5-like
hsa-miR-1225-3p	1	0	1	1	1	1	ZNF396	zinc finger protein 396
hsa-miR-1225-3p	1	0	1	1	1	1	LSM12	LSM12 homolog (S. cerevisiae)
hsa-miR-1225-3p	0	0	1	0	1	1	MAB21L3	mab-21-like 3 (C. elegans)
hsa-miR-1225-3p	1	0	1	0	1	1	DCP2	DCP2 decapping enzyme homolog (S. cerevisiae)
hsa-miR-1225-3p	0	0	1	1	1	1	METTL15	methyltransferase like 15
hsa-miR-1225-3p	1	0	1	1	1	1	ATXN7L1	ataxin 7-like 1
hsa-miR-1225-3p	1	0	1	1	1	1	WTAP	Wilms tumor 1 associated protein
hsa-miR-1225-3p	1	0	1	1	1	1	C15orf32	chromosome 15 open reading frame 32
hsa-miR-1225-3p	1	0	1	1	1	1	TMEM151A	transmembrane protein 151A
hsa-miR-1225-3p	0	0	1	1	0	0	SCARF2	scavenger receptor class F, member 2
hsa-miR-1225-3p	1	0	1	1	0	0	TMEM86A	transmembrane protein 86A
hsa-miR-1225-3p	1	0	1	1	1	1	TMEM161B	transmembrane protein 161B
hsa-miR-1225-3p	1	0	1	0	1	1	GPR26	G protein-coupled receptor 26
hsa-miR-1225-3p	1	0	1	0	1	1	MDGA1	MAM domain containing glycosylphosphatidylinositol anchor 1
hsa-miR-1225-3p	0	0	1	1	1	1	CAMK1D	calcium/calmodulin-dependent protein kinase ID
hsa-miR-1225-3p	1	0	1	1	1	1	IL28RA	interleukin 28 receptor, alpha (interferon, lambda receptor)
hsa-miR-1225-3p	1	0	1	1	1	1	NR4A2	nuclear receptor subfamily 4, group A, member 2
hsa-miR-1225-3p	0	0	1	0	1	1	USH1G	Usher syndrome 1G (autosomal recessive)
hsa-miR-1225-3p	1	0	1	1	1	1	CNTD1	cyclin N-terminal domain containing 1
hsa-miR-1225-3p	0	0	1	1	1	1	CYP4F22	cytochrome P450, family 4, subfamily F, polypeptide 22
hsa-miR-1225-3p	1	0	1	0	1	1	KSR2	kinase suppressor of ras 2
hsa-miR-1225-3p	1	0	1	1	1	1	ATG9B	autophagy related 9B
hsa-miR-1225-3p	1	0	1	1	1	1	XKR6	XK, Kell blood group complex subunit-related family, member 6
hsa-miR-1225-3p	1	0	1	1	1	1	SCN4B	sodium channel, voltage-gated, type IV, beta subunit
hsa-miR-1225-3p	0	0	1	1	1	1	SPDYE1	speedy homolog E1 (Xenopus laevis)
hsa-miR-1225-3p	1	0	1	1	1	1	RAB3IP	RAB3A interacting protein (rabin3)
hsa-miR-1225-3p	0	0	1	0	1	1	SYT12	synaptotagmin XII
hsa-miR-1225-3p	1	0	1	1	1	1	DCAF12L1	DDB1 and CUL4 associated factor 12-like 1
hsa-miR-1225-3p	0	0	1	1	1	1	TFAP2E	transcription factor AP-2 epsilon (activating enhancer binding protein 2 epsilon)
hsa-miR-1225-3p	0	0	1	1	1	1	NPAS4	neuronal PAS domain protein 4
hsa-miR-1225-3p	0	0	1	1	1	1	IL22RA2	interleukin 22 receptor, alpha 2
hsa-miR-1225-3p	1	0	1	1	1	1	BCL9L	B-cell CLL/lymphoma 9-like
hsa-miR-1225-3p	1	0	1	1	1	1	ANKRD42	ankyrin repeat domain 42
hsa-miR-1225-3p	1	0	1	0	1	1	RIMS4	regulating synaptic membrane exocytosis 4
hsa-miR-1225-3p	0	0	1	1	1	1	PXDC1	PX domain containing 1
hsa-miR-1225-3p	1	0	1	1	1	1	PXMP4	peroxisomal membrane protein 4, 24kDa
hsa-miR-1225-3p	1	0	1	1	1	1	RBPMS2	RNA binding protein with multiple splicing 2
hsa-miR-1225-3p	0	0	1	1	0	0	TMEM173	transmembrane protein 173
hsa-miR-1225-3p	1	0	1	0	1	1	NRK	Nik related kinase
hsa-miR-1225-3p	1	0	1	1	1	1	RAB43	RAB43, member RAS oncogene family
hsa-miR-1225-3p	1	0	1	1	0	0	HDDC3	HD domain containing 3
hsa-miR-1225-3p	1	0	1	1	0	0	ENHO	energy homeostasis associated
hsa-miR-1225-3p	1	0	1	0	1	1	PRICKLE2	prickle homolog 2 (Drosophila)
hsa-miR-1225-3p	1	0	1	1	1	1	NSUN4	NOP2/Sun domain family, member 4
hsa-miR-1225-3p	1	0	1	1	1	1	CXCL12	chemokine (C-X-C motif) ligand 12
hsa-miR-1225-3p	1	0	1	1	1	1	THRA	thyroid hormone receptor, alpha
hsa-miR-1225-3p	1	0	1	1	1	1	WARS2	tryptophanyl tRNA synthetase 2, mitochondrial
hsa-miR-1225-3p	0	0	1	1	1	1	AMACR	alpha-methylacyl-CoA racemase
hsa-miR-1225-3p	0	0	1	1	0	0	IER5L	immediate early response 5-like
hsa-miR-1225-3p	0	0	1	1	1	1	C10orf129	chromosome 10 open reading frame 129
hsa-miR-1225-3p	1	0	1	1	1	1	FAM43B	family with sequence similarity 43, member B
hsa-miR-1225-3p	0	0	1	0	1	1	C1orf229	chromosome 1 open reading frame 229
hsa-miR-1225-3p	1	0	1	0	1	1	C17orf102	chromosome 17 open reading frame 102
hsa-miR-1225-3p	0	0	1	0	0	0	CELP	carboxyl ester lipase pseudogene
hsa-miR-1225-3p	0	0	1	0	0	0	LOC339240	keratin 17 pseudogene
hsa-miR-1225-3p	0	0	1	0	0	0	MT1L	metallothionein 1L (gene/pseudogene)
hsa-miR-1225-3p	0	0	1	0	0	0	TTTY2	testis-specific transcript, Y-linked 2 (non-protein coding)
hsa-miR-1225-3p	0	0	1	0	0	0	MEIS3P1	Meis homeobox 3 pseudogene 1
hsa-miR-1225-3p	0	0	1	0	0	0	RPL29P2	ribosomal protein L29 pseudogene 2
hsa-miR-1225-3p	0	0	1	0	0	0	HOXA11-AS	HOXA11 antisense RNA
hsa-miR-1225-3p	0	0	1	0	0	0	AQP7P1	aquaporin 7 pseudogene 1
hsa-miR-1225-3p	0	0	1	0	0	0	LOC401010	nucleolar complex associated 2 homolog (S. cerevisiae) pseudogene
hsa-miR-1225-3p	0	0	1	0	0	0	PYY2	peptide YY, 2 (pseudogene)
hsa-miR-1225-3p	0	0	1	0	0	0	NBR2	neighbor of BRCA1 gene 2 (non-protein coding)
hsa-miR-1225-3p	1	0	1	0	1	1	NFIX	nuclear factor I/X (CCAAT-binding transcription factor)
hsa-miR-1225-3p	1	0	1	1	1	1	TRIO	trio Rho guanine nucleotide exchange factor
hsa-miR-1225-3p	1	0	1	1	1	1	ATF6B	activating transcription factor 6 beta
hsa-miR-1225-3p	1	0	1	1	1	1	SNRNP70	small nuclear ribonucleoprotein 70kDa (U1)
hsa-miR-1225-3p	0	0	1	1	0	0	EPX	eosinophil peroxidase
hsa-miR-1225-3p	1	0	1	1	1	1	HNRNPA1	heterogeneous nuclear ribonucleoprotein A1
