# Supplementary material for: Profiling of Selected MicroRNAs in Proliferative Eutopic Endometrium of Women with Ovarian Endometriosis
Source: Biomed Res Int. 2015 Aug 20;2015:760698. doi: 10.1155/2015/760698 (PMC4558423; doi:10.1155/2015/760698)
Supplement: Supplementary file 1 — Table I: The names of miRNAs significantly differentially expressed between eutopic endometrium of patients with endometriosis vs eutopic endometrium of patients without endometriosis. Table II: The associations between miRNA and mRNA, which presents detailed results of the search of six major databases i.e targetscan, tarbase, miranda, mirbase, mirtarget2 and pictar. [file 760698.f1.zip › 760698.f1/Table II/hsa-miR-1225-5p.tsv]

miR	targetscan	tarbase	miranda	mirbase	mirtarget2	pictar	GeneSymbol	GeneName
hsa-miR-1225-5p	1	0	1	1	0	0	SRCAP	Snf2-related CREBBP activator protein
hsa-miR-1225-5p	1	0	1	1	0	0	RAPGEF2	Rap guanine nucleotide exchange factor (GEF) 2
hsa-miR-1225-5p	0	0	1	1	0	0	PLXNB1	plexin B1
hsa-miR-1225-5p	1	0	1	0	1	1	MTSS1	metastasis suppressor 1
hsa-miR-1225-5p	0	0	1	1	0	0	RAP1GAP	RAP1 GTPase activating protein
hsa-miR-1225-5p	1	0	1	1	0	0	DENND4B	DENN/MADD domain containing 4B
hsa-miR-1225-5p	1	0	1	1	1	1	GPATCH8	G patch domain containing 8
hsa-miR-1225-5p	0	0	1	1	0	0	ARHGEF2	Rho/Rac guanine nucleotide exchange factor (GEF) 2
hsa-miR-1225-5p	1	0	1	1	1	1	AHCYL2	adenosylhomocysteinase-like 2
hsa-miR-1225-5p	0	0	1	1	0	0	FAM169A	family with sequence similarity 169, member A
hsa-miR-1225-5p	0	0	1	1	0	0	FAM149B1	family with sequence similarity 149, member B1
hsa-miR-1225-5p	1	0	1	1	1	1	PHF8	PHD finger protein 8
hsa-miR-1225-5p	1	0	1	0	1	1	SRGAP3	SLIT-ROBO Rho GTPase activating protein 3
hsa-miR-1225-5p	1	0	1	0	0	0	ODZ4	odz, odd Oz/ten-m homolog 4 (Drosophila)
hsa-miR-1225-5p	1	0	1	0	1	1	KCTD16	potassium channel tetramerisation domain containing 16
hsa-miR-1225-5p	1	0	1	1	1	1	SEMA6A	sema domain, transmembrane domain (TM), and cytoplasmic domain, (semaphorin) 6A
hsa-miR-1225-5p	1	0	1	1	1	1	UNC79	unc-79 homolog (C. elegans)
hsa-miR-1225-5p	1	0	1	0	1	1	SEMA6D	sema domain, transmembrane domain (TM), and cytoplasmic domain, (semaphorin) 6D
hsa-miR-1225-5p	0	0	1	1	0	0	PQBP1	polyglutamine binding protein 1
hsa-miR-1225-5p	1	0	1	0	0	0	TANC2	tetratricopeptide repeat, ankyrin repeat and coiled-coil containing 2
hsa-miR-1225-5p	0	0	1	0	0	0	LOC440792	proline dehydrogenase (oxidase) 1 pseudogene
hsa-miR-1225-5p	1	0	1	1	0	0	TMCO7	transmembrane and coiled-coil domains 7
hsa-miR-1225-5p	0	0	1	1	0	0	COL27A1	collagen, type XXVII, alpha 1
hsa-miR-1225-5p	1	0	1	1	1	1	CSMD3	CUB and Sushi multiple domains 3
hsa-miR-1225-5p	1	0	1	1	1	1	BCL2L11	BCL2-like 11 (apoptosis facilitator)
hsa-miR-1225-5p	1	0	1	0	1	1	RNF43	ring finger protein 43
hsa-miR-1225-5p	1	0	1	0	0	0	ZC3H12C	zinc finger CCCH-type containing 12C
hsa-miR-1225-5p	1	0	1	0	1	1	BEND4	BEN domain containing 4
hsa-miR-1225-5p	1	1	1	1	1	1	BACE1	beta-site APP-cleaving enzyme 1
hsa-miR-1225-5p	0	0	1	0	1	1	ACE2	angiotensin I converting enzyme (peptidyl-dipeptidase A) 2
hsa-miR-1225-5p	1	0	1	1	1	1	RPS6KA3	ribosomal protein S6 kinase, 90kDa, polypeptide 3
hsa-miR-1225-5p	1	0	1	1	0	0	ELN	elastin
hsa-miR-1225-5p	1	0	1	1	1	1	MEF2A	myocyte enhancer factor 2A
hsa-miR-1225-5p	0	0	1	1	1	1	MAZ	MYC-associated zinc finger protein (purine-binding transcription factor)
hsa-miR-1225-5p	1	0	1	0	1	1	PLAG1	pleiomorphic adenoma gene 1
hsa-miR-1225-5p	0	0	1	1	1	1	DGKI	diacylglycerol kinase, iota
hsa-miR-1225-5p	1	0	1	1	0	0	CACNB1	calcium channel, voltage-dependent, beta 1 subunit
hsa-miR-1225-5p	1	0	1	1	0	0	TSPYL2	TSPY-like 2
hsa-miR-1225-5p	1	0	1	0	1	1	ETV1	ets variant 1
hsa-miR-1225-5p	1	0	1	1	1	1	TBX2	T-box 2
hsa-miR-1225-5p	1	0	1	1	1	1	PML	promyelocytic leukemia
hsa-miR-1225-5p	0	0	1	1	0	0	CFLAR	CASP8 and FADD-like apoptosis regulator
hsa-miR-1225-5p	1	0	1	1	1	1	EPB41	erythrocyte membrane protein band 4.1 (elliptocytosis 1, RH-linked)
hsa-miR-1225-5p	1	0	1	1	1	1	COL24A1	collagen, type XXIV, alpha 1
hsa-miR-1225-5p	0	0	1	1	0	0	SLC22A8	solute carrier family 22 (organic anion transporter), member 8
hsa-miR-1225-5p	0	0	1	1	1	1	KIF3A	kinesin family member 3A
hsa-miR-1225-5p	1	0	1	0	1	1	PDE7B	phosphodiesterase 7B
hsa-miR-1225-5p	0	0	1	0	1	1	ZMYM2	zinc finger, MYM-type 2
hsa-miR-1225-5p	0	0	1	1	1	1	PLEKHB1	pleckstrin homology domain containing, family B (evectins) member 1
hsa-miR-1225-5p	1	0	1	1	1	1	GLS	glutaminase
hsa-miR-1225-5p	1	0	1	1	1	1	SLMAP	sarcolemma associated protein
hsa-miR-1225-5p	1	0	1	1	1	1	USP15	ubiquitin specific peptidase 15
hsa-miR-1225-5p	1	0	1	1	1	1	FAM49B	family with sequence similarity 49, member B
hsa-miR-1225-5p	0	0	1	1	0	0	C3orf24	chromosome 3 open reading frame 24
hsa-miR-1225-5p	0	0	1	1	1	1	CCR3	chemokine (C-C motif) receptor 3
hsa-miR-1225-5p	1	0	1	0	1	1	PARP11	poly (ADP-ribose) polymerase family, member 11
hsa-miR-1225-5p	0	0	1	1	0	0	TCP11	t-complex 11 homolog (mouse)
hsa-miR-1225-5p	1	0	1	1	1	1	DCLRE1B	DNA cross-link repair 1B
hsa-miR-1225-5p	0	0	1	1	0	0	SNRPN	small nuclear ribonucleoprotein polypeptide N
hsa-miR-1225-5p	0	0	1	1	1	1	SPSB1	splA/ryanodine receptor domain and SOCS box containing 1
hsa-miR-1225-5p	1	0	1	1	1	1	ST3GAL3	ST3 beta-galactoside alpha-2,3-sialyltransferase 3
hsa-miR-1225-5p	1	0	1	0	1	1	PPP1R12A	protein phosphatase 1, regulatory subunit 12A
hsa-miR-1225-5p	1	0	1	1	1	1	BRSK1	BR serine/threonine kinase 1
hsa-miR-1225-5p	0	0	1	1	1	1	PTK7	PTK7 protein tyrosine kinase 7
hsa-miR-1225-5p	1	0	1	0	1	1	IL1RAP	interleukin 1 receptor accessory protein
hsa-miR-1225-5p	0	0	1	1	1	1	RANBP17	RAN binding protein 17
hsa-miR-1225-5p	1	0	1	1	1	1	NRXN3	neurexin 3
hsa-miR-1225-5p	1	0	1	1	1	1	PCDH11X	protocadherin 11 X-linked
hsa-miR-1225-5p	1	0	1	1	1	1	ARL4C	ADP-ribosylation factor-like 4C
hsa-miR-1225-5p	0	0	1	1	0	0	GPRC5C	G protein-coupled receptor, family C, group 5, member C
hsa-miR-1225-5p	1	0	1	0	1	1	NFAT5	nuclear factor of activated T-cells 5, tonicity-responsive
hsa-miR-1225-5p	1	0	1	1	1	1	ENOX2	ecto-NOX disulfide-thiol exchanger 2
hsa-miR-1225-5p	0	0	1	0	0	0	TUG1	taurine upregulated 1 (non-protein coding)
hsa-miR-1225-5p	1	0	1	1	0	0	SENP3	SUMO1/sentrin/SMT3 specific peptidase 3
hsa-miR-1225-5p	1	0	1	1	1	1	PTBP3	polypyrimidine tract binding protein 3
hsa-miR-1225-5p	0	0	1	1	0	0	ANAPC7	anaphase promoting complex subunit 7
hsa-miR-1225-5p	0	0	1	1	0	0	UBR4	ubiquitin protein ligase E3 component n-recognin 4
hsa-miR-1225-5p	1	0	1	1	0	0	UQCC	ubiquinol-cytochrome c reductase complex chaperone
hsa-miR-1225-5p	0	0	1	0	0	0	SOX2-OT	SOX2 overlapping transcript (non-protein coding)
hsa-miR-1225-5p	0	0	1	0	0	0	DUXAP10	double homeobox A pseudogene 10
hsa-miR-1225-5p	0	0	1	1	0	0	JMJD4	jumonji domain containing 4
hsa-miR-1225-5p	1	0	1	1	1	1	PHF20L1	PHD finger protein 20-like 1
hsa-miR-1225-5p	0	0	1	0	1	1	FLJ14186	uncharacterized LOC401149
hsa-miR-1225-5p	1	0	1	1	1	1	ZMIZ1	zinc finger, MIZ-type containing 1
hsa-miR-1225-5p	1	0	1	0	1	1	STK40	serine/threonine kinase 40
hsa-miR-1225-5p	1	0	1	0	1	1	ATP2B1	ATPase, Ca++ transporting, plasma membrane 1
hsa-miR-1225-5p	1	0	1	1	1	1	NAA30	N(alpha)-acetyltransferase 30, NatC catalytic subunit
hsa-miR-1225-5p	1	0	1	0	0	0	DTX2	deltex homolog 2 (Drosophila)
hsa-miR-1225-5p	0	0	1	0	1	1	FLJ22763	uncharacterized LOC401081
hsa-miR-1225-5p	0	0	1	1	1	1	ZBBX	zinc finger, B-box domain containing
hsa-miR-1225-5p	1	0	1	1	1	1	RNF185	ring finger protein 185
hsa-miR-1225-5p	1	0	1	1	1	1	LRP4	low density lipoprotein receptor-related protein 4
hsa-miR-1225-5p	0	0	1	1	0	0	FAM48A	family with sequence similarity 48, member A
hsa-miR-1225-5p	0	0	1	1	1	1	PRR5L	proline rich 5 like
hsa-miR-1225-5p	0	0	1	0	0	0	LOC154092	uncharacterized LOC154092
hsa-miR-1225-5p	0	0	1	0	0	0	LOC440894	uncharacterized LOC440894
hsa-miR-1225-5p	0	0	1	1	0	0	BEAN1	brain expressed, associated with NEDD4, 1
hsa-miR-1225-5p	0	0	1	1	0	0	CHRM3	cholinergic receptor, muscarinic 3
hsa-miR-1225-5p	0	0	1	1	0	0	ZNF185	zinc finger protein 185 (LIM domain)
hsa-miR-1225-5p	1	0	1	1	1	1	CLCN5	chloride channel, voltage-sensitive 5
hsa-miR-1225-5p	0	0	1	0	1	1	ZNF498	zinc finger protein 498
hsa-miR-1225-5p	0	0	1	1	1	1	PSME3	proteasome (prosome, macropain) activator subunit 3 (PA28 gamma; Ki)
hsa-miR-1225-5p	1	0	1	1	1	1	MAP3K11	mitogen-activated protein kinase kinase kinase 11
hsa-miR-1225-5p	0	0	1	0	0	0	LOC147004	uncharacterized LOC147004
hsa-miR-1225-5p	0	0	1	1	0	0	CERS5	ceramide synthase 5
hsa-miR-1225-5p	0	0	1	0	0	0	FLJ25363	uncharacterized LOC401082
hsa-miR-1225-5p	0	0	1	0	0	0	LINC00301	long intergenic non-protein coding RNA 301
hsa-miR-1225-5p	0	0	1	0	0	0	C6orf228	chromosome 6 open reading frame 228
hsa-miR-1225-5p	1	0	1	1	1	1	HLF	hepatic leukemia factor
hsa-miR-1225-5p	0	0	1	0	0	0	CAPN13	calpain 13
hsa-miR-1225-5p	1	0	1	0	1	1	TPBG	trophoblast glycoprotein
hsa-miR-1225-5p	0	0	1	1	0	0	NISCH	nischarin
hsa-miR-1225-5p	1	0	1	0	1	1	SLC25A37	solute carrier family 25 (mitochondrial iron transporter), member 37
hsa-miR-1225-5p	1	0	1	1	1	1	PIP4K2C	phosphatidylinositol-5-phosphate 4-kinase, type II, gamma
hsa-miR-1225-5p	1	0	1	0	0	0	YLPM1	YLP motif containing 1
hsa-miR-1225-5p	0	0	1	1	1	1	SP100	SP100 nuclear antigen
hsa-miR-1225-5p	0	0	1	0	0	0	KIAA1430	KIAA1430
hsa-miR-1225-5p	0	0	1	1	0	0	MSANTD3	Myb/SANT-like DNA-binding domain containing 3
hsa-miR-1225-5p	0	0	1	1	0	0	PLTP	phospholipid transfer protein
hsa-miR-1225-5p	0	0	1	1	1	1	STAMBPL1	STAM binding protein-like 1
hsa-miR-1225-5p	0	0	1	1	1	1	N4BP2L2	NEDD4 binding protein 2-like 2
hsa-miR-1225-5p	1	0	1	0	0	0	SH3RF3	SH3 domain containing ring finger 3
hsa-miR-1225-5p	1	0	1	1	1	1	SPTBN1	spectrin, beta, non-erythrocytic 1
hsa-miR-1225-5p	0	0	1	1	1	1	CYP11B1	cytochrome P450, family 11, subfamily B, polypeptide 1
hsa-miR-1225-5p	0	0	1	0	0	0	CXXC1P1	CXXC finger protein 1 pseudogene 1
hsa-miR-1225-5p	1	0	1	1	1	1	LPPR2	lipid phosphate phosphatase-related protein type 2
hsa-miR-1225-5p	0	0	1	1	1	1	TMEM170A	transmembrane protein 170A
hsa-miR-1225-5p	0	0	1	1	0	0	DPAGT1	dolichyl-phosphate (UDP-N-acetylglucosamine) N-acetylglucosaminephosphotransferase 1 (GlcNAc-1-P transferase)
hsa-miR-1225-5p	1	0	1	1	1	1	NDEL1	nudE nuclear distribution E homolog (A. nidulans)-like 1
hsa-miR-1225-5p	1	0	1	0	1	1	UVRAG	UV radiation resistance associated gene
hsa-miR-1225-5p	0	0	1	1	1	1	FUT11	fucosyltransferase 11 (alpha (1,3) fucosyltransferase)
hsa-miR-1225-5p	0	0	1	0	0	0	LOC100129858	uncharacterized LOC100129858
hsa-miR-1225-5p	0	0	1	0	0	0	LOC284577	uncharacterized LOC284577
hsa-miR-1225-5p	0	0	1	1	0	0	MAP7D1	MAP7 domain containing 1
hsa-miR-1225-5p	1	0	1	0	1	1	THRB	thyroid hormone receptor, beta
hsa-miR-1225-5p	0	0	1	1	1	1	GBAS	glioblastoma amplified sequence
hsa-miR-1225-5p	0	0	1	0	0	0	DNAJB8-AS1	DNAJB8 antisense RNA 1
hsa-miR-1225-5p	0	0	1	1	1	1	CBWD5	COBW domain containing 5
hsa-miR-1225-5p	0	0	1	1	0	0	CORO1A	coronin, actin binding protein, 1A
hsa-miR-1225-5p	0	0	1	1	1	1	ABCC12	ATP-binding cassette, sub-family C (CFTR/MRP), member 12
hsa-miR-1225-5p	1	0	1	1	0	0	CACNB3	calcium channel, voltage-dependent, beta 3 subunit
hsa-miR-1225-5p	0	0	1	0	1	1	PATE4	prostate and testis expressed 4
hsa-miR-1225-5p	0	0	1	1	0	0	KRT37	keratin 37
hsa-miR-1225-5p	1	0	1	0	0	0	GPR137C	G protein-coupled receptor 137C
hsa-miR-1225-5p	1	0	1	0	0	0	ANKRD52	ankyrin repeat domain 52
hsa-miR-1225-5p	1	0	1	1	1	1	DLGAP4	discs, large (Drosophila) homolog-associated protein 4
hsa-miR-1225-5p	0	0	1	0	0	0	FAM95B1	family with sequence similarity 95, member B1
hsa-miR-1225-5p	0	0	1	1	0	0	RPRD2	regulation of nuclear pre-mRNA domain containing 2
hsa-miR-1225-5p	0	0	1	1	0	0	FSIP2	fibrous sheath interacting protein 2
hsa-miR-1225-5p	1	0	1	1	0	0	ATXN7L3	ataxin 7-like 3
hsa-miR-1225-5p	1	0	1	1	1	1	DLG2	discs, large homolog 2 (Drosophila)
hsa-miR-1225-5p	0	0	1	1	0	0	HS3ST5	heparan sulfate (glucosamine) 3-O-sulfotransferase 5
hsa-miR-1225-5p	0	0	1	1	1	1	SZT2	seizure threshold 2 homolog (mouse)
hsa-miR-1225-5p	1	0	1	1	1	1	EIF4E3	eukaryotic translation initiation factor 4E family member 3
hsa-miR-1225-5p	1	0	1	1	0	0	MAN1B1	mannosidase, alpha, class 1B, member 1
hsa-miR-1225-5p	1	0	1	0	1	1	N4BP3	NEDD4 binding protein 3
hsa-miR-1225-5p	1	0	1	0	1	1	FNDC3B	fibronectin type III domain containing 3B
hsa-miR-1225-5p	0	0	1	1	0	0	C1orf86	chromosome 1 open reading frame 86
hsa-miR-1225-5p	0	0	1	0	0	0	FAM205B	transmembrane protein C9orf144B pseudogene
hsa-miR-1225-5p	1	0	1	1	0	0	SMCR7	Smith-Magenis syndrome chromosome region, candidate 7
hsa-miR-1225-5p	1	0	1	0	0	0	SP7	Sp7 transcription factor
hsa-miR-1225-5p	0	0	1	1	1	1	SHROOM3	shroom family member 3
hsa-miR-1225-5p	0	0	1	0	0	0	LOC100129940	uncharacterized LOC100129940
hsa-miR-1225-5p	0	0	1	1	1	1	ZNF346	zinc finger protein 346
hsa-miR-1225-5p	1	0	1	0	1	1	TMEM106B	transmembrane protein 106B
hsa-miR-1225-5p	1	0	1	1	1	1	KIAA0907	KIAA0907
hsa-miR-1225-5p	1	0	1	1	0	0	ZNF219	zinc finger protein 219
hsa-miR-1225-5p	0	0	1	1	1	1	SERPINE2	serpin peptidase inhibitor, clade E (nexin, plasminogen activator inhibitor type 1), member 2
hsa-miR-1225-5p	1	0	1	1	0	0	PRRC2B	proline-rich coiled-coil 2B
hsa-miR-1225-5p	1	0	1	1	1	1	RIF1	RAP1 interacting factor homolog (yeast)
hsa-miR-1225-5p	0	0	1	0	0	0	POM121L9P	POM121 transmembrane nucleoporin-like 9, pseudogene
hsa-miR-1225-5p	0	0	1	1	0	0	TBC1D10B	TBC1 domain family, member 10B
hsa-miR-1225-5p	0	0	1	0	0	0	KIAA0913	KIAA0913
hsa-miR-1225-5p	0	0	1	0	0	0	RPL23AP82	ribosomal protein L23a pseudogene 82
hsa-miR-1225-5p	0	0	1	0	0	0	FAM66D	family with sequence similarity 66, member D
hsa-miR-1225-5p	1	0	1	1	1	1	PKNOX2	PBX/knotted 1 homeobox 2
hsa-miR-1225-5p	1	0	1	1	1	1	YTHDF3	YTH domain family, member 3
hsa-miR-1225-5p	0	0	1	1	1	1	C10orf57	chromosome 10 open reading frame 57
hsa-miR-1225-5p	1	0	1	0	1	1	FAM214A	family with sequence similarity 214, member A
hsa-miR-1225-5p	1	0	1	1	1	1	SH3TC2	SH3 domain and tetratricopeptide repeats 2
hsa-miR-1225-5p	1	0	1	1	1	1	NABP1	nucleic acid binding protein 1
hsa-miR-1225-5p	0	0	1	1	0	0	LGI4	leucine-rich repeat LGI family, member 4
hsa-miR-1225-5p	1	0	1	0	1	1	MEF2C	myocyte enhancer factor 2C
hsa-miR-1225-5p	1	0	1	1	1	1	UNC45B	unc-45 homolog B (C. elegans)
hsa-miR-1225-5p	1	0	1	1	1	1	RHOT2	ras homolog family member T2
hsa-miR-1225-5p	0	0	1	0	0	0	CR1L	complement component (3b/4b) receptor 1-like
hsa-miR-1225-5p	1	0	1	1	1	1	PBRM1	polybromo 1
hsa-miR-1225-5p	0	0	1	0	0	0	ZNFX1-AS1	ZNFX1 antisense RNA 1
hsa-miR-1225-5p	1	0	1	0	1	1	AP2B1	adaptor-related protein complex 2, beta 1 subunit
hsa-miR-1225-5p	1	0	1	1	1	1	IQGAP2	IQ motif containing GTPase activating protein 2
hsa-miR-1225-5p	0	0	1	1	0	0	FETUB	fetuin B
hsa-miR-1225-5p	0	0	1	1	1	1	POTEG	POTE ankyrin domain family, member G
hsa-miR-1225-5p	0	0	1	1	1	1	HMBOX1	homeobox containing 1
hsa-miR-1225-5p	1	0	1	1	1	1	MECP2	methyl CpG binding protein 2 (Rett syndrome)
hsa-miR-1225-5p	1	0	1	1	0	0	ADAM15	ADAM metallopeptidase domain 15
hsa-miR-1225-5p	1	0	1	1	1	1	PLCH1	phospholipase C, eta 1
hsa-miR-1225-5p	1	0	1	1	1	1	PFKFB4	6-phosphofructo-2-kinase/fructose-2,6-biphosphatase 4
hsa-miR-1225-5p	1	0	1	0	1	1	FAM46A	family with sequence similarity 46, member A
hsa-miR-1225-5p	1	0	1	1	1	1	TSPAN14	tetraspanin 14
hsa-miR-1225-5p	1	0	1	1	1	1	RIMS3	regulating synaptic membrane exocytosis 3
hsa-miR-1225-5p	1	0	1	1	1	1	DTNA	dystrobrevin, alpha
hsa-miR-1225-5p	0	0	1	1	0	0	SCG5	secretogranin V (7B2 protein)
hsa-miR-1225-5p	0	0	1	1	1	1	ARFGAP1	ADP-ribosylation factor GTPase activating protein 1
hsa-miR-1225-5p	0	0	1	1	0	0	AGBL5	ATP/GTP binding protein-like 5
hsa-miR-1225-5p	0	0	1	1	0	0	PANK2	pantothenate kinase 2
hsa-miR-1225-5p	1	0	1	0	1	1	TMEM39A	transmembrane protein 39A
hsa-miR-1225-5p	0	0	1	1	0	0	ARHGAP8	Rho GTPase activating protein 8
hsa-miR-1225-5p	0	0	1	1	1	1	KLHL29	kelch-like 29 (Drosophila)
hsa-miR-1225-5p	0	0	1	1	1	1	DLX4	distal-less homeobox 4
hsa-miR-1225-5p	0	0	1	1	1	1	TOMM40L	translocase of outer mitochondrial membrane 40 homolog (yeast)-like
hsa-miR-1225-5p	0	0	1	0	0	0	KLHL15	kelch-like 15 (Drosophila)
hsa-miR-1225-5p	0	0	1	0	1	1	ZNF37A	zinc finger protein 37A
hsa-miR-1225-5p	0	0	1	1	0	0	ZBTB32	zinc finger and BTB domain containing 32
hsa-miR-1225-5p	0	0	1	0	0	0	TCP11L2	t-complex 11 (mouse)-like 2
hsa-miR-1225-5p	1	0	1	1	0	0	CSNK1G2	casein kinase 1, gamma 2
hsa-miR-1225-5p	0	0	1	0	1	1	TP53RK	TP53 regulating kinase
hsa-miR-1225-5p	0	0	1	1	0	0	CA5BP1	carbonic anhydrase VB pseudogene 1
hsa-miR-1225-5p	0	0	1	0	0	0	AZGP1P1	alpha-2-glycoprotein 1, zinc-binding pseudogene 1
hsa-miR-1225-5p	1	0	1	1	1	1	NIPA1	non imprinted in Prader-Willi/Angelman syndrome 1
hsa-miR-1225-5p	0	0	1	1	0	0	SPERT	spermatid associated
hsa-miR-1225-5p	1	0	1	1	1	1	PTPRD	protein tyrosine phosphatase, receptor type, D
hsa-miR-1225-5p	1	0	1	1	1	1	HTR2C	5-hydroxytryptamine (serotonin) receptor 2C, G protein-coupled
hsa-miR-1225-5p	0	0	1	1	0	0	SLC1A6	solute carrier family 1 (high affinity aspartate/glutamate transporter), member 6
hsa-miR-1225-5p	1	0	1	1	1	1	PPARGC1A	peroxisome proliferator-activated receptor gamma, coactivator 1 alpha
hsa-miR-1225-5p	1	0	1	1	1	1	TIAL1	TIA1 cytotoxic granule-associated RNA binding protein-like 1
hsa-miR-1225-5p	0	0	1	1	1	1	CD48	CD48 molecule
hsa-miR-1225-5p	0	0	1	1	0	0	AGBL3	ATP/GTP binding protein-like 3
hsa-miR-1225-5p	0	0	1	0	0	0	LOC729307	uncharacterized LOC729307
hsa-miR-1225-5p	1	0	1	1	1	1	PITPNB	phosphatidylinositol transfer protein, beta
hsa-miR-1225-5p	0	0	1	1	0	0	KIAA1324	KIAA1324
hsa-miR-1225-5p	1	0	1	1	1	1	PFAS	phosphoribosylformylglycinamidine synthase
hsa-miR-1225-5p	1	0	1	0	1	1	RNF4	ring finger protein 4
hsa-miR-1225-5p	1	0	1	1	1	1	PHF17	PHD finger protein 17
hsa-miR-1225-5p	1	0	1	1	1	1	RAB5B	RAB5B, member RAS oncogene family
hsa-miR-1225-5p	0	0	1	1	0	0	CHERP	calcium homeostasis endoplasmic reticulum protein
hsa-miR-1225-5p	0	0	1	0	1	1	FAM72A	family with sequence similarity 72, member A
hsa-miR-1225-5p	1	0	1	1	1	1	ACVR1	activin A receptor, type I
hsa-miR-1225-5p	0	0	1	0	0	0	SRGAP2C	SLIT-ROBO Rho GTPase activating protein 2C
hsa-miR-1225-5p	0	0	1	1	1	1	EFCAB13	EF-hand calcium binding domain 13
hsa-miR-1225-5p	0	0	1	0	0	0	CRYBB2P1	crystallin, beta B2 pseudogene 1
hsa-miR-1225-5p	1	0	1	1	1	1	C4orf19	chromosome 4 open reading frame 19
hsa-miR-1225-5p	0	0	1	0	0	0	INHBA-AS1	INHBA antisense RNA 1
hsa-miR-1225-5p	0	0	1	1	0	0	H2AFZ	H2A histone family, member Z
hsa-miR-1225-5p	0	0	1	0	0	0	LOC388906	opioid growth factor receptor pseudogene
hsa-miR-1225-5p	0	0	1	0	0	0	TOB1-AS1	TOB1 antisense RNA 1
hsa-miR-1225-5p	0	0	1	1	1	1	SLC14A1	solute carrier family 14 (urea transporter), member 1 (Kidd blood group)
hsa-miR-1225-5p	1	0	1	1	1	1	LEF1	lymphoid enhancer-binding factor 1
hsa-miR-1225-5p	0	0	1	0	0	0	LOC154822	uncharacterized LOC154822
hsa-miR-1225-5p	1	0	1	1	1	1	DOC2A	double C2-like domains, alpha
hsa-miR-1225-5p	0	0	1	0	0	0	LINC00347	long intergenic non-protein coding RNA 347
hsa-miR-1225-5p	1	0	1	0	1	1	PSD3	pleckstrin and Sec7 domain containing 3
hsa-miR-1225-5p	0	0	1	1	0	0	FAM72B	family with sequence similarity 72, member B
hsa-miR-1225-5p	0	0	1	0	1	1	IL33	interleukin 33
hsa-miR-1225-5p	0	0	1	1	1	1	ZNF589	zinc finger protein 589
hsa-miR-1225-5p	0	0	1	0	1	1	ITGA1	integrin, alpha 1
hsa-miR-1225-5p	1	0	1	0	1	1	CCNY	cyclin Y
hsa-miR-1225-5p	0	0	1	1	0	0	RFNG	RFNG O-fucosylpeptide 3-beta-N-acetylglucosaminyltransferase
hsa-miR-1225-5p	1	0	1	1	1	1	PTPDC1	protein tyrosine phosphatase domain containing 1
hsa-miR-1225-5p	1	0	1	0	1	1	C14orf43	chromosome 14 open reading frame 43
hsa-miR-1225-5p	0	0	1	1	0	0	GRIN2C	glutamate receptor, ionotropic, N-methyl D-aspartate 2C
hsa-miR-1225-5p	1	0	1	1	1	1	SCOC	short coiled-coil protein
hsa-miR-1225-5p	1	0	1	1	1	1	FTL	ferritin, light polypeptide
hsa-miR-1225-5p	0	0	1	1	0	0	TMEM183A	transmembrane protein 183A
hsa-miR-1225-5p	1	0	1	0	1	1	MAGIX	MAGI family member, X-linked
hsa-miR-1225-5p	0	0	1	1	0	0	CELF3	CUGBP, Elav-like family member 3
hsa-miR-1225-5p	1	0	1	1	1	1	PHACTR4	phosphatase and actin regulator 4
hsa-miR-1225-5p	1	0	1	1	0	0	DCAF15	DDB1 and CUL4 associated factor 15
hsa-miR-1225-5p	0	0	1	1	0	0	TRIM46	tripartite motif containing 46
hsa-miR-1225-5p	0	0	1	1	0	0	CYP4F30P	cytochrome P450, family 4, subfamily F, polypeptide 30, pseudogene
hsa-miR-1225-5p	1	0	1	1	1	1	OPCML	opioid binding protein/cell adhesion molecule-like
hsa-miR-1225-5p	1	0	1	1	1	1	NTRK2	neurotrophic tyrosine kinase, receptor, type 2
hsa-miR-1225-5p	0	0	1	1	0	0	C16orf86	chromosome 16 open reading frame 86
hsa-miR-1225-5p	1	0	1	1	1	1	ZMYND11	zinc finger, MYND-type containing 11
hsa-miR-1225-5p	0	0	1	1	1	1	COBL	cordon-bleu homolog (mouse)
hsa-miR-1225-5p	0	0	1	0	0	0	FAM106A	family with sequence similarity 106, member A
hsa-miR-1225-5p	0	0	1	1	1	1	TMEM52B	transmembrane protein 52B
hsa-miR-1225-5p	0	0	1	1	1	1	ZNF365	zinc finger protein 365
hsa-miR-1225-5p	0	0	1	0	0	0	TPTEP1	transmembrane phosphatase with tensin homology pseudogene 1
hsa-miR-1225-5p	1	0	1	0	1	1	BTBD3	BTB (POZ) domain containing 3
hsa-miR-1225-5p	0	0	1	1	0	0	PRAMEF10	PRAME family member 10
hsa-miR-1225-5p	1	0	1	1	1	1	SHANK2	SH3 and multiple ankyrin repeat domains 2
hsa-miR-1225-5p	0	0	1	0	0	0	LRRC37BP1	leucine rich repeat containing 37B pseudogene 1
hsa-miR-1225-5p	1	0	1	1	1	1	ANK2	ankyrin 2, neuronal
hsa-miR-1225-5p	0	0	1	1	1	1	KANSL1L	KAT8 regulatory NSL complex subunit 1-like
hsa-miR-1225-5p	1	0	1	0	1	1	FAM196A	family with sequence similarity 196, member A
hsa-miR-1225-5p	0	0	1	0	0	0	LOC100133207	uncharacterized LOC100133207
hsa-miR-1225-5p	0	0	1	0	0	0	FLJ39632	uncharacterized LOC642477
hsa-miR-1225-5p	1	0	1	1	0	0	KRT80	keratin 80
hsa-miR-1225-5p	0	0	1	1	1	1	C10orf82	chromosome 10 open reading frame 82
hsa-miR-1225-5p	1	0	1	1	1	1	SASH1	SAM and SH3 domain containing 1
hsa-miR-1225-5p	0	0	1	0	0	0	DKFZp686D0853	uncharacterized LOC401613
hsa-miR-1225-5p	1	0	1	1	1	1	RBL2	retinoblastoma-like 2 (p130)
hsa-miR-1225-5p	1	0	1	1	1	1	SH3BP4	SH3-domain binding protein 4
hsa-miR-1225-5p	0	0	1	1	1	1	IPCEF1	interaction protein for cytohesin exchange factors 1
hsa-miR-1225-5p	1	0	1	0	1	1	GALNT4	UDP-N-acetyl-alpha-D-galactosamine:polypeptide N-acetylgalactosaminyltransferase 4 (GalNAc-T4)
hsa-miR-1225-5p	0	0	1	1	1	1	PRR14L	proline rich 14-like
hsa-miR-1225-5p	0	0	1	1	0	0	SNAPC2	small nuclear RNA activating complex, polypeptide 2, 45kDa
hsa-miR-1225-5p	1	0	1	1	1	1	SLC39A13	solute carrier family 39 (zinc transporter), member 13
hsa-miR-1225-5p	1	0	1	1	1	1	GTDC1	glycosyltransferase-like domain containing 1
hsa-miR-1225-5p	1	0	1	1	1	1	DDAH1	dimethylarginine dimethylaminohydrolase 1
hsa-miR-1225-5p	1	0	1	1	1	1	SEMA4D	sema domain, immunoglobulin domain (Ig), transmembrane domain (TM) and short cytoplasmic domain, (semaphorin) 4D
hsa-miR-1225-5p	1	0	1	1	1	1	NAV1	neuron navigator 1
hsa-miR-1225-5p	1	0	1	1	1	1	POLA1	polymerase (DNA directed), alpha 1, catalytic subunit
hsa-miR-1225-5p	1	0	1	1	1	1	PGAP1	post-GPI attachment to proteins 1
hsa-miR-1225-5p	1	0	1	1	1	1	KCNMA1	potassium large conductance calcium-activated channel, subfamily M, alpha member 1
hsa-miR-1225-5p	1	0	1	1	1	1	CREB3L2	cAMP responsive element binding protein 3-like 2
hsa-miR-1225-5p	1	0	1	1	1	1	BSDC1	BSD domain containing 1
hsa-miR-1225-5p	0	0	1	0	1	1	CD59	CD59 molecule, complement regulatory protein
hsa-miR-1225-5p	1	0	1	1	1	1	ARHGDIA	Rho GDP dissociation inhibitor (GDI) alpha
hsa-miR-1225-5p	0	0	1	1	0	0	MRPL48	mitochondrial ribosomal protein L48
hsa-miR-1225-5p	1	0	1	1	1	1	SEL1L3	sel-1 suppressor of lin-12-like 3 (C. elegans)
hsa-miR-1225-5p	0	0	1	1	0	0	NDUFS2	NADH dehydrogenase (ubiquinone) Fe-S protein 2, 49kDa (NADH-coenzyme Q reductase)
hsa-miR-1225-5p	0	0	1	1	0	0	PPOX	protoporphyrinogen oxidase
hsa-miR-1225-5p	1	0	1	1	1	1	LETMD1	LETM1 domain containing 1
hsa-miR-1225-5p	1	0	1	1	1	1	FGF11	fibroblast growth factor 11
hsa-miR-1225-5p	0	0	1	1	1	1	FUS	fused in sarcoma
hsa-miR-1225-5p	0	0	1	1	1	1	BCL7B	B-cell CLL/lymphoma 7B
hsa-miR-1225-5p	1	0	1	1	1	1	NTM	neurotrimin
hsa-miR-1225-5p	0	0	1	1	0	0	FAM195A	family with sequence similarity 195, member A
hsa-miR-1225-5p	0	0	1	1	0	0	WISP2	WNT1 inducible signaling pathway protein 2
hsa-miR-1225-5p	0	0	1	1	1	1	ANKRD53	ankyrin repeat domain 53
hsa-miR-1225-5p	0	0	1	1	0	0	CXorf40A	chromosome X open reading frame 40A
hsa-miR-1225-5p	1	0	1	1	1	1	BAMBI	BMP and activin membrane-bound inhibitor homolog (Xenopus laevis)
hsa-miR-1225-5p	1	0	1	1	1	1	ARFIP2	ADP-ribosylation factor interacting protein 2
hsa-miR-1225-5p	0	0	1	1	0	0	SNRPA	small nuclear ribonucleoprotein polypeptide A
hsa-miR-1225-5p	0	0	1	0	0	0	LOC150568	uncharacterized LOC150568
hsa-miR-1225-5p	1	0	1	1	1	1	SSBP3	single stranded DNA binding protein 3
hsa-miR-1225-5p	0	0	1	1	1	1	TRIM38	tripartite motif containing 38
hsa-miR-1225-5p	0	0	1	1	0	0	MAST1	microtubule associated serine/threonine kinase 1
hsa-miR-1225-5p	0	0	1	1	0	0	GMPPA	GDP-mannose pyrophosphorylase A
hsa-miR-1225-5p	1	0	1	1	1	1	HN1	hematological and neurological expressed 1
hsa-miR-1225-5p	1	0	1	1	1	1	SLC39A1	solute carrier family 39 (zinc transporter), member 1
hsa-miR-1225-5p	1	0	1	1	1	1	TIMP3	TIMP metallopeptidase inhibitor 3
hsa-miR-1225-5p	0	0	1	1	0	0	FAM57B	family with sequence similarity 57, member B
hsa-miR-1225-5p	1	0	1	1	1	1	ARHGEF40	Rho guanine nucleotide exchange factor (GEF) 40
hsa-miR-1225-5p	1	0	1	1	1	1	PDCL	phosducin-like
hsa-miR-1225-5p	0	0	1	0	0	0	NUDT18	nudix (nucleoside diphosphate linked moiety X)-type motif 18
hsa-miR-1225-5p	0	0	1	1	1	1	ZNF75D	zinc finger protein 75D
hsa-miR-1225-5p	1	0	1	1	1	1	JUNB	jun B proto-oncogene
hsa-miR-1225-5p	0	0	1	0	0	0	MYSM1	Myb-like, SWIRM and MPN domains 1
hsa-miR-1225-5p	0	0	1	0	0	0	LOC731789	uncharacterized LOC731789
hsa-miR-1225-5p	1	0	1	0	1	1	MEGF10	multiple EGF-like-domains 10
hsa-miR-1225-5p	1	0	1	1	1	1	ANKS6	ankyrin repeat and sterile alpha motif domain containing 6
hsa-miR-1225-5p	1	0	1	1	1	1	SLC39A10	solute carrier family 39 (zinc transporter), member 10
hsa-miR-1225-5p	1	0	1	1	1	1	BNC2	basonuclin 2
hsa-miR-1225-5p	1	0	1	0	1	1	ZNF652	zinc finger protein 652
hsa-miR-1225-5p	0	0	1	1	0	0	TENC1	tensin like C1 domain containing phosphatase (tensin 2)
hsa-miR-1225-5p	1	0	1	1	1	1	SP2	Sp2 transcription factor
hsa-miR-1225-5p	1	0	1	1	1	1	RBPMS	RNA binding protein with multiple splicing
hsa-miR-1225-5p	1	0	1	1	1	1	QKI	QKI, KH domain containing, RNA binding
hsa-miR-1225-5p	1	0	1	1	1	1	GLIS3	GLIS family zinc finger 3
hsa-miR-1225-5p	0	0	1	1	1	1	C1orf27	chromosome 1 open reading frame 27
hsa-miR-1225-5p	1	0	1	0	1	1	RBBP5	retinoblastoma binding protein 5
hsa-miR-1225-5p	1	0	1	1	1	1	ATP2B2	ATPase, Ca++ transporting, plasma membrane 2
hsa-miR-1225-5p	1	0	1	0	1	1	BCL2	B-cell CLL/lymphoma 2
hsa-miR-1225-5p	0	0	1	1	0	0	COL6A2	collagen, type VI, alpha 2
hsa-miR-1225-5p	1	0	1	1	1	1	FAS	Fas (TNF receptor superfamily, member 6)
hsa-miR-1225-5p	0	0	1	1	1	1	CA2	carbonic anhydrase II
hsa-miR-1225-5p	1	0	1	1	1	1	CYP19A1	cytochrome P450, family 19, subfamily A, polypeptide 1
hsa-miR-1225-5p	1	0	1	1	1	1	FUT1	fucosyltransferase 1 (galactoside 2-alpha-L-fucosyltransferase, H blood group)
hsa-miR-1225-5p	1	0	1	0	1	1	ITGB3	integrin, beta 3 (platelet glycoprotein IIIa, antigen CD61)
hsa-miR-1225-5p	1	0	1	1	1	1	KCNA1	potassium voltage-gated channel, shaker-related subfamily, member 1 (episodic ataxia with myokymia)
hsa-miR-1225-5p	1	0	1	1	1	1	LEP	leptin
hsa-miR-1225-5p	1	0	1	1	1	1	RB1	retinoblastoma 1
hsa-miR-1225-5p	0	0	1	1	0	0	IAPP	islet amyloid polypeptide
hsa-miR-1225-5p	1	0	1	0	1	1	PCSK1	proprotein convertase subtilisin/kexin type 1
hsa-miR-1225-5p	0	0	1	1	0	0	IL1B	interleukin 1, beta
hsa-miR-1225-5p	0	0	1	1	1	1	IFNG	interferon, gamma
hsa-miR-1225-5p	1	0	1	1	1	1	ADRA1A	adrenoceptor alpha 1A
hsa-miR-1225-5p	1	0	1	1	1	1	GABRB3	gamma-aminobutyric acid (GABA) A receptor, beta 3
hsa-miR-1225-5p	1	0	1	1	1	1	GRIA4	glutamate receptor, ionotropic, AMPA 4
hsa-miR-1225-5p	0	0	1	1	1	1	HTR7	5-hydroxytryptamine (serotonin) receptor 7, adenylate cyclase-coupled
hsa-miR-1225-5p	0	0	1	1	1	1	NPY2R	neuropeptide Y receptor Y2
hsa-miR-1225-5p	1	0	1	1	1	1	PDE3B	phosphodiesterase 3B, cGMP-inhibited
hsa-miR-1225-5p	0	0	1	1	1	1	FLJ45079	FLJ45079 protein
hsa-miR-1225-5p	1	0	1	1	1	1	ATP1B1	ATPase, Na+/K+ transporting, beta 1 polypeptide
hsa-miR-1225-5p	1	0	1	1	1	1	RREB1	ras responsive element binding protein 1
hsa-miR-1225-5p	1	0	1	1	1	1	IGSF3	immunoglobulin superfamily, member 3
hsa-miR-1225-5p	0	0	1	1	0	0	C1orf186	chromosome 1 open reading frame 186
hsa-miR-1225-5p	1	0	1	1	1	1	SLC25A53	solute carrier family 25, member 53
hsa-miR-1225-5p	1	0	1	0	1	1	FIGNL2	fidgetin-like 2
hsa-miR-1225-5p	1	0	1	1	1	1	RUNX2	runt-related transcription factor 2
hsa-miR-1225-5p	1	0	1	1	1	1	SH3PXD2B	SH3 and PX domains 2B
hsa-miR-1225-5p	1	0	1	1	1	1	SBK1	SH3-binding domain kinase 1
hsa-miR-1225-5p	1	0	1	0	1	1	TNRC6B	trinucleotide repeat containing 6B
hsa-miR-1225-5p	1	0	1	1	1	1	TGFBR2	transforming growth factor, beta receptor II (70/80kDa)
hsa-miR-1225-5p	1	0	1	0	1	1	CELF2	CUGBP, Elav-like family member 2
hsa-miR-1225-5p	0	0	1	1	1	1	ARRDC2	arrestin domain containing 2
hsa-miR-1225-5p	1	0	1	1	1	1	RGS7BP	regulator of G-protein signaling 7 binding protein
hsa-miR-1225-5p	0	0	1	1	1	1	ATF3	activating transcription factor 3
hsa-miR-1225-5p	1	0	1	0	1	1	SCML1	sex comb on midleg-like 1 (Drosophila)
hsa-miR-1225-5p	1	0	1	1	1	1	CHTF8	CTF8, chromosome transmission fidelity factor 8 homolog (S. cerevisiae)
hsa-miR-1225-5p	0	0	1	1	1	1	SPOCK3	sparc/osteonectin, cwcv and kazal-like domains proteoglycan (testican) 3
hsa-miR-1225-5p	0	0	1	1	1	1	C6orf162	chromosome 6 open reading frame 162
hsa-miR-1225-5p	1	0	1	1	1	1	PABPC1L2B	poly(A) binding protein, cytoplasmic 1-like 2B
hsa-miR-1225-5p	0	0	1	1	1	1	RCC1	regulator of chromosome condensation 1
hsa-miR-1225-5p	1	0	1	1	1	1	CDC14B	CDC14 cell division cycle 14 homolog B (S. cerevisiae)
hsa-miR-1225-5p	0	0	1	1	0	0	VPS37D	vacuolar protein sorting 37 homolog D (S. cerevisiae)
hsa-miR-1225-5p	1	0	1	1	1	1	ITGA6	integrin, alpha 6
hsa-miR-1225-5p	1	0	1	1	1	1	MGA	MAX gene associated
hsa-miR-1225-5p	1	0	1	1	1	1	REPS2	RALBP1 associated Eps domain containing 2
hsa-miR-1225-5p	0	0	1	1	1	1	G6PC2	glucose-6-phosphatase, catalytic, 2
hsa-miR-1225-5p	0	0	1	1	1	1	CCNT2	cyclin T2
hsa-miR-1225-5p	1	0	1	0	1	1	COL19A1	collagen, type XIX, alpha 1
hsa-miR-1225-5p	0	0	1	1	0	0	COX6B1	cytochrome c oxidase subunit VIb polypeptide 1 (ubiquitous)
hsa-miR-1225-5p	0	0	1	1	1	1	COX7B	cytochrome c oxidase subunit VIIb
hsa-miR-1225-5p	1	0	1	1	1	1	MASP1	mannan-binding lectin serine peptidase 1 (C4/C2 activating component of Ra-reactive factor)
hsa-miR-1225-5p	1	0	1	1	1	1	DUSP6	dual specificity phosphatase 6
hsa-miR-1225-5p	0	0	1	0	1	1	FGF2	fibroblast growth factor 2 (basic)
hsa-miR-1225-5p	0	0	1	1	0	0	FTH1	ferritin, heavy polypeptide 1
hsa-miR-1225-5p	0	0	1	1	1	1	KCNK1	potassium channel, subfamily K, member 1
hsa-miR-1225-5p	0	0	1	1	0	0	KCNK3	potassium channel, subfamily K, member 3
hsa-miR-1225-5p	1	0	1	1	1	1	LIFR	leukemia inhibitory factor receptor alpha
hsa-miR-1225-5p	1	0	1	1	1	1	MSN	moesin
hsa-miR-1225-5p	0	0	1	1	1	1	OAS2	2'-5'-oligoadenylate synthetase 2, 69/71kDa
hsa-miR-1225-5p	0	0	1	0	1	1	OPHN1	oligophrenin 1
hsa-miR-1225-5p	1	0	1	0	1	1	PCDHGC3	protocadherin gamma subfamily C, 3
hsa-miR-1225-5p	1	0	1	1	1	1	PLAGL2	pleiomorphic adenoma gene-like 2
hsa-miR-1225-5p	1	0	1	1	0	0	RFX1	regulatory factor X, 1 (influences HLA class II expression)
hsa-miR-1225-5p	1	0	1	1	1	1	SMARCD1	SWI/SNF related, matrix associated, actin dependent regulator of chromatin, subfamily d, member 1
hsa-miR-1225-5p	1	0	1	1	1	1	SRF	serum response factor (c-fos serum response element-binding transcription factor)
hsa-miR-1225-5p	1	0	1	0	1	1	TAL1	T-cell acute lymphocytic leukemia 1
hsa-miR-1225-5p	1	0	1	1	1	1	TDG	thymine-DNA glycosylase
hsa-miR-1225-5p	1	0	1	1	1	1	PAX8	paired box 8
hsa-miR-1225-5p	1	0	1	1	1	1	CUL5	cullin 5
hsa-miR-1225-5p	0	0	1	1	1	1	USP5	ubiquitin specific peptidase 5 (isopeptidase T)
hsa-miR-1225-5p	0	0	1	1	0	0	SEMA7A	semaphorin 7A, GPI membrane anchor (John Milton Hagen blood group)
hsa-miR-1225-5p	0	0	1	1	1	1	ITGA10	integrin, alpha 10
hsa-miR-1225-5p	1	0	1	0	1	1	PCDHGA12	protocadherin gamma subfamily A, 12
hsa-miR-1225-5p	1	0	1	0	1	1	PCDHGB4	protocadherin gamma subfamily B, 4
hsa-miR-1225-5p	0	0	1	1	0	0	TMEM11	transmembrane protein 11
hsa-miR-1225-5p	1	0	1	0	1	1	WASL	Wiskott-Aldrich syndrome-like
hsa-miR-1225-5p	0	0	1	1	1	1	MPZL1	myelin protein zero-like 1
hsa-miR-1225-5p	0	0	1	1	1	1	UBA3	ubiquitin-like modifier activating enzyme 3
hsa-miR-1225-5p	1	0	1	1	1	1	BCL2L2	BCL2-like 2
hsa-miR-1225-5p	0	0	1	1	1	1	CSRP1	cysteine and glycine-rich protein 1
hsa-miR-1225-5p	1	0	1	1	1	1	PPP2CB	protein phosphatase 2, catalytic subunit, beta isozyme
hsa-miR-1225-5p	1	0	1	0	1	1	CHST3	carbohydrate (chondroitin 6) sulfotransferase 3
hsa-miR-1225-5p	0	0	1	1	1	1	CDH1	cadherin 1, type 1, E-cadherin (epithelial)
hsa-miR-1225-5p	0	0	1	1	1	1	CSK	c-src tyrosine kinase
hsa-miR-1225-5p	1	0	1	1	1	1	EFNA1	ephrin-A1
hsa-miR-1225-5p	1	0	1	1	1	1	MLLT3	myeloid/lymphoid or mixed-lineage leukemia (trithorax homolog, Drosophila); translocated to, 3
hsa-miR-1225-5p	0	0	1	1	0	0	DYRK1B	dual-specificity tyrosine-(Y)-phosphorylation regulated kinase 1B
hsa-miR-1225-5p	1	0	1	1	1	1	DCLK1	doublecortin-like kinase 1
hsa-miR-1225-5p	1	0	1	1	1	1	BZRAP1	benzodiazapine receptor (peripheral) associated protein 1
hsa-miR-1225-5p	1	0	1	1	1	1	NREP	neuronal regeneration related protein homolog (rat)
hsa-miR-1225-5p	1	0	1	1	1	1	ONECUT2	one cut homeobox 2
hsa-miR-1225-5p	1	0	1	1	1	1	GABRE	gamma-aminobutyric acid (GABA) A receptor, epsilon
hsa-miR-1225-5p	1	0	1	1	1	1	KCNA2	potassium voltage-gated channel, shaker-related subfamily, member 2
hsa-miR-1225-5p	1	0	1	1	0	0	MMP14	matrix metallopeptidase 14 (membrane-inserted)
hsa-miR-1225-5p	1	0	1	1	0	0	ZMYM3	zinc finger, MYM-type 3
hsa-miR-1225-5p	1	0	1	1	1	1	MED13	mediator complex subunit 13
hsa-miR-1225-5p	1	0	1	0	1	1	NUP153	nucleoporin 153kDa
hsa-miR-1225-5p	0	0	1	1	1	1	CSTA	cystatin A (stefin A)
hsa-miR-1225-5p	1	0	1	1	1	1	DLX3	distal-less homeobox 3
hsa-miR-1225-5p	1	0	1	0	1	1	DLX6	distal-less homeobox 6
hsa-miR-1225-5p	1	0	1	1	1	1	GAS2	growth arrest-specific 2
hsa-miR-1225-5p	0	0	1	1	0	0	NCKAP1L	NCK-associated protein 1-like
hsa-miR-1225-5p	1	0	1	1	1	1	PHF2	PHD finger protein 2
hsa-miR-1225-5p	1	0	1	0	1	1	SRC	v-src sarcoma (Schmidt-Ruppin A-2) viral oncogene homolog (avian)
hsa-miR-1225-5p	1	0	1	1	1	1	KCNE3	potassium voltage-gated channel, Isk-related family, member 3
hsa-miR-1225-5p	0	0	1	1	1	1	ING1	inhibitor of growth family, member 1
hsa-miR-1225-5p	0	0	1	1	0	0	SNURF	SNRPN upstream reading frame
hsa-miR-1225-5p	0	0	1	1	1	1	TSPAN3	tetraspanin 3
hsa-miR-1225-5p	1	0	1	0	1	1	DCAF7	DDB1 and CUL4 associated factor 7
hsa-miR-1225-5p	1	0	1	1	1	1	MTF1	metal-regulatory transcription factor 1
hsa-miR-1225-5p	0	0	1	1	0	0	LAMC3	laminin, gamma 3
hsa-miR-1225-5p	1	0	1	0	1	1	SCML2	sex comb on midleg-like 2 (Drosophila)
hsa-miR-1225-5p	1	0	1	1	1	1	CDK16	cyclin-dependent kinase 16
hsa-miR-1225-5p	1	0	1	1	1	1	SMC1A	structural maintenance of chromosomes 1A
hsa-miR-1225-5p	0	0	1	0	0	0	CREB3	cAMP responsive element binding protein 3
hsa-miR-1225-5p	1	0	1	1	1	1	DIAPH2	diaphanous homolog 2 (Drosophila)
hsa-miR-1225-5p	1	0	1	1	1	1	PPP1R1A	protein phosphatase 1, regulatory (inhibitor) subunit 1A
hsa-miR-1225-5p	1	0	1	0	1	1	SLC5A3	solute carrier family 5 (sodium/myo-inositol cotransporter), member 3
hsa-miR-1225-5p	1	0	1	0	1	1	SOX12	SRY (sex determining region Y)-box 12
hsa-miR-1225-5p	1	0	1	0	1	1	PAPD7	PAP associated domain containing 7
hsa-miR-1225-5p	1	0	1	1	1	1	ADAMTS5	ADAM metallopeptidase with thrombospondin type 1 motif, 5
hsa-miR-1225-5p	1	0	1	1	1	1	KAT7	K(lysine) acetyltransferase 7
hsa-miR-1225-5p	0	0	1	1	0	0	USF1	upstream transcription factor 1
hsa-miR-1225-5p	1	0	1	1	1	1	PADI2	peptidyl arginine deiminase, type II
hsa-miR-1225-5p	1	0	1	0	1	1	FZD4	frizzled family receptor 4
hsa-miR-1225-5p	1	0	1	1	1	1	MMD	monocyte to macrophage differentiation-associated
hsa-miR-1225-5p	1	0	1	1	0	0	TIMM10	translocase of inner mitochondrial membrane 10 homolog (yeast)
hsa-miR-1225-5p	1	0	1	1	1	1	TLL2	tolloid-like 2
hsa-miR-1225-5p	1	0	1	1	1	1	CLCF1	cardiotrophin-like cytokine factor 1
hsa-miR-1225-5p	0	0	1	1	0	0	PRSS50	protease, serine, 50
hsa-miR-1225-5p	0	0	1	1	1	1	UBL4A	ubiquitin-like 4A
hsa-miR-1225-5p	0	0	1	1	1	1	PSME4	proteasome (prosome, macropain) activator subunit 4
hsa-miR-1225-5p	0	0	1	1	1	1	DZIP3	DAZ interacting protein 3, zinc finger
hsa-miR-1225-5p	1	0	1	0	1	1	RAB11FIP3	RAB11 family interacting protein 3 (class II)
hsa-miR-1225-5p	1	0	1	0	1	1	KIAA0513	KIAA0513
hsa-miR-1225-5p	1	0	1	1	1	1	MRPL19	mitochondrial ribosomal protein L19
hsa-miR-1225-5p	0	0	1	1	1	1	KIAA0196	KIAA0196
hsa-miR-1225-5p	1	0	1	0	1	1	PDAP1	PDGFA associated protein 1
hsa-miR-1225-5p	0	0	1	1	1	1	KDM4C	lysine (K)-specific demethylase 4C
hsa-miR-1225-5p	1	0	1	0	1	1	PEG10	paternally expressed 10
hsa-miR-1225-5p	1	0	1	1	1	1	PLCB1	phospholipase C, beta 1 (phosphoinositide-specific)
hsa-miR-1225-5p	1	0	1	0	1	1	KIAA1024	KIAA1024
hsa-miR-1225-5p	1	0	1	1	1	1	NUP160	nucleoporin 160kDa
hsa-miR-1225-5p	1	0	1	1	1	1	ANKS1A	ankyrin repeat and sterile alpha motif domain containing 1A
hsa-miR-1225-5p	1	0	1	1	1	1	PHF15	PHD finger protein 15
hsa-miR-1225-5p	1	0	1	0	1	1	LARP1	La ribonucleoprotein domain family, member 1
hsa-miR-1225-5p	0	0	1	1	1	1	CCDC69	coiled-coil domain containing 69
hsa-miR-1225-5p	0	0	1	1	1	1	SNX7	sorting nexin 7
hsa-miR-1225-5p	1	0	1	1	0	0	YBX2	Y box binding protein 2
hsa-miR-1225-5p	0	0	1	1	1	1	HSD17B11	hydroxysteroid (17-beta) dehydrogenase 11
hsa-miR-1225-5p	0	0	1	1	0	0	GP6	glycoprotein VI (platelet)
hsa-miR-1225-5p	1	0	1	0	1	1	RNF141	ring finger protein 141
hsa-miR-1225-5p	0	0	1	1	0	0	NCKIPSD	NCK interacting protein with SH3 domain
hsa-miR-1225-5p	0	0	1	1	0	0	PCDH12	protocadherin 12
hsa-miR-1225-5p	0	0	1	1	1	1	SLC22A17	solute carrier family 22, member 17
hsa-miR-1225-5p	0	0	1	1	0	0	DLL3	delta-like 3 (Drosophila)
hsa-miR-1225-5p	1	0	1	0	1	1	KLHL3	kelch-like 3 (Drosophila)
hsa-miR-1225-5p	1	0	1	1	1	1	PLXNA3	plexin A3
hsa-miR-1225-5p	1	0	1	1	0	0	C17orf59	chromosome 17 open reading frame 59
hsa-miR-1225-5p	1	0	1	1	1	1	HAUS6	HAUS augmin-like complex, subunit 6
hsa-miR-1225-5p	1	0	1	0	1	1	FAM46C	family with sequence similarity 46, member C
hsa-miR-1225-5p	1	0	1	1	1	1	LPPR1	lipid phosphate phosphatase-related protein type 1
hsa-miR-1225-5p	1	0	1	1	1	1	ELOVL2	ELOVL fatty acid elongase 2
hsa-miR-1225-5p	1	0	1	1	1	1	IMPAD1	inositol monophosphatase domain containing 1
hsa-miR-1225-5p	1	0	1	1	1	1	RNF125	ring finger protein 125, E3 ubiquitin protein ligase
hsa-miR-1225-5p	1	0	1	1	1	1	SLC35A5	solute carrier family 35, member A5
hsa-miR-1225-5p	0	0	1	1	1	1	MRPS10	mitochondrial ribosomal protein S10
hsa-miR-1225-5p	0	0	1	0	1	1	TMEM57	transmembrane protein 57
hsa-miR-1225-5p	1	0	1	1	1	1	UBA6	ubiquitin-like modifier activating enzyme 6
hsa-miR-1225-5p	0	0	1	0	0	0	KDM3A	lysine (K)-specific demethylase 3A
hsa-miR-1225-5p	1	0	1	1	1	1	PAG1	phosphoprotein associated with glycosphingolipid microdomains 1
hsa-miR-1225-5p	1	0	1	1	1	1	PCDHGA1	protocadherin gamma subfamily A, 1
hsa-miR-1225-5p	1	0	1	0	1	1	PCDHGA10	protocadherin gamma subfamily A, 10
hsa-miR-1225-5p	1	0	1	0	1	1	PCDHGA11	protocadherin gamma subfamily A, 11
hsa-miR-1225-5p	1	0	1	1	1	1	PCDHGA2	protocadherin gamma subfamily A, 2
hsa-miR-1225-5p	1	0	1	0	1	1	PCDHGA3	protocadherin gamma subfamily A, 3
hsa-miR-1225-5p	1	0	1	0	1	1	PCDHGA4	protocadherin gamma subfamily A, 4
hsa-miR-1225-5p	1	0	1	0	1	1	PCDHGA5	protocadherin gamma subfamily A, 5
hsa-miR-1225-5p	1	0	1	0	1	1	PCDHGA6	protocadherin gamma subfamily A, 6
hsa-miR-1225-5p	1	0	1	0	1	1	PCDHGA7	protocadherin gamma subfamily A, 7
hsa-miR-1225-5p	1	0	1	0	1	1	PCDHGA9	protocadherin gamma subfamily A, 9
hsa-miR-1225-5p	1	0	1	0	1	1	PCDHGB1	protocadherin gamma subfamily B, 1
hsa-miR-1225-5p	1	0	1	0	1	1	PCDHGB2	protocadherin gamma subfamily B, 2
hsa-miR-1225-5p	1	0	1	0	1	1	PCDHGB3	protocadherin gamma subfamily B, 3
hsa-miR-1225-5p	1	0	1	0	1	1	PCDHGB5	protocadherin gamma subfamily B, 5
hsa-miR-1225-5p	1	0	1	0	1	1	PCDHGB6	protocadherin gamma subfamily B, 6
hsa-miR-1225-5p	1	0	1	0	1	1	PCDHGB7	protocadherin gamma subfamily B, 7
hsa-miR-1225-5p	1	0	1	0	1	1	PCDHGC4	protocadherin gamma subfamily C, 4
hsa-miR-1225-5p	1	0	1	0	1	1	PCDHGC5	protocadherin gamma subfamily C, 5
hsa-miR-1225-5p	0	0	1	1	1	1	TMEM167B	transmembrane protein 167B
hsa-miR-1225-5p	0	0	1	1	0	0	NDUFA4L2	NADH dehydrogenase (ubiquinone) 1 alpha subcomplex, 4-like 2
hsa-miR-1225-5p	1	0	1	1	0	0	SLC17A7	solute carrier family 17 (sodium-dependent inorganic phosphate cotransporter), member 7
hsa-miR-1225-5p	0	0	1	1	0	0	PDXP	pyridoxal (pyridoxine, vitamin B6) phosphatase
hsa-miR-1225-5p	1	0	1	1	1	1	KIAA1244	KIAA1244
hsa-miR-1225-5p	0	0	1	1	0	0	ENTPD7	ectonucleoside triphosphate diphosphohydrolase 7
hsa-miR-1225-5p	1	0	1	1	1	1	SLC24A3	solute carrier family 24 (sodium/potassium/calcium exchanger), member 3
hsa-miR-1225-5p	0	0	1	1	0	0	AMIGO1	adhesion molecule with Ig-like domain 1
hsa-miR-1225-5p	1	0	1	1	1	1	DLG3	discs, large homolog 3 (Drosophila)
hsa-miR-1225-5p	1	0	1	0	1	1	SYT4	synaptotagmin IV
hsa-miR-1225-5p	0	0	1	0	1	1	TRMT5	tRNA methyltransferase 5 homolog (S. cerevisiae)
hsa-miR-1225-5p	1	0	1	1	1	1	RANBP10	RAN binding protein 10
hsa-miR-1225-5p	1	0	1	0	1	1	TMX4	thioredoxin-related transmembrane protein 4
hsa-miR-1225-5p	1	0	1	1	1	1	NTN4	netrin 4
hsa-miR-1225-5p	0	0	1	1	1	1	IL22RA1	interleukin 22 receptor, alpha 1
hsa-miR-1225-5p	1	0	1	1	1	1	PRDM12	PR domain containing 12
hsa-miR-1225-5p	1	0	1	1	1	1	SENP2	SUMO1/sentrin/SMT3 specific peptidase 2
hsa-miR-1225-5p	0	0	1	1	1	1	GABBR1	gamma-aminobutyric acid (GABA) B receptor, 1
hsa-miR-1225-5p	0	0	1	1	0	0	ABHD4	abhydrolase domain containing 4
hsa-miR-1225-5p	1	0	1	1	1	1	MRPL17	mitochondrial ribosomal protein L17
hsa-miR-1225-5p	0	0	1	1	1	1	FAM204A	family with sequence similarity 204, member A
hsa-miR-1225-5p	0	0	1	1	1	1	TCTA	T-cell leukemia translocation altered
hsa-miR-1225-5p	0	0	1	1	1	1	ICAM4	intercellular adhesion molecule 4 (Landsteiner-Wiener blood group)
hsa-miR-1225-5p	1	0	1	1	1	1	GIGYF1	GRB10 interacting GYF protein 1
hsa-miR-1225-5p	1	0	1	1	1	1	FNDC4	fibronectin type III domain containing 4
hsa-miR-1225-5p	1	0	1	1	1	1	AIDA	axin interactor, dorsalization associated
hsa-miR-1225-5p	1	0	1	1	1	1	REEP1	receptor accessory protein 1
hsa-miR-1225-5p	1	0	1	0	1	1	NOTCH2	notch 2
hsa-miR-1225-5p	1	0	1	1	1	1	NKAIN1	Na+/K+ transporting ATPase interacting 1
hsa-miR-1225-5p	1	0	1	1	1	1	DHX40	DEAH (Asp-Glu-Ala-His) box polypeptide 40
hsa-miR-1225-5p	1	0	1	1	0	0	UBTD1	ubiquitin domain containing 1
hsa-miR-1225-5p	1	0	1	1	1	1	KLHL18	kelch-like 18 (Drosophila)
hsa-miR-1225-5p	0	0	1	1	0	0	BAIAP2L2	BAI1-associated protein 2-like 2
hsa-miR-1225-5p	1	0	1	1	1	1	CYB5B	cytochrome b5 type B (outer mitochondrial membrane)
hsa-miR-1225-5p	1	0	1	1	1	1	JHDM1D	jumonji C domain containing histone demethylase 1 homolog D (S. cerevisiae)
hsa-miR-1225-5p	1	0	1	0	1	1	VOPP1	vesicular, overexpressed in cancer, prosurvival protein 1
hsa-miR-1225-5p	1	0	1	1	0	0	SCRT1	scratch homolog 1, zinc finger protein (Drosophila)
hsa-miR-1225-5p	0	0	1	0	1	1	ENAM	enamelin
hsa-miR-1225-5p	1	0	1	1	1	1	PATZ1	POZ (BTB) and AT hook containing zinc finger 1
hsa-miR-1225-5p	1	0	1	0	1	1	PCDHGA8	protocadherin gamma subfamily A, 8
hsa-miR-1225-5p	0	0	1	1	0	0	NICN1	nicolin 1
hsa-miR-1225-5p	1	0	1	1	1	1	SYVN1	synovial apoptosis inhibitor 1, synoviolin
hsa-miR-1225-5p	1	0	1	1	1	1	DCTN5	dynactin 5 (p25)
hsa-miR-1225-5p	0	0	1	1	1	1	KIAA1841	KIAA1841
hsa-miR-1225-5p	0	0	1	1	1	1	FBXL20	F-box and leucine-rich repeat protein 20
hsa-miR-1225-5p	1	0	1	0	1	1	C5orf62	chromosome 5 open reading frame 62
hsa-miR-1225-5p	0	0	1	1	1	1	SUCNR1	succinate receptor 1
hsa-miR-1225-5p	1	0	1	0	1	1	PURB	purine-rich element binding protein B
hsa-miR-1225-5p	0	0	1	1	1	1	ARHGAP18	Rho GTPase activating protein 18
hsa-miR-1225-5p	1	0	1	1	1	1	SLC2A13	solute carrier family 2 (facilitated glucose transporter), member 13
hsa-miR-1225-5p	0	0	1	1	1	1	PLEKHG4B	pleckstrin homology domain containing, family G (with RhoGef domain) member 4B
hsa-miR-1225-5p	1	0	1	1	1	1	SLITRK1	SLIT and NTRK-like family, member 1
hsa-miR-1225-5p	1	0	1	0	1	1	FAM129A	family with sequence similarity 129, member A
hsa-miR-1225-5p	1	0	1	0	1	1	SOCS4	suppressor of cytokine signaling 4
hsa-miR-1225-5p	0	0	1	1	1	1	RGS18	regulator of G-protein signaling 18
hsa-miR-1225-5p	1	0	1	1	1	1	SLC30A7	solute carrier family 30 (zinc transporter), member 7
hsa-miR-1225-5p	1	0	1	1	0	0	PKDCC	protein kinase domain containing, cytoplasmic homolog (mouse)
hsa-miR-1225-5p	0	0	1	1	1	1	CASC4	cancer susceptibility candidate 4
hsa-miR-1225-5p	0	0	1	0	1	1	PRELID2	PRELI domain containing 2
hsa-miR-1225-5p	0	0	1	1	1	1	SLC25A46	solute carrier family 25, member 46
hsa-miR-1225-5p	0	0	1	1	0	0	ESAM	endothelial cell adhesion molecule
hsa-miR-1225-5p	0	0	1	1	1	1	ADAMTS17	ADAM metallopeptidase with thrombospondin type 1 motif, 17
hsa-miR-1225-5p	1	0	1	1	0	0	SMCR8	Smith-Magenis syndrome chromosome region, candidate 8
hsa-miR-1225-5p	0	0	1	1	1	1	FAM100A	family with sequence similarity 100, member A
hsa-miR-1225-5p	1	0	1	1	1	1	OSR1	odd-skipped related 1 (Drosophila)
hsa-miR-1225-5p	0	0	1	1	1	1	APOBEC3F	apolipoprotein B mRNA editing enzyme, catalytic polypeptide-like 3F
hsa-miR-1225-5p	0	0	1	0	1	1	CHKB	choline kinase beta
hsa-miR-1225-5p	0	0	1	1	1	1	RMI2	RMI2, RecQ mediated genome instability 2, homolog (S. cerevisiae)
hsa-miR-1225-5p	1	0	1	1	1	1	ZNF362	zinc finger protein 362
hsa-miR-1225-5p	1	0	1	1	1	1	C7orf60	chromosome 7 open reading frame 60
hsa-miR-1225-5p	1	0	1	0	1	1	MOSPD2	motile sperm domain containing 2
hsa-miR-1225-5p	0	0	1	1	0	0	MUC20	mucin 20, cell surface associated
hsa-miR-1225-5p	1	0	1	1	0	0	TMEM86A	transmembrane protein 86A
hsa-miR-1225-5p	1	0	1	0	1	1	MDGA1	MAM domain containing glycosylphosphatidylinositol anchor 1
hsa-miR-1225-5p	1	0	1	1	1	1	PKHD1	polycystic kidney and hepatic disease 1 (autosomal recessive)
hsa-miR-1225-5p	1	0	1	1	1	1	PIP5KL1	phosphatidylinositol-4-phosphate 5-kinase-like 1
hsa-miR-1225-5p	1	0	1	1	1	1	CCDC117	coiled-coil domain containing 117
hsa-miR-1225-5p	1	0	1	1	1	1	ARL10	ADP-ribosylation factor-like 10
hsa-miR-1225-5p	0	0	1	1	1	1	ZCCHC12	zinc finger, CCHC domain containing 12
hsa-miR-1225-5p	1	0	1	1	1	1	EXOC8	exocyst complex component 8
hsa-miR-1225-5p	1	0	1	0	1	1	CCDC71L	coiled-coil domain containing 71-like
hsa-miR-1225-5p	0	0	1	1	1	1	C16orf54	chromosome 16 open reading frame 54
hsa-miR-1225-5p	1	0	1	1	1	1	PPAP2B	phosphatidic acid phosphatase type 2B
hsa-miR-1225-5p	1	0	1	1	1	1	STX12	syntaxin 12
hsa-miR-1225-5p	0	0	1	1	0	0	CCDC36	coiled-coil domain containing 36
hsa-miR-1225-5p	0	0	1	0	1	1	BAGE5	B melanoma antigen family, member 5
hsa-miR-1225-5p	0	0	1	0	0	0	FER1L6-AS2	FER1L6 antisense RNA 2
hsa-miR-1225-5p	1	0	1	1	1	1	RBM38	RNA binding motif protein 38
hsa-miR-1225-5p	1	0	1	1	1	1	VAX1	ventral anterior homeobox 1
hsa-miR-1225-5p	0	0	1	1	1	1	ELP5	elongator acetyltransferase complex subunit 5
hsa-miR-1225-5p	1	0	1	1	0	0	TSEN54	tRNA splicing endonuclease 54 homolog (S. cerevisiae)
hsa-miR-1225-5p	1	0	1	1	1	1	GADL1	glutamate decarboxylase-like 1
hsa-miR-1225-5p	1	0	1	1	1	1	CHCHD10	coiled-coil-helix-coiled-coil-helix domain containing 10
hsa-miR-1225-5p	0	0	1	0	0	0	CELP	carboxyl ester lipase pseudogene
hsa-miR-1225-5p	0	0	1	0	0	0	TTTY21	testis-specific transcript, Y-linked 21 (non-protein coding)
hsa-miR-1225-5p	0	0	1	0	0	0	NXF4	nuclear RNA export factor 4 pseudogene
hsa-miR-1225-5p	0	0	1	0	0	0	SLC25A3P1	solute carrier family 25 (mitochondrial carrier; phosphate carrier), member 3 pseudogene 1
hsa-miR-1225-5p	0	0	1	0	0	0	SNORD56	small nucleolar RNA, C/D box 56
hsa-miR-1225-5p	0	0	1	0	0	0	LOC256880	uncharacterized LOC256880
hsa-miR-1225-5p	0	0	1	0	0	0	TCAM1P	testicular cell adhesion molecule 1 homolog (mouse), pseudogene
hsa-miR-1225-5p	0	0	1	0	0	0	HSP90B3P	heat shock protein 90kDa beta (Grp94), member 3, pseudogene
hsa-miR-1225-5p	0	0	1	0	0	0	NCF1B	neutrophil cytosolic factor 1B pseudogene
hsa-miR-1225-5p	0	0	1	0	0	0	USP32P1	ubiquitin specific peptidase 32 pseudogene 1
hsa-miR-1225-5p	1	0	1	1	0	0	DTNB	dystrobrevin, beta
