# Supplementary material for: Profiling of Selected MicroRNAs in Proliferative Eutopic Endometrium of Women with Ovarian Endometriosis
Source: Biomed Res Int. 2015 Aug 20;2015:760698. doi: 10.1155/2015/760698 (PMC4558423; doi:10.1155/2015/760698)
Supplement: Supplementary file 1 — Table I: The names of miRNAs significantly differentially expressed between eutopic endometrium of patients with endometriosis vs eutopic endometrium of patients without endometriosis. Table II: The associations between miRNA and mRNA, which presents detailed results of the search of six major databases i.e targetscan, tarbase, miranda, mirbase, mirtarget2 and pictar. [file 760698.f1.zip › 760698.f1/Table II/hsa-miR-1231.tsv]

miR	targetscan	tarbase	miranda	mirbase	mirtarget2	pictar	GeneSymbol	GeneName
hsa-miR-1231	1	0	1	1	1	1	PLAU	plasminogen activator, urokinase
hsa-miR-1231	0	0	1	1	1	1	VRK2	vaccinia related kinase 2
hsa-miR-1231	1	0	1	1	0	0	SRCAP	Snf2-related CREBBP activator protein
hsa-miR-1231	1	0	1	0	1	1	PTPRT	protein tyrosine phosphatase, receptor type, T
hsa-miR-1231	0	0	1	1	1	1	PDE4DIP	phosphodiesterase 4D interacting protein
hsa-miR-1231	0	0	1	1	1	1	RABGAP1L	RAB GTPase activating protein 1-like
hsa-miR-1231	0	0	1	1	0	0	RAP1GAP	RAP1 GTPase activating protein
hsa-miR-1231	1	0	1	0	1	1	MGRN1	mahogunin ring finger 1, E3 ubiquitin protein ligase
hsa-miR-1231	1	0	1	0	1	1	CHST15	carbohydrate (N-acetylgalactosamine 4-sulfate 6-O) sulfotransferase 15
hsa-miR-1231	1	0	1	0	0	0	HECTD4	HECT domain containing E3 ubiquitin protein ligase 4
hsa-miR-1231	1	0	1	1	0	0	SMCHD1	structural maintenance of chromosomes flexible hinge domain containing 1
hsa-miR-1231	1	0	1	1	1	1	DNM3	dynamin 3
hsa-miR-1231	1	0	1	1	1	1	PALLD	palladin, cytoskeletal associated protein
hsa-miR-1231	1	0	1	1	1	1	FOXJ3	forkhead box J3
hsa-miR-1231	0	0	1	1	0	0	RTEL1	regulator of telomere elongation helicase 1
hsa-miR-1231	1	0	1	1	1	1	PHF8	PHD finger protein 8
hsa-miR-1231	1	0	1	0	1	1	SRGAP3	SLIT-ROBO Rho GTPase activating protein 3
hsa-miR-1231	1	0	1	1	1	1	RALGAPB	Ral GTPase activating protein, beta subunit (non-catalytic)
hsa-miR-1231	0	0	1	1	0	0	TNFRSF12A	tumor necrosis factor receptor superfamily, member 12A
hsa-miR-1231	1	0	1	0	0	0	ODZ4	odz, odd Oz/ten-m homolog 4 (Drosophila)
hsa-miR-1231	1	0	1	0	0	0	NYNRIN	NYN domain and retroviral integrase containing
hsa-miR-1231	1	0	1	1	1	1	PCDH19	protocadherin 19
hsa-miR-1231	0	0	1	0	0	0	COG1	component of oligomeric golgi complex 1
hsa-miR-1231	1	0	1	1	1	1	UPF2	UPF2 regulator of nonsense transcripts homolog (yeast)
hsa-miR-1231	1	1	1	1	1	1	NFIA	nuclear factor I/A
hsa-miR-1231	1	0	1	1	0	0	EBF4	early B-cell factor 4
hsa-miR-1231	0	0	1	1	0	0	POLR3E	polymerase (RNA) III (DNA directed) polypeptide E (80kD)
hsa-miR-1231	0	0	1	0	0	0	NYAP2	neuronal tyrosine-phosphorylated phosphoinositide-3-kinase adaptor 2
hsa-miR-1231	1	0	1	1	1	1	FRAS1	Fraser syndrome 1
hsa-miR-1231	0	0	1	1	0	0	URGCP	upregulator of cell proliferation
hsa-miR-1231	0	0	1	0	0	0	COL20A1	collagen, type XX, alpha 1
hsa-miR-1231	1	0	1	0	0	0	TANC2	tetratricopeptide repeat, ankyrin repeat and coiled-coil containing 2
hsa-miR-1231	1	0	1	1	1	1	PTBP2	polypyrimidine tract binding protein 2
hsa-miR-1231	0	0	1	0	0	0	LOC440792	proline dehydrogenase (oxidase) 1 pseudogene
hsa-miR-1231	0	0	1	0	1	1	SETD5	SET domain containing 5
hsa-miR-1231	1	0	1	1	1	1	IKZF4	IKAROS family zinc finger 4 (Eos)
hsa-miR-1231	0	0	1	1	0	0	COL27A1	collagen, type XXVII, alpha 1
hsa-miR-1231	1	0	1	1	1	1	LSM14A	LSM14A, SCD6 homolog A (S. cerevisiae)
hsa-miR-1231	1	0	1	0	1	1	KIF5C	kinesin family member 5C
hsa-miR-1231	1	0	1	0	1	1	TMEM132D	transmembrane protein 132D
hsa-miR-1231	1	0	1	1	1	1	SH3TC2	SH3 domain and tetratricopeptide repeats 2
hsa-miR-1231	1	0	1	1	1	1	PRDM16	PR domain containing 16
hsa-miR-1231	1	0	1	0	1	1	RNF43	ring finger protein 43
hsa-miR-1231	0	0	1	0	1	1	RASSF8	Ras association (RalGDS/AF-6) domain family (N-terminal) member 8
hsa-miR-1231	1	0	1	1	1	1	TRPM3	transient receptor potential cation channel, subfamily M, member 3
hsa-miR-1231	1	0	1	1	1	1	KCNMA1	potassium large conductance calcium-activated channel, subfamily M, alpha member 1
hsa-miR-1231	0	0	1	0	0	0	TIFAB	TRAF-interacting protein with forkhead-associated domain, family member B
hsa-miR-1231	1	0	1	1	1	1	NRXN2	neurexin 2
hsa-miR-1231	0	0	1	1	1	1	ING4	inhibitor of growth family, member 4
hsa-miR-1231	0	0	1	1	0	0	DBP	D site of albumin promoter (albumin D-box) binding protein
hsa-miR-1231	0	0	1	1	0	0	KCNC3	potassium voltage-gated channel, Shaw-related subfamily, member 3
hsa-miR-1231	1	0	1	1	1	1	PLEKHH3	pleckstrin homology domain containing, family H (with MyTH4 domain) member 3
hsa-miR-1231	0	0	1	1	0	0	SMARCC2	SWI/SNF related, matrix associated, actin dependent regulator of chromatin, subfamily c, member 2
hsa-miR-1231	1	0	1	0	1	1	SLC6A6	solute carrier family 6 (neurotransmitter transporter, taurine), member 6
hsa-miR-1231	0	0	1	0	1	1	NPY1R	neuropeptide Y receptor Y1
hsa-miR-1231	1	0	1	1	1	1	TBX2	T-box 2
hsa-miR-1231	1	0	1	1	0	0	RGS6	regulator of G-protein signaling 6
hsa-miR-1231	0	0	1	1	0	0	EIF4E2	eukaryotic translation initiation factor 4E family member 2
hsa-miR-1231	1	0	1	1	1	1	GIT1	G protein-coupled receptor kinase interacting ArfGAP 1
hsa-miR-1231	0	0	1	1	1	1	STAU1	staufen, RNA binding protein, homolog 1 (Drosophila)
hsa-miR-1231	1	0	1	1	1	1	DDX17	DEAD (Asp-Glu-Ala-Asp) box helicase 17
hsa-miR-1231	1	0	1	0	1	1	TBL1X	transducin (beta)-like 1X-linked
hsa-miR-1231	0	0	1	1	1	1	HLA-DQA1	major histocompatibility complex, class II, DQ alpha 1
hsa-miR-1231	1	0	1	1	0	0	KAT5	K(lysine) acetyltransferase 5
hsa-miR-1231	1	0	1	1	1	1	HMGA2	high mobility group AT-hook 2
hsa-miR-1231	1	0	1	1	0	0	PPP2R5D	protein phosphatase 2, regulatory subunit B', delta
hsa-miR-1231	0	0	1	1	0	0	TRIM27	tripartite motif containing 27
hsa-miR-1231	1	0	1	1	1	1	ZFX	zinc finger protein, X-linked
hsa-miR-1231	1	0	1	1	0	0	TNPO2	transportin 2
hsa-miR-1231	1	0	1	1	1	1	MYH10	myosin, heavy chain 10, non-muscle
hsa-miR-1231	0	0	1	0	0	0	MIAT	myocardial infarction associated transcript (non-protein coding)
hsa-miR-1231	0	0	1	1	0	0	MUC3A	mucin 3A, cell surface associated
hsa-miR-1231	1	0	1	0	1	1	MLL2	myeloid/lymphoid or mixed-lineage leukemia 2
hsa-miR-1231	0	0	1	1	1	1	CREB3L1	cAMP responsive element binding protein 3-like 1
hsa-miR-1231	1	0	1	1	1	1	CBFA2T2	core-binding factor, runt domain, alpha subunit 2; translocated to, 2
hsa-miR-1231	1	0	1	1	0	0	SLC44A2	solute carrier family 44, member 2
hsa-miR-1231	1	0	1	1	0	0	PAK1	p21 protein (Cdc42/Rac)-activated kinase 1
hsa-miR-1231	1	0	1	1	1	1	ZNF236	zinc finger protein 236
hsa-miR-1231	1	0	1	0	1	1	CELF2	CUGBP, Elav-like family member 2
hsa-miR-1231	0	0	1	1	1	1	PLEKHB1	pleckstrin homology domain containing, family B (evectins) member 1
hsa-miR-1231	0	0	1	1	0	0	RBM5	RNA binding motif protein 5
hsa-miR-1231	0	0	1	1	1	1	GUCA1C	guanylate cyclase activator 1C
hsa-miR-1231	1	0	1	1	1	1	NF2	neurofibromin 2 (merlin)
hsa-miR-1231	1	0	1	0	1	1	WDR82	WD repeat domain 82
hsa-miR-1231	1	0	1	1	1	1	C16orf70	chromosome 16 open reading frame 70
hsa-miR-1231	1	0	1	1	1	1	SNPH	syntaphilin
hsa-miR-1231	1	0	1	1	1	1	DAB2	disabled homolog 2, mitogen-responsive phosphoprotein (Drosophila)
hsa-miR-1231	1	0	1	1	1	1	C3orf18	chromosome 3 open reading frame 18
hsa-miR-1231	1	0	1	1	1	1	SYDE1	synapse defective 1, Rho GTPase, homolog 1 (C. elegans)
hsa-miR-1231	0	0	1	1	0	0	KCNK9	potassium channel, subfamily K, member 9
hsa-miR-1231	0	0	1	1	0	0	KCNK6	potassium channel, subfamily K, member 6
hsa-miR-1231	0	0	1	1	1	1	FCRL1	Fc receptor-like 1
hsa-miR-1231	0	0	1	1	0	0	TRO	trophinin
hsa-miR-1231	0	0	1	1	0	0	SPNS1	spinster homolog 1 (Drosophila)
hsa-miR-1231	0	0	1	0	0	0	NBPF10	neuroblastoma breakpoint family, member 10
hsa-miR-1231	1	0	1	1	1	1	PDE8A	phosphodiesterase 8A
hsa-miR-1231	0	0	1	1	1	1	ORMDL1	ORM1-like 1 (S. cerevisiae)
hsa-miR-1231	0	0	1	1	1	1	OLFM3	olfactomedin 3
hsa-miR-1231	0	0	1	1	0	0	SNRPN	small nuclear ribonucleoprotein polypeptide N
hsa-miR-1231	1	0	1	1	1	1	NTRK2	neurotrophic tyrosine kinase, receptor, type 2
hsa-miR-1231	0	0	1	0	0	0	MYO15B	myosin XVB pseudogene
hsa-miR-1231	1	0	1	1	1	1	PSIP1	PC4 and SFRS1 interacting protein 1
hsa-miR-1231	1	0	1	1	1	1	HNRNPU	heterogeneous nuclear ribonucleoprotein U (scaffold attachment factor A)
hsa-miR-1231	0	0	1	1	1	1	AMPH	amphiphysin
hsa-miR-1231	0	0	1	1	0	0	MPI	mannose phosphate isomerase
hsa-miR-1231	0	0	1	1	1	1	CARD8	caspase recruitment domain family, member 8
hsa-miR-1231	1	0	1	1	1	1	IQCK	IQ motif containing K
hsa-miR-1231	1	0	1	1	1	1	AFF2	AF4/FMR2 family, member 2
hsa-miR-1231	1	0	1	1	0	0	PI4KB	phosphatidylinositol 4-kinase, catalytic, beta
hsa-miR-1231	1	0	1	1	1	1	FLNC	filamin C, gamma
hsa-miR-1231	0	0	1	1	1	1	GNAS	GNAS complex locus
hsa-miR-1231	0	0	1	1	1	1	C6orf48	chromosome 6 open reading frame 48
hsa-miR-1231	0	0	1	1	1	1	CD1E	CD1e molecule
hsa-miR-1231	1	0	1	1	1	1	NAV3	neuron navigator 3
hsa-miR-1231	1	0	1	1	1	1	PPP1R9A	protein phosphatase 1, regulatory subunit 9A
hsa-miR-1231	0	0	1	1	0	0	ACSS2	acyl-CoA synthetase short-chain family member 2
hsa-miR-1231	0	0	1	1	1	1	ESRP1	epithelial splicing regulatory protein 1
hsa-miR-1231	1	0	1	1	1	1	AKAP2	A kinase (PRKA) anchor protein 2
hsa-miR-1231	0	0	1	0	0	0	TUG1	taurine upregulated 1 (non-protein coding)
hsa-miR-1231	1	0	1	1	1	1	MEIS2	Meis homeobox 2
hsa-miR-1231	0	0	1	1	1	1	RNF220	ring finger protein 220
hsa-miR-1231	1	0	1	1	0	0	SMUG1	single-strand-selective monofunctional uracil-DNA glycosylase 1
hsa-miR-1231	0	0	1	0	0	0	LINC00284	long intergenic non-protein coding RNA 284
hsa-miR-1231	1	0	1	1	0	0	DPP3	dipeptidyl-peptidase 3
hsa-miR-1231	0	0	1	0	0	0	DUXAP10	double homeobox A pseudogene 10
hsa-miR-1231	1	0	1	1	1	1	MACF1	microtubule-actin crosslinking factor 1
hsa-miR-1231	0	0	1	0	1	1	ARHGAP42	Rho GTPase activating protein 42
hsa-miR-1231	0	0	1	0	0	0	LOC284561	uncharacterized LOC284561
hsa-miR-1231	0	0	1	0	1	1	FLJ14186	uncharacterized LOC401149
hsa-miR-1231	1	0	1	0	0	0	ZDBF2	zinc finger, DBF-type containing 2
hsa-miR-1231	1	0	1	0	1	1	ATP2B1	ATPase, Ca++ transporting, plasma membrane 1
hsa-miR-1231	1	0	1	0	1	1	MYO5B	myosin VB
hsa-miR-1231	0	0	1	1	1	1	CDH4	cadherin 4, type 1, R-cadherin (retinal)
hsa-miR-1231	0	0	1	0	1	1	HEMK1	HemK methyltransferase family member 1
hsa-miR-1231	0	0	1	1	1	1	DUSP14	dual specificity phosphatase 14
hsa-miR-1231	1	0	1	1	1	1	FOXP1	forkhead box P1
hsa-miR-1231	0	0	1	1	0	0	CCDC142	coiled-coil domain containing 142
hsa-miR-1231	1	0	1	1	1	1	KCTD15	potassium channel tetramerisation domain containing 15
hsa-miR-1231	1	0	1	1	1	1	SLAIN1	SLAIN motif family, member 1
hsa-miR-1231	1	0	1	1	1	1	ARHGAP36	Rho GTPase activating protein 36
hsa-miR-1231	1	0	1	1	1	1	C7orf43	chromosome 7 open reading frame 43
hsa-miR-1231	1	0	1	1	1	1	PPM1L	protein phosphatase, Mg2+/Mn2+ dependent, 1L
hsa-miR-1231	0	0	1	0	0	0	FLJ30838	uncharacterized LOC400955
hsa-miR-1231	0	0	1	1	0	0	DNAH9	dynein, axonemal, heavy chain 9
hsa-miR-1231	1	0	1	1	1	1	ZNF664	zinc finger protein 664
hsa-miR-1231	1	0	1	1	1	1	LMNA	lamin A/C
hsa-miR-1231	0	0	1	1	1	1	PDE1C	phosphodiesterase 1C, calmodulin-dependent 70kDa
hsa-miR-1231	0	0	1	1	1	1	SEPT5	septin 5
hsa-miR-1231	1	0	1	1	1	1	SHISA5	shisa homolog 5 (Xenopus laevis)
hsa-miR-1231	0	0	1	1	0	0	ZNF185	zinc finger protein 185 (LIM domain)
hsa-miR-1231	0	0	1	0	0	0	LOC158376	uncharacterized LOC158376
hsa-miR-1231	0	0	1	0	0	0	ERVV-1	endogenous retrovirus group V, member 1
hsa-miR-1231	0	0	1	0	0	0	LOC100125918	uncharacterized LOC100125918
hsa-miR-1231	1	0	1	1	1	1	MPP7	membrane protein, palmitoylated 7 (MAGUK p55 subfamily member 7)
hsa-miR-1231	0	0	1	1	0	0	NXF2	nuclear RNA export factor 2
hsa-miR-1231	0	0	1	1	1	1	MS4A14	membrane-spanning 4-domains, subfamily A, member 14
hsa-miR-1231	1	0	1	1	0	0	GBA2	glucosidase, beta (bile acid) 2
hsa-miR-1231	0	0	1	0	0	0	LOC285074	anaphase promoting complex subunit 1 pseudogene
hsa-miR-1231	0	0	1	0	0	0	LOC284014	uncharacterized LOC284014
hsa-miR-1231	0	0	1	1	0	0	MRPL46	mitochondrial ribosomal protein L46
hsa-miR-1231	1	0	1	1	1	1	FAM73B	family with sequence similarity 73, member B
hsa-miR-1231	1	0	1	1	1	1	HLF	hepatic leukemia factor
hsa-miR-1231	0	0	1	1	0	0	NDOR1	NADPH dependent diflavin oxidoreductase 1
hsa-miR-1231	0	0	1	1	1	1	STBD1	starch binding domain 1
hsa-miR-1231	0	0	1	0	0	0	LOC440910	uncharacterized LOC440910
hsa-miR-1231	0	0	1	1	1	1	SP100	SP100 nuclear antigen
hsa-miR-1231	1	0	1	1	1	1	LUC7L2	LUC7-like 2 (S. cerevisiae)
hsa-miR-1231	1	0	1	1	1	1	GPD2	glycerol-3-phosphate dehydrogenase 2 (mitochondrial)
hsa-miR-1231	0	0	1	0	0	0	LOC283887	uncharacterized LOC283887
hsa-miR-1231	0	0	1	1	1	1	MARC1	mitochondrial amidoxime reducing component 1
hsa-miR-1231	0	0	1	1	0	0	WBP1	WW domain binding protein 1
hsa-miR-1231	1	0	1	1	1	1	KCND1	potassium voltage-gated channel, Shal-related subfamily, member 1
hsa-miR-1231	0	0	1	1	1	1	SPOCK1	sparc/osteonectin, cwcv and kazal-like domains proteoglycan (testican) 1
hsa-miR-1231	0	0	1	0	0	0	PART1	prostate androgen-regulated transcript 1 (non-protein coding)
hsa-miR-1231	1	0	1	1	1	1	SEPT4	septin 4
hsa-miR-1231	1	0	1	1	1	1	KLC2	kinesin light chain 2
hsa-miR-1231	1	0	1	1	1	1	LPPR2	lipid phosphate phosphatase-related protein type 2
hsa-miR-1231	0	0	1	0	0	0	LOC285778	uncharacterized LOC285778
hsa-miR-1231	0	0	1	0	0	0	LOC285500	uncharacterized LOC285500
hsa-miR-1231	0	0	1	1	1	1	SPAG16	sperm associated antigen 16
hsa-miR-1231	0	0	1	1	1	1	LRRC34	leucine rich repeat containing 34
hsa-miR-1231	1	0	1	1	1	1	KLF4	Kruppel-like factor 4 (gut)
hsa-miR-1231	0	0	1	1	1	1	AES	amino-terminal enhancer of split
hsa-miR-1231	0	0	1	1	0	0	HPN	hepsin
hsa-miR-1231	1	0	1	1	1	1	NDEL1	nudE nuclear distribution E homolog (A. nidulans)-like 1
hsa-miR-1231	0	0	1	0	0	0	LOC147670	uncharacterized LOC147670
hsa-miR-1231	1	0	1	0	1	1	UVRAG	UV radiation resistance associated gene
hsa-miR-1231	0	0	1	1	1	1	EXOC4	exocyst complex component 4
hsa-miR-1231	1	0	1	1	1	1	SPATS2	spermatogenesis associated, serine-rich 2
hsa-miR-1231	0	0	1	0	1	1	NBPF3	neuroblastoma breakpoint family, member 3
hsa-miR-1231	0	0	1	0	0	0	LOC284577	uncharacterized LOC284577
hsa-miR-1231	0	0	1	0	1	1	HDAC9	histone deacetylase 9
hsa-miR-1231	1	0	1	1	1	1	AMT	aminomethyltransferase
hsa-miR-1231	0	0	1	0	1	1	C19orf66	chromosome 19 open reading frame 66
hsa-miR-1231	1	0	1	1	1	1	GAPVD1	GTPase activating protein and VPS9 domains 1
hsa-miR-1231	0	0	1	1	1	1	GNAI2	guanine nucleotide binding protein (G protein), alpha inhibiting activity polypeptide 2
hsa-miR-1231	0	0	1	1	1	1	C8orf46	chromosome 8 open reading frame 46
hsa-miR-1231	1	0	1	1	1	1	HDGF	hepatoma-derived growth factor
hsa-miR-1231	0	0	1	0	0	0	C1orf204	chromosome 1 open reading frame 204
hsa-miR-1231	0	0	1	0	0	0	LOC643327	uncharacterized LOC643327
hsa-miR-1231	1	0	1	1	1	1	SYT6	synaptotagmin VI
hsa-miR-1231	0	0	1	1	1	1	IL17RE	interleukin 17 receptor E
hsa-miR-1231	0	0	1	1	1	1	SC5DL	sterol-C5-desaturase (ERG3 delta-5-desaturase homolog, S. cerevisiae)-like
hsa-miR-1231	0	0	1	1	1	1	CORO7	coronin 7
hsa-miR-1231	0	0	1	0	0	0	LOC400680	uncharacterized LOC400680
hsa-miR-1231	0	0	1	1	1	1	PPFIBP2	PTPRF interacting protein, binding protein 2 (liprin beta 2)
hsa-miR-1231	0	0	1	0	0	0	LINC00293	long intergenic non-protein coding RNA 293
hsa-miR-1231	1	0	1	1	1	1	PRKAG1	protein kinase, AMP-activated, gamma 1 non-catalytic subunit
hsa-miR-1231	1	0	1	1	0	0	CFL1	cofilin 1 (non-muscle)
hsa-miR-1231	0	0	1	0	0	0	CECR7	cat eye syndrome chromosome region, candidate 7 (non-protein coding)
hsa-miR-1231	0	0	1	1	1	1	RP1	retinitis pigmentosa 1 (autosomal dominant)
hsa-miR-1231	0	0	1	1	0	0	DCBLD1	discoidin, CUB and LCCL domain containing 1
hsa-miR-1231	1	0	1	1	1	1	DDX42	DEAD (Asp-Glu-Ala-Asp) box polypeptide 42
hsa-miR-1231	0	0	1	1	1	1	WDR64	WD repeat domain 64
hsa-miR-1231	0	0	1	0	1	1	FLJ41200	uncharacterized LOC401492
hsa-miR-1231	1	0	1	1	1	1	MDGA2	MAM domain containing glycosylphosphatidylinositol anchor 2
hsa-miR-1231	0	0	1	1	1	1	FAM5B	family with sequence similarity 5, member B
hsa-miR-1231	0	0	1	1	1	1	BAI2	brain-specific angiogenesis inhibitor 2
hsa-miR-1231	0	0	1	0	0	0	LOC650368	asparagine-linked glycosylation 1-like pseudogene
hsa-miR-1231	0	0	1	1	1	1	BTN2A2	butyrophilin, subfamily 2, member A2
hsa-miR-1231	0	0	1	0	0	0	LOC285043	uncharacterized LOC285043
hsa-miR-1231	1	0	1	0	1	1	TTYH3	tweety homolog 3 (Drosophila)
hsa-miR-1231	1	0	1	1	1	1	ERBB3	v-erb-b2 erythroblastic leukemia viral oncogene homolog 3 (avian)
hsa-miR-1231	1	0	1	1	1	1	PIAS3	protein inhibitor of activated STAT, 3
hsa-miR-1231	0	0	1	0	1	1	RASGRP3	RAS guanyl releasing protein 3 (calcium and DAG-regulated)
hsa-miR-1231	1	0	1	1	1	1	KPNA1	karyopherin alpha 1 (importin alpha 5)
hsa-miR-1231	0	0	1	0	0	0	FAM95B1	family with sequence similarity 95, member B1
hsa-miR-1231	1	0	1	1	1	1	MACROD2	MACRO domain containing 2
hsa-miR-1231	1	0	1	1	1	1	IL16	interleukin 16
hsa-miR-1231	0	0	1	0	1	1	LOC388942	uncharacterized LOC388942
hsa-miR-1231	0	0	1	1	1	1	SNX22	sorting nexin 22
hsa-miR-1231	1	0	1	1	1	1	CLIP1	CAP-GLY domain containing linker protein 1
hsa-miR-1231	0	0	1	0	0	0	RPL23AP53	ribosomal protein L23a pseudogene 53
hsa-miR-1231	1	0	1	1	1	1	MKRN1	makorin ring finger protein 1
hsa-miR-1231	0	0	1	1	1	1	USP4	ubiquitin specific peptidase 4 (proto-oncogene)
hsa-miR-1231	0	0	1	1	1	1	CSPP1	centrosome and spindle pole associated protein 1
hsa-miR-1231	0	0	1	1	0	0	TMEM136	transmembrane protein 136
hsa-miR-1231	0	0	1	1	0	0	TRIM46	tripartite motif containing 46
hsa-miR-1231	0	0	1	0	0	0	FAM205B	transmembrane protein C9orf144B pseudogene
hsa-miR-1231	1	0	1	1	1	1	KALRN	kalirin, RhoGEF kinase
hsa-miR-1231	0	0	1	1	1	1	MON1B	MON1 homolog B (yeast)
hsa-miR-1231	1	0	1	0	1	1	NBR1	neighbor of BRCA1 gene 1
hsa-miR-1231	1	0	1	1	1	1	AIF1L	allograft inflammatory factor 1-like
hsa-miR-1231	1	0	1	0	1	1	KPNA6	karyopherin alpha 6 (importin alpha 7)
hsa-miR-1231	0	0	1	1	1	1	MRPL49	mitochondrial ribosomal protein L49
hsa-miR-1231	0	0	1	1	0	0	HEATR8	HEAT repeat containing 8
hsa-miR-1231	0	0	1	0	0	0	LOC390660	FLJ00317 protein
hsa-miR-1231	0	0	1	1	1	1	TMC5	transmembrane channel-like 5
hsa-miR-1231	1	0	1	1	0	0	FOXP2	forkhead box P2
hsa-miR-1231	0	0	1	1	1	1	RNF19B	ring finger protein 19B
hsa-miR-1231	1	0	1	1	1	1	MAP2K4	mitogen-activated protein kinase kinase 4
hsa-miR-1231	0	0	1	0	0	0	LOC619207	scavenger receptor protein family member
hsa-miR-1231	0	0	1	0	0	0	AGAP9	ArfGAP with GTPase domain, ankyrin repeat and PH domain 9
hsa-miR-1231	1	0	1	0	1	1	TMEM106B	transmembrane protein 106B
hsa-miR-1231	1	0	1	1	1	1	RPS6KA4	ribosomal protein S6 kinase, 90kDa, polypeptide 4
hsa-miR-1231	0	0	1	1	0	0	PDZD7	PDZ domain containing 7
hsa-miR-1231	1	0	1	1	1	1	TRPM6	transient receptor potential cation channel, subfamily M, member 6
hsa-miR-1231	1	0	1	1	1	1	MEAF6	MYST/Esa1-associated factor 6
hsa-miR-1231	0	0	1	0	0	0	RRN3P2	RNA polymerase I transcription factor homolog (S. cerevisiae) pseudogene 2
hsa-miR-1231	1	0	1	1	1	1	ACTN1	actinin, alpha 1
hsa-miR-1231	0	0	1	1	1	1	SERPINE2	serpin peptidase inhibitor, clade E (nexin, plasminogen activator inhibitor type 1), member 2
hsa-miR-1231	0	0	1	1	1	1	RNF135	ring finger protein 135
hsa-miR-1231	0	0	1	1	1	1	RASGRF1	Ras protein-specific guanine nucleotide-releasing factor 1
hsa-miR-1231	1	0	1	1	1	1	NOVA1	neuro-oncological ventral antigen 1
hsa-miR-1231	0	0	1	1	0	0	ODF3	outer dense fiber of sperm tails 3
hsa-miR-1231	0	0	1	0	0	0	KIAA0913	KIAA0913
hsa-miR-1231	0	0	1	1	1	1	STAG3L1	stromal antigen 3-like 1
hsa-miR-1231	0	0	1	1	1	1	AQP6	aquaporin 6, kidney specific
hsa-miR-1231	1	0	1	1	1	1	TFE3	transcription factor binding to IGHM enhancer 3
hsa-miR-1231	0	0	1	1	0	0	DOPEY1	dopey family member 1
hsa-miR-1231	0	0	1	1	1	1	SLC30A10	solute carrier family 30, member 10
hsa-miR-1231	1	0	1	1	1	1	TMEM182	transmembrane protein 182
hsa-miR-1231	0	0	1	1	1	1	INPP5B	inositol polyphosphate-5-phosphatase, 75kDa
hsa-miR-1231	0	0	1	1	1	1	CCDC132	coiled-coil domain containing 132
hsa-miR-1231	0	0	1	0	1	1	PLEKHM1P	pleckstrin homology domain containing, family M (with RUN domain) member 1 pseudogene
hsa-miR-1231	0	0	1	1	1	1	CCDC66	coiled-coil domain containing 66
hsa-miR-1231	1	0	1	1	1	1	UHRF2	ubiquitin-like with PHD and ring finger domains 2, E3 ubiquitin protein ligase
hsa-miR-1231	0	0	1	0	0	0	LOC286135	uncharacterized LOC286135
hsa-miR-1231	0	0	1	1	1	1	NFE2L1	nuclear factor (erythroid-derived 2)-like 1
hsa-miR-1231	0	0	1	0	0	0	EPHA1-AS1	EPHA1 antisense RNA 1
hsa-miR-1231	1	0	1	1	1	1	NRP1	neuropilin 1
hsa-miR-1231	1	0	1	1	1	1	IL17RD	interleukin 17 receptor D
hsa-miR-1231	1	0	1	1	1	1	SLC24A4	solute carrier family 24 (sodium/potassium/calcium exchanger), member 4
hsa-miR-1231	1	0	1	0	0	0	XPNPEP3	X-prolyl aminopeptidase (aminopeptidase P) 3, putative
hsa-miR-1231	1	0	1	0	1	1	NR3C1	nuclear receptor subfamily 3, group C, member 1 (glucocorticoid receptor)
hsa-miR-1231	0	0	1	1	1	1	TMEM130	transmembrane protein 130
hsa-miR-1231	0	0	1	0	0	0	TRBJ2-2	T cell receptor beta joining 2-2
hsa-miR-1231	1	0	1	1	1	1	MAPK3	mitogen-activated protein kinase 3
hsa-miR-1231	0	0	1	1	1	1	OSR2	odd-skipped related 2 (Drosophila)
hsa-miR-1231	1	0	1	1	1	1	RFFL	ring finger and FYVE-like domain containing E3 ubiquitin protein ligase
hsa-miR-1231	1	0	1	1	1	1	LAMA3	laminin, alpha 3
hsa-miR-1231	0	0	1	1	0	0	PIGU	phosphatidylinositol glycan anchor biosynthesis, class U
hsa-miR-1231	1	0	1	1	1	1	CAMTA1	calmodulin binding transcription activator 1
hsa-miR-1231	0	0	1	1	0	0	VSIG4	V-set and immunoglobulin domain containing 4
hsa-miR-1231	0	0	1	1	0	0	RAET1E	retinoic acid early transcript 1E
hsa-miR-1231	0	0	1	1	1	1	PAQR5	progestin and adipoQ receptor family member V
hsa-miR-1231	0	0	1	1	1	1	POTEG	POTE ankyrin domain family, member G
hsa-miR-1231	1	0	1	1	1	1	MECP2	methyl CpG binding protein 2 (Rett syndrome)
hsa-miR-1231	0	0	1	1	1	1	DIO1	deiodinase, iodothyronine, type I
hsa-miR-1231	1	0	1	1	0	0	ADAM15	ADAM metallopeptidase domain 15
hsa-miR-1231	0	0	1	1	1	1	IL24	interleukin 24
hsa-miR-1231	1	0	1	1	1	1	NTNG1	netrin G1
hsa-miR-1231	1	0	1	1	1	1	QKI	QKI, KH domain containing, RNA binding
hsa-miR-1231	1	0	1	1	1	1	CD109	CD109 molecule
hsa-miR-1231	0	0	1	1	0	0	DMKN	dermokine
hsa-miR-1231	0	0	1	0	0	0	MAST4	microtubule associated serine/threonine kinase family member 4
hsa-miR-1231	0	0	1	1	0	0	NBPF8	neuroblastoma breakpoint family, member 8
hsa-miR-1231	0	0	1	1	1	1	IL23R	interleukin 23 receptor
hsa-miR-1231	0	0	1	0	1	1	MIS12	MIS12, MIND kinetochore complex component, homolog (S. pombe)
hsa-miR-1231	0	0	1	1	0	0	ISG20L2	interferon stimulated exonuclease gene 20kDa-like 2
hsa-miR-1231	0	0	1	1	1	1	FAM115A	family with sequence similarity 115, member A
hsa-miR-1231	0	0	1	1	1	1	ZCCHC17	zinc finger, CCHC domain containing 17
hsa-miR-1231	0	0	1	1	0	0	DGUOK	deoxyguanosine kinase
hsa-miR-1231	0	0	1	1	0	0	GNA11	guanine nucleotide binding protein (G protein), alpha 11 (Gq class)
hsa-miR-1231	1	0	1	1	1	1	HOXC13	homeobox C13
hsa-miR-1231	1	0	1	0	1	1	DPYSL5	dihydropyrimidinase-like 5
hsa-miR-1231	0	0	1	1	1	1	TUFT1	tuftelin 1
hsa-miR-1231	1	0	1	1	1	1	RIMS3	regulating synaptic membrane exocytosis 3
hsa-miR-1231	0	0	1	0	1	1	HAUS3	HAUS augmin-like complex, subunit 3
hsa-miR-1231	1	0	1	1	1	1	ZNF410	zinc finger protein 410
hsa-miR-1231	1	0	1	1	0	0	POLR3D	polymerase (RNA) III (DNA directed) polypeptide D, 44kDa
hsa-miR-1231	0	0	1	1	0	0	TMEM51	transmembrane protein 51
hsa-miR-1231	1	0	1	0	1	1	CGGBP1	CGG triplet repeat binding protein 1
hsa-miR-1231	1	0	1	1	1	1	MBNL1	muscleblind-like splicing regulator 1
hsa-miR-1231	1	0	1	1	1	1	PCGF5	polycomb group ring finger 5
hsa-miR-1231	0	0	1	1	0	0	AGBL5	ATP/GTP binding protein-like 5
hsa-miR-1231	1	0	1	1	1	1	PTMS	parathymosin
hsa-miR-1231	0	0	1	1	0	0	MYLK2	myosin light chain kinase 2
hsa-miR-1231	1	0	1	1	1	1	GSPT1	G1 to S phase transition 1
hsa-miR-1231	1	0	1	0	1	1	TMEM39A	transmembrane protein 39A
hsa-miR-1231	1	0	1	1	0	0	SIGMAR1	sigma non-opioid intracellular receptor 1
hsa-miR-1231	0	0	1	1	1	1	ATXN2L	ataxin 2-like
hsa-miR-1231	0	0	1	1	0	0	ARHGAP8	Rho GTPase activating protein 8
hsa-miR-1231	0	0	1	1	1	1	PWP1	PWP1 homolog (S. cerevisiae)
hsa-miR-1231	0	0	1	1	1	1	TAGLN	transgelin
hsa-miR-1231	0	0	1	0	0	0	LRRC14	leucine rich repeat containing 14
hsa-miR-1231	1	0	1	1	0	0	SLC29A2	solute carrier family 29 (nucleoside transporters), member 2
hsa-miR-1231	0	0	1	1	1	1	KLHL29	kelch-like 29 (Drosophila)
hsa-miR-1231	1	0	1	1	1	1	ZBTB38	zinc finger and BTB domain containing 38
hsa-miR-1231	1	0	1	1	1	1	NUMBL	numb homolog (Drosophila)-like
hsa-miR-1231	1	0	1	1	1	1	CC2D1B	coiled-coil and C2 domain containing 1B
hsa-miR-1231	1	0	1	1	1	1	NRF1	nuclear respiratory factor 1
hsa-miR-1231	0	0	1	0	0	0	APOBEC3D	apolipoprotein B mRNA editing enzyme, catalytic polypeptide-like 3D
hsa-miR-1231	1	0	1	0	1	1	ICMT	isoprenylcysteine carboxyl methyltransferase
hsa-miR-1231	0	0	1	1	0	0	ZBTB32	zinc finger and BTB domain containing 32
hsa-miR-1231	0	0	1	0	0	0	WDFY3-AS2	WDFY3 antisense RNA 2
hsa-miR-1231	0	0	1	1	1	1	RNF103	ring finger protein 103
hsa-miR-1231	1	0	1	1	1	1	SPOCK2	sparc/osteonectin, cwcv and kazal-like domains proteoglycan (testican) 2
hsa-miR-1231	0	0	1	1	0	0	FAM89B	family with sequence similarity 89, member B
hsa-miR-1231	0	0	1	0	0	0	SNX29P2	sorting nexin 29 pseudogene 2
hsa-miR-1231	1	0	1	1	1	1	EPHA4	EPH receptor A4
hsa-miR-1231	1	0	1	1	1	1	APPL2	adaptor protein, phosphotyrosine interaction, PH domain and leucine zipper containing 2
hsa-miR-1231	1	0	1	1	1	1	U2SURP	U2 snRNP-associated SURP domain containing
hsa-miR-1231	0	0	1	1	0	0	SYT3	synaptotagmin III
hsa-miR-1231	1	0	1	1	1	1	TMEM127	transmembrane protein 127
hsa-miR-1231	1	0	1	0	1	1	NCAM1	neural cell adhesion molecule 1
hsa-miR-1231	0	0	1	1	1	1	KIAA1755	KIAA1755
hsa-miR-1231	1	0	1	0	1	1	SV2B	synaptic vesicle glycoprotein 2B
hsa-miR-1231	0	0	1	1	0	0	TMEM251	transmembrane protein 251
hsa-miR-1231	0	0	1	1	1	1	CD48	CD48 molecule
hsa-miR-1231	0	0	1	1	1	1	TMEM117	transmembrane protein 117
hsa-miR-1231	0	0	1	1	1	1	PIP5K1B	phosphatidylinositol-4-phosphate 5-kinase, type I, beta
hsa-miR-1231	0	0	1	1	1	1	COL25A1	collagen, type XXV, alpha 1
hsa-miR-1231	1	0	1	1	1	1	OSGIN2	oxidative stress induced growth inhibitor family member 2
hsa-miR-1231	0	0	1	1	1	1	AADAT	aminoadipate aminotransferase
hsa-miR-1231	1	0	1	1	1	1	MUM1L1	melanoma associated antigen (mutated) 1-like 1
hsa-miR-1231	1	0	1	1	1	1	RCOR3	REST corepressor 3
hsa-miR-1231	0	0	1	1	1	1	C7orf53	chromosome 7 open reading frame 53
hsa-miR-1231	1	0	1	1	1	1	BRD3	bromodomain containing 3
hsa-miR-1231	0	0	1	1	1	1	C5orf22	chromosome 5 open reading frame 22
hsa-miR-1231	1	0	1	1	1	1	PLEKHA7	pleckstrin homology domain containing, family A member 7
hsa-miR-1231	0	0	1	1	0	0	ADAP2	ArfGAP with dual PH domains 2
hsa-miR-1231	0	0	1	1	0	0	TNMD	tenomodulin
hsa-miR-1231	0	0	1	1	1	1	HEXA	hexosaminidase A (alpha polypeptide)
hsa-miR-1231	0	0	1	1	1	1	ZNF337	zinc finger protein 337
hsa-miR-1231	0	0	1	0	0	0	FAM66C	family with sequence similarity 66, member C
hsa-miR-1231	0	0	1	1	1	1	EDA2R	ectodysplasin A2 receptor
hsa-miR-1231	0	0	1	0	1	1	KSR1	kinase suppressor of ras 1
hsa-miR-1231	0	0	1	1	0	0	SNTG2	syntrophin, gamma 2
hsa-miR-1231	0	0	1	1	1	1	ATP1A4	ATPase, Na+/K+ transporting, alpha 4 polypeptide
hsa-miR-1231	0	0	1	0	0	0	FAM201A	family with sequence similarity 201, member A
hsa-miR-1231	0	0	1	0	0	0	ANKRD30BP2	ankyrin repeat domain 30B pseudogene 2
hsa-miR-1231	0	0	1	0	0	0	LOC654433	uncharacterized LOC654433
hsa-miR-1231	1	0	1	1	1	1	UBXN2A	UBX domain protein 2A
hsa-miR-1231	1	0	1	0	1	1	PACSIN1	protein kinase C and casein kinase substrate in neurons 1
hsa-miR-1231	0	0	1	1	0	0	TMEM95	transmembrane protein 95
hsa-miR-1231	0	0	1	1	1	1	FAM71F1	family with sequence similarity 71, member F1
hsa-miR-1231	1	0	1	1	0	0	RGL2	ral guanine nucleotide dissociation stimulator-like 2
hsa-miR-1231	0	0	1	0	1	1	METTL12	methyltransferase like 12
hsa-miR-1231	1	0	1	1	1	1	ARPP21	cAMP-regulated phosphoprotein, 21kDa
hsa-miR-1231	1	0	1	0	1	1	HSPA12A	heat shock 70kDa protein 12A
hsa-miR-1231	0	0	1	1	0	0	COL9A2	collagen, type IX, alpha 2
hsa-miR-1231	1	0	1	1	1	1	ARID3B	AT rich interactive domain 3B (BRIGHT-like)
hsa-miR-1231	1	0	1	1	1	1	C12orf76	chromosome 12 open reading frame 76
hsa-miR-1231	0	0	1	1	1	1	COL22A1	collagen, type XXII, alpha 1
hsa-miR-1231	0	0	1	1	0	0	C1orf87	chromosome 1 open reading frame 87
hsa-miR-1231	0	0	1	0	0	0	LRRC37BP1	leucine rich repeat containing 37B pseudogene 1
hsa-miR-1231	0	0	1	0	0	0	LOC283914	uncharacterized LOC283914
hsa-miR-1231	1	0	1	0	1	1	LYPD6	LY6/PLAUR domain containing 6
hsa-miR-1231	1	0	1	1	1	1	SLC35G1	solute carrier family 35, member G1
hsa-miR-1231	1	0	1	1	1	1	TOMM40	translocase of outer mitochondrial membrane 40 homolog (yeast)
hsa-miR-1231	0	0	1	0	1	1	LOC401021	uncharacterized LOC401021
hsa-miR-1231	0	0	1	0	0	0	LOC283038	uncharacterized LOC283038
hsa-miR-1231	1	0	1	1	1	1	TMPO	thymopoietin
hsa-miR-1231	0	0	1	1	0	0	RFNG	RFNG O-fucosylpeptide 3-beta-N-acetylglucosaminyltransferase
hsa-miR-1231	0	0	1	0	0	0	AURKAPS1	aurora kinase A pseudogene 1
hsa-miR-1231	1	0	1	0	1	1	SEMA4G	sema domain, immunoglobulin domain (Ig), transmembrane domain (TM) and short cytoplasmic domain, (semaphorin) 4G
hsa-miR-1231	1	0	1	1	1	1	LIMD2	LIM domain containing 2
hsa-miR-1231	0	0	1	1	1	1	SLC25A35	solute carrier family 25, member 35
hsa-miR-1231	1	0	1	0	1	1	C14orf43	chromosome 14 open reading frame 43
hsa-miR-1231	0	0	1	1	0	0	LY6H	lymphocyte antigen 6 complex, locus H
hsa-miR-1231	0	0	1	0	0	0	LINC00265	long intergenic non-protein coding RNA 265
hsa-miR-1231	1	0	1	1	1	1	KDM5C	lysine (K)-specific demethylase 5C
hsa-miR-1231	1	0	1	1	1	1	KLHL28	kelch-like 28 (Drosophila)
hsa-miR-1231	1	0	1	1	0	0	ANKRD13B	ankyrin repeat domain 13B
hsa-miR-1231	0	0	1	1	0	0	PDSS1	prenyl (decaprenyl) diphosphate synthase, subunit 1
hsa-miR-1231	1	0	1	1	1	1	ADCY6	adenylate cyclase 6
hsa-miR-1231	0	0	1	1	1	1	SH2D1B	SH2 domain containing 1B
hsa-miR-1231	0	0	1	0	0	0	PTGER4P2	prostaglandin E receptor 4 (subtype EP4) pseudogene 2
hsa-miR-1231	0	0	1	1	0	0	CYP4F30P	cytochrome P450, family 4, subfamily F, polypeptide 30, pseudogene
hsa-miR-1231	1	0	1	1	1	1	AHR	aryl hydrocarbon receptor
hsa-miR-1231	0	0	1	1	0	0	CSF2RB	colony stimulating factor 2 receptor, beta, low-affinity (granulocyte-macrophage)
hsa-miR-1231	0	0	1	0	0	0	AQP7P2	aquaporin 7 pseudogene 2
hsa-miR-1231	0	0	1	1	1	1	SLC11A1	solute carrier family 11 (proton-coupled divalent metal ion transporters), member 1
hsa-miR-1231	0	0	1	1	1	1	TNFSF12	tumor necrosis factor (ligand) superfamily, member 12
hsa-miR-1231	0	0	1	1	0	0	TRIM73	tripartite motif containing 73
hsa-miR-1231	0	0	1	0	0	0	PHKA2-AS1	PHKA2 antisense RNA 1
hsa-miR-1231	0	0	1	1	0	0	C8orf31	chromosome 8 open reading frame 31
hsa-miR-1231	1	0	1	1	1	1	WBP1L	WW domain binding protein 1-like
hsa-miR-1231	0	0	1	0	0	0	LINC00152	long intergenic non-protein coding RNA 152
hsa-miR-1231	0	0	1	1	0	0	MASP2	mannan-binding lectin serine peptidase 2
hsa-miR-1231	0	0	1	0	0	0	LINC00537	long intergenic non-protein coding RNA 537
hsa-miR-1231	0	0	1	0	1	1	LOC389043	uncharacterized LOC389043
hsa-miR-1231	1	0	1	0	1	1	PIK3R3	phosphoinositide-3-kinase, regulatory subunit 3 (gamma)
hsa-miR-1231	0	0	1	0	0	0	FRG1B	FSHD region gene 1 family, member B
hsa-miR-1231	1	0	1	1	0	0	SRRM3	serine/arginine repetitive matrix 3
hsa-miR-1231	0	0	1	1	1	1	PARPBP	PARP1 binding protein
hsa-miR-1231	1	0	1	0	1	1	MYBL1	v-myb myeloblastosis viral oncogene homolog (avian)-like 1
hsa-miR-1231	0	0	1	1	0	0	FBXO16	F-box protein 16
hsa-miR-1231	0	0	1	0	0	0	LOC441493	uncharacterized LOC441493
hsa-miR-1231	0	0	1	0	0	0	LSAMP-AS3	LSAMP antisense RNA 3
hsa-miR-1231	1	0	1	1	1	1	GABRB2	gamma-aminobutyric acid (GABA) A receptor, beta 2
hsa-miR-1231	0	0	1	0	0	0	FBXL19-AS1	FBXL19 antisense RNA 1 (head to head)
hsa-miR-1231	1	0	1	1	1	1	PTPRD	protein tyrosine phosphatase, receptor type, D
hsa-miR-1231	0	0	1	1	0	0	ITGB1BP2	integrin beta 1 binding protein (melusin) 2
hsa-miR-1231	1	0	1	1	1	1	TBP	TATA box binding protein
hsa-miR-1231	0	0	1	0	0	0	INTS4L1	integrator complex subunit 4-like 1
hsa-miR-1231	1	0	1	1	1	1	SLK	STE20-like kinase
hsa-miR-1231	0	0	1	0	0	0	LRRC37A11P	leucine rich repeat containing 37, member A11, pseudogene
hsa-miR-1231	0	0	1	1	0	0	PRAMEF10	PRAME family member 10
hsa-miR-1231	0	0	1	1	0	0	RNF123	ring finger protein 123
hsa-miR-1231	0	0	1	0	0	0	LINC00661	long intergenic non-protein coding RNA 661
hsa-miR-1231	0	0	1	1	0	0	RGSL1	regulator of G-protein signaling like 1
hsa-miR-1231	0	0	1	0	0	0	LINC00486	long intergenic non-protein coding RNA 486
hsa-miR-1231	0	0	1	1	1	1	KANSL1L	KAT8 regulatory NSL complex subunit 1-like
hsa-miR-1231	0	0	1	0	0	0	FAM225B	family with sequence similarity 225, member B (non-protein coding)
hsa-miR-1231	1	0	1	1	1	1	PHC2	polyhomeotic homolog 2 (Drosophila)
hsa-miR-1231	1	0	1	1	1	1	TMEM218	transmembrane protein 218
hsa-miR-1231	0	0	1	1	1	1	DLGAP5	discs, large (Drosophila) homolog-associated protein 5
hsa-miR-1231	0	0	1	0	1	1	ZNF498	zinc finger protein 498
hsa-miR-1231	0	0	1	1	1	1	PSMA2	proteasome (prosome, macropain) subunit, alpha type, 2
hsa-miR-1231	0	0	1	1	1	1	MAP2K6	mitogen-activated protein kinase kinase 6
hsa-miR-1231	1	0	1	1	1	1	RAB30	RAB30, member RAS oncogene family
hsa-miR-1231	0	0	1	1	1	1	COL6A3	collagen, type VI, alpha 3
hsa-miR-1231	1	0	1	1	1	1	SMAD4	SMAD family member 4
hsa-miR-1231	1	0	1	1	1	1	MASP1	mannan-binding lectin serine peptidase 1 (C4/C2 activating component of Ra-reactive factor)
hsa-miR-1231	0	0	1	1	1	1	IPCEF1	interaction protein for cytohesin exchange factors 1
hsa-miR-1231	0	0	1	0	0	0	SMG1P1	smg-1 homolog, phosphatidylinositol 3-kinase-related kinase pseudogene 1
hsa-miR-1231	0	0	1	1	1	1	MYOM3	myomesin family, member 3
hsa-miR-1231	0	0	1	1	1	1	MLIP	muscular LMNA-interacting protein
hsa-miR-1231	0	0	1	1	0	0	ANKRD33	ankyrin repeat domain 33
hsa-miR-1231	1	0	1	1	1	1	STARD13	StAR-related lipid transfer (START) domain containing 13
hsa-miR-1231	1	0	1	1	1	1	CYB5B	cytochrome b5 type B (outer mitochondrial membrane)
hsa-miR-1231	1	0	1	1	1	1	NAV1	neuron navigator 1
hsa-miR-1231	1	0	1	1	1	1	PGAP1	post-GPI attachment to proteins 1
hsa-miR-1231	0	0	1	0	0	0	ZNRD1-AS1	ZNRD1 antisense RNA 1
hsa-miR-1231	1	0	1	0	1	1	C1orf21	chromosome 1 open reading frame 21
hsa-miR-1231	0	0	1	1	1	1	USP54	ubiquitin specific peptidase 54
hsa-miR-1231	1	0	1	1	1	1	DLG5	discs, large homolog 5 (Drosophila)
hsa-miR-1231	1	0	1	0	1	1	TTL	tubulin tyrosine ligase
hsa-miR-1231	0	0	1	0	1	1	GINS3	GINS complex subunit 3 (Psf3 homolog)
hsa-miR-1231	0	0	1	1	0	0	SREBF2	sterol regulatory element binding transcription factor 2
hsa-miR-1231	1	0	1	1	0	0	SMARCA2	SWI/SNF related, matrix associated, actin dependent regulator of chromatin, subfamily a, member 2
hsa-miR-1231	0	0	1	1	1	1	DUSP26	dual specificity phosphatase 26 (putative)
hsa-miR-1231	1	0	1	0	0	0	IGLON5	IgLON family member 5
hsa-miR-1231	1	0	1	1	1	1	GPBP1	GC-rich promoter binding protein 1
hsa-miR-1231	1	0	1	1	0	0	CGREF1	cell growth regulator with EF-hand domain 1
hsa-miR-1231	1	0	1	1	1	1	TARBP2	TAR (HIV-1) RNA binding protein 2
hsa-miR-1231	1	0	1	1	1	1	EIF4B	eukaryotic translation initiation factor 4B
hsa-miR-1231	0	0	1	1	0	0	RAD23A	RAD23 homolog A (S. cerevisiae)
hsa-miR-1231	1	0	1	1	1	1	CLDN11	claudin 11
hsa-miR-1231	1	0	1	1	1	1	LETMD1	LETM1 domain containing 1
hsa-miR-1231	0	0	1	1	1	1	HSPB8	heat shock 22kDa protein 8
hsa-miR-1231	0	0	1	1	1	1	PMPCB	peptidase (mitochondrial processing) beta
hsa-miR-1231	0	0	1	1	1	1	MRPS36	mitochondrial ribosomal protein S36
hsa-miR-1231	1	0	1	1	1	1	CCNE1	cyclin E1
hsa-miR-1231	0	0	1	0	1	1	IGF2-AS	IGF2 antisense RNA
hsa-miR-1231	0	0	1	1	0	0	ZFYVE19	zinc finger, FYVE domain containing 19
hsa-miR-1231	0	0	1	1	0	0	FAM64A	family with sequence similarity 64, member A
hsa-miR-1231	0	0	1	1	1	1	GRAP2	GRB2-related adaptor protein 2
hsa-miR-1231	1	0	1	0	1	1	RPS6KB1	ribosomal protein S6 kinase, 70kDa, polypeptide 1
hsa-miR-1231	0	0	1	1	1	1	STON1	stonin 1
hsa-miR-1231	1	0	1	1	1	1	LYPLA2	lysophospholipase II
hsa-miR-1231	0	0	1	1	0	0	SNRPA	small nuclear ribonucleoprotein polypeptide A
hsa-miR-1231	1	0	1	1	1	1	WIPF1	WAS/WASL interacting protein family, member 1
hsa-miR-1231	0	0	1	1	1	1	TOX4	TOX high mobility group box family member 4
hsa-miR-1231	0	0	1	0	0	0	FLJ45248	FLJ45248 protein
hsa-miR-1231	0	0	1	1	1	1	CAPZB	capping protein (actin filament) muscle Z-line, beta
hsa-miR-1231	1	0	1	0	1	1	IP6K1	inositol hexakisphosphate kinase 1
hsa-miR-1231	0	0	1	1	0	0	NUP205	nucleoporin 205kDa
hsa-miR-1231	0	0	1	0	0	0	SLC22A18	solute carrier family 22, member 18
hsa-miR-1231	1	0	1	1	1	1	ARNTL	aryl hydrocarbon receptor nuclear translocator-like
hsa-miR-1231	0	0	1	0	0	0	LOC254559	uncharacterized LOC254559
hsa-miR-1231	0	0	1	1	1	1	DEDD	death effector domain containing
hsa-miR-1231	1	0	1	1	1	1	TIMP3	TIMP metallopeptidase inhibitor 3
hsa-miR-1231	0	0	1	1	1	1	TCTN3	tectonic family member 3
hsa-miR-1231	0	0	1	1	1	1	ACSF3	acyl-CoA synthetase family member 3
hsa-miR-1231	1	0	1	1	1	1	EIF1	eukaryotic translation initiation factor 1
hsa-miR-1231	1	0	1	1	1	1	RPUSD3	RNA pseudouridylate synthase domain containing 3
hsa-miR-1231	0	0	1	1	0	0	RNASEH2A	ribonuclease H2, subunit A
hsa-miR-1231	1	0	1	0	1	1	MAP1B	microtubule-associated protein 1B
hsa-miR-1231	1	0	1	1	1	1	HMGN2	high mobility group nucleosomal binding domain 2
hsa-miR-1231	0	0	1	1	0	0	CCDC107	coiled-coil domain containing 107
hsa-miR-1231	0	0	1	1	0	0	BCKDK	branched chain ketoacid dehydrogenase kinase
hsa-miR-1231	1	0	1	1	1	1	GDA	guanine deaminase
hsa-miR-1231	1	0	1	1	1	1	HIGD1A	HIG1 hypoxia inducible domain family, member 1A
hsa-miR-1231	0	0	1	1	1	1	LGI1	leucine-rich, glioma inactivated 1
hsa-miR-1231	0	0	1	0	0	0	NUDT18	nudix (nucleoside diphosphate linked moiety X)-type motif 18
hsa-miR-1231	0	0	1	1	1	1	INPP5K	inositol polyphosphate-5-phosphatase K
hsa-miR-1231	0	0	1	1	1	1	C10orf2	chromosome 10 open reading frame 2
hsa-miR-1231	1	0	1	1	0	0	MMP11	matrix metallopeptidase 11 (stromelysin 3)
hsa-miR-1231	0	0	1	0	0	0	FAM47E	family with sequence similarity 47, member E
hsa-miR-1231	0	0	1	0	0	0	LOC731789	uncharacterized LOC731789
hsa-miR-1231	0	0	1	1	1	1	CCP110	centriolar coiled coil protein 110kDa
hsa-miR-1231	0	0	1	1	1	1	UPRT	uracil phosphoribosyltransferase (FUR1) homolog (S. cerevisiae)
hsa-miR-1231	0	0	1	1	1	1	ATG5	autophagy related 5
hsa-miR-1231	1	0	1	1	1	1	KIAA2018	KIAA2018
hsa-miR-1231	1	0	1	0	1	1	SLC7A6	solute carrier family 7 (amino acid transporter light chain, y+L system), member 6
hsa-miR-1231	0	0	1	1	1	1	SDAD1	SDA1 domain containing 1
hsa-miR-1231	0	0	1	0	0	0	MIR143HG	MIR143 host gene (non-protein coding)
hsa-miR-1231	1	0	1	1	1	1	BCL2L1	BCL2-like 1
hsa-miR-1231	1	0	1	1	1	1	ADD1	adducin 1 (alpha)
hsa-miR-1231	0	0	1	1	0	0	TENC1	tensin like C1 domain containing phosphatase (tensin 2)
hsa-miR-1231	0	0	1	0	1	1	SYNPR	synaptoporin
hsa-miR-1231	1	0	1	1	1	1	SP2	Sp2 transcription factor
hsa-miR-1231	1	0	1	1	1	1	PI15	peptidase inhibitor 15
hsa-miR-1231	1	0	1	1	1	1	SEC14L1	SEC14-like 1 (S. cerevisiae)
hsa-miR-1231	1	0	1	0	1	1	IRF4	interferon regulatory factor 4
hsa-miR-1231	1	0	1	1	1	1	RB1CC1	RB1-inducible coiled-coil 1
hsa-miR-1231	1	0	1	0	1	1	KLHDC10	kelch domain containing 10
hsa-miR-1231	0	0	1	1	0	0	SPATA20	spermatogenesis associated 20
hsa-miR-1231	0	0	1	1	0	0	GPR111	G protein-coupled receptor 111
hsa-miR-1231	1	0	1	1	1	1	MOSPD1	motile sperm domain containing 1
hsa-miR-1231	0	0	1	0	0	0	POM121L8P	POM121 transmembrane nucleoporin-like 8 pseudogene
hsa-miR-1231	1	0	1	1	1	1	BNC2	basonuclin 2
hsa-miR-1231	0	0	1	1	0	0	CYP27B1	cytochrome P450, family 27, subfamily B, polypeptide 1
hsa-miR-1231	0	0	1	0	0	0	GPR144	G protein-coupled receptor 144
hsa-miR-1231	1	0	1	1	1	1	MLL	myeloid/lymphoid or mixed-lineage leukemia (trithorax homolog, Drosophila)
hsa-miR-1231	1	0	1	1	1	1	AFF1	AF4/FMR2 family, member 1
hsa-miR-1231	0	0	1	1	1	1	PLCB4	phospholipase C, beta 4
hsa-miR-1231	1	0	1	0	1	1	BCL2	B-cell CLL/lymphoma 2
hsa-miR-1231	1	0	1	1	1	1	ELK1	ELK1, member of ETS oncogene family
hsa-miR-1231	1	0	1	1	1	1	IGF1	insulin-like growth factor 1 (somatomedin C)
hsa-miR-1231	1	0	1	1	1	1	COL4A3	collagen, type IV, alpha 3 (Goodpasture antigen)
hsa-miR-1231	1	0	1	1	1	1	COL4A4	collagen, type IV, alpha 4
hsa-miR-1231	1	0	1	1	1	1	F13A1	coagulation factor XIII, A1 polypeptide
hsa-miR-1231	0	0	1	1	0	0	GBA	glucosidase, beta, acid
hsa-miR-1231	1	0	1	1	1	1	KCNA1	potassium voltage-gated channel, shaker-related subfamily, member 1 (episodic ataxia with myokymia)
hsa-miR-1231	0	0	1	1	1	1	MAOA	monoamine oxidase A
hsa-miR-1231	1	0	1	1	1	1	OCRL	oculocerebrorenal syndrome of Lowe
hsa-miR-1231	0	0	1	1	1	1	SRD5A2	steroid-5-alpha-reductase, alpha polypeptide 2 (3-oxo-5 alpha-steroid delta 4-dehydrogenase alpha 2)
hsa-miR-1231	0	0	1	1	1	1	SLC25A20	solute carrier family 25 (carnitine/acylcarnitine translocase), member 20
hsa-miR-1231	1	0	1	0	1	1	PAFAH1B1	platelet-activating factor acetylhydrolase 1b, regulatory subunit 1 (45kDa)
hsa-miR-1231	0	0	1	1	1	1	PECAM1	platelet/endothelial cell adhesion molecule 1
hsa-miR-1231	0	0	1	1	1	1	PLEC	plectin
hsa-miR-1231	1	0	1	1	1	1	HNF1B	HNF1 homeobox B
hsa-miR-1231	1	0	1	1	1	1	AQP2	aquaporin 2 (collecting duct)
hsa-miR-1231	1	0	1	1	1	1	HOXA13	homeobox A13
hsa-miR-1231	1	0	1	1	1	1	DCX	doublecortin
hsa-miR-1231	1	0	1	1	1	1	TNF	tumor necrosis factor
hsa-miR-1231	1	0	1	1	1	1	FASLG	Fas ligand (TNF superfamily, member 6)
hsa-miR-1231	0	0	1	1	0	0	FOLR1	folate receptor 1 (adult)
hsa-miR-1231	1	0	1	0	1	1	GABRA4	gamma-aminobutyric acid (GABA) A receptor, alpha 4
hsa-miR-1231	1	0	1	1	1	1	HTR4	5-hydroxytryptamine (serotonin) receptor 4, G protein-coupled
hsa-miR-1231	0	0	1	1	1	1	HTR7	5-hydroxytryptamine (serotonin) receptor 7, adenylate cyclase-coupled
hsa-miR-1231	0	0	1	1	0	0	RPL38	ribosomal protein L38
hsa-miR-1231	1	0	1	0	1	1	UBE2W	ubiquitin-conjugating enzyme E2W (putative)
hsa-miR-1231	1	0	1	0	1	1	FLJ33360	FLJ33360 protein
hsa-miR-1231	0	0	1	1	1	1	DDI1	DNA-damage inducible 1 homolog 1 (S. cerevisiae)
hsa-miR-1231	1	0	1	1	1	1	TPD52L3	tumor protein D52-like 3
hsa-miR-1231	1	0	1	0	1	1	CACNA1I	calcium channel, voltage-dependent, T type, alpha 1I subunit
hsa-miR-1231	0	0	1	0	0	0	FLJ42842	uncharacterized FLJ42842
hsa-miR-1231	0	0	1	0	1	1	FLJ16124	FLJ16124 protein
hsa-miR-1231	1	0	1	0	1	1	LRRC55	leucine rich repeat containing 55
hsa-miR-1231	0	0	1	1	1	1	HMGN2P46	high mobility group nucleosomal binding domain 2 pseudogene 46
hsa-miR-1231	0	0	1	0	1	1	FLJ46347	uncharacterized LOC389064
hsa-miR-1231	0	0	1	1	1	1	PLAUR	plasminogen activator, urokinase receptor
hsa-miR-1231	0	0	1	1	1	1	SCP2	sterol carrier protein 2
hsa-miR-1231	1	0	1	1	1	1	CTDSPL	CTD (carboxy-terminal domain, RNA polymerase II, polypeptide A) small phosphatase-like
hsa-miR-1231	0	0	1	1	0	0	CDKL4	cyclin-dependent kinase-like 4
hsa-miR-1231	1	0	1	1	1	1	LUZP2	leucine zipper protein 2
hsa-miR-1231	1	0	1	0	1	1	ERMN	ermin, ERM-like protein
hsa-miR-1231	0	0	1	1	1	1	MUC21	mucin 21, cell surface associated
hsa-miR-1231	1	0	1	0	1	1	FYTTD1	forty-two-three domain containing 1
hsa-miR-1231	1	0	1	1	1	1	DYNC2LI1	dynein, cytoplasmic 2, light intermediate chain 1
hsa-miR-1231	0	0	1	1	0	0	RGR	retinal G protein coupled receptor
hsa-miR-1231	1	0	1	1	1	1	SLC25A53	solute carrier family 25, member 53
hsa-miR-1231	1	0	1	1	1	1	UBE2NL	ubiquitin-conjugating enzyme E2N-like
hsa-miR-1231	1	0	1	1	1	1	FXR1	fragile X mental retardation, autosomal homolog 1
hsa-miR-1231	1	0	1	1	1	1	C12orf68	chromosome 12 open reading frame 68
hsa-miR-1231	0	0	1	0	1	1	C12orf69	chromosome 12 open reading frame 69
hsa-miR-1231	1	0	1	1	1	1	KATNAL1	katanin p60 subunit A-like 1
hsa-miR-1231	1	0	1	1	1	1	RUNX2	runt-related transcription factor 2
hsa-miR-1231	1	0	1	0	1	1	GOPC	golgi-associated PDZ and coiled-coil motif containing
hsa-miR-1231	0	0	1	1	1	1	GCOM1	GRINL1A complex locus 1
hsa-miR-1231	1	0	1	1	1	1	IQCB1	IQ motif containing B1
hsa-miR-1231	1	0	1	1	1	1	CANX	calnexin
hsa-miR-1231	1	0	1	0	1	1	TNRC6B	trinucleotide repeat containing 6B
hsa-miR-1231	0	0	1	1	1	1	ARRDC2	arrestin domain containing 2
hsa-miR-1231	1	0	1	1	1	1	RGS7BP	regulator of G-protein signaling 7 binding protein
hsa-miR-1231	0	0	1	1	0	0	KLK3	kallikrein-related peptidase 3
hsa-miR-1231	1	0	1	0	1	1	MSRB3	methionine sulfoxide reductase B3
hsa-miR-1231	1	0	1	1	1	1	CSNK1G3	casein kinase 1, gamma 3
hsa-miR-1231	1	0	1	1	1	1	TFAP2A	transcription factor AP-2 alpha (activating enhancer binding protein 2 alpha)
hsa-miR-1231	1	0	1	1	1	1	SMOC1	SPARC related modular calcium binding 1
hsa-miR-1231	1	0	1	1	1	1	SCN1B	sodium channel, voltage-gated, type I, beta subunit
hsa-miR-1231	1	0	1	1	1	1	AGAP1	ArfGAP with GTPase domain, ankyrin repeat and PH domain 1
hsa-miR-1231	1	0	1	1	1	1	SCD5	stearoyl-CoA desaturase 5
hsa-miR-1231	0	0	1	1	1	1	ATAD3C	ATPase family, AAA domain containing 3C
hsa-miR-1231	1	0	1	1	1	1	ELMO1	engulfment and cell motility 1
hsa-miR-1231	1	0	1	1	1	1	KIAA0317	KIAA0317
hsa-miR-1231	1	0	1	0	1	1	GK5	glycerol kinase 5 (putative)
hsa-miR-1231	1	0	1	1	1	1	KREMEN1	kringle containing transmembrane protein 1
hsa-miR-1231	1	0	1	1	1	1	KCNC4	potassium voltage-gated channel, Shaw-related subfamily, member 4
hsa-miR-1231	1	0	1	1	1	1	CHTF8	CTF8, chromosome transmission fidelity factor 8 homolog (S. cerevisiae)
hsa-miR-1231	1	0	1	1	1	1	C3orf65	chromosome 3 open reading frame 65
hsa-miR-1231	1	0	1	1	1	1	STRN4	striatin, calmodulin binding protein 4
hsa-miR-1231	1	0	1	1	1	1	ZNF384	zinc finger protein 384
hsa-miR-1231	0	0	1	0	1	1	SCN3B	sodium channel, voltage-gated, type III, beta subunit
hsa-miR-1231	0	0	1	1	1	1	SPOCK3	sparc/osteonectin, cwcv and kazal-like domains proteoglycan (testican) 3
hsa-miR-1231	1	0	1	1	1	1	PAPD5	PAP associated domain containing 5
hsa-miR-1231	1	0	1	1	0	0	KIAA0895L	KIAA0895-like
hsa-miR-1231	1	0	1	1	1	1	RUFY2	RUN and FYVE domain containing 2
hsa-miR-1231	0	0	1	1	1	1	C6orf162	chromosome 6 open reading frame 162
hsa-miR-1231	1	0	1	1	1	1	KDM5A	lysine (K)-specific demethylase 5A
hsa-miR-1231	1	0	1	0	1	1	SRGAP2	SLIT-ROBO Rho GTPase activating protein 2
hsa-miR-1231	1	0	1	1	1	1	NET1	neuroepithelial cell transforming 1
hsa-miR-1231	0	0	1	1	1	1	SSTR2	somatostatin receptor 2
hsa-miR-1231	1	0	1	1	1	1	METTL9	methyltransferase like 9
hsa-miR-1231	1	0	1	1	1	1	ZNF436	zinc finger protein 436
hsa-miR-1231	1	0	1	1	1	1	PDE11A	phosphodiesterase 11A
hsa-miR-1231	0	0	1	1	0	0	FAM127A	family with sequence similarity 127, member A
hsa-miR-1231	1	0	1	0	0	0	FAM127B	family with sequence similarity 127, member B
hsa-miR-1231	1	0	1	0	1	1	FAM127C	family with sequence similarity 127, member C
hsa-miR-1231	1	0	1	0	1	1	TRAPPC6B	trafficking protein particle complex 6B
hsa-miR-1231	1	0	1	0	1	1	MEGF9	multiple EGF-like-domains 9
hsa-miR-1231	0	0	1	1	0	0	TSPAN11	tetraspanin 11
hsa-miR-1231	1	0	1	1	1	1	MYO1C	myosin IC
hsa-miR-1231	1	0	1	1	1	1	REPS2	RALBP1 associated Eps domain containing 2
hsa-miR-1231	1	0	1	1	1	1	ASIC1	acid-sensing (proton-gated) ion channel 1
hsa-miR-1231	1	0	1	1	1	1	BMP2	bone morphogenetic protein 2
hsa-miR-1231	1	0	1	1	1	1	CREBL2	cAMP responsive element binding protein-like 2
hsa-miR-1231	1	0	1	0	1	1	EFNB3	ephrin-B3
hsa-miR-1231	1	0	1	0	1	1	ELAVL3	ELAV (embryonic lethal, abnormal vision, Drosophila)-like 3 (Hu antigen C)
hsa-miR-1231	1	0	1	1	1	1	FOXF2	forkhead box F2
hsa-miR-1231	1	0	1	1	1	1	FOXC1	forkhead box C1
hsa-miR-1231	0	0	1	0	1	1	FMO2	flavin containing monooxygenase 2 (non-functional)
hsa-miR-1231	1	0	1	1	1	1	IFIT2	interferon-induced protein with tetratricopeptide repeats 2
hsa-miR-1231	0	0	1	1	1	1	IMPG1	interphotoreceptor matrix proteoglycan 1
hsa-miR-1231	1	0	1	1	1	1	IRAK2	interleukin-1 receptor-associated kinase 2
hsa-miR-1231	1	0	1	1	1	1	ARF3	ADP-ribosylation factor 3
hsa-miR-1231	0	0	1	1	1	1	ARF4	ADP-ribosylation factor 4
hsa-miR-1231	1	0	1	1	1	1	BTG1	B-cell translocation gene 1, anti-proliferative
hsa-miR-1231	0	0	1	1	1	1	CALB2	calbindin 2
hsa-miR-1231	0	0	1	1	1	1	SLC31A2	solute carrier family 31 (copper transporters), member 2
hsa-miR-1231	0	0	1	1	1	1	DLAT	dihydrolipoamide S-acetyltransferase
hsa-miR-1231	1	0	1	1	1	1	DPP4	dipeptidyl-peptidase 4
hsa-miR-1231	1	0	1	0	0	0	DRP2	dystrophin related protein 2
hsa-miR-1231	1	0	1	1	1	1	DUSP6	dual specificity phosphatase 6
hsa-miR-1231	1	0	1	1	1	1	FBN2	fibrillin 2
hsa-miR-1231	1	0	1	0	1	1	FUT4	fucosyltransferase 4 (alpha (1,3) fucosyltransferase, myeloid-specific)
hsa-miR-1231	0	0	1	1	0	0	GLP1R	glucagon-like peptide 1 receptor
hsa-miR-1231	0	0	1	1	1	1	GNAQ	guanine nucleotide binding protein (G protein), q polypeptide
hsa-miR-1231	1	0	1	1	1	1	HOXB3	homeobox B3
hsa-miR-1231	1	0	1	1	1	1	ITGA5	integrin, alpha 5 (fibronectin receptor, alpha polypeptide)
hsa-miR-1231	1	0	1	1	1	1	LRP1	low density lipoprotein receptor-related protein 1
hsa-miR-1231	1	0	1	1	1	1	MAP1A	microtubule-associated protein 1A
hsa-miR-1231	0	0	1	1	1	1	NID1	nidogen 1
hsa-miR-1231	1	0	1	1	1	1	NPAS2	neuronal PAS domain protein 2
hsa-miR-1231	0	0	1	1	0	0	NTSR1	neurotensin receptor 1 (high affinity)
hsa-miR-1231	1	0	1	1	1	1	PBX2	pre-B-cell leukemia homeobox 2
hsa-miR-1231	1	0	1	1	1	1	PLAGL2	pleiomorphic adenoma gene-like 2
hsa-miR-1231	0	0	1	1	1	1	PNN	pinin, desmosome associated protein
hsa-miR-1231	1	0	1	1	1	1	PPP2R1B	protein phosphatase 2, regulatory subunit A, beta
hsa-miR-1231	1	0	1	1	1	1	PVRL1	poliovirus receptor-related 1 (herpesvirus entry mediator C)
hsa-miR-1231	0	0	1	1	1	1	CCL2	chemokine (C-C motif) ligand 2
hsa-miR-1231	1	0	1	0	0	0	CX3CL1	chemokine (C-X3-C motif) ligand 1
hsa-miR-1231	1	0	1	0	1	1	ST6GAL1	ST6 beta-galactosamide alpha-2,6-sialyltranferase 1
hsa-miR-1231	1	0	1	0	1	1	SLC6A1	solute carrier family 6 (neurotransmitter transporter, GABA), member 1
hsa-miR-1231	0	0	1	1	1	1	SLC34A1	solute carrier family 34 (sodium phosphate), member 1
hsa-miR-1231	1	0	1	1	1	1	SMARCD2	SWI/SNF related, matrix associated, actin dependent regulator of chromatin, subfamily d, member 2
hsa-miR-1231	0	0	1	1	1	1	SNAPC1	small nuclear RNA activating complex, polypeptide 1, 43kDa
hsa-miR-1231	1	0	1	0	1	1	SOX11	SRY (sex determining region Y)-box 11
hsa-miR-1231	1	0	1	1	1	1	SRPR	signal recognition particle receptor (docking protein)
hsa-miR-1231	1	0	1	0	1	1	STC1	stanniocalcin 1
hsa-miR-1231	0	0	1	1	1	1	STIM1	stromal interaction molecule 1
hsa-miR-1231	1	0	1	1	1	1	SUV39H1	suppressor of variegation 3-9 homolog 1 (Drosophila)
hsa-miR-1231	1	0	1	1	1	1	TEC	tec protein tyrosine kinase
hsa-miR-1231	1	0	1	1	1	1	TIAM1	T-cell lymphoma invasion and metastasis 1
hsa-miR-1231	1	0	1	1	1	1	NR2E1	nuclear receptor subfamily 2, group E, member 1
hsa-miR-1231	1	0	1	1	1	1	TOP1	topoisomerase (DNA) I
hsa-miR-1231	0	0	1	1	1	1	TPP2	tripeptidyl peptidase II
hsa-miR-1231	1	0	1	1	1	1	NR2C2	nuclear receptor subfamily 2, group C, member 2
hsa-miR-1231	1	0	1	0	1	1	TSPYL1	TSPY-like 1
hsa-miR-1231	1	0	1	0	1	1	UBE2L3	ubiquitin-conjugating enzyme E2L 3
hsa-miR-1231	1	0	1	1	1	1	UBE2N	ubiquitin-conjugating enzyme E2N
hsa-miR-1231	0	0	1	1	0	0	VEGFB	vascular endothelial growth factor B
hsa-miR-1231	0	0	1	1	1	1	ITGA10	integrin, alpha 10
hsa-miR-1231	1	0	1	0	1	1	TNKS	tankyrase, TRF1-interacting ankyrin-related ADP-ribose polymerase
hsa-miR-1231	0	0	1	1	0	0	ADAM7	ADAM metallopeptidase domain 7
hsa-miR-1231	0	0	1	1	1	1	PRPF4B	PRP4 pre-mRNA processing factor 4 homolog B (yeast)
hsa-miR-1231	0	0	1	1	1	1	RNF8	ring finger protein 8, E3 ubiquitin protein ligase
hsa-miR-1231	1	0	1	1	1	1	UBE2M	ubiquitin-conjugating enzyme E2M
hsa-miR-1231	1	0	1	0	1	1	DGKB	diacylglycerol kinase, beta 90kDa
hsa-miR-1231	0	0	1	1	0	0	FGF14	fibroblast growth factor 14
hsa-miR-1231	0	0	1	1	1	1	SLC1A1	solute carrier family 1 (neuronal/epithelial high affinity glutamate transporter, system Xag), member 1
hsa-miR-1231	0	0	1	1	1	1	LY86	lymphocyte antigen 86
hsa-miR-1231	1	0	1	1	1	1	DBN1	drebrin 1
hsa-miR-1231	1	0	1	1	1	1	DTX1	deltex homolog 1 (Drosophila)
hsa-miR-1231	1	0	1	1	1	1	DUSP5	dual specificity phosphatase 5
hsa-miR-1231	1	0	1	0	1	1	ETV5	ets variant 5
hsa-miR-1231	0	0	1	1	1	1	GPC5	glypican 5
hsa-miR-1231	0	0	1	1	1	1	FOXA1	forkhead box A1
hsa-miR-1231	1	0	1	1	0	0	HOXC6	homeobox C6
hsa-miR-1231	0	0	1	1	1	1	PIGH	phosphatidylinositol glycan anchor biosynthesis, class H
hsa-miR-1231	1	0	1	1	1	1	WNT11	wingless-type MMTV integration site family, member 11
hsa-miR-1231	1	0	1	1	1	1	SF1	splicing factor 1
hsa-miR-1231	0	0	1	1	0	0	MAP3K6	mitogen-activated protein kinase kinase kinase 6
hsa-miR-1231	0	0	1	0	1	1	CXorf1	chromosome X open reading frame 1
hsa-miR-1231	1	0	1	1	1	1	NRXN3	neurexin 3
hsa-miR-1231	1	0	1	1	1	1	MED26	mediator complex subunit 26
hsa-miR-1231	1	0	1	1	1	1	ONECUT2	one cut homeobox 2
hsa-miR-1231	1	0	1	1	1	1	CTNS	cystinosin, lysosomal cystine transporter
hsa-miR-1231	1	0	1	1	1	1	GABRE	gamma-aminobutyric acid (GABA) A receptor, epsilon
hsa-miR-1231	1	0	1	0	1	1	SCD	stearoyl-CoA desaturase (delta-9-desaturase)
hsa-miR-1231	1	0	1	0	1	1	SEL1L	sel-1 suppressor of lin-12-like (C. elegans)
hsa-miR-1231	0	0	1	1	1	1	XYLB	xylulokinase homolog (H. influenzae)
hsa-miR-1231	0	0	1	1	0	0	HR	hairless homolog (mouse)
hsa-miR-1231	1	0	1	1	1	1	DLX3	distal-less homeobox 3
hsa-miR-1231	1	0	1	1	1	1	ETS1	v-ets erythroblastosis virus E26 oncogene homolog 1 (avian)
hsa-miR-1231	1	0	1	1	1	1	GAS2	growth arrest-specific 2
hsa-miR-1231	1	0	1	1	1	1	GJA5	gap junction protein, alpha 5, 40kDa
hsa-miR-1231	1	0	1	1	1	1	GPR3	G protein-coupled receptor 3
hsa-miR-1231	1	0	1	1	1	1	NEFM	neurofilament, medium polypeptide
hsa-miR-1231	1	0	1	0	1	1	PRKAB2	protein kinase, AMP-activated, beta 2 non-catalytic subunit
hsa-miR-1231	1	0	1	1	1	1	RND2	Rho family GTPase 2
hsa-miR-1231	1	0	1	1	0	0	NOG	noggin
hsa-miR-1231	1	0	1	1	1	1	GABBR2	gamma-aminobutyric acid (GABA) B receptor, 2
hsa-miR-1231	1	0	1	1	1	1	PIGK	phosphatidylinositol glycan anchor biosynthesis, class K
hsa-miR-1231	1	0	1	1	1	1	HOXA1	homeobox A1
hsa-miR-1231	1	0	1	1	1	1	MAB21L1	mab-21-like 1 (C. elegans)
hsa-miR-1231	1	0	1	1	1	1	SMAD6	SMAD family member 6
hsa-miR-1231	0	0	1	1	0	0	RTN2	reticulon 2
hsa-miR-1231	1	0	1	1	1	1	TERF2	telomeric repeat binding factor 2
hsa-miR-1231	1	0	1	1	1	1	EVI5	ecotropic viral integration site 5
hsa-miR-1231	1	0	1	1	1	1	NAMPT	nicotinamide phosphoribosyltransferase
hsa-miR-1231	0	0	1	1	0	0	EBI3	Epstein-Barr virus induced 3
hsa-miR-1231	0	0	1	1	1	1	NUTF2	nuclear transport factor 2
hsa-miR-1231	1	0	1	1	1	1	EFS	embryonal Fyn-associated substrate
hsa-miR-1231	1	0	1	1	0	0	TRAIP	TRAF interacting protein
hsa-miR-1231	1	0	1	1	1	1	SNAI1	snail homolog 1 (Drosophila)
hsa-miR-1231	0	0	1	1	1	1	AKR1D1	aldo-keto reductase family 1, member D1 (delta 4-3-ketosteroid-5-beta-reductase)
hsa-miR-1231	1	0	1	1	1	1	TSNAX	translin-associated factor X
hsa-miR-1231	1	0	1	1	1	1	LIPG	lipase, endothelial
hsa-miR-1231	0	0	1	1	1	1	TRDN	triadin
hsa-miR-1231	1	0	1	1	1	1	SPON1	spondin 1, extracellular matrix protein
hsa-miR-1231	1	0	1	1	1	1	NFATC1	nuclear factor of activated T-cells, cytoplasmic, calcineurin-dependent 1
hsa-miR-1231	0	0	1	1	1	1	NKX3-1	NK3 homeobox 1
hsa-miR-1231	1	0	1	1	1	1	NR4A2	nuclear receptor subfamily 4, group A, member 2
hsa-miR-1231	1	0	1	1	1	1	CDK16	cyclin-dependent kinase 16
hsa-miR-1231	0	0	1	1	0	0	CCL19	chemokine (C-C motif) ligand 19
hsa-miR-1231	0	0	1	1	0	0	TESK1	testis-specific kinase 1
hsa-miR-1231	0	0	1	1	1	1	TYRO3	TYRO3 protein tyrosine kinase
hsa-miR-1231	0	0	1	1	1	1	PPIH	peptidylprolyl isomerase H (cyclophilin H)
hsa-miR-1231	0	0	1	1	1	1	TM9SF1	transmembrane 9 superfamily member 1
hsa-miR-1231	1	0	1	0	1	1	NCOA2	nuclear receptor coactivator 2
hsa-miR-1231	1	0	1	0	1	1	IGF2BP1	insulin-like growth factor 2 mRNA binding protein 1
hsa-miR-1231	1	0	1	1	1	1	KHDRBS1	KH domain containing, RNA binding, signal transduction associated 1
hsa-miR-1231	1	0	1	1	1	1	RBBP9	retinoblastoma binding protein 9
hsa-miR-1231	1	0	1	1	1	1	MMP24	matrix metallopeptidase 24 (membrane-inserted)
hsa-miR-1231	1	0	1	1	1	1	BTG2	BTG family, member 2
hsa-miR-1231	1	0	1	1	1	1	GLIPR1	GLI pathogenesis-related 1
hsa-miR-1231	0	0	1	1	0	0	PIM2	pim-2 oncogene
hsa-miR-1231	1	0	1	0	1	1	SOX12	SRY (sex determining region Y)-box 12
hsa-miR-1231	0	0	1	1	1	1	TMEM115	transmembrane protein 115
hsa-miR-1231	1	0	1	1	1	1	FGFR1OP	FGFR1 oncogene partner
hsa-miR-1231	1	0	1	1	1	1	TMF1	TATA element modulatory factor 1
hsa-miR-1231	1	0	1	1	1	1	TESK2	testis-specific kinase 2
hsa-miR-1231	1	0	1	1	1	1	PALM2-AKAP2	PALM2-AKAP2 readthrough
hsa-miR-1231	1	0	1	1	1	1	KLF12	Kruppel-like factor 12
hsa-miR-1231	0	0	1	1	1	1	LMOD1	leiomodin 1 (smooth muscle)
hsa-miR-1231	0	0	1	1	0	0	GLG1	golgi glycoprotein 1
hsa-miR-1231	0	0	1	1	0	0	GNG3	guanine nucleotide binding protein (G protein), gamma 3
hsa-miR-1231	1	0	1	1	1	1	RYBP	RING1 and YY1 binding protein
hsa-miR-1231	0	0	1	1	1	1	RRAS2	related RAS viral (r-ras) oncogene homolog 2
hsa-miR-1231	1	0	1	0	1	1	ACAP2	ArfGAP with coiled-coil, ankyrin repeat and PH domains 2
hsa-miR-1231	1	0	1	1	1	1	RANBP6	RAN binding protein 6
hsa-miR-1231	1	0	1	0	1	1	VPS4A	vacuolar protein sorting 4 homolog A (S. cerevisiae)
hsa-miR-1231	1	0	1	1	1	1	ZNF215	zinc finger protein 215
hsa-miR-1231	0	0	1	1	1	1	UQCR10	ubiquinol-cytochrome c reductase, complex III subunit X
hsa-miR-1231	0	0	1	1	0	0	PSORS1C2	psoriasis susceptibility 1 candidate 2
hsa-miR-1231	0	0	1	1	1	1	CAPN6	calpain 6
hsa-miR-1231	0	0	1	1	1	1	TMOD2	tropomodulin 2 (neuronal)
hsa-miR-1231	1	0	1	0	1	1	HUNK	hormonally up-regulated Neu-associated kinase
hsa-miR-1231	0	0	1	1	1	1	EHD2	EH-domain containing 2
hsa-miR-1231	1	0	1	1	1	1	ZNF592	zinc finger protein 592
hsa-miR-1231	0	0	1	1	1	1	FAM53B	family with sequence similarity 53, member B
hsa-miR-1231	0	0	1	1	1	1	FRMPD4	FERM and PDZ domain containing 4
hsa-miR-1231	1	0	1	0	1	1	MLEC	malectin
hsa-miR-1231	1	0	1	1	1	1	KIAA0753	KIAA0753
hsa-miR-1231	0	0	1	0	1	1	EPM2AIP1	EPM2A (laforin) interacting protein 1
hsa-miR-1231	1	0	1	1	1	1	FCHSD2	FCH and double SH3 domains 2
hsa-miR-1231	1	0	1	1	1	1	JOSD1	Josephin domain containing 1
hsa-miR-1231	1	0	1	1	1	1	SPAST	spastin
hsa-miR-1231	1	0	1	1	1	1	PHLPP2	PH domain and leucine rich repeat protein phosphatase 2
hsa-miR-1231	1	0	1	0	1	1	LARP4B	La ribonucleoprotein domain family, member 4B
hsa-miR-1231	1	0	1	1	1	1	CSTF2T	cleavage stimulation factor, 3' pre-RNA, subunit 2, 64kDa, tau variant
hsa-miR-1231	1	0	1	1	1	1	WDR7	WD repeat domain 7
hsa-miR-1231	1	0	1	1	1	1	PHF15	PHD finger protein 15
hsa-miR-1231	0	0	1	1	1	1	NBPF14	neuroblastoma breakpoint family, member 14
hsa-miR-1231	0	0	1	1	1	1	ANAPC13	anaphase promoting complex subunit 13
hsa-miR-1231	1	0	1	1	1	1	CNOT6	CCR4-NOT transcription complex, subunit 6
hsa-miR-1231	1	0	1	1	1	1	NSL1	NSL1, MIND kinetochore complex component, homolog (S. cerevisiae)
hsa-miR-1231	0	0	1	1	1	1	TMEM87A	transmembrane protein 87A
hsa-miR-1231	1	0	1	1	1	1	CLIP3	CAP-GLY domain containing linker protein 3
hsa-miR-1231	1	0	1	0	1	1	OSBPL3	oxysterol binding protein-like 3
hsa-miR-1231	1	0	1	1	1	1	FAM155B	family with sequence similarity 155, member B
hsa-miR-1231	1	0	1	1	1	1	AZIN1	antizyme inhibitor 1
hsa-miR-1231	1	0	1	1	1	1	ST8SIA3	ST8 alpha-N-acetyl-neuraminide alpha-2,8-sialyltransferase 3
hsa-miR-1231	0	0	1	1	0	0	HEBP1	heme binding protein 1
hsa-miR-1231	1	0	1	1	1	1	RRP15	ribosomal RNA processing 15 homolog (S. cerevisiae)
hsa-miR-1231	0	0	1	1	1	1	HDGFRP3	hepatoma-derived growth factor, related protein 3
hsa-miR-1231	1	0	1	1	1	1	VGLL3	vestigial like 3 (Drosophila)
hsa-miR-1231	1	0	1	0	1	1	HPCAL4	hippocalcin like 4
hsa-miR-1231	0	0	1	1	1	1	CD244	CD244 molecule, natural killer cell receptor 2B4
hsa-miR-1231	1	0	1	1	1	1	PHF20	PHD finger protein 20
hsa-miR-1231	1	0	1	0	1	1	NT5DC3	5'-nucleotidase domain containing 3
hsa-miR-1231	1	0	1	1	1	1	GRID1	glutamate receptor, ionotropic, delta 1
hsa-miR-1231	0	0	1	1	1	1	SMG6	smg-6 homolog, nonsense mediated mRNA decay factor (C. elegans)
hsa-miR-1231	1	0	1	0	1	1	UBE2Q1	ubiquitin-conjugating enzyme E2Q family member 1
hsa-miR-1231	1	0	1	1	1	1	DIRAS2	DIRAS family, GTP-binding RAS-like 2
hsa-miR-1231	0	0	1	1	0	0	NUP62CL	nucleoporin 62kDa C-terminal like
hsa-miR-1231	0	0	1	1	1	1	QRICH1	glutamine-rich 1
hsa-miR-1231	0	0	1	1	1	1	NCAPG2	non-SMC condensin II complex, subunit G2
hsa-miR-1231	1	0	1	0	1	1	CHD7	chromodomain helicase DNA binding protein 7
hsa-miR-1231	1	0	1	0	1	1	MARCH5	membrane-associated ring finger (C3HC4) 5
hsa-miR-1231	1	0	1	1	1	1	RNF125	ring finger protein 125, E3 ubiquitin protein ligase
hsa-miR-1231	0	0	1	1	1	1	ODAM	odontogenic, ameloblast asssociated
hsa-miR-1231	0	0	1	1	0	0	INTS8	integrator complex subunit 8
hsa-miR-1231	1	0	1	1	1	1	ZNHIT6	zinc finger, HIT-type containing 6
hsa-miR-1231	0	0	1	1	1	1	INTS10	integrator complex subunit 10
hsa-miR-1231	1	0	1	1	1	1	SLC25A36	solute carrier family 25 (pyrimidine nucleotide carrier ), member 36
hsa-miR-1231	1	0	1	1	1	1	AGPAT5	1-acylglycerol-3-phosphate O-acyltransferase 5 (lysophosphatidic acid acyltransferase, epsilon)
hsa-miR-1231	0	0	1	1	1	1	BDP1	B double prime 1, subunit of RNA polymerase III transcription initiation factor IIIB
hsa-miR-1231	1	0	1	1	1	1	ASH1L	ash1 (absent, small, or homeotic)-like (Drosophila)
hsa-miR-1231	1	0	1	0	1	1	CYCS	cytochrome c, somatic
hsa-miR-1231	1	0	1	1	1	1	LRRC8A	leucine rich repeat containing 8 family, member A
hsa-miR-1231	0	0	1	1	1	1	PRTFDC1	phosphoribosyl transferase domain containing 1
hsa-miR-1231	1	0	1	1	1	1	OSM	oncostatin M
hsa-miR-1231	0	0	1	1	1	1	TCL6	T-cell leukemia/lymphoma 6 (non-protein coding)
hsa-miR-1231	1	0	1	0	1	1	DCUN1D1	DCN1, defective in cullin neddylation 1, domain containing 1 (S. cerevisiae)
hsa-miR-1231	0	0	1	1	1	1	SHROOM4	shroom family member 4
hsa-miR-1231	1	0	1	1	1	1	RGAG1	retrotransposon gag domain containing 1
hsa-miR-1231	1	0	1	0	1	1	NUFIP2	nuclear fragile X mental retardation protein interacting protein 2
hsa-miR-1231	1	0	1	0	1	1	ZNF398	zinc finger protein 398
hsa-miR-1231	1	0	1	1	1	1	NLGN2	neuroligin 2
hsa-miR-1231	0	0	1	0	1	1	TRMT5	tRNA methyltransferase 5 homolog (S. cerevisiae)
hsa-miR-1231	1	0	1	1	1	1	PCDH10	protocadherin 10
hsa-miR-1231	1	0	1	1	1	1	RANBP10	RAN binding protein 10
hsa-miR-1231	1	0	1	0	1	1	GPAM	glycerol-3-phosphate acyltransferase, mitochondrial
hsa-miR-1231	0	0	1	1	1	1	B3GALT1	UDP-Gal:betaGlcNAc beta 1,3-galactosyltransferase, polypeptide 1
hsa-miR-1231	1	0	1	1	1	1	MTMR3	myotubularin related protein 3
hsa-miR-1231	0	0	1	1	1	1	RNASEL	ribonuclease L (2',5'-oligoisoadenylate synthetase-dependent)
hsa-miR-1231	1	0	1	1	1	1	ZFYVE1	zinc finger, FYVE domain containing 1
hsa-miR-1231	1	0	1	1	1	1	TMEM35	transmembrane protein 35
hsa-miR-1231	1	0	1	1	1	1	ZFAND3	zinc finger, AN1-type domain 3
hsa-miR-1231	0	0	1	1	1	1	NR0B2	nuclear receptor subfamily 0, group B, member 2
hsa-miR-1231	1	0	1	0	1	1	GAN	gigaxonin
hsa-miR-1231	1	0	1	1	1	1	GPR88	G protein-coupled receptor 88
hsa-miR-1231	1	0	1	1	1	1	HIF3A	hypoxia inducible factor 3, alpha subunit
hsa-miR-1231	0	0	1	1	0	0	POLR1E	polymerase (RNA) I polypeptide E, 53kDa
hsa-miR-1231	1	0	1	1	1	1	SUDS3	suppressor of defective silencing 3 homolog (S. cerevisiae)
hsa-miR-1231	1	0	1	1	1	1	FAM160B2	family with sequence similarity 160, member B2
hsa-miR-1231	0	0	1	1	0	0	SNURF	SNRPN upstream reading frame
hsa-miR-1231	1	0	1	1	1	1	REEP1	receptor accessory protein 1
hsa-miR-1231	0	0	1	1	0	0	PRAMEF2	PRAME family member 2
hsa-miR-1231	1	0	1	1	1	1	FGFR1	fibroblast growth factor receptor 1
hsa-miR-1231	1	0	1	1	1	1	GRAMD3	GRAM domain containing 3
hsa-miR-1231	1	0	1	1	1	1	C1orf116	chromosome 1 open reading frame 116
hsa-miR-1231	1	0	1	1	1	1	EBF1	early B-cell factor 1
hsa-miR-1231	1	0	1	1	0	0	PHF23	PHD finger protein 23
hsa-miR-1231	1	0	1	1	1	1	EFHD2	EF-hand domain family, member D2
hsa-miR-1231	1	0	1	0	1	1	NOTCH2	notch 2
hsa-miR-1231	1	0	1	1	1	1	HOXD1	homeobox D1
hsa-miR-1231	1	0	1	0	1	1	MOB3B	MOB kinase activator 3B
hsa-miR-1231	1	0	1	1	0	0	SYNDIG1	synapse differentiation inducing 1
hsa-miR-1231	1	0	1	1	1	1	CPED1	cadherin-like and PC-esterase domain containing 1
hsa-miR-1231	1	0	1	1	1	1	GRHL2	grainyhead-like 2 (Drosophila)
hsa-miR-1231	1	0	1	1	0	0	UBTD1	ubiquitin domain containing 1
hsa-miR-1231	0	0	1	1	0	0	BAIAP2L2	BAI1-associated protein 2-like 2
hsa-miR-1231	1	0	1	1	1	1	JHDM1D	jumonji C domain containing histone demethylase 1 homolog D (S. cerevisiae)
hsa-miR-1231	0	0	1	1	1	1	FCRL2	Fc receptor-like 2
hsa-miR-1231	0	0	1	1	0	0	HM13	histocompatibility (minor) 13
hsa-miR-1231	0	0	1	1	1	1	FCRL5	Fc receptor-like 5
hsa-miR-1231	1	0	1	1	1	1	FAM175B	family with sequence similarity 175, member B
hsa-miR-1231	1	0	1	1	0	0	MAF1	MAF1 homolog (S. cerevisiae)
hsa-miR-1231	1	0	1	1	1	1	ZDHHC18	zinc finger, DHHC-type containing 18
hsa-miR-1231	1	0	1	1	1	1	DCTN5	dynactin 5 (p25)
hsa-miR-1231	1	0	1	1	1	1	TRIM63	tripartite motif containing 63, E3 ubiquitin protein ligase
hsa-miR-1231	1	0	1	1	1	1	PHF5A	PHD finger protein 5A
hsa-miR-1231	1	0	1	0	1	1	UBASH3B	ubiquitin associated and SH3 domain containing B
hsa-miR-1231	0	0	1	1	0	0	KRT84	keratin 84
hsa-miR-1231	1	0	1	1	1	1	HIAT1	hippocampus abundant transcript 1
hsa-miR-1231	1	0	1	1	1	1	RCSD1	RCSD domain containing 1
hsa-miR-1231	1	0	1	1	1	1	MAL2	mal, T-cell differentiation protein 2 (gene/pseudogene)
hsa-miR-1231	1	0	1	1	1	1	ELFN2	extracellular leucine-rich repeat and fibronectin type III domain containing 2
hsa-miR-1231	0	0	1	1	1	1	PRDM7	PR domain containing 7
hsa-miR-1231	1	0	1	1	1	1	SRSF10	serine/arginine-rich splicing factor 10
hsa-miR-1231	0	0	1	0	0	0	CRYBA2	crystallin, beta A2
hsa-miR-1231	1	0	1	1	1	1	NAA15	N(alpha)-acetyltransferase 15, NatA auxiliary subunit
hsa-miR-1231	1	0	1	1	0	0	BRD4	bromodomain containing 4
hsa-miR-1231	1	0	1	1	1	1	BTN2A1	butyrophilin, subfamily 2, member A1
hsa-miR-1231	1	0	1	1	1	1	SPSB4	splA/ryanodine receptor domain and SOCS box containing 4
hsa-miR-1231	1	0	1	0	1	1	SOCS4	suppressor of cytokine signaling 4
hsa-miR-1231	1	0	1	1	1	1	KLHL6	kelch-like 6 (Drosophila)
hsa-miR-1231	0	0	1	1	1	1	FCAR	Fc fragment of IgA, receptor for
hsa-miR-1231	1	0	1	1	1	1	ZAK	sterile alpha motif and leucine zipper containing kinase AZK
hsa-miR-1231	0	0	1	1	1	1	BOD1	biorientation of chromosomes in cell division 1
hsa-miR-1231	1	0	1	1	0	0	PKDCC	protein kinase domain containing, cytoplasmic homolog (mouse)
hsa-miR-1231	0	0	1	1	0	0	C12orf57	chromosome 12 open reading frame 57
hsa-miR-1231	1	0	1	1	1	1	MSI2	musashi homolog 2 (Drosophila)
hsa-miR-1231	1	0	1	1	1	1	BACE2	beta-site APP-cleaving enzyme 2
hsa-miR-1231	1	0	1	1	1	1	RFTN2	raftlin family member 2
hsa-miR-1231	0	0	1	1	1	1	MARVELD2	MARVEL domain containing 2
hsa-miR-1231	1	0	1	1	1	1	ANKRD23	ankyrin repeat domain 23
hsa-miR-1231	1	0	1	1	1	1	C9orf72	chromosome 9 open reading frame 72
hsa-miR-1231	1	0	1	0	1	1	CENPBD1	CENPB DNA-binding domains containing 1
hsa-miR-1231	0	0	1	1	0	0	RNF183	ring finger protein 183
hsa-miR-1231	1	0	1	1	1	1	FAM84A	family with sequence similarity 84, member A
hsa-miR-1231	0	0	1	1	1	1	APOBEC3F	apolipoprotein B mRNA editing enzyme, catalytic polypeptide-like 3F
hsa-miR-1231	0	0	1	0	1	1	CHKB	choline kinase beta
hsa-miR-1231	0	0	1	1	0	0	C1orf158	chromosome 1 open reading frame 158
hsa-miR-1231	1	0	1	0	1	1	UBXN10	UBX domain protein 10
hsa-miR-1231	1	0	1	1	1	1	TBX15	T-box 15
hsa-miR-1231	1	0	1	1	1	1	FAM123B	family with sequence similarity 123B
hsa-miR-1231	1	0	1	1	1	1	ZSCAN29	zinc finger and SCAN domain containing 29
hsa-miR-1231	1	0	1	1	1	1	ZNF362	zinc finger protein 362
hsa-miR-1231	0	0	1	1	1	1	C12orf50	chromosome 12 open reading frame 50
hsa-miR-1231	0	0	1	1	0	0	MARCH10	membrane-associated ring finger (C3HC4) 10, E3 ubiquitin protein ligase
hsa-miR-1231	1	0	1	1	1	1	CNST	consortin, connexin sorting protein
hsa-miR-1231	0	0	1	1	1	1	NANP	N-acetylneuraminic acid phosphatase
hsa-miR-1231	1	0	1	1	1	1	BEND6	BEN domain containing 6
hsa-miR-1231	1	0	1	0	1	1	C7orf41	chromosome 7 open reading frame 41
hsa-miR-1231	1	0	1	1	1	1	WTAP	Wilms tumor 1 associated protein
hsa-miR-1231	0	0	1	1	1	1	TMEM74	transmembrane protein 74
hsa-miR-1231	1	0	1	0	1	1	N4BP1	NEDD4 binding protein 1
hsa-miR-1231	0	0	1	1	0	0	ESX1	ESX homeobox 1
hsa-miR-1231	1	0	1	1	1	1	CREBRF	CREB3 regulatory factor
hsa-miR-1231	1	0	1	0	1	1	SEMA6D	sema domain, transmembrane domain (TM), and cytoplasmic domain, (semaphorin) 6D
hsa-miR-1231	1	0	1	1	1	1	FNDC5	fibronectin type III domain containing 5
hsa-miR-1231	1	0	1	1	1	1	PHF13	PHD finger protein 13
hsa-miR-1231	0	0	1	1	1	1	CREG2	cellular repressor of E1A-stimulated genes 2
hsa-miR-1231	0	0	1	1	1	1	WFDC13	WAP four-disulfide core domain 13
hsa-miR-1231	1	0	1	1	1	1	IL28RA	interleukin 28 receptor, alpha (interferon, lambda receptor)
hsa-miR-1231	1	0	1	0	1	1	RUNDC1	RUN domain containing 1
hsa-miR-1231	1	0	1	1	1	1	FAM117B	family with sequence similarity 117, member B
hsa-miR-1231	0	0	1	1	0	0	EFCAB4A	EF-hand calcium binding domain 4A
hsa-miR-1231	1	0	1	1	1	1	DIP2B	DIP2 disco-interacting protein 2 homolog B (Drosophila)
hsa-miR-1231	0	0	1	0	1	1	NBPF15	neuroblastoma breakpoint family, member 15
hsa-miR-1231	1	0	1	1	1	1	ATG9B	autophagy related 9B
hsa-miR-1231	0	0	1	1	1	1	FAM133A	family with sequence similarity 133, member A
hsa-miR-1231	0	0	1	1	1	1	C14orf79	chromosome 14 open reading frame 79
hsa-miR-1231	1	0	1	1	1	1	LDLRAD3	low density lipoprotein receptor class A domain containing 3
hsa-miR-1231	1	0	1	1	0	0	EMC10	ER membrane protein complex subunit 10
hsa-miR-1231	0	0	1	1	1	1	IL6ST	interleukin 6 signal transducer (gp130, oncostatin M receptor)
hsa-miR-1231	1	0	1	1	1	1	EXOC8	exocyst complex component 8
hsa-miR-1231	1	0	1	1	0	0	JPH2	junctophilin 2
hsa-miR-1231	0	0	1	1	1	1	IFNE	interferon, epsilon
hsa-miR-1231	0	0	1	1	0	0	TAS1R1	taste receptor, type 1, member 1
hsa-miR-1231	0	0	1	1	0	0	PAQR7	progestin and adipoQ receptor family member VII
hsa-miR-1231	0	0	1	1	1	1	ZNF831	zinc finger protein 831
hsa-miR-1231	0	0	1	0	1	1	GATS	GATS, stromal antigen 3 opposite strand
hsa-miR-1231	0	0	1	1	0	0	PRDX2	peroxiredoxin 2
hsa-miR-1231	1	0	1	1	1	1	ZSCAN22	zinc finger and SCAN domain containing 22
hsa-miR-1231	1	0	1	1	1	1	ADAT2	adenosine deaminase, tRNA-specific 2
hsa-miR-1231	0	0	1	0	1	1	VSIG1	V-set and immunoglobulin domain containing 1
hsa-miR-1231	0	0	1	1	1	1	C2orf48	chromosome 2 open reading frame 48
hsa-miR-1231	0	0	1	0	1	1	NBPF11	neuroblastoma breakpoint family, member 11
hsa-miR-1231	1	0	1	1	0	0	TMEM219	transmembrane protein 219
hsa-miR-1231	0	0	1	1	1	1	ZNF169	zinc finger protein 169
hsa-miR-1231	0	0	1	0	1	1	BTNL3	butyrophilin-like 3
hsa-miR-1231	1	0	1	1	1	1	GPRIN3	GPRIN family member 3
hsa-miR-1231	1	0	1	1	0	0	AGRN	agrin
hsa-miR-1231	0	0	1	1	1	1	MDFIC	MyoD family inhibitor domain containing
hsa-miR-1231	1	0	1	1	1	1	FBXO33	F-box protein 33
hsa-miR-1231	1	0	1	0	1	1	CAPRIN1	cell cycle associated protein 1
hsa-miR-1231	0	0	1	1	0	0	IER5L	immediate early response 5-like
hsa-miR-1231	1	0	1	1	1	1	IGSF1	immunoglobulin superfamily, member 1
hsa-miR-1231	0	0	1	1	0	0	LST1	leukocyte specific transcript 1
hsa-miR-1231	0	0	1	0	1	1	NPSR1-AS1	NPSR1 antisense RNA 1
hsa-miR-1231	1	0	1	1	0	0	CD164L2	CD164 sialomucin-like 2
hsa-miR-1231	0	0	1	1	0	0	TMPRSS11F	transmembrane protease, serine 11F
hsa-miR-1231	1	0	1	1	1	1	TEX19	testis expressed 19
hsa-miR-1231	0	0	1	1	1	1	PATE2	prostate and testis expressed 2
hsa-miR-1231	0	0	1	0	0	0	SNORD21	small nucleolar RNA, C/D box 21
hsa-miR-1231	0	0	1	0	0	0	ESRRAP2	estrogen-related receptor alpha pseudogene 2
hsa-miR-1231	0	0	1	0	0	0	CELP	carboxyl ester lipase pseudogene
hsa-miR-1231	0	0	1	0	0	0	TOP1P2	topoisomerase (DNA) I pseudogene 2
hsa-miR-1231	0	0	1	0	0	0	LYPLA2P1	lysophospholipase II pseudogene 1
hsa-miR-1231	0	0	1	0	0	0	TTTY2	testis-specific transcript, Y-linked 2 (non-protein coding)
hsa-miR-1231	0	0	1	0	0	0	TTTY22	testis-specific transcript, Y-linked 22 (non-protein coding)
hsa-miR-1231	0	0	1	0	0	0	TTTY15	testis-specific transcript, Y-linked 15 (non-protein coding)
hsa-miR-1231	0	0	1	0	0	0	TTTY12	testis-specific transcript, Y-linked 12 (non-protein coding)
hsa-miR-1231	0	0	1	0	0	0	TTTY6B	testis-specific transcript, Y-linked 6B (non-protein coding)
hsa-miR-1231	0	0	1	0	0	0	RPL23AP32	ribosomal protein L23a pseudogene 32
hsa-miR-1231	0	0	1	0	0	0	SNORA4	small nucleolar RNA, H/ACA box 4
hsa-miR-1231	0	0	1	0	0	0	TOP1P1	topoisomerase (DNA) I pseudogene 1
hsa-miR-1231	0	0	1	0	0	0	HTR7P1	5-hydroxytryptamine (serotonin) receptor 7 pseudogene 1
hsa-miR-1231	0	0	1	0	0	0	AQP7P1	aquaporin 7 pseudogene 1
hsa-miR-1231	0	0	1	0	0	0	DUSP5P	dual specificity phosphatase 5 pseudogene
hsa-miR-1231	0	0	1	0	0	0	PTPRVP	protein tyrosine phosphatase, receptor type, V, pseudogene
hsa-miR-1231	0	0	1	0	0	0	TCAM1P	testicular cell adhesion molecule 1 homolog (mouse), pseudogene
hsa-miR-1231	0	0	1	0	0	0	SNORA15	small nucleolar RNA, H/ACA box 15
hsa-miR-1231	0	0	1	0	0	0	SNORA77	small nucleolar RNA, H/ACA box 77
hsa-miR-1231	0	0	1	0	0	0	HSP90B3P	heat shock protein 90kDa beta (Grp94), member 3, pseudogene
hsa-miR-1231	0	0	1	0	0	0	GBP1P1	guanylate binding protein 1, interferon-inducible pseudogene 1
hsa-miR-1231	0	0	1	0	0	0	MST1P9	macrophage stimulating 1 (hepatocyte growth factor-like) pseudogene 9
hsa-miR-1231	1	0	1	1	1	1	AKAP1	A kinase (PRKA) anchor protein 1
hsa-miR-1231	1	0	1	1	0	0	TNXB	tenascin XB
hsa-miR-1231	1	0	1	1	1	1	ATF6B	activating transcription factor 6 beta
hsa-miR-1231	0	0	1	1	0	0	SHBG	sex hormone-binding globulin
hsa-miR-1231	0	0	1	1	1	1	CD6	CD6 molecule
hsa-miR-1231	0	0	1	1	0	0	BMP1	bone morphogenetic protein 1
hsa-miR-1231	0	0	1	1	1	1	COL14A1	collagen, type XIV, alpha 1
