# Supplementary material for: Profiling of Selected MicroRNAs in Proliferative Eutopic Endometrium of Women with Ovarian Endometriosis
Source: Biomed Res Int. 2015 Aug 20;2015:760698. doi: 10.1155/2015/760698 (PMC4558423; doi:10.1155/2015/760698)
Supplement: Supplementary file 1 — Table I: The names of miRNAs significantly differentially expressed between eutopic endometrium of patients with endometriosis vs eutopic endometrium of patients without endometriosis. Table II: The associations between miRNA and mRNA, which presents detailed results of the search of six major databases i.e targetscan, tarbase, miranda, mirbase, mirtarget2 and pictar. [file 760698.f1.zip › 760698.f1/Table II/hsa-miR-1248.tsv]

miR	targetscan	tarbase	miranda	mirbase	mirtarget2	pictar	GeneSymbol	GeneName
hsa-miR-1248	1	0	1	1	1	1	PLAU	plasminogen activator, urokinase
hsa-miR-1248	1	0	1	1	1	1	ARNTL	aryl hydrocarbon receptor nuclear translocator-like
hsa-miR-1248	1	0	1	1	1	1	CHD9	chromodomain helicase DNA binding protein 9
hsa-miR-1248	1	0	1	1	0	0	SRCAP	Snf2-related CREBBP activator protein
hsa-miR-1248	1	0	1	1	0	0	RAPGEF2	Rap guanine nucleotide exchange factor (GEF) 2
hsa-miR-1248	1	0	1	0	0	0	TRANK1	tetratricopeptide repeat and ankyrin repeat containing 1
hsa-miR-1248	0	0	1	1	1	1	PPIP5K1	diphosphoinositol pentakisphosphate kinase 1
hsa-miR-1248	0	0	1	1	1	1	HSPH1	heat shock 105kDa/110kDa protein 1
hsa-miR-1248	1	0	1	0	1	1	PTPRT	protein tyrosine phosphatase, receptor type, T
hsa-miR-1248	0	0	1	1	1	1	C2CD2L	C2CD2-like
hsa-miR-1248	0	0	1	1	0	0	PLXNB1	plexin B1
hsa-miR-1248	1	0	1	1	0	0	DENND4B	DENN/MADD domain containing 4B
hsa-miR-1248	1	0	1	0	1	1	CEP350	centrosomal protein 350kDa
hsa-miR-1248	0	0	1	1	1	1	NEU3	sialidase 3 (membrane sialidase)
hsa-miR-1248	1	0	1	1	1	1	RNGTT	RNA guanylyltransferase and 5'-phosphatase
hsa-miR-1248	0	0	1	1	1	1	SPAG9	sperm associated antigen 9
hsa-miR-1248	0	0	1	1	0	0	ZNF862	zinc finger protein 862
hsa-miR-1248	1	0	1	1	1	1	NRXN1	neurexin 1
hsa-miR-1248	1	0	1	1	1	1	HIPK1	homeodomain interacting protein kinase 1
hsa-miR-1248	1	0	1	1	1	1	GIGYF2	GRB10 interacting GYF protein 2
hsa-miR-1248	0	0	1	1	0	0	ARHGEF2	Rho/Rac guanine nucleotide exchange factor (GEF) 2
hsa-miR-1248	0	0	1	1	0	0	FKBP15	FK506 binding protein 15, 133kDa
hsa-miR-1248	1	0	1	1	1	1	ANKRD17	ankyrin repeat domain 17
hsa-miR-1248	0	0	1	1	0	0	ATP10B	ATPase, class V, type 10B
hsa-miR-1248	1	0	1	0	1	1	DOCK4	dedicator of cytokinesis 4
hsa-miR-1248	1	0	1	1	0	0	RIMS2	regulating synaptic membrane exocytosis 2
hsa-miR-1248	1	0	1	0	1	1	RBM12	RNA binding motif protein 12
hsa-miR-1248	1	0	1	1	1	1	DNM3	dynamin 3
hsa-miR-1248	1	0	1	1	1	1	AHCYL2	adenosylhomocysteinase-like 2
hsa-miR-1248	1	0	1	1	1	1	LMO7	LIM domain 7
hsa-miR-1248	1	0	1	1	1	1	RNMT	RNA (guanine-7-) methyltransferase
hsa-miR-1248	1	0	1	1	1	1	CALCR	calcitonin receptor
hsa-miR-1248	1	0	1	0	0	0	DTX4	deltex homolog 4 (Drosophila)
hsa-miR-1248	1	0	1	1	1	1	CPEB3	cytoplasmic polyadenylation element binding protein 3
hsa-miR-1248	1	0	1	1	1	1	BAHD1	bromo adjacent homology domain containing 1
hsa-miR-1248	1	0	1	1	1	1	NLGN4Y	neuroligin 4, Y-linked
hsa-miR-1248	1	0	1	1	1	1	RGL1	ral guanine nucleotide dissociation stimulator-like 1
hsa-miR-1248	0	0	1	0	0	0	THSD7A	thrombospondin, type I, domain containing 7A
hsa-miR-1248	1	0	1	1	1	1	NTNG1	netrin G1
hsa-miR-1248	0	0	1	1	1	1	TBC1D30	TBC1 domain family, member 30
hsa-miR-1248	1	0	1	1	1	1	PALLD	palladin, cytoskeletal associated protein
hsa-miR-1248	1	0	1	1	1	1	RPGRIP1L	RPGRIP1-like
hsa-miR-1248	1	0	1	1	1	1	PDE10A	phosphodiesterase 10A
hsa-miR-1248	1	0	1	1	1	1	FOXJ3	forkhead box J3
hsa-miR-1248	1	0	1	1	0	0	KIAA1045	KIAA1045
hsa-miR-1248	1	0	1	1	1	1	NLGN1	neuroligin 1
hsa-miR-1248	1	0	1	1	1	1	FAM208A	family with sequence similarity 208, member A
hsa-miR-1248	1	0	1	1	1	1	PHF8	PHD finger protein 8
hsa-miR-1248	1	0	1	0	1	1	ODZ2	odz, odd Oz/ten-m homolog 2 (Drosophila)
hsa-miR-1248	1	0	1	1	1	1	SPIRE1	spire homolog 1 (Drosophila)
hsa-miR-1248	1	0	1	0	1	1	GPR158	G protein-coupled receptor 158
hsa-miR-1248	1	0	1	1	1	1	ATXN7L1	ataxin 7-like 1
hsa-miR-1248	1	0	1	1	1	1	RALGAPB	Ral GTPase activating protein, beta subunit (non-catalytic)
hsa-miR-1248	0	0	1	1	0	0	ODF2L	outer dense fiber of sperm tails 2-like
hsa-miR-1248	1	0	1	0	0	0	HEG1	HEG homolog 1 (zebrafish)
hsa-miR-1248	1	0	1	1	1	1	RIMKLB	ribosomal modification protein rimK-like family member B
hsa-miR-1248	1	0	1	1	1	1	MKL2	MKL/myocardin-like 2
hsa-miR-1248	0	0	1	1	1	1	FSTL5	follistatin-like 5
hsa-miR-1248	0	0	1	0	0	0	MTA3	metastasis associated 1 family, member 3
hsa-miR-1248	1	0	1	1	1	1	DKK2	dickkopf 2 homolog (Xenopus laevis)
hsa-miR-1248	1	0	1	1	1	1	PCDH19	protocadherin 19
hsa-miR-1248	1	0	1	0	1	1	KCTD16	potassium channel tetramerisation domain containing 16
hsa-miR-1248	1	0	1	1	1	1	SEMA6A	sema domain, transmembrane domain (TM), and cytoplasmic domain, (semaphorin) 6A
hsa-miR-1248	0	0	1	1	1	1	OGG1	8-oxoguanine DNA glycosylase
hsa-miR-1248	1	0	1	1	0	0	KIAA1462	KIAA1462
hsa-miR-1248	0	0	1	0	1	1	KIAA1468	KIAA1468
hsa-miR-1248	0	0	1	0	0	0	NYAP2	neuronal tyrosine-phosphorylated phosphoinositide-3-kinase adaptor 2
hsa-miR-1248	0	0	1	0	1	1	ARHGAP23	Rho GTPase activating protein 23
hsa-miR-1248	1	0	1	1	1	1	USP28	ubiquitin specific peptidase 28
hsa-miR-1248	1	0	1	1	1	1	FAM214B	family with sequence similarity 214, member B
hsa-miR-1248	1	0	1	0	1	1	LMO3	LIM domain only 3 (rhombotin-like 2)
hsa-miR-1248	1	0	1	1	1	1	INADL	InaD-like (Drosophila)
hsa-miR-1248	1	0	1	1	0	0	KIAA1549	KIAA1549
hsa-miR-1248	1	0	1	1	0	0	MAGI3	membrane associated guanylate kinase, WW and PDZ domain containing 3
hsa-miR-1248	1	0	1	0	0	0	TANC2	tetratricopeptide repeat, ankyrin repeat and coiled-coil containing 2
hsa-miR-1248	1	0	1	1	1	1	SNX3	sorting nexin 3
hsa-miR-1248	1	0	1	1	1	1	PHF21A	PHD finger protein 21A
hsa-miR-1248	0	0	1	1	1	1	BHLHB9	basic helix-loop-helix domain containing, class B, 9
hsa-miR-1248	0	0	1	0	1	1	SETD5	SET domain containing 5
hsa-miR-1248	1	0	1	0	1	1	RIMS1	regulating synaptic membrane exocytosis 1
hsa-miR-1248	1	0	1	1	1	1	IKZF4	IKAROS family zinc finger 4 (Eos)
hsa-miR-1248	1	0	1	1	1	1	CDK13	cyclin-dependent kinase 13
hsa-miR-1248	1	0	1	1	1	1	LCOR	ligand dependent nuclear receptor corepressor
hsa-miR-1248	1	0	1	1	1	1	LZTS2	leucine zipper, putative tumor suppressor 2
hsa-miR-1248	1	0	1	0	1	1	JPH4	junctophilin 4
hsa-miR-1248	1	0	1	1	1	1	CSMD3	CUB and Sushi multiple domains 3
hsa-miR-1248	0	0	1	1	0	0	SEC16B	SEC16 homolog B (S. cerevisiae)
hsa-miR-1248	1	0	1	1	1	1	BCL2L11	BCL2-like 11 (apoptosis facilitator)
hsa-miR-1248	0	0	1	1	1	1	KIAA1967	KIAA1967
hsa-miR-1248	1	0	1	1	1	1	SH3TC2	SH3 domain and tetratricopeptide repeats 2
hsa-miR-1248	0	0	1	1	0	0	CIRH1A	cirrhosis, autosomal recessive 1A (cirhin)
hsa-miR-1248	1	0	1	0	0	0	FAT3	FAT tumor suppressor homolog 3 (Drosophila)
hsa-miR-1248	1	0	1	1	1	1	CSGALNACT1	chondroitin sulfate N-acetylgalactosaminyltransferase 1
hsa-miR-1248	1	0	1	0	0	0	RNF169	ring finger protein 169
hsa-miR-1248	1	0	1	1	1	1	ACBD5	acyl-CoA binding domain containing 5
hsa-miR-1248	0	0	1	1	1	1	NELL1	NEL-like 1 (chicken)
hsa-miR-1248	0	0	1	0	1	1	RASSF8	Ras association (RalGDS/AF-6) domain family (N-terminal) member 8
hsa-miR-1248	1	0	1	0	0	0	ZC3H12C	zinc finger CCCH-type containing 12C
hsa-miR-1248	1	0	1	1	1	1	C11orf57	chromosome 11 open reading frame 57
hsa-miR-1248	0	0	1	1	0	0	SSPO	SCO-spondin homolog (Bos taurus)
hsa-miR-1248	1	0	1	1	1	1	KCNMA1	potassium large conductance calcium-activated channel, subfamily M, alpha member 1
hsa-miR-1248	1	0	1	1	1	1	FAT2	FAT tumor suppressor homolog 2 (Drosophila)
hsa-miR-1248	0	0	1	1	0	0	ERAP2	endoplasmic reticulum aminopeptidase 2
hsa-miR-1248	1	1	1	1	1	1	BACE1	beta-site APP-cleaving enzyme 1
hsa-miR-1248	1	0	1	1	1	1	NRXN2	neurexin 2
hsa-miR-1248	0	0	1	1	1	1	DOCK8	dedicator of cytokinesis 8
hsa-miR-1248	0	0	1	1	0	0	HFM1	HFM1, ATP-dependent DNA helicase homolog (S. cerevisiae)
hsa-miR-1248	0	0	1	1	0	0	DBP	D site of albumin promoter (albumin D-box) binding protein
hsa-miR-1248	1	0	1	1	1	1	VLDLR	very low density lipoprotein receptor
hsa-miR-1248	0	0	1	1	1	1	ATP7A	ATPase, Cu++ transporting, alpha polypeptide
hsa-miR-1248	1	0	1	1	1	1	COL11A1	collagen, type XI, alpha 1
hsa-miR-1248	0	0	1	0	1	1	ATR	ataxia telangiectasia and Rad3 related
hsa-miR-1248	1	0	1	1	1	1	SHC1	SHC (Src homology 2 domain containing) transforming protein 1
hsa-miR-1248	1	0	1	1	1	1	DAPK1	death-associated protein kinase 1
hsa-miR-1248	1	0	1	0	1	1	PCDHA13	protocadherin alpha 13
hsa-miR-1248	1	0	1	1	1	1	PCDHA4	protocadherin alpha 4
hsa-miR-1248	0	0	1	0	0	0	RIPK1	receptor (TNFRSF)-interacting serine-threonine kinase 1
hsa-miR-1248	1	0	1	1	1	1	RPS6KA3	ribosomal protein S6 kinase, 90kDa, polypeptide 3
hsa-miR-1248	1	0	1	1	0	0	ELN	elastin
hsa-miR-1248	0	0	1	1	0	0	STON2	stonin 2
hsa-miR-1248	1	0	1	1	1	1	MEF2A	myocyte enhancer factor 2A
hsa-miR-1248	1	0	1	1	1	1	HMGB1	high mobility group box 1
hsa-miR-1248	1	0	1	1	1	1	PHC1	polyhomeotic homolog 1 (Drosophila)
hsa-miR-1248	0	0	1	1	1	1	DNM1L	dynamin 1-like
hsa-miR-1248	1	0	1	1	1	1	SLC8A1	solute carrier family 8 (sodium/calcium exchanger), member 1
hsa-miR-1248	1	0	1	1	0	0	GRIA1	glutamate receptor, ionotropic, AMPA 1
hsa-miR-1248	1	0	1	1	1	1	DTNA	dystrobrevin, alpha
hsa-miR-1248	1	0	1	1	1	1	RASSF5	Ras association (RalGDS/AF-6) domain family member 5
hsa-miR-1248	1	0	1	0	1	1	SLC6A6	solute carrier family 6 (neurotransmitter transporter, taurine), member 6
hsa-miR-1248	1	0	1	1	0	0	TSPYL2	TSPY-like 2
hsa-miR-1248	1	0	1	1	1	1	FMR1	fragile X mental retardation 1
hsa-miR-1248	0	0	1	1	1	1	DDX39B	DEAD (Asp-Glu-Ala-Asp) box polypeptide 39B
hsa-miR-1248	1	0	1	1	1	1	ABI1	abl-interactor 1
hsa-miR-1248	1	0	1	1	1	1	EPHA7	EPH receptor A7
hsa-miR-1248	0	0	1	1	1	1	DGKE	diacylglycerol kinase, epsilon 64kDa
hsa-miR-1248	1	0	1	1	1	1	TBX2	T-box 2
hsa-miR-1248	1	0	1	0	1	1	CDON	Cdon homolog (mouse)
hsa-miR-1248	1	0	1	1	1	1	SPTB	spectrin, beta, erythrocytic
hsa-miR-1248	0	0	1	1	0	0	ASIC3	acid-sensing (proton-gated) ion channel 3
hsa-miR-1248	0	0	1	1	1	1	RYR1	ryanodine receptor 1 (skeletal)
hsa-miR-1248	0	0	1	0	0	0	CACNA1B	calcium channel, voltage-dependent, N type, alpha 1B subunit
hsa-miR-1248	0	0	1	1	0	0	PSMB2	proteasome (prosome, macropain) subunit, beta type, 2
hsa-miR-1248	1	0	1	1	1	1	MYO5A	myosin VA (heavy chain 12, myoxin)
hsa-miR-1248	0	0	1	1	0	0	EIF4E2	eukaryotic translation initiation factor 4E family member 2
hsa-miR-1248	0	0	1	1	1	1	GPM6B	glycoprotein M6B
hsa-miR-1248	0	0	1	1	0	0	EIF2B4	eukaryotic translation initiation factor 2B, subunit 4 delta, 67kDa
hsa-miR-1248	0	0	1	1	0	0	CLK3	CDC-like kinase 3
hsa-miR-1248	0	0	1	1	0	0	CFLAR	CASP8 and FADD-like apoptosis regulator
hsa-miR-1248	1	0	1	0	1	1	TBL1X	transducin (beta)-like 1X-linked
hsa-miR-1248	1	0	1	1	1	1	EPB41	erythrocyte membrane protein band 4.1 (elliptocytosis 1, RH-linked)
hsa-miR-1248	1	0	1	1	1	1	ARHGEF3	Rho guanine nucleotide exchange factor (GEF) 3
hsa-miR-1248	1	0	1	1	1	1	COL24A1	collagen, type XXIV, alpha 1
hsa-miR-1248	1	0	1	1	0	0	GRIN2A	glutamate receptor, ionotropic, N-methyl D-aspartate 2A
hsa-miR-1248	1	0	1	1	1	1	SLC6A8	solute carrier family 6 (neurotransmitter transporter, creatine), member 8
hsa-miR-1248	1	0	1	1	1	1	MLLT10	myeloid/lymphoid or mixed-lineage leukemia (trithorax homolog, Drosophila); translocated to, 10
hsa-miR-1248	0	0	1	1	1	1	ELOVL5	ELOVL fatty acid elongase 5
hsa-miR-1248	1	0	1	1	0	0	KAT5	K(lysine) acetyltransferase 5
hsa-miR-1248	1	0	1	1	1	1	CRTAM	cytotoxic and regulatory T cell molecule
hsa-miR-1248	1	0	1	1	1	1	HMGA2	high mobility group AT-hook 2
hsa-miR-1248	1	0	1	1	0	0	PPP2R5D	protein phosphatase 2, regulatory subunit B', delta
hsa-miR-1248	1	0	1	1	1	1	ZFX	zinc finger protein, X-linked
hsa-miR-1248	1	0	1	0	1	1	CAV1	caveolin 1, caveolae protein, 22kDa
hsa-miR-1248	1	0	1	0	1	1	PDE7B	phosphodiesterase 7B
hsa-miR-1248	1	0	1	1	1	1	MEF2D	myocyte enhancer factor 2D
hsa-miR-1248	1	0	1	1	1	1	PICALM	phosphatidylinositol binding clathrin assembly protein
hsa-miR-1248	1	0	1	1	1	1	SDHC	succinate dehydrogenase complex, subunit C, integral membrane protein, 15kDa
hsa-miR-1248	0	0	1	0	0	0	MIAT	myocardial infarction associated transcript (non-protein coding)
hsa-miR-1248	0	0	1	0	1	1	PARG	poly (ADP-ribose) glycohydrolase
hsa-miR-1248	1	0	1	1	1	1	DLGAP2	discs, large (Drosophila) homolog-associated protein 2
hsa-miR-1248	0	0	1	1	1	1	MFSD11	major facilitator superfamily domain containing 11
hsa-miR-1248	1	0	1	1	1	1	OVOL1	ovo-like 1(Drosophila)
hsa-miR-1248	0	0	1	1	1	1	CD3EAP	CD3e molecule, epsilon associated protein
hsa-miR-1248	0	0	1	1	0	0	SPTBN2	spectrin, beta, non-erythrocytic 2
hsa-miR-1248	1	0	1	1	1	1	PCDH17	protocadherin 17
hsa-miR-1248	0	0	1	1	1	1	SESN1	sestrin 1
hsa-miR-1248	1	0	1	1	1	1	MYT1L	myelin transcription factor 1-like
hsa-miR-1248	1	0	1	1	1	1	MRAS	muscle RAS oncogene homolog
hsa-miR-1248	1	0	1	1	0	0	SH2D2A	SH2 domain containing 2A
hsa-miR-1248	1	0	1	1	1	1	LDB2	LIM domain binding 2
hsa-miR-1248	0	0	1	1	1	1	CD84	CD84 molecule
hsa-miR-1248	1	0	1	1	1	1	CTNND1	catenin (cadherin-associated protein), delta 1
hsa-miR-1248	1	0	1	1	1	1	RBBP6	retinoblastoma binding protein 6
hsa-miR-1248	0	0	1	1	1	1	NOL3	nucleolar protein 3 (apoptosis repressor with CARD domain)
hsa-miR-1248	0	0	1	1	1	1	SC5DL	sterol-C5-desaturase (ERG3 delta-5-desaturase homolog, S. cerevisiae)-like
hsa-miR-1248	1	0	1	1	1	1	CBFA2T2	core-binding factor, runt domain, alpha subunit 2; translocated to, 2
hsa-miR-1248	1	0	1	1	1	1	TMEM159	transmembrane protein 159
hsa-miR-1248	0	0	1	1	1	1	ERAL1	Era G-protein-like 1 (E. coli)
hsa-miR-1248	1	0	1	1	1	1	DMTF1	cyclin D binding myb-like transcription factor 1
hsa-miR-1248	0	0	1	1	0	0	ZNF814	zinc finger protein 814
hsa-miR-1248	1	0	1	0	1	1	CELF2	CUGBP, Elav-like family member 2
hsa-miR-1248	0	0	1	1	1	1	C11orf54	chromosome 11 open reading frame 54
hsa-miR-1248	0	0	1	1	1	1	PCBP4	poly(rC) binding protein 4
hsa-miR-1248	0	0	1	1	1	1	BBS9	Bardet-Biedl syndrome 9
hsa-miR-1248	0	0	1	1	1	1	FHL1	four and a half LIM domains 1
hsa-miR-1248	1	0	1	1	0	0	RASSF1	Ras association (RalGDS/AF-6) domain family member 1
hsa-miR-1248	1	0	1	1	1	1	LPHN2	latrophilin 2
hsa-miR-1248	1	0	1	0	1	1	CD164	CD164 molecule, sialomucin
hsa-miR-1248	0	0	1	1	1	1	DMRT2	doublesex and mab-3 related transcription factor 2
hsa-miR-1248	1	0	1	1	1	1	HNRNPH3	heterogeneous nuclear ribonucleoprotein H3 (2H9)
hsa-miR-1248	1	0	1	1	1	1	SORBS1	sorbin and SH3 domain containing 1
hsa-miR-1248	0	0	1	0	1	1	CLEC5A	C-type lectin domain family 5, member A
hsa-miR-1248	1	0	1	1	1	1	SCHIP1	schwannomin interacting protein 1
hsa-miR-1248	1	0	1	1	1	1	HMG20A	high mobility group 20A
hsa-miR-1248	0	0	1	1	1	1	GPR89B	G protein-coupled receptor 89B
hsa-miR-1248	1	0	1	1	1	1	ZNF202	zinc finger protein 202
hsa-miR-1248	0	0	1	0	1	1	ZDHHC17	zinc finger, DHHC-type containing 17
hsa-miR-1248	0	0	1	1	1	1	NBPF14	neuroblastoma breakpoint family, member 14
hsa-miR-1248	0	0	1	1	1	1	FGFR1OP2	FGFR1 oncogene partner 2
hsa-miR-1248	1	0	1	1	1	1	STXBP6	syntaxin binding protein 6 (amisyn)
hsa-miR-1248	1	0	1	1	0	0	ZCCHC4	zinc finger, CCHC domain containing 4
hsa-miR-1248	1	0	1	1	1	1	TLK2	tousled-like kinase 2
hsa-miR-1248	1	0	1	1	1	1	USP25	ubiquitin specific peptidase 25
hsa-miR-1248	1	0	1	1	1	1	MARK3	MAP/microtubule affinity-regulating kinase 3
hsa-miR-1248	0	0	1	0	1	1	CLDN2	claudin 2
hsa-miR-1248	1	0	1	1	1	1	BCL2L13	BCL2-like 13 (apoptosis facilitator)
hsa-miR-1248	1	0	1	1	1	1	C3orf18	chromosome 3 open reading frame 18
hsa-miR-1248	1	0	1	1	0	0	ECE2	endothelin converting enzyme 2
hsa-miR-1248	0	0	1	1	1	1	SLCO2B1	solute carrier organic anion transporter family, member 2B1
hsa-miR-1248	1	0	1	1	1	1	KCNMB2	potassium large conductance calcium-activated channel, subfamily M, beta member 2
hsa-miR-1248	0	0	1	1	0	0	LGALS12	lectin, galactoside-binding, soluble, 12
hsa-miR-1248	1	0	1	1	1	1	OGT	O-linked N-acetylglucosamine (GlcNAc) transferase
hsa-miR-1248	1	0	1	1	1	1	C21orf91	chromosome 21 open reading frame 91
hsa-miR-1248	1	0	1	1	1	1	SNTB2	syntrophin, beta 2 (dystrophin-associated protein A1, 59kDa, basic component 2)
hsa-miR-1248	1	0	1	1	1	1	STRN3	striatin, calmodulin binding protein 3
hsa-miR-1248	0	0	1	1	1	1	DAZ2	deleted in azoospermia 2
hsa-miR-1248	0	0	1	0	1	1	DAZ3	deleted in azoospermia 3
hsa-miR-1248	0	0	1	1	1	1	CELF1	CUGBP, Elav-like family member 1
hsa-miR-1248	0	0	1	1	1	1	NKX3-1	NK3 homeobox 1
hsa-miR-1248	0	0	1	0	0	0	TIGD7	tigger transposable element derived 7
hsa-miR-1248	0	0	1	1	0	0	ELMOD3	ELMO/CED-12 domain containing 3
hsa-miR-1248	1	0	1	1	1	1	RBM47	RNA binding motif protein 47
hsa-miR-1248	1	0	1	0	1	1	PARP11	poly (ADP-ribose) polymerase family, member 11
hsa-miR-1248	1	0	1	0	1	1	TRPS1	trichorhinophalangeal syndrome I
hsa-miR-1248	0	0	1	1	1	1	RANGRF	RAN guanine nucleotide release factor
hsa-miR-1248	0	0	1	1	1	1	DAZ1	deleted in azoospermia 1
hsa-miR-1248	1	0	1	1	1	1	VPS39	vacuolar protein sorting 39 homolog (S. cerevisiae)
hsa-miR-1248	0	0	1	0	0	0	LOC645355	uncharacterized LOC645355
hsa-miR-1248	0	0	1	0	1	1	KANSL3	KAT8 regulatory NSL complex subunit 3
hsa-miR-1248	0	0	1	1	0	0	SLC4A9	solute carrier family 4, sodium bicarbonate cotransporter, member 9
hsa-miR-1248	1	0	1	1	1	1	VEGFA	vascular endothelial growth factor A
hsa-miR-1248	0	0	1	1	0	0	ZAN	zonadhesin
hsa-miR-1248	1	0	1	1	1	1	CABLES1	Cdk5 and Abl enzyme substrate 1
hsa-miR-1248	1	0	1	0	1	1	USP32	ubiquitin specific peptidase 32
hsa-miR-1248	1	0	1	0	1	1	WIPF2	WAS/WASL interacting protein family, member 2
hsa-miR-1248	1	0	1	1	1	1	LARP4	La ribonucleoprotein domain family, member 4
hsa-miR-1248	0	0	1	0	0	0	NBPF10	neuroblastoma breakpoint family, member 10
hsa-miR-1248	1	0	1	1	1	1	SON	SON DNA binding protein
hsa-miR-1248	0	0	1	0	0	0	CLRN1-AS1	CLRN1 antisense RNA 1
hsa-miR-1248	0	0	1	1	0	0	CREB3L4	cAMP responsive element binding protein 3-like 4
hsa-miR-1248	0	0	1	1	1	1	ORMDL1	ORM1-like 1 (S. cerevisiae)
hsa-miR-1248	1	0	1	1	1	1	RCAN1	regulator of calcineurin 1
hsa-miR-1248	0	0	1	1	0	0	SNRPN	small nuclear ribonucleoprotein polypeptide N
hsa-miR-1248	1	0	1	1	1	1	MAGI1	membrane associated guanylate kinase, WW and PDZ domain containing 1
hsa-miR-1248	0	0	1	1	0	0	CNKSR2	connector enhancer of kinase suppressor of Ras 2
hsa-miR-1248	0	0	1	0	0	0	MYO15B	myosin XVB pseudogene
hsa-miR-1248	0	0	1	0	1	1	NBPF15	neuroblastoma breakpoint family, member 15
hsa-miR-1248	1	0	1	1	1	1	ST3GAL3	ST3 beta-galactoside alpha-2,3-sialyltransferase 3
hsa-miR-1248	1	0	1	1	1	1	STX16	syntaxin 16
hsa-miR-1248	1	0	1	1	0	0	SAMD4A	sterile alpha motif domain containing 4A
hsa-miR-1248	1	0	1	1	1	1	ASB8	ankyrin repeat and SOCS box containing 8
hsa-miR-1248	1	0	1	1	1	1	ZC3H14	zinc finger CCCH-type containing 14
hsa-miR-1248	0	0	1	1	0	0	HOPX	HOP homeobox
hsa-miR-1248	0	0	1	1	1	1	AMPH	amphiphysin
hsa-miR-1248	1	0	1	1	0	0	ST3GAL4	ST3 beta-galactoside alpha-2,3-sialyltransferase 4
hsa-miR-1248	0	0	1	1	1	1	TTLL11	tubulin tyrosine ligase-like family, member 11
hsa-miR-1248	0	0	1	1	1	1	R3HCC1L	R3H domain and coiled-coil containing 1-like
hsa-miR-1248	0	0	1	1	1	1	PTK7	PTK7 protein tyrosine kinase 7
hsa-miR-1248	0	0	1	1	1	1	ZNF638	zinc finger protein 638
hsa-miR-1248	1	0	1	0	1	1	IL1RAP	interleukin 1 receptor accessory protein
hsa-miR-1248	1	0	1	1	1	1	GPR64	G protein-coupled receptor 64
hsa-miR-1248	1	0	1	1	1	1	AFF2	AF4/FMR2 family, member 2
hsa-miR-1248	1	0	1	1	0	0	BRSK2	BR serine/threonine kinase 2
hsa-miR-1248	0	0	1	1	1	1	GNAS	GNAS complex locus
hsa-miR-1248	1	0	1	0	1	1	CACNA1C	calcium channel, voltage-dependent, L type, alpha 1C subunit
hsa-miR-1248	1	0	1	1	0	0	NAGK	N-acetylglucosamine kinase
hsa-miR-1248	0	0	1	1	0	0	TREX1	three prime repair exonuclease 1
hsa-miR-1248	0	0	1	1	1	1	CLDND1	claudin domain containing 1
hsa-miR-1248	1	0	1	0	1	1	GRB10	growth factor receptor-bound protein 10
hsa-miR-1248	1	0	1	1	1	1	ILF3	interleukin enhancer binding factor 3, 90kDa
hsa-miR-1248	0	0	1	0	0	0	CACNA2D3	calcium channel, voltage-dependent, alpha 2/delta subunit 3
hsa-miR-1248	1	0	1	1	1	1	PFKFB3	6-phosphofructo-2-kinase/fructose-2,6-biphosphatase 3
hsa-miR-1248	0	0	1	1	1	1	RANBP17	RAN binding protein 17
hsa-miR-1248	1	0	1	1	1	1	VAMP7	vesicle-associated membrane protein 7
hsa-miR-1248	0	0	1	0	0	0	CD177	CD177 molecule
hsa-miR-1248	1	0	1	1	1	1	PALM2	paralemmin 2
hsa-miR-1248	1	0	1	1	1	1	PDE1B	phosphodiesterase 1B, calmodulin-dependent
hsa-miR-1248	1	0	1	1	1	1	NFYA	nuclear transcription factor Y, alpha
hsa-miR-1248	0	0	1	1	1	1	FUT10	fucosyltransferase 10 (alpha (1,3) fucosyltransferase)
hsa-miR-1248	1	0	1	1	1	1	NAV3	neuron navigator 3
hsa-miR-1248	1	0	1	1	1	1	PPP3CB	protein phosphatase 3, catalytic subunit, beta isozyme
hsa-miR-1248	0	0	1	1	1	1	ZNF248	zinc finger protein 248
hsa-miR-1248	0	0	1	1	1	1	TAF1	TAF1 RNA polymerase II, TATA box binding protein (TBP)-associated factor, 250kDa
hsa-miR-1248	1	0	1	1	1	1	XIRP1	xin actin-binding repeat containing 1
hsa-miR-1248	0	0	1	1	1	1	DEPDC5	DEP domain containing 5
hsa-miR-1248	1	0	1	1	1	1	NOX4	NADPH oxidase 4
hsa-miR-1248	0	0	1	1	0	0	C22orf24	chromosome 22 open reading frame 24
hsa-miR-1248	1	0	1	1	1	1	PPP1R9A	protein phosphatase 1, regulatory subunit 9A
hsa-miR-1248	0	0	1	1	0	0	ASAP3	ArfGAP with SH3 domain, ankyrin repeat and PH domain 3
hsa-miR-1248	1	0	1	1	1	1	AKAP2	A kinase (PRKA) anchor protein 2
hsa-miR-1248	1	0	1	0	1	1	NFAT5	nuclear factor of activated T-cells 5, tonicity-responsive
hsa-miR-1248	1	0	1	1	1	1	ENOX2	ecto-NOX disulfide-thiol exchanger 2
hsa-miR-1248	0	0	1	1	0	0	VSIG2	V-set and immunoglobulin domain containing 2
hsa-miR-1248	0	0	1	0	0	0	TUG1	taurine upregulated 1 (non-protein coding)
hsa-miR-1248	0	0	1	1	1	1	PARPBP	PARP1 binding protein
hsa-miR-1248	1	0	1	1	1	1	ARHGAP12	Rho GTPase activating protein 12
hsa-miR-1248	1	0	1	1	0	0	SENP3	SUMO1/sentrin/SMT3 specific peptidase 3
hsa-miR-1248	0	0	1	1	1	1	TAX1BP3	Tax1 (human T-cell leukemia virus type I) binding protein 3
hsa-miR-1248	0	0	1	1	0	0	FAM64A	family with sequence similarity 64, member A
hsa-miR-1248	1	0	1	1	1	1	HNRNPF	heterogeneous nuclear ribonucleoprotein F
hsa-miR-1248	0	0	1	1	1	1	STOX2	storkhead box 2
hsa-miR-1248	1	0	1	1	1	1	RIC8B	resistance to inhibitors of cholinesterase 8 homolog B (C. elegans)
hsa-miR-1248	1	0	1	1	1	1	EIF2C1	eukaryotic translation initiation factor 2C, 1
hsa-miR-1248	1	0	1	1	1	1	PTBP3	polypyrimidine tract binding protein 3
hsa-miR-1248	1	0	1	1	1	1	ZNF395	zinc finger protein 395
hsa-miR-1248	1	0	1	1	1	1	HNRNPUL1	heterogeneous nuclear ribonucleoprotein U-like 1
hsa-miR-1248	1	0	1	1	1	1	C12orf23	chromosome 12 open reading frame 23
hsa-miR-1248	0	0	1	1	0	0	TTC21A	tetratricopeptide repeat domain 21A
hsa-miR-1248	1	0	1	0	1	1	LIN28A	lin-28 homolog A (C. elegans)
hsa-miR-1248	1	0	1	1	1	1	MON2	MON2 homolog (S. cerevisiae)
hsa-miR-1248	0	0	1	1	0	0	CPSF3L	cleavage and polyadenylation specific factor 3-like
hsa-miR-1248	1	0	1	1	1	1	SLCO5A1	solute carrier organic anion transporter family, member 5A1
hsa-miR-1248	0	0	1	0	0	0	SOX2-OT	SOX2 overlapping transcript (non-protein coding)
hsa-miR-1248	1	0	1	1	1	1	S100PBP	S100P binding protein
hsa-miR-1248	0	0	1	1	0	0	JMJD4	jumonji domain containing 4
hsa-miR-1248	1	0	1	1	1	1	WDTC1	WD and tetratricopeptide repeats 1
hsa-miR-1248	1	0	1	1	1	1	SMEK2	SMEK homolog 2, suppressor of mek1 (Dictyostelium)
hsa-miR-1248	0	0	1	1	0	0	POLR3E	polymerase (RNA) III (DNA directed) polypeptide E (80kD)
hsa-miR-1248	1	0	1	1	1	1	STARD7	StAR-related lipid transfer (START) domain containing 7
hsa-miR-1248	0	0	1	0	0	0	MIRLET7BHG	MIRLET7B host gene (non-protein coding)
hsa-miR-1248	1	0	1	1	1	1	SRP72	signal recognition particle 72kDa
hsa-miR-1248	1	0	1	1	1	1	PHF20L1	PHD finger protein 20-like 1
hsa-miR-1248	0	0	1	1	1	1	CLEC4M	C-type lectin domain family 4, member M
hsa-miR-1248	1	0	1	1	0	0	MEX3A	mex-3 homolog A (C. elegans)
hsa-miR-1248	0	0	1	0	1	1	FLJ14186	uncharacterized LOC401149
hsa-miR-1248	0	0	1	1	1	1	CXorf57	chromosome X open reading frame 57
hsa-miR-1248	1	0	1	1	1	1	COPS7B	COP9 constitutive photomorphogenic homolog subunit 7B (Arabidopsis)
hsa-miR-1248	0	0	1	1	1	1	HDAC7	histone deacetylase 7
hsa-miR-1248	0	0	1	1	1	1	SIGLEC1	sialic acid binding Ig-like lectin 1, sialoadhesin
hsa-miR-1248	0	0	1	0	0	0	IFFO2	intermediate filament family orphan 2
hsa-miR-1248	0	0	1	1	1	1	GGNBP2	gametogenetin binding protein 2
hsa-miR-1248	0	0	1	1	1	1	PDE4DIP	phosphodiesterase 4D interacting protein
hsa-miR-1248	0	0	1	0	0	0	FLJ21408	uncharacterized LOC400512
hsa-miR-1248	0	0	1	0	1	1	ATXN1L	ataxin 1-like
hsa-miR-1248	1	0	1	1	1	1	PHACTR4	phosphatase and actin regulator 4
hsa-miR-1248	0	0	1	1	1	1	CC2D2A	coiled-coil and C2 domain containing 2A
hsa-miR-1248	1	0	1	1	1	1	DLC1	deleted in liver cancer 1
hsa-miR-1248	1	0	1	1	1	1	ARFGEF1	ADP-ribosylation factor guanine nucleotide-exchange factor 1 (brefeldin A-inhibited)
hsa-miR-1248	1	0	1	1	1	1	TNRC6A	trinucleotide repeat containing 6A
hsa-miR-1248	0	0	1	1	1	1	C12orf65	chromosome 12 open reading frame 65
hsa-miR-1248	0	0	1	1	0	0	STPG1	sperm-tail PG-rich repeat containing 1
hsa-miR-1248	0	0	1	0	1	1	HEMK1	HemK methyltransferase family member 1
hsa-miR-1248	0	0	1	0	1	1	FLJ22447	uncharacterized LOC400221
hsa-miR-1248	0	0	1	0	0	0	LINC00340	long intergenic non-protein coding RNA 340
hsa-miR-1248	0	0	1	1	0	0	EWSR1	Ewing sarcoma breakpoint region 1
hsa-miR-1248	0	0	1	0	1	1	FLJ22763	uncharacterized LOC401081
hsa-miR-1248	1	0	1	1	0	0	UBXN7	UBX domain protein 7
hsa-miR-1248	0	0	1	1	0	0	NUDT7	nudix (nucleoside diphosphate linked moiety X)-type motif 7
hsa-miR-1248	0	0	1	1	0	0	ZNF276	zinc finger protein 276
hsa-miR-1248	0	0	1	1	1	1	PION	pigeon homolog (Drosophila)
hsa-miR-1248	0	0	1	0	1	1	FLJ23152	uncharacterized LOC401236
hsa-miR-1248	0	0	1	1	1	1	GTF2H1	general transcription factor IIH, polypeptide 1, 62kDa
hsa-miR-1248	1	0	1	1	1	1	LRP4	low density lipoprotein receptor-related protein 4
hsa-miR-1248	1	0	1	1	1	1	GORASP2	golgi reassembly stacking protein 2, 55kDa
hsa-miR-1248	0	0	1	1	1	1	GPBP1L1	GC-rich promoter binding protein 1-like 1
hsa-miR-1248	1	0	1	1	1	1	FOXP1	forkhead box P1
hsa-miR-1248	1	0	1	1	1	1	FAM53C	family with sequence similarity 53, member C
hsa-miR-1248	0	0	1	1	1	1	KDM2B	lysine (K)-specific demethylase 2B
hsa-miR-1248	0	0	1	1	0	0	FAM48A	family with sequence similarity 48, member A
hsa-miR-1248	1	0	1	1	1	1	FAM40A	family with sequence similarity 40, member A
hsa-miR-1248	0	0	1	1	0	0	ZNF252P	zinc finger protein 252, pseudogene
hsa-miR-1248	1	0	1	1	1	1	ZNF462	zinc finger protein 462
hsa-miR-1248	1	0	1	0	1	1	LOC90462	zinc finger protein 605-like
hsa-miR-1248	0	0	1	1	1	1	PAQR4	progestin and adipoQ receptor family member IV
hsa-miR-1248	1	0	1	1	1	1	ARHGAP36	Rho GTPase activating protein 36
hsa-miR-1248	1	0	1	0	1	1	ZKSCAN1	zinc finger with KRAB and SCAN domains 1
hsa-miR-1248	0	0	1	0	0	0	KIAA0664L3	KIAA0664-like 3
hsa-miR-1248	0	0	1	0	0	0	FAM185A	family with sequence similarity 185, member A
hsa-miR-1248	0	0	1	1	1	1	C8orf46	chromosome 8 open reading frame 46
hsa-miR-1248	0	0	1	0	0	0	CHST9-AS1	CHST9 antisense RNA 1
hsa-miR-1248	1	0	1	1	1	1	MBD5	methyl-CpG binding domain protein 5
hsa-miR-1248	0	0	1	0	0	0	LOC154092	uncharacterized LOC154092
hsa-miR-1248	1	0	1	1	1	1	TPM1	tropomyosin 1 (alpha)
hsa-miR-1248	1	0	1	1	0	0	SPEG	SPEG complex locus
hsa-miR-1248	0	0	1	0	0	0	FLJ30838	uncharacterized LOC400955
hsa-miR-1248	0	0	1	0	0	0	LOC219688	uncharacterized LOC219688
hsa-miR-1248	0	0	1	0	0	0	FLJ31104	uncharacterized LOC441072
hsa-miR-1248	1	0	1	1	1	1	HERPUD2	HERPUD family member 2
hsa-miR-1248	1	0	1	1	1	1	GULP1	GULP, engulfment adaptor PTB domain containing 1
hsa-miR-1248	0	0	1	0	1	1	C17orf108	chromosome 17 open reading frame 108
hsa-miR-1248	0	0	1	0	0	0	LOC201617	uncharacterized LOC201617
hsa-miR-1248	0	0	1	0	0	0	LOC149684	uncharacterized LOC149684
hsa-miR-1248	0	0	1	0	0	0	LOC157273	uncharacterized LOC157273
hsa-miR-1248	1	0	1	0	1	1	RNF165	ring finger protein 165
hsa-miR-1248	1	0	1	1	1	1	ZNF664	zinc finger protein 664
hsa-miR-1248	0	0	1	1	1	1	ANKRD36B	ankyrin repeat domain 36B
hsa-miR-1248	1	0	1	0	1	1	PTPRE	protein tyrosine phosphatase, receptor type, E
hsa-miR-1248	0	0	1	0	0	0	RMST	rhabdomyosarcoma 2 associated transcript (non-protein coding)
hsa-miR-1248	0	0	1	0	0	0	JPX	JPX transcript, XIST activator (non-protein coding)
hsa-miR-1248	1	0	1	1	1	1	LMNA	lamin A/C
hsa-miR-1248	1	0	1	1	1	1	RAI2	retinoic acid induced 2
hsa-miR-1248	1	0	1	1	0	0	SLC26A6	solute carrier family 26, member 6
hsa-miR-1248	0	0	1	1	0	0	CHRM3	cholinergic receptor, muscarinic 3
hsa-miR-1248	1	0	1	1	1	1	ZIC4	Zic family member 4
hsa-miR-1248	0	0	1	0	0	0	FLJ12825	uncharacterized LOC440101
hsa-miR-1248	1	0	1	1	1	1	SCAMP5	secretory carrier membrane protein 5
hsa-miR-1248	0	0	1	0	0	0	LOC284600	uncharacterized LOC284600
hsa-miR-1248	1	0	1	1	1	1	CLCN5	chloride channel, voltage-sensitive 5
hsa-miR-1248	0	0	1	1	0	0	FAM54B	family with sequence similarity 54, member B
hsa-miR-1248	0	0	1	1	1	1	GNB2	guanine nucleotide binding protein (G protein), beta polypeptide 2
hsa-miR-1248	1	0	1	1	1	1	GABARAPL1	GABA(A) receptor-associated protein like 1
hsa-miR-1248	1	0	1	1	1	1	TBC1D14	TBC1 domain family, member 14
hsa-miR-1248	1	0	1	1	1	1	MGAT1	mannosyl (alpha-1,3-)-glycoprotein beta-1,2-N-acetylglucosaminyltransferase
hsa-miR-1248	0	0	1	1	0	0	LOXHD1	lipoxygenase homology domains 1
hsa-miR-1248	1	0	1	1	1	1	TLE4	transducin-like enhancer of split 4 (E(sp1) homolog, Drosophila)
hsa-miR-1248	0	0	1	1	1	1	VWA3B	von Willebrand factor A domain containing 3B
hsa-miR-1248	1	0	1	1	1	1	ISCU	iron-sulfur cluster scaffold homolog (E. coli)
hsa-miR-1248	0	0	1	0	0	0	TUBA3FP	tubulin, alpha 3f, pseudogene
hsa-miR-1248	1	0	1	1	0	0	ZBTB37	zinc finger and BTB domain containing 37
hsa-miR-1248	0	0	1	1	0	0	VWA5B1	von Willebrand factor A domain containing 5B1
hsa-miR-1248	1	0	1	1	1	1	MPP7	membrane protein, palmitoylated 7 (MAGUK p55 subfamily member 7)
hsa-miR-1248	0	0	1	1	0	0	NXF2	nuclear RNA export factor 2
hsa-miR-1248	0	0	1	1	1	1	MS4A14	membrane-spanning 4-domains, subfamily A, member 14
hsa-miR-1248	0	0	1	1	0	0	PTOV1	prostate tumor overexpressed 1
hsa-miR-1248	0	0	1	1	1	1	A2ML1	alpha-2-macroglobulin-like 1
hsa-miR-1248	0	0	1	0	0	0	LINC00637	long intergenic non-protein coding RNA 637
hsa-miR-1248	0	0	1	1	1	1	ZNF385B	zinc finger protein 385B
hsa-miR-1248	0	0	1	0	1	1	CCDC68	coiled-coil domain containing 68
hsa-miR-1248	0	0	1	0	0	0	LINC00301	long intergenic non-protein coding RNA 301
hsa-miR-1248	0	0	1	1	0	0	ANKAR	ankyrin and armadillo repeat containing
hsa-miR-1248	0	0	1	0	1	1	UHMK1	U2AF homology motif (UHM) kinase 1
hsa-miR-1248	0	0	1	1	0	0	GRIP2	glutamate receptor interacting protein 2
hsa-miR-1248	0	0	1	1	1	1	HDAC8	histone deacetylase 8
hsa-miR-1248	0	0	1	0	0	0	CAPN13	calpain 13
hsa-miR-1248	1	0	1	1	1	1	BLCAP	bladder cancer associated protein
hsa-miR-1248	0	0	1	1	1	1	SEC16A	SEC16 homolog A (S. cerevisiae)
hsa-miR-1248	1	0	1	1	1	1	CNOT4	CCR4-NOT transcription complex, subunit 4
hsa-miR-1248	0	0	1	0	0	0	SDHAP2	succinate dehydrogenase complex, subunit A, flavoprotein pseudogene 2
hsa-miR-1248	1	0	1	1	1	1	KCTD6	potassium channel tetramerisation domain containing 6
hsa-miR-1248	0	0	1	1	1	1	GSG1	germ cell associated 1
hsa-miR-1248	1	0	1	0	1	1	SLC25A37	solute carrier family 25 (mitochondrial iron transporter), member 37
hsa-miR-1248	0	0	1	1	0	0	LGR5	leucine-rich repeat containing G protein-coupled receptor 5
hsa-miR-1248	0	0	1	0	1	1	CADM1	cell adhesion molecule 1
hsa-miR-1248	0	0	1	1	1	1	TMED3	transmembrane emp24 protein transport domain containing 3
hsa-miR-1248	1	0	1	1	1	1	TTC13	tetratricopeptide repeat domain 13
hsa-miR-1248	0	0	1	1	0	0	ATP6AP1	ATPase, H+ transporting, lysosomal accessory protein 1
hsa-miR-1248	0	0	1	1	0	0	PPP2R1A	protein phosphatase 2, regulatory subunit A, alpha
hsa-miR-1248	0	0	1	0	0	0	LOC152225	uncharacterized LOC152225
hsa-miR-1248	1	0	1	1	1	1	TLK1	tousled-like kinase 1
hsa-miR-1248	0	0	1	0	1	1	TMSB15B	thymosin beta 15B
hsa-miR-1248	0	0	1	0	0	0	LOC643837	uncharacterized LOC643837
hsa-miR-1248	0	0	1	1	0	0	ACOT11	acyl-CoA thioesterase 11
hsa-miR-1248	1	0	1	1	1	1	ARIH2	ariadne homolog 2 (Drosophila)
hsa-miR-1248	1	0	1	1	1	1	AMMECR1	Alport syndrome, mental retardation, midface hypoplasia and elliptocytosis chromosomal region gene 1
hsa-miR-1248	1	0	1	1	1	1	SUPT16H	suppressor of Ty 16 homolog (S. cerevisiae)
hsa-miR-1248	0	0	1	1	0	0	CDK15	cyclin-dependent kinase 15
hsa-miR-1248	0	0	1	0	0	0	LOC440910	uncharacterized LOC440910
hsa-miR-1248	1	0	1	1	1	1	FBXW2	F-box and WD repeat domain containing 2
hsa-miR-1248	1	0	1	1	1	1	TSN	translin
hsa-miR-1248	1	0	1	1	1	1	LUC7L2	LUC7-like 2 (S. cerevisiae)
hsa-miR-1248	1	0	1	1	1	1	MAFK	v-maf musculoaponeurotic fibrosarcoma oncogene homolog K (avian)
hsa-miR-1248	0	0	1	1	1	1	NRBP1	nuclear receptor binding protein 1
hsa-miR-1248	1	0	1	1	1	1	IVNS1ABP	influenza virus NS1A binding protein
hsa-miR-1248	1	0	1	0	1	1	CRTAP	cartilage associated protein
hsa-miR-1248	0	0	1	1	1	1	WT1	Wilms tumor 1
hsa-miR-1248	1	0	1	1	1	1	GPD2	glycerol-3-phosphate dehydrogenase 2 (mitochondrial)
hsa-miR-1248	1	0	1	1	1	1	SLBP	stem-loop binding protein
hsa-miR-1248	0	0	1	0	0	0	LOC283887	uncharacterized LOC283887
hsa-miR-1248	0	0	1	1	1	1	XPNPEP1	X-prolyl aminopeptidase (aminopeptidase P) 1, soluble
hsa-miR-1248	1	0	1	0	0	0	SH3RF3	SH3 domain containing ring finger 3
hsa-miR-1248	1	0	1	1	1	1	SPTBN1	spectrin, beta, non-erythrocytic 1
hsa-miR-1248	0	0	1	1	0	0	SERPINH1	serpin peptidase inhibitor, clade H (heat shock protein 47), member 1, (collagen binding protein 1)
hsa-miR-1248	0	0	1	1	1	1	SLC16A1	solute carrier family 16, member 1 (monocarboxylic acid transporter 1)
hsa-miR-1248	0	0	1	1	1	1	CYP11B1	cytochrome P450, family 11, subfamily B, polypeptide 1
hsa-miR-1248	1	0	1	1	1	1	SSH3	slingshot homolog 3 (Drosophila)
hsa-miR-1248	0	0	1	1	0	0	NDUFA4L2	NADH dehydrogenase (ubiquinone) 1 alpha subcomplex, 4-like 2
hsa-miR-1248	1	0	1	1	1	1	KCND1	potassium voltage-gated channel, Shal-related subfamily, member 1
hsa-miR-1248	1	0	1	1	0	0	TSEN54	tRNA splicing endonuclease 54 homolog (S. cerevisiae)
hsa-miR-1248	0	0	1	1	1	1	SPOCK1	sparc/osteonectin, cwcv and kazal-like domains proteoglycan (testican) 1
hsa-miR-1248	0	0	1	0	0	0	PART1	prostate androgen-regulated transcript 1 (non-protein coding)
hsa-miR-1248	0	0	1	1	1	1	CORO7	coronin 7
hsa-miR-1248	0	0	1	0	0	0	ZNF806	zinc finger protein 806
hsa-miR-1248	1	0	1	1	1	1	SIAH1	siah E3 ubiquitin protein ligase 1
hsa-miR-1248	1	0	1	0	1	1	GATAD2B	GATA zinc finger domain containing 2B
hsa-miR-1248	1	0	1	0	1	1	ARL6IP6	ADP-ribosylation-like factor 6 interacting protein 6
hsa-miR-1248	0	0	1	1	1	1	NMD3	NMD3 homolog (S. cerevisiae)
hsa-miR-1248	1	0	1	1	1	1	GALNTL2	UDP-N-acetyl-alpha-D-galactosamine:polypeptide N-acetylgalactosaminyltransferase-like 2
hsa-miR-1248	0	0	1	1	0	0	CES4A	carboxylesterase 4A
hsa-miR-1248	1	0	1	1	1	1	PTPRU	protein tyrosine phosphatase, receptor type, U
hsa-miR-1248	1	0	1	1	1	1	LPPR2	lipid phosphate phosphatase-related protein type 2
hsa-miR-1248	1	0	1	1	1	1	KANSL1	KAT8 regulatory NSL complex subunit 1
hsa-miR-1248	1	0	1	1	1	1	CPNE8	copine VIII
hsa-miR-1248	0	0	1	1	0	0	DPAGT1	dolichyl-phosphate (UDP-N-acetylglucosamine) N-acetylglucosaminephosphotransferase 1 (GlcNAc-1-P transferase)
hsa-miR-1248	1	0	1	1	1	1	NDEL1	nudE nuclear distribution E homolog (A. nidulans)-like 1
hsa-miR-1248	0	0	1	0	0	0	LINC00486	long intergenic non-protein coding RNA 486
hsa-miR-1248	1	0	1	0	1	1	SLC39A11	solute carrier family 39 (metal ion transporter), member 11
hsa-miR-1248	0	0	1	0	0	0	LOC730101	uncharacterized LOC730101
hsa-miR-1248	0	0	1	1	1	1	GPR115	G protein-coupled receptor 115
hsa-miR-1248	0	0	1	1	1	1	LTBR	lymphotoxin beta receptor (TNFR superfamily, member 3)
hsa-miR-1248	0	0	1	1	0	0	PLCB2	phospholipase C, beta 2
hsa-miR-1248	0	0	1	0	0	0	LOC100129620	uncharacterized LOC100129620
hsa-miR-1248	1	0	1	1	1	1	SPATS2	spermatogenesis associated, serine-rich 2
hsa-miR-1248	0	0	1	0	1	1	NBPF3	neuroblastoma breakpoint family, member 3
hsa-miR-1248	1	0	1	1	1	1	CECR6	cat eye syndrome chromosome region, candidate 6
hsa-miR-1248	0	0	1	0	0	0	LOC284577	uncharacterized LOC284577
hsa-miR-1248	0	0	1	1	1	1	BBS1	Bardet-Biedl syndrome 1
hsa-miR-1248	0	0	1	1	0	0	CXorf38	chromosome X open reading frame 38
hsa-miR-1248	1	0	1	1	1	1	ANKRD10	ankyrin repeat domain 10
hsa-miR-1248	1	0	1	1	1	1	PEA15	phosphoprotein enriched in astrocytes 15
hsa-miR-1248	0	0	1	1	0	0	KDM5D	lysine (K)-specific demethylase 5D
hsa-miR-1248	1	0	1	0	1	1	CLIC4	chloride intracellular channel 4
hsa-miR-1248	0	0	1	1	0	0	C11orf74	chromosome 11 open reading frame 74
hsa-miR-1248	0	0	1	0	0	0	CCDC150	coiled-coil domain containing 150
hsa-miR-1248	0	0	1	1	1	1	RPE	ribulose-5-phosphate-3-epimerase
hsa-miR-1248	1	0	1	1	1	1	GAPVD1	GTPase activating protein and VPS9 domains 1
hsa-miR-1248	0	0	1	0	0	0	FAM66C	family with sequence similarity 66, member C
hsa-miR-1248	1	0	1	1	0	0	FBRS	fibrosin
hsa-miR-1248	1	0	1	1	0	0	CHD3	chromodomain helicase DNA binding protein 3
hsa-miR-1248	1	0	1	0	1	1	THRB	thyroid hormone receptor, beta
hsa-miR-1248	0	0	1	1	1	1	DNM1	dynamin 1
hsa-miR-1248	1	0	1	0	0	0	PID1	phosphotyrosine interaction domain containing 1
hsa-miR-1248	1	0	1	1	1	1	SYT6	synaptotagmin VI
hsa-miR-1248	1	0	1	1	1	1	ETS2	v-ets erythroblastosis virus E26 oncogene homolog 2 (avian)
hsa-miR-1248	1	0	1	1	1	1	CA12	carbonic anhydrase XII
hsa-miR-1248	1	0	1	1	1	1	STIM2	stromal interaction molecule 2
hsa-miR-1248	1	0	1	1	1	1	EPB41L1	erythrocyte membrane protein band 4.1-like 1
hsa-miR-1248	0	0	1	0	0	0	FLJ39534	uncharacterized FLJ39534
hsa-miR-1248	1	0	1	1	1	1	CDV3	CDV3 homolog (mouse)
hsa-miR-1248	0	0	1	1	1	1	ZNF513	zinc finger protein 513
hsa-miR-1248	0	0	1	1	1	1	GBAS	glioblastoma amplified sequence
hsa-miR-1248	1	0	1	1	1	1	GATA4	GATA binding protein 4
hsa-miR-1248	0	0	1	1	1	1	ITGAD	integrin, alpha D
hsa-miR-1248	0	0	1	0	1	1	TNFAIP8	tumor necrosis factor, alpha-induced protein 8
hsa-miR-1248	0	0	1	1	0	0	NUCB2	nucleobindin 2
hsa-miR-1248	1	0	1	1	1	1	RAB11FIP4	RAB11 family interacting protein 4 (class II)
hsa-miR-1248	0	0	1	1	0	0	ACAD10	acyl-CoA dehydrogenase family, member 10
hsa-miR-1248	0	0	1	0	0	0	DNAJB8-AS1	DNAJB8 antisense RNA 1
hsa-miR-1248	0	0	1	0	0	0	LINC00293	long intergenic non-protein coding RNA 293
hsa-miR-1248	0	0	1	0	0	0	LOC100128560	uncharacterized LOC100128560
hsa-miR-1248	0	0	1	1	1	1	TEX35	testis expressed 35
hsa-miR-1248	1	0	1	1	1	1	NSUN4	NOP2/Sun domain family, member 4
hsa-miR-1248	1	0	1	1	1	1	GOLGA8B	golgin A8 family, member B
hsa-miR-1248	0	0	1	1	1	1	ADGB	androglobin
hsa-miR-1248	0	0	1	1	0	0	MFSD5	major facilitator superfamily domain containing 5
hsa-miR-1248	0	0	1	1	0	0	AHCY	adenosylhomocysteinase
hsa-miR-1248	1	0	1	1	1	1	IGSF11	immunoglobulin superfamily, member 11
hsa-miR-1248	1	0	1	1	1	1	HOOK1	hook homolog 1 (Drosophila)
hsa-miR-1248	1	0	1	1	1	1	VAV3	vav 3 guanine nucleotide exchange factor
hsa-miR-1248	0	0	1	1	1	1	ATP9B	ATPase, class II, type 9B
hsa-miR-1248	1	0	1	1	1	1	ST7L	suppression of tumorigenicity 7 like
hsa-miR-1248	0	0	1	1	1	1	PRSS16	protease, serine, 16 (thymus)
hsa-miR-1248	0	0	1	1	1	1	CKAP2L	cytoskeleton associated protein 2-like
hsa-miR-1248	1	0	1	1	0	0	DNM2	dynamin 2
hsa-miR-1248	0	0	1	0	0	0	CECR7	cat eye syndrome chromosome region, candidate 7 (non-protein coding)
hsa-miR-1248	1	0	1	1	1	1	CHD6	chromodomain helicase DNA binding protein 6
hsa-miR-1248	0	0	1	1	0	0	ZNF283	zinc finger protein 283
hsa-miR-1248	0	0	1	1	1	1	RP1	retinitis pigmentosa 1 (autosomal dominant)
hsa-miR-1248	1	0	1	1	0	0	ENTPD1	ectonucleoside triphosphate diphosphohydrolase 1
hsa-miR-1248	0	0	1	0	0	0	LOC100130954	uncharacterized LOC100130954
hsa-miR-1248	0	0	1	1	0	0	FBXO16	F-box protein 16
hsa-miR-1248	0	0	1	1	1	1	ANKZF1	ankyrin repeat and zinc finger domain containing 1
hsa-miR-1248	1	0	1	1	1	1	LARP1B	La ribonucleoprotein domain family, member 1B
hsa-miR-1248	0	0	1	1	1	1	GRPEL1	GrpE-like 1, mitochondrial (E. coli)
hsa-miR-1248	0	0	1	0	0	0	LOC728095	uncharacterized LOC728095
hsa-miR-1248	1	0	1	1	1	1	NDFIP2	Nedd4 family interacting protein 2
hsa-miR-1248	1	0	1	0	1	1	UNC5D	unc-5 homolog D (C. elegans)
hsa-miR-1248	0	0	1	1	0	0	ZACN	zinc activated ligand-gated ion channel
hsa-miR-1248	1	0	1	1	1	1	UHRF2	ubiquitin-like with PHD and ring finger domains 2, E3 ubiquitin protein ligase
hsa-miR-1248	0	0	1	1	1	1	SLFN13	schlafen family member 13
hsa-miR-1248	1	0	1	1	1	1	CRMP1	collapsin response mediator protein 1
hsa-miR-1248	0	0	1	1	0	0	KIAA0146	KIAA0146
hsa-miR-1248	0	0	1	1	1	1	ZDHHC15	zinc finger, DHHC-type containing 15
hsa-miR-1248	1	0	1	1	0	0	CACNB3	calcium channel, voltage-dependent, beta 3 subunit
hsa-miR-1248	0	0	1	1	0	0	HDAC6	histone deacetylase 6
hsa-miR-1248	1	0	1	1	1	1	PXN	paxillin
hsa-miR-1248	1	0	1	1	1	1	ZNF275	zinc finger protein 275
hsa-miR-1248	0	0	1	1	1	1	FRMD5	FERM domain containing 5
hsa-miR-1248	1	0	1	1	1	1	KALRN	kalirin, RhoGEF kinase
hsa-miR-1248	1	0	1	1	1	1	HNRNPA1L2	heterogeneous nuclear ribonucleoprotein A1-like 2
hsa-miR-1248	0	0	1	0	0	0	C1orf132	chromosome 1 open reading frame 132
hsa-miR-1248	1	0	1	1	1	1	MDGA2	MAM domain containing glycosylphosphatidylinositol anchor 2
hsa-miR-1248	1	0	1	0	1	1	KCNK2	potassium channel, subfamily K, member 2
hsa-miR-1248	0	0	1	1	1	1	EXD1	exonuclease 3'-5' domain containing 1
hsa-miR-1248	0	0	1	1	1	1	CC2D2B	coiled-coil and C2 domain containing 2B
hsa-miR-1248	0	0	1	1	1	1	PCBP2	poly(rC) binding protein 2
hsa-miR-1248	0	0	1	1	1	1	FAM19A2	family with sequence similarity 19 (chemokine (C-C motif)-like), member A2
hsa-miR-1248	1	0	1	1	1	1	SBF2	SET binding factor 2
hsa-miR-1248	1	0	1	1	1	1	PHKB	phosphorylase kinase, beta
hsa-miR-1248	0	0	1	1	0	0	KRT37	keratin 37
hsa-miR-1248	1	0	1	1	1	1	EPAS1	endothelial PAS domain protein 1
hsa-miR-1248	1	0	1	1	1	1	TBC1D9B	TBC1 domain family, member 9B (with GRAM domain)
hsa-miR-1248	1	0	1	1	1	1	FAM219A	family with sequence similarity 219, member A
hsa-miR-1248	0	0	1	1	1	1	BTN2A2	butyrophilin, subfamily 2, member A2
hsa-miR-1248	1	0	1	0	0	0	GPR137C	G protein-coupled receptor 137C
hsa-miR-1248	1	0	1	1	1	1	SH2D4B	SH2 domain containing 4B
hsa-miR-1248	0	0	1	0	0	0	DKFZP434H168	uncharacterized LOC26077
hsa-miR-1248	1	0	1	1	1	1	SMAP1	small ArfGAP 1
hsa-miR-1248	1	0	1	1	0	0	KIAA1549L	KIAA1549-like
hsa-miR-1248	1	0	1	1	1	1	ADIPOR1	adiponectin receptor 1
hsa-miR-1248	0	0	1	1	0	0	NPIP	nuclear pore complex interacting protein
hsa-miR-1248	1	0	1	1	1	1	FAM122B	family with sequence similarity 122B
hsa-miR-1248	0	0	1	0	0	0	LOC728716	uncharacterized LOC728716
hsa-miR-1248	1	0	1	1	1	1	UBA2	ubiquitin-like modifier activating enzyme 2
hsa-miR-1248	1	0	1	0	1	1	CNTN2	contactin 2 (axonal)
hsa-miR-1248	0	0	1	1	0	0	PPP1R18	protein phosphatase 1, regulatory subunit 18
hsa-miR-1248	0	0	1	1	0	0	FAM176C	family with sequence similarity 176, member C
hsa-miR-1248	0	0	1	1	1	1	ATPBD4	ATP binding domain 4
hsa-miR-1248	1	0	1	1	1	1	FAM118A	family with sequence similarity 118, member A
hsa-miR-1248	1	0	1	1	1	1	SGIP1	SH3-domain GRB2-like (endophilin) interacting protein 1
hsa-miR-1248	1	0	1	1	1	1	C17orf85	chromosome 17 open reading frame 85
hsa-miR-1248	1	0	1	1	1	1	ATXN7	ataxin 7
hsa-miR-1248	1	0	1	1	0	0	GXYLT1	glucoside xylosyltransferase 1
hsa-miR-1248	0	0	1	1	0	0	FAM21B	family with sequence similarity 21, member B
hsa-miR-1248	1	0	1	1	1	1	PIAS3	protein inhibitor of activated STAT, 3
hsa-miR-1248	1	0	1	1	1	1	SGSM2	small G protein signaling modulator 2
hsa-miR-1248	1	0	1	1	1	1	IGFBP3	insulin-like growth factor binding protein 3
hsa-miR-1248	1	0	1	1	1	1	METAP2	methionyl aminopeptidase 2
hsa-miR-1248	0	0	1	1	1	1	MKX	mohawk homeobox
hsa-miR-1248	1	0	1	1	1	1	KTN1	kinectin 1 (kinesin receptor)
hsa-miR-1248	0	0	1	0	0	0	LOC613266	uncharacterized LOC613266
hsa-miR-1248	0	0	1	0	1	1	CTBP1-AS1	CTBP1 antisense RNA 1
hsa-miR-1248	0	0	1	0	0	0	FAM75D4	family with sequence similarity 75, member D4
hsa-miR-1248	0	0	1	1	0	0	LOC399829	uncharacterized LOC399829
hsa-miR-1248	0	0	1	0	0	0	FAM95B1	family with sequence similarity 95, member B1
hsa-miR-1248	1	0	1	1	1	1	MACROD2	MACRO domain containing 2
hsa-miR-1248	1	0	1	1	0	0	UBN2	ubinuclein 2
hsa-miR-1248	0	0	1	1	0	0	C20orf141	chromosome 20 open reading frame 141
hsa-miR-1248	0	0	1	1	0	0	FSIP2	fibrous sheath interacting protein 2
hsa-miR-1248	0	0	1	1	1	1	MORF4L2	mortality factor 4 like 2
hsa-miR-1248	1	0	1	1	0	0	ATXN7L3	ataxin 7-like 3
hsa-miR-1248	1	0	1	1	1	1	SIKE1	suppressor of IKBKE 1
hsa-miR-1248	0	0	1	0	1	1	LOC388942	uncharacterized LOC388942
hsa-miR-1248	0	0	1	1	1	1	BDH1	3-hydroxybutyrate dehydrogenase, type 1
hsa-miR-1248	0	0	1	1	0	0	CCDC88B	coiled-coil domain containing 88B
hsa-miR-1248	1	0	1	1	1	1	LRIG1	leucine-rich repeats and immunoglobulin-like domains 1
hsa-miR-1248	1	0	1	1	1	1	MTOR	mechanistic target of rapamycin (serine/threonine kinase)
hsa-miR-1248	1	0	1	1	1	1	DLG2	discs, large homolog 2 (Drosophila)
hsa-miR-1248	1	0	1	0	1	1	GPR180	G protein-coupled receptor 180
hsa-miR-1248	1	0	1	1	1	1	NIPBL	Nipped-B homolog (Drosophila)
hsa-miR-1248	0	0	1	0	0	0	HNRNPKP3	heterogeneous nuclear ribonucleoprotein K pseudogene 3
hsa-miR-1248	0	0	1	1	0	0	TMEM151B	transmembrane protein 151B
hsa-miR-1248	0	0	1	1	1	1	SPICE1	spindle and centriole associated protein 1
hsa-miR-1248	1	0	1	1	1	1	LRP2BP	LRP2 binding protein
hsa-miR-1248	1	0	1	1	1	1	EIF4E3	eukaryotic translation initiation factor 4E family member 3
hsa-miR-1248	0	0	1	0	0	0	RPL23AP53	ribosomal protein L23a pseudogene 53
hsa-miR-1248	1	0	1	1	0	0	MAN1B1	mannosidase, alpha, class 1B, member 1
hsa-miR-1248	0	0	1	1	1	1	KLC4	kinesin light chain 4
hsa-miR-1248	1	0	1	1	1	1	MKRN1	makorin ring finger protein 1
hsa-miR-1248	0	0	1	1	1	1	USP4	ubiquitin specific peptidase 4 (proto-oncogene)
hsa-miR-1248	0	0	1	1	1	1	CSPP1	centrosome and spindle pole associated protein 1
hsa-miR-1248	1	0	1	0	1	1	ADIPOR2	adiponectin receptor 2
hsa-miR-1248	0	0	1	1	1	1	DOCK9	dedicator of cytokinesis 9
hsa-miR-1248	1	0	1	0	1	1	N4BP3	NEDD4 binding protein 3
hsa-miR-1248	1	0	1	1	0	0	PTPN5	protein tyrosine phosphatase, non-receptor type 5 (striatum-enriched)
hsa-miR-1248	1	0	1	1	1	1	PHF17	PHD finger protein 17
hsa-miR-1248	0	0	1	1	0	0	PSMC6	proteasome (prosome, macropain) 26S subunit, ATPase, 6
hsa-miR-1248	0	0	1	0	0	0	LOC285812	uncharacterized LOC285812
hsa-miR-1248	1	0	1	1	1	1	ENAH	enabled homolog (Drosophila)
hsa-miR-1248	0	0	1	1	1	1	PIN4	protein (peptidylprolyl cis/trans isomerase) NIMA-interacting, 4 (parvulin)
hsa-miR-1248	0	0	1	1	1	1	ZNF503	zinc finger protein 503
hsa-miR-1248	1	0	1	0	1	1	SP6	Sp6 transcription factor
hsa-miR-1248	1	0	1	1	1	1	CXorf23	chromosome X open reading frame 23
hsa-miR-1248	1	0	1	1	1	1	EYA1	eyes absent homolog 1 (Drosophila)
hsa-miR-1248	1	0	1	1	1	1	PLA2G15	phospholipase A2, group XV
hsa-miR-1248	0	0	1	1	0	0	NCF1	neutrophil cytosolic factor 1
hsa-miR-1248	0	0	1	1	0	0	BPIFB1	BPI fold containing family B, member 1
hsa-miR-1248	0	0	1	0	0	0	FAM71E2	family with sequence similarity 71, member E2
hsa-miR-1248	0	0	1	0	1	1	LOC401321	uncharacterized LOC401321
hsa-miR-1248	0	0	1	1	1	1	MCU	mitochondrial calcium uniporter
hsa-miR-1248	0	0	1	0	0	0	LRRC9	leucine rich repeat containing 9
hsa-miR-1248	0	0	1	1	0	0	LOC100128682	uncharacterized LOC100128682
hsa-miR-1248	0	0	1	0	0	0	FAM205B	transmembrane protein C9orf144B pseudogene
hsa-miR-1248	0	0	1	0	0	0	EP400NL	EP400 N-terminal like
hsa-miR-1248	0	0	1	0	0	0	AFG3L1P	AFG3 ATPase family gene 3-like 1 (S. cerevisiae), pseudogene
hsa-miR-1248	1	0	1	0	1	1	PLSCR4	phospholipid scramblase 4
hsa-miR-1248	1	0	1	1	1	1	FRYL	FRY-like
hsa-miR-1248	1	0	1	1	0	0	ATP2A1	ATPase, Ca++ transporting, cardiac muscle, fast twitch 1
hsa-miR-1248	1	0	1	0	0	0	SP7	Sp7 transcription factor
hsa-miR-1248	1	0	1	0	1	1	USP37	ubiquitin specific peptidase 37
hsa-miR-1248	1	0	1	0	1	1	KPNA6	karyopherin alpha 6 (importin alpha 7)
hsa-miR-1248	0	0	1	1	1	1	TPK1	thiamin pyrophosphokinase 1
hsa-miR-1248	0	0	1	1	1	1	RAB13	RAB13, member RAS oncogene family
hsa-miR-1248	1	0	1	1	1	1	ADAMTSL1	ADAMTS-like 1
hsa-miR-1248	1	0	1	1	1	1	UPF1	UPF1 regulator of nonsense transcripts homolog (yeast)
hsa-miR-1248	0	0	1	1	0	0	GSG1L	GSG1-like
hsa-miR-1248	1	0	1	1	1	1	PHC2	polyhomeotic homolog 2 (Drosophila)
hsa-miR-1248	1	0	1	1	1	1	DPY19L3	dpy-19-like 3 (C. elegans)
hsa-miR-1248	0	0	1	0	0	0	PINLYP	phospholipase A2 inhibitor and LY6/PLAUR domain containing
hsa-miR-1248	0	0	1	0	0	0	FLJ26245	uncharacterized LOC400533
hsa-miR-1248	0	0	1	1	1	1	G3BP1	GTPase activating protein (SH3 domain) binding protein 1
hsa-miR-1248	1	0	1	0	1	1	GPC6	glypican 6
hsa-miR-1248	0	0	1	1	0	0	HEATR8	HEAT repeat containing 8
hsa-miR-1248	0	0	1	1	0	0	EXOSC7	exosome component 7
hsa-miR-1248	0	0	1	1	1	1	ST8SIA5	ST8 alpha-N-acetyl-neuraminide alpha-2,8-sialyltransferase 5
hsa-miR-1248	1	0	1	1	1	1	ARHGAP24	Rho GTPase activating protein 24
hsa-miR-1248	0	0	1	0	1	1	GALNT13	UDP-N-acetyl-alpha-D-galactosamine:polypeptide N-acetylgalactosaminyltransferase 13 (GalNAc-T13)
hsa-miR-1248	0	0	1	0	1	1	RUFY4	RUN and FYVE domain containing 4
hsa-miR-1248	0	0	1	0	0	0	LOC100124692	maltase-glucoamylase (alpha-glucosidase) pseudogene
hsa-miR-1248	1	0	1	0	0	0	ASXL3	additional sex combs like 3 (Drosophila)
hsa-miR-1248	0	0	1	1	1	1	SYPL2	synaptophysin-like 2
hsa-miR-1248	1	0	1	1	1	1	MAP2K4	mitogen-activated protein kinase kinase 4
hsa-miR-1248	0	0	1	1	1	1	NR4A1	nuclear receptor subfamily 4, group A, member 1
hsa-miR-1248	0	0	1	0	0	0	AGAP9	ArfGAP with GTPase domain, ankyrin repeat and PH domain 9
hsa-miR-1248	0	0	1	1	0	0	CNOT3	CCR4-NOT transcription complex, subunit 3
hsa-miR-1248	1	0	1	1	1	1	SYS1	SYS1 Golgi-localized integral membrane protein homolog (S. cerevisiae)
hsa-miR-1248	1	0	1	1	1	1	CTSA	cathepsin A
hsa-miR-1248	1	0	1	1	1	1	NME6	NME/NM23 nucleoside diphosphate kinase 6
hsa-miR-1248	0	0	1	1	1	1	FANCC	Fanconi anemia, complementation group C
hsa-miR-1248	1	0	1	1	1	1	CYYR1	cysteine/tyrosine-rich 1
hsa-miR-1248	0	0	1	1	0	0	ZNF414	zinc finger protein 414
hsa-miR-1248	1	0	1	0	1	1	CHD7	chromodomain helicase DNA binding protein 7
hsa-miR-1248	1	0	1	1	1	1	UBE2O	ubiquitin-conjugating enzyme E2O
hsa-miR-1248	1	0	1	1	1	1	TMEM25	transmembrane protein 25
hsa-miR-1248	0	0	1	0	1	1	BCAS1	breast carcinoma amplified sequence 1
hsa-miR-1248	1	0	1	1	0	0	ABLIM3	actin binding LIM protein family, member 3
hsa-miR-1248	1	0	1	1	1	1	CAMK2G	calcium/calmodulin-dependent protein kinase II gamma
hsa-miR-1248	0	0	1	1	0	0	UFD1L	ubiquitin fusion degradation 1 like (yeast)
hsa-miR-1248	0	0	1	1	0	0	HSPB11	heat shock protein family B (small), member 11
hsa-miR-1248	1	0	1	1	1	1	LUC7L3	LUC7-like 3 (S. cerevisiae)
hsa-miR-1248	1	0	1	1	1	1	SETX	senataxin
hsa-miR-1248	0	0	1	1	1	1	CCKBR	cholecystokinin B receptor
hsa-miR-1248	1	0	1	1	1	1	NCOA1	nuclear receptor coactivator 1
hsa-miR-1248	1	0	1	1	1	1	NOVA1	neuro-oncological ventral antigen 1
hsa-miR-1248	1	0	1	1	1	1	DUSP3	dual specificity phosphatase 3
hsa-miR-1248	1	0	1	1	1	1	AHCYL1	adenosylhomocysteinase-like 1
hsa-miR-1248	1	0	1	1	1	1	RIF1	RAP1 interacting factor homolog (yeast)
hsa-miR-1248	0	0	1	1	1	1	TFDP2	transcription factor Dp-2 (E2F dimerization partner 2)
hsa-miR-1248	0	0	1	1	0	0	PLK1S1	polo-like kinase 1 substrate 1
hsa-miR-1248	0	0	1	0	0	0	POM121L9P	POM121 transmembrane nucleoporin-like 9, pseudogene
hsa-miR-1248	1	0	1	1	1	1	ARF6	ADP-ribosylation factor 6
hsa-miR-1248	0	0	1	1	1	1	ARIH1	ariadne homolog, ubiquitin-conjugating enzyme E2 binding protein, 1 (Drosophila)
hsa-miR-1248	1	0	1	0	1	1	DCDC2	doublecortin domain containing 2
hsa-miR-1248	1	0	1	1	1	1	ARPP21	cAMP-regulated phosphoprotein, 21kDa
hsa-miR-1248	0	0	1	1	1	1	TTLL5	tubulin tyrosine ligase-like family, member 5
hsa-miR-1248	0	0	1	1	0	0	H2AFJ	H2A histone family, member J
hsa-miR-1248	0	0	1	0	0	0	DNAJC5B	DnaJ (Hsp40) homolog, subfamily C, member 5 beta
hsa-miR-1248	0	0	1	0	0	0	KIAA0913	KIAA0913
hsa-miR-1248	0	0	1	1	1	1	ZNF280D	zinc finger protein 280D
hsa-miR-1248	0	0	1	1	1	1	RHOT1	ras homolog family member T1
hsa-miR-1248	0	0	1	1	1	1	STAG3L1	stromal antigen 3-like 1
hsa-miR-1248	1	0	1	1	1	1	ERI1	exoribonuclease 1
hsa-miR-1248	1	0	1	1	1	1	GOLGA8A	golgin A8 family, member A
hsa-miR-1248	1	0	1	1	1	1	DNAJC16	DnaJ (Hsp40) homolog, subfamily C, member 16
hsa-miR-1248	0	0	1	1	1	1	AQP6	aquaporin 6, kidney specific
hsa-miR-1248	0	0	1	1	0	0	NOL12	nucleolar protein 12
hsa-miR-1248	1	0	1	0	1	1	GPR85	G protein-coupled receptor 85
hsa-miR-1248	1	0	1	0	1	1	CEP170	centrosomal protein 170kDa
hsa-miR-1248	1	0	1	1	1	1	TFE3	transcription factor binding to IGHM enhancer 3
hsa-miR-1248	0	0	1	1	0	0	DOPEY1	dopey family member 1
hsa-miR-1248	1	0	1	1	1	1	CTTNBP2NL	CTTNBP2 N-terminal like
hsa-miR-1248	0	0	1	1	1	1	SLC30A10	solute carrier family 30, member 10
hsa-miR-1248	0	0	1	0	0	0	LRRC37BP1	leucine rich repeat containing 37B pseudogene 1
hsa-miR-1248	1	0	1	1	1	1	PKNOX2	PBX/knotted 1 homeobox 2
hsa-miR-1248	0	0	1	1	1	1	ING3	inhibitor of growth family, member 3
hsa-miR-1248	1	0	1	1	1	1	YTHDF3	YTH domain family, member 3
hsa-miR-1248	1	0	1	1	1	1	DENND1B	DENN/MADD domain containing 1B
hsa-miR-1248	0	0	1	1	1	1	TMEM132C	transmembrane protein 132C
hsa-miR-1248	0	0	1	0	1	1	GAB3	GRB2-associated binding protein 3
hsa-miR-1248	0	0	1	1	1	1	BEND7	BEN domain containing 7
hsa-miR-1248	0	0	1	0	0	0	ZNF720	zinc finger protein 720
hsa-miR-1248	1	0	1	1	1	1	FAM126B	family with sequence similarity 126, member B
hsa-miR-1248	1	0	1	1	0	0	USP24	ubiquitin specific peptidase 24
hsa-miR-1248	0	0	1	1	1	1	C10orf57	chromosome 10 open reading frame 57
hsa-miR-1248	1	0	1	1	0	0	SLC44A2	solute carrier family 44, member 2
hsa-miR-1248	1	0	1	1	1	1	RNF180	ring finger protein 180
hsa-miR-1248	0	0	1	1	1	1	SYTL4	synaptotagmin-like 4
hsa-miR-1248	1	0	1	1	1	1	DNAJC10	DnaJ (Hsp40) homolog, subfamily C, member 10
hsa-miR-1248	1	0	1	1	1	1	NABP1	nucleic acid binding protein 1
hsa-miR-1248	1	0	1	1	0	0	PTAR1	protein prenyltransferase alpha subunit repeat containing 1
hsa-miR-1248	1	0	1	1	1	1	TMEM182	transmembrane protein 182
hsa-miR-1248	0	0	1	1	1	1	BRD2	bromodomain containing 2
hsa-miR-1248	0	0	1	1	1	1	DAZ4	deleted in azoospermia 4
hsa-miR-1248	1	0	1	0	1	1	MEF2C	myocyte enhancer factor 2C
hsa-miR-1248	1	0	1	1	1	1	SOX6	SRY (sex determining region Y)-box 6
hsa-miR-1248	0	0	1	1	1	1	NARG2	NMDA receptor regulated 2
hsa-miR-1248	0	0	1	1	1	1	CCDC66	coiled-coil domain containing 66
hsa-miR-1248	1	0	1	1	1	1	BPTF	bromodomain PHD finger transcription factor
hsa-miR-1248	0	0	1	1	1	1	NFE2L1	nuclear factor (erythroid-derived 2)-like 1
hsa-miR-1248	1	0	1	1	1	1	CEP164	centrosomal protein 164kDa
hsa-miR-1248	1	0	1	0	1	1	CLINT1	clathrin interactor 1
hsa-miR-1248	0	0	1	1	0	0	PPIE	peptidylprolyl isomerase E (cyclophilin E)
hsa-miR-1248	0	0	1	0	0	0	EPHA1-AS1	EPHA1 antisense RNA 1
hsa-miR-1248	1	0	1	1	1	1	NRP1	neuropilin 1
hsa-miR-1248	1	0	1	1	1	1	FAM63B	family with sequence similarity 63, member B
hsa-miR-1248	1	0	1	0	1	1	CNOT7	CCR4-NOT transcription complex, subunit 7
hsa-miR-1248	0	0	1	0	0	0	ADCY10P1	adenylate cyclase 10 (soluble) pseudogene 1
hsa-miR-1248	1	0	1	1	1	1	MARCH7	membrane-associated ring finger (C3HC4) 7, E3 ubiquitin protein ligase
hsa-miR-1248	0	0	1	1	1	1	PCDH20	protocadherin 20
hsa-miR-1248	1	0	1	1	1	1	IL17RD	interleukin 17 receptor D
hsa-miR-1248	1	0	1	1	1	1	PRPF38B	PRP38 pre-mRNA processing factor 38 (yeast) domain containing B
hsa-miR-1248	0	0	1	1	0	0	TTLL6	tubulin tyrosine ligase-like family, member 6
hsa-miR-1248	1	0	1	0	1	1	JAZF1	JAZF zinc finger 1
hsa-miR-1248	0	0	1	1	1	1	PNMAL1	paraneoplastic Ma antigen family-like 1
hsa-miR-1248	1	0	1	0	1	1	COX18	COX18 cytochrome c oxidase assembly homolog (S. cerevisiae)
hsa-miR-1248	1	0	1	0	1	1	NR3C1	nuclear receptor subfamily 3, group C, member 1 (glucocorticoid receptor)
hsa-miR-1248	0	0	1	0	1	1	SYNPO2	synaptopodin 2
hsa-miR-1248	1	0	1	1	1	1	AP1AR	adaptor-related protein complex 1 associated regulatory protein
hsa-miR-1248	1	0	1	1	0	0	LRRC58	leucine rich repeat containing 58
hsa-miR-1248	1	0	1	1	1	1	PPP3CA	protein phosphatase 3, catalytic subunit, alpha isozyme
hsa-miR-1248	0	0	1	1	1	1	TMEM130	transmembrane protein 130
hsa-miR-1248	1	0	1	1	1	1	RNF38	ring finger protein 38
hsa-miR-1248	0	0	1	1	0	0	TMEM134	transmembrane protein 134
hsa-miR-1248	1	0	1	1	1	1	IKZF2	IKAROS family zinc finger 2 (Helios)
hsa-miR-1248	0	0	1	0	0	0	PMCHL2	pro-melanin-concentrating hormone-like 2, pseudogene
hsa-miR-1248	0	0	1	1	1	1	ALS2CR8	amyotrophic lateral sclerosis 2 (juvenile) chromosome region, candidate 8
hsa-miR-1248	0	0	1	1	0	0	TP73	tumor protein p73
hsa-miR-1248	0	0	1	1	1	1	CD209	CD209 molecule
hsa-miR-1248	1	0	1	1	1	1	TXNRD1	thioredoxin reductase 1
hsa-miR-1248	0	0	1	0	0	0	LOC374443	C-type lectin domain family 2, member D pseudogene
hsa-miR-1248	1	0	1	1	1	1	SORCS1	sortilin-related VPS10 domain containing receptor 1
hsa-miR-1248	0	0	1	1	0	0	CRB3	crumbs homolog 3 (Drosophila)
hsa-miR-1248	1	0	1	1	1	1	ANGPT1	angiopoietin 1
hsa-miR-1248	0	0	1	0	1	1	UNC5B	unc-5 homolog B (C. elegans)
hsa-miR-1248	0	0	1	1	1	1	NFXL1	nuclear transcription factor, X-box binding-like 1
hsa-miR-1248	1	0	1	1	1	1	USF2	upstream transcription factor 2, c-fos interacting
hsa-miR-1248	0	0	1	1	0	0	CMTM1	CKLF-like MARVEL transmembrane domain containing 1
hsa-miR-1248	1	0	1	1	1	1	WDR26	WD repeat domain 26
hsa-miR-1248	0	0	1	1	0	0	DNAH1	dynein, axonemal, heavy chain 1
hsa-miR-1248	1	0	1	1	1	1	BCL11A	B-cell CLL/lymphoma 11A (zinc finger protein)
hsa-miR-1248	0	0	1	1	1	1	IYD	iodotyrosine deiodinase
hsa-miR-1248	1	0	1	1	1	1	PBRM1	polybromo 1
hsa-miR-1248	1	0	1	1	1	1	OPRM1	opioid receptor, mu 1
hsa-miR-1248	0	0	1	1	0	0	MUC1	mucin 1, cell surface associated
hsa-miR-1248	0	0	1	1	1	1	GCOM1	GRINL1A complex locus 1
hsa-miR-1248	1	0	1	1	1	1	TAB3	TGF-beta activated kinase 1/MAP3K7 binding protein 3
hsa-miR-1248	0	0	1	1	1	1	MFAP5	microfibrillar associated protein 5
hsa-miR-1248	0	0	1	1	0	0	PIGU	phosphatidylinositol glycan anchor biosynthesis, class U
hsa-miR-1248	0	0	1	0	0	0	FAM138C	family with sequence similarity 138, member C
hsa-miR-1248	1	0	1	1	1	1	CAMTA1	calmodulin binding transcription activator 1
hsa-miR-1248	1	0	1	1	1	1	NLGN4X	neuroligin 4, X-linked
hsa-miR-1248	0	0	1	1	1	1	TNFRSF19	tumor necrosis factor receptor superfamily, member 19
hsa-miR-1248	1	0	1	1	0	0	CLASRP	CLK4-associating serine/arginine rich protein
hsa-miR-1248	0	0	1	1	1	1	NYAP1	neuronal tyrosine-phosphorylated phosphoinositide-3-kinase adaptor 1
hsa-miR-1248	1	0	1	1	1	1	FAM120A	family with sequence similarity 120A
hsa-miR-1248	1	0	1	0	1	1	CHRM2	cholinergic receptor, muscarinic 2
hsa-miR-1248	1	0	1	0	1	1	NHS	Nance-Horan syndrome (congenital cataracts and dental anomalies)
hsa-miR-1248	0	0	1	1	1	1	PLD5	phospholipase D family, member 5
hsa-miR-1248	0	0	1	1	1	1	POTEG	POTE ankyrin domain family, member G
hsa-miR-1248	0	0	1	0	0	0	ZNFX1-AS1	ZNFX1 antisense RNA 1
hsa-miR-1248	1	0	1	1	1	1	MYNN	myoneurin
hsa-miR-1248	0	0	1	1	1	1	UGT2B4	UDP glucuronosyltransferase 2 family, polypeptide B4
hsa-miR-1248	0	0	1	0	1	1	XKR5	XK, Kell blood group complex subunit-related family, member 5
hsa-miR-1248	0	0	1	1	1	1	AICDA	activation-induced cytidine deaminase
hsa-miR-1248	1	0	1	1	1	1	MECP2	methyl CpG binding protein 2 (Rett syndrome)
hsa-miR-1248	1	0	1	0	1	1	LRAT	lecithin retinol acyltransferase (phosphatidylcholine--retinol O-acyltransferase)
hsa-miR-1248	1	0	1	1	1	1	RBM24	RNA binding motif protein 24
hsa-miR-1248	0	0	1	1	1	1	DIO1	deiodinase, iodothyronine, type I
hsa-miR-1248	1	0	1	1	0	0	ADAM15	ADAM metallopeptidase domain 15
hsa-miR-1248	0	0	1	1	0	0	DHRS4	dehydrogenase/reductase (SDR family) member 4
hsa-miR-1248	0	0	1	1	1	1	IL24	interleukin 24
hsa-miR-1248	1	0	1	1	1	1	ALCAM	activated leukocyte cell adhesion molecule
hsa-miR-1248	0	0	1	1	1	1	SMPD1	sphingomyelin phosphodiesterase 1, acid lysosomal
hsa-miR-1248	1	0	1	1	1	1	PLCH1	phospholipase C, eta 1
hsa-miR-1248	0	0	1	1	0	0	FAM170A	family with sequence similarity 170, member A
hsa-miR-1248	1	0	1	1	1	1	TRIT1	tRNA isopentenyltransferase 1
hsa-miR-1248	0	0	1	1	1	1	CEACAM1	carcinoembryonic antigen-related cell adhesion molecule 1 (biliary glycoprotein)
hsa-miR-1248	1	0	1	1	0	0	DGAT2	diacylglycerol O-acyltransferase 2
hsa-miR-1248	1	0	1	1	1	1	QKI	QKI, KH domain containing, RNA binding
hsa-miR-1248	1	0	1	1	1	1	CD109	CD109 molecule
hsa-miR-1248	1	0	1	1	1	1	PCDH11X	protocadherin 11 X-linked
hsa-miR-1248	1	0	1	1	0	0	TAF4B	TAF4b RNA polymerase II, TATA box binding protein (TBP)-associated factor, 105kDa
hsa-miR-1248	0	0	1	1	0	0	NBPF8	neuroblastoma breakpoint family, member 8
hsa-miR-1248	1	0	1	1	1	1	PRKACB	protein kinase, cAMP-dependent, catalytic, beta
hsa-miR-1248	1	0	1	1	1	1	TBC1D22B	TBC1 domain family, member 22B
hsa-miR-1248	0	0	1	1	1	1	IL23R	interleukin 23 receptor
hsa-miR-1248	1	0	1	1	1	1	AMOT	angiomotin
hsa-miR-1248	0	0	1	1	0	0	C17orf53	chromosome 17 open reading frame 53
hsa-miR-1248	0	0	1	0	1	1	MIS12	MIS12, MIND kinetochore complex component, homolog (S. pombe)
hsa-miR-1248	0	0	1	0	0	0	GBAP1	glucosidase, beta, acid pseudogene 1
hsa-miR-1248	0	0	1	1	1	1	SLC6A2	solute carrier family 6 (neurotransmitter transporter, noradrenalin), member 2
hsa-miR-1248	0	0	1	1	1	1	RAD51C	RAD51 homolog C (S. cerevisiae)
hsa-miR-1248	0	0	1	1	0	0	GFOD2	glucose-fructose oxidoreductase domain containing 2
hsa-miR-1248	1	0	1	0	1	1	BAG4	BCL2-associated athanogene 4
hsa-miR-1248	1	0	1	1	1	1	PAFAH2	platelet-activating factor acetylhydrolase 2, 40kDa
hsa-miR-1248	1	0	1	1	0	0	PPP4C	protein phosphatase 4, catalytic subunit
hsa-miR-1248	0	0	1	1	1	1	PAFAH1B2	platelet-activating factor acetylhydrolase 1b, catalytic subunit 2 (30kDa)
hsa-miR-1248	1	0	1	1	1	1	TMUB2	transmembrane and ubiquitin-like domain containing 2
hsa-miR-1248	1	0	1	1	1	1	PPP5C	protein phosphatase 5, catalytic subunit
hsa-miR-1248	0	0	1	1	1	1	WDR55	WD repeat domain 55
hsa-miR-1248	1	0	1	1	1	1	HOXC13	homeobox C13
hsa-miR-1248	0	0	1	1	0	0	C20orf43	chromosome 20 open reading frame 43
hsa-miR-1248	0	0	1	1	1	1	MRRF	mitochondrial ribosome recycling factor
hsa-miR-1248	1	0	1	1	1	1	RIMS3	regulating synaptic membrane exocytosis 3
hsa-miR-1248	1	0	1	1	1	1	NONO	non-POU domain containing, octamer-binding
hsa-miR-1248	1	0	1	1	1	1	PPP1R11	protein phosphatase 1, regulatory (inhibitor) subunit 11
hsa-miR-1248	0	0	1	1	0	0	RUSC1	RUN and SH3 domain containing 1
hsa-miR-1248	1	0	1	1	1	1	SMO	smoothened, frizzled family receptor
hsa-miR-1248	1	0	1	1	1	1	ZNF410	zinc finger protein 410
hsa-miR-1248	1	0	1	0	1	1	CGGBP1	CGG triplet repeat binding protein 1
hsa-miR-1248	1	0	1	1	1	1	MBNL1	muscleblind-like splicing regulator 1
hsa-miR-1248	0	0	1	1	0	0	SCG5	secretogranin V (7B2 protein)
hsa-miR-1248	0	0	1	1	1	1	ARFGAP1	ADP-ribosylation factor GTPase activating protein 1
hsa-miR-1248	0	0	1	0	0	0	MGC13053	uncharacterized MGC13053
hsa-miR-1248	1	0	1	1	0	0	EIF4A1	eukaryotic translation initiation factor 4A1
hsa-miR-1248	1	0	1	0	1	1	C15orf41	chromosome 15 open reading frame 41
hsa-miR-1248	1	0	1	1	1	1	KIAA1191	KIAA1191
hsa-miR-1248	0	0	1	1	0	0	LOC100132167	uncharacterized LOC100132167
hsa-miR-1248	0	0	1	1	1	1	DYNLRB1	dynein, light chain, roadblock-type 1
hsa-miR-1248	0	0	1	1	1	1	ACPP	acid phosphatase, prostate
hsa-miR-1248	1	0	1	1	1	1	TRIM39	tripartite motif containing 39
hsa-miR-1248	1	0	1	0	1	1	DDX3X	DEAD (Asp-Glu-Ala-Asp) box polypeptide 3, X-linked
hsa-miR-1248	0	0	1	1	0	0	SPAG7	sperm associated antigen 7
hsa-miR-1248	1	0	1	1	1	1	CALM1	calmodulin 1 (phosphorylase kinase, delta)
hsa-miR-1248	1	0	1	1	1	1	PLEKHO2	pleckstrin homology domain containing, family O member 2
hsa-miR-1248	1	0	1	1	1	1	SHOX2	short stature homeobox 2
hsa-miR-1248	0	0	1	1	1	1	TMEM30A	transmembrane protein 30A
hsa-miR-1248	0	0	1	0	0	0	LOC400043	uncharacterized LOC400043
hsa-miR-1248	0	0	1	1	0	0	PANK2	pantothenate kinase 2
hsa-miR-1248	0	0	1	0	0	0	HIST1H2BN	histone cluster 1, H2bn
hsa-miR-1248	0	0	1	1	1	1	PRPF4B	PRP4 pre-mRNA processing factor 4 homolog B (yeast)
hsa-miR-1248	1	0	1	0	1	1	TMEM39A	transmembrane protein 39A
hsa-miR-1248	1	0	1	1	1	1	ATP6AP2	ATPase, H+ transporting, lysosomal accessory protein 2
hsa-miR-1248	1	0	1	1	1	1	SZRD1	SUZ RNA binding domain containing 1
hsa-miR-1248	0	0	1	1	1	1	CDC16	cell division cycle 16 homolog (S. cerevisiae)
hsa-miR-1248	0	0	1	1	1	1	PWP1	PWP1 homolog (S. cerevisiae)
hsa-miR-1248	1	0	1	1	1	1	ZFAND5	zinc finger, AN1-type domain 5
hsa-miR-1248	0	0	1	0	0	0	LRRC14	leucine rich repeat containing 14
hsa-miR-1248	0	0	1	1	1	1	GNL3L	guanine nucleotide binding protein-like 3 (nucleolar)-like
hsa-miR-1248	0	0	1	1	1	1	PSEN1	presenilin 1
hsa-miR-1248	1	0	1	1	1	1	ZBTB7B	zinc finger and BTB domain containing 7B
hsa-miR-1248	0	0	1	0	0	0	TPTEP1	transmembrane phosphatase with tensin homology pseudogene 1
hsa-miR-1248	1	0	1	1	1	1	DNAJB5	DnaJ (Hsp40) homolog, subfamily B, member 5
hsa-miR-1248	0	0	1	1	0	0	C8orf76	chromosome 8 open reading frame 76
hsa-miR-1248	0	0	1	1	0	0	ELP4	elongator acetyltransferase complex subunit 4
hsa-miR-1248	1	0	1	1	1	1	GDA	guanine deaminase
hsa-miR-1248	0	0	1	1	1	1	KLF7	Kruppel-like factor 7 (ubiquitous)
hsa-miR-1248	0	0	1	1	0	0	KLHDC3	kelch domain containing 3
hsa-miR-1248	1	0	1	1	1	1	SNCA	synuclein, alpha (non A4 component of amyloid precursor)
hsa-miR-1248	1	0	1	1	1	1	RBM7	RNA binding motif protein 7
hsa-miR-1248	0	0	1	1	1	1	PCNP	PEST proteolytic signal containing nuclear protein
hsa-miR-1248	1	0	1	1	1	1	CAP1	CAP, adenylate cyclase-associated protein 1 (yeast)
hsa-miR-1248	0	0	1	1	1	1	KLHL29	kelch-like 29 (Drosophila)
hsa-miR-1248	1	0	1	1	1	1	ETF1	eukaryotic translation termination factor 1
hsa-miR-1248	0	0	1	1	1	1	DLX4	distal-less homeobox 4
hsa-miR-1248	1	0	1	1	1	1	PRDM2	PR domain containing 2, with ZNF domain
hsa-miR-1248	0	0	1	1	1	1	C8orf33	chromosome 8 open reading frame 33
hsa-miR-1248	0	0	1	1	1	1	GIN1	gypsy retrotransposon integrase 1
hsa-miR-1248	0	0	1	0	1	1	ZNF37A	zinc finger protein 37A
hsa-miR-1248	1	0	1	0	1	1	NR1D2	nuclear receptor subfamily 1, group D, member 2
hsa-miR-1248	1	0	1	1	1	1	NUMBL	numb homolog (Drosophila)-like
hsa-miR-1248	1	0	1	0	1	1	CYBRD1	cytochrome b reductase 1
hsa-miR-1248	1	0	1	1	0	0	USP53	ubiquitin specific peptidase 53
hsa-miR-1248	0	0	1	1	0	0	ZBTB32	zinc finger and BTB domain containing 32
hsa-miR-1248	0	0	1	0	0	0	LOC100144602	uncharacterized LOC100144602
hsa-miR-1248	0	0	1	1	1	1	TARP	TCR gamma alternate reading frame protein
hsa-miR-1248	0	0	1	0	0	0	TCP11L2	t-complex 11 (mouse)-like 2
hsa-miR-1248	0	0	1	0	1	1	LOC646736	uncharacterized LOC646736
hsa-miR-1248	0	0	1	1	1	1	SLC17A3	solute carrier family 17 (sodium phosphate), member 3
hsa-miR-1248	0	0	1	0	0	0	FAM200B	family with sequence similarity 200, member B
hsa-miR-1248	0	0	1	1	0	0	GAGE2D	G antigen 2D
hsa-miR-1248	0	0	1	1	0	0	GAGE2E	G antigen 2E
hsa-miR-1248	0	0	1	1	0	0	DPPA2	developmental pluripotency associated 2
hsa-miR-1248	1	0	1	1	1	1	ARHGEF9	Cdc42 guanine nucleotide exchange factor (GEF) 9
hsa-miR-1248	1	0	1	1	1	1	SUZ12	suppressor of zeste 12 homolog (Drosophila)
hsa-miR-1248	0	0	1	1	1	1	EIF2B3	eukaryotic translation initiation factor 2B, subunit 3 gamma, 58kDa
hsa-miR-1248	1	0	1	1	1	1	ZMAT4	zinc finger, matrin-type 4
hsa-miR-1248	1	0	1	1	1	1	FAM188A	family with sequence similarity 188, member A
hsa-miR-1248	0	0	1	0	0	0	EEF1DP3	eukaryotic translation elongation factor 1 delta pseudogene 3
hsa-miR-1248	0	0	1	1	0	0	CA5BP1	carbonic anhydrase VB pseudogene 1
hsa-miR-1248	0	0	1	1	1	1	FMNL1	formin-like 1
hsa-miR-1248	0	0	1	0	0	0	LOC284260	uncharacterized LOC284260
hsa-miR-1248	0	0	1	0	0	0	FAM92A1P2	family with sequence similarity 92, member A3
hsa-miR-1248	0	0	1	0	0	0	NBR2	neighbor of BRCA1 gene 2 (non-protein coding)
hsa-miR-1248	0	0	1	1	1	1	SRGN	serglycin
hsa-miR-1248	0	0	1	1	1	1	RNF103	ring finger protein 103
hsa-miR-1248	1	0	1	0	1	1	CDK19	cyclin-dependent kinase 19
hsa-miR-1248	0	0	1	1	0	0	GLS2	glutaminase 2 (liver, mitochondrial)
hsa-miR-1248	0	0	1	0	0	0	TRAV20	T cell receptor alpha variable 20
hsa-miR-1248	0	0	1	1	1	1	C1orf114	chromosome 1 open reading frame 114
hsa-miR-1248	1	0	1	1	1	1	FAM131A	family with sequence similarity 131, member A
hsa-miR-1248	1	0	1	1	1	1	DDX6	DEAD (Asp-Glu-Ala-Asp) box helicase 6
hsa-miR-1248	0	0	1	1	0	0	TRO	trophinin
hsa-miR-1248	0	0	1	1	1	1	MAP2	microtubule-associated protein 2
hsa-miR-1248	1	0	1	1	1	1	APPL2	adaptor protein, phosphotyrosine interaction, PH domain and leucine zipper containing 2
hsa-miR-1248	1	0	1	1	1	1	B3GNT5	UDP-GlcNAc:betaGal beta-1,3-N-acetylglucosaminyltransferase 5
hsa-miR-1248	0	0	1	1	1	1	MLKL	mixed lineage kinase domain-like
hsa-miR-1248	0	0	1	1	1	1	ZNF589	zinc finger protein 589
hsa-miR-1248	0	0	1	0	1	1	KIAA0895	KIAA0895
hsa-miR-1248	1	0	1	1	1	1	HTR2C	5-hydroxytryptamine (serotonin) receptor 2C, G protein-coupled
hsa-miR-1248	0	0	1	0	0	0	ANKRD19P	ankyrin repeat domain 19, pseudogene
hsa-miR-1248	0	0	1	1	0	0	FCRL3	Fc receptor-like 3
hsa-miR-1248	0	0	1	0	0	0	LOC145837	uncharacterized LOC145837
hsa-miR-1248	0	0	1	1	1	1	KIAA1755	KIAA1755
hsa-miR-1248	0	0	1	1	0	0	CCDC42	coiled-coil domain containing 42
hsa-miR-1248	0	0	1	1	0	0	TMEM120A	transmembrane protein 120A
hsa-miR-1248	0	0	1	0	0	0	LOC100130950	uncharacterized LOC100130950
hsa-miR-1248	1	0	1	1	1	1	SYT9	synaptotagmin IX
hsa-miR-1248	0	0	1	0	0	0	BCAS3	breast carcinoma amplified sequence 3
hsa-miR-1248	0	0	1	1	1	1	CCP110	centriolar coiled coil protein 110kDa
hsa-miR-1248	0	0	1	1	1	1	CD48	CD48 molecule
hsa-miR-1248	0	0	1	1	0	0	FOLR3	folate receptor 3 (gamma)
hsa-miR-1248	1	0	1	1	1	1	ZBTB44	zinc finger and BTB domain containing 44
hsa-miR-1248	0	0	1	1	1	1	PIP5K1B	phosphatidylinositol-4-phosphate 5-kinase, type I, beta
hsa-miR-1248	1	0	1	1	1	1	TAF15	TAF15 RNA polymerase II, TATA box binding protein (TBP)-associated factor, 68kDa
hsa-miR-1248	0	0	1	1	1	1	COL25A1	collagen, type XXV, alpha 1
hsa-miR-1248	0	0	1	1	0	0	AGBL3	ATP/GTP binding protein-like 3
hsa-miR-1248	1	0	1	1	1	1	ELAVL2	ELAV (embryonic lethal, abnormal vision, Drosophila)-like 2 (Hu antigen B)
hsa-miR-1248	0	0	1	1	1	1	TMEM67	transmembrane protein 67
hsa-miR-1248	1	0	1	1	1	1	ZPLD1	zona pellucida-like domain containing 1
hsa-miR-1248	0	0	1	0	1	1	FLJ25328	uncharacterized LOC148231
hsa-miR-1248	1	0	1	1	1	1	PITPNB	phosphatidylinositol transfer protein, beta
hsa-miR-1248	1	0	1	1	1	1	RCOR3	REST corepressor 3
hsa-miR-1248	0	0	1	1	1	1	C7orf53	chromosome 7 open reading frame 53
hsa-miR-1248	1	0	1	1	1	1	PDZD2	PDZ domain containing 2
hsa-miR-1248	0	0	1	1	1	1	SNX17	sorting nexin 17
hsa-miR-1248	0	0	1	0	0	0	LOC643648	uncharacterized LOC643648
hsa-miR-1248	1	0	1	1	1	1	FGF1	fibroblast growth factor 1 (acidic)
hsa-miR-1248	1	0	1	1	1	1	DCLK2	doublecortin-like kinase 2
hsa-miR-1248	0	0	1	0	0	0	FAM86JP	family with sequence similarity 86, member A pseudogene
hsa-miR-1248	1	0	1	1	1	1	PPP2R2C	protein phosphatase 2, regulatory subunit B, gamma
hsa-miR-1248	1	0	1	1	1	1	SECISBP2L	SECIS binding protein 2-like
hsa-miR-1248	1	0	1	1	1	1	CEP76	centrosomal protein 76kDa
hsa-miR-1248	1	0	1	1	1	1	SLC25A27	solute carrier family 25, member 27
hsa-miR-1248	1	0	1	1	1	1	SIRPA	signal-regulatory protein alpha
hsa-miR-1248	0	0	1	0	0	0	WDFY3-AS2	WDFY3 antisense RNA 2
hsa-miR-1248	0	0	1	0	0	0	LOC96610	BMS1 homolog, ribosome assembly protein (yeast) pseudogene
hsa-miR-1248	0	0	1	1	1	1	IL20RB	interleukin 20 receptor beta
hsa-miR-1248	1	0	1	0	1	1	KCTD2	potassium channel tetramerisation domain containing 2
hsa-miR-1248	0	0	1	0	0	0	HILS1	histone linker H1 domain, spermatid-specific 1, pseudogene
hsa-miR-1248	0	0	1	0	0	0	LINC00238	long intergenic non-protein coding RNA 238
hsa-miR-1248	0	0	1	1	1	1	C16orf89	chromosome 16 open reading frame 89
hsa-miR-1248	1	0	1	1	1	1	PCDHA5	protocadherin alpha 5
hsa-miR-1248	0	0	1	1	0	0	TNMD	tenomodulin
hsa-miR-1248	0	0	1	1	1	1	ZNF337	zinc finger protein 337
hsa-miR-1248	0	0	1	0	0	0	NDUFB4	NADH dehydrogenase (ubiquinone) 1 beta subcomplex, 4, 15kDa
hsa-miR-1248	1	0	1	1	1	1	LPGAT1	lysophosphatidylglycerol acyltransferase 1
hsa-miR-1248	0	0	1	0	1	1	DKFZP434I0714	uncharacterized protein DKFZP434I0714
hsa-miR-1248	0	0	1	1	1	1	EDA2R	ectodysplasin A2 receptor
hsa-miR-1248	1	0	1	0	1	1	DDX3Y	DEAD (Asp-Glu-Ala-Asp) box polypeptide 3, Y-linked
hsa-miR-1248	1	0	1	0	1	1	PDE12	phosphodiesterase 12
hsa-miR-1248	1	0	1	1	0	0	CHST4	carbohydrate (N-acetylglucosamine 6-O) sulfotransferase 4
hsa-miR-1248	0	0	1	0	1	1	KSR1	kinase suppressor of ras 1
hsa-miR-1248	1	0	1	1	1	1	GRIA4	glutamate receptor, ionotropic, AMPA 4
hsa-miR-1248	1	0	1	1	1	1	ZEB2	zinc finger E-box binding homeobox 2
hsa-miR-1248	0	0	1	1	0	0	SNTG2	syntrophin, gamma 2
hsa-miR-1248	0	0	1	1	1	1	TMEM139	transmembrane protein 139
hsa-miR-1248	0	0	1	0	0	0	HOXA-AS2	HOXA cluster antisense RNA 2
hsa-miR-1248	0	0	1	1	1	1	SNAPC3	small nuclear RNA activating complex, polypeptide 3, 50kDa
hsa-miR-1248	1	0	1	1	1	1	ZNF618	zinc finger protein 618
hsa-miR-1248	0	0	1	1	1	1	ATP1A4	ATPase, Na+/K+ transporting, alpha 4 polypeptide
hsa-miR-1248	1	0	1	1	1	1	PEX5L	peroxisomal biogenesis factor 5-like
hsa-miR-1248	0	0	1	1	1	1	DUSP28	dual specificity phosphatase 28
hsa-miR-1248	1	0	1	1	1	1	SLC38A9	solute carrier family 38, member 9
hsa-miR-1248	0	0	1	0	0	0	SPATA3	spermatogenesis associated 3
hsa-miR-1248	0	0	1	0	1	1	C9orf57	chromosome 9 open reading frame 57
hsa-miR-1248	1	0	1	1	1	1	HECTD2	HECT domain containing E3 ubiquitin protein ligase 2
hsa-miR-1248	1	0	1	1	1	1	MEIS1	Meis homeobox 1
hsa-miR-1248	0	0	1	0	0	0	LOC652276	potassium channel tetramerisation domain containing 5 pseudogene
hsa-miR-1248	1	0	1	1	1	1	ACVR1	activin A receptor, type I
hsa-miR-1248	1	0	1	0	1	1	CLDN12	claudin 12
hsa-miR-1248	1	0	1	0	1	1	NEGR1	neuronal growth regulator 1
hsa-miR-1248	1	0	1	0	1	1	CPEB4	cytoplasmic polyadenylation element binding protein 4
hsa-miR-1248	1	0	1	1	1	1	BNC2	basonuclin 2
hsa-miR-1248	1	0	1	1	1	1	FAM135B	family with sequence similarity 135, member B
hsa-miR-1248	0	0	1	1	0	0	FNTA	farnesyltransferase, CAAX box, alpha
hsa-miR-1248	1	0	1	0	1	1	RAG1	recombination activating gene 1
hsa-miR-1248	0	0	1	0	0	0	LOC286184	uncharacterized LOC286184
hsa-miR-1248	1	0	1	1	0	0	EBF4	early B-cell factor 4
hsa-miR-1248	1	0	1	1	1	1	SLC35F3	solute carrier family 35, member F3
hsa-miR-1248	0	0	1	0	0	0	CRYBB2P1	crystallin, beta B2 pseudogene 1
hsa-miR-1248	0	0	1	0	0	0	INHBA-AS1	INHBA antisense RNA 1
hsa-miR-1248	1	0	1	1	1	1	WSCD2	WSC domain containing 2
hsa-miR-1248	1	0	1	1	1	1	FOXK1	forkhead box K1
hsa-miR-1248	0	0	1	1	0	0	PRMT2	protein arginine methyltransferase 2
hsa-miR-1248	0	0	1	1	1	1	C14orf118	chromosome 14 open reading frame 118
hsa-miR-1248	1	0	1	1	1	1	PRR16	proline rich 16
hsa-miR-1248	0	0	1	1	0	0	HSPA14	heat shock 70kDa protein 14
hsa-miR-1248	0	0	1	0	0	0	FLJ36000	uncharacterized FLJ36000
hsa-miR-1248	1	0	1	1	1	1	FGFR2	fibroblast growth factor receptor 2
hsa-miR-1248	0	0	1	0	0	0	USP32P1	ubiquitin specific peptidase 32 pseudogene 1
hsa-miR-1248	1	0	1	0	0	0	MSL1	male-specific lethal 1 homolog (Drosophila)
hsa-miR-1248	1	0	1	0	1	1	LPHN3	latrophilin 3
hsa-miR-1248	0	0	1	0	0	0	LOC100132735	uncharacterized LOC100132735
hsa-miR-1248	1	0	1	1	1	1	UNK	unkempt homolog (Drosophila)
hsa-miR-1248	0	0	1	0	0	0	TOB1-AS1	TOB1 antisense RNA 1
hsa-miR-1248	1	0	1	0	1	1	GPR107	G protein-coupled receptor 107
hsa-miR-1248	0	0	1	0	0	0	C4orf52	chromosome 4 open reading frame 52
hsa-miR-1248	1	0	1	1	1	1	FOSB	FBJ murine osteosarcoma viral oncogene homolog B
hsa-miR-1248	1	0	1	1	1	1	DACH2	dachshund homolog 2 (Drosophila)
hsa-miR-1248	0	0	1	1	0	0	CNGA4	cyclic nucleotide gated channel alpha 4
hsa-miR-1248	0	0	1	0	0	0	LOC339622	uncharacterized LOC339622
hsa-miR-1248	0	0	1	1	1	1	ZFP90	zinc finger protein 90 homolog (mouse)
hsa-miR-1248	1	0	1	1	1	1	SLITRK3	SLIT and NTRK-like family, member 3
hsa-miR-1248	1	0	1	1	1	1	BVES	blood vessel epicardial substance
hsa-miR-1248	1	0	1	1	1	1	LEF1	lymphoid enhancer-binding factor 1
hsa-miR-1248	0	0	1	0	0	0	LOC339240	keratin 17 pseudogene
hsa-miR-1248	0	0	1	0	0	0	SLC7A11-AS1	SLC7A11 antisense RNA 1
hsa-miR-1248	0	0	1	0	0	0	PMS2CL	PMS2 C-terminal like pseudogene
hsa-miR-1248	1	0	1	1	1	1	FAM123A	family with sequence similarity 123A
hsa-miR-1248	1	0	1	1	1	1	TNFSF4	tumor necrosis factor (ligand) superfamily, member 4
hsa-miR-1248	0	0	1	1	1	1	CARD8	caspase recruitment domain family, member 8
hsa-miR-1248	1	0	1	0	1	1	TNFAIP3	tumor necrosis factor, alpha-induced protein 3
hsa-miR-1248	1	0	1	1	1	1	ROCK1	Rho-associated, coiled-coil containing protein kinase 1
hsa-miR-1248	0	0	1	1	1	1	GOLGA6L9	golgin A6 family-like 9
hsa-miR-1248	0	0	1	1	1	1	MTHFD2L	methylenetetrahydrofolate dehydrogenase (NADP+ dependent) 2-like
hsa-miR-1248	1	0	1	1	1	1	C12orf76	chromosome 12 open reading frame 76
hsa-miR-1248	0	0	1	0	1	1	OAZ1	ornithine decarboxylase antizyme 1
hsa-miR-1248	0	0	1	0	0	0	LOC154822	uncharacterized LOC154822
hsa-miR-1248	0	0	1	1	1	1	SH3GL3	SH3-domain GRB2-like 3
hsa-miR-1248	1	0	1	1	1	1	ADD1	adducin 1 (alpha)
hsa-miR-1248	0	0	1	0	0	0	LOC157381	uncharacterized LOC157381
hsa-miR-1248	0	0	1	0	0	0	LOC646168	uncharacterized LOC646168
hsa-miR-1248	1	0	1	1	1	1	AGAP3	ArfGAP with GTPase domain, ankyrin repeat and PH domain 3
hsa-miR-1248	1	0	1	1	1	1	RNF145	ring finger protein 145
hsa-miR-1248	0	0	1	1	1	1	MST1	macrophage stimulating 1 (hepatocyte growth factor-like)
hsa-miR-1248	0	0	1	0	0	0	KIF18B	kinesin family member 18B
hsa-miR-1248	1	0	1	1	1	1	MAMDC2	MAM domain containing 2
hsa-miR-1248	0	0	1	1	1	1	MGC57346	uncharacterized LOC401884
hsa-miR-1248	0	0	1	0	0	0	LOC283914	uncharacterized LOC283914
hsa-miR-1248	1	0	1	1	1	1	PPP2R5B	protein phosphatase 2, regulatory subunit B', beta
hsa-miR-1248	0	0	1	0	0	0	LOC286135	uncharacterized LOC286135
hsa-miR-1248	0	0	1	1	0	0	NIT1	nitrilase 1
hsa-miR-1248	0	0	1	1	1	1	NUDT13	nudix (nucleoside diphosphate linked moiety X)-type motif 13
hsa-miR-1248	0	0	1	1	1	1	EBP	emopamil binding protein (sterol isomerase)
hsa-miR-1248	0	0	1	0	0	0	MDP1	magnesium-dependent phosphatase 1
hsa-miR-1248	0	0	1	0	1	1	IL33	interleukin 33
hsa-miR-1248	0	0	1	0	0	0	LOC348120	uncharacterized LOC348120
hsa-miR-1248	1	0	1	1	1	1	BRD1	bromodomain containing 1
hsa-miR-1248	0	0	1	0	0	0	LOC729678	uncharacterized LOC729678
hsa-miR-1248	0	0	1	1	0	0	MT3	metallothionein 3
hsa-miR-1248	1	0	1	1	1	1	RTKN2	rhotekin 2
hsa-miR-1248	1	0	1	1	1	1	PTPRG	protein tyrosine phosphatase, receptor type, G
hsa-miR-1248	0	0	1	1	1	1	INO80C	INO80 complex subunit C
hsa-miR-1248	1	0	1	1	1	1	PELI1	pellino E3 ubiquitin protein ligase 1
hsa-miR-1248	0	0	1	0	1	1	ITGA1	integrin, alpha 1
hsa-miR-1248	1	0	1	1	1	1	RECK	reversion-inducing-cysteine-rich protein with kazal motifs
hsa-miR-1248	1	0	1	1	0	0	EIF2B5	eukaryotic translation initiation factor 2B, subunit 5 epsilon, 82kDa
hsa-miR-1248	0	0	1	1	0	0	NISCH	nischarin
hsa-miR-1248	1	0	1	1	1	1	PDCD6	programmed cell death 6
hsa-miR-1248	0	0	1	0	0	0	AURKAPS1	aurora kinase A pseudogene 1
hsa-miR-1248	0	0	1	1	0	0	RPS9	ribosomal protein S9
hsa-miR-1248	1	0	1	0	1	1	NUDT10	nudix (nucleoside diphosphate linked moiety X)-type motif 10
hsa-miR-1248	0	0	1	1	1	1	FKBP1B	FK506 binding protein 1B, 12.6 kDa
hsa-miR-1248	1	0	1	1	1	1	GATA2	GATA binding protein 2
hsa-miR-1248	1	0	1	1	1	1	PTPDC1	protein tyrosine phosphatase domain containing 1
hsa-miR-1248	0	0	1	1	1	1	LINC00086	long intergenic non-protein coding RNA 86
hsa-miR-1248	1	0	1	1	1	1	ZFP91	zinc finger protein 91 homolog (mouse)
hsa-miR-1248	1	0	1	1	1	1	PCGF5	polycomb group ring finger 5
hsa-miR-1248	0	0	1	1	1	1	SLC25A35	solute carrier family 25, member 35
hsa-miR-1248	1	0	1	1	1	1	SCUBE3	signal peptide, CUB domain, EGF-like 3
hsa-miR-1248	1	0	1	0	1	1	C14orf43	chromosome 14 open reading frame 43
hsa-miR-1248	1	0	1	1	1	1	OLFML2A	olfactomedin-like 2A
hsa-miR-1248	1	0	1	1	0	0	DALRD3	DALR anticodon binding domain containing 3
hsa-miR-1248	1	0	1	1	1	1	KDM5C	lysine (K)-specific demethylase 5C
hsa-miR-1248	0	0	1	1	0	0	BCAS4	breast carcinoma amplified sequence 4
hsa-miR-1248	0	0	1	0	0	0	ADAM5	ADAM metallopeptidase domain 5, pseudogene
hsa-miR-1248	1	0	1	0	1	1	LYSMD3	LysM, putative peptidoglycan-binding, domain containing 3
hsa-miR-1248	0	0	1	1	0	0	GRIN2C	glutamate receptor, ionotropic, N-methyl D-aspartate 2C
hsa-miR-1248	0	0	1	1	1	1	MCOLN3	mucolipin 3
hsa-miR-1248	1	0	1	1	1	1	DHX57	DEAH (Asp-Glu-Ala-Asp/His) box polypeptide 57
hsa-miR-1248	1	0	1	1	1	1	PRRG1	proline rich Gla (G-carboxyglutamic acid) 1
hsa-miR-1248	0	0	1	1	1	1	ELL3	elongation factor RNA polymerase II-like 3
hsa-miR-1248	0	0	1	1	1	1	B4GALT4	UDP-Gal:betaGlcNAc beta 1,4- galactosyltransferase, polypeptide 4
hsa-miR-1248	0	0	1	0	0	0	FRG1B	FSHD region gene 1 family, member B
hsa-miR-1248	1	0	1	1	1	1	PDGFRA	platelet-derived growth factor receptor, alpha polypeptide
hsa-miR-1248	0	0	1	1	0	0	C8orf31	chromosome 8 open reading frame 31
hsa-miR-1248	0	0	1	1	1	1	CAMLG	calcium modulating ligand
hsa-miR-1248	0	0	1	0	0	0	SCAND2	SCAN domain containing 2 pseudogene
hsa-miR-1248	0	0	1	0	0	0	GNN	Grp94 neighboring nucleotidase pseudogene
hsa-miR-1248	0	0	1	1	0	0	PRSS55	protease, serine, 55
hsa-miR-1248	0	0	1	0	0	0	FLJ35390	uncharacterized LOC255031
hsa-miR-1248	0	0	1	1	0	0	CLIC1	chloride intracellular channel 1
hsa-miR-1248	1	0	1	1	1	1	UEVLD	UEV and lactate/malate dehyrogenase domains
hsa-miR-1248	0	0	1	1	1	1	HSF2	heat shock transcription factor 2
hsa-miR-1248	1	0	1	1	1	1	ADCY6	adenylate cyclase 6
hsa-miR-1248	0	0	1	0	0	0	LOC158435	uncharacterized LOC158435
hsa-miR-1248	0	0	1	1	1	1	ZNF33B	zinc finger protein 33B
hsa-miR-1248	0	0	1	1	1	1	METTL15	methyltransferase like 15
hsa-miR-1248	1	0	1	1	1	1	ASPH	aspartate beta-hydroxylase
hsa-miR-1248	1	0	1	1	1	1	C18orf1	chromosome 18 open reading frame 1
hsa-miR-1248	1	0	1	1	1	1	NRSN1	neurensin 1
hsa-miR-1248	1	0	1	1	1	1	FAM129B	family with sequence similarity 129, member B
hsa-miR-1248	1	0	1	1	1	1	FTL	ferritin, light polypeptide
hsa-miR-1248	1	0	1	1	0	0	GPR89A	G protein-coupled receptor 89A
hsa-miR-1248	0	0	1	1	0	0	TBCA	tubulin folding cofactor A
hsa-miR-1248	1	0	1	1	1	1	CDKN1C	cyclin-dependent kinase inhibitor 1C (p57, Kip2)
hsa-miR-1248	0	0	1	0	0	0	LINC00442	long intergenic non-protein coding RNA 442
hsa-miR-1248	0	0	1	0	0	0	PCP4L1	Purkinje cell protein 4 like 1
hsa-miR-1248	1	0	1	1	1	1	PDCD6IP	programmed cell death 6 interacting protein
hsa-miR-1248	1	0	1	1	1	1	BAZ2B	bromodomain adjacent to zinc finger domain, 2B
hsa-miR-1248	1	0	1	1	1	1	SRPK2	SRSF protein kinase 2
hsa-miR-1248	0	0	1	0	0	0	FLJ12334	uncharacterized LOC400946
hsa-miR-1248	0	0	1	1	1	1	TTLL9	tubulin tyrosine ligase-like family, member 9
hsa-miR-1248	0	0	1	0	0	0	GAGE7	G antigen 7
hsa-miR-1248	0	0	1	1	0	0	GAGE12I	G antigen 12I
hsa-miR-1248	0	0	1	1	0	0	GAGE12G	G antigen 12G
hsa-miR-1248	0	0	1	1	0	0	GAGE12F	G antigen 12F
hsa-miR-1248	0	0	1	0	0	0	C17orf69	chromosome 17 open reading frame 69
hsa-miR-1248	0	0	1	1	0	0	GAGE2A	G antigen 2A
hsa-miR-1248	1	0	1	1	1	1	DDR1	discoidin domain receptor tyrosine kinase 1
hsa-miR-1248	0	0	1	0	0	0	ZRANB2-AS1	ZRANB2 antisense RNA 1
hsa-miR-1248	0	0	1	0	0	0	AQP7P2	aquaporin 7 pseudogene 2
hsa-miR-1248	1	0	1	0	1	1	HMGB3	high mobility group box 3
hsa-miR-1248	0	0	1	0	0	0	ULK4P1	unc-51-like kinase 4 (C. elegans) pseudogene 1
hsa-miR-1248	0	0	1	1	1	1	SLC11A1	solute carrier family 11 (proton-coupled divalent metal ion transporters), member 1
hsa-miR-1248	1	0	1	0	1	1	TGFBR1	transforming growth factor, beta receptor 1
hsa-miR-1248	1	0	1	0	1	1	TMEM194A	transmembrane protein 194A
hsa-miR-1248	0	0	1	0	0	0	LOC100147773	uncharacterized LOC100147773
hsa-miR-1248	0	0	1	1	1	1	CTXN3	cortexin 3
hsa-miR-1248	0	0	1	0	0	0	TRGV9	T cell receptor gamma variable 9
hsa-miR-1248	0	0	1	1	1	1	PCED1B	PC-esterase domain containing 1B
hsa-miR-1248	0	0	1	0	0	0	LOC283070	uncharacterized LOC283070
hsa-miR-1248	1	0	1	1	1	1	WBP1L	WW domain binding protein 1-like
hsa-miR-1248	0	0	1	1	0	0	D2HGDH	D-2-hydroxyglutarate dehydrogenase
hsa-miR-1248	1	0	1	1	1	1	OPCML	opioid binding protein/cell adhesion molecule-like
hsa-miR-1248	1	0	1	1	1	1	WNT5A	wingless-type MMTV integration site family, member 5A
hsa-miR-1248	1	0	1	1	1	1	NTRK2	neurotrophic tyrosine kinase, receptor, type 2
hsa-miR-1248	0	0	1	1	0	0	FAM21A	family with sequence similarity 21, member A
hsa-miR-1248	0	0	1	1	1	1	C3orf67	chromosome 3 open reading frame 67
hsa-miR-1248	1	0	1	0	1	1	DPYSL3	dihydropyrimidinase-like 3
hsa-miR-1248	1	0	1	0	1	1	AMMECR1L	AMME chromosomal region gene 1-like
hsa-miR-1248	0	0	1	0	0	0	LINC00537	long intergenic non-protein coding RNA 537
hsa-miR-1248	0	0	1	0	0	0	TBC1D25	TBC1 domain family, member 25
hsa-miR-1248	0	0	1	1	0	0	PDLIM7	PDZ and LIM domain 7 (enigma)
hsa-miR-1248	0	0	1	1	1	1	MAPK13	mitogen-activated protein kinase 13
hsa-miR-1248	0	0	1	1	1	1	C1orf141	chromosome 1 open reading frame 141
hsa-miR-1248	1	0	1	1	1	1	NOTCH2NL	notch 2 N-terminal like
hsa-miR-1248	1	0	1	1	1	1	FMNL3	formin-like 3
hsa-miR-1248	1	0	1	1	1	1	ZMYND11	zinc finger, MYND-type containing 11
hsa-miR-1248	0	0	1	0	1	1	CCL4L2	chemokine (C-C motif) ligand 4-like 2
hsa-miR-1248	0	0	1	1	1	1	CCL4L1	chemokine (C-C motif) ligand 4-like 1
hsa-miR-1248	1	0	1	1	1	1	RHOBTB1	Rho-related BTB domain containing 1
hsa-miR-1248	0	0	1	0	1	1	PPIA	peptidylprolyl isomerase A (cyclophilin A)
hsa-miR-1248	0	0	1	1	1	1	COBL	cordon-bleu homolog (mouse)
hsa-miR-1248	0	0	1	1	0	0	HERC2P3	hect domain and RLD 2 pseudogene 3
hsa-miR-1248	1	0	1	1	1	1	GBF1	golgi brefeldin A resistant guanine nucleotide exchange factor 1
hsa-miR-1248	1	0	1	0	1	1	PIK3R3	phosphoinositide-3-kinase, regulatory subunit 3 (gamma)
hsa-miR-1248	1	0	1	1	1	1	ELOVL7	ELOVL fatty acid elongase 7
hsa-miR-1248	1	0	1	1	1	1	WARS	tryptophanyl-tRNA synthetase
hsa-miR-1248	1	0	1	1	1	1	ST8SIA2	ST8 alpha-N-acetyl-neuraminide alpha-2,8-sialyltransferase 2
hsa-miR-1248	0	0	1	0	1	1	TGFB2	transforming growth factor, beta 2
hsa-miR-1248	1	0	1	1	1	1	ACVR2B	activin A receptor, type IIB
hsa-miR-1248	1	0	1	1	1	1	WNT10B	wingless-type MMTV integration site family, member 10B
hsa-miR-1248	0	0	1	1	1	1	COL8A2	collagen, type VIII, alpha 2
hsa-miR-1248	0	0	1	1	0	0	IDUA	iduronidase, alpha-L-
hsa-miR-1248	0	0	1	1	0	0	SEC14L3	SEC14-like 3 (S. cerevisiae)
hsa-miR-1248	0	0	1	1	1	1	ZNF365	zinc finger protein 365
hsa-miR-1248	1	0	1	1	1	1	SLC36A2	solute carrier family 36 (proton/amino acid symporter), member 2
hsa-miR-1248	1	0	1	0	1	1	MYBL1	v-myb myeloblastosis viral oncogene homolog (avian)-like 1
hsa-miR-1248	0	0	1	0	0	0	CCDC163P	coiled-coil domain containing 163, pseudogene
hsa-miR-1248	1	0	1	1	1	1	IL28RA	interleukin 28 receptor, alpha (interferon, lambda receptor)
hsa-miR-1248	1	0	1	1	1	1	HNRNPA1	heterogeneous nuclear ribonucleoprotein A1
hsa-miR-1248	0	0	1	1	0	0	PLA2G16	phospholipase A2, group XVI
hsa-miR-1248	1	0	1	0	1	1	CPEB2	cytoplasmic polyadenylation element binding protein 2
hsa-miR-1248	0	0	1	0	0	0	LOC441493	uncharacterized LOC441493
hsa-miR-1248	0	0	1	1	1	1	CCDC126	coiled-coil domain containing 126
hsa-miR-1248	0	0	1	1	1	1	SPHKAP	SPHK1 interactor, AKAP domain containing
hsa-miR-1248	1	0	1	1	1	1	GABRB2	gamma-aminobutyric acid (GABA) A receptor, beta 2
hsa-miR-1248	0	0	1	0	0	0	FBXL19-AS1	FBXL19 antisense RNA 1 (head to head)
hsa-miR-1248	1	0	1	1	1	1	NR2F2	nuclear receptor subfamily 2, group F, member 2
hsa-miR-1248	1	0	1	1	1	1	PTPRD	protein tyrosine phosphatase, receptor type, D
hsa-miR-1248	0	0	1	0	0	0	HIST2H2BA	histone cluster 2, H2ba (pseudogene)
hsa-miR-1248	1	0	1	1	1	1	SUV420H1	suppressor of variegation 4-20 homolog 1 (Drosophila)
hsa-miR-1248	0	0	1	1	0	0	C9orf153	chromosome 9 open reading frame 153
hsa-miR-1248	0	0	1	0	0	0	LOC389765	kinesin family member 27 pseudogene
hsa-miR-1248	0	0	1	1	1	1	DET1	de-etiolated homolog 1 (Arabidopsis)
hsa-miR-1248	1	0	1	1	1	1	TLR10	toll-like receptor 10
hsa-miR-1248	0	0	1	1	1	1	TBRG1	transforming growth factor beta regulator 1
hsa-miR-1248	1	0	1	0	1	1	BTBD3	BTB (POZ) domain containing 3
hsa-miR-1248	1	0	1	0	1	1	KIF5C	kinesin family member 5C
hsa-miR-1248	0	0	1	1	0	0	STK19	serine/threonine kinase 19
hsa-miR-1248	1	0	1	1	1	1	TET2	tet methylcytosine dioxygenase 2
hsa-miR-1248	0	0	1	1	1	1	RASAL2	RAS protein activator like 2
hsa-miR-1248	1	0	1	1	0	0	PIAS2	protein inhibitor of activated STAT, 2
hsa-miR-1248	0	0	1	1	1	1	RBM25	RNA binding motif protein 25
hsa-miR-1248	0	0	1	0	0	0	INTS4L1	integrator complex subunit 4-like 1
hsa-miR-1248	0	0	1	0	0	0	LRRC37A11P	leucine rich repeat containing 37, member A11, pseudogene
hsa-miR-1248	0	0	1	0	0	0	LINC00310	long intergenic non-protein coding RNA 310
hsa-miR-1248	1	0	1	0	1	1	ROBO1	roundabout, axon guidance receptor, homolog 1 (Drosophila)
hsa-miR-1248	0	0	1	1	1	1	LOC100499484-C9ORF174	LOC100499484-C9orf174 readthrough
hsa-miR-1248	1	0	1	1	1	1	PPP6R1	protein phosphatase 6, regulatory subunit 1
hsa-miR-1248	1	0	1	1	1	1	PAX3	paired box 3
hsa-miR-1248	1	0	1	1	1	1	GRIA3	glutamate receptor, ionotropic, AMPA 3
hsa-miR-1248	0	0	1	0	0	0	FAM27E3	family with sequence similarity 27, member E3
hsa-miR-1248	1	0	1	1	1	1	FAM59A	family with sequence similarity 59, member A
hsa-miR-1248	0	0	1	1	0	0	HOXD12	homeobox D12
hsa-miR-1248	0	0	1	0	0	0	KRT8P12	keratin 8 pseudogene 12
hsa-miR-1248	1	0	1	1	1	1	ANK2	ankyrin 2, neuronal
hsa-miR-1248	0	0	1	1	1	1	RNF14	ring finger protein 14
hsa-miR-1248	0	0	1	0	0	0	LINC00314	long intergenic non-protein coding RNA 314
hsa-miR-1248	1	0	1	1	1	1	MEGF11	multiple EGF-like-domains 11
hsa-miR-1248	1	0	1	1	1	1	ZMYM4	zinc finger, MYM-type 4
hsa-miR-1248	1	0	1	1	1	1	CHIC1	cysteine-rich hydrophobic domain 1
hsa-miR-1248	0	0	1	0	0	0	IGSF23	immunoglobulin superfamily, member 23
hsa-miR-1248	1	0	1	0	1	1	LHFPL3	lipoma HMGIC fusion partner-like 3
hsa-miR-1248	0	0	1	1	1	1	GLB1L3	galactosidase, beta 1-like 3
hsa-miR-1248	1	0	1	1	1	1	TMEM218	transmembrane protein 218
hsa-miR-1248	0	0	1	1	1	1	PRKAR2A	protein kinase, cAMP-dependent, regulatory, type II, alpha
hsa-miR-1248	0	0	1	1	0	0	CHMP4A	charged multivesicular body protein 4A
hsa-miR-1248	1	0	1	0	1	1	TTC7B	tetratricopeptide repeat domain 7B
hsa-miR-1248	0	0	1	1	0	0	NDRG2	NDRG family member 2
hsa-miR-1248	0	0	1	0	0	0	TMED8	transmembrane emp24 protein transport domain containing 8
hsa-miR-1248	0	0	1	1	0	0	PSMB5	proteasome (prosome, macropain) subunit, beta type, 5
hsa-miR-1248	0	0	1	0	0	0	LINC00643	long intergenic non-protein coding RNA 643
hsa-miR-1248	1	0	1	1	1	1	BTBD7	BTB (POZ) domain containing 7
hsa-miR-1248	1	0	1	1	1	1	DLST	dihydrolipoamide S-succinyltransferase (E2 component of 2-oxo-glutarate complex)
hsa-miR-1248	0	0	1	0	0	0	FLJ39632	uncharacterized LOC642477
hsa-miR-1248	1	0	1	1	1	1	EIF5	eukaryotic translation initiation factor 5
hsa-miR-1248	0	0	1	1	1	1	NCBP2	nuclear cap binding protein subunit 2, 20kDa
hsa-miR-1248	1	0	1	1	1	1	LITAF	lipopolysaccharide-induced TNF factor
hsa-miR-1248	0	0	1	1	1	1	C10orf82	chromosome 10 open reading frame 82
hsa-miR-1248	0	0	1	0	0	0	DKFZp686D0853	uncharacterized LOC401613
hsa-miR-1248	1	0	1	1	1	1	JPH1	junctophilin 1
hsa-miR-1248	1	0	1	1	1	1	SGCD	sarcoglycan, delta (35kDa dystrophin-associated glycoprotein)
hsa-miR-1248	1	0	1	0	1	1	CCDC88A	coiled-coil domain containing 88A
hsa-miR-1248	1	0	1	0	1	1	MTX3	metaxin 3
hsa-miR-1248	0	0	1	1	0	0	NHLRC2	NHL repeat containing 2
hsa-miR-1248	1	0	1	1	1	1	ETS1	v-ets erythroblastosis virus E26 oncogene homolog 1 (avian)
hsa-miR-1248	0	0	1	1	1	1	AIG1	androgen-induced 1
hsa-miR-1248	1	0	1	0	1	1	CLASP2	cytoplasmic linker associated protein 2
hsa-miR-1248	0	0	1	1	0	0	TTC5	tetratricopeptide repeat domain 5
hsa-miR-1248	1	0	1	1	1	1	C7orf31	chromosome 7 open reading frame 31
hsa-miR-1248	0	0	1	1	0	0	CDK5RAP2	CDK5 regulatory subunit associated protein 2
hsa-miR-1248	0	0	1	1	1	1	GLIPR1L2	GLI pathogenesis-related 1 like 2
hsa-miR-1248	0	0	1	1	1	1	THSD4	thrombospondin, type I, domain containing 4
hsa-miR-1248	1	0	1	0	0	0	TADA2B	transcriptional adaptor 2B
hsa-miR-1248	0	0	1	1	1	1	COL6A3	collagen, type VI, alpha 3
hsa-miR-1248	0	0	1	0	0	0	EML6	echinoderm microtubule associated protein like 6
hsa-miR-1248	0	0	1	0	0	0	TRAF3IP2-AS1	TRAF3IP2 antisense RNA 1
hsa-miR-1248	1	0	1	1	1	1	SMAD4	SMAD family member 4
hsa-miR-1248	1	0	1	1	1	1	MYCBP2	MYC binding protein 2, E3 ubiquitin protein ligase
hsa-miR-1248	0	0	1	1	1	1	IPCEF1	interaction protein for cytohesin exchange factors 1
hsa-miR-1248	0	0	1	0	0	0	SMG1P1	smg-1 homolog, phosphatidylinositol 3-kinase-related kinase pseudogene 1
hsa-miR-1248	0	0	1	1	1	1	UHRF1BP1L	UHRF1 binding protein 1-like
hsa-miR-1248	1	0	1	1	0	0	RBM27	RNA binding motif protein 27
hsa-miR-1248	0	0	1	1	1	1	ADH1B	alcohol dehydrogenase 1B (class I), beta polypeptide
hsa-miR-1248	0	0	1	1	1	1	MLIP	muscular LMNA-interacting protein
hsa-miR-1248	0	0	1	0	1	1	THAP6	THAP domain containing 6
hsa-miR-1248	0	0	1	1	1	1	NIPSNAP3B	nipsnap homolog 3B (C. elegans)
hsa-miR-1248	1	0	1	1	1	1	STARD13	StAR-related lipid transfer (START) domain containing 13
hsa-miR-1248	1	0	1	0	1	1	EML4	echinoderm microtubule associated protein like 4
hsa-miR-1248	1	0	1	1	1	1	GABPA	GA binding protein transcription factor, alpha subunit 60kDa
hsa-miR-1248	1	0	1	1	1	1	KLHL2	kelch-like 2, Mayven (Drosophila)
hsa-miR-1248	0	0	1	1	1	1	DUSP19	dual specificity phosphatase 19
hsa-miR-1248	1	0	1	1	1	1	TSC22D3	TSC22 domain family, member 3
hsa-miR-1248	0	0	1	0	0	0	OVOS	ovostatin
hsa-miR-1248	1	0	1	1	1	1	CASP7	caspase 7, apoptosis-related cysteine peptidase
hsa-miR-1248	1	0	1	1	1	1	DCAF5	DDB1 and CUL4 associated factor 5
hsa-miR-1248	1	0	1	1	1	1	GDI2	GDP dissociation inhibitor 2
hsa-miR-1248	1	0	1	1	1	1	ATP6V1C1	ATPase, H+ transporting, lysosomal 42kDa, V1 subunit C1
hsa-miR-1248	0	0	1	1	1	1	EXT2	exostosin 2
hsa-miR-1248	1	0	1	1	1	1	LCA5	Leber congenital amaurosis 5
hsa-miR-1248	0	0	1	1	1	1	ZNF250	zinc finger protein 250
hsa-miR-1248	0	0	1	0	1	1	TYW5	tRNA-yW synthesizing protein 5
hsa-miR-1248	0	0	1	1	1	1	ATP2A2	ATPase, Ca++ transporting, cardiac muscle, slow twitch 2
hsa-miR-1248	0	0	1	1	1	1	DDX21	DEAD (Asp-Glu-Ala-Asp) box helicase 21
hsa-miR-1248	1	0	1	1	1	1	NFIB	nuclear factor I/B
hsa-miR-1248	1	0	1	1	1	1	BCLAF1	BCL2-associated transcription factor 1
hsa-miR-1248	1	0	1	1	1	1	NAV1	neuron navigator 1
hsa-miR-1248	0	0	1	0	0	0	LOC286299	uncharacterized LOC286299
hsa-miR-1248	0	0	1	0	0	0	TMEM232	transmembrane protein 232
hsa-miR-1248	1	0	1	1	1	1	C5orf24	chromosome 5 open reading frame 24
hsa-miR-1248	1	0	1	1	1	1	PTER	phosphotriesterase related
hsa-miR-1248	1	0	1	1	1	1	PGAP1	post-GPI attachment to proteins 1
hsa-miR-1248	1	0	1	1	1	1	TMEM135	transmembrane protein 135
hsa-miR-1248	1	0	1	1	1	1	CACNB4	calcium channel, voltage-dependent, beta 4 subunit
hsa-miR-1248	0	0	1	1	1	1	ABCD3	ATP-binding cassette, sub-family D (ALD), member 3
hsa-miR-1248	0	0	1	0	0	0	ZNRD1-AS1	ZNRD1 antisense RNA 1
hsa-miR-1248	1	0	1	1	1	1	BZRAP1	benzodiazapine receptor (peripheral) associated protein 1
hsa-miR-1248	1	0	1	1	1	1	HIF1A	hypoxia inducible factor 1, alpha subunit (basic helix-loop-helix transcription factor)
hsa-miR-1248	1	0	1	1	1	1	CALD1	caldesmon 1
hsa-miR-1248	0	0	1	1	0	0	CEP152	centrosomal protein 152kDa
hsa-miR-1248	0	0	1	1	1	1	KIAA1328	KIAA1328
hsa-miR-1248	0	0	1	1	1	1	SSFA2	sperm specific antigen 2
hsa-miR-1248	0	0	1	0	0	0	DKFZp686K1684	uncharacterized LOC440034
hsa-miR-1248	0	0	1	1	0	0	NEB	nebulin
hsa-miR-1248	1	0	1	0	1	1	TTL	tubulin tyrosine ligase
hsa-miR-1248	0	0	1	1	0	0	APOBEC3H	apolipoprotein B mRNA editing enzyme, catalytic polypeptide-like 3H
hsa-miR-1248	0	0	1	1	1	1	PLA2G4C	phospholipase A2, group IVC (cytosolic, calcium-independent)
hsa-miR-1248	1	0	1	1	1	1	BSDC1	BSD domain containing 1
hsa-miR-1248	0	0	1	0	1	1	GINS3	GINS complex subunit 3 (Psf3 homolog)
hsa-miR-1248	0	0	1	0	0	0	LINC00341	long intergenic non-protein coding RNA 341
hsa-miR-1248	0	0	1	0	1	1	CD59	CD59 molecule, complement regulatory protein
hsa-miR-1248	1	0	1	1	1	1	MDK	midkine (neurite growth-promoting factor 2)
hsa-miR-1248	0	0	1	1	1	1	POLR2H	polymerase (RNA) II (DNA directed) polypeptide H
hsa-miR-1248	0	0	1	1	0	0	CRIP2	cysteine-rich protein 2
hsa-miR-1248	1	0	1	1	1	1	PCMT1	protein-L-isoaspartate (D-aspartate) O-methyltransferase
hsa-miR-1248	0	0	1	1	0	0	CSH1	chorionic somatomammotropin hormone 1 (placental lactogen)
hsa-miR-1248	0	0	1	1	0	0	TPM2	tropomyosin 2 (beta)
hsa-miR-1248	0	0	1	1	0	0	SNRNP25	small nuclear ribonucleoprotein 25kDa (U11/U12)
hsa-miR-1248	1	0	1	1	1	1	PGGT1B	protein geranylgeranyltransferase type I, beta subunit
hsa-miR-1248	0	0	1	1	1	1	RABEPK	Rab9 effector protein with kelch motifs
hsa-miR-1248	0	0	1	1	1	1	GRN	granulin
hsa-miR-1248	1	0	1	1	1	1	RNF10	ring finger protein 10
hsa-miR-1248	0	0	1	0	1	1	IDO1	indoleamine 2,3-dioxygenase 1
hsa-miR-1248	0	0	1	1	1	1	GSTM3	glutathione S-transferase mu 3 (brain)
hsa-miR-1248	1	0	1	0	1	1	STX6	syntaxin 6
hsa-miR-1248	0	0	1	1	1	1	RIPK2	receptor-interacting serine-threonine kinase 2
hsa-miR-1248	0	0	1	1	1	1	ARFGAP2	ADP-ribosylation factor GTPase activating protein 2
hsa-miR-1248	0	0	1	1	0	0	SLC39A7	solute carrier family 39 (zinc transporter), member 7
hsa-miR-1248	0	0	1	1	0	0	H2AFY2	H2A histone family, member Y2
hsa-miR-1248	0	0	1	1	0	0	CHCHD3	coiled-coil-helix-coiled-coil-helix domain containing 3
hsa-miR-1248	0	0	1	1	0	0	EMX1	empty spiracles homeobox 1
hsa-miR-1248	0	0	1	1	0	0	HSD3B1	hydroxy-delta-5-steroid dehydrogenase, 3 beta- and steroid delta-isomerase 1
hsa-miR-1248	1	0	1	1	1	1	FUT9	fucosyltransferase 9 (alpha (1,3) fucosyltransferase)
hsa-miR-1248	1	0	1	1	1	1	TOM1L1	target of myb1 (chicken)-like 1
hsa-miR-1248	0	0	1	0	0	0	RPS16P10	ribosomal protein S16 pseudogene 10
hsa-miR-1248	0	0	1	1	0	0	PHKG2	phosphorylase kinase, gamma 2 (testis)
hsa-miR-1248	0	0	1	1	0	0	APOA1BP	apolipoprotein A-I binding protein
hsa-miR-1248	0	0	1	1	1	1	DGCR14	DiGeorge syndrome critical region gene 14
hsa-miR-1248	1	0	1	1	1	1	TARBP2	TAR (HIV-1) RNA binding protein 2
hsa-miR-1248	0	0	1	1	1	1	FANCL	Fanconi anemia, complementation group L
hsa-miR-1248	0	0	1	1	0	0	RBM28	RNA binding motif protein 28
hsa-miR-1248	0	0	1	1	0	0	RAD54L	RAD54-like (S. cerevisiae)
hsa-miR-1248	0	0	1	1	1	1	NR2C2AP	nuclear receptor 2C2-associated protein
hsa-miR-1248	0	0	1	1	1	1	RTCA	RNA 3'-terminal phosphate cyclase
hsa-miR-1248	0	0	1	1	1	1	ATP1B3	ATPase, Na+/K+ transporting, beta 3 polypeptide
hsa-miR-1248	0	0	1	1	1	1	APBB1	amyloid beta (A4) precursor protein-binding, family B, member 1 (Fe65)
hsa-miR-1248	0	0	1	1	0	0	ITGB3BP	integrin beta 3 binding protein (beta3-endonexin)
hsa-miR-1248	0	0	1	1	1	1	CYTH2	cytohesin 2
hsa-miR-1248	0	0	1	1	1	1	BTF3	basic transcription factor 3
hsa-miR-1248	0	0	1	1	0	0	FCGRT	Fc fragment of IgG, receptor, transporter, alpha
hsa-miR-1248	0	0	1	1	1	1	ERLEC1	endoplasmic reticulum lectin 1
hsa-miR-1248	0	0	1	1	0	0	CCNDBP1	cyclin D-type binding-protein 1
hsa-miR-1248	0	0	1	0	0	0	ZBED3-AS1	ZBED3 antisense RNA 1
hsa-miR-1248	1	0	1	1	1	1	FGF11	fibroblast growth factor 11
hsa-miR-1248	1	0	1	0	1	1	BNIP3L	BCL2/adenovirus E1B 19kDa interacting protein 3-like
hsa-miR-1248	0	0	1	1	0	0	NOP56	NOP56 ribonucleoprotein homolog (yeast)
hsa-miR-1248	0	0	1	1	1	1	PMPCB	peptidase (mitochondrial processing) beta
hsa-miR-1248	1	0	1	1	1	1	HSPA9	heat shock 70kDa protein 9 (mortalin)
hsa-miR-1248	0	0	1	0	0	0	MYCT1	myc target 1
hsa-miR-1248	1	0	1	1	1	1	ADM	adrenomedullin
hsa-miR-1248	0	0	1	1	1	1	FBXO4	F-box protein 4
hsa-miR-1248	0	0	1	0	1	1	CD99P1	CD99 molecule pseudogene 1
hsa-miR-1248	0	0	1	1	0	0	RPL7L1	ribosomal protein L7-like 1
hsa-miR-1248	0	0	1	1	1	1	SORD	sorbitol dehydrogenase
hsa-miR-1248	0	0	1	0	1	1	IGF2-AS	IGF2 antisense RNA
hsa-miR-1248	0	0	1	1	0	0	RAD54B	RAD54 homolog B (S. cerevisiae)
hsa-miR-1248	0	0	1	0	1	1	EMX2	empty spiracles homeobox 2
hsa-miR-1248	1	0	1	1	1	1	COPZ1	coatomer protein complex, subunit zeta 1
hsa-miR-1248	1	0	1	1	1	1	TRA2B	transformer 2 beta homolog (Drosophila)
hsa-miR-1248	1	0	1	1	1	1	PLEKHB2	pleckstrin homology domain containing, family B (evectins) member 2
hsa-miR-1248	0	0	1	0	0	0	HMGN1P37	high mobility group nucleosome binding domain 1 pseudogene 37
hsa-miR-1248	0	0	1	1	0	0	WISP2	WNT1 inducible signaling pathway protein 2
hsa-miR-1248	0	0	1	1	0	0	TCP1	t-complex 1
hsa-miR-1248	0	0	1	1	1	1	HMGB2	high mobility group box 2
hsa-miR-1248	0	0	1	1	1	1	GRAP2	GRB2-related adaptor protein 2
hsa-miR-1248	0	0	1	1	0	0	TMEM183A	transmembrane protein 183A
hsa-miR-1248	1	0	1	0	1	1	RPS6KB1	ribosomal protein S6 kinase, 70kDa, polypeptide 1
hsa-miR-1248	0	0	1	1	1	1	KCTD1	potassium channel tetramerisation domain containing 1
hsa-miR-1248	0	0	1	1	1	1	STON1	stonin 1
hsa-miR-1248	0	0	1	0	0	0	LOC643072	uncharacterized LOC643072
hsa-miR-1248	1	0	1	1	1	1	EEF1A1	eukaryotic translation elongation factor 1 alpha 1
hsa-miR-1248	0	0	1	0	1	1	WASH3P	WAS protein family homolog 3 pseudogene
hsa-miR-1248	0	0	1	1	1	1	PGAP2	post-GPI attachment to proteins 2
hsa-miR-1248	0	0	1	1	0	0	NDUFS7	NADH dehydrogenase (ubiquinone) Fe-S protein 7, 20kDa (NADH-coenzyme Q reductase)
hsa-miR-1248	1	0	1	1	1	1	ARFIP2	ADP-ribosylation factor interacting protein 2
hsa-miR-1248	1	0	1	1	1	1	STK38L	serine/threonine kinase 38 like
hsa-miR-1248	1	0	1	1	1	1	LIMD2	LIM domain containing 2
hsa-miR-1248	0	0	1	1	1	1	EIF3J	eukaryotic translation initiation factor 3, subunit J
hsa-miR-1248	0	0	1	1	1	1	STXBP3	syntaxin binding protein 3
hsa-miR-1248	1	0	1	1	1	1	TMEM245	transmembrane protein 245
hsa-miR-1248	1	0	1	1	1	1	WIPF1	WAS/WASL interacting protein family, member 1
hsa-miR-1248	0	0	1	1	1	1	ATG4A	autophagy related 4A, cysteine peptidase
hsa-miR-1248	1	0	1	1	0	0	MYO1F	myosin IF
hsa-miR-1248	1	0	1	1	1	1	SSBP3	single stranded DNA binding protein 3
hsa-miR-1248	0	0	1	1	1	1	NFATC4	nuclear factor of activated T-cells, cytoplasmic, calcineurin-dependent 4
hsa-miR-1248	0	0	1	0	0	0	FLJ45248	FLJ45248 protein
hsa-miR-1248	0	0	1	1	0	0	FGB	fibrinogen beta chain
hsa-miR-1248	0	0	1	0	1	1	TMEM155	transmembrane protein 155
hsa-miR-1248	1	0	1	1	1	1	PTPN18	protein tyrosine phosphatase, non-receptor type 18 (brain-derived)
hsa-miR-1248	0	0	1	1	0	0	CSHL1	chorionic somatomammotropin hormone-like 1
hsa-miR-1248	1	0	1	1	1	1	OSBPL9	oxysterol binding protein-like 9
hsa-miR-1248	1	0	1	1	0	0	TBC1D17	TBC1 domain family, member 17
hsa-miR-1248	1	0	1	1	1	1	KCNIP4	Kv channel interacting protein 4
hsa-miR-1248	1	0	1	1	1	1	CUL4A	cullin 4A
hsa-miR-1248	0	0	1	1	0	0	NOX5	NADPH oxidase, EF-hand calcium binding domain 5
hsa-miR-1248	1	0	1	1	1	1	NRN1	neuritin 1
hsa-miR-1248	0	0	1	1	0	0	CCDC22	coiled-coil domain containing 22
hsa-miR-1248	0	0	1	1	0	0	SCRN2	secernin 2
hsa-miR-1248	0	0	1	1	1	1	PEX19	peroxisomal biogenesis factor 19
hsa-miR-1248	0	0	1	1	0	0	WDR43	WD repeat domain 43
hsa-miR-1248	0	0	1	1	0	0	C11orf48	chromosome 11 open reading frame 48
hsa-miR-1248	0	0	1	1	1	1	SMNDC1	survival motor neuron domain containing 1
hsa-miR-1248	0	0	1	0	0	0	LOC100128988	uncharacterized LOC100128988
hsa-miR-1248	1	0	1	1	1	1	CAMK2A	calcium/calmodulin-dependent protein kinase II alpha
hsa-miR-1248	0	0	1	1	0	0	NARF	nuclear prelamin A recognition factor
hsa-miR-1248	1	0	1	1	1	1	HN1	hematological and neurological expressed 1
hsa-miR-1248	1	0	1	0	1	1	NLN	neurolysin (metallopeptidase M3 family)
hsa-miR-1248	0	0	1	1	0	0	RGS9	regulator of G-protein signaling 9
hsa-miR-1248	0	0	1	0	1	1	VSTM2A	V-set and transmembrane domain containing 2A
hsa-miR-1248	0	0	1	1	1	1	PABPN1	poly(A) binding protein, nuclear 1
hsa-miR-1248	0	0	1	1	1	1	JMJD8	jumonji domain containing 8
hsa-miR-1248	0	0	1	1	0	0	UQCRC1	ubiquinol-cytochrome c reductase core protein I
hsa-miR-1248	1	0	1	1	1	1	TIMP3	TIMP metallopeptidase inhibitor 3
hsa-miR-1248	0	0	1	1	1	1	RFT1	RFT1 homolog (S. cerevisiae)
hsa-miR-1248	1	0	1	1	1	1	ARL4A	ADP-ribosylation factor-like 4A
hsa-miR-1248	0	0	1	1	1	1	BEST3	bestrophin 3
hsa-miR-1248	0	0	1	1	1	1	LYSMD4	LysM, putative peptidoglycan-binding, domain containing 4
hsa-miR-1248	1	0	1	1	1	1	ATAT1	alpha tubulin acetyltransferase 1
hsa-miR-1248	1	0	1	1	1	1	ANAPC16	anaphase promoting complex subunit 16
hsa-miR-1248	1	0	1	1	1	1	EIF1	eukaryotic translation initiation factor 1
hsa-miR-1248	1	0	1	1	1	1	CNBP	CCHC-type zinc finger, nucleic acid binding protein
hsa-miR-1248	1	0	1	1	1	1	GOLGA7	golgin A7
hsa-miR-1248	0	0	1	0	0	0	LOC93622	Morf4 family associated protein 1-like 1 pseudogene
hsa-miR-1248	0	0	1	1	0	0	AHSG	alpha-2-HS-glycoprotein
hsa-miR-1248	1	0	1	1	0	0	ATP6V1B2	ATPase, H+ transporting, lysosomal 56/58kDa, V1 subunit B2
hsa-miR-1248	0	0	1	1	1	1	GFM1	G elongation factor, mitochondrial 1
hsa-miR-1248	0	0	1	1	1	1	STRAP	serine/threonine kinase receptor associated protein
hsa-miR-1248	1	0	1	1	1	1	RPUSD3	RNA pseudouridylate synthase domain containing 3
hsa-miR-1248	1	0	1	1	1	1	ITGA4	integrin, alpha 4 (antigen CD49D, alpha 4 subunit of VLA-4 receptor)
hsa-miR-1248	0	0	1	1	0	0	CLEC1A	C-type lectin domain family 1, member A
hsa-miR-1248	1	0	1	0	1	1	GIT2	G protein-coupled receptor kinase interacting ArfGAP 2
hsa-miR-1248	1	0	1	1	1	1	HMGN2	high mobility group nucleosomal binding domain 2
hsa-miR-1248	1	0	1	1	1	1	RALY	RNA binding protein, autoantigenic (hnRNP-associated with lethal yellow homolog (mouse))
hsa-miR-1248	0	0	1	1	0	0	PC	pyruvate carboxylase
hsa-miR-1248	0	0	1	1	1	1	HS3ST2	heparan sulfate (glucosamine) 3-O-sulfotransferase 2
hsa-miR-1248	0	0	1	0	1	1	ARMC10	armadillo repeat containing 10
hsa-miR-1248	1	0	1	1	1	1	MFSD2A	major facilitator superfamily domain containing 2A
hsa-miR-1248	1	0	1	1	1	1	SRSF2	serine/arginine-rich splicing factor 2
hsa-miR-1248	1	0	1	1	1	1	ACTN4	actinin, alpha 4
hsa-miR-1248	0	0	1	1	1	1	LGI1	leucine-rich, glioma inactivated 1
hsa-miR-1248	1	0	1	1	0	0	CCM2	cerebral cavernous malformation 2
hsa-miR-1248	1	0	1	0	1	1	CD47	CD47 molecule
hsa-miR-1248	1	0	1	1	1	1	ATP1B1	ATPase, Na+/K+ transporting, beta 1 polypeptide
hsa-miR-1248	1	0	1	1	1	1	RUNX1	runt-related transcription factor 1
hsa-miR-1248	0	0	1	0	0	0	CHEK2P2	checkpoint kinase 2 pseudogene 2
hsa-miR-1248	0	0	1	0	0	0	LOC100132984	uncharacterized LOC100132984
hsa-miR-1248	0	0	1	1	1	1	ZNF75D	zinc finger protein 75D
hsa-miR-1248	0	0	1	1	1	1	ARHGEF25	Rho guanine nucleotide exchange factor (GEF) 25
hsa-miR-1248	0	0	1	0	1	1	TSPAN7	tetraspanin 7
hsa-miR-1248	0	0	1	1	1	1	RFESD	Rieske (Fe-S) domain containing
hsa-miR-1248	0	0	1	1	1	1	SUGT1	SGT1, suppressor of G2 allele of SKP1 (S. cerevisiae)
hsa-miR-1248	0	0	1	1	1	1	NUDT21	nudix (nucleoside diphosphate linked moiety X)-type motif 21
hsa-miR-1248	1	0	1	1	1	1	MED1	mediator complex subunit 1
hsa-miR-1248	1	0	1	1	1	1	CALR	calreticulin
hsa-miR-1248	1	0	1	1	1	1	LHX9	LIM homeobox 9
hsa-miR-1248	0	0	1	1	0	0	PCOLCE	procollagen C-endopeptidase enhancer
hsa-miR-1248	0	0	1	0	1	1	COTL1	coactosin-like 1 (Dictyostelium)
hsa-miR-1248	1	0	1	1	1	1	LGALSL	lectin, galactoside-binding-like
hsa-miR-1248	0	0	1	1	1	1	EPCAM	epithelial cell adhesion molecule
hsa-miR-1248	1	0	1	1	1	1	TFPI	tissue factor pathway inhibitor (lipoprotein-associated coagulation inhibitor)
hsa-miR-1248	0	0	1	1	0	0	C18orf8	chromosome 18 open reading frame 8
hsa-miR-1248	0	0	1	1	1	1	NUB1	negative regulator of ubiquitin-like proteins 1
hsa-miR-1248	1	0	1	1	0	0	MMP11	matrix metallopeptidase 11 (stromelysin 3)
hsa-miR-1248	1	0	1	0	1	1	NMT1	N-myristoyltransferase 1
hsa-miR-1248	1	0	1	0	1	1	KIAA0240	KIAA0240
hsa-miR-1248	0	0	1	0	0	0	FAM47E	family with sequence similarity 47, member E
hsa-miR-1248	0	0	1	1	1	1	BDP1	B double prime 1, subunit of RNA polymerase III transcription initiation factor IIIB
hsa-miR-1248	0	0	1	0	0	0	LOC731789	uncharacterized LOC731789
hsa-miR-1248	1	0	1	0	1	1	BTRC	beta-transducin repeat containing E3 ubiquitin protein ligase
hsa-miR-1248	1	0	1	1	1	1	FBXW7	F-box and WD repeat domain containing 7, E3 ubiquitin protein ligase
hsa-miR-1248	0	0	1	1	1	1	SYNE2	spectrin repeat containing, nuclear envelope 2
hsa-miR-1248	0	0	1	0	0	0	C18orf63	chromosome 18 open reading frame 63
hsa-miR-1248	1	0	1	1	1	1	HECW2	HECT, C2 and WW domain containing E3 ubiquitin protein ligase 2
hsa-miR-1248	1	0	1	1	1	1	KIAA2018	KIAA2018
hsa-miR-1248	0	0	1	0	0	0	MUC19	mucin 19, oligomeric
hsa-miR-1248	1	0	1	0	1	1	XRN1	5'-3' exoribonuclease 1
hsa-miR-1248	0	0	1	0	1	1	HDAC9	histone deacetylase 9
hsa-miR-1248	1	0	1	0	1	1	MCFD2	multiple coagulation factor deficiency 2
hsa-miR-1248	1	0	1	1	1	1	MAPK8IP3	mitogen-activated protein kinase 8 interacting protein 3
hsa-miR-1248	1	0	1	1	0	0	POMGNT1	protein O-linked mannose beta1,2-N-acetylglucosaminyltransferase
hsa-miR-1248	0	0	1	1	1	1	SLC25A26	solute carrier family 25 (S-adenosylmethionine carrier), member 26
hsa-miR-1248	0	0	1	0	1	1	NWD1	NACHT and WD repeat domain containing 1
hsa-miR-1248	0	0	1	0	0	0	DNAJC27-AS1	DNAJC27 antisense RNA 1
hsa-miR-1248	1	0	1	0	1	1	CNTNAP2	contactin associated protein-like 2
hsa-miR-1248	1	0	1	0	1	1	ZNF652	zinc finger protein 652
hsa-miR-1248	1	0	1	0	1	1	ZNF776	zinc finger protein 776
hsa-miR-1248	0	0	1	0	0	0	LOC440518	golgin A2 pseudogene
hsa-miR-1248	0	0	1	1	1	1	MOBP	myelin-associated oligodendrocyte basic protein
hsa-miR-1248	1	0	1	1	1	1	SP2	Sp2 transcription factor
hsa-miR-1248	1	0	1	1	1	1	PRKG1	protein kinase, cGMP-dependent, type I
hsa-miR-1248	1	0	1	1	1	1	MAN2A2	mannosidase, alpha, class 2A, member 2
hsa-miR-1248	1	0	1	0	1	1	EFR3A	EFR3 homolog A (S. cerevisiae)
hsa-miR-1248	1	0	1	1	1	1	SEC14L1	SEC14-like 1 (S. cerevisiae)
hsa-miR-1248	1	0	1	1	1	1	RB1CC1	RB1-inducible coiled-coil 1
hsa-miR-1248	0	0	1	0	0	0	61E3.4	nuclear pore complex interacting protein-like
hsa-miR-1248	0	0	1	1	1	1	PARP14	poly (ADP-ribose) polymerase family, member 14
hsa-miR-1248	0	0	1	1	1	1	LTA	lymphotoxin alpha (TNF superfamily, member 1)
hsa-miR-1248	1	0	1	1	1	1	RSPO1	R-spondin 1
hsa-miR-1248	1	0	1	1	1	1	KCNE3	potassium voltage-gated channel, Isk-related family, member 3
hsa-miR-1248	1	0	1	1	1	1	TRIOBP	TRIO and F-actin binding protein
hsa-miR-1248	0	0	1	0	0	0	DPY19L2P3	dpy-19-like 2 pseudogene 3 (C. elegans)
hsa-miR-1248	1	0	1	1	1	1	MOSPD1	motile sperm domain containing 1
hsa-miR-1248	0	0	1	1	1	1	PAX4	paired box 4
hsa-miR-1248	1	0	1	1	1	1	ANKRD42	ankyrin repeat domain 42
hsa-miR-1248	0	0	1	1	1	1	C1orf27	chromosome 1 open reading frame 27
hsa-miR-1248	0	0	1	0	0	0	POM121L8P	POM121 transmembrane nucleoporin-like 8 pseudogene
hsa-miR-1248	0	0	1	1	0	0	NBPF9	neuroblastoma breakpoint family, member 9
hsa-miR-1248	1	0	1	0	1	1	RBBP5	retinoblastoma binding protein 5
hsa-miR-1248	1	0	1	1	1	1	LGR4	leucine-rich repeat containing G protein-coupled receptor 4
hsa-miR-1248	1	0	1	1	1	1	SLC4A8	solute carrier family 4, sodium bicarbonate cotransporter, member 8
hsa-miR-1248	0	0	1	0	0	0	GPR144	G protein-coupled receptor 144
hsa-miR-1248	1	0	1	1	1	1	MLL	myeloid/lymphoid or mixed-lineage leukemia (trithorax homolog, Drosophila)
hsa-miR-1248	1	0	1	1	1	1	ATP2B2	ATPase, Ca++ transporting, plasma membrane 2
hsa-miR-1248	1	0	1	1	1	1	AFF1	AF4/FMR2 family, member 1
hsa-miR-1248	0	0	1	0	0	0	CTSL1P2	cathepsin L1 pseudogene 2
hsa-miR-1248	0	0	1	1	0	0	KIF22	kinesin family member 22
hsa-miR-1248	0	0	1	0	1	1	OPRK1	opioid receptor, kappa 1
hsa-miR-1248	1	0	1	0	0	0	YLPM1	YLP motif containing 1
hsa-miR-1248	1	0	1	0	1	1	YES1	v-yes-1 Yamaguchi sarcoma viral oncogene homolog 1
hsa-miR-1248	1	0	1	1	1	1	ELK1	ELK1, member of ETS oncogene family
hsa-miR-1248	0	0	1	1	0	0	COL6A2	collagen, type VI, alpha 2
hsa-miR-1248	1	0	1	1	1	1	IGF1	insulin-like growth factor 1 (somatomedin C)
hsa-miR-1248	1	0	1	0	1	1	ACVR2A	activin A receptor, type IIA
hsa-miR-1248	1	0	1	1	0	0	ADRB3	adrenoceptor beta 3
hsa-miR-1248	0	0	1	1	1	1	ALDOB	aldolase B, fructose-bisphosphate
hsa-miR-1248	0	0	1	1	0	0	ASPA	aspartoacylase
hsa-miR-1248	1	0	1	1	1	1	COL1A2	collagen, type I, alpha 2
hsa-miR-1248	1	0	1	1	1	1	CYP19A1	cytochrome P450, family 19, subfamily A, polypeptide 1
hsa-miR-1248	1	0	1	1	1	1	DMD	dystrophin
hsa-miR-1248	1	0	1	0	1	1	SLC26A2	solute carrier family 26 (sulfate transporter), member 2
hsa-miR-1248	1	0	1	1	1	1	ESR1	estrogen receptor 1
hsa-miR-1248	0	0	1	1	1	1	F11	coagulation factor XI
hsa-miR-1248	1	0	1	1	1	1	F13A1	coagulation factor XIII, A1 polypeptide
hsa-miR-1248	0	0	1	1	1	1	F5	coagulation factor V (proaccelerin, labile factor)
hsa-miR-1248	0	0	1	1	0	0	FANCA	Fanconi anemia, complementation group A
hsa-miR-1248	0	0	1	0	1	1	MS4A2	membrane-spanning 4-domains, subfamily A, member 2
hsa-miR-1248	0	0	1	1	1	1	FXN	frataxin
hsa-miR-1248	1	0	1	0	1	1	G6PC	glucose-6-phosphatase, catalytic subunit
hsa-miR-1248	1	0	1	1	1	1	GALC	galactosylceramidase
hsa-miR-1248	0	0	1	1	0	0	GBA	glucosidase, beta, acid
hsa-miR-1248	1	0	1	0	1	1	GHR	growth hormone receptor
hsa-miR-1248	0	0	1	1	0	0	GJB1	gap junction protein, beta 1, 32kDa
hsa-miR-1248	1	0	1	0	1	1	GLI3	GLI family zinc finger 3
hsa-miR-1248	0	0	1	1	1	1	HPRT1	hypoxanthine phosphoribosyltransferase 1
hsa-miR-1248	1	0	1	0	1	1	ITGB3	integrin, beta 3 (platelet glycoprotein IIIa, antigen CD61)
hsa-miR-1248	1	0	1	1	1	1	KCNA1	potassium voltage-gated channel, shaker-related subfamily, member 1 (episodic ataxia with myokymia)
hsa-miR-1248	1	0	1	0	1	1	KIT	v-kit Hardy-Zuckerman 4 feline sarcoma viral oncogene homolog
hsa-miR-1248	1	0	1	1	1	1	MET	met proto-oncogene (hepatocyte growth factor receptor)
hsa-miR-1248	1	0	1	1	1	1	MITF	microphthalmia-associated transcription factor
hsa-miR-1248	0	0	1	1	1	1	MTR	5-methyltetrahydrofolate-homocysteine methyltransferase
hsa-miR-1248	0	0	1	1	1	1	MUT	methylmalonyl CoA mutase
hsa-miR-1248	0	0	1	1	1	1	NDP	Norrie disease (pseudoglioma)
hsa-miR-1248	1	0	1	1	0	0	PAX2	paired box 2
hsa-miR-1248	1	0	1	1	1	1	PEX12	peroxisomal biogenesis factor 12
hsa-miR-1248	0	0	1	0	1	1	PGK1	phosphoglycerate kinase 1
hsa-miR-1248	1	0	1	0	1	1	PTEN	phosphatase and tensin homolog
hsa-miR-1248	0	0	1	1	1	1	SRD5A2	steroid-5-alpha-reductase, alpha polypeptide 2 (3-oxo-5 alpha-steroid delta 4-dehydrogenase alpha 2)
hsa-miR-1248	0	0	1	1	1	1	CASR	calcium-sensing receptor
hsa-miR-1248	1	0	1	0	1	1	CYBB	cytochrome b-245, beta polypeptide
hsa-miR-1248	0	0	1	0	1	1	GNRHR	gonadotropin-releasing hormone receptor
hsa-miR-1248	0	0	1	1	0	0	IL2RA	interleukin 2 receptor, alpha
hsa-miR-1248	1	0	1	0	1	1	PAFAH1B1	platelet-activating factor acetylhydrolase 1b, regulatory subunit 1 (45kDa)
hsa-miR-1248	1	0	1	1	0	0	NOTCH3	notch 3
hsa-miR-1248	0	0	1	1	1	1	OXCT1	3-oxoacid CoA transferase 1
hsa-miR-1248	1	0	1	1	1	1	AQP2	aquaporin 2 (collecting duct)
hsa-miR-1248	1	0	1	1	1	1	HOXA13	homeobox A13
hsa-miR-1248	1	0	1	1	1	1	PLP1	proteolipid protein 1
hsa-miR-1248	0	0	1	1	1	1	RHO	rhodopsin
hsa-miR-1248	0	0	1	1	1	1	VHL	von Hippel-Lindau tumor suppressor, E3 ubiquitin protein ligase
hsa-miR-1248	0	0	1	1	1	1	WRN	Werner syndrome, RecQ helicase-like
hsa-miR-1248	0	0	1	1	1	1	CRX	cone-rod homeobox
hsa-miR-1248	1	0	1	1	1	1	DCX	doublecortin
hsa-miR-1248	0	0	1	1	1	1	FCGR1A	Fc fragment of IgG, high affinity Ia, receptor (CD64)
hsa-miR-1248	1	0	1	1	1	1	IL1A	interleukin 1, alpha
hsa-miR-1248	0	0	1	1	1	1	IL15	interleukin 15
hsa-miR-1248	1	0	1	1	1	1	ADRA1A	adrenoceptor alpha 1A
hsa-miR-1248	0	0	1	1	1	1	CALCB	calcitonin-related polypeptide beta
hsa-miR-1248	1	0	1	1	1	1	CHRM1	cholinergic receptor, muscarinic 1
hsa-miR-1248	1	0	1	1	1	1	CSF1	colony stimulating factor 1 (macrophage)
hsa-miR-1248	1	0	1	1	1	1	DIO2	deiodinase, iodothyronine, type II
hsa-miR-1248	1	0	1	1	1	1	GABRB3	gamma-aminobutyric acid (GABA) A receptor, beta 3
hsa-miR-1248	1	0	1	1	1	1	GAD1	glutamate decarboxylase 1 (brain, 67kDa)
hsa-miR-1248	0	0	1	1	1	1	GAD2	glutamate decarboxylase 2 (pancreatic islets and brain, 65kDa)
hsa-miR-1248	0	0	1	1	1	1	GRIN2B	glutamate receptor, ionotropic, N-methyl D-aspartate 2B
hsa-miR-1248	1	0	1	1	1	1	GRM1	glutamate receptor, metabotropic 1
hsa-miR-1248	1	0	1	1	1	1	HTR4	5-hydroxytryptamine (serotonin) receptor 4, G protein-coupled
hsa-miR-1248	0	0	1	1	1	1	IL5	interleukin 5 (colony-stimulating factor, eosinophil)
hsa-miR-1248	0	0	1	1	1	1	IL12A	interleukin 12A (natural killer cell stimulatory factor 1, cytotoxic lymphocyte maturation factor 1, p35)
hsa-miR-1248	1	0	1	0	1	1	KCNJ2	potassium inwardly-rectifying channel, subfamily J, member 2
hsa-miR-1248	1	0	1	1	1	1	MME	membrane metallo-endopeptidase
hsa-miR-1248	1	0	1	1	1	1	PDE3B	phosphodiesterase 3B, cGMP-inhibited
hsa-miR-1248	1	0	1	1	1	1	PTGER4	prostaglandin E receptor 4 (subtype EP4)
hsa-miR-1248	1	0	1	1	1	1	PTGFR	prostaglandin F receptor (FP)
hsa-miR-1248	0	0	1	1	0	0	PTGIR	prostaglandin I2 (prostacyclin) receptor (IP)
hsa-miR-1248	1	0	1	1	1	1	RARB	retinoic acid receptor, beta
hsa-miR-1248	0	0	1	1	1	1	ZNF676	zinc finger protein 676
hsa-miR-1248	1	0	1	0	1	1	SMAD5	SMAD family member 5
hsa-miR-1248	1	0	1	0	1	1	SPOPL	speckle-type POZ protein-like
hsa-miR-1248	1	0	1	0	1	1	ARHGEF37	Rho guanine nucleotide exchange factor (GEF) 37
hsa-miR-1248	0	0	1	1	1	1	FLJ45079	FLJ45079 protein
hsa-miR-1248	0	0	1	1	1	1	C4orf3	chromosome 4 open reading frame 3
hsa-miR-1248	0	0	1	0	0	0	C10orf55	chromosome 10 open reading frame 55
hsa-miR-1248	1	0	1	1	1	1	TPD52L3	tumor protein D52-like 3
hsa-miR-1248	0	0	1	1	1	1	ATP5C1	ATP synthase, H+ transporting, mitochondrial F1 complex, gamma polypeptide 1
hsa-miR-1248	0	0	1	0	0	0	KLK2	kallikrein-related peptidase 2
hsa-miR-1248	1	0	1	1	1	1	LCLAT1	lysocardiolipin acyltransferase 1
hsa-miR-1248	0	0	1	1	1	1	FCGR2B	Fc fragment of IgG, low affinity IIb, receptor (CD32)
hsa-miR-1248	1	0	1	1	1	1	GATA3	GATA binding protein 3
hsa-miR-1248	1	0	1	1	1	1	WNK3	WNK lysine deficient protein kinase 3
hsa-miR-1248	1	0	1	1	1	1	KCTD11	potassium channel tetramerisation domain containing 11
hsa-miR-1248	1	0	1	1	1	1	ABLIM1	actin binding LIM protein 1
hsa-miR-1248	1	0	1	1	1	1	LEPR	leptin receptor
hsa-miR-1248	1	0	1	1	1	1	HMGXB4	HMG box domain containing 4
hsa-miR-1248	1	0	1	1	1	1	TMEM200B	transmembrane protein 200B
hsa-miR-1248	0	0	1	1	1	1	SMAD1	SMAD family member 1
hsa-miR-1248	1	0	1	1	1	1	KLHL31	kelch-like 31 (Drosophila)
hsa-miR-1248	1	0	1	1	1	1	RBMS3	RNA binding motif, single stranded interacting protein 3
hsa-miR-1248	1	0	1	1	1	1	BICD2	bicaudal D homolog 2 (Drosophila)
hsa-miR-1248	0	0	1	1	1	1	SP5	Sp5 transcription factor
hsa-miR-1248	1	0	1	1	1	1	EVI2A	ecotropic viral integration site 2A
hsa-miR-1248	1	0	1	0	1	1	BMF	Bcl2 modifying factor
hsa-miR-1248	1	0	1	1	0	0	NOMO3	NODAL modulator 3
hsa-miR-1248	0	0	1	1	1	1	ALG11	asparagine-linked glycosylation 11, alpha-1,2-mannosyltransferase homolog (yeast)
hsa-miR-1248	0	0	1	1	1	1	CCDC144NL	coiled-coil domain containing 144 family, N-terminal like
hsa-miR-1248	1	0	1	0	1	1	LIN28B	lin-28 homolog B (C. elegans)
hsa-miR-1248	0	0	1	1	1	1	DBX2	developing brain homeobox 2
hsa-miR-1248	0	0	1	0	0	0	FLJ42842	uncharacterized FLJ42842
hsa-miR-1248	0	0	1	0	1	1	FLJ16124	FLJ16124 protein
hsa-miR-1248	0	0	1	1	1	1	CLEC2D	C-type lectin domain family 2, member D
hsa-miR-1248	1	0	1	1	1	1	NCK2	NCK adaptor protein 2
hsa-miR-1248	0	0	1	1	1	1	SP140	SP140 nuclear body protein
hsa-miR-1248	1	0	1	0	1	1	LRRC55	leucine rich repeat containing 55
hsa-miR-1248	0	0	1	1	1	1	HMGN2P46	high mobility group nucleosomal binding domain 2 pseudogene 46
hsa-miR-1248	1	0	1	0	1	1	YPEL2	yippee-like 2 (Drosophila)
hsa-miR-1248	1	0	1	1	1	1	EBF3	early B-cell factor 3
hsa-miR-1248	1	0	1	1	1	1	PLCXD3	phosphatidylinositol-specific phospholipase C, X domain containing 3
hsa-miR-1248	1	0	1	1	1	1	EDA	ectodysplasin A
hsa-miR-1248	0	0	1	1	1	1	LINC00478	long intergenic non-protein coding RNA 478
hsa-miR-1248	1	0	1	0	1	1	IP6K1	inositol hexakisphosphate kinase 1
hsa-miR-1248	0	0	1	1	1	1	WBP5	WW domain binding protein 5
hsa-miR-1248	1	0	1	0	1	1	GOSR1	golgi SNAP receptor complex member 1
hsa-miR-1248	0	0	1	1	1	1	SCP2	sterol carrier protein 2
hsa-miR-1248	1	0	1	1	1	1	L3MBTL3	l(3)mbt-like 3 (Drosophila)
hsa-miR-1248	1	0	1	1	1	1	IGSF3	immunoglobulin superfamily, member 3
hsa-miR-1248	1	0	1	1	1	1	BRWD1	bromodomain and WD repeat domain containing 1
hsa-miR-1248	1	0	1	0	1	1	SS18	synovial sarcoma translocation, chromosome 18
hsa-miR-1248	0	0	1	1	1	1	FAM154B	family with sequence similarity 154, member B
hsa-miR-1248	1	0	1	1	1	1	BCAP29	B-cell receptor-associated protein 29
hsa-miR-1248	0	0	1	1	1	1	TCHHL1	trichohyalin-like 1
hsa-miR-1248	0	0	1	1	1	1	MXI1	MAX interactor 1
hsa-miR-1248	1	0	1	1	1	1	EML1	echinoderm microtubule associated protein like 1
hsa-miR-1248	0	0	1	1	1	1	CCDC147	coiled-coil domain containing 147
hsa-miR-1248	0	0	1	1	1	1	FBXO47	F-box protein 47
hsa-miR-1248	0	0	1	0	0	0	CD200R1L	CD200 receptor 1-like
hsa-miR-1248	0	0	1	0	1	1	ZNF648	zinc finger protein 648
hsa-miR-1248	1	0	1	1	1	1	SHE	Src homology 2 domain containing E
hsa-miR-1248	0	0	1	1	1	1	SPIN3	spindlin family, member 3
hsa-miR-1248	1	0	1	0	1	1	ZC3H12B	zinc finger CCCH-type containing 12B
hsa-miR-1248	0	0	1	1	1	1	MUC21	mucin 21, cell surface associated
hsa-miR-1248	0	0	1	1	1	1	HGF	hepatocyte growth factor (hepapoietin A; scatter factor)
hsa-miR-1248	0	0	1	1	1	1	NCMAP	noncompact myelin associated protein
hsa-miR-1248	0	0	1	1	0	0	MYBPHL	myosin binding protein H-like
hsa-miR-1248	1	0	1	1	0	0	RPL21P44	ribosomal protein L21 pseudogene 44
hsa-miR-1248	1	0	1	0	1	1	CREB5	cAMP responsive element binding protein 5
hsa-miR-1248	0	0	1	1	1	1	XKR9	XK, Kell blood group complex subunit-related family, member 9
hsa-miR-1248	1	0	1	1	1	1	BTBD1	BTB (POZ) domain containing 1
hsa-miR-1248	0	0	1	1	0	0	SOHLH1	spermatogenesis and oogenesis specific basic helix-loop-helix 1
hsa-miR-1248	1	0	1	0	1	1	ZKSCAN2	zinc finger with KRAB and SCAN domains 2
hsa-miR-1248	0	0	1	1	0	0	LINC00207	long intergenic non-protein coding RNA 207
hsa-miR-1248	1	0	1	1	1	1	FXR1	fragile X mental retardation, autosomal homolog 1
hsa-miR-1248	0	0	1	1	1	1	C2orf68	chromosome 2 open reading frame 68
hsa-miR-1248	1	0	1	1	1	1	RUNX2	runt-related transcription factor 2
hsa-miR-1248	1	0	1	1	1	1	PHF6	PHD finger protein 6
hsa-miR-1248	1	0	1	1	1	1	MSMO1	methylsterol monooxygenase 1
hsa-miR-1248	1	0	1	1	1	1	TMCC1	transmembrane and coiled-coil domain family 1
hsa-miR-1248	1	0	1	1	1	1	ZHX1	zinc fingers and homeoboxes 1
hsa-miR-1248	1	0	1	1	1	1	VMA21	VMA21 vacuolar H+-ATPase homolog (S. cerevisiae)
hsa-miR-1248	1	0	1	1	1	1	SH3PXD2B	SH3 and PX domains 2B
hsa-miR-1248	0	0	1	1	1	1	VPS13A	vacuolar protein sorting 13 homolog A (S. cerevisiae)
hsa-miR-1248	1	0	1	1	1	1	PFKFB2	6-phosphofructo-2-kinase/fructose-2,6-biphosphatase 2
hsa-miR-1248	0	0	1	1	1	1	POLR2M	polymerase (RNA) II (DNA directed) polypeptide M
hsa-miR-1248	0	0	1	1	1	1	NPIPL1	nuclear pore complex interacting protein-like 1
hsa-miR-1248	1	0	1	1	1	1	GPHN	gephyrin
hsa-miR-1248	1	0	1	1	1	1	BAALC	brain and acute leukemia, cytoplasmic
hsa-miR-1248	0	0	1	0	1	1	TM2D2	TM2 domain containing 2
hsa-miR-1248	1	0	1	0	1	1	RGAG4	retrotransposon gag domain containing 4
hsa-miR-1248	1	0	1	1	1	1	CANX	calnexin
hsa-miR-1248	1	0	1	0	1	1	BCL7A	B-cell CLL/lymphoma 7A
hsa-miR-1248	0	0	1	1	1	1	WASF1	WAS protein family, member 1
hsa-miR-1248	1	0	1	1	1	1	FNBP1L	formin binding protein 1-like
hsa-miR-1248	1	0	1	1	1	1	AFF3	AF4/FMR2 family, member 3
hsa-miR-1248	1	0	1	0	1	1	ANO6	anoctamin 6
hsa-miR-1248	1	0	1	1	1	1	SLC35F1	solute carrier family 35, member F1
hsa-miR-1248	0	0	1	0	1	1	C6orf120	chromosome 6 open reading frame 120
hsa-miR-1248	0	0	1	1	0	0	CCT8L1P	chaperonin containing TCP1, subunit 8 (theta)-like 1, pseudogene
hsa-miR-1248	1	0	1	1	1	1	RGS7BP	regulator of G-protein signaling 7 binding protein
hsa-miR-1248	0	0	1	1	0	0	GRB7	growth factor receptor-bound protein 7
hsa-miR-1248	0	0	1	1	0	0	KLK3	kallikrein-related peptidase 3
hsa-miR-1248	1	0	1	1	1	1	OPN5	opsin 5
hsa-miR-1248	1	0	1	0	1	1	SAMD5	sterile alpha motif domain containing 5
hsa-miR-1248	1	0	1	1	0	0	MANEAL	mannosidase, endo-alpha-like
hsa-miR-1248	0	0	1	1	1	1	LYPD5	LY6/PLAUR domain containing 5
hsa-miR-1248	1	0	1	1	1	1	MAF	v-maf musculoaponeurotic fibrosarcoma oncogene homolog (avian)
hsa-miR-1248	1	0	1	1	1	1	CSNK1G3	casein kinase 1, gamma 3
hsa-miR-1248	0	0	1	0	1	1	STXBP1	syntaxin binding protein 1
hsa-miR-1248	1	0	1	1	1	1	KLF10	Kruppel-like factor 10
hsa-miR-1248	1	0	1	1	1	1	UBE2V1	ubiquitin-conjugating enzyme E2 variant 1
hsa-miR-1248	0	0	1	1	1	1	SLC35A2	solute carrier family 35 (UDP-galactose transporter), member A2
hsa-miR-1248	1	0	1	0	1	1	GPR126	G protein-coupled receptor 126
hsa-miR-1248	1	0	1	0	1	1	NPNT	nephronectin
hsa-miR-1248	1	0	1	1	1	1	AMD1	adenosylmethionine decarboxylase 1
hsa-miR-1248	1	0	1	1	1	1	MYCL1	v-myc myelocytomatosis viral oncogene homolog 1, lung carcinoma derived (avian)
hsa-miR-1248	0	0	1	1	1	1	HAT1	histone acetyltransferase 1
hsa-miR-1248	1	0	1	0	1	1	SRGAP3	SLIT-ROBO Rho GTPase activating protein 3
hsa-miR-1248	0	0	1	1	1	1	CSTF3	cleavage stimulation factor, 3' pre-RNA, subunit 3, 77kDa
hsa-miR-1248	1	0	1	1	1	1	ZNF704	zinc finger protein 704
hsa-miR-1248	0	0	1	1	0	0	CALCA	calcitonin-related polypeptide alpha
hsa-miR-1248	0	0	1	1	1	1	ERP29	endoplasmic reticulum protein 29
hsa-miR-1248	0	0	1	1	1	1	KCNIP1	Kv channel interacting protein 1
hsa-miR-1248	1	0	1	1	1	1	GALNTL6	UDP-N-acetyl-alpha-D-galactosamine:polypeptide N-acetylgalactosaminyltransferase-like 6
hsa-miR-1248	0	0	1	1	1	1	ESRP1	epithelial splicing regulatory protein 1
hsa-miR-1248	1	0	1	1	1	1	AGAP1	ArfGAP with GTPase domain, ankyrin repeat and PH domain 1
hsa-miR-1248	1	0	1	1	1	1	ACPL2	acid phosphatase-like 2
hsa-miR-1248	1	0	1	0	1	1	ARL5A	ADP-ribosylation factor-like 5A
hsa-miR-1248	0	0	1	1	1	1	CTLA4	cytotoxic T-lymphocyte-associated protein 4
hsa-miR-1248	1	0	1	0	1	1	CDC42SE1	CDC42 small effector 1
hsa-miR-1248	0	0	1	1	1	1	ATAD3C	ATPase family, AAA domain containing 3C
hsa-miR-1248	0	0	1	1	1	1	EFEMP1	EGF containing fibulin-like extracellular matrix protein 1
hsa-miR-1248	1	0	1	1	1	1	DPP6	dipeptidyl-peptidase 6
hsa-miR-1248	1	0	1	1	1	1	ELMO1	engulfment and cell motility 1
hsa-miR-1248	1	0	1	1	1	1	KIAA0317	KIAA0317
hsa-miR-1248	1	0	1	0	1	1	GK5	glycerol kinase 5 (putative)
hsa-miR-1248	1	0	1	1	1	1	KCNC4	potassium voltage-gated channel, Shaw-related subfamily, member 4
hsa-miR-1248	0	0	1	1	1	1	MAP9	microtubule-associated protein 9
hsa-miR-1248	1	0	1	0	1	1	USP9X	ubiquitin specific peptidase 9, X-linked
hsa-miR-1248	1	0	1	1	1	1	CHTF8	CTF8, chromosome transmission fidelity factor 8 homolog (S. cerevisiae)
hsa-miR-1248	1	0	1	1	1	1	CBLN3	cerebellin 3 precursor
hsa-miR-1248	0	0	1	0	0	0	C19orf55	chromosome 19 open reading frame 55
hsa-miR-1248	1	0	1	1	0	0	ANKRD34A	ankyrin repeat domain 34A
hsa-miR-1248	1	0	1	1	1	1	ZNF384	zinc finger protein 384
hsa-miR-1248	1	0	1	1	1	1	MLLT4	myeloid/lymphoid or mixed-lineage leukemia (trithorax homolog, Drosophila); translocated to, 4
hsa-miR-1248	1	0	1	1	1	1	TCERG1	transcription elongation regulator 1
hsa-miR-1248	1	0	1	0	1	1	FAM133B	family with sequence similarity 133, member B
hsa-miR-1248	1	0	1	1	1	1	SCN2A	sodium channel, voltage-gated, type II, alpha subunit
hsa-miR-1248	1	0	1	0	1	1	CD83	CD83 molecule
hsa-miR-1248	1	0	1	1	1	1	ZBTB8A	zinc finger and BTB domain containing 8A
hsa-miR-1248	0	0	1	1	1	1	BTNL8	butyrophilin-like 8
hsa-miR-1248	0	0	1	1	1	1	ATF3	activating transcription factor 3
hsa-miR-1248	1	0	1	1	1	1	NCALD	neurocalcin delta
hsa-miR-1248	0	0	1	1	0	0	GAGE1	G antigen 1
hsa-miR-1248	1	0	1	1	1	1	CYLD	cylindromatosis (turban tumor syndrome)
hsa-miR-1248	1	0	1	1	1	1	ZNF706	zinc finger protein 706
hsa-miR-1248	1	0	1	1	1	1	SLC9A6	solute carrier family 9, subfamily A (NHE6, cation proton antiporter 6), member 6
hsa-miR-1248	1	0	1	1	1	1	NSL1	NSL1, MIND kinetochore complex component, homolog (S. cerevisiae)
hsa-miR-1248	1	0	1	1	1	1	FRS2	fibroblast growth factor receptor substrate 2
hsa-miR-1248	1	0	1	1	1	1	ERBB4	v-erb-a erythroblastic leukemia viral oncogene homolog 4 (avian)
hsa-miR-1248	0	0	1	1	1	1	TTC14	tetratricopeptide repeat domain 14
hsa-miR-1248	1	0	1	1	1	1	SNX21	sorting nexin family member 21
hsa-miR-1248	1	0	1	1	1	1	TPM3	tropomyosin 3
hsa-miR-1248	0	0	1	1	1	1	SLC6A3	solute carrier family 6 (neurotransmitter transporter, dopamine), member 3
hsa-miR-1248	1	0	1	0	1	1	TMEM237	transmembrane protein 237
hsa-miR-1248	1	0	1	1	1	1	SLA	Src-like-adaptor
hsa-miR-1248	1	0	1	0	1	1	SLC12A2	solute carrier family 12 (sodium/potassium/chloride transporters), member 2
hsa-miR-1248	1	0	1	1	1	1	NET1	neuroepithelial cell transforming 1
hsa-miR-1248	1	0	1	1	1	1	HIPK3	homeodomain interacting protein kinase 3
hsa-miR-1248	1	0	1	1	1	1	MZT1	mitotic spindle organizing protein 1
hsa-miR-1248	1	0	1	0	1	1	SLC7A6	solute carrier family 7 (amino acid transporter light chain, y+L system), member 6
hsa-miR-1248	1	0	1	1	1	1	METTL9	methyltransferase like 9
hsa-miR-1248	1	0	1	1	1	1	HS6ST2	heparan sulfate 6-O-sulfotransferase 2
hsa-miR-1248	1	0	1	1	1	1	PDE11A	phosphodiesterase 11A
hsa-miR-1248	1	0	1	1	1	1	ATG9A	autophagy related 9A
hsa-miR-1248	1	0	1	1	1	1	SREK1	splicing regulatory glutamine/lysine-rich protein 1
hsa-miR-1248	1	0	1	1	1	1	NCOR2	nuclear receptor corepressor 2
hsa-miR-1248	1	0	1	1	1	1	IRF2BP2	interferon regulatory factor 2 binding protein 2
hsa-miR-1248	1	0	1	1	1	1	PRR3	proline rich 3
hsa-miR-1248	0	0	1	1	1	1	TCF19	transcription factor 19
hsa-miR-1248	0	0	1	1	0	0	EXOC3L4	exocyst complex component 3-like 4
hsa-miR-1248	0	0	1	0	1	1	WTH3DI	RAB6C-like
hsa-miR-1248	0	0	1	1	1	1	VCAM1	vascular cell adhesion molecule 1
hsa-miR-1248	0	0	1	0	0	0	TMEM183B	transmembrane protein 183B
hsa-miR-1248	1	0	1	1	1	1	CUL4B	cullin 4B
hsa-miR-1248	1	0	1	1	1	1	DMP1	dentin matrix acidic phosphoprotein 1
hsa-miR-1248	1	0	1	1	1	1	LDB3	LIM domain binding 3
hsa-miR-1248	1	0	1	0	1	1	FBXO41	F-box protein 41
hsa-miR-1248	1	0	1	1	1	1	SHANK3	SH3 and multiple ankyrin repeat domains 3
hsa-miR-1248	1	0	1	0	1	1	CCDC85A	coiled-coil domain containing 85A
hsa-miR-1248	0	0	1	1	1	1	HSF5	heat shock transcription factor family member 5
hsa-miR-1248	0	0	1	0	1	1	EPHA6	EPH receptor A6
hsa-miR-1248	1	0	1	0	1	1	ODZ3	odz, odd Oz/ten-m homolog 3 (Drosophila)
hsa-miR-1248	0	0	1	0	0	0	ARHGEF28	Rho guanine nucleotide exchange factor (GEF) 28
hsa-miR-1248	1	0	1	1	1	1	MBOAT1	membrane bound O-acyltransferase domain containing 1
hsa-miR-1248	1	0	1	0	1	1	MEGF9	multiple EGF-like-domains 9
hsa-miR-1248	0	0	1	1	1	1	TBX18	T-box 18
hsa-miR-1248	0	0	1	0	1	1	WIPF3	WAS/WASL interacting protein family, member 3
hsa-miR-1248	1	0	1	1	1	1	UNC119B	unc-119 homolog B (C. elegans)
hsa-miR-1248	1	0	1	1	1	1	MGA	MAX gene associated
hsa-miR-1248	0	0	1	1	1	1	PPP1R1C	protein phosphatase 1, regulatory (inhibitor) subunit 1C
hsa-miR-1248	1	0	1	1	1	1	DGKG	diacylglycerol kinase, gamma 90kDa
hsa-miR-1248	1	0	1	1	1	1	MYO1C	myosin IC
hsa-miR-1248	1	0	1	1	1	1	REPS2	RALBP1 associated Eps domain containing 2
hsa-miR-1248	1	0	1	1	0	0	KRT80	keratin 80
hsa-miR-1248	1	0	1	0	1	1	SCN3A	sodium channel, voltage-gated, type III, alpha subunit
hsa-miR-1248	1	0	1	1	0	0	ASIC2	acid-sensing (proton-gated) ion channel 2
hsa-miR-1248	1	0	1	0	0	0	ACAN	aggrecan
hsa-miR-1248	1	0	1	0	1	1	XIAP	X-linked inhibitor of apoptosis
hsa-miR-1248	1	0	1	0	1	1	BACH1	BTB and CNC homology 1, basic leucine zipper transcription factor 1
hsa-miR-1248	1	0	1	0	1	1	BMPR2	bone morphogenetic protein receptor, type II (serine/threonine kinase)
hsa-miR-1248	1	0	1	0	1	1	KLF9	Kruppel-like factor 9
hsa-miR-1248	1	0	1	1	1	1	CASP10	caspase 10, apoptosis-related cysteine peptidase
hsa-miR-1248	1	0	1	0	1	1	CDK6	cyclin-dependent kinase 6
hsa-miR-1248	1	0	1	1	1	1	CDS1	CDP-diacylglycerol synthase (phosphatidate cytidylyltransferase) 1
hsa-miR-1248	0	0	1	1	1	1	CLIC2	chloride intracellular channel 2
hsa-miR-1248	1	0	1	0	1	1	CPD	carboxypeptidase D
hsa-miR-1248	1	0	1	1	1	1	MAPK14	mitogen-activated protein kinase 14
hsa-miR-1248	1	0	1	1	1	1	CTNND2	catenin (cadherin-associated protein), delta 2
hsa-miR-1248	1	0	1	1	1	1	DYRK1A	dual-specificity tyrosine-(Y)-phosphorylation regulated kinase 1A
hsa-miR-1248	1	0	1	0	1	1	EFNB3	ephrin-B3
hsa-miR-1248	1	0	1	1	1	1	CELSR3	cadherin, EGF LAG seven-pass G-type receptor 3 (flamingo homolog, Drosophila)
hsa-miR-1248	1	0	1	1	1	1	ELAVL1	ELAV (embryonic lethal, abnormal vision, Drosophila)-like 1 (Hu antigen R)
hsa-miR-1248	0	0	1	0	1	1	EMP1	epithelial membrane protein 1
hsa-miR-1248	1	0	1	1	1	1	EN2	engrailed homeobox 2
hsa-miR-1248	1	0	1	1	1	1	GPC4	glypican 4
hsa-miR-1248	1	0	1	1	1	1	FOXF2	forkhead box F2
hsa-miR-1248	1	0	1	1	1	1	FOXC1	forkhead box C1
hsa-miR-1248	0	0	1	1	0	0	GAGE2C	G antigen 2C
hsa-miR-1248	1	0	1	1	1	1	NR6A1	nuclear receptor subfamily 6, group A, member 1
hsa-miR-1248	1	0	1	1	1	1	GCNT1	glucosaminyl (N-acetyl) transferase 1, core 2
hsa-miR-1248	1	0	1	0	1	1	GCNT2	glucosaminyl (N-acetyl) transferase 2, I-branching enzyme (I blood group)
hsa-miR-1248	0	0	1	1	0	0	GPR39	G protein-coupled receptor 39
hsa-miR-1248	1	0	1	1	1	1	NDST1	N-deacetylase/N-sulfotransferase (heparan glucosaminyl) 1
hsa-miR-1248	0	0	1	1	1	1	CXCL10	chemokine (C-X-C motif) ligand 10
hsa-miR-1248	1	0	1	1	1	1	ADD2	adducin 2 (beta)
hsa-miR-1248	1	0	1	1	1	1	AIM1	absent in melanoma 1
hsa-miR-1248	1	0	1	1	1	1	AQP4	aquaporin 4
hsa-miR-1248	1	0	1	0	1	1	ARCN1	archain 1
hsa-miR-1248	1	0	1	1	1	1	ARF3	ADP-ribosylation factor 3
hsa-miR-1248	1	0	1	0	1	1	ARNT	aryl hydrocarbon receptor nuclear translocator
hsa-miR-1248	1	0	1	1	1	1	BAAT	bile acid CoA: amino acid N-acyltransferase (glycine N-choloyltransferase)
hsa-miR-1248	1	0	1	0	1	1	CCND2	cyclin D2
hsa-miR-1248	0	0	1	1	1	1	CD1D	CD1d molecule
hsa-miR-1248	1	0	1	1	1	1	CDC25A	cell division cycle 25 homolog A (S. pombe)
hsa-miR-1248	1	0	1	1	1	1	CDH5	cadherin 5, type 2 (vascular endothelium)
hsa-miR-1248	1	0	1	1	1	1	CDH11	cadherin 11, type 2, OB-cadherin (osteoblast)
hsa-miR-1248	1	0	1	1	1	1	CDK2	cyclin-dependent kinase 2
hsa-miR-1248	0	0	1	1	0	0	CDKN2D	cyclin-dependent kinase inhibitor 2D (p19, inhibits CDK4)
hsa-miR-1248	0	0	1	1	1	1	CDO1	cysteine dioxygenase, type I
hsa-miR-1248	1	0	1	1	1	1	CENPB	centromere protein B, 80kDa
hsa-miR-1248	0	0	1	1	1	1	CEACAM8	carcinoembryonic antigen-related cell adhesion molecule 8
hsa-miR-1248	1	0	1	1	1	1	CLCN3	chloride channel, voltage-sensitive 3
hsa-miR-1248	1	0	1	1	1	1	CLCN4	chloride channel, voltage-sensitive 4
hsa-miR-1248	1	0	1	1	1	1	COL4A6	collagen, type IV, alpha 6
hsa-miR-1248	1	0	1	0	1	1	COL19A1	collagen, type XIX, alpha 1
hsa-miR-1248	1	0	1	1	1	1	CSNK2A1	casein kinase 2, alpha 1 polypeptide
hsa-miR-1248	0	0	1	1	0	0	DDB1	damage-specific DNA binding protein 1, 127kDa
hsa-miR-1248	0	0	1	1	1	1	GADD45A	growth arrest and DNA-damage-inducible, alpha
hsa-miR-1248	1	0	1	1	0	0	DES	desmin
hsa-miR-1248	1	0	1	1	1	1	DPP4	dipeptidyl-peptidase 4
hsa-miR-1248	1	0	1	0	0	0	DRP2	dystrophin related protein 2
hsa-miR-1248	1	0	1	1	1	1	DSC3	desmocollin 3
hsa-miR-1248	1	0	1	1	1	1	DUSP6	dual specificity phosphatase 6
hsa-miR-1248	1	0	1	1	1	1	E2F3	E2F transcription factor 3
hsa-miR-1248	0	0	1	1	0	0	EFNA5	ephrin-A5
hsa-miR-1248	1	0	1	0	1	1	FOXO1	forkhead box O1
hsa-miR-1248	0	0	1	1	1	1	FLI1	Friend leukemia virus integration 1
hsa-miR-1248	1	0	1	0	1	1	FUT4	fucosyltransferase 4 (alpha (1,3) fucosyltransferase, myeloid-specific)
hsa-miR-1248	0	0	1	1	1	1	GFAP	glial fibrillary acidic protein
hsa-miR-1248	1	0	1	0	1	1	GNAI1	guanine nucleotide binding protein (G protein), alpha inhibiting activity polypeptide 1
hsa-miR-1248	0	0	1	1	1	1	GNAQ	guanine nucleotide binding protein (G protein), q polypeptide
hsa-miR-1248	1	0	1	1	1	1	GNAZ	guanine nucleotide binding protein (G protein), alpha z polypeptide
hsa-miR-1248	0	0	1	0	1	1	GYPA	glycophorin A (MNS blood group)
hsa-miR-1248	0	0	1	1	1	1	HLA-DPB1	major histocompatibility complex, class II, DP beta 1
hsa-miR-1248	1	0	1	1	1	1	HNRNPA2B1	heterogeneous nuclear ribonucleoprotein A2/B1
hsa-miR-1248	0	0	1	1	1	1	HOXA4	homeobox A4
hsa-miR-1248	0	0	1	1	1	1	FOXN2	forkhead box N2
hsa-miR-1248	0	0	1	1	0	0	ID3	inhibitor of DNA binding 3, dominant negative helix-loop-helix protein
hsa-miR-1248	1	0	1	1	1	1	IL13	interleukin 13
hsa-miR-1248	0	0	1	1	1	1	IL17A	interleukin 17A
hsa-miR-1248	1	0	1	0	1	1	IRF2	interferon regulatory factor 2
hsa-miR-1248	1	0	1	1	1	1	ISL1	ISL LIM homeobox 1
hsa-miR-1248	1	0	1	1	1	1	ITGA2	integrin, alpha 2 (CD49B, alpha 2 subunit of VLA-2 receptor)
hsa-miR-1248	1	0	1	1	1	1	ITGA3	integrin, alpha 3 (antigen CD49C, alpha 3 subunit of VLA-3 receptor)
hsa-miR-1248	1	0	1	1	1	1	ITGB8	integrin, beta 8
hsa-miR-1248	1	0	1	1	1	1	ITPR2	inositol 1,4,5-trisphosphate receptor, type 2
hsa-miR-1248	1	0	1	1	1	1	KCNA3	potassium voltage-gated channel, shaker-related subfamily, member 3
hsa-miR-1248	1	0	1	1	1	1	KCNA4	potassium voltage-gated channel, shaker-related subfamily, member 4
hsa-miR-1248	1	0	1	1	1	1	KCNJ10	potassium inwardly-rectifying channel, subfamily J, member 10
hsa-miR-1248	1	0	1	1	1	1	KPNB1	karyopherin (importin) beta 1
hsa-miR-1248	1	0	1	1	1	1	KPNA4	karyopherin alpha 4 (importin alpha 3)
hsa-miR-1248	1	0	1	0	1	1	LAMC1	laminin, gamma 1 (formerly LAMB2)
hsa-miR-1248	1	0	1	1	1	1	LBR	lamin B receptor
hsa-miR-1248	1	0	1	1	1	1	LIF	leukemia inhibitory factor
hsa-miR-1248	1	0	1	1	1	1	LIFR	leukemia inhibitory factor receptor alpha
hsa-miR-1248	1	0	1	1	1	1	LRP6	low density lipoprotein receptor-related protein 6
hsa-miR-1248	1	0	1	1	1	1	M6PR	mannose-6-phosphate receptor (cation dependent)
hsa-miR-1248	1	0	1	1	1	1	MARCKS	myristoylated alanine-rich protein kinase C substrate
hsa-miR-1248	1	0	1	0	1	1	MXD1	MAX dimerization protein 1
hsa-miR-1248	1	0	1	1	1	1	ADAM11	ADAM metallopeptidase domain 11
hsa-miR-1248	0	0	1	1	1	1	MMP1	matrix metallopeptidase 1 (interstitial collagenase)
hsa-miR-1248	1	0	1	1	1	1	MSN	moesin
hsa-miR-1248	0	0	1	1	1	1	MTAP	methylthioadenosine phosphorylase
hsa-miR-1248	1	0	1	1	1	1	MYH9	myosin, heavy chain 9, non-muscle
hsa-miR-1248	0	0	1	1	0	0	MYOG	myogenin (myogenic factor 4)
hsa-miR-1248	1	0	1	1	1	1	NGFR	nerve growth factor receptor
hsa-miR-1248	0	0	1	1	0	0	NPPB	natriuretic peptide B
hsa-miR-1248	1	0	1	1	1	1	NPTX1	neuronal pentraxin I
hsa-miR-1248	0	0	1	0	1	1	OPHN1	oligophrenin 1
hsa-miR-1248	1	0	1	1	1	1	OSBP	oxysterol binding protein
hsa-miR-1248	1	0	1	0	1	1	PAK2	p21 protein (Cdc42/Rac)-activated kinase 2
hsa-miR-1248	1	0	1	0	1	1	PCDHGC3	protocadherin gamma subfamily C, 3
hsa-miR-1248	0	0	1	1	1	1	PF4V1	platelet factor 4 variant 1
hsa-miR-1248	0	0	1	1	1	1	PIM1	pim-1 oncogene
hsa-miR-1248	1	0	1	1	1	1	PLAGL2	pleiomorphic adenoma gene-like 2
hsa-miR-1248	1	0	1	1	1	1	PLCG1	phospholipase C, gamma 1
hsa-miR-1248	0	0	1	1	0	0	PPBP	pro-platelet basic protein (chemokine (C-X-C motif) ligand 7)
hsa-miR-1248	0	0	1	1	0	0	PPP1R8	protein phosphatase 1, regulatory subunit 8
hsa-miR-1248	0	0	1	1	0	0	PRKACG	protein kinase, cAMP-dependent, catalytic, gamma
hsa-miR-1248	1	0	1	1	1	1	PRKAR2B	protein kinase, cAMP-dependent, regulatory, type II, beta
hsa-miR-1248	0	0	1	1	1	1	MAP2K6	mitogen-activated protein kinase kinase 6
hsa-miR-1248	1	0	1	0	1	1	PRKY	protein kinase, Y-linked, pseudogene
hsa-miR-1248	1	0	1	1	1	1	PROX1	prospero homeobox 1
hsa-miR-1248	0	0	1	1	1	1	HTRA1	HtrA serine peptidase 1
hsa-miR-1248	0	0	1	0	0	0	PSMB10	proteasome (prosome, macropain) subunit, beta type, 10
hsa-miR-1248	1	0	1	1	1	1	PTPN9	protein tyrosine phosphatase, non-receptor type 9
hsa-miR-1248	0	0	1	1	1	1	PTPRR	protein tyrosine phosphatase, receptor type, R
hsa-miR-1248	0	0	1	1	1	1	RAB3A	RAB3A, member RAS oncogene family
hsa-miR-1248	1	0	1	0	1	1	RAB6A	RAB6A, member RAS oncogene family
hsa-miR-1248	1	0	1	1	1	1	ARID4A	AT rich interactive domain 4A (RBP1-like)
hsa-miR-1248	1	0	1	1	0	0	RFX1	regulatory factor X, 1 (influences HLA class II expression)
[truncated: 990 more rows]
