# Supplementary material for: Profiling of Selected MicroRNAs in Proliferative Eutopic Endometrium of Women with Ovarian Endometriosis
Source: Biomed Res Int. 2015 Aug 20;2015:760698. doi: 10.1155/2015/760698 (PMC4558423; doi:10.1155/2015/760698)
Supplement: Supplementary file 1 — Table I: The names of miRNAs significantly differentially expressed between eutopic endometrium of patients with endometriosis vs eutopic endometrium of patients without endometriosis. Table II: The associations between miRNA and mRNA, which presents detailed results of the search of six major databases i.e targetscan, tarbase, miranda, mirbase, mirtarget2 and pictar. [file 760698.f1.zip › 760698.f1/Table II/hsa-miR-1249.tsv]

miR	targetscan	tarbase	miranda	mirbase	mirtarget2	pictar	GeneSymbol	GeneName
hsa-miR-1249	1	0	1	1	0	0	SRCAP	Snf2-related CREBBP activator protein
hsa-miR-1249	1	0	1	1	1	1	RNGTT	RNA guanylyltransferase and 5'-phosphatase
hsa-miR-1249	1	0	1	1	1	1	IQSEC2	IQ motif and Sec7 domain 2
hsa-miR-1249	1	0	1	1	1	1	SEMA4F	sema domain, immunoglobulin domain (Ig), transmembrane domain (TM) and short cytoplasmic domain, (semaphorin) 4F
hsa-miR-1249	0	0	1	1	1	1	FSTL5	follistatin-like 5
hsa-miR-1249	0	0	1	0	0	0	MTA3	metastasis associated 1 family, member 3
hsa-miR-1249	0	0	1	1	0	0	TNFRSF12A	tumor necrosis factor receptor superfamily, member 12A
hsa-miR-1249	1	0	1	1	0	0	ARHGAP39	Rho GTPase activating protein 39
hsa-miR-1249	1	0	1	1	0	0	SEMA4C	sema domain, immunoglobulin domain (Ig), transmembrane domain (TM) and short cytoplasmic domain, (semaphorin) 4C
hsa-miR-1249	0	0	1	0	1	1	SETD5	SET domain containing 5
hsa-miR-1249	1	0	1	1	1	1	IKZF4	IKAROS family zinc finger 4 (Eos)
hsa-miR-1249	0	0	1	1	0	0	SEC16B	SEC16 homolog B (S. cerevisiae)
hsa-miR-1249	0	0	1	1	0	0	FAM65A	family with sequence similarity 65, member A
hsa-miR-1249	0	0	1	1	0	0	CIRH1A	cirrhosis, autosomal recessive 1A (cirhin)
hsa-miR-1249	1	0	1	1	1	1	SMEK1	SMEK homolog 1, suppressor of mek1 (Dictyostelium)
hsa-miR-1249	0	0	1	1	0	0	SSPO	SCO-spondin homolog (Bos taurus)
hsa-miR-1249	0	0	1	1	0	0	ERAP2	endoplasmic reticulum aminopeptidase 2
hsa-miR-1249	1	1	1	1	1	1	BACE1	beta-site APP-cleaving enzyme 1
hsa-miR-1249	0	0	1	1	0	0	PTPRF	protein tyrosine phosphatase, receptor type, F
hsa-miR-1249	1	0	1	1	1	1	NRXN2	neurexin 2
hsa-miR-1249	0	0	1	1	1	1	GABBR1	gamma-aminobutyric acid (GABA) B receptor, 1
hsa-miR-1249	1	0	1	1	1	1	DAPK1	death-associated protein kinase 1
hsa-miR-1249	0	0	1	1	0	0	KCNC3	potassium voltage-gated channel, Shaw-related subfamily, member 3
hsa-miR-1249	1	0	1	1	0	0	ELN	elastin
hsa-miR-1249	0	0	1	0	1	1	DCAF11	DDB1 and CUL4 associated factor 11
hsa-miR-1249	1	0	1	0	1	1	PLAG1	pleiomorphic adenoma gene 1
hsa-miR-1249	1	0	1	0	1	1	MAML1	mastermind-like 1 (Drosophila)
hsa-miR-1249	1	0	1	1	0	0	CACNB1	calcium channel, voltage-dependent, beta 1 subunit
hsa-miR-1249	1	0	1	1	0	0	TSPYL2	TSPY-like 2
hsa-miR-1249	0	0	1	0	1	1	NPY1R	neuropeptide Y receptor Y1
hsa-miR-1249	1	0	1	1	1	1	TBX2	T-box 2
hsa-miR-1249	1	0	1	1	0	0	RGS6	regulator of G-protein signaling 6
hsa-miR-1249	0	0	1	1	1	1	ZNF747	zinc finger protein 747
hsa-miR-1249	1	0	1	1	1	1	HNRNPK	heterogeneous nuclear ribonucleoprotein K
hsa-miR-1249	0	0	1	1	0	0	CDK10	cyclin-dependent kinase 10
hsa-miR-1249	1	0	1	1	1	1	MEF2D	myocyte enhancer factor 2D
hsa-miR-1249	1	0	1	1	1	1	PICALM	phosphatidylinositol binding clathrin assembly protein
hsa-miR-1249	0	0	1	0	0	0	MIAT	myocardial infarction associated transcript (non-protein coding)
hsa-miR-1249	0	0	1	1	0	0	ITGA7	integrin, alpha 7
hsa-miR-1249	1	0	1	1	1	1	MRAS	muscle RAS oncogene homolog
hsa-miR-1249	1	0	1	1	1	1	RBBP6	retinoblastoma binding protein 6
hsa-miR-1249	1	0	1	1	0	0	SLC44A2	solute carrier family 44, member 2
hsa-miR-1249	0	0	1	1	1	1	EPN1	epsin 1
hsa-miR-1249	0	0	1	1	1	1	PCF11	PCF11, cleavage and polyadenylation factor subunit, homolog (S. cerevisiae)
hsa-miR-1249	0	0	1	1	0	0	CARD10	caspase recruitment domain family, member 10
hsa-miR-1249	0	0	1	0	1	1	ZDHHC17	zinc finger, DHHC-type containing 17
hsa-miR-1249	1	0	1	1	0	0	ECE2	endothelin converting enzyme 2
hsa-miR-1249	0	0	1	1	0	0	SH2B1	SH2B adaptor protein 1
hsa-miR-1249	1	0	1	1	1	1	SNTB2	syntrophin, beta 2 (dystrophin-associated protein A1, 59kDa, basic component 2)
hsa-miR-1249	1	0	1	1	1	1	SNX21	sorting nexin family member 21
hsa-miR-1249	0	0	1	1	1	1	CTDSP1	CTD (carboxy-terminal domain, RNA polymerase II, polypeptide A) small phosphatase 1
hsa-miR-1249	0	0	1	1	1	1	LRTOMT	leucine rich transmembrane and 0-methyltransferase domain containing
hsa-miR-1249	1	0	1	1	1	1	SPTBN4	spectrin, beta, non-erythrocytic 4
hsa-miR-1249	0	0	1	1	1	1	SEMA6C	sema domain, transmembrane domain (TM), and cytoplasmic domain, (semaphorin) 6C
hsa-miR-1249	1	0	1	0	1	1	WIPF2	WAS/WASL interacting protein family, member 2
hsa-miR-1249	0	0	1	1	0	0	SPNS1	spinster homolog 1 (Drosophila)
hsa-miR-1249	1	0	1	1	1	1	ST3GAL3	ST3 beta-galactoside alpha-2,3-sialyltransferase 3
hsa-miR-1249	1	0	1	1	1	1	STX16	syntaxin 16
hsa-miR-1249	1	0	1	0	1	1	IL1RAP	interleukin 1 receptor accessory protein
hsa-miR-1249	1	0	1	1	1	1	GPR64	G protein-coupled receptor 64
hsa-miR-1249	1	0	1	1	1	1	CACNA2D2	calcium channel, voltage-dependent, alpha 2/delta subunit 2
hsa-miR-1249	0	0	1	1	1	1	TCFL5	transcription factor-like 5 (basic helix-loop-helix)
hsa-miR-1249	0	0	1	0	0	0	CACNA2D3	calcium channel, voltage-dependent, alpha 2/delta subunit 3
hsa-miR-1249	0	0	1	1	0	0	LOC100131138	uncharacterized LOC100131138
hsa-miR-1249	0	0	1	1	0	0	VSIG2	V-set and immunoglobulin domain containing 2
hsa-miR-1249	1	0	1	1	1	1	CADM3	cell adhesion molecule 3
hsa-miR-1249	1	0	1	1	1	1	EIF2C1	eukaryotic translation initiation factor 2C, 1
hsa-miR-1249	1	0	1	1	1	1	PTBP3	polypyrimidine tract binding protein 3
hsa-miR-1249	0	0	1	1	0	0	ADCK4	aarF domain containing kinase 4
hsa-miR-1249	0	0	1	1	0	0	CPSF3L	cleavage and polyadenylation specific factor 3-like
hsa-miR-1249	0	0	1	1	0	0	POLR3E	polymerase (RNA) III (DNA directed) polypeptide E (80kD)
hsa-miR-1249	1	0	1	1	1	1	MACF1	microtubule-actin crosslinking factor 1
hsa-miR-1249	0	0	1	0	0	0	LOC284561	uncharacterized LOC284561
hsa-miR-1249	1	0	1	1	0	0	FBXO45	F-box protein 45
hsa-miR-1249	1	0	1	0	1	1	ZCCHC3	zinc finger, CCHC domain containing 3
hsa-miR-1249	0	0	1	0	1	1	HEMK1	HemK methyltransferase family member 1
hsa-miR-1249	1	0	1	1	1	1	POLK	polymerase (DNA directed) kappa
hsa-miR-1249	1	0	1	1	1	1	DCAF8	DDB1 and CUL4 associated factor 8
hsa-miR-1249	1	0	1	1	1	1	ARHGAP36	Rho GTPase activating protein 36
hsa-miR-1249	1	0	1	0	1	1	AP1G1	adaptor-related protein complex 1, gamma 1 subunit
hsa-miR-1249	1	0	1	1	1	1	LMNA	lamin A/C
hsa-miR-1249	0	0	1	0	0	0	LOC284600	uncharacterized LOC284600
hsa-miR-1249	1	0	1	0	1	1	NCAM1	neural cell adhesion molecule 1
hsa-miR-1249	0	0	1	1	0	0	CD37	CD37 molecule
hsa-miR-1249	0	0	1	0	0	0	LINC00301	long intergenic non-protein coding RNA 301
hsa-miR-1249	0	0	1	1	0	0	TRIM41	tripartite motif containing 41
hsa-miR-1249	1	0	1	1	1	1	UBAP1	ubiquitin associated protein 1
hsa-miR-1249	0	0	1	1	1	1	TMED3	transmembrane emp24 protein transport domain containing 3
hsa-miR-1249	0	0	1	0	0	0	LOC152225	uncharacterized LOC152225
hsa-miR-1249	0	0	1	0	0	0	LOC643837	uncharacterized LOC643837
hsa-miR-1249	0	0	1	1	0	0	CDK15	cyclin-dependent kinase 15
hsa-miR-1249	0	0	1	0	0	0	LOC440910	uncharacterized LOC440910
hsa-miR-1249	0	0	1	1	0	0	SERPINH1	serpin peptidase inhibitor, clade H (heat shock protein 47), member 1, (collagen binding protein 1)
hsa-miR-1249	0	0	1	0	0	0	CXXC1P1	CXXC finger protein 1 pseudogene 1
hsa-miR-1249	0	0	1	1	0	0	WBP1	WW domain binding protein 1
hsa-miR-1249	1	0	1	1	1	1	DTX3	deltex homolog 3 (Drosophila)
hsa-miR-1249	0	0	1	1	1	1	SPOCK1	sparc/osteonectin, cwcv and kazal-like domains proteoglycan (testican) 1
hsa-miR-1249	1	0	1	1	1	1	SLC7A8	solute carrier family 7 (amino acid transporter light chain, L system), member 8
hsa-miR-1249	0	0	1	1	1	1	WBSCR17	Williams-Beuren syndrome chromosome region 17
hsa-miR-1249	0	0	1	1	1	1	LTBR	lymphotoxin beta receptor (TNFR superfamily, member 3)
hsa-miR-1249	1	0	1	0	1	1	STC2	stanniocalcin 2
hsa-miR-1249	1	0	1	1	1	1	PEA15	phosphoprotein enriched in astrocytes 15
hsa-miR-1249	1	0	1	1	0	0	FBRS	fibrosin
hsa-miR-1249	0	0	1	0	0	0	C1orf204	chromosome 1 open reading frame 204
hsa-miR-1249	1	0	1	1	0	0	CHD3	chromodomain helicase DNA binding protein 3
hsa-miR-1249	1	0	1	1	1	1	SNRNP70	small nuclear ribonucleoprotein 70kDa (U1)
hsa-miR-1249	0	0	1	1	1	1	FGD2	FYVE, RhoGEF and PH domain containing 2
hsa-miR-1249	0	0	1	1	0	0	VPS37C	vacuolar protein sorting 37 homolog C (S. cerevisiae)
hsa-miR-1249	1	0	1	1	1	1	RAB11FIP4	RAB11 family interacting protein 4 (class II)
hsa-miR-1249	0	0	1	1	1	1	TEX35	testis expressed 35
hsa-miR-1249	1	0	1	1	1	1	GOLGA8B	golgin A8 family, member B
hsa-miR-1249	0	0	1	0	0	0	LOC284385	uncharacterized LOC284385
hsa-miR-1249	0	0	1	1	0	0	KLHDC3	kelch domain containing 3
hsa-miR-1249	1	0	1	1	0	0	FBXL19	F-box and leucine-rich repeat protein 19
hsa-miR-1249	1	0	1	0	1	1	LRRTM4	leucine rich repeat transmembrane neuronal 4
hsa-miR-1249	1	0	1	1	1	1	AGAP2	ArfGAP with GTPase domain, ankyrin repeat and PH domain 2
hsa-miR-1249	0	0	1	1	1	1	GGA1	golgi-associated, gamma adaptin ear containing, ARF binding protein 1
hsa-miR-1249	1	0	1	1	0	0	CACNB3	calcium channel, voltage-dependent, beta 3 subunit
hsa-miR-1249	0	0	1	1	0	0	WDR81	WD repeat domain 81
hsa-miR-1249	1	0	1	1	0	0	KCNC1	potassium voltage-gated channel, Shaw-related subfamily, member 1
hsa-miR-1249	0	0	1	0	0	0	C1orf132	chromosome 1 open reading frame 132
hsa-miR-1249	1	0	1	1	1	1	PDZD4	PDZ domain containing 4
hsa-miR-1249	0	0	1	0	0	0	DKFZP434H168	uncharacterized LOC26077
hsa-miR-1249	0	0	1	1	1	1	CNPY3	canopy 3 homolog (zebrafish)
hsa-miR-1249	0	0	1	1	0	0	C20orf27	chromosome 20 open reading frame 27
hsa-miR-1249	1	0	1	1	1	1	CORO2B	coronin, actin binding protein, 2B
hsa-miR-1249	0	0	1	1	1	1	C2orf91	chromosome 2 open reading frame 91
hsa-miR-1249	1	0	1	1	0	0	GXYLT1	glucoside xylosyltransferase 1
hsa-miR-1249	0	0	1	1	0	0	LOC100128239	uncharacterized LOC100128239
hsa-miR-1249	1	0	1	0	0	0	MSL1	male-specific lethal 1 homolog (Drosophila)
hsa-miR-1249	0	0	1	1	0	0	C20orf141	chromosome 20 open reading frame 141
hsa-miR-1249	0	0	1	1	0	0	CLDN4	claudin 4
hsa-miR-1249	1	0	1	1	0	0	TNK2	tyrosine kinase, non-receptor, 2
hsa-miR-1249	1	0	1	1	1	1	DLG2	discs, large homolog 2 (Drosophila)
hsa-miR-1249	0	0	1	0	0	0	HNRNPKP3	heterogeneous nuclear ribonucleoprotein K pseudogene 3
hsa-miR-1249	0	0	1	0	1	1	NPHP4	nephronophthisis 4
hsa-miR-1249	0	0	1	1	1	1	ZNF503	zinc finger protein 503
hsa-miR-1249	1	0	1	0	1	1	SP6	Sp6 transcription factor
hsa-miR-1249	1	0	1	0	1	1	KPNA6	karyopherin alpha 6 (importin alpha 7)
hsa-miR-1249	0	0	1	0	0	0	EMBP1	embigin pseudogene 1
hsa-miR-1249	1	0	1	1	1	1	PHC2	polyhomeotic homolog 2 (Drosophila)
hsa-miR-1249	0	0	1	0	1	1	KIF1A	kinesin family member 1A
hsa-miR-1249	0	0	1	1	0	0	SCNN1A	sodium channel, non-voltage-gated 1 alpha subunit
hsa-miR-1249	1	0	1	1	1	1	CTSA	cathepsin A
hsa-miR-1249	0	0	1	1	1	1	RGS3	regulator of G-protein signaling 3
hsa-miR-1249	0	0	1	1	1	1	CD48	CD48 molecule
hsa-miR-1249	1	0	1	1	1	1	SETX	senataxin
hsa-miR-1249	1	0	1	1	1	1	NCOA1	nuclear receptor coactivator 1
hsa-miR-1249	0	0	1	1	0	0	FAAH	fatty acid amide hydrolase
hsa-miR-1249	0	0	1	0	0	0	LINC00588	long intergenic non-protein coding RNA 588
hsa-miR-1249	0	0	1	0	0	0	DNAJC5B	DnaJ (Hsp40) homolog, subfamily C, member 5 beta
hsa-miR-1249	0	0	1	0	0	0	KIAA0913	KIAA0913
hsa-miR-1249	1	0	1	1	1	1	GOLGA8A	golgin A8 family, member A
hsa-miR-1249	0	0	1	0	0	0	FAM66D	family with sequence similarity 66, member D
hsa-miR-1249	1	0	1	1	1	1	PKNOX2	PBX/knotted 1 homeobox 2
hsa-miR-1249	0	0	1	1	1	1	ING3	inhibitor of growth family, member 3
hsa-miR-1249	0	0	1	1	1	1	BRD2	bromodomain containing 2
hsa-miR-1249	0	0	1	0	0	0	EPHA1-AS1	EPHA1 antisense RNA 1
hsa-miR-1249	1	0	1	1	1	1	FAM63B	family with sequence similarity 63, member B
hsa-miR-1249	0	0	1	1	1	1	PNMAL1	paraneoplastic Ma antigen family-like 1
hsa-miR-1249	1	0	1	0	1	1	NR3C1	nuclear receptor subfamily 3, group C, member 1 (glucocorticoid receptor)
hsa-miR-1249	1	0	1	1	1	1	IKZF2	IKAROS family zinc finger 2 (Helios)
hsa-miR-1249	0	0	1	1	1	1	GCOM1	GRINL1A complex locus 1
hsa-miR-1249	0	0	1	0	0	0	FAM138C	family with sequence similarity 138, member C
hsa-miR-1249	0	0	1	1	1	1	LHFPL1	lipoma HMGIC fusion partner-like 1
hsa-miR-1249	0	0	1	1	0	0	VSIG4	V-set and immunoglobulin domain containing 4
hsa-miR-1249	1	0	1	1	1	1	VPS45	vacuolar protein sorting 45 homolog (S. cerevisiae)
hsa-miR-1249	1	0	1	0	1	1	NHS	Nance-Horan syndrome (congenital cataracts and dental anomalies)
hsa-miR-1249	1	0	1	1	1	1	MECP2	methyl CpG binding protein 2 (Rett syndrome)
hsa-miR-1249	1	0	1	1	0	0	ADAM15	ADAM metallopeptidase domain 15
hsa-miR-1249	0	0	1	1	1	1	SMPD1	sphingomyelin phosphodiesterase 1, acid lysosomal
hsa-miR-1249	1	0	1	1	1	1	PLCH1	phospholipase C, eta 1
hsa-miR-1249	0	0	1	1	0	0	CLSTN3	calsyntenin 3
hsa-miR-1249	0	0	1	0	0	0	LOC100128076	protein tyrosine phosphatase pseudogene
hsa-miR-1249	0	0	1	0	0	0	PTPRVP	protein tyrosine phosphatase, receptor type, V, pseudogene
hsa-miR-1249	1	0	1	1	0	0	FAM108A1	family with sequence similarity 108, member A1
hsa-miR-1249	1	0	1	1	1	1	PPP5C	protein phosphatase 5, catalytic subunit
hsa-miR-1249	0	0	1	1	1	1	B4GALT2	UDP-Gal:betaGlcNAc beta 1,4- galactosyltransferase, polypeptide 2
hsa-miR-1249	1	0	1	1	1	1	PPP1R11	protein phosphatase 1, regulatory (inhibitor) subunit 11
hsa-miR-1249	0	0	1	1	1	1	ARFGAP1	ADP-ribosylation factor GTPase activating protein 1
hsa-miR-1249	1	0	1	1	0	0	EIF4A1	eukaryotic translation initiation factor 4A1
hsa-miR-1249	0	0	1	1	1	1	RANGRF	RAN guanine nucleotide release factor
hsa-miR-1249	0	0	1	1	0	0	RBM14	RNA binding motif protein 14
hsa-miR-1249	0	0	1	1	0	0	STAC3	SH3 and cysteine rich domain 3
hsa-miR-1249	0	0	1	1	0	0	PANK2	pantothenate kinase 2
hsa-miR-1249	1	0	1	1	0	0	MARCH9	membrane-associated ring finger (C3HC4) 9
hsa-miR-1249	1	0	1	1	1	1	OTUD5	OTU domain containing 5
hsa-miR-1249	1	0	1	0	1	1	RNF165	ring finger protein 165
hsa-miR-1249	1	0	1	1	1	1	SUPT16H	suppressor of Ty 16 homolog (S. cerevisiae)
hsa-miR-1249	0	0	1	1	1	1	DLX4	distal-less homeobox 4
hsa-miR-1249	0	0	1	1	1	1	TOMM40L	translocase of outer mitochondrial membrane 40 homolog (yeast)-like
hsa-miR-1249	0	0	1	1	1	1	C8orf33	chromosome 8 open reading frame 33
hsa-miR-1249	0	0	1	0	1	1	ZNF37A	zinc finger protein 37A
hsa-miR-1249	1	0	1	1	0	0	AKT1S1	AKT1 substrate 1 (proline-rich)
hsa-miR-1249	0	0	1	1	1	1	CSDE1	cold shock domain containing E1, RNA-binding
hsa-miR-1249	0	0	1	1	0	0	ZBTB32	zinc finger and BTB domain containing 32
hsa-miR-1249	0	0	1	1	1	1	GLIPR2	GLI pathogenesis-related 2
hsa-miR-1249	0	0	1	1	0	0	HIST2H4A	histone cluster 2, H4a
hsa-miR-1249	0	0	1	1	0	0	HIST2H4B	histone cluster 2, H4b
hsa-miR-1249	0	0	1	0	1	1	TMSB15B	thymosin beta 15B
hsa-miR-1249	1	0	1	1	1	1	PRR7	proline rich 7 (synaptic)
hsa-miR-1249	1	0	1	1	1	1	SPOCK2	sparc/osteonectin, cwcv and kazal-like domains proteoglycan (testican) 2
hsa-miR-1249	0	0	1	0	0	0	SNX29P2	sorting nexin 29 pseudogene 2
hsa-miR-1249	0	0	1	1	0	0	PRRG2	proline rich Gla (G-carboxyglutamic acid) 2
hsa-miR-1249	1	0	1	1	1	1	FAM131A	family with sequence similarity 131, member A
hsa-miR-1249	0	0	1	0	0	0	ANKRD19P	ankyrin repeat domain 19, pseudogene
hsa-miR-1249	0	0	1	1	0	0	SWI5	SWI5 recombination repair homolog (yeast)
hsa-miR-1249	0	0	1	1	0	0	ICAM5	intercellular adhesion molecule 5, telencephalin
hsa-miR-1249	0	0	1	1	0	0	TNMD	tenomodulin
hsa-miR-1249	1	0	1	1	1	1	LPGAT1	lysophosphatidylglycerol acyltransferase 1
hsa-miR-1249	1	0	1	1	1	1	ZEB2	zinc finger E-box binding homeobox 2
hsa-miR-1249	0	0	1	0	0	0	CRYBB2P1	crystallin, beta B2 pseudogene 1
hsa-miR-1249	0	0	1	1	0	0	VMO1	vitelline membrane outer layer 1 homolog (chicken)
hsa-miR-1249	0	0	1	1	0	0	BLK	B lymphoid tyrosine kinase
hsa-miR-1249	0	0	1	0	0	0	LOC388906	opioid growth factor receptor pseudogene
hsa-miR-1249	0	0	1	0	0	0	TOB1-AS1	TOB1 antisense RNA 1
hsa-miR-1249	1	0	1	0	1	1	GPR107	G protein-coupled receptor 107
hsa-miR-1249	1	0	1	1	1	1	FOSB	FBJ murine osteosarcoma viral oncogene homolog B
hsa-miR-1249	0	0	1	0	0	0	LRRC48	leucine rich repeat containing 48
hsa-miR-1249	1	0	1	1	1	1	SLITRK3	SLIT and NTRK-like family, member 3
hsa-miR-1249	0	0	1	1	1	1	PINX1	PIN2/TERF1 interacting, telomerase inhibitor 1
hsa-miR-1249	0	0	1	1	1	1	MST1	macrophage stimulating 1 (hepatocyte growth factor-like)
hsa-miR-1249	1	0	1	1	1	1	PPP2R5B	protein phosphatase 2, regulatory subunit B', beta
hsa-miR-1249	1	0	1	1	1	1	SENP1	SUMO1/sentrin specific peptidase 1
hsa-miR-1249	0	0	1	1	0	0	FKBP11	FK506 binding protein 11, 19 kDa
hsa-miR-1249	0	0	1	1	1	1	ZNF589	zinc finger protein 589
hsa-miR-1249	0	0	1	1	1	1	PPIP5K1	diphosphoinositol pentakisphosphate kinase 1
hsa-miR-1249	1	0	1	0	1	1	FAM131B	family with sequence similarity 131, member B
hsa-miR-1249	0	0	1	1	1	1	SLC29A3	solute carrier family 29 (nucleoside transporters), member 3
hsa-miR-1249	0	0	1	1	0	0	RPS9	ribosomal protein S9
hsa-miR-1249	1	0	1	0	1	1	SEMA4G	sema domain, immunoglobulin domain (Ig), transmembrane domain (TM) and short cytoplasmic domain, (semaphorin) 4G
hsa-miR-1249	0	0	1	1	1	1	LINC00086	long intergenic non-protein coding RNA 86
hsa-miR-1249	1	0	1	1	1	1	LIMD2	LIM domain containing 2
hsa-miR-1249	1	0	1	1	1	1	SCUBE3	signal peptide, CUB domain, EGF-like 3
hsa-miR-1249	0	0	1	1	0	0	LAG3	lymphocyte-activation gene 3
hsa-miR-1249	0	0	1	1	1	1	GRIK5	glutamate receptor, ionotropic, kainate 5
hsa-miR-1249	1	0	1	0	1	1	C14orf43	chromosome 14 open reading frame 43
hsa-miR-1249	0	0	1	1	0	0	LY6H	lymphocyte antigen 6 complex, locus H
hsa-miR-1249	0	0	1	1	1	1	C17orf97	chromosome 17 open reading frame 97
hsa-miR-1249	0	0	1	1	1	1	ELL3	elongation factor RNA polymerase II-like 3
hsa-miR-1249	0	0	1	1	1	1	B4GALT4	UDP-Gal:betaGlcNAc beta 1,4- galactosyltransferase, polypeptide 4
hsa-miR-1249	0	0	1	0	0	0	FLJ35390	uncharacterized LOC255031
hsa-miR-1249	1	0	1	1	1	1	CDKN1C	cyclin-dependent kinase inhibitor 1C (p57, Kip2)
hsa-miR-1249	0	0	1	0	0	0	LEF1-AS1	LEF1 antisense RNA 1
hsa-miR-1249	1	0	1	1	1	1	MAPKAPK3	mitogen-activated protein kinase-activated protein kinase 3
hsa-miR-1249	1	0	1	1	1	1	PHACTR4	phosphatase and actin regulator 4
hsa-miR-1249	0	0	1	0	0	0	PTGER4P2	prostaglandin E receptor 4 (subtype EP4) pseudogene 2
hsa-miR-1249	1	0	1	1	0	0	DCAF15	DDB1 and CUL4 associated factor 15
hsa-miR-1249	0	0	1	0	0	0	FOXN3-AS2	FOXN3 antisense RNA 2
hsa-miR-1249	1	0	1	1	1	1	DDR1	discoidin domain receptor tyrosine kinase 1
hsa-miR-1249	0	0	1	0	0	0	AQP7P2	aquaporin 7 pseudogene 2
hsa-miR-1249	0	0	1	1	0	0	S100A1	S100 calcium binding protein A1
hsa-miR-1249	0	0	1	0	0	0	LOC727849	golgin A2 pseudogene
hsa-miR-1249	0	0	1	0	0	0	LOC727751	uncharacterized LOC727751
hsa-miR-1249	0	0	1	0	0	0	AGSK1	golgin subfamily A member 2-like
hsa-miR-1249	0	0	1	1	0	0	ASIC4	acid-sensing (proton-gated) ion channel family member 4
hsa-miR-1249	0	0	1	0	0	0	LOC642846	DEAD/H (Asp-Glu-Ala-Asp/His) box polypeptide 11-like
hsa-miR-1249	0	0	1	0	0	0	LINC00537	long intergenic non-protein coding RNA 537
hsa-miR-1249	0	0	1	1	0	0	DNHD1	dynein heavy chain domain 1
hsa-miR-1249	0	0	1	1	0	0	PDLIM7	PDZ and LIM domain 7 (enigma)
hsa-miR-1249	1	0	1	0	1	1	PIK3R3	phosphoinositide-3-kinase, regulatory subunit 3 (gamma)
hsa-miR-1249	0	0	1	0	1	1	TGFB2	transforming growth factor, beta 2
hsa-miR-1249	1	0	1	1	1	1	WNT10B	wingless-type MMTV integration site family, member 10B
hsa-miR-1249	0	0	1	0	0	0	ABCA11P	ATP-binding cassette, sub-family A (ABC1), member 11, pseudogene
hsa-miR-1249	0	0	1	1	1	1	ZNF365	zinc finger protein 365
hsa-miR-1249	0	0	1	1	1	1	TATDN2	TatD DNase domain containing 2
hsa-miR-1249	1	0	1	0	1	1	CPEB2	cytoplasmic polyadenylation element binding protein 2
hsa-miR-1249	0	0	1	1	0	0	RIPPLY1	ripply1 homolog (zebrafish)
hsa-miR-1249	1	0	1	1	1	1	KLHL17	kelch-like 17 (Drosophila)
hsa-miR-1249	1	0	1	1	1	1	PTPRD	protein tyrosine phosphatase, receptor type, D
hsa-miR-1249	0	0	1	1	1	1	ZNF514	zinc finger protein 514
hsa-miR-1249	0	0	1	1	0	0	TMC2	transmembrane channel-like 2
hsa-miR-1249	1	0	1	1	1	1	PPP6R1	protein phosphatase 6, regulatory subunit 1
hsa-miR-1249	1	0	1	1	1	1	OSBP2	oxysterol binding protein 2
hsa-miR-1249	1	0	1	1	1	1	ANK2	ankyrin 2, neuronal
hsa-miR-1249	1	0	1	1	1	1	MACROD2	MACRO domain containing 2
hsa-miR-1249	0	0	1	1	1	1	TINF2	TERF1 (TRF1)-interacting nuclear factor 2
hsa-miR-1249	0	0	1	1	0	0	NDRG2	NDRG family member 2
hsa-miR-1249	1	0	1	1	1	1	ETS1	v-ets erythroblastosis virus E26 oncogene homolog 1 (avian)
hsa-miR-1249	0	0	1	1	0	0	CDK5RAP2	CDK5 regulatory subunit associated protein 2
hsa-miR-1249	1	0	1	1	1	1	SH3BP4	SH3-domain binding protein 4
hsa-miR-1249	1	0	1	1	0	0	CECR2	cat eye syndrome chromosome region, candidate 2
hsa-miR-1249	0	0	1	1	0	0	LRR1	leucine rich repeat protein 1
hsa-miR-1249	0	0	1	1	1	1	CCNT2	cyclin T2
hsa-miR-1249	0	0	1	1	0	0	FDPS	farnesyl diphosphate synthase
hsa-miR-1249	0	0	1	1	0	0	STMN4	stathmin-like 4
hsa-miR-1249	0	0	1	1	0	0	CDC37	cell division cycle 37 homolog (S. cerevisiae)
hsa-miR-1249	0	0	1	1	1	1	TBC1D10A	TBC1 domain family, member 10A
hsa-miR-1249	0	0	1	1	1	1	UPRT	uracil phosphoribosyltransferase (FUR1) homolog (S. cerevisiae)
hsa-miR-1249	0	0	1	1	1	1	APH1A	anterior pharynx defective 1 homolog A (C. elegans)
hsa-miR-1249	0	0	1	1	1	1	CYTH2	cytohesin 2
hsa-miR-1249	0	0	1	1	1	1	PISD	phosphatidylserine decarboxylase
hsa-miR-1249	0	0	1	0	0	0	LOC100009676	uncharacterized LOC100009676
hsa-miR-1249	1	0	1	1	1	1	CTDNEP1	CTD nuclear envelope phosphatase 1
hsa-miR-1249	1	0	1	1	0	0	FSCN1	fascin homolog 1, actin-bundling protein (Strongylocentrotus purpuratus)
hsa-miR-1249	0	0	1	1	0	0	IKBKG	inhibitor of kappa light polypeptide gene enhancer in B-cells, kinase gamma
hsa-miR-1249	1	0	1	1	1	1	POU2F2	POU class 2 homeobox 2
hsa-miR-1249	0	0	1	1	1	1	PGAP2	post-GPI attachment to proteins 2
hsa-miR-1249	1	0	1	1	1	1	STK38L	serine/threonine kinase 38 like
hsa-miR-1249	0	0	1	1	1	1	MPDU1	mannose-P-dolichol utilization defect 1
hsa-miR-1249	0	0	1	0	0	0	LOC677759	uncharacterized LOC677759
hsa-miR-1249	0	0	1	1	1	1	SAP130	Sin3A-associated protein, 130kDa
hsa-miR-1249	0	0	1	1	0	0	C11orf48	chromosome 11 open reading frame 48
hsa-miR-1249	1	0	1	1	1	1	CAMK2A	calcium/calmodulin-dependent protein kinase II alpha
hsa-miR-1249	1	0	1	1	1	1	SLC39A1	solute carrier family 39 (zinc transporter), member 1
hsa-miR-1249	1	0	1	1	1	1	TIMP3	TIMP metallopeptidase inhibitor 3
hsa-miR-1249	0	0	1	1	1	1	ATP1A1	ATPase, Na+/K+ transporting, alpha 1 polypeptide
hsa-miR-1249	0	0	1	1	0	0	STUB1	STIP1 homology and U-box containing protein 1, E3 ubiquitin protein ligase
hsa-miR-1249	0	0	1	1	1	1	LYSMD4	LysM, putative peptidoglycan-binding, domain containing 4
hsa-miR-1249	0	0	1	1	0	0	FAM57B	family with sequence similarity 57, member B
hsa-miR-1249	0	0	1	1	1	1	IL15	interleukin 15
hsa-miR-1249	1	0	1	1	1	1	TRAPPC3	trafficking protein particle complex 3
hsa-miR-1249	0	0	1	0	0	0	CHEK2P2	checkpoint kinase 2 pseudogene 2
hsa-miR-1249	0	0	1	1	0	0	RPS6KB2	ribosomal protein S6 kinase, 70kDa, polypeptide 2
hsa-miR-1249	1	0	1	1	0	0	SOD1	superoxide dismutase 1, soluble
hsa-miR-1249	0	0	1	1	0	0	PCOLCE	procollagen C-endopeptidase enhancer
hsa-miR-1249	0	0	1	1	1	1	FAM118B	family with sequence similarity 118, member B
hsa-miR-1249	0	0	1	1	1	1	TOP3B	topoisomerase (DNA) III beta
hsa-miR-1249	0	0	1	1	0	0	INO80B	INO80 complex subunit B
hsa-miR-1249	0	0	1	1	0	0	CORO1B	coronin, actin binding protein, 1B
hsa-miR-1249	1	0	1	0	1	1	BTRC	beta-transducin repeat containing E3 ubiquitin protein ligase
hsa-miR-1249	1	0	1	1	0	0	GSK3A	glycogen synthase kinase 3 alpha
hsa-miR-1249	0	0	1	1	0	0	TENC1	tensin like C1 domain containing phosphatase (tensin 2)
hsa-miR-1249	0	0	1	0	0	0	LOC440518	golgin A2 pseudogene
hsa-miR-1249	0	0	1	1	1	1	UBXN8	UBX domain protein 8
hsa-miR-1249	0	0	1	1	0	0	CHRNE	cholinergic receptor, nicotinic, epsilon (muscle)
hsa-miR-1249	1	0	1	1	1	1	MITF	microphthalmia-associated transcription factor
hsa-miR-1249	1	0	1	1	0	0	PAX2	paired box 2
hsa-miR-1249	0	0	1	1	0	0	PHKG2	phosphorylase kinase, gamma 2 (testis)
hsa-miR-1249	1	0	1	1	1	1	SOX9	SRY (sex determining region Y)-box 9
hsa-miR-1249	1	0	1	0	1	1	CYBB	cytochrome b-245, beta polypeptide
hsa-miR-1249	1	0	1	1	0	0	NOTCH3	notch 3
hsa-miR-1249	1	0	1	1	1	1	APP	amyloid beta (A4) precursor protein
hsa-miR-1249	0	0	1	0	1	1	CCR5	chemokine (C-C motif) receptor 5 (gene/pseudogene)
hsa-miR-1249	1	0	1	1	0	0	ADRA1B	adrenoceptor alpha 1B
hsa-miR-1249	1	0	1	1	1	1	DIO2	deiodinase, iodothyronine, type II
hsa-miR-1249	1	0	1	0	1	1	GABRA4	gamma-aminobutyric acid (GABA) A receptor, alpha 4
hsa-miR-1249	1	0	1	1	1	1	RARA	retinoic acid receptor, alpha
hsa-miR-1249	1	0	1	1	1	1	BICD2	bicaudal D homolog 2 (Drosophila)
hsa-miR-1249	0	0	1	0	0	0	RNASEK	ribonuclease, RNase K
hsa-miR-1249	1	0	1	0	1	1	LRRC55	leucine rich repeat containing 55
hsa-miR-1249	0	0	1	1	1	1	HMGN2P46	high mobility group nucleosomal binding domain 2 pseudogene 46
hsa-miR-1249	1	0	1	0	1	1	YPEL2	yippee-like 2 (Drosophila)
hsa-miR-1249	1	0	1	1	0	0	NEURL4	neuralized homolog 4 (Drosophila)
hsa-miR-1249	1	0	1	0	1	1	GOSR1	golgi SNAP receptor complex member 1
hsa-miR-1249	1	0	1	1	1	1	L3MBTL3	l(3)mbt-like 3 (Drosophila)
hsa-miR-1249	1	0	1	1	1	1	IGSF3	immunoglobulin superfamily, member 3
hsa-miR-1249	1	0	1	0	1	1	KIAA2022	KIAA2022
hsa-miR-1249	1	0	1	1	1	1	LPHN1	latrophilin 1
hsa-miR-1249	1	0	1	0	1	1	RCHY1	ring finger and CHY zinc finger domain containing 1, E3 ubiquitin protein ligase
hsa-miR-1249	0	0	1	0	1	1	ZNF648	zinc finger protein 648
hsa-miR-1249	0	0	1	1	1	1	NCMAP	noncompact myelin associated protein
hsa-miR-1249	0	0	1	0	1	1	C9orf106	chromosome 9 open reading frame 106
hsa-miR-1249	1	0	1	1	1	1	PABPC1L2A	poly(A) binding protein, cytoplasmic 1-like 2A
hsa-miR-1249	0	0	1	1	1	1	FAM53A	family with sequence similarity 53, member A
hsa-miR-1249	1	0	1	1	1	1	TRNP1	TMF1-regulated nuclear protein 1
hsa-miR-1249	0	0	1	1	1	1	LDLRAD2	low density lipoprotein receptor class A domain containing 2
hsa-miR-1249	1	0	1	1	1	1	NTRK2	neurotrophic tyrosine kinase, receptor, type 2
hsa-miR-1249	1	0	1	1	1	1	SERBP1	SERPINE1 mRNA binding protein 1
hsa-miR-1249	1	0	1	1	1	1	SLC6A9	solute carrier family 6 (neurotransmitter transporter, glycine), member 9
hsa-miR-1249	1	0	1	0	1	1	CELF2	CUGBP, Elav-like family member 2
hsa-miR-1249	1	0	1	1	0	0	CRELD1	cysteine-rich with EGF-like domains 1
hsa-miR-1249	1	0	1	1	1	1	RCE1	RCE1 homolog, prenyl protein protease (S. cerevisiae)
hsa-miR-1249	1	0	1	1	1	1	SMOC1	SPARC related modular calcium binding 1
hsa-miR-1249	0	0	1	1	1	1	ATAD3C	ATPase family, AAA domain containing 3C
hsa-miR-1249	1	0	1	0	1	1	CCNL2	cyclin L2
hsa-miR-1249	0	0	1	1	1	1	C15orf59	chromosome 15 open reading frame 59
hsa-miR-1249	0	0	1	1	0	0	TNFRSF25	tumor necrosis factor receptor superfamily, member 25
hsa-miR-1249	1	0	1	1	1	1	CBLN3	cerebellin 3 precursor
hsa-miR-1249	1	0	1	1	1	1	ZNF384	zinc finger protein 384
hsa-miR-1249	1	0	1	1	1	1	SLC2A4	solute carrier family 2 (facilitated glucose transporter), member 4
hsa-miR-1249	1	0	1	1	1	1	PABPC1L2B	poly(A) binding protein, cytoplasmic 1-like 2B
hsa-miR-1249	1	0	1	1	1	1	ATG9A	autophagy related 9A
hsa-miR-1249	1	0	1	1	1	1	NCOR2	nuclear receptor corepressor 2
hsa-miR-1249	1	0	1	1	1	1	HNRNPUL2	heterogeneous nuclear ribonucleoprotein U-like 2
hsa-miR-1249	1	0	1	1	1	1	UNK	unkempt homolog (Drosophila)
hsa-miR-1249	1	0	1	1	1	1	SHANK3	SH3 and multiple ankyrin repeat domains 3
hsa-miR-1249	1	0	1	0	1	1	UNC13A	unc-13 homolog A (C. elegans)
hsa-miR-1249	1	0	1	0	0	0	CCDC159	coiled-coil domain containing 159
hsa-miR-1249	1	0	1	1	1	1	ADCY9	adenylate cyclase 9
hsa-miR-1249	0	0	1	1	0	0	CDC6	cell division cycle 6 homolog (S. cerevisiae)
hsa-miR-1249	0	0	1	1	1	1	CLIC2	chloride intracellular channel 2
hsa-miR-1249	0	0	1	1	0	0	CLK3	CDC-like kinase 3
hsa-miR-1249	1	0	1	1	1	1	MAPK14	mitogen-activated protein kinase 14
hsa-miR-1249	1	0	1	1	1	1	DUSP4	dual specificity phosphatase 4
hsa-miR-1249	1	0	1	0	1	1	EFNB3	ephrin-B3
hsa-miR-1249	1	0	1	1	1	1	ELAVL1	ELAV (embryonic lethal, abnormal vision, Drosophila)-like 1 (Hu antigen R)
hsa-miR-1249	1	0	1	0	1	1	ATP1B2	ATPase, Na+/K+ transporting, beta 2 polypeptide
hsa-miR-1249	1	0	1	1	1	1	CENPB	centromere protein B, 80kDa
hsa-miR-1249	0	0	1	1	0	0	CSNK2A2	casein kinase 2, alpha prime polypeptide
hsa-miR-1249	1	0	1	1	0	0	DES	desmin
hsa-miR-1249	0	0	1	1	1	1	DLAT	dihydrolipoamide S-acetyltransferase
hsa-miR-1249	0	0	1	1	1	1	GFAP	glial fibrillary acidic protein
hsa-miR-1249	0	0	1	1	0	0	GPX2	glutathione peroxidase 2 (gastrointestinal)
hsa-miR-1249	0	0	1	1	1	1	GYS1	glycogen synthase 1 (muscle)
hsa-miR-1249	1	0	1	1	1	1	HOXB3	homeobox B3
hsa-miR-1249	1	0	1	1	1	1	INSM1	insulinoma-associated 1
hsa-miR-1249	0	0	1	1	0	0	ITPKA	inositol-trisphosphate 3-kinase A
hsa-miR-1249	1	0	1	1	1	1	JAG2	jagged 2
hsa-miR-1249	1	0	1	1	1	1	KCNJ10	potassium inwardly-rectifying channel, subfamily J, member 10
hsa-miR-1249	1	0	1	1	1	1	NDN	necdin homolog (mouse)
hsa-miR-1249	1	0	1	1	1	1	FURIN	furin (paired basic amino acid cleaving enzyme)
hsa-miR-1249	1	0	1	1	1	1	PBX2	pre-B-cell leukemia homeobox 2
hsa-miR-1249	1	0	1	1	1	1	PLAGL2	pleiomorphic adenoma gene-like 2
hsa-miR-1249	1	0	1	1	1	1	PPP2R1B	protein phosphatase 2, regulatory subunit A, beta
hsa-miR-1249	1	0	1	1	1	1	PVRL1	poliovirus receptor-related 1 (herpesvirus entry mediator C)
hsa-miR-1249	0	0	1	1	1	1	SLAMF1	signaling lymphocytic activation molecule family member 1
hsa-miR-1249	1	0	1	1	1	1	SMARCC1	SWI/SNF related, matrix associated, actin dependent regulator of chromatin, subfamily c, member 1
hsa-miR-1249	0	0	1	1	0	0	SNTA1	syntrophin, alpha 1
hsa-miR-1249	1	0	1	1	1	1	SOX2	SRY (sex determining region Y)-box 2
hsa-miR-1249	1	0	1	0	1	1	SOX4	SRY (sex determining region Y)-box 4
hsa-miR-1249	1	0	1	1	1	1	SRF	serum response factor (c-fos serum response element-binding transcription factor)
hsa-miR-1249	0	0	1	1	1	1	STIM1	stromal interaction molecule 1
hsa-miR-1249	1	0	1	1	1	1	TFAP2B	transcription factor AP-2 beta (activating enhancer binding protein 2 beta)
hsa-miR-1249	1	0	1	0	1	1	THBS1	thrombospondin 1
hsa-miR-1249	1	0	1	1	1	1	TOP1	topoisomerase (DNA) I
hsa-miR-1249	0	0	1	1	1	1	ZNF137P	zinc finger protein 137, pseudogene
hsa-miR-1249	1	0	1	1	1	1	FZD5	frizzled family receptor 5
hsa-miR-1249	1	0	1	1	1	1	CUL5	cullin 5
hsa-miR-1249	0	0	1	1	1	1	RGS5	regulator of G-protein signaling 5
hsa-miR-1249	1	0	1	1	0	0	TCAP	titin-cap (telethonin)
hsa-miR-1249	1	0	1	0	1	1	IRS2	insulin receptor substrate 2
hsa-miR-1249	1	0	1	1	1	1	NRP2	neuropilin 2
hsa-miR-1249	1	0	1	1	1	1	EFNB2	ephrin-B2
hsa-miR-1249	1	0	1	1	1	1	SYT7	synaptotagmin VII
hsa-miR-1249	1	0	1	0	1	1	ACVR1B	activin A receptor, type IB
hsa-miR-1249	1	0	1	1	1	1	DACH1	dachshund homolog 1 (Drosophila)
hsa-miR-1249	1	0	1	1	1	1	ENSA	endosulfine alpha
hsa-miR-1249	1	0	1	1	1	1	EPHB2	EPH receptor B2
hsa-miR-1249	1	0	1	0	1	1	ETV5	ets variant 5
hsa-miR-1249	1	0	1	0	1	1	ACSL4	acyl-CoA synthetase long-chain family member 4
hsa-miR-1249	1	0	1	1	1	1	FOXK2	forkhead box K2
hsa-miR-1249	1	0	1	1	1	1	SYNGR1	synaptogyrin 1
hsa-miR-1249	0	0	1	1	0	0	ZW10	ZW10, kinetochore associated, homolog (Drosophila)
hsa-miR-1249	1	0	1	0	1	1	MAPKAPK2	mitogen-activated protein kinase-activated protein kinase 2
hsa-miR-1249	1	0	1	1	1	1	MED1	mediator complex subunit 1
hsa-miR-1249	1	0	1	1	1	1	B4GALT5	UDP-Gal:betaGlcNAc beta 1,4- galactosyltransferase, polypeptide 5
hsa-miR-1249	0	0	1	1	1	1	TAOK2	TAO kinase 2
hsa-miR-1249	1	0	1	1	1	1	KIF3B	kinesin family member 3B
hsa-miR-1249	1	0	1	1	1	1	ZFYVE9	zinc finger, FYVE domain containing 9
hsa-miR-1249	1	0	1	1	0	0	MMP14	matrix metallopeptidase 14 (membrane-inserted)
hsa-miR-1249	1	0	1	1	1	1	APLNR	apelin receptor
hsa-miR-1249	1	0	1	0	1	1	CALM3	calmodulin 3 (phosphorylase kinase, delta)
hsa-miR-1249	1	0	1	0	1	1	E2F1	E2F transcription factor 1
hsa-miR-1249	1	0	1	1	1	1	GPR3	G protein-coupled receptor 3
hsa-miR-1249	0	0	1	1	1	1	NUP98	nucleoporin 98kDa
hsa-miR-1249	1	0	1	1	1	1	GABBR2	gamma-aminobutyric acid (GABA) B receptor, 2
hsa-miR-1249	1	0	1	1	1	1	AKT3	v-akt murine thymoma viral oncogene homolog 3 (protein kinase B, gamma)
hsa-miR-1249	1	0	1	1	1	1	HOXA1	homeobox A1
hsa-miR-1249	0	0	1	1	0	0	LMNB1	lamin B1
hsa-miR-1249	0	0	1	1	1	1	BCAM	basal cell adhesion molecule (Lutheran blood group)
hsa-miR-1249	0	0	1	0	1	1	POU3F2	POU class 3 homeobox 2
hsa-miR-1249	1	0	1	1	1	1	SRRM1	serine/arginine repetitive matrix 1
hsa-miR-1249	0	0	1	1	0	0	KATNB1	katanin p80 (WD repeat containing) subunit B 1
hsa-miR-1249	1	0	1	1	1	1	LIPG	lipase, endothelial
hsa-miR-1249	1	0	1	0	1	1	HDAC4	histone deacetylase 4
hsa-miR-1249	1	0	1	1	1	1	SEMA3A	sema domain, immunoglobulin domain (Ig), short basic domain, secreted, (semaphorin) 3A
hsa-miR-1249	1	0	1	1	1	1	DAGLA	diacylglycerol lipase, alpha
hsa-miR-1249	1	0	1	0	1	1	PITPNA	phosphatidylinositol transfer protein, alpha
hsa-miR-1249	1	0	1	1	1	1	TIMM17A	translocase of inner mitochondrial membrane 17 homolog A (yeast)
hsa-miR-1249	1	0	1	1	1	1	SLC2A1	solute carrier family 2 (facilitated glucose transporter), member 1
hsa-miR-1249	0	0	1	1	1	1	CLCA2	chloride channel accessory 2
hsa-miR-1249	1	0	1	0	1	1	IGF2BP1	insulin-like growth factor 2 mRNA binding protein 1
hsa-miR-1249	1	0	1	1	1	1	PLK2	polo-like kinase 2
hsa-miR-1249	1	0	1	1	0	0	FRS3	fibroblast growth factor receptor substrate 3
hsa-miR-1249	1	0	1	0	1	1	SYNGAP1	synaptic Ras GTPase activating protein 1
hsa-miR-1249	1	0	1	1	1	1	CBX1	chromobox homolog 1
hsa-miR-1249	1	0	1	0	1	1	WASF2	WAS protein family, member 2
hsa-miR-1249	1	0	1	1	1	1	FSTL1	follistatin-like 1
hsa-miR-1249	1	0	1	1	1	1	UTRN	utrophin
hsa-miR-1249	1	0	1	1	1	1	PHLDA1	pleckstrin homology-like domain, family A, member 1
hsa-miR-1249	1	0	1	0	1	1	FZD4	frizzled family receptor 4
hsa-miR-1249	1	0	1	0	1	1	GAB2	GRB2-associated binding protein 2
hsa-miR-1249	1	0	1	1	1	1	STAT5B	signal transducer and activator of transcription 5B
hsa-miR-1249	1	0	1	1	1	1	SERTAD3	SERTA domain containing 3
hsa-miR-1249	1	0	1	1	1	1	AK2	adenylate kinase 2
hsa-miR-1249	0	0	1	1	1	1	ORMDL2	ORM1-like 2 (S. cerevisiae)
hsa-miR-1249	1	0	1	1	0	0	HOXC11	homeobox C11
hsa-miR-1249	0	0	1	1	0	0	SIT1	signaling threshold regulating transmembrane adaptor 1
hsa-miR-1249	1	0	1	1	1	1	KLHL20	kelch-like 20 (Drosophila)
hsa-miR-1249	0	0	1	1	0	0	HOXD4	homeobox D4
hsa-miR-1249	1	0	1	1	0	0	TTLL4	tubulin tyrosine ligase-like family, member 4
hsa-miR-1249	1	0	1	1	1	1	TBKBP1	TBK1 binding protein 1
hsa-miR-1249	0	0	1	1	1	1	TOX4	TOX high mobility group box family member 4
hsa-miR-1249	1	0	1	1	1	1	ARHGAP44	Rho GTPase activating protein 44
hsa-miR-1249	1	0	1	1	0	0	IQSEC1	IQ motif and Sec7 domain 1
hsa-miR-1249	1	0	1	1	1	1	SORCS3	sortilin-related VPS10 domain containing receptor 3
hsa-miR-1249	1	0	1	1	1	1	XPO7	exportin 7
hsa-miR-1249	1	0	1	0	1	1	ERC1	ELKS/RAB6-interacting/CAST family member 1
hsa-miR-1249	1	0	1	0	1	1	LARP1	La ribonucleoprotein domain family, member 1
hsa-miR-1249	1	0	1	1	1	1	MED13L	mediator complex subunit 13-like
hsa-miR-1249	1	0	1	1	1	1	MAGI1	membrane associated guanylate kinase, WW and PDZ domain containing 1
hsa-miR-1249	1	0	1	1	1	1	FAM155B	family with sequence similarity 155, member B
hsa-miR-1249	0	0	1	1	1	1	HMP19	HMP19 protein
hsa-miR-1249	0	0	1	1	0	0	PCDH12	protocadherin 12
hsa-miR-1249	0	0	1	1	1	1	POLE3	polymerase (DNA directed), epsilon 3, accessory subunit
hsa-miR-1249	1	0	1	1	1	1	PLXNA3	plexin A3
hsa-miR-1249	1	0	1	1	1	1	GRID1	glutamate receptor, ionotropic, delta 1
hsa-miR-1249	1	0	1	0	1	1	EIF2C4	eukaryotic translation initiation factor 2C, 4
hsa-miR-1249	1	0	1	1	1	1	UBA6	ubiquitin-like modifier activating enzyme 6
hsa-miR-1249	1	0	1	1	1	1	ASH1L	ash1 (absent, small, or homeotic)-like (Drosophila)
hsa-miR-1249	1	0	1	1	1	1	LRRC59	leucine rich repeat containing 59
hsa-miR-1249	1	0	1	1	1	1	SEPT3	septin 3
hsa-miR-1249	0	0	1	1	1	1	RALGAPA2	Ral GTPase activating protein, alpha subunit 2 (catalytic)
hsa-miR-1249	1	0	1	1	0	0	JPH2	junctophilin 2
hsa-miR-1249	1	0	1	1	1	1	DLG3	discs, large homolog 3 (Drosophila)
hsa-miR-1249	1	0	1	1	1	1	HCN3	hyperpolarization activated cyclic nucleotide-gated potassium channel 3
hsa-miR-1249	1	0	1	1	1	1	ZFP14	zinc finger protein 14 homolog (mouse)
hsa-miR-1249	0	0	1	1	1	1	PRX	periaxin
hsa-miR-1249	1	0	1	1	1	1	C6orf47	chromosome 6 open reading frame 47
hsa-miR-1249	0	0	1	1	1	1	CHST6	carbohydrate (N-acetylglucosamine 6-O) sulfotransferase 6
hsa-miR-1249	1	0	1	1	1	1	FOXM1	forkhead box M1
hsa-miR-1249	1	0	1	1	1	1	LRRC4	leucine rich repeat containing 4
hsa-miR-1249	1	0	1	1	1	1	GIGYF1	GRB10 interacting GYF protein 1
hsa-miR-1249	0	0	1	1	1	1	SMN2	survival of motor neuron 2, centromeric
hsa-miR-1249	1	0	1	1	1	1	REEP1	receptor accessory protein 1
hsa-miR-1249	1	0	1	1	1	1	HOXB8	homeobox B8
hsa-miR-1249	0	0	1	1	0	0	PRRG3	proline rich Gla (G-carboxyglutamic acid) 3 (transmembrane)
hsa-miR-1249	1	0	1	0	1	1	LIN28A	lin-28 homolog A (C. elegans)
hsa-miR-1249	0	0	1	0	1	1	C1orf115	chromosome 1 open reading frame 115
hsa-miR-1249	1	0	1	1	0	0	CCDC48	coiled-coil domain containing 48
hsa-miR-1249	1	0	1	1	1	1	KLHL18	kelch-like 18 (Drosophila)
hsa-miR-1249	1	0	1	0	1	1	SRCIN1	SRC kinase signaling inhibitor 1
hsa-miR-1249	1	0	1	1	1	1	JHDM1D	jumonji C domain containing histone demethylase 1 homolog D (S. cerevisiae)
hsa-miR-1249	1	0	1	0	1	1	CSRNP2	cysteine-serine-rich nuclear protein 2
hsa-miR-1249	1	0	1	1	1	1	PDRG1	p53 and DNA-damage regulated 1
hsa-miR-1249	1	0	1	1	1	1	GPR61	G protein-coupled receptor 61
hsa-miR-1249	1	0	1	1	0	0	SPATA16	spermatogenesis associated 16
hsa-miR-1249	1	0	1	1	1	1	DSEL	dermatan sulfate epimerase-like
hsa-miR-1249	1	0	1	1	1	1	ZNRF1	zinc and ring finger 1, E3 ubiquitin protein ligase
hsa-miR-1249	0	0	1	0	1	1	LDOC1L	leucine zipper, down-regulated in cancer 1-like
hsa-miR-1249	1	0	1	1	1	1	ING5	inhibitor of growth family, member 5
hsa-miR-1249	0	0	1	1	0	0	ZNF414	zinc finger protein 414
hsa-miR-1249	0	0	1	1	0	0	PCDH1	protocadherin 1
hsa-miR-1249	1	0	1	1	1	1	TTBK1	tau tubulin kinase 1
hsa-miR-1249	1	0	1	1	1	1	TRIM63	tripartite motif containing 63, E3 ubiquitin protein ligase
hsa-miR-1249	1	0	1	1	1	1	CASP2	caspase 2, apoptosis-related cysteine peptidase
hsa-miR-1249	1	0	1	1	1	1	TRIM55	tripartite motif containing 55
hsa-miR-1249	1	0	1	0	1	1	PURB	purine-rich element binding protein B
hsa-miR-1249	1	0	1	1	1	1	SSH2	slingshot homolog 2 (Drosophila)
hsa-miR-1249	1	0	1	1	1	1	LUZP1	leucine zipper protein 1
hsa-miR-1249	1	0	1	1	1	1	MBD6	methyl-CpG binding domain protein 6
hsa-miR-1249	0	0	1	1	0	0	TSGA13	testis specific, 13
hsa-miR-1249	0	0	1	1	1	1	FKBP1B	FK506 binding protein 1B, 12.6 kDa
hsa-miR-1249	1	0	1	1	0	0	AP1S1	adaptor-related protein complex 1, sigma 1 subunit
hsa-miR-1249	0	0	1	1	1	1	SLC32A1	solute carrier family 32 (GABA vesicular transporter), member 1
hsa-miR-1249	1	0	1	0	1	1	EDARADD	EDAR-associated death domain
hsa-miR-1249	1	0	1	1	1	1	GPR62	G protein-coupled receptor 62
hsa-miR-1249	1	0	1	1	1	1	KCTD12	potassium channel tetramerisation domain containing 12
hsa-miR-1249	1	0	1	1	1	1	FAM84A	family with sequence similarity 84, member A
hsa-miR-1249	0	0	1	1	0	0	NKX2-3	NK2 homeobox 3
hsa-miR-1249	1	0	1	1	1	1	CADM4	cell adhesion molecule 4
hsa-miR-1249	1	0	1	1	1	1	FAM123B	family with sequence similarity 123B
hsa-miR-1249	1	0	1	1	1	1	FGFBP3	fibroblast growth factor binding protein 3
hsa-miR-1249	1	0	1	1	1	1	UHRF2	ubiquitin-like with PHD and ring finger domains 2, E3 ubiquitin protein ligase
hsa-miR-1249	1	0	1	1	1	1	TMEM151A	transmembrane protein 151A
hsa-miR-1249	1	0	1	1	1	1	IL28RA	interleukin 28 receptor, alpha (interferon, lambda receptor)
hsa-miR-1249	0	0	1	1	1	1	FAM133A	family with sequence similarity 133, member A
hsa-miR-1249	0	0	1	1	0	0	CHMP4B	charged multivesicular body protein 4B
hsa-miR-1249	1	0	1	1	1	1	STX12	syntaxin 12
hsa-miR-1249	1	0	1	1	1	1	MARCH3	membrane-associated ring finger (C3HC4) 3, E3 ubiquitin protein ligase
hsa-miR-1249	1	0	1	1	1	1	TCF20	transcription factor 20 (AR1)
hsa-miR-1249	1	0	1	1	1	1	ADAT2	adenosine deaminase, tRNA-specific 2
hsa-miR-1249	1	0	1	1	1	1	ISM2	isthmin 2 homolog (zebrafish)
hsa-miR-1249	1	0	1	1	1	1	RBM38	RNA binding motif protein 38
hsa-miR-1249	1	0	1	1	1	1	AQP1	aquaporin 1 (Colton blood group)
hsa-miR-1249	0	0	1	1	0	0	LENG9	leukocyte receptor cluster (LRC) member 9
hsa-miR-1249	0	0	1	0	1	1	SOGA1	suppressor of glucose, autophagy associated 1
hsa-miR-1249	1	0	1	1	1	1	VAMP1	vesicle-associated membrane protein 1 (synaptobrevin 1)
hsa-miR-1249	1	0	1	1	1	1	THRA	thyroid hormone receptor, alpha
hsa-miR-1249	0	0	1	0	1	1	TMEM215	transmembrane protein 215
hsa-miR-1249	0	0	1	0	0	0	TOP1P2	topoisomerase (DNA) I pseudogene 2
hsa-miR-1249	0	0	1	0	0	0	MIR155HG	MIR155 host gene (non-protein coding)
hsa-miR-1249	0	0	1	0	0	0	SLC25A3P1	solute carrier family 25 (mitochondrial carrier; phosphate carrier), member 3 pseudogene 1
hsa-miR-1249	0	0	1	0	0	0	TOP1P1	topoisomerase (DNA) I pseudogene 1
hsa-miR-1249	0	0	1	0	0	0	TREML5P	triggering receptor expressed on myeloid cells-like 5, pseudogene
hsa-miR-1249	0	0	1	0	0	0	LOC256880	uncharacterized LOC256880
hsa-miR-1249	0	0	1	0	0	0	LOC374443	C-type lectin domain family 2, member D pseudogene
hsa-miR-1249	0	0	1	0	0	0	MALAT1	metastasis associated lung adenocarcinoma transcript 1 (non-protein coding)
hsa-miR-1249	0	0	1	0	0	0	IGBP1P1	immunoglobulin (CD79A) binding protein 1 pseudogene 1
hsa-miR-1249	0	0	1	0	0	0	PYY2	peptide YY, 2 (pseudogene)
