# Supplementary material for: Profiling of Selected MicroRNAs in Proliferative Eutopic Endometrium of Women with Ovarian Endometriosis
Source: Biomed Res Int. 2015 Aug 20;2015:760698. doi: 10.1155/2015/760698 (PMC4558423; doi:10.1155/2015/760698)
Supplement: Supplementary file 1 — Table I: The names of miRNAs significantly differentially expressed between eutopic endometrium of patients with endometriosis vs eutopic endometrium of patients without endometriosis. Table II: The associations between miRNA and mRNA, which presents detailed results of the search of six major databases i.e targetscan, tarbase, miranda, mirbase, mirtarget2 and pictar. [file 760698.f1.zip › 760698.f1/Table II/hsa-miR-1250.tsv]

miR	targetscan	tarbase	miranda	mirbase	mirtarget2	pictar	GeneSymbol	GeneName
hsa-miR-1250	1	0	1	1	1	1	PLAU	plasminogen activator, urokinase
hsa-miR-1250	1	0	1	1	0	0	SRCAP	Snf2-related CREBBP activator protein
hsa-miR-1250	1	0	1	0	1	1	KIAA0355	KIAA0355
hsa-miR-1250	0	0	1	1	0	0	SIPA1	signal-induced proliferation-associated 1
hsa-miR-1250	0	0	1	1	0	0	PLCH2	phospholipase C, eta 2
hsa-miR-1250	1	0	1	1	1	1	TTC39A	tetratricopeptide repeat domain 39A
hsa-miR-1250	0	0	1	1	0	0	RAP1GAP	RAP1 GTPase activating protein
hsa-miR-1250	0	0	1	1	0	0	ZNF862	zinc finger protein 862
hsa-miR-1250	0	0	1	1	0	0	ARHGEF2	Rho/Rac guanine nucleotide exchange factor (GEF) 2
hsa-miR-1250	0	0	1	1	0	0	PAN2	PAN2 poly(A) specific ribonuclease subunit homolog (S. cerevisiae)
hsa-miR-1250	0	0	1	1	0	0	ATP10B	ATPase, class V, type 10B
hsa-miR-1250	0	0	1	1	1	1	MAN2B2	mannosidase, alpha, class 2B, member 2
hsa-miR-1250	1	0	1	1	1	1	PALLD	palladin, cytoskeletal associated protein
hsa-miR-1250	1	0	1	0	1	1	ZNF507	zinc finger protein 507
hsa-miR-1250	1	0	1	1	1	1	ZMYND8	zinc finger, MYND-type containing 8
hsa-miR-1250	1	0	1	1	1	1	SPIRE1	spire homolog 1 (Drosophila)
hsa-miR-1250	1	0	1	1	0	0	KIAA1210	KIAA1210
hsa-miR-1250	1	0	1	0	0	0	HEG1	HEG homolog 1 (zebrafish)
hsa-miR-1250	1	0	1	1	0	0	EBF4	early B-cell factor 4
hsa-miR-1250	1	0	1	0	0	0	PITPNM2	phosphatidylinositol transfer protein, membrane-associated 2
hsa-miR-1250	1	0	1	1	1	1	ZNF532	zinc finger protein 532
hsa-miR-1250	1	0	1	0	0	0	TANC2	tetratricopeptide repeat, ankyrin repeat and coiled-coil containing 2
hsa-miR-1250	0	0	1	0	0	0	KIAA1671	KIAA1671
hsa-miR-1250	0	0	1	1	0	0	COL27A1	collagen, type XXVII, alpha 1
hsa-miR-1250	0	0	1	1	1	1	LENG8	leukocyte receptor cluster (LRC) member 8
hsa-miR-1250	1	0	1	1	0	0	ADC	arginine decarboxylase
hsa-miR-1250	1	0	1	0	0	0	ZC3H12C	zinc finger CCCH-type containing 12C
hsa-miR-1250	1	0	1	0	1	1	BEND4	BEN domain containing 4
hsa-miR-1250	0	0	1	1	1	1	DOCK8	dedicator of cytokinesis 8
hsa-miR-1250	0	0	1	1	0	0	MPST	mercaptopyruvate sulfurtransferase
hsa-miR-1250	1	0	1	1	0	0	ELN	elastin
hsa-miR-1250	1	0	1	0	1	1	MAML1	mastermind-like 1 (Drosophila)
hsa-miR-1250	1	0	1	1	0	0	CACNB1	calcium channel, voltage-dependent, beta 1 subunit
hsa-miR-1250	0	0	1	1	1	1	DDX39B	DEAD (Asp-Glu-Ala-Asp) box polypeptide 39B
hsa-miR-1250	1	0	1	1	1	1	ERF	Ets2 repressor factor
hsa-miR-1250	1	0	1	0	1	1	CHL1	cell adhesion molecule with homology to L1CAM (close homolog of L1)
hsa-miR-1250	1	0	1	1	0	0	TNK2	tyrosine kinase, non-receptor, 2
hsa-miR-1250	1	0	1	1	1	1	TBX2	T-box 2
hsa-miR-1250	1	0	1	1	1	1	SPTB	spectrin, beta, erythrocytic
hsa-miR-1250	0	0	1	1	0	0	ASIC3	acid-sensing (proton-gated) ion channel 3
hsa-miR-1250	0	0	1	1	0	0	IFT27	intraflagellar transport 27 homolog (Chlamydomonas)
hsa-miR-1250	0	0	1	1	0	0	IGFBP2	insulin-like growth factor binding protein 2, 36kDa
hsa-miR-1250	0	0	1	1	0	0	EIF4E2	eukaryotic translation initiation factor 4E family member 2
hsa-miR-1250	0	0	1	1	0	0	MCM5	minichromosome maintenance complex component 5
hsa-miR-1250	0	0	1	1	1	1	CHN1	chimerin (chimaerin) 1
hsa-miR-1250	0	0	1	1	1	1	SGSH	N-sulfoglucosamine sulfohydrolase
hsa-miR-1250	1	0	1	1	1	1	PCDH17	protocadherin 17
hsa-miR-1250	1	0	1	0	1	1	CELF2	CUGBP, Elav-like family member 2
hsa-miR-1250	0	0	1	1	1	1	CD84	CD84 molecule
hsa-miR-1250	1	0	1	1	1	1	MBNL2	muscleblind-like splicing regulator 2
hsa-miR-1250	1	0	1	1	0	0	PAK1	p21 protein (Cdc42/Rac)-activated kinase 1
hsa-miR-1250	0	0	1	1	1	1	IL18BP	interleukin 18 binding protein
hsa-miR-1250	1	0	1	0	0	0	PPME1	protein phosphatase methylesterase 1
hsa-miR-1250	1	0	1	0	1	1	SLC25A37	solute carrier family 25 (mitochondrial iron transporter), member 37
hsa-miR-1250	1	0	1	1	1	1	NF2	neurofibromin 2 (merlin)
hsa-miR-1250	1	0	1	1	1	1	HTRA2	HtrA serine peptidase 2
hsa-miR-1250	1	0	1	1	1	1	HMG20A	high mobility group 20A
hsa-miR-1250	0	0	1	1	1	1	AIG1	androgen-induced 1
hsa-miR-1250	1	0	1	1	1	1	EDC3	enhancer of mRNA decapping 3 homolog (S. cerevisiae)
hsa-miR-1250	0	0	1	1	1	1	CHPT1	choline phosphotransferase 1
hsa-miR-1250	0	0	1	0	0	0	BPESC1	blepharophimosis, epicanthus inversus and ptosis, candidate 1 (non-protein coding)
hsa-miR-1250	0	0	1	0	0	0	TIGD7	tigger transposable element derived 7
hsa-miR-1250	1	0	1	1	1	1	RBM47	RNA binding motif protein 47
hsa-miR-1250	0	0	1	1	1	1	MED28	mediator complex subunit 28
hsa-miR-1250	1	0	1	1	1	1	CALCOCO1	calcium binding and coiled-coil domain 1
hsa-miR-1250	1	0	1	1	1	1	ST3GAL3	ST3 beta-galactoside alpha-2,3-sialyltransferase 3
hsa-miR-1250	0	0	1	1	0	0	CLEC18A	C-type lectin domain family 18, member A
hsa-miR-1250	0	0	1	1	0	0	CLEC18C	C-type lectin domain family 18, member C
hsa-miR-1250	1	0	1	1	1	1	AFF2	AF4/FMR2 family, member 2
hsa-miR-1250	0	0	1	0	0	0	CACNA2D3	calcium channel, voltage-dependent, alpha 2/delta subunit 3
hsa-miR-1250	0	0	1	0	0	0	CD177	CD177 molecule
hsa-miR-1250	1	0	1	1	1	1	NRXN3	neurexin 3
hsa-miR-1250	0	0	1	1	1	1	PDE1A	phosphodiesterase 1A, calmodulin-dependent
hsa-miR-1250	0	0	1	0	0	0	TOMM6	translocase of outer mitochondrial membrane 6 homolog (yeast)
hsa-miR-1250	0	0	1	1	0	0	ANKAR	ankyrin and armadillo repeat containing
hsa-miR-1250	1	0	1	0	1	1	NFAT5	nuclear factor of activated T-cells 5, tonicity-responsive
hsa-miR-1250	0	0	1	0	0	0	TUG1	taurine upregulated 1 (non-protein coding)
hsa-miR-1250	0	0	1	1	1	1	PARPBP	PARP1 binding protein
hsa-miR-1250	0	0	1	1	1	1	OLFM4	olfactomedin 4
hsa-miR-1250	0	0	1	0	0	0	RNF31	ring finger protein 31
hsa-miR-1250	0	0	1	1	1	1	TCP11L1	t-complex 11 (mouse)-like 1
hsa-miR-1250	0	0	1	1	0	0	UBR4	ubiquitin protein ligase E3 component n-recognin 4
hsa-miR-1250	1	0	1	1	0	0	YPEL3	yippee-like 3 (Drosophila)
hsa-miR-1250	1	0	1	1	1	1	SLCO5A1	solute carrier organic anion transporter family, member 5A1
hsa-miR-1250	0	0	1	0	0	0	LOC149134	uncharacterized LOC149134
hsa-miR-1250	0	0	1	0	0	0	DUXAP10	double homeobox A pseudogene 10
hsa-miR-1250	1	0	1	1	0	0	ST6GALNAC6	ST6 (alpha-N-acetyl-neuraminyl-2,3-beta-galactosyl-1,3)-N-acetylgalactosaminide alpha-2,6-sialyltransferase 6
hsa-miR-1250	1	0	1	0	0	0	ZDBF2	zinc finger, DBF-type containing 2
hsa-miR-1250	1	0	1	0	1	1	STK40	serine/threonine kinase 40
hsa-miR-1250	1	0	1	0	1	1	ATP2B1	ATPase, Ca++ transporting, plasma membrane 1
hsa-miR-1250	0	0	1	0	0	0	RASAL3	RAS protein activator like 3
hsa-miR-1250	0	0	1	1	1	1	PPFIBP2	PTPRF interacting protein, binding protein 2 (liprin beta 2)
hsa-miR-1250	1	0	1	1	1	1	TNRC6A	trinucleotide repeat containing 6A
hsa-miR-1250	0	0	1	1	0	0	PIF1	PIF1 5'-to-3' DNA helicase homolog (S. cerevisiae)
hsa-miR-1250	0	0	1	1	1	1	FAM124B	family with sequence similarity 124B
hsa-miR-1250	1	0	1	1	1	1	FAM53C	family with sequence similarity 53, member C
hsa-miR-1250	0	0	1	0	0	0	JAKMIP2-AS1	JAKMIP2 antisense RNA 1
hsa-miR-1250	0	0	1	1	1	1	BBS1	Bardet-Biedl syndrome 1
hsa-miR-1250	1	0	1	1	1	1	DLGAP4	discs, large (Drosophila) homolog-associated protein 4
hsa-miR-1250	1	0	1	1	0	0	SPEG	SPEG complex locus
hsa-miR-1250	1	0	1	1	1	1	PDLIM2	PDZ and LIM domain 2 (mystique)
hsa-miR-1250	0	0	1	1	0	0	DNAH9	dynein, axonemal, heavy chain 9
hsa-miR-1250	0	0	1	1	1	1	ANKRD36B	ankyrin repeat domain 36B
hsa-miR-1250	0	0	1	1	0	0	ANXA11	annexin A11
hsa-miR-1250	0	0	1	1	1	1	SEPT5	septin 5
hsa-miR-1250	0	0	1	0	1	1	FAM70A	family with sequence similarity 70, member A
hsa-miR-1250	0	0	1	1	0	0	ATP13A1	ATPase type 13A1
hsa-miR-1250	0	0	1	0	0	0	LOC284600	uncharacterized LOC284600
hsa-miR-1250	1	0	1	1	1	1	CLCN5	chloride channel, voltage-sensitive 5
hsa-miR-1250	0	0	1	1	0	0	PYGM	phosphorylase, glycogen, muscle
hsa-miR-1250	0	0	1	1	1	1	ZNF606	zinc finger protein 606
hsa-miR-1250	0	0	1	0	0	0	MAGI1-IT1	MAGI1 intronic transcript 1 (non-protein coding)
hsa-miR-1250	1	0	1	0	1	1	PCGF3	polycomb group ring finger 3
hsa-miR-1250	0	0	1	1	0	0	COMMD4	COMM domain containing 4
hsa-miR-1250	0	0	1	1	0	0	HSD3B7	hydroxy-delta-5-steroid dehydrogenase, 3 beta- and steroid delta-isomerase 7
hsa-miR-1250	0	0	1	0	0	0	LINC00637	long intergenic non-protein coding RNA 637
hsa-miR-1250	1	0	1	1	1	1	C6orf89	chromosome 6 open reading frame 89
hsa-miR-1250	0	0	1	1	0	0	CD37	CD37 molecule
hsa-miR-1250	1	0	1	1	1	1	BOC	Boc homolog (mouse)
hsa-miR-1250	0	0	1	1	0	0	ACOT11	acyl-CoA thioesterase 11
hsa-miR-1250	0	0	1	0	0	0	IDO2	indoleamine 2,3-dioxygenase 2
hsa-miR-1250	0	0	1	1	1	1	STAMBPL1	STAM binding protein-like 1
hsa-miR-1250	1	0	1	0	1	1	CRTAP	cartilage associated protein
hsa-miR-1250	0	0	1	0	0	0	CXXC1P1	CXXC finger protein 1 pseudogene 1
hsa-miR-1250	0	0	1	0	1	1	PVR	poliovirus receptor
hsa-miR-1250	1	0	1	1	1	1	SEPT4	septin 4
hsa-miR-1250	0	0	1	1	1	1	WDR67	WD repeat domain 67
hsa-miR-1250	0	0	1	1	0	0	C9orf24	chromosome 9 open reading frame 24
hsa-miR-1250	1	0	1	1	1	1	NDEL1	nudE nuclear distribution E homolog (A. nidulans)-like 1
hsa-miR-1250	1	0	1	1	1	1	CTNNB1	catenin (cadherin-associated protein), beta 1, 88kDa
hsa-miR-1250	1	0	1	1	1	1	FAM98A	family with sequence similarity 98, member A
hsa-miR-1250	0	0	1	0	0	0	ZNF815P	zinc finger protein 815, pseudogene
hsa-miR-1250	1	0	1	1	1	1	SYT6	synaptotagmin VI
hsa-miR-1250	0	0	1	0	1	1	HDAC9	histone deacetylase 9
hsa-miR-1250	1	0	1	0	1	1	YPEL2	yippee-like 2 (Drosophila)
hsa-miR-1250	0	0	1	0	0	0	LOC400680	uncharacterized LOC400680
hsa-miR-1250	0	0	1	1	1	1	TEX35	testis expressed 35
hsa-miR-1250	1	0	1	1	0	0	DNM2	dynamin 2
hsa-miR-1250	0	0	1	0	0	0	CECR7	cat eye syndrome chromosome region, candidate 7 (non-protein coding)
hsa-miR-1250	1	0	1	1	0	0	DGCR6	DiGeorge syndrome critical region gene 6
hsa-miR-1250	1	0	1	0	1	1	UNC5D	unc-5 homolog D (C. elegans)
hsa-miR-1250	0	0	1	1	0	0	FBXO18	F-box protein, helicase, 18
hsa-miR-1250	0	0	1	1	0	0	MARS	methionyl-tRNA synthetase
hsa-miR-1250	1	0	1	1	1	1	ZNF275	zinc finger protein 275
hsa-miR-1250	0	0	1	1	1	1	RNF103	ring finger protein 103
hsa-miR-1250	0	0	1	1	1	1	DNAJC24	DnaJ (Hsp40) homolog, subfamily C, member 24
hsa-miR-1250	0	0	1	0	0	0	CLEC4GP1	C-type lectin domain family 4, member G pseudogene 1
hsa-miR-1250	0	0	1	1	1	1	PRRT1	proline-rich transmembrane protein 1
hsa-miR-1250	0	0	1	0	0	0	LOC650368	asparagine-linked glycosylation 1-like pseudogene
hsa-miR-1250	0	0	1	1	0	0	KRT37	keratin 37
hsa-miR-1250	1	0	1	1	1	1	FAM219A	family with sequence similarity 219, member A
hsa-miR-1250	0	0	1	0	0	0	DKFZP434H168	uncharacterized LOC26077
hsa-miR-1250	1	0	1	1	1	1	NECAB3	N-terminal EF-hand calcium binding protein 3
hsa-miR-1250	0	0	1	1	0	0	SSPO	SCO-spondin homolog (Bos taurus)
hsa-miR-1250	1	0	1	1	1	1	CORO2B	coronin, actin binding protein, 2B
hsa-miR-1250	1	0	1	1	1	1	C15orf52	chromosome 15 open reading frame 52
hsa-miR-1250	1	0	1	0	0	0	ANKRD52	ankyrin repeat domain 52
hsa-miR-1250	0	0	1	1	1	1	DENND5A	DENN/MADD domain containing 5A
hsa-miR-1250	1	0	1	1	1	1	SIKE1	suppressor of IKBKE 1
hsa-miR-1250	0	0	1	1	0	0	HSPG2	heparan sulfate proteoglycan 2
hsa-miR-1250	0	0	1	1	0	0	SPATS1	spermatogenesis associated, serine-rich 1
hsa-miR-1250	0	0	1	1	0	0	CCDC88B	coiled-coil domain containing 88B
hsa-miR-1250	0	0	1	1	0	0	NPIP	nuclear pore complex interacting protein
hsa-miR-1250	0	0	1	0	0	0	LOC619207	scavenger receptor protein family member
hsa-miR-1250	0	0	1	0	0	0	GRAMD1B	GRAM domain containing 1B
hsa-miR-1250	1	0	1	1	1	1	SLC26A9	solute carrier family 26, member 9
hsa-miR-1250	0	0	1	1	1	1	PITX2	paired-like homeodomain 2
hsa-miR-1250	0	0	1	1	1	1	MCU	mitochondrial calcium uniporter
hsa-miR-1250	1	0	1	1	1	1	ZNF655	zinc finger protein 655
hsa-miR-1250	0	0	1	1	0	0	TRIM46	tripartite motif containing 46
hsa-miR-1250	1	0	1	1	0	0	MAN1B1	mannosidase, alpha, class 1B, member 1
hsa-miR-1250	1	0	1	0	1	1	KDM2A	lysine (K)-specific demethylase 2A
hsa-miR-1250	1	0	1	1	1	1	KCTD12	potassium channel tetramerisation domain containing 12
hsa-miR-1250	1	0	1	1	1	1	ADAMTS19	ADAM metallopeptidase with thrombospondin type 1 motif, 19
hsa-miR-1250	0	0	1	0	0	0	AFG3L1P	AFG3 ATPase family gene 3-like 1 (S. cerevisiae), pseudogene
hsa-miR-1250	1	0	1	1	1	1	CD200	CD200 molecule
hsa-miR-1250	0	0	1	1	1	1	LYPD1	LY6/PLAUR domain containing 1
hsa-miR-1250	0	0	1	1	0	0	HEATR8	HEAT repeat containing 8
hsa-miR-1250	0	0	1	0	1	1	RUFY4	RUN and FYVE domain containing 4
hsa-miR-1250	0	0	1	0	0	0	AGAP9	ArfGAP with GTPase domain, ankyrin repeat and PH domain 9
hsa-miR-1250	0	0	1	1	0	0	ZSCAN18	zinc finger and SCAN domain containing 18
hsa-miR-1250	0	0	1	1	0	0	CNOT3	CCR4-NOT transcription complex, subunit 3
hsa-miR-1250	1	0	1	1	1	1	RPS6KA4	ribosomal protein S6 kinase, 90kDa, polypeptide 4
hsa-miR-1250	0	0	1	0	0	0	RRN3P2	RNA polymerase I transcription factor homolog (S. cerevisiae) pseudogene 2
hsa-miR-1250	1	0	1	1	1	1	CAMK2G	calcium/calmodulin-dependent protein kinase II gamma
hsa-miR-1250	1	0	1	1	1	1	PHTF2	putative homeodomain transcription factor 2
hsa-miR-1250	0	0	1	1	1	1	TIMMDC1	translocase of inner mitochondrial membrane domain containing 1
hsa-miR-1250	0	0	1	1	1	1	TBC1D3G	TBC1 domain family, member 3G
hsa-miR-1250	0	0	1	1	1	1	CCKBR	cholecystokinin B receptor
hsa-miR-1250	0	0	1	0	0	0	POM121L9P	POM121 transmembrane nucleoporin-like 9, pseudogene
hsa-miR-1250	0	0	1	1	0	0	TBC1D10B	TBC1 domain family, member 10B
hsa-miR-1250	0	0	1	1	0	0	RIMBP3	RIMS binding protein 3
hsa-miR-1250	0	0	1	0	0	0	DNAJC5B	DnaJ (Hsp40) homolog, subfamily C, member 5 beta
hsa-miR-1250	0	0	1	0	1	1	TBC1D3F	TBC1 domain family, member 3F
hsa-miR-1250	0	0	1	1	0	0	LRCH3	leucine-rich repeats and calponin homology (CH) domain containing 3
hsa-miR-1250	1	0	1	1	1	1	DNAJC16	DnaJ (Hsp40) homolog, subfamily C, member 16
hsa-miR-1250	1	0	1	0	1	1	GPR85	G protein-coupled receptor 85
hsa-miR-1250	1	0	1	1	1	1	PKNOX2	PBX/knotted 1 homeobox 2
hsa-miR-1250	1	0	1	1	1	1	SLC30A8	solute carrier family 30 (zinc transporter), member 8
hsa-miR-1250	0	0	1	1	0	0	KRBA1	KRAB-A domain containing 1
hsa-miR-1250	0	0	1	1	1	1	ZFP41	zinc finger protein 41 homolog (mouse)
hsa-miR-1250	1	0	1	1	1	1	CHMP7	charged multivesicular body protein 7
hsa-miR-1250	0	0	1	1	1	1	YAP1	Yes-associated protein 1
hsa-miR-1250	0	0	1	0	0	0	FAM225A	family with sequence similarity 225, member A (non-protein coding)
hsa-miR-1250	1	0	1	1	1	1	SBF2	SET binding factor 2
hsa-miR-1250	0	0	1	1	0	0	PPIE	peptidylprolyl isomerase E (cyclophilin E)
hsa-miR-1250	1	0	1	1	1	1	MBD6	methyl-CpG binding domain protein 6
hsa-miR-1250	0	0	1	1	0	0	TMEM134	transmembrane protein 134
hsa-miR-1250	1	0	1	1	1	1	GAL3ST3	galactose-3-O-sulfotransferase 3
hsa-miR-1250	0	0	1	1	1	1	ALS2CR8	amyotrophic lateral sclerosis 2 (juvenile) chromosome region, candidate 8
hsa-miR-1250	1	0	1	1	1	1	RCAN2	regulator of calcineurin 2
hsa-miR-1250	0	0	1	1	0	0	TP73	tumor protein p73
hsa-miR-1250	0	0	1	1	1	1	CD209	CD209 molecule
hsa-miR-1250	0	0	1	1	0	0	DNAH1	dynein, axonemal, heavy chain 1
hsa-miR-1250	1	0	1	1	1	1	MAEA	macrophage erythroblast attacher
hsa-miR-1250	1	0	1	0	1	1	DLEU7	deleted in lymphocytic leukemia, 7
hsa-miR-1250	1	0	1	0	1	1	ANKRD28	ankyrin repeat domain 28
hsa-miR-1250	0	0	1	1	1	1	RPTN	repetin
hsa-miR-1250	0	0	1	1	1	1	PTPRC	protein tyrosine phosphatase, receptor type, C
hsa-miR-1250	1	0	1	1	1	1	MECP2	methyl CpG binding protein 2 (Rett syndrome)
hsa-miR-1250	0	0	1	0	0	0	LOC646743	uncharacterized LOC646743
hsa-miR-1250	1	0	1	1	1	1	MYB	v-myb myeloblastosis viral oncogene homolog (avian)
hsa-miR-1250	0	0	1	1	1	1	DLEC1	deleted in lung and esophageal cancer 1
hsa-miR-1250	0	0	1	0	0	0	MAST4	microtubule associated serine/threonine kinase family member 4
hsa-miR-1250	0	0	1	1	1	1	WDR55	WD repeat domain 55
hsa-miR-1250	0	0	1	1	1	1	CENPA	centromere protein A
hsa-miR-1250	1	0	1	1	1	1	HOXC13	homeobox C13
hsa-miR-1250	1	0	1	1	1	1	RIMS3	regulating synaptic membrane exocytosis 3
hsa-miR-1250	1	0	1	0	1	1	DDX3X	DEAD (Asp-Glu-Ala-Asp) box polypeptide 3, X-linked
hsa-miR-1250	0	0	1	1	0	0	PRR11	proline rich 11
hsa-miR-1250	1	0	1	1	1	1	SHOX2	short stature homeobox 2
hsa-miR-1250	1	0	1	1	1	1	NXN	nucleoredoxin
hsa-miR-1250	1	0	1	1	1	1	RELL2	RELT-like 2
hsa-miR-1250	1	0	1	1	1	1	ZFAND5	zinc finger, AN1-type domain 5
hsa-miR-1250	0	0	1	0	0	0	LRRC14	leucine rich repeat containing 14
hsa-miR-1250	0	0	1	0	0	0	MGC21881	uncharacterized locus MGC21881
hsa-miR-1250	0	0	1	1	0	0	ZNF584	zinc finger protein 584
hsa-miR-1250	0	0	1	1	0	0	ZBTB32	zinc finger and BTB domain containing 32
hsa-miR-1250	0	0	1	1	1	1	TARP	TCR gamma alternate reading frame protein
hsa-miR-1250	1	0	1	1	1	1	MID1IP1	MID1 interacting protein 1
hsa-miR-1250	0	0	1	1	1	1	LRRK1	leucine-rich repeat kinase 1
hsa-miR-1250	0	0	1	1	1	1	HLA-G	major histocompatibility complex, class I, G
hsa-miR-1250	1	0	1	1	1	1	SCML4	sex comb on midleg-like 4 (Drosophila)
hsa-miR-1250	0	0	1	1	1	1	FMNL1	formin-like 1
hsa-miR-1250	1	0	1	1	1	1	LIMS1	LIM and senescent cell antigen-like domains 1
hsa-miR-1250	1	0	1	1	1	1	BEND6	BEN domain containing 6
hsa-miR-1250	0	0	1	1	0	0	CCDC114	coiled-coil domain containing 114
hsa-miR-1250	0	0	1	1	0	0	TRO	trophinin
hsa-miR-1250	0	0	1	0	1	1	PLEKHM1P	pleckstrin homology domain containing, family M (with RUN domain) member 1 pseudogene
hsa-miR-1250	1	0	1	1	1	1	DCLK2	doublecortin-like kinase 2
hsa-miR-1250	1	0	1	1	1	1	SORL1	sortilin-related receptor, L(DLR class) A repeats containing
hsa-miR-1250	0	0	1	0	0	0	LINC00238	long intergenic non-protein coding RNA 238
hsa-miR-1250	1	0	1	1	1	1	RIC8B	resistance to inhibitors of cholinesterase 8 homolog B (C. elegans)
hsa-miR-1250	0	0	1	1	0	0	PLA2G6	phospholipase A2, group VI (cytosolic, calcium-independent)
hsa-miR-1250	0	0	1	1	1	1	CLCNKA	chloride channel, voltage-sensitive Ka
hsa-miR-1250	0	0	1	0	1	1	KSR1	kinase suppressor of ras 1
hsa-miR-1250	1	0	1	1	1	1	ZEB2	zinc finger E-box binding homeobox 2
hsa-miR-1250	0	0	1	0	0	0	C12orf77	chromosome 12 open reading frame 77
hsa-miR-1250	0	0	1	0	0	0	SPATA3	spermatogenesis associated 3
hsa-miR-1250	1	0	1	1	1	1	SLC35G1	solute carrier family 35, member G1
hsa-miR-1250	0	0	1	0	0	0	LOC652276	potassium channel tetramerisation domain containing 5 pseudogene
hsa-miR-1250	1	0	1	0	1	1	RAG1	recombination activating gene 1
hsa-miR-1250	0	0	1	0	0	0	LOC286184	uncharacterized LOC286184
hsa-miR-1250	0	0	1	1	1	1	TTC39B	tetratricopeptide repeat domain 39B
hsa-miR-1250	0	0	1	1	0	0	PRMT2	protein arginine methyltransferase 2
hsa-miR-1250	0	0	1	0	0	0	LOC100134868	uncharacterized LOC100134868
hsa-miR-1250	0	0	1	0	0	0	LOC401074	uncharacterized LOC401074
hsa-miR-1250	0	0	1	1	1	1	SLTM	SAFB-like, transcription modulator
hsa-miR-1250	0	0	1	0	1	1	LINC00634	long intergenic non-protein coding RNA 634
hsa-miR-1250	0	0	1	0	1	1	TSLP	thymic stromal lymphopoietin
hsa-miR-1250	0	0	1	1	0	0	SLC13A4	solute carrier family 13 (sodium/sulfate symporters), member 4
hsa-miR-1250	1	0	1	1	1	1	ARID3B	AT rich interactive domain 3B (BRIGHT-like)
hsa-miR-1250	0	0	1	1	0	0	PTOV1	prostate tumor overexpressed 1
hsa-miR-1250	0	0	1	1	1	1	STRADA	STE20-related kinase adaptor alpha
hsa-miR-1250	1	0	1	1	1	1	AGAP3	ArfGAP with GTPase domain, ankyrin repeat and PH domain 3
hsa-miR-1250	1	0	1	1	1	1	RNF145	ring finger protein 145
hsa-miR-1250	0	0	1	1	1	1	MST1	macrophage stimulating 1 (hepatocyte growth factor-like)
hsa-miR-1250	1	0	1	0	1	1	PSD3	pleckstrin and Sec7 domain containing 3
hsa-miR-1250	1	0	1	1	1	1	MAMDC2	MAM domain containing 2
hsa-miR-1250	0	0	1	0	0	0	INHBA-AS1	INHBA antisense RNA 1
hsa-miR-1250	1	0	1	1	1	1	RTKN2	rhotekin 2
hsa-miR-1250	1	0	1	1	1	1	CLVS1	clavesin 1
hsa-miR-1250	1	0	1	1	1	1	TMPO	thymopoietin
hsa-miR-1250	1	0	1	1	1	1	KIF11	kinesin family member 11
hsa-miR-1250	0	0	1	1	0	0	NSUN5P2	NOP2/Sun domain family, member 5 pseudogene 2
hsa-miR-1250	1	0	1	1	1	1	FNDC3A	fibronectin type III domain containing 3A
hsa-miR-1250	0	0	1	1	1	1	RAB3IL1	RAB3A interacting protein (rabin3)-like 1
hsa-miR-1250	1	0	1	1	1	1	SCUBE3	signal peptide, CUB domain, EGF-like 3
hsa-miR-1250	1	0	1	1	1	1	HP1BP3	heterochromatin protein 1, binding protein 3
hsa-miR-1250	1	0	1	1	1	1	LIMCH1	LIM and calponin homology domains 1
hsa-miR-1250	0	0	1	0	1	1	C16orf52	chromosome 16 open reading frame 52
hsa-miR-1250	0	0	1	1	0	0	GRIN2C	glutamate receptor, ionotropic, N-methyl D-aspartate 2C
hsa-miR-1250	1	0	1	1	1	1	SOX5	SRY (sex determining region Y)-box 5
hsa-miR-1250	0	0	1	1	1	1	ZNF365	zinc finger protein 365
hsa-miR-1250	0	0	1	0	0	0	TEX36	testis expressed 36
hsa-miR-1250	0	0	1	0	0	0	USP32P1	ubiquitin specific peptidase 32 pseudogene 1
hsa-miR-1250	0	0	1	1	1	1	P2RX6	purinergic receptor P2X, ligand-gated ion channel, 6
hsa-miR-1250	1	0	1	1	1	1	ADCY6	adenylate cyclase 6
hsa-miR-1250	0	0	1	0	0	0	LINC00052	long intergenic non-protein coding RNA 52
hsa-miR-1250	1	0	1	1	1	1	C5orf25	chromosome 5 open reading frame 25
hsa-miR-1250	1	0	1	1	1	1	CCDC149	coiled-coil domain containing 149
hsa-miR-1250	1	0	1	0	1	1	MAGIX	MAGI family member, X-linked
hsa-miR-1250	0	0	1	1	0	0	CYP4F30P	cytochrome P450, family 4, subfamily F, polypeptide 30, pseudogene
hsa-miR-1250	0	0	1	0	0	0	ZRANB2-AS1	ZRANB2 antisense RNA 1
hsa-miR-1250	1	0	1	1	1	1	USP47	ubiquitin specific peptidase 47
hsa-miR-1250	1	0	1	1	0	0	TNXB	tenascin XB
hsa-miR-1250	0	0	1	1	0	0	TRIM41	tripartite motif containing 41
hsa-miR-1250	0	0	1	0	0	0	LOC440416	uncharacterized LOC440416
hsa-miR-1250	0	0	1	0	0	0	SDHAP2	succinate dehydrogenase complex, subunit A, flavoprotein pseudogene 2
hsa-miR-1250	0	0	1	0	0	0	LINC00152	long intergenic non-protein coding RNA 152
hsa-miR-1250	1	0	1	0	1	1	AMMECR1L	AMME chromosomal region gene 1-like
hsa-miR-1250	0	0	1	1	0	0	MASP2	mannan-binding lectin serine peptidase 2
hsa-miR-1250	0	0	1	0	0	0	LINC00537	long intergenic non-protein coding RNA 537
hsa-miR-1250	0	0	1	0	0	0	TBC1D25	TBC1 domain family, member 25
hsa-miR-1250	0	0	1	0	0	0	LOC554249	uncharacterized LOC554249
hsa-miR-1250	0	0	1	1	0	0	TMEM222	transmembrane protein 222
hsa-miR-1250	0	0	1	1	0	0	ZNHIT3	zinc finger, HIT-type containing 3
hsa-miR-1250	0	0	1	1	0	0	SLC17A4	solute carrier family 17 (sodium phosphate), member 4
hsa-miR-1250	0	0	1	1	0	0	RELA	v-rel reticuloendotheliosis viral oncogene homolog A (avian)
hsa-miR-1250	0	0	1	0	0	0	LRRC37A11P	leucine rich repeat containing 37, member A11, pseudogene
hsa-miR-1250	0	0	1	1	1	1	ZNF621	zinc finger protein 621
hsa-miR-1250	0	0	1	0	0	0	BTF3P11	basic transcription factor 3 pseudogene 11
hsa-miR-1250	1	0	1	1	1	1	ZNF827	zinc finger protein 827
hsa-miR-1250	0	0	1	1	0	0	SOCS7	suppressor of cytokine signaling 7
hsa-miR-1250	0	0	1	0	0	0	LINC00643	long intergenic non-protein coding RNA 643
hsa-miR-1250	1	0	1	1	0	0	KRT80	keratin 80
hsa-miR-1250	1	0	1	0	1	1	NFIX	nuclear factor I/X (CCAAT-binding transcription factor)
hsa-miR-1250	1	0	1	1	1	1	SGCD	sarcoglycan, delta (35kDa dystrophin-associated glycoprotein)
hsa-miR-1250	0	0	1	1	1	1	TRDMT1	tRNA aspartic acid methyltransferase 1
hsa-miR-1250	0	0	1	1	1	1	VCAN	versican
hsa-miR-1250	0	0	1	1	1	1	IPCEF1	interaction protein for cytohesin exchange factors 1
hsa-miR-1250	1	0	1	1	0	0	RBM27	RNA binding motif protein 27
hsa-miR-1250	0	0	1	1	0	0	SNAPC2	small nuclear RNA activating complex, polypeptide 2, 45kDa
hsa-miR-1250	1	0	1	1	0	0	CECR2	cat eye syndrome chromosome region, candidate 2
hsa-miR-1250	1	0	1	1	1	1	KLHL2	kelch-like 2, Mayven (Drosophila)
hsa-miR-1250	0	0	1	1	1	1	ARMCX3	armadillo repeat containing, X-linked 3
hsa-miR-1250	1	0	1	1	1	1	NAV1	neuron navigator 1
hsa-miR-1250	1	0	1	1	1	1	ASB6	ankyrin repeat and SOCS box containing 6
hsa-miR-1250	0	0	1	1	1	1	IPO11	importin 11
hsa-miR-1250	0	0	1	1	0	0	NDUFB11	NADH dehydrogenase (ubiquinone) 1 beta subcomplex, 11, 17.3kDa
hsa-miR-1250	0	0	1	1	0	0	TECR	trans-2,3-enoyl-CoA reductase
hsa-miR-1250	0	0	1	1	0	0	STMN4	stathmin-like 4
hsa-miR-1250	0	0	1	1	1	1	CAT	catalase
hsa-miR-1250	0	0	1	1	1	1	DNM1	dynamin 1
hsa-miR-1250	0	0	1	1	0	0	H2AFY2	H2A histone family, member Y2
hsa-miR-1250	0	0	1	0	0	0	ARRDC1	arrestin domain containing 1
hsa-miR-1250	0	0	1	1	0	0	RPL11	ribosomal protein L11
hsa-miR-1250	0	0	1	1	1	1	BCL7B	B-cell CLL/lymphoma 7B
hsa-miR-1250	0	0	1	1	1	1	FAT1	FAT tumor suppressor homolog 1 (Drosophila)
hsa-miR-1250	0	0	1	1	1	1	COPS7A	COP9 constitutive photomorphogenic homolog subunit 7A (Arabidopsis)
hsa-miR-1250	0	0	1	0	0	0	LOC643837	uncharacterized LOC643837
hsa-miR-1250	1	0	1	1	1	1	COPZ1	coatomer protein complex, subunit zeta 1
hsa-miR-1250	0	0	1	1	0	0	KIAA0100	KIAA0100
hsa-miR-1250	0	0	1	1	0	0	MUS81	MUS81 endonuclease homolog (S. cerevisiae)
hsa-miR-1250	1	0	1	1	1	1	PPP2R4	protein phosphatase 2A activator, regulatory subunit 4
hsa-miR-1250	1	0	1	0	1	1	PLK3	polo-like kinase 3
hsa-miR-1250	0	0	1	1	0	0	ATRAID	all-trans retinoic acid-induced differentiation factor
hsa-miR-1250	0	0	1	0	1	1	TMEM155	transmembrane protein 155
hsa-miR-1250	0	0	1	1	1	1	UIMC1	ubiquitin interaction motif containing 1
hsa-miR-1250	0	0	1	1	0	0	MAST1	microtubule associated serine/threonine kinase 1
hsa-miR-1250	1	0	1	1	1	1	DUSP3	dual specificity phosphatase 3
hsa-miR-1250	1	0	1	1	1	1	CUX1	cut-like homeobox 1
hsa-miR-1250	0	0	1	1	0	0	PTGDS	prostaglandin D2 synthase 21kDa (brain)
hsa-miR-1250	1	0	1	1	1	1	DOK4	docking protein 4
hsa-miR-1250	0	0	1	1	0	0	CCDC22	coiled-coil domain containing 22
hsa-miR-1250	0	0	1	1	1	1	CPZ	carboxypeptidase Z
hsa-miR-1250	1	0	1	1	1	1	SLC39A1	solute carrier family 39 (zinc transporter), member 1
hsa-miR-1250	0	0	1	1	0	0	PRR5	proline rich 5 (renal)
hsa-miR-1250	1	0	1	1	1	1	TIMP3	TIMP metallopeptidase inhibitor 3
hsa-miR-1250	0	0	1	1	1	1	ATP1A1	ATPase, Na+/K+ transporting, alpha 1 polypeptide
hsa-miR-1250	0	0	1	0	0	0	RPS16P10	ribosomal protein S16 pseudogene 10
hsa-miR-1250	1	0	1	1	1	1	ATAT1	alpha tubulin acetyltransferase 1
hsa-miR-1250	1	0	1	1	1	1	GOLGA7	golgin A7
hsa-miR-1250	0	0	1	1	1	1	ZNF333	zinc finger protein 333
hsa-miR-1250	1	0	1	1	1	1	ARMC8	armadillo repeat containing 8
hsa-miR-1250	0	0	1	1	0	0	BCKDK	branched chain ketoacid dehydrogenase kinase
hsa-miR-1250	0	0	1	1	1	1	HUS1	HUS1 checkpoint homolog (S. pombe)
hsa-miR-1250	0	0	1	1	1	1	ZNF259	zinc finger protein 259
hsa-miR-1250	0	0	1	1	1	1	TOR2A	torsin family 2, member A
hsa-miR-1250	0	0	1	1	0	0	TESK1	testis-specific kinase 1
hsa-miR-1250	0	0	1	1	0	0	FES	feline sarcoma oncogene
hsa-miR-1250	0	0	1	1	1	1	C10orf2	chromosome 10 open reading frame 2
hsa-miR-1250	0	0	1	1	0	0	IL11RA	interleukin 11 receptor, alpha
hsa-miR-1250	1	0	1	1	0	0	GSK3A	glycogen synthase kinase 3 alpha
hsa-miR-1250	0	0	1	1	1	1	SLC25A26	solute carrier family 25 (S-adenosylmethionine carrier), member 26
hsa-miR-1250	0	0	1	1	0	0	TENC1	tensin like C1 domain containing phosphatase (tensin 2)
hsa-miR-1250	1	0	1	1	1	1	RBPJ	recombination signal binding protein for immunoglobulin kappa J region
hsa-miR-1250	1	0	1	0	1	1	KLHDC10	kelch domain containing 10
hsa-miR-1250	0	0	1	1	0	0	PXK	PX domain containing serine/threonine kinase
hsa-miR-1250	0	0	1	0	0	0	PILRB	paired immunoglobin-like type 2 receptor beta
hsa-miR-1250	1	0	1	1	1	1	GRM1	glutamate receptor, metabotropic 1
hsa-miR-1250	1	0	1	0	1	1	BCL2	B-cell CLL/lymphoma 2
hsa-miR-1250	1	0	1	1	1	1	COL4A3	collagen, type IV, alpha 3 (Goodpasture antigen)
hsa-miR-1250	0	0	1	1	1	1	F8	coagulation factor VIII, procoagulant component
hsa-miR-1250	1	0	1	1	1	1	OCRL	oculocerebrorenal syndrome of Lowe
hsa-miR-1250	0	0	1	1	1	1	L1CAM	L1 cell adhesion molecule
hsa-miR-1250	0	0	1	1	1	1	PECAM1	platelet/endothelial cell adhesion molecule 1
hsa-miR-1250	1	0	1	0	1	1	ADRA2B	adrenoceptor alpha 2B
hsa-miR-1250	0	0	1	0	0	0	ADRA2C	adrenoceptor alpha 2C
hsa-miR-1250	1	0	1	0	1	1	CACNA1E	calcium channel, voltage-dependent, R type, alpha 1E subunit
hsa-miR-1250	0	0	1	1	1	1	CRAT	carnitine O-acetyltransferase
hsa-miR-1250	1	0	1	1	1	1	CSF1	colony stimulating factor 1 (macrophage)
hsa-miR-1250	1	0	1	1	1	1	GRIA4	glutamate receptor, ionotropic, AMPA 4
hsa-miR-1250	1	0	1	1	1	1	GRM7	glutamate receptor, metabotropic 7
hsa-miR-1250	0	0	1	1	1	1	PTGS2	prostaglandin-endoperoxide synthase 2 (prostaglandin G/H synthase and cyclooxygenase)
hsa-miR-1250	0	0	1	1	1	1	TBC1D3C	TBC1 domain family, member 3C
hsa-miR-1250	0	0	1	0	0	0	KLK2	kallikrein-related peptidase 2
hsa-miR-1250	1	0	1	1	1	1	RREB1	ras responsive element binding protein 1
hsa-miR-1250	1	0	1	0	1	1	LRRC55	leucine rich repeat containing 55
hsa-miR-1250	1	0	1	1	0	0	SDC1	syndecan 1
hsa-miR-1250	0	0	1	1	1	1	SCP2	sterol carrier protein 2
hsa-miR-1250	0	0	1	1	0	0	CARD17	caspase recruitment domain family, member 17
hsa-miR-1250	0	0	1	1	1	1	TRIM13	tripartite motif containing 13
hsa-miR-1250	1	0	1	0	1	1	SS18	synovial sarcoma translocation, chromosome 18
hsa-miR-1250	1	0	1	1	1	1	ZDHHC9	zinc finger, DHHC-type containing 9
hsa-miR-1250	1	0	1	1	1	1	BCAP29	B-cell receptor-associated protein 29
hsa-miR-1250	1	0	1	1	1	1	STEAP3	STEAP family member 3, metalloreductase
hsa-miR-1250	1	0	1	0	1	1	KIAA2022	KIAA2022
hsa-miR-1250	0	0	1	0	1	1	LPPR5	lipid phosphate phosphatase-related protein type 5
hsa-miR-1250	0	0	1	1	0	0	CLEC18B	C-type lectin domain family 18, member B
hsa-miR-1250	0	0	1	1	0	0	FAM221B	family with sequence similarity 221, member B
hsa-miR-1250	0	0	1	1	0	0	LINC00207	long intergenic non-protein coding RNA 207
hsa-miR-1250	0	0	1	1	1	1	LDLRAD2	low density lipoprotein receptor class A domain containing 2
hsa-miR-1250	1	0	1	1	1	1	CA7	carbonic anhydrase VII
hsa-miR-1250	1	0	1	1	1	1	NTRK2	neurotrophic tyrosine kinase, receptor, type 2
hsa-miR-1250	1	0	1	1	1	1	SERF2	small EDRK-rich factor 2
hsa-miR-1250	1	0	1	1	1	1	FNBP1L	formin binding protein 1-like
hsa-miR-1250	0	0	1	1	0	0	ARPC4	actin related protein 2/3 complex, subunit 4, 20kDa
hsa-miR-1250	0	0	1	1	1	1	CIB4	calcium and integrin binding family member 4
hsa-miR-1250	1	0	1	1	1	1	MAF	v-maf musculoaponeurotic fibrosarcoma oncogene homolog (avian)
hsa-miR-1250	1	0	1	1	0	0	MTUS2	microtubule associated tumor suppressor candidate 2
hsa-miR-1250	1	0	1	1	1	1	KREMEN1	kringle containing transmembrane protein 1
hsa-miR-1250	0	0	1	1	1	1	ZDHHC19	zinc finger, DHHC-type containing 19
hsa-miR-1250	1	0	1	1	1	1	CHTF8	CTF8, chromosome transmission fidelity factor 8 homolog (S. cerevisiae)
hsa-miR-1250	1	0	1	1	1	1	CBLN3	cerebellin 3 precursor
hsa-miR-1250	1	0	1	0	1	1	CEP44	centrosomal protein 44kDa
hsa-miR-1250	1	0	1	1	1	1	FRS2	fibroblast growth factor receptor substrate 2
hsa-miR-1250	1	0	1	1	1	1	PDE11A	phosphodiesterase 11A
hsa-miR-1250	1	0	1	1	1	1	VAV3	vav 3 guanine nucleotide exchange factor
hsa-miR-1250	1	0	1	1	0	0	DLGAP3	discs, large (Drosophila) homolog-associated protein 3
hsa-miR-1250	1	0	1	1	1	1	UNK	unkempt homolog (Drosophila)
hsa-miR-1250	1	0	1	0	1	1	UNC13A	unc-13 homolog A (C. elegans)
hsa-miR-1250	1	0	1	0	1	1	XIAP	X-linked inhibitor of apoptosis
hsa-miR-1250	1	0	1	1	1	1	CHD2	chromodomain helicase DNA binding protein 2
hsa-miR-1250	1	0	1	1	1	1	CREBL2	cAMP responsive element binding protein-like 2
hsa-miR-1250	1	0	1	0	1	1	ELAVL3	ELAV (embryonic lethal, abnormal vision, Drosophila)-like 3 (Hu antigen C)
hsa-miR-1250	1	0	1	0	1	1	GCNT2	glucosaminyl (N-acetyl) transferase 2, I-branching enzyme (I blood group)
hsa-miR-1250	0	0	1	1	0	0	HSPB2	heat shock 27kDa protein 2
hsa-miR-1250	0	0	1	0	0	0	BAI1	brain-specific angiogenesis inhibitor 1
hsa-miR-1250	1	0	1	1	0	0	CDH8	cadherin 8, type 2
hsa-miR-1250	0	0	1	1	1	1	COX7B	cytochrome c oxidase subunit VIIb
hsa-miR-1250	1	0	1	1	1	1	MASP1	mannan-binding lectin serine peptidase 1 (C4/C2 activating component of Ra-reactive factor)
hsa-miR-1250	1	0	1	1	1	1	CSNK2A1	casein kinase 2, alpha 1 polypeptide
hsa-miR-1250	1	0	1	1	1	1	DSC3	desmocollin 3
hsa-miR-1250	0	0	1	1	1	1	GFAP	glial fibrillary acidic protein
hsa-miR-1250	1	0	1	1	0	0	GRK6	G protein-coupled receptor kinase 6
hsa-miR-1250	1	0	1	0	1	1	IRF2	interferon regulatory factor 2
hsa-miR-1250	1	0	1	1	1	1	IPO5	importin 5
hsa-miR-1250	0	0	1	1	0	0	KRT4	keratin 4
hsa-miR-1250	1	0	1	1	1	1	LIFR	leukemia inhibitory factor receptor alpha
hsa-miR-1250	1	0	1	1	1	1	LY75	lymphocyte antigen 75
hsa-miR-1250	1	0	1	1	1	1	OSBP	oxysterol binding protein
hsa-miR-1250	1	0	1	0	1	1	PCDHGC3	protocadherin gamma subfamily C, 3
hsa-miR-1250	1	0	1	0	1	1	MAPK4	mitogen-activated protein kinase 4
hsa-miR-1250	1	0	1	1	1	1	SH3GL2	SH3-domain GRB2-like 2
hsa-miR-1250	1	0	1	0	1	1	SOX11	SRY (sex determining region Y)-box 11
hsa-miR-1250	0	0	1	1	1	1	STAT6	signal transducer and activator of transcription 6, interleukin-4 induced
hsa-miR-1250	0	0	1	1	1	1	STRN	striatin, calmodulin binding protein
hsa-miR-1250	1	0	1	0	1	1	CNTNAP1	contactin associated protein 1
hsa-miR-1250	1	0	1	0	1	1	PCDHGA12	protocadherin gamma subfamily A, 12
hsa-miR-1250	1	0	1	0	1	1	PCDHGB4	protocadherin gamma subfamily B, 4
hsa-miR-1250	0	0	1	0	1	1	AP1S2	adaptor-related protein complex 1, sigma 2 subunit
hsa-miR-1250	1	0	1	0	1	1	MED14	mediator complex subunit 14
hsa-miR-1250	1	0	1	1	1	1	DUSP1	dual specificity phosphatase 1
hsa-miR-1250	1	0	1	1	0	0	HOXC6	homeobox C6
hsa-miR-1250	1	0	1	1	1	1	FOXK2	forkhead box K2
hsa-miR-1250	0	0	1	0	1	1	BPY2	basic charge, Y-linked, 2
hsa-miR-1250	1	0	1	1	1	1	B4GALT6	UDP-Gal:betaGlcNAc beta 1,4- galactosyltransferase, polypeptide 6
hsa-miR-1250	1	0	1	0	1	1	ROCK2	Rho-associated, coiled-coil containing protein kinase 2
hsa-miR-1250	1	0	1	1	1	1	CTNS	cystinosin, lysosomal cystine transporter
hsa-miR-1250	1	0	1	1	1	1	KDM5A	lysine (K)-specific demethylase 5A
hsa-miR-1250	1	0	1	0	1	1	SEL1L	sel-1 suppressor of lin-12-like (C. elegans)
hsa-miR-1250	1	0	1	1	1	1	TLE1	transducin-like enhancer of split 1 (E(sp1) homolog, Drosophila)
hsa-miR-1250	1	0	1	1	1	1	WDR1	WD repeat domain 1
hsa-miR-1250	1	0	1	1	1	1	CBL	Cbl proto-oncogene, E3 ubiquitin protein ligase
hsa-miR-1250	1	0	1	1	1	1	FOXN3	forkhead box N3
hsa-miR-1250	1	0	1	1	1	1	DLX3	distal-less homeobox 3
hsa-miR-1250	0	0	1	1	1	1	GPR52	G protein-coupled receptor 52
hsa-miR-1250	0	0	1	1	1	1	RNF41	ring finger protein 41
hsa-miR-1250	0	0	1	1	1	1	SLC17A2	solute carrier family 17 (sodium phosphate), member 2
hsa-miR-1250	1	0	1	1	1	1	MAT2A	methionine adenosyltransferase II, alpha
hsa-miR-1250	1	0	1	1	1	1	FOXO4	forkhead box O4
hsa-miR-1250	0	0	1	1	0	0	BMP1	bone morphogenetic protein 1
hsa-miR-1250	1	0	1	1	1	1	DAGLA	diacylglycerol lipase, alpha
hsa-miR-1250	1	0	1	1	1	1	SMC1A	structural maintenance of chromosomes 1A
hsa-miR-1250	1	0	1	1	1	1	CDRT1	CMT1A duplicated region transcript 1
hsa-miR-1250	1	0	1	1	1	1	TRIM3	tripartite motif containing 3
hsa-miR-1250	0	0	1	0	1	1	SLC16A2	solute carrier family 16, member 2 (thyroid hormone transporter)
hsa-miR-1250	1	0	1	1	1	1	MMP24	matrix metallopeptidase 24 (membrane-inserted)
hsa-miR-1250	1	0	1	1	1	1	ABHD2	abhydrolase domain containing 2
hsa-miR-1250	1	0	1	1	1	1	ADAMTS5	ADAM metallopeptidase with thrombospondin type 1 motif, 5
hsa-miR-1250	1	0	1	1	1	1	KAT7	K(lysine) acetyltransferase 7
hsa-miR-1250	1	0	1	1	1	1	UBL3	ubiquitin-like 3
hsa-miR-1250	1	0	1	1	1	1	VEZF1	vascular endothelial zinc finger 1
hsa-miR-1250	1	0	1	1	1	1	KLF12	Kruppel-like factor 12
hsa-miR-1250	1	0	1	1	0	0	GRIN1	glutamate receptor, ionotropic, N-methyl D-aspartate 1
hsa-miR-1250	1	0	1	1	1	1	TARDBP	TAR DNA binding protein
hsa-miR-1250	1	0	1	0	1	1	EIF2C2	eukaryotic translation initiation factor 2C, 2
hsa-miR-1250	1	0	1	1	1	1	RHOQ	ras homolog family member Q
hsa-miR-1250	0	0	1	0	1	1	PIGN	phosphatidylinositol glycan anchor biosynthesis, class N
hsa-miR-1250	0	0	1	1	0	0	HILPDA	hypoxia inducible lipid droplet-associated
hsa-miR-1250	0	0	1	1	1	1	PRICKLE4	prickle homolog 4 (Drosophila)
hsa-miR-1250	0	0	1	1	1	1	LRP10	low density lipoprotein receptor-related protein 10
hsa-miR-1250	0	0	1	1	1	1	CCDC113	coiled-coil domain containing 113
hsa-miR-1250	0	0	1	1	1	1	IL1RAPL1	interleukin 1 receptor accessory protein-like 1
hsa-miR-1250	0	0	1	1	1	1	TSPAN13	tetraspanin 13
hsa-miR-1250	0	0	1	1	1	1	TCL6	T-cell leukemia/lymphoma 6 (non-protein coding)
hsa-miR-1250	0	0	1	1	0	0	SIT1	signaling threshold regulating transmembrane adaptor 1
hsa-miR-1250	0	0	1	1	0	0	MEA1	male-enhanced antigen 1
hsa-miR-1250	1	0	1	1	1	1	ZNF592	zinc finger protein 592
hsa-miR-1250	1	0	1	0	1	1	PPM1F	protein phosphatase, Mg2+/Mn2+ dependent, 1F
hsa-miR-1250	1	0	1	1	1	1	RALGPS1	Ral GEF with PH domain and SH3 binding motif 1
hsa-miR-1250	1	0	1	0	1	1	MLEC	malectin
hsa-miR-1250	1	0	1	1	1	1	KIAA0753	KIAA0753
hsa-miR-1250	1	0	1	1	1	1	LRIG2	leucine-rich repeats and immunoglobulin-like domains 2
hsa-miR-1250	1	0	1	1	1	1	FCHSD2	FCH and double SH3 domains 2
hsa-miR-1250	1	0	1	0	1	1	PEG10	paternally expressed 10
hsa-miR-1250	1	0	1	1	1	1	IQSEC2	IQ motif and Sec7 domain 2
hsa-miR-1250	1	0	1	0	1	1	LARP4B	La ribonucleoprotein domain family, member 4B
hsa-miR-1250	1	0	1	0	1	1	LPHN3	latrophilin 3
hsa-miR-1250	1	0	1	0	1	1	SRGAP2	SLIT-ROBO Rho GTPase activating protein 2
hsa-miR-1250	1	0	1	1	0	0	SMG5	smg-5 homolog, nonsense mediated mRNA decay factor (C. elegans)
hsa-miR-1250	1	0	1	1	1	1	DSTYK	dual serine/threonine and tyrosine protein kinase
hsa-miR-1250	1	0	1	1	1	1	CAMSAP1	calmodulin regulated spectrin-associated protein 1
hsa-miR-1250	1	0	1	1	1	1	CNOT6	CCR4-NOT transcription complex, subunit 6
hsa-miR-1250	0	0	1	1	1	1	TMEM87A	transmembrane protein 87A
hsa-miR-1250	1	0	1	1	1	1	MAGI1	membrane associated guanylate kinase, WW and PDZ domain containing 1
hsa-miR-1250	1	0	1	0	1	1	PPP1R16B	protein phosphatase 1, regulatory subunit 16B
hsa-miR-1250	0	0	1	1	1	1	KRT76	keratin 76
hsa-miR-1250	1	0	1	0	1	1	TRIM33	tripartite motif containing 33
hsa-miR-1250	1	0	1	1	1	1	GPRC5B	G protein-coupled receptor, family C, group 5, member B
hsa-miR-1250	1	0	1	1	1	1	TOB2	transducer of ERBB2, 2
hsa-miR-1250	1	0	1	0	1	1	SELT	selenoprotein T
hsa-miR-1250	1	0	1	1	1	1	INO80	INO80 homolog (S. cerevisiae)
hsa-miR-1250	0	0	1	1	1	1	SMG6	smg-6 homolog, nonsense mediated mRNA decay factor (C. elegans)
hsa-miR-1250	1	0	1	0	1	1	EIF2C4	eukaryotic translation initiation factor 2C, 4
hsa-miR-1250	1	0	1	1	1	1	ZNF3	zinc finger protein 3
hsa-miR-1250	1	0	1	1	1	1	WBP1L	WW domain binding protein 1-like
hsa-miR-1250	1	0	1	1	1	1	IFT57	intraflagellar transport 57 homolog (Chlamydomonas)
hsa-miR-1250	1	0	1	1	1	1	WDR6	WD repeat domain 6
hsa-miR-1250	0	0	1	1	1	1	MRPS10	mitochondrial ribosomal protein S10
hsa-miR-1250	0	0	1	1	1	1	TRIM62	tripartite motif containing 62
hsa-miR-1250	1	0	1	1	1	1	RSBN1	round spermatid basic protein 1
hsa-miR-1250	1	0	1	1	1	1	MLL5	myeloid/lymphoid or mixed-lineage leukemia 5 (trithorax homolog, Drosophila)
hsa-miR-1250	1	0	1	1	1	1	PCDHGA1	protocadherin gamma subfamily A, 1
hsa-miR-1250	1	0	1	0	1	1	PCDHGA10	protocadherin gamma subfamily A, 10
hsa-miR-1250	1	0	1	0	1	1	PCDHGA11	protocadherin gamma subfamily A, 11
hsa-miR-1250	1	0	1	1	1	1	PCDHGA2	protocadherin gamma subfamily A, 2
hsa-miR-1250	1	0	1	0	1	1	PCDHGA3	protocadherin gamma subfamily A, 3
hsa-miR-1250	1	0	1	0	1	1	PCDHGA4	protocadherin gamma subfamily A, 4
hsa-miR-1250	1	0	1	0	1	1	PCDHGA5	protocadherin gamma subfamily A, 5
hsa-miR-1250	1	0	1	0	1	1	PCDHGA6	protocadherin gamma subfamily A, 6
hsa-miR-1250	1	0	1	0	1	1	PCDHGA7	protocadherin gamma subfamily A, 7
hsa-miR-1250	1	0	1	0	1	1	PCDHGA9	protocadherin gamma subfamily A, 9
hsa-miR-1250	1	0	1	0	1	1	PCDHGB1	protocadherin gamma subfamily B, 1
hsa-miR-1250	1	0	1	0	1	1	PCDHGB2	protocadherin gamma subfamily B, 2
hsa-miR-1250	1	0	1	0	1	1	PCDHGB3	protocadherin gamma subfamily B, 3
hsa-miR-1250	1	0	1	0	1	1	PCDHGB5	protocadherin gamma subfamily B, 5
hsa-miR-1250	1	0	1	0	1	1	PCDHGB6	protocadherin gamma subfamily B, 6
hsa-miR-1250	1	0	1	0	1	1	PCDHGB7	protocadherin gamma subfamily B, 7
hsa-miR-1250	1	0	1	0	1	1	PCDHGC4	protocadherin gamma subfamily C, 4
hsa-miR-1250	1	0	1	0	1	1	PCDHGC5	protocadherin gamma subfamily C, 5
hsa-miR-1250	0	0	1	1	1	1	ERRFI1	ERBB receptor feedback inhibitor 1
hsa-miR-1250	1	0	1	0	1	1	CCDC93	coiled-coil domain containing 93
hsa-miR-1250	1	0	1	1	1	1	SEPT3	septin 3
hsa-miR-1250	1	0	1	1	1	1	EPB41L4B	erythrocyte membrane protein band 4.1 like 4B
hsa-miR-1250	1	0	1	0	1	1	PAPOLB	poly(A) polymerase beta (testis specific)
hsa-miR-1250	1	0	1	1	1	1	C1GALT1	core 1 synthase, glycoprotein-N-acetylgalactosamine 3-beta-galactosyltransferase, 1
hsa-miR-1250	1	0	1	1	1	1	EPHA8	EPH receptor A8
hsa-miR-1250	1	0	1	1	1	1	NLGN2	neuroligin 2
hsa-miR-1250	1	0	1	0	1	1	GPAM	glycerol-3-phosphate acyltransferase, mitochondrial
hsa-miR-1250	1	0	1	1	1	1	FAM160B1	family with sequence similarity 160, member B1
hsa-miR-1250	1	0	1	1	1	1	GPR88	G protein-coupled receptor 88
hsa-miR-1250	0	0	1	1	1	1	RAB38	RAB38, member RAS oncogene family
hsa-miR-1250	1	0	1	1	1	1	FAM160B2	family with sequence similarity 160, member B2
hsa-miR-1250	1	0	1	1	1	1	REEP1	receptor accessory protein 1
hsa-miR-1250	1	0	1	1	0	0	UBE2Z	ubiquitin-conjugating enzyme E2Z
hsa-miR-1250	1	0	1	1	1	1	C10orf76	chromosome 10 open reading frame 76
hsa-miR-1250	0	0	1	1	1	1	AKIRIN1	akirin 1
hsa-miR-1250	1	0	1	1	1	1	DHX40	DEAH (Asp-Glu-Ala-His) box polypeptide 40
hsa-miR-1250	1	0	1	1	0	0	CCDC48	coiled-coil domain containing 48
hsa-miR-1250	0	0	1	1	1	1	ZNF767	zinc finger family member 767
hsa-miR-1250	1	0	1	1	1	1	ZC3H12A	zinc finger CCCH-type containing 12A
hsa-miR-1250	0	0	1	1	0	0	CENPT	centromere protein T
hsa-miR-1250	1	0	1	0	1	1	EDEM3	ER degradation enhancer, mannosidase alpha-like 3
hsa-miR-1250	0	0	1	1	1	1	THUMPD2	THUMP domain containing 2
hsa-miR-1250	0	0	1	1	1	1	ITIH5	inter-alpha-trypsin inhibitor heavy chain family, member 5
hsa-miR-1250	1	0	1	1	1	1	PTPRO	protein tyrosine phosphatase, receptor type, O
hsa-miR-1250	1	0	1	1	1	1	TUBB1	tubulin, beta 1 class VI
hsa-miR-1250	1	0	1	1	1	1	SGPP1	sphingosine-1-phosphate phosphatase 1
hsa-miR-1250	1	0	1	0	1	1	C1orf21	chromosome 1 open reading frame 21
hsa-miR-1250	1	0	1	0	1	1	SH3BGRL2	SH3 domain binding glutamic acid-rich protein like 2
hsa-miR-1250	1	0	1	1	1	1	GPR61	G protein-coupled receptor 61
hsa-miR-1250	1	0	1	0	1	1	PCDHGA8	protocadherin gamma subfamily A, 8
hsa-miR-1250	0	0	1	1	0	0	ATRIP	ATR interacting protein
hsa-miR-1250	1	0	1	1	1	1	FAM175B	family with sequence similarity 175, member B
hsa-miR-1250	0	0	1	1	1	1	RNASEH2C	ribonuclease H2, subunit C
hsa-miR-1250	1	0	1	0	1	1	PSD2	pleckstrin and Sec7 domain containing 2
hsa-miR-1250	1	0	1	1	0	0	ZC3H10	zinc finger CCCH-type containing 10
hsa-miR-1250	1	0	1	0	1	1	ADO	2-aminoethanethiol (cysteamine) dioxygenase
hsa-miR-1250	0	0	1	1	1	1	DMRTC1	DMRT-like family C1
hsa-miR-1250	1	0	1	0	1	1	PURB	purine-rich element binding protein B
hsa-miR-1250	1	0	1	1	1	1	ADAM19	ADAM metallopeptidase domain 19
hsa-miR-1250	1	0	1	1	1	1	SSH2	slingshot homolog 2 (Drosophila)
hsa-miR-1250	0	0	1	1	1	1	PLEKHG4B	pleckstrin homology domain containing, family G (with RhoGef domain) member 4B
hsa-miR-1250	1	0	1	1	1	1	C20orf112	chromosome 20 open reading frame 112
hsa-miR-1250	1	0	1	1	1	1	SPSB4	splA/ryanodine receptor domain and SOCS box containing 4
hsa-miR-1250	1	0	1	1	1	1	PANK1	pantothenate kinase 1
hsa-miR-1250	0	0	1	1	0	0	KIAA2013	KIAA2013
hsa-miR-1250	0	0	1	0	1	1	PRELID2	PRELI domain containing 2
hsa-miR-1250	1	0	1	1	0	0	CCDC167	coiled-coil domain containing 167
hsa-miR-1250	0	0	1	1	0	0	ESAM	endothelial cell adhesion molecule
hsa-miR-1250	1	0	1	1	1	1	ARX	aristaless related homeobox
hsa-miR-1250	1	0	1	1	1	1	FAM91A1	family with sequence similarity 91, member A1
hsa-miR-1250	1	0	1	1	1	1	ANKRD23	ankyrin repeat domain 23
hsa-miR-1250	0	0	1	1	0	0	EVI5L	ecotropic viral integration site 5-like
hsa-miR-1250	0	0	1	1	0	0	TMEM217	transmembrane protein 217
hsa-miR-1250	1	0	1	1	1	1	SEPT6	septin 6
hsa-miR-1250	0	0	1	1	1	1	GLIS1	GLIS family zinc finger 1
hsa-miR-1250	1	0	1	1	1	1	UBTD2	ubiquitin domain containing 2
hsa-miR-1250	0	0	1	1	0	0	C16orf46	chromosome 16 open reading frame 46
hsa-miR-1250	0	0	1	1	1	1	CDYL2	chromodomain protein, Y-like 2
hsa-miR-1250	0	0	1	1	0	0	IGLL1	immunoglobulin lambda-like polypeptide 1
hsa-miR-1250	1	0	1	1	1	1	PIP5KL1	phosphatidylinositol-4-phosphate 5-kinase-like 1
hsa-miR-1250	0	0	1	0	1	1	KRT18P55	keratin 18 pseudogene 55
hsa-miR-1250	0	0	1	1	1	1	YIPF6	Yip1 domain family, member 6
hsa-miR-1250	0	0	1	1	0	0	FAAH2	fatty acid amide hydrolase 2
hsa-miR-1250	1	0	1	1	1	1	SCN4B	sodium channel, voltage-gated, type IV, beta subunit
hsa-miR-1250	0	0	1	0	1	1	C15orf37	chromosome 15 open reading frame 37
hsa-miR-1250	0	0	1	1	1	1	STXBP4	syntaxin binding protein 4
hsa-miR-1250	1	0	1	0	1	1	RTN4RL1	reticulon 4 receptor-like 1
hsa-miR-1250	1	0	1	1	1	1	ISM2	isthmin 2 homolog (zebrafish)
hsa-miR-1250	0	0	1	0	0	0	FER1L6-AS2	FER1L6 antisense RNA 2
hsa-miR-1250	0	0	1	1	1	1	THEM5	thioesterase superfamily member 5
hsa-miR-1250	0	0	1	0	1	1	C16orf82	chromosome 16 open reading frame 82
hsa-miR-1250	1	0	1	1	1	1	KCTD4	potassium channel tetramerisation domain containing 4
hsa-miR-1250	0	0	1	1	0	0	KLRG2	killer cell lectin-like receptor subfamily G, member 2
hsa-miR-1250	0	0	1	1	1	1	COL25A1	collagen, type XXV, alpha 1
hsa-miR-1250	0	0	1	0	1	1	WASH3P	WAS protein family homolog 3 pseudogene
hsa-miR-1250	1	0	1	1	1	1	METTL21B	methyltransferase like 21B
hsa-miR-1250	0	0	1	0	1	1	TP73-AS1	TP73 antisense RNA 1
hsa-miR-1250	0	0	1	1	1	1	C8orf86	chromosome 8 open reading frame 86
hsa-miR-1250	1	0	1	1	1	1	C11orf87	chromosome 11 open reading frame 87
hsa-miR-1250	0	0	1	0	1	1	SIGLEC15	sialic acid binding Ig-like lectin 15
hsa-miR-1250	0	0	1	0	0	0	ESRRAP2	estrogen-related receptor alpha pseudogene 2
hsa-miR-1250	0	0	1	0	0	0	CELP	carboxyl ester lipase pseudogene
hsa-miR-1250	0	0	1	0	0	0	LOC339240	keratin 17 pseudogene
hsa-miR-1250	0	0	1	0	0	0	ANXA2P3	annexin A2 pseudogene 3
hsa-miR-1250	0	0	1	0	0	0	MIR155HG	MIR155 host gene (non-protein coding)
hsa-miR-1250	0	0	1	0	0	0	GOLGA2P3Y	golgin A2 pseudogene 3, Y-linked
hsa-miR-1250	0	0	1	0	0	0	LOC606724	coronin, actin binding protein, 1A pseudogene
hsa-miR-1250	0	0	1	0	0	0	AQP7P1	aquaporin 7 pseudogene 1
hsa-miR-1250	0	0	1	0	0	0	PTPRVP	protein tyrosine phosphatase, receptor type, V, pseudogene
hsa-miR-1250	0	0	1	0	0	0	SNX29P2	sorting nexin 29 pseudogene 2
hsa-miR-1250	0	0	1	0	0	0	SNORD92	small nucleolar RNA, C/D box 92
hsa-miR-1250	1	0	1	1	1	1	MLL	myeloid/lymphoid or mixed-lineage leukemia (trithorax homolog, Drosophila)
hsa-miR-1250	0	0	1	1	0	0	GLP1R	glucagon-like peptide 1 receptor
hsa-miR-1250	1	0	1	1	1	1	TRIO	trio Rho guanine nucleotide exchange factor
hsa-miR-1250	0	0	1	1	0	0	MUC1	mucin 1, cell surface associated
hsa-miR-1250	0	0	1	1	1	1	CD6	CD6 molecule
hsa-miR-1250	0	0	1	1	0	0	GPR17	G protein-coupled receptor 17
