# Supplementary material for: Profiling of Selected MicroRNAs in Proliferative Eutopic Endometrium of Women with Ovarian Endometriosis
Source: Biomed Res Int. 2015 Aug 20;2015:760698. doi: 10.1155/2015/760698 (PMC4558423; doi:10.1155/2015/760698)
Supplement: Supplementary file 1 — Table I: The names of miRNAs significantly differentially expressed between eutopic endometrium of patients with endometriosis vs eutopic endometrium of patients without endometriosis. Table II: The associations between miRNA and mRNA, which presents detailed results of the search of six major databases i.e targetscan, tarbase, miranda, mirbase, mirtarget2 and pictar. [file 760698.f1.zip › 760698.f1/Table II/hsa-miR-1251.tsv]

miR	targetscan	tarbase	miranda	mirbase	mirtarget2	pictar	GeneSymbol	GeneName
hsa-miR-1251	1	0	1	1	1	1	ABCC5	ATP-binding cassette, sub-family C (CFTR/MRP), member 5
hsa-miR-1251	1	0	1	1	0	0	DENND4B	DENN/MADD domain containing 4B
hsa-miR-1251	1	0	1	1	0	0	TBC1D12	TBC1 domain family, member 12
hsa-miR-1251	1	0	1	1	1	1	GIGYF2	GRB10 interacting GYF protein 2
hsa-miR-1251	0	0	1	1	0	0	ARHGEF2	Rho/Rac guanine nucleotide exchange factor (GEF) 2
hsa-miR-1251	1	0	1	1	1	1	ARHGEF15	Rho guanine nucleotide exchange factor (GEF) 15
hsa-miR-1251	0	0	1	1	1	1	MAN2B2	mannosidase, alpha, class 2B, member 2
hsa-miR-1251	1	0	1	1	0	0	KIAA1045	KIAA1045
hsa-miR-1251	1	0	1	1	1	1	PHF8	PHD finger protein 8
hsa-miR-1251	1	0	1	0	1	1	GPR158	G protein-coupled receptor 158
hsa-miR-1251	1	0	1	1	1	1	KIAA1217	KIAA1217
hsa-miR-1251	1	0	1	1	0	0	ZSWIM5	zinc finger, SWIM-type containing 5
hsa-miR-1251	1	0	1	1	1	1	PHF21A	PHD finger protein 21A
hsa-miR-1251	0	0	1	0	0	0	NBLA00301	Nbla00301
hsa-miR-1251	1	0	1	0	1	1	BEND4	BEN domain containing 4
hsa-miR-1251	0	0	1	0	1	1	DCAF11	DDB1 and CUL4 associated factor 11
hsa-miR-1251	1	0	1	0	1	1	SLC6A6	solute carrier family 6 (neurotransmitter transporter, taurine), member 6
hsa-miR-1251	1	0	1	1	0	0	TSPYL2	TSPY-like 2
hsa-miR-1251	1	0	1	1	1	1	PPFIA1	protein tyrosine phosphatase, receptor type, f polypeptide (PTPRF), interacting protein (liprin), alpha 1
hsa-miR-1251	1	0	1	1	1	1	COL24A1	collagen, type XXIV, alpha 1
hsa-miR-1251	0	0	1	0	1	1	TGFB2	transforming growth factor, beta 2
hsa-miR-1251	0	0	1	1	1	1	SGSH	N-sulfoglucosamine sulfohydrolase
hsa-miR-1251	0	0	1	1	1	1	PLD1	phospholipase D1, phosphatidylcholine-specific
hsa-miR-1251	1	0	1	1	1	1	SDHC	succinate dehydrogenase complex, subunit C, integral membrane protein, 15kDa
hsa-miR-1251	1	0	1	1	1	1	CBFA2T2	core-binding factor, runt domain, alpha subunit 2; translocated to, 2
hsa-miR-1251	0	0	1	1	1	1	CD3EAP	CD3e molecule, epsilon associated protein
hsa-miR-1251	1	0	1	1	1	1	CTNND1	catenin (cadherin-associated protein), delta 1
hsa-miR-1251	1	0	1	1	1	1	VAPB	VAMP (vesicle-associated membrane protein)-associated protein B and C
hsa-miR-1251	1	0	1	1	1	1	HTRA2	HtrA serine peptidase 2
hsa-miR-1251	0	0	1	1	1	1	HEPH	hephaestin
hsa-miR-1251	0	0	1	1	1	1	SLC25A14	solute carrier family 25 (mitochondrial carrier, brain), member 14
hsa-miR-1251	0	0	1	0	1	1	ZDHHC17	zinc finger, DHHC-type containing 17
hsa-miR-1251	1	0	1	1	1	1	SNPH	syntaphilin
hsa-miR-1251	1	0	1	1	1	1	C3orf18	chromosome 3 open reading frame 18
hsa-miR-1251	0	0	1	0	1	1	SLC38A4	solute carrier family 38, member 4
hsa-miR-1251	1	0	1	1	1	1	SNTB2	syntrophin, beta 2 (dystrophin-associated protein A1, 59kDa, basic component 2)
hsa-miR-1251	1	0	1	1	1	1	RBM47	RNA binding motif protein 47
hsa-miR-1251	1	0	1	1	1	1	SH3GLB1	SH3-domain GRB2-like endophilin B1
hsa-miR-1251	0	0	1	1	1	1	GOLGA6A	golgin A6 family, member A
hsa-miR-1251	0	0	1	1	1	1	TBC1D2	TBC1 domain family, member 2
hsa-miR-1251	1	0	1	1	1	1	VEGFA	vascular endothelial growth factor A
hsa-miR-1251	1	0	1	1	1	1	LETMD1	LETM1 domain containing 1
hsa-miR-1251	1	0	1	0	1	1	USP32	ubiquitin specific peptidase 32
hsa-miR-1251	1	0	1	1	1	1	KCNIP2	Kv channel interacting protein 2
hsa-miR-1251	0	0	1	1	1	1	U2AF1	U2 small nuclear RNA auxiliary factor 1
hsa-miR-1251	0	0	1	1	1	1	CASP8	caspase 8, apoptosis-related cysteine peptidase
hsa-miR-1251	1	0	1	1	1	1	ST3GAL3	ST3 beta-galactoside alpha-2,3-sialyltransferase 3
hsa-miR-1251	1	0	1	1	1	1	CACNB2	calcium channel, voltage-dependent, beta 2 subunit
hsa-miR-1251	1	0	1	0	1	1	IL1RAP	interleukin 1 receptor accessory protein
hsa-miR-1251	1	0	1	1	1	1	SH2B3	SH2B adaptor protein 3
hsa-miR-1251	1	0	1	1	1	1	ILF3	interleukin enhancer binding factor 3, 90kDa
hsa-miR-1251	0	0	1	0	0	0	CD177	CD177 molecule
hsa-miR-1251	1	0	1	1	1	1	EMID2	EMI domain containing 2
hsa-miR-1251	1	0	1	1	1	1	NAV3	neuron navigator 3
hsa-miR-1251	1	0	1	1	1	1	NRXN3	neurexin 3
hsa-miR-1251	1	0	1	1	1	1	XIRP1	xin actin-binding repeat containing 1
hsa-miR-1251	0	0	1	1	0	0	C22orf24	chromosome 22 open reading frame 24
hsa-miR-1251	1	0	1	0	1	1	NFAT5	nuclear factor of activated T-cells 5, tonicity-responsive
hsa-miR-1251	0	0	1	0	0	0	TUG1	taurine upregulated 1 (non-protein coding)
hsa-miR-1251	1	0	1	1	0	0	DPP3	dipeptidyl-peptidase 3
hsa-miR-1251	0	0	1	1	0	0	C17orf53	chromosome 17 open reading frame 53
hsa-miR-1251	0	0	1	0	0	0	DUXAP10	double homeobox A pseudogene 10
hsa-miR-1251	0	0	1	1	0	0	JMJD4	jumonji domain containing 4
hsa-miR-1251	1	0	1	1	0	0	FASTK	Fas-activated serine/threonine kinase
hsa-miR-1251	0	0	1	1	1	1	SPATA5L1	spermatogenesis associated 5-like 1
hsa-miR-1251	0	0	1	0	0	0	MIRLET7BHG	MIRLET7B host gene (non-protein coding)
hsa-miR-1251	1	0	1	1	0	0	MEX3A	mex-3 homolog A (C. elegans)
hsa-miR-1251	0	0	1	0	1	1	ATXN1L	ataxin 1-like
hsa-miR-1251	0	0	1	0	0	0	ARHGEF28	Rho guanine nucleotide exchange factor (GEF) 28
hsa-miR-1251	0	0	1	1	1	1	MYEOV	myeloma overexpressed (in a subset of t(11;14) positive multiple myelomas)
hsa-miR-1251	1	0	1	1	1	1	LRP4	low density lipoprotein receptor-related protein 4
hsa-miR-1251	1	0	1	0	1	1	ATP10D	ATPase, class V, type 10D
hsa-miR-1251	1	0	1	1	1	1	GPD2	glycerol-3-phosphate dehydrogenase 2 (mitochondrial)
hsa-miR-1251	0	0	1	1	1	1	C8orf46	chromosome 8 open reading frame 46
hsa-miR-1251	0	0	1	0	0	0	LOC154092	uncharacterized LOC154092
hsa-miR-1251	0	0	1	0	0	0	CASC2	cancer susceptibility candidate 2 (non-protein coding)
hsa-miR-1251	1	0	1	1	1	1	FRMD6	FERM domain containing 6
hsa-miR-1251	0	0	1	1	1	1	ANKRD36B	ankyrin repeat domain 36B
hsa-miR-1251	0	0	1	1	1	1	BRD2	bromodomain containing 2
hsa-miR-1251	1	0	1	1	1	1	CLCN5	chloride channel, voltage-sensitive 5
hsa-miR-1251	1	0	1	1	1	1	TPM3	tropomyosin 3
hsa-miR-1251	1	0	1	1	1	1	HLF	hepatic leukemia factor
hsa-miR-1251	1	0	1	1	1	1	BLCAP	bladder cancer associated protein
hsa-miR-1251	1	0	1	0	1	1	RNF165	ring finger protein 165
hsa-miR-1251	1	0	1	1	1	1	PAX6	paired box 6
hsa-miR-1251	0	0	1	1	0	0	NISCH	nischarin
hsa-miR-1251	0	0	1	1	0	0	GHDC	GH3 domain containing
hsa-miR-1251	0	0	1	1	0	0	CTNNBL1	catenin, beta like 1
hsa-miR-1251	0	0	1	0	0	0	SEC14L2	SEC14-like 2 (S. cerevisiae)
hsa-miR-1251	1	0	1	1	1	1	AMMECR1	Alport syndrome, mental retardation, midface hypoplasia and elliptocytosis chromosomal region gene 1
hsa-miR-1251	1	0	1	1	1	1	EPN2	epsin 2
hsa-miR-1251	0	0	1	0	1	1	SSPN	sarcospan
hsa-miR-1251	1	0	1	1	1	1	HMOX2	heme oxygenase (decycling) 2
hsa-miR-1251	0	0	1	1	1	1	TGFBI	transforming growth factor, beta-induced, 68kDa
hsa-miR-1251	0	0	1	1	1	1	CYP11B1	cytochrome P450, family 11, subfamily B, polypeptide 1
hsa-miR-1251	0	0	1	0	0	0	LINC00340	long intergenic non-protein coding RNA 340
hsa-miR-1251	0	0	1	1	0	0	CES4A	carboxylesterase 4A
hsa-miR-1251	0	0	1	1	1	1	MOBP	myelin-associated oligodendrocyte basic protein
hsa-miR-1251	1	0	1	1	1	1	SPATS2	spermatogenesis associated, serine-rich 2
hsa-miR-1251	1	0	1	1	1	1	CECR6	cat eye syndrome chromosome region, candidate 6
hsa-miR-1251	0	0	1	0	0	0	LOC284577	uncharacterized LOC284577
hsa-miR-1251	1	0	1	1	1	1	AMT	aminomethyltransferase
hsa-miR-1251	1	0	1	1	1	1	ACSL1	acyl-CoA synthetase long-chain family member 1
hsa-miR-1251	1	0	1	1	1	1	FAM98A	family with sequence similarity 98, member A
hsa-miR-1251	0	0	1	0	0	0	ZNF815P	zinc finger protein 815, pseudogene
hsa-miR-1251	0	0	1	1	1	1	IL17RE	interleukin 17 receptor E
hsa-miR-1251	0	0	1	0	0	0	LINC00293	long intergenic non-protein coding RNA 293
hsa-miR-1251	0	0	1	1	1	1	TEX35	testis expressed 35
hsa-miR-1251	0	0	1	1	0	0	AHCY	adenosylhomocysteinase
hsa-miR-1251	0	0	1	1	1	1	CKAP2L	cytoskeleton associated protein 2-like
hsa-miR-1251	0	0	1	1	0	0	CORO1A	coronin, actin binding protein, 1A
hsa-miR-1251	1	0	1	1	1	1	LZTS2	leucine zipper, putative tumor suppressor 2
hsa-miR-1251	0	0	1	1	1	1	RP1	retinitis pigmentosa 1 (autosomal dominant)
hsa-miR-1251	0	0	1	1	1	1	SYTL4	synaptotagmin-like 4
hsa-miR-1251	0	0	1	1	1	1	ARFGAP2	ADP-ribosylation factor GTPase activating protein 2
hsa-miR-1251	1	0	1	1	0	0	WIZ	widely interspaced zinc finger motifs
hsa-miR-1251	0	0	1	1	0	0	CFP	complement factor properdin
hsa-miR-1251	1	0	1	1	1	1	IKBKAP	inhibitor of kappa light polypeptide gene enhancer in B-cells, kinase complex-associated protein
hsa-miR-1251	0	0	1	1	1	1	BAI2	brain-specific angiogenesis inhibitor 2
hsa-miR-1251	1	0	1	1	1	1	SBF2	SET binding factor 2
hsa-miR-1251	0	0	1	0	0	0	SATB2-AS1	SATB2 antisense RNA 1
hsa-miR-1251	0	0	1	1	1	1	CNPY3	canopy 3 homolog (zebrafish)
hsa-miR-1251	1	0	1	1	0	0	RANBP3	RAN binding protein 3
hsa-miR-1251	0	0	1	1	1	1	MKX	mohawk homeobox
hsa-miR-1251	1	0	1	0	0	0	ANKRD52	ankyrin repeat domain 52
hsa-miR-1251	0	0	1	0	1	1	RASGRP3	RAS guanyl releasing protein 3 (calcium and DAG-regulated)
hsa-miR-1251	0	0	1	0	0	0	LOC613266	uncharacterized LOC613266
hsa-miR-1251	0	0	1	1	0	0	ANKHD1-EIF4EBP3	ANKHD1-EIF4EBP3 readthrough
hsa-miR-1251	0	0	1	0	0	0	FAM95B1	family with sequence similarity 95, member B1
hsa-miR-1251	1	0	1	1	1	1	DCTN4	dynactin 4 (p62)
hsa-miR-1251	0	0	1	1	0	0	FSIP2	fibrous sheath interacting protein 2
hsa-miR-1251	1	0	1	1	1	1	SACM1L	SAC1 suppressor of actin mutations 1-like (yeast)
hsa-miR-1251	1	0	1	1	1	1	ATP1A2	ATPase, Na+/K+ transporting, alpha 2 polypeptide
hsa-miR-1251	0	0	1	1	1	1	SPICE1	spindle and centriole associated protein 1
hsa-miR-1251	0	0	1	1	0	0	FAM54B	family with sequence similarity 54, member B
hsa-miR-1251	1	0	1	1	1	1	FMNL3	formin-like 3
hsa-miR-1251	1	0	1	1	1	1	PHF17	PHD finger protein 17
hsa-miR-1251	1	0	1	0	1	1	SP6	Sp6 transcription factor
hsa-miR-1251	1	0	1	1	1	1	PLA2G15	phospholipase A2, group XV
hsa-miR-1251	1	0	1	0	1	1	YOD1	YOD1 OTU deubiquinating enzyme 1 homolog (S. cerevisiae)
hsa-miR-1251	0	0	1	1	1	1	SLC35F2	solute carrier family 35, member F2
hsa-miR-1251	0	0	1	0	0	0	LOC440993	uncharacterized LOC440993
hsa-miR-1251	0	0	1	1	1	1	ALG11	asparagine-linked glycosylation 11, alpha-1,2-mannosyltransferase homolog (yeast)
hsa-miR-1251	0	0	1	1	1	1	ATXN2	ataxin 2
hsa-miR-1251	1	0	1	1	1	1	ADAMTSL1	ADAMTS-like 1
hsa-miR-1251	1	0	1	1	1	1	ADAMTS19	ADAM metallopeptidase with thrombospondin type 1 motif, 19
hsa-miR-1251	0	0	1	1	0	0	WFIKKN1	WAP, follistatin/kazal, immunoglobulin, kunitz and netrin domain containing 1
hsa-miR-1251	0	0	1	0	0	0	LOC390660	FLJ00317 protein
hsa-miR-1251	0	0	1	1	0	0	HSH2D	hematopoietic SH2 domain containing
hsa-miR-1251	1	0	1	1	1	1	SYS1	SYS1 Golgi-localized integral membrane protein homolog (S. cerevisiae)
hsa-miR-1251	0	0	1	1	0	0	SCNN1A	sodium channel, non-voltage-gated 1 alpha subunit
hsa-miR-1251	1	0	1	1	1	1	RBBP4	retinoblastoma binding protein 4
hsa-miR-1251	1	0	1	1	1	1	TAP2	transporter 2, ATP-binding cassette, sub-family B (MDR/TAP)
hsa-miR-1251	1	0	1	0	1	1	MAP3K3	mitogen-activated protein kinase kinase kinase 3
hsa-miR-1251	1	0	1	1	0	0	ZNF219	zinc finger protein 219
hsa-miR-1251	1	0	1	1	1	1	APBB2	amyloid beta (A4) precursor protein-binding, family B, member 2
hsa-miR-1251	0	0	1	1	1	1	PTPN20B	protein tyrosine phosphatase, non-receptor type 20B
hsa-miR-1251	0	0	1	1	1	1	PTPN20A	protein tyrosine phosphatase, non-receptor type 20A
hsa-miR-1251	1	0	1	1	0	0	PRRC2B	proline-rich coiled-coil 2B
hsa-miR-1251	0	0	1	0	0	0	PART1	prostate androgen-regulated transcript 1 (non-protein coding)
hsa-miR-1251	0	0	1	0	0	0	POM121L9P	POM121 transmembrane nucleoporin-like 9, pseudogene
hsa-miR-1251	0	0	1	1	0	0	PACSIN2	protein kinase C and casein kinase substrate in neurons 2
hsa-miR-1251	0	0	1	0	0	0	TPTE2P6	transmembrane phosphoinositide 3-phosphatase and tensin homolog 2 pseudogene 6
hsa-miR-1251	1	0	1	0	1	1	GRIN3A	glutamate receptor, ionotropic, N-methyl-D-aspartate 3A
hsa-miR-1251	0	0	1	0	1	1	GAB3	GRB2-associated binding protein 3
hsa-miR-1251	0	0	1	0	0	0	ZNF720	zinc finger protein 720
hsa-miR-1251	1	0	1	1	1	1	FAM126A	family with sequence similarity 126, member A
hsa-miR-1251	1	0	1	1	1	1	SOX6	SRY (sex determining region Y)-box 6
hsa-miR-1251	0	0	1	0	0	0	EPHA1-AS1	EPHA1 antisense RNA 1
hsa-miR-1251	1	0	1	1	0	0	LRRC16B	leucine rich repeat containing 16B
hsa-miR-1251	1	0	1	1	1	1	SET	SET nuclear oncogene
hsa-miR-1251	0	0	1	1	1	1	CD209	CD209 molecule
hsa-miR-1251	1	0	1	1	1	1	SULF1	sulfatase 1
hsa-miR-1251	1	0	1	1	1	1	KIAA0907	KIAA0907
hsa-miR-1251	1	0	1	1	1	1	WDR26	WD repeat domain 26
hsa-miR-1251	0	0	1	1	1	1	GPR114	G protein-coupled receptor 114
hsa-miR-1251	1	0	1	0	1	1	NHS	Nance-Horan syndrome (congenital cataracts and dental anomalies)
hsa-miR-1251	0	0	1	0	1	1	XKR5	XK, Kell blood group complex subunit-related family, member 5
hsa-miR-1251	1	0	1	1	1	1	MECP2	methyl CpG binding protein 2 (Rett syndrome)
hsa-miR-1251	0	0	1	1	0	0	DHRS4	dehydrogenase/reductase (SDR family) member 4
hsa-miR-1251	1	0	1	1	0	0	ZCCHC4	zinc finger, CCHC domain containing 4
hsa-miR-1251	0	0	1	1	1	1	RHD	Rh blood group, D antigen
hsa-miR-1251	0	0	1	0	0	0	PTPRVP	protein tyrosine phosphatase, receptor type, V, pseudogene
hsa-miR-1251	0	0	1	1	0	0	CXorf26	chromosome X open reading frame 26
hsa-miR-1251	1	0	1	1	1	1	AMOT	angiomotin
hsa-miR-1251	0	0	1	1	0	0	ISG20L2	interferon stimulated exonuclease gene 20kDa-like 2
hsa-miR-1251	1	0	1	0	1	1	FAM46A	family with sequence similarity 46, member A
hsa-miR-1251	0	0	1	1	1	1	ZCCHC17	zinc finger, CCHC domain containing 17
hsa-miR-1251	0	0	1	1	0	0	ANXA5	annexin A5
hsa-miR-1251	0	0	1	1	1	1	PTDSS1	phosphatidylserine synthase 1
hsa-miR-1251	0	0	1	1	1	1	FTO	fat mass and obesity associated
hsa-miR-1251	1	0	1	1	1	1	MBNL1	muscleblind-like splicing regulator 1
hsa-miR-1251	0	0	1	0	1	1	AIPL1	aryl hydrocarbon receptor interacting protein-like 1
hsa-miR-1251	1	0	1	1	0	0	MARCH9	membrane-associated ring finger (C3HC4) 9
hsa-miR-1251	1	0	1	0	1	1	TMEM39A	transmembrane protein 39A
hsa-miR-1251	0	0	1	1	1	1	GTPBP8	GTP-binding protein 8 (putative)
hsa-miR-1251	0	0	1	0	0	0	LRRC14	leucine rich repeat containing 14
hsa-miR-1251	0	0	1	0	0	0	GRAMD1B	GRAM domain containing 1B
hsa-miR-1251	1	0	1	0	1	1	FNDC3B	fibronectin type III domain containing 3B
hsa-miR-1251	0	0	1	1	0	0	MLXIPL	MLX interacting protein-like
hsa-miR-1251	0	0	1	1	1	1	UCHL5	ubiquitin carboxyl-terminal hydrolase L5
hsa-miR-1251	0	0	1	0	0	0	NUDT16P1	nudix (nucleoside diphosphate linked moiety X)-type motif 16 pseudogene 1
hsa-miR-1251	1	0	1	1	1	1	NUMBL	numb homolog (Drosophila)-like
hsa-miR-1251	0	0	1	1	1	1	POLR3F	polymerase (RNA) III (DNA directed) polypeptide F, 39 kDa
hsa-miR-1251	1	0	1	0	0	0	ZBTB34	zinc finger and BTB domain containing 34
hsa-miR-1251	1	0	1	1	1	1	SCML4	sex comb on midleg-like 4 (Drosophila)
hsa-miR-1251	0	0	1	1	1	1	SEC61A2	Sec61 alpha 2 subunit (S. cerevisiae)
hsa-miR-1251	0	0	1	1	1	1	WDR67	WD repeat domain 67
hsa-miR-1251	0	0	1	0	0	0	EVPLL	envoplakin-like
hsa-miR-1251	0	0	1	0	1	1	FHAD1	forkhead-associated (FHA) phosphopeptide binding domain 1
hsa-miR-1251	1	0	1	1	1	1	RSPO2	R-spondin 2
hsa-miR-1251	0	0	1	1	1	1	ANKZF1	ankyrin repeat and zinc finger domain containing 1
hsa-miR-1251	0	0	1	0	0	0	LOC145837	uncharacterized LOC145837
hsa-miR-1251	0	0	1	1	0	0	TSPAN16	tetraspanin 16
hsa-miR-1251	0	0	1	1	0	0	SWI5	SWI5 recombination repair homolog (yeast)
hsa-miR-1251	1	0	1	0	1	1	SV2B	synaptic vesicle glycoprotein 2B
hsa-miR-1251	1	0	1	1	1	1	MUM1L1	melanoma associated antigen (mutated) 1-like 1
hsa-miR-1251	0	0	1	0	0	0	LINC00593	long intergenic non-protein coding RNA 593
hsa-miR-1251	0	0	1	0	0	0	LOC643648	uncharacterized LOC643648
hsa-miR-1251	1	0	1	1	1	1	SORL1	sortilin-related receptor, L(DLR class) A repeats containing
hsa-miR-1251	1	0	1	1	1	1	PPP2R2C	protein phosphatase 2, regulatory subunit B, gamma
hsa-miR-1251	0	0	1	1	0	0	RAB4B	RAB4B, member RAS oncogene family
hsa-miR-1251	0	0	1	0	0	0	LINC00238	long intergenic non-protein coding RNA 238
hsa-miR-1251	0	0	1	1	1	1	HRASLS5	HRAS-like suppressor family, member 5
hsa-miR-1251	0	0	1	0	0	0	FLJ10661	family with sequence similarity 86, member A pseudogene
hsa-miR-1251	0	0	1	1	1	1	TMEM139	transmembrane protein 139
hsa-miR-1251	1	0	1	1	1	1	ZNF618	zinc finger protein 618
hsa-miR-1251	0	0	1	0	0	0	CYP4F35P	cytochrome P450, family 4, subfamily F, polypeptide 35, pseudogene
hsa-miR-1251	0	0	1	1	0	0	H2AFZ	H2A histone family, member Z
hsa-miR-1251	0	0	1	1	0	0	CCDC152	coiled-coil domain containing 152
hsa-miR-1251	0	0	1	0	0	0	USP32P1	ubiquitin specific peptidase 32 pseudogene 1
hsa-miR-1251	0	0	1	1	1	1	SLC14A1	solute carrier family 14 (urea transporter), member 1 (Kidd blood group)
hsa-miR-1251	0	0	1	0	0	0	LRRC48	leucine rich repeat containing 48
hsa-miR-1251	0	0	1	1	0	0	CNGA4	cyclic nucleotide gated channel alpha 4
hsa-miR-1251	0	0	1	1	1	1	TMEM45A	transmembrane protein 45A
hsa-miR-1251	1	0	1	1	1	1	LEF1	lymphoid enhancer-binding factor 1
hsa-miR-1251	0	0	1	1	0	0	NT5DC4	5'-nucleotidase domain containing 4
hsa-miR-1251	1	0	1	1	0	0	INPP5J	inositol polyphosphate-5-phosphatase J
hsa-miR-1251	0	0	1	0	1	1	PDGFC	platelet derived growth factor C
hsa-miR-1251	1	0	1	1	1	1	ARID3B	AT rich interactive domain 3B (BRIGHT-like)
hsa-miR-1251	0	0	1	1	1	1	C8orf34	chromosome 8 open reading frame 34
hsa-miR-1251	1	0	1	1	1	1	MEIS3	Meis homeobox 3
hsa-miR-1251	0	0	1	1	1	1	STRADA	STE20-related kinase adaptor alpha
hsa-miR-1251	1	0	1	1	1	1	PLXND1	plexin D1
hsa-miR-1251	0	0	1	0	0	0	LOC348120	uncharacterized LOC348120
hsa-miR-1251	0	0	1	1	1	1	ZNF74	zinc finger protein 74
hsa-miR-1251	0	0	1	1	1	1	ZNF589	zinc finger protein 589
hsa-miR-1251	0	0	1	0	0	0	AURKAPS1	aurora kinase A pseudogene 1
hsa-miR-1251	1	0	1	1	1	1	SCUBE3	signal peptide, CUB domain, EGF-like 3
hsa-miR-1251	1	0	1	1	1	1	CRCP	CGRP receptor component
hsa-miR-1251	0	0	1	1	1	1	ATP6V0B	ATPase, H+ transporting, lysosomal 21kDa, V0 subunit b
hsa-miR-1251	1	0	1	1	1	1	SCOC	short coiled-coil protein
hsa-miR-1251	0	0	1	0	1	1	SUB1	SUB1 homolog (S. cerevisiae)
hsa-miR-1251	1	0	1	1	1	1	PDGFRA	platelet-derived growth factor receptor, alpha polypeptide
hsa-miR-1251	0	0	1	1	0	0	C8orf31	chromosome 8 open reading frame 31
hsa-miR-1251	0	0	1	1	0	0	DHX30	DEAH (Asp-Glu-Ala-His) box polypeptide 30
hsa-miR-1251	0	0	1	1	1	1	C1orf109	chromosome 1 open reading frame 109
hsa-miR-1251	1	0	1	1	0	0	XRRA1	X-ray radiation resistance associated 1
hsa-miR-1251	0	0	1	1	1	1	STAG1	stromal antigen 1
hsa-miR-1251	1	0	1	0	1	1	TGFBR1	transforming growth factor, beta receptor 1
hsa-miR-1251	1	0	1	0	1	1	NCOA7	nuclear receptor coactivator 7
hsa-miR-1251	1	0	1	1	1	1	OPCML	opioid binding protein/cell adhesion molecule-like
hsa-miR-1251	1	0	1	1	1	1	EIF2AK4	eukaryotic translation initiation factor 2 alpha kinase 4
hsa-miR-1251	0	0	1	0	0	0	LINC00537	long intergenic non-protein coding RNA 537
hsa-miR-1251	0	0	1	1	0	0	C16orf86	chromosome 16 open reading frame 86
hsa-miR-1251	0	0	1	0	0	0	LOC554249	uncharacterized LOC554249
hsa-miR-1251	1	0	1	1	1	1	ZMYND11	zinc finger, MYND-type containing 11
hsa-miR-1251	1	0	1	1	1	1	GBF1	golgi brefeldin A resistant guanine nucleotide exchange factor 1
hsa-miR-1251	0	0	1	1	1	1	R3HCC1L	R3H domain and coiled-coil containing 1-like
hsa-miR-1251	1	0	1	1	1	1	SYNJ1	synaptojanin 1
hsa-miR-1251	0	0	1	1	0	0	HOXB1	homeobox B1
hsa-miR-1251	0	0	1	1	1	1	XG	Xg blood group
hsa-miR-1251	1	0	1	1	1	1	LRRC15	leucine rich repeat containing 15
hsa-miR-1251	0	0	1	1	0	0	RGL4	ral guanine nucleotide dissociation stimulator-like 4
hsa-miR-1251	0	0	1	1	0	0	PLA2G16	phospholipase A2, group XVI
hsa-miR-1251	0	0	1	1	0	0	TMC2	transmembrane channel-like 2
hsa-miR-1251	1	0	1	1	1	1	TMEM132B	transmembrane protein 132B
hsa-miR-1251	1	0	1	1	1	1	CTSC	cathepsin C
hsa-miR-1251	1	0	1	1	1	1	PAX3	paired box 3
hsa-miR-1251	1	0	1	1	1	1	GRIA3	glutamate receptor, ionotropic, AMPA 3
hsa-miR-1251	0	0	1	0	0	0	KRT8P12	keratin 8 pseudogene 12
hsa-miR-1251	0	0	1	0	1	1	C20orf202	chromosome 20 open reading frame 202
hsa-miR-1251	0	0	1	0	0	0	FAM225B	family with sequence similarity 225, member B (non-protein coding)
hsa-miR-1251	0	0	1	0	0	0	LILRP2	leukocyte immunoglobulin-like receptor pseudogene 2
hsa-miR-1251	0	0	1	0	0	0	FLJ39632	uncharacterized LOC642477
hsa-miR-1251	1	0	1	1	1	1	TRIM37	tripartite motif containing 37
hsa-miR-1251	0	0	1	1	1	1	VCAN	versican
hsa-miR-1251	1	0	1	0	1	1	FAM73A	family with sequence similarity 73, member A
hsa-miR-1251	1	0	1	1	0	0	CECR2	cat eye syndrome chromosome region, candidate 2
hsa-miR-1251	1	0	1	1	1	1	EPS15	epidermal growth factor receptor pathway substrate 15
hsa-miR-1251	1	0	1	1	1	1	FOXP1	forkhead box P1
hsa-miR-1251	1	0	1	1	1	1	USP6	ubiquitin specific peptidase 6 (Tre-2 oncogene)
hsa-miR-1251	0	0	1	0	1	1	B3GALTL	beta 1,3-galactosyltransferase-like
hsa-miR-1251	1	0	1	1	1	1	DCAF5	DDB1 and CUL4 associated factor 5
hsa-miR-1251	1	0	1	1	1	1	KLHL6	kelch-like 6 (Drosophila)
hsa-miR-1251	1	0	1	1	1	1	NFIB	nuclear factor I/B
hsa-miR-1251	0	0	1	1	1	1	DAZL	deleted in azoospermia-like
hsa-miR-1251	0	0	1	1	0	0	MRPL48	mitochondrial ribosomal protein L48
hsa-miR-1251	0	0	1	0	0	0	DCTN2	dynactin 2 (p50)
hsa-miR-1251	0	0	1	1	1	1	SMYD5	SMYD family member 5
hsa-miR-1251	0	0	1	0	0	0	LOC100128988	uncharacterized LOC100128988
hsa-miR-1251	0	0	1	1	1	1	GTPBP3	GTP binding protein 3 (mitochondrial)
hsa-miR-1251	0	0	1	1	1	1	UPRT	uracil phosphoribosyltransferase (FUR1) homolog (S. cerevisiae)
hsa-miR-1251	0	0	1	1	1	1	FBXO36	F-box protein 36
hsa-miR-1251	1	0	1	1	1	1	HNRNPC	heterogeneous nuclear ribonucleoprotein C (C1/C2)
hsa-miR-1251	0	0	1	0	0	0	H19	H19, imprinted maternally expressed transcript (non-protein coding)
hsa-miR-1251	1	0	1	1	1	1	RASL12	RAS-like, family 12
hsa-miR-1251	0	0	1	1	1	1	RNF32	ring finger protein 32
hsa-miR-1251	0	0	1	0	1	1	CD99P1	CD99 molecule pseudogene 1
hsa-miR-1251	1	0	1	1	1	1	EI24	etoposide induced 2.4 mRNA
hsa-miR-1251	0	0	1	1	0	0	RAD54B	RAD54 homolog B (S. cerevisiae)
hsa-miR-1251	0	0	1	1	1	1	IFNGR2	interferon gamma receptor 2 (interferon gamma transducer 1)
hsa-miR-1251	0	0	1	1	0	0	IKBKG	inhibitor of kappa light polypeptide gene enhancer in B-cells, kinase gamma
hsa-miR-1251	1	0	1	1	1	1	LYPLA2	lysophospholipase II
hsa-miR-1251	1	0	1	1	1	1	PTPN18	protein tyrosine phosphatase, non-receptor type 18 (brain-derived)
hsa-miR-1251	1	0	1	1	1	1	DOK4	docking protein 4
hsa-miR-1251	0	0	1	1	0	0	NOX5	NADPH oxidase, EF-hand calcium binding domain 5
hsa-miR-1251	0	0	1	1	0	0	CSF3R	colony stimulating factor 3 receptor (granulocyte)
hsa-miR-1251	1	0	1	1	1	1	ARNTL	aryl hydrocarbon receptor nuclear translocator-like
hsa-miR-1251	0	0	1	1	1	1	PABPN1	poly(A) binding protein, nuclear 1
hsa-miR-1251	1	0	1	1	1	1	TIMP3	TIMP metallopeptidase inhibitor 3
hsa-miR-1251	1	0	1	1	1	1	TOR3A	torsin family 3, member A
hsa-miR-1251	0	0	1	1	0	0	DDB2	damage-specific DNA binding protein 2, 48kDa
hsa-miR-1251	0	0	1	1	0	0	ATP6V0C	ATPase, H+ transporting, lysosomal 16kDa, V0 subunit c
hsa-miR-1251	1	0	1	1	1	1	F11R	F11 receptor
hsa-miR-1251	1	0	1	1	0	0	CRELD1	cysteine-rich with EGF-like domains 1
hsa-miR-1251	0	0	1	1	1	1	RPL14	ribosomal protein L14
hsa-miR-1251	1	0	1	1	1	1	ARHGEF40	Rho guanine nucleotide exchange factor (GEF) 40
hsa-miR-1251	0	0	1	0	0	0	ZNF674-AS1	ZNF674 antisense RNA 1
hsa-miR-1251	0	0	1	1	0	0	GPC3	glypican 3
hsa-miR-1251	0	0	1	1	0	0	HEBP1	heme binding protein 1
hsa-miR-1251	1	0	1	0	1	1	SLC2A3	solute carrier family 2 (facilitated glucose transporter), member 3
hsa-miR-1251	0	0	1	0	0	0	CHEK2P2	checkpoint kinase 2 pseudogene 2
hsa-miR-1251	0	0	1	1	1	1	INPP5K	inositol polyphosphate-5-phosphatase K
hsa-miR-1251	0	0	1	1	1	1	OTOR	otoraplin
hsa-miR-1251	0	0	1	1	0	0	KAT8	K(lysine) acetyltransferase 8
hsa-miR-1251	0	0	1	1	1	1	FAM118B	family with sequence similarity 118, member B
hsa-miR-1251	0	0	1	1	0	0	ISG20	interferon stimulated exonuclease gene 20kDa
hsa-miR-1251	1	0	1	1	0	0	MMP11	matrix metallopeptidase 11 (stromelysin 3)
hsa-miR-1251	1	0	1	1	1	1	RND3	Rho family GTPase 3
hsa-miR-1251	0	0	1	0	0	0	MYSM1	Myb-like, SWIRM and MPN domains 1
hsa-miR-1251	1	0	1	1	1	1	STAG2	stromal antigen 2
hsa-miR-1251	0	0	1	0	0	0	LOC731789	uncharacterized LOC731789
hsa-miR-1251	1	0	1	1	1	1	FBXW7	F-box and WD repeat domain containing 7, E3 ubiquitin protein ligase
hsa-miR-1251	0	0	1	1	1	1	SYNE2	spectrin repeat containing, nuclear envelope 2
hsa-miR-1251	0	0	1	0	0	0	LINC00661	long intergenic non-protein coding RNA 661
hsa-miR-1251	0	0	1	0	0	0	MUC19	mucin 19, oligomeric
hsa-miR-1251	1	0	1	1	1	1	TIPARP	TCDD-inducible poly(ADP-ribose) polymerase
hsa-miR-1251	1	0	1	1	1	1	BCL2L1	BCL2-like 1
hsa-miR-1251	1	0	1	1	1	1	MAN2A2	mannosidase, alpha, class 2A, member 2
hsa-miR-1251	1	0	1	1	1	1	RB1CC1	RB1-inducible coiled-coil 1
hsa-miR-1251	1	0	1	0	1	1	KLHDC10	kelch domain containing 10
hsa-miR-1251	1	0	1	1	1	1	TMEFF2	transmembrane protein with EGF-like and two follistatin-like domains 2
hsa-miR-1251	0	0	1	1	1	1	PTGS1	prostaglandin-endoperoxide synthase 1 (prostaglandin G/H synthase and cyclooxygenase)
hsa-miR-1251	0	0	1	1	0	0	SPATA20	spermatogenesis associated 20
hsa-miR-1251	1	0	1	1	1	1	MOSPD1	motile sperm domain containing 1
hsa-miR-1251	0	0	1	0	0	0	C1orf81	chromosome 1 open reading frame 81
hsa-miR-1251	0	0	1	1	1	1	ALDH3B1	aldehyde dehydrogenase 3 family, member B1
hsa-miR-1251	1	0	1	0	0	0	YLPM1	YLP motif containing 1
hsa-miR-1251	1	0	1	0	1	1	BCL2	B-cell CLL/lymphoma 2
hsa-miR-1251	1	0	1	1	1	1	IGF1	insulin-like growth factor 1 (somatomedin C)
hsa-miR-1251	0	0	1	1	1	1	NPR3	natriuretic peptide receptor C/guanylate cyclase C (atrionatriuretic peptide receptor C)
hsa-miR-1251	1	0	1	0	1	1	ACVR2A	activin A receptor, type IIA
hsa-miR-1251	1	0	1	0	1	1	ALAD	aminolevulinate dehydratase
hsa-miR-1251	0	0	1	1	1	1	ATP7A	ATPase, Cu++ transporting, alpha polypeptide
hsa-miR-1251	0	0	1	1	1	1	COL7A1	collagen, type VII, alpha 1
hsa-miR-1251	1	0	1	0	1	1	G6PC	glucose-6-phosphatase, catalytic subunit
hsa-miR-1251	1	0	1	0	1	1	GLI3	GLI family zinc finger 3
hsa-miR-1251	0	0	1	1	1	1	MAOA	monoamine oxidase A
hsa-miR-1251	0	0	1	1	1	1	MTM1	myotubularin 1
hsa-miR-1251	1	0	1	1	1	1	SLC26A4	solute carrier family 26, member 4
hsa-miR-1251	1	0	1	1	1	1	DCX	doublecortin
hsa-miR-1251	0	0	1	1	0	0	AVPR1B	arginine vasopressin receptor 1B
hsa-miR-1251	1	0	1	1	1	1	GABRB3	gamma-aminobutyric acid (GABA) A receptor, beta 3
hsa-miR-1251	1	0	1	1	1	1	TPD52L3	tumor protein D52-like 3
hsa-miR-1251	0	0	1	1	1	1	MAP1LC3C	microtubule-associated protein 1 light chain 3 gamma
hsa-miR-1251	0	0	1	1	1	1	PRR13	proline rich 13
hsa-miR-1251	1	0	1	0	1	1	YPEL2	yippee-like 2 (Drosophila)
hsa-miR-1251	1	0	1	1	1	1	EBF3	early B-cell factor 3
hsa-miR-1251	1	0	1	1	1	1	PLCXD3	phosphatidylinositol-specific phospholipase C, X domain containing 3
hsa-miR-1251	1	0	1	1	1	1	EDA	ectodysplasin A
hsa-miR-1251	1	0	1	1	1	1	L3MBTL3	l(3)mbt-like 3 (Drosophila)
hsa-miR-1251	1	0	1	1	1	1	BRWD1	bromodomain and WD repeat domain containing 1
hsa-miR-1251	1	0	1	1	1	1	LPHN1	latrophilin 1
hsa-miR-1251	0	0	1	0	0	0	CD200R1L	CD200 receptor 1-like
hsa-miR-1251	0	0	1	1	1	1	SPIN3	spindlin family, member 3
hsa-miR-1251	1	0	1	0	1	1	ZC3H12B	zinc finger CCCH-type containing 12B
hsa-miR-1251	1	0	1	1	0	0	RPL21P44	ribosomal protein L21 pseudogene 44
hsa-miR-1251	1	0	1	1	1	1	SORCS1	sortilin-related VPS10 domain containing receptor 1
hsa-miR-1251	1	0	1	1	1	1	NCDN	neurochondrin
hsa-miR-1251	1	0	1	1	1	1	PHF6	PHD finger protein 6
hsa-miR-1251	0	0	1	1	1	1	PGBD2	piggyBac transposable element derived 2
hsa-miR-1251	1	0	1	1	1	1	PFKFB2	6-phosphofructo-2-kinase/fructose-2,6-biphosphatase 2
hsa-miR-1251	1	0	1	0	1	1	BRCC3	BRCA1/BRCA2-containing complex, subunit 3
hsa-miR-1251	0	0	1	1	1	1	NARG2	NMDA receptor regulated 2
hsa-miR-1251	1	0	1	1	1	1	SBK1	SH3-binding domain kinase 1
hsa-miR-1251	1	0	1	0	1	1	TNRC6B	trinucleotide repeat containing 6B
hsa-miR-1251	1	0	1	1	1	1	TPD52	tumor protein D52
hsa-miR-1251	1	0	1	1	1	1	SLC35F1	solute carrier family 35, member F1
hsa-miR-1251	0	0	1	1	1	1	SOWAHB	sosondowah ankyrin repeat domain family member B
hsa-miR-1251	0	0	1	1	1	1	RSPO4	R-spondin 4
hsa-miR-1251	1	0	1	0	1	1	C2orf71	chromosome 2 open reading frame 71
hsa-miR-1251	1	0	1	0	1	1	SAMD5	sterile alpha motif domain containing 5
hsa-miR-1251	1	0	1	1	1	1	NEK10	NIMA (never in mitosis gene a)- related kinase 10
hsa-miR-1251	1	0	1	1	1	1	STK24	serine/threonine kinase 24
hsa-miR-1251	0	0	1	1	1	1	PLGLB1	plasminogen-like B1
hsa-miR-1251	0	0	1	0	0	0	CEACAM16	carcinoembryonic antigen-related cell adhesion molecule 16
hsa-miR-1251	1	0	1	1	1	1	SPTSSB	serine palmitoyltransferase, small subunit B
hsa-miR-1251	0	0	1	1	0	0	CKLF	chemokine-like factor
hsa-miR-1251	0	0	1	1	1	1	MTHFD2	methylenetetrahydrofolate dehydrogenase (NADP+ dependent) 2, methenyltetrahydrofolate cyclohydrolase
hsa-miR-1251	1	0	1	1	1	1	FAM63B	family with sequence similarity 63, member B
hsa-miR-1251	0	0	1	1	1	1	METTL21D	methyltransferase like 21D
hsa-miR-1251	1	0	1	1	1	1	GDAP1	ganglioside induced differentiation associated protein 1
hsa-miR-1251	1	0	1	1	1	1	ERBB4	v-erb-a erythroblastic leukemia viral oncogene homolog 4 (avian)
hsa-miR-1251	1	0	1	1	1	1	KDM5A	lysine (K)-specific demethylase 5A
hsa-miR-1251	0	0	1	1	1	1	SEC24B	SEC24 family, member B (S. cerevisiae)
hsa-miR-1251	1	0	1	0	1	1	TMEM237	transmembrane protein 237
hsa-miR-1251	1	0	1	1	1	1	QSER1	glutamine and serine rich 1
hsa-miR-1251	0	0	1	1	1	1	DIAPH1	diaphanous homolog 1 (Drosophila)
hsa-miR-1251	1	0	1	1	1	1	ZNF697	zinc finger protein 697
hsa-miR-1251	1	0	1	0	1	1	MEGF9	multiple EGF-like-domains 9
hsa-miR-1251	0	0	1	1	1	1	TBX18	T-box 18
hsa-miR-1251	0	0	1	1	1	1	RTBDN	retbindin
hsa-miR-1251	1	0	1	0	1	1	CDK6	cyclin-dependent kinase 6
hsa-miR-1251	0	0	1	1	1	1	DKC1	dyskeratosis congenita 1, dyskerin
hsa-miR-1251	1	0	1	1	1	1	FOXF1	forkhead box F1
hsa-miR-1251	1	0	1	1	1	1	NDST1	N-deacetylase/N-sulfotransferase (heparan glucosaminyl) 1
hsa-miR-1251	1	0	1	0	1	1	MPPED2	metallophosphoesterase domain containing 2
hsa-miR-1251	0	0	1	1	0	0	ACP2	acid phosphatase 2, lysosomal
hsa-miR-1251	0	0	1	1	1	1	BTN1A1	butyrophilin, subfamily 1, member A1
hsa-miR-1251	1	0	1	1	1	1	CSNK2A1	casein kinase 2, alpha 1 polypeptide
hsa-miR-1251	1	0	1	1	1	1	EIF4E	eukaryotic translation initiation factor 4E
hsa-miR-1251	1	0	1	0	1	1	ETV6	ets variant 6
hsa-miR-1251	0	0	1	1	1	1	GFAP	glial fibrillary acidic protein
hsa-miR-1251	0	0	1	1	1	1	HOXB5	homeobox B5
hsa-miR-1251	0	0	1	1	1	1	KCNK1	potassium channel, subfamily K, member 1
hsa-miR-1251	1	0	1	1	1	1	KPNB1	karyopherin (importin) beta 1
hsa-miR-1251	1	0	1	1	1	1	KPNA3	karyopherin alpha 3 (importin alpha 4)
hsa-miR-1251	0	0	1	1	0	0	KRT85	keratin 85
hsa-miR-1251	0	0	1	0	1	1	CXCL9	chemokine (C-X-C motif) ligand 9
hsa-miR-1251	1	0	1	1	1	1	TNFRSF11B	tumor necrosis factor receptor superfamily, member 11b
hsa-miR-1251	1	0	1	1	1	1	PCSK6	proprotein convertase subtilisin/kexin type 6
hsa-miR-1251	0	0	1	1	1	1	PEX13	peroxisomal biogenesis factor 13
hsa-miR-1251	0	0	1	1	1	1	PLGLB2	plasminogen-like B2
hsa-miR-1251	0	0	1	1	1	1	MAPK9	mitogen-activated protein kinase 9
hsa-miR-1251	1	0	1	1	0	0	PSMD7	proteasome (prosome, macropain) 26S subunit, non-ATPase, 7
hsa-miR-1251	1	0	1	1	1	1	PVRL1	poliovirus receptor-related 1 (herpesvirus entry mediator C)
hsa-miR-1251	1	0	1	0	1	1	ST6GAL1	ST6 beta-galactosamide alpha-2,6-sialyltranferase 1
hsa-miR-1251	1	0	1	1	1	1	SMARCC1	SWI/SNF related, matrix associated, actin dependent regulator of chromatin, subfamily c, member 1
hsa-miR-1251	1	0	1	0	1	1	SOX4	SRY (sex determining region Y)-box 4
hsa-miR-1251	1	0	1	0	1	1	SOX11	SRY (sex determining region Y)-box 11
hsa-miR-1251	0	0	1	1	1	1	SRP9	signal recognition particle 9kDa
hsa-miR-1251	1	0	1	1	1	1	TFAP4	transcription factor AP-4 (activating enhancer binding protein 4)
hsa-miR-1251	1	0	1	0	1	1	TSPYL1	TSPY-like 1
hsa-miR-1251	0	0	1	1	0	0	TTC1	tetratricopeptide repeat domain 1
hsa-miR-1251	1	0	1	1	1	1	UBE2D3	ubiquitin-conjugating enzyme E2D 3
hsa-miR-1251	1	0	1	1	1	1	ZIC3	Zic family member 3
hsa-miR-1251	0	0	1	1	1	1	ITGA10	integrin, alpha 10
hsa-miR-1251	1	0	1	1	0	0	TCAP	titin-cap (telethonin)
hsa-miR-1251	1	0	1	1	0	0	KHSRP	KH-type splicing regulatory protein
hsa-miR-1251	0	0	1	1	0	0	EIF4EBP3	eukaryotic translation initiation factor 4E binding protein 3
hsa-miR-1251	0	0	1	1	1	1	SCEL	sciellin
hsa-miR-1251	1	0	1	1	1	1	NRP2	neuropilin 2
hsa-miR-1251	1	0	1	1	1	1	ALDH1A2	aldehyde dehydrogenase 1 family, member A2
hsa-miR-1251	1	0	1	0	1	1	SKAP2	src kinase associated phosphoprotein 2
hsa-miR-1251	1	0	1	0	1	1	PLK3	polo-like kinase 3
hsa-miR-1251	0	0	1	1	1	1	GYG1	glycogenin 1
hsa-miR-1251	1	0	1	0	1	1	SLC1A2	solute carrier family 1 (glial high affinity glutamate transporter), member 2
hsa-miR-1251	1	0	1	1	1	1	DAG1	dystroglycan 1 (dystrophin-associated glycoprotein 1)
hsa-miR-1251	1	0	1	0	1	1	ETV5	ets variant 5
hsa-miR-1251	1	0	1	0	1	1	FGF5	fibroblast growth factor 5
hsa-miR-1251	0	0	1	1	1	1	PNPLA4	patatin-like phospholipase domain containing 4
hsa-miR-1251	0	0	1	1	1	1	LATS1	LATS, large tumor suppressor, homolog 1 (Drosophila)
hsa-miR-1251	0	0	1	0	1	1	CXorf1	chromosome X open reading frame 1
hsa-miR-1251	0	0	1	1	1	1	LHX2	LIM homeobox 2
hsa-miR-1251	0	0	1	0	1	1	ADIPOQ	adiponectin, C1Q and collagen domain containing
hsa-miR-1251	0	0	1	1	1	1	IL27RA	interleukin 27 receptor, alpha
hsa-miR-1251	1	0	1	1	1	1	ONECUT2	one cut homeobox 2
hsa-miR-1251	1	0	1	1	1	1	SEC24C	SEC24 family, member C (S. cerevisiae)
hsa-miR-1251	0	0	1	1	0	0	CNGA2	cyclic nucleotide gated channel alpha 2
hsa-miR-1251	1	0	1	1	1	1	APLNR	apelin receptor
hsa-miR-1251	0	0	1	1	0	0	ASCL2	achaete-scute complex homolog 2 (Drosophila)
hsa-miR-1251	0	0	1	1	1	1	DDOST	dolichyl-diphosphooligosaccharide--protein glycosyltransferase
hsa-miR-1251	1	0	1	0	1	1	SPRY3	sprouty homolog 3 (Drosophila)
hsa-miR-1251	1	0	1	1	1	1	FOXO4	forkhead box O4
hsa-miR-1251	1	0	1	1	0	0	NAB2	NGFI-A binding protein 2 (EGR1 binding protein 2)
hsa-miR-1251	0	0	1	1	1	1	LANCL1	LanC lantibiotic synthetase component C-like 1 (bacterial)
hsa-miR-1251	1	0	1	1	1	1	SEMA3A	sema domain, immunoglobulin domain (Ig), short basic domain, secreted, (semaphorin) 3A
hsa-miR-1251	1	0	1	1	1	1	NR4A2	nuclear receptor subfamily 4, group A, member 2
hsa-miR-1251	1	0	1	1	1	1	ORC2	origin recognition complex, subunit 2
hsa-miR-1251	0	0	1	1	1	1	PA2G4	proliferation-associated 2G4, 38kDa
hsa-miR-1251	0	0	1	1	1	1	PRKG2	protein kinase, cGMP-dependent, type II
hsa-miR-1251	1	0	1	1	1	1	NEBL	nebulette
hsa-miR-1251	0	0	1	1	1	1	TM9SF1	transmembrane 9 superfamily member 1
hsa-miR-1251	1	0	1	1	1	1	DYNLT3	dynein, light chain, Tctex-type 3
hsa-miR-1251	0	0	1	1	0	0	YEATS4	YEATS domain containing 4
hsa-miR-1251	1	0	1	1	1	1	FUT9	fucosyltransferase 9 (alpha (1,3) fucosyltransferase)
hsa-miR-1251	1	0	1	1	0	0	FRS3	fibroblast growth factor receptor substrate 3
hsa-miR-1251	0	0	1	1	1	1	PPP1R17	protein phosphatase 1, regulatory subunit 17
hsa-miR-1251	0	0	1	1	1	1	INMT	indolethylamine N-methyltransferase
hsa-miR-1251	1	0	1	1	1	1	PRRX1	paired related homeobox 1
hsa-miR-1251	1	0	1	0	1	1	SOX12	SRY (sex determining region Y)-box 12
hsa-miR-1251	1	0	1	0	1	1	WASF2	WAS protein family, member 2
hsa-miR-1251	0	0	1	1	1	1	DNAJB4	DnaJ (Hsp40) homolog, subfamily B, member 4
hsa-miR-1251	1	0	1	1	1	1	TMF1	TATA element modulatory factor 1
hsa-miR-1251	1	0	1	1	1	1	ERLIN2	ER lipid raft associated 2
hsa-miR-1251	1	0	1	1	1	1	KLF12	Kruppel-like factor 12
hsa-miR-1251	1	0	1	1	1	1	TUSC2	tumor suppressor candidate 2
hsa-miR-1251	1	0	1	1	1	1	ZNF236	zinc finger protein 236
hsa-miR-1251	0	0	1	0	1	1	AP4E1	adaptor-related protein complex 4, epsilon 1 subunit
hsa-miR-1251	0	0	1	1	1	1	EHF	ets homologous factor
hsa-miR-1251	1	0	1	0	1	1	FZD4	frizzled family receptor 4
hsa-miR-1251	1	0	1	1	1	1	HS2ST1	heparan sulfate 2-O-sulfotransferase 1
hsa-miR-1251	1	0	1	1	1	1	KIF4A	kinesin family member 4A
hsa-miR-1251	1	0	1	0	1	1	MYCBP	c-myc binding protein
hsa-miR-1251	1	0	1	0	1	1	MYO10	myosin X
hsa-miR-1251	1	0	1	1	1	1	RANBP6	RAN binding protein 6
hsa-miR-1251	1	0	1	0	1	1	FLRT2	fibronectin leucine rich transmembrane protein 2
hsa-miR-1251	0	0	1	1	0	0	TBX21	T-box 21
hsa-miR-1251	0	0	1	0	1	1	EMR2	egf-like module containing, mucin-like, hormone receptor-like 2
hsa-miR-1251	1	0	1	1	1	1	ZBTB44	zinc finger and BTB domain containing 44
hsa-miR-1251	1	0	1	1	1	1	LHX6	LIM homeobox 6
hsa-miR-1251	1	0	1	1	1	1	AFF4	AF4/FMR2 family, member 4
hsa-miR-1251	1	0	1	1	1	1	PCDH11X	protocadherin 11 X-linked
hsa-miR-1251	0	0	1	0	1	1	CTR9	Ctr9, Paf1/RNA polymerase II complex component, homolog (S. cerevisiae)
hsa-miR-1251	1	0	1	1	1	1	GCC2	GRIP and coiled-coil domain containing 2
hsa-miR-1251	1	0	1	1	1	1	ARHGAP32	Rho GTPase activating protein 32
hsa-miR-1251	0	0	1	1	1	1	FRMPD4	FERM and PDZ domain containing 4
hsa-miR-1251	1	0	1	0	1	1	MLEC	malectin
hsa-miR-1251	1	0	1	1	1	1	KIAA0247	KIAA0247
hsa-miR-1251	1	0	1	0	1	1	MAML1	mastermind-like 1 (Drosophila)
hsa-miR-1251	1	0	1	1	1	1	ZBTB39	zinc finger and BTB domain containing 39
hsa-miR-1251	1	0	1	1	1	1	PLEKHA6	pleckstrin homology domain containing, family A member 6
hsa-miR-1251	1	0	1	0	1	1	NMNAT2	nicotinamide nucleotide adenylyltransferase 2
hsa-miR-1251	0	0	1	1	1	1	VWA8	von Willebrand factor A domain containing 8
hsa-miR-1251	1	0	1	1	1	1	RTF1	Rtf1, Paf1/RNA polymerase II complex component, homolog (S. cerevisiae)
hsa-miR-1251	0	0	1	1	0	0	C22orf31	chromosome 22 open reading frame 31
hsa-miR-1251	1	0	1	1	1	1	ATL3	atlastin GTPase 3
hsa-miR-1251	0	0	1	1	1	1	TMEM87A	transmembrane protein 87A
hsa-miR-1251	1	0	1	1	1	1	FAM155B	family with sequence similarity 155, member B
hsa-miR-1251	0	0	1	1	0	0	ZC2HC1A	zinc finger, C2HC-type containing 1A
hsa-miR-1251	1	0	1	0	1	1	CNR1	cannabinoid receptor 1 (brain)
hsa-miR-1251	1	0	1	1	1	1	SUFU	suppressor of fused homolog (Drosophila)
hsa-miR-1251	1	0	1	1	1	1	VGLL3	vestigial like 3 (Drosophila)
hsa-miR-1251	0	0	1	1	1	1	CYB5R1	cytochrome b5 reductase 1
hsa-miR-1251	0	0	1	1	1	1	HSD17B11	hydroxysteroid (17-beta) dehydrogenase 11
hsa-miR-1251	1	0	1	1	1	1	SIX2	SIX homeobox 2
hsa-miR-1251	0	0	1	1	0	0	IL1RAPL2	interleukin 1 receptor accessory protein-like 2
hsa-miR-1251	1	0	1	1	1	1	INO80	INO80 homolog (S. cerevisiae)
hsa-miR-1251	1	0	1	1	0	0	C17orf59	chromosome 17 open reading frame 59
hsa-miR-1251	1	0	1	0	1	1	KCTD9	potassium channel tetramerisation domain containing 9
hsa-miR-1251	1	0	1	1	1	1	ALKBH5	alkB, alkylation repair homolog 5 (E. coli)
hsa-miR-1251	1	0	1	1	1	1	FAM120C	family with sequence similarity 120C
hsa-miR-1251	0	0	1	1	1	1	C2orf42	chromosome 2 open reading frame 42
hsa-miR-1251	1	0	1	1	1	1	HIF1AN	hypoxia inducible factor 1, alpha subunit inhibitor
hsa-miR-1251	1	0	1	1	1	1	ARGLU1	arginine and glutamate rich 1
hsa-miR-1251	1	0	1	0	1	1	ARL8B	ADP-ribosylation factor-like 8B
hsa-miR-1251	1	0	1	0	1	1	LIN7C	lin-7 homolog C (C. elegans)
hsa-miR-1251	1	0	1	1	1	1	RRN3	RRN3 RNA polymerase I transcription factor homolog (S. cerevisiae)
hsa-miR-1251	1	0	1	0	1	1	BRK1	BRICK1, SCAR/WAVE actin-nucleating complex subunit
hsa-miR-1251	0	0	1	1	1	1	GOLGA6B	golgin A6 family, member B
hsa-miR-1251	1	0	1	0	1	1	FAM190B	family with sequence similarity 190, member B
hsa-miR-1251	0	0	1	1	0	0	RNF186	ring finger protein 186
hsa-miR-1251	1	0	1	0	1	1	PAPOLB	poly(A) polymerase beta (testis specific)
hsa-miR-1251	1	0	1	0	1	1	OTUD7B	OTU domain containing 7B
hsa-miR-1251	0	0	1	1	1	1	PDSS2	prenyl (decaprenyl) diphosphate synthase, subunit 2
hsa-miR-1251	0	0	1	1	1	1	PLXDC1	plexin domain containing 1
hsa-miR-1251	0	0	1	1	1	1	IL22	interleukin 22
hsa-miR-1251	0	0	1	0	1	1	ZNF490	zinc finger protein 490
hsa-miR-1251	0	0	1	1	1	1	SHROOM4	shroom family member 4
hsa-miR-1251	1	0	1	1	1	1	USP31	ubiquitin specific peptidase 31
hsa-miR-1251	1	0	1	0	1	1	ALPK3	alpha-kinase 3
hsa-miR-1251	1	0	1	1	1	1	NLGN2	neuroligin 2
hsa-miR-1251	1	0	1	1	1	1	ZFP14	zinc finger protein 14 homolog (mouse)
hsa-miR-1251	0	0	1	1	1	1	PRX	periaxin
hsa-miR-1251	1	0	1	1	1	1	ZNFX1	zinc finger, NFX1-type containing 1
hsa-miR-1251	1	0	1	0	1	1	TMX4	thioredoxin-related transmembrane protein 4
hsa-miR-1251	1	0	1	1	1	1	NTN4	netrin 4
hsa-miR-1251	0	0	1	1	1	1	UTP14C	UTP14, U3 small nucleolar ribonucleoprotein, homolog C (yeast)
hsa-miR-1251	1	0	1	0	1	1	MCL1	myeloid cell leukemia sequence 1 (BCL2-related)
hsa-miR-1251	0	0	1	1	1	1	PGM5	phosphoglucomutase 5
hsa-miR-1251	1	0	1	1	1	1	SEC24A	SEC24 family, member A (S. cerevisiae)
hsa-miR-1251	1	0	1	0	1	1	GAN	gigaxonin
hsa-miR-1251	1	0	1	1	1	1	MRPL17	mitochondrial ribosomal protein L17
hsa-miR-1251	1	0	1	1	1	1	TMEM168	transmembrane protein 168
hsa-miR-1251	0	0	1	1	1	1	SUSD1	sushi domain containing 1
hsa-miR-1251	1	0	1	0	1	1	HOXC8	homeobox C8
hsa-miR-1251	1	0	1	1	1	1	RFX7	regulatory factor X, 7
hsa-miR-1251	0	0	1	1	0	0	DCTN3	dynactin 3 (p22)
hsa-miR-1251	1	0	1	1	1	1	DSC3	desmocollin 3
hsa-miR-1251	0	0	1	1	1	1	LRRK1	leucine-rich repeat kinase 1
hsa-miR-1251	1	0	1	0	1	1	MAGIX	MAGI family member, X-linked
hsa-miR-1251	1	0	1	1	1	1	NAA50	N(alpha)-acetyltransferase 50, NatE catalytic subunit
hsa-miR-1251	1	0	1	0	1	1	EDEM3	ER degradation enhancer, mannosidase alpha-like 3
hsa-miR-1251	1	0	1	0	1	1	CSRNP2	cysteine-serine-rich nuclear protein 2
hsa-miR-1251	1	0	1	1	1	1	GPR61	G protein-coupled receptor 61
hsa-miR-1251	0	0	1	1	1	1	CCDC8	coiled-coil domain containing 8
hsa-miR-1251	1	0	1	1	1	1	OTP	orthopedia homeobox
hsa-miR-1251	1	0	1	1	1	1	ARID5B	AT rich interactive domain 5B (MRF1-like)
hsa-miR-1251	1	0	1	1	1	1	SETD3	SET domain containing 3
hsa-miR-1251	1	0	1	1	0	0	TRAF7	TNF receptor-associated factor 7, E3 ubiquitin protein ligase
hsa-miR-1251	1	0	1	1	1	1	ZDHHC18	zinc finger, DHHC-type containing 18
hsa-miR-1251	1	0	1	0	1	1	PSD2	pleckstrin and Sec7 domain containing 2
hsa-miR-1251	1	0	1	1	1	1	DNAJC14	DnaJ (Hsp40) homolog, subfamily C, member 14
hsa-miR-1251	0	0	1	1	1	1	C5orf4	chromosome 5 open reading frame 4
hsa-miR-1251	0	0	1	1	1	1	FAM136A	family with sequence similarity 136, member A
hsa-miR-1251	1	0	1	0	1	1	PURB	purine-rich element binding protein B
hsa-miR-1251	1	0	1	1	0	0	CCDC120	coiled-coil domain containing 120
hsa-miR-1251	1	0	1	1	1	1	TRIM9	tripartite motif containing 9
hsa-miR-1251	1	0	1	1	1	1	COL11A2	collagen, type XI, alpha 2
hsa-miR-1251	1	0	1	1	1	1	FAM122A	family with sequence similarity 122A
hsa-miR-1251	1	0	1	0	1	1	NUS1	nuclear undecaprenyl pyrophosphate synthase 1 homolog (S. cerevisiae)
hsa-miR-1251	1	0	1	0	1	1	SP1	Sp1 transcription factor
hsa-miR-1251	1	0	1	1	1	1	HAS3	hyaluronan synthase 3
hsa-miR-1251	0	0	1	1	1	1	TGIF2LY	TGFB-induced factor homeobox 2-like, Y-linked
hsa-miR-1251	1	0	1	1	1	1	ATRN	attractin
hsa-miR-1251	0	0	1	1	1	1	HSPB6	heat shock protein, alpha-crystallin-related, B6
hsa-miR-1251	0	0	1	1	1	1	C7orf45	chromosome 7 open reading frame 45
hsa-miR-1251	0	0	1	1	0	0	TCEB3C	transcription elongation factor B polypeptide 3C (elongin A3)
hsa-miR-1251	1	0	1	1	1	1	LSM12	LSM12 homolog (S. cerevisiae)
hsa-miR-1251	1	0	1	1	1	1	FAM123B	family with sequence similarity 123B
hsa-miR-1251	1	0	1	1	1	1	SLC16A14	solute carrier family 16, member 14 (monocarboxylic acid transporter 14)
hsa-miR-1251	0	0	1	1	1	1	NANP	N-acetylneuraminic acid phosphatase
hsa-miR-1251	1	0	1	1	1	1	PDIK1L	PDLIM1 interacting kinase 1 like
hsa-miR-1251	1	0	1	1	1	1	HS6ST3	heparan sulfate 6-O-sulfotransferase 3
hsa-miR-1251	1	0	1	1	1	1	PHF13	PHD finger protein 13
hsa-miR-1251	0	0	1	1	1	1	ZFP91-CNTF	ZFP91-CNTF readthrough (non-protein coding)
hsa-miR-1251	0	0	1	1	1	1	KCNH5	potassium voltage-gated channel, subfamily H (eag-related), member 5
hsa-miR-1251	1	0	1	1	1	1	MMGT1	membrane magnesium transporter 1
hsa-miR-1251	0	0	1	1	1	1	DZIP1L	DAZ interacting protein 1-like
hsa-miR-1251	1	0	1	1	1	1	UBR1	ubiquitin protein ligase E3 component n-recognin 1
hsa-miR-1251	0	0	1	1	1	1	ZDHHC22	zinc finger, DHHC-type containing 22
hsa-miR-1251	1	0	1	1	1	1	ASB6	ankyrin repeat and SOCS box containing 6
hsa-miR-1251	0	0	1	1	1	1	CCDC67	coiled-coil domain containing 67
hsa-miR-1251	0	0	1	1	0	0	BPIFB4	BPI fold containing family B, member 4
hsa-miR-1251	0	0	1	1	1	1	C15orf38	chromosome 15 open reading frame 38
hsa-miR-1251	1	0	1	1	1	1	KIF1B	kinesin family member 1B
hsa-miR-1251	1	0	1	1	1	1	RALGAPA1	Ral GTPase activating protein, alpha subunit 1 (catalytic)
hsa-miR-1251	1	0	1	1	1	1	RAB43	RAB43, member RAS oncogene family
hsa-miR-1251	1	0	1	1	1	1	MIA3	melanoma inhibitory activity family, member 3
hsa-miR-1251	1	0	1	1	0	0	ENHO	energy homeostasis associated
hsa-miR-1251	1	0	1	1	1	1	PTGER3	prostaglandin E receptor 3 (subtype EP3)
hsa-miR-1251	1	0	1	1	1	1	NSUN4	NOP2/Sun domain family, member 4
hsa-miR-1251	1	0	1	0	1	1	CAPRIN1	cell cycle associated protein 1
hsa-miR-1251	1	0	1	1	1	1	METTL21B	methyltransferase like 21B
hsa-miR-1251	0	0	1	1	1	1	SEPT14	septin 14
hsa-miR-1251	0	0	1	0	1	1	CLEC17A	C-type lectin domain family 17, member A
hsa-miR-1251	0	0	1	0	1	1	C1orf220	chromosome 1 open reading frame 220
hsa-miR-1251	1	0	1	0	1	1	STAT3	signal transducer and activator of transcription 3 (acute-phase response factor)
hsa-miR-1251	0	0	1	0	0	0	PCDHB19P	protocadherin beta 19 pseudogene
hsa-miR-1251	0	0	1	0	0	0	TOP1P2	topoisomerase (DNA) I pseudogene 2
hsa-miR-1251	0	0	1	0	0	0	LOC339240	keratin 17 pseudogene
hsa-miR-1251	0	0	1	0	0	0	LYPLA2P1	lysophospholipase II pseudogene 1
hsa-miR-1251	0	0	1	0	0	0	MIR155HG	MIR155 host gene (non-protein coding)
hsa-miR-1251	0	0	1	0	0	0	TTTY15	testis-specific transcript, Y-linked 15 (non-protein coding)
hsa-miR-1251	0	0	1	0	0	0	GOLGA2P3Y	golgin A2 pseudogene 3, Y-linked
hsa-miR-1251	0	0	1	0	0	0	MEIS3P1	Meis homeobox 3 pseudogene 1
hsa-miR-1251	0	0	1	0	0	0	LOC606724	coronin, actin binding protein, 1A pseudogene
hsa-miR-1251	0	0	1	0	0	0	SNORA3	small nucleolar RNA, H/ACA box 3
hsa-miR-1251	0	0	1	0	0	0	ATXN8OS	ATXN8 opposite strand (non-protein coding)
hsa-miR-1251	0	0	1	0	0	0	AOC4	amine oxidase, copper containing 3 (vascular adhesion protein 1) pseudogene
hsa-miR-1251	0	0	1	0	0	0	LOC256880	uncharacterized LOC256880
hsa-miR-1251	0	0	1	0	0	0	LOC285359	phosducin-like 3 pseudogene
hsa-miR-1251	0	0	1	0	0	0	SNORA22	small nucleolar RNA, H/ACA box 22
hsa-miR-1251	0	0	1	0	0	0	SNORA45	small nucleolar RNA, H/ACA box 45
hsa-miR-1251	0	0	1	0	0	0	SNORA76	small nucleolar RNA, H/ACA box 76
hsa-miR-1251	0	0	1	0	0	0	GBP1P1	guanylate binding protein 1, interferon-inducible pseudogene 1
hsa-miR-1251	0	0	1	0	0	0	GMCL1P1	germ cell-less, spermatogenesis associated 1 pseudogene 1
hsa-miR-1251	1	0	1	0	1	1	NFIX	nuclear factor I/X (CCAAT-binding transcription factor)
hsa-miR-1251	1	0	1	1	1	1	TRIO	trio Rho guanine nucleotide exchange factor
