# Supplementary material for: Profiling of Selected MicroRNAs in Proliferative Eutopic Endometrium of Women with Ovarian Endometriosis
Source: Biomed Res Int. 2015 Aug 20;2015:760698. doi: 10.1155/2015/760698 (PMC4558423; doi:10.1155/2015/760698)
Supplement: Supplementary file 1 — Table I: The names of miRNAs significantly differentially expressed between eutopic endometrium of patients with endometriosis vs eutopic endometrium of patients without endometriosis. Table II: The associations between miRNA and mRNA, which presents detailed results of the search of six major databases i.e targetscan, tarbase, miranda, mirbase, mirtarget2 and pictar. [file 760698.f1.zip › 760698.f1/Table II/hsa-miR-1253.tsv]

miR	targetscan	tarbase	miranda	mirbase	mirtarget2	pictar	GeneSymbol	GeneName
hsa-miR-1253	0	0	1	0	0	0	NOP14-AS1	NOP14 antisense RNA 1
hsa-miR-1253	1	0	1	1	1	1	ZFYVE16	zinc finger, FYVE domain containing 16
hsa-miR-1253	1	0	1	1	0	0	SRCAP	Snf2-related CREBBP activator protein
hsa-miR-1253	1	0	1	1	0	0	HUWE1	HECT, UBA and WWE domain containing 1, E3 ubiquitin protein ligase
hsa-miR-1253	1	0	1	1	0	0	RAPGEF2	Rap guanine nucleotide exchange factor (GEF) 2
hsa-miR-1253	1	0	1	0	0	0	TRANK1	tetratricopeptide repeat and ankyrin repeat containing 1
hsa-miR-1253	1	0	1	1	1	1	ABCC5	ATP-binding cassette, sub-family C (CFTR/MRP), member 5
hsa-miR-1253	1	0	1	0	1	1	PTPRT	protein tyrosine phosphatase, receptor type, T
hsa-miR-1253	0	0	1	1	1	1	C2CD2L	C2CD2-like
hsa-miR-1253	1	0	1	0	1	1	MTSS1	metastasis suppressor 1
hsa-miR-1253	1	0	1	1	1	1	PPIP5K2	diphosphoinositol pentakisphosphate kinase 2
hsa-miR-1253	1	0	1	0	1	1	NEDD4L	neural precursor cell expressed, developmentally down-regulated 4-like, E3 ubiquitin protein ligase
hsa-miR-1253	1	0	1	0	1	1	CEP350	centrosomal protein 350kDa
hsa-miR-1253	0	0	1	1	1	1	NEU3	sialidase 3 (membrane sialidase)
hsa-miR-1253	1	0	1	1	1	1	GPATCH8	G patch domain containing 8
hsa-miR-1253	1	0	1	1	1	1	SLC4A7	solute carrier family 4, sodium bicarbonate cotransporter, member 7
hsa-miR-1253	1	0	1	0	1	1	MFAP3L	microfibrillar-associated protein 3-like
hsa-miR-1253	0	0	1	1	1	1	PHLDB1	pleckstrin homology-like domain, family B, member 1
hsa-miR-1253	1	0	1	1	1	1	GIGYF2	GRB10 interacting GYF protein 2
hsa-miR-1253	0	0	1	1	1	1	CLUAP1	clusterin associated protein 1
hsa-miR-1253	0	0	1	1	0	0	ARHGEF2	Rho/Rac guanine nucleotide exchange factor (GEF) 2
hsa-miR-1253	1	0	1	1	1	1	TP63	tumor protein p63
hsa-miR-1253	1	0	1	0	1	1	SNX13	sorting nexin 13
hsa-miR-1253	0	0	1	1	0	0	ATP10B	ATPase, class V, type 10B
hsa-miR-1253	1	0	1	1	1	1	DNM3	dynamin 3
hsa-miR-1253	0	0	1	1	1	1	WDR47	WD repeat domain 47
hsa-miR-1253	1	0	1	1	1	1	ARHGEF15	Rho guanine nucleotide exchange factor (GEF) 15
hsa-miR-1253	1	0	1	0	0	0	DTX4	deltex homolog 4 (Drosophila)
hsa-miR-1253	1	0	1	1	1	1	C11orf9	chromosome 11 open reading frame 9
hsa-miR-1253	0	0	1	0	1	1	TP53TG3	TP53 target 3
hsa-miR-1253	0	0	1	0	0	0	TP53TG3B	TP53 target 3B
hsa-miR-1253	1	0	1	1	0	0	KIAA1045	KIAA1045
hsa-miR-1253	1	0	1	1	1	1	NLGN1	neuroligin 1
hsa-miR-1253	1	0	1	1	1	1	PHF8	PHD finger protein 8
hsa-miR-1253	1	0	1	0	1	1	SRGAP3	SLIT-ROBO Rho GTPase activating protein 3
hsa-miR-1253	1	0	1	1	1	1	NDRG4	NDRG family member 4
hsa-miR-1253	1	0	1	1	1	1	ATXN7L1	ataxin 7-like 1
hsa-miR-1253	1	0	1	1	1	1	RALGAPB	Ral GTPase activating protein, beta subunit (non-catalytic)
hsa-miR-1253	1	0	1	1	1	1	RIMKLB	ribosomal modification protein rimK-like family member B
hsa-miR-1253	1	0	1	1	1	1	MKL2	MKL/myocardin-like 2
hsa-miR-1253	0	0	1	1	1	1	FSTL5	follistatin-like 5
hsa-miR-1253	0	0	1	0	0	0	MTA3	metastasis associated 1 family, member 3
hsa-miR-1253	1	0	1	1	1	1	STK36	serine/threonine kinase 36
hsa-miR-1253	1	0	1	0	1	1	KCTD16	potassium channel tetramerisation domain containing 16
hsa-miR-1253	1	0	1	1	1	1	LRRC7	leucine rich repeat containing 7
hsa-miR-1253	1	0	1	1	1	1	UPF2	UPF2 regulator of nonsense transcripts homolog (yeast)
hsa-miR-1253	0	0	1	0	0	0	NYAP2	neuronal tyrosine-phosphorylated phosphoinositide-3-kinase adaptor 2
hsa-miR-1253	1	0	1	1	0	0	ZSWIM5	zinc finger, SWIM-type containing 5
hsa-miR-1253	1	0	1	1	1	1	TOPORS	topoisomerase I binding, arginine/serine-rich, E3 ubiquitin protein ligase
hsa-miR-1253	1	0	1	0	1	1	IGDCC4	immunoglobulin superfamily, DCC subclass, member 4
hsa-miR-1253	1	0	1	0	0	0	TANC2	tetratricopeptide repeat, ankyrin repeat and coiled-coil containing 2
hsa-miR-1253	1	0	1	1	0	0	ARHGAP39	Rho GTPase activating protein 39
hsa-miR-1253	0	0	1	1	1	1	BHLHB9	basic helix-loop-helix domain containing, class B, 9
hsa-miR-1253	0	0	1	1	1	1	AMBRA1	autophagy/beclin-1 regulator 1
hsa-miR-1253	1	0	1	1	1	1	SYNE1	spectrin repeat containing, nuclear envelope 1
hsa-miR-1253	0	0	1	0	1	1	SETD5	SET domain containing 5
hsa-miR-1253	1	0	1	1	1	1	NPAS3	neuronal PAS domain protein 3
hsa-miR-1253	1	0	1	1	1	1	IKZF4	IKAROS family zinc finger 4 (Eos)
hsa-miR-1253	1	0	1	1	1	1	LCOR	ligand dependent nuclear receptor corepressor
hsa-miR-1253	0	0	1	1	0	0	FOCAD	focadhesin
hsa-miR-1253	1	0	1	0	1	1	JPH4	junctophilin 4
hsa-miR-1253	0	0	1	1	1	1	UNC80	unc-80 homolog (C. elegans)
hsa-miR-1253	0	0	1	1	0	0	COL27A1	collagen, type XXVII, alpha 1
hsa-miR-1253	1	0	1	1	1	1	HNRPDL	heterogeneous nuclear ribonucleoprotein D-like
hsa-miR-1253	0	0	1	0	0	0	MYSM1	Myb-like, SWIRM and MPN domains 1
hsa-miR-1253	0	0	1	1	0	0	SEC16B	SEC16 homolog B (S. cerevisiae)
hsa-miR-1253	1	0	1	1	1	1	SH3TC2	SH3 domain and tetratricopeptide repeats 2
hsa-miR-1253	1	0	1	1	1	1	CDC20B	cell division cycle 20 homolog B (S. cerevisiae)
hsa-miR-1253	1	0	1	0	1	1	RNF43	ring finger protein 43
hsa-miR-1253	1	0	1	1	1	1	ACBD5	acyl-CoA binding domain containing 5
hsa-miR-1253	0	0	1	1	1	1	MCF2	MCF.2 cell line derived transforming sequence
hsa-miR-1253	1	1	1	1	1	1	BACE1	beta-site APP-cleaving enzyme 1
hsa-miR-1253	0	0	1	0	1	1	RASSF8	Ras association (RalGDS/AF-6) domain family (N-terminal) member 8
hsa-miR-1253	0	0	1	1	0	0	ANKRD18A	ankyrin repeat domain 18A
hsa-miR-1253	1	0	1	1	1	1	UBR3	ubiquitin protein ligase E3 component n-recognin 3 (putative)
hsa-miR-1253	1	0	1	0	0	0	ZC3H12C	zinc finger CCCH-type containing 12C
hsa-miR-1253	0	0	1	1	0	0	KRTAP24-1	keratin associated protein 24-1
hsa-miR-1253	1	0	1	1	1	1	TRPM3	transient receptor potential cation channel, subfamily M, member 3
hsa-miR-1253	0	0	1	1	1	1	MICAL2	microtubule associated monoxygenase, calponin and LIM domain containing 2
hsa-miR-1253	1	0	1	1	1	1	ADARB1	adenosine deaminase, RNA-specific, B1
hsa-miR-1253	0	0	1	1	1	1	ING4	inhibitor of growth family, member 4
hsa-miR-1253	1	0	1	0	1	1	CCDC88A	coiled-coil domain containing 88A
hsa-miR-1253	0	0	1	1	0	0	HFM1	HFM1, ATP-dependent DNA helicase homolog (S. cerevisiae)
hsa-miR-1253	0	0	1	1	0	0	OVGP1	oviductal glycoprotein 1, 120kDa
hsa-miR-1253	1	0	1	1	1	1	AP3D1	adaptor-related protein complex 3, delta 1 subunit
hsa-miR-1253	0	0	1	1	0	0	DBP	D site of albumin promoter (albumin D-box) binding protein
hsa-miR-1253	0	0	1	1	1	1	ATP7A	ATPase, Cu++ transporting, alpha polypeptide
hsa-miR-1253	1	0	1	1	1	1	COL11A1	collagen, type XI, alpha 1
hsa-miR-1253	1	0	1	1	1	1	SHC1	SHC (Src homology 2 domain containing) transforming protein 1
hsa-miR-1253	0	0	1	0	1	1	ITPR1	inositol 1,4,5-trisphosphate receptor, type 1
hsa-miR-1253	1	0	1	1	1	1	BACH2	BTB and CNC homology 1, basic leucine zipper transcription factor 2
hsa-miR-1253	0	0	1	1	1	1	NLRP3	NLR family, pyrin domain containing 3
hsa-miR-1253	0	0	1	1	0	0	KCNC3	potassium voltage-gated channel, Shaw-related subfamily, member 3
hsa-miR-1253	1	0	1	1	1	1	RPS6KA3	ribosomal protein S6 kinase, 90kDa, polypeptide 3
hsa-miR-1253	1	0	1	1	1	1	PLEKHH3	pleckstrin homology domain containing, family H (with MyTH4 domain) member 3
hsa-miR-1253	0	0	1	1	0	0	TNNI3K	TNNI3 interacting kinase
hsa-miR-1253	0	0	1	0	0	0	PIDD	p53-induced death domain protein
hsa-miR-1253	1	0	1	1	1	1	NFYC	nuclear transcription factor Y, gamma
hsa-miR-1253	0	0	1	1	1	1	MAZ	MYC-associated zinc finger protein (purine-binding transcription factor)
hsa-miR-1253	1	0	1	1	1	1	PHC1	polyhomeotic homolog 1 (Drosophila)
hsa-miR-1253	1	0	1	1	1	1	SLC8A1	solute carrier family 8 (sodium/calcium exchanger), member 1
hsa-miR-1253	1	0	1	1	1	1	DTNA	dystrobrevin, alpha
hsa-miR-1253	1	0	1	0	1	1	PLAG1	pleiomorphic adenoma gene 1
hsa-miR-1253	0	0	1	1	1	1	DGKI	diacylglycerol kinase, iota
hsa-miR-1253	1	0	1	0	1	1	SLC6A6	solute carrier family 6 (neurotransmitter transporter, taurine), member 6
hsa-miR-1253	1	0	1	0	1	1	DPYSL2	dihydropyrimidinase-like 2
hsa-miR-1253	0	0	1	1	1	1	DDX39B	DEAD (Asp-Glu-Ala-Asp) box polypeptide 39B
hsa-miR-1253	0	0	1	1	1	1	TFRC	transferrin receptor (p90, CD71)
hsa-miR-1253	1	0	1	1	1	1	SATB2	SATB homeobox 2
hsa-miR-1253	1	0	1	1	1	1	MAP4	microtubule-associated protein 4
hsa-miR-1253	0	0	1	1	0	0	IFT27	intraflagellar transport 27 homolog (Chlamydomonas)
hsa-miR-1253	0	0	1	1	1	1	ACO1	aconitase 1, soluble
hsa-miR-1253	1	0	1	1	1	1	MYO5A	myosin VA (heavy chain 12, myoxin)
hsa-miR-1253	0	0	1	1	0	0	EIF2B4	eukaryotic translation initiation factor 2B, subunit 4 delta, 67kDa
hsa-miR-1253	0	0	1	1	1	1	STAU1	staufen, RNA binding protein, homolog 1 (Drosophila)
hsa-miR-1253	0	0	1	1	0	0	HLA-DMB	major histocompatibility complex, class II, DM beta
hsa-miR-1253	0	0	1	1	0	0	BMP1	bone morphogenetic protein 1
hsa-miR-1253	1	0	1	1	1	1	DDX17	DEAD (Asp-Glu-Ala-Asp) box helicase 17
hsa-miR-1253	0	0	1	1	0	0	CFLAR	CASP8 and FADD-like apoptosis regulator
hsa-miR-1253	1	0	1	1	1	1	IPO8	importin 8
hsa-miR-1253	0	0	1	1	1	1	HLA-DQA1	major histocompatibility complex, class II, DQ alpha 1
hsa-miR-1253	1	0	1	1	1	1	EPB41	erythrocyte membrane protein band 4.1 (elliptocytosis 1, RH-linked)
hsa-miR-1253	1	0	1	1	1	1	CD40	CD40 molecule, TNF receptor superfamily member 5
hsa-miR-1253	1	0	1	1	1	1	SATB1	SATB homeobox 1
hsa-miR-1253	0	0	1	1	1	1	CHN1	chimerin (chimaerin) 1
hsa-miR-1253	0	0	1	1	0	0	CDK10	cyclin-dependent kinase 10
hsa-miR-1253	0	0	1	1	1	1	MYO9A	myosin IXA
hsa-miR-1253	1	0	1	1	0	0	PPP2R5D	protein phosphatase 2, regulatory subunit B', delta
hsa-miR-1253	1	0	1	1	1	1	OSBPL10	oxysterol binding protein-like 10
hsa-miR-1253	0	0	1	1	1	1	DDX10	DEAD (Asp-Glu-Ala-Asp) box polypeptide 10
hsa-miR-1253	1	0	1	1	1	1	ZFX	zinc finger protein, X-linked
hsa-miR-1253	0	0	1	1	1	1	SGSH	N-sulfoglucosamine sulfohydrolase
hsa-miR-1253	0	0	1	1	1	1	PLD1	phospholipase D1, phosphatidylcholine-specific
hsa-miR-1253	1	0	1	0	1	1	PDE7B	phosphodiesterase 7B
hsa-miR-1253	1	0	1	1	1	1	MEF2D	myocyte enhancer factor 2D
hsa-miR-1253	1	0	1	1	0	0	TNPO2	transportin 2
hsa-miR-1253	1	0	1	1	1	1	PICALM	phosphatidylinositol binding clathrin assembly protein
hsa-miR-1253	0	0	1	1	1	1	ACLY	ATP citrate lyase
hsa-miR-1253	1	0	1	0	1	1	MLL2	myeloid/lymphoid or mixed-lineage leukemia 2
hsa-miR-1253	1	0	1	1	1	1	CBFA2T2	core-binding factor, runt domain, alpha subunit 2; translocated to, 2
hsa-miR-1253	0	0	1	1	1	1	MFSD11	major facilitator superfamily domain containing 11
hsa-miR-1253	1	0	1	1	1	1	MID1	midline 1 (Opitz/BBB syndrome)
hsa-miR-1253	0	0	1	1	1	1	SH3GL3	SH3-domain GRB2-like 3
hsa-miR-1253	1	0	1	0	0	0	MAP3K1	mitogen-activated protein kinase kinase kinase 1, E3 ubiquitin protein ligase
hsa-miR-1253	0	0	1	1	1	1	CD84	CD84 molecule
hsa-miR-1253	1	0	1	1	1	1	CTNND1	catenin (cadherin-associated protein), delta 1
hsa-miR-1253	0	0	1	1	1	1	SC5DL	sterol-C5-desaturase (ERG3 delta-5-desaturase homolog, S. cerevisiae)-like
hsa-miR-1253	1	0	1	1	1	1	TMEM159	transmembrane protein 159
hsa-miR-1253	1	0	1	1	0	0	PAK1	p21 protein (Cdc42/Rac)-activated kinase 1
hsa-miR-1253	0	0	1	1	1	1	LYPLA1	lysophospholipase I
hsa-miR-1253	1	0	1	0	1	1	MAP4K4	mitogen-activated protein kinase kinase kinase kinase 4
hsa-miR-1253	0	0	1	1	1	1	SH2D1A	SH2 domain containing 1A
hsa-miR-1253	1	0	1	0	1	1	CD164	CD164 molecule, sialomucin
hsa-miR-1253	0	0	1	1	1	1	MSTO1	misato homolog 1 (Drosophila)
hsa-miR-1253	1	0	1	1	1	1	EDNRB	endothelin receptor type B
hsa-miR-1253	0	0	1	1	1	1	TMEM176B	transmembrane protein 176B
hsa-miR-1253	1	0	1	1	1	1	PKN2	protein kinase N2
hsa-miR-1253	0	0	1	1	1	1	DMRT2	doublesex and mab-3 related transcription factor 2
hsa-miR-1253	1	0	1	0	1	1	BECN1	beclin 1, autophagy related
hsa-miR-1253	0	0	1	1	0	0	CNTROB	centrobin, centrosomal BRCA2 interacting protein
hsa-miR-1253	1	0	1	1	1	1	HMG20A	high mobility group 20A
hsa-miR-1253	1	0	1	0	1	1	SLC34A2	solute carrier family 34 (sodium phosphate), member 2
hsa-miR-1253	0	0	1	1	1	1	CNPPD1	cyclin Pas1/PHO80 domain containing 1
hsa-miR-1253	1	0	1	1	1	1	ZNF202	zinc finger protein 202
hsa-miR-1253	0	0	1	1	1	1	FGFR1OP2	FGFR1 oncogene partner 2
hsa-miR-1253	1	0	1	1	1	1	STXBP6	syntaxin binding protein 6 (amisyn)
hsa-miR-1253	0	0	1	1	0	0	STYXL1	serine/threonine/tyrosine interacting-like 1
hsa-miR-1253	1	0	1	1	1	1	CHFR	checkpoint with forkhead and ring finger domains, E3 ubiquitin protein ligase
hsa-miR-1253	1	0	1	1	1	1	C3orf18	chromosome 3 open reading frame 18
hsa-miR-1253	0	0	1	0	1	1	SLC38A4	solute carrier family 38, member 4
hsa-miR-1253	0	0	1	1	0	0	NCOA6	nuclear receptor coactivator 6
hsa-miR-1253	1	0	1	1	1	1	KCNMB2	potassium large conductance calcium-activated channel, subfamily M, beta member 2
hsa-miR-1253	0	0	1	1	0	0	CHEK2	checkpoint kinase 2
hsa-miR-1253	1	0	1	1	1	1	SUFU	suppressor of fused homolog (Drosophila)
hsa-miR-1253	1	0	1	0	1	1	CSNK1G1	casein kinase 1, gamma 1
hsa-miR-1253	1	0	1	1	1	1	DESI2	desumoylating isopeptidase 2
hsa-miR-1253	0	0	1	1	1	1	PGLYRP4	peptidoglycan recognition protein 4
hsa-miR-1253	1	0	1	1	1	1	STRN3	striatin, calmodulin binding protein 3
hsa-miR-1253	0	0	1	1	1	1	NKX3-1	NK3 homeobox 1
hsa-miR-1253	0	0	1	0	0	0	TIGD7	tigger transposable element derived 7
hsa-miR-1253	1	0	1	1	0	0	LMO2	LIM domain only 2 (rhombotin-like 1)
hsa-miR-1253	0	0	1	1	0	0	TRIM41	tripartite motif containing 41
hsa-miR-1253	1	0	1	0	1	1	TRPS1	trichorhinophalangeal syndrome I
hsa-miR-1253	1	0	1	1	1	1	ERGIC1	endoplasmic reticulum-golgi intermediate compartment (ERGIC) 1
hsa-miR-1253	0	0	1	1	0	0	BCAT2	branched chain amino-acid transaminase 2, mitochondrial
hsa-miR-1253	1	0	1	1	1	1	PUM2	pumilio homolog 2 (Drosophila)
hsa-miR-1253	0	0	1	1	0	0	KCNK6	potassium channel, subfamily K, member 6
hsa-miR-1253	1	0	1	1	1	1	DCLRE1B	DNA cross-link repair 1B
hsa-miR-1253	0	0	1	1	1	1	RERG	RAS-like, estrogen-regulated, growth inhibitor
hsa-miR-1253	0	0	1	1	1	1	FCRL5	Fc receptor-like 5
hsa-miR-1253	1	0	1	1	1	1	CALU	calumenin
hsa-miR-1253	1	0	1	1	1	1	CABLES1	Cdk5 and Abl enzyme substrate 1
hsa-miR-1253	1	0	1	0	1	1	WIPF2	WAS/WASL interacting protein family, member 2
hsa-miR-1253	0	0	1	0	0	0	CLRN1-AS1	CLRN1 antisense RNA 1
hsa-miR-1253	0	0	1	0	0	0	MIR155HG	MIR155 host gene (non-protein coding)
hsa-miR-1253	1	0	1	1	1	1	NTRK2	neurotrophic tyrosine kinase, receptor, type 2
hsa-miR-1253	0	0	1	1	0	0	CNKSR2	connector enhancer of kinase suppressor of Ras 2
hsa-miR-1253	1	0	1	1	0	0	YTHDF2	YTH domain family, member 2
hsa-miR-1253	1	0	1	1	1	1	SGMS2	sphingomyelin synthase 2
hsa-miR-1253	1	0	1	1	1	1	HNRNPU	heterogeneous nuclear ribonucleoprotein U (scaffold attachment factor A)
hsa-miR-1253	0	0	1	1	1	1	OSCAR	osteoclast associated, immunoglobulin-like receptor
hsa-miR-1253	0	0	1	1	0	0	MT1E	metallothionein 1E
hsa-miR-1253	0	0	1	1	1	1	RBM11	RNA binding motif protein 11
hsa-miR-1253	0	0	1	1	0	0	SVIP	small VCP/p97-interacting protein
hsa-miR-1253	0	0	1	1	1	1	ZNF638	zinc finger protein 638
hsa-miR-1253	1	0	1	0	1	1	IL1RAP	interleukin 1 receptor accessory protein
hsa-miR-1253	1	0	1	1	1	1	AFF2	AF4/FMR2 family, member 2
hsa-miR-1253	1	0	1	1	1	1	PLAGL1	pleiomorphic adenoma gene-like 1
hsa-miR-1253	1	0	1	0	1	1	DICER1	dicer 1, ribonuclease type III
hsa-miR-1253	1	0	1	1	1	1	ZNF281	zinc finger protein 281
hsa-miR-1253	1	0	1	1	1	1	UBAP2L	ubiquitin associated protein 2-like
hsa-miR-1253	1	0	1	0	1	1	GRB10	growth factor receptor-bound protein 10
hsa-miR-1253	1	0	1	1	1	1	ILF3	interleukin enhancer binding factor 3, 90kDa
hsa-miR-1253	0	0	1	1	1	1	DMRTC1	DMRT-like family C1
hsa-miR-1253	0	0	1	1	0	0	DMRTC1B	DMRT-like family C1B
hsa-miR-1253	0	0	1	1	1	1	WWTR1	WW domain containing transcription regulator 1
hsa-miR-1253	1	0	1	1	1	1	PALM2	paralemmin 2
hsa-miR-1253	0	0	1	1	1	1	TRDN	triadin
hsa-miR-1253	1	0	1	1	1	1	VAMP7	vesicle-associated membrane protein 7
hsa-miR-1253	1	0	1	0	1	1	NAALADL2	N-acetylated alpha-linked acidic dipeptidase-like 2
hsa-miR-1253	0	0	1	1	1	1	PHACTR3	phosphatase and actin regulator 3
hsa-miR-1253	1	0	1	1	1	1	PPP1R9A	protein phosphatase 1, regulatory subunit 9A
hsa-miR-1253	0	0	1	1	0	0	NHLRC2	NHL repeat containing 2
hsa-miR-1253	0	0	1	1	1	1	ESRP1	epithelial splicing regulatory protein 1
hsa-miR-1253	0	0	1	1	0	0	ASAP3	ArfGAP with SH3 domain, ankyrin repeat and PH domain 3
hsa-miR-1253	1	0	1	0	1	1	NFAT5	nuclear factor of activated T-cells 5, tonicity-responsive
hsa-miR-1253	0	0	1	0	0	0	TUG1	taurine upregulated 1 (non-protein coding)
hsa-miR-1253	1	0	1	1	1	1	ARHGAP12	Rho GTPase activating protein 12
hsa-miR-1253	1	0	1	1	0	0	SENP3	SUMO1/sentrin/SMT3 specific peptidase 3
hsa-miR-1253	0	0	1	0	1	1	EBF2	early B-cell factor 2
hsa-miR-1253	1	0	1	1	1	1	NIP7	nuclear import 7 homolog (S. cerevisiae)
hsa-miR-1253	1	0	1	1	1	1	DNMT3B	DNA (cytosine-5-)-methyltransferase 3 beta
hsa-miR-1253	1	0	1	1	1	1	MEIS2	Meis homeobox 2
hsa-miR-1253	0	0	1	0	0	0	TPTEP1	transmembrane phosphatase with tensin homology pseudogene 1
hsa-miR-1253	0	0	1	1	1	1	STOX2	storkhead box 2
hsa-miR-1253	0	0	1	1	1	1	RNF220	ring finger protein 220
hsa-miR-1253	1	0	1	1	1	1	EIF2C1	eukaryotic translation initiation factor 2C, 1
hsa-miR-1253	1	0	1	1	1	1	SLC38A2	solute carrier family 38, member 2
hsa-miR-1253	1	0	1	1	0	0	SMUG1	single-strand-selective monofunctional uracil-DNA glycosylase 1
hsa-miR-1253	0	0	1	0	0	0	LINC00284	long intergenic non-protein coding RNA 284
hsa-miR-1253	0	0	1	1	1	1	MBNL3	muscleblind-like splicing regulator 3
hsa-miR-1253	1	0	1	1	0	0	SLC35C1	solute carrier family 35, member C1
hsa-miR-1253	1	0	1	1	1	1	PGAP1	post-GPI attachment to proteins 1
hsa-miR-1253	1	0	1	0	1	1	LIN28A	lin-28 homolog A (C. elegans)
hsa-miR-1253	1	0	1	1	1	1	MON2	MON2 homolog (S. cerevisiae)
hsa-miR-1253	0	0	1	0	0	0	SOX2-OT	SOX2 overlapping transcript (non-protein coding)
hsa-miR-1253	1	0	1	1	1	1	WDTC1	WD and tetratricopeptide repeats 1
hsa-miR-1253	0	0	1	1	1	1	ARMC5	armadillo repeat containing 5
hsa-miR-1253	1	0	1	0	1	1	DCAF17	DDB1 and CUL4 associated factor 17
hsa-miR-1253	0	0	1	1	1	1	TTC23	tetratricopeptide repeat domain 23
hsa-miR-1253	0	0	1	0	0	0	LOC284561	uncharacterized LOC284561
hsa-miR-1253	1	0	1	1	1	1	BAZ2A	bromodomain adjacent to zinc finger domain, 2A
hsa-miR-1253	1	0	1	1	1	1	DERL1	derlin 1
hsa-miR-1253	0	0	1	1	1	1	AMFR	autocrine motility factor receptor, E3 ubiquitin protein ligase
hsa-miR-1253	1	0	1	0	1	1	C14orf101	chromosome 14 open reading frame 101
hsa-miR-1253	0	0	1	1	1	1	NSUN7	NOP2/Sun domain family, member 7
hsa-miR-1253	0	0	1	0	1	1	FLJ14186	uncharacterized LOC401149
hsa-miR-1253	0	0	1	1	1	1	METTL7A	methyltransferase like 7A
hsa-miR-1253	0	0	1	1	1	1	SIGLEC1	sialic acid binding Ig-like lectin 1, sialoadhesin
hsa-miR-1253	0	0	1	0	0	0	IFFO2	intermediate filament family orphan 2
hsa-miR-1253	1	0	1	0	1	1	ATP2B1	ATPase, Ca++ transporting, plasma membrane 1
hsa-miR-1253	1	0	1	1	1	1	ABI3BP	ABI family, member 3 (NESH) binding protein
hsa-miR-1253	0	0	1	1	0	0	TRAF3IP2	TRAF3 interacting protein 2
hsa-miR-1253	1	0	1	1	1	1	DLC1	deleted in liver cancer 1
hsa-miR-1253	1	0	1	1	1	1	ARFGEF1	ADP-ribosylation factor guanine nucleotide-exchange factor 1 (brefeldin A-inhibited)
hsa-miR-1253	1	0	1	1	1	1	YPEL5	yippee-like 5 (Drosophila)
hsa-miR-1253	1	0	1	1	1	1	NAA30	N(alpha)-acetyltransferase 30, NatC catalytic subunit
hsa-miR-1253	0	0	1	0	1	1	HEMK1	HemK methyltransferase family member 1
hsa-miR-1253	0	0	1	1	1	1	MYEOV	myeloma overexpressed (in a subset of t(11;14) positive multiple myelomas)
hsa-miR-1253	0	0	1	1	0	0	MOGAT2	monoacylglycerol O-acyltransferase 2
hsa-miR-1253	0	0	1	1	1	1	FAM124B	family with sequence similarity 124B
hsa-miR-1253	0	0	1	0	1	1	FLJ22763	uncharacterized LOC401081
hsa-miR-1253	0	0	1	1	0	0	EXOC6B	exocyst complex component 6B
hsa-miR-1253	1	0	1	1	1	1	DCAF8	DDB1 and CUL4 associated factor 8
hsa-miR-1253	0	0	1	1	1	1	SH3YL1	SH3 domain containing, Ysc84-like 1 (S. cerevisiae)
hsa-miR-1253	0	0	1	1	1	1	USP48	ubiquitin specific peptidase 48
hsa-miR-1253	0	0	1	1	1	1	TGIF1	TGFB-induced factor homeobox 1
hsa-miR-1253	1	0	1	1	1	1	RNF185	ring finger protein 185
hsa-miR-1253	0	0	1	1	1	1	MINA	MYC induced nuclear antigen
hsa-miR-1253	1	0	1	1	1	1	FAM53C	family with sequence similarity 53, member C
hsa-miR-1253	0	0	1	0	0	0	JAKMIP2-AS1	JAKMIP2 antisense RNA 1
hsa-miR-1253	0	0	1	1	1	1	CCDC14	coiled-coil domain containing 14
hsa-miR-1253	0	0	1	1	1	1	DTL	denticleless E3 ubiquitin protein ligase homolog (Drosophila)
hsa-miR-1253	1	0	1	1	1	1	GPD2	glycerol-3-phosphate dehydrogenase 2 (mitochondrial)
hsa-miR-1253	0	0	1	1	0	0	CYP21A2	cytochrome P450, family 21, subfamily A, polypeptide 2
hsa-miR-1253	0	0	1	1	1	1	FAM107A	family with sequence similarity 107, member A
hsa-miR-1253	1	0	1	1	0	0	C15orf27	chromosome 15 open reading frame 27
hsa-miR-1253	0	0	1	0	0	0	CHST9-AS1	CHST9 antisense RNA 1
hsa-miR-1253	1	0	1	0	1	1	AP1G1	adaptor-related protein complex 1, gamma 1 subunit
hsa-miR-1253	1	0	1	1	0	0	SMARCA4	SWI/SNF related, matrix associated, actin dependent regulator of chromatin, subfamily a, member 4
hsa-miR-1253	0	0	1	0	0	0	CASC2	cancer susceptibility candidate 2 (non-protein coding)
hsa-miR-1253	0	0	1	0	1	1	HDX	highly divergent homeobox
hsa-miR-1253	0	0	1	0	0	0	FLJ30838	uncharacterized LOC400955
hsa-miR-1253	1	0	1	1	1	1	FRMD6	FERM domain containing 6
hsa-miR-1253	0	0	1	1	1	1	GLYATL1	glycine-N-acyltransferase-like 1
hsa-miR-1253	1	0	1	1	1	1	DIXDC1	DIX domain containing 1
hsa-miR-1253	0	0	1	1	0	0	DNAH9	dynein, axonemal, heavy chain 9
hsa-miR-1253	1	0	1	1	1	1	ZNF664	zinc finger protein 664
hsa-miR-1253	1	0	1	1	1	1	LMNA	lamin A/C
hsa-miR-1253	0	0	1	1	1	1	SEPT5	septin 5
hsa-miR-1253	1	0	1	0	1	1	FSTL4	follistatin-like 4
hsa-miR-1253	1	0	1	1	1	1	TMEM25	transmembrane protein 25
hsa-miR-1253	1	0	1	1	1	1	AGPAT1	1-acylglycerol-3-phosphate O-acyltransferase 1 (lysophosphatidic acid acyltransferase, alpha)
hsa-miR-1253	0	0	1	0	0	0	FLG-AS1	FLG antisense RNA 1
hsa-miR-1253	1	0	1	1	1	1	CLCN5	chloride channel, voltage-sensitive 5
hsa-miR-1253	1	0	1	1	1	1	SORBS2	sorbin and SH3 domain containing 2
hsa-miR-1253	0	0	1	1	1	1	PTCD2	pentatricopeptide repeat domain 2
hsa-miR-1253	0	0	1	1	1	1	XAF1	XIAP associated factor 1
hsa-miR-1253	0	0	1	1	0	0	AARSD1	alanyl-tRNA synthetase domain containing 1
hsa-miR-1253	1	0	1	1	1	1	HMGB1	high mobility group box 1
hsa-miR-1253	1	0	1	0	1	1	PCGF3	polycomb group ring finger 3
hsa-miR-1253	1	0	1	1	1	1	TLE4	transducin-like enhancer of split 4 (E(sp1) homolog, Drosophila)
hsa-miR-1253	0	0	1	0	1	1	ARHGAP42	Rho GTPase activating protein 42
hsa-miR-1253	0	0	1	1	1	1	MS4A14	membrane-spanning 4-domains, subfamily A, member 14
hsa-miR-1253	0	0	1	0	1	1	CHURC1	churchill domain containing 1
hsa-miR-1253	1	0	1	1	1	1	ANKRD49	ankyrin repeat domain 49
hsa-miR-1253	0	0	1	1	1	1	FXC1	fracture callus 1 homolog (rat)
hsa-miR-1253	1	0	1	1	1	1	C6orf89	chromosome 6 open reading frame 89
hsa-miR-1253	0	0	1	0	1	1	CCDC68	coiled-coil domain containing 68
hsa-miR-1253	0	0	1	0	1	1	UHMK1	U2AF homology motif (UHM) kinase 1
hsa-miR-1253	1	0	1	1	1	1	ARID1B	AT rich interactive domain 1B (SWI1-like)
hsa-miR-1253	0	0	1	0	1	1	CDHR3	cadherin-related family member 3
hsa-miR-1253	0	0	1	1	0	0	WDR83	WD repeat domain 83
hsa-miR-1253	1	0	1	0	1	1	RNF165	ring finger protein 165
hsa-miR-1253	0	0	1	1	1	1	SLC52A3	solute carrier family 52, riboflavin transporter, member 3
hsa-miR-1253	1	0	1	1	1	1	NOTCH2NL	notch 2 N-terminal like
hsa-miR-1253	0	0	1	1	1	1	TMEM139	transmembrane protein 139
hsa-miR-1253	0	0	1	1	1	1	KDELR1	KDEL (Lys-Asp-Glu-Leu) endoplasmic reticulum protein retention receptor 1
hsa-miR-1253	0	0	1	1	1	1	CAMKV	CaM kinase-like vesicle-associated
hsa-miR-1253	0	0	1	0	1	1	CADM1	cell adhesion molecule 1
hsa-miR-1253	0	0	1	1	1	1	TOR2A	torsin family 2, member A
hsa-miR-1253	0	0	1	1	0	0	PIGO	phosphatidylinositol glycan anchor biosynthesis, class O
hsa-miR-1253	0	0	1	1	0	0	ATP6AP1	ATPase, H+ transporting, lysosomal accessory protein 1
hsa-miR-1253	0	0	1	1	1	1	STBD1	starch binding domain 1
hsa-miR-1253	1	0	1	1	1	1	ARIH2	ariadne homolog 2 (Drosophila)
hsa-miR-1253	1	0	1	1	1	1	FRY	furry homolog (Drosophila)
hsa-miR-1253	1	0	1	1	1	1	SUPT16H	suppressor of Ty 16 homolog (S. cerevisiae)
hsa-miR-1253	1	0	1	1	1	1	MAFK	v-maf musculoaponeurotic fibrosarcoma oncogene homolog K (avian)
hsa-miR-1253	0	0	1	0	0	0	IDO2	indoleamine 2,3-dioxygenase 2
hsa-miR-1253	0	0	1	0	1	1	SSPN	sarcospan
hsa-miR-1253	0	0	1	1	1	1	CHPT1	choline phosphotransferase 1
hsa-miR-1253	0	0	1	1	1	1	WT1	Wilms tumor 1
hsa-miR-1253	0	0	1	1	1	1	SLC16A1	solute carrier family 16, member 1 (monocarboxylic acid transporter 1)
hsa-miR-1253	0	0	1	0	0	0	CXXC1P1	CXXC finger protein 1 pseudogene 1
hsa-miR-1253	1	0	1	1	1	1	LRRC57	leucine rich repeat containing 57
hsa-miR-1253	1	0	1	1	1	1	MAP3K12	mitogen-activated protein kinase kinase kinase 12
hsa-miR-1253	0	0	1	1	0	0	WBP1	WW domain binding protein 1
hsa-miR-1253	1	0	1	1	1	1	DTX3	deltex homolog 3 (Drosophila)
hsa-miR-1253	1	0	1	1	1	1	KCND1	potassium voltage-gated channel, Shal-related subfamily, member 1
hsa-miR-1253	0	0	1	1	1	1	SPOCK1	sparc/osteonectin, cwcv and kazal-like domains proteoglycan (testican) 1
hsa-miR-1253	1	0	1	1	1	1	SLC7A8	solute carrier family 7 (amino acid transporter light chain, L system), member 8
hsa-miR-1253	1	0	1	1	1	1	SIAH1	siah E3 ubiquitin protein ligase 1
hsa-miR-1253	1	0	1	0	1	1	GATAD2B	GATA zinc finger domain containing 2B
hsa-miR-1253	1	0	1	1	1	1	GALNTL2	UDP-N-acetyl-alpha-D-galactosamine:polypeptide N-acetylgalactosaminyltransferase-like 2
hsa-miR-1253	0	0	1	1	0	0	CES4A	carboxylesterase 4A
hsa-miR-1253	0	0	1	0	0	0	FLJ37505	uncharacterized LOC400087
hsa-miR-1253	0	0	1	0	1	1	AGBL4	ATP/GTP binding protein-like 4
hsa-miR-1253	0	0	1	1	1	1	AIFM3	apoptosis-inducing factor, mitochondrion-associated, 3
hsa-miR-1253	1	0	1	1	1	1	LPPR2	lipid phosphate phosphatase-related protein type 2
hsa-miR-1253	0	0	1	0	0	0	MYO1H	myosin IH
hsa-miR-1253	1	0	1	1	1	1	GCLC	glutamate-cysteine ligase, catalytic subunit
hsa-miR-1253	1	0	1	1	1	1	KANSL1	KAT8 regulatory NSL complex subunit 1
hsa-miR-1253	1	0	1	1	1	1	CPNE8	copine VIII
hsa-miR-1253	0	0	1	1	0	0	HPN	hepsin
hsa-miR-1253	1	0	1	1	1	1	NDEL1	nudE nuclear distribution E homolog (A. nidulans)-like 1
hsa-miR-1253	1	0	1	1	1	1	ATXN10	ataxin 10
hsa-miR-1253	1	0	1	0	1	1	UVRAG	UV radiation resistance associated gene
hsa-miR-1253	0	0	1	1	0	0	PLCB2	phospholipase C, beta 2
hsa-miR-1253	0	0	1	1	1	1	SETD2	SET domain containing 2
hsa-miR-1253	1	0	1	1	1	1	KCNIP3	Kv channel interacting protein 3, calsenilin
hsa-miR-1253	0	0	1	0	0	0	LOC100129858	uncharacterized LOC100129858
hsa-miR-1253	1	0	1	1	1	1	SPATS2	spermatogenesis associated, serine-rich 2
hsa-miR-1253	1	0	1	1	1	1	CECR6	cat eye syndrome chromosome region, candidate 6
hsa-miR-1253	1	0	1	1	1	1	ZC3H11A	zinc finger CCCH-type containing 11A
hsa-miR-1253	1	0	1	1	1	1	ACSL1	acyl-CoA synthetase long-chain family member 1
hsa-miR-1253	0	0	1	0	0	0	CCDC150	coiled-coil domain containing 150
hsa-miR-1253	0	0	1	1	0	0	TRIM46	tripartite motif containing 46
hsa-miR-1253	0	0	1	1	1	1	KIAA1755	KIAA1755
hsa-miR-1253	1	0	1	1	1	1	GAPVD1	GTPase activating protein and VPS9 domains 1
hsa-miR-1253	0	0	1	0	0	0	ZNF815P	zinc finger protein 815, pseudogene
hsa-miR-1253	0	0	1	0	0	0	FAM66C	family with sequence similarity 66, member C
hsa-miR-1253	1	0	1	1	0	0	FBRS	fibrosin
hsa-miR-1253	1	0	1	1	1	1	HDGF	hepatoma-derived growth factor
hsa-miR-1253	1	0	1	0	1	1	THRB	thyroid hormone receptor, beta
hsa-miR-1253	0	0	1	1	1	1	IL17RE	interleukin 17 receptor E
hsa-miR-1253	1	0	1	1	1	1	C3orf62	chromosome 3 open reading frame 62
hsa-miR-1253	1	0	1	1	1	1	ETS2	v-ets erythroblastosis virus E26 oncogene homolog 2 (avian)
hsa-miR-1253	1	0	1	1	1	1	EPB41L1	erythrocyte membrane protein band 4.1-like 1
hsa-miR-1253	1	0	1	1	1	1	EBF3	early B-cell factor 3
hsa-miR-1253	0	0	1	0	0	0	LOC400680	uncharacterized LOC400680
hsa-miR-1253	1	0	1	1	1	1	TMEM185A	transmembrane protein 185A
hsa-miR-1253	1	0	1	1	1	1	RAB11FIP4	RAB11 family interacting protein 4 (class II)
hsa-miR-1253	0	0	1	1	1	1	PPFIBP2	PTPRF interacting protein, binding protein 2 (liprin beta 2)
hsa-miR-1253	0	0	1	0	0	0	LINC00293	long intergenic non-protein coding RNA 293
hsa-miR-1253	1	0	1	1	1	1	NSUN4	NOP2/Sun domain family, member 4
hsa-miR-1253	0	0	1	0	0	0	LOC285626	uncharacterized LOC285626
hsa-miR-1253	1	0	1	1	1	1	GOLGA8B	golgin A8 family, member B
hsa-miR-1253	0	0	1	1	1	1	RBM4	RNA binding motif protein 4
hsa-miR-1253	1	0	1	1	1	1	IGSF11	immunoglobulin superfamily, member 11
hsa-miR-1253	0	0	1	1	0	0	MEI1	meiosis inhibitor 1
hsa-miR-1253	1	0	1	1	1	1	LZTS2	leucine zipper, putative tumor suppressor 2
hsa-miR-1253	0	0	1	0	0	0	HLA-DQB2	major histocompatibility complex, class II, DQ beta 2
hsa-miR-1253	1	0	1	1	1	1	GATM	glycine amidinotransferase (L-arginine:glycine amidinotransferase)
hsa-miR-1253	0	0	1	1	0	0	DCBLD1	discoidin, CUB and LCCL domain containing 1
hsa-miR-1253	0	0	1	1	1	1	SYTL4	synaptotagmin-like 4
hsa-miR-1253	1	0	1	1	1	1	LARP1B	La ribonucleoprotein domain family, member 1B
hsa-miR-1253	1	0	1	1	1	1	PCMT1	protein-L-isoaspartate (D-aspartate) O-methyltransferase
hsa-miR-1253	1	0	1	0	1	1	UNC5D	unc-5 homolog D (C. elegans)
hsa-miR-1253	0	0	1	0	1	1	CFI	complement factor I
hsa-miR-1253	0	0	1	1	0	0	SLC14A2	solute carrier family 14 (urea transporter), member 2
hsa-miR-1253	1	0	1	1	1	1	ACSL6	acyl-CoA synthetase long-chain family member 6
hsa-miR-1253	0	0	1	1	0	0	KIAA0146	KIAA0146
hsa-miR-1253	1	0	1	1	1	1	WEE1	WEE1 homolog (S. pombe)
hsa-miR-1253	0	0	1	1	0	0	MX2	myxovirus (influenza virus) resistance 2 (mouse)
hsa-miR-1253	0	0	1	1	0	0	MARS	methionyl-tRNA synthetase
hsa-miR-1253	1	0	1	1	1	1	ZNF275	zinc finger protein 275
hsa-miR-1253	0	0	1	1	0	0	SLC26A10	solute carrier family 26, member 10
hsa-miR-1253	1	0	1	1	1	1	CBLB	Cbl proto-oncogene, E3 ubiquitin protein ligase B
hsa-miR-1253	1	0	1	0	1	1	KCNK2	potassium channel, subfamily K, member 2
hsa-miR-1253	0	0	1	1	1	1	PRRT1	proline-rich transmembrane protein 1
hsa-miR-1253	0	0	1	0	0	0	LOC650368	asparagine-linked glycosylation 1-like pseudogene
hsa-miR-1253	1	0	1	1	1	1	OSBPL9	oxysterol binding protein-like 9
hsa-miR-1253	0	0	1	1	1	1	ANKRD44	ankyrin repeat domain 44
hsa-miR-1253	1	0	1	1	0	0	KCNC1	potassium voltage-gated channel, Shaw-related subfamily, member 1
hsa-miR-1253	0	0	1	1	1	1	IDS	iduronate 2-sulfatase
hsa-miR-1253	1	0	1	1	1	1	ERBB3	v-erb-b2 erythroblastic leukemia viral oncogene homolog 3 (avian)
hsa-miR-1253	0	0	1	1	0	0	DOCK11	dedicator of cytokinesis 11
hsa-miR-1253	0	0	1	1	1	1	C2orf91	chromosome 2 open reading frame 91
hsa-miR-1253	0	0	1	0	0	0	FAM47E	family with sequence similarity 47, member E
hsa-miR-1253	1	0	1	1	1	1	PIAS3	protein inhibitor of activated STAT, 3
hsa-miR-1253	0	0	1	1	0	0	LOC100128239	uncharacterized LOC100128239
hsa-miR-1253	1	0	1	1	1	1	DLGAP4	discs, large (Drosophila) homolog-associated protein 4
hsa-miR-1253	0	0	1	1	1	1	HLA-A	major histocompatibility complex, class I, A
hsa-miR-1253	1	0	1	1	1	1	KPNA1	karyopherin alpha 1 (importin alpha 5)
hsa-miR-1253	1	0	1	0	0	0	MSL1	male-specific lethal 1 homolog (Drosophila)
hsa-miR-1253	1	0	1	0	1	1	HECTD1	HECT domain containing E3 ubiquitin protein ligase 1
hsa-miR-1253	0	0	1	1	0	0	RPRD2	regulation of nuclear pre-mRNA domain containing 2
hsa-miR-1253	0	0	1	1	1	1	RBM46	RNA binding motif protein 46
hsa-miR-1253	1	0	1	1	0	0	UBN2	ubinuclein 2
hsa-miR-1253	1	0	1	1	1	1	KALRN	kalirin, RhoGEF kinase
hsa-miR-1253	1	0	1	1	1	1	FAM122B	family with sequence similarity 122B
hsa-miR-1253	0	0	1	1	0	0	C20orf141	chromosome 20 open reading frame 141
hsa-miR-1253	1	0	1	1	1	1	CSRNP3	cysteine-serine-rich nuclear protein 3
hsa-miR-1253	1	0	1	1	1	1	DPY19L3	dpy-19-like 3 (C. elegans)
hsa-miR-1253	0	0	1	0	1	1	LOC388942	uncharacterized LOC388942
hsa-miR-1253	0	0	1	1	1	1	RHPN2	rhophilin, Rho GTPase binding protein 2
hsa-miR-1253	1	0	1	1	1	1	DMXL1	Dmx-like 1
hsa-miR-1253	1	0	1	1	1	1	DLG2	discs, large homolog 2 (Drosophila)
hsa-miR-1253	1	0	1	1	1	1	NIPBL	Nipped-B homolog (Drosophila)
hsa-miR-1253	1	0	1	1	1	1	KDM4B	lysine (K)-specific demethylase 4B
hsa-miR-1253	0	0	1	0	0	0	RPL23AP53	ribosomal protein L23a pseudogene 53
hsa-miR-1253	1	0	1	1	1	1	MKRN1	makorin ring finger protein 1
hsa-miR-1253	0	0	1	1	1	1	MOBP	myelin-associated oligodendrocyte basic protein
hsa-miR-1253	0	0	1	1	0	0	FAM54B	family with sequence similarity 54, member B
hsa-miR-1253	1	0	1	0	1	1	ADIPOR2	adiponectin receptor 2
hsa-miR-1253	1	0	1	1	1	1	FMNL3	formin-like 3
hsa-miR-1253	1	0	1	1	1	1	HYOU1	hypoxia up-regulated 1
hsa-miR-1253	1	0	1	1	1	1	PHF17	PHD finger protein 17
hsa-miR-1253	1	0	1	1	1	1	KANK4	KN motif and ankyrin repeat domains 4
hsa-miR-1253	1	0	1	0	1	1	YAF2	YY1 associated factor 2
hsa-miR-1253	1	0	1	1	1	1	ENAH	enabled homolog (Drosophila)
hsa-miR-1253	0	0	1	1	1	1	ZNF503	zinc finger protein 503
hsa-miR-1253	1	0	1	0	1	1	SP6	Sp6 transcription factor
hsa-miR-1253	1	0	1	1	1	1	CXorf23	chromosome X open reading frame 23
hsa-miR-1253	1	0	1	0	1	1	FNDC3B	fibronectin type III domain containing 3B
hsa-miR-1253	0	0	1	0	0	0	TRAV20	T cell receptor alpha variable 20
hsa-miR-1253	0	0	1	1	0	0	C1orf86	chromosome 1 open reading frame 86
hsa-miR-1253	0	0	1	1	0	0	LOC100128682	uncharacterized LOC100128682
hsa-miR-1253	1	0	1	1	1	1	SLC12A6	solute carrier family 12 (potassium/chloride transporters), member 6
hsa-miR-1253	0	0	1	0	0	0	IGHG1	immunoglobulin heavy constant gamma 1 (G1m marker)
hsa-miR-1253	0	0	1	1	1	1	SLC11A2	solute carrier family 11 (proton-coupled divalent metal ion transporters), member 2
hsa-miR-1253	0	0	1	1	1	1	TPK1	thiamin pyrophosphokinase 1
hsa-miR-1253	0	0	1	0	0	0	LOC100129940	uncharacterized LOC100129940
hsa-miR-1253	0	0	1	0	0	0	EMBP1	embigin pseudogene 1
hsa-miR-1253	0	0	1	1	1	1	LYPD1	LY6/PLAUR domain containing 1
hsa-miR-1253	0	0	1	1	0	0	HEATR8	HEAT repeat containing 8
hsa-miR-1253	0	0	1	0	0	0	FAM27A	family with sequence similarity 27, member A
hsa-miR-1253	0	0	1	1	1	1	TMEM202	transmembrane protein 202
hsa-miR-1253	1	0	1	0	1	1	ESRRG	estrogen-related receptor gamma
hsa-miR-1253	0	0	1	0	1	1	GALNT13	UDP-N-acetyl-alpha-D-galactosamine:polypeptide N-acetylgalactosaminyltransferase 13 (GalNAc-T13)
hsa-miR-1253	0	0	1	0	1	1	RUFY4	RUN and FYVE domain containing 4
hsa-miR-1253	1	0	1	1	1	1	MTERFD2	MTERF domain containing 2
hsa-miR-1253	1	0	1	0	1	1	FMNL2	formin-like 2
hsa-miR-1253	1	0	1	1	1	1	MAP3K14	mitogen-activated protein kinase kinase kinase 14
hsa-miR-1253	0	0	1	1	0	0	ZNF730	zinc finger protein 730
hsa-miR-1253	1	0	1	1	1	1	MAP2K4	mitogen-activated protein kinase kinase 4
hsa-miR-1253	0	0	1	0	0	0	LOC619207	scavenger receptor protein family member
hsa-miR-1253	0	0	1	0	0	0	AGAP9	ArfGAP with GTPase domain, ankyrin repeat and PH domain 9
hsa-miR-1253	1	0	1	1	1	1	NME6	NME/NM23 nucleoside diphosphate kinase 6
hsa-miR-1253	1	0	1	1	1	1	RBBP4	retinoblastoma binding protein 4
hsa-miR-1253	1	0	1	1	1	1	TAP2	transporter 2, ATP-binding cassette, sub-family B (MDR/TAP)
hsa-miR-1253	1	0	1	0	1	1	TMEM106B	transmembrane protein 106B
hsa-miR-1253	0	0	1	1	1	1	CRISP3	cysteine-rich secretory protein 3
hsa-miR-1253	1	0	1	1	1	1	GATA6	GATA binding protein 6
hsa-miR-1253	1	0	1	1	1	1	RPS6KA4	ribosomal protein S6 kinase, 90kDa, polypeptide 4
hsa-miR-1253	1	0	1	1	0	0	ATP13A3	ATPase type 13A3
hsa-miR-1253	0	0	1	1	0	0	C19orf44	chromosome 19 open reading frame 44
hsa-miR-1253	0	0	1	0	1	1	PEX5	peroxisomal biogenesis factor 5
hsa-miR-1253	1	0	1	1	0	0	TDRKH	tudor and KH domain containing
hsa-miR-1253	1	0	1	1	1	1	TBC1D15	TBC1 domain family, member 15
hsa-miR-1253	1	0	1	1	0	0	ABLIM3	actin binding LIM protein family, member 3
hsa-miR-1253	1	0	1	1	1	1	TGFBR3	transforming growth factor, beta receptor III
hsa-miR-1253	0	0	1	1	1	1	PRSS16	protease, serine, 16 (thymus)
hsa-miR-1253	1	0	1	1	1	1	AHCYL1	adenosylhomocysteinase-like 1
hsa-miR-1253	1	0	1	1	1	1	NECAP1	NECAP endocytosis associated 1
hsa-miR-1253	0	0	1	1	0	0	NEK7	NIMA (never in mitosis gene a)-related kinase 7
hsa-miR-1253	0	0	1	1	1	1	TTLL3	tubulin tyrosine ligase-like family, member 3
hsa-miR-1253	1	0	1	1	0	0	MAN1B1	mannosidase, alpha, class 1B, member 1
hsa-miR-1253	1	0	1	1	1	1	DVL3	dishevelled, dsh homolog 3 (Drosophila)
hsa-miR-1253	0	0	1	1	1	1	TTLL5	tubulin tyrosine ligase-like family, member 5
hsa-miR-1253	0	0	1	0	0	0	DNAJC5B	DnaJ (Hsp40) homolog, subfamily C, member 5 beta
hsa-miR-1253	1	0	1	1	1	1	PREX1	phosphatidylinositol-3,4,5-trisphosphate-dependent Rac exchange factor 1
hsa-miR-1253	1	0	1	1	1	1	SLC25A36	solute carrier family 25 (pyrimidine nucleotide carrier ), member 36
hsa-miR-1253	0	0	1	1	0	0	BAG3	BCL2-associated athanogene 3
hsa-miR-1253	1	0	1	1	1	1	GOLGA8A	golgin A8 family, member A
hsa-miR-1253	0	0	1	1	1	1	TAOK2	TAO kinase 2
hsa-miR-1253	1	0	1	0	1	1	GPR85	G protein-coupled receptor 85
hsa-miR-1253	0	0	1	1	0	0	DOPEY1	dopey family member 1
hsa-miR-1253	0	0	1	0	0	0	FAM66D	family with sequence similarity 66, member D
hsa-miR-1253	1	0	1	1	1	1	MSANTD2	Myb/SANT-like DNA-binding domain containing 2
hsa-miR-1253	1	0	1	1	1	1	YTHDF3	YTH domain family, member 3
hsa-miR-1253	0	0	1	0	1	1	GAB3	GRB2-associated binding protein 3
hsa-miR-1253	0	0	1	1	1	1	BEND7	BEN domain containing 7
hsa-miR-1253	1	0	1	1	1	1	FAM126B	family with sequence similarity 126, member B
hsa-miR-1253	1	0	1	1	1	1	MLL3	myeloid/lymphoid or mixed-lineage leukemia 3
hsa-miR-1253	0	0	1	1	1	1	YAP1	Yes-associated protein 1
hsa-miR-1253	0	0	1	0	0	0	FAM225A	family with sequence similarity 225, member A (non-protein coding)
hsa-miR-1253	0	0	1	1	1	1	USPL1	ubiquitin specific peptidase like 1
hsa-miR-1253	1	0	1	1	1	1	POU6F1	POU class 6 homeobox 1
hsa-miR-1253	1	0	1	1	1	1	SBF2	SET binding factor 2
hsa-miR-1253	0	0	1	0	1	1	PAPD4	PAP associated domain containing 4
hsa-miR-1253	1	0	1	0	1	1	MEF2C	myocyte enhancer factor 2C
hsa-miR-1253	0	0	1	1	1	1	NARG2	NMDA receptor regulated 2
hsa-miR-1253	0	0	1	1	1	1	NFE2L1	nuclear factor (erythroid-derived 2)-like 1
hsa-miR-1253	0	0	1	1	0	0	PPIE	peptidylprolyl isomerase E (cyclophilin E)
hsa-miR-1253	1	0	1	1	1	1	ANO1	anoctamin 1, calcium activated chloride channel
hsa-miR-1253	0	0	1	1	1	1	KIAA1841	KIAA1841
hsa-miR-1253	1	0	1	1	1	1	NRP1	neuropilin 1
hsa-miR-1253	0	0	1	0	0	0	ADCY10P1	adenylate cyclase 10 (soluble) pseudogene 1
hsa-miR-1253	1	0	1	0	1	1	EXOC5	exocyst complex component 5
hsa-miR-1253	0	0	1	1	0	0	TTLL6	tubulin tyrosine ligase-like family, member 6
hsa-miR-1253	1	0	1	1	1	1	SMCR7L	Smith-Magenis syndrome chromosome region, candidate 7-like
hsa-miR-1253	1	0	1	1	1	1	CAPRIN2	caprin family member 2
hsa-miR-1253	1	0	1	1	1	1	SLC24A4	solute carrier family 24 (sodium/potassium/calcium exchanger), member 4
hsa-miR-1253	1	0	1	1	1	1	MBD6	methyl-CpG binding domain protein 6
hsa-miR-1253	1	0	1	0	1	1	JAZF1	JAZF zinc finger 1
hsa-miR-1253	0	0	1	1	1	1	C8orf34	chromosome 8 open reading frame 34
hsa-miR-1253	1	0	1	1	1	1	RICTOR	RPTOR independent companion of MTOR, complex 2
hsa-miR-1253	0	0	1	1	1	1	BTK	Bruton agammaglobulinemia tyrosine kinase
hsa-miR-1253	1	0	1	1	1	1	SET	SET nuclear oncogene
hsa-miR-1253	1	0	1	0	1	1	PHYHIPL	phytanoyl-CoA 2-hydroxylase interacting protein-like
hsa-miR-1253	1	0	1	1	1	1	PPP3CA	protein phosphatase 3, catalytic subunit, alpha isozyme
hsa-miR-1253	1	0	1	1	1	1	RNF38	ring finger protein 38
hsa-miR-1253	0	0	1	1	1	1	MTMR14	myotubularin related protein 14
hsa-miR-1253	1	0	1	1	1	1	IKZF2	IKAROS family zinc finger 2 (Helios)
hsa-miR-1253	0	0	1	1	1	1	CCDC62	coiled-coil domain containing 62
hsa-miR-1253	1	0	1	1	1	1	RCAN2	regulator of calcineurin 2
hsa-miR-1253	1	0	1	1	1	1	TXNRD1	thioredoxin reductase 1
hsa-miR-1253	0	0	1	1	0	0	TREM1	triggering receptor expressed on myeloid cells 1
hsa-miR-1253	0	0	1	0	0	0	KGFLP1	fibroblast growth factor 7 pseudogene
hsa-miR-1253	0	0	1	1	0	0	EIF5A	eukaryotic translation initiation factor 5A
hsa-miR-1253	0	0	1	1	1	1	MED19	mediator complex subunit 19
hsa-miR-1253	0	0	1	1	1	1	CEP41	centrosomal protein 41kDa
hsa-miR-1253	0	0	1	1	1	1	APTX	aprataxin
hsa-miR-1253	0	0	1	1	0	0	DNAH1	dynein, axonemal, heavy chain 1
hsa-miR-1253	0	0	1	1	1	1	IYD	iodotyrosine deiodinase
hsa-miR-1253	1	0	1	1	1	1	TPP1	tripeptidyl peptidase I
hsa-miR-1253	1	0	1	1	1	1	RAI14	retinoic acid induced 14
hsa-miR-1253	1	0	1	1	1	1	GFRA2	GDNF family receptor alpha 2
hsa-miR-1253	1	0	1	1	1	1	TAB3	TGF-beta activated kinase 1/MAP3K7 binding protein 3
hsa-miR-1253	0	0	1	1	1	1	MFAP5	microfibrillar associated protein 5
hsa-miR-1253	0	0	1	0	0	0	FAM138C	family with sequence similarity 138, member C
hsa-miR-1253	1	0	1	1	1	1	CAMTA1	calmodulin binding transcription activator 1
hsa-miR-1253	0	0	1	1	1	1	GCOM1	GRINL1A complex locus 1
hsa-miR-1253	1	0	1	0	1	1	MEGF9	multiple EGF-like-domains 9
hsa-miR-1253	0	0	1	0	1	1	FAM198B	family with sequence similarity 198, member B
hsa-miR-1253	0	0	1	1	1	1	VWA5A	von Willebrand factor A domain containing 5A
hsa-miR-1253	1	0	1	0	1	1	ANKRD28	ankyrin repeat domain 28
hsa-miR-1253	1	0	1	1	1	1	ECT2	epithelial cell transforming sequence 2 oncogene
hsa-miR-1253	0	0	1	1	1	1	RPTN	repetin
hsa-miR-1253	0	0	1	1	1	1	PLD5	phospholipase D family, member 5
hsa-miR-1253	0	0	1	1	1	1	POTEG	POTE ankyrin domain family, member G
hsa-miR-1253	0	0	1	1	1	1	EHBP1	EH domain binding protein 1
hsa-miR-1253	1	0	1	1	1	1	MECP2	methyl CpG binding protein 2 (Rett syndrome)
hsa-miR-1253	1	0	1	0	1	1	LRAT	lecithin retinol acyltransferase (phosphatidylcholine--retinol O-acyltransferase)
hsa-miR-1253	1	0	1	1	1	1	RBM24	RNA binding motif protein 24
hsa-miR-1253	0	0	1	1	0	0	ASB16	ankyrin repeat and SOCS box containing 16
hsa-miR-1253	1	0	1	1	1	1	HMGA2	high mobility group AT-hook 2
hsa-miR-1253	0	0	1	1	1	1	HORMAD1	HORMA domain containing 1
hsa-miR-1253	0	0	1	0	1	1	CCL4L2	chemokine (C-C motif) ligand 4-like 2
hsa-miR-1253	0	0	1	1	1	1	CCL4L1	chemokine (C-C motif) ligand 4-like 1
hsa-miR-1253	1	0	1	1	1	1	QKI	QKI, KH domain containing, RNA binding
hsa-miR-1253	1	0	1	1	1	1	PRKACB	protein kinase, cAMP-dependent, catalytic, beta
hsa-miR-1253	1	0	1	1	1	1	TBC1D22B	TBC1 domain family, member 22B
hsa-miR-1253	1	0	1	1	1	1	ZNF282	zinc finger protein 282
hsa-miR-1253	1	0	1	1	1	1	AMOT	angiomotin
hsa-miR-1253	1	0	1	1	1	1	RPRD1A	regulation of nuclear pre-mRNA domain containing 1A
hsa-miR-1253	0	0	1	1	1	1	SLC6A2	solute carrier family 6 (neurotransmitter transporter, noradrenalin), member 2
hsa-miR-1253	1	0	1	0	1	1	FAM46A	family with sequence similarity 46, member A
hsa-miR-1253	0	0	1	1	1	1	PAFAH1B2	platelet-activating factor acetylhydrolase 1b, catalytic subunit 2 (30kDa)
hsa-miR-1253	1	0	1	1	1	1	AZI2	5-azacytidine induced 2
hsa-miR-1253	0	0	1	1	1	1	WDR55	WD repeat domain 55
hsa-miR-1253	1	0	1	0	0	0	VGLL4	vestigial like 4 (Drosophila)
hsa-miR-1253	1	0	1	1	1	1	RIMS3	regulating synaptic membrane exocytosis 3
hsa-miR-1253	1	0	1	1	1	1	ZNF410	zinc finger protein 410
hsa-miR-1253	1	0	1	1	1	1	TSEN34	tRNA splicing endonuclease 34 homolog (S. cerevisiae)
hsa-miR-1253	1	0	1	0	1	1	CGGBP1	CGG triplet repeat binding protein 1
hsa-miR-1253	1	0	1	1	1	1	POU2F2	POU class 2 homeobox 2
hsa-miR-1253	1	0	1	1	0	0	EIF4A1	eukaryotic translation initiation factor 4A1
hsa-miR-1253	1	0	1	0	1	1	VAMP4	vesicle-associated membrane protein 4
hsa-miR-1253	1	0	1	1	1	1	MACF1	microtubule-actin crosslinking factor 1
hsa-miR-1253	0	0	1	1	1	1	ACPP	acid phosphatase, prostate
hsa-miR-1253	1	0	1	1	1	1	PTMS	parathymosin
hsa-miR-1253	0	0	1	1	1	1	C1orf94	chromosome 1 open reading frame 94
hsa-miR-1253	0	0	1	1	0	0	RBM14	RNA binding motif protein 14
hsa-miR-1253	1	0	1	1	1	1	RSU1	Ras suppressor protein 1
hsa-miR-1253	0	0	1	1	0	0	SLC4A2	solute carrier family 4, anion exchanger, member 2 (erythrocyte membrane protein band 3-like 1)
hsa-miR-1253	1	0	1	1	1	1	RELL2	RELT-like 2
hsa-miR-1253	0	0	1	1	1	1	ATXN2L	ataxin 2-like
hsa-miR-1253	1	0	1	1	1	1	SLC46A1	solute carrier family 46 (folate transporter), member 1
hsa-miR-1253	1	0	1	1	1	1	TRIM2	tripartite motif containing 2
hsa-miR-1253	0	0	1	1	1	1	GNL3L	guanine nucleotide binding protein-like 3 (nucleolar)-like
hsa-miR-1253	0	0	1	1	1	1	HDHD2	haloacid dehalogenase-like hydrolase domain containing 2
hsa-miR-1253	0	0	1	0	0	0	GRAMD1B	GRAM domain containing 1B
hsa-miR-1253	1	0	1	1	1	1	IDH1	isocitrate dehydrogenase 1 (NADP+), soluble
hsa-miR-1253	1	0	1	1	1	1	DPH1	DPH1 homolog (S. cerevisiae)
hsa-miR-1253	0	0	1	1	0	0	PTPMT1	protein tyrosine phosphatase, mitochondrial 1
hsa-miR-1253	1	0	1	1	1	1	YY1	YY1 transcription factor
hsa-miR-1253	1	0	1	1	1	1	MEIS3	Meis homeobox 3
hsa-miR-1253	1	0	1	1	0	0	FHL3	four and a half LIM domains 3
hsa-miR-1253	1	0	1	1	0	0	LRFN1	leucine rich repeat and fibronectin type III domain containing 1
hsa-miR-1253	0	0	1	1	1	1	TOMM40L	translocase of outer mitochondrial membrane 40 homolog (yeast)-like
hsa-miR-1253	0	0	1	1	1	1	C8orf33	chromosome 8 open reading frame 33
hsa-miR-1253	0	0	1	1	1	1	UCHL5	ubiquitin carboxyl-terminal hydrolase L5
hsa-miR-1253	0	0	1	0	0	0	KLHL15	kelch-like 15 (Drosophila)
hsa-miR-1253	1	0	1	1	1	1	ZDHHC3	zinc finger, DHHC-type containing 3
hsa-miR-1253	0	0	1	1	1	1	KRCC1	lysine-rich coiled-coil 1
hsa-miR-1253	0	0	1	1	0	0	DPY30	dpy-30 homolog (C. elegans)
hsa-miR-1253	0	0	1	1	1	1	C1QTNF3	C1q and tumor necrosis factor related protein 3
hsa-miR-1253	1	0	1	1	1	1	SCAMP1	secretory carrier membrane protein 1
hsa-miR-1253	1	0	1	0	1	1	CYBRD1	cytochrome b reductase 1
hsa-miR-1253	1	0	1	1	1	1	ELF4	E74-like factor 4 (ets domain transcription factor)
hsa-miR-1253	0	0	1	1	0	0	ZDHHC6	zinc finger, DHHC-type containing 6
hsa-miR-1253	0	0	1	1	1	1	PARP9	poly (ADP-ribose) polymerase family, member 9
hsa-miR-1253	1	0	1	1	1	1	ARHGEF9	Cdc42 guanine nucleotide exchange factor (GEF) 9
hsa-miR-1253	0	0	1	0	1	1	TMSB15B	thymosin beta 15B
hsa-miR-1253	0	0	1	1	1	1	TMEM40	transmembrane protein 40
hsa-miR-1253	0	0	1	1	0	0	PLRG1	pleiotropic regulator 1
hsa-miR-1253	0	0	1	1	0	0	TMEM150B	transmembrane protein 150B
hsa-miR-1253	1	0	1	0	1	1	BTF3L4	basic transcription factor 3-like 4
hsa-miR-1253	0	0	1	1	0	0	CA5BP1	carbonic anhydrase VB pseudogene 1
hsa-miR-1253	0	0	1	1	1	1	SRGN	serglycin
hsa-miR-1253	0	0	1	1	1	1	PDE1C	phosphodiesterase 1C, calmodulin-dependent 70kDa
hsa-miR-1253	0	0	1	1	1	1	CDC42SE2	CDC42 small effector 2
hsa-miR-1253	0	0	1	0	0	0	DPY19L2P2	dpy-19-like 2 pseudogene 2 (C. elegans)
hsa-miR-1253	1	0	1	1	1	1	RACGAP1	Rac GTPase activating protein 1
hsa-miR-1253	1	0	1	0	1	1	CDK19	cyclin-dependent kinase 19
hsa-miR-1253	1	0	1	1	1	1	NIPA1	non imprinted in Prader-Willi/Angelman syndrome 1
hsa-miR-1253	0	0	1	0	0	0	ADAM5	ADAM metallopeptidase domain 5, pseudogene
hsa-miR-1253	1	0	1	1	1	1	CNTN4	contactin 4
hsa-miR-1253	1	0	1	1	1	1	ZBTB11	zinc finger and BTB domain containing 11
hsa-miR-1253	0	0	1	1	1	1	SELP	selectin P (granule membrane protein 140kDa, antigen CD62)
hsa-miR-1253	1	0	1	1	1	1	SMYD2	SET and MYND domain containing 2
hsa-miR-1253	1	0	1	1	1	1	TMEM127	transmembrane protein 127
hsa-miR-1253	1	0	1	1	1	1	HTR2C	5-hydroxytryptamine (serotonin) receptor 2C, G protein-coupled
hsa-miR-1253	1	0	1	1	1	1	MRO	maestro
hsa-miR-1253	0	0	1	1	0	0	TSPAN16	tetraspanin 16
hsa-miR-1253	0	0	1	1	1	1	SLC22A2	solute carrier family 22 (organic cation transporter), member 2
hsa-miR-1253	1	0	1	1	1	1	PLS1	plastin 1
hsa-miR-1253	1	0	1	1	1	1	ZPLD1	zona pellucida-like domain containing 1
hsa-miR-1253	0	0	1	0	0	0	CFL1P1	cofilin 1 (non-muscle) pseudogene 1
hsa-miR-1253	0	0	1	0	0	0	LOC387647	patched domain containing 3 pseudogene
hsa-miR-1253	0	0	1	1	0	0	ASIC4	acid-sensing (proton-gated) ion channel family member 4
hsa-miR-1253	0	0	1	1	1	1	CEPT1	choline/ethanolamine phosphotransferase 1
hsa-miR-1253	0	0	1	1	1	1	UBXN1	UBX domain protein 1
hsa-miR-1253	0	0	1	0	0	0	FAM86JP	family with sequence similarity 86, member A pseudogene
hsa-miR-1253	0	0	1	1	0	0	WASIR2	WASH and IL9R antisense RNA 2
hsa-miR-1253	1	0	1	1	1	1	SORL1	sortilin-related receptor, L(DLR class) A repeats containing
hsa-miR-1253	1	0	1	1	1	1	SIRPA	signal-regulatory protein alpha
hsa-miR-1253	1	0	1	1	1	1	ADAM19	ADAM metallopeptidase domain 19
hsa-miR-1253	0	0	1	0	0	0	MGC45922	uncharacterized LOC284365
hsa-miR-1253	1	0	1	1	0	0	DGCR6	DiGeorge syndrome critical region gene 6
hsa-miR-1253	0	0	1	1	0	0	TNMD	tenomodulin
hsa-miR-1253	1	0	1	1	1	1	RIC8B	resistance to inhibitors of cholinesterase 8 homolog B (C. elegans)
hsa-miR-1253	0	0	1	1	1	1	ZNF337	zinc finger protein 337
hsa-miR-1253	1	0	1	1	0	0	CHST4	carbohydrate (N-acetylglucosamine 6-O) sulfotransferase 4
hsa-miR-1253	1	0	1	1	0	0	CKAP5	cytoskeleton associated protein 5
hsa-miR-1253	0	0	1	0	0	0	TRAJ17	T cell receptor alpha joining 17
hsa-miR-1253	1	0	1	1	1	1	ZEB2	zinc finger E-box binding homeobox 2
hsa-miR-1253	0	0	1	1	0	0	C2orf80	chromosome 2 open reading frame 80
hsa-miR-1253	1	0	1	1	1	1	CTDSPL2	CTD (carboxy-terminal domain, RNA polymerase II, polypeptide A) small phosphatase like 2
hsa-miR-1253	0	0	1	1	0	0	SNTG2	syntrophin, gamma 2
hsa-miR-1253	0	0	1	0	0	0	LOC339862	uncharacterized LOC339862
hsa-miR-1253	0	0	1	1	0	0	VPS8	vacuolar protein sorting 8 homolog (S. cerevisiae)
hsa-miR-1253	0	0	1	1	1	1	SNAPC3	small nuclear RNA activating complex, polypeptide 3, 50kDa
hsa-miR-1253	0	0	1	1	1	1	CLEC12B	C-type lectin domain family 12, member B
hsa-miR-1253	1	0	1	1	1	1	PEX5L	peroxisomal biogenesis factor 5-like
hsa-miR-1253	0	0	1	1	0	0	MCCC1	methylcrotonoyl-CoA carboxylase 1 (alpha)
hsa-miR-1253	0	0	1	1	1	1	FAM171B	family with sequence similarity 171, member B
hsa-miR-1253	1	0	1	1	1	1	HECTD2	HECT domain containing E3 ubiquitin protein ligase 2
hsa-miR-1253	1	0	1	1	1	1	MEIS1	Meis homeobox 1
hsa-miR-1253	0	0	1	0	0	0	SRGAP2C	SLIT-ROBO Rho GTPase activating protein 2C
hsa-miR-1253	1	0	1	0	1	1	CPEB4	cytoplasmic polyadenylation element binding protein 4
hsa-miR-1253	1	0	1	1	1	1	BNC2	basonuclin 2
hsa-miR-1253	1	0	1	1	1	1	FAM135B	family with sequence similarity 135, member B
hsa-miR-1253	1	0	1	1	1	1	SOX6	SRY (sex determining region Y)-box 6
hsa-miR-1253	0	0	1	1	0	0	LAG3	lymphocyte-activation gene 3
hsa-miR-1253	1	0	1	1	1	1	CMIP	c-Maf inducing protein
hsa-miR-1253	1	0	1	1	1	1	GALNT1	UDP-N-acetyl-alpha-D-galactosamine:polypeptide N-acetylgalactosaminyltransferase 1 (GalNAc-T1)
hsa-miR-1253	1	0	1	1	1	1	DPP10	dipeptidyl-peptidase 10 (non-functional)
hsa-miR-1253	0	0	1	0	0	0	FLJ36000	uncharacterized FLJ36000
hsa-miR-1253	0	0	1	0	0	0	USP32P1	ubiquitin specific peptidase 32 pseudogene 1
hsa-miR-1253	1	0	1	1	1	1	UNK	unkempt homolog (Drosophila)
hsa-miR-1253	0	0	1	0	0	0	TRDV2	T cell receptor delta variable 2
hsa-miR-1253	0	0	1	0	0	0	RNASEK	ribonuclease, RNase K
hsa-miR-1253	1	0	1	1	1	1	DOLPP1	dolichyl pyrophosphate phosphatase 1
hsa-miR-1253	1	0	1	1	1	1	DACH2	dachshund homolog 2 (Drosophila)
hsa-miR-1253	1	0	1	1	1	1	SOGA2	SOGA family member 2
hsa-miR-1253	1	0	1	0	1	1	PCSK2	proprotein convertase subtilisin/kexin type 2
hsa-miR-1253	1	0	1	1	1	1	LEF1	lymphoid enhancer-binding factor 1
hsa-miR-1253	1	0	1	1	1	1	INTS6	integrator complex subunit 6
hsa-miR-1253	0	0	1	1	0	0	MTCH1	mitochondrial carrier 1
hsa-miR-1253	0	0	1	1	0	0	SLC13A4	solute carrier family 13 (sodium/sulfate symporters), member 4
hsa-miR-1253	0	0	1	0	1	1	FAM13B	family with sequence similarity 13, member B
hsa-miR-1253	1	0	1	1	1	1	FAM123A	family with sequence similarity 123A
hsa-miR-1253	0	0	1	1	0	0	NT5DC4	5'-nucleotidase domain containing 4
hsa-miR-1253	0	0	1	0	0	0	CDKL3	cyclin-dependent kinase-like 3
hsa-miR-1253	0	0	1	1	1	1	MTHFD2L	methylenetetrahydrofolate dehydrogenase (NADP+ dependent) 2-like
hsa-miR-1253	0	0	1	1	1	1	C4orf32	chromosome 4 open reading frame 32
hsa-miR-1253	1	0	1	1	1	1	FKBP5	FK506 binding protein 5
hsa-miR-1253	0	0	1	0	0	0	LOC157381	uncharacterized LOC157381
hsa-miR-1253	0	0	1	0	0	0	LOC338739	uncharacterized LOC338739
hsa-miR-1253	0	0	1	1	1	1	CBWD5	COBW domain containing 5
hsa-miR-1253	0	0	1	1	1	1	STRADA	STE20-related kinase adaptor alpha
hsa-miR-1253	0	0	1	1	0	0	TCTN1	tectonic family member 1
hsa-miR-1253	0	0	1	0	0	0	LOC283914	uncharacterized LOC283914
hsa-miR-1253	0	0	1	0	0	0	LOC339529	uncharacterized LOC339529
hsa-miR-1253	1	0	1	0	1	1	LYPD6	LY6/PLAUR domain containing 6
hsa-miR-1253	0	0	1	0	0	0	DPY19L2P4	dpy-19-like 2 pseudogene 4 (C. elegans)
hsa-miR-1253	1	0	1	0	1	1	ZNF800	zinc finger protein 800
hsa-miR-1253	1	0	1	1	1	1	RMND5A	required for meiotic nuclear division 5 homolog A (S. cerevisiae)
hsa-miR-1253	1	0	1	1	1	1	WSB1	WD repeat and SOCS box containing 1
hsa-miR-1253	1	0	1	1	1	1	PELI1	pellino E3 ubiquitin protein ligase 1
hsa-miR-1253	1	0	1	0	1	1	RNF182	ring finger protein 182
hsa-miR-1253	1	0	1	0	1	1	CCNY	cyclin Y
hsa-miR-1253	0	0	1	1	1	1	NCMAP	noncompact myelin associated protein
hsa-miR-1253	0	0	1	0	0	0	IDI2-AS1	IDI2 antisense RNA 1
hsa-miR-1253	0	0	1	1	1	1	LINC00086	long intergenic non-protein coding RNA 86
hsa-miR-1253	1	0	1	1	1	1	ZFP91	zinc finger protein 91 homolog (mouse)
hsa-miR-1253	0	0	1	1	0	0	TRABD2A	TraB domain containing 2A
hsa-miR-1253	0	0	1	1	1	1	COG2	component of oligomeric golgi complex 2
hsa-miR-1253	0	0	1	1	1	1	GRIK5	glutamate receptor, ionotropic, kainate 5
hsa-miR-1253	1	0	1	0	1	1	C14orf43	chromosome 14 open reading frame 43
hsa-miR-1253	0	0	1	1	0	0	HIST1H3E	histone cluster 1, H3e
hsa-miR-1253	0	0	1	1	0	0	ADAM7	ADAM metallopeptidase domain 7
hsa-miR-1253	1	0	1	1	1	1	SOX5	SRY (sex determining region Y)-box 5
hsa-miR-1253	0	0	1	1	1	1	ZNF365	zinc finger protein 365
hsa-miR-1253	1	0	1	1	1	1	PRRG1	proline rich Gla (G-carboxyglutamic acid) 1
hsa-miR-1253	1	0	1	1	1	1	INPP5A	inositol polyphosphate-5-phosphatase, 40kDa
hsa-miR-1253	0	0	1	0	1	1	PPM1N	protein phosphatase, Mg2+/Mn2+ dependent, 1N (putative)
hsa-miR-1253	1	0	1	1	1	1	SCOC	short coiled-coil protein
hsa-miR-1253	0	0	1	0	0	0	TRA@	T cell receptor alpha locus
hsa-miR-1253	1	0	1	1	1	1	PDGFRA	platelet-derived growth factor receptor, alpha polypeptide
hsa-miR-1253	0	0	1	1	0	0	TM6SF1	transmembrane 6 superfamily member 1
hsa-miR-1253	0	0	1	1	0	0	C8orf31	chromosome 8 open reading frame 31
hsa-miR-1253	0	0	1	1	1	1	SCLT1	sodium channel and clathrin linker 1
hsa-miR-1253	0	0	1	1	0	0	SLC38A6	solute carrier family 38, member 6
hsa-miR-1253	1	0	1	1	1	1	ADCY6	adenylate cyclase 6
hsa-miR-1253	0	0	1	1	0	0	TSNARE1	t-SNARE domain containing 1
hsa-miR-1253	1	0	1	1	1	1	STXBP5	syntaxin binding protein 5 (tomosyn)
hsa-miR-1253	1	0	1	1	1	1	CUX1	cut-like homeobox 1
hsa-miR-1253	1	0	1	1	1	1	ASPH	aspartate beta-hydroxylase
hsa-miR-1253	1	0	1	1	1	1	C18orf1	chromosome 18 open reading frame 1
hsa-miR-1253	1	0	1	1	1	1	NRSN1	neurensin 1
hsa-miR-1253	1	0	1	1	1	1	FTL	ferritin, light polypeptide
hsa-miR-1253	1	0	1	0	1	1	MAGIX	MAGI family member, X-linked
hsa-miR-1253	0	0	1	1	0	0	TBCA	tubulin folding cofactor A
hsa-miR-1253	0	0	1	0	0	0	ZNF66P	zinc finger protein 66, pseudogene
hsa-miR-1253	0	0	1	1	0	0	CELF3	CUGBP, Elav-like family member 3
hsa-miR-1253	1	0	1	1	1	1	PHACTR4	phosphatase and actin regulator 4
hsa-miR-1253	1	0	1	1	1	1	LINGO1	leucine rich repeat and Ig domain containing 1
hsa-miR-1253	0	0	1	0	0	0	SPDYE8P	speedy homolog E8 (Xenopus laevis), pseudogene
hsa-miR-1253	0	0	1	1	0	0	RELA	v-rel reticuloendotheliosis viral oncogene homolog A (avian)
hsa-miR-1253	0	0	1	1	0	0	GP6	glycoprotein VI (platelet)
hsa-miR-1253	0	0	1	0	0	0	FOXN3-AS2	FOXN3 antisense RNA 2
hsa-miR-1253	1	0	1	1	1	1	ANLN	anillin, actin binding protein
hsa-miR-1253	1	0	1	0	1	1	HMGB3	high mobility group box 3
hsa-miR-1253	1	0	1	1	1	1	USP47	ubiquitin specific peptidase 47
hsa-miR-1253	0	0	1	1	1	1	ABHD14B	abhydrolase domain containing 14B
hsa-miR-1253	0	0	1	1	1	1	PCED1B	PC-esterase domain containing 1B
hsa-miR-1253	1	0	1	1	1	1	WNT5A	wingless-type MMTV integration site family, member 5A
hsa-miR-1253	0	0	1	1	1	1	C3orf67	chromosome 3 open reading frame 67
hsa-miR-1253	1	0	1	0	1	1	AMMECR1L	AMME chromosomal region gene 1-like
hsa-miR-1253	0	0	1	0	0	0	LINC00537	long intergenic non-protein coding RNA 537
hsa-miR-1253	0	0	1	1	1	1	NDUFB5	NADH dehydrogenase (ubiquinone) 1 beta subcomplex, 5, 16kDa
hsa-miR-1253	0	0	1	1	1	1	TMBIM4	transmembrane BAX inhibitor motif containing 4
hsa-miR-1253	0	0	1	1	0	0	DNASE1	deoxyribonuclease I
hsa-miR-1253	0	0	1	1	1	1	SPRR2A	small proline-rich protein 2A
hsa-miR-1253	1	0	1	1	1	1	ST8SIA2	ST8 alpha-N-acetyl-neuraminide alpha-2,8-sialyltransferase 2
hsa-miR-1253	1	0	1	0	1	1	LRRTM4	leucine rich repeat transmembrane neuronal 4
hsa-miR-1253	1	0	1	1	1	1	SYNJ1	synaptojanin 1
hsa-miR-1253	1	0	1	1	1	1	LRRC15	leucine rich repeat containing 15
hsa-miR-1253	1	0	1	0	1	1	MYBL1	v-myb myeloblastosis viral oncogene homolog (avian)-like 1
hsa-miR-1253	0	0	1	0	0	0	CCDC163P	coiled-coil domain containing 163, pseudogene
hsa-miR-1253	1	0	1	0	1	1	VANGL2	vang-like 2 (van gogh, Drosophila)
hsa-miR-1253	1	0	1	0	1	1	CPEB2	cytoplasmic polyadenylation element binding protein 2
hsa-miR-1253	1	0	1	0	1	1	KCNT2	potassium channel, subfamily T, member 2
hsa-miR-1253	0	0	1	1	1	1	TTLL9	tubulin tyrosine ligase-like family, member 9
hsa-miR-1253	0	0	1	0	0	0	LSAMP-AS3	LSAMP antisense RNA 3
hsa-miR-1253	0	0	1	1	1	1	CCDC126	coiled-coil domain containing 126
hsa-miR-1253	1	0	1	1	1	1	GABRB2	gamma-aminobutyric acid (GABA) A receptor, beta 2
hsa-miR-1253	0	0	1	0	0	0	LOC727924	uncharacterized LOC727924
hsa-miR-1253	1	0	1	1	1	1	SP4	Sp4 transcription factor
hsa-miR-1253	0	0	1	0	0	0	PHGR1	proline/histidine/glycine-rich 1
hsa-miR-1253	0	0	1	1	0	0	SH2D6	SH2 domain containing 6
hsa-miR-1253	0	0	1	1	1	1	RASAL2	RAS protein activator like 2
hsa-miR-1253	0	0	1	1	0	0	ASB3	ankyrin repeat and SOCS box containing 3
hsa-miR-1253	1	0	1	1	1	1	UBE4A	ubiquitination factor E4A
hsa-miR-1253	0	0	1	0	0	0	LRRC37A11P	leucine rich repeat containing 37, member A11, pseudogene
hsa-miR-1253	0	0	1	1	1	1	UNC13B	unc-13 homolog B (C. elegans)
hsa-miR-1253	1	0	1	1	1	1	TMEM132B	transmembrane protein 132B
hsa-miR-1253	1	0	1	1	1	1	TRIP12	thyroid hormone receptor interactor 12
hsa-miR-1253	1	0	1	1	1	1	PAX3	paired box 3
hsa-miR-1253	1	0	1	1	1	1	SHANK2	SH3 and multiple ankyrin repeat domains 2
hsa-miR-1253	1	0	1	1	1	1	SIDT2	SID1 transmembrane family, member 2
hsa-miR-1253	0	0	1	0	0	0	LOC286094	uncharacterized LOC286094
hsa-miR-1253	1	0	1	0	1	1	PRDM10	PR domain containing 10
hsa-miR-1253	1	0	1	1	1	1	GRIA3	glutamate receptor, ionotropic, AMPA 3
hsa-miR-1253	1	0	1	1	1	1	OTUD4	OTU domain containing 4
hsa-miR-1253	0	0	1	0	0	0	FAM27E3	family with sequence similarity 27, member E3
hsa-miR-1253	0	0	1	1	1	1	UGT1A4	UDP glucuronosyltransferase 1 family, polypeptide A4
hsa-miR-1253	0	0	1	1	1	1	C9orf171	chromosome 9 open reading frame 171
hsa-miR-1253	1	0	1	0	1	1	CAMSAP2	calmodulin regulated spectrin-associated protein family, member 2
hsa-miR-1253	0	0	1	0	1	1	RBM44	RNA binding motif protein 44
hsa-miR-1253	0	0	1	0	0	0	C3orf55	chromosome 3 open reading frame 55
hsa-miR-1253	1	0	1	1	1	1	MEGF11	multiple EGF-like-domains 11
hsa-miR-1253	1	0	1	1	1	1	ZMYM4	zinc finger, MYM-type 4
hsa-miR-1253	1	0	1	1	1	1	CHIC1	cysteine-rich hydrophobic domain 1
hsa-miR-1253	1	0	1	1	1	1	MLLT10	myeloid/lymphoid or mixed-lineage leukemia (trithorax homolog, Drosophila); translocated to, 10
hsa-miR-1253	0	0	1	0	0	0	FAM225B	family with sequence similarity 225, member B (non-protein coding)
hsa-miR-1253	1	0	1	0	1	1	FAM196A	family with sequence similarity 196, member A
hsa-miR-1253	0	0	1	1	0	0	TCHH	trichohyalin
hsa-miR-1253	0	0	1	1	0	0	CCDC144A	coiled-coil domain containing 144A
hsa-miR-1253	0	0	1	1	0	0	EFCAB11	EF-hand calcium binding domain 11
hsa-miR-1253	0	0	1	1	0	0	DHRS1	dehydrogenase/reductase (SDR family) member 1
hsa-miR-1253	1	0	1	1	1	1	LITAF	lipopolysaccharide-induced TNF factor
hsa-miR-1253	0	0	1	0	0	0	DKFZp686D0853	uncharacterized LOC401613
hsa-miR-1253	1	0	1	1	1	1	ATP2B4	ATPase, Ca++ transporting, plasma membrane 4
hsa-miR-1253	1	0	1	1	1	1	RAB7A	RAB7A, member RAS oncogene family
hsa-miR-1253	1	0	1	0	1	1	NFIX	nuclear factor I/X (CCAAT-binding transcription factor)
hsa-miR-1253	1	0	1	1	1	1	MIER3	mesoderm induction early response 1, family member 3
hsa-miR-1253	1	0	1	1	1	1	SGCD	sarcoglycan, delta (35kDa dystrophin-associated glycoprotein)
hsa-miR-1253	0	0	1	1	1	1	SLC12A8	solute carrier family 12 (potassium/chloride transporters), member 8
hsa-miR-1253	0	0	1	0	0	0	ZNF542	zinc finger protein 542
hsa-miR-1253	1	0	1	1	1	1	SPPL3	signal peptide peptidase like 3
hsa-miR-1253	1	0	1	1	1	1	CSGALNACT2	chondroitin sulfate N-acetylgalactosaminyltransferase 2
hsa-miR-1253	0	0	1	1	1	1	PSMA2	proteasome (prosome, macropain) subunit, alpha type, 2
hsa-miR-1253	1	0	1	1	1	1	PRKRIR	protein-kinase, interferon-inducible double stranded RNA dependent inhibitor, repressor of (P58 repressor)
hsa-miR-1253	0	0	1	1	1	1	COL6A3	collagen, type VI, alpha 3
hsa-miR-1253	0	0	1	1	1	1	GTF3C2	general transcription factor IIIC, polypeptide 2, beta 110kDa
hsa-miR-1253	0	0	1	0	1	1	NHSL1	NHS-like 1
hsa-miR-1253	1	0	1	0	1	1	GALNT4	UDP-N-acetyl-alpha-D-galactosamine:polypeptide N-acetylgalactosaminyltransferase 4 (GalNAc-T4)
hsa-miR-1253	0	0	1	1	1	1	PRR14L	proline rich 14-like
hsa-miR-1253	1	0	1	1	0	0	RBM27	RNA binding motif protein 27
hsa-miR-1253	0	0	1	1	1	1	NIPSNAP3B	nipsnap homolog 3B (C. elegans)
hsa-miR-1253	1	0	1	1	1	1	STARD13	StAR-related lipid transfer (START) domain containing 13
hsa-miR-1253	1	0	1	0	1	1	EML4	echinoderm microtubule associated protein like 4
hsa-miR-1253	0	0	1	0	1	1	ANKRD36	ankyrin repeat domain 36
hsa-miR-1253	0	0	1	1	1	1	ARMCX3	armadillo repeat containing, X-linked 3
hsa-miR-1253	1	0	1	1	1	1	TSC22D3	TSC22 domain family, member 3
hsa-miR-1253	0	0	1	0	1	1	MYO3B	myosin IIIB
hsa-miR-1253	0	0	1	1	0	0	TMEM41A	transmembrane protein 41A
hsa-miR-1253	0	0	1	0	0	0	OVOS	ovostatin
hsa-miR-1253	1	0	1	1	1	1	DCAF5	DDB1 and CUL4 associated factor 5
hsa-miR-1253	1	0	1	1	1	1	NEDD9	neural precursor cell expressed, developmentally down-regulated 9
hsa-miR-1253	1	0	1	1	1	1	HDAC1	histone deacetylase 1
hsa-miR-1253	1	0	1	1	1	1	DDAH1	dimethylarginine dimethylaminohydrolase 1
hsa-miR-1253	0	0	1	1	1	1	ATP2A2	ATPase, Ca++ transporting, cardiac muscle, slow twitch 2
hsa-miR-1253	1	0	1	1	1	1	KLHL6	kelch-like 6 (Drosophila)
hsa-miR-1253	1	0	1	1	1	1	GAP43	growth associated protein 43
hsa-miR-1253	1	0	1	1	1	1	NAV1	neuron navigator 1
hsa-miR-1253	1	0	1	0	1	1	KLHL24	kelch-like 24 (Drosophila)
hsa-miR-1253	0	0	1	1	0	0	UFD1L	ubiquitin fusion degradation 1 like (yeast)
hsa-miR-1253	1	0	1	1	1	1	PTER	phosphotriesterase related
hsa-miR-1253	1	0	1	1	1	1	RECK	reversion-inducing-cysteine-rich protein with kazal motifs
hsa-miR-1253	0	0	1	1	1	1	THSD4	thrombospondin, type I, domain containing 4
hsa-miR-1253	1	0	1	1	1	1	WLS	wntless homolog (Drosophila)
hsa-miR-1253	1	0	1	1	1	1	BZRAP1	benzodiazapine receptor (peripheral) associated protein 1
hsa-miR-1253	1	0	1	1	1	1	HIF1A	hypoxia inducible factor 1, alpha subunit (basic helix-loop-helix transcription factor)
hsa-miR-1253	1	0	1	1	1	1	CALD1	caldesmon 1
hsa-miR-1253	1	0	1	1	1	1	KCNMA1	potassium large conductance calcium-activated channel, subfamily M, alpha member 1
hsa-miR-1253	0	0	1	1	0	0	CNIH4	cornichon homolog 4 (Drosophila)
hsa-miR-1253	0	0	1	1	1	1	USP54	ubiquitin specific peptidase 54
hsa-miR-1253	1	0	1	1	1	1	SSR2	signal sequence receptor, beta (translocon-associated protein beta)
hsa-miR-1253	0	0	1	1	0	0	NDUFB11	NADH dehydrogenase (ubiquinone) 1 beta subcomplex, 11, 17.3kDa
hsa-miR-1253	1	0	1	1	1	1	BSDC1	BSD domain containing 1
hsa-miR-1253	1	0	1	1	1	1	SEL1L3	sel-1 suppressor of lin-12-like 3 (C. elegans)
hsa-miR-1253	0	0	1	1	1	1	ARFGAP2	ADP-ribosylation factor GTPase activating protein 2
hsa-miR-1253	0	0	1	0	0	0	RPS16P10	ribosomal protein S16 pseudogene 10
hsa-miR-1253	1	0	1	1	1	1	CUL4A	cullin 4A
hsa-miR-1253	1	0	1	1	1	1	TARBP2	TAR (HIV-1) RNA binding protein 2
hsa-miR-1253	0	0	1	0	0	0	LOC400768	uncharacterized LOC400768
hsa-miR-1253	0	0	1	1	0	0	URM1	ubiquitin related modifier 1
hsa-miR-1253	0	0	1	1	1	1	APH1A	anterior pharynx defective 1 homolog A (C. elegans)
hsa-miR-1253	1	0	1	1	1	1	LETMD1	LETM1 domain containing 1
hsa-miR-1253	1	0	1	1	1	1	ARL1	ADP-ribosylation factor-like 1
hsa-miR-1253	1	0	1	1	1	1	AP3S1	adaptor-related protein complex 3, sigma 1 subunit
hsa-miR-1253	0	0	1	0	0	0	ARRDC1	arrestin domain containing 1
hsa-miR-1253	0	0	1	0	1	1	BLM	Bloom syndrome, RecQ helicase-like
hsa-miR-1253	1	0	1	1	1	1	NEU1	sialidase 1 (lysosomal sialidase)
hsa-miR-1253	0	0	1	1	0	0	CD81	CD81 molecule
hsa-miR-1253	1	0	1	1	1	1	FGF11	fibroblast growth factor 11
hsa-miR-1253	1	0	1	0	1	1	BNIP3L	BCL2/adenovirus E1B 19kDa interacting protein 3-like
hsa-miR-1253	0	0	1	0	0	0	LOC100009676	uncharacterized LOC100009676
hsa-miR-1253	0	0	1	1	1	1	FGL1	fibrinogen-like 1
hsa-miR-1253	0	0	1	1	1	1	TASP1	taspase, threonine aspartase, 1
hsa-miR-1253	0	0	1	1	1	1	SDE2	SDE2 telomere maintenance homolog (S. pombe)
hsa-miR-1253	1	0	1	1	0	0	STX5	syntaxin 5
hsa-miR-1253	0	0	1	1	1	1	XRCC4	X-ray repair complementing defective repair in Chinese hamster cells 4
hsa-miR-1253	1	0	1	1	1	1	TPM4	tropomyosin 4
hsa-miR-1253	0	0	1	1	1	1	FBXO4	F-box protein 4
hsa-miR-1253	0	0	1	0	1	1	CD99P1	CD99 molecule pseudogene 1
hsa-miR-1253	0	0	1	0	1	1	C17orf108	chromosome 17 open reading frame 108
hsa-miR-1253	1	0	1	1	1	1	EI24	etoposide induced 2.4 mRNA
hsa-miR-1253	0	0	1	1	1	1	PROCR	protein C receptor, endothelial
hsa-miR-1253	1	0	1	1	1	1	ADAM9	ADAM metallopeptidase domain 9
hsa-miR-1253	1	0	1	1	0	0	FSCN1	fascin homolog 1, actin-bundling protein (Strongylocentrotus purpuratus)
hsa-miR-1253	1	0	1	1	1	1	DRAM2	DNA-damage regulated autophagy modulator 2
hsa-miR-1253	0	0	1	0	1	1	EMX2	empty spiracles homeobox 2
hsa-miR-1253	1	0	1	1	1	1	COPZ1	coatomer protein complex, subunit zeta 1
hsa-miR-1253	1	0	1	1	1	1	PLEKHB2	pleckstrin homology domain containing, family B (evectins) member 2
hsa-miR-1253	0	0	1	1	1	1	DCTD	dCMP deaminase
hsa-miR-1253	0	0	1	1	1	1	STON1	stonin 1
hsa-miR-1253	0	0	1	0	0	0	LOC643072	uncharacterized LOC643072
hsa-miR-1253	1	0	1	1	1	1	PCTP	phosphatidylcholine transfer protein
hsa-miR-1253	1	0	1	1	1	1	LYPLA2	lysophospholipase II
hsa-miR-1253	1	0	1	1	1	1	ARFIP2	ADP-ribosylation factor interacting protein 2
hsa-miR-1253	1	0	1	1	1	1	STK38L	serine/threonine kinase 38 like
hsa-miR-1253	0	0	1	1	0	0	C11orf73	chromosome 11 open reading frame 73
hsa-miR-1253	1	0	1	1	1	1	WIPF1	WAS/WASL interacting protein family, member 1
hsa-miR-1253	1	0	1	1	1	1	PEX2	peroxisomal biogenesis factor 2
hsa-miR-1253	1	0	1	1	0	0	TBC1D17	TBC1 domain family, member 17
hsa-miR-1253	1	0	1	1	1	1	MMP2	matrix metallopeptidase 2 (gelatinase A, 72kDa gelatinase, 72kDa type IV collagenase)
hsa-miR-1253	0	0	1	1	1	1	C1orf88	chromosome 1 open reading frame 88
hsa-miR-1253	0	0	1	1	0	0	CCDC22	coiled-coil domain containing 22
hsa-miR-1253	0	0	1	0	0	0	ZNF720	zinc finger protein 720
hsa-miR-1253	1	0	1	1	1	1	ARNTL	aryl hydrocarbon receptor nuclear translocator-like
hsa-miR-1253	1	0	1	1	1	1	EIF4A2	eukaryotic translation initiation factor 4A2
hsa-miR-1253	1	0	1	1	1	1	FOS	FBJ murine osteosarcoma viral oncogene homolog
hsa-miR-1253	0	0	1	1	1	1	LDHB	lactate dehydrogenase B
hsa-miR-1253	0	0	1	1	1	1	DEDD	death effector domain containing
hsa-miR-1253	0	0	1	1	0	0	PLB1	phospholipase B1
hsa-miR-1253	1	0	1	1	1	1	SLC39A1	solute carrier family 39 (zinc transporter), member 1
hsa-miR-1253	1	0	1	1	1	1	FUBP3	far upstream element (FUSE) binding protein 3
hsa-miR-1253	0	0	1	1	0	0	CD53	CD53 molecule
hsa-miR-1253	0	0	1	1	1	1	PDLIM1	PDZ and LIM domain 1
hsa-miR-1253	1	0	1	1	1	1	ARL4A	ADP-ribosylation factor-like 4A
hsa-miR-1253	0	0	1	1	1	1	CD1C	CD1c molecule
hsa-miR-1253	1	0	1	1	1	1	ANAPC16	anaphase promoting complex subunit 16
hsa-miR-1253	1	0	1	1	1	1	PFN2	profilin 2
hsa-miR-1253	1	0	1	1	1	1	CNBP	CCHC-type zinc finger, nucleic acid binding protein
hsa-miR-1253	0	0	1	1	1	1	FUS	fused in sarcoma
hsa-miR-1253	0	0	1	1	1	1	ZNF333	zinc finger protein 333
hsa-miR-1253	0	0	1	1	0	0	TUSC3	tumor suppressor candidate 3
hsa-miR-1253	0	0	1	1	0	0	CLEC1A	C-type lectin domain family 1, member A
hsa-miR-1253	1	0	1	1	1	1	HMGN2	high mobility group nucleosomal binding domain 2
hsa-miR-1253	0	0	1	1	1	1	FMO1	flavin containing monooxygenase 1
hsa-miR-1253	0	0	1	1	1	1	RNF166	ring finger protein 166
hsa-miR-1253	1	0	1	1	1	1	RALY	RNA binding protein, autoantigenic (hnRNP-associated with lethal yellow homolog (mouse))
hsa-miR-1253	0	0	1	0	0	0	RNF115	ring finger protein 115
hsa-miR-1253	1	0	1	1	0	0	STAG3L4	stromal antigen 3-like 4
hsa-miR-1253	1	0	1	1	1	1	SRSF2	serine/arginine-rich splicing factor 2
hsa-miR-1253	0	0	1	1	1	1	PLAC8	placenta-specific 8
hsa-miR-1253	1	0	1	0	1	1	CD47	CD47 molecule
hsa-miR-1253	0	0	1	0	0	0	CHEK2P2	checkpoint kinase 2 pseudogene 2
hsa-miR-1253	1	0	1	1	1	1	YWHAE	tyrosine 3-monooxygenase/tryptophan 5-monooxygenase activation protein, epsilon polypeptide
hsa-miR-1253	1	0	1	1	1	1	PHF20L1	PHD finger protein 20-like 1
hsa-miR-1253	0	0	1	1	0	0	TESK1	testis-specific kinase 1
hsa-miR-1253	0	0	1	0	0	0	LOC100132984	uncharacterized LOC100132984
hsa-miR-1253	0	0	1	1	1	1	PSMD9	proteasome (prosome, macropain) 26S subunit, non-ATPase, 9
hsa-miR-1253	1	0	1	1	1	1	MAN1C1	mannosidase, alpha, class 1C, member 1
hsa-miR-1253	0	0	1	1	1	1	CIRBP	cold inducible RNA binding protein
hsa-miR-1253	1	0	1	1	1	1	LGALSL	lectin, galactoside-binding-like
hsa-miR-1253	1	0	1	1	1	1	TFPI	tissue factor pathway inhibitor (lipoprotein-associated coagulation inhibitor)
hsa-miR-1253	0	0	1	1	1	1	VPS16	vacuolar protein sorting 16 homolog (S. cerevisiae)
hsa-miR-1253	1	0	1	0	1	1	KIAA0240	KIAA0240
hsa-miR-1253	1	0	1	0	1	1	KDM1B	lysine (K)-specific demethylase 1B
hsa-miR-1253	1	0	1	1	1	1	STAG2	stromal antigen 2
hsa-miR-1253	0	0	1	0	0	0	LOC731789	uncharacterized LOC731789
hsa-miR-1253	0	0	1	1	1	1	CCP110	centriolar coiled coil protein 110kDa
hsa-miR-1253	1	0	1	0	1	1	BTRC	beta-transducin repeat containing E3 ubiquitin protein ligase
hsa-miR-1253	1	0	1	1	1	1	FBXW7	F-box and WD repeat domain containing 7, E3 ubiquitin protein ligase
hsa-miR-1253	0	0	1	1	1	1	SYNE2	spectrin repeat containing, nuclear envelope 2
hsa-miR-1253	1	0	1	0	1	1	MEGF10	multiple EGF-like-domains 10
hsa-miR-1253	1	0	1	1	1	1	ANKS6	ankyrin repeat and sterile alpha motif domain containing 6
hsa-miR-1253	1	0	1	0	1	1	SLC7A6	solute carrier family 7 (amino acid transporter light chain, y+L system), member 6
hsa-miR-1253	0	0	1	0	1	1	USP10	ubiquitin specific peptidase 10
hsa-miR-1253	0	0	1	0	0	0	MUC19	mucin 19, oligomeric
hsa-miR-1253	1	0	1	0	1	1	XRN1	5'-3' exoribonuclease 1
hsa-miR-1253	1	0	1	0	1	1	MCFD2	multiple coagulation factor deficiency 2
hsa-miR-1253	1	0	1	0	1	1	TNS3	tensin 3
hsa-miR-1253	1	0	1	1	1	1	TIPARP	TCDD-inducible poly(ADP-ribose) polymerase
hsa-miR-1253	1	0	1	0	1	1	CNTNAP2	contactin associated protein-like 2
hsa-miR-1253	1	0	1	0	1	1	ZNF652	zinc finger protein 652
hsa-miR-1253	0	0	1	1	0	0	TENC1	tensin like C1 domain containing phosphatase (tensin 2)
hsa-miR-1253	1	0	1	1	1	1	ZFHX3	zinc finger homeobox 3
hsa-miR-1253	0	0	1	1	0	0	GOLGB1	golgin B1
hsa-miR-1253	1	0	1	1	1	1	SP2	Sp2 transcription factor
hsa-miR-1253	0	0	1	1	1	1	SLC39A14	solute carrier family 39 (zinc transporter), member 14
hsa-miR-1253	1	0	1	1	1	1	MAN2A2	mannosidase, alpha, class 2A, member 2
hsa-miR-1253	1	0	1	0	1	1	KLHDC10	kelch domain containing 10
hsa-miR-1253	0	0	1	1	1	1	FCAR	Fc fragment of IgA, receptor for
hsa-miR-1253	0	0	1	1	1	1	PARP14	poly (ADP-ribose) polymerase family, member 14
hsa-miR-1253	0	0	1	1	0	0	SPINK5	serine peptidase inhibitor, Kazal type 5
hsa-miR-1253	1	0	1	1	1	1	ATP2B3	ATPase, Ca++ transporting, plasma membrane 3
hsa-miR-1253	0	0	1	1	0	0	SPATA20	spermatogenesis associated 20
hsa-miR-1253	0	0	1	1	1	1	P2RX7	purinergic receptor P2X, ligand-gated ion channel, 7
hsa-miR-1253	1	0	1	1	1	1	GLIS3	GLIS family zinc finger 3
hsa-miR-1253	1	0	1	1	1	1	CAPZA2	capping protein (actin filament) muscle Z-line, alpha 2
hsa-miR-1253	0	0	1	1	1	1	PROS1	protein S (alpha)
hsa-miR-1253	1	0	1	1	1	1	TNFAIP1	tumor necrosis factor, alpha-induced protein 1 (endothelial)
hsa-miR-1253	1	0	1	1	1	1	SLC4A8	solute carrier family 4, sodium bicarbonate cotransporter, member 8
hsa-miR-1253	0	0	1	1	1	1	MORC4	MORC family CW-type zinc finger 4
hsa-miR-1253	0	0	1	1	1	1	ALDH3B1	aldehyde dehydrogenase 3 family, member B1
hsa-miR-1253	1	0	1	1	1	1	MLL	myeloid/lymphoid or mixed-lineage leukemia (trithorax homolog, Drosophila)
hsa-miR-1253	1	0	1	1	0	0	PPARD	peroxisome proliferator-activated receptor delta
hsa-miR-1253	0	0	1	0	1	1	OPRK1	opioid receptor, kappa 1
hsa-miR-1253	1	0	1	0	1	1	BCL2	B-cell CLL/lymphoma 2
hsa-miR-1253	1	0	1	1	1	1	IGF1	insulin-like growth factor 1 (somatomedin C)
hsa-miR-1253	1	0	1	1	0	0	ADRB3	adrenoceptor beta 3
hsa-miR-1253	1	0	1	1	1	1	COL1A2	collagen, type I, alpha 2
hsa-miR-1253	1	0	1	1	1	1	COL4A3	collagen, type IV, alpha 3 (Goodpasture antigen)
hsa-miR-1253	0	0	1	0	1	1	MS4A2	membrane-spanning 4-domains, subfamily A, member 2
hsa-miR-1253	1	0	1	0	1	1	G6PC	glucose-6-phosphatase, catalytic subunit
hsa-miR-1253	1	0	1	1	1	1	GK	glycerol kinase
hsa-miR-1253	1	0	1	0	1	1	GLI3	GLI family zinc finger 3
hsa-miR-1253	1	0	1	1	1	1	JAG1	jagged 1
hsa-miR-1253	1	0	1	1	1	1	KCNA1	potassium voltage-gated channel, shaker-related subfamily, member 1 (episodic ataxia with myokymia)
hsa-miR-1253	1	0	1	0	1	1	SGCB	sarcoglycan, beta (43kDa dystrophin-associated glycoprotein)
hsa-miR-1253	0	0	1	1	0	0	KCNH2	potassium voltage-gated channel, subfamily H (eag-related), member 2
hsa-miR-1253	0	0	1	1	1	1	MAOA	monoamine oxidase A
hsa-miR-1253	1	0	1	1	1	1	NF1	neurofibromin 1
hsa-miR-1253	0	0	1	1	1	1	PRNP	prion protein
hsa-miR-1253	1	0	1	0	1	1	PTEN	phosphatase and tensin homolog
hsa-miR-1253	0	0	1	1	1	1	SRD5A2	steroid-5-alpha-reductase, alpha polypeptide 2 (3-oxo-5 alpha-steroid delta 4-dehydrogenase alpha 2)
hsa-miR-1253	0	0	1	1	1	1	TSHR	thyroid stimulating hormone receptor
hsa-miR-1253	1	1	1	1	1	1	CDKN1A	cyclin-dependent kinase inhibitor 1A (p21, Cip1)
hsa-miR-1253	1	0	1	0	1	1	CYBB	cytochrome b-245, beta polypeptide
hsa-miR-1253	1	0	1	0	1	1	PCSK1	proprotein convertase subtilisin/kexin type 1
hsa-miR-1253	0	0	1	1	1	1	PECAM1	platelet/endothelial cell adhesion molecule 1
hsa-miR-1253	1	0	1	0	1	1	RAG1	recombination activating gene 1
hsa-miR-1253	1	0	1	1	1	1	RFX5	regulatory factor X, 5 (influences HLA class II expression)
hsa-miR-1253	1	0	1	1	1	1	ATRX	alpha thalassemia/mental retardation syndrome X-linked
hsa-miR-1253	0	0	1	1	1	1	CYP11B2	cytochrome P450, family 11, subfamily B, polypeptide 2
hsa-miR-1253	1	0	1	1	1	1	MPZ	myelin protein zero
hsa-miR-1253	1	0	1	1	1	1	PLP1	proteolipid protein 1
hsa-miR-1253	1	0	1	0	1	1	IL6R	interleukin 6 receptor
hsa-miR-1253	0	0	1	1	1	1	C7	complement component 7
hsa-miR-1253	0	0	1	1	1	1	TAP1	transporter 1, ATP-binding cassette, sub-family B (MDR/TAP)
hsa-miR-1253	0	0	1	1	0	0	BLVRA	biliverdin reductase A
hsa-miR-1253	0	0	1	1	0	0	C4BPB	complement component 4 binding protein, beta
hsa-miR-1253	1	0	1	0	1	1	CACNA1E	calcium channel, voltage-dependent, R type, alpha 1E subunit
hsa-miR-1253	0	0	1	1	1	1	CYP7A1	cytochrome P450, family 7, subfamily A, polypeptide 1
hsa-miR-1253	1	0	1	1	1	1	DIO2	deiodinase, iodothyronine, type II
hsa-miR-1253	1	0	1	0	1	1	GABRA4	gamma-aminobutyric acid (GABA) A receptor, alpha 4
hsa-miR-1253	1	0	1	1	1	1	GABRG2	gamma-aminobutyric acid (GABA) A receptor, gamma 2
hsa-miR-1253	1	0	1	1	1	1	GAD1	glutamate decarboxylase 1 (brain, 67kDa)
hsa-miR-1253	1	0	1	1	1	1	GRIA4	glutamate receptor, ionotropic, AMPA 4
hsa-miR-1253	0	0	1	1	1	1	HTR7	5-hydroxytryptamine (serotonin) receptor 7, adenylate cyclase-coupled
hsa-miR-1253	1	0	1	1	1	1	IGF1R	insulin-like growth factor 1 receptor
hsa-miR-1253	0	0	1	1	1	1	ITGAX	integrin, alpha X (complement component 3 receptor 4 subunit)
hsa-miR-1253	1	0	1	0	1	1	KCNJ2	potassium inwardly-rectifying channel, subfamily J, member 2
hsa-miR-1253	0	0	1	1	1	1	NPY2R	neuropeptide Y receptor Y2
hsa-miR-1253	0	0	1	1	1	1	ABCB1	ATP-binding cassette, sub-family B (MDR/TAP), member 1
hsa-miR-1253	1	0	1	1	1	1	PPP3R1	protein phosphatase 3, regulatory subunit B, alpha
hsa-miR-1253	1	0	1	1	1	1	PTGER4	prostaglandin E receptor 4 (subtype EP4)
hsa-miR-1253	0	0	1	0	1	1	PTGIS	prostaglandin I2 (prostacyclin) synthase
hsa-miR-1253	0	0	1	1	1	1	PTGS2	prostaglandin-endoperoxide synthase 2 (prostaglandin G/H synthase and cyclooxygenase)
hsa-miR-1253	0	0	1	1	1	1	BLOC1S2	biogenesis of lysosomal organelles complex-1, subunit 2
hsa-miR-1253	0	0	1	0	1	1	DNAJB3	DnaJ (Hsp40) homolog, subfamily B, member 3
hsa-miR-1253	1	0	1	0	1	1	SMAD5	SMAD family member 5
hsa-miR-1253	1	0	1	0	1	1	FLJ33360	FLJ33360 protein
hsa-miR-1253	0	0	1	1	1	1	CC2D2B	coiled-coil and C2 domain containing 2B
hsa-miR-1253	1	0	1	1	1	1	FAM13C	family with sequence similarity 13, member C
hsa-miR-1253	1	0	1	1	0	0	EXOSC3	exosome component 3
hsa-miR-1253	1	0	1	0	1	1	SMAD2	SMAD family member 2
hsa-miR-1253	1	0	1	1	1	1	HMGXB4	HMG box domain containing 4
hsa-miR-1253	0	0	1	1	1	1	SMAD1	SMAD family member 1
hsa-miR-1253	1	0	1	1	1	1	KLHL31	kelch-like 31 (Drosophila)
hsa-miR-1253	0	0	1	1	1	1	CCDC144NL	coiled-coil domain containing 144 family, N-terminal like
hsa-miR-1253	0	0	1	1	1	1	ZCCHC16	zinc finger, CCHC domain containing 16
hsa-miR-1253	1	0	1	0	1	1	LRRC55	leucine rich repeat containing 55
hsa-miR-1253	0	0	1	1	1	1	HMGN2P46	high mobility group nucleosomal binding domain 2 pseudogene 46
hsa-miR-1253	1	0	1	0	1	1	YPEL2	yippee-like 2 (Drosophila)
hsa-miR-1253	1	0	1	1	1	1	PLCXD3	phosphatidylinositol-specific phospholipase C, X domain containing 3
hsa-miR-1253	1	0	1	1	1	1	EDA	ectodysplasin A
hsa-miR-1253	1	0	1	0	1	1	IP6K1	inositol hexakisphosphate kinase 1
hsa-miR-1253	0	0	1	1	1	1	MAPKAP1	mitogen-activated protein kinase associated protein 1
hsa-miR-1253	1	0	1	1	0	0	RPS6KA1	ribosomal protein S6 kinase, 90kDa, polypeptide 1
hsa-miR-1253	1	0	1	1	1	1	NTRK3	neurotrophic tyrosine kinase, receptor, type 3
hsa-miR-1253	0	0	1	0	1	1	C8orf22	chromosome 8 open reading frame 22
hsa-miR-1253	0	0	1	0	1	1	GIMAP6	GTPase, IMAP family member 6
hsa-miR-1253	1	0	1	1	1	1	IGF2BP2	insulin-like growth factor 2 mRNA binding protein 2
hsa-miR-1253	1	0	1	1	1	1	SPOP	speckle-type POZ protein
hsa-miR-1253	0	0	1	0	0	0	RWDD1	RWD domain containing 1
hsa-miR-1253	0	0	1	0	1	1	C3orf56	chromosome 3 open reading frame 56
hsa-miR-1253	1	0	1	0	1	1	CPLX2	complexin 2
hsa-miR-1253	1	0	1	1	1	1	ZDHHC9	zinc finger, DHHC-type containing 9
hsa-miR-1253	1	0	1	0	1	1	C18orf25	chromosome 18 open reading frame 25
hsa-miR-1253	1	0	1	1	1	1	UMOD	uromodulin
hsa-miR-1253	1	0	1	1	1	1	RBM33	RNA binding motif protein 33
hsa-miR-1253	1	0	1	0	1	1	KIAA2022	KIAA2022
hsa-miR-1253	0	0	1	1	1	1	MXI1	MAX interactor 1
hsa-miR-1253	1	0	1	1	1	1	LPHN1	latrophilin 1
hsa-miR-1253	0	0	1	1	1	1	GCSAM	germinal center-associated, signaling and motility
hsa-miR-1253	0	0	1	1	0	0	CCT3	chaperonin containing TCP1, subunit 3 (gamma)
hsa-miR-1253	0	0	1	1	1	1	ZCCHC11	zinc finger, CCHC domain containing 11
hsa-miR-1253	1	0	1	0	1	1	ERMN	ermin, ERM-like protein
hsa-miR-1253	0	0	1	0	1	1	ZNF648	zinc finger protein 648
hsa-miR-1253	1	0	1	1	1	1	SHE	Src homology 2 domain containing E
hsa-miR-1253	1	0	1	0	1	1	PM20D2	peptidase M20 domain containing 2
hsa-miR-1253	0	0	1	0	1	1	LPPR5	lipid phosphate phosphatase-related protein type 5
hsa-miR-1253	0	0	1	1	1	1	SPIN3	spindlin family, member 3
hsa-miR-1253	1	0	1	0	1	1	ZC3H12B	zinc finger CCCH-type containing 12B
hsa-miR-1253	0	0	1	1	1	1	C1QL3	complement component 1, q subcomponent-like 3
hsa-miR-1253	0	0	1	1	1	1	HGF	hepatocyte growth factor (hepapoietin A; scatter factor)
hsa-miR-1253	1	0	1	0	1	1	CREB5	cAMP responsive element binding protein 5
hsa-miR-1253	0	0	1	1	1	1	MS4A13	membrane-spanning 4-domains, subfamily A, member 13
hsa-miR-1253	1	0	1	1	1	1	SLC25A53	solute carrier family 25, member 53
hsa-miR-1253	0	0	1	0	1	1	GNRHR	gonadotropin-releasing hormone receptor
hsa-miR-1253	0	0	1	1	1	1	SPIN4	spindlin family, member 4
hsa-miR-1253	1	0	1	1	1	1	PABPC1L2A	poly(A) binding protein, cytoplasmic 1-like 2A
hsa-miR-1253	1	0	1	0	1	1	ZKSCAN2	zinc finger with KRAB and SCAN domains 2
hsa-miR-1253	1	0	1	1	1	1	SORCS1	sortilin-related VPS10 domain containing receptor 1
hsa-miR-1253	0	0	1	0	1	1	LINC00268	long intergenic non-protein coding RNA 268
hsa-miR-1253	1	0	1	1	1	1	CA7	carbonic anhydrase VII
hsa-miR-1253	0	0	1	0	0	0	SPRR2F	small proline-rich protein 2F
hsa-miR-1253	1	0	1	1	1	1	TMCC1	transmembrane and coiled-coil domain family 1
hsa-miR-1253	0	0	1	1	0	0	SPRR2B	small proline-rich protein 2B
hsa-miR-1253	0	0	1	1	1	1	BTBD11	BTB (POZ) domain containing 11
hsa-miR-1253	1	0	1	1	1	1	ZHX1	zinc fingers and homeoboxes 1
hsa-miR-1253	1	0	1	1	1	1	SH3PXD2B	SH3 and PX domains 2B
hsa-miR-1253	0	0	1	1	1	1	VPS13A	vacuolar protein sorting 13 homolog A (S. cerevisiae)
hsa-miR-1253	1	0	1	1	1	1	SERBP1	SERPINE1 mRNA binding protein 1
hsa-miR-1253	0	0	1	1	1	1	POLR2M	polymerase (RNA) II (DNA directed) polypeptide M
hsa-miR-1253	0	0	1	1	1	1	SPRR2E	small proline-rich protein 2E
hsa-miR-1253	1	0	1	1	1	1	GPHN	gephyrin
hsa-miR-1253	1	0	1	0	1	1	RGAG4	retrotransposon gag domain containing 4
hsa-miR-1253	1	0	1	1	1	1	CANX	calnexin
hsa-miR-1253	1	0	1	0	1	1	TNRC6B	trinucleotide repeat containing 6B
hsa-miR-1253	1	0	1	1	1	1	FNBP1L	formin binding protein 1-like
hsa-miR-1253	1	0	1	0	1	1	CELF2	CUGBP, Elav-like family member 2
hsa-miR-1253	1	0	1	1	1	1	TPD52	tumor protein D52
hsa-miR-1253	1	0	1	1	1	1	SLC35F1	solute carrier family 35, member F1
hsa-miR-1253	1	0	1	1	1	1	RGS7BP	regulator of G-protein signaling 7 binding protein
hsa-miR-1253	1	0	1	0	1	1	CYB5RL	cytochrome b5 reductase-like
hsa-miR-1253	1	0	1	1	1	1	MAF	v-maf musculoaponeurotic fibrosarcoma oncogene homolog (avian)
hsa-miR-1253	1	0	1	1	1	1	CSNK1G3	casein kinase 1, gamma 3
hsa-miR-1253	0	0	1	0	1	1	STXBP1	syntaxin binding protein 1
hsa-miR-1253	1	0	1	1	1	1	TFAP2A	transcription factor AP-2 alpha (activating enhancer binding protein 2 alpha)
hsa-miR-1253	1	0	1	1	1	1	UBE2V1	ubiquitin-conjugating enzyme E2 variant 1
hsa-miR-1253	0	0	1	1	1	1	PLGLB1	plasminogen-like B1
hsa-miR-1253	1	0	1	0	1	1	NPNT	nephronectin
hsa-miR-1253	1	0	1	1	1	1	MAGI1	membrane associated guanylate kinase, WW and PDZ domain containing 1
hsa-miR-1253	0	0	1	1	1	1	PHF12	PHD finger protein 12
hsa-miR-1253	1	0	1	1	1	1	ZNF704	zinc finger protein 704
hsa-miR-1253	0	0	1	1	0	0	CALCA	calcitonin-related polypeptide alpha
hsa-miR-1253	1	0	1	0	1	1	RYR2	ryanodine receptor 2 (cardiac)
hsa-miR-1253	1	0	1	1	1	1	AGAP1	ArfGAP with GTPase domain, ankyrin repeat and PH domain 1
hsa-miR-1253	1	0	1	0	1	1	ARL5A	ADP-ribosylation factor-like 5A
hsa-miR-1253	1	0	1	1	1	1	PDE4B	phosphodiesterase 4B, cAMP-specific
hsa-miR-1253	1	0	1	0	1	1	CDC42SE1	CDC42 small effector 1
hsa-miR-1253	1	0	1	0	1	1	USP9X	ubiquitin specific peptidase 9, X-linked
hsa-miR-1253	1	0	1	0	1	1	CREBZF	CREB/ATF bZIP transcription factor
hsa-miR-1253	0	0	1	1	1	1	MTL5	metallothionein-like 5, testis-specific (tesmin)
hsa-miR-1253	1	0	1	1	1	1	CHTF8	CTF8, chromosome transmission fidelity factor 8 homolog (S. cerevisiae)
hsa-miR-1253	0	0	1	1	0	0	LOC643923	uncharacterized LOC643923
hsa-miR-1253	1	0	1	1	1	1	TCERG1	transcription elongation regulator 1
hsa-miR-1253	1	0	1	0	1	1	FAM133B	family with sequence similarity 133, member B
hsa-miR-1253	1	0	1	1	1	1	MOSPD3	motile sperm domain containing 3
hsa-miR-1253	1	0	1	1	1	1	PAPD5	PAP associated domain containing 5
hsa-miR-1253	0	0	1	0	1	1	STEAP2	STEAP family member 2, metalloreductase
hsa-miR-1253	1	0	1	1	1	1	CEP63	centrosomal protein 63kDa
hsa-miR-1253	1	0	1	1	1	1	PPP4R1	protein phosphatase 4, regulatory subunit 1
hsa-miR-1253	1	0	1	1	1	1	PABPC1L2B	poly(A) binding protein, cytoplasmic 1-like 2B
hsa-miR-1253	1	0	1	1	1	1	C2orf88	chromosome 2 open reading frame 88
hsa-miR-1253	1	0	1	1	1	1	FRS2	fibroblast growth factor receptor substrate 2
hsa-miR-1253	1	0	1	1	1	1	ERBB4	v-erb-a erythroblastic leukemia viral oncogene homolog 4 (avian)
hsa-miR-1253	0	0	1	1	1	1	TTC14	tetratricopeptide repeat domain 14
hsa-miR-1253	1	0	1	1	1	1	RERE	arginine-glutamic acid dipeptide (RE) repeats
hsa-miR-1253	1	0	1	0	1	1	SLC12A2	solute carrier family 12 (sodium/potassium/chloride transporters), member 2
hsa-miR-1253	0	0	1	0	1	1	TOP2A	topoisomerase (DNA) II alpha 170kDa
hsa-miR-1253	0	0	1	1	1	1	TOP2B	topoisomerase (DNA) II beta 180kDa
hsa-miR-1253	1	0	1	1	1	1	PDE11A	phosphodiesterase 11A
hsa-miR-1253	1	0	1	1	1	1	PRR3	proline rich 3
hsa-miR-1253	1	0	1	1	1	1	SRSF1	serine/arginine-rich splicing factor 1
hsa-miR-1253	0	0	1	1	0	0	SLC29A1	solute carrier family 29 (nucleoside transporters), member 1
hsa-miR-1253	1	0	1	1	1	1	TMTC4	transmembrane and tetratricopeptide repeat containing 4
hsa-miR-1253	0	0	1	1	1	1	DIAPH1	diaphanous homolog 1 (Drosophila)
hsa-miR-1253	1	0	1	1	1	1	ITGA6	integrin, alpha 6
hsa-miR-1253	1	0	1	1	1	1	CUL4B	cullin 4B
hsa-miR-1253	1	0	1	1	1	1	DMP1	dentin matrix acidic phosphoprotein 1
hsa-miR-1253	1	0	1	1	1	1	LDB3	LIM domain binding 3
hsa-miR-1253	1	0	1	1	1	1	FAM155A	family with sequence similarity 155, member A
hsa-miR-1253	1	0	1	0	1	1	FBXO41	F-box protein 41
hsa-miR-1253	1	0	1	1	1	1	ZNF697	zinc finger protein 697
hsa-miR-1253	1	0	1	0	1	1	ODZ3	odz, odd Oz/ten-m homolog 3 (Drosophila)
hsa-miR-1253	1	0	1	1	1	1	DGKG	diacylglycerol kinase, gamma 90kDa
hsa-miR-1253	1	0	1	1	1	1	REPS2	RALBP1 associated Eps domain containing 2
hsa-miR-1253	0	0	1	1	1	1	G6PC2	glucose-6-phosphatase, catalytic, 2
hsa-miR-1253	1	0	1	1	0	0	ASIC2	acid-sensing (proton-gated) ion channel 2
hsa-miR-1253	1	0	1	1	1	1	ADCY9	adenylate cyclase 9
hsa-miR-1253	1	0	1	0	0	0	ACAN	aggrecan
hsa-miR-1253	1	0	1	0	1	1	XIAP	X-linked inhibitor of apoptosis
hsa-miR-1253	1	0	1	1	1	1	BMP2	bone morphogenetic protein 2
hsa-miR-1253	1	0	1	0	1	1	BMPR2	bone morphogenetic protein receptor, type II (serine/threonine kinase)
hsa-miR-1253	1	0	1	1	1	1	CAMK2D	calcium/calmodulin-dependent protein kinase II delta
hsa-miR-1253	0	0	1	1	0	0	SIGLEC6	sialic acid binding Ig-like lectin 6
hsa-miR-1253	1	0	1	0	1	1	CDK6	cyclin-dependent kinase 6
hsa-miR-1253	0	0	1	1	1	1	CDSN	corneodesmosin
hsa-miR-1253	1	0	1	0	1	1	CPD	carboxypeptidase D
hsa-miR-1253	1	0	1	1	1	1	CREBL2	cAMP responsive element binding protein-like 2
hsa-miR-1253	1	0	1	1	1	1	CTNND2	catenin (cadherin-associated protein), delta 2
hsa-miR-1253	1	0	1	0	0	0	DLG4	discs, large homolog 4 (Drosophila)
hsa-miR-1253	1	0	1	0	1	1	EFNB3	ephrin-B3
hsa-miR-1253	1	0	1	1	1	1	CELSR2	cadherin, EGF LAG seven-pass G-type receptor 2 (flamingo homolog, Drosophila)
hsa-miR-1253	1	0	1	1	1	1	EN1	engrailed homeobox 1
hsa-miR-1253	1	0	1	1	1	1	GPC4	glypican 4
hsa-miR-1253	1	0	1	1	1	1	FOXC1	forkhead box C1
hsa-miR-1253	0	0	1	1	1	1	FRZB	frizzled-related protein
hsa-miR-1253	1	0	1	0	1	1	GCNT2	glucosaminyl (N-acetyl) transferase 2, I-branching enzyme (I blood group)
hsa-miR-1253	0	0	1	1	0	0	GUCY2F	guanylate cyclase 2F, retinal
hsa-miR-1253	0	0	1	1	0	0	ACRV1	acrosomal vesicle protein 1
hsa-miR-1253	1	0	1	1	1	1	ADD2	adducin 2 (beta)
hsa-miR-1253	1	0	1	1	1	1	AQP4	aquaporin 4
hsa-miR-1253	1	0	1	1	1	1	ARF3	ADP-ribosylation factor 3
hsa-miR-1253	1	0	1	1	1	1	ARL4D	ADP-ribosylation factor-like 4D
hsa-miR-1253	0	0	1	1	1	1	RHOA	ras homolog family member A
hsa-miR-1253	0	0	1	1	1	1	ATP12A	ATPase, H+/K+ transporting, nongastric, alpha polypeptide
hsa-miR-1253	1	0	1	1	1	1	BCL6	B-cell CLL/lymphoma 6
hsa-miR-1253	0	0	1	1	0	0	BICD1	bicaudal D homolog 1 (Drosophila)
hsa-miR-1253	1	0	1	1	1	1	BTG1	B-cell translocation gene 1, anti-proliferative
hsa-miR-1253	0	0	1	1	0	0	C9	complement component 9
hsa-miR-1253	0	0	1	1	1	1	CALB2	calbindin 2
hsa-miR-1253	1	0	1	0	1	1	CCND2	cyclin D2
hsa-miR-1253	0	0	1	1	0	0	CDKN2D	cyclin-dependent kinase inhibitor 2D (p19, inhibits CDK4)
hsa-miR-1253	1	0	1	0	1	1	CEBPG	CCAAT/enhancer binding protein (C/EBP), gamma
hsa-miR-1253	0	0	1	1	0	0	CLC	Charcot-Leyden crystal protein
hsa-miR-1253	1	0	1	1	1	1	CLCN4	chloride channel, voltage-sensitive 4
hsa-miR-1253	1	0	1	1	1	1	COL4A1	collagen, type IV, alpha 1
hsa-miR-1253	1	0	1	1	1	1	COL4A6	collagen, type IV, alpha 6
hsa-miR-1253	0	0	1	1	1	1	SLC31A2	solute carrier family 31 (copper transporters), member 2
hsa-miR-1253	1	0	1	1	1	1	CSNK2A1	casein kinase 2, alpha 1 polypeptide
hsa-miR-1253	0	0	1	1	0	0	CTSG	cathepsin G
hsa-miR-1253	1	0	1	1	1	1	DLST	dihydrolipoamide S-succinyltransferase (E2 component of 2-oxo-glutarate complex)
hsa-miR-1253	1	0	1	1	1	1	DPP4	dipeptidyl-peptidase 4
hsa-miR-1253	1	0	1	1	1	1	DSC3	desmocollin 3
hsa-miR-1253	1	0	1	1	1	1	DUSP6	dual specificity phosphatase 6
hsa-miR-1253	1	0	1	1	1	1	ENPEP	glutamyl aminopeptidase (aminopeptidase A)
hsa-miR-1253	1	0	1	0	1	1	ETV6	ets variant 6
hsa-miR-1253	1	0	1	1	1	1	FBN2	fibrillin 2
hsa-miR-1253	1	0	1	1	1	1	FGF7	fibroblast growth factor 7
hsa-miR-1253	1	0	1	1	1	1	FKBP4	FK506 binding protein 4, 59kDa
hsa-miR-1253	1	0	1	0	1	1	FOXO1	forkhead box O1
hsa-miR-1253	0	0	1	0	1	1	GCG	glucagon
hsa-miR-1253	1	0	1	0	1	1	GNAI1	guanine nucleotide binding protein (G protein), alpha inhibiting activity polypeptide 1
hsa-miR-1253	0	0	1	1	1	1	GTF2E2	general transcription factor IIE, polypeptide 2, beta 34kDa
hsa-miR-1253	0	0	1	1	1	1	FOXN2	forkhead box N2
hsa-miR-1253	1	0	1	0	1	1	IRF2	interferon regulatory factor 2
hsa-miR-1253	1	0	1	1	1	1	ITGA9	integrin, alpha 9
hsa-miR-1253	1	0	1	1	1	1	ITGB8	integrin, beta 8
hsa-miR-1253	1	0	1	1	1	1	JUN	jun proto-oncogene
hsa-miR-1253	1	0	1	1	1	1	KCNJ10	potassium inwardly-rectifying channel, subfamily J, member 10
hsa-miR-1253	1	0	1	1	1	1	KDR	kinase insert domain receptor (a type III receptor tyrosine kinase)
hsa-miR-1253	1	0	1	0	1	1	KIF3C	kinesin family member 3C
hsa-miR-1253	1	0	1	1	1	1	LIF	leukemia inhibitory factor
hsa-miR-1253	1	0	1	1	1	1	LIFR	leukemia inhibitory factor receptor alpha
hsa-miR-1253	1	0	1	0	1	1	MXD1	MAX dimerization protein 1
hsa-miR-1253	0	0	1	0	1	1	CXCL9	chemokine (C-X-C motif) ligand 9
hsa-miR-1253	1	0	1	1	1	1	MN1	meningioma (disrupted in balanced translocation) 1
hsa-miR-1253	1	0	1	1	1	1	MSN	moesin
hsa-miR-1253	1	0	1	1	1	1	MSR1	macrophage scavenger receptor 1
hsa-miR-1253	0	0	1	1	1	1	MTAP	methylthioadenosine phosphorylase
hsa-miR-1253	1	0	1	1	1	1	MYH9	myosin, heavy chain 9, non-muscle
hsa-miR-1253	0	0	1	1	0	0	NDUFB3	NADH dehydrogenase (ubiquinone) 1 beta subcomplex, 3, 12kDa
hsa-miR-1253	1	0	1	1	1	1	NGFR	nerve growth factor receptor
hsa-miR-1253	1	0	1	1	1	1	NPTX1	neuronal pentraxin I
hsa-miR-1253	1	0	1	1	1	1	OSBP	oxysterol binding protein
hsa-miR-1253	0	0	1	1	1	1	PBX1	pre-B-cell leukemia homeobox 1
hsa-miR-1253	0	0	1	1	1	1	PCNA	proliferating cell nuclear antigen
hsa-miR-1253	1	0	1	0	1	1	CDK17	cyclin-dependent kinase 17
hsa-miR-1253	0	0	1	1	1	1	PDE2A	phosphodiesterase 2A, cGMP-stimulated
hsa-miR-1253	0	0	1	1	0	0	PER1	period homolog 1 (Drosophila)
hsa-miR-1253	1	0	1	1	1	1	PHB	prohibitin
hsa-miR-1253	1	0	1	1	1	1	PHF1	PHD finger protein 1
hsa-miR-1253	0	0	1	1	1	1	PIM1	pim-1 oncogene
hsa-miR-1253	1	0	1	0	1	1	PLEK	pleckstrin
hsa-miR-1253	0	0	1	1	1	1	PLGLB2	plasminogen-like B2
hsa-miR-1253	1	0	1	0	1	1	POU3F1	POU class 3 homeobox 1
hsa-miR-1253	1	0	1	0	1	1	PRKCA	protein kinase C, alpha
hsa-miR-1253	0	0	1	0	0	0	PSMB10	proteasome (prosome, macropain) subunit, beta type, 10
hsa-miR-1253	1	0	1	1	1	1	RAD23B	RAD23 homolog B (S. cerevisiae)
hsa-miR-1253	0	0	1	1	1	1	RAF1	v-raf-1 murine leukemia viral oncogene homolog 1
hsa-miR-1253	1	0	1	1	0	0	RFX1	regulatory factor X, 1 (influences HLA class II expression)
hsa-miR-1253	0	0	1	1	1	1	RNASE4	ribonuclease, RNase A family, 4
hsa-miR-1253	1	0	1	1	1	1	ROBO2	roundabout, axon guidance receptor, homolog 2 (Drosophila)
hsa-miR-1253	1	0	1	0	1	1	SORT1	sortilin 1
hsa-miR-1253	0	0	1	1	0	0	S100A7	S100 calcium binding protein A7
hsa-miR-1253	1	0	1	1	1	1	SALL1	sal-like 1 (Drosophila)
hsa-miR-1253	0	0	1	1	1	1	CXCL6	chemokine (C-X-C motif) ligand 6 (granulocyte chemotactic protein 2)
hsa-miR-1253	0	0	1	1	1	1	SDC4	syndecan 4
hsa-miR-1253	1	0	1	1	1	1	SMARCC1	SWI/SNF related, matrix associated, actin dependent regulator of chromatin, subfamily c, member 1
hsa-miR-1253	1	0	1	1	1	1	SMARCD1	SWI/SNF related, matrix associated, actin dependent regulator of chromatin, subfamily d, member 1
hsa-miR-1253	1	0	1	0	1	1	SOX4	SRY (sex determining region Y)-box 4
hsa-miR-1253	1	0	1	0	1	1	SOX11	SRY (sex determining region Y)-box 11
hsa-miR-1253	0	0	1	1	1	1	SRP54	signal recognition particle 54kDa
hsa-miR-1253	0	0	1	1	1	1	SSBP1	single-stranded DNA binding protein 1, mitochondrial
hsa-miR-1253	1	0	1	0	1	1	STC1	stanniocalcin 1
hsa-miR-1253	0	0	1	1	1	1	STIM1	stromal interaction molecule 1
hsa-miR-1253	1	0	1	0	1	1	RPS6KB1	ribosomal protein S6 kinase, 70kDa, polypeptide 1
hsa-miR-1253	1	0	1	1	1	1	SYN2	synapsin II
hsa-miR-1253	1	0	1	1	1	1	TDG	thymine-DNA glycosylase
hsa-miR-1253	1	0	1	1	1	1	TFAP4	transcription factor AP-4 (activating enhancer binding protein 4)
hsa-miR-1253	0	0	1	1	0	0	TG	thyroglobulin
hsa-miR-1253	1	0	1	1	1	1	TGFB3	transforming growth factor, beta 3
hsa-miR-1253	1	0	1	0	1	1	THBS1	thrombospondin 1
hsa-miR-1253	1	0	1	1	1	1	NR2E1	nuclear receptor subfamily 2, group E, member 1
hsa-miR-1253	1	0	1	1	1	1	NR2C2	nuclear receptor subfamily 2, group C, member 2
hsa-miR-1253	1	0	1	1	1	1	UBE2B	ubiquitin-conjugating enzyme E2B
hsa-miR-1253	0	0	1	1	1	1	VRK1	vaccinia related kinase 1
hsa-miR-1253	0	0	1	0	1	1	ZFY	zinc finger protein, Y-linked
hsa-miR-1253	1	0	1	1	1	1	FZD5	frizzled family receptor 5
hsa-miR-1253	0	0	1	1	1	1	PIP5K1A	phosphatidylinositol-4-phosphate 5-kinase, type I, alpha
hsa-miR-1253	1	0	1	1	1	1	EEA1	early endosome antigen 1
hsa-miR-1253	1	0	1	1	1	1	DYRK2	dual-specificity tyrosine-(Y)-phosphorylation regulated kinase 2
hsa-miR-1253	1	0	1	1	1	1	CBX4	chromobox homolog 4
hsa-miR-1253	1	0	1	1	1	1	CDC14A	CDC14 cell division cycle 14 homolog A (S. cerevisiae)
hsa-miR-1253	1	0	1	1	0	0	KHSRP	KH-type splicing regulatory protein
hsa-miR-1253	1	0	1	1	1	1	EXO1	exonuclease 1
hsa-miR-1253	1	0	1	0	1	1	TNKS	tankyrase, TRF1-interacting ankyrin-related ADP-ribose polymerase
hsa-miR-1253	1	0	1	0	1	1	IRS2	insulin receptor substrate 2
hsa-miR-1253	0	0	1	1	1	1	SNX4	sorting nexin 4
hsa-miR-1253	1	0	1	1	1	1	SNAP23	synaptosomal-associated protein, 23kDa
hsa-miR-1253	0	0	1	1	1	1	TNFRSF11A	tumor necrosis factor receptor superfamily, member 11a, NFKB activator
hsa-miR-1253	1	0	1	1	1	1	SUCLG2	succinate-CoA ligase, GDP-forming, beta subunit
hsa-miR-1253	0	0	1	1	1	1	IL18R1	interleukin 18 receptor 1
hsa-miR-1253	1	0	1	1	1	1	NRP2	neuropilin 2
hsa-miR-1253	1	0	1	0	1	1	SGPL1	sphingosine-1-phosphate lyase 1
hsa-miR-1253	1	0	1	1	1	1	PHOX2B	paired-like homeobox 2b
hsa-miR-1253	0	0	1	1	1	1	ATP6V0E1	ATPase, H+ transporting, lysosomal 9kDa, V0 subunit e1
hsa-miR-1253	0	0	1	1	1	1	CDKN1B	cyclin-dependent kinase inhibitor 1B (p27, Kip1)
hsa-miR-1253	0	0	1	0	1	1	EIF4EBP2	eukaryotic translation initiation factor 4E binding protein 2
hsa-miR-1253	1	0	1	1	1	1	EYA4	eyes absent homolog 4 (Drosophila)
hsa-miR-1253	1	0	1	1	1	1	FGF12	fibroblast growth factor 12
hsa-miR-1253	0	0	1	0	1	1	HABP2	hyaluronan binding protein 2
hsa-miR-1253	1	0	1	0	1	1	SLC1A2	solute carrier family 1 (glial high affinity glutamate transporter), member 2
hsa-miR-1253	0	0	1	1	1	1	CHST2	carbohydrate (N-acetylglucosamine-6-O) sulfotransferase 2
hsa-miR-1253	0	0	1	1	1	1	HOMER1	homer homolog 1 (Drosophila)
hsa-miR-1253	1	0	1	0	1	1	ACVR1B	activin A receptor, type IB
hsa-miR-1253	0	0	1	1	0	0	CPT1B	carnitine palmitoyltransferase 1B (muscle)
hsa-miR-1253	1	0	1	1	1	1	ATF6B	activating transcription factor 6 beta
hsa-miR-1253	1	0	1	1	1	1	DACH1	dachshund homolog 1 (Drosophila)
hsa-miR-1253	0	0	1	1	1	1	DNM1	dynamin 1
hsa-miR-1253	1	0	1	1	1	1	EGR3	early growth response 3
hsa-miR-1253	1	0	1	1	1	1	EPS8	epidermal growth factor receptor pathway substrate 8
hsa-miR-1253	1	0	1	0	1	1	ACSL4	acyl-CoA synthetase long-chain family member 4
hsa-miR-1253	0	0	1	1	1	1	GPC5	glypican 5
hsa-miR-1253	1	0	1	0	1	1	GALNT2	UDP-N-acetyl-alpha-D-galactosamine:polypeptide N-acetylgalactosaminyltransferase 2 (GalNAc-T2)
hsa-miR-1253	0	0	1	1	1	1	GP5	glycoprotein V (platelet)
hsa-miR-1253	1	0	1	1	1	1	KIF11	kinesin family member 11
hsa-miR-1253	1	0	1	1	1	1	MLLT3	myeloid/lymphoid or mixed-lineage leukemia (trithorax homolog, Drosophila); translocated to, 3
hsa-miR-1253	0	0	1	1	1	1	PABPN1	poly(A) binding protein, nuclear 1
hsa-miR-1253	1	0	1	1	1	1	RAB11A	RAB11A, member RAS oncogene family
hsa-miR-1253	0	0	1	1	1	1	CDY1	chromodomain protein, Y-linked, 1
hsa-miR-1253	1	0	1	1	1	1	RABEP1	rabaptin, RAB GTPase binding effector protein 1
hsa-miR-1253	1	0	1	1	1	1	DCLK1	doublecortin-like kinase 1
hsa-miR-1253	1	0	1	1	1	1	XPR1	xenotropic and polytropic retrovirus receptor 1
hsa-miR-1253	0	0	1	1	1	1	MMP20	matrix metallopeptidase 20
hsa-miR-1253	1	0	1	1	1	1	MED1	mediator complex subunit 1
hsa-miR-1253	1	0	1	1	1	1	KIF3B	kinesin family member 3B
hsa-miR-1253	1	0	1	0	1	1	CDYL	chromodomain protein, Y-like
hsa-miR-1253	1	0	1	1	1	1	ONECUT2	one cut homeobox 2
hsa-miR-1253	0	0	1	1	1	1	CALB1	calbindin 1, 28kDa
hsa-miR-1253	0	0	1	1	1	1	CD8B	CD8b molecule
hsa-miR-1253	1	0	1	1	1	1	GABRE	gamma-aminobutyric acid (GABA) A receptor, epsilon
hsa-miR-1253	1	0	1	1	1	1	JARID2	jumonji, AT rich interactive domain 2
hsa-miR-1253	1	0	1	0	1	1	KIF5A	kinesin family member 5A
hsa-miR-1253	0	0	1	1	0	0	MMP9	matrix metallopeptidase 9 (gelatinase B, 92kDa gelatinase, 92kDa type IV collagenase)
hsa-miR-1253	0	0	1	1	1	1	PRF1	perforin 1 (pore forming protein)
hsa-miR-1253	1	0	1	0	1	1	SCD	stearoyl-CoA desaturase (delta-9-desaturase)
hsa-miR-1253	1	0	1	0	1	1	SEL1L	sel-1 suppressor of lin-12-like (C. elegans)
hsa-miR-1253	1	0	1	1	1	1	SIAH2	siah E3 ubiquitin protein ligase 2
hsa-miR-1253	1	0	1	1	0	0	ZMYM3	zinc finger, MYM-type 3
hsa-miR-1253	1	0	1	1	1	1	OXSR1	oxidative-stress responsive 1
hsa-miR-1253	1	0	1	1	1	1	GFPT2	glutamine-fructose-6-phosphate transaminase 2
hsa-miR-1253	1	0	1	1	1	1	MED13	mediator complex subunit 13
hsa-miR-1253	1	0	1	1	1	1	BMI1	BMI1 polycomb ring finger oncogene
hsa-miR-1253	0	0	1	1	1	1	CA3	carbonic anhydrase III, muscle specific
hsa-miR-1253	1	0	1	0	1	1	CALM3	calmodulin 3 (phosphorylase kinase, delta)
hsa-miR-1253	1	0	1	0	1	1	DLX6	distal-less homeobox 6
hsa-miR-1253	1	0	1	1	1	1	ETS1	v-ets erythroblastosis virus E26 oncogene homolog 1 (avian)
hsa-miR-1253	1	0	1	1	1	1	GPM6A	glycoprotein M6A
hsa-miR-1253	1	0	1	1	1	1	H3F3B	H3 histone, family 3B (H3.3B)
hsa-miR-1253	1	0	1	1	0	0	HCFC1	host cell factor C1 (VP16-accessory protein)
hsa-miR-1253	1	0	1	0	1	1	PRKAB2	protein kinase, AMP-activated, beta 2 non-catalytic subunit
hsa-miR-1253	1	0	1	1	0	0	SALL2	sal-like 2 (Drosophila)
hsa-miR-1253	1	0	1	0	1	1	SRC	v-src sarcoma (Schmidt-Ruppin A-2) viral oncogene homolog (avian)
hsa-miR-1253	0	0	1	1	0	0	ARHGEF5	Rho guanine nucleotide exchange factor (GEF) 5
hsa-miR-1253	0	0	1	1	1	1	NCOA4	nuclear receptor coactivator 4
hsa-miR-1253	1	0	1	1	1	1	RND2	Rho family GTPase 2
hsa-miR-1253	0	0	1	1	1	1	INSL5	insulin-like 5
hsa-miR-1253	1	0	1	1	1	1	PIGK	phosphatidylinositol glycan anchor biosynthesis, class K
hsa-miR-1253	1	0	1	1	1	1	ABCA1	ATP-binding cassette, sub-family A (ABC1), member 1
hsa-miR-1253	1	0	1	1	1	1	GTF2E1	general transcription factor IIE, polypeptide 1, alpha 56kDa
hsa-miR-1253	1	0	1	1	1	1	HOXA1	homeobox A1
hsa-miR-1253	1	0	1	1	1	1	HOXA11	homeobox A11
hsa-miR-1253	0	0	1	1	0	0	LMNB1	lamin B1
hsa-miR-1253	1	0	1	1	1	1	RGS4	regulator of G-protein signaling 4
hsa-miR-1253	1	0	1	0	1	1	TSPAN2	tetraspanin 2
hsa-miR-1253	1	0	1	0	1	1	DCAF7	DDB1 and CUL4 associated factor 7
hsa-miR-1253	1	0	1	0	1	1	SPRY3	sprouty homolog 3 (Drosophila)
hsa-miR-1253	1	0	1	1	1	1	BET1	blocked early in transport 1 homolog (S. cerevisiae)
hsa-miR-1253	0	0	1	1	1	1	SAP18	Sin3A-associated protein, 18kDa
hsa-miR-1253	1	0	1	1	1	1	MMP16	matrix metallopeptidase 16 (membrane-inserted)
hsa-miR-1253	1	0	1	1	1	1	MTF1	metal-regulatory transcription factor 1
hsa-miR-1253	1	0	1	0	1	1	NAB1	NGFI-A binding protein 1 (EGR1 binding protein 1)
hsa-miR-1253	0	0	1	1	0	0	PPYR1	pancreatic polypeptide receptor 1
hsa-miR-1253	0	0	1	1	0	0	SIX1	SIX homeobox 1
hsa-miR-1253	0	0	1	1	0	0	SKP2	S-phase kinase-associated protein 2, E3 ubiquitin protein ligase
hsa-miR-1253	0	0	1	1	0	0	SPRR1A	small proline-rich protein 1A
hsa-miR-1253	0	0	1	1	1	1	TSC22D1	TSC22 domain family, member 1
hsa-miR-1253	1	0	1	1	1	1	LIPG	lipase, endothelial
hsa-miR-1253	1	0	1	1	1	1	HS3ST4	heparan sulfate (glucosamine) 3-O-sulfotransferase 4
hsa-miR-1253	0	0	1	1	0	0	RRAGB	Ras-related GTP binding B
hsa-miR-1253	1	0	1	1	1	1	SEMA3A	sema domain, immunoglobulin domain (Ig), short basic domain, secreted, (semaphorin) 3A
hsa-miR-1253	1	0	1	1	1	1	TMEM50B	transmembrane protein 50B
hsa-miR-1253	0	0	1	1	1	1	IRF6	interferon regulatory factor 6
hsa-miR-1253	1	0	1	1	1	1	LASP1	LIM and SH3 protein 1
hsa-miR-1253	0	0	1	1	1	1	PA2G4	proliferation-associated 2G4, 38kDa
hsa-miR-1253	1	0	1	1	1	1	ENPP1	ectonucleotide pyrophosphatase/phosphodiesterase 1
hsa-miR-1253	1	0	1	0	1	1	PPP1R2	protein phosphatase 1, regulatory (inhibitor) subunit 2
hsa-miR-1253	0	0	1	1	1	1	PRKCH	protein kinase C, eta
hsa-miR-1253	0	0	1	1	1	1	PRKG2	protein kinase, cGMP-dependent, type II
hsa-miR-1253	1	0	1	1	1	1	RANBP2	RAN binding protein 2
hsa-miR-1253	1	0	1	1	1	1	STK4	serine/threonine kinase 4
hsa-miR-1253	1	0	1	1	1	1	TSG101	tumor susceptibility gene 101
hsa-miR-1253	0	0	1	1	1	1	UBE2E3	ubiquitin-conjugating enzyme E2E 3
hsa-miR-1253	0	0	1	1	1	1	CAP2	CAP, adenylate cyclase-associated protein, 2 (yeast)
hsa-miR-1253	1	0	1	1	1	1	NEBL	nebulette
hsa-miR-1253	1	0	1	1	1	1	SLC35A1	solute carrier family 35 (CMP-sialic acid transporter), member A1
hsa-miR-1253	1	0	1	0	1	1	IGF2BP1	insulin-like growth factor 2 mRNA binding protein 1
hsa-miR-1253	1	0	1	1	1	1	KHDRBS1	KH domain containing, RNA binding, signal transduction associated 1
hsa-miR-1253	0	0	1	1	1	1	TBR1	T-box, brain, 1
hsa-miR-1253	1	0	1	1	1	1	MAP3K2	mitogen-activated protein kinase kinase kinase 2
hsa-miR-1253	0	0	1	1	0	0	KIF1C	kinesin family member 1C
hsa-miR-1253	1	0	1	1	1	1	SRSF10	serine/arginine-rich splicing factor 10
hsa-miR-1253	1	0	1	1	1	1	ZBTB6	zinc finger and BTB domain containing 6
hsa-miR-1253	1	0	1	1	1	1	CCR9	chemokine (C-C motif) receptor 9
hsa-miR-1253	1	0	1	1	1	1	PGRMC1	progesterone receptor membrane component 1
hsa-miR-1253	0	0	1	1	1	1	JTB	jumping translocation breakpoint
hsa-miR-1253	1	0	1	1	1	1	MAN1A2	mannosidase, alpha, class 1A, member 2
hsa-miR-1253	0	0	1	1	1	1	GLO1	glyoxalase I
hsa-miR-1253	1	0	1	1	1	1	DIAPH2	diaphanous homolog 2 (Drosophila)
hsa-miR-1253	0	0	1	1	1	1	HOXA2	homeobox A2
hsa-miR-1253	1	0	1	1	1	1	BTG2	BTG family, member 2
hsa-miR-1253	1	0	1	1	1	1	KAT6A	K(lysine) acetyltransferase 6A
hsa-miR-1253	0	0	1	1	1	1	TMED10	transmembrane emp24-like trafficking protein 10 (yeast)
hsa-miR-1253	1	0	1	1	1	1	RAB35	RAB35, member RAS oncogene family
hsa-miR-1253	0	0	1	1	0	0	PIM2	pim-2 oncogene
hsa-miR-1253	1	0	1	1	1	1	CD86	CD86 molecule
hsa-miR-1253	1	0	1	1	1	1	PRRX1	paired related homeobox 1
hsa-miR-1253	1	0	1	0	1	1	SOX12	SRY (sex determining region Y)-box 12
hsa-miR-1253	1	0	1	0	1	1	WASF2	WAS protein family, member 2
hsa-miR-1253	1	0	1	1	1	1	WWP1	WW domain containing E3 ubiquitin protein ligase 1
hsa-miR-1253	0	0	1	1	1	1	TOPBP1	topoisomerase (DNA) II binding protein 1
hsa-miR-1253	0	0	1	1	1	1	DNAJB4	DnaJ (Hsp40) homolog, subfamily B, member 4
hsa-miR-1253	0	0	1	1	1	1	CD160	CD160 molecule
hsa-miR-1253	1	0	1	1	1	1	KAT7	K(lysine) acetyltransferase 7
hsa-miR-1253	1	0	1	1	1	1	FSTL1	follistatin-like 1
hsa-miR-1253	1	0	1	1	1	1	ZNF81	zinc finger protein 81
hsa-miR-1253	1	0	1	1	1	1	VEZF1	vascular endothelial zinc finger 1
hsa-miR-1253	0	0	1	0	1	1	ZNF208	zinc finger protein 208
hsa-miR-1253	0	0	1	0	1	1	ZXDB	zinc finger, X-linked, duplicated B
hsa-miR-1253	0	0	1	1	1	1	WBP4	WW domain binding protein 4 (formin binding protein 21)
hsa-miR-1253	1	0	1	1	1	1	FZD10	frizzled family receptor 10
hsa-miR-1253	1	0	1	1	1	1	KLF12	Kruppel-like factor 12
hsa-miR-1253	0	0	1	1	1	1	STAT1	signal transducer and activator of transcription 1, 91kDa
hsa-miR-1253	1	0	1	1	1	1	CASC3	cancer susceptibility candidate 3
hsa-miR-1253	0	0	1	1	1	1	ABCB10	ATP-binding cassette, sub-family B (MDR/TAP), member 10
hsa-miR-1253	0	0	1	1	1	1	LMOD1	leiomodin 1 (smooth muscle)
hsa-miR-1253	0	0	1	1	1	1	EHF	ets homologous factor
hsa-miR-1253	1	0	1	0	1	1	FZD4	frizzled family receptor 4
hsa-miR-1253	0	0	1	1	1	1	RRAS2	related RAS viral (r-ras) oncogene homolog 2
hsa-miR-1253	1	0	1	1	1	1	HS2ST1	heparan sulfate 2-O-sulfotransferase 1
hsa-miR-1253	1	0	1	0	1	1	G3BP2	GTPase activating protein (SH3 domain) binding protein 2
hsa-miR-1253	1	0	1	0	1	1	FBXL7	F-box and leucine-rich repeat protein 7
hsa-miR-1253	1	0	1	1	1	1	LSM5	LSM5 homolog, U6 small nuclear RNA associated (S. cerevisiae)
hsa-miR-1253	1	0	1	1	1	1	MAPRE1	microtubule-associated protein, RP/EB family, member 1
hsa-miR-1253	1	0	1	1	1	1	MMD	monocyte to macrophage differentiation-associated
hsa-miR-1253	1	0	1	0	1	1	MYCBP	c-myc binding protein
hsa-miR-1253	0	0	1	0	1	1	PRND	prion protein 2 (dublet)
hsa-miR-1253	1	0	1	1	1	1	RANBP6	RAN binding protein 6
hsa-miR-1253	0	0	1	1	1	1	N6AMT1	N-6 adenine-specific DNA methyltransferase 1 (putative)
hsa-miR-1253	1	0	1	1	1	1	CLCF1	cardiotrophin-like cytokine factor 1
hsa-miR-1253	0	0	1	1	1	1	UBQLN1	ubiquilin 1
hsa-miR-1253	0	0	1	0	1	1	EMR2	egf-like module containing, mucin-like, hormone receptor-like 2
hsa-miR-1253	1	0	1	0	1	1	OSTM1	osteopetrosis associated transmembrane protein 1
hsa-miR-1253	1	0	1	1	1	1	ASF1A	ASF1 anti-silencing function 1 homolog A (S. cerevisiae)
hsa-miR-1253	0	0	1	1	1	1	DUOX2	dual oxidase 2
hsa-miR-1253	1	0	1	1	1	1	ZBTB44	zinc finger and BTB domain containing 44
hsa-miR-1253	0	0	1	0	1	1	SCN8A	sodium channel, voltage gated, type VIII, alpha subunit
hsa-miR-1253	0	0	1	1	1	1	UBL4A	ubiquitin-like 4A
hsa-miR-1253	1	0	1	1	1	1	MAPRE2	microtubule-associated protein, RP/EB family, member 2
hsa-miR-1253	0	0	1	1	1	1	C22orf28	chromosome 22 open reading frame 28
hsa-miR-1253	1	0	1	1	1	1	MTCH2	mitochondrial carrier 2
hsa-miR-1253	0	0	1	1	0	0	CLEC4E	C-type lectin domain family 4, member E
hsa-miR-1253	1	0	1	1	1	1	LHX6	LIM homeobox 6
hsa-miR-1253	1	0	1	0	1	1	RNF11	ring finger protein 11
hsa-miR-1253	0	0	1	0	1	1	VPS41	vacuolar protein sorting 41 homolog (S. cerevisiae)
hsa-miR-1253	0	0	1	1	1	1	LAMP3	lysosomal-associated membrane protein 3
hsa-miR-1253	0	0	1	1	1	1	TAF5L	TAF5-like RNA polymerase II, p300/CBP-associated factor (PCAF)-associated factor, 65kDa
hsa-miR-1253	1	0	1	1	1	1	AFF4	AF4/FMR2 family, member 4
hsa-miR-1253	1	0	1	1	1	1	SERP1	stress-associated endoplasmic reticulum protein 1
hsa-miR-1253	1	0	1	1	1	1	KLHL20	kelch-like 20 (Drosophila)
hsa-miR-1253	0	0	1	1	1	1	ZNF330	zinc finger protein 330
hsa-miR-1253	1	0	1	1	1	1	CNOT2	CCR4-NOT transcription complex, subunit 2
hsa-miR-1253	1	0	1	1	1	1	OTX1	orthodenticle homeobox 1
hsa-miR-1253	1	0	1	1	1	1	ERO1L	ERO1-like (S. cerevisiae)
hsa-miR-1253	1	0	1	0	1	1	HUNK	hormonally up-regulated Neu-associated kinase
hsa-miR-1253	1	0	1	1	1	1	VSX1	visual system homeobox 1
hsa-miR-1253	1	0	1	1	1	1	HERC3	HECT and RLD domain containing E3 ubiquitin protein ligase 3
hsa-miR-1253	1	0	1	1	1	1	ZNF592	zinc finger protein 592
hsa-miR-1253	0	0	1	0	1	1	CTR9	Ctr9, Paf1/RNA polymerase II complex component, homolog (S. cerevisiae)
hsa-miR-1253	1	0	1	1	1	1	RALGPS1	Ral GEF with PH domain and SH3 binding motif 1
hsa-miR-1253	1	0	1	1	1	1	KDM4A	lysine (K)-specific demethylase 4A
hsa-miR-1253	0	0	1	1	0	0	ZNF646	zinc finger protein 646
hsa-miR-1253	0	0	1	1	1	1	VPRBP	Vpr (HIV-1) binding protein
hsa-miR-1253	0	0	1	1	1	1	FRMPD4	FERM and PDZ domain containing 4
hsa-miR-1253	1	0	1	0	1	1	TOX	thymocyte selection-associated high mobility group box
hsa-miR-1253	1	0	1	0	1	1	MLEC	malectin
hsa-miR-1253	1	0	1	0	1	1	KIAA0513	KIAA0513
hsa-miR-1253	1	0	1	0	1	1	SERTAD2	SERTA domain containing 2
hsa-miR-1253	0	0	1	0	1	1	DHCR24	24-dehydrocholesterol reductase
hsa-miR-1253	0	0	1	1	0	0	PCNXL2	pecanex-like 2 (Drosophila)
hsa-miR-1253	1	0	1	0	1	1	TRIL	TLR4 interactor with leucine-rich repeats
hsa-miR-1253	1	0	1	0	1	1	PJA2	praja ring finger 2, E3 ubiquitin protein ligase
hsa-miR-1253	1	0	1	1	1	1	TOMM70A	translocase of outer mitochondrial membrane 70 homolog A (S. cerevisiae)
hsa-miR-1253	1	0	1	1	1	1	FCHSD2	FCH and double SH3 domains 2
hsa-miR-1253	1	0	1	1	1	1	ZBTB39	zinc finger and BTB domain containing 39
hsa-miR-1253	1	0	1	1	1	1	TBC1D4	TBC1 domain family, member 4
hsa-miR-1253	1	0	1	0	1	1	ZBTB40	zinc finger and BTB domain containing 40
hsa-miR-1253	1	0	1	1	1	1	JOSD1	Josephin domain containing 1
hsa-miR-1253	1	0	1	0	1	1	RAB11FIP2	RAB11 family interacting protein 2 (class I)
hsa-miR-1253	0	0	1	1	1	1	ADNP2	ADNP homeobox 2
hsa-miR-1253	0	0	1	1	1	1	TMEM41B	transmembrane protein 41B
hsa-miR-1253	0	0	1	1	0	0	RBM34	RNA binding motif protein 34
hsa-miR-1253	1	0	1	1	1	1	PHLPP2	PH domain and leucine rich repeat protein phosphatase 2
hsa-miR-1253	1	0	1	1	1	1	XPO7	exportin 7
hsa-miR-1253	1	0	1	0	1	1	NMNAT2	nicotinamide nucleotide adenylyltransferase 2
hsa-miR-1253	1	0	1	1	1	1	ERP44	endoplasmic reticulum protein 44
hsa-miR-1253	0	0	1	1	1	1	VWA8	von Willebrand factor A domain containing 8
hsa-miR-1253	1	0	1	1	1	1	SMG1	smg-1 homolog, phosphatidylinositol 3-kinase-related kinase (C. elegans)
hsa-miR-1253	1	0	1	1	1	1	TAB2	TGF-beta activated kinase 1/MAP3K7 binding protein 2
hsa-miR-1253	1	0	1	1	0	0	RFTN1	raftlin, lipid raft linker 1
hsa-miR-1253	1	0	1	0	1	1	LARP4B	La ribonucleoprotein domain family, member 4B
hsa-miR-1253	1	0	1	0	1	1	KIAA1024	KIAA1024
hsa-miR-1253	0	0	1	1	1	1	POFUT2	protein O-fucosyltransferase 2
hsa-miR-1253	0	0	1	1	1	1	ADNP	activity-dependent neuroprotector homeobox
hsa-miR-1253	0	0	1	1	1	1	LEPROTL1	leptin receptor overlapping transcript-like 1
hsa-miR-1253	1	0	1	1	1	1	ZFYVE26	zinc finger, FYVE domain containing 26
hsa-miR-1253	1	0	1	1	1	1	RIMBP2	RIMS binding protein 2
hsa-miR-1253	1	0	1	1	1	1	PARM1	prostate androgen-regulated mucin-like protein 1
hsa-miR-1253	0	0	1	1	1	1	ZNF10	zinc finger protein 10
hsa-miR-1253	1	0	1	1	1	1	RNF19A	ring finger protein 19A, E3 ubiquitin protein ligase
hsa-miR-1253	1	0	1	1	1	1	CNOT6	CCR4-NOT transcription complex, subunit 6
hsa-miR-1253	1	0	1	1	0	0	LDLRAP1	low density lipoprotein receptor adaptor protein 1
hsa-miR-1253	1	0	1	1	1	1	EPC2	enhancer of polycomb homolog 2 (Drosophila)
hsa-miR-1253	0	0	1	1	1	1	GIMAP2	GTPase, IMAP family member 2
hsa-miR-1253	1	0	1	0	1	1	WWC3	WWC family member 3
hsa-miR-1253	0	0	1	1	1	1	BRPF3	bromodomain and PHD finger containing, 3
hsa-miR-1253	0	0	1	1	1	1	KRT76	keratin 76
hsa-miR-1253	1	0	1	0	1	1	TRIM33	tripartite motif containing 33
hsa-miR-1253	1	0	1	1	1	1	TXNDC12	thioredoxin domain containing 12 (endoplasmic reticulum)
hsa-miR-1253	1	0	1	1	1	1	MEMO1	mediator of cell motility 1
hsa-miR-1253	1	0	1	1	1	1	GOLT1B	golgi transport 1B
hsa-miR-1253	1	0	1	0	1	1	CNR1	cannabinoid receptor 1 (brain)
hsa-miR-1253	0	0	1	1	1	1	ZFR	zinc finger RNA binding protein
hsa-miR-1253	0	0	1	1	1	1	RAB10	RAB10, member RAS oncogene family
hsa-miR-1253	0	0	1	1	1	1	HSD17B12	hydroxysteroid (17-beta) dehydrogenase 12
hsa-miR-1253	1	0	1	1	1	1	VGLL3	vestigial like 3 (Drosophila)
hsa-miR-1253	0	0	1	1	1	1	VPS29	vacuolar protein sorting 29 homolog (S. cerevisiae)
hsa-miR-1253	1	0	1	1	1	1	NLK	nemo-like kinase
hsa-miR-1253	1	0	1	1	1	1	AKAP11	A kinase (PRKA) anchor protein 11
hsa-miR-1253	0	0	1	1	1	1	KLF2	Kruppel-like factor 2 (lung)
hsa-miR-1253	1	0	1	1	1	1	TOB2	transducer of ERBB2, 2
hsa-miR-1253	1	0	1	1	1	1	RAB14	RAB14, member RAS oncogene family
hsa-miR-1253	0	0	1	1	0	0	TRMT112	tRNA methyltransferase 11-2 homolog (S. cerevisiae)
hsa-miR-1253	1	0	1	1	1	1	PHF20	PHD finger protein 20
hsa-miR-1253	0	0	1	0	1	1	ERAP1	endoplasmic reticulum aminopeptidase 1
hsa-miR-1253	0	0	1	1	1	1	KLRF1	killer cell lectin-like receptor subfamily F, member 1
hsa-miR-1253	1	0	1	0	1	1	RAB8B	RAB8B, member RAS oncogene family
hsa-miR-1253	1	0	1	0	1	1	NT5DC3	5'-nucleotidase domain containing 3
hsa-miR-1253	1	0	1	1	1	1	RAB6B	RAB6B, member RAS oncogene family
hsa-miR-1253	0	0	1	1	1	1	KDM3B	lysine (K)-specific demethylase 3B
hsa-miR-1253	0	0	1	1	1	1	USP18	ubiquitin specific peptidase 18
hsa-miR-1253	1	0	1	0	1	1	KLHL3	kelch-like 3 (Drosophila)
hsa-miR-1253	1	0	1	1	1	1	SIX4	SIX homeobox 4
hsa-miR-1253	0	0	1	1	1	1	POLE3	polymerase (DNA directed), epsilon 3, accessory subunit
hsa-miR-1253	1	0	1	1	1	1	HAO1	hydroxyacid oxidase (glycolate oxidase) 1
hsa-miR-1253	1	0	1	1	1	1	DIRAS2	DIRAS family, GTP-binding RAS-like 2
hsa-miR-1253	1	0	1	0	1	1	KCTD9	potassium channel tetramerisation domain containing 9
hsa-miR-1253	1	0	1	1	1	1	HAUS6	HAUS augmin-like complex, subunit 6
hsa-miR-1253	0	0	1	0	1	1	GIPC2	GIPC PDZ domain containing family, member 2
hsa-miR-1253	1	0	1	1	1	1	ZNF280C	zinc finger protein 280C
hsa-miR-1253	0	0	1	1	0	0	NDE1	nudE nuclear distribution E homolog 1 (A. nidulans)
hsa-miR-1253	0	0	1	1	0	0	NUP62CL	nucleoporin 62kDa C-terminal like
hsa-miR-1253	1	0	1	1	1	1	VPS13C	vacuolar protein sorting 13 homolog C (S. cerevisiae)
hsa-miR-1253	1	0	1	0	1	1	FAM46C	family with sequence similarity 46, member C
hsa-miR-1253	0	0	1	1	0	0	CNTLN	centlein, centrosomal protein
hsa-miR-1253	1	0	1	0	1	1	DCAF16	DDB1 and CUL4 associated factor 16
hsa-miR-1253	1	0	1	1	1	1	LPPR1	lipid phosphate phosphatase-related protein type 1
hsa-miR-1253	1	0	1	1	0	0	INO80D	INO80 complex subunit D
hsa-miR-1253	0	0	1	1	1	1	WHSC1L1	Wolf-Hirschhorn syndrome candidate 1-like 1
hsa-miR-1253	1	0	1	0	1	1	CMTM6	CKLF-like MARVEL transmembrane domain containing 6
hsa-miR-1253	0	0	1	1	0	0	INTS8	integrator complex subunit 8
hsa-miR-1253	0	0	1	1	1	1	DDX27	DEAD (Asp-Glu-Ala-Asp) box polypeptide 27
hsa-miR-1253	1	0	1	1	1	1	HIF1AN	hypoxia inducible factor 1, alpha subunit inhibitor
hsa-miR-1253	0	0	1	0	1	1	MREG	melanoregulin
hsa-miR-1253	1	0	1	1	1	1	ARGLU1	arginine and glutamate rich 1
hsa-miR-1253	1	0	1	0	1	1	KIF26B	kinesin family member 26B
hsa-miR-1253	1	0	1	1	1	1	SOBP	sine oculis binding protein homolog (Drosophila)
hsa-miR-1253	0	0	1	1	1	1	RBM22	RNA binding motif protein 22
hsa-miR-1253	1	0	1	0	1	1	ARMC1	armadillo repeat containing 1
hsa-miR-1253	1	0	1	1	1	1	FAM178A	family with sequence similarity 178, member A
hsa-miR-1253	1	0	1	0	1	1	LGI2	leucine-rich repeat LGI family, member 2
hsa-miR-1253	1	0	1	0	1	1	ARL8B	ADP-ribosylation factor-like 8B
hsa-miR-1253	0	0	1	1	1	1	TMLHE	trimethyllysine hydroxylase, epsilon
hsa-miR-1253	0	0	1	1	1	1	TRIM62	tripartite motif containing 62
hsa-miR-1253	1	0	1	1	1	1	LRRC1	leucine rich repeat containing 1
hsa-miR-1253	1	0	1	1	1	1	C9orf72	chromosome 9 open reading frame 72
hsa-miR-1253	1	0	1	1	1	1	AGPAT5	1-acylglycerol-3-phosphate O-acyltransferase 5 (lysophosphatidic acid acyltransferase, epsilon)
hsa-miR-1253	1	0	1	1	1	1	RSBN1	round spermatid basic protein 1
hsa-miR-1253	0	0	1	1	1	1	LAPTM4B	lysosomal protein transmembrane 4 beta
hsa-miR-1253	1	0	1	0	1	1	FOXJ2	forkhead box J2
hsa-miR-1253	0	0	1	1	1	1	BDP1	B double prime 1, subunit of RNA polymerase III transcription initiation factor IIIB
hsa-miR-1253	0	0	1	1	0	0	ALLC	allantoicase
hsa-miR-1253	1	0	1	1	1	1	PAG1	phosphoprotein associated with glycosphingolipid microdomains 1
hsa-miR-1253	0	0	1	1	1	1	ZC3H15	zinc finger CCCH-type containing 15
hsa-miR-1253	1	0	1	1	1	1	STRADB	STE20-related kinase adaptor beta
hsa-miR-1253	1	0	1	1	1	1	ETNK1	ethanolamine kinase 1
hsa-miR-1253	1	0	1	0	1	1	TMEM55A	transmembrane protein 55A
hsa-miR-1253	1	0	1	1	1	1	CDCA7L	cell division cycle associated 7-like
hsa-miR-1253	0	0	1	1	0	0	SH3BP1	SH3-domain binding protein 1
hsa-miR-1253	1	0	1	1	1	1	KCTD5	potassium channel tetramerisation domain containing 5
hsa-miR-1253	1	0	1	0	1	1	FAM190B	family with sequence similarity 190, member B
hsa-miR-1253	0	0	1	0	1	1	ARL15	ADP-ribosylation factor-like 15
hsa-miR-1253	1	0	1	1	1	1	SEPT3	septin 3
hsa-miR-1253	1	0	1	0	1	1	UBFD1	ubiquitin family domain containing 1
hsa-miR-1253	0	0	1	1	1	1	RNF20	ring finger protein 20, E3 ubiquitin protein ligase
hsa-miR-1253	1	0	1	1	1	1	LRRC8A	leucine rich repeat containing 8 family, member A
hsa-miR-1253	1	0	1	1	1	1	SERTAD4	SERTA domain containing 4
hsa-miR-1253	0	0	1	1	0	0	GKN1	gastrokine 1
hsa-miR-1253	1	0	1	1	1	1	POLE4	polymerase (DNA-directed), epsilon 4, accessory subunit
hsa-miR-1253	0	0	1	1	1	1	HLA-DQA2	major histocompatibility complex, class II, DQ alpha 2
hsa-miR-1253	0	0	1	1	1	1	FMN2	formin 2
hsa-miR-1253	1	0	1	0	1	1	TM9SF3	transmembrane 9 superfamily member 3
hsa-miR-1253	1	0	1	0	1	1	SLAMF8	SLAM family member 8
hsa-miR-1253	1	0	1	1	1	1	MDM1	Mdm1 nuclear protein homolog (mouse)
hsa-miR-1253	1	0	1	1	1	1	WRNIP1	Werner helicase interacting protein 1
hsa-miR-1253	1	0	1	1	1	1	SAR1A	SAR1 homolog A (S. cerevisiae)
hsa-miR-1253	1	0	1	1	1	1	FEM1C	fem-1 homolog c (C. elegans)
hsa-miR-1253	1	0	1	1	0	0	C11orf75	chromosome 11 open reading frame 75
hsa-miR-1253	0	0	1	1	1	1	ACN9	ACN9 homolog (S. cerevisiae)
hsa-miR-1253	0	0	1	1	1	1	PRTFDC1	phosphoribosyl transferase domain containing 1
hsa-miR-1253	0	0	1	1	0	0	PRDM11	PR domain containing 11
hsa-miR-1253	1	0	1	1	0	0	SLC17A7	solute carrier family 17 (sodium-dependent inorganic phosphate cotransporter), member 7
hsa-miR-1253	0	0	1	1	1	1	RALGAPA2	Ral GTPase activating protein, alpha subunit 2 (catalytic)
hsa-miR-1253	0	0	1	1	0	0	ENTPD7	ectonucleoside triphosphate diphosphohydrolase 7
hsa-miR-1253	1	0	1	1	1	1	PITHD1	PITH (C-terminal proteasome-interacting domain of thioredoxin-like) domain containing 1
hsa-miR-1253	0	0	1	1	0	0	CD248	CD248 molecule, endosialin
hsa-miR-1253	1	0	1	0	1	1	ADCY2	adenylate cyclase 2 (brain)
hsa-miR-1253	1	0	1	0	1	1	DCUN1D1	DCN1, defective in cullin neddylation 1, domain containing 1 (S. cerevisiae)
hsa-miR-1253	1	0	1	1	1	1	ZNF304	zinc finger protein 304
hsa-miR-1253	1	0	1	1	1	1	RAB22A	RAB22A, member RAS oncogene family
hsa-miR-1253	1	0	1	1	1	1	DSCAML1	Down syndrome cell adhesion molecule like 1
hsa-miR-1253	0	0	1	1	1	1	SHROOM4	shroom family member 4
hsa-miR-1253	1	0	1	1	1	1	ARHGAP31	Rho GTPase activating protein 31
hsa-miR-1253	1	0	1	1	1	1	RGAG1	retrotransposon gag domain containing 1
hsa-miR-1253	1	0	1	0	1	1	NUFIP2	nuclear fragile X mental retardation protein interacting protein 2
hsa-miR-1253	1	0	1	1	1	1	NLGN2	neuroligin 2
hsa-miR-1253	0	0	1	0	1	1	TRMT5	tRNA methyltransferase 5 homolog (S. cerevisiae)
hsa-miR-1253	1	0	1	0	1	1	WDFY1	WD repeat and FYVE domain containing 1
hsa-miR-1253	1	0	1	1	1	1	RANBP10	RAN binding protein 10
hsa-miR-1253	1	0	1	1	1	1	TSHZ3	teashirt zinc finger homeobox 3
hsa-miR-1253	1	0	1	1	1	1	ZBTB2	zinc finger and BTB domain containing 2
hsa-miR-1253	1	0	1	0	1	1	SH3RF1	SH3 domain containing ring finger 1
hsa-miR-1253	0	0	1	1	0	0	DNAH2	dynein, axonemal, heavy chain 2
hsa-miR-1253	1	0	1	0	1	1	RNF213	ring finger protein 213
hsa-miR-1253	1	0	1	1	1	1	ZFP14	zinc finger protein 14 homolog (mouse)
hsa-miR-1253	0	0	1	1	1	1	TLX3	T-cell leukemia homeobox 3
hsa-miR-1253	1	0	1	0	1	1	RAP2A	RAP2A, member of RAS oncogene family
hsa-miR-1253	0	0	1	1	1	1	HIST1H2AG	histone cluster 1, H2ag
hsa-miR-1253	1	0	1	1	1	1	HCN1	hyperpolarization activated cyclic nucleotide-gated potassium channel 1
hsa-miR-1253	1	0	1	1	1	1	MTMR3	myotubularin related protein 3
hsa-miR-1253	1	0	1	1	0	0	SLC5A6	solute carrier family 5 (sodium-dependent vitamin transporter), member 6
hsa-miR-1253	1	0	1	1	1	1	RTN1	reticulon 1
hsa-miR-1253	0	0	1	1	0	0	HOXD11	homeobox D11
hsa-miR-1253	0	0	1	0	1	1	MS4A7	membrane-spanning 4-domains, subfamily A, member 7
hsa-miR-1253	0	0	1	1	1	1	OSTC	oligosaccharyltransferase complex subunit
hsa-miR-1253	1	0	1	1	1	1	PELI2	pellino E3 ubiquitin protein ligase family member 2
hsa-miR-1253	0	0	1	1	1	1	SCPEP1	serine carboxypeptidase 1
hsa-miR-1253	1	0	1	0	1	1	TSPYL4	TSPY-like 4
hsa-miR-1253	0	0	1	1	1	1	VPS11	vacuolar protein sorting 11 homolog (S. cerevisiae)
hsa-miR-1253	0	0	1	1	0	0	TMSB15A	thymosin beta 15a
hsa-miR-1253	1	0	1	0	1	1	CERS2	ceramide synthase 2
hsa-miR-1253	1	0	1	1	1	1	SNX16	sorting nexin 16
hsa-miR-1253	0	0	1	1	0	0	POPDC2	popeye domain containing 2
hsa-miR-1253	1	0	1	1	1	1	ABCG4	ATP-binding cassette, sub-family G (WHITE), member 4
hsa-miR-1253	1	0	1	0	1	1	EIF4H	eukaryotic translation initiation factor 4H
hsa-miR-1253	0	0	1	1	1	1	TCTA	T-cell leukemia translocation altered
hsa-miR-1253	1	0	1	1	1	1	SUDS3	suppressor of defective silencing 3 homolog (S. cerevisiae)
hsa-miR-1253	1	0	1	1	1	1	GIGYF1	GRB10 interacting GYF protein 1
hsa-miR-1253	1	0	1	1	1	1	NEUROD6	neuronal differentiation 6
hsa-miR-1253	0	0	1	1	1	1	OSBPL11	oxysterol binding protein-like 11
hsa-miR-1253	1	0	1	1	1	1	DEPTOR	DEP domain containing MTOR-interacting protein
hsa-miR-1253	1	0	1	1	1	1	RFX7	regulatory factor X, 7
hsa-miR-1253	1	0	1	0	1	1	BCL11B	B-cell CLL/lymphoma 11B (zinc finger protein)
hsa-miR-1253	1	0	1	1	1	1	REEP1	receptor accessory protein 1
hsa-miR-1253	1	0	1	1	0	0	C19orf43	chromosome 19 open reading frame 43
hsa-miR-1253	1	0	1	1	1	1	GID4	GID complex subunit 4, VID24 homolog (S. cerevisiae)
hsa-miR-1253	1	0	1	0	1	1	NOTCH2	notch 2
hsa-miR-1253	0	0	1	1	1	1	PDYN	prodynorphin
hsa-miR-1253	0	0	1	0	1	1	DSC2	desmocollin 2
hsa-miR-1253	1	0	1	1	1	1	NKAIN1	Na+/K+ transporting ATPase interacting 1
hsa-miR-1253	1	0	1	1	1	1	GCC1	GRIP and coiled-coil domain containing 1
hsa-miR-1253	1	0	1	1	1	1	CDC73	cell division cycle 73, Paf1/RNA polymerase II complex component, homolog (S. cerevisiae)
hsa-miR-1253	1	0	1	1	1	1	PGBD5	piggyBac transposable element derived 5
hsa-miR-1253	0	0	1	1	1	1	NAA16	N(alpha)-acetyltransferase 16, NatA auxiliary subunit
hsa-miR-1253	0	0	1	1	1	1	AKIRIN1	akirin 1
hsa-miR-1253	0	0	1	0	1	1	ZYG11B	zyg-11 homolog B (C. elegans)
hsa-miR-1253	1	0	1	1	1	1	CLMP	CXADR-like membrane protein
hsa-miR-1253	0	0	1	1	1	1	ZNF767	zinc finger family member 767
hsa-miR-1253	0	0	1	1	0	0	NRSN2	neurensin 2
hsa-miR-1253	1	0	1	1	1	1	KLHL18	kelch-like 18 (Drosophila)
hsa-miR-1253	1	0	1	0	1	1	VCPIP1	valosin containing protein (p97)/p47 complex interacting protein 1
hsa-miR-1253	0	0	1	1	1	1	CCDC170	coiled-coil domain containing 170
hsa-miR-1253	1	0	1	1	1	1	NAA50	N(alpha)-acetyltransferase 50, NatE catalytic subunit
hsa-miR-1253	1	0	1	0	1	1	EDEM3	ER degradation enhancer, mannosidase alpha-like 3
hsa-miR-1253	1	0	1	1	1	1	TRIB1	tribbles homolog 1 (Drosophila)
hsa-miR-1253	0	0	1	1	0	0	BPIFB2	BPI fold containing family B, member 2
hsa-miR-1253	1	0	1	0	1	1	SRCIN1	SRC kinase signaling inhibitor 1
hsa-miR-1253	1	0	1	1	1	1	CYB5B	cytochrome b5 type B (outer mitochondrial membrane)
hsa-miR-1253	0	0	1	1	0	0	INTS5	integrator complex subunit 5
hsa-miR-1253	1	0	1	1	1	1	JHDM1D	jumonji C domain containing histone demethylase 1 homolog D (S. cerevisiae)
hsa-miR-1253	1	0	1	0	1	1	SETD7	SET domain containing (lysine methyltransferase) 7
hsa-miR-1253	0	0	1	1	1	1	FCRL2	Fc receptor-like 2
hsa-miR-1253	1	0	1	1	1	1	SYNC	syncoilin, intermediate filament protein
hsa-miR-1253	1	0	1	0	1	1	C1orf21	chromosome 1 open reading frame 21
hsa-miR-1253	1	0	1	0	1	1	CSRNP2	cysteine-serine-rich nuclear protein 2
hsa-miR-1253	1	0	1	1	1	1	OR2H1	olfactory receptor, family 2, subfamily H, member 1
hsa-miR-1253	1	0	1	0	1	1	LBH	limb bud and heart development homolog (mouse)
hsa-miR-1253	1	0	1	0	1	1	SPRY4	sprouty homolog 4 (Drosophila)
hsa-miR-1253	1	0	1	1	1	1	TEX14	testis expressed 14
hsa-miR-1253	0	0	1	1	1	1	FCRL4	Fc receptor-like 4
hsa-miR-1253	1	0	1	0	1	1	THAP2	THAP domain containing, apoptosis associated protein 2
hsa-miR-1253	0	0	1	1	1	1	RIOK1	RIO kinase 1 (yeast)
hsa-miR-1253	0	0	1	1	1	1	TSSK1B	testis-specific serine kinase 1B
hsa-miR-1253	1	0	1	0	1	1	FAM172A	family with sequence similarity 172, member A
hsa-miR-1253	0	0	1	1	0	0	TMEM222	transmembrane protein 222
hsa-miR-1253	1	0	1	1	1	1	ARID5B	AT rich interactive domain 5B (MRF1-like)
hsa-miR-1253	1	0	1	1	1	1	LOXL4	lysyl oxidase-like 4
hsa-miR-1253	1	0	1	1	1	1	SLITRK6	SLIT and NTRK-like family, member 6
hsa-miR-1253	0	0	1	1	1	1	ATP13A4	ATPase type 13A4
hsa-miR-1253	1	0	1	1	1	1	POLDIP3	polymerase (DNA-directed), delta interacting protein 3
hsa-miR-1253	0	0	1	1	1	1	VPS25	vacuolar protein sorting 25 homolog (S. cerevisiae)
hsa-miR-1253	1	0	1	1	1	1	TRIM63	tripartite motif containing 63, E3 ubiquitin protein ligase
hsa-miR-1253	1	0	1	0	1	1	INA	internexin neuronal intermediate filament protein, alpha
hsa-miR-1253	1	0	1	1	0	0	ZC3H10	zinc finger CCCH-type containing 10
hsa-miR-1253	1	0	1	1	1	1	ARHGEF39	Rho guanine nucleotide exchange factor (GEF) 39
hsa-miR-1253	1	0	1	1	1	1	PCDH10	protocadherin 10
hsa-miR-1253	1	0	1	1	1	1	TRIM55	tripartite motif containing 55
hsa-miR-1253	0	0	1	1	1	1	GALP	galanin-like peptide
hsa-miR-1253	1	0	1	1	1	1	TP53INP1	tumor protein p53 inducible nuclear protein 1
hsa-miR-1253	1	0	1	1	1	1	RASL10B	RAS-like, family 10, member B
hsa-miR-1253	1	0	1	1	1	1	EPT1	ethanolaminephosphotransferase 1 (CDP-ethanolamine-specific)
hsa-miR-1253	1	0	1	1	1	1	TPD52L3	tumor protein D52-like 3
hsa-miR-1253	1	0	1	1	0	0	CCDC120	coiled-coil domain containing 120
hsa-miR-1253	1	0	1	1	1	1	LUZP1	leucine zipper protein 1
hsa-miR-1253	1	0	1	1	1	1	BRWD1	bromodomain and WD repeat domain containing 1
hsa-miR-1253	0	0	1	1	1	1	NALCN	sodium leak channel, non-selective
hsa-miR-1253	1	0	1	1	1	1	STX1B	syntaxin 1B
hsa-miR-1253	0	0	1	1	0	0	STK11IP	serine/threonine kinase 11 interacting protein
hsa-miR-1253	0	0	1	1	1	1	LENG8	leukocyte receptor cluster (LRC) member 8
hsa-miR-1253	1	0	1	0	1	1	TMEM123	transmembrane protein 123
hsa-miR-1253	0	0	1	1	0	0	THEM4	thioesterase superfamily member 4
hsa-miR-1253	1	0	1	1	0	0	BRD4	bromodomain containing 4
hsa-miR-1253	1	0	1	1	0	0	ADAMTS14	ADAM metallopeptidase with thrombospondin type 1 motif, 14
hsa-miR-1253	1	0	1	0	1	1	EDARADD	EDAR-associated death domain
hsa-miR-1253	1	0	1	0	1	1	SOCS4	suppressor of cytokine signaling 4
hsa-miR-1253	1	0	1	1	1	1	SYN1	synapsin I
hsa-miR-1253	0	0	1	1	1	1	C7orf29	chromosome 7 open reading frame 29
hsa-miR-1253	1	0	1	1	1	1	KCTD12	potassium channel tetramerisation domain containing 12
hsa-miR-1253	1	0	1	0	1	1	SP1	Sp1 transcription factor
hsa-miR-1253	1	0	1	1	1	1	PKHD1	polycystic kidney and hepatic disease 1 (autosomal recessive)
hsa-miR-1253	1	0	1	0	1	1	FCHO2	FCH domain only 2
hsa-miR-1253	0	0	1	1	0	0	BRD8	bromodomain containing 8
hsa-miR-1253	0	0	1	1	1	1	C1orf105	chromosome 1 open reading frame 105
hsa-miR-1253	1	0	1	1	1	1	MAPK1IP1L	mitogen-activated protein kinase 1 interacting protein 1-like
hsa-miR-1253	0	0	1	1	1	1	GTSF1	gametocyte specific factor 1
hsa-miR-1253	0	0	1	1	0	0	LINC00477	long intergenic non-protein coding RNA 477
hsa-miR-1253	0	0	1	1	0	0	CMTM2	CKLF-like MARVEL transmembrane domain containing 2
hsa-miR-1253	1	0	1	1	1	1	UBQLNL	ubiquilin-like
hsa-miR-1253	0	0	1	1	0	0	CISH	cytokine inducible SH2-containing protein
hsa-miR-1253	1	0	1	1	1	1	PRRT2	proline-rich transmembrane protein 2
hsa-miR-1253	0	0	1	1	0	0	RNASE11	ribonuclease, RNase A family, 11 (non-active)
hsa-miR-1253	0	0	1	1	1	1	APOBEC3F	apolipoprotein B mRNA editing enzyme, catalytic polypeptide-like 3F
hsa-miR-1253	0	0	1	0	1	1	OSTCP1	oligosaccharyltransferase complex subunit pseudogene 1
hsa-miR-1253	0	0	1	1	0	0	TMEM217	transmembrane protein 217
hsa-miR-1253	1	0	1	1	1	1	SEPT6	septin 6
hsa-miR-1253	1	0	1	0	1	1	MTPN	myotrophin
hsa-miR-1253	1	0	1	1	1	1	SGMS1	sphingomyelin synthase 1
hsa-miR-1253	0	0	1	0	1	1	CHKB	choline kinase beta
hsa-miR-1253	0	0	1	1	0	0	C19orf40	chromosome 19 open reading frame 40
hsa-miR-1253	0	0	1	1	1	1	TCEAL7	transcription elongation factor A (SII)-like 7
hsa-miR-1253	1	0	1	0	1	1	SYT11	synaptotagmin XI
hsa-miR-1253	0	0	1	1	0	0	C1orf158	chromosome 1 open reading frame 158
hsa-miR-1253	0	0	1	1	1	1	MRFAP1L1	Morf4 family associated protein 1-like 1
hsa-miR-1253	0	0	1	1	1	1	RMI2	RMI2, RecQ mediated genome instability 2, homolog (S. cerevisiae)
hsa-miR-1253	0	0	1	1	1	1	ELOVL3	ELOVL fatty acid elongase 3
hsa-miR-1253	0	0	1	1	0	0	C16orf46	chromosome 16 open reading frame 46
hsa-miR-1253	1	0	1	1	1	1	LSM12	LSM12 homolog (S. cerevisiae)
hsa-miR-1253	1	0	1	1	1	1	TMEM178A	transmembrane protein 178A
hsa-miR-1253	1	0	1	1	1	1	FAM123B	family with sequence similarity 123B
hsa-miR-1253	0	0	1	1	1	1	RDH12	retinol dehydrogenase 12 (all-trans/9-cis/11-cis)
hsa-miR-1253	1	0	1	1	1	1	FAM81A	family with sequence similarity 81, member A
hsa-miR-1253	0	0	1	1	1	1	CNIH3	cornichon homolog 3 (Drosophila)
hsa-miR-1253	0	0	1	0	1	1	HORMAD2	HORMA domain containing 2
hsa-miR-1253	1	0	1	0	1	1	TMTC2	transmembrane and tetratricopeptide repeat containing 2
hsa-miR-1253	1	0	1	0	1	1	ARID2	AT rich interactive domain 2 (ARID, RFX-like)
hsa-miR-1253	0	0	1	1	1	1	GAPT	GRB2-binding adaptor protein, transmembrane
hsa-miR-1253	1	0	1	1	1	1	PDIK1L	PDLIM1 interacting kinase 1 like
hsa-miR-1253	1	0	1	1	1	1	WTAP	Wilms tumor 1 associated protein
hsa-miR-1253	1	0	1	1	1	1	PXT1	peroxisomal, testis specific 1
hsa-miR-1253	0	0	1	1	1	1	COL6A5	collagen, type VI, alpha 5
hsa-miR-1253	0	0	1	1	1	1	CAMK1D	calcium/calmodulin-dependent protein kinase ID
hsa-miR-1253	1	0	1	1	1	1	FNDC5	fibronectin type III domain containing 5
hsa-miR-1253	1	0	1	1	1	1	MSI2	musashi homolog 2 (Drosophila)
hsa-miR-1253	1	0	1	1	1	1	RAB39B	RAB39B, member RAS oncogene family
hsa-miR-1253	1	0	1	0	1	1	PLEKHH2	pleckstrin homology domain containing, family H (with MyTH4 domain) member 2
hsa-miR-1253	1	0	1	1	1	1	RC3H1	ring finger and CCCH-type domains 1
hsa-miR-1253	0	0	1	1	1	1	REXO1L1	REX1, RNA exonuclease 1 homolog (S. cerevisiae)-like 1
hsa-miR-1253	1	0	1	1	1	1	L3MBTL4	l(3)mbt-like 4 (Drosophila)
hsa-miR-1253	1	0	1	1	1	1	MMGT1	membrane magnesium transporter 1
hsa-miR-1253	1	0	1	1	1	1	TTBK2	tau tubulin kinase 2
hsa-miR-1253	1	0	1	1	1	1	FAM117B	family with sequence similarity 117, member B
hsa-miR-1253	0	0	1	1	0	0	EPHX4	epoxide hydrolase 4
hsa-miR-1253	1	0	1	0	1	1	PGM2L1	phosphoglucomutase 2-like 1
hsa-miR-1253	1	0	1	0	1	1	KSR2	kinase suppressor of ras 2
hsa-miR-1253	1	0	1	1	1	1	DIP2B	DIP2 disco-interacting protein 2 homolog B (Drosophila)
hsa-miR-1253	1	0	1	1	1	1	RNF149	ring finger protein 149
hsa-miR-1253	0	0	1	1	0	0	TIGIT	T cell immunoreceptor with Ig and ITIM domains
hsa-miR-1253	0	0	1	1	1	1	AQPEP	laeverin
hsa-miR-1253	0	0	1	1	1	1	C1orf101	chromosome 1 open reading frame 101
hsa-miR-1253	1	0	1	1	1	1	RABL3	RAB, member of RAS oncogene family-like 3
hsa-miR-1253	0	0	1	1	1	1	YIPF6	Yip1 domain family, member 6
hsa-miR-1253	1	0	1	1	1	1	SLC41A1	solute carrier family 41, member 1
hsa-miR-1253	0	0	1	0	1	1	C17orf49	chromosome 17 open reading frame 49
hsa-miR-1253	1	0	1	1	1	1	SCN4B	sodium channel, voltage-gated, type IV, beta subunit
hsa-miR-1253	0	0	1	1	1	1	IL6ST	interleukin 6 signal transducer (gp130, oncostatin M receptor)
hsa-miR-1253	0	0	1	1	1	1	KRTAP8-1	keratin associated protein 8-1
hsa-miR-1253	1	0	1	1	1	1	EXOC8	exocyst complex component 8
hsa-miR-1253	1	0	1	0	1	1	CCDC71L	coiled-coil domain containing 71-like
hsa-miR-1253	0	0	1	1	0	0	MT1M	metallothionein 1M
hsa-miR-1253	1	0	1	1	1	1	PDLIM2	PDZ and LIM domain 2 (mystique)
hsa-miR-1253	1	0	1	1	1	1	INADL	InaD-like (Drosophila)
hsa-miR-1253	1	0	1	1	1	1	PPAP2B	phosphatidic acid phosphatase type 2B
hsa-miR-1253	0	0	1	1	1	1	PRNT	prion protein (testis specific)
hsa-miR-1253	1	0	1	1	1	1	GGT7	gamma-glutamyltransferase 7
hsa-miR-1253	0	0	1	1	1	1	SESTD1	SEC14 and spectrin domains 1
hsa-miR-1253	1	0	1	1	1	1	FAM134C	family with sequence similarity 134, member C
hsa-miR-1253	1	0	1	1	1	1	RILPL1	Rab interacting lysosomal protein-like 1
hsa-miR-1253	0	0	1	1	1	1	MRPL52	mitochondrial ribosomal protein L52
hsa-miR-1253	0	0	1	1	1	1	STXBP4	syntaxin binding protein 4
hsa-miR-1253	1	0	1	0	1	1	RTN4RL1	reticulon 4 receptor-like 1
hsa-miR-1253	1	0	1	0	1	1	ARL5B	ADP-ribosylation factor-like 5B
hsa-miR-1253	1	0	1	1	1	1	CREM	cAMP responsive element modulator
hsa-miR-1253	0	0	1	1	1	1	LYRM7	Lyrm7 homolog (mouse)
hsa-miR-1253	1	0	1	1	1	1	BCL6B	B-cell CLL/lymphoma 6, member B
hsa-miR-1253	0	0	1	1	1	1	USP12	ubiquitin specific peptidase 12
hsa-miR-1253	1	0	1	1	1	1	ADAT2	adenosine deaminase, tRNA-specific 2
hsa-miR-1253	1	0	1	1	1	1	DDX26B	DEAD/H (Asp-Glu-Ala-Asp/His) box polypeptide 26B
hsa-miR-1253	0	0	1	0	1	1	VSTM2A	V-set and transmembrane domain containing 2A
hsa-miR-1253	1	0	1	0	1	1	C12orf36	chromosome 12 open reading frame 36
hsa-miR-1253	0	0	1	1	1	1	C7orf53	chromosome 7 open reading frame 53
hsa-miR-1253	0	0	1	0	1	1	C16orf82	chromosome 16 open reading frame 82
hsa-miR-1253	1	0	1	0	1	1	VSX2	visual system homeobox 2
hsa-miR-1253	0	0	1	0	1	1	CLDN23	claudin 23
hsa-miR-1253	1	0	1	1	1	1	SPTY2D1	SPT2, Suppressor of Ty, domain containing 1 (S. cerevisiae)
hsa-miR-1253	1	0	1	1	1	1	TMEM65	transmembrane protein 65
hsa-miR-1253	1	0	1	0	1	1	SLC16A9	solute carrier family 16, member 9 (monocarboxylic acid transporter 9)
hsa-miR-1253	0	0	1	0	1	1	BTNL3	butyrophilin-like 3
hsa-miR-1253	0	0	1	1	1	1	APOOL	apolipoprotein O-like
hsa-miR-1253	0	0	1	1	1	1	CXCL17	chemokine (C-X-C motif) ligand 17
hsa-miR-1253	1	0	1	0	1	1	PRICKLE2	prickle homolog 2 (Drosophila)
hsa-miR-1253	0	0	1	0	1	1	WASH3P	WAS protein family homolog 3 pseudogene
hsa-miR-1253	1	0	1	1	1	1	TMEM189-UBE2V1	TMEM189-UBE2V1 readthrough
hsa-miR-1253	1	0	1	1	1	1	VAMP1	vesicle-associated membrane protein 1 (synaptobrevin 1)
hsa-miR-1253	0	0	1	1	0	0	CCDC23	coiled-coil domain containing 23
hsa-miR-1253	0	0	1	1	1	1	PFN4	profilin family, member 4
hsa-miR-1253	1	0	1	1	1	1	BLOC1S5	biogenesis of lysosomal organelles complex-1, subunit 5, muted
hsa-miR-1253	1	0	1	0	1	1	CAPRIN1	cell cycle associated protein 1
hsa-miR-1253	1	0	1	0	1	1	LURAP1L	leucine rich adaptor protein 1-like
hsa-miR-1253	0	0	1	1	1	1	TMIGD1	transmembrane and immunoglobulin domain containing 1
hsa-miR-1253	0	0	1	1	1	1	SPAG17	sperm associated antigen 17
hsa-miR-1253	1	0	1	1	1	1	ENSA	endosulfine alpha
hsa-miR-1253	0	0	1	0	0	0	EFCAB12	EF-hand calcium binding domain 12
hsa-miR-1253	0	0	1	1	1	1	C10orf129	chromosome 10 open reading frame 129
hsa-miR-1253	1	0	1	1	1	1	GADL1	glutamate decarboxylase-like 1
hsa-miR-1253	0	0	1	1	1	1	SEPT14	septin 14
hsa-miR-1253	0	0	1	0	0	0	C16orf47	chromosome 16 open reading frame 47
hsa-miR-1253	0	0	1	1	1	1	FAM211A	family with sequence similarity 211, member A
hsa-miR-1253	0	0	1	1	1	1	C15orf53	chromosome 15 open reading frame 53
hsa-miR-1253	1	0	1	1	1	1	MAP6	microtubule-associated protein 6
hsa-miR-1253	0	0	1	0	1	1	FSD1L	fibronectin type III and SPRY domain containing 1-like
hsa-miR-1253	1	0	1	1	1	1	CAPN3	calpain 3, (p94)
hsa-miR-1253	0	0	1	1	1	1	PATE2	prostate and testis expressed 2
hsa-miR-1253	0	0	1	0	1	1	TMEM215	transmembrane protein 215
hsa-miR-1253	1	0	1	1	1	1	XKRX	XK, Kell blood group complex subunit-related, X-linked
hsa-miR-1253	0	0	1	1	1	1	CLEC4M	C-type lectin domain family 4, member M
hsa-miR-1253	0	0	1	0	0	0	CELP	carboxyl ester lipase pseudogene
hsa-miR-1253	0	0	1	0	0	0	PCDHB17	protocadherin beta 17 pseudogene
hsa-miR-1253	0	0	1	0	0	0	PCDHB19P	protocadherin beta 19 pseudogene
hsa-miR-1253	0	0	1	0	0	0	LYPLA2P1	lysophospholipase II pseudogene 1
hsa-miR-1253	0	0	1	1	0	0	TTTY8	testis-specific transcript, Y-linked 8 (non-protein coding)
hsa-miR-1253	0	0	1	0	0	0	TTTY2	testis-specific transcript, Y-linked 2 (non-protein coding)
hsa-miR-1253	0	0	1	0	0	0	TTTY15	testis-specific transcript, Y-linked 15 (non-protein coding)
hsa-miR-1253	0	0	1	0	0	0	PPP1R2P3	protein phosphatase 1, regulatory (inhibitor) subunit 2 pseudogene 3
hsa-miR-1253	0	0	1	0	0	0	NXF4	nuclear RNA export factor 4 pseudogene
hsa-miR-1253	0	0	1	0	0	0	SNORA4	small nucleolar RNA, H/ACA box 4
hsa-miR-1253	0	0	1	0	0	0	SNORD96A	small nucleolar RNA, C/D box 96A
hsa-miR-1253	0	0	1	0	0	0	DGCR5	DiGeorge syndrome critical region gene 5 (non-protein coding)
hsa-miR-1253	0	0	1	0	0	0	HTR7P1	5-hydroxytryptamine (serotonin) receptor 7 pseudogene 1
hsa-miR-1253	0	0	1	0	0	0	SEPHS1P1	selenophosphate synthetase 1 pseudogene 1
hsa-miR-1253	0	0	1	0	0	0	HOXA11-AS	HOXA11 antisense RNA
hsa-miR-1253	0	0	1	0	0	0	TMED10P1	transmembrane emp24-like trafficking protein 10 (yeast) pseudogene 1
hsa-miR-1253	0	0	1	0	0	0	AQP7P1	aquaporin 7 pseudogene 1
hsa-miR-1253	0	0	1	0	0	0	DUSP5P	dual specificity phosphatase 5 pseudogene
hsa-miR-1253	0	0	1	0	0	0	TCAM1P	testicular cell adhesion molecule 1 homolog (mouse), pseudogene
hsa-miR-1253	0	0	1	0	0	0	SNORA22	small nucleolar RNA, H/ACA box 22
hsa-miR-1253	0	0	1	0	0	0	SCARNA23	small Cajal body-specific RNA 23
hsa-miR-1253	0	0	1	0	0	0	SNORD7	small nucleolar RNA, C/D box 7
hsa-miR-1253	0	0	1	0	0	0	SNORD111	small nucleolar RNA, C/D box 111
hsa-miR-1253	0	0	1	0	0	0	RNF5P1	ring finger protein 5, E3 ubiquitin protein ligase pseudogene 1
hsa-miR-1253	0	0	1	0	0	0	HSP90B3P	heat shock protein 90kDa beta (Grp94), member 3, pseudogene
hsa-miR-1253	0	0	1	0	0	0	MYADML	myeloid-associated differentiation marker-like (pseudogene)
hsa-miR-1253	0	0	1	0	0	0	LOC729603	calcium binding protein P22 pseudogene
hsa-miR-1253	0	0	1	0	1	1	SRSF5	serine/arginine-rich splicing factor 5
hsa-miR-1253	1	0	1	1	0	0	TNXB	tenascin XB
hsa-miR-1253	1	0	1	1	1	1	ESR1	estrogen receptor 1
hsa-miR-1253	0	0	1	0	0	0	TRAC	T cell receptor alpha constant
