# Supplementary material for: Profiling of Selected MicroRNAs in Proliferative Eutopic Endometrium of Women with Ovarian Endometriosis
Source: Biomed Res Int. 2015 Aug 20;2015:760698. doi: 10.1155/2015/760698 (PMC4558423; doi:10.1155/2015/760698)
Supplement: Supplementary file 1 — Table I: The names of miRNAs significantly differentially expressed between eutopic endometrium of patients with endometriosis vs eutopic endometrium of patients without endometriosis. Table II: The associations between miRNA and mRNA, which presents detailed results of the search of six major databases i.e targetscan, tarbase, miranda, mirbase, mirtarget2 and pictar. [file 760698.f1.zip › 760698.f1/Table II/hsa-miR-1254.tsv]

miR	targetscan	tarbase	miranda	mirbase	mirtarget2	pictar	GeneSymbol	GeneName
hsa-miR-1254	0	0	1	0	0	0	NOP14-AS1	NOP14 antisense RNA 1
hsa-miR-1254	1	0	1	1	0	0	SRCAP	Snf2-related CREBBP activator protein
hsa-miR-1254	1	0	1	0	1	1	PTPRT	protein tyrosine phosphatase, receptor type, T
hsa-miR-1254	1	0	1	1	1	1	ZHX3	zinc fingers and homeoboxes 3
hsa-miR-1254	1	0	1	1	1	1	SGSM2	small G protein signaling modulator 2
hsa-miR-1254	0	0	1	1	0	0	PLXNB1	plexin B1
hsa-miR-1254	1	0	1	0	1	1	MTSS1	metastasis suppressor 1
hsa-miR-1254	0	0	1	1	0	0	RAP1GAP	RAP1 GTPase activating protein
hsa-miR-1254	1	0	1	0	1	1	CEP350	centrosomal protein 350kDa
hsa-miR-1254	0	0	1	1	1	1	NEU3	sialidase 3 (membrane sialidase)
hsa-miR-1254	1	0	1	1	1	1	RNGTT	RNA guanylyltransferase and 5'-phosphatase
hsa-miR-1254	0	0	1	1	0	0	ZNF862	zinc finger protein 862
hsa-miR-1254	1	0	1	1	1	1	GPATCH8	G patch domain containing 8
hsa-miR-1254	1	0	1	1	0	0	PCLO	piccolo (presynaptic cytomatrix protein)
hsa-miR-1254	0	0	1	1	0	0	PAN2	PAN2 poly(A) specific ribonuclease subunit homolog (S. cerevisiae)
hsa-miR-1254	1	0	1	1	1	1	AHCYL2	adenosylhomocysteinase-like 2
hsa-miR-1254	0	0	1	1	0	0	FAM169A	family with sequence similarity 169, member A
hsa-miR-1254	1	0	1	1	1	1	CALCR	calcitonin receptor
hsa-miR-1254	1	0	1	0	0	0	DTX4	deltex homolog 4 (Drosophila)
hsa-miR-1254	1	0	1	1	1	1	BAHD1	bromo adjacent homology domain containing 1
hsa-miR-1254	1	0	1	1	1	1	C11orf9	chromosome 11 open reading frame 9
hsa-miR-1254	1	0	1	1	1	1	NTNG1	netrin G1
hsa-miR-1254	0	0	1	1	1	1	TTC28	tetratricopeptide repeat domain 28
hsa-miR-1254	1	0	1	1	0	0	KIAA1045	KIAA1045
hsa-miR-1254	0	0	1	1	0	0	RTEL1	regulator of telomere elongation helicase 1
hsa-miR-1254	1	0	1	1	1	1	PRRC2C	proline-rich coiled-coil 2C
hsa-miR-1254	0	0	1	1	0	0	ZC4H2	zinc finger, C4H2 domain containing
hsa-miR-1254	1	0	1	1	1	1	NDRG4	NDRG family member 4
hsa-miR-1254	1	0	1	1	1	1	ATXN7L1	ataxin 7-like 1
hsa-miR-1254	1	0	1	1	1	1	ASAP1	ArfGAP with SH3 domain, ankyrin repeat and PH domain 1
hsa-miR-1254	1	0	1	0	1	1	ANKFY1	ankyrin repeat and FYVE domain containing 1
hsa-miR-1254	0	0	1	1	1	1	FSTL5	follistatin-like 5
hsa-miR-1254	1	0	1	1	1	1	PCDH19	protocadherin 19
hsa-miR-1254	1	0	1	1	0	0	EBF4	early B-cell factor 4
hsa-miR-1254	0	0	1	0	1	1	MUC3B	mucin 3B, cell surface associated
hsa-miR-1254	1	0	1	0	0	0	PITPNM2	phosphatidylinositol transfer protein, membrane-associated 2
hsa-miR-1254	0	0	1	0	1	1	KIAA1468	KIAA1468
hsa-miR-1254	0	0	1	0	0	0	KRT19P2	keratin 19 pseudogene 2
hsa-miR-1254	0	0	1	0	1	1	CDC42EP4	CDC42 effector protein (Rho GTPase binding) 4
hsa-miR-1254	1	0	1	1	1	1	PPP6R3	protein phosphatase 6, regulatory subunit 3
hsa-miR-1254	1	0	1	1	0	0	NCKAP5L	NCK-associated protein 5-like
hsa-miR-1254	1	0	1	0	0	0	TANC2	tetratricopeptide repeat, ankyrin repeat and coiled-coil containing 2
hsa-miR-1254	1	0	1	1	1	1	SNX3	sorting nexin 3
hsa-miR-1254	0	0	1	0	0	0	TTC28-AS1	TTC28 antisense RNA 1
hsa-miR-1254	0	0	1	0	0	0	LOC440792	proline dehydrogenase (oxidase) 1 pseudogene
hsa-miR-1254	0	0	1	1	1	1	FANCI	Fanconi anemia, complementation group I
hsa-miR-1254	0	0	1	1	1	1	UNC80	unc-80 homolog (C. elegans)
hsa-miR-1254	0	0	1	1	0	0	COL27A1	collagen, type XXVII, alpha 1
hsa-miR-1254	1	0	1	1	1	1	AHCTF1	AT hook containing transcription factor 1
hsa-miR-1254	1	0	1	1	1	1	CSRNP1	cysteine-serine-rich nuclear protein 1
hsa-miR-1254	0	0	1	0	0	0	NBLA00301	Nbla00301
hsa-miR-1254	1	0	1	1	1	1	SH3TC2	SH3 domain and tetratricopeptide repeats 2
hsa-miR-1254	1	0	1	0	0	0	FAT3	FAT tumor suppressor homolog 3 (Drosophila)
hsa-miR-1254	1	0	1	0	1	1	RNF43	ring finger protein 43
hsa-miR-1254	1	0	1	0	0	0	ZBTB34	zinc finger and BTB domain containing 34
hsa-miR-1254	0	0	1	0	1	1	RASSF8	Ras association (RalGDS/AF-6) domain family (N-terminal) member 8
hsa-miR-1254	1	0	1	1	1	1	C11orf57	chromosome 11 open reading frame 57
hsa-miR-1254	1	0	1	1	1	1	TRPM3	transient receptor potential cation channel, subfamily M, member 3
hsa-miR-1254	1	1	1	1	1	1	BACE1	beta-site APP-cleaving enzyme 1
hsa-miR-1254	0	0	1	1	0	0	PTPRF	protein tyrosine phosphatase, receptor type, F
hsa-miR-1254	1	0	1	1	1	1	ADARB1	adenosine deaminase, RNA-specific, B1
hsa-miR-1254	0	0	1	1	0	0	DBP	D site of albumin promoter (albumin D-box) binding protein
hsa-miR-1254	1	0	1	1	1	1	VLDLR	very low density lipoprotein receptor
hsa-miR-1254	0	0	1	1	1	1	ATP7A	ATPase, Cu++ transporting, alpha polypeptide
hsa-miR-1254	0	0	1	0	1	1	ATR	ataxia telangiectasia and Rad3 related
hsa-miR-1254	1	0	1	1	0	0	NDST2	N-deacetylase/N-sulfotransferase (heparan glucosaminyl) 2
hsa-miR-1254	1	0	1	1	1	1	BACH2	BTB and CNC homology 1, basic leucine zipper transcription factor 2
hsa-miR-1254	1	0	1	1	0	0	ELN	elastin
hsa-miR-1254	0	0	1	1	0	0	SMARCC2	SWI/SNF related, matrix associated, actin dependent regulator of chromatin, subfamily c, member 2
hsa-miR-1254	1	0	1	0	1	1	CACNA1C	calcium channel, voltage-dependent, L type, alpha 1C subunit
hsa-miR-1254	0	0	1	1	1	1	MAZ	MYC-associated zinc finger protein (purine-binding transcription factor)
hsa-miR-1254	1	0	1	1	1	1	PHC1	polyhomeotic homolog 1 (Drosophila)
hsa-miR-1254	1	0	1	1	1	1	SLC8A1	solute carrier family 8 (sodium/calcium exchanger), member 1
hsa-miR-1254	1	0	1	0	1	1	PLAG1	pleiomorphic adenoma gene 1
hsa-miR-1254	1	0	1	0	1	1	SLC6A6	solute carrier family 6 (neurotransmitter transporter, taurine), member 6
hsa-miR-1254	1	0	1	1	0	0	TSPYL2	TSPY-like 2
hsa-miR-1254	1	0	1	1	1	1	CAMK2D	calcium/calmodulin-dependent protein kinase II delta
hsa-miR-1254	1	0	1	1	1	1	SATB2	SATB homeobox 2
hsa-miR-1254	1	0	1	1	1	1	NEO1	neogenin 1
hsa-miR-1254	1	0	1	1	1	1	ANK1	ankyrin 1, erythrocytic
hsa-miR-1254	1	0	1	1	1	1	MYO5A	myosin VA (heavy chain 12, myoxin)
hsa-miR-1254	0	0	1	1	0	0	ITGA2B	integrin, alpha 2b (platelet glycoprotein IIb of IIb/IIIa complex, antigen CD41)
hsa-miR-1254	1	0	1	1	1	1	EPHB4	EPH receptor B4
hsa-miR-1254	1	0	1	1	0	0	SYN3	synapsin III
hsa-miR-1254	1	0	1	1	1	1	SLC6A8	solute carrier family 6 (neurotransmitter transporter, creatine), member 8
hsa-miR-1254	1	0	1	1	1	1	MLLT10	myeloid/lymphoid or mixed-lineage leukemia (trithorax homolog, Drosophila); translocated to, 10
hsa-miR-1254	1	0	1	0	1	1	ADD3	adducin 3 (gamma)
hsa-miR-1254	1	0	1	1	0	0	PPP2R5D	protein phosphatase 2, regulatory subunit B', delta
hsa-miR-1254	0	0	1	1	1	1	SGSH	N-sulfoglucosamine sulfohydrolase
hsa-miR-1254	0	0	1	1	1	1	PLD1	phospholipase D1, phosphatidylcholine-specific
hsa-miR-1254	1	0	1	1	1	1	ANPEP	alanyl (membrane) aminopeptidase
hsa-miR-1254	1	0	1	0	1	1	PDE7B	phosphodiesterase 7B
hsa-miR-1254	1	0	1	1	1	1	MEF2D	myocyte enhancer factor 2D
hsa-miR-1254	1	0	1	1	1	1	MYH10	myosin, heavy chain 10, non-muscle
hsa-miR-1254	0	0	1	0	0	0	MIAT	myocardial infarction associated transcript (non-protein coding)
hsa-miR-1254	1	0	1	0	1	1	DDX3X	DEAD (Asp-Glu-Ala-Asp) box polypeptide 3, X-linked
hsa-miR-1254	0	0	1	1	1	1	BRCA1	breast cancer 1, early onset
hsa-miR-1254	1	0	1	1	1	1	TTC39A	tetratricopeptide repeat domain 39A
hsa-miR-1254	1	0	1	0	1	1	MLL2	myeloid/lymphoid or mixed-lineage leukemia 2
hsa-miR-1254	1	0	1	0	1	1	PDE4D	phosphodiesterase 4D, cAMP-specific
hsa-miR-1254	0	0	1	1	1	1	CD3EAP	CD3e molecule, epsilon associated protein
hsa-miR-1254	0	0	1	0	0	0	ALOX12P2	arachidonate 12-lipoxygenase pseudogene 2
hsa-miR-1254	0	0	1	1	0	0	SPTBN2	spectrin, beta, non-erythrocytic 2
hsa-miR-1254	1	0	1	1	1	1	SOCS2	suppressor of cytokine signaling 2
hsa-miR-1254	0	0	1	0	0	0	FP588	uncharacterized LOC92973
hsa-miR-1254	1	0	1	1	1	1	MBNL2	muscleblind-like splicing regulator 2
hsa-miR-1254	0	0	1	1	0	0	MRPS22	mitochondrial ribosomal protein S22
hsa-miR-1254	1	0	1	1	1	1	ERLIN1	ER lipid raft associated 1
hsa-miR-1254	0	0	1	1	1	1	BIN1	bridging integrator 1
hsa-miR-1254	1	0	1	1	1	1	CBFA2T2	core-binding factor, runt domain, alpha subunit 2; translocated to, 2
hsa-miR-1254	0	0	1	0	1	1	SERF1A	small EDRK-rich factor 1A (telomeric)
hsa-miR-1254	1	0	1	1	0	0	PRRC2A	proline-rich coiled-coil 2A
hsa-miR-1254	0	0	1	1	1	1	ERAL1	Era G-protein-like 1 (E. coli)
hsa-miR-1254	0	0	1	1	0	0	CARD10	caspase recruitment domain family, member 10
hsa-miR-1254	0	0	1	1	0	0	ZNF814	zinc finger protein 814
hsa-miR-1254	1	0	1	0	1	1	CELF2	CUGBP, Elav-like family member 2
hsa-miR-1254	1	0	1	0	0	0	PPME1	protein phosphatase methylesterase 1
hsa-miR-1254	1	0	1	0	1	1	SLC25A37	solute carrier family 25 (mitochondrial iron transporter), member 37
hsa-miR-1254	0	0	1	1	0	0	SCMH1	sex comb on midleg homolog 1 (Drosophila)
hsa-miR-1254	1	0	1	1	1	1	ANKRD13A	ankyrin repeat domain 13A
hsa-miR-1254	0	0	1	1	1	1	MPP6	membrane protein, palmitoylated 6 (MAGUK p55 subfamily member 6)
hsa-miR-1254	0	0	1	1	1	1	SCLY	selenocysteine lyase
hsa-miR-1254	0	0	1	0	1	1	CLDN2	claudin 2
hsa-miR-1254	0	0	1	1	1	1	SLCO2B1	solute carrier organic anion transporter family, member 2B1
hsa-miR-1254	1	0	1	1	1	1	SYDE1	synapse defective 1, Rho GTPase, homolog 1 (C. elegans)
hsa-miR-1254	0	0	1	1	1	1	ETV7	ets variant 7
hsa-miR-1254	1	0	1	1	1	1	OGT	O-linked N-acetylglucosamine (GlcNAc) transferase
hsa-miR-1254	1	0	1	1	0	0	TDRKH	tudor and KH domain containing
hsa-miR-1254	1	0	1	1	1	1	DESI2	desumoylating isopeptidase 2
hsa-miR-1254	0	0	1	1	1	1	RBM8A	RNA binding motif protein 8A
hsa-miR-1254	0	0	1	1	1	1	NKX3-1	NK3 homeobox 1
hsa-miR-1254	0	0	1	1	1	1	FOLH1	folate hydrolase (prostate-specific membrane antigen) 1
hsa-miR-1254	0	0	1	1	0	0	HES6	hairy and enhancer of split 6 (Drosophila)
hsa-miR-1254	1	0	1	1	1	1	ERGIC1	endoplasmic reticulum-golgi intermediate compartment (ERGIC) 1
hsa-miR-1254	0	0	1	1	0	0	KCNK6	potassium channel, subfamily K, member 6
hsa-miR-1254	0	0	1	0	1	1	KANSL3	KAT8 regulatory NSL complex subunit 3
hsa-miR-1254	1	0	1	1	1	1	RNF7	ring finger protein 7
hsa-miR-1254	0	0	1	1	1	1	MED28	mediator complex subunit 28
hsa-miR-1254	0	0	1	1	0	0	FEZF2	FEZ family zinc finger 2
hsa-miR-1254	0	0	1	1	0	0	ZAN	zonadhesin
hsa-miR-1254	1	0	1	1	1	1	BIVM	basic, immunoglobulin-like variable motif containing
hsa-miR-1254	1	0	1	1	1	1	KCNIP2	Kv channel interacting protein 2
hsa-miR-1254	1	0	1	0	1	1	WIPF2	WAS/WASL interacting protein family, member 2
hsa-miR-1254	1	0	1	1	1	1	SON	SON DNA binding protein
hsa-miR-1254	0	0	1	1	0	0	SNRPN	small nuclear ribonucleoprotein polypeptide N
hsa-miR-1254	0	0	1	0	0	0	MYO15B	myosin XVB pseudogene
hsa-miR-1254	0	0	1	0	1	1	NBPF15	neuroblastoma breakpoint family, member 15
hsa-miR-1254	1	0	1	1	1	1	ST3GAL3	ST3 beta-galactoside alpha-2,3-sialyltransferase 3
hsa-miR-1254	1	0	1	1	1	1	STX16	syntaxin 16
hsa-miR-1254	0	0	1	1	1	1	PPP1R1B	protein phosphatase 1, regulatory (inhibitor) subunit 1B
hsa-miR-1254	1	0	1	1	0	0	XRRA1	X-ray radiation resistance associated 1
hsa-miR-1254	1	0	1	1	0	0	FOXP2	forkhead box P2
hsa-miR-1254	1	0	1	1	1	1	FTSJD1	FtsJ methyltransferase domain containing 1
hsa-miR-1254	1	0	1	1	0	0	POLR2J3	polymerase (RNA) II (DNA directed) polypeptide J3
hsa-miR-1254	1	0	1	1	1	1	WAPAL	wings apart-like homolog (Drosophila)
hsa-miR-1254	0	0	1	1	0	0	HOPX	HOP homeobox
hsa-miR-1254	1	0	1	1	1	1	TRIP10	thyroid hormone receptor interactor 10
hsa-miR-1254	1	0	1	1	0	0	ST3GAL4	ST3 beta-galactoside alpha-2,3-sialyltransferase 4
hsa-miR-1254	0	0	1	1	1	1	TTLL11	tubulin tyrosine ligase-like family, member 11
hsa-miR-1254	0	0	1	1	1	1	TPO	thyroid peroxidase
hsa-miR-1254	1	0	1	1	1	1	AFF2	AF4/FMR2 family, member 2
hsa-miR-1254	1	0	1	1	1	1	PLAGL1	pleiomorphic adenoma gene-like 1
hsa-miR-1254	1	0	1	1	1	1	FLNC	filamin C, gamma
hsa-miR-1254	1	0	1	1	1	1	SH2B3	SH2B adaptor protein 3
hsa-miR-1254	1	0	1	0	1	1	DICER1	dicer 1, ribonuclease type III
hsa-miR-1254	0	0	1	0	0	0	SNHG4	small nucleolar RNA host gene 4 (non-protein coding)
hsa-miR-1254	0	0	1	1	1	1	GNAS	GNAS complex locus
hsa-miR-1254	0	0	1	0	0	0	CACNA2D3	calcium channel, voltage-dependent, alpha 2/delta subunit 3
hsa-miR-1254	0	0	1	1	1	1	DMRTC1	DMRT-like family C1
hsa-miR-1254	0	0	1	1	0	0	DMRTC1B	DMRT-like family C1B
hsa-miR-1254	1	0	1	1	1	1	RAB3IP	RAB3A interacting protein (rabin3)
hsa-miR-1254	1	0	1	1	1	1	NRXN3	neurexin 3
hsa-miR-1254	0	0	1	0	1	1	SRPK1	SRSF protein kinase 1
hsa-miR-1254	1	0	1	1	1	1	PPP3CB	protein phosphatase 3, catalytic subunit, beta isozyme
hsa-miR-1254	0	0	1	1	0	0	RPP21	ribonuclease P/MRP 21kDa subunit
hsa-miR-1254	0	0	1	1	0	0	KIAA1324	KIAA1324
hsa-miR-1254	1	0	1	1	1	1	VAMP7	vesicle-associated membrane protein 7
hsa-miR-1254	0	0	1	1	0	0	MBD1	methyl-CpG binding domain protein 1
hsa-miR-1254	1	0	1	1	1	1	ARL4C	ADP-ribosylation factor-like 4C
hsa-miR-1254	0	0	1	1	1	1	PHACTR3	phosphatase and actin regulator 3
hsa-miR-1254	1	0	1	1	1	1	SYNM	synemin, intermediate filament protein
hsa-miR-1254	0	0	1	1	0	0	IL4I1	interleukin 4 induced 1
hsa-miR-1254	0	0	1	1	0	0	ASAP3	ArfGAP with SH3 domain, ankyrin repeat and PH domain 3
hsa-miR-1254	1	0	1	0	1	1	NFAT5	nuclear factor of activated T-cells 5, tonicity-responsive
hsa-miR-1254	0	0	1	0	0	0	TUG1	taurine upregulated 1 (non-protein coding)
hsa-miR-1254	0	0	1	1	0	0	TUBGCP6	tubulin, gamma complex associated protein 6
hsa-miR-1254	0	0	1	1	0	0	LOC100128398	uncharacterized LOC100128398
hsa-miR-1254	1	0	1	1	1	1	MEIS2	Meis homeobox 2
hsa-miR-1254	0	0	1	1	1	1	TAX1BP3	Tax1 (human T-cell leukemia virus type I) binding protein 3
hsa-miR-1254	1	0	1	1	1	1	RIC8B	resistance to inhibitors of cholinesterase 8 homolog B (C. elegans)
hsa-miR-1254	1	0	1	1	1	1	EIF2C1	eukaryotic translation initiation factor 2C, 1
hsa-miR-1254	0	0	1	1	0	0	C17orf53	chromosome 17 open reading frame 53
hsa-miR-1254	1	0	1	1	1	1	INSIG2	insulin induced gene 2
hsa-miR-1254	1	0	1	1	1	1	C12orf23	chromosome 12 open reading frame 23
hsa-miR-1254	1	0	1	0	1	1	LIN28A	lin-28 homolog A (C. elegans)
hsa-miR-1254	0	0	1	1	0	0	JMJD4	jumonji domain containing 4
hsa-miR-1254	1	0	1	1	0	0	FASTK	Fas-activated serine/threonine kinase
hsa-miR-1254	1	0	1	1	1	1	STARD7	StAR-related lipid transfer (START) domain containing 7
hsa-miR-1254	0	0	1	1	1	1	LRRN1	leucine rich repeat neuronal 1
hsa-miR-1254	0	0	1	1	1	1	CLEC4M	C-type lectin domain family 4, member M
hsa-miR-1254	0	0	1	0	1	1	FLJ14186	uncharacterized LOC401149
hsa-miR-1254	1	0	1	1	1	1	COPS7B	COP9 constitutive photomorphogenic homolog subunit 7B (Arabidopsis)
hsa-miR-1254	1	0	1	1	1	1	FAM131A	family with sequence similarity 131, member A
hsa-miR-1254	1	0	1	1	1	1	ZNF385A	zinc finger protein 385A
hsa-miR-1254	0	0	1	1	1	1	HDAC7	histone deacetylase 7
hsa-miR-1254	0	0	1	0	0	0	IFFO2	intermediate filament family orphan 2
hsa-miR-1254	1	0	1	1	1	1	DYRK2	dual-specificity tyrosine-(Y)-phosphorylation regulated kinase 2
hsa-miR-1254	1	0	1	1	1	1	GBF1	golgi brefeldin A resistant guanine nucleotide exchange factor 1
hsa-miR-1254	1	0	1	1	1	1	YPEL5	yippee-like 5 (Drosophila)
hsa-miR-1254	0	0	1	0	1	1	HEMK1	HemK methyltransferase family member 1
hsa-miR-1254	1	0	1	1	1	1	FBXO31	F-box protein 31
hsa-miR-1254	0	0	1	0	1	1	FLJ22763	uncharacterized LOC401081
hsa-miR-1254	1	0	1	1	0	0	POMGNT1	protein O-linked mannose beta1,2-N-acetylglucosaminyltransferase
hsa-miR-1254	1	0	1	1	0	0	UBXN7	UBX domain protein 7
hsa-miR-1254	0	0	1	1	0	0	NUDT7	nudix (nucleoside diphosphate linked moiety X)-type motif 7
hsa-miR-1254	1	0	1	0	1	1	TOX3	TOX high mobility group box family member 3
hsa-miR-1254	1	0	1	1	1	1	RNF185	ring finger protein 185
hsa-miR-1254	0	0	1	0	0	0	A1BG-AS1	A1BG antisense RNA 1
hsa-miR-1254	1	0	1	1	1	1	FOXP1	forkhead box P1
hsa-miR-1254	0	0	1	1	1	1	MINA	MYC induced nuclear antigen
hsa-miR-1254	1	0	1	1	1	1	FAM53C	family with sequence similarity 53, member C
hsa-miR-1254	0	0	1	0	0	0	JAKMIP2-AS1	JAKMIP2 antisense RNA 1
hsa-miR-1254	0	0	1	1	1	1	NETO2	neuropilin (NRP) and tolloid (TLL)-like 2
hsa-miR-1254	0	0	1	1	0	0	IMPDH1	IMP (inosine 5'-monophosphate) dehydrogenase 1
hsa-miR-1254	1	0	1	1	1	1	PPM1L	protein phosphatase, Mg2+/Mn2+ dependent, 1L
hsa-miR-1254	1	0	1	0	1	1	AP1G1	adaptor-related protein complex 1, gamma 1 subunit
hsa-miR-1254	0	0	1	0	0	0	LOC100131060	uncharacterized LOC100131060
hsa-miR-1254	1	0	1	1	1	1	DLGAP4	discs, large (Drosophila) homolog-associated protein 4
hsa-miR-1254	0	0	1	1	0	0	SLC26A8	solute carrier family 26, member 8
hsa-miR-1254	0	0	1	1	1	1	ZNF213	zinc finger protein 213
hsa-miR-1254	0	0	1	0	0	0	LOC401242	uncharacterized LOC401242
hsa-miR-1254	1	0	1	1	1	1	PDLIM2	PDZ and LIM domain 2 (mystique)
hsa-miR-1254	0	0	1	0	0	0	LOC219688	uncharacterized LOC219688
hsa-miR-1254	1	0	1	1	1	1	DIXDC1	DIX domain containing 1
hsa-miR-1254	1	0	1	1	1	1	ZNF664	zinc finger protein 664
hsa-miR-1254	0	0	1	0	0	0	LOC440894	uncharacterized LOC440894
hsa-miR-1254	0	0	1	1	0	0	BEAN1	brain expressed, associated with NEDD4, 1
hsa-miR-1254	1	0	1	1	1	1	LMNA	lamin A/C
hsa-miR-1254	1	0	1	1	0	0	SLC26A6	solute carrier family 26, member 6
hsa-miR-1254	1	0	1	1	1	1	ZIC4	Zic family member 4
hsa-miR-1254	1	0	1	1	1	1	SCAMP5	secretory carrier membrane protein 5
hsa-miR-1254	0	0	1	0	0	0	LOC441204	uncharacterized LOC441204
hsa-miR-1254	1	0	1	1	1	1	SORBS2	sorbin and SH3 domain containing 2
hsa-miR-1254	0	0	1	1	1	1	ZNF606	zinc finger protein 606
hsa-miR-1254	0	0	1	1	1	1	IPO4	importin 4
hsa-miR-1254	0	0	1	1	0	0	SLC25A28	solute carrier family 25 (mitochondrial iron transporter), member 28
hsa-miR-1254	1	0	1	1	1	1	GABARAPL1	GABA(A) receptor-associated protein like 1
hsa-miR-1254	0	0	1	1	1	1	XAF1	XIAP associated factor 1
hsa-miR-1254	1	0	1	1	1	1	PCMTD1	protein-L-isoaspartate (D-aspartate) O-methyltransferase domain containing 1
hsa-miR-1254	0	0	1	1	0	0	RELT	RELT tumor necrosis factor receptor
hsa-miR-1254	1	0	1	0	1	1	PCGF3	polycomb group ring finger 3
hsa-miR-1254	0	0	1	1	0	0	COMMD4	COMM domain containing 4
hsa-miR-1254	1	0	1	1	0	0	ZBTB37	zinc finger and BTB domain containing 37
hsa-miR-1254	0	0	1	1	0	0	NXF2	nuclear RNA export factor 2
hsa-miR-1254	0	0	1	1	0	0	DMRTC2	DMRT-like family C2
hsa-miR-1254	0	0	1	1	1	1	RANBP17	RAN binding protein 17
hsa-miR-1254	0	0	1	1	1	1	A2ML1	alpha-2-macroglobulin-like 1
hsa-miR-1254	0	0	1	1	0	0	CERS5	ceramide synthase 5
hsa-miR-1254	0	0	1	1	1	1	ZBTB26	zinc finger and BTB domain containing 26
hsa-miR-1254	0	0	1	0	0	0	LINC00301	long intergenic non-protein coding RNA 301
hsa-miR-1254	0	0	1	1	0	0	TRIM41	tripartite motif containing 41
hsa-miR-1254	0	0	1	1	0	0	PIGO	phosphatidylinositol glycan anchor biosynthesis, class O
hsa-miR-1254	1	0	1	1	1	1	FAM102A	family with sequence similarity 102, member A
hsa-miR-1254	1	0	1	1	1	1	FAM73B	family with sequence similarity 73, member B
hsa-miR-1254	0	0	1	1	0	0	NDOR1	NADPH dependent diflavin oxidoreductase 1
hsa-miR-1254	0	0	1	0	1	1	CDHR3	cadherin-related family member 3
hsa-miR-1254	0	0	1	1	1	1	SEC16A	SEC16 homolog A (S. cerevisiae)
hsa-miR-1254	1	0	1	1	1	1	SEC61A1	Sec61 alpha 1 subunit (S. cerevisiae)
hsa-miR-1254	0	0	1	1	0	0	NISCH	nischarin
hsa-miR-1254	1	0	1	1	1	1	NOTCH2NL	notch 2 N-terminal like
hsa-miR-1254	1	0	1	1	0	0	B3GAT3	beta-1,3-glucuronyltransferase 3 (glucuronosyltransferase I)
hsa-miR-1254	0	0	1	1	1	1	CAMKV	CaM kinase-like vesicle-associated
hsa-miR-1254	0	0	1	1	1	1	TOR2A	torsin family 2, member A
hsa-miR-1254	0	0	1	1	0	0	ATP6AP1	ATPase, H+ transporting, lysosomal accessory protein 1
hsa-miR-1254	1	0	1	1	1	1	CYP46A1	cytochrome P450, family 46, subfamily A, polypeptide 1
hsa-miR-1254	0	0	1	1	1	1	STBD1	starch binding domain 1
hsa-miR-1254	0	0	1	0	1	1	TMSB15B	thymosin beta 15B
hsa-miR-1254	0	0	1	0	0	0	SEC14L2	SEC14-like 2 (S. cerevisiae)
hsa-miR-1254	0	0	1	0	0	0	FLJ34208	uncharacterized LOC401106
hsa-miR-1254	1	0	1	1	1	1	SUPT16H	suppressor of Ty 16 homolog (S. cerevisiae)
hsa-miR-1254	0	0	1	1	0	0	CDK15	cyclin-dependent kinase 15
hsa-miR-1254	0	0	1	0	1	1	TBX5-AS1	TBX5 antisense RNA 1
hsa-miR-1254	1	0	1	1	1	1	FBXW2	F-box and WD repeat domain containing 2
hsa-miR-1254	1	0	1	1	1	1	TSN	translin
hsa-miR-1254	1	0	1	0	1	1	TEF	thyrotrophic embryonic factor
hsa-miR-1254	0	0	1	1	1	1	NRCAM	neuronal cell adhesion molecule
hsa-miR-1254	0	0	1	1	0	0	TRMT44	tRNA methyltransferase 44 homolog (S. cerevisiae)
hsa-miR-1254	0	0	1	1	0	0	C6orf163	chromosome 6 open reading frame 163
hsa-miR-1254	1	0	1	0	1	1	CRTAP	cartilage associated protein
hsa-miR-1254	0	0	1	1	1	1	WT1	Wilms tumor 1
hsa-miR-1254	1	0	1	1	1	1	GPD2	glycerol-3-phosphate dehydrogenase 2 (mitochondrial)
hsa-miR-1254	0	0	1	0	0	0	LOC283887	uncharacterized LOC283887
hsa-miR-1254	1	0	1	1	1	1	RRBP1	ribosome binding protein 1 homolog 180kDa (dog)
hsa-miR-1254	0	0	1	1	0	0	EIF3B	eukaryotic translation initiation factor 3, subunit B
hsa-miR-1254	0	0	1	1	1	1	CYP11B1	cytochrome P450, family 11, subfamily B, polypeptide 1
hsa-miR-1254	0	0	1	1	1	1	SLC9A3R1	solute carrier family 9, subfamily A (NHE3, cation proton antiporter 3), member 3 regulator 1
hsa-miR-1254	1	0	1	1	1	1	RNF121	ring finger protein 121
hsa-miR-1254	0	0	1	0	0	0	PART1	prostate androgen-regulated transcript 1 (non-protein coding)
hsa-miR-1254	1	0	1	1	1	1	SYT1	synaptotagmin I
hsa-miR-1254	0	0	1	1	0	0	CES4A	carboxylesterase 4A
hsa-miR-1254	0	0	1	1	1	1	C9orf47	chromosome 9 open reading frame 47
hsa-miR-1254	0	0	1	1	0	0	PPOX	protoporphyrinogen oxidase
hsa-miR-1254	0	0	1	1	1	1	GPT2	glutamic pyruvate transaminase (alanine aminotransferase) 2
hsa-miR-1254	0	0	1	1	0	0	HPN	hepsin
hsa-miR-1254	1	0	1	1	1	1	NDEL1	nudE nuclear distribution E homolog (A. nidulans)-like 1
hsa-miR-1254	1	0	1	1	1	1	CTNNB1	catenin (cadherin-associated protein), beta 1, 88kDa
hsa-miR-1254	1	0	1	0	1	1	UVRAG	UV radiation resistance associated gene
hsa-miR-1254	0	0	1	1	1	1	SIRPB2	signal-regulatory protein beta 2
hsa-miR-1254	1	0	1	1	1	1	SPATS2	spermatogenesis associated, serine-rich 2
hsa-miR-1254	1	0	1	1	1	1	ZC3H11A	zinc finger CCCH-type containing 11A
hsa-miR-1254	0	0	1	1	1	1	P4HB	prolyl 4-hydroxylase, beta polypeptide
hsa-miR-1254	0	0	1	1	1	1	VDAC1	voltage-dependent anion channel 1
hsa-miR-1254	0	0	1	1	0	0	TRIM46	tripartite motif containing 46
hsa-miR-1254	1	0	1	1	1	1	GAPVD1	GTPase activating protein and VPS9 domains 1
hsa-miR-1254	0	0	1	0	0	0	FAM66C	family with sequence similarity 66, member C
hsa-miR-1254	1	0	1	1	0	0	FBRS	fibrosin
hsa-miR-1254	0	0	1	1	1	1	C8orf46	chromosome 8 open reading frame 46
hsa-miR-1254	1	0	1	1	0	0	SCAMP2	secretory carrier membrane protein 2
hsa-miR-1254	0	0	1	0	0	0	OTUD1	OTU domain containing 1
hsa-miR-1254	0	0	1	0	0	0	C1orf204	chromosome 1 open reading frame 204
hsa-miR-1254	1	0	1	0	1	1	KIAA1737	KIAA1737
hsa-miR-1254	1	0	1	0	1	1	THRB	thyroid hormone receptor, beta
hsa-miR-1254	1	0	1	0	0	0	PID1	phosphotyrosine interaction domain containing 1
hsa-miR-1254	0	0	1	1	1	1	FCRL1	Fc receptor-like 1
hsa-miR-1254	1	0	1	1	1	1	SNRNP70	small nuclear ribonucleoprotein 70kDa (U1)
hsa-miR-1254	1	0	1	1	1	1	STIM2	stromal interaction molecule 2
hsa-miR-1254	0	0	1	1	1	1	SC5DL	sterol-C5-desaturase (ERG3 delta-5-desaturase homolog, S. cerevisiae)-like
hsa-miR-1254	0	0	1	0	0	0	CCDC150	coiled-coil domain containing 150
hsa-miR-1254	1	0	1	0	1	1	YPEL2	yippee-like 2 (Drosophila)
hsa-miR-1254	0	0	1	1	0	0	VPS37C	vacuolar protein sorting 37 homolog C (S. cerevisiae)
hsa-miR-1254	0	0	1	0	0	0	LOC400680	uncharacterized LOC400680
hsa-miR-1254	0	0	1	1	1	1	MED20	mediator complex subunit 20
hsa-miR-1254	0	0	1	0	0	0	LINC00293	long intergenic non-protein coding RNA 293
hsa-miR-1254	0	0	1	1	1	1	TEX35	testis expressed 35
hsa-miR-1254	1	0	1	1	1	1	NSUN4	NOP2/Sun domain family, member 4
hsa-miR-1254	0	0	1	0	0	0	KIRREL3-AS3	KIRREL3 antisense RNA 3
hsa-miR-1254	1	0	1	1	1	1	GOLGA8B	golgin A8 family, member B
hsa-miR-1254	0	0	1	0	0	0	LOC284385	uncharacterized LOC284385
hsa-miR-1254	0	0	1	1	1	1	PLA2G5	phospholipase A2, group V
hsa-miR-1254	0	0	1	0	1	1	TNFAIP8	tumor necrosis factor, alpha-induced protein 8
hsa-miR-1254	0	0	1	1	0	0	CORO1A	coronin, actin binding protein, 1A
hsa-miR-1254	0	0	1	0	0	0	CECR7	cat eye syndrome chromosome region, candidate 7 (non-protein coding)
hsa-miR-1254	0	0	1	1	1	1	RP1	retinitis pigmentosa 1 (autosomal dominant)
hsa-miR-1254	0	0	1	1	1	1	TIMM50	translocase of inner mitochondrial membrane 50 homolog (S. cerevisiae)
hsa-miR-1254	0	0	1	0	0	0	LOC100130954	uncharacterized LOC100130954
hsa-miR-1254	0	0	1	1	1	1	GRPEL1	GrpE-like 1, mitochondrial (E. coli)
hsa-miR-1254	1	0	1	1	1	1	SLC39A13	solute carrier family 39 (zinc transporter), member 13
hsa-miR-1254	0	0	1	1	1	1	LRRC27	leucine rich repeat containing 27
hsa-miR-1254	0	0	1	1	0	0	ALDOA	aldolase A, fructose-bisphosphate
hsa-miR-1254	1	0	1	1	1	1	CRMP1	collapsin response mediator protein 1
hsa-miR-1254	1	0	1	1	0	0	SLX4	SLX4 structure-specific endonuclease subunit homolog (S. cerevisiae)
hsa-miR-1254	0	0	1	1	1	1	RNF217	ring finger protein 217
hsa-miR-1254	1	0	1	1	1	1	AGAP2	ArfGAP with GTPase domain, ankyrin repeat and PH domain 2
hsa-miR-1254	1	0	1	1	1	1	WEE1	WEE1 homolog (S. pombe)
hsa-miR-1254	1	0	1	1	0	0	CACNB3	calcium channel, voltage-dependent, beta 3 subunit
hsa-miR-1254	0	0	1	1	0	0	PMFBP1	polyamine modulated factor 1 binding protein 1
hsa-miR-1254	0	0	1	1	0	0	MARS	methionyl-tRNA synthetase
hsa-miR-1254	0	0	1	1	0	0	ZNF335	zinc finger protein 335
hsa-miR-1254	1	0	1	1	1	1	PDZD4	PDZ domain containing 4
hsa-miR-1254	1	0	1	1	1	1	MDGA2	MAM domain containing glycosylphosphatidylinositol anchor 2
hsa-miR-1254	0	0	1	1	1	1	RGS3	regulator of G-protein signaling 3
hsa-miR-1254	0	0	1	1	1	1	PRRT1	proline-rich transmembrane protein 1
hsa-miR-1254	0	0	1	0	0	0	LGALS17A	Charcot-Leyden crystal protein pseudogene
hsa-miR-1254	0	0	1	1	1	1	FAM19A2	family with sequence similarity 19 (chemokine (C-C motif)-like), member A2
hsa-miR-1254	0	0	1	0	0	0	LOC650368	asparagine-linked glycosylation 1-like pseudogene
hsa-miR-1254	0	0	1	1	0	0	LIX1L	Lix1 homolog (mouse)-like
hsa-miR-1254	1	0	1	1	1	1	METTL8	methyltransferase like 8
hsa-miR-1254	0	0	1	1	1	1	CNPY3	canopy 3 homolog (zebrafish)
hsa-miR-1254	0	0	1	1	1	1	SLC9A1	solute carrier family 9, subfamily A (NHE1, cation proton antiporter 1), member 1
hsa-miR-1254	0	0	1	1	1	1	PKP4	plakophilin 4
hsa-miR-1254	1	0	1	1	1	1	ADIPOR1	adiponectin receptor 1
hsa-miR-1254	0	0	1	1	0	0	SSPO	SCO-spondin homolog (Bos taurus)
hsa-miR-1254	0	0	1	1	1	1	IDS	iduronate 2-sulfatase
hsa-miR-1254	1	0	1	1	1	1	CELF6	CUGBP, Elav-like family member 6
hsa-miR-1254	0	0	1	1	1	1	C2orf91	chromosome 2 open reading frame 91
hsa-miR-1254	0	0	1	1	1	1	KANSL1L	KAT8 regulatory NSL complex subunit 1-like
hsa-miR-1254	0	0	1	0	0	0	TMEM232	transmembrane protein 232
hsa-miR-1254	0	0	1	1	0	0	LOC100128239	uncharacterized LOC100128239
hsa-miR-1254	0	0	1	1	1	1	CCDC66	coiled-coil domain containing 66
hsa-miR-1254	0	0	1	1	0	0	ANKHD1-EIF4EBP3	ANKHD1-EIF4EBP3 readthrough
hsa-miR-1254	0	0	1	0	0	0	FAM95B1	family with sequence similarity 95, member B1
hsa-miR-1254	0	0	1	1	1	1	RBM46	RNA binding motif protein 46
hsa-miR-1254	0	0	1	1	1	1	MYOM3	myomesin family, member 3
hsa-miR-1254	0	0	1	1	1	1	EPPIN	epididymal peptidase inhibitor
hsa-miR-1254	0	0	1	1	0	0	C20orf141	chromosome 20 open reading frame 141
hsa-miR-1254	1	0	1	1	1	1	CPNE2	copine II
hsa-miR-1254	0	0	1	0	1	1	LOC388942	uncharacterized LOC388942
hsa-miR-1254	1	0	1	1	0	0	SPEG	SPEG complex locus
hsa-miR-1254	0	0	1	1	1	1	TGM2	transglutaminase 2 (C polypeptide, protein-glutamine-gamma-glutamyltransferase)
hsa-miR-1254	1	0	1	1	1	1	NCAN	neurocan
hsa-miR-1254	0	0	1	1	0	0	CCDC88B	coiled-coil domain containing 88B
hsa-miR-1254	0	0	1	0	0	0	PLEKHD1	pleckstrin homology domain containing, family D (with coiled-coil domains) member 1
hsa-miR-1254	1	0	1	0	1	1	GPR180	G protein-coupled receptor 180
hsa-miR-1254	0	0	1	1	0	0	NPIP	nuclear pore complex interacting protein
hsa-miR-1254	0	0	1	1	1	1	SZT2	seizure threshold 2 homolog (mouse)
hsa-miR-1254	1	0	1	1	1	1	CLIP1	CAP-GLY domain containing linker protein 1
hsa-miR-1254	1	0	1	1	1	1	MKRN1	makorin ring finger protein 1
hsa-miR-1254	0	0	1	1	1	1	MOBP	myelin-associated oligodendrocyte basic protein
hsa-miR-1254	1	0	1	1	1	1	DLG2	discs, large homolog 2 (Drosophila)
hsa-miR-1254	0	0	1	1	0	0	FAM54B	family with sequence similarity 54, member B
hsa-miR-1254	1	0	1	0	1	1	N4BP3	NEDD4 binding protein 3
hsa-miR-1254	0	0	1	1	1	1	RALGAPA2	Ral GTPase activating protein, alpha subunit 2 (catalytic)
hsa-miR-1254	1	0	1	0	1	1	KIAA0182	KIAA0182
hsa-miR-1254	1	0	1	1	1	1	LSM14A	LSM14A, SCD6 homolog A (S. cerevisiae)
hsa-miR-1254	0	0	1	1	1	1	CCDC78	coiled-coil domain containing 78
hsa-miR-1254	1	0	1	1	1	1	ENAH	enabled homolog (Drosophila)
hsa-miR-1254	1	0	1	0	1	1	SP6	Sp6 transcription factor
hsa-miR-1254	0	0	1	0	0	0	ERVFRD-2	endogenous retrovirus group FRD, member 2
hsa-miR-1254	0	0	1	1	1	1	WDR69	WD repeat domain 69
hsa-miR-1254	1	0	1	1	1	1	PLA2G15	phospholipase A2, group XV
hsa-miR-1254	0	0	1	0	1	1	LOC401321	uncharacterized LOC401321
hsa-miR-1254	0	0	1	1	1	1	MCU	mitochondrial calcium uniporter
hsa-miR-1254	1	0	1	1	1	1	WDR37	WD repeat domain 37
hsa-miR-1254	1	0	1	1	1	1	KALRN	kalirin, RhoGEF kinase
hsa-miR-1254	0	0	1	0	0	0	LINC00514	long intergenic non-protein coding RNA 514
hsa-miR-1254	1	0	1	0	1	1	KDM2A	lysine (K)-specific demethylase 2A
hsa-miR-1254	0	0	1	0	0	0	LOC440993	uncharacterized LOC440993
hsa-miR-1254	0	0	1	1	0	0	INTS1	integrator complex subunit 1
hsa-miR-1254	0	0	1	1	1	1	ATXN2	ataxin 2
hsa-miR-1254	0	0	1	1	1	1	PDDC1	Parkinson disease 7 domain containing 1
hsa-miR-1254	0	0	1	1	1	1	ZNF662	zinc finger protein 662
hsa-miR-1254	0	0	1	0	0	0	IDO2	indoleamine 2,3-dioxygenase 2
hsa-miR-1254	0	0	1	1	0	0	WFIKKN1	WAP, follistatin/kazal, immunoglobulin, kunitz and netrin domain containing 1
hsa-miR-1254	0	0	1	0	0	0	FLJ46906	uncharacterized LOC441172
hsa-miR-1254	0	0	1	1	0	0	IQCF2	IQ motif containing F2
hsa-miR-1254	1	0	1	1	1	1	CD200	CD200 molecule
hsa-miR-1254	0	0	1	1	1	1	MRPL49	mitochondrial ribosomal protein L49
hsa-miR-1254	0	0	1	1	0	0	HEATR8	HEAT repeat containing 8
hsa-miR-1254	1	0	1	1	1	1	SEC14L1	SEC14-like 1 (S. cerevisiae)
hsa-miR-1254	0	0	1	1	0	0	MAVS	mitochondrial antiviral signaling protein
hsa-miR-1254	0	0	1	0	0	0	LOC494141	mitochondrial carrier triple repeat 1 pseudogene
hsa-miR-1254	1	0	1	0	1	1	ESRRG	estrogen-related receptor gamma
hsa-miR-1254	0	0	1	1	1	1	CDIPT	CDP-diacylglycerol--inositol 3-phosphatidyltransferase
hsa-miR-1254	0	0	1	0	1	1	RUFY4	RUN and FYVE domain containing 4
hsa-miR-1254	0	0	1	1	1	1	RAD51	RAD51 homolog (S. cerevisiae)
hsa-miR-1254	1	0	1	1	1	1	RABGAP1	RAB GTPase activating protein 1
hsa-miR-1254	1	0	1	0	0	0	ASXL3	additional sex combs like 3 (Drosophila)
hsa-miR-1254	0	0	1	1	1	1	SYPL2	synaptophysin-like 2
hsa-miR-1254	0	0	1	1	0	0	C9orf96	chromosome 9 open reading frame 96
hsa-miR-1254	1	0	1	1	1	1	CTSA	cathepsin A
hsa-miR-1254	0	0	1	1	1	1	KAZALD1	Kazal-type serine peptidase inhibitor domain 1
hsa-miR-1254	0	0	1	1	0	0	ANAPC15	anaphase promoting complex subunit 15
hsa-miR-1254	0	0	1	1	1	1	NECAP2	NECAP endocytosis associated 2
hsa-miR-1254	0	0	1	1	1	1	DHRS3	dehydrogenase/reductase (SDR family) member 3
hsa-miR-1254	0	0	1	1	0	0	PDZD7	PDZ domain containing 7
hsa-miR-1254	1	0	1	1	1	1	UBE2O	ubiquitin-conjugating enzyme E2O
hsa-miR-1254	1	0	1	1	1	1	MEAF6	MYST/Esa1-associated factor 6
hsa-miR-1254	0	0	1	1	1	1	PDSS2	prenyl (decaprenyl) diphosphate synthase, subunit 2
hsa-miR-1254	1	0	1	1	1	1	KIAA0907	KIAA0907
hsa-miR-1254	1	0	1	1	1	1	CAMK2G	calcium/calmodulin-dependent protein kinase II gamma
hsa-miR-1254	1	0	1	1	1	1	NOVA1	neuro-oncological ventral antigen 1
hsa-miR-1254	0	0	1	1	0	0	TRIM69	tripartite motif containing 69
hsa-miR-1254	0	0	1	1	1	1	PTPN20B	protein tyrosine phosphatase, non-receptor type 20B
hsa-miR-1254	0	0	1	1	1	1	PTPN20A	protein tyrosine phosphatase, non-receptor type 20A
hsa-miR-1254	0	0	1	0	0	0	NBPF10	neuroblastoma breakpoint family, member 10
hsa-miR-1254	1	0	1	1	1	1	NECAP1	NECAP endocytosis associated 1
hsa-miR-1254	0	0	1	1	1	1	TTLL3	tubulin tyrosine ligase-like family, member 3
hsa-miR-1254	0	0	1	1	1	1	PGAP2	post-GPI attachment to proteins 2
hsa-miR-1254	0	0	1	1	0	0	PSTPIP1	proline-serine-threonine phosphatase interacting protein 1
hsa-miR-1254	0	0	1	0	0	0	POM121L9P	POM121 transmembrane nucleoporin-like 9, pseudogene
hsa-miR-1254	1	0	1	1	1	1	TAB2	TGF-beta activated kinase 1/MAP3K7 binding protein 2
hsa-miR-1254	0	0	1	0	0	0	POM121L8P	POM121 transmembrane nucleoporin-like 8 pseudogene
hsa-miR-1254	1	0	1	0	1	1	DCDC2	doublecortin domain containing 2
hsa-miR-1254	0	0	1	1	0	0	H2AFJ	H2A histone family, member J
hsa-miR-1254	1	0	1	1	1	1	PREX1	phosphatidylinositol-3,4,5-trisphosphate-dependent Rac exchange factor 1
hsa-miR-1254	0	0	1	0	0	0	TPTE2P6	transmembrane phosphoinositide 3-phosphatase and tensin homolog 2 pseudogene 6
hsa-miR-1254	0	0	1	0	0	0	LOC643529	hCG2024094
hsa-miR-1254	1	0	1	1	1	1	GOLGA8A	golgin A8 family, member A
hsa-miR-1254	1	0	1	1	1	1	CTTNBP2NL	CTTNBP2 N-terminal like
hsa-miR-1254	1	0	1	0	1	1	GRIN3A	glutamate receptor, ionotropic, N-methyl-D-aspartate 3A
hsa-miR-1254	1	0	1	1	1	1	TRIM3	tripartite motif containing 3
hsa-miR-1254	0	0	1	0	0	0	FAM66D	family with sequence similarity 66, member D
hsa-miR-1254	0	0	1	1	1	1	ING3	inhibitor of growth family, member 3
hsa-miR-1254	1	0	1	1	1	1	MAP4	microtubule-associated protein 4
hsa-miR-1254	1	0	1	1	1	1	MIER1	mesoderm induction early response 1 homolog (Xenopus laevis)
hsa-miR-1254	0	0	1	0	1	1	GAB3	GRB2-associated binding protein 3
hsa-miR-1254	0	0	1	0	0	0	ZNF720	zinc finger protein 720
hsa-miR-1254	1	0	1	1	1	1	CHMP7	charged multivesicular body protein 7
hsa-miR-1254	0	0	1	1	1	1	YAP1	Yes-associated protein 1
hsa-miR-1254	0	0	1	0	0	0	FAM225A	family with sequence similarity 225, member A (non-protein coding)
hsa-miR-1254	1	0	1	1	1	1	POU6F1	POU class 6 homeobox 1
hsa-miR-1254	1	0	1	1	1	1	SBF2	SET binding factor 2
hsa-miR-1254	0	0	1	1	1	1	INPP5B	inositol polyphosphate-5-phosphatase, 75kDa
hsa-miR-1254	0	0	1	1	1	1	NARG2	NMDA receptor regulated 2
hsa-miR-1254	1	0	1	1	1	1	NRP1	neuropilin 1
hsa-miR-1254	0	0	1	1	1	1	SOAT1	sterol O-acyltransferase 1
hsa-miR-1254	1	0	1	1	1	1	IL17RD	interleukin 17 receptor D
hsa-miR-1254	0	0	1	1	1	1	TDRD9	tudor domain containing 9
hsa-miR-1254	1	0	1	1	1	1	CAPRIN2	caprin family member 2
hsa-miR-1254	1	0	1	1	1	1	MBD6	methyl-CpG binding domain protein 6
hsa-miR-1254	1	0	1	1	1	1	MSANTD4	Myb/SANT-like DNA-binding domain containing 4 with coiled-coils
hsa-miR-1254	1	0	1	1	1	1	WDR44	WD repeat domain 44
hsa-miR-1254	1	0	1	1	1	1	IKZF2	IKAROS family zinc finger 2 (Helios)
hsa-miR-1254	1	0	1	1	1	1	GAL3ST3	galactose-3-O-sulfotransferase 3
hsa-miR-1254	1	0	1	1	1	1	CLIC5	chloride intracellular channel 5
hsa-miR-1254	0	0	1	1	1	1	OSR2	odd-skipped related 2 (Drosophila)
hsa-miR-1254	1	0	1	1	1	1	DUSP16	dual specificity phosphatase 16
hsa-miR-1254	0	0	1	1	1	1	CD209	CD209 molecule
hsa-miR-1254	0	0	1	0	0	0	TDH	L-threonine dehydrogenase
hsa-miR-1254	0	0	1	1	1	1	MED19	mediator complex subunit 19
hsa-miR-1254	0	0	1	1	0	0	ESPN	espin
hsa-miR-1254	1	0	1	1	1	1	ILF3	interleukin enhancer binding factor 3, 90kDa
hsa-miR-1254	0	0	1	1	1	1	ATF3	activating transcription factor 3
hsa-miR-1254	0	0	1	0	0	0	TAG	tumor antigen gene
hsa-miR-1254	0	0	1	1	1	1	GON4L	gon-4-like (C. elegans)
hsa-miR-1254	0	0	1	1	0	0	PIGU	phosphatidylinositol glycan anchor biosynthesis, class U
hsa-miR-1254	0	0	1	1	1	1	GCOM1	GRINL1A complex locus 1
hsa-miR-1254	0	0	1	1	1	1	GPR114	G protein-coupled receptor 114
hsa-miR-1254	0	0	1	0	0	0	LINC00085	long intergenic non-protein coding RNA 85
hsa-miR-1254	0	0	1	1	1	1	TNFRSF19	tumor necrosis factor receptor superfamily, member 19
hsa-miR-1254	0	0	1	1	0	0	TEX264	testis expressed 264
hsa-miR-1254	0	0	1	1	0	0	RAET1E	retinoic acid early transcript 1E
hsa-miR-1254	1	0	1	1	1	1	FGD4	FYVE, RhoGEF and PH domain containing 4
hsa-miR-1254	1	0	1	0	1	1	ANKRD28	ankyrin repeat domain 28
hsa-miR-1254	0	0	1	1	0	0	SH2D6	SH2 domain containing 6
hsa-miR-1254	1	0	1	1	1	1	MECP2	methyl CpG binding protein 2 (Rett syndrome)
hsa-miR-1254	1	0	1	1	0	0	ADAM15	ADAM metallopeptidase domain 15
hsa-miR-1254	1	0	1	1	1	1	ITSN1	intersectin 1 (SH3 domain protein)
hsa-miR-1254	0	0	1	1	1	1	IL24	interleukin 24
hsa-miR-1254	0	0	1	1	1	1	SMPD1	sphingomyelin phosphodiesterase 1, acid lysosomal
hsa-miR-1254	0	0	1	1	1	1	FCRLB	Fc receptor-like B
hsa-miR-1254	0	0	1	1	1	1	CEACAM1	carcinoembryonic antigen-related cell adhesion molecule 1 (biliary glycoprotein)
hsa-miR-1254	1	0	1	1	1	1	PCDH11X	protocadherin 11 X-linked
hsa-miR-1254	0	0	1	1	0	0	NBPF8	neuroblastoma breakpoint family, member 8
hsa-miR-1254	0	0	1	1	1	1	IL23R	interleukin 23 receptor
hsa-miR-1254	0	0	1	1	1	1	IYD	iodotyrosine deiodinase
hsa-miR-1254	1	0	1	1	1	1	RPRD1A	regulation of nuclear pre-mRNA domain containing 1A
hsa-miR-1254	0	0	1	0	0	0	GBAP1	glucosidase, beta, acid pseudogene 1
hsa-miR-1254	0	0	1	1	1	1	ZCCHC17	zinc finger, CCHC domain containing 17
hsa-miR-1254	1	0	1	1	1	1	ARHGAP17	Rho GTPase activating protein 17
hsa-miR-1254	0	0	1	1	1	1	PAFAH1B2	platelet-activating factor acetylhydrolase 1b, catalytic subunit 2 (30kDa)
hsa-miR-1254	1	0	1	1	1	1	TMUB2	transmembrane and ubiquitin-like domain containing 2
hsa-miR-1254	0	0	1	1	1	1	B4GALT2	UDP-Gal:betaGlcNAc beta 1,4- galactosyltransferase, polypeptide 2
hsa-miR-1254	0	0	1	1	1	1	MRRF	mitochondrial ribosome recycling factor
hsa-miR-1254	1	0	1	1	1	1	TSPAN14	tetraspanin 14
hsa-miR-1254	1	0	1	0	0	0	VGLL4	vestigial like 4 (Drosophila)
hsa-miR-1254	1	0	1	1	1	1	RIMS3	regulating synaptic membrane exocytosis 3
hsa-miR-1254	0	0	1	1	1	1	BOD1	biorientation of chromosomes in cell division 1
hsa-miR-1254	1	0	1	1	1	1	PPP1R11	protein phosphatase 1, regulatory (inhibitor) subunit 11
hsa-miR-1254	1	0	1	1	1	1	NUMA1	nuclear mitotic apparatus protein 1
hsa-miR-1254	1	0	1	1	1	1	SMO	smoothened, frizzled family receptor
hsa-miR-1254	1	0	1	1	1	1	TSEN34	tRNA splicing endonuclease 34 homolog (S. cerevisiae)
hsa-miR-1254	1	0	1	1	0	0	SLC10A3	solute carrier family 10 (sodium/bile acid cotransporter family), member 3
hsa-miR-1254	1	0	1	1	1	1	POU2F2	POU class 2 homeobox 2
hsa-miR-1254	0	0	1	1	1	1	MMACHC	methylmalonic aciduria (cobalamin deficiency) cblC type, with homocystinuria
hsa-miR-1254	0	0	1	0	0	0	LOC93622	Morf4 family associated protein 1-like 1 pseudogene
hsa-miR-1254	1	0	1	1	0	0	EIF4A1	eukaryotic translation initiation factor 4A1
hsa-miR-1254	0	0	1	0	0	0	GLIS3-AS1	GLIS3 antisense RNA 1
hsa-miR-1254	0	0	1	1	0	0	AGBL5	ATP/GTP binding protein-like 5
hsa-miR-1254	0	0	1	1	0	0	RBM14	RNA binding motif protein 14
hsa-miR-1254	0	0	1	1	0	0	MYLK2	myosin light chain kinase 2
hsa-miR-1254	0	0	1	0	0	0	FBXO46	F-box protein 46
hsa-miR-1254	0	0	1	1	1	1	ICA1	islet cell autoantigen 1, 69kDa
hsa-miR-1254	0	0	1	1	0	0	BARX1	BARX homeobox 1
hsa-miR-1254	0	0	1	1	0	0	ARHGAP8	Rho GTPase activating protein 8
hsa-miR-1254	0	0	1	1	0	0	NDUFA3	NADH dehydrogenase (ubiquinone) 1 alpha subcomplex, 3, 9kDa
hsa-miR-1254	0	0	1	0	0	0	LRRC14	leucine rich repeat containing 14
hsa-miR-1254	1	0	1	0	0	0	XPNPEP3	X-prolyl aminopeptidase (aminopeptidase P) 3, putative
hsa-miR-1254	0	0	1	1	1	1	GNL3L	guanine nucleotide binding protein-like 3 (nucleolar)-like
hsa-miR-1254	0	0	1	1	0	0	CAPNS1	calpain, small subunit 1
hsa-miR-1254	0	0	1	0	0	0	GRAMD1B	GRAM domain containing 1B
hsa-miR-1254	0	0	1	1	1	1	TRMT10B	tRNA methyltransferase 10 homolog B (S. cerevisiae)
hsa-miR-1254	1	0	1	0	1	1	FNDC3B	fibronectin type III domain containing 3B
hsa-miR-1254	0	0	1	1	0	0	KLHDC3	kelch domain containing 3
hsa-miR-1254	0	0	1	1	0	0	VAV1	vav 1 guanine nucleotide exchange factor
hsa-miR-1254	0	0	1	1	1	1	DEDD2	death effector domain containing 2
hsa-miR-1254	0	0	1	1	1	1	KLHL29	kelch-like 29 (Drosophila)
hsa-miR-1254	0	0	1	1	0	0	PTPMT1	protein tyrosine phosphatase, mitochondrial 1
hsa-miR-1254	0	0	1	1	0	0	USP19	ubiquitin specific peptidase 19
hsa-miR-1254	0	0	1	0	0	0	MGC21881	uncharacterized locus MGC21881
hsa-miR-1254	0	0	1	1	1	1	KRCC1	lysine-rich coiled-coil 1
hsa-miR-1254	1	0	1	1	0	0	AKT1S1	AKT1 substrate 1 (proline-rich)
hsa-miR-1254	0	0	1	0	0	0	LOC441528	uncharacterized LOC441528
hsa-miR-1254	0	0	1	1	0	0	ZBTB32	zinc finger and BTB domain containing 32
hsa-miR-1254	0	0	1	1	1	1	PEX14	peroxisomal biogenesis factor 14
hsa-miR-1254	0	0	1	0	0	0	TCP11L2	t-complex 11 (mouse)-like 2
hsa-miR-1254	1	0	1	1	1	1	ADPGK	ADP-dependent glucokinase
hsa-miR-1254	0	0	1	1	0	0	NPRL3	nitrogen permease regulator-like 3 (S. cerevisiae)
hsa-miR-1254	0	0	1	1	1	1	CCBP2	chemokine binding protein 2
hsa-miR-1254	0	0	1	1	1	1	TMEM40	transmembrane protein 40
hsa-miR-1254	1	0	1	0	1	1	ARHGAP26	Rho GTPase activating protein 26
hsa-miR-1254	0	0	1	0	0	0	TMEM208	transmembrane protein 208
hsa-miR-1254	1	0	1	1	1	1	C11orf30	chromosome 11 open reading frame 30
hsa-miR-1254	0	0	1	0	0	0	AZGP1P1	alpha-2-glycoprotein 1, zinc-binding pseudogene 1
hsa-miR-1254	0	0	1	1	1	1	CDC42SE2	CDC42 small effector 2
hsa-miR-1254	0	0	1	1	0	0	FAM89B	family with sequence similarity 89, member B
hsa-miR-1254	1	0	1	1	1	1	RACGAP1	Rac GTPase activating protein 1
hsa-miR-1254	0	0	1	0	0	0	FLJ35390	uncharacterized LOC255031
hsa-miR-1254	0	0	1	0	0	0	JMJD7	jumonji domain containing 7
hsa-miR-1254	1	0	1	1	1	1	VASP	vasodilator-stimulated phosphoprotein
hsa-miR-1254	0	0	1	1	0	0	TBX6	T-box 6
hsa-miR-1254	1	0	1	1	1	1	CNTN4	contactin 4
hsa-miR-1254	1	0	1	1	1	1	CRKL	v-crk sarcoma virus CT10 oncogene homolog (avian)-like
hsa-miR-1254	0	0	1	1	0	0	TRO	trophinin
hsa-miR-1254	0	0	1	0	0	0	ZBED3-AS1	ZBED3 antisense RNA 1
hsa-miR-1254	0	0	1	0	0	0	EVPLL	envoplakin-like
hsa-miR-1254	1	0	1	0	1	1	CERS3	ceramide synthase 3
hsa-miR-1254	0	0	1	1	1	1	CCPG1	cell cycle progression 1
hsa-miR-1254	0	0	1	1	0	0	ALPK1	alpha-kinase 1
hsa-miR-1254	0	0	1	0	0	0	LOC400891	chromosome 14 open reading frame 166B pseudogene
hsa-miR-1254	1	0	1	1	1	1	TMEM127	transmembrane protein 127
hsa-miR-1254	1	0	1	0	0	0	KCNU1	potassium channel, subfamily U, member 1
hsa-miR-1254	0	0	1	0	0	0	LOC145837	uncharacterized LOC145837
hsa-miR-1254	0	0	1	1	0	0	CPT1C	carnitine palmitoyltransferase 1C
hsa-miR-1254	0	0	1	1	1	1	KIAA1755	KIAA1755
hsa-miR-1254	0	0	1	1	0	0	C2	complement component 2
hsa-miR-1254	1	0	1	0	1	1	TFEC	transcription factor EC
hsa-miR-1254	0	0	1	0	0	0	BCAS3	breast carcinoma amplified sequence 3
hsa-miR-1254	0	0	1	1	0	0	AGBL3	ATP/GTP binding protein-like 3
hsa-miR-1254	1	0	1	1	1	1	MUM1L1	melanoma associated antigen (mutated) 1-like 1
hsa-miR-1254	0	0	1	0	0	0	LOC729307	uncharacterized LOC729307
hsa-miR-1254	0	0	1	1	1	1	ZNF100	zinc finger protein 100
hsa-miR-1254	1	0	1	1	1	1	PITPNB	phosphatidylinositol transfer protein, beta
hsa-miR-1254	1	0	1	1	1	1	ZNF282	zinc finger protein 282
hsa-miR-1254	0	0	1	0	0	0	LOC402779	uncharacterized LOC402779
hsa-miR-1254	0	0	1	0	0	0	LINC00593	long intergenic non-protein coding RNA 593
hsa-miR-1254	0	0	1	0	1	1	PLEKHM1P	pleckstrin homology domain containing, family M (with RUN domain) member 1 pseudogene
hsa-miR-1254	1	0	1	1	1	1	SF1	splicing factor 1
hsa-miR-1254	1	0	1	1	1	1	RAB5B	RAB5B, member RAS oncogene family
hsa-miR-1254	1	0	1	1	1	1	SIRPA	signal-regulatory protein alpha
hsa-miR-1254	1	0	1	1	1	1	ADAM19	ADAM metallopeptidase domain 19
hsa-miR-1254	0	0	1	1	1	1	IL20RB	interleukin 20 receptor beta
hsa-miR-1254	0	0	1	1	0	0	LINC00176	long intergenic non-protein coding RNA 176
hsa-miR-1254	1	0	1	0	1	1	KIF5A	kinesin family member 5A
hsa-miR-1254	0	0	1	1	0	0	TNMD	tenomodulin
hsa-miR-1254	0	0	1	1	1	1	ZNF337	zinc finger protein 337
hsa-miR-1254	0	0	1	0	1	1	DKFZP434I0714	uncharacterized protein DKFZP434I0714
hsa-miR-1254	1	0	1	0	1	1	RHOBTB2	Rho-related BTB domain containing 2
hsa-miR-1254	1	0	1	1	1	1	NKAIN2	Na+/K+ transporting ATPase interacting 2
hsa-miR-1254	0	0	1	1	0	0	GGT1	gamma-glutamyltransferase 1
hsa-miR-1254	1	0	1	1	0	0	INO80E	INO80 complex subunit E
hsa-miR-1254	1	0	1	1	1	1	ZEB2	zinc finger E-box binding homeobox 2
hsa-miR-1254	1	0	1	1	1	1	CTDSPL2	CTD (carboxy-terminal domain, RNA polymerase II, polypeptide A) small phosphatase like 2
hsa-miR-1254	0	0	1	1	1	1	TMEM139	transmembrane protein 139
hsa-miR-1254	0	0	1	1	0	0	VPS8	vacuolar protein sorting 8 homolog (S. cerevisiae)
hsa-miR-1254	1	0	1	1	1	1	ZNF618	zinc finger protein 618
hsa-miR-1254	1	0	1	1	1	1	IMPACT	Impact homolog (mouse)
hsa-miR-1254	0	0	1	0	0	0	FAM201A	family with sequence similarity 201, member A
hsa-miR-1254	1	0	1	1	1	1	SMG7	smg-7 homolog, nonsense mediated mRNA decay factor (C. elegans)
hsa-miR-1254	0	0	1	1	1	1	FAM171B	family with sequence similarity 171, member B
hsa-miR-1254	0	0	1	1	1	1	SNX22	sorting nexin 22
hsa-miR-1254	0	0	1	0	0	0	LOC652276	potassium channel tetramerisation domain containing 5 pseudogene
hsa-miR-1254	1	0	1	1	1	1	GAS8	growth arrest-specific 8
hsa-miR-1254	0	0	1	1	1	1	CELF1	CUGBP, Elav-like family member 1
hsa-miR-1254	0	0	1	0	0	0	TMEM235	transmembrane protein 235
hsa-miR-1254	1	0	1	1	1	1	BNC2	basonuclin 2
hsa-miR-1254	0	0	1	0	0	0	CYP4F35P	cytochrome P450, family 4, subfamily F, polypeptide 35, pseudogene
hsa-miR-1254	1	0	1	0	0	0	RAVER1	ribonucleoprotein, PTB-binding 1
hsa-miR-1254	0	0	1	1	0	0	ATXN7L2	ataxin 7-like 2
hsa-miR-1254	1	0	1	0	1	1	MMD2	monocyte to macrophage differentiation-associated 2
hsa-miR-1254	1	0	1	0	1	1	CYB5RL	cytochrome b5 reductase-like
hsa-miR-1254	0	0	1	0	0	0	LOC284263	uncharacterized LOC284263
hsa-miR-1254	1	0	1	1	1	1	NFYA	nuclear transcription factor Y, alpha
hsa-miR-1254	0	0	1	0	0	0	LOC401074	uncharacterized LOC401074
hsa-miR-1254	1	0	1	1	0	0	LMO1	LIM domain only 1 (rhombotin 1)
hsa-miR-1254	0	0	1	0	0	0	LOC221122	uncharacterized LOC221122
hsa-miR-1254	1	0	1	1	0	0	HES7	hairy and enhancer of split 7 (Drosophila)
hsa-miR-1254	1	0	1	1	1	1	FOSB	FBJ murine osteosarcoma viral oncogene homolog B
hsa-miR-1254	1	0	1	1	1	1	IL16	interleukin 16
hsa-miR-1254	0	0	1	1	0	0	TMEM95	transmembrane protein 95
hsa-miR-1254	0	0	1	0	1	1	METTL12	methyltransferase like 12
hsa-miR-1254	1	0	1	0	1	1	HSPA12A	heat shock 70kDa protein 12A
hsa-miR-1254	0	0	1	1	0	0	NT5DC4	5'-nucleotidase domain containing 4
hsa-miR-1254	1	0	1	1	1	1	ARID3B	AT rich interactive domain 3B (BRIGHT-like)
hsa-miR-1254	1	0	1	1	1	1	TNFRSF1B	tumor necrosis factor receptor superfamily, member 1B
hsa-miR-1254	1	0	1	1	1	1	MEIS3	Meis homeobox 3
hsa-miR-1254	0	0	1	0	0	0	LRRC37BP1	leucine rich repeat containing 37B pseudogene 1
hsa-miR-1254	0	0	1	1	0	0	PLB1	phospholipase B1
hsa-miR-1254	0	0	1	0	0	0	LOC643837	uncharacterized LOC643837
hsa-miR-1254	0	0	1	1	0	0	PTOV1	prostate tumor overexpressed 1
hsa-miR-1254	1	0	1	1	1	1	ADD1	adducin 1 (alpha)
hsa-miR-1254	0	0	1	0	0	0	LOC401176	uncharacterized LOC401176
hsa-miR-1254	0	0	1	0	0	0	LOC338579	ankyrin repeat domain-containing protein 30B pseudogene
hsa-miR-1254	0	0	1	0	0	0	LOC339260	uncharacterized LOC339260
hsa-miR-1254	1	0	1	0	1	1	PSD3	pleckstrin and Sec7 domain containing 3
hsa-miR-1254	0	0	1	0	0	0	LOC728342	uncharacterized LOC728342
hsa-miR-1254	1	0	1	1	1	1	PPP2R5B	protein phosphatase 2, regulatory subunit B', beta
hsa-miR-1254	1	0	1	1	1	1	SF3B1	splicing factor 3b, subunit 1, 155kDa
hsa-miR-1254	0	0	1	0	1	1	IL33	interleukin 33
hsa-miR-1254	0	0	1	0	1	1	FBXO42	F-box protein 42
hsa-miR-1254	0	0	1	0	0	0	LOC348120	uncharacterized LOC348120
hsa-miR-1254	0	0	1	0	0	0	DPY19L2P4	dpy-19-like 2 pseudogene 4 (C. elegans)
hsa-miR-1254	1	0	1	1	0	0	CELF5	CUGBP, Elav-like family member 5
hsa-miR-1254	1	0	1	1	1	1	RMND5A	required for meiotic nuclear division 5 homolog A (S. cerevisiae)
hsa-miR-1254	0	0	1	0	0	0	SUZ12P1	suppressor of zeste 12 homolog pseudogene 1
hsa-miR-1254	0	0	1	1	1	1	CDADC1	cytidine and dCMP deaminase domain containing 1
hsa-miR-1254	0	0	1	1	0	0	OXLD1	oxidoreductase-like domain containing 1
hsa-miR-1254	1	0	1	1	1	1	PTPRG	protein tyrosine phosphatase, receptor type, G
hsa-miR-1254	0	0	1	0	0	0	LOC283038	uncharacterized LOC283038
hsa-miR-1254	1	0	1	1	1	1	KIF11	kinesin family member 11
hsa-miR-1254	0	0	1	0	0	0	AURKAPS1	aurora kinase A pseudogene 1
hsa-miR-1254	1	0	1	1	1	1	FNDC3A	fibronectin type III domain containing 3A
hsa-miR-1254	1	0	1	0	1	1	SEMA4G	sema domain, immunoglobulin domain (Ig), transmembrane domain (TM) and short cytoplasmic domain, (semaphorin) 4G
hsa-miR-1254	0	0	1	1	1	1	LINC00086	long intergenic non-protein coding RNA 86
hsa-miR-1254	0	0	1	1	1	1	SLC25A35	solute carrier family 25, member 35
hsa-miR-1254	0	0	1	0	0	0	LINC00265	long intergenic non-protein coding RNA 265
hsa-miR-1254	0	0	1	0	1	1	C17orf51	chromosome 17 open reading frame 51
hsa-miR-1254	1	0	1	1	1	1	OLFML2A	olfactomedin-like 2A
hsa-miR-1254	0	0	1	1	0	0	TENC1	tensin like C1 domain containing phosphatase (tensin 2)
hsa-miR-1254	1	0	1	1	1	1	PRRG1	proline rich Gla (G-carboxyglutamic acid) 1
hsa-miR-1254	0	0	1	1	0	0	WDR90	WD repeat domain 90
hsa-miR-1254	0	0	1	1	1	1	CLEC2D	C-type lectin domain family 2, member D
hsa-miR-1254	0	0	1	1	1	1	GPATCH2	G patch domain containing 2
hsa-miR-1254	1	0	1	1	0	0	MANEAL	mannosidase, endo-alpha-like
hsa-miR-1254	0	0	1	1	0	0	CERS4	ceramide synthase 4
hsa-miR-1254	1	0	1	1	1	1	NIPBL	Nipped-B homolog (Drosophila)
hsa-miR-1254	1	0	1	0	0	0	PRRT4	proline-rich transmembrane protein 4
hsa-miR-1254	0	0	1	1	0	0	PRSS55	protease, serine, 55
hsa-miR-1254	1	0	1	1	1	1	UEVLD	UEV and lactate/malate dehyrogenase domains
hsa-miR-1254	0	0	1	1	1	1	ZNF333	zinc finger protein 333
hsa-miR-1254	1	0	1	1	1	1	ADCY6	adenylate cyclase 6
hsa-miR-1254	1	0	1	1	1	1	GANAB	glucosidase, alpha; neutral AB
hsa-miR-1254	1	0	1	1	1	1	FAM129B	family with sequence similarity 129, member B
hsa-miR-1254	1	0	1	1	1	1	CCDC149	coiled-coil domain containing 149
hsa-miR-1254	0	0	1	1	0	0	TMEM183A	transmembrane protein 183A
hsa-miR-1254	1	0	1	0	1	1	MAGIX	MAGI family member, X-linked
hsa-miR-1254	1	0	1	1	1	1	MAPKAPK3	mitogen-activated protein kinase-activated protein kinase 3
hsa-miR-1254	1	0	1	1	0	0	TMEM198	transmembrane protein 198
hsa-miR-1254	0	0	1	1	0	0	RELA	v-rel reticuloendotheliosis viral oncogene homolog A (avian)
hsa-miR-1254	0	0	1	1	1	1	C21orf62	chromosome 21 open reading frame 62
hsa-miR-1254	0	0	1	1	1	1	MSTO1	misato homolog 1 (Drosophila)
hsa-miR-1254	0	0	1	1	1	1	SLC11A1	solute carrier family 11 (proton-coupled divalent metal ion transporters), member 1
hsa-miR-1254	0	0	1	1	1	1	PCDH18	protocadherin 18
hsa-miR-1254	1	0	1	0	1	1	TMEM194A	transmembrane protein 194A
hsa-miR-1254	0	0	1	0	0	0	ULK4P3	unc-51-like kinase 4 (C. elegans) pseudogene 3
hsa-miR-1254	0	0	1	0	0	0	PHKA2-AS1	PHKA2 antisense RNA 1
hsa-miR-1254	0	0	1	1	0	0	C8orf31	chromosome 8 open reading frame 31
hsa-miR-1254	1	0	1	1	0	0	PLEKHG3	pleckstrin homology domain containing, family G (with RhoGef domain) member 3
hsa-miR-1254	0	0	1	0	0	0	OAZ3	ornithine decarboxylase antizyme 3
hsa-miR-1254	1	0	1	1	1	1	OPCML	opioid binding protein/cell adhesion molecule-like
hsa-miR-1254	1	0	1	1	1	1	ESRRA	estrogen-related receptor alpha
hsa-miR-1254	0	0	1	1	0	0	DNASE1	deoxyribonuclease I
hsa-miR-1254	1	0	1	1	1	1	WNT10B	wingless-type MMTV integration site family, member 10B
hsa-miR-1254	0	0	1	1	1	1	KLRF1	killer cell lectin-like receptor subfamily F, member 1
hsa-miR-1254	0	0	1	0	0	0	ABCA11P	ATP-binding cassette, sub-family A (ABC1), member 11, pseudogene
hsa-miR-1254	1	0	1	1	1	1	LRRC15	leucine rich repeat containing 15
hsa-miR-1254	1	0	1	1	1	1	IL28RA	interleukin 28 receptor, alpha (interferon, lambda receptor)
hsa-miR-1254	0	0	1	1	0	0	ADAMTS13	ADAM metallopeptidase with thrombospondin type 1 motif, 13
hsa-miR-1254	0	0	1	0	0	0	FBXL19-AS1	FBXL19 antisense RNA 1 (head to head)
hsa-miR-1254	1	0	1	1	1	1	ANO4	anoctamin 4
hsa-miR-1254	1	0	1	1	1	1	LARP1B	La ribonucleoprotein domain family, member 1B
hsa-miR-1254	0	0	1	0	0	0	LRRC37A11P	leucine rich repeat containing 37, member A11, pseudogene
hsa-miR-1254	1	0	1	1	1	1	NR3C2	nuclear receptor subfamily 3, group C, member 2
hsa-miR-1254	0	0	1	1	0	0	RNF123	ring finger protein 123
hsa-miR-1254	0	0	1	1	1	1	LRCH1	leucine-rich repeats and calponin homology (CH) domain containing 1
hsa-miR-1254	0	0	1	1	1	1	ZNF621	zinc finger protein 621
hsa-miR-1254	1	0	1	1	1	1	TRIP12	thyroid hormone receptor interactor 12
hsa-miR-1254	0	0	1	1	0	0	RGS12	regulator of G-protein signaling 12
hsa-miR-1254	1	0	1	1	1	1	FKBP1A	FK506 binding protein 1A, 12kDa
hsa-miR-1254	0	0	1	0	0	0	EEF1DP3	eukaryotic translation elongation factor 1 delta pseudogene 3
hsa-miR-1254	0	0	1	0	0	0	KRT8P12	keratin 8 pseudogene 12
hsa-miR-1254	1	0	1	1	1	1	ANK2	ankyrin 2, neuronal
hsa-miR-1254	0	0	1	1	1	1	RNF14	ring finger protein 14
hsa-miR-1254	0	0	1	0	0	0	LINC00314	long intergenic non-protein coding RNA 314
hsa-miR-1254	0	0	1	0	0	0	FAM225B	family with sequence similarity 225, member B (non-protein coding)
hsa-miR-1254	1	0	1	1	1	1	PHC2	polyhomeotic homolog 2 (Drosophila)
hsa-miR-1254	0	0	1	1	0	0	EPS15L1	epidermal growth factor receptor pathway substrate 15-like 1
hsa-miR-1254	0	0	1	1	1	1	FAM153C	family with sequence similarity 153, member C, pseudogene
hsa-miR-1254	0	0	1	1	0	0	CCDC144A	coiled-coil domain containing 144A
hsa-miR-1254	1	0	1	0	0	0	SDR39U1	short chain dehydrogenase/reductase family 39U, member 1
hsa-miR-1254	0	0	1	1	0	0	EFCAB11	EF-hand calcium binding domain 11
hsa-miR-1254	0	0	1	0	0	0	MEG3	maternally expressed 3 (non-protein coding)
hsa-miR-1254	1	0	1	1	1	1	NUMB	numb homolog (Drosophila)
hsa-miR-1254	0	0	1	0	0	0	FLJ39632	uncharacterized LOC642477
hsa-miR-1254	1	0	1	1	0	0	RGS6	regulator of G-protein signaling 6
hsa-miR-1254	1	0	1	1	0	0	KRT80	keratin 80
hsa-miR-1254	1	0	1	1	1	1	RBL2	retinoblastoma-like 2 (p130)
hsa-miR-1254	1	0	1	1	1	1	TRIM37	tripartite motif containing 37
hsa-miR-1254	0	0	1	1	0	0	CDK5RAP2	CDK5 regulatory subunit associated protein 2
hsa-miR-1254	0	0	1	0	0	0	MGC23284	uncharacterized LOC197187
hsa-miR-1254	0	0	1	1	1	1	THSD4	thrombospondin, type I, domain containing 4
hsa-miR-1254	0	0	1	1	1	1	COL6A3	collagen, type VI, alpha 3
hsa-miR-1254	1	0	1	1	1	1	SMAD4	SMAD family member 4
hsa-miR-1254	0	0	1	0	1	1	PRH2	proline-rich protein HaeIII subfamily 2
hsa-miR-1254	1	0	1	1	1	1	MASP1	mannan-binding lectin serine peptidase 1 (C4/C2 activating component of Ra-reactive factor)
hsa-miR-1254	0	0	1	1	1	1	PRR14L	proline rich 14-like
hsa-miR-1254	0	0	1	1	1	1	NIPSNAP3B	nipsnap homolog 3B (C. elegans)
hsa-miR-1254	1	0	1	1	1	1	EPS15	epidermal growth factor receptor pathway substrate 15
hsa-miR-1254	0	0	1	0	0	0	OVOS	ovostatin
hsa-miR-1254	1	0	1	1	1	1	ATP6V1C1	ATPase, H+ transporting, lysosomal 42kDa, V1 subunit C1
hsa-miR-1254	1	0	1	1	1	1	DDAH1	dimethylarginine dimethylaminohydrolase 1
hsa-miR-1254	0	0	1	1	1	1	ZNF250	zinc finger protein 250
hsa-miR-1254	1	0	1	1	1	1	NFIB	nuclear factor I/B
hsa-miR-1254	1	0	1	1	1	1	SOGA2	SOGA family member 2
hsa-miR-1254	1	0	1	1	1	1	NAV1	neuron navigator 1
hsa-miR-1254	1	0	1	1	1	1	AZI2	5-azacytidine induced 2
hsa-miR-1254	1	0	1	0	1	1	IGF2BP3	insulin-like growth factor 2 mRNA binding protein 3
hsa-miR-1254	0	0	1	1	1	1	KIAA1328	KIAA1328
hsa-miR-1254	1	0	1	1	1	1	FAM208A	family with sequence similarity 208, member A
hsa-miR-1254	0	0	1	0	0	0	DKFZp686K1684	uncharacterized LOC440034
hsa-miR-1254	0	0	1	1	1	1	USP54	ubiquitin specific peptidase 54
hsa-miR-1254	1	0	1	0	1	1	TTL	tubulin tyrosine ligase
hsa-miR-1254	0	0	1	1	1	1	PLA2G4C	phospholipase A2, group IVC (cytosolic, calcium-independent)
hsa-miR-1254	0	0	1	1	0	0	HNRNPAB	heterogeneous nuclear ribonucleoprotein A/B
hsa-miR-1254	0	0	1	0	1	1	CD59	CD59 molecule, complement regulatory protein
hsa-miR-1254	0	0	1	1	0	0	CSH1	chorionic somatomammotropin hormone 1 (placental lactogen)
hsa-miR-1254	0	0	1	1	0	0	PPT2	palmitoyl-protein thioesterase 2
hsa-miR-1254	0	0	1	1	0	0	STMN4	stathmin-like 4
hsa-miR-1254	1	0	1	1	1	1	CLU	clusterin
hsa-miR-1254	0	0	1	1	1	1	WDR61	WD repeat domain 61
hsa-miR-1254	0	0	1	1	1	1	DNM1	dynamin 1
hsa-miR-1254	1	0	1	1	1	1	ARF1	ADP-ribosylation factor 1
hsa-miR-1254	0	0	1	1	0	0	CDC37	cell division cycle 37 homolog (S. cerevisiae)
hsa-miR-1254	0	0	1	1	1	1	TMEM53	transmembrane protein 53
hsa-miR-1254	0	0	1	1	0	0	EMX1	empty spiracles homeobox 1
hsa-miR-1254	0	0	1	1	1	1	TBC1D10A	TBC1 domain family, member 10A
hsa-miR-1254	0	0	1	1	0	0	HSD3B1	hydroxy-delta-5-steroid dehydrogenase, 3 beta- and steroid delta-isomerase 1
hsa-miR-1254	0	0	1	1	1	1	GTPBP3	GTP binding protein 3 (mitochondrial)
hsa-miR-1254	0	0	1	0	0	0	RPS16P10	ribosomal protein S16 pseudogene 10
hsa-miR-1254	1	0	1	1	1	1	CSNK1D	casein kinase 1, delta
hsa-miR-1254	0	0	1	1	0	0	TBC1D22A	TBC1 domain family, member 22A
hsa-miR-1254	0	0	1	1	1	1	DUT	deoxyuridine triphosphatase
hsa-miR-1254	0	0	1	0	0	0	LOC400768	uncharacterized LOC400768
hsa-miR-1254	0	0	1	0	0	0	COX4I2	cytochrome c oxidase subunit IV isoform 2 (lung)
hsa-miR-1254	1	0	1	1	0	0	PHGDH	phosphoglycerate dehydrogenase
hsa-miR-1254	1	0	1	1	1	1	LETMD1	LETM1 domain containing 1
hsa-miR-1254	0	0	1	1	1	1	APBB1	amyloid beta (A4) precursor protein-binding, family B, member 1 (Fe65)
hsa-miR-1254	0	0	1	1	1	1	CYTH2	cytohesin 2
hsa-miR-1254	0	0	1	1	0	0	FXYD7	FXYD domain containing ion transport regulator 7
hsa-miR-1254	1	0	1	1	1	1	DOLPP1	dolichyl pyrophosphate phosphatase 1
hsa-miR-1254	1	0	1	1	0	0	SHF	Src homology 2 domain containing F
hsa-miR-1254	1	1	1	1	0	0	EFNA3	ephrin-A3
hsa-miR-1254	0	0	1	1	1	1	PTGES3	prostaglandin E synthase 3 (cytosolic)
hsa-miR-1254	1	0	1	1	1	1	FGF11	fibroblast growth factor 11
hsa-miR-1254	0	0	1	1	1	1	ATP5F1	ATP synthase, H+ transporting, mitochondrial Fo complex, subunit B1
hsa-miR-1254	0	0	1	1	1	1	BCL7B	B-cell CLL/lymphoma 7B
hsa-miR-1254	1	0	1	1	1	1	RASL12	RAS-like, family 12
hsa-miR-1254	0	0	1	1	1	1	COPS7A	COP9 constitutive photomorphogenic homolog subunit 7A (Arabidopsis)
hsa-miR-1254	0	0	1	1	0	0	TFCP2	transcription factor CP2
hsa-miR-1254	0	0	1	1	0	0	METTL23	methyltransferase like 23
hsa-miR-1254	0	0	1	1	1	1	ABCD1	ATP-binding cassette, sub-family D (ALD), member 1
hsa-miR-1254	1	0	1	1	1	1	CHTF8	CTF8, chromosome transmission fidelity factor 8 homolog (S. cerevisiae)
hsa-miR-1254	0	0	1	1	1	1	MTCP1	mature T-cell proliferation 1
hsa-miR-1254	0	0	1	1	0	0	NSUN5P2	NOP2/Sun domain family, member 5 pseudogene 2
hsa-miR-1254	1	0	1	1	1	1	NTM	neurotrimin
hsa-miR-1254	0	0	1	1	0	0	FAM195A	family with sequence similarity 195, member A
hsa-miR-1254	1	0	1	1	1	1	COPZ1	coatomer protein complex, subunit zeta 1
hsa-miR-1254	0	0	1	1	1	1	GGPS1	geranylgeranyl diphosphate synthase 1
hsa-miR-1254	0	0	1	1	1	1	CD55	CD55 molecule, decay accelerating factor for complement (Cromer blood group)
hsa-miR-1254	0	0	1	1	1	1	GRAP2	GRB2-related adaptor protein 2
hsa-miR-1254	0	0	1	1	0	0	KIAA0100	KIAA0100
hsa-miR-1254	0	0	1	1	1	1	STON1	stonin 1
hsa-miR-1254	0	0	1	0	0	0	LOC729678	uncharacterized LOC729678
hsa-miR-1254	1	0	1	1	1	1	TMEM248	transmembrane protein 248
hsa-miR-1254	1	0	1	1	1	1	LYPLA2	lysophospholipase II
hsa-miR-1254	1	0	1	1	1	1	ARFIP2	ADP-ribosylation factor interacting protein 2
hsa-miR-1254	1	0	1	1	1	1	TMEM245	transmembrane protein 245
hsa-miR-1254	1	0	1	1	1	1	WIPF1	WAS/WASL interacting protein family, member 1
hsa-miR-1254	0	0	1	1	0	0	SAC3D1	SAC3 domain containing 1
hsa-miR-1254	0	0	1	1	0	0	C11orf68	chromosome 11 open reading frame 68
hsa-miR-1254	0	0	1	1	1	1	MPDU1	mannose-P-dolichol utilization defect 1
hsa-miR-1254	0	0	1	1	0	0	MAST1	microtubule associated serine/threonine kinase 1
hsa-miR-1254	1	0	1	1	1	1	PEX2	peroxisomal biogenesis factor 2
hsa-miR-1254	0	0	1	1	0	0	NIT1	nitrilase 1
hsa-miR-1254	1	0	1	1	1	1	CUX1	cut-like homeobox 1
hsa-miR-1254	0	0	1	1	1	1	RPUSD1	RNA pseudouridylate synthase domain containing 1
hsa-miR-1254	0	0	1	1	0	0	C1orf122	chromosome 1 open reading frame 122
hsa-miR-1254	0	0	1	1	0	0	SCRN2	secernin 2
hsa-miR-1254	1	0	1	1	1	1	ARNTL	aryl hydrocarbon receptor nuclear translocator-like
hsa-miR-1254	0	0	1	1	1	1	PEX19	peroxisomal biogenesis factor 19
hsa-miR-1254	0	0	1	1	0	0	RPSA	ribosomal protein SA
hsa-miR-1254	0	0	1	1	1	1	COMMD3	COMM domain containing 3
hsa-miR-1254	0	0	1	1	0	0	TMEM132A	transmembrane protein 132A
hsa-miR-1254	0	0	1	0	1	1	RPL10	ribosomal protein L10
hsa-miR-1254	0	0	1	1	1	1	RFT1	RFT1 homolog (S. cerevisiae)
hsa-miR-1254	0	0	1	1	1	1	FKBP1B	FK506 binding protein 1B, 12.6 kDa
hsa-miR-1254	0	0	1	1	0	0	PHPT1	phosphohistidine phosphatase 1
hsa-miR-1254	0	0	1	1	1	1	BEST3	bestrophin 3
hsa-miR-1254	0	0	1	1	1	1	FUS	fused in sarcoma
hsa-miR-1254	0	0	1	1	0	0	ATP6V0C	ATPase, H+ transporting, lysosomal 16kDa, V0 subunit c
hsa-miR-1254	1	0	1	1	1	1	F11R	F11 receptor
hsa-miR-1254	0	0	1	1	1	1	AMACR	alpha-methylacyl-CoA racemase
hsa-miR-1254	0	0	1	1	1	1	TMEM14C	transmembrane protein 14C
hsa-miR-1254	1	0	1	1	1	1	RPUSD3	RNA pseudouridylate synthase domain containing 3
hsa-miR-1254	0	0	1	1	0	0	OXA1L	oxidase (cytochrome c) assembly 1-like
hsa-miR-1254	0	0	1	1	0	0	ZNF276	zinc finger protein 276
hsa-miR-1254	0	0	1	0	1	1	ARMC10	armadillo repeat containing 10
hsa-miR-1254	0	0	1	1	0	0	HEBP1	heme binding protein 1
hsa-miR-1254	1	0	1	1	0	0	CCM2	cerebral cavernous malformation 2
hsa-miR-1254	0	0	1	1	0	0	GPRC5C	G protein-coupled receptor, family C, group 5, member C
hsa-miR-1254	0	0	1	1	1	1	INPP5K	inositol polyphosphate-5-phosphatase K
hsa-miR-1254	0	0	1	1	0	0	CLK2	CDC-like kinase 2
hsa-miR-1254	0	0	1	1	1	1	CDKAL1	CDK5 regulatory subunit associated protein 1-like 1
hsa-miR-1254	0	0	1	1	0	0	TESK1	testis-specific kinase 1
hsa-miR-1254	0	0	1	1	0	0	TTYH1	tweety homolog 1 (Drosophila)
hsa-miR-1254	1	0	1	1	1	1	MYT1	myelin transcription factor 1
hsa-miR-1254	1	0	1	1	1	1	LGALSL	lectin, galactoside-binding-like
hsa-miR-1254	0	0	1	1	1	1	TOP3B	topoisomerase (DNA) III beta
hsa-miR-1254	0	0	1	1	0	0	INO80B	INO80 complex subunit B
hsa-miR-1254	1	0	1	1	0	0	MMP11	matrix metallopeptidase 11 (stromelysin 3)
hsa-miR-1254	1	0	1	0	1	1	KIAA0664	KIAA0664
hsa-miR-1254	0	0	1	0	0	0	LOC731789	uncharacterized LOC731789
hsa-miR-1254	0	0	1	1	1	1	CCP110	centriolar coiled coil protein 110kDa
hsa-miR-1254	0	0	1	1	1	1	SYNE2	spectrin repeat containing, nuclear envelope 2
hsa-miR-1254	0	0	1	0	0	0	LINC00661	long intergenic non-protein coding RNA 661
hsa-miR-1254	1	0	1	0	1	1	MCFD2	multiple coagulation factor deficiency 2
hsa-miR-1254	0	0	1	0	1	1	NWD1	NACHT and WD repeat domain containing 1
hsa-miR-1254	1	0	1	1	1	1	SLC16A12	solute carrier family 16, member 12 (monocarboxylic acid transporter 12)
hsa-miR-1254	1	0	1	1	1	1	METAP1	methionyl aminopeptidase 1
hsa-miR-1254	1	0	1	1	1	1	PI15	peptidase inhibitor 15
hsa-miR-1254	1	0	1	1	1	1	LEP	leptin
hsa-miR-1254	1	0	1	1	1	1	MAN2A2	mannosidase, alpha, class 2A, member 2
hsa-miR-1254	1	0	1	0	1	1	KLHDC10	kelch domain containing 10
hsa-miR-1254	0	0	1	1	1	1	LTA	lymphotoxin alpha (TNF superfamily, member 1)
hsa-miR-1254	1	0	1	1	1	1	RSPO1	R-spondin 1
hsa-miR-1254	0	0	1	1	1	1	PTGS1	prostaglandin-endoperoxide synthase 1 (prostaglandin G/H synthase and cyclooxygenase)
hsa-miR-1254	1	0	1	1	1	1	KCNE3	potassium voltage-gated channel, Isk-related family, member 3
hsa-miR-1254	1	0	1	1	1	1	TRIOBP	TRIO and F-actin binding protein
hsa-miR-1254	0	0	1	1	1	1	FAM83A	family with sequence similarity 83, member A
hsa-miR-1254	0	0	1	1	1	1	PAX4	paired box 4
hsa-miR-1254	0	0	1	0	0	0	DYTN	dystrotelin
hsa-miR-1254	0	0	1	1	1	1	C1orf27	chromosome 1 open reading frame 27
hsa-miR-1254	0	0	1	1	1	1	MARVELD2	MARVEL domain containing 2
hsa-miR-1254	1	0	1	1	1	1	CADM3	cell adhesion molecule 3
hsa-miR-1254	0	0	1	0	0	0	FAM226A	family with sequence similarity 226, member A (non-protein coding)
hsa-miR-1254	1	0	1	0	1	1	EPDR1	ependymin related protein 1 (zebrafish)
hsa-miR-1254	0	0	1	1	0	0	CEACAM3	carcinoembryonic antigen-related cell adhesion molecule 3
hsa-miR-1254	0	0	1	1	1	1	ALDH3B1	aldehyde dehydrogenase 3 family, member B1
hsa-miR-1254	0	0	1	1	1	1	ADPRH	ADP-ribosylarginine hydrolase
hsa-miR-1254	1	0	1	1	1	1	ATP2B2	ATPase, Ca++ transporting, plasma membrane 2
hsa-miR-1254	1	0	1	1	1	1	AFF1	AF4/FMR2 family, member 1
hsa-miR-1254	1	0	1	0	1	1	STAT3	signal transducer and activator of transcription 3 (acute-phase response factor)
hsa-miR-1254	0	0	1	1	0	0	SGCA	sarcoglycan, alpha (50kDa dystrophin-associated glycoprotein)
hsa-miR-1254	1	0	1	1	1	1	GRM1	glutamate receptor, metabotropic 1
hsa-miR-1254	1	0	1	0	1	1	BCL2	B-cell CLL/lymphoma 2
hsa-miR-1254	0	0	1	1	0	0	GGT2	gamma-glutamyltransferase 2
hsa-miR-1254	0	0	1	1	1	1	NPR3	natriuretic peptide receptor C/guanylate cyclase C (atrionatriuretic peptide receptor C)
hsa-miR-1254	1	0	1	1	1	1	PML	promyelocytic leukemia
hsa-miR-1254	1	0	1	1	0	0	ADRB3	adrenoceptor beta 3
hsa-miR-1254	0	0	1	1	0	0	CD40LG	CD40 ligand
hsa-miR-1254	1	0	1	1	1	1	DMD	dystrophin
hsa-miR-1254	1	0	1	1	1	1	F13A1	coagulation factor XIII, A1 polypeptide
hsa-miR-1254	0	0	1	1	0	0	FANCA	Fanconi anemia, complementation group A
hsa-miR-1254	1	0	1	1	1	1	FBN1	fibrillin 1
hsa-miR-1254	1	0	1	1	1	1	FUT1	fucosyltransferase 1 (galactoside 2-alpha-L-fucosyltransferase, H blood group)
hsa-miR-1254	0	0	1	1	0	0	GBA	glucosidase, beta, acid
hsa-miR-1254	1	0	1	1	1	1	GJA1	gap junction protein, alpha 1, 43kDa
hsa-miR-1254	0	0	1	1	0	0	GP9	glycoprotein IX (platelet)
hsa-miR-1254	1	0	1	1	1	1	KCNA1	potassium voltage-gated channel, shaker-related subfamily, member 1 (episodic ataxia with myokymia)
hsa-miR-1254	1	0	1	1	1	1	LAMB3	laminin, beta 3
hsa-miR-1254	0	0	1	1	0	0	SLC12A3	solute carrier family 12 (sodium/chloride transporters), member 3
hsa-miR-1254	1	0	1	1	1	1	TAT	tyrosine aminotransferase
hsa-miR-1254	1	0	1	0	1	1	TSC1	tuberous sclerosis 1
hsa-miR-1254	0	0	1	1	1	1	TTR	transthyretin
hsa-miR-1254	0	0	1	1	1	1	CASR	calcium-sensing receptor
hsa-miR-1254	1	1	1	1	1	1	CDKN1A	cyclin-dependent kinase inhibitor 1A (p21, Cip1)
hsa-miR-1254	0	0	1	1	1	1	GM2A	GM2 ganglioside activator
hsa-miR-1254	0	0	1	1	1	1	LTBP2	latent transforming growth factor beta binding protein 2
hsa-miR-1254	1	0	1	0	1	1	PAFAH1B1	platelet-activating factor acetylhydrolase 1b, regulatory subunit 1 (45kDa)
hsa-miR-1254	0	0	1	1	1	1	PECAM1	platelet/endothelial cell adhesion molecule 1
hsa-miR-1254	1	0	1	0	1	1	RAG1	recombination activating gene 1
hsa-miR-1254	1	0	1	1	1	1	AQP2	aquaporin 2 (collecting duct)
hsa-miR-1254	0	0	1	1	1	1	CYP11B2	cytochrome P450, family 11, subfamily B, polypeptide 2
hsa-miR-1254	1	0	1	1	1	1	HOXD13	homeobox D13
hsa-miR-1254	1	0	1	1	1	1	MPZ	myelin protein zero
hsa-miR-1254	1	0	1	1	1	1	PLP1	proteolipid protein 1
hsa-miR-1254	1	0	1	1	1	1	DCX	doublecortin
hsa-miR-1254	0	0	1	1	1	1	FCGR1A	Fc fragment of IgG, high affinity Ia, receptor (CD64)
hsa-miR-1254	0	0	1	1	1	1	C7	complement component 7
hsa-miR-1254	0	0	1	1	0	0	CA4	carbonic anhydrase IV
hsa-miR-1254	1	0	1	1	1	1	CACNB4	calcium channel, voltage-dependent, beta 4 subunit
hsa-miR-1254	1	0	1	1	1	1	CHRM1	cholinergic receptor, muscarinic 1
hsa-miR-1254	0	0	1	1	1	1	CRH	corticotropin releasing hormone
hsa-miR-1254	1	0	1	1	1	1	DIO2	deiodinase, iodothyronine, type II
hsa-miR-1254	0	0	1	1	1	1	EPO	erythropoietin
hsa-miR-1254	0	0	1	0	0	0	GABRA3	gamma-aminobutyric acid (GABA) A receptor, alpha 3
hsa-miR-1254	1	0	1	0	1	1	GABRA4	gamma-aminobutyric acid (GABA) A receptor, alpha 4
hsa-miR-1254	1	0	1	1	0	0	GRIN2A	glutamate receptor, ionotropic, N-methyl D-aspartate 2A
hsa-miR-1254	0	0	1	1	1	1	HTR7	5-hydroxytryptamine (serotonin) receptor 7, adenylate cyclase-coupled
hsa-miR-1254	0	0	1	1	1	1	IL5	interleukin 5 (colony-stimulating factor, eosinophil)
hsa-miR-1254	0	0	1	1	0	0	KNG1	kininogen 1
hsa-miR-1254	1	0	1	1	1	1	PTGFR	prostaglandin F receptor (FP)
hsa-miR-1254	0	0	1	0	1	1	PTGIS	prostaglandin I2 (prostacyclin) synthase
hsa-miR-1254	1	0	1	1	1	1	RARB	retinoic acid receptor, beta
hsa-miR-1254	1	0	1	0	1	1	UBE2W	ubiquitin-conjugating enzyme E2W (putative)
hsa-miR-1254	1	0	1	0	1	1	ARHGEF37	Rho guanine nucleotide exchange factor (GEF) 37
hsa-miR-1254	0	0	1	1	1	1	FLJ45079	FLJ45079 protein
hsa-miR-1254	0	0	1	1	1	1	DDI1	DNA-damage inducible 1 homolog 1 (S. cerevisiae)
hsa-miR-1254	0	0	1	0	0	0	C10orf55	chromosome 10 open reading frame 55
hsa-miR-1254	1	0	1	0	1	1	PPARA	peroxisome proliferator-activated receptor alpha
hsa-miR-1254	1	0	1	1	1	1	GATA3	GATA binding protein 3
hsa-miR-1254	0	0	1	1	1	1	PTRH1	peptidyl-tRNA hydrolase 1 homolog (S. cerevisiae)
hsa-miR-1254	1	0	1	1	1	1	KCTD11	potassium channel tetramerisation domain containing 11
hsa-miR-1254	1	0	1	0	1	1	CACNA1I	calcium channel, voltage-dependent, T type, alpha 1I subunit
hsa-miR-1254	1	0	1	1	1	1	ABLIM1	actin binding LIM protein 1
hsa-miR-1254	0	0	1	1	1	1	C11orf49	chromosome 11 open reading frame 49
hsa-miR-1254	0	0	1	1	0	0	MANBAL	mannosidase, beta A, lysosomal-like
hsa-miR-1254	1	0	1	0	1	1	BMF	Bcl2 modifying factor
hsa-miR-1254	0	0	1	1	1	1	ANXA13	annexin A13
hsa-miR-1254	0	0	1	0	1	1	ZNF705A	zinc finger protein 705A
hsa-miR-1254	0	0	1	0	0	0	FLJ42842	uncharacterized FLJ42842
hsa-miR-1254	1	0	1	0	1	1	LRRC55	leucine rich repeat containing 55
hsa-miR-1254	0	0	1	1	1	1	HMGN2P46	high mobility group nucleosomal binding domain 2 pseudogene 46
hsa-miR-1254	0	0	1	0	1	1	FLJ46347	uncharacterized LOC389064
hsa-miR-1254	0	0	1	1	0	0	MARCH2	membrane-associated ring finger (C3HC4) 2, E3 ubiquitin protein ligase
hsa-miR-1254	1	0	1	1	1	1	EDA	ectodysplasin A
hsa-miR-1254	1	0	1	0	1	1	IP6K1	inositol hexakisphosphate kinase 1
hsa-miR-1254	1	0	1	1	0	0	RPS6KA1	ribosomal protein S6 kinase, 90kDa, polypeptide 1
hsa-miR-1254	1	0	1	1	1	1	TCEAL8	transcription elongation factor A (SII)-like 8
hsa-miR-1254	1	0	1	1	0	0	SDC1	syndecan 1
hsa-miR-1254	1	0	1	1	1	1	ATN1	atrophin 1
hsa-miR-1254	0	0	1	1	1	1	SCP2	sterol carrier protein 2
hsa-miR-1254	1	0	1	1	1	1	L3MBTL3	l(3)mbt-like 3 (Drosophila)
hsa-miR-1254	1	0	1	1	1	1	NTRK3	neurotrophic tyrosine kinase, receptor, type 3
hsa-miR-1254	0	0	1	0	1	1	C8orf22	chromosome 8 open reading frame 22
hsa-miR-1254	1	0	1	1	1	1	IGSF3	immunoglobulin superfamily, member 3
hsa-miR-1254	1	0	1	1	1	1	TULP4	tubby like protein 4
hsa-miR-1254	0	0	1	1	0	0	NTRK1	neurotrophic tyrosine kinase, receptor, type 1
hsa-miR-1254	1	0	1	0	1	1	C18orf25	chromosome 18 open reading frame 25
hsa-miR-1254	0	0	1	1	1	1	CCDC73	coiled-coil domain containing 73
hsa-miR-1254	0	0	1	1	1	1	CXCR4	chemokine (C-X-C motif) receptor 4
hsa-miR-1254	0	0	1	1	0	0	ARMCX6	armadillo repeat containing, X-linked 6
hsa-miR-1254	0	0	1	1	1	1	NCMAP	noncompact myelin associated protein
hsa-miR-1254	0	0	1	1	1	1	DSTN	destrin (actin depolymerizing factor)
hsa-miR-1254	1	0	1	0	1	1	CREB5	cAMP responsive element binding protein 5
hsa-miR-1254	0	0	1	1	0	0	SOHLH1	spermatogenesis and oogenesis specific basic helix-loop-helix 1
hsa-miR-1254	1	0	1	1	1	1	FOXP4	forkhead box P4
hsa-miR-1254	0	0	1	1	1	1	C18orf56	chromosome 18 open reading frame 56
hsa-miR-1254	1	0	1	1	1	1	PABPC1L2A	poly(A) binding protein, cytoplasmic 1-like 2A
hsa-miR-1254	0	0	1	1	1	1	CCNC	cyclin C
hsa-miR-1254	1	0	1	1	1	1	FXR1	fragile X mental retardation, autosomal homolog 1
hsa-miR-1254	0	0	1	1	1	1	C2orf68	chromosome 2 open reading frame 68
hsa-miR-1254	0	0	1	1	0	0	VSIG8	V-set and immunoglobulin domain containing 8
hsa-miR-1254	0	0	1	0	0	0	LOC400707	uncharacterized LOC400707
hsa-miR-1254	0	0	1	1	1	1	LDLRAD2	low density lipoprotein receptor class A domain containing 2
hsa-miR-1254	1	0	1	1	1	1	NCDN	neurochondrin
hsa-miR-1254	1	0	1	1	1	1	RUNX2	runt-related transcription factor 2
hsa-miR-1254	0	0	1	1	0	0	SPRR2B	small proline-rich protein 2B
hsa-miR-1254	0	0	1	1	0	0	ALDH18A1	aldehyde dehydrogenase 18 family, member A1
hsa-miR-1254	0	0	1	1	1	1	BTBD11	BTB (POZ) domain containing 11
hsa-miR-1254	0	0	1	0	1	1	TMEM30B	transmembrane protein 30B
hsa-miR-1254	1	0	1	1	1	1	PFKFB2	6-phosphofructo-2-kinase/fructose-2,6-biphosphatase 2
hsa-miR-1254	0	0	1	1	1	1	POLR2M	polymerase (RNA) II (DNA directed) polypeptide M
hsa-miR-1254	1	0	1	0	1	1	TNRC6B	trinucleotide repeat containing 6B
hsa-miR-1254	1	0	1	1	1	1	SLC6A9	solute carrier family 6 (neurotransmitter transporter, glycine), member 9
hsa-miR-1254	1	0	1	1	1	1	FNBP1L	formin binding protein 1-like
hsa-miR-1254	1	0	1	0	1	1	CLLU1	chronic lymphocytic leukemia up-regulated 1
hsa-miR-1254	1	0	1	0	1	1	C3orf70	chromosome 3 open reading frame 70
hsa-miR-1254	1	0	1	0	1	1	ANO6	anoctamin 6
hsa-miR-1254	1	0	1	1	1	1	SLC35F1	solute carrier family 35, member F1
hsa-miR-1254	0	0	1	0	1	1	C6orf120	chromosome 6 open reading frame 120
hsa-miR-1254	1	0	1	1	1	1	OPN4	opsin 4
hsa-miR-1254	1	0	1	1	1	1	CSNK1G3	casein kinase 1, gamma 3
hsa-miR-1254	1	0	1	1	1	1	TFAP2A	transcription factor AP-2 alpha (activating enhancer binding protein 2 alpha)
hsa-miR-1254	1	0	1	1	1	1	SAR1B	SAR1 homolog B (S. cerevisiae)
hsa-miR-1254	0	0	1	1	1	1	CEP112	centrosomal protein 112kDa
hsa-miR-1254	1	0	1	0	1	1	CDC42SE1	CDC42 small effector 1
hsa-miR-1254	0	0	1	1	1	1	SPATA6L	spermatogenesis associated 6-like
hsa-miR-1254	1	0	1	0	1	1	GK5	glycerol kinase 5 (putative)
hsa-miR-1254	1	0	1	0	1	1	CCNL2	cyclin L2
hsa-miR-1254	0	0	1	1	1	1	MAP9	microtubule-associated protein 9
hsa-miR-1254	0	0	1	0	1	1	ZNF705D	zinc finger protein 705D
hsa-miR-1254	0	0	1	1	1	1	ZDHHC19	zinc finger, DHHC-type containing 19
hsa-miR-1254	1	0	1	1	1	1	STRN4	striatin, calmodulin binding protein 4
hsa-miR-1254	1	0	1	1	0	0	ANKRD34A	ankyrin repeat domain 34A
hsa-miR-1254	1	0	1	1	1	1	TCERG1	transcription elongation regulator 1
hsa-miR-1254	1	0	1	1	1	1	MAPK3	mitogen-activated protein kinase 3
hsa-miR-1254	0	0	1	1	1	1	MTHFD2	methylenetetrahydrofolate dehydrogenase (NADP+ dependent) 2, methenyltetrahydrofolate cyclohydrolase
hsa-miR-1254	1	0	1	1	1	1	NCALD	neurocalcin delta
hsa-miR-1254	1	0	1	1	1	1	PABPC1L2B	poly(A) binding protein, cytoplasmic 1-like 2B
hsa-miR-1254	1	0	1	1	1	1	KDM5A	lysine (K)-specific demethylase 5A
hsa-miR-1254	1	0	1	1	1	1	PVRL2	poliovirus receptor-related 2 (herpesvirus entry mediator B)
hsa-miR-1254	0	0	1	0	0	0	MSMP	microseminoprotein, prostate associated
hsa-miR-1254	1	0	1	0	1	1	TMEM237	transmembrane protein 237
hsa-miR-1254	0	0	1	1	1	1	FAM22G	family with sequence similarity 22, member G
hsa-miR-1254	0	0	1	1	1	1	SSTR2	somatostatin receptor 2
hsa-miR-1254	1	0	1	1	1	1	MZT1	mitotic spindle organizing protein 1
hsa-miR-1254	1	0	1	1	1	1	HS6ST2	heparan sulfate 6-O-sulfotransferase 2
hsa-miR-1254	1	0	1	1	1	1	PDE11A	phosphodiesterase 11A
hsa-miR-1254	1	0	1	1	1	1	PRR3	proline rich 3
hsa-miR-1254	0	0	1	1	0	0	EXOC3L4	exocyst complex component 3-like 4
hsa-miR-1254	1	0	1	0	1	1	UBXN2B	UBX domain protein 2B
hsa-miR-1254	0	0	1	0	1	1	WTH3DI	RAB6C-like
hsa-miR-1254	0	0	1	1	0	0	FAM127A	family with sequence similarity 127, member A
hsa-miR-1254	1	0	1	0	0	0	FAM127B	family with sequence similarity 127, member B
hsa-miR-1254	1	0	1	0	1	1	FAM127C	family with sequence similarity 127, member C
hsa-miR-1254	1	0	1	1	1	1	UBN1	ubinuclein 1
hsa-miR-1254	1	0	1	1	1	1	CREBBP	CREB binding protein
hsa-miR-1254	1	0	1	0	1	1	FBXO41	F-box protein 41
hsa-miR-1254	1	0	1	0	1	1	MEGF9	multiple EGF-like-domains 9
hsa-miR-1254	0	0	1	0	0	0	C16orf90	chromosome 16 open reading frame 90
hsa-miR-1254	1	0	1	1	1	1	MGA	MAX gene associated
hsa-miR-1254	1	0	1	1	1	1	MYO1C	myosin IC
hsa-miR-1254	1	0	1	0	1	1	SCN3A	sodium channel, voltage-gated, type III, alpha subunit
hsa-miR-1254	0	0	1	1	1	1	G6PC2	glucose-6-phosphatase, catalytic, 2
hsa-miR-1254	1	0	1	1	0	0	ASIC2	acid-sensing (proton-gated) ion channel 2
hsa-miR-1254	1	0	1	1	1	1	ASIC1	acid-sensing (proton-gated) ion channel 1
hsa-miR-1254	1	0	1	0	0	0	ACAN	aggrecan
hsa-miR-1254	0	0	1	1	1	1	AQP8	aquaporin 8
hsa-miR-1254	1	0	1	0	1	1	BMPR2	bone morphogenetic protein receptor, type II (serine/threonine kinase)
hsa-miR-1254	1	0	1	1	1	1	CDH13	cadherin 13, H-cadherin (heart)
hsa-miR-1254	1	0	1	0	1	1	CDK6	cyclin-dependent kinase 6
hsa-miR-1254	1	0	1	1	1	1	CHD2	chromodomain helicase DNA binding protein 2
hsa-miR-1254	1	0	1	1	1	1	KLF6	Kruppel-like factor 6
hsa-miR-1254	1	0	1	1	1	1	CELSR2	cadherin, EGF LAG seven-pass G-type receptor 2 (flamingo homolog, Drosophila)
hsa-miR-1254	1	0	1	0	1	1	EIF2S3	eukaryotic translation initiation factor 2, subunit 3 gamma, 52kDa
hsa-miR-1254	1	0	1	1	1	1	ELAVL1	ELAV (embryonic lethal, abnormal vision, Drosophila)-like 1 (Hu antigen R)
hsa-miR-1254	1	0	1	1	1	1	NR6A1	nuclear receptor subfamily 6, group A, member 1
hsa-miR-1254	1	0	1	1	1	1	NDST1	N-deacetylase/N-sulfotransferase (heparan glucosaminyl) 1
hsa-miR-1254	1	0	1	1	1	1	ADD2	adducin 2 (beta)
hsa-miR-1254	1	0	1	1	1	1	ARF3	ADP-ribosylation factor 3
hsa-miR-1254	0	0	1	1	0	0	RHOG	ras homolog family member G
hsa-miR-1254	1	0	1	0	1	1	ARNT	aryl hydrocarbon receptor nuclear translocator
hsa-miR-1254	0	0	1	0	0	0	BAI1	brain-specific angiogenesis inhibitor 1
hsa-miR-1254	0	0	1	1	1	1	BTN1A1	butyrophilin, subfamily 1, member A1
hsa-miR-1254	0	0	1	1	1	1	CALB2	calbindin 2
hsa-miR-1254	0	0	1	1	1	1	CD1D	CD1d molecule
hsa-miR-1254	1	0	1	1	1	1	COL4A6	collagen, type IV, alpha 6
hsa-miR-1254	0	0	1	1	1	1	SLC31A2	solute carrier family 31 (copper transporters), member 2
hsa-miR-1254	0	0	1	1	0	0	CPA1	carboxypeptidase A1 (pancreatic)
hsa-miR-1254	0	0	1	1	1	1	DPT	dermatopontin
hsa-miR-1254	1	0	1	1	1	1	DUSP6	dual specificity phosphatase 6
hsa-miR-1254	1	0	1	1	1	1	E2F3	E2F transcription factor 3
hsa-miR-1254	1	0	1	1	1	1	EPB49	erythrocyte membrane protein band 4.9 (dematin)
hsa-miR-1254	1	0	1	1	1	1	FKBP4	FK506 binding protein 4, 59kDa
hsa-miR-1254	1	0	1	0	1	1	FOXO1	forkhead box O1
hsa-miR-1254	1	0	1	0	1	1	FUT4	fucosyltransferase 4 (alpha (1,3) fucosyltransferase, myeloid-specific)
hsa-miR-1254	0	0	1	1	1	1	HLA-DOA	major histocompatibility complex, class II, DO alpha
hsa-miR-1254	1	0	1	1	1	1	HOXD10	homeobox D10
hsa-miR-1254	0	0	1	1	1	1	IRF8	interferon regulatory factor 8
hsa-miR-1254	0	0	1	1	1	1	IL12B	interleukin 12B (natural killer cell stimulatory factor 2, cytotoxic lymphocyte maturation factor 2, p40)
hsa-miR-1254	1	0	1	1	0	0	INHBB	inhibin, beta B
hsa-miR-1254	1	0	1	1	1	1	ITGA5	integrin, alpha 5 (fibronectin receptor, alpha polypeptide)
hsa-miR-1254	1	0	1	1	1	1	JAG2	jagged 2
hsa-miR-1254	1	0	1	1	0	0	JUP	junction plakoglobin
hsa-miR-1254	1	0	1	1	1	1	KCNA6	potassium voltage-gated channel, shaker-related subfamily, member 6
hsa-miR-1254	1	0	1	1	1	1	KDR	kinase insert domain receptor (a type III receptor tyrosine kinase)
hsa-miR-1254	1	0	1	0	1	1	KIF3C	kinesin family member 3C
hsa-miR-1254	1	0	1	1	1	1	IPO5	importin 5
hsa-miR-1254	0	0	1	0	1	1	CXCL9	chemokine (C-X-C motif) ligand 9
hsa-miR-1254	0	0	1	1	1	1	MSMB	microseminoprotein, beta-
hsa-miR-1254	0	0	1	1	0	0	MYBL2	v-myb myeloblastosis viral oncogene homolog (avian)-like 2
hsa-miR-1254	0	0	1	1	0	0	MYOG	myogenin (myogenic factor 4)
hsa-miR-1254	1	0	1	1	1	1	NGFR	nerve growth factor receptor
hsa-miR-1254	1	0	1	1	1	1	NPTX1	neuronal pentraxin I
hsa-miR-1254	1	0	1	1	1	1	OLR1	oxidized low density lipoprotein (lectin-like) receptor 1
hsa-miR-1254	1	0	1	0	1	1	PAPPA	pregnancy-associated plasma protein A, pappalysin 1
hsa-miR-1254	1	0	1	1	1	1	PBX2	pre-B-cell leukemia homeobox 2
hsa-miR-1254	1	0	1	1	0	0	PDGFB	platelet-derived growth factor beta polypeptide
hsa-miR-1254	1	0	1	1	1	1	PLAGL2	pleiomorphic adenoma gene-like 2
hsa-miR-1254	0	0	1	1	0	0	PLP2	proteolipid protein 2 (colonic epithelium-enriched)
hsa-miR-1254	1	0	1	0	0	0	PPP1R10	protein phosphatase 1, regulatory subunit 10
hsa-miR-1254	0	0	1	1	1	1	PRKCB	protein kinase C, beta
hsa-miR-1254	1	0	1	0	1	1	MAPK4	mitogen-activated protein kinase 4
hsa-miR-1254	0	0	1	1	0	0	MAPK7	mitogen-activated protein kinase 7
hsa-miR-1254	0	0	1	1	1	1	MAPK13	mitogen-activated protein kinase 13
hsa-miR-1254	0	0	1	1	1	1	PSMD10	proteasome (prosome, macropain) 26S subunit, non-ATPase, 10
hsa-miR-1254	1	0	1	0	1	1	RAB6A	RAB6A, member RAS oncogene family
hsa-miR-1254	1	0	1	1	1	1	ARID4A	AT rich interactive domain 4A (RBP1-like)
hsa-miR-1254	0	0	1	1	1	1	RGS1	regulator of G-protein signaling 1
hsa-miR-1254	1	0	1	0	1	1	SLC6A1	solute carrier family 6 (neurotransmitter transporter, GABA), member 1
hsa-miR-1254	1	0	1	1	1	1	SSR2	signal sequence receptor, beta (translocon-associated protein beta)
hsa-miR-1254	1	0	1	1	1	1	STAC	SH3 and cysteine rich domain
hsa-miR-1254	0	0	1	1	1	1	STIM1	stromal interaction molecule 1
hsa-miR-1254	1	0	1	1	1	1	SUV39H1	suppressor of variegation 3-9 homolog 1 (Drosophila)
hsa-miR-1254	1	0	1	1	1	1	TIAM1	T-cell lymphoma invasion and metastasis 1
hsa-miR-1254	0	0	1	1	1	1	TPR	translocated promoter region, nuclear basket protein
hsa-miR-1254	0	0	1	1	1	1	TSSC1	tumor suppressing subtransferable candidate 1
hsa-miR-1254	1	0	1	0	1	1	TUB	tubby homolog (mouse)
hsa-miR-1254	1	0	1	1	0	0	CLIP2	CAP-GLY domain containing linker protein 2
hsa-miR-1254	1	0	1	0	1	1	ZIC1	Zic family member 1
hsa-miR-1254	1	0	1	0	1	1	BSN	bassoon (presynaptic cytomatrix protein)
hsa-miR-1254	1	0	1	0	1	1	SNN	stannin
hsa-miR-1254	1	0	1	1	1	1	CDC14A	CDC14 cell division cycle 14 homolog A (S. cerevisiae)
hsa-miR-1254	0	0	1	1	0	0	EIF4EBP3	eukaryotic translation initiation factor 4E binding protein 3
hsa-miR-1254	1	0	1	0	1	1	TNKS	tankyrase, TRF1-interacting ankyrin-related ADP-ribose polymerase
hsa-miR-1254	1	0	1	1	1	1	ALDH4A1	aldehyde dehydrogenase 4 family, member A1
hsa-miR-1254	1	0	1	0	1	1	IRS2	insulin receptor substrate 2
hsa-miR-1254	0	0	1	1	1	1	TNFSF13	tumor necrosis factor (ligand) superfamily, member 13
hsa-miR-1254	1	0	1	1	1	1	ALDH1A2	aldehyde dehydrogenase 1 family, member A2
hsa-miR-1254	1	0	1	0	1	1	WASL	Wiskott-Aldrich syndrome-like
hsa-miR-1254	1	0	1	1	1	1	MAP7	microtubule-associated protein 7
hsa-miR-1254	1	0	1	0	1	1	E2F2	E2F transcription factor 2
hsa-miR-1254	1	0	1	0	1	1	SLC1A2	solute carrier family 1 (glial high affinity glutamate transporter), member 2
hsa-miR-1254	1	0	1	0	1	1	GTPBP1	GTP binding protein 1
hsa-miR-1254	1	0	1	1	1	1	GDA	guanine deaminase
hsa-miR-1254	0	0	1	1	0	0	CAMP	cathelicidin antimicrobial peptide
hsa-miR-1254	1	0	1	0	1	1	RUNX1T1	runt-related transcription factor 1; translocated to, 1 (cyclin D-related)
hsa-miR-1254	1	0	1	1	1	1	COX11	COX11 cytochrome c oxidase assembly homolog (yeast)
hsa-miR-1254	1	0	1	1	1	1	EFNB1	ephrin-B1
hsa-miR-1254	1	0	1	1	1	1	EGR3	early growth response 3
hsa-miR-1254	1	0	1	1	1	1	EPS8	epidermal growth factor receptor pathway substrate 8
hsa-miR-1254	1	0	1	0	1	1	ETV5	ets variant 5
hsa-miR-1254	0	0	1	1	1	1	EXTL1	exostoses (multiple)-like 1
hsa-miR-1254	1	0	1	0	1	1	FOXD1	forkhead box D1
hsa-miR-1254	1	0	1	1	0	0	HOXC6	homeobox C6
hsa-miR-1254	1	0	1	1	1	1	MLLT3	myeloid/lymphoid or mixed-lineage leukemia (trithorax homolog, Drosophila); translocated to, 3
hsa-miR-1254	1	0	1	0	1	1	SCN2B	sodium channel, voltage-gated, type II, beta subunit
hsa-miR-1254	1	0	1	1	1	1	WNT11	wingless-type MMTV integration site family, member 11
hsa-miR-1254	1	0	1	1	1	1	BAP1	BRCA1 associated protein-1 (ubiquitin carboxy-terminal hydrolase)
hsa-miR-1254	0	0	1	1	1	1	KCNAB3	potassium voltage-gated channel, shaker-related subfamily, beta member 3
hsa-miR-1254	1	0	1	1	1	1	LARGE	like-glycosyltransferase
hsa-miR-1254	1	0	1	1	1	1	KIF3B	kinesin family member 3B
hsa-miR-1254	0	0	1	1	0	0	SLC22A14	solute carrier family 22, member 14
hsa-miR-1254	1	0	1	1	1	1	KIF23	kinesin family member 23
hsa-miR-1254	1	0	1	1	1	1	FXR2	fragile X mental retardation, autosomal homolog 2
hsa-miR-1254	1	0	1	1	1	1	SEC24C	SEC24 family, member C (S. cerevisiae)
hsa-miR-1254	1	0	1	1	1	1	ZFP36L1	zinc finger protein 36, C3H type-like 1
hsa-miR-1254	0	0	1	0	0	0	CDK5	cyclin-dependent kinase 5
hsa-miR-1254	0	0	1	1	1	1	CDKN2B	cyclin-dependent kinase inhibitor 2B (p15, inhibits CDK4)
hsa-miR-1254	1	0	1	0	1	1	DOCK3	dedicator of cytokinesis 3
hsa-miR-1254	0	0	1	1	0	0	PITX3	paired-like homeodomain 3
hsa-miR-1254	1	0	1	0	1	1	SCD	stearoyl-CoA desaturase (delta-9-desaturase)
hsa-miR-1254	0	0	1	1	1	1	AKAP17A	A kinase (PRKA) anchor protein 17A
hsa-miR-1254	1	0	1	1	1	1	GFPT2	glutamine-fructose-6-phosphate transaminase 2
hsa-miR-1254	1	0	1	1	1	1	MED13	mediator complex subunit 13
hsa-miR-1254	0	0	1	1	1	1	SART1	squamous cell carcinoma antigen recognized by T cells
hsa-miR-1254	1	0	1	1	1	1	CBL	Cbl proto-oncogene, E3 ubiquitin protein ligase
hsa-miR-1254	0	0	1	1	1	1	CEBPB	CCAAT/enhancer binding protein (C/EBP), beta
hsa-miR-1254	1	0	1	1	1	1	DCC	deleted in colorectal carcinoma
hsa-miR-1254	1	0	1	0	1	1	DLX6	distal-less homeobox 6
hsa-miR-1254	1	0	1	1	1	1	ELK1	ELK1, member of ETS oncogene family
hsa-miR-1254	1	0	1	1	1	1	NR2F6	nuclear receptor subfamily 2, group F, member 6
hsa-miR-1254	0	0	1	1	0	0	GNL1	guanine nucleotide binding protein-like 1
hsa-miR-1254	1	0	1	1	1	1	GPR3	G protein-coupled receptor 3
hsa-miR-1254	1	0	1	0	1	1	RAPGEF1	Rap guanine nucleotide exchange factor (GEF) 1
hsa-miR-1254	1	0	1	1	1	1	HAS3	hyaluronan synthase 3
hsa-miR-1254	1	0	1	1	1	1	PHF2	PHD finger protein 2
hsa-miR-1254	1	0	1	0	1	1	PRKAB2	protein kinase, AMP-activated, beta 2 non-catalytic subunit
hsa-miR-1254	1	0	1	1	1	1	RALA	v-ral simian leukemia viral oncogene homolog A (ras related)
hsa-miR-1254	1	0	1	1	0	0	SALL2	sal-like 2 (Drosophila)
hsa-miR-1254	0	0	1	1	1	1	XRCC2	X-ray repair complementing defective repair in Chinese hamster cells 2
hsa-miR-1254	0	0	1	1	0	0	ARHGEF5	Rho guanine nucleotide exchange factor (GEF) 5
hsa-miR-1254	0	0	1	1	1	1	FOSL1	FOS-like antigen 1
hsa-miR-1254	1	0	1	1	1	1	GABBR2	gamma-aminobutyric acid (GABA) B receptor, 2
hsa-miR-1254	1	0	1	1	1	1	SCARB2	scavenger receptor class B, member 2
hsa-miR-1254	1	0	1	1	1	1	INSIG1	insulin induced gene 1
hsa-miR-1254	0	0	1	0	1	1	POU3F2	POU class 3 homeobox 2
hsa-miR-1254	0	0	1	1	0	0	RTN2	reticulon 2
hsa-miR-1254	0	0	1	1	1	1	SRSF4	serine/arginine-rich splicing factor 4
hsa-miR-1254	1	0	1	1	1	1	ST8SIA4	ST8 alpha-N-acetyl-neuraminide alpha-2,8-sialyltransferase 4
hsa-miR-1254	0	0	1	1	0	0	SNURF	SNRPN upstream reading frame
hsa-miR-1254	1	0	1	1	1	1	UST	uronyl-2-sulfotransferase
hsa-miR-1254	1	0	1	1	1	1	GIPC1	GIPC PDZ domain containing family, member 1
hsa-miR-1254	1	0	1	1	1	1	ACTR1A	ARP1 actin-related protein 1 homolog A, centractin alpha (yeast)
hsa-miR-1254	0	0	1	1	0	0	DHRS9	dehydrogenase/reductase (SDR family) member 9
hsa-miR-1254	0	0	1	1	1	1	RNF41	ring finger protein 41
hsa-miR-1254	1	0	1	0	1	1	SPRY3	sprouty homolog 3 (Drosophila)
hsa-miR-1254	0	0	1	1	1	1	FSTL3	follistatin-like 3 (secreted glycoprotein)
hsa-miR-1254	1	0	1	1	0	0	TRAIP	TRAF interacting protein
hsa-miR-1254	1	0	1	1	1	1	MEOX2	mesenchyme homeobox 2
hsa-miR-1254	1	0	1	1	1	1	MMP16	matrix metallopeptidase 16 (membrane-inserted)
hsa-miR-1254	1	0	1	1	1	1	MTF1	metal-regulatory transcription factor 1
hsa-miR-1254	1	0	1	1	0	0	NAB2	NGFI-A binding protein 2 (EGR1 binding protein 2)
hsa-miR-1254	0	0	1	1	0	0	UQCRH	ubiquinol-cytochrome c reductase hinge protein
hsa-miR-1254	0	0	1	0	1	1	HCAR3	hydroxycarboxylic acid receptor 3
hsa-miR-1254	0	0	1	1	1	1	LANCL1	LanC lantibiotic synthetase component C-like 1 (bacterial)
hsa-miR-1254	1	0	1	1	1	1	DAGLA	diacylglycerol lipase, alpha
hsa-miR-1254	1	0	1	1	1	1	CAPZA1	capping protein (actin filament) muscle Z-line, alpha 1
hsa-miR-1254	0	0	1	1	1	1	CD28	CD28 molecule
hsa-miR-1254	0	0	1	1	0	0	NEDD8	neural precursor cell expressed, developmentally down-regulated 8
hsa-miR-1254	1	0	1	1	1	1	NEUROG1	neurogenin 1
hsa-miR-1254	0	0	1	0	1	1	OAS3	2'-5'-oligoadenylate synthetase 3, 100kDa
hsa-miR-1254	1	0	1	1	1	1	CDK16	cyclin-dependent kinase 16
hsa-miR-1254	1	0	1	0	1	1	PITPNA	phosphatidylinositol transfer protein, alpha
hsa-miR-1254	0	0	1	1	0	0	PNOC	prepronociceptin
hsa-miR-1254	0	0	1	1	1	1	PPP2R5A	protein phosphatase 2, regulatory subunit B', alpha
hsa-miR-1254	1	0	1	1	1	1	STK4	serine/threonine kinase 4
hsa-miR-1254	1	0	1	1	1	1	TACC1	transforming, acidic coiled-coil containing protein 1
hsa-miR-1254	0	0	1	1	1	1	TNFAIP2	tumor necrosis factor, alpha-induced protein 2
hsa-miR-1254	0	0	1	1	1	1	TYRO3	TYRO3 protein tyrosine kinase
hsa-miR-1254	1	0	1	1	1	1	ZER1	zer-1 homolog (C. elegans)
hsa-miR-1254	1	0	1	1	1	1	NEBL	nebulette
hsa-miR-1254	1	0	1	0	1	1	IGF2BP1	insulin-like growth factor 2 mRNA binding protein 1
hsa-miR-1254	1	0	1	0	1	1	MAP4K5	mitogen-activated protein kinase kinase kinase kinase 5
hsa-miR-1254	0	0	1	1	0	0	KIF1C	kinesin family member 1C
hsa-miR-1254	1	0	1	1	0	0	FRS3	fibroblast growth factor receptor substrate 3
hsa-miR-1254	0	0	1	1	1	1	PPP1R17	protein phosphatase 1, regulatory subunit 17
hsa-miR-1254	0	0	1	1	1	1	CD300C	CD300c molecule
hsa-miR-1254	1	0	1	1	1	1	SPIN1	spindlin 1
hsa-miR-1254	1	0	1	1	1	1	DIAPH2	diaphanous homolog 2 (Drosophila)
hsa-miR-1254	1	0	1	1	0	0	PSKH1	protein serine kinase H1
hsa-miR-1254	0	0	1	1	1	1	HOXD3	homeobox D3
hsa-miR-1254	1	0	1	1	1	1	RP2	retinitis pigmentosa 2 (X-linked recessive)
hsa-miR-1254	1	0	1	1	1	1	HSPA13	heat shock protein 70kDa family, member 13
hsa-miR-1254	1	0	1	1	1	1	SYN1	synapsin I
hsa-miR-1254	0	0	1	1	1	1	TAF5	TAF5 RNA polymerase II, TATA box binding protein (TBP)-associated factor, 100kDa
hsa-miR-1254	1	0	1	1	1	1	ABHD2	abhydrolase domain containing 2
hsa-miR-1254	0	0	1	1	1	1	TMEM115	transmembrane protein 115
hsa-miR-1254	0	0	1	0	1	1	ZNF208	zinc finger protein 208
hsa-miR-1254	1	0	1	1	1	1	TESK2	testis-specific kinase 2
hsa-miR-1254	0	0	1	1	0	0	MAP4K1	mitogen-activated protein kinase kinase kinase kinase 1
hsa-miR-1254	0	0	1	1	0	0	NXPH3	neurexophilin 3
hsa-miR-1254	1	0	1	1	1	1	PHLDA1	pleckstrin homology-like domain, family A, member 1
hsa-miR-1254	1	0	1	1	1	1	TARDBP	TAR DNA binding protein
hsa-miR-1254	0	0	1	1	1	1	LMOD1	leiomodin 1 (smooth muscle)
hsa-miR-1254	1	0	1	0	1	1	EIF2C2	eukaryotic translation initiation factor 2C, 2
hsa-miR-1254	1	0	1	0	1	1	FZD4	frizzled family receptor 4
hsa-miR-1254	0	0	1	1	1	1	RAB3GAP1	RAB3 GTPase activating protein subunit 1 (catalytic)
hsa-miR-1254	0	0	1	1	1	1	SEPHS2	selenophosphate synthetase 2
hsa-miR-1254	1	0	1	1	1	1	KCNE1L	KCNE1-like
hsa-miR-1254	1	0	1	0	1	1	G3BP2	GTPase activating protein (SH3 domain) binding protein 2
hsa-miR-1254	1	0	1	0	1	1	FBXL7	F-box and leucine-rich repeat protein 7
hsa-miR-1254	1	0	1	1	1	1	KIF4A	kinesin family member 4A
hsa-miR-1254	0	0	1	0	1	1	TLL1	tolloid-like 1
hsa-miR-1254	0	0	1	1	1	1	N6AMT1	N-6 adenine-specific DNA methyltransferase 1 (putative)
hsa-miR-1254	1	0	1	0	1	1	VPS4A	vacuolar protein sorting 4 homolog A (S. cerevisiae)
hsa-miR-1254	1	0	1	1	1	1	EEF2K	eukaryotic elongation factor-2 kinase
hsa-miR-1254	1	0	1	1	1	1	SERTAD3	SERTA domain containing 3
hsa-miR-1254	0	0	1	1	1	1	ABT1	activator of basal transcription 1
hsa-miR-1254	0	0	1	1	1	1	UQCR10	ubiquinol-cytochrome c reductase, complex III subunit X
hsa-miR-1254	0	0	1	0	1	1	EMR2	egf-like module containing, mucin-like, hormone receptor-like 2
hsa-miR-1254	1	0	1	1	1	1	NRG1	neuregulin 1
hsa-miR-1254	1	0	1	1	0	0	DEXI	Dexi homolog (mouse)
hsa-miR-1254	0	0	1	1	0	0	PSORS1C2	psoriasis susceptibility 1 candidate 2
hsa-miR-1254	1	0	1	1	1	1	ZNF770	zinc finger protein 770
hsa-miR-1254	1	0	1	1	1	1	SCN11A	sodium channel, voltage-gated, type XI, alpha subunit
hsa-miR-1254	0	0	1	1	0	0	OLFM1	olfactomedin 1
hsa-miR-1254	0	0	1	1	1	1	CAPN6	calpain 6
hsa-miR-1254	0	0	1	1	1	1	C22orf28	chromosome 22 open reading frame 28
hsa-miR-1254	0	0	1	1	1	1	LAMP3	lysosomal-associated membrane protein 3
hsa-miR-1254	1	0	1	1	1	1	CDR2L	cerebellar degeneration-related protein 2-like
hsa-miR-1254	0	0	1	1	0	0	MEA1	male-enhanced antigen 1
hsa-miR-1254	1	0	1	0	1	1	SH3PXD2A	SH3 and PX domains 2A
hsa-miR-1254	1	0	1	1	1	1	RALGPS1	Ral GEF with PH domain and SH3 binding motif 1
hsa-miR-1254	0	0	1	1	1	1	FAM53B	family with sequence similarity 53, member B
hsa-miR-1254	1	0	1	1	1	1	KDM4A	lysine (K)-specific demethylase 4A
hsa-miR-1254	1	0	1	1	1	1	ULK2	unc-51-like kinase 2 (C. elegans)
hsa-miR-1254	1	0	1	1	1	1	TBKBP1	TBK1 binding protein 1
hsa-miR-1254	0	0	1	1	1	1	FRMPD4	FERM and PDZ domain containing 4
hsa-miR-1254	1	0	1	0	1	1	MLEC	malectin
hsa-miR-1254	1	0	1	0	1	1	MAML1	mastermind-like 1 (Drosophila)
hsa-miR-1254	1	0	1	1	1	1	DAZAP2	DAZ associated protein 2
hsa-miR-1254	1	0	1	0	1	1	SCRN1	secernin 1
hsa-miR-1254	1	0	1	1	1	1	KIAA0753	KIAA0753
hsa-miR-1254	1	0	1	1	1	1	LRIG2	leucine-rich repeats and immunoglobulin-like domains 2
hsa-miR-1254	1	0	1	1	1	1	FCHSD2	FCH and double SH3 domains 2
hsa-miR-1254	1	0	1	1	1	1	NUAK1	NUAK family, SNF1-like kinase, 1
hsa-miR-1254	1	0	1	0	1	1	SV2B	synaptic vesicle glycoprotein 2B
hsa-miR-1254	1	0	1	0	1	1	ZBTB40	zinc finger and BTB domain containing 40
hsa-miR-1254	1	0	1	1	1	1	SPAST	spastin
hsa-miR-1254	1	0	1	1	1	1	SORCS3	sortilin-related VPS10 domain containing receptor 3
hsa-miR-1254	1	0	1	1	1	1	RALGAPA1	Ral GTPase activating protein, alpha subunit 1 (catalytic)
hsa-miR-1254	0	0	1	1	1	1	MYO16	myosin XVI
hsa-miR-1254	1	0	1	1	1	1	XPO7	exportin 7
hsa-miR-1254	1	0	1	1	1	1	TRAK2	trafficking protein, kinesin binding 2
hsa-miR-1254	1	0	1	1	1	1	HECW1	HECT, C2 and WW domain containing E3 ubiquitin protein ligase 1
hsa-miR-1254	0	0	1	1	0	0	AVL9	AVL9 homolog (S. cerevisiase)
hsa-miR-1254	1	0	1	0	1	1	PEG10	paternally expressed 10
hsa-miR-1254	1	0	1	1	0	0	CIC	capicua homolog (Drosophila)
hsa-miR-1254	0	0	1	1	1	1	FBXO28	F-box protein 28
hsa-miR-1254	1	0	1	1	0	0	KIAA0556	KIAA0556
hsa-miR-1254	1	0	1	1	1	1	CSTF2T	cleavage stimulation factor, 3' pre-RNA, subunit 2, 64kDa, tau variant
hsa-miR-1254	1	0	1	1	1	1	ANKS1A	ankyrin repeat and sterile alpha motif domain containing 1A
hsa-miR-1254	1	0	1	1	1	1	CUX2	cut-like homeobox 2
hsa-miR-1254	1	0	1	1	1	1	PHF15	PHD finger protein 15
hsa-miR-1254	1	0	1	0	1	1	KHNYN	KH and NYN domain containing
hsa-miR-1254	0	0	1	1	1	1	ANGEL1	angel homolog 1 (Drosophila)
hsa-miR-1254	1	0	1	0	1	1	LARP1	La ribonucleoprotein domain family, member 1
hsa-miR-1254	0	0	1	0	1	1	RRP8	ribosomal RNA processing 8, methyltransferase, homolog (yeast)
hsa-miR-1254	0	0	1	1	1	1	LEPROTL1	leptin receptor overlapping transcript-like 1
hsa-miR-1254	1	0	1	1	1	1	PARM1	prostate androgen-regulated mucin-like protein 1
hsa-miR-1254	0	0	1	1	0	0	SPEF1	sperm flagellar 1
hsa-miR-1254	1	0	1	1	1	1	CNOT6	CCR4-NOT transcription complex, subunit 6
hsa-miR-1254	0	0	1	1	1	1	NOL11	nucleolar protein 11
hsa-miR-1254	1	0	1	1	1	1	PNKD	paroxysmal nonkinesigenic dyskinesia
hsa-miR-1254	1	0	1	1	1	1	CLIP3	CAP-GLY domain containing linker protein 3
hsa-miR-1254	1	0	1	0	1	1	PPP1R16B	protein phosphatase 1, regulatory subunit 16B
hsa-miR-1254	1	0	1	1	1	1	PHF19	PHD finger protein 19
hsa-miR-1254	1	0	1	1	1	1	FAM155B	family with sequence similarity 155, member B
hsa-miR-1254	1	0	1	0	1	1	RRM2B	ribonucleotide reductase M2 B (TP53 inducible)
hsa-miR-1254	0	0	1	1	0	0	NOX3	NADPH oxidase 3
hsa-miR-1254	1	0	1	1	1	1	AZIN1	antizyme inhibitor 1
hsa-miR-1254	0	0	1	1	1	1	SNX7	sorting nexin 7
hsa-miR-1254	0	0	1	1	1	1	HMP19	HMP19 protein
hsa-miR-1254	1	0	1	1	1	1	RRP15	ribosomal RNA processing 15 homolog (S. cerevisiae)
hsa-miR-1254	1	0	1	0	1	1	CNR1	cannabinoid receptor 1 (brain)
hsa-miR-1254	1	0	1	0	1	1	HPCAL4	hippocalcin like 4
hsa-miR-1254	0	0	1	1	1	1	FBXO40	F-box protein 40
hsa-miR-1254	0	0	1	1	0	0	C22orf43	chromosome 22 open reading frame 43
hsa-miR-1254	0	0	1	1	0	0	NCKIPSD	NCK interacting protein with SH3 domain
hsa-miR-1254	0	0	1	1	0	0	FAM203A	family with sequence similarity 203, member A
hsa-miR-1254	0	0	1	1	1	1	COX16	COX16 cytochrome c oxidase assembly homolog (S. cerevisiae)
hsa-miR-1254	1	0	1	1	1	1	RAB6B	RAB6B, member RAS oncogene family
hsa-miR-1254	1	0	1	1	1	1	ZNF644	zinc finger protein 644
hsa-miR-1254	1	0	1	0	1	1	FZD3	frizzled family receptor 3
hsa-miR-1254	1	0	1	0	1	1	KLHL3	kelch-like 3 (Drosophila)
hsa-miR-1254	0	0	1	1	1	1	PRKAG3	protein kinase, AMP-activated, gamma 3 non-catalytic subunit
hsa-miR-1254	0	0	1	0	1	1	VEZT	vezatin, adherens junctions transmembrane protein
hsa-miR-1254	1	0	1	1	1	1	ZNF280C	zinc finger protein 280C
hsa-miR-1254	0	0	1	0	1	1	OTUB1	OTU domain, ubiquitin aldehyde binding 1
hsa-miR-1254	0	0	1	1	1	1	QRICH1	glutamine-rich 1
hsa-miR-1254	0	0	1	0	1	1	CWC25	CWC25 spliceosome-associated protein homolog (S. cerevisiae)
hsa-miR-1254	1	0	1	0	1	1	UHRF1BP1	UHRF1 binding protein 1
hsa-miR-1254	1	0	1	1	1	1	HIF1AN	hypoxia inducible factor 1, alpha subunit inhibitor
hsa-miR-1254	0	0	1	1	1	1	C14orf118	chromosome 14 open reading frame 118
hsa-miR-1254	1	0	1	1	1	1	FBXO34	F-box protein 34
hsa-miR-1254	1	0	1	1	1	1	IFT57	intraflagellar transport 57 homolog (Chlamydomonas)
hsa-miR-1254	1	0	1	1	1	1	SOBP	sine oculis binding protein homolog (Drosophila)
hsa-miR-1254	1	0	1	1	1	1	FAM178A	family with sequence similarity 178, member A
hsa-miR-1254	1	0	1	1	1	1	TMEM33	transmembrane protein 33
hsa-miR-1254	1	0	1	1	1	1	LRRC20	leucine rich repeat containing 20
hsa-miR-1254	0	0	1	1	1	1	TRIM62	tripartite motif containing 62
hsa-miR-1254	1	0	1	1	1	1	SPTLC3	serine palmitoyltransferase, long chain base subunit 3
hsa-miR-1254	0	0	1	1	1	1	RSAD1	radical S-adenosyl methionine domain containing 1
hsa-miR-1254	1	0	1	1	1	1	SLC39A9	solute carrier family 39 (zinc transporter), member 9
hsa-miR-1254	1	0	1	0	1	1	FOXJ2	forkhead box J2
hsa-miR-1254	0	0	1	0	0	0	KDM3A	lysine (K)-specific demethylase 3A
hsa-miR-1254	0	0	1	1	1	1	HDAC8	histone deacetylase 8
hsa-miR-1254	1	0	1	1	1	1	ASH1L	ash1 (absent, small, or homeotic)-like (Drosophila)
hsa-miR-1254	1	0	1	1	1	1	KIAA1199	KIAA1199
hsa-miR-1254	1	0	1	1	1	1	GNG12	guanine nucleotide binding protein (G protein), gamma 12
hsa-miR-1254	1	0	1	1	1	1	HOXA10	homeobox A10
hsa-miR-1254	0	0	1	1	1	1	NPAP1	nuclear pore associated protein 1
hsa-miR-1254	0	0	1	1	1	1	TERF2IP	telomeric repeat binding factor 2, interacting protein
hsa-miR-1254	1	0	1	1	1	1	SASH3	SAM and SH3 domain containing 3
hsa-miR-1254	1	0	1	1	1	1	KCTD5	potassium channel tetramerisation domain containing 5
hsa-miR-1254	1	0	1	0	1	1	FAM190B	family with sequence similarity 190, member B
hsa-miR-1254	1	0	1	1	1	1	DLL4	delta-like 4 (Drosophila)
hsa-miR-1254	1	0	1	0	1	1	UBFD1	ubiquitin family domain containing 1
hsa-miR-1254	1	0	1	1	0	0	KCNQ5	potassium voltage-gated channel, KQT-like subfamily, member 5
hsa-miR-1254	0	0	1	1	1	1	UBQLN4	ubiquilin 4
hsa-miR-1254	1	0	1	0	1	1	OTUD7B	OTU domain containing 7B
hsa-miR-1254	1	0	1	1	1	1	PRDM8	PR domain containing 8
hsa-miR-1254	1	0	1	1	0	0	SLC17A7	solute carrier family 17 (sodium-dependent inorganic phosphate cotransporter), member 7
hsa-miR-1254	1	0	1	1	1	1	PAK7	p21 protein (Cdc42/Rac)-activated kinase 7
hsa-miR-1254	0	0	1	1	0	0	ENTPD7	ectonucleoside triphosphate diphosphohydrolase 7
hsa-miR-1254	1	0	1	0	1	1	EIF5A2	eukaryotic translation initiation factor 5A2
hsa-miR-1254	0	0	1	1	1	1	PLXDC1	plexin domain containing 1
hsa-miR-1254	1	0	1	1	0	0	JPH2	junctophilin 2
hsa-miR-1254	1	0	1	0	1	1	DCUN1D1	DCN1, defective in cullin neddylation 1, domain containing 1 (S. cerevisiae)
hsa-miR-1254	1	0	1	1	1	1	RAB22A	RAB22A, member RAS oncogene family
hsa-miR-1254	1	0	1	0	1	1	KCNS2	potassium voltage-gated channel, delayed-rectifier, subfamily S, member 2
hsa-miR-1254	1	0	1	0	1	1	FAM40B	family with sequence similarity 40, member B
hsa-miR-1254	1	0	1	1	1	1	ZNF512B	zinc finger protein 512B
hsa-miR-1254	0	0	1	0	1	1	ZNF490	zinc finger protein 490
hsa-miR-1254	1	0	1	1	1	1	ARHGAP31	Rho GTPase activating protein 31
hsa-miR-1254	1	0	1	1	1	1	RGAG1	retrotransposon gag domain containing 1
hsa-miR-1254	1	0	1	0	1	1	ZNF398	zinc finger protein 398
hsa-miR-1254	1	0	1	1	1	1	KLHL14	kelch-like 14 (Drosophila)
hsa-miR-1254	1	0	1	1	1	1	ARHGAP21	Rho GTPase activating protein 21
hsa-miR-1254	1	0	1	1	1	1	HOMEZ	homeobox and leucine zipper encoding
hsa-miR-1254	1	0	1	1	1	1	RANBP10	RAN binding protein 10
hsa-miR-1254	1	0	1	1	1	1	ZBTB2	zinc finger and BTB domain containing 2
hsa-miR-1254	0	0	1	1	1	1	PRX	periaxin
hsa-miR-1254	1	0	1	1	1	1	ZNFX1	zinc finger, NFX1-type containing 1
hsa-miR-1254	1	0	1	1	1	1	NEFH	neurofilament, heavy polypeptide
hsa-miR-1254	1	0	1	0	1	1	NMT1	N-myristoyltransferase 1
hsa-miR-1254	1	0	1	1	1	1	MTMR3	myotubularin related protein 3
hsa-miR-1254	0	0	1	1	0	0	TRIB3	tribbles homolog 3 (Drosophila)
hsa-miR-1254	1	0	1	0	1	1	TP53INP2	tumor protein p53 inducible nuclear protein 2
hsa-miR-1254	0	0	1	1	1	1	CHST6	carbohydrate (N-acetylglucosamine 6-O) sulfotransferase 6
hsa-miR-1254	0	0	1	1	0	0	ALOXE3	arachidonate lipoxygenase 3
hsa-miR-1254	1	0	1	1	1	1	TMEM35	transmembrane protein 35
hsa-miR-1254	1	0	1	1	1	1	TRIB2	tribbles homolog 2 (Drosophila)
hsa-miR-1254	1	0	1	0	0	0	ALX4	ALX homeobox 4
hsa-miR-1254	1	0	1	1	1	1	FOXM1	forkhead box M1
hsa-miR-1254	0	0	1	1	1	1	CHP2	calcineurin-like EF hand protein 2
hsa-miR-1254	1	0	1	1	1	1	XYLT2	xylosyltransferase II
hsa-miR-1254	1	0	1	1	1	1	ABCG4	ATP-binding cassette, sub-family G (WHITE), member 4
hsa-miR-1254	1	0	1	1	1	1	TMEM168	transmembrane protein 168
hsa-miR-1254	1	0	1	1	1	1	SUDS3	suppressor of defective silencing 3 homolog (S. cerevisiae)
hsa-miR-1254	1	0	1	1	1	1	GIGYF1	GRB10 interacting GYF protein 1
hsa-miR-1254	1	0	1	1	1	1	PRRX1	paired related homeobox 1
hsa-miR-1254	1	0	1	1	1	1	C16orf58	chromosome 16 open reading frame 58
hsa-miR-1254	1	0	1	1	1	1	FAM160B2	family with sequence similarity 160, member B2
hsa-miR-1254	1	0	1	1	1	1	S100PBP	S100P binding protein
hsa-miR-1254	1	0	1	0	1	1	USP46	ubiquitin specific peptidase 46
hsa-miR-1254	0	0	1	1	1	1	UPF3B	UPF3 regulator of nonsense transcripts homolog B (yeast)
hsa-miR-1254	0	0	1	1	0	0	PRAMEF2	PRAME family member 2
hsa-miR-1254	1	0	1	1	1	1	FGFR1	fibroblast growth factor receptor 1
hsa-miR-1254	0	0	1	1	1	1	LYNX1	Ly6/neurotoxin 1
hsa-miR-1254	0	0	1	1	1	1	HTR5A	5-hydroxytryptamine (serotonin) receptor 5A, G protein-coupled
hsa-miR-1254	1	0	1	1	1	1	HOXB4	homeobox B4
hsa-miR-1254	0	0	1	1	0	0	CUEDC2	CUE domain containing 2
hsa-miR-1254	1	0	1	1	1	1	FAM134A	family with sequence similarity 134, member A
hsa-miR-1254	0	0	1	1	0	0	NOL12	nucleolar protein 12
hsa-miR-1254	0	0	1	1	1	1	NAA16	N(alpha)-acetyltransferase 16, NatA auxiliary subunit
hsa-miR-1254	0	0	1	1	1	1	AKIRIN1	akirin 1
hsa-miR-1254	1	0	1	1	1	1	C3orf52	chromosome 3 open reading frame 52
hsa-miR-1254	0	0	1	1	1	1	GLT25D1	glycosyltransferase 25 domain containing 1
hsa-miR-1254	0	0	1	1	1	1	WDR78	WD repeat domain 78
hsa-miR-1254	1	0	1	1	0	0	CNTD2	cyclin N-terminal domain containing 2
hsa-miR-1254	0	0	1	1	1	1	ZNF767	zinc finger family member 767
hsa-miR-1254	1	0	1	1	1	1	KLHL18	kelch-like 18 (Drosophila)
hsa-miR-1254	1	0	1	0	1	1	VCPIP1	valosin containing protein (p97)/p47 complex interacting protein 1
hsa-miR-1254	0	0	1	1	0	0	CENPT	centromere protein T
hsa-miR-1254	1	0	1	1	1	1	NUBPL	nucleotide binding protein-like
hsa-miR-1254	0	0	1	0	1	1	PDGFD	platelet derived growth factor D
hsa-miR-1254	0	0	1	1	0	0	BPIFB2	BPI fold containing family B, member 2
hsa-miR-1254	1	0	1	1	1	1	TNKS2	tankyrase, TRF1-interacting ankyrin-related ADP-ribose polymerase 2
hsa-miR-1254	0	0	1	1	1	1	THUMPD2	THUMP domain containing 2
hsa-miR-1254	0	0	1	1	1	1	ITIH5	inter-alpha-trypsin inhibitor heavy chain family, member 5
hsa-miR-1254	1	0	1	0	1	1	VOPP1	vesicular, overexpressed in cancer, prosurvival protein 1
hsa-miR-1254	1	0	1	0	1	1	C1orf21	chromosome 1 open reading frame 21
hsa-miR-1254	1	0	1	0	1	1	CSRNP2	cysteine-serine-rich nuclear protein 2
hsa-miR-1254	0	0	1	1	0	0	URM1	ubiquitin related modifier 1
hsa-miR-1254	1	0	1	1	1	1	SNX27	sorting nexin family member 27
hsa-miR-1254	0	0	1	1	1	1	ISCA1	iron-sulfur cluster assembly 1 homolog (S. cerevisiae)
hsa-miR-1254	1	0	1	1	1	1	TIGD6	tigger transposable element derived 6
hsa-miR-1254	1	0	1	1	1	1	RAB1B	RAB1B, member RAS oncogene family
hsa-miR-1254	0	0	1	1	1	1	FCRL4	Fc receptor-like 4
hsa-miR-1254	1	0	1	1	1	1	SESN2	sestrin 2
hsa-miR-1254	1	0	1	0	1	1	CD99L2	CD99 molecule-like 2
hsa-miR-1254	0	0	1	1	1	1	INHBE	inhibin, beta E
hsa-miR-1254	0	0	1	1	1	1	KCNA7	potassium voltage-gated channel, shaker-related subfamily, member 7
hsa-miR-1254	1	0	1	1	1	1	C1QTNF2	C1q and tumor necrosis factor related protein 2
hsa-miR-1254	0	0	1	1	0	0	KRTAP17-1	keratin associated protein 17-1
hsa-miR-1254	0	0	1	1	0	0	SLC4A11	solute carrier family 4, sodium borate transporter, member 11
hsa-miR-1254	0	0	1	0	1	1	RAB6C	RAB6C, member RAS oncogene family
hsa-miR-1254	1	0	1	1	1	1	LOXL4	lysyl oxidase-like 4
hsa-miR-1254	1	0	1	0	1	1	FAR1	fatty acyl CoA reductase 1
hsa-miR-1254	1	0	1	1	1	1	ZNRF1	zinc and ring finger 1, E3 ubiquitin protein ligase
hsa-miR-1254	0	0	1	1	1	1	VPS25	vacuolar protein sorting 25 homolog (S. cerevisiae)
hsa-miR-1254	1	0	1	1	1	1	SYVN1	synovial apoptosis inhibitor 1, synoviolin
hsa-miR-1254	1	0	1	1	0	0	ACRBP	acrosin binding protein
hsa-miR-1254	1	0	1	1	1	1	TTBK1	tau tubulin kinase 1
hsa-miR-1254	0	0	1	1	1	1	HCAR1	hydroxycarboxylic acid receptor 1
hsa-miR-1254	1	0	1	1	1	1	PPP1R9B	protein phosphatase 1, regulatory subunit 9B
hsa-miR-1254	1	0	1	1	0	0	ORAI1	ORAI calcium release-activated calcium modulator 1
hsa-miR-1254	0	0	1	1	1	1	FAM136A	family with sequence similarity 136, member A
hsa-miR-1254	1	0	1	1	1	1	CGNL1	cingulin-like 1
hsa-miR-1254	1	0	1	0	1	1	UBASH3B	ubiquitin associated and SH3 domain containing B
hsa-miR-1254	1	0	1	0	1	1	C5orf62	chromosome 5 open reading frame 62
hsa-miR-1254	0	0	1	1	1	1	POLR2J2	polymerase (RNA) II (DNA directed) polypeptide J2
hsa-miR-1254	1	0	1	1	1	1	PCDH11Y	protocadherin 11 Y-linked
hsa-miR-1254	1	0	1	1	1	1	CASP2	caspase 2, apoptosis-related cysteine peptidase
hsa-miR-1254	1	0	1	0	1	1	SCRT2	scratch homolog 2, zinc finger protein (Drosophila)
hsa-miR-1254	1	0	1	0	1	1	PURB	purine-rich element binding protein B
hsa-miR-1254	1	0	1	1	0	0	CAMK2N2	calcium/calmodulin-dependent protein kinase II inhibitor 2
hsa-miR-1254	1	0	1	1	1	1	FOXQ1	forkhead box Q1
hsa-miR-1254	1	0	1	1	1	1	RASL10B	RAS-like, family 10, member B
hsa-miR-1254	0	0	1	1	0	0	CGB1	chorionic gonadotropin, beta polypeptide 1
hsa-miR-1254	0	0	1	1	0	0	CGB2	chorionic gonadotropin, beta polypeptide 2
hsa-miR-1254	1	0	1	1	1	1	C19orf6	chromosome 19 open reading frame 6
hsa-miR-1254	1	0	1	1	0	0	FCHSD1	FCH and double SH3 domains 1
hsa-miR-1254	1	0	1	1	1	1	EPT1	ethanolaminephosphotransferase 1 (CDP-ethanolamine-specific)
hsa-miR-1254	1	0	1	1	0	0	CCDC120	coiled-coil domain containing 120
hsa-miR-1254	1	0	1	1	1	1	STX1B	syntaxin 1B
hsa-miR-1254	0	0	1	1	0	0	SIGLEC11	sialic acid binding Ig-like lectin 11
hsa-miR-1254	0	0	1	1	1	1	CARD16	caspase recruitment domain family, member 16
hsa-miR-1254	0	0	1	1	1	1	PLEKHG4B	pleckstrin homology domain containing, family G (with RhoGef domain) member 4B
hsa-miR-1254	0	0	1	1	0	0	FAM46B	family with sequence similarity 46, member B
hsa-miR-1254	1	0	1	1	1	1	MED12L	mediator complex subunit 12-like
hsa-miR-1254	1	0	1	0	1	1	CCND1	cyclin D1
hsa-miR-1254	1	0	1	1	1	1	SRSF10	serine/arginine-rich splicing factor 10
hsa-miR-1254	0	0	1	0	1	1	SLC36A1	solute carrier family 36 (proton/amino acid symporter), member 1
hsa-miR-1254	0	0	1	1	0	0	S100A16	S100 calcium binding protein A16
hsa-miR-1254	1	0	1	1	1	1	SEPT4	septin 4
hsa-miR-1254	1	0	1	1	0	0	ADAMTS14	ADAM metallopeptidase with thrombospondin type 1 motif, 14
hsa-miR-1254	0	0	1	1	0	0	WFDC6	WAP four-disulfide core domain 6
hsa-miR-1254	0	0	1	1	0	0	GGTLC1	gamma-glutamyltransferase light chain 1
hsa-miR-1254	1	0	1	1	1	1	KLHL6	kelch-like 6 (Drosophila)
hsa-miR-1254	0	0	1	1	1	1	CHST14	carbohydrate (N-acetylgalactosamine 4-0) sulfotransferase 14
hsa-miR-1254	0	0	1	0	1	1	PAQR8	progestin and adipoQ receptor family member VIII
hsa-miR-1254	0	0	1	1	0	0	CITED4	Cbp/p300-interacting transactivator, with Glu/Asp-rich carboxy-terminal domain, 4
hsa-miR-1254	0	0	1	1	1	1	POFUT2	protein O-fucosyltransferase 2
hsa-miR-1254	0	0	1	1	1	1	PATE1	prostate and testis expressed 1
hsa-miR-1254	1	0	1	1	0	0	PKDCC	protein kinase domain containing, cytoplasmic homolog (mouse)
hsa-miR-1254	1	0	1	1	1	1	KCTD12	potassium channel tetramerisation domain containing 12
hsa-miR-1254	0	0	1	1	1	1	C1orf213	chromosome 1 open reading frame 213
hsa-miR-1254	0	0	1	1	1	1	KLF14	Kruppel-like factor 14
hsa-miR-1254	0	0	1	1	1	1	GALM	galactose mutarotase (aldose 1-epimerase)
hsa-miR-1254	1	0	1	1	1	1	MSI2	musashi homolog 2 (Drosophila)
hsa-miR-1254	1	0	1	1	1	1	ZMAT2	zinc finger, matrin-type 2
hsa-miR-1254	0	0	1	1	0	0	PEBP4	phosphatidylethanolamine-binding protein 4
hsa-miR-1254	0	0	1	1	1	1	ZFC3H1	zinc finger, C3H1-type containing
hsa-miR-1254	0	0	1	1	1	1	VWA3B	von Willebrand factor A domain containing 3B
hsa-miR-1254	0	0	1	1	1	1	TMEM106A	transmembrane protein 106A
hsa-miR-1254	1	0	1	1	1	1	UBQLNL	ubiquilin-like
hsa-miR-1254	1	0	1	0	1	1	DIRAS1	DIRAS family, GTP-binding RAS-like 1
hsa-miR-1254	1	0	1	1	1	1	FAM84A	family with sequence similarity 84, member A
hsa-miR-1254	0	0	1	0	0	0	MRPL10	mitochondrial ribosomal protein L10
hsa-miR-1254	0	0	1	1	1	1	HFE2	hemochromatosis type 2 (juvenile)
hsa-miR-1254	1	0	1	1	1	1	MOB3C	MOB kinase activator 3C
hsa-miR-1254	0	0	1	1	0	0	NKX2-3	NK2 homeobox 3
hsa-miR-1254	1	0	1	1	1	1	CADM4	cell adhesion molecule 4
hsa-miR-1254	0	0	1	1	1	1	APOBEC3F	apolipoprotein B mRNA editing enzyme, catalytic polypeptide-like 3F
hsa-miR-1254	0	0	1	1	1	1	SCARF1	scavenger receptor class F, member 1
hsa-miR-1254	0	0	1	1	0	0	TCEB3C	transcription elongation factor B polypeptide 3C (elongin A3)
hsa-miR-1254	1	0	1	1	1	1	SEPT6	septin 6
hsa-miR-1254	0	0	1	0	1	1	CHKB	choline kinase beta
hsa-miR-1254	1	0	1	1	1	1	UBTD2	ubiquitin domain containing 2
hsa-miR-1254	0	0	1	1	1	1	ELOVL3	ELOVL fatty acid elongase 3
hsa-miR-1254	1	0	1	1	1	1	LSM12	LSM12 homolog (S. cerevisiae)
hsa-miR-1254	1	0	1	1	1	1	TBX15	T-box 15
hsa-miR-1254	1	0	1	1	1	1	BHLHE22	basic helix-loop-helix family, member e22
hsa-miR-1254	1	0	1	1	1	1	FAM123B	family with sequence similarity 123B
hsa-miR-1254	0	0	1	1	1	1	SLC35G3	solute carrier family 35, member G3
hsa-miR-1254	1	0	1	1	1	1	ZNF362	zinc finger protein 362
hsa-miR-1254	1	0	1	0	1	1	DCP2	DCP2 decapping enzyme homolog (S. cerevisiae)
hsa-miR-1254	1	0	1	1	1	1	HEPACAM	hepatic and glial cell adhesion molecule
hsa-miR-1254	0	0	1	1	1	1	TMEM74	transmembrane protein 74
hsa-miR-1254	1	0	1	1	1	1	C3orf45	chromosome 3 open reading frame 45
hsa-miR-1254	0	0	1	1	1	1	COL6A5	collagen, type VI, alpha 5
hsa-miR-1254	0	0	1	1	1	1	FAM71C	family with sequence similarity 71, member C
hsa-miR-1254	1	0	1	1	1	1	FNDC5	fibronectin type III domain containing 5
hsa-miR-1254	0	0	1	1	1	1	WFDC13	WAP four-disulfide core domain 13
hsa-miR-1254	0	0	1	1	1	1	TNFSF12-TNFSF13	TNFSF12-TNFSF13 readthrough
hsa-miR-1254	0	0	1	1	0	0	KCNE2	potassium voltage-gated channel, Isk-related family, member 2
hsa-miR-1254	0	0	1	1	1	1	KCNH5	potassium voltage-gated channel, subfamily H (eag-related), member 5
hsa-miR-1254	0	0	1	1	1	1	KLF17	Kruppel-like factor 17
hsa-miR-1254	1	0	1	1	1	1	LSM11	LSM11, U7 small nuclear RNA associated
hsa-miR-1254	0	0	1	1	1	1	FAM163A	family with sequence similarity 163, member A
hsa-miR-1254	1	0	1	1	1	1	CCDC117	coiled-coil domain containing 117
hsa-miR-1254	1	0	1	0	1	1	KSR2	kinase suppressor of ras 2
hsa-miR-1254	1	0	1	1	1	1	DIP2B	DIP2 disco-interacting protein 2 homolog B (Drosophila)
hsa-miR-1254	1	0	1	1	1	1	SLC9A9	solute carrier family 9, subfamily A (NHE9, cation proton antiporter 9), member 9
hsa-miR-1254	1	0	1	1	1	1	ARL10	ADP-ribosylation factor-like 10
hsa-miR-1254	0	0	1	0	1	1	C5orf64	chromosome 5 open reading frame 64
hsa-miR-1254	1	0	1	1	1	1	ATG9B	autophagy related 9B
hsa-miR-1254	1	0	1	1	1	1	UBR1	ubiquitin protein ligase E3 component n-recognin 1
hsa-miR-1254	0	0	1	1	1	1	ZDHHC22	zinc finger, DHHC-type containing 22
hsa-miR-1254	0	0	1	1	1	1	CLEC14A	C-type lectin domain family 14, member A
hsa-miR-1254	0	0	1	1	0	0	C17orf74	chromosome 17 open reading frame 74
hsa-miR-1254	0	0	1	1	1	1	CHSY3	chondroitin sulfate synthase 3
hsa-miR-1254	0	0	1	1	1	1	MRPL43	mitochondrial ribosomal protein L43
hsa-miR-1254	0	0	1	1	0	0	TAS1R1	taste receptor, type 1, member 1
hsa-miR-1254	0	0	1	0	1	1	SYT12	synaptotagmin XII
hsa-miR-1254	1	0	1	1	1	1	ASB6	ankyrin repeat and SOCS box containing 6
hsa-miR-1254	0	0	1	1	0	0	PAQR7	progestin and adipoQ receptor family member VII
hsa-miR-1254	1	0	1	1	0	0	PHOSPHO1	phosphatase, orphan 1
hsa-miR-1254	0	0	1	1	1	1	TFAP2E	transcription factor AP-2 epsilon (activating enhancer binding protein 2 epsilon)
hsa-miR-1254	0	0	1	1	0	0	C2orf53	chromosome 2 open reading frame 53
hsa-miR-1254	1	0	1	1	0	0	KY	kyphoscoliosis peptidase
hsa-miR-1254	1	0	1	1	1	1	MTDH	metadherin
hsa-miR-1254	0	0	1	1	1	1	FBXO27	F-box protein 27
hsa-miR-1254	0	0	1	1	0	0	PRDX2	peroxiredoxin 2
hsa-miR-1254	1	0	1	1	1	1	NF2	neurofibromin 2 (merlin)
hsa-miR-1254	1	0	1	1	1	1	ZSCAN22	zinc finger and SCAN domain containing 22
hsa-miR-1254	0	0	1	1	0	0	BPIFB4	BPI fold containing family B, member 4
hsa-miR-1254	1	0	1	1	1	1	TMEM229B	transmembrane protein 229B
hsa-miR-1254	1	0	1	1	1	1	DDX26B	DEAD/H (Asp-Glu-Ala-Asp/His) box polypeptide 26B
hsa-miR-1254	0	0	1	0	1	1	VSTM2A	V-set and transmembrane domain containing 2A
hsa-miR-1254	1	0	1	0	1	1	C12orf36	chromosome 12 open reading frame 36
hsa-miR-1254	1	0	1	1	1	1	SP8	Sp8 transcription factor
hsa-miR-1254	0	0	1	1	0	0	GPX6	glutathione peroxidase 6 (olfactory)
hsa-miR-1254	1	0	1	0	1	1	RIMS4	regulating synaptic membrane exocytosis 4
hsa-miR-1254	1	0	1	1	1	1	RBPMS2	RNA binding protein with multiple splicing 2
hsa-miR-1254	1	0	1	0	1	1	SRRM4	serine/arginine repetitive matrix 4
hsa-miR-1254	0	0	1	1	1	1	ZNF169	zinc finger protein 169
hsa-miR-1254	0	0	1	0	1	1	TCF21	transcription factor 21
hsa-miR-1254	1	0	1	1	1	1	RAB43	RAB43, member RAS oncogene family
hsa-miR-1254	0	0	1	1	1	1	KIF7	kinesin family member 7
hsa-miR-1254	0	0	1	1	0	0	SPATA21	spermatogenesis associated 21
hsa-miR-1254	0	0	1	1	1	1	LHFPL4	lipoma HMGIC fusion partner-like 4
hsa-miR-1254	0	0	1	1	0	0	SPATC1	spermatogenesis and centriole associated 1
hsa-miR-1254	1	0	1	1	0	0	ENHO	energy homeostasis associated
hsa-miR-1254	1	0	1	1	0	0	AGRN	agrin
hsa-miR-1254	1	0	1	0	1	1	ZC3H6	zinc finger CCCH-type containing 6
hsa-miR-1254	1	0	1	1	1	1	NHLRC1	NHL repeat containing 1
hsa-miR-1254	0	0	1	1	1	1	COL25A1	collagen, type XXV, alpha 1
hsa-miR-1254	0	0	1	1	1	1	FAM120AOS	family with sequence similarity 120A opposite strand
hsa-miR-1254	1	0	1	0	1	1	PRICKLE2	prickle homolog 2 (Drosophila)
hsa-miR-1254	0	0	1	1	1	1	COL18A1-AS1	COL18A1 antisense RNA 1
hsa-miR-1254	0	0	1	1	0	0	C6orf108	chromosome 6 open reading frame 108
hsa-miR-1254	0	0	1	1	0	0	BRE	brain and reproductive organ-expressed (TNFRSF1A modulator)
hsa-miR-1254	1	0	1	1	1	1	THRA	thyroid hormone receptor, alpha
hsa-miR-1254	0	0	1	1	1	1	GPX1	glutathione peroxidase 1
hsa-miR-1254	1	0	1	1	1	1	GLYAT	glycine-N-acyltransferase
hsa-miR-1254	0	0	1	1	1	1	ELP5	elongator acetyltransferase complex subunit 5
hsa-miR-1254	0	0	1	1	0	0	LRRN4CL	LRRN4 C-terminal like
hsa-miR-1254	1	0	1	1	1	1	IGSF1	immunoglobulin superfamily, member 1
hsa-miR-1254	1	0	1	1	1	1	METTL21B	methyltransferase like 21B
hsa-miR-1254	1	0	1	1	1	1	ENSA	endosulfine alpha
hsa-miR-1254	0	0	1	0	1	1	NPSR1-AS1	NPSR1 antisense RNA 1
hsa-miR-1254	0	0	1	1	1	1	C10orf129	chromosome 10 open reading frame 129
hsa-miR-1254	1	0	1	1	1	1	GADL1	glutamate decarboxylase-like 1
hsa-miR-1254	0	0	1	0	0	0	C16orf47	chromosome 16 open reading frame 47
hsa-miR-1254	0	0	1	1	1	1	C15orf53	chromosome 15 open reading frame 53
hsa-miR-1254	0	0	1	1	1	1	FAM177B	family with sequence similarity 177, member B
hsa-miR-1254	0	0	1	0	0	0	CELP	carboxyl ester lipase pseudogene
hsa-miR-1254	0	0	1	0	0	0	TOP1P2	topoisomerase (DNA) I pseudogene 2
hsa-miR-1254	0	0	1	0	0	0	MT1L	metallothionein 1L (gene/pseudogene)
hsa-miR-1254	0	0	1	0	0	0	TTTY1	testis-specific transcript, Y-linked 1 (non-protein coding)
hsa-miR-1254	0	0	1	0	0	0	ST13P4	suppression of tumorigenicity 13 (colon carcinoma) (Hsp70 interacting protein) pseudogene 4
hsa-miR-1254	0	0	1	0	0	0	DKFZP586I1420	uncharacterized protein DKFZp586I1420
hsa-miR-1254	0	0	1	0	0	0	SUMO1P1	SUMO1 pseudogene 1
hsa-miR-1254	0	0	1	0	0	0	GOLGA2P3Y	golgin A2 pseudogene 3, Y-linked
hsa-miR-1254	0	0	1	0	0	0	MEIS3P1	Meis homeobox 3 pseudogene 1
hsa-miR-1254	0	0	1	0	0	0	LOC606724	coronin, actin binding protein, 1A pseudogene
hsa-miR-1254	0	0	1	0	0	0	DGCR5	DiGeorge syndrome critical region gene 5 (non-protein coding)
hsa-miR-1254	0	0	1	0	0	0	CPS1-IT1	CPS1 intronic transcript 1 (non-protein coding)
hsa-miR-1254	0	0	1	0	0	0	AOC4	amine oxidase, copper containing 3 (vascular adhesion protein 1) pseudogene
hsa-miR-1254	0	0	1	0	0	0	HOXA11-AS	HOXA11 antisense RNA
hsa-miR-1254	0	0	1	0	0	0	RPL13P5	ribosomal protein L13 pseudogene 5
hsa-miR-1254	0	0	1	0	0	0	AQP7P1	aquaporin 7 pseudogene 1
hsa-miR-1254	0	0	1	0	0	0	MALAT1	metastasis associated lung adenocarcinoma transcript 1 (non-protein coding)
hsa-miR-1254	0	0	1	0	0	0	HAS2-AS1	HAS2 antisense RNA 1
hsa-miR-1254	0	0	1	0	0	0	SNORA74A	small nucleolar RNA, H/ACA box 74A
hsa-miR-1254	0	0	1	0	0	0	PTPRVP	protein tyrosine phosphatase, receptor type, V, pseudogene
hsa-miR-1254	0	0	1	0	0	0	SNX29P2	sorting nexin 29 pseudogene 2
hsa-miR-1254	0	0	1	0	0	0	TCAM1P	testicular cell adhesion molecule 1 homolog (mouse), pseudogene
hsa-miR-1254	0	0	1	0	0	0	SNORA40	small nucleolar RNA, H/ACA box 40
hsa-miR-1254	0	0	1	0	0	0	SNORA77	small nucleolar RNA, H/ACA box 77
hsa-miR-1254	0	0	1	0	0	0	EIF3IP1	eukaryotic translation initiation factor 3, subunit I pseudogene 1
hsa-miR-1254	0	0	1	0	0	0	LILRP2	leukocyte immunoglobulin-like receptor pseudogene 2
hsa-miR-1254	0	0	1	0	0	0	PYY2	peptide YY, 2 (pseudogene)
hsa-miR-1254	0	0	1	0	0	0	HSP90B3P	heat shock protein 90kDa beta (Grp94), member 3, pseudogene
hsa-miR-1254	0	0	1	0	0	0	HSP90AB2P	heat shock protein 90kDa alpha (cytosolic), class B member 2, pseudogene
hsa-miR-1254	0	0	1	0	0	0	AFG3L1P	AFG3 ATPase family gene 3-like 1 (S. cerevisiae), pseudogene
hsa-miR-1254	0	0	1	0	0	0	CDRT15P1	CMT1A duplicated region transcript 15 pseudogene 1
hsa-miR-1254	1	0	1	1	1	1	MLL	myeloid/lymphoid or mixed-lineage leukemia (trithorax homolog, Drosophila)
hsa-miR-1254	0	0	1	1	0	0	GLP1R	glucagon-like peptide 1 receptor
hsa-miR-1254	1	0	1	1	1	1	CTNNA1	catenin (cadherin-associated protein), alpha 1, 102kDa
hsa-miR-1254	1	0	1	0	1	1	NFIX	nuclear factor I/X (CCAAT-binding transcription factor)
hsa-miR-1254	0	0	1	0	0	0	MST1P9	macrophage stimulating 1 (hepatocyte growth factor-like) pseudogene 9
hsa-miR-1254	0	0	1	0	1	1	DDX12P	DEAD/H (Asp-Glu-Ala-Asp/His) box polypeptide 12, pseudogene
hsa-miR-1254	1	0	1	1	1	1	AKAP1	A kinase (PRKA) anchor protein 1
hsa-miR-1254	1	0	1	1	1	1	TRIO	trio Rho guanine nucleotide exchange factor
hsa-miR-1254	1	0	1	1	0	0	TNXB	tenascin XB
hsa-miR-1254	1	0	1	1	1	1	ATF6B	activating transcription factor 6 beta
hsa-miR-1254	0	0	1	1	1	1	CAST	calpastatin
hsa-miR-1254	0	0	1	1	1	1	CD84	CD84 molecule
hsa-miR-1254	1	0	1	1	1	1	CUL5	cullin 5
