# Supplementary material for: Profiling of Selected MicroRNAs in Proliferative Eutopic Endometrium of Women with Ovarian Endometriosis
Source: Biomed Res Int. 2015 Aug 20;2015:760698. doi: 10.1155/2015/760698 (PMC4558423; doi:10.1155/2015/760698)
Supplement: Supplementary file 1 — Table I: The names of miRNAs significantly differentially expressed between eutopic endometrium of patients with endometriosis vs eutopic endometrium of patients without endometriosis. Table II: The associations between miRNA and mRNA, which presents detailed results of the search of six major databases i.e targetscan, tarbase, miranda, mirbase, mirtarget2 and pictar. [file 760698.f1.zip › 760698.f1/Table II/hsa-miR-1255a.tsv]

miR	targetscan	tarbase	miranda	mirbase	mirtarget2	pictar	GeneSymbol	GeneName
hsa-miR-1255a	1	0	1	1	1	1	PLAU	plasminogen activator, urokinase
hsa-miR-1255a	1	0	1	1	1	1	ARNTL	aryl hydrocarbon receptor nuclear translocator-like
hsa-miR-1255a	1	0	1	1	0	0	SRCAP	Snf2-related CREBBP activator protein
hsa-miR-1255a	1	0	1	1	0	0	HUWE1	HECT, UBA and WWE domain containing 1, E3 ubiquitin protein ligase
hsa-miR-1255a	1	0	1	0	0	0	TRANK1	tetratricopeptide repeat and ankyrin repeat containing 1
hsa-miR-1255a	1	0	1	1	1	1	PRUNE2	prune homolog 2 (Drosophila)
hsa-miR-1255a	1	0	1	0	1	1	PTPRT	protein tyrosine phosphatase, receptor type, T
hsa-miR-1255a	0	0	1	1	1	1	C2CD2L	C2CD2-like
hsa-miR-1255a	1	0	1	1	1	1	PPIP5K2	diphosphoinositol pentakisphosphate kinase 2
hsa-miR-1255a	1	0	1	0	1	1	NEDD4L	neural precursor cell expressed, developmentally down-regulated 4-like, E3 ubiquitin protein ligase
hsa-miR-1255a	0	0	1	1	1	1	PDE4DIP	phosphodiesterase 4D interacting protein
hsa-miR-1255a	1	0	1	0	1	1	CEP350	centrosomal protein 350kDa
hsa-miR-1255a	0	0	1	1	1	1	NEU3	sialidase 3 (membrane sialidase)
hsa-miR-1255a	0	0	1	1	0	0	GRB7	growth factor receptor-bound protein 7
hsa-miR-1255a	1	0	1	1	1	1	GPATCH8	G patch domain containing 8
hsa-miR-1255a	1	0	1	1	0	0	MEGF8	multiple EGF-like-domains 8
hsa-miR-1255a	1	0	1	0	1	1	MFAP3L	microfibrillar-associated protein 3-like
hsa-miR-1255a	1	0	1	1	1	1	HIPK1	homeodomain interacting protein kinase 1
hsa-miR-1255a	0	0	1	1	0	0	ARHGEF2	Rho/Rac guanine nucleotide exchange factor (GEF) 2
hsa-miR-1255a	0	0	1	1	1	1	DZIP3	DAZ interacting protein 3, zinc finger
hsa-miR-1255a	1	0	1	0	1	1	SNX13	sorting nexin 13
hsa-miR-1255a	1	0	1	0	1	1	RBM12	RNA binding motif protein 12
hsa-miR-1255a	1	0	1	1	1	1	LPHN2	latrophilin 2
hsa-miR-1255a	1	0	1	1	1	1	DNM3	dynamin 3
hsa-miR-1255a	1	0	1	0	1	1	ATG14	autophagy related 14
hsa-miR-1255a	1	0	1	1	1	1	CDK12	cyclin-dependent kinase 12
hsa-miR-1255a	0	0	1	1	1	1	MAN2B2	mannosidase, alpha, class 2B, member 2
hsa-miR-1255a	1	0	1	0	0	0	DTX4	deltex homolog 4 (Drosophila)
hsa-miR-1255a	1	0	1	1	1	1	CIT	citron (rho-interacting, serine/threonine kinase 21)
hsa-miR-1255a	0	0	1	1	0	0	FAM149B1	family with sequence similarity 149, member B1
hsa-miR-1255a	1	0	1	1	1	1	RPGRIP1L	RPGRIP1-like
hsa-miR-1255a	0	0	1	0	1	1	TP53TG3	TP53 target 3
hsa-miR-1255a	0	0	1	0	0	0	TP53TG3B	TP53 target 3B
hsa-miR-1255a	1	0	1	1	0	0	KIAA1045	KIAA1045
hsa-miR-1255a	1	0	1	1	1	1	NLGN1	neuroligin 1
hsa-miR-1255a	1	0	1	1	1	1	PHF8	PHD finger protein 8
hsa-miR-1255a	1	0	1	0	1	1	ODZ2	odz, odd Oz/ten-m homolog 2 (Drosophila)
hsa-miR-1255a	0	0	1	1	0	0	ZC4H2	zinc finger, C4H2 domain containing
hsa-miR-1255a	1	0	1	1	0	0	KIAA1210	KIAA1210
hsa-miR-1255a	1	0	1	1	1	1	ATXN7L1	ataxin 7-like 1
hsa-miR-1255a	1	0	1	0	0	0	ODZ4	odz, odd Oz/ten-m homolog 4 (Drosophila)
hsa-miR-1255a	1	0	1	0	1	1	KCTD16	potassium channel tetramerisation domain containing 16
hsa-miR-1255a	1	0	1	1	0	0	CARNS1	carnosine synthase 1
hsa-miR-1255a	0	0	1	0	1	1	MUC3B	mucin 3B, cell surface associated
hsa-miR-1255a	0	0	1	1	0	0	MAGED4B	melanoma antigen family D, 4B
hsa-miR-1255a	0	0	1	1	0	0	MAGED4	melanoma antigen family D, 4
hsa-miR-1255a	0	0	1	0	0	0	NYAP2	neuronal tyrosine-phosphorylated phosphoinositide-3-kinase adaptor 2
hsa-miR-1255a	0	0	1	0	1	1	ZSWIM6	zinc finger, SWIM-type containing 6
hsa-miR-1255a	1	0	1	1	1	1	FUT8	fucosyltransferase 8 (alpha (1,6) fucosyltransferase)
hsa-miR-1255a	0	0	1	1	1	1	AMBRA1	autophagy/beclin-1 regulator 1
hsa-miR-1255a	1	0	1	1	1	1	IKZF4	IKAROS family zinc finger 4 (Eos)
hsa-miR-1255a	1	0	1	1	1	1	LCOR	ligand dependent nuclear receptor corepressor
hsa-miR-1255a	1	0	1	0	1	1	JPH4	junctophilin 4
hsa-miR-1255a	1	0	1	1	1	1	NAV2	neuron navigator 2
hsa-miR-1255a	0	0	1	1	0	0	SEC16B	SEC16 homolog B (S. cerevisiae)
hsa-miR-1255a	1	0	1	1	1	1	MAT2B	methionine adenosyltransferase II, beta
hsa-miR-1255a	1	0	1	1	1	1	POGZ	pogo transposable element with ZNF domain
hsa-miR-1255a	1	0	1	1	1	1	SH3TC2	SH3 domain and tetratricopeptide repeats 2
hsa-miR-1255a	0	0	1	1	0	0	CIRH1A	cirrhosis, autosomal recessive 1A (cirhin)
hsa-miR-1255a	1	0	1	0	0	0	ZBTB34	zinc finger and BTB domain containing 34
hsa-miR-1255a	0	0	1	0	1	1	RASSF8	Ras association (RalGDS/AF-6) domain family (N-terminal) member 8
hsa-miR-1255a	1	0	1	1	1	1	SMEK1	SMEK homolog 1, suppressor of mek1 (Dictyostelium)
hsa-miR-1255a	1	0	1	1	1	1	WLS	wntless homolog (Drosophila)
hsa-miR-1255a	0	0	1	1	0	0	SGCE	sarcoglycan, epsilon
hsa-miR-1255a	1	0	1	0	1	1	BEND4	BEN domain containing 4
hsa-miR-1255a	1	1	1	1	1	1	BACE1	beta-site APP-cleaving enzyme 1
hsa-miR-1255a	1	0	1	1	1	1	UBE3A	ubiquitin protein ligase E3A
hsa-miR-1255a	0	0	1	1	0	0	OVGP1	oviductal glycoprotein 1, 120kDa
hsa-miR-1255a	1	0	1	1	1	1	COL11A1	collagen, type XI, alpha 1
hsa-miR-1255a	1	0	1	1	1	1	SHC1	SHC (Src homology 2 domain containing) transforming protein 1
hsa-miR-1255a	1	0	1	1	0	0	NDST2	N-deacetylase/N-sulfotransferase (heparan glucosaminyl) 2
hsa-miR-1255a	1	0	1	1	1	1	BACH2	BTB and CNC homology 1, basic leucine zipper transcription factor 2
hsa-miR-1255a	0	0	1	1	0	0	TNNI3K	TNNI3 interacting kinase
hsa-miR-1255a	1	0	1	1	0	0	ELN	elastin
hsa-miR-1255a	0	0	1	1	1	1	MAZ	MYC-associated zinc finger protein (purine-binding transcription factor)
hsa-miR-1255a	1	0	1	1	1	1	SLC8A1	solute carrier family 8 (sodium/calcium exchanger), member 1
hsa-miR-1255a	1	0	1	0	1	1	PLAG1	pleiomorphic adenoma gene 1
hsa-miR-1255a	1	0	1	1	1	1	E2F5	E2F transcription factor 5, p130-binding
hsa-miR-1255a	1	0	1	1	1	1	PRKACB	protein kinase, cAMP-dependent, catalytic, beta
hsa-miR-1255a	1	0	1	0	1	1	DPYSL2	dihydropyrimidinase-like 2
hsa-miR-1255a	1	0	1	1	1	1	SATB2	SATB homeobox 2
hsa-miR-1255a	1	0	1	1	1	1	SPTB	spectrin, beta, erythrocytic
hsa-miR-1255a	0	0	1	1	0	0	EIF4E2	eukaryotic translation initiation factor 4E family member 2
hsa-miR-1255a	0	0	1	0	1	1	ACTN2	actinin, alpha 2
hsa-miR-1255a	0	0	1	1	0	0	CFLAR	CASP8 and FADD-like apoptosis regulator
hsa-miR-1255a	1	0	1	1	1	1	IPO8	importin 8
hsa-miR-1255a	0	0	1	1	1	1	HLA-DQA1	major histocompatibility complex, class II, DQ alpha 1
hsa-miR-1255a	1	0	1	1	1	1	EPB41	erythrocyte membrane protein band 4.1 (elliptocytosis 1, RH-linked)
hsa-miR-1255a	1	0	1	1	1	1	COL24A1	collagen, type XXIV, alpha 1
hsa-miR-1255a	0	0	1	1	0	0	CDK10	cyclin-dependent kinase 10
hsa-miR-1255a	1	0	1	1	0	0	PPP2R5D	protein phosphatase 2, regulatory subunit B', delta
hsa-miR-1255a	1	0	1	0	1	1	CAV1	caveolin 1, caveolae protein, 22kDa
hsa-miR-1255a	1	0	1	1	1	1	MEF2D	myocyte enhancer factor 2D
hsa-miR-1255a	1	0	1	1	0	0	TNPO2	transportin 2
hsa-miR-1255a	1	0	1	1	1	1	SDHC	succinate dehydrogenase complex, subunit C, integral membrane protein, 15kDa
hsa-miR-1255a	0	0	1	0	0	0	MIAT	myocardial infarction associated transcript (non-protein coding)
hsa-miR-1255a	1	0	1	1	1	1	STX16	syntaxin 16
hsa-miR-1255a	1	0	1	1	1	1	DLGAP2	discs, large (Drosophila) homolog-associated protein 2
hsa-miR-1255a	1	0	1	1	1	1	CBFA2T2	core-binding factor, runt domain, alpha subunit 2; translocated to, 2
hsa-miR-1255a	0	0	1	1	1	1	CD84	CD84 molecule
hsa-miR-1255a	1	0	1	1	1	1	SHOC2	soc-2 suppressor of clear homolog (C. elegans)
hsa-miR-1255a	1	0	1	1	1	1	MBNL2	muscleblind-like splicing regulator 2
hsa-miR-1255a	1	0	1	1	1	1	CTNND1	catenin (cadherin-associated protein), delta 1
hsa-miR-1255a	0	0	1	1	1	1	SC5DL	sterol-C5-desaturase (ERG3 delta-5-desaturase homolog, S. cerevisiae)-like
hsa-miR-1255a	1	0	1	1	1	1	TP63	tumor protein p63
hsa-miR-1255a	0	0	1	1	1	1	PCF11	PCF11, cleavage and polyadenylation factor subunit, homolog (S. cerevisiae)
hsa-miR-1255a	0	0	1	1	1	1	PLEKHB1	pleckstrin homology domain containing, family B (evectins) member 1
hsa-miR-1255a	1	0	1	1	1	1	RABEP1	rabaptin, RAB GTPase binding effector protein 1
hsa-miR-1255a	0	0	1	1	1	1	MSTO1	misato homolog 1 (Drosophila)
hsa-miR-1255a	1	0	1	1	1	1	EDNRB	endothelin receptor type B
hsa-miR-1255a	1	0	1	0	1	1	CDK14	cyclin-dependent kinase 14
hsa-miR-1255a	1	0	1	1	1	1	TLK2	tousled-like kinase 2
hsa-miR-1255a	1	0	1	1	1	1	C16orf70	chromosome 16 open reading frame 70
hsa-miR-1255a	1	0	1	1	1	1	HBP1	HMG-box transcription factor 1
hsa-miR-1255a	1	0	1	1	1	1	C3orf18	chromosome 3 open reading frame 18
hsa-miR-1255a	0	0	1	0	1	1	SLC38A4	solute carrier family 38, member 4
hsa-miR-1255a	1	0	1	1	1	1	KCNMB2	potassium large conductance calcium-activated channel, subfamily M, beta member 2
hsa-miR-1255a	1	0	1	1	1	1	SYDE1	synapse defective 1, Rho GTPase, homolog 1 (C. elegans)
hsa-miR-1255a	0	0	1	1	1	1	MFF	mitochondrial fission factor
hsa-miR-1255a	1	0	1	1	1	1	DESI2	desumoylating isopeptidase 2
hsa-miR-1255a	0	0	1	0	0	0	TIGD7	tigger transposable element derived 7
hsa-miR-1255a	1	0	1	1	1	1	RBM47	RNA binding motif protein 47
hsa-miR-1255a	1	0	1	0	1	1	TRPS1	trichorhinophalangeal syndrome I
hsa-miR-1255a	1	0	1	1	1	1	PUM2	pumilio homolog 2 (Drosophila)
hsa-miR-1255a	0	0	1	0	1	1	ERBB2IP	erbb2 interacting protein
hsa-miR-1255a	0	0	1	1	0	0	KCNK6	potassium channel, subfamily K, member 6
hsa-miR-1255a	1	0	1	1	0	0	RAB34	RAB34, member RAS oncogene family
hsa-miR-1255a	0	0	1	1	0	0	ZAN	zonadhesin
hsa-miR-1255a	1	0	1	1	1	1	DDR1	discoidin domain receptor tyrosine kinase 1
hsa-miR-1255a	1	0	1	1	1	1	KCNIP2	Kv channel interacting protein 2
hsa-miR-1255a	1	0	1	0	1	1	WIPF2	WAS/WASL interacting protein family, member 2
hsa-miR-1255a	1	0	1	1	1	1	CALCOCO1	calcium binding and coiled-coil domain 1
hsa-miR-1255a	0	0	1	0	0	0	NBPF10	neuroblastoma breakpoint family, member 10
hsa-miR-1255a	0	0	1	1	0	0	MYO1G	myosin IG
hsa-miR-1255a	0	0	1	0	0	0	RMST	rhabdomyosarcoma 2 associated transcript (non-protein coding)
hsa-miR-1255a	1	0	1	1	1	1	SGMS2	sphingomyelin synthase 2
hsa-miR-1255a	0	0	1	1	1	1	SLC2A14	solute carrier family 2 (facilitated glucose transporter), member 14
hsa-miR-1255a	0	0	1	1	1	1	AMPH	amphiphysin
hsa-miR-1255a	0	0	1	1	1	1	CARD8	caspase recruitment domain family, member 8
hsa-miR-1255a	0	0	1	1	1	1	MBD4	methyl-CpG binding domain protein 4
hsa-miR-1255a	1	0	1	0	1	1	IL1RAP	interleukin 1 receptor accessory protein
hsa-miR-1255a	0	0	1	0	0	0	CACNA2D3	calcium channel, voltage-dependent, alpha 2/delta subunit 3
hsa-miR-1255a	0	0	1	1	0	0	LOC100131138	uncharacterized LOC100131138
hsa-miR-1255a	0	0	1	1	1	1	CD1E	CD1e molecule
hsa-miR-1255a	1	0	1	1	1	1	NRXN3	neurexin 3
hsa-miR-1255a	1	0	1	1	1	1	EMID2	EMI domain containing 2
hsa-miR-1255a	0	0	1	1	1	1	TRDN	triadin
hsa-miR-1255a	0	0	1	1	1	1	ABLIM2	actin binding LIM protein family, member 2
hsa-miR-1255a	1	0	1	1	1	1	PPP1R9A	protein phosphatase 1, regulatory subunit 9A
hsa-miR-1255a	0	0	1	1	0	0	ASAP3	ArfGAP with SH3 domain, ankyrin repeat and PH domain 3
hsa-miR-1255a	1	0	1	1	1	1	AKAP2	A kinase (PRKA) anchor protein 2
hsa-miR-1255a	1	0	1	0	1	1	NFAT5	nuclear factor of activated T-cells 5, tonicity-responsive
hsa-miR-1255a	0	0	1	0	0	0	TUG1	taurine upregulated 1 (non-protein coding)
hsa-miR-1255a	0	0	1	1	1	1	OLFM4	olfactomedin 4
hsa-miR-1255a	0	0	1	0	1	1	EBF2	early B-cell factor 2
hsa-miR-1255a	1	0	1	1	1	1	EIF2C1	eukaryotic translation initiation factor 2C, 1
hsa-miR-1255a	1	0	1	1	1	1	ARMC8	armadillo repeat containing 8
hsa-miR-1255a	1	0	1	1	1	1	WDTC1	WD and tetratricopeptide repeats 1
hsa-miR-1255a	1	0	1	1	1	1	MBD5	methyl-CpG binding domain protein 5
hsa-miR-1255a	0	0	1	1	1	1	PRPF39	PRP39 pre-mRNA processing factor 39 homolog (S. cerevisiae)
hsa-miR-1255a	1	0	1	1	1	1	MKLN1	muskelin 1, intracellular mediator containing kelch motifs
hsa-miR-1255a	1	0	1	1	1	1	ZNF395	zinc finger protein 395
hsa-miR-1255a	1	0	1	1	1	1	C12orf23	chromosome 12 open reading frame 23
hsa-miR-1255a	0	0	1	1	0	0	ANAPC7	anaphase promoting complex subunit 7
hsa-miR-1255a	0	0	1	1	1	1	COA1	cytochrome C oxidase assembly factor 1 homolog (S. cerevisiae)
hsa-miR-1255a	0	0	1	0	0	0	DUXAP10	double homeobox A pseudogene 10
hsa-miR-1255a	1	0	1	1	1	1	S100PBP	S100P binding protein
hsa-miR-1255a	1	0	1	1	1	1	SMEK2	SMEK homolog 2, suppressor of mek1 (Dictyostelium)
hsa-miR-1255a	0	0	1	1	1	1	TTC23	tetratricopeptide repeat domain 23
hsa-miR-1255a	0	0	1	1	1	1	C14orf118	chromosome 14 open reading frame 118
hsa-miR-1255a	0	0	1	0	0	0	LINC00475	long intergenic non-protein coding RNA 475
hsa-miR-1255a	1	0	1	1	1	1	PHF20L1	PHD finger protein 20-like 1
hsa-miR-1255a	0	0	1	0	0	0	LOC284561	uncharacterized LOC284561
hsa-miR-1255a	1	0	1	1	1	1	BAZ2A	bromodomain adjacent to zinc finger domain, 2A
hsa-miR-1255a	1	0	1	1	1	1	COPS7B	COP9 constitutive photomorphogenic homolog subunit 7B (Arabidopsis)
hsa-miR-1255a	0	0	1	1	1	1	SIGLEC1	sialic acid binding Ig-like lectin 1, sialoadhesin
hsa-miR-1255a	1	0	1	0	1	1	ATP2B1	ATPase, Ca++ transporting, plasma membrane 1
hsa-miR-1255a	1	0	1	1	1	1	PHACTR4	phosphatase and actin regulator 4
hsa-miR-1255a	1	0	1	1	1	1	ARFGEF1	ADP-ribosylation factor guanine nucleotide-exchange factor 1 (brefeldin A-inhibited)
hsa-miR-1255a	1	0	1	0	1	1	ZCCHC3	zinc finger, CCHC domain containing 3
hsa-miR-1255a	0	0	1	1	0	0	STPG1	sperm-tail PG-rich repeat containing 1
hsa-miR-1255a	1	0	1	1	0	0	NIPAL4	NIPA-like domain containing 4
hsa-miR-1255a	0	0	1	0	0	0	LINC00340	long intergenic non-protein coding RNA 340
hsa-miR-1255a	1	0	1	1	1	1	HPS3	Hermansky-Pudlak syndrome 3
hsa-miR-1255a	0	0	1	1	1	1	FAM124B	family with sequence similarity 124B
hsa-miR-1255a	0	0	1	0	1	1	FLJ22763	uncharacterized LOC401081
hsa-miR-1255a	1	0	1	1	1	1	DCAF8	DDB1 and CUL4 associated factor 8
hsa-miR-1255a	1	0	1	1	1	1	ITGA9	integrin, alpha 9
hsa-miR-1255a	0	0	1	0	1	1	ZCCHC8	zinc finger, CCHC domain containing 8
hsa-miR-1255a	1	0	1	1	1	1	RNF185	ring finger protein 185
hsa-miR-1255a	1	0	1	1	1	1	LRP4	low density lipoprotein receptor-related protein 4
hsa-miR-1255a	1	0	1	1	1	1	FOXP1	forkhead box P1
hsa-miR-1255a	1	0	1	1	1	1	FAM53C	family with sequence similarity 53, member C
hsa-miR-1255a	0	0	1	1	1	1	RNF146	ring finger protein 146
hsa-miR-1255a	1	0	1	0	1	1	ZKSCAN1	zinc finger with KRAB and SCAN domains 1
hsa-miR-1255a	0	0	1	1	0	0	FAM153B	family with sequence similarity 153, member B
hsa-miR-1255a	0	0	1	1	1	1	C8orf46	chromosome 8 open reading frame 46
hsa-miR-1255a	1	0	1	1	1	1	SGK1	serum/glucocorticoid regulated kinase 1
hsa-miR-1255a	0	0	1	1	1	1	GABRP	gamma-aminobutyric acid (GABA) A receptor, pi
hsa-miR-1255a	0	0	1	1	0	0	SLC26A8	solute carrier family 26, member 8
hsa-miR-1255a	1	0	1	1	1	1	FRMD6	FERM domain containing 6
hsa-miR-1255a	0	0	1	0	0	0	LOC149684	uncharacterized LOC149684
hsa-miR-1255a	1	0	1	1	1	1	MAP3K7	mitogen-activated protein kinase kinase kinase 7
hsa-miR-1255a	1	0	1	1	1	1	ZNF664	zinc finger protein 664
hsa-miR-1255a	0	0	1	0	0	0	JPX	JPX transcript, XIST activator (non-protein coding)
hsa-miR-1255a	1	0	1	1	1	1	PPP1R3F	protein phosphatase 1, regulatory subunit 3F
hsa-miR-1255a	1	0	1	1	1	1	AGPAT1	1-acylglycerol-3-phosphate O-acyltransferase 1 (lysophosphatidic acid acyltransferase, alpha)
hsa-miR-1255a	0	0	1	1	1	1	BRD2	bromodomain containing 2
hsa-miR-1255a	1	0	1	1	1	1	CLCN5	chloride channel, voltage-sensitive 5
hsa-miR-1255a	0	0	1	1	1	1	GNB2	guanine nucleotide binding protein (G protein), beta polypeptide 2
hsa-miR-1255a	0	0	1	0	0	0	LOC255187	hCG1980447
hsa-miR-1255a	0	0	1	1	1	1	DST	dystonin
hsa-miR-1255a	1	0	1	1	0	0	QARS	glutaminyl-tRNA synthetase
hsa-miR-1255a	1	0	1	0	1	1	RABGEF1	RAB guanine nucleotide exchange factor (GEF) 1
hsa-miR-1255a	0	0	1	1	1	1	SCIMP	SLP adaptor and CSK interacting membrane protein
hsa-miR-1255a	0	0	1	1	0	0	NXF2	nuclear RNA export factor 2
hsa-miR-1255a	1	0	1	0	1	1	NCAM1	neural cell adhesion molecule 1
hsa-miR-1255a	0	0	1	0	1	1	CHURC1	churchill domain containing 1
hsa-miR-1255a	0	0	1	0	0	0	INTS4L1	integrator complex subunit 4-like 1
hsa-miR-1255a	0	0	1	1	0	0	PTOV1	prostate tumor overexpressed 1
hsa-miR-1255a	0	0	1	0	1	1	UHMK1	U2AF homology motif (UHM) kinase 1
hsa-miR-1255a	0	0	1	1	0	0	RHBDF2	rhomboid 5 homolog 2 (Drosophila)
hsa-miR-1255a	1	0	1	0	1	1	CLASP1	cytoplasmic linker associated protein 1
hsa-miR-1255a	0	0	1	1	1	1	PKIB	protein kinase (cAMP-dependent, catalytic) inhibitor beta
hsa-miR-1255a	1	0	1	1	1	1	PRRT2	proline-rich transmembrane protein 2
hsa-miR-1255a	0	0	1	1	0	0	LGR5	leucine-rich repeat containing G protein-coupled receptor 5
hsa-miR-1255a	0	0	1	1	0	0	PIGO	phosphatidylinositol glycan anchor biosynthesis, class O
hsa-miR-1255a	0	0	1	1	1	1	MTR	5-methyltetrahydrofolate-homocysteine methyltransferase
hsa-miR-1255a	0	0	1	0	0	0	LOC727993	uncharacterized LOC727993
hsa-miR-1255a	0	0	1	1	0	0	CTNNBL1	catenin, beta like 1
hsa-miR-1255a	0	0	1	1	1	1	KBTBD4	kelch repeat and BTB (POZ) domain containing 4
hsa-miR-1255a	1	0	1	1	1	1	SUPT16H	suppressor of Ty 16 homolog (S. cerevisiae)
hsa-miR-1255a	0	0	1	1	1	1	GPATCH1	G patch domain containing 1
hsa-miR-1255a	1	0	1	1	1	1	FBXW2	F-box and WD repeat domain containing 2
hsa-miR-1255a	1	0	1	1	1	1	LUC7L2	LUC7-like 2 (S. cerevisiae)
hsa-miR-1255a	1	0	1	1	1	1	ZNF286A	zinc finger protein 286A
hsa-miR-1255a	0	0	1	1	0	0	SUGP1	SURP and G patch domain containing 1
hsa-miR-1255a	1	0	1	1	0	0	TOE1	target of EGR1, member 1 (nuclear)
hsa-miR-1255a	0	0	1	0	0	0	LOC257358	uncharacterized LOC257358
hsa-miR-1255a	0	0	1	1	0	0	WBP1	WW domain binding protein 1
hsa-miR-1255a	0	0	1	1	1	1	SPOCK1	sparc/osteonectin, cwcv and kazal-like domains proteoglycan (testican) 1
hsa-miR-1255a	1	0	1	1	1	1	SLC7A8	solute carrier family 7 (amino acid transporter light chain, L system), member 8
hsa-miR-1255a	1	0	1	0	1	1	NCOA7	nuclear receptor coactivator 7
hsa-miR-1255a	1	0	1	1	1	1	TMEM100	transmembrane protein 100
hsa-miR-1255a	0	0	1	1	1	1	MOBP	myelin-associated oligodendrocyte basic protein
hsa-miR-1255a	0	0	1	1	0	0	ZNF185	zinc finger protein 185 (LIM domain)
hsa-miR-1255a	0	0	1	1	1	1	MYO6	myosin VI
hsa-miR-1255a	1	0	1	0	1	1	UVRAG	UV radiation resistance associated gene
hsa-miR-1255a	1	0	1	0	1	1	UBXN4	UBX domain protein 4
hsa-miR-1255a	0	0	1	1	1	1	LTBR	lymphotoxin beta receptor (TNFR superfamily, member 3)
hsa-miR-1255a	1	0	1	0	1	1	FAM129A	family with sequence similarity 129, member A
hsa-miR-1255a	1	0	1	1	1	1	FAM222B	family with sequence similarity 222, member B
hsa-miR-1255a	0	0	1	0	0	0	LOC730101	uncharacterized LOC730101
hsa-miR-1255a	1	0	1	0	1	1	STC2	stanniocalcin 2
hsa-miR-1255a	1	0	1	1	1	1	PEA15	phosphoprotein enriched in astrocytes 15
hsa-miR-1255a	0	0	1	0	0	0	CCDC150	coiled-coil domain containing 150
hsa-miR-1255a	0	0	1	0	0	0	ZNF815P	zinc finger protein 815, pseudogene
hsa-miR-1255a	0	0	1	0	0	0	METTL21CP1	methyltransferase like 21C pseudogene 1
hsa-miR-1255a	0	0	1	0	0	0	C1orf204	chromosome 1 open reading frame 204
hsa-miR-1255a	1	0	1	0	1	1	THRB	thyroid hormone receptor, beta
hsa-miR-1255a	1	0	1	1	1	1	SYT6	synaptotagmin VI
hsa-miR-1255a	1	0	1	1	1	1	EPB41L1	erythrocyte membrane protein band 4.1-like 1
hsa-miR-1255a	1	0	1	1	1	1	CDV3	CDV3 homolog (mouse)
hsa-miR-1255a	0	0	1	0	0	0	LOC400680	uncharacterized LOC400680
hsa-miR-1255a	1	0	1	1	1	1	POU2F3	POU class 2 homeobox 3
hsa-miR-1255a	0	0	1	0	0	0	LINC00293	long intergenic non-protein coding RNA 293
hsa-miR-1255a	1	0	1	1	1	1	NSUN4	NOP2/Sun domain family, member 4
hsa-miR-1255a	1	0	1	1	1	1	GOLGA8B	golgin A8 family, member B
hsa-miR-1255a	1	0	1	1	1	1	IGSF11	immunoglobulin superfamily, member 11
hsa-miR-1255a	1	0	1	1	1	1	LZTS2	leucine zipper, putative tumor suppressor 2
hsa-miR-1255a	0	0	1	0	0	0	CECR7	cat eye syndrome chromosome region, candidate 7 (non-protein coding)
hsa-miR-1255a	0	0	1	1	1	1	RP1	retinitis pigmentosa 1 (autosomal dominant)
hsa-miR-1255a	0	0	1	1	0	0	FBXO16	F-box protein 16
hsa-miR-1255a	0	0	1	1	1	1	GRPEL1	GrpE-like 1, mitochondrial (E. coli)
hsa-miR-1255a	1	0	1	1	1	1	THTPA	thiamine triphosphatase
hsa-miR-1255a	0	0	1	0	1	1	MYLK4	myosin light chain kinase family, member 4
hsa-miR-1255a	0	0	1	1	1	1	UPP2	uridine phosphorylase 2
hsa-miR-1255a	0	0	1	1	0	0	KIAA0146	KIAA0146
hsa-miR-1255a	1	0	1	1	0	0	CACNB3	calcium channel, voltage-dependent, beta 3 subunit
hsa-miR-1255a	0	0	1	1	0	0	PROKR1	prokineticin receptor 1
hsa-miR-1255a	0	0	1	1	0	0	MX2	myxovirus (influenza virus) resistance 2 (mouse)
hsa-miR-1255a	1	0	1	1	1	1	PXN	paxillin
hsa-miR-1255a	0	0	1	1	0	0	SLC26A10	solute carrier family 26, member 10
hsa-miR-1255a	0	0	1	1	1	1	FRMD5	FERM domain containing 5
hsa-miR-1255a	1	0	1	1	0	0	KCNC1	potassium voltage-gated channel, Shaw-related subfamily, member 1
hsa-miR-1255a	0	0	1	0	0	0	MORN2	MORN repeat containing 2
hsa-miR-1255a	1	0	1	0	1	1	KCNK2	potassium channel, subfamily K, member 2
hsa-miR-1255a	1	0	1	1	0	0	XPO6	exportin 6
hsa-miR-1255a	0	0	1	1	1	1	BTN2A2	butyrophilin, subfamily 2, member A2
hsa-miR-1255a	1	0	1	0	0	0	GPR137C	G protein-coupled receptor 137C
hsa-miR-1255a	1	0	1	1	1	1	SH2D4B	SH2 domain containing 4B
hsa-miR-1255a	1	0	1	1	1	1	CREBRF	CREB3 regulatory factor
hsa-miR-1255a	0	0	1	1	0	0	NMI	N-myc (and STAT) interactor
hsa-miR-1255a	1	0	1	1	1	1	GJC1	gap junction protein, gamma 1, 45kDa
hsa-miR-1255a	1	0	1	1	1	1	NECAB3	N-terminal EF-hand calcium binding protein 3
hsa-miR-1255a	0	0	1	1	1	1	IDS	iduronate 2-sulfatase
hsa-miR-1255a	0	0	1	1	0	0	KCNAB2	potassium voltage-gated channel, shaker-related subfamily, beta member 2
hsa-miR-1255a	1	0	1	1	1	1	PLEKHH1	pleckstrin homology domain containing, family H (with MyTH4 domain) member 1
hsa-miR-1255a	0	0	1	1	1	1	C2orf91	chromosome 2 open reading frame 91
hsa-miR-1255a	0	0	1	1	1	1	C3orf67	chromosome 3 open reading frame 67
hsa-miR-1255a	1	0	1	1	1	1	SGIP1	SH3-domain GRB2-like (endophilin) interacting protein 1
hsa-miR-1255a	0	0	1	0	0	0	TMEM232	transmembrane protein 232
hsa-miR-1255a	1	0	1	1	1	1	PIAS3	protein inhibitor of activated STAT, 3
hsa-miR-1255a	1	0	1	1	1	1	SGSM2	small G protein signaling modulator 2
hsa-miR-1255a	0	0	1	1	0	0	LOC100128239	uncharacterized LOC100128239
hsa-miR-1255a	0	0	1	0	0	0	C3orf72	chromosome 3 open reading frame 72
hsa-miR-1255a	0	0	1	1	1	1	MKX	mohawk homeobox
hsa-miR-1255a	1	0	1	1	1	1	SACS	spastic ataxia of Charlevoix-Saguenay (sacsin)
hsa-miR-1255a	1	0	1	0	0	0	MSL1	male-specific lethal 1 homolog (Drosophila)
hsa-miR-1255a	0	0	1	1	0	0	UBR2	ubiquitin protein ligase E3 component n-recognin 2
hsa-miR-1255a	0	0	1	0	1	1	C17orf105	chromosome 17 open reading frame 105
hsa-miR-1255a	1	0	1	1	0	0	UBN2	ubinuclein 2
hsa-miR-1255a	1	0	1	1	0	0	ATXN7L3	ataxin 7-like 3
hsa-miR-1255a	1	0	1	1	1	1	CSRNP3	cysteine-serine-rich nuclear protein 3
hsa-miR-1255a	0	0	1	0	1	1	LOC388942	uncharacterized LOC388942
hsa-miR-1255a	0	0	1	1	1	1	USP54	ubiquitin specific peptidase 54
hsa-miR-1255a	0	0	1	1	0	0	HS3ST5	heparan sulfate (glucosamine) 3-O-sulfotransferase 5
hsa-miR-1255a	1	0	1	1	1	1	MKRN1	makorin ring finger protein 1
hsa-miR-1255a	1	0	1	0	1	1	N4BP3	NEDD4 binding protein 3
hsa-miR-1255a	0	0	1	0	1	1	NPHP4	nephronophthisis 4
hsa-miR-1255a	0	0	1	1	1	1	SYT15	synaptotagmin XV
hsa-miR-1255a	1	0	1	1	1	1	SLC26A9	solute carrier family 26, member 9
hsa-miR-1255a	1	0	1	1	1	1	PLCL1	phospholipase C-like 1
hsa-miR-1255a	1	0	1	0	1	1	FNDC3B	fibronectin type III domain containing 3B
hsa-miR-1255a	0	0	1	1	0	0	NCF1	neutrophil cytosolic factor 1
hsa-miR-1255a	1	0	1	0	1	1	CAPRIN1	cell cycle associated protein 1
hsa-miR-1255a	0	0	1	0	1	1	LOC401321	uncharacterized LOC401321
hsa-miR-1255a	1	0	1	0	1	1	YOD1	YOD1 OTU deubiquinating enzyme 1 homolog (S. cerevisiae)
hsa-miR-1255a	0	0	1	1	1	1	MCU	mitochondrial calcium uniporter
hsa-miR-1255a	0	0	1	1	1	1	MON1B	MON1 homolog B (yeast)
hsa-miR-1255a	1	0	1	0	1	1	PLSCR4	phospholipid scramblase 4
hsa-miR-1255a	1	0	1	1	1	1	FRYL	FRY-like
hsa-miR-1255a	0	0	1	1	1	1	ATXN2	ataxin 2
hsa-miR-1255a	1	0	1	0	1	1	CYB561D1	cytochrome b-561 domain containing 1
hsa-miR-1255a	1	0	1	1	1	1	DPY19L3	dpy-19-like 3 (C. elegans)
hsa-miR-1255a	0	0	1	1	1	1	WBP2NL	WBP2 N-terminal like
hsa-miR-1255a	1	0	1	1	1	1	CD200	CD200 molecule
hsa-miR-1255a	0	0	1	1	0	0	HEATR8	HEAT repeat containing 8
hsa-miR-1255a	0	0	1	1	1	1	TMEM202	transmembrane protein 202
hsa-miR-1255a	0	0	1	1	0	0	CPA5	carboxypeptidase A5
hsa-miR-1255a	0	0	1	0	1	1	GALNT13	UDP-N-acetyl-alpha-D-galactosamine:polypeptide N-acetylgalactosaminyltransferase 13 (GalNAc-T13)
hsa-miR-1255a	1	0	1	1	1	1	MAP2K4	mitogen-activated protein kinase kinase 4
hsa-miR-1255a	1	0	1	0	1	1	ZNF607	zinc finger protein 607
hsa-miR-1255a	0	0	1	0	0	0	AGAP9	ArfGAP with GTPase domain, ankyrin repeat and PH domain 9
hsa-miR-1255a	0	0	1	1	0	0	FIZ1	FLT3-interacting zinc finger 1
hsa-miR-1255a	1	0	1	1	1	1	SYS1	SYS1 Golgi-localized integral membrane protein homolog (S. cerevisiae)
hsa-miR-1255a	1	0	1	1	1	1	TAP2	transporter 2, ATP-binding cassette, sub-family B (MDR/TAP)
hsa-miR-1255a	0	0	1	1	1	1	CRISP3	cysteine-rich secretory protein 3
hsa-miR-1255a	0	0	1	1	1	1	DHRS3	dehydrogenase/reductase (SDR family) member 3
hsa-miR-1255a	0	0	1	0	1	1	PEX5	peroxisomal biogenesis factor 5
hsa-miR-1255a	1	0	1	1	1	1	CAMK2G	calcium/calmodulin-dependent protein kinase II gamma
hsa-miR-1255a	0	0	1	1	0	0	CFDP1	craniofacial development protein 1
hsa-miR-1255a	1	0	1	1	1	1	NCOA1	nuclear receptor coactivator 1
hsa-miR-1255a	0	0	1	1	0	0	MTMR1	myotubularin related protein 1
hsa-miR-1255a	1	0	1	1	1	1	NOVA1	neuro-oncological ventral antigen 1
hsa-miR-1255a	1	0	1	0	1	1	TEAD3	TEA domain family member 3
hsa-miR-1255a	0	0	1	1	0	0	NFATC2	nuclear factor of activated T-cells, cytoplasmic, calcineurin-dependent 2
hsa-miR-1255a	0	0	1	1	1	1	PTPN20B	protein tyrosine phosphatase, non-receptor type 20B
hsa-miR-1255a	0	0	1	1	1	1	PTPN20A	protein tyrosine phosphatase, non-receptor type 20A
hsa-miR-1255a	0	0	1	0	0	0	PART1	prostate androgen-regulated transcript 1 (non-protein coding)
hsa-miR-1255a	1	0	1	1	1	1	NECAP1	NECAP endocytosis associated 1
hsa-miR-1255a	0	0	1	0	1	1	NEK1	NIMA (never in mitosis gene a)-related kinase 1
hsa-miR-1255a	0	0	1	0	0	0	ANKRD34C	ankyrin repeat domain 34C
hsa-miR-1255a	1	0	1	0	1	1	SLC2A3	solute carrier family 2 (facilitated glucose transporter), member 3
hsa-miR-1255a	0	0	1	1	1	1	ARIH1	ariadne homolog, ubiquitin-conjugating enzyme E2 binding protein, 1 (Drosophila)
hsa-miR-1255a	0	0	1	0	0	0	KIAA0913	KIAA0913
hsa-miR-1255a	1	0	1	1	1	1	GOLGA8A	golgin A8 family, member A
hsa-miR-1255a	0	0	1	1	1	1	TAOK2	TAO kinase 2
hsa-miR-1255a	1	0	1	0	1	1	GPR85	G protein-coupled receptor 85
hsa-miR-1255a	0	0	1	1	0	0	DOPEY1	dopey family member 1
hsa-miR-1255a	0	0	1	0	0	0	FAM66D	family with sequence similarity 66, member D
hsa-miR-1255a	1	0	1	1	1	1	PKNOX2	PBX/knotted 1 homeobox 2
hsa-miR-1255a	1	0	1	1	1	1	MSANTD2	Myb/SANT-like DNA-binding domain containing 2
hsa-miR-1255a	0	0	1	0	0	0	LOC441204	uncharacterized LOC441204
hsa-miR-1255a	1	0	1	1	1	1	SLC30A8	solute carrier family 30 (zinc transporter), member 8
hsa-miR-1255a	0	0	1	1	0	0	KRBA1	KRAB-A domain containing 1
hsa-miR-1255a	0	0	1	1	1	1	ZFP41	zinc finger protein 41 homolog (mouse)
hsa-miR-1255a	0	0	1	0	0	0	SLC25A30	solute carrier family 25, member 30
hsa-miR-1255a	0	0	1	1	1	1	RAD51AP1	RAD51 associated protein 1
hsa-miR-1255a	0	0	1	1	1	1	SRSF11	serine/arginine-rich splicing factor 11
hsa-miR-1255a	1	0	1	0	0	0	YLPM1	YLP motif containing 1
hsa-miR-1255a	0	0	1	1	1	1	YAP1	Yes-associated protein 1
hsa-miR-1255a	1	0	1	1	1	1	NABP1	nucleic acid binding protein 1
hsa-miR-1255a	0	0	1	1	1	1	VIT	vitrin
hsa-miR-1255a	0	0	1	0	0	0	FAM225A	family with sequence similarity 225, member A (non-protein coding)
hsa-miR-1255a	0	0	1	0	1	1	CEP95	centrosomal protein 95kDa
hsa-miR-1255a	1	0	1	1	1	1	FBXO3	F-box protein 3
hsa-miR-1255a	1	0	1	1	1	1	POU6F1	POU class 6 homeobox 1
hsa-miR-1255a	0	0	1	1	0	0	TMEM44	transmembrane protein 44
hsa-miR-1255a	1	0	1	0	1	1	SLC25A37	solute carrier family 25 (mitochondrial iron transporter), member 37
hsa-miR-1255a	0	0	1	1	1	1	NEK11	NIMA (never in mitosis gene a)- related kinase 11
hsa-miR-1255a	0	0	1	0	0	0	EPHA1-AS1	EPHA1 antisense RNA 1
hsa-miR-1255a	1	0	1	1	1	1	ANP32E	acidic (leucine-rich) nuclear phosphoprotein 32 family, member E
hsa-miR-1255a	0	0	1	1	0	0	CD37	CD37 molecule
hsa-miR-1255a	1	0	1	1	1	1	IL17RD	interleukin 17 receptor D
hsa-miR-1255a	0	0	1	1	0	0	TTLL6	tubulin tyrosine ligase-like family, member 6
hsa-miR-1255a	1	0	1	1	1	1	DIS3L2	DIS3 mitotic control homolog (S. cerevisiae)-like 2
hsa-miR-1255a	1	0	1	1	1	1	MBD6	methyl-CpG binding domain protein 6
hsa-miR-1255a	1	0	1	0	1	1	SMURF1	SMAD specific E3 ubiquitin protein ligase 1
hsa-miR-1255a	1	0	1	1	1	1	RICTOR	RPTOR independent companion of MTOR, complex 2
hsa-miR-1255a	1	0	1	0	1	1	PATL1	protein associated with topoisomerase II homolog 1 (yeast)
hsa-miR-1255a	1	0	1	1	0	0	LRRC58	leucine rich repeat containing 58
hsa-miR-1255a	0	0	1	0	1	1	PSG1	pregnancy specific beta-1-glycoprotein 1
hsa-miR-1255a	1	0	1	1	1	1	PPP3CA	protein phosphatase 3, catalytic subunit, alpha isozyme
hsa-miR-1255a	1	0	1	1	1	1	WDR44	WD repeat domain 44
hsa-miR-1255a	0	0	1	1	0	0	TMEM134	transmembrane protein 134
hsa-miR-1255a	0	0	1	1	1	1	MOXD1	monooxygenase, DBH-like 1
hsa-miR-1255a	0	0	1	0	1	1	STEAP2	STEAP family member 2, metalloreductase
hsa-miR-1255a	0	0	1	1	0	0	IL1F10	interleukin 1 family, member 10 (theta)
hsa-miR-1255a	0	0	1	1	1	1	ALS2CR8	amyotrophic lateral sclerosis 2 (juvenile) chromosome region, candidate 8
hsa-miR-1255a	1	0	1	1	1	1	TACC1	transforming, acidic coiled-coil containing protein 1
hsa-miR-1255a	0	0	1	1	1	1	CRB1	crumbs homolog 1 (Drosophila)
hsa-miR-1255a	0	0	1	0	0	0	CLCN1	chloride channel, voltage-sensitive 1
hsa-miR-1255a	1	0	1	1	1	1	MARK4	MAP/microtubule affinity-regulating kinase 4
hsa-miR-1255a	0	0	1	1	1	1	MED19	mediator complex subunit 19
hsa-miR-1255a	1	0	1	1	1	1	WDR26	WD repeat domain 26
hsa-miR-1255a	0	0	1	1	0	0	DNAH1	dynein, axonemal, heavy chain 1
hsa-miR-1255a	1	0	1	1	1	1	PBRM1	polybromo 1
hsa-miR-1255a	1	0	1	1	1	1	OPRM1	opioid receptor, mu 1
hsa-miR-1255a	0	0	1	1	1	1	MFAP5	microfibrillar associated protein 5
hsa-miR-1255a	1	0	1	1	1	1	CAMTA1	calmodulin binding transcription activator 1
hsa-miR-1255a	0	0	1	1	1	1	LHFPL1	lipoma HMGIC fusion partner-like 1
hsa-miR-1255a	1	0	1	0	1	1	ANKRD28	ankyrin repeat domain 28
hsa-miR-1255a	1	0	1	1	1	1	BCL2L11	BCL2-like 11 (apoptosis facilitator)
hsa-miR-1255a	0	0	1	0	1	1	XKR5	XK, Kell blood group complex subunit-related family, member 5
hsa-miR-1255a	1	0	1	1	1	1	MECP2	methyl CpG binding protein 2 (Rett syndrome)
hsa-miR-1255a	1	0	1	1	1	1	MOG	myelin oligodendrocyte glycoprotein
hsa-miR-1255a	1	0	1	1	1	1	PLCH1	phospholipase C, eta 1
hsa-miR-1255a	1	0	1	1	1	1	NIPA2	non imprinted in Prader-Willi/Angelman syndrome 2
hsa-miR-1255a	1	0	1	1	1	1	RTN3	reticulon 3
hsa-miR-1255a	0	0	1	1	1	1	CEACAM1	carcinoembryonic antigen-related cell adhesion molecule 1 (biliary glycoprotein)
hsa-miR-1255a	0	0	1	1	0	0	NBPF8	neuroblastoma breakpoint family, member 8
hsa-miR-1255a	0	0	1	1	1	1	IYD	iodotyrosine deiodinase
hsa-miR-1255a	1	0	1	1	1	1	TMUB2	transmembrane and ubiquitin-like domain containing 2
hsa-miR-1255a	1	0	1	1	1	1	HOXC13	homeobox C13
hsa-miR-1255a	1	0	1	1	1	1	RIMS3	regulating synaptic membrane exocytosis 3
hsa-miR-1255a	1	0	1	1	1	1	PPP1R11	protein phosphatase 1, regulatory (inhibitor) subunit 11
hsa-miR-1255a	1	0	1	1	0	0	POLR3D	polymerase (RNA) III (DNA directed) polypeptide D, 44kDa
hsa-miR-1255a	0	0	1	1	0	0	SCG5	secretogranin V (7B2 protein)
hsa-miR-1255a	1	0	1	1	1	1	POU2F2	POU class 2 homeobox 2
hsa-miR-1255a	1	0	1	1	1	1	KIAA1191	KIAA1191
hsa-miR-1255a	1	0	1	1	1	1	PCGF5	polycomb group ring finger 5
hsa-miR-1255a	0	0	1	1	1	1	C1orf94	chromosome 1 open reading frame 94
hsa-miR-1255a	1	0	1	1	1	1	HMGA1	high mobility group AT-hook 1
hsa-miR-1255a	0	0	1	0	0	0	ATXN7L3B	ataxin 7-like 3B
hsa-miR-1255a	1	0	1	1	0	0	MARCH9	membrane-associated ring finger (C3HC4) 9
hsa-miR-1255a	1	0	1	1	1	1	AGK	acylglycerol kinase
hsa-miR-1255a	0	0	1	1	1	1	C9orf85	chromosome 9 open reading frame 85
hsa-miR-1255a	0	0	1	1	1	1	ATXN2L	ataxin 2-like
hsa-miR-1255a	1	0	1	1	1	1	LRRFIP1	leucine rich repeat (in FLII) interacting protein 1
hsa-miR-1255a	0	0	1	1	0	0	TCN2	transcobalamin II
hsa-miR-1255a	0	0	1	1	1	1	TAF12	TAF12 RNA polymerase II, TATA box binding protein (TBP)-associated factor, 20kDa
hsa-miR-1255a	1	0	1	0	1	1	TBC1D5	TBC1 domain family, member 5
hsa-miR-1255a	0	0	1	1	1	1	H2AFY	H2A histone family, member Y
hsa-miR-1255a	1	0	1	1	1	1	ZNF3	zinc finger protein 3
hsa-miR-1255a	0	0	1	1	0	0	C8orf44	chromosome 8 open reading frame 44
hsa-miR-1255a	1	0	1	1	0	0	FHL3	four and a half LIM domains 3
hsa-miR-1255a	1	0	1	1	0	0	LRFN1	leucine rich repeat and fibronectin type III domain containing 1
hsa-miR-1255a	0	0	1	1	0	0	CCDC36	coiled-coil domain containing 36
hsa-miR-1255a	0	0	1	1	0	0	BEST1	bestrophin 1
hsa-miR-1255a	0	0	1	0	0	0	KLHL15	kelch-like 15 (Drosophila)
hsa-miR-1255a	1	0	1	1	1	1	ZBTB38	zinc finger and BTB domain containing 38
hsa-miR-1255a	1	0	1	1	1	1	ZNF512	zinc finger protein 512
hsa-miR-1255a	0	0	1	1	1	1	CEP70	centrosomal protein 70kDa
hsa-miR-1255a	1	0	1	1	1	1	RAN	RAN, member RAS oncogene family
hsa-miR-1255a	0	0	1	0	0	0	FAM86DP	family with sequence similarity 86, member D, pseudogene
hsa-miR-1255a	0	0	1	1	1	1	MBIP	MAP3K12 binding inhibitory protein 1
hsa-miR-1255a	1	0	1	0	1	1	CYBRD1	cytochrome b reductase 1
hsa-miR-1255a	1	0	1	1	1	1	NRF1	nuclear respiratory factor 1
hsa-miR-1255a	0	0	1	1	1	1	PARP9	poly (ADP-ribose) polymerase family, member 9
hsa-miR-1255a	0	0	1	1	0	0	ZNF584	zinc finger protein 584
hsa-miR-1255a	1	0	1	1	1	1	ARHGEF9	Cdc42 guanine nucleotide exchange factor (GEF) 9
hsa-miR-1255a	1	0	1	0	1	1	SLC19A2	solute carrier family 19 (thiamine transporter), member 2
hsa-miR-1255a	0	0	1	1	0	0	TLX2	T-cell leukemia homeobox 2
hsa-miR-1255a	1	0	1	1	1	1	KIAA1217	KIAA1217
hsa-miR-1255a	0	0	1	0	0	0	WDFY3-AS2	WDFY3 antisense RNA 2
hsa-miR-1255a	1	0	1	1	1	1	ZMAT4	zinc finger, matrin-type 4
hsa-miR-1255a	0	0	1	0	1	1	CD99P1	CD99 molecule pseudogene 1
hsa-miR-1255a	0	0	1	1	1	1	HIBADH	3-hydroxyisobutyrate dehydrogenase
hsa-miR-1255a	0	0	1	0	1	1	ZNF718	zinc finger protein 718
hsa-miR-1255a	0	0	1	0	0	0	ENTPD5	ectonucleoside triphosphate diphosphohydrolase 5
hsa-miR-1255a	1	0	1	0	1	1	BTF3L4	basic transcription factor 3-like 4
hsa-miR-1255a	0	0	1	0	0	0	NBR2	neighbor of BRCA1 gene 2 (non-protein coding)
hsa-miR-1255a	0	0	1	1	1	1	SRGN	serglycin
hsa-miR-1255a	0	0	1	1	0	0	SLC22A9	solute carrier family 22 (organic anion transporter), member 9
hsa-miR-1255a	0	0	1	1	1	1	CDC42SE2	CDC42 small effector 2
hsa-miR-1255a	1	0	1	1	1	1	EPHA4	EPH receptor A4
hsa-miR-1255a	0	0	1	1	1	1	MAP2	microtubule-associated protein 2
hsa-miR-1255a	0	0	1	1	1	1	RHBDD1	rhomboid domain containing 1
hsa-miR-1255a	1	0	1	1	1	1	TMEM127	transmembrane protein 127
hsa-miR-1255a	1	0	1	1	1	1	HTR2C	5-hydroxytryptamine (serotonin) receptor 2C, G protein-coupled
hsa-miR-1255a	0	0	1	1	0	0	GEMIN6	gem (nuclear organelle) associated protein 6
hsa-miR-1255a	0	0	1	1	1	1	TFAM	transcription factor A, mitochondrial
hsa-miR-1255a	1	0	1	1	1	1	MRO	maestro
hsa-miR-1255a	1	0	1	0	1	1	SV2B	synaptic vesicle glycoprotein 2B
hsa-miR-1255a	1	0	1	1	1	1	EYA4	eyes absent homolog 4 (Drosophila)
hsa-miR-1255a	1	0	1	1	1	1	WDR20	WD repeat domain 20
hsa-miR-1255a	0	0	1	0	1	1	FLJ25328	uncharacterized LOC148231
hsa-miR-1255a	1	0	1	1	1	1	BZRAP1	benzodiazapine receptor (peripheral) associated protein 1
hsa-miR-1255a	0	0	1	0	0	0	LOC402779	uncharacterized LOC402779
hsa-miR-1255a	1	0	1	1	1	1	TBC1D1	TBC1 (tre-2/USP6, BUB2, cdc16) domain family, member 1
hsa-miR-1255a	0	0	1	1	1	1	CCDC90B	coiled-coil domain containing 90B
hsa-miR-1255a	1	0	1	1	1	1	DCLK2	doublecortin-like kinase 2
hsa-miR-1255a	0	0	1	0	0	0	FAM86JP	family with sequence similarity 86, member A pseudogene
hsa-miR-1255a	0	0	1	1	1	1	C5orf22	chromosome 5 open reading frame 22
hsa-miR-1255a	1	0	1	1	1	1	RHOBTB1	Rho-related BTB domain containing 1
hsa-miR-1255a	0	0	1	0	1	1	TTC23L	tetratricopeptide repeat domain 23-like
hsa-miR-1255a	0	0	1	1	0	0	WASIR2	WASH and IL9R antisense RNA 2
hsa-miR-1255a	0	0	1	0	0	0	LOC641515	uncharacterized LOC641515
hsa-miR-1255a	1	0	1	1	1	1	SECISBP2L	SECIS binding protein 2-like
hsa-miR-1255a	1	0	1	1	1	1	SIRPA	signal-regulatory protein alpha
hsa-miR-1255a	0	0	1	0	0	0	BCAS3	breast carcinoma amplified sequence 3
hsa-miR-1255a	0	0	1	1	1	1	C16orf89	chromosome 16 open reading frame 89
hsa-miR-1255a	0	0	1	1	0	0	PLA2G6	phospholipase A2, group VI (cytosolic, calcium-independent)
hsa-miR-1255a	0	0	1	1	1	1	EDA2R	ectodysplasin A2 receptor
hsa-miR-1255a	0	0	1	1	1	1	KIF16B	kinesin family member 16B
hsa-miR-1255a	0	0	1	0	0	0	TMPRSS12	transmembrane (C-terminal) protease, serine 12
hsa-miR-1255a	0	0	1	1	1	1	C12orf29	chromosome 12 open reading frame 29
hsa-miR-1255a	0	0	1	1	0	0	SNRPN	small nuclear ribonucleoprotein polypeptide N
hsa-miR-1255a	1	0	1	1	1	1	COL4A5	collagen, type IV, alpha 5
hsa-miR-1255a	0	0	1	1	1	1	NR1H4	nuclear receptor subfamily 1, group H, member 4
hsa-miR-1255a	0	0	1	1	0	0	PGS1	phosphatidylglycerophosphate synthase 1
hsa-miR-1255a	0	0	1	1	1	1	PIK3CG	phosphatidylinositol-4,5-bisphosphate 3-kinase, catalytic subunit gamma
hsa-miR-1255a	0	0	1	1	1	1	SEC24D	SEC24 family, member D (S. cerevisiae)
hsa-miR-1255a	0	0	1	0	0	0	LOC339862	uncharacterized LOC339862
hsa-miR-1255a	1	0	1	1	1	1	DPP6	dipeptidyl-peptidase 6
hsa-miR-1255a	0	0	1	1	1	1	CLEC12B	C-type lectin domain family 12, member B
hsa-miR-1255a	0	0	1	1	1	1	ATP1A4	ATPase, Na+/K+ transporting, alpha 4 polypeptide
hsa-miR-1255a	0	0	1	1	0	0	FAM3B	family with sequence similarity 3, member B
hsa-miR-1255a	1	0	1	1	1	1	SMG7	smg-7 homolog, nonsense mediated mRNA decay factor (C. elegans)
hsa-miR-1255a	1	0	1	1	1	1	SLC35G1	solute carrier family 35, member G1
hsa-miR-1255a	1	0	1	1	1	1	MACROD2	MACRO domain containing 2
hsa-miR-1255a	1	0	1	1	1	1	ELMO2	engulfment and cell motility 2
hsa-miR-1255a	1	0	1	1	1	1	MEIS1	Meis homeobox 1
hsa-miR-1255a	0	0	1	0	0	0	SRGAP2C	SLIT-ROBO Rho GTPase activating protein 2C
hsa-miR-1255a	1	0	1	1	1	1	CEP128	centrosomal protein 128kDa
hsa-miR-1255a	0	0	1	0	0	0	CYP4F35P	cytochrome P450, family 4, subfamily F, polypeptide 35, pseudogene
hsa-miR-1255a	0	0	1	0	0	0	CRYBB2P1	crystallin, beta B2 pseudogene 1
hsa-miR-1255a	1	0	1	0	1	1	CEP44	centrosomal protein 44kDa
hsa-miR-1255a	0	0	1	1	0	0	CCDC152	coiled-coil domain containing 152
hsa-miR-1255a	0	0	1	0	0	0	FLJ36000	uncharacterized FLJ36000
hsa-miR-1255a	1	0	1	1	1	1	ULK2	unc-51-like kinase 2 (C. elegans)
hsa-miR-1255a	1	0	1	1	1	1	TIMP2	TIMP metallopeptidase inhibitor 2
hsa-miR-1255a	1	0	1	1	1	1	FOSB	FBJ murine osteosarcoma viral oncogene homolog B
hsa-miR-1255a	1	0	1	1	1	1	DACH2	dachshund homolog 2 (Drosophila)
hsa-miR-1255a	0	0	1	1	1	1	ZFP90	zinc finger protein 90 homolog (mouse)
hsa-miR-1255a	1	0	1	1	1	1	BVES	blood vessel epicardial substance
hsa-miR-1255a	1	0	1	1	1	1	LEF1	lymphoid enhancer-binding factor 1
hsa-miR-1255a	1	0	1	1	1	1	KCNJ11	potassium inwardly-rectifying channel, subfamily J, member 11
hsa-miR-1255a	0	0	1	1	0	0	MTCH1	mitochondrial carrier 1
hsa-miR-1255a	1	0	1	1	1	1	FAM123A	family with sequence similarity 123A
hsa-miR-1255a	1	0	1	0	1	1	HSPA12A	heat shock 70kDa protein 12A
hsa-miR-1255a	1	0	1	1	1	1	GNG2	guanine nucleotide binding protein (G protein), gamma 2
hsa-miR-1255a	0	0	1	1	1	1	C17orf104	chromosome 17 open reading frame 104
hsa-miR-1255a	1	0	1	1	0	0	INPP5J	inositol polyphosphate-5-phosphatase J
hsa-miR-1255a	0	0	1	0	1	1	PDGFC	platelet derived growth factor C
hsa-miR-1255a	0	0	1	0	0	0	SUZ12P1	suppressor of zeste 12 homolog pseudogene 1
hsa-miR-1255a	0	0	1	1	1	1	C4orf32	chromosome 4 open reading frame 32
hsa-miR-1255a	0	0	1	0	0	0	LRRC37BP1	leucine rich repeat containing 37B pseudogene 1
hsa-miR-1255a	0	0	1	0	1	1	C11orf93	chromosome 11 open reading frame 93
hsa-miR-1255a	1	0	1	1	1	1	FKBP5	FK506 binding protein 5
hsa-miR-1255a	0	0	1	0	0	0	LOC157381	uncharacterized LOC157381
hsa-miR-1255a	0	0	1	0	0	0	LINC00347	long intergenic non-protein coding RNA 347
hsa-miR-1255a	0	0	1	0	0	0	LOC339316	uncharacterized LOC339316
hsa-miR-1255a	0	0	1	0	0	0	LOC339260	uncharacterized LOC339260
hsa-miR-1255a	0	0	1	0	0	0	LOC646168	uncharacterized LOC646168
hsa-miR-1255a	1	0	1	1	0	0	WNK1	WNK lysine deficient protein kinase 1
hsa-miR-1255a	1	0	1	0	1	1	PSD3	pleckstrin and Sec7 domain containing 3
hsa-miR-1255a	0	0	1	1	0	0	LILRA1	leukocyte immunoglobulin-like receptor, subfamily A (with TM domain), member 1
hsa-miR-1255a	1	0	1	0	1	1	LYPD6	LY6/PLAUR domain containing 6
hsa-miR-1255a	0	0	1	1	1	1	LOC100499484-C9ORF174	LOC100499484-C9orf174 readthrough
hsa-miR-1255a	0	0	1	1	0	0	ANKAR	ankyrin and armadillo repeat containing
hsa-miR-1255a	0	0	1	0	0	0	LOC348120	uncharacterized LOC348120
hsa-miR-1255a	0	0	1	1	1	1	OLFML2B	olfactomedin-like 2B
hsa-miR-1255a	1	0	1	0	1	1	KDM2A	lysine (K)-specific demethylase 2A
hsa-miR-1255a	0	0	1	1	0	0	CSF1R	colony stimulating factor 1 receptor
hsa-miR-1255a	1	0	1	1	1	1	SLC39A9	solute carrier family 39 (zinc transporter), member 9
hsa-miR-1255a	0	0	1	0	0	0	WASH2P	WAS protein family homolog 2 pseudogene
hsa-miR-1255a	0	0	1	0	0	0	LOC283038	uncharacterized LOC283038
hsa-miR-1255a	1	0	1	1	1	1	CLVS1	clavesin 1
hsa-miR-1255a	0	0	1	1	0	0	NSUN5P2	NOP2/Sun domain family, member 5 pseudogene 2
hsa-miR-1255a	1	0	1	0	1	1	NUDT10	nudix (nucleoside diphosphate linked moiety X)-type motif 10
hsa-miR-1255a	1	0	1	1	1	1	FNDC3A	fibronectin type III domain containing 3A
hsa-miR-1255a	1	0	1	0	1	1	SEMA4G	sema domain, immunoglobulin domain (Ig), transmembrane domain (TM) and short cytoplasmic domain, (semaphorin) 4G
hsa-miR-1255a	0	0	1	1	1	1	LINC00086	long intergenic non-protein coding RNA 86
hsa-miR-1255a	1	0	1	1	1	1	ZFP91	zinc finger protein 91 homolog (mouse)
hsa-miR-1255a	1	0	1	1	1	1	YWHAZ	tyrosine 3-monooxygenase/tryptophan 5-monooxygenase activation protein, zeta polypeptide
hsa-miR-1255a	0	0	1	1	1	1	RHOT1	ras homolog family member T1
hsa-miR-1255a	1	0	1	1	1	1	SCUBE3	signal peptide, CUB domain, EGF-like 3
hsa-miR-1255a	1	0	1	1	1	1	CRCP	CGRP receptor component
hsa-miR-1255a	0	0	1	1	0	0	ABHD1	abhydrolase domain containing 1
hsa-miR-1255a	1	0	1	1	0	0	OSMR	oncostatin M receptor
hsa-miR-1255a	0	0	1	1	0	0	SLC2A11	solute carrier family 2 (facilitated glucose transporter), member 11
hsa-miR-1255a	0	0	1	1	1	1	P2RX6	purinergic receptor P2X, ligand-gated ion channel, 6
hsa-miR-1255a	0	0	1	1	1	1	C10orf129	chromosome 10 open reading frame 129
hsa-miR-1255a	0	0	1	1	0	0	PRSS55	protease, serine, 55
hsa-miR-1255a	0	0	1	1	1	1	VNN2	vanin 2
hsa-miR-1255a	0	0	1	1	1	1	STAG1	stromal antigen 1
hsa-miR-1255a	0	0	1	1	1	1	GORAB	golgin, RAB6-interacting
hsa-miR-1255a	1	0	1	1	1	1	IL15RA	interleukin 15 receptor, alpha
hsa-miR-1255a	1	0	1	1	1	1	STXBP5	syntaxin binding protein 5 (tomosyn)
hsa-miR-1255a	1	0	1	1	1	1	LMO4	LIM domain only 4
hsa-miR-1255a	0	0	1	1	1	1	PSMD12	proteasome (prosome, macropain) 26S subunit, non-ATPase, 12
hsa-miR-1255a	0	0	1	1	0	0	TTYH1	tweety homolog 1 (Drosophila)
hsa-miR-1255a	1	0	1	1	1	1	ZNF449	zinc finger protein 449
hsa-miR-1255a	0	0	1	0	0	0	LINC00052	long intergenic non-protein coding RNA 52
hsa-miR-1255a	1	0	1	1	1	1	AP3M1	adaptor-related protein complex 3, mu 1 subunit
hsa-miR-1255a	1	0	1	1	1	1	NRSN1	neurensin 1
hsa-miR-1255a	1	0	1	1	1	1	FAM129B	family with sequence similarity 129, member B
hsa-miR-1255a	0	0	1	0	0	0	LEF1-AS1	LEF1 antisense RNA 1
hsa-miR-1255a	1	0	1	1	1	1	PDCD6IP	programmed cell death 6 interacting protein
hsa-miR-1255a	1	0	1	1	1	1	SLC26A7	solute carrier family 26, member 7
hsa-miR-1255a	1	0	1	1	1	1	LINGO1	leucine rich repeat and Ig domain containing 1
hsa-miR-1255a	0	0	1	0	0	0	C17orf69	chromosome 17 open reading frame 69
hsa-miR-1255a	0	0	1	1	0	0	RELA	v-rel reticuloendotheliosis viral oncogene homolog A (avian)
hsa-miR-1255a	0	0	1	1	0	0	CYP4F30P	cytochrome P450, family 4, subfamily F, polypeptide 30, pseudogene
hsa-miR-1255a	1	0	1	1	0	0	CHTOP	chromatin target of PRMT1
hsa-miR-1255a	0	0	1	1	1	1	CTXN3	cortexin 3
hsa-miR-1255a	1	0	1	1	1	1	SNX27	sorting nexin family member 27
hsa-miR-1255a	0	0	1	1	1	1	SOX15	SRY (sex determining region Y)-box 15
hsa-miR-1255a	1	0	1	1	1	1	RARG	retinoic acid receptor, gamma
hsa-miR-1255a	1	0	1	1	1	1	OPCML	opioid binding protein/cell adhesion molecule-like
hsa-miR-1255a	1	0	1	1	1	1	WNT5A	wingless-type MMTV integration site family, member 5A
hsa-miR-1255a	1	0	1	1	1	1	NTRK2	neurotrophic tyrosine kinase, receptor, type 2
hsa-miR-1255a	1	0	1	0	1	1	AMMECR1L	AMME chromosomal region gene 1-like
hsa-miR-1255a	0	0	1	0	0	0	LINC00537	long intergenic non-protein coding RNA 537
hsa-miR-1255a	1	0	1	1	1	1	SAMD4B	sterile alpha motif domain containing 4B
hsa-miR-1255a	1	0	1	1	1	1	C18orf34	chromosome 18 open reading frame 34
hsa-miR-1255a	1	0	1	1	1	1	TRPM3	transient receptor potential cation channel, subfamily M, member 3
hsa-miR-1255a	1	0	1	1	1	1	PLXNA2	plexin A2
hsa-miR-1255a	0	0	1	1	0	0	DNASE1	deoxyribonuclease I
hsa-miR-1255a	0	0	1	1	1	1	NELL1	NEL-like 1 (chicken)
hsa-miR-1255a	0	0	1	1	1	1	SPRR2A	small proline-rich protein 2A
hsa-miR-1255a	1	0	1	1	1	1	ACVR2B	activin A receptor, type IIB
hsa-miR-1255a	0	0	1	1	1	1	SLC39A2	solute carrier family 39 (zinc transporter), member 2
hsa-miR-1255a	0	0	1	1	1	1	XG	Xg blood group
hsa-miR-1255a	1	0	1	0	1	1	VANGL2	vang-like 2 (van gogh, Drosophila)
hsa-miR-1255a	0	0	1	1	0	0	RIPPLY1	ripply1 homolog (zebrafish)
hsa-miR-1255a	0	0	1	0	0	0	FBXL19-AS1	FBXL19 antisense RNA 1 (head to head)
hsa-miR-1255a	0	0	1	1	1	1	CCDC148	coiled-coil domain containing 148
hsa-miR-1255a	1	0	1	1	1	1	CAPN3	calpain 3, (p94)
hsa-miR-1255a	0	0	1	1	1	1	TTN	titin
hsa-miR-1255a	0	0	1	1	0	0	SLC17A4	solute carrier family 17 (sodium phosphate), member 4
hsa-miR-1255a	1	0	1	0	1	1	DNAJC6	DnaJ (Hsp40) homolog, subfamily C, member 6
hsa-miR-1255a	1	0	1	1	1	1	CERS6	ceramide synthase 6
hsa-miR-1255a	0	0	1	0	0	0	FAM86C2P	family with sequence similarity 86, member A pseudogene
hsa-miR-1255a	1	0	1	1	1	1	TET2	tet methylcytosine dioxygenase 2
hsa-miR-1255a	0	0	1	1	1	1	ZNF514	zinc finger protein 514
hsa-miR-1255a	0	0	1	1	1	1	RASAL2	RAS protein activator like 2
hsa-miR-1255a	0	0	1	1	1	1	UNC13B	unc-13 homolog B (C. elegans)
hsa-miR-1255a	0	0	1	1	1	1	LRCH1	leucine-rich repeats and calponin homology (CH) domain containing 1
hsa-miR-1255a	0	0	1	1	1	1	ZNF621	zinc finger protein 621
hsa-miR-1255a	1	0	1	1	1	1	ST18	suppression of tumorigenicity 18 (breast carcinoma) (zinc finger protein)
hsa-miR-1255a	0	0	1	0	0	0	LOC286094	uncharacterized LOC286094
hsa-miR-1255a	1	0	1	0	1	1	PRDM10	PR domain containing 10
hsa-miR-1255a	1	0	1	1	1	1	OSBP2	oxysterol binding protein 2
hsa-miR-1255a	1	0	1	1	1	1	FKBP1A	FK506 binding protein 1A, 12kDa
hsa-miR-1255a	0	0	1	0	1	1	GOLGA8G	golgin A8 family, member G
hsa-miR-1255a	1	0	1	1	1	1	MEGF11	multiple EGF-like-domains 11
hsa-miR-1255a	1	0	1	1	1	1	TRAPPC8	trafficking protein particle complex 8
hsa-miR-1255a	0	0	1	0	1	1	C20orf202	chromosome 20 open reading frame 202
hsa-miR-1255a	0	0	1	0	0	0	FAM225B	family with sequence similarity 225, member B (non-protein coding)
hsa-miR-1255a	0	0	1	0	0	0	LILRP2	leukocyte immunoglobulin-like receptor pseudogene 2
hsa-miR-1255a	0	0	1	1	0	0	CCDC144A	coiled-coil domain containing 144A
hsa-miR-1255a	0	0	1	1	1	1	UCHL5	ubiquitin carboxyl-terminal hydrolase L5
hsa-miR-1255a	0	0	1	1	1	1	DLGAP5	discs, large (Drosophila) homolog-associated protein 5
hsa-miR-1255a	0	0	1	0	0	0	FLJ39632	uncharacterized LOC642477
hsa-miR-1255a	0	0	1	1	1	1	IP6K2	inositol hexakisphosphate kinase 2
hsa-miR-1255a	1	0	1	1	0	0	KRT80	keratin 80
hsa-miR-1255a	0	0	1	0	0	0	DKFZp686D0853	uncharacterized LOC401613
hsa-miR-1255a	1	0	1	1	1	1	ATP2B4	ATPase, Ca++ transporting, plasma membrane 4
hsa-miR-1255a	1	0	1	1	1	1	MIER3	mesoderm induction early response 1, family member 3
hsa-miR-1255a	0	0	1	1	1	1	C10orf57	chromosome 10 open reading frame 57
hsa-miR-1255a	1	0	1	1	1	1	SPPL3	signal peptide peptidase like 3
hsa-miR-1255a	0	0	1	0	0	0	PCNXL3	pecanex-like 3 (Drosophila)
hsa-miR-1255a	0	0	1	1	1	1	VPS35	vacuolar protein sorting 35 homolog (S. cerevisiae)
hsa-miR-1255a	1	0	1	1	1	1	MASP1	mannan-binding lectin serine peptidase 1 (C4/C2 activating component of Ra-reactive factor)
hsa-miR-1255a	0	0	1	1	1	1	IPCEF1	interaction protein for cytohesin exchange factors 1
hsa-miR-1255a	1	0	1	0	1	1	GALNT4	UDP-N-acetyl-alpha-D-galactosamine:polypeptide N-acetylgalactosaminyltransferase 4 (GalNAc-T4)
hsa-miR-1255a	0	0	1	1	1	1	ADH1B	alcohol dehydrogenase 1B (class I), beta polypeptide
hsa-miR-1255a	1	0	1	1	1	1	TC2N	tandem C2 domains, nuclear
hsa-miR-1255a	1	0	1	1	1	1	TSC22D3	TSC22 domain family, member 3
hsa-miR-1255a	1	0	1	1	1	1	PHF21A	PHD finger protein 21A
hsa-miR-1255a	0	0	1	1	1	1	ATP2A2	ATPase, Ca++ transporting, cardiac muscle, slow twitch 2
hsa-miR-1255a	1	0	1	1	1	1	NAV1	neuron navigator 1
hsa-miR-1255a	1	0	1	1	1	1	C5orf24	chromosome 5 open reading frame 24
hsa-miR-1255a	1	0	1	1	1	1	PGAP1	post-GPI attachment to proteins 1
hsa-miR-1255a	0	0	1	1	1	1	THSD4	thrombospondin, type I, domain containing 4
hsa-miR-1255a	1	0	1	0	1	1	C1orf21	chromosome 1 open reading frame 21
hsa-miR-1255a	1	0	1	1	1	1	SGK3	serum/glucocorticoid regulated kinase family, member 3
hsa-miR-1255a	1	0	1	1	1	1	CREB3L2	cAMP responsive element binding protein 3-like 2
hsa-miR-1255a	0	0	1	0	1	1	GINS3	GINS complex subunit 3 (Psf3 homolog)
hsa-miR-1255a	0	0	1	1	1	1	HPGD	hydroxyprostaglandin dehydrogenase 15-(NAD)
hsa-miR-1255a	0	0	1	1	1	1	POLR2H	polymerase (RNA) II (DNA directed) polypeptide H
hsa-miR-1255a	0	0	1	1	1	1	SLC25A11	solute carrier family 25 (mitochondrial carrier; oxoglutarate carrier), member 11
hsa-miR-1255a	1	0	1	1	1	1	SEL1L3	sel-1 suppressor of lin-12-like 3 (C. elegans)
hsa-miR-1255a	1	0	1	1	1	1	TOM1L1	target of myb1 (chicken)-like 1
hsa-miR-1255a	0	0	1	0	0	0	RPS16P10	ribosomal protein S16 pseudogene 10
hsa-miR-1255a	1	0	1	1	1	1	PCGF2	polycomb group ring finger 2
hsa-miR-1255a	0	0	1	1	0	0	URM1	ubiquitin related modifier 1
hsa-miR-1255a	0	0	1	1	0	0	TCEAL4	transcription elongation factor A (SII)-like 4
hsa-miR-1255a	0	0	1	1	1	1	DMWD	dystrophia myotonica, WD repeat containing
hsa-miR-1255a	0	0	1	1	0	0	PSG8	pregnancy specific beta-1-glycoprotein 8
hsa-miR-1255a	0	0	1	1	1	1	APBB1	amyloid beta (A4) precursor protein-binding, family B, member 1 (Fe65)
hsa-miR-1255a	0	0	1	1	0	0	FXYD7	FXYD domain containing ion transport regulator 7
hsa-miR-1255a	0	0	1	1	1	1	PISD	phosphatidylserine decarboxylase
hsa-miR-1255a	1	0	1	1	1	1	DOLPP1	dolichyl pyrophosphate phosphatase 1
hsa-miR-1255a	0	0	1	0	0	0	ARRDC1	arrestin domain containing 1
hsa-miR-1255a	0	0	1	1	1	1	ERLEC1	endoplasmic reticulum lectin 1
hsa-miR-1255a	0	0	1	0	0	0	ZBED3-AS1	ZBED3 antisense RNA 1
hsa-miR-1255a	0	0	1	0	0	0	H19	H19, imprinted maternally expressed transcript (non-protein coding)
hsa-miR-1255a	0	0	1	1	1	1	TASP1	taspase, threonine aspartase, 1
hsa-miR-1255a	0	0	1	1	0	0	SPAG8	sperm associated antigen 8
hsa-miR-1255a	0	0	1	1	1	1	COPS7A	COP9 constitutive photomorphogenic homolog subunit 7A (Arabidopsis)
hsa-miR-1255a	0	0	1	1	0	0	FAM64A	family with sequence similarity 64, member A
hsa-miR-1255a	1	0	1	1	1	1	SMARCE1	SWI/SNF related, matrix associated, actin dependent regulator of chromatin, subfamily e, member 1
hsa-miR-1255a	0	0	1	1	0	0	MYL6	myosin, light chain 6, alkali, smooth muscle and non-muscle
hsa-miR-1255a	1	0	1	1	1	1	CHTF8	CTF8, chromosome transmission fidelity factor 8 homolog (S. cerevisiae)
hsa-miR-1255a	0	0	1	0	0	0	LOC643837	uncharacterized LOC643837
hsa-miR-1255a	0	0	1	1	1	1	SORD	sorbitol dehydrogenase
hsa-miR-1255a	1	0	1	1	1	1	COPZ1	coatomer protein complex, subunit zeta 1
hsa-miR-1255a	0	0	1	0	0	0	HMGN1P37	high mobility group nucleosome binding domain 1 pseudogene 37
hsa-miR-1255a	1	0	1	1	1	1	PCTP	phosphatidylcholine transfer protein
hsa-miR-1255a	0	0	1	0	1	1	WASH3P	WAS protein family homolog 3 pseudogene
hsa-miR-1255a	1	0	1	1	1	1	PPP2R4	protein phosphatase 2A activator, regulatory subunit 4
hsa-miR-1255a	0	0	1	0	0	0	C12orf75	chromosome 12 open reading frame 75
hsa-miR-1255a	0	0	1	0	0	0	TMEM208	transmembrane protein 208
hsa-miR-1255a	0	0	1	1	0	0	C11orf68	chromosome 11 open reading frame 68
hsa-miR-1255a	1	0	1	1	1	1	DKK3	dickkopf 3 homolog (Xenopus laevis)
hsa-miR-1255a	0	0	1	1	1	1	CAPZB	capping protein (actin filament) muscle Z-line, beta
hsa-miR-1255a	0	0	1	1	0	0	GMPPA	GDP-mannose pyrophosphorylase A
hsa-miR-1255a	0	0	1	1	0	0	CCDC22	coiled-coil domain containing 22
hsa-miR-1255a	0	0	1	1	0	0	C1orf122	chromosome 1 open reading frame 122
hsa-miR-1255a	0	0	1	0	0	0	ZNF720	zinc finger protein 720
hsa-miR-1255a	0	0	1	1	0	0	FHOD1	formin homology 2 domain containing 1
hsa-miR-1255a	0	0	1	1	0	0	WDR43	WD repeat domain 43
hsa-miR-1255a	1	0	1	0	1	1	C15orf41	chromosome 15 open reading frame 41
hsa-miR-1255a	0	0	1	0	0	0	LOC389765	kinesin family member 27 pseudogene
hsa-miR-1255a	0	0	1	1	0	0	RGS9	regulator of G-protein signaling 9
hsa-miR-1255a	0	0	1	0	1	1	RPL10	ribosomal protein L10
hsa-miR-1255a	0	0	1	1	0	0	STUB1	STIP1 homology and U-box containing protein 1, E3 ubiquitin protein ligase
hsa-miR-1255a	0	0	1	1	0	0	FAM57B	family with sequence similarity 57, member B
hsa-miR-1255a	1	0	1	1	1	1	ATAT1	alpha tubulin acetyltransferase 1
hsa-miR-1255a	1	0	1	1	1	1	KCNS3	potassium voltage-gated channel, delayed-rectifier, subfamily S, member 3
hsa-miR-1255a	1	0	1	1	1	1	NFYB	nuclear transcription factor Y, beta
hsa-miR-1255a	0	0	1	1	0	0	C9orf114	chromosome 9 open reading frame 114
hsa-miR-1255a	0	0	1	1	1	1	HOXC9	homeobox C9
hsa-miR-1255a	0	0	1	1	1	1	TMEM14C	transmembrane protein 14C
hsa-miR-1255a	0	0	1	1	0	0	CCDC107	coiled-coil domain containing 107
hsa-miR-1255a	0	0	1	1	0	0	RAMP2	receptor (G protein-coupled) activity modifying protein 2
hsa-miR-1255a	1	0	1	0	1	1	CD47	CD47 molecule
hsa-miR-1255a	1	0	1	1	0	0	RUNDC3A	RUN domain containing 3A
hsa-miR-1255a	0	0	1	1	1	1	INPP5K	inositol polyphosphate-5-phosphatase K
hsa-miR-1255a	0	0	1	0	0	0	LOC650368	asparagine-linked glycosylation 1-like pseudogene
hsa-miR-1255a	0	0	1	1	0	0	TESK1	testis-specific kinase 1
hsa-miR-1255a	0	0	1	0	1	1	TSPAN7	tetraspanin 7
hsa-miR-1255a	0	0	1	1	1	1	ANXA7	annexin A7
hsa-miR-1255a	0	0	1	1	1	1	NUDT21	nudix (nucleoside diphosphate linked moiety X)-type motif 21
hsa-miR-1255a	1	0	1	1	1	1	TFPI	tissue factor pathway inhibitor (lipoprotein-associated coagulation inhibitor)
hsa-miR-1255a	0	0	1	1	1	1	NUB1	negative regulator of ubiquitin-like proteins 1
hsa-miR-1255a	1	0	1	1	1	1	RND3	Rho family GTPase 3
hsa-miR-1255a	1	0	1	0	1	1	NMT1	N-myristoyltransferase 1
hsa-miR-1255a	0	0	1	0	0	0	LOC731789	uncharacterized LOC731789
hsa-miR-1255a	0	0	1	1	1	1	CCP110	centriolar coiled coil protein 110kDa
hsa-miR-1255a	1	0	1	0	1	1	BTRC	beta-transducin repeat containing E3 ubiquitin protein ligase
hsa-miR-1255a	1	0	1	1	1	1	ANKS6	ankyrin repeat and sterile alpha motif domain containing 6
hsa-miR-1255a	1	0	1	1	1	1	MAPK8IP3	mitogen-activated protein kinase 8 interacting protein 3
hsa-miR-1255a	1	0	1	1	0	0	POMGNT1	protein O-linked mannose beta1,2-N-acetylglucosaminyltransferase
hsa-miR-1255a	1	0	1	1	1	1	BCL2L1	BCL2-like 1
hsa-miR-1255a	0	0	1	1	1	1	MSS51	MSS51 mitochondrial translational activator homolog (S. cerevisiae)
hsa-miR-1255a	1	0	1	1	1	1	ZFHX3	zinc finger homeobox 3
hsa-miR-1255a	1	0	1	1	1	1	RB1CC1	RB1-inducible coiled-coil 1
hsa-miR-1255a	1	0	1	1	1	1	PHYHIP	phytanoyl-CoA 2-hydroxylase interacting protein
hsa-miR-1255a	0	0	1	1	1	1	CD274	CD274 molecule
hsa-miR-1255a	0	0	1	1	0	0	AMY2B	amylase, alpha 2B (pancreatic)
hsa-miR-1255a	0	0	1	0	0	0	PILRB	paired immunoglobin-like type 2 receptor beta
hsa-miR-1255a	1	0	1	0	1	1	RBBP5	retinoblastoma binding protein 5
hsa-miR-1255a	1	0	1	0	1	1	DCBLD2	discoidin, CUB and LCCL domain containing 2
hsa-miR-1255a	1	0	1	0	1	1	EPDR1	ependymin related protein 1 (zebrafish)
hsa-miR-1255a	0	0	1	1	1	1	ADPRH	ADP-ribosylarginine hydrolase
hsa-miR-1255a	1	0	1	1	1	1	RALBP1	ralA binding protein 1
hsa-miR-1255a	1	0	1	0	1	1	BCL2	B-cell CLL/lymphoma 2
hsa-miR-1255a	0	0	1	1	1	1	ALDOB	aldolase B, fructose-bisphosphate
hsa-miR-1255a	0	0	1	1	1	1	APOH	apolipoprotein H (beta-2-glycoprotein I)
hsa-miR-1255a	1	0	1	1	1	1	COL4A4	collagen, type IV, alpha 4
hsa-miR-1255a	1	0	1	1	1	1	ESR1	estrogen receptor 1
hsa-miR-1255a	0	0	1	0	1	1	GBE1	glucan (1,4-alpha-), branching enzyme 1
hsa-miR-1255a	1	0	1	1	1	1	GK	glycerol kinase
hsa-miR-1255a	1	0	1	0	1	1	ITGB3	integrin, beta 3 (platelet glycoprotein IIIa, antigen CD61)
hsa-miR-1255a	0	0	1	0	1	1	KAL1	Kallmann syndrome 1 sequence
hsa-miR-1255a	1	0	1	1	1	1	KCNA1	potassium voltage-gated channel, shaker-related subfamily, member 1 (episodic ataxia with myokymia)
hsa-miR-1255a	0	0	1	1	1	1	MAOA	monoamine oxidase A
hsa-miR-1255a	0	0	1	1	0	0	MPO	myeloperoxidase
hsa-miR-1255a	1	0	1	1	1	1	NF1	neurofibromin 1
hsa-miR-1255a	1	0	1	1	1	1	OCRL	oculocerebrorenal syndrome of Lowe
hsa-miR-1255a	1	0	1	0	1	1	PTEN	phosphatase and tensin homolog
hsa-miR-1255a	1	0	1	1	1	1	RB1	retinoblastoma 1
hsa-miR-1255a	0	0	1	1	1	1	XDH	xanthine dehydrogenase
hsa-miR-1255a	1	1	1	1	1	1	CDKN1A	cyclin-dependent kinase inhibitor 1A (p21, Cip1)
hsa-miR-1255a	0	0	1	1	0	0	IL2RA	interleukin 2 receptor, alpha
hsa-miR-1255a	0	0	1	1	1	1	KRT10	keratin 10
hsa-miR-1255a	0	0	1	1	1	1	LTBP2	latent transforming growth factor beta binding protein 2
hsa-miR-1255a	1	0	1	1	1	1	RFX5	regulatory factor X, 5 (influences HLA class II expression)
hsa-miR-1255a	1	0	1	1	1	1	TWIST1	twist homolog 1 (Drosophila)
hsa-miR-1255a	1	0	1	1	1	1	AQP2	aquaporin 2 (collecting duct)
hsa-miR-1255a	0	0	1	1	1	1	CYP11B2	cytochrome P450, family 11, subfamily B, polypeptide 2
hsa-miR-1255a	1	0	1	1	1	1	MPZ	myelin protein zero
hsa-miR-1255a	0	0	1	1	1	1	RFXAP	regulatory factor X-associated protein
hsa-miR-1255a	1	0	1	1	1	1	DCX	doublecortin
hsa-miR-1255a	0	0	1	1	1	1	CD55	CD55 molecule, decay accelerating factor for complement (Cromer blood group)
hsa-miR-1255a	0	0	1	1	1	1	IL15	interleukin 15
hsa-miR-1255a	0	0	1	1	1	1	IFNG	interferon, gamma
hsa-miR-1255a	0	0	1	1	1	1	CGA	glycoprotein hormones, alpha polypeptide
hsa-miR-1255a	1	0	1	1	1	1	CHRM1	cholinergic receptor, muscarinic 1
hsa-miR-1255a	0	0	1	1	1	1	CYP7A1	cytochrome P450, family 7, subfamily A, polypeptide 1
hsa-miR-1255a	1	0	1	1	1	1	DIO2	deiodinase, iodothyronine, type II
hsa-miR-1255a	1	0	1	1	1	1	GABRG2	gamma-aminobutyric acid (GABA) A receptor, gamma 2
hsa-miR-1255a	1	0	1	1	1	1	GRIA4	glutamate receptor, ionotropic, AMPA 4
hsa-miR-1255a	1	0	1	1	1	1	IGF1R	insulin-like growth factor 1 receptor
hsa-miR-1255a	0	0	1	1	1	1	NPY2R	neuropeptide Y receptor Y2
hsa-miR-1255a	1	0	1	1	1	1	PPP3R1	protein phosphatase 3, regulatory subunit B, alpha
hsa-miR-1255a	1	0	1	1	1	1	PTGER2	prostaglandin E receptor 2 (subtype EP2), 53kDa
hsa-miR-1255a	0	0	1	1	1	1	BLOC1S2	biogenesis of lysosomal organelles complex-1, subunit 2
hsa-miR-1255a	1	0	1	0	1	1	CLDN18	claudin 18
hsa-miR-1255a	1	0	1	1	1	1	KLHL31	kelch-like 31 (Drosophila)
hsa-miR-1255a	1	0	1	0	1	1	BMF	Bcl2 modifying factor
hsa-miR-1255a	1	0	1	0	1	1	ZNF740	zinc finger protein 740
hsa-miR-1255a	0	0	1	0	1	1	ZNF705A	zinc finger protein 705A
hsa-miR-1255a	1	0	1	0	1	1	LRRC55	leucine rich repeat containing 55
hsa-miR-1255a	1	0	1	1	1	1	ACTR2	ARP2 actin-related protein 2 homolog (yeast)
hsa-miR-1255a	0	0	1	1	1	1	RYK	receptor-like tyrosine kinase
hsa-miR-1255a	1	0	1	0	1	1	GOSR1	golgi SNAP receptor complex member 1
hsa-miR-1255a	1	0	1	1	1	1	NTRK3	neurotrophic tyrosine kinase, receptor, type 3
hsa-miR-1255a	0	0	1	0	1	1	GIMAP6	GTPase, IMAP family member 6
hsa-miR-1255a	1	0	1	1	1	1	IGF2BP2	insulin-like growth factor 2 mRNA binding protein 2
hsa-miR-1255a	1	0	1	1	1	1	SPOP	speckle-type POZ protein
hsa-miR-1255a	1	0	1	1	1	1	TULP4	tubby like protein 4
hsa-miR-1255a	1	0	1	1	1	1	ZDHHC9	zinc finger, DHHC-type containing 9
hsa-miR-1255a	1	0	1	0	1	1	C18orf25	chromosome 18 open reading frame 25
hsa-miR-1255a	1	0	1	1	1	1	CISD2	CDGSH iron sulfur domain 2
hsa-miR-1255a	0	0	1	1	0	0	AKAP14	A kinase (PRKA) anchor protein 14
hsa-miR-1255a	0	0	1	1	1	1	TCHHL1	trichohyalin-like 1
hsa-miR-1255a	1	0	1	0	1	1	KIAA2022	KIAA2022
hsa-miR-1255a	0	0	1	1	1	1	MXI1	MAX interactor 1
hsa-miR-1255a	1	0	1	1	1	1	LPHN1	latrophilin 1
hsa-miR-1255a	1	0	1	1	1	1	EML1	echinoderm microtubule associated protein like 1
hsa-miR-1255a	1	0	1	1	1	1	FNIP1	folliculin interacting protein 1
hsa-miR-1255a	0	0	1	1	1	1	GCSAM	germinal center-associated, signaling and motility
hsa-miR-1255a	0	0	1	1	1	1	SLC35D3	solute carrier family 35, member D3
hsa-miR-1255a	1	0	1	0	1	1	RCHY1	ring finger and CHY zinc finger domain containing 1, E3 ubiquitin protein ligase
hsa-miR-1255a	0	0	1	1	1	1	MUC21	mucin 21, cell surface associated
hsa-miR-1255a	1	0	1	1	1	1	BCL2L15	BCL2-like 15
hsa-miR-1255a	0	0	1	1	1	1	ZMAT1	zinc finger, matrin-type 1
hsa-miR-1255a	0	0	1	1	1	1	MS4A13	membrane-spanning 4-domains, subfamily A, member 13
hsa-miR-1255a	0	0	1	0	1	1	GOLGA8E	golgin A8 family, member E
hsa-miR-1255a	1	0	1	1	1	1	PABPC1L2A	poly(A) binding protein, cytoplasmic 1-like 2A
hsa-miR-1255a	1	0	1	0	1	1	ZKSCAN2	zinc finger with KRAB and SCAN domains 2
hsa-miR-1255a	0	0	1	1	1	1	C2orf68	chromosome 2 open reading frame 68
hsa-miR-1255a	1	0	1	1	1	1	KATNAL1	katanin p60 subunit A-like 1
hsa-miR-1255a	1	0	1	1	1	1	NCDN	neurochondrin
hsa-miR-1255a	1	0	1	1	1	1	TMCC1	transmembrane and coiled-coil domain family 1
hsa-miR-1255a	0	0	1	1	0	0	SPRR2B	small proline-rich protein 2B
hsa-miR-1255a	0	0	1	1	0	0	ALDH18A1	aldehyde dehydrogenase 18 family, member A1
hsa-miR-1255a	1	0	1	1	1	1	ZHX1	zinc fingers and homeoboxes 1
hsa-miR-1255a	0	0	1	1	1	1	RNF215	ring finger protein 215
hsa-miR-1255a	0	0	1	1	1	1	ACTBL2	actin, beta-like 2
hsa-miR-1255a	1	0	1	1	1	1	VPS13C	vacuolar protein sorting 13 homolog C (S. cerevisiae)
hsa-miR-1255a	1	0	1	1	1	1	GPHN	gephyrin
hsa-miR-1255a	1	0	1	1	1	1	RAB3IP	RAB3A interacting protein (rabin3)
hsa-miR-1255a	1	0	1	0	1	1	BCL7A	B-cell CLL/lymphoma 7A
hsa-miR-1255a	1	0	1	0	1	1	TNRC6B	trinucleotide repeat containing 6B
hsa-miR-1255a	1	0	1	1	1	1	TGFBR2	transforming growth factor, beta receptor II (70/80kDa)
hsa-miR-1255a	1	0	1	0	1	1	CELF2	CUGBP, Elav-like family member 2
hsa-miR-1255a	1	0	1	1	1	1	VEGFA	vascular endothelial growth factor A
hsa-miR-1255a	1	0	1	1	1	1	FAM108B1	family with sequence similarity 108, member B1
hsa-miR-1255a	0	0	1	1	1	1	SOWAHB	sosondowah ankyrin repeat domain family member B
hsa-miR-1255a	1	0	1	1	1	1	PLEKHG1	pleckstrin homology domain containing, family G (with RhoGef domain) member 1
hsa-miR-1255a	1	0	1	0	1	1	SAMD5	sterile alpha motif domain containing 5
hsa-miR-1255a	0	0	1	1	1	1	MS4A3	membrane-spanning 4-domains, subfamily A, member 3 (hematopoietic cell-specific)
hsa-miR-1255a	1	0	1	0	1	1	CYB5RL	cytochrome b5 reductase-like
hsa-miR-1255a	1	0	1	1	1	1	YTHDC1	YTH domain containing 1
hsa-miR-1255a	1	0	1	1	1	1	UBE2V1	ubiquitin-conjugating enzyme E2 variant 1
hsa-miR-1255a	1	0	1	1	1	1	STK24	serine/threonine kinase 24
hsa-miR-1255a	1	0	1	0	1	1	GPR126	G protein-coupled receptor 126
hsa-miR-1255a	1	0	1	0	1	1	NPNT	nephronectin
hsa-miR-1255a	0	0	1	1	0	0	SSX4B	synovial sarcoma, X breakpoint 4B
hsa-miR-1255a	1	0	1	0	1	1	RYR2	ryanodine receptor 2 (cardiac)
hsa-miR-1255a	1	0	1	0	1	1	CDC42SE1	CDC42 small effector 1
hsa-miR-1255a	1	0	1	1	1	1	KIAA0317	KIAA0317
hsa-miR-1255a	1	0	1	0	1	1	GK5	glycerol kinase 5 (putative)
hsa-miR-1255a	1	0	1	1	1	1	CBLN3	cerebellin 3 precursor
hsa-miR-1255a	1	0	1	1	1	1	C3orf65	chromosome 3 open reading frame 65
hsa-miR-1255a	1	0	1	1	1	1	ZNF384	zinc finger protein 384
hsa-miR-1255a	1	0	1	1	1	1	MLLT4	myeloid/lymphoid or mixed-lineage leukemia (trithorax homolog, Drosophila); translocated to, 4
hsa-miR-1255a	1	0	1	0	1	1	FAM133B	family with sequence similarity 133, member B
hsa-miR-1255a	0	0	1	0	1	1	OPALIN	oligodendrocytic myelin paranodal and inner loop protein
hsa-miR-1255a	1	0	1	1	1	1	SCN2A	sodium channel, voltage-gated, type II, alpha subunit
hsa-miR-1255a	1	0	1	1	1	1	GDAP1	ganglioside induced differentiation associated protein 1
hsa-miR-1255a	1	0	1	1	1	1	FILIP1L	filamin A interacting protein 1-like
hsa-miR-1255a	1	0	1	1	1	1	PABPC1L2B	poly(A) binding protein, cytoplasmic 1-like 2B
hsa-miR-1255a	1	0	1	1	1	1	FRS2	fibroblast growth factor receptor substrate 2
hsa-miR-1255a	1	0	1	1	1	1	ERBB4	v-erb-a erythroblastic leukemia viral oncogene homolog 4 (avian)
hsa-miR-1255a	0	0	1	1	1	1	TTC14	tetratricopeptide repeat domain 14
hsa-miR-1255a	0	0	1	1	1	1	RCC1	regulator of chromosome condensation 1
hsa-miR-1255a	0	0	1	1	0	0	UBL5	ubiquitin-like 5
hsa-miR-1255a	1	0	1	1	1	1	METTL9	methyltransferase like 9
hsa-miR-1255a	1	0	1	1	1	1	HS6ST2	heparan sulfate 6-O-sulfotransferase 2
hsa-miR-1255a	1	0	1	1	1	1	ATG9A	autophagy related 9A
hsa-miR-1255a	1	0	1	1	1	1	RNF214	ring finger protein 214
hsa-miR-1255a	0	0	1	1	1	1	KLK10	kallikrein-related peptidase 10
hsa-miR-1255a	1	0	1	0	1	1	UBXN2B	UBX domain protein 2B
hsa-miR-1255a	0	0	1	0	1	1	WTH3DI	RAB6C-like
hsa-miR-1255a	0	0	1	1	1	1	DIAPH1	diaphanous homolog 1 (Drosophila)
hsa-miR-1255a	1	0	1	1	1	1	CREBBP	CREB binding protein
hsa-miR-1255a	1	0	1	1	1	1	CUL4B	cullin 4B
hsa-miR-1255a	1	0	1	1	1	1	SHANK3	SH3 and multiple ankyrin repeat domains 3
hsa-miR-1255a	1	0	1	0	1	1	CCDC85A	coiled-coil domain containing 85A
hsa-miR-1255a	0	0	1	1	1	1	HSF5	heat shock transcription factor family member 5
hsa-miR-1255a	0	0	1	1	0	0	SLC35F4	solute carrier family 35, member F4
hsa-miR-1255a	1	0	1	1	1	1	ZNF697	zinc finger protein 697
hsa-miR-1255a	0	0	1	1	1	1	TBX18	T-box 18
hsa-miR-1255a	1	0	1	1	1	1	MGA	MAX gene associated
hsa-miR-1255a	0	0	1	1	0	0	C9orf84	chromosome 9 open reading frame 84
hsa-miR-1255a	1	0	1	1	1	1	MYO1C	myosin IC
hsa-miR-1255a	0	0	1	1	1	1	C15orf57	chromosome 15 open reading frame 57
hsa-miR-1255a	1	0	1	0	1	1	BACH1	BTB and CNC homology 1, basic leucine zipper transcription factor 1
hsa-miR-1255a	1	0	1	1	1	1	BMP2	bone morphogenetic protein 2
hsa-miR-1255a	1	0	1	1	1	1	CTNND2	catenin (cadherin-associated protein), delta 2
hsa-miR-1255a	0	0	1	0	1	1	DOCK1	dedicator of cytokinesis 1
hsa-miR-1255a	1	0	1	1	1	1	DYRK1A	dual-specificity tyrosine-(Y)-phosphorylation regulated kinase 1A
hsa-miR-1255a	1	0	1	0	1	1	ELAVL3	ELAV (embryonic lethal, abnormal vision, Drosophila)-like 3 (Hu antigen C)
hsa-miR-1255a	0	0	1	0	1	1	EMP1	epithelial membrane protein 1
hsa-miR-1255a	0	0	1	1	1	1	FBL	fibrillarin
hsa-miR-1255a	1	0	1	1	1	1	GPC4	glypican 4
hsa-miR-1255a	1	0	1	0	1	1	GCNT2	glucosaminyl (N-acetyl) transferase 2, I-branching enzyme (I blood group)
hsa-miR-1255a	1	0	1	1	1	1	IRAK2	interleukin-1 receptor-associated kinase 2
hsa-miR-1255a	0	0	1	1	1	1	ALOX5AP	arachidonate 5-lipoxygenase-activating protein
hsa-miR-1255a	1	0	1	1	1	1	AQP4	aquaporin 4
hsa-miR-1255a	1	0	1	1	1	1	ARF3	ADP-ribosylation factor 3
hsa-miR-1255a	0	0	1	1	0	0	RHOG	ras homolog family member G
hsa-miR-1255a	0	0	1	1	0	0	ARL2	ADP-ribosylation factor-like 2
hsa-miR-1255a	0	0	1	1	1	1	ATP5F1	ATP synthase, H+ transporting, mitochondrial Fo complex, subunit B1
hsa-miR-1255a	1	0	1	1	1	1	ATP6V1A	ATPase, H+ transporting, lysosomal 70kDa, V1 subunit A
hsa-miR-1255a	1	0	1	1	1	1	BAAT	bile acid CoA: amino acid N-acyltransferase (glycine N-choloyltransferase)
hsa-miR-1255a	1	0	1	1	1	1	BCL6	B-cell CLL/lymphoma 6
hsa-miR-1255a	0	0	1	1	1	1	BTN1A1	butyrophilin, subfamily 1, member A1
hsa-miR-1255a	1	0	1	1	1	1	CDC25A	cell division cycle 25 homolog A (S. pombe)
hsa-miR-1255a	1	0	1	1	1	1	CLCN4	chloride channel, voltage-sensitive 4
hsa-miR-1255a	1	0	1	1	1	1	CNN3	calponin 3, acidic
hsa-miR-1255a	1	0	1	0	1	1	COL19A1	collagen, type XIX, alpha 1
hsa-miR-1255a	1	0	1	1	1	1	SLC31A1	solute carrier family 31 (copper transporters), member 1
hsa-miR-1255a	1	0	1	1	1	1	CSNK2A1	casein kinase 2, alpha 1 polypeptide
hsa-miR-1255a	1	0	1	1	1	1	HBEGF	heparin-binding EGF-like growth factor
hsa-miR-1255a	0	0	1	1	0	0	EFNA5	ephrin-A5
hsa-miR-1255a	0	0	1	1	0	0	EIF5A	eukaryotic translation initiation factor 5A
hsa-miR-1255a	1	0	1	1	1	1	FKBP4	FK506 binding protein 4, 59kDa
hsa-miR-1255a	1	0	1	1	1	1	GBP1	guanylate binding protein 1, interferon-inducible
hsa-miR-1255a	0	0	1	1	1	1	GFAP	glial fibrillary acidic protein
hsa-miR-1255a	1	0	1	1	1	1	GLRA2	glycine receptor, alpha 2
hsa-miR-1255a	1	0	1	1	1	1	GRB2	growth factor receptor-bound protein 2
hsa-miR-1255a	0	0	1	1	1	1	HLA-DPB1	major histocompatibility complex, class II, DP beta 1
hsa-miR-1255a	0	0	1	1	1	1	HOXA4	homeobox A4
hsa-miR-1255a	1	0	1	1	1	1	IL13	interleukin 13
hsa-miR-1255a	0	0	1	1	0	0	INSL4	insulin-like 4 (placenta)
hsa-miR-1255a	1	0	1	1	1	1	ITGA2	integrin, alpha 2 (CD49B, alpha 2 subunit of VLA-2 receptor)
hsa-miR-1255a	0	0	1	1	0	0	KCNK3	potassium channel, subfamily K, member 3
hsa-miR-1255a	1	0	1	1	1	1	KPNA3	karyopherin alpha 3 (importin alpha 4)
hsa-miR-1255a	0	0	1	1	0	0	KRT4	keratin 4
hsa-miR-1255a	0	0	1	1	0	0	KRT31	keratin 31
hsa-miR-1255a	1	0	1	0	1	1	MXD1	MAX dimerization protein 1
hsa-miR-1255a	0	0	1	1	1	1	MAG	myelin associated glycoprotein
hsa-miR-1255a	1	0	1	1	1	1	MAP1A	microtubule-associated protein 1A
hsa-miR-1255a	1	0	1	1	1	1	MAX	MYC associated factor X
hsa-miR-1255a	0	0	1	0	1	1	CXCL9	chemokine (C-X-C motif) ligand 9
hsa-miR-1255a	0	0	1	1	0	0	MYOG	myogenin (myogenic factor 4)
hsa-miR-1255a	1	0	1	1	1	1	PPP1R12B	protein phosphatase 1, regulatory subunit 12B
hsa-miR-1255a	0	0	1	1	0	0	NDUFB3	NADH dehydrogenase (ubiquinone) 1 beta subcomplex, 3, 12kDa
hsa-miR-1255a	0	0	1	1	1	1	OAS2	2'-5'-oligoadenylate synthetase 2, 69/71kDa
hsa-miR-1255a	0	0	1	0	1	1	OPHN1	oligophrenin 1
hsa-miR-1255a	1	0	1	1	1	1	ORC5	origin recognition complex, subunit 5
hsa-miR-1255a	1	0	1	1	1	1	OSBP	oxysterol binding protein
hsa-miR-1255a	1	0	1	0	1	1	PAPPA	pregnancy-associated plasma protein A, pappalysin 1
hsa-miR-1255a	1	0	1	1	1	1	PBX2	pre-B-cell leukemia homeobox 2
hsa-miR-1255a	1	0	1	1	1	1	PHF1	PHD finger protein 1
hsa-miR-1255a	0	0	1	1	0	0	PI3	peptidase inhibitor 3, skin-derived
hsa-miR-1255a	1	0	1	1	1	1	PLAGL2	pleiomorphic adenoma gene-like 2
hsa-miR-1255a	0	0	1	1	1	1	POLR2G	polymerase (RNA) II (DNA directed) polypeptide G
hsa-miR-1255a	1	0	1	0	1	1	POU3F1	POU class 3 homeobox 1
hsa-miR-1255a	1	0	1	1	1	1	PPP2R1B	protein phosphatase 2, regulatory subunit A, beta
hsa-miR-1255a	1	0	1	1	1	1	MAPK6	mitogen-activated protein kinase 6
hsa-miR-1255a	1	0	1	1	1	1	PRPS1	phosphoribosyl pyrophosphate synthetase 1
hsa-miR-1255a	0	0	1	1	0	0	PSMC6	proteasome (prosome, macropain) 26S subunit, ATPase, 6
hsa-miR-1255a	0	0	1	1	1	1	PTK7	PTK7 protein tyrosine kinase 7
hsa-miR-1255a	1	0	1	1	1	1	PTPN9	protein tyrosine phosphatase, non-receptor type 9
hsa-miR-1255a	0	0	1	1	1	1	PTPN12	protein tyrosine phosphatase, non-receptor type 12
hsa-miR-1255a	1	0	1	1	1	1	PVRL1	poliovirus receptor-related 1 (herpesvirus entry mediator C)
hsa-miR-1255a	1	0	1	0	1	1	RAB6A	RAB6A, member RAS oncogene family
hsa-miR-1255a	1	0	1	1	1	1	RASA1	RAS p21 protein activator (GTPase activating protein) 1
hsa-miR-1255a	1	0	1	0	1	1	SORT1	sortilin 1
hsa-miR-1255a	1	0	1	0	0	0	CX3CL1	chemokine (C-X3-C motif) ligand 1
hsa-miR-1255a	1	0	1	1	1	1	SRSF3	serine/arginine-rich splicing factor 3
hsa-miR-1255a	1	0	1	1	1	1	SHB	Src homology 2 domain containing adaptor protein B
hsa-miR-1255a	1	0	1	0	1	1	SLC6A1	solute carrier family 6 (neurotransmitter transporter, GABA), member 1
hsa-miR-1255a	0	0	1	0	0	0	SLC18A2	solute carrier family 18 (vesicular monoamine), member 2
hsa-miR-1255a	0	0	1	1	0	0	SNTA1	syntrophin, alpha 1
hsa-miR-1255a	1	0	1	0	1	1	SOX11	SRY (sex determining region Y)-box 11
hsa-miR-1255a	0	0	1	1	0	0	SSX2	synovial sarcoma, X breakpoint 2
hsa-miR-1255a	1	0	1	0	1	1	STC1	stanniocalcin 1
hsa-miR-1255a	0	0	1	1	1	1	STIM1	stromal interaction molecule 1
hsa-miR-1255a	1	0	1	1	1	1	SYN2	synapsin II
hsa-miR-1255a	0	0	1	1	1	1	TPP2	tripeptidyl peptidase II
hsa-miR-1255a	0	0	1	1	1	1	TPR	translocated promoter region, nuclear basket protein
hsa-miR-1255a	1	0	1	0	0	0	PHLDA2	pleckstrin homology-like domain, family A, member 2
hsa-miR-1255a	1	0	1	0	1	1	TUB	tubby homolog (mouse)
hsa-miR-1255a	1	0	1	1	1	1	UBE2D3	ubiquitin-conjugating enzyme E2D 3
hsa-miR-1255a	0	0	1	1	1	1	PIP5K1A	phosphatidylinositol-4-phosphate 5-kinase, type I, alpha
hsa-miR-1255a	1	0	1	0	1	1	VAPA	VAMP (vesicle-associated membrane protein)-associated protein A, 33kDa
hsa-miR-1255a	1	0	1	0	1	1	CUL3	cullin 3
hsa-miR-1255a	1	0	1	1	1	1	PPM1D	protein phosphatase, Mg2+/Mn2+ dependent, 1D
hsa-miR-1255a	1	0	1	0	1	1	CNTNAP1	contactin associated protein 1
hsa-miR-1255a	0	0	1	1	0	0	NIPSNAP1	nipsnap homolog 1 (C. elegans)
hsa-miR-1255a	1	0	1	1	1	1	EXO1	exonuclease 1
hsa-miR-1255a	0	0	1	1	1	1	SLC25A12	solute carrier family 25 (aspartate/glutamate carrier), member 12
hsa-miR-1255a	0	0	1	1	1	1	OASL	2'-5'-oligoadenylate synthetase-like
hsa-miR-1255a	1	0	1	0	1	1	TNKS	tankyrase, TRF1-interacting ankyrin-related ADP-ribose polymerase
hsa-miR-1255a	1	0	1	1	1	1	NR5A2	nuclear receptor subfamily 5, group A, member 2
hsa-miR-1255a	1	0	1	1	1	1	PEX11B	peroxisomal biogenesis factor 11 beta
hsa-miR-1255a	1	0	1	1	1	1	SUCLG2	succinate-CoA ligase, GDP-forming, beta subunit
hsa-miR-1255a	1	0	1	1	1	1	NRP2	neuropilin 2
hsa-miR-1255a	0	0	1	1	1	1	TIMELESS	timeless homolog (Drosophila)
hsa-miR-1255a	1	0	1	0	1	1	SEMA5A	sema domain, seven thrombospondin repeats (type 1 and type 1-like), transmembrane domain (TM) and short cytoplasmic domain, (semaphorin) 5A
hsa-miR-1255a	0	0	1	1	0	0	GPX5	glutathione peroxidase 5 (epididymal androgen-related protein)
hsa-miR-1255a	1	0	1	1	1	1	CDH17	cadherin 17, LI cadherin (liver-intestine)
hsa-miR-1255a	1	0	1	1	1	1	FGF12	fibroblast growth factor 12
hsa-miR-1255a	1	0	1	0	1	1	IREB2	iron-responsive element binding protein 2
hsa-miR-1255a	0	0	1	1	1	1	SLC1A1	solute carrier family 1 (neuronal/epithelial high affinity glutamate transporter, system Xag), member 1
hsa-miR-1255a	1	0	1	0	1	1	SLC1A2	solute carrier family 1 (glial high affinity glutamate transporter), member 2
hsa-miR-1255a	1	0	1	1	1	1	STK17B	serine/threonine kinase 17b
hsa-miR-1255a	1	0	1	0	1	1	MED14	mediator complex subunit 14
hsa-miR-1255a	1	0	1	1	1	1	SOCS6	suppressor of cytokine signaling 6
hsa-miR-1255a	1	0	1	1	1	1	MED21	mediator complex subunit 21
hsa-miR-1255a	1	0	1	1	1	1	GDA	guanine deaminase
hsa-miR-1255a	1	0	1	0	1	1	RUNX1T1	runt-related transcription factor 1; translocated to, 1 (cyclin D-related)
hsa-miR-1255a	1	0	1	1	1	1	ATF6B	activating transcription factor 6 beta
hsa-miR-1255a	1	0	1	1	1	1	EPHA2	EPH receptor A2
hsa-miR-1255a	1	0	1	0	1	1	FGF5	fibroblast growth factor 5
hsa-miR-1255a	1	0	1	1	1	1	FLOT2	flotillin 2
hsa-miR-1255a	1	0	1	1	1	1	RAB4A	RAB4A, member RAS oncogene family
hsa-miR-1255a	0	0	1	1	1	1	TK2	thymidine kinase 2, mitochondrial
hsa-miR-1255a	1	0	1	1	1	1	SF1	splicing factor 1
hsa-miR-1255a	0	0	1	1	1	1	PABPN1	poly(A) binding protein, nuclear 1
hsa-miR-1255a	1	0	1	1	1	1	MTMR4	myotubularin related protein 4
hsa-miR-1255a	0	0	1	0	1	1	CXorf1	chromosome X open reading frame 1
hsa-miR-1255a	1	0	1	1	0	0	COX7A2L	cytochrome c oxidase subunit VIIa polypeptide 2 like
hsa-miR-1255a	1	0	1	1	1	1	SCAF11	SR-related CTD-associated factor 11
hsa-miR-1255a	0	0	1	0	1	1	ADIPOQ	adiponectin, C1Q and collagen domain containing
hsa-miR-1255a	1	0	1	0	1	1	ARHGEF6	Rac/Cdc42 guanine nucleotide exchange factor (GEF) 6
hsa-miR-1255a	1	0	1	1	1	1	ONECUT2	one cut homeobox 2
hsa-miR-1255a	1	0	1	0	1	1	SCD	stearoyl-CoA desaturase (delta-9-desaturase)
hsa-miR-1255a	1	0	1	1	1	1	SIAH2	siah E3 ubiquitin protein ligase 2
hsa-miR-1255a	0	0	1	1	0	0	TNFSF18	tumor necrosis factor (ligand) superfamily, member 18
hsa-miR-1255a	1	0	1	1	1	1	OXSR1	oxidative-stress responsive 1
hsa-miR-1255a	1	0	1	0	1	1	NUP153	nucleoporin 153kDa
hsa-miR-1255a	1	0	1	0	1	1	CALM3	calmodulin 3 (phosphorylase kinase, delta)
hsa-miR-1255a	1	0	1	1	1	1	CBL	Cbl proto-oncogene, E3 ubiquitin protein ligase
hsa-miR-1255a	1	0	1	1	1	1	DLX3	distal-less homeobox 3
hsa-miR-1255a	1	0	1	1	0	0	EFNA4	ephrin-A4
hsa-miR-1255a	1	0	1	1	1	1	NR2F6	nuclear receptor subfamily 2, group F, member 6
hsa-miR-1255a	1	0	1	1	1	1	GAS2	growth arrest-specific 2
hsa-miR-1255a	1	0	1	0	1	1	PRKAB2	protein kinase, AMP-activated, beta 2 non-catalytic subunit
hsa-miR-1255a	1	0	1	0	1	1	PRKCE	protein kinase C, epsilon
hsa-miR-1255a	1	0	1	1	0	0	SALL2	sal-like 2 (Drosophila)
hsa-miR-1255a	0	0	1	1	1	1	SEPP1	selenoprotein P, plasma, 1
hsa-miR-1255a	1	0	1	0	1	1	CCDC6	coiled-coil domain containing 6
hsa-miR-1255a	1	0	1	1	1	1	RND2	Rho family GTPase 2
hsa-miR-1255a	1	0	1	1	1	1	ABCA1	ATP-binding cassette, sub-family A (ABC1), member 1
hsa-miR-1255a	0	0	1	1	0	0	IFI35	interferon-induced protein 35
hsa-miR-1255a	0	0	1	1	1	1	ITK	IL2-inducible T-cell kinase
hsa-miR-1255a	1	0	1	1	1	1	LNPEP	leucyl/cystinyl aminopeptidase
hsa-miR-1255a	1	0	1	1	1	1	LPP	LIM domain containing preferred translocation partner in lipoma
hsa-miR-1255a	1	0	1	1	1	1	SMAD6	SMAD family member 6
hsa-miR-1255a	0	0	1	0	1	1	POU3F2	POU class 3 homeobox 2
hsa-miR-1255a	1	0	1	1	1	1	RGS4	regulator of G-protein signaling 4
hsa-miR-1255a	0	0	1	1	0	0	SSX4	synovial sarcoma, X breakpoint 4
hsa-miR-1255a	1	0	1	0	1	1	REEP5	receptor accessory protein 5
hsa-miR-1255a	1	0	1	0	1	1	CLEC3A	C-type lectin domain family 3, member A
hsa-miR-1255a	1	0	1	1	1	1	LHFPL2	lipoma HMGIC fusion partner-like 2
hsa-miR-1255a	0	0	1	1	1	1	MPHOSPH6	M-phase phosphoprotein 6
hsa-miR-1255a	0	0	1	1	1	1	KLRG1	killer cell lectin-like receptor subfamily G, member 1
hsa-miR-1255a	0	0	1	0	1	1	CD96	CD96 molecule
hsa-miR-1255a	1	0	1	1	1	1	GLYAT	glycine-N-acyltransferase
hsa-miR-1255a	1	0	1	0	1	1	SPRY3	sprouty homolog 3 (Drosophila)
hsa-miR-1255a	0	0	1	1	1	1	MFAP3	microfibrillar-associated protein 3
hsa-miR-1255a	1	0	1	1	1	1	MMP16	matrix metallopeptidase 16 (membrane-inserted)
hsa-miR-1255a	0	0	1	1	1	1	PNMA1	paraneoplastic Ma antigen 1
hsa-miR-1255a	1	0	1	1	1	1	HS3ST4	heparan sulfate (glucosamine) 3-O-sulfotransferase 4
hsa-miR-1255a	0	0	1	1	1	1	LANCL1	LanC lantibiotic synthetase component C-like 1 (bacterial)
hsa-miR-1255a	0	0	1	1	1	1	KRT1	keratin 1
hsa-miR-1255a	1	0	1	1	1	1	DAGLA	diacylglycerol lipase, alpha
hsa-miR-1255a	0	0	1	1	1	1	PA2G4	proliferation-associated 2G4, 38kDa
hsa-miR-1255a	1	0	1	0	1	1	PITPNA	phosphatidylinositol transfer protein, alpha
hsa-miR-1255a	1	0	1	1	1	1	POU4F1	POU class 4 homeobox 1
hsa-miR-1255a	0	0	1	1	1	1	PRKCH	protein kinase C, eta
hsa-miR-1255a	1	0	1	1	1	1	PKN2	protein kinase N2
hsa-miR-1255a	1	0	1	1	1	1	RAD21	RAD21 homolog (S. pombe)
hsa-miR-1255a	1	0	1	1	1	1	STK4	serine/threonine kinase 4
hsa-miR-1255a	1	0	1	1	1	1	SMC1A	structural maintenance of chromosomes 1A
hsa-miR-1255a	1	0	1	1	1	1	BASP1	brain abundant, membrane attached signal protein 1
hsa-miR-1255a	1	0	1	1	1	1	VAT1	vesicle amine transport protein 1 homolog (T. californica)
hsa-miR-1255a	1	0	1	0	1	1	APPBP2	amyloid beta precursor protein (cytoplasmic tail) binding protein 2
hsa-miR-1255a	1	0	1	1	1	1	NEBL	nebulette
hsa-miR-1255a	0	0	1	1	1	1	CXCL13	chemokine (C-X-C motif) ligand 13
hsa-miR-1255a	0	0	1	1	1	1	COLEC10	collectin sub-family member 10 (C-type lectin)
hsa-miR-1255a	1	0	1	1	1	1	PAIP1	poly(A) binding protein interacting protein 1
hsa-miR-1255a	1	0	1	1	1	1	TXNIP	thioredoxin interacting protein
hsa-miR-1255a	1	0	1	1	0	0	DYNLT1	dynein, light chain, Tctex-type 1
hsa-miR-1255a	1	0	1	0	1	1	IGF2BP1	insulin-like growth factor 2 mRNA binding protein 1
hsa-miR-1255a	0	0	1	1	1	1	CD226	CD226 molecule
hsa-miR-1255a	0	0	1	1	1	1	TBR1	T-box, brain, 1
hsa-miR-1255a	0	0	1	1	1	1	PPP1R17	protein phosphatase 1, regulatory subunit 17
hsa-miR-1255a	1	0	1	1	1	1	MMP24	matrix metallopeptidase 24 (membrane-inserted)
hsa-miR-1255a	1	0	1	1	1	1	DIAPH2	diaphanous homolog 2 (Drosophila)
hsa-miR-1255a	1	0	1	0	1	1	SYNGAP1	synaptic Ras GTPase activating protein 1
hsa-miR-1255a	1	0	1	1	1	1	MORF4L1	mortality factor 4 like 1
hsa-miR-1255a	0	0	1	1	0	0	C10orf116	chromosome 10 open reading frame 116
hsa-miR-1255a	1	0	1	1	1	1	SLC38A3	solute carrier family 38, member 3
hsa-miR-1255a	1	0	1	1	1	1	GLIPR1	GLI pathogenesis-related 1
hsa-miR-1255a	0	0	1	1	1	1	SNRNP27	small nuclear ribonucleoprotein 27kDa (U4/U6.U5)
hsa-miR-1255a	1	0	1	1	1	1	CD86	CD86 molecule
hsa-miR-1255a	0	0	1	1	1	1	CEACAM7	carcinoembryonic antigen-related cell adhesion molecule 7
hsa-miR-1255a	1	0	1	1	1	1	PRRX1	paired related homeobox 1
hsa-miR-1255a	1	0	1	0	1	1	SOX12	SRY (sex determining region Y)-box 12
hsa-miR-1255a	1	0	1	0	1	1	WASF2	WAS protein family, member 2
hsa-miR-1255a	1	0	1	0	1	1	PAPD7	PAP associated domain containing 7
hsa-miR-1255a	1	0	1	1	1	1	ADAMTS5	ADAM metallopeptidase with thrombospondin type 1 motif, 5
hsa-miR-1255a	1	0	1	1	1	1	UBL3	ubiquitin-like 3
hsa-miR-1255a	1	0	1	1	1	1	TRIO	trio Rho guanine nucleotide exchange factor
hsa-miR-1255a	1	0	1	1	1	1	UTRN	utrophin
hsa-miR-1255a	0	0	1	1	1	1	ZNF80	zinc finger protein 80
hsa-miR-1255a	0	0	1	0	1	1	ZXDB	zinc finger, X-linked, duplicated B
hsa-miR-1255a	1	0	1	1	1	1	PALM2-AKAP2	PALM2-AKAP2 readthrough
hsa-miR-1255a	1	0	1	1	1	1	CA5B	carbonic anhydrase VB, mitochondrial
hsa-miR-1255a	1	0	1	1	1	1	KLF12	Kruppel-like factor 12
hsa-miR-1255a	0	0	1	0	1	1	PNMA2	paraneoplastic Ma antigen 2
hsa-miR-1255a	0	0	1	1	1	1	STAT1	signal transducer and activator of transcription 1, 91kDa
hsa-miR-1255a	1	0	1	1	1	1	TARDBP	TAR DNA binding protein
hsa-miR-1255a	0	0	1	1	1	1	ATF5	activating transcription factor 5
hsa-miR-1255a	1	0	1	1	1	1	ELL2	elongation factor, RNA polymerase II, 2
hsa-miR-1255a	1	0	1	1	1	1	ICOS	inducible T-cell co-stimulator
hsa-miR-1255a	1	0	1	0	1	1	CASP8AP2	caspase 8 associated protein 2
hsa-miR-1255a	1	0	1	1	1	1	HS2ST1	heparan sulfate 2-O-sulfotransferase 1
hsa-miR-1255a	1	0	1	1	1	1	KCNE1L	KCNE1-like
hsa-miR-1255a	1	0	1	1	1	1	KIF4A	kinesin family member 4A
hsa-miR-1255a	1	0	1	1	1	1	DNAJB9	DnaJ (Hsp40) homolog, subfamily B, member 9
hsa-miR-1255a	1	0	1	0	1	1	MYO10	myosin X
hsa-miR-1255a	1	0	1	1	0	0	MYO1F	myosin IF
hsa-miR-1255a	1	0	1	1	1	1	TRPC5	transient receptor potential cation channel, subfamily C, member 5
hsa-miR-1255a	0	0	1	1	1	1	DNAJC15	DnaJ (Hsp40) homolog, subfamily C, member 15
hsa-miR-1255a	1	0	1	1	1	1	PPARGC1A	peroxisome proliferator-activated receptor gamma, coactivator 1 alpha
hsa-miR-1255a	1	0	1	1	1	1	LRP12	low density lipoprotein receptor-related protein 12
hsa-miR-1255a	0	0	1	0	1	1	EMR2	egf-like module containing, mucin-like, hormone receptor-like 2
hsa-miR-1255a	1	0	1	0	1	1	C16orf72	chromosome 16 open reading frame 72
hsa-miR-1255a	0	0	1	1	1	1	CCDC113	coiled-coil domain containing 113
hsa-miR-1255a	0	0	1	0	1	1	AP2A1	adaptor-related protein complex 2, alpha 1 subunit
hsa-miR-1255a	1	0	1	1	1	1	VAMP1	vesicle-associated membrane protein 1 (synaptobrevin 1)
hsa-miR-1255a	0	0	1	0	1	1	ADAMTS3	ADAM metallopeptidase with thrombospondin type 1 motif, 3
hsa-miR-1255a	0	0	1	1	0	0	QPRT	quinolinate phosphoribosyltransferase
hsa-miR-1255a	1	0	1	0	1	1	FJX1	four jointed box 1 (Drosophila)
hsa-miR-1255a	0	0	1	1	1	1	HIBCH	3-hydroxyisobutyryl-CoA hydrolase
hsa-miR-1255a	1	0	1	0	1	1	DIEXF	digestive organ expansion factor homolog (zebrafish)
hsa-miR-1255a	1	0	1	1	1	1	SERP1	stress-associated endoplasmic reticulum protein 1
hsa-miR-1255a	1	0	1	1	1	1	KLHL20	kelch-like 20 (Drosophila)
hsa-miR-1255a	0	0	1	1	1	1	KCNMB4	potassium large conductance calcium-activated channel, subfamily M, beta member 4
hsa-miR-1255a	0	0	1	1	0	0	APOBEC3C	apolipoprotein B mRNA editing enzyme, catalytic polypeptide-like 3C
hsa-miR-1255a	0	0	1	1	1	1	TMOD2	tropomodulin 2 (neuronal)
hsa-miR-1255a	1	0	1	1	1	1	HERC3	HECT and RLD domain containing E3 ubiquitin protein ligase 3
hsa-miR-1255a	0	0	1	1	1	1	HOXC4	homeobox C4
hsa-miR-1255a	0	0	1	1	1	1	PHF14	PHD finger protein 14
hsa-miR-1255a	1	0	1	0	1	1	TOX	thymocyte selection-associated high mobility group box
hsa-miR-1255a	1	0	1	1	1	1	RASSF2	Ras association (RalGDS/AF-6) domain family member 2
hsa-miR-1255a	0	0	1	1	1	1	KIAA0141	KIAA0141
hsa-miR-1255a	0	0	1	0	1	1	EPM2AIP1	EPM2A (laforin) interacting protein 1
hsa-miR-1255a	1	0	1	1	1	1	FCHSD2	FCH and double SH3 domains 2
hsa-miR-1255a	0	0	1	1	1	1	ADNP2	ADNP homeobox 2
hsa-miR-1255a	1	0	1	0	1	1	ICK	intestinal cell (MAK-like) kinase
hsa-miR-1255a	1	0	1	1	1	1	DIP2C	DIP2 disco-interacting protein 2 homolog C (Drosophila)
hsa-miR-1255a	1	0	1	0	1	1	WDFY3	WD repeat and FYVE domain containing 3
hsa-miR-1255a	1	0	1	1	1	1	STK38L	serine/threonine kinase 38 like
hsa-miR-1255a	0	0	1	1	1	1	MYO16	myosin XVI
hsa-miR-1255a	1	0	1	0	1	1	GGA2	golgi-associated, gamma adaptin ear containing, ARF binding protein 2
hsa-miR-1255a	1	0	1	1	1	1	SIPA1L3	signal-induced proliferation-associated 1 like 3
hsa-miR-1255a	1	0	1	1	1	1	IQSEC2	IQ motif and Sec7 domain 2
hsa-miR-1255a	1	0	1	1	1	1	DDN	dendrin
hsa-miR-1255a	1	0	1	1	1	1	SMG1	smg-1 homolog, phosphatidylinositol 3-kinase-related kinase (C. elegans)
hsa-miR-1255a	1	0	1	1	1	1	RTF1	Rtf1, Paf1/RNA polymerase II complex component, homolog (S. cerevisiae)
hsa-miR-1255a	1	0	1	1	1	1	RCOR1	REST corepressor 1
hsa-miR-1255a	0	0	1	1	1	1	ARL6IP1	ADP-ribosylation factor-like 6 interacting protein 1
hsa-miR-1255a	1	0	1	1	1	1	TRIM9	tripartite motif containing 9
hsa-miR-1255a	1	0	1	1	1	1	CSTF2T	cleavage stimulation factor, 3' pre-RNA, subunit 2, 64kDa, tau variant
hsa-miR-1255a	1	0	1	1	1	1	AHCYL2	adenosylhomocysteinase-like 2
hsa-miR-1255a	0	0	1	1	1	1	NBPF14	neuroblastoma breakpoint family, member 14
hsa-miR-1255a	1	0	1	1	1	1	PARM1	prostate androgen-regulated mucin-like protein 1
hsa-miR-1255a	1	0	1	1	1	1	CNOT6	CCR4-NOT transcription complex, subunit 6
hsa-miR-1255a	1	0	1	1	1	1	MYRIP	myosin VIIA and Rab interacting protein
hsa-miR-1255a	0	0	1	1	0	0	NGDN	neuroguidin, EIF4E binding protein
hsa-miR-1255a	0	0	1	1	1	1	TRPC4AP	transient receptor potential cation channel, subfamily C, member 4 associated protein
hsa-miR-1255a	1	0	1	1	1	1	FAM155B	family with sequence similarity 155, member B
hsa-miR-1255a	0	0	1	1	1	1	BRPF3	bromodomain and PHD finger containing, 3
hsa-miR-1255a	0	0	1	1	1	1	MED31	mediator complex subunit 31
hsa-miR-1255a	0	0	1	1	1	1	MRPS16	mitochondrial ribosomal protein S16
hsa-miR-1255a	0	0	1	1	1	1	RAB10	RAB10, member RAS oncogene family
hsa-miR-1255a	0	0	1	1	0	0	CRNN	cornulin
hsa-miR-1255a	1	0	1	1	1	1	VGLL3	vestigial like 3 (Drosophila)
hsa-miR-1255a	1	0	1	1	1	1	TOB2	transducer of ERBB2, 2
hsa-miR-1255a	1	0	1	1	1	1	PHF20	PHD finger protein 20
hsa-miR-1255a	0	0	1	1	0	0	FAM203A	family with sequence similarity 203, member A
hsa-miR-1255a	0	0	1	1	1	1	BET1L	blocked early in transport 1 homolog (S. cerevisiae)-like
hsa-miR-1255a	0	0	1	0	1	1	GPR83	G protein-coupled receptor 83
hsa-miR-1255a	0	0	1	1	1	1	TIMMDC1	translocase of inner mitochondrial membrane domain containing 1
hsa-miR-1255a	0	0	1	1	1	1	OGG1	8-oxoguanine DNA glycosylase
hsa-miR-1255a	1	0	1	0	1	1	FZD3	frizzled family receptor 3
hsa-miR-1255a	1	0	1	1	1	1	SIX4	SIX homeobox 4
hsa-miR-1255a	1	0	1	1	1	1	ARID1B	AT rich interactive domain 1B (SWI1-like)
hsa-miR-1255a	1	0	1	1	1	1	INO80	INO80 homolog (S. cerevisiae)
hsa-miR-1255a	1	0	1	0	1	1	UBE2Q1	ubiquitin-conjugating enzyme E2Q family member 1
hsa-miR-1255a	0	0	1	0	1	1	TRIM44	tripartite motif containing 44
hsa-miR-1255a	1	0	1	0	1	1	FAM46C	family with sequence similarity 46, member C
hsa-miR-1255a	1	0	1	1	1	1	YTHDF1	YTH domain family, member 1
hsa-miR-1255a	1	0	1	0	1	1	MARCH5	membrane-associated ring finger (C3HC4) 5
hsa-miR-1255a	1	0	1	1	1	1	RNF125	ring finger protein 125, E3 ubiquitin protein ligase
hsa-miR-1255a	0	0	1	1	1	1	C2orf42	chromosome 2 open reading frame 42
hsa-miR-1255a	1	0	1	1	1	1	RFWD3	ring finger and WD repeat domain 3
hsa-miR-1255a	0	0	1	1	1	1	NUDT11	nudix (nucleoside diphosphate linked moiety X)-type motif 11
hsa-miR-1255a	1	0	1	1	1	1	RPRD1A	regulation of nuclear pre-mRNA domain containing 1A
hsa-miR-1255a	0	0	1	0	1	1	FAM86C1	family with sequence similarity 86, member C1
hsa-miR-1255a	1	0	1	0	1	1	LGI2	leucine-rich repeat LGI family, member 2
hsa-miR-1255a	0	0	1	0	1	1	GOLPH3L	golgi phosphoprotein 3-like
hsa-miR-1255a	0	0	1	1	1	1	TMLHE	trimethyllysine hydroxylase, epsilon
hsa-miR-1255a	1	0	1	1	1	1	TBC1D13	TBC1 domain family, member 13
hsa-miR-1255a	0	0	1	1	1	1	TRIM62	tripartite motif containing 62
hsa-miR-1255a	1	0	1	1	1	1	C20orf20	chromosome 20 open reading frame 20
hsa-miR-1255a	1	0	1	1	1	1	RSBN1	round spermatid basic protein 1
hsa-miR-1255a	1	0	1	0	1	1	FOXJ2	forkhead box J2
hsa-miR-1255a	0	0	1	0	0	0	KDM3A	lysine (K)-specific demethylase 3A
hsa-miR-1255a	1	0	1	0	1	1	MAML3	mastermind-like 3 (Drosophila)
hsa-miR-1255a	0	0	1	1	0	0	SH3BP1	SH3-domain binding protein 1
hsa-miR-1255a	1	0	1	0	1	1	CCNJ	cyclin J
hsa-miR-1255a	0	0	1	0	1	1	ARL15	ADP-ribosylation factor-like 15
hsa-miR-1255a	1	0	1	1	1	1	HOXA5	homeobox A5
hsa-miR-1255a	1	0	1	1	1	1	SEPT3	septin 3
hsa-miR-1255a	1	0	1	0	1	1	UBFD1	ubiquitin family domain containing 1
hsa-miR-1255a	0	0	1	1	1	1	KLHL4	kelch-like 4 (Drosophila)
hsa-miR-1255a	1	0	1	1	1	1	LRRC8A	leucine rich repeat containing 8 family, member A
hsa-miR-1255a	1	0	1	0	1	1	KCMF1	potassium channel modulatory factor 1
hsa-miR-1255a	1	0	1	0	1	1	SLAMF8	SLAM family member 8
hsa-miR-1255a	0	0	1	1	1	1	ACN9	ACN9 homolog (S. cerevisiae)
hsa-miR-1255a	0	0	1	1	1	1	STOX2	storkhead box 2
hsa-miR-1255a	1	0	1	1	1	1	PAK7	p21 protein (Cdc42/Rac)-activated kinase 7
hsa-miR-1255a	1	0	1	0	1	1	SLC17A6	solute carrier family 17 (sodium-dependent inorganic phosphate cotransporter), member 6
hsa-miR-1255a	0	0	1	1	1	1	FGF23	fibroblast growth factor 23
hsa-miR-1255a	1	0	1	0	1	1	KCNS2	potassium voltage-gated channel, delayed-rectifier, subfamily S, member 2
hsa-miR-1255a	1	0	1	1	1	1	SLC12A5	solute carrier family 12 (potassium/chloride transporter), member 5
hsa-miR-1255a	0	0	1	1	1	1	SHROOM4	shroom family member 4
hsa-miR-1255a	1	0	1	1	1	1	NLGN2	neuroligin 2
hsa-miR-1255a	1	0	1	1	1	1	PCDH10	protocadherin 10
hsa-miR-1255a	1	0	1	1	1	1	ZBTB2	zinc finger and BTB domain containing 2
hsa-miR-1255a	1	0	1	0	1	1	GPAM	glycerol-3-phosphate acyltransferase, mitochondrial
hsa-miR-1255a	0	0	1	1	1	1	B3GALT1	UDP-Gal:betaGlcNAc beta 1,3-galactosyltransferase, polypeptide 1
hsa-miR-1255a	0	0	1	1	1	1	SSX3	synovial sarcoma, X breakpoint 3
hsa-miR-1255a	0	0	1	1	0	0	SSX5	synovial sarcoma, X breakpoint 5
hsa-miR-1255a	1	0	1	0	1	1	RAP2A	RAP2A, member of RAS oncogene family
hsa-miR-1255a	1	0	1	0	1	1	TMX4	thioredoxin-related transmembrane protein 4
hsa-miR-1255a	1	0	1	1	1	1	SNX6	sorting nexin 6
hsa-miR-1255a	1	0	1	1	1	1	SENP2	SUMO1/sentrin/SMT3 specific peptidase 2
hsa-miR-1255a	1	0	1	1	1	1	TMEM35	transmembrane protein 35
hsa-miR-1255a	0	0	1	1	1	1	GABBR1	gamma-aminobutyric acid (GABA) B receptor, 1
hsa-miR-1255a	0	0	1	0	1	1	CFL2	cofilin 2 (muscle)
hsa-miR-1255a	1	0	1	0	1	1	GAN	gigaxonin
hsa-miR-1255a	1	0	1	0	1	1	CSNK1G1	casein kinase 1, gamma 1
hsa-miR-1255a	0	0	1	1	1	1	NXF3	nuclear RNA export factor 3
hsa-miR-1255a	0	0	1	1	0	0	ABHD4	abhydrolase domain containing 4
hsa-miR-1255a	1	0	1	1	1	1	CLSTN2	calsyntenin 2
hsa-miR-1255a	1	0	1	1	1	1	ABCG4	ATP-binding cassette, sub-family G (WHITE), member 4
hsa-miR-1255a	0	0	1	1	0	0	KIF9	kinesin family member 9
hsa-miR-1255a	1	0	1	1	1	1	NDRG3	NDRG family member 3
hsa-miR-1255a	1	0	1	1	1	1	GIGYF1	GRB10 interacting GYF protein 1
hsa-miR-1255a	0	0	1	1	1	1	ACBD3	acyl-CoA binding domain containing 3
hsa-miR-1255a	1	0	1	1	1	1	C16orf58	chromosome 16 open reading frame 58
hsa-miR-1255a	1	0	1	1	1	1	C6orf106	chromosome 6 open reading frame 106
hsa-miR-1255a	1	0	1	1	0	0	AEN	apoptosis enhancing nuclease
hsa-miR-1255a	1	0	1	1	1	1	DEPTOR	DEP domain containing MTOR-interacting protein
hsa-miR-1255a	0	0	1	1	1	1	METTL4	methyltransferase like 4
hsa-miR-1255a	1	0	1	0	1	1	BCL11B	B-cell CLL/lymphoma 11B (zinc finger protein)
hsa-miR-1255a	1	0	1	1	1	1	REEP1	receptor accessory protein 1
hsa-miR-1255a	1	0	1	1	0	0	UBE2Z	ubiquitin-conjugating enzyme E2Z
hsa-miR-1255a	1	0	1	1	1	1	FGFR1	fibroblast growth factor receptor 1
hsa-miR-1255a	1	0	1	1	1	1	C1orf116	chromosome 1 open reading frame 116
hsa-miR-1255a	0	0	1	1	0	0	C7orf25	chromosome 7 open reading frame 25
hsa-miR-1255a	1	0	1	1	1	1	FAM134A	family with sequence similarity 134, member A
hsa-miR-1255a	1	0	1	1	1	1	PSTPIP2	proline-serine-threonine phosphatase interacting protein 2
hsa-miR-1255a	1	0	1	1	1	1	GCC1	GRIP and coiled-coil domain containing 1
hsa-miR-1255a	1	0	1	1	1	1	MUL1	mitochondrial E3 ubiquitin protein ligase 1
hsa-miR-1255a	0	0	1	1	1	1	AKIRIN1	akirin 1
hsa-miR-1255a	1	0	1	0	1	1	MOB3B	MOB kinase activator 3B
hsa-miR-1255a	0	0	1	1	0	0	RNF122	ring finger protein 122
hsa-miR-1255a	1	0	1	1	1	1	L2HGDH	L-2-hydroxyglutarate dehydrogenase
hsa-miR-1255a	0	0	1	1	1	1	ZNF767	zinc finger family member 767
hsa-miR-1255a	0	0	1	1	0	0	NRSN2	neurensin 2
hsa-miR-1255a	1	0	1	0	1	1	VCPIP1	valosin containing protein (p97)/p47 complex interacting protein 1
hsa-miR-1255a	0	0	1	1	0	0	BPIFB2	BPI fold containing family B, member 2
hsa-miR-1255a	1	0	1	1	0	0	RNF39	ring finger protein 39
hsa-miR-1255a	1	0	1	1	1	1	JHDM1D	jumonji C domain containing histone demethylase 1 homolog D (S. cerevisiae)
hsa-miR-1255a	1	0	1	0	1	1	SETD7	SET domain containing (lysine methyltransferase) 7
hsa-miR-1255a	1	0	1	1	1	1	PTPRO	protein tyrosine phosphatase, receptor type, O
hsa-miR-1255a	0	0	1	1	0	0	HM13	histocompatibility (minor) 13
hsa-miR-1255a	1	0	1	1	0	0	PVRL4	poliovirus receptor-related 4
hsa-miR-1255a	1	0	1	1	1	1	C6orf62	chromosome 6 open reading frame 62
hsa-miR-1255a	1	0	1	1	1	1	RAB1B	RAB1B, member RAS oncogene family
hsa-miR-1255a	0	0	1	1	1	1	FRMD8	FERM domain containing 8
hsa-miR-1255a	1	0	1	1	1	1	KLF16	Kruppel-like factor 16
hsa-miR-1255a	0	0	1	1	1	1	MAGT1	magnesium transporter 1
hsa-miR-1255a	0	0	1	0	1	1	RAB6C	RAB6C, member RAS oncogene family
hsa-miR-1255a	0	0	1	1	0	0	ARL6	ADP-ribosylation factor-like 6
hsa-miR-1255a	1	0	1	1	1	1	DSEL	dermatan sulfate epimerase-like
hsa-miR-1255a	1	0	1	1	1	1	ARID5B	AT rich interactive domain 5B (MRF1-like)
hsa-miR-1255a	0	0	1	1	0	0	ELMOD3	ELMO/CED-12 domain containing 3
hsa-miR-1255a	0	0	1	1	1	1	FAM96A	family with sequence similarity 96, member A
hsa-miR-1255a	1	0	1	0	1	1	PSD2	pleckstrin and Sec7 domain containing 2
hsa-miR-1255a	1	0	1	1	1	1	CAMKK1	calcium/calmodulin-dependent protein kinase kinase 1, alpha
hsa-miR-1255a	0	0	1	1	0	0	ZNF414	zinc finger protein 414
hsa-miR-1255a	1	0	1	0	1	1	INA	internexin neuronal intermediate filament protein, alpha
hsa-miR-1255a	0	0	1	0	1	1	LMNB2	lamin B2
hsa-miR-1255a	0	0	1	1	1	1	USMG5	up-regulated during skeletal muscle growth 5 homolog (mouse)
hsa-miR-1255a	1	0	1	1	1	1	RSPO3	R-spondin 3
hsa-miR-1255a	1	0	1	1	1	1	RAB2B	RAB2B, member RAS oncogene family
hsa-miR-1255a	1	0	1	0	1	1	C5orf62	chromosome 5 open reading frame 62
hsa-miR-1255a	0	0	1	1	1	1	SEC22C	SEC22 vesicle trafficking protein homolog C (S. cerevisiae)
hsa-miR-1255a	1	0	1	0	1	1	EAF1	ELL associated factor 1
hsa-miR-1255a	0	0	1	1	1	1	CABS1	calcium-binding protein, spermatid-specific 1
hsa-miR-1255a	1	0	1	0	1	1	PURB	purine-rich element binding protein B
hsa-miR-1255a	1	0	1	1	1	1	ADAM19	ADAM metallopeptidase domain 19
hsa-miR-1255a	1	0	1	1	1	1	SSH2	slingshot homolog 2 (Drosophila)
hsa-miR-1255a	1	0	1	1	1	1	RCSD1	RCSD domain containing 1
hsa-miR-1255a	1	0	1	1	1	1	ELFN2	extracellular leucine-rich repeat and fibronectin type III domain containing 2
hsa-miR-1255a	0	0	1	1	1	1	IL22RA2	interleukin 22 receptor, alpha 2
hsa-miR-1255a	1	0	1	1	1	1	NAA15	N(alpha)-acetyltransferase 15, NatA auxiliary subunit
hsa-miR-1255a	1	0	1	0	1	1	ANTXR2	anthrax toxin receptor 2
hsa-miR-1255a	1	0	1	1	1	1	BTN2A1	butyrophilin, subfamily 2, member A1
hsa-miR-1255a	0	0	1	1	1	1	CLEC4D	C-type lectin domain family 4, member D
hsa-miR-1255a	1	0	1	0	1	1	SOCS4	suppressor of cytokine signaling 4
hsa-miR-1255a	1	0	1	1	1	1	KLHL6	kelch-like 6 (Drosophila)
hsa-miR-1255a	1	0	1	1	0	0	UNC5A	unc-5 homolog A (C. elegans)
hsa-miR-1255a	0	0	1	0	1	1	SYNPO2	synaptopodin 2
hsa-miR-1255a	1	0	1	1	1	1	SLC30A7	solute carrier family 30 (zinc transporter), member 7
hsa-miR-1255a	0	0	1	1	1	1	PATE1	prostate and testis expressed 1
hsa-miR-1255a	1	0	1	1	1	1	PANK1	pantothenate kinase 1
hsa-miR-1255a	1	0	1	1	1	1	PCSK6	proprotein convertase subtilisin/kexin type 6
hsa-miR-1255a	1	0	1	1	1	1	FAM122A	family with sequence similarity 122A
hsa-miR-1255a	1	0	1	0	1	1	SP1	Sp1 transcription factor
hsa-miR-1255a	0	0	1	1	1	1	KLF14	Kruppel-like factor 14
hsa-miR-1255a	0	0	1	0	1	1	MYO3B	myosin IIIB
hsa-miR-1255a	1	0	1	1	1	1	ZMAT2	zinc finger, matrin-type 2
hsa-miR-1255a	0	0	1	1	1	1	DACT3	dapper, antagonist of beta-catenin, homolog 3 (Xenopus laevis)
hsa-miR-1255a	0	0	1	1	0	0	IL27	interleukin 27
hsa-miR-1255a	0	0	1	1	1	1	MRPL27	mitochondrial ribosomal protein L27
hsa-miR-1255a	1	0	1	1	1	1	UBTD2	ubiquitin domain containing 2
hsa-miR-1255a	1	0	1	1	1	1	POGLUT1	protein O-glucosyltransferase 1
hsa-miR-1255a	0	0	1	1	1	1	CDYL2	chromodomain protein, Y-like 2
hsa-miR-1255a	1	0	1	1	1	1	LSM12	LSM12 homolog (S. cerevisiae)
hsa-miR-1255a	1	0	1	1	1	1	ZSCAN29	zinc finger and SCAN domain containing 29
hsa-miR-1255a	0	0	1	1	1	1	ATP6V0D2	ATPase, H+ transporting, lysosomal 38kDa, V0 subunit d2
hsa-miR-1255a	0	0	1	1	0	0	FAM47B	family with sequence similarity 47, member B
hsa-miR-1255a	1	0	1	0	1	1	TMEM154	transmembrane protein 154
hsa-miR-1255a	1	0	1	0	1	1	C7orf41	chromosome 7 open reading frame 41
hsa-miR-1255a	1	0	1	1	1	1	FAS	Fas (TNF receptor superfamily, member 6)
hsa-miR-1255a	0	0	1	1	0	0	ODF4	outer dense fiber of sperm tails 4
hsa-miR-1255a	1	0	1	1	1	1	TCEANC2	transcription elongation factor A (SII) N-terminal and central domain containing 2
hsa-miR-1255a	0	0	1	1	0	0	TMEM174	transmembrane protein 174
hsa-miR-1255a	0	0	1	0	1	1	TMEM92	transmembrane protein 92
hsa-miR-1255a	1	0	1	1	1	1	TXLNB	taxilin beta
hsa-miR-1255a	0	0	1	1	1	1	SLC22A7	solute carrier family 22 (organic anion transporter), member 7
hsa-miR-1255a	1	0	1	0	1	1	ENPP6	ectonucleotide pyrophosphatase/phosphodiesterase 6
hsa-miR-1255a	1	0	1	1	0	0	TMEM86A	transmembrane protein 86A
hsa-miR-1255a	0	0	1	0	1	1	RTP1	receptor (chemosensory) transporter protein 1
hsa-miR-1255a	1	0	1	1	1	1	FNDC5	fibronectin type III domain containing 5
hsa-miR-1255a	0	0	1	1	1	1	TEDDM1	transmembrane epididymal protein 1
hsa-miR-1255a	1	0	1	1	1	1	CAMK2D	calcium/calmodulin-dependent protein kinase II delta
hsa-miR-1255a	0	0	1	1	1	1	REXO1L1	REX1, RNA exonuclease 1 homolog (S. cerevisiae)-like 1
hsa-miR-1255a	0	0	1	0	1	1	TUSC5	tumor suppressor candidate 5
hsa-miR-1255a	0	0	1	1	0	0	SPRR4	small proline-rich protein 4
hsa-miR-1255a	0	0	1	1	0	0	SSX6	synovial sarcoma, X breakpoint 6 (pseudogene)
hsa-miR-1255a	1	0	1	1	1	1	DCUN1D3	DCN1, defective in cullin neddylation 1, domain containing 3 (S. cerevisiae)
hsa-miR-1255a	1	0	1	1	1	1	TTBK2	tau tubulin kinase 2
hsa-miR-1255a	0	0	1	1	0	0	EFCAB3	EF-hand calcium binding domain 3
hsa-miR-1255a	1	0	1	1	1	1	CCDC117	coiled-coil domain containing 117
hsa-miR-1255a	1	0	1	1	1	1	FAM117B	family with sequence similarity 117, member B
hsa-miR-1255a	0	0	1	1	1	1	FNDC7	fibronectin type III domain containing 7
hsa-miR-1255a	0	0	1	1	1	1	FUT11	fucosyltransferase 11 (alpha (1,3) fucosyltransferase)
hsa-miR-1255a	0	0	1	1	1	1	APLF	aprataxin and PNKP like factor
hsa-miR-1255a	1	0	1	0	1	1	PGM2L1	phosphoglucomutase 2-like 1
hsa-miR-1255a	1	0	1	1	1	1	IGSF22	immunoglobulin superfamily, member 22
hsa-miR-1255a	1	0	1	1	1	1	DIP2B	DIP2 disco-interacting protein 2 homolog B (Drosophila)
hsa-miR-1255a	0	0	1	1	1	1	CDRT4	CMT1A duplicated region transcript 4
hsa-miR-1255a	0	0	1	1	1	1	HARBI1	harbinger transposase derived 1
hsa-miR-1255a	1	0	1	1	1	1	RABL3	RAB, member of RAS oncogene family-like 3
hsa-miR-1255a	1	0	1	1	1	1	LDLRAD3	low density lipoprotein receptor class A domain containing 3
hsa-miR-1255a	1	0	1	1	1	1	UBR1	ubiquitin protein ligase E3 component n-recognin 1
hsa-miR-1255a	0	0	1	1	1	1	ZDHHC22	zinc finger, DHHC-type containing 22
hsa-miR-1255a	1	0	1	1	1	1	SYT9	synaptotagmin IX
hsa-miR-1255a	0	0	1	1	1	1	KRTAP8-1	keratin associated protein 8-1
hsa-miR-1255a	1	0	1	1	1	1	INADL	InaD-like (Drosophila)
hsa-miR-1255a	1	0	1	1	1	1	PPAP2B	phosphatidic acid phosphatase type 2B
hsa-miR-1255a	1	0	1	1	1	1	STX12	syntaxin 12
hsa-miR-1255a	1	0	1	1	1	1	LRRTM3	leucine rich repeat transmembrane neuronal 3
hsa-miR-1255a	1	0	1	1	1	1	FAM134C	family with sequence similarity 134, member C
hsa-miR-1255a	1	0	1	1	1	1	PTF1A	pancreas specific transcription factor, 1a
hsa-miR-1255a	0	0	1	0	1	1	CDCP1	CUB domain containing protein 1
hsa-miR-1255a	0	0	1	1	1	1	NAA20	N(alpha)-acetyltransferase 20, NatB catalytic subunit
hsa-miR-1255a	0	0	1	0	1	1	HCG27	HLA complex group 27 (non-protein coding)
hsa-miR-1255a	0	0	1	1	0	0	POLN	polymerase (DNA directed) nu
hsa-miR-1255a	0	0	1	1	1	1	KRT40	keratin 40
hsa-miR-1255a	0	0	1	1	1	1	SKA2	spindle and kinetochore associated complex subunit 2
hsa-miR-1255a	1	0	1	1	1	1	NIN	ninein (GSK3B interacting protein)
hsa-miR-1255a	0	0	1	0	1	1	NBPF11	neuroblastoma breakpoint family, member 11
hsa-miR-1255a	1	0	1	1	1	1	KIF1B	kinesin family member 1B
hsa-miR-1255a	1	0	1	1	1	1	RBPMS2	RNA binding protein with multiple splicing 2
hsa-miR-1255a	0	0	1	0	1	1	CLDN23	claudin 23
hsa-miR-1255a	1	0	1	0	1	1	SLC16A9	solute carrier family 16, member 9 (monocarboxylic acid transporter 9)
hsa-miR-1255a	1	0	1	1	1	1	ADAMTS6	ADAM metallopeptidase with thrombospondin type 1 motif, 6
hsa-miR-1255a	0	0	1	0	1	1	BTNL3	butyrophilin-like 3
hsa-miR-1255a	1	0	1	0	1	1	GNPNAT1	glucosamine-phosphate N-acetyltransferase 1
hsa-miR-1255a	0	0	1	1	1	1	APOOL	apolipoprotein O-like
hsa-miR-1255a	0	0	1	1	1	1	FOXR2	forkhead box R2
hsa-miR-1255a	0	0	1	1	1	1	MMS22L	MMS22-like, DNA repair protein
hsa-miR-1255a	0	0	1	1	0	0	FUOM	fucose mutarotase
hsa-miR-1255a	0	0	1	1	0	0	LRRC33	leucine rich repeat containing 33
hsa-miR-1255a	1	0	1	1	1	1	PTGER3	prostaglandin E receptor 3 (subtype EP3)
hsa-miR-1255a	1	0	1	0	1	1	LHFPL3	lipoma HMGIC fusion partner-like 3
hsa-miR-1255a	1	0	1	1	1	1	TMEM189-UBE2V1	TMEM189-UBE2V1 readthrough
hsa-miR-1255a	1	0	1	1	1	1	THRA	thyroid hormone receptor, alpha
hsa-miR-1255a	1	0	1	1	0	0	KAZN	kazrin, periplakin interacting protein
hsa-miR-1255a	1	0	1	1	1	1	E2F7	E2F transcription factor 7
hsa-miR-1255a	1	0	1	1	1	1	PPAPDC2	phosphatidic acid phosphatase type 2 domain containing 2
hsa-miR-1255a	1	0	1	1	1	1	IGSF1	immunoglobulin superfamily, member 1
hsa-miR-1255a	1	0	1	1	1	1	ENSA	endosulfine alpha
hsa-miR-1255a	0	0	1	0	1	1	NPSR1-AS1	NPSR1 antisense RNA 1
hsa-miR-1255a	0	0	1	1	1	1	ZNF474	zinc finger protein 474
hsa-miR-1255a	1	0	1	1	1	1	SPRYD4	SPRY domain containing 4
hsa-miR-1255a	1	0	1	1	1	1	FREM2	FRAS1 related extracellular matrix protein 2
hsa-miR-1255a	0	0	1	1	1	1	SEPT14	septin 14
hsa-miR-1255a	1	0	1	1	1	1	SKIDA1	SKI/DACH domain containing 1
hsa-miR-1255a	0	0	1	0	1	1	C1orf229	chromosome 1 open reading frame 229
hsa-miR-1255a	0	0	1	1	1	1	FAM177B	family with sequence similarity 177, member B
hsa-miR-1255a	0	0	1	1	1	1	LYSMD1	LysM, putative peptidoglycan-binding, domain containing 1
hsa-miR-1255a	0	0	1	1	1	1	PATE2	prostate and testis expressed 2
hsa-miR-1255a	1	0	1	0	1	1	STAT3	signal transducer and activator of transcription 3 (acute-phase response factor)
hsa-miR-1255a	0	0	1	1	1	1	CLEC4M	C-type lectin domain family 4, member M
hsa-miR-1255a	0	0	1	0	0	0	ESRRAP2	estrogen-related receptor alpha pseudogene 2
hsa-miR-1255a	0	0	1	0	0	0	MIR155HG	MIR155 host gene (non-protein coding)
hsa-miR-1255a	0	0	1	0	0	0	TTTY15	testis-specific transcript, Y-linked 15 (non-protein coding)
hsa-miR-1255a	0	0	1	0	0	0	VENTXP1	VENT homeobox pseudogene 1
hsa-miR-1255a	0	0	1	0	0	0	TPI1P2	triosephosphate isomerase 1 pseudogene 2
hsa-miR-1255a	0	0	1	0	0	0	SUMO1P1	SUMO1 pseudogene 1
hsa-miR-1255a	0	0	1	0	0	0	DPRXP4	divergent-paired related homeobox pseudogene 4
hsa-miR-1255a	0	0	1	0	0	0	RPL13P5	ribosomal protein L13 pseudogene 5
hsa-miR-1255a	0	0	1	0	0	0	PTPRVP	protein tyrosine phosphatase, receptor type, V, pseudogene
hsa-miR-1255a	0	0	1	0	0	0	SNX29P2	sorting nexin 29 pseudogene 2
hsa-miR-1255a	0	0	1	0	0	0	SNORA74B	small nucleolar RNA, H/ACA box 74B
hsa-miR-1255a	0	0	1	0	0	0	PYY2	peptide YY, 2 (pseudogene)
hsa-miR-1255a	0	0	1	0	0	0	LOC284441	actin-related protein 2 pseudogene
hsa-miR-1255a	0	0	1	0	0	0	USP32P1	ubiquitin specific peptidase 32 pseudogene 1
hsa-miR-1255a	0	0	1	0	0	0	CDRT15P1	CMT1A duplicated region transcript 15 pseudogene 1
hsa-miR-1255a	1	0	1	1	0	0	KIAA1549L	KIAA1549-like
hsa-miR-1255a	1	0	1	0	1	1	NFIX	nuclear factor I/X (CCAAT-binding transcription factor)
hsa-miR-1255a	1	0	1	1	1	1	CBLB	Cbl proto-oncogene, E3 ubiquitin protein ligase B
hsa-miR-1255a	0	0	1	0	0	0	MST1P9	macrophage stimulating 1 (hepatocyte growth factor-like) pseudogene 9
hsa-miR-1255a	1	0	1	1	1	1	KLF6	Kruppel-like factor 6
hsa-miR-1255a	0	0	1	0	0	0	PLGLA	plasminogen-like A
hsa-miR-1255a	1	0	1	1	1	1	TCF3	transcription factor 3 (E2A immunoglobulin enhancer binding factors E12/E47)
