# Supplementary material for: Profiling of Selected MicroRNAs in Proliferative Eutopic Endometrium of Women with Ovarian Endometriosis
Source: Biomed Res Int. 2015 Aug 20;2015:760698. doi: 10.1155/2015/760698 (PMC4558423; doi:10.1155/2015/760698)
Supplement: Supplementary file 1 — Table I: The names of miRNAs significantly differentially expressed between eutopic endometrium of patients with endometriosis vs eutopic endometrium of patients without endometriosis. Table II: The associations between miRNA and mRNA, which presents detailed results of the search of six major databases i.e targetscan, tarbase, miranda, mirbase, mirtarget2 and pictar. [file 760698.f1.zip › 760698.f1/Table II/hsa-miR-1256.tsv]

miR	targetscan	tarbase	miranda	mirbase	mirtarget2	pictar	GeneSymbol	GeneName
hsa-miR-1256	1	0	1	1	0	0	RAPGEF2	Rap guanine nucleotide exchange factor (GEF) 2
hsa-miR-1256	1	0	1	1	1	1	PRUNE2	prune homolog 2 (Drosophila)
hsa-miR-1256	1	0	1	0	1	1	PTPRT	protein tyrosine phosphatase, receptor type, T
hsa-miR-1256	1	0	1	1	0	0	SEC14L5	SEC14-like 5 (S. cerevisiae)
hsa-miR-1256	0	0	1	1	1	1	NEU3	sialidase 3 (membrane sialidase)
hsa-miR-1256	0	0	1	1	0	0	ZNF862	zinc finger protein 862
hsa-miR-1256	1	0	1	0	1	1	CHST15	carbohydrate (N-acetylgalactosamine 4-sulfate 6-O) sulfotransferase 15
hsa-miR-1256	1	0	1	1	0	0	SMCHD1	structural maintenance of chromosomes flexible hinge domain containing 1
hsa-miR-1256	1	0	1	0	1	1	DOCK4	dedicator of cytokinesis 4
hsa-miR-1256	1	0	1	1	1	1	CAMKK2	calcium/calmodulin-dependent protein kinase kinase 2, beta
hsa-miR-1256	1	0	1	1	1	1	DMXL2	Dmx-like 2
hsa-miR-1256	1	0	1	1	1	1	WWC1	WW and C2 domain containing 1
hsa-miR-1256	1	0	1	1	1	1	RPGRIP1L	RPGRIP1-like
hsa-miR-1256	1	0	1	1	0	0	KIAA1045	KIAA1045
hsa-miR-1256	1	0	1	1	1	1	PHF8	PHD finger protein 8
hsa-miR-1256	1	0	1	1	0	0	SRGAP1	SLIT-ROBO Rho GTPase activating protein 1
hsa-miR-1256	1	0	1	1	1	1	PCDH19	protocadherin 19
hsa-miR-1256	1	0	1	1	1	1	LRRC7	leucine rich repeat containing 7
hsa-miR-1256	1	0	1	1	0	0	KIAA1462	KIAA1462
hsa-miR-1256	1	0	1	0	1	1	SEMA6D	sema domain, transmembrane domain (TM), and cytoplasmic domain, (semaphorin) 6D
hsa-miR-1256	0	0	1	0	0	0	KRT19P2	keratin 19 pseudogene 2
hsa-miR-1256	1	0	1	0	1	1	IGDCC4	immunoglobulin superfamily, DCC subclass, member 4
hsa-miR-1256	1	0	1	0	0	0	TANC2	tetratricopeptide repeat, ankyrin repeat and coiled-coil containing 2
hsa-miR-1256	0	0	1	1	1	1	FANCI	Fanconi anemia, complementation group I
hsa-miR-1256	0	0	1	1	0	0	FAM65A	family with sequence similarity 65, member A
hsa-miR-1256	1	0	1	1	1	1	ANKRD12	ankyrin repeat domain 12
hsa-miR-1256	1	0	1	1	1	1	POGZ	pogo transposable element with ZNF domain
hsa-miR-1256	1	0	1	1	1	1	FHOD3	formin homology 2 domain containing 3
hsa-miR-1256	0	0	1	0	1	1	RASSF8	Ras association (RalGDS/AF-6) domain family (N-terminal) member 8
hsa-miR-1256	1	0	1	1	1	1	PAN3	PAN3 poly(A) specific ribonuclease subunit homolog (S. cerevisiae)
hsa-miR-1256	0	0	1	1	0	0	SSPO	SCO-spondin homolog (Bos taurus)
hsa-miR-1256	1	0	1	1	1	1	KCNMA1	potassium large conductance calcium-activated channel, subfamily M, alpha member 1
hsa-miR-1256	0	0	1	0	1	1	ACE2	angiotensin I converting enzyme (peptidyl-dipeptidase A) 2
hsa-miR-1256	1	0	1	1	1	1	UBE3A	ubiquitin protein ligase E3A
hsa-miR-1256	1	0	1	1	1	1	TRIM36	tripartite motif containing 36
hsa-miR-1256	1	0	1	1	1	1	COL11A1	collagen, type XI, alpha 1
hsa-miR-1256	1	0	1	1	1	1	RPS6KA3	ribosomal protein S6 kinase, 90kDa, polypeptide 3
hsa-miR-1256	1	0	1	1	1	1	PML	promyelocytic leukemia
hsa-miR-1256	1	0	1	1	1	1	CLIP4	CAP-GLY domain containing linker protein family, member 4
hsa-miR-1256	1	0	1	1	1	1	MKNK2	MAP kinase interacting serine/threonine kinase 2
hsa-miR-1256	1	0	1	0	1	1	DPYSL2	dihydropyrimidinase-like 2
hsa-miR-1256	0	0	1	1	1	1	TFRC	transferrin receptor (p90, CD71)
hsa-miR-1256	1	0	1	1	1	1	TBX2	T-box 2
hsa-miR-1256	0	0	1	1	1	1	RYR1	ryanodine receptor 1 (skeletal)
hsa-miR-1256	1	0	1	1	1	1	PDLIM5	PDZ and LIM domain 5
hsa-miR-1256	0	0	1	1	0	0	EIF2B4	eukaryotic translation initiation factor 2B, subunit 4 delta, 67kDa
hsa-miR-1256	0	0	1	1	0	0	BMP1	bone morphogenetic protein 1
hsa-miR-1256	1	0	1	1	1	1	DDX17	DEAD (Asp-Glu-Ala-Asp) box helicase 17
hsa-miR-1256	0	0	1	1	0	0	CFLAR	CASP8 and FADD-like apoptosis regulator
hsa-miR-1256	0	0	1	1	1	1	HLA-DQA1	major histocompatibility complex, class II, DQ alpha 1
hsa-miR-1256	1	0	1	1	1	1	EPB41	erythrocyte membrane protein band 4.1 (elliptocytosis 1, RH-linked)
hsa-miR-1256	1	0	1	1	1	1	GULP1	GULP, engulfment adaptor PTB domain containing 1
hsa-miR-1256	1	0	1	1	1	1	ZFX	zinc finger protein, X-linked
hsa-miR-1256	0	0	1	1	1	1	PLD1	phospholipase D1, phosphatidylcholine-specific
hsa-miR-1256	1	0	1	1	1	1	SDHC	succinate dehydrogenase complex, subunit C, integral membrane protein, 15kDa
hsa-miR-1256	1	0	1	1	1	1	STX16	syntaxin 16
hsa-miR-1256	1	0	1	1	1	1	SYNJ1	synaptojanin 1
hsa-miR-1256	1	0	1	1	1	1	CBFA2T2	core-binding factor, runt domain, alpha subunit 2; translocated to, 2
hsa-miR-1256	1	0	1	1	1	1	PCDH17	protocadherin 17
hsa-miR-1256	0	0	1	1	0	0	PLA1A	phospholipase A1 member A
hsa-miR-1256	1	0	1	0	1	1	CELF2	CUGBP, Elav-like family member 2
hsa-miR-1256	0	0	1	1	1	1	CD84	CD84 molecule
hsa-miR-1256	1	0	1	1	0	0	ASPHD1	aspartate beta-hydroxylase domain containing 1
hsa-miR-1256	0	0	1	1	1	1	RGS7	regulator of G-protein signaling 7
hsa-miR-1256	1	0	1	1	1	1	LPHN2	latrophilin 2
hsa-miR-1256	0	0	1	1	1	1	MSTO1	misato homolog 1 (Drosophila)
hsa-miR-1256	0	0	1	1	1	1	DMRT2	doublesex and mab-3 related transcription factor 2
hsa-miR-1256	1	0	1	1	1	1	CAB39	calcium binding protein 39
hsa-miR-1256	1	0	1	1	1	1	TSC22D2	TSC22 domain family, member 2
hsa-miR-1256	0	0	1	1	0	0	NCOA6	nuclear receptor coactivator 6
hsa-miR-1256	0	0	1	1	1	1	CHRD	chordin
hsa-miR-1256	1	0	1	1	1	1	SYDE1	synapse defective 1, Rho GTPase, homolog 1 (C. elegans)
hsa-miR-1256	0	0	1	1	1	1	CD28	CD28 molecule
hsa-miR-1256	1	0	1	1	1	1	OGT	O-linked N-acetylglucosamine (GlcNAc) transferase
hsa-miR-1256	0	0	1	0	0	0	TIGD7	tigger transposable element derived 7
hsa-miR-1256	1	0	1	0	1	1	TRPS1	trichorhinophalangeal syndrome I
hsa-miR-1256	0	0	1	0	1	1	PRDM6	PR domain containing 6
hsa-miR-1256	1	0	1	1	1	1	TMUB2	transmembrane and ubiquitin-like domain containing 2
hsa-miR-1256	1	0	1	1	1	1	CALU	calumenin
hsa-miR-1256	0	0	1	1	0	0	MUC1	mucin 1, cell surface associated
hsa-miR-1256	1	0	1	0	1	1	WIPF2	WAS/WASL interacting protein family, member 2
hsa-miR-1256	0	0	1	0	0	0	NBPF10	neuroblastoma breakpoint family, member 10
hsa-miR-1256	0	0	1	0	1	1	MYO3B	myosin IIIB
hsa-miR-1256	1	0	1	1	1	1	RCAN1	regulator of calcineurin 1
hsa-miR-1256	0	0	1	0	0	0	ANKRD30BP2	ankyrin repeat domain 30B pseudogene 2
hsa-miR-1256	0	0	1	1	0	0	CLEC18A	C-type lectin domain family 18, member A
hsa-miR-1256	1	0	1	1	1	1	SLC35A4	solute carrier family 35, member A4
hsa-miR-1256	0	0	1	1	0	0	CLEC18C	C-type lectin domain family 18, member C
hsa-miR-1256	0	0	1	1	0	0	SLC6A13	solute carrier family 6 (neurotransmitter transporter, GABA), member 13
hsa-miR-1256	1	0	1	1	1	1	BAK1	BCL2-antagonist/killer 1
hsa-miR-1256	0	0	1	1	1	1	R3HCC1L	R3H domain and coiled-coil containing 1-like
hsa-miR-1256	1	0	1	1	1	1	GPR64	G protein-coupled receptor 64
hsa-miR-1256	0	0	1	0	0	0	SNHG4	small nucleolar RNA host gene 4 (non-protein coding)
hsa-miR-1256	0	0	1	1	1	1	GNAS	GNAS complex locus
hsa-miR-1256	0	0	1	1	0	0	KIF13A	kinesin family member 13A
hsa-miR-1256	0	0	1	0	1	1	SCN8A	sodium channel, voltage gated, type VIII, alpha subunit
hsa-miR-1256	0	0	1	1	0	0	MORN4	MORN repeat containing 4
hsa-miR-1256	1	0	1	1	1	1	PALM2	paralemmin 2
hsa-miR-1256	0	0	1	0	0	0	TOMM6	translocase of outer mitochondrial membrane 6 homolog (yeast)
hsa-miR-1256	0	0	1	1	1	1	ESRP1	epithelial splicing regulatory protein 1
hsa-miR-1256	1	0	1	1	1	1	AKAP2	A kinase (PRKA) anchor protein 2
hsa-miR-1256	1	0	1	0	1	1	NFAT5	nuclear factor of activated T-cells 5, tonicity-responsive
hsa-miR-1256	0	0	1	1	0	0	RTEL1	regulator of telomere elongation helicase 1
hsa-miR-1256	1	0	1	1	0	0	SENP3	SUMO1/sentrin/SMT3 specific peptidase 3
hsa-miR-1256	1	0	1	1	1	1	CADM3	cell adhesion molecule 3
hsa-miR-1256	1	0	1	1	1	1	EIF2C1	eukaryotic translation initiation factor 2C, 1
hsa-miR-1256	0	0	1	1	0	0	PARP2	poly (ADP-ribose) polymerase 2
hsa-miR-1256	0	0	1	1	1	1	SNCAIP	synuclein, alpha interacting protein
hsa-miR-1256	1	0	1	1	1	1	PGAP1	post-GPI attachment to proteins 1
hsa-miR-1256	0	0	1	1	1	1	RBM15	RNA binding motif protein 15
hsa-miR-1256	1	0	1	1	1	1	SLCO5A1	solute carrier organic anion transporter family, member 5A1
hsa-miR-1256	0	0	1	0	0	0	LOC284561	uncharacterized LOC284561
hsa-miR-1256	0	0	1	0	1	1	FLJ14186	uncharacterized LOC401149
hsa-miR-1256	1	0	1	1	1	1	COPS7B	COP9 constitutive photomorphogenic homolog subunit 7B (Arabidopsis)
hsa-miR-1256	1	0	1	0	1	1	MYO5B	myosin VB
hsa-miR-1256	0	0	1	1	1	1	CC2D2A	coiled-coil and C2 domain containing 2A
hsa-miR-1256	1	0	1	1	0	0	FBXO45	F-box protein 45
hsa-miR-1256	0	0	1	1	0	0	STPG1	sperm-tail PG-rich repeat containing 1
hsa-miR-1256	0	0	1	1	1	1	USP48	ubiquitin specific peptidase 48
hsa-miR-1256	1	0	1	1	1	1	ITGA9	integrin, alpha 9
hsa-miR-1256	0	0	1	1	1	1	GTF2H1	general transcription factor IIH, polypeptide 1, 62kDa
hsa-miR-1256	1	0	1	1	1	1	FAM53C	family with sequence similarity 53, member C
hsa-miR-1256	1	0	1	1	1	1	NFASC	neurofascin
hsa-miR-1256	0	0	1	1	1	1	C8orf46	chromosome 8 open reading frame 46
hsa-miR-1256	1	0	1	1	1	1	SGK1	serum/glucocorticoid regulated kinase 1
hsa-miR-1256	0	0	1	1	1	1	GABRP	gamma-aminobutyric acid (GABA) A receptor, pi
hsa-miR-1256	0	0	1	0	0	0	RMST	rhabdomyosarcoma 2 associated transcript (non-protein coding)
hsa-miR-1256	0	0	1	0	1	1	FAM70A	family with sequence similarity 70, member A
hsa-miR-1256	0	0	1	1	0	0	ZNF185	zinc finger protein 185 (LIM domain)
hsa-miR-1256	1	0	1	1	1	1	CLCN5	chloride channel, voltage-sensitive 5
hsa-miR-1256	0	0	1	1	1	1	VWA3B	von Willebrand factor A domain containing 3B
hsa-miR-1256	1	0	1	1	1	1	C20orf26	chromosome 20 open reading frame 26
hsa-miR-1256	0	0	1	1	0	0	HSD3B7	hydroxy-delta-5-steroid dehydrogenase, 3 beta- and steroid delta-isomerase 7
hsa-miR-1256	0	0	1	1	0	0	UBAP2	ubiquitin associated protein 2
hsa-miR-1256	1	0	1	1	1	1	ANKRD49	ankyrin repeat domain 49
hsa-miR-1256	1	0	1	1	1	1	IST1	increased sodium tolerance 1 homolog (yeast)
hsa-miR-1256	0	0	1	1	0	0	ANKAR	ankyrin and armadillo repeat containing
hsa-miR-1256	0	0	1	1	1	1	ROBO4	roundabout, axon guidance receptor, homolog 4 (Drosophila)
hsa-miR-1256	1	0	1	0	1	1	SLC25A37	solute carrier family 25 (mitochondrial iron transporter), member 37
hsa-miR-1256	1	0	1	1	1	1	PIP4K2C	phosphatidylinositol-5-phosphate 4-kinase, type II, gamma
hsa-miR-1256	0	0	1	1	0	0	PIGO	phosphatidylinositol glycan anchor biosynthesis, class O
hsa-miR-1256	1	0	1	1	1	1	STXBP5	syntaxin binding protein 5 (tomosyn)
hsa-miR-1256	0	0	1	0	0	0	LOC643837	uncharacterized LOC643837
hsa-miR-1256	1	0	1	1	1	1	FBXW2	F-box and WD repeat domain containing 2
hsa-miR-1256	0	0	1	1	0	0	ADH6	alcohol dehydrogenase 6 (class V)
hsa-miR-1256	1	0	1	1	1	1	GPD2	glycerol-3-phosphate dehydrogenase 2 (mitochondrial)
hsa-miR-1256	0	0	1	1	1	1	N4BP2L2	NEDD4 binding protein 2-like 2
hsa-miR-1256	0	0	1	1	1	1	CYP11B1	cytochrome P450, family 11, subfamily B, polypeptide 1
hsa-miR-1256	0	0	1	1	1	1	C19orf47	chromosome 19 open reading frame 47
hsa-miR-1256	0	0	1	0	0	0	LINC00340	long intergenic non-protein coding RNA 340
hsa-miR-1256	0	0	1	1	1	1	TMEM170A	transmembrane protein 170A
hsa-miR-1256	0	0	1	0	0	0	FLJ37798	uncharacterized LOC401264
hsa-miR-1256	1	0	1	1	1	1	NDEL1	nudE nuclear distribution E homolog (A. nidulans)-like 1
hsa-miR-1256	1	0	1	1	1	1	CUL2	cullin 2
hsa-miR-1256	1	0	1	1	0	0	DOT1L	DOT1-like, histone H3 methyltransferase (S. cerevisiae)
hsa-miR-1256	1	0	1	1	1	1	CNEP1R1	CTD nuclear envelope phosphatase 1 regulatory subunit 1
hsa-miR-1256	0	0	1	1	1	1	SIRPB2	signal-regulatory protein beta 2
hsa-miR-1256	1	0	1	1	1	1	SPATS2	spermatogenesis associated, serine-rich 2
hsa-miR-1256	0	0	1	0	1	1	NBPF3	neuroblastoma breakpoint family, member 3
hsa-miR-1256	0	0	1	0	0	0	LOC100133029	sirtuin 5 pseudogene
hsa-miR-1256	1	0	1	1	1	1	FAM98A	family with sequence similarity 98, member A
hsa-miR-1256	1	0	1	1	1	1	CRTC2	CREB regulated transcription coactivator 2
hsa-miR-1256	0	0	1	0	0	0	OTUD1	OTU domain containing 1
hsa-miR-1256	1	0	1	0	0	0	PID1	phosphotyrosine interaction domain containing 1
hsa-miR-1256	1	0	1	1	1	1	SYT6	synaptotagmin VI
hsa-miR-1256	1	0	1	1	1	1	EPB41L1	erythrocyte membrane protein band 4.1-like 1
hsa-miR-1256	0	0	1	0	0	0	CCDC150	coiled-coil domain containing 150
hsa-miR-1256	1	0	1	0	1	1	AGFG1	ArfGAP with FG repeats 1
hsa-miR-1256	0	0	1	0	0	0	LINC00293	long intergenic non-protein coding RNA 293
hsa-miR-1256	0	0	1	0	0	0	LOC284385	uncharacterized LOC284385
hsa-miR-1256	0	0	1	1	1	1	POLR1D	polymerase (RNA) I polypeptide D, 16kDa
hsa-miR-1256	1	0	1	1	1	1	LZTS2	leucine zipper, putative tumor suppressor 2
hsa-miR-1256	0	0	1	0	0	0	CECR7	cat eye syndrome chromosome region, candidate 7 (non-protein coding)
hsa-miR-1256	1	0	1	1	1	1	ZCCHC2	zinc finger, CCHC domain containing 2
hsa-miR-1256	1	0	1	0	1	1	UNC5D	unc-5 homolog D (C. elegans)
hsa-miR-1256	1	0	1	1	1	1	HBP1	HMG-box transcription factor 1
hsa-miR-1256	0	0	1	1	1	1	RNF217	ring finger protein 217
hsa-miR-1256	1	0	1	1	0	0	WIZ	widely interspaced zinc finger motifs
hsa-miR-1256	0	0	1	1	0	0	PROKR1	prokineticin receptor 1
hsa-miR-1256	0	0	1	1	0	0	MARS	methionyl-tRNA synthetase
hsa-miR-1256	0	0	1	1	1	1	RGS3	regulator of G-protein signaling 3
hsa-miR-1256	1	0	1	0	1	1	KCNK2	potassium channel, subfamily K, member 2
hsa-miR-1256	0	0	1	0	0	0	LGALS17A	Charcot-Leyden crystal protein pseudogene
hsa-miR-1256	1	0	1	1	1	1	SH2D4B	SH2 domain containing 4B
hsa-miR-1256	0	0	1	0	0	0	DKFZP434H168	uncharacterized LOC26077
hsa-miR-1256	0	0	1	1	1	1	CNPY3	canopy 3 homolog (zebrafish)
hsa-miR-1256	0	0	1	1	0	0	NPIP	nuclear pore complex interacting protein
hsa-miR-1256	0	0	1	1	1	1	IDS	iduronate 2-sulfatase
hsa-miR-1256	1	0	1	1	0	0	BCORL1	BCL6 corepressor-like 1
hsa-miR-1256	0	0	1	1	1	1	ZNF337	zinc finger protein 337
hsa-miR-1256	0	0	1	0	0	0	LOC613266	uncharacterized LOC613266
hsa-miR-1256	0	0	1	1	0	0	C20orf141	chromosome 20 open reading frame 141
hsa-miR-1256	1	0	1	1	0	0	ATXN7L3	ataxin 7-like 3
hsa-miR-1256	1	0	1	1	1	1	PIK3R1	phosphoinositide-3-kinase, regulatory subunit 1 (alpha)
hsa-miR-1256	1	0	1	0	1	1	ANO6	anoctamin 6
hsa-miR-1256	0	0	1	0	0	0	MIR143HG	MIR143 host gene (non-protein coding)
hsa-miR-1256	1	0	1	1	1	1	DLG2	discs, large homolog 2 (Drosophila)
hsa-miR-1256	1	0	1	1	0	0	LRRC73	leucine rich repeat containing 73
hsa-miR-1256	1	0	1	1	1	1	KDM4B	lysine (K)-specific demethylase 4B
hsa-miR-1256	1	0	1	1	1	1	MKRN1	makorin ring finger protein 1
hsa-miR-1256	0	0	1	1	0	0	FAM54B	family with sequence similarity 54, member B
hsa-miR-1256	1	0	1	1	1	1	PHF17	PHD finger protein 17
hsa-miR-1256	0	0	1	1	1	1	PDIA6	protein disulfide isomerase family A, member 6
hsa-miR-1256	1	0	1	1	0	0	PEAK1	NKF3 kinase family member
hsa-miR-1256	1	0	1	1	1	1	EYA1	eyes absent homolog 1 (Drosophila)
hsa-miR-1256	1	0	1	0	1	1	FNDC3B	fibronectin type III domain containing 3B
hsa-miR-1256	1	0	1	1	1	1	CROT	carnitine O-octanoyltransferase
hsa-miR-1256	0	0	1	1	1	1	MCU	mitochondrial calcium uniporter
hsa-miR-1256	0	0	1	0	0	0	FAM205B	transmembrane protein C9orf144B pseudogene
hsa-miR-1256	1	0	1	0	0	0	HK1	hexokinase 1
hsa-miR-1256	0	0	1	0	0	0	IGHD	immunoglobulin heavy constant delta
hsa-miR-1256	1	0	1	1	1	1	PUS7	pseudouridylate synthase 7 homolog (S. cerevisiae)
hsa-miR-1256	0	0	1	0	0	0	EMBP1	embigin pseudogene 1
hsa-miR-1256	1	0	1	0	1	1	CYB561D1	cytochrome b-561 domain containing 1
hsa-miR-1256	0	0	1	0	0	0	PINLYP	phospholipase A2 inhibitor and LY6/PLAUR domain containing
hsa-miR-1256	1	0	1	1	1	1	CD200	CD200 molecule
hsa-miR-1256	1	0	1	0	1	1	RXRA	retinoid X receptor, alpha
hsa-miR-1256	1	0	1	1	0	0	FOXP2	forkhead box P2
hsa-miR-1256	0	0	1	1	0	0	ZNF730	zinc finger protein 730
hsa-miR-1256	0	0	1	1	1	1	KAZALD1	Kazal-type serine peptidase inhibitor domain 1
hsa-miR-1256	1	0	1	1	1	1	CYYR1	cysteine/tyrosine-rich 1
hsa-miR-1256	0	0	1	1	1	1	C5orf28	chromosome 5 open reading frame 28
hsa-miR-1256	1	0	1	1	1	1	COBLL1	COBL-like 1
hsa-miR-1256	1	0	1	1	1	1	PHTF2	putative homeodomain transcription factor 2
hsa-miR-1256	0	0	1	0	0	0	PART1	prostate androgen-regulated transcript 1 (non-protein coding)
hsa-miR-1256	0	0	1	1	0	0	CPNE6	copine VI (neuronal)
hsa-miR-1256	0	0	1	0	0	0	POM121L8P	POM121 transmembrane nucleoporin-like 8 pseudogene
hsa-miR-1256	0	0	1	1	1	1	ARIH1	ariadne homolog, ubiquitin-conjugating enzyme E2 binding protein, 1 (Drosophila)
hsa-miR-1256	0	0	1	1	0	0	MSH5	mutS homolog 5 (E. coli)
hsa-miR-1256	0	0	1	1	0	0	SAPCD1	suppressor APC domain containing 1
hsa-miR-1256	1	0	1	1	1	1	KIAA1033	KIAA1033
hsa-miR-1256	1	0	1	0	1	1	GPR85	G protein-coupled receptor 85
hsa-miR-1256	1	0	1	1	1	1	YTHDF3	YTH domain family, member 3
hsa-miR-1256	1	0	1	0	0	0	SYNPO	synaptopodin
hsa-miR-1256	1	0	1	1	1	1	MIER1	mesoderm induction early response 1 homolog (Xenopus laevis)
hsa-miR-1256	0	0	1	1	1	1	FILIP1	filamin A interacting protein 1
hsa-miR-1256	0	0	1	1	1	1	BEND7	BEN domain containing 7
hsa-miR-1256	1	0	1	0	0	0	YLPM1	YLP motif containing 1
hsa-miR-1256	1	0	1	1	1	1	RNF180	ring finger protein 180
hsa-miR-1256	1	0	1	1	1	1	LPP	LIM domain containing preferred translocation partner in lipoma
hsa-miR-1256	0	0	1	0	0	0	EPHA1-AS1	EPHA1 antisense RNA 1
hsa-miR-1256	0	0	1	0	0	0	ADCY10P1	adenylate cyclase 10 (soluble) pseudogene 1
hsa-miR-1256	1	0	1	1	1	1	CAPRIN2	caprin family member 2
hsa-miR-1256	1	0	1	1	1	1	ZNF207	zinc finger protein 207
hsa-miR-1256	1	0	1	0	1	1	NR3C1	nuclear receptor subfamily 3, group C, member 1 (glucocorticoid receptor)
hsa-miR-1256	1	0	1	1	0	0	LRRC58	leucine rich repeat containing 58
hsa-miR-1256	1	0	1	0	1	1	APOLD1	apolipoprotein L domain containing 1
hsa-miR-1256	1	0	1	0	1	1	BDNF	brain-derived neurotrophic factor
hsa-miR-1256	0	0	1	0	0	0	KGFLP1	fibroblast growth factor 7 pseudogene
hsa-miR-1256	1	0	1	1	1	1	RFFL	ring finger and FYVE-like domain containing E3 ubiquitin protein ligase
hsa-miR-1256	0	0	1	1	0	0	CRB3	crumbs homolog 3 (Drosophila)
hsa-miR-1256	1	0	1	1	1	1	KIAA0907	KIAA0907
hsa-miR-1256	0	0	1	1	1	1	SYNE2	spectrin repeat containing, nuclear envelope 2
hsa-miR-1256	1	0	1	1	0	0	DSG4	desmoglein 4
hsa-miR-1256	1	0	1	1	1	1	BCL11A	B-cell CLL/lymphoma 11A (zinc finger protein)
hsa-miR-1256	0	0	1	1	1	1	IYD	iodotyrosine deiodinase
hsa-miR-1256	0	0	1	1	0	0	EGFL8	EGF-like-domain, multiple 8
hsa-miR-1256	1	0	1	0	1	1	ANKRD28	ankyrin repeat domain 28
hsa-miR-1256	0	0	1	1	1	1	NYAP1	neuronal tyrosine-phosphorylated phosphoinositide-3-kinase adaptor 1
hsa-miR-1256	0	0	1	1	0	0	ESRRB	estrogen-related receptor beta
hsa-miR-1256	0	0	1	1	1	1	POTEG	POTE ankyrin domain family, member G
hsa-miR-1256	0	0	1	0	1	1	XKR5	XK, Kell blood group complex subunit-related family, member 5
hsa-miR-1256	1	0	1	1	0	0	ADAM15	ADAM metallopeptidase domain 15
hsa-miR-1256	0	0	1	1	1	1	SMPD1	sphingomyelin phosphodiesterase 1, acid lysosomal
hsa-miR-1256	1	0	1	1	1	1	RTN3	reticulon 3
hsa-miR-1256	0	0	1	0	0	0	LOC100128076	protein tyrosine phosphatase pseudogene
hsa-miR-1256	0	0	1	1	0	0	NBPF8	neuroblastoma breakpoint family, member 8
hsa-miR-1256	0	0	1	1	0	0	KLK4	kallikrein-related peptidase 4
hsa-miR-1256	1	0	1	1	1	1	TBC1D22B	TBC1 domain family, member 22B
hsa-miR-1256	1	0	1	0	1	1	FAM46A	family with sequence similarity 46, member A
hsa-miR-1256	1	0	1	1	1	1	PPP5C	protein phosphatase 5, catalytic subunit
hsa-miR-1256	0	0	1	1	1	1	TMOD1	tropomodulin 1
hsa-miR-1256	0	0	1	1	0	0	DNAJC7	DnaJ (Hsp40) homolog, subfamily C, member 7
hsa-miR-1256	1	0	1	1	0	0	DHDDS	dehydrodolichyl diphosphate synthase
hsa-miR-1256	1	0	1	0	1	1	CGGBP1	CGG triplet repeat binding protein 1
hsa-miR-1256	0	0	1	1	1	1	ARFGAP1	ADP-ribosylation factor GTPase activating protein 1
hsa-miR-1256	1	0	1	1	1	1	POU2F2	POU class 2 homeobox 2
hsa-miR-1256	1	0	1	1	1	1	RIMKLB	ribosomal modification protein rimK-like family member B
hsa-miR-1256	1	0	1	1	1	1	CALM1	calmodulin 1 (phosphorylase kinase, delta)
hsa-miR-1256	0	0	1	1	1	1	ZNF85	zinc finger protein 85
hsa-miR-1256	1	0	1	1	0	0	MARCH9	membrane-associated ring finger (C3HC4) 9
hsa-miR-1256	1	0	1	1	1	1	SZRD1	SUZ RNA binding domain containing 1
hsa-miR-1256	1	0	1	1	1	1	ZFAND5	zinc finger, AN1-type domain 5
hsa-miR-1256	0	0	1	1	0	0	TCN2	transcobalamin II
hsa-miR-1256	0	0	1	1	0	0	KLHDC3	kelch domain containing 3
hsa-miR-1256	0	0	1	0	0	0	MGC21881	uncharacterized locus MGC21881
hsa-miR-1256	0	0	1	1	1	1	UCHL5	ubiquitin carboxyl-terminal hydrolase L5
hsa-miR-1256	0	0	1	0	0	0	KLHL15	kelch-like 15 (Drosophila)
hsa-miR-1256	0	0	1	0	1	1	ZNF37A	zinc finger protein 37A
hsa-miR-1256	1	0	1	1	1	1	NUMBL	numb homolog (Drosophila)-like
hsa-miR-1256	1	0	1	0	1	1	ICMT	isoprenylcysteine carboxyl methyltransferase
hsa-miR-1256	1	0	1	1	1	1	ELF4	E74-like factor 4 (ets domain transcription factor)
hsa-miR-1256	0	0	1	1	1	1	PARP9	poly (ADP-ribose) polymerase family, member 9
hsa-miR-1256	1	0	1	1	0	0	ATP6V0A1	ATPase, H+ transporting, lysosomal V0 subunit a1
hsa-miR-1256	1	0	1	0	1	1	ARHGAP26	Rho GTPase activating protein 26
hsa-miR-1256	0	0	1	1	1	1	PDE1C	phosphodiesterase 1C, calmodulin-dependent 70kDa
hsa-miR-1256	0	0	1	1	0	0	FAM89B	family with sequence similarity 89, member B
hsa-miR-1256	1	0	1	1	1	1	FAM131A	family with sequence similarity 131, member A
hsa-miR-1256	1	0	1	1	1	1	VASH2	vasohibin 2
hsa-miR-1256	0	0	1	1	0	0	SWI5	SWI5 recombination repair homolog (yeast)
hsa-miR-1256	0	0	1	1	1	1	TMEM117	transmembrane protein 117
hsa-miR-1256	1	0	1	1	1	1	ADARB1	adenosine deaminase, RNA-specific, B1
hsa-miR-1256	1	0	1	1	0	0	FAM83F	family with sequence similarity 83, member F
hsa-miR-1256	1	0	1	1	1	1	PFAS	phosphoribosylformylglycinamidine synthase
hsa-miR-1256	1	0	1	1	1	1	RHOBTB1	Rho-related BTB domain containing 1
hsa-miR-1256	1	0	1	1	1	1	ANO1	anoctamin 1, calcium activated chloride channel
hsa-miR-1256	1	0	1	1	1	1	SIRPA	signal-regulatory protein alpha
hsa-miR-1256	0	0	1	1	1	1	IL20RB	interleukin 20 receptor beta
hsa-miR-1256	0	0	1	1	1	1	SLC6A16	solute carrier family 6, member 16
hsa-miR-1256	0	0	1	0	0	0	TMPRSS12	transmembrane (C-terminal) protease, serine 12
hsa-miR-1256	0	0	1	1	0	0	SNTG2	syntrophin, gamma 2
hsa-miR-1256	1	0	1	1	1	1	PEX5L	peroxisomal biogenesis factor 5-like
hsa-miR-1256	1	0	1	1	1	1	ELMO2	engulfment and cell motility 2
hsa-miR-1256	1	0	1	1	1	1	CEP128	centrosomal protein 128kDa
hsa-miR-1256	1	0	1	1	1	1	WDR48	WD repeat domain 48
hsa-miR-1256	0	0	1	0	0	0	CYP4F35P	cytochrome P450, family 4, subfamily F, polypeptide 35, pseudogene
hsa-miR-1256	1	0	1	1	1	1	DPP10	dipeptidyl-peptidase 10 (non-functional)
hsa-miR-1256	0	0	1	1	1	1	C14orf118	chromosome 14 open reading frame 118
hsa-miR-1256	0	0	1	1	0	0	ADAMTS13	ADAM metallopeptidase with thrombospondin type 1 motif, 13
hsa-miR-1256	1	0	1	1	1	1	MARCKS	myristoylated alanine-rich protein kinase C substrate
hsa-miR-1256	1	0	1	1	0	0	HES7	hairy and enhancer of split 7 (Drosophila)
hsa-miR-1256	0	0	1	1	1	1	SLC14A1	solute carrier family 14 (urea transporter), member 1 (Kidd blood group)
hsa-miR-1256	1	0	1	1	1	1	FOSB	FBJ murine osteosarcoma viral oncogene homolog B
hsa-miR-1256	0	0	1	1	1	1	ZFP90	zinc finger protein 90 homolog (mouse)
hsa-miR-1256	1	0	1	1	1	1	BVES	blood vessel epicardial substance
hsa-miR-1256	0	0	1	1	0	0	TMEM95	transmembrane protein 95
hsa-miR-1256	0	0	1	0	1	1	FAM13B	family with sequence similarity 13, member B
hsa-miR-1256	1	0	1	1	1	1	ARPP21	cAMP-regulated phosphoprotein, 21kDa
hsa-miR-1256	0	0	1	0	0	0	LOC154092	uncharacterized LOC154092
hsa-miR-1256	0	0	1	1	0	0	PLB1	phospholipase B1
hsa-miR-1256	0	0	1	0	1	1	C12orf74	chromosome 12 open reading frame 74
hsa-miR-1256	1	0	1	1	1	1	ARHGAP30	Rho GTPase activating protein 30
hsa-miR-1256	0	0	1	1	0	0	C12orf42	chromosome 12 open reading frame 42
hsa-miR-1256	0	0	1	1	0	0	TCTN1	tectonic family member 1
hsa-miR-1256	1	0	1	1	1	1	MAMDC2	MAM domain containing 2
hsa-miR-1256	1	0	1	1	1	1	SF3B1	splicing factor 3b, subunit 1, 155kDa
hsa-miR-1256	1	0	1	1	1	1	DIP2A	DIP2 disco-interacting protein 2 homolog A (Drosophila)
hsa-miR-1256	0	0	1	1	0	0	MT3	metallothionein 3
hsa-miR-1256	1	0	1	1	0	0	TTC9	tetratricopeptide repeat domain 9
hsa-miR-1256	0	0	1	0	1	1	ITGA1	integrin, alpha 1
hsa-miR-1256	1	0	1	0	1	1	FAM131B	family with sequence similarity 131, member B
hsa-miR-1256	0	0	1	0	0	0	AURKAPS1	aurora kinase A pseudogene 1
hsa-miR-1256	1	0	1	1	1	1	PCGF5	polycomb group ring finger 5
hsa-miR-1256	0	0	1	0	1	1	C17orf51	chromosome 17 open reading frame 51
hsa-miR-1256	0	0	1	1	0	0	BCAS4	breast carcinoma amplified sequence 4
hsa-miR-1256	1	0	1	1	1	1	SOX5	SRY (sex determining region Y)-box 5
hsa-miR-1256	0	0	1	1	0	0	LRRIQ3	leucine-rich repeats and IQ motif containing 3
hsa-miR-1256	0	0	1	1	1	1	C1orf109	chromosome 1 open reading frame 109
hsa-miR-1256	1	0	1	0	0	0	PRRT4	proline-rich transmembrane protein 4
hsa-miR-1256	1	0	1	1	1	1	MYLK	myosin light chain kinase
hsa-miR-1256	0	0	1	1	1	1	AQP6	aquaporin 6, kidney specific
hsa-miR-1256	1	0	1	1	1	1	EIF4G2	eukaryotic translation initiation factor 4 gamma, 2
hsa-miR-1256	0	0	1	0	0	0	LINC00052	long intergenic non-protein coding RNA 52
hsa-miR-1256	1	0	1	1	1	1	C5orf25	chromosome 5 open reading frame 25
hsa-miR-1256	0	0	1	0	0	0	LEF1-AS1	LEF1 antisense RNA 1
hsa-miR-1256	1	0	1	1	1	1	PDCD6IP	programmed cell death 6 interacting protein
hsa-miR-1256	0	0	1	1	1	1	TTLL9	tubulin tyrosine ligase-like family, member 9
hsa-miR-1256	0	0	1	1	0	0	TRIM46	tripartite motif containing 46
hsa-miR-1256	0	0	1	1	0	0	CYP4F30P	cytochrome P450, family 4, subfamily F, polypeptide 30, pseudogene
hsa-miR-1256	1	0	1	1	1	1	USP47	ubiquitin specific peptidase 47
hsa-miR-1256	0	0	1	0	0	0	JPX	JPX transcript, XIST activator (non-protein coding)
hsa-miR-1256	0	0	1	0	0	0	LOC727849	golgin A2 pseudogene
hsa-miR-1256	0	0	1	0	0	0	LOC727751	uncharacterized LOC727751
hsa-miR-1256	0	0	1	0	0	0	AGSK1	golgin subfamily A member 2-like
hsa-miR-1256	0	0	1	0	0	0	AGAP9	ArfGAP with GTPase domain, ankyrin repeat and PH domain 9
hsa-miR-1256	0	0	1	1	0	0	DNHD1	dynein heavy chain domain 1
hsa-miR-1256	0	0	1	0	0	0	LOC554249	uncharacterized LOC554249
hsa-miR-1256	1	0	1	1	1	1	ESRRA	estrogen-related receptor alpha
hsa-miR-1256	0	0	1	1	0	0	HERC2P3	hect domain and RLD 2 pseudogene 3
hsa-miR-1256	1	0	1	1	1	1	ST8SIA2	ST8 alpha-N-acetyl-neuraminide alpha-2,8-sialyltransferase 2
hsa-miR-1256	1	0	1	1	1	1	ACVR2B	activin A receptor, type IIB
hsa-miR-1256	0	0	1	1	0	0	PPP1R14D	protein phosphatase 1, regulatory (inhibitor) subunit 14D
hsa-miR-1256	0	0	1	0	0	0	FAM106A	family with sequence similarity 106, member A
hsa-miR-1256	1	0	1	1	1	1	GABRB2	gamma-aminobutyric acid (GABA) A receptor, beta 2
hsa-miR-1256	0	0	1	1	1	1	TTN	titin
hsa-miR-1256	0	0	1	1	0	0	SLC17A4	solute carrier family 17 (sodium phosphate), member 4
hsa-miR-1256	1	0	1	1	1	1	TET2	tet methylcytosine dioxygenase 2
hsa-miR-1256	0	0	1	1	1	1	RASAL2	RAS protein activator like 2
hsa-miR-1256	1	0	1	1	1	1	SLK	STE20-like kinase
hsa-miR-1256	0	0	1	0	0	0	LRRC37A11P	leucine rich repeat containing 37, member A11, pseudogene
hsa-miR-1256	0	0	1	1	0	0	PRAMEF10	PRAME family member 10
hsa-miR-1256	0	0	1	1	1	1	LRCH1	leucine-rich repeats and calponin homology (CH) domain containing 1
hsa-miR-1256	1	0	1	1	1	1	PAX3	paired box 3
hsa-miR-1256	1	0	1	1	1	1	ST18	suppression of tumorigenicity 18 (breast carcinoma) (zinc finger protein)
hsa-miR-1256	0	0	1	0	0	0	LRRC37BP1	leucine rich repeat containing 37B pseudogene 1
hsa-miR-1256	1	0	1	1	1	1	OTUD4	OTU domain containing 4
hsa-miR-1256	1	0	1	1	1	1	OSBP2	oxysterol binding protein 2
hsa-miR-1256	0	0	1	1	0	0	RGSL1	regulator of G-protein signaling like 1
hsa-miR-1256	0	0	1	0	0	0	KRT8P12	keratin 8 pseudogene 12
hsa-miR-1256	0	0	1	0	0	0	FAM225B	family with sequence similarity 225, member B (non-protein coding)
hsa-miR-1256	0	0	1	1	0	0	FBXL15	F-box and leucine-rich repeat protein 15
hsa-miR-1256	0	0	1	0	1	1	PDLIM4	PDZ and LIM domain 4
hsa-miR-1256	0	0	1	0	0	0	MEG3	maternally expressed 3 (non-protein coding)
hsa-miR-1256	1	0	1	1	1	1	BTBD7	BTB (POZ) domain containing 7
hsa-miR-1256	0	0	1	0	0	0	DKFZp686D0853	uncharacterized LOC401613
hsa-miR-1256	1	0	1	1	1	1	RAB7A	RAB7A, member RAS oncogene family
hsa-miR-1256	1	0	1	1	1	1	SGCD	sarcoglycan, delta (35kDa dystrophin-associated glycoprotein)
hsa-miR-1256	1	0	1	0	1	1	MTX3	metaxin 3
hsa-miR-1256	0	0	1	1	1	1	PDZRN4	PDZ domain containing ring finger 4
hsa-miR-1256	1	0	1	1	1	1	SLC35F1	solute carrier family 35, member F1
hsa-miR-1256	0	0	1	1	1	1	COL6A3	collagen, type VI, alpha 3
hsa-miR-1256	0	0	1	0	1	1	NHSL1	NHS-like 1
hsa-miR-1256	1	0	1	0	1	1	GALNT4	UDP-N-acetyl-alpha-D-galactosamine:polypeptide N-acetylgalactosaminyltransferase 4 (GalNAc-T4)
hsa-miR-1256	0	0	1	1	1	1	PRR14L	proline rich 14-like
hsa-miR-1256	0	0	1	1	0	0	CST3	cystatin C
hsa-miR-1256	0	0	1	1	1	1	NIPSNAP3B	nipsnap homolog 3B (C. elegans)
hsa-miR-1256	1	0	1	1	1	1	PHF21A	PHD finger protein 21A
hsa-miR-1256	0	0	1	0	1	1	TYW5	tRNA-yW synthesizing protein 5
hsa-miR-1256	1	0	1	1	1	1	NFIB	nuclear factor I/B
hsa-miR-1256	1	0	1	1	1	1	RECK	reversion-inducing-cysteine-rich protein with kazal motifs
hsa-miR-1256	0	0	1	1	1	1	ABCD3	ATP-binding cassette, sub-family D (ALD), member 3
hsa-miR-1256	1	0	1	1	1	1	CALD1	caldesmon 1
hsa-miR-1256	0	0	1	1	0	0	H2AFY2	H2A histone family, member Y2
hsa-miR-1256	0	0	1	1	1	1	TMEM53	transmembrane protein 53
hsa-miR-1256	0	0	1	1	0	0	SARS	seryl-tRNA synthetase
hsa-miR-1256	0	0	1	0	0	0	RPS16P10	ribosomal protein S16 pseudogene 10
hsa-miR-1256	1	0	1	1	1	1	MMAB	methylmalonic aciduria (cobalamin deficiency) cblB type
hsa-miR-1256	0	0	1	1	1	1	TPRA1	transmembrane protein, adipocyte asscociated 1
hsa-miR-1256	1	0	1	0	1	1	SLCO2A1	solute carrier organic anion transporter family, member 2A1
hsa-miR-1256	1	0	1	1	1	1	NEU1	sialidase 1 (lysosomal sialidase)
hsa-miR-1256	0	0	1	1	1	1	FAT1	FAT tumor suppressor homolog 1 (Drosophila)
hsa-miR-1256	1	0	1	1	1	1	E2F5	E2F transcription factor 5, p130-binding
hsa-miR-1256	1	0	1	1	1	1	SMARCE1	SWI/SNF related, matrix associated, actin dependent regulator of chromatin, subfamily e, member 1
hsa-miR-1256	0	0	1	0	1	1	C17orf108	chromosome 17 open reading frame 108
hsa-miR-1256	1	0	1	1	1	1	CCNE1	cyclin E1
hsa-miR-1256	0	0	1	0	1	1	EMX2	empty spiracles homeobox 2
hsa-miR-1256	1	0	1	1	1	1	PCTP	phosphatidylcholine transfer protein
hsa-miR-1256	0	0	1	1	0	0	CD38	CD38 molecule
hsa-miR-1256	0	0	1	1	0	0	DOK5	docking protein 5
hsa-miR-1256	0	0	1	1	0	0	NRSN2	neurensin 2
hsa-miR-1256	0	0	1	1	1	1	VPS16	vacuolar protein sorting 16 homolog (S. cerevisiae)
hsa-miR-1256	0	0	1	1	1	1	HADHB	hydroxyacyl-CoA dehydrogenase/3-ketoacyl-CoA thiolase/enoyl-CoA hydratase (trifunctional protein), beta subunit
hsa-miR-1256	1	0	1	0	1	1	IP6K1	inositol hexakisphosphate kinase 1
hsa-miR-1256	1	0	1	1	1	1	BTBD10	BTB (POZ) domain containing 10
hsa-miR-1256	0	0	1	0	0	0	PGF	placental growth factor
hsa-miR-1256	0	0	1	1	0	0	MRPS18A	mitochondrial ribosomal protein S18A
hsa-miR-1256	1	0	1	1	1	1	TLE1	transducin-like enhancer of split 1 (E(sp1) homolog, Drosophila)
hsa-miR-1256	0	0	1	1	1	1	DEDD	death effector domain containing
hsa-miR-1256	1	0	1	1	1	1	RCL1	RNA terminal phosphate cyclase-like 1
hsa-miR-1256	1	0	1	1	1	1	SLC39A1	solute carrier family 39 (zinc transporter), member 1
hsa-miR-1256	0	0	1	1	1	1	UBE2F	ubiquitin-conjugating enzyme E2F (putative)
hsa-miR-1256	1	0	1	1	1	1	EIF1	eukaryotic translation initiation factor 1
hsa-miR-1256	1	0	1	1	1	1	PPP2R4	protein phosphatase 2A activator, regulatory subunit 4
hsa-miR-1256	0	0	1	1	1	1	SAMD3	sterile alpha motif domain containing 3
hsa-miR-1256	1	0	1	0	1	1	EIF2S2	eukaryotic translation initiation factor 2, subunit 2 beta, 38kDa
hsa-miR-1256	0	0	1	1	1	1	PLAC8	placenta-specific 8
hsa-miR-1256	1	0	1	0	1	1	CD47	CD47 molecule
hsa-miR-1256	0	0	1	1	0	0	ISG20	interferon stimulated exonuclease gene 20kDa
hsa-miR-1256	0	0	1	1	0	0	IL11RA	interleukin 11 receptor, alpha
hsa-miR-1256	0	0	1	0	1	1	SERF1A	small EDRK-rich factor 1A (telomeric)
hsa-miR-1256	0	0	1	0	0	0	LOC731789	uncharacterized LOC731789
hsa-miR-1256	0	0	1	1	1	1	BDP1	B double prime 1, subunit of RNA polymerase III transcription initiation factor IIIB
hsa-miR-1256	1	0	1	1	1	1	SNRK	SNF related kinase
hsa-miR-1256	0	0	1	0	1	1	NWD1	NACHT and WD repeat domain containing 1
hsa-miR-1256	0	0	1	1	0	0	SPATA20	spermatogenesis associated 20
hsa-miR-1256	0	0	1	1	1	1	CD274	CD274 molecule
hsa-miR-1256	0	0	1	0	0	0	DPY19L2P3	dpy-19-like 2 pseudogene 3 (C. elegans)
hsa-miR-1256	1	0	1	1	0	0	LGSN	lengsin, lens protein with glutamine synthetase domain
hsa-miR-1256	1	0	1	1	1	1	BCL2L11	BCL2-like 11 (apoptosis facilitator)
hsa-miR-1256	1	0	1	1	1	1	LGR4	leucine-rich repeat containing G protein-coupled receptor 4
hsa-miR-1256	1	0	1	1	1	1	IRF1	interferon regulatory factor 1
hsa-miR-1256	1	0	1	0	1	1	EPDR1	ependymin related protein 1 (zebrafish)
hsa-miR-1256	1	0	1	1	1	1	SLC4A8	solute carrier family 4, sodium bicarbonate cotransporter, member 8
hsa-miR-1256	1	0	1	1	1	1	AFF1	AF4/FMR2 family, member 1
hsa-miR-1256	0	0	1	0	1	1	OPRK1	opioid receptor, kappa 1
hsa-miR-1256	0	0	1	1	0	0	COL6A2	collagen, type VI, alpha 2
hsa-miR-1256	0	0	1	1	1	1	ALDOB	aldolase B, fructose-bisphosphate
hsa-miR-1256	0	0	1	1	1	1	ATP7A	ATPase, Cu++ transporting, alpha polypeptide
hsa-miR-1256	1	0	1	1	1	1	DLD	dihydrolipoamide dehydrogenase
hsa-miR-1256	1	0	1	1	1	1	ESR1	estrogen receptor 1
hsa-miR-1256	1	0	1	1	1	1	FBN1	fibrillin 1
hsa-miR-1256	1	0	1	1	1	1	KCNA1	potassium voltage-gated channel, shaker-related subfamily, member 1 (episodic ataxia with myokymia)
hsa-miR-1256	0	0	1	1	1	1	MTM1	myotubularin 1
hsa-miR-1256	0	0	1	0	1	1	PGK1	phosphoglycerate kinase 1
hsa-miR-1256	1	0	1	0	1	1	PTEN	phosphatase and tensin homolog
hsa-miR-1256	0	0	1	1	1	1	CASR	calcium-sensing receptor
hsa-miR-1256	1	0	1	0	1	1	CYBB	cytochrome b-245, beta polypeptide
hsa-miR-1256	1	0	1	1	1	1	HLCS	holocarboxylase synthetase (biotin-(proprionyl-CoA-carboxylase (ATP-hydrolysing)) ligase)
hsa-miR-1256	1	0	1	0	1	1	RAG1	recombination activating gene 1
hsa-miR-1256	1	0	1	1	1	1	HNF1B	HNF1 homeobox B
hsa-miR-1256	1	0	1	1	1	1	AQP2	aquaporin 2 (collecting duct)
hsa-miR-1256	0	0	1	1	1	1	NOS1	nitric oxide synthase 1 (neuronal)
hsa-miR-1256	1	0	1	1	1	1	FASLG	Fas ligand (TNF superfamily, member 6)
hsa-miR-1256	0	0	1	1	1	1	AGTR1	angiotensin II receptor, type 1
hsa-miR-1256	0	0	1	1	1	1	CRAT	carnitine O-acetyltransferase
hsa-miR-1256	1	0	1	0	1	1	GABRA4	gamma-aminobutyric acid (GABA) A receptor, alpha 4
hsa-miR-1256	1	0	1	1	1	1	GABRB3	gamma-aminobutyric acid (GABA) A receptor, beta 3
hsa-miR-1256	1	0	1	1	0	0	GRIN2A	glutamate receptor, ionotropic, N-methyl D-aspartate 2A
hsa-miR-1256	1	0	1	1	1	1	GRM1	glutamate receptor, metabotropic 1
hsa-miR-1256	1	0	1	1	1	1	PDE3B	phosphodiesterase 3B, cGMP-inhibited
hsa-miR-1256	1	0	1	1	1	1	PTGFR	prostaglandin F receptor (FP)
hsa-miR-1256	1	0	1	0	1	1	SPOPL	speckle-type POZ protein-like
hsa-miR-1256	1	0	1	1	1	1	WNK3	WNK lysine deficient protein kinase 3
hsa-miR-1256	1	0	1	1	1	1	TMEM200B	transmembrane protein 200B
hsa-miR-1256	0	0	1	1	1	1	DYRK3	dual-specificity tyrosine-(Y)-phosphorylation regulated kinase 3
hsa-miR-1256	0	0	1	1	1	1	CCDC144NL	coiled-coil domain containing 144 family, N-terminal like
hsa-miR-1256	0	0	1	1	0	0	VHLL	von Hippel-Lindau tumor suppressor-like
hsa-miR-1256	1	0	1	1	1	1	NCK2	NCK adaptor protein 2
hsa-miR-1256	1	0	1	0	1	1	LRRC55	leucine rich repeat containing 55
hsa-miR-1256	1	0	1	0	1	1	YPEL2	yippee-like 2 (Drosophila)
hsa-miR-1256	1	0	1	1	1	1	EBF3	early B-cell factor 3
hsa-miR-1256	1	0	1	1	1	1	PLCXD3	phosphatidylinositol-specific phospholipase C, X domain containing 3
hsa-miR-1256	0	0	1	1	1	1	SCP2	sterol carrier protein 2
hsa-miR-1256	1	0	1	1	1	1	IGF2BP2	insulin-like growth factor 2 mRNA binding protein 2
hsa-miR-1256	1	0	1	0	1	1	CPLX2	complexin 2
hsa-miR-1256	0	0	1	1	1	1	TCHHL1	trichohyalin-like 1
hsa-miR-1256	1	0	1	0	1	1	KIAA2022	KIAA2022
hsa-miR-1256	0	0	1	1	1	1	MXI1	MAX interactor 1
hsa-miR-1256	0	0	1	1	1	1	GEMIN2	gem (nuclear organelle) associated protein 2
hsa-miR-1256	1	0	1	0	1	1	ZC3H12B	zinc finger CCCH-type containing 12B
hsa-miR-1256	1	0	1	0	1	1	CREB5	cAMP responsive element binding protein 5
hsa-miR-1256	0	0	1	1	0	0	CLEC18B	C-type lectin domain family 18, member B
hsa-miR-1256	0	0	1	1	1	1	C9orf152	chromosome 9 open reading frame 152
hsa-miR-1256	0	0	1	1	1	1	C2orf68	chromosome 2 open reading frame 68
hsa-miR-1256	0	0	1	1	1	1	C17orf97	chromosome 17 open reading frame 97
hsa-miR-1256	1	0	1	0	1	1	GOPC	golgi-associated PDZ and coiled-coil motif containing
hsa-miR-1256	0	0	1	1	1	1	VPS13A	vacuolar protein sorting 13 homolog A (S. cerevisiae)
hsa-miR-1256	1	0	1	1	1	1	NTRK2	neurotrophic tyrosine kinase, receptor, type 2
hsa-miR-1256	1	0	1	0	1	1	RGAG4	retrotransposon gag domain containing 4
hsa-miR-1256	0	0	1	1	1	1	VNN3	vanin 3
hsa-miR-1256	1	0	1	1	1	1	KALRN	kalirin, RhoGEF kinase
hsa-miR-1256	1	0	1	1	1	1	SH3KBP1	SH3-domain kinase binding protein 1
hsa-miR-1256	1	0	1	0	1	1	BCL7A	B-cell CLL/lymphoma 7A
hsa-miR-1256	1	0	1	0	1	1	TNRC6B	trinucleotide repeat containing 6B
hsa-miR-1256	1	0	1	0	1	1	C2orf71	chromosome 2 open reading frame 71
hsa-miR-1256	0	0	1	1	1	1	RPS29	ribosomal protein S29
hsa-miR-1256	0	0	1	1	1	1	SLC35A2	solute carrier family 35 (UDP-galactose transporter), member A2
hsa-miR-1256	1	0	1	0	1	1	SRGAP3	SLIT-ROBO Rho GTPase activating protein 3
hsa-miR-1256	1	0	1	1	1	1	ATP6V1C2	ATPase, H+ transporting, lysosomal 42kDa, V1 subunit C2
hsa-miR-1256	1	0	1	1	1	1	KIAA0317	KIAA0317
hsa-miR-1256	1	0	1	0	1	1	GK5	glycerol kinase 5 (putative)
hsa-miR-1256	1	0	1	0	1	1	CREBZF	CREB/ATF bZIP transcription factor
hsa-miR-1256	1	0	1	1	1	1	CDC42	cell division cycle 42 (GTP binding protein, 25kDa)
hsa-miR-1256	1	0	1	1	1	1	CHN2	chimerin (chimaerin) 2
hsa-miR-1256	1	0	1	0	1	1	FAM133B	family with sequence similarity 133, member B
hsa-miR-1256	1	0	1	1	1	1	SCN2A	sodium channel, voltage-gated, type II, alpha subunit
hsa-miR-1256	0	0	1	1	0	0	RHBDD2	rhomboid domain containing 2
hsa-miR-1256	0	0	1	1	1	1	ZXDC	ZXD family zinc finger C
hsa-miR-1256	1	0	1	1	1	1	C2orf88	chromosome 2 open reading frame 88
hsa-miR-1256	1	0	1	1	1	1	SLC9A6	solute carrier family 9, subfamily A (NHE6, cation proton antiporter 6), member 6
hsa-miR-1256	1	0	1	1	1	1	FRS2	fibroblast growth factor receptor substrate 2
hsa-miR-1256	1	0	1	1	1	1	SNX21	sorting nexin family member 21
hsa-miR-1256	1	0	1	1	1	1	PVRL2	poliovirus receptor-related 2 (herpesvirus entry mediator B)
hsa-miR-1256	1	0	1	1	1	1	QSER1	glutamine and serine rich 1
hsa-miR-1256	1	0	1	1	1	1	PDE11A	phosphodiesterase 11A
hsa-miR-1256	1	0	1	1	1	1	SRSF1	serine/arginine-rich splicing factor 1
hsa-miR-1256	1	0	1	1	1	1	N4BP2L1	NEDD4 binding protein 2-like 1
hsa-miR-1256	1	0	1	1	1	1	CASZ1	castor zinc finger 1
hsa-miR-1256	1	0	1	1	1	1	MGA	MAX gene associated
hsa-miR-1256	1	0	1	1	1	1	REPS2	RALBP1 associated Eps domain containing 2
hsa-miR-1256	1	0	1	0	1	1	SCN3A	sodium channel, voltage-gated, type III, alpha subunit
hsa-miR-1256	1	0	1	0	1	1	CDK6	cyclin-dependent kinase 6
hsa-miR-1256	1	0	1	1	1	1	CTNND2	catenin (cadherin-associated protein), delta 2
hsa-miR-1256	1	0	1	1	1	1	NDST1	N-deacetylase/N-sulfotransferase (heparan glucosaminyl) 1
hsa-miR-1256	1	0	1	1	1	1	AQP4	aquaporin 4
hsa-miR-1256	0	0	1	1	1	1	BTN1A1	butyrophilin, subfamily 1, member A1
hsa-miR-1256	1	0	1	1	1	1	CDC25A	cell division cycle 25 homolog A (S. pombe)
hsa-miR-1256	1	0	1	0	1	1	CEBPG	CCAAT/enhancer binding protein (C/EBP), gamma
hsa-miR-1256	0	0	1	1	0	0	CNTFR	ciliary neurotrophic factor receptor
hsa-miR-1256	0	0	1	1	1	1	SLC31A2	solute carrier family 31 (copper transporters), member 2
hsa-miR-1256	1	0	1	1	1	1	MASP1	mannan-binding lectin serine peptidase 1 (C4/C2 activating component of Ra-reactive factor)
hsa-miR-1256	0	0	1	1	1	1	DPT	dermatopontin
hsa-miR-1256	0	0	1	1	1	1	DSG1	desmoglein 1
hsa-miR-1256	1	0	1	1	1	1	E2F3	E2F transcription factor 3
hsa-miR-1256	1	0	1	0	1	1	FUT4	fucosyltransferase 4 (alpha (1,3) fucosyltransferase, myeloid-specific)
hsa-miR-1256	0	0	1	1	1	1	HMGCS1	3-hydroxy-3-methylglutaryl-CoA synthase 1 (soluble)
hsa-miR-1256	1	0	1	1	1	1	ITGA2	integrin, alpha 2 (CD49B, alpha 2 subunit of VLA-2 receptor)
hsa-miR-1256	1	0	1	1	1	1	ITGB8	integrin, beta 8
hsa-miR-1256	1	0	1	1	1	1	ITPR2	inositol 1,4,5-trisphosphate receptor, type 2
hsa-miR-1256	1	0	1	1	1	1	KCNJ10	potassium inwardly-rectifying channel, subfamily J, member 10
hsa-miR-1256	0	0	1	1	1	1	KLRC1	killer cell lectin-like receptor subfamily C, member 1
hsa-miR-1256	0	0	1	1	1	1	KLRC2	killer cell lectin-like receptor subfamily C, member 2
hsa-miR-1256	0	0	1	1	0	0	KRT4	keratin 4
hsa-miR-1256	0	0	1	1	1	1	LOX	lysyl oxidase
hsa-miR-1256	1	0	1	1	1	1	MAP1A	microtubule-associated protein 1A
hsa-miR-1256	0	0	1	1	1	1	MMP19	matrix metallopeptidase 19
hsa-miR-1256	0	0	1	1	0	0	MYOG	myogenin (myogenic factor 4)
hsa-miR-1256	0	0	1	1	1	1	P2RY1	purinergic receptor P2Y, G-protein coupled, 1
hsa-miR-1256	1	0	1	1	1	1	PAWR	PRKC, apoptosis, WT1, regulator
hsa-miR-1256	0	0	1	1	0	0	PPP1R8	protein phosphatase 1, regulatory subunit 8
hsa-miR-1256	0	0	1	1	1	1	MAPK9	mitogen-activated protein kinase 9
hsa-miR-1256	0	0	1	1	0	0	PRM1	protamine 1
hsa-miR-1256	1	0	1	1	1	1	PTPRK	protein tyrosine phosphatase, receptor type, K
hsa-miR-1256	1	0	1	1	1	1	SALL1	sal-like 1 (Drosophila)
hsa-miR-1256	1	0	1	0	1	1	SCN9A	sodium channel, voltage-gated, type IX, alpha subunit
hsa-miR-1256	1	0	1	1	1	1	SFRP4	secreted frizzled-related protein 4
hsa-miR-1256	1	0	1	0	1	1	STC1	stanniocalcin 1
hsa-miR-1256	1	0	1	0	1	1	RPS6KB1	ribosomal protein S6 kinase, 70kDa, polypeptide 1
hsa-miR-1256	1	0	1	1	1	1	SVIL	supervillin
hsa-miR-1256	1	0	1	1	0	0	SYP	synaptophysin
hsa-miR-1256	1	0	1	0	1	1	TAL1	T-cell acute lymphocytic leukemia 1
hsa-miR-1256	1	0	1	0	1	1	THBS1	thrombospondin 1
hsa-miR-1256	1	0	1	1	1	1	NR2E1	nuclear receptor subfamily 2, group E, member 1
hsa-miR-1256	0	0	1	1	1	1	TNNI1	troponin I type 1 (skeletal, slow)
hsa-miR-1256	1	0	1	0	1	1	TUB	tubby homolog (mouse)
hsa-miR-1256	1	0	1	1	1	1	UBE2D3	ubiquitin-conjugating enzyme E2D 3
hsa-miR-1256	1	0	1	1	1	1	VSNL1	visinin-like 1
hsa-miR-1256	1	0	1	1	1	1	CUL5	cullin 5
hsa-miR-1256	1	0	1	1	1	1	NRIP1	nuclear receptor interacting protein 1
hsa-miR-1256	1	0	1	0	1	1	CNTNAP1	contactin associated protein 1
hsa-miR-1256	0	0	1	1	1	1	AGPS	alkylglycerone phosphate synthase
hsa-miR-1256	0	0	1	1	1	1	PRPF4B	PRP4 pre-mRNA processing factor 4 homolog B (yeast)
hsa-miR-1256	1	0	1	0	1	1	WASL	Wiskott-Aldrich syndrome-like
hsa-miR-1256	0	0	1	0	0	0	ARRB1	arrestin, beta 1
hsa-miR-1256	1	0	1	1	1	1	BCL2L2	BCL2-like 2
hsa-miR-1256	1	0	1	0	1	1	DGKB	diacylglycerol kinase, beta 90kDa
hsa-miR-1256	0	0	1	1	1	1	TIMM8A	translocase of inner mitochondrial membrane 8 homolog A (yeast)
hsa-miR-1256	1	0	1	0	1	1	EIF2S1	eukaryotic translation initiation factor 2, subunit 1 alpha, 35kDa
hsa-miR-1256	1	0	1	1	1	1	EYA4	eyes absent homolog 4 (Drosophila)
hsa-miR-1256	1	0	1	0	1	1	SLC1A2	solute carrier family 1 (glial high affinity glutamate transporter), member 2
hsa-miR-1256	1	0	1	0	1	1	CYTH3	cytohesin 3
hsa-miR-1256	1	0	1	1	1	1	SOCS6	suppressor of cytokine signaling 6
hsa-miR-1256	0	0	1	1	1	1	HOMER1	homer homolog 1 (Drosophila)
hsa-miR-1256	1	0	1	0	1	1	AKAP6	A kinase (PRKA) anchor protein 6
hsa-miR-1256	0	0	1	1	1	1	CARTPT	CART prepropeptide
hsa-miR-1256	1	0	1	0	1	1	ACVR1B	activin A receptor, type IB
hsa-miR-1256	1	0	1	0	1	1	CEBPA	CCAAT/enhancer binding protein (C/EBP), alpha
hsa-miR-1256	1	0	1	1	1	1	DAG1	dystroglycan 1 (dystrophin-associated glycoprotein 1)
hsa-miR-1256	1	0	1	1	1	1	EFNA1	ephrin-A1
hsa-miR-1256	1	0	1	0	1	1	ACSL4	acyl-CoA synthetase long-chain family member 4
hsa-miR-1256	1	0	1	1	1	1	FUT8	fucosyltransferase 8 (alpha (1,6) fucosyltransferase)
hsa-miR-1256	1	0	1	0	1	1	SCN2B	sodium channel, voltage-gated, type II, beta subunit
hsa-miR-1256	1	0	1	1	1	1	DCLK1	doublecortin-like kinase 1
hsa-miR-1256	1	0	1	1	1	1	LARGE	like-glycosyltransferase
hsa-miR-1256	1	0	1	1	1	1	KIF3B	kinesin family member 3B
hsa-miR-1256	0	0	1	1	0	0	SLC22A14	solute carrier family 22, member 14
hsa-miR-1256	1	0	1	0	1	1	ROCK2	Rho-associated, coiled-coil containing protein kinase 2
hsa-miR-1256	0	0	1	1	1	1	PIGB	phosphatidylinositol glycan anchor biosynthesis, class B
hsa-miR-1256	0	0	1	1	1	1	CD8B	CD8b molecule
hsa-miR-1256	1	0	1	1	1	1	GABRE	gamma-aminobutyric acid (GABA) A receptor, epsilon
hsa-miR-1256	1	0	1	0	1	1	KRAS	v-Ki-ras2 Kirsten rat sarcoma viral oncogene homolog
hsa-miR-1256	1	0	1	0	1	1	SCD	stearoyl-CoA desaturase (delta-9-desaturase)
hsa-miR-1256	0	0	1	1	0	0	ASCL2	achaete-scute complex homolog 2 (Drosophila)
hsa-miR-1256	1	0	1	1	1	1	BMI1	BMI1 polycomb ring finger oncogene
hsa-miR-1256	1	0	1	1	1	1	FOXN3	forkhead box N3
hsa-miR-1256	1	0	1	1	1	1	GEM	GTP binding protein overexpressed in skeletal muscle
hsa-miR-1256	1	0	1	0	1	1	RAPGEF1	Rap guanine nucleotide exchange factor (GEF) 1
hsa-miR-1256	1	0	1	0	1	1	CCDC6	coiled-coil domain containing 6
hsa-miR-1256	1	0	1	1	1	1	MLF2	myeloid leukemia factor 2
hsa-miR-1256	0	0	1	1	1	1	FAIM3	Fas apoptotic inhibitory molecule 3
hsa-miR-1256	1	0	1	1	1	1	GABBR2	gamma-aminobutyric acid (GABA) B receptor, 2
hsa-miR-1256	0	0	1	1	1	1	ING1	inhibitor of growth family, member 1
hsa-miR-1256	1	0	1	1	1	1	SMAD6	SMAD family member 6
hsa-miR-1256	0	0	1	1	1	1	S100A11	S100 calcium binding protein A11
hsa-miR-1256	1	0	1	1	1	1	ACTR1A	ARP1 actin-related protein 1 homolog A, centractin alpha (yeast)
hsa-miR-1256	0	0	1	1	1	1	NUTF2	nuclear transport factor 2
hsa-miR-1256	1	0	1	0	1	1	SPRY3	sprouty homolog 3 (Drosophila)
hsa-miR-1256	1	0	1	1	1	1	MAT2A	methionine adenosyltransferase II, alpha
hsa-miR-1256	1	0	1	1	1	1	MMP16	matrix metallopeptidase 16 (membrane-inserted)
hsa-miR-1256	1	0	1	1	1	1	MTF1	metal-regulatory transcription factor 1
hsa-miR-1256	0	0	1	1	1	1	UQCRFS1	ubiquinol-cytochrome c reductase, Rieske iron-sulfur polypeptide 1
hsa-miR-1256	1	0	1	0	1	1	HDAC4	histone deacetylase 4
hsa-miR-1256	1	0	1	0	1	1	SPATA2	spermatogenesis associated 2
hsa-miR-1256	1	0	1	1	1	1	SPON1	spondin 1, extracellular matrix protein
hsa-miR-1256	1	0	1	1	1	1	DAGLA	diacylglycerol lipase, alpha
hsa-miR-1256	1	0	1	1	1	1	NFATC1	nuclear factor of activated T-cells, cytoplasmic, calcineurin-dependent 1
hsa-miR-1256	0	0	1	1	1	1	NKX3-1	NK3 homeobox 1
hsa-miR-1256	1	0	1	1	1	1	CDK16	cyclin-dependent kinase 16
hsa-miR-1256	1	0	1	1	1	1	PDGFRA	platelet-derived growth factor receptor, alpha polypeptide
hsa-miR-1256	1	0	1	0	1	1	PPP1R2	protein phosphatase 1, regulatory (inhibitor) subunit 2
hsa-miR-1256	1	0	1	1	1	1	PPP2R5E	protein phosphatase 2, regulatory subunit B', epsilon isoform
hsa-miR-1256	0	0	1	1	1	1	PRKCH	protein kinase C, eta
hsa-miR-1256	1	0	1	1	1	1	STK4	serine/threonine kinase 4
hsa-miR-1256	1	0	1	1	1	1	BASP1	brain abundant, membrane attached signal protein 1
hsa-miR-1256	1	0	1	1	1	1	ZNF238	zinc finger protein 238
hsa-miR-1256	0	0	1	0	1	1	SLC16A2	solute carrier family 16, member 2 (thyroid hormone transporter)
hsa-miR-1256	1	0	1	0	1	1	NCOA2	nuclear receptor coactivator 2
hsa-miR-1256	1	0	1	0	1	1	IGF2BP1	insulin-like growth factor 2 mRNA binding protein 1
hsa-miR-1256	1	0	1	0	1	1	API5	apoptosis inhibitor 5
hsa-miR-1256	1	0	1	1	0	0	PSKH1	protein serine kinase H1
hsa-miR-1256	1	0	1	1	1	1	ZBTB33	zinc finger and BTB domain containing 33
hsa-miR-1256	0	0	1	1	0	0	PIM2	pim-2 oncogene
hsa-miR-1256	0	0	1	1	1	1	HOXA7	homeobox A7
hsa-miR-1256	1	0	1	1	1	1	SCN1A	sodium channel, voltage-gated, type I, alpha subunit
hsa-miR-1256	1	0	1	1	1	1	SOX30	SRY (sex determining region Y)-box 30
hsa-miR-1256	0	0	1	1	1	1	RER1	RER1 retention in endoplasmic reticulum 1 homolog (S. cerevisiae)
hsa-miR-1256	1	0	1	1	1	1	ADAMTS5	ADAM metallopeptidase with thrombospondin type 1 motif, 5
hsa-miR-1256	0	0	1	0	1	1	ZXDB	zinc finger, X-linked, duplicated B
hsa-miR-1256	0	0	1	1	0	0	IRAK3	interleukin-1 receptor-associated kinase 3
hsa-miR-1256	1	0	1	1	1	1	PALM2-AKAP2	PALM2-AKAP2 readthrough
hsa-miR-1256	1	0	1	1	1	1	KLF12	Kruppel-like factor 12
hsa-miR-1256	0	0	1	1	1	1	STAT1	signal transducer and activator of transcription 1, 91kDa
hsa-miR-1256	1	0	1	1	1	1	HDHD1	haloacid dehalogenase-like hydrolase domain containing 1
hsa-miR-1256	1	0	1	1	1	1	ICOS	inducible T-cell co-stimulator
hsa-miR-1256	0	0	1	1	1	1	LMOD1	leiomodin 1 (smooth muscle)
hsa-miR-1256	0	0	1	1	1	1	EHF	ets homologous factor
hsa-miR-1256	1	0	1	0	1	1	EIF2C2	eukaryotic translation initiation factor 2C, 2
hsa-miR-1256	1	0	1	1	1	1	MGAT4A	mannosyl (alpha-1,3-)-glycoprotein beta-1,4-N-acetylglucosaminyltransferase, isozyme A
hsa-miR-1256	1	0	1	1	1	1	LAMP5	lysosomal-associated membrane protein family, member 5
hsa-miR-1256	1	0	1	0	1	1	FBXL7	F-box and leucine-rich repeat protein 7
hsa-miR-1256	1	0	1	1	1	1	MAPRE1	microtubule-associated protein, RP/EB family, member 1
hsa-miR-1256	1	0	1	1	1	1	PITPNB	phosphatidylinositol transfer protein, beta
hsa-miR-1256	1	0	1	0	1	1	FLRT2	fibronectin leucine rich transmembrane protein 2
hsa-miR-1256	0	0	1	1	0	0	ZDHHC8	zinc finger, DHHC-type containing 8
hsa-miR-1256	0	0	1	1	1	1	UBQLN2	ubiquilin 2
hsa-miR-1256	0	0	1	1	0	0	MCTS1	malignant T cell amplified sequence 1
hsa-miR-1256	1	0	1	0	1	1	C16orf72	chromosome 16 open reading frame 72
hsa-miR-1256	1	0	1	0	1	1	ODZ1	odz, odd Oz/ten-m homolog 1 (Drosophila)
hsa-miR-1256	0	0	1	1	0	0	CNPY2	canopy 2 homolog (zebrafish)
hsa-miR-1256	0	0	1	1	0	0	OLFM1	olfactomedin 1
hsa-miR-1256	1	0	1	1	1	1	LEMD3	LEM domain containing 3
hsa-miR-1256	1	0	1	1	1	1	PATZ1	POZ (BTB) and AT hook containing zinc finger 1
hsa-miR-1256	1	0	1	1	1	1	SLC7A11	solute carrier family 7 (anionic amino acid transporter light chain, xc- system), member 11
hsa-miR-1256	1	0	1	1	1	1	AFF4	AF4/FMR2 family, member 4
hsa-miR-1256	1	0	1	1	1	1	VSX1	visual system homeobox 1
hsa-miR-1256	1	0	1	1	1	1	EHD3	EH-domain containing 3
hsa-miR-1256	1	0	1	1	1	1	RALGPS1	Ral GEF with PH domain and SH3 binding motif 1
hsa-miR-1256	0	0	1	1	1	1	FRMPD4	FERM and PDZ domain containing 4
hsa-miR-1256	1	0	1	1	1	1	KIAA0753	KIAA0753
hsa-miR-1256	0	0	1	0	1	1	EPM2AIP1	EPM2A (laforin) interacting protein 1
hsa-miR-1256	0	0	1	0	1	1	PPM1E	protein phosphatase, Mg2+/Mn2+ dependent, 1E
hsa-miR-1256	1	0	1	0	1	1	ICK	intestinal cell (MAK-like) kinase
hsa-miR-1256	1	0	1	1	1	1	PLEKHA6	pleckstrin homology domain containing, family A member 6
hsa-miR-1256	1	0	1	0	1	1	PDS5B	PDS5, regulator of cohesion maintenance, homolog B (S. cerevisiae)
hsa-miR-1256	1	0	1	1	1	1	TRAK2	trafficking protein, kinesin binding 2
hsa-miR-1256	1	0	1	1	1	1	TAB2	TGF-beta activated kinase 1/MAP3K7 binding protein 2
hsa-miR-1256	1	0	1	1	0	0	RFTN1	raftlin, lipid raft linker 1
hsa-miR-1256	1	0	1	1	1	1	TRIM9	tripartite motif containing 9
hsa-miR-1256	1	0	1	1	1	1	DNAJC13	DnaJ (Hsp40) homolog, subfamily C, member 13
hsa-miR-1256	1	0	1	1	1	1	PHF15	PHD finger protein 15
hsa-miR-1256	0	0	1	1	1	1	NBPF14	neuroblastoma breakpoint family, member 14
hsa-miR-1256	1	0	1	1	1	1	PARM1	prostate androgen-regulated mucin-like protein 1
hsa-miR-1256	1	0	1	1	1	1	CLIP3	CAP-GLY domain containing linker protein 3
hsa-miR-1256	0	0	1	1	0	0	PTCD1	pentatricopeptide repeat domain 1
hsa-miR-1256	1	0	1	1	1	1	SETBP1	SET binding protein 1
hsa-miR-1256	1	0	1	1	1	1	ST8SIA3	ST8 alpha-N-acetyl-neuraminide alpha-2,8-sialyltransferase 3
hsa-miR-1256	1	0	1	0	1	1	CNR1	cannabinoid receptor 1 (brain)
hsa-miR-1256	0	0	1	1	1	1	HSD17B11	hydroxysteroid (17-beta) dehydrogenase 11
hsa-miR-1256	1	0	1	0	1	1	HPCAL4	hippocalcin like 4
hsa-miR-1256	1	0	1	1	1	1	ARID4B	AT rich interactive domain 4B (RBP1-like)
hsa-miR-1256	0	0	1	0	1	1	ERAP1	endoplasmic reticulum aminopeptidase 1
hsa-miR-1256	1	0	1	1	1	1	SIX4	SIX homeobox 4
hsa-miR-1256	1	0	1	0	1	1	FLVCR2	feline leukemia virus subgroup C cellular receptor family, member 2
hsa-miR-1256	0	0	1	1	1	1	FKBP14	FK506 binding protein 14, 22 kDa
hsa-miR-1256	0	0	1	1	1	1	AKIRIN2	akirin 2
hsa-miR-1256	1	0	1	0	1	1	CCDC88A	coiled-coil domain containing 88A
hsa-miR-1256	0	0	1	1	1	1	NUDT11	nudix (nucleoside diphosphate linked moiety X)-type motif 11
hsa-miR-1256	1	0	1	0	1	1	LIN7C	lin-7 homolog C (C. elegans)
hsa-miR-1256	1	0	1	0	1	1	FOXJ2	forkhead box J2
hsa-miR-1256	0	0	1	1	1	1	STYK1	serine/threonine/tyrosine kinase 1
hsa-miR-1256	1	0	1	1	1	1	PAG1	phosphoprotein associated with glycosphingolipid microdomains 1
hsa-miR-1256	0	0	1	1	1	1	ZC3H15	zinc finger CCCH-type containing 15
hsa-miR-1256	1	0	1	1	1	1	ASH1L	ash1 (absent, small, or homeotic)-like (Drosophila)
hsa-miR-1256	0	0	1	0	0	0	APOBR	apolipoprotein B receptor
hsa-miR-1256	0	0	1	1	1	1	MYO5C	myosin VC
hsa-miR-1256	1	0	1	0	1	1	KLHL9	kelch-like 9 (Drosophila)
hsa-miR-1256	1	0	1	1	1	1	SASH3	SAM and SH3 domain containing 3
hsa-miR-1256	0	0	1	1	1	1	GNL3L	guanine nucleotide binding protein-like 3 (nucleolar)-like
hsa-miR-1256	1	0	1	0	1	1	CCNJ	cyclin J
hsa-miR-1256	0	0	1	0	1	1	ARL15	ADP-ribosylation factor-like 15
hsa-miR-1256	1	0	1	0	1	1	UBFD1	ubiquitin family domain containing 1
hsa-miR-1256	1	0	1	1	1	1	MDM1	Mdm1 nuclear protein homolog (mouse)
hsa-miR-1256	1	0	1	1	1	1	C8orf4	chromosome 8 open reading frame 4
hsa-miR-1256	0	0	1	1	1	1	TOMM22	translocase of outer mitochondrial membrane 22 homolog (yeast)
hsa-miR-1256	1	0	1	1	1	1	PITHD1	PITH (C-terminal proteasome-interacting domain of thioredoxin-like) domain containing 1
hsa-miR-1256	1	0	1	1	1	1	PCDH9	protocadherin 9
hsa-miR-1256	0	0	1	1	1	1	PLXDC1	plexin domain containing 1
hsa-miR-1256	0	0	1	1	1	1	IL22	interleukin 22
hsa-miR-1256	1	0	1	0	1	1	DCUN1D1	DCN1, defective in cullin neddylation 1, domain containing 1 (S. cerevisiae)
hsa-miR-1256	0	0	1	1	1	1	SHROOM4	shroom family member 4
hsa-miR-1256	1	0	1	1	1	1	USP31	ubiquitin specific peptidase 31
hsa-miR-1256	1	0	1	1	1	1	RGAG1	retrotransposon gag domain containing 1
hsa-miR-1256	1	0	1	1	1	1	NLGN2	neuroligin 2
hsa-miR-1256	1	0	1	1	1	1	KLHL14	kelch-like 14 (Drosophila)
hsa-miR-1256	0	0	1	1	1	1	ZNF319	zinc finger protein 319
hsa-miR-1256	1	0	1	1	1	1	SIPA1L2	signal-induced proliferation-associated 1 like 2
hsa-miR-1256	1	0	1	1	1	1	ZFP14	zinc finger protein 14 homolog (mouse)
hsa-miR-1256	1	0	1	0	1	1	RAP2A	RAP2A, member of RAS oncogene family
hsa-miR-1256	0	0	1	1	0	0	MAGEA5	melanoma antigen family A, 5
hsa-miR-1256	1	0	1	0	1	1	XK	X-linked Kx blood group (McLeod syndrome)
hsa-miR-1256	1	0	1	1	1	1	RPRD1B	regulation of nuclear pre-mRNA domain containing 1B
hsa-miR-1256	1	0	1	1	1	1	CDH22	cadherin 22, type 2
hsa-miR-1256	0	0	1	1	1	1	IL22RA1	interleukin 22 receptor, alpha 1
hsa-miR-1256	1	0	1	1	1	1	BACH2	BTB and CNC homology 1, basic leucine zipper transcription factor 2
hsa-miR-1256	1	0	1	1	1	1	GRIK2	glutamate receptor, ionotropic, kainate 2
hsa-miR-1256	1	0	1	1	1	1	ABCG4	ATP-binding cassette, sub-family G (WHITE), member 4
hsa-miR-1256	0	0	1	1	1	1	TCTA	T-cell leukemia translocation altered
hsa-miR-1256	1	0	1	1	1	1	FNDC4	fibronectin type III domain containing 4
hsa-miR-1256	1	0	1	1	1	1	MARCH7	membrane-associated ring finger (C3HC4) 7, E3 ubiquitin protein ligase
hsa-miR-1256	0	0	1	1	1	1	SERF1B	small EDRK-rich factor 1B (centromeric)
hsa-miR-1256	1	0	1	1	0	0	UBE2Z	ubiquitin-conjugating enzyme E2Z
hsa-miR-1256	1	0	1	1	1	1	NEUROG2	neurogenin 2
hsa-miR-1256	1	0	1	1	1	1	NKAIN1	Na+/K+ transporting ATPase interacting 1
hsa-miR-1256	1	0	1	1	1	1	PGBD5	piggyBac transposable element derived 5
hsa-miR-1256	0	0	1	1	0	0	TNFAIP8L2	tumor necrosis factor, alpha-induced protein 8-like 2
hsa-miR-1256	0	0	1	1	1	1	STEAP4	STEAP family member 4
hsa-miR-1256	0	0	1	1	1	1	SHCBP1	SHC SH2-domain binding protein 1
hsa-miR-1256	0	0	1	1	1	1	PREX2	phosphatidylinositol-3,4,5-trisphosphate-dependent Rac exchange factor 2
hsa-miR-1256	0	0	1	1	0	0	CENPT	centromere protein T
hsa-miR-1256	0	0	1	1	1	1	DBF4B	DBF4 homolog B (S. cerevisiae)
hsa-miR-1256	1	0	1	0	1	1	C1orf21	chromosome 1 open reading frame 21
hsa-miR-1256	1	0	1	1	1	1	GABARAPL1	GABA(A) receptor-associated protein like 1
hsa-miR-1256	0	0	1	1	0	0	KCNK17	potassium channel, subfamily K, member 17
hsa-miR-1256	1	0	1	1	0	0	SPATA16	spermatogenesis associated 16
hsa-miR-1256	0	0	1	1	0	0	KRTAP17-1	keratin associated protein 17-1
hsa-miR-1256	0	0	1	1	0	0	SLC4A11	solute carrier family 4, sodium borate transporter, member 11
hsa-miR-1256	1	0	1	1	1	1	ANTXR1	anthrax toxin receptor 1
hsa-miR-1256	1	0	1	1	0	0	MAF1	MAF1 homolog (S. cerevisiae)
hsa-miR-1256	1	0	1	1	1	1	GPR124	G protein-coupled receptor 124
hsa-miR-1256	1	0	1	1	1	1	CGNL1	cingulin-like 1
hsa-miR-1256	1	0	1	1	1	1	PCDH10	protocadherin 10
hsa-miR-1256	0	0	1	1	1	1	ZIC5	Zic family member 5
hsa-miR-1256	0	0	1	0	1	1	KRTAP2-4	keratin associated protein 2-4
hsa-miR-1256	1	0	1	0	1	1	PURB	purine-rich element binding protein B
hsa-miR-1256	0	0	1	1	1	1	LHX4	LIM homeobox 4
hsa-miR-1256	1	0	1	1	1	1	EPT1	ethanolaminephosphotransferase 1 (CDP-ethanolamine-specific)
hsa-miR-1256	0	0	1	1	0	0	FAM46B	family with sequence similarity 46, member B
hsa-miR-1256	0	0	1	1	0	0	DIRC1	disrupted in renal carcinoma 1
hsa-miR-1256	0	0	1	1	1	1	MRGPRX2	MAS-related GPR, member X2
hsa-miR-1256	0	0	1	1	1	1	FKBP1B	FK506 binding protein 1B, 12.6 kDa
hsa-miR-1256	0	0	1	1	1	1	BCCIP	BRCA2 and CDKN1A interacting protein
hsa-miR-1256	0	0	1	1	1	1	SELM	selenoprotein M
hsa-miR-1256	0	0	1	1	0	0	CITED4	Cbp/p300-interacting transactivator, with Glu/Asp-rich carboxy-terminal domain, 4
hsa-miR-1256	1	0	1	1	1	1	FAM122A	family with sequence similarity 122A
hsa-miR-1256	1	0	1	1	1	1	GNPDA2	glucosamine-6-phosphate deaminase 2
hsa-miR-1256	0	0	1	1	1	1	PPIL4	peptidylprolyl isomerase (cyclophilin)-like 4
hsa-miR-1256	1	0	1	1	1	1	LGI3	leucine-rich repeat LGI family, member 3
hsa-miR-1256	0	0	1	1	0	0	C10orf35	chromosome 10 open reading frame 35
hsa-miR-1256	0	0	1	1	0	0	TCEB3C	transcription elongation factor B polypeptide 3C (elongin A3)
hsa-miR-1256	1	0	1	1	1	1	FAM110B	family with sequence similarity 110, member B
hsa-miR-1256	1	0	1	1	0	0	GAS2L1	growth arrest-specific 2 like 1
hsa-miR-1256	0	0	1	1	1	1	DEPDC4	DEP domain containing 4
hsa-miR-1256	0	0	1	1	1	1	TARSL2	threonyl-tRNA synthetase-like 2
hsa-miR-1256	1	0	1	0	1	1	UBXN10	UBX domain protein 10
hsa-miR-1256	1	0	1	1	1	1	ZSCAN29	zinc finger and SCAN domain containing 29
hsa-miR-1256	1	0	1	1	1	1	UHRF2	ubiquitin-like with PHD and ring finger domains 2, E3 ubiquitin protein ligase
hsa-miR-1256	0	0	1	1	1	1	SLC22A7	solute carrier family 22 (organic anion transporter), member 7
hsa-miR-1256	1	0	1	1	0	0	TMEM86A	transmembrane protein 86A
hsa-miR-1256	1	0	1	0	1	1	TAPT1	transmembrane anterior posterior transformation 1
hsa-miR-1256	0	0	1	0	1	1	VGLL2	vestigial like 2 (Drosophila)
hsa-miR-1256	0	0	1	1	1	1	TAF1L	TAF1 RNA polymerase II, TATA box binding protein (TBP)-associated factor, 210kDa-like
hsa-miR-1256	0	0	1	1	1	1	SIAE	sialic acid acetylesterase
hsa-miR-1256	0	0	1	1	1	1	CATSPER2	cation channel, sperm associated 2
hsa-miR-1256	1	0	1	1	1	1	MOB1B	MOB kinase activator 1B
hsa-miR-1256	1	0	1	1	1	1	MMGT1	membrane magnesium transporter 1
hsa-miR-1256	0	0	1	1	1	1	SLC25A26	solute carrier family 25 (S-adenosylmethionine carrier), member 26
hsa-miR-1256	1	0	1	1	1	1	TTBK2	tau tubulin kinase 2
hsa-miR-1256	0	0	1	1	0	0	PRSS36	protease, serine, 36
hsa-miR-1256	1	0	1	1	1	1	CCDC117	coiled-coil domain containing 117
hsa-miR-1256	1	0	1	0	1	1	C3orf58	chromosome 3 open reading frame 58
hsa-miR-1256	1	0	1	0	1	1	KSR2	kinase suppressor of ras 2
hsa-miR-1256	0	0	1	0	1	1	C5orf64	chromosome 5 open reading frame 64
hsa-miR-1256	1	0	1	1	1	1	CEP57L1	centrosomal protein 57kDa-like 1
hsa-miR-1256	1	0	1	0	1	1	FAM84B	family with sequence similarity 84, member B
hsa-miR-1256	0	0	1	1	1	1	FRMD3	FERM domain containing 3
hsa-miR-1256	0	0	1	1	0	0	C17orf74	chromosome 17 open reading frame 74
hsa-miR-1256	0	0	1	1	1	1	IL6ST	interleukin 6 signal transducer (gp130, oncostatin M receptor)
hsa-miR-1256	0	0	1	1	1	1	PRNT	prion protein (testis specific)
hsa-miR-1256	0	0	1	1	1	1	GPIHBP1	glycosylphosphatidylinositol anchored high density lipoprotein binding protein 1
hsa-miR-1256	0	0	1	1	1	1	ZNF831	zinc finger protein 831
hsa-miR-1256	1	0	1	1	1	1	HIF1A	hypoxia inducible factor 1, alpha subunit (basic helix-loop-helix transcription factor)
hsa-miR-1256	1	0	1	1	1	1	CREM	cAMP responsive element modulator
hsa-miR-1256	0	0	1	1	1	1	KRTAP13-1	keratin associated protein 13-1
hsa-miR-1256	0	0	1	0	1	1	SPATA12	spermatogenesis associated 12
hsa-miR-1256	1	0	1	1	1	1	TMEM229B	transmembrane protein 229B
hsa-miR-1256	0	0	1	1	0	0	GKN2	gastrokine 2
hsa-miR-1256	0	0	1	0	1	1	C16orf82	chromosome 16 open reading frame 82
hsa-miR-1256	0	0	1	0	1	1	NBPF11	neuroblastoma breakpoint family, member 11
hsa-miR-1256	1	0	1	0	1	1	HNRNPA3	heterogeneous nuclear ribonucleoprotein A3
hsa-miR-1256	1	0	1	1	1	1	GPRIN3	GPRIN family member 3
hsa-miR-1256	0	0	1	1	1	1	GBP6	guanylate binding protein family, member 6
hsa-miR-1256	0	0	1	1	1	1	THAP1	THAP domain containing, apoptosis associated protein 1
hsa-miR-1256	1	0	1	1	1	1	BLOC1S5	biogenesis of lysosomal organelles complex-1, subunit 5, muted
hsa-miR-1256	1	0	1	0	1	1	CAPRIN1	cell cycle associated protein 1
hsa-miR-1256	1	0	1	1	1	1	RBM12B	RNA binding motif protein 12B
hsa-miR-1256	1	0	1	1	1	1	E2F7	E2F transcription factor 7
hsa-miR-1256	0	0	1	1	1	1	ZNF474	zinc finger protein 474
hsa-miR-1256	1	0	1	1	1	1	FREM2	FRAS1 related extracellular matrix protein 2
hsa-miR-1256	0	0	1	0	0	0	ESRRAP2	estrogen-related receptor alpha pseudogene 2
hsa-miR-1256	0	0	1	0	0	0	CELP	carboxyl ester lipase pseudogene
hsa-miR-1256	0	0	1	0	0	0	TTTY1	testis-specific transcript, Y-linked 1 (non-protein coding)
hsa-miR-1256	0	0	1	0	0	0	TTTY15	testis-specific transcript, Y-linked 15 (non-protein coding)
hsa-miR-1256	0	0	1	0	0	0	TTTY12	testis-specific transcript, Y-linked 12 (non-protein coding)
hsa-miR-1256	0	0	1	0	0	0	PPP1R2P3	protein phosphatase 1, regulatory (inhibitor) subunit 2 pseudogene 3
hsa-miR-1256	0	0	1	0	0	0	TPI1P2	triosephosphate isomerase 1 pseudogene 2
hsa-miR-1256	0	0	1	0	0	0	SUMO1P1	SUMO1 pseudogene 1
hsa-miR-1256	0	0	1	0	0	0	GOLGA2P3Y	golgin A2 pseudogene 3, Y-linked
hsa-miR-1256	0	0	1	0	0	0	H3F3AP4	H3 histone, family 3A, pseudogene 4
hsa-miR-1256	0	0	1	0	0	0	TOP1P1	topoisomerase (DNA) I pseudogene 1
hsa-miR-1256	0	0	1	0	0	0	HNRNPA3P1	heterogeneous nuclear ribonucleoprotein A3 pseudogene 1
hsa-miR-1256	0	0	1	0	0	0	RPL29P2	ribosomal protein L29 pseudogene 2
hsa-miR-1256	0	0	1	0	0	0	TPTE2P6	transmembrane phosphoinositide 3-phosphatase and tensin homolog 2 pseudogene 6
hsa-miR-1256	0	0	1	0	0	0	MALAT1	metastasis associated lung adenocarcinoma transcript 1 (non-protein coding)
hsa-miR-1256	0	0	1	0	0	0	HERC2P8	hect domain and RLD 2 pseudogene 8
hsa-miR-1256	0	0	1	0	0	0	PTPRVP	protein tyrosine phosphatase, receptor type, V, pseudogene
hsa-miR-1256	0	0	1	0	0	0	SNORA45	small nucleolar RNA, H/ACA box 45
hsa-miR-1256	0	0	1	0	0	0	GBP1P1	guanylate binding protein 1, interferon-inducible pseudogene 1
hsa-miR-1256	0	0	1	0	0	0	LOC729603	calcium binding protein P22 pseudogene
hsa-miR-1256	1	0	1	1	0	0	KIAA1549L	KIAA1549-like
hsa-miR-1256	1	0	1	0	1	1	NFIX	nuclear factor I/X (CCAAT-binding transcription factor)
hsa-miR-1256	0	0	1	1	1	1	CD6	CD6 molecule
