# Supplementary material for: Profiling of Selected MicroRNAs in Proliferative Eutopic Endometrium of Women with Ovarian Endometriosis
Source: Biomed Res Int. 2015 Aug 20;2015:760698. doi: 10.1155/2015/760698 (PMC4558423; doi:10.1155/2015/760698)
Supplement: Supplementary file 1 — Table I: The names of miRNAs significantly differentially expressed between eutopic endometrium of patients with endometriosis vs eutopic endometrium of patients without endometriosis. Table II: The associations between miRNA and mRNA, which presents detailed results of the search of six major databases i.e targetscan, tarbase, miranda, mirbase, mirtarget2 and pictar. [file 760698.f1.zip › 760698.f1/Table II/hsa-miR-1261.tsv]

miR	targetscan	tarbase	miranda	mirbase	mirtarget2	pictar	GeneSymbol	GeneName
hsa-miR-1261	1	0	1	0	1	1	PTPRT	protein tyrosine phosphatase, receptor type, T
hsa-miR-1261	1	0	1	1	1	1	NUPL1	nucleoporin like 1
hsa-miR-1261	1	0	1	0	1	1	NEDD4L	neural precursor cell expressed, developmentally down-regulated 4-like, E3 ubiquitin protein ligase
hsa-miR-1261	0	0	1	0	0	0	FAM91A2	family with sequence similarity 91, member A2
hsa-miR-1261	0	0	1	1	1	1	NEU3	sialidase 3 (membrane sialidase)
hsa-miR-1261	1	0	1	1	1	1	RNGTT	RNA guanylyltransferase and 5'-phosphatase
hsa-miR-1261	1	0	1	1	0	0	PCLO	piccolo (presynaptic cytomatrix protein)
hsa-miR-1261	1	0	1	1	1	1	SLC4A7	solute carrier family 4, sodium bicarbonate cotransporter, member 7
hsa-miR-1261	1	0	1	1	0	0	SMCHD1	structural maintenance of chromosomes flexible hinge domain containing 1
hsa-miR-1261	0	0	1	1	0	0	PAN2	PAN2 poly(A) specific ribonuclease subunit homolog (S. cerevisiae)
hsa-miR-1261	1	0	1	1	1	1	CPEB3	cytoplasmic polyadenylation element binding protein 3
hsa-miR-1261	0	0	1	1	0	0	FAM149B1	family with sequence similarity 149, member B1
hsa-miR-1261	0	0	1	1	1	1	TTC28	tetratricopeptide repeat domain 28
hsa-miR-1261	1	0	1	0	1	1	ZNF507	zinc finger protein 507
hsa-miR-1261	1	0	1	1	1	1	PHF8	PHD finger protein 8
hsa-miR-1261	1	0	1	0	1	1	GPR158	G protein-coupled receptor 158
hsa-miR-1261	1	0	1	1	1	1	RALGAPB	Ral GTPase activating protein, beta subunit (non-catalytic)
hsa-miR-1261	1	0	1	1	1	1	ZMIZ1	zinc finger, MIZ-type containing 1
hsa-miR-1261	1	0	1	1	1	1	RIMKLB	ribosomal modification protein rimK-like family member B
hsa-miR-1261	1	0	1	1	1	1	MKL2	MKL/myocardin-like 2
hsa-miR-1261	0	0	1	1	1	1	FSTL5	follistatin-like 5
hsa-miR-1261	1	0	1	1	1	1	HACE1	HECT domain and ankyrin repeat containing E3 ubiquitin protein ligase 1
hsa-miR-1261	1	0	1	1	1	1	UPF2	UPF2 regulator of nonsense transcripts homolog (yeast)
hsa-miR-1261	1	0	1	0	1	1	SEMA6D	sema domain, transmembrane domain (TM), and cytoplasmic domain, (semaphorin) 6D
hsa-miR-1261	1	0	1	1	0	0	KIAA1549	KIAA1549
hsa-miR-1261	0	0	1	0	1	1	ZSWIM6	zinc finger, SWIM-type containing 6
hsa-miR-1261	1	0	1	0	0	0	TANC2	tetratricopeptide repeat, ankyrin repeat and coiled-coil containing 2
hsa-miR-1261	0	0	1	1	1	1	AMBRA1	autophagy/beclin-1 regulator 1
hsa-miR-1261	1	0	1	1	1	1	DOCK7	dedicator of cytokinesis 7
hsa-miR-1261	1	0	1	1	1	1	POGZ	pogo transposable element with ZNF domain
hsa-miR-1261	1	0	1	1	1	1	SH3TC2	SH3 domain and tetratricopeptide repeats 2
hsa-miR-1261	0	0	1	1	0	0	SLC22A10	solute carrier family 22, member 10
hsa-miR-1261	1	0	1	0	0	0	FAT3	FAT tumor suppressor homolog 3 (Drosophila)
hsa-miR-1261	1	0	1	1	1	1	CSGALNACT1	chondroitin sulfate N-acetylgalactosaminyltransferase 1
hsa-miR-1261	1	0	1	0	1	1	RNF43	ring finger protein 43
hsa-miR-1261	1	0	1	0	0	0	ZBTB34	zinc finger and BTB domain containing 34
hsa-miR-1261	1	0	1	1	1	1	PGR	progesterone receptor
hsa-miR-1261	0	0	1	0	1	1	RASSF8	Ras association (RalGDS/AF-6) domain family (N-terminal) member 8
hsa-miR-1261	1	0	1	1	1	1	PAN3	PAN3 poly(A) specific ribonuclease subunit homolog (S. cerevisiae)
hsa-miR-1261	1	1	1	1	1	1	BACE1	beta-site APP-cleaving enzyme 1
hsa-miR-1261	1	0	1	1	1	1	NRXN2	neurexin 2
hsa-miR-1261	0	0	1	1	1	1	DOCK8	dedicator of cytokinesis 8
hsa-miR-1261	1	0	1	0	1	1	PCDHA13	protocadherin alpha 13
hsa-miR-1261	1	0	1	1	1	1	PCDHA4	protocadherin alpha 4
hsa-miR-1261	0	0	1	1	0	0	KCNC3	potassium voltage-gated channel, Shaw-related subfamily, member 3
hsa-miR-1261	1	0	1	1	1	1	PHC1	polyhomeotic homolog 1 (Drosophila)
hsa-miR-1261	0	0	1	1	1	1	PTK2	PTK2 protein tyrosine kinase 2
hsa-miR-1261	1	0	1	1	1	1	DTNA	dystrobrevin, alpha
hsa-miR-1261	1	0	1	0	1	1	PLAG1	pleiomorphic adenoma gene 1
hsa-miR-1261	1	0	1	0	1	1	MPPED2	metallophosphoesterase domain containing 2
hsa-miR-1261	1	0	1	0	1	1	ETV1	ets variant 1
hsa-miR-1261	1	0	1	1	1	1	SATB2	SATB homeobox 2
hsa-miR-1261	1	0	1	1	1	1	AEBP2	AE binding protein 2
hsa-miR-1261	1	0	1	0	1	1	CDON	Cdon homolog (mouse)
hsa-miR-1261	1	0	1	1	1	1	PDLIM5	PDZ and LIM domain 5
hsa-miR-1261	0	0	1	1	0	0	HLA-DMB	major histocompatibility complex, class II, DM beta
hsa-miR-1261	0	0	1	1	0	0	SLC22A8	solute carrier family 22 (organic anion transporter), member 8
hsa-miR-1261	1	0	1	1	1	1	SATB1	SATB homeobox 1
hsa-miR-1261	0	0	1	1	1	1	CHN1	chimerin (chimaerin) 1
hsa-miR-1261	1	0	1	1	1	1	ZFX	zinc finger protein, X-linked
hsa-miR-1261	1	0	1	0	1	1	CAV1	caveolin 1, caveolae protein, 22kDa
hsa-miR-1261	1	0	1	1	1	1	PICALM	phosphatidylinositol binding clathrin assembly protein
hsa-miR-1261	0	0	1	1	1	1	BRCA1	breast cancer 1, early onset
hsa-miR-1261	0	0	1	1	1	1	HDAC3	histone deacetylase 3
hsa-miR-1261	1	0	1	1	1	1	DLGAP2	discs, large (Drosophila) homolog-associated protein 2
hsa-miR-1261	0	0	1	1	0	0	PLA1A	phospholipase A1 member A
hsa-miR-1261	1	0	1	1	1	1	MRAS	muscle RAS oncogene homolog
hsa-miR-1261	1	0	1	1	1	1	ERLIN1	ER lipid raft associated 1
hsa-miR-1261	0	0	1	1	1	1	PCF11	PCF11, cleavage and polyadenylation factor subunit, homolog (S. cerevisiae)
hsa-miR-1261	1	0	1	1	1	1	VAPB	VAMP (vesicle-associated membrane protein)-associated protein B and C
hsa-miR-1261	0	0	1	1	1	1	BBS9	Bardet-Biedl syndrome 9
hsa-miR-1261	1	0	1	1	1	1	GLS	glutaminase
hsa-miR-1261	0	0	1	1	1	1	EIF2A	eukaryotic translation initiation factor 2A, 65kDa
hsa-miR-1261	1	0	1	1	1	1	EDNRB	endothelin receptor type B
hsa-miR-1261	0	0	1	1	0	0	THAP4	THAP domain containing 4
hsa-miR-1261	1	0	1	1	1	1	CAB39	calcium binding protein 39
hsa-miR-1261	0	0	1	0	1	1	PDP1	pyruvate dehyrogenase phosphatase catalytic subunit 1
hsa-miR-1261	1	0	1	1	0	0	ZCCHC4	zinc finger, CCHC domain containing 4
hsa-miR-1261	1	0	1	1	1	1	C16orf70	chromosome 16 open reading frame 70
hsa-miR-1261	1	0	1	1	1	1	TSC22D2	TSC22 domain family, member 2
hsa-miR-1261	0	0	1	1	1	1	CD28	CD28 molecule
hsa-miR-1261	1	0	1	1	1	1	DESI2	desumoylating isopeptidase 2
hsa-miR-1261	1	0	1	1	1	1	C21orf91	chromosome 21 open reading frame 91
hsa-miR-1261	1	0	1	1	1	1	STRN3	striatin, calmodulin binding protein 3
hsa-miR-1261	0	0	1	1	1	1	KIAA1704	KIAA1704
hsa-miR-1261	1	0	1	0	1	1	TRPS1	trichorhinophalangeal syndrome I
hsa-miR-1261	0	0	1	0	1	1	ERBB2IP	erbb2 interacting protein
hsa-miR-1261	1	0	1	1	0	0	RAB34	RAB34, member RAS oncogene family
hsa-miR-1261	1	0	1	1	1	1	PBX3	pre-B-cell leukemia homeobox 3
hsa-miR-1261	1	0	1	1	1	1	ATAD1	ATPase family, AAA domain containing 1
hsa-miR-1261	1	0	1	1	1	1	LARP4	La ribonucleoprotein domain family, member 4
hsa-miR-1261	0	0	1	0	0	0	CLRN1-AS1	CLRN1 antisense RNA 1
hsa-miR-1261	1	0	1	1	1	1	PSIP1	PC4 and SFRS1 interacting protein 1
hsa-miR-1261	1	0	1	0	1	1	PPP1R12A	protein phosphatase 1, regulatory subunit 12A
hsa-miR-1261	0	0	1	1	0	0	MTO1	mitochondrial translation optimization 1 homolog (S. cerevisiae)
hsa-miR-1261	0	0	1	1	1	1	SAMD9L	sterile alpha motif domain containing 9-like
hsa-miR-1261	1	0	1	1	1	1	LRRC7	leucine rich repeat containing 7
hsa-miR-1261	1	0	1	0	1	1	IL1RAP	interleukin 1 receptor accessory protein
hsa-miR-1261	1	0	1	1	1	1	AFF2	AF4/FMR2 family, member 2
hsa-miR-1261	1	0	1	1	0	0	NAGK	N-acetylglucosamine kinase
hsa-miR-1261	0	0	1	1	1	1	TCFL5	transcription factor-like 5 (basic helix-loop-helix)
hsa-miR-1261	1	0	1	1	1	1	PALM2	paralemmin 2
hsa-miR-1261	1	0	1	1	1	1	NRXN3	neurexin 3
hsa-miR-1261	0	0	1	0	1	1	SRPK1	SRSF protein kinase 1
hsa-miR-1261	1	0	1	1	1	1	NAV3	neuron navigator 3
hsa-miR-1261	0	0	1	1	1	1	TRDN	triadin
hsa-miR-1261	1	0	1	1	0	0	TRPM4	transient receptor potential cation channel, subfamily M, member 4
hsa-miR-1261	1	0	1	0	1	1	NFAT5	nuclear factor of activated T-cells 5, tonicity-responsive
hsa-miR-1261	0	0	1	0	0	0	TUG1	taurine upregulated 1 (non-protein coding)
hsa-miR-1261	0	0	1	1	1	1	STOX2	storkhead box 2
hsa-miR-1261	1	0	1	1	1	1	RIC8B	resistance to inhibitors of cholinesterase 8 homolog B (C. elegans)
hsa-miR-1261	0	0	1	1	1	1	CXXC5	CXXC finger protein 5
hsa-miR-1261	0	0	1	1	0	0	UBR4	ubiquitin protein ligase E3 component n-recognin 4
hsa-miR-1261	1	0	1	1	1	1	S100PBP	S100P binding protein
hsa-miR-1261	0	0	1	0	0	0	TDRD12	tudor domain containing 12
hsa-miR-1261	1	0	1	1	1	1	MACF1	microtubule-actin crosslinking factor 1
hsa-miR-1261	0	0	1	0	0	0	LOC284561	uncharacterized LOC284561
hsa-miR-1261	0	0	1	1	1	1	AMFR	autocrine motility factor receptor, E3 ubiquitin protein ligase
hsa-miR-1261	1	0	1	0	1	1	C14orf101	chromosome 14 open reading frame 101
hsa-miR-1261	0	0	1	0	1	1	ATXN1L	ataxin 1-like
hsa-miR-1261	0	0	1	0	0	0	KIAA1671	KIAA1671
hsa-miR-1261	1	0	1	1	1	1	DLC1	deleted in liver cancer 1
hsa-miR-1261	1	0	1	0	1	1	CADPS2	Ca++-dependent secretion activator 2
hsa-miR-1261	1	0	1	0	1	1	ZCCHC3	zinc finger, CCHC domain containing 3
hsa-miR-1261	0	0	1	0	0	0	LINC00340	long intergenic non-protein coding RNA 340
hsa-miR-1261	1	0	1	1	1	1	DCAF8	DDB1 and CUL4 associated factor 8
hsa-miR-1261	1	0	1	0	1	1	TOX3	TOX high mobility group box family member 3
hsa-miR-1261	1	0	1	1	1	1	FAM53C	family with sequence similarity 53, member C
hsa-miR-1261	1	0	1	1	1	1	MARK1	MAP/microtubule affinity-regulating kinase 1
hsa-miR-1261	0	0	1	1	1	1	DTL	denticleless E3 ubiquitin protein ligase homolog (Drosophila)
hsa-miR-1261	0	0	1	1	0	0	ZNF252P	zinc finger protein 252, pseudogene
hsa-miR-1261	1	0	1	1	1	1	GPD2	glycerol-3-phosphate dehydrogenase 2 (mitochondrial)
hsa-miR-1261	0	0	1	1	1	1	C8orf46	chromosome 8 open reading frame 46
hsa-miR-1261	1	0	1	1	1	1	FAM123A	family with sequence similarity 123A
hsa-miR-1261	0	0	1	0	0	0	CHST9-AS1	CHST9 antisense RNA 1
hsa-miR-1261	1	0	1	1	1	1	ZIC4	Zic family member 4
hsa-miR-1261	0	0	1	0	0	0	FLJ30901	uncharacterized protein FLJ30901
hsa-miR-1261	1	0	1	1	1	1	CLCN5	chloride channel, voltage-sensitive 5
hsa-miR-1261	0	0	1	0	1	1	SNRNP48	small nuclear ribonucleoprotein 48kDa (U11/U12)
hsa-miR-1261	0	0	1	1	1	1	LNX1	ligand of numb-protein X 1, E3 ubiquitin protein ligase
hsa-miR-1261	0	0	1	0	0	0	LOC157381	uncharacterized LOC157381
hsa-miR-1261	1	0	1	1	1	1	ZBTB10	zinc finger and BTB domain containing 10
hsa-miR-1261	0	0	1	1	0	0	RELT	RELT tumor necrosis factor receptor
hsa-miR-1261	0	0	1	1	0	0	COMMD4	COMM domain containing 4
hsa-miR-1261	0	0	1	1	0	0	NXF2	nuclear RNA export factor 2
hsa-miR-1261	1	0	1	0	1	1	PLEKHA1	pleckstrin homology domain containing, family A (phosphoinositide binding specific) member 1
hsa-miR-1261	0	0	1	1	1	1	SEC61A2	Sec61 alpha 2 subunit (S. cerevisiae)
hsa-miR-1261	1	0	1	1	1	1	ANKRD49	ankyrin repeat domain 49
hsa-miR-1261	0	0	1	1	1	1	A2ML1	alpha-2-macroglobulin-like 1
hsa-miR-1261	1	0	1	1	1	1	TBCK	TBC1 domain containing kinase
hsa-miR-1261	1	0	1	0	1	1	RNF165	ring finger protein 165
hsa-miR-1261	1	0	1	0	1	1	TPBG	trophoblast glycoprotein
hsa-miR-1261	1	0	1	1	1	1	PAX6	paired box 6
hsa-miR-1261	1	0	1	1	0	0	APBB3	amyloid beta (A4) precursor protein-binding, family B, member 3
hsa-miR-1261	0	0	1	1	0	0	GJB6	gap junction protein, beta 6, 30kDa
hsa-miR-1261	1	0	1	1	1	1	AMMECR1	Alport syndrome, mental retardation, midface hypoplasia and elliptocytosis chromosomal region gene 1
hsa-miR-1261	0	0	1	1	1	1	KBTBD4	kelch repeat and BTB (POZ) domain containing 4
hsa-miR-1261	1	0	1	1	1	1	FBXW2	F-box and WD repeat domain containing 2
hsa-miR-1261	0	0	1	1	1	1	CD34	CD34 molecule
hsa-miR-1261	1	0	1	1	1	1	GNG2	guanine nucleotide binding protein (G protein), gamma 2
hsa-miR-1261	0	0	1	1	1	1	ITGB1BP1	integrin beta 1 binding protein 1
hsa-miR-1261	1	0	1	1	1	1	RRBP1	ribosome binding protein 1 homolog 180kDa (dog)
hsa-miR-1261	0	0	1	1	0	0	ORC3	origin recognition complex, subunit 3
hsa-miR-1261	0	0	1	1	0	0	TUBA1B	tubulin, alpha 1b
hsa-miR-1261	0	0	1	1	0	0	C9orf24	chromosome 9 open reading frame 24
hsa-miR-1261	0	0	1	1	0	0	PPOX	protoporphyrinogen oxidase
hsa-miR-1261	1	0	1	1	1	1	TBC1D20	TBC1 domain family, member 20
hsa-miR-1261	1	0	1	1	1	1	ADCY3	adenylate cyclase 3
hsa-miR-1261	0	0	1	1	1	1	MYO6	myosin VI
hsa-miR-1261	1	0	1	0	1	1	UVRAG	UV radiation resistance associated gene
hsa-miR-1261	0	0	1	1	1	1	SETD2	SET domain containing 2
hsa-miR-1261	0	0	1	0	0	0	LOC100129858	uncharacterized LOC100129858
hsa-miR-1261	1	0	1	1	1	1	ALCAM	activated leukocyte cell adhesion molecule
hsa-miR-1261	1	0	1	0	1	1	STC2	stanniocalcin 2
hsa-miR-1261	0	0	1	0	0	0	FAM66C	family with sequence similarity 66, member C
hsa-miR-1261	1	0	1	1	1	1	CRTC2	CREB regulated transcription coactivator 2
hsa-miR-1261	0	0	1	1	1	1	ZNF673	zinc finger family member 673
hsa-miR-1261	1	0	1	0	1	1	THRB	thyroid hormone receptor, beta
hsa-miR-1261	1	0	1	1	1	1	SYT6	synaptotagmin VI
hsa-miR-1261	0	0	1	1	1	1	EXTL2	exostoses (multiple)-like 2
hsa-miR-1261	1	0	1	1	1	1	KL	klotho
hsa-miR-1261	1	0	1	0	1	1	AGFG1	ArfGAP with FG repeats 1
hsa-miR-1261	1	0	1	1	1	1	ST7L	suppression of tumorigenicity 7 like
hsa-miR-1261	0	0	1	0	1	1	TNFAIP8	tumor necrosis factor, alpha-induced protein 8
hsa-miR-1261	0	0	1	0	0	0	FLJ12334	uncharacterized LOC400946
hsa-miR-1261	1	0	1	1	1	1	PIGA	phosphatidylinositol glycan anchor biosynthesis, class A
hsa-miR-1261	1	0	1	1	1	1	CHD6	chromodomain helicase DNA binding protein 6
hsa-miR-1261	0	0	1	1	1	1	FAM76A	family with sequence similarity 76, member A
hsa-miR-1261	0	0	1	0	1	1	MYLK4	myosin light chain kinase family, member 4
hsa-miR-1261	0	0	1	1	0	0	GPR82	G protein-coupled receptor 82
hsa-miR-1261	0	0	1	1	0	0	KIAA0146	KIAA0146
hsa-miR-1261	1	0	1	1	1	1	SIK3	SIK family kinase 3
hsa-miR-1261	0	0	1	1	1	1	NFKB1	nuclear factor of kappa light polypeptide gene enhancer in B-cells 1
hsa-miR-1261	0	0	1	1	1	1	FRMPD2	FERM and PDZ domain containing 2
hsa-miR-1261	1	0	1	1	1	1	CBLB	Cbl proto-oncogene, E3 ubiquitin protein ligase B
hsa-miR-1261	0	0	1	0	1	1	FLJ41200	uncharacterized LOC401492
hsa-miR-1261	0	0	1	1	1	1	SLC13A3	solute carrier family 13 (sodium-dependent dicarboxylate transporter), member 3
hsa-miR-1261	1	0	1	1	1	1	EPAS1	endothelial PAS domain protein 1
hsa-miR-1261	1	0	1	0	1	1	WDR82	WD repeat domain 82
hsa-miR-1261	0	0	1	1	1	1	TMEM17	transmembrane protein 17
hsa-miR-1261	1	0	1	0	1	1	DCUN1D4	DCN1, defective in cullin neddylation 1, domain containing 4 (S. cerevisiae)
hsa-miR-1261	0	0	1	0	1	1	NAIP	NLR family, apoptosis inhibitory protein
hsa-miR-1261	1	0	1	1	1	1	DAB2IP	DAB2 interacting protein
hsa-miR-1261	1	0	1	1	1	1	FAM122B	family with sequence similarity 122B
hsa-miR-1261	0	0	1	1	1	1	ATPBD4	ATP binding domain 4
hsa-miR-1261	1	0	1	1	1	1	SGIP1	SH3-domain GRB2-like (endophilin) interacting protein 1
hsa-miR-1261	1	0	1	1	1	1	SEPHS1	selenophosphate synthetase 1
hsa-miR-1261	1	0	1	1	0	0	GXYLT1	glucoside xylosyltransferase 1
hsa-miR-1261	0	0	1	0	0	0	C3orf72	chromosome 3 open reading frame 72
hsa-miR-1261	1	0	1	1	1	1	C15orf52	chromosome 15 open reading frame 52
hsa-miR-1261	1	0	1	1	1	1	ATP11C	ATPase, class VI, type 11C
hsa-miR-1261	1	0	1	1	1	1	KTN1	kinectin 1 (kinesin receptor)
hsa-miR-1261	1	0	1	1	0	0	CCDC92	coiled-coil domain containing 92
hsa-miR-1261	0	0	1	1	1	1	RBM46	RNA binding motif protein 46
hsa-miR-1261	1	0	1	1	1	1	MACROD2	MACRO domain containing 2
hsa-miR-1261	0	0	1	1	0	0	C20orf141	chromosome 20 open reading frame 141
hsa-miR-1261	1	0	1	1	1	1	PIK3R1	phosphoinositide-3-kinase, regulatory subunit 1 (alpha)
hsa-miR-1261	1	0	1	1	1	1	SACM1L	SAC1 suppressor of actin mutations 1-like (yeast)
hsa-miR-1261	0	0	1	1	1	1	USP54	ubiquitin specific peptidase 54
hsa-miR-1261	0	0	1	1	1	1	C18orf54	chromosome 18 open reading frame 54
hsa-miR-1261	1	0	1	1	1	1	DLG2	discs, large homolog 2 (Drosophila)
hsa-miR-1261	0	0	1	0	0	0	RPL23AP53	ribosomal protein L23a pseudogene 53
hsa-miR-1261	0	0	1	1	0	0	C1orf86	chromosome 1 open reading frame 86
hsa-miR-1261	1	0	1	0	1	1	YOD1	YOD1 OTU deubiquinating enzyme 1 homolog (S. cerevisiae)
hsa-miR-1261	1	0	1	1	1	1	FRYL	FRY-like
hsa-miR-1261	1	0	1	1	1	1	BCAT1	branched chain amino-acid transaminase 1, cytosolic
hsa-miR-1261	1	0	1	1	1	1	SDCBP	syndecan binding protein (syntenin)
hsa-miR-1261	0	0	1	1	1	1	RAB13	RAB13, member RAS oncogene family
hsa-miR-1261	0	0	1	1	1	1	LYPD1	LY6/PLAUR domain containing 1
hsa-miR-1261	1	0	1	0	1	1	ESRRG	estrogen-related receptor gamma
hsa-miR-1261	0	0	1	0	1	1	GALNT13	UDP-N-acetyl-alpha-D-galactosamine:polypeptide N-acetylgalactosaminyltransferase 13 (GalNAc-T13)
hsa-miR-1261	0	0	1	1	1	1	TMC5	transmembrane channel-like 5
hsa-miR-1261	1	0	1	1	1	1	RNF111	ring finger protein 111
hsa-miR-1261	0	0	1	0	0	0	LOC100124692	maltase-glucoamylase (alpha-glucosidase) pseudogene
hsa-miR-1261	1	0	1	1	1	1	MAP3K14	mitogen-activated protein kinase kinase kinase 14
hsa-miR-1261	1	0	1	1	1	1	RABGAP1	RAB GTPase activating protein 1
hsa-miR-1261	0	0	1	1	1	1	SLC36A3	solute carrier family 36 (proton/amino acid symporter), member 3
hsa-miR-1261	0	0	1	0	0	0	AGAP9	ArfGAP with GTPase domain, ankyrin repeat and PH domain 9
hsa-miR-1261	0	0	1	1	0	0	PDZD7	PDZ domain containing 7
hsa-miR-1261	1	0	1	1	0	0	TDRKH	tudor and KH domain containing
hsa-miR-1261	0	0	1	1	1	1	C5orf28	chromosome 5 open reading frame 28
hsa-miR-1261	1	0	1	1	1	1	CAMK2G	calcium/calmodulin-dependent protein kinase II gamma
hsa-miR-1261	1	0	1	1	1	1	AHCYL1	adenosylhomocysteinase-like 1
hsa-miR-1261	0	0	1	0	0	0	PART1	prostate androgen-regulated transcript 1 (non-protein coding)
hsa-miR-1261	0	0	1	1	0	0	NEK7	NIMA (never in mitosis gene a)-related kinase 7
hsa-miR-1261	1	0	1	1	1	1	ARF6	ADP-ribosylation factor 6
hsa-miR-1261	0	0	1	1	1	1	ARIH1	ariadne homolog, ubiquitin-conjugating enzyme E2 binding protein, 1 (Drosophila)
hsa-miR-1261	0	0	1	0	0	0	TPTE2P6	transmembrane phosphoinositide 3-phosphatase and tensin homolog 2 pseudogene 6
hsa-miR-1261	0	0	1	1	1	1	RHOT1	ras homolog family member T1
hsa-miR-1261	1	0	1	1	1	1	NBEA	neurobeachin
hsa-miR-1261	1	0	1	0	1	1	GPR85	G protein-coupled receptor 85
hsa-miR-1261	1	0	1	1	1	1	CTTNBP2NL	CTTNBP2 N-terminal like
hsa-miR-1261	1	0	1	1	1	1	SLC30A8	solute carrier family 30 (zinc transporter), member 8
hsa-miR-1261	1	0	1	1	0	0	FNIP2	folliculin interacting protein 2
hsa-miR-1261	1	0	1	1	1	1	TMEFF1	transmembrane protein with EGF-like and two follistatin-like domains 1
hsa-miR-1261	1	0	1	1	1	1	MIER1	mesoderm induction early response 1 homolog (Xenopus laevis)
hsa-miR-1261	0	0	1	1	1	1	ZCCHC6	zinc finger, CCHC domain containing 6
hsa-miR-1261	0	0	1	1	1	1	EGFLAM	EGF-like, fibronectin type III and laminin G domains
hsa-miR-1261	1	0	1	1	1	1	RNF180	ring finger protein 180
hsa-miR-1261	1	0	1	1	1	1	NABP1	nucleic acid binding protein 1
hsa-miR-1261	1	0	1	1	0	0	PTAR1	protein prenyltransferase alpha subunit repeat containing 1
hsa-miR-1261	1	0	1	0	1	1	MEF2C	myocyte enhancer factor 2C
hsa-miR-1261	0	0	1	1	1	1	NFE2L1	nuclear factor (erythroid-derived 2)-like 1
hsa-miR-1261	0	0	1	0	0	0	ADCY10P1	adenylate cyclase 10 (soluble) pseudogene 1
hsa-miR-1261	0	0	1	1	0	0	LIPF	lipase, gastric
hsa-miR-1261	0	0	1	1	1	1	PCDH20	protocadherin 20
hsa-miR-1261	1	0	1	1	1	1	PRPF38B	PRP38 pre-mRNA processing factor 38 (yeast) domain containing B
hsa-miR-1261	1	0	1	1	1	1	DIS3L2	DIS3 mitotic control homolog (S. cerevisiae)-like 2
hsa-miR-1261	1	0	1	1	1	1	RICTOR	RPTOR independent companion of MTOR, complex 2
hsa-miR-1261	1	0	1	1	1	1	BOLL	bol, boule-like (Drosophila)
hsa-miR-1261	1	0	1	1	1	1	WDR44	WD repeat domain 44
hsa-miR-1261	0	0	1	1	1	1	KLHL7	kelch-like 7 (Drosophila)
hsa-miR-1261	1	0	1	1	1	1	CLIC5	chloride intracellular channel 5
hsa-miR-1261	0	0	1	1	1	1	ALS2CR8	amyotrophic lateral sclerosis 2 (juvenile) chromosome region, candidate 8
hsa-miR-1261	1	0	1	1	1	1	TACC1	transforming, acidic coiled-coil containing protein 1
hsa-miR-1261	1	0	1	1	1	1	MIPOL1	mirror-image polydactyly 1
hsa-miR-1261	1	0	1	1	1	1	KIAA0907	KIAA0907
hsa-miR-1261	0	0	1	0	1	1	UNC5B	unc-5 homolog B (C. elegans)
hsa-miR-1261	0	0	1	1	0	0	NABP2	nucleic acid binding protein 2
hsa-miR-1261	1	0	1	1	1	1	BCL11A	B-cell CLL/lymphoma 11A (zinc finger protein)
hsa-miR-1261	1	0	1	1	1	1	TPP1	tripeptidyl peptidase I
hsa-miR-1261	1	0	1	0	1	1	RAB11FIP1	RAB11 family interacting protein 1 (class I)
hsa-miR-1261	0	0	1	1	1	1	MFAP5	microfibrillar associated protein 5
hsa-miR-1261	1	0	1	1	1	1	CAMTA1	calmodulin binding transcription activator 1
hsa-miR-1261	0	0	1	1	0	0	EGFL8	EGF-like-domain, multiple 8
hsa-miR-1261	0	0	1	0	1	1	FAM198B	family with sequence similarity 198, member B
hsa-miR-1261	1	0	1	1	1	1	SSX2IP	synovial sarcoma, X breakpoint 2 interacting protein
hsa-miR-1261	1	0	1	1	1	1	ECT2	epithelial cell transforming sequence 2 oncogene
hsa-miR-1261	1	0	1	1	1	1	SP3	Sp3 transcription factor
hsa-miR-1261	1	0	1	1	1	1	ARHGAP20	Rho GTPase activating protein 20
hsa-miR-1261	0	0	1	1	1	1	AICDA	activation-induced cytidine deaminase
hsa-miR-1261	1	0	1	1	1	1	MECP2	methyl CpG binding protein 2 (Rett syndrome)
hsa-miR-1261	0	0	1	1	1	1	ALB	albumin
hsa-miR-1261	1	0	1	1	0	0	CDK8	cyclin-dependent kinase 8
hsa-miR-1261	0	0	1	1	1	1	KCNJ13	potassium inwardly-rectifying channel, subfamily J, member 13
hsa-miR-1261	0	0	1	1	1	1	P2RX7	purinergic receptor P2X, ligand-gated ion channel, 7
hsa-miR-1261	1	0	1	1	0	0	TRPC3	transient receptor potential cation channel, subfamily C, member 3
hsa-miR-1261	1	0	1	1	0	0	TAF4B	TAF4b RNA polymerase II, TATA box binding protein (TBP)-associated factor, 105kDa
hsa-miR-1261	0	0	1	1	0	0	NBPF8	neuroblastoma breakpoint family, member 8
hsa-miR-1261	1	0	1	1	1	1	NEK6	NIMA (never in mitosis gene a)-related kinase 6
hsa-miR-1261	0	0	1	1	0	0	ANXA5	annexin A5
hsa-miR-1261	0	0	1	1	1	1	C20orf24	chromosome 20 open reading frame 24
hsa-miR-1261	1	0	1	1	1	1	TSPAN14	tetraspanin 14
hsa-miR-1261	1	0	1	1	1	1	RIMS3	regulating synaptic membrane exocytosis 3
hsa-miR-1261	1	0	1	0	1	1	CGGBP1	CGG triplet repeat binding protein 1
hsa-miR-1261	1	0	1	1	1	1	PCGF5	polycomb group ring finger 5
hsa-miR-1261	0	0	1	1	0	0	PRR11	proline rich 11
hsa-miR-1261	1	0	1	1	1	1	RSU1	Ras suppressor protein 1
hsa-miR-1261	0	0	1	1	0	0	CCDC106	coiled-coil domain containing 106
hsa-miR-1261	0	0	1	1	1	1	TMEM30A	transmembrane protein 30A
hsa-miR-1261	1	0	1	1	0	0	SIGMAR1	sigma non-opioid intracellular receptor 1
hsa-miR-1261	1	0	1	1	1	1	DNAJB5	DnaJ (Hsp40) homolog, subfamily B, member 5
hsa-miR-1261	0	0	1	1	1	1	RNF170	ring finger protein 170
hsa-miR-1261	1	0	1	1	0	0	CAPN12	calpain 12
hsa-miR-1261	1	0	1	1	1	1	SOX5	SRY (sex determining region Y)-box 5
hsa-miR-1261	0	0	1	1	1	1	C8orf33	chromosome 8 open reading frame 33
hsa-miR-1261	0	0	1	0	0	0	KLHL15	kelch-like 15 (Drosophila)
hsa-miR-1261	1	0	1	1	1	1	ZBTB38	zinc finger and BTB domain containing 38
hsa-miR-1261	1	0	1	1	1	1	ZNF512	zinc finger protein 512
hsa-miR-1261	1	0	1	1	0	0	ARMCX2	armadillo repeat containing, X-linked 2
hsa-miR-1261	0	0	1	1	1	1	PARP9	poly (ADP-ribose) polymerase family, member 9
hsa-miR-1261	0	0	1	1	1	1	RDH11	retinol dehydrogenase 11 (all-trans/9-cis/11-cis)
hsa-miR-1261	1	0	1	1	1	1	WWC2	WW and C2 domain containing 2
hsa-miR-1261	0	0	1	0	1	1	ZNF641	zinc finger protein 641
hsa-miR-1261	0	0	1	0	0	0	ZNF720	zinc finger protein 720
hsa-miR-1261	1	0	1	0	1	1	SLC19A2	solute carrier family 19 (thiamine transporter), member 2
hsa-miR-1261	1	0	1	1	1	1	ZMAT4	zinc finger, matrin-type 4
hsa-miR-1261	1	0	1	0	1	1	BTF3L4	basic transcription factor 3-like 4
hsa-miR-1261	0	0	1	0	0	0	LINC00488	long intergenic non-protein coding RNA 488
hsa-miR-1261	1	0	1	1	1	1	C16orf45	chromosome 16 open reading frame 45
hsa-miR-1261	1	0	1	1	1	1	CNTN4	contactin 4
hsa-miR-1261	1	0	1	1	1	1	HTR2C	5-hydroxytryptamine (serotonin) receptor 2C, G protein-coupled
hsa-miR-1261	1	0	1	1	1	1	TIAL1	TIA1 cytotoxic granule-associated RNA binding protein-like 1
hsa-miR-1261	1	0	1	1	1	1	MLLT3	myeloid/lymphoid or mixed-lineage leukemia (trithorax homolog, Drosophila); translocated to, 3
hsa-miR-1261	1	0	1	1	1	1	EYA4	eyes absent homolog 4 (Drosophila)
hsa-miR-1261	0	0	1	1	1	1	CTNNA3	catenin (cadherin-associated protein), alpha 3
hsa-miR-1261	1	0	1	1	1	1	CEP57	centrosomal protein 57kDa
hsa-miR-1261	1	0	1	1	1	1	ZPLD1	zona pellucida-like domain containing 1
hsa-miR-1261	0	0	1	0	0	0	CFL1P1	cofilin 1 (non-muscle) pseudogene 1
hsa-miR-1261	1	0	1	1	1	1	RHOBTB1	Rho-related BTB domain containing 1
hsa-miR-1261	0	0	1	1	1	1	CDADC1	cytidine and dCMP deaminase domain containing 1
hsa-miR-1261	1	0	1	1	1	1	PCDHA5	protocadherin alpha 5
hsa-miR-1261	0	0	1	1	0	0	ADAP2	ArfGAP with dual PH domains 2
hsa-miR-1261	0	0	1	0	0	0	NDUFB4	NADH dehydrogenase (ubiquinone) 1 beta subcomplex, 4, 15kDa
hsa-miR-1261	1	0	1	0	1	1	DDX3Y	DEAD (Asp-Glu-Ala-Asp) box polypeptide 3, Y-linked
hsa-miR-1261	1	0	1	1	1	1	GRIA4	glutamate receptor, ionotropic, AMPA 4
hsa-miR-1261	0	0	1	1	1	1	PIK3CG	phosphatidylinositol-4,5-bisphosphate 3-kinase, catalytic subunit gamma
hsa-miR-1261	1	0	1	1	1	1	CTDSPL2	CTD (carboxy-terminal domain, RNA polymerase II, polypeptide A) small phosphatase like 2
hsa-miR-1261	0	0	1	1	1	1	CBLN2	cerebellin 2 precursor
hsa-miR-1261	0	0	1	0	0	0	LOC339862	uncharacterized LOC339862
hsa-miR-1261	0	0	1	0	0	0	C12orf77	chromosome 12 open reading frame 77
hsa-miR-1261	0	0	1	1	0	0	VPS8	vacuolar protein sorting 8 homolog (S. cerevisiae)
hsa-miR-1261	0	0	1	0	1	1	C9orf57	chromosome 9 open reading frame 57
hsa-miR-1261	1	0	1	1	1	1	MEIS1	Meis homeobox 1
hsa-miR-1261	1	0	1	1	1	1	ACVR1	activin A receptor, type I
hsa-miR-1261	1	0	1	0	1	1	CLDN12	claudin 12
hsa-miR-1261	1	0	1	0	1	1	NEGR1	neuronal growth regulator 1
hsa-miR-1261	0	0	1	0	0	0	SRGAP2C	SLIT-ROBO Rho GTPase activating protein 2C
hsa-miR-1261	1	0	1	1	1	1	BNC2	basonuclin 2
hsa-miR-1261	1	0	1	0	1	1	YAF2	YY1 associated factor 2
hsa-miR-1261	0	0	1	1	1	1	EFCAB13	EF-hand calcium binding domain 13
hsa-miR-1261	0	0	1	1	0	0	CCDC152	coiled-coil domain containing 152
hsa-miR-1261	0	0	1	1	1	1	CACHD1	cache domain containing 1
hsa-miR-1261	1	0	1	1	1	1	DACH2	dachshund homolog 2 (Drosophila)
hsa-miR-1261	0	0	1	1	1	1	SCLT1	sodium channel and clathrin linker 1
hsa-miR-1261	1	0	1	1	1	1	FBXO8	F-box protein 8
hsa-miR-1261	1	0	1	0	1	1	KIAA0430	KIAA0430
hsa-miR-1261	0	0	1	1	0	0	AQP12B	aquaporin 12B
hsa-miR-1261	0	0	1	1	1	1	CARD8	caspase recruitment domain family, member 8
hsa-miR-1261	0	0	1	1	1	1	RABGAP1L	RAB GTPase activating protein 1-like
hsa-miR-1261	0	0	1	1	1	1	MTHFD2L	methylenetetrahydrofolate dehydrogenase (NADP+ dependent) 2-like
hsa-miR-1261	0	0	1	1	1	1	C8orf34	chromosome 8 open reading frame 34
hsa-miR-1261	0	0	1	0	0	0	LOC253044	uncharacterized LOC253044
hsa-miR-1261	0	0	1	0	0	0	LOC338579	ankyrin repeat domain-containing protein 30B pseudogene
hsa-miR-1261	0	0	1	0	1	1	C12orf74	chromosome 12 open reading frame 74
hsa-miR-1261	0	0	1	0	0	0	SLC8A1-AS1	SLC8A1 antisense RNA 1
hsa-miR-1261	0	0	1	0	0	0	LOC646168	uncharacterized LOC646168
hsa-miR-1261	0	0	1	0	0	0	DKFZp686O1327	uncharacterized LOC401014
hsa-miR-1261	0	0	1	0	0	0	LOC348120	uncharacterized LOC348120
hsa-miR-1261	0	0	1	1	1	1	ANGEL2	angel homolog 2 (Drosophila)
hsa-miR-1261	1	0	1	0	1	1	ZNF800	zinc finger protein 800
hsa-miR-1261	1	0	1	1	1	1	RTKN2	rhotekin 2
hsa-miR-1261	1	0	1	1	1	1	WSB1	WD repeat and SOCS box containing 1
hsa-miR-1261	1	0	1	1	1	1	PTPRG	protein tyrosine phosphatase, receptor type, G
hsa-miR-1261	0	0	1	0	1	1	ITGA1	integrin, alpha 1
hsa-miR-1261	1	0	1	1	1	1	FNDC3A	fibronectin type III domain containing 3A
hsa-miR-1261	0	0	1	1	0	0	TRABD2A	TraB domain containing 2A
hsa-miR-1261	0	0	1	1	0	0	C11orf70	chromosome 11 open reading frame 70
hsa-miR-1261	0	0	1	1	0	0	CRYM-AS1	CRYM antisense RNA 1
hsa-miR-1261	1	0	1	1	1	1	KLHL28	kelch-like 28 (Drosophila)
hsa-miR-1261	1	0	1	1	1	1	RAB3IP	RAB3A interacting protein (rabin3)
hsa-miR-1261	1	0	1	1	1	1	PRRG1	proline rich Gla (G-carboxyglutamic acid) 1
hsa-miR-1261	0	0	1	1	1	1	HSPBAP1	HSPB (heat shock 27kDa) associated protein 1
hsa-miR-1261	1	0	1	1	1	1	EIF4G2	eukaryotic translation initiation factor 4 gamma, 2
hsa-miR-1261	1	0	1	1	1	1	STXBP5	syntaxin binding protein 5 (tomosyn)
hsa-miR-1261	0	0	1	1	1	1	ATP2A2	ATPase, Ca++ transporting, cardiac muscle, slow twitch 2
hsa-miR-1261	0	0	1	0	0	0	LEF1-AS1	LEF1 antisense RNA 1
hsa-miR-1261	0	0	1	1	0	0	CELF3	CUGBP, Elav-like family member 3
hsa-miR-1261	0	0	1	1	1	1	PABPC1L	poly(A) binding protein, cytoplasmic 1-like
hsa-miR-1261	1	0	1	1	1	1	SLC26A7	solute carrier family 26, member 7
hsa-miR-1261	1	0	1	1	1	1	SRPK2	SRSF protein kinase 2
hsa-miR-1261	0	0	1	0	0	0	PTGER4P2	prostaglandin E receptor 4 (subtype EP4) pseudogene 2
hsa-miR-1261	0	0	1	1	0	0	RELA	v-rel reticuloendotheliosis viral oncogene homolog A (avian)
hsa-miR-1261	1	0	1	1	1	1	SCAF8	SR-related CTD-associated factor 8
hsa-miR-1261	1	0	1	0	1	1	TGFBR1	transforming growth factor, beta receptor 1
hsa-miR-1261	1	0	1	0	1	1	NCOA7	nuclear receptor coactivator 7
hsa-miR-1261	0	0	1	1	1	1	FRMPDP2	FERM and PDZ domain containing 2 pseudogene 2
hsa-miR-1261	0	0	1	1	1	1	FRMPD2P1	FERM and PDZ domain containing 2 pseudogene 1
hsa-miR-1261	0	0	1	0	0	0	LOC440416	uncharacterized LOC440416
hsa-miR-1261	1	0	1	1	1	1	WNT5A	wingless-type MMTV integration site family, member 5A
hsa-miR-1261	0	0	1	0	0	0	LOC441259	PMS2 postmeiotic segregation increased 2 (S. cerevisiae)-like
hsa-miR-1261	1	0	1	0	1	1	AMMECR1L	AMME chromosomal region gene 1-like
hsa-miR-1261	0	0	1	0	0	0	LINC00537	long intergenic non-protein coding RNA 537
hsa-miR-1261	0	0	1	1	0	0	ZNF703	zinc finger protein 703
hsa-miR-1261	0	0	1	1	1	1	C1orf141	chromosome 1 open reading frame 141
hsa-miR-1261	1	0	1	1	1	1	ZMYND11	zinc finger, MYND-type containing 11
hsa-miR-1261	0	0	1	1	1	1	ZCWPW2	zinc finger, CW type with PWWP domain 2
hsa-miR-1261	1	0	1	1	1	1	ARHGAP44	Rho GTPase activating protein 44
hsa-miR-1261	1	0	1	1	1	1	ELOVL7	ELOVL fatty acid elongase 7
hsa-miR-1261	1	0	1	0	1	1	CPEB2	cytoplasmic polyadenylation element binding protein 2
hsa-miR-1261	0	0	1	0	0	0	GUSBP9	glucuronidase, beta pseudogene 9
hsa-miR-1261	0	0	1	1	0	0	ANAPC11	anaphase promoting complex subunit 11
hsa-miR-1261	0	0	1	0	0	0	FAM71F2	family with sequence similarity 71, member F2
hsa-miR-1261	1	0	1	1	1	1	PTPRD	protein tyrosine phosphatase, receptor type, D
hsa-miR-1261	0	0	1	1	0	0	FMN1	formin 1
hsa-miR-1261	1	0	1	1	1	1	CERS6	ceramide synthase 6
hsa-miR-1261	0	0	1	1	1	1	IL4R	interleukin 4 receptor
hsa-miR-1261	0	0	1	1	0	0	KCNAB2	potassium voltage-gated channel, shaker-related subfamily, beta member 2
hsa-miR-1261	0	0	1	1	1	1	UNC13B	unc-13 homolog B (C. elegans)
hsa-miR-1261	1	0	1	1	1	1	SHANK2	SH3 and multiple ankyrin repeat domains 2
hsa-miR-1261	0	0	1	1	0	0	RGSL1	regulator of G-protein signaling like 1
hsa-miR-1261	1	0	1	1	1	1	CHIC1	cysteine-rich hydrophobic domain 1
hsa-miR-1261	1	0	1	1	1	1	MLLT10	myeloid/lymphoid or mixed-lineage leukemia (trithorax homolog, Drosophila); translocated to, 10
hsa-miR-1261	1	0	1	1	1	1	PTPRZ1	protein tyrosine phosphatase, receptor-type, Z polypeptide 1
hsa-miR-1261	0	0	1	0	0	0	SMA4	glucuronidase, beta pseudogene
hsa-miR-1261	1	0	1	1	1	1	CCNK	cyclin K
hsa-miR-1261	1	0	1	1	1	1	MIER3	mesoderm induction early response 1, family member 3
hsa-miR-1261	1	0	1	1	1	1	ETS1	v-ets erythroblastosis virus E26 oncogene homolog 1 (avian)
hsa-miR-1261	1	0	1	1	0	0	CCDC30	coiled-coil domain containing 30
hsa-miR-1261	0	0	1	0	1	1	PRH2	proline-rich protein HaeIII subfamily 2
hsa-miR-1261	0	0	1	1	1	1	VPS35	vacuolar protein sorting 35 homolog (S. cerevisiae)
hsa-miR-1261	1	0	1	1	1	1	MASP1	mannan-binding lectin serine peptidase 1 (C4/C2 activating component of Ra-reactive factor)
hsa-miR-1261	1	0	1	1	1	1	PRDM2	PR domain containing 2, with ZNF domain
hsa-miR-1261	1	0	1	1	1	1	SLC39A13	solute carrier family 39 (zinc transporter), member 13
hsa-miR-1261	0	0	1	1	1	1	MLIP	muscular LMNA-interacting protein
hsa-miR-1261	0	0	1	0	1	1	THAP6	THAP domain containing 6
hsa-miR-1261	1	0	1	1	1	1	USP6	ubiquitin specific peptidase 6 (Tre-2 oncogene)
hsa-miR-1261	0	0	1	0	1	1	MYO3B	myosin IIIB
hsa-miR-1261	0	0	1	0	0	0	OVOS	ovostatin
hsa-miR-1261	0	0	1	1	1	1	TMEM48	transmembrane protein 48
hsa-miR-1261	1	0	1	1	1	1	DDAH1	dimethylarginine dimethylaminohydrolase 1
hsa-miR-1261	1	0	1	1	1	1	NAV1	neuron navigator 1
hsa-miR-1261	1	0	1	1	1	1	ZKSCAN5	zinc finger with KRAB and SCAN domains 5
hsa-miR-1261	1	0	1	1	1	1	TMEM135	transmembrane protein 135
hsa-miR-1261	0	0	1	1	1	1	KIAA1328	KIAA1328
hsa-miR-1261	0	0	1	0	0	0	DKFZp686K1684	uncharacterized LOC440034
hsa-miR-1261	1	0	1	0	1	1	TTL	tubulin tyrosine ligase
hsa-miR-1261	0	0	1	1	1	1	SNRNP27	small nuclear ribonucleoprotein 27kDa (U4/U6.U5)
hsa-miR-1261	0	0	1	1	1	1	CHEK1	checkpoint kinase 1
hsa-miR-1261	0	0	1	1	1	1	GTPBP3	GTP binding protein 3 (mitochondrial)
hsa-miR-1261	0	0	1	1	1	1	DUT	deoxyuridine triphosphatase
hsa-miR-1261	0	0	1	1	0	0	TMEM62	transmembrane protein 62
hsa-miR-1261	0	0	1	1	0	0	RBM28	RNA binding motif protein 28
hsa-miR-1261	1	0	1	1	1	1	CNIH2	cornichon homolog 2 (Drosophila)
hsa-miR-1261	1	0	1	1	1	1	RBM3	RNA binding motif (RNP1, RRM) protein 3
hsa-miR-1261	0	0	1	1	1	1	HSPB8	heat shock 22kDa protein 8
hsa-miR-1261	0	0	1	1	1	1	FAT1	FAT tumor suppressor homolog 1 (Drosophila)
hsa-miR-1261	0	0	1	0	0	0	MYCT1	myc target 1
hsa-miR-1261	0	0	1	1	1	1	PPP1R1C	protein phosphatase 1, regulatory (inhibitor) subunit 1C
hsa-miR-1261	0	0	1	1	1	1	MRPS36	mitochondrial ribosomal protein S36
hsa-miR-1261	0	0	1	0	1	1	CD99P1	CD99 molecule pseudogene 1
hsa-miR-1261	0	0	1	0	0	0	LOC643837	uncharacterized LOC643837
hsa-miR-1261	0	0	1	1	0	0	MRPS28	mitochondrial ribosomal protein S28
hsa-miR-1261	1	0	1	1	1	1	COPZ1	coatomer protein complex, subunit zeta 1
hsa-miR-1261	0	0	1	1	1	1	GGPS1	geranylgeranyl diphosphate synthase 1
hsa-miR-1261	0	0	1	1	0	0	KIAA0100	KIAA0100
hsa-miR-1261	1	0	1	1	1	1	LYPLA2	lysophospholipase II
hsa-miR-1261	0	0	1	1	1	1	MS4A6A	membrane-spanning 4-domains, subfamily A, member 6A
hsa-miR-1261	1	0	1	1	1	1	ARFIP2	ADP-ribosylation factor interacting protein 2
hsa-miR-1261	0	0	1	1	1	1	SSB	Sjogren syndrome antigen B (autoantigen La)
hsa-miR-1261	1	0	1	1	1	1	BTBD10	BTB (POZ) domain containing 10
hsa-miR-1261	1	0	1	1	1	1	LAMTOR3	late endosomal/lysosomal adaptor, MAPK and MTOR activator 3
hsa-miR-1261	1	0	1	1	1	1	ARNTL	aryl hydrocarbon receptor nuclear translocator-like
hsa-miR-1261	0	0	1	1	1	1	RHEBL1	Ras homolog enriched in brain like 1
hsa-miR-1261	1	0	1	1	1	1	METAP2	methionyl aminopeptidase 2
hsa-miR-1261	1	0	1	1	1	1	ARL4A	ADP-ribosylation factor-like 4A
hsa-miR-1261	1	0	1	1	1	1	PFN2	profilin 2
hsa-miR-1261	0	0	1	1	1	1	RNF166	ring finger protein 166
hsa-miR-1261	1	0	1	1	1	1	TMEM55B	transmembrane protein 55B
hsa-miR-1261	1	0	1	0	1	1	CD47	CD47 molecule
hsa-miR-1261	1	0	1	1	1	1	RUNX1	runt-related transcription factor 1
hsa-miR-1261	0	0	1	0	1	1	SEPT7	septin 7
hsa-miR-1261	0	0	1	1	1	1	BDP1	B double prime 1, subunit of RNA polymerase III transcription initiation factor IIIB
hsa-miR-1261	1	0	1	1	1	1	HECW2	HECT, C2 and WW domain containing E3 ubiquitin protein ligase 2
hsa-miR-1261	1	0	1	0	1	1	PTP4A1	protein tyrosine phosphatase type IVA, member 1
hsa-miR-1261	1	0	1	0	1	1	SLC7A6	solute carrier family 7 (amino acid transporter light chain, y+L system), member 6
hsa-miR-1261	1	0	1	0	1	1	OSBPL8	oxysterol binding protein-like 8
hsa-miR-1261	1	0	1	1	1	1	SLC39A10	solute carrier family 39 (zinc transporter), member 10
hsa-miR-1261	1	0	1	1	1	1	PI15	peptidase inhibitor 15
hsa-miR-1261	1	0	1	1	1	1	RBPMS	RNA binding protein with multiple splicing
hsa-miR-1261	1	0	1	0	1	1	KLHDC10	kelch domain containing 10
hsa-miR-1261	0	0	1	0	0	0	CDKN2B-AS1	CDKN2B antisense RNA 1
hsa-miR-1261	0	0	1	1	0	0	MLH1	mutL homolog 1, colon cancer, nonpolyposis type 2 (E. coli)
hsa-miR-1261	1	0	1	0	1	1	RBBP5	retinoblastoma binding protein 5
hsa-miR-1261	0	0	1	1	0	0	SLCO3A1	solute carrier organic anion transporter family, member 3A1
hsa-miR-1261	0	0	1	1	1	1	ADPRH	ADP-ribosylarginine hydrolase
hsa-miR-1261	1	0	1	1	1	1	ATP2B2	ATPase, Ca++ transporting, plasma membrane 2
hsa-miR-1261	1	0	1	1	1	1	AFF1	AF4/FMR2 family, member 1
hsa-miR-1261	1	0	1	1	1	1	IGF1	insulin-like growth factor 1 (somatomedin C)
hsa-miR-1261	1	0	1	1	1	1	PML	promyelocytic leukemia
hsa-miR-1261	1	0	1	0	1	1	ACVR2A	activin A receptor, type IIA
hsa-miR-1261	0	0	1	1	0	0	FANCA	Fanconi anemia, complementation group A
hsa-miR-1261	1	0	1	0	1	1	GHR	growth hormone receptor
hsa-miR-1261	1	0	1	0	1	1	SGCB	sarcoglycan, beta (43kDa dystrophin-associated glycoprotein)
hsa-miR-1261	1	0	1	1	1	1	MITF	microphthalmia-associated transcription factor
hsa-miR-1261	1	0	1	1	1	1	NF1	neurofibromin 1
hsa-miR-1261	0	0	1	1	1	1	RHAG	Rh-associated glycoprotein
hsa-miR-1261	1	0	1	1	1	1	ATXN1	ataxin 1
hsa-miR-1261	0	0	1	1	0	0	SERPINA7	serpin peptidase inhibitor, clade A (alpha-1 antiproteinase, antitrypsin), member 7
hsa-miR-1261	0	0	1	1	1	1	THBD	thrombomodulin
hsa-miR-1261	1	0	1	0	1	1	CYBB	cytochrome b-245, beta polypeptide
hsa-miR-1261	1	0	1	1	1	1	HLCS	holocarboxylase synthetase (biotin-(proprionyl-CoA-carboxylase (ATP-hydrolysing)) ligase)
hsa-miR-1261	0	0	1	1	1	1	LTBP2	latent transforming growth factor beta binding protein 2
hsa-miR-1261	0	0	1	1	0	0	PSEN2	presenilin 2 (Alzheimer disease 4)
hsa-miR-1261	1	0	1	1	1	1	PLP1	proteolipid protein 1
hsa-miR-1261	1	0	1	1	1	1	DCX	doublecortin
hsa-miR-1261	0	0	1	1	1	1	GSR	glutathione reductase
hsa-miR-1261	1	0	1	0	1	1	ABAT	4-aminobutyrate aminotransferase
hsa-miR-1261	0	0	1	1	0	0	ADORA3	adenosine A3 receptor
hsa-miR-1261	1	0	1	1	1	1	DRD1	dopamine receptor D1
hsa-miR-1261	1	0	1	1	1	1	GABRB3	gamma-aminobutyric acid (GABA) A receptor, beta 3
hsa-miR-1261	1	0	1	1	1	1	GAD1	glutamate decarboxylase 1 (brain, 67kDa)
hsa-miR-1261	1	0	1	1	1	1	GRM8	glutamate receptor, metabotropic 8
hsa-miR-1261	1	0	1	1	1	1	IGF1R	insulin-like growth factor 1 receptor
hsa-miR-1261	1	0	1	0	1	1	KCNJ2	potassium inwardly-rectifying channel, subfamily J, member 2
hsa-miR-1261	0	0	1	1	1	1	NPY2R	neuropeptide Y receptor Y2
hsa-miR-1261	1	0	1	1	1	1	PDE3B	phosphodiesterase 3B, cGMP-inhibited
hsa-miR-1261	1	0	1	1	1	1	PTGER3	prostaglandin E receptor 3 (subtype EP3)
hsa-miR-1261	1	0	1	1	1	1	PTGFR	prostaglandin F receptor (FP)
hsa-miR-1261	0	0	1	1	1	1	DDI1	DNA-damage inducible 1 homolog 1 (S. cerevisiae)
hsa-miR-1261	0	0	1	1	1	1	SUMO4	SMT3 suppressor of mif two 3 homolog 4 (S. cerevisiae)
hsa-miR-1261	0	0	1	1	1	1	EPSTI1	epithelial stromal interaction 1 (breast)
hsa-miR-1261	1	0	1	1	1	1	WNK3	WNK lysine deficient protein kinase 3
hsa-miR-1261	1	0	1	1	1	1	HMGXB4	HMG box domain containing 4
hsa-miR-1261	0	0	1	1	1	1	ATP5S	ATP synthase, H+ transporting, mitochondrial Fo complex, subunit s (factor B)
hsa-miR-1261	1	0	1	0	1	1	ZNF740	zinc finger protein 740
hsa-miR-1261	0	0	1	1	1	1	CCDC144NL	coiled-coil domain containing 144 family, N-terminal like
hsa-miR-1261	0	0	1	0	1	1	ZNF705A	zinc finger protein 705A
hsa-miR-1261	0	0	1	1	1	1	LINC00478	long intergenic non-protein coding RNA 478
hsa-miR-1261	1	0	1	1	1	1	ADAM9	ADAM metallopeptidase domain 9
hsa-miR-1261	1	0	1	0	1	1	PDPN	podoplanin
hsa-miR-1261	1	0	1	1	1	1	L3MBTL3	l(3)mbt-like 3 (Drosophila)
hsa-miR-1261	1	0	1	1	1	1	IGSF3	immunoglobulin superfamily, member 3
hsa-miR-1261	1	0	1	1	1	1	BCAP29	B-cell receptor-associated protein 29
hsa-miR-1261	0	0	1	1	1	1	TCHHL1	trichohyalin-like 1
hsa-miR-1261	0	0	1	1	1	1	MXI1	MAX interactor 1
hsa-miR-1261	1	0	1	1	1	1	EML1	echinoderm microtubule associated protein like 1
hsa-miR-1261	1	0	1	1	1	1	FNIP1	folliculin interacting protein 1
hsa-miR-1261	1	0	1	1	1	1	ARHGAP28	Rho GTPase activating protein 28
hsa-miR-1261	1	0	1	0	1	1	PM20D2	peptidase M20 domain containing 2
hsa-miR-1261	1	0	1	0	1	1	ZC3H12B	zinc finger CCCH-type containing 12B
hsa-miR-1261	0	0	1	1	1	1	C1QL3	complement component 1, q subcomponent-like 3
hsa-miR-1261	0	0	1	0	1	1	THEMIS	thymocyte selection associated
hsa-miR-1261	1	0	1	1	1	1	FAM171A1	family with sequence similarity 171, member A1
hsa-miR-1261	0	0	1	1	1	1	SEH1L	SEH1-like (S. cerevisiae)
hsa-miR-1261	0	0	1	0	1	1	LINC00268	long intergenic non-protein coding RNA 268
hsa-miR-1261	1	0	1	1	1	1	RUNX2	runt-related transcription factor 2
hsa-miR-1261	1	0	1	1	1	1	TMCC1	transmembrane and coiled-coil domain family 1
hsa-miR-1261	1	0	1	0	1	1	GOPC	golgi-associated PDZ and coiled-coil motif containing
hsa-miR-1261	0	0	1	1	1	1	USP1	ubiquitin specific peptidase 1
hsa-miR-1261	1	0	1	1	1	1	VMA21	VMA21 vacuolar H+-ATPase homolog (S. cerevisiae)
hsa-miR-1261	0	0	1	1	0	0	POLR3H	polymerase (RNA) III (DNA directed) polypeptide H (22.9kD)
hsa-miR-1261	1	0	1	1	1	1	NTRK2	neurotrophic tyrosine kinase, receptor, type 2
hsa-miR-1261	1	0	1	1	1	1	CANX	calnexin
hsa-miR-1261	1	0	1	1	1	1	SH3KBP1	SH3-domain kinase binding protein 1
hsa-miR-1261	0	0	1	1	0	0	ABCF1	ATP-binding cassette, sub-family F (GCN20), member 1
hsa-miR-1261	1	0	1	1	1	1	RGS7BP	regulator of G-protein signaling 7 binding protein
hsa-miR-1261	1	0	1	1	1	1	PLEKHG1	pleckstrin homology domain containing, family G (with RhoGef domain) member 1
hsa-miR-1261	1	0	1	0	1	1	SAMD5	sterile alpha motif domain containing 5
hsa-miR-1261	0	0	1	1	1	1	MS4A3	membrane-spanning 4-domains, subfamily A, member 3 (hematopoietic cell-specific)
hsa-miR-1261	1	0	1	1	1	1	YTHDC1	YTH domain containing 1
hsa-miR-1261	0	0	1	1	1	1	VSTM4	V-set and transmembrane domain containing 4
hsa-miR-1261	1	0	1	1	1	1	TMPO	thymopoietin
hsa-miR-1261	0	0	1	1	1	1	PLGLB1	plasminogen-like B1
hsa-miR-1261	1	0	1	0	1	1	NPNT	nephronectin
hsa-miR-1261	1	0	1	1	1	1	MYCL1	v-myc myelocytomatosis viral oncogene homolog 1, lung carcinoma derived (avian)
hsa-miR-1261	0	0	1	1	1	1	KCNIP1	Kv channel interacting protein 1
hsa-miR-1261	0	0	1	0	1	1	RGS21	regulator of G-protein signaling 21
hsa-miR-1261	0	0	1	0	1	1	ZNF705D	zinc finger protein 705D
hsa-miR-1261	1	0	1	1	1	1	ZNF384	zinc finger protein 384
hsa-miR-1261	0	0	1	1	1	1	ATF3	activating transcription factor 3
hsa-miR-1261	1	0	1	1	1	1	HEY1	hairy/enhancer-of-split related with YRPW motif 1
hsa-miR-1261	1	0	1	1	0	0	KIAA0895L	KIAA0895-like
hsa-miR-1261	0	0	1	1	1	1	C15orf60	chromosome 15 open reading frame 60
hsa-miR-1261	1	0	1	1	1	1	ZC2HC1C	zinc finger, C2HC-type containing 1C
hsa-miR-1261	1	0	1	1	1	1	SLC9A6	solute carrier family 9, subfamily A (NHE6, cation proton antiporter 6), member 6
hsa-miR-1261	1	0	1	1	1	1	NSL1	NSL1, MIND kinetochore complex component, homolog (S. cerevisiae)
hsa-miR-1261	1	0	1	1	1	1	ERBB4	v-erb-a erythroblastic leukemia viral oncogene homolog 4 (avian)
hsa-miR-1261	0	0	1	1	1	1	SSTR2	somatostatin receptor 2
hsa-miR-1261	1	0	1	1	1	1	QSER1	glutamine and serine rich 1
hsa-miR-1261	1	0	1	1	1	1	PRR3	proline rich 3
hsa-miR-1261	1	0	1	1	1	1	ALG9	asparagine-linked glycosylation 9, alpha-1,2-mannosyltransferase homolog (S. cerevisiae)
hsa-miR-1261	1	0	1	1	1	1	DACT1	dapper, antagonist of beta-catenin, homolog 1 (Xenopus laevis)
hsa-miR-1261	1	0	1	1	1	1	TMTC4	transmembrane and tetratricopeptide repeat containing 4
hsa-miR-1261	1	0	1	0	1	1	THSD7B	thrombospondin, type I, domain containing 7B
hsa-miR-1261	0	0	1	1	1	1	HSF5	heat shock transcription factor family member 5
hsa-miR-1261	1	0	1	1	1	1	ADCY9	adenylate cyclase 9
hsa-miR-1261	1	0	1	1	1	1	ADCYAP1	adenylate cyclase activating polypeptide 1 (pituitary)
hsa-miR-1261	1	0	1	0	0	0	ACAN	aggrecan
hsa-miR-1261	1	0	1	0	1	1	XIAP	X-linked inhibitor of apoptosis
hsa-miR-1261	1	0	1	0	1	1	BMPR2	bone morphogenetic protein receptor, type II (serine/threonine kinase)
hsa-miR-1261	0	0	1	0	1	1	CASQ2	calsequestrin 2 (cardiac muscle)
hsa-miR-1261	0	0	1	1	1	1	CCR1	chemokine (C-C motif) receptor 1
hsa-miR-1261	1	0	1	1	1	1	CREBL2	cAMP responsive element binding protein-like 2
hsa-miR-1261	0	0	1	1	1	1	DPYS	dihydropyrimidinase
hsa-miR-1261	0	0	1	1	0	0	ACRV1	acrosomal vesicle protein 1
hsa-miR-1261	1	0	1	1	1	1	AQP4	aquaporin 4
hsa-miR-1261	0	0	1	1	0	0	C9	complement component 9
hsa-miR-1261	1	0	1	1	1	1	CALM2	calmodulin 2 (phosphorylase kinase, delta)
hsa-miR-1261	1	0	1	1	1	1	CLCN4	chloride channel, voltage-sensitive 4
hsa-miR-1261	1	0	1	1	1	1	COL4A6	collagen, type IV, alpha 6
hsa-miR-1261	1	0	1	1	1	1	DUSP6	dual specificity phosphatase 6
hsa-miR-1261	1	0	1	1	1	1	GLRA2	glycine receptor, alpha 2
hsa-miR-1261	1	0	1	1	1	1	ITGB8	integrin, beta 8
hsa-miR-1261	1	0	1	1	1	1	KCNJ10	potassium inwardly-rectifying channel, subfamily J, member 10
hsa-miR-1261	1	0	1	1	1	1	KDR	kinase insert domain receptor (a type III receptor tyrosine kinase)
hsa-miR-1261	1	0	1	1	1	1	KPNA3	karyopherin alpha 3 (importin alpha 4)
hsa-miR-1261	1	0	1	1	1	1	KPNA4	karyopherin alpha 4 (importin alpha 3)
hsa-miR-1261	0	0	1	1	0	0	KRT4	keratin 4
hsa-miR-1261	1	0	1	1	1	1	MAFG	v-maf musculoaponeurotic fibrosarcoma oncogene homolog G (avian)
hsa-miR-1261	0	0	1	0	1	1	CXCL9	chemokine (C-X-C motif) ligand 9
hsa-miR-1261	0	0	1	1	1	1	MTAP	methylthioadenosine phosphorylase
hsa-miR-1261	0	0	1	1	1	1	NOV	nephroblastoma overexpressed
hsa-miR-1261	1	0	1	1	1	1	PAWR	PRKC, apoptosis, WT1, regulator
hsa-miR-1261	0	0	1	1	1	1	PDE2A	phosphodiesterase 2A, cGMP-stimulated
hsa-miR-1261	0	0	1	1	0	0	SERPINF1	serpin peptidase inhibitor, clade F (alpha-2 antiplasmin, pigment epithelium derived factor), member 1
hsa-miR-1261	1	0	1	1	1	1	PLAGL2	pleiomorphic adenoma gene-like 2
hsa-miR-1261	0	0	1	1	1	1	PLGLB2	plasminogen-like B2
hsa-miR-1261	0	0	1	0	1	1	PMP2	peripheral myelin protein 2
hsa-miR-1261	1	0	1	1	1	1	PPP1CB	protein phosphatase 1, catalytic subunit, beta isozyme
hsa-miR-1261	1	0	1	1	1	1	PPP6C	protein phosphatase 6, catalytic subunit
hsa-miR-1261	1	0	1	1	1	1	RBL1	retinoblastoma-like 1 (p107)
hsa-miR-1261	0	0	1	1	1	1	RFC3	replication factor C (activator 1) 3, 38kDa
hsa-miR-1261	0	0	1	1	1	1	RGS1	regulator of G-protein signaling 1
hsa-miR-1261	0	0	1	1	1	1	RNASE4	ribonuclease, RNase A family, 4
hsa-miR-1261	1	0	1	0	1	1	SORT1	sortilin 1
hsa-miR-1261	1	0	1	1	1	1	SRSF2	serine/arginine-rich splicing factor 2
hsa-miR-1261	1	0	1	1	1	1	SHB	Src homology 2 domain containing adaptor protein B
hsa-miR-1261	0	0	1	1	1	1	SRY	sex determining region Y
hsa-miR-1261	0	0	1	1	1	1	STIM1	stromal interaction molecule 1
hsa-miR-1261	1	0	1	0	1	1	TAL1	T-cell acute lymphocytic leukemia 1
hsa-miR-1261	1	0	1	1	1	1	TFAP2C	transcription factor AP-2 gamma (activating enhancer binding protein 2 gamma)
hsa-miR-1261	1	0	1	0	1	1	THBS1	thrombospondin 1
hsa-miR-1261	1	0	1	0	1	1	SEC62	SEC62 homolog (S. cerevisiae)
hsa-miR-1261	0	0	1	1	0	0	TTC1	tetratricopeptide repeat domain 1
hsa-miR-1261	1	0	1	1	1	1	UBE2D3	ubiquitin-conjugating enzyme E2D 3
hsa-miR-1261	1	0	1	0	1	1	ZIC1	Zic family member 1
hsa-miR-1261	1	0	1	1	1	1	ZIC3	Zic family member 3
hsa-miR-1261	1	0	1	0	1	1	BSN	bassoon (presynaptic cytomatrix protein)
hsa-miR-1261	1	0	1	1	1	1	NRIP1	nuclear receptor interacting protein 1
hsa-miR-1261	0	0	1	1	0	0	HIST1H2BL	histone cluster 1, H2bl
hsa-miR-1261	0	0	1	1	1	1	PIP5K1B	phosphatidylinositol-4-phosphate 5-kinase, type I, beta
hsa-miR-1261	1	0	1	1	1	1	CDC14A	CDC14 cell division cycle 14 homolog A (S. cerevisiae)
hsa-miR-1261	1	0	1	0	1	1	TNKS	tankyrase, TRF1-interacting ankyrin-related ADP-ribose polymerase
hsa-miR-1261	1	0	1	1	1	1	URI1	URI1, prefoldin-like chaperone
hsa-miR-1261	0	0	1	1	0	0	ADAM7	ADAM metallopeptidase domain 7
hsa-miR-1261	1	0	1	1	1	1	PEX11B	peroxisomal biogenesis factor 11 beta
hsa-miR-1261	0	0	1	1	1	1	IL18R1	interleukin 18 receptor 1
hsa-miR-1261	1	0	1	1	1	1	NRP2	neuropilin 2
hsa-miR-1261	1	0	1	1	1	1	ALDH1A2	aldehyde dehydrogenase 1 family, member A2
hsa-miR-1261	0	0	1	1	1	1	BYSL	bystin-like
hsa-miR-1261	1	0	1	1	1	1	EFNB2	ephrin-B2
hsa-miR-1261	1	0	1	0	1	1	SLC1A2	solute carrier family 1 (glial high affinity glutamate transporter), member 2
hsa-miR-1261	1	0	1	0	1	1	MED14	mediator complex subunit 14
hsa-miR-1261	1	0	1	1	1	1	SOCS6	suppressor of cytokine signaling 6
hsa-miR-1261	0	0	1	1	1	1	HOMER1	homer homolog 1 (Drosophila)
hsa-miR-1261	1	0	1	1	1	1	GDA	guanine deaminase
hsa-miR-1261	1	0	1	0	1	1	ACVR1B	activin A receptor, type IB
hsa-miR-1261	0	0	1	1	1	1	DDX10	DEAD (Asp-Glu-Ala-Asp) box polypeptide 10
hsa-miR-1261	1	0	1	1	1	1	EGR3	early growth response 3
hsa-miR-1261	0	0	1	1	1	1	GCSH	glycine cleavage system protein H (aminomethyl carrier)
hsa-miR-1261	0	0	1	1	1	1	RAB27A	RAB27A, member RAS oncogene family
hsa-miR-1261	0	0	1	1	1	1	XPC	xeroderma pigmentosum, complementation group C
hsa-miR-1261	1	0	1	1	1	1	SCAF11	SR-related CTD-associated factor 11
hsa-miR-1261	1	0	1	1	1	1	NREP	neuronal regeneration related protein homolog (rat)
hsa-miR-1261	0	0	1	0	1	1	ADIPOQ	adiponectin, C1Q and collagen domain containing
hsa-miR-1261	1	0	1	1	1	1	AKAP7	A kinase (PRKA) anchor protein 7
hsa-miR-1261	0	0	1	1	1	1	ATP6V1G1	ATPase, H+ transporting, lysosomal 13kDa, V1 subunit G1
hsa-miR-1261	0	0	1	1	1	1	MTL5	metallothionein-like 5, testis-specific (tesmin)
hsa-miR-1261	0	0	1	1	1	1	CALB1	calbindin 1, 28kDa
hsa-miR-1261	0	0	1	1	1	1	CDH6	cadherin 6, type 2, K-cadherin (fetal kidney)
hsa-miR-1261	0	0	1	1	1	1	GDF10	growth differentiation factor 10
hsa-miR-1261	1	0	1	1	1	1	GAS2	growth arrest-specific 2
hsa-miR-1261	1	0	1	1	1	1	H3F3B	H3 histone, family 3B (H3.3B)
hsa-miR-1261	1	0	1	1	1	1	ROCK1	Rho-associated, coiled-coil containing protein kinase 1
hsa-miR-1261	0	0	1	1	1	1	ZRANB2	zinc finger, RAN-binding domain containing 2
hsa-miR-1261	0	0	1	1	1	1	CST8	cystatin 8 (cystatin-related epididymal specific)
hsa-miR-1261	1	0	1	1	1	1	HOXA1	homeobox A1
hsa-miR-1261	0	0	1	1	1	1	HSD11B1	hydroxysteroid (11-beta) dehydrogenase 1
hsa-miR-1261	0	0	1	1	1	1	IMPA1	inositol(myo)-1(or 4)-monophosphatase 1
hsa-miR-1261	1	0	1	1	1	1	INSIG1	insulin induced gene 1
hsa-miR-1261	0	0	1	1	1	1	ITK	IL2-inducible T-cell kinase
hsa-miR-1261	1	0	1	1	1	1	LPP	LIM domain containing preferred translocation partner in lipoma
hsa-miR-1261	1	0	1	1	1	1	RGS4	regulator of G-protein signaling 4
hsa-miR-1261	0	0	1	1	0	0	SNURF	SNRPN upstream reading frame
hsa-miR-1261	0	0	1	1	1	1	ACTR3	ARP3 actin-related protein 3 homolog (yeast)
hsa-miR-1261	1	0	1	1	1	1	PURA	purine-rich element binding protein A
hsa-miR-1261	1	0	1	1	1	1	BET1	blocked early in transport 1 homolog (S. cerevisiae)
hsa-miR-1261	1	0	1	0	1	1	NBR1	neighbor of BRCA1 gene 1
hsa-miR-1261	1	0	1	0	1	1	NAB1	NGFI-A binding protein 1 (EGR1 binding protein 1)
hsa-miR-1261	1	0	1	1	1	1	ENDOU	endonuclease, polyU-specific
hsa-miR-1261	0	0	1	1	1	1	LANCL1	LanC lantibiotic synthetase component C-like 1 (bacterial)
hsa-miR-1261	0	0	1	1	1	1	NKX3-1	NK3 homeobox 1
hsa-miR-1261	1	0	1	1	1	1	SMC1A	structural maintenance of chromosomes 1A
hsa-miR-1261	1	0	1	1	1	1	ZER1	zer-1 homolog (C. elegans)
hsa-miR-1261	1	0	1	1	1	1	KHDRBS1	KH domain containing, RNA binding, signal transduction associated 1
hsa-miR-1261	1	0	1	1	1	1	KDM5B	lysine (K)-specific demethylase 5B
hsa-miR-1261	0	0	1	1	1	1	PPP1R17	protein phosphatase 1, regulatory subunit 17
hsa-miR-1261	0	0	1	1	1	1	FGL2	fibrinogen-like 2
hsa-miR-1261	1	0	1	1	1	1	DIAPH2	diaphanous homolog 2 (Drosophila)
hsa-miR-1261	0	0	1	1	1	1	SSFA2	sperm specific antigen 2
hsa-miR-1261	1	0	1	0	1	1	SYNGAP1	synaptic Ras GTPase activating protein 1
hsa-miR-1261	0	0	1	1	1	1	TMED10	transmembrane emp24-like trafficking protein 10 (yeast)
hsa-miR-1261	0	0	1	1	1	1	CEACAM7	carcinoembryonic antigen-related cell adhesion molecule 7
hsa-miR-1261	0	0	1	1	1	1	HOXD3	homeobox D3
hsa-miR-1261	1	0	1	1	1	1	RIT1	Ras-like without CAAX 1
hsa-miR-1261	1	0	1	1	1	1	ESM1	endothelial cell-specific molecule 1
hsa-miR-1261	1	0	1	1	1	1	ZIC2	Zic family member 2
hsa-miR-1261	1	0	1	1	1	1	VEZF1	vascular endothelial zinc finger 1
hsa-miR-1261	1	0	1	1	1	1	C14orf1	chromosome 14 open reading frame 1
hsa-miR-1261	1	0	1	1	1	1	HPS5	Hermansky-Pudlak syndrome 5
hsa-miR-1261	1	0	1	1	1	1	CA5B	carbonic anhydrase VB, mitochondrial
hsa-miR-1261	0	0	1	1	1	1	KLF8	Kruppel-like factor 8
hsa-miR-1261	1	0	1	1	1	1	CBX3	chromobox homolog 3
hsa-miR-1261	0	0	1	1	1	1	GABARAPL2	GABA(A) receptor-associated protein-like 2
hsa-miR-1261	1	0	1	1	1	1	CASC3	cancer susceptibility candidate 3
hsa-miR-1261	0	0	1	1	1	1	SEPHS2	selenophosphate synthetase 2
hsa-miR-1261	1	0	1	1	1	1	KCND2	potassium voltage-gated channel, Shal-related subfamily, member 2
hsa-miR-1261	1	0	1	0	1	1	G3BP2	GTPase activating protein (SH3 domain) binding protein 2
hsa-miR-1261	1	0	1	0	1	1	FBXL7	F-box and leucine-rich repeat protein 7
hsa-miR-1261	0	0	1	0	1	1	PIGN	phosphatidylinositol glycan anchor biosynthesis, class N
hsa-miR-1261	1	0	1	1	1	1	RANBP6	RAN binding protein 6
hsa-miR-1261	0	0	1	1	0	0	SYNGR4	synaptogyrin 4
hsa-miR-1261	0	0	1	1	1	1	CD24	CD24 molecule
hsa-miR-1261	0	0	1	1	0	0	C2orf27A	chromosome 2 open reading frame 27A
hsa-miR-1261	0	0	1	1	1	1	SNX10	sorting nexin 10
hsa-miR-1261	1	0	1	1	1	1	WDR37	WD repeat domain 37
hsa-miR-1261	0	0	1	1	1	1	CCDC113	coiled-coil domain containing 113
hsa-miR-1261	1	0	1	1	1	1	YME1L1	YME1-like 1 (S. cerevisiae)
hsa-miR-1261	0	0	1	1	1	1	ZNF318	zinc finger protein 318
hsa-miR-1261	1	0	1	0	1	1	CNTN5	contactin 5
hsa-miR-1261	1	0	1	1	1	1	LHX6	LIM homeobox 6
hsa-miR-1261	1	0	1	0	1	1	RNF11	ring finger protein 11
hsa-miR-1261	0	0	1	1	1	1	KCNV1	potassium channel, subfamily V, member 1
hsa-miR-1261	0	0	1	1	1	1	LAMP3	lysosomal-associated membrane protein 3
hsa-miR-1261	1	0	1	1	1	1	AFF4	AF4/FMR2 family, member 4
hsa-miR-1261	1	0	1	1	1	1	PDCD4	programmed cell death 4 (neoplastic transformation inhibitor)
hsa-miR-1261	0	0	1	1	1	1	TMOD2	tropomodulin 2 (neuronal)
hsa-miR-1261	1	1	1	1	1	1	LATS2	LATS, large tumor suppressor, homolog 2 (Drosophila)
hsa-miR-1261	1	0	1	1	1	1	RALGPS1	Ral GEF with PH domain and SH3 binding motif 1
hsa-miR-1261	1	0	1	1	1	1	TBKBP1	TBK1 binding protein 1
hsa-miR-1261	0	0	1	1	1	1	FRMPD4	FERM and PDZ domain containing 4
hsa-miR-1261	0	0	1	1	1	1	KIAA0141	KIAA0141
hsa-miR-1261	1	0	1	0	1	1	KIAA0494	KIAA0494
hsa-miR-1261	1	0	1	1	1	1	JAKMIP2	janus kinase and microtubule interacting protein 2
hsa-miR-1261	0	0	1	0	1	1	EPM2AIP1	EPM2A (laforin) interacting protein 1
hsa-miR-1261	1	0	1	1	1	1	RUSC2	RUN and SH3 domain containing 2
hsa-miR-1261	1	0	1	0	1	1	RAB11FIP2	RAB11 family interacting protein 2 (class I)
hsa-miR-1261	1	0	1	1	1	1	FBXO21	F-box protein 21
hsa-miR-1261	0	0	1	1	1	1	MYO16	myosin XVI
hsa-miR-1261	1	0	1	1	1	1	ERP44	endoplasmic reticulum protein 44
hsa-miR-1261	1	0	1	0	1	1	SNX13	sorting nexin 13
hsa-miR-1261	1	0	1	1	1	1	RTF1	Rtf1, Paf1/RNA polymerase II complex component, homolog (S. cerevisiae)
hsa-miR-1261	1	0	1	1	1	1	RCOR1	REST corepressor 1
hsa-miR-1261	1	0	1	1	1	1	PRRC2C	proline-rich coiled-coil 2C
hsa-miR-1261	1	0	1	1	1	1	CUX2	cut-like homeobox 2
hsa-miR-1261	1	0	1	1	1	1	PHF15	PHD finger protein 15
hsa-miR-1261	1	0	1	0	1	1	ARHGEF12	Rho guanine nucleotide exchange factor (GEF) 12
hsa-miR-1261	0	0	1	0	1	1	ZDHHC17	zinc finger, DHHC-type containing 17
hsa-miR-1261	0	0	1	1	1	1	LEPROTL1	leptin receptor overlapping transcript-like 1
hsa-miR-1261	1	0	1	1	1	1	NIPBL	Nipped-B homolog (Drosophila)
hsa-miR-1261	1	0	1	1	1	1	PARM1	prostate androgen-regulated mucin-like protein 1
hsa-miR-1261	0	0	1	1	1	1	TMEM87A	transmembrane protein 87A
hsa-miR-1261	1	0	1	0	1	1	OSBPL3	oxysterol binding protein-like 3
hsa-miR-1261	1	0	1	0	1	1	WWC3	WWC family member 3
hsa-miR-1261	1	0	1	1	1	1	AZIN1	antizyme inhibitor 1
hsa-miR-1261	1	0	1	1	1	1	PHF20L1	PHD finger protein 20-like 1
hsa-miR-1261	0	0	1	0	1	1	OTUD6B	OTU domain containing 6B
hsa-miR-1261	1	0	1	1	1	1	SLMO2	slowmo homolog 2 (Drosophila)
hsa-miR-1261	1	0	1	1	1	1	VGLL3	vestigial like 3 (Drosophila)
hsa-miR-1261	0	0	1	1	1	1	EMCN	endomucin
hsa-miR-1261	0	0	1	0	1	1	FAM8A1	family with sequence similarity 8, member A1
hsa-miR-1261	0	0	1	1	1	1	CD244	CD244 molecule, natural killer cell receptor 2B4
hsa-miR-1261	1	0	1	0	1	1	RNF141	ring finger protein 141
hsa-miR-1261	0	0	1	1	1	1	KDM3B	lysine (K)-specific demethylase 3B
hsa-miR-1261	0	0	1	1	1	1	MRPL35	mitochondrial ribosomal protein L35
hsa-miR-1261	1	0	1	1	1	1	WAC	WW domain containing adaptor with coiled-coil
hsa-miR-1261	1	0	1	0	1	1	FZD3	frizzled family receptor 3
hsa-miR-1261	0	0	1	1	0	0	UBQLN3	ubiquilin 3
hsa-miR-1261	1	0	1	1	1	1	ARID1B	AT rich interactive domain 1B (SWI1-like)
hsa-miR-1261	1	0	1	0	1	1	ZRANB1	zinc finger, RAN-binding domain containing 1
hsa-miR-1261	0	0	1	0	1	1	TRIM44	tripartite motif containing 44
hsa-miR-1261	1	0	1	1	1	1	ZNF280C	zinc finger protein 280C
hsa-miR-1261	1	0	1	0	1	1	FAM46C	family with sequence similarity 46, member C
hsa-miR-1261	1	0	1	0	1	1	DCAF16	DDB1 and CUL4 associated factor 16
hsa-miR-1261	1	0	1	1	1	1	ELOVL2	ELOVL fatty acid elongase 2
hsa-miR-1261	0	0	1	0	1	1	MREG	melanoregulin
hsa-miR-1261	1	0	1	0	1	1	KIF26B	kinesin family member 26B
hsa-miR-1261	0	0	1	1	1	1	OSBPL1A	oxysterol binding protein-like 1A
hsa-miR-1261	0	0	1	1	1	1	KDM4D	lysine (K)-specific demethylase 4D
hsa-miR-1261	1	0	1	1	1	1	FIGN	fidgetin
hsa-miR-1261	1	0	1	1	1	1	RFWD3	ring finger and WD repeat domain 3
hsa-miR-1261	0	0	1	1	0	0	CEP55	centrosomal protein 55kDa
hsa-miR-1261	0	0	1	1	1	1	NUDT11	nudix (nucleoside diphosphate linked moiety X)-type motif 11
hsa-miR-1261	1	0	1	1	1	1	RPRD1A	regulation of nuclear pre-mRNA domain containing 1A
hsa-miR-1261	1	0	1	0	1	1	ARL8B	ADP-ribosylation factor-like 8B
hsa-miR-1261	0	0	1	1	1	1	RCBTB1	regulator of chromosome condensation (RCC1) and BTB (POZ) domain containing protein 1
hsa-miR-1261	1	0	1	0	1	1	LIN7C	lin-7 homolog C (C. elegans)
hsa-miR-1261	1	0	1	1	1	1	RSBN1	round spermatid basic protein 1
hsa-miR-1261	1	0	1	0	1	1	LRP1B	low density lipoprotein receptor-related protein 1B
hsa-miR-1261	1	0	1	0	1	1	TMEM55A	transmembrane protein 55A
hsa-miR-1261	1	0	1	0	1	1	PCDHAC1	protocadherin alpha subfamily C, 1
hsa-miR-1261	1	0	1	0	1	1	PCDHAC2	protocadherin alpha subfamily C, 2
hsa-miR-1261	1	0	1	1	1	1	PCDHA1	protocadherin alpha 1
hsa-miR-1261	1	0	1	0	1	1	PCDHA10	protocadherin alpha 10
hsa-miR-1261	1	0	1	0	1	1	PCDHA11	protocadherin alpha 11
hsa-miR-1261	1	0	1	0	1	1	PCDHA12	protocadherin alpha 12
hsa-miR-1261	1	0	1	1	1	1	PCDHA2	protocadherin alpha 2
hsa-miR-1261	1	0	1	1	1	1	PCDHA3	protocadherin alpha 3
hsa-miR-1261	1	0	1	1	1	1	PCDHA6	protocadherin alpha 6
hsa-miR-1261	1	0	1	0	1	1	PCDHA7	protocadherin alpha 7
hsa-miR-1261	1	0	1	1	1	1	PCDHA8	protocadherin alpha 8
hsa-miR-1261	0	0	1	1	1	1	ERRFI1	ERBB receptor feedback inhibitor 1
hsa-miR-1261	1	0	1	0	1	1	FAM190B	family with sequence similarity 190, member B
hsa-miR-1261	0	0	1	1	1	1	TRMT13	tRNA methyltransferase 13 homolog (S. cerevisiae)
hsa-miR-1261	1	0	1	1	1	1	SEPT3	septin 3
hsa-miR-1261	0	0	1	1	1	1	RNF20	ring finger protein 20, E3 ubiquitin protein ligase
hsa-miR-1261	1	0	1	0	1	1	KCMF1	potassium channel modulatory factor 1
hsa-miR-1261	1	0	1	1	1	1	C8orf4	chromosome 8 open reading frame 4
hsa-miR-1261	1	0	1	1	1	1	FEM1C	fem-1 homolog c (C. elegans)
hsa-miR-1261	1	0	1	1	1	1	C5orf15	chromosome 5 open reading frame 15
hsa-miR-1261	0	0	1	1	0	0	ENTPD7	ectonucleoside triphosphate diphosphohydrolase 7
hsa-miR-1261	0	0	1	1	1	1	CYSLTR2	cysteinyl leukotriene receptor 2
hsa-miR-1261	1	0	1	1	1	1	PCDH9	protocadherin 9
hsa-miR-1261	1	0	1	1	1	1	NRIP3	nuclear receptor interacting protein 3
hsa-miR-1261	1	0	1	0	1	1	KCNS2	potassium voltage-gated channel, delayed-rectifier, subfamily S, member 2
hsa-miR-1261	0	0	1	1	1	1	SHROOM4	shroom family member 4
hsa-miR-1261	1	0	1	1	1	1	ZNF608	zinc finger protein 608
hsa-miR-1261	1	0	1	0	1	1	SYT4	synaptotagmin IV
hsa-miR-1261	1	0	1	1	1	1	NLGN2	neuroligin 2
hsa-miR-1261	1	0	1	1	1	1	SEMA6A	sema domain, transmembrane domain (TM), and cytoplasmic domain, (semaphorin) 6A
hsa-miR-1261	1	0	1	1	1	1	WDR48	WD repeat domain 48
hsa-miR-1261	1	0	1	0	1	1	GPAM	glycerol-3-phosphate acyltransferase, mitochondrial
hsa-miR-1261	1	0	1	1	1	1	CLDN1	claudin 1
hsa-miR-1261	0	0	1	1	1	1	RNASEL	ribonuclease L (2',5'-oligoisoadenylate synthetase-dependent)
hsa-miR-1261	1	0	1	1	1	1	RPRD1B	regulation of nuclear pre-mRNA domain containing 1B
hsa-miR-1261	1	0	1	1	1	1	NTN4	netrin 4
hsa-miR-1261	0	0	1	1	1	1	HRH4	histamine receptor H4
hsa-miR-1261	1	0	1	1	1	1	SENP2	SUMO1/sentrin/SMT3 specific peptidase 2
hsa-miR-1261	0	0	1	1	1	1	GABBR1	gamma-aminobutyric acid (GABA) B receptor, 1
hsa-miR-1261	0	0	1	0	1	1	CFL2	cofilin 2 (muscle)
hsa-miR-1261	1	0	1	1	1	1	FOXM1	forkhead box M1
hsa-miR-1261	1	0	1	1	1	1	EGLN1	egl nine homolog 1 (C. elegans)
hsa-miR-1261	0	0	1	1	0	0	ABHD4	abhydrolase domain containing 4
hsa-miR-1261	1	0	1	1	1	1	MRPL17	mitochondrial ribosomal protein L17
hsa-miR-1261	1	0	1	1	1	1	SNX16	sorting nexin 16
hsa-miR-1261	1	0	1	1	1	1	LRRC4	leucine rich repeat containing 4
hsa-miR-1261	1	0	1	1	1	1	PRRX1	paired related homeobox 1
hsa-miR-1261	0	0	1	1	1	1	OSBPL11	oxysterol binding protein-like 11
hsa-miR-1261	0	0	1	1	1	1	METTL4	methyltransferase like 4
hsa-miR-1261	0	0	1	1	1	1	HTR5A	5-hydroxytryptamine (serotonin) receptor 5A, G protein-coupled
hsa-miR-1261	1	0	1	1	1	1	NEUROG2	neurogenin 2
hsa-miR-1261	0	0	1	1	0	0	DDX50	DEAD (Asp-Glu-Ala-Asp) box polypeptide 50
hsa-miR-1261	0	0	1	1	0	0	C20orf195	chromosome 20 open reading frame 195
hsa-miR-1261	1	0	1	1	1	1	AHNAK	AHNAK nucleoprotein
hsa-miR-1261	0	0	1	1	0	0	DHRS11	dehydrogenase/reductase (SDR family) member 11
hsa-miR-1261	1	0	1	1	1	1	FYCO1	FYVE and coiled-coil domain containing 1
hsa-miR-1261	1	0	1	1	1	1	CCDC82	coiled-coil domain containing 82
hsa-miR-1261	1	0	1	0	1	1	MOB3B	MOB kinase activator 3B
hsa-miR-1261	0	0	1	1	1	1	ZNF767	zinc finger family member 767
hsa-miR-1261	1	0	1	0	1	1	EDEM3	ER degradation enhancer, mannosidase alpha-like 3
hsa-miR-1261	0	0	1	0	1	1	PDGFD	platelet derived growth factor D
hsa-miR-1261	1	0	1	1	1	1	JHDM1D	jumonji C domain containing histone demethylase 1 homolog D (S. cerevisiae)
hsa-miR-1261	1	0	1	0	1	1	SETD7	SET domain containing (lysine methyltransferase) 7
hsa-miR-1261	1	0	1	1	1	1	SGPP1	sphingosine-1-phosphate phosphatase 1
hsa-miR-1261	1	0	1	1	1	1	PPP1R14C	protein phosphatase 1, regulatory (inhibitor) subunit 14C
hsa-miR-1261	1	0	1	1	1	1	PCDHA9	protocadherin alpha 9
hsa-miR-1261	0	0	1	0	1	1	ENAM	enamelin
hsa-miR-1261	0	0	1	0	1	1	KRTAP1-5	keratin associated protein 1-5
hsa-miR-1261	1	0	1	0	1	1	FAM172A	family with sequence similarity 172, member A
hsa-miR-1261	0	0	1	1	1	1	MAGT1	magnesium transporter 1
hsa-miR-1261	0	0	1	1	1	1	MAML2	mastermind-like 2 (Drosophila)
hsa-miR-1261	1	0	1	1	1	1	DCTN5	dynactin 5 (p25)
hsa-miR-1261	1	0	1	0	1	1	UBASH3B	ubiquitin associated and SH3 domain containing B
hsa-miR-1261	1	0	1	0	1	1	PURB	purine-rich element binding protein B
hsa-miR-1261	0	0	1	1	1	1	FBXO4	F-box protein 4
hsa-miR-1261	1	0	1	1	1	1	EPT1	ethanolaminephosphotransferase 1 (CDP-ethanolamine-specific)
hsa-miR-1261	1	0	1	1	1	1	BRWD1	bromodomain and WD repeat domain containing 1
hsa-miR-1261	1	0	1	1	1	1	PCMTD1	protein-L-isoaspartate (D-aspartate) O-methyltransferase domain containing 1
hsa-miR-1261	0	0	1	1	1	1	IL22RA2	interleukin 22 receptor, alpha 2
hsa-miR-1261	0	0	1	0	1	1	ZNF518B	zinc finger protein 518B
hsa-miR-1261	1	0	1	1	0	0	AP1S1	adaptor-related protein complex 1, sigma 1 subunit
hsa-miR-1261	0	0	1	1	1	1	BCCIP	BRCA2 and CDKN1A interacting protein
hsa-miR-1261	1	0	1	1	1	1	SLC44A1	solute carrier family 44, member 1
hsa-miR-1261	0	0	1	1	1	1	PABPC5	poly(A) binding protein, cytoplasmic 5
hsa-miR-1261	0	0	1	1	1	1	CHST14	carbohydrate (N-acetylgalactosamine 4-0) sulfotransferase 14
hsa-miR-1261	1	0	1	1	1	1	ADAMTS19	ADAM metallopeptidase with thrombospondin type 1 motif, 19
hsa-miR-1261	1	0	1	1	1	1	ICA1L	islet cell autoantigen 1,69kDa-like
hsa-miR-1261	0	0	1	1	1	1	SLC25A46	solute carrier family 25, member 46
hsa-miR-1261	0	0	1	1	1	1	TGIF2LY	TGFB-induced factor homeobox 2-like, Y-linked
hsa-miR-1261	0	0	1	0	1	1	SLC17A8	solute carrier family 17 (sodium-dependent inorganic phosphate cotransporter), member 8
hsa-miR-1261	0	0	1	1	1	1	HIPK4	homeodomain interacting protein kinase 4
hsa-miR-1261	0	0	1	1	1	1	NXPE3	neurexophilin and PC-esterase domain family, member 3
hsa-miR-1261	0	0	1	1	1	1	HFE2	hemochromatosis type 2 (juvenile)
hsa-miR-1261	0	0	1	1	1	1	APOBEC3F	apolipoprotein B mRNA editing enzyme, catalytic polypeptide-like 3F
hsa-miR-1261	1	0	1	1	1	1	SGMS1	sphingomyelin synthase 1
hsa-miR-1261	0	0	1	1	1	1	LONRF1	LON peptidase N-terminal domain and ring finger 1
hsa-miR-1261	1	0	1	1	1	1	FAM81A	family with sequence similarity 81, member A
hsa-miR-1261	0	0	1	1	1	1	TMEM199	transmembrane protein 199
hsa-miR-1261	0	0	1	0	1	1	HORMAD2	HORMA domain containing 2
hsa-miR-1261	0	0	1	1	1	1	GAPT	GRB2-binding adaptor protein, transmembrane
hsa-miR-1261	1	0	1	1	1	1	NXPH1	neurexophilin 1
hsa-miR-1261	0	0	1	1	1	1	TMEM74	transmembrane protein 74
hsa-miR-1261	1	0	1	1	1	1	C15orf32	chromosome 15 open reading frame 32
hsa-miR-1261	1	0	1	0	1	1	MDGA1	MAM domain containing glycosylphosphatidylinositol anchor 1
hsa-miR-1261	1	0	1	1	1	1	CREBRF	CREB3 regulatory factor
hsa-miR-1261	1	0	1	1	1	1	ELMOD2	ELMO/CED-12 domain containing 2
hsa-miR-1261	0	0	1	0	1	1	RTP1	receptor (chemosensory) transporter protein 1
hsa-miR-1261	1	0	1	1	1	1	FNDC5	fibronectin type III domain containing 5
hsa-miR-1261	0	0	1	1	1	1	SIAE	sialic acid acetylesterase
hsa-miR-1261	0	0	1	1	1	1	TEDDM1	transmembrane epididymal protein 1
hsa-miR-1261	1	0	1	1	1	1	RDH10	retinol dehydrogenase 10 (all-trans)
hsa-miR-1261	1	0	1	1	1	1	NR4A3	nuclear receptor subfamily 4, group A, member 3
hsa-miR-1261	1	0	1	1	1	1	DCUN1D3	DCN1, defective in cullin neddylation 1, domain containing 3 (S. cerevisiae)
hsa-miR-1261	1	0	1	1	1	1	CNTD1	cyclin N-terminal domain containing 1
hsa-miR-1261	1	0	1	1	1	1	DIP2B	DIP2 disco-interacting protein 2 homolog B (Drosophila)
hsa-miR-1261	1	0	1	1	1	1	LDLRAD3	low density lipoprotein receptor class A domain containing 3
hsa-miR-1261	1	0	1	0	1	1	CCDC71L	coiled-coil domain containing 71-like
hsa-miR-1261	0	0	1	1	0	0	PAQR7	progestin and adipoQ receptor family member VII
hsa-miR-1261	1	0	1	1	1	1	GMCL1	germ cell-less, spermatogenesis associated 1
hsa-miR-1261	1	0	1	1	1	1	MB21D2	Mab-21 domain containing 2
hsa-miR-1261	1	0	1	1	1	1	FAM216B	family with sequence similarity 216, member B
hsa-miR-1261	1	0	1	1	1	1	TMEM229B	transmembrane protein 229B
hsa-miR-1261	0	0	1	0	1	1	VSTM2A	V-set and transmembrane domain containing 2A
hsa-miR-1261	0	0	1	0	1	1	TMED4	transmembrane emp24 protein transport domain containing 4
hsa-miR-1261	1	0	1	0	1	1	RNF144B	ring finger protein 144B
hsa-miR-1261	1	0	1	1	1	1	ASB7	ankyrin repeat and SOCS box containing 7
hsa-miR-1261	1	0	1	1	1	1	E2F6	E2F transcription factor 6
hsa-miR-1261	1	0	1	1	1	1	MIA3	melanoma inhibitory activity family, member 3
hsa-miR-1261	0	0	1	1	1	1	RBM43	RNA binding motif protein 43
hsa-miR-1261	0	0	1	0	1	1	GYPE	glycophorin E (MNS blood group)
hsa-miR-1261	0	0	1	1	1	1	PTHLH	parathyroid hormone-like hormone
hsa-miR-1261	1	0	1	1	1	1	VAX1	ventral anterior homeobox 1
hsa-miR-1261	1	0	1	1	1	1	ATRNL1	attractin-like 1
hsa-miR-1261	1	0	1	1	1	1	GADL1	glutamate decarboxylase-like 1
hsa-miR-1261	0	0	1	1	0	0	C2orf27B	chromosome 2 open reading frame 27B
hsa-miR-1261	0	0	1	0	0	0	PPIAP29	peptidylprolyl isomerase A (cyclophilin A) pseudogene 29
hsa-miR-1261	0	0	1	0	0	0	TFAMP1	transcription factor A, mitochondrial pseudogene 1
hsa-miR-1261	0	0	1	0	0	0	SNORD38B	small nucleolar RNA, C/D box 38B
hsa-miR-1261	0	0	1	0	0	0	MIR155HG	MIR155 host gene (non-protein coding)
hsa-miR-1261	0	0	1	0	0	0	DKFZP586I1420	uncharacterized protein DKFZp586I1420
hsa-miR-1261	0	0	1	0	0	0	HYALP1	hyaluronoglucosaminidase pseudogene 1
hsa-miR-1261	0	0	1	0	0	0	TRIM78P	tripartite motif containing 78, pseudogene
hsa-miR-1261	0	0	1	0	0	0	SEPHS1P1	selenophosphate synthetase 1 pseudogene 1
hsa-miR-1261	0	0	1	0	0	0	PER4	period homolog 3 (Drosophila) pseudogene
hsa-miR-1261	0	0	1	0	0	0	MALAT1	metastasis associated lung adenocarcinoma transcript 1 (non-protein coding)
hsa-miR-1261	0	0	1	0	0	0	HAS2-AS1	HAS2 antisense RNA 1
hsa-miR-1261	0	0	1	0	0	0	EIF3IP1	eukaryotic translation initiation factor 3, subunit I pseudogene 1
hsa-miR-1261	0	0	1	0	0	0	HSP90B3P	heat shock protein 90kDa beta (Grp94), member 3, pseudogene
hsa-miR-1261	0	0	1	0	0	0	USP32P1	ubiquitin specific peptidase 32 pseudogene 1
hsa-miR-1261	0	0	1	0	0	0	GMCL1P1	germ cell-less, spermatogenesis associated 1 pseudogene 1
hsa-miR-1261	0	0	1	0	0	0	SNORD116-26	small nucleolar RNA, C/D box 116-26
hsa-miR-1261	0	0	1	1	0	0	SNRPN	small nuclear ribonucleoprotein polypeptide N
