# Supplementary material for: Profiling of Selected MicroRNAs in Proliferative Eutopic Endometrium of Women with Ovarian Endometriosis
Source: Biomed Res Int. 2015 Aug 20;2015:760698. doi: 10.1155/2015/760698 (PMC4558423; doi:10.1155/2015/760698)
Supplement: Supplementary file 1 — Table I: The names of miRNAs significantly differentially expressed between eutopic endometrium of patients with endometriosis vs eutopic endometrium of patients without endometriosis. Table II: The associations between miRNA and mRNA, which presents detailed results of the search of six major databases i.e targetscan, tarbase, miranda, mirbase, mirtarget2 and pictar. [file 760698.f1.zip › 760698.f1/Table II/hsa-miR-1262.tsv]

miR	targetscan	tarbase	miranda	mirbase	mirtarget2	pictar	GeneSymbol	GeneName
hsa-miR-1262	1	0	1	1	1	1	PLAU	plasminogen activator, urokinase
hsa-miR-1262	1	0	1	1	0	0	SRCAP	Snf2-related CREBBP activator protein
hsa-miR-1262	1	0	1	0	0	0	TRANK1	tetratricopeptide repeat and ankyrin repeat containing 1
hsa-miR-1262	1	0	1	1	1	1	PRUNE2	prune homolog 2 (Drosophila)
hsa-miR-1262	1	0	1	0	1	1	KIAA0408	KIAA0408
hsa-miR-1262	0	0	1	1	0	0	PCNXL2	pecanex-like 2 (Drosophila)
hsa-miR-1262	1	0	1	1	0	0	DENND4B	DENN/MADD domain containing 4B
hsa-miR-1262	1	0	1	1	1	1	IQSEC2	IQ motif and Sec7 domain 2
hsa-miR-1262	0	0	1	1	0	0	ZNF862	zinc finger protein 862
hsa-miR-1262	1	0	1	1	1	1	GPATCH8	G patch domain containing 8
hsa-miR-1262	1	0	1	1	0	0	PCLO	piccolo (presynaptic cytomatrix protein)
hsa-miR-1262	1	0	1	1	1	1	HIPK1	homeodomain interacting protein kinase 1
hsa-miR-1262	1	0	1	1	1	1	GIGYF2	GRB10 interacting GYF protein 2
hsa-miR-1262	1	0	1	0	1	1	MAGI2	membrane associated guanylate kinase, WW and PDZ domain containing 2
hsa-miR-1262	0	0	1	1	1	1	XYLB	xylulokinase homolog (H. influenzae)
hsa-miR-1262	0	0	1	1	0	0	ATP10B	ATPase, class V, type 10B
hsa-miR-1262	1	0	1	1	0	0	ESYT1	extended synaptotagmin-like protein 1
hsa-miR-1262	1	0	1	1	1	1	DNM3	dynamin 3
hsa-miR-1262	1	0	1	1	0	0	SEZ6L	seizure related 6 homolog (mouse)-like
hsa-miR-1262	1	0	1	0	0	0	DTX4	deltex homolog 4 (Drosophila)
hsa-miR-1262	1	0	1	1	1	1	CPEB3	cytoplasmic polyadenylation element binding protein 3
hsa-miR-1262	1	0	1	1	1	1	BAHD1	bromo adjacent homology domain containing 1
hsa-miR-1262	1	0	1	1	1	1	RPGRIP1L	RPGRIP1-like
hsa-miR-1262	0	0	1	1	0	0	RBPJL	recombination signal binding protein for immunoglobulin kappa J region-like
hsa-miR-1262	1	0	1	1	1	1	FOXJ3	forkhead box J3
hsa-miR-1262	1	0	1	1	0	0	ZC3H4	zinc finger CCCH-type containing 4
hsa-miR-1262	1	0	1	1	1	1	PHF8	PHD finger protein 8
hsa-miR-1262	1	0	1	1	1	1	ZMYND8	zinc finger, MYND-type containing 8
hsa-miR-1262	1	0	1	0	1	1	GPR158	G protein-coupled receptor 158
hsa-miR-1262	1	0	1	1	1	1	RIMKLB	ribosomal modification protein rimK-like family member B
hsa-miR-1262	0	0	1	1	1	1	CA10	carbonic anhydrase X
hsa-miR-1262	1	0	1	0	0	0	ODZ4	odz, odd Oz/ten-m homolog 4 (Drosophila)
hsa-miR-1262	1	0	1	0	0	0	NYNRIN	NYN domain and retroviral integrase containing
hsa-miR-1262	1	0	1	1	1	1	HACE1	HECT domain and ankyrin repeat containing E3 ubiquitin protein ligase 1
hsa-miR-1262	1	1	1	1	1	1	NFIA	nuclear factor I/A
hsa-miR-1262	1	0	1	1	0	0	EBF4	early B-cell factor 4
hsa-miR-1262	1	0	1	1	1	1	FRAS1	Fraser syndrome 1
hsa-miR-1262	1	0	1	0	1	1	LMO3	LIM domain only 3 (rhombotin-like 2)
hsa-miR-1262	0	0	1	0	1	1	ZSWIM6	zinc finger, SWIM-type containing 6
hsa-miR-1262	1	0	1	1	0	0	NCKAP5L	NCK-associated protein 5-like
hsa-miR-1262	1	0	1	1	1	1	DENND1A	DENN/MADD domain containing 1A
hsa-miR-1262	1	0	1	0	0	0	TANC2	tetratricopeptide repeat, ankyrin repeat and coiled-coil containing 2
hsa-miR-1262	1	0	1	1	1	1	PER3	period homolog 3 (Drosophila)
hsa-miR-1262	0	0	1	0	0	0	TTC28-AS1	TTC28 antisense RNA 1
hsa-miR-1262	1	0	1	1	1	1	IKZF4	IKAROS family zinc finger 4 (Eos)
hsa-miR-1262	0	0	1	1	1	1	FANCI	Fanconi anemia, complementation group I
hsa-miR-1262	1	0	1	1	1	1	LCOR	ligand dependent nuclear receptor corepressor
hsa-miR-1262	1	0	1	1	1	1	LZTS2	leucine zipper, putative tumor suppressor 2
hsa-miR-1262	0	0	1	1	0	0	FAM65A	family with sequence similarity 65, member A
hsa-miR-1262	1	0	1	1	0	0	ZNF292	zinc finger protein 292
hsa-miR-1262	0	0	1	1	1	1	KIAA1967	KIAA1967
hsa-miR-1262	1	0	1	1	1	1	SH3TC2	SH3 domain and tetratricopeptide repeats 2
hsa-miR-1262	1	0	1	0	0	0	RNF169	ring finger protein 169
hsa-miR-1262	1	0	1	1	1	1	PAM	peptidylglycine alpha-amidating monooxygenase
hsa-miR-1262	0	0	1	1	1	1	PAK3	p21 protein (Cdc42/Rac)-activated kinase 3
hsa-miR-1262	1	0	1	0	1	1	BEND4	BEN domain containing 4
hsa-miR-1262	1	1	1	1	1	1	BACE1	beta-site APP-cleaving enzyme 1
hsa-miR-1262	0	0	1	1	1	1	PCBP2	poly(rC) binding protein 2
hsa-miR-1262	0	0	1	1	1	1	FN1	fibronectin 1
hsa-miR-1262	0	0	1	0	1	1	ACE2	angiotensin I converting enzyme (peptidyl-dipeptidase A) 2
hsa-miR-1262	0	0	1	0	1	1	ITPR1	inositol 1,4,5-trisphosphate receptor, type 1
hsa-miR-1262	1	0	1	1	1	1	BACH2	BTB and CNC homology 1, basic leucine zipper transcription factor 2
hsa-miR-1262	1	0	1	1	0	0	ELN	elastin
hsa-miR-1262	1	0	1	1	1	1	PCCB	propionyl CoA carboxylase, beta polypeptide
hsa-miR-1262	1	0	1	1	1	1	PHC1	polyhomeotic homolog 1 (Drosophila)
hsa-miR-1262	1	0	1	1	1	1	SLC8A1	solute carrier family 8 (sodium/calcium exchanger), member 1
hsa-miR-1262	1	0	1	0	1	1	PLAG1	pleiomorphic adenoma gene 1
hsa-miR-1262	1	0	1	0	1	1	DPYSL2	dihydropyrimidinase-like 2
hsa-miR-1262	1	0	1	0	1	1	CHL1	cell adhesion molecule with homology to L1CAM (close homolog of L1)
hsa-miR-1262	1	0	1	1	1	1	EPHA5	EPH receptor A5
hsa-miR-1262	1	0	1	1	1	1	TBX2	T-box 2
hsa-miR-1262	1	0	1	0	1	1	CDON	Cdon homolog (mouse)
hsa-miR-1262	1	0	1	1	1	1	SPTB	spectrin, beta, erythrocytic
hsa-miR-1262	0	0	1	1	1	1	ACO1	aconitase 1, soluble
hsa-miR-1262	1	0	1	1	1	1	MYO5A	myosin VA (heavy chain 12, myoxin)
hsa-miR-1262	0	0	1	0	1	1	ACTN2	actinin, alpha 2
hsa-miR-1262	0	0	1	1	1	1	STAU1	staufen, RNA binding protein, homolog 1 (Drosophila)
hsa-miR-1262	0	0	1	1	0	0	CFLAR	CASP8 and FADD-like apoptosis regulator
hsa-miR-1262	1	0	1	1	1	1	CD40	CD40 molecule, TNF receptor superfamily member 5
hsa-miR-1262	1	0	1	1	1	1	ARHGEF3	Rho guanine nucleotide exchange factor (GEF) 3
hsa-miR-1262	1	0	1	0	1	1	ADD3	adducin 3 (gamma)
hsa-miR-1262	1	0	1	1	0	0	PPP2R5D	protein phosphatase 2, regulatory subunit B', delta
hsa-miR-1262	0	0	1	1	1	1	SGSH	N-sulfoglucosamine sulfohydrolase
hsa-miR-1262	1	0	1	1	1	1	PHLDB2	pleckstrin homology-like domain, family B, member 2
hsa-miR-1262	0	0	1	1	1	1	PLD1	phospholipase D1, phosphatidylcholine-specific
hsa-miR-1262	1	0	1	0	1	1	PDE7B	phosphodiesterase 7B
hsa-miR-1262	1	0	1	1	1	1	APC	adenomatous polyposis coli
hsa-miR-1262	1	0	1	1	1	1	MEF2D	myocyte enhancer factor 2D
hsa-miR-1262	1	0	1	1	1	1	INSC	inscuteable homolog (Drosophila)
hsa-miR-1262	0	0	1	0	0	0	MIAT	myocardial infarction associated transcript (non-protein coding)
hsa-miR-1262	1	0	1	1	1	1	SLC4A4	solute carrier family 4, sodium bicarbonate cotransporter, member 4
hsa-miR-1262	0	0	1	0	1	1	ZMYM2	zinc finger, MYM-type 2
hsa-miR-1262	1	0	1	1	1	1	MBNL2	muscleblind-like splicing regulator 2
hsa-miR-1262	0	0	1	1	1	1	ZNF33A	zinc finger protein 33A
hsa-miR-1262	1	0	1	1	1	1	LDB2	LIM domain binding 2
hsa-miR-1262	1	0	1	1	0	0	PRRC2A	proline-rich coiled-coil 2A
hsa-miR-1262	1	0	1	1	1	1	TP63	tumor protein p63
hsa-miR-1262	0	0	1	1	0	0	PIF1	PIF1 5'-to-3' DNA helicase homolog (S. cerevisiae)
hsa-miR-1262	1	0	1	1	1	1	EDNRB	endothelin receptor type B
hsa-miR-1262	1	0	1	1	1	1	SORBS1	sorbin and SH3 domain containing 1
hsa-miR-1262	0	0	1	1	1	1	SAP30L	SAP30-like
hsa-miR-1262	0	0	1	1	0	0	BBX	bobby sox homolog (Drosophila)
hsa-miR-1262	0	0	1	0	1	1	SLC38A4	solute carrier family 38, member 4
hsa-miR-1262	1	0	1	1	1	1	SENP7	SUMO1/sentrin specific peptidase 7
hsa-miR-1262	1	0	1	1	1	1	AXIN2	axin 2
hsa-miR-1262	1	0	1	1	1	1	C21orf91	chromosome 21 open reading frame 91
hsa-miR-1262	0	0	1	0	0	0	TIGD7	tigger transposable element derived 7
hsa-miR-1262	1	0	1	0	1	1	PARP11	poly (ADP-ribose) polymerase family, member 11
hsa-miR-1262	0	0	1	1	1	1	C21orf7	chromosome 21 open reading frame 7
hsa-miR-1262	0	0	1	1	1	1	LRTOMT	leucine rich transmembrane and 0-methyltransferase domain containing
hsa-miR-1262	1	0	1	1	1	1	CHST9	carbohydrate (N-acetylgalactosamine 4-0) sulfotransferase 9
hsa-miR-1262	0	0	1	0	0	0	NBPF10	neuroblastoma breakpoint family, member 10
hsa-miR-1262	0	0	1	1	0	0	SNRPN	small nuclear ribonucleoprotein polypeptide N
hsa-miR-1262	0	0	1	0	0	0	RMST	rhabdomyosarcoma 2 associated transcript (non-protein coding)
hsa-miR-1262	1	0	1	1	0	0	SAMD4A	sterile alpha motif domain containing 4A
hsa-miR-1262	0	0	1	1	1	1	PPP1R1B	protein phosphatase 1, regulatory (inhibitor) subunit 1B
hsa-miR-1262	1	0	1	1	0	0	SEPT8	septin 8
hsa-miR-1262	0	0	1	0	1	1	EPM2A	epilepsy, progressive myoclonus type 2A, Lafora disease (laforin)
hsa-miR-1262	1	0	1	1	1	1	HNRNPU	heterogeneous nuclear ribonucleoprotein U (scaffold attachment factor A)
hsa-miR-1262	1	0	1	1	1	1	CACNB2	calcium channel, voltage-dependent, beta 2 subunit
hsa-miR-1262	0	0	1	0	0	0	SNHG11	small nucleolar RNA host gene 11 (non-protein coding)
hsa-miR-1262	0	0	1	1	1	1	TTLL11	tubulin tyrosine ligase-like family, member 11
hsa-miR-1262	0	0	1	1	1	1	R3HCC1L	R3H domain and coiled-coil containing 1-like
hsa-miR-1262	1	0	1	0	1	1	IL1RAP	interleukin 1 receptor accessory protein
hsa-miR-1262	1	0	1	1	1	1	AFF2	AF4/FMR2 family, member 2
hsa-miR-1262	0	0	1	0	0	0	ADAM5	ADAM metallopeptidase domain 5, pseudogene
hsa-miR-1262	0	0	1	0	0	0	SNHG4	small nucleolar RNA host gene 4 (non-protein coding)
hsa-miR-1262	0	0	1	1	0	0	SERGEF	secretion regulating guanine nucleotide exchange factor
hsa-miR-1262	1	0	1	1	1	1	SUCO	SUN domain containing ossification factor
hsa-miR-1262	0	0	1	1	1	1	TCFL5	transcription factor-like 5 (basic helix-loop-helix)
hsa-miR-1262	0	0	1	1	1	1	CD1E	CD1e molecule
hsa-miR-1262	0	0	1	1	1	1	RNASE7	ribonuclease, RNase A family, 7
hsa-miR-1262	0	0	1	0	1	1	SCN8A	sodium channel, voltage gated, type VIII, alpha subunit
hsa-miR-1262	1	0	1	1	1	1	NRXN3	neurexin 3
hsa-miR-1262	0	0	1	1	0	0	RPP21	ribonuclease P/MRP 21kDa subunit
hsa-miR-1262	0	0	1	1	1	1	TAF1	TAF1 RNA polymerase II, TATA box binding protein (TBP)-associated factor, 250kDa
hsa-miR-1262	0	0	1	1	0	0	ACSS2	acyl-CoA synthetase short-chain family member 2
hsa-miR-1262	0	0	1	0	0	0	TUG1	taurine upregulated 1 (non-protein coding)
hsa-miR-1262	0	0	1	1	1	1	STOX2	storkhead box 2
hsa-miR-1262	1	0	1	1	1	1	PTBP3	polypyrimidine tract binding protein 3
hsa-miR-1262	1	0	1	1	1	1	SLC38A2	solute carrier family 38, member 2
hsa-miR-1262	1	0	1	1	1	1	WDTC1	WD and tetratricopeptide repeats 1
hsa-miR-1262	0	0	1	1	0	0	UBR4	ubiquitin protein ligase E3 component n-recognin 4
hsa-miR-1262	1	0	1	1	1	1	VASH2	vasohibin 2
hsa-miR-1262	0	0	1	1	0	0	CPSF3L	cleavage and polyadenylation specific factor 3-like
hsa-miR-1262	0	0	1	0	0	0	SOX2-OT	SOX2 overlapping transcript (non-protein coding)
hsa-miR-1262	0	0	1	0	0	0	DUXAP10	double homeobox A pseudogene 10
hsa-miR-1262	1	0	1	0	1	1	DCAF17	DDB1 and CUL4 associated factor 17
hsa-miR-1262	0	0	1	1	1	1	VPRBP	Vpr (HIV-1) binding protein
hsa-miR-1262	1	0	1	1	0	0	CCDC136	coiled-coil domain containing 136
hsa-miR-1262	0	0	1	1	1	1	C14orf118	chromosome 14 open reading frame 118
hsa-miR-1262	1	0	1	1	1	1	USP33	ubiquitin specific peptidase 33
hsa-miR-1262	1	0	1	1	1	1	PHF20L1	PHD finger protein 20-like 1
hsa-miR-1262	0	0	1	1	1	1	CLEC4M	C-type lectin domain family 4, member M
hsa-miR-1262	0	0	1	1	0	0	OBSL1	obscurin-like 1
hsa-miR-1262	1	0	1	0	1	1	C14orf101	chromosome 14 open reading frame 101
hsa-miR-1262	1	0	1	1	0	0	MEX3A	mex-3 homolog A (C. elegans)
hsa-miR-1262	1	0	1	1	1	1	COPS7B	COP9 constitutive photomorphogenic homolog subunit 7B (Arabidopsis)
hsa-miR-1262	1	0	1	1	1	1	FAM131A	family with sequence similarity 131, member A
hsa-miR-1262	0	0	1	1	1	1	SIGLEC1	sialic acid binding Ig-like lectin 1, sialoadhesin
hsa-miR-1262	0	0	1	0	0	0	IFFO2	intermediate filament family orphan 2
hsa-miR-1262	0	0	1	1	0	0	FERMT1	fermitin family member 1
hsa-miR-1262	1	0	1	1	1	1	TNRC6A	trinucleotide repeat containing 6A
hsa-miR-1262	0	0	1	0	1	1	FLJ22447	uncharacterized LOC400221
hsa-miR-1262	1	0	1	1	1	1	EML2	echinoderm microtubule associated protein like 2
hsa-miR-1262	1	0	1	1	1	1	GORASP2	golgi reassembly stacking protein 2, 55kDa
hsa-miR-1262	0	0	1	1	1	1	SPRTN	SprT-like N-terminal domain
hsa-miR-1262	0	0	1	1	1	1	NETO2	neuropilin (NRP) and tolloid (TLL)-like 2
hsa-miR-1262	0	0	1	1	1	1	CHD1L	chromodomain helicase DNA binding protein 1-like
hsa-miR-1262	1	0	1	1	1	1	GPD2	glycerol-3-phosphate dehydrogenase 2 (mitochondrial)
hsa-miR-1262	0	0	1	1	1	1	RAB37	RAB37, member RAS oncogene family
hsa-miR-1262	0	0	1	1	1	1	GNAS	GNAS complex locus
hsa-miR-1262	0	0	1	0	0	0	LOC283508	uncharacterized LOC283508
hsa-miR-1262	0	0	1	0	0	0	CHST9-AS1	CHST9 antisense RNA 1
hsa-miR-1262	1	0	1	0	1	1	AP1G1	adaptor-related protein complex 1, gamma 1 subunit
hsa-miR-1262	1	0	1	1	1	1	DLGAP4	discs, large (Drosophila) homolog-associated protein 4
hsa-miR-1262	0	0	1	0	0	0	CASC2	cancer susceptibility candidate 2 (non-protein coding)
hsa-miR-1262	0	0	1	0	1	1	HDX	highly divergent homeobox
hsa-miR-1262	1	0	1	1	0	0	AUP1	ancient ubiquitous protein 1
hsa-miR-1262	0	0	1	0	0	0	LOC157273	uncharacterized LOC157273
hsa-miR-1262	0	0	1	1	1	1	ANKRD36B	ankyrin repeat domain 36B
hsa-miR-1262	0	0	1	1	0	0	BEAN1	brain expressed, associated with NEDD4, 1
hsa-miR-1262	0	0	1	0	0	0	JPX	JPX transcript, XIST activator (non-protein coding)
hsa-miR-1262	1	0	1	1	1	1	SCAMP5	secretory carrier membrane protein 5
hsa-miR-1262	1	0	1	1	1	1	CLCN5	chloride channel, voltage-sensitive 5
hsa-miR-1262	0	0	1	1	1	1	AGBL2	ATP/GTP binding protein-like 2
hsa-miR-1262	0	0	1	0	1	1	THAP6	THAP domain containing 6
hsa-miR-1262	0	0	1	1	1	1	PSME3	proteasome (prosome, macropain) activator subunit 3 (PA28 gamma; Ki)
hsa-miR-1262	0	0	1	1	0	0	LOXHD1	lipoxygenase homology domains 1
hsa-miR-1262	0	0	1	1	0	0	NXF2	nuclear RNA export factor 2
hsa-miR-1262	0	0	1	1	1	1	SEC61A2	Sec61 alpha 2 subunit (S. cerevisiae)
hsa-miR-1262	0	0	1	0	0	0	LOC285074	anaphase promoting complex subunit 1 pseudogene
hsa-miR-1262	0	0	1	0	0	0	UBE2QL1	ubiquitin-conjugating enzyme E2Q family-like 1
hsa-miR-1262	0	0	1	0	0	0	GTF3A	general transcription factor IIIA
hsa-miR-1262	0	0	1	1	1	1	FXC1	fracture callus 1 homolog (rat)
hsa-miR-1262	0	0	1	1	1	1	ZBTB26	zinc finger and BTB domain containing 26
hsa-miR-1262	0	0	1	1	0	0	RHBDF2	rhomboid 5 homolog 2 (Drosophila)
hsa-miR-1262	1	0	1	1	1	1	HLF	hepatic leukemia factor
hsa-miR-1262	1	0	1	1	1	1	TBCK	TBC1 domain containing kinase
hsa-miR-1262	0	0	1	0	1	1	CDHR3	cadherin-related family member 3
hsa-miR-1262	1	0	1	1	1	1	CNOT4	CCR4-NOT transcription complex, subunit 4
hsa-miR-1262	0	0	1	1	1	1	CAMKV	CaM kinase-like vesicle-associated
hsa-miR-1262	0	0	1	0	1	1	CADM1	cell adhesion molecule 1
hsa-miR-1262	1	0	1	1	1	1	BOC	Boc homolog (mouse)
hsa-miR-1262	1	0	1	1	1	1	AMMECR1	Alport syndrome, mental retardation, midface hypoplasia and elliptocytosis chromosomal region gene 1
hsa-miR-1262	1	0	1	1	1	1	RBMX	RNA binding motif protein, X-linked
hsa-miR-1262	0	0	1	0	1	1	TBX5-AS1	TBX5 antisense RNA 1
hsa-miR-1262	1	0	1	1	1	1	FBXW2	F-box and WD repeat domain containing 2
hsa-miR-1262	0	0	1	1	1	1	NRCAM	neuronal cell adhesion molecule
hsa-miR-1262	0	0	1	1	0	0	ADH6	alcohol dehydrogenase 6 (class V)
hsa-miR-1262	0	0	1	1	0	0	FNTB	farnesyltransferase, CAAX box, beta
hsa-miR-1262	1	0	1	1	1	1	SPTBN1	spectrin, beta, non-erythrocytic 1
hsa-miR-1262	0	0	1	1	0	0	HSD17B4	hydroxysteroid (17-beta) dehydrogenase 4
hsa-miR-1262	0	0	1	0	0	0	ZNF806	zinc finger protein 806
hsa-miR-1262	1	0	1	0	1	1	GATAD2B	GATA zinc finger domain containing 2B
hsa-miR-1262	0	0	1	1	1	1	C9orf47	chromosome 9 open reading frame 47
hsa-miR-1262	1	0	1	1	1	1	LPPR2	lipid phosphate phosphatase-related protein type 2
hsa-miR-1262	1	0	1	1	1	1	UBA6	ubiquitin-like modifier activating enzyme 6
hsa-miR-1262	0	0	1	1	1	1	MOBP	myelin-associated oligodendrocyte basic protein
hsa-miR-1262	0	0	1	1	1	1	MYO6	myosin VI
hsa-miR-1262	1	0	1	0	1	1	UVRAG	UV radiation resistance associated gene
hsa-miR-1262	1	0	1	1	1	1	KCNIP3	Kv channel interacting protein 3, calsenilin
hsa-miR-1262	0	0	1	0	0	0	LOC100129620	uncharacterized LOC100129620
hsa-miR-1262	1	0	1	1	1	1	SPATS2	spermatogenesis associated, serine-rich 2
hsa-miR-1262	1	0	1	1	1	1	CECR6	cat eye syndrome chromosome region, candidate 6
hsa-miR-1262	1	0	1	0	1	1	STC2	stanniocalcin 2
hsa-miR-1262	0	0	1	1	0	0	TRIM46	tripartite motif containing 46
hsa-miR-1262	1	0	1	1	1	1	GAPVD1	GTPase activating protein and VPS9 domains 1
hsa-miR-1262	0	0	1	0	0	0	FAM66C	family with sequence similarity 66, member C
hsa-miR-1262	1	0	1	1	1	1	HDGF	hepatoma-derived growth factor
hsa-miR-1262	1	0	1	1	1	1	LRP8	low density lipoprotein receptor-related protein 8, apolipoprotein e receptor
hsa-miR-1262	1	0	1	1	1	1	TCEANC2	transcription elongation factor A (SII) N-terminal and central domain containing 2
hsa-miR-1262	0	0	1	0	0	0	ZNF300P1	zinc finger protein 300 pseudogene 1
hsa-miR-1262	1	0	1	1	0	0	CHD3	chromodomain helicase DNA binding protein 3
hsa-miR-1262	0	0	1	1	0	0	DHX9	DEAH (Asp-Glu-Ala-His) box polypeptide 9
hsa-miR-1262	0	0	1	0	0	0	LINC00340	long intergenic non-protein coding RNA 340
hsa-miR-1262	0	0	1	1	0	0	LAS1L	LAS1-like (S. cerevisiae)
hsa-miR-1262	1	0	1	0	0	0	CTSB	cathepsin B
hsa-miR-1262	1	0	1	1	1	1	NSUN4	NOP2/Sun domain family, member 4
hsa-miR-1262	0	0	1	1	0	0	KLHDC3	kelch domain containing 3
hsa-miR-1262	0	0	1	0	0	0	THAP7-AS1	THAP7 antisense RNA 1
hsa-miR-1262	1	0	1	1	1	1	PIGA	phosphatidylinositol glycan anchor biosynthesis, class A
hsa-miR-1262	0	0	1	1	0	0	TMEM150A	transmembrane protein 150A
hsa-miR-1262	0	0	1	1	1	1	RP1	retinitis pigmentosa 1 (autosomal dominant)
hsa-miR-1262	1	0	1	1	0	0	ENTPD1	ectonucleoside triphosphate diphosphohydrolase 1
hsa-miR-1262	1	0	1	1	1	1	IL20RA	interleukin 20 receptor, alpha
hsa-miR-1262	0	0	1	1	1	1	GRPEL1	GrpE-like 1, mitochondrial (E. coli)
hsa-miR-1262	0	0	1	0	0	0	LOC338579	ankyrin repeat domain-containing protein 30B pseudogene
hsa-miR-1262	0	0	1	1	1	1	UPP2	uridine phosphorylase 2
hsa-miR-1262	0	0	1	1	0	0	FBXO18	F-box protein, helicase, 18
hsa-miR-1262	0	0	1	1	1	1	SCLT1	sodium channel and clathrin linker 1
hsa-miR-1262	0	0	1	1	0	0	MARS	methionyl-tRNA synthetase
hsa-miR-1262	1	0	1	1	1	1	PXN	paxillin
hsa-miR-1262	1	0	1	1	1	1	PLEKHH1	pleckstrin homology domain containing, family H (with MyTH4 domain) member 1
hsa-miR-1262	1	0	1	1	1	1	EGLN3	egl nine homolog 3 (C. elegans)
hsa-miR-1262	0	0	1	0	0	0	MORN2	MORN repeat containing 2
hsa-miR-1262	0	0	1	1	0	0	TTLL12	tubulin tyrosine ligase-like family, member 12
hsa-miR-1262	1	0	1	1	1	1	FAM219A	family with sequence similarity 219, member A
hsa-miR-1262	1	0	1	1	1	1	SMAP1	small ArfGAP 1
hsa-miR-1262	1	0	1	0	1	1	DCUN1D4	DCN1, defective in cullin neddylation 1, domain containing 4 (S. cerevisiae)
hsa-miR-1262	0	0	1	1	1	1	IDS	iduronate 2-sulfatase
hsa-miR-1262	1	0	1	1	1	1	ERBB3	v-erb-b2 erythroblastic leukemia viral oncogene homolog 3 (avian)
hsa-miR-1262	1	0	1	1	1	1	CORO2B	coronin, actin binding protein, 2B
hsa-miR-1262	0	0	1	1	0	0	JAKMIP1	janus kinase and microtubule interacting protein 1
hsa-miR-1262	0	0	1	0	0	0	FAM47E	family with sequence similarity 47, member E
hsa-miR-1262	1	0	1	1	1	1	C17orf85	chromosome 17 open reading frame 85
hsa-miR-1262	0	0	1	0	0	0	TMEM232	transmembrane protein 232
hsa-miR-1262	0	0	1	1	0	0	FAM21B	family with sequence similarity 21, member B
hsa-miR-1262	1	0	1	1	1	1	PIAS3	protein inhibitor of activated STAT, 3
hsa-miR-1262	0	0	1	1	0	0	GABRA2	gamma-aminobutyric acid (GABA) A receptor, alpha 2
hsa-miR-1262	1	0	1	1	1	1	IGFBP3	insulin-like growth factor binding protein 3
hsa-miR-1262	0	0	1	0	1	1	RASGRP3	RAS guanyl releasing protein 3 (calcium and DAG-regulated)
hsa-miR-1262	1	0	1	0	1	1	RBM23	RNA binding motif protein 23
hsa-miR-1262	0	0	1	0	0	0	FAM95B1	family with sequence similarity 95, member B1
hsa-miR-1262	0	0	1	1	0	0	RPRD2	regulation of nuclear pre-mRNA domain containing 2
hsa-miR-1262	1	0	1	1	0	0	UBN2	ubinuclein 2
hsa-miR-1262	1	0	1	1	1	1	DCTN4	dynactin 4 (p62)
hsa-miR-1262	1	0	1	1	1	1	FAM122B	family with sequence similarity 122B
hsa-miR-1262	0	0	1	1	0	0	C20orf141	chromosome 20 open reading frame 141
hsa-miR-1262	0	0	1	1	0	0	FSIP2	fibrous sheath interacting protein 2
hsa-miR-1262	1	0	1	1	1	1	IL16	interleukin 16
hsa-miR-1262	1	0	1	1	1	1	SIKE1	suppressor of IKBKE 1
hsa-miR-1262	1	0	1	1	1	1	PIK3R1	phosphoinositide-3-kinase, regulatory subunit 1 (alpha)
hsa-miR-1262	0	0	1	1	0	0	CLDN4	claudin 4
hsa-miR-1262	0	0	1	1	1	1	C18orf54	chromosome 18 open reading frame 54
hsa-miR-1262	0	0	1	1	1	1	SPICE1	spindle and centriole associated protein 1
hsa-miR-1262	1	0	1	1	0	0	MAN1B1	mannosidase, alpha, class 1B, member 1
hsa-miR-1262	1	0	1	1	1	1	MKRN1	makorin ring finger protein 1
hsa-miR-1262	0	0	1	1	1	1	USP4	ubiquitin specific peptidase 4 (proto-oncogene)
hsa-miR-1262	1	0	1	0	1	1	ADIPOR2	adiponectin receptor 2
hsa-miR-1262	1	0	1	1	1	1	FMNL3	formin-like 3
hsa-miR-1262	1	0	1	1	1	1	PLCL1	phospholipase C-like 1
hsa-miR-1262	1	0	1	1	0	0	PEAK1	NKF3 kinase family member
hsa-miR-1262	1	0	1	0	1	1	FNDC3B	fibronectin type III domain containing 3B
hsa-miR-1262	0	0	1	1	0	0	AADACL3	arylacetamide deacetylase-like 3
hsa-miR-1262	0	0	1	0	0	0	ERVFRD-2	endogenous retrovirus group FRD, member 2
hsa-miR-1262	1	0	1	0	1	1	CAPRIN1	cell cycle associated protein 1
hsa-miR-1262	0	0	1	0	1	1	LOC401321	uncharacterized LOC401321
hsa-miR-1262	1	0	1	1	1	1	ZNF655	zinc finger protein 655
hsa-miR-1262	0	0	1	1	0	0	LOC100128682	uncharacterized LOC100128682
hsa-miR-1262	1	0	1	1	1	1	BCAT1	branched chain amino-acid transaminase 1, cytosolic
hsa-miR-1262	1	0	1	0	1	1	USP37	ubiquitin specific peptidase 37
hsa-miR-1262	0	0	1	1	1	1	ZNF662	zinc finger protein 662
hsa-miR-1262	0	0	1	0	0	0	IDO2	indoleamine 2,3-dioxygenase 2
hsa-miR-1262	1	0	1	1	1	1	ADAMTSL1	ADAMTS-like 1
hsa-miR-1262	0	0	1	1	1	1	TBX19	T-box 19
hsa-miR-1262	1	0	1	1	1	1	GPD1	glycerol-3-phosphate dehydrogenase 1 (soluble)
hsa-miR-1262	1	0	1	0	1	1	KIF21B	kinesin family member 21B
hsa-miR-1262	1	0	1	1	1	1	SMAD7	SMAD family member 7
hsa-miR-1262	1	0	1	1	1	1	LRRK2	leucine-rich repeat kinase 2
hsa-miR-1262	1	0	1	1	1	1	MAP2K4	mitogen-activated protein kinase kinase 4
hsa-miR-1262	1	0	1	0	1	1	ZNF607	zinc finger protein 607
hsa-miR-1262	0	0	1	0	0	0	AGAP9	ArfGAP with GTPase domain, ankyrin repeat and PH domain 9
hsa-miR-1262	0	0	1	1	0	0	ZSCAN18	zinc finger and SCAN domain containing 18
hsa-miR-1262	0	0	1	1	1	1	CRISP3	cysteine-rich secretory protein 3
hsa-miR-1262	1	0	1	1	1	1	RPS6KA4	ribosomal protein S6 kinase, 90kDa, polypeptide 4
hsa-miR-1262	1	0	1	1	1	1	ATL2	atlastin GTPase 2
hsa-miR-1262	0	0	1	1	0	0	C6orf10	chromosome 6 open reading frame 10
hsa-miR-1262	1	0	1	1	1	1	UPK1B	uroplakin 1B
hsa-miR-1262	0	0	1	1	0	0	TRIM69	tripartite motif containing 69
hsa-miR-1262	0	0	1	0	0	0	PART1	prostate androgen-regulated transcript 1 (non-protein coding)
hsa-miR-1262	1	0	1	1	1	1	NECAP1	NECAP endocytosis associated 1
hsa-miR-1262	0	0	1	0	1	1	NEK1	NIMA (never in mitosis gene a)-related kinase 1
hsa-miR-1262	0	0	1	1	0	0	KAT8	K(lysine) acetyltransferase 8
hsa-miR-1262	0	0	1	1	0	0	NEK7	NIMA (never in mitosis gene a)-related kinase 7
hsa-miR-1262	1	0	1	1	1	1	RIF1	RAP1 interacting factor homolog (yeast)
hsa-miR-1262	0	0	1	1	1	1	TFDP2	transcription factor Dp-2 (E2F dimerization partner 2)
hsa-miR-1262	0	0	1	1	0	0	PSTPIP1	proline-serine-threonine phosphatase interacting protein 1
hsa-miR-1262	0	0	1	0	0	0	POM121L9P	POM121 transmembrane nucleoporin-like 9, pseudogene
hsa-miR-1262	1	0	1	1	1	1	TAB2	TGF-beta activated kinase 1/MAP3K7 binding protein 2
hsa-miR-1262	0	0	1	1	1	1	ARIH1	ariadne homolog, ubiquitin-conjugating enzyme E2 binding protein, 1 (Drosophila)
hsa-miR-1262	0	0	1	1	0	0	MSH5	mutS homolog 5 (E. coli)
hsa-miR-1262	0	0	1	1	0	0	SAPCD1	suppressor APC domain containing 1
hsa-miR-1262	1	0	1	1	1	1	ARPP21	cAMP-regulated phosphoprotein, 21kDa
hsa-miR-1262	0	0	1	0	0	0	KIAA0913	KIAA0913
hsa-miR-1262	0	0	1	1	1	1	STAG3L1	stromal antigen 3-like 1
hsa-miR-1262	0	0	1	1	0	0	LRCH3	leucine-rich repeats and calponin homology (CH) domain containing 3
hsa-miR-1262	1	0	1	0	1	1	GPR85	G protein-coupled receptor 85
hsa-miR-1262	0	0	1	1	0	0	DOPEY1	dopey family member 1
hsa-miR-1262	0	0	1	0	0	0	FAM66D	family with sequence similarity 66, member D
hsa-miR-1262	1	0	1	1	1	1	MSANTD2	Myb/SANT-like DNA-binding domain containing 2
hsa-miR-1262	1	0	1	1	1	1	USP45	ubiquitin specific peptidase 45
hsa-miR-1262	1	0	1	1	0	0	CCDC30	coiled-coil domain containing 30
hsa-miR-1262	1	0	1	1	1	1	CHMP7	charged multivesicular body protein 7
hsa-miR-1262	0	0	1	0	0	0	LOC387647	patched domain containing 3 pseudogene
hsa-miR-1262	0	0	1	1	0	0	TMEM44	transmembrane protein 44
hsa-miR-1262	1	0	1	1	1	1	UNC45B	unc-45 homolog B (C. elegans)
hsa-miR-1262	0	0	1	0	1	1	PLEKHM1P	pleckstrin homology domain containing, family M (with RUN domain) member 1 pseudogene
hsa-miR-1262	0	0	1	1	1	1	NARG2	NMDA receptor regulated 2
hsa-miR-1262	0	0	1	1	1	1	TAF8	TAF8 RNA polymerase II, TATA box binding protein (TBP)-associated factor, 43kDa
hsa-miR-1262	0	0	1	1	1	1	NEK11	NIMA (never in mitosis gene a)- related kinase 11
hsa-miR-1262	0	0	1	0	0	0	LOC286135	uncharacterized LOC286135
hsa-miR-1262	1	0	1	1	1	1	FAM63B	family with sequence similarity 63, member B
hsa-miR-1262	0	0	1	1	0	0	CD37	CD37 molecule
hsa-miR-1262	1	0	1	0	1	1	EXOC5	exocyst complex component 5
hsa-miR-1262	1	0	1	1	1	1	PRPF38B	PRP38 pre-mRNA processing factor 38 (yeast) domain containing B
hsa-miR-1262	1	0	1	1	1	1	ANKRD12	ankyrin repeat domain 12
hsa-miR-1262	1	0	1	0	1	1	SMURF1	SMAD specific E3 ubiquitin protein ligase 1
hsa-miR-1262	1	0	1	1	1	1	CADM2	cell adhesion molecule 2
hsa-miR-1262	0	0	1	1	1	1	BAIAP3	BAI1-associated protein 3
hsa-miR-1262	1	0	1	0	1	1	NR3C1	nuclear receptor subfamily 3, group C, member 1 (glucocorticoid receptor)
hsa-miR-1262	1	0	1	0	1	1	PATL1	protein associated with topoisomerase II homolog 1 (yeast)
hsa-miR-1262	1	0	1	1	0	0	LRRC58	leucine rich repeat containing 58
hsa-miR-1262	1	0	1	1	1	1	PPP3CA	protein phosphatase 3, catalytic subunit, alpha isozyme
hsa-miR-1262	0	0	1	1	1	1	TMEM130	transmembrane protein 130
hsa-miR-1262	1	0	1	1	1	1	IKZF2	IKAROS family zinc finger 2 (Helios)
hsa-miR-1262	1	0	1	1	1	1	CLIC5	chloride intracellular channel 5
hsa-miR-1262	1	0	1	1	1	1	TXNRD1	thioredoxin reductase 1
hsa-miR-1262	0	0	1	1	0	0	CRB3	crumbs homolog 3 (Drosophila)
hsa-miR-1262	0	0	1	1	1	1	SHPRH	SNF2 histone linker PHD RING helicase, E3 ubiquitin protein ligase
hsa-miR-1262	0	0	1	1	0	0	CMTM1	CKLF-like MARVEL transmembrane domain containing 1
hsa-miR-1262	0	0	1	1	1	1	CEP41	centrosomal protein 41kDa
hsa-miR-1262	1	0	1	1	1	1	WDR26	WD repeat domain 26
hsa-miR-1262	0	0	1	1	1	1	SUGT1	SGT1, suppressor of G2 allele of SKP1 (S. cerevisiae)
hsa-miR-1262	1	0	1	1	1	1	TAB3	TGF-beta activated kinase 1/MAP3K7 binding protein 3
hsa-miR-1262	0	0	1	1	1	1	MFAP5	microfibrillar associated protein 5
hsa-miR-1262	0	0	1	0	1	1	ANKS1B	ankyrin repeat and sterile alpha motif domain containing 1B
hsa-miR-1262	1	0	1	1	1	1	OPRM1	opioid receptor, mu 1
hsa-miR-1262	1	0	1	1	1	1	FGD4	FYVE, RhoGEF and PH domain containing 4
hsa-miR-1262	1	0	1	1	1	1	SP3	Sp3 transcription factor
hsa-miR-1262	1	0	1	1	1	1	MECP2	methyl CpG binding protein 2 (Rett syndrome)
hsa-miR-1262	0	0	1	1	0	0	PAOX	polyamine oxidase (exo-N4-amino)
hsa-miR-1262	1	0	1	0	1	1	LRAT	lecithin retinol acyltransferase (phosphatidylcholine--retinol O-acyltransferase)
hsa-miR-1262	0	0	1	1	0	0	DHRS4	dehydrogenase/reductase (SDR family) member 4
hsa-miR-1262	0	0	1	1	1	1	RHD	Rh blood group, D antigen
hsa-miR-1262	1	0	1	1	1	1	QKI	QKI, KH domain containing, RNA binding
hsa-miR-1262	1	0	1	1	1	1	MYB	v-myb myeloblastosis viral oncogene homolog (avian)
hsa-miR-1262	1	0	1	1	1	1	CD109	CD109 molecule
hsa-miR-1262	0	0	1	1	0	0	NBPF8	neuroblastoma breakpoint family, member 8
hsa-miR-1262	0	0	1	1	1	1	IL23R	interleukin 23 receptor
hsa-miR-1262	0	0	1	1	1	1	IYD	iodotyrosine deiodinase
hsa-miR-1262	0	0	1	0	1	1	MIS12	MIS12, MIND kinetochore complex component, homolog (S. pombe)
hsa-miR-1262	0	0	1	1	1	1	ZCCHC17	zinc finger, CCHC domain containing 17
hsa-miR-1262	0	0	1	1	0	0	TMCO6	transmembrane and coiled-coil domains 6
hsa-miR-1262	0	0	1	1	1	1	PTDSS1	phosphatidylserine synthase 1
hsa-miR-1262	1	0	1	1	1	1	NRGN	neurogranin (protein kinase C substrate, RC3)
hsa-miR-1262	1	0	1	1	1	1	TSPAN14	tetraspanin 14
hsa-miR-1262	1	0	1	1	1	1	RIMS3	regulating synaptic membrane exocytosis 3
hsa-miR-1262	1	0	1	0	1	1	DCAF10	DDB1 and CUL4 associated factor 10
hsa-miR-1262	0	0	1	1	0	0	DNAJC7	DnaJ (Hsp40) homolog, subfamily C, member 7
hsa-miR-1262	0	0	1	0	1	1	HAUS3	HAUS augmin-like complex, subunit 3
hsa-miR-1262	0	0	1	1	1	1	RABL5	RAB, member RAS oncogene family-like 5
hsa-miR-1262	0	0	1	0	0	0	LOC254896	uncharacterized LOC254896
hsa-miR-1262	1	0	1	0	1	1	EIF1AD	eukaryotic translation initiation factor 1A domain containing
hsa-miR-1262	0	0	1	1	0	0	SCG5	secretogranin V (7B2 protein)
hsa-miR-1262	1	0	1	0	1	1	CAV1	caveolin 1, caveolae protein, 22kDa
hsa-miR-1262	0	0	1	1	0	0	AGBL5	ATP/GTP binding protein-like 5
hsa-miR-1262	0	0	1	1	0	0	MYLK2	myosin light chain kinase 2
hsa-miR-1262	0	0	1	1	1	1	ZNF85	zinc finger protein 85
hsa-miR-1262	1	0	1	1	1	1	RSU1	Ras suppressor protein 1
hsa-miR-1262	1	0	1	1	1	1	TNPO3	transportin 3
hsa-miR-1262	0	0	1	1	1	1	TAGLN	transgelin
hsa-miR-1262	0	0	1	0	0	0	LRRC14	leucine rich repeat containing 14
hsa-miR-1262	1	0	1	0	1	1	RNF165	ring finger protein 165
hsa-miR-1262	0	0	1	1	1	1	NUP98	nucleoporin 98kDa
hsa-miR-1262	1	0	1	1	1	1	DPH1	DPH1 homolog (S. cerevisiae)
hsa-miR-1262	1	0	1	1	1	1	TMEM185A	transmembrane protein 185A
hsa-miR-1262	0	0	1	1	0	0	C8orf44	chromosome 8 open reading frame 44
hsa-miR-1262	0	0	1	1	0	0	BEST1	bestrophin 1
hsa-miR-1262	0	0	1	1	1	1	FAM122C	family with sequence similarity 122C
hsa-miR-1262	1	0	1	0	1	1	CYBRD1	cytochrome b reductase 1
hsa-miR-1262	1	0	1	1	1	1	NRF1	nuclear respiratory factor 1
hsa-miR-1262	1	0	1	1	0	0	USP53	ubiquitin specific peptidase 53
hsa-miR-1262	0	0	1	0	0	0	LOC100144602	uncharacterized LOC100144602
hsa-miR-1262	0	0	1	0	1	1	CD99P1	CD99 molecule pseudogene 1
hsa-miR-1262	0	0	1	1	0	0	PTPMT1	protein tyrosine phosphatase, mitochondrial 1
hsa-miR-1262	1	0	1	1	1	1	TM9SF4	transmembrane 9 superfamily protein member 4
hsa-miR-1262	0	0	1	1	0	0	TPT1	tumor protein, translationally-controlled 1
hsa-miR-1262	0	0	1	1	1	1	CDC42SE2	CDC42 small effector 2
hsa-miR-1262	0	0	1	1	0	0	GLS2	glutaminase 2 (liver, mitochondrial)
hsa-miR-1262	1	0	1	1	1	1	CNTN4	contactin 4
hsa-miR-1262	0	0	1	0	1	1	FHAD1	forkhead-associated (FHA) phosphopeptide binding domain 1
hsa-miR-1262	0	0	1	0	0	0	LOC145837	uncharacterized LOC145837
hsa-miR-1262	0	0	1	1	1	1	SEMA3D	sema domain, immunoglobulin domain (Ig), short basic domain, secreted, (semaphorin) 3D
hsa-miR-1262	1	0	1	0	1	1	SV2B	synaptic vesicle glycoprotein 2B
hsa-miR-1262	1	0	1	1	1	1	TAF15	TAF15 RNA polymerase II, TATA box binding protein (TBP)-associated factor, 68kDa
hsa-miR-1262	1	0	1	1	1	1	WDR20	WD repeat domain 20
hsa-miR-1262	1	0	1	1	1	1	ZNF518A	zinc finger protein 518A
hsa-miR-1262	1	0	1	1	1	1	RHOBTB1	Rho-related BTB domain containing 1
hsa-miR-1262	1	0	1	1	1	1	PPP2R2C	protein phosphatase 2, regulatory subunit B, gamma
hsa-miR-1262	0	0	1	1	0	0	SELENBP1	selenium binding protein 1
hsa-miR-1262	1	0	1	0	1	1	KIF5A	kinesin family member 5A
hsa-miR-1262	1	0	1	1	1	1	RIC8B	resistance to inhibitors of cholinesterase 8 homolog B (C. elegans)
hsa-miR-1262	0	0	1	1	1	1	ZNF337	zinc finger protein 337
hsa-miR-1262	0	0	1	1	0	0	PLA2G6	phospholipase A2, group VI (cytosolic, calcium-independent)
hsa-miR-1262	0	0	1	1	1	1	EDA2R	ectodysplasin A2 receptor
hsa-miR-1262	1	0	1	0	1	1	DDX3Y	DEAD (Asp-Glu-Ala-Asp) box polypeptide 3, Y-linked
hsa-miR-1262	1	0	1	1	1	1	NKAIN2	Na+/K+ transporting ATPase interacting 2
hsa-miR-1262	1	0	1	1	1	1	ZZZ3	zinc finger, ZZ-type containing 3
hsa-miR-1262	0	0	1	0	0	0	LINC00494	long intergenic non-protein coding RNA 494
hsa-miR-1262	0	0	1	1	1	1	NR1H4	nuclear receptor subfamily 1, group H, member 4
hsa-miR-1262	0	0	1	0	1	1	FAM72A	family with sequence similarity 72, member A
hsa-miR-1262	0	0	1	1	1	1	TMEM139	transmembrane protein 139
hsa-miR-1262	0	0	1	1	1	1	ATP1A4	ATPase, Na+/K+ transporting, alpha 4 polypeptide
hsa-miR-1262	1	0	1	1	1	1	MIPOL1	mirror-image polydactyly 1
hsa-miR-1262	0	0	1	1	1	1	DUSP28	dual specificity phosphatase 28
hsa-miR-1262	0	0	1	1	0	0	FAM3B	family with sequence similarity 3, member B
hsa-miR-1262	1	0	1	1	1	1	SMG7	smg-7 homolog, nonsense mediated mRNA decay factor (C. elegans)
hsa-miR-1262	1	0	1	1	1	1	ACVR1	activin A receptor, type I
hsa-miR-1262	1	0	1	0	1	1	CLDN12	claudin 12
hsa-miR-1262	1	0	1	1	1	1	BNC2	basonuclin 2
hsa-miR-1262	0	0	1	0	0	0	CYP4F35P	cytochrome P450, family 4, subfamily F, polypeptide 35, pseudogene
hsa-miR-1262	0	0	1	0	0	0	CRYBB2P1	crystallin, beta B2 pseudogene 1
hsa-miR-1262	1	0	1	1	1	1	C4orf19	chromosome 4 open reading frame 19
hsa-miR-1262	1	0	1	1	1	1	DAAM1	dishevelled associated activator of morphogenesis 1
hsa-miR-1262	1	0	1	1	1	1	DPP10	dipeptidyl-peptidase 10 (non-functional)
hsa-miR-1262	1	0	1	1	1	1	PRR16	proline rich 16
hsa-miR-1262	1	0	1	1	1	1	DOLPP1	dolichyl pyrophosphate phosphatase 1
hsa-miR-1262	0	0	1	1	0	0	TMEM95	transmembrane protein 95
hsa-miR-1262	0	0	1	0	1	1	FAM13B	family with sequence similarity 13, member B
hsa-miR-1262	1	0	1	1	1	1	PRRG1	proline rich Gla (G-carboxyglutamic acid) 1
hsa-miR-1262	0	0	1	1	1	1	C4orf32	chromosome 4 open reading frame 32
hsa-miR-1262	0	0	1	1	1	1	C3orf33	chromosome 3 open reading frame 33
hsa-miR-1262	0	0	1	0	0	0	LOC728853	WD repeat domain 87 pseudogene
hsa-miR-1262	0	0	1	1	1	1	SH3GL3	SH3-domain GRB2-like 3
hsa-miR-1262	0	0	1	0	0	0	LOC157381	uncharacterized LOC157381
hsa-miR-1262	0	0	1	0	0	0	MORF4L2-AS1	MORF4L2 antisense RNA 1
hsa-miR-1262	0	0	1	1	1	1	STRADA	STE20-related kinase adaptor alpha
hsa-miR-1262	1	0	1	0	1	1	PSD3	pleckstrin and Sec7 domain containing 3
hsa-miR-1262	0	0	1	0	0	0	LOC283914	uncharacterized LOC283914
hsa-miR-1262	0	0	1	1	0	0	FAM72B	family with sequence similarity 72, member B
hsa-miR-1262	1	0	1	0	1	1	LYPD6	LY6/PLAUR domain containing 6
hsa-miR-1262	0	0	1	0	0	0	LOC348120	uncharacterized LOC348120
hsa-miR-1262	0	0	1	0	1	1	LOC338758	uncharacterized LOC338758
hsa-miR-1262	1	0	1	0	1	1	KDM2A	lysine (K)-specific demethylase 2A
hsa-miR-1262	0	0	1	0	0	0	LOC283038	uncharacterized LOC283038
hsa-miR-1262	1	0	1	1	1	1	CLVS1	clavesin 1
hsa-miR-1262	1	0	1	0	1	1	ARHGAP5	Rho GTPase activating protein 5
hsa-miR-1262	0	0	1	1	0	0	ENTPD8	ectonucleoside triphosphate diphosphohydrolase 8
hsa-miR-1262	1	0	1	1	1	1	RECK	reversion-inducing-cysteine-rich protein with kazal motifs
hsa-miR-1262	1	0	1	1	1	1	FNDC3A	fibronectin type III domain containing 3A
hsa-miR-1262	1	0	1	1	1	1	OLFML2A	olfactomedin-like 2A
hsa-miR-1262	0	0	1	1	0	0	BCL7C	B-cell CLL/lymphoma 7C
hsa-miR-1262	1	0	1	1	1	1	SOX5	SRY (sex determining region Y)-box 5
hsa-miR-1262	1	0	1	1	0	0	ANKRD13B	ankyrin repeat domain 13B
hsa-miR-1262	0	0	1	1	0	0	AGAP11	ankyrin repeat and GTPase domain Arf GTPase activating protein 11
hsa-miR-1262	1	0	1	0	1	1	PLEKHH2	pleckstrin homology domain containing, family H (with MyTH4 domain) member 2
hsa-miR-1262	1	0	1	1	0	0	MANEAL	mannosidase, endo-alpha-like
hsa-miR-1262	1	0	1	1	1	1	UEVLD	UEV and lactate/malate dehyrogenase domains
hsa-miR-1262	0	0	1	1	1	1	ZNF333	zinc finger protein 333
hsa-miR-1262	1	0	1	1	1	1	ADCY6	adenylate cyclase 6
hsa-miR-1262	1	0	1	1	1	1	ZNF449	zinc finger protein 449
hsa-miR-1262	1	0	1	1	1	1	GRHL1	grainyhead-like 1 (Drosophila)
hsa-miR-1262	0	0	1	0	0	0	ZNF66P	zinc finger protein 66, pseudogene
hsa-miR-1262	0	0	1	1	0	0	KLK15	kallikrein-related peptidase 15
hsa-miR-1262	0	0	1	1	0	0	CYP4F30P	cytochrome P450, family 4, subfamily F, polypeptide 30, pseudogene
hsa-miR-1262	1	0	1	1	1	1	ANLN	anillin, actin binding protein
hsa-miR-1262	0	0	1	1	1	1	TNFSF12	tumor necrosis factor (ligand) superfamily, member 12
hsa-miR-1262	0	0	1	1	0	0	TRIM41	tripartite motif containing 41
hsa-miR-1262	0	0	1	1	0	0	S100A1	S100 calcium binding protein A1
hsa-miR-1262	1	0	1	1	1	1	OPCML	opioid binding protein/cell adhesion molecule-like
hsa-miR-1262	0	0	1	1	0	0	FAM21A	family with sequence similarity 21, member A
hsa-miR-1262	0	0	1	1	0	0	DNHD1	dynein heavy chain domain 1
hsa-miR-1262	0	0	1	1	1	1	MAPK13	mitogen-activated protein kinase 13
hsa-miR-1262	1	0	1	1	1	1	ZMYND11	zinc finger, MYND-type containing 11
hsa-miR-1262	0	0	1	0	0	0	LOC150776	sphingomyelin phosphodiesterase 4, neutral membrane (neutral sphingomyelinase-3) pseudogene
hsa-miR-1262	1	0	1	1	1	1	TRPM3	transient receptor potential cation channel, subfamily M, member 3
hsa-miR-1262	0	0	1	1	0	0	DNASE1	deoxyribonuclease I
hsa-miR-1262	0	0	1	0	0	0	FRG1B	FSHD region gene 1 family, member B
hsa-miR-1262	1	0	1	1	1	1	ACVR2B	activin A receptor, type IIB
hsa-miR-1262	1	0	1	1	1	1	WNT10B	wingless-type MMTV integration site family, member 10B
hsa-miR-1262	0	0	1	1	0	0	RPS9	ribosomal protein S9
hsa-miR-1262	0	0	1	1	1	1	KLRF1	killer cell lectin-like receptor subfamily F, member 1
hsa-miR-1262	0	0	1	1	0	0	HOXB1	homeobox B1
hsa-miR-1262	0	0	1	1	0	0	RGL4	ral guanine nucleotide dissociation stimulator-like 4
hsa-miR-1262	1	0	1	0	1	1	VANGL2	vang-like 2 (van gogh, Drosophila)
hsa-miR-1262	1	0	1	0	1	1	CPEB2	cytoplasmic polyadenylation element binding protein 2
hsa-miR-1262	1	0	1	1	1	1	SLC35G1	solute carrier family 35, member G1
hsa-miR-1262	0	0	1	1	1	1	SPHKAP	SPHK1 interactor, AKAP domain containing
hsa-miR-1262	0	0	1	0	0	0	LOC150577	uncharacterized LOC150577
hsa-miR-1262	1	0	1	1	1	1	KLHL17	kelch-like 17 (Drosophila)
hsa-miR-1262	1	0	1	1	1	1	PTPRD	protein tyrosine phosphatase, receptor type, D
hsa-miR-1262	0	0	1	0	0	0	TPTEP1	transmembrane phosphatase with tensin homology pseudogene 1
hsa-miR-1262	1	0	1	0	1	1	MAP3K9	mitogen-activated protein kinase kinase kinase 9
hsa-miR-1262	0	0	1	0	0	0	LRRC37A11P	leucine rich repeat containing 37, member A11, pseudogene
hsa-miR-1262	0	0	1	0	0	0	LOC143188	uncharacterized LOC143188
hsa-miR-1262	1	0	1	1	1	1	TMEM64	transmembrane protein 64
hsa-miR-1262	1	0	1	1	1	1	ST18	suppression of tumorigenicity 18 (breast carcinoma) (zinc finger protein)
hsa-miR-1262	0	0	1	1	0	0	RGS12	regulator of G-protein signaling 12
hsa-miR-1262	1	0	1	1	0	0	RASGEF1B	RasGEF domain family, member 1B
hsa-miR-1262	1	0	1	0	1	1	CAMSAP2	calmodulin regulated spectrin-associated protein family, member 2
hsa-miR-1262	1	0	1	1	1	1	ANK2	ankyrin 2, neuronal
hsa-miR-1262	1	0	1	1	1	1	MEGF11	multiple EGF-like-domains 11
hsa-miR-1262	0	0	1	1	0	0	KIF13A	kinesin family member 13A
hsa-miR-1262	1	0	1	0	1	1	SEMA4G	sema domain, immunoglobulin domain (Ig), transmembrane domain (TM) and short cytoplasmic domain, (semaphorin) 4G
hsa-miR-1262	1	0	1	1	1	1	MECOM	MDS1 and EVI1 complex locus
hsa-miR-1262	1	0	1	1	1	1	C18orf34	chromosome 18 open reading frame 34
hsa-miR-1262	1	0	1	1	1	1	PTPRZ1	protein tyrosine phosphatase, receptor-type, Z polypeptide 1
hsa-miR-1262	1	0	1	0	1	1	FAM196A	family with sequence similarity 196, member A
hsa-miR-1262	0	0	1	0	0	0	DKFZp686D0853	uncharacterized LOC401613
hsa-miR-1262	1	0	1	1	1	1	ATP2B4	ATPase, Ca++ transporting, plasma membrane 4
hsa-miR-1262	0	0	1	1	0	0	CCDC171	coiled-coil domain containing 171
hsa-miR-1262	1	0	1	1	1	1	SGCD	sarcoglycan, delta (35kDa dystrophin-associated glycoprotein)
hsa-miR-1262	0	0	1	1	1	1	DSG3	desmoglein 3
hsa-miR-1262	1	0	1	1	1	1	ETS1	v-ets erythroblastosis virus E26 oncogene homolog 1 (avian)
hsa-miR-1262	0	0	1	1	1	1	GTF3C2	general transcription factor IIIC, polypeptide 2, beta 110kDa
hsa-miR-1262	1	0	1	1	1	1	SMAD4	SMAD family member 4
hsa-miR-1262	1	0	1	1	1	1	MASP1	mannan-binding lectin serine peptidase 1 (C4/C2 activating component of Ra-reactive factor)
hsa-miR-1262	0	0	1	1	0	0	RPS24	ribosomal protein S24
hsa-miR-1262	1	0	1	1	1	1	CBX3	chromobox homolog 3
hsa-miR-1262	0	0	1	0	1	1	GTF2H2D	general transcription factor IIH, polypeptide 2D
hsa-miR-1262	1	0	1	1	1	1	TLN2	talin 2
hsa-miR-1262	0	0	1	1	0	0	AFMID	arylformamidase
hsa-miR-1262	1	0	1	1	1	1	TC2N	tandem C2 domains, nuclear
hsa-miR-1262	1	0	1	1	1	1	TSC22D3	TSC22 domain family, member 3
hsa-miR-1262	1	0	1	1	1	1	DCAF5	DDB1 and CUL4 associated factor 5
hsa-miR-1262	0	0	1	1	1	1	ATP2A2	ATPase, Ca++ transporting, cardiac muscle, slow twitch 2
hsa-miR-1262	0	0	1	1	1	1	DOCK5	dedicator of cytokinesis 5
hsa-miR-1262	1	0	1	1	1	1	NFIB	nuclear factor I/B
hsa-miR-1262	1	0	1	0	1	1	IGF2BP3	insulin-like growth factor 2 mRNA binding protein 3
hsa-miR-1262	0	0	1	0	0	0	LOC286299	uncharacterized LOC286299
hsa-miR-1262	1	0	1	1	1	1	PGAP1	post-GPI attachment to proteins 1
hsa-miR-1262	0	0	1	0	0	0	ZNRD1-AS1	ZNRD1 antisense RNA 1
hsa-miR-1262	1	0	1	1	1	1	SIN3A	SIN3 transcription regulator homolog A (yeast)
hsa-miR-1262	1	0	1	1	1	1	BSDC1	BSD domain containing 1
hsa-miR-1262	1	0	1	1	1	1	ARHGDIA	Rho GDP dissociation inhibitor (GDI) alpha
hsa-miR-1262	0	0	1	1	1	1	POLR2H	polymerase (RNA) II (DNA directed) polypeptide H
hsa-miR-1262	1	0	1	0	1	1	CSNK1E	casein kinase 1, epsilon
hsa-miR-1262	1	0	1	0	0	0	IGLON5	IgLON family member 5
hsa-miR-1262	0	0	1	0	0	0	LOC401127	WD repeat domain 5 pseudogene
hsa-miR-1262	0	0	1	1	1	1	DNM1	dynamin 1
hsa-miR-1262	0	0	1	1	0	0	H2AFY2	H2A histone family, member Y2
hsa-miR-1262	1	0	1	1	1	1	SYNGR2	synaptogyrin 2
hsa-miR-1262	0	0	1	0	0	0	LOC400768	uncharacterized LOC400768
hsa-miR-1262	0	0	1	0	0	0	CMAHP	cytidine monophospho-N-acetylneuraminic acid hydroxylase, pseudogene
hsa-miR-1262	1	0	1	0	1	1	SLCO2A1	solute carrier organic anion transporter family, member 2A1
hsa-miR-1262	0	0	1	0	0	0	ARRDC1	arrestin domain containing 1
hsa-miR-1262	0	0	1	1	1	1	TOP3B	topoisomerase (DNA) III beta
hsa-miR-1262	0	0	1	1	1	1	ERLEC1	endoplasmic reticulum lectin 1
hsa-miR-1262	1	0	1	1	1	1	FGF11	fibroblast growth factor 11
hsa-miR-1262	0	0	1	1	1	1	HSPB8	heat shock 22kDa protein 8
hsa-miR-1262	0	0	1	1	1	1	CCDC132	coiled-coil domain containing 132
hsa-miR-1262	1	0	1	1	0	0	ELOVL1	ELOVL fatty acid elongase 1
hsa-miR-1262	0	0	1	1	1	1	FUS	fused in sarcoma
hsa-miR-1262	1	0	1	1	1	1	CD9	CD9 molecule
hsa-miR-1262	0	0	1	1	0	0	SLC3A2	solute carrier family 3 (activators of dibasic and neutral amino acid transport), member 2
hsa-miR-1262	0	0	1	1	0	0	DNAJB2	DnaJ (Hsp40) homolog, subfamily B, member 2
hsa-miR-1262	0	0	1	1	1	1	ABCD1	ATP-binding cassette, sub-family D (ALD), member 1
hsa-miR-1262	0	0	1	1	1	1	SORD	sorbitol dehydrogenase
hsa-miR-1262	1	0	1	1	1	1	TRA2B	transformer 2 beta homolog (Drosophila)
hsa-miR-1262	0	0	1	1	1	1	GGPS1	geranylgeranyl diphosphate synthase 1
hsa-miR-1262	0	0	1	1	0	0	F10	coagulation factor X
hsa-miR-1262	1	0	1	1	1	1	MAPRE3	microtubule-associated protein, RP/EB family, member 3
hsa-miR-1262	1	0	1	1	1	1	POU2F2	POU class 2 homeobox 2
hsa-miR-1262	0	0	1	1	0	0	C20orf43	chromosome 20 open reading frame 43
hsa-miR-1262	1	0	1	1	1	1	ARFIP2	ADP-ribosylation factor interacting protein 2
hsa-miR-1262	1	0	1	1	1	1	STK38L	serine/threonine kinase 38 like
hsa-miR-1262	0	0	1	1	0	0	DOK5	docking protein 5
hsa-miR-1262	0	0	1	1	1	1	ATG4A	autophagy related 4A, cysteine peptidase
hsa-miR-1262	0	0	1	1	1	1	RGS14	regulator of G-protein signaling 14
hsa-miR-1262	0	0	1	0	0	0	LOC150568	uncharacterized LOC150568
hsa-miR-1262	0	0	1	1	0	0	NRSN2	neurensin 2
hsa-miR-1262	0	0	1	1	1	1	GLRX3	glutaredoxin 3
hsa-miR-1262	0	0	1	1	1	1	BMPR1A	bone morphogenetic protein receptor, type IA
hsa-miR-1262	0	0	1	1	0	0	NOX5	NADPH oxidase, EF-hand calcium binding domain 5
hsa-miR-1262	0	0	1	0	0	0	LOC100130353	hippocampus abundant transcript-like 1 pseudogene
hsa-miR-1262	0	0	1	1	1	1	SERP2	stress-associated endoplasmic reticulum protein family member 2
hsa-miR-1262	1	0	1	0	1	1	C15orf41	chromosome 15 open reading frame 41
hsa-miR-1262	0	0	1	1	1	1	DEDD	death effector domain containing
hsa-miR-1262	1	0	1	1	1	1	PPP3CB	protein phosphatase 3, catalytic subunit, beta isozyme
hsa-miR-1262	0	0	1	1	0	0	PRR5	proline rich 5 (renal)
hsa-miR-1262	0	0	1	1	1	1	MXD3	MAX dimerization protein 3
hsa-miR-1262	0	0	1	1	1	1	ACSF3	acyl-CoA synthetase family member 3
hsa-miR-1262	1	0	1	1	1	1	RPUSD3	RNA pseudouridylate synthase domain containing 3
hsa-miR-1262	1	0	1	0	1	1	GIT2	G protein-coupled receptor kinase interacting ArfGAP 2
hsa-miR-1262	0	0	1	1	0	0	BCKDK	branched chain ketoacid dehydrogenase kinase
hsa-miR-1262	1	0	1	1	1	1	TAGLN2	transgelin 2
hsa-miR-1262	1	0	1	1	1	1	GALE	UDP-galactose-4-epimerase
hsa-miR-1262	0	0	1	1	1	1	TSEN15	tRNA splicing endonuclease 15 homolog (S. cerevisiae)
hsa-miR-1262	1	0	1	1	1	1	ACTN4	actinin, alpha 4
hsa-miR-1262	0	0	1	1	1	1	PAAF1	proteasomal ATPase-associated factor 1
hsa-miR-1262	1	0	1	1	1	1	LHX9	LIM homeobox 9
hsa-miR-1262	0	0	1	0	0	0	LOC731789	uncharacterized LOC731789
hsa-miR-1262	0	0	1	1	1	1	BDP1	B double prime 1, subunit of RNA polymerase III transcription initiation factor IIIB
hsa-miR-1262	0	0	1	0	0	0	C18orf63	chromosome 18 open reading frame 63
hsa-miR-1262	1	0	1	1	1	1	KIAA2018	KIAA2018
hsa-miR-1262	0	0	1	0	0	0	MUC19	mucin 19, oligomeric
hsa-miR-1262	1	0	1	1	1	1	MAPK8IP3	mitogen-activated protein kinase 8 interacting protein 3
hsa-miR-1262	1	0	1	1	0	0	POMGNT1	protein O-linked mannose beta1,2-N-acetylglucosaminyltransferase
hsa-miR-1262	0	0	1	0	0	0	DNAJC27-AS1	DNAJC27 antisense RNA 1
hsa-miR-1262	0	0	1	1	0	0	TENC1	tensin like C1 domain containing phosphatase (tensin 2)
hsa-miR-1262	0	0	1	1	1	1	RBM48	RNA binding motif protein 48
hsa-miR-1262	0	0	1	1	1	1	TMEM41B	transmembrane protein 41B
hsa-miR-1262	1	0	1	1	1	1	METAP1	methionyl aminopeptidase 1
hsa-miR-1262	1	0	1	1	1	1	SEC14L1	SEC14-like 1 (S. cerevisiae)
hsa-miR-1262	0	0	1	1	1	1	ATF2	activating transcription factor 2
hsa-miR-1262	0	0	1	1	1	1	PARP14	poly (ADP-ribose) polymerase family, member 14
hsa-miR-1262	1	0	1	1	1	1	TMEFF2	transmembrane protein with EGF-like and two follistatin-like domains 2
hsa-miR-1262	0	0	1	1	1	1	PTGS1	prostaglandin-endoperoxide synthase 1 (prostaglandin G/H synthase and cyclooxygenase)
hsa-miR-1262	1	0	1	1	1	1	ATP2B3	ATPase, Ca++ transporting, plasma membrane 3
hsa-miR-1262	0	0	1	1	1	1	CD274	CD274 molecule
hsa-miR-1262	1	0	1	1	1	1	CAPZA2	capping protein (actin filament) muscle Z-line, alpha 2
hsa-miR-1262	1	0	1	1	1	1	ITSN1	intersectin 1 (SH3 domain protein)
hsa-miR-1262	0	0	1	0	0	0	LOC728377	Rho guanine nucleotide exchange factor (GEF) 5 pseudogene
hsa-miR-1262	1	0	1	0	1	1	DCBLD2	discoidin, CUB and LCCL domain containing 2
hsa-miR-1262	0	0	1	1	1	1	ITGAX	integrin, alpha X (complement component 3 receptor 4 subunit)
hsa-miR-1262	1	0	1	0	1	1	EPDR1	ependymin related protein 1 (zebrafish)
hsa-miR-1262	0	0	1	1	1	1	PCYT1A	phosphate cytidylyltransferase 1, choline, alpha
hsa-miR-1262	0	0	1	1	0	0	SUOX	sulfite oxidase
hsa-miR-1262	0	0	1	1	1	1	PLCB4	phospholipase C, beta 4
hsa-miR-1262	0	0	1	1	0	0	INHBA	inhibin, beta A
hsa-miR-1262	1	0	1	0	1	1	BCL2	B-cell CLL/lymphoma 2
hsa-miR-1262	0	0	1	0	1	1	TGFB2	transforming growth factor, beta 2
hsa-miR-1262	1	0	1	1	1	1	IGF1	insulin-like growth factor 1 (somatomedin C)
hsa-miR-1262	0	0	1	1	1	1	APOH	apolipoprotein H (beta-2-glycoprotein I)
hsa-miR-1262	1	0	1	0	1	1	ATM	ataxia telangiectasia mutated
hsa-miR-1262	0	0	1	1	1	1	ATP7A	ATPase, Cu++ transporting, alpha polypeptide
hsa-miR-1262	1	0	1	1	1	1	CYP19A1	cytochrome P450, family 19, subfamily A, polypeptide 1
hsa-miR-1262	1	0	1	1	1	1	DMD	dystrophin
hsa-miR-1262	1	0	1	1	1	1	ESR1	estrogen receptor 1
hsa-miR-1262	1	0	1	1	1	1	F13A1	coagulation factor XIII, A1 polypeptide
hsa-miR-1262	0	0	1	1	1	1	F5	coagulation factor V (proaccelerin, labile factor)
hsa-miR-1262	0	0	1	0	1	1	MS4A2	membrane-spanning 4-domains, subfamily A, member 2
hsa-miR-1262	0	0	1	1	0	0	FSHR	follicle stimulating hormone receptor
hsa-miR-1262	1	0	1	0	1	1	ITGB3	integrin, beta 3 (platelet glycoprotein IIIa, antigen CD61)
hsa-miR-1262	1	0	1	1	1	1	JAG1	jagged 1
hsa-miR-1262	1	0	1	0	1	1	KIT	v-kit Hardy-Zuckerman 4 feline sarcoma viral oncogene homolog
hsa-miR-1262	1	0	1	1	1	1	LEP	leptin
hsa-miR-1262	1	0	1	0	1	1	SGCB	sarcoglycan, beta (43kDa dystrophin-associated glycoprotein)
hsa-miR-1262	0	0	1	1	0	0	KCNH2	potassium voltage-gated channel, subfamily H (eag-related), member 2
hsa-miR-1262	1	0	1	1	1	1	MET	met proto-oncogene (hepatocyte growth factor receptor)
hsa-miR-1262	1	0	1	1	1	1	MITF	microphthalmia-associated transcription factor
hsa-miR-1262	0	0	1	1	1	1	MTR	5-methyltetrahydrofolate-homocysteine methyltransferase
hsa-miR-1262	1	0	1	1	1	1	NF1	neurofibromin 1
hsa-miR-1262	0	0	1	1	0	0	PCCA	propionyl CoA carboxylase, alpha polypeptide
hsa-miR-1262	1	0	1	0	1	1	PKD2	polycystic kidney disease 2 (autosomal dominant)
hsa-miR-1262	1	0	1	1	1	1	ATXN1	ataxin 1
hsa-miR-1262	0	0	1	1	1	1	WAS	Wiskott-Aldrich syndrome
hsa-miR-1262	0	0	1	1	1	1	CASR	calcium-sensing receptor
hsa-miR-1262	1	0	1	1	1	1	CHM	choroideremia (Rab escort protein 1)
hsa-miR-1262	1	0	1	0	1	1	COL5A2	collagen, type V, alpha 2
hsa-miR-1262	1	0	1	1	1	1	HLCS	holocarboxylase synthetase (biotin-(proprionyl-CoA-carboxylase (ATP-hydrolysing)) ligase)
hsa-miR-1262	1	0	1	0	1	1	PAFAH1B1	platelet-activating factor acetylhydrolase 1b, regulatory subunit 1 (45kDa)
hsa-miR-1262	1	0	1	0	1	1	PCSK1	proprotein convertase subtilisin/kexin type 1
hsa-miR-1262	1	0	1	0	1	1	RAG1	recombination activating gene 1
hsa-miR-1262	1	0	1	1	1	1	RFX5	regulatory factor X, 5 (influences HLA class II expression)
hsa-miR-1262	1	0	1	1	1	1	HNF1B	HNF1 homeobox B
hsa-miR-1262	1	0	1	1	1	1	PLP1	proteolipid protein 1
hsa-miR-1262	1	0	1	1	1	1	DCX	doublecortin
hsa-miR-1262	1	0	1	1	1	1	DIO2	deiodinase, iodothyronine, type II
hsa-miR-1262	1	0	1	0	1	1	GABRA4	gamma-aminobutyric acid (GABA) A receptor, alpha 4
hsa-miR-1262	1	0	1	1	1	1	GABRB3	gamma-aminobutyric acid (GABA) A receptor, beta 3
hsa-miR-1262	1	0	1	1	0	0	GRIN2D	glutamate receptor, ionotropic, N-methyl D-aspartate 2D
hsa-miR-1262	1	0	1	1	1	1	GRM7	glutamate receptor, metabotropic 7
hsa-miR-1262	1	0	1	1	1	1	IGF1R	insulin-like growth factor 1 receptor
hsa-miR-1262	0	0	1	1	1	1	SLC2A9	solute carrier family 2 (facilitated glucose transporter), member 9
hsa-miR-1262	1	0	1	0	1	1	SMAD5	SMAD family member 5
hsa-miR-1262	0	0	1	1	0	0	RNASE9	ribonuclease, RNase A family, 9 (non-active)
hsa-miR-1262	0	0	1	0	1	1	BLID	BH3-like motif containing, cell death inducer
hsa-miR-1262	0	0	1	1	1	1	FAM109B	family with sequence similarity 109, member B
hsa-miR-1262	1	0	1	1	0	0	AWAT2	acyl-CoA wax alcohol acyltransferase 2
hsa-miR-1262	1	0	1	1	1	1	LCLAT1	lysocardiolipin acyltransferase 1
hsa-miR-1262	1	0	1	1	1	1	DNAJB12	DnaJ (Hsp40) homolog, subfamily B, member 12
hsa-miR-1262	1	0	1	1	1	1	WNK3	WNK lysine deficient protein kinase 3
hsa-miR-1262	1	0	1	1	1	1	KLHL31	kelch-like 31 (Drosophila)
hsa-miR-1262	0	0	1	1	1	1	ALG11	asparagine-linked glycosylation 11, alpha-1,2-mannosyltransferase homolog (yeast)
hsa-miR-1262	0	0	1	1	0	0	VHLL	von Hippel-Lindau tumor suppressor-like
hsa-miR-1262	0	0	1	1	1	1	AGMO	alkylglycerol monooxygenase
hsa-miR-1262	0	0	1	0	1	1	ZNF705A	zinc finger protein 705A
hsa-miR-1262	1	0	1	0	1	1	LRRC55	leucine rich repeat containing 55
hsa-miR-1262	0	0	1	1	1	1	OR9Q1	olfactory receptor, family 9, subfamily Q, member 1
hsa-miR-1262	1	0	1	0	1	1	YPEL2	yippee-like 2 (Drosophila)
hsa-miR-1262	0	0	1	1	0	0	TCEAL3	transcription elongation factor A (SII)-like 3
hsa-miR-1262	0	0	1	1	1	1	TCEAL6	transcription elongation factor A (SII)-like 6
hsa-miR-1262	0	0	1	1	1	1	SCP2	sterol carrier protein 2
hsa-miR-1262	0	0	1	0	0	0	FSD2	fibronectin type III and SPRY domain containing 2
hsa-miR-1262	1	0	1	1	1	1	IGF2BP2	insulin-like growth factor 2 mRNA binding protein 2
hsa-miR-1262	0	0	1	1	0	0	F8A3	coagulation factor VIII-associated 3
hsa-miR-1262	0	0	1	1	1	1	AKR1CL1	aldo-keto reductase family 1, member C-like 1
hsa-miR-1262	1	0	1	1	1	1	COA5	cytochrome C oxidase assembly factor 5
hsa-miR-1262	1	0	1	1	1	1	ZDHHC9	zinc finger, DHHC-type containing 9
hsa-miR-1262	1	0	1	0	1	1	KIAA2022	KIAA2022
hsa-miR-1262	1	0	1	1	1	1	NUPL1	nucleoporin like 1
hsa-miR-1262	0	0	1	1	1	1	GCSAM	germinal center-associated, signaling and motility
hsa-miR-1262	0	0	1	1	1	1	FBXO47	F-box protein 47
hsa-miR-1262	1	0	1	0	1	1	ERMN	ermin, ERM-like protein
hsa-miR-1262	0	0	1	0	1	1	ZNF648	zinc finger protein 648
hsa-miR-1262	1	0	1	1	1	1	FAM171A1	family with sequence similarity 171, member A1
hsa-miR-1262	0	0	1	1	1	1	NCMAP	noncompact myelin associated protein
hsa-miR-1262	1	0	1	0	1	1	CREB5	cAMP responsive element binding protein 5
hsa-miR-1262	0	0	1	1	0	0	RPS8	ribosomal protein S8
hsa-miR-1262	1	0	1	1	1	1	CTNNBIP1	catenin, beta interacting protein 1
hsa-miR-1262	1	0	1	1	1	1	FOXP4	forkhead box P4
hsa-miR-1262	0	0	1	1	0	0	RGR	retinal G protein coupled receptor
hsa-miR-1262	1	0	1	1	1	1	SLC25A53	solute carrier family 25, member 53
hsa-miR-1262	0	0	1	1	1	1	SPIN4	spindlin family, member 4
hsa-miR-1262	0	0	1	1	0	0	TCEAL5	transcription elongation factor A (SII)-like 5
hsa-miR-1262	0	0	1	1	1	1	C9orf152	chromosome 9 open reading frame 152
hsa-miR-1262	0	0	1	1	0	0	PRR23B	proline rich 23B
hsa-miR-1262	1	0	1	1	1	1	KATNAL1	katanin p60 subunit A-like 1
hsa-miR-1262	0	0	1	1	0	0	DDR2	discoidin domain receptor tyrosine kinase 2
hsa-miR-1262	1	0	1	1	1	1	KCNMA1	potassium large conductance calcium-activated channel, subfamily M, alpha member 1
hsa-miR-1262	1	0	1	1	1	1	PHF6	PHD finger protein 6
hsa-miR-1262	1	0	1	1	1	1	TMCC1	transmembrane and coiled-coil domain family 1
hsa-miR-1262	1	0	1	0	1	1	GOPC	golgi-associated PDZ and coiled-coil motif containing
hsa-miR-1262	0	0	1	1	1	1	USP1	ubiquitin specific peptidase 1
hsa-miR-1262	0	0	1	1	1	1	BTBD11	BTB (POZ) domain containing 11
hsa-miR-1262	0	0	1	1	1	1	CARD16	caspase recruitment domain family, member 16
hsa-miR-1262	1	0	1	1	1	1	VMA21	VMA21 vacuolar H+-ATPase homolog (S. cerevisiae)
hsa-miR-1262	1	0	1	1	1	1	DKK3	dickkopf 3 homolog (Xenopus laevis)
hsa-miR-1262	1	0	1	1	1	1	PODXL	podocalyxin-like
hsa-miR-1262	0	0	1	1	1	1	HAX1	HCLS1 associated protein X-1
hsa-miR-1262	1	0	1	0	1	1	RGAG4	retrotransposon gag domain containing 4
hsa-miR-1262	1	0	1	0	1	1	TNRC6B	trinucleotide repeat containing 6B
hsa-miR-1262	1	0	1	1	1	1	KCTD21	potassium channel tetramerisation domain containing 21
hsa-miR-1262	1	0	1	1	1	1	RGS7BP	regulator of G-protein signaling 7 binding protein
hsa-miR-1262	0	0	1	1	1	1	CPLX3	complexin 3
hsa-miR-1262	0	0	1	1	1	1	MS4A3	membrane-spanning 4-domains, subfamily A, member 3 (hematopoietic cell-specific)
hsa-miR-1262	1	0	1	1	1	1	SRSF7	serine/arginine-rich splicing factor 7
hsa-miR-1262	0	0	1	1	1	1	TP53BP2	tumor protein p53 binding protein, 2
hsa-miR-1262	1	0	1	1	1	1	AMD1	adenosylmethionine decarboxylase 1
hsa-miR-1262	1	0	1	0	1	1	RYR2	ryanodine receptor 2 (cardiac)
hsa-miR-1262	1	0	1	1	1	1	SDHC	succinate dehydrogenase complex, subunit C, integral membrane protein, 15kDa
hsa-miR-1262	1	0	1	1	1	1	SCD5	stearoyl-CoA desaturase 5
hsa-miR-1262	0	0	1	1	1	1	EFEMP1	EGF containing fibulin-like extracellular matrix protein 1
hsa-miR-1262	1	0	1	1	1	1	ELMO1	engulfment and cell motility 1
hsa-miR-1262	0	0	1	0	1	1	ZNF705D	zinc finger protein 705D
hsa-miR-1262	0	0	1	0	1	1	SCN3B	sodium channel, voltage-gated, type III, beta subunit
hsa-miR-1262	1	0	1	1	1	1	PAPD5	PAP associated domain containing 5
hsa-miR-1262	0	0	1	1	1	1	YARS2	tyrosyl-tRNA synthetase 2, mitochondrial
hsa-miR-1262	1	0	1	1	1	1	ZBTB8A	zinc finger and BTB domain containing 8A
hsa-miR-1262	0	0	1	1	1	1	METTL21D	methyltransferase like 21D
hsa-miR-1262	0	0	1	0	1	1	STEAP2	STEAP family member 2, metalloreductase
hsa-miR-1262	1	0	1	1	1	1	ERBB4	v-erb-a erythroblastic leukemia viral oncogene homolog 4 (avian)
hsa-miR-1262	1	0	1	1	1	1	TPM3	tropomyosin 3
hsa-miR-1262	1	0	1	0	1	1	SLC12A2	solute carrier family 12 (sodium/potassium/chloride transporters), member 2
hsa-miR-1262	0	0	1	0	1	1	SSTR1	somatostatin receptor 1
hsa-miR-1262	1	0	1	1	1	1	CDC14B	CDC14 cell division cycle 14 homolog B (S. cerevisiae)
hsa-miR-1262	1	0	1	1	1	1	SREK1	splicing regulatory glutamine/lysine-rich protein 1
hsa-miR-1262	1	0	1	1	1	1	RNF214	ring finger protein 214
hsa-miR-1262	0	0	1	1	1	1	FKTN	fukutin
hsa-miR-1262	1	0	1	1	1	1	CASZ1	castor zinc finger 1
hsa-miR-1262	1	0	1	0	1	1	FBXO41	F-box protein 41
hsa-miR-1262	1	0	1	1	1	1	SHANK3	SH3 and multiple ankyrin repeat domains 3
hsa-miR-1262	0	0	1	1	0	0	LMTK3	lemur tyrosine kinase 3
hsa-miR-1262	0	0	1	0	1	1	EPHA6	EPH receptor A6
hsa-miR-1262	1	0	1	1	1	1	ZNF697	zinc finger protein 697
hsa-miR-1262	0	0	1	1	0	0	OVOS2	ovostatin 2
hsa-miR-1262	0	0	1	1	1	1	SNTN	sentan, cilia apical structure protein
hsa-miR-1262	1	0	1	1	1	1	MGA	MAX gene associated
hsa-miR-1262	1	0	1	1	0	0	ASIC2	acid-sensing (proton-gated) ion channel 2
hsa-miR-1262	1	0	1	0	1	1	XIAP	X-linked inhibitor of apoptosis
hsa-miR-1262	1	0	1	0	1	1	BMPR2	bone morphogenetic protein receptor, type II (serine/threonine kinase)
hsa-miR-1262	0	0	1	1	1	1	CDC5L	CDC5 cell division cycle 5-like (S. pombe)
hsa-miR-1262	1	0	1	1	1	1	CDH13	cadherin 13, H-cadherin (heart)
hsa-miR-1262	1	0	1	0	1	1	CDK6	cyclin-dependent kinase 6
hsa-miR-1262	0	0	1	1	1	1	CORT	cortistatin
hsa-miR-1262	1	0	1	1	1	1	CELSR3	cadherin, EGF LAG seven-pass G-type receptor 3 (flamingo homolog, Drosophila)
hsa-miR-1262	1	0	1	1	1	1	CELSR2	cadherin, EGF LAG seven-pass G-type receptor 2 (flamingo homolog, Drosophila)
hsa-miR-1262	1	0	1	1	1	1	ELAVL1	ELAV (embryonic lethal, abnormal vision, Drosophila)-like 1 (Hu antigen R)
hsa-miR-1262	1	0	1	1	1	1	EXTL3	exostoses (multiple)-like 3
hsa-miR-1262	1	0	1	1	1	1	FOXC1	forkhead box C1
hsa-miR-1262	0	0	1	0	1	1	FMO2	flavin containing monooxygenase 2 (non-functional)
hsa-miR-1262	1	0	1	1	0	0	GDI1	GDP dissociation inhibitor 1
hsa-miR-1262	1	0	1	1	1	1	NDST1	N-deacetylase/N-sulfotransferase (heparan glucosaminyl) 1
hsa-miR-1262	0	0	1	1	0	0	ACP2	acid phosphatase 2, lysosomal
hsa-miR-1262	1	0	1	1	1	1	AQP4	aquaporin 4
hsa-miR-1262	0	0	1	1	0	0	RHOG	ras homolog family member G
hsa-miR-1262	1	0	1	0	1	1	ATP1B2	ATPase, Na+/K+ transporting, beta 2 polypeptide
hsa-miR-1262	0	0	1	1	0	0	BMP6	bone morphogenetic protein 6
hsa-miR-1262	0	0	1	1	1	1	BTN1A1	butyrophilin, subfamily 1, member A1
hsa-miR-1262	1	0	1	1	0	0	CDH8	cadherin 8, type 2
hsa-miR-1262	0	0	1	1	1	1	CKS2	CDC28 protein kinase regulatory subunit 2
hsa-miR-1262	1	0	1	1	1	1	CSNK1D	casein kinase 1, delta
hsa-miR-1262	1	0	1	0	0	0	DRP2	dystrophin related protein 2
hsa-miR-1262	1	0	1	0	1	1	ETV6	ets variant 6
hsa-miR-1262	1	0	1	1	1	1	FBN2	fibrillin 2
hsa-miR-1262	0	0	1	1	1	1	FLI1	Friend leukemia virus integration 1
hsa-miR-1262	0	0	1	1	0	0	IFI6	interferon, alpha-inducible protein 6
hsa-miR-1262	1	0	1	1	1	1	GBP1	guanylate binding protein 1, interferon-inducible
hsa-miR-1262	0	0	1	0	1	1	GYPA	glycophorin A (MNS blood group)
hsa-miR-1262	1	0	1	1	1	1	ITGA9	integrin, alpha 9
hsa-miR-1262	0	0	1	0	1	1	ITGAV	integrin, alpha V
hsa-miR-1262	1	0	1	1	1	1	KCNJ10	potassium inwardly-rectifying channel, subfamily J, member 10
hsa-miR-1262	1	0	1	1	1	1	KPNA4	karyopherin alpha 4 (importin alpha 3)
hsa-miR-1262	1	0	1	1	1	1	IPO5	importin 5
hsa-miR-1262	0	0	1	1	0	0	KRT31	keratin 31
hsa-miR-1262	0	0	1	0	1	1	CXCL9	chemokine (C-X-C motif) ligand 9
hsa-miR-1262	0	0	1	1	0	0	MNAT1	menage a trois homolog 1, cyclin H assembly factor (Xenopus laevis)
hsa-miR-1262	1	0	1	1	1	1	MSN	moesin
hsa-miR-1262	0	0	1	1	1	1	MTAP	methylthioadenosine phosphorylase
hsa-miR-1262	1	0	1	1	1	1	NEUROD1	neuronal differentiation 1
hsa-miR-1262	1	0	1	1	1	1	OLR1	oxidized low density lipoprotein (lectin-like) receptor 1
hsa-miR-1262	0	0	1	0	1	1	OPHN1	oligophrenin 1
hsa-miR-1262	1	0	1	0	1	1	PAPPA	pregnancy-associated plasma protein A, pappalysin 1
hsa-miR-1262	0	0	1	1	1	1	PFDN4	prefoldin subunit 4
hsa-miR-1262	1	0	1	1	1	1	PLAGL2	pleiomorphic adenoma gene-like 2
hsa-miR-1262	1	0	1	1	1	1	PPP2R1B	protein phosphatase 2, regulatory subunit A, beta
hsa-miR-1262	1	0	1	0	1	1	MAPK4	mitogen-activated protein kinase 4
hsa-miR-1262	1	0	1	1	1	1	MAPK6	mitogen-activated protein kinase 6
hsa-miR-1262	0	0	1	1	1	1	PSMD10	proteasome (prosome, macropain) 26S subunit, non-ATPase, 10
hsa-miR-1262	0	0	1	1	1	1	RAB3A	RAB3A, member RAS oncogene family
hsa-miR-1262	1	0	1	1	1	1	RBL1	retinoblastoma-like 1 (p107)
hsa-miR-1262	1	0	1	0	1	1	SFRP1	secreted frizzled-related protein 1
hsa-miR-1262	1	0	1	1	1	1	SRSF3	serine/arginine-rich splicing factor 3
hsa-miR-1262	0	0	1	1	1	1	STIM1	stromal interaction molecule 1
hsa-miR-1262	1	0	1	0	1	1	TAL1	T-cell acute lymphocytic leukemia 1
hsa-miR-1262	1	0	1	1	1	1	LEFTY2	left-right determination factor 2
hsa-miR-1262	1	0	1	1	1	1	TIAM1	T-cell lymphoma invasion and metastasis 1
hsa-miR-1262	1	0	1	0	1	1	YWHAB	tyrosine 3-monooxygenase/tryptophan 5-monooxygenase activation protein, beta polypeptide
hsa-miR-1262	1	0	1	1	1	1	YWHAH	tyrosine 3-monooxygenase/tryptophan 5-monooxygenase activation protein, eta polypeptide
hsa-miR-1262	1	0	1	0	1	1	ZIC1	Zic family member 1
hsa-miR-1262	1	0	1	1	1	1	ZIC3	Zic family member 3
hsa-miR-1262	1	0	1	0	1	1	CNTNAP1	contactin associated protein 1
hsa-miR-1262	0	0	1	1	0	0	KRT36	keratin 36
hsa-miR-1262	1	0	1	1	1	1	NR5A2	nuclear receptor subfamily 5, group A, member 2
hsa-miR-1262	0	0	1	1	1	1	SCEL	sciellin
hsa-miR-1262	1	0	1	1	1	1	NRP2	neuropilin 2
hsa-miR-1262	1	0	1	1	1	1	ALDH1A2	aldehyde dehydrogenase 1 family, member A2
hsa-miR-1262	0	0	1	1	1	1	PRPF4B	PRP4 pre-mRNA processing factor 4 homolog B (yeast)
hsa-miR-1262	0	0	1	1	1	1	HERC1	HECT and RLD domain containing E3 ubiquitin protein ligase family member 1
hsa-miR-1262	1	0	1	1	1	1	KALRN	kalirin, RhoGEF kinase
hsa-miR-1262	0	0	1	0	0	0	ARRB1	arrestin, beta 1
hsa-miR-1262	0	0	1	1	1	1	CSRP1	cysteine and glycine-rich protein 1
hsa-miR-1262	0	0	1	0	1	1	EIF4EBP2	eukaryotic translation initiation factor 4E binding protein 2
hsa-miR-1262	1	0	1	1	1	1	FGF12	fibroblast growth factor 12
hsa-miR-1262	1	0	1	1	1	1	FGF13	fibroblast growth factor 13
hsa-miR-1262	0	0	1	1	1	1	FLT3	fms-related tyrosine kinase 3
hsa-miR-1262	0	0	1	0	1	1	HABP2	hyaluronan binding protein 2
hsa-miR-1262	1	0	1	0	1	1	SLC1A2	solute carrier family 1 (glial high affinity glutamate transporter), member 2
hsa-miR-1262	1	0	1	1	1	1	SYT7	synaptotagmin VII
hsa-miR-1262	1	0	1	0	1	1	MED14	mediator complex subunit 14
hsa-miR-1262	0	0	1	1	1	1	COL12A1	collagen, type XII, alpha 1
hsa-miR-1262	1	0	1	1	1	1	DAP	death-associated protein
hsa-miR-1262	1	0	1	1	1	1	DUSP1	dual specificity phosphatase 1
hsa-miR-1262	1	0	1	1	1	1	DVL2	dishevelled, dsh homolog 2 (Drosophila)
hsa-miR-1262	0	0	1	1	1	1	EXTL1	exostoses (multiple)-like 1
hsa-miR-1262	0	0	1	0	1	1	POU4F2	POU class 4 homeobox 2
hsa-miR-1262	1	0	1	1	1	1	SF1	splicing factor 1
hsa-miR-1262	1	0	1	1	1	1	RAB11A	RAB11A, member RAS oncogene family
hsa-miR-1262	0	0	1	0	0	0	XKRY	XK, Kell blood group complex subunit-related, Y-linked
hsa-miR-1262	0	0	1	0	1	1	BPY2	basic charge, Y-linked, 2
hsa-miR-1262	0	0	1	1	0	0	ZW10	ZW10, kinetochore associated, homolog (Drosophila)
hsa-miR-1262	0	0	1	1	0	0	ASIC3	acid-sensing (proton-gated) ion channel 3
hsa-miR-1262	1	0	1	1	1	1	NREP	neuronal regeneration related protein homolog (rat)
hsa-miR-1262	1	0	1	0	1	1	CDYL	chromodomain protein, Y-like
hsa-miR-1262	1	0	1	0	1	1	ROCK2	Rho-associated, coiled-coil containing protein kinase 2
hsa-miR-1262	1	0	1	0	1	1	SPTLC2	serine palmitoyltransferase, long chain base subunit 2
hsa-miR-1262	0	0	1	1	1	1	PRDX6	peroxiredoxin 6
hsa-miR-1262	0	0	1	1	1	1	CLCA3P	chloride channel accessory 3, pseudogene
hsa-miR-1262	1	0	1	1	1	1	SIAH2	siah E3 ubiquitin protein ligase 2
hsa-miR-1262	0	0	1	1	1	1	SIM1	single-minded homolog 1 (Drosophila)
hsa-miR-1262	1	0	1	1	0	0	ZMYM3	zinc finger, MYM-type 3
hsa-miR-1262	1	0	1	0	1	1	NUP153	nucleoporin 153kDa
hsa-miR-1262	1	0	1	1	1	1	BMI1	BMI1 polycomb ring finger oncogene
hsa-miR-1262	1	0	1	1	1	1	DCC	deleted in colorectal carcinoma
hsa-miR-1262	0	0	1	0	1	1	EPHA3	EPH receptor A3
hsa-miR-1262	1	0	1	1	1	1	GEM	GTP binding protein overexpressed in skeletal muscle
hsa-miR-1262	1	0	1	1	1	1	GJA5	gap junction protein, alpha 5, 40kDa
hsa-miR-1262	1	0	1	1	1	1	HIP1	huntingtin interacting protein 1
hsa-miR-1262	1	0	1	0	1	1	SRC	v-src sarcoma (Schmidt-Ruppin A-2) viral oncogene homolog (avian)
hsa-miR-1262	0	0	1	0	0	0	TNP2	transition protein 2 (during histone to protamine replacement)
hsa-miR-1262	1	0	1	0	1	1	CCDC6	coiled-coil domain containing 6
hsa-miR-1262	1	0	1	1	1	1	RND2	Rho family GTPase 2
hsa-miR-1262	0	0	1	1	1	1	ZRANB2	zinc finger, RAN-binding domain containing 2
hsa-miR-1262	1	0	1	1	1	1	GABBR2	gamma-aminobutyric acid (GABA) B receptor, 2
hsa-miR-1262	1	0	1	1	1	1	MNX1	motor neuron and pancreas homeobox 1
hsa-miR-1262	1	0	1	1	1	1	LPP	LIM domain containing preferred translocation partner in lipoma
hsa-miR-1262	1	0	1	1	1	1	ARPC5	actin related protein 2/3 complex, subunit 5, 16kDa
hsa-miR-1262	0	0	1	1	1	1	RNF41	ring finger protein 41
hsa-miR-1262	0	0	1	0	0	0	ALG3	asparagine-linked glycosylation 3, alpha-1,3- mannosyltransferase homolog (S. cerevisiae)
hsa-miR-1262	1	0	1	1	1	1	GLYAT	glycine-N-acyltransferase
hsa-miR-1262	1	0	1	1	1	1	MAN1A1	mannosidase, alpha, class 1A, member 1
hsa-miR-1262	1	0	1	1	1	1	MAT2A	methionine adenosyltransferase II, alpha
hsa-miR-1262	1	0	1	1	1	1	MEOX2	mesenchyme homeobox 2
hsa-miR-1262	1	0	1	1	1	1	CITED2	Cbp/p300-interacting transactivator, with Glu/Asp-rich carboxy-terminal domain, 2
hsa-miR-1262	1	0	1	1	1	1	CAPZA1	capping protein (actin filament) muscle Z-line, alpha 1
hsa-miR-1262	0	0	1	1	1	1	CSF2RA	colony stimulating factor 2 receptor, alpha, low-affinity (granulocyte-macrophage)
hsa-miR-1262	1	0	1	1	1	1	NEUROD2	neuronal differentiation 2
hsa-miR-1262	0	0	1	1	1	1	NKX3-1	NK3 homeobox 1
hsa-miR-1262	1	0	1	1	1	1	NR4A2	nuclear receptor subfamily 4, group A, member 2
hsa-miR-1262	1	0	1	0	1	1	PITPNA	phosphatidylinositol transfer protein, alpha
hsa-miR-1262	0	0	1	1	1	1	PPEF2	protein phosphatase, EF-hand calcium binding domain 2
hsa-miR-1262	0	0	1	1	1	1	PPP2R5A	protein phosphatase 2, regulatory subunit B', alpha
hsa-miR-1262	0	0	1	1	1	1	TYRO3	TYRO3 protein tyrosine kinase
hsa-miR-1262	1	0	1	1	1	1	SMC1A	structural maintenance of chromosomes 1A
hsa-miR-1262	1	0	1	1	1	1	FBLN5	fibulin 5
hsa-miR-1262	1	0	1	1	1	1	ZNF238	zinc finger protein 238
hsa-miR-1262	0	0	1	1	1	1	SLC25A17	solute carrier family 25 (mitochondrial carrier; peroxisomal membrane protein, 34kDa), member 17
hsa-miR-1262	1	0	1	1	1	1	NEBL	nebulette
hsa-miR-1262	0	0	1	1	0	0	STAMBP	STAM binding protein
hsa-miR-1262	1	0	1	1	1	1	SLC2A1	solute carrier family 2 (facilitated glucose transporter), member 1
hsa-miR-1262	0	0	1	0	1	1	SLC16A2	solute carrier family 16, member 2 (thyroid hormone transporter)
hsa-miR-1262	1	0	1	1	1	1	DYNLT3	dynein, light chain, Tctex-type 3
hsa-miR-1262	1	0	1	0	1	1	API5	apoptosis inhibitor 5
hsa-miR-1262	1	0	1	1	1	1	RBBP9	retinoblastoma binding protein 9
hsa-miR-1262	1	0	1	0	1	1	SYNGAP1	synaptic Ras GTPase activating protein 1
hsa-miR-1262	1	0	1	1	1	1	MORF4L1	mortality factor 4 like 1
hsa-miR-1262	0	0	1	1	1	1	PKIA	protein kinase (cAMP-dependent, catalytic) inhibitor alpha
hsa-miR-1262	0	0	1	1	1	1	TMED10	transmembrane emp24-like trafficking protein 10 (yeast)
hsa-miR-1262	1	0	1	0	1	1	SOX12	SRY (sex determining region Y)-box 12
hsa-miR-1262	1	0	1	1	1	1	ADAMTS5	ADAM metallopeptidase with thrombospondin type 1 motif, 5
hsa-miR-1262	1	0	1	1	1	1	FGFR1OP	FGFR1 oncogene partner
hsa-miR-1262	1	0	1	1	1	1	ZIC2	Zic family member 2
hsa-miR-1262	1	0	1	1	1	1	ZNF81	zinc finger protein 81
hsa-miR-1262	1	0	1	0	1	1	PRSS23	protease, serine, 23
hsa-miR-1262	1	0	1	1	1	1	KLF12	Kruppel-like factor 12
hsa-miR-1262	0	0	1	0	1	1	PNMA2	paraneoplastic Ma antigen 2
hsa-miR-1262	0	0	1	0	1	1	AP4E1	adaptor-related protein complex 4, epsilon 1 subunit
hsa-miR-1262	1	0	1	1	1	1	APPL1	adaptor protein, phosphotyrosine interaction, PH domain and leucine zipper containing 1
hsa-miR-1262	1	0	1	0	1	1	CD2AP	CD2-associated protein
hsa-miR-1262	1	0	1	1	1	1	MGEA5	meningioma expressed antigen 5 (hyaluronidase)
hsa-miR-1262	1	0	1	1	1	1	FBXW11	F-box and WD repeat domain containing 11
hsa-miR-1262	1	0	1	1	1	1	MAPRE1	microtubule-associated protein, RP/EB family, member 1
hsa-miR-1262	1	0	1	0	1	1	MYCBP	c-myc binding protein
hsa-miR-1262	1	0	1	1	1	1	NUFIP1	nuclear fragile X mental retardation protein interacting protein 1
hsa-miR-1262	0	0	1	0	1	1	PLA2G2D	phospholipase A2, group IID
hsa-miR-1262	1	0	1	1	1	1	TRPC5	transient receptor potential cation channel, subfamily C, member 5
hsa-miR-1262	0	0	1	1	1	1	N6AMT1	N-6 adenine-specific DNA methyltransferase 1 (putative)
hsa-miR-1262	0	0	1	1	1	1	SNX10	sorting nexin 10
hsa-miR-1262	0	0	1	1	0	0	KCNJ14	potassium inwardly-rectifying channel, subfamily J, member 14
hsa-miR-1262	0	0	1	1	1	1	PNMA3	paraneoplastic Ma antigen 3
hsa-miR-1262	0	0	1	1	1	1	UBQLN2	ubiquilin 2
hsa-miR-1262	0	0	1	0	1	1	EMR2	egf-like module containing, mucin-like, hormone receptor-like 2
hsa-miR-1262	1	0	1	1	1	1	BAZ1A	bromodomain adjacent to zinc finger domain, 1A
hsa-miR-1262	1	0	1	1	1	1	SOCS5	suppressor of cytokine signaling 5
hsa-miR-1262	0	0	1	1	1	1	METTL7A	methyltransferase like 7A
hsa-miR-1262	1	0	1	0	1	1	C16orf72	chromosome 16 open reading frame 72
hsa-miR-1262	0	0	1	1	1	1	ORMDL2	ORM1-like 2 (S. cerevisiae)
hsa-miR-1262	1	0	1	1	1	1	VAMP1	vesicle-associated membrane protein 1 (synaptobrevin 1)
hsa-miR-1262	1	0	1	1	1	1	RNF7	ring finger protein 7
hsa-miR-1262	1	0	1	0	1	1	ODZ1	odz, odd Oz/ten-m homolog 1 (Drosophila)
hsa-miR-1262	1	0	1	1	1	1	MAPRE2	microtubule-associated protein, RP/EB family, member 2
hsa-miR-1262	0	0	1	1	1	1	DNAJC8	DnaJ (Hsp40) homolog, subfamily C, member 8
hsa-miR-1262	0	0	1	1	1	1	CAPN6	calpain 6
hsa-miR-1262	1	0	1	0	1	1	FJX1	four jointed box 1 (Drosophila)
hsa-miR-1262	1	0	1	1	1	1	LHX6	LIM homeobox 6
hsa-miR-1262	0	0	1	1	0	0	NGFRAP1	nerve growth factor receptor (TNFRSF16) associated protein 1
hsa-miR-1262	0	0	1	0	1	1	VPS41	vacuolar protein sorting 41 homolog (S. cerevisiae)
hsa-miR-1262	0	0	1	1	1	1	CLUL1	clusterin-like 1 (retinal)
hsa-miR-1262	1	0	1	1	1	1	SERP1	stress-associated endoplasmic reticulum protein 1
hsa-miR-1262	0	0	1	1	1	1	ZNF330	zinc finger protein 330
hsa-miR-1262	1	0	1	1	1	1	KDM4A	lysine (K)-specific demethylase 4A
hsa-miR-1262	1	0	1	0	1	1	TOX	thymocyte selection-associated high mobility group box
hsa-miR-1262	1	0	1	0	1	1	MLEC	malectin
hsa-miR-1262	0	0	1	1	1	1	SNX19	sorting nexin 19
hsa-miR-1262	1	0	1	1	1	1	ARHGEF11	Rho guanine nucleotide exchange factor (GEF) 11
hsa-miR-1262	0	0	1	0	1	1	EPM2AIP1	EPM2A (laforin) interacting protein 1
hsa-miR-1262	1	0	1	1	1	1	TOMM70A	translocase of outer mitochondrial membrane 70 homolog A (S. cerevisiae)
hsa-miR-1262	1	0	1	1	1	1	NUAK1	NUAK family, SNF1-like kinase, 1
hsa-miR-1262	1	0	1	1	1	1	JOSD1	Josephin domain containing 1
hsa-miR-1262	1	0	1	1	1	1	PLEKHA6	pleckstrin homology domain containing, family A member 6
hsa-miR-1262	1	0	1	0	1	1	WDFY3	WD repeat and FYVE domain containing 3
hsa-miR-1262	1	0	1	0	1	1	GGA2	golgi-associated, gamma adaptin ear containing, ARF binding protein 2
hsa-miR-1262	1	0	1	1	1	1	HECW1	HECT, C2 and WW domain containing E3 ubiquitin protein ligase 1
hsa-miR-1262	1	0	1	1	1	1	DDN	dendrin
hsa-miR-1262	1	0	1	1	1	1	RTF1	Rtf1, Paf1/RNA polymerase II complex component, homolog (S. cerevisiae)
hsa-miR-1262	1	0	1	0	1	1	LARP4B	La ribonucleoprotein domain family, member 4B
hsa-miR-1262	1	0	1	1	1	1	PDS5A	PDS5, regulator of cohesion maintenance, homolog A (S. cerevisiae)
hsa-miR-1262	1	0	1	0	1	1	KIAA1024	KIAA1024
hsa-miR-1262	0	0	1	1	1	1	POFUT2	protein O-fucosyltransferase 2
hsa-miR-1262	1	0	1	1	0	0	SMG5	smg-5 homolog, nonsense mediated mRNA decay factor (C. elegans)
hsa-miR-1262	1	0	1	1	1	1	PARM1	prostate androgen-regulated mucin-like protein 1
hsa-miR-1262	1	0	1	1	1	1	CNOT6	CCR4-NOT transcription complex, subunit 6
hsa-miR-1262	1	0	1	1	1	1	NSL1	NSL1, MIND kinetochore complex component, homolog (S. cerevisiae)
hsa-miR-1262	1	0	1	1	1	1	MAGI1	membrane associated guanylate kinase, WW and PDZ domain containing 1
hsa-miR-1262	1	0	1	1	1	1	CLIP3	CAP-GLY domain containing linker protein 3
hsa-miR-1262	1	0	1	0	1	1	OSBPL3	oxysterol binding protein-like 3
hsa-miR-1262	1	0	1	1	1	1	FAM155B	family with sequence similarity 155, member B
hsa-miR-1262	1	0	1	1	1	1	FGFR1	fibroblast growth factor receptor 1
hsa-miR-1262	1	0	1	1	1	1	AZIN1	antizyme inhibitor 1
hsa-miR-1262	1	0	1	0	1	1	TRIM33	tripartite motif containing 33
hsa-miR-1262	0	0	1	1	1	1	ISOC1	isochorismatase domain containing 1
hsa-miR-1262	1	0	1	1	1	1	RRP15	ribosomal RNA processing 15 homolog (S. cerevisiae)
hsa-miR-1262	0	0	1	0	0	0	FAM96B	family with sequence similarity 96, member B
hsa-miR-1262	1	0	1	0	1	1	CNR1	cannabinoid receptor 1 (brain)
hsa-miR-1262	0	0	1	1	1	1	ZFR	zinc finger RNA binding protein
hsa-miR-1262	0	0	1	1	0	0	CPQ	carboxypeptidase Q
hsa-miR-1262	0	0	1	0	1	1	ZNF44	zinc finger protein 44
hsa-miR-1262	0	0	1	1	1	1	CDH9	cadherin 9, type 2 (T1-cadherin)
hsa-miR-1262	1	0	1	1	1	1	RAB14	RAB14, member RAS oncogene family
hsa-miR-1262	1	0	1	1	1	1	RAPGEFL1	Rap guanine nucleotide exchange factor (GEF)-like 1
hsa-miR-1262	0	0	1	1	1	1	CD244	CD244 molecule, natural killer cell receptor 2B4
hsa-miR-1262	1	0	1	1	1	1	LUC7L3	LUC7-like 3 (S. cerevisiae)
hsa-miR-1262	1	0	1	1	1	1	PHF20	PHD finger protein 20
hsa-miR-1262	1	0	1	0	1	1	CRIM1	cysteine rich transmembrane BMP regulator 1 (chordin-like)
hsa-miR-1262	0	0	1	1	0	0	FAM203A	family with sequence similarity 203, member A
hsa-miR-1262	0	0	1	1	0	0	PHF7	PHD finger protein 7
hsa-miR-1262	1	0	1	0	1	1	RAB8B	RAB8B, member RAS oncogene family
hsa-miR-1262	0	0	1	0	1	1	GPR83	G protein-coupled receptor 83
hsa-miR-1262	1	0	1	1	1	1	RAB6B	RAB6B, member RAS oncogene family
hsa-miR-1262	0	0	1	1	1	1	KDM3B	lysine (K)-specific demethylase 3B
hsa-miR-1262	1	0	1	1	1	1	UFM1	ubiquitin-fold modifier 1
hsa-miR-1262	1	0	1	1	1	1	HOXC10	homeobox C10
hsa-miR-1262	0	0	1	1	1	1	PRKAG3	protein kinase, AMP-activated, gamma 3 non-catalytic subunit
hsa-miR-1262	1	0	1	1	0	0	DUOX1	dual oxidase 1
hsa-miR-1262	1	0	1	1	1	1	CPSF2	cleavage and polyadenylation specific factor 2, 100kDa
hsa-miR-1262	1	0	1	1	1	1	ARID1B	AT rich interactive domain 1B (SWI1-like)
hsa-miR-1262	1	0	1	1	1	1	DIRAS2	DIRAS family, GTP-binding RAS-like 2
hsa-miR-1262	1	0	1	1	1	1	YTHDF1	YTH domain family, member 1
hsa-miR-1262	1	0	1	1	1	1	ZNHIT6	zinc finger, HIT-type containing 6
hsa-miR-1262	1	0	1	1	1	1	TMEM33	transmembrane protein 33
hsa-miR-1262	0	0	1	1	1	1	TSR1	TSR1, 20S rRNA accumulation, homolog (S. cerevisiae)
hsa-miR-1262	0	0	1	0	1	1	GOLPH3L	golgi phosphoprotein 3-like
hsa-miR-1262	1	0	1	0	1	1	TMEM106B	transmembrane protein 106B
hsa-miR-1262	1	0	1	1	1	1	ASH1L	ash1 (absent, small, or homeotic)-like (Drosophila)
hsa-miR-1262	1	0	1	1	1	1	LRRC59	leucine rich repeat containing 59
hsa-miR-1262	1	0	1	0	1	1	SMPD3	sphingomyelin phosphodiesterase 3, neutral membrane (neutral sphingomyelinase II)
hsa-miR-1262	1	0	1	1	1	1	SVOP	SV2 related protein homolog (rat)
hsa-miR-1262	1	0	1	1	1	1	SASH3	SAM and SH3 domain containing 3
hsa-miR-1262	1	0	1	0	1	1	FAM190B	family with sequence similarity 190, member B
hsa-miR-1262	0	0	1	1	1	1	GNL3L	guanine nucleotide binding protein-like 3 (nucleolar)-like
hsa-miR-1262	1	0	1	0	1	1	UBFD1	ubiquitin family domain containing 1
hsa-miR-1262	1	0	1	1	1	1	CCBL2	cysteine conjugate-beta lyase 2
hsa-miR-1262	0	0	1	1	0	0	IRGC	immunity-related GTPase family, cinema
hsa-miR-1262	1	0	1	1	1	1	POLE4	polymerase (DNA-directed), epsilon 4, accessory subunit
hsa-miR-1262	1	0	1	0	1	1	SLAMF8	SLAM family member 8
hsa-miR-1262	1	0	1	0	1	1	MNT	MAX binding protein
hsa-miR-1262	1	0	1	0	1	1	CNNM1	cyclin M1
hsa-miR-1262	0	0	1	1	1	1	CYSLTR2	cysteinyl leukotriene receptor 2
hsa-miR-1262	1	0	1	1	1	1	PCDH9	protocadherin 9
hsa-miR-1262	1	0	1	0	1	1	ADCY2	adenylate cyclase 2 (brain)
hsa-miR-1262	0	0	1	0	1	1	TWSG1	twisted gastrulation homolog 1 (Drosophila)
hsa-miR-1262	0	0	1	1	1	1	SHROOM4	shroom family member 4
hsa-miR-1262	1	0	1	1	1	1	USP31	ubiquitin specific peptidase 31
hsa-miR-1262	1	0	1	1	1	1	RGAG1	retrotransposon gag domain containing 1
hsa-miR-1262	1	0	1	0	1	1	ALPK3	alpha-kinase 3
hsa-miR-1262	1	0	1	0	1	1	SYT4	synaptotagmin IV
hsa-miR-1262	1	0	1	1	1	1	KLHL14	kelch-like 14 (Drosophila)
hsa-miR-1262	1	0	1	0	1	1	SH3RF1	SH3 domain containing ring finger 1
hsa-miR-1262	1	0	1	1	1	1	ZFP14	zinc finger protein 14 homolog (mouse)
hsa-miR-1262	0	0	1	1	1	1	PRX	periaxin
hsa-miR-1262	1	0	1	1	1	1	ZNFX1	zinc finger, NFX1-type containing 1
hsa-miR-1262	0	0	1	1	0	0	MAGEA5	melanoma antigen family A, 5
hsa-miR-1262	1	0	1	0	1	1	XK	X-linked Kx blood group (McLeod syndrome)
hsa-miR-1262	0	0	1	1	0	0	HOXD11	homeobox D11
hsa-miR-1262	1	0	1	1	1	1	PELI2	pellino E3 ubiquitin protein ligase family member 2
hsa-miR-1262	1	0	1	1	1	1	TMEM35	transmembrane protein 35
hsa-miR-1262	0	0	1	1	0	0	FCGR2A	Fc fragment of IgG, low affinity IIa, receptor (CD32)
hsa-miR-1262	1	0	1	1	1	1	CLCN6	chloride channel, voltage-sensitive 6
hsa-miR-1262	0	0	1	1	1	1	PGM5	phosphoglucomutase 5
hsa-miR-1262	0	0	1	1	0	0	ABHD4	abhydrolase domain containing 4
hsa-miR-1262	1	0	1	0	1	1	CERS2	ceramide synthase 2
hsa-miR-1262	0	0	1	1	1	1	CHP2	calcineurin-like EF hand protein 2
hsa-miR-1262	0	0	1	1	0	0	POPDC2	popeye domain containing 2
hsa-miR-1262	1	0	1	1	1	1	ABCG4	ATP-binding cassette, sub-family G (WHITE), member 4
hsa-miR-1262	0	0	1	1	1	1	TCTA	T-cell leukemia translocation altered
hsa-miR-1262	0	0	1	1	0	0	DPEP3	dipeptidase 3
hsa-miR-1262	1	0	1	1	1	1	GIGYF1	GRB10 interacting GYF protein 1
hsa-miR-1262	0	0	1	1	1	1	ACBD3	acyl-CoA binding domain containing 3
hsa-miR-1262	1	0	1	1	1	1	FAM59A	family with sequence similarity 59, member A
hsa-miR-1262	0	0	1	1	1	1	SFXN1	sideroflexin 1
hsa-miR-1262	1	0	1	0	1	1	MAP1LC3B	microtubule-associated protein 1 light chain 3 beta
hsa-miR-1262	1	0	1	1	1	1	MARCH7	membrane-associated ring finger (C3HC4) 7, E3 ubiquitin protein ligase
hsa-miR-1262	1	0	1	1	1	1	AIDA	axin interactor, dorsalization associated
hsa-miR-1262	0	0	1	1	1	1	MARCKSL1	MARCKS-like 1
hsa-miR-1262	1	0	1	1	0	0	UBE2Z	ubiquitin-conjugating enzyme E2Z
hsa-miR-1262	1	0	1	1	1	1	HOXB8	homeobox B8
hsa-miR-1262	0	0	1	0	1	1	TRPM8	transient receptor potential cation channel, subfamily M, member 8
hsa-miR-1262	1	0	1	1	0	0	APOO	apolipoprotein O
hsa-miR-1262	1	0	1	1	1	1	RNF128	ring finger protein 128, E3 ubiquitin protein ligase
hsa-miR-1262	1	0	1	1	1	1	CCNJL	cyclin J-like
hsa-miR-1262	1	0	1	1	1	1	PANK3	pantothenate kinase 3
hsa-miR-1262	1	0	1	1	1	1	PPP1R3B	protein phosphatase 1, regulatory subunit 3B
hsa-miR-1262	0	0	1	1	1	1	GLT25D1	glycosyltransferase 25 domain containing 1
hsa-miR-1262	1	0	1	0	1	1	ZFHX4	zinc finger homeobox 4
hsa-miR-1262	1	0	1	0	1	1	MOB3B	MOB kinase activator 3B
hsa-miR-1262	1	0	1	1	1	1	CLMP	CXADR-like membrane protein
hsa-miR-1262	0	0	1	1	1	1	SNX22	sorting nexin 22
hsa-miR-1262	1	0	1	1	1	1	TMC7	transmembrane channel-like 7
hsa-miR-1262	0	0	1	1	1	1	ZNF767	zinc finger family member 767
hsa-miR-1262	1	0	1	1	1	1	POF1B	premature ovarian failure, 1B
hsa-miR-1262	1	0	1	1	1	1	KLHL18	kelch-like 18 (Drosophila)
hsa-miR-1262	1	0	1	0	1	1	VCPIP1	valosin containing protein (p97)/p47 complex interacting protein 1
hsa-miR-1262	0	0	1	0	1	1	PDGFD	platelet derived growth factor D
hsa-miR-1262	1	0	1	0	1	1	TET1	tet methylcytosine dioxygenase 1
hsa-miR-1262	1	0	1	0	1	1	SETD7	SET domain containing (lysine methyltransferase) 7
hsa-miR-1262	0	0	1	1	1	1	HMGN5	high mobility group nucleosome binding domain 5
hsa-miR-1262	1	0	1	1	1	1	SYNC	syncoilin, intermediate filament protein
hsa-miR-1262	1	0	1	0	1	1	C1orf21	chromosome 1 open reading frame 21
hsa-miR-1262	1	0	1	0	1	1	CSRNP2	cysteine-serine-rich nuclear protein 2
hsa-miR-1262	0	0	1	1	1	1	APOL2	apolipoprotein L, 2
hsa-miR-1262	1	0	1	1	1	1	SNX27	sorting nexin family member 27
hsa-miR-1262	0	0	1	1	1	1	KIF18A	kinesin family member 18A
hsa-miR-1262	1	0	1	0	1	1	THAP2	THAP domain containing, apoptosis associated protein 2
hsa-miR-1262	1	0	1	1	1	1	SOX7	SRY (sex determining region Y)-box 7
hsa-miR-1262	1	0	1	1	1	1	SESN2	sestrin 2
hsa-miR-1262	1	0	1	0	1	1	SH3BGRL2	SH3 domain binding glutamic acid-rich protein like 2
hsa-miR-1262	0	0	1	1	1	1	CRISPLD2	cysteine-rich secretory protein LCCL domain containing 2
hsa-miR-1262	1	0	1	0	1	1	ITCH	itchy E3 ubiquitin protein ligase
hsa-miR-1262	0	0	1	0	1	1	KRTAP1-5	keratin associated protein 1-5
hsa-miR-1262	0	0	1	1	0	0	C10orf11	chromosome 10 open reading frame 11
hsa-miR-1262	1	0	1	0	1	1	SRSF8	serine/arginine-rich splicing factor 8
hsa-miR-1262	1	0	1	1	1	1	UTP15	UTP15, U3 small nucleolar ribonucleoprotein, homolog (S. cerevisiae)
hsa-miR-1262	1	0	1	1	1	1	ARID5B	AT rich interactive domain 5B (MRF1-like)
hsa-miR-1262	1	0	1	1	1	1	ANTXR1	anthrax toxin receptor 1
hsa-miR-1262	0	0	1	1	0	0	ELMOD3	ELMO/CED-12 domain containing 3
hsa-miR-1262	1	0	1	0	1	1	FAR1	fatty acyl CoA reductase 1
hsa-miR-1262	1	0	1	1	1	1	MEX3B	mex-3 homolog B (C. elegans)
hsa-miR-1262	0	0	1	1	1	1	YIPF4	Yip1 domain family, member 4
hsa-miR-1262	0	0	1	1	0	0	NICN1	nicolin 1
hsa-miR-1262	1	0	1	1	1	1	DNAJC14	DnaJ (Hsp40) homolog, subfamily C, member 14
hsa-miR-1262	1	0	1	1	1	1	SYVN1	synovial apoptosis inhibitor 1, synoviolin
hsa-miR-1262	0	0	1	1	1	1	MAP1LC3A	microtubule-associated protein 1 light chain 3 alpha
hsa-miR-1262	0	0	1	1	1	1	FNDC1	fibronectin type III domain containing 1
hsa-miR-1262	1	0	1	1	1	1	HIATL1	hippocampus abundant transcript-like 1
hsa-miR-1262	1	0	1	1	1	1	PHF5A	PHD finger protein 5A
hsa-miR-1262	0	0	1	1	1	1	HAVCR2	hepatitis A virus cellular receptor 2
hsa-miR-1262	1	0	1	1	1	1	ARHGEF39	Rho guanine nucleotide exchange factor (GEF) 39
hsa-miR-1262	1	0	1	1	1	1	CGNL1	cingulin-like 1
hsa-miR-1262	0	0	1	1	1	1	FBXL20	F-box and leucine-rich repeat protein 20
hsa-miR-1262	1	0	1	1	1	1	PCDH10	protocadherin 10
hsa-miR-1262	1	0	1	1	1	1	TRIM5	tripartite motif containing 5
hsa-miR-1262	0	0	1	1	1	1	KRTAP3-3	keratin associated protein 3-3
hsa-miR-1262	1	0	1	0	1	1	PURB	purine-rich element binding protein B
hsa-miR-1262	1	0	1	1	1	1	TANC1	tetratricopeptide repeat, ankyrin repeat and coiled-coil containing 1
hsa-miR-1262	1	0	1	1	1	1	EPT1	ethanolaminephosphotransferase 1 (CDP-ethanolamine-specific)
hsa-miR-1262	1	0	1	1	1	1	LUZP1	leucine zipper protein 1
hsa-miR-1262	1	0	1	1	1	1	XKR4	XK, Kell blood group complex subunit-related family, member 4
hsa-miR-1262	1	0	1	1	1	1	WDFY2	WD repeat and FYVE domain containing 2
hsa-miR-1262	1	0	1	0	1	1	FAM129A	family with sequence similarity 129, member A
hsa-miR-1262	1	0	1	1	1	1	NAA15	N(alpha)-acetyltransferase 15, NatA auxiliary subunit
hsa-miR-1262	0	0	1	1	1	1	CBLN4	cerebellin 4 precursor
hsa-miR-1262	0	0	1	1	1	1	C14orf126	chromosome 14 open reading frame 126
hsa-miR-1262	0	0	1	1	0	0	ZSWIM3	zinc finger, SWIM-type containing 3
hsa-miR-1262	1	0	1	1	1	1	DYRK1A	dual-specificity tyrosine-(Y)-phosphorylation regulated kinase 1A
hsa-miR-1262	0	0	1	1	0	0	SYCE1	synaptonemal complex central element protein 1
hsa-miR-1262	0	0	1	0	0	0	AP5B1	adaptor-related protein complex 5, beta 1 subunit
hsa-miR-1262	0	0	1	0	1	1	SP140L	SP140 nuclear body protein-like
hsa-miR-1262	1	0	1	0	1	1	NUS1	nuclear undecaprenyl pyrophosphate synthase 1 homolog (S. cerevisiae)
hsa-miR-1262	1	0	1	0	1	1	SP1	Sp1 transcription factor
hsa-miR-1262	0	0	1	1	1	1	KLF14	Kruppel-like factor 14
hsa-miR-1262	1	0	1	1	1	1	PKHD1	polycystic kidney and hepatic disease 1 (autosomal recessive)
hsa-miR-1262	0	0	1	1	1	1	MPLKIP	M-phase specific PLK1 interacting protein
hsa-miR-1262	1	0	1	1	1	1	ATRN	attractin
hsa-miR-1262	1	0	1	0	1	1	CNOT6L	CCR4-NOT transcription complex, subunit 6-like
hsa-miR-1262	0	0	1	1	1	1	SESN3	sestrin 3
hsa-miR-1262	1	0	1	1	0	0	SMCR8	Smith-Magenis syndrome chromosome region, candidate 8
hsa-miR-1262	1	0	1	1	1	1	FAM91A1	family with sequence similarity 91, member A1
hsa-miR-1262	0	0	1	1	1	1	VWA3B	von Willebrand factor A domain containing 3B
hsa-miR-1262	0	0	1	1	0	0	GLYATL2	glycine-N-acyltransferase-like 2
hsa-miR-1262	0	0	1	1	0	0	CISH	cytokine inducible SH2-containing protein
hsa-miR-1262	0	0	1	1	0	0	EVI5L	ecotropic viral integration site 5-like
hsa-miR-1262	0	0	1	1	1	1	APOBEC3F	apolipoprotein B mRNA editing enzyme, catalytic polypeptide-like 3F
hsa-miR-1262	1	0	1	1	1	1	SEPT6	septin 6
hsa-miR-1262	0	0	1	0	1	1	BBS5	Bardet-Biedl syndrome 5
hsa-miR-1262	1	0	1	1	1	1	FAM123B	family with sequence similarity 123B
hsa-miR-1262	1	0	1	1	1	1	FAM81A	family with sequence similarity 81, member A
hsa-miR-1262	0	0	1	1	0	0	MUC20	mucin 20, cell surface associated
hsa-miR-1262	1	0	1	0	1	1	TMEM154	transmembrane protein 154
hsa-miR-1262	0	0	1	1	0	0	IGLL1	immunoglobulin lambda-like polypeptide 1
hsa-miR-1262	1	0	1	1	1	1	C3orf45	chromosome 3 open reading frame 45
hsa-miR-1262	0	0	1	0	1	1	LIX1	Lix1 homolog (chicken)
hsa-miR-1262	1	0	1	1	1	1	TXLNB	taxilin beta
hsa-miR-1262	1	0	1	1	1	1	TMEM151A	transmembrane protein 151A
hsa-miR-1262	1	0	1	1	0	0	TMEM86A	transmembrane protein 86A
hsa-miR-1262	0	0	1	1	0	0	APCDD1L	adenomatosis polyposis coli down-regulated 1-like
hsa-miR-1262	0	0	1	0	1	1	VGLL2	vestigial like 2 (Drosophila)
hsa-miR-1262	1	0	1	0	1	1	SEMA6D	sema domain, transmembrane domain (TM), and cytoplasmic domain, (semaphorin) 6D
hsa-miR-1262	1	0	1	1	1	1	HOXA1	homeobox A1
hsa-miR-1262	0	0	1	1	0	0	CPNE9	copine family member IX
hsa-miR-1262	0	0	1	0	1	1	RTP1	receptor (chemosensory) transporter protein 1
hsa-miR-1262	1	0	1	1	1	1	FNDC5	fibronectin type III domain containing 5
hsa-miR-1262	1	0	1	1	1	1	CACUL1	CDK2-associated, cullin domain 1
hsa-miR-1262	0	0	1	1	1	1	CDY1	chromodomain protein, Y-linked, 1
hsa-miR-1262	0	0	1	1	1	1	TEDDM1	transmembrane epididymal protein 1
hsa-miR-1262	0	0	1	1	1	1	REXO1L1	REX1, RNA exonuclease 1 homolog (S. cerevisiae)-like 1
hsa-miR-1262	0	0	1	0	1	1	TUSC5	tumor suppressor candidate 5
hsa-miR-1262	1	0	1	1	1	1	L3MBTL4	l(3)mbt-like 4 (Drosophila)
hsa-miR-1262	1	0	1	1	1	1	DCUN1D3	DCN1, defective in cullin neddylation 1, domain containing 3 (S. cerevisiae)
hsa-miR-1262	1	0	1	1	1	1	FAM117B	family with sequence similarity 117, member B
hsa-miR-1262	1	0	1	1	1	1	ARL10	ADP-ribosylation factor-like 10
hsa-miR-1262	0	0	1	1	1	1	ZCCHC12	zinc finger, CCHC domain containing 12
hsa-miR-1262	0	0	1	1	1	1	AQPEP	laeverin
hsa-miR-1262	1	0	1	1	1	1	LDLRAD3	low density lipoprotein receptor class A domain containing 3
hsa-miR-1262	0	0	1	1	1	1	ZDHHC22	zinc finger, DHHC-type containing 22
hsa-miR-1262	0	0	1	1	0	0	SEC14L4	SEC14-like 4 (S. cerevisiae)
hsa-miR-1262	0	0	1	1	1	1	C16orf54	chromosome 16 open reading frame 54
hsa-miR-1262	1	0	1	1	1	1	ZADH2	zinc binding alcohol dehydrogenase domain containing 2
hsa-miR-1262	0	0	1	1	1	1	MRPL43	mitochondrial ribosomal protein L43
hsa-miR-1262	1	0	1	1	1	1	PDLIM2	PDZ and LIM domain 2 (mystique)
hsa-miR-1262	1	0	1	1	1	1	STX12	syntaxin 12
hsa-miR-1262	1	0	1	1	1	1	PPM1B	protein phosphatase, Mg2+/Mn2+ dependent, 1B
hsa-miR-1262	1	0	1	1	1	1	ASB6	ankyrin repeat and SOCS box containing 6
hsa-miR-1262	1	0	1	1	1	1	LRRTM3	leucine rich repeat transmembrane neuronal 3
hsa-miR-1262	1	0	1	1	1	1	GMCL1	germ cell-less, spermatogenesis associated 1
hsa-miR-1262	1	0	1	1	0	0	PHOSPHO1	phosphatase, orphan 1
hsa-miR-1262	1	0	1	1	0	0	KY	kyphoscoliosis peptidase
hsa-miR-1262	1	0	1	0	1	1	ARL5B	ADP-ribosylation factor-like 5B
hsa-miR-1262	0	0	1	0	1	1	SLCO4C1	solute carrier organic anion transporter family, member 4C1
hsa-miR-1262	1	0	1	1	1	1	PAX3	paired box 3
hsa-miR-1262	1	0	1	1	1	1	AKT3	v-akt murine thymoma viral oncogene homolog 3 (protein kinase B, gamma)
hsa-miR-1262	0	0	1	1	1	1	DNAJC24	DnaJ (Hsp40) homolog, subfamily C, member 24
hsa-miR-1262	1	0	1	1	1	1	ZSCAN22	zinc finger and SCAN domain containing 22
hsa-miR-1262	1	0	1	1	1	1	ADAT2	adenosine deaminase, tRNA-specific 2
hsa-miR-1262	0	0	1	0	1	1	VSIG1	V-set and immunoglobulin domain containing 1
hsa-miR-1262	0	0	1	0	1	1	NBPF11	neuroblastoma breakpoint family, member 11
hsa-miR-1262	1	0	1	1	1	1	ADAMTS6	ADAM metallopeptidase with thrombospondin type 1 motif, 6
hsa-miR-1262	0	0	1	0	1	1	BTNL3	butyrophilin-like 3
hsa-miR-1262	1	0	1	1	1	1	AQP1	aquaporin 1 (Colton blood group)
hsa-miR-1262	1	0	1	1	1	1	ASB7	ankyrin repeat and SOCS box containing 7
hsa-miR-1262	1	0	1	1	1	1	GPRIN3	GPRIN family member 3
hsa-miR-1262	0	0	1	0	1	1	TCF21	transcription factor 21
hsa-miR-1262	0	0	1	1	1	1	FOXR2	forkhead box R2
hsa-miR-1262	1	0	1	0	1	1	NRK	Nik related kinase
hsa-miR-1262	1	0	1	1	1	1	PAQR9	progestin and adipoQ receptor family member IX
hsa-miR-1262	0	0	1	1	1	1	APITD1	apoptosis-inducing, TAF9-like domain 1
hsa-miR-1262	1	0	1	0	1	1	FAM73A	family with sequence similarity 73, member A
hsa-miR-1262	0	0	1	1	1	1	LHFPL4	lipoma HMGIC fusion partner-like 4
hsa-miR-1262	1	0	1	0	1	1	ZC3H6	zinc finger CCCH-type containing 6
hsa-miR-1262	1	0	1	1	1	1	PTGER3	prostaglandin E receptor 3 (subtype EP3)
hsa-miR-1262	1	0	1	1	0	0	KAZN	kazrin, periplakin interacting protein
hsa-miR-1262	0	0	1	1	1	1	ZCCHC13	zinc finger, CCHC domain containing 13
hsa-miR-1262	0	0	1	1	0	0	CXorf67	chromosome X open reading frame 67
hsa-miR-1262	0	0	1	1	1	1	SERTM1	serine-rich and transmembrane domain containing 1
hsa-miR-1262	0	0	1	1	1	1	C10orf129	chromosome 10 open reading frame 129
hsa-miR-1262	1	0	1	1	1	1	FREM2	FRAS1 related extracellular matrix protein 2
hsa-miR-1262	1	0	1	1	1	1	SKIDA1	SKI/DACH domain containing 1
hsa-miR-1262	0	0	1	1	1	1	C20orf132	chromosome 20 open reading frame 132
hsa-miR-1262	0	0	1	0	0	0	SNORD56B	small nucleolar RNA, C/D box 56B
hsa-miR-1262	0	0	1	0	0	0	PCDHB19P	protocadherin beta 19 pseudogene
hsa-miR-1262	0	0	1	0	0	0	TTTY15	testis-specific transcript, Y-linked 15 (non-protein coding)
hsa-miR-1262	0	0	1	0	0	0	TPI1P2	triosephosphate isomerase 1 pseudogene 2
hsa-miR-1262	0	0	1	0	0	0	RBMXP3	RNA binding motif protein, X-linked pseudogene 3
hsa-miR-1262	0	0	1	0	0	0	NXF4	nuclear RNA export factor 4 pseudogene
hsa-miR-1262	0	0	1	0	0	0	RPL23AP32	ribosomal protein L23a pseudogene 32
hsa-miR-1262	0	0	1	0	0	0	SNORD102	small nucleolar RNA, C/D box 102
hsa-miR-1262	0	0	1	0	0	0	DGCR5	DiGeorge syndrome critical region gene 5 (non-protein coding)
hsa-miR-1262	0	0	1	0	0	0	SNORD56	small nucleolar RNA, C/D box 56
hsa-miR-1262	0	0	1	0	0	0	TREML5P	triggering receptor expressed on myeloid cells-like 5, pseudogene
hsa-miR-1262	0	0	1	0	0	0	NEAT1	nuclear paraspeckle assembly transcript 1 (non-protein coding)
hsa-miR-1262	0	0	1	0	0	0	TMED10P1	transmembrane emp24-like trafficking protein 10 (yeast) pseudogene 1
hsa-miR-1262	0	0	1	0	0	0	TPTE2P6	transmembrane phosphoinositide 3-phosphatase and tensin homolog 2 pseudogene 6
hsa-miR-1262	0	0	1	0	0	0	AQP7P1	aquaporin 7 pseudogene 1
hsa-miR-1262	0	0	1	0	0	0	RNF126P1	ring finger protein 126 pseudogene 1
hsa-miR-1262	0	0	1	0	0	0	RNASEH2CP1	ribonuclease H2, subunit C pseudogene 1
hsa-miR-1262	0	0	1	0	0	0	SIGLEC16	sialic acid binding Ig-like lectin 16 (gene/pseudogene)
hsa-miR-1262	0	0	1	0	0	0	DUSP5P	dual specificity phosphatase 5 pseudogene
hsa-miR-1262	0	0	1	0	0	0	HAS2-AS1	HAS2 antisense RNA 1
hsa-miR-1262	0	0	1	0	0	0	SNX29P2	sorting nexin 29 pseudogene 2
hsa-miR-1262	0	0	1	0	0	0	SNORA39	small nucleolar RNA, H/ACA box 39
hsa-miR-1262	0	0	1	0	0	0	SNORA26	small nucleolar RNA, H/ACA box 26
hsa-miR-1262	0	0	1	0	0	0	SNORD65	small nucleolar RNA, C/D box 65
hsa-miR-1262	0	0	1	0	0	0	LILRP2	leukocyte immunoglobulin-like receptor pseudogene 2
hsa-miR-1262	0	0	1	0	0	0	RNF5P1	ring finger protein 5, E3 ubiquitin protein ligase pseudogene 1
hsa-miR-1262	0	0	1	0	0	0	HSP90B3P	heat shock protein 90kDa beta (Grp94), member 3, pseudogene
hsa-miR-1262	0	0	1	0	0	0	HSP90AB2P	heat shock protein 90kDa alpha (cytosolic), class B member 2, pseudogene
hsa-miR-1262	0	0	1	0	0	0	USP32P1	ubiquitin specific peptidase 32 pseudogene 1
hsa-miR-1262	0	0	1	0	0	0	HAR1A	highly accelerated region 1A (non-protein coding)
hsa-miR-1262	0	0	1	1	0	0	GLP1R	glucagon-like peptide 1 receptor
hsa-miR-1262	1	0	1	1	0	0	KIAA1549L	KIAA1549-like
hsa-miR-1262	0	0	1	0	0	0	GAGE3	G antigen 3
hsa-miR-1262	1	0	1	1	1	1	TRIO	trio Rho guanine nucleotide exchange factor
hsa-miR-1262	1	0	1	1	0	0	TNXB	tenascin XB
hsa-miR-1262	1	0	1	1	1	1	ATF6B	activating transcription factor 6 beta
hsa-miR-1262	0	0	1	1	1	1	BBS9	Bardet-Biedl syndrome 9
hsa-miR-1262	0	0	1	1	1	1	PEG3	paternally expressed 3
hsa-miR-1262	0	0	1	1	1	1	CD6	CD6 molecule
hsa-miR-1262	1	0	1	1	0	0	DTNB	dystrobrevin, beta
