# Supplementary material for: Profiling of Selected MicroRNAs in Proliferative Eutopic Endometrium of Women with Ovarian Endometriosis
Source: Biomed Res Int. 2015 Aug 20;2015:760698. doi: 10.1155/2015/760698 (PMC4558423; doi:10.1155/2015/760698)
Supplement: Supplementary file 1 — Table I: The names of miRNAs significantly differentially expressed between eutopic endometrium of patients with endometriosis vs eutopic endometrium of patients without endometriosis. Table II: The associations between miRNA and mRNA, which presents detailed results of the search of six major databases i.e targetscan, tarbase, miranda, mirbase, mirtarget2 and pictar. [file 760698.f1.zip › 760698.f1/Table II/hsa-miR-1263.tsv]

miR	targetscan	tarbase	miranda	mirbase	mirtarget2	pictar	GeneSymbol	GeneName
hsa-miR-1263	1	0	1	1	1	1	SGSM2	small G protein signaling modulator 2
hsa-miR-1263	1	0	1	1	1	1	PPIP5K2	diphosphoinositol pentakisphosphate kinase 2
hsa-miR-1263	1	0	1	1	0	0	DENND4B	DENN/MADD domain containing 4B
hsa-miR-1263	1	0	1	0	1	1	CEP350	centrosomal protein 350kDa
hsa-miR-1263	0	0	1	1	0	0	ZNF862	zinc finger protein 862
hsa-miR-1263	1	0	1	1	1	1	GPATCH8	G patch domain containing 8
hsa-miR-1263	0	0	1	1	1	1	PHLDB1	pleckstrin homology-like domain, family B, member 1
hsa-miR-1263	0	0	1	1	1	1	TBC1D30	TBC1 domain family, member 30
hsa-miR-1263	1	0	1	0	1	1	ODZ2	odz, odd Oz/ten-m homolog 2 (Drosophila)
hsa-miR-1263	1	0	1	1	1	1	SPIRE1	spire homolog 1 (Drosophila)
hsa-miR-1263	1	0	1	0	1	1	SRGAP3	SLIT-ROBO Rho GTPase activating protein 3
hsa-miR-1263	1	0	1	0	1	1	KCTD16	potassium channel tetramerisation domain containing 16
hsa-miR-1263	0	0	1	1	1	1	BHLHB9	basic helix-loop-helix domain containing, class B, 9
hsa-miR-1263	0	0	1	1	0	0	GPR123	G protein-coupled receptor 123
hsa-miR-1263	1	0	1	1	1	1	CSRNP1	cysteine-serine-rich nuclear protein 1
hsa-miR-1263	1	0	1	1	0	0	CDH8	cadherin 8, type 2
hsa-miR-1263	1	0	1	1	0	0	ADC	arginine decarboxylase
hsa-miR-1263	0	0	1	1	1	1	KIAA1967	KIAA1967
hsa-miR-1263	1	0	1	1	1	1	ACBD5	acyl-CoA binding domain containing 5
hsa-miR-1263	0	0	1	1	0	0	KREMEN2	kringle containing transmembrane protein 2
hsa-miR-1263	0	0	1	0	1	1	RASSF8	Ras association (RalGDS/AF-6) domain family (N-terminal) member 8
hsa-miR-1263	1	0	1	1	1	1	RFX4	regulatory factor X, 4 (influences HLA class II expression)
hsa-miR-1263	0	0	1	1	1	1	BCO2	beta-carotene oxygenase 2
hsa-miR-1263	1	1	1	1	1	1	BACE1	beta-site APP-cleaving enzyme 1
hsa-miR-1263	1	0	1	1	1	1	COL11A1	collagen, type XI, alpha 1
hsa-miR-1263	1	0	1	1	1	1	RPS6KA3	ribosomal protein S6 kinase, 90kDa, polypeptide 3
hsa-miR-1263	1	0	1	1	1	1	PHC1	polyhomeotic homolog 1 (Drosophila)
hsa-miR-1263	1	0	1	1	0	0	TSPYL2	TSPY-like 2
hsa-miR-1263	1	0	1	1	1	1	FMR1	fragile X mental retardation 1
hsa-miR-1263	1	0	1	1	1	1	EPHA5	EPH receptor A5
hsa-miR-1263	1	0	1	1	1	1	TEAD1	TEA domain family member 1 (SV40 transcriptional enhancer factor)
hsa-miR-1263	1	0	1	1	0	0	TNPO2	transportin 2
hsa-miR-1263	1	0	1	0	1	1	FYB	FYN binding protein
hsa-miR-1263	1	0	1	1	1	1	STX16	syntaxin 16
hsa-miR-1263	1	0	1	0	1	1	PDE4D	phosphodiesterase 4D, cAMP-specific
hsa-miR-1263	0	0	1	0	0	0	ALOX12P2	arachidonate 12-lipoxygenase pseudogene 2
hsa-miR-1263	0	0	1	0	0	0	ZNRD1-AS1	ZNRD1 antisense RNA 1
hsa-miR-1263	0	0	1	1	1	1	NAT6	N-acetyltransferase 6 (GCN5-related)
hsa-miR-1263	1	0	1	1	1	1	CSE1L	CSE1 chromosome segregation 1-like (yeast)
hsa-miR-1263	1	0	1	1	1	1	MBNL2	muscleblind-like splicing regulator 2
hsa-miR-1263	0	0	1	1	1	1	NOL3	nucleolar protein 3 (apoptosis repressor with CARD domain)
hsa-miR-1263	1	0	1	1	1	1	SLMAP	sarcolemma associated protein
hsa-miR-1263	0	0	1	1	0	0	RBM5	RNA binding motif protein 5
hsa-miR-1263	0	0	1	1	1	1	ACIN1	apoptotic chromatin condensation inducer 1
hsa-miR-1263	1	0	1	1	1	1	C16orf70	chromosome 16 open reading frame 70
hsa-miR-1263	0	0	1	0	0	0	TIGD7	tigger transposable element derived 7
hsa-miR-1263	0	0	1	0	1	1	KANSL3	KAT8 regulatory NSL complex subunit 3
hsa-miR-1263	0	0	1	1	0	0	CREB3L4	cAMP responsive element binding protein 3-like 4
hsa-miR-1263	0	0	1	1	1	1	RAPGEF6	Rap guanine nucleotide exchange factor (GEF) 6
hsa-miR-1263	1	0	1	1	1	1	RCAN1	regulator of calcineurin 1
hsa-miR-1263	0	0	1	1	0	0	SNRPN	small nuclear ribonucleoprotein polypeptide N
hsa-miR-1263	0	0	1	1	1	1	CLEC7A	C-type lectin domain family 7, member A
hsa-miR-1263	0	0	1	1	0	0	FOXN4	forkhead box N4
hsa-miR-1263	1	0	1	1	1	1	SLC35A4	solute carrier family 35, member A4
hsa-miR-1263	1	0	1	1	1	1	HNRNPU	heterogeneous nuclear ribonucleoprotein U (scaffold attachment factor A)
hsa-miR-1263	1	0	1	0	1	1	NUDCD1	NudC domain containing 1
hsa-miR-1263	1	0	1	0	1	1	DICER1	dicer 1, ribonuclease type III
hsa-miR-1263	1	0	1	0	1	1	CACNA1C	calcium channel, voltage-dependent, L type, alpha 1C subunit
hsa-miR-1263	0	0	1	0	1	1	COL13A1	collagen, type XIII, alpha 1
hsa-miR-1263	1	0	1	1	1	1	PALM2	paralemmin 2
hsa-miR-1263	1	0	1	1	1	1	NRXN3	neurexin 3
hsa-miR-1263	0	0	1	0	1	1	SRPK1	SRSF protein kinase 1
hsa-miR-1263	0	0	1	1	1	1	TAF1	TAF1 RNA polymerase II, TATA box binding protein (TBP)-associated factor, 250kDa
hsa-miR-1263	0	0	1	1	1	1	STOX2	storkhead box 2
hsa-miR-1263	0	0	1	1	1	1	RNF220	ring finger protein 220
hsa-miR-1263	0	0	1	1	1	1	ARAP3	ArfGAP with RhoGAP domain, ankyrin repeat and PH domain 3
hsa-miR-1263	1	0	1	1	1	1	SLC38A2	solute carrier family 38, member 2
hsa-miR-1263	0	0	1	1	0	0	PARP2	poly (ADP-ribose) polymerase 2
hsa-miR-1263	0	0	1	1	0	0	MTBP	Mdm2, transformed 3T3 cell double minute 2, p53 binding protein (mouse) binding protein, 104kDa
hsa-miR-1263	1	0	1	1	1	1	MON2	MON2 homolog (S. cerevisiae)
hsa-miR-1263	1	0	1	1	1	1	BAZ2A	bromodomain adjacent to zinc finger domain, 2A
hsa-miR-1263	1	0	1	1	1	1	COPS7B	COP9 constitutive photomorphogenic homolog subunit 7B (Arabidopsis)
hsa-miR-1263	0	0	1	1	1	1	SIGLEC1	sialic acid binding Ig-like lectin 1, sialoadhesin
hsa-miR-1263	0	0	1	1	1	1	CC2D2A	coiled-coil and C2 domain containing 2A
hsa-miR-1263	1	0	1	1	1	1	NAA30	N(alpha)-acetyltransferase 30, NatC catalytic subunit
hsa-miR-1263	1	0	1	1	1	1	RNF185	ring finger protein 185
hsa-miR-1263	1	0	1	1	1	1	SLAIN1	SLAIN motif family, member 1
hsa-miR-1263	0	0	1	1	0	0	CYP21A2	cytochrome P450, family 21, subfamily A, polypeptide 2
hsa-miR-1263	0	0	1	0	0	0	CHST9-AS1	CHST9 antisense RNA 1
hsa-miR-1263	0	0	1	1	1	1	GABRP	gamma-aminobutyric acid (GABA) A receptor, pi
hsa-miR-1263	1	0	1	1	1	1	DIXDC1	DIX domain containing 1
hsa-miR-1263	1	0	1	1	1	1	LMNA	lamin A/C
hsa-miR-1263	0	0	1	1	1	1	BRD2	bromodomain containing 2
hsa-miR-1263	0	0	1	1	1	1	PTCD2	pentatricopeptide repeat domain 2
hsa-miR-1263	1	0	1	0	1	1	RABGEF1	RAB guanine nucleotide exchange factor (GEF) 1
hsa-miR-1263	0	0	1	1	0	0	RELT	RELT tumor necrosis factor receptor
hsa-miR-1263	0	0	1	1	0	0	COMMD4	COMM domain containing 4
hsa-miR-1263	0	0	1	0	0	0	LOC100125918	uncharacterized LOC100125918
hsa-miR-1263	0	0	1	1	1	1	ZBTB26	zinc finger and BTB domain containing 26
hsa-miR-1263	0	0	1	1	0	0	KRT86	keratin 86
hsa-miR-1263	0	0	1	1	1	1	MAPK10	mitogen-activated protein kinase 10
hsa-miR-1263	1	0	1	1	1	1	ARIH2	ariadne homolog 2 (Drosophila)
hsa-miR-1263	1	0	1	1	1	1	AMMECR1	Alport syndrome, mental retardation, midface hypoplasia and elliptocytosis chromosomal region gene 1
hsa-miR-1263	0	0	1	1	1	1	USP8	ubiquitin specific peptidase 8
hsa-miR-1263	0	0	1	1	0	0	SERPINH1	serpin peptidase inhibitor, clade H (heat shock protein 47), member 1, (collagen binding protein 1)
hsa-miR-1263	1	0	1	1	1	1	KLC2	kinesin light chain 2
hsa-miR-1263	1	0	1	0	1	1	GATAD2B	GATA zinc finger domain containing 2B
hsa-miR-1263	0	0	1	1	1	1	SPAG16	sperm associated antigen 16
hsa-miR-1263	1	0	1	0	1	1	IL1RAP	interleukin 1 receptor accessory protein
hsa-miR-1263	1	0	1	1	1	1	KLF4	Kruppel-like factor 4 (gut)
hsa-miR-1263	1	0	1	1	1	1	CUL2	cullin 2
hsa-miR-1263	1	0	1	1	1	1	CTNNB1	catenin (cadherin-associated protein), beta 1, 88kDa
hsa-miR-1263	1	0	1	0	1	1	UVRAG	UV radiation resistance associated gene
hsa-miR-1263	0	0	1	0	1	1	C19orf66	chromosome 19 open reading frame 66
hsa-miR-1263	1	0	1	1	1	1	SLITRK2	SLIT and NTRK-like family, member 2
hsa-miR-1263	1	0	1	1	1	1	LRP8	low density lipoprotein receptor-related protein 8, apolipoprotein e receptor
hsa-miR-1263	0	0	1	0	0	0	LINC00340	long intergenic non-protein coding RNA 340
hsa-miR-1263	1	0	1	0	1	1	KBTBD8	kelch repeat and BTB (POZ) domain containing 8
hsa-miR-1263	0	0	1	1	0	0	TCEANC	transcription elongation factor A (SII) N-terminal and central domain containing
hsa-miR-1263	1	0	1	1	1	1	KL	klotho
hsa-miR-1263	1	0	1	1	1	1	POU2F3	POU class 2 homeobox 3
hsa-miR-1263	1	0	1	1	1	1	NSUN4	NOP2/Sun domain family, member 4
hsa-miR-1263	0	0	1	0	0	0	LOC284385	uncharacterized LOC284385
hsa-miR-1263	0	0	1	0	1	1	TNFAIP8	tumor necrosis factor, alpha-induced protein 8
hsa-miR-1263	0	0	1	0	0	0	FLJ12334	uncharacterized LOC400946
hsa-miR-1263	0	0	1	0	0	0	HLA-DQB2	major histocompatibility complex, class II, DQ beta 2
hsa-miR-1263	1	0	1	1	1	1	ZMAT3	zinc finger, matrin-type 3
hsa-miR-1263	0	0	1	1	0	0	CFP	complement factor properdin
hsa-miR-1263	0	0	1	0	1	1	FLJ41200	uncharacterized LOC401492
hsa-miR-1263	1	0	1	0	0	0	GPR137C	G protein-coupled receptor 137C
hsa-miR-1263	0	0	1	1	1	1	SLC9A1	solute carrier family 9, subfamily A (NHE1, cation proton antiporter 1), member 1
hsa-miR-1263	0	0	1	1	1	1	C3orf67	chromosome 3 open reading frame 67
hsa-miR-1263	0	0	1	1	0	0	LOC442075	uncharacterized LOC442075
hsa-miR-1263	0	0	1	1	0	0	C20orf141	chromosome 20 open reading frame 141
hsa-miR-1263	1	0	1	1	1	1	SACM1L	SAC1 suppressor of actin mutations 1-like (yeast)
hsa-miR-1263	0	0	1	1	0	0	SPATS1	spermatogenesis associated, serine-rich 1
hsa-miR-1263	1	0	1	1	1	1	CLIP1	CAP-GLY domain containing linker protein 1
hsa-miR-1263	0	0	1	0	0	0	RPL23AP53	ribosomal protein L23a pseudogene 53
hsa-miR-1263	0	0	1	0	0	0	LOC100127955	uncharacterized LOC100127955
hsa-miR-1263	1	0	1	1	1	1	HYOU1	hypoxia up-regulated 1
hsa-miR-1263	1	0	1	1	1	1	PHF17	PHD finger protein 17
hsa-miR-1263	1	0	1	1	1	1	RALGDS	ral guanine nucleotide dissociation stimulator
hsa-miR-1263	0	0	1	1	1	1	PIN4	protein (peptidylprolyl cis/trans isomerase) NIMA-interacting, 4 (parvulin)
hsa-miR-1263	0	0	1	1	0	0	TMEM136	transmembrane protein 136
hsa-miR-1263	0	0	1	1	0	0	TRIM46	tripartite motif containing 46
hsa-miR-1263	0	0	1	0	0	0	FAM205B	transmembrane protein C9orf144B pseudogene
hsa-miR-1263	0	0	1	0	0	0	LOC100129940	uncharacterized LOC100129940
hsa-miR-1263	0	0	1	1	1	1	LYPD1	LY6/PLAUR domain containing 1
hsa-miR-1263	0	0	1	1	0	0	HEATR8	HEAT repeat containing 8
hsa-miR-1263	1	0	1	1	1	1	SMAD7	SMAD family member 7
hsa-miR-1263	1	0	1	1	1	1	RBBP4	retinoblastoma binding protein 4
hsa-miR-1263	1	0	1	1	1	1	ZNF655	zinc finger protein 655
hsa-miR-1263	1	0	1	1	1	1	NCOA1	nuclear receptor coactivator 1
hsa-miR-1263	1	0	1	1	1	1	AHCYL1	adenosylhomocysteinase-like 1
hsa-miR-1263	1	0	1	1	0	0	PRRC2B	proline-rich coiled-coil 2B
hsa-miR-1263	0	0	1	1	0	0	NEK7	NIMA (never in mitosis gene a)-related kinase 7
hsa-miR-1263	0	0	1	0	0	0	POM121L9P	POM121 transmembrane nucleoporin-like 9, pseudogene
hsa-miR-1263	1	0	1	0	1	1	DCDC2	doublecortin domain containing 2
hsa-miR-1263	1	0	1	0	1	1	GPR85	G protein-coupled receptor 85
hsa-miR-1263	0	0	1	0	0	0	FAM66D	family with sequence similarity 66, member D
hsa-miR-1263	0	0	1	1	1	1	BEND7	BEN domain containing 7
hsa-miR-1263	1	0	1	0	1	1	HNRNPA3	heterogeneous nuclear ribonucleoprotein A3
hsa-miR-1263	0	0	1	1	1	1	C10orf57	chromosome 10 open reading frame 57
hsa-miR-1263	1	0	1	0	1	1	STYX	serine/threonine/tyrosine interacting protein
hsa-miR-1263	1	0	1	1	0	0	PTAR1	protein prenyltransferase alpha subunit repeat containing 1
hsa-miR-1263	0	0	1	1	0	0	TMEM44	transmembrane protein 44
hsa-miR-1263	0	0	1	1	1	1	INPP5B	inositol polyphosphate-5-phosphatase, 75kDa
hsa-miR-1263	0	0	1	1	1	1	CCDC132	coiled-coil domain containing 132
hsa-miR-1263	0	0	1	1	0	0	PPIE	peptidylprolyl isomerase E (cyclophilin E)
hsa-miR-1263	1	0	1	0	1	1	JAZF1	JAZF zinc finger 1
hsa-miR-1263	0	0	1	0	1	1	SRR	serine racemase
hsa-miR-1263	1	0	1	1	1	1	LUZP2	leucine zipper protein 2
hsa-miR-1263	1	0	1	1	1	1	WDR26	WD repeat domain 26
hsa-miR-1263	0	0	1	1	1	1	PINX1	PIN2/TERF1 interacting, telomerase inhibitor 1
hsa-miR-1263	0	0	1	1	0	0	GLYCTK	glycerate kinase
hsa-miR-1263	0	0	1	1	0	0	PIGU	phosphatidylinositol glycan anchor biosynthesis, class U
hsa-miR-1263	1	0	1	1	1	1	ECT2	epithelial cell transforming sequence 2 oncogene
hsa-miR-1263	1	0	1	0	1	1	NHS	Nance-Horan syndrome (congenital cataracts and dental anomalies)
hsa-miR-1263	0	0	1	1	0	0	MUC1	mucin 1, cell surface associated
hsa-miR-1263	1	0	1	1	1	1	MECP2	methyl CpG binding protein 2 (Rett syndrome)
hsa-miR-1263	0	0	1	1	0	0	ASB16	ankyrin repeat and SOCS box containing 16
hsa-miR-1263	0	0	1	1	1	1	NR1I3	nuclear receptor subfamily 1, group I, member 3
hsa-miR-1263	1	0	1	1	1	1	SAT1	spermidine/spermine N1-acetyltransferase 1
hsa-miR-1263	1	0	1	1	0	0	TAF4B	TAF4b RNA polymerase II, TATA box binding protein (TBP)-associated factor, 105kDa
hsa-miR-1263	0	0	1	1	0	0	NBPF8	neuroblastoma breakpoint family, member 8
hsa-miR-1263	0	0	1	1	1	1	IYD	iodotyrosine deiodinase
hsa-miR-1263	0	0	1	1	1	1	FAM115A	family with sequence similarity 115, member A
hsa-miR-1263	0	0	1	1	1	1	WDR55	WD repeat domain 55
hsa-miR-1263	1	0	1	1	1	1	DTNA	dystrobrevin, alpha
hsa-miR-1263	1	0	1	0	1	1	MAP2K7	mitogen-activated protein kinase kinase 7
hsa-miR-1263	0	0	1	0	0	0	DNM1P33	DNM1 pseudogene 33
hsa-miR-1263	0	0	1	1	0	0	RBM14	RNA binding motif protein 14
hsa-miR-1263	0	0	1	0	0	0	FBXO46	F-box protein 46
hsa-miR-1263	1	0	1	1	0	0	MARCH9	membrane-associated ring finger (C3HC4) 9
hsa-miR-1263	0	0	1	1	0	0	KLHDC3	kelch domain containing 3
hsa-miR-1263	0	0	1	1	1	1	KLHL29	kelch-like 29 (Drosophila)
hsa-miR-1263	1	0	1	1	1	1	ETF1	eukaryotic translation termination factor 1
hsa-miR-1263	0	0	1	1	0	0	BEST1	bestrophin 1
hsa-miR-1263	0	0	1	0	0	0	NUDT16P1	nudix (nucleoside diphosphate linked moiety X)-type motif 16 pseudogene 1
hsa-miR-1263	1	0	1	0	1	1	NR1D2	nuclear receptor subfamily 1, group D, member 2
hsa-miR-1263	1	0	1	1	0	0	AKT1S1	AKT1 substrate 1 (proline-rich)
hsa-miR-1263	0	0	1	1	1	1	CMAS	cytidine monophosphate N-acetylneuraminic acid synthetase
hsa-miR-1263	1	0	1	1	1	1	ARHGEF9	Cdc42 guanine nucleotide exchange factor (GEF) 9
hsa-miR-1263	1	0	1	1	1	1	KIAA1217	KIAA1217
hsa-miR-1263	1	0	1	1	1	1	WHSC1	Wolf-Hirschhorn syndrome candidate 1
hsa-miR-1263	0	0	1	1	1	1	SRGN	serglycin
hsa-miR-1263	1	0	1	1	1	1	METTL8	methyltransferase like 8
hsa-miR-1263	1	0	1	0	0	0	KCNU1	potassium channel, subfamily U, member 1
hsa-miR-1263	0	0	1	1	1	1	KIAA1755	KIAA1755
hsa-miR-1263	1	0	1	0	1	1	SV2B	synaptic vesicle glycoprotein 2B
hsa-miR-1263	0	0	1	1	0	0	TREM2	triggering receptor expressed on myeloid cells 2
hsa-miR-1263	0	0	1	0	0	0	LOC643648	uncharacterized LOC643648
hsa-miR-1263	1	0	1	1	1	1	SF1	splicing factor 1
hsa-miR-1263	0	0	1	1	1	1	C5orf22	chromosome 5 open reading frame 22
hsa-miR-1263	1	0	1	1	1	1	PPP2R2C	protein phosphatase 2, regulatory subunit B, gamma
hsa-miR-1263	0	0	1	1	1	1	HEXA	hexosaminidase A (alpha polypeptide)
hsa-miR-1263	0	0	1	1	1	1	ZNF337	zinc finger protein 337
hsa-miR-1263	1	0	1	0	1	1	DDX3Y	DEAD (Asp-Glu-Ala-Asp) box polypeptide 3, Y-linked
hsa-miR-1263	1	0	1	1	1	1	ZEB2	zinc finger E-box binding homeobox 2
hsa-miR-1263	0	0	1	1	1	1	C6	complement component 6
hsa-miR-1263	0	0	1	0	0	0	LOC339862	uncharacterized LOC339862
hsa-miR-1263	0	0	1	1	1	1	UBE3D	ubiquitin protein ligase E3D
hsa-miR-1263	0	0	1	0	0	0	LOC652276	potassium channel tetramerisation domain containing 5 pseudogene
hsa-miR-1263	1	0	1	0	1	1	YAF2	YY1 associated factor 2
hsa-miR-1263	1	0	1	1	1	1	SLC35F3	solute carrier family 35, member F3
hsa-miR-1263	1	0	1	1	1	1	FGFR2	fibroblast growth factor receptor 2
hsa-miR-1263	0	0	1	0	0	0	USP32P1	ubiquitin specific peptidase 32 pseudogene 1
hsa-miR-1263	0	0	1	0	0	0	LINC00326	long intergenic non-protein coding RNA 326
hsa-miR-1263	0	0	1	0	0	0	SLC7A11-AS1	SLC7A11 antisense RNA 1
hsa-miR-1263	0	0	1	0	1	1	FAM13B	family with sequence similarity 13, member B
hsa-miR-1263	1	0	1	1	1	1	ARPP21	cAMP-regulated phosphoprotein, 21kDa
hsa-miR-1263	1	0	1	1	1	1	FAM123A	family with sequence similarity 123A
hsa-miR-1263	1	0	1	0	1	1	HSPA12A	heat shock 70kDa protein 12A
hsa-miR-1263	0	0	1	1	0	0	AQP12B	aquaporin 12B
hsa-miR-1263	1	0	1	1	0	0	INPP5J	inositol polyphosphate-5-phosphatase J
hsa-miR-1263	1	0	1	1	1	1	CLOCK	clock homolog (mouse)
hsa-miR-1263	0	0	1	1	1	1	STARD4	StAR-related lipid transfer (START) domain containing 4
hsa-miR-1263	0	0	1	1	0	0	TCTN1	tectonic family member 1
hsa-miR-1263	1	0	1	0	1	1	PSD3	pleckstrin and Sec7 domain containing 3
hsa-miR-1263	1	0	1	1	1	1	DIP2A	DIP2 disco-interacting protein 2 homolog A (Drosophila)
hsa-miR-1263	1	0	1	0	1	1	LYPD6	LY6/PLAUR domain containing 6
hsa-miR-1263	0	0	1	0	0	0	LOC348120	uncharacterized LOC348120
hsa-miR-1263	1	0	1	0	1	1	KDM2A	lysine (K)-specific demethylase 2A
hsa-miR-1263	0	0	1	1	0	0	FKBP11	FK506 binding protein 11, 19 kDa
hsa-miR-1263	1	0	1	0	1	1	ARHGAP5	Rho GTPase activating protein 5
hsa-miR-1263	0	0	1	1	0	0	HYAL3	hyaluronoglucosaminidase 3
hsa-miR-1263	0	0	1	1	1	1	RAB3IL1	RAB3A interacting protein (rabin3)-like 1
hsa-miR-1263	1	0	1	1	0	0	DALRD3	DALR anticodon binding domain containing 3
hsa-miR-1263	1	0	1	1	1	1	PPP2R5E	protein phosphatase 2, regulatory subunit B', epsilon isoform
hsa-miR-1263	1	0	1	1	1	1	GTDC1	glycosyltransferase-like domain containing 1
hsa-miR-1263	1	0	1	1	1	1	FNDC5	fibronectin type III domain containing 5
hsa-miR-1263	1	0	1	1	1	1	INPP5A	inositol polyphosphate-5-phosphatase, 40kDa
hsa-miR-1263	0	0	1	1	1	1	C1orf109	chromosome 1 open reading frame 109
hsa-miR-1263	0	0	1	0	0	0	LOC158435	uncharacterized LOC158435
hsa-miR-1263	0	0	1	1	1	1	SH2D1B	SH2 domain containing 1B
hsa-miR-1263	1	0	1	1	1	1	AP3M1	adaptor-related protein complex 3, mu 1 subunit
hsa-miR-1263	0	0	1	0	0	0	PCP4L1	Purkinje cell protein 4 like 1
hsa-miR-1263	0	0	1	0	1	1	ANKS1B	ankyrin repeat and sterile alpha motif domain containing 1B
hsa-miR-1263	1	0	1	0	1	1	MAP4K3	mitogen-activated protein kinase kinase kinase kinase 3
hsa-miR-1263	1	0	1	1	1	1	OPCML	opioid binding protein/cell adhesion molecule-like
hsa-miR-1263	1	0	1	1	1	1	NTRK2	neurotrophic tyrosine kinase, receptor, type 2
hsa-miR-1263	0	0	1	1	0	0	ZNF703	zinc finger protein 703
hsa-miR-1263	1	0	1	1	1	1	FMNL3	formin-like 3
hsa-miR-1263	0	0	1	1	0	0	SEC14L3	SEC14-like 3 (S. cerevisiae)
hsa-miR-1263	1	0	1	1	1	1	HNRNPA1	heterogeneous nuclear ribonucleoprotein A1
hsa-miR-1263	1	0	1	1	1	1	ARFIP1	ADP-ribosylation factor interacting protein 1
hsa-miR-1263	0	0	1	1	0	0	RIPPLY1	ripply1 homolog (zebrafish)
hsa-miR-1263	1	0	1	1	1	1	ZNF763	zinc finger protein 763
hsa-miR-1263	0	0	1	1	0	0	RELA	v-rel reticuloendotheliosis viral oncogene homolog A (avian)
hsa-miR-1263	1	0	1	1	1	1	SLK	STE20-like kinase
hsa-miR-1263	0	0	1	0	0	0	MAGEL2	MAGE-like 2
hsa-miR-1263	0	0	1	1	0	0	RGSL1	regulator of G-protein signaling like 1
hsa-miR-1263	0	0	1	0	0	0	LINC00486	long intergenic non-protein coding RNA 486
hsa-miR-1263	1	0	1	0	1	1	LRCH2	leucine-rich repeats and calponin homology (CH) domain containing 2
hsa-miR-1263	0	0	1	1	1	1	RNF14	ring finger protein 14
hsa-miR-1263	0	0	1	0	0	0	FAM225B	family with sequence similarity 225, member B (non-protein coding)
hsa-miR-1263	1	0	1	1	1	1	CADPS	Ca++-dependent secretion activator
hsa-miR-1263	0	0	1	1	0	0	TCHH	trichohyalin
hsa-miR-1263	0	0	1	1	1	1	TINF2	TERF1 (TRF1)-interacting nuclear factor 2
hsa-miR-1263	0	0	1	0	0	0	TMED8	transmembrane emp24 protein transport domain containing 8
hsa-miR-1263	1	0	1	1	1	1	EIF5	eukaryotic translation initiation factor 5
hsa-miR-1263	1	0	1	1	0	0	RGS6	regulator of G-protein signaling 6
hsa-miR-1263	1	0	1	1	1	1	ATP2B4	ATPase, Ca++ transporting, plasma membrane 4
hsa-miR-1263	0	0	1	0	0	0	RGPD4	RANBP2-like and GRIP domain containing 4
hsa-miR-1263	1	0	1	1	1	1	C7orf31	chromosome 7 open reading frame 31
hsa-miR-1263	1	0	1	1	1	1	RORB	RAR-related orphan receptor B
hsa-miR-1263	0	0	1	1	1	1	MLIP	muscular LMNA-interacting protein
hsa-miR-1263	1	0	1	1	1	1	FOXP1	forkhead box P1
hsa-miR-1263	1	0	1	1	1	1	C5orf24	chromosome 5 open reading frame 24
hsa-miR-1263	1	0	1	1	1	1	RECK	reversion-inducing-cysteine-rich protein with kazal motifs
hsa-miR-1263	0	0	1	1	1	1	C4orf40	chromosome 4 open reading frame 40
hsa-miR-1263	0	0	1	0	0	0	DKFZp686K1684	uncharacterized LOC440034
hsa-miR-1263	1	0	1	1	1	1	SGK3	serum/glucocorticoid regulated kinase family, member 3
hsa-miR-1263	1	0	1	0	1	1	TTL	tubulin tyrosine ligase
hsa-miR-1263	0	0	1	1	1	1	IPO11	importin 11
hsa-miR-1263	0	0	1	1	1	1	GRN	granulin
hsa-miR-1263	1	0	1	1	1	1	CLU	clusterin
hsa-miR-1263	0	0	1	1	1	1	KIAA0141	KIAA0141
hsa-miR-1263	1	0	1	1	1	1	DOLPP1	dolichyl pyrophosphate phosphatase 1
hsa-miR-1263	1	1	1	1	0	0	EFNA3	ephrin-A3
hsa-miR-1263	0	0	1	1	1	1	TASP1	taspase, threonine aspartase, 1
hsa-miR-1263	0	0	1	1	1	1	SORD	sorbitol dehydrogenase
hsa-miR-1263	0	0	1	1	0	0	FAM195A	family with sequence similarity 195, member A
hsa-miR-1263	1	0	1	1	1	1	PLEKHB2	pleckstrin homology domain containing, family B (evectins) member 2
hsa-miR-1263	0	0	1	1	0	0	GPSM3	G-protein signaling modulator 3
hsa-miR-1263	1	0	1	1	1	1	NAP1L1	nucleosome assembly protein 1-like 1
hsa-miR-1263	0	0	1	1	1	1	VPS16	vacuolar protein sorting 16 homolog (S. cerevisiae)
hsa-miR-1263	0	0	1	1	1	1	ZDHHC16	zinc finger, DHHC-type containing 16
hsa-miR-1263	1	0	1	1	1	1	ARNTL	aryl hydrocarbon receptor nuclear translocator-like
hsa-miR-1263	0	0	1	1	1	1	SMNDC1	survival motor neuron domain containing 1
hsa-miR-1263	1	0	1	1	1	1	BAALC	brain and acute leukemia, cytoplasmic
hsa-miR-1263	0	0	1	1	1	1	SLCO4A1	solute carrier organic anion transporter family, member 4A1
hsa-miR-1263	0	0	1	1	1	1	GFM1	G elongation factor, mitochondrial 1
hsa-miR-1263	0	0	1	1	0	0	CLEC1A	C-type lectin domain family 1, member A
hsa-miR-1263	1	0	1	1	1	1	RALY	RNA binding protein, autoantigenic (hnRNP-associated with lethal yellow homolog (mouse))
hsa-miR-1263	0	0	1	1	1	1	HS3ST2	heparan sulfate (glucosamine) 3-O-sulfotransferase 2
hsa-miR-1263	0	0	1	0	0	0	LOC100132984	uncharacterized LOC100132984
hsa-miR-1263	0	0	1	1	0	0	FCGR2A	Fc fragment of IgG, low affinity IIa, receptor (CD32)
hsa-miR-1263	0	0	1	1	1	1	ZFAND2B	zinc finger, AN1-type domain 2B
hsa-miR-1263	0	0	1	1	1	1	C10orf2	chromosome 10 open reading frame 2
hsa-miR-1263	1	0	1	1	1	1	KIAA2018	KIAA2018
hsa-miR-1263	0	0	1	0	0	0	MUC19	mucin 19, oligomeric
hsa-miR-1263	1	0	1	0	1	1	XRN1	5'-3' exoribonuclease 1
hsa-miR-1263	0	0	1	1	0	0	TENC1	tensin like C1 domain containing phosphatase (tensin 2)
hsa-miR-1263	1	0	1	1	0	0	KIAA0226	KIAA0226
hsa-miR-1263	1	0	1	0	1	1	CBX7	chromobox homolog 7
hsa-miR-1263	1	0	1	1	1	1	ATP2B3	ATPase, Ca++ transporting, plasma membrane 3
hsa-miR-1263	0	0	1	1	1	1	CLEC12B	C-type lectin domain family 12, member B
hsa-miR-1263	1	0	1	1	1	1	TNFAIP1	tumor necrosis factor, alpha-induced protein 1 (endothelial)
hsa-miR-1263	0	0	1	0	1	1	OPRK1	opioid receptor, kappa 1
hsa-miR-1263	1	0	1	0	1	1	ALAD	aminolevulinate dehydratase
hsa-miR-1263	1	0	1	0	0	0	CACNA1A	calcium channel, voltage-dependent, P/Q type, alpha 1A subunit
hsa-miR-1263	1	0	1	1	1	1	CYP19A1	cytochrome P450, family 19, subfamily A, polypeptide 1
hsa-miR-1263	0	0	1	0	1	1	GBE1	glucan (1,4-alpha-), branching enzyme 1
hsa-miR-1263	1	0	1	1	1	1	KCNA1	potassium voltage-gated channel, shaker-related subfamily, member 1 (episodic ataxia with myokymia)
hsa-miR-1263	1	0	1	0	1	1	SGCB	sarcoglycan, beta (43kDa dystrophin-associated glycoprotein)
hsa-miR-1263	1	0	1	1	1	1	MET	met proto-oncogene (hepatocyte growth factor receptor)
hsa-miR-1263	0	0	1	1	1	1	SLC25A20	solute carrier family 25 (carnitine/acylcarnitine translocase), member 20
hsa-miR-1263	1	0	1	1	0	0	LOR	loricrin
hsa-miR-1263	1	0	1	0	1	1	PAFAH1B1	platelet-activating factor acetylhydrolase 1b, regulatory subunit 1 (45kDa)
hsa-miR-1263	0	0	1	1	1	1	LTA	lymphotoxin alpha (TNF superfamily, member 1)
hsa-miR-1263	0	0	1	0	1	1	IFNAR1	interferon (alpha, beta and omega) receptor 1
hsa-miR-1263	1	0	1	1	0	0	ADRA1B	adrenoceptor alpha 1B
hsa-miR-1263	0	0	1	1	1	1	AGTR2	angiotensin II receptor, type 2
hsa-miR-1263	1	0	1	1	1	1	CACNA2D1	calcium channel, voltage-dependent, alpha 2/delta subunit 1
hsa-miR-1263	1	0	1	1	1	1	CACNB4	calcium channel, voltage-dependent, beta 4 subunit
hsa-miR-1263	0	0	1	1	1	1	GABRA5	gamma-aminobutyric acid (GABA) A receptor, alpha 5
hsa-miR-1263	1	0	1	0	1	1	SPOPL	speckle-type POZ protein-like
hsa-miR-1263	0	0	1	1	1	1	NT5C3	5'-nucleotidase, cytosolic III
hsa-miR-1263	0	0	1	0	0	0	KLK2	kallikrein-related peptidase 2
hsa-miR-1263	1	0	1	1	1	1	HMGXB4	HMG box domain containing 4
hsa-miR-1263	0	0	1	1	0	0	PMS2P3	postmeiotic segregation increased 2 pseudogene 3
hsa-miR-1263	1	0	1	0	1	1	BMF	Bcl2 modifying factor
hsa-miR-1263	1	0	1	1	0	0	NOMO3	NODAL modulator 3
hsa-miR-1263	0	0	1	1	1	1	CCDC144NL	coiled-coil domain containing 144 family, N-terminal like
hsa-miR-1263	1	0	1	0	1	1	LIN28B	lin-28 homolog B (C. elegans)
hsa-miR-1263	0	0	1	1	1	1	OR9Q1	olfactory receptor, family 9, subfamily Q, member 1
hsa-miR-1263	1	0	1	1	1	1	PLCXD3	phosphatidylinositol-specific phospholipase C, X domain containing 3
hsa-miR-1263	1	0	1	1	1	1	TCEAL8	transcription elongation factor A (SII)-like 8
hsa-miR-1263	1	0	1	0	1	1	GOSR1	golgi SNAP receptor complex member 1
hsa-miR-1263	1	0	1	1	1	1	IGSF3	immunoglobulin superfamily, member 3
hsa-miR-1263	1	0	1	1	1	1	EI24	etoposide induced 2.4 mRNA
hsa-miR-1263	1	0	1	1	1	1	EML1	echinoderm microtubule associated protein like 1
hsa-miR-1263	1	0	1	0	1	1	ERMN	ermin, ERM-like protein
hsa-miR-1263	1	0	1	0	1	1	CREB5	cAMP responsive element binding protein 5
hsa-miR-1263	0	0	1	1	1	1	LDLRAD2	low density lipoprotein receptor class A domain containing 2
hsa-miR-1263	0	0	1	0	1	1	LINC00268	long intergenic non-protein coding RNA 268
hsa-miR-1263	1	0	1	1	1	1	RUNX2	runt-related transcription factor 2
hsa-miR-1263	0	0	1	1	0	0	RTKN	rhotekin
hsa-miR-1263	1	0	1	1	1	1	TMCC1	transmembrane and coiled-coil domain family 1
hsa-miR-1263	0	0	1	1	0	0	SPRR2B	small proline-rich protein 2B
hsa-miR-1263	1	0	1	0	1	1	KCNK2	potassium channel, subfamily K, member 2
hsa-miR-1263	0	0	1	1	1	1	POLR2M	polymerase (RNA) II (DNA directed) polypeptide M
hsa-miR-1263	1	0	1	1	1	1	SH3KBP1	SH3-domain kinase binding protein 1
hsa-miR-1263	1	0	1	0	1	1	BCL7A	B-cell CLL/lymphoma 7A
hsa-miR-1263	1	0	1	0	1	1	C3orf70	chromosome 3 open reading frame 70
hsa-miR-1263	0	0	1	1	0	0	KLK3	kallikrein-related peptidase 3
hsa-miR-1263	0	0	1	1	1	1	TP53BP2	tumor protein p53 binding protein, 2
hsa-miR-1263	1	0	1	1	1	1	NEK10	NIMA (never in mitosis gene a)- related kinase 10
hsa-miR-1263	1	0	1	1	1	1	TFAP2A	transcription factor AP-2 alpha (activating enhancer binding protein 2 alpha)
hsa-miR-1263	0	0	1	1	1	1	MAP9	microtubule-associated protein 9
hsa-miR-1263	0	0	1	0	1	1	SPINK13	serine peptidase inhibitor, Kazal type 13 (putative)
hsa-miR-1263	1	0	1	0	1	1	DCUN1D4	DCN1, defective in cullin neddylation 1, domain containing 4 (S. cerevisiae)
hsa-miR-1263	0	0	1	1	1	1	MTHFD2	methylenetetrahydrofolate dehydrogenase (NADP+ dependent) 2, methenyltetrahydrofolate cyclohydrolase
hsa-miR-1263	1	0	1	1	1	1	GDAP1	ganglioside induced differentiation associated protein 1
hsa-miR-1263	0	0	1	0	1	1	ABCE1	ATP-binding cassette, sub-family E (OABP), member 1
hsa-miR-1263	0	0	1	1	1	1	GEMIN8	gem (nuclear organelle) associated protein 8
hsa-miR-1263	0	0	1	1	1	1	TTC14	tetratricopeptide repeat domain 14
hsa-miR-1263	1	0	1	1	1	1	ZNF436	zinc finger protein 436
hsa-miR-1263	1	0	1	0	1	1	FBXO41	F-box protein 41
hsa-miR-1263	1	0	1	0	1	1	CCDC85A	coiled-coil domain containing 85A
hsa-miR-1263	0	0	1	1	1	1	IGSF5	immunoglobulin superfamily, member 5
hsa-miR-1263	1	0	1	1	1	1	MGA	MAX gene associated
hsa-miR-1263	1	0	1	1	1	1	CDH13	cadherin 13, H-cadherin (heart)
hsa-miR-1263	1	0	1	0	1	1	CDK6	cyclin-dependent kinase 6
hsa-miR-1263	1	0	1	0	1	1	B4GALT1	UDP-Gal:betaGlcNAc beta 1,4- galactosyltransferase, polypeptide 1
hsa-miR-1263	1	0	1	1	1	1	IRAK2	interleukin-1 receptor-associated kinase 2
hsa-miR-1263	0	0	1	0	0	0	BAI1	brain-specific angiogenesis inhibitor 1
hsa-miR-1263	0	0	1	1	1	1	CD1D	CD1d molecule
hsa-miR-1263	1	0	1	1	1	1	DUSP6	dual specificity phosphatase 6
hsa-miR-1263	1	0	1	1	1	1	E2F3	E2F transcription factor 3
hsa-miR-1263	1	0	1	1	1	1	GLRA2	glycine receptor, alpha 2
hsa-miR-1263	0	0	1	0	1	1	ITGAV	integrin, alpha V
hsa-miR-1263	1	0	1	1	1	1	KCNA6	potassium voltage-gated channel, shaker-related subfamily, member 6
hsa-miR-1263	1	0	1	1	1	1	KCNJ10	potassium inwardly-rectifying channel, subfamily J, member 10
hsa-miR-1263	0	0	1	0	1	1	KCNN1	potassium intermediate/small conductance calcium-activated channel, subfamily N, member 1
hsa-miR-1263	1	0	1	1	1	1	KDR	kinase insert domain receptor (a type III receptor tyrosine kinase)
hsa-miR-1263	1	0	1	1	1	1	KPNA3	karyopherin alpha 3 (importin alpha 4)
hsa-miR-1263	1	0	1	1	1	1	LIMK1	LIM domain kinase 1
hsa-miR-1263	1	0	1	1	1	1	M6PR	mannose-6-phosphate receptor (cation dependent)
hsa-miR-1263	1	0	1	1	1	1	MAN2A1	mannosidase, alpha, class 2A, member 1
hsa-miR-1263	0	0	1	1	1	1	MTRR	5-methyltetrahydrofolate-homocysteine methyltransferase reductase
hsa-miR-1263	1	0	1	1	1	1	NEUROD1	neuronal differentiation 1
hsa-miR-1263	1	0	1	1	1	1	TNFRSF11B	tumor necrosis factor receptor superfamily, member 11b
hsa-miR-1263	1	0	1	0	1	1	PAPPA	pregnancy-associated plasma protein A, pappalysin 1
hsa-miR-1263	0	0	1	1	0	0	PDGFRB	platelet-derived growth factor receptor, beta polypeptide
hsa-miR-1263	1	0	1	1	1	1	PIGR	polymeric immunoglobulin receptor
hsa-miR-1263	0	0	1	1	1	1	PIM1	pim-1 oncogene
hsa-miR-1263	1	0	1	1	1	1	PLAGL2	pleiomorphic adenoma gene-like 2
hsa-miR-1263	1	0	1	1	1	1	PPP2R3A	protein phosphatase 2, regulatory subunit B'', alpha
hsa-miR-1263	1	0	1	0	1	1	PRKCA	protein kinase C, alpha
hsa-miR-1263	1	0	1	0	1	1	RAP2B	RAP2B, member of RAS oncogene family
hsa-miR-1263	1	0	1	1	1	1	ROBO2	roundabout, axon guidance receptor, homolog 2 (Drosophila)
hsa-miR-1263	1	0	1	0	1	1	SORT1	sortilin 1
hsa-miR-1263	1	0	1	1	1	1	SRSF3	serine/arginine-rich splicing factor 3
hsa-miR-1263	1	0	1	1	1	1	TSPAN6	tetraspanin 6
hsa-miR-1263	0	0	1	0	1	1	ZFY	zinc finger protein, Y-linked
hsa-miR-1263	1	0	1	0	1	1	BSN	bassoon (presynaptic cytomatrix protein)
hsa-miR-1263	1	0	1	1	1	1	NRIP1	nuclear receptor interacting protein 1
hsa-miR-1263	1	0	1	1	1	1	KLF11	Kruppel-like factor 11
hsa-miR-1263	1	0	1	1	1	1	CDC14A	CDC14 cell division cycle 14 homolog A (S. cerevisiae)
hsa-miR-1263	0	0	1	1	1	1	PRPF4B	PRP4 pre-mRNA processing factor 4 homolog B (yeast)
hsa-miR-1263	0	0	1	1	0	0	CDK5R2	cyclin-dependent kinase 5, regulatory subunit 2 (p39)
hsa-miR-1263	0	0	1	1	1	1	TIMM8A	translocase of inner mitochondrial membrane 8 homolog A (yeast)
hsa-miR-1263	1	0	1	1	1	1	EFNB2	ephrin-B2
hsa-miR-1263	1	0	1	1	1	1	FGF12	fibroblast growth factor 12
hsa-miR-1263	1	0	1	0	1	1	CYTH3	cytohesin 3
hsa-miR-1263	1	0	1	1	1	1	BCL9	B-cell CLL/lymphoma 9
hsa-miR-1263	1	0	1	1	1	1	ATF6B	activating transcription factor 6 beta
hsa-miR-1263	0	0	1	1	1	1	DDX10	DEAD (Asp-Glu-Ala-Asp) box polypeptide 10
hsa-miR-1263	1	0	1	1	1	1	DUSP8	dual specificity phosphatase 8
hsa-miR-1263	1	0	1	1	1	1	EPHB3	EPH receptor B3
hsa-miR-1263	1	0	1	1	1	1	MLLT3	myeloid/lymphoid or mixed-lineage leukemia (trithorax homolog, Drosophila); translocated to, 3
hsa-miR-1263	1	0	1	0	1	1	USP9Y	ubiquitin specific peptidase 9, Y-linked
hsa-miR-1263	1	0	1	1	1	1	RAB11A	RAB11A, member RAS oncogene family
hsa-miR-1263	1	0	1	1	1	1	RABEP1	rabaptin, RAB GTPase binding effector protein 1
hsa-miR-1263	1	0	1	1	1	1	NREP	neuronal regeneration related protein homolog (rat)
hsa-miR-1263	1	0	1	1	1	1	KIF3B	kinesin family member 3B
hsa-miR-1263	1	0	1	1	1	1	ONECUT2	one cut homeobox 2
hsa-miR-1263	1	0	1	1	1	1	FXR2	fragile X mental retardation, autosomal homolog 2
hsa-miR-1263	1	0	1	1	1	1	SEC24C	SEC24 family, member C (S. cerevisiae)
hsa-miR-1263	0	0	1	1	1	1	PRCP	prolylcarboxypeptidase (angiotensinase C)
hsa-miR-1263	0	0	1	1	1	1	RGPD5	RANBP2-like and GRIP domain containing 5
hsa-miR-1263	1	0	1	1	1	1	MED13	mediator complex subunit 13
hsa-miR-1263	1	0	1	1	1	1	BMI1	BMI1 polycomb ring finger oncogene
hsa-miR-1263	1	0	1	1	1	1	CBL	Cbl proto-oncogene, E3 ubiquitin protein ligase
hsa-miR-1263	1	0	1	1	1	1	GPM6A	glycoprotein M6A
hsa-miR-1263	0	0	1	1	0	0	ACOT8	acyl-CoA thioesterase 8
hsa-miR-1263	0	0	1	1	1	1	GNPDA1	glucosamine-6-phosphate deaminase 1
hsa-miR-1263	1	0	1	1	1	1	SCARB2	scavenger receptor class B, member 2
hsa-miR-1263	1	0	1	1	1	1	ST8SIA4	ST8 alpha-N-acetyl-neuraminide alpha-2,8-sialyltransferase 4
hsa-miR-1263	0	0	1	1	0	0	SNURF	SNRPN upstream reading frame
hsa-miR-1263	1	0	1	0	1	1	GPC6	glypican 6
hsa-miR-1263	1	0	1	1	1	1	GIPC1	GIPC PDZ domain containing family, member 1
hsa-miR-1263	1	0	1	0	1	1	DCAF7	DDB1 and CUL4 associated factor 7
hsa-miR-1263	1	0	1	0	1	1	MAP1B	microtubule-associated protein 1B
hsa-miR-1263	1	0	1	1	1	1	MAT2A	methionine adenosyltransferase II, alpha
hsa-miR-1263	0	0	1	1	1	1	TRDN	triadin
hsa-miR-1263	1	0	1	1	1	1	TACC1	transforming, acidic coiled-coil containing protein 1
hsa-miR-1263	0	0	1	1	1	1	LRRC41	leucine rich repeat containing 41
hsa-miR-1263	1	0	1	1	1	1	NEBL	nebulette
hsa-miR-1263	1	0	1	1	1	1	PAIP1	poly(A) binding protein interacting protein 1
hsa-miR-1263	1	0	1	0	1	1	MAP4K5	mitogen-activated protein kinase kinase kinase kinase 5
hsa-miR-1263	1	0	1	1	1	1	B3GNT2	UDP-GlcNAc:betaGal beta-1,3-N-acetylglucosaminyltransferase 2
hsa-miR-1263	1	0	1	0	1	1	API5	apoptosis inhibitor 5
hsa-miR-1263	1	0	1	1	1	1	MAP3K2	mitogen-activated protein kinase kinase kinase 2
hsa-miR-1263	1	0	1	1	1	1	MMP24	matrix metallopeptidase 24 (membrane-inserted)
hsa-miR-1263	1	0	1	1	0	0	PSKH1	protein serine kinase H1
hsa-miR-1263	1	0	1	1	1	1	ZBTB33	zinc finger and BTB domain containing 33
hsa-miR-1263	0	0	1	1	1	1	TMED10	transmembrane emp24-like trafficking protein 10 (yeast)
hsa-miR-1263	1	0	1	0	1	1	SLC2A3	solute carrier family 2 (facilitated glucose transporter), member 3
hsa-miR-1263	1	0	1	0	1	1	PAPD7	PAP associated domain containing 7
hsa-miR-1263	0	0	1	0	1	1	AP4E1	adaptor-related protein complex 4, epsilon 1 subunit
hsa-miR-1263	1	0	1	0	1	1	ZFPM2	zinc finger protein, multitype 2
hsa-miR-1263	1	0	1	0	1	1	FZD4	frizzled family receptor 4
hsa-miR-1263	1	0	1	1	1	1	TLL2	tolloid-like 2
hsa-miR-1263	1	0	1	1	1	1	STK39	serine threonine kinase 39
hsa-miR-1263	0	0	1	1	1	1	N6AMT1	N-6 adenine-specific DNA methyltransferase 1 (putative)
hsa-miR-1263	0	0	1	1	0	0	ZDHHC8	zinc finger, DHHC-type containing 8
hsa-miR-1263	1	0	1	0	1	1	TRHDE	thyrotropin-releasing hormone degrading enzyme
hsa-miR-1263	1	0	1	0	1	1	VAMP2	vesicle-associated membrane protein 2 (synaptobrevin 2)
hsa-miR-1263	0	0	1	1	1	1	DNAJC8	DnaJ (Hsp40) homolog, subfamily C, member 8
hsa-miR-1263	0	0	1	1	0	0	NOMO1	NODAL modulator 1
hsa-miR-1263	1	0	1	1	1	1	SLC7A11	solute carrier family 7 (anionic amino acid transporter light chain, xc- system), member 11
hsa-miR-1263	0	0	1	1	1	1	TSPAN13	tetraspanin 13
hsa-miR-1263	1	0	1	1	1	1	AFF4	AF4/FMR2 family, member 4
hsa-miR-1263	1	0	1	1	1	1	SERP1	stress-associated endoplasmic reticulum protein 1
hsa-miR-1263	1	0	1	1	1	1	TNFRSF21	tumor necrosis factor receptor superfamily, member 21
hsa-miR-1263	1	0	1	0	1	1	SH3PXD2A	SH3 and PX domains 2A
hsa-miR-1263	1	0	1	1	1	1	GCC2	GRIP and coiled-coil domain containing 2
hsa-miR-1263	0	0	1	1	1	1	FRMPD4	FERM and PDZ domain containing 4
hsa-miR-1263	1	0	1	0	1	1	TOX	thymocyte selection-associated high mobility group box
hsa-miR-1263	1	0	1	1	1	1	LRIG2	leucine-rich repeats and immunoglobulin-like domains 2
hsa-miR-1263	0	0	1	0	1	1	PPM1E	protein phosphatase, Mg2+/Mn2+ dependent, 1E
hsa-miR-1263	0	0	1	0	1	1	VASH1	vasohibin 1
hsa-miR-1263	1	0	1	1	1	1	USP33	ubiquitin specific peptidase 33
hsa-miR-1263	1	0	1	1	1	1	RTF1	Rtf1, Paf1/RNA polymerase II complex component, homolog (S. cerevisiae)
hsa-miR-1263	1	0	1	1	1	1	PRRC2C	proline-rich coiled-coil 2C
hsa-miR-1263	1	0	1	0	1	1	KIAA1024	KIAA1024
hsa-miR-1263	1	0	1	1	1	1	ANKS1A	ankyrin repeat and sterile alpha motif domain containing 1A
hsa-miR-1263	1	0	1	1	0	0	SMG5	smg-5 homolog, nonsense mediated mRNA decay factor (C. elegans)
hsa-miR-1263	0	0	1	0	1	1	ZDHHC17	zinc finger, DHHC-type containing 17
hsa-miR-1263	0	0	1	1	1	1	HERC4	HECT and RLD domain containing E3 ubiquitin protein ligase 4
hsa-miR-1263	0	0	1	1	1	1	BRPF3	bromodomain and PHD finger containing, 3
hsa-miR-1263	0	0	1	1	0	0	GPKOW	G patch domain and KOW motifs
hsa-miR-1263	1	0	1	1	1	1	PHF20L1	PHD finger protein 20-like 1
hsa-miR-1263	0	0	1	1	1	1	CENPF	centromere protein F, 350/400kDa (mitosin)
hsa-miR-1263	1	0	1	0	1	1	TMEM216	transmembrane protein 216
hsa-miR-1263	1	0	1	0	1	1	RAB8B	RAB8B, member RAS oncogene family
hsa-miR-1263	0	0	1	1	1	1	POLE3	polymerase (DNA directed), epsilon 3, accessory subunit
hsa-miR-1263	1	0	1	1	1	1	NOTCH1	notch 1
hsa-miR-1263	1	0	1	0	1	1	CHD7	chromodomain helicase DNA binding protein 7
hsa-miR-1263	1	0	1	0	1	1	MARCH5	membrane-associated ring finger (C3HC4) 5
hsa-miR-1263	1	0	1	1	1	1	RNF125	ring finger protein 125, E3 ubiquitin protein ligase
hsa-miR-1263	1	0	1	1	1	1	HIF1AN	hypoxia inducible factor 1, alpha subunit inhibitor
hsa-miR-1263	1	0	1	1	1	1	CDC37L1	cell division cycle 37 homolog (S. cerevisiae)-like 1
hsa-miR-1263	1	0	1	1	1	1	IFT57	intraflagellar transport 57 homolog (Chlamydomonas)
hsa-miR-1263	1	0	1	1	1	1	RIC8B	resistance to inhibitors of cholinesterase 8 homolog B (C. elegans)
hsa-miR-1263	1	0	1	1	1	1	CSGALNACT2	chondroitin sulfate N-acetylgalactosaminyltransferase 2
hsa-miR-1263	0	0	1	1	1	1	TERF2IP	telomeric repeat binding factor 2, interacting protein
hsa-miR-1263	1	0	1	1	1	1	SASH3	SAM and SH3 domain containing 3
hsa-miR-1263	0	0	1	1	1	1	GNL3L	guanine nucleotide binding protein-like 3 (nucleolar)-like
hsa-miR-1263	0	0	1	1	1	1	RAD18	RAD18 homolog (S. cerevisiae)
hsa-miR-1263	1	0	1	1	1	1	PITHD1	PITH (C-terminal proteasome-interacting domain of thioredoxin-like) domain containing 1
hsa-miR-1263	1	0	1	1	1	1	PCDH9	protocadherin 9
hsa-miR-1263	1	0	1	1	1	1	USP31	ubiquitin specific peptidase 31
hsa-miR-1263	0	0	1	1	1	1	ARRDC3	arrestin domain containing 3
hsa-miR-1263	1	0	1	1	1	1	ARHGAP21	Rho GTPase activating protein 21
hsa-miR-1263	1	0	1	0	1	1	GPAM	glycerol-3-phosphate acyltransferase, mitochondrial
hsa-miR-1263	1	0	1	1	1	1	ZNFX1	zinc finger, NFX1-type containing 1
hsa-miR-1263	0	0	1	1	1	1	TCTA	T-cell leukemia translocation altered
hsa-miR-1263	0	0	1	1	1	1	NSD1	nuclear receptor binding SET domain protein 1
hsa-miR-1263	1	0	1	1	1	1	SUDS3	suppressor of defective silencing 3 homolog (S. cerevisiae)
hsa-miR-1263	0	0	1	0	1	1	EBF2	early B-cell factor 2
hsa-miR-1263	1	0	1	0	1	1	BCL11B	B-cell CLL/lymphoma 11B (zinc finger protein)
hsa-miR-1263	1	0	1	1	1	1	SOWAHC	sosondowah ankyrin repeat domain family member C
hsa-miR-1263	1	0	1	1	0	0	UBE2Z	ubiquitin-conjugating enzyme E2Z
hsa-miR-1263	1	0	1	1	1	1	GRAMD3	GRAM domain containing 3
hsa-miR-1263	1	0	1	1	1	1	HOXB8	homeobox B8
hsa-miR-1263	1	0	1	1	1	1	ATP10A	ATPase, class V, type 10A
hsa-miR-1263	0	0	1	1	1	1	AKIRIN1	akirin 1
hsa-miR-1263	0	0	1	1	1	1	GLT25D1	glycosyltransferase 25 domain containing 1
hsa-miR-1263	1	0	1	1	1	1	FBXO11	F-box protein 11
hsa-miR-1263	1	0	1	1	1	1	TRIB1	tribbles homolog 1 (Drosophila)
hsa-miR-1263	1	0	1	1	1	1	CYB5B	cytochrome b5 type B (outer mitochondrial membrane)
hsa-miR-1263	1	0	1	0	1	1	TET1	tet methylcytosine dioxygenase 1
hsa-miR-1263	1	0	1	1	1	1	JHDM1D	jumonji C domain containing histone demethylase 1 homolog D (S. cerevisiae)
hsa-miR-1263	1	0	1	0	1	1	SETD7	SET domain containing (lysine methyltransferase) 7
hsa-miR-1263	0	0	1	0	0	0	KRTAP3-1	keratin associated protein 3-1
hsa-miR-1263	0	0	1	1	0	0	C19orf44	chromosome 19 open reading frame 44
hsa-miR-1263	0	0	1	0	1	1	LDOC1L	leucine zipper, down-regulated in cancer 1-like
hsa-miR-1263	0	0	1	1	1	1	FAM136A	family with sequence similarity 136, member A
hsa-miR-1263	1	0	1	1	1	1	CASP2	caspase 2, apoptosis-related cysteine peptidase
hsa-miR-1263	1	0	1	1	1	1	FOXQ1	forkhead box Q1
hsa-miR-1263	1	0	1	1	0	0	KCNH7	potassium voltage-gated channel, subfamily H (eag-related), member 7
hsa-miR-1263	1	0	1	1	1	1	EPT1	ethanolaminephosphotransferase 1 (CDP-ethanolamine-specific)
hsa-miR-1263	1	0	1	1	1	1	BRWD1	bromodomain and WD repeat domain containing 1
hsa-miR-1263	0	0	1	1	0	0	FAM46B	family with sequence similarity 46, member B
hsa-miR-1263	1	0	1	1	1	1	TRIM9	tripartite motif containing 9
hsa-miR-1263	0	0	1	0	1	1	ZNF518B	zinc finger protein 518B
hsa-miR-1263	1	0	1	1	1	1	NAA15	N(alpha)-acetyltransferase 15, NatA auxiliary subunit
hsa-miR-1263	0	0	1	1	1	1	RSAD2	radical S-adenosyl methionine domain containing 2
hsa-miR-1263	1	0	1	0	1	1	EDARADD	EDAR-associated death domain
hsa-miR-1263	0	0	1	1	1	1	CHST14	carbohydrate (N-acetylgalactosamine 4-0) sulfotransferase 14
hsa-miR-1263	1	0	1	1	1	1	KCTD12	potassium channel tetramerisation domain containing 12
hsa-miR-1263	1	0	1	0	1	1	NUS1	nuclear undecaprenyl pyrophosphate synthase 1 homolog (S. cerevisiae)
hsa-miR-1263	1	0	1	0	1	1	SP1	Sp1 transcription factor
hsa-miR-1263	1	0	1	1	1	1	LGI3	leucine-rich repeat LGI family, member 3
hsa-miR-1263	0	0	1	1	1	1	SCARF1	scavenger receptor class F, member 1
hsa-miR-1263	0	0	1	1	1	1	ARL14EP	ADP-ribosylation factor-like 14 effector protein
hsa-miR-1263	1	0	1	1	1	1	FAM123B	family with sequence similarity 123B
hsa-miR-1263	1	0	1	1	1	1	ZSCAN29	zinc finger and SCAN domain containing 29
hsa-miR-1263	0	0	1	1	0	0	MUC20	mucin 20, cell surface associated
hsa-miR-1263	1	0	1	1	1	1	MAMDC2	MAM domain containing 2
hsa-miR-1263	0	0	1	1	1	1	SLC22A7	solute carrier family 22 (organic anion transporter), member 7
hsa-miR-1263	0	0	1	1	1	1	FAM71C	family with sequence similarity 71, member C
hsa-miR-1263	1	0	1	0	1	1	ZCCHC24	zinc finger, CCHC domain containing 24
hsa-miR-1263	0	0	1	0	1	1	RTP1	receptor (chemosensory) transporter protein 1
hsa-miR-1263	1	0	1	1	1	1	PKHD1	polycystic kidney and hepatic disease 1 (autosomal recessive)
hsa-miR-1263	0	0	1	0	1	1	TUSC5	tumor suppressor candidate 5
hsa-miR-1263	0	0	1	1	1	1	C15orf26	chromosome 15 open reading frame 26
hsa-miR-1263	1	0	1	0	1	1	KSR2	kinase suppressor of ras 2
hsa-miR-1263	0	0	1	1	0	0	NOMO2	NODAL modulator 2
hsa-miR-1263	0	0	1	1	0	0	C8orf31	chromosome 8 open reading frame 31
hsa-miR-1263	0	0	1	1	1	1	SCARA5	scavenger receptor class A, member 5 (putative)
hsa-miR-1263	0	0	1	1	1	1	CHSY3	chondroitin sulfate synthase 3
hsa-miR-1263	1	0	1	1	1	1	TMEM26	transmembrane protein 26
hsa-miR-1263	0	0	1	0	1	1	GATS	GATS, stromal antigen 3 opposite strand
hsa-miR-1263	1	0	1	1	1	1	LRRTM1	leucine rich repeat transmembrane neuronal 1
hsa-miR-1263	0	0	1	0	1	1	SPATA12	spermatogenesis associated 12
hsa-miR-1263	1	0	1	1	1	1	BCL9L	B-cell CLL/lymphoma 9-like
hsa-miR-1263	0	0	1	0	1	1	C16orf82	chromosome 16 open reading frame 82
hsa-miR-1263	1	0	1	1	1	1	SPTY2D1	SPT2, Suppressor of Ty, domain containing 1 (S. cerevisiae)
hsa-miR-1263	1	0	1	0	1	1	SLC16A9	solute carrier family 16, member 9 (monocarboxylic acid transporter 9)
hsa-miR-1263	1	0	1	1	1	1	RALGAPA1	Ral GTPase activating protein, alpha subunit 1 (catalytic)
hsa-miR-1263	1	0	1	1	1	1	ZBTB41	zinc finger and BTB domain containing 41
hsa-miR-1263	1	0	1	0	1	1	PRICKLE2	prickle homolog 2 (Drosophila)
hsa-miR-1263	1	0	1	1	1	1	SKIDA1	SKI/DACH domain containing 1
hsa-miR-1263	0	0	1	1	0	0	TOMM20L	translocase of outer mitochondrial membrane 20 homolog (yeast)-like
hsa-miR-1263	1	0	1	1	1	1	C11orf87	chromosome 11 open reading frame 87
hsa-miR-1263	0	0	1	0	0	0	RAB9BP1	RAB9B, member RAS oncogene family pseudogene 1
hsa-miR-1263	0	0	1	0	0	0	TTTY12	testis-specific transcript, Y-linked 12 (non-protein coding)
hsa-miR-1263	0	0	1	0	0	0	TPI1P2	triosephosphate isomerase 1 pseudogene 2
hsa-miR-1263	0	0	1	0	0	0	COX6B1P1	cytochrome c oxidase subunit VIb polypeptide 1 (ubiquitous) pseudogene 1
hsa-miR-1263	0	0	1	0	0	0	ATXN8OS	ATXN8 opposite strand (non-protein coding)
hsa-miR-1263	0	0	1	0	0	0	HNRNPA3P1	heterogeneous nuclear ribonucleoprotein A3 pseudogene 1
hsa-miR-1263	0	0	1	0	0	0	SNORD56	small nucleolar RNA, C/D box 56
hsa-miR-1263	0	0	1	0	0	0	HTR7P1	5-hydroxytryptamine (serotonin) receptor 7 pseudogene 1
hsa-miR-1263	0	0	1	0	0	0	RPL29P2	ribosomal protein L29 pseudogene 2
hsa-miR-1263	0	0	1	0	0	0	TMED10P1	transmembrane emp24-like trafficking protein 10 (yeast) pseudogene 1
hsa-miR-1263	0	0	1	0	0	0	PTPRVP	protein tyrosine phosphatase, receptor type, V, pseudogene
hsa-miR-1263	0	0	1	0	0	0	SNX29P2	sorting nexin 29 pseudogene 2
hsa-miR-1263	0	0	1	0	0	0	HNRNPA1P10	heterogeneous nuclear ribonucleoprotein A1 pseudogene 10
hsa-miR-1263	0	0	1	0	0	0	SCARNA16	small Cajal body-specific RNA 16
hsa-miR-1263	0	0	1	0	0	0	LILRP2	leukocyte immunoglobulin-like receptor pseudogene 2
hsa-miR-1263	0	0	1	0	0	0	HSP90B3P	heat shock protein 90kDa beta (Grp94), member 3, pseudogene
hsa-miR-1263	0	0	1	0	0	0	HSP90AB2P	heat shock protein 90kDa alpha (cytosolic), class B member 2, pseudogene
hsa-miR-1263	0	0	1	0	0	0	CDRT15P1	CMT1A duplicated region transcript 15 pseudogene 1
hsa-miR-1263	0	0	1	0	0	0	SNORD116-28	small nucleolar RNA, C/D box 116-28
hsa-miR-1263	1	0	1	1	1	1	ESR1	estrogen receptor 1
hsa-miR-1263	1	0	1	1	1	1	POU6F1	POU class 6 homeobox 1
