# Supplementary material for: Profiling of Selected MicroRNAs in Proliferative Eutopic Endometrium of Women with Ovarian Endometriosis
Source: Biomed Res Int. 2015 Aug 20;2015:760698. doi: 10.1155/2015/760698 (PMC4558423; doi:10.1155/2015/760698)
Supplement: Supplementary file 1 — Table I: The names of miRNAs significantly differentially expressed between eutopic endometrium of patients with endometriosis vs eutopic endometrium of patients without endometriosis. Table II: The associations between miRNA and mRNA, which presents detailed results of the search of six major databases i.e targetscan, tarbase, miranda, mirbase, mirtarget2 and pictar. [file 760698.f1.zip › 760698.f1/Table II/hsa-miR-1265.tsv]

miR	targetscan	tarbase	miranda	mirbase	mirtarget2	pictar	GeneSymbol	GeneName
hsa-miR-1265	1	0	1	1	1	1	CHD9	chromodomain helicase DNA binding protein 9
hsa-miR-1265	1	0	1	1	0	0	SRCAP	Snf2-related CREBBP activator protein
hsa-miR-1265	1	0	1	1	0	0	RAPGEF2	Rap guanine nucleotide exchange factor (GEF) 2
hsa-miR-1265	1	0	1	0	1	1	KIAA0355	KIAA0355
hsa-miR-1265	1	0	1	1	1	1	FAM65B	family with sequence similarity 65, member B
hsa-miR-1265	1	0	1	0	1	1	PTPRT	protein tyrosine phosphatase, receptor type, T
hsa-miR-1265	0	0	1	1	1	1	PEG3	paternally expressed 3
hsa-miR-1265	0	0	1	1	0	0	PLXNB1	plexin B1
hsa-miR-1265	1	0	1	0	1	1	KIAA0408	KIAA0408
hsa-miR-1265	1	0	1	0	1	1	NEDD4L	neural precursor cell expressed, developmentally down-regulated 4-like, E3 ubiquitin protein ligase
hsa-miR-1265	1	0	1	0	1	1	CEP350	centrosomal protein 350kDa
hsa-miR-1265	1	0	1	1	1	1	BAI3	brain-specific angiogenesis inhibitor 3
hsa-miR-1265	0	0	1	1	1	1	XRCC4	X-ray repair complementing defective repair in Chinese hamster cells 4
hsa-miR-1265	0	0	1	1	0	0	ATP10B	ATPase, class V, type 10B
hsa-miR-1265	1	0	1	0	1	1	DOCK4	dedicator of cytokinesis 4
hsa-miR-1265	1	0	1	1	1	1	SEMA4F	sema domain, immunoglobulin domain (Ig), transmembrane domain (TM) and short cytoplasmic domain, (semaphorin) 4F
hsa-miR-1265	1	0	1	1	1	1	BAHD1	bromo adjacent homology domain containing 1
hsa-miR-1265	0	0	1	1	1	1	AGTPBP1	ATP/GTP binding protein 1
hsa-miR-1265	1	0	1	1	0	0	KIAA1045	KIAA1045
hsa-miR-1265	1	0	1	1	1	1	NLGN1	neuroligin 1
hsa-miR-1265	1	0	1	0	1	1	GPR158	G protein-coupled receptor 158
hsa-miR-1265	1	0	1	0	1	1	SRGAP3	SLIT-ROBO Rho GTPase activating protein 3
hsa-miR-1265	1	0	1	1	0	0	KIAA1210	KIAA1210
hsa-miR-1265	1	0	1	1	0	0	ATAD2B	ATPase family, AAA domain containing 2B
hsa-miR-1265	1	0	1	1	1	1	ASAP1	ArfGAP with SH3 domain, ankyrin repeat and PH domain 1
hsa-miR-1265	1	0	1	0	1	1	ANKFY1	ankyrin repeat and FYVE domain containing 1
hsa-miR-1265	0	0	1	1	1	1	FSTL5	follistatin-like 5
hsa-miR-1265	1	0	1	0	0	0	ODZ4	odz, odd Oz/ten-m homolog 4 (Drosophila)
hsa-miR-1265	1	0	1	0	0	0	NYNRIN	NYN domain and retroviral integrase containing
hsa-miR-1265	1	0	1	0	1	1	KCTD16	potassium channel tetramerisation domain containing 16
hsa-miR-1265	1	0	1	1	1	1	UPF2	UPF2 regulator of nonsense transcripts homolog (yeast)
hsa-miR-1265	0	0	1	0	1	1	MUC3B	mucin 3B, cell surface associated
hsa-miR-1265	1	0	1	1	1	1	BAZ2B	bromodomain adjacent to zinc finger domain, 2B
hsa-miR-1265	0	0	1	0	0	0	CHD8	chromodomain helicase DNA binding protein 8
hsa-miR-1265	0	0	1	1	1	1	BHLHB9	basic helix-loop-helix domain containing, class B, 9
hsa-miR-1265	1	0	1	1	1	1	IKZF4	IKAROS family zinc finger 4 (Eos)
hsa-miR-1265	0	0	1	1	1	1	UNC80	unc-80 homolog (C. elegans)
hsa-miR-1265	0	0	1	1	0	0	ARMC9	armadillo repeat containing 9
hsa-miR-1265	0	0	1	1	0	0	COL27A1	collagen, type XXVII, alpha 1
hsa-miR-1265	0	0	1	1	1	1	SLC11A2	solute carrier family 11 (proton-coupled divalent metal ion transporters), member 2
hsa-miR-1265	0	0	1	1	0	0	SEC16B	SEC16 homolog B (S. cerevisiae)
hsa-miR-1265	0	0	1	0	0	0	NBLA00301	Nbla00301
hsa-miR-1265	1	0	1	1	1	1	OXR1	oxidation resistance 1
hsa-miR-1265	1	0	1	1	1	1	SH3TC2	SH3 domain and tetratricopeptide repeats 2
hsa-miR-1265	1	0	1	1	1	1	FHOD3	formin homology 2 domain containing 3
hsa-miR-1265	0	0	1	1	1	1	NELL1	NEL-like 1 (chicken)
hsa-miR-1265	0	0	1	0	1	1	RASSF8	Ras association (RalGDS/AF-6) domain family (N-terminal) member 8
hsa-miR-1265	1	0	1	1	1	1	TRPM3	transient receptor potential cation channel, subfamily M, member 3
hsa-miR-1265	0	0	1	1	1	1	IL7	interleukin 7
hsa-miR-1265	0	0	1	1	0	0	DDB2	damage-specific DNA binding protein 2, 48kDa
hsa-miR-1265	1	1	1	1	1	1	BACE1	beta-site APP-cleaving enzyme 1
hsa-miR-1265	0	0	1	1	0	0	APH1B	anterior pharynx defective 1 homolog B (C. elegans)
hsa-miR-1265	1	0	1	1	1	1	UBE3A	ubiquitin protein ligase E3A
hsa-miR-1265	1	0	1	1	1	1	SEC14L1	SEC14-like 1 (S. cerevisiae)
hsa-miR-1265	0	0	1	1	1	1	CAST	calpastatin
hsa-miR-1265	0	0	1	1	0	0	MPST	mercaptopyruvate sulfurtransferase
hsa-miR-1265	1	0	1	1	0	0	NDST2	N-deacetylase/N-sulfotransferase (heparan glucosaminyl) 2
hsa-miR-1265	1	0	1	1	1	1	OSBPL6	oxysterol binding protein-like 6
hsa-miR-1265	0	0	1	1	0	0	STON2	stonin 2
hsa-miR-1265	1	0	1	1	1	1	PML	promyelocytic leukemia
hsa-miR-1265	1	0	1	1	1	1	MEF2A	myocyte enhancer factor 2A
hsa-miR-1265	0	0	1	1	1	1	DYNC1I2	dynein, cytoplasmic 1, intermediate chain 2
hsa-miR-1265	0	0	1	1	1	1	MAZ	MYC-associated zinc finger protein (purine-binding transcription factor)
hsa-miR-1265	1	0	1	0	1	1	PLAG1	pleiomorphic adenoma gene 1
hsa-miR-1265	1	0	1	0	1	1	SLC6A6	solute carrier family 6 (neurotransmitter transporter, taurine), member 6
hsa-miR-1265	1	0	1	0	1	1	DPYSL2	dihydropyrimidinase-like 2
hsa-miR-1265	0	0	1	0	1	1	NPY1R	neuropeptide Y receptor Y1
hsa-miR-1265	1	0	1	0	1	1	CHL1	cell adhesion molecule with homology to L1CAM (close homolog of L1)
hsa-miR-1265	1	0	1	1	1	1	EPHA5	EPH receptor A5
hsa-miR-1265	1	0	1	1	1	1	AEBP2	AE binding protein 2
hsa-miR-1265	0	0	1	1	0	0	BMP1	bone morphogenetic protein 1
hsa-miR-1265	0	0	1	1	0	0	CFLAR	CASP8 and FADD-like apoptosis regulator
hsa-miR-1265	1	0	1	1	1	1	ARHGEF3	Rho guanine nucleotide exchange factor (GEF) 3
hsa-miR-1265	0	0	1	1	0	0	SLC22A8	solute carrier family 22 (organic anion transporter), member 8
hsa-miR-1265	0	0	1	1	0	0	MBD1	methyl-CpG binding domain protein 1
hsa-miR-1265	1	0	1	1	1	1	CRTAM	cytotoxic and regulatory T cell molecule
hsa-miR-1265	1	0	1	1	1	1	TEAD1	TEA domain family member 1 (SV40 transcriptional enhancer factor)
hsa-miR-1265	0	0	1	1	0	0	TRIM27	tripartite motif containing 27
hsa-miR-1265	1	0	1	1	1	1	ZFX	zinc finger protein, X-linked
hsa-miR-1265	1	0	1	0	1	1	CAV1	caveolin 1, caveolae protein, 22kDa
hsa-miR-1265	1	0	1	1	1	1	MYH10	myosin, heavy chain 10, non-muscle
hsa-miR-1265	1	0	1	1	1	1	SDHC	succinate dehydrogenase complex, subunit C, integral membrane protein, 15kDa
hsa-miR-1265	1	0	1	1	1	1	STX16	syntaxin 16
hsa-miR-1265	1	0	1	1	1	1	MID1	midline 1 (Opitz/BBB syndrome)
hsa-miR-1265	0	0	1	1	1	1	SH3GL3	SH3-domain GRB2-like 3
hsa-miR-1265	1	0	1	1	1	1	MBNL2	muscleblind-like splicing regulator 2
hsa-miR-1265	0	0	1	1	1	1	ERAL1	Era G-protein-like 1 (E. coli)
hsa-miR-1265	0	0	1	1	1	1	MINPP1	multiple inositol-polyphosphate phosphatase 1
hsa-miR-1265	1	0	1	1	1	1	PHF8	PHD finger protein 8
hsa-miR-1265	0	0	1	1	1	1	FHL1	four and a half LIM domains 1
hsa-miR-1265	0	0	1	1	1	1	SH2D1A	SH2 domain containing 1A
hsa-miR-1265	0	0	1	1	0	0	RBM5	RNA binding motif protein 5
hsa-miR-1265	1	0	1	1	1	1	CAB39	calcium binding protein 39
hsa-miR-1265	1	0	1	1	1	1	HTRA2	HtrA serine peptidase 2
hsa-miR-1265	0	0	1	1	1	1	ZNF317	zinc finger protein 317
hsa-miR-1265	0	0	1	1	1	1	CNPPD1	cyclin Pas1/PHO80 domain containing 1
hsa-miR-1265	1	0	1	0	0	0	PRPF40A	PRP40 pre-mRNA processing factor 40 homolog A (S. cerevisiae)
hsa-miR-1265	1	0	1	1	1	1	C16orf70	chromosome 16 open reading frame 70
hsa-miR-1265	0	0	1	0	1	1	CLDN2	claudin 2
hsa-miR-1265	0	0	1	1	1	1	SLC39A8	solute carrier family 39 (zinc transporter), member 8
hsa-miR-1265	0	0	1	0	0	0	BPESC1	blepharophimosis, epicanthus inversus and ptosis, candidate 1 (non-protein coding)
hsa-miR-1265	0	0	1	0	0	0	ARL17A	ADP-ribosylation factor-like 17A
hsa-miR-1265	0	0	1	1	1	1	SLC30A5	solute carrier family 30 (zinc transporter), member 5
hsa-miR-1265	0	0	1	1	1	1	CD28	CD28 molecule
hsa-miR-1265	1	0	1	1	1	1	OGT	O-linked N-acetylglucosamine (GlcNAc) transferase
hsa-miR-1265	1	0	1	1	1	1	DESI2	desumoylating isopeptidase 2
hsa-miR-1265	0	0	1	1	1	1	PGLYRP4	peptidoglycan recognition protein 4
hsa-miR-1265	0	0	1	0	0	0	TIGD7	tigger transposable element derived 7
hsa-miR-1265	1	0	1	1	1	1	ELF2	E74-like factor 2 (ets domain transcription factor)
hsa-miR-1265	1	0	1	1	1	1	SH3GLB1	SH3-domain GRB2-like endophilin B1
hsa-miR-1265	0	0	1	1	0	0	HPSE2	heparanase 2
hsa-miR-1265	0	0	1	1	1	1	SLC4A5	solute carrier family 4, sodium bicarbonate cotransporter, member 5
hsa-miR-1265	1	0	1	1	1	1	CHST9	carbohydrate (N-acetylgalactosamine 4-0) sulfotransferase 9
hsa-miR-1265	0	0	1	1	0	0	ZAN	zonadhesin
hsa-miR-1265	0	0	1	1	0	0	TRO	trophinin
hsa-miR-1265	1	0	1	1	1	1	PBX3	pre-B-cell leukemia homeobox 3
hsa-miR-1265	1	0	1	1	1	1	LARP4	La ribonucleoprotein domain family, member 4
hsa-miR-1265	0	0	1	0	1	1	MYO3B	myosin IIIB
hsa-miR-1265	0	0	1	1	0	0	ELP2	elongator acetyltransferase complex subunit 2
hsa-miR-1265	1	0	1	1	0	0	YTHDF2	YTH domain family, member 2
hsa-miR-1265	0	0	1	1	0	0	RASGEF1C	RasGEF domain family, member 1C
hsa-miR-1265	1	0	1	0	1	1	PPP1R12A	protein phosphatase 1, regulatory subunit 12A
hsa-miR-1265	1	0	1	1	1	1	WAPAL	wings apart-like homolog (Drosophila)
hsa-miR-1265	0	0	1	1	1	1	SLC2A14	solute carrier family 2 (facilitated glucose transporter), member 14
hsa-miR-1265	0	0	1	1	1	1	PTK7	PTK7 protein tyrosine kinase 7
hsa-miR-1265	1	0	1	1	1	1	GPR64	G protein-coupled receptor 64
hsa-miR-1265	1	0	1	1	1	1	AFF2	AF4/FMR2 family, member 2
hsa-miR-1265	1	0	1	1	1	1	SH2B3	SH2B adaptor protein 3
hsa-miR-1265	0	0	1	1	1	1	TCFL5	transcription factor-like 5 (basic helix-loop-helix)
hsa-miR-1265	0	0	1	0	0	0	CACNA2D3	calcium channel, voltage-dependent, alpha 2/delta subunit 3
hsa-miR-1265	0	0	1	1	1	1	DMRTC1	DMRT-like family C1
hsa-miR-1265	0	0	1	1	0	0	DMRTC1B	DMRT-like family C1B
hsa-miR-1265	1	0	1	1	1	1	SLAMF6	SLAM family member 6
hsa-miR-1265	1	0	1	1	1	1	NRXN3	neurexin 3
hsa-miR-1265	0	0	1	0	1	1	SRPK1	SRSF protein kinase 1
hsa-miR-1265	1	0	1	1	1	1	PDE1B	phosphodiesterase 1B, calmodulin-dependent
hsa-miR-1265	0	0	1	0	1	1	MUC15	mucin 15, cell surface associated
hsa-miR-1265	0	0	1	1	1	1	DEPDC5	DEP domain containing 5
hsa-miR-1265	0	0	1	1	1	1	ABLIM2	actin binding LIM protein family, member 2
hsa-miR-1265	0	0	1	1	0	0	ACSS2	acyl-CoA synthetase short-chain family member 2
hsa-miR-1265	1	0	1	1	1	1	AKAP2	A kinase (PRKA) anchor protein 2
hsa-miR-1265	0	0	1	0	0	0	FLJ20518	FSHD region gene 2 family, member C pseudogene
hsa-miR-1265	1	0	1	1	1	1	BCAP29	B-cell receptor-associated protein 29
hsa-miR-1265	0	0	1	1	0	0	MANSC1	MANSC domain containing 1
hsa-miR-1265	0	0	1	0	0	0	TPTEP1	transmembrane phosphatase with tensin homology pseudogene 1
hsa-miR-1265	0	0	1	1	1	1	ARAP3	ArfGAP with RhoGAP domain, ankyrin repeat and PH domain 3
hsa-miR-1265	1	0	1	1	1	1	SLC38A2	solute carrier family 38, member 2
hsa-miR-1265	0	0	1	1	1	1	GBP3	guanylate binding protein 3
hsa-miR-1265	1	0	1	1	1	1	ACER3	alkaline ceramidase 3
hsa-miR-1265	0	0	1	1	0	0	UBR4	ubiquitin protein ligase E3 component n-recognin 4
hsa-miR-1265	1	0	1	1	1	1	GALNT14	UDP-N-acetyl-alpha-D-galactosamine:polypeptide N-acetylgalactosaminyltransferase 14 (GalNAc-T14)
hsa-miR-1265	0	0	1	0	0	0	LOC149134	uncharacterized LOC149134
hsa-miR-1265	0	0	1	0	0	0	DUXAP10	double homeobox A pseudogene 10
hsa-miR-1265	0	0	1	1	1	1	LRRN1	leucine rich repeat neuronal 1
hsa-miR-1265	0	0	1	0	0	0	LOC399491	GPS, PLAT and transmembrane domain-containing protein
hsa-miR-1265	0	0	1	0	1	1	GVINP1	GTPase, very large interferon inducible pseudogene 1
hsa-miR-1265	0	0	1	0	0	0	LOC284561	uncharacterized LOC284561
hsa-miR-1265	1	0	1	1	1	1	BAZ2A	bromodomain adjacent to zinc finger domain, 2A
hsa-miR-1265	1	0	1	1	1	1	DERL1	derlin 1
hsa-miR-1265	1	0	1	1	1	1	ARHGEF15	Rho guanine nucleotide exchange factor (GEF) 15
hsa-miR-1265	1	0	1	1	0	0	MEX3A	mex-3 homolog A (C. elegans)
hsa-miR-1265	0	0	1	1	1	1	CDKAL1	CDK5 regulatory subunit associated protein 1-like 1
hsa-miR-1265	0	0	1	1	1	1	CXorf57	chromosome X open reading frame 57
hsa-miR-1265	0	0	1	0	0	0	LOC286059	tumor necrosis factor receptor superfamily, member 10d, decoy with truncated death domain pseudogene
hsa-miR-1265	0	0	1	1	1	1	METTL7A	methyltransferase like 7A
hsa-miR-1265	1	0	1	1	1	1	ABHD3	abhydrolase domain containing 3
hsa-miR-1265	1	0	1	1	1	1	GBF1	golgi brefeldin A resistant guanine nucleotide exchange factor 1
hsa-miR-1265	1	0	1	1	0	0	GPI	glucose-6-phosphate isomerase
hsa-miR-1265	1	0	1	1	1	1	TNRC6A	trinucleotide repeat containing 6A
hsa-miR-1265	1	0	1	1	1	1	YPEL5	yippee-like 5 (Drosophila)
hsa-miR-1265	0	0	1	0	1	1	HEMK1	HemK methyltransferase family member 1
hsa-miR-1265	0	0	1	0	0	0	LINC00340	long intergenic non-protein coding RNA 340
hsa-miR-1265	1	0	1	1	1	1	HPS3	Hermansky-Pudlak syndrome 3
hsa-miR-1265	1	0	1	1	1	1	DCAF8	DDB1 and CUL4 associated factor 8
hsa-miR-1265	1	0	1	1	1	1	ITGA9	integrin, alpha 9
hsa-miR-1265	1	0	1	1	1	1	RNF185	ring finger protein 185
hsa-miR-1265	0	0	1	0	0	0	LOC729852	uncharacterized LOC729852
hsa-miR-1265	1	0	1	1	1	1	LRP4	low density lipoprotein receptor-related protein 4
hsa-miR-1265	0	0	1	0	0	0	A1BG-AS1	A1BG antisense RNA 1
hsa-miR-1265	1	0	1	1	1	1	FOXP1	forkhead box P1
hsa-miR-1265	0	0	1	1	1	1	SPRTN	SprT-like N-terminal domain
hsa-miR-1265	1	0	1	1	1	1	SEC63	SEC63 homolog (S. cerevisiae)
hsa-miR-1265	1	0	1	1	1	1	NFASC	neurofascin
hsa-miR-1265	1	0	1	1	1	1	GPD2	glycerol-3-phosphate dehydrogenase 2 (mitochondrial)
hsa-miR-1265	0	0	1	1	1	1	SNAP47	synaptosomal-associated protein, 47kDa
hsa-miR-1265	1	0	1	0	1	1	ZKSCAN1	zinc finger with KRAB and SCAN domains 1
hsa-miR-1265	0	0	1	0	0	0	KIAA0664L3	KIAA0664-like 3
hsa-miR-1265	0	0	1	1	0	0	ABHD16A	abhydrolase domain containing 16A
hsa-miR-1265	1	0	1	1	1	1	SULF1	sulfatase 1
hsa-miR-1265	0	0	1	0	1	1	LOC152742	uncharacterized LOC152742
hsa-miR-1265	1	0	1	1	1	1	FRMD6	FERM domain containing 6
hsa-miR-1265	0	0	1	0	0	0	LOC201617	uncharacterized LOC201617
hsa-miR-1265	0	0	1	1	0	0	BEAN1	brain expressed, associated with NEDD4, 1
hsa-miR-1265	0	0	1	0	0	0	RMST	rhabdomyosarcoma 2 associated transcript (non-protein coding)
hsa-miR-1265	0	0	1	0	0	0	JPX	JPX transcript, XIST activator (non-protein coding)
hsa-miR-1265	1	0	1	1	0	0	SLC26A6	solute carrier family 26, member 6
hsa-miR-1265	1	0	1	0	1	1	FSTL4	follistatin-like 4
hsa-miR-1265	1	0	1	1	1	1	TMEM25	transmembrane protein 25
hsa-miR-1265	1	0	1	1	1	1	CLCN5	chloride channel, voltage-sensitive 5
hsa-miR-1265	0	0	1	0	0	0	LOC255187	hCG1980447
hsa-miR-1265	0	0	1	1	1	1	DST	dystonin
hsa-miR-1265	1	0	1	1	1	1	APLP2	amyloid beta (A4) precursor-like protein 2
hsa-miR-1265	1	0	1	1	1	1	TPM3	tropomyosin 3
hsa-miR-1265	1	0	1	1	1	1	MGAT1	mannosyl (alpha-1,3-)-glycoprotein beta-1,2-N-acetylglucosaminyltransferase
hsa-miR-1265	0	0	1	0	0	0	FLJ32742	uncharacterized locus FLJ32742
hsa-miR-1265	0	0	1	0	0	0	LOC145820	uncharacterized LOC145820
hsa-miR-1265	1	0	1	1	1	1	MPP7	membrane protein, palmitoylated 7 (MAGUK p55 subfamily member 7)
hsa-miR-1265	0	0	1	1	0	0	NXF2	nuclear RNA export factor 2
hsa-miR-1265	0	0	1	0	0	0	TUG1	taurine upregulated 1 (non-protein coding)
hsa-miR-1265	0	0	1	1	0	0	KRT86	keratin 86
hsa-miR-1265	0	0	1	1	0	0	CD320	CD320 molecule
hsa-miR-1265	1	0	1	1	1	1	C6orf89	chromosome 6 open reading frame 89
hsa-miR-1265	0	0	1	1	0	0	RHBDF2	rhomboid 5 homolog 2 (Drosophila)
hsa-miR-1265	1	0	1	1	1	1	FAM102A	family with sequence similarity 102, member A
hsa-miR-1265	1	0	1	1	1	1	FAM73B	family with sequence similarity 73, member B
hsa-miR-1265	0	0	1	0	0	0	CAPN13	calpain 13
hsa-miR-1265	0	0	1	1	0	0	NISCH	nischarin
hsa-miR-1265	0	0	1	1	1	1	LILRB5	leukocyte immunoglobulin-like receptor, subfamily B (with TM and ITIM domains), member 5
hsa-miR-1265	1	0	1	1	1	1	STXBP5	syntaxin binding protein 5 (tomosyn)
hsa-miR-1265	1	0	1	1	1	1	TLK1	tousled-like kinase 1
hsa-miR-1265	0	0	1	0	1	1	TMSB15B	thymosin beta 15B
hsa-miR-1265	0	0	1	1	0	0	CTNNBL1	catenin, beta like 1
hsa-miR-1265	1	0	1	1	1	1	FBXW2	F-box and WD repeat domain containing 2
hsa-miR-1265	1	0	1	1	1	1	TSN	translin
hsa-miR-1265	1	0	1	1	1	1	EPN2	epsin 2
hsa-miR-1265	1	0	1	1	1	1	GNG2	guanine nucleotide binding protein (G protein), gamma 2
hsa-miR-1265	0	0	1	1	0	0	ADH6	alcohol dehydrogenase 6 (class V)
hsa-miR-1265	0	0	1	1	0	0	GPX5	glutathione peroxidase 5 (epididymal androgen-related protein)
hsa-miR-1265	1	0	1	1	1	1	HMOX2	heme oxygenase (decycling) 2
hsa-miR-1265	1	0	1	1	1	1	SARM1	sterile alpha and TIR motif containing 1
hsa-miR-1265	1	0	1	1	1	1	DZIP1	DAZ interacting protein 1
hsa-miR-1265	0	0	1	1	1	1	SLC16A1	solute carrier family 16, member 1 (monocarboxylic acid transporter 1)
hsa-miR-1265	0	0	1	1	1	1	CYP11B1	cytochrome P450, family 11, subfamily B, polypeptide 1
hsa-miR-1265	0	0	1	0	0	0	CXXC1P1	CXXC finger protein 1 pseudogene 1
hsa-miR-1265	1	0	1	0	1	1	KIAA1456	KIAA1456
hsa-miR-1265	1	0	1	1	1	1	SEPT4	septin 4
hsa-miR-1265	0	0	1	0	0	0	ZNF806	zinc finger protein 806
hsa-miR-1265	0	0	1	0	1	1	ATP6V0E2	ATPase, H+ transporting V0 subunit e2
hsa-miR-1265	0	0	1	1	1	1	NMD3	NMD3 homolog (S. cerevisiae)
hsa-miR-1265	0	0	1	1	1	1	TMEM170A	transmembrane protein 170A
hsa-miR-1265	0	0	1	1	0	0	TMEM108	transmembrane protein 108
hsa-miR-1265	1	0	1	1	1	1	RASGEF1A	RasGEF domain family, member 1A
hsa-miR-1265	0	0	1	1	1	1	MOBP	myelin-associated oligodendrocyte basic protein
hsa-miR-1265	1	0	1	1	1	1	CTNNB1	catenin (cadherin-associated protein), beta 1, 88kDa
hsa-miR-1265	0	0	1	1	1	1	MYO6	myosin VI
hsa-miR-1265	0	0	1	1	1	1	CHI3L1	chitinase 3-like 1 (cartilage glycoprotein-39)
hsa-miR-1265	0	0	1	1	1	1	SIRPB2	signal-regulatory protein beta 2
hsa-miR-1265	0	0	1	0	0	0	LOC100129858	uncharacterized LOC100129858
hsa-miR-1265	0	0	1	0	1	1	NBPF3	neuroblastoma breakpoint family, member 3
hsa-miR-1265	0	0	1	1	0	0	CXorf38	chromosome X open reading frame 38
hsa-miR-1265	0	0	1	1	0	0	KDM5D	lysine (K)-specific demethylase 5D
hsa-miR-1265	0	0	1	1	1	1	BAG1	BCL2-associated athanogene
hsa-miR-1265	1	0	1	1	1	1	FADS1	fatty acid desaturase 1
hsa-miR-1265	0	0	1	0	0	0	OTUD1	OTU domain containing 1
hsa-miR-1265	0	0	1	0	1	1	FLJ39080	uncharacterized LOC441355
hsa-miR-1265	0	0	1	0	0	0	METTL21CP1	methyltransferase like 21C pseudogene 1
hsa-miR-1265	0	0	1	0	0	0	C1orf204	chromosome 1 open reading frame 204
hsa-miR-1265	1	0	1	0	1	1	KIAA1737	KIAA1737
hsa-miR-1265	1	0	1	1	1	1	SLC30A6	solute carrier family 30 (zinc transporter), member 6
hsa-miR-1265	0	0	1	1	1	1	IL17RE	interleukin 17 receptor E
hsa-miR-1265	1	0	1	1	1	1	STIM2	stromal interaction molecule 2
hsa-miR-1265	1	0	1	1	1	1	EPB41L1	erythrocyte membrane protein band 4.1-like 1
hsa-miR-1265	0	0	1	1	1	1	EXTL2	exostoses (multiple)-like 2
hsa-miR-1265	0	0	1	1	0	0	PRKRIP1	PRKR interacting protein 1 (IL11 inducible)
hsa-miR-1265	0	0	1	0	0	0	LOC400680	uncharacterized LOC400680
hsa-miR-1265	1	0	1	1	1	1	RAB11FIP4	RAB11 family interacting protein 4 (class II)
hsa-miR-1265	1	0	1	0	1	1	AGFG1	ArfGAP with FG repeats 1
hsa-miR-1265	1	0	1	1	1	1	GOLGA8B	golgin A8 family, member B
hsa-miR-1265	0	0	1	1	1	1	PLA2G5	phospholipase A2, group V
hsa-miR-1265	0	0	1	1	0	0	PSAPL1	prosaposin-like 1 (gene/pseudogene)
hsa-miR-1265	0	0	1	0	0	0	THAP7-AS1	THAP7 antisense RNA 1
hsa-miR-1265	0	0	1	1	1	1	PRSS16	protease, serine, 16 (thymus)
hsa-miR-1265	0	0	1	1	0	0	STXBP2	syntaxin binding protein 2
hsa-miR-1265	0	0	1	0	0	0	CECR7	cat eye syndrome chromosome region, candidate 7 (non-protein coding)
hsa-miR-1265	1	0	1	1	1	1	CHD6	chromodomain helicase DNA binding protein 6
hsa-miR-1265	0	0	1	1	0	0	DCBLD1	discoidin, CUB and LCCL domain containing 1
hsa-miR-1265	0	0	1	0	0	0	LOC100130954	uncharacterized LOC100130954
hsa-miR-1265	0	0	1	1	1	1	FAM76A	family with sequence similarity 76, member A
hsa-miR-1265	0	0	1	1	0	0	PPAPDC1A	phosphatidic acid phosphatase type 2 domain containing 1A
hsa-miR-1265	1	0	1	1	1	1	NDFIP2	Nedd4 family interacting protein 2
hsa-miR-1265	0	0	1	0	1	1	MYLK4	myosin light chain kinase family, member 4
hsa-miR-1265	1	0	1	0	1	1	UNC5D	unc-5 homolog D (C. elegans)
hsa-miR-1265	0	0	1	1	0	0	ZACN	zinc activated ligand-gated ion channel
hsa-miR-1265	0	0	1	1	1	1	UPP2	uridine phosphorylase 2
hsa-miR-1265	1	0	1	1	1	1	CRMP1	collapsin response mediator protein 1
hsa-miR-1265	0	0	1	1	0	0	KIAA0146	KIAA0146
hsa-miR-1265	1	0	1	1	0	0	CACNB3	calcium channel, voltage-dependent, beta 3 subunit
hsa-miR-1265	1	0	1	1	1	1	ZNF25	zinc finger protein 25
hsa-miR-1265	0	0	1	1	1	1	ARHGEF26	Rho guanine nucleotide exchange factor (GEF) 26
hsa-miR-1265	0	0	1	0	1	1	PATE4	prostate and testis expressed 4
hsa-miR-1265	1	0	1	1	1	1	KALRN	kalirin, RhoGEF kinase
hsa-miR-1265	1	0	1	1	1	1	TPRG1	tumor protein p63 regulated 1
hsa-miR-1265	1	0	1	1	1	1	IKBKAP	inhibitor of kappa light polypeptide gene enhancer in B-cells, kinase complex-associated protein
hsa-miR-1265	1	0	1	1	1	1	EGLN3	egl nine homolog 3 (C. elegans)
hsa-miR-1265	0	0	1	0	0	0	MORN2	MORN repeat containing 2
hsa-miR-1265	0	0	1	1	0	0	CENPM	centromere protein M
hsa-miR-1265	1	0	1	1	1	1	PHKB	phosphorylase kinase, beta
hsa-miR-1265	1	0	1	0	1	1	WDR82	WD repeat domain 82
hsa-miR-1265	1	0	1	1	1	1	FAM219A	family with sequence similarity 219, member A
hsa-miR-1265	1	0	1	0	1	1	DCUN1D4	DCN1, defective in cullin neddylation 1, domain containing 4 (S. cerevisiae)
hsa-miR-1265	0	0	1	1	0	0	NPIP	nuclear pore complex interacting protein
hsa-miR-1265	1	0	1	1	1	1	DAB2IP	DAB2 interacting protein
hsa-miR-1265	1	0	1	1	1	1	KIF21A	kinesin family member 21A
hsa-miR-1265	1	0	1	1	1	1	ERBB3	v-erb-b2 erythroblastic leukemia viral oncogene homolog 3 (avian)
hsa-miR-1265	0	0	1	1	0	0	PPP1R18	protein phosphatase 1, regulatory subunit 18
hsa-miR-1265	0	0	1	1	1	1	ATPBD4	ATP binding domain 4
hsa-miR-1265	1	0	1	1	1	1	C17orf85	chromosome 17 open reading frame 85
hsa-miR-1265	0	0	1	1	1	1	MKX	mohawk homeobox
hsa-miR-1265	0	0	1	0	1	1	ASB15	ankyrin repeat and SOCS box containing 15
hsa-miR-1265	1	0	1	0	0	0	MSL1	male-specific lethal 1 homolog (Drosophila)
hsa-miR-1265	1	0	1	1	1	1	DPY19L3	dpy-19-like 3 (C. elegans)
hsa-miR-1265	1	0	1	1	1	1	FAM122B	family with sequence similarity 122B
hsa-miR-1265	0	0	1	1	0	0	FSIP2	fibrous sheath interacting protein 2
hsa-miR-1265	1	0	1	1	0	0	ATXN7L3	ataxin 7-like 3
hsa-miR-1265	0	0	1	0	0	0	LOC729177	uncharacterized LOC729177
hsa-miR-1265	1	0	1	1	1	1	COPS7B	COP9 constitutive photomorphogenic homolog subunit 7B (Arabidopsis)
hsa-miR-1265	1	0	1	0	1	1	ANO6	anoctamin 6
hsa-miR-1265	1	0	1	1	1	1	SACM1L	SAC1 suppressor of actin mutations 1-like (yeast)
hsa-miR-1265	0	0	1	1	0	0	HSPG2	heparan sulfate proteoglycan 2
hsa-miR-1265	0	0	1	1	0	0	SPATS1	spermatogenesis associated, serine-rich 1
hsa-miR-1265	0	0	1	0	0	0	RPL23AP53	ribosomal protein L23a pseudogene 53
hsa-miR-1265	0	0	1	1	1	1	KLC4	kinesin light chain 4
hsa-miR-1265	1	0	1	1	1	1	TSHZ1	teashirt zinc finger homeobox 1
hsa-miR-1265	1	0	1	0	1	1	ADIPOR2	adiponectin receptor 2
hsa-miR-1265	1	0	1	1	1	1	FMNL3	formin-like 3
hsa-miR-1265	1	0	1	1	1	1	CTNNA2	catenin (cadherin-associated protein), alpha 2
hsa-miR-1265	1	0	1	1	0	0	SLC30A3	solute carrier family 30 (zinc transporter), member 3
hsa-miR-1265	1	0	1	0	1	1	KIAA0182	KIAA0182
hsa-miR-1265	0	0	1	1	1	1	CCDC78	coiled-coil domain containing 78
hsa-miR-1265	1	0	1	1	1	1	CXorf23	chromosome X open reading frame 23
hsa-miR-1265	0	0	1	0	0	0	ERVFRD-2	endogenous retrovirus group FRD, member 2
hsa-miR-1265	0	0	1	0	0	0	FAM71E2	family with sequence similarity 71, member E2
hsa-miR-1265	1	0	1	1	1	1	SLC12A6	solute carrier family 12 (potassium/chloride transporters), member 6
hsa-miR-1265	1	0	1	1	1	1	KCTD12	potassium channel tetramerisation domain containing 12
hsa-miR-1265	1	0	1	1	1	1	FRYL	FRY-like
hsa-miR-1265	1	0	1	1	0	0	ATP2A1	ATPase, Ca++ transporting, cardiac muscle, fast twitch 1
hsa-miR-1265	1	0	1	1	1	1	BCAT1	branched chain amino-acid transaminase 1, cytosolic
hsa-miR-1265	1	0	1	1	1	1	PUS7	pseudouridylate synthase 7 homolog (S. cerevisiae)
hsa-miR-1265	0	0	1	1	1	1	ZNF662	zinc finger protein 662
hsa-miR-1265	0	0	1	0	0	0	IDO2	indoleamine 2,3-dioxygenase 2
hsa-miR-1265	0	0	1	0	0	0	EMBP1	embigin pseudogene 1
hsa-miR-1265	1	0	1	0	1	1	CYB561D1	cytochrome b-561 domain containing 1
hsa-miR-1265	0	0	1	0	0	0	FLJ26245	uncharacterized LOC400533
hsa-miR-1265	1	0	1	1	1	1	RBM24	RNA binding motif protein 24
hsa-miR-1265	0	0	1	1	1	1	ANXA6	annexin A6
hsa-miR-1265	0	0	1	1	1	1	ST8SIA5	ST8 alpha-N-acetyl-neuraminide alpha-2,8-sialyltransferase 5
hsa-miR-1265	1	0	1	0	1	1	IRF4	interferon regulatory factor 4
hsa-miR-1265	1	0	1	0	1	1	ESRRG	estrogen-related receptor gamma
hsa-miR-1265	0	0	1	0	1	1	RUFY4	RUN and FYVE domain containing 4
hsa-miR-1265	0	0	1	0	0	0	LOC100124692	maltase-glucoamylase (alpha-glucosidase) pseudogene
hsa-miR-1265	1	0	1	1	1	1	MAP3K14	mitogen-activated protein kinase kinase kinase 14
hsa-miR-1265	0	0	1	1	1	1	RNF19B	ring finger protein 19B
hsa-miR-1265	1	0	1	1	1	1	MAP2K4	mitogen-activated protein kinase kinase 4
hsa-miR-1265	0	0	1	0	0	0	AGAP9	ArfGAP with GTPase domain, ankyrin repeat and PH domain 9
hsa-miR-1265	1	0	1	1	1	1	SYS1	SYS1 Golgi-localized integral membrane protein homolog (S. cerevisiae)
hsa-miR-1265	1	0	1	1	1	1	CTSA	cathepsin A
hsa-miR-1265	1	0	1	1	1	1	NME6	NME/NM23 nucleoside diphosphate kinase 6
hsa-miR-1265	1	0	1	0	1	1	TMEM106B	transmembrane protein 106B
hsa-miR-1265	0	0	1	1	1	1	CRISP3	cysteine-rich secretory protein 3
hsa-miR-1265	1	0	1	1	0	0	TDRKH	tudor and KH domain containing
hsa-miR-1265	1	0	1	1	1	1	MEAF6	MYST/Esa1-associated factor 6
hsa-miR-1265	1	0	1	0	1	1	MAP3K3	mitogen-activated protein kinase kinase kinase 3
hsa-miR-1265	1	0	1	1	1	1	COBLL1	COBL-like 1
hsa-miR-1265	0	0	1	1	0	0	UFD1L	ubiquitin fusion degradation 1 like (yeast)
hsa-miR-1265	0	0	1	1	1	1	RNF135	ring finger protein 135
hsa-miR-1265	1	0	1	1	1	1	NCOA1	nuclear receptor coactivator 1
hsa-miR-1265	1	0	1	1	1	1	NOVA1	neuro-oncological ventral antigen 1
hsa-miR-1265	1	0	1	1	1	1	APBB2	amyloid beta (A4) precursor protein-binding, family B, member 2
hsa-miR-1265	1	0	1	1	1	1	AHCYL1	adenosylhomocysteinase-like 1
hsa-miR-1265	0	0	1	0	0	0	PART1	prostate androgen-regulated transcript 1 (non-protein coding)
hsa-miR-1265	0	0	1	1	1	1	TFDP2	transcription factor Dp-2 (E2F dimerization partner 2)
hsa-miR-1265	1	0	1	0	1	1	SLC2A3	solute carrier family 2 (facilitated glucose transporter), member 3
hsa-miR-1265	1	0	1	1	1	1	TAB2	TGF-beta activated kinase 1/MAP3K7 binding protein 2
hsa-miR-1265	0	0	1	1	0	0	RIMBP3	RIMS binding protein 3
hsa-miR-1265	1	0	1	1	1	1	ARF6	ADP-ribosylation factor 6
hsa-miR-1265	0	0	1	1	1	1	ARIH1	ariadne homolog, ubiquitin-conjugating enzyme E2 binding protein, 1 (Drosophila)
hsa-miR-1265	0	0	1	1	0	0	MSH5	mutS homolog 5 (E. coli)
hsa-miR-1265	0	0	1	1	0	0	SAPCD1	suppressor APC domain containing 1
hsa-miR-1265	0	0	1	0	0	0	TPTE2P6	transmembrane phosphoinositide 3-phosphatase and tensin homolog 2 pseudogene 6
hsa-miR-1265	1	0	1	1	1	1	SMAP2	small ArfGAP2
hsa-miR-1265	0	0	1	0	0	0	DNAJC5B	DnaJ (Hsp40) homolog, subfamily C, member 5 beta
hsa-miR-1265	0	0	1	1	0	0	PCIF1	PDX1 C-terminal inhibiting factor 1
hsa-miR-1265	1	0	1	1	1	1	NBEA	neurobeachin
hsa-miR-1265	1	0	1	0	1	1	GPR85	G protein-coupled receptor 85
hsa-miR-1265	1	0	1	0	1	1	CEP170	centrosomal protein 170kDa
hsa-miR-1265	0	0	1	1	0	0	DOPEY1	dopey family member 1
hsa-miR-1265	0	0	1	0	0	0	FAM66D	family with sequence similarity 66, member D
hsa-miR-1265	1	0	1	1	1	1	USP45	ubiquitin specific peptidase 45
hsa-miR-1265	1	0	1	1	1	1	SLC30A8	solute carrier family 30 (zinc transporter), member 8
hsa-miR-1265	1	0	1	1	1	1	YTHDF3	YTH domain family, member 3
hsa-miR-1265	1	0	1	1	1	1	MIER1	mesoderm induction early response 1 homolog (Xenopus laevis)
hsa-miR-1265	1	0	1	1	1	1	KDM6A	lysine (K)-specific demethylase 6A
hsa-miR-1265	0	0	1	0	0	0	ZNF720	zinc finger protein 720
hsa-miR-1265	1	0	1	1	1	1	FAM126B	family with sequence similarity 126, member B
hsa-miR-1265	1	0	1	0	0	0	YLPM1	YLP motif containing 1
hsa-miR-1265	1	0	1	1	0	0	USP24	ubiquitin specific peptidase 24
hsa-miR-1265	0	0	1	1	1	1	MYPN	myopalladin
hsa-miR-1265	1	0	1	1	1	1	MLL3	myeloid/lymphoid or mixed-lineage leukemia 3
hsa-miR-1265	1	0	1	1	1	1	RNF180	ring finger protein 180
hsa-miR-1265	1	0	1	1	1	1	SBF2	SET binding factor 2
hsa-miR-1265	0	0	1	1	1	1	AMIGO2	adhesion molecule with Ig-like domain 2
hsa-miR-1265	0	0	1	0	1	1	PAPD4	PAP associated domain containing 4
hsa-miR-1265	1	0	1	0	1	1	MEF2C	myocyte enhancer factor 2C
hsa-miR-1265	1	0	1	1	1	1	CAMK4	calcium/calmodulin-dependent protein kinase IV
hsa-miR-1265	0	0	1	0	0	0	LOC286135	uncharacterized LOC286135
hsa-miR-1265	0	0	1	1	1	1	SOAT1	sterol O-acyltransferase 1
hsa-miR-1265	1	0	1	1	1	1	ATAT1	alpha tubulin acetyltransferase 1
hsa-miR-1265	1	0	1	1	1	1	IL17RD	interleukin 17 receptor D
hsa-miR-1265	1	0	1	1	1	1	PRPF38B	PRP38 pre-mRNA processing factor 38 (yeast) domain containing B
hsa-miR-1265	0	0	1	1	1	1	SLC35F2	solute carrier family 35, member F2
hsa-miR-1265	1	0	1	1	1	1	ANKRD49	ankyrin repeat domain 49
hsa-miR-1265	1	0	1	1	1	1	DIS3L2	DIS3 mitotic control homolog (S. cerevisiae)-like 2
hsa-miR-1265	0	0	1	0	1	1	SRR	serine racemase
hsa-miR-1265	1	0	1	1	1	1	ZNF207	zinc finger protein 207
hsa-miR-1265	1	0	1	1	1	1	SET	SET nuclear oncogene
hsa-miR-1265	0	0	1	1	1	1	RBM10	RNA binding motif protein 10
hsa-miR-1265	1	0	1	0	1	1	APOLD1	apolipoprotein L domain containing 1
hsa-miR-1265	1	0	1	1	1	1	RCAN2	regulator of calcineurin 2
hsa-miR-1265	0	0	1	1	1	1	OSR2	odd-skipped related 2 (Drosophila)
hsa-miR-1265	1	0	1	1	1	1	DUSP16	dual specificity phosphatase 16
hsa-miR-1265	0	0	1	1	1	1	CD209	CD209 molecule
hsa-miR-1265	0	0	1	1	1	1	SHPRH	SNF2 histone linker PHD RING helicase, E3 ubiquitin protein ligase
hsa-miR-1265	1	0	1	1	1	1	BCL11A	B-cell CLL/lymphoma 11A (zinc finger protein)
hsa-miR-1265	1	0	1	1	1	1	PBRM1	polybromo 1
hsa-miR-1265	0	0	1	1	1	1	GCOM1	GRINL1A complex locus 1
hsa-miR-1265	1	0	1	0	1	1	AP2B1	adaptor-related protein complex 2, beta 1 subunit
hsa-miR-1265	0	0	1	1	1	1	BRCA1	breast cancer 1, early onset
hsa-miR-1265	0	0	1	1	0	0	LRRC28	leucine rich repeat containing 28
hsa-miR-1265	1	0	1	1	1	1	NLGN4X	neuroligin 4, X-linked
hsa-miR-1265	0	0	1	1	1	1	KDELC2	KDEL (Lys-Asp-Glu-Leu) containing 2
hsa-miR-1265	1	0	1	0	1	1	ANKRD28	ankyrin repeat domain 28
hsa-miR-1265	0	0	1	1	1	1	PLD5	phospholipase D family, member 5
hsa-miR-1265	0	0	1	1	1	1	DIDO1	death inducer-obliterator 1
hsa-miR-1265	0	0	1	1	1	1	HMBOX1	homeobox containing 1
hsa-miR-1265	0	0	1	0	1	1	XKR5	XK, Kell blood group complex subunit-related family, member 5
hsa-miR-1265	1	0	1	1	1	1	MECP2	methyl CpG binding protein 2 (Rett syndrome)
hsa-miR-1265	0	0	1	1	1	1	DIO1	deiodinase, iodothyronine, type I
hsa-miR-1265	0	0	1	1	1	1	SMPD1	sphingomyelin phosphodiesterase 1, acid lysosomal
hsa-miR-1265	1	0	1	1	1	1	PLCH1	phospholipase C, eta 1
hsa-miR-1265	1	0	1	1	1	1	ADAMTS6	ADAM metallopeptidase with thrombospondin type 1 motif, 6
hsa-miR-1265	0	0	1	1	0	0	C15orf61	chromosome 15 open reading frame 61
hsa-miR-1265	1	0	1	1	1	1	MCHR1	melanin-concentrating hormone receptor 1
hsa-miR-1265	0	0	1	1	1	1	RHD	Rh blood group, D antigen
hsa-miR-1265	0	0	1	1	1	1	AGER	advanced glycosylation end product-specific receptor
hsa-miR-1265	1	0	1	1	1	1	PFKFB4	6-phosphofructo-2-kinase/fructose-2,6-biphosphatase 4
hsa-miR-1265	0	0	1	1	1	1	KCNJ13	potassium inwardly-rectifying channel, subfamily J, member 13
hsa-miR-1265	0	0	1	0	0	0	LOC100128076	protein tyrosine phosphatase pseudogene
hsa-miR-1265	1	0	1	1	1	1	MYB	v-myb myeloblastosis viral oncogene homolog (avian)
hsa-miR-1265	0	0	1	0	1	1	KCNE1	potassium voltage-gated channel, Isk-related family, member 1
hsa-miR-1265	0	0	1	0	0	0	PTPRVP	protein tyrosine phosphatase, receptor type, V, pseudogene
hsa-miR-1265	0	0	1	1	1	1	NOLC1	nucleolar and coiled-body phosphoprotein 1
hsa-miR-1265	1	0	1	1	0	0	TAF4B	TAF4b RNA polymerase II, TATA box binding protein (TBP)-associated factor, 105kDa
hsa-miR-1265	0	0	1	1	1	1	IYD	iodotyrosine deiodinase
hsa-miR-1265	1	0	1	1	1	1	AMOT	angiomotin
hsa-miR-1265	0	0	1	1	0	0	TMEM116	transmembrane protein 116
hsa-miR-1265	1	0	1	1	1	1	ARHGAP17	Rho GTPase activating protein 17
hsa-miR-1265	0	0	1	1	1	1	PAFAH1B2	platelet-activating factor acetylhydrolase 1b, catalytic subunit 2 (30kDa)
hsa-miR-1265	0	0	1	1	1	1	RLIM	ring finger protein, LIM domain interacting
hsa-miR-1265	0	0	1	1	1	1	WDR55	WD repeat domain 55
hsa-miR-1265	1	0	1	1	1	1	MYCN	v-myc myelocytomatosis viral related oncogene, neuroblastoma derived (avian)
hsa-miR-1265	1	0	1	1	1	1	RIMS3	regulating synaptic membrane exocytosis 3
hsa-miR-1265	1	0	1	1	1	1	ZNF410	zinc finger protein 410
hsa-miR-1265	1	0	1	1	0	0	POLR3D	polymerase (RNA) III (DNA directed) polypeptide D, 44kDa
hsa-miR-1265	1	0	1	1	1	1	TSEN34	tRNA splicing endonuclease 34 homolog (S. cerevisiae)
hsa-miR-1265	0	0	1	1	0	0	PNLIPRP1	pancreatic lipase-related protein 1
hsa-miR-1265	0	0	1	1	0	0	HAUS1	HAUS augmin-like complex, subunit 1
hsa-miR-1265	0	0	1	1	1	1	LZIC	leucine zipper and CTNNBIP1 domain containing
hsa-miR-1265	0	0	1	1	1	1	DYDC2	DPY30 domain containing 2
hsa-miR-1265	1	0	1	1	1	1	PCGF5	polycomb group ring finger 5
hsa-miR-1265	1	0	1	1	1	1	TRIM39	tripartite motif containing 39
hsa-miR-1265	0	0	1	1	0	0	ANXA8L2	annexin A8-like 2
hsa-miR-1265	0	0	1	1	1	1	TMEM30A	transmembrane protein 30A
hsa-miR-1265	0	0	1	1	1	1	WSCD1	WSC domain containing 1
hsa-miR-1265	1	0	1	1	1	1	SZRD1	SUZ RNA binding domain containing 1
hsa-miR-1265	1	0	1	1	1	1	TRIM2	tripartite motif containing 2
hsa-miR-1265	0	0	1	1	1	1	ZNF587	zinc finger protein 587
hsa-miR-1265	0	0	1	1	1	1	GNL3L	guanine nucleotide binding protein-like 3 (nucleolar)-like
hsa-miR-1265	0	0	1	0	0	0	GRAMD1B	GRAM domain containing 1B
hsa-miR-1265	1	0	1	0	1	1	FNDC3B	fibronectin type III domain containing 3B
hsa-miR-1265	1	0	1	1	1	1	SUPT16H	suppressor of Ty 16 homolog (S. cerevisiae)
hsa-miR-1265	0	0	1	1	1	1	CPNE5	copine V
hsa-miR-1265	1	0	1	1	1	1	RBM7	RNA binding motif protein 7
hsa-miR-1265	0	0	1	1	1	1	H2AFY	H2A histone family, member Y
hsa-miR-1265	0	0	1	1	1	1	PCNP	PEST proteolytic signal containing nuclear protein
hsa-miR-1265	0	0	1	1	0	0	CCDC36	coiled-coil domain containing 36
hsa-miR-1265	1	0	1	1	1	1	PAPOLA	poly(A) polymerase alpha
hsa-miR-1265	0	0	1	1	1	1	GIN1	gypsy retrotransposon integrase 1
hsa-miR-1265	0	0	1	0	1	1	ZNF37A	zinc finger protein 37A
hsa-miR-1265	0	0	1	1	0	0	SARNP	SAP domain containing ribonucleoprotein
hsa-miR-1265	1	0	1	1	1	1	DNAJC14	DnaJ (Hsp40) homolog, subfamily C, member 14
hsa-miR-1265	0	0	1	1	1	1	PARP9	poly (ADP-ribose) polymerase family, member 9
hsa-miR-1265	1	0	1	1	1	1	ARHGEF9	Cdc42 guanine nucleotide exchange factor (GEF) 9
hsa-miR-1265	1	0	1	0	1	1	SLC19A2	solute carrier family 19 (thiamine transporter), member 2
hsa-miR-1265	0	0	1	1	0	0	PTPMT1	protein tyrosine phosphatase, mitochondrial 1
hsa-miR-1265	0	0	1	1	1	1	NELL2	NEL-like 2 (chicken)
hsa-miR-1265	1	0	1	1	1	1	TLN1	talin 1
hsa-miR-1265	1	0	1	1	1	1	TM9SF4	transmembrane 9 superfamily protein member 4
hsa-miR-1265	0	0	1	0	0	0	LOC284260	uncharacterized LOC284260
hsa-miR-1265	1	0	1	1	0	0	TMEM63B	transmembrane protein 63B
hsa-miR-1265	0	0	1	1	1	1	SRGN	serglycin
hsa-miR-1265	0	0	1	1	0	0	SLC22A9	solute carrier family 22 (organic anion transporter), member 9
hsa-miR-1265	1	0	1	1	1	1	SPRYD7	SPRY domain containing 7
hsa-miR-1265	0	0	1	1	1	1	PDE1C	phosphodiesterase 1C, calmodulin-dependent 70kDa
hsa-miR-1265	0	0	1	0	0	0	FLJ35390	uncharacterized LOC255031
hsa-miR-1265	0	0	1	1	1	1	TLR4	toll-like receptor 4
hsa-miR-1265	1	0	1	1	1	1	NIPA1	non imprinted in Prader-Willi/Angelman syndrome 1
hsa-miR-1265	0	0	1	0	0	0	LOC494141	mitochondrial carrier triple repeat 1 pseudogene
hsa-miR-1265	1	0	1	0	1	1	CERS3	ceramide synthase 3
hsa-miR-1265	0	0	1	1	1	1	HS1BP3	HCLS1 binding protein 3
hsa-miR-1265	1	0	1	1	1	1	TMEM127	transmembrane protein 127
hsa-miR-1265	1	0	1	1	1	1	SYT9	synaptotagmin IX
hsa-miR-1265	1	0	1	0	1	1	PSMF1	proteasome (prosome, macropain) inhibitor subunit 1 (PI31)
hsa-miR-1265	0	0	1	0	0	0	BCAS3	breast carcinoma amplified sequence 3
hsa-miR-1265	0	0	1	1	0	0	AGBL3	ATP/GTP binding protein-like 3
hsa-miR-1265	1	0	1	1	1	1	WDR20	WD repeat domain 20
hsa-miR-1265	1	0	1	1	1	1	ADARB1	adenosine deaminase, RNA-specific, B1
hsa-miR-1265	1	0	1	1	1	1	ELAVL2	ELAV (embryonic lethal, abnormal vision, Drosophila)-like 2 (Hu antigen B)
hsa-miR-1265	1	0	1	1	1	1	GABRA1	gamma-aminobutyric acid (GABA) A receptor, alpha 1
hsa-miR-1265	0	0	1	0	1	1	FLJ25328	uncharacterized LOC148231
hsa-miR-1265	1	0	1	1	1	1	PITPNB	phosphatidylinositol transfer protein, beta
hsa-miR-1265	0	0	1	0	0	0	LOC402779	uncharacterized LOC402779
hsa-miR-1265	1	0	1	1	1	1	SPATS2	spermatogenesis associated, serine-rich 2
hsa-miR-1265	0	0	1	1	1	1	CEPT1	choline/ethanolamine phosphotransferase 1
hsa-miR-1265	1	0	1	1	1	1	PMAIP1	phorbol-12-myristate-13-acetate-induced protein 1
hsa-miR-1265	1	0	1	1	1	1	DFFB	DNA fragmentation factor, 40kDa, beta polypeptide (caspase-activated DNase)
hsa-miR-1265	1	0	1	0	1	1	LYPD6	LY6/PLAUR domain containing 6
hsa-miR-1265	1	0	1	1	1	1	PLEKHA7	pleckstrin homology domain containing, family A member 7
hsa-miR-1265	0	0	1	1	1	1	C16orf89	chromosome 16 open reading frame 89
hsa-miR-1265	1	0	1	1	1	1	FAM189B	family with sequence similarity 189, member B
hsa-miR-1265	1	0	1	0	1	1	KIF5A	kinesin family member 5A
hsa-miR-1265	0	0	1	1	1	1	HEXA	hexosaminidase A (alpha polypeptide)
hsa-miR-1265	0	0	1	1	1	1	ZNF337	zinc finger protein 337
hsa-miR-1265	1	0	1	0	1	1	RHOBTB2	Rho-related BTB domain containing 2
hsa-miR-1265	0	0	1	1	1	1	EDA2R	ectodysplasin A2 receptor
hsa-miR-1265	1	0	1	0	1	1	DDX3Y	DEAD (Asp-Glu-Ala-Asp) box polypeptide 3, Y-linked
hsa-miR-1265	0	0	1	0	0	0	TMPRSS12	transmembrane (C-terminal) protease, serine 12
hsa-miR-1265	1	0	1	1	1	1	THRA	thyroid hormone receptor, alpha
hsa-miR-1265	0	0	1	0	0	0	LINC00494	long intergenic non-protein coding RNA 494
hsa-miR-1265	1	0	1	1	0	0	CHST4	carbohydrate (N-acetylglucosamine 6-O) sulfotransferase 4
hsa-miR-1265	0	0	1	1	1	1	ESRP1	epithelial splicing regulatory protein 1
hsa-miR-1265	0	0	1	1	1	1	PIK3CG	phosphatidylinositol-4,5-bisphosphate 3-kinase, catalytic subunit gamma
hsa-miR-1265	0	0	1	1	1	1	C6	complement component 6
hsa-miR-1265	0	0	1	0	0	0	LOC339862	uncharacterized LOC339862
hsa-miR-1265	1	0	1	1	1	1	IMPACT	Impact homolog (mouse)
hsa-miR-1265	0	0	1	1	1	1	DUSP28	dual specificity phosphatase 28
hsa-miR-1265	1	0	1	1	1	1	SLC35G1	solute carrier family 35, member G1
hsa-miR-1265	1	0	1	1	1	1	HECTD2	HECT domain containing E3 ubiquitin protein ligase 2
hsa-miR-1265	0	0	1	1	1	1	TADA1	transcriptional adaptor 1
hsa-miR-1265	1	0	1	0	1	1	CLDN12	claudin 12
hsa-miR-1265	1	0	1	0	1	1	CPEB4	cytoplasmic polyadenylation element binding protein 4
hsa-miR-1265	0	0	1	0	0	0	CYP4F35P	cytochrome P450, family 4, subfamily F, polypeptide 35, pseudogene
hsa-miR-1265	1	0	1	1	1	1	FAM135B	family with sequence similarity 135, member B
hsa-miR-1265	0	0	1	0	0	0	LOC286184	uncharacterized LOC286184
hsa-miR-1265	1	0	1	1	1	1	SOX6	SRY (sex determining region Y)-box 6
hsa-miR-1265	0	0	1	0	0	0	MGC42157	uncharacterized locus MGC42157
hsa-miR-1265	0	0	1	0	0	0	INHBA-AS1	INHBA antisense RNA 1
hsa-miR-1265	1	0	1	1	1	1	GALNT1	UDP-N-acetyl-alpha-D-galactosamine:polypeptide N-acetylgalactosaminyltransferase 1 (GalNAc-T1)
hsa-miR-1265	1	0	1	0	1	1	ARID2	AT rich interactive domain 2 (ARID, RFX-like)
hsa-miR-1265	0	0	1	1	1	1	C14orf118	chromosome 14 open reading frame 118
hsa-miR-1265	1	0	1	1	1	1	PRR16	proline rich 16
hsa-miR-1265	0	0	1	0	0	0	FLJ36000	uncharacterized FLJ36000
hsa-miR-1265	1	0	1	1	1	1	NFYA	nuclear transcription factor Y, alpha
hsa-miR-1265	0	0	1	1	0	0	ADAMTS13	ADAM metallopeptidase with thrombospondin type 1 motif, 13
hsa-miR-1265	0	0	1	1	1	1	CACHD1	cache domain containing 1
hsa-miR-1265	0	0	1	0	0	0	USP32P1	ubiquitin specific peptidase 32 pseudogene 1
hsa-miR-1265	1	0	1	0	1	1	LPHN3	latrophilin 3
hsa-miR-1265	0	0	1	0	0	0	DLGAP1-AS3	DLGAP1 antisense RNA 3
hsa-miR-1265	1	0	1	1	1	1	FOSB	FBJ murine osteosarcoma viral oncogene homolog B
hsa-miR-1265	1	0	1	1	1	1	DACH2	dachshund homolog 2 (Drosophila)
hsa-miR-1265	0	0	1	0	0	0	LOC339622	uncharacterized LOC339622
hsa-miR-1265	0	0	1	0	0	0	LOC339240	keratin 17 pseudogene
hsa-miR-1265	0	0	1	1	1	1	FAM71F1	family with sequence similarity 71, member F1
hsa-miR-1265	0	0	1	1	1	1	PCMTD2	protein-L-isoaspartate (D-aspartate) O-methyltransferase domain containing 2
hsa-miR-1265	1	0	1	1	0	0	RGL2	ral guanine nucleotide dissociation stimulator-like 2
hsa-miR-1265	0	0	1	0	1	1	FAM13B	family with sequence similarity 13, member B
hsa-miR-1265	1	0	1	0	1	1	HSPA12A	heat shock 70kDa protein 12A
hsa-miR-1265	0	0	1	0	1	1	PDGFC	platelet derived growth factor C
hsa-miR-1265	1	0	1	0	1	1	TNFAIP3	tumor necrosis factor, alpha-induced protein 3
hsa-miR-1265	1	0	1	1	1	1	CLOCK	clock homolog (mouse)
hsa-miR-1265	0	0	1	0	0	0	LOC338579	ankyrin repeat domain-containing protein 30B pseudogene
hsa-miR-1265	0	0	1	0	0	0	LOC646168	uncharacterized LOC646168
hsa-miR-1265	0	0	1	0	0	0	DKFZp686O1327	uncharacterized LOC401014
hsa-miR-1265	1	0	1	1	1	1	MAMDC2	MAM domain containing 2
hsa-miR-1265	1	0	1	1	1	1	SF3B1	splicing factor 3b, subunit 1, 155kDa
hsa-miR-1265	0	0	1	1	0	0	LILRA1	leukocyte immunoglobulin-like receptor, subfamily A (with TM domain), member 1
hsa-miR-1265	1	0	1	1	1	1	HSDL2	hydroxysteroid dehydrogenase like 2
hsa-miR-1265	0	0	1	1	1	1	DDX4	DEAD (Asp-Glu-Ala-Asp) box polypeptide 4
hsa-miR-1265	0	0	1	0	0	0	LOC348120	uncharacterized LOC348120
hsa-miR-1265	0	0	1	0	0	0	DPY19L2P4	dpy-19-like 2 pseudogene 4 (C. elegans)
hsa-miR-1265	0	0	1	1	0	0	CDA	cytidine deaminase
hsa-miR-1265	0	0	1	1	1	1	ZNF589	zinc finger protein 589
hsa-miR-1265	1	0	1	1	1	1	CLVS1	clavesin 1
hsa-miR-1265	0	0	1	0	1	1	ITGA1	integrin, alpha 1
hsa-miR-1265	0	0	1	0	0	0	AURKAPS1	aurora kinase A pseudogene 1
hsa-miR-1265	1	0	1	1	1	1	LARP1B	La ribonucleoprotein domain family, member 1B
hsa-miR-1265	1	0	1	1	1	1	FNDC3A	fibronectin type III domain containing 3A
hsa-miR-1265	1	0	1	0	1	1	SEMA4G	sema domain, immunoglobulin domain (Ig), transmembrane domain (TM) and short cytoplasmic domain, (semaphorin) 4G
hsa-miR-1265	0	0	1	1	1	1	LINC00086	long intergenic non-protein coding RNA 86
hsa-miR-1265	0	0	1	1	1	1	RHOT1	ras homolog family member T1
hsa-miR-1265	1	0	1	1	1	1	SCUBE3	signal peptide, CUB domain, EGF-like 3
hsa-miR-1265	1	0	1	0	1	1	C14orf43	chromosome 14 open reading frame 43
hsa-miR-1265	1	0	1	1	1	1	OLFML2A	olfactomedin-like 2A
hsa-miR-1265	0	0	1	1	0	0	ABHD1	abhydrolase domain containing 1
hsa-miR-1265	0	0	1	1	0	0	BCL7C	B-cell CLL/lymphoma 7C
hsa-miR-1265	0	0	1	1	1	1	SPAG9	sperm associated antigen 9
hsa-miR-1265	1	0	1	1	1	1	SOX5	SRY (sex determining region Y)-box 5
hsa-miR-1265	0	0	1	0	0	0	TEX36	testis expressed 36
hsa-miR-1265	0	0	1	1	0	0	LRRIQ3	leucine-rich repeats and IQ motif containing 3
hsa-miR-1265	1	0	1	1	1	1	CLK4	CDC-like kinase 4
hsa-miR-1265	0	0	1	1	1	1	P2RX6	purinergic receptor P2X, ligand-gated ion channel, 6
hsa-miR-1265	0	0	1	1	1	1	KIAA1009	KIAA1009
hsa-miR-1265	0	0	1	0	0	0	SCAND2	SCAN domain containing 2 pseudogene
hsa-miR-1265	1	0	1	1	1	1	NIPBL	Nipped-B homolog (Drosophila)
hsa-miR-1265	0	0	1	1	1	1	ZNF333	zinc finger protein 333
hsa-miR-1265	1	0	1	1	1	1	MYLK	myosin light chain kinase
hsa-miR-1265	1	0	1	1	1	1	GANAB	glucosidase, alpha; neutral AB
hsa-miR-1265	1	0	1	1	1	1	RAVER2	ribonucleoprotein, PTB-binding 2
hsa-miR-1265	1	0	1	1	1	1	LMO4	LIM domain only 4
hsa-miR-1265	1	0	1	1	1	1	C18orf1	chromosome 18 open reading frame 1
hsa-miR-1265	1	0	1	1	1	1	FAM129B	family with sequence similarity 129, member B
hsa-miR-1265	0	0	1	0	0	0	LEF1-AS1	LEF1 antisense RNA 1
hsa-miR-1265	0	0	1	0	0	0	PABPC1P2	poly(A) binding protein, cytoplasmic 1 pseudogene 2
hsa-miR-1265	1	0	1	1	1	1	PDCD6IP	programmed cell death 6 interacting protein
hsa-miR-1265	0	0	1	1	1	1	AQPEP	laeverin
hsa-miR-1265	0	0	1	0	0	0	FLJ12334	uncharacterized LOC400946
hsa-miR-1265	0	0	1	1	1	1	TTLL9	tubulin tyrosine ligase-like family, member 9
hsa-miR-1265	1	0	1	1	1	1	EED	embryonic ectoderm development
hsa-miR-1265	0	0	1	0	1	1	LOC728228	uncharacterized LOC728228
hsa-miR-1265	0	0	1	0	0	0	C17orf69	chromosome 17 open reading frame 69
hsa-miR-1265	0	0	1	1	0	0	CYP4F30P	cytochrome P450, family 4, subfamily F, polypeptide 30, pseudogene
hsa-miR-1265	1	0	1	1	0	0	CHTOP	chromatin target of PRMT1
hsa-miR-1265	1	0	1	1	1	1	AHR	aryl hydrocarbon receptor
hsa-miR-1265	0	0	1	1	0	0	NDUFAF2	NADH dehydrogenase (ubiquinone) complex I, assembly factor 2
hsa-miR-1265	0	0	1	0	0	0	ULK4P1	unc-51-like kinase 4 (C. elegans) pseudogene 1
hsa-miR-1265	0	0	1	1	1	1	PCDH18	protocadherin 18
hsa-miR-1265	1	0	1	0	1	1	TMEM194A	transmembrane protein 194A
hsa-miR-1265	0	0	1	0	0	0	ULK4P3	unc-51-like kinase 4 (C. elegans) pseudogene 3
hsa-miR-1265	1	0	1	1	1	1	LOXL3	lysyl oxidase-like 3
hsa-miR-1265	0	0	1	0	0	0	LOC440416	uncharacterized LOC440416
hsa-miR-1265	0	0	1	1	0	0	C8orf31	chromosome 8 open reading frame 31
hsa-miR-1265	0	0	1	0	1	1	SH3RF2	SH3 domain containing ring finger 2
hsa-miR-1265	1	0	1	1	1	1	OPCML	opioid binding protein/cell adhesion molecule-like
hsa-miR-1265	1	0	1	1	1	1	WNT5A	wingless-type MMTV integration site family, member 5A
hsa-miR-1265	1	0	1	1	1	1	NTRK2	neurotrophic tyrosine kinase, receptor, type 2
hsa-miR-1265	0	0	1	1	1	1	C3orf67	chromosome 3 open reading frame 67
hsa-miR-1265	1	0	1	0	1	1	AMMECR1L	AMME chromosomal region gene 1-like
hsa-miR-1265	0	0	1	0	0	0	LINC00537	long intergenic non-protein coding RNA 537
hsa-miR-1265	0	0	1	1	0	0	HEATR8	HEAT repeat containing 8
hsa-miR-1265	0	0	1	0	0	0	FRG1B	FSHD region gene 1 family, member B
hsa-miR-1265	1	0	1	1	1	1	ST8SIA2	ST8 alpha-N-acetyl-neuraminide alpha-2,8-sialyltransferase 2
hsa-miR-1265	0	0	1	1	1	1	KLRF1	killer cell lectin-like receptor subfamily F, member 1
hsa-miR-1265	0	0	1	0	0	0	ABCA11P	ATP-binding cassette, sub-family A (ABC1), member 11, pseudogene
hsa-miR-1265	0	0	1	1	0	0	EDDM3A	epididymal protein 3A
hsa-miR-1265	1	0	1	1	1	1	SYNJ1	synaptojanin 1
hsa-miR-1265	0	0	1	1	1	1	COL8A2	collagen, type VIII, alpha 2
hsa-miR-1265	0	0	1	1	0	0	RGL4	ral guanine nucleotide dissociation stimulator-like 4
hsa-miR-1265	1	0	1	1	1	1	IL28RA	interleukin 28 receptor, alpha (interferon, lambda receptor)
hsa-miR-1265	1	0	1	1	1	1	HNRNPA1	heterogeneous nuclear ribonucleoprotein A1
hsa-miR-1265	1	0	1	0	1	1	CPEB2	cytoplasmic polyadenylation element binding protein 2
hsa-miR-1265	0	0	1	1	0	0	TMC1	transmembrane channel-like 1
hsa-miR-1265	0	0	1	1	1	1	CCDC126	coiled-coil domain containing 126
hsa-miR-1265	1	0	1	0	0	0	PWWP2A	PWWP domain containing 2A
hsa-miR-1265	1	0	1	1	1	1	GABRB2	gamma-aminobutyric acid (GABA) A receptor, beta 2
hsa-miR-1265	0	0	1	0	0	0	FAM71F2	family with sequence similarity 71, member F2
hsa-miR-1265	1	0	1	1	1	1	KLHL17	kelch-like 17 (Drosophila)
hsa-miR-1265	0	0	1	1	0	0	TMEM95	transmembrane protein 95
hsa-miR-1265	0	0	1	1	1	1	DET1	de-etiolated homolog 1 (Arabidopsis)
hsa-miR-1265	0	0	1	1	0	0	SLC17A4	solute carrier family 17 (sodium phosphate), member 4
hsa-miR-1265	1	0	1	0	1	1	BTBD3	BTB (POZ) domain containing 3
hsa-miR-1265	0	0	1	0	0	0	PHGR1	proline/histidine/glycine-rich 1
hsa-miR-1265	1	0	1	1	1	1	HNRNPR	heterogeneous nuclear ribonucleoprotein R
hsa-miR-1265	0	0	1	1	0	0	GKN2	gastrokine 2
hsa-miR-1265	0	0	1	0	0	0	LRRC37A11P	leucine rich repeat containing 37, member A11, pseudogene
hsa-miR-1265	0	0	1	1	1	1	FSHB	follicle stimulating hormone, beta polypeptide
hsa-miR-1265	0	0	1	0	0	0	OR1D4	olfactory receptor, family 1, subfamily D, member 4 (gene/pseudogene)
hsa-miR-1265	0	0	1	0	0	0	LINC00266-1	long intergenic non-protein coding RNA 266-1
hsa-miR-1265	0	0	1	0	1	1	GOLGA8G	golgin A8 family, member G
hsa-miR-1265	1	0	1	1	1	1	CHIC1	cysteine-rich hydrophobic domain 1
hsa-miR-1265	0	0	1	1	0	0	DZANK1	double zinc ribbon and ankyrin repeat domains 1
hsa-miR-1265	0	0	1	0	1	1	PPIAL4G	peptidylprolyl isomerase A (cyclophilin A)-like 4G
hsa-miR-1265	0	0	1	1	1	1	UCHL5	ubiquitin carboxyl-terminal hydrolase L5
hsa-miR-1265	0	0	1	0	0	0	MEG3	maternally expressed 3 (non-protein coding)
hsa-miR-1265	0	0	1	1	1	1	TINF2	TERF1 (TRF1)-interacting nuclear factor 2
hsa-miR-1265	1	0	1	1	1	1	CHGA	chromogranin A (parathyroid secretory protein 1)
hsa-miR-1265	1	0	1	1	1	1	SASH1	SAM and SH3 domain containing 1
hsa-miR-1265	1	0	1	1	1	1	MIER3	mesoderm induction early response 1, family member 3
hsa-miR-1265	1	0	1	0	1	1	MTX3	metaxin 3
hsa-miR-1265	0	0	1	1	1	1	PDZRN4	PDZ domain containing ring finger 4
hsa-miR-1265	1	0	1	0	1	1	CLASP2	cytoplasmic linker associated protein 2
hsa-miR-1265	1	0	1	1	1	1	SLC35F1	solute carrier family 35, member F1
hsa-miR-1265	1	0	1	1	1	1	TJP1	tight junction protein 1
hsa-miR-1265	0	0	1	1	1	1	GLIPR1L2	GLI pathogenesis-related 1 like 2
hsa-miR-1265	1	0	1	1	1	1	CSGALNACT2	chondroitin sulfate N-acetylgalactosaminyltransferase 2
hsa-miR-1265	0	0	1	0	0	0	PCNXL3	pecanex-like 3 (Drosophila)
hsa-miR-1265	0	0	1	1	1	1	MAP2K6	mitogen-activated protein kinase kinase 6
hsa-miR-1265	0	0	1	1	1	1	COL6A3	collagen, type VI, alpha 3
hsa-miR-1265	0	0	1	0	1	1	NHSL1	NHS-like 1
hsa-miR-1265	0	0	1	1	1	1	C5orf45	chromosome 5 open reading frame 45
hsa-miR-1265	0	0	1	0	1	1	TYW5	tRNA-yW synthesizing protein 5
hsa-miR-1265	1	0	1	1	1	1	USP6	ubiquitin specific peptidase 6 (Tre-2 oncogene)
hsa-miR-1265	0	0	1	1	1	1	HTR2A	5-hydroxytryptamine (serotonin) receptor 2A, G protein-coupled
hsa-miR-1265	0	0	1	1	1	1	ARMCX3	armadillo repeat containing, X-linked 3
hsa-miR-1265	1	0	1	1	1	1	TC2N	tandem C2 domains, nuclear
hsa-miR-1265	0	0	1	1	1	1	DDX21	DEAD (Asp-Glu-Ala-Asp) box helicase 21
hsa-miR-1265	0	0	1	0	0	0	ZNRD1-AS1	ZNRD1 antisense RNA 1
hsa-miR-1265	1	0	1	1	1	1	WLS	wntless homolog (Drosophila)
hsa-miR-1265	1	0	1	1	1	1	HIF1A	hypoxia inducible factor 1, alpha subunit (basic helix-loop-helix transcription factor)
hsa-miR-1265	1	0	1	1	1	1	CREB3L2	cAMP responsive element binding protein 3-like 2
hsa-miR-1265	1	0	1	0	1	1	TTL	tubulin tyrosine ligase
hsa-miR-1265	0	0	1	0	1	1	CD59	CD59 molecule, complement regulatory protein
hsa-miR-1265	1	0	1	0	1	1	RNF144A	ring finger protein 144A
hsa-miR-1265	1	0	1	0	0	0	IGLON5	IgLON family member 5
hsa-miR-1265	1	0	1	1	1	1	RSBN1L	round spermatid basic protein 1-like
hsa-miR-1265	0	0	1	1	1	1	TBC1D10A	TBC1 domain family, member 10A
hsa-miR-1265	1	0	1	1	1	1	FUT9	fucosyltransferase 9 (alpha (1,3) fucosyltransferase)
hsa-miR-1265	1	0	1	1	1	1	FAM192A	family with sequence similarity 192, member A
hsa-miR-1265	0	0	1	0	0	0	RPS16P10	ribosomal protein S16 pseudogene 10
hsa-miR-1265	0	0	1	0	0	0	FLJ30838	uncharacterized LOC400955
hsa-miR-1265	1	0	1	1	1	1	MMAB	methylmalonic aciduria (cobalamin deficiency) cblB type
hsa-miR-1265	1	0	1	1	1	1	EIF4B	eukaryotic translation initiation factor 4B
hsa-miR-1265	1	0	1	1	1	1	LETMD1	LETM1 domain containing 1
hsa-miR-1265	0	0	1	1	1	1	MMADHC	methylmalonic aciduria (cobalamin deficiency) cblD type, with homocystinuria
hsa-miR-1265	0	0	1	1	1	1	CIRBP	cold inducible RNA binding protein
hsa-miR-1265	1	1	1	1	0	0	EFNA3	ephrin-A3
hsa-miR-1265	1	0	1	1	0	0	LOXL1	lysyl oxidase-like 1
hsa-miR-1265	0	0	1	1	1	1	TCEA2	transcription elongation factor A (SII), 2
hsa-miR-1265	0	0	1	1	1	1	COPS7A	COP9 constitutive photomorphogenic homolog subunit 7A (Arabidopsis)
hsa-miR-1265	0	0	1	1	1	1	MRPS36	mitochondrial ribosomal protein S36
hsa-miR-1265	0	0	1	1	0	0	MYL6	myosin, light chain 6, alkali, smooth muscle and non-muscle
hsa-miR-1265	1	0	1	1	1	1	CDK7	cyclin-dependent kinase 7
hsa-miR-1265	0	0	1	1	1	1	SMYD3	SET and MYND domain containing 3
hsa-miR-1265	1	0	1	1	1	1	MBNL1	muscleblind-like splicing regulator 1
hsa-miR-1265	0	0	1	1	1	1	CCDC115	coiled-coil domain containing 115
hsa-miR-1265	0	0	1	1	0	0	EMC7	ER membrane protein complex subunit 7
hsa-miR-1265	0	0	1	1	1	1	STON1	stonin 1
hsa-miR-1265	0	0	1	1	1	1	PGAP2	post-GPI attachment to proteins 2
hsa-miR-1265	0	0	1	0	1	1	MMAA	methylmalonic aciduria (cobalamin deficiency) cblA type
hsa-miR-1265	1	0	1	1	1	1	ARFIP2	ADP-ribosylation factor interacting protein 2
hsa-miR-1265	0	0	1	1	0	0	CD38	CD38 molecule
hsa-miR-1265	0	0	1	0	1	1	TMEM155	transmembrane protein 155
hsa-miR-1265	0	0	1	1	1	1	B3GNT3	UDP-GlcNAc:betaGal beta-1,3-N-acetylglucosaminyltransferase 3
hsa-miR-1265	0	0	1	1	1	1	CPZ	carboxypeptidase Z
hsa-miR-1265	0	0	1	1	1	1	CXCL16	chemokine (C-X-C motif) ligand 16
hsa-miR-1265	1	0	1	1	1	1	CAMK2A	calcium/calmodulin-dependent protein kinase II alpha
hsa-miR-1265	1	0	1	1	1	1	NT5DC1	5'-nucleotidase domain containing 1
hsa-miR-1265	1	0	1	0	1	1	NLN	neurolysin (metallopeptidase M3 family)
hsa-miR-1265	1	0	1	1	1	1	TIMP3	TIMP metallopeptidase inhibitor 3
hsa-miR-1265	0	0	1	0	1	1	SUMO2	SMT3 suppressor of mif two 3 homolog 2 (S. cerevisiae)
hsa-miR-1265	1	0	1	1	1	1	METAP2	methionyl aminopeptidase 2
hsa-miR-1265	0	0	1	1	1	1	TCTN3	tectonic family member 3
hsa-miR-1265	1	0	1	1	1	1	ANAPC16	anaphase promoting complex subunit 16
hsa-miR-1265	1	0	1	1	1	1	NFYB	nuclear transcription factor Y, beta
hsa-miR-1265	0	0	1	1	0	0	ZNF511	zinc finger protein 511
hsa-miR-1265	0	0	1	1	0	0	FXYD1	FXYD domain containing ion transport regulator 1
hsa-miR-1265	1	0	1	1	0	0	CRELD1	cysteine-rich with EGF-like domains 1
hsa-miR-1265	1	0	1	1	1	1	RPUSD3	RNA pseudouridylate synthase domain containing 3
hsa-miR-1265	1	0	1	1	1	1	RALY	RNA binding protein, autoantigenic (hnRNP-associated with lethal yellow homolog (mouse))
hsa-miR-1265	1	0	1	1	1	1	VLDLR	very low density lipoprotein receptor
hsa-miR-1265	1	0	1	1	1	1	TRAPPC3	trafficking protein particle complex 3
hsa-miR-1265	0	0	1	0	0	0	NUDT18	nudix (nucleoside diphosphate linked moiety X)-type motif 18
hsa-miR-1265	0	0	1	0	0	0	LOC650368	asparagine-linked glycosylation 1-like pseudogene
hsa-miR-1265	1	0	1	1	1	1	ATPAF1	ATP synthase mitochondrial F1 complex assembly factor 1
hsa-miR-1265	0	0	1	1	1	1	ZNF75D	zinc finger protein 75D
hsa-miR-1265	0	0	1	1	0	0	TTYH1	tweety homolog 1 (Drosophila)
hsa-miR-1265	0	0	1	1	0	0	KAT8	K(lysine) acetyltransferase 8
hsa-miR-1265	1	0	1	1	1	1	LGALSL	lectin, galactoside-binding-like
hsa-miR-1265	1	0	1	1	1	1	STAG2	stromal antigen 2
hsa-miR-1265	0	0	1	1	1	1	CCP110	centriolar coiled coil protein 110kDa
hsa-miR-1265	0	0	1	1	1	1	ISX	intestine-specific homeobox
hsa-miR-1265	1	0	1	1	1	1	NKTR	natural killer-tumor recognition sequence
hsa-miR-1265	1	0	1	1	1	1	KIAA2018	KIAA2018
hsa-miR-1265	1	0	1	0	1	1	SLC7A6	solute carrier family 7 (amino acid transporter light chain, y+L system), member 6
hsa-miR-1265	1	0	1	0	1	1	OSBPL8	oxysterol binding protein-like 8
hsa-miR-1265	1	0	1	0	1	1	MCFD2	multiple coagulation factor deficiency 2
hsa-miR-1265	1	0	1	1	1	1	SLC39A10	solute carrier family 39 (zinc transporter), member 10
hsa-miR-1265	1	0	1	0	1	1	CNTNAP2	contactin associated protein-like 2
hsa-miR-1265	1	0	1	0	1	1	ZNF652	zinc finger protein 652
hsa-miR-1265	1	0	1	1	1	1	BCL2L1	BCL2-like 1
hsa-miR-1265	1	0	1	1	1	1	SP2	Sp2 transcription factor
hsa-miR-1265	1	0	1	1	1	1	PI15	peptidase inhibitor 15
hsa-miR-1265	1	0	1	1	1	1	RB1CC1	RB1-inducible coiled-coil 1
hsa-miR-1265	1	0	1	0	1	1	KLHDC10	kelch domain containing 10
hsa-miR-1265	1	0	1	1	1	1	ATP2B3	ATPase, Ca++ transporting, plasma membrane 3
hsa-miR-1265	0	0	1	0	0	0	FAM92A1	family with sequence similarity 92, member A1
hsa-miR-1265	0	0	1	1	1	1	P2RX7	purinergic receptor P2X, ligand-gated ion channel, 7
hsa-miR-1265	1	0	1	1	1	1	ITSN1	intersectin 1 (SH3 domain protein)
hsa-miR-1265	1	0	1	1	1	1	TNFAIP1	tumor necrosis factor, alpha-induced protein 1 (endothelial)
hsa-miR-1265	1	0	1	1	1	1	SLC4A8	solute carrier family 4, sodium bicarbonate cotransporter, member 8
hsa-miR-1265	0	0	1	1	1	1	ALDH3B1	aldehyde dehydrogenase 3 family, member B1
hsa-miR-1265	1	0	1	1	1	1	ATP2B2	ATPase, Ca++ transporting, plasma membrane 2
hsa-miR-1265	0	0	1	0	0	0	CTSL1P2	cathepsin L1 pseudogene 2
hsa-miR-1265	1	0	1	0	1	1	STAT3	signal transducer and activator of transcription 3 (acute-phase response factor)
hsa-miR-1265	0	0	1	0	1	1	OPRK1	opioid receptor, kappa 1
hsa-miR-1265	1	0	1	0	1	1	BCL2	B-cell CLL/lymphoma 2
hsa-miR-1265	0	0	1	1	1	1	CD55	CD55 molecule, decay accelerating factor for complement (Cromer blood group)
hsa-miR-1265	0	0	1	1	1	1	ELF1	E74-like factor 1 (ets domain transcription factor)
hsa-miR-1265	1	0	1	1	1	1	CD44	CD44 molecule (Indian blood group)
hsa-miR-1265	0	0	1	1	1	1	ERCC8	excision repair cross-complementing rodent repair deficiency, complementation group 8
hsa-miR-1265	1	0	1	1	1	1	COL3A1	collagen, type III, alpha 1
hsa-miR-1265	1	0	1	1	1	1	COL4A3	collagen, type IV, alpha 3 (Goodpasture antigen)
hsa-miR-1265	1	0	1	1	1	1	COL4A4	collagen, type IV, alpha 4
hsa-miR-1265	1	0	1	1	1	1	DMD	dystrophin
hsa-miR-1265	1	0	1	0	1	1	G6PC	glucose-6-phosphatase, catalytic subunit
hsa-miR-1265	1	0	1	1	1	1	GK	glycerol kinase
hsa-miR-1265	0	0	1	1	1	1	KRT12	keratin 12
hsa-miR-1265	1	0	1	1	1	1	MET	met proto-oncogene (hepatocyte growth factor receptor)
hsa-miR-1265	0	0	1	0	1	1	PGK1	phosphoglycerate kinase 1
hsa-miR-1265	1	0	1	0	1	1	PTEN	phosphatase and tensin homolog
hsa-miR-1265	0	0	1	1	1	1	PTS	6-pyruvoyltetrahydropterin synthase
hsa-miR-1265	0	0	1	1	1	1	SLC5A1	solute carrier family 5 (sodium/glucose cotransporter), member 1
hsa-miR-1265	0	0	1	1	1	1	SLC25A20	solute carrier family 25 (carnitine/acylcarnitine translocase), member 20
hsa-miR-1265	0	0	1	1	0	0	IL2RA	interleukin 2 receptor, alpha
hsa-miR-1265	0	0	1	1	0	0	KEL	Kell blood group, metallo-endopeptidase
hsa-miR-1265	1	0	1	0	1	1	PAFAH1B1	platelet-activating factor acetylhydrolase 1b, regulatory subunit 1 (45kDa)
hsa-miR-1265	1	0	1	0	1	1	PCSK1	proprotein convertase subtilisin/kexin type 1
hsa-miR-1265	0	0	1	1	1	1	PECAM1	platelet/endothelial cell adhesion molecule 1
hsa-miR-1265	1	0	1	0	1	1	RAG1	recombination activating gene 1
hsa-miR-1265	1	0	1	1	1	1	HNF1B	HNF1 homeobox B
hsa-miR-1265	1	0	1	1	1	1	MPZ	myelin protein zero
hsa-miR-1265	1	0	1	1	1	1	DCX	doublecortin
hsa-miR-1265	0	0	1	1	1	1	GSR	glutathione reductase
hsa-miR-1265	1	0	1	0	1	1	ABAT	4-aminobutyrate aminotransferase
hsa-miR-1265	0	0	1	1	1	1	AGTR2	angiotensin II receptor, type 2
hsa-miR-1265	0	0	1	1	1	1	ALDH1B1	aldehyde dehydrogenase 1 family, member B1
hsa-miR-1265	0	0	1	1	1	1	CRAT	carnitine O-acetyltransferase
hsa-miR-1265	1	0	1	1	1	1	DIO2	deiodinase, iodothyronine, type II
hsa-miR-1265	1	0	1	0	1	1	GABRA4	gamma-aminobutyric acid (GABA) A receptor, alpha 4
hsa-miR-1265	1	0	1	1	1	1	GABRB3	gamma-aminobutyric acid (GABA) A receptor, beta 3
hsa-miR-1265	1	0	1	1	0	0	PDE3A	phosphodiesterase 3A, cGMP-inhibited
hsa-miR-1265	1	0	1	1	1	1	PPP3R1	protein phosphatase 3, regulatory subunit B, alpha
hsa-miR-1265	1	0	1	1	1	1	RARA	retinoic acid receptor, alpha
hsa-miR-1265	1	0	1	0	1	1	ATP2B1	ATPase, Ca++ transporting, plasma membrane 1
hsa-miR-1265	0	0	1	1	1	1	C16orf87	chromosome 16 open reading frame 87
hsa-miR-1265	1	0	1	1	1	1	RORC	RAR-related orphan receptor C
hsa-miR-1265	1	0	1	0	1	1	SPOPL	speckle-type POZ protein-like
hsa-miR-1265	0	0	1	1	1	1	FLJ45079	FLJ45079 protein
hsa-miR-1265	1	0	1	0	1	1	PLEKHA1	pleckstrin homology domain containing, family A (phosphoinositide binding specific) member 1
hsa-miR-1265	1	0	1	1	0	0	AWAT2	acyl-CoA wax alcohol acyltransferase 2
hsa-miR-1265	0	0	1	1	1	1	SUMO4	SMT3 suppressor of mif two 3 homolog 4 (S. cerevisiae)
hsa-miR-1265	1	0	1	1	1	1	GATA3	GATA binding protein 3
hsa-miR-1265	0	0	1	0	0	0	OR8G1	olfactory receptor, family 8, subfamily G, member 1
hsa-miR-1265	1	0	1	0	1	1	SMAD2	SMAD family member 2
hsa-miR-1265	0	0	1	1	1	1	CCDC144NL	coiled-coil domain containing 144 family, N-terminal like
hsa-miR-1265	0	0	1	0	1	1	FLJ16124	FLJ16124 protein
hsa-miR-1265	0	0	1	1	1	1	FRG2	FSHD region gene 2
hsa-miR-1265	1	0	1	1	0	0	MAGED1	melanoma antigen family D, 1
hsa-miR-1265	0	0	1	1	1	1	ZWINT	ZW10 interactor
hsa-miR-1265	1	0	1	1	1	1	PLCXD3	phosphatidylinositol-specific phospholipase C, X domain containing 3
hsa-miR-1265	0	0	1	1	1	1	RYK	receptor-like tyrosine kinase
hsa-miR-1265	1	0	1	1	1	1	ATN1	atrophin 1
hsa-miR-1265	1	0	1	1	1	1	SPOP	speckle-type POZ protein
hsa-miR-1265	1	0	1	0	1	1	CPLX2	complexin 2
hsa-miR-1265	0	0	1	1	1	1	UACA	uveal autoantigen with coiled-coil domains and ankyrin repeats
hsa-miR-1265	1	0	1	1	1	1	CTDSPL	CTD (carboxy-terminal domain, RNA polymerase II, polypeptide A) small phosphatase-like
hsa-miR-1265	1	0	1	1	1	1	RBM33	RNA binding motif protein 33
hsa-miR-1265	1	0	1	0	1	1	KIAA2022	KIAA2022
hsa-miR-1265	0	0	1	1	0	0	TCOF1	Treacher Collins-Franceschetti syndrome 1
hsa-miR-1265	1	0	1	1	1	1	FNIP1	folliculin interacting protein 1
hsa-miR-1265	0	0	1	1	1	1	GEMIN2	gem (nuclear organelle) associated protein 2
hsa-miR-1265	1	0	1	1	1	1	ARHGAP28	Rho GTPase activating protein 28
hsa-miR-1265	0	0	1	1	0	0	CLVS2	clavesin 2
hsa-miR-1265	1	0	1	0	1	1	ZC3H12B	zinc finger CCCH-type containing 12B
hsa-miR-1265	0	0	1	1	1	1	NCMAP	noncompact myelin associated protein
hsa-miR-1265	0	0	1	0	1	1	GOLGA8E	golgin A8 family, member E
hsa-miR-1265	0	0	1	0	1	1	C9orf106	chromosome 9 open reading frame 106
hsa-miR-1265	1	0	1	1	1	1	SORCS1	sortilin-related VPS10 domain containing receptor 1
hsa-miR-1265	1	0	1	1	1	1	TRNP1	TMF1-regulated nuclear protein 1
hsa-miR-1265	0	0	1	1	1	1	C2orf68	chromosome 2 open reading frame 68
hsa-miR-1265	1	0	1	1	1	1	KCNMA1	potassium large conductance calcium-activated channel, subfamily M, alpha member 1
hsa-miR-1265	1	0	1	1	1	1	TMCC1	transmembrane and coiled-coil domain family 1
hsa-miR-1265	1	0	1	0	1	1	GOPC	golgi-associated PDZ and coiled-coil motif containing
hsa-miR-1265	0	0	1	1	1	1	RAB28	RAB28, member RAS oncogene family
hsa-miR-1265	0	0	1	1	1	1	ACTBL2	actin, beta-like 2
hsa-miR-1265	1	0	1	1	1	1	SORBS3	sorbin and SH3 domain containing 3
hsa-miR-1265	1	0	1	1	1	1	PFKFB2	6-phosphofructo-2-kinase/fructose-2,6-biphosphatase 2
hsa-miR-1265	1	0	1	1	1	1	VPS13C	vacuolar protein sorting 13 homolog C (S. cerevisiae)
hsa-miR-1265	0	0	1	1	1	1	LRRC66	leucine rich repeat containing 66
hsa-miR-1265	1	0	1	0	1	1	BCL7A	B-cell CLL/lymphoma 7A
hsa-miR-1265	1	0	1	0	1	1	TNRC6B	trinucleotide repeat containing 6B
hsa-miR-1265	1	0	1	1	1	1	FNBP1L	formin binding protein 1-like
hsa-miR-1265	1	0	1	1	1	1	AFF3	AF4/FMR2 family, member 3
hsa-miR-1265	1	0	1	1	1	1	MAF	v-maf musculoaponeurotic fibrosarcoma oncogene homolog (avian)
hsa-miR-1265	1	0	1	1	1	1	CSNK1G3	casein kinase 1, gamma 3
hsa-miR-1265	1	0	1	1	1	1	UBE2V1	ubiquitin-conjugating enzyme E2 variant 1
hsa-miR-1265	1	0	1	0	1	1	MINOS1	mitochondrial inner membrane organizing system 1
hsa-miR-1265	1	0	1	0	1	1	NPNT	nephronectin
hsa-miR-1265	1	0	1	1	1	1	MAGI1	membrane associated guanylate kinase, WW and PDZ domain containing 1
hsa-miR-1265	1	0	1	1	1	1	PPM1B	protein phosphatase, Mg2+/Mn2+ dependent, 1B
hsa-miR-1265	0	0	1	1	1	1	ERP29	endoplasmic reticulum protein 29
hsa-miR-1265	0	0	1	1	1	1	KCNIP1	Kv channel interacting protein 1
hsa-miR-1265	1	0	1	0	1	1	CDC42SE1	CDC42 small effector 1
hsa-miR-1265	1	0	1	1	1	1	ELMO1	engulfment and cell motility 1
hsa-miR-1265	1	0	1	1	1	1	KIAA0317	KIAA0317
hsa-miR-1265	1	0	1	1	1	1	KCNC4	potassium voltage-gated channel, Shaw-related subfamily, member 4
hsa-miR-1265	1	0	1	1	1	1	CBLN3	cerebellin 3 precursor
hsa-miR-1265	1	0	1	1	1	1	C3orf65	chromosome 3 open reading frame 65
hsa-miR-1265	1	0	1	1	1	1	CDC42	cell division cycle 42 (GTP binding protein, 25kDa)
hsa-miR-1265	1	0	1	0	1	1	FAM133B	family with sequence similarity 133, member B
hsa-miR-1265	0	0	1	1	0	0	ANXA8	annexin A8
hsa-miR-1265	1	0	1	0	1	1	CEP44	centrosomal protein 44kDa
hsa-miR-1265	1	0	1	1	1	1	MTMR12	myotubularin related protein 12
hsa-miR-1265	0	0	1	1	1	1	BTNL8	butyrophilin-like 8
hsa-miR-1265	0	0	1	1	1	1	ATF3	activating transcription factor 3
hsa-miR-1265	1	0	1	1	1	1	PRKAG2	protein kinase, AMP-activated, gamma 2 non-catalytic subunit
hsa-miR-1265	0	0	1	1	0	0	HSF4	heat shock transcription factor 4
hsa-miR-1265	1	0	1	1	1	1	CYLD	cylindromatosis (turban tumor syndrome)
hsa-miR-1265	1	0	1	1	1	1	ZC2HC1C	zinc finger, C2HC-type containing 1C
hsa-miR-1265	0	0	1	1	1	1	MST4	serine/threonine protein kinase MST4
hsa-miR-1265	1	0	1	1	1	1	NSL1	NSL1, MIND kinetochore complex component, homolog (S. cerevisiae)
hsa-miR-1265	0	0	1	1	1	1	POT1	protection of telomeres 1 homolog (S. pombe)
hsa-miR-1265	1	0	1	0	1	1	SRGAP2	SLIT-ROBO Rho GTPase activating protein 2
hsa-miR-1265	1	0	1	0	1	1	TMEM237	transmembrane protein 237
hsa-miR-1265	1	0	1	1	1	1	QSER1	glutamine and serine rich 1
hsa-miR-1265	1	0	1	1	1	1	METTL9	methyltransferase like 9
hsa-miR-1265	1	0	1	1	1	1	HS6ST2	heparan sulfate 6-O-sulfotransferase 2
hsa-miR-1265	0	0	1	1	1	1	KLK10	kallikrein-related peptidase 10
hsa-miR-1265	1	0	1	0	1	1	UBXN2B	UBX domain protein 2B
hsa-miR-1265	1	0	1	1	1	1	SRSF1	serine/arginine-rich splicing factor 1
hsa-miR-1265	1	0	1	1	1	1	CUL4B	cullin 4B
hsa-miR-1265	1	0	1	1	1	1	VAV3	vav 3 guanine nucleotide exchange factor
hsa-miR-1265	0	0	1	1	1	1	IGSF5	immunoglobulin superfamily, member 5
hsa-miR-1265	1	0	1	1	1	1	BEND3	BEN domain containing 3
hsa-miR-1265	0	0	1	1	1	1	PPP1R1C	protein phosphatase 1, regulatory (inhibitor) subunit 1C
hsa-miR-1265	1	0	1	1	1	1	DGKG	diacylglycerol kinase, gamma 90kDa
hsa-miR-1265	1	0	1	1	0	0	ASIC2	acid-sensing (proton-gated) ion channel 2
hsa-miR-1265	1	0	1	1	1	1	ASIC1	acid-sensing (proton-gated) ion channel 1
hsa-miR-1265	0	0	1	1	1	1	ADSS	adenylosuccinate synthase
hsa-miR-1265	0	0	1	1	0	0	ARG2	arginase, type II
hsa-miR-1265	0	0	1	0	1	1	BAGE	B melanoma antigen
hsa-miR-1265	1	0	1	1	1	1	BMP2	bone morphogenetic protein 2
hsa-miR-1265	0	0	1	1	1	1	ENTPD3	ectonucleoside triphosphate diphosphohydrolase 3
hsa-miR-1265	1	0	1	0	1	1	CDK6	cyclin-dependent kinase 6
hsa-miR-1265	0	0	1	1	1	1	CDKN2C	cyclin-dependent kinase inhibitor 2C (p18, inhibits CDK4)
hsa-miR-1265	0	0	1	1	1	1	CLIC2	chloride intracellular channel 2
hsa-miR-1265	1	0	1	0	1	1	CPD	carboxypeptidase D
hsa-miR-1265	0	0	1	1	1	1	CSTF3	cleavage stimulation factor, 3' pre-RNA, subunit 3, 77kDa
hsa-miR-1265	0	0	1	1	1	1	DNAH8	dynein, axonemal, heavy chain 8
hsa-miR-1265	1	0	1	1	1	1	DYRK1A	dual-specificity tyrosine-(Y)-phosphorylation regulated kinase 1A
hsa-miR-1265	0	0	1	0	1	1	ELF5	E74-like factor 5 (ets domain transcription factor)
hsa-miR-1265	0	0	1	1	1	1	FABP4	fatty acid binding protein 4, adipocyte
hsa-miR-1265	0	0	1	1	1	1	ACADL	acyl-CoA dehydrogenase, long chain
hsa-miR-1265	0	0	1	1	0	0	ACRV1	acrosomal vesicle protein 1
hsa-miR-1265	0	0	1	1	1	1	ALOX5AP	arachidonate 5-lipoxygenase-activating protein
hsa-miR-1265	1	0	1	0	1	1	ATP1B2	ATPase, Na+/K+ transporting, beta 2 polypeptide
hsa-miR-1265	1	0	1	1	1	1	BNC1	basonuclin 1
hsa-miR-1265	1	0	1	0	1	1	CCND2	cyclin D2
hsa-miR-1265	0	0	1	1	0	0	CD33	CD33 molecule
hsa-miR-1265	0	0	1	1	1	1	CDR2	cerebellar degeneration-related protein 2, 62kDa
hsa-miR-1265	1	0	1	0	1	1	CEBPG	CCAAT/enhancer binding protein (C/EBP), gamma
hsa-miR-1265	1	0	1	1	1	1	CLCN4	chloride channel, voltage-sensitive 4
hsa-miR-1265	1	0	1	1	1	1	COL4A1	collagen, type IV, alpha 1
hsa-miR-1265	1	0	1	1	1	1	COL15A1	collagen, type XV, alpha 1
hsa-miR-1265	0	0	1	1	1	1	CTSE	cathepsin E
hsa-miR-1265	1	0	1	1	1	1	DR1	down-regulator of transcription 1, TBP-binding (negative cofactor 2)
hsa-miR-1265	1	0	1	1	1	1	DSC3	desmocollin 3
hsa-miR-1265	1	0	1	1	1	1	DUSP6	dual specificity phosphatase 6
hsa-miR-1265	0	0	1	1	0	0	GLP1R	glucagon-like peptide 1 receptor
hsa-miR-1265	0	0	1	1	1	1	HLA-DOA	major histocompatibility complex, class II, DO alpha
hsa-miR-1265	1	0	1	1	1	1	HOXB3	homeobox B3
hsa-miR-1265	1	0	1	1	1	1	HOXD10	homeobox D10
hsa-miR-1265	1	0	1	0	1	1	IRF2	interferon regulatory factor 2
hsa-miR-1265	0	0	1	0	1	1	ITGAV	integrin, alpha V
hsa-miR-1265	0	0	1	1	1	1	ITGB1	integrin, beta 1 (fibronectin receptor, beta polypeptide, antigen CD29 includes MDF2, MSK12)
hsa-miR-1265	1	0	1	1	1	1	KCNA3	potassium voltage-gated channel, shaker-related subfamily, member 3
hsa-miR-1265	1	0	1	1	1	1	KCNA4	potassium voltage-gated channel, shaker-related subfamily, member 4
hsa-miR-1265	1	0	1	0	1	1	KIF3C	kinesin family member 3C
hsa-miR-1265	0	0	1	1	1	1	KLRC1	killer cell lectin-like receptor subfamily C, member 1
hsa-miR-1265	0	0	1	1	1	1	KLRC2	killer cell lectin-like receptor subfamily C, member 2
hsa-miR-1265	1	0	1	0	1	1	LAMC1	laminin, gamma 1 (formerly LAMB2)
hsa-miR-1265	1	0	1	1	1	1	LIFR	leukemia inhibitory factor receptor alpha
hsa-miR-1265	0	0	1	0	1	1	CXCL9	chemokine (C-X-C motif) ligand 9
hsa-miR-1265	1	0	1	1	1	1	MSR1	macrophage scavenger receptor 1
hsa-miR-1265	0	0	1	1	1	1	MTAP	methylthioadenosine phosphorylase
hsa-miR-1265	0	0	1	1	1	1	NOV	nephroblastoma overexpressed
hsa-miR-1265	1	0	1	1	1	1	OLR1	oxidized low density lipoprotein (lectin-like) receptor 1
hsa-miR-1265	1	0	1	0	1	1	PAPPA	pregnancy-associated plasma protein A, pappalysin 1
hsa-miR-1265	0	0	1	1	1	1	SERPINB8	serpin peptidase inhibitor, clade B (ovalbumin), member 8
hsa-miR-1265	1	0	1	1	1	1	PPP1CC	protein phosphatase 1, catalytic subunit, gamma isozyme
hsa-miR-1265	0	0	1	1	1	1	PPP1R3A	protein phosphatase 1, regulatory subunit 3A
hsa-miR-1265	1	0	1	1	1	1	PPP2R3A	protein phosphatase 2, regulatory subunit B'', alpha
hsa-miR-1265	1	0	1	1	1	1	MAPK6	mitogen-activated protein kinase 6
hsa-miR-1265	0	0	1	1	0	0	PRM1	protamine 1
hsa-miR-1265	0	0	1	1	1	1	PSMD10	proteasome (prosome, macropain) 26S subunit, non-ATPase, 10
hsa-miR-1265	0	0	1	0	1	1	RAB3B	RAB3B, member RAS oncogene family
hsa-miR-1265	1	0	1	1	1	1	RAD23B	RAD23 homolog B (S. cerevisiae)
hsa-miR-1265	1	0	1	1	1	1	SALL1	sal-like 1 (Drosophila)
hsa-miR-1265	1	0	1	1	1	1	SFRP2	secreted frizzled-related protein 2
hsa-miR-1265	1	0	1	1	1	1	ST8SIA1	ST8 alpha-N-acetyl-neuraminide alpha-2,8-sialyltransferase 1
hsa-miR-1265	1	0	1	1	1	1	SLC7A1	solute carrier family 7 (cationic amino acid transporter, y+ system), member 1
hsa-miR-1265	1	0	1	1	1	1	SLC9A2	solute carrier family 9, subfamily A (NHE2, cation proton antiporter 2), member 2
hsa-miR-1265	1	0	1	0	1	1	SOX4	SRY (sex determining region Y)-box 4
hsa-miR-1265	1	0	1	1	1	1	SPAM1	sperm adhesion molecule 1 (PH-20 hyaluronidase, zona pellucida binding)
hsa-miR-1265	1	0	1	1	1	1	SPTBN1	spectrin, beta, non-erythrocytic 1
hsa-miR-1265	1	0	1	1	1	1	STAC	SH3 and cysteine rich domain
hsa-miR-1265	0	0	1	0	1	1	STXBP1	syntaxin binding protein 1
hsa-miR-1265	1	0	1	0	1	1	TAL1	T-cell acute lymphocytic leukemia 1
hsa-miR-1265	1	0	1	0	1	1	THBS1	thrombospondin 1
hsa-miR-1265	1	0	1	1	1	1	TOP1	topoisomerase (DNA) I
hsa-miR-1265	0	0	1	1	1	1	TPP2	tripeptidyl peptidase II
hsa-miR-1265	1	0	1	1	1	1	NR2C2	nuclear receptor subfamily 2, group C, member 2
hsa-miR-1265	1	0	1	1	1	1	UBE2B	ubiquitin-conjugating enzyme E2B
hsa-miR-1265	1	0	1	0	1	1	UBE2D2	ubiquitin-conjugating enzyme E2D 2
hsa-miR-1265	1	0	1	0	1	1	VCL	vinculin
hsa-miR-1265	1	0	1	1	1	1	YY1	YY1 transcription factor
hsa-miR-1265	1	0	1	1	1	1	ZIC3	Zic family member 3
hsa-miR-1265	0	0	1	1	1	1	ZNF141	zinc finger protein 141
hsa-miR-1265	0	0	1	1	1	1	STAM	signal transducing adaptor molecule (SH3 domain and ITAM motif) 1
hsa-miR-1265	1	0	1	1	1	1	ADAM12	ADAM metallopeptidase domain 12
hsa-miR-1265	1	0	1	1	1	1	NRIP1	nuclear receptor interacting protein 1
hsa-miR-1265	1	0	1	0	1	1	CUL3	cullin 3
hsa-miR-1265	0	0	1	1	1	1	CHST1	carbohydrate (keratan sulfate Gal-6) sulfotransferase 1
hsa-miR-1265	0	0	1	1	1	1	AGPS	alkylglycerone phosphate synthase
hsa-miR-1265	1	0	1	1	1	1	CDC14A	CDC14 cell division cycle 14 homolog A (S. cerevisiae)
hsa-miR-1265	1	0	1	1	1	1	B3GALT2	UDP-Gal:betaGlcNAc beta 1,3-galactosyltransferase, polypeptide 2
hsa-miR-1265	0	0	1	1	1	1	SNX4	sorting nexin 4
hsa-miR-1265	1	0	1	1	1	1	PHOX2B	paired-like homeobox 2b
hsa-miR-1265	1	0	1	0	1	1	WASL	Wiskott-Aldrich syndrome-like
hsa-miR-1265	1	0	1	1	1	1	CDKL2	cyclin-dependent kinase-like 2 (CDC2-related kinase)
hsa-miR-1265	0	0	1	1	1	1	MPZL1	myelin protein zero-like 1
hsa-miR-1265	1	0	1	1	1	1	BTAF1	BTAF1 RNA polymerase II, B-TFIID transcription factor-associated, 170kDa (Mot1 homolog, S. cerevisiae)
hsa-miR-1265	1	0	1	1	1	1	MAP7	microtubule-associated protein 7
hsa-miR-1265	1	0	1	1	1	1	CDH12	cadherin 12, type 2 (N-cadherin 2)
hsa-miR-1265	0	0	1	1	1	1	TIMM8A	translocase of inner mitochondrial membrane 8 homolog A (yeast)
hsa-miR-1265	1	0	1	0	1	1	E2F2	E2F transcription factor 2
hsa-miR-1265	1	0	1	1	1	1	FGF12	fibroblast growth factor 12
hsa-miR-1265	0	0	1	1	1	1	SLC1A1	solute carrier family 1 (neuronal/epithelial high affinity glutamate transporter, system Xag), member 1
hsa-miR-1265	1	0	1	0	1	1	SLC1A2	solute carrier family 1 (glial high affinity glutamate transporter), member 2
hsa-miR-1265	0	0	1	1	0	0	SLC6A5	solute carrier family 6 (neurotransmitter transporter, glycine), member 5
hsa-miR-1265	1	0	1	0	1	1	MED14	mediator complex subunit 14
hsa-miR-1265	1	0	1	1	1	1	MED21	mediator complex subunit 21
hsa-miR-1265	0	0	1	1	1	1	HOMER1	homer homolog 1 (Drosophila)
hsa-miR-1265	1	0	1	1	1	1	CREB1	cAMP responsive element binding protein 1
hsa-miR-1265	1	0	1	1	1	1	DUSP5	dual specificity phosphatase 5
hsa-miR-1265	1	0	1	1	1	1	FUT8	fucosyltransferase 8 (alpha (1,6) fucosyltransferase)
hsa-miR-1265	0	0	1	1	1	1	GP5	glycoprotein V (platelet)
hsa-miR-1265	0	0	1	1	1	1	FOXA1	forkhead box A1
hsa-miR-1265	0	0	1	0	1	1	POU4F2	POU class 4 homeobox 2
hsa-miR-1265	0	0	1	1	1	1	RAB27A	RAB27A, member RAS oncogene family
hsa-miR-1265	1	0	1	1	1	1	RAB5C	RAB5C, member RAS oncogene family
hsa-miR-1265	0	0	1	1	1	1	LIN7A	lin-7 homolog A (C. elegans)
hsa-miR-1265	0	0	1	0	1	1	BPY2	basic charge, Y-linked, 2
hsa-miR-1265	1	0	1	1	1	1	SPARCL1	SPARC-like 1 (hevin)
hsa-miR-1265	0	0	1	1	1	1	LATS1	LATS, large tumor suppressor, homolog 1 (Drosophila)
hsa-miR-1265	1	0	1	1	1	1	MAP3K13	mitogen-activated protein kinase kinase kinase 13
hsa-miR-1265	1	0	1	1	1	1	STK17A	serine/threonine kinase 17a
hsa-miR-1265	0	0	1	1	0	0	ASIC3	acid-sensing (proton-gated) ion channel 3
hsa-miR-1265	1	0	1	1	1	1	B4GALT5	UDP-Gal:betaGlcNAc beta 1,4- galactosyltransferase, polypeptide 5
hsa-miR-1265	1	0	1	1	1	1	KIF3B	kinesin family member 3B
hsa-miR-1265	1	0	1	1	1	1	AKAP7	A kinase (PRKA) anchor protein 7
hsa-miR-1265	1	0	1	1	1	1	ONECUT2	one cut homeobox 2
hsa-miR-1265	0	0	1	1	1	1	NRG2	neuregulin 2
hsa-miR-1265	1	0	1	1	1	1	CXCL14	chemokine (C-X-C motif) ligand 14
hsa-miR-1265	0	0	1	1	1	1	ATP6V1G1	ATPase, H+ transporting, lysosomal 13kDa, V1 subunit G1
hsa-miR-1265	1	0	1	0	1	1	SEC22B	SEC22 vesicle trafficking protein homolog B (S. cerevisiae) (gene/pseudogene)
hsa-miR-1265	0	0	1	1	1	1	PRDX6	peroxiredoxin 6
hsa-miR-1265	1	0	1	1	1	1	JARID2	jumonji, AT rich interactive domain 2
hsa-miR-1265	0	0	1	1	1	1	PDE1A	phosphodiesterase 1A, calmodulin-dependent
hsa-miR-1265	1	0	1	1	0	0	PIP4K2A	phosphatidylinositol-5-phosphate 4-kinase, type II, alpha
hsa-miR-1265	0	0	1	1	1	1	PTH2R	parathyroid hormone 2 receptor
hsa-miR-1265	1	0	1	1	0	0	ZMYM3	zinc finger, MYM-type 3
hsa-miR-1265	1	0	1	1	0	0	ADAMTS4	ADAM metallopeptidase with thrombospondin type 1 motif, 4
hsa-miR-1265	1	0	1	1	1	1	MED13	mediator complex subunit 13
hsa-miR-1265	0	0	1	1	0	0	CNGA2	cyclic nucleotide gated channel alpha 2
hsa-miR-1265	1	0	1	1	1	1	BMI1	BMI1 polycomb ring finger oncogene
hsa-miR-1265	1	0	1	1	1	1	FOXN3	forkhead box N3
hsa-miR-1265	1	0	1	1	1	1	H3F3B	H3 histone, family 3B (H3.3B)
hsa-miR-1265	1	0	1	1	1	1	PDCL	phosducin-like
hsa-miR-1265	0	0	1	1	1	1	PPP1R3C	protein phosphatase 1, regulatory subunit 3C
hsa-miR-1265	1	0	1	0	1	1	CCDC6	coiled-coil domain containing 6
hsa-miR-1265	1	0	1	1	1	1	RND2	Rho family GTPase 2
hsa-miR-1265	1	0	1	1	0	0	ZBTB22	zinc finger and BTB domain containing 22
hsa-miR-1265	1	0	1	1	1	1	GABBR2	gamma-aminobutyric acid (GABA) B receptor, 2
hsa-miR-1265	1	0	1	1	1	1	AKT3	v-akt murine thymoma viral oncogene homolog 3 (protein kinase B, gamma)
hsa-miR-1265	1	0	1	1	1	1	PIGK	phosphatidylinositol glycan anchor biosynthesis, class K
hsa-miR-1265	1	0	1	1	1	1	SCARB2	scavenger receptor class B, member 2
hsa-miR-1265	1	0	1	1	1	1	GTF2E1	general transcription factor IIE, polypeptide 1, alpha 56kDa
hsa-miR-1265	1	0	1	1	1	1	LPP	LIM domain containing preferred translocation partner in lipoma
hsa-miR-1265	1	0	1	1	1	1	NHLH1	nescient helix loop helix 1
hsa-miR-1265	1	0	1	1	1	1	SYT1	synaptotagmin I
hsa-miR-1265	0	0	1	1	0	0	VDAC3	voltage-dependent anion channel 3
hsa-miR-1265	1	0	1	1	1	1	ST8SIA4	ST8 alpha-N-acetyl-neuraminide alpha-2,8-sialyltransferase 4
hsa-miR-1265	1	0	1	0	1	1	TSPAN2	tetraspanin 2
hsa-miR-1265	1	0	1	1	1	1	NAMPT	nicotinamide phosphoribosyltransferase
hsa-miR-1265	0	0	1	1	0	0	CELA3A	chymotrypsin-like elastase family, member 3A
hsa-miR-1265	1	0	1	1	1	1	LHFP	lipoma HMGIC fusion partner
hsa-miR-1265	0	0	1	1	1	1	RNF41	ring finger protein 41
hsa-miR-1265	0	0	1	1	1	1	MPHOSPH6	M-phase phosphoprotein 6
hsa-miR-1265	1	0	1	0	1	1	SPRY3	sprouty homolog 3 (Drosophila)
hsa-miR-1265	1	0	1	1	1	1	MAN1A1	mannosidase, alpha, class 1A, member 1
hsa-miR-1265	1	0	1	0	1	1	MAP1B	microtubule-associated protein 1B
hsa-miR-1265	0	0	1	0	1	1	MT1X	metallothionein 1X
hsa-miR-1265	1	0	1	1	1	1	MTF1	metal-regulatory transcription factor 1
hsa-miR-1265	1	0	1	0	1	1	SPATA2	spermatogenesis associated 2
hsa-miR-1265	0	0	1	1	1	1	TRDN	triadin
hsa-miR-1265	1	0	1	1	1	1	SPON1	spondin 1, extracellular matrix protein
hsa-miR-1265	1	0	1	1	1	1	CAPZA1	capping protein (actin filament) muscle Z-line, alpha 1
hsa-miR-1265	0	0	1	1	1	1	LRMP	lymphoid-restricted membrane protein
hsa-miR-1265	0	0	1	1	0	0	NPPA	natriuretic peptide A
hsa-miR-1265	0	0	1	0	1	1	OAS3	2'-5'-oligoadenylate synthetase 3, 100kDa
hsa-miR-1265	1	0	1	1	0	0	PAX9	paired box 9
hsa-miR-1265	1	0	1	1	1	1	CDK16	cyclin-dependent kinase 16
hsa-miR-1265	0	0	1	1	0	0	PDE6H	phosphodiesterase 6H, cGMP-specific, cone, gamma
hsa-miR-1265	1	0	1	0	1	1	PITPNA	phosphatidylinositol transfer protein, alpha
hsa-miR-1265	0	0	1	1	1	1	PPP2R5A	protein phosphatase 2, regulatory subunit B', alpha
hsa-miR-1265	1	0	1	1	1	1	PPP2R5E	protein phosphatase 2, regulatory subunit B', epsilon isoform
hsa-miR-1265	0	0	1	0	1	1	ZNF192	zinc finger protein 192
hsa-miR-1265	1	0	1	1	1	1	SMC1A	structural maintenance of chromosomes 1A
hsa-miR-1265	1	0	1	1	1	1	TUBGCP3	tubulin, gamma complex associated protein 3
hsa-miR-1265	1	0	1	1	1	1	SEC23A	Sec23 homolog A (S. cerevisiae)
hsa-miR-1265	1	0	1	1	1	1	SPTLC1	serine palmitoyltransferase, long chain base subunit 1
hsa-miR-1265	0	0	1	1	1	1	SLCO1B1	solute carrier organic anion transporter family, member 1B1
hsa-miR-1265	1	0	1	0	1	1	PTPRE	protein tyrosine phosphatase, receptor type, E
hsa-miR-1265	0	0	1	1	1	1	CD226	CD226 molecule
hsa-miR-1265	0	0	1	1	0	0	KIF1C	kinesin family member 1C
hsa-miR-1265	1	0	1	1	1	1	CDH10	cadherin 10, type 2 (T2-cadherin)
hsa-miR-1265	1	0	1	1	0	0	PSKH1	protein serine kinase H1
hsa-miR-1265	0	0	1	1	1	1	SYPL1	synaptophysin-like 1
hsa-miR-1265	0	0	1	1	1	1	INMT	indolethylamine N-methyltransferase
hsa-miR-1265	0	0	1	1	1	1	TRIM10	tripartite motif containing 10
hsa-miR-1265	0	0	1	1	1	1	MYOT	myotilin
hsa-miR-1265	1	0	1	1	1	1	RAB35	RAB35, member RAS oncogene family
hsa-miR-1265	1	0	1	1	1	1	B3GNT1	UDP-GlcNAc:betaGal beta-1,3-N-acetylglucosaminyltransferase 1
hsa-miR-1265	0	0	1	1	1	1	CEACAM7	carcinoembryonic antigen-related cell adhesion molecule 7
hsa-miR-1265	0	0	1	1	1	1	RLN1	relaxin 1
hsa-miR-1265	1	0	1	0	1	1	SLC5A3	solute carrier family 5 (sodium/myo-inositol cotransporter), member 3
hsa-miR-1265	1	0	1	1	1	1	HSPA13	heat shock protein 70kDa family, member 13
hsa-miR-1265	0	0	1	1	1	1	TMEM115	transmembrane protein 115
hsa-miR-1265	1	0	1	1	1	1	ADAMTS5	ADAM metallopeptidase with thrombospondin type 1 motif, 5
hsa-miR-1265	1	0	1	1	1	1	PTPN21	protein tyrosine phosphatase, non-receptor type 21
hsa-miR-1265	0	0	1	1	1	1	AKAP10	A kinase (PRKA) anchor protein 10
hsa-miR-1265	1	0	1	1	1	1	PALM2-AKAP2	PALM2-AKAP2 readthrough
hsa-miR-1265	1	0	1	1	1	1	CA5B	carbonic anhydrase VB, mitochondrial
hsa-miR-1265	1	0	1	1	1	1	KLF12	Kruppel-like factor 12
hsa-miR-1265	1	0	1	1	1	1	CBX3	chromobox homolog 3
hsa-miR-1265	0	0	1	1	1	1	STAT1	signal transducer and activator of transcription 1, 91kDa
hsa-miR-1265	0	0	1	1	0	0	CELA3B	chymotrypsin-like elastase family, member 3B
hsa-miR-1265	0	0	1	1	1	1	MIP	major intrinsic protein of lens fiber
hsa-miR-1265	1	0	1	1	1	1	ICOS	inducible T-cell co-stimulator
hsa-miR-1265	0	0	1	1	1	1	LMOD1	leiomodin 1 (smooth muscle)
hsa-miR-1265	1	0	1	0	1	1	FZD4	frizzled family receptor 4
hsa-miR-1265	1	0	1	1	1	1	MGAT4A	mannosyl (alpha-1,3-)-glycoprotein beta-1,4-N-acetylglucosaminyltransferase, isozyme A
hsa-miR-1265	0	0	1	1	1	1	RAB3GAP1	RAB3 GTPase activating protein subunit 1 (catalytic)
hsa-miR-1265	1	0	1	1	1	1	RYBP	RING1 and YY1 binding protein
hsa-miR-1265	1	0	1	1	1	1	MMD	monocyte to macrophage differentiation-associated
hsa-miR-1265	0	0	1	0	1	1	TLL1	tolloid-like 1
hsa-miR-1265	1	0	1	0	1	1	FLRT2	fibronectin leucine rich transmembrane protein 2
hsa-miR-1265	1	0	1	1	1	1	PPARGC1A	peroxisome proliferator-activated receptor gamma, coactivator 1 alpha
hsa-miR-1265	1	0	1	1	1	1	PADI1	peptidyl arginine deiminase, type I
hsa-miR-1265	1	0	1	1	1	1	BAZ1A	bromodomain adjacent to zinc finger domain, 1A
hsa-miR-1265	1	0	1	1	1	1	NRG1	neuregulin 1
hsa-miR-1265	1	0	1	1	1	1	ASF1A	ASF1 anti-silencing function 1 homolog A (S. cerevisiae)
hsa-miR-1265	1	0	1	1	1	1	KLF15	Kruppel-like factor 15
hsa-miR-1265	0	0	1	1	1	1	CCDC113	coiled-coil domain containing 113
hsa-miR-1265	0	0	1	1	1	1	ORMDL2	ORM1-like 2 (S. cerevisiae)
hsa-miR-1265	0	0	1	1	0	0	GNPAT	glyceronephosphate O-acyltransferase
hsa-miR-1265	0	0	1	1	1	1	ADAM28	ADAM metallopeptidase domain 28
hsa-miR-1265	0	0	1	1	1	1	CAPN6	calpain 6
hsa-miR-1265	0	0	1	0	1	1	EID1	EP300 interacting inhibitor of differentiation 1
hsa-miR-1265	1	0	1	0	1	1	RNF11	ring finger protein 11
hsa-miR-1265	0	0	1	1	1	1	KCNV1	potassium channel, subfamily V, member 1
hsa-miR-1265	1	0	1	1	0	0	SND1	staphylococcal nuclease and tudor domain containing 1
hsa-miR-1265	1	0	1	1	1	1	AFF4	AF4/FMR2 family, member 4
hsa-miR-1265	1	0	1	1	1	1	FAF2	Fas associated factor family member 2
hsa-miR-1265	0	0	1	1	0	0	MEA1	male-enhanced antigen 1
hsa-miR-1265	1	0	1	1	1	1	RALGPS1	Ral GEF with PH domain and SH3 binding motif 1
hsa-miR-1265	0	0	1	1	1	1	FRMPD4	FERM and PDZ domain containing 4
hsa-miR-1265	1	0	1	0	1	1	MLEC	malectin
hsa-miR-1265	1	0	1	1	1	1	RASSF2	Ras association (RalGDS/AF-6) domain family member 2
hsa-miR-1265	1	0	1	0	1	1	SERTAD2	SERTA domain containing 2
hsa-miR-1265	1	0	1	1	1	1	MRPL19	mitochondrial ribosomal protein L19
hsa-miR-1265	1	0	1	1	1	1	ARHGEF11	Rho guanine nucleotide exchange factor (GEF) 11
hsa-miR-1265	1	0	1	0	1	1	PJA2	praja ring finger 2, E3 ubiquitin protein ligase
hsa-miR-1265	1	0	1	1	1	1	FCHSD2	FCH and double SH3 domains 2
hsa-miR-1265	1	0	1	1	1	1	CHSY1	chondroitin sulfate synthase 1
hsa-miR-1265	1	0	1	1	1	1	PLEKHA6	pleckstrin homology domain containing, family A member 6
hsa-miR-1265	0	0	1	1	1	1	ENPP4	ectonucleotide pyrophosphatase/phosphodiesterase 4 (putative)
hsa-miR-1265	0	0	1	1	0	0	KIFAP3	kinesin-associated protein 3
hsa-miR-1265	1	0	1	1	1	1	DIP2C	DIP2 disco-interacting protein 2 homolog C (Drosophila)
hsa-miR-1265	1	0	1	1	1	1	RAB21	RAB21, member RAS oncogene family
hsa-miR-1265	1	0	1	1	1	1	FBXO21	F-box protein 21
hsa-miR-1265	1	0	1	0	1	1	PEG10	paternally expressed 10
hsa-miR-1265	1	0	1	1	1	1	PRRC2C	proline-rich coiled-coil 2C
hsa-miR-1265	1	0	1	1	1	1	PLCB1	phospholipase C, beta 1 (phosphoinositide-specific)
hsa-miR-1265	1	0	1	1	1	1	CUX2	cut-like homeobox 2
hsa-miR-1265	1	0	1	1	1	1	DNAJC13	DnaJ (Hsp40) homolog, subfamily C, member 13
hsa-miR-1265	1	0	1	0	1	1	ARHGEF12	Rho guanine nucleotide exchange factor (GEF) 12
hsa-miR-1265	1	0	1	0	1	1	LARP1	La ribonucleoprotein domain family, member 1
hsa-miR-1265	1	0	1	1	1	1	MED13L	mediator complex subunit 13-like
hsa-miR-1265	0	0	1	0	1	1	ZDHHC17	zinc finger, DHHC-type containing 17
hsa-miR-1265	1	0	1	1	1	1	PARM1	prostate androgen-regulated mucin-like protein 1
hsa-miR-1265	0	0	1	1	1	1	ZNF10	zinc finger protein 10
hsa-miR-1265	0	0	1	0	1	1	TMEM158	transmembrane protein 158 (gene/pseudogene)
hsa-miR-1265	0	0	1	1	1	1	TMEM87A	transmembrane protein 87A
hsa-miR-1265	1	0	1	1	1	1	LTN1	listerin E3 ubiquitin protein ligase 1
hsa-miR-1265	1	0	1	0	1	1	ERC2	ELKS/RAB6-interacting/CAST family member 2
hsa-miR-1265	0	0	1	1	0	0	CCDC9	coiled-coil domain containing 9
hsa-miR-1265	1	0	1	1	1	1	PLA2G3	phospholipase A2, group III
hsa-miR-1265	1	0	1	1	1	1	MEMO1	mediator of cell motility 1
hsa-miR-1265	0	0	1	1	0	0	HEBP1	heme binding protein 1
hsa-miR-1265	0	0	1	1	0	0	ZC2HC1A	zinc finger, C2HC-type containing 1A
hsa-miR-1265	1	0	1	1	1	1	PHF20L1	PHD finger protein 20-like 1
hsa-miR-1265	1	0	1	1	1	1	UBE2J1	ubiquitin-conjugating enzyme E2, J1
hsa-miR-1265	0	0	1	1	1	1	APH1A	anterior pharynx defective 1 homolog A (C. elegans)
hsa-miR-1265	1	0	1	1	1	1	SLMO2	slowmo homolog 2 (Drosophila)
hsa-miR-1265	0	0	1	1	1	1	ISOC1	isochorismatase domain containing 1
hsa-miR-1265	1	0	1	1	1	1	RRP15	ribosomal RNA processing 15 homolog (S. cerevisiae)
hsa-miR-1265	0	0	1	1	1	1	PPIL1	peptidylprolyl isomerase (cyclophilin)-like 1
hsa-miR-1265	0	0	1	1	1	1	MRPS33	mitochondrial ribosomal protein S33
hsa-miR-1265	1	0	1	1	1	1	GOLT1B	golgi transport 1B
hsa-miR-1265	0	0	1	1	1	1	RAB10	RAB10, member RAS oncogene family
hsa-miR-1265	1	0	1	1	1	1	AKAP11	A kinase (PRKA) anchor protein 11
hsa-miR-1265	1	0	1	1	1	1	BIRC6	baculoviral IAP repeat containing 6
hsa-miR-1265	1	0	1	0	1	1	HPCAL4	hippocalcin like 4
hsa-miR-1265	1	0	1	1	1	1	CMPK1	cytidine monophosphate (UMP-CMP) kinase 1, cytosolic
hsa-miR-1265	1	0	1	1	1	1	RAB14	RAB14, member RAS oncogene family
hsa-miR-1265	0	0	1	1	1	1	ADAM22	ADAM metallopeptidase domain 22
hsa-miR-1265	1	0	1	0	1	1	RAB8B	RAB8B, member RAS oncogene family
hsa-miR-1265	0	0	1	0	1	1	ERGIC2	ERGIC and golgi 2
hsa-miR-1265	1	0	1	1	1	1	RAB6B	RAB6B, member RAS oncogene family
hsa-miR-1265	0	0	1	1	1	1	GNAS	GNAS complex locus
hsa-miR-1265	1	0	1	1	1	1	ZAK	sterile alpha motif and leucine zipper containing kinase AZK
hsa-miR-1265	0	0	1	1	1	1	SHC3	SHC (Src homology 2 domain containing) transforming protein 3
hsa-miR-1265	0	0	1	1	0	0	DLL3	delta-like 3 (Drosophila)
hsa-miR-1265	1	0	1	0	1	1	KLHL3	kelch-like 3 (Drosophila)
hsa-miR-1265	1	0	1	1	1	1	SIX4	SIX homeobox 4
hsa-miR-1265	1	0	1	1	1	1	GALNT7	UDP-N-acetyl-alpha-D-galactosamine:polypeptide N-acetylgalactosaminyltransferase 7 (GalNAc-T7)
hsa-miR-1265	0	0	1	1	1	1	PION	pigeon homolog (Drosophila)
hsa-miR-1265	0	0	1	1	0	0	UBQLN3	ubiquilin 3
hsa-miR-1265	0	0	1	0	1	1	TRIM44	tripartite motif containing 44
hsa-miR-1265	1	0	1	1	1	1	DIRAS2	DIRAS family, GTP-binding RAS-like 2
hsa-miR-1265	1	0	1	1	1	1	CNNM2	cyclin M2
hsa-miR-1265	1	0	1	0	1	1	FAM46C	family with sequence similarity 46, member C
hsa-miR-1265	0	0	1	1	0	0	PALMD	palmdelphin
hsa-miR-1265	1	0	1	0	1	1	DCAF16	DDB1 and CUL4 associated factor 16
hsa-miR-1265	0	0	1	1	1	1	WHSC1L1	Wolf-Hirschhorn syndrome candidate 1-like 1
hsa-miR-1265	1	0	1	1	1	1	IMPAD1	inositol monophosphatase domain containing 1
hsa-miR-1265	1	0	1	0	1	1	MARCH5	membrane-associated ring finger (C3HC4) 5
hsa-miR-1265	1	0	1	1	1	1	RNF125	ring finger protein 125, E3 ubiquitin protein ligase
hsa-miR-1265	1	0	1	1	1	1	HIF1AN	hypoxia inducible factor 1, alpha subunit inhibitor
hsa-miR-1265	1	0	1	0	1	1	NPLOC4	nuclear protein localization 4 homolog (S. cerevisiae)
hsa-miR-1265	1	0	1	1	1	1	CDCA4	cell division cycle associated 4
hsa-miR-1265	1	0	1	1	1	1	ARGLU1	arginine and glutamate rich 1
hsa-miR-1265	1	0	1	1	1	1	AGGF1	angiogenic factor with G patch and FHA domains 1
hsa-miR-1265	0	0	1	1	0	0	NODAL	nodal homolog (mouse)
hsa-miR-1265	1	0	1	1	1	1	FAM178A	family with sequence similarity 178, member A
hsa-miR-1265	0	0	1	1	0	0	CEP55	centrosomal protein 55kDa
hsa-miR-1265	1	0	1	1	1	1	RIC8B	resistance to inhibitors of cholinesterase 8 homolog B (C. elegans)
hsa-miR-1265	0	0	1	1	1	1	N4BP2	NEDD4 binding protein 2
hsa-miR-1265	1	0	1	0	1	1	ARL8B	ADP-ribosylation factor-like 8B
hsa-miR-1265	1	0	1	0	1	1	PARVA	parvin, alpha
hsa-miR-1265	1	0	1	1	1	1	ZNF654	zinc finger protein 654
hsa-miR-1265	1	0	1	0	1	1	LIN7C	lin-7 homolog C (C. elegans)
hsa-miR-1265	1	0	1	1	1	1	RSBN1	round spermatid basic protein 1
hsa-miR-1265	0	0	1	1	1	1	STK32B	serine/threonine kinase 32B
hsa-miR-1265	0	0	1	1	1	1	LAPTM4B	lysosomal protein transmembrane 4 beta
hsa-miR-1265	0	0	1	1	1	1	BDP1	B double prime 1, subunit of RNA polymerase III transcription initiation factor IIIB
hsa-miR-1265	0	0	1	1	1	1	ZC3H15	zinc finger CCCH-type containing 15
hsa-miR-1265	1	0	1	1	1	1	SLC16A10	solute carrier family 16, member 10 (aromatic amino acid transporter)
hsa-miR-1265	0	0	1	0	0	0	APOBR	apolipoprotein B receptor
hsa-miR-1265	1	0	1	0	1	1	CYCS	cytochrome c, somatic
hsa-miR-1265	0	0	1	1	1	1	ERRFI1	ERBB receptor feedback inhibitor 1
hsa-miR-1265	1	0	1	1	1	1	HOXA10	homeobox A10
hsa-miR-1265	1	0	1	0	1	1	FAM190B	family with sequence similarity 190, member B
hsa-miR-1265	1	0	1	0	1	1	CCNJ	cyclin J
hsa-miR-1265	1	0	1	1	1	1	SEPT3	septin 3
hsa-miR-1265	1	0	1	0	1	1	UBFD1	ubiquitin family domain containing 1
hsa-miR-1265	0	0	1	0	1	1	ZC3HAV1	zinc finger CCCH-type, antiviral 1
hsa-miR-1265	1	0	1	0	1	1	SLAMF8	SLAM family member 8
hsa-miR-1265	0	0	1	1	1	1	CYSLTR2	cysteinyl leukotriene receptor 2
hsa-miR-1265	1	0	1	0	1	1	EIF5A2	eukaryotic translation initiation factor 5A2
hsa-miR-1265	1	0	1	0	1	1	DCUN1D1	DCN1, defective in cullin neddylation 1, domain containing 1 (S. cerevisiae)
hsa-miR-1265	1	0	1	1	1	1	SLC24A3	solute carrier family 24 (sodium/potassium/calcium exchanger), member 3
hsa-miR-1265	1	0	1	1	1	1	SLC12A5	solute carrier family 12 (potassium/chloride transporter), member 5
hsa-miR-1265	0	0	1	1	1	1	SHROOM4	shroom family member 4
hsa-miR-1265	1	0	1	1	1	1	ZNF608	zinc finger protein 608
hsa-miR-1265	0	0	1	0	1	1	XPO5	exportin 5
hsa-miR-1265	1	0	1	1	1	1	RGAG1	retrotransposon gag domain containing 1
hsa-miR-1265	1	0	1	0	1	1	NUFIP2	nuclear fragile X mental retardation protein interacting protein 2
hsa-miR-1265	1	0	1	1	1	1	MIB1	mindbomb E3 ubiquitin protein ligase 1
hsa-miR-1265	1	0	1	0	1	1	ALPK3	alpha-kinase 3
hsa-miR-1265	1	0	1	1	1	1	KLHL14	kelch-like 14 (Drosophila)
hsa-miR-1265	0	0	1	0	1	1	TRMT5	tRNA methyltransferase 5 homolog (S. cerevisiae)
hsa-miR-1265	1	0	1	1	1	1	RANBP10	RAN binding protein 10
hsa-miR-1265	1	0	1	1	1	1	ZBTB2	zinc finger and BTB domain containing 2
hsa-miR-1265	0	0	1	1	1	1	KIAA1586	KIAA1586
hsa-miR-1265	0	0	1	1	1	1	AQP9	aquaporin 9
hsa-miR-1265	1	0	1	0	1	1	NMT1	N-myristoyltransferase 1
hsa-miR-1265	0	0	1	1	1	1	PSAT1	phosphoserine aminotransferase 1
hsa-miR-1265	1	0	1	1	1	1	RPRD1B	regulation of nuclear pre-mRNA domain containing 1B
hsa-miR-1265	1	0	1	1	1	1	FAM60A	family with sequence similarity 60, member A
hsa-miR-1265	1	0	1	1	1	1	DMRT3	doublesex and mab-3 related transcription factor 3
hsa-miR-1265	1	0	1	1	1	1	PELI2	pellino E3 ubiquitin protein ligase family member 2
hsa-miR-1265	0	0	1	1	1	1	CHST6	carbohydrate (N-acetylglucosamine 6-O) sulfotransferase 6
hsa-miR-1265	1	0	1	1	1	1	TRIB2	tribbles homolog 2 (Drosophila)
hsa-miR-1265	1	0	1	1	1	1	PPP1R11	protein phosphatase 1, regulatory (inhibitor) subunit 11
hsa-miR-1265	0	0	1	1	0	0	ABHD4	abhydrolase domain containing 4
hsa-miR-1265	0	0	1	1	0	0	RNF123	ring finger protein 123
hsa-miR-1265	0	0	1	1	0	0	TFB2M	transcription factor B2, mitochondrial
hsa-miR-1265	1	0	1	0	1	1	GREM2	gremlin 2
hsa-miR-1265	1	0	1	1	1	1	TMEM168	transmembrane protein 168
hsa-miR-1265	1	0	1	1	1	1	SUDS3	suppressor of defective silencing 3 homolog (S. cerevisiae)
hsa-miR-1265	0	0	1	0	1	1	EBF2	early B-cell factor 2
hsa-miR-1265	1	0	1	1	1	1	S100PBP	S100P binding protein
hsa-miR-1265	1	0	1	1	1	1	REEP1	receptor accessory protein 1
hsa-miR-1265	1	0	1	1	1	1	FGFR1	fibroblast growth factor receptor 1
hsa-miR-1265	0	0	1	1	1	1	WDR77	WD repeat domain 77
hsa-miR-1265	1	0	1	1	1	1	PSTPIP2	proline-serine-threonine phosphatase interacting protein 2
hsa-miR-1265	0	0	1	1	1	1	CEP70	centrosomal protein 70kDa
hsa-miR-1265	0	0	1	0	1	1	ZYG11B	zyg-11 homolog B (C. elegans)
hsa-miR-1265	1	0	1	0	1	1	MOB3B	MOB kinase activator 3B
hsa-miR-1265	0	0	1	1	1	1	WDR78	WD repeat domain 78
hsa-miR-1265	1	0	1	1	1	1	CLMP	CXADR-like membrane protein
hsa-miR-1265	0	0	1	1	1	1	SNX22	sorting nexin 22
hsa-miR-1265	1	0	1	0	1	1	MAGIX	MAGI family member, X-linked
hsa-miR-1265	1	0	1	1	1	1	L2HGDH	L-2-hydroxyglutarate dehydrogenase
hsa-miR-1265	1	0	1	0	1	1	EDEM3	ER degradation enhancer, mannosidase alpha-like 3
hsa-miR-1265	0	0	1	0	1	1	PDGFD	platelet derived growth factor D
hsa-miR-1265	1	0	1	1	1	1	BTBD1	BTB (POZ) domain containing 1
hsa-miR-1265	1	0	1	0	1	1	TET1	tet methylcytosine dioxygenase 1
hsa-miR-1265	1	0	1	0	1	1	SETD7	SET domain containing (lysine methyltransferase) 7
hsa-miR-1265	1	0	1	1	1	1	FAM117A	family with sequence similarity 117, member A
hsa-miR-1265	1	0	1	0	1	1	C1orf21	chromosome 1 open reading frame 21
hsa-miR-1265	1	0	1	1	1	1	SNX27	sorting nexin family member 27
hsa-miR-1265	0	0	1	1	1	1	ARPC5L	actin related protein 2/3 complex, subunit 5-like
hsa-miR-1265	1	0	1	1	0	0	SCRT1	scratch homolog 1, zinc finger protein (Drosophila)
hsa-miR-1265	0	0	1	1	1	1	INHBE	inhibin, beta E
hsa-miR-1265	1	0	1	0	1	1	ITCH	itchy E3 ubiquitin protein ligase
hsa-miR-1265	0	0	1	0	1	1	KRTAP4-12	keratin associated protein 4-12
hsa-miR-1265	0	0	1	1	0	0	KRTAP17-1	keratin associated protein 17-1
hsa-miR-1265	0	0	1	1	1	1	ANKRD27	ankyrin repeat domain 27 (VPS9 domain)
hsa-miR-1265	0	0	1	1	1	1	ACAD11	acyl-CoA dehydrogenase family, member 11
hsa-miR-1265	0	0	1	1	1	1	RNASEH2C	ribonuclease H2, subunit C
hsa-miR-1265	1	0	1	1	1	1	ARID5B	AT rich interactive domain 5B (MRF1-like)
hsa-miR-1265	1	0	1	1	1	1	ANTXR1	anthrax toxin receptor 1
hsa-miR-1265	0	0	1	0	1	1	LDOC1L	leucine zipper, down-regulated in cancer 1-like
hsa-miR-1265	1	0	1	1	1	1	CAMKK1	calcium/calmodulin-dependent protein kinase kinase 1, alpha
hsa-miR-1265	0	0	1	0	1	1	TMEM246	transmembrane protein 246
hsa-miR-1265	0	0	1	1	0	0	PDCD2L	programmed cell death 2-like
hsa-miR-1265	1	0	1	1	1	1	DCTN5	dynactin 5 (p25)
hsa-miR-1265	1	0	1	1	1	1	RSPO3	R-spondin 3
hsa-miR-1265	1	0	1	1	1	1	ARHGEF39	Rho guanine nucleotide exchange factor (GEF) 39
hsa-miR-1265	0	0	1	1	1	1	FAM136A	family with sequence similarity 136, member A
hsa-miR-1265	0	0	1	1	1	1	FBXL20	F-box and leucine-rich repeat protein 20
hsa-miR-1265	1	0	1	0	1	1	C5orf62	chromosome 5 open reading frame 62
hsa-miR-1265	1	0	1	1	1	1	HIAT1	hippocampus abundant transcript 1
hsa-miR-1265	1	0	1	0	1	1	EAF1	ELL associated factor 1
hsa-miR-1265	0	0	1	1	1	1	ZIC5	Zic family member 5
hsa-miR-1265	1	0	1	0	1	1	PURB	purine-rich element binding protein B
hsa-miR-1265	1	0	1	1	0	0	FCHSD1	FCH and double SH3 domains 1
hsa-miR-1265	1	0	1	1	1	1	EPT1	ethanolaminephosphotransferase 1 (CDP-ethanolamine-specific)
hsa-miR-1265	1	0	1	1	1	1	BRWD1	bromodomain and WD repeat domain containing 1
hsa-miR-1265	1	0	1	1	1	1	RCSD1	RCSD domain containing 1
hsa-miR-1265	0	0	1	1	1	1	NALCN	sodium leak channel, non-selective
hsa-miR-1265	1	0	1	1	1	1	MAL2	mal, T-cell differentiation protein 2 (gene/pseudogene)
hsa-miR-1265	1	0	1	1	1	1	XKR4	XK, Kell blood group complex subunit-related family, member 4
hsa-miR-1265	1	0	1	1	1	1	ELFN2	extracellular leucine-rich repeat and fibronectin type III domain containing 2
hsa-miR-1265	0	0	1	1	1	1	PLEKHG4B	pleckstrin homology domain containing, family G (with RhoGef domain) member 4B
hsa-miR-1265	1	0	1	0	1	1	FAM129A	family with sequence similarity 129, member A
hsa-miR-1265	0	0	1	1	0	0	APOA5	apolipoprotein A-V
hsa-miR-1265	0	0	1	1	1	1	CDKN2B	cyclin-dependent kinase inhibitor 2B (p15, inhibits CDK4)
hsa-miR-1265	0	0	1	1	0	0	WFDC3	WAP four-disulfide core domain 3
hsa-miR-1265	0	0	1	1	1	1	C14orf126	chromosome 14 open reading frame 126
hsa-miR-1265	1	0	1	1	1	1	COL11A2	collagen, type XI, alpha 2
hsa-miR-1265	1	0	1	0	1	1	EDARADD	EDAR-associated death domain
hsa-miR-1265	0	0	1	1	0	0	WFDC10A	WAP four-disulfide core domain 10A
hsa-miR-1265	1	0	1	1	1	1	GPR62	G protein-coupled receptor 62
hsa-miR-1265	1	0	1	1	1	1	KLHL6	kelch-like 6 (Drosophila)
hsa-miR-1265	0	0	1	1	1	1	ATP6V1G2	ATPase, H+ transporting, lysosomal 13kDa, V1 subunit G2
hsa-miR-1265	1	0	1	1	0	0	SYN3	synapsin III
hsa-miR-1265	0	0	1	1	1	1	PKD1L1	polycystic kidney disease 1 like 1
hsa-miR-1265	1	0	1	1	1	1	GNPDA2	glucosamine-6-phosphate deaminase 2
hsa-miR-1265	0	0	1	1	1	1	TMEM129	transmembrane protein 129
hsa-miR-1265	1	0	1	1	1	1	GLCCI1	glucocorticoid induced transcript 1
hsa-miR-1265	0	0	1	1	1	1	SLC25A46	solute carrier family 25, member 46
hsa-miR-1265	1	0	1	1	1	1	HLTF	helicase-like transcription factor
hsa-miR-1265	0	0	1	1	0	0	SGCZ	sarcoglycan, zeta
hsa-miR-1265	0	0	1	1	0	0	BRD8	bromodomain containing 8
hsa-miR-1265	1	0	1	1	1	1	TSTD2	thiosulfate sulfurtransferase (rhodanese)-like domain containing 2
hsa-miR-1265	0	0	1	1	0	0	KLK8	kallikrein-related peptidase 8
hsa-miR-1265	1	0	1	0	1	1	CNOT6L	CCR4-NOT transcription complex, subunit 6-like
hsa-miR-1265	1	0	1	1	1	1	TEX261	testis expressed 261
hsa-miR-1265	0	0	1	1	1	1	CYB5D1	cytochrome b5 domain containing 1
hsa-miR-1265	1	0	1	1	1	1	KCNH8	potassium voltage-gated channel, subfamily H (eag-related), member 8
hsa-miR-1265	0	0	1	1	1	1	PUS10	pseudouridylate synthase 10
hsa-miR-1265	1	0	1	1	1	1	ZMAT2	zinc finger, matrin-type 2
hsa-miR-1265	0	0	1	1	1	1	RIBC1	RIB43A domain with coiled-coils 1
hsa-miR-1265	0	0	1	1	1	1	RANBP3L	RAN binding protein 3-like
hsa-miR-1265	1	0	1	0	1	1	CENPBD1	CENPB DNA-binding domains containing 1
hsa-miR-1265	0	0	1	0	1	1	DDIT4L	DNA-damage-inducible transcript 4-like
hsa-miR-1265	0	0	1	1	1	1	APOBEC3F	apolipoprotein B mRNA editing enzyme, catalytic polypeptide-like 3F
hsa-miR-1265	0	0	1	1	1	1	SLC25A43	solute carrier family 25, member 43
hsa-miR-1265	0	0	1	1	0	0	TCEB3C	transcription elongation factor B polypeptide 3C (elongin A3)
hsa-miR-1265	0	0	1	1	0	0	SPESP1	sperm equatorial segment protein 1
hsa-miR-1265	1	0	1	1	1	1	SEPT6	septin 6
hsa-miR-1265	1	0	1	0	1	1	MTPN	myotrophin
hsa-miR-1265	0	0	1	0	1	1	CHKB	choline kinase beta
hsa-miR-1265	0	0	1	1	1	1	RMI2	RMI2, RecQ mediated genome instability 2, homolog (S. cerevisiae)
hsa-miR-1265	0	0	1	1	1	1	CDYL2	chromodomain protein, Y-like 2
hsa-miR-1265	0	0	1	1	1	1	C17orf76-AS1	C17orf76 antisense RNA 1
hsa-miR-1265	0	0	1	0	0	0	ZNF285	zinc finger protein 285
hsa-miR-1265	1	0	1	1	1	1	FAM123B	family with sequence similarity 123B
hsa-miR-1265	1	0	1	1	1	1	CEP128	centrosomal protein 128kDa
hsa-miR-1265	0	0	1	1	1	1	ENTHD1	ENTH domain containing 1
hsa-miR-1265	0	0	1	1	1	1	ZNF746	zinc finger protein 746
hsa-miR-1265	0	0	1	1	1	1	RASEF	RAS and EF-hand domain containing
hsa-miR-1265	0	0	1	1	0	0	TRIM42	tripartite motif containing 42
hsa-miR-1265	0	0	1	1	1	1	SNX31	sorting nexin 31
hsa-miR-1265	0	0	1	1	0	0	MUC20	mucin 20, cell surface associated
hsa-miR-1265	1	0	1	0	1	1	RWDD4	RWD domain containing 4
hsa-miR-1265	1	0	1	1	1	1	ZCCHC5	zinc finger, CCHC domain containing 5
hsa-miR-1265	0	0	1	1	0	0	MS4A15	membrane-spanning 4-domains, subfamily A, member 15
hsa-miR-1265	0	0	1	1	0	0	GPC2	glypican 2
hsa-miR-1265	1	0	1	1	1	1	ATXN7L1	ataxin 7-like 1
hsa-miR-1265	1	0	1	1	1	1	PDIK1L	PDLIM1 interacting kinase 1 like
hsa-miR-1265	1	0	1	1	1	1	WTAP	Wilms tumor 1 associated protein
hsa-miR-1265	1	0	1	0	1	1	ST6GALNAC3	ST6 (alpha-N-acetyl-neuraminyl-2,3-beta-galactosyl-1,3)-N-acetylgalactosaminide alpha-2,6-sialyltransferase 3
hsa-miR-1265	0	0	1	1	1	1	BEND2	BEN domain containing 2
hsa-miR-1265	1	0	1	1	1	1	HS6ST3	heparan sulfate 6-O-sulfotransferase 3
hsa-miR-1265	0	0	1	1	0	0	WFDC10B	WAP four-disulfide core domain 10B
hsa-miR-1265	0	0	1	1	1	1	REXO1L1	REX1, RNA exonuclease 1 homolog (S. cerevisiae)-like 1
hsa-miR-1265	0	0	1	0	1	1	TUSC5	tumor suppressor candidate 5
hsa-miR-1265	1	0	1	1	1	1	L3MBTL4	l(3)mbt-like 4 (Drosophila)
hsa-miR-1265	1	0	1	1	1	1	MMGT1	membrane magnesium transporter 1
hsa-miR-1265	1	0	1	1	1	1	LSM11	LSM11, U7 small nuclear RNA associated
hsa-miR-1265	0	0	1	1	1	1	FNDC7	fibronectin type III domain containing 7
hsa-miR-1265	1	0	1	0	1	1	PGM2L1	phosphoglucomutase 2-like 1
hsa-miR-1265	0	0	1	1	1	1	C17orf78	chromosome 17 open reading frame 78
hsa-miR-1265	1	0	1	1	1	1	RIMKLA	ribosomal modification protein rimK-like family member A
hsa-miR-1265	0	0	1	1	1	1	FAM133A	family with sequence similarity 133, member A
hsa-miR-1265	0	0	1	1	1	1	YIPF6	Yip1 domain family, member 6
hsa-miR-1265	1	0	1	0	1	1	TMEM167A	transmembrane protein 167A
hsa-miR-1265	1	0	1	1	1	1	PPAP2B	phosphatidic acid phosphatase type 2B
hsa-miR-1265	1	0	1	1	1	1	STX12	syntaxin 12
hsa-miR-1265	0	0	1	1	1	1	PRNT	prion protein (testis specific)
hsa-miR-1265	1	0	1	1	1	1	LRRTM3	leucine rich repeat transmembrane neuronal 3
hsa-miR-1265	0	0	1	1	1	1	SESTD1	SEC14 and spectrin domains 1
hsa-miR-1265	0	0	1	1	0	0	C7orf34	chromosome 7 open reading frame 34
hsa-miR-1265	0	0	1	0	1	1	ZNF445	zinc finger protein 445
hsa-miR-1265	0	0	1	1	1	1	LYRM7	Lyrm7 homolog (mouse)
hsa-miR-1265	0	0	1	1	0	0	CENPV	centromere protein V
hsa-miR-1265	0	0	1	0	1	1	SPATA12	spermatogenesis associated 12
hsa-miR-1265	1	0	1	1	1	1	SPRED2	sprouty-related, EVH1 domain containing 2
hsa-miR-1265	1	0	1	1	1	1	NF2	neurofibromin 2 (merlin)
hsa-miR-1265	0	0	1	0	1	1	BAGE5	B melanoma antigen family, member 5
hsa-miR-1265	1	0	1	1	1	1	FAM216B	family with sequence similarity 216, member B
hsa-miR-1265	0	0	1	0	1	1	VSTM2A	V-set and transmembrane domain containing 2A
hsa-miR-1265	1	0	1	1	1	1	BCL9L	B-cell CLL/lymphoma 9-like
hsa-miR-1265	1	0	1	1	1	1	FILIP1L	filamin A interacting protein 1-like
hsa-miR-1265	1	0	1	0	1	1	RIMS4	regulating synaptic membrane exocytosis 4
hsa-miR-1265	1	0	1	0	1	1	HNRNPA3	heterogeneous nuclear ribonucleoprotein A3
hsa-miR-1265	1	0	1	0	1	1	SLC16A9	solute carrier family 16, member 9 (monocarboxylic acid transporter 9)
hsa-miR-1265	1	0	1	1	1	1	ZBTB41	zinc finger and BTB domain containing 41
hsa-miR-1265	1	0	1	1	1	1	C1orf52	chromosome 1 open reading frame 52
hsa-miR-1265	1	0	1	1	1	1	GPRIN3	GPRIN family member 3
hsa-miR-1265	1	0	1	0	1	1	NRK	Nik related kinase
hsa-miR-1265	1	0	1	1	1	1	PTGER3	prostaglandin E receptor 3 (subtype EP3)
hsa-miR-1265	0	0	1	0	1	1	SIAH3	siah E3 ubiquitin protein ligase family member 3
hsa-miR-1265	1	0	1	0	1	1	PRICKLE2	prickle homolog 2 (Drosophila)
hsa-miR-1265	0	0	1	1	0	0	LENG9	leukocyte receptor cluster (LRC) member 9
hsa-miR-1265	0	0	1	1	1	1	FAM5C	family with sequence similarity 5, member C
hsa-miR-1265	1	0	1	1	1	1	TMEM189-UBE2V1	TMEM189-UBE2V1 readthrough
hsa-miR-1265	0	0	1	1	1	1	SLC25A35	solute carrier family 25, member 35
hsa-miR-1265	1	0	1	1	0	0	KAZN	kazrin, periplakin interacting protein
hsa-miR-1265	1	0	1	1	1	1	GLYAT	glycine-N-acyltransferase
hsa-miR-1265	0	0	1	1	1	1	ZRANB2	zinc finger, RAN-binding domain containing 2
hsa-miR-1265	1	0	1	1	1	1	RAPH1	Ras association (RalGDS/AF-6) and pleckstrin homology domains 1
hsa-miR-1265	1	0	1	1	1	1	ATRNL1	attractin-like 1
hsa-miR-1265	0	0	1	1	1	1	ZNF474	zinc finger protein 474
hsa-miR-1265	0	0	1	1	1	1	C10orf129	chromosome 10 open reading frame 129
hsa-miR-1265	1	0	1	1	1	1	FREM2	FRAS1 related extracellular matrix protein 2
hsa-miR-1265	0	0	1	1	1	1	SEPT14	septin 14
hsa-miR-1265	0	0	1	1	1	1	FAM211A	family with sequence similarity 211, member A
hsa-miR-1265	0	0	1	0	1	1	FSD1L	fibronectin type III and SPRY domain containing 1-like
hsa-miR-1265	1	0	1	1	1	1	XKRX	XK, Kell blood group complex subunit-related, X-linked
hsa-miR-1265	0	0	1	0	0	0	CELP	carboxyl ester lipase pseudogene
hsa-miR-1265	0	0	1	0	0	0	TOP1P2	topoisomerase (DNA) I pseudogene 2
hsa-miR-1265	0	0	1	0	0	0	MIR155HG	MIR155 host gene (non-protein coding)
hsa-miR-1265	0	0	1	0	0	0	CYCSP52	cytochrome c, somatic pseudogene 52
hsa-miR-1265	0	0	1	0	0	0	TTTY6B	testis-specific transcript, Y-linked 6B (non-protein coding)
hsa-miR-1265	0	0	1	0	0	0	DKFZP586I1420	uncharacterized protein DKFZp586I1420
hsa-miR-1265	0	0	1	0	0	0	TPI1P2	triosephosphate isomerase 1 pseudogene 2
hsa-miR-1265	0	0	1	0	0	0	SUMO1P1	SUMO1 pseudogene 1
hsa-miR-1265	0	0	1	0	0	0	FTH1P7	ferritin, heavy polypeptide 1 pseudogene 7
hsa-miR-1265	0	0	1	0	0	0	FAM192BP	family with sequence similarity 192, member B pseudogene
hsa-miR-1265	0	0	1	0	0	0	TOP1P1	topoisomerase (DNA) I pseudogene 1
hsa-miR-1265	0	0	1	0	0	0	HYALP1	hyaluronoglucosaminidase pseudogene 1
hsa-miR-1265	0	0	1	0	0	0	SNORD53	small nucleolar RNA, C/D box 53
hsa-miR-1265	0	0	1	0	0	0	CPS1-IT1	CPS1 intronic transcript 1 (non-protein coding)
hsa-miR-1265	0	0	1	0	0	0	NEAT1	nuclear paraspeckle assembly transcript 1 (non-protein coding)
hsa-miR-1265	0	0	1	0	0	0	MALAT1	metastasis associated lung adenocarcinoma transcript 1 (non-protein coding)
hsa-miR-1265	0	0	1	0	0	0	HAS2-AS1	HAS2 antisense RNA 1
hsa-miR-1265	0	0	1	0	0	0	HNRNPA1P10	heterogeneous nuclear ribonucleoprotein A1 pseudogene 10
hsa-miR-1265	0	0	1	0	0	0	SNORA45	small nucleolar RNA, H/ACA box 45
hsa-miR-1265	0	0	1	0	0	0	SNORD45C	small nucleolar RNA, C/D box 45C
hsa-miR-1265	0	0	1	0	0	0	PYY2	peptide YY, 2 (pseudogene)
hsa-miR-1265	0	0	1	0	0	0	GBP1P1	guanylate binding protein 1, interferon-inducible pseudogene 1
hsa-miR-1265	0	0	1	0	0	0	MYADML	myeloid-associated differentiation marker-like (pseudogene)
hsa-miR-1265	0	0	1	0	1	1	SRSF5	serine/arginine-rich splicing factor 5
hsa-miR-1265	1	0	1	1	1	1	ZNF238	zinc finger protein 238
hsa-miR-1265	1	0	1	1	1	1	TRIO	trio Rho guanine nucleotide exchange factor
