# Supplementary material for: Profiling of Selected MicroRNAs in Proliferative Eutopic Endometrium of Women with Ovarian Endometriosis
Source: Biomed Res Int. 2015 Aug 20;2015:760698. doi: 10.1155/2015/760698 (PMC4558423; doi:10.1155/2015/760698)
Supplement: Supplementary file 1 — Table I: The names of miRNAs significantly differentially expressed between eutopic endometrium of patients with endometriosis vs eutopic endometrium of patients without endometriosis. Table II: The associations between miRNA and mRNA, which presents detailed results of the search of six major databases i.e targetscan, tarbase, miranda, mirbase, mirtarget2 and pictar. [file 760698.f1.zip › 760698.f1/Table II/hsa-miR-1266.tsv]

miR	targetscan	tarbase	miranda	mirbase	mirtarget2	pictar	GeneSymbol	GeneName
hsa-miR-1266	1	0	1	1	1	1	PLAU	plasminogen activator, urokinase
hsa-miR-1266	1	0	1	1	1	1	SH3BP2	SH3-domain binding protein 2
hsa-miR-1266	1	0	1	1	1	1	TMCC2	transmembrane and coiled-coil domain family 2
hsa-miR-1266	1	0	1	1	0	0	SRCAP	Snf2-related CREBBP activator protein
hsa-miR-1266	1	0	1	0	1	1	KIAA0355	KIAA0355
hsa-miR-1266	1	0	1	0	1	1	PTPRT	protein tyrosine phosphatase, receptor type, T
hsa-miR-1266	0	0	1	1	1	1	C2CD2L	C2CD2-like
hsa-miR-1266	0	0	1	1	1	1	PEG3	paternally expressed 3
hsa-miR-1266	1	0	1	1	0	0	SEC14L5	SEC14-like 5 (S. cerevisiae)
hsa-miR-1266	0	0	1	1	1	1	PDE4DIP	phosphodiesterase 4D interacting protein
hsa-miR-1266	1	0	1	0	1	1	CEP350	centrosomal protein 350kDa
hsa-miR-1266	1	0	1	1	1	1	IQSEC2	IQ motif and Sec7 domain 2
hsa-miR-1266	0	0	1	1	0	0	ZNF862	zinc finger protein 862
hsa-miR-1266	0	0	1	1	1	1	MEGF6	multiple EGF-like-domains 6
hsa-miR-1266	1	0	1	1	1	1	HIPK1	homeodomain interacting protein kinase 1
hsa-miR-1266	1	0	1	1	1	1	GIGYF2	GRB10 interacting GYF protein 2
hsa-miR-1266	1	0	1	1	1	1	MATR3	matrin 3
hsa-miR-1266	1	0	1	1	0	0	ESYT1	extended synaptotagmin-like protein 1
hsa-miR-1266	1	0	1	1	1	1	AHCYL2	adenosylhomocysteinase-like 2
hsa-miR-1266	1	0	1	0	1	1	ATG14	autophagy related 14
hsa-miR-1266	1	0	1	1	1	1	ARHGEF15	Rho guanine nucleotide exchange factor (GEF) 15
hsa-miR-1266	1	0	1	1	1	1	SEMA4F	sema domain, immunoglobulin domain (Ig), transmembrane domain (TM) and short cytoplasmic domain, (semaphorin) 4F
hsa-miR-1266	1	0	1	1	1	1	UBE2K	ubiquitin-conjugating enzyme E2K
hsa-miR-1266	1	0	1	1	1	1	BAHD1	bromo adjacent homology domain containing 1
hsa-miR-1266	1	0	1	1	1	1	CIT	citron (rho-interacting, serine/threonine kinase 21)
hsa-miR-1266	1	0	1	1	1	1	C11orf9	chromosome 11 open reading frame 9
hsa-miR-1266	1	0	1	1	1	1	NTNG1	netrin G1
hsa-miR-1266	1	0	1	1	0	0	KIAA1045	KIAA1045
hsa-miR-1266	1	0	1	1	1	1	CEP164	centrosomal protein 164kDa
hsa-miR-1266	1	0	1	1	1	1	NLGN1	neuroligin 1
hsa-miR-1266	0	0	1	0	0	0	C11orf21	chromosome 11 open reading frame 21
hsa-miR-1266	0	0	1	1	0	0	MUTYH	mutY homolog (E. coli)
hsa-miR-1266	0	0	1	1	0	0	ZC4H2	zinc finger, C4H2 domain containing
hsa-miR-1266	1	0	1	1	1	1	ATXN7L1	ataxin 7-like 1
hsa-miR-1266	1	0	1	1	1	1	ZMIZ1	zinc finger, MIZ-type containing 1
hsa-miR-1266	1	0	1	1	1	1	MKL2	MKL/myocardin-like 2
hsa-miR-1266	1	0	1	1	1	1	ASAP1	ArfGAP with SH3 domain, ankyrin repeat and PH domain 1
hsa-miR-1266	0	0	1	1	1	1	FSTL5	follistatin-like 5
hsa-miR-1266	0	0	1	0	0	0	MTA3	metastasis associated 1 family, member 3
hsa-miR-1266	0	0	1	1	1	1	COPS7A	COP9 constitutive photomorphogenic homolog subunit 7A (Arabidopsis)
hsa-miR-1266	0	0	1	1	0	0	TNFRSF12A	tumor necrosis factor receptor superfamily, member 12A
hsa-miR-1266	1	0	1	1	1	1	PCDH19	protocadherin 19
hsa-miR-1266	1	0	1	1	1	1	LRRC7	leucine rich repeat containing 7
hsa-miR-1266	0	0	1	0	1	1	MUC3B	mucin 3B, cell surface associated
hsa-miR-1266	0	0	1	0	1	1	KIAA1468	KIAA1468
hsa-miR-1266	0	0	1	0	0	0	COL20A1	collagen, type XX, alpha 1
hsa-miR-1266	1	0	1	1	0	0	ZSWIM5	zinc finger, SWIM-type containing 5
hsa-miR-1266	1	0	1	1	1	1	FAM214B	family with sequence similarity 214, member B
hsa-miR-1266	0	0	1	0	0	0	KRT19P2	keratin 19 pseudogene 2
hsa-miR-1266	1	0	1	1	1	1	INADL	InaD-like (Drosophila)
hsa-miR-1266	1	0	1	1	0	0	PLXNA4	plexin A4
hsa-miR-1266	1	0	1	0	1	1	GPR107	G protein-coupled receptor 107
hsa-miR-1266	1	0	1	0	1	1	IGDCC4	immunoglobulin superfamily, DCC subclass, member 4
hsa-miR-1266	1	0	1	1	1	1	ZNF532	zinc finger protein 532
hsa-miR-1266	1	0	1	0	0	0	TANC2	tetratricopeptide repeat, ankyrin repeat and coiled-coil containing 2
hsa-miR-1266	0	0	1	0	0	0	TTC28-AS1	TTC28 antisense RNA 1
hsa-miR-1266	0	0	1	0	1	1	SETD5	SET domain containing 5
hsa-miR-1266	0	0	1	1	0	0	PFDN5	prefoldin subunit 5
hsa-miR-1266	1	0	1	1	1	1	IKZF4	IKAROS family zinc finger 4 (Eos)
hsa-miR-1266	1	0	1	1	1	1	LCOR	ligand dependent nuclear receptor corepressor
hsa-miR-1266	0	0	1	1	0	0	COL27A1	collagen, type XXVII, alpha 1
hsa-miR-1266	1	0	1	1	1	1	CSRNP1	cysteine-serine-rich nuclear protein 1
hsa-miR-1266	1	0	1	1	1	1	HNRPDL	heterogeneous nuclear ribonucleoprotein D-like
hsa-miR-1266	1	0	1	1	1	1	CSMD3	CUB and Sushi multiple domains 3
hsa-miR-1266	0	0	1	0	0	0	KIAA1908	uncharacterized LOC114796
hsa-miR-1266	0	0	1	1	0	0	FAM65A	family with sequence similarity 65, member A
hsa-miR-1266	0	0	1	1	1	1	LENG8	leukocyte receptor cluster (LRC) member 8
hsa-miR-1266	1	0	1	1	0	0	ADC	arginine decarboxylase
hsa-miR-1266	1	0	1	0	0	0	ZBTB34	zinc finger and BTB domain containing 34
hsa-miR-1266	1	0	1	1	1	1	SMEK1	SMEK homolog 1, suppressor of mek1 (Dictyostelium)
hsa-miR-1266	0	0	1	1	0	0	FAM22D	family with sequence similarity 22, member D
hsa-miR-1266	1	0	1	1	1	1	C11orf57	chromosome 11 open reading frame 57
hsa-miR-1266	0	0	1	1	0	0	DDB2	damage-specific DNA binding protein 2, 48kDa
hsa-miR-1266	1	0	1	1	1	1	PAN3	PAN3 poly(A) specific ribonuclease subunit homolog (S. cerevisiae)
hsa-miR-1266	0	0	1	1	0	0	SSPO	SCO-spondin homolog (Bos taurus)
hsa-miR-1266	1	1	1	1	1	1	BACE1	beta-site APP-cleaving enzyme 1
hsa-miR-1266	1	0	1	1	1	1	NRXN2	neurexin 2
hsa-miR-1266	0	0	1	1	0	0	DBP	D site of albumin promoter (albumin D-box) binding protein
hsa-miR-1266	0	0	1	1	0	0	MPST	mercaptopyruvate sulfurtransferase
hsa-miR-1266	1	0	1	1	1	1	DAPK1	death-associated protein kinase 1
hsa-miR-1266	0	0	1	1	0	0	KCNC3	potassium voltage-gated channel, Shaw-related subfamily, member 3
hsa-miR-1266	1	0	1	1	1	1	PML	promyelocytic leukemia
hsa-miR-1266	1	0	1	1	1	1	PHC1	polyhomeotic homolog 1 (Drosophila)
hsa-miR-1266	0	0	1	0	1	1	DCAF11	DDB1 and CUL4 associated factor 11
hsa-miR-1266	1	0	1	1	1	1	DTNA	dystrobrevin, alpha
hsa-miR-1266	1	0	1	1	1	1	EIF4G3	eukaryotic translation initiation factor 4 gamma, 3
hsa-miR-1266	1	0	1	1	1	1	RASSF5	Ras association (RalGDS/AF-6) domain family member 5
hsa-miR-1266	0	0	1	1	1	1	DGKI	diacylglycerol kinase, iota
hsa-miR-1266	1	0	1	0	1	1	SLC6A6	solute carrier family 6 (neurotransmitter transporter, taurine), member 6
hsa-miR-1266	1	0	1	1	0	0	CACNB1	calcium channel, voltage-dependent, beta 1 subunit
hsa-miR-1266	1	0	1	1	0	0	TSPYL2	TSPY-like 2
hsa-miR-1266	1	0	1	1	0	0	TNK2	tyrosine kinase, non-receptor, 2
hsa-miR-1266	1	0	1	1	1	1	TBX2	T-box 2
hsa-miR-1266	1	0	1	0	1	1	CDON	Cdon homolog (mouse)
hsa-miR-1266	1	0	1	1	1	1	SPTB	spectrin, beta, erythrocytic
hsa-miR-1266	0	0	1	1	0	0	ASIC3	acid-sensing (proton-gated) ion channel 3
hsa-miR-1266	0	0	1	1	0	0	IFT27	intraflagellar transport 27 homolog (Chlamydomonas)
hsa-miR-1266	0	0	1	1	1	1	RYR1	ryanodine receptor 1 (skeletal)
hsa-miR-1266	1	0	1	1	1	1	MINK1	misshapen-like kinase 1
hsa-miR-1266	0	0	1	1	0	0	EIF4E2	eukaryotic translation initiation factor 4E family member 2
hsa-miR-1266	0	0	1	1	1	1	ZNF747	zinc finger protein 747
hsa-miR-1266	0	0	1	1	0	0	CFLAR	CASP8 and FADD-like apoptosis regulator
hsa-miR-1266	0	0	1	1	1	1	HLA-DQA1	major histocompatibility complex, class II, DQ alpha 1
hsa-miR-1266	0	0	1	1	1	1	ALDH3B1	aldehyde dehydrogenase 3 family, member B1
hsa-miR-1266	0	0	1	1	0	0	SLC22A8	solute carrier family 22 (organic anion transporter), member 8
hsa-miR-1266	0	0	1	1	0	0	MBD1	methyl-CpG binding domain protein 1
hsa-miR-1266	0	0	1	1	0	0	CDK10	cyclin-dependent kinase 10
hsa-miR-1266	1	0	1	1	1	1	HMGA2	high mobility group AT-hook 2
hsa-miR-1266	1	0	1	1	1	1	TEAD1	TEA domain family member 1 (SV40 transcriptional enhancer factor)
hsa-miR-1266	1	0	1	1	0	0	PPP2R5D	protein phosphatase 2, regulatory subunit B', delta
hsa-miR-1266	1	0	1	1	1	1	MEF2D	myocyte enhancer factor 2D
hsa-miR-1266	1	0	1	1	0	0	TNPO2	transportin 2
hsa-miR-1266	0	0	1	1	1	1	EIF4G1	eukaryotic translation initiation factor 4 gamma, 1
hsa-miR-1266	1	0	1	1	1	1	SDHC	succinate dehydrogenase complex, subunit C, integral membrane protein, 15kDa
hsa-miR-1266	0	0	1	0	0	0	MIAT	myocardial infarction associated transcript (non-protein coding)
hsa-miR-1266	0	0	1	1	1	1	BRCA1	breast cancer 1, early onset
hsa-miR-1266	0	0	1	1	0	0	MUC3A	mucin 3A, cell surface associated
hsa-miR-1266	1	0	1	0	1	1	MLL2	myeloid/lymphoid or mixed-lineage leukemia 2
hsa-miR-1266	1	0	1	1	1	1	CBFA2T2	core-binding factor, runt domain, alpha subunit 2; translocated to, 2
hsa-miR-1266	0	0	1	0	0	0	ZNRD1-AS1	ZNRD1 antisense RNA 1
hsa-miR-1266	1	0	1	0	1	1	CELF2	CUGBP, Elav-like family member 2
hsa-miR-1266	0	0	1	1	0	0	SLC12A4	solute carrier family 12 (potassium/chloride transporters), member 4
hsa-miR-1266	0	0	1	1	1	1	CYP4F3	cytochrome P450, family 4, subfamily F, polypeptide 3
hsa-miR-1266	1	0	1	1	1	1	PFKFB3	6-phosphofructo-2-kinase/fructose-2,6-biphosphatase 3
hsa-miR-1266	1	0	1	1	1	1	CTNND1	catenin (cadherin-associated protein), delta 1
hsa-miR-1266	1	0	1	1	1	1	ERLIN1	ER lipid raft associated 1
hsa-miR-1266	1	0	1	1	0	0	PAK1	p21 protein (Cdc42/Rac)-activated kinase 1
hsa-miR-1266	1	0	1	1	1	1	TP63	tumor protein p63
hsa-miR-1266	0	0	1	1	1	1	ERAL1	Era G-protein-like 1 (E. coli)
hsa-miR-1266	0	0	1	0	0	0	C3orf79	chromosome 3 open reading frame 79
hsa-miR-1266	1	0	1	1	1	1	GLS	glutaminase
hsa-miR-1266	1	0	1	1	0	0	RASSF1	Ras association (RalGDS/AF-6) domain family member 1
hsa-miR-1266	0	0	1	1	1	1	MSTO1	misato homolog 1 (Drosophila)
hsa-miR-1266	1	0	1	0	0	0	PPME1	protein phosphatase methylesterase 1
hsa-miR-1266	1	0	1	1	1	1	NF2	neurofibromin 2 (merlin)
hsa-miR-1266	0	0	1	1	1	1	ACIN1	apoptotic chromatin condensation inducer 1
hsa-miR-1266	0	0	1	1	1	1	DMRT2	doublesex and mab-3 related transcription factor 2
hsa-miR-1266	1	0	1	1	0	0	C16orf5	chromosome 16 open reading frame 5
hsa-miR-1266	1	0	1	1	1	1	AASDHPPT	aminoadipate-semialdehyde dehydrogenase-phosphopantetheinyl transferase
hsa-miR-1266	0	0	1	0	1	1	ZC3HAV1	zinc finger CCCH-type, antiviral 1
hsa-miR-1266	0	0	1	0	1	1	CLEC5A	C-type lectin domain family 5, member A
hsa-miR-1266	0	0	1	1	1	1	CNPPD1	cyclin Pas1/PHO80 domain containing 1
hsa-miR-1266	1	0	1	1	1	1	ZNF202	zinc finger protein 202
hsa-miR-1266	1	0	1	1	1	1	TLK2	tousled-like kinase 2
hsa-miR-1266	1	0	1	1	1	1	C16orf70	chromosome 16 open reading frame 70
hsa-miR-1266	0	0	1	1	0	0	SLC24A2	solute carrier family 24 (sodium/potassium/calcium exchanger), member 2
hsa-miR-1266	1	0	1	1	1	1	TSC22D2	TSC22 domain family, member 2
hsa-miR-1266	0	0	1	1	1	1	SLCO2B1	solute carrier organic anion transporter family, member 2B1
hsa-miR-1266	1	0	1	0	1	1	KLHL3	kelch-like 3 (Drosophila)
hsa-miR-1266	0	0	1	0	0	0	ARL17A	ADP-ribosylation factor-like 17A
hsa-miR-1266	0	0	1	1	1	1	CHRD	chordin
hsa-miR-1266	0	0	1	1	1	1	SLC30A5	solute carrier family 30 (zinc transporter), member 5
hsa-miR-1266	0	0	1	1	1	1	CSNK1A1	casein kinase 1, alpha 1
hsa-miR-1266	1	0	1	1	1	1	DESI2	desumoylating isopeptidase 2
hsa-miR-1266	0	0	1	1	1	1	CELF1	CUGBP, Elav-like family member 1
hsa-miR-1266	0	0	1	0	0	0	TIGD7	tigger transposable element derived 7
hsa-miR-1266	0	0	1	1	0	0	TRIM41	tripartite motif containing 41
hsa-miR-1266	0	0	1	1	0	0	HES6	hairy and enhancer of split 6 (Drosophila)
hsa-miR-1266	0	0	1	1	0	0	ARL6IP4	ADP-ribosylation-like factor 6 interacting protein 4
hsa-miR-1266	1	0	1	1	1	1	PUM2	pumilio homolog 2 (Drosophila)
hsa-miR-1266	1	0	1	1	1	1	CALN1	calneuron 1
hsa-miR-1266	0	0	1	1	0	0	GHRHR	growth hormone releasing hormone receptor
hsa-miR-1266	1	0	1	1	1	1	TMUB2	transmembrane and ubiquitin-like domain containing 2
hsa-miR-1266	1	0	1	1	1	1	KLHL12	kelch-like 12 (Drosophila)
hsa-miR-1266	1	0	1	1	1	1	DCLRE1B	DNA cross-link repair 1B
hsa-miR-1266	1	0	1	1	1	1	VEGFA	vascular endothelial growth factor A
hsa-miR-1266	1	0	1	0	1	1	GLYR1	glyoxylate reductase 1 homolog (Arabidopsis)
hsa-miR-1266	0	0	1	0	1	1	C1QTNF7	C1q and tumor necrosis factor related protein 7
hsa-miR-1266	0	0	1	1	0	0	TTTY7	testis-specific transcript, Y-linked 7 (non-protein coding)
hsa-miR-1266	0	0	1	1	0	0	ZAN	zonadhesin
hsa-miR-1266	0	0	1	1	1	1	ITPA	inosine triphosphatase (nucleoside triphosphate pyrophosphatase)
hsa-miR-1266	0	0	1	1	1	1	SEMA6C	sema domain, transmembrane domain (TM), and cytoplasmic domain, (semaphorin) 6C
hsa-miR-1266	1	0	1	1	1	1	BIVM	basic, immunoglobulin-like variable motif containing
hsa-miR-1266	1	0	1	1	1	1	CALU	calumenin
hsa-miR-1266	1	0	1	0	1	1	USP32	ubiquitin specific peptidase 32
hsa-miR-1266	1	0	1	1	1	1	BBC3	BCL2 binding component 3
hsa-miR-1266	1	0	1	1	1	1	PBX3	pre-B-cell leukemia homeobox 3
hsa-miR-1266	1	0	1	1	1	1	CALCOCO1	calcium binding and coiled-coil domain 1
hsa-miR-1266	0	0	1	0	0	0	CLRN1-AS1	CLRN1 antisense RNA 1
hsa-miR-1266	0	0	1	0	1	1	MYO3B	myosin IIIB
hsa-miR-1266	0	0	1	1	0	0	SNRPN	small nuclear ribonucleoprotein polypeptide N
hsa-miR-1266	0	0	1	1	1	1	SPSB1	splA/ryanodine receptor domain and SOCS box containing 1
hsa-miR-1266	0	0	1	1	0	0	ELP2	elongator acetyltransferase complex subunit 2
hsa-miR-1266	0	0	1	0	0	0	MYO15B	myosin XVB pseudogene
hsa-miR-1266	1	0	1	1	1	1	ST3GAL3	ST3 beta-galactoside alpha-2,3-sialyltransferase 3
hsa-miR-1266	1	0	1	1	1	1	STX16	syntaxin 16
hsa-miR-1266	1	0	1	1	0	0	SAMD4A	sterile alpha motif domain containing 4A
hsa-miR-1266	1	0	1	1	1	1	SLC35A4	solute carrier family 35, member A4
hsa-miR-1266	1	0	1	1	1	1	RBFOX1	RNA binding protein, fox-1 homolog (C. elegans) 1
hsa-miR-1266	1	0	1	1	1	1	SGMS2	sphingomyelin synthase 2
hsa-miR-1266	1	0	1	1	0	0	FOXP2	forkhead box P2
hsa-miR-1266	1	0	1	1	1	1	CPNE4	copine IV
hsa-miR-1266	1	0	1	1	0	0	POLR2J3	polymerase (RNA) II (DNA directed) polypeptide J3
hsa-miR-1266	1	0	1	1	1	1	WAPAL	wings apart-like homolog (Drosophila)
hsa-miR-1266	0	0	1	1	1	1	PTK7	PTK7 protein tyrosine kinase 7
hsa-miR-1266	0	0	1	1	1	1	TPO	thyroid peroxidase
hsa-miR-1266	1	0	1	0	1	1	IL1RAP	interleukin 1 receptor accessory protein
hsa-miR-1266	1	0	1	1	1	1	AFF2	AF4/FMR2 family, member 2
hsa-miR-1266	1	0	1	1	0	0	PNPLA6	patatin-like phospholipase domain containing 6
hsa-miR-1266	1	0	1	1	1	1	SH2B3	SH2B adaptor protein 3
hsa-miR-1266	0	0	1	1	1	1	GNAS	GNAS complex locus
hsa-miR-1266	1	0	1	1	1	1	UBAP2L	ubiquitin associated protein 2-like
hsa-miR-1266	0	0	1	1	1	1	TCFL5	transcription factor-like 5 (basic helix-loop-helix)
hsa-miR-1266	0	0	1	0	0	0	CACNA2D3	calcium channel, voltage-dependent, alpha 2/delta subunit 3
hsa-miR-1266	0	0	1	1	1	1	RANBP17	RAN binding protein 17
hsa-miR-1266	0	0	1	1	0	0	MORN4	MORN repeat containing 4
hsa-miR-1266	1	0	1	1	1	1	NRXN3	neurexin 3
hsa-miR-1266	0	0	1	0	0	0	CASC2	cancer susceptibility candidate 2 (non-protein coding)
hsa-miR-1266	1	0	1	1	1	1	PDE1B	phosphodiesterase 1B, calmodulin-dependent
hsa-miR-1266	0	0	1	0	0	0	TOMM6	translocase of outer mitochondrial membrane 6 homolog (yeast)
hsa-miR-1266	1	0	1	1	1	1	NAV3	neuron navigator 3
hsa-miR-1266	0	0	1	1	1	1	TRDN	triadin
hsa-miR-1266	0	0	1	1	0	0	KIAA1324	KIAA1324
hsa-miR-1266	1	0	1	1	1	1	SYT14	synaptotagmin XIV
hsa-miR-1266	0	0	1	1	1	1	PPARG	peroxisome proliferator-activated receptor gamma
hsa-miR-1266	0	0	1	1	0	0	IL4I1	interleukin 4 induced 1
hsa-miR-1266	0	0	1	1	0	0	GPRC5C	G protein-coupled receptor, family C, group 5, member C
hsa-miR-1266	1	0	1	0	1	1	NFAT5	nuclear factor of activated T-cells 5, tonicity-responsive
hsa-miR-1266	0	0	1	0	0	0	TUG1	taurine upregulated 1 (non-protein coding)
hsa-miR-1266	0	0	1	0	0	0	RNF31	ring finger protein 31
hsa-miR-1266	0	0	1	1	1	1	PGM3	phosphoglucomutase 3
hsa-miR-1266	1	0	1	1	1	1	CADM3	cell adhesion molecule 3
hsa-miR-1266	1	0	1	1	1	1	EIF2C1	eukaryotic translation initiation factor 2C, 1
hsa-miR-1266	1	0	1	1	1	1	ARMC8	armadillo repeat containing 8
hsa-miR-1266	1	0	1	1	1	1	WDTC1	WD and tetratricopeptide repeats 1
hsa-miR-1266	1	0	1	1	0	0	CCDC120	coiled-coil domain containing 120
hsa-miR-1266	0	0	1	0	0	0	LINC00284	long intergenic non-protein coding RNA 284
hsa-miR-1266	1	0	1	1	0	0	SLC35C1	solute carrier family 35, member C1
hsa-miR-1266	1	0	1	1	1	1	C12orf23	chromosome 12 open reading frame 23
hsa-miR-1266	0	0	1	1	0	0	TFR2	transferrin receptor 2
hsa-miR-1266	0	0	1	1	0	0	MLST8	MTOR associated protein, LST8 homolog (S. cerevisiae)
hsa-miR-1266	1	0	1	1	0	0	YPEL3	yippee-like 3 (Drosophila)
hsa-miR-1266	0	0	1	1	0	0	CPSF3L	cleavage and polyadenylation specific factor 3-like
hsa-miR-1266	1	0	1	1	1	1	SLCO5A1	solute carrier organic anion transporter family, member 5A1
hsa-miR-1266	1	0	1	0	0	0	ZNRF3	zinc and ring finger 3
hsa-miR-1266	0	0	1	0	0	0	LOC149134	uncharacterized LOC149134
hsa-miR-1266	0	0	1	0	0	0	DUXAP10	double homeobox A pseudogene 10
hsa-miR-1266	0	0	1	1	1	1	ARMC5	armadillo repeat containing 5
hsa-miR-1266	1	0	1	1	0	0	FASTK	Fas-activated serine/threonine kinase
hsa-miR-1266	0	0	1	0	0	0	LOC399491	GPS, PLAT and transmembrane domain-containing protein
hsa-miR-1266	0	0	1	0	0	0	MIRLET7BHG	MIRLET7B host gene (non-protein coding)
hsa-miR-1266	0	0	1	1	1	1	PCBP2	poly(rC) binding protein 2
hsa-miR-1266	1	0	1	1	1	1	BAZ2A	bromodomain adjacent to zinc finger domain, 2A
hsa-miR-1266	1	0	1	1	1	1	PAX8	paired box 8
hsa-miR-1266	0	0	1	0	1	1	FLJ14186	uncharacterized LOC401149
hsa-miR-1266	1	0	1	0	0	0	ZDBF2	zinc finger, DBF-type containing 2
hsa-miR-1266	0	0	1	1	1	1	CYTH4	cytohesin 4
hsa-miR-1266	0	0	1	1	1	1	HDAC7	histone deacetylase 7
hsa-miR-1266	0	0	1	1	1	1	SIGLEC1	sialic acid binding Ig-like lectin 1, sialoadhesin
hsa-miR-1266	0	0	1	0	0	0	IFFO2	intermediate filament family orphan 2
hsa-miR-1266	1	0	1	0	1	1	STK40	serine/threonine kinase 40
hsa-miR-1266	0	0	1	0	0	0	RASAL3	RAS protein activator like 3
hsa-miR-1266	1	0	1	1	1	1	GBF1	golgi brefeldin A resistant guanine nucleotide exchange factor 1
hsa-miR-1266	0	0	1	1	1	1	PPFIBP2	PTPRF interacting protein, binding protein 2 (liprin beta 2)
hsa-miR-1266	0	0	1	1	0	0	STPG1	sperm-tail PG-rich repeat containing 1
hsa-miR-1266	0	0	1	0	1	1	HEMK1	HemK methyltransferase family member 1
hsa-miR-1266	0	0	1	1	1	1	MYEOV	myeloma overexpressed (in a subset of t(11;14) positive multiple myelomas)
hsa-miR-1266	0	0	1	0	0	0	LINC00340	long intergenic non-protein coding RNA 340
hsa-miR-1266	1	0	1	0	0	0	DTX2	deltex homolog 2 (Drosophila)
hsa-miR-1266	1	0	1	1	1	1	DCAF8	DDB1 and CUL4 associated factor 8
hsa-miR-1266	1	0	1	1	1	1	RNF185	ring finger protein 185
hsa-miR-1266	1	0	1	1	1	1	FOXP1	forkhead box P1
hsa-miR-1266	1	0	1	1	1	1	FAM53C	family with sequence similarity 53, member C
hsa-miR-1266	1	0	1	0	1	1	ATP10D	ATPase, class V, type 10D
hsa-miR-1266	0	0	1	1	1	1	DTL	denticleless E3 ubiquitin protein ligase homolog (Drosophila)
hsa-miR-1266	1	0	1	0	1	1	CCNL2	cyclin L2
hsa-miR-1266	1	0	1	1	1	1	KCTD15	potassium channel tetramerisation domain containing 15
hsa-miR-1266	1	0	1	1	1	1	ARHGAP36	Rho GTPase activating protein 36
hsa-miR-1266	0	0	1	1	0	0	IMPDH1	IMP (inosine 5'-monophosphate) dehydrogenase 1
hsa-miR-1266	1	0	1	0	1	1	ZKSCAN1	zinc finger with KRAB and SCAN domains 1
hsa-miR-1266	0	0	1	0	0	0	KIAA0664L3	KIAA0664-like 3
hsa-miR-1266	0	0	1	1	1	1	FAM107A	family with sequence similarity 107, member A
hsa-miR-1266	0	0	1	1	0	0	FGGY	FGGY carbohydrate kinase domain containing
hsa-miR-1266	0	0	1	1	1	1	C8orf46	chromosome 8 open reading frame 46
hsa-miR-1266	1	0	1	0	1	1	AP1G1	adaptor-related protein complex 1, gamma 1 subunit
hsa-miR-1266	0	0	1	1	1	1	TOX2	TOX high mobility group box family member 2
hsa-miR-1266	0	0	1	1	1	1	THEM6	thioesterase superfamily member 6
hsa-miR-1266	0	0	1	0	0	0	LOC100131060	uncharacterized LOC100131060
hsa-miR-1266	1	0	1	1	1	1	DLGAP4	discs, large (Drosophila) homolog-associated protein 4
hsa-miR-1266	0	0	1	0	0	0	LOC154092	uncharacterized LOC154092
hsa-miR-1266	0	0	1	1	1	1	GABRP	gamma-aminobutyric acid (GABA) A receptor, pi
hsa-miR-1266	0	0	1	1	1	1	ZNF213	zinc finger protein 213
hsa-miR-1266	0	0	1	0	0	0	FLJ30838	uncharacterized LOC400955
hsa-miR-1266	0	0	1	0	0	0	LOC401242	uncharacterized LOC401242
hsa-miR-1266	1	0	1	1	1	1	FRMD6	FERM domain containing 6
hsa-miR-1266	1	0	1	1	1	1	PDLIM2	PDZ and LIM domain 2 (mystique)
hsa-miR-1266	0	0	1	1	0	0	USP11	ubiquitin specific peptidase 11
hsa-miR-1266	0	0	1	0	0	0	FLJ31104	uncharacterized LOC441072
hsa-miR-1266	1	0	1	1	1	1	DIXDC1	DIX domain containing 1
hsa-miR-1266	0	0	1	0	0	0	BTBD19	BTB (POZ) domain containing 19
hsa-miR-1266	0	0	1	0	0	0	JPX	JPX transcript, XIST activator (non-protein coding)
hsa-miR-1266	1	0	1	1	1	1	LMNA	lamin A/C
hsa-miR-1266	1	0	1	0	1	1	FSTL4	follistatin-like 4
hsa-miR-1266	1	0	1	1	1	1	AGPAT1	1-acylglycerol-3-phosphate O-acyltransferase 1 (lysophosphatidic acid acyltransferase, alpha)
hsa-miR-1266	1	0	1	1	1	1	SCAMP5	secretory carrier membrane protein 5
hsa-miR-1266	0	0	1	0	0	0	AFG3L1P	AFG3 ATPase family gene 3-like 1 (S. cerevisiae), pseudogene
hsa-miR-1266	0	0	1	1	1	1	IPO4	importin 4
hsa-miR-1266	0	0	1	0	0	0	LOC158376	uncharacterized LOC158376
hsa-miR-1266	0	0	1	1	1	1	GNB2	guanine nucleotide binding protein (G protein), beta polypeptide 2
hsa-miR-1266	0	0	1	0	0	0	LOC157381	uncharacterized LOC157381
hsa-miR-1266	0	0	1	1	1	1	XAF1	XIAP associated factor 1
hsa-miR-1266	0	0	1	0	1	1	THAP6	THAP domain containing 6
hsa-miR-1266	0	0	1	1	0	0	COMMD4	COMM domain containing 4
hsa-miR-1266	0	0	1	1	0	0	VWA5B1	von Willebrand factor A domain containing 5B1
hsa-miR-1266	0	0	1	1	0	0	NXF2	nuclear RNA export factor 2
hsa-miR-1266	0	0	1	1	1	1	ELL3	elongation factor RNA polymerase II-like 3
hsa-miR-1266	1	0	1	1	1	1	SEC22A	SEC22 vesicle trafficking protein homolog A (S. cerevisiae)
hsa-miR-1266	1	0	1	1	0	0	GBA2	glucosidase, beta (bile acid) 2
hsa-miR-1266	0	0	1	1	0	0	FAM156A	family with sequence similarity 156, member A
hsa-miR-1266	0	0	1	0	0	0	INTS4L1	integrator complex subunit 4-like 1
hsa-miR-1266	0	0	1	0	0	0	UBE2QL1	ubiquitin-conjugating enzyme E2Q family-like 1
hsa-miR-1266	0	0	1	0	0	0	LOC284014	uncharacterized LOC284014
hsa-miR-1266	0	0	1	1	0	0	CD320	CD320 molecule
hsa-miR-1266	0	0	1	0	1	1	UHMK1	U2AF homology motif (UHM) kinase 1
hsa-miR-1266	1	0	1	1	1	1	FAM102A	family with sequence similarity 102, member A
hsa-miR-1266	1	0	1	1	1	1	FAM73B	family with sequence similarity 73, member B
hsa-miR-1266	1	0	1	0	1	1	RNF165	ring finger protein 165
hsa-miR-1266	0	0	1	1	1	1	ZFAND2B	zinc finger, AN1-type domain 2B
hsa-miR-1266	0	0	1	0	0	0	SDHAP2	succinate dehydrogenase complex, subunit A, flavoprotein pseudogene 2
hsa-miR-1266	1	0	1	1	1	1	UBAP1	ubiquitin associated protein 1
hsa-miR-1266	0	0	1	1	1	1	TMEM139	transmembrane protein 139
hsa-miR-1266	0	0	1	1	1	1	CAMKV	CaM kinase-like vesicle-associated
hsa-miR-1266	1	0	1	1	1	1	KCTD6	potassium channel tetramerisation domain containing 6
hsa-miR-1266	0	0	1	1	1	1	ANKDD1A	ankyrin repeat and death domain containing 1A
hsa-miR-1266	0	0	1	1	0	0	PIGO	phosphatidylinositol glycan anchor biosynthesis, class O
hsa-miR-1266	1	0	1	1	1	1	DPH1	DPH1 homolog (S. cerevisiae)
hsa-miR-1266	1	0	1	1	1	1	CYP46A1	cytochrome P450, family 46, subfamily A, polypeptide 1
hsa-miR-1266	0	0	1	0	1	1	TMSB15B	thymosin beta 15B
hsa-miR-1266	0	0	1	0	0	0	LOC643837	uncharacterized LOC643837
hsa-miR-1266	0	0	1	1	0	0	ACOT11	acyl-CoA thioesterase 11
hsa-miR-1266	0	0	1	1	0	0	CTNNBL1	catenin, beta like 1
hsa-miR-1266	1	0	1	1	1	1	ARIH2	ariadne homolog 2 (Drosophila)
hsa-miR-1266	1	0	1	1	1	1	EGR2	early growth response 2
hsa-miR-1266	0	0	1	0	0	0	SEC14L2	SEC14-like 2 (S. cerevisiae)
hsa-miR-1266	0	0	1	0	1	1	PIANP	PILR alpha associated neural protein
hsa-miR-1266	1	0	1	1	1	1	SUPT16H	suppressor of Ty 16 homolog (S. cerevisiae)
hsa-miR-1266	0	0	1	1	1	1	CD34	CD34 molecule
hsa-miR-1266	1	0	1	0	1	1	TEF	thyrotrophic embryonic factor
hsa-miR-1266	1	0	1	1	1	1	EPN2	epsin 2
hsa-miR-1266	1	0	1	1	0	0	TOE1	target of EGR1, member 1 (nuclear)
hsa-miR-1266	0	0	1	0	0	0	LOC283887	uncharacterized LOC283887
hsa-miR-1266	1	0	1	1	1	1	HMOX2	heme oxygenase (decycling) 2
hsa-miR-1266	0	0	1	1	0	0	AXDND1	axonemal dynein light chain domain containing 1
hsa-miR-1266	0	0	1	1	0	0	EIF3B	eukaryotic translation initiation factor 3, subunit B
hsa-miR-1266	0	0	1	0	0	0	CXXC1P1	CXXC finger protein 1 pseudogene 1
hsa-miR-1266	0	0	1	1	1	1	C19orf47	chromosome 19 open reading frame 47
hsa-miR-1266	0	0	1	1	1	1	SPOCK1	sparc/osteonectin, cwcv and kazal-like domains proteoglycan (testican) 1
hsa-miR-1266	0	0	1	0	0	0	PART1	prostate androgen-regulated transcript 1 (non-protein coding)
hsa-miR-1266	0	0	1	1	1	1	CORO7	coronin 7
hsa-miR-1266	1	0	1	0	1	1	GATAD2B	GATA zinc finger domain containing 2B
hsa-miR-1266	0	0	1	1	0	0	C9orf24	chromosome 9 open reading frame 24
hsa-miR-1266	0	0	1	1	1	1	METTL13	methyltransferase like 13
hsa-miR-1266	0	0	1	0	1	1	AGBL4	ATP/GTP binding protein-like 4
hsa-miR-1266	0	0	1	0	0	0	MYO1H	myosin IH
hsa-miR-1266	0	0	1	0	0	0	LOC285778	uncharacterized LOC285778
hsa-miR-1266	0	0	1	1	0	0	TMEM108	transmembrane protein 108
hsa-miR-1266	0	0	1	1	1	1	MOBP	myelin-associated oligodendrocyte basic protein
hsa-miR-1266	0	0	1	1	1	1	MYBBP1A	MYB binding protein (P160) 1a
hsa-miR-1266	1	0	1	1	1	1	ANKRD46	ankyrin repeat domain 46
hsa-miR-1266	0	0	1	1	0	0	ZNF185	zinc finger protein 185 (LIM domain)
hsa-miR-1266	1	0	1	1	0	0	SAP30BP	SAP30 binding protein
hsa-miR-1266	1	0	1	1	0	0	DOT1L	DOT1-like, histone H3 methyltransferase (S. cerevisiae)
hsa-miR-1266	1	0	1	1	1	1	EPHB1	EPH receptor B1
hsa-miR-1266	0	0	1	1	1	1	GPR115	G protein-coupled receptor 115
hsa-miR-1266	0	0	1	1	0	0	NLRP12	NLR family, pyrin domain containing 12
hsa-miR-1266	1	0	1	1	0	0	FSCN1	fascin homolog 1, actin-bundling protein (Strongylocentrotus purpuratus)
hsa-miR-1266	1	0	1	1	1	1	CS	citrate synthase
hsa-miR-1266	1	0	1	1	1	1	PEA15	phosphoprotein enriched in astrocytes 15
hsa-miR-1266	0	0	1	1	1	1	FBLN1	fibulin 1
hsa-miR-1266	0	0	1	1	1	1	HADH	hydroxyacyl-CoA dehydrogenase
hsa-miR-1266	0	0	1	0	0	0	LOC100133029	sirtuin 5 pseudogene
hsa-miR-1266	0	0	1	1	0	0	TRIM46	tripartite motif containing 46
hsa-miR-1266	1	0	1	1	1	1	GAPVD1	GTPase activating protein and VPS9 domains 1
hsa-miR-1266	1	0	1	1	0	0	FBRS	fibrosin
hsa-miR-1266	0	0	1	0	0	0	C1orf204	chromosome 1 open reading frame 204
hsa-miR-1266	1	0	1	0	1	1	THRB	thyroid hormone receptor, beta
hsa-miR-1266	1	0	1	1	1	1	C3orf62	chromosome 3 open reading frame 62
hsa-miR-1266	1	0	1	1	1	1	CCDC141	coiled-coil domain containing 141
hsa-miR-1266	1	0	1	1	1	1	ETS2	v-ets erythroblastosis virus E26 oncogene homolog 2 (avian)
hsa-miR-1266	1	0	1	1	1	1	EPB41L1	erythrocyte membrane protein band 4.1-like 1
hsa-miR-1266	0	0	1	1	1	1	EXTL2	exostoses (multiple)-like 2
hsa-miR-1266	0	0	1	1	0	0	TCEANC	transcription elongation factor A (SII) N-terminal and central domain containing
hsa-miR-1266	1	0	1	1	1	1	KL	klotho
hsa-miR-1266	0	0	1	1	0	0	LAS1L	LAS1-like (S. cerevisiae)
hsa-miR-1266	0	0	1	1	1	1	LRRC27	leucine rich repeat containing 27
hsa-miR-1266	1	0	1	1	1	1	RAB11FIP4	RAB11 family interacting protein 4 (class II)
hsa-miR-1266	0	0	1	0	0	0	LOC100128560	uncharacterized LOC100128560
hsa-miR-1266	1	0	1	1	1	1	GDA	guanine deaminase
hsa-miR-1266	0	0	1	1	0	0	AHCY	adenosylhomocysteinase
hsa-miR-1266	0	0	1	1	1	1	CBWD5	COBW domain containing 5
hsa-miR-1266	0	0	1	1	0	0	C10orf68	chromosome 10 open reading frame 68
hsa-miR-1266	0	0	1	0	0	0	LOC284385	uncharacterized LOC284385
hsa-miR-1266	0	0	1	1	0	0	PSAPL1	prosaposin-like 1 (gene/pseudogene)
hsa-miR-1266	0	0	1	1	0	0	CDC25C	cell division cycle 25 homolog C (S. pombe)
hsa-miR-1266	0	0	1	1	0	0	KLHDC3	kelch domain containing 3
hsa-miR-1266	0	0	1	0	0	0	HLA-DQB2	major histocompatibility complex, class II, DQ beta 2
hsa-miR-1266	0	0	1	0	0	0	CECR7	cat eye syndrome chromosome region, candidate 7 (non-protein coding)
hsa-miR-1266	1	0	1	1	1	1	GATM	glycine amidinotransferase (L-arginine:glycine amidinotransferase)
hsa-miR-1266	0	0	1	0	0	0	LOC100130954	uncharacterized LOC100130954
hsa-miR-1266	1	0	1	1	1	1	SLC12A5	solute carrier family 12 (potassium/chloride transporter), member 5
hsa-miR-1266	0	0	1	1	0	0	PPAPDC1A	phosphatidic acid phosphatase type 2 domain containing 1A
hsa-miR-1266	1	0	1	1	1	1	NAP1L1	nucleosome assembly protein 1-like 1
hsa-miR-1266	0	0	1	1	1	1	SLFN13	schlafen family member 13
hsa-miR-1266	0	0	1	1	0	0	FBXO18	F-box protein, helicase, 18
hsa-miR-1266	1	0	1	1	1	1	CRMP1	collapsin response mediator protein 1
hsa-miR-1266	1	0	1	1	0	0	SLX4	SLX4 structure-specific endonuclease subunit homolog (S. cerevisiae)
hsa-miR-1266	0	0	1	1	1	1	HMGCL	3-hydroxymethyl-3-methylglutaryl-CoA lyase
hsa-miR-1266	1	0	1	1	1	1	BCL6B	B-cell CLL/lymphoma 6, member B
hsa-miR-1266	1	0	1	1	0	0	CACNB3	calcium channel, voltage-dependent, beta 3 subunit
hsa-miR-1266	0	0	1	1	0	0	PMFBP1	polyamine modulated factor 1 binding protein 1
hsa-miR-1266	1	0	1	1	1	1	ABHD6	abhydrolase domain containing 6
hsa-miR-1266	0	0	1	1	1	1	ARHGEF26	Rho guanine nucleotide exchange factor (GEF) 26
hsa-miR-1266	0	0	1	0	1	1	FLJ41200	uncharacterized LOC401492
hsa-miR-1266	1	0	1	1	1	1	MDGA2	MAM domain containing glycosylphosphatidylinositol anchor 2
hsa-miR-1266	0	0	1	1	1	1	SLC13A3	solute carrier family 13 (sodium-dependent dicarboxylate transporter), member 3
hsa-miR-1266	0	0	1	0	0	0	MORN2	MORN repeat containing 2
hsa-miR-1266	1	0	1	0	1	1	KCNK2	potassium channel, subfamily K, member 2
hsa-miR-1266	1	0	1	1	1	1	IPPK	inositol 1,3,4,5,6-pentakisphosphate 2-kinase
hsa-miR-1266	0	0	1	1	0	0	C16orf86	chromosome 16 open reading frame 86
hsa-miR-1266	1	0	1	1	1	1	FAM219A	family with sequence similarity 219, member A
hsa-miR-1266	0	0	1	1	1	1	BTN2A2	butyrophilin, subfamily 2, member A2
hsa-miR-1266	1	0	1	1	1	1	OSBPL9	oxysterol binding protein-like 9
hsa-miR-1266	0	0	1	1	0	0	NMI	N-myc (and STAT) interactor
hsa-miR-1266	0	0	1	0	1	1	NAIP	NLR family, apoptosis inhibitory protein
hsa-miR-1266	0	0	1	1	0	0	NPIP	nuclear pore complex interacting protein
hsa-miR-1266	1	0	1	0	1	1	TTYH3	tweety homolog 3 (Drosophila)
hsa-miR-1266	1	0	1	1	0	0	OSBPL5	oxysterol binding protein-like 5
hsa-miR-1266	1	0	1	1	1	1	SLC44A1	solute carrier family 44, member 1
hsa-miR-1266	0	0	1	0	0	0	TMEM232	transmembrane protein 232
hsa-miR-1266	1	0	1	0	1	1	RBM23	RNA binding motif protein 23
hsa-miR-1266	1	0	1	0	0	0	MSL1	male-specific lethal 1 homolog (Drosophila)
hsa-miR-1266	0	0	1	1	1	1	PLOD2	procollagen-lysine, 2-oxoglutarate 5-dioxygenase 2
hsa-miR-1266	0	0	1	1	0	0	LOC399829	uncharacterized LOC399829
hsa-miR-1266	0	0	1	1	1	1	EPPIN	epididymal peptidase inhibitor
hsa-miR-1266	1	0	1	1	0	0	ATXN7L3	ataxin 7-like 3
hsa-miR-1266	1	0	1	1	1	1	PIK3R1	phosphoinositide-3-kinase, regulatory subunit 1 (alpha)
hsa-miR-1266	1	0	1	0	1	1	ANO6	anoctamin 6
hsa-miR-1266	0	0	1	0	1	1	LOC388942	uncharacterized LOC388942
hsa-miR-1266	0	0	1	1	1	1	CCDC132	coiled-coil domain containing 132
hsa-miR-1266	0	0	1	1	0	0	HSPG2	heparan sulfate proteoglycan 2
hsa-miR-1266	0	0	1	1	0	0	CCDC88B	coiled-coil domain containing 88B
hsa-miR-1266	1	0	1	1	1	1	DLG2	discs, large homolog 2 (Drosophila)
hsa-miR-1266	0	0	1	1	0	0	TMEM151B	transmembrane protein 151B
hsa-miR-1266	0	0	1	1	1	1	SZT2	seizure threshold 2 homolog (mouse)
hsa-miR-1266	1	0	1	1	1	1	C14orf28	chromosome 14 open reading frame 28
hsa-miR-1266	0	0	1	0	0	0	RPL23AP53	ribosomal protein L23a pseudogene 53
hsa-miR-1266	1	0	1	1	1	1	MKRN1	makorin ring finger protein 1
hsa-miR-1266	0	0	1	1	1	1	USP4	ubiquitin specific peptidase 4 (proto-oncogene)
hsa-miR-1266	1	0	1	1	1	1	CLTC	clathrin, heavy chain (Hc)
hsa-miR-1266	0	0	1	1	0	0	FAM54B	family with sequence similarity 54, member B
hsa-miR-1266	0	0	1	0	0	0	LOC619207	scavenger receptor protein family member
hsa-miR-1266	0	0	1	0	0	0	LOC100128262	uncharacterized LOC100128262
hsa-miR-1266	0	0	1	0	0	0	ERVFRD-2	endogenous retrovirus group FRD, member 2
hsa-miR-1266	1	0	1	1	1	1	PLA2G15	phospholipase A2, group XV
hsa-miR-1266	0	0	1	1	0	0	BPIFB1	BPI fold containing family B, member 1
hsa-miR-1266	0	0	1	1	1	1	SLC35F2	solute carrier family 35, member F2
hsa-miR-1266	0	0	1	1	0	0	LOC100128682	uncharacterized LOC100128682
hsa-miR-1266	0	0	1	0	1	1	FAM46D	family with sequence similarity 46, member D
hsa-miR-1266	0	0	1	0	0	0	FAM205B	transmembrane protein C9orf144B pseudogene
hsa-miR-1266	1	0	1	1	1	1	WDR37	WD repeat domain 37
hsa-miR-1266	1	0	1	1	0	0	C15orf39	chromosome 15 open reading frame 39
hsa-miR-1266	0	0	1	1	0	0	FAM159A	family with sequence similarity 159, member A
hsa-miR-1266	1	0	1	0	1	1	KDM2A	lysine (K)-specific demethylase 2A
hsa-miR-1266	0	0	1	1	1	1	MON1B	MON1 homolog B (yeast)
hsa-miR-1266	1	0	1	1	0	0	ATP2A1	ATPase, Ca++ transporting, cardiac muscle, fast twitch 1
hsa-miR-1266	1	0	1	0	0	0	SP7	Sp7 transcription factor
hsa-miR-1266	1	0	1	0	1	1	KPNA6	karyopherin alpha 6 (importin alpha 7)
hsa-miR-1266	0	0	1	1	1	1	ATXN2	ataxin 2
hsa-miR-1266	0	0	1	1	1	1	TPK1	thiamin pyrophosphokinase 1
hsa-miR-1266	0	0	1	1	0	0	WFIKKN1	WAP, follistatin/kazal, immunoglobulin, kunitz and netrin domain containing 1
hsa-miR-1266	1	0	1	0	1	1	CYB561D1	cytochrome b-561 domain containing 1
hsa-miR-1266	0	0	1	1	0	0	HEATR8	HEAT repeat containing 8
hsa-miR-1266	0	0	1	1	0	0	TMEM91	transmembrane protein 91
hsa-miR-1266	0	0	1	1	1	1	TMEM202	transmembrane protein 202
hsa-miR-1266	0	0	1	0	0	0	LOC390660	FLJ00317 protein
hsa-miR-1266	0	0	1	1	1	1	CDIPT	CDP-diacylglycerol--inositol 3-phosphatidyltransferase
hsa-miR-1266	1	0	1	1	1	1	SMAD7	SMAD family member 7
hsa-miR-1266	1	0	1	0	0	0	ASXL3	additional sex combs like 3 (Drosophila)
hsa-miR-1266	0	0	1	1	1	1	PDE2A	phosphodiesterase 2A, cGMP-stimulated
hsa-miR-1266	1	0	1	1	1	1	LRRK2	leucine-rich repeat kinase 2
hsa-miR-1266	0	0	1	0	0	0	AGAP9	ArfGAP with GTPase domain, ankyrin repeat and PH domain 9
hsa-miR-1266	0	0	1	0	1	1	ATP6V0E2	ATPase, H+ transporting V0 subunit e2
hsa-miR-1266	1	0	1	1	1	1	SYS1	SYS1 Golgi-localized integral membrane protein homolog (S. cerevisiae)
hsa-miR-1266	1	0	1	1	1	1	RBBP4	retinoblastoma binding protein 4
hsa-miR-1266	0	0	1	1	1	1	ARID1A	AT rich interactive domain 1A (SWI-like)
hsa-miR-1266	1	0	1	1	1	1	RPS6KA4	ribosomal protein S6 kinase, 90kDa, polypeptide 4
hsa-miR-1266	1	0	1	0	1	1	SEZ6	seizure related 6 homolog (mouse)
hsa-miR-1266	1	0	1	1	0	0	ABLIM3	actin binding LIM protein family, member 3
hsa-miR-1266	1	0	1	1	1	1	TGFBR3	transforming growth factor, beta receptor III
hsa-miR-1266	1	0	1	1	1	1	NCOA1	nuclear receptor coactivator 1
hsa-miR-1266	0	0	1	1	1	1	PRSS16	protease, serine, 16 (thymus)
hsa-miR-1266	1	0	1	1	1	1	NOVA1	neuro-oncological ventral antigen 1
hsa-miR-1266	1	0	1	1	1	1	DUSP3	dual specificity phosphatase 3
hsa-miR-1266	0	0	1	1	0	0	MCM7	minichromosome maintenance complex component 7
hsa-miR-1266	0	0	1	0	1	1	NEK1	NIMA (never in mitosis gene a)-related kinase 1
hsa-miR-1266	0	0	1	1	0	0	CPNE6	copine VI (neuronal)
hsa-miR-1266	1	0	1	1	1	1	RIF1	RAP1 interacting factor homolog (yeast)
hsa-miR-1266	0	0	1	1	0	0	OPLAH	5-oxoprolinase (ATP-hydrolysing)
hsa-miR-1266	0	0	1	1	1	1	PGAP2	post-GPI attachment to proteins 2
hsa-miR-1266	0	0	1	0	0	0	POM121L9P	POM121 transmembrane nucleoporin-like 9, pseudogene
hsa-miR-1266	0	0	1	0	0	0	POM121L8P	POM121 transmembrane nucleoporin-like 8 pseudogene
hsa-miR-1266	0	0	1	1	0	0	RIMBP3	RIMS binding protein 3
hsa-miR-1266	0	0	1	1	1	1	ARIH1	ariadne homolog, ubiquitin-conjugating enzyme E2 binding protein, 1 (Drosophila)
hsa-miR-1266	0	0	1	1	1	1	GFAP	glial fibrillary acidic protein
hsa-miR-1266	1	0	1	1	1	1	SMAP2	small ArfGAP2
hsa-miR-1266	0	0	1	1	1	1	TTLL5	tubulin tyrosine ligase-like family, member 5
hsa-miR-1266	0	0	1	1	0	0	ODF3	outer dense fiber of sperm tails 3
hsa-miR-1266	0	0	1	0	0	0	KIAA0913	KIAA0913
hsa-miR-1266	0	0	1	1	1	1	MYO9A	myosin IXA
hsa-miR-1266	0	0	1	1	1	1	AQP6	aquaporin 6, kidney specific
hsa-miR-1266	0	0	1	1	0	0	DOPEY1	dopey family member 1
hsa-miR-1266	1	0	1	1	1	1	CTTNBP2NL	CTTNBP2 N-terminal like
hsa-miR-1266	1	0	1	1	1	1	NEO1	neogenin 1
hsa-miR-1266	0	0	1	1	1	1	SLC30A10	solute carrier family 30, member 10
hsa-miR-1266	1	0	1	0	1	1	GRIN3A	glutamate receptor, ionotropic, N-methyl-D-aspartate 3A
hsa-miR-1266	0	0	1	1	1	1	CD276	CD276 molecule
hsa-miR-1266	0	0	1	0	0	0	FAM66D	family with sequence similarity 66, member D
hsa-miR-1266	1	0	1	1	1	1	PKNOX2	PBX/knotted 1 homeobox 2
hsa-miR-1266	1	0	1	1	1	1	MSANTD2	Myb/SANT-like DNA-binding domain containing 2
hsa-miR-1266	1	0	1	1	1	1	YTHDF3	YTH domain family, member 3
hsa-miR-1266	0	0	1	1	0	0	KRBA1	KRAB-A domain containing 1
hsa-miR-1266	1	0	1	1	1	1	BCL2L13	BCL2-like 13 (apoptosis facilitator)
hsa-miR-1266	0	0	1	0	1	1	GAB3	GRB2-associated binding protein 3
hsa-miR-1266	1	0	1	1	1	1	LYPD3	LY6/PLAUR domain containing 3
hsa-miR-1266	0	0	1	1	1	1	SRSF11	serine/arginine-rich splicing factor 11
hsa-miR-1266	1	0	1	1	1	1	CHMP7	charged multivesicular body protein 7
hsa-miR-1266	0	0	1	1	1	1	SYTL4	synaptotagmin-like 4
hsa-miR-1266	1	0	1	1	0	0	PTAR1	protein prenyltransferase alpha subunit repeat containing 1
hsa-miR-1266	0	0	1	0	0	0	FAM225A	family with sequence similarity 225, member A (non-protein coding)
hsa-miR-1266	0	0	1	1	1	1	USPL1	ubiquitin specific peptidase like 1
hsa-miR-1266	1	0	1	1	1	1	FBXO3	F-box protein 3
hsa-miR-1266	0	0	1	1	1	1	CYR61	cysteine-rich, angiogenic inducer, 61
hsa-miR-1266	0	0	1	0	1	1	MYD88	myeloid differentiation primary response gene (88)
hsa-miR-1266	1	0	1	1	1	1	SBF2	SET binding factor 2
hsa-miR-1266	0	0	1	1	0	0	LGI4	leucine-rich repeat LGI family, member 4
hsa-miR-1266	0	0	1	1	1	1	TAF8	TAF8 RNA polymerase II, TATA box binding protein (TBP)-associated factor, 43kDa
hsa-miR-1266	0	0	1	1	0	0	LRRN2	leucine rich repeat neuronal 2
hsa-miR-1266	1	0	1	1	1	1	FAM63B	family with sequence similarity 63, member B
hsa-miR-1266	0	0	1	0	0	0	ADCY10P1	adenylate cyclase 10 (soluble) pseudogene 1
hsa-miR-1266	1	0	1	1	1	1	MARCH7	membrane-associated ring finger (C3HC4) 7, E3 ubiquitin protein ligase
hsa-miR-1266	0	0	1	1	0	0	CD37	CD37 molecule
hsa-miR-1266	1	0	1	1	1	1	ATAT1	alpha tubulin acetyltransferase 1
hsa-miR-1266	1	0	1	1	1	1	IL17RD	interleukin 17 receptor D
hsa-miR-1266	1	0	1	0	0	0	NPEPL1	aminopeptidase-like 1
hsa-miR-1266	1	0	1	1	1	1	SMCR7L	Smith-Magenis syndrome chromosome region, candidate 7-like
hsa-miR-1266	1	0	1	1	1	1	CAPRIN2	caprin family member 2
hsa-miR-1266	1	0	1	1	1	1	MBD6	methyl-CpG binding domain protein 6
hsa-miR-1266	0	0	1	1	1	1	PNMAL1	paraneoplastic Ma antigen family-like 1
hsa-miR-1266	1	0	1	0	1	1	KIF21B	kinesin family member 21B
hsa-miR-1266	0	0	1	1	1	1	LMAN2L	lectin, mannose-binding 2-like
hsa-miR-1266	0	0	1	0	1	1	SYNPO2	synaptopodin 2
hsa-miR-1266	1	0	1	0	1	1	PATL1	protein associated with topoisomerase II homolog 1 (yeast)
hsa-miR-1266	1	0	1	1	1	1	SET	SET nuclear oncogene
hsa-miR-1266	1	0	1	1	1	1	TSHZ3	teashirt zinc finger homeobox 3
hsa-miR-1266	0	0	1	1	1	1	TMEM130	transmembrane protein 130
hsa-miR-1266	0	0	1	1	0	0	TMEM134	transmembrane protein 134
hsa-miR-1266	1	0	1	1	1	1	CLIC5	chloride intracellular channel 5
hsa-miR-1266	1	0	1	1	1	1	MAPK3	mitogen-activated protein kinase 3
hsa-miR-1266	1	0	1	1	1	1	RCAN2	regulator of calcineurin 2
hsa-miR-1266	0	0	1	1	1	1	CD209	CD209 molecule
hsa-miR-1266	0	0	1	1	1	1	GPRASP1	G protein-coupled receptor associated sorting protein 1
hsa-miR-1266	0	0	1	0	0	0	KGFLP1	fibroblast growth factor 7 pseudogene
hsa-miR-1266	1	0	1	1	1	1	SORCS1	sortilin-related VPS10 domain containing receptor 1
hsa-miR-1266	0	0	1	1	0	0	CRB3	crumbs homolog 3 (Drosophila)
hsa-miR-1266	0	0	1	0	0	0	CR1L	complement component (3b/4b) receptor 1-like
hsa-miR-1266	1	0	1	1	1	1	USF2	upstream transcription factor 2, c-fos interacting
hsa-miR-1266	0	0	1	1	1	1	CEP41	centrosomal protein 41kDa
hsa-miR-1266	0	0	1	1	1	1	APTX	aprataxin
hsa-miR-1266	0	0	1	1	0	0	ZSCAN30	zinc finger and SCAN domain containing 30
hsa-miR-1266	1	0	1	1	1	1	PBRM1	polybromo 1
hsa-miR-1266	1	0	1	1	1	1	OPRM1	opioid receptor, mu 1
hsa-miR-1266	0	0	1	1	1	1	STAG3L3	stromal antigen 3-like 3
hsa-miR-1266	0	0	1	0	0	0	MEG3	maternally expressed 3 (non-protein coding)
hsa-miR-1266	1	0	1	1	1	1	RAI14	retinoic acid induced 14
hsa-miR-1266	0	0	1	1	1	1	GON4L	gon-4-like (C. elegans)
hsa-miR-1266	1	0	1	1	1	1	CAMTA1	calmodulin binding transcription activator 1
hsa-miR-1266	0	0	1	1	0	0	LRRC28	leucine rich repeat containing 28
hsa-miR-1266	0	0	1	1	1	1	LRRC18	leucine rich repeat containing 18
hsa-miR-1266	0	0	1	1	0	0	ART5	ADP-ribosyltransferase 5
hsa-miR-1266	0	0	1	1	1	1	PIGG	phosphatidylinositol glycan anchor biosynthesis, class G
hsa-miR-1266	0	0	1	0	0	0	LINC00085	long intergenic non-protein coding RNA 85
hsa-miR-1266	0	0	1	1	0	0	RAET1E	retinoic acid early transcript 1E
hsa-miR-1266	1	0	1	0	1	1	ANKRD28	ankyrin repeat domain 28
hsa-miR-1266	0	0	1	1	1	1	NYAP1	neuronal tyrosine-phosphorylated phosphoinositide-3-kinase adaptor 1
hsa-miR-1266	1	0	1	1	1	1	ECT2	epithelial cell transforming sequence 2 oncogene
hsa-miR-1266	0	0	1	0	0	0	CACNA1B	calcium channel, voltage-dependent, N type, alpha 1B subunit
hsa-miR-1266	1	0	1	1	1	1	GLRA2	glycine receptor, alpha 2
hsa-miR-1266	0	0	1	1	1	1	POTEG	POTE ankyrin domain family, member G
hsa-miR-1266	0	0	1	1	0	0	SH2D6	SH2 domain containing 6
hsa-miR-1266	0	0	1	0	1	1	XKR5	XK, Kell blood group complex subunit-related family, member 5
hsa-miR-1266	1	0	1	1	1	1	MECP2	methyl CpG binding protein 2 (Rett syndrome)
hsa-miR-1266	1	0	1	1	0	0	ADAM15	ADAM metallopeptidase domain 15
hsa-miR-1266	1	0	1	1	1	1	ITSN1	intersectin 1 (SH3 domain protein)
hsa-miR-1266	0	0	1	1	0	0	DHRS4	dehydrogenase/reductase (SDR family) member 4
hsa-miR-1266	0	0	1	1	1	1	SMPD1	sphingomyelin phosphodiesterase 1, acid lysosomal
hsa-miR-1266	1	0	1	1	1	1	TRIT1	tRNA isopentenyltransferase 1
hsa-miR-1266	1	0	1	0	1	1	MYO18A	myosin XVIIIA
hsa-miR-1266	1	0	1	1	1	1	PFKFB4	6-phosphofructo-2-kinase/fructose-2,6-biphosphatase 4
hsa-miR-1266	0	0	1	1	1	1	CEACAM1	carcinoembryonic antigen-related cell adhesion molecule 1 (biliary glycoprotein)
hsa-miR-1266	0	0	1	0	1	1	KCNE1	potassium voltage-gated channel, Isk-related family, member 1
hsa-miR-1266	0	0	1	0	0	0	PTPRVP	protein tyrosine phosphatase, receptor type, V, pseudogene
hsa-miR-1266	0	0	1	1	0	0	NBPF8	neuroblastoma breakpoint family, member 8
hsa-miR-1266	0	0	1	1	1	1	CDK20	cyclin-dependent kinase 20
hsa-miR-1266	1	0	1	1	0	0	PLXNB3	plexin B3
hsa-miR-1266	1	0	1	1	1	1	AMOT	angiomotin
hsa-miR-1266	0	0	1	1	0	0	DHCR7	7-dehydrocholesterol reductase
hsa-miR-1266	0	0	1	1	0	0	C17orf53	chromosome 17 open reading frame 53
hsa-miR-1266	1	0	1	0	1	1	FAM46A	family with sequence similarity 46, member A
hsa-miR-1266	0	0	1	1	1	1	SNX11	sorting nexin 11
hsa-miR-1266	1	0	1	1	1	1	PDLIM3	PDZ and LIM domain 3
hsa-miR-1266	0	0	1	1	0	0	DGUOK	deoxyguanosine kinase
hsa-miR-1266	0	0	1	1	0	0	NCAPH2	non-SMC condensin II complex, subunit H2
hsa-miR-1266	0	0	1	1	1	1	B4GALT2	UDP-Gal:betaGlcNAc beta 1,4- galactosyltransferase, polypeptide 2
hsa-miR-1266	0	0	1	1	1	1	WDR55	WD repeat domain 55
hsa-miR-1266	1	0	1	1	1	1	MYCN	v-myc myelocytomatosis viral related oncogene, neuroblastoma derived (avian)
hsa-miR-1266	0	0	1	1	1	1	TUFT1	tuftelin 1
hsa-miR-1266	1	0	1	0	0	0	VGLL4	vestigial like 4 (Drosophila)
hsa-miR-1266	1	0	1	1	1	1	RIMS3	regulating synaptic membrane exocytosis 3
hsa-miR-1266	1	0	1	1	1	1	PPP1R11	protein phosphatase 1, regulatory (inhibitor) subunit 11
hsa-miR-1266	1	0	1	0	1	1	DCAF10	DDB1 and CUL4 associated factor 10
hsa-miR-1266	1	0	1	1	1	1	SMO	smoothened, frizzled family receptor
hsa-miR-1266	0	0	1	1	1	1	RABL5	RAB, member RAS oncogene family-like 5
hsa-miR-1266	0	0	1	1	0	0	PNLIPRP1	pancreatic lipase-related protein 1
hsa-miR-1266	0	0	1	1	1	1	PRMT5	protein arginine methyltransferase 5
hsa-miR-1266	1	0	1	1	1	1	POU2F2	POU class 2 homeobox 2
hsa-miR-1266	0	0	1	0	0	0	MGC13053	uncharacterized MGC13053
hsa-miR-1266	1	0	1	1	1	1	U2SURP	U2 snRNP-associated SURP domain containing
hsa-miR-1266	1	0	1	0	1	1	FAXC	failed axon connections homolog (Drosophila)
hsa-miR-1266	1	0	1	1	1	1	COL2A1	collagen, type II, alpha 1
hsa-miR-1266	0	0	1	1	1	1	KIRREL2	kin of IRRE like 2 (Drosophila)
hsa-miR-1266	1	0	1	1	0	0	OSTF1	osteoclast stimulating factor 1
hsa-miR-1266	0	0	1	1	0	0	RBM14	RNA binding motif protein 14
hsa-miR-1266	1	0	1	1	1	1	SHMT2	serine hydroxymethyltransferase 2 (mitochondrial)
hsa-miR-1266	0	0	1	0	0	0	ATXN7L3B	ataxin 7-like 3B
hsa-miR-1266	0	0	1	1	0	0	BARX1	BARX homeobox 1
hsa-miR-1266	0	0	1	1	0	0	TALDO1	transaldolase 1
hsa-miR-1266	0	0	1	1	0	0	MPRIP	myosin phosphatase Rho interacting protein
hsa-miR-1266	1	0	1	1	1	1	ATP6AP2	ATPase, H+ transporting, lysosomal accessory protein 2
hsa-miR-1266	1	0	1	1	1	1	SLC46A1	solute carrier family 46 (folate transporter), member 1
hsa-miR-1266	0	0	1	1	0	0	MEF2BNB-MEF2B	MEF2BNB-MEF2B readthrough
hsa-miR-1266	0	0	1	1	1	1	TAGLN	transgelin
hsa-miR-1266	0	0	1	1	0	0	TCN2	transcobalamin II
hsa-miR-1266	1	0	1	1	1	1	BTG3	BTG family, member 3
hsa-miR-1266	0	0	1	0	1	1	GDE1	glycerophosphodiester phosphodiesterase 1
hsa-miR-1266	0	0	1	1	1	1	CPNE5	copine V
hsa-miR-1266	0	0	1	1	0	0	MLXIPL	MLX interacting protein-like
hsa-miR-1266	1	0	1	1	1	1	GAS2	growth arrest-specific 2
hsa-miR-1266	1	0	1	1	1	1	TMEM185A	transmembrane protein 185A
hsa-miR-1266	1	0	1	1	1	1	CAP1	CAP, adenylate cyclase-associated protein 1 (yeast)
hsa-miR-1266	0	0	1	1	1	1	KLHL29	kelch-like 29 (Drosophila)
hsa-miR-1266	0	0	1	1	0	0	C9orf11	chromosome 9 open reading frame 11
hsa-miR-1266	0	0	1	0	0	0	LOC729013	uncharacterized LOC729013
hsa-miR-1266	1	0	1	1	0	0	LRFN1	leucine rich repeat and fibronectin type III domain containing 1
hsa-miR-1266	0	0	1	1	1	1	TOMM40L	translocase of outer mitochondrial membrane 40 homolog (yeast)-like
hsa-miR-1266	0	0	1	0	0	0	MGC21881	uncharacterized locus MGC21881
hsa-miR-1266	0	0	1	1	0	0	PARP6	poly (ADP-ribose) polymerase family, member 6
hsa-miR-1266	0	0	1	1	0	0	HBE1	hemoglobin, epsilon 1
hsa-miR-1266	0	0	1	1	0	0	TRIML1	tripartite motif family-like 1
hsa-miR-1266	1	0	1	1	1	1	ZNF512	zinc finger protein 512
hsa-miR-1266	1	0	1	1	0	0	AKT1S1	AKT1 substrate 1 (proline-rich)
hsa-miR-1266	0	0	1	1	0	0	RBCK1	RanBP-type and C3HC4-type zinc finger containing 1
hsa-miR-1266	0	0	1	1	1	1	CMAS	cytidine monophosphate N-acetylneuraminic acid synthetase
hsa-miR-1266	0	0	1	1	1	1	FAM122C	family with sequence similarity 122C
hsa-miR-1266	1	0	1	1	1	1	CC2D1B	coiled-coil and C2 domain containing 1B
hsa-miR-1266	1	0	1	1	1	1	NRF1	nuclear respiratory factor 1
hsa-miR-1266	1	0	1	1	1	1	ELF4	E74-like factor 4 (ets domain transcription factor)
hsa-miR-1266	0	0	1	0	0	0	LOC441528	uncharacterized LOC441528
hsa-miR-1266	0	0	1	1	1	1	GLIPR2	GLI pathogenesis-related 2
hsa-miR-1266	0	0	1	0	0	0	FAM200B	family with sequence similarity 200, member B
hsa-miR-1266	1	0	1	1	1	1	ARHGEF9	Cdc42 guanine nucleotide exchange factor (GEF) 9
hsa-miR-1266	0	0	1	0	0	0	ZNF720	zinc finger protein 720
hsa-miR-1266	0	0	1	1	1	1	PTCD2	pentatricopeptide repeat domain 2
hsa-miR-1266	1	0	1	1	1	1	KIAA1217	KIAA1217
hsa-miR-1266	0	0	1	0	1	1	CD99P1	CD99 molecule pseudogene 1
hsa-miR-1266	0	0	1	1	1	1	LRRK1	leucine-rich repeat kinase 1
hsa-miR-1266	0	0	1	1	0	0	NPRL3	nitrogen permease regulator-like 3 (S. cerevisiae)
hsa-miR-1266	1	0	1	1	1	1	WHSC1	Wolf-Hirschhorn syndrome candidate 1
hsa-miR-1266	0	0	1	1	1	1	TMEM40	transmembrane protein 40
hsa-miR-1266	0	0	1	0	1	1	ZNF718	zinc finger protein 718
hsa-miR-1266	1	0	1	1	1	1	AIF1L	allograft inflammatory factor 1-like
hsa-miR-1266	0	0	1	1	1	1	PDE1C	phosphodiesterase 1C, calmodulin-dependent 70kDa
hsa-miR-1266	0	0	1	1	1	1	CDC42SE2	CDC42 small effector 2
hsa-miR-1266	0	0	1	0	0	0	SNX29P2	sorting nexin 29 pseudogene 2
hsa-miR-1266	0	0	1	1	1	1	TLR4	toll-like receptor 4
hsa-miR-1266	0	0	1	1	1	1	HYAL1	hyaluronoglucosaminidase 1
hsa-miR-1266	1	0	1	1	1	1	VASP	vasodilator-stimulated phosphoprotein
hsa-miR-1266	1	0	1	1	1	1	CRKL	v-crk sarcoma virus CT10 oncogene homolog (avian)-like
hsa-miR-1266	1	0	1	1	1	1	ZDHHC5	zinc finger, DHHC-type containing 5
hsa-miR-1266	0	0	1	1	1	1	HS1BP3	HCLS1 binding protein 3
hsa-miR-1266	0	0	1	1	1	1	SELP	selectin P (granule membrane protein 140kDa, antigen CD62)
hsa-miR-1266	0	0	1	1	1	1	ZNF589	zinc finger protein 589
hsa-miR-1266	0	0	1	1	0	0	SYT3	synaptotagmin III
hsa-miR-1266	1	0	1	1	1	1	TMEM127	transmembrane protein 127
hsa-miR-1266	1	0	1	0	0	0	KCNU1	potassium channel, subfamily U, member 1
hsa-miR-1266	0	0	1	0	0	0	LOC145837	uncharacterized LOC145837
hsa-miR-1266	0	0	1	1	0	0	CCDC42	coiled-coil domain containing 42
hsa-miR-1266	0	0	1	1	1	1	LRMP	lymphoid-restricted membrane protein
hsa-miR-1266	0	0	1	1	0	0	TOMM5	translocase of outer mitochondrial membrane 5 homolog (yeast)
hsa-miR-1266	0	0	1	0	0	0	LOC100130950	uncharacterized LOC100130950
hsa-miR-1266	1	0	1	1	1	1	ATRNL1	attractin-like 1
hsa-miR-1266	1	0	1	1	1	1	SYT9	synaptotagmin IX
hsa-miR-1266	1	0	1	0	1	1	TFEC	transcription factor EC
hsa-miR-1266	0	0	1	1	0	0	TSPAN16	tetraspanin 16
hsa-miR-1266	0	0	1	0	0	0	BCAS3	breast carcinoma amplified sequence 3
hsa-miR-1266	1	0	1	0	1	1	SV2B	synaptic vesicle glycoprotein 2B
hsa-miR-1266	1	0	1	1	1	1	TIAL1	TIA1 cytotoxic granule-associated RNA binding protein-like 1
hsa-miR-1266	0	0	1	1	1	1	CCP110	centriolar coiled coil protein 110kDa
hsa-miR-1266	0	0	1	1	1	1	CD48	CD48 molecule
hsa-miR-1266	0	0	1	1	1	1	TMEM117	transmembrane protein 117
hsa-miR-1266	0	0	1	1	1	1	MFSD1	major facilitator superfamily domain containing 1
hsa-miR-1266	1	0	1	1	1	1	MLLT3	myeloid/lymphoid or mixed-lineage leukemia (trithorax homolog, Drosophila); translocated to, 3
hsa-miR-1266	0	0	1	1	1	1	TARP	TCR gamma alternate reading frame protein
hsa-miR-1266	0	0	1	1	1	1	PIP5K1B	phosphatidylinositol-4-phosphate 5-kinase, type I, beta
hsa-miR-1266	1	0	1	1	1	1	TAF15	TAF15 RNA polymerase II, TATA box binding protein (TBP)-associated factor, 68kDa
hsa-miR-1266	1	0	1	1	1	1	ADARB1	adenosine deaminase, RNA-specific, B1
hsa-miR-1266	1	0	1	1	1	1	ELAVL2	ELAV (embryonic lethal, abnormal vision, Drosophila)-like 2 (Hu antigen B)
hsa-miR-1266	1	0	1	1	0	0	FAM83F	family with sequence similarity 83, member F
hsa-miR-1266	0	0	1	1	0	0	TRIM69	tripartite motif containing 69
hsa-miR-1266	1	0	1	1	1	1	RCOR3	REST corepressor 3
hsa-miR-1266	0	0	1	0	0	0	CFL1P1	cofilin 1 (non-muscle) pseudogene 1
hsa-miR-1266	1	0	1	1	1	1	PFAS	phosphoribosylformylglycinamidine synthase
hsa-miR-1266	0	0	1	1	0	0	ASIC4	acid-sensing (proton-gated) ion channel family member 4
hsa-miR-1266	0	0	1	1	1	1	C7orf53	chromosome 7 open reading frame 53
hsa-miR-1266	1	0	1	0	1	1	CCDC88A	coiled-coil domain containing 88A
hsa-miR-1266	0	0	1	1	1	1	UBXN1	UBX domain protein 1
hsa-miR-1266	1	0	1	1	1	1	RAB5B	RAB5B, member RAS oncogene family
hsa-miR-1266	0	0	1	0	0	0	FAM86JP	family with sequence similarity 86, member A pseudogene
hsa-miR-1266	0	0	1	0	1	1	TTC23L	tetratricopeptide repeat domain 23-like
hsa-miR-1266	1	0	1	1	1	1	SORL1	sortilin-related receptor, L(DLR class) A repeats containing
hsa-miR-1266	1	0	1	1	0	0	DGCR6	DiGeorge syndrome critical region gene 6
hsa-miR-1266	0	0	1	1	1	1	ZNF337	zinc finger protein 337
hsa-miR-1266	0	0	1	1	0	0	PLA2G6	phospholipase A2, group VI (cytosolic, calcium-independent)
hsa-miR-1266	0	0	1	1	1	1	EDA2R	ectodysplasin A2 receptor
hsa-miR-1266	0	0	1	1	1	1	KIF16B	kinesin family member 16B
hsa-miR-1266	0	0	1	0	0	0	TMPRSS12	transmembrane (C-terminal) protease, serine 12
hsa-miR-1266	0	0	1	1	0	0	TSNAXIP1	translin-associated factor X interacting protein 1
hsa-miR-1266	1	0	1	1	0	0	CKAP5	cytoskeleton associated protein 5
hsa-miR-1266	0	0	1	1	0	0	PGS1	phosphatidylglycerophosphate synthase 1
hsa-miR-1266	0	0	1	1	0	0	HCRTR1	hypocretin (orexin) receptor 1
hsa-miR-1266	0	0	1	1	1	1	C6	complement component 6
hsa-miR-1266	0	0	1	0	0	0	LOC339862	uncharacterized LOC339862
hsa-miR-1266	1	0	1	0	1	1	NEGR1	neuronal growth regulator 1
hsa-miR-1266	0	0	1	0	0	0	CYP4F35P	cytochrome P450, family 4, subfamily F, polypeptide 35, pseudogene
hsa-miR-1266	0	0	1	1	1	1	FAM71F1	family with sequence similarity 71, member F1
hsa-miR-1266	1	0	1	0	0	0	RAVER1	ribonucleoprotein, PTB-binding 1
hsa-miR-1266	1	0	1	1	1	1	SOX6	SRY (sex determining region Y)-box 6
hsa-miR-1266	0	0	1	1	1	1	EFCAB13	EF-hand calcium binding domain 13
hsa-miR-1266	0	0	1	0	0	0	CRYBB2P1	crystallin, beta B2 pseudogene 1
hsa-miR-1266	1	0	1	1	1	1	DPP10	dipeptidyl-peptidase 10 (non-functional)
hsa-miR-1266	0	0	1	0	0	0	FLJ36000	uncharacterized FLJ36000
hsa-miR-1266	1	0	1	0	1	1	LPHN3	latrophilin 3
hsa-miR-1266	1	0	1	0	1	1	PACSIN1	protein kinase C and casein kinase substrate in neurons 1
hsa-miR-1266	1	0	1	1	1	1	IL16	interleukin 16
hsa-miR-1266	1	0	1	1	1	1	LEF1	lymphoid enhancer-binding factor 1
hsa-miR-1266	0	0	1	1	1	1	SLC22A23	solute carrier family 22, member 23
hsa-miR-1266	0	0	1	0	0	0	A1BG-AS1	A1BG antisense RNA 1
hsa-miR-1266	0	0	1	1	1	1	SIAE	sialic acid acetylesterase
hsa-miR-1266	1	0	1	1	1	1	ARPP21	cAMP-regulated phosphoprotein, 21kDa
hsa-miR-1266	0	0	1	1	0	0	GRM2	glutamate receptor, metabotropic 2
hsa-miR-1266	0	0	1	0	0	0	MDS2	myelodysplastic syndrome 2 translocation associated
hsa-miR-1266	1	0	1	1	1	1	PRRG1	proline rich Gla (G-carboxyglutamic acid) 1
hsa-miR-1266	1	0	1	1	0	0	INPP5J	inositol polyphosphate-5-phosphatase J
hsa-miR-1266	1	0	1	0	1	1	TNFAIP3	tumor necrosis factor, alpha-induced protein 3
hsa-miR-1266	1	0	1	1	1	1	C12orf76	chromosome 12 open reading frame 76
hsa-miR-1266	0	0	1	1	1	1	COL22A1	collagen, type XXII, alpha 1
hsa-miR-1266	1	0	1	1	1	1	TNFRSF1B	tumor necrosis factor receptor superfamily, member 1B
hsa-miR-1266	1	0	1	1	1	1	MEIS3	Meis homeobox 3
hsa-miR-1266	1	0	1	1	0	0	PRRC2A	proline-rich coiled-coil 2A
hsa-miR-1266	0	0	1	1	1	1	FAM90A1	family with sequence similarity 90, member A1
hsa-miR-1266	0	0	1	0	0	0	MORC2-AS1	MORC2 antisense RNA 1
hsa-miR-1266	1	0	1	1	1	1	ARHGAP30	Rho GTPase activating protein 30
hsa-miR-1266	0	0	1	0	0	0	DKFZp686O1327	uncharacterized LOC401014
hsa-miR-1266	1	0	1	1	1	1	PSIP1	PC4 and SFRS1 interacting protein 1
hsa-miR-1266	0	0	1	0	0	0	FAM27E3	family with sequence similarity 27, member E3
hsa-miR-1266	1	0	1	0	1	1	PSD3	pleckstrin and Sec7 domain containing 3
hsa-miR-1266	1	0	1	1	1	1	MAMDC2	MAM domain containing 2
hsa-miR-1266	0	0	1	1	1	1	MGC57346	uncharacterized LOC401884
hsa-miR-1266	0	0	1	0	0	0	LOC283914	uncharacterized LOC283914
hsa-miR-1266	0	0	1	1	1	1	DOCK8	dedicator of cytokinesis 8
hsa-miR-1266	1	0	1	1	1	1	SENP1	SUMO1/sentrin specific peptidase 1
hsa-miR-1266	1	0	1	1	1	1	CARM1	coactivator-associated arginine methyltransferase 1
hsa-miR-1266	0	0	1	0	0	0	LOC348120	uncharacterized LOC348120
hsa-miR-1266	0	0	1	0	0	0	DPY19L2P4	dpy-19-like 2 pseudogene 4 (C. elegans)
hsa-miR-1266	1	0	1	1	0	0	CELF5	CUGBP, Elav-like family member 5
hsa-miR-1266	1	0	1	1	1	1	WSB1	WD repeat and SOCS box containing 1
hsa-miR-1266	0	0	1	1	0	0	CDA	cytidine deaminase
hsa-miR-1266	1	0	1	1	1	1	CLVS1	clavesin 1
hsa-miR-1266	1	0	1	1	0	0	TMEM219	transmembrane protein 219
hsa-miR-1266	0	0	1	1	0	0	NLRC5	NLR family, CARD domain containing 5
hsa-miR-1266	1	0	1	1	1	1	FNDC3A	fibronectin type III domain containing 3A
hsa-miR-1266	1	0	1	0	1	1	SMURF2	SMAD specific E3 ubiquitin protein ligase 2
hsa-miR-1266	0	0	1	1	0	0	GPRASP2	G protein-coupled receptor associated sorting protein 2
hsa-miR-1266	0	0	1	1	1	1	RAB3IL1	RAB3A interacting protein (rabin3)-like 1
hsa-miR-1266	1	0	1	1	1	1	BZW2	basic leucine zipper and W2 domains 2
hsa-miR-1266	0	0	1	1	1	1	COG2	component of oligomeric golgi complex 2
hsa-miR-1266	1	0	1	1	1	1	SCUBE3	signal peptide, CUB domain, EGF-like 3
hsa-miR-1266	1	0	1	1	1	1	HP1BP3	heterochromatin protein 1, binding protein 3
hsa-miR-1266	0	0	1	1	0	0	LY6H	lymphocyte antigen 6 complex, locus H
hsa-miR-1266	0	0	1	1	0	0	EDC4	enhancer of mRNA decapping 4
hsa-miR-1266	0	0	1	0	0	0	LINC00265	long intergenic non-protein coding RNA 265
hsa-miR-1266	1	0	1	1	1	1	RCC2	regulator of chromosome condensation 2
hsa-miR-1266	0	0	1	1	1	1	HOGA1	4-hydroxy-2-oxoglutarate aldolase 1
hsa-miR-1266	1	0	1	0	1	1	C7orf41	chromosome 7 open reading frame 41
hsa-miR-1266	1	0	1	1	0	0	ANKRD13B	ankyrin repeat domain 13B
hsa-miR-1266	0	0	1	1	0	0	PRR19	proline rich 19
hsa-miR-1266	1	0	1	1	1	1	PDGFRA	platelet-derived growth factor receptor, alpha polypeptide
hsa-miR-1266	0	0	1	1	1	1	GPATCH2	G patch domain containing 2
hsa-miR-1266	0	0	1	1	0	0	C8orf31	chromosome 8 open reading frame 31
hsa-miR-1266	0	0	1	1	1	1	CAMLG	calcium modulating ligand
hsa-miR-1266	0	0	1	1	1	1	ATF7IP	activating transcription factor 7 interacting protein
hsa-miR-1266	1	0	1	0	0	0	PRRT4	proline-rich transmembrane protein 4
hsa-miR-1266	1	0	1	1	1	1	ADCY6	adenylate cyclase 6
hsa-miR-1266	1	0	1	1	1	1	EIF4G2	eukaryotic translation initiation factor 4 gamma, 2
hsa-miR-1266	1	0	1	1	1	1	VTCN1	V-set domain containing T cell activation inhibitor 1
hsa-miR-1266	1	0	1	1	1	1	CUX1	cut-like homeobox 1
hsa-miR-1266	0	0	1	1	1	1	SH2D1B	SH2 domain containing 1B
hsa-miR-1266	1	0	1	1	1	1	C5orf25	chromosome 5 open reading frame 25
hsa-miR-1266	1	0	1	1	1	1	FAM129B	family with sequence similarity 129, member B
hsa-miR-1266	1	0	1	1	1	1	FTL	ferritin, light polypeptide
hsa-miR-1266	0	0	1	1	0	0	TMEM183A	transmembrane protein 183A
hsa-miR-1266	0	0	1	1	0	0	CELF3	CUGBP, Elav-like family member 3
hsa-miR-1266	0	0	1	0	0	0	PABPC1P2	poly(A) binding protein, cytoplasmic 1 pseudogene 2
hsa-miR-1266	1	0	1	1	1	1	SLC26A7	solute carrier family 26, member 7
hsa-miR-1266	1	0	1	1	1	1	MAPKAPK3	mitogen-activated protein kinase-activated protein kinase 3
hsa-miR-1266	1	0	1	1	1	1	PHACTR4	phosphatase and actin regulator 4
hsa-miR-1266	0	0	1	0	0	0	FLJ12334	uncharacterized LOC400946
hsa-miR-1266	0	0	1	0	0	0	CHADL	chondroadherin-like
hsa-miR-1266	0	0	1	0	0	0	PTGER4P2	prostaglandin E receptor 4 (subtype EP4) pseudogene 2
hsa-miR-1266	0	0	1	1	0	0	OCM	oncomodulin
hsa-miR-1266	0	0	1	1	0	0	CYP4F30P	cytochrome P450, family 4, subfamily F, polypeptide 30, pseudogene
hsa-miR-1266	0	0	1	1	0	0	SLAMF9	SLAM family member 9
hsa-miR-1266	0	0	1	0	0	0	AQP7P2	aquaporin 7 pseudogene 2
hsa-miR-1266	0	0	1	0	0	0	ULK4P1	unc-51-like kinase 4 (C. elegans) pseudogene 1
hsa-miR-1266	1	0	1	0	1	1	TGFBR1	transforming growth factor, beta receptor 1
hsa-miR-1266	1	0	1	0	1	1	TMEM194A	transmembrane protein 194A
hsa-miR-1266	0	0	1	1	0	0	D2HGDH	D-2-hydroxyglutarate dehydrogenase
hsa-miR-1266	0	0	1	1	1	1	CTXN3	cortexin 3
hsa-miR-1266	0	0	1	0	0	0	ULK4P3	unc-51-like kinase 4 (C. elegans) pseudogene 3
hsa-miR-1266	0	0	1	0	0	0	TRGV9	T cell receptor gamma variable 9
hsa-miR-1266	1	0	1	1	1	1	NTRK2	neurotrophic tyrosine kinase, receptor, type 2
hsa-miR-1266	1	0	1	0	1	1	AMMECR1L	AMME chromosomal region gene 1-like
hsa-miR-1266	0	0	1	0	0	0	LINC00537	long intergenic non-protein coding RNA 537
hsa-miR-1266	0	0	1	1	0	0	FAM98C	family with sequence similarity 98, member C
hsa-miR-1266	0	0	1	0	0	0	TBC1D25	TBC1 domain family, member 25
hsa-miR-1266	0	0	1	0	0	0	LOC554249	uncharacterized LOC554249
hsa-miR-1266	0	0	1	1	1	1	MAPK13	mitogen-activated protein kinase 13
hsa-miR-1266	0	0	1	0	1	1	LOC389043	uncharacterized LOC389043
hsa-miR-1266	0	0	1	1	0	0	TMEM222	transmembrane protein 222
hsa-miR-1266	1	0	1	1	1	1	FMNL3	formin-like 3
hsa-miR-1266	1	0	1	1	0	0	TIMM17B	translocase of inner mitochondrial membrane 17 homolog B (yeast)
hsa-miR-1266	1	0	1	1	1	1	STK38	serine/threonine kinase 38
hsa-miR-1266	1	0	1	1	1	1	ST8SIA2	ST8 alpha-N-acetyl-neuraminide alpha-2,8-sialyltransferase 2
hsa-miR-1266	0	0	1	0	0	0	ABCA11P	ATP-binding cassette, sub-family A (ABC1), member 11, pseudogene
hsa-miR-1266	1	0	1	1	1	1	GTF2I	general transcription factor IIi
hsa-miR-1266	1	0	1	0	1	1	MYBL1	v-myb myeloblastosis viral oncogene homolog (avian)-like 1
hsa-miR-1266	0	0	1	1	0	0	FBXO16	F-box protein 16
hsa-miR-1266	0	0	1	1	0	0	ADAMTS13	ADAM metallopeptidase with thrombospondin type 1 motif, 13
hsa-miR-1266	0	0	1	1	0	0	TMC1	transmembrane channel-like 1
hsa-miR-1266	0	0	1	0	0	0	LSAMP-AS3	LSAMP antisense RNA 3
hsa-miR-1266	1	0	1	1	0	0	KIAA1644	KIAA1644
hsa-miR-1266	0	0	1	1	0	0	ANAPC11	anaphase promoting complex subunit 11
hsa-miR-1266	0	0	1	1	1	1	TTN	titin
hsa-miR-1266	1	0	1	0	1	1	BTBD3	BTB (POZ) domain containing 3
hsa-miR-1266	0	0	1	1	0	0	RELA	v-rel reticuloendotheliosis viral oncogene homolog A (avian)
hsa-miR-1266	0	0	1	1	1	1	SMTNL2	smoothelin-like 2
hsa-miR-1266	1	0	1	0	1	1	MAP3K9	mitogen-activated protein kinase kinase kinase 9
hsa-miR-1266	0	0	1	0	0	0	LRRC37A11P	leucine rich repeat containing 37, member A11, pseudogene
hsa-miR-1266	0	0	1	1	1	1	UNC13B	unc-13 homolog B (C. elegans)
hsa-miR-1266	0	0	1	1	0	0	PRAMEF10	PRAME family member 10
hsa-miR-1266	0	0	1	1	0	0	RNF123	ring finger protein 123
hsa-miR-1266	0	0	1	1	0	0	THBS3	thrombospondin 3
hsa-miR-1266	0	0	1	0	0	0	BTF3P11	basic transcription factor 3 pseudogene 11
hsa-miR-1266	1	0	1	1	1	1	KIAA0528	KIAA0528
hsa-miR-1266	1	0	1	1	1	1	KIAA1324L	KIAA1324-like
hsa-miR-1266	1	0	1	1	1	1	GRIA3	glutamate receptor, ionotropic, AMPA 3
hsa-miR-1266	0	0	1	1	1	1	LRCH1	leucine-rich repeats and calponin homology (CH) domain containing 1
hsa-miR-1266	1	0	1	1	1	1	OSBP2	oxysterol binding protein 2
hsa-miR-1266	0	0	1	1	0	0	SOCS7	suppressor of cytokine signaling 7
hsa-miR-1266	0	0	1	1	0	0	RGSL1	regulator of G-protein signaling like 1
hsa-miR-1266	0	0	1	0	0	0	LINC00486	long intergenic non-protein coding RNA 486
hsa-miR-1266	0	0	1	0	0	0	LINC00266-1	long intergenic non-protein coding RNA 266-1
hsa-miR-1266	1	0	1	0	1	1	CAMSAP2	calmodulin regulated spectrin-associated protein family, member 2
hsa-miR-1266	1	0	1	1	1	1	ANK2	ankyrin 2, neuronal
hsa-miR-1266	0	0	1	1	1	1	TMEM129	transmembrane protein 129
hsa-miR-1266	1	0	1	1	1	1	TRAPPC8	trafficking protein particle complex 8
hsa-miR-1266	0	0	1	0	1	1	C20orf202	chromosome 20 open reading frame 202
hsa-miR-1266	1	0	1	1	1	1	MACROD2	MACRO domain containing 2
hsa-miR-1266	0	0	1	1	0	0	HSF4	heat shock transcription factor 4
hsa-miR-1266	0	0	1	0	0	0	FAM225B	family with sequence similarity 225, member B (non-protein coding)
hsa-miR-1266	1	0	1	1	1	1	CADPS	Ca++-dependent secretion activator
hsa-miR-1266	0	0	1	0	0	0	FUT8-AS1	FUT8 antisense RNA 1
hsa-miR-1266	0	0	1	1	1	1	TINF2	TERF1 (TRF1)-interacting nuclear factor 2
hsa-miR-1266	0	0	1	1	0	0	CHMP4A	charged multivesicular body protein 4A
hsa-miR-1266	0	0	1	0	0	0	TMED8	transmembrane emp24 protein transport domain containing 8
hsa-miR-1266	0	0	1	0	0	0	LINC00643	long intergenic non-protein coding RNA 643
hsa-miR-1266	0	0	1	0	0	0	FLJ39632	uncharacterized LOC642477
hsa-miR-1266	1	0	1	1	1	1	LITAF	lipopolysaccharide-induced TNF factor
hsa-miR-1266	0	0	1	1	1	1	FUCA2	fucosidase, alpha-L- 2, plasma
hsa-miR-1266	0	0	1	0	0	0	DKFZp686D0853	uncharacterized LOC401613
hsa-miR-1266	1	0	1	1	1	1	SGCD	sarcoglycan, delta (35kDa dystrophin-associated glycoprotein)
hsa-miR-1266	0	0	1	1	1	1	ECM2	extracellular matrix protein 2, female organ and adipocyte specific
hsa-miR-1266	1	0	1	1	0	0	ABL2	v-abl Abelson murine leukemia viral oncogene homolog 2
hsa-miR-1266	0	0	1	0	0	0	IGHA2	immunoglobulin heavy constant alpha 2 (A2m marker)
hsa-miR-1266	1	0	1	1	1	1	TGOLN2	trans-golgi network protein 2
hsa-miR-1266	0	0	1	1	0	0	CDK5RAP2	CDK5 regulatory subunit associated protein 2
hsa-miR-1266	0	0	1	0	0	0	PCNXL3	pecanex-like 3 (Drosophila)
hsa-miR-1266	1	0	1	0	1	1	FAM73A	family with sequence similarity 73, member A
hsa-miR-1266	0	0	1	1	1	1	TSGA10	testis specific, 10
hsa-miR-1266	1	0	1	1	1	1	MASP1	mannan-binding lectin serine peptidase 1 (C4/C2 activating component of Ra-reactive factor)
hsa-miR-1266	0	0	1	0	1	1	NHSL1	NHS-like 1
hsa-miR-1266	0	0	1	0	0	0	SMG1P1	smg-1 homolog, phosphatidylinositol 3-kinase-related kinase pseudogene 1
hsa-miR-1266	1	0	1	1	0	0	RBM27	RNA binding motif protein 27
hsa-miR-1266	1	0	1	1	0	0	CECR2	cat eye syndrome chromosome region, candidate 2
hsa-miR-1266	0	0	1	1	1	1	ADH1B	alcohol dehydrogenase 1B (class I), beta polypeptide
hsa-miR-1266	1	0	1	1	1	1	NEDD9	neural precursor cell expressed, developmentally down-regulated 9
hsa-miR-1266	1	0	1	1	1	1	NFIB	nuclear factor I/B
hsa-miR-1266	1	0	1	1	1	1	NAV1	neuron navigator 1
hsa-miR-1266	1	0	1	1	1	1	PTER	phosphotriesterase related
hsa-miR-1266	1	0	1	1	1	1	PGAP1	post-GPI attachment to proteins 1
hsa-miR-1266	1	0	1	1	1	1	TMEM135	transmembrane protein 135
hsa-miR-1266	0	0	1	1	1	1	THSD4	thrombospondin, type I, domain containing 4
hsa-miR-1266	0	0	1	1	1	1	SSFA2	sperm specific antigen 2
hsa-miR-1266	1	0	1	0	1	1	C1orf21	chromosome 1 open reading frame 21
hsa-miR-1266	1	0	1	1	1	1	CREB3L2	cAMP responsive element binding protein 3-like 2
hsa-miR-1266	0	0	1	1	1	1	PLA2G4C	phospholipase A2, group IVC (cytosolic, calcium-independent)
hsa-miR-1266	0	0	1	0	1	1	CD59	CD59 molecule, complement regulatory protein
hsa-miR-1266	0	0	1	1	0	0	MRPL48	mitochondrial ribosomal protein L48
hsa-miR-1266	1	0	1	1	0	0	SMARCA2	SWI/SNF related, matrix associated, actin dependent regulator of chromatin, subfamily a, member 2
hsa-miR-1266	0	0	1	1	1	1	SMYD5	SMYD family member 5
hsa-miR-1266	0	0	1	1	1	1	DNM1	dynamin 1
hsa-miR-1266	0	0	1	1	1	1	KIAA0141	KIAA0141
hsa-miR-1266	0	0	1	1	0	0	GPX3	glutathione peroxidase 3 (plasma)
hsa-miR-1266	0	0	1	0	0	0	LOC100128988	uncharacterized LOC100128988
hsa-miR-1266	1	0	1	1	1	1	NABP1	nucleic acid binding protein 1
hsa-miR-1266	0	0	1	0	0	0	LOC400768	uncharacterized LOC400768
hsa-miR-1266	0	0	1	1	0	0	TMEM62	transmembrane protein 62
hsa-miR-1266	0	0	1	1	1	1	APH1A	anterior pharynx defective 1 homolog A (C. elegans)
hsa-miR-1266	0	0	1	1	1	1	NR2C2AP	nuclear receptor 2C2-associated protein
hsa-miR-1266	0	0	1	1	0	0	RAD23A	RAD23 homolog A (S. cerevisiae)
hsa-miR-1266	1	0	1	1	1	1	CNIH2	cornichon homolog 2 (Drosophila)
hsa-miR-1266	1	0	1	1	0	0	EEFSEC	eukaryotic elongation factor, selenocysteine-tRNA-specific
hsa-miR-1266	0	0	1	1	0	0	FCGRT	Fc fragment of IgG, receptor, transporter, alpha
hsa-miR-1266	0	0	1	0	0	0	ARRDC1	arrestin domain containing 1
hsa-miR-1266	0	0	1	1	0	0	FCHO1	FCH domain only 1
hsa-miR-1266	0	0	1	1	1	1	CIRBP	cold inducible RNA binding protein
hsa-miR-1266	1	0	1	1	1	1	RAP1A	RAP1A, member of RAS oncogene family
hsa-miR-1266	1	1	1	1	0	0	EFNA3	ephrin-A3
hsa-miR-1266	1	0	1	1	1	1	NEU1	sialidase 1 (lysosomal sialidase)
hsa-miR-1266	0	0	1	1	0	0	CCNDBP1	cyclin D-type binding-protein 1
hsa-miR-1266	0	0	1	1	0	0	CD81	CD81 molecule
hsa-miR-1266	1	0	1	1	1	1	FGF11	fibroblast growth factor 11
hsa-miR-1266	1	0	1	1	1	1	SIX5	SIX homeobox 5
hsa-miR-1266	0	0	1	1	1	1	ATP5F1	ATP synthase, H+ transporting, mitochondrial Fo complex, subunit B1
hsa-miR-1266	0	0	1	1	0	0	NOP56	NOP56 ribonucleoprotein homolog (yeast)
hsa-miR-1266	0	0	1	0	0	0	LOC100009676	uncharacterized LOC100009676
hsa-miR-1266	0	0	1	0	0	0	H19	H19, imprinted maternally expressed transcript (non-protein coding)
hsa-miR-1266	1	0	1	1	1	1	CD9	CD9 molecule
hsa-miR-1266	1	0	1	1	0	0	STX5	syntaxin 5
hsa-miR-1266	0	0	1	1	0	0	HPCAL1	hippocalcin-like 1
hsa-miR-1266	0	0	1	1	1	1	PPP1R1C	protein phosphatase 1, regulatory (inhibitor) subunit 1C
hsa-miR-1266	1	0	1	1	0	0	CCM2	cerebral cavernous malformation 2
hsa-miR-1266	0	0	1	1	1	1	ZNF263	zinc finger protein 263
hsa-miR-1266	0	0	1	1	1	1	PKP4	plakophilin 4
hsa-miR-1266	0	0	1	1	0	0	TRAF3IP3	TRAF3 interacting protein 3
hsa-miR-1266	1	0	1	1	1	1	COPZ1	coatomer protein complex, subunit zeta 1
hsa-miR-1266	0	0	1	1	0	0	WISP2	WNT1 inducible signaling pathway protein 2
hsa-miR-1266	1	0	1	1	1	1	ANKRD10	ankyrin repeat domain 10
hsa-miR-1266	0	0	1	1	1	1	TRIM68	tripartite motif containing 68
hsa-miR-1266	1	0	1	1	1	1	CCDC25	coiled-coil domain containing 25
hsa-miR-1266	0	0	1	1	0	0	PDK3	pyruvate dehydrogenase kinase, isozyme 3
hsa-miR-1266	0	0	1	0	0	0	TMEM208	transmembrane protein 208
hsa-miR-1266	1	0	1	1	1	1	BAMBI	BMP and activin membrane-bound inhibitor homolog (Xenopus laevis)
hsa-miR-1266	1	0	1	1	1	1	ARFIP2	ADP-ribosylation factor interacting protein 2
hsa-miR-1266	1	0	1	1	1	1	STK38L	serine/threonine kinase 38 like
hsa-miR-1266	1	0	1	1	1	1	TMEM245	transmembrane protein 245
hsa-miR-1266	0	0	1	1	0	0	CDK2AP2	cyclin-dependent kinase 2 associated protein 2
hsa-miR-1266	1	0	1	1	1	1	WIPF1	WAS/WASL interacting protein family, member 1
hsa-miR-1266	0	0	1	1	0	0	C11orf68	chromosome 11 open reading frame 68
hsa-miR-1266	0	0	1	0	0	0	FLJ45248	FLJ45248 protein
hsa-miR-1266	0	0	1	0	1	1	TMEM155	transmembrane protein 155
hsa-miR-1266	1	0	1	1	0	0	THY1	Thy-1 cell surface antigen
hsa-miR-1266	0	0	1	1	1	1	CAPZB	capping protein (actin filament) muscle Z-line, beta
hsa-miR-1266	0	0	1	1	1	1	PDLIM1	PDZ and LIM domain 1
hsa-miR-1266	1	0	1	1	1	1	PTPN18	protein tyrosine phosphatase, non-receptor type 18 (brain-derived)
hsa-miR-1266	1	0	1	0	1	1	IP6K1	inositol hexakisphosphate kinase 1
hsa-miR-1266	0	0	1	0	0	0	LOC677759	uncharacterized LOC677759
hsa-miR-1266	0	0	1	1	1	1	TMEM109	transmembrane protein 109
hsa-miR-1266	0	0	1	1	0	0	PTGDS	prostaglandin D2 synthase 21kDa (brain)
hsa-miR-1266	0	0	1	1	0	0	NOX5	NADPH oxidase, EF-hand calcium binding domain 5
hsa-miR-1266	1	0	1	1	0	0	FAT4	FAT tumor suppressor homolog 4 (Drosophila)
hsa-miR-1266	0	0	1	1	1	1	CD3E	CD3e molecule, epsilon (CD3-TCR complex)
hsa-miR-1266	0	0	1	1	1	1	SERP2	stress-associated endoplasmic reticulum protein family member 2
hsa-miR-1266	0	0	1	1	0	0	FAM64A	family with sequence similarity 64, member A
hsa-miR-1266	1	0	1	1	1	1	TAGLN2	transgelin 2
hsa-miR-1266	0	0	1	1	0	0	WDR43	WD repeat domain 43
hsa-miR-1266	1	0	1	1	1	1	NT5DC1	5'-nucleotidase domain containing 1
hsa-miR-1266	0	0	1	1	0	0	NARF	nuclear prelamin A recognition factor
hsa-miR-1266	0	0	1	1	0	0	RGS9	regulator of G-protein signaling 9
hsa-miR-1266	0	0	1	1	1	1	SLC9A3R1	solute carrier family 9, subfamily A (NHE3, cation proton antiporter 3), member 3 regulator 1
hsa-miR-1266	0	0	1	1	0	0	STUB1	STIP1 homology and U-box containing protein 1, E3 ubiquitin protein ligase
hsa-miR-1266	1	0	1	1	0	0	ATP6V1B2	ATPase, H+ transporting, lysosomal 56/58kDa, V1 subunit B2
hsa-miR-1266	1	0	1	0	1	1	GRAMD1A	GRAM domain containing 1A
hsa-miR-1266	0	0	1	1	1	1	DNAJC25	DnaJ (Hsp40) homolog, subfamily C , member 25
hsa-miR-1266	1	0	1	1	1	1	ARHGEF40	Rho guanine nucleotide exchange factor (GEF) 40
hsa-miR-1266	0	0	1	1	1	1	TMEM14C	transmembrane protein 14C
hsa-miR-1266	1	0	1	1	1	1	LAPTM4A	lysosomal protein transmembrane 4 alpha
hsa-miR-1266	0	0	1	1	1	1	FAM18B1	family with sequence similarity 18, member B1
hsa-miR-1266	1	0	1	0	1	1	MAP1B	microtubule-associated protein 1B
hsa-miR-1266	0	0	1	1	0	0	BCKDK	branched chain ketoacid dehydrogenase kinase
hsa-miR-1266	0	0	1	1	1	1	EMC4	ER membrane protein complex subunit 4
hsa-miR-1266	1	0	1	1	1	1	TMEM55B	transmembrane protein 55B
hsa-miR-1266	0	0	1	1	0	0	THNSL2	threonine synthase-like 2 (S. cerevisiae)
hsa-miR-1266	0	0	1	1	1	1	TSEN15	tRNA splicing endonuclease 15 homolog (S. cerevisiae)
hsa-miR-1266	1	0	1	1	1	1	MFSD2A	major facilitator superfamily domain containing 2A
hsa-miR-1266	1	0	1	1	1	1	RUNX1	runt-related transcription factor 1
hsa-miR-1266	0	0	1	1	1	1	ZNF346	zinc finger protein 346
hsa-miR-1266	1	0	1	1	0	0	CGREF1	cell growth regulator with EF-hand domain 1
hsa-miR-1266	1	0	1	1	0	0	PPP4C	protein phosphatase 4, catalytic subunit
hsa-miR-1266	0	0	1	1	0	0	ARVCF	armadillo repeat gene deleted in velocardiofacial syndrome
hsa-miR-1266	0	0	1	1	0	0	TESK1	testis-specific kinase 1
hsa-miR-1266	0	0	1	1	1	1	TNK1	tyrosine kinase, non-receptor, 1
hsa-miR-1266	0	0	1	1	1	1	ZNF75D	zinc finger protein 75D
hsa-miR-1266	1	0	1	1	0	0	RAD9A	RAD9 homolog A (S. pombe)
hsa-miR-1266	0	0	1	1	0	0	FCGR2A	Fc fragment of IgG, low affinity IIa, receptor (CD32)
hsa-miR-1266	0	0	1	1	1	1	SLC2A8	solute carrier family 2 (facilitated glucose transporter), member 8
hsa-miR-1266	1	0	1	1	1	1	LGALSL	lectin, galactoside-binding-like
hsa-miR-1266	1	0	1	0	1	1	DNMT3A	DNA (cytosine-5-)-methyltransferase 3 alpha
hsa-miR-1266	0	0	1	1	1	1	C10orf2	chromosome 10 open reading frame 2
hsa-miR-1266	0	0	1	1	1	1	BDP1	B double prime 1, subunit of RNA polymerase III transcription initiation factor IIIB
hsa-miR-1266	0	0	1	0	0	0	LOC731789	uncharacterized LOC731789
hsa-miR-1266	1	0	1	1	1	1	FBXW7	F-box and WD repeat domain containing 7, E3 ubiquitin protein ligase
hsa-miR-1266	0	0	1	0	0	0	LINC00661	long intergenic non-protein coding RNA 661
hsa-miR-1266	1	0	1	1	1	1	KIAA2018	KIAA2018
hsa-miR-1266	1	0	1	0	1	1	PTP4A1	protein tyrosine phosphatase type IVA, member 1
hsa-miR-1266	1	0	1	1	1	1	ANKS6	ankyrin repeat and sterile alpha motif domain containing 6
hsa-miR-1266	1	0	1	1	0	0	POMGNT1	protein O-linked mannose beta1,2-N-acetylglucosaminyltransferase
hsa-miR-1266	1	0	1	1	1	1	BNC2	basonuclin 2
hsa-miR-1266	0	0	1	0	0	0	DNAJC27-AS1	DNAJC27 antisense RNA 1
hsa-miR-1266	1	0	1	0	1	1	CNTNAP2	contactin associated protein-like 2
hsa-miR-1266	1	0	1	1	1	1	BCL2L1	BCL2-like 1
hsa-miR-1266	1	0	1	1	1	1	ADD1	adducin 1 (alpha)
hsa-miR-1266	0	0	1	1	0	0	TENC1	tensin like C1 domain containing phosphatase (tensin 2)
hsa-miR-1266	0	0	1	1	0	0	STK25	serine/threonine kinase 25
hsa-miR-1266	1	0	1	1	1	1	ZFHX3	zinc finger homeobox 3
hsa-miR-1266	1	0	1	1	1	1	SP2	Sp2 transcription factor
hsa-miR-1266	1	0	1	1	1	1	SEC14L1	SEC14-like 1 (S. cerevisiae)
hsa-miR-1266	0	0	1	1	0	0	HMGXB3	HMG box domain containing 3
hsa-miR-1266	0	0	1	1	0	0	AIFM1	apoptosis-inducing factor, mitochondrion-associated, 1
hsa-miR-1266	0	0	1	1	1	1	LTA	lymphotoxin alpha (TNF superfamily, member 1)
hsa-miR-1266	1	0	1	1	1	1	ATP2B3	ATPase, Ca++ transporting, plasma membrane 3
hsa-miR-1266	0	0	1	1	0	0	SPATA20	spermatogenesis associated 20
hsa-miR-1266	1	0	1	1	0	0	DPY19L1	dpy-19-like 1 (C. elegans)
hsa-miR-1266	1	0	1	1	1	1	GLIS3	GLIS family zinc finger 3
hsa-miR-1266	0	0	1	1	1	1	MARVELD2	MARVEL domain containing 2
hsa-miR-1266	0	0	1	0	0	0	PILRB	paired immunoglobin-like type 2 receptor beta
hsa-miR-1266	1	0	1	1	1	1	IRF1	interferon regulatory factor 1
hsa-miR-1266	0	0	1	1	0	0	CYP27B1	cytochrome P450, family 27, subfamily B, polypeptide 1
hsa-miR-1266	1	0	1	1	1	1	SLC4A8	solute carrier family 4, sodium bicarbonate cotransporter, member 8
hsa-miR-1266	0	0	1	1	0	0	CEACAM3	carcinoembryonic antigen-related cell adhesion molecule 3
hsa-miR-1266	1	0	1	1	1	1	MLL	myeloid/lymphoid or mixed-lineage leukemia (trithorax homolog, Drosophila)
hsa-miR-1266	0	0	1	0	1	1	OPRK1	opioid receptor, kappa 1
hsa-miR-1266	0	0	1	1	0	0	HLA-DQB1	major histocompatibility complex, class II, DQ beta 1
hsa-miR-1266	1	0	1	1	1	1	RALBP1	ralA binding protein 1
hsa-miR-1266	1	0	1	0	1	1	BCL2	B-cell CLL/lymphoma 2
hsa-miR-1266	1	0	1	1	1	1	ELK1	ELK1, member of ETS oncogene family
hsa-miR-1266	0	0	1	0	0	0	PVT1	Pvt1 oncogene (non-protein coding)
hsa-miR-1266	0	0	1	1	0	0	CFP	complement factor properdin
hsa-miR-1266	0	0	1	1	1	1	HLA-G	major histocompatibility complex, class I, G
hsa-miR-1266	1	0	1	1	1	1	ARSB	arylsulfatase B
hsa-miR-1266	0	0	1	1	1	1	ATP7A	ATPase, Cu++ transporting, alpha polypeptide
hsa-miR-1266	0	0	1	1	0	0	CD40LG	CD40 ligand
hsa-miR-1266	0	0	1	1	0	0	FANCA	Fanconi anemia, complementation group A
hsa-miR-1266	1	0	1	1	1	1	FBN1	fibrillin 1
hsa-miR-1266	0	0	1	0	1	1	GBE1	glucan (1,4-alpha-), branching enzyme 1
hsa-miR-1266	0	0	1	1	0	0	GP9	glycoprotein IX (platelet)
hsa-miR-1266	1	0	1	0	1	1	ITGB3	integrin, beta 3 (platelet glycoprotein IIIa, antigen CD61)
hsa-miR-1266	1	0	1	1	1	1	KCNA1	potassium voltage-gated channel, shaker-related subfamily, member 1 (episodic ataxia with myokymia)
hsa-miR-1266	1	0	1	1	1	1	LEP	leptin
hsa-miR-1266	0	0	1	1	0	0	KCNH2	potassium voltage-gated channel, subfamily H (eag-related), member 2
hsa-miR-1266	1	0	1	1	1	1	MITF	microphthalmia-associated transcription factor
hsa-miR-1266	0	0	1	0	0	0	MYBPC3	myosin binding protein C, cardiac
hsa-miR-1266	0	0	1	0	1	1	MYO7A	myosin VIIA
hsa-miR-1266	1	0	1	1	1	1	NF1	neurofibromin 1
hsa-miR-1266	1	0	1	1	1	1	TIMP3	TIMP metallopeptidase inhibitor 3
hsa-miR-1266	1	1	1	1	1	1	CDKN1A	cyclin-dependent kinase inhibitor 1A (p21, Cip1)
hsa-miR-1266	0	0	1	1	1	1	LTBP2	latent transforming growth factor beta binding protein 2
hsa-miR-1266	1	0	1	0	1	1	PAFAH1B1	platelet-activating factor acetylhydrolase 1b, regulatory subunit 1 (45kDa)
hsa-miR-1266	0	0	1	1	0	0	PHEX	phosphate regulating endopeptidase homolog, X-linked
hsa-miR-1266	0	0	1	1	1	1	PLEC	plectin
hsa-miR-1266	0	0	1	0	1	1	SLC10A2	solute carrier family 10 (sodium/bile acid cotransporter family), member 2
hsa-miR-1266	0	0	1	1	1	1	CYP11B2	cytochrome P450, family 11, subfamily B, polypeptide 2
hsa-miR-1266	0	0	1	1	1	1	CRX	cone-rod homeobox
hsa-miR-1266	1	0	1	1	1	1	DCX	doublecortin
hsa-miR-1266	1	0	1	1	1	1	CD44	CD44 molecule (Indian blood group)
hsa-miR-1266	0	0	1	1	1	1	IGF2	insulin-like growth factor 2 (somatomedin A)
hsa-miR-1266	0	0	1	1	1	1	NOS1	nitric oxide synthase 1 (neuronal)
hsa-miR-1266	1	0	1	0	1	1	ADRA2B	adrenoceptor alpha 2B
hsa-miR-1266	1	0	1	0	1	1	CACNA1E	calcium channel, voltage-dependent, R type, alpha 1E subunit
hsa-miR-1266	0	0	1	1	1	1	DIO1	deiodinase, iodothyronine, type I
hsa-miR-1266	1	0	1	1	1	1	DIO2	deiodinase, iodothyronine, type II
hsa-miR-1266	1	0	1	0	1	1	GABRA4	gamma-aminobutyric acid (GABA) A receptor, alpha 4
hsa-miR-1266	1	0	1	1	1	1	GABRB3	gamma-aminobutyric acid (GABA) A receptor, beta 3
hsa-miR-1266	1	0	1	1	1	1	GRIA4	glutamate receptor, ionotropic, AMPA 4
hsa-miR-1266	1	0	1	1	0	0	GRIN2A	glutamate receptor, ionotropic, N-methyl D-aspartate 2A
hsa-miR-1266	1	0	1	1	1	1	GRM8	glutamate receptor, metabotropic 8
hsa-miR-1266	1	0	1	1	1	1	HTR4	5-hydroxytryptamine (serotonin) receptor 4, G protein-coupled
hsa-miR-1266	1	0	1	1	1	1	IGF1R	insulin-like growth factor 1 receptor
hsa-miR-1266	0	0	1	1	1	1	IL1R1	interleukin 1 receptor, type I
hsa-miR-1266	0	0	1	1	0	0	KNG1	kininogen 1
hsa-miR-1266	1	0	1	1	1	1	MME	membrane metallo-endopeptidase
hsa-miR-1266	0	0	1	1	0	0	SNCB	synuclein, beta
hsa-miR-1266	0	0	1	1	1	1	IL17REL	interleukin 17 receptor E-like
hsa-miR-1266	0	0	1	1	1	1	CC2D2B	coiled-coil and C2 domain containing 2B
hsa-miR-1266	0	0	1	0	0	0	KLK2	kallikrein-related peptidase 2
hsa-miR-1266	1	0	1	1	0	0	AWAT2	acyl-CoA wax alcohol acyltransferase 2
hsa-miR-1266	0	0	1	0	0	0	OR8G1	olfactory receptor, family 8, subfamily G, member 1
hsa-miR-1266	1	0	1	1	1	1	KCTD11	potassium channel tetramerisation domain containing 11
hsa-miR-1266	0	0	1	1	0	0	BICD1	bicaudal D homolog 1 (Drosophila)
hsa-miR-1266	1	0	1	0	1	1	CACNA1I	calcium channel, voltage-dependent, T type, alpha 1I subunit
hsa-miR-1266	1	0	1	1	1	1	HMGXB4	HMG box domain containing 4
hsa-miR-1266	1	0	1	0	1	1	BMF	Bcl2 modifying factor
hsa-miR-1266	0	0	1	1	1	1	ALG11	asparagine-linked glycosylation 11, alpha-1,2-mannosyltransferase homolog (yeast)
hsa-miR-1266	0	0	1	1	1	1	CCDC144NL	coiled-coil domain containing 144 family, N-terminal like
hsa-miR-1266	0	0	1	1	1	1	CLEC2D	C-type lectin domain family 2, member D
hsa-miR-1266	1	0	1	0	1	1	LRRC55	leucine rich repeat containing 55
hsa-miR-1266	0	0	1	1	1	1	PRR13	proline rich 13
hsa-miR-1266	1	0	1	0	1	1	YPEL2	yippee-like 2 (Drosophila)
hsa-miR-1266	1	0	1	1	1	1	EDA	ectodysplasin A
hsa-miR-1266	0	0	1	1	1	1	IP6K2	inositol hexakisphosphate kinase 2
hsa-miR-1266	1	0	1	0	1	1	PDPN	podoplanin
hsa-miR-1266	1	0	1	0	1	1	GOSR1	golgi SNAP receptor complex member 1
hsa-miR-1266	1	0	1	1	1	1	NTRK3	neurotrophic tyrosine kinase, receptor, type 3
hsa-miR-1266	0	0	1	1	0	0	DUSP13	dual specificity phosphatase 13
hsa-miR-1266	1	0	1	1	1	1	EI24	etoposide induced 2.4 mRNA
hsa-miR-1266	0	0	1	0	1	1	C3orf56	chromosome 3 open reading frame 56
hsa-miR-1266	1	0	1	0	1	1	C18orf25	chromosome 18 open reading frame 25
hsa-miR-1266	0	0	1	1	0	0	REG3G	regenerating islet-derived 3 gamma
hsa-miR-1266	1	0	1	1	1	1	STEAP3	STEAP family member 3, metalloreductase
hsa-miR-1266	0	0	1	1	1	1	MXRA7	matrix-remodelling associated 7
hsa-miR-1266	1	0	1	1	1	1	FNIP1	folliculin interacting protein 1
hsa-miR-1266	1	0	1	1	1	1	CUL4A	cullin 4A
hsa-miR-1266	0	0	1	0	1	1	ZNF648	zinc finger protein 648
hsa-miR-1266	0	0	1	1	1	1	SPIN3	spindlin family, member 3
hsa-miR-1266	0	0	1	1	1	1	ERCC6L2	excision repair cross-complementing rodent repair deficiency, complementation group 6-like 2
hsa-miR-1266	0	0	1	1	1	1	MUC21	mucin 21, cell surface associated
hsa-miR-1266	1	0	1	1	1	1	BCL2L15	BCL2-like 15
hsa-miR-1266	1	0	1	1	1	1	RAP1B	RAP1B, member of RAS oncogene family
hsa-miR-1266	1	0	1	1	1	1	PDLIM5	PDZ and LIM domain 5
hsa-miR-1266	1	0	1	1	1	1	CENPP	centromere protein P
hsa-miR-1266	0	0	1	0	1	1	ERVMER61-1	endogenous retrovirus group MER61, member 1
hsa-miR-1266	1	0	1	1	1	1	CTNNBIP1	catenin, beta interacting protein 1
hsa-miR-1266	0	0	1	1	0	0	SOHLH1	spermatogenesis and oogenesis specific basic helix-loop-helix 1
hsa-miR-1266	1	0	1	1	1	1	FOXP4	forkhead box P4
hsa-miR-1266	0	0	1	0	1	1	U2AF2	U2 small nuclear RNA auxiliary factor 2
hsa-miR-1266	1	0	1	1	1	1	GOSR2	golgi SNAP receptor complex member 2
hsa-miR-1266	1	0	1	1	1	1	GRAMD2	GRAM domain containing 2
hsa-miR-1266	0	0	1	0	1	1	ARGFX	arginine-fifty homeobox
hsa-miR-1266	1	0	1	1	1	1	PABPC1L2A	poly(A) binding protein, cytoplasmic 1-like 2A
hsa-miR-1266	1	0	1	1	1	1	FXR1	fragile X mental retardation, autosomal homolog 1
hsa-miR-1266	1	0	1	1	1	1	C12orf68	chromosome 12 open reading frame 68
hsa-miR-1266	0	0	1	1	0	0	PRR23B	proline rich 23B
hsa-miR-1266	0	0	1	1	0	0	VSIG8	V-set and immunoglobulin domain containing 8
hsa-miR-1266	0	0	1	0	0	0	LOC400707	uncharacterized LOC400707
hsa-miR-1266	1	0	1	0	1	1	SYT14L	synaptotagmin XIV-like
hsa-miR-1266	1	0	1	1	1	1	CA7	carbonic anhydrase VII
hsa-miR-1266	0	0	1	1	0	0	RTKN	rhotekin
hsa-miR-1266	0	0	1	1	1	1	PURG	purine-rich element binding protein G
hsa-miR-1266	1	0	1	1	1	1	ZNF2	zinc finger protein 2
hsa-miR-1266	1	0	1	1	1	1	TPM1	tropomyosin 1 (alpha)
hsa-miR-1266	0	0	1	1	0	0	POLR3H	polymerase (RNA) III (DNA directed) polypeptide H (22.9kD)
hsa-miR-1266	1	0	1	1	1	1	SERF2	small EDRK-rich factor 2
hsa-miR-1266	0	0	1	0	1	1	TM2D2	TM2 domain containing 2
hsa-miR-1266	1	0	1	1	1	1	SBK1	SH3-binding domain kinase 1
hsa-miR-1266	1	0	1	0	1	1	BCL7A	B-cell CLL/lymphoma 7A
hsa-miR-1266	1	0	1	0	1	1	TNRC6B	trinucleotide repeat containing 6B
hsa-miR-1266	0	0	1	1	0	0	ARPC4	actin related protein 2/3 complex, subunit 4, 20kDa
hsa-miR-1266	0	0	1	0	1	1	STAG3L2	stromal antigen 3-like 2
hsa-miR-1266	1	0	1	1	1	1	SLC35F1	solute carrier family 35, member F1
hsa-miR-1266	0	0	1	1	1	1	RSPO4	R-spondin 4
hsa-miR-1266	0	0	1	1	0	0	KLK3	kallikrein-related peptidase 3
hsa-miR-1266	1	0	1	0	1	1	CYB5RL	cytochrome b5 reductase-like
hsa-miR-1266	0	0	1	1	1	1	PLGLB1	plasminogen-like B1
hsa-miR-1266	1	0	1	0	1	1	GPR126	G protein-coupled receptor 126
hsa-miR-1266	1	0	1	1	1	1	MYCL1	v-myc myelocytomatosis viral oncogene homolog 1, lung carcinoma derived (avian)
hsa-miR-1266	1	0	1	0	1	1	SRGAP3	SLIT-ROBO Rho GTPase activating protein 3
hsa-miR-1266	1	0	1	1	1	1	TMEM98	transmembrane protein 98
hsa-miR-1266	1	0	1	1	0	0	MTUS2	microtubule associated tumor suppressor candidate 2
hsa-miR-1266	1	0	1	1	1	1	SCD5	stearoyl-CoA desaturase 5
hsa-miR-1266	0	0	1	0	0	0	CEACAM16	carcinoembryonic antigen-related cell adhesion molecule 16
hsa-miR-1266	1	0	1	1	1	1	ELMO1	engulfment and cell motility 1
hsa-miR-1266	0	0	1	1	1	1	SIRPG	signal-regulatory protein gamma
hsa-miR-1266	1	0	1	1	1	1	CDC42	cell division cycle 42 (GTP binding protein, 25kDa)
hsa-miR-1266	1	0	1	1	1	1	ZNF384	zinc finger protein 384
hsa-miR-1266	0	0	1	0	1	1	SCN3B	sodium channel, voltage-gated, type III, beta subunit
hsa-miR-1266	1	0	1	1	1	1	LFNG	LFNG O-fucosylpeptide 3-beta-N-acetylglucosaminyltransferase
hsa-miR-1266	0	0	1	1	1	1	BTNL8	butyrophilin-like 8
hsa-miR-1266	1	0	1	1	1	1	CRCP	CGRP receptor component
hsa-miR-1266	0	0	1	1	1	1	METTL21D	methyltransferase like 21D
hsa-miR-1266	1	0	1	1	1	1	HEY1	hairy/enhancer-of-split related with YRPW motif 1
hsa-miR-1266	1	0	1	1	0	0	KIAA0895L	KIAA0895-like
hsa-miR-1266	1	0	1	1	1	1	PPP4R1	protein phosphatase 4, regulatory subunit 1
hsa-miR-1266	0	0	1	1	1	1	GEMIN8	gem (nuclear organelle) associated protein 8
hsa-miR-1266	1	0	1	1	1	1	PABPC1L2B	poly(A) binding protein, cytoplasmic 1-like 2B
hsa-miR-1266	1	0	1	1	1	1	DIAPH3	diaphanous homolog 3 (Drosophila)
hsa-miR-1266	1	0	1	1	1	1	FRS2	fibroblast growth factor receptor substrate 2
hsa-miR-1266	0	0	1	1	1	1	TMEM8B	transmembrane protein 8B
hsa-miR-1266	1	0	1	1	1	1	KDM5A	lysine (K)-specific demethylase 5A
hsa-miR-1266	1	0	1	1	1	1	PVRL2	poliovirus receptor-related 2 (herpesvirus entry mediator B)
hsa-miR-1266	1	0	1	0	1	1	SRGAP2	SLIT-ROBO Rho GTPase activating protein 2
hsa-miR-1266	1	0	1	1	1	1	TPM3	tropomyosin 3
hsa-miR-1266	0	0	1	1	1	1	FAM22G	family with sequence similarity 22, member G
hsa-miR-1266	1	0	1	0	1	1	SLC12A2	solute carrier family 12 (sodium/potassium/chloride transporters), member 2
hsa-miR-1266	0	0	1	1	1	1	RCC1	regulator of chromosome condensation 1
hsa-miR-1266	0	0	1	0	1	1	SSTR1	somatostatin receptor 1
hsa-miR-1266	1	0	1	1	1	1	MZT1	mitotic spindle organizing protein 1
hsa-miR-1266	1	0	1	1	1	1	UBTF	upstream binding transcription factor, RNA polymerase I
hsa-miR-1266	1	0	1	1	1	1	CDC14B	CDC14 cell division cycle 14 homolog B (S. cerevisiae)
hsa-miR-1266	1	0	1	1	1	1	ZNF436	zinc finger protein 436
hsa-miR-1266	1	0	1	1	1	1	ATG9A	autophagy related 9A
hsa-miR-1266	0	0	1	1	1	1	PPCS	phosphopantothenoylcysteine synthetase
hsa-miR-1266	0	0	1	1	1	1	KLK5	kallikrein-related peptidase 5
hsa-miR-1266	1	0	1	1	1	1	PRR3	proline rich 3
hsa-miR-1266	0	0	1	1	1	1	KLK10	kallikrein-related peptidase 10
hsa-miR-1266	0	0	1	1	0	0	VPS37D	vacuolar protein sorting 37 homolog D (S. cerevisiae)
hsa-miR-1266	0	0	1	1	0	0	FAM127A	family with sequence similarity 127, member A
hsa-miR-1266	1	0	1	0	1	1	FAM127C	family with sequence similarity 127, member C
hsa-miR-1266	0	0	1	1	1	1	DIAPH1	diaphanous homolog 1 (Drosophila)
hsa-miR-1266	1	0	1	1	1	1	ITGA6	integrin, alpha 6
hsa-miR-1266	1	0	1	1	1	1	CUL4B	cullin 4B
hsa-miR-1266	1	0	1	1	1	1	DMP1	dentin matrix acidic phosphoprotein 1
hsa-miR-1266	1	0	1	1	1	1	PACRG	PARK2 co-regulated
hsa-miR-1266	1	0	1	1	1	1	SHANK3	SH3 and multiple ankyrin repeat domains 3
hsa-miR-1266	1	0	1	0	1	1	MEGF9	multiple EGF-like-domains 9
hsa-miR-1266	0	0	1	1	0	0	TSPAN11	tetraspanin 11
hsa-miR-1266	0	0	1	0	0	0	C16orf90	chromosome 16 open reading frame 90
hsa-miR-1266	1	0	1	1	1	1	DGKG	diacylglycerol kinase, gamma 90kDa
hsa-miR-1266	1	0	1	1	1	1	MYO1C	myosin IC
hsa-miR-1266	0	0	1	1	1	1	RTBDN	retbindin
hsa-miR-1266	0	0	1	1	0	0	JMJD6	jumonji domain containing 6
hsa-miR-1266	0	0	1	1	0	0	PLOD3	procollagen-lysine, 2-oxoglutarate 5-dioxygenase 3
hsa-miR-1266	1	0	1	1	1	1	ADCYAP1	adenylate cyclase activating polypeptide 1 (pituitary)
hsa-miR-1266	1	0	1	0	1	1	XIAP	X-linked inhibitor of apoptosis
hsa-miR-1266	0	0	1	1	0	0	ATP6AP1	ATPase, H+ transporting, lysosomal accessory protein 1
hsa-miR-1266	0	0	1	0	1	1	BAGE	B melanoma antigen
hsa-miR-1266	1	0	1	1	1	1	CAMK2D	calcium/calmodulin-dependent protein kinase II delta
hsa-miR-1266	0	0	1	0	1	1	CASQ2	calsequestrin 2 (cardiac muscle)
hsa-miR-1266	1	0	1	0	1	1	CDK6	cyclin-dependent kinase 6
hsa-miR-1266	0	0	1	1	1	1	CHI3L1	chitinase 3-like 1 (cartilage glycoprotein-39)
hsa-miR-1266	0	0	1	1	0	0	CLK3	CDC-like kinase 3
hsa-miR-1266	1	0	1	1	1	1	CREBL2	cAMP responsive element binding protein-like 2
hsa-miR-1266	1	0	1	1	1	1	MAPK14	mitogen-activated protein kinase 14
hsa-miR-1266	0	0	1	1	0	0	DIO3	deiodinase, iodothyronine, type III
hsa-miR-1266	1	0	1	1	1	1	S1PR1	sphingosine-1-phosphate receptor 1
hsa-miR-1266	1	0	1	1	1	1	CELSR3	cadherin, EGF LAG seven-pass G-type receptor 3 (flamingo homolog, Drosophila)
hsa-miR-1266	1	0	1	1	1	1	CELSR2	cadherin, EGF LAG seven-pass G-type receptor 2 (flamingo homolog, Drosophila)
hsa-miR-1266	0	0	1	0	1	1	EMP1	epithelial membrane protein 1
hsa-miR-1266	1	0	1	1	1	1	EN2	engrailed homeobox 2
hsa-miR-1266	1	0	1	1	1	1	EREG	epiregulin
hsa-miR-1266	1	0	1	1	1	1	EXTL3	exostoses (multiple)-like 3
hsa-miR-1266	1	0	1	1	1	1	GPC4	glypican 4
hsa-miR-1266	0	0	1	1	0	0	GAGE1	G antigen 1
hsa-miR-1266	1	0	1	1	1	1	NDST1	N-deacetylase/N-sulfotransferase (heparan glucosaminyl) 1
hsa-miR-1266	0	0	1	1	1	1	IL13RA1	interleukin 13 receptor, alpha 1
hsa-miR-1266	1	0	1	1	1	1	IRAK2	interleukin-1 receptor-associated kinase 2
hsa-miR-1266	0	0	1	1	0	0	AARS	alanyl-tRNA synthetase
hsa-miR-1266	1	0	1	1	1	1	ADD2	adducin 2 (beta)
hsa-miR-1266	1	0	1	1	1	1	ARF3	ADP-ribosylation factor 3
hsa-miR-1266	0	0	1	1	1	1	ARF4	ADP-ribosylation factor 4
hsa-miR-1266	1	0	1	0	1	1	ATP1B2	ATPase, Na+/K+ transporting, beta 2 polypeptide
hsa-miR-1266	1	0	1	1	1	1	ATP6V1A	ATPase, H+ transporting, lysosomal 70kDa, V1 subunit A
hsa-miR-1266	1	0	1	1	1	1	BNC1	basonuclin 1
hsa-miR-1266	0	0	1	1	1	1	BTN1A1	butyrophilin, subfamily 1, member A1
hsa-miR-1266	0	0	1	1	1	1	CALB2	calbindin 2
hsa-miR-1266	1	0	1	1	1	1	CBFB	core-binding factor, beta subunit
hsa-miR-1266	1	0	1	0	1	1	CCND2	cyclin D2
hsa-miR-1266	1	0	1	1	1	1	CDK2	cyclin-dependent kinase 2
hsa-miR-1266	0	0	1	1	0	0	DDB1	damage-specific DNA binding protein 1, 127kDa
hsa-miR-1266	1	0	1	1	1	1	DPP4	dipeptidyl-peptidase 4
hsa-miR-1266	0	0	1	1	1	1	DPT	dermatopontin
hsa-miR-1266	0	0	1	1	0	0	EDN2	endothelin 2
hsa-miR-1266	0	0	1	1	1	1	EDNRA	endothelin receptor type A
hsa-miR-1266	0	0	1	1	0	0	EIF5A	eukaryotic translation initiation factor 5A
hsa-miR-1266	1	0	1	1	1	1	EPB49	erythrocyte membrane protein band 4.9 (dematin)
hsa-miR-1266	1	0	1	0	1	1	FOXO1	forkhead box O1
hsa-miR-1266	1	0	1	1	1	1	FMOD	fibromodulin
hsa-miR-1266	0	0	1	1	0	0	FUT5	fucosyltransferase 5 (alpha (1,3) fucosyltransferase)
hsa-miR-1266	0	0	1	1	1	1	GTF2E2	general transcription factor IIE, polypeptide 2, beta 34kDa
hsa-miR-1266	0	0	1	1	0	0	ID3	inhibitor of DNA binding 3, dominant negative helix-loop-helix protein
hsa-miR-1266	0	0	1	1	1	1	IL17A	interleukin 17A
hsa-miR-1266	1	0	1	1	1	1	ITGB8	integrin, beta 8
hsa-miR-1266	1	0	1	1	1	1	KCNJ10	potassium inwardly-rectifying channel, subfamily J, member 10
hsa-miR-1266	0	0	1	0	1	1	KCNN1	potassium intermediate/small conductance calcium-activated channel, subfamily N, member 1
hsa-miR-1266	1	0	1	0	1	1	KIF3C	kinesin family member 3C
hsa-miR-1266	1	0	1	1	1	1	KPNA3	karyopherin alpha 3 (importin alpha 4)
hsa-miR-1266	1	0	1	1	1	1	LIF	leukemia inhibitory factor
hsa-miR-1266	1	0	1	1	1	1	LIFR	leukemia inhibitory factor receptor alpha
hsa-miR-1266	0	0	1	1	0	0	LTK	leukocyte receptor tyrosine kinase
hsa-miR-1266	1	0	1	1	1	1	M6PR	mannose-6-phosphate receptor (cation dependent)
hsa-miR-1266	1	0	1	0	1	1	MXD1	MAX dimerization protein 1
hsa-miR-1266	1	0	1	1	1	1	MATN1	matrilin 1, cartilage matrix protein
hsa-miR-1266	1	0	1	1	1	1	MN1	meningioma (disrupted in balanced translocation) 1
hsa-miR-1266	1	0	1	1	1	1	MSN	moesin
hsa-miR-1266	0	0	1	1	1	1	MTAP	methylthioadenosine phosphorylase
hsa-miR-1266	0	0	1	1	1	1	MYOD1	myogenic differentiation 1
hsa-miR-1266	0	0	1	1	0	0	MYOG	myogenin (myogenic factor 4)
hsa-miR-1266	1	0	1	1	1	1	NGFR	nerve growth factor receptor
hsa-miR-1266	0	0	1	1	1	1	NID1	nidogen 1
hsa-miR-1266	1	0	1	1	1	1	NPTX1	neuronal pentraxin I
hsa-miR-1266	0	0	1	0	1	1	OAZ2	ornithine decarboxylase antizyme 2
hsa-miR-1266	1	0	1	1	1	1	OSBP	oxysterol binding protein
hsa-miR-1266	1	0	1	0	1	1	PAPPA	pregnancy-associated plasma protein A, pappalysin 1
hsa-miR-1266	1	0	1	1	1	1	PBX2	pre-B-cell leukemia homeobox 2
hsa-miR-1266	1	0	1	0	1	1	PCDHGC3	protocadherin gamma subfamily C, 3
hsa-miR-1266	1	0	1	1	0	0	PDGFB	platelet-derived growth factor beta polypeptide
hsa-miR-1266	0	0	1	1	1	1	PIGF	phosphatidylinositol glycan anchor biosynthesis, class F
hsa-miR-1266	0	0	1	1	1	1	PITX1	paired-like homeodomain 1
hsa-miR-1266	0	0	1	1	1	1	PLGLB2	plasminogen-like B2
hsa-miR-1266	1	0	1	0	1	1	POU3F1	POU class 3 homeobox 1
hsa-miR-1266	1	0	1	1	1	1	PPP1CB	protein phosphatase 1, catalytic subunit, beta isozyme
hsa-miR-1266	1	0	1	1	1	1	PPP2R3A	protein phosphatase 2, regulatory subunit B'', alpha
hsa-miR-1266	0	0	1	1	0	0	PRKACG	protein kinase, cAMP-dependent, catalytic, gamma
hsa-miR-1266	0	0	1	0	0	0	PSMB10	proteasome (prosome, macropain) subunit, beta type, 10
hsa-miR-1266	0	0	1	1	0	0	PTPN6	protein tyrosine phosphatase, non-receptor type 6
hsa-miR-1266	1	0	1	1	1	1	PTPRJ	protein tyrosine phosphatase, receptor type, J
hsa-miR-1266	1	0	1	1	1	1	PVRL1	poliovirus receptor-related 1 (herpesvirus entry mediator C)
hsa-miR-1266	1	0	1	1	0	0	RFX1	regulatory factor X, 1 (influences HLA class II expression)
hsa-miR-1266	0	0	1	1	1	1	RING1	ring finger protein 1
hsa-miR-1266	1	0	1	0	1	1	SORT1	sortilin 1
hsa-miR-1266	1	0	1	0	1	1	CCL22	chemokine (C-C motif) ligand 22
hsa-miR-1266	1	0	1	1	1	1	SHB	Src homology 2 domain containing adaptor protein B
hsa-miR-1266	1	0	1	1	0	0	SLN	sarcolipin
hsa-miR-1266	0	0	1	1	0	0	SLPI	secretory leukocyte peptidase inhibitor
hsa-miR-1266	1	0	1	1	1	1	SMARCD1	SWI/SNF related, matrix associated, actin dependent regulator of chromatin, subfamily d, member 1
hsa-miR-1266	0	0	1	1	0	0	SNTA1	syntrophin, alpha 1
hsa-miR-1266	1	0	1	1	1	1	SRF	serum response factor (c-fos serum response element-binding transcription factor)
hsa-miR-1266	1	0	1	1	1	1	SSR2	signal sequence receptor, beta (translocon-associated protein beta)
hsa-miR-1266	0	0	1	1	0	0	SSX2	synovial sarcoma, X breakpoint 2
hsa-miR-1266	1	0	1	0	1	1	STC1	stanniocalcin 1
hsa-miR-1266	0	0	1	1	1	1	STRN	striatin, calmodulin binding protein
hsa-miR-1266	0	0	1	1	1	1	SUPT6H	suppressor of Ty 6 homolog (S. cerevisiae)
hsa-miR-1266	1	0	1	0	1	1	TAL1	T-cell acute lymphocytic leukemia 1
hsa-miR-1266	1	0	1	1	1	1	TFAP2B	transcription factor AP-2 beta (activating enhancer binding protein 2 beta)
hsa-miR-1266	1	0	1	1	1	1	TGFB3	transforming growth factor, beta 3
hsa-miR-1266	1	0	1	1	1	1	TIAM1	T-cell lymphoma invasion and metastasis 1
hsa-miR-1266	1	0	1	1	1	1	NR2E1	nuclear receptor subfamily 2, group E, member 1
hsa-miR-1266	0	0	1	1	0	0	TYROBP	TYRO protein tyrosine kinase binding protein
hsa-miR-1266	1	0	1	1	1	1	UBE2B	ubiquitin-conjugating enzyme E2B
hsa-miR-1266	1	0	1	1	1	1	UBE2N	ubiquitin-conjugating enzyme E2N
hsa-miR-1266	1	0	1	1	1	1	VAV2	vav 2 guanine nucleotide exchange factor
hsa-miR-1266	0	0	1	1	1	1	ZNF137P	zinc finger protein 137, pseudogene
hsa-miR-1266	1	0	1	1	0	0	SLC30A3	solute carrier family 30 (zinc transporter), member 3
hsa-miR-1266	1	0	1	1	1	1	CUL5	cullin 5
hsa-miR-1266	1	0	1	1	1	1	FZD7	frizzled family receptor 7
hsa-miR-1266	1	0	1	0	1	1	VAPA	VAMP (vesicle-associated membrane protein)-associated protein A, 33kDa
hsa-miR-1266	1	0	1	1	0	0	TCAP	titin-cap (telethonin)
hsa-miR-1266	0	0	1	1	1	1	KMO	kynurenine 3-monooxygenase (kynurenine 3-hydroxylase)
hsa-miR-1266	1	0	1	1	0	0	KHSRP	KH-type splicing regulatory protein
hsa-miR-1266	1	0	1	0	1	1	PCDHGA12	protocadherin gamma subfamily A, 12
hsa-miR-1266	1	0	1	0	1	1	PCDHGB4	protocadherin gamma subfamily B, 4
hsa-miR-1266	0	0	1	1	0	0	DCHS1	dachsous 1 (Drosophila)
hsa-miR-1266	1	0	1	1	1	1	SRSF9	serine/arginine-rich splicing factor 9
hsa-miR-1266	0	0	1	1	1	1	CRADD	CASP2 and RIPK1 domain containing adaptor with death domain
hsa-miR-1266	1	0	1	1	1	1	NR5A2	nuclear receptor subfamily 5, group A, member 2
hsa-miR-1266	0	0	1	1	1	1	IL18R1	interleukin 18 receptor 1
hsa-miR-1266	1	0	1	1	1	1	NRP2	neuropilin 2
hsa-miR-1266	1	0	1	1	1	1	ALDH1A2	aldehyde dehydrogenase 1 family, member A2
hsa-miR-1266	0	0	1	1	1	1	PRPF4B	PRP4 pre-mRNA processing factor 4 homolog B (yeast)
hsa-miR-1266	1	0	1	0	1	1	ST13	suppression of tumorigenicity 13 (colon carcinoma) (Hsp70 interacting protein)
hsa-miR-1266	0	0	1	1	0	0	CCRL2	chemokine (C-C motif) receptor-like 2
hsa-miR-1266	0	0	1	1	0	0	GPX5	glutathione peroxidase 5 (epididymal androgen-related protein)
hsa-miR-1266	1	0	1	1	1	1	BCL2L2	BCL2-like 2
hsa-miR-1266	1	0	1	0	1	1	E2F2	E2F transcription factor 2
hsa-miR-1266	1	0	1	1	1	1	EYA4	eyes absent homolog 4 (Drosophila)
hsa-miR-1266	0	0	1	1	1	1	PTK2B	PTK2B protein tyrosine kinase 2 beta
hsa-miR-1266	0	0	1	1	1	1	RAB27B	RAB27B, member RAS oncogene family
hsa-miR-1266	1	0	1	0	1	1	SLC1A2	solute carrier family 1 (glial high affinity glutamate transporter), member 2
hsa-miR-1266	0	0	1	1	0	0	WNT2B	wingless-type MMTV integration site family, member 2B
hsa-miR-1266	0	0	1	1	0	0	BAG3	BCL2-associated athanogene 3
hsa-miR-1266	1	0	1	0	1	1	GTPBP1	GTP binding protein 1
hsa-miR-1266	0	0	1	1	0	0	RIN1	Ras and Rab interactor 1
hsa-miR-1266	1	0	1	0	1	1	ACVR1B	activin A receptor, type IB
hsa-miR-1266	1	0	1	1	1	1	ASTN1	astrotactin 1
hsa-miR-1266	0	0	1	1	0	0	BAD	BCL2-associated agonist of cell death
hsa-miR-1266	1	0	1	1	1	1	BNIP2	BCL2/adenovirus E1B 19kDa interacting protein 2
hsa-miR-1266	0	0	1	1	0	0	CAMP	cathelicidin antimicrobial peptide
hsa-miR-1266	1	0	1	0	1	1	CEBPA	CCAAT/enhancer binding protein (C/EBP), alpha
hsa-miR-1266	0	0	1	1	0	0	CPT1B	carnitine palmitoyltransferase 1B (muscle)
hsa-miR-1266	1	0	1	1	1	1	DAG1	dystroglycan 1 (dystrophin-associated glycoprotein 1)
hsa-miR-1266	0	0	1	1	1	1	DDX10	DEAD (Asp-Glu-Ala-Asp) box polypeptide 10
hsa-miR-1266	1	0	1	1	1	1	DUSP5	dual specificity phosphatase 5
hsa-miR-1266	1	0	1	1	1	1	EPHB3	EPH receptor B3
hsa-miR-1266	1	0	1	0	1	1	ACSL4	acyl-CoA synthetase long-chain family member 4
hsa-miR-1266	0	0	1	1	0	0	FKBP2	FK506 binding protein 2, 13kDa
hsa-miR-1266	1	0	1	1	1	1	FLOT2	flotillin 2
hsa-miR-1266	0	0	1	1	1	1	GP5	glycoprotein V (platelet)
hsa-miR-1266	1	0	1	1	1	1	RAB5C	RAB5C, member RAS oncogene family
hsa-miR-1266	1	0	1	0	1	1	SCN2B	sodium channel, voltage-gated, type II, beta subunit
hsa-miR-1266	1	0	1	1	1	1	BAP1	BRCA1 associated protein-1 (ubiquitin carboxy-terminal hydrolase)
hsa-miR-1266	0	0	1	1	0	0	DYRK1B	dual-specificity tyrosine-(Y)-phosphorylation regulated kinase 1B
hsa-miR-1266	1	0	1	1	1	1	XPR1	xenotropic and polytropic retrovirus receptor 1
hsa-miR-1266	1	0	1	1	1	1	B4GALT6	UDP-Gal:betaGlcNAc beta 1,4- galactosyltransferase, polypeptide 6
hsa-miR-1266	0	0	1	0	1	1	ADIPOQ	adiponectin, C1Q and collagen domain containing
hsa-miR-1266	1	0	1	1	1	1	KIF3B	kinesin family member 3B
hsa-miR-1266	0	0	1	1	0	0	TM9SF2	transmembrane 9 superfamily member 2
hsa-miR-1266	0	0	1	1	0	0	SLC22A14	solute carrier family 22, member 14
hsa-miR-1266	0	0	1	1	1	1	DSC1	desmocollin 1
hsa-miR-1266	0	0	1	1	0	0	NR5A1	nuclear receptor subfamily 5, group A, member 1
hsa-miR-1266	1	0	1	1	1	1	GABRE	gamma-aminobutyric acid (GABA) A receptor, epsilon
hsa-miR-1266	1	0	1	1	1	1	KCNC4	potassium voltage-gated channel, Shaw-related subfamily, member 4
hsa-miR-1266	1	0	1	1	0	0	MMP14	matrix metallopeptidase 14 (membrane-inserted)
hsa-miR-1266	0	0	1	1	0	0	PITX3	paired-like homeodomain 3
hsa-miR-1266	0	0	1	1	1	1	PRF1	perforin 1 (pore forming protein)
hsa-miR-1266	1	0	1	0	1	1	SCD	stearoyl-CoA desaturase (delta-9-desaturase)
hsa-miR-1266	1	0	1	1	0	0	ADAMTS4	ADAM metallopeptidase with thrombospondin type 1 motif, 4
hsa-miR-1266	0	0	1	1	0	0	ALDOC	aldolase C, fructose-bisphosphate
hsa-miR-1266	1	0	1	0	1	1	CALM3	calmodulin 3 (phosphorylase kinase, delta)
hsa-miR-1266	0	0	1	1	1	1	CEBPB	CCAAT/enhancer binding protein (C/EBP), beta
hsa-miR-1266	1	0	1	0	1	1	DLX6	distal-less homeobox 6
hsa-miR-1266	1	0	1	1	1	1	ARID3A	AT rich interactive domain 3A (BRIGHT-like)
hsa-miR-1266	1	0	1	0	1	1	E2F1	E2F transcription factor 1
hsa-miR-1266	1	0	1	1	1	1	ETS1	v-ets erythroblastosis virus E26 oncogene homolog 1 (avian)
hsa-miR-1266	0	0	1	0	1	1	FOSL2	FOS-like antigen 2
hsa-miR-1266	1	0	1	1	0	0	NNAT	neuronatin
hsa-miR-1266	1	0	1	1	1	1	PHF2	PHD finger protein 2
hsa-miR-1266	1	0	1	0	1	1	PRKAB2	protein kinase, AMP-activated, beta 2 non-catalytic subunit
hsa-miR-1266	1	0	1	1	0	0	SALL2	sal-like 2 (Drosophila)
hsa-miR-1266	1	0	1	0	1	1	CCDC6	coiled-coil domain containing 6
hsa-miR-1266	0	0	1	1	1	1	FAIM3	Fas apoptotic inhibitory molecule 3
hsa-miR-1266	1	0	1	1	1	1	GABBR2	gamma-aminobutyric acid (GABA) B receptor, 2
hsa-miR-1266	1	0	1	1	1	1	MAFB	v-maf musculoaponeurotic fibrosarcoma oncogene homolog B (avian)
hsa-miR-1266	1	0	1	1	1	1	HCN4	hyperpolarization activated cyclic nucleotide-gated potassium channel 4
hsa-miR-1266	1	0	1	1	1	1	HOXA1	homeobox A1
hsa-miR-1266	1	0	1	1	1	1	HOXA11	homeobox A11
hsa-miR-1266	0	0	1	1	1	1	HSD11B1	hydroxysteroid (11-beta) dehydrogenase 1
hsa-miR-1266	0	0	1	1	1	1	S100A11	S100 calcium binding protein A11
hsa-miR-1266	1	0	1	1	1	1	UST	uronyl-2-sulfotransferase
hsa-miR-1266	0	0	1	1	1	1	ARPC3	actin related protein 2/3 complex, subunit 3, 21kDa
hsa-miR-1266	0	0	1	1	1	1	ACTR3	ARP3 actin-related protein 3 homolog (yeast)
hsa-miR-1266	1	0	1	0	1	1	TSPAN2	tetraspanin 2
hsa-miR-1266	1	0	1	1	1	1	ACTR1A	ARP1 actin-related protein 1 homolog A, centractin alpha (yeast)
hsa-miR-1266	0	0	1	1	1	1	TOB1	transducer of ERBB2, 1
hsa-miR-1266	1	0	1	0	1	1	SPRY3	sprouty homolog 3 (Drosophila)
hsa-miR-1266	1	0	1	1	1	1	EFS	embryonal Fyn-associated substrate
hsa-miR-1266	1	0	1	1	1	1	FOXO4	forkhead box O4
hsa-miR-1266	0	0	1	1	1	1	MT1A	metallothionein 1A
hsa-miR-1266	0	0	1	0	1	1	MT1X	metallothionein 1X
hsa-miR-1266	0	0	1	1	1	1	MT2A	metallothionein 2A
hsa-miR-1266	1	0	1	1	1	1	MTF1	metal-regulatory transcription factor 1
hsa-miR-1266	1	0	1	0	1	1	NAB1	NGFI-A binding protein 1 (EGR1 binding protein 1)
hsa-miR-1266	0	0	1	1	0	0	SPRR1A	small proline-rich protein 1A
hsa-miR-1266	1	0	1	1	1	1	LIPG	lipase, endothelial
hsa-miR-1266	1	0	1	0	1	1	SPATA2	spermatogenesis associated 2
hsa-miR-1266	0	0	1	1	1	1	KRT1	keratin 1
hsa-miR-1266	1	0	1	1	1	1	DAGLA	diacylglycerol lipase, alpha
hsa-miR-1266	1	0	1	1	1	1	TMEM50B	transmembrane protein 50B
hsa-miR-1266	1	0	1	1	1	1	CAPZA2	capping protein (actin filament) muscle Z-line, alpha 2
hsa-miR-1266	1	0	1	1	1	1	DYNC1LI2	dynein, cytoplasmic 1, light intermediate chain 2
hsa-miR-1266	1	0	1	1	1	1	NEFL	neurofilament, light polypeptide
hsa-miR-1266	1	0	1	1	1	1	NEUROG1	neurogenin 1
hsa-miR-1266	0	0	1	0	1	1	OAS3	2'-5'-oligoadenylate synthetase 3, 100kDa
hsa-miR-1266	0	0	1	1	1	1	OCM2	oncomodulin 2
hsa-miR-1266	1	0	1	1	1	1	CDK16	cyclin-dependent kinase 16
hsa-miR-1266	1	0	1	1	1	1	PPP2R5E	protein phosphatase 2, regulatory subunit B', epsilon isoform
hsa-miR-1266	0	0	1	1	0	0	MOGS	mannosyl-oligosaccharide glucosidase
hsa-miR-1266	1	0	1	1	1	1	SMC1A	structural maintenance of chromosomes 1A
hsa-miR-1266	1	0	1	1	1	1	ZER1	zer-1 homolog (C. elegans)
hsa-miR-1266	1	0	1	1	1	1	ZNF238	zinc finger protein 238
hsa-miR-1266	1	0	1	1	1	1	AGR2	anterior gradient 2 homolog (Xenopus laevis)
hsa-miR-1266	1	0	1	1	1	1	MAB21L2	mab-21-like 2 (C. elegans)
hsa-miR-1266	1	0	1	1	1	1	CDC42EP3	CDC42 effector protein (Rho GTPase binding) 3
hsa-miR-1266	1	0	1	1	1	1	HEXIM1	hexamethylene bis-acetamide inducible 1
hsa-miR-1266	1	0	1	1	1	1	TXNIP	thioredoxin interacting protein
hsa-miR-1266	0	0	1	0	1	1	SLC16A2	solute carrier family 16, member 2 (thyroid hormone transporter)
hsa-miR-1266	0	0	1	1	1	1	CACNG3	calcium channel, voltage-dependent, gamma subunit 3
hsa-miR-1266	1	0	1	0	1	1	IGF2BP1	insulin-like growth factor 2 mRNA binding protein 1
hsa-miR-1266	1	0	1	1	1	1	CTCF	CCCTC-binding factor (zinc finger protein)
hsa-miR-1266	0	0	1	1	1	1	PPP1R17	protein phosphatase 1, regulatory subunit 17
hsa-miR-1266	1	0	1	1	1	1	PGRMC1	progesterone receptor membrane component 1
hsa-miR-1266	1	0	1	1	1	1	TSPAN9	tetraspanin 9
hsa-miR-1266	0	0	1	1	1	1	CD300C	CD300c molecule
hsa-miR-1266	1	0	1	1	1	1	MMP24	matrix metallopeptidase 24 (membrane-inserted)
hsa-miR-1266	0	0	1	1	1	1	LYVE1	lymphatic vessel endothelial hyaluronan receptor 1
hsa-miR-1266	0	0	1	1	1	1	HOXA2	homeobox A2
hsa-miR-1266	1	0	1	1	0	0	PSKH1	protein serine kinase H1
hsa-miR-1266	0	0	1	1	1	1	SYPL1	synaptophysin-like 1
hsa-miR-1266	1	0	1	1	1	1	BTG2	BTG family, member 2
hsa-miR-1266	0	0	1	1	1	1	IFRD2	interferon-related developmental regulator 2
hsa-miR-1266	0	0	1	1	0	0	BRAP	BRCA1 associated protein
hsa-miR-1266	1	0	1	0	1	1	SYNGAP1	synaptic Ras GTPase activating protein 1
hsa-miR-1266	1	0	1	1	1	1	PRDX3	peroxiredoxin 3
hsa-miR-1266	1	0	1	1	1	1	SF3A3	splicing factor 3a, subunit 3, 60kDa
hsa-miR-1266	0	0	1	1	1	1	SERINC3	serine incorporator 3
hsa-miR-1266	0	0	1	1	0	0	COPS6	COP9 constitutive photomorphogenic homolog subunit 6 (Arabidopsis)
hsa-miR-1266	1	0	1	1	1	1	RAB35	RAB35, member RAS oncogene family
hsa-miR-1266	1	0	1	1	1	1	B3GNT1	UDP-GlcNAc:betaGal beta-1,3-N-acetylglucosaminyltransferase 1
hsa-miR-1266	0	0	1	1	0	0	RASGRF2	Ras protein-specific guanine nucleotide-releasing factor 2
hsa-miR-1266	0	0	1	1	1	1	SNRPD1	small nuclear ribonucleoprotein D1 polypeptide 16kDa
hsa-miR-1266	1	0	1	0	1	1	SOX12	SRY (sex determining region Y)-box 12
hsa-miR-1266	1	0	1	1	1	1	SYN1	synapsin I
hsa-miR-1266	1	0	1	0	1	1	WASF2	WAS protein family, member 2
hsa-miR-1266	1	0	1	0	1	1	PAPD7	PAP associated domain containing 7
hsa-miR-1266	1	0	1	1	1	1	ABHD2	abhydrolase domain containing 2
hsa-miR-1266	1	0	1	1	1	1	WWP1	WW domain containing E3 ubiquitin protein ligase 1
hsa-miR-1266	0	0	1	1	1	1	TMEM115	transmembrane protein 115
hsa-miR-1266	0	0	1	1	1	1	PKIG	protein kinase (cAMP-dependent, catalytic) inhibitor gamma
hsa-miR-1266	1	0	1	1	1	1	KAT7	K(lysine) acetyltransferase 7
hsa-miR-1266	0	0	1	1	0	0	GUCA2B	guanylate cyclase activator 2B (uroguanylin)
hsa-miR-1266	1	0	1	1	1	1	SSR3	signal sequence receptor, gamma (translocon-associated protein gamma)
hsa-miR-1266	1	0	1	1	1	1	UTRN	utrophin
hsa-miR-1266	1	0	1	1	1	1	ZNF81	zinc finger protein 81
hsa-miR-1266	0	0	1	0	1	1	ZXDB	zinc finger, X-linked, duplicated B
hsa-miR-1266	0	0	1	1	0	0	GABARAP	GABA(A) receptor-associated protein
hsa-miR-1266	1	0	1	1	1	1	CASC3	cancer susceptibility candidate 3
hsa-miR-1266	1	0	1	1	1	1	TARDBP	TAR DNA binding protein
hsa-miR-1266	1	0	1	1	1	1	ICOS	inducible T-cell co-stimulator
hsa-miR-1266	0	0	1	1	0	0	PRDX5	peroxiredoxin 5
hsa-miR-1266	0	0	1	1	0	0	TMEM59L	transmembrane protein 59-like
hsa-miR-1266	0	0	1	1	1	1	LMOD1	leiomodin 1 (smooth muscle)
hsa-miR-1266	1	0	1	0	1	1	FZD4	frizzled family receptor 4
hsa-miR-1266	0	0	1	1	1	1	HARS2	histidyl-tRNA synthetase 2, mitochondrial
hsa-miR-1266	1	0	1	1	1	1	KCNE1L	KCNE1-like
hsa-miR-1266	1	0	1	0	1	1	RAPGEF5	Rap guanine nucleotide exchange factor (GEF) 5
hsa-miR-1266	1	0	1	0	1	1	FBXL7	F-box and leucine-rich repeat protein 7
hsa-miR-1266	0	0	1	1	1	1	MAFF	v-maf musculoaponeurotic fibrosarcoma oncogene homolog F (avian)
hsa-miR-1266	1	0	1	1	1	1	MAPRE1	microtubule-associated protein, RP/EB family, member 1
hsa-miR-1266	1	0	1	1	0	0	TIMM10	translocase of inner mitochondrial membrane 10 homolog (yeast)
hsa-miR-1266	0	0	1	1	1	1	UCK2	uridine-cytidine kinase 2
hsa-miR-1266	0	0	1	1	1	1	DNAJC15	DnaJ (Hsp40) homolog, subfamily C, member 15
hsa-miR-1266	0	0	1	1	0	0	KCNJ14	potassium inwardly-rectifying channel, subfamily J, member 14
hsa-miR-1266	0	0	1	1	1	1	PCOLCE2	procollagen C-endopeptidase enhancer 2
hsa-miR-1266	1	0	1	1	1	1	SERTAD3	SERTA domain containing 3
hsa-miR-1266	1	0	1	1	1	1	LRP12	low density lipoprotein receptor-related protein 12
hsa-miR-1266	1	0	1	1	1	1	NRG1	neuregulin 1
hsa-miR-1266	0	0	1	1	0	0	MACROD1	MACRO domain containing 1
hsa-miR-1266	1	0	1	1	1	1	SCN11A	sodium channel, voltage-gated, type XI, alpha subunit
hsa-miR-1266	1	0	1	1	1	1	ZBTB44	zinc finger and BTB domain containing 44
hsa-miR-1266	1	0	1	1	0	0	HOXC11	homeobox C11
hsa-miR-1266	1	0	1	1	1	1	VAMP1	vesicle-associated membrane protein 1 (synaptobrevin 1)
hsa-miR-1266	1	0	1	0	1	1	ODZ1	odz, odd Oz/ten-m homolog 1 (Drosophila)
hsa-miR-1266	1	0	1	1	1	1	MAPRE2	microtubule-associated protein, RP/EB family, member 2
hsa-miR-1266	0	0	1	1	0	0	OLFM1	olfactomedin 1
hsa-miR-1266	0	0	1	1	0	0	VSIG2	V-set and immunoglobulin domain containing 2
hsa-miR-1266	1	0	1	1	1	1	PATZ1	POZ (BTB) and AT hook containing zinc finger 1
hsa-miR-1266	0	0	1	1	1	1	DAPK2	death-associated protein kinase 2
hsa-miR-1266	1	0	1	1	1	1	LHX6	LIM homeobox 6
hsa-miR-1266	1	0	1	0	1	1	DIEXF	digestive organ expansion factor homolog (zebrafish)
hsa-miR-1266	0	0	1	0	0	0	SND1-IT1	SND1 intronic transcript 1 (non-protein coding)
hsa-miR-1266	1	0	1	1	1	1	RND1	Rho family GTPase 1
hsa-miR-1266	1	0	1	1	1	1	CNOT2	CCR4-NOT transcription complex, subunit 2
hsa-miR-1266	0	0	1	1	0	0	RHOD	ras homolog family member D
hsa-miR-1266	0	0	1	1	1	1	ZNRD1	zinc ribbon domain containing 1
hsa-miR-1266	1	0	1	1	1	1	CDR2L	cerebellar degeneration-related protein 2-like
hsa-miR-1266	1	0	1	1	1	1	HERC3	HECT and RLD domain containing E3 ubiquitin protein ligase 3
hsa-miR-1266	1	0	1	1	1	1	FAF2	Fas associated factor family member 2
hsa-miR-1266	0	0	1	1	1	1	PSME4	proteasome (prosome, macropain) activator subunit 4
hsa-miR-1266	1	0	1	1	1	1	ZNF592	zinc finger protein 592
hsa-miR-1266	1	0	1	0	1	1	SH3PXD2A	SH3 and PX domains 2A
hsa-miR-1266	1	0	1	1	1	1	RALGPS1	Ral GEF with PH domain and SH3 binding motif 1
hsa-miR-1266	0	0	1	1	1	1	FAM53B	family with sequence similarity 53, member B
hsa-miR-1266	1	0	1	0	1	1	EDEM1	ER degradation enhancer, mannosidase alpha-like 1
hsa-miR-1266	0	0	1	1	0	0	SETD1A	SET domain containing 1A
hsa-miR-1266	1	0	1	1	1	1	TBKBP1	TBK1 binding protein 1
hsa-miR-1266	1	0	1	1	1	1	MLL4	myeloid/lymphoid or mixed-lineage leukemia 4
hsa-miR-1266	0	0	1	1	1	1	FRMPD4	FERM and PDZ domain containing 4
hsa-miR-1266	1	0	1	0	1	1	MLEC	malectin
hsa-miR-1266	1	0	1	0	1	1	SERTAD2	SERTA domain containing 2
hsa-miR-1266	0	0	1	0	1	1	DHCR24	24-dehydrocholesterol reductase
hsa-miR-1266	0	0	1	1	0	0	PCNXL2	pecanex-like 2 (Drosophila)
hsa-miR-1266	1	0	1	1	1	1	LRIG2	leucine-rich repeats and immunoglobulin-like domains 2
hsa-miR-1266	1	0	1	0	1	1	TRIL	TLR4 interactor with leucine-rich repeats
hsa-miR-1266	1	0	1	1	1	1	TOMM70A	translocase of outer mitochondrial membrane 70 homolog A (S. cerevisiae)
hsa-miR-1266	1	0	1	0	1	1	LPPR4	lipid phosphate phosphatase-related protein type 4
hsa-miR-1266	1	0	1	1	1	1	NUAK1	NUAK family, SNF1-like kinase, 1
hsa-miR-1266	0	0	1	1	1	1	ADNP2	ADNP homeobox 2
hsa-miR-1266	1	0	1	1	1	1	SPAST	spastin
hsa-miR-1266	1	0	1	1	1	1	RAB21	RAB21, member RAS oncogene family
hsa-miR-1266	1	0	1	0	1	1	ZNF609	zinc finger protein 609
hsa-miR-1266	0	0	1	1	1	1	FTSJD2	FtsJ methyltransferase domain containing 2
hsa-miR-1266	1	0	1	1	1	1	DDN	dendrin
hsa-miR-1266	1	0	1	1	0	0	CIC	capicua homolog (Drosophila)
hsa-miR-1266	1	0	1	0	1	1	SNX13	sorting nexin 13
hsa-miR-1266	1	0	1	1	1	1	RCOR1	REST corepressor 1
hsa-miR-1266	0	0	1	1	1	1	FBXO28	F-box protein 28
hsa-miR-1266	1	0	1	1	1	1	PHF15	PHD finger protein 15
hsa-miR-1266	1	0	1	0	1	1	KHNYN	KH and NYN domain containing
hsa-miR-1266	1	0	1	0	1	1	ARHGEF12	Rho guanine nucleotide exchange factor (GEF) 12
hsa-miR-1266	1	0	1	0	1	1	LARP1	La ribonucleoprotein domain family, member 1
hsa-miR-1266	0	0	1	0	1	1	RRP8	ribosomal RNA processing 8, methyltransferase, homolog (yeast)
hsa-miR-1266	1	0	1	1	0	0	SMG5	smg-5 homolog, nonsense mediated mRNA decay factor (C. elegans)
hsa-miR-1266	1	0	1	1	1	1	NUDCD3	NudC domain containing 3
hsa-miR-1266	1	0	1	1	1	1	MXRA5	matrix-remodelling associated 5
hsa-miR-1266	0	0	1	1	0	0	DPCD	deleted in primary ciliary dyskinesia homolog (mouse)
hsa-miR-1266	1	0	1	1	1	1	CLIP3	CAP-GLY domain containing linker protein 3
hsa-miR-1266	1	0	1	1	1	1	CHD5	chromodomain helicase DNA binding protein 5
hsa-miR-1266	1	0	1	1	1	1	LTN1	listerin E3 ubiquitin protein ligase 1
hsa-miR-1266	1	0	1	0	1	1	PPP1R16B	protein phosphatase 1, regulatory subunit 16B
hsa-miR-1266	1	0	1	1	0	0	POLDIP2	polymerase (DNA-directed), delta interacting protein 2
hsa-miR-1266	1	0	1	1	1	1	PHF19	PHD finger protein 19
hsa-miR-1266	1	0	1	1	1	1	FAM155B	family with sequence similarity 155, member B
hsa-miR-1266	1	0	1	1	1	1	PLA2G3	phospholipase A2, group III
hsa-miR-1266	0	0	1	1	1	1	KRT76	keratin 76
hsa-miR-1266	1	0	1	1	1	1	WT1-AS	WT1 antisense RNA
hsa-miR-1266	0	0	1	1	0	0	MBTPS2	membrane-bound transcription factor peptidase, site 2
hsa-miR-1266	0	0	1	1	1	1	HMP19	HMP19 protein
hsa-miR-1266	0	0	1	1	1	1	ATP6V1D	ATPase, H+ transporting, lysosomal 34kDa, V1 subunit D
hsa-miR-1266	1	0	1	0	1	1	KLF13	Kruppel-like factor 13
hsa-miR-1266	1	0	1	1	1	1	RRP15	ribosomal RNA processing 15 homolog (S. cerevisiae)
hsa-miR-1266	1	0	1	1	1	1	SUFU	suppressor of fused homolog (Drosophila)
hsa-miR-1266	1	0	1	1	1	1	VGLL3	vestigial like 3 (Drosophila)
hsa-miR-1266	1	0	1	0	1	1	HECA	headcase homolog (Drosophila)
hsa-miR-1266	1	0	1	1	1	1	GPRC5B	G protein-coupled receptor, family C, group 5, member B
hsa-miR-1266	1	0	1	0	1	1	HPCAL4	hippocalcin like 4
hsa-miR-1266	1	0	1	1	1	1	RAPGEFL1	Rap guanine nucleotide exchange factor (GEF)-like 1
hsa-miR-1266	0	0	1	1	1	1	CENPF	centromere protein F, 350/400kDa (mitosin)
hsa-miR-1266	0	0	1	1	1	1	CD244	CD244 molecule, natural killer cell receptor 2B4
hsa-miR-1266	0	0	1	1	0	0	CPB2	carboxypeptidase B2 (plasma)
hsa-miR-1266	0	0	1	1	0	0	FAM203A	family with sequence similarity 203, member A
hsa-miR-1266	0	0	1	0	1	1	GPR83	G protein-coupled receptor 83
hsa-miR-1266	1	0	1	0	1	1	SLC25A37	solute carrier family 25 (mitochondrial iron transporter), member 37
hsa-miR-1266	1	0	1	1	1	1	ZAK	sterile alpha motif and leucine zipper containing kinase AZK
hsa-miR-1266	0	0	1	1	1	1	PRKAG3	protein kinase, AMP-activated, gamma 3 non-catalytic subunit
hsa-miR-1266	1	0	1	1	1	1	GRID1	glutamate receptor, ionotropic, delta 1
hsa-miR-1266	0	0	1	1	1	1	HYDIN	HYDIN, axonemal central pair apparatus protein
hsa-miR-1266	1	0	1	1	0	0	C17orf59	chromosome 17 open reading frame 59
hsa-miR-1266	1	0	1	1	1	1	CNNM2	cyclin M2
hsa-miR-1266	1	0	1	0	1	1	FAM46C	family with sequence similarity 46, member C
hsa-miR-1266	0	0	1	1	1	1	SOHLH2	spermatogenesis and oogenesis specific basic helix-loop-helix 2
hsa-miR-1266	1	0	1	1	1	1	RNF125	ring finger protein 125, E3 ubiquitin protein ligase
hsa-miR-1266	0	0	1	1	1	1	C2orf42	chromosome 2 open reading frame 42
hsa-miR-1266	1	0	1	1	1	1	HIF1AN	hypoxia inducible factor 1, alpha subunit inhibitor
hsa-miR-1266	1	0	1	1	0	0	LAMTOR1	late endosomal/lysosomal adaptor, MAPK and MTOR activator 1
hsa-miR-1266	0	0	1	1	1	1	FKBP14	FK506 binding protein 14, 22 kDa
hsa-miR-1266	0	0	1	1	0	0	TRMT12	tRNA methyltransferase 12 homolog (S. cerevisiae)
hsa-miR-1266	0	0	1	1	1	1	SCYL2	SCY1-like 2 (S. cerevisiae)
hsa-miR-1266	1	0	1	1	1	1	ARGLU1	arginine and glutamate rich 1
hsa-miR-1266	1	0	1	1	1	1	PACS1	phosphofurin acidic cluster sorting protein 1
hsa-miR-1266	1	0	1	1	1	1	FIGN	fidgetin
hsa-miR-1266	0	0	1	1	1	1	MRPS10	mitochondrial ribosomal protein S10
hsa-miR-1266	1	0	1	1	1	1	RIC8B	resistance to inhibitors of cholinesterase 8 homolog B (C. elegans)
hsa-miR-1266	1	0	1	1	1	1	TBC1D13	TBC1 domain family, member 13
hsa-miR-1266	1	0	1	1	1	1	LRRC20	leucine rich repeat containing 20
hsa-miR-1266	0	0	1	1	1	1	TRIM62	tripartite motif containing 62
hsa-miR-1266	0	0	1	1	0	0	INTS9	integrator complex subunit 9
hsa-miR-1266	0	0	1	1	1	1	C1orf106	chromosome 1 open reading frame 106
hsa-miR-1266	1	0	1	1	1	1	PI4K2B	phosphatidylinositol 4-kinase type 2 beta
hsa-miR-1266	0	0	1	1	1	1	WDR33	WD repeat domain 33
hsa-miR-1266	0	0	1	1	1	1	STK32B	serine/threonine kinase 32B
hsa-miR-1266	1	0	1	0	1	1	FOXJ2	forkhead box J2
hsa-miR-1266	1	0	1	1	1	1	EPB41L4B	erythrocyte membrane protein band 4.1 like 4B
hsa-miR-1266	1	0	1	1	1	1	LRRC59	leucine rich repeat containing 59
hsa-miR-1266	1	0	1	1	1	1	CAMK2N1	calcium/calmodulin-dependent protein kinase II inhibitor 1
hsa-miR-1266	0	0	1	1	1	1	LENEP	lens epithelial protein
hsa-miR-1266	0	0	1	0	0	0	APOBR	apolipoprotein B receptor
hsa-miR-1266	0	0	1	1	1	1	DHTKD1	dehydrogenase E1 and transketolase domain containing 1
hsa-miR-1266	1	0	1	1	1	1	PCDHGA1	protocadherin gamma subfamily A, 1
hsa-miR-1266	1	0	1	0	1	1	PCDHGA10	protocadherin gamma subfamily A, 10
hsa-miR-1266	1	0	1	0	1	1	PCDHGA11	protocadherin gamma subfamily A, 11
hsa-miR-1266	1	0	1	1	1	1	PCDHGA2	protocadherin gamma subfamily A, 2
hsa-miR-1266	1	0	1	0	1	1	PCDHGA3	protocadherin gamma subfamily A, 3
hsa-miR-1266	1	0	1	0	1	1	PCDHGA4	protocadherin gamma subfamily A, 4
hsa-miR-1266	1	0	1	0	1	1	PCDHGA5	protocadherin gamma subfamily A, 5
hsa-miR-1266	1	0	1	0	1	1	PCDHGA6	protocadherin gamma subfamily A, 6
hsa-miR-1266	1	0	1	0	1	1	PCDHGA7	protocadherin gamma subfamily A, 7
hsa-miR-1266	1	0	1	0	1	1	PCDHGA9	protocadherin gamma subfamily A, 9
hsa-miR-1266	1	0	1	0	1	1	PCDHGB1	protocadherin gamma subfamily B, 1
hsa-miR-1266	1	0	1	0	1	1	PCDHGB2	protocadherin gamma subfamily B, 2
hsa-miR-1266	1	0	1	0	1	1	PCDHGB3	protocadherin gamma subfamily B, 3
hsa-miR-1266	1	0	1	0	1	1	PCDHGB5	protocadherin gamma subfamily B, 5
hsa-miR-1266	1	0	1	0	1	1	PCDHGB6	protocadherin gamma subfamily B, 6
hsa-miR-1266	1	0	1	0	1	1	PCDHGB7	protocadherin gamma subfamily B, 7
hsa-miR-1266	1	0	1	0	1	1	PCDHGC4	protocadherin gamma subfamily C, 4
hsa-miR-1266	1	0	1	0	1	1	PCDHGC5	protocadherin gamma subfamily C, 5
hsa-miR-1266	1	0	1	1	1	1	HOXA10	homeobox A10
hsa-miR-1266	0	0	1	1	1	1	NPAP1	nuclear pore associated protein 1
hsa-miR-1266	1	0	1	1	1	1	KCTD5	potassium channel tetramerisation domain containing 5
hsa-miR-1266	0	0	1	1	1	1	RIN2	Ras and Rab interactor 2
hsa-miR-1266	1	0	1	0	1	1	FAM190B	family with sequence similarity 190, member B
hsa-miR-1266	0	0	1	0	1	1	ARL15	ADP-ribosylation factor-like 15
hsa-miR-1266	1	0	1	0	1	1	UBFD1	ubiquitin family domain containing 1
hsa-miR-1266	1	0	1	1	1	1	LRRC8A	leucine rich repeat containing 8 family, member A
hsa-miR-1266	0	0	1	1	1	1	RPRM	reprimo, TP53 dependent G2 arrest mediator candidate
hsa-miR-1266	1	0	1	1	1	1	MDM1	Mdm1 nuclear protein homolog (mouse)
hsa-miR-1266	1	0	1	1	0	0	SEMA3G	sema domain, immunoglobulin domain (Ig), short basic domain, secreted, (semaphorin) 3G
hsa-miR-1266	0	0	1	1	1	1	PRTFDC1	phosphoribosyl transferase domain containing 1
hsa-miR-1266	0	0	1	1	1	1	CYSLTR2	cysteinyl leukotriene receptor 2
hsa-miR-1266	0	0	1	1	1	1	ZNF695	zinc finger protein 695
hsa-miR-1266	1	0	1	1	1	1	PTGFRN	prostaglandin F2 receptor negative regulator
hsa-miR-1266	1	0	1	1	1	1	ATP8B2	ATPase, aminophospholipid transporter, class I, type 8B, member 2
hsa-miR-1266	0	0	1	1	1	1	TCL6	T-cell leukemia/lymphoma 6 (non-protein coding)
hsa-miR-1266	0	0	1	0	0	0	C11orf16	chromosome 11 open reading frame 16
hsa-miR-1266	1	0	1	1	1	1	JPH1	junctophilin 1
hsa-miR-1266	1	0	1	1	1	1	SLC24A3	solute carrier family 24 (sodium/potassium/calcium exchanger), member 3
hsa-miR-1266	1	0	1	1	1	1	GALNTL1	UDP-N-acetyl-alpha-D-galactosamine:polypeptide N-acetylgalactosaminyltransferase-like 1
hsa-miR-1266	1	0	1	0	1	1	KCNS2	potassium voltage-gated channel, delayed-rectifier, subfamily S, member 2
hsa-miR-1266	0	0	1	1	1	1	KIAA1161	KIAA1161
hsa-miR-1266	0	0	1	0	1	1	ZNF490	zinc finger protein 490
hsa-miR-1266	0	0	1	1	1	1	SHROOM4	shroom family member 4
hsa-miR-1266	1	0	1	1	1	1	DLG3	discs, large homolog 3 (Drosophila)
hsa-miR-1266	1	0	1	0	1	1	ALPK3	alpha-kinase 3
hsa-miR-1266	0	0	1	1	1	1	TXNDC16	thioredoxin domain containing 16
hsa-miR-1266	1	0	1	1	1	1	SEMA6A	sema domain, transmembrane domain (TM), and cytoplasmic domain, (semaphorin) 6A
hsa-miR-1266	1	0	1	1	1	1	RANBP10	RAN binding protein 10
hsa-miR-1266	1	0	1	1	1	1	NIN	ninein (GSK3B interacting protein)
hsa-miR-1266	0	0	1	1	1	1	PRX	periaxin
hsa-miR-1266	1	0	1	0	1	1	RAP2A	RAP2A, member of RAS oncogene family
hsa-miR-1266	0	0	1	1	0	0	MAGEA5	melanoma antigen family A, 5
hsa-miR-1266	1	0	1	0	1	1	XK	X-linked Kx blood group (McLeod syndrome)
hsa-miR-1266	1	0	1	1	1	1	KCNK10	potassium channel, subfamily K, member 10
hsa-miR-1266	0	0	1	1	0	0	HOXD11	homeobox D11
hsa-miR-1266	1	0	1	0	1	1	TP53INP2	tumor protein p53 inducible nuclear protein 2
hsa-miR-1266	0	0	1	1	0	0	PRODH2	proline dehydrogenase (oxidase) 2
hsa-miR-1266	1	0	1	1	1	1	DMRT3	doublesex and mab-3 related transcription factor 3
hsa-miR-1266	1	0	1	1	1	1	PELI2	pellino E3 ubiquitin protein ligase family member 2
hsa-miR-1266	1	0	1	1	1	1	SENP2	SUMO1/sentrin/SMT3 specific peptidase 2
hsa-miR-1266	0	0	1	1	0	0	ALOXE3	arachidonate lipoxygenase 3
hsa-miR-1266	0	0	1	1	1	1	NR1D1	nuclear receptor subfamily 1, group D, member 1
hsa-miR-1266	1	0	1	0	0	0	ALX4	ALX homeobox 4
hsa-miR-1266	0	0	1	0	1	1	SPCS3	signal peptidase complex subunit 3 homolog (S. cerevisiae)
hsa-miR-1266	0	0	1	1	1	1	PGM5	phosphoglucomutase 5
hsa-miR-1266	1	0	1	0	1	1	CSNK1G1	casein kinase 1, gamma 1
hsa-miR-1266	0	0	1	1	0	0	ABHD4	abhydrolase domain containing 4
hsa-miR-1266	1	0	1	1	1	1	CLSTN2	calsyntenin 2
hsa-miR-1266	0	0	1	1	1	1	TCTA	T-cell leukemia translocation altered
hsa-miR-1266	0	0	1	1	1	1	SUSD1	sushi domain containing 1
hsa-miR-1266	1	0	1	1	1	1	GIGYF1	GRB10 interacting GYF protein 1
hsa-miR-1266	1	0	1	1	1	1	LPPR2	lipid phosphate phosphatase-related protein type 2
hsa-miR-1266	1	0	1	1	1	1	FAM160B2	family with sequence similarity 160, member B2
hsa-miR-1266	1	0	1	1	1	1	FNDC4	fibronectin type III domain containing 4
hsa-miR-1266	1	0	1	1	1	1	FBXL17	F-box and leucine-rich repeat protein 17
hsa-miR-1266	0	0	1	1	1	1	MARCKSL1	MARCKS-like 1
hsa-miR-1266	0	0	1	1	1	1	HTR5A	5-hydroxytryptamine (serotonin) receptor 5A, G protein-coupled
hsa-miR-1266	1	0	1	1	0	0	C19orf43	chromosome 19 open reading frame 43
hsa-miR-1266	0	0	1	1	0	0	CUEDC2	CUE domain containing 2
hsa-miR-1266	0	0	1	0	1	1	TRPM8	transient receptor potential cation channel, subfamily M, member 8
hsa-miR-1266	0	0	1	1	0	0	DHRS11	dehydrogenase/reductase (SDR family) member 11
hsa-miR-1266	0	0	1	1	1	1	PDYN	prodynorphin
hsa-miR-1266	1	0	1	1	1	1	LRRC2	leucine rich repeat containing 2
hsa-miR-1266	1	0	1	1	1	1	NKAIN1	Na+/K+ transporting ATPase interacting 1
hsa-miR-1266	1	0	1	1	1	1	GCC1	GRIP and coiled-coil domain containing 1
hsa-miR-1266	1	0	1	1	1	1	C10orf76	chromosome 10 open reading frame 76
hsa-miR-1266	0	0	1	1	1	1	RNF219	ring finger protein 219
hsa-miR-1266	0	0	1	1	0	0	TNFAIP8L2	tumor necrosis factor, alpha-induced protein 8-like 2
hsa-miR-1266	1	0	1	1	1	1	C3orf52	chromosome 3 open reading frame 52
hsa-miR-1266	0	0	1	1	1	1	GALNT12	UDP-N-acetyl-alpha-D-galactosamine:polypeptide N-acetylgalactosaminyltransferase 12 (GalNAc-T12)
hsa-miR-1266	0	0	1	1	1	1	ZNF768	zinc finger protein 768
hsa-miR-1266	0	0	1	1	1	1	SNIP1	Smad nuclear interacting protein 1
hsa-miR-1266	1	0	1	0	1	1	ZFHX4	zinc finger homeobox 4
hsa-miR-1266	1	0	1	0	1	1	MOB3B	MOB kinase activator 3B
hsa-miR-1266	1	0	1	0	1	1	MAGIX	MAGI family member, X-linked
hsa-miR-1266	1	0	1	1	0	0	CNTD2	cyclin N-terminal domain containing 2
hsa-miR-1266	0	0	1	1	1	1	ZNF767	zinc finger family member 767
hsa-miR-1266	1	0	1	1	1	1	GRHL2	grainyhead-like 2 (Drosophila)
hsa-miR-1266	1	0	1	1	1	1	KLHL18	kelch-like 18 (Drosophila)
hsa-miR-1266	0	0	1	1	0	0	BAIAP2L2	BAI1-associated protein 2-like 2
hsa-miR-1266	0	0	1	1	0	0	CENPT	centromere protein T
hsa-miR-1266	0	0	1	1	0	0	BPIFB2	BPI fold containing family B, member 2
hsa-miR-1266	1	0	1	1	1	1	TNKS2	tankyrase, TRF1-interacting ankyrin-related ADP-ribose polymerase 2
hsa-miR-1266	1	0	1	0	1	1	SRCIN1	SRC kinase signaling inhibitor 1
hsa-miR-1266	0	0	1	1	1	1	ITIH5	inter-alpha-trypsin inhibitor heavy chain family, member 5
hsa-miR-1266	1	0	1	1	1	1	CYB5B	cytochrome b5 type B (outer mitochondrial membrane)
hsa-miR-1266	0	0	1	1	1	1	SLC25A21	solute carrier family 25 (mitochondrial oxoadipate carrier), member 21
hsa-miR-1266	1	0	1	1	1	1	JHDM1D	jumonji C domain containing histone demethylase 1 homolog D (S. cerevisiae)
hsa-miR-1266	1	0	1	1	1	1	HOXA3	homeobox A3
hsa-miR-1266	1	0	1	1	1	1	PTPRO	protein tyrosine phosphatase, receptor type, O
hsa-miR-1266	1	0	1	1	1	1	FAM117A	family with sequence similarity 117, member A
hsa-miR-1266	1	0	1	1	1	1	PDRG1	p53 and DNA-damage regulated 1
hsa-miR-1266	0	0	1	1	1	1	APOL2	apolipoprotein L, 2
hsa-miR-1266	1	0	1	0	1	1	LBH	limb bud and heart development homolog (mouse)
hsa-miR-1266	1	0	1	1	1	1	SNX27	sorting nexin family member 27
hsa-miR-1266	0	0	1	1	1	1	PABPC3	poly(A) binding protein, cytoplasmic 3
hsa-miR-1266	1	0	1	1	1	1	RAB1B	RAB1B, member RAS oncogene family
hsa-miR-1266	0	0	1	1	1	1	KIF18A	kinesin family member 18A
hsa-miR-1266	0	0	1	1	1	1	FCRL5	Fc receptor-like 5
hsa-miR-1266	1	0	1	0	1	1	ITCH	itchy E3 ubiquitin protein ligase
hsa-miR-1266	0	0	1	1	1	1	KCNA7	potassium voltage-gated channel, shaker-related subfamily, member 7
hsa-miR-1266	0	0	1	0	1	1	ENAM	enamelin
hsa-miR-1266	0	0	1	1	1	1	FRMD8	FERM domain containing 8
hsa-miR-1266	0	0	1	1	0	0	KRTAP17-1	keratin associated protein 17-1
hsa-miR-1266	0	0	1	1	1	1	FCAMR	Fc receptor, IgA, IgM, high affinity
hsa-miR-1266	1	0	1	0	1	1	PCDHGA8	protocadherin gamma subfamily A, 8
hsa-miR-1266	1	0	1	1	1	1	FBXO30	F-box protein 30
hsa-miR-1266	0	0	1	1	0	0	ATRIP	ATR interacting protein
hsa-miR-1266	0	0	1	1	1	1	RNASEH2C	ribonuclease H2, subunit C
hsa-miR-1266	1	0	1	1	1	1	ANTXR1	anthrax toxin receptor 1
hsa-miR-1266	1	0	1	1	1	1	ZDHHC18	zinc finger, DHHC-type containing 18
hsa-miR-1266	1	0	1	1	1	1	CAMKK1	calcium/calmodulin-dependent protein kinase kinase 1, alpha
hsa-miR-1266	0	0	1	1	0	0	NICN1	nicolin 1
hsa-miR-1266	0	0	1	1	0	0	CHCHD6	coiled-coil-helix-coiled-coil-helix domain containing 6
hsa-miR-1266	0	0	1	1	0	0	PCDH1	protocadherin 1
hsa-miR-1266	1	0	1	1	1	1	SYVN1	synovial apoptosis inhibitor 1, synoviolin
hsa-miR-1266	0	0	1	1	1	1	MAP1LC3A	microtubule-associated protein 1 light chain 3 alpha
hsa-miR-1266	1	0	1	1	1	1	TTBK1	tau tubulin kinase 1
hsa-miR-1266	1	0	1	1	1	1	PPP1R9B	protein phosphatase 1, regulatory subunit 9B
hsa-miR-1266	1	0	1	1	0	0	ZC3H10	zinc finger CCCH-type containing 10
hsa-miR-1266	0	0	1	1	1	1	FAM136A	family with sequence similarity 136, member A
hsa-miR-1266	1	0	1	1	1	1	RAB2B	RAB2B, member RAS oncogene family
hsa-miR-1266	0	0	1	1	0	0	TNS4	tensin 4
hsa-miR-1266	1	0	1	1	1	1	RBM17	RNA binding motif protein 17
hsa-miR-1266	0	0	1	1	0	0	NXF5	nuclear RNA export factor 5
hsa-miR-1266	1	0	1	0	1	1	C5orf62	chromosome 5 open reading frame 62
hsa-miR-1266	0	0	1	1	1	1	POLR2J2	polymerase (RNA) II (DNA directed) polypeptide J2
hsa-miR-1266	1	0	1	1	1	1	PDGFA	platelet-derived growth factor alpha polypeptide
hsa-miR-1266	1	0	1	1	1	1	FGD3	FYVE, RhoGEF and PH domain containing 3
hsa-miR-1266	1	0	1	0	1	1	FGF5	fibroblast growth factor 5
hsa-miR-1266	1	0	1	1	0	0	CAMK2N2	calcium/calmodulin-dependent protein kinase II inhibitor 2
hsa-miR-1266	1	0	1	1	1	1	SSH2	slingshot homolog 2 (Drosophila)
hsa-miR-1266	1	0	1	1	1	1	C19orf6	chromosome 19 open reading frame 6
hsa-miR-1266	1	0	1	1	0	0	FCHSD1	FCH and double SH3 domains 1
hsa-miR-1266	1	0	1	1	1	1	EPT1	ethanolaminephosphotransferase 1 (CDP-ethanolamine-specific)
hsa-miR-1266	0	0	1	0	0	0	CEACAM21	carcinoembryonic antigen-related cell adhesion molecule 21
hsa-miR-1266	1	0	1	1	1	1	LUZP1	leucine zipper protein 1
hsa-miR-1266	0	0	1	0	1	1	CCDC97	coiled-coil domain containing 97
hsa-miR-1266	0	0	1	1	1	1	PLEKHG4B	pleckstrin homology domain containing, family G (with RhoGef domain) member 4B
hsa-miR-1266	0	0	1	1	1	1	IL22RA2	interleukin 22 receptor, alpha 2
hsa-miR-1266	1	0	1	0	1	1	CCND1	cyclin D1
hsa-miR-1266	0	0	1	1	1	1	FKBP1B	FK506 binding protein 1B, 12.6 kDa
hsa-miR-1266	0	0	1	1	1	1	IP6K3	inositol hexakisphosphate kinase 3
hsa-miR-1266	1	0	1	1	1	1	NAA15	N(alpha)-acetyltransferase 15, NatA auxiliary subunit
hsa-miR-1266	0	0	1	0	1	1	SLC36A1	solute carrier family 36 (proton/amino acid symporter), member 1
hsa-miR-1266	1	0	1	1	1	1	SEPT4	septin 4
hsa-miR-1266	0	0	1	1	1	1	CBLN4	cerebellin 4 precursor
hsa-miR-1266	0	0	1	1	0	0	ACY3	aspartoacylase (aminocyclase) 3
hsa-miR-1266	1	0	1	1	1	1	COL11A2	collagen, type XI, alpha 2
hsa-miR-1266	0	0	1	1	0	0	ZSWIM3	zinc finger, SWIM-type containing 3
hsa-miR-1266	1	0	1	1	1	1	KLHL6	kelch-like 6 (Drosophila)
hsa-miR-1266	1	0	1	1	0	0	MADD	MAP-kinase activating death domain
hsa-miR-1266	0	0	1	0	1	1	PAQR8	progestin and adipoQ receptor family member VIII
hsa-miR-1266	1	0	1	1	0	0	UNC5A	unc-5 homolog A (C. elegans)
hsa-miR-1266	1	0	1	1	1	1	ICA1L	islet cell autoantigen 1,69kDa-like
hsa-miR-1266	1	0	1	0	1	1	SP1	Sp1 transcription factor
hsa-miR-1266	1	0	1	1	1	1	HAS3	hyaluronan synthase 3
hsa-miR-1266	0	0	1	1	1	1	ALKBH8	alkB, alkylation repair homolog 8 (E. coli)
hsa-miR-1266	1	0	1	1	1	1	BACE2	beta-site APP-cleaving enzyme 2
hsa-miR-1266	1	0	1	1	1	1	TSTD2	thiosulfate sulfurtransferase (rhodanese)-like domain containing 2
hsa-miR-1266	0	0	1	1	0	0	COMTD1	catechol-O-methyltransferase domain containing 1
hsa-miR-1266	1	0	1	1	1	1	KCNH8	potassium voltage-gated channel, subfamily H (eag-related), member 8
hsa-miR-1266	0	0	1	1	1	1	C10orf82	chromosome 10 open reading frame 82
hsa-miR-1266	0	0	1	1	1	1	SPICE1	spindle and centriole associated protein 1
hsa-miR-1266	1	0	1	1	0	0	SMCR8	Smith-Magenis syndrome chromosome region, candidate 8
hsa-miR-1266	1	0	1	1	1	1	FAM91A1	family with sequence similarity 91, member A1
hsa-miR-1266	0	0	1	1	1	1	SLFN5	schlafen family member 5
hsa-miR-1266	0	0	1	1	0	0	CCDC11	coiled-coil domain containing 11
hsa-miR-1266	1	0	1	1	1	1	UBQLNL	ubiquilin-like
hsa-miR-1266	1	0	1	1	0	0	NAPRT1	nicotinate phosphoribosyltransferase domain containing 1
hsa-miR-1266	0	0	1	1	0	0	CSNK1A1L	casein kinase 1, alpha 1-like
hsa-miR-1266	1	0	1	1	1	1	VTI1A	vesicle transport through interaction with t-SNAREs homolog 1A (yeast)
hsa-miR-1266	0	0	1	1	0	0	EVI5L	ecotropic viral integration site 5-like
hsa-miR-1266	0	0	1	0	0	0	MRPL10	mitochondrial ribosomal protein L10
hsa-miR-1266	0	0	1	0	1	1	SPATA18	spermatogenesis associated 18
hsa-miR-1266	0	0	1	1	1	1	C7orf45	chromosome 7 open reading frame 45
hsa-miR-1266	0	0	1	1	1	1	GCSAML	germinal center-associated, signaling and motility-like
hsa-miR-1266	0	0	1	1	1	1	APOBEC3F	apolipoprotein B mRNA editing enzyme, catalytic polypeptide-like 3F
hsa-miR-1266	0	0	1	1	0	0	TCEB3C	transcription elongation factor B polypeptide 3C (elongin A3)
hsa-miR-1266	1	0	1	1	1	1	UBTD2	ubiquitin domain containing 2
hsa-miR-1266	1	0	1	1	1	1	FAM123B	family with sequence similarity 123B
hsa-miR-1266	0	0	1	1	1	1	C16orf89	chromosome 16 open reading frame 89
hsa-miR-1266	1	0	1	1	1	1	ZNF362	zinc finger protein 362
hsa-miR-1266	0	0	1	1	1	1	ENTHD1	ENTH domain containing 1
hsa-miR-1266	1	0	1	1	1	1	SPRED1	sprouty-related, EVH1 domain containing 1
hsa-miR-1266	1	0	1	0	1	1	ARID2	AT rich interactive domain 2 (ARID, RFX-like)
hsa-miR-1266	1	0	1	0	1	1	TMEM154	transmembrane protein 154
hsa-miR-1266	0	0	1	1	0	0	MS4A15	membrane-spanning 4-domains, subfamily A, member 15
hsa-miR-1266	1	0	1	1	1	1	HEPACAM	hepatic and glial cell adhesion molecule
hsa-miR-1266	1	0	1	1	1	1	NXPH1	neurexophilin 1
hsa-miR-1266	0	0	1	1	1	1	ASPRV1	aspartic peptidase, retroviral-like 1
hsa-miR-1266	1	0	1	1	1	1	FAS	Fas (TNF receptor superfamily, member 6)
hsa-miR-1266	1	0	1	1	1	1	PXT1	peroxisomal, testis specific 1
hsa-miR-1266	1	0	1	1	1	1	TCEANC2	transcription elongation factor A (SII) N-terminal and central domain containing 2
hsa-miR-1266	0	0	1	0	0	0	FLJ32955	uncharacterized protein FLJ32955
hsa-miR-1266	1	0	1	1	1	1	HS6ST3	heparan sulfate 6-O-sulfotransferase 3
hsa-miR-1266	1	0	1	0	1	1	MDGA1	MAM domain containing glycosylphosphatidylinositol anchor 1
hsa-miR-1266	1	0	1	0	1	1	SEMA6D	sema domain, transmembrane domain (TM), and cytoplasmic domain, (semaphorin) 6D
hsa-miR-1266	1	0	1	1	1	1	CACUL1	CDK2-associated, cullin domain 1
hsa-miR-1266	1	0	1	1	1	1	POM121	POM121 transmembrane nucleoporin
hsa-miR-1266	0	0	1	1	1	1	IL29	interleukin 29 (interferon, lambda 1)
hsa-miR-1266	0	0	1	1	1	1	REXO1L1	REX1, RNA exonuclease 1 homolog (S. cerevisiae)-like 1
hsa-miR-1266	0	0	1	1	1	1	KCNH5	potassium voltage-gated channel, subfamily H (eag-related), member 5
hsa-miR-1266	1	0	1	1	1	1	IL28RA	interleukin 28 receptor, alpha (interferon, lambda receptor)
hsa-miR-1266	1	0	1	1	1	1	FAM117B	family with sequence similarity 117, member B
hsa-miR-1266	0	0	1	1	1	1	FNDC7	fibronectin type III domain containing 7
hsa-miR-1266	0	0	1	1	0	0	TMEM145	transmembrane protein 145
hsa-miR-1266	1	0	1	1	1	1	ARL10	ADP-ribosylation factor-like 10
hsa-miR-1266	0	0	1	0	1	1	NKAIN3	Na+/K+ transporting ATPase interacting 3
hsa-miR-1266	0	0	1	1	1	1	AQPEP	laeverin
hsa-miR-1266	1	0	1	1	1	1	RABL3	RAB, member of RAS oncogene family-like 3
hsa-miR-1266	0	0	1	1	1	1	CCDC50	coiled-coil domain containing 50
hsa-miR-1266	1	0	1	1	0	0	JPH2	junctophilin 2
hsa-miR-1266	0	0	1	1	1	1	MRPL43	mitochondrial ribosomal protein L43
hsa-miR-1266	1	0	1	1	1	1	STX12	syntaxin 12
hsa-miR-1266	0	0	1	0	1	1	SYT12	synaptotagmin XII
hsa-miR-1266	1	0	1	1	1	1	PRIMA1	proline rich membrane anchor 1
hsa-miR-1266	0	0	1	1	1	1	ATPIF1	ATPase inhibitory factor 1
hsa-miR-1266	0	0	1	1	1	1	ZNF831	zinc finger protein 831
hsa-miR-1266	0	0	1	1	0	0	C2orf53	chromosome 2 open reading frame 53
hsa-miR-1266	0	0	1	1	1	1	NPAS4	neuronal PAS domain protein 4
hsa-miR-1266	0	0	1	1	1	1	CCDC67	coiled-coil domain containing 67
hsa-miR-1266	0	0	1	0	1	1	PITPNC1	phosphatidylinositol transfer protein, cytoplasmic 1
hsa-miR-1266	0	0	1	1	0	0	CENPV	centromere protein V
hsa-miR-1266	0	0	1	0	1	1	HCG27	HLA complex group 27 (non-protein coding)
hsa-miR-1266	0	0	1	1	0	0	BPIFB4	BPI fold containing family B, member 4
hsa-miR-1266	1	0	1	1	1	1	TMEM229B	transmembrane protein 229B
hsa-miR-1266	1	0	1	1	1	1	BCL9L	B-cell CLL/lymphoma 9-like
hsa-miR-1266	1	0	1	1	1	1	SP8	Sp8 transcription factor
hsa-miR-1266	0	0	1	1	0	0	GPX6	glutathione peroxidase 6 (olfactory)
hsa-miR-1266	1	0	1	1	1	1	SUMF1	sulfatase modifying factor 1
hsa-miR-1266	1	0	1	1	1	1	ARRDC4	arrestin domain containing 4
hsa-miR-1266	1	0	1	1	1	1	PXMP4	peroxisomal membrane protein 4, 24kDa
hsa-miR-1266	1	0	1	0	1	1	HNRNPA3	heterogeneous nuclear ribonucleoprotein A3
hsa-miR-1266	1	0	1	0	1	1	SRRM4	serine/arginine repetitive matrix 4
hsa-miR-1266	1	0	1	1	1	1	ZBTB41	zinc finger and BTB domain containing 41
hsa-miR-1266	0	0	1	0	1	1	BTNL3	butyrophilin-like 3
hsa-miR-1266	1	0	1	1	1	1	CPXM2	carboxypeptidase X (M14 family), member 2
hsa-miR-1266	1	0	1	1	1	1	ASB7	ankyrin repeat and SOCS box containing 7
hsa-miR-1266	1	0	1	1	1	1	KCTD4	potassium channel tetramerisation domain containing 4
hsa-miR-1266	0	0	1	1	1	1	DERL3	derlin 3
hsa-miR-1266	0	0	1	1	1	1	EMB	embigin
hsa-miR-1266	1	0	1	1	1	1	RAB43	RAB43, member RAS oncogene family
hsa-miR-1266	0	0	1	1	0	0	ITIH6	inter-alpha-trypsin inhibitor heavy chain family, member 6
hsa-miR-1266	0	0	1	0	0	0	IGFL1	IGF-like family member 1
hsa-miR-1266	0	0	1	1	1	1	LHFPL4	lipoma HMGIC fusion partner-like 4
hsa-miR-1266	1	0	1	1	1	1	CXCL12	chemokine (C-X-C motif) ligand 12
hsa-miR-1266	0	0	1	1	1	1	COL18A1-AS1	COL18A1 antisense RNA 1
hsa-miR-1266	1	0	1	1	1	1	THRA	thyroid hormone receptor, alpha
hsa-miR-1266	0	0	1	1	1	1	PRC1	protein regulator of cytokinesis 1
hsa-miR-1266	0	0	1	1	0	0	TRIM7	tripartite motif containing 7
hsa-miR-1266	1	0	1	1	1	1	E2F7	E2F transcription factor 7
hsa-miR-1266	0	0	1	1	1	1	ELP5	elongator acetyltransferase complex subunit 5
hsa-miR-1266	1	0	1	1	1	1	MOG	myelin oligodendrocyte glycoprotein
hsa-miR-1266	0	0	1	1	0	0	NPSR1	neuropeptide S receptor 1
hsa-miR-1266	1	0	1	1	0	0	TSEN54	tRNA splicing endonuclease 54 homolog (S. cerevisiae)
hsa-miR-1266	1	0	1	1	0	0	CD164L2	CD164 sialomucin-like 2
hsa-miR-1266	0	0	1	1	1	1	C8orf86	chromosome 8 open reading frame 86
hsa-miR-1266	1	0	1	1	1	1	TEX19	testis expressed 19
hsa-miR-1266	1	0	1	1	1	1	SAMD12	sterile alpha motif domain containing 12
hsa-miR-1266	1	0	1	1	1	1	MAP6	microtubule-associated protein 6
hsa-miR-1266	0	0	1	0	0	0	CELP	carboxyl ester lipase pseudogene
hsa-miR-1266	0	0	1	0	0	0	TFAMP1	transcription factor A, mitochondrial pseudogene 1
hsa-miR-1266	0	0	1	0	0	0	HLA-H	major histocompatibility complex, class I, H (pseudogene)
hsa-miR-1266	0	0	1	0	0	0	MIR155HG	MIR155 host gene (non-protein coding)
hsa-miR-1266	0	0	1	0	0	0	TTTY6	testis-specific transcript, Y-linked 6 (non-protein coding)
hsa-miR-1266	0	0	1	0	0	0	TTTY2	testis-specific transcript, Y-linked 2 (non-protein coding)
hsa-miR-1266	0	0	1	0	0	0	TTTY15	testis-specific transcript, Y-linked 15 (non-protein coding)
hsa-miR-1266	0	0	1	0	0	0	FAM224B	family with sequence similarity 224, member B (non-protein coding)
hsa-miR-1266	0	0	1	0	0	0	TTTY6B	testis-specific transcript, Y-linked 6B (non-protein coding)
hsa-miR-1266	0	0	1	0	0	0	TTTY4B	testis-specific transcript, Y-linked 4B (non-protein coding)
hsa-miR-1266	0	0	1	0	0	0	DKFZP586I1420	uncharacterized protein DKFZp586I1420
hsa-miR-1266	0	0	1	0	0	0	SUMO1P1	SUMO1 pseudogene 1
hsa-miR-1266	0	0	1	0	0	0	GTF2IP1	general transcription factor IIi, pseudogene 1
hsa-miR-1266	0	0	1	0	0	0	NXF4	nuclear RNA export factor 4 pseudogene
hsa-miR-1266	0	0	1	0	0	0	MSX2P1	msh homeobox 2 pseudogene 1
hsa-miR-1266	0	0	1	0	0	0	SCARNA9	small Cajal body-specific RNA 9
hsa-miR-1266	0	0	1	0	0	0	TOP1P1	topoisomerase (DNA) I pseudogene 1
hsa-miR-1266	0	0	1	0	0	0	AOC4	amine oxidase, copper containing 3 (vascular adhesion protein 1) pseudogene
hsa-miR-1266	0	0	1	0	0	0	HOXA11-AS	HOXA11 antisense RNA
hsa-miR-1266	0	0	1	0	0	0	PRR24	proline rich 24
hsa-miR-1266	0	0	1	0	0	0	NPHP3-AS1	NPHP3 antisense RNA 1
hsa-miR-1266	0	0	1	0	0	0	LOC374443	C-type lectin domain family 2, member D pseudogene
hsa-miR-1266	0	0	1	0	0	0	AQP7P1	aquaporin 7 pseudogene 1
hsa-miR-1266	0	0	1	0	0	0	RNF126P1	ring finger protein 126 pseudogene 1
hsa-miR-1266	0	0	1	0	0	0	MALAT1	metastasis associated lung adenocarcinoma transcript 1 (non-protein coding)
hsa-miR-1266	0	0	1	0	0	0	SIGLEC16	sialic acid binding Ig-like lectin 16 (gene/pseudogene)
hsa-miR-1266	0	0	1	0	0	0	SNORA74A	small nucleolar RNA, H/ACA box 74A
hsa-miR-1266	0	0	1	0	0	0	TCAM1P	testicular cell adhesion molecule 1 homolog (mouse), pseudogene
hsa-miR-1266	0	0	1	0	0	0	SNORA30	small nucleolar RNA, H/ACA box 30
hsa-miR-1266	0	0	1	0	0	0	SNORD32B	small nucleolar RNA, C/D box 32B
hsa-miR-1266	0	0	1	0	0	0	SNORD69	small nucleolar RNA, C/D box 69
hsa-miR-1266	0	0	1	0	0	0	LILRP2	leukocyte immunoglobulin-like receptor pseudogene 2
hsa-miR-1266	0	0	1	0	0	0	PYY2	peptide YY, 2 (pseudogene)
hsa-miR-1266	0	0	1	0	0	0	RNF5P1	ring finger protein 5, E3 ubiquitin protein ligase pseudogene 1
hsa-miR-1266	0	0	1	0	0	0	SNORD114-3	small nucleolar RNA, C/D box 114-3
hsa-miR-1266	0	0	1	0	0	0	SNORD114-4	small nucleolar RNA, C/D box 114-4
hsa-miR-1266	0	0	1	0	0	0	SNORD114-5	small nucleolar RNA, C/D box 114-5
hsa-miR-1266	0	0	1	0	0	0	SNORD114-6	small nucleolar RNA, C/D box 114-6
hsa-miR-1266	0	0	1	0	0	0	SNORD114-12	small nucleolar RNA, C/D box 114-12
hsa-miR-1266	0	0	1	0	0	0	SNORD114-14	small nucleolar RNA, C/D box 114-14
hsa-miR-1266	0	0	1	0	0	0	SNORD114-15	small nucleolar RNA, C/D box 114-15
hsa-miR-1266	0	0	1	0	0	0	SNORD114-21	small nucleolar RNA, C/D box 114-21
hsa-miR-1266	0	0	1	0	0	0	SNORD114-26	small nucleolar RNA, C/D box 114-26
hsa-miR-1266	0	0	1	0	0	0	SNORD114-28	small nucleolar RNA, C/D box 114-28
hsa-miR-1266	0	0	1	0	0	0	SNORD113-5	small nucleolar RNA, C/D box 113-5
hsa-miR-1266	0	0	1	0	0	0	SNORD113-6	small nucleolar RNA, C/D box 113-6
hsa-miR-1266	0	0	1	0	0	0	SNORD113-7	small nucleolar RNA, C/D box 113-7
hsa-miR-1266	0	0	1	0	0	0	SNORD113-8	small nucleolar RNA, C/D box 113-8
hsa-miR-1266	0	0	1	0	0	0	SNORD113-9	small nucleolar RNA, C/D box 113-9
hsa-miR-1266	0	0	1	0	0	0	SNORD115-7	small nucleolar RNA, C/D box 115-7
hsa-miR-1266	0	0	1	0	0	0	SNORD115-26	small nucleolar RNA, C/D box 115-26
hsa-miR-1266	1	0	1	1	0	0	KIAA1549L	KIAA1549-like
hsa-miR-1266	0	0	1	0	0	0	MST1P9	macrophage stimulating 1 (hepatocyte growth factor-like) pseudogene 9
hsa-miR-1266	0	0	1	1	0	0	VEGFB	vascular endothelial growth factor B
hsa-miR-1266	1	0	1	1	0	0	TNXB	tenascin XB
hsa-miR-1266	1	0	1	1	1	1	ATF6B	activating transcription factor 6 beta
hsa-miR-1266	1	0	1	1	1	1	TCF3	transcription factor 3 (E2A immunoglobulin enhancer binding factors E12/E47)
hsa-miR-1266	0	0	1	1	0	0	MUC1	mucin 1, cell surface associated
hsa-miR-1266	0	0	1	1	1	1	CD6	CD6 molecule
hsa-miR-1266	0	0	1	1	0	0	BMP1	bone morphogenetic protein 1
hsa-miR-1266	1	0	1	1	1	1	POU6F1	POU class 6 homeobox 1
