# Supplementary material for: Profiling of Selected MicroRNAs in Proliferative Eutopic Endometrium of Women with Ovarian Endometriosis
Source: Biomed Res Int. 2015 Aug 20;2015:760698. doi: 10.1155/2015/760698 (PMC4558423; doi:10.1155/2015/760698)
Supplement: Supplementary file 1 — Table I: The names of miRNAs significantly differentially expressed between eutopic endometrium of patients with endometriosis vs eutopic endometrium of patients without endometriosis. Table II: The associations between miRNA and mRNA, which presents detailed results of the search of six major databases i.e targetscan, tarbase, miranda, mirbase, mirtarget2 and pictar. [file 760698.f1.zip › 760698.f1/Table II/hsa-miR-1267.tsv]

miR	targetscan	tarbase	miranda	mirbase	mirtarget2	pictar	GeneSymbol	GeneName
hsa-miR-1267	1	0	1	0	1	1	PTPRT	protein tyrosine phosphatase, receptor type, T
hsa-miR-1267	1	0	1	0	1	1	KIAA0408	KIAA0408
hsa-miR-1267	1	0	1	0	1	1	MTSS1	metastasis suppressor 1
hsa-miR-1267	1	0	1	0	1	1	NEDD4L	neural precursor cell expressed, developmentally down-regulated 4-like, E3 ubiquitin protein ligase
hsa-miR-1267	0	0	1	1	1	1	PDE4DIP	phosphodiesterase 4D interacting protein
hsa-miR-1267	1	0	1	1	1	1	GPATCH8	G patch domain containing 8
hsa-miR-1267	1	0	1	0	1	1	MFAP3L	microfibrillar-associated protein 3-like
hsa-miR-1267	1	0	1	1	1	1	HIPK1	homeodomain interacting protein kinase 1
hsa-miR-1267	1	0	1	1	1	1	ANKRD17	ankyrin repeat domain 17
hsa-miR-1267	0	0	1	1	1	1	XRCC4	X-ray repair complementing defective repair in Chinese hamster cells 4
hsa-miR-1267	0	0	1	1	0	0	ATP10B	ATPase, class V, type 10B
hsa-miR-1267	0	0	1	1	1	1	WDR47	WD repeat domain 47
hsa-miR-1267	1	0	1	1	1	1	CALCR	calcitonin receptor
hsa-miR-1267	1	0	1	1	1	1	UBE2K	ubiquitin-conjugating enzyme E2K
hsa-miR-1267	0	0	1	1	1	1	MAN2B2	mannosidase, alpha, class 2B, member 2
hsa-miR-1267	1	0	1	1	1	1	RPGRIP1L	RPGRIP1-like
hsa-miR-1267	0	0	1	1	1	1	TTC28	tetratricopeptide repeat domain 28
hsa-miR-1267	1	0	1	1	1	1	PLCL2	phospholipase C-like 2
hsa-miR-1267	1	0	1	1	1	1	SPIRE1	spire homolog 1 (Drosophila)
hsa-miR-1267	1	0	1	0	1	1	SRGAP3	SLIT-ROBO Rho GTPase activating protein 3
hsa-miR-1267	1	0	1	1	1	1	ZMIZ1	zinc finger, MIZ-type containing 1
hsa-miR-1267	0	0	1	1	1	1	TCF7L2	transcription factor 7-like 2 (T-cell specific, HMG-box)
hsa-miR-1267	1	0	1	1	1	1	PCDH19	protocadherin 19
hsa-miR-1267	1	0	1	1	1	1	UPF2	UPF2 regulator of nonsense transcripts homolog (yeast)
hsa-miR-1267	1	0	1	1	0	0	EBF4	early B-cell factor 4
hsa-miR-1267	0	0	1	1	0	0	PQBP1	polyglutamine binding protein 1
hsa-miR-1267	1	0	1	0	1	1	LMO3	LIM domain only 3 (rhombotin-like 2)
hsa-miR-1267	1	0	1	1	1	1	INADL	InaD-like (Drosophila)
hsa-miR-1267	0	0	1	1	1	1	BHLHB9	basic helix-loop-helix domain containing, class B, 9
hsa-miR-1267	1	0	1	1	1	1	CDK13	cyclin-dependent kinase 13
hsa-miR-1267	0	0	1	1	1	1	UNC80	unc-80 homolog (C. elegans)
hsa-miR-1267	0	0	1	1	0	0	SEC16B	SEC16 homolog B (S. cerevisiae)
hsa-miR-1267	1	0	1	1	1	1	SH3TC2	SH3 domain and tetratricopeptide repeats 2
hsa-miR-1267	1	0	1	0	0	0	RNF169	ring finger protein 169
hsa-miR-1267	0	0	1	0	1	1	RASSF8	Ras association (RalGDS/AF-6) domain family (N-terminal) member 8
hsa-miR-1267	1	0	1	1	1	1	SMEK1	SMEK homolog 1, suppressor of mek1 (Dictyostelium)
hsa-miR-1267	1	0	1	1	1	1	KCNMA1	potassium large conductance calcium-activated channel, subfamily M, alpha member 1
hsa-miR-1267	1	1	1	1	1	1	BACE1	beta-site APP-cleaving enzyme 1
hsa-miR-1267	1	0	1	1	1	1	TRIM36	tripartite motif containing 36
hsa-miR-1267	1	0	1	1	1	1	COL11A1	collagen, type XI, alpha 1
hsa-miR-1267	0	0	1	0	1	1	ATF6	activating transcription factor 6
hsa-miR-1267	1	0	1	1	1	1	RPS6KA3	ribosomal protein S6 kinase, 90kDa, polypeptide 3
hsa-miR-1267	0	0	1	1	1	1	MAZ	MYC-associated zinc finger protein (purine-binding transcription factor)
hsa-miR-1267	1	0	1	1	0	0	GRIA1	glutamate receptor, ionotropic, AMPA 1
hsa-miR-1267	1	0	1	1	0	0	TSPYL2	TSPY-like 2
hsa-miR-1267	1	0	1	0	1	1	CHL1	cell adhesion molecule with homology to L1CAM (close homolog of L1)
hsa-miR-1267	1	0	1	1	0	0	TNK2	tyrosine kinase, non-receptor, 2
hsa-miR-1267	0	0	1	1	0	0	BMP1	bone morphogenetic protein 1
hsa-miR-1267	1	0	1	0	1	1	TBL1X	transducin (beta)-like 1X-linked
hsa-miR-1267	1	0	1	1	1	1	EPB41	erythrocyte membrane protein band 4.1 (elliptocytosis 1, RH-linked)
hsa-miR-1267	1	0	1	1	0	0	SYN3	synapsin III
hsa-miR-1267	0	0	1	1	0	0	SLC22A8	solute carrier family 22 (organic anion transporter), member 8
hsa-miR-1267	1	0	1	1	1	1	SATB1	SATB homeobox 1
hsa-miR-1267	0	0	1	1	1	1	ELOVL5	ELOVL fatty acid elongase 5
hsa-miR-1267	1	0	1	1	1	1	HMGA2	high mobility group AT-hook 2
hsa-miR-1267	1	0	1	1	1	1	TLE1	transducin-like enhancer of split 1 (E(sp1) homolog, Drosophila)
hsa-miR-1267	1	0	1	1	1	1	PHLDB2	pleckstrin homology-like domain, family B, member 2
hsa-miR-1267	1	0	1	1	1	1	ANPEP	alanyl (membrane) aminopeptidase
hsa-miR-1267	1	0	1	1	1	1	APC	adenomatous polyposis coli
hsa-miR-1267	1	0	1	1	1	1	MEF2D	myocyte enhancer factor 2D
hsa-miR-1267	1	0	1	1	1	1	PICALM	phosphatidylinositol binding clathrin assembly protein
hsa-miR-1267	1	0	1	1	1	1	SDHC	succinate dehydrogenase complex, subunit C, integral membrane protein, 15kDa
hsa-miR-1267	1	0	1	1	1	1	DLGAP2	discs, large (Drosophila) homolog-associated protein 2
hsa-miR-1267	1	0	1	1	1	1	CBFA2T2	core-binding factor, runt domain, alpha subunit 2; translocated to, 2
hsa-miR-1267	1	0	1	1	1	1	PCDH17	protocadherin 17
hsa-miR-1267	1	0	1	1	1	1	SOCS2	suppressor of cytokine signaling 2
hsa-miR-1267	1	0	1	1	1	1	MBNL2	muscleblind-like splicing regulator 2
hsa-miR-1267	1	0	1	1	1	1	CTNND1	catenin (cadherin-associated protein), delta 1
hsa-miR-1267	1	0	1	1	1	1	LDB2	LIM domain binding 2
hsa-miR-1267	1	0	1	1	1	1	TMEM159	transmembrane protein 159
hsa-miR-1267	1	0	1	1	1	1	UNC50	unc-50 homolog (C. elegans)
hsa-miR-1267	1	0	1	1	1	1	DMTF1	cyclin D binding myb-like transcription factor 1
hsa-miR-1267	1	0	1	0	1	1	CELF2	CUGBP, Elav-like family member 2
hsa-miR-1267	0	0	1	1	1	1	BBS9	Bardet-Biedl syndrome 9
hsa-miR-1267	0	0	1	1	0	0	AVPR2	arginine vasopressin receptor 2
hsa-miR-1267	1	0	1	0	1	1	CD164	CD164 molecule, sialomucin
hsa-miR-1267	0	0	1	1	0	0	RBM5	RNA binding motif protein 5
hsa-miR-1267	1	0	1	1	1	1	EDNRB	endothelin receptor type B
hsa-miR-1267	1	0	1	0	1	1	FAM19A5	family with sequence similarity 19 (chemokine (C-C motif)-like), member A5
hsa-miR-1267	1	0	1	1	1	1	CAB39	calcium binding protein 39
hsa-miR-1267	0	0	1	0	1	1	CLEC5A	C-type lectin domain family 5, member A
hsa-miR-1267	0	0	1	1	1	1	HEPH	hephaestin
hsa-miR-1267	1	0	1	1	1	1	USP15	ubiquitin specific peptidase 15
hsa-miR-1267	0	0	1	1	1	1	FAM114A2	family with sequence similarity 114, member A2
hsa-miR-1267	1	0	1	1	1	1	TLK2	tousled-like kinase 2
hsa-miR-1267	1	0	1	1	1	1	USP25	ubiquitin specific peptidase 25
hsa-miR-1267	0	0	1	0	0	0	BPESC1	blepharophimosis, epicanthus inversus and ptosis, candidate 1 (non-protein coding)
hsa-miR-1267	1	0	1	1	1	1	TSC22D2	TSC22 domain family, member 2
hsa-miR-1267	1	0	1	1	1	1	NXT2	nuclear transport factor 2-like export factor 2
hsa-miR-1267	1	0	1	1	1	1	OGT	O-linked N-acetylglucosamine (GlcNAc) transferase
hsa-miR-1267	0	0	1	1	1	1	MFF	mitochondrial fission factor
hsa-miR-1267	0	0	1	0	0	0	TIGD7	tigger transposable element derived 7
hsa-miR-1267	1	0	1	1	1	1	SH3GLB1	SH3-domain GRB2-like endophilin B1
hsa-miR-1267	0	0	1	1	0	0	DAB1	disabled homolog 1 (Drosophila)
hsa-miR-1267	1	0	1	0	1	1	TRPS1	trichorhinophalangeal syndrome I
hsa-miR-1267	1	0	1	1	1	1	PCDH11Y	protocadherin 11 Y-linked
hsa-miR-1267	1	0	1	1	1	1	RNF6	ring finger protein (C3H2C3 type) 6
hsa-miR-1267	1	0	1	1	1	1	KLHL12	kelch-like 12 (Drosophila)
hsa-miR-1267	0	0	1	1	1	1	PARP9	poly (ADP-ribose) polymerase family, member 9
hsa-miR-1267	1	0	1	1	0	0	ZBTB37	zinc finger and BTB domain containing 37
hsa-miR-1267	1	0	1	1	1	1	CHST9	carbohydrate (N-acetylgalactosamine 4-0) sulfotransferase 9
hsa-miR-1267	0	0	1	1	0	0	ZAN	zonadhesin
hsa-miR-1267	1	0	1	1	1	1	CALU	calumenin
hsa-miR-1267	0	0	1	1	1	1	MS4A4A	membrane-spanning 4-domains, subfamily A, member 4A
hsa-miR-1267	0	0	1	1	1	1	PARK2	parkinson protein 2, E3 ubiquitin protein ligase (parkin)
hsa-miR-1267	0	0	1	0	0	0	MIR155HG	MIR155 host gene (non-protein coding)
hsa-miR-1267	1	0	1	1	1	1	NTRK2	neurotrophic tyrosine kinase, receptor, type 2
hsa-miR-1267	1	0	1	1	1	1	ST3GAL3	ST3 beta-galactoside alpha-2,3-sialyltransferase 3
hsa-miR-1267	0	0	1	0	0	0	ANKRD30BP2	ankyrin repeat domain 30B pseudogene 2
hsa-miR-1267	0	0	1	1	0	0	FAM82A1	family with sequence similarity 82, member A1
hsa-miR-1267	0	0	1	1	1	1	RNF32	ring finger protein 32
hsa-miR-1267	0	0	1	1	0	0	RASGEF1C	RasGEF domain family, member 1C
hsa-miR-1267	1	0	1	1	1	1	ASB8	ankyrin repeat and SOCS box containing 8
hsa-miR-1267	0	0	1	1	1	1	AMPH	amphiphysin
hsa-miR-1267	0	0	1	1	1	1	CARD8	caspase recruitment domain family, member 8
hsa-miR-1267	0	0	1	1	1	1	PTK7	PTK7 protein tyrosine kinase 7
hsa-miR-1267	1	0	1	1	1	1	AFF2	AF4/FMR2 family, member 2
hsa-miR-1267	1	0	1	1	1	1	PLAGL1	pleiomorphic adenoma gene-like 1
hsa-miR-1267	0	0	1	1	0	0	NCR2	natural cytotoxicity triggering receptor 2
hsa-miR-1267	1	0	1	1	1	1	SH2B3	SH2B adaptor protein 3
hsa-miR-1267	0	0	1	0	0	0	CACNA2D3	calcium channel, voltage-dependent, alpha 2/delta subunit 3
hsa-miR-1267	0	0	1	1	1	1	RANBP17	RAN binding protein 17
hsa-miR-1267	0	0	1	1	0	0	KIF13A	kinesin family member 13A
hsa-miR-1267	1	0	1	1	1	1	RAB3IP	RAB3A interacting protein (rabin3)
hsa-miR-1267	1	0	1	1	1	1	NRXN3	neurexin 3
hsa-miR-1267	1	0	1	1	1	1	NAV3	neuron navigator 3
hsa-miR-1267	1	0	1	1	1	1	ARL4C	ADP-ribosylation factor-like 4C
hsa-miR-1267	0	0	1	1	1	1	PIWIL2	piwi-like 2 (Drosophila)
hsa-miR-1267	0	0	1	1	1	1	PARP16	poly (ADP-ribose) polymerase family, member 16
hsa-miR-1267	0	0	1	0	0	0	TUG1	taurine upregulated 1 (non-protein coding)
hsa-miR-1267	0	0	1	1	1	1	BANK1	B-cell scaffold protein with ankyrin repeats 1
hsa-miR-1267	1	0	1	1	1	1	BCAP29	B-cell receptor-associated protein 29
hsa-miR-1267	0	0	1	1	0	0	AP4B1	adaptor-related protein complex 4, beta 1 subunit
hsa-miR-1267	0	0	1	0	0	0	MCM3AP-AS1	MCM3AP antisense RNA 1
hsa-miR-1267	1	0	1	1	1	1	RIC8B	resistance to inhibitors of cholinesterase 8 homolog B (C. elegans)
hsa-miR-1267	1	0	1	1	1	1	PTBP3	polypyrimidine tract binding protein 3
hsa-miR-1267	1	0	1	1	1	1	ARMC8	armadillo repeat containing 8
hsa-miR-1267	1	0	1	1	1	1	PGAP1	post-GPI attachment to proteins 1
hsa-miR-1267	0	0	1	0	0	0	DUXAP10	double homeobox A pseudogene 10
hsa-miR-1267	1	0	1	1	1	1	S100PBP	S100P binding protein
hsa-miR-1267	1	0	1	1	1	1	SMEK2	SMEK homolog 2, suppressor of mek1 (Dictyostelium)
hsa-miR-1267	0	0	1	1	0	0	BUB1	budding uninhibited by benzimidazoles 1 homolog (yeast)
hsa-miR-1267	0	0	1	0	0	0	LOC284561	uncharacterized LOC284561
hsa-miR-1267	0	0	1	1	1	1	NSUN7	NOP2/Sun domain family, member 7
hsa-miR-1267	1	0	1	1	1	1	COPS7B	COP9 constitutive photomorphogenic homolog subunit 7B (Arabidopsis)
hsa-miR-1267	0	0	1	1	1	1	SIGLEC1	sialic acid binding Ig-like lectin 1, sialoadhesin
hsa-miR-1267	1	0	1	0	1	1	ATP2B1	ATPase, Ca++ transporting, plasma membrane 1
hsa-miR-1267	0	0	1	0	0	0	FLJ21408	uncharacterized LOC400512
hsa-miR-1267	1	0	1	1	1	1	ABI3BP	ABI family, member 3 (NESH) binding protein
hsa-miR-1267	0	0	1	1	0	0	EIF4ENIF1	eukaryotic translation initiation factor 4E nuclear import factor 1
hsa-miR-1267	1	0	1	1	1	1	ARFGEF1	ADP-ribosylation factor guanine nucleotide-exchange factor 1 (brefeldin A-inhibited)
hsa-miR-1267	1	0	1	1	1	1	TNRC6A	trinucleotide repeat containing 6A
hsa-miR-1267	0	0	1	1	1	1	CDH4	cadherin 4, type 1, R-cadherin (retinal)
hsa-miR-1267	0	0	1	0	1	1	HEMK1	HemK methyltransferase family member 1
hsa-miR-1267	0	0	1	0	1	1	FLJ22447	uncharacterized LOC400221
hsa-miR-1267	1	0	1	1	1	1	DCAF8	DDB1 and CUL4 associated factor 8
hsa-miR-1267	1	0	1	1	1	1	ITGA9	integrin, alpha 9
hsa-miR-1267	1	0	1	1	1	1	RNF185	ring finger protein 185
hsa-miR-1267	0	0	1	0	0	0	LOC729852	uncharacterized LOC729852
hsa-miR-1267	1	0	1	1	1	1	FAM53C	family with sequence similarity 53, member C
hsa-miR-1267	1	0	1	1	1	1	GPD2	glycerol-3-phosphate dehydrogenase 2 (mitochondrial)
hsa-miR-1267	0	0	1	1	1	1	SNAP47	synaptosomal-associated protein, 47kDa
hsa-miR-1267	1	0	1	0	1	1	AP1G1	adaptor-related protein complex 1, gamma 1 subunit
hsa-miR-1267	1	0	1	1	1	1	TPM1	tropomyosin 1 (alpha)
hsa-miR-1267	0	0	1	1	1	1	GABRP	gamma-aminobutyric acid (GABA) A receptor, pi
hsa-miR-1267	0	0	1	0	1	1	HDX	highly divergent homeobox
hsa-miR-1267	1	0	1	1	1	1	HERPUD2	HERPUD family member 2
hsa-miR-1267	1	0	1	0	1	1	RAB1A	RAB1A, member RAS oncogene family
hsa-miR-1267	1	0	1	1	1	1	TMTC1	transmembrane and tetratricopeptide repeat containing 1
hsa-miR-1267	0	0	1	1	1	1	ANKRD36B	ankyrin repeat domain 36B
hsa-miR-1267	1	0	1	0	1	1	PTPRE	protein tyrosine phosphatase, receptor type, E
hsa-miR-1267	1	0	1	1	1	1	CLCN5	chloride channel, voltage-sensitive 5
hsa-miR-1267	1	0	1	1	1	1	SORBS2	sorbin and SH3 domain containing 2
hsa-miR-1267	0	0	1	1	1	1	IFT43	intraflagellar transport 43 homolog (Chlamydomonas)
hsa-miR-1267	0	0	1	1	1	1	PTCD2	pentatricopeptide repeat domain 2
hsa-miR-1267	0	0	1	1	1	1	MS4A14	membrane-spanning 4-domains, subfamily A, member 14
hsa-miR-1267	1	0	1	0	1	1	NCAM1	neural cell adhesion molecule 1
hsa-miR-1267	0	0	1	1	1	1	A2ML1	alpha-2-macroglobulin-like 1
hsa-miR-1267	0	0	1	0	0	0	LINC00637	long intergenic non-protein coding RNA 637
hsa-miR-1267	0	0	1	1	1	1	ZBTB26	zinc finger and BTB domain containing 26
hsa-miR-1267	0	0	1	1	0	0	ANKAR	ankyrin and armadillo repeat containing
hsa-miR-1267	1	0	1	1	1	1	PEAR1	platelet endothelial aggregation receptor 1
hsa-miR-1267	1	0	1	1	1	1	PHF15	PHD finger protein 15
hsa-miR-1267	0	0	1	0	0	0	SDHAP2	succinate dehydrogenase complex, subunit A, flavoprotein pseudogene 2
hsa-miR-1267	0	0	1	1	1	1	ALG2	asparagine-linked glycosylation 2, alpha-1,3-mannosyltransferase homolog (S. cerevisiae)
hsa-miR-1267	1	0	1	1	1	1	NOTCH2NL	notch 2 N-terminal like
hsa-miR-1267	1	0	1	1	1	1	UXS1	UDP-glucuronate decarboxylase 1
hsa-miR-1267	0	0	1	1	0	0	LGR5	leucine-rich repeat containing G protein-coupled receptor 5
hsa-miR-1267	1	0	1	1	1	1	SH3BP5	SH3-domain binding protein 5 (BTK-associated)
hsa-miR-1267	1	0	1	1	1	1	TLK1	tousled-like kinase 1
hsa-miR-1267	0	0	1	0	0	0	LOC643837	uncharacterized LOC643837
hsa-miR-1267	1	0	1	1	1	1	EGR2	early growth response 2
hsa-miR-1267	1	0	1	1	1	1	AMMECR1	Alport syndrome, mental retardation, midface hypoplasia and elliptocytosis chromosomal region gene 1
hsa-miR-1267	1	0	1	1	1	1	RBMX	RNA binding motif protein, X-linked
hsa-miR-1267	0	0	1	0	0	0	FLJ34208	uncharacterized LOC401106
hsa-miR-1267	1	0	1	1	1	1	TSN	translin
hsa-miR-1267	1	0	1	1	1	1	GNG2	guanine nucleotide binding protein (G protein), gamma 2
hsa-miR-1267	1	0	1	1	1	1	IVNS1ABP	influenza virus NS1A binding protein
hsa-miR-1267	0	0	1	0	1	1	SSPN	sarcospan
hsa-miR-1267	0	0	1	1	0	0	AXDND1	axonemal dynein light chain domain containing 1
hsa-miR-1267	0	0	1	1	1	1	N4BP2L2	NEDD4 binding protein 2-like 2
hsa-miR-1267	1	0	1	1	1	1	DZIP1	DAZ interacting protein 1
hsa-miR-1267	1	0	1	1	1	1	MAP3K12	mitogen-activated protein kinase kinase kinase 12
hsa-miR-1267	0	0	1	0	0	0	PART1	prostate androgen-regulated transcript 1 (non-protein coding)
hsa-miR-1267	1	0	1	1	1	1	SIAH1	siah E3 ubiquitin protein ligase 1
hsa-miR-1267	1	0	1	0	1	1	GATAD2B	GATA zinc finger domain containing 2B
hsa-miR-1267	1	0	1	0	1	1	ARL6IP6	ADP-ribosylation-like factor 6 interacting protein 6
hsa-miR-1267	0	0	1	1	1	1	TMEM170A	transmembrane protein 170A
hsa-miR-1267	1	0	1	0	1	1	IL1RAP	interleukin 1 receptor accessory protein
hsa-miR-1267	0	0	1	1	1	1	LRRC34	leucine rich repeat containing 34
hsa-miR-1267	0	0	1	1	1	1	CHRM5	cholinergic receptor, muscarinic 5
hsa-miR-1267	0	0	1	1	1	1	MYBBP1A	MYB binding protein (P160) 1a
hsa-miR-1267	1	0	1	1	1	1	ANKRD46	ankyrin repeat domain 46
hsa-miR-1267	0	0	1	1	1	1	MYO6	myosin VI
hsa-miR-1267	1	0	1	1	1	1	EPHB1	EPH receptor B1
hsa-miR-1267	1	0	1	0	1	1	UVRAG	UV radiation resistance associated gene
hsa-miR-1267	0	0	1	0	0	0	LOC100129620	uncharacterized LOC100129620
hsa-miR-1267	1	0	1	1	1	1	SPATS2	spermatogenesis associated, serine-rich 2
hsa-miR-1267	0	0	1	1	0	0	CXorf38	chromosome X open reading frame 38
hsa-miR-1267	1	0	1	1	1	1	CS	citrate synthase
hsa-miR-1267	1	0	1	1	1	1	PEA15	phosphoprotein enriched in astrocytes 15
hsa-miR-1267	1	0	1	0	1	1	KBTBD8	kelch repeat and BTB (POZ) domain containing 8
hsa-miR-1267	1	0	1	1	1	1	CDV3	CDV3 homolog (mouse)
hsa-miR-1267	0	0	1	0	0	0	LINC00293	long intergenic non-protein coding RNA 293
hsa-miR-1267	1	0	1	1	1	1	GOLGA8B	golgin A8 family, member B
hsa-miR-1267	0	0	1	1	1	1	ADGB	androglobin
hsa-miR-1267	1	0	1	1	1	1	LONRF3	LON peptidase N-terminal domain and ring finger 3
hsa-miR-1267	1	0	1	1	1	1	PIGA	phosphatidylinositol glycan anchor biosynthesis, class A
hsa-miR-1267	0	0	1	1	1	1	VIPAS39	VPS33B interacting protein, apical-basolateral polarity regulator, spe-39 homolog
hsa-miR-1267	0	0	1	1	1	1	TRPM7	transient receptor potential cation channel, subfamily M, member 7
hsa-miR-1267	1	0	1	1	1	1	GLUD1	glutamate dehydrogenase 1
hsa-miR-1267	0	0	1	1	0	0	KIAA0146	KIAA0146
hsa-miR-1267	1	0	1	1	1	1	AGAP2	ArfGAP with GTPase domain, ankyrin repeat and PH domain 2
hsa-miR-1267	0	0	1	1	1	1	WDR64	WD repeat domain 64
hsa-miR-1267	0	0	1	1	0	0	MARS	methionyl-tRNA synthetase
hsa-miR-1267	1	0	1	1	1	1	CBLB	Cbl proto-oncogene, E3 ubiquitin protein ligase B
hsa-miR-1267	1	0	1	1	1	1	TPRG1	tumor protein p63 regulated 1
hsa-miR-1267	1	0	1	1	1	1	PRDM2	PR domain containing 2, with ZNF domain
hsa-miR-1267	1	0	1	0	1	1	DCUN1D4	DCN1, defective in cullin neddylation 1, domain containing 4 (S. cerevisiae)
hsa-miR-1267	0	0	1	0	1	1	NAIP	NLR family, apoptosis inhibitory protein
hsa-miR-1267	0	0	1	1	1	1	ATPBD4	ATP binding domain 4
hsa-miR-1267	1	0	1	1	1	1	ATXN7	ataxin 7
hsa-miR-1267	0	0	1	1	1	1	ZNF337	zinc finger protein 337
hsa-miR-1267	0	0	1	1	1	1	PLOD2	procollagen-lysine, 2-oxoglutarate 5-dioxygenase 2
hsa-miR-1267	0	0	1	0	0	0	FAM95B1	family with sequence similarity 95, member B1
hsa-miR-1267	1	0	1	1	1	1	MACROD2	MACRO domain containing 2
hsa-miR-1267	0	0	1	1	0	0	FSIP2	fibrous sheath interacting protein 2
hsa-miR-1267	1	0	1	1	1	1	SACM1L	SAC1 suppressor of actin mutations 1-like (yeast)
hsa-miR-1267	1	0	1	1	0	0	SPEG	SPEG complex locus
hsa-miR-1267	1	0	1	1	1	1	DMXL1	Dmx-like 1
hsa-miR-1267	1	0	1	1	1	1	LRP2BP	LRP2 binding protein
hsa-miR-1267	0	0	1	1	0	0	HS3ST5	heparan sulfate (glucosamine) 3-O-sulfotransferase 5
hsa-miR-1267	0	0	1	1	0	0	FAM54B	family with sequence similarity 54, member B
hsa-miR-1267	0	0	1	1	1	1	ERI2	ERI1 exoribonuclease family member 2
hsa-miR-1267	0	0	1	1	0	0	IQUB	IQ motif and ubiquitin domain containing
hsa-miR-1267	1	0	1	0	1	1	CAPRIN1	cell cycle associated protein 1
hsa-miR-1267	1	0	1	1	1	1	SLC12A6	solute carrier family 12 (potassium/chloride transporters), member 6
hsa-miR-1267	1	0	1	0	1	1	KDM2A	lysine (K)-specific demethylase 2A
hsa-miR-1267	0	0	1	0	0	0	AFG3L1P	AFG3 ATPase family gene 3-like 1 (S. cerevisiae), pseudogene
hsa-miR-1267	1	0	1	1	1	1	KCTD12	potassium channel tetramerisation domain containing 12
hsa-miR-1267	0	0	1	1	1	1	TPK1	thiamin pyrophosphokinase 1
hsa-miR-1267	1	0	1	1	1	1	ADAMTSL1	ADAMTS-like 1
hsa-miR-1267	1	0	1	1	1	1	MRFAP1	Morf4 family associated protein 1
hsa-miR-1267	1	0	1	0	1	1	ESRRG	estrogen-related receptor gamma
hsa-miR-1267	0	0	1	1	1	1	ZNF680	zinc finger protein 680
hsa-miR-1267	1	0	1	1	0	0	FOXP2	forkhead box P2
hsa-miR-1267	0	0	1	0	0	0	AGAP9	ArfGAP with GTPase domain, ankyrin repeat and PH domain 9
hsa-miR-1267	0	0	1	1	1	1	FANCC	Fanconi anemia, complementation group C
hsa-miR-1267	0	0	1	1	1	1	RGS3	regulator of G-protein signaling 3
hsa-miR-1267	0	0	1	1	1	1	ARID1A	AT rich interactive domain 1A (SWI-like)
hsa-miR-1267	0	0	1	1	1	1	CRISP3	cysteine-rich secretory protein 3
hsa-miR-1267	1	0	1	1	1	1	CYYR1	cysteine/tyrosine-rich 1
hsa-miR-1267	1	0	1	1	1	1	CYFIP2	cytoplasmic FMR1 interacting protein 2
hsa-miR-1267	1	0	1	0	1	1	SEZ6	seizure related 6 homolog (mouse)
hsa-miR-1267	1	0	1	1	1	1	PHTF2	putative homeodomain transcription factor 2
hsa-miR-1267	1	0	1	1	1	1	SETX	senataxin
hsa-miR-1267	0	0	1	1	0	0	NEK7	NIMA (never in mitosis gene a)-related kinase 7
hsa-miR-1267	0	0	1	1	0	0	OPLAH	5-oxoprolinase (ATP-hydrolysing)
hsa-miR-1267	0	0	1	1	0	0	PLK1S1	polo-like kinase 1 substrate 1
hsa-miR-1267	0	0	1	0	0	0	POM121L9P	POM121 transmembrane nucleoporin-like 9, pseudogene
hsa-miR-1267	1	0	1	1	1	1	TAB2	TGF-beta activated kinase 1/MAP3K7 binding protein 2
hsa-miR-1267	0	0	1	1	1	1	RTTN	rotatin
hsa-miR-1267	0	0	1	0	0	0	TPTE2P6	transmembrane phosphoinositide 3-phosphatase and tensin homolog 2 pseudogene 6
hsa-miR-1267	1	0	1	1	1	1	SMAP2	small ArfGAP2
hsa-miR-1267	0	0	1	0	0	0	DNAJC5B	DnaJ (Hsp40) homolog, subfamily C, member 5 beta
hsa-miR-1267	0	0	1	1	0	0	PACSIN2	protein kinase C and casein kinase substrate in neurons 2
hsa-miR-1267	0	0	1	1	1	1	UBE3D	ubiquitin protein ligase E3D
hsa-miR-1267	1	0	1	1	1	1	GOLGA8A	golgin A8 family, member A
hsa-miR-1267	0	0	1	1	0	0	DOPEY1	dopey family member 1
hsa-miR-1267	0	0	1	1	1	1	ING3	inhibitor of growth family, member 3
hsa-miR-1267	1	0	1	1	1	1	YTHDF3	YTH domain family, member 3
hsa-miR-1267	1	0	1	1	1	1	MTMR10	myotubularin related protein 10
hsa-miR-1267	0	0	1	1	1	1	BEND7	BEN domain containing 7
hsa-miR-1267	1	0	1	1	1	1	FAM126B	family with sequence similarity 126, member B
hsa-miR-1267	0	0	1	1	0	0	EFCAB11	EF-hand calcium binding domain 11
hsa-miR-1267	1	0	1	0	0	0	YLPM1	YLP motif containing 1
hsa-miR-1267	1	0	1	1	1	1	RNF180	ring finger protein 180
hsa-miR-1267	0	0	1	1	1	1	YAP1	Yes-associated protein 1
hsa-miR-1267	1	0	1	1	0	0	PTAR1	protein prenyltransferase alpha subunit repeat containing 1
hsa-miR-1267	0	0	1	1	1	1	WHSC1L1	Wolf-Hirschhorn syndrome candidate 1-like 1
hsa-miR-1267	0	0	1	1	0	0	TMEM44	transmembrane protein 44
hsa-miR-1267	0	0	1	1	1	1	CCDC132	coiled-coil domain containing 132
hsa-miR-1267	1	0	1	1	1	1	SOX6	SRY (sex determining region Y)-box 6
hsa-miR-1267	0	0	1	0	1	1	PLEKHM1P	pleckstrin homology domain containing, family M (with RUN domain) member 1 pseudogene
hsa-miR-1267	0	0	1	1	1	1	NARG2	NMDA receptor regulated 2
hsa-miR-1267	1	0	1	0	1	1	JAZF1	JAZF zinc finger 1
hsa-miR-1267	1	0	1	1	1	1	RICTOR	RPTOR independent companion of MTOR, complex 2
hsa-miR-1267	1	0	1	0	1	1	PHYHIPL	phytanoyl-CoA 2-hydroxylase interacting protein-like
hsa-miR-1267	1	0	1	1	0	0	LRRC58	leucine rich repeat containing 58
hsa-miR-1267	0	0	1	0	1	1	USO1	USO1 vesicle docking protein homolog (yeast)
hsa-miR-1267	1	0	1	1	1	1	PPP3CA	protein phosphatase 3, catalytic subunit, alpha isozyme
hsa-miR-1267	0	0	1	1	0	0	ERAP2	endoplasmic reticulum aminopeptidase 2
hsa-miR-1267	1	0	1	1	1	1	TACC1	transforming, acidic coiled-coil containing protein 1
hsa-miR-1267	0	0	1	0	0	0	CR1L	complement component (3b/4b) receptor 1-like
hsa-miR-1267	0	0	1	1	0	0	LETM2	leucine zipper-EF-hand containing transmembrane protein 2
hsa-miR-1267	0	0	1	1	1	1	DNAJB14	DnaJ (Hsp40) homolog, subfamily B, member 14
hsa-miR-1267	0	0	1	1	0	0	DNAH1	dynein, axonemal, heavy chain 1
hsa-miR-1267	1	0	1	1	1	1	BCL11A	B-cell CLL/lymphoma 11A (zinc finger protein)
hsa-miR-1267	0	0	1	1	1	1	IYD	iodotyrosine deiodinase
hsa-miR-1267	0	0	1	1	1	1	GCOM1	GRINL1A complex locus 1
hsa-miR-1267	0	0	1	0	1	1	ANKS1B	ankyrin repeat and sterile alpha motif domain containing 1B
hsa-miR-1267	0	0	1	1	0	0	EGFL8	EGF-like-domain, multiple 8
hsa-miR-1267	1	0	1	1	0	0	USP7	ubiquitin specific peptidase 7 (herpes virus-associated)
hsa-miR-1267	1	0	1	1	1	1	FAM120A	family with sequence similarity 120A
hsa-miR-1267	0	0	1	1	1	1	POTEG	POTE ankyrin domain family, member G
hsa-miR-1267	1	0	1	1	1	1	MYNN	myoneurin
hsa-miR-1267	0	0	1	0	1	1	XKR5	XK, Kell blood group complex subunit-related family, member 5
hsa-miR-1267	1	0	1	0	1	1	LRAT	lecithin retinol acyltransferase (phosphatidylcholine--retinol O-acyltransferase)
hsa-miR-1267	1	0	1	1	1	1	CHRDL1	chordin-like 1
hsa-miR-1267	1	0	1	1	1	1	MYB	v-myb myeloblastosis viral oncogene homolog (avian)
hsa-miR-1267	1	0	1	1	1	1	PCDH11X	protocadherin 11 X-linked
hsa-miR-1267	0	0	1	1	1	1	IL23R	interleukin 23 receptor
hsa-miR-1267	1	0	1	1	1	1	AMOT	angiomotin
hsa-miR-1267	1	0	1	1	1	1	RPRD1A	regulation of nuclear pre-mRNA domain containing 1A
hsa-miR-1267	1	0	1	0	1	1	FAM46A	family with sequence similarity 46, member A
hsa-miR-1267	0	0	1	1	1	1	PTDSS1	phosphatidylserine synthase 1
hsa-miR-1267	1	0	1	1	1	1	PPP1R11	protein phosphatase 1, regulatory (inhibitor) subunit 11
hsa-miR-1267	1	0	1	0	1	1	DCAF10	DDB1 and CUL4 associated factor 10
hsa-miR-1267	1	0	1	1	1	1	NUMA1	nuclear mitotic apparatus protein 1
hsa-miR-1267	0	0	1	1	1	1	ZNF589	zinc finger protein 589
hsa-miR-1267	0	0	1	0	0	0	MGC13053	uncharacterized MGC13053
hsa-miR-1267	1	0	1	1	1	1	U2SURP	U2 snRNP-associated SURP domain containing
hsa-miR-1267	0	0	1	1	0	0	AGBL5	ATP/GTP binding protein-like 5
hsa-miR-1267	1	0	1	1	1	1	TRIM39	tripartite motif containing 39
hsa-miR-1267	1	0	1	0	1	1	DDX3X	DEAD (Asp-Glu-Ala-Asp) box polypeptide 3, X-linked
hsa-miR-1267	0	0	1	1	0	0	PRR11	proline rich 11
hsa-miR-1267	0	0	1	1	1	1	RSRC1	arginine/serine-rich coiled-coil 1
hsa-miR-1267	0	0	1	1	1	1	HDHD2	haloacid dehalogenase-like hydrolase domain containing 2
hsa-miR-1267	0	0	1	0	0	0	GRAMD1B	GRAM domain containing 1B
hsa-miR-1267	0	0	1	1	1	1	KLHL29	kelch-like 29 (Drosophila)
hsa-miR-1267	0	0	1	0	0	0	NUDT16P1	nudix (nucleoside diphosphate linked moiety X)-type motif 16 pseudogene 1
hsa-miR-1267	0	0	1	1	0	0	MAST2	microtubule associated serine/threonine kinase 2
hsa-miR-1267	0	0	1	0	1	1	ZNF37A	zinc finger protein 37A
hsa-miR-1267	1	0	1	1	1	1	RIMKLB	ribosomal modification protein rimK-like family member B
hsa-miR-1267	0	0	1	1	1	1	FAM122C	family with sequence similarity 122C
hsa-miR-1267	1	0	1	1	1	1	NRF1	nuclear respiratory factor 1
hsa-miR-1267	0	0	1	0	0	0	FAM200B	family with sequence similarity 200, member B
hsa-miR-1267	0	0	1	1	0	0	C3orf78	chromosome 3 open reading frame 78
hsa-miR-1267	0	0	1	1	1	1	HIBADH	3-hydroxyisobutyrate dehydrogenase
hsa-miR-1267	0	0	1	0	0	0	LOC728196	uncharacterized LOC728196
hsa-miR-1267	0	0	1	0	0	0	LINC00488	long intergenic non-protein coding RNA 488
hsa-miR-1267	1	0	1	1	1	1	ZNF200	zinc finger protein 200
hsa-miR-1267	0	0	1	0	1	1	FHAD1	forkhead-associated (FHA) phosphopeptide binding domain 1
hsa-miR-1267	0	0	1	1	1	1	RHBDD1	rhomboid domain containing 1
hsa-miR-1267	1	0	1	1	1	1	APPL2	adaptor protein, phosphotyrosine interaction, PH domain and leucine zipper containing 2
hsa-miR-1267	0	0	1	1	0	0	PLSCR3	phospholipid scramblase 3
hsa-miR-1267	0	0	1	1	1	1	LRMP	lymphoid-restricted membrane protein
hsa-miR-1267	0	0	1	1	1	1	SEMA3D	sema domain, immunoglobulin domain (Ig), short basic domain, secreted, (semaphorin) 3D
hsa-miR-1267	1	0	1	0	1	1	SV2B	synaptic vesicle glycoprotein 2B
hsa-miR-1267	0	0	1	1	1	1	CD48	CD48 molecule
hsa-miR-1267	0	0	1	1	1	1	TMEM117	transmembrane protein 117
hsa-miR-1267	1	0	1	1	1	1	PLS1	plastin 1
hsa-miR-1267	1	0	1	1	1	1	MUM1L1	melanoma associated antigen (mutated) 1-like 1
hsa-miR-1267	1	0	1	1	1	1	RCOR3	REST corepressor 3
hsa-miR-1267	1	0	1	0	1	1	RNF4	ring finger protein 4
hsa-miR-1267	0	0	1	1	1	1	SNX17	sorting nexin 17
hsa-miR-1267	0	0	1	0	0	0	LOC643648	uncharacterized LOC643648
hsa-miR-1267	1	0	1	1	1	1	PMAIP1	phorbol-12-myristate-13-acetate-induced protein 1
hsa-miR-1267	1	0	1	1	1	1	SF1	splicing factor 1
hsa-miR-1267	1	0	1	1	1	1	DFFB	DNA fragmentation factor, 40kDa, beta polypeptide (caspase-activated DNase)
hsa-miR-1267	1	0	1	1	1	1	FBXL16	F-box and leucine-rich repeat protein 16
hsa-miR-1267	1	0	1	1	1	1	CLK4	CDC-like kinase 4
hsa-miR-1267	0	0	1	0	0	0	FAM66C	family with sequence similarity 66, member C
hsa-miR-1267	0	0	1	1	1	1	EDA2R	ectodysplasin A2 receptor
hsa-miR-1267	1	0	1	0	1	1	DDX3Y	DEAD (Asp-Glu-Ala-Asp) box polypeptide 3, Y-linked
hsa-miR-1267	1	0	1	0	1	1	PDE12	phosphodiesterase 12
hsa-miR-1267	1	0	1	1	1	1	NKAIN2	Na+/K+ transporting ATPase interacting 2
hsa-miR-1267	1	0	1	1	1	1	ZZZ3	zinc finger, ZZ-type containing 3
hsa-miR-1267	0	0	1	0	0	0	LINC00494	long intergenic non-protein coding RNA 494
hsa-miR-1267	1	0	1	1	1	1	RAP2C	RAP2C, member of RAS oncogene family
hsa-miR-1267	0	0	1	0	1	1	KSR1	kinase suppressor of ras 1
hsa-miR-1267	1	0	1	1	1	1	CTDSPL2	CTD (carboxy-terminal domain, RNA polymerase II, polypeptide A) small phosphatase like 2
hsa-miR-1267	0	0	1	1	0	0	SNTG2	syntrophin, gamma 2
hsa-miR-1267	0	0	1	0	0	0	LOC339862	uncharacterized LOC339862
hsa-miR-1267	0	0	1	1	0	0	VPS8	vacuolar protein sorting 8 homolog (S. cerevisiae)
hsa-miR-1267	1	0	1	1	1	1	ZNF618	zinc finger protein 618
hsa-miR-1267	0	0	1	0	0	0	FAM201A	family with sequence similarity 201, member A
hsa-miR-1267	1	0	1	1	1	1	HECTD2	HECT domain containing E3 ubiquitin protein ligase 2
hsa-miR-1267	1	0	1	0	1	1	NEGR1	neuronal growth regulator 1
hsa-miR-1267	1	0	1	1	1	1	FAM135B	family with sequence similarity 135, member B
hsa-miR-1267	1	0	1	0	1	1	RAG1	recombination activating gene 1
hsa-miR-1267	1	0	1	1	1	1	UBXN2A	UBX domain protein 2A
hsa-miR-1267	0	0	1	0	0	0	MGC42157	uncharacterized locus MGC42157
hsa-miR-1267	1	0	1	1	1	1	C4orf19	chromosome 4 open reading frame 19
hsa-miR-1267	1	0	1	1	1	1	ULK2	unc-51-like kinase 2 (C. elegans)
hsa-miR-1267	1	0	1	0	1	1	LPHN3	latrophilin 3
hsa-miR-1267	0	0	1	0	0	0	LOC401074	uncharacterized LOC401074
hsa-miR-1267	0	0	1	1	1	1	SLC14A1	solute carrier family 14 (urea transporter), member 1 (Kidd blood group)
hsa-miR-1267	1	0	1	1	1	1	FOSB	FBJ murine osteosarcoma viral oncogene homolog B
hsa-miR-1267	1	0	1	1	1	1	DPP8	dipeptidyl-peptidase 8
hsa-miR-1267	0	0	1	0	1	1	SRSF5	serine/arginine-rich splicing factor 5
hsa-miR-1267	0	0	1	1	1	1	ZFP90	zinc finger protein 90 homolog (mouse)
hsa-miR-1267	1	0	1	1	1	1	LEF1	lymphoid enhancer-binding factor 1
hsa-miR-1267	0	0	1	1	1	1	SIAE	sialic acid acetylesterase
hsa-miR-1267	1	0	1	0	1	1	KIAA0430	KIAA0430
hsa-miR-1267	1	0	1	0	1	1	USP6NL	USP6 N-terminal like
hsa-miR-1267	0	0	1	0	0	0	LOC338579	ankyrin repeat domain-containing protein 30B pseudogene
hsa-miR-1267	0	0	1	0	0	0	LINC00347	long intergenic non-protein coding RNA 347
hsa-miR-1267	0	0	1	0	0	0	SLC8A1-AS1	SLC8A1 antisense RNA 1
hsa-miR-1267	0	0	1	0	0	0	LOC283914	uncharacterized LOC283914
hsa-miR-1267	1	0	1	1	1	1	SF3B1	splicing factor 3b, subunit 1, 155kDa
hsa-miR-1267	0	0	1	0	0	0	LOC339529	uncharacterized LOC339529
hsa-miR-1267	1	0	1	0	1	1	LYPD6	LY6/PLAUR domain containing 6
hsa-miR-1267	0	0	1	0	0	0	LOC348120	uncharacterized LOC348120
hsa-miR-1267	1	0	1	1	1	1	RMND5A	required for meiotic nuclear division 5 homolog A (S. cerevisiae)
hsa-miR-1267	0	0	1	0	0	0	WASH2P	WAS protein family homolog 2 pseudogene
hsa-miR-1267	0	0	1	0	1	1	ITGA1	integrin, alpha 1
hsa-miR-1267	1	0	1	0	1	1	SMURF2	SMAD specific E3 ubiquitin protein ligase 2
hsa-miR-1267	0	0	1	1	1	1	PPP1R7	protein phosphatase 1, regulatory subunit 7
hsa-miR-1267	1	0	1	1	1	1	ZFP91	zinc finger protein 91 homolog (mouse)
hsa-miR-1267	1	0	1	1	1	1	PCGF5	polycomb group ring finger 5
hsa-miR-1267	1	0	1	1	1	1	BZW2	basic leucine zipper and W2 domains 2
hsa-miR-1267	1	0	1	1	1	1	HP1BP3	heterochromatin protein 1, binding protein 3
hsa-miR-1267	0	0	1	1	0	0	TINAG	tubulointerstitial nephritis antigen
hsa-miR-1267	1	0	1	1	1	1	KLHL28	kelch-like 28 (Drosophila)
hsa-miR-1267	1	0	1	0	1	1	LYSMD3	LysM, putative peptidoglycan-binding, domain containing 3
hsa-miR-1267	0	0	1	1	1	1	CDC42SE2	CDC42 small effector 2
hsa-miR-1267	1	0	1	1	1	1	FAM63B	family with sequence similarity 63, member B
hsa-miR-1267	0	0	1	0	1	1	PPM1N	protein phosphatase, Mg2+/Mn2+ dependent, 1N (putative)
hsa-miR-1267	1	0	1	1	1	1	RANBP9	RAN binding protein 9
hsa-miR-1267	0	0	1	0	0	0	GNN	Grp94 neighboring nucleotidase pseudogene
hsa-miR-1267	0	0	1	0	0	0	LINC00052	long intergenic non-protein coding RNA 52
hsa-miR-1267	1	0	1	1	1	1	CKAP2	cytoskeleton associated protein 2
hsa-miR-1267	1	0	1	1	1	1	C18orf1	chromosome 18 open reading frame 1
hsa-miR-1267	1	0	1	1	1	1	C5orf25	chromosome 5 open reading frame 25
hsa-miR-1267	1	0	1	1	1	1	SLC26A7	solute carrier family 26, member 7
hsa-miR-1267	0	0	1	0	0	0	LOC283070	uncharacterized LOC283070
hsa-miR-1267	0	0	1	0	0	0	PHKA2-AS1	PHKA2 antisense RNA 1
hsa-miR-1267	0	0	1	0	1	1	TNFRSF8	tumor necrosis factor receptor superfamily, member 8
hsa-miR-1267	1	0	1	1	1	1	PARP8	poly (ADP-ribose) polymerase family, member 8
hsa-miR-1267	0	0	1	0	0	0	TBC1D25	TBC1 domain family, member 25
hsa-miR-1267	0	0	1	1	1	1	C1orf141	chromosome 1 open reading frame 141
hsa-miR-1267	1	0	1	0	1	1	PIK3R3	phosphoinositide-3-kinase, regulatory subunit 3 (gamma)
hsa-miR-1267	1	0	1	1	1	1	ACVR2B	activin A receptor, type IIB
hsa-miR-1267	0	0	1	1	1	1	R3HCC1L	R3H domain and coiled-coil containing 1-like
hsa-miR-1267	1	0	1	1	1	1	SYNJ1	synaptojanin 1
hsa-miR-1267	0	0	1	1	0	0	HOXB1	homeobox B1
hsa-miR-1267	1	0	1	0	1	1	ARPP19	cAMP-regulated phosphoprotein, 19kDa
hsa-miR-1267	0	0	1	1	1	1	HMGB2	high mobility group box 2
hsa-miR-1267	1	0	1	1	1	1	GABRB2	gamma-aminobutyric acid (GABA) A receptor, beta 2
hsa-miR-1267	1	0	1	1	1	1	PTPRD	protein tyrosine phosphatase, receptor type, D
hsa-miR-1267	0	0	1	1	0	0	SLC17A4	solute carrier family 17 (sodium phosphate), member 4
hsa-miR-1267	1	0	1	1	1	1	SP4	Sp4 transcription factor
hsa-miR-1267	1	0	1	1	1	1	UBE4A	ubiquitination factor E4A
hsa-miR-1267	1	0	1	1	1	1	SLK	STE20-like kinase
hsa-miR-1267	1	0	1	1	1	1	NR3C2	nuclear receptor subfamily 3, group C, member 2
hsa-miR-1267	0	0	1	1	0	0	TMC1	transmembrane channel-like 1
hsa-miR-1267	1	0	1	1	1	1	ITSN1	intersectin 1 (SH3 domain protein)
hsa-miR-1267	1	0	1	1	1	1	ST18	suppression of tumorigenicity 18 (breast carcinoma) (zinc finger protein)
hsa-miR-1267	1	0	1	1	1	1	GRIA3	glutamate receptor, ionotropic, AMPA 3
hsa-miR-1267	0	0	1	1	0	0	RGSL1	regulator of G-protein signaling like 1
hsa-miR-1267	0	0	1	1	0	0	HOXD12	homeobox D12
hsa-miR-1267	0	0	1	0	0	0	LINC00266-1	long intergenic non-protein coding RNA 266-1
hsa-miR-1267	0	0	1	1	0	0	C10orf68	chromosome 10 open reading frame 68
hsa-miR-1267	0	0	1	0	1	1	GOLGA8G	golgin A8 family, member G
hsa-miR-1267	1	0	1	0	1	1	CAMSAP2	calmodulin regulated spectrin-associated protein family, member 2
hsa-miR-1267	0	0	1	1	1	1	HSF2	heat shock transcription factor 2
hsa-miR-1267	1	0	1	0	1	1	LHFPL3	lipoma HMGIC fusion partner-like 3
hsa-miR-1267	0	0	1	0	0	0	FAM225B	family with sequence similarity 225, member B (non-protein coding)
hsa-miR-1267	1	0	1	1	1	1	PTPRZ1	protein tyrosine phosphatase, receptor-type, Z polypeptide 1
hsa-miR-1267	1	0	1	0	1	1	FAM196A	family with sequence similarity 196, member A
hsa-miR-1267	1	0	1	0	1	1	VAMP3	vesicle-associated membrane protein 3 (cellubrevin)
hsa-miR-1267	0	0	1	1	1	1	TINF2	TERF1 (TRF1)-interacting nuclear factor 2
hsa-miR-1267	1	0	1	1	1	1	BTBD7	BTB (POZ) domain containing 7
hsa-miR-1267	0	0	1	0	0	0	FLJ39632	uncharacterized LOC642477
hsa-miR-1267	0	0	1	1	1	1	RAD17	RAD17 homolog (S. pombe)
hsa-miR-1267	1	0	1	1	1	1	JPH1	junctophilin 1
hsa-miR-1267	0	0	1	0	1	1	THUMPD1	THUMP domain containing 1
hsa-miR-1267	1	0	1	0	0	0	HEPHL1	hephaestin-like 1
hsa-miR-1267	0	0	1	0	1	1	PRH2	proline-rich protein HaeIII subfamily 2
hsa-miR-1267	1	0	1	1	0	0	RBM27	RNA binding motif protein 27
hsa-miR-1267	1	0	1	1	1	1	SLC39A13	solute carrier family 39 (zinc transporter), member 13
hsa-miR-1267	1	0	1	1	1	1	ABCA13	ATP-binding cassette, sub-family A (ABC1), member 13
hsa-miR-1267	0	0	1	1	1	1	NIPSNAP3B	nipsnap homolog 3B (C. elegans)
hsa-miR-1267	1	0	1	1	1	1	EPS15	epidermal growth factor receptor pathway substrate 15
hsa-miR-1267	1	0	1	1	1	1	FOXP1	forkhead box P1
hsa-miR-1267	1	0	1	1	1	1	GTDC1	glycosyltransferase-like domain containing 1
hsa-miR-1267	1	0	1	1	1	1	TC2N	tandem C2 domains, nuclear
hsa-miR-1267	1	0	1	1	1	1	TSC22D3	TSC22 domain family, member 3
hsa-miR-1267	0	0	1	0	0	0	OVOS	ovostatin
hsa-miR-1267	1	0	1	1	1	1	CASP7	caspase 7, apoptosis-related cysteine peptidase
hsa-miR-1267	0	0	1	1	1	1	TMEM48	transmembrane protein 48
hsa-miR-1267	1	0	1	1	1	1	PPFIA1	protein tyrosine phosphatase, receptor type, f polypeptide (PTPRF), interacting protein (liprin), alpha 1
hsa-miR-1267	0	0	1	0	0	0	PLA2G4B	phospholipase A2, group IVB (cytosolic)
hsa-miR-1267	1	0	1	0	1	1	PCGF3	polycomb group ring finger 3
hsa-miR-1267	1	0	1	1	1	1	NFIB	nuclear factor I/B
hsa-miR-1267	1	0	1	0	1	1	KLHL24	kelch-like 24 (Drosophila)
hsa-miR-1267	1	0	1	0	1	1	IGF2BP3	insulin-like growth factor 2 mRNA binding protein 3
hsa-miR-1267	1	0	1	1	1	1	RDX	radixin
hsa-miR-1267	1	0	1	1	1	1	CALD1	caldesmon 1
hsa-miR-1267	1	0	1	1	1	1	EOGT	EGF domain-specific O-linked N-acetylglucosamine (GlcNAc) transferase
hsa-miR-1267	1	0	1	1	1	1	FAM208A	family with sequence similarity 208, member A
hsa-miR-1267	1	0	1	1	1	1	HIC2	hypermethylated in cancer 2
hsa-miR-1267	1	0	1	0	0	0	ZNRF3	zinc and ring finger 3
hsa-miR-1267	0	0	1	1	1	1	HPGD	hydroxyprostaglandin dehydrogenase 15-(NAD)
hsa-miR-1267	0	0	1	1	0	0	AHSG	alpha-2-HS-glycoprotein
hsa-miR-1267	1	0	1	1	1	1	SEL1L3	sel-1 suppressor of lin-12-like 3 (C. elegans)
hsa-miR-1267	0	0	1	1	1	1	SNRNP27	small nuclear ribonucleoprotein 27kDa (U4/U6.U5)
hsa-miR-1267	0	0	1	1	1	1	CAT	catalase
hsa-miR-1267	0	0	1	0	0	0	LOC401127	WD repeat domain 5 pseudogene
hsa-miR-1267	1	0	1	1	1	1	FUT9	fucosyltransferase 9 (alpha (1,3) fucosyltransferase)
hsa-miR-1267	0	0	1	0	0	0	AKR1A1	aldo-keto reductase family 1, member A1 (aldehyde reductase)
hsa-miR-1267	0	0	1	1	0	0	TMEM62	transmembrane protein 62
hsa-miR-1267	0	0	1	1	1	1	ATP1B3	ATPase, Na+/K+ transporting, beta 3 polypeptide
hsa-miR-1267	0	0	1	1	1	1	ADK	adenosine kinase
hsa-miR-1267	1	0	1	0	1	1	BNIP3L	BCL2/adenovirus E1B 19kDa interacting protein 3-like
hsa-miR-1267	1	0	1	0	0	0	FAM69A	family with sequence similarity 69, member A
hsa-miR-1267	0	0	1	1	0	0	RAD54B	RAD54 homolog B (S. cerevisiae)
hsa-miR-1267	0	0	1	0	1	1	PDCD5	programmed cell death 5
hsa-miR-1267	0	0	1	1	0	0	FAM64A	family with sequence similarity 64, member A
hsa-miR-1267	0	0	1	1	1	1	GRAP2	GRB2-related adaptor protein 2
hsa-miR-1267	1	0	1	0	1	1	RPS6KB1	ribosomal protein S6 kinase, 70kDa, polypeptide 1
hsa-miR-1267	0	0	1	1	1	1	ANKRD53	ankyrin repeat domain 53
hsa-miR-1267	0	0	1	1	1	1	STON1	stonin 1
hsa-miR-1267	1	0	1	1	1	1	POU2F2	POU class 2 homeobox 2
hsa-miR-1267	0	0	1	0	1	1	WASH3P	WAS protein family homolog 3 pseudogene
hsa-miR-1267	0	0	1	0	0	0	C12orf75	chromosome 12 open reading frame 75
hsa-miR-1267	0	0	1	1	1	1	MS4A6A	membrane-spanning 4-domains, subfamily A, member 6A
hsa-miR-1267	1	0	1	1	1	1	TMEM245	transmembrane protein 245
hsa-miR-1267	0	0	1	1	1	1	RGS14	regulator of G-protein signaling 14
hsa-miR-1267	0	0	1	1	1	1	UIMC1	ubiquitin interaction motif containing 1
hsa-miR-1267	0	0	1	0	0	0	LOC677759	uncharacterized LOC677759
hsa-miR-1267	0	0	1	1	1	1	ZDHHC16	zinc finger, DHHC-type containing 16
hsa-miR-1267	0	0	1	1	0	0	NOX5	NADPH oxidase, EF-hand calcium binding domain 5
hsa-miR-1267	1	0	1	1	0	0	FAT4	FAT tumor suppressor homolog 4 (Drosophila)
hsa-miR-1267	0	0	1	0	0	0	LOC100130353	hippocampus abundant transcript-like 1 pseudogene
hsa-miR-1267	0	0	1	0	0	0	ZNF720	zinc finger protein 720
hsa-miR-1267	1	0	1	1	1	1	FUBP3	far upstream element (FUSE) binding protein 3
hsa-miR-1267	0	0	1	1	1	1	MAPK8	mitogen-activated protein kinase 8
hsa-miR-1267	0	0	1	1	0	0	LGALS9	lectin, galactoside-binding, soluble, 9
hsa-miR-1267	0	0	1	1	0	0	CLEC1A	C-type lectin domain family 1, member A
hsa-miR-1267	0	0	1	1	0	0	BCKDK	branched chain ketoacid dehydrogenase kinase
hsa-miR-1267	1	0	1	1	1	1	TMEM55B	transmembrane protein 55B
hsa-miR-1267	0	0	1	1	0	0	PC	pyruvate carboxylase
hsa-miR-1267	0	0	1	1	0	0	PCCA	propionyl CoA carboxylase, alpha polypeptide
hsa-miR-1267	1	0	1	1	1	1	YWHAE	tyrosine 3-monooxygenase/tryptophan 5-monooxygenase activation protein, epsilon polypeptide
hsa-miR-1267	0	0	1	1	1	1	ZNF346	zinc finger protein 346
hsa-miR-1267	1	0	1	1	1	1	RHOBTB1	Rho-related BTB domain containing 1
hsa-miR-1267	0	0	1	1	1	1	NUDT21	nudix (nucleoside diphosphate linked moiety X)-type motif 21
hsa-miR-1267	0	0	1	1	1	1	TOP3B	topoisomerase (DNA) III beta
hsa-miR-1267	1	0	1	1	1	1	SLC37A3	solute carrier family 37 (glycerol-3-phosphate transporter), member 3
hsa-miR-1267	0	0	1	0	0	0	FAM47E	family with sequence similarity 47, member E
hsa-miR-1267	1	0	1	1	0	0	SMCHD1	structural maintenance of chromosomes flexible hinge domain containing 1
hsa-miR-1267	1	0	1	1	1	1	HECW2	HECT, C2 and WW domain containing E3 ubiquitin protein ligase 2
hsa-miR-1267	1	0	1	0	1	1	MEGF10	multiple EGF-like-domains 10
hsa-miR-1267	1	0	1	1	1	1	KIAA2018	KIAA2018
hsa-miR-1267	1	0	1	0	1	1	SLC7A6	solute carrier family 7 (amino acid transporter light chain, y+L system), member 6
hsa-miR-1267	1	0	1	0	1	1	MCFD2	multiple coagulation factor deficiency 2
hsa-miR-1267	0	0	1	1	1	1	SLC25A26	solute carrier family 25 (S-adenosylmethionine carrier), member 26
hsa-miR-1267	1	0	1	1	1	1	SLC39A10	solute carrier family 39 (zinc transporter), member 10
hsa-miR-1267	0	0	1	0	1	1	ZNF28	zinc finger protein 28
hsa-miR-1267	1	0	1	0	1	1	ZNF652	zinc finger protein 652
hsa-miR-1267	1	0	1	0	1	1	ZNF776	zinc finger protein 776
hsa-miR-1267	1	0	1	1	1	1	ZFHX3	zinc finger homeobox 3
hsa-miR-1267	1	0	1	1	1	1	PI15	peptidase inhibitor 15
hsa-miR-1267	1	0	1	1	1	1	MAN2A2	mannosidase, alpha, class 2A, member 2
hsa-miR-1267	0	0	1	0	0	0	61E3.4	nuclear pore complex interacting protein-like
hsa-miR-1267	0	0	1	1	1	1	CEACAM1	carcinoembryonic antigen-related cell adhesion molecule 1 (biliary glycoprotein)
hsa-miR-1267	1	0	1	1	1	1	BTLA	B and T lymphocyte associated
hsa-miR-1267	1	0	1	1	1	1	IRF1	interferon regulatory factor 1
hsa-miR-1267	1	0	1	1	1	1	SLC4A8	solute carrier family 4, sodium bicarbonate cotransporter, member 8
hsa-miR-1267	0	0	1	1	1	1	PCYT1A	phosphate cytidylyltransferase 1, choline, alpha
hsa-miR-1267	1	0	1	1	1	1	RALBP1	ralA binding protein 1
hsa-miR-1267	1	0	1	0	1	1	BCL2	B-cell CLL/lymphoma 2
hsa-miR-1267	0	0	1	1	1	1	CD55	CD55 molecule, decay accelerating factor for complement (Cromer blood group)
hsa-miR-1267	1	0	1	0	1	1	ACVR2A	activin A receptor, type IIA
hsa-miR-1267	1	0	1	1	1	1	AGL	amylo-alpha-1, 6-glucosidase, 4-alpha-glucanotransferase
hsa-miR-1267	1	0	1	1	1	1	COL3A1	collagen, type III, alpha 1
hsa-miR-1267	1	0	1	1	1	1	FBN1	fibrillin 1
hsa-miR-1267	1	0	1	0	1	1	GHR	growth hormone receptor
hsa-miR-1267	1	0	1	1	1	1	JAG1	jagged 1
hsa-miR-1267	1	0	1	1	1	1	KCNA1	potassium voltage-gated channel, shaker-related subfamily, member 1 (episodic ataxia with myokymia)
hsa-miR-1267	1	0	1	1	1	1	MET	met proto-oncogene (hepatocyte growth factor receptor)
hsa-miR-1267	1	0	1	1	1	1	OCRL	oculocerebrorenal syndrome of Lowe
hsa-miR-1267	1	0	1	1	1	1	ATXN1	ataxin 1
hsa-miR-1267	0	0	1	1	1	1	TSHR	thyroid stimulating hormone receptor
hsa-miR-1267	1	0	1	0	1	1	CYBB	cytochrome b-245, beta polypeptide
hsa-miR-1267	0	0	1	0	1	1	GNRHR	gonadotropin-releasing hormone receptor
hsa-miR-1267	0	0	1	1	1	1	TYRP1	tyrosinase-related protein 1
hsa-miR-1267	1	0	1	1	1	1	DCX	doublecortin
hsa-miR-1267	1	0	1	1	1	1	CR1	complement component (3b/4b) receptor 1 (Knops blood group)
hsa-miR-1267	1	0	1	1	1	1	IL1A	interleukin 1, alpha
hsa-miR-1267	1	0	1	1	1	1	CD44	CD44 molecule (Indian blood group)
hsa-miR-1267	0	0	1	1	0	0	IL13RA2	interleukin 13 receptor, alpha 2
hsa-miR-1267	1	0	1	1	1	1	DIO2	deiodinase, iodothyronine, type II
hsa-miR-1267	1	0	1	1	1	1	GAD1	glutamate decarboxylase 1 (brain, 67kDa)
hsa-miR-1267	1	0	1	0	1	1	KCNJ2	potassium inwardly-rectifying channel, subfamily J, member 2
hsa-miR-1267	0	0	1	1	1	1	NPY2R	neuropeptide Y receptor Y2
hsa-miR-1267	1	0	1	1	1	1	PTGDR	prostaglandin D2 receptor (DP)
hsa-miR-1267	1	0	1	1	1	1	REEP3	receptor accessory protein 3
hsa-miR-1267	1	0	1	0	1	1	SPOPL	speckle-type POZ protein-like
hsa-miR-1267	0	0	1	1	1	1	CC2D2B	coiled-coil and C2 domain containing 2B
hsa-miR-1267	0	0	1	0	0	0	KLK2	kallikrein-related peptidase 2
hsa-miR-1267	1	0	1	1	1	1	LCLAT1	lysocardiolipin acyltransferase 1
hsa-miR-1267	1	0	1	1	1	1	LEPR	leptin receptor
hsa-miR-1267	1	0	1	1	1	1	HMGXB4	HMG box domain containing 4
hsa-miR-1267	1	0	1	1	1	1	KLHL31	kelch-like 31 (Drosophila)
hsa-miR-1267	1	0	1	0	1	1	LIN28B	lin-28 homolog B (C. elegans)
hsa-miR-1267	0	0	1	1	1	1	AGMO	alkylglycerol monooxygenase
hsa-miR-1267	0	0	1	1	1	1	DBX2	developing brain homeobox 2
hsa-miR-1267	1	0	1	1	1	1	ACTR2	ARP2 actin-related protein 2 homolog (yeast)
hsa-miR-1267	0	0	1	1	1	1	APOBEC3F	apolipoprotein B mRNA editing enzyme, catalytic polypeptide-like 3F
hsa-miR-1267	1	0	1	1	1	1	IGF2BP2	insulin-like growth factor 2 mRNA binding protein 2
hsa-miR-1267	1	0	1	1	1	1	SPOP	speckle-type POZ protein
hsa-miR-1267	0	0	1	1	1	1	MXI1	MAX interactor 1
hsa-miR-1267	1	0	1	1	1	1	FNIP1	folliculin interacting protein 1
hsa-miR-1267	0	0	1	1	1	1	GCSAM	germinal center-associated, signaling and motility
hsa-miR-1267	0	0	1	1	1	1	ZCCHC11	zinc finger, CCHC domain containing 11
hsa-miR-1267	1	0	1	1	1	1	LUZP2	leucine zipper protein 2
hsa-miR-1267	1	0	1	0	1	1	ERMN	ermin, ERM-like protein
hsa-miR-1267	0	0	1	0	1	1	LPPR5	lipid phosphate phosphatase-related protein type 5
hsa-miR-1267	1	0	1	1	1	1	CTNNBIP1	catenin, beta interacting protein 1
hsa-miR-1267	0	0	1	0	1	1	GOLGA8E	golgin A8 family, member E
hsa-miR-1267	1	0	1	1	1	1	PABPC1L2A	poly(A) binding protein, cytoplasmic 1-like 2A
hsa-miR-1267	1	0	1	0	1	1	ZKSCAN2	zinc finger with KRAB and SCAN domains 2
hsa-miR-1267	1	0	1	1	1	1	CA7	carbonic anhydrase VII
hsa-miR-1267	0	0	1	1	1	1	FAM96A	family with sequence similarity 96, member A
hsa-miR-1267	1	0	1	1	1	1	RUNX2	runt-related transcription factor 2
hsa-miR-1267	0	0	1	1	1	1	PURG	purine-rich element binding protein G
hsa-miR-1267	1	0	1	1	1	1	PHF6	PHD finger protein 6
hsa-miR-1267	1	0	1	0	1	1	GOPC	golgi-associated PDZ and coiled-coil motif containing
hsa-miR-1267	0	0	1	1	1	1	BTBD11	BTB (POZ) domain containing 11
hsa-miR-1267	0	0	1	1	0	0	CCDC58	coiled-coil domain containing 58
hsa-miR-1267	0	0	1	1	1	1	MURC	muscle-related coiled-coil protein
hsa-miR-1267	1	0	1	0	1	1	TNRC6B	trinucleotide repeat containing 6B
hsa-miR-1267	1	0	1	0	1	1	ANO6	anoctamin 6
hsa-miR-1267	1	0	1	1	1	1	SLC35F1	solute carrier family 35, member F1
hsa-miR-1267	0	0	1	1	1	1	ATF3	activating transcription factor 3
hsa-miR-1267	0	0	1	1	1	1	CALML4	calmodulin-like 4
hsa-miR-1267	1	0	1	1	1	1	CSNK1G3	casein kinase 1, gamma 3
hsa-miR-1267	1	0	1	1	1	1	STK24	serine/threonine kinase 24
hsa-miR-1267	0	0	1	1	1	1	HNRNPH2	heterogeneous nuclear ribonucleoprotein H2 (H')
hsa-miR-1267	0	0	1	0	1	1	RGS21	regulator of G-protein signaling 21
hsa-miR-1267	0	0	1	1	1	1	SPATA6L	spermatogenesis associated 6-like
hsa-miR-1267	1	0	1	1	1	1	SEC14L1	SEC14-like 1 (S. cerevisiae)
hsa-miR-1267	0	0	1	1	1	1	MAP9	microtubule-associated protein 9
hsa-miR-1267	0	0	1	0	1	1	ZNF705D	zinc finger protein 705D
hsa-miR-1267	1	0	1	1	1	1	SPTSSB	serine palmitoyltransferase, small subunit B
hsa-miR-1267	0	0	1	1	1	1	MLH3	mutL homolog 3 (E. coli)
hsa-miR-1267	1	0	1	1	1	1	SCN2A	sodium channel, voltage-gated, type II, alpha subunit
hsa-miR-1267	0	0	1	1	1	1	SPOCK3	sparc/osteonectin, cwcv and kazal-like domains proteoglycan (testican) 3
hsa-miR-1267	1	0	1	1	1	1	ASB1	ankyrin repeat and SOCS box containing 1
hsa-miR-1267	1	0	1	1	1	1	MTMR12	myotubularin related protein 12
hsa-miR-1267	0	0	1	1	1	1	CENPA	centromere protein A
hsa-miR-1267	0	0	1	1	1	1	MST4	serine/threonine protein kinase MST4
hsa-miR-1267	1	0	1	1	1	1	PABPC1L2B	poly(A) binding protein, cytoplasmic 1-like 2B
hsa-miR-1267	1	0	1	1	1	1	ZNF706	zinc finger protein 706
hsa-miR-1267	1	0	1	1	1	1	SLC9A6	solute carrier family 9, subfamily A (NHE6, cation proton antiporter 6), member 6
hsa-miR-1267	1	0	1	1	1	1	QSER1	glutamine and serine rich 1
hsa-miR-1267	1	0	1	1	1	1	SREK1	splicing regulatory glutamine/lysine-rich protein 1
hsa-miR-1267	0	0	1	0	1	1	WTH3DI	RAB6C-like
hsa-miR-1267	1	0	1	1	1	1	ALG9	asparagine-linked glycosylation 9, alpha-1,2-mannosyltransferase homolog (S. cerevisiae)
hsa-miR-1267	1	0	1	0	1	1	THSD7B	thrombospondin, type I, domain containing 7B
hsa-miR-1267	0	0	1	1	1	1	HSF5	heat shock transcription factor family member 5
hsa-miR-1267	1	0	1	1	1	1	ZNF697	zinc finger protein 697
hsa-miR-1267	0	0	1	0	0	0	VWC2L	von Willebrand factor C domain containing protein 2-like
hsa-miR-1267	0	0	1	1	0	0	OVOS2	ovostatin 2
hsa-miR-1267	0	0	1	1	1	1	TBX18	T-box 18
hsa-miR-1267	1	0	1	1	1	1	MGA	MAX gene associated
hsa-miR-1267	1	0	1	1	1	1	DGKG	diacylglycerol kinase, gamma 90kDa
hsa-miR-1267	1	0	1	1	1	1	ADCYAP1	adenylate cyclase activating polypeptide 1 (pituitary)
hsa-miR-1267	0	0	1	1	1	1	ADSS	adenylosuccinate synthase
hsa-miR-1267	0	0	1	1	1	1	CRISP1	cysteine-rich secretory protein 1
hsa-miR-1267	0	0	1	1	0	0	NUDT2	nudix (nucleoside diphosphate linked moiety X)-type motif 2
hsa-miR-1267	1	0	1	1	1	1	CAMK2D	calcium/calmodulin-dependent protein kinase II delta
hsa-miR-1267	1	0	1	1	1	1	CDK9	cyclin-dependent kinase 9
hsa-miR-1267	1	0	1	1	1	1	CREBL2	cAMP responsive element binding protein-like 2
hsa-miR-1267	0	0	1	1	1	1	CSTF3	cleavage stimulation factor, 3' pre-RNA, subunit 3, 77kDa
hsa-miR-1267	1	0	1	1	1	1	DTNA	dystrobrevin, alpha
hsa-miR-1267	1	0	1	1	1	1	S1PR1	sphingosine-1-phosphate receptor 1
hsa-miR-1267	1	0	1	0	1	1	EFNB3	ephrin-B3
hsa-miR-1267	0	0	1	0	1	1	ELF5	E74-like factor 5 (ets domain transcription factor)
hsa-miR-1267	1	0	1	0	1	1	GCNT2	glucosaminyl (N-acetyl) transferase 2, I-branching enzyme (I blood group)
hsa-miR-1267	1	0	1	0	1	1	B4GALT1	UDP-Gal:betaGlcNAc beta 1,4- galactosyltransferase, polypeptide 1
hsa-miR-1267	1	0	1	1	1	1	IRAK2	interleukin-1 receptor-associated kinase 2
hsa-miR-1267	1	0	1	1	1	1	AHNAK	AHNAK nucleoprotein
hsa-miR-1267	0	0	1	1	1	1	AOAH	acyloxyacyl hydrolase (neutrophil)
hsa-miR-1267	1	0	1	0	1	1	ARNT	aryl hydrocarbon receptor nuclear translocator
hsa-miR-1267	0	0	1	1	0	0	C9	complement component 9
hsa-miR-1267	1	0	1	1	1	1	CDH2	cadherin 2, type 1, N-cadherin (neuronal)
hsa-miR-1267	1	0	1	1	1	1	CENPB	centromere protein B, 80kDa
hsa-miR-1267	1	0	1	1	1	1	CLCN3	chloride channel, voltage-sensitive 3
hsa-miR-1267	0	0	1	1	1	1	CNTN1	contactin 1
hsa-miR-1267	1	0	1	1	1	1	COL4A1	collagen, type IV, alpha 1
hsa-miR-1267	1	0	1	1	1	1	MASP1	mannan-binding lectin serine peptidase 1 (C4/C2 activating component of Ra-reactive factor)
hsa-miR-1267	0	0	1	1	1	1	DLAT	dihydrolipoamide S-acetyltransferase
hsa-miR-1267	1	0	1	1	1	1	FRK	fyn-related kinase
hsa-miR-1267	1	0	1	1	1	1	GBP1	guanylate binding protein 1, interferon-inducible
hsa-miR-1267	0	0	1	1	1	1	GNB1	guanine nucleotide binding protein (G protein), beta polypeptide 1
hsa-miR-1267	0	0	1	1	1	1	IL6ST	interleukin 6 signal transducer (gp130, oncostatin M receptor)
hsa-miR-1267	1	0	1	1	1	1	KCNA6	potassium voltage-gated channel, shaker-related subfamily, member 6
hsa-miR-1267	1	0	1	1	1	1	M6PR	mannose-6-phosphate receptor (cation dependent)
hsa-miR-1267	1	0	1	1	1	1	MAN2A1	mannosidase, alpha, class 2A, member 1
hsa-miR-1267	1	0	1	1	1	1	ME1	malic enzyme 1, NADP(+)-dependent, cytosolic
hsa-miR-1267	1	0	1	1	1	1	MSR1	macrophage scavenger receptor 1
hsa-miR-1267	1	0	1	1	1	1	NPAT	nuclear protein, ataxia-telangiectasia locus
hsa-miR-1267	1	0	1	1	1	1	NPTX1	neuronal pentraxin I
hsa-miR-1267	0	0	1	1	1	1	PDE6D	phosphodiesterase 6D, cGMP-specific, rod, delta
hsa-miR-1267	0	0	1	1	1	1	PIM1	pim-1 oncogene
hsa-miR-1267	1	0	1	1	1	1	PPP1CC	protein phosphatase 1, catalytic subunit, gamma isozyme
hsa-miR-1267	1	0	1	1	1	1	PPP2CA	protein phosphatase 2, catalytic subunit, alpha isozyme
hsa-miR-1267	1	0	1	1	1	1	PRKD1	protein kinase D1
hsa-miR-1267	1	0	1	1	1	1	PRPS1	phosphoribosyl pyrophosphate synthetase 1
hsa-miR-1267	1	0	1	1	1	1	PTPRJ	protein tyrosine phosphatase, receptor type, J
hsa-miR-1267	1	0	1	1	1	1	PTPRS	protein tyrosine phosphatase, receptor type, S
hsa-miR-1267	1	0	1	0	1	1	RAB6A	RAB6A, member RAS oncogene family
hsa-miR-1267	1	0	1	1	0	0	RFX1	regulatory factor X, 1 (influences HLA class II expression)
hsa-miR-1267	1	0	1	1	1	1	RIT2	Ras-like without CAAX 2
hsa-miR-1267	1	0	1	1	1	1	SYN2	synapsin II
hsa-miR-1267	0	0	1	1	1	1	TRAF3	TNF receptor-associated factor 3
hsa-miR-1267	1	0	1	1	1	1	UBE2N	ubiquitin-conjugating enzyme E2N
hsa-miR-1267	1	0	1	0	1	1	YWHAB	tyrosine 3-monooxygenase/tryptophan 5-monooxygenase activation protein, beta polypeptide
hsa-miR-1267	0	0	1	1	1	1	STAM	signal transducing adaptor molecule (SH3 domain and ITAM motif) 1
hsa-miR-1267	1	0	1	1	1	1	ADAM12	ADAM metallopeptidase domain 12
hsa-miR-1267	1	0	1	1	1	1	CUL5	cullin 5
hsa-miR-1267	0	0	1	1	1	1	STX7	syntaxin 7
hsa-miR-1267	0	0	1	1	1	1	BFSP2	beaded filament structural protein 2, phakinin
hsa-miR-1267	0	0	1	1	1	1	PEX3	peroxisomal biogenesis factor 3
hsa-miR-1267	1	0	1	0	1	1	CNTNAP1	contactin associated protein 1
hsa-miR-1267	0	0	1	1	1	1	ITGA10	integrin, alpha 10
hsa-miR-1267	1	0	1	0	1	1	IRS2	insulin receptor substrate 2
hsa-miR-1267	1	0	1	1	1	1	SRSF9	serine/arginine-rich splicing factor 9
hsa-miR-1267	1	0	1	1	1	1	NR5A2	nuclear receptor subfamily 5, group A, member 2
hsa-miR-1267	1	0	1	1	1	1	PEX11B	peroxisomal biogenesis factor 11 beta
hsa-miR-1267	0	0	1	1	1	1	CREG1	cellular repressor of E1A-stimulated genes 1
hsa-miR-1267	1	0	1	1	1	1	NRP2	neuropilin 2
hsa-miR-1267	1	0	1	1	1	1	KAT2B	K(lysine) acetyltransferase 2B
hsa-miR-1267	0	0	1	1	1	1	ATP6V0E1	ATPase, H+ transporting, lysosomal 9kDa, V0 subunit e1
hsa-miR-1267	1	0	1	1	1	1	CDKL2	cyclin-dependent kinase-like 2 (CDC2-related kinase)
hsa-miR-1267	0	0	1	0	1	1	EIF4EBP2	eukaryotic translation initiation factor 4E binding protein 2
hsa-miR-1267	1	0	1	1	1	1	FGF12	fibroblast growth factor 12
hsa-miR-1267	1	0	1	1	1	1	GMFB	glia maturation factor, beta
hsa-miR-1267	0	0	1	1	1	1	RAB27B	RAB27B, member RAS oncogene family
hsa-miR-1267	0	0	1	1	1	1	SEP15	15 kDa selenoprotein
hsa-miR-1267	0	0	1	1	1	1	HOMER1	homer homolog 1 (Drosophila)
hsa-miR-1267	1	0	1	0	1	1	AKAP6	A kinase (PRKA) anchor protein 6
hsa-miR-1267	1	0	1	1	1	1	BCL9	B-cell CLL/lymphoma 9
hsa-miR-1267	1	0	1	0	1	1	RUNX1T1	runt-related transcription factor 1; translocated to, 1 (cyclin D-related)
hsa-miR-1267	1	0	1	1	1	1	CREB1	cAMP responsive element binding protein 1
hsa-miR-1267	1	0	1	1	1	1	FUT8	fucosyltransferase 8 (alpha (1,6) fucosyltransferase)
hsa-miR-1267	1	0	1	1	1	1	ONECUT1	one cut homeobox 1
hsa-miR-1267	1	0	1	1	1	1	MLLT3	myeloid/lymphoid or mixed-lineage leukemia (trithorax homolog, Drosophila); translocated to, 3
hsa-miR-1267	1	0	1	1	1	1	MTMR4	myotubularin related protein 4
hsa-miR-1267	1	0	1	1	1	1	STK17A	serine/threonine kinase 17a
hsa-miR-1267	0	0	1	1	0	0	AIM2	absent in melanoma 2
hsa-miR-1267	1	0	1	1	1	1	HOMER2	homer homolog 2 (Drosophila)
hsa-miR-1267	1	0	1	0	1	1	ROCK2	Rho-associated, coiled-coil containing protein kinase 2
hsa-miR-1267	1	0	1	1	1	1	ONECUT2	one cut homeobox 2
hsa-miR-1267	0	0	1	1	1	1	CLCA3P	chloride channel accessory 3, pseudogene
hsa-miR-1267	0	0	1	1	1	1	CALB1	calbindin 1, 28kDa
hsa-miR-1267	0	0	1	0	1	1	DSC2	desmocollin 2
hsa-miR-1267	1	0	1	1	1	1	JARID2	jumonji, AT rich interactive domain 2
hsa-miR-1267	1	0	1	1	1	1	RELN	reelin
hsa-miR-1267	1	0	1	1	1	1	SIAH2	siah E3 ubiquitin protein ligase 2
hsa-miR-1267	0	0	1	1	1	1	XYLB	xylulokinase homolog (H. influenzae)
hsa-miR-1267	1	0	1	1	1	1	MED13	mediator complex subunit 13
hsa-miR-1267	0	0	1	1	0	0	HR	hairless homolog (mouse)
hsa-miR-1267	1	0	1	1	1	1	ACTC1	actin, alpha, cardiac muscle 1
hsa-miR-1267	1	0	1	1	1	1	CBL	Cbl proto-oncogene, E3 ubiquitin protein ligase
hsa-miR-1267	1	0	1	1	1	1	FOXN3	forkhead box N3
hsa-miR-1267	1	0	1	1	1	1	CRK	v-crk sarcoma virus CT10 oncogene homolog (avian)
hsa-miR-1267	0	0	1	1	0	0	DLX5	distal-less homeobox 5
hsa-miR-1267	1	0	1	1	1	1	GAS2	growth arrest-specific 2
hsa-miR-1267	0	0	1	1	1	1	SLC20A1	solute carrier family 20 (phosphate transporter), member 1
hsa-miR-1267	1	0	1	0	1	1	CCDC6	coiled-coil domain containing 6
hsa-miR-1267	1	0	1	1	1	1	RND2	Rho family GTPase 2
hsa-miR-1267	0	0	1	1	1	1	ZRANB2	zinc finger, RAN-binding domain containing 2
hsa-miR-1267	1	0	1	1	1	1	GABBR2	gamma-aminobutyric acid (GABA) B receptor, 2
hsa-miR-1267	1	0	1	1	1	1	PIGK	phosphatidylinositol glycan anchor biosynthesis, class K
hsa-miR-1267	1	0	1	1	1	1	GTF2E1	general transcription factor IIE, polypeptide 1, alpha 56kDa
hsa-miR-1267	1	0	1	1	1	1	LAMC2	laminin, gamma 2
hsa-miR-1267	0	0	1	1	1	1	MKRN3	makorin ring finger protein 3
hsa-miR-1267	1	0	1	1	1	1	UST	uronyl-2-sulfotransferase
hsa-miR-1267	1	0	1	1	1	1	ACTR1A	ARP1 actin-related protein 1 homolog A, centractin alpha (yeast)
hsa-miR-1267	1	0	1	1	1	1	SRRM1	serine/arginine repetitive matrix 1
hsa-miR-1267	1	0	1	0	1	1	MAP1B	microtubule-associated protein 1B
hsa-miR-1267	1	0	1	1	1	1	MTF1	metal-regulatory transcription factor 1
hsa-miR-1267	1	0	1	0	1	1	NAB1	NGFI-A binding protein 1 (EGR1 binding protein 1)
hsa-miR-1267	0	0	1	1	1	1	LAGE3	L antigen family, member 3
hsa-miR-1267	0	0	1	1	1	1	KRT1	keratin 1
hsa-miR-1267	1	0	1	1	1	1	TMEM50B	transmembrane protein 50B
hsa-miR-1267	1	0	1	1	1	1	CAPZA2	capping protein (actin filament) muscle Z-line, alpha 2
hsa-miR-1267	1	0	1	1	1	1	NFATC1	nuclear factor of activated T-cells, cytoplasmic, calcineurin-dependent 1
hsa-miR-1267	1	0	1	0	1	1	PITPNA	phosphatidylinositol transfer protein, alpha
hsa-miR-1267	0	0	1	1	0	0	PNOC	prepronociceptin
hsa-miR-1267	1	0	1	1	1	1	PRKAA1	protein kinase, AMP-activated, alpha 1 catalytic subunit
hsa-miR-1267	1	0	1	0	1	1	PRKAA2	protein kinase, AMP-activated, alpha 2 catalytic subunit
hsa-miR-1267	1	0	1	0	1	1	SRSF6	serine/arginine-rich splicing factor 6
hsa-miR-1267	1	0	1	1	1	1	NPEPPS	aminopeptidase puromycin sensitive
hsa-miR-1267	1	0	1	1	1	1	TIMM17A	translocase of inner mitochondrial membrane 17 homolog A (yeast)
hsa-miR-1267	1	0	1	1	1	1	ZNF238	zinc finger protein 238
hsa-miR-1267	1	0	1	0	1	1	APPBP2	amyloid beta precursor protein (cytoplasmic tail) binding protein 2
hsa-miR-1267	1	0	1	1	1	1	CDC42EP3	CDC42 effector protein (Rho GTPase binding) 3
hsa-miR-1267	1	0	1	1	1	1	TXNIP	thioredoxin interacting protein
hsa-miR-1267	1	0	1	0	1	1	IGF2BP1	insulin-like growth factor 2 mRNA binding protein 1
hsa-miR-1267	1	0	1	1	1	1	SNTB2	syntrophin, beta 2 (dystrophin-associated protein A1, 59kDa, basic component 2)
hsa-miR-1267	0	0	1	1	0	0	CCNI	cyclin I
hsa-miR-1267	1	0	1	1	1	1	RAB35	RAB35, member RAS oncogene family
hsa-miR-1267	1	0	1	1	1	1	SCN1A	sodium channel, voltage-gated, type I, alpha subunit
hsa-miR-1267	1	0	1	1	1	1	SYN1	synapsin I
hsa-miR-1267	1	0	1	1	1	1	NR4A3	nuclear receptor subfamily 4, group A, member 3
hsa-miR-1267	1	0	1	1	1	1	ABHD2	abhydrolase domain containing 2
hsa-miR-1267	1	0	1	1	1	1	KAT7	K(lysine) acetyltransferase 7
hsa-miR-1267	1	0	1	1	1	1	SOX21	SRY (sex determining region Y)-box 21
hsa-miR-1267	0	0	1	1	1	1	CALB2	calbindin 2
hsa-miR-1267	0	0	1	0	1	1	ZXDB	zinc finger, X-linked, duplicated B
hsa-miR-1267	1	0	1	1	1	1	HPS5	Hermansky-Pudlak syndrome 5
hsa-miR-1267	0	0	1	1	1	1	SLC6A14	solute carrier family 6 (amino acid transporter), member 14
hsa-miR-1267	1	0	1	1	1	1	KLF12	Kruppel-like factor 12
hsa-miR-1267	1	0	1	1	1	1	RNF13	ring finger protein 13
hsa-miR-1267	1	0	1	1	1	1	TARDBP	TAR DNA binding protein
hsa-miR-1267	0	0	1	1	1	1	GLUD2	glutamate dehydrogenase 2
hsa-miR-1267	1	0	1	0	1	1	FZD4	frizzled family receptor 4
hsa-miR-1267	0	0	1	1	1	1	RAB3GAP1	RAB3 GTPase activating protein subunit 1 (catalytic)
hsa-miR-1267	1	0	1	1	1	1	RHOQ	ras homolog family member Q
hsa-miR-1267	0	0	1	1	1	1	RRAS2	related RAS viral (r-ras) oncogene homolog 2
hsa-miR-1267	1	0	1	1	1	1	HS2ST1	heparan sulfate 2-O-sulfotransferase 1
hsa-miR-1267	1	0	1	1	1	1	KCND2	potassium voltage-gated channel, Shal-related subfamily, member 2
hsa-miR-1267	1	0	1	0	1	1	RAPGEF5	Rap guanine nucleotide exchange factor (GEF) 5
hsa-miR-1267	1	0	1	0	1	1	FBXL7	F-box and leucine-rich repeat protein 7
hsa-miR-1267	1	0	1	1	1	1	KIF4A	kinesin family member 4A
hsa-miR-1267	1	0	1	1	1	1	MAPRE1	microtubule-associated protein, RP/EB family, member 1
hsa-miR-1267	1	0	1	0	1	1	MYO10	myosin X
hsa-miR-1267	0	0	1	1	1	1	TIMM9	translocase of inner mitochondrial membrane 9 homolog (yeast)
hsa-miR-1267	1	0	1	1	1	1	TLL2	tolloid-like 2
hsa-miR-1267	1	0	1	1	1	1	TRPC5	transient receptor potential cation channel, subfamily C, member 5
hsa-miR-1267	1	0	1	0	1	1	FLRT2	fibronectin leucine rich transmembrane protein 2
hsa-miR-1267	0	0	1	1	1	1	N6AMT1	N-6 adenine-specific DNA methyltransferase 1 (putative)
hsa-miR-1267	1	0	1	0	1	1	VPS4A	vacuolar protein sorting 4 homolog A (S. cerevisiae)
hsa-miR-1267	1	0	1	1	1	1	PPARGC1A	peroxisome proliferator-activated receptor gamma, coactivator 1 alpha
hsa-miR-1267	1	0	1	0	1	1	TRHDE	thyrotropin-releasing hormone degrading enzyme
hsa-miR-1267	1	0	1	1	1	1	AK2	adenylate kinase 2
hsa-miR-1267	1	0	1	1	1	1	SOCS5	suppressor of cytokine signaling 5
hsa-miR-1267	1	0	1	1	1	1	KLF15	Kruppel-like factor 15
hsa-miR-1267	1	0	1	0	1	1	C16orf72	chromosome 16 open reading frame 72
hsa-miR-1267	0	0	1	0	1	1	ADAMTS3	ADAM metallopeptidase with thrombospondin type 1 motif, 3
hsa-miR-1267	1	0	1	1	1	1	MAPRE2	microtubule-associated protein, RP/EB family, member 2
hsa-miR-1267	1	0	1	1	1	1	TDRD7	tudor domain containing 7
hsa-miR-1267	1	0	1	1	1	1	ZBTB11	zinc finger and BTB domain containing 11
hsa-miR-1267	1	0	1	1	1	1	AFF4	AF4/FMR2 family, member 4
hsa-miR-1267	0	0	1	1	1	1	GOLIM4	golgi integral membrane protein 4
hsa-miR-1267	1	0	1	1	1	1	RALGPS1	Ral GEF with PH domain and SH3 binding motif 1
hsa-miR-1267	0	0	1	1	1	1	PHF14	PHD finger protein 14
hsa-miR-1267	1	0	1	1	1	1	KDM4A	lysine (K)-specific demethylase 4A
hsa-miR-1267	1	0	1	0	1	1	MLEC	malectin
hsa-miR-1267	1	0	1	1	1	1	RASSF2	Ras association (RalGDS/AF-6) domain family member 2
hsa-miR-1267	1	0	1	0	1	1	KIAA0232	KIAA0232
hsa-miR-1267	1	0	1	0	1	1	TRIL	TLR4 interactor with leucine-rich repeats
hsa-miR-1267	1	0	1	1	1	1	ZBTB5	zinc finger and BTB domain containing 5
hsa-miR-1267	1	0	1	1	1	1	RNF44	ring finger protein 44
hsa-miR-1267	1	0	1	0	1	1	ZBTB1	zinc finger and BTB domain containing 1
hsa-miR-1267	1	0	1	0	1	1	WDFY3	WD repeat and FYVE domain containing 3
hsa-miR-1267	1	0	1	1	1	1	RAB21	RAB21, member RAS oncogene family
hsa-miR-1267	0	0	1	1	1	1	MYO16	myosin XVI
hsa-miR-1267	1	0	1	0	1	1	ZNF609	zinc finger protein 609
hsa-miR-1267	1	0	1	1	1	1	ERP44	endoplasmic reticulum protein 44
hsa-miR-1267	1	0	1	0	1	1	ERC1	ELKS/RAB6-interacting/CAST family member 1
hsa-miR-1267	1	0	1	1	1	1	ZNF423	zinc finger protein 423
hsa-miR-1267	1	0	1	1	1	1	RTF1	Rtf1, Paf1/RNA polymerase II complex component, homolog (S. cerevisiae)
hsa-miR-1267	1	0	1	0	1	1	LARP4B	La ribonucleoprotein domain family, member 4B
hsa-miR-1267	1	0	1	0	1	1	KIAA1024	KIAA1024
hsa-miR-1267	1	0	1	0	1	1	ARHGEF12	Rho guanine nucleotide exchange factor (GEF) 12
hsa-miR-1267	1	0	1	0	1	1	SRGAP2	SLIT-ROBO Rho GTPase activating protein 2
hsa-miR-1267	1	0	1	1	1	1	MED13L	mediator complex subunit 13-like
hsa-miR-1267	0	0	1	0	1	1	ZDHHC17	zinc finger, DHHC-type containing 17
hsa-miR-1267	0	0	1	1	1	1	ZNF10	zinc finger protein 10
hsa-miR-1267	1	0	1	1	1	1	MYRIP	myosin VIIA and Rab interacting protein
hsa-miR-1267	1	0	1	0	1	1	ERC2	ELKS/RAB6-interacting/CAST family member 2
hsa-miR-1267	1	0	1	1	1	1	ST8SIA3	ST8 alpha-N-acetyl-neuraminide alpha-2,8-sialyltransferase 3
hsa-miR-1267	1	0	1	1	1	1	PHF20L1	PHD finger protein 20-like 1
hsa-miR-1267	0	0	1	1	1	1	PPIL1	peptidylprolyl isomerase (cyclophilin)-like 1
hsa-miR-1267	0	0	1	1	0	0	SCFD1	sec1 family domain containing 1
hsa-miR-1267	1	0	1	1	1	1	SNX9	sorting nexin 9
hsa-miR-1267	0	0	1	1	1	1	PADI3	peptidyl arginine deiminase, type III
hsa-miR-1267	1	0	1	1	1	1	AKAP11	A kinase (PRKA) anchor protein 11
hsa-miR-1267	1	0	1	1	1	1	BIRC6	baculoviral IAP repeat containing 6
hsa-miR-1267	1	0	1	1	1	1	RAB14	RAB14, member RAS oncogene family
hsa-miR-1267	1	0	1	1	1	1	RAPGEFL1	Rap guanine nucleotide exchange factor (GEF)-like 1
hsa-miR-1267	0	0	1	1	1	1	CD244	CD244 molecule, natural killer cell receptor 2B4
hsa-miR-1267	1	0	1	1	1	1	PHF20	PHD finger protein 20
hsa-miR-1267	0	0	1	0	1	1	GPR83	G protein-coupled receptor 83
hsa-miR-1267	1	0	1	1	1	1	DNAJC27	DnaJ (Hsp40) homolog, subfamily C, member 27
hsa-miR-1267	1	0	1	1	1	1	CYP39A1	cytochrome P450, family 39, subfamily A, polypeptide 1
hsa-miR-1267	1	0	1	1	1	1	SIX2	SIX homeobox 2
hsa-miR-1267	1	0	1	1	1	1	SIX4	SIX homeobox 4
hsa-miR-1267	1	0	1	1	1	1	GALNT7	UDP-N-acetyl-alpha-D-galactosamine:polypeptide N-acetylgalactosaminyltransferase 7 (GalNAc-T7)
hsa-miR-1267	1	0	1	1	1	1	TET2	tet methylcytosine dioxygenase 2
hsa-miR-1267	0	0	1	0	1	1	GIPC2	GIPC PDZ domain containing family, member 2
hsa-miR-1267	1	0	1	1	1	1	ZNF280C	zinc finger protein 280C
hsa-miR-1267	1	0	1	1	1	1	GDAP2	ganglioside induced differentiation associated protein 2
hsa-miR-1267	1	0	1	1	1	1	LPPR1	lipid phosphate phosphatase-related protein type 1
hsa-miR-1267	1	0	1	1	0	0	OSGEP	O-sialoglycoprotein endopeptidase
hsa-miR-1267	1	0	1	1	1	1	FAM178A	family with sequence similarity 178, member A
hsa-miR-1267	0	0	1	1	1	1	NUDT11	nudix (nucleoside diphosphate linked moiety X)-type motif 11
hsa-miR-1267	1	0	1	0	1	1	ARL8B	ADP-ribosylation factor-like 8B
hsa-miR-1267	1	0	1	0	1	1	PARVA	parvin, alpha
hsa-miR-1267	0	0	1	1	1	1	STK32B	serine/threonine kinase 32B
hsa-miR-1267	1	0	1	1	1	1	PAG1	phosphoprotein associated with glycosphingolipid microdomains 1
hsa-miR-1267	0	0	1	1	1	1	ZC3H15	zinc finger CCCH-type containing 15
hsa-miR-1267	0	0	1	1	0	0	TMEM176A	transmembrane protein 176A
hsa-miR-1267	0	0	1	0	1	1	IL17RB	interleukin 17 receptor B
hsa-miR-1267	0	0	1	1	1	1	ERRFI1	ERBB receptor feedback inhibitor 1
hsa-miR-1267	0	0	1	1	1	1	RIN2	Ras and Rab interactor 2
hsa-miR-1267	0	0	1	1	1	1	TRMT13	tRNA methyltransferase 13 homolog (S. cerevisiae)
hsa-miR-1267	1	0	1	1	1	1	SEPT3	septin 3
hsa-miR-1267	1	0	1	1	1	1	SERTAD4	SERTA domain containing 4
hsa-miR-1267	1	0	1	1	1	1	CCBL2	cysteine conjugate-beta lyase 2
hsa-miR-1267	1	0	1	1	0	0	KCNQ5	potassium voltage-gated channel, KQT-like subfamily, member 5
hsa-miR-1267	1	0	1	0	1	1	KCMF1	potassium channel modulatory factor 1
hsa-miR-1267	1	0	1	0	1	1	SLAMF8	SLAM family member 8
hsa-miR-1267	0	0	1	1	1	1	TMEM167B	transmembrane protein 167B
hsa-miR-1267	0	0	1	1	1	1	PRTFDC1	phosphoribosyl transferase domain containing 1
hsa-miR-1267	1	0	1	1	1	1	PAK7	p21 protein (Cdc42/Rac)-activated kinase 7
hsa-miR-1267	0	0	1	1	0	0	ENTPD7	ectonucleoside triphosphate diphosphohydrolase 7
hsa-miR-1267	1	0	1	0	1	1	EIF5A2	eukaryotic translation initiation factor 5A2
hsa-miR-1267	1	0	1	1	1	1	EPHA8	EPH receptor A8
hsa-miR-1267	1	0	1	1	1	1	SLC24A3	solute carrier family 24 (sodium/potassium/calcium exchanger), member 3
hsa-miR-1267	0	0	1	1	1	1	KIAA1161	KIAA1161
hsa-miR-1267	1	0	1	1	1	1	SLC12A5	solute carrier family 12 (potassium/chloride transporter), member 5
hsa-miR-1267	0	0	1	1	1	1	SHROOM4	shroom family member 4
hsa-miR-1267	1	0	1	1	1	1	HOMEZ	homeobox and leucine zipper encoding
hsa-miR-1267	1	0	1	1	1	1	KIAA1467	KIAA1467
hsa-miR-1267	0	0	1	1	1	1	PRX	periaxin
hsa-miR-1267	1	0	1	1	0	0	ANO8	anoctamin 8
hsa-miR-1267	0	0	1	1	1	1	B3GALT1	UDP-Gal:betaGlcNAc beta 1,3-galactosyltransferase, polypeptide 1
hsa-miR-1267	1	0	1	0	1	1	RAP2A	RAP2A, member of RAS oncogene family
hsa-miR-1267	0	0	1	0	1	1	MS4A7	membrane-spanning 4-domains, subfamily A, member 7
hsa-miR-1267	1	0	1	0	1	1	TP53INP2	tumor protein p53 inducible nuclear protein 2
hsa-miR-1267	1	0	1	1	1	1	ZFYVE1	zinc finger, FYVE domain containing 1
hsa-miR-1267	1	0	1	1	1	1	TGIF2	TGFB-induced factor homeobox 2
hsa-miR-1267	1	0	1	1	1	1	SLC5A7	solute carrier family 5 (choline transporter), member 7
hsa-miR-1267	0	0	1	1	1	1	MS4A1	membrane-spanning 4-domains, subfamily A, member 1
hsa-miR-1267	1	0	1	0	1	1	CERS2	ceramide synthase 2
hsa-miR-1267	0	0	1	1	0	0	MMP27	matrix metallopeptidase 27
hsa-miR-1267	1	0	1	1	1	1	XYLT1	xylosyltransferase I
hsa-miR-1267	1	0	1	0	1	1	MRPS25	mitochondrial ribosomal protein S25
hsa-miR-1267	0	0	1	1	1	1	SFXN1	sideroflexin 1
hsa-miR-1267	1	0	1	1	1	1	AIDA	axin interactor, dorsalization associated
hsa-miR-1267	1	0	1	1	1	1	NEUROG2	neurogenin 2
hsa-miR-1267	1	0	1	1	1	1	LRRC2	leucine rich repeat containing 2
hsa-miR-1267	0	0	1	1	1	1	E2F8	E2F transcription factor 8
hsa-miR-1267	0	0	1	0	1	1	C1orf115	chromosome 1 open reading frame 115
hsa-miR-1267	1	0	1	0	1	1	MOB3B	MOB kinase activator 3B
hsa-miR-1267	1	0	1	1	1	1	CBLL1	Cbl proto-oncogene, E3 ubiquitin protein ligase-like 1
hsa-miR-1267	1	0	1	1	1	1	L2HGDH	L-2-hydroxyglutarate dehydrogenase
hsa-miR-1267	0	0	1	1	1	1	ERMP1	endoplasmic reticulum metallopeptidase 1
hsa-miR-1267	1	0	1	0	1	1	SEMA6D	sema domain, transmembrane domain (TM), and cytoplasmic domain, (semaphorin) 6D
hsa-miR-1267	1	0	1	0	1	1	VCPIP1	valosin containing protein (p97)/p47 complex interacting protein 1
hsa-miR-1267	1	0	1	1	1	1	FBXO11	F-box protein 11
hsa-miR-1267	1	0	1	1	1	1	PROSER1	proline and serine rich 1
hsa-miR-1267	1	0	1	1	1	1	NAA50	N(alpha)-acetyltransferase 50, NatE catalytic subunit
hsa-miR-1267	1	0	1	1	1	1	TNKS2	tankyrase, TRF1-interacting ankyrin-related ADP-ribose polymerase 2
hsa-miR-1267	0	0	1	1	1	1	ITIH5	inter-alpha-trypsin inhibitor heavy chain family, member 5
hsa-miR-1267	1	0	1	1	1	1	JHDM1D	jumonji C domain containing histone demethylase 1 homolog D (S. cerevisiae)
hsa-miR-1267	1	0	1	0	1	1	SETD7	SET domain containing (lysine methyltransferase) 7
hsa-miR-1267	1	0	1	1	1	1	PTPRO	protein tyrosine phosphatase, receptor type, O
hsa-miR-1267	0	0	1	1	1	1	FCRL2	Fc receptor-like 2
hsa-miR-1267	1	0	1	0	1	1	C1orf21	chromosome 1 open reading frame 21
hsa-miR-1267	1	0	1	1	1	1	MAP4	microtubule-associated protein 4
hsa-miR-1267	1	0	1	1	1	1	SNX27	sorting nexin family member 27
hsa-miR-1267	0	0	1	1	1	1	KRTAP1-1	keratin associated protein 1-1
hsa-miR-1267	0	0	1	1	1	1	TKTL2	transketolase-like 2
hsa-miR-1267	0	0	1	0	1	1	RAB6C	RAB6C, member RAS oncogene family
hsa-miR-1267	1	0	1	1	1	1	USP42	ubiquitin specific peptidase 42
hsa-miR-1267	1	0	1	1	1	1	PHAX	phosphorylated adaptor for RNA export
hsa-miR-1267	1	0	1	1	1	1	ARID5B	AT rich interactive domain 5B (MRF1-like)
hsa-miR-1267	1	0	1	1	1	1	ANTXR1	anthrax toxin receptor 1
hsa-miR-1267	0	0	1	0	1	1	LDOC1L	leucine zipper, down-regulated in cancer 1-like
hsa-miR-1267	0	0	1	1	0	0	NICN1	nicolin 1
hsa-miR-1267	1	0	1	1	1	1	NTPCR	nucleoside-triphosphatase, cancer-related
hsa-miR-1267	0	0	1	1	0	0	C3orf26	chromosome 3 open reading frame 26
hsa-miR-1267	1	0	1	1	1	1	HOOK3	hook homolog 3 (Drosophila)
hsa-miR-1267	1	0	1	1	1	1	HIATL1	hippocampus abundant transcript-like 1
hsa-miR-1267	0	0	1	1	1	1	SPZ1	spermatogenic leucine zipper 1
hsa-miR-1267	1	0	1	0	1	1	INA	internexin neuronal intermediate filament protein, alpha
hsa-miR-1267	1	0	1	0	1	1	PPP1R15B	protein phosphatase 1, regulatory subunit 15B
hsa-miR-1267	1	0	1	1	1	1	FAM104A	family with sequence similarity 104, member A
hsa-miR-1267	1	0	1	0	1	1	UBASH3B	ubiquitin associated and SH3 domain containing B
hsa-miR-1267	1	0	1	1	1	1	TMEM60	transmembrane protein 60
hsa-miR-1267	0	0	1	1	1	1	POLR2J2	polymerase (RNA) II (DNA directed) polypeptide J2
hsa-miR-1267	1	0	1	1	1	1	TRIM5	tripartite motif containing 5
hsa-miR-1267	1	0	1	1	1	1	TRIM55	tripartite motif containing 55
hsa-miR-1267	1	0	1	1	1	1	C5orf30	chromosome 5 open reading frame 30
hsa-miR-1267	0	0	1	1	1	1	CTTNBP2	cortactin binding protein 2
hsa-miR-1267	0	0	1	0	0	0	CEACAM21	carcinoembryonic antigen-related cell adhesion molecule 21
hsa-miR-1267	1	0	1	1	1	1	LUZP1	leucine zipper protein 1
hsa-miR-1267	0	0	1	1	1	1	ANKRD30A	ankyrin repeat domain 30A
hsa-miR-1267	0	0	1	1	1	1	PPP4R4	protein phosphatase 4, regulatory subunit 4
hsa-miR-1267	0	0	1	1	1	1	RSAD2	radical S-adenosyl methionine domain containing 2
hsa-miR-1267	1	0	1	1	1	1	DYRK1A	dual-specificity tyrosine-(Y)-phosphorylation regulated kinase 1A
hsa-miR-1267	1	0	1	1	1	1	BMPER	BMP binding endothelial regulator
hsa-miR-1267	0	0	1	1	1	1	RAD51B	RAD51 homolog B (S. cerevisiae)
hsa-miR-1267	1	0	1	1	1	1	MARS2	methionyl-tRNA synthetase 2, mitochondrial
hsa-miR-1267	0	0	1	1	1	1	KCNC2	potassium voltage-gated channel, Shaw-related subfamily, member 2
hsa-miR-1267	0	0	1	1	1	1	TGIF2LY	TGFB-induced factor homeobox 2-like, Y-linked
hsa-miR-1267	1	0	1	0	1	1	CNOT6L	CCR4-NOT transcription complex, subunit 6-like
hsa-miR-1267	1	0	1	1	1	1	MAPK1IP1L	mitogen-activated protein kinase 1 interacting protein 1-like
hsa-miR-1267	0	0	1	1	1	1	ZFC3H1	zinc finger, C3H1-type containing
hsa-miR-1267	1	0	1	1	1	1	FAM84A	family with sequence similarity 84, member A
hsa-miR-1267	1	0	1	1	1	1	MRPL30	mitochondrial ribosomal protein L30
hsa-miR-1267	1	0	1	1	1	1	UBTD2	ubiquitin domain containing 2
hsa-miR-1267	1	0	1	1	1	1	BHLHE22	basic helix-loop-helix family, member e22
hsa-miR-1267	1	0	1	1	1	1	FAM123B	family with sequence similarity 123B
hsa-miR-1267	1	0	1	1	1	1	ZSCAN29	zinc finger and SCAN domain containing 29
hsa-miR-1267	1	0	1	1	1	1	C7orf60	chromosome 7 open reading frame 60
hsa-miR-1267	1	0	1	0	1	1	TMEM154	transmembrane protein 154
hsa-miR-1267	0	0	1	1	1	1	GAPT	GRB2-binding adaptor protein, transmembrane
hsa-miR-1267	1	0	1	0	1	1	ZBTB9	zinc finger and BTB domain containing 9
hsa-miR-1267	1	0	1	1	1	1	PDIK1L	PDLIM1 interacting kinase 1 like
hsa-miR-1267	1	0	1	1	1	1	WTAP	Wilms tumor 1 associated protein
hsa-miR-1267	0	0	1	0	1	1	KBTBD6	kelch repeat and BTB (POZ) domain containing 6
hsa-miR-1267	1	0	1	0	1	1	ST6GALNAC3	ST6 (alpha-N-acetyl-neuraminyl-2,3-beta-galactosyl-1,3)-N-acetylgalactosaminide alpha-2,6-sialyltransferase 3
hsa-miR-1267	1	0	1	1	1	1	ELMOD2	ELMO/CED-12 domain containing 2
hsa-miR-1267	1	0	1	1	1	1	PKHD1	polycystic kidney and hepatic disease 1 (autosomal recessive)
hsa-miR-1267	0	0	1	1	1	1	REXO1L1	REX1, RNA exonuclease 1 homolog (S. cerevisiae)-like 1
hsa-miR-1267	0	0	1	1	1	1	KCNH5	potassium voltage-gated channel, subfamily H (eag-related), member 5
hsa-miR-1267	0	0	1	1	0	0	SCUBE1	signal peptide, CUB domain, EGF-like 1
hsa-miR-1267	0	0	1	1	1	1	TPH2	tryptophan hydroxylase 2
hsa-miR-1267	1	0	1	1	1	1	L3MBTL4	l(3)mbt-like 4 (Drosophila)
hsa-miR-1267	1	0	1	1	1	1	MOB1B	MOB kinase activator 1B
hsa-miR-1267	1	0	1	1	1	1	CNTD1	cyclin N-terminal domain containing 1
hsa-miR-1267	1	0	1	1	1	1	LSM11	LSM11, U7 small nuclear RNA associated
hsa-miR-1267	1	0	1	1	1	1	CCDC117	coiled-coil domain containing 117
hsa-miR-1267	1	0	1	1	1	1	FAM117B	family with sequence similarity 117, member B
hsa-miR-1267	1	0	1	0	1	1	RNF152	ring finger protein 152
hsa-miR-1267	1	0	1	0	1	1	KSR2	kinase suppressor of ras 2
hsa-miR-1267	0	0	1	0	1	1	KRT18P55	keratin 18 pseudogene 55
hsa-miR-1267	0	0	1	1	1	1	C17orf78	chromosome 17 open reading frame 78
hsa-miR-1267	0	0	1	1	1	1	FAM133A	family with sequence similarity 133, member A
hsa-miR-1267	0	0	1	1	1	1	CD300LB	CD300 molecule-like family member b
hsa-miR-1267	1	0	1	1	1	1	LDLRAD3	low density lipoprotein receptor class A domain containing 3
hsa-miR-1267	1	0	1	1	1	1	UBR1	ubiquitin protein ligase E3 component n-recognin 1
hsa-miR-1267	0	0	1	1	1	1	FRMD3	FERM domain containing 3
hsa-miR-1267	0	0	1	1	1	1	MRPL43	mitochondrial ribosomal protein L43
hsa-miR-1267	0	0	1	1	0	0	TAS1R1	taste receptor, type 1, member 1
hsa-miR-1267	1	0	1	1	1	1	PPM1B	protein phosphatase, Mg2+/Mn2+ dependent, 1B
hsa-miR-1267	0	0	1	1	1	1	STXBP4	syntaxin binding protein 4
hsa-miR-1267	1	0	1	1	1	1	MTDH	metadherin
hsa-miR-1267	1	0	1	0	1	1	ARL5B	ADP-ribosylation factor-like 5B
hsa-miR-1267	0	0	1	1	1	1	FBXO27	F-box protein 27
hsa-miR-1267	0	0	1	0	1	1	ZNF445	zinc finger protein 445
hsa-miR-1267	1	0	1	0	1	1	EFHA2	EF-hand domain family, member A2
hsa-miR-1267	1	0	1	1	1	1	BCL6B	B-cell CLL/lymphoma 6, member B
hsa-miR-1267	0	0	1	1	1	1	C2orf48	chromosome 2 open reading frame 48
hsa-miR-1267	1	0	1	0	1	1	RIMS4	regulating synaptic membrane exocytosis 4
hsa-miR-1267	1	0	1	0	1	1	HNRNPA3	heterogeneous nuclear ribonucleoprotein A3
hsa-miR-1267	1	0	1	1	1	1	RBPMS2	RNA binding protein with multiple splicing 2
hsa-miR-1267	1	0	1	1	1	1	C1orf52	chromosome 1 open reading frame 52
hsa-miR-1267	1	0	1	1	1	1	GPRIN3	GPRIN family member 3
hsa-miR-1267	1	0	1	0	1	1	FAM73A	family with sequence similarity 73, member A
hsa-miR-1267	1	0	1	0	1	1	ZC3H6	zinc finger CCCH-type containing 6
hsa-miR-1267	1	0	1	1	1	1	PTGER3	prostaglandin E receptor 3 (subtype EP3)
hsa-miR-1267	1	0	1	1	1	1	CXCL12	chemokine (C-X-C motif) ligand 12
hsa-miR-1267	0	0	1	1	1	1	ARHGAP27	Rho GTPase activating protein 27
hsa-miR-1267	1	0	1	1	1	1	GLYAT	glycine-N-acyltransferase
hsa-miR-1267	0	0	1	1	1	1	SERTM1	serine-rich and transmembrane domain containing 1
hsa-miR-1267	0	0	1	0	1	1	NPSR1-AS1	NPSR1 antisense RNA 1
hsa-miR-1267	1	0	1	1	1	1	ATRNL1	attractin-like 1
hsa-miR-1267	0	0	1	1	1	1	C10orf129	chromosome 10 open reading frame 129
hsa-miR-1267	0	0	1	1	0	0	TMPRSS11F	transmembrane protease, serine 11F
hsa-miR-1267	1	0	1	1	1	1	CAPN3	calpain 3, (p94)
hsa-miR-1267	0	0	1	0	0	0	SNORD56B	small nucleolar RNA, C/D box 56B
hsa-miR-1267	0	0	1	1	0	0	TTTY8	testis-specific transcript, Y-linked 8 (non-protein coding)
hsa-miR-1267	0	0	1	0	0	0	TTTY2	testis-specific transcript, Y-linked 2 (non-protein coding)
hsa-miR-1267	0	0	1	0	0	0	TTTY19	testis-specific transcript, Y-linked 19 (non-protein coding)
hsa-miR-1267	0	0	1	0	0	0	TTTY4B	testis-specific transcript, Y-linked 4B (non-protein coding)
hsa-miR-1267	0	0	1	0	0	0	RBMXP3	RNA binding motif protein, X-linked pseudogene 3
hsa-miR-1267	0	0	1	0	0	0	HNRNPA3P1	heterogeneous nuclear ribonucleoprotein A3 pseudogene 1
hsa-miR-1267	0	0	1	0	0	0	SNORD56	small nucleolar RNA, C/D box 56
hsa-miR-1267	0	0	1	0	0	0	SEPHS1P1	selenophosphate synthetase 1 pseudogene 1
hsa-miR-1267	0	0	1	0	0	0	LOC374443	C-type lectin domain family 2, member D pseudogene
hsa-miR-1267	0	0	1	0	0	0	SNORA40	small nucleolar RNA, H/ACA box 40
hsa-miR-1267	0	0	1	0	0	0	EIF3IP1	eukaryotic translation initiation factor 3, subunit I pseudogene 1
hsa-miR-1267	0	0	1	0	0	0	LOC729603	calcium binding protein P22 pseudogene
hsa-miR-1267	1	0	1	1	1	1	HOXA1	homeobox A1
hsa-miR-1267	0	0	1	1	1	1	PEG3	paternally expressed 3
hsa-miR-1267	1	0	1	1	1	1	IFNAR2	interferon (alpha, beta and omega) receptor 2
