# Supplementary material for: Profiling of Selected MicroRNAs in Proliferative Eutopic Endometrium of Women with Ovarian Endometriosis
Source: Biomed Res Int. 2015 Aug 20;2015:760698. doi: 10.1155/2015/760698 (PMC4558423; doi:10.1155/2015/760698)
Supplement: Supplementary file 1 — Table I: The names of miRNAs significantly differentially expressed between eutopic endometrium of patients with endometriosis vs eutopic endometrium of patients without endometriosis. Table II: The associations between miRNA and mRNA, which presents detailed results of the search of six major databases i.e targetscan, tarbase, miranda, mirbase, mirtarget2 and pictar. [file 760698.f1.zip › 760698.f1/Table II/hsa-miR-1282.tsv]

miR	targetscan	tarbase	miranda	mirbase	mirtarget2	pictar	GeneSymbol	GeneName
hsa-miR-1282	1	0	1	1	1	1	PLAU	plasminogen activator, urokinase
hsa-miR-1282	1	0	1	1	1	1	CHD9	chromodomain helicase DNA binding protein 9
hsa-miR-1282	1	0	1	1	0	0	SRCAP	Snf2-related CREBBP activator protein
hsa-miR-1282	0	0	1	0	0	0	FAM91A2	family with sequence similarity 91, member A2
hsa-miR-1282	1	0	1	0	1	1	DOCK4	dedicator of cytokinesis 4
hsa-miR-1282	1	0	1	0	0	0	DTX4	deltex homolog 4 (Drosophila)
hsa-miR-1282	1	0	1	1	1	1	C11orf9	chromosome 11 open reading frame 9
hsa-miR-1282	0	0	1	1	1	1	FASTKD2	FAST kinase domains 2
hsa-miR-1282	1	0	1	1	1	1	PRRC2C	proline-rich coiled-coil 2C
hsa-miR-1282	1	0	1	1	1	1	PHF8	PHD finger protein 8
hsa-miR-1282	0	0	1	1	0	0	ZC4H2	zinc finger, C4H2 domain containing
hsa-miR-1282	1	0	1	1	1	1	ATXN7L1	ataxin 7-like 1
hsa-miR-1282	1	0	1	1	0	0	ATAD2B	ATPase family, AAA domain containing 2B
hsa-miR-1282	0	0	1	1	1	1	COPS7A	COP9 constitutive photomorphogenic homolog subunit 7A (Arabidopsis)
hsa-miR-1282	1	1	1	1	1	1	NFIA	nuclear factor I/A
hsa-miR-1282	1	0	1	0	1	1	SEMA6D	sema domain, transmembrane domain (TM), and cytoplasmic domain, (semaphorin) 6D
hsa-miR-1282	0	0	1	0	1	1	FBRSL1	fibrosin-like 1
hsa-miR-1282	1	0	1	0	0	0	TANC2	tetratricopeptide repeat, ankyrin repeat and coiled-coil containing 2
hsa-miR-1282	0	0	1	0	0	0	MYSM1	Myb-like, SWIRM and MPN domains 1
hsa-miR-1282	1	0	1	1	1	1	POGZ	pogo transposable element with ZNF domain
hsa-miR-1282	1	0	1	1	1	1	ACBD5	acyl-CoA binding domain containing 5
hsa-miR-1282	1	0	1	1	1	1	KCNMA1	potassium large conductance calcium-activated channel, subfamily M, alpha member 1
hsa-miR-1282	1	0	1	0	1	1	BEND4	BEN domain containing 4
hsa-miR-1282	1	0	1	1	1	1	FAT2	FAT tumor suppressor homolog 2 (Drosophila)
hsa-miR-1282	1	0	1	1	1	1	NRXN2	neurexin 2
hsa-miR-1282	1	0	1	1	1	1	RPS6KA3	ribosomal protein S6 kinase, 90kDa, polypeptide 3
hsa-miR-1282	1	0	1	1	1	1	DTNA	dystrobrevin, alpha
hsa-miR-1282	0	0	1	1	1	1	DDX39B	DEAD (Asp-Glu-Ala-Asp) box polypeptide 39B
hsa-miR-1282	1	0	1	1	1	1	PPFIA1	protein tyrosine phosphatase, receptor type, f polypeptide (PTPRF), interacting protein (liprin), alpha 1
hsa-miR-1282	1	0	1	1	1	1	SPTB	spectrin, beta, erythrocytic
hsa-miR-1282	0	0	1	1	0	0	IFT27	intraflagellar transport 27 homolog (Chlamydomonas)
hsa-miR-1282	1	0	1	1	0	0	RGS6	regulator of G-protein signaling 6
hsa-miR-1282	0	0	1	1	0	0	EIF4E2	eukaryotic translation initiation factor 4E family member 2
hsa-miR-1282	1	0	1	1	1	1	PTPRK	protein tyrosine phosphatase, receptor type, K
hsa-miR-1282	1	0	1	1	1	1	PHLDB2	pleckstrin homology-like domain, family B, member 2
hsa-miR-1282	0	0	1	1	1	1	SPP1	secreted phosphoprotein 1
hsa-miR-1282	1	0	1	1	1	1	MEF2D	myocyte enhancer factor 2D
hsa-miR-1282	1	0	1	1	1	1	YME1L1	YME1-like 1 (S. cerevisiae)
hsa-miR-1282	0	0	1	1	1	1	UBE4B	ubiquitination factor E4B
hsa-miR-1282	1	0	1	1	0	0	SH2D2A	SH2 domain containing 2A
hsa-miR-1282	1	0	1	1	1	1	PFKFB3	6-phosphofructo-2-kinase/fructose-2,6-biphosphatase 3
hsa-miR-1282	1	0	1	1	1	1	PDE4A	phosphodiesterase 4A, cAMP-specific
hsa-miR-1282	1	0	1	1	1	1	TP63	tumor protein p63
hsa-miR-1282	1	0	1	0	1	1	CELF2	CUGBP, Elav-like family member 2
hsa-miR-1282	1	0	1	1	1	1	RABEP1	rabaptin, RAB GTPase binding effector protein 1
hsa-miR-1282	0	0	1	1	1	1	EIF2A	eukaryotic translation initiation factor 2A, 65kDa
hsa-miR-1282	1	0	1	1	1	1	CAB39	calcium binding protein 39
hsa-miR-1282	0	0	1	0	1	1	CLEC5A	C-type lectin domain family 5, member A
hsa-miR-1282	1	0	1	1	0	0	ECE2	endothelin converting enzyme 2
hsa-miR-1282	0	0	1	0	0	0	TIGD7	tigger transposable element derived 7
hsa-miR-1282	1	0	1	0	1	1	TRPS1	trichorhinophalangeal syndrome I
hsa-miR-1282	0	0	1	1	0	0	EXOSC8	exosome component 8
hsa-miR-1282	0	0	1	0	1	1	MYO3B	myosin IIIB
hsa-miR-1282	1	0	1	1	1	1	F3	coagulation factor III (thromboplastin, tissue factor)
hsa-miR-1282	1	0	1	1	1	1	AFF2	AF4/FMR2 family, member 2
hsa-miR-1282	0	0	1	1	1	1	RNASE7	ribonuclease, RNase A family, 7
hsa-miR-1282	0	0	1	1	1	1	ESRP1	epithelial splicing regulatory protein 1
hsa-miR-1282	1	0	1	0	1	1	NFAT5	nuclear factor of activated T-cells 5, tonicity-responsive
hsa-miR-1282	0	0	1	1	1	1	OLFM4	olfactomedin 4
hsa-miR-1282	1	0	1	1	1	1	BCAP29	B-cell receptor-associated protein 29
hsa-miR-1282	0	0	1	1	1	1	STOX2	storkhead box 2
hsa-miR-1282	1	0	1	0	1	1	VPS13D	vacuolar protein sorting 13 homolog D (S. cerevisiae)
hsa-miR-1282	0	0	1	1	1	1	CDKAL1	CDK5 regulatory subunit associated protein 1-like 1
hsa-miR-1282	0	0	1	0	0	0	KIAA1671	KIAA1671
hsa-miR-1282	0	0	1	0	1	1	HEMK1	HemK methyltransferase family member 1
hsa-miR-1282	0	0	1	1	1	1	ZBBX	zinc finger, B-box domain containing
hsa-miR-1282	0	0	1	0	0	0	LOC729852	uncharacterized LOC729852
hsa-miR-1282	1	0	1	1	1	1	FOXP1	forkhead box P1
hsa-miR-1282	0	0	1	0	1	1	TWSG1	twisted gastrulation homolog 1 (Drosophila)
hsa-miR-1282	0	0	1	0	0	0	LOC254559	uncharacterized LOC254559
hsa-miR-1282	0	0	1	0	0	0	CHST9-AS1	CHST9 antisense RNA 1
hsa-miR-1282	1	0	1	1	1	1	TMTC1	transmembrane and tetratricopeptide repeat containing 1
hsa-miR-1282	1	0	1	1	1	1	LMNA	lamin A/C
hsa-miR-1282	1	0	1	1	1	1	TMEM25	transmembrane protein 25
hsa-miR-1282	0	0	1	1	0	0	CHRM3	cholinergic receptor, muscarinic 3
hsa-miR-1282	1	0	1	1	1	1	ZIC4	Zic family member 4
hsa-miR-1282	0	0	1	0	1	1	FAM70A	family with sequence similarity 70, member A
hsa-miR-1282	1	0	1	1	1	1	CLCN5	chloride channel, voltage-sensitive 5
hsa-miR-1282	0	0	1	0	1	1	THAP6	THAP domain containing 6
hsa-miR-1282	0	0	1	0	0	0	FLJ32742	uncharacterized locus FLJ32742
hsa-miR-1282	0	0	1	0	0	0	LOC100125918	uncharacterized LOC100125918
hsa-miR-1282	0	0	1	0	0	0	UBE2QL1	ubiquitin-conjugating enzyme E2Q family-like 1
hsa-miR-1282	0	0	1	1	1	1	ZNF385B	zinc finger protein 385B
hsa-miR-1282	0	0	1	1	0	0	TRIM41	tripartite motif containing 41
hsa-miR-1282	0	0	1	0	1	1	CDHR3	cadherin-related family member 3
hsa-miR-1282	1	0	1	1	1	1	BLCAP	bladder cancer associated protein
hsa-miR-1282	1	0	1	1	1	1	NOTCH2NL	notch 2 N-terminal like
hsa-miR-1282	1	0	1	1	1	1	CLIC5	chloride intracellular channel 5
hsa-miR-1282	0	0	1	1	0	0	PPP2R1A	protein phosphatase 2, regulatory subunit A, alpha
hsa-miR-1282	1	0	1	1	1	1	CBFA2T3	core-binding factor, runt domain, alpha subunit 2; translocated to, 3
hsa-miR-1282	0	0	1	0	0	0	LOC643837	uncharacterized LOC643837
hsa-miR-1282	1	0	1	1	1	1	ARIH2	ariadne homolog 2 (Drosophila)
hsa-miR-1282	1	0	1	1	1	1	RBMX	RNA binding motif protein, X-linked
hsa-miR-1282	0	0	1	1	0	0	MSANTD3	Myb/SANT-like DNA-binding domain containing 3
hsa-miR-1282	1	0	1	1	1	1	SLC25A3	solute carrier family 25 (mitochondrial carrier; phosphate carrier), member 3
hsa-miR-1282	0	0	1	1	1	1	SLC16A1	solute carrier family 16, member 1 (monocarboxylic acid transporter 1)
hsa-miR-1282	0	0	1	1	1	1	SPOCK1	sparc/osteonectin, cwcv and kazal-like domains proteoglycan (testican) 1
hsa-miR-1282	0	0	1	0	0	0	PART1	prostate androgen-regulated transcript 1 (non-protein coding)
hsa-miR-1282	0	0	1	0	1	1	AGBL4	ATP/GTP binding protein-like 4
hsa-miR-1282	1	0	1	1	1	1	EPB41L3	erythrocyte membrane protein band 4.1-like 3
hsa-miR-1282	1	0	1	1	1	1	KLF4	Kruppel-like factor 4 (gut)
hsa-miR-1282	0	0	1	1	1	1	MOBP	myelin-associated oligodendrocyte basic protein
hsa-miR-1282	0	0	1	0	0	0	LOC730101	uncharacterized LOC730101
hsa-miR-1282	1	0	1	1	1	1	ZC3H11A	zinc finger CCCH-type containing 11A
hsa-miR-1282	1	0	1	0	1	1	NUP50	nucleoporin 50kDa
hsa-miR-1282	1	0	1	1	1	1	ACSL1	acyl-CoA synthetase long-chain family member 1
hsa-miR-1282	1	0	1	1	1	1	FAM98A	family with sequence similarity 98, member A
hsa-miR-1282	1	0	1	1	1	1	SLITRK2	SLIT and NTRK-like family, member 2
hsa-miR-1282	0	0	1	1	1	1	MPHOSPH9	M-phase phosphoprotein 9
hsa-miR-1282	1	0	1	0	1	1	KIAA1737	KIAA1737
hsa-miR-1282	0	0	1	0	0	0	LINC00340	long intergenic non-protein coding RNA 340
hsa-miR-1282	0	0	1	1	1	1	POLR3F	polymerase (RNA) III (DNA directed) polypeptide F, 39 kDa
hsa-miR-1282	0	0	1	1	1	1	FCRL1	Fc receptor-like 1
hsa-miR-1282	0	0	1	1	0	0	TCEANC	transcription elongation factor A (SII) N-terminal and central domain containing
hsa-miR-1282	0	0	1	0	0	0	LOC100128560	uncharacterized LOC100128560
hsa-miR-1282	1	0	1	1	1	1	IGSF11	immunoglobulin superfamily, member 11
hsa-miR-1282	1	0	1	1	1	1	HOOK1	hook homolog 1 (Drosophila)
hsa-miR-1282	0	0	1	1	0	0	TAPBPL	TAP binding protein-like
hsa-miR-1282	0	0	1	1	1	1	RP1	retinitis pigmentosa 1 (autosomal dominant)
hsa-miR-1282	0	0	1	1	1	1	GRPEL1	GrpE-like 1, mitochondrial (E. coli)
hsa-miR-1282	1	0	1	1	0	0	FBXL19	F-box and leucine-rich repeat protein 19
hsa-miR-1282	0	0	1	1	0	0	ZACN	zinc activated ligand-gated ion channel
hsa-miR-1282	0	0	1	1	0	0	KIAA0146	KIAA0146
hsa-miR-1282	0	0	1	1	1	1	CC2D2B	coiled-coil and C2 domain containing 2B
hsa-miR-1282	0	0	1	1	1	1	PCBP2	poly(rC) binding protein 2
hsa-miR-1282	1	0	1	1	1	1	IPPK	inositol 1,3,4,5,6-pentakisphosphate 2-kinase
hsa-miR-1282	0	0	1	0	1	1	NAIP	NLR family, apoptosis inhibitory protein
hsa-miR-1282	1	0	1	1	1	1	DAB2IP	DAB2 interacting protein
hsa-miR-1282	1	0	1	1	1	1	SGIP1	SH3-domain GRB2-like (endophilin) interacting protein 1
hsa-miR-1282	1	0	1	1	0	0	GXYLT1	glucoside xylosyltransferase 1
hsa-miR-1282	1	0	1	1	1	1	PIAS3	protein inhibitor of activated STAT, 3
hsa-miR-1282	0	0	1	1	0	0	LOC100128239	uncharacterized LOC100128239
hsa-miR-1282	1	0	1	1	1	1	KPNA1	karyopherin alpha 1 (importin alpha 5)
hsa-miR-1282	0	0	1	1	1	1	PLOD2	procollagen-lysine, 2-oxoglutarate 5-dioxygenase 2
hsa-miR-1282	1	0	1	1	1	1	FAM122B	family with sequence similarity 122B
hsa-miR-1282	0	0	1	1	0	0	FAM54B	family with sequence similarity 54, member B
hsa-miR-1282	1	0	1	1	1	1	MFSD6	major facilitator superfamily domain containing 6
hsa-miR-1282	0	0	1	0	0	0	LOC100128262	uncharacterized LOC100128262
hsa-miR-1282	1	0	1	1	1	1	EYA1	eyes absent homolog 1 (Drosophila)
hsa-miR-1282	0	0	1	1	0	0	NCF1	neutrophil cytosolic factor 1
hsa-miR-1282	1	0	1	1	1	1	FRYL	FRY-like
hsa-miR-1282	0	0	1	1	0	0	HELQ	helicase, POLQ-like
hsa-miR-1282	1	0	1	1	1	1	DPY19L3	dpy-19-like 3 (C. elegans)
hsa-miR-1282	1	0	1	0	1	1	ESRRG	estrogen-related receptor gamma
hsa-miR-1282	1	0	1	1	0	0	FOXP2	forkhead box P2
hsa-miR-1282	0	0	1	1	0	0	DNASE1L3	deoxyribonuclease I-like 3
hsa-miR-1282	1	0	1	1	1	1	EIF4G3	eukaryotic translation initiation factor 4 gamma, 3
hsa-miR-1282	0	0	1	1	1	1	PRSS16	protease, serine, 16 (thymus)
hsa-miR-1282	1	0	1	1	0	0	PRRC2B	proline-rich coiled-coil 2B
hsa-miR-1282	0	0	1	1	0	0	FAM149A	family with sequence similarity 149, member A
hsa-miR-1282	0	0	1	1	0	0	RIMBP3	RIMS binding protein 3
hsa-miR-1282	0	0	1	1	1	1	ARIH1	ariadne homolog, ubiquitin-conjugating enzyme E2 binding protein, 1 (Drosophila)
hsa-miR-1282	0	0	1	1	0	0	H2AFJ	H2A histone family, member J
hsa-miR-1282	1	0	1	0	1	1	CEP170	centrosomal protein 170kDa
hsa-miR-1282	0	0	1	1	0	0	DOPEY1	dopey family member 1
hsa-miR-1282	1	0	1	0	1	1	GRIN3A	glutamate receptor, ionotropic, N-methyl-D-aspartate 3A
hsa-miR-1282	0	0	1	1	1	1	ING3	inhibitor of growth family, member 3
hsa-miR-1282	0	0	1	1	1	1	BEND7	BEN domain containing 7
hsa-miR-1282	0	0	1	1	1	1	YAP1	Yes-associated protein 1
hsa-miR-1282	0	0	1	1	1	1	RANBP17	RAN binding protein 17
hsa-miR-1282	0	0	1	1	0	0	TMEM44	transmembrane protein 44
hsa-miR-1282	0	0	1	1	1	1	INPP5B	inositol polyphosphate-5-phosphatase, 75kDa
hsa-miR-1282	0	0	1	1	1	1	NARG2	NMDA receptor regulated 2
hsa-miR-1282	0	0	1	1	1	1	KIAA1841	KIAA1841
hsa-miR-1282	1	0	1	1	1	1	NRP1	neuropilin 1
hsa-miR-1282	0	0	1	0	1	1	USO1	USO1 vesicle docking protein homolog (yeast)
hsa-miR-1282	1	0	1	1	1	1	RCAN2	regulator of calcineurin 2
hsa-miR-1282	0	0	1	0	0	0	CR1L	complement component (3b/4b) receptor 1-like
hsa-miR-1282	0	0	1	0	1	1	UNC5B	unc-5 homolog B (C. elegans)
hsa-miR-1282	0	0	1	1	0	0	RAET1E	retinoic acid early transcript 1E
hsa-miR-1282	0	0	1	1	1	1	TIMM50	translocase of inner mitochondrial membrane 50 homolog (S. cerevisiae)
hsa-miR-1282	1	0	1	0	1	1	CHRM2	cholinergic receptor, muscarinic 2
hsa-miR-1282	0	0	1	0	1	1	XKR5	XK, Kell blood group complex subunit-related family, member 5
hsa-miR-1282	0	0	1	1	1	1	KCNJ13	potassium inwardly-rectifying channel, subfamily J, member 13
hsa-miR-1282	0	0	1	1	1	1	IL23R	interleukin 23 receptor
hsa-miR-1282	1	0	1	1	1	1	AMOT	angiomotin
hsa-miR-1282	1	0	1	1	1	1	NRGN	neurogranin (protein kinase C substrate, RC3)
hsa-miR-1282	1	0	1	1	1	1	NONO	non-POU domain containing, octamer-binding
hsa-miR-1282	1	0	1	1	0	0	DHDDS	dehydrodolichyl diphosphate synthase
hsa-miR-1282	0	0	1	1	0	0	LOC100132167	uncharacterized LOC100132167
hsa-miR-1282	0	0	1	1	1	1	LZIC	leucine zipper and CTNNBIP1 domain containing
hsa-miR-1282	1	0	1	1	1	1	CALM1	calmodulin 1 (phosphorylase kinase, delta)
hsa-miR-1282	0	0	1	0	0	0	FBXO46	F-box protein 46
hsa-miR-1282	0	0	1	0	0	0	HIST1H2BN	histone cluster 1, H2bn
hsa-miR-1282	0	0	1	1	1	1	WSCD1	WSC domain containing 1
hsa-miR-1282	1	0	1	1	1	1	LRRFIP1	leucine rich repeat (in FLII) interacting protein 1
hsa-miR-1282	1	0	1	0	0	0	XPNPEP3	X-prolyl aminopeptidase (aminopeptidase P) 3, putative
hsa-miR-1282	0	0	1	1	1	1	TRMT10B	tRNA methyltransferase 10 homolog B (S. cerevisiae)
hsa-miR-1282	0	0	1	1	0	0	UCK1	uridine-cytidine kinase 1
hsa-miR-1282	0	0	1	0	0	0	NUDT16P1	nudix (nucleoside diphosphate linked moiety X)-type motif 16 pseudogene 1
hsa-miR-1282	1	0	1	1	1	1	WIPI2	WD repeat domain, phosphoinositide interacting 2
hsa-miR-1282	1	0	1	1	1	1	MID1IP1	MID1 interacting protein 1
hsa-miR-1282	0	0	1	1	1	1	FHL5	four and a half LIM domains 5
hsa-miR-1282	1	0	1	0	1	1	CDK19	cyclin-dependent kinase 19
hsa-miR-1282	0	0	1	0	0	0	FLJ35390	uncharacterized LOC255031
hsa-miR-1282	1	0	1	1	1	1	SPG20	spastic paraplegia 20 (Troyer syndrome)
hsa-miR-1282	0	0	1	1	1	1	RHBDD1	rhomboid domain containing 1
hsa-miR-1282	1	0	1	1	1	1	APPL2	adaptor protein, phosphotyrosine interaction, PH domain and leucine zipper containing 2
hsa-miR-1282	1	0	1	0	1	1	NCAM1	neural cell adhesion molecule 1
hsa-miR-1282	0	0	1	1	1	1	ASTN2	astrotactin 2
hsa-miR-1282	0	0	1	1	0	0	C7orf57	chromosome 7 open reading frame 57
hsa-miR-1282	0	0	1	1	1	1	STAT4	signal transducer and activator of transcription 4
hsa-miR-1282	1	0	1	1	1	1	PHF17	PHD finger protein 17
hsa-miR-1282	0	0	1	0	1	1	PLEKHM1P	pleckstrin homology domain containing, family M (with RUN domain) member 1 pseudogene
hsa-miR-1282	1	0	1	1	1	1	SF1	splicing factor 1
hsa-miR-1282	1	0	1	1	0	0	MRC2	mannose receptor, C type 2
hsa-miR-1282	1	0	1	1	1	1	LPGAT1	lysophosphatidylglycerol acyltransferase 1
hsa-miR-1282	0	0	1	1	1	1	EDA2R	ectodysplasin A2 receptor
hsa-miR-1282	1	0	1	1	1	1	FAM120A	family with sequence similarity 120A
hsa-miR-1282	1	0	1	0	1	1	DDX3Y	DEAD (Asp-Glu-Ala-Asp) box polypeptide 3, Y-linked
hsa-miR-1282	0	0	1	0	1	1	TMSB15B	thymosin beta 15B
hsa-miR-1282	1	0	1	1	1	1	MIPOL1	mirror-image polydactyly 1
hsa-miR-1282	0	0	1	0	0	0	SPATA3	spermatogenesis associated 3
hsa-miR-1282	1	0	1	1	1	1	ACVR1	activin A receptor, type I
hsa-miR-1282	0	0	1	0	0	0	INHBA-AS1	INHBA antisense RNA 1
hsa-miR-1282	1	0	1	0	1	1	ARID2	AT rich interactive domain 2 (ARID, RFX-like)
hsa-miR-1282	0	0	1	1	0	0	CCDC152	coiled-coil domain containing 152
hsa-miR-1282	0	0	1	0	0	0	TOB1-AS1	TOB1 antisense RNA 1
hsa-miR-1282	0	0	1	1	1	1	ZFP90	zinc finger protein 90 homolog (mouse)
hsa-miR-1282	1	0	1	1	1	1	INTS6	integrator complex subunit 6
hsa-miR-1282	0	0	1	1	0	0	MTCH1	mitochondrial carrier 1
hsa-miR-1282	0	0	1	1	1	1	FAM71F1	family with sequence similarity 71, member F1
hsa-miR-1282	0	0	1	1	1	1	C17orf104	chromosome 17 open reading frame 104
hsa-miR-1282	0	0	1	0	0	0	LOC154092	uncharacterized LOC154092
hsa-miR-1282	1	0	1	1	1	1	TNFSF4	tumor necrosis factor (ligand) superfamily, member 4
hsa-miR-1282	0	0	1	1	1	1	CARD8	caspase recruitment domain family, member 8
hsa-miR-1282	0	0	1	0	0	0	LOC154822	uncharacterized LOC154822
hsa-miR-1282	0	0	1	0	0	0	MORF4L2-AS1	MORF4L2 antisense RNA 1
hsa-miR-1282	1	0	1	1	1	1	HLTF	helicase-like transcription factor
hsa-miR-1282	1	0	1	1	1	1	SUPT7L	suppressor of Ty 7 (S. cerevisiae)-like
hsa-miR-1282	0	0	1	1	0	0	MT3	metallothionein 3
hsa-miR-1282	1	0	1	1	1	1	WSB1	WD repeat and SOCS box containing 1
hsa-miR-1282	1	0	1	0	1	1	SEMA4G	sema domain, immunoglobulin domain (Ig), transmembrane domain (TM) and short cytoplasmic domain, (semaphorin) 4G
hsa-miR-1282	1	0	1	1	1	1	ZFP91	zinc finger protein 91 homolog (mouse)
hsa-miR-1282	1	0	1	1	1	1	PCGF5	polycomb group ring finger 5
hsa-miR-1282	0	0	1	1	0	0	LAG3	lymphocyte-activation gene 3
hsa-miR-1282	0	0	1	0	0	0	TMEM213	transmembrane protein 213
hsa-miR-1282	1	0	1	1	1	1	ZEB2	zinc finger E-box binding homeobox 2
hsa-miR-1282	1	0	1	1	1	1	ZSCAN29	zinc finger and SCAN domain containing 29
hsa-miR-1282	1	0	1	1	1	1	SCOC	short coiled-coil protein
hsa-miR-1282	1	0	1	1	1	1	RANBP9	RAN binding protein 9
hsa-miR-1282	0	0	1	0	0	0	UBE2Q2P2	ubiquitin-conjugating enzyme E2Q family member 2 pseudogene 2
hsa-miR-1282	0	0	1	0	0	0	DPY19L2P1	dpy-19-like 2 pseudogene 1 (C. elegans)
hsa-miR-1282	1	0	1	1	1	1	AP3M1	adaptor-related protein complex 3, mu 1 subunit
hsa-miR-1282	1	0	1	1	1	1	GRHL1	grainyhead-like 1 (Drosophila)
hsa-miR-1282	0	0	1	0	0	0	LINC00442	long intergenic non-protein coding RNA 442
hsa-miR-1282	1	0	1	1	1	1	SLC26A7	solute carrier family 26, member 7
hsa-miR-1282	0	0	1	0	0	0	ULK4P1	unc-51-like kinase 4 (C. elegans) pseudogene 1
hsa-miR-1282	1	0	1	0	1	1	TMEM194A	transmembrane protein 194A
hsa-miR-1282	0	0	1	0	1	1	WDR27	WD repeat domain 27
hsa-miR-1282	1	0	1	1	1	1	WBP1L	WW domain binding protein 1-like
hsa-miR-1282	1	0	1	0	1	1	DPYSL3	dihydropyrimidinase-like 3
hsa-miR-1282	0	0	1	1	0	0	HOXB1	homeobox B1
hsa-miR-1282	0	0	1	1	1	1	FUT11	fucosyltransferase 11 (alpha (1,3) fucosyltransferase)
hsa-miR-1282	0	0	1	0	0	0	MT1JP	metallothionein 1J, pseudogene
hsa-miR-1282	1	0	1	0	1	1	CPEB2	cytoplasmic polyadenylation element binding protein 2
hsa-miR-1282	0	0	1	1	0	0	TMC1	transmembrane channel-like 1
hsa-miR-1282	0	0	1	0	0	0	HIST2H2BA	histone cluster 2, H2ba (pseudogene)
hsa-miR-1282	0	0	1	1	1	1	TTN	titin
hsa-miR-1282	0	0	1	1	1	1	CCDC125	coiled-coil domain containing 125
hsa-miR-1282	1	0	1	1	1	1	KIAA1324L	KIAA1324-like
hsa-miR-1282	1	0	1	0	1	1	PRDM10	PR domain containing 10
hsa-miR-1282	0	0	1	0	1	1	GOLGA8G	golgin A8 family, member G
hsa-miR-1282	0	0	1	0	0	0	C3orf55	chromosome 3 open reading frame 55
hsa-miR-1282	1	0	1	1	1	1	MEGF11	multiple EGF-like-domains 11
hsa-miR-1282	0	0	1	1	0	0	HSF4	heat shock transcription factor 4
hsa-miR-1282	0	0	1	0	0	0	MEG3	maternally expressed 3 (non-protein coding)
hsa-miR-1282	1	0	1	1	1	1	JPH1	junctophilin 1
hsa-miR-1282	1	0	1	0	1	1	NFIX	nuclear factor I/X (CCAAT-binding transcription factor)
hsa-miR-1282	0	0	1	1	1	1	GLIPR1L2	GLI pathogenesis-related 1 like 2
hsa-miR-1282	0	0	1	1	1	1	COL6A3	collagen, type VI, alpha 3
hsa-miR-1282	0	0	1	1	1	1	IPCEF1	interaction protein for cytohesin exchange factors 1
hsa-miR-1282	0	0	1	1	0	0	PRKCQ	protein kinase C, theta
hsa-miR-1282	1	0	1	1	1	1	EPS15	epidermal growth factor receptor pathway substrate 15
hsa-miR-1282	0	0	1	0	1	1	ANKRD36	ankyrin repeat domain 36
hsa-miR-1282	0	0	1	1	1	1	ZNF92	zinc finger protein 92
hsa-miR-1282	1	0	1	0	1	1	PCGF3	polycomb group ring finger 3
hsa-miR-1282	1	0	1	1	1	1	NAV1	neuron navigator 1
hsa-miR-1282	0	0	1	0	0	0	LOC286299	uncharacterized LOC286299
hsa-miR-1282	1	0	1	1	1	1	C5orf24	chromosome 5 open reading frame 24
hsa-miR-1282	1	0	1	1	1	1	PTER	phosphotriesterase related
hsa-miR-1282	1	0	1	1	1	1	TMEM135	transmembrane protein 135
hsa-miR-1282	0	0	1	0	1	1	GINS3	GINS complex subunit 3 (Psf3 homolog)
hsa-miR-1282	0	0	1	1	1	1	HPGD	hydroxyprostaglandin dehydrogenase 15-(NAD)
hsa-miR-1282	1	0	1	1	1	1	ARF1	ADP-ribosylation factor 1
hsa-miR-1282	0	0	1	0	0	0	RPS16P10	ribosomal protein S16 pseudogene 10
hsa-miR-1282	1	0	1	1	1	1	IFNAR2	interferon (alpha, beta and omega) receptor 2
hsa-miR-1282	0	0	1	1	0	0	ITGB3BP	integrin beta 3 binding protein (beta3-endonexin)
hsa-miR-1282	0	0	1	1	1	1	CIRBP	cold inducible RNA binding protein
hsa-miR-1282	1	0	1	1	1	1	HSPA9	heat shock 70kDa protein 9 (mortalin)
hsa-miR-1282	1	0	1	1	1	1	E2F5	E2F transcription factor 5, p130-binding
hsa-miR-1282	0	0	1	1	0	0	CGRRF1	cell growth regulator with ring finger domain 1
hsa-miR-1282	1	0	1	1	1	1	TRA2B	transformer 2 beta homolog (Drosophila)
hsa-miR-1282	0	0	1	1	1	1	CCDC115	coiled-coil domain containing 115
hsa-miR-1282	0	0	1	1	1	1	STON1	stonin 1
hsa-miR-1282	1	0	1	0	1	1	DCAF7	DDB1 and CUL4 associated factor 7
hsa-miR-1282	0	0	1	1	1	1	STXBP3	syntaxin binding protein 3
hsa-miR-1282	1	0	1	1	1	1	DKK3	dickkopf 3 homolog (Xenopus laevis)
hsa-miR-1282	0	0	1	0	0	0	LOC677759	uncharacterized LOC677759
hsa-miR-1282	1	0	1	1	1	1	NRN1	neuritin 1
hsa-miR-1282	1	0	1	1	1	1	ARNTL	aryl hydrocarbon receptor nuclear translocator-like
hsa-miR-1282	0	0	1	1	1	1	RFT1	RFT1 homolog (S. cerevisiae)
hsa-miR-1282	1	0	1	1	1	1	METAP2	methionyl aminopeptidase 2
hsa-miR-1282	0	0	1	1	1	1	LGI1	leucine-rich, glioma inactivated 1
hsa-miR-1282	1	0	1	1	1	1	ATPAF1	ATP synthase mitochondrial F1 complex assembly factor 1
hsa-miR-1282	1	0	1	1	1	1	MYT1	myelin transcription factor 1
hsa-miR-1282	0	0	1	1	0	0	ISG20	interferon stimulated exonuclease gene 20kDa
hsa-miR-1282	1	0	1	1	1	1	LGALSL	lectin, galactoside-binding-like
hsa-miR-1282	0	0	1	1	1	1	EPCAM	epithelial cell adhesion molecule
hsa-miR-1282	1	0	1	0	1	1	KIAA0240	KIAA0240
hsa-miR-1282	0	0	1	0	0	0	LOC731789	uncharacterized LOC731789
hsa-miR-1282	0	0	1	0	0	0	LINC00661	long intergenic non-protein coding RNA 661
hsa-miR-1282	0	0	1	0	1	1	HDAC9	histone deacetylase 9
hsa-miR-1282	1	0	1	1	1	1	ZFHX3	zinc finger homeobox 3
hsa-miR-1282	1	0	1	1	1	1	PI15	peptidase inhibitor 15
hsa-miR-1282	1	0	1	0	1	1	DCBLD2	discoidin, CUB and LCCL domain containing 2
hsa-miR-1282	0	0	1	1	1	1	PLCB4	phospholipase C, beta 4
hsa-miR-1282	1	0	1	1	1	1	GRM1	glutamate receptor, metabotropic 1
hsa-miR-1282	0	0	1	0	0	0	AR	androgen receptor
hsa-miR-1282	0	0	1	1	1	1	ATP7A	ATPase, Cu++ transporting, alpha polypeptide
hsa-miR-1282	1	0	1	1	1	1	FBN1	fibrillin 1
hsa-miR-1282	1	0	1	1	1	1	KCNA1	potassium voltage-gated channel, shaker-related subfamily, member 1 (episodic ataxia with myokymia)
hsa-miR-1282	1	0	1	1	1	1	OCRL	oculocerebrorenal syndrome of Lowe
hsa-miR-1282	0	0	1	1	1	1	SLC5A1	solute carrier family 5 (sodium/glucose cotransporter), member 1
hsa-miR-1282	1	0	1	0	1	1	PAFAH1B1	platelet-activating factor acetylhydrolase 1b, regulatory subunit 1 (45kDa)
hsa-miR-1282	1	0	1	1	1	1	MPZ	myelin protein zero
hsa-miR-1282	0	0	1	1	1	1	RFXAP	regulatory factor X-associated protein
hsa-miR-1282	1	0	1	0	1	1	ABAT	4-aminobutyrate aminotransferase
hsa-miR-1282	0	0	1	0	1	1	ADRA2A	adrenoceptor alpha 2A
hsa-miR-1282	1	0	1	0	1	1	KCNJ2	potassium inwardly-rectifying channel, subfamily J, member 2
hsa-miR-1282	1	0	1	1	0	0	PDE3A	phosphodiesterase 3A, cGMP-inhibited
hsa-miR-1282	1	0	1	1	1	1	RARA	retinoic acid receptor, alpha
hsa-miR-1282	0	0	1	1	1	1	CYP27C1	cytochrome P450, family 27, subfamily C, polypeptide 1
hsa-miR-1282	0	0	1	1	1	1	MTHFD2L	methylenetetrahydrofolate dehydrogenase (NADP+ dependent) 2-like
hsa-miR-1282	1	0	1	0	1	1	KIAA2022	KIAA2022
hsa-miR-1282	0	0	1	1	1	1	IL4R	interleukin 4 receptor
hsa-miR-1282	0	0	1	0	1	1	ZNF648	zinc finger protein 648
hsa-miR-1282	0	0	1	0	1	1	LPPR5	lipid phosphate phosphatase-related protein type 5
hsa-miR-1282	1	0	1	0	1	1	CREB5	cAMP responsive element binding protein 5
hsa-miR-1282	1	0	1	1	1	1	SORCS1	sortilin-related VPS10 domain containing receptor 1
hsa-miR-1282	1	0	1	1	1	1	TMCC1	transmembrane and coiled-coil domain family 1
hsa-miR-1282	0	0	1	1	1	1	BTBD11	BTB (POZ) domain containing 11
hsa-miR-1282	0	0	1	1	1	1	MTCP1	mature T-cell proliferation 1
hsa-miR-1282	1	0	1	1	1	1	KALRN	kalirin, RhoGEF kinase
hsa-miR-1282	1	0	1	1	1	1	SH3KBP1	SH3-domain kinase binding protein 1
hsa-miR-1282	1	0	1	0	1	1	BCL7A	B-cell CLL/lymphoma 7A
hsa-miR-1282	1	0	1	1	1	1	YIPF5	Yip1 domain family, member 5
hsa-miR-1282	0	0	1	1	1	1	RSPO4	R-spondin 4
hsa-miR-1282	0	0	1	0	1	1	STXBP1	syntaxin binding protein 1
hsa-miR-1282	1	0	1	1	1	1	SAR1B	SAR1 homolog B (S. cerevisiae)
hsa-miR-1282	1	0	1	1	0	0	MTUS2	microtubule associated tumor suppressor candidate 2
hsa-miR-1282	0	0	1	1	0	0	SSX4B	synovial sarcoma, X breakpoint 4B
hsa-miR-1282	1	0	1	1	1	1	ZNF384	zinc finger protein 384
hsa-miR-1282	1	0	1	1	1	1	PPP4R1	protein phosphatase 4, regulatory subunit 1
hsa-miR-1282	1	0	1	1	1	1	AJAP1	adherens junctions associated protein 1
hsa-miR-1282	1	0	1	1	1	1	SLC9A6	solute carrier family 9, subfamily A (NHE6, cation proton antiporter 6), member 6
hsa-miR-1282	1	0	1	1	1	1	SREK1	splicing regulatory glutamine/lysine-rich protein 1
hsa-miR-1282	1	0	1	1	1	1	PHF16	PHD finger protein 16
hsa-miR-1282	1	0	1	0	1	1	SCN3A	sodium channel, voltage-gated, type III, alpha subunit
hsa-miR-1282	0	0	1	1	1	1	ACPP	acid phosphatase, prostate
hsa-miR-1282	0	0	1	1	0	0	CDC6	cell division cycle 6 homolog (S. cerevisiae)
hsa-miR-1282	1	0	1	0	1	1	CDK6	cyclin-dependent kinase 6
hsa-miR-1282	1	0	1	1	1	1	DUSP4	dual specificity phosphatase 4
hsa-miR-1282	1	0	1	1	1	1	ELAVL1	ELAV (embryonic lethal, abnormal vision, Drosophila)-like 1 (Hu antigen R)
hsa-miR-1282	1	0	1	1	0	0	EMP2	epithelial membrane protein 2
hsa-miR-1282	1	0	1	1	1	1	AQP4	aquaporin 4
hsa-miR-1282	1	0	1	1	1	1	BAAT	bile acid CoA: amino acid N-acyltransferase (glycine N-choloyltransferase)
hsa-miR-1282	1	0	1	1	1	1	CDC25A	cell division cycle 25 homolog A (S. pombe)
hsa-miR-1282	1	0	1	1	1	1	CDH11	cadherin 11, type 2, OB-cadherin (osteoblast)
hsa-miR-1282	1	0	1	1	1	1	E2F3	E2F transcription factor 3
hsa-miR-1282	1	0	1	0	1	1	GNAI1	guanine nucleotide binding protein (G protein), alpha inhibiting activity polypeptide 1
hsa-miR-1282	0	0	1	1	1	1	GNB1	guanine nucleotide binding protein (G protein), beta polypeptide 1
hsa-miR-1282	1	0	1	1	1	1	HOXB3	homeobox B3
hsa-miR-1282	0	0	1	1	1	1	IRF8	interferon regulatory factor 8
hsa-miR-1282	1	0	1	1	1	1	ITGA3	integrin, alpha 3 (antigen CD49C, alpha 3 subunit of VLA-3 receptor)
hsa-miR-1282	1	0	1	1	1	1	KCNA4	potassium voltage-gated channel, shaker-related subfamily, member 4
hsa-miR-1282	1	0	1	1	1	1	KPNB1	karyopherin (importin) beta 1
hsa-miR-1282	1	0	1	1	1	1	KPNA3	karyopherin alpha 3 (importin alpha 4)
hsa-miR-1282	0	0	1	1	1	1	CEACAM6	carcinoembryonic antigen-related cell adhesion molecule 6 (non-specific cross reacting antigen)
hsa-miR-1282	1	0	1	1	1	1	NPTX1	neuronal pentraxin I
hsa-miR-1282	0	0	1	0	1	1	OPHN1	oligophrenin 1
hsa-miR-1282	1	0	1	0	1	1	PAK2	p21 protein (Cdc42/Rac)-activated kinase 2
hsa-miR-1282	1	0	1	1	1	1	PRKAR2B	protein kinase, cAMP-dependent, regulatory, type II, beta
hsa-miR-1282	1	0	1	1	1	1	PTPN2	protein tyrosine phosphatase, non-receptor type 2
hsa-miR-1282	1	0	1	1	1	1	SALL1	sal-like 1 (Drosophila)
hsa-miR-1282	0	0	1	0	1	1	CXCL5	chemokine (C-X-C motif) ligand 5
hsa-miR-1282	1	0	1	1	1	1	SFRP2	secreted frizzled-related protein 2
hsa-miR-1282	1	0	1	1	1	1	SOX2	SRY (sex determining region Y)-box 2
hsa-miR-1282	1	0	1	0	1	1	SOX11	SRY (sex determining region Y)-box 11
hsa-miR-1282	0	0	1	1	0	0	SSX2	synovial sarcoma, X breakpoint 2
hsa-miR-1282	1	0	1	0	1	1	RPS6KB1	ribosomal protein S6 kinase, 70kDa, polypeptide 1
hsa-miR-1282	1	0	1	1	1	1	NR2E1	nuclear receptor subfamily 2, group E, member 1
hsa-miR-1282	0	0	1	1	1	1	TRAF3	TNF receptor-associated factor 3
hsa-miR-1282	0	0	1	1	1	1	ZNF137P	zinc finger protein 137, pseudogene
hsa-miR-1282	1	0	1	1	1	1	KCNAB1	potassium voltage-gated channel, shaker-related subfamily, beta member 1
hsa-miR-1282	1	0	1	0	1	1	TNKS	tankyrase, TRF1-interacting ankyrin-related ADP-ribose polymerase
hsa-miR-1282	1	0	1	0	1	1	IRS2	insulin receptor substrate 2
hsa-miR-1282	0	0	1	1	0	0	TMEM11	transmembrane protein 11
hsa-miR-1282	0	0	1	1	1	1	PRPF4B	PRP4 pre-mRNA processing factor 4 homolog B (yeast)
hsa-miR-1282	1	0	1	1	1	1	RAB5A	RAB5A, member RAS oncogene family
hsa-miR-1282	1	0	1	1	1	1	MFHAS1	malignant fibrous histiocytoma amplified sequence 1
hsa-miR-1282	1	0	1	0	1	1	AKAP6	A kinase (PRKA) anchor protein 6
hsa-miR-1282	1	0	1	1	1	1	DACH1	dachshund homolog 1 (Drosophila)
hsa-miR-1282	1	0	1	1	1	1	DUSP8	dual specificity phosphatase 8
hsa-miR-1282	1	0	1	1	1	1	DVL2	dishevelled, dsh homolog 2 (Drosophila)
hsa-miR-1282	1	0	1	1	1	1	ENSA	endosulfine alpha
hsa-miR-1282	0	0	1	1	1	1	SMS	spermine synthase
hsa-miR-1282	0	0	1	0	1	1	BPY2	basic charge, Y-linked, 2
hsa-miR-1282	1	0	1	1	1	1	RPS6KA5	ribosomal protein S6 kinase, 90kDa, polypeptide 5
hsa-miR-1282	1	0	1	1	1	1	NRXN3	neurexin 3
hsa-miR-1282	1	0	1	1	1	1	ONECUT2	one cut homeobox 2
hsa-miR-1282	1	0	1	0	1	1	KRAS	v-Ki-ras2 Kirsten rat sarcoma viral oncogene homolog
hsa-miR-1282	0	0	1	1	0	0	ASCL2	achaete-scute complex homolog 2 (Drosophila)
hsa-miR-1282	1	0	1	1	1	1	CRK	v-crk sarcoma virus CT10 oncogene homolog (avian)
hsa-miR-1282	1	0	1	1	1	1	ARID3A	AT rich interactive domain 3A (BRIGHT-like)
hsa-miR-1282	1	0	1	1	1	1	GJA5	gap junction protein, alpha 5, 40kDa
hsa-miR-1282	1	0	1	1	1	1	HAS3	hyaluronan synthase 3
hsa-miR-1282	1	0	1	0	1	1	PRKAB2	protein kinase, AMP-activated, beta 2 non-catalytic subunit
hsa-miR-1282	0	0	1	1	1	1	CXCL11	chemokine (C-X-C motif) ligand 11
hsa-miR-1282	1	0	1	0	1	1	CCDC6	coiled-coil domain containing 6
hsa-miR-1282	0	0	1	1	1	1	MAPK8IP1	mitogen-activated protein kinase 8 interacting protein 1
hsa-miR-1282	1	0	1	1	1	1	AKT3	v-akt murine thymoma viral oncogene homolog 3 (protein kinase B, gamma)
hsa-miR-1282	1	0	1	1	1	1	LAMP1	lysosomal-associated membrane protein 1
hsa-miR-1282	0	0	1	0	1	1	POU3F2	POU class 3 homeobox 2
hsa-miR-1282	0	0	1	1	0	0	SSX4	synovial sarcoma, X breakpoint 4
hsa-miR-1282	1	0	1	1	1	1	NAMPT	nicotinamide phosphoribosyltransferase
hsa-miR-1282	1	0	1	0	1	1	SPRY3	sprouty homolog 3 (Drosophila)
hsa-miR-1282	1	0	1	1	1	1	NEUROD2	neuronal differentiation 2
hsa-miR-1282	1	0	1	1	1	1	NR4A2	nuclear receptor subfamily 4, group A, member 2
hsa-miR-1282	1	0	1	1	1	1	PKN2	protein kinase N2
hsa-miR-1282	0	0	1	0	0	0	PTPN13	protein tyrosine phosphatase, non-receptor type 13 (APO-1/CD95 (Fas)-associated phosphatase)
hsa-miR-1282	1	0	1	1	1	1	SMC1A	structural maintenance of chromosomes 1A
hsa-miR-1282	1	0	1	1	1	1	RP2	retinitis pigmentosa 2 (X-linked recessive)
hsa-miR-1282	1	0	1	1	1	1	SOX21	SRY (sex determining region Y)-box 21
hsa-miR-1282	0	0	1	0	1	1	ZNF208	zinc finger protein 208
hsa-miR-1282	1	0	1	1	1	1	HS2ST1	heparan sulfate 2-O-sulfotransferase 1
hsa-miR-1282	1	0	1	1	1	1	TSPAN12	tetraspanin 12
hsa-miR-1282	1	0	1	1	1	1	PRDM4	PR domain containing 4
hsa-miR-1282	1	0	1	1	1	1	TRPC5	transient receptor potential cation channel, subfamily C, member 5
hsa-miR-1282	1	0	1	1	1	1	STK39	serine threonine kinase 39
hsa-miR-1282	1	0	1	1	1	1	CLCF1	cardiotrophin-like cytokine factor 1
hsa-miR-1282	1	0	1	1	1	1	SLC30A4	solute carrier family 30 (zinc transporter), member 4
hsa-miR-1282	1	0	1	0	1	1	CLIC4	chloride intracellular channel 4
hsa-miR-1282	0	0	1	1	1	1	ORMDL2	ORM1-like 2 (S. cerevisiae)
hsa-miR-1282	0	0	1	1	0	0	OLFM1	olfactomedin 1
hsa-miR-1282	0	0	1	1	1	1	ANKRD1	ankyrin repeat domain 1 (cardiac muscle)
hsa-miR-1282	0	0	1	1	1	1	TMOD2	tropomodulin 2 (neuronal)
hsa-miR-1282	1	0	1	0	1	1	TOX	thymocyte selection-associated high mobility group box
hsa-miR-1282	1	0	1	0	1	1	KIAA0513	KIAA0513
hsa-miR-1282	1	0	1	0	1	1	KIAA0232	KIAA0232
hsa-miR-1282	1	0	1	0	1	1	MAML1	mastermind-like 1 (Drosophila)
hsa-miR-1282	1	0	1	1	1	1	LRIG2	leucine-rich repeats and immunoglobulin-like domains 2
hsa-miR-1282	1	0	1	0	1	1	LPPR4	lipid phosphate phosphatase-related protein type 4
hsa-miR-1282	1	0	1	0	1	1	WDFY3	WD repeat and FYVE domain containing 3
hsa-miR-1282	1	0	1	1	1	1	SMG1	smg-1 homolog, phosphatidylinositol 3-kinase-related kinase (C. elegans)
hsa-miR-1282	1	0	1	0	1	1	ZZEF1	zinc finger, ZZ-type with EF-hand domain 1
hsa-miR-1282	1	0	1	1	1	1	MYO1D	myosin ID
hsa-miR-1282	1	0	1	1	0	0	KIAA0556	KIAA0556
hsa-miR-1282	1	0	1	1	1	1	PHF15	PHD finger protein 15
hsa-miR-1282	1	0	1	1	1	1	ASXL1	additional sex combs like 1 (Drosophila)
hsa-miR-1282	1	0	1	1	1	1	MOB4	MOB family member 4, phocein
hsa-miR-1282	1	0	1	1	1	1	UBE2J1	ubiquitin-conjugating enzyme E2, J1
hsa-miR-1282	0	0	1	0	1	1	ERGIC2	ERGIC and golgi 2
hsa-miR-1282	1	0	1	1	1	1	SIX4	SIX homeobox 4
hsa-miR-1282	1	0	1	0	1	1	ZRANB1	zinc finger, RAN-binding domain containing 1
hsa-miR-1282	1	0	1	1	1	1	MBTD1	mbt domain containing 1
hsa-miR-1282	1	0	1	0	1	1	FAM46C	family with sequence similarity 46, member C
hsa-miR-1282	1	0	1	1	1	1	LPPR1	lipid phosphate phosphatase-related protein type 1
hsa-miR-1282	1	0	1	1	1	1	UBE2R2	ubiquitin-conjugating enzyme E2R 2
hsa-miR-1282	1	0	1	0	1	1	KIF26B	kinesin family member 26B
hsa-miR-1282	1	0	1	1	1	1	SOBP	sine oculis binding protein homolog (Drosophila)
hsa-miR-1282	0	0	1	1	1	1	HEATR1	HEAT repeat containing 1
hsa-miR-1282	1	0	1	1	1	1	FAM178A	family with sequence similarity 178, member A
hsa-miR-1282	1	0	1	1	1	1	TMEM184C	transmembrane protein 184C
hsa-miR-1282	1	0	1	0	1	1	SEPT11	septin 11
hsa-miR-1282	1	0	1	1	1	1	TMEM143	transmembrane protein 143
hsa-miR-1282	1	0	1	1	1	1	DDX19A	DEAD (Asp-Glu-Ala-Asp) box polypeptide 19A
hsa-miR-1282	1	0	1	1	1	1	DEPDC1B	DEP domain containing 1B
hsa-miR-1282	0	0	1	1	1	1	STK32B	serine/threonine kinase 32B
hsa-miR-1282	1	0	1	0	1	1	FOXJ2	forkhead box J2
hsa-miR-1282	0	0	1	0	0	0	FAM45B	family with sequence similarity 45, member A pseudogene
hsa-miR-1282	1	0	1	1	1	1	HOXA10	homeobox A10
hsa-miR-1282	0	0	1	1	1	1	NPAP1	nuclear pore associated protein 1
hsa-miR-1282	1	0	1	1	1	1	CCBL2	cysteine conjugate-beta lyase 2
hsa-miR-1282	0	0	1	1	1	1	FMN2	formin 2
hsa-miR-1282	0	0	1	1	1	1	TMEM167B	transmembrane protein 167B
hsa-miR-1282	1	0	1	1	1	1	CCDC47	coiled-coil domain containing 47
hsa-miR-1282	0	0	1	1	1	1	PRTFDC1	phosphoribosyl transferase domain containing 1
hsa-miR-1282	1	0	1	0	1	1	EIF5A2	eukaryotic translation initiation factor 5A2
hsa-miR-1282	1	0	1	1	1	1	SLC24A3	solute carrier family 24 (sodium/potassium/calcium exchanger), member 3
hsa-miR-1282	1	0	1	1	1	1	USP31	ubiquitin specific peptidase 31
hsa-miR-1282	1	0	1	1	1	1	ARHGAP31	Rho GTPase activating protein 31
hsa-miR-1282	1	0	1	0	1	1	KIAA1456	KIAA1456
hsa-miR-1282	0	0	1	1	1	1	KLHL1	kelch-like 1 (Drosophila)
hsa-miR-1282	0	0	1	1	1	1	SSX3	synovial sarcoma, X breakpoint 3
hsa-miR-1282	0	0	1	1	0	0	SSX5	synovial sarcoma, X breakpoint 5
hsa-miR-1282	0	0	1	1	0	0	MAGEA5	melanoma antigen family A, 5
hsa-miR-1282	0	0	1	0	1	1	SLCO1A2	solute carrier organic anion transporter family, member 1A2
hsa-miR-1282	0	0	1	1	0	0	HOXD11	homeobox D11
hsa-miR-1282	1	0	1	1	1	1	SNX6	sorting nexin 6
hsa-miR-1282	0	0	1	1	1	1	NR1D1	nuclear receptor subfamily 1, group D, member 1
hsa-miR-1282	0	0	1	1	1	1	CHP2	calcineurin-like EF hand protein 2
hsa-miR-1282	0	0	1	1	1	1	RAB38	RAB38, member RAS oncogene family
hsa-miR-1282	0	0	1	0	1	1	EBF2	early B-cell factor 2
hsa-miR-1282	1	0	1	1	1	1	YTHDC2	YTH domain containing 2
hsa-miR-1282	1	0	1	0	1	1	BCL11B	B-cell CLL/lymphoma 11B (zinc finger protein)
hsa-miR-1282	1	0	1	1	1	1	SOWAHC	sosondowah ankyrin repeat domain family member C
hsa-miR-1282	1	0	1	1	1	1	GID4	GID complex subunit 4, VID24 homolog (S. cerevisiae)
hsa-miR-1282	0	0	1	0	1	1	KXD1	KxDL motif containing 1
hsa-miR-1282	0	0	1	1	1	1	PDYN	prodynorphin
hsa-miR-1282	1	0	1	1	1	1	CCNJL	cyclin J-like
hsa-miR-1282	1	0	1	1	1	1	IQCA1	IQ motif containing with AAA domain 1
hsa-miR-1282	0	0	1	1	1	1	ZNF767	zinc finger family member 767
hsa-miR-1282	1	0	1	1	0	0	UBTD1	ubiquitin domain containing 1
hsa-miR-1282	1	0	1	0	1	1	VCPIP1	valosin containing protein (p97)/p47 complex interacting protein 1
hsa-miR-1282	1	0	1	1	1	1	RAI1	retinoic acid induced 1
hsa-miR-1282	1	0	1	0	1	1	TMEM47	transmembrane protein 47
hsa-miR-1282	1	0	1	1	1	1	SESN2	sestrin 2
hsa-miR-1282	1	0	1	0	1	1	ITCH	itchy E3 ubiquitin protein ligase
hsa-miR-1282	0	0	1	1	0	0	CACNG6	calcium channel, voltage-dependent, gamma subunit 6
hsa-miR-1282	1	0	1	1	1	1	SLC10A7	solute carrier family 10 (sodium/bile acid cotransporter family), member 7
hsa-miR-1282	1	0	1	1	1	1	ARID5B	AT rich interactive domain 5B (MRF1-like)
hsa-miR-1282	1	0	1	1	1	1	ANTXR1	anthrax toxin receptor 1
hsa-miR-1282	1	0	1	1	1	1	ZNRF1	zinc and ring finger 1, E3 ubiquitin protein ligase
hsa-miR-1282	0	0	1	1	0	0	DCUN1D5	DCN1, defective in cullin neddylation 1, domain containing 5 (S. cerevisiae)
hsa-miR-1282	0	0	1	1	1	1	HAVCR2	hepatitis A virus cellular receptor 2
hsa-miR-1282	1	0	1	1	1	1	PDGFA	platelet-derived growth factor alpha polypeptide
hsa-miR-1282	0	0	1	0	1	1	TSLP	thymic stromal lymphopoietin
hsa-miR-1282	1	0	1	1	1	1	FGF1	fibroblast growth factor 1 (acidic)
hsa-miR-1282	1	0	1	0	1	1	FGF5	fibroblast growth factor 5
hsa-miR-1282	1	0	1	1	1	1	C5orf30	chromosome 5 open reading frame 30
hsa-miR-1282	1	0	1	0	1	1	PURB	purine-rich element binding protein B
hsa-miR-1282	1	0	1	1	1	1	BRWD1	bromodomain and WD repeat domain containing 1
hsa-miR-1282	0	0	1	1	0	0	TSSK3	testis-specific serine kinase 3
hsa-miR-1282	1	0	1	1	1	1	PTP4A2	protein tyrosine phosphatase type IVA, member 2
hsa-miR-1282	0	0	1	1	1	1	CTCFL	CCCTC-binding factor (zinc finger protein)-like
hsa-miR-1282	1	0	1	1	1	1	KLHL6	kelch-like 6 (Drosophila)
hsa-miR-1282	0	0	1	1	0	0	XAGE5	X antigen family, member 5
hsa-miR-1282	1	0	1	1	1	1	ADAMTS19	ADAM metallopeptidase with thrombospondin type 1 motif, 19
hsa-miR-1282	0	0	1	1	1	1	PATE1	prostate and testis expressed 1
hsa-miR-1282	1	0	1	1	1	1	MARS2	methionyl-tRNA synthetase 2, mitochondrial
hsa-miR-1282	1	0	1	1	1	1	KCTD12	potassium channel tetramerisation domain containing 12
hsa-miR-1282	0	0	1	1	1	1	ZMYND19	zinc finger, MYND-type containing 19
hsa-miR-1282	0	0	1	1	1	1	KCNC2	potassium voltage-gated channel, Shaw-related subfamily, member 2
hsa-miR-1282	0	0	1	1	1	1	MS4A6E	membrane-spanning 4-domains, subfamily A, member 6E
hsa-miR-1282	1	0	1	1	1	1	MBNL2	muscleblind-like splicing regulator 2
hsa-miR-1282	1	0	1	1	1	1	MOB3C	MOB kinase activator 3C
hsa-miR-1282	1	0	1	0	1	1	SYT11	synaptotagmin XI
hsa-miR-1282	1	0	1	1	1	1	LSM12	LSM12 homolog (S. cerevisiae)
hsa-miR-1282	1	0	1	1	1	1	NEK10	NIMA (never in mitosis gene a)- related kinase 10
hsa-miR-1282	1	0	1	1	1	1	PPM1K	protein phosphatase, Mg2+/Mn2+ dependent, 1K
hsa-miR-1282	0	0	1	1	1	1	DAND5	DAN domain family, member 5
hsa-miR-1282	1	0	1	1	1	1	PDIK1L	PDLIM1 interacting kinase 1 like
hsa-miR-1282	1	0	1	1	1	1	AEBP2	AE binding protein 2
hsa-miR-1282	1	0	1	1	1	1	MAMDC2	MAM domain containing 2
hsa-miR-1282	0	0	1	1	1	1	REXO1L1	REX1, RNA exonuclease 1 homolog (S. cerevisiae)-like 1
hsa-miR-1282	0	0	1	1	0	0	SSX6	synovial sarcoma, X breakpoint 6 (pseudogene)
hsa-miR-1282	0	0	1	1	0	0	SSX7	synovial sarcoma, X breakpoint 7
hsa-miR-1282	1	0	1	1	1	1	TTBK2	tau tubulin kinase 2
hsa-miR-1282	1	0	1	0	1	1	PGM2L1	phosphoglucomutase 2-like 1
hsa-miR-1282	0	0	1	1	1	1	CDRT4	CMT1A duplicated region transcript 4
hsa-miR-1282	1	0	1	1	1	1	XKR6	XK, Kell blood group complex subunit-related family, member 6
hsa-miR-1282	1	0	1	0	1	1	SREK1IP1	SREK1-interacting protein 1
hsa-miR-1282	0	0	1	0	1	1	SSX9	synovial sarcoma, X breakpoint 9
hsa-miR-1282	0	0	1	1	1	1	ZDHHC22	zinc finger, DHHC-type containing 22
hsa-miR-1282	1	0	1	1	1	1	RAB3IP	RAB3A interacting protein (rabin3)
hsa-miR-1282	0	0	1	1	1	1	KRTAP8-1	keratin associated protein 8-1
hsa-miR-1282	0	0	1	1	0	0	HRAS	v-Ha-ras Harvey rat sarcoma viral oncogene homolog
hsa-miR-1282	0	0	1	1	1	1	GPIHBP1	glycosylphosphatidylinositol anchored high density lipoprotein binding protein 1
hsa-miR-1282	1	0	1	1	1	1	MARCH3	membrane-associated ring finger (C3HC4) 3, E3 ubiquitin protein ligase
hsa-miR-1282	1	0	1	1	1	1	DCAF12L1	DDB1 and CUL4 associated factor 12-like 1
hsa-miR-1282	1	0	1	1	1	1	TCF20	transcription factor 20 (AR1)
hsa-miR-1282	0	0	1	0	1	1	BAGE5	B melanoma antigen family, member 5
hsa-miR-1282	0	0	1	1	1	1	C2orf48	chromosome 2 open reading frame 48
hsa-miR-1282	1	0	1	1	1	1	RNF7	ring finger protein 7
hsa-miR-1282	1	0	1	1	1	1	ARRDC4	arrestin domain containing 4
hsa-miR-1282	1	0	1	1	1	1	ZBTB41	zinc finger and BTB domain containing 41
hsa-miR-1282	0	0	1	1	1	1	CXCL17	chemokine (C-X-C motif) ligand 17
hsa-miR-1282	0	0	1	0	1	1	ANKRD45	ankyrin repeat domain 45
hsa-miR-1282	1	0	1	1	1	1	PAQR9	progestin and adipoQ receptor family member IX
hsa-miR-1282	1	0	1	0	0	0	RAB15	RAB15, member RAS oncogene family
hsa-miR-1282	1	0	1	1	1	1	PTGER3	prostaglandin E receptor 3 (subtype EP3)
hsa-miR-1282	0	0	1	0	1	1	SIAH3	siah E3 ubiquitin protein ligase family member 3
hsa-miR-1282	1	0	1	0	1	1	PRICKLE2	prickle homolog 2 (Drosophila)
hsa-miR-1282	1	0	1	0	1	1	DLEU7	deleted in lymphocytic leukemia, 7
hsa-miR-1282	0	0	1	1	1	1	MDFIC	MyoD family inhibitor domain containing
hsa-miR-1282	1	0	1	1	1	1	VAX1	ventral anterior homeobox 1
hsa-miR-1282	1	0	1	1	1	1	THRA	thyroid hormone receptor, alpha
hsa-miR-1282	0	0	1	1	1	1	SHC4	SHC (Src homology 2 domain containing) family, member 4
hsa-miR-1282	1	0	1	0	1	1	MBLAC2	metallo-beta-lactamase domain containing 2
hsa-miR-1282	0	0	1	1	1	1	APOBEC4	apolipoprotein B mRNA editing enzyme, catalytic polypeptide-like 4 (putative)
hsa-miR-1282	0	0	1	0	0	0	TOP1P2	topoisomerase (DNA) I pseudogene 2
hsa-miR-1282	0	0	1	0	0	0	MT1L	metallothionein 1L (gene/pseudogene)
hsa-miR-1282	0	0	1	0	0	0	CYCSP52	cytochrome c, somatic pseudogene 52
hsa-miR-1282	0	0	1	0	0	0	RBMXP3	RNA binding motif protein, X-linked pseudogene 3
hsa-miR-1282	0	0	1	0	0	0	PDIA3P	protein disulfide isomerase family A, member 3 pseudogene
hsa-miR-1282	0	0	1	0	0	0	NPY6R	neuropeptide Y receptor Y6 (pseudogene)
hsa-miR-1282	0	0	1	0	0	0	NUDT9P1	nudix (nucleoside diphosphate linked moiety X)-type motif 9 pseudogene 1
hsa-miR-1282	0	0	1	0	0	0	HOXA11-AS	HOXA11 antisense RNA
hsa-miR-1282	0	0	1	0	0	0	LOC256880	uncharacterized LOC256880
hsa-miR-1282	0	0	1	0	0	0	LOC374443	C-type lectin domain family 2, member D pseudogene
hsa-miR-1282	0	0	1	0	0	0	SNX29P2	sorting nexin 29 pseudogene 2
hsa-miR-1282	0	0	1	0	0	0	ANP32AP1	acidic (leucine-rich) nuclear phosphoprotein 32 family, member A pseudogene 1
hsa-miR-1282	1	0	1	1	1	1	MLL	myeloid/lymphoid or mixed-lineage leukemia (trithorax homolog, Drosophila)
hsa-miR-1282	0	0	1	1	1	1	SPIB	Spi-B transcription factor (Spi-1/PU.1 related)
