# Supplementary material for: Profiling of Selected MicroRNAs in Proliferative Eutopic Endometrium of Women with Ovarian Endometriosis
Source: Biomed Res Int. 2015 Aug 20;2015:760698. doi: 10.1155/2015/760698 (PMC4558423; doi:10.1155/2015/760698)
Supplement: Supplementary file 1 — Table I: The names of miRNAs significantly differentially expressed between eutopic endometrium of patients with endometriosis vs eutopic endometrium of patients without endometriosis. Table II: The associations between miRNA and mRNA, which presents detailed results of the search of six major databases i.e targetscan, tarbase, miranda, mirbase, mirtarget2 and pictar. [file 760698.f1.zip › 760698.f1/Table II/hsa-miR-1283.tsv]

miR	targetscan	tarbase	miranda	mirbase	mirtarget2	pictar	GeneSymbol	GeneName
hsa-miR-1283	0	0	1	1	1	1	PPIP5K1	diphosphoinositol pentakisphosphate kinase 1
hsa-miR-1283	1	0	1	0	1	1	PTPRT	protein tyrosine phosphatase, receptor type, T
hsa-miR-1283	1	0	1	0	1	1	KIAA0408	KIAA0408
hsa-miR-1283	1	0	1	1	1	1	NUPL1	nucleoporin like 1
hsa-miR-1283	1	0	1	0	1	1	MTSS1	metastasis suppressor 1
hsa-miR-1283	1	0	1	1	1	1	PPIP5K2	diphosphoinositol pentakisphosphate kinase 2
hsa-miR-1283	1	0	1	0	1	1	NEDD4L	neural precursor cell expressed, developmentally down-regulated 4-like, E3 ubiquitin protein ligase
hsa-miR-1283	0	0	1	1	0	0	SIPA1L1	signal-induced proliferation-associated 1 like 1
hsa-miR-1283	1	0	1	1	1	1	AUTS2	autism susceptibility candidate 2
hsa-miR-1283	1	0	1	1	0	0	DENND4B	DENN/MADD domain containing 4B
hsa-miR-1283	1	0	1	0	1	1	CEP350	centrosomal protein 350kDa
hsa-miR-1283	0	0	1	1	1	1	NEU3	sialidase 3 (membrane sialidase)
hsa-miR-1283	1	0	1	1	1	1	RNGTT	RNA guanylyltransferase and 5'-phosphatase
hsa-miR-1283	1	0	1	1	1	1	GPATCH8	G patch domain containing 8
hsa-miR-1283	1	0	1	1	1	1	KIF1B	kinesin family member 1B
hsa-miR-1283	1	0	1	1	0	0	TBC1D12	TBC1 domain family, member 12
hsa-miR-1283	1	0	1	1	1	1	SLC4A7	solute carrier family 4, sodium bicarbonate cotransporter, member 7
hsa-miR-1283	1	0	1	0	0	0	HECTD4	HECT domain containing E3 ubiquitin protein ligase 4
hsa-miR-1283	1	0	1	1	1	1	HIPK1	homeodomain interacting protein kinase 1
hsa-miR-1283	1	0	1	1	1	1	GIGYF2	GRB10 interacting GYF protein 2
hsa-miR-1283	1	0	1	1	1	1	ANKRD17	ankyrin repeat domain 17
hsa-miR-1283	1	0	1	1	1	1	SMOC2	SPARC related modular calcium binding 2
hsa-miR-1283	1	0	1	1	1	1	TP63	tumor protein p63
hsa-miR-1283	1	0	1	0	1	1	SNX13	sorting nexin 13
hsa-miR-1283	1	0	1	1	1	1	MATR3	matrin 3
hsa-miR-1283	0	0	1	1	1	1	GPR116	G protein-coupled receptor 116
hsa-miR-1283	1	0	1	1	1	1	LPHN2	latrophilin 2
hsa-miR-1283	1	0	1	1	1	1	DNM3	dynamin 3
hsa-miR-1283	1	0	1	1	1	1	DMXL2	Dmx-like 2
hsa-miR-1283	0	0	1	1	0	0	FAM169A	family with sequence similarity 169, member A
hsa-miR-1283	0	0	1	1	1	1	WDR47	WD repeat domain 47
hsa-miR-1283	1	0	1	1	1	1	UBR5	ubiquitin protein ligase E3 component n-recognin 5
hsa-miR-1283	1	0	1	1	1	1	CPEB3	cytoplasmic polyadenylation element binding protein 3
hsa-miR-1283	1	0	1	1	1	1	BAHD1	bromo adjacent homology domain containing 1
hsa-miR-1283	1	0	1	1	1	1	NLGN4Y	neuroligin 4, Y-linked
hsa-miR-1283	1	0	1	1	1	1	NTNG1	netrin G1
hsa-miR-1283	1	0	1	1	1	1	CNOT1	CCR4-NOT transcription complex, subunit 1
hsa-miR-1283	0	0	1	1	1	1	CCDC125	coiled-coil domain containing 125
hsa-miR-1283	1	0	1	1	0	0	KIAA1045	KIAA1045
hsa-miR-1283	1	0	1	0	1	1	ZNF507	zinc finger protein 507
hsa-miR-1283	1	0	1	1	1	1	PHF8	PHD finger protein 8
hsa-miR-1283	0	0	1	1	0	0	MUTYH	mutY homolog (E. coli)
hsa-miR-1283	1	0	1	0	1	1	SRGAP3	SLIT-ROBO Rho GTPase activating protein 3
hsa-miR-1283	1	0	1	1	0	0	KIAA1210	KIAA1210
hsa-miR-1283	1	0	1	1	0	0	ATAD2B	ATPase family, AAA domain containing 2B
hsa-miR-1283	1	0	1	0	1	1	ANKFY1	ankyrin repeat and FYVE domain containing 1
hsa-miR-1283	0	0	1	1	1	1	FSTL5	follistatin-like 5
hsa-miR-1283	1	0	1	0	1	1	INTS2	integrator complex subunit 2
hsa-miR-1283	0	0	1	1	1	1	TCF7L2	transcription factor 7-like 2 (T-cell specific, HMG-box)
hsa-miR-1283	1	0	1	0	0	0	ODZ4	odz, odd Oz/ten-m homolog 4 (Drosophila)
hsa-miR-1283	1	0	1	0	0	0	NYNRIN	NYN domain and retroviral integrase containing
hsa-miR-1283	1	0	1	1	1	1	PCDH19	protocadherin 19
hsa-miR-1283	1	0	1	0	1	1	KCTD16	potassium channel tetramerisation domain containing 16
hsa-miR-1283	1	0	1	1	1	1	TAOK1	TAO kinase 1
hsa-miR-1283	1	0	1	1	1	1	LRRC7	leucine rich repeat containing 7
hsa-miR-1283	1	0	1	1	1	1	UNC79	unc-79 homolog (C. elegans)
hsa-miR-1283	1	1	1	1	1	1	NFIA	nuclear factor I/A
hsa-miR-1283	0	0	1	1	1	1	SCAPER	S-phase cyclin A-associated protein in the ER
hsa-miR-1283	1	0	1	1	1	1	BAZ2B	bromodomain adjacent to zinc finger domain, 2B
hsa-miR-1283	0	0	1	1	1	1	NLGN3	neuroligin 3
hsa-miR-1283	0	0	1	0	1	1	ZSWIM6	zinc finger, SWIM-type containing 6
hsa-miR-1283	1	0	1	0	1	1	IGDCC4	immunoglobulin superfamily, DCC subclass, member 4
hsa-miR-1283	1	0	1	0	0	0	TANC2	tetratricopeptide repeat, ankyrin repeat and coiled-coil containing 2
hsa-miR-1283	0	0	1	0	1	1	SETD5	SET domain containing 5
hsa-miR-1283	0	0	1	1	1	1	SPEF2	sperm flagellar 2
hsa-miR-1283	1	0	1	1	1	1	CDK13	cyclin-dependent kinase 13
hsa-miR-1283	1	0	1	1	1	1	LCOR	ligand dependent nuclear receptor corepressor
hsa-miR-1283	1	0	1	1	1	1	AHCTF1	AT hook containing transcription factor 1
hsa-miR-1283	1	0	1	1	1	1	HNRPDL	heterogeneous nuclear ribonucleoprotein D-like
hsa-miR-1283	0	0	1	1	1	1	MOB2	MOB kinase activator 2
hsa-miR-1283	1	0	1	0	1	1	SLC25A25	solute carrier family 25 (mitochondrial carrier; phosphate carrier), member 25
hsa-miR-1283	0	0	1	1	0	0	SEC16B	SEC16 homolog B (S. cerevisiae)
hsa-miR-1283	1	0	1	1	1	1	LSM14A	LSM14A, SCD6 homolog A (S. cerevisiae)
hsa-miR-1283	1	0	1	1	1	1	OXR1	oxidation resistance 1
hsa-miR-1283	1	0	1	1	0	0	ZNF292	zinc finger protein 292
hsa-miR-1283	1	0	1	1	1	1	SH3TC2	SH3 domain and tetratricopeptide repeats 2
hsa-miR-1283	0	0	1	1	0	0	CIRH1A	cirrhosis, autosomal recessive 1A (cirhin)
hsa-miR-1283	1	0	1	0	0	0	FAT3	FAT tumor suppressor homolog 3 (Drosophila)
hsa-miR-1283	1	0	1	0	0	0	RNF169	ring finger protein 169
hsa-miR-1283	1	0	1	0	0	0	ZBTB34	zinc finger and BTB domain containing 34
hsa-miR-1283	1	0	1	1	1	1	ACBD5	acyl-CoA binding domain containing 5
hsa-miR-1283	0	0	1	0	1	1	RASSF8	Ras association (RalGDS/AF-6) domain family (N-terminal) member 8
hsa-miR-1283	1	0	1	1	1	1	RFX4	regulatory factor X, 4 (influences HLA class II expression)
hsa-miR-1283	1	0	1	1	1	1	SMEK1	SMEK homolog 1, suppressor of mek1 (Dictyostelium)
hsa-miR-1283	1	0	1	0	0	0	ZC3H12C	zinc finger CCCH-type containing 12C
hsa-miR-1283	0	0	1	1	0	0	DDB2	damage-specific DNA binding protein 2, 48kDa
hsa-miR-1283	1	0	1	1	1	1	PAN3	PAN3 poly(A) specific ribonuclease subunit homolog (S. cerevisiae)
hsa-miR-1283	1	0	1	0	1	1	BEND4	BEN domain containing 4
hsa-miR-1283	0	0	1	1	0	0	PTPRF	protein tyrosine phosphatase, receptor type, F
hsa-miR-1283	1	0	1	1	1	1	UBE3A	ubiquitin protein ligase E3A
hsa-miR-1283	1	0	1	1	1	1	LTBP1	latent transforming growth factor beta binding protein 1
hsa-miR-1283	1	0	1	0	1	1	LRBA	LPS-responsive vesicle trafficking, beach and anchor containing
hsa-miR-1283	0	0	1	0	1	1	ITPR1	inositol 1,4,5-trisphosphate receptor, type 1
hsa-miR-1283	1	0	1	1	1	1	DAPK1	death-associated protein kinase 1
hsa-miR-1283	1	0	1	1	1	1	PLEKHH3	pleckstrin homology domain containing, family H (with MyTH4 domain) member 3
hsa-miR-1283	1	0	1	1	1	1	MEF2A	myocyte enhancer factor 2A
hsa-miR-1283	1	0	1	1	1	1	HMGB1	high mobility group box 1
hsa-miR-1283	0	0	1	1	1	1	PTK2	PTK2 protein tyrosine kinase 2
hsa-miR-1283	1	0	1	1	1	1	SYNCRIP	synaptotagmin binding, cytoplasmic RNA interacting protein
hsa-miR-1283	1	0	1	1	1	1	DTNA	dystrobrevin, alpha
hsa-miR-1283	1	0	1	0	1	1	PLAG1	pleiomorphic adenoma gene 1
hsa-miR-1283	1	0	1	0	1	1	SLC6A6	solute carrier family 6 (neurotransmitter transporter, taurine), member 6
hsa-miR-1283	1	0	1	1	0	0	CACNB1	calcium channel, voltage-dependent, beta 1 subunit
hsa-miR-1283	1	0	1	1	1	1	PRKACB	protein kinase, cAMP-dependent, catalytic, beta
hsa-miR-1283	1	0	1	0	1	1	DPYSL2	dihydropyrimidinase-like 2
hsa-miR-1283	0	0	1	0	1	1	NPY1R	neuropeptide Y receptor Y1
hsa-miR-1283	1	0	1	1	1	1	EPHA7	EPH receptor A7
hsa-miR-1283	1	0	1	0	1	1	CHL1	cell adhesion molecule with homology to L1CAM (close homolog of L1)
hsa-miR-1283	1	0	1	1	1	1	MTA1	metastasis associated 1
hsa-miR-1283	1	0	1	1	1	1	MAP4	microtubule-associated protein 4
hsa-miR-1283	1	0	1	0	1	1	CDON	Cdon homolog (mouse)
hsa-miR-1283	1	0	1	1	1	1	NEO1	neogenin 1
hsa-miR-1283	1	0	1	0	1	1	AKAP13	A kinase (PRKA) anchor protein 13
hsa-miR-1283	1	0	1	1	0	0	RGS6	regulator of G-protein signaling 6
hsa-miR-1283	1	0	1	1	1	1	MYO5A	myosin VA (heavy chain 12, myoxin)
hsa-miR-1283	1	0	1	1	1	1	LIMA1	LIM domain and actin binding 1
hsa-miR-1283	0	0	1	1	1	1	GPM6B	glycoprotein M6B
hsa-miR-1283	1	0	1	1	1	1	HNRNPK	heterogeneous nuclear ribonucleoprotein K
hsa-miR-1283	1	0	1	1	1	1	DDX17	DEAD (Asp-Glu-Ala-Asp) box helicase 17
hsa-miR-1283	1	0	1	1	1	1	EPB41	erythrocyte membrane protein band 4.1 (elliptocytosis 1, RH-linked)
hsa-miR-1283	1	0	1	1	1	1	ARHGEF3	Rho guanine nucleotide exchange factor (GEF) 3
hsa-miR-1283	1	0	1	1	1	1	COL24A1	collagen, type XXIV, alpha 1
hsa-miR-1283	0	0	1	1	1	1	HNRNPM	heterogeneous nuclear ribonucleoprotein M
hsa-miR-1283	1	0	1	1	1	1	SATB1	SATB homeobox 1
hsa-miR-1283	0	0	1	1	1	1	CHN1	chimerin (chimaerin) 1
hsa-miR-1283	1	0	1	1	0	0	KAT5	K(lysine) acetyltransferase 5
hsa-miR-1283	0	0	1	1	1	1	MYO9A	myosin IXA
hsa-miR-1283	1	0	1	1	1	1	HMGA2	high mobility group AT-hook 2
hsa-miR-1283	1	0	1	1	1	1	TEAD1	TEA domain family member 1 (SV40 transcriptional enhancer factor)
hsa-miR-1283	1	0	1	1	1	1	NCOA3	nuclear receptor coactivator 3
hsa-miR-1283	1	0	1	1	1	1	OSBPL10	oxysterol binding protein-like 10
hsa-miR-1283	0	0	1	1	0	0	TRIM27	tripartite motif containing 27
hsa-miR-1283	0	0	1	1	1	1	PLD1	phospholipase D1, phosphatidylcholine-specific
hsa-miR-1283	1	0	1	1	1	1	MEF2D	myocyte enhancer factor 2D
hsa-miR-1283	0	0	1	0	1	1	PARG	poly (ADP-ribose) glycohydrolase
hsa-miR-1283	0	0	1	1	1	1	HDAC3	histone deacetylase 3
hsa-miR-1283	1	0	1	1	0	0	RIMS2	regulating synaptic membrane exocytosis 2
hsa-miR-1283	1	0	1	1	1	1	SLC4A4	solute carrier family 4, sodium bicarbonate cotransporter, member 4
hsa-miR-1283	1	0	1	0	1	1	PDE4D	phosphodiesterase 4D, cAMP-specific
hsa-miR-1283	0	0	1	0	1	1	ZMYM2	zinc finger, MYM-type 2
hsa-miR-1283	1	0	1	1	1	1	TMBIM6	transmembrane BAX inhibitor motif containing 6
hsa-miR-1283	0	0	1	1	1	1	SH3GL3	SH3-domain GRB2-like 3
hsa-miR-1283	1	0	1	1	1	1	MYT1L	myelin transcription factor 1-like
hsa-miR-1283	1	0	1	0	1	1	CELF2	CUGBP, Elav-like family member 2
hsa-miR-1283	1	0	1	0	0	0	MAP3K1	mitogen-activated protein kinase kinase kinase 1, E3 ubiquitin protein ligase
hsa-miR-1283	0	0	1	1	1	1	KHDRBS3	KH domain containing, RNA binding, signal transduction associated 3
hsa-miR-1283	1	0	1	1	1	1	PFKFB3	6-phosphofructo-2-kinase/fructose-2,6-biphosphatase 3
hsa-miR-1283	1	0	1	1	1	1	MBNL2	muscleblind-like splicing regulator 2
hsa-miR-1283	1	0	1	1	1	1	NUDT4	nudix (nucleoside diphosphate linked moiety X)-type motif 4
hsa-miR-1283	0	0	1	1	1	1	SC5DL	sterol-C5-desaturase (ERG3 delta-5-desaturase homolog, S. cerevisiae)-like
hsa-miR-1283	1	0	1	1	1	1	CBFA2T2	core-binding factor, runt domain, alpha subunit 2; translocated to, 2
hsa-miR-1283	1	0	1	1	1	1	MTF2	metal response element binding transcription factor 2
hsa-miR-1283	1	0	1	1	1	1	PDE4A	phosphodiesterase 4A, cAMP-specific
hsa-miR-1283	1	0	1	1	1	1	UNC50	unc-50 homolog (C. elegans)
hsa-miR-1283	1	0	1	1	1	1	AKAP9	A kinase (PRKA) anchor protein (yotiao) 9
hsa-miR-1283	0	0	1	1	1	1	RGS7	regulator of G-protein signaling 7
hsa-miR-1283	0	0	1	1	1	1	RER1	RER1 retention in endoplasmic reticulum 1 homolog (S. cerevisiae)
hsa-miR-1283	0	0	1	1	1	1	PLEKHB1	pleckstrin homology domain containing, family B (evectins) member 1
hsa-miR-1283	1	0	1	0	1	1	MAP4K4	mitogen-activated protein kinase kinase kinase kinase 4
hsa-miR-1283	1	0	1	0	1	1	CD164	CD164 molecule, sialomucin
hsa-miR-1283	0	0	1	1	1	1	EIF2A	eukaryotic translation initiation factor 2A, 65kDa
hsa-miR-1283	1	0	1	1	1	1	KAT6B	K(lysine) acetyltransferase 6B
hsa-miR-1283	0	0	1	1	1	1	COG6	component of oligomeric golgi complex 6
hsa-miR-1283	0	0	1	1	1	1	DMRT2	doublesex and mab-3 related transcription factor 2
hsa-miR-1283	1	0	1	1	0	0	C16orf5	chromosome 16 open reading frame 5
hsa-miR-1283	1	0	1	0	1	1	FAM19A5	family with sequence similarity 19 (chemokine (C-C motif)-like), member A5
hsa-miR-1283	1	0	1	1	1	1	HNRNPH3	heterogeneous nuclear ribonucleoprotein H3 (2H9)
hsa-miR-1283	1	0	1	1	1	1	CAB39	calcium binding protein 39
hsa-miR-1283	0	0	1	0	1	1	CLEC5A	C-type lectin domain family 5, member A
hsa-miR-1283	1	0	1	1	1	1	HTRA2	HtrA serine peptidase 2
hsa-miR-1283	1	0	1	1	1	1	C14orf129	chromosome 14 open reading frame 129
hsa-miR-1283	0	0	1	1	1	1	CNPPD1	cyclin Pas1/PHO80 domain containing 1
hsa-miR-1283	1	0	1	1	1	1	USP15	ubiquitin specific peptidase 15
hsa-miR-1283	1	0	1	1	1	1	ANKRD13A	ankyrin repeat domain 13A
hsa-miR-1283	0	0	1	0	1	1	PDP1	pyruvate dehyrogenase phosphatase catalytic subunit 1
hsa-miR-1283	1	0	1	1	1	1	AGPAT3	1-acylglycerol-3-phosphate O-acyltransferase 3
hsa-miR-1283	0	0	1	1	1	1	FAM114A2	family with sequence similarity 114, member A2
hsa-miR-1283	1	0	1	1	1	1	STXBP6	syntaxin binding protein 6 (amisyn)
hsa-miR-1283	1	0	1	1	1	1	USP25	ubiquitin specific peptidase 25
hsa-miR-1283	0	0	1	0	1	1	CLDN2	claudin 2
hsa-miR-1283	1	0	1	1	1	1	SENP7	SUMO1/sentrin specific peptidase 7
hsa-miR-1283	0	0	1	1	1	1	SLC30A5	solute carrier family 30 (zinc transporter), member 5
hsa-miR-1283	0	0	1	1	1	1	MFF	mitochondrial fission factor
hsa-miR-1283	1	0	1	1	1	1	SNTB2	syntrophin, beta 2 (dystrophin-associated protein A1, 59kDa, basic component 2)
hsa-miR-1283	1	0	1	1	1	1	CALD1	caldesmon 1
hsa-miR-1283	0	0	1	1	1	1	CELF1	CUGBP, Elav-like family member 1
hsa-miR-1283	0	0	1	1	1	1	DOCK10	dedicator of cytokinesis 10
hsa-miR-1283	0	0	1	1	0	0	HES6	hairy and enhancer of split 6 (Drosophila)
hsa-miR-1283	1	0	1	1	1	1	RBM47	RNA binding motif protein 47
hsa-miR-1283	1	0	1	1	1	1	SH3GLB1	SH3-domain GRB2-like endophilin B1
hsa-miR-1283	1	0	1	0	1	1	TRPS1	trichorhinophalangeal syndrome I
hsa-miR-1283	1	0	1	1	1	1	PUM2	pumilio homolog 2 (Drosophila)
hsa-miR-1283	1	0	1	1	1	1	VPS39	vacuolar protein sorting 39 homolog (S. cerevisiae)
hsa-miR-1283	1	0	1	1	1	1	CALN1	calneuron 1
hsa-miR-1283	1	0	1	1	1	1	KLHL12	kelch-like 12 (Drosophila)
hsa-miR-1283	1	0	1	1	1	1	CPEB1	cytoplasmic polyadenylation element binding protein 1
hsa-miR-1283	1	0	1	1	1	1	BIVM	basic, immunoglobulin-like variable motif containing
hsa-miR-1283	1	0	1	1	1	1	CALU	calumenin
hsa-miR-1283	0	0	1	1	1	1	SLC6A15	solute carrier family 6 (neutral amino acid transporter), member 15
hsa-miR-1283	1	0	1	1	1	1	PBX3	pre-B-cell leukemia homeobox 3
hsa-miR-1283	0	0	1	1	1	1	U2AF1	U2 small nuclear RNA auxiliary factor 1
hsa-miR-1283	1	0	1	1	1	1	SON	SON DNA binding protein
hsa-miR-1283	0	0	1	0	0	0	CLRN1-AS1	CLRN1 antisense RNA 1
hsa-miR-1283	0	0	1	1	1	1	RAPGEF6	Rap guanine nucleotide exchange factor (GEF) 6
hsa-miR-1283	1	0	1	1	1	1	NTRK2	neurotrophic tyrosine kinase, receptor, type 2
hsa-miR-1283	1	0	1	1	1	1	PSIP1	PC4 and SFRS1 interacting protein 1
hsa-miR-1283	0	0	1	1	1	1	CSPG5	chondroitin sulfate proteoglycan 5 (neuroglycan C)
hsa-miR-1283	0	0	1	1	1	1	TTLL11	tubulin tyrosine ligase-like family, member 11
hsa-miR-1283	1	0	1	1	1	1	GPR64	G protein-coupled receptor 64
hsa-miR-1283	0	0	1	1	1	1	ANKRD36B	ankyrin repeat domain 36B
hsa-miR-1283	1	0	1	1	1	1	AFF2	AF4/FMR2 family, member 2
hsa-miR-1283	1	0	1	1	1	1	SH2B3	SH2B adaptor protein 3
hsa-miR-1283	1	0	1	0	1	1	DICER1	dicer 1, ribonuclease type III
hsa-miR-1283	0	0	1	0	0	0	ADAM5	ADAM metallopeptidase domain 5, pseudogene
hsa-miR-1283	1	0	1	1	0	0	ENTPD1	ectonucleoside triphosphate diphosphohydrolase 1
hsa-miR-1283	0	0	1	1	1	1	TCFL5	transcription factor-like 5 (basic helix-loop-helix)
hsa-miR-1283	1	0	1	1	1	1	ILF3	interleukin enhancer binding factor 3, 90kDa
hsa-miR-1283	0	0	1	0	0	0	CACNA2D3	calcium channel, voltage-dependent, alpha 2/delta subunit 3
hsa-miR-1283	0	0	1	1	0	0	TRERF1	transcriptional regulating factor 1
hsa-miR-1283	0	0	1	1	0	0	KIF13A	kinesin family member 13A
hsa-miR-1283	1	0	1	1	1	1	SAV1	salvador homolog 1 (Drosophila)
hsa-miR-1283	0	0	1	1	0	0	MCOLN1	mucolipin 1
hsa-miR-1283	1	0	1	1	1	1	PALM2	paralemmin 2
hsa-miR-1283	0	0	1	0	1	1	SRPK1	SRSF protein kinase 1
hsa-miR-1283	1	0	1	1	1	1	NAV3	neuron navigator 3
hsa-miR-1283	1	0	1	1	1	1	NRXN3	neurexin 3
hsa-miR-1283	1	0	1	1	1	1	ARL4C	ADP-ribosylation factor-like 4C
hsa-miR-1283	1	0	1	1	1	1	SYT14	synaptotagmin XIV
hsa-miR-1283	1	0	1	1	1	1	PPP1R9A	protein phosphatase 1, regulatory subunit 9A
hsa-miR-1283	0	0	1	1	1	1	ESRP1	epithelial splicing regulatory protein 1
hsa-miR-1283	0	0	1	0	0	0	TUG1	taurine upregulated 1 (non-protein coding)
hsa-miR-1283	0	0	1	1	1	1	RNF220	ring finger protein 220
hsa-miR-1283	1	0	1	1	1	1	EIF2C1	eukaryotic translation initiation factor 2C, 1
hsa-miR-1283	1	0	1	0	1	1	CLIC4	chloride intracellular channel 4
hsa-miR-1283	1	0	1	1	1	1	PTBP3	polypyrimidine tract binding protein 3
hsa-miR-1283	1	0	1	1	1	1	SLC38A2	solute carrier family 38, member 2
hsa-miR-1283	1	0	1	1	1	1	MBD5	methyl-CpG binding domain protein 5
hsa-miR-1283	0	0	1	1	1	1	PRPF39	PRP39 pre-mRNA processing factor 39 homolog (S. cerevisiae)
hsa-miR-1283	1	0	1	1	1	1	MKLN1	muskelin 1, intracellular mediator containing kelch motifs
hsa-miR-1283	1	0	1	0	1	1	SPATS2L	spermatogenesis associated, serine-rich 2-like
hsa-miR-1283	1	0	1	1	1	1	INSIG2	insulin induced gene 2
hsa-miR-1283	1	0	1	1	1	1	PGAP1	post-GPI attachment to proteins 1
hsa-miR-1283	0	0	1	1	0	0	CCDC51	coiled-coil domain containing 51
hsa-miR-1283	1	0	1	1	1	1	MAEA	macrophage erythroblast attacher
hsa-miR-1283	1	0	1	0	1	1	LIN28A	lin-28 homolog A (C. elegans)
hsa-miR-1283	1	0	1	1	1	1	MON2	MON2 homolog (S. cerevisiae)
hsa-miR-1283	1	0	1	1	1	1	S100PBP	S100P binding protein
hsa-miR-1283	1	0	1	1	1	1	SMEK2	SMEK homolog 2, suppressor of mek1 (Dictyostelium)
hsa-miR-1283	0	0	1	1	1	1	VPRBP	Vpr (HIV-1) binding protein
hsa-miR-1283	0	0	1	1	1	1	LRRN1	leucine rich repeat neuronal 1
hsa-miR-1283	1	0	1	1	1	1	MACF1	microtubule-actin crosslinking factor 1
hsa-miR-1283	1	0	1	1	1	1	PHF20L1	PHD finger protein 20-like 1
hsa-miR-1283	0	0	1	0	0	0	LOC284561	uncharacterized LOC284561
hsa-miR-1283	0	0	1	0	1	1	FLJ14186	uncharacterized LOC401149
hsa-miR-1283	1	0	1	1	1	1	COPS7B	COP9 constitutive photomorphogenic homolog subunit 7B (Arabidopsis)
hsa-miR-1283	1	0	1	0	0	0	ZDBF2	zinc finger, DBF-type containing 2
hsa-miR-1283	1	0	1	1	1	1	DYRK2	dual-specificity tyrosine-(Y)-phosphorylation regulated kinase 2
hsa-miR-1283	1	0	1	0	1	1	ATP2B1	ATPase, Ca++ transporting, plasma membrane 1
hsa-miR-1283	1	0	1	1	1	1	ABHD3	abhydrolase domain containing 3
hsa-miR-1283	0	0	1	0	0	0	KIAA1671	KIAA1671
hsa-miR-1283	1	0	1	1	1	1	KANK1	KN motif and ankyrin repeat domains 1
hsa-miR-1283	0	0	1	1	1	1	WDR67	WD repeat domain 67
hsa-miR-1283	1	0	1	1	1	1	TNRC6A	trinucleotide repeat containing 6A
hsa-miR-1283	1	0	1	1	1	1	NAA30	N(alpha)-acetyltransferase 30, NatC catalytic subunit
hsa-miR-1283	1	0	1	0	1	1	ZCCHC3	zinc finger, CCHC domain containing 3
hsa-miR-1283	0	0	1	1	0	0	NDUFAF5	NADH dehydrogenase (ubiquinone) complex I, assembly factor 5
hsa-miR-1283	0	0	1	0	1	1	FLJ22447	uncharacterized LOC400221
hsa-miR-1283	1	0	1	1	1	1	RNF185	ring finger protein 185
hsa-miR-1283	0	0	1	0	0	0	LOC729852	uncharacterized LOC729852
hsa-miR-1283	1	0	1	1	1	1	FOXP1	forkhead box P1
hsa-miR-1283	1	0	1	1	1	1	SEC63	SEC63 homolog (S. cerevisiae)
hsa-miR-1283	1	0	1	1	1	1	FAM53C	family with sequence similarity 53, member C
hsa-miR-1283	1	0	1	1	1	1	NFASC	neurofascin
hsa-miR-1283	1	0	1	0	1	1	ATP10D	ATPase, class V, type 10D
hsa-miR-1283	1	0	1	1	1	1	SLC38A1	solute carrier family 38, member 1
hsa-miR-1283	1	0	1	1	1	1	SLAIN1	SLAIN motif family, member 1
hsa-miR-1283	0	0	1	1	1	1	C8orf46	chromosome 8 open reading frame 46
hsa-miR-1283	1	0	1	0	1	1	AP1G1	adaptor-related protein complex 1, gamma 1 subunit
hsa-miR-1283	1	0	1	1	1	1	TPM1	tropomyosin 1 (alpha)
hsa-miR-1283	0	0	1	0	1	1	HDX	highly divergent homeobox
hsa-miR-1283	1	0	1	1	1	1	FRMD6	FERM domain containing 6
hsa-miR-1283	1	0	1	0	0	0	PWWP2A	PWWP domain containing 2A
hsa-miR-1283	1	0	1	0	1	1	RNF165	ring finger protein 165
hsa-miR-1283	1	0	1	1	1	1	ZNF664	zinc finger protein 664
hsa-miR-1283	0	0	1	1	0	0	STRA6	stimulated by retinoic acid gene 6 homolog (mouse)
hsa-miR-1283	0	0	1	1	0	0	BEAN1	brain expressed, associated with NEDD4, 1
hsa-miR-1283	1	0	1	1	1	1	TMEM25	transmembrane protein 25
hsa-miR-1283	0	0	1	0	0	0	FLJ12825	uncharacterized LOC440101
hsa-miR-1283	1	0	1	1	1	1	SCAMP5	secretory carrier membrane protein 5
hsa-miR-1283	0	0	1	0	0	0	LOC441204	uncharacterized LOC441204
hsa-miR-1283	1	0	1	1	1	1	CLCN5	chloride channel, voltage-sensitive 5
hsa-miR-1283	0	0	1	1	0	0	NUP93	nucleoporin 93kDa
hsa-miR-1283	1	0	1	1	1	1	PUM1	pumilio homolog 1 (Drosophila)
hsa-miR-1283	1	0	1	1	1	1	TPM3	tropomyosin 3
hsa-miR-1283	1	0	1	1	1	1	PCMTD1	protein-L-isoaspartate (D-aspartate) O-methyltransferase domain containing 1
hsa-miR-1283	0	0	1	0	1	1	ZNF498	zinc finger protein 498
hsa-miR-1283	0	0	1	1	0	0	RELT	RELT tumor necrosis factor receptor
hsa-miR-1283	1	0	1	0	1	1	NCAM1	neural cell adhesion molecule 1
hsa-miR-1283	0	0	1	0	0	0	LINC00637	long intergenic non-protein coding RNA 637
hsa-miR-1283	0	0	1	1	1	1	ZNF385B	zinc finger protein 385B
hsa-miR-1283	0	0	1	1	0	0	CD37	CD37 molecule
hsa-miR-1283	0	0	1	0	1	1	CCDC68	coiled-coil domain containing 68
hsa-miR-1283	0	0	1	0	1	1	UHMK1	U2AF homology motif (UHM) kinase 1
hsa-miR-1283	1	0	1	1	1	1	HLF	hepatic leukemia factor
hsa-miR-1283	1	0	1	0	1	1	CLASP1	cytoplasmic linker associated protein 1
hsa-miR-1283	0	0	1	0	1	1	CDHR3	cadherin-related family member 3
hsa-miR-1283	0	0	1	1	1	1	PDZRN3	PDZ domain containing ring finger 3
hsa-miR-1283	0	0	1	1	0	0	GPR19	G protein-coupled receptor 19
hsa-miR-1283	1	0	1	1	1	1	SIRT1	sirtuin 1
hsa-miR-1283	1	0	1	1	1	1	MYO1B	myosin IB
hsa-miR-1283	0	0	1	1	1	1	KDELR1	KDEL (Lys-Asp-Glu-Leu) endoplasmic reticulum protein retention receptor 1
hsa-miR-1283	0	0	1	1	0	0	LGR5	leucine-rich repeat containing G protein-coupled receptor 5
hsa-miR-1283	0	0	1	0	1	1	CADM1	cell adhesion molecule 1
hsa-miR-1283	1	0	1	1	1	1	STXBP5	syntaxin binding protein 5 (tomosyn)
hsa-miR-1283	0	0	1	0	0	0	LOC643837	uncharacterized LOC643837
hsa-miR-1283	0	0	1	1	1	1	DYNC1I1	dynein, cytoplasmic 1, intermediate chain 1
hsa-miR-1283	1	0	1	1	1	1	EGR2	early growth response 2
hsa-miR-1283	1	0	1	1	1	1	FRY	furry homolog (Drosophila)
hsa-miR-1283	1	0	1	1	1	1	AMMECR1	Alport syndrome, mental retardation, midface hypoplasia and elliptocytosis chromosomal region gene 1
hsa-miR-1283	0	0	1	0	1	1	TBX5-AS1	TBX5 antisense RNA 1
hsa-miR-1283	1	0	1	1	1	1	TSN	translin
hsa-miR-1283	1	0	1	0	1	1	TEF	thyrotrophic embryonic factor
hsa-miR-1283	1	0	1	1	1	1	HHAT	hedgehog acyltransferase
hsa-miR-1283	0	0	1	1	1	1	NRCAM	neuronal cell adhesion molecule
hsa-miR-1283	0	0	1	1	0	0	APOBEC3G	apolipoprotein B mRNA editing enzyme, catalytic polypeptide-like 3G
hsa-miR-1283	1	0	1	0	1	1	CRTAP	cartilage associated protein
hsa-miR-1283	1	0	1	1	1	1	CLGN	calmegin
hsa-miR-1283	1	0	1	1	1	1	SLC7A8	solute carrier family 7 (amino acid transporter light chain, L system), member 8
hsa-miR-1283	1	0	1	1	1	1	SNAP25	synaptosomal-associated protein, 25kDa
hsa-miR-1283	0	0	1	1	1	1	CORO7	coronin 7
hsa-miR-1283	1	0	1	1	1	1	SYT1	synaptotagmin I
hsa-miR-1283	0	0	1	1	1	1	RBM25	RNA binding motif protein 25
hsa-miR-1283	1	0	1	0	1	1	NCOA7	nuclear receptor coactivator 7
hsa-miR-1283	1	0	1	1	1	1	GCLC	glutamate-cysteine ligase, catalytic subunit
hsa-miR-1283	1	0	1	1	1	1	KANSL1	KAT8 regulatory NSL complex subunit 1
hsa-miR-1283	1	0	1	1	1	1	NDEL1	nudE nuclear distribution E homolog (A. nidulans)-like 1
hsa-miR-1283	1	0	1	1	1	1	ANKRD46	ankyrin repeat domain 46
hsa-miR-1283	0	0	1	1	0	0	ZNF185	zinc finger protein 185 (LIM domain)
hsa-miR-1283	1	0	1	1	1	1	CNEP1R1	CTD nuclear envelope phosphatase 1 regulatory subunit 1
hsa-miR-1283	0	0	1	0	1	1	NBPF3	neuroblastoma breakpoint family, member 3
hsa-miR-1283	1	0	1	1	1	1	ANKRD10	ankyrin repeat domain 10
hsa-miR-1283	0	0	1	0	1	1	HDAC9	histone deacetylase 9
hsa-miR-1283	1	0	1	0	1	1	STC2	stanniocalcin 2
hsa-miR-1283	0	0	1	1	1	1	AIMP1	aminoacyl tRNA synthetase complex-interacting multifunctional protein 1
hsa-miR-1283	0	0	1	1	1	1	FBLN1	fibulin 1
hsa-miR-1283	1	0	1	1	1	1	AMT	aminomethyltransferase
hsa-miR-1283	1	0	1	1	1	1	ACSL1	acyl-CoA synthetase long-chain family member 1
hsa-miR-1283	1	0	1	1	1	1	FAM98A	family with sequence similarity 98, member A
hsa-miR-1283	1	0	1	1	1	1	SLITRK2	SLIT and NTRK-like family, member 2
hsa-miR-1283	0	0	1	0	0	0	FAM92A1	family with sequence similarity 92, member A1
hsa-miR-1283	0	0	1	0	1	1	FLJ39080	uncharacterized LOC441355
hsa-miR-1283	0	0	1	0	0	0	METTL21CP1	methyltransferase like 21C pseudogene 1
hsa-miR-1283	1	0	1	1	1	1	LRP8	low density lipoprotein receptor-related protein 8, apolipoprotein e receptor
hsa-miR-1283	0	0	1	1	1	1	MPHOSPH9	M-phase phosphoprotein 9
hsa-miR-1283	1	0	1	1	1	1	SLC30A6	solute carrier family 30 (zinc transporter), member 6
hsa-miR-1283	1	0	1	1	1	1	SYT6	synaptotagmin VI
hsa-miR-1283	1	0	1	1	1	1	EPB41L1	erythrocyte membrane protein band 4.1-like 1
hsa-miR-1283	0	0	1	0	0	0	LOC401463	uncharacterized LOC401463
hsa-miR-1283	1	0	1	1	1	1	POU2F3	POU class 2 homeobox 3
hsa-miR-1283	1	0	1	1	1	1	RAB11FIP4	RAB11 family interacting protein 4 (class II)
hsa-miR-1283	1	0	1	1	1	1	IGSF11	immunoglobulin superfamily, member 11
hsa-miR-1283	0	0	1	1	0	0	LUC7L	LUC7-like (S. cerevisiae)
hsa-miR-1283	1	0	1	1	1	1	ZCCHC2	zinc finger, CCHC domain containing 2
hsa-miR-1283	0	0	1	1	0	0	DCBLD1	discoidin, CUB and LCCL domain containing 1
hsa-miR-1283	1	0	1	1	1	1	IL20RA	interleukin 20 receptor, alpha
hsa-miR-1283	0	0	1	1	1	1	TRPM7	transient receptor potential cation channel, subfamily M, member 7
hsa-miR-1283	1	0	1	1	1	1	NAP1L1	nucleosome assembly protein 1-like 1
hsa-miR-1283	1	0	1	1	1	1	CRMP1	collapsin response mediator protein 1
hsa-miR-1283	1	0	1	1	1	1	ZMAT3	zinc finger, matrin-type 3
hsa-miR-1283	0	0	1	1	1	1	RNF217	ring finger protein 217
hsa-miR-1283	1	0	1	1	1	1	WEE1	WEE1 homolog (S. pombe)
hsa-miR-1283	1	0	1	1	1	1	SIK3	SIK family kinase 3
hsa-miR-1283	1	0	1	1	1	1	PXN	paxillin
hsa-miR-1283	1	0	1	1	1	1	ZNF275	zinc finger protein 275
hsa-miR-1283	1	0	1	1	1	1	CBLB	Cbl proto-oncogene, E3 ubiquitin protein ligase B
hsa-miR-1283	0	0	1	0	1	1	FLJ41200	uncharacterized LOC401492
hsa-miR-1283	1	0	1	1	1	1	PDZD4	PDZ domain containing 4
hsa-miR-1283	1	0	1	1	1	1	TPRG1	tumor protein p63 regulated 1
hsa-miR-1283	0	0	1	1	1	1	FAM5B	family with sequence similarity 5, member B
hsa-miR-1283	1	0	1	0	1	1	KCNK2	potassium channel, subfamily K, member 2
hsa-miR-1283	0	0	1	1	1	1	TMEM59	transmembrane protein 59
hsa-miR-1283	0	0	1	1	1	1	FAM19A2	family with sequence similarity 19 (chemokine (C-C motif)-like), member A2
hsa-miR-1283	1	0	1	1	1	1	SBF2	SET binding factor 2
hsa-miR-1283	1	0	1	1	1	1	EPAS1	endothelial PAS domain protein 1
hsa-miR-1283	1	0	1	0	0	0	GPR137C	G protein-coupled receptor 137C
hsa-miR-1283	1	0	1	1	1	1	MBTD1	mbt domain containing 1
hsa-miR-1283	1	0	1	1	1	1	DERL1	derlin 1
hsa-miR-1283	0	0	1	1	1	1	PKP4	plakophilin 4
hsa-miR-1283	1	0	1	1	1	1	SMAP1	small ArfGAP 1
hsa-miR-1283	1	0	1	0	1	1	DCUN1D4	DCN1, defective in cullin neddylation 1, domain containing 4 (S. cerevisiae)
hsa-miR-1283	1	0	1	1	1	1	VPS54	vacuolar protein sorting 54 homolog (S. cerevisiae)
hsa-miR-1283	1	0	1	1	1	1	ADIPOR1	adiponectin receptor 1
hsa-miR-1283	0	0	1	1	1	1	IDS	iduronate 2-sulfatase
hsa-miR-1283	1	0	1	1	1	1	CORO2B	coronin, actin binding protein, 2B
hsa-miR-1283	1	0	1	0	1	1	CNTN2	contactin 2 (axonal)
hsa-miR-1283	1	0	1	1	1	1	NAPB	N-ethylmaleimide-sensitive factor attachment protein, beta
hsa-miR-1283	0	0	1	1	1	1	C2orf91	chromosome 2 open reading frame 91
hsa-miR-1283	0	0	1	1	1	1	C3orf67	chromosome 3 open reading frame 67
hsa-miR-1283	0	0	1	1	1	1	ATPBD4	ATP binding domain 4
hsa-miR-1283	1	0	1	1	1	1	C17orf85	chromosome 17 open reading frame 85
hsa-miR-1283	1	0	1	1	1	1	SEPHS1	selenophosphate synthetase 1
hsa-miR-1283	1	0	1	1	1	1	METAP2	methionyl aminopeptidase 2
hsa-miR-1283	1	0	1	1	1	1	SACS	spastic ataxia of Charlevoix-Saguenay (sacsin)
hsa-miR-1283	0	0	1	1	1	1	SRPX	sushi-repeat containing protein, X-linked
hsa-miR-1283	0	0	1	1	0	0	LOC442075	uncharacterized LOC442075
hsa-miR-1283	0	0	1	0	0	0	LOC613266	uncharacterized LOC613266
hsa-miR-1283	1	0	1	1	1	1	KPNA1	karyopherin alpha 1 (importin alpha 5)
hsa-miR-1283	1	0	1	0	0	0	MSL1	male-specific lethal 1 homolog (Drosophila)
hsa-miR-1283	1	0	1	0	1	1	HECTD1	HECT domain containing E3 ubiquitin protein ligase 1
hsa-miR-1283	1	0	1	1	1	1	SH3BP5L	SH3-binding domain protein 5-like
hsa-miR-1283	1	0	1	1	1	1	DPY19L3	dpy-19-like 3 (C. elegans)
hsa-miR-1283	0	0	1	0	0	0	FAM95B1	family with sequence similarity 95, member B1
hsa-miR-1283	0	0	1	1	1	1	RBM46	RNA binding motif protein 46
hsa-miR-1283	1	0	1	1	0	0	DYDC1	DPY30 domain containing 1
hsa-miR-1283	1	0	1	1	0	0	UBN2	ubinuclein 2
hsa-miR-1283	1	0	1	1	1	1	CHD5	chromodomain helicase DNA binding protein 5
hsa-miR-1283	0	0	1	1	0	0	C20orf141	chromosome 20 open reading frame 141
hsa-miR-1283	1	0	1	1	1	1	PLEKHB2	pleckstrin homology domain containing, family B (evectins) member 2
hsa-miR-1283	1	0	1	1	1	1	SACM1L	SAC1 suppressor of actin mutations 1-like (yeast)
hsa-miR-1283	0	0	1	1	1	1	USP54	ubiquitin specific peptidase 54
hsa-miR-1283	0	0	1	1	0	0	LLGL2	lethal giant larvae homolog 2 (Drosophila)
hsa-miR-1283	1	0	1	0	1	1	CLEC16A	C-type lectin domain family 16, member A
hsa-miR-1283	1	0	1	1	1	1	DLG2	discs, large homolog 2 (Drosophila)
hsa-miR-1283	1	0	1	0	1	1	GPR180	G protein-coupled receptor 180
hsa-miR-1283	0	0	1	0	0	0	HNRNPKP3	heterogeneous nuclear ribonucleoprotein K pseudogene 3
hsa-miR-1283	1	0	1	1	1	1	KDM4B	lysine (K)-specific demethylase 4B
hsa-miR-1283	0	0	1	1	1	1	SZT2	seizure threshold 2 homolog (mouse)
hsa-miR-1283	1	0	1	1	1	1	EIF4E3	eukaryotic translation initiation factor 4E family member 3
hsa-miR-1283	0	0	1	0	0	0	RPL23AP53	ribosomal protein L23a pseudogene 53
hsa-miR-1283	1	0	1	1	1	1	MKRN1	makorin ring finger protein 1
hsa-miR-1283	0	0	1	1	1	1	MOBP	myelin-associated oligodendrocyte basic protein
hsa-miR-1283	1	0	1	1	1	1	TSHZ1	teashirt zinc finger homeobox 1
hsa-miR-1283	1	0	1	0	1	1	ADIPOR2	adiponectin receptor 2
hsa-miR-1283	0	0	1	1	0	0	PSMC6	proteasome (prosome, macropain) 26S subunit, ATPase, 6
hsa-miR-1283	1	0	1	1	1	1	KANK4	KN motif and ankyrin repeat domains 4
hsa-miR-1283	1	0	1	0	1	1	YAF2	YY1 associated factor 2
hsa-miR-1283	1	0	1	1	1	1	ENAH	enabled homolog (Drosophila)
hsa-miR-1283	0	0	1	1	1	1	PIN4	protein (peptidylprolyl cis/trans isomerase) NIMA-interacting, 4 (parvulin)
hsa-miR-1283	0	0	1	1	0	0	SLC22A25	solute carrier family 22, member 25
hsa-miR-1283	1	0	1	0	1	1	SP6	Sp6 transcription factor
hsa-miR-1283	0	0	1	1	0	0	IQUB	IQ motif and ubiquitin domain containing
hsa-miR-1283	1	0	1	0	1	1	FNDC3B	fibronectin type III domain containing 3B
hsa-miR-1283	1	0	1	1	1	1	AFAP1	actin filament associated protein 1
hsa-miR-1283	1	0	1	0	1	1	CAPRIN1	cell cycle associated protein 1
hsa-miR-1283	1	0	1	0	1	1	YOD1	YOD1 OTU deubiquinating enzyme 1 homolog (S. cerevisiae)
hsa-miR-1283	1	0	1	1	1	1	FBXO3	F-box protein 3
hsa-miR-1283	1	0	1	1	1	1	SH3D19	SH3 domain containing 19
hsa-miR-1283	1	0	1	1	1	1	BCAT1	branched chain amino-acid transaminase 1, cytosolic
hsa-miR-1283	0	0	1	0	0	0	IGHD	immunoglobulin heavy constant delta
hsa-miR-1283	0	0	1	1	1	1	SHROOM3	shroom family member 3
hsa-miR-1283	0	0	1	0	0	0	EMBP1	embigin pseudogene 1
hsa-miR-1283	1	0	1	1	1	1	ADAMTSL1	ADAMTS-like 1
hsa-miR-1283	1	0	1	1	1	1	PHC2	polyhomeotic homolog 2 (Drosophila)
hsa-miR-1283	0	0	1	0	0	0	FLJ26245	uncharacterized LOC400533
hsa-miR-1283	1	0	1	1	1	1	CD200	CD200 molecule
hsa-miR-1283	0	0	1	1	1	1	G3BP1	GTPase activating protein (SH3 domain) binding protein 1
hsa-miR-1283	1	0	1	0	1	1	GPC6	glypican 6
hsa-miR-1283	1	0	1	0	1	1	RXRA	retinoid X receptor, alpha
hsa-miR-1283	1	0	1	1	1	1	RNF111	ring finger protein 111
hsa-miR-1283	0	0	1	1	1	1	ZSCAN20	zinc finger and SCAN domain containing 20
hsa-miR-1283	0	0	1	1	0	0	C3orf20	chromosome 3 open reading frame 20
hsa-miR-1283	0	0	1	1	1	1	AKTIP	AKT interacting protein
hsa-miR-1283	0	0	1	0	1	1	PEX5	peroxisomal biogenesis factor 5
hsa-miR-1283	1	0	1	1	1	1	ATL2	atlastin GTPase 2
hsa-miR-1283	0	0	1	1	1	1	C5orf28	chromosome 5 open reading frame 28
hsa-miR-1283	1	0	1	1	1	1	TBC1D15	TBC1 domain family, member 15
hsa-miR-1283	1	0	1	1	0	0	ZNF219	zinc finger protein 219
hsa-miR-1283	1	0	1	1	1	1	COBLL1	COBL-like 1
hsa-miR-1283	1	0	1	1	1	1	UPK1B	uroplakin 1B
hsa-miR-1283	0	0	1	1	1	1	TBC1D3G	TBC1 domain family, member 3G
hsa-miR-1283	1	0	1	1	1	1	SETX	senataxin
hsa-miR-1283	0	0	1	1	1	1	RNF135	ring finger protein 135
hsa-miR-1283	1	0	1	1	1	1	NCOA1	nuclear receptor coactivator 1
hsa-miR-1283	1	0	1	0	1	1	TEAD3	TEA domain family member 3
hsa-miR-1283	0	0	1	0	0	0	PART1	prostate androgen-regulated transcript 1 (non-protein coding)
hsa-miR-1283	0	0	1	1	1	1	TFDP2	transcription factor Dp-2 (E2F dimerization partner 2)
hsa-miR-1283	0	0	1	0	0	0	POM121L8P	POM121 transmembrane nucleoporin-like 8 pseudogene
hsa-miR-1283	1	0	1	1	1	1	ARF6	ADP-ribosylation factor 6
hsa-miR-1283	1	0	1	1	1	1	FBXL17	F-box and leucine-rich repeat protein 17
hsa-miR-1283	0	0	1	1	1	1	WDR52	WD repeat domain 52
hsa-miR-1283	0	0	1	1	1	1	GMEB2	glucocorticoid modulatory element binding protein 2
hsa-miR-1283	0	0	1	1	0	0	PACSIN2	protein kinase C and casein kinase substrate in neurons 2
hsa-miR-1283	0	0	1	0	1	1	TBC1D3F	TBC1 domain family, member 3F
hsa-miR-1283	0	0	1	1	0	0	WDR11	WD repeat domain 11
hsa-miR-1283	1	0	1	1	1	1	NBEA	neurobeachin
hsa-miR-1283	1	0	1	1	1	1	CTTNBP2NL	CTTNBP2 N-terminal like
hsa-miR-1283	0	0	1	1	1	1	SLC30A10	solute carrier family 30, member 10
hsa-miR-1283	1	0	1	0	1	1	GRIN3A	glutamate receptor, ionotropic, N-methyl-D-aspartate 3A
hsa-miR-1283	0	0	1	0	0	0	FAM66D	family with sequence similarity 66, member D
hsa-miR-1283	0	0	1	1	1	1	IDH3A	isocitrate dehydrogenase 3 (NAD+) alpha
hsa-miR-1283	1	0	1	1	1	1	PKNOX2	PBX/knotted 1 homeobox 2
hsa-miR-1283	1	0	1	0	1	1	BRPF1	bromodomain and PHD finger containing, 1
hsa-miR-1283	1	0	1	1	1	1	USP45	ubiquitin specific peptidase 45
hsa-miR-1283	1	0	1	1	1	1	YTHDF3	YTH domain family, member 3
hsa-miR-1283	1	0	1	1	1	1	TMEFF1	transmembrane protein with EGF-like and two follistatin-like domains 1
hsa-miR-1283	0	0	1	1	1	1	TMEM132C	transmembrane protein 132C
hsa-miR-1283	1	0	1	1	1	1	MIER1	mesoderm induction early response 1 homolog (Xenopus laevis)
hsa-miR-1283	1	0	1	1	1	1	KDM6A	lysine (K)-specific demethylase 6A
hsa-miR-1283	0	0	1	1	0	0	RPL9	ribosomal protein L9
hsa-miR-1283	0	0	1	0	0	0	ZNF720	zinc finger protein 720
hsa-miR-1283	1	0	1	0	1	1	HNRNPA3	heterogeneous nuclear ribonucleoprotein A3
hsa-miR-1283	0	0	1	1	1	1	EGFLAM	EGF-like, fibronectin type III and laminin G domains
hsa-miR-1283	1	0	1	1	1	1	CHMP7	charged multivesicular body protein 7
hsa-miR-1283	0	0	1	1	1	1	MYPN	myopalladin
hsa-miR-1283	1	0	1	1	1	1	MLL3	myeloid/lymphoid or mixed-lineage leukemia 3
hsa-miR-1283	1	0	1	1	0	0	ZBTB49	zinc finger and BTB domain containing 49
hsa-miR-1283	1	0	1	1	1	1	TMEM68	transmembrane protein 68
hsa-miR-1283	1	0	1	0	1	1	GPCPD1	glycerophosphocholine phosphodiesterase GDE1 homolog (S. cerevisiae)
hsa-miR-1283	0	0	1	1	1	1	CCDC132	coiled-coil domain containing 132
hsa-miR-1283	0	0	1	0	1	1	PAPD4	PAP associated domain containing 4
hsa-miR-1283	1	0	1	0	1	1	MEF2C	myocyte enhancer factor 2C
hsa-miR-1283	1	0	1	1	1	1	SOX6	SRY (sex determining region Y)-box 6
hsa-miR-1283	1	0	1	1	1	1	BPTF	bromodomain PHD finger transcription factor
hsa-miR-1283	0	0	1	1	1	1	KIAA1841	KIAA1841
hsa-miR-1283	1	0	1	1	1	1	NRP1	neuropilin 1
hsa-miR-1283	0	0	1	1	1	1	NUSAP1	nucleolar and spindle associated protein 1
hsa-miR-1283	0	0	1	1	1	1	SOAT1	sterol O-acyltransferase 1
hsa-miR-1283	1	0	1	0	1	1	CNOT7	CCR4-NOT transcription complex, subunit 7
hsa-miR-1283	1	0	1	1	1	1	ANP32E	acidic (leucine-rich) nuclear phosphoprotein 32 family, member E
hsa-miR-1283	0	0	1	1	1	1	PCDH20	protocadherin 20
hsa-miR-1283	1	0	1	1	1	1	ATAT1	alpha tubulin acetyltransferase 1
hsa-miR-1283	0	0	1	1	1	1	CAND1	cullin-associated and neddylation-dissociated 1
hsa-miR-1283	1	0	1	1	1	1	IL17RD	interleukin 17 receptor D
hsa-miR-1283	1	0	1	1	1	1	PRPF38B	PRP38 pre-mRNA processing factor 38 (yeast) domain containing B
hsa-miR-1283	1	0	1	1	1	1	MBD6	methyl-CpG binding domain protein 6
hsa-miR-1283	1	0	1	0	1	1	JAZF1	JAZF zinc finger 1
hsa-miR-1283	0	0	1	1	1	1	PNMAL1	paraneoplastic Ma antigen family-like 1
hsa-miR-1283	1	0	1	1	1	1	RICTOR	RPTOR independent companion of MTOR, complex 2
hsa-miR-1283	1	0	1	0	1	1	NR3C1	nuclear receptor subfamily 3, group C, member 1 (glucocorticoid receptor)
hsa-miR-1283	1	0	1	1	1	1	FAM76B	family with sequence similarity 76, member B
hsa-miR-1283	1	0	1	1	1	1	PPP3CA	protein phosphatase 3, catalytic subunit, alpha isozyme
hsa-miR-1283	1	0	1	1	1	1	RNF38	ring finger protein 38
hsa-miR-1283	1	0	1	1	1	1	CLIC5	chloride intracellular channel 5
hsa-miR-1283	0	0	1	1	1	1	ALS2CR8	amyotrophic lateral sclerosis 2 (juvenile) chromosome region, candidate 8
hsa-miR-1283	0	0	1	1	1	1	CD209	CD209 molecule
hsa-miR-1283	0	0	1	0	0	0	LOC374443	C-type lectin domain family 2, member D pseudogene
hsa-miR-1283	0	0	1	1	1	1	MED19	mediator complex subunit 19
hsa-miR-1283	0	0	1	1	1	1	CEP41	centrosomal protein 41kDa
hsa-miR-1283	1	0	1	1	1	1	WDR26	WD repeat domain 26
hsa-miR-1283	1	0	1	1	1	1	RAI14	retinoic acid induced 14
hsa-miR-1283	1	0	1	1	1	1	TAB3	TGF-beta activated kinase 1/MAP3K7 binding protein 3
hsa-miR-1283	0	0	1	1	1	1	GCOM1	GRINL1A complex locus 1
hsa-miR-1283	0	0	1	1	1	1	GON4L	gon-4-like (C. elegans)
hsa-miR-1283	0	0	1	1	1	1	MFAP5	microfibrillar associated protein 5
hsa-miR-1283	0	0	1	1	1	1	SULF2	sulfatase 2
hsa-miR-1283	0	0	1	1	1	1	PIGG	phosphatidylinositol glycan anchor biosynthesis, class G
hsa-miR-1283	1	0	1	0	1	1	ST6GALNAC3	ST6 (alpha-N-acetyl-neuraminyl-2,3-beta-galactosyl-1,3)-N-acetylgalactosaminide alpha-2,6-sialyltransferase 3
hsa-miR-1283	1	0	1	1	1	1	NLGN4X	neuroligin 4, X-linked
hsa-miR-1283	1	0	1	1	1	1	ECT2	epithelial cell transforming sequence 2 oncogene
hsa-miR-1283	1	0	1	1	1	1	BCL2L11	BCL2-like 11 (apoptosis facilitator)
hsa-miR-1283	1	0	1	1	1	1	SP3	Sp3 transcription factor
hsa-miR-1283	1	0	1	0	1	1	NHS	Nance-Horan syndrome (congenital cataracts and dental anomalies)
hsa-miR-1283	1	0	1	1	1	1	ARHGAP20	Rho GTPase activating protein 20
hsa-miR-1283	1	0	1	1	1	1	MECP2	methyl CpG binding protein 2 (Rett syndrome)
hsa-miR-1283	0	0	1	1	0	0	PAOX	polyamine oxidase (exo-N4-amino)
hsa-miR-1283	1	0	1	1	1	1	BHLHE41	basic helix-loop-helix family, member e41
hsa-miR-1283	1	0	1	1	1	1	TRIT1	tRNA isopentenyltransferase 1
hsa-miR-1283	1	0	1	1	0	0	CDK8	cyclin-dependent kinase 8
hsa-miR-1283	1	0	1	1	1	1	QKI	QKI, KH domain containing, RNA binding
hsa-miR-1283	1	0	1	1	1	1	PCDH11X	protocadherin 11 X-linked
hsa-miR-1283	1	0	1	1	1	1	TBC1D22B	TBC1 domain family, member 22B
hsa-miR-1283	1	0	1	1	1	1	CPSF6	cleavage and polyadenylation specific factor 6, 68kDa
hsa-miR-1283	0	0	1	1	1	1	SNX11	sorting nexin 11
hsa-miR-1283	1	0	1	1	1	1	TMUB2	transmembrane and ubiquitin-like domain containing 2
hsa-miR-1283	0	0	1	1	1	1	C20orf24	chromosome 20 open reading frame 24
hsa-miR-1283	0	0	1	1	1	1	RLIM	ring finger protein, LIM domain interacting
hsa-miR-1283	1	0	1	0	0	0	VGLL4	vestigial like 4 (Drosophila)
hsa-miR-1283	0	0	1	1	1	1	BOD1	biorientation of chromosomes in cell division 1
hsa-miR-1283	0	0	1	1	1	1	REXO2	REX2, RNA exonuclease 2 homolog (S. cerevisiae)
hsa-miR-1283	1	0	1	1	1	1	SPRY2	sprouty homolog 2 (Drosophila)
hsa-miR-1283	1	0	1	1	1	1	ZNF410	zinc finger protein 410
hsa-miR-1283	1	0	1	1	1	1	TSEN34	tRNA splicing endonuclease 34 homolog (S. cerevisiae)
hsa-miR-1283	0	0	1	1	1	1	ZNF146	zinc finger protein 146
hsa-miR-1283	1	0	1	0	1	1	CGGBP1	CGG triplet repeat binding protein 1
hsa-miR-1283	0	0	1	1	0	0	PNLIPRP1	pancreatic lipase-related protein 1
hsa-miR-1283	0	0	1	0	0	0	MGC13053	uncharacterized MGC13053
hsa-miR-1283	1	0	1	1	1	1	U2SURP	U2 snRNP-associated SURP domain containing
hsa-miR-1283	0	0	1	1	0	0	RBM14	RNA binding motif protein 14
hsa-miR-1283	0	0	1	0	0	0	ATXN7L3B	ataxin 7-like 3B
hsa-miR-1283	0	0	1	1	1	1	BBOX1	butyrobetaine (gamma), 2-oxoglutarate dioxygenase (gamma-butyrobetaine hydroxylase) 1
hsa-miR-1283	1	0	1	1	1	1	TRIM2	tripartite motif containing 2
hsa-miR-1283	0	0	1	1	1	1	TAF12	TAF12 RNA polymerase II, TATA box binding protein (TBP)-associated factor, 20kDa
hsa-miR-1283	0	0	1	1	1	1	PCNP	PEST proteolytic signal containing nuclear protein
hsa-miR-1283	0	0	1	1	1	1	KLHL29	kelch-like 29 (Drosophila)
hsa-miR-1283	1	0	1	1	1	1	ETF1	eukaryotic translation termination factor 1
hsa-miR-1283	0	0	1	1	0	0	C9orf11	chromosome 9 open reading frame 11
hsa-miR-1283	0	0	1	0	1	1	AHI1	Abelson helper integration site 1
hsa-miR-1283	0	0	1	1	1	1	C8orf33	chromosome 8 open reading frame 33
hsa-miR-1283	0	0	1	0	0	0	KLHL15	kelch-like 15 (Drosophila)
hsa-miR-1283	1	0	1	1	1	1	ZBTB38	zinc finger and BTB domain containing 38
hsa-miR-1283	1	0	1	0	1	1	NR1D2	nuclear receptor subfamily 1, group D, member 2
hsa-miR-1283	0	0	1	1	1	1	MBIP	MAP3K12 binding inhibitory protein 1
hsa-miR-1283	1	0	1	0	1	1	CYBRD1	cytochrome b reductase 1
hsa-miR-1283	1	0	1	1	1	1	NRF1	nuclear respiratory factor 1
hsa-miR-1283	1	0	1	1	0	0	UBR7	ubiquitin protein ligase E3 component n-recognin 7 (putative)
hsa-miR-1283	0	0	1	1	1	1	CSDE1	cold shock domain containing E1, RNA-binding
hsa-miR-1283	1	0	1	1	1	1	SCAF11	SR-related CTD-associated factor 11
hsa-miR-1283	0	0	1	0	0	0	FAM200B	family with sequence similarity 200, member B
hsa-miR-1283	1	0	1	1	1	1	ARHGEF9	Cdc42 guanine nucleotide exchange factor (GEF) 9
hsa-miR-1283	1	0	1	1	1	1	KIAA1217	KIAA1217
hsa-miR-1283	0	0	1	0	1	1	TMSB15B	thymosin beta 15B
hsa-miR-1283	0	0	1	0	1	1	ZNF718	zinc finger protein 718
hsa-miR-1283	0	0	1	1	0	0	LYSMD2	LysM, putative peptidoglycan-binding, domain containing 2
hsa-miR-1283	0	0	1	1	1	1	ZCCHC10	zinc finger, CCHC domain containing 10
hsa-miR-1283	1	0	1	1	1	1	SPRYD7	SPRY domain containing 7
hsa-miR-1283	1	0	1	1	1	1	RACGAP1	Rac GTPase activating protein 1
hsa-miR-1283	1	0	1	0	1	1	CDK19	cyclin-dependent kinase 19
hsa-miR-1283	1	0	1	1	1	1	ASPH	aspartate beta-hydroxylase
hsa-miR-1283	1	0	1	1	1	1	CNTN4	contactin 4
hsa-miR-1283	0	0	1	1	1	1	MAP2	microtubule-associated protein 2
hsa-miR-1283	1	0	1	1	1	1	SMYD2	SET and MYND domain containing 2
hsa-miR-1283	0	0	1	0	0	0	ANKRD19P	ankyrin repeat domain 19, pseudogene
hsa-miR-1283	0	0	1	1	1	1	CCDC146	coiled-coil domain containing 146
hsa-miR-1283	0	0	1	1	1	1	SLC51A	solute carrier family 51, alpha subunit
hsa-miR-1283	1	0	1	0	1	1	PSMF1	proteasome (prosome, macropain) inhibitor subunit 1 (PI31)
hsa-miR-1283	0	0	1	1	1	1	TMEM117	transmembrane protein 117
hsa-miR-1283	1	0	1	1	1	1	MLLT3	myeloid/lymphoid or mixed-lineage leukemia (trithorax homolog, Drosophila); translocated to, 3
hsa-miR-1283	1	0	1	1	1	1	EYA4	eyes absent homolog 4 (Drosophila)
hsa-miR-1283	1	0	1	1	1	1	SULT4A1	sulfotransferase family 4A, member 1
hsa-miR-1283	1	0	1	1	1	1	ELAVL2	ELAV (embryonic lethal, abnormal vision, Drosophila)-like 2 (Hu antigen B)
hsa-miR-1283	1	0	1	1	1	1	GABRA1	gamma-aminobutyric acid (GABA) A receptor, alpha 1
hsa-miR-1283	0	0	1	1	0	0	AHSA2	AHA1, activator of heat shock 90kDa protein ATPase homolog 2 (yeast)
hsa-miR-1283	0	0	1	1	1	1	AADAT	aminoadipate aminotransferase
hsa-miR-1283	0	0	1	1	1	1	ZNF100	zinc finger protein 100
hsa-miR-1283	1	0	1	1	1	1	ZPLD1	zona pellucida-like domain containing 1
hsa-miR-1283	1	0	1	1	1	1	GLUL	glutamate-ammonia ligase
hsa-miR-1283	0	0	1	1	1	1	C7orf53	chromosome 7 open reading frame 53
hsa-miR-1283	1	0	1	1	1	1	TBC1D1	TBC1 (tre-2/USP6, BUB2, cdc16) domain family, member 1
hsa-miR-1283	1	0	1	1	1	1	PHF17	PHD finger protein 17
hsa-miR-1283	0	0	1	0	1	1	TTC23L	tetratricopeptide repeat domain 23-like
hsa-miR-1283	0	0	1	1	0	0	WASIR2	WASH and IL9R antisense RNA 2
hsa-miR-1283	1	0	1	1	1	1	SECISBP2L	SECIS binding protein 2-like
hsa-miR-1283	1	0	1	1	1	1	HMGCR	3-hydroxy-3-methylglutaryl-CoA reductase
hsa-miR-1283	1	0	1	1	1	1	ATF7IP2	activating transcription factor 7 interacting protein 2
hsa-miR-1283	0	0	1	1	1	1	ZNF337	zinc finger protein 337
hsa-miR-1283	1	0	1	1	1	1	CLK4	CDC-like kinase 4
hsa-miR-1283	0	0	1	0	1	1	DKFZP434I0714	uncharacterized protein DKFZP434I0714
hsa-miR-1283	0	0	1	1	1	1	EDA2R	ectodysplasin A2 receptor
hsa-miR-1283	1	0	1	0	1	1	DDX3Y	DEAD (Asp-Glu-Ala-Asp) box polypeptide 3, Y-linked
hsa-miR-1283	1	0	1	1	1	1	ZZZ3	zinc finger, ZZ-type containing 3
hsa-miR-1283	0	0	1	1	1	1	SLC39A12	solute carrier family 39 (zinc transporter), member 12
hsa-miR-1283	1	0	1	1	1	1	RAP2C	RAP2C, member of RAS oncogene family
hsa-miR-1283	1	0	1	1	1	1	ZEB2	zinc finger E-box binding homeobox 2
hsa-miR-1283	0	0	1	1	0	0	C2orf80	chromosome 2 open reading frame 80
hsa-miR-1283	1	0	1	1	1	1	CTDSPL2	CTD (carboxy-terminal domain, RNA polymerase II, polypeptide A) small phosphatase like 2
hsa-miR-1283	0	0	1	1	1	1	CBLN2	cerebellin 2 precursor
hsa-miR-1283	0	0	1	1	0	0	VPS8	vacuolar protein sorting 8 homolog (S. cerevisiae)
hsa-miR-1283	0	0	1	1	1	1	SNAPC3	small nuclear RNA activating complex, polypeptide 3, 50kDa
hsa-miR-1283	1	0	1	1	1	1	ZNF618	zinc finger protein 618
hsa-miR-1283	0	0	1	1	1	1	UBE3D	ubiquitin protein ligase E3D
hsa-miR-1283	1	0	1	1	1	1	IMPACT	Impact homolog (mouse)
hsa-miR-1283	1	0	1	1	1	1	SMG7	smg-7 homolog, nonsense mediated mRNA decay factor (C. elegans)
hsa-miR-1283	1	0	1	1	1	1	ACVR1	activin A receptor, type I
hsa-miR-1283	1	0	1	0	1	1	NEGR1	neuronal growth regulator 1
hsa-miR-1283	0	0	1	0	0	0	SRGAP2C	SLIT-ROBO Rho GTPase activating protein 2C
hsa-miR-1283	1	0	1	0	1	1	CPEB4	cytoplasmic polyadenylation element binding protein 4
hsa-miR-1283	0	0	1	0	0	0	CYP4F35P	cytochrome P450, family 4, subfamily F, polypeptide 35, pseudogene
hsa-miR-1283	1	0	1	1	1	1	DPP10	dipeptidyl-peptidase 10 (non-functional)
hsa-miR-1283	0	0	1	1	1	1	C14orf118	chromosome 14 open reading frame 118
hsa-miR-1283	1	0	1	1	1	1	PLS3	plastin 3
hsa-miR-1283	0	0	1	1	0	0	CCDC152	coiled-coil domain containing 152
hsa-miR-1283	1	0	1	1	1	1	FGFR2	fibroblast growth factor receptor 2
hsa-miR-1283	0	0	1	0	0	0	USP32P1	ubiquitin specific peptidase 32 pseudogene 1
hsa-miR-1283	1	0	1	0	1	1	LPHN3	latrophilin 3
hsa-miR-1283	1	0	1	1	1	1	CEP57	centrosomal protein 57kDa
hsa-miR-1283	0	0	1	1	1	1	FBXL4	F-box and leucine-rich repeat protein 4
hsa-miR-1283	0	0	1	0	1	1	SRSF5	serine/arginine-rich splicing factor 5
hsa-miR-1283	1	0	1	1	1	1	DACH2	dachshund homolog 2 (Drosophila)
hsa-miR-1283	1	0	1	1	1	1	SLITRK3	SLIT and NTRK-like family, member 3
hsa-miR-1283	0	0	1	1	1	1	STAG1	stromal antigen 1
hsa-miR-1283	0	0	1	1	1	1	SIAE	sialic acid acetylesterase
hsa-miR-1283	1	0	1	1	1	1	ARPP21	cAMP-regulated phosphoprotein, 21kDa
hsa-miR-1283	1	0	1	0	1	1	HSPA12A	heat shock 70kDa protein 12A
hsa-miR-1283	0	0	1	1	0	0	GRM2	glutamate receptor, metabotropic 2
hsa-miR-1283	0	0	1	1	1	1	CARD8	caspase recruitment domain family, member 8
hsa-miR-1283	1	0	1	1	1	1	ROCK1	Rho-associated, coiled-coil containing protein kinase 1
hsa-miR-1283	0	0	1	0	0	0	OR7E47P	olfactory receptor, family 7, subfamily E, member 47 pseudogene
hsa-miR-1283	0	0	1	0	1	1	C11orf93	chromosome 11 open reading frame 93
hsa-miR-1283	0	0	1	1	1	1	STARD4	StAR-related lipid transfer (START) domain containing 4
hsa-miR-1283	1	0	1	1	1	1	TXNRD1	thioredoxin reductase 1
hsa-miR-1283	1	0	1	1	1	1	ADD1	adducin 1 (alpha)
hsa-miR-1283	0	0	1	0	0	0	LOC338579	ankyrin repeat domain-containing protein 30B pseudogene
hsa-miR-1283	0	0	1	0	0	0	LOC339260	uncharacterized LOC339260
hsa-miR-1283	0	0	1	1	1	1	TMEM200A	transmembrane protein 200A
hsa-miR-1283	1	0	1	1	0	0	WNK1	WNK lysine deficient protein kinase 1
hsa-miR-1283	1	0	1	1	1	1	HLTF	helicase-like transcription factor
hsa-miR-1283	1	0	1	0	1	1	PSD3	pleckstrin and Sec7 domain containing 3
hsa-miR-1283	0	0	1	1	1	1	MYO3A	myosin IIIA
hsa-miR-1283	1	0	1	1	1	1	MAMDC2	MAM domain containing 2
hsa-miR-1283	0	0	1	0	0	0	LOC283914	uncharacterized LOC283914
hsa-miR-1283	1	0	1	1	1	1	SENP1	SUMO1/sentrin specific peptidase 1
hsa-miR-1283	1	0	1	1	1	1	SF3B1	splicing factor 3b, subunit 1, 155kDa
hsa-miR-1283	0	0	1	1	0	0	POLR2B	polymerase (RNA) II (DNA directed) polypeptide B, 140kDa
hsa-miR-1283	1	0	1	0	1	1	LYPD6	LY6/PLAUR domain containing 6
hsa-miR-1283	0	0	1	0	1	1	IL33	interleukin 33
hsa-miR-1283	0	0	1	0	0	0	INHBA-AS1	INHBA antisense RNA 1
hsa-miR-1283	0	0	1	0	1	1	LOC338758	uncharacterized LOC338758
hsa-miR-1283	1	0	1	1	1	1	KIF2A	kinesin heavy chain member 2A
hsa-miR-1283	1	0	1	1	0	0	BMPR1B	bone morphogenetic protein receptor, type IB
hsa-miR-1283	1	0	1	1	1	1	RTKN2	rhotekin 2
hsa-miR-1283	1	0	1	1	1	1	RECK	reversion-inducing-cysteine-rich protein with kazal motifs
hsa-miR-1283	1	0	1	0	1	1	CCNY	cyclin Y
hsa-miR-1283	0	0	1	1	1	1	LINC00086	long intergenic non-protein coding RNA 86
hsa-miR-1283	1	0	1	1	1	1	ZFP91	zinc finger protein 91 homolog (mouse)
hsa-miR-1283	1	0	1	1	1	1	HP1BP3	heterochromatin protein 1, binding protein 3
hsa-miR-1283	0	0	1	1	1	1	LRRFIP2	leucine rich repeat (in FLII) interacting protein 2
hsa-miR-1283	0	0	1	0	0	0	LINC00265	long intergenic non-protein coding RNA 265
hsa-miR-1283	1	0	1	1	1	1	PPP2R5E	protein phosphatase 2, regulatory subunit B', epsilon isoform
hsa-miR-1283	0	0	1	1	1	1	MPP3	membrane protein, palmitoylated 3 (MAGUK p55 subfamily member 3)
hsa-miR-1283	0	0	1	1	0	0	CUEDC1	CUE domain containing 1
hsa-miR-1283	1	0	1	1	1	1	KLHL28	kelch-like 28 (Drosophila)
hsa-miR-1283	0	0	1	1	1	1	ZBTB8OS	zinc finger and BTB domain containing 8 opposite strand
hsa-miR-1283	0	0	1	0	0	0	SDHAP2	succinate dehydrogenase complex, subunit A, flavoprotein pseudogene 2
hsa-miR-1283	1	0	1	1	1	1	SCOC	short coiled-coil protein
hsa-miR-1283	0	0	1	1	1	1	GPATCH2	G patch domain containing 2
hsa-miR-1283	0	0	1	1	1	1	SCRIB	scribbled homolog (Drosophila)
hsa-miR-1283	1	0	1	1	1	1	RANBP9	RAN binding protein 9
hsa-miR-1283	1	0	1	1	0	0	ANKIB1	ankyrin repeat and IBR domain containing 1
hsa-miR-1283	0	0	1	1	1	1	ZNF333	zinc finger protein 333
hsa-miR-1283	1	0	1	1	1	1	MYLK	myosin light chain kinase
hsa-miR-1283	0	0	1	1	1	1	ZNF33B	zinc finger protein 33B
hsa-miR-1283	1	0	1	1	1	1	EIF4G2	eukaryotic translation initiation factor 4 gamma, 2
hsa-miR-1283	1	0	1	1	1	1	LMO4	LIM domain only 4
hsa-miR-1283	1	0	1	1	1	1	CUX1	cut-like homeobox 1
hsa-miR-1283	1	0	1	1	1	1	C18orf1	chromosome 18 open reading frame 1
hsa-miR-1283	1	0	1	1	0	0	SNX18	sorting nexin 18
hsa-miR-1283	0	0	1	0	0	0	PABPC1P2	poly(A) binding protein, cytoplasmic 1 pseudogene 2
hsa-miR-1283	1	0	1	1	1	1	SRPK2	SRSF protein kinase 2
hsa-miR-1283	0	0	1	0	0	0	FOXN3-AS2	FOXN3 antisense RNA 2
hsa-miR-1283	0	0	1	1	0	0	CYP4F30P	cytochrome P450, family 4, subfamily F, polypeptide 30, pseudogene
hsa-miR-1283	1	0	1	1	0	0	CHTOP	chromatin target of PRMT1
hsa-miR-1283	0	0	1	1	1	1	TSPAN8	tetraspanin 8
hsa-miR-1283	1	0	1	1	1	1	MED27	mediator complex subunit 27
hsa-miR-1283	1	0	1	0	1	1	TGFBR1	transforming growth factor, beta receptor 1
hsa-miR-1283	1	0	1	1	1	1	USP47	ubiquitin specific peptidase 47
hsa-miR-1283	1	0	1	0	1	1	TMEM194A	transmembrane protein 194A
hsa-miR-1283	0	0	1	1	1	1	ABHD14B	abhydrolase domain containing 14B
hsa-miR-1283	1	0	1	0	1	1	AMMECR1L	AMME chromosomal region gene 1-like
hsa-miR-1283	0	0	1	0	0	0	LINC00537	long intergenic non-protein coding RNA 537
hsa-miR-1283	1	0	1	1	1	1	ZBTB7A	zinc finger and BTB domain containing 7A
hsa-miR-1283	1	0	1	1	1	1	ZMYND11	zinc finger, MYND-type containing 11
hsa-miR-1283	1	0	1	1	1	1	STK38	serine/threonine kinase 38
hsa-miR-1283	1	0	1	1	1	1	ST8SIA2	ST8 alpha-N-acetyl-neuraminide alpha-2,8-sialyltransferase 2
hsa-miR-1283	1	0	1	1	1	1	ACVR2B	activin A receptor, type IIB
hsa-miR-1283	1	0	1	0	1	1	ARPP19	cAMP-regulated phosphoprotein, 19kDa
hsa-miR-1283	0	0	1	1	1	1	XG	Xg blood group
hsa-miR-1283	0	0	1	1	0	0	MTMR11	myotubularin related protein 11
hsa-miR-1283	1	0	1	1	1	1	LRRC15	leucine rich repeat containing 15
hsa-miR-1283	0	0	1	1	1	1	ZNF365	zinc finger protein 365
hsa-miR-1283	0	0	1	1	0	0	PPAPDC1A	phosphatidic acid phosphatase type 2 domain containing 1A
hsa-miR-1283	1	0	1	0	1	1	VANGL2	vang-like 2 (van gogh, Drosophila)
hsa-miR-1283	1	0	1	0	1	1	CPEB2	cytoplasmic polyadenylation element binding protein 2
hsa-miR-1283	1	0	1	0	1	1	RBM23	RNA binding motif protein 23
hsa-miR-1283	1	0	1	1	1	1	NR2F2	nuclear receptor subfamily 2, group F, member 2
hsa-miR-1283	0	0	1	1	0	0	C9orf153	chromosome 9 open reading frame 153
hsa-miR-1283	1	0	1	0	1	1	DNAJC6	DnaJ (Hsp40) homolog, subfamily C, member 6
hsa-miR-1283	1	0	1	1	1	1	CERS6	ceramide synthase 6
hsa-miR-1283	1	0	1	1	1	1	SP4	Sp4 transcription factor
hsa-miR-1283	1	0	1	0	1	1	BTBD3	BTB (POZ) domain containing 3
hsa-miR-1283	1	0	1	0	1	1	KIAA1715	KIAA1715
hsa-miR-1283	1	0	1	1	1	1	HNRNPR	heterogeneous nuclear ribonucleoprotein R
hsa-miR-1283	0	0	1	1	1	1	STAU2	staufen, RNA binding protein, homolog 2 (Drosophila)
hsa-miR-1283	0	0	1	1	1	1	TTLL5	tubulin tyrosine ligase-like family, member 5
hsa-miR-1283	0	0	1	0	0	0	LRRC37A11P	leucine rich repeat containing 37, member A11, pseudogene
hsa-miR-1283	0	0	1	1	1	1	ATXN2	ataxin 2
hsa-miR-1283	1	0	1	1	1	1	NR3C2	nuclear receptor subfamily 3, group C, member 2
hsa-miR-1283	0	0	1	0	0	0	LINC00310	long intergenic non-protein coding RNA 310
hsa-miR-1283	0	0	1	1	1	1	LRCH1	leucine-rich repeats and calponin homology (CH) domain containing 1
hsa-miR-1283	1	0	1	1	1	1	ST18	suppression of tumorigenicity 18 (breast carcinoma) (zinc finger protein)
hsa-miR-1283	1	0	1	0	1	1	PRDM10	PR domain containing 10
hsa-miR-1283	0	0	1	0	1	1	NWD1	NACHT and WD repeat domain containing 1
hsa-miR-1283	1	0	1	1	1	1	OTUD4	OTU domain containing 4
hsa-miR-1283	1	0	1	1	1	1	OSBP2	oxysterol binding protein 2
hsa-miR-1283	1	0	1	1	1	1	FKBP1A	FK506 binding protein 1A, 12kDa
hsa-miR-1283	0	0	1	0	0	0	LGALS17A	Charcot-Leyden crystal protein pseudogene
hsa-miR-1283	0	0	1	0	0	0	EEF1DP3	eukaryotic translation elongation factor 1 delta pseudogene 3
hsa-miR-1283	1	0	1	0	1	1	LRCH2	leucine-rich repeats and calponin homology (CH) domain containing 2
hsa-miR-1283	0	0	1	1	1	1	ZNF189	zinc finger protein 189
hsa-miR-1283	1	0	1	1	1	1	JMJD1C	jumonji domain containing 1C
hsa-miR-1283	1	0	1	1	1	1	ZMYM4	zinc finger, MYM-type 4
hsa-miR-1283	1	0	1	1	1	1	CHIC1	cysteine-rich hydrophobic domain 1
hsa-miR-1283	1	0	1	0	1	1	SEMA4G	sema domain, immunoglobulin domain (Ig), transmembrane domain (TM) and short cytoplasmic domain, (semaphorin) 4G
hsa-miR-1283	1	0	1	1	1	1	MLLT10	myeloid/lymphoid or mixed-lineage leukemia (trithorax homolog, Drosophila); translocated to, 10
hsa-miR-1283	1	0	1	0	1	1	NFAT5	nuclear factor of activated T-cells 5, tonicity-responsive
hsa-miR-1283	1	0	1	1	1	1	PTPRZ1	protein tyrosine phosphatase, receptor-type, Z polypeptide 1
hsa-miR-1283	0	0	1	1	0	0	TCHH	trichohyalin
hsa-miR-1283	1	0	1	1	1	1	TMEM218	transmembrane protein 218
hsa-miR-1283	0	0	1	1	0	0	CCDC144A	coiled-coil domain containing 144A
hsa-miR-1283	0	0	1	1	1	1	CNIH	cornichon homolog (Drosophila)
hsa-miR-1283	1	0	1	1	1	1	GOLGA5	golgin A5
hsa-miR-1283	0	0	1	0	0	0	FLJ39632	uncharacterized LOC642477
hsa-miR-1283	1	0	1	1	1	1	ERMAP	erythroblast membrane-associated protein (Scianna blood group)
hsa-miR-1283	1	0	1	1	1	1	SASH1	SAM and SH3 domain containing 1
hsa-miR-1283	0	0	1	0	0	0	DKFZp686D0853	uncharacterized LOC401613
hsa-miR-1283	1	0	1	1	1	1	RBL2	retinoblastoma-like 2 (p130)
hsa-miR-1283	0	0	1	0	1	1	FEZ2	fasciculation and elongation protein zeta 2 (zygin II)
hsa-miR-1283	1	0	1	1	1	1	MIER3	mesoderm induction early response 1, family member 3
hsa-miR-1283	1	0	1	1	1	1	HECTD2	HECT domain containing E3 ubiquitin protein ligase 2
hsa-miR-1283	1	0	1	1	1	1	SGCD	sarcoglycan, delta (35kDa dystrophin-associated glycoprotein)
hsa-miR-1283	0	0	1	1	1	1	SLC12A8	solute carrier family 12 (potassium/chloride transporters), member 8
hsa-miR-1283	1	0	1	0	1	1	MTX3	metaxin 3
hsa-miR-1283	1	0	1	1	1	1	FAM184A	family with sequence similarity 184, member A
hsa-miR-1283	1	0	1	1	1	1	ETS1	v-ets erythroblastosis virus E26 oncogene homolog 1 (avian)
hsa-miR-1283	0	0	1	1	1	1	AIG1	androgen-induced 1
hsa-miR-1283	0	0	1	1	0	0	TTC5	tetratricopeptide repeat domain 5
hsa-miR-1283	0	0	1	1	1	1	KLHL8	kelch-like 8 (Drosophila)
hsa-miR-1283	0	0	1	1	1	1	SLC26A3	solute carrier family 26, member 3
hsa-miR-1283	1	0	1	1	1	1	TJP1	tight junction protein 1
hsa-miR-1283	0	0	1	1	1	1	PSMA2	proteasome (prosome, macropain) subunit, alpha type, 2
hsa-miR-1283	1	0	1	1	1	1	PRKRIR	protein-kinase, interferon-inducible double stranded RNA dependent inhibitor, repressor of (P58 repressor)
hsa-miR-1283	1	0	1	0	1	1	FAM73A	family with sequence similarity 73, member A
hsa-miR-1283	1	0	1	1	1	1	RORB	RAR-related orphan receptor B
hsa-miR-1283	0	0	1	1	1	1	VPS35	vacuolar protein sorting 35 homolog (S. cerevisiae)
hsa-miR-1283	0	0	1	1	0	0	RPS24	ribosomal protein S24
hsa-miR-1283	1	0	1	1	1	1	PRDM2	PR domain containing 2, with ZNF domain
hsa-miR-1283	1	0	1	1	0	0	RBM27	RNA binding motif protein 27
hsa-miR-1283	0	0	1	1	1	1	MLIP	muscular LMNA-interacting protein
hsa-miR-1283	0	0	1	0	1	1	THAP6	THAP domain containing 6
hsa-miR-1283	0	0	1	1	1	1	FAM9C	family with sequence similarity 9, member C
hsa-miR-1283	0	0	1	0	0	0	LINC00240	long intergenic non-protein coding RNA 240
hsa-miR-1283	1	0	1	1	1	1	GTDC1	glycosyltransferase-like domain containing 1
hsa-miR-1283	1	0	1	0	1	1	VPS36	vacuolar protein sorting 36 homolog (S. cerevisiae)
hsa-miR-1283	1	0	1	1	1	1	TSC22D3	TSC22 domain family, member 3
hsa-miR-1283	0	0	1	0	0	0	OVOS	ovostatin
hsa-miR-1283	1	0	1	1	1	1	GDI2	GDP dissociation inhibitor 2
hsa-miR-1283	1	0	1	1	1	1	NEDD9	neural precursor cell expressed, developmentally down-regulated 9
hsa-miR-1283	1	0	1	1	1	1	PDXDC1	pyridoxal-dependent decarboxylase domain containing 1
hsa-miR-1283	0	0	1	1	1	1	CCNT2	cyclin T2
hsa-miR-1283	1	0	1	1	1	1	PTPRB	protein tyrosine phosphatase, receptor type, B
hsa-miR-1283	0	0	1	1	1	1	ATP2A2	ATPase, Ca++ transporting, cardiac muscle, slow twitch 2
hsa-miR-1283	1	0	1	1	1	1	NFIB	nuclear factor I/B
hsa-miR-1283	1	0	1	1	1	1	NAV1	neuron navigator 1
hsa-miR-1283	1	0	1	0	1	1	IGF2BP3	insulin-like growth factor 2 mRNA binding protein 3
hsa-miR-1283	1	0	1	1	1	1	RDX	radixin
hsa-miR-1283	1	0	1	1	1	1	TMEM135	transmembrane protein 135
hsa-miR-1283	1	0	1	1	1	1	EOGT	EGF domain-specific O-linked N-acetylglucosamine (GlcNAc) transferase
hsa-miR-1283	0	0	1	1	1	1	PRPSAP2	phosphoribosyl pyrophosphate synthetase-associated protein 2
hsa-miR-1283	1	0	1	0	1	1	TBL1XR1	transducin (beta)-like 1 X-linked receptor 1
hsa-miR-1283	1	0	1	0	1	1	C1orf21	chromosome 1 open reading frame 21
hsa-miR-1283	1	0	1	1	1	1	CREB3L2	cAMP responsive element binding protein 3-like 2
hsa-miR-1283	1	0	1	1	1	1	BSDC1	BSD domain containing 1
hsa-miR-1283	1	0	1	1	1	1	PGGT1B	protein geranylgeranyltransferase type I, beta subunit
hsa-miR-1283	1	0	1	1	0	0	SMARCA2	SWI/SNF related, matrix associated, actin dependent regulator of chromatin, subfamily a, member 2
hsa-miR-1283	1	0	1	0	1	1	RNF144A	ring finger protein 144A
hsa-miR-1283	1	0	1	1	1	1	ARF1	ADP-ribosylation factor 1
hsa-miR-1283	1	0	1	1	1	1	FUT9	fucosyltransferase 9 (alpha (1,3) fucosyltransferase)
hsa-miR-1283	1	0	1	1	1	1	TOM1L1	target of myb1 (chicken)-like 1
hsa-miR-1283	0	0	1	1	0	0	RNPS1	RNA binding protein S1, serine-rich domain
hsa-miR-1283	0	0	1	1	1	1	PRDX1	peroxiredoxin 1
hsa-miR-1283	1	0	1	1	1	1	EIF4B	eukaryotic translation initiation factor 4B
hsa-miR-1283	0	0	1	1	1	1	APH1A	anterior pharynx defective 1 homolog A (C. elegans)
hsa-miR-1283	1	0	1	1	1	1	CLDN11	claudin 11
hsa-miR-1283	0	0	1	1	1	1	COPS8	COP9 constitutive photomorphogenic homolog subunit 8 (Arabidopsis)
hsa-miR-1283	1	0	1	1	1	1	ARL1	ADP-ribosylation factor-like 1
hsa-miR-1283	1	0	1	1	1	1	PTN	pleiotrophin
hsa-miR-1283	1	0	1	1	1	1	DOLPP1	dolichyl pyrophosphate phosphatase 1
hsa-miR-1283	0	0	1	1	1	1	FAT1	FAT tumor suppressor homolog 1 (Drosophila)
hsa-miR-1283	0	0	1	1	1	1	TASP1	taspase, threonine aspartase, 1
hsa-miR-1283	1	0	1	1	1	1	CD9	CD9 molecule
hsa-miR-1283	0	0	1	1	1	1	CD99	CD99 molecule
hsa-miR-1283	1	0	1	1	1	1	TPD52L2	tumor protein D52-like 2
hsa-miR-1283	0	0	1	0	1	1	CD99P1	CD99 molecule pseudogene 1
hsa-miR-1283	1	0	1	1	1	1	NFKBIA	nuclear factor of kappa light polypeptide gene enhancer in B-cells inhibitor, alpha
hsa-miR-1283	1	0	1	1	1	1	TFDP1	transcription factor Dp-1
hsa-miR-1283	1	0	1	0	1	1	RPS6KB1	ribosomal protein S6 kinase, 70kDa, polypeptide 1
hsa-miR-1283	1	0	1	1	1	1	PCTP	phosphatidylcholine transfer protein
hsa-miR-1283	0	0	1	1	1	1	TRIM68	tripartite motif containing 68
hsa-miR-1283	0	0	1	1	1	1	CDS2	CDP-diacylglycerol synthase (phosphatidate cytidylyltransferase) 2
hsa-miR-1283	1	0	1	1	1	1	STK38L	serine/threonine kinase 38 like
hsa-miR-1283	0	0	1	0	1	1	TMEM155	transmembrane protein 155
hsa-miR-1283	0	0	1	1	1	1	PDLIM1	PDZ and LIM domain 1
hsa-miR-1283	0	0	1	1	1	1	HADHB	hydroxyacyl-CoA dehydrogenase/3-ketoacyl-CoA thiolase/enoyl-CoA hydratase (trifunctional protein), beta subunit
hsa-miR-1283	0	0	1	1	1	1	KLHDC2	kelch domain containing 2
hsa-miR-1283	1	0	1	1	1	1	MMP2	matrix metallopeptidase 2 (gelatinase A, 72kDa gelatinase, 72kDa type IV collagenase)
hsa-miR-1283	1	0	1	1	1	1	PPP5C	protein phosphatase 5, catalytic subunit
hsa-miR-1283	1	0	1	1	1	1	KCNIP4	Kv channel interacting protein 4
hsa-miR-1283	1	0	1	1	0	0	FAT4	FAT tumor suppressor homolog 4 (Drosophila)
hsa-miR-1283	1	0	1	1	1	1	LAMTOR3	late endosomal/lysosomal adaptor, MAPK and MTOR activator 3
hsa-miR-1283	1	0	1	1	1	1	ARNTL	aryl hydrocarbon receptor nuclear translocator-like
hsa-miR-1283	0	0	1	1	1	1	TRMT61B	tRNA methyltransferase 61 homolog B (S. cerevisiae)
hsa-miR-1283	1	0	1	0	1	1	C15orf41	chromosome 15 open reading frame 41
hsa-miR-1283	0	0	1	1	1	1	SMNDC1	survival motor neuron domain containing 1
hsa-miR-1283	1	0	1	1	1	1	PPP3CB	protein phosphatase 3, catalytic subunit, beta isozyme
hsa-miR-1283	0	0	1	1	1	1	CHEK1	checkpoint kinase 1
hsa-miR-1283	0	0	1	1	1	1	ODC1	ornithine decarboxylase 1
hsa-miR-1283	1	0	1	0	1	1	NLN	neurolysin (metallopeptidase M3 family)
hsa-miR-1283	1	0	1	1	1	1	YWHAQ	tyrosine 3-monooxygenase/tryptophan 5-monooxygenase activation protein, theta polypeptide
hsa-miR-1283	1	0	1	1	1	1	FUBP3	far upstream element (FUSE) binding protein 3
hsa-miR-1283	0	0	1	1	1	1	TMCO1	transmembrane and coiled-coil domains 1
hsa-miR-1283	1	0	1	1	1	1	ARL4A	ADP-ribosylation factor-like 4A
hsa-miR-1283	0	0	1	1	1	1	CD1C	CD1c molecule
hsa-miR-1283	1	0	1	1	1	1	PFN2	profilin 2
hsa-miR-1283	0	0	1	1	0	0	TBC1D7	TBC1 domain family, member 7
hsa-miR-1283	1	0	1	1	1	1	NFYB	nuclear transcription factor Y, beta
hsa-miR-1283	0	0	1	1	1	1	RCN2	reticulocalbin 2, EF-hand calcium binding domain
hsa-miR-1283	0	0	1	1	1	1	GFM1	G elongation factor, mitochondrial 1
hsa-miR-1283	1	0	1	1	1	1	F11R	F11 receptor
hsa-miR-1283	0	0	1	1	1	1	HEATR5B	HEAT repeat containing 5B
hsa-miR-1283	1	0	1	1	1	1	PDCL	phosducin-like
hsa-miR-1283	1	0	1	1	1	1	RNF2	ring finger protein 2
hsa-miR-1283	0	0	1	0	0	0	ZNF674-AS1	ZNF674 antisense RNA 1
hsa-miR-1283	0	0	1	1	1	1	TSEN15	tRNA splicing endonuclease 15 homolog (S. cerevisiae)
hsa-miR-1283	0	0	1	1	0	0	RAMP2	receptor (G protein-coupled) activity modifying protein 2
hsa-miR-1283	1	0	1	0	1	1	CD47	CD47 molecule
hsa-miR-1283	0	0	1	1	1	1	GATSL3	GATS protein-like 3
hsa-miR-1283	1	0	1	1	1	1	ATPAF1	ATP synthase mitochondrial F1 complex assembly factor 1
hsa-miR-1283	0	0	1	1	1	1	BEX4	brain expressed, X-linked 4
hsa-miR-1283	0	0	1	1	1	1	NUDT21	nudix (nucleoside diphosphate linked moiety X)-type motif 21
hsa-miR-1283	0	0	1	1	1	1	COPS4	COP9 constitutive photomorphogenic homolog subunit 4 (Arabidopsis)
hsa-miR-1283	1	0	1	1	1	1	JUNB	jun B proto-oncogene
hsa-miR-1283	0	0	1	1	0	0	RAE1	RAE1 RNA export 1 homolog (S. pombe)
hsa-miR-1283	0	0	1	1	1	1	C10orf2	chromosome 10 open reading frame 2
hsa-miR-1283	0	0	1	1	1	1	BDH1	3-hydroxybutyrate dehydrogenase, type 1
hsa-miR-1283	1	0	1	1	1	1	RND3	Rho family GTPase 3
hsa-miR-1283	1	0	1	0	1	1	NMT1	N-myristoyltransferase 1
hsa-miR-1283	0	0	1	0	0	0	LOC731789	uncharacterized LOC731789
hsa-miR-1283	1	0	1	1	1	1	FBXW7	F-box and WD repeat domain containing 7, E3 ubiquitin protein ligase
hsa-miR-1283	0	0	1	0	0	0	LINC00661	long intergenic non-protein coding RNA 661
hsa-miR-1283	0	0	1	0	1	1	STARD8	StAR-related lipid transfer (START) domain containing 8
hsa-miR-1283	1	0	1	1	1	1	HECW2	HECT, C2 and WW domain containing E3 ubiquitin protein ligase 2
hsa-miR-1283	1	0	1	0	1	1	MEGF10	multiple EGF-like-domains 10
hsa-miR-1283	1	0	1	1	1	1	KIAA2018	KIAA2018
hsa-miR-1283	1	0	1	0	1	1	PTP4A1	protein tyrosine phosphatase type IVA, member 1
hsa-miR-1283	1	0	1	0	1	1	OSBPL8	oxysterol binding protein-like 8
hsa-miR-1283	1	0	1	1	1	1	SNRK	SNF related kinase
hsa-miR-1283	1	0	1	1	1	1	TIPARP	TCDD-inducible poly(ADP-ribose) polymerase
hsa-miR-1283	1	0	1	1	0	0	POMGNT1	protein O-linked mannose beta1,2-N-acetylglucosaminyltransferase
hsa-miR-1283	1	0	1	0	1	1	CNTNAP2	contactin associated protein-like 2
hsa-miR-1283	1	0	1	0	1	1	ZNF652	zinc finger protein 652
hsa-miR-1283	0	0	1	0	1	1	SYNPR	synaptoporin
hsa-miR-1283	0	0	1	1	1	1	STON1	stonin 1
hsa-miR-1283	1	0	1	1	1	1	ZFHX3	zinc finger homeobox 3
hsa-miR-1283	1	0	1	1	1	1	RBPJ	recombination signal binding protein for immunoglobulin kappa J region
hsa-miR-1283	1	0	1	1	1	1	PI15	peptidase inhibitor 15
hsa-miR-1283	1	0	1	1	1	1	UBAP2L	ubiquitin associated protein 2-like
hsa-miR-1283	0	0	1	1	1	1	UBXN8	UBX domain protein 8
hsa-miR-1283	1	0	1	0	1	1	CBX7	chromobox homolog 7
hsa-miR-1283	0	0	1	1	0	0	FAM58A	family with sequence similarity 58, member A
hsa-miR-1283	1	0	1	0	1	1	MAP2K7	mitogen-activated protein kinase kinase 7
hsa-miR-1283	1	0	1	1	1	1	ITSN1	intersectin 1 (SH3 domain protein)
hsa-miR-1283	1	0	1	1	1	1	MLL	myeloid/lymphoid or mixed-lineage leukemia (trithorax homolog, Drosophila)
hsa-miR-1283	0	0	1	1	1	1	RFC1	replication factor C (activator 1) 1, 145kDa
hsa-miR-1283	1	0	1	1	1	1	RALBP1	ralA binding protein 1
hsa-miR-1283	0	0	1	1	1	1	CD55	CD55 molecule, decay accelerating factor for complement (Cromer blood group)
hsa-miR-1283	1	0	1	1	1	1	IGF1	insulin-like growth factor 1 (somatomedin C)
hsa-miR-1283	0	0	1	1	1	1	NPR3	natriuretic peptide receptor C/guanylate cyclase C (atrionatriuretic peptide receptor C)
hsa-miR-1283	0	0	1	1	1	1	GAD2	glutamate decarboxylase 2 (pancreatic islets and brain, 65kDa)
hsa-miR-1283	0	0	1	1	1	1	ELF1	E74-like factor 1 (ets domain transcription factor)
hsa-miR-1283	1	0	1	1	1	1	FAS	Fas (TNF receptor superfamily, member 6)
hsa-miR-1283	1	0	1	0	1	1	ATM	ataxia telangiectasia mutated
hsa-miR-1283	1	0	1	1	1	1	COL1A2	collagen, type I, alpha 2
hsa-miR-1283	1	0	1	1	1	1	COL5A1	collagen, type V, alpha 1
hsa-miR-1283	1	0	1	1	1	1	DLD	dihydrolipoamide dehydrogenase
hsa-miR-1283	0	0	1	1	1	1	DPYD	dihydropyrimidine dehydrogenase
hsa-miR-1283	0	0	1	1	1	1	F11	coagulation factor XI
hsa-miR-1283	1	0	1	1	1	1	FBN1	fibrillin 1
hsa-miR-1283	0	0	1	0	1	1	MS4A2	membrane-spanning 4-domains, subfamily A, member 2
hsa-miR-1283	1	0	1	1	1	1	KCNA1	potassium voltage-gated channel, shaker-related subfamily, member 1 (episodic ataxia with myokymia)
hsa-miR-1283	1	0	1	1	1	1	NF1	neurofibromin 1
hsa-miR-1283	1	0	1	1	1	1	OCRL	oculocerebrorenal syndrome of Lowe
hsa-miR-1283	1	0	1	1	1	1	PEX12	peroxisomal biogenesis factor 12
hsa-miR-1283	0	0	1	0	1	1	PGK1	phosphoglycerate kinase 1
hsa-miR-1283	0	0	1	1	1	1	PRNP	prion protein
hsa-miR-1283	1	0	1	0	1	1	PTEN	phosphatase and tensin homolog
hsa-miR-1283	1	0	1	1	1	1	RB1	retinoblastoma 1
hsa-miR-1283	1	0	1	1	1	1	ATXN1	ataxin 1
hsa-miR-1283	1	0	1	0	1	1	SCN4A	sodium channel, voltage-gated, type IV, alpha subunit
hsa-miR-1283	1	0	1	1	1	1	SOX9	SRY (sex determining region Y)-box 9
hsa-miR-1283	1	0	1	0	1	1	PCSK1	proprotein convertase subtilisin/kexin type 1
hsa-miR-1283	1	0	1	1	1	1	HNF1B	HNF1 homeobox B
hsa-miR-1283	0	0	1	1	1	1	COL10A1	collagen, type X, alpha 1
hsa-miR-1283	1	0	1	1	1	1	LDLR	low density lipoprotein receptor
hsa-miR-1283	0	0	1	1	1	1	VHL	von Hippel-Lindau tumor suppressor, E3 ubiquitin protein ligase
hsa-miR-1283	1	0	1	1	1	1	DCX	doublecortin
hsa-miR-1283	0	0	1	1	0	0	IL3	interleukin 3 (colony-stimulating factor, multiple)
hsa-miR-1283	1	0	1	1	1	1	CD44	CD44 molecule (Indian blood group)
hsa-miR-1283	0	0	1	1	1	1	GSR	glutathione reductase
hsa-miR-1283	0	0	1	1	1	1	ALDH1A1	aldehyde dehydrogenase 1 family, member A1
hsa-miR-1283	0	0	1	1	1	1	ALDH1B1	aldehyde dehydrogenase 1 family, member B1
hsa-miR-1283	1	0	1	1	1	1	GABRB3	gamma-aminobutyric acid (GABA) A receptor, beta 3
hsa-miR-1283	1	0	1	1	1	1	GAD1	glutamate decarboxylase 1 (brain, 67kDa)
hsa-miR-1283	0	0	1	1	1	1	GLRB	glycine receptor, beta
hsa-miR-1283	0	0	1	1	1	1	GRM3	glutamate receptor, metabotropic 3
hsa-miR-1283	0	0	1	1	1	1	HTR7	5-hydroxytryptamine (serotonin) receptor 7, adenylate cyclase-coupled
hsa-miR-1283	1	0	1	1	1	1	IGF1R	insulin-like growth factor 1 receptor
hsa-miR-1283	0	0	1	1	1	1	TBC1D3C	TBC1 domain family, member 3C
hsa-miR-1283	1	0	1	0	1	1	SMAD5	SMAD family member 5
hsa-miR-1283	1	0	1	0	1	1	UBE2W	ubiquitin-conjugating enzyme E2W (putative)
hsa-miR-1283	0	0	1	0	1	1	ZDHHC13	zinc finger, DHHC-type containing 13
hsa-miR-1283	1	0	1	0	1	1	SPOPL	speckle-type POZ protein-like
hsa-miR-1283	1	0	1	1	1	1	C14orf37	chromosome 14 open reading frame 37
hsa-miR-1283	1	0	1	1	1	1	LCLAT1	lysocardiolipin acyltransferase 1
hsa-miR-1283	1	0	1	1	1	1	LEPR	leptin receptor
hsa-miR-1283	1	0	1	1	1	1	TMEM200B	transmembrane protein 200B
hsa-miR-1283	1	0	1	1	1	1	KLHL31	kelch-like 31 (Drosophila)
hsa-miR-1283	0	0	1	1	1	1	AGMO	alkylglycerol monooxygenase
hsa-miR-1283	0	0	1	1	1	1	PRR13	proline rich 13
hsa-miR-1283	1	0	1	0	1	1	YPEL2	yippee-like 2 (Drosophila)
hsa-miR-1283	1	0	1	1	1	1	EBF3	early B-cell factor 3
hsa-miR-1283	1	0	1	1	1	1	PLCXD3	phosphatidylinositol-specific phospholipase C, X domain containing 3
hsa-miR-1283	1	0	1	1	1	1	NFKBIZ	nuclear factor of kappa light polypeptide gene enhancer in B-cells inhibitor, zeta
hsa-miR-1283	0	0	1	1	1	1	MAPKAP1	mitogen-activated protein kinase associated protein 1
hsa-miR-1283	0	0	1	1	0	0	SPIN2B	spindlin family, member 2B
hsa-miR-1283	1	0	1	1	1	1	L3MBTL3	l(3)mbt-like 3 (Drosophila)
hsa-miR-1283	0	0	1	1	1	1	ERCC8	excision repair cross-complementing rodent repair deficiency, complementation group 8
hsa-miR-1283	1	0	1	1	1	1	IGSF3	immunoglobulin superfamily, member 3
hsa-miR-1283	1	0	1	1	1	1	BRWD1	bromodomain and WD repeat domain containing 1
hsa-miR-1283	0	0	1	1	1	1	TRIM13	tripartite motif containing 13
hsa-miR-1283	1	0	1	1	1	1	LMBRD2	LMBR1 domain containing 2
hsa-miR-1283	1	0	1	0	1	1	SS18	synovial sarcoma translocation, chromosome 18
hsa-miR-1283	1	0	1	0	1	1	C18orf25	chromosome 18 open reading frame 25
hsa-miR-1283	1	0	1	1	1	1	BCAP29	B-cell receptor-associated protein 29
hsa-miR-1283	1	0	1	1	1	1	RBM33	RNA binding motif protein 33
hsa-miR-1283	1	0	1	0	1	1	KIAA2022	KIAA2022
hsa-miR-1283	1	0	1	1	1	1	FNIP1	folliculin interacting protein 1
hsa-miR-1283	0	0	1	1	0	0	CDKL4	cyclin-dependent kinase-like 4
hsa-miR-1283	1	0	1	0	1	1	ERMN	ermin, ERM-like protein
hsa-miR-1283	1	0	1	1	1	1	ARHGAP28	Rho GTPase activating protein 28
hsa-miR-1283	1	0	1	1	1	1	SHE	Src homology 2 domain containing E
hsa-miR-1283	1	0	1	0	1	1	ZC3H12B	zinc finger CCCH-type containing 12B
hsa-miR-1283	1	0	1	1	1	1	SLC6A17	solute carrier family 6, member 17
hsa-miR-1283	1	0	1	0	1	1	C6orf222	chromosome 6 open reading frame 222
hsa-miR-1283	0	0	1	1	0	0	PNLIPRP3	pancreatic lipase-related protein 3
hsa-miR-1283	1	0	1	1	1	1	BTBD1	BTB (POZ) domain containing 1
hsa-miR-1283	1	0	1	1	1	1	CTNNBIP1	catenin, beta interacting protein 1
hsa-miR-1283	1	0	1	1	1	1	FOXP4	forkhead box P4
hsa-miR-1283	1	0	1	1	1	1	SLC25A53	solute carrier family 25, member 53
hsa-miR-1283	0	0	1	1	1	1	SPIN4	spindlin family, member 4
hsa-miR-1283	1	0	1	1	1	1	PABPC1L2A	poly(A) binding protein, cytoplasmic 1-like 2A
hsa-miR-1283	1	0	1	1	1	1	SORCS1	sortilin-related VPS10 domain containing receptor 1
hsa-miR-1283	1	0	1	1	1	1	C12orf68	chromosome 12 open reading frame 68
hsa-miR-1283	1	0	1	1	1	1	H3F3C	H3 histone, family 3C
hsa-miR-1283	0	0	1	0	1	1	LINC00268	long intergenic non-protein coding RNA 268
hsa-miR-1283	1	0	1	0	1	1	SYT14L	synaptotagmin XIV-like
hsa-miR-1283	1	0	1	1	1	1	KCNMA1	potassium large conductance calcium-activated channel, subfamily M, alpha member 1
hsa-miR-1283	1	0	1	1	1	1	RUNX2	runt-related transcription factor 2
hsa-miR-1283	1	0	1	1	1	1	PHF6	PHD finger protein 6
hsa-miR-1283	1	0	1	1	1	1	TMCC1	transmembrane and coiled-coil domain family 1
hsa-miR-1283	1	0	1	0	1	1	GOPC	golgi-associated PDZ and coiled-coil motif containing
hsa-miR-1283	0	0	1	1	1	1	USP1	ubiquitin specific peptidase 1
hsa-miR-1283	1	0	1	1	1	1	ZHX1	zinc fingers and homeoboxes 1
hsa-miR-1283	0	0	1	1	1	1	RAB28	RAB28, member RAS oncogene family
hsa-miR-1283	1	0	1	1	1	1	VMA21	VMA21 vacuolar H+-ATPase homolog (S. cerevisiae)
hsa-miR-1283	0	0	1	1	0	0	FNTA	farnesyltransferase, CAAX box, alpha
hsa-miR-1283	1	0	1	0	1	1	GCH1	GTP cyclohydrolase 1
hsa-miR-1283	1	0	1	1	1	1	CANX	calnexin
hsa-miR-1283	0	0	1	1	1	1	WASF1	WAS protein family, member 1
hsa-miR-1283	1	0	1	1	1	1	FNBP1L	formin binding protein 1-like
hsa-miR-1283	1	0	1	0	1	1	ADAR	adenosine deaminase, RNA-specific
hsa-miR-1283	1	0	1	1	1	1	AFF3	AF4/FMR2 family, member 3
hsa-miR-1283	1	0	1	0	1	1	CLLU1	chronic lymphocytic leukemia up-regulated 1
hsa-miR-1283	1	0	1	1	1	1	SLC35F1	solute carrier family 35, member F1
hsa-miR-1283	1	0	1	1	1	1	RGS7BP	regulator of G-protein signaling 7 binding protein
hsa-miR-1283	1	0	1	1	1	1	PLEKHG1	pleckstrin homology domain containing, family G (with RhoGef domain) member 1
hsa-miR-1283	1	0	1	0	1	1	MSRB3	methionine sulfoxide reductase B3
hsa-miR-1283	0	0	1	1	1	1	TP53BP2	tumor protein p53 binding protein, 2
hsa-miR-1283	1	0	1	1	1	1	RCE1	RCE1 homolog, prenyl protein protease (S. cerevisiae)
hsa-miR-1283	1	0	1	1	1	1	TMPO	thymopoietin
hsa-miR-1283	1	0	1	1	1	1	STK24	serine/threonine kinase 24
hsa-miR-1283	0	0	1	1	1	1	HNRNPH2	heterogeneous nuclear ribonucleoprotein H2 (H')
hsa-miR-1283	1	0	1	1	1	1	PPM1B	protein phosphatase, Mg2+/Mn2+ dependent, 1B
hsa-miR-1283	0	0	1	1	1	1	PHF12	PHD finger protein 12
hsa-miR-1283	1	0	1	1	1	1	ZNF704	zinc finger protein 704
hsa-miR-1283	1	0	1	1	1	1	SMOC1	SPARC related modular calcium binding 1
hsa-miR-1283	0	0	1	1	0	0	AGBL5	ATP/GTP binding protein-like 5
hsa-miR-1283	0	0	1	1	1	1	CEP112	centrosomal protein 112kDa
hsa-miR-1283	1	0	1	1	1	1	SCD5	stearoyl-CoA desaturase 5
hsa-miR-1283	0	0	1	1	1	1	MAP9	microtubule-associated protein 9
hsa-miR-1283	1	0	1	0	1	1	USP9X	ubiquitin specific peptidase 9, X-linked
hsa-miR-1283	0	0	1	1	1	1	ZMYM5	zinc finger, MYM-type 5
hsa-miR-1283	1	0	1	0	1	1	FAM133B	family with sequence similarity 133, member B
hsa-miR-1283	1	0	1	1	1	1	SPTSSB	serine palmitoyltransferase, small subunit B
hsa-miR-1283	0	0	1	1	1	1	MUC17	mucin 17, cell surface associated
hsa-miR-1283	0	0	1	1	0	0	SPINK9	serine peptidase inhibitor, Kazal type 9
hsa-miR-1283	1	0	1	1	1	1	ASB1	ankyrin repeat and SOCS box containing 1
hsa-miR-1283	1	0	1	1	1	1	FAM63B	family with sequence similarity 63, member B
hsa-miR-1283	1	0	1	1	1	1	PRKAG2	protein kinase, AMP-activated, gamma 2 non-catalytic subunit
hsa-miR-1283	0	0	1	1	1	1	SI	sucrase-isomaltase (alpha-glucosidase)
hsa-miR-1283	1	0	1	1	1	1	CYLD	cylindromatosis (turban tumor syndrome)
hsa-miR-1283	1	0	1	1	1	1	GLIS3	GLIS family zinc finger 3
hsa-miR-1283	0	0	1	1	1	1	PSPC1	paraspeckle component 1
hsa-miR-1283	1	0	1	1	1	1	ST3GAL5	ST3 beta-galactoside alpha-2,3-sialyltransferase 5
hsa-miR-1283	0	0	1	1	1	1	GEMIN8	gem (nuclear organelle) associated protein 8
hsa-miR-1283	1	0	1	1	1	1	PABPC1L2B	poly(A) binding protein, cytoplasmic 1-like 2B
hsa-miR-1283	1	0	1	1	1	1	C2orf88	chromosome 2 open reading frame 88
hsa-miR-1283	1	0	1	1	1	1	NSL1	NSL1, MIND kinetochore complex component, homolog (S. cerevisiae)
hsa-miR-1283	1	0	1	1	1	1	FRS2	fibroblast growth factor receptor substrate 2
hsa-miR-1283	1	0	1	1	1	1	ERBB4	v-erb-a erythroblastic leukemia viral oncogene homolog 4 (avian)
hsa-miR-1283	1	0	1	1	1	1	KDM5A	lysine (K)-specific demethylase 5A
hsa-miR-1283	0	0	1	1	1	1	FAM22G	family with sequence similarity 22, member G
hsa-miR-1283	1	0	1	1	1	1	MZT1	mitotic spindle organizing protein 1
hsa-miR-1283	1	0	1	1	1	1	UBTF	upstream binding transcription factor, RNA polymerase I
hsa-miR-1283	1	0	1	1	1	1	QSER1	glutamine and serine rich 1
hsa-miR-1283	1	0	1	1	1	1	METTL9	methyltransferase like 9
hsa-miR-1283	1	0	1	1	1	1	HS6ST2	heparan sulfate 6-O-sulfotransferase 2
hsa-miR-1283	0	0	1	1	0	0	VPS37D	vacuolar protein sorting 37 homolog D (S. cerevisiae)
hsa-miR-1283	0	0	1	0	1	1	WTH3DI	RAB6C-like
hsa-miR-1283	0	0	1	1	1	1	VCAM1	vascular cell adhesion molecule 1
hsa-miR-1283	1	0	1	1	1	1	SRSF1	serine/arginine-rich splicing factor 1
hsa-miR-1283	1	0	1	1	1	1	DACT1	dapper, antagonist of beta-catenin, homolog 1 (Xenopus laevis)
hsa-miR-1283	0	0	1	1	1	1	DIAPH1	diaphanous homolog 1 (Drosophila)
hsa-miR-1283	1	0	1	1	1	1	CREBBP	CREB binding protein
hsa-miR-1283	1	0	1	1	1	1	VAV3	vav 3 guanine nucleotide exchange factor
hsa-miR-1283	1	0	1	1	1	1	DMP1	dentin matrix acidic phosphoprotein 1
hsa-miR-1283	1	0	1	1	1	1	LDB3	LIM domain binding 3
hsa-miR-1283	1	0	1	1	1	1	FAM155A	family with sequence similarity 155, member A
hsa-miR-1283	1	0	1	1	1	1	ZNF629	zinc finger protein 629
hsa-miR-1283	1	0	1	0	1	1	THSD7B	thrombospondin, type I, domain containing 7B
hsa-miR-1283	1	0	1	1	1	1	DNA2	DNA replication helicase 2 homolog (yeast)
hsa-miR-1283	1	0	1	0	1	1	ODZ3	odz, odd Oz/ten-m homolog 3 (Drosophila)
hsa-miR-1283	1	0	1	0	1	1	MEGF9	multiple EGF-like-domains 9
hsa-miR-1283	0	0	1	0	1	1	RBM44	RNA binding motif protein 44
hsa-miR-1283	1	0	1	0	1	1	SCN3A	sodium channel, voltage-gated, type III, alpha subunit
hsa-miR-1283	0	0	1	1	1	1	G6PC2	glucose-6-phosphatase, catalytic, 2
hsa-miR-1283	1	0	1	1	1	1	ADAM10	ADAM metallopeptidase domain 10
hsa-miR-1283	1	0	1	1	1	1	ADCY9	adenylate cyclase 9
hsa-miR-1283	1	0	1	1	1	1	ADCYAP1	adenylate cyclase activating polypeptide 1 (pituitary)
hsa-miR-1283	0	0	1	1	1	1	ADSS	adenylosuccinate synthase
hsa-miR-1283	0	0	1	1	1	1	ARHGDIB	Rho GDP dissociation inhibitor (GDI) beta
hsa-miR-1283	1	0	1	0	1	1	BACH1	BTB and CNC homology 1, basic leucine zipper transcription factor 1
hsa-miR-1283	1	0	1	1	1	1	PRDM1	PR domain containing 1, with ZNF domain
hsa-miR-1283	1	0	1	0	1	1	BMPR2	bone morphogenetic protein receptor, type II (serine/threonine kinase)
hsa-miR-1283	0	0	1	0	1	1	CASQ2	calsequestrin 2 (cardiac muscle)
hsa-miR-1283	1	0	1	1	1	1	CCNA2	cyclin A2
hsa-miR-1283	0	0	1	1	0	0	CDC6	cell division cycle 6 homolog (S. cerevisiae)
hsa-miR-1283	1	0	1	0	1	1	CDK6	cyclin-dependent kinase 6
hsa-miR-1283	0	0	1	1	1	1	CHUK	conserved helix-loop-helix ubiquitous kinase
hsa-miR-1283	1	0	1	1	1	1	MAPK14	mitogen-activated protein kinase 14
hsa-miR-1283	0	0	1	1	1	1	CSTF3	cleavage stimulation factor, 3' pre-RNA, subunit 3, 77kDa
hsa-miR-1283	1	0	1	1	1	1	DYRK1A	dual-specificity tyrosine-(Y)-phosphorylation regulated kinase 1A
hsa-miR-1283	1	0	1	1	1	1	ELAVL1	ELAV (embryonic lethal, abnormal vision, Drosophila)-like 1 (Hu antigen R)
hsa-miR-1283	1	0	1	1	1	1	FOXC1	forkhead box C1
hsa-miR-1283	0	0	1	1	1	1	FRZB	frizzled-related protein
hsa-miR-1283	1	0	1	0	1	1	B4GALT1	UDP-Gal:betaGlcNAc beta 1,4- galactosyltransferase, polypeptide 1
hsa-miR-1283	1	0	1	1	1	1	GTF2B	general transcription factor IIB
hsa-miR-1283	1	0	1	1	1	1	NDST1	N-deacetylase/N-sulfotransferase (heparan glucosaminyl) 1
hsa-miR-1283	0	0	1	1	1	1	IL13RA1	interleukin 13 receptor, alpha 1
hsa-miR-1283	1	0	1	1	1	1	ADRBK1	adrenergic, beta, receptor kinase 1
hsa-miR-1283	0	0	1	1	1	1	ARF4	ADP-ribosylation factor 4
hsa-miR-1283	1	0	1	1	1	1	ARL4D	ADP-ribosylation factor-like 4D
hsa-miR-1283	1	0	1	1	1	1	BAAT	bile acid CoA: amino acid N-acyltransferase (glycine N-choloyltransferase)
hsa-miR-1283	1	0	1	1	1	1	BCL6	B-cell CLL/lymphoma 6
hsa-miR-1283	0	0	1	1	0	0	BICD1	bicaudal D homolog 1 (Drosophila)
hsa-miR-1283	0	0	1	1	1	1	BTN1A1	butyrophilin, subfamily 1, member A1
hsa-miR-1283	1	0	1	1	1	1	CBFB	core-binding factor, beta subunit
hsa-miR-1283	1	0	1	1	1	1	CD69	CD69 molecule
hsa-miR-1283	1	0	1	1	1	1	CDH2	cadherin 2, type 1, N-cadherin (neuronal)
hsa-miR-1283	1	0	1	1	1	1	CDK2	cyclin-dependent kinase 2
hsa-miR-1283	1	0	1	0	1	1	COL19A1	collagen, type XIX, alpha 1
hsa-miR-1283	1	0	1	1	1	1	SLC31A1	solute carrier family 31 (copper transporters), member 1
hsa-miR-1283	0	0	1	1	1	1	CTSE	cathepsin E
hsa-miR-1283	0	0	1	1	1	1	GADD45A	growth arrest and DNA-damage-inducible, alpha
hsa-miR-1283	1	0	1	1	1	1	DUSP6	dual specificity phosphatase 6
hsa-miR-1283	1	0	1	1	1	1	E2F3	E2F transcription factor 3
hsa-miR-1283	1	0	1	1	1	1	EGR1	early growth response 1
hsa-miR-1283	1	0	1	1	1	1	FBN2	fibrillin 2
hsa-miR-1283	1	0	1	0	1	1	FOXO1	forkhead box O1
hsa-miR-1283	0	0	1	1	0	0	FTH1	ferritin, heavy polypeptide 1
hsa-miR-1283	1	0	1	1	1	1	GAS1	growth arrest-specific 1
hsa-miR-1283	1	0	1	0	1	1	GNAI1	guanine nucleotide binding protein (G protein), alpha inhibiting activity polypeptide 1
hsa-miR-1283	0	0	1	1	1	1	GNAQ	guanine nucleotide binding protein (G protein), q polypeptide
hsa-miR-1283	0	0	1	1	1	1	GNB1	guanine nucleotide binding protein (G protein), beta polypeptide 1
hsa-miR-1283	0	0	1	0	1	1	GYPA	glycophorin A (MNS blood group)
hsa-miR-1283	1	0	1	1	1	1	HOXB3	homeobox B3
hsa-miR-1283	0	0	1	1	1	1	HOXB5	homeobox B5
hsa-miR-1283	0	0	1	1	1	1	FOXN2	forkhead box N2
hsa-miR-1283	0	0	1	1	1	1	IL12B	interleukin 12B (natural killer cell stimulatory factor 2, cytotoxic lymphocyte maturation factor 2, p40)
hsa-miR-1283	0	0	1	0	1	1	ITGAV	integrin, alpha V
hsa-miR-1283	1	0	1	1	1	1	JAG2	jagged 2
hsa-miR-1283	1	0	1	1	1	1	JUN	jun proto-oncogene
hsa-miR-1283	1	0	1	1	1	1	KCNA5	potassium voltage-gated channel, shaker-related subfamily, member 5
hsa-miR-1283	0	0	1	1	1	1	KCNJ6	potassium inwardly-rectifying channel, subfamily J, member 6
hsa-miR-1283	0	0	1	1	1	1	KCNK1	potassium channel, subfamily K, member 1
hsa-miR-1283	1	0	1	0	1	1	KIF3C	kinesin family member 3C
hsa-miR-1283	0	0	1	1	1	1	KLRC1	killer cell lectin-like receptor subfamily C, member 1
hsa-miR-1283	0	0	1	1	1	1	KLRC2	killer cell lectin-like receptor subfamily C, member 2
hsa-miR-1283	1	0	1	1	1	1	IPO5	importin 5
hsa-miR-1283	1	0	1	1	1	1	LBR	lamin B receptor
hsa-miR-1283	1	0	1	1	1	1	LIFR	leukemia inhibitory factor receptor alpha
hsa-miR-1283	0	0	1	1	1	1	LUM	lumican
hsa-miR-1283	1	0	1	1	1	1	LY75	lymphocyte antigen 75
hsa-miR-1283	1	0	1	1	1	1	M6PR	mannose-6-phosphate receptor (cation dependent)
hsa-miR-1283	1	0	1	0	1	1	MXD1	MAX dimerization protein 1
hsa-miR-1283	0	0	1	1	1	1	NOV	nephroblastoma overexpressed
hsa-miR-1283	1	0	1	1	1	1	NPAS2	neuronal PAS domain protein 2
hsa-miR-1283	1	0	1	1	1	1	NPAT	nuclear protein, ataxia-telangiectasia locus
hsa-miR-1283	1	0	1	1	1	1	NPTX1	neuronal pentraxin I
hsa-miR-1283	1	0	1	1	1	1	NPTX2	neuronal pentraxin II
hsa-miR-1283	1	0	1	0	1	1	NRAS	neuroblastoma RAS viral (v-ras) oncogene homolog
hsa-miR-1283	1	0	1	1	1	1	TNFRSF11B	tumor necrosis factor receptor superfamily, member 11b
hsa-miR-1283	0	0	1	1	1	1	PAFAH1B2	platelet-activating factor acetylhydrolase 1b, catalytic subunit 2 (30kDa)
hsa-miR-1283	1	0	1	0	1	1	PAK2	p21 protein (Cdc42/Rac)-activated kinase 2
hsa-miR-1283	1	0	1	0	1	1	POU3F1	POU class 3 homeobox 1
hsa-miR-1283	1	0	1	1	1	1	PPP1CB	protein phosphatase 1, catalytic subunit, beta isozyme
hsa-miR-1283	1	0	1	1	1	1	PPP2CA	protein phosphatase 2, catalytic subunit, alpha isozyme
hsa-miR-1283	0	0	1	1	1	1	MAP2K6	mitogen-activated protein kinase kinase 6
hsa-miR-1283	0	0	1	1	1	1	PSMD10	proteasome (prosome, macropain) 26S subunit, non-ATPase, 10
hsa-miR-1283	1	0	1	1	1	1	PTPN2	protein tyrosine phosphatase, non-receptor type 2
hsa-miR-1283	1	0	1	1	1	1	PTPRK	protein tyrosine phosphatase, receptor type, K
hsa-miR-1283	0	0	1	1	1	1	PTPRR	protein tyrosine phosphatase, receptor type, R
hsa-miR-1283	1	0	1	1	1	1	RAD23B	RAD23 homolog B (S. cerevisiae)
hsa-miR-1283	0	0	1	1	1	1	RFC3	replication factor C (activator 1) 3, 38kDa
hsa-miR-1283	1	0	1	1	0	0	RFX1	regulatory factor X, 1 (influences HLA class II expression)
hsa-miR-1283	1	0	1	0	1	1	SORT1	sortilin 1
hsa-miR-1283	1	0	1	1	1	1	SALL1	sal-like 1 (Drosophila)
hsa-miR-1283	1	0	1	1	1	1	SAT1	spermidine/spermine N1-acetyltransferase 1
hsa-miR-1283	0	0	1	1	1	1	XCL1	chemokine (C motif) ligand 1
hsa-miR-1283	0	0	1	1	1	1	SDC2	syndecan 2
hsa-miR-1283	1	0	1	1	1	1	SFRP4	secreted frizzled-related protein 4
hsa-miR-1283	1	0	1	1	1	1	SRSF3	serine/arginine-rich splicing factor 3
hsa-miR-1283	0	0	1	1	1	1	SH3BGRL	SH3 domain binding glutamic acid-rich protein like
hsa-miR-1283	1	0	1	1	1	1	SHB	Src homology 2 domain containing adaptor protein B
hsa-miR-1283	1	0	1	1	1	1	SLC7A1	solute carrier family 7 (cationic amino acid transporter, y+ system), member 1
hsa-miR-1283	1	0	1	1	1	1	SNAI2	snail homolog 2 (Drosophila)
hsa-miR-1283	1	0	1	1	1	1	SMARCD1	SWI/SNF related, matrix associated, actin dependent regulator of chromatin, subfamily d, member 1
hsa-miR-1283	1	0	1	1	1	1	SMARCD2	SWI/SNF related, matrix associated, actin dependent regulator of chromatin, subfamily d, member 2
hsa-miR-1283	0	0	1	1	1	1	SNRPB2	small nuclear ribonucleoprotein polypeptide B
hsa-miR-1283	0	0	1	1	0	0	SNRPC	small nuclear ribonucleoprotein polypeptide C
hsa-miR-1283	1	0	1	0	1	1	SOX11	SRY (sex determining region Y)-box 11
hsa-miR-1283	0	0	1	1	1	1	SP100	SP100 nuclear antigen
hsa-miR-1283	1	0	1	1	1	1	SRF	serum response factor (c-fos serum response element-binding transcription factor)
hsa-miR-1283	0	0	1	1	1	1	STAT5A	signal transducer and activator of transcription 5A
hsa-miR-1283	0	0	1	1	1	1	STIM1	stromal interaction molecule 1
hsa-miR-1283	0	0	1	1	1	1	XCL2	chemokine (C motif) ligand 2
hsa-miR-1283	1	0	1	1	1	1	TAF4	TAF4 RNA polymerase II, TATA box binding protein (TBP)-associated factor, 135kDa
hsa-miR-1283	1	0	1	0	1	1	TAL1	T-cell acute lymphocytic leukemia 1
hsa-miR-1283	0	0	1	0	1	1	TCEB3	transcription elongation factor B (SIII), polypeptide 3 (110kDa, elongin A)
hsa-miR-1283	0	0	1	0	1	1	TDGF1	teratocarcinoma-derived growth factor 1
hsa-miR-1283	1	0	1	0	1	1	THBS1	thrombospondin 1
hsa-miR-1283	1	0	1	1	1	1	TIAM1	T-cell lymphoma invasion and metastasis 1
hsa-miR-1283	1	0	1	0	1	1	SEC62	SEC62 homolog (S. cerevisiae)
hsa-miR-1283	1	0	1	1	1	1	TRAPPC10	trafficking protein particle complex 10
hsa-miR-1283	1	0	1	1	1	1	TOP1	topoisomerase (DNA) I
hsa-miR-1283	0	0	1	1	0	0	HIRA	HIR histone cell cycle regulation defective homolog A (S. cerevisiae)
hsa-miR-1283	0	0	1	1	1	1	UBE2D1	ubiquitin-conjugating enzyme E2D 1
hsa-miR-1283	1	0	1	1	1	1	UBE2D3	ubiquitin-conjugating enzyme E2D 3
hsa-miR-1283	1	0	1	0	1	1	UBE2L3	ubiquitin-conjugating enzyme E2L 3
hsa-miR-1283	1	0	1	1	1	1	UBE2N	ubiquitin-conjugating enzyme E2N
hsa-miR-1283	1	0	1	0	1	1	VCL	vinculin
hsa-miR-1283	1	0	1	1	1	1	YY1	YY1 transcription factor
hsa-miR-1283	1	0	1	0	1	1	YWHAB	tyrosine 3-monooxygenase/tryptophan 5-monooxygenase activation protein, beta polypeptide
hsa-miR-1283	0	0	1	0	1	1	ZFY	zinc finger protein, Y-linked
hsa-miR-1283	1	0	1	0	1	1	ZIC1	Zic family member 1
hsa-miR-1283	1	0	1	1	1	1	ZIC3	Zic family member 3
hsa-miR-1283	1	0	1	1	1	1	FZD5	frizzled family receptor 5
hsa-miR-1283	1	0	1	1	1	1	CUL5	cullin 5
hsa-miR-1283	1	0	1	1	1	1	TAF15	TAF15 RNA polymerase II, TATA box binding protein (TBP)-associated factor, 68kDa
hsa-miR-1283	0	0	1	1	1	1	HIST2H2BE	histone cluster 2, H2be
hsa-miR-1283	0	0	1	1	1	1	PIP5K1A	phosphatidylinositol-4-phosphate 5-kinase, type I, alpha
hsa-miR-1283	1	0	1	0	1	1	VAPA	VAMP (vesicle-associated membrane protein)-associated protein A, 33kDa
hsa-miR-1283	1	0	1	0	1	1	CUL3	cullin 3
hsa-miR-1283	1	0	1	1	1	1	KLF11	Kruppel-like factor 11
hsa-miR-1283	1	0	1	1	1	1	PPM1D	protein phosphatase, Mg2+/Mn2+ dependent, 1D
hsa-miR-1283	1	0	1	0	1	1	ENC1	ectodermal-neural cortex 1 (with BTB-like domain)
hsa-miR-1283	1	0	1	1	1	1	CBX4	chromobox homolog 4
hsa-miR-1283	1	0	1	1	0	0	TCAP	titin-cap (telethonin)
hsa-miR-1283	0	0	1	1	1	1	SLC25A12	solute carrier family 25 (aspartate/glutamate carrier), member 12
hsa-miR-1283	0	0	1	0	0	0	PSMG1	proteasome (prosome, macropain) assembly chaperone 1
hsa-miR-1283	1	0	1	0	1	1	TNKS	tankyrase, TRF1-interacting ankyrin-related ADP-ribose polymerase
hsa-miR-1283	0	0	1	1	1	1	EIF3A	eukaryotic translation initiation factor 3, subunit A
hsa-miR-1283	1	0	1	1	1	1	SRSF9	serine/arginine-rich splicing factor 9
hsa-miR-1283	0	0	1	1	1	1	JRKL	jerky homolog-like (mouse)
hsa-miR-1283	1	0	1	1	1	1	MBTPS1	membrane-bound transcription factor peptidase, site 1
hsa-miR-1283	0	0	1	1	1	1	SNX4	sorting nexin 4
hsa-miR-1283	1	0	1	1	1	1	NR5A2	nuclear receptor subfamily 5, group A, member 2
hsa-miR-1283	1	0	1	1	1	1	FGF18	fibroblast growth factor 18
hsa-miR-1283	1	0	1	0	1	1	SGPL1	sphingosine-1-phosphate lyase 1
hsa-miR-1283	0	0	1	1	1	1	PRPF4B	PRP4 pre-mRNA processing factor 4 homolog B (yeast)
hsa-miR-1283	1	0	1	0	1	1	ST13	suppression of tumorigenicity 13 (colon carcinoma) (Hsp70 interacting protein)
hsa-miR-1283	1	0	1	1	1	1	KALRN	kalirin, RhoGEF kinase
hsa-miR-1283	0	0	1	1	1	1	RNF8	ring finger protein 8, E3 ubiquitin protein ligase
hsa-miR-1283	1	0	1	1	1	1	MAP7	microtubule-associated protein 7
hsa-miR-1283	1	0	1	0	1	1	PLK3	polo-like kinase 3
hsa-miR-1283	1	0	1	0	1	1	E2F2	E2F transcription factor 2
hsa-miR-1283	0	0	1	0	1	1	EIF4EBP2	eukaryotic translation initiation factor 4E binding protein 2
hsa-miR-1283	1	0	1	1	1	1	FGF12	fibroblast growth factor 12
hsa-miR-1283	1	0	1	0	1	1	SLC1A2	solute carrier family 1 (glial high affinity glutamate transporter), member 2
hsa-miR-1283	0	0	1	0	1	1	SLC1A3	solute carrier family 1 (glial high affinity glutamate transporter), member 3
hsa-miR-1283	0	0	1	1	0	0	WNT2B	wingless-type MMTV integration site family, member 2B
hsa-miR-1283	1	0	1	1	1	1	MFHAS1	malignant fibrous histiocytoma amplified sequence 1
hsa-miR-1283	1	0	1	1	1	1	STK17B	serine/threonine kinase 17b
hsa-miR-1283	1	0	1	1	1	1	SOCS6	suppressor of cytokine signaling 6
hsa-miR-1283	0	0	1	1	1	1	SEP15	15 kDa selenoprotein
hsa-miR-1283	0	0	1	1	1	1	HOMER1	homer homolog 1 (Drosophila)
hsa-miR-1283	1	0	1	0	1	1	GTPBP1	GTP binding protein 1
hsa-miR-1283	0	0	1	1	1	1	ACTL6A	actin-like 6A
hsa-miR-1283	1	0	1	1	1	1	DACH1	dachshund homolog 1 (Drosophila)
hsa-miR-1283	1	0	1	1	1	1	DUSP1	dual specificity phosphatase 1
hsa-miR-1283	1	0	1	1	1	1	DUSP5	dual specificity phosphatase 5
hsa-miR-1283	1	0	1	1	1	1	EFNA1	ephrin-A1
hsa-miR-1283	1	0	1	1	1	1	EGR3	early growth response 3
hsa-miR-1283	1	0	1	1	1	1	EPHA4	EPH receptor A4
hsa-miR-1283	1	0	1	0	1	1	ETV5	ets variant 5
hsa-miR-1283	0	0	1	1	1	1	HOXB7	homeobox B7
hsa-miR-1283	0	0	1	0	1	1	POU4F2	POU class 4 homeobox 2
hsa-miR-1283	0	0	1	1	1	1	RAB27A	RAB27A, member RAS oncogene family
hsa-miR-1283	0	0	1	1	1	1	CDK2AP1	cyclin-dependent kinase 2 associated protein 1
hsa-miR-1283	1	0	1	1	1	1	COIL	coilin
hsa-miR-1283	1	0	1	1	1	1	SPARCL1	SPARC-like 1 (hevin)
hsa-miR-1283	0	0	1	0	1	1	CXorf1	chromosome X open reading frame 1
hsa-miR-1283	1	0	1	1	1	1	DCLK1	doublecortin-like kinase 1
hsa-miR-1283	0	0	1	1	1	1	MMP20	matrix metallopeptidase 20
hsa-miR-1283	1	0	1	1	1	1	NREP	neuronal regeneration related protein homolog (rat)
hsa-miR-1283	1	0	1	1	1	1	KIF3B	kinesin family member 3B
hsa-miR-1283	0	0	1	1	1	1	TJP2	tight junction protein 2
hsa-miR-1283	0	0	1	1	1	1	EIF2AK3	eukaryotic translation initiation factor 2-alpha kinase 3
hsa-miR-1283	1	0	1	1	1	1	CXCL14	chemokine (C-X-C motif) ligand 14
hsa-miR-1283	0	0	1	1	1	1	CALB1	calbindin 1, 28kDa
hsa-miR-1283	1	0	1	1	1	1	GABRE	gamma-aminobutyric acid (GABA) A receptor, epsilon
hsa-miR-1283	1	0	1	1	1	1	JARID2	jumonji, AT rich interactive domain 2
hsa-miR-1283	1	0	1	1	1	1	KCNJ8	potassium inwardly-rectifying channel, subfamily J, member 8
hsa-miR-1283	1	0	1	0	1	1	KRAS	v-Ki-ras2 Kirsten rat sarcoma viral oncogene homolog
hsa-miR-1283	0	0	1	1	1	1	PRCP	prolylcarboxypeptidase (angiotensinase C)
hsa-miR-1283	0	0	1	1	1	1	PTH2R	parathyroid hormone 2 receptor
hsa-miR-1283	1	0	1	0	1	1	SCD	stearoyl-CoA desaturase (delta-9-desaturase)
hsa-miR-1283	0	0	1	1	1	1	SIM1	single-minded homolog 1 (Drosophila)
hsa-miR-1283	1	0	1	1	1	1	TLE1	transducin-like enhancer of split 1 (E(sp1) homolog, Drosophila)
hsa-miR-1283	1	0	1	1	1	1	OXSR1	oxidative-stress responsive 1
hsa-miR-1283	1	0	1	1	1	1	FGF19	fibroblast growth factor 19
hsa-miR-1283	1	0	1	1	1	1	MED13	mediator complex subunit 13
hsa-miR-1283	1	0	1	1	0	0	BCL3	B-cell CLL/lymphoma 3
hsa-miR-1283	1	0	1	1	1	1	BMI1	BMI1 polycomb ring finger oncogene
hsa-miR-1283	1	0	1	1	1	1	FOXN3	forkhead box N3
hsa-miR-1283	1	0	1	1	1	1	DCC	deleted in colorectal carcinoma
hsa-miR-1283	0	0	1	0	1	1	EPHA3	EPH receptor A3
hsa-miR-1283	0	0	1	0	1	1	FOSL2	FOS-like antigen 2
hsa-miR-1283	1	0	1	1	1	1	GABPB1	GA binding protein transcription factor, beta subunit 1
hsa-miR-1283	0	0	1	1	1	1	MSTN	myostatin
hsa-miR-1283	0	0	1	1	0	0	GNL1	guanine nucleotide binding protein-like 1
hsa-miR-1283	1	0	1	1	1	1	GPM6A	glycoprotein M6A
hsa-miR-1283	1	0	1	1	1	1	H3F3B	H3 histone, family 3B (H3.3B)
hsa-miR-1283	1	0	1	1	1	1	PHF2	PHD finger protein 2
hsa-miR-1283	0	0	1	1	1	1	PPP1R3C	protein phosphatase 1, regulatory subunit 3C
hsa-miR-1283	1	0	1	0	1	1	PRKAB2	protein kinase, AMP-activated, beta 2 non-catalytic subunit
hsa-miR-1283	1	0	1	0	1	1	PRKCE	protein kinase C, epsilon
hsa-miR-1283	0	0	1	1	1	1	SKIL	SKI-like oncogene
hsa-miR-1283	1	0	1	0	1	1	SRC	v-src sarcoma (Schmidt-Ruppin A-2) viral oncogene homolog (avian)
hsa-miR-1283	0	0	1	1	1	1	ST5	suppression of tumorigenicity 5
hsa-miR-1283	1	0	1	0	1	1	CCDC6	coiled-coil domain containing 6
hsa-miR-1283	0	0	1	1	1	1	FOSL1	FOS-like antigen 1
hsa-miR-1283	0	0	1	1	1	1	PAPSS1	3'-phosphoadenosine 5'-phosphosulfate synthase 1
hsa-miR-1283	1	0	1	1	1	1	PIGK	phosphatidylinositol glycan anchor biosynthesis, class K
hsa-miR-1283	1	0	1	1	1	1	ABCA1	ATP-binding cassette, sub-family A (ABC1), member 1
hsa-miR-1283	0	0	1	1	1	1	HES1	hairy and enhancer of split 1, (Drosophila)
hsa-miR-1283	1	0	1	1	1	1	INSIG1	insulin induced gene 1
hsa-miR-1283	1	0	1	1	1	1	LPP	LIM domain containing preferred translocation partner in lipoma
hsa-miR-1283	1	0	1	1	1	1	NHLH2	nescient helix loop helix 2
hsa-miR-1283	0	0	1	1	0	0	TAF13	TAF13 RNA polymerase II, TATA box binding protein (TBP)-associated factor, 18kDa
hsa-miR-1283	1	0	1	1	1	1	EVI5	ecotropic viral integration site 5
hsa-miR-1283	1	0	1	1	1	1	ST8SIA4	ST8 alpha-N-acetyl-neuraminide alpha-2,8-sialyltransferase 4
hsa-miR-1283	1	0	1	1	1	1	ARPC5	actin related protein 2/3 complex, subunit 5, 16kDa
hsa-miR-1283	1	0	1	1	1	1	NAMPT	nicotinamide phosphoribosyltransferase
hsa-miR-1283	1	0	1	1	1	1	LHFP	lipoma HMGIC fusion partner
hsa-miR-1283	1	0	1	1	1	1	PRKD3	protein kinase D3
hsa-miR-1283	1	0	1	0	1	1	DCAF7	DDB1 and CUL4 associated factor 7
hsa-miR-1283	1	0	1	1	1	1	SRRM1	serine/arginine repetitive matrix 1
hsa-miR-1283	1	0	1	0	1	1	SPRY3	sprouty homolog 3 (Drosophila)
hsa-miR-1283	1	0	1	1	1	1	PURA	purine-rich element binding protein A
hsa-miR-1283	1	0	1	1	1	1	MAN1A1	mannosidase, alpha, class 1A, member 1
hsa-miR-1283	0	0	1	1	1	1	MFAP3	microfibrillar-associated protein 3
hsa-miR-1283	1	0	1	1	1	1	FOXO4	forkhead box O4
hsa-miR-1283	1	0	1	1	1	1	MTF1	metal-regulatory transcription factor 1
hsa-miR-1283	1	0	1	0	1	1	NAB1	NGFI-A binding protein 1 (EGR1 binding protein 1)
hsa-miR-1283	1	0	1	1	1	1	LIPG	lipase, endothelial
hsa-miR-1283	1	0	1	0	1	1	HDAC4	histone deacetylase 4
hsa-miR-1283	1	0	1	1	1	1	CITED2	Cbp/p300-interacting transactivator, with Glu/Asp-rich carboxy-terminal domain, 2
hsa-miR-1283	0	0	1	1	1	1	KRT1	keratin 1
hsa-miR-1283	1	0	1	1	1	1	TMEM50B	transmembrane protein 50B
hsa-miR-1283	1	0	1	1	1	1	NEUROG1	neurogenin 1
hsa-miR-1283	1	0	1	1	1	1	NR4A2	nuclear receptor subfamily 4, group A, member 2
hsa-miR-1283	0	0	1	1	1	1	PA2G4	proliferation-associated 2G4, 38kDa
hsa-miR-1283	1	0	1	1	1	1	PFKFB2	6-phosphofructo-2-kinase/fructose-2,6-biphosphatase 2
hsa-miR-1283	1	0	1	0	1	1	PPP1R2	protein phosphatase 1, regulatory (inhibitor) subunit 2
hsa-miR-1283	1	0	1	1	1	1	PRKAA1	protein kinase, AMP-activated, alpha 1 catalytic subunit
hsa-miR-1283	0	0	1	1	1	1	PRKCH	protein kinase C, eta
hsa-miR-1283	1	0	1	1	1	1	PKN2	protein kinase N2
hsa-miR-1283	1	0	1	1	1	1	RAD21	RAD21 homolog (S. pombe)
hsa-miR-1283	1	0	1	1	1	1	RANBP2	RAN binding protein 2
hsa-miR-1283	1	0	1	0	1	1	SRSF6	serine/arginine-rich splicing factor 6
hsa-miR-1283	1	0	1	1	1	1	STK4	serine/threonine kinase 4
hsa-miR-1283	1	0	1	1	1	1	SMC1A	structural maintenance of chromosomes 1A
hsa-miR-1283	0	0	1	1	1	1	HMGN4	high mobility group nucleosomal binding domain 4
hsa-miR-1283	0	0	1	1	1	1	UBE2E3	ubiquitin-conjugating enzyme E2E 3
hsa-miR-1283	1	0	1	1	1	1	NXF1	nuclear RNA export factor 1
hsa-miR-1283	1	0	1	1	1	1	SEC23A	Sec23 homolog A (S. cerevisiae)
hsa-miR-1283	0	0	1	1	1	1	CAP2	CAP, adenylate cyclase-associated protein, 2 (yeast)
hsa-miR-1283	1	0	1	1	1	1	NEBL	nebulette
hsa-miR-1283	1	0	1	1	1	1	ANP32B	acidic (leucine-rich) nuclear phosphoprotein 32 family, member B
hsa-miR-1283	1	0	1	1	1	1	CDC42EP3	CDC42 effector protein (Rho GTPase binding) 3
hsa-miR-1283	1	0	1	1	1	1	PAIP1	poly(A) binding protein interacting protein 1
hsa-miR-1283	1	0	1	1	1	1	HEXIM1	hexamethylene bis-acetamide inducible 1
hsa-miR-1283	0	0	1	1	0	0	STAMBP	STAM binding protein
hsa-miR-1283	1	0	1	0	1	1	GNAI3	guanine nucleotide binding protein (G protein), alpha inhibiting activity polypeptide 3
hsa-miR-1283	1	0	1	0	1	1	NCOA2	nuclear receptor coactivator 2
hsa-miR-1283	1	0	1	1	1	1	KHDRBS1	KH domain containing, RNA binding, signal transduction associated 1
hsa-miR-1283	1	0	1	1	1	1	CTCF	CCCTC-binding factor (zinc finger protein)
hsa-miR-1283	1	0	1	0	1	1	GNA13	guanine nucleotide binding protein (G protein), alpha 13
hsa-miR-1283	1	0	1	0	1	1	API5	apoptosis inhibitor 5
hsa-miR-1283	0	0	1	1	0	0	SLC12A7	solute carrier family 12 (potassium/chloride transporters), member 7
hsa-miR-1283	1	0	1	1	1	1	MAP3K2	mitogen-activated protein kinase kinase kinase 2
hsa-miR-1283	1	0	1	1	1	1	MAN1A2	mannosidase, alpha, class 1A, member 2
hsa-miR-1283	1	0	1	1	1	1	SPIN1	spindlin 1
hsa-miR-1283	1	0	1	1	1	1	HIVEP2	human immunodeficiency virus type I enhancer binding protein 2
hsa-miR-1283	0	0	1	1	1	1	HOXA2	homeobox A2
hsa-miR-1283	1	0	1	1	0	0	PSKH1	protein serine kinase H1
hsa-miR-1283	1	0	1	0	1	1	SYNGAP1	synaptic Ras GTPase activating protein 1
hsa-miR-1283	0	0	1	1	1	1	MYOT	myotilin
hsa-miR-1283	1	0	1	1	1	1	PRDX3	peroxiredoxin 3
hsa-miR-1283	0	0	1	1	1	1	MSL3	male-specific lethal 3 homolog (Drosophila)
hsa-miR-1283	1	0	1	1	1	1	SF3A3	splicing factor 3a, subunit 3, 60kDa
hsa-miR-1283	0	0	1	1	0	0	HNRNPA0	heterogeneous nuclear ribonucleoprotein A0
hsa-miR-1283	0	0	1	1	1	1	TMED10	transmembrane emp24-like trafficking protein 10 (yeast)
hsa-miR-1283	0	0	1	1	1	1	HOXA7	homeobox A7
hsa-miR-1283	0	0	1	1	1	1	HOXD3	homeobox D3
hsa-miR-1283	1	0	1	1	1	1	PRRX1	paired related homeobox 1
hsa-miR-1283	0	0	1	0	1	1	PSG1	pregnancy specific beta-1-glycoprotein 1
hsa-miR-1283	1	0	1	0	1	1	SLC5A3	solute carrier family 5 (sodium/myo-inositol cotransporter), member 3
hsa-miR-1283	0	0	1	1	0	0	RNF113A	ring finger protein 113A
hsa-miR-1283	1	0	1	0	1	1	WASF2	WAS protein family, member 2
hsa-miR-1283	1	0	1	1	1	1	ABHD2	abhydrolase domain containing 2
hsa-miR-1283	1	0	1	1	1	1	UTY	ubiquitously transcribed tetratricopeptide repeat gene, Y-linked
hsa-miR-1283	1	0	1	1	1	1	VCP	valosin containing protein
hsa-miR-1283	1	0	1	1	1	1	ZIC2	Zic family member 2
hsa-miR-1283	0	0	1	0	1	1	ZXDB	zinc finger, X-linked, duplicated B
hsa-miR-1283	0	0	1	1	0	0	SLC14A2	solute carrier family 14 (urea transporter), member 2
hsa-miR-1283	1	0	1	1	1	1	TESK2	testis-specific kinase 2
hsa-miR-1283	1	0	1	0	1	1	PRSS23	protease, serine, 23
hsa-miR-1283	1	0	1	1	1	1	ERLIN2	ER lipid raft associated 2
hsa-miR-1283	1	0	1	1	1	1	FZD10	frizzled family receptor 10
hsa-miR-1283	1	0	1	1	1	1	DUSP10	dual specificity phosphatase 10
hsa-miR-1283	0	0	1	1	1	1	XPOT	exportin, tRNA (nuclear export receptor for tRNAs)
hsa-miR-1283	1	0	1	1	1	1	KLF12	Kruppel-like factor 12
hsa-miR-1283	0	0	1	1	1	1	STXBP3	syntaxin binding protein 3
hsa-miR-1283	1	0	1	1	1	1	TUSC2	tumor suppressor candidate 2
hsa-miR-1283	1	0	1	1	1	1	CBX3	chromobox homolog 3
hsa-miR-1283	1	0	1	1	1	1	CASC3	cancer susceptibility candidate 3
hsa-miR-1283	1	0	1	1	1	1	TARDBP	TAR DNA binding protein
hsa-miR-1283	1	0	1	1	1	1	ICOS	inducible T-cell co-stimulator
hsa-miR-1283	1	0	1	0	1	1	CASP8AP2	caspase 8 associated protein 2
hsa-miR-1283	0	0	1	1	1	1	EHF	ets homologous factor
hsa-miR-1283	1	0	1	1	1	1	FBXL3	F-box and leucine-rich repeat protein 3
hsa-miR-1283	0	0	1	1	1	1	FOXI1	forkhead box I1
hsa-miR-1283	1	0	1	0	1	1	FZD4	frizzled family receptor 4
hsa-miR-1283	0	0	1	1	1	1	HARS2	histidyl-tRNA synthetase 2, mitochondrial
hsa-miR-1283	1	0	1	1	1	1	MGEA5	meningioma expressed antigen 5 (hyaluronidase)
hsa-miR-1283	1	0	1	1	1	1	RYBP	RING1 and YY1 binding protein
hsa-miR-1283	1	0	1	1	1	1	RHOQ	ras homolog family member Q
hsa-miR-1283	1	0	1	1	1	1	HEY2	hairy/enhancer-of-split related with YRPW motif 2
hsa-miR-1283	1	0	1	1	1	1	LAMP5	lysosomal-associated membrane protein family, member 5
hsa-miR-1283	1	0	1	1	1	1	HS2ST1	heparan sulfate 2-O-sulfotransferase 1
hsa-miR-1283	1	0	1	1	1	1	KCND2	potassium voltage-gated channel, Shal-related subfamily, member 2
hsa-miR-1283	1	0	1	0	1	1	ACAP2	ArfGAP with coiled-coil, ankyrin repeat and PH domains 2
hsa-miR-1283	1	0	1	0	1	1	PXDN	peroxidasin homolog (Drosophila)
hsa-miR-1283	1	0	1	0	1	1	G3BP2	GTPase activating protein (SH3 domain) binding protein 2
hsa-miR-1283	1	0	1	1	1	1	KIN	KIN, antigenic determinant of recA protein homolog (mouse)
hsa-miR-1283	1	0	1	1	1	1	LSM5	LSM5 homolog, U6 small nuclear RNA associated (S. cerevisiae)
hsa-miR-1283	0	0	1	1	1	1	MAFF	v-maf musculoaponeurotic fibrosarcoma oncogene homolog F (avian)
hsa-miR-1283	0	0	1	0	1	1	PIGN	phosphatidylinositol glycan anchor biosynthesis, class N
hsa-miR-1283	1	0	1	1	1	1	DNAJB9	DnaJ (Hsp40) homolog, subfamily B, member 9
hsa-miR-1283	1	0	1	1	1	1	MMD	monocyte to macrophage differentiation-associated
hsa-miR-1283	1	0	1	0	1	1	MYCBP	c-myc binding protein
hsa-miR-1283	1	0	1	1	1	1	NUFIP1	nuclear fragile X mental retardation protein interacting protein 1
hsa-miR-1283	1	0	1	1	1	1	RGS17	regulator of G-protein signaling 17
hsa-miR-1283	0	0	1	0	1	1	TLL1	tolloid-like 1
hsa-miR-1283	0	0	1	1	0	0	TXN2	thioredoxin 2
hsa-miR-1283	1	0	1	1	1	1	YWHAG	tyrosine 3-monooxygenase/tryptophan 5-monooxygenase activation protein, gamma polypeptide
hsa-miR-1283	1	0	1	1	1	1	PPARGC1A	peroxisome proliferator-activated receptor gamma, coactivator 1 alpha
hsa-miR-1283	0	0	1	1	0	0	FLRT1	fibronectin leucine rich transmembrane protein 1
hsa-miR-1283	0	0	1	1	1	1	UBQLN2	ubiquilin 2
hsa-miR-1283	0	0	1	0	1	1	EMR2	egf-like module containing, mucin-like, hormone receptor-like 2
hsa-miR-1283	1	0	1	1	1	1	LAMP2	lysosomal-associated membrane protein 2
hsa-miR-1283	1	0	1	1	1	1	SOCS5	suppressor of cytokine signaling 5
hsa-miR-1283	1	0	1	1	1	1	WDR37	WD repeat domain 37
hsa-miR-1283	0	0	1	1	1	1	METTL7A	methyltransferase like 7A
hsa-miR-1283	1	0	1	0	1	1	CHMP2B	charged multivesicular body protein 2B
hsa-miR-1283	1	0	1	0	1	1	VAMP2	vesicle-associated membrane protein 2 (synaptobrevin 2)
hsa-miR-1283	1	0	1	1	1	1	C11orf58	chromosome 11 open reading frame 58
hsa-miR-1283	0	0	1	1	1	1	IL1RAPL1	interleukin 1 receptor accessory protein-like 1
hsa-miR-1283	0	0	1	1	1	1	TRAM1	translocation associated membrane protein 1
hsa-miR-1283	1	0	1	1	1	1	CORO1C	coronin, actin binding protein, 1C
hsa-miR-1283	0	0	1	1	1	1	HIBCH	3-hydroxyisobutyryl-CoA hydrolase
hsa-miR-1283	1	0	1	1	1	1	LHX6	LIM homeobox 6
hsa-miR-1283	0	0	1	1	1	1	TAF5L	TAF5-like RNA polymerase II, p300/CBP-associated factor (PCAF)-associated factor, 65kDa
hsa-miR-1283	1	0	1	1	1	1	DKK2	dickkopf 2 homolog (Xenopus laevis)
hsa-miR-1283	1	0	1	1	1	1	AFF4	AF4/FMR2 family, member 4
hsa-miR-1283	1	0	1	1	1	1	SERP1	stress-associated endoplasmic reticulum protein 1
hsa-miR-1283	1	0	1	1	1	1	PDCD4	programmed cell death 4 (neoplastic transformation inhibitor)
hsa-miR-1283	0	0	1	1	1	1	GOLIM4	golgi integral membrane protein 4
hsa-miR-1283	1	0	1	1	1	1	CNOT2	CCR4-NOT transcription complex, subunit 2
hsa-miR-1283	0	0	1	1	1	1	ARFGAP3	ADP-ribosylation factor GTPase activating protein 3
hsa-miR-1283	1	0	1	1	1	1	TMEM97	transmembrane protein 97
hsa-miR-1283	0	0	1	1	0	0	LMCD1	LIM and cysteine-rich domains 1
hsa-miR-1283	1	0	1	0	1	1	HUNK	hormonally up-regulated Neu-associated kinase
hsa-miR-1283	0	0	1	1	1	1	SOX8	SRY (sex determining region Y)-box 8
hsa-miR-1283	1	0	1	1	1	1	VSX1	visual system homeobox 1
hsa-miR-1283	1	0	1	0	1	1	SH3PXD2A	SH3 and PX domains 2A
hsa-miR-1283	0	0	1	0	1	1	CTR9	Ctr9, Paf1/RNA polymerase II complex component, homolog (S. cerevisiae)
hsa-miR-1283	1	0	1	1	1	1	RALGPS1	Ral GEF with PH domain and SH3 binding motif 1
hsa-miR-1283	1	0	1	1	0	0	TTLL4	tubulin tyrosine ligase-like family, member 4
hsa-miR-1283	0	0	1	1	1	1	FAM53B	family with sequence similarity 53, member B
hsa-miR-1283	1	0	1	0	1	1	BZW1	basic leucine zipper and W2 domains 1
hsa-miR-1283	1	0	1	1	1	1	UBE3C	ubiquitin protein ligase E3C
hsa-miR-1283	1	0	1	1	1	1	ULK2	unc-51-like kinase 2 (C. elegans)
hsa-miR-1283	0	0	1	1	1	1	AQR	aquarius homolog (mouse)
hsa-miR-1283	0	0	1	1	0	0	SETD1A	SET domain containing 1A
hsa-miR-1283	1	0	1	0	1	1	TOX	thymocyte selection-associated high mobility group box
hsa-miR-1283	1	0	1	0	1	1	MLEC	malectin
hsa-miR-1283	1	0	1	1	1	1	SPCS2	signal peptidase complex subunit 2 homolog (S. cerevisiae)
hsa-miR-1283	1	0	1	0	1	1	SERTAD2	SERTA domain containing 2
hsa-miR-1283	1	0	1	0	1	1	MAML1	mastermind-like 1 (Drosophila)
hsa-miR-1283	0	0	1	0	1	1	DHCR24	24-dehydrocholesterol reductase
hsa-miR-1283	1	0	1	1	1	1	MRPL19	mitochondrial ribosomal protein L19
hsa-miR-1283	1	0	1	0	1	1	KIAA0494	KIAA0494
hsa-miR-1283	0	0	1	0	1	1	EPM2AIP1	EPM2A (laforin) interacting protein 1
hsa-miR-1283	0	0	1	1	1	1	PPP1R26	protein phosphatase 1, regulatory subunit 26
hsa-miR-1283	1	0	1	1	1	1	TOMM70A	translocase of outer mitochondrial membrane 70 homolog A (S. cerevisiae)
hsa-miR-1283	1	0	1	0	1	1	LPPR4	lipid phosphate phosphatase-related protein type 4
hsa-miR-1283	1	0	1	0	1	1	SV2B	synaptic vesicle glycoprotein 2B
hsa-miR-1283	1	0	1	0	1	1	PDAP1	PDGFA associated protein 1
hsa-miR-1283	1	0	1	1	1	1	RNF44	ring finger protein 44
hsa-miR-1283	0	0	1	0	1	1	PPM1E	protein phosphatase, Mg2+/Mn2+ dependent, 1E
hsa-miR-1283	1	0	1	1	1	1	CHSY1	chondroitin sulfate synthase 1
hsa-miR-1283	1	0	1	0	1	1	ICK	intestinal cell (MAK-like) kinase
hsa-miR-1283	1	0	1	1	1	1	SPAST	spastin
hsa-miR-1283	1	0	1	1	1	1	RALGAPA1	Ral GTPase activating protein, alpha subunit 1 (catalytic)
hsa-miR-1283	1	0	1	0	1	1	WDFY3	WD repeat and FYVE domain containing 3
hsa-miR-1283	1	0	1	1	1	1	RAB21	RAB21, member RAS oncogene family
hsa-miR-1283	0	0	1	1	1	1	MYO16	myosin XVI
hsa-miR-1283	1	0	1	0	1	1	PDS5B	PDS5, regulator of cohesion maintenance, homolog B (S. cerevisiae)
hsa-miR-1283	1	0	1	0	1	1	NMNAT2	nicotinamide nucleotide adenylyltransferase 2
hsa-miR-1283	1	0	1	1	1	1	HECW1	HECT, C2 and WW domain containing E3 ubiquitin protein ligase 1
hsa-miR-1283	1	0	1	0	1	1	PEG10	paternally expressed 10
hsa-miR-1283	1	0	1	1	1	1	RTF1	Rtf1, Paf1/RNA polymerase II complex component, homolog (S. cerevisiae)
hsa-miR-1283	0	0	1	1	1	1	ARL6IP1	ADP-ribosylation factor-like 6 interacting protein 1
hsa-miR-1283	1	0	1	1	1	1	PRRC2C	proline-rich coiled-coil 2C
hsa-miR-1283	1	0	1	1	0	0	KIAA0556	KIAA0556
hsa-miR-1283	1	0	1	1	1	1	PHF15	PHD finger protein 15
hsa-miR-1283	1	0	1	0	1	1	SRGAP2	SLIT-ROBO Rho GTPase activating protein 2
hsa-miR-1283	0	0	1	0	1	1	ZDHHC17	zinc finger, DHHC-type containing 17
hsa-miR-1283	1	0	1	1	1	1	RIMBP2	RIMS binding protein 2
hsa-miR-1283	1	0	1	1	1	1	MORC3	MORC family CW-type zinc finger 3
hsa-miR-1283	1	0	1	1	1	1	NIPBL	Nipped-B homolog (Drosophila)
hsa-miR-1283	1	0	1	1	1	1	CNOT6	CCR4-NOT transcription complex, subunit 6
hsa-miR-1283	1	0	1	0	1	1	OSBPL3	oxysterol binding protein-like 3
hsa-miR-1283	1	0	1	0	1	1	GLCE	glucuronic acid epimerase
hsa-miR-1283	1	0	1	1	1	1	LTN1	listerin E3 ubiquitin protein ligase 1
hsa-miR-1283	1	0	1	1	1	1	PHF19	PHD finger protein 19
hsa-miR-1283	1	0	1	0	1	1	RRM2B	ribonucleotide reductase M2 B (TP53 inducible)
hsa-miR-1283	1	0	1	1	1	1	AZIN1	antizyme inhibitor 1
hsa-miR-1283	1	0	1	1	1	1	ST8SIA3	ST8 alpha-N-acetyl-neuraminide alpha-2,8-sialyltransferase 3
hsa-miR-1283	1	0	1	1	1	1	CDC40	cell division cycle 40 homolog (S. cerevisiae)
hsa-miR-1283	0	0	1	1	1	1	NOP58	NOP58 ribonucleoprotein homolog (yeast)
hsa-miR-1283	0	0	1	1	1	1	HMP19	HMP19 protein
hsa-miR-1283	0	0	1	1	1	1	SCCPDH	saccharopine dehydrogenase (putative)
hsa-miR-1283	0	0	1	1	1	1	MED31	mediator complex subunit 31
hsa-miR-1283	1	0	1	1	1	1	GOLT1B	golgi transport 1B
hsa-miR-1283	0	0	1	1	1	1	HDGFRP3	hepatoma-derived growth factor, related protein 3
hsa-miR-1283	0	0	1	1	1	1	ZFR	zinc finger RNA binding protein
hsa-miR-1283	0	0	1	1	0	0	TRPC4	transient receptor potential cation channel, subfamily C, member 4
hsa-miR-1283	1	0	1	1	1	1	VGLL3	vestigial like 3 (Drosophila)
hsa-miR-1283	1	0	1	1	1	1	CYB5R4	cytochrome b5 reductase 4
hsa-miR-1283	1	0	1	1	1	1	AKAP11	A kinase (PRKA) anchor protein 11
hsa-miR-1283	0	0	1	1	1	1	KLF2	Kruppel-like factor 2 (lung)
hsa-miR-1283	1	0	1	1	1	1	RNF138	ring finger protein 138, E3 ubiquitin protein ligase
hsa-miR-1283	1	0	1	1	1	1	PCYOX1	prenylcysteine oxidase 1
hsa-miR-1283	1	0	1	1	1	1	ARID4B	AT rich interactive domain 4B (RBP1-like)
hsa-miR-1283	1	0	1	1	1	1	LUC7L3	LUC7-like 3 (S. cerevisiae)
hsa-miR-1283	1	0	1	1	1	1	PHF20	PHD finger protein 20
hsa-miR-1283	1	0	1	0	1	1	CRIM1	cysteine rich transmembrane BMP regulator 1 (chordin-like)
hsa-miR-1283	1	0	1	1	1	1	VTA1	Vps20-associated 1 homolog (S. cerevisiae)
hsa-miR-1283	1	0	1	0	1	1	RAB8B	RAB8B, member RAS oncogene family
hsa-miR-1283	1	0	1	1	1	1	DNAJC27	DnaJ (Hsp40) homolog, subfamily C, member 27
hsa-miR-1283	1	0	1	1	1	1	IER5	immediate early response 5
hsa-miR-1283	0	0	1	1	0	0	IL23A	interleukin 23, alpha subunit p19
hsa-miR-1283	0	0	1	1	1	1	KDM3B	lysine (K)-specific demethylase 3B
hsa-miR-1283	1	0	1	1	1	1	WAC	WW domain containing adaptor with coiled-coil
hsa-miR-1283	1	0	1	1	1	1	ZAK	sterile alpha motif and leucine zipper containing kinase AZK
hsa-miR-1283	0	0	1	0	1	1	PAX5	paired box 5
hsa-miR-1283	0	0	1	1	0	0	DLL3	delta-like 3 (Drosophila)
hsa-miR-1283	1	0	1	0	1	1	FZD3	frizzled family receptor 3
hsa-miR-1283	1	0	1	0	1	1	KLHL3	kelch-like 3 (Drosophila)
hsa-miR-1283	1	0	1	1	1	1	SIX4	SIX homeobox 4
hsa-miR-1283	1	0	1	1	1	1	GALNT7	UDP-N-acetyl-alpha-D-galactosamine:polypeptide N-acetylgalactosaminyltransferase 7 (GalNAc-T7)
hsa-miR-1283	1	0	1	1	1	1	CPSF2	cleavage and polyadenylation specific factor 2, 100kDa
hsa-miR-1283	1	0	1	1	1	1	MDM1	Mdm1 nuclear protein homolog (mouse)
hsa-miR-1283	0	0	1	1	1	1	CYTH2	cytohesin 2
hsa-miR-1283	1	0	1	1	1	1	DIRAS2	DIRAS family, GTP-binding RAS-like 2
hsa-miR-1283	0	0	1	0	1	1	VEZT	vezatin, adherens junctions transmembrane protein
hsa-miR-1283	0	0	1	1	1	1	BHMT2	betaine--homocysteine S-methyltransferase 2
hsa-miR-1283	1	0	1	1	1	1	TET2	tet methylcytosine dioxygenase 2
hsa-miR-1283	1	0	1	1	1	1	HAUS6	HAUS augmin-like complex, subunit 6
hsa-miR-1283	0	0	1	0	1	1	GIPC2	GIPC PDZ domain containing family, member 2
hsa-miR-1283	0	0	1	1	1	1	ERCC6L	excision repair cross-complementing rodent repair deficiency, complementation group 6-like
hsa-miR-1283	1	0	1	0	1	1	FAM46C	family with sequence similarity 46, member C
hsa-miR-1283	0	0	1	1	0	0	CNTLN	centlein, centrosomal protein
hsa-miR-1283	1	0	1	1	1	1	LPPR1	lipid phosphate phosphatase-related protein type 1
hsa-miR-1283	1	0	1	1	1	1	ALKBH5	alkB, alkylation repair homolog 5 (E. coli)
hsa-miR-1283	1	0	1	1	1	1	ELOVL2	ELOVL fatty acid elongase 2
hsa-miR-1283	0	0	1	1	1	1	WHSC1L1	Wolf-Hirschhorn syndrome candidate 1-like 1
hsa-miR-1283	1	0	1	0	1	1	FLVCR2	feline leukemia virus subgroup C cellular receptor family, member 2
hsa-miR-1283	1	0	1	1	1	1	UBE2R2	ubiquitin-conjugating enzyme E2R 2
hsa-miR-1283	0	0	1	1	1	1	PIGX	phosphatidylinositol glycan anchor biosynthesis, class X
hsa-miR-1283	0	0	1	1	1	1	ACSM5	acyl-CoA synthetase medium-chain family member 5
hsa-miR-1283	0	0	1	1	1	1	FKBP14	FK506 binding protein 14, 22 kDa
hsa-miR-1283	1	0	1	1	1	1	ZNHIT6	zinc finger, HIT-type containing 6
hsa-miR-1283	0	0	1	1	1	1	IWS1	IWS1 homolog (S. cerevisiae)
hsa-miR-1283	1	0	1	1	1	1	IFT57	intraflagellar transport 57 homolog (Chlamydomonas)
hsa-miR-1283	1	0	1	1	1	1	ARGLU1	arginine and glutamate rich 1
hsa-miR-1283	0	0	1	1	1	1	SRBD1	S1 RNA binding domain 1
hsa-miR-1283	1	0	1	0	1	1	CCDC88A	coiled-coil domain containing 88A
hsa-miR-1283	1	0	1	1	1	1	FIGN	fidgetin
hsa-miR-1283	1	0	1	1	1	1	LRRC8D	leucine rich repeat containing 8 family, member D
hsa-miR-1283	0	0	1	1	1	1	TMEM38B	transmembrane protein 38B
hsa-miR-1283	1	0	1	1	1	1	FAM178A	family with sequence similarity 178, member A
hsa-miR-1283	1	0	1	0	1	1	MSL2	male-specific lethal 2 homolog (Drosophila)
hsa-miR-1283	0	0	1	1	1	1	MRPS10	mitochondrial ribosomal protein S10
hsa-miR-1283	0	0	1	1	1	1	NUDT11	nudix (nucleoside diphosphate linked moiety X)-type motif 11
hsa-miR-1283	1	0	1	0	1	1	ARL8B	ADP-ribosylation factor-like 8B
hsa-miR-1283	0	0	1	1	1	1	TMLHE	trimethyllysine hydroxylase, epsilon
hsa-miR-1283	1	0	1	1	1	1	LRRC1	leucine rich repeat containing 1
hsa-miR-1283	1	0	1	0	1	1	PARVA	parvin, alpha
hsa-miR-1283	1	0	1	1	1	1	C20orf20	chromosome 20 open reading frame 20
hsa-miR-1283	1	0	1	1	1	1	PI4K2B	phosphatidylinositol 4-kinase type 2 beta
hsa-miR-1283	1	0	1	1	1	1	DDX19A	DEAD (Asp-Glu-Ala-Asp) box polypeptide 19A
hsa-miR-1283	1	0	1	1	1	1	RSBN1	round spermatid basic protein 1
hsa-miR-1283	1	0	1	1	1	1	ACER3	alkaline ceramidase 3
hsa-miR-1283	1	0	1	1	1	1	DRAM1	DNA-damage regulated autophagy modulator 1
hsa-miR-1283	0	0	1	1	0	0	C17orf79	chromosome 17 open reading frame 79
hsa-miR-1283	1	0	1	1	1	1	PAG1	phosphoprotein associated with glycosphingolipid microdomains 1
hsa-miR-1283	1	0	1	1	1	1	TMEM165	transmembrane protein 165
hsa-miR-1283	0	0	1	1	1	1	HDAC8	histone deacetylase 8
hsa-miR-1283	1	0	1	1	1	1	LRRC59	leucine rich repeat containing 59
hsa-miR-1283	1	0	1	0	1	1	LRP1B	low density lipoprotein receptor-related protein 1B
hsa-miR-1283	1	0	1	1	1	1	STRADB	STE20-related kinase adaptor beta
hsa-miR-1283	1	0	1	1	1	1	ETNK1	ethanolamine kinase 1
hsa-miR-1283	0	0	1	1	1	1	DHTKD1	dehydrogenase E1 and transketolase domain containing 1
hsa-miR-1283	1	0	1	0	1	1	TMEM55A	transmembrane protein 55A
hsa-miR-1283	1	0	1	1	0	0	HOXB6	homeobox B6
hsa-miR-1283	0	0	1	1	1	1	NPAP1	nuclear pore associated protein 1
hsa-miR-1283	0	0	1	1	1	1	TERF2IP	telomeric repeat binding factor 2, interacting protein
hsa-miR-1283	1	0	1	1	1	1	KCTD5	potassium channel tetramerisation domain containing 5
hsa-miR-1283	1	0	1	0	1	1	FAM190B	family with sequence similarity 190, member B
hsa-miR-1283	0	0	1	1	0	0	SPIN2A	spindlin family, member 2A
hsa-miR-1283	1	0	1	0	1	1	CCDC93	coiled-coil domain containing 93
hsa-miR-1283	1	0	1	1	1	1	DENND1B	DENN/MADD domain containing 1B
hsa-miR-1283	0	0	1	1	1	1	GNL3L	guanine nucleotide binding protein-like 3 (nucleolar)-like
hsa-miR-1283	1	0	1	1	1	1	DLL4	delta-like 4 (Drosophila)
hsa-miR-1283	0	0	1	1	1	1	TRMT13	tRNA methyltransferase 13 homolog (S. cerevisiae)
hsa-miR-1283	0	0	1	0	1	1	ARL15	ADP-ribosylation factor-like 15
hsa-miR-1283	1	0	1	1	1	1	SERTAD4	SERTA domain containing 4
hsa-miR-1283	0	0	1	1	1	1	FMN2	formin 2
hsa-miR-1283	1	0	1	0	1	1	KCMF1	potassium channel modulatory factor 1
hsa-miR-1283	1	0	1	0	1	1	SLAMF8	SLAM family member 8
hsa-miR-1283	0	0	1	1	1	1	TMEM167B	transmembrane protein 167B
hsa-miR-1283	1	0	1	0	1	1	PMEPA1	prostate transmembrane protein, androgen induced 1
hsa-miR-1283	1	0	1	1	1	1	CCDC47	coiled-coil domain containing 47
hsa-miR-1283	0	0	1	1	0	0	ENTPD7	ectonucleoside triphosphate diphosphohydrolase 7
hsa-miR-1283	1	0	1	1	1	1	PITHD1	PITH (C-terminal proteasome-interacting domain of thioredoxin-like) domain containing 1
hsa-miR-1283	0	0	1	1	1	1	PDSS2	prenyl (decaprenyl) diphosphate synthase, subunit 2
hsa-miR-1283	1	0	1	0	1	1	EIF5A2	eukaryotic translation initiation factor 5A2
hsa-miR-1283	1	0	1	1	0	0	JPH2	junctophilin 2
hsa-miR-1283	1	0	1	1	1	1	PTGFRN	prostaglandin F2 receptor negative regulator
hsa-miR-1283	0	0	1	1	1	1	FGF23	fibroblast growth factor 23
hsa-miR-1283	0	0	1	1	1	1	TMEM27	transmembrane protein 27
hsa-miR-1283	1	0	1	1	1	1	RAB22A	RAB22A, member RAS oncogene family
hsa-miR-1283	1	0	1	1	1	1	USP31	ubiquitin specific peptidase 31
hsa-miR-1283	0	0	1	0	1	1	XPO5	exportin 5
hsa-miR-1283	0	0	1	1	1	1	TXNDC16	thioredoxin domain containing 16
hsa-miR-1283	1	0	1	1	1	1	SIPA1L2	signal-induced proliferation-associated 1 like 2
hsa-miR-1283	1	0	1	1	1	1	EPB41L5	erythrocyte membrane protein band 4.1 like 5
hsa-miR-1283	1	0	1	0	1	1	GPAM	glycerol-3-phosphate acyltransferase, mitochondrial
hsa-miR-1283	0	0	1	1	1	1	PPP4R4	protein phosphatase 4, regulatory subunit 4
hsa-miR-1283	0	0	1	1	1	1	GNAO1	guanine nucleotide binding protein (G protein), alpha activating activity polypeptide O
hsa-miR-1283	1	0	1	0	1	1	RAP2A	RAP2A, member of RAS oncogene family
hsa-miR-1283	1	0	1	1	1	1	CLDN1	claudin 1
hsa-miR-1283	1	0	1	1	1	1	TMSB4X	thymosin beta 4, X-linked
hsa-miR-1283	0	0	1	1	1	1	COL14A1	collagen, type XIV, alpha 1
hsa-miR-1283	1	0	1	1	1	1	ADCY1	adenylate cyclase 1 (brain)
hsa-miR-1283	0	0	1	1	0	0	TRIB3	tribbles homolog 3 (Drosophila)
hsa-miR-1283	0	0	1	0	1	1	MS4A7	membrane-spanning 4-domains, subfamily A, member 7
hsa-miR-1283	1	0	1	0	1	1	TP53INP2	tumor protein p53 inducible nuclear protein 2
hsa-miR-1283	1	0	1	1	1	1	RPRD1B	regulation of nuclear pre-mRNA domain containing 1B
hsa-miR-1283	1	0	1	1	1	1	NTN4	netrin 4
hsa-miR-1283	1	0	1	1	1	1	FAM60A	family with sequence similarity 60, member A
hsa-miR-1283	1	0	1	1	1	1	PELI2	pellino E3 ubiquitin protein ligase family member 2
hsa-miR-1283	0	0	1	1	0	0	IL21	interleukin 21
hsa-miR-1283	0	0	1	0	1	1	CFL2	cofilin 2 (muscle)
hsa-miR-1283	0	0	1	0	1	1	SPCS3	signal peptidase complex subunit 3 homolog (S. cerevisiae)
hsa-miR-1283	1	0	1	1	1	1	SEC24A	SEC24 family, member A (S. cerevisiae)
hsa-miR-1283	0	0	1	1	0	0	TMSB15A	thymosin beta 15a
hsa-miR-1283	0	0	1	1	1	1	ITM2B	integral membrane protein 2B
hsa-miR-1283	1	0	1	0	1	1	GAN	gigaxonin
hsa-miR-1283	1	0	1	1	0	0	SDF2L1	stromal cell-derived factor 2-like 1
hsa-miR-1283	1	0	1	0	1	1	CSNK1G1	casein kinase 1, gamma 1
hsa-miR-1283	0	0	1	1	1	1	FAM204A	family with sequence similarity 204, member A
hsa-miR-1283	1	0	1	1	1	1	LRRC4	leucine rich repeat containing 4
hsa-miR-1283	0	0	1	1	1	1	RTP4	receptor (chemosensory) transporter protein 4
hsa-miR-1283	1	0	1	1	1	1	XYLT1	xylosyltransferase I
hsa-miR-1283	1	0	1	1	1	1	XYLT2	xylosyltransferase II
hsa-miR-1283	1	0	1	1	1	1	ABCG4	ATP-binding cassette, sub-family G (WHITE), member 4
hsa-miR-1283	0	0	1	0	1	1	SLC13A1	solute carrier family 13 (sodium/sulfate symporters), member 1
hsa-miR-1283	1	0	1	1	1	1	TMEM168	transmembrane protein 168
hsa-miR-1283	0	0	1	0	1	1	EBF2	early B-cell factor 2
hsa-miR-1283	0	0	1	1	1	1	ACBD3	acyl-CoA binding domain containing 3
hsa-miR-1283	0	0	1	1	1	1	OSBPL11	oxysterol binding protein-like 11
hsa-miR-1283	1	0	1	1	1	1	DEPTOR	DEP domain containing MTOR-interacting protein
hsa-miR-1283	0	0	1	1	1	1	METTL4	methyltransferase like 4
hsa-miR-1283	1	0	1	1	1	1	RFX7	regulatory factor X, 7
hsa-miR-1283	1	0	1	0	1	1	BCL11B	B-cell CLL/lymphoma 11B (zinc finger protein)
hsa-miR-1283	1	0	1	1	1	1	SOWAHC	sosondowah ankyrin repeat domain family member C
hsa-miR-1283	1	0	1	1	1	1	HOXB8	homeobox B8
hsa-miR-1283	1	0	1	1	1	1	NEUROG2	neurogenin 2
hsa-miR-1283	0	0	1	1	1	1	CEP70	centrosomal protein 70kDa
hsa-miR-1283	1	0	1	1	1	1	HOXD1	homeobox D1
hsa-miR-1283	1	0	1	1	1	1	LRRC2	leucine rich repeat containing 2
hsa-miR-1283	1	0	1	1	1	1	RNF128	ring finger protein 128, E3 ubiquitin protein ligase
hsa-miR-1283	0	0	1	1	1	1	RNF219	ring finger protein 219
hsa-miR-1283	1	0	1	1	1	1	C3orf52	chromosome 3 open reading frame 52
hsa-miR-1283	0	0	1	1	1	1	E2F8	E2F transcription factor 8
hsa-miR-1283	0	0	1	1	1	1	BBS10	Bardet-Biedl syndrome 10
hsa-miR-1283	0	0	1	1	1	1	SNIP1	Smad nuclear interacting protein 1
hsa-miR-1283	1	0	1	0	1	1	ZFHX4	zinc finger homeobox 4
hsa-miR-1283	1	0	1	1	1	1	PIP4K2C	phosphatidylinositol-5-phosphate 4-kinase, type II, gamma
hsa-miR-1283	0	0	1	1	0	0	RNF122	ring finger protein 122
hsa-miR-1283	1	0	1	1	1	1	L2HGDH	L-2-hydroxyglutarate dehydrogenase
hsa-miR-1283	0	0	1	1	1	1	ESRP2	epithelial splicing regulatory protein 2
hsa-miR-1283	1	0	1	1	1	1	KLHL18	kelch-like 18 (Drosophila)
hsa-miR-1283	1	0	1	0	1	1	VCPIP1	valosin containing protein (p97)/p47 complex interacting protein 1
hsa-miR-1283	1	0	1	1	1	1	NAA50	N(alpha)-acetyltransferase 50, NatE catalytic subunit
hsa-miR-1283	1	0	1	1	1	1	SLC35F5	solute carrier family 35, member F5
hsa-miR-1283	1	0	1	0	1	1	EDEM3	ER degradation enhancer, mannosidase alpha-like 3
hsa-miR-1283	1	0	1	1	1	1	TNKS2	tankyrase, TRF1-interacting ankyrin-related ADP-ribose polymerase 2
hsa-miR-1283	1	0	1	1	1	1	JHDM1D	jumonji C domain containing histone demethylase 1 homolog D (S. cerevisiae)
hsa-miR-1283	1	0	1	0	1	1	SETD7	SET domain containing (lysine methyltransferase) 7
hsa-miR-1283	1	0	1	1	1	1	PTPRO	protein tyrosine phosphatase, receptor type, O
hsa-miR-1283	1	0	1	1	0	0	WNT4	wingless-type MMTV integration site family, member 4
hsa-miR-1283	0	0	1	1	1	1	BCL2L14	BCL2-like 14 (apoptosis facilitator)
hsa-miR-1283	1	0	1	1	1	1	ITFG1	integrin alpha FG-GAP repeat containing 1
hsa-miR-1283	1	0	1	1	1	1	SGPP1	sphingosine-1-phosphate phosphatase 1
hsa-miR-1283	1	0	1	1	1	1	PDRG1	p53 and DNA-damage regulated 1
hsa-miR-1283	1	0	1	1	1	1	SNX27	sorting nexin family member 27
hsa-miR-1283	1	0	1	1	1	1	C6orf62	chromosome 6 open reading frame 62
hsa-miR-1283	1	0	1	1	1	1	PPP1R14C	protein phosphatase 1, regulatory (inhibitor) subunit 14C
hsa-miR-1283	1	0	1	1	1	1	TIGD6	tigger transposable element derived 6
hsa-miR-1283	1	0	1	0	1	1	SPRY4	sprouty homolog 4 (Drosophila)
hsa-miR-1283	0	0	1	1	1	1	PABPC3	poly(A) binding protein, cytoplasmic 3
hsa-miR-1283	0	0	1	1	1	1	SEH1L	SEH1-like (S. cerevisiae)
hsa-miR-1283	1	0	1	1	0	0	TCF7L1	transcription factor 7-like 1 (T-cell specific, HMG-box)
hsa-miR-1283	1	0	1	1	1	1	ANO3	anoctamin 3
hsa-miR-1283	1	0	1	1	1	1	DNAL1	dynein, axonemal, light chain 1
hsa-miR-1283	1	0	1	0	1	1	THAP2	THAP domain containing, apoptosis associated protein 2
hsa-miR-1283	1	0	1	0	1	1	TMEM47	transmembrane protein 47
hsa-miR-1283	1	0	1	1	1	1	FAM103A1	family with sequence similarity 103, member A1
hsa-miR-1283	1	0	1	1	1	1	CRISPLD1	cysteine-rich secretory protein LCCL domain containing 1
hsa-miR-1283	1	0	1	0	1	1	SH3BGRL2	SH3 domain binding glutamic acid-rich protein like 2
hsa-miR-1283	1	0	1	0	1	1	ITCH	itchy E3 ubiquitin protein ligase
hsa-miR-1283	0	0	1	1	1	1	FRMD8	FERM domain containing 8
hsa-miR-1283	0	0	1	1	0	0	KRTAP17-1	keratin associated protein 17-1
hsa-miR-1283	1	0	1	1	1	1	TMEM133	transmembrane protein 133
hsa-miR-1283	1	0	1	1	1	1	OTP	orthopedia homeobox
hsa-miR-1283	1	0	1	1	1	1	FBXO30	F-box protein 30
hsa-miR-1283	0	0	1	1	1	1	C4orf17	chromosome 4 open reading frame 17
hsa-miR-1283	0	0	1	1	1	1	ACAD11	acyl-CoA dehydrogenase family, member 11
hsa-miR-1283	1	0	1	1	1	1	ARID5B	AT rich interactive domain 5B (MRF1-like)
hsa-miR-1283	1	0	1	0	1	1	FAR1	fatty acyl CoA reductase 1
hsa-miR-1283	1	0	1	1	1	1	SLITRK6	SLIT and NTRK-like family, member 6
hsa-miR-1283	1	0	1	1	1	1	MEX3B	mex-3 homolog B (C. elegans)
hsa-miR-1283	1	0	1	1	0	0	MAF1	MAF1 homolog (S. cerevisiae)
hsa-miR-1283	0	0	1	1	1	1	YIPF4	Yip1 domain family, member 4
hsa-miR-1283	1	0	1	1	1	1	BRMS1L	breast cancer metastasis-suppressor 1-like
hsa-miR-1283	1	0	1	1	1	1	DNAJC14	DnaJ (Hsp40) homolog, subfamily C, member 14
hsa-miR-1283	1	0	1	1	1	1	HOOK3	hook homolog 3 (Drosophila)
hsa-miR-1283	1	0	1	1	1	1	RBBP6	retinoblastoma binding protein 6
hsa-miR-1283	1	0	1	0	1	1	PPP1R15B	protein phosphatase 1, regulatory subunit 15B
hsa-miR-1283	1	0	1	0	1	1	LACTB	lactamase, beta
hsa-miR-1283	1	0	1	0	1	1	UBASH3B	ubiquitin associated and SH3 domain containing B
hsa-miR-1283	1	0	1	1	1	1	PCDH11Y	protocadherin 11 Y-linked
hsa-miR-1283	0	0	1	1	1	1	TRIM4	tripartite motif containing 4
hsa-miR-1283	0	0	1	0	1	1	TSLP	thymic stromal lymphopoietin
hsa-miR-1283	1	0	1	1	1	1	HIAT1	hippocampus abundant transcript 1
hsa-miR-1283	1	0	1	0	1	1	EAF1	ELL associated factor 1
hsa-miR-1283	0	0	1	1	1	1	RBM18	RNA binding motif protein 18
hsa-miR-1283	0	0	1	1	1	1	ZIC5	Zic family member 5
hsa-miR-1283	1	0	1	0	1	1	PURB	purine-rich element binding protein B
hsa-miR-1283	1	0	1	1	1	1	COL4A5	collagen, type IV, alpha 5
hsa-miR-1283	1	0	1	1	1	1	SSH2	slingshot homolog 2 (Drosophila)
hsa-miR-1283	1	0	1	1	1	1	EPT1	ethanolaminephosphotransferase 1 (CDP-ethanolamine-specific)
hsa-miR-1283	1	0	1	1	1	1	TPD52L3	tumor protein D52-like 3
hsa-miR-1283	1	0	1	1	1	1	LUZP1	leucine zipper protein 1
hsa-miR-1283	1	0	1	0	0	0	ANKRD40	ankyrin repeat domain 40
hsa-miR-1283	1	0	1	1	1	1	SLC2A13	solute carrier family 2 (facilitated glucose transporter), member 13
hsa-miR-1283	1	0	1	1	1	1	MAL2	mal, T-cell differentiation protein 2 (gene/pseudogene)
hsa-miR-1283	0	0	1	0	0	0	LRRC37B	leucine rich repeat containing 37B
hsa-miR-1283	0	0	1	1	0	0	DNTTIP1	deoxynucleotidyltransferase, terminal, interacting protein 1
hsa-miR-1283	1	0	1	1	1	1	TRIM9	tripartite motif containing 9
hsa-miR-1283	0	0	1	0	1	1	ZNF518B	zinc finger protein 518B
hsa-miR-1283	1	0	1	0	1	1	CCND1	cyclin D1
hsa-miR-1283	0	0	1	1	1	1	CCNE2	cyclin E2
hsa-miR-1283	0	0	1	1	1	1	BCCIP	BRCA2 and CDKN1A interacting protein
hsa-miR-1283	1	0	1	1	1	1	SLC44A1	solute carrier family 44, member 1
hsa-miR-1283	1	0	1	0	1	1	SOCS4	suppressor of cytokine signaling 4
hsa-miR-1283	0	0	1	1	0	0	DGUOK	deoxyguanosine kinase
hsa-miR-1283	0	0	1	1	1	1	COLEC12	collectin sub-family member 12
hsa-miR-1283	0	0	1	1	1	1	TRIM34	tripartite motif containing 34
hsa-miR-1283	1	0	1	1	1	1	PRRC1	proline-rich coiled-coil 1
hsa-miR-1283	0	0	1	0	1	1	SYNPO2	synaptopodin 2
hsa-miR-1283	1	0	1	1	1	1	SLC26A7	solute carrier family 26, member 7
hsa-miR-1283	0	0	1	1	1	1	RFX3	regulatory factor X, 3 (influences HLA class II expression)
hsa-miR-1283	1	0	1	1	1	1	NUP35	nucleoporin 35kDa
hsa-miR-1283	1	0	1	1	1	1	SPTSSA	serine palmitoyltransferase, small subunit A
hsa-miR-1283	1	0	1	1	0	0	PKDCC	protein kinase domain containing, cytoplasmic homolog (mouse)
hsa-miR-1283	1	0	1	1	1	1	MARS2	methionyl-tRNA synthetase 2, mitochondrial
hsa-miR-1283	1	0	1	1	1	1	GLCCI1	glucocorticoid induced transcript 1
hsa-miR-1283	1	0	1	0	1	1	NUS1	nuclear undecaprenyl pyrophosphate synthase 1 homolog (S. cerevisiae)
hsa-miR-1283	1	0	1	0	1	1	SP1	Sp1 transcription factor
hsa-miR-1283	1	0	1	0	1	1	FCHO2	FCH domain only 2
hsa-miR-1283	0	0	1	1	1	1	SDR16C5	short chain dehydrogenase/reductase family 16C, member 5
hsa-miR-1283	0	0	1	1	1	1	PPIL4	peptidylprolyl isomerase (cyclophilin)-like 4
hsa-miR-1283	1	0	1	1	1	1	PPTC7	PTC7 protein phosphatase homolog (S. cerevisiae)
hsa-miR-1283	1	0	1	0	1	1	CNOT6L	CCR4-NOT transcription complex, subunit 6-like
hsa-miR-1283	0	0	1	1	1	1	C15orf40	chromosome 15 open reading frame 40
hsa-miR-1283	1	0	1	1	1	1	TMEM182	transmembrane protein 182
hsa-miR-1283	1	0	1	1	1	1	FAM91A1	family with sequence similarity 91, member A1
hsa-miR-1283	0	0	1	1	1	1	ZFC3H1	zinc finger, C3H1-type containing
hsa-miR-1283	0	0	1	1	1	1	DNAJB7	DnaJ (Hsp40) homolog, subfamily B, member 7
hsa-miR-1283	0	0	1	0	1	1	SPATA18	spermatogenesis associated 18
hsa-miR-1283	0	0	1	1	1	1	APOBEC3F	apolipoprotein B mRNA editing enzyme, catalytic polypeptide-like 3F
hsa-miR-1283	0	0	1	1	0	0	SPESP1	sperm equatorial segment protein 1
hsa-miR-1283	1	0	1	1	1	1	ZNF396	zinc finger protein 396
hsa-miR-1283	1	0	1	1	1	1	SGMS1	sphingomyelin synthase 1
hsa-miR-1283	0	0	1	1	1	1	MRFAP1L1	Morf4 family associated protein 1-like 1
hsa-miR-1283	1	0	1	1	1	1	POGLUT1	protein O-glucosyltransferase 1
hsa-miR-1283	0	0	1	1	1	1	ARL14EP	ADP-ribosylation factor-like 14 effector protein
hsa-miR-1283	1	0	1	1	1	1	LSM12	LSM12 homolog (S. cerevisiae)
hsa-miR-1283	0	0	1	1	1	1	PIWIL4	piwi-like 4 (Drosophila)
hsa-miR-1283	0	0	1	1	1	1	RDH12	retinol dehydrogenase 12 (all-trans/9-cis/11-cis)
hsa-miR-1283	1	0	1	1	1	1	CEP128	centrosomal protein 128kDa
hsa-miR-1283	1	0	1	1	1	1	FAM81A	family with sequence similarity 81, member A
hsa-miR-1283	1	0	1	1	1	1	ZNF583	zinc finger protein 583
hsa-miR-1283	1	0	1	0	1	1	DCP2	DCP2 decapping enzyme homolog (S. cerevisiae)
hsa-miR-1283	1	0	1	0	1	1	FAM116A	family with sequence similarity 116, member A
hsa-miR-1283	1	0	1	0	1	1	RWDD4	RWD domain containing 4
hsa-miR-1283	1	0	1	0	1	1	C7orf41	chromosome 7 open reading frame 41
hsa-miR-1283	1	0	1	1	1	1	PDIK1L	PDLIM1 interacting kinase 1 like
hsa-miR-1283	0	0	1	0	1	1	KBTBD6	kelch repeat and BTB (POZ) domain containing 6
hsa-miR-1283	1	0	1	1	1	1	TCEANC2	transcription elongation factor A (SII) N-terminal and central domain containing 2
hsa-miR-1283	1	0	1	1	1	1	CEP120	centrosomal protein 120kDa
hsa-miR-1283	0	0	1	1	1	1	BEND2	BEN domain containing 2
hsa-miR-1283	1	0	1	0	1	1	TAPT1	transmembrane anterior posterior transformation 1
hsa-miR-1283	1	0	1	1	1	1	HS6ST3	heparan sulfate 6-O-sulfotransferase 3
hsa-miR-1283	0	0	1	1	1	1	CAMK1D	calcium/calmodulin-dependent protein kinase ID
hsa-miR-1283	1	0	1	1	1	1	CREBRF	CREB3 regulatory factor
hsa-miR-1283	0	0	1	1	0	0	LIX1L	Lix1 homolog (mouse)-like
hsa-miR-1283	0	0	1	1	1	1	SALL3	sal-like 3 (Drosophila)
hsa-miR-1283	0	0	1	1	1	1	REXO1L1	REX1, RNA exonuclease 1 homolog (S. cerevisiae)-like 1
hsa-miR-1283	0	0	1	1	0	0	SLITRK4	SLIT and NTRK-like family, member 4
hsa-miR-1283	1	0	1	1	1	1	NR4A3	nuclear receptor subfamily 4, group A, member 3
hsa-miR-1283	0	0	1	1	0	0	DEFB119	defensin, beta 119
hsa-miR-1283	1	0	1	1	1	1	MMGT1	membrane magnesium transporter 1
hsa-miR-1283	1	0	1	1	1	1	DCUN1D3	DCN1, defective in cullin neddylation 1, domain containing 3 (S. cerevisiae)
hsa-miR-1283	0	0	1	1	1	1	C4orf33	chromosome 4 open reading frame 33
hsa-miR-1283	1	0	1	1	1	1	CCDC117	coiled-coil domain containing 117
hsa-miR-1283	1	0	1	1	1	1	FAM117B	family with sequence similarity 117, member B
hsa-miR-1283	1	0	1	0	1	1	GABRG1	gamma-aminobutyric acid (GABA) A receptor, gamma 1
hsa-miR-1283	1	0	1	1	1	1	RIMKLA	ribosomal modification protein rimK-like family member A
hsa-miR-1283	0	0	1	1	1	1	FAM133A	family with sequence similarity 133, member A
hsa-miR-1283	0	0	1	1	1	1	MAGEB18	melanoma antigen family B, 18
hsa-miR-1283	1	0	1	0	1	1	SREK1IP1	SREK1-interacting protein 1
hsa-miR-1283	1	0	1	0	1	1	FAM84B	family with sequence similarity 84, member B
hsa-miR-1283	1	0	1	1	1	1	C4orf34	chromosome 4 open reading frame 34
hsa-miR-1283	1	0	1	1	0	0	TCERG1L	transcription elongation regulator 1-like
hsa-miR-1283	1	0	1	1	1	1	SYT9	synaptotagmin IX
hsa-miR-1283	1	0	1	0	1	1	CCDC71L	coiled-coil domain containing 71-like
hsa-miR-1283	1	0	1	1	1	1	ZADH2	zinc binding alcohol dehydrogenase domain containing 2
hsa-miR-1283	1	0	1	0	1	1	C5orf51	chromosome 5 open reading frame 51
hsa-miR-1283	0	0	1	1	1	1	IFNE	interferon, epsilon
hsa-miR-1283	1	0	1	1	1	1	PPAP2B	phosphatidic acid phosphatase type 2B
hsa-miR-1283	1	0	1	1	1	1	STX12	syntaxin 12
hsa-miR-1283	1	0	1	0	1	1	ERC1	ELKS/RAB6-interacting/CAST family member 1
hsa-miR-1283	0	0	1	1	1	1	SESTD1	SEC14 and spectrin domains 1
hsa-miR-1283	0	0	1	1	1	1	HSD17B13	hydroxysteroid (17-beta) dehydrogenase 13
hsa-miR-1283	0	0	1	1	1	1	ZNF831	zinc finger protein 831
hsa-miR-1283	1	0	1	1	1	1	DCAF12L1	DDB1 and CUL4 associated factor 12-like 1
hsa-miR-1283	1	0	1	1	1	1	MB21D2	Mab-21 domain containing 2
hsa-miR-1283	0	0	1	1	1	1	STXBP4	syntaxin binding protein 4
hsa-miR-1283	0	0	1	0	1	1	NAT8L	N-acetyltransferase 8-like (GCN5-related, putative)
hsa-miR-1283	1	0	1	1	1	1	PPP2R5C	protein phosphatase 2, regulatory subunit B', gamma
hsa-miR-1283	1	0	1	0	1	1	ARL5B	ADP-ribosylation factor-like 5B
hsa-miR-1283	0	0	1	1	1	1	CMTM4	CKLF-like MARVEL transmembrane domain containing 4
hsa-miR-1283	0	0	1	1	1	1	NPAS4	neuronal PAS domain protein 4
hsa-miR-1283	0	0	1	0	1	1	SLCO4C1	solute carrier organic anion transporter family, member 4C1
hsa-miR-1283	0	0	1	0	1	1	ZNF445	zinc finger protein 445
hsa-miR-1283	1	0	1	1	1	1	CREM	cAMP responsive element modulator
hsa-miR-1283	0	0	1	1	1	1	CCDC67	coiled-coil domain containing 67
hsa-miR-1283	0	0	1	0	1	1	HCG27	HLA complex group 27 (non-protein coding)
hsa-miR-1283	1	0	1	1	1	1	TMED7	transmembrane emp24 protein transport domain containing 7
hsa-miR-1283	1	0	1	1	1	1	BCL6B	B-cell CLL/lymphoma 6, member B
hsa-miR-1283	1	0	1	1	1	1	ADAT2	adenosine deaminase, tRNA-specific 2
hsa-miR-1283	0	0	1	1	1	1	ZNF326	zinc finger protein 326
hsa-miR-1283	1	0	1	0	1	1	TMSB4XP8	thymosin beta 4, X-linked pseudogene 8
hsa-miR-1283	0	0	1	1	1	1	ZNF804A	zinc finger protein 804A
hsa-miR-1283	1	0	1	1	0	0	TMEM219	transmembrane protein 219
hsa-miR-1283	1	0	1	1	1	1	TMEM65	transmembrane protein 65
hsa-miR-1283	1	0	1	0	1	1	SLC16A9	solute carrier family 16, member 9 (monocarboxylic acid transporter 9)
hsa-miR-1283	0	0	1	1	1	1	KIF24	kinesin family member 24
hsa-miR-1283	1	0	1	1	1	1	ZBTB41	zinc finger and BTB domain containing 41
hsa-miR-1283	1	0	1	1	1	1	PHLPP1	PH domain and leucine rich repeat protein phosphatase 1
hsa-miR-1283	1	0	1	1	1	1	ADAMTS6	ADAM metallopeptidase with thrombospondin type 1 motif, 6
hsa-miR-1283	1	0	1	1	1	1	E2F6	E2F transcription factor 6
hsa-miR-1283	1	0	1	1	1	1	PAQR9	progestin and adipoQ receptor family member IX
hsa-miR-1283	0	0	1	1	0	0	SPATA21	spermatogenesis associated 21
hsa-miR-1283	1	0	1	1	1	1	MIA3	melanoma inhibitory activity family, member 3
hsa-miR-1283	1	0	1	1	1	1	PTGER3	prostaglandin E receptor 3 (subtype EP3)
hsa-miR-1283	1	0	1	0	1	1	ACACA	acetyl-CoA carboxylase alpha
hsa-miR-1283	0	0	1	1	1	1	PTHLH	parathyroid hormone-like hormone
hsa-miR-1283	0	0	1	1	1	1	FAM5C	family with sequence similarity 5, member C
hsa-miR-1283	0	0	1	1	1	1	SHC4	SHC (Src homology 2 domain containing) family, member 4
hsa-miR-1283	1	0	1	0	1	1	NCKAP5	NCK-associated protein 5
hsa-miR-1283	0	0	1	1	0	0	AADACL2	arylacetamide deacetylase-like 2
hsa-miR-1283	1	0	1	1	1	1	SKIDA1	SKI/DACH domain containing 1
hsa-miR-1283	1	0	1	1	1	1	ADAMTSL3	ADAMTS-like 3
hsa-miR-1283	1	0	1	1	1	1	C11orf87	chromosome 11 open reading frame 87
hsa-miR-1283	0	0	1	0	1	1	TMEM215	transmembrane protein 215
hsa-miR-1283	1	0	1	0	1	1	STAT3	signal transducer and activator of transcription 3 (acute-phase response factor)
hsa-miR-1283	0	0	1	0	0	0	RAB9BP1	RAB9B, member RAS oncogene family pseudogene 1
hsa-miR-1283	0	0	1	0	0	0	TOP1P2	topoisomerase (DNA) I pseudogene 2
hsa-miR-1283	0	0	1	0	0	0	MIR155HG	MIR155 host gene (non-protein coding)
hsa-miR-1283	0	0	1	0	0	0	TTTY15	testis-specific transcript, Y-linked 15 (non-protein coding)
hsa-miR-1283	0	0	1	0	0	0	TPTEP1	transmembrane phosphatase with tensin homology pseudogene 1
hsa-miR-1283	0	0	1	0	0	0	FTH1P3	ferritin, heavy polypeptide 1 pseudogene 3
hsa-miR-1283	0	0	1	0	0	0	FTH1P8	ferritin, heavy polypeptide 1 pseudogene 8
hsa-miR-1283	0	0	1	0	0	0	FTH1P12	ferritin, heavy polypeptide 1 pseudogene 12
hsa-miR-1283	0	0	1	0	0	0	NUDT4P1	nudix (nucleoside diphosphate linked moiety X)-type motif 4 pseudogene 1
hsa-miR-1283	0	0	1	0	0	0	H3F3AP4	H3 histone, family 3A, pseudogene 4
hsa-miR-1283	0	0	1	0	0	0	SNORA4	small nucleolar RNA, H/ACA box 4
hsa-miR-1283	0	0	1	0	0	0	NPY6R	neuropeptide Y receptor Y6 (pseudogene)
hsa-miR-1283	0	0	1	0	0	0	TOP1P1	topoisomerase (DNA) I pseudogene 1
hsa-miR-1283	0	0	1	0	0	0	HNRNPA3P1	heterogeneous nuclear ribonucleoprotein A3 pseudogene 1
hsa-miR-1283	0	0	1	0	0	0	AKIRIN2-AS1	AKIRIN2 antisense RNA 1
hsa-miR-1283	0	0	1	0	0	0	PER4	period homolog 3 (Drosophila) pseudogene
hsa-miR-1283	0	0	1	0	0	0	TPTE2P6	transmembrane phosphoinositide 3-phosphatase and tensin homolog 2 pseudogene 6
hsa-miR-1283	0	0	1	0	0	0	MALAT1	metastasis associated lung adenocarcinoma transcript 1 (non-protein coding)
hsa-miR-1283	0	0	1	0	0	0	RNASEH2CP1	ribonuclease H2, subunit C pseudogene 1
hsa-miR-1283	0	0	1	0	0	0	TCAM1P	testicular cell adhesion molecule 1 homolog (mouse), pseudogene
hsa-miR-1283	0	0	1	0	0	0	SNORA36B	small nucleolar RNA, H/ACA box 36B
hsa-miR-1283	0	0	1	0	0	0	HSP90B3P	heat shock protein 90kDa beta (Grp94), member 3, pseudogene
hsa-miR-1283	0	0	1	0	0	0	SNORD116-28	small nucleolar RNA, C/D box 116-28
hsa-miR-1283	0	0	1	1	0	0	SNRPN	small nuclear ribonucleoprotein polypeptide N
hsa-miR-1283	1	0	1	0	1	1	NFIX	nuclear factor I/X (CCAAT-binding transcription factor)
hsa-miR-1283	0	0	1	0	0	0	PLGLA	plasminogen-like A
hsa-miR-1283	0	0	1	1	1	1	PEG3	paternally expressed 3
