# Supplementary material for: Profiling of Selected MicroRNAs in Proliferative Eutopic Endometrium of Women with Ovarian Endometriosis
Source: Biomed Res Int. 2015 Aug 20;2015:760698. doi: 10.1155/2015/760698 (PMC4558423; doi:10.1155/2015/760698)
Supplement: Supplementary file 1 — Table I: The names of miRNAs significantly differentially expressed between eutopic endometrium of patients with endometriosis vs eutopic endometrium of patients without endometriosis. Table II: The associations between miRNA and mRNA, which presents detailed results of the search of six major databases i.e targetscan, tarbase, miranda, mirbase, mirtarget2 and pictar. [file 760698.f1.zip › 760698.f1/Table II/hsa-miR-1293.tsv]

miR	targetscan	tarbase	miranda	mirbase	mirtarget2	pictar	GeneSymbol	GeneName
hsa-miR-1293	1	0	1	1	1	1	CHD9	chromodomain helicase DNA binding protein 9
hsa-miR-1293	1	0	1	1	0	0	SRCAP	Snf2-related CREBBP activator protein
hsa-miR-1293	0	0	1	1	0	0	PLXNB2	plexin B2
hsa-miR-1293	1	0	1	1	1	1	DAAM2	dishevelled associated activator of morphogenesis 2
hsa-miR-1293	1	0	1	0	1	1	PTPRT	protein tyrosine phosphatase, receptor type, T
hsa-miR-1293	1	0	1	0	1	1	GAS7	growth arrest-specific 7
hsa-miR-1293	1	0	1	1	1	1	SGSM2	small G protein signaling modulator 2
hsa-miR-1293	0	0	1	1	0	0	RAP1GAP	RAP1 GTPase activating protein
hsa-miR-1293	1	0	1	1	1	1	BAI3	brain-specific angiogenesis inhibitor 3
hsa-miR-1293	1	0	1	1	1	1	GPATCH8	G patch domain containing 8
hsa-miR-1293	1	0	1	0	1	1	MFAP3L	microfibrillar-associated protein 3-like
hsa-miR-1293	1	0	1	0	1	1	DOCK4	dedicator of cytokinesis 4
hsa-miR-1293	1	0	1	1	1	1	DMXL2	Dmx-like 2
hsa-miR-1293	0	0	1	1	1	1	MAU2	MAU2 chromatid cohesion factor homolog (C. elegans)
hsa-miR-1293	1	0	1	1	1	1	PALLD	palladin, cytoskeletal associated protein
hsa-miR-1293	1	0	1	1	0	0	KIAA1045	KIAA1045
hsa-miR-1293	0	0	1	0	0	0	IQSEC3	IQ motif and Sec7 domain 3
hsa-miR-1293	1	0	1	1	1	1	PHF8	PHD finger protein 8
hsa-miR-1293	0	0	1	0	0	0	ELTD1	EGF, latrophilin and seven transmembrane domain containing 1
hsa-miR-1293	1	0	1	0	1	1	ODZ2	odz, odd Oz/ten-m homolog 2 (Drosophila)
hsa-miR-1293	1	0	1	1	0	0	PPM1H	protein phosphatase, Mg2+/Mn2+ dependent, 1H
hsa-miR-1293	1	0	1	1	0	0	KIAA1210	KIAA1210
hsa-miR-1293	1	0	1	1	1	1	ATXN7L1	ataxin 7-like 1
hsa-miR-1293	0	0	1	0	0	0	MTA3	metastasis associated 1 family, member 3
hsa-miR-1293	1	0	1	1	1	1	ATP2C1	ATPase, Ca++ transporting, type 2C, member 1
hsa-miR-1293	0	0	1	0	1	1	MUC3B	mucin 3B, cell surface associated
hsa-miR-1293	1	0	1	1	1	1	KIAA1522	KIAA1522
hsa-miR-1293	1	0	1	1	1	1	FAM214B	family with sequence similarity 214, member B
hsa-miR-1293	0	0	1	1	0	0	TMEM132A	transmembrane protein 132A
hsa-miR-1293	1	0	1	1	1	1	ZNF532	zinc finger protein 532
hsa-miR-1293	1	0	1	0	0	0	TANC2	tetratricopeptide repeat, ankyrin repeat and coiled-coil containing 2
hsa-miR-1293	0	0	1	0	1	1	SETD5	SET domain containing 5
hsa-miR-1293	0	0	1	1	1	1	SPEF2	sperm flagellar 2
hsa-miR-1293	1	0	1	1	1	1	CSMD3	CUB and Sushi multiple domains 3
hsa-miR-1293	1	0	1	1	1	1	POGZ	pogo transposable element with ZNF domain
hsa-miR-1293	1	0	1	1	0	0	ZNF292	zinc finger protein 292
hsa-miR-1293	1	0	1	1	1	1	SH3TC2	SH3 domain and tetratricopeptide repeats 2
hsa-miR-1293	0	0	1	1	1	1	NELL1	NEL-like 1 (chicken)
hsa-miR-1293	1	0	1	1	1	1	RFX4	regulatory factor X, 4 (influences HLA class II expression)
hsa-miR-1293	1	0	1	0	0	0	ZC3H12C	zinc finger CCCH-type containing 12C
hsa-miR-1293	1	0	1	1	1	1	PAN3	PAN3 poly(A) specific ribonuclease subunit homolog (S. cerevisiae)
hsa-miR-1293	0	0	1	1	0	0	SSPO	SCO-spondin homolog (Bos taurus)
hsa-miR-1293	1	0	1	1	1	1	KCNMA1	potassium large conductance calcium-activated channel, subfamily M, alpha member 1
hsa-miR-1293	1	1	1	1	1	1	BACE1	beta-site APP-cleaving enzyme 1
hsa-miR-1293	0	0	1	1	1	1	PCBP2	poly(rC) binding protein 2
hsa-miR-1293	0	0	1	1	1	1	FN1	fibronectin 1
hsa-miR-1293	1	0	1	1	0	0	GRIN1	glutamate receptor, ionotropic, N-methyl D-aspartate 1
hsa-miR-1293	1	0	1	0	1	1	PCDHA13	protocadherin alpha 13
hsa-miR-1293	1	0	1	1	1	1	PCDHA4	protocadherin alpha 4
hsa-miR-1293	0	0	1	1	0	0	KCNC3	potassium voltage-gated channel, Shaw-related subfamily, member 3
hsa-miR-1293	1	0	1	1	0	0	ELN	elastin
hsa-miR-1293	1	0	1	1	1	1	PML	promyelocytic leukemia
hsa-miR-1293	0	0	1	1	1	1	DYNC1I2	dynein, cytoplasmic 1, intermediate chain 2
hsa-miR-1293	0	0	1	1	1	1	PTK2	PTK2 protein tyrosine kinase 2
hsa-miR-1293	1	0	1	1	1	1	SLC8A1	solute carrier family 8 (sodium/calcium exchanger), member 1
hsa-miR-1293	1	0	1	1	1	1	SYNCRIP	synaptotagmin binding, cytoplasmic RNA interacting protein
hsa-miR-1293	1	0	1	0	1	1	PLAG1	pleiomorphic adenoma gene 1
hsa-miR-1293	1	0	1	1	1	1	RASSF5	Ras association (RalGDS/AF-6) domain family member 5
hsa-miR-1293	0	0	1	1	1	1	DGKI	diacylglycerol kinase, iota
hsa-miR-1293	1	0	1	0	1	1	DPYSL2	dihydropyrimidinase-like 2
hsa-miR-1293	0	0	1	1	1	1	DDX39B	DEAD (Asp-Glu-Ala-Asp) box polypeptide 39B
hsa-miR-1293	1	0	1	1	1	1	EPHA7	EPH receptor A7
hsa-miR-1293	1	0	1	1	1	1	TBX2	T-box 2
hsa-miR-1293	1	0	1	1	1	1	SPTB	spectrin, beta, erythrocytic
hsa-miR-1293	1	0	1	1	1	1	ANK1	ankyrin 1, erythrocytic
hsa-miR-1293	1	0	1	1	1	1	MINK1	misshapen-like kinase 1
hsa-miR-1293	0	0	1	1	0	0	PSMB2	proteasome (prosome, macropain) subunit, beta type, 2
hsa-miR-1293	0	0	1	1	1	1	ACO1	aconitase 1, soluble
hsa-miR-1293	0	0	1	1	0	0	HLA-DMB	major histocompatibility complex, class II, DM beta
hsa-miR-1293	0	0	1	1	0	0	CFLAR	CASP8 and FADD-like apoptosis regulator
hsa-miR-1293	1	0	1	0	1	1	RPL28	ribosomal protein L28
hsa-miR-1293	0	0	1	1	0	0	SLC22A8	solute carrier family 22 (organic anion transporter), member 8
hsa-miR-1293	1	0	1	1	0	0	PPP2R5D	protein phosphatase 2, regulatory subunit B', delta
hsa-miR-1293	1	0	1	1	1	1	ZFX	zinc finger protein, X-linked
hsa-miR-1293	1	0	1	1	1	1	MEF2D	myocyte enhancer factor 2D
hsa-miR-1293	0	0	1	1	1	1	EIF4G1	eukaryotic translation initiation factor 4 gamma, 1
hsa-miR-1293	1	0	1	1	1	1	MYH10	myosin, heavy chain 10, non-muscle
hsa-miR-1293	0	0	1	1	1	1	CD55	CD55 molecule, decay accelerating factor for complement (Cromer blood group)
hsa-miR-1293	0	0	1	0	0	0	MIAT	myocardial infarction associated transcript (non-protein coding)
hsa-miR-1293	0	0	1	1	0	0	MUC3A	mucin 3A, cell surface associated
hsa-miR-1293	0	0	1	0	1	1	ZMYM2	zinc finger, MYM-type 2
hsa-miR-1293	0	0	1	1	0	0	TM7SF2	transmembrane 7 superfamily member 2
hsa-miR-1293	0	0	1	1	0	0	SPTBN2	spectrin, beta, non-erythrocytic 2
hsa-miR-1293	1	0	1	1	1	1	PCYT1B	phosphate cytidylyltransferase 1, choline, beta
hsa-miR-1293	0	0	1	1	1	1	CYP4F3	cytochrome P450, family 4, subfamily F, polypeptide 3
hsa-miR-1293	1	0	1	1	1	1	CTNND1	catenin (cadherin-associated protein), delta 1
hsa-miR-1293	0	0	1	1	1	1	SC5DL	sterol-C5-desaturase (ERG3 delta-5-desaturase homolog, S. cerevisiae)-like
hsa-miR-1293	1	0	1	1	1	1	CBFA2T2	core-binding factor, runt domain, alpha subunit 2; translocated to, 2
hsa-miR-1293	0	0	1	1	1	1	PCBP4	poly(rC) binding protein 4
hsa-miR-1293	0	0	1	1	1	1	SH2D1A	SH2 domain containing 1A
hsa-miR-1293	0	0	1	1	0	0	RBM5	RNA binding motif protein 5
hsa-miR-1293	1	0	1	1	1	1	EDNRB	endothelin receptor type B
hsa-miR-1293	0	0	1	1	1	1	ACIN1	apoptotic chromatin condensation inducer 1
hsa-miR-1293	1	0	1	1	1	1	HTRA2	HtrA serine peptidase 2
hsa-miR-1293	1	0	1	1	1	1	C16orf70	chromosome 16 open reading frame 70
hsa-miR-1293	1	0	1	1	1	1	DAB2	disabled homolog 2, mitogen-responsive phosphoprotein (Drosophila)
hsa-miR-1293	1	0	1	1	1	1	C3orf18	chromosome 3 open reading frame 18
hsa-miR-1293	1	0	1	1	1	1	SEPT9	septin 9
hsa-miR-1293	0	0	1	1	1	1	CHRD	chordin
hsa-miR-1293	0	0	1	1	1	1	MFF	mitochondrial fission factor
hsa-miR-1293	1	0	1	1	1	1	SNTB2	syntrophin, beta 2 (dystrophin-associated protein A1, 59kDa, basic component 2)
hsa-miR-1293	0	0	1	1	1	1	CELF1	CUGBP, Elav-like family member 1
hsa-miR-1293	0	0	1	0	0	0	TIGD7	tigger transposable element derived 7
hsa-miR-1293	1	0	1	1	1	1	ERGIC1	endoplasmic reticulum-golgi intermediate compartment (ERGIC) 1
hsa-miR-1293	0	0	1	1	0	0	CSAG2	CSAG family, member 2
hsa-miR-1293	0	0	1	0	0	0	CSAG3	CSAG family, member 3
hsa-miR-1293	0	0	1	1	1	1	ZNF331	zinc finger protein 331
hsa-miR-1293	0	0	1	1	1	1	LRTOMT	leucine rich transmembrane and 0-methyltransferase domain containing
hsa-miR-1293	0	0	1	0	0	0	LOC645355	uncharacterized LOC645355
hsa-miR-1293	1	0	1	1	1	1	VEGFA	vascular endothelial growth factor A
hsa-miR-1293	1	0	1	1	1	1	SPTBN4	spectrin, beta, non-erythrocytic 4
hsa-miR-1293	1	0	1	1	1	1	CPEB1	cytoplasmic polyadenylation element binding protein 1
hsa-miR-1293	0	0	1	1	1	1	FCRLA	Fc receptor-like A
hsa-miR-1293	0	0	1	1	0	0	TTTY7	testis-specific transcript, Y-linked 7 (non-protein coding)
hsa-miR-1293	0	0	1	1	0	0	ZAN	zonadhesin
hsa-miR-1293	1	0	1	1	1	1	CALU	calumenin
hsa-miR-1293	1	0	1	1	1	1	NF2	neurofibromin 2 (merlin)
hsa-miR-1293	1	0	1	0	1	1	WIPF2	WAS/WASL interacting protein family, member 2
hsa-miR-1293	0	0	1	1	0	0	MYO1G	myosin IG
hsa-miR-1293	0	0	1	1	0	0	SNRPN	small nuclear ribonucleoprotein polypeptide N
hsa-miR-1293	0	0	1	0	0	0	MYO15B	myosin XVB pseudogene
hsa-miR-1293	1	0	1	1	1	1	ST3GAL3	ST3 beta-galactoside alpha-2,3-sialyltransferase 3
hsa-miR-1293	1	0	1	1	0	0	XRRA1	X-ray radiation resistance associated 1
hsa-miR-1293	1	0	1	1	0	0	SEPT8	septin 8
hsa-miR-1293	0	0	1	1	0	0	RASGEF1C	RasGEF domain family, member 1C
hsa-miR-1293	0	0	1	0	1	1	EPM2A	epilepsy, progressive myoclonus type 2A, Lafora disease (laforin)
hsa-miR-1293	1	0	1	1	0	0	FOXP2	forkhead box P2
hsa-miR-1293	1	0	1	0	1	1	PPP1R12A	protein phosphatase 1, regulatory subunit 12A
hsa-miR-1293	0	0	1	1	1	1	SAMD9L	sterile alpha motif domain containing 9-like
hsa-miR-1293	1	0	1	1	1	1	BAK1	BCL2-antagonist/killer 1
hsa-miR-1293	0	0	1	1	1	1	R3HCC1L	R3H domain and coiled-coil containing 1-like
hsa-miR-1293	0	0	1	1	1	1	PTK7	PTK7 protein tyrosine kinase 7
hsa-miR-1293	1	0	1	0	1	1	IL1RAP	interleukin 1 receptor accessory protein
hsa-miR-1293	1	0	1	1	1	1	AFF2	AF4/FMR2 family, member 2
hsa-miR-1293	1	0	1	0	1	1	MED14	mediator complex subunit 14
hsa-miR-1293	1	0	1	1	1	1	UBAP2L	ubiquitin associated protein 2-like
hsa-miR-1293	0	0	1	1	1	1	CLDND1	claudin domain containing 1
hsa-miR-1293	0	0	1	0	0	0	CACNA2D3	calcium channel, voltage-dependent, alpha 2/delta subunit 3
hsa-miR-1293	0	0	1	1	1	1	CD1E	CD1e molecule
hsa-miR-1293	0	0	1	0	0	0	CD177	CD177 molecule
hsa-miR-1293	1	0	1	1	1	1	SLAMF6	SLAM family member 6
hsa-miR-1293	0	0	1	1	1	1	RNASE7	ribonuclease, RNase A family, 7
hsa-miR-1293	0	0	1	0	1	1	SCN8A	sodium channel, voltage gated, type VIII, alpha subunit
hsa-miR-1293	1	0	1	1	1	1	NRXN3	neurexin 3
hsa-miR-1293	0	0	1	0	0	0	TOMM6	translocase of outer mitochondrial membrane 6 homolog (yeast)
hsa-miR-1293	1	0	1	1	1	1	NAV3	neuron navigator 3
hsa-miR-1293	1	0	1	1	1	1	PPP3CB	protein phosphatase 3, catalytic subunit, beta isozyme
hsa-miR-1293	0	0	1	1	0	0	MBD1	methyl-CpG binding domain protein 1
hsa-miR-1293	0	0	1	1	1	1	PHACTR3	phosphatase and actin regulator 3
hsa-miR-1293	0	0	1	1	1	1	PPARG	peroxisome proliferator-activated receptor gamma
hsa-miR-1293	1	0	1	1	0	0	TRPM4	transient receptor potential cation channel, subfamily M, member 4
hsa-miR-1293	0	0	1	1	0	0	RTEL1	regulator of telomere elongation helicase 1
hsa-miR-1293	0	0	1	1	1	1	PARP16	poly (ADP-ribose) polymerase family, member 16
hsa-miR-1293	0	0	1	0	0	0	TUG1	taurine upregulated 1 (non-protein coding)
hsa-miR-1293	0	0	1	0	0	0	TPTEP1	transmembrane phosphatase with tensin homology pseudogene 1
hsa-miR-1293	1	0	1	1	1	1	CADM3	cell adhesion molecule 3
hsa-miR-1293	1	0	1	1	1	1	WDTC1	WD and tetratricopeptide repeats 1
hsa-miR-1293	0	0	1	1	0	0	ANAPC4	anaphase promoting complex subunit 4
hsa-miR-1293	1	0	1	1	1	1	ACER3	alkaline ceramidase 3
hsa-miR-1293	0	0	1	1	0	0	C17orf53	chromosome 17 open reading frame 53
hsa-miR-1293	0	0	1	1	1	1	SNCAIP	synuclein, alpha interacting protein
hsa-miR-1293	0	0	1	1	0	0	CPSF3L	cleavage and polyadenylation specific factor 3-like
hsa-miR-1293	0	0	1	0	0	0	DUXAP10	double homeobox A pseudogene 10
hsa-miR-1293	1	0	1	1	1	1	S100PBP	S100P binding protein
hsa-miR-1293	0	0	1	1	0	0	JMJD4	jumonji domain containing 4
hsa-miR-1293	1	0	1	1	1	1	SMEK2	SMEK homolog 2, suppressor of mek1 (Dictyostelium)
hsa-miR-1293	1	0	1	1	0	0	CCDC136	coiled-coil domain containing 136
hsa-miR-1293	1	0	1	1	1	1	PHF20L1	PHD finger protein 20-like 1
hsa-miR-1293	0	0	1	0	0	0	LOC284561	uncharacterized LOC284561
hsa-miR-1293	1	0	1	1	1	1	ARHGEF15	Rho guanine nucleotide exchange factor (GEF) 15
hsa-miR-1293	0	0	1	0	1	1	FLJ14186	uncharacterized LOC401149
hsa-miR-1293	0	0	1	0	0	0	IFFO2	intermediate filament family orphan 2
hsa-miR-1293	1	0	1	1	1	1	ZMIZ1	zinc finger, MIZ-type containing 1
hsa-miR-1293	0	0	1	1	0	0	SPON2	spondin 2, extracellular matrix protein
hsa-miR-1293	1	0	1	1	1	1	GBF1	golgi brefeldin A resistant guanine nucleotide exchange factor 1
hsa-miR-1293	0	0	1	1	0	0	FERMT1	fermitin family member 1
hsa-miR-1293	1	0	1	1	0	0	GPI	glucose-6-phosphate isomerase
hsa-miR-1293	1	0	1	1	1	1	DLC1	deleted in liver cancer 1
hsa-miR-1293	0	0	1	1	0	0	PIF1	PIF1 5'-to-3' DNA helicase homolog (S. cerevisiae)
hsa-miR-1293	1	0	1	1	1	1	DCAF8	DDB1 and CUL4 associated factor 8
hsa-miR-1293	0	0	1	1	1	1	CCDC33	coiled-coil domain containing 33
hsa-miR-1293	1	0	1	1	1	1	ITGA9	integrin, alpha 9
hsa-miR-1293	1	0	1	1	1	1	GORASP2	golgi reassembly stacking protein 2, 55kDa
hsa-miR-1293	1	0	1	1	1	1	FAM53C	family with sequence similarity 53, member C
hsa-miR-1293	0	0	1	0	0	0	KIAA0664L3	KIAA0664-like 3
hsa-miR-1293	1	0	1	1	0	0	C15orf27	chromosome 15 open reading frame 27
hsa-miR-1293	0	0	1	0	0	0	LOC254559	uncharacterized LOC254559
hsa-miR-1293	1	0	1	1	1	1	PPM1L	protein phosphatase, Mg2+/Mn2+ dependent, 1L
hsa-miR-1293	1	0	1	1	1	1	FRMD6	FERM domain containing 6
hsa-miR-1293	1	0	1	1	1	1	PDLIM2	PDZ and LIM domain 2 (mystique)
hsa-miR-1293	0	0	1	0	0	0	LOC201617	uncharacterized LOC201617
hsa-miR-1293	1	0	1	1	1	1	DIXDC1	DIX domain containing 1
hsa-miR-1293	1	0	1	0	0	0	PWWP2A	PWWP domain containing 2A
hsa-miR-1293	1	0	1	1	1	1	MEIS2	Meis homeobox 2
hsa-miR-1293	1	0	1	1	0	0	SH2D3C	SH2 domain containing 3C
hsa-miR-1293	0	0	1	1	0	0	BEAN1	brain expressed, associated with NEDD4, 1
hsa-miR-1293	0	0	1	0	0	0	JPX	JPX transcript, XIST activator (non-protein coding)
hsa-miR-1293	0	0	1	1	1	1	TP53I11	tumor protein p53 inducible protein 11
hsa-miR-1293	1	0	1	1	1	1	PHF15	PHD finger protein 15
hsa-miR-1293	0	0	1	0	0	0	LOC441204	uncharacterized LOC441204
hsa-miR-1293	0	0	1	1	1	1	BRD2	bromodomain containing 2
hsa-miR-1293	1	0	1	1	1	1	CLCN5	chloride channel, voltage-sensitive 5
hsa-miR-1293	0	0	1	1	1	1	IPO4	importin 4
hsa-miR-1293	0	0	1	1	0	0	HECTD3	HECT domain containing E3 ubiquitin protein ligase 3
hsa-miR-1293	1	0	1	1	1	1	TPM3	tropomyosin 3
hsa-miR-1293	1	0	1	1	0	0	ZBTB37	zinc finger and BTB domain containing 37
hsa-miR-1293	1	0	1	1	1	1	MPP7	membrane protein, palmitoylated 7 (MAGUK p55 subfamily member 7)
hsa-miR-1293	0	0	1	1	0	0	LOC285033	uncharacterized LOC285033
hsa-miR-1293	1	0	1	0	1	1	NCAM1	neural cell adhesion molecule 1
hsa-miR-1293	0	0	1	1	0	0	PTOV1	prostate tumor overexpressed 1
hsa-miR-1293	0	0	1	0	1	1	UHMK1	U2AF homology motif (UHM) kinase 1
hsa-miR-1293	0	0	1	1	0	0	TRIM41	tripartite motif containing 41
hsa-miR-1293	0	0	1	1	0	0	PLCE1	phospholipase C, epsilon 1
hsa-miR-1293	1	0	1	1	1	1	BLCAP	bladder cancer associated protein
hsa-miR-1293	0	0	1	1	1	1	PDZRN3	PDZ domain containing ring finger 3
hsa-miR-1293	0	0	1	1	1	1	GALNT6	UDP-N-acetyl-alpha-D-galactosamine:polypeptide N-acetylgalactosaminyltransferase 6 (GalNAc-T6)
hsa-miR-1293	1	0	1	1	1	1	CNOT4	CCR4-NOT transcription complex, subunit 4
hsa-miR-1293	0	0	1	1	0	0	PIGO	phosphatidylinositol glycan anchor biosynthesis, class O
hsa-miR-1293	1	0	1	1	1	1	CYP46A1	cytochrome P450, family 46, subfamily A, polypeptide 1
hsa-miR-1293	0	0	1	0	0	0	LOC643837	uncharacterized LOC643837
hsa-miR-1293	0	0	1	1	0	0	ACOT11	acyl-CoA thioesterase 11
hsa-miR-1293	1	0	1	1	1	1	EGR2	early growth response 2
hsa-miR-1293	1	0	1	1	1	1	AMMECR1	Alport syndrome, mental retardation, midface hypoplasia and elliptocytosis chromosomal region gene 1
hsa-miR-1293	0	0	1	0	1	1	PIANP	PILR alpha associated neural protein
hsa-miR-1293	0	0	1	1	0	0	CDK15	cyclin-dependent kinase 15
hsa-miR-1293	1	0	1	1	1	1	FBXW2	F-box and WD repeat domain containing 2
hsa-miR-1293	1	0	1	0	1	1	ERC1	ELKS/RAB6-interacting/CAST family member 1
hsa-miR-1293	0	0	1	1	0	0	MSANTD3	Myb/SANT-like DNA-binding domain containing 3
hsa-miR-1293	1	0	1	1	1	1	GCFC1	GC-rich sequence DNA-binding factor 1
hsa-miR-1293	0	0	1	0	0	0	LOC283887	uncharacterized LOC283887
hsa-miR-1293	0	0	1	1	0	0	NDUFA4L2	NADH dehydrogenase (ubiquinone) 1 alpha subcomplex, 4-like 2
hsa-miR-1293	0	0	1	1	0	0	WBP1	WW domain binding protein 1
hsa-miR-1293	1	0	1	1	1	1	KCND1	potassium voltage-gated channel, Shal-related subfamily, member 1
hsa-miR-1293	0	0	1	0	0	0	PART1	prostate androgen-regulated transcript 1 (non-protein coding)
hsa-miR-1293	1	0	1	1	1	1	NSG1	neuron specific gene family member 1
hsa-miR-1293	0	0	1	1	1	1	RBM25	RNA binding motif protein 25
hsa-miR-1293	1	0	1	1	1	1	LPPR2	lipid phosphate phosphatase-related protein type 2
hsa-miR-1293	0	0	1	1	1	1	TMEM170A	transmembrane protein 170A
hsa-miR-1293	0	0	1	1	1	1	LRRC34	leucine rich repeat containing 34
hsa-miR-1293	0	0	1	1	0	0	HPN	hepsin
hsa-miR-1293	0	0	1	1	1	1	CHRM5	cholinergic receptor, muscarinic 5
hsa-miR-1293	1	0	1	0	1	1	UVRAG	UV radiation resistance associated gene
hsa-miR-1293	1	0	1	1	1	1	KCNIP3	Kv channel interacting protein 3, calsenilin
hsa-miR-1293	0	0	1	0	0	0	LOC100129620	uncharacterized LOC100129620
hsa-miR-1293	0	0	1	0	0	0	LOC100129858	uncharacterized LOC100129858
hsa-miR-1293	0	0	1	0	0	0	LOC284577	uncharacterized LOC284577
hsa-miR-1293	0	0	1	1	1	1	CDK5RAP1	CDK5 regulatory subunit associated protein 1
hsa-miR-1293	1	0	1	1	1	1	PEA15	phosphoprotein enriched in astrocytes 15
hsa-miR-1293	0	0	1	0	0	0	LOC100133029	sirtuin 5 pseudogene
hsa-miR-1293	0	0	1	0	0	0	FAM66C	family with sequence similarity 66, member C
hsa-miR-1293	1	0	1	1	0	0	FBRS	fibrosin
hsa-miR-1293	1	0	1	0	1	1	THRB	thyroid hormone receptor, beta
hsa-miR-1293	1	0	1	1	1	1	SYT6	synaptotagmin VI
hsa-miR-1293	1	0	1	1	1	1	ETS2	v-ets erythroblastosis virus E26 oncogene homolog 2 (avian)
hsa-miR-1293	0	0	1	0	0	0	FLJ39534	uncharacterized FLJ39534
hsa-miR-1293	1	0	1	1	1	1	CDV3	CDV3 homolog (mouse)
hsa-miR-1293	0	0	1	1	1	1	TMEM177	transmembrane protein 177
hsa-miR-1293	1	0	1	1	1	1	LCP1	lymphocyte cytosolic protein 1 (L-plastin)
hsa-miR-1293	0	0	1	1	0	0	VPS37C	vacuolar protein sorting 37 homolog C (S. cerevisiae)
hsa-miR-1293	0	0	1	0	0	0	DNAJB8-AS1	DNAJB8 antisense RNA 1
hsa-miR-1293	1	0	1	1	1	1	GOLGA8B	golgin A8 family, member B
hsa-miR-1293	0	0	1	0	0	0	LOC284385	uncharacterized LOC284385
hsa-miR-1293	0	0	1	1	0	0	PSAPL1	prosaposin-like 1 (gene/pseudogene)
hsa-miR-1293	1	0	1	1	1	1	HOOK1	hook homolog 1 (Drosophila)
hsa-miR-1293	0	0	1	0	0	0	THAP7-AS1	THAP7 antisense RNA 1
hsa-miR-1293	0	0	1	0	1	1	TNFAIP8	tumor necrosis factor, alpha-induced protein 8
hsa-miR-1293	0	0	1	1	1	1	POLR1D	polymerase (RNA) I polypeptide D, 16kDa
hsa-miR-1293	0	0	1	0	0	0	CECR7	cat eye syndrome chromosome region, candidate 7 (non-protein coding)
hsa-miR-1293	0	0	1	1	1	1	ARFGAP2	ADP-ribosylation factor GTPase activating protein 2
hsa-miR-1293	1	0	1	1	1	1	THTPA	thiamine triphosphatase
hsa-miR-1293	1	0	1	1	0	0	FBXL19	F-box and leucine-rich repeat protein 19
hsa-miR-1293	0	0	1	1	0	0	MARCH10	membrane-associated ring finger (C3HC4) 10, E3 ubiquitin protein ligase
hsa-miR-1293	0	0	1	1	0	0	MX2	myxovirus (influenza virus) resistance 2 (mouse)
hsa-miR-1293	1	0	1	1	1	1	ABHD6	abhydrolase domain containing 6
hsa-miR-1293	0	0	1	1	1	1	FAM5B	family with sequence similarity 5, member B
hsa-miR-1293	0	0	1	1	0	0	TTLL12	tubulin tyrosine ligase-like family, member 12
hsa-miR-1293	1	0	1	0	1	1	WDR82	WD repeat domain 82
hsa-miR-1293	1	0	1	1	1	1	FAM219A	family with sequence similarity 219, member A
hsa-miR-1293	1	0	1	1	1	1	MBTD1	mbt domain containing 1
hsa-miR-1293	1	0	1	1	1	1	PRDM2	PR domain containing 2, with ZNF domain
hsa-miR-1293	0	0	1	1	1	1	SLC9A1	solute carrier family 9, subfamily A (NHE1, cation proton antiporter 1), member 1
hsa-miR-1293	0	0	1	1	0	0	NPIP	nuclear pore complex interacting protein
hsa-miR-1293	0	0	1	1	0	0	KCNAB2	potassium voltage-gated channel, shaker-related subfamily, beta member 2
hsa-miR-1293	1	0	1	1	1	1	CORO2B	coronin, actin binding protein, 2B
hsa-miR-1293	1	0	1	1	1	1	SLC44A1	solute carrier family 44, member 1
hsa-miR-1293	0	0	1	1	1	1	ATPBD4	ATP binding domain 4
hsa-miR-1293	1	0	1	1	1	1	C17orf85	chromosome 17 open reading frame 85
hsa-miR-1293	0	0	1	1	0	0	CUL9	cullin 9
hsa-miR-1293	1	0	1	0	1	1	CHRM2	cholinergic receptor, muscarinic 2
hsa-miR-1293	1	0	1	1	1	1	DLGAP4	discs, large (Drosophila) homolog-associated protein 4
hsa-miR-1293	1	0	1	1	1	1	ATP11C	ATPase, class VI, type 11C
hsa-miR-1293	1	0	1	0	1	1	HECTD1	HECT domain containing E3 ubiquitin protein ligase 1
hsa-miR-1293	0	0	1	0	0	0	FAM95B1	family with sequence similarity 95, member B1
hsa-miR-1293	0	0	1	1	1	1	RBM46	RNA binding motif protein 46
hsa-miR-1293	1	0	1	1	1	1	TP53INP1	tumor protein p53 inducible nuclear protein 1
hsa-miR-1293	0	0	1	1	0	0	SPATS1	spermatogenesis associated, serine-rich 1
hsa-miR-1293	0	0	1	0	0	0	RPL23AP53	ribosomal protein L23a pseudogene 53
hsa-miR-1293	0	0	1	1	1	1	LARS	leucyl-tRNA synthetase
hsa-miR-1293	0	0	1	1	0	0	FAM54B	family with sequence similarity 54, member B
hsa-miR-1293	1	0	1	1	0	0	MRVI1	murine retrovirus integration site 1 homolog
hsa-miR-1293	0	0	1	1	1	1	ARHGAP33	Rho GTPase activating protein 33
hsa-miR-1293	0	0	1	0	1	1	NPHP4	nephronophthisis 4
hsa-miR-1293	0	0	1	1	0	0	SLC22A25	solute carrier family 22, member 25
hsa-miR-1293	1	0	1	1	1	1	RNF44	ring finger protein 44
hsa-miR-1293	1	0	1	0	1	1	CAPRIN1	cell cycle associated protein 1
hsa-miR-1293	1	0	1	0	1	1	YOD1	YOD1 OTU deubiquinating enzyme 1 homolog (S. cerevisiae)
hsa-miR-1293	0	0	1	0	0	0	FAM205B	transmembrane protein C9orf144B pseudogene
hsa-miR-1293	1	0	1	0	1	1	KPNA6	karyopherin alpha 6 (importin alpha 7)
hsa-miR-1293	0	0	1	1	1	1	SHROOM3	shroom family member 3
hsa-miR-1293	1	0	1	1	1	1	RBM24	RNA binding motif protein 24
hsa-miR-1293	0	0	1	1	0	0	HEATR8	HEAT repeat containing 8
hsa-miR-1293	1	0	1	1	1	1	GPD1	glycerol-3-phosphate dehydrogenase 1 (soluble)
hsa-miR-1293	0	0	1	0	0	0	LOC390660	FLJ00317 protein
hsa-miR-1293	0	0	1	1	0	0	ISOC2	isochorismatase domain containing 2
hsa-miR-1293	0	0	1	1	1	1	SYPL2	synaptophysin-like 2
hsa-miR-1293	1	0	1	1	1	1	LRRK2	leucine-rich repeat kinase 2
hsa-miR-1293	1	0	1	0	1	1	ZNF607	zinc finger protein 607
hsa-miR-1293	0	0	1	1	1	1	NR4A1	nuclear receptor subfamily 4, group A, member 1
hsa-miR-1293	0	0	1	0	0	0	AGAP9	ArfGAP with GTPase domain, ankyrin repeat and PH domain 9
hsa-miR-1293	1	0	1	1	1	1	SYS1	SYS1 Golgi-localized integral membrane protein homolog (S. cerevisiae)
hsa-miR-1293	0	0	1	1	1	1	CEACAM5	carcinoembryonic antigen-related cell adhesion molecule 5
hsa-miR-1293	1	0	1	0	1	1	SEZ6	seizure related 6 homolog (mouse)
hsa-miR-1293	0	0	1	1	1	1	PDSS2	prenyl (decaprenyl) diphosphate synthase, subunit 2
hsa-miR-1293	1	0	1	0	1	1	MAP3K3	mitogen-activated protein kinase kinase kinase 3
hsa-miR-1293	1	0	1	1	1	1	NCOA1	nuclear receptor coactivator 1
hsa-miR-1293	0	0	1	1	0	0	TRIM69	tripartite motif containing 69
hsa-miR-1293	1	0	1	1	1	1	AHCYL1	adenosylhomocysteinase-like 1
hsa-miR-1293	0	0	1	1	0	0	KAT8	K(lysine) acetyltransferase 8
hsa-miR-1293	0	0	1	0	0	0	POM121L9P	POM121 transmembrane nucleoporin-like 9, pseudogene
hsa-miR-1293	0	0	1	0	0	0	POM121L8P	POM121 transmembrane nucleoporin-like 8 pseudogene
hsa-miR-1293	0	0	1	1	0	0	MSH5	mutS homolog 5 (E. coli)
hsa-miR-1293	0	0	1	1	0	0	SAPCD1	suppressor APC domain containing 1
hsa-miR-1293	0	0	1	1	0	0	LRCH3	leucine-rich repeats and calponin homology (CH) domain containing 3
hsa-miR-1293	1	0	1	1	1	1	GOLGA8A	golgin A8 family, member A
hsa-miR-1293	0	0	1	1	0	0	NXF2	nuclear RNA export factor 2
hsa-miR-1293	1	0	1	1	1	1	TFE3	transcription factor binding to IGHM enhancer 3
hsa-miR-1293	1	0	1	1	1	1	CTTNBP2NL	CTTNBP2 N-terminal like
hsa-miR-1293	0	0	1	0	0	0	RPL23AP82	ribosomal protein L23a pseudogene 82
hsa-miR-1293	1	0	1	1	1	1	MSANTD2	Myb/SANT-like DNA-binding domain containing 2
hsa-miR-1293	1	0	1	0	1	1	BRPF1	bromodomain and PHD finger containing, 1
hsa-miR-1293	1	0	1	1	1	1	SLC30A8	solute carrier family 30 (zinc transporter), member 8
hsa-miR-1293	1	0	1	1	1	1	YTHDF3	YTH domain family, member 3
hsa-miR-1293	1	0	1	0	0	0	SYNPO	synaptopodin
hsa-miR-1293	0	0	1	0	1	1	GAB3	GRB2-associated binding protein 3
hsa-miR-1293	0	0	1	1	1	1	BEND7	BEN domain containing 7
hsa-miR-1293	1	0	1	1	1	1	CHMP7	charged multivesicular body protein 7
hsa-miR-1293	1	0	1	1	1	1	RNF180	ring finger protein 180
hsa-miR-1293	1	0	1	1	1	1	TMEM182	transmembrane protein 182
hsa-miR-1293	0	0	1	1	1	1	CCDC132	coiled-coil domain containing 132
hsa-miR-1293	0	0	1	1	0	0	CD37	CD37 molecule
hsa-miR-1293	1	0	1	1	1	1	ATAT1	alpha tubulin acetyltransferase 1
hsa-miR-1293	1	0	1	1	0	0	KIAA0895L	KIAA0895-like
hsa-miR-1293	1	0	1	1	1	1	DIS3L2	DIS3 mitotic control homolog (S. cerevisiae)-like 2
hsa-miR-1293	1	0	1	1	1	1	MBD6	methyl-CpG binding domain protein 6
hsa-miR-1293	1	0	1	0	1	1	SMURF1	SMAD specific E3 ubiquitin protein ligase 1
hsa-miR-1293	1	0	1	1	1	1	CADM2	cell adhesion molecule 2
hsa-miR-1293	0	0	1	1	1	1	LMAN2L	lectin, mannose-binding 2-like
hsa-miR-1293	0	0	1	1	1	1	TMEM130	transmembrane protein 130
hsa-miR-1293	1	0	1	1	1	1	IKZF2	IKAROS family zinc finger 2 (Helios)
hsa-miR-1293	0	0	1	0	0	0	PMCHL1	pro-melanin-concentrating hormone-like 1, pseudogene
hsa-miR-1293	0	0	1	1	0	0	ERAP2	endoplasmic reticulum aminopeptidase 2
hsa-miR-1293	1	0	1	1	1	1	RCAN2	regulator of calcineurin 2
hsa-miR-1293	0	0	1	1	1	1	CRB1	crumbs homolog 1 (Drosophila)
hsa-miR-1293	1	0	1	1	1	1	ANGPT1	angiopoietin 1
hsa-miR-1293	0	0	1	1	1	1	CYP4B1	cytochrome P450, family 4, subfamily B, polypeptide 1
hsa-miR-1293	1	0	1	1	1	1	WDR26	WD repeat domain 26
hsa-miR-1293	0	0	1	1	0	0	DNAH1	dynein, axonemal, heavy chain 1
hsa-miR-1293	0	0	1	1	1	1	KLK6	kallikrein-related peptidase 6
hsa-miR-1293	1	0	1	1	1	1	OPRM1	opioid receptor, mu 1
hsa-miR-1293	0	0	1	1	1	1	STAG3L3	stromal antigen 3-like 3
hsa-miR-1293	0	0	1	1	1	1	GON4L	gon-4-like (C. elegans)
hsa-miR-1293	0	0	1	1	1	1	MFAP5	microfibrillar associated protein 5
hsa-miR-1293	1	0	1	1	1	1	CAMTA1	calmodulin binding transcription activator 1
hsa-miR-1293	1	0	1	1	1	1	TMCC2	transmembrane and coiled-coil domain family 2
hsa-miR-1293	0	0	1	1	1	1	IL20	interleukin 20
hsa-miR-1293	0	0	1	1	0	0	TMEM54	transmembrane protein 54
hsa-miR-1293	1	0	1	1	1	1	FGD4	FYVE, RhoGEF and PH domain containing 4
hsa-miR-1293	0	0	1	1	1	1	NYAP1	neuronal tyrosine-phosphorylated phosphoinositide-3-kinase adaptor 1
hsa-miR-1293	1	0	1	1	1	1	BCL2L11	BCL2-like 11 (apoptosis facilitator)
hsa-miR-1293	0	0	1	1	1	1	PTPRC	protein tyrosine phosphatase, receptor type, C
hsa-miR-1293	1	0	1	1	1	1	SP3	Sp3 transcription factor
hsa-miR-1293	0	0	1	1	1	1	UGT2B4	UDP glucuronosyltransferase 2 family, polypeptide B4
hsa-miR-1293	0	0	1	1	1	1	PMS1	PMS1 postmeiotic segregation increased 1 (S. cerevisiae)
hsa-miR-1293	1	0	1	1	1	1	MECP2	methyl CpG binding protein 2 (Rett syndrome)
hsa-miR-1293	1	0	1	0	1	1	LRAT	lecithin retinol acyltransferase (phosphatidylcholine--retinol O-acyltransferase)
hsa-miR-1293	1	0	1	1	1	1	ITSN1	intersectin 1 (SH3 domain protein)
hsa-miR-1293	0	0	1	1	0	0	USP27X	ubiquitin specific peptidase 27, X-linked
hsa-miR-1293	1	0	1	1	1	1	PLCH1	phospholipase C, eta 1
hsa-miR-1293	0	0	1	0	0	0	LOC100128076	protein tyrosine phosphatase pseudogene
hsa-miR-1293	1	0	1	1	1	1	MYB	v-myb myeloblastosis viral oncogene homolog (avian)
hsa-miR-1293	0	0	1	1	0	0	DMKN	dermokine
hsa-miR-1293	1	0	1	1	1	1	TBC1D22B	TBC1 domain family, member 22B
hsa-miR-1293	1	0	1	1	1	1	AMOT	angiomotin
hsa-miR-1293	1	0	1	0	1	1	FAM46A	family with sequence similarity 46, member A
hsa-miR-1293	0	0	1	1	1	1	C20orf24	chromosome 20 open reading frame 24
hsa-miR-1293	0	0	1	1	1	1	TMOD1	tropomodulin 1
hsa-miR-1293	1	0	1	1	1	1	HOXC13	homeobox C13
hsa-miR-1293	1	0	1	0	1	1	DPYSL5	dihydropyrimidinase-like 5
hsa-miR-1293	1	0	1	0	0	0	VGLL4	vestigial like 4 (Drosophila)
hsa-miR-1293	1	0	1	1	1	1	RIMS3	regulating synaptic membrane exocytosis 3
hsa-miR-1293	0	0	1	1	0	0	DNAJC7	DnaJ (Hsp40) homolog, subfamily C, member 7
hsa-miR-1293	0	0	1	1	0	0	RUSC1	RUN and SH3 domain containing 1
hsa-miR-1293	0	0	1	1	0	0	TMEM51	transmembrane protein 51
hsa-miR-1293	0	0	1	1	1	1	ZNF589	zinc finger protein 589
hsa-miR-1293	0	0	1	1	0	0	MYLK2	myosin light chain kinase 2
hsa-miR-1293	0	0	1	1	0	0	SPAG7	sperm associated antigen 7
hsa-miR-1293	1	0	1	1	1	1	LMBR1L	limb region 1 homolog (mouse)-like
hsa-miR-1293	0	0	1	1	0	0	PRR11	proline rich 11
hsa-miR-1293	0	0	1	0	0	0	ATXN7L3B	ataxin 7-like 3B
hsa-miR-1293	1	0	1	1	1	1	NXN	nucleoredoxin
hsa-miR-1293	0	0	1	1	0	0	PANK2	pantothenate kinase 2
hsa-miR-1293	1	0	1	0	1	1	TMEM39A	transmembrane protein 39A
hsa-miR-1293	0	0	1	1	1	1	ATXN2L	ataxin 2-like
hsa-miR-1293	1	0	1	1	1	1	TRIM2	tripartite motif containing 2
hsa-miR-1293	0	0	1	1	0	0	GHDC	GH3 domain containing
hsa-miR-1293	0	0	1	1	1	1	ZNF587	zinc finger protein 587
hsa-miR-1293	0	0	1	1	1	1	GNL3L	guanine nucleotide binding protein-like 3 (nucleolar)-like
hsa-miR-1293	0	0	1	1	1	1	PSEN1	presenilin 1
hsa-miR-1293	0	0	1	0	0	0	GRAMD1B	GRAM domain containing 1B
hsa-miR-1293	0	0	1	1	1	1	DEDD2	death effector domain containing 2
hsa-miR-1293	1	0	1	1	0	0	FHL3	four and a half LIM domains 3
hsa-miR-1293	0	0	1	1	0	0	CCDC36	coiled-coil domain containing 36
hsa-miR-1293	0	0	1	0	0	0	MGC21881	uncharacterized locus MGC21881
hsa-miR-1293	0	0	1	1	0	0	PARP6	poly (ADP-ribose) polymerase family, member 6
hsa-miR-1293	1	0	1	1	1	1	ZBTB38	zinc finger and BTB domain containing 38
hsa-miR-1293	0	0	1	1	0	0	UCK1	uridine-cytidine kinase 1
hsa-miR-1293	1	0	1	1	1	1	ZNF512	zinc finger protein 512
hsa-miR-1293	0	0	1	0	0	0	FAM200B	family with sequence similarity 200, member B
hsa-miR-1293	1	0	1	1	1	1	ARHGEF9	Cdc42 guanine nucleotide exchange factor (GEF) 9
hsa-miR-1293	1	0	1	1	1	1	KIAA1217	KIAA1217
hsa-miR-1293	0	0	1	1	1	1	SOX10	SRY (sex determining region Y)-box 10
hsa-miR-1293	1	0	1	1	1	1	SUV420H2	suppressor of variegation 4-20 homolog 2 (Drosophila)
hsa-miR-1293	0	0	1	1	1	1	PRMT3	protein arginine methyltransferase 3
hsa-miR-1293	1	0	1	1	1	1	WHSC1	Wolf-Hirschhorn syndrome candidate 1
hsa-miR-1293	1	0	1	1	1	1	TM9SF4	transmembrane 9 superfamily protein member 4
hsa-miR-1293	1	0	1	1	1	1	SPRYD7	SPRY domain containing 7
hsa-miR-1293	0	0	1	1	0	0	FAM89B	family with sequence similarity 89, member B
hsa-miR-1293	1	0	1	0	1	1	CDK19	cyclin-dependent kinase 19
hsa-miR-1293	0	0	1	1	1	1	TLR4	toll-like receptor 4
hsa-miR-1293	1	0	1	1	1	1	CRKL	v-crk sarcoma virus CT10 oncogene homolog (avian)-like
hsa-miR-1293	0	0	1	0	0	0	ZBED3-AS1	ZBED3 antisense RNA 1
hsa-miR-1293	0	0	1	1	1	1	SELP	selectin P (granule membrane protein 140kDa, antigen CD62)
hsa-miR-1293	1	0	1	1	1	1	TMEM127	transmembrane protein 127
hsa-miR-1293	0	0	1	1	1	1	PIP5K1B	phosphatidylinositol-4-phosphate 5-kinase, type I, beta
hsa-miR-1293	1	0	1	1	1	1	TAF15	TAF15 RNA polymerase II, TATA box binding protein (TBP)-associated factor, 68kDa
hsa-miR-1293	0	0	1	1	0	0	AGBL3	ATP/GTP binding protein-like 3
hsa-miR-1293	1	0	1	1	1	1	RCOR3	REST corepressor 3
hsa-miR-1293	0	0	1	1	0	0	FAM211B	family with sequence similarity 211, member B
hsa-miR-1293	1	0	1	1	1	1	SF1	splicing factor 1
hsa-miR-1293	1	0	1	0	1	1	LYPD6	LY6/PLAUR domain containing 6
hsa-miR-1293	0	0	1	1	1	1	C5orf22	chromosome 5 open reading frame 22
hsa-miR-1293	1	0	1	1	1	1	RHOBTB1	Rho-related BTB domain containing 1
hsa-miR-1293	1	0	1	1	1	1	SIRPA	signal-regulatory protein alpha
hsa-miR-1293	0	0	1	0	0	0	LOC96610	BMS1 homolog, ribosome assembly protein (yeast) pseudogene
hsa-miR-1293	0	0	1	0	0	0	BCAS3	breast carcinoma amplified sequence 3
hsa-miR-1293	0	0	1	1	1	1	IL20RB	interleukin 20 receptor beta
hsa-miR-1293	0	0	1	0	0	0	HILS1	histone linker H1 domain, spermatid-specific 1, pseudogene
hsa-miR-1293	1	0	1	1	1	1	PCDHA5	protocadherin alpha 5
hsa-miR-1293	0	0	1	1	0	0	TNMD	tenomodulin
hsa-miR-1293	1	0	1	1	1	1	RIC8B	resistance to inhibitors of cholinesterase 8 homolog B (C. elegans)
hsa-miR-1293	0	0	1	0	0	0	C9orf62	chromosome 9 open reading frame 62
hsa-miR-1293	0	0	1	0	1	1	DKFZP434I0714	uncharacterized protein DKFZP434I0714
hsa-miR-1293	1	0	1	1	1	1	ABCA1	ATP-binding cassette, sub-family A (ABC1), member 1
hsa-miR-1293	0	0	1	1	1	1	EDA2R	ectodysplasin A2 receptor
hsa-miR-1293	1	0	1	1	1	1	FAM120A	family with sequence similarity 120A
hsa-miR-1293	0	0	1	1	1	1	SLC6A16	solute carrier family 6, member 16
hsa-miR-1293	1	0	1	0	1	1	PDE12	phosphodiesterase 12
hsa-miR-1293	0	0	1	1	1	1	KIF16B	kinesin family member 16B
hsa-miR-1293	1	0	1	1	1	1	NKAIN2	Na+/K+ transporting ATPase interacting 2
hsa-miR-1293	0	0	1	1	0	0	TSNAXIP1	translin-associated factor X interacting protein 1
hsa-miR-1293	1	0	1	1	0	0	TBC1D10C	TBC1 domain family, member 10C
hsa-miR-1293	0	0	1	0	0	0	FLJ10661	family with sequence similarity 86, member A pseudogene
hsa-miR-1293	0	0	1	0	0	0	LOC339862	uncharacterized LOC339862
hsa-miR-1293	0	0	1	0	0	0	C12orf77	chromosome 12 open reading frame 77
hsa-miR-1293	0	0	1	0	0	0	HOXA-AS2	HOXA cluster antisense RNA 2
hsa-miR-1293	1	0	1	1	1	1	ZNF618	zinc finger protein 618
hsa-miR-1293	0	0	1	0	1	1	C9orf57	chromosome 9 open reading frame 57
hsa-miR-1293	1	0	1	1	1	1	ELMO2	engulfment and cell motility 2
hsa-miR-1293	1	0	1	1	1	1	MEIS1	Meis homeobox 1
hsa-miR-1293	1	0	1	1	1	1	ACVR1	activin A receptor, type I
hsa-miR-1293	1	0	1	1	0	0	TMEM131	transmembrane protein 131
hsa-miR-1293	0	0	1	0	0	0	SRGAP2C	SLIT-ROBO Rho GTPase activating protein 2C
hsa-miR-1293	0	0	1	0	0	0	CYP4F35P	cytochrome P450, family 4, subfamily F, polypeptide 35, pseudogene
hsa-miR-1293	0	0	1	0	0	0	LOC286184	uncharacterized LOC286184
hsa-miR-1293	1	0	1	0	0	0	RAVER1	ribonucleoprotein, PTB-binding 1
hsa-miR-1293	1	0	1	1	1	1	UBXN2A	UBX domain protein 2A
hsa-miR-1293	0	0	1	0	0	0	LOC415056	uncharacterized LOC415056
hsa-miR-1293	0	0	1	0	0	0	LOC100134868	uncharacterized LOC100134868
hsa-miR-1293	1	0	1	1	1	1	PSD	pleckstrin and Sec7 domain containing
hsa-miR-1293	1	0	1	1	1	1	ULK2	unc-51-like kinase 2 (C. elegans)
hsa-miR-1293	1	0	1	0	1	1	LPHN3	latrophilin 3
hsa-miR-1293	0	0	1	0	0	0	LOC100132735	uncharacterized LOC100132735
hsa-miR-1293	0	0	1	0	0	0	TOB1-AS1	TOB1 antisense RNA 1
hsa-miR-1293	1	0	1	1	1	1	DPP8	dipeptidyl-peptidase 8
hsa-miR-1293	0	0	1	1	1	1	MDFIC	MyoD family inhibitor domain containing
hsa-miR-1293	0	0	1	1	1	1	FAM71F1	family with sequence similarity 71, member F1
hsa-miR-1293	0	0	1	1	1	1	VPS35	vacuolar protein sorting 35 homolog (S. cerevisiae)
hsa-miR-1293	1	0	1	1	1	1	PRRG1	proline rich Gla (G-carboxyglutamic acid) 1
hsa-miR-1293	0	0	1	1	1	1	CARD8	caspase recruitment domain family, member 8
hsa-miR-1293	1	0	1	1	1	1	DOC2A	double C2-like domains, alpha
hsa-miR-1293	1	0	1	0	1	1	TNFAIP3	tumor necrosis factor, alpha-induced protein 3
hsa-miR-1293	0	0	1	1	1	1	C4orf32	chromosome 4 open reading frame 32
hsa-miR-1293	0	0	1	1	0	0	PLB1	phospholipase B1
hsa-miR-1293	0	0	1	0	0	0	LOC157381	uncharacterized LOC157381
hsa-miR-1293	0	0	1	0	0	0	LINC00347	long intergenic non-protein coding RNA 347
hsa-miR-1293	0	0	1	0	0	0	LOC339260	uncharacterized LOC339260
hsa-miR-1293	0	0	1	1	1	1	MST1	macrophage stimulating 1 (hepatocyte growth factor-like)
hsa-miR-1293	1	0	1	1	1	1	SUPT7L	suppressor of Ty 7 (S. cerevisiae)-like
hsa-miR-1293	0	0	1	1	0	0	TOM1	target of myb1 (chicken)
hsa-miR-1293	0	0	1	1	0	0	FOXJ1	forkhead box J1
hsa-miR-1293	1	0	1	1	1	1	FNDC3A	fibronectin type III domain containing 3A
hsa-miR-1293	1	0	1	0	1	1	SEMA4G	sema domain, immunoglobulin domain (Ig), transmembrane domain (TM) and short cytoplasmic domain, (semaphorin) 4G
hsa-miR-1293	0	0	1	0	0	0	BMS1P6	BMS1 pseudogene 6
hsa-miR-1293	0	0	1	1	0	0	SREBF2	sterol regulatory element binding transcription factor 2
hsa-miR-1293	1	0	1	1	1	1	SCUBE3	signal peptide, CUB domain, EGF-like 3
hsa-miR-1293	1	0	1	0	1	1	C14orf43	chromosome 14 open reading frame 43
hsa-miR-1293	0	0	1	0	0	0	LINC00265	long intergenic non-protein coding RNA 265
hsa-miR-1293	0	0	1	0	1	1	C17orf51	chromosome 17 open reading frame 51
hsa-miR-1293	1	0	1	1	1	1	ZFP161	zinc finger protein 161 homolog (mouse)
hsa-miR-1293	1	0	1	0	1	1	C7orf41	chromosome 7 open reading frame 41
hsa-miR-1293	0	0	1	1	0	0	PRR19	proline rich 19
hsa-miR-1293	0	0	1	0	1	1	ASAP2	ArfGAP with SH3 domain, ankyrin repeat and PH domain 2
hsa-miR-1293	1	0	1	1	1	1	PDGFRA	platelet-derived growth factor receptor, alpha polypeptide
hsa-miR-1293	0	0	1	1	0	0	PDSS1	prenyl (decaprenyl) diphosphate synthase, subunit 1
hsa-miR-1293	0	0	1	0	0	0	SCAND2	SCAN domain containing 2 pseudogene
hsa-miR-1293	1	0	1	0	0	0	PRRT4	proline-rich transmembrane protein 4
hsa-miR-1293	1	0	1	1	1	1	GANAB	glucosidase, alpha; neutral AB
hsa-miR-1293	1	0	1	1	1	1	IL15RA	interleukin 15 receptor, alpha
hsa-miR-1293	0	0	1	0	0	0	LINC00052	long intergenic non-protein coding RNA 52
hsa-miR-1293	0	0	1	1	1	1	SH2D1B	SH2 domain containing 1B
hsa-miR-1293	1	0	1	1	1	1	FAM129B	family with sequence similarity 129, member B
hsa-miR-1293	0	0	1	0	0	0	PCP4L1	Purkinje cell protein 4 like 1
hsa-miR-1293	0	0	1	1	0	0	CELF3	CUGBP, Elav-like family member 3
hsa-miR-1293	0	0	1	1	1	1	IL1RN	interleukin 1 receptor antagonist
hsa-miR-1293	1	0	1	1	1	1	PHACTR4	phosphatase and actin regulator 4
hsa-miR-1293	0	0	1	1	1	1	AQPEP	laeverin
hsa-miR-1293	0	0	1	1	1	1	TTLL9	tubulin tyrosine ligase-like family, member 9
hsa-miR-1293	0	0	1	0	0	0	PTGER4P2	prostaglandin E receptor 4 (subtype EP4) pseudogene 2
hsa-miR-1293	0	0	1	1	0	0	KLK15	kallikrein-related peptidase 15
hsa-miR-1293	0	0	1	1	0	0	CYP4F30P	cytochrome P450, family 4, subfamily F, polypeptide 30, pseudogene
hsa-miR-1293	0	0	1	0	0	0	AQP7P2	aquaporin 7 pseudogene 2
hsa-miR-1293	0	0	1	1	0	0	ASIC4	acid-sensing (proton-gated) ion channel family member 4
hsa-miR-1293	1	0	1	1	1	1	OPCML	opioid binding protein/cell adhesion molecule-like
hsa-miR-1293	1	0	1	1	1	1	NTRK2	neurotrophic tyrosine kinase, receptor, type 2
hsa-miR-1293	0	0	1	0	0	0	LOC441259	PMS2 postmeiotic segregation increased 2 (S. cerevisiae)-like
hsa-miR-1293	0	0	1	0	0	0	CAPN1	calpain 1, (mu/I) large subunit
hsa-miR-1293	1	0	1	1	1	1	SAMD4B	sterile alpha motif domain containing 4B
hsa-miR-1293	0	0	1	1	0	0	ZNF703	zinc finger protein 703
hsa-miR-1293	0	0	1	1	0	0	HERC2P3	hect domain and RLD 2 pseudogene 3
hsa-miR-1293	1	0	1	1	1	1	ELOVL7	ELOVL fatty acid elongase 7
hsa-miR-1293	0	0	1	0	0	0	ABCA11P	ATP-binding cassette, sub-family A (ABC1), member 11, pseudogene
hsa-miR-1293	0	0	1	1	0	0	TMC1	transmembrane channel-like 1
hsa-miR-1293	0	0	1	0	0	0	GUSBP9	glucuronidase, beta pseudogene 9
hsa-miR-1293	0	0	1	1	0	0	USP19	ubiquitin specific peptidase 19
hsa-miR-1293	0	0	1	1	1	1	PAX4	paired box 4
hsa-miR-1293	1	0	1	1	1	1	PNISR	PNN-interacting serine/arginine-rich protein
hsa-miR-1293	0	0	1	1	1	1	TTN	titin
hsa-miR-1293	1	0	1	0	1	1	DNAJC6	DnaJ (Hsp40) homolog, subfamily C, member 6
hsa-miR-1293	0	0	1	1	0	0	TMC2	transmembrane channel-like 2
hsa-miR-1293	0	0	1	0	0	0	LRRC37A11P	leucine rich repeat containing 37, member A11, pseudogene
hsa-miR-1293	1	0	1	0	1	1	ROBO1	roundabout, axon guidance receptor, homolog 1 (Drosophila)
hsa-miR-1293	0	0	1	1	0	0	C14orf178	chromosome 14 open reading frame 178
hsa-miR-1293	1	0	1	1	1	1	SHANK2	SH3 and multiple ankyrin repeat domains 2
hsa-miR-1293	0	0	1	1	1	1	KDM2B	lysine (K)-specific demethylase 2B
hsa-miR-1293	1	0	1	1	1	1	TNS1	tensin 1
hsa-miR-1293	0	0	1	0	0	0	TUBA4B	tubulin, alpha 4b (pseudogene)
hsa-miR-1293	1	0	1	0	1	1	CAMSAP2	calmodulin regulated spectrin-associated protein family, member 2
hsa-miR-1293	1	0	1	1	1	1	MEGF11	multiple EGF-like-domains 11
hsa-miR-1293	0	0	1	0	1	1	C20orf202	chromosome 20 open reading frame 202
hsa-miR-1293	1	0	1	1	1	1	PHC2	polyhomeotic homolog 2 (Drosophila)
hsa-miR-1293	0	0	1	1	0	0	EPS15L1	epidermal growth factor receptor pathway substrate 15-like 1
hsa-miR-1293	0	0	1	0	0	0	SMA4	glucuronidase, beta pseudogene
hsa-miR-1293	0	0	1	0	0	0	MEG3	maternally expressed 3 (non-protein coding)
hsa-miR-1293	1	0	1	0	1	1	TTC7B	tetratricopeptide repeat domain 7B
hsa-miR-1293	1	0	1	1	1	1	CHGA	chromogranin A (parathyroid secretory protein 1)
hsa-miR-1293	1	0	1	1	0	0	RGS6	regulator of G-protein signaling 6
hsa-miR-1293	0	0	1	1	1	1	AP1B1	adaptor-related protein complex 1, beta 1 subunit
hsa-miR-1293	1	0	1	1	1	1	ATP2B4	ATPase, Ca++ transporting, plasma membrane 4
hsa-miR-1293	1	0	1	1	1	1	MIER3	mesoderm induction early response 1, family member 3
hsa-miR-1293	0	0	1	0	1	1	GPX8	glutathione peroxidase 8 (putative)
hsa-miR-1293	1	0	1	0	1	1	CLASP2	cytoplasmic linker associated protein 2
hsa-miR-1293	1	0	1	1	1	1	TGOLN2	trans-golgi network protein 2
hsa-miR-1293	0	0	1	1	1	1	GLIPR1L2	GLI pathogenesis-related 1 like 2
hsa-miR-1293	0	0	1	1	1	1	VCAN	versican
hsa-miR-1293	0	0	1	0	0	0	TRAF3IP2-AS1	TRAF3IP2 antisense RNA 1
hsa-miR-1293	0	0	1	1	1	1	PRR14L	proline rich 14-like
hsa-miR-1293	1	0	1	1	0	0	RBM27	RNA binding motif protein 27
hsa-miR-1293	1	0	1	1	1	1	SLC39A13	solute carrier family 39 (zinc transporter), member 13
hsa-miR-1293	0	0	1	1	0	0	ANKRD33	ankyrin repeat domain 33
hsa-miR-1293	1	0	1	1	1	1	GTDC1	glycosyltransferase-like domain containing 1
hsa-miR-1293	0	0	1	0	1	1	MYO3B	myosin IIIB
hsa-miR-1293	0	0	1	0	0	0	OVOS	ovostatin
hsa-miR-1293	1	0	1	1	1	1	DDAH1	dimethylarginine dimethylaminohydrolase 1
hsa-miR-1293	0	0	1	0	0	0	PLA2G4B	phospholipase A2, group IVB (cytosolic)
hsa-miR-1293	1	0	1	1	1	1	NAV1	neuron navigator 1
hsa-miR-1293	1	0	1	1	1	1	FAM208A	family with sequence similarity 208, member A
hsa-miR-1293	1	0	1	0	1	1	C1orf21	chromosome 1 open reading frame 21
hsa-miR-1293	0	0	1	0	0	0	DKFZp686K1684	uncharacterized LOC440034
hsa-miR-1293	1	0	1	1	1	1	CREB3L2	cAMP responsive element binding protein 3-like 2
hsa-miR-1293	1	0	1	1	1	1	SIN3A	SIN3 transcription regulator homolog A (yeast)
hsa-miR-1293	1	0	1	0	0	0	ZNRF3	zinc and ring finger 3
hsa-miR-1293	0	0	1	1	1	1	HPGD	hydroxyprostaglandin dehydrogenase 15-(NAD)
hsa-miR-1293	0	0	1	1	0	0	MARCH11	membrane-associated ring finger (C3HC4) 11
hsa-miR-1293	1	0	1	1	1	1	ARHGDIA	Rho GDP dissociation inhibitor (GDI) alpha
hsa-miR-1293	0	0	1	1	0	0	TECR	trans-2,3-enoyl-CoA reductase
hsa-miR-1293	1	0	1	1	1	1	CLU	clusterin
hsa-miR-1293	1	0	1	1	1	1	RNF10	ring finger protein 10
hsa-miR-1293	1	0	1	0	0	0	IGLON5	IgLON family member 5
hsa-miR-1293	0	0	1	1	1	1	TMEM53	transmembrane protein 53
hsa-miR-1293	0	0	1	1	1	1	GTPBP3	GTP binding protein 3 (mitochondrial)
hsa-miR-1293	1	0	1	1	1	1	PCGF2	polycomb group ring finger 2
hsa-miR-1293	0	0	1	1	0	0	APOA1BP	apolipoprotein A-I binding protein
hsa-miR-1293	0	0	1	1	1	1	APEX1	APEX nuclease (multifunctional DNA repair enzyme) 1
hsa-miR-1293	1	0	1	1	1	1	DDX19B	DEAD (Asp-Glu-Ala-Asp) box polypeptide 19B
hsa-miR-1293	0	0	1	1	0	0	RAD23A	RAD23 homolog A (S. cerevisiae)
hsa-miR-1293	0	0	1	1	0	0	PPOX	protoporphyrinogen oxidase
hsa-miR-1293	1	0	1	1	1	1	LETMD1	LETM1 domain containing 1
hsa-miR-1293	0	0	1	1	1	1	ATP1B3	ATPase, Na+/K+ transporting, beta 3 polypeptide
hsa-miR-1293	0	0	1	1	0	0	CYGB	cytoglobin
hsa-miR-1293	0	0	1	1	0	0	FCGRT	Fc fragment of IgG, receptor, transporter, alpha
hsa-miR-1293	0	0	1	1	0	0	FCHO1	FCH domain only 1
hsa-miR-1293	1	0	1	1	0	0	SHF	Src homology 2 domain containing F
hsa-miR-1293	0	0	1	1	0	0	CCNDBP1	cyclin D-type binding-protein 1
hsa-miR-1293	1	0	1	0	1	1	BNIP3L	BCL2/adenovirus E1B 19kDa interacting protein 3-like
hsa-miR-1293	0	0	1	1	1	1	FUS	fused in sarcoma
hsa-miR-1293	0	0	1	0	0	0	H19	H19, imprinted maternally expressed transcript (non-protein coding)
hsa-miR-1293	1	0	1	1	1	1	RASL12	RAS-like, family 12
hsa-miR-1293	0	0	1	1	1	1	INCENP	inner centromere protein antigens 135/155kDa
hsa-miR-1293	1	0	1	1	0	0	STX5	syntaxin 5
hsa-miR-1293	0	0	1	1	1	1	BLZF1	basic leucine zipper nuclear factor 1
hsa-miR-1293	1	0	1	1	1	1	CHTF8	CTF8, chromosome transmission fidelity factor 8 homolog (S. cerevisiae)
hsa-miR-1293	1	0	1	1	1	1	EI24	etoposide induced 2.4 mRNA
hsa-miR-1293	0	0	1	1	0	0	RPL7L1	ribosomal protein L7-like 1
hsa-miR-1293	0	0	1	0	1	1	IGF2-AS	IGF2 antisense RNA
hsa-miR-1293	0	0	1	1	0	0	RAD54B	RAD54 homolog B (S. cerevisiae)
hsa-miR-1293	1	0	1	1	1	1	NTM	neurotrimin
hsa-miR-1293	0	0	1	1	0	0	NDUFV1	NADH dehydrogenase (ubiquinone) flavoprotein 1, 51kDa
hsa-miR-1293	0	0	1	1	1	1	GGPS1	geranylgeranyl diphosphate synthase 1
hsa-miR-1293	0	0	1	1	0	0	NR1H2	nuclear receptor subfamily 1, group H, member 2
hsa-miR-1293	0	0	1	1	0	0	BSPRY	B-box and SPRY domain containing
hsa-miR-1293	0	0	1	1	1	1	GRAP2	GRB2-related adaptor protein 2
hsa-miR-1293	1	0	1	0	1	1	RPS6KB1	ribosomal protein S6 kinase, 70kDa, polypeptide 1
hsa-miR-1293	0	0	1	1	1	1	ANKRD53	ankyrin repeat domain 53
hsa-miR-1293	1	0	1	1	1	1	POU2F2	POU class 2 homeobox 2
hsa-miR-1293	0	0	1	1	1	1	TRIM68	tripartite motif containing 68
hsa-miR-1293	1	0	1	1	1	1	DDR1	discoidin domain receptor tyrosine kinase 1
hsa-miR-1293	0	0	1	1	1	1	AHSA1	AHA1, activator of heat shock 90kDa protein ATPase homolog 1 (yeast)
hsa-miR-1293	0	0	1	1	0	0	C20orf43	chromosome 20 open reading frame 43
hsa-miR-1293	1	0	1	0	1	1	PLK3	polo-like kinase 3
hsa-miR-1293	1	0	1	1	1	1	WIPF1	WAS/WASL interacting protein family, member 1
hsa-miR-1293	0	0	1	0	0	0	FLJ45248	FLJ45248 protein
hsa-miR-1293	0	0	1	1	1	1	BMPR1A	bone morphogenetic protein receptor, type IA
hsa-miR-1293	1	0	1	1	1	1	NABP1	nucleic acid binding protein 1
hsa-miR-1293	1	0	1	1	1	1	MMP2	matrix metallopeptidase 2 (gelatinase A, 72kDa gelatinase, 72kDa type IV collagenase)
hsa-miR-1293	0	0	1	1	0	0	PTGDS	prostaglandin D2 synthase 21kDa (brain)
hsa-miR-1293	1	0	1	1	1	1	KCNIP4	Kv channel interacting protein 4
hsa-miR-1293	1	0	1	1	1	1	DOK4	docking protein 4
hsa-miR-1293	0	0	1	0	0	0	LOC100130353	hippocampus abundant transcript-like 1 pseudogene
hsa-miR-1293	0	0	1	1	0	0	C1orf122	chromosome 1 open reading frame 122
hsa-miR-1293	0	0	1	1	0	0	DOK2	docking protein 2, 56kDa
hsa-miR-1293	0	0	1	0	0	0	ZNF720	zinc finger protein 720
hsa-miR-1293	1	0	1	0	1	1	C15orf41	chromosome 15 open reading frame 41
hsa-miR-1293	0	0	1	1	0	0	EXOSC8	exosome component 8
hsa-miR-1293	0	0	1	1	1	1	WIBG	within bgcn homolog (Drosophila)
hsa-miR-1293	0	0	1	1	0	0	STUB1	STIP1 homology and U-box containing protein 1, E3 ubiquitin protein ligase
hsa-miR-1293	0	0	1	1	1	1	ACSF3	acyl-CoA synthetase family member 3
hsa-miR-1293	1	0	1	1	1	1	ZNF207	zinc finger protein 207
hsa-miR-1293	0	0	1	1	0	0	ATP6V0C	ATPase, H+ transporting, lysosomal 16kDa, V0 subunit c
hsa-miR-1293	0	0	1	1	0	0	KRT18	keratin 18
hsa-miR-1293	0	0	1	1	1	1	NGLY1	N-glycanase 1
hsa-miR-1293	1	0	1	1	1	1	RNF2	ring finger protein 2
hsa-miR-1293	0	0	1	0	0	0	ZNF674-AS1	ZNF674 antisense RNA 1
hsa-miR-1293	0	0	1	1	0	0	CCDC107	coiled-coil domain containing 107
hsa-miR-1293	1	0	1	1	1	1	ACTN4	actinin, alpha 4
hsa-miR-1293	1	0	1	1	0	0	SAP30BP	SAP30 binding protein
hsa-miR-1293	0	0	1	1	1	1	GOT1	glutamic-oxaloacetic transaminase 1, soluble (aspartate aminotransferase 1)
hsa-miR-1293	1	0	1	1	1	1	YWHAE	tyrosine 3-monooxygenase/tryptophan 5-monooxygenase activation protein, epsilon polypeptide
hsa-miR-1293	1	0	1	1	0	0	FOXO3	forkhead box O3
hsa-miR-1293	0	0	1	1	0	0	TESK1	testis-specific kinase 1
hsa-miR-1293	0	0	1	0	1	1	SEPT7	septin 7
hsa-miR-1293	0	0	1	1	1	1	PTMA	prothymosin, alpha
hsa-miR-1293	0	0	1	1	1	1	FAM118B	family with sequence similarity 118, member B
hsa-miR-1293	1	0	1	1	0	0	MMP11	matrix metallopeptidase 11 (stromelysin 3)
hsa-miR-1293	1	0	1	0	1	1	NMT1	N-myristoyltransferase 1
hsa-miR-1293	0	0	1	1	1	1	VPS16	vacuolar protein sorting 16 homolog (S. cerevisiae)
hsa-miR-1293	1	0	1	0	1	1	KIAA0664	KIAA0664
hsa-miR-1293	0	0	1	0	0	0	LOC731789	uncharacterized LOC731789
hsa-miR-1293	0	0	1	0	1	1	STARD8	StAR-related lipid transfer (START) domain containing 8
hsa-miR-1293	1	0	1	1	1	1	KIAA2018	KIAA2018
hsa-miR-1293	0	0	1	1	1	1	SLC25A26	solute carrier family 25 (S-adenosylmethionine carrier), member 26
hsa-miR-1293	0	0	1	0	1	1	NWD1	NACHT and WD repeat domain containing 1
hsa-miR-1293	1	0	1	1	1	1	BCL2L1	BCL2-like 1
hsa-miR-1293	0	0	1	1	0	0	GOLGB1	golgin B1
hsa-miR-1293	0	0	1	1	1	1	MOBP	myelin-associated oligodendrocyte basic protein
hsa-miR-1293	1	0	1	1	1	1	SEC14L1	SEC14-like 1 (S. cerevisiae)
hsa-miR-1293	1	0	1	0	1	1	CBX7	chromobox homolog 7
hsa-miR-1293	0	0	1	1	1	1	LTA	lymphotoxin alpha (TNF superfamily, member 1)
hsa-miR-1293	0	0	1	1	1	1	MARVELD2	MARVEL domain containing 2
hsa-miR-1293	0	0	1	1	0	0	SLCO3A1	solute carrier organic anion transporter family, member 3A1
hsa-miR-1293	1	0	1	1	1	1	IRF1	interferon regulatory factor 1
hsa-miR-1293	0	0	1	1	1	1	ALDH3B1	aldehyde dehydrogenase 3 family, member B1
hsa-miR-1293	1	0	1	1	1	1	MLL	myeloid/lymphoid or mixed-lineage leukemia (trithorax homolog, Drosophila)
hsa-miR-1293	1	0	1	1	1	1	RALBP1	ralA binding protein 1
hsa-miR-1293	1	0	1	1	1	1	PLAU	plasminogen activator, urokinase
hsa-miR-1293	1	0	1	1	1	1	IGF1	insulin-like growth factor 1 (somatomedin C)
hsa-miR-1293	1	0	1	1	1	1	CD44	CD44 molecule (Indian blood group)
hsa-miR-1293	0	0	1	1	1	1	HLA-G	major histocompatibility complex, class I, G
hsa-miR-1293	1	0	1	1	1	1	COL4A3	collagen, type IV, alpha 3 (Goodpasture antigen)
hsa-miR-1293	1	0	1	1	1	1	COL5A1	collagen, type V, alpha 1
hsa-miR-1293	0	0	1	0	1	1	TOR1A	torsin family 1, member A (torsin A)
hsa-miR-1293	1	0	1	1	1	1	F13A1	coagulation factor XIII, A1 polypeptide
hsa-miR-1293	0	0	1	1	1	1	FABP2	fatty acid binding protein 2, intestinal
hsa-miR-1293	1	0	1	1	1	1	GALC	galactosylceramidase
hsa-miR-1293	1	0	1	0	1	1	GLI3	GLI family zinc finger 3
hsa-miR-1293	1	0	1	1	1	1	KCNA1	potassium voltage-gated channel, shaker-related subfamily, member 1 (episodic ataxia with myokymia)
hsa-miR-1293	1	0	1	1	1	1	LEP	leptin
hsa-miR-1293	1	0	1	1	1	1	MITF	microphthalmia-associated transcription factor
hsa-miR-1293	0	0	1	1	0	0	OCA2	oculocutaneous albinism II
hsa-miR-1293	1	0	1	1	1	1	OCRL	oculocerebrorenal syndrome of Lowe
hsa-miR-1293	0	0	1	1	0	0	PCCA	propionyl CoA carboxylase, alpha polypeptide
hsa-miR-1293	1	0	1	0	1	1	COL5A2	collagen, type V, alpha 2
hsa-miR-1293	1	0	1	1	1	1	HLCS	holocarboxylase synthetase (biotin-(proprionyl-CoA-carboxylase (ATP-hydrolysing)) ligase)
hsa-miR-1293	0	0	1	1	1	1	L1CAM	L1 cell adhesion molecule
hsa-miR-1293	1	0	1	0	1	1	PAFAH1B1	platelet-activating factor acetylhydrolase 1b, regulatory subunit 1 (45kDa)
hsa-miR-1293	1	0	1	1	0	0	NOTCH3	notch 3
hsa-miR-1293	0	0	1	1	1	1	PDE6A	phosphodiesterase 6A, cGMP-specific, rod, alpha
hsa-miR-1293	1	0	1	1	1	1	MPZ	myelin protein zero
hsa-miR-1293	0	0	1	1	1	1	IGF2	insulin-like growth factor 2 (somatomedin A)
hsa-miR-1293	0	0	1	1	1	1	ALDH1A1	aldehyde dehydrogenase 1 family, member A1
hsa-miR-1293	1	0	1	1	1	1	CSF1	colony stimulating factor 1 (macrophage)
hsa-miR-1293	1	0	1	1	1	1	DIO2	deiodinase, iodothyronine, type II
hsa-miR-1293	1	0	1	0	1	1	GABRA4	gamma-aminobutyric acid (GABA) A receptor, alpha 4
hsa-miR-1293	1	0	1	1	1	1	GABRB3	gamma-aminobutyric acid (GABA) A receptor, beta 3
hsa-miR-1293	0	0	1	1	0	0	GABRD	gamma-aminobutyric acid (GABA) A receptor, delta
hsa-miR-1293	1	0	1	1	1	1	GRIA4	glutamate receptor, ionotropic, AMPA 4
hsa-miR-1293	0	0	1	1	1	1	HTR1D	5-hydroxytryptamine (serotonin) receptor 1D, G protein-coupled
hsa-miR-1293	1	0	1	1	1	1	HTR4	5-hydroxytryptamine (serotonin) receptor 4, G protein-coupled
hsa-miR-1293	0	0	1	1	1	1	HTR7	5-hydroxytryptamine (serotonin) receptor 7, adenylate cyclase-coupled
hsa-miR-1293	1	0	1	1	1	1	IGF1R	insulin-like growth factor 1 receptor
hsa-miR-1293	0	0	1	1	0	0	KNG1	kininogen 1
hsa-miR-1293	1	0	1	1	1	1	PPP3R1	protein phosphatase 3, regulatory subunit B, alpha
hsa-miR-1293	0	0	1	1	1	1	BLOC1S2	biogenesis of lysosomal organelles complex-1, subunit 2
hsa-miR-1293	1	0	1	0	1	1	GDF6	growth differentiation factor 6
hsa-miR-1293	0	0	1	0	0	0	KLK2	kallikrein-related peptidase 2
hsa-miR-1293	0	0	1	1	1	1	FMO3	flavin containing monooxygenase 3
hsa-miR-1293	1	0	1	0	1	1	BMF	Bcl2 modifying factor
hsa-miR-1293	0	0	1	1	1	1	DBX2	developing brain homeobox 2
hsa-miR-1293	0	0	1	1	1	1	OR9Q1	olfactory receptor, family 9, subfamily Q, member 1
hsa-miR-1293	1	0	1	0	1	1	PKP2	plakophilin 2
hsa-miR-1293	0	0	1	0	1	1	FLJ46347	uncharacterized LOC389064
hsa-miR-1293	1	0	1	1	1	1	EBF3	early B-cell factor 3
hsa-miR-1293	1	0	1	1	1	1	NTRK3	neurotrophic tyrosine kinase, receptor, type 3
hsa-miR-1293	1	0	1	1	1	1	IGF2BP2	insulin-like growth factor 2 mRNA binding protein 2
hsa-miR-1293	1	0	1	1	1	1	SPOP	speckle-type POZ protein
hsa-miR-1293	0	0	1	0	1	1	C3orf56	chromosome 3 open reading frame 56
hsa-miR-1293	1	0	1	1	1	1	ZDHHC9	zinc finger, DHHC-type containing 9
hsa-miR-1293	0	0	1	1	1	1	TCHHL1	trichohyalin-like 1
hsa-miR-1293	1	0	1	0	1	1	KIAA2022	KIAA2022
hsa-miR-1293	0	0	1	1	1	1	SLC35D3	solute carrier family 35, member D3
hsa-miR-1293	0	0	1	0	0	0	CD200R1L	CD200 receptor 1-like
hsa-miR-1293	0	0	1	1	1	1	BRD9	bromodomain containing 9
hsa-miR-1293	1	0	1	0	1	1	FAM102B	family with sequence similarity 102, member B
hsa-miR-1293	1	0	1	0	1	1	MTX3	metaxin 3
hsa-miR-1293	0	0	1	1	0	0	ROPN1B	rhophilin associated tail protein 1B
hsa-miR-1293	1	0	1	1	1	1	FOXP4	forkhead box P4
hsa-miR-1293	1	0	1	1	1	1	GRAMD2	GRAM domain containing 2
hsa-miR-1293	1	0	1	1	1	1	DYNC2LI1	dynein, cytoplasmic 2, light intermediate chain 1
hsa-miR-1293	0	0	1	1	1	1	C9orf152	chromosome 9 open reading frame 152
hsa-miR-1293	1	0	1	1	1	1	SORCS1	sortilin-related VPS10 domain containing receptor 1
hsa-miR-1293	1	0	1	1	1	1	FXR1	fragile X mental retardation, autosomal homolog 1
hsa-miR-1293	0	0	1	1	1	1	LDLRAD2	low density lipoprotein receptor class A domain containing 2
hsa-miR-1293	0	0	1	1	0	0	BANF2	barrier to autointegration factor 2
hsa-miR-1293	0	0	1	1	1	1	PURG	purine-rich element binding protein G
hsa-miR-1293	1	0	1	1	1	1	SORBS3	sorbin and SH3 domain containing 3
hsa-miR-1293	0	0	1	1	0	0	POLR3H	polymerase (RNA) III (DNA directed) polypeptide H (22.9kD)
hsa-miR-1293	1	0	1	0	1	1	RGAG4	retrotransposon gag domain containing 4
hsa-miR-1293	1	0	1	1	1	1	SH3KBP1	SH3-domain kinase binding protein 1
hsa-miR-1293	1	0	1	0	1	1	TNRC6B	trinucleotide repeat containing 6B
hsa-miR-1293	0	0	1	1	0	0	ARPC4	actin related protein 2/3 complex, subunit 4, 20kDa
hsa-miR-1293	1	0	1	0	1	1	CELF2	CUGBP, Elav-like family member 2
hsa-miR-1293	1	0	1	0	1	1	ANO6	anoctamin 6
hsa-miR-1293	0	0	1	1	0	0	KLK3	kallikrein-related peptidase 3
hsa-miR-1293	1	0	1	1	1	1	MASP1	mannan-binding lectin serine peptidase 1 (C4/C2 activating component of Ra-reactive factor)
hsa-miR-1293	1	0	1	1	1	1	TFAP2A	transcription factor AP-2 alpha (activating enhancer binding protein 2 alpha)
hsa-miR-1293	1	0	1	1	1	1	UBE2V1	ubiquitin-conjugating enzyme E2 variant 1
hsa-miR-1293	1	0	1	0	1	1	SRGAP3	SLIT-ROBO Rho GTPase activating protein 3
hsa-miR-1293	0	0	1	1	1	1	C18orf62	chromosome 18 open reading frame 62
hsa-miR-1293	1	0	1	0	1	1	CDC42SE1	CDC42 small effector 1
hsa-miR-1293	0	0	1	1	1	1	ATAD3C	ATPase family, AAA domain containing 3C
hsa-miR-1293	0	0	1	0	0	0	CEACAM16	carcinoembryonic antigen-related cell adhesion molecule 16
hsa-miR-1293	0	0	1	1	1	1	SPATA6L	spermatogenesis associated 6-like
hsa-miR-1293	1	0	1	1	1	1	KIAA0317	KIAA0317
hsa-miR-1293	1	0	1	0	1	1	USP9X	ubiquitin specific peptidase 9, X-linked
hsa-miR-1293	1	0	1	1	1	1	C3orf65	chromosome 3 open reading frame 65
hsa-miR-1293	1	0	1	1	1	1	CHN2	chimerin (chimaerin) 2
hsa-miR-1293	1	0	1	1	1	1	MAPK3	mitogen-activated protein kinase 3
hsa-miR-1293	1	0	1	1	1	1	SCN2A	sodium channel, voltage-gated, type II, alpha subunit
hsa-miR-1293	0	0	1	0	1	1	SCN3B	sodium channel, voltage-gated, type III, beta subunit
hsa-miR-1293	1	0	1	1	1	1	MAPK8IP3	mitogen-activated protein kinase 8 interacting protein 3
hsa-miR-1293	1	0	1	1	1	1	PPP4R1	protein phosphatase 4, regulatory subunit 1
hsa-miR-1293	1	0	1	1	1	1	SNX21	sorting nexin family member 21
hsa-miR-1293	0	0	1	1	1	1	SLC6A4	solute carrier family 6 (neurotransmitter transporter, serotonin), member 4
hsa-miR-1293	0	0	1	1	1	1	FAM22G	family with sequence similarity 22, member G
hsa-miR-1293	0	0	1	1	1	1	TUBG1	tubulin, gamma 1
hsa-miR-1293	1	0	1	1	1	1	METTL9	methyltransferase like 9
hsa-miR-1293	1	0	1	1	1	1	SREK1	splicing regulatory glutamine/lysine-rich protein 1
hsa-miR-1293	0	0	1	1	1	1	KLK10	kallikrein-related peptidase 10
hsa-miR-1293	0	0	1	1	1	1	MTMR14	myotubularin related protein 14
hsa-miR-1293	0	0	1	1	0	0	FAM127A	family with sequence similarity 127, member A
hsa-miR-1293	0	0	1	1	1	1	DIAPH1	diaphanous homolog 1 (Drosophila)
hsa-miR-1293	1	0	1	1	1	1	CASZ1	castor zinc finger 1
hsa-miR-1293	1	0	1	1	1	1	CUL4B	cullin 4B
hsa-miR-1293	1	0	1	0	1	1	FBXO41	F-box protein 41
hsa-miR-1293	1	0	1	1	1	1	KDM6B	lysine (K)-specific demethylase 6B
hsa-miR-1293	1	0	1	1	1	1	DGKG	diacylglycerol kinase, gamma 90kDa
hsa-miR-1293	1	0	1	1	1	1	MYO1C	myosin IC
hsa-miR-1293	1	0	1	1	1	1	REPS2	RALBP1 associated Eps domain containing 2
hsa-miR-1293	1	0	1	1	0	0	ASIC2	acid-sensing (proton-gated) ion channel 2
hsa-miR-1293	0	0	1	1	1	1	CRISP1	cysteine-rich secretory protein 1
hsa-miR-1293	1	0	1	0	1	1	BMPR2	bone morphogenetic protein receptor, type II (serine/threonine kinase)
hsa-miR-1293	0	0	1	1	1	1	ENTPD3	ectonucleoside triphosphate diphosphohydrolase 3
hsa-miR-1293	0	0	1	1	1	1	CDC5L	CDC5 cell division cycle 5-like (S. pombe)
hsa-miR-1293	1	0	1	1	1	1	MAPK14	mitogen-activated protein kinase 14
hsa-miR-1293	0	0	1	1	0	0	CST2	cystatin SA
hsa-miR-1293	0	0	1	1	1	1	DAD1	defender against cell death 1
hsa-miR-1293	1	0	1	1	1	1	S1PR1	sphingosine-1-phosphate receptor 1
hsa-miR-1293	1	0	1	0	1	1	EFNB3	ephrin-B3
hsa-miR-1293	1	0	1	1	1	1	CELSR3	cadherin, EGF LAG seven-pass G-type receptor 3 (flamingo homolog, Drosophila)
hsa-miR-1293	1	0	1	1	1	1	ELAVL1	ELAV (embryonic lethal, abnormal vision, Drosophila)-like 1 (Hu antigen R)
hsa-miR-1293	1	0	1	0	1	1	ELAVL3	ELAV (embryonic lethal, abnormal vision, Drosophila)-like 3 (Hu antigen C)
hsa-miR-1293	0	0	1	1	0	0	ACP2	acid phosphatase 2, lysosomal
hsa-miR-1293	1	0	1	1	1	1	ADD2	adducin 2 (beta)
hsa-miR-1293	1	0	1	1	1	1	AHNAK	AHNAK nucleoprotein
hsa-miR-1293	1	0	1	1	1	1	AHR	aryl hydrocarbon receptor
hsa-miR-1293	0	0	1	1	1	1	APOF	apolipoprotein F
hsa-miR-1293	1	0	1	1	1	1	ARF3	ADP-ribosylation factor 3
hsa-miR-1293	1	0	1	0	1	1	ATP1B2	ATPase, Na+/K+ transporting, beta 2 polypeptide
hsa-miR-1293	1	0	1	0	1	1	BMP7	bone morphogenetic protein 7
hsa-miR-1293	0	0	1	1	1	1	CALB2	calbindin 2
hsa-miR-1293	1	0	1	1	1	1	CBFB	core-binding factor, beta subunit
hsa-miR-1293	1	0	1	1	1	1	CDC25A	cell division cycle 25 homolog A (S. pombe)
hsa-miR-1293	1	0	1	1	0	0	CDH8	cadherin 8, type 2
hsa-miR-1293	1	0	1	1	1	1	CDK2	cyclin-dependent kinase 2
hsa-miR-1293	1	0	1	1	1	1	CENPB	centromere protein B, 80kDa
hsa-miR-1293	1	0	1	1	1	1	CSNK1D	casein kinase 1, delta
hsa-miR-1293	1	0	1	1	1	1	E2F3	E2F transcription factor 3
hsa-miR-1293	0	0	1	1	0	0	EIF5A	eukaryotic translation initiation factor 5A
hsa-miR-1293	1	0	1	1	1	1	FKBP4	FK506 binding protein 4, 59kDa
hsa-miR-1293	0	0	1	1	0	0	FUT5	fucosyltransferase 5 (alpha (1,3) fucosyltransferase)
hsa-miR-1293	1	0	1	1	1	1	GBP1	guanylate binding protein 1, interferon-inducible
hsa-miR-1293	1	0	1	1	1	1	KCNA3	potassium voltage-gated channel, shaker-related subfamily, member 3
hsa-miR-1293	1	0	1	1	1	1	KCNJ10	potassium inwardly-rectifying channel, subfamily J, member 10
hsa-miR-1293	1	0	1	1	1	1	KPNA3	karyopherin alpha 3 (importin alpha 4)
hsa-miR-1293	1	0	1	1	1	1	MAP1A	microtubule-associated protein 1A
hsa-miR-1293	0	0	1	0	1	1	CXCL9	chemokine (C-X-C motif) ligand 9
hsa-miR-1293	1	0	1	1	1	1	MSN	moesin
hsa-miR-1293	1	0	1	1	1	1	MSR1	macrophage scavenger receptor 1
hsa-miR-1293	1	0	1	1	1	1	NPTX1	neuronal pentraxin I
hsa-miR-1293	1	0	1	0	1	1	PAK2	p21 protein (Cdc42/Rac)-activated kinase 2
hsa-miR-1293	1	0	1	1	1	1	MAPK6	mitogen-activated protein kinase 6
hsa-miR-1293	1	0	1	1	1	1	RASA1	RAS p21 protein activator (GTPase activating protein) 1
hsa-miR-1293	0	0	1	1	0	0	RBP1	retinol binding protein 1, cellular
hsa-miR-1293	1	0	1	1	0	0	RFX1	regulatory factor X, 1 (influences HLA class II expression)
hsa-miR-1293	1	0	1	1	1	1	ROBO2	roundabout, axon guidance receptor, homolog 2 (Drosophila)
hsa-miR-1293	1	0	1	0	1	1	SORT1	sortilin 1
hsa-miR-1293	1	0	1	1	1	1	CCL21	chemokine (C-C motif) ligand 21
hsa-miR-1293	1	0	1	0	1	1	CCL22	chemokine (C-C motif) ligand 22
hsa-miR-1293	0	0	1	1	1	1	SDC4	syndecan 4
hsa-miR-1293	1	0	1	0	1	1	ST6GAL1	ST6 beta-galactosamide alpha-2,6-sialyltranferase 1
hsa-miR-1293	1	0	1	1	1	1	SMARCC1	SWI/SNF related, matrix associated, actin dependent regulator of chromatin, subfamily c, member 1
hsa-miR-1293	1	0	1	1	1	1	SMARCD2	SWI/SNF related, matrix associated, actin dependent regulator of chromatin, subfamily d, member 2
hsa-miR-1293	0	0	1	0	1	1	TRIM21	tripartite motif containing 21
hsa-miR-1293	1	0	1	1	1	1	SSR2	signal sequence receptor, beta (translocon-associated protein beta)
hsa-miR-1293	0	0	1	1	1	1	STAT6	signal transducer and activator of transcription 6, interleukin-4 induced
hsa-miR-1293	1	0	1	0	1	1	STC1	stanniocalcin 1
hsa-miR-1293	0	0	1	1	1	1	SULT2A1	sulfotransferase family, cytosolic, 2A, dehydroepiandrosterone (DHEA)-preferring, member 1
hsa-miR-1293	0	0	1	1	1	1	SUPT6H	suppressor of Ty 6 homolog (S. cerevisiae)
hsa-miR-1293	1	0	1	1	0	0	SYP	synaptophysin
hsa-miR-1293	1	0	1	1	1	1	TFAP2B	transcription factor AP-2 beta (activating enhancer binding protein 2 beta)
hsa-miR-1293	1	0	1	0	1	1	THBS1	thrombospondin 1
hsa-miR-1293	0	0	1	1	0	0	TIMP1	TIMP metallopeptidase inhibitor 1
hsa-miR-1293	0	0	1	1	1	1	UBE2E1	ubiquitin-conjugating enzyme E2E 1
hsa-miR-1293	1	0	1	0	1	1	YWHAB	tyrosine 3-monooxygenase/tryptophan 5-monooxygenase activation protein, beta polypeptide
hsa-miR-1293	1	0	1	1	1	1	YWHAH	tyrosine 3-monooxygenase/tryptophan 5-monooxygenase activation protein, eta polypeptide
hsa-miR-1293	1	0	1	1	1	1	ZIC3	Zic family member 3
hsa-miR-1293	1	0	1	0	1	1	BSN	bassoon (presynaptic cytomatrix protein)
hsa-miR-1293	1	0	1	1	1	1	HMGA2	high mobility group AT-hook 2
hsa-miR-1293	0	0	1	1	1	1	HIST2H2BE	histone cluster 2, H2be
hsa-miR-1293	0	0	1	1	0	0	HIST1H3B	histone cluster 1, H3b
hsa-miR-1293	1	0	1	1	1	1	PIP4K2B	phosphatidylinositol-5-phosphate 4-kinase, type II, beta
hsa-miR-1293	1	0	1	1	1	1	CBX4	chromobox homolog 4
hsa-miR-1293	0	0	1	1	1	1	TNFSF12	tumor necrosis factor (ligand) superfamily, member 12
hsa-miR-1293	1	0	1	0	1	1	CDK5R1	cyclin-dependent kinase 5, regulatory subunit 1 (p35)
hsa-miR-1293	0	0	1	1	1	1	LDB1	LIM domain binding 1
hsa-miR-1293	1	0	1	0	1	1	ST13	suppression of tumorigenicity 13 (colon carcinoma) (Hsp70 interacting protein)
hsa-miR-1293	1	0	1	1	1	1	KALRN	kalirin, RhoGEF kinase
hsa-miR-1293	1	0	1	1	1	1	EFNB2	ephrin-B2
hsa-miR-1293	1	0	1	1	0	0	EIF4EBP1	eukaryotic translation initiation factor 4E binding protein 1
hsa-miR-1293	0	0	1	1	1	1	FABP3	fatty acid binding protein 3, muscle and heart (mammary-derived growth inhibitor)
hsa-miR-1293	0	0	1	1	1	1	LBP	lipopolysaccharide binding protein
hsa-miR-1293	0	0	1	1	1	1	SLC1A1	solute carrier family 1 (neuronal/epithelial high affinity glutamate transporter, system Xag), member 1
hsa-miR-1293	0	0	1	1	0	0	SLC6A5	solute carrier family 6 (neurotransmitter transporter, glycine), member 5
hsa-miR-1293	1	0	1	1	1	1	SOCS6	suppressor of cytokine signaling 6
hsa-miR-1293	0	0	1	1	0	0	PIGL	phosphatidylinositol glycan anchor biosynthesis, class L
hsa-miR-1293	1	0	1	0	1	1	GTPBP1	GTP binding protein 1
hsa-miR-1293	1	0	1	1	1	1	TRAF4	TNF receptor-associated factor 4
hsa-miR-1293	1	0	1	1	1	1	DACH1	dachshund homolog 1 (Drosophila)
hsa-miR-1293	1	0	1	0	1	1	ETV5	ets variant 5
hsa-miR-1293	1	0	1	1	1	1	ONECUT1	one cut homeobox 1
hsa-miR-1293	1	0	1	1	0	0	HOXC6	homeobox C6
hsa-miR-1293	1	0	1	1	1	1	MLLT3	myeloid/lymphoid or mixed-lineage leukemia (trithorax homolog, Drosophila); translocated to, 3
hsa-miR-1293	1	0	1	1	1	1	WNT11	wingless-type MMTV integration site family, member 11
hsa-miR-1293	0	0	1	1	1	1	PABPN1	poly(A) binding protein, nuclear 1
hsa-miR-1293	1	0	1	1	1	1	MAP3K13	mitogen-activated protein kinase kinase kinase 13
hsa-miR-1293	1	0	1	1	1	1	XPR1	xenotropic and polytropic retrovirus receptor 1
hsa-miR-1293	1	0	1	1	1	1	LARGE	like-glycosyltransferase
hsa-miR-1293	0	0	1	1	0	0	SLC22A6	solute carrier family 22 (organic anion transporter), member 6
hsa-miR-1293	1	0	1	1	1	1	KIF3B	kinesin family member 3B
hsa-miR-1293	1	0	1	1	1	1	ONECUT2	one cut homeobox 2
hsa-miR-1293	1	0	1	0	1	1	SPTLC2	serine palmitoyltransferase, long chain base subunit 2
hsa-miR-1293	1	0	1	0	1	1	DOCK3	dedicator of cytokinesis 3
hsa-miR-1293	0	0	1	1	1	1	DSC1	desmocollin 1
hsa-miR-1293	0	0	1	1	1	1	KCND3	potassium voltage-gated channel, Shal-related subfamily, member 3
hsa-miR-1293	0	0	1	1	1	1	PRCP	prolylcarboxypeptidase (angiotensinase C)
hsa-miR-1293	1	0	1	1	1	1	KDM5A	lysine (K)-specific demethylase 5A
hsa-miR-1293	0	0	1	1	1	1	XYLB	xylulokinase homolog (H. influenzae)
hsa-miR-1293	1	0	1	1	1	1	ACTC1	actin, alpha, cardiac muscle 1
hsa-miR-1293	1	0	1	1	1	1	FOXN3	forkhead box N3
hsa-miR-1293	1	0	1	1	1	1	DCC	deleted in colorectal carcinoma
hsa-miR-1293	1	0	1	1	0	0	EFNA4	ephrin-A4
hsa-miR-1293	0	0	1	1	0	0	HIST1H1E	histone cluster 1, H1e
hsa-miR-1293	0	0	1	1	0	0	HIST1H1B	histone cluster 1, H1b
hsa-miR-1293	1	0	1	1	0	0	HCFC1	host cell factor C1 (VP16-accessory protein)
hsa-miR-1293	1	0	1	1	1	1	RND2	Rho family GTPase 2
hsa-miR-1293	1	0	1	1	0	0	NOG	noggin
hsa-miR-1293	1	0	1	1	0	0	ZBTB22	zinc finger and BTB domain containing 22
hsa-miR-1293	1	0	1	1	1	1	GABBR2	gamma-aminobutyric acid (GABA) B receptor, 2
hsa-miR-1293	1	0	1	1	1	1	KCNE3	potassium voltage-gated channel, Isk-related family, member 3
hsa-miR-1293	1	0	1	1	1	1	HOXA1	homeobox A1
hsa-miR-1293	0	0	1	1	1	1	HES1	hairy and enhancer of split 1, (Drosophila)
hsa-miR-1293	0	0	1	1	0	0	RTN2	reticulon 2
hsa-miR-1293	0	0	1	1	1	1	SLC35A2	solute carrier family 35 (UDP-galactose transporter), member A2
hsa-miR-1293	1	0	1	1	1	1	EVI5	ecotropic viral integration site 5
hsa-miR-1293	0	0	1	1	0	0	SNURF	SNRPN upstream reading frame
hsa-miR-1293	1	0	1	1	1	1	ABCF2	ATP-binding cassette, sub-family F (GCN20), member 2
hsa-miR-1293	1	0	1	1	1	1	GIPC1	GIPC PDZ domain containing family, member 1
hsa-miR-1293	1	0	1	0	1	1	DCAF7	DDB1 and CUL4 associated factor 7
hsa-miR-1293	1	0	1	1	1	1	GLYAT	glycine-N-acyltransferase
hsa-miR-1293	1	0	1	1	1	1	PURA	purine-rich element binding protein A
hsa-miR-1293	1	0	1	1	1	1	EFS	embryonal Fyn-associated substrate
hsa-miR-1293	1	0	1	1	1	1	MTF1	metal-regulatory transcription factor 1
hsa-miR-1293	1	0	1	1	1	1	SNAI1	snail homolog 1 (Drosophila)
hsa-miR-1293	0	0	1	1	1	1	KRT1	keratin 1
hsa-miR-1293	0	0	1	1	0	0	BMP1	bone morphogenetic protein 1
hsa-miR-1293	1	0	1	1	1	1	DAGLA	diacylglycerol lipase, alpha
hsa-miR-1293	1	0	1	1	1	1	LASP1	LIM and SH3 protein 1
hsa-miR-1293	0	0	1	0	1	1	OAS3	2'-5'-oligoadenylate synthetase 3, 100kDa
hsa-miR-1293	0	0	1	1	1	1	PA2G4	proliferation-associated 2G4, 38kDa
hsa-miR-1293	1	0	1	1	1	1	ITSN2	intersectin 2
hsa-miR-1293	1	0	1	0	0	0	VARS	valyl-tRNA synthetase
hsa-miR-1293	0	0	1	0	1	1	ZNF192	zinc finger protein 192
hsa-miR-1293	0	0	1	1	1	1	ZNF230	zinc finger protein 230
hsa-miR-1293	1	0	1	1	1	1	ZNF238	zinc finger protein 238
hsa-miR-1293	0	0	1	1	1	1	LRRC41	leucine rich repeat containing 41
hsa-miR-1293	1	0	1	1	1	1	VAT1	vesicle amine transport protein 1 homolog (T. californica)
hsa-miR-1293	0	0	1	1	1	1	ARL6IP5	ADP-ribosylation-like factor 6 interacting protein 5
hsa-miR-1293	0	0	1	1	0	0	AKAP3	A kinase (PRKA) anchor protein 3
hsa-miR-1293	1	0	1	1	1	1	TRIM3	tripartite motif containing 3
hsa-miR-1293	0	0	1	0	1	1	SLC16A2	solute carrier family 16, member 2 (thyroid hormone transporter)
hsa-miR-1293	1	0	1	0	1	1	IGF2BP1	insulin-like growth factor 2 mRNA binding protein 1
hsa-miR-1293	0	0	1	1	0	0	KIF1C	kinesin family member 1C
hsa-miR-1293	1	0	1	1	1	1	MMP24	matrix metallopeptidase 24 (membrane-inserted)
hsa-miR-1293	1	0	1	1	1	1	SPIN1	spindlin 1
hsa-miR-1293	1	0	1	1	0	0	PSKH1	protein serine kinase H1
hsa-miR-1293	0	0	1	1	1	1	IFI44L	interferon-induced protein 44-like
hsa-miR-1293	0	0	1	1	1	1	PKIA	protein kinase (cAMP-dependent, catalytic) inhibitor alpha
hsa-miR-1293	0	0	1	1	1	1	CLP1	CLP1, cleavage and polyadenylation factor I subunit, homolog (S. cerevisiae)
hsa-miR-1293	0	0	1	1	1	1	ATF7	activating transcription factor 7
hsa-miR-1293	1	0	1	1	1	1	RAB35	RAB35, member RAS oncogene family
hsa-miR-1293	1	0	1	0	1	1	SOX12	SRY (sex determining region Y)-box 12
hsa-miR-1293	0	0	1	1	0	0	UPK3A	uroplakin 3A
hsa-miR-1293	1	0	1	1	1	1	NR4A3	nuclear receptor subfamily 4, group A, member 3
hsa-miR-1293	0	0	1	1	1	1	PKIG	protein kinase (cAMP-dependent, catalytic) inhibitor gamma
hsa-miR-1293	0	0	1	1	0	0	GUCA2B	guanylate cyclase activator 2B (uroguanylin)
hsa-miR-1293	1	0	1	1	1	1	ZIC2	Zic family member 2
hsa-miR-1293	1	0	1	1	1	1	ERLIN2	ER lipid raft associated 2
hsa-miR-1293	1	0	1	1	1	1	HPS5	Hermansky-Pudlak syndrome 5
hsa-miR-1293	1	0	1	0	1	1	CHP1	calcineurin-like EF hand protein 1
hsa-miR-1293	1	0	1	1	1	1	TUSC2	tumor suppressor candidate 2
hsa-miR-1293	0	0	1	1	1	1	MIP	major intrinsic protein of lens fiber
hsa-miR-1293	1	0	1	1	1	1	ELL2	elongation factor, RNA polymerase II, 2
hsa-miR-1293	1	0	1	0	1	1	FZD4	frizzled family receptor 4
hsa-miR-1293	1	0	1	0	1	1	ACAP2	ArfGAP with coiled-coil, ankyrin repeat and PH domains 2
hsa-miR-1293	1	0	1	1	1	1	LDOC1	leucine zipper, down-regulated in cancer 1
hsa-miR-1293	1	0	1	0	1	1	MYO10	myosin X
hsa-miR-1293	0	0	1	0	1	1	PLA2G2D	phospholipase A2, group IID
hsa-miR-1293	1	0	1	1	1	1	TRPC5	transient receptor potential cation channel, subfamily C, member 5
hsa-miR-1293	1	0	1	0	1	1	FLRT2	fibronectin leucine rich transmembrane protein 2
hsa-miR-1293	0	0	1	1	1	1	N6AMT1	N-6 adenine-specific DNA methyltransferase 1 (putative)
hsa-miR-1293	1	0	1	1	1	1	PPARGC1A	peroxisome proliferator-activated receptor gamma, coactivator 1 alpha
hsa-miR-1293	0	0	1	1	0	0	KCNJ14	potassium inwardly-rectifying channel, subfamily J, member 14
hsa-miR-1293	0	0	1	1	1	1	UQCR10	ubiquinol-cytochrome c reductase, complex III subunit X
hsa-miR-1293	0	0	1	1	1	1	PRICKLE4	prickle homolog 4 (Drosophila)
hsa-miR-1293	1	0	1	1	1	1	AK2	adenylate kinase 2
hsa-miR-1293	1	0	1	1	1	1	NRG1	neuregulin 1
hsa-miR-1293	1	0	1	1	1	1	LAMP2	lysosomal-associated membrane protein 2
hsa-miR-1293	0	0	1	1	1	1	CCDC113	coiled-coil domain containing 113
hsa-miR-1293	0	0	1	1	1	1	TM4SF1	transmembrane 4 L six family member 1
hsa-miR-1293	1	0	1	1	1	1	VAMP1	vesicle-associated membrane protein 1 (synaptobrevin 1)
hsa-miR-1293	1	0	1	1	1	1	MAPRE2	microtubule-associated protein, RP/EB family, member 2
hsa-miR-1293	0	0	1	1	1	1	DNAJC8	DnaJ (Hsp40) homolog, subfamily C, member 8
hsa-miR-1293	1	0	1	1	1	1	PATZ1	POZ (BTB) and AT hook containing zinc finger 1
hsa-miR-1293	1	0	1	1	1	1	LHX6	LIM homeobox 6
hsa-miR-1293	1	0	1	0	1	1	DIEXF	digestive organ expansion factor homolog (zebrafish)
hsa-miR-1293	1	0	1	0	1	1	HEYL	hairy/enhancer-of-split related with YRPW motif-like
hsa-miR-1293	0	0	1	1	0	0	LMCD1	LIM and cysteine-rich domains 1
hsa-miR-1293	1	0	1	1	1	1	RALGPS1	Ral GEF with PH domain and SH3 binding motif 1
hsa-miR-1293	1	0	1	0	1	1	TOX	thymocyte selection-associated high mobility group box
hsa-miR-1293	1	0	1	1	1	1	RASSF2	Ras association (RalGDS/AF-6) domain family member 2
hsa-miR-1293	1	0	1	0	1	1	SERTAD2	SERTA domain containing 2
hsa-miR-1293	0	0	1	1	1	1	SNX19	sorting nexin 19
hsa-miR-1293	1	0	1	1	1	1	ARHGEF11	Rho guanine nucleotide exchange factor (GEF) 11
hsa-miR-1293	1	0	1	1	1	1	KIAA0753	KIAA0753
hsa-miR-1293	1	0	1	0	1	1	TRIL	TLR4 interactor with leucine-rich repeats
hsa-miR-1293	1	0	1	1	1	1	NUAK1	NUAK family, SNF1-like kinase, 1
hsa-miR-1293	0	0	1	0	1	1	KIF14	kinesin family member 14
hsa-miR-1293	1	0	1	1	1	1	PLEKHA6	pleckstrin homology domain containing, family A member 6
hsa-miR-1293	1	0	1	0	1	1	ZNF609	zinc finger protein 609
hsa-miR-1293	1	0	1	0	1	1	PEG10	paternally expressed 10
hsa-miR-1293	1	0	1	1	1	1	IQSEC2	IQ motif and Sec7 domain 2
hsa-miR-1293	1	0	1	1	1	1	SMG1	smg-1 homolog, phosphatidylinositol 3-kinase-related kinase (C. elegans)
hsa-miR-1293	1	0	1	1	1	1	TAB2	TGF-beta activated kinase 1/MAP3K7 binding protein 2
hsa-miR-1293	1	0	1	1	1	1	NUP160	nucleoporin 160kDa
hsa-miR-1293	1	0	1	1	1	1	CUX2	cut-like homeobox 2
hsa-miR-1293	1	0	1	0	1	1	KHNYN	KH and NYN domain containing
hsa-miR-1293	1	0	1	1	1	1	MED13L	mediator complex subunit 13-like
hsa-miR-1293	1	0	1	1	1	1	ASXL1	additional sex combs like 1 (Drosophila)
hsa-miR-1293	0	0	1	1	1	1	ANAPC13	anaphase promoting complex subunit 13
hsa-miR-1293	1	0	1	1	1	1	PARM1	prostate androgen-regulated mucin-like protein 1
hsa-miR-1293	0	0	1	1	1	1	ZNF10	zinc finger protein 10
hsa-miR-1293	0	0	1	1	0	0	PTPN23	protein tyrosine phosphatase, non-receptor type 23
hsa-miR-1293	1	0	1	1	1	1	CLIP3	CAP-GLY domain containing linker protein 3
hsa-miR-1293	0	0	1	1	1	1	C10orf12	chromosome 10 open reading frame 12
hsa-miR-1293	1	0	1	1	1	1	FAM155B	family with sequence similarity 155, member B
hsa-miR-1293	0	0	1	1	1	1	KRT76	keratin 76
hsa-miR-1293	1	0	1	0	1	1	TRIM33	tripartite motif containing 33
hsa-miR-1293	0	0	1	1	1	1	HMP19	HMP19 protein
hsa-miR-1293	1	0	1	1	1	1	UBE2J1	ubiquitin-conjugating enzyme E2, J1
hsa-miR-1293	0	0	1	1	1	1	APH1A	anterior pharynx defective 1 homolog A (C. elegans)
hsa-miR-1293	1	0	1	1	1	1	RRP15	ribosomal RNA processing 15 homolog (S. cerevisiae)
hsa-miR-1293	1	0	1	0	1	1	CNR1	cannabinoid receptor 1 (brain)
hsa-miR-1293	1	0	1	0	1	1	HPCAL4	hippocalcin like 4
hsa-miR-1293	1	0	1	1	1	1	TOB2	transducer of ERBB2, 2
hsa-miR-1293	1	0	1	1	1	1	RAB14	RAB14, member RAS oncogene family
hsa-miR-1293	1	0	1	1	1	1	RAPGEFL1	Rap guanine nucleotide exchange factor (GEF)-like 1
hsa-miR-1293	0	0	1	1	0	0	IL23A	interleukin 23, alpha subunit p19
hsa-miR-1293	1	0	1	1	1	1	GCNT4	glucosaminyl (N-acetyl) transferase 4, core 2
hsa-miR-1293	0	0	1	1	1	1	KDM3B	lysine (K)-specific demethylase 3B
hsa-miR-1293	0	0	1	1	1	1	POLE3	polymerase (DNA directed), epsilon 3, accessory subunit
hsa-miR-1293	1	0	1	1	1	1	ARID1B	AT rich interactive domain 1B (SWI1-like)
hsa-miR-1293	0	0	1	1	0	0	FNDC8	fibronectin type III domain containing 8
hsa-miR-1293	0	0	1	1	0	0	ROPN1	rhophilin associated tail protein 1
hsa-miR-1293	1	0	1	0	1	1	UBE2Q1	ubiquitin-conjugating enzyme E2Q family member 1
hsa-miR-1293	0	0	1	0	1	1	OTUB1	OTU domain, ubiquitin aldehyde binding 1
hsa-miR-1293	0	0	1	1	0	0	FAM83E	family with sequence similarity 83, member E
hsa-miR-1293	1	0	1	0	1	1	DCAF16	DDB1 and CUL4 associated factor 16
hsa-miR-1293	1	0	1	0	1	1	CMTM6	CKLF-like MARVEL transmembrane domain containing 6
hsa-miR-1293	0	0	1	1	0	0	BCAS4	breast carcinoma amplified sequence 4
hsa-miR-1293	0	0	1	1	0	0	THG1L	tRNA-histidine guanylyltransferase 1-like (S. cerevisiae)
hsa-miR-1293	1	0	1	1	1	1	VPS13B	vacuolar protein sorting 13 homolog B (yeast)
hsa-miR-1293	1	0	1	1	1	1	ZNHIT6	zinc finger, HIT-type containing 6
hsa-miR-1293	0	0	1	1	1	1	TRIM62	tripartite motif containing 62
hsa-miR-1293	0	0	1	1	1	1	PNMAL1	paraneoplastic Ma antigen family-like 1
hsa-miR-1293	1	0	1	1	1	1	TMEM143	transmembrane protein 143
hsa-miR-1293	1	0	1	1	1	1	DDX19A	DEAD (Asp-Glu-Ala-Asp) box polypeptide 19A
hsa-miR-1293	1	0	1	0	1	1	LIN7C	lin-7 homolog C (C. elegans)
hsa-miR-1293	1	0	1	1	1	1	DRAM1	DNA-damage regulated autophagy modulator 1
hsa-miR-1293	1	0	1	0	1	1	FOXJ2	forkhead box J2
hsa-miR-1293	0	0	1	1	1	1	ECHDC1	enoyl CoA hydratase domain containing 1
hsa-miR-1293	0	0	1	1	1	1	HDAC8	histone deacetylase 8
hsa-miR-1293	1	0	1	1	1	1	LRRC59	leucine rich repeat containing 59
hsa-miR-1293	1	0	1	1	1	1	NRP2	neuropilin 2
hsa-miR-1293	0	0	1	0	0	0	APOBR	apolipoprotein B receptor
hsa-miR-1293	1	0	1	0	1	1	PCDHAC1	protocadherin alpha subfamily C, 1
hsa-miR-1293	1	0	1	0	1	1	PCDHAC2	protocadherin alpha subfamily C, 2
hsa-miR-1293	1	0	1	1	1	1	PCDHA1	protocadherin alpha 1
hsa-miR-1293	1	0	1	0	1	1	PCDHA10	protocadherin alpha 10
hsa-miR-1293	1	0	1	0	1	1	PCDHA11	protocadherin alpha 11
hsa-miR-1293	1	0	1	0	1	1	PCDHA12	protocadherin alpha 12
hsa-miR-1293	1	0	1	1	1	1	PCDHA2	protocadherin alpha 2
hsa-miR-1293	1	0	1	1	1	1	PCDHA3	protocadherin alpha 3
hsa-miR-1293	1	0	1	1	1	1	PCDHA6	protocadherin alpha 6
hsa-miR-1293	1	0	1	0	1	1	PCDHA7	protocadherin alpha 7
hsa-miR-1293	1	0	1	1	1	1	PCDHA8	protocadherin alpha 8
hsa-miR-1293	0	0	1	1	1	1	ANKRD16	ankyrin repeat domain 16
hsa-miR-1293	1	0	1	1	1	1	DLL4	delta-like 4 (Drosophila)
hsa-miR-1293	1	0	1	1	1	1	SEPT3	septin 3
hsa-miR-1293	1	0	1	0	1	1	SLAMF8	SLAM family member 8
hsa-miR-1293	1	0	1	0	1	1	MNT	MAX binding protein
hsa-miR-1293	0	0	1	1	0	0	PDXP	pyridoxal (pyridoxine, vitamin B6) phosphatase
hsa-miR-1293	0	0	1	1	1	1	PLXDC1	plexin domain containing 1
hsa-miR-1293	1	0	1	0	1	1	DCUN1D1	DCN1, defective in cullin neddylation 1, domain containing 1 (S. cerevisiae)
hsa-miR-1293	0	0	1	0	1	1	ZNF490	zinc finger protein 490
hsa-miR-1293	0	0	1	1	1	1	SHROOM4	shroom family member 4
hsa-miR-1293	1	0	1	1	1	1	USP31	ubiquitin specific peptidase 31
hsa-miR-1293	1	0	1	1	1	1	RNF150	ring finger protein 150
hsa-miR-1293	1	0	1	1	1	1	RGAG1	retrotransposon gag domain containing 1
hsa-miR-1293	1	0	1	0	1	1	SYT4	synaptotagmin IV
hsa-miR-1293	1	0	1	1	1	1	HOMEZ	homeobox and leucine zipper encoding
hsa-miR-1293	0	0	1	1	0	0	CTAG2	cancer/testis antigen 2
hsa-miR-1293	1	0	1	0	1	1	RAP2A	RAP2A, member of RAS oncogene family
hsa-miR-1293	0	0	1	1	0	0	HIST1H2AE	histone cluster 1, H2ae
hsa-miR-1293	0	0	1	1	0	0	HIST2H3C	histone cluster 2, H3c
hsa-miR-1293	0	0	1	1	1	1	HIST1H2AG	histone cluster 1, H2ag
hsa-miR-1293	0	0	1	0	0	0	HIST1H2AD	histone cluster 1, H2ad
hsa-miR-1293	1	0	1	1	1	1	CRY2	cryptochrome 2 (photolyase-like)
hsa-miR-1293	0	0	1	1	1	1	RNASEL	ribonuclease L (2',5'-oligoisoadenylate synthetase-dependent)
hsa-miR-1293	0	0	1	1	0	0	TRIB3	tribbles homolog 3 (Drosophila)
hsa-miR-1293	0	0	1	1	1	1	IL22RA1	interleukin 22 receptor, alpha 1
hsa-miR-1293	1	0	1	1	1	1	CLCN6	chloride channel, voltage-sensitive 6
hsa-miR-1293	0	0	1	1	1	1	FANCE	Fanconi anemia, complementation group E
hsa-miR-1293	1	0	1	1	1	1	PPP1R11	protein phosphatase 1, regulatory (inhibitor) subunit 11
hsa-miR-1293	0	0	1	1	1	1	PGM5	phosphoglucomutase 5
hsa-miR-1293	0	0	1	1	0	0	HIST1H4J	histone cluster 1, H4j
hsa-miR-1293	1	0	1	0	1	1	GAN	gigaxonin
hsa-miR-1293	1	0	1	1	1	1	GOLPH3	golgi phosphoprotein 3 (coat-protein)
hsa-miR-1293	0	0	1	1	0	0	MCCC2	methylcrotonoyl-CoA carboxylase 2 (beta)
hsa-miR-1293	1	0	1	1	1	1	HIF3A	hypoxia inducible factor 3, alpha subunit
hsa-miR-1293	1	0	1	1	1	1	SUDS3	suppressor of defective silencing 3 homolog (S. cerevisiae)
hsa-miR-1293	1	0	1	1	1	1	GIGYF1	GRB10 interacting GYF protein 1
hsa-miR-1293	1	0	1	0	1	1	HOXC8	homeobox C8
hsa-miR-1293	1	0	1	1	1	1	PRRX1	paired related homeobox 1
hsa-miR-1293	0	0	1	1	1	1	IQCH	IQ motif containing H
hsa-miR-1293	0	0	1	1	0	0	SELRC1	Sel1 repeat containing 1
hsa-miR-1293	1	0	1	1	1	1	DLK2	delta-like 2 homolog (Drosophila)
hsa-miR-1293	0	0	1	0	1	1	TRPM8	transient receptor potential cation channel, subfamily M, member 8
hsa-miR-1293	0	0	1	1	0	0	ZBED2	zinc finger, BED-type containing 2
hsa-miR-1293	1	0	1	1	1	1	GCC1	GRIP and coiled-coil domain containing 1
hsa-miR-1293	1	0	1	1	1	1	C10orf76	chromosome 10 open reading frame 76
hsa-miR-1293	0	0	1	1	1	1	CXorf36	chromosome X open reading frame 36
hsa-miR-1293	1	0	1	0	1	1	ZFHX4	zinc finger homeobox 4
hsa-miR-1293	1	0	1	0	1	1	MOB3B	MOB kinase activator 3B
hsa-miR-1293	1	0	1	1	0	0	CNTD2	cyclin N-terminal domain containing 2
hsa-miR-1293	0	0	1	1	0	0	TMEM156	transmembrane protein 156
hsa-miR-1293	1	0	1	1	0	0	UBTD1	ubiquitin domain containing 1
hsa-miR-1293	0	0	1	1	0	0	BAIAP2L2	BAI1-associated protein 2-like 2
hsa-miR-1293	1	0	1	1	1	1	FBXO11	F-box protein 11
hsa-miR-1293	1	0	1	1	1	1	OPA3	optic atrophy 3 (autosomal recessive, with chorea and spastic paraplegia)
hsa-miR-1293	1	0	1	0	1	1	EDEM3	ER degradation enhancer, mannosidase alpha-like 3
hsa-miR-1293	0	0	1	1	1	1	BCL2L14	BCL2-like 14 (apoptosis facilitator)
hsa-miR-1293	1	0	1	1	1	1	C6orf62	chromosome 6 open reading frame 62
hsa-miR-1293	1	0	1	0	1	1	SH3BGRL2	SH3 domain binding glutamic acid-rich protein like 2
hsa-miR-1293	1	0	1	0	1	1	ITCH	itchy E3 ubiquitin protein ligase
hsa-miR-1293	0	0	1	1	0	0	GNGT2	guanine nucleotide binding protein (G protein), gamma transducing activity polypeptide 2
hsa-miR-1293	1	0	1	1	1	1	PCDHA9	protocadherin alpha 9
hsa-miR-1293	0	0	1	0	1	1	KRTAP1-5	keratin associated protein 1-5
hsa-miR-1293	1	0	1	0	1	1	FAM172A	family with sequence similarity 172, member A
hsa-miR-1293	1	0	1	1	1	1	ARID5B	AT rich interactive domain 5B (MRF1-like)
hsa-miR-1293	1	0	1	1	1	1	ANTXR1	anthrax toxin receptor 1
hsa-miR-1293	1	0	1	1	1	1	ZNRF1	zinc and ring finger 1, E3 ubiquitin protein ligase
hsa-miR-1293	1	0	1	0	1	1	PSD2	pleckstrin and Sec7 domain containing 2
hsa-miR-1293	0	0	1	1	0	0	PCDH1	protocadherin 1
hsa-miR-1293	0	0	1	1	1	1	KIAA1841	KIAA1841
hsa-miR-1293	1	0	1	1	1	1	PPP1R9B	protein phosphatase 1, regulatory subunit 9B
hsa-miR-1293	1	0	1	0	1	1	INA	internexin neuronal intermediate filament protein, alpha
hsa-miR-1293	1	0	1	0	1	1	C5orf62	chromosome 5 open reading frame 62
hsa-miR-1293	0	0	1	1	0	0	BPIFB1	BPI fold containing family B, member 1
hsa-miR-1293	1	0	1	1	1	1	RASL10B	RAS-like, family 10, member B
hsa-miR-1293	0	0	1	1	0	0	CGB1	chorionic gonadotropin, beta polypeptide 1
hsa-miR-1293	0	0	1	1	0	0	CGB2	chorionic gonadotropin, beta polypeptide 2
hsa-miR-1293	1	0	1	1	0	0	FCHSD1	FCH and double SH3 domains 1
hsa-miR-1293	1	0	1	1	1	1	EPT1	ethanolaminephosphotransferase 1 (CDP-ethanolamine-specific)
hsa-miR-1293	1	0	1	1	1	1	RCSD1	RCSD domain containing 1
hsa-miR-1293	1	0	1	1	1	1	STX1B	syntaxin 1B
hsa-miR-1293	0	0	1	1	0	0	PGLYRP2	peptidoglycan recognition protein 2
hsa-miR-1293	1	0	1	1	1	1	GPRIN1	G protein regulated inducer of neurite outgrowth 1
hsa-miR-1293	0	0	1	1	1	1	PLEKHG4B	pleckstrin homology domain containing, family G (with RhoGef domain) member 4B
hsa-miR-1293	1	0	1	1	1	1	WDFY2	WD repeat and FYVE domain containing 2
hsa-miR-1293	1	0	1	0	1	1	FAM129A	family with sequence similarity 129, member A
hsa-miR-1293	0	0	1	1	1	1	FKBP1B	FK506 binding protein 1B, 12.6 kDa
hsa-miR-1293	1	0	1	1	1	1	NAA15	N(alpha)-acetyltransferase 15, NatA auxiliary subunit
hsa-miR-1293	1	0	1	1	1	1	COL11A2	collagen, type XI, alpha 2
hsa-miR-1293	1	0	1	0	1	1	EDARADD	EDAR-associated death domain
hsa-miR-1293	0	0	1	1	0	0	SRCRB4D	scavenger receptor cysteine rich domain containing, group B (4 domains)
hsa-miR-1293	0	0	1	1	1	1	PABPC5	poly(A) binding protein, cytoplasmic 5
hsa-miR-1293	0	0	1	1	0	0	ASZ1	ankyrin repeat, SAM and basic leucine zipper domain containing 1
hsa-miR-1293	1	0	1	1	1	1	SLC30A7	solute carrier family 30 (zinc transporter), member 7
hsa-miR-1293	1	0	1	1	1	1	SYN1	synapsin I
hsa-miR-1293	1	0	1	1	1	1	MTSS1L	metastasis suppressor 1-like
hsa-miR-1293	0	0	1	1	1	1	MRAP2	melanocortin 2 receptor accessory protein 2
hsa-miR-1293	1	0	1	1	1	1	GLCCI1	glucocorticoid induced transcript 1
hsa-miR-1293	1	0	1	1	1	1	KCTD12	potassium channel tetramerisation domain containing 12
hsa-miR-1293	0	0	1	0	0	0	TM4SF18	transmembrane 4 L six family member 18
hsa-miR-1293	1	0	1	1	1	1	VANGL1	vang-like 1 (van gogh, Drosophila)
hsa-miR-1293	0	0	1	1	0	0	ESAM	endothelial cell adhesion molecule
hsa-miR-1293	1	0	1	1	0	0	SMCR8	Smith-Magenis syndrome chromosome region, candidate 8
hsa-miR-1293	0	0	1	0	1	1	DDIT4L	DNA-damage-inducible transcript 4-like
hsa-miR-1293	0	0	1	1	1	1	FAM100A	family with sequence similarity 100, member A
hsa-miR-1293	0	0	1	0	1	1	SPATA18	spermatogenesis associated 18
hsa-miR-1293	0	0	1	1	1	1	HFE2	hemochromatosis type 2 (juvenile)
hsa-miR-1293	1	0	1	1	1	1	CADM4	cell adhesion molecule 4
hsa-miR-1293	0	0	1	1	1	1	APOBEC3F	apolipoprotein B mRNA editing enzyme, catalytic polypeptide-like 3F
hsa-miR-1293	0	0	1	1	0	0	TMEM217	transmembrane protein 217
hsa-miR-1293	1	0	1	1	1	1	SEPT6	septin 6
hsa-miR-1293	0	0	1	0	1	1	CHKB	choline kinase beta
hsa-miR-1293	0	0	1	1	1	1	TTC30A	tetratricopeptide repeat domain 30A
hsa-miR-1293	1	0	1	1	1	1	FAM123B	family with sequence similarity 123B
hsa-miR-1293	1	0	1	1	1	1	FAM81A	family with sequence similarity 81, member A
hsa-miR-1293	1	0	1	1	1	1	ZNF362	zinc finger protein 362
hsa-miR-1293	1	0	1	0	1	1	ARID2	AT rich interactive domain 2 (ARID, RFX-like)
hsa-miR-1293	0	0	1	1	1	1	GAPT	GRB2-binding adaptor protein, transmembrane
hsa-miR-1293	1	0	1	1	1	1	HEPACAM	hepatic and glial cell adhesion molecule
hsa-miR-1293	1	0	1	0	1	1	ST6GALNAC3	ST6 (alpha-N-acetyl-neuraminyl-2,3-beta-galactosyl-1,3)-N-acetylgalactosaminide alpha-2,6-sialyltransferase 3
hsa-miR-1293	1	0	1	1	1	1	APCDD1	adenomatosis polyposis coli down-regulated 1
hsa-miR-1293	1	0	1	1	1	1	TCEANC2	transcription elongation factor A (SII) N-terminal and central domain containing 2
hsa-miR-1293	1	0	1	1	1	1	C3orf45	chromosome 3 open reading frame 45
hsa-miR-1293	1	0	1	1	1	1	SYT14	synaptotagmin XIV
hsa-miR-1293	1	0	1	1	1	1	TMEM161B	transmembrane protein 161B
hsa-miR-1293	1	0	1	0	1	1	TAPT1	transmembrane anterior posterior transformation 1
hsa-miR-1293	1	0	1	0	1	1	ZCCHC24	zinc finger, CCHC domain containing 24
hsa-miR-1293	0	0	1	1	1	1	MED19	mediator complex subunit 19
hsa-miR-1293	1	0	1	0	1	1	MDGA1	MAM domain containing glycosylphosphatidylinositol anchor 1
hsa-miR-1293	1	0	1	0	1	1	SEMA6D	sema domain, transmembrane domain (TM), and cytoplasmic domain, (semaphorin) 6D
hsa-miR-1293	1	0	1	1	1	1	RC3H1	ring finger and CCCH-type domains 1
hsa-miR-1293	0	0	1	1	1	1	REXO1L1	REX1, RNA exonuclease 1 homolog (S. cerevisiae)-like 1
hsa-miR-1293	0	0	1	1	1	1	KCNH5	potassium voltage-gated channel, subfamily H (eag-related), member 5
hsa-miR-1293	1	0	1	1	1	1	IL28RA	interleukin 28 receptor, alpha (interferon, lambda receptor)
hsa-miR-1293	1	0	1	1	1	1	CCDC117	coiled-coil domain containing 117
hsa-miR-1293	0	0	1	1	1	1	C15orf26	chromosome 15 open reading frame 26
hsa-miR-1293	1	0	1	0	1	1	C3orf58	chromosome 3 open reading frame 58
hsa-miR-1293	1	0	1	0	1	1	PGM2L1	phosphoglucomutase 2-like 1
hsa-miR-1293	0	0	1	1	1	1	CDRT4	CMT1A duplicated region transcript 4
hsa-miR-1293	0	0	1	0	1	1	KRT18P55	keratin 18 pseudogene 55
hsa-miR-1293	0	0	1	1	1	1	SIGLECL1	SIGLEC family like 1
hsa-miR-1293	0	0	1	0	1	1	C5orf64	chromosome 5 open reading frame 64
hsa-miR-1293	0	0	1	1	0	0	C8orf31	chromosome 8 open reading frame 31
hsa-miR-1293	0	0	1	1	1	1	FAM133A	family with sequence similarity 133, member A
hsa-miR-1293	0	0	1	1	1	1	ZCCHC12	zinc finger, CCHC domain containing 12
hsa-miR-1293	0	0	1	1	1	1	C1orf162	chromosome 1 open reading frame 162
hsa-miR-1293	0	0	1	1	0	0	SEC14L4	SEC14-like 4 (S. cerevisiae)
hsa-miR-1293	0	0	1	1	1	1	SESTD1	SEC14 and spectrin domains 1
hsa-miR-1293	1	0	1	1	1	1	FAM134C	family with sequence similarity 134, member C
hsa-miR-1293	0	0	1	1	0	0	NEK8	NIMA (never in mitosis gene a)- related kinase 8
hsa-miR-1293	1	0	1	1	1	1	MB21D2	Mab-21 domain containing 2
hsa-miR-1293	0	0	1	1	1	1	C1orf110	chromosome 1 open reading frame 110
hsa-miR-1293	1	0	1	0	1	1	RTN4RL1	reticulon 4 receptor-like 1
hsa-miR-1293	1	0	1	1	1	1	MTDH	metadherin
hsa-miR-1293	0	0	1	1	1	1	FBXO27	F-box protein 27
hsa-miR-1293	0	0	1	0	1	1	ZNF445	zinc finger protein 445
hsa-miR-1293	1	0	1	1	1	1	TCF20	transcription factor 20 (AR1)
hsa-miR-1293	0	0	1	1	1	1	RFC3	replication factor C (activator 1) 3, 38kDa
hsa-miR-1293	0	0	1	1	0	0	BPIFB4	BPI fold containing family B, member 4
hsa-miR-1293	0	0	1	1	1	1	FLT4	fms-related tyrosine kinase 4
hsa-miR-1293	1	0	1	0	1	1	RIMS4	regulating synaptic membrane exocytosis 4
hsa-miR-1293	1	0	1	1	1	1	SPTY2D1	SPT2, Suppressor of Ty, domain containing 1 (S. cerevisiae)
hsa-miR-1293	0	0	1	0	0	0	IGFL1	IGF-like family member 1
hsa-miR-1293	0	0	1	1	1	1	LHFPL4	lipoma HMGIC fusion partner-like 4
hsa-miR-1293	1	0	1	1	1	1	PTGER3	prostaglandin E receptor 3 (subtype EP3)
hsa-miR-1293	0	0	1	1	1	1	COL25A1	collagen, type XXV, alpha 1
hsa-miR-1293	0	0	1	0	1	1	WASH3P	WAS protein family homolog 3 pseudogene
hsa-miR-1293	1	0	1	1	1	1	TMEM189-UBE2V1	TMEM189-UBE2V1 readthrough
hsa-miR-1293	1	0	1	1	1	1	PPAPDC2	phosphatidic acid phosphatase type 2 domain containing 2
hsa-miR-1293	1	0	1	1	1	1	ATRNL1	attractin-like 1
hsa-miR-1293	1	0	1	1	1	1	SKIDA1	SKI/DACH domain containing 1
hsa-miR-1293	0	0	1	0	0	0	C16orf47	chromosome 16 open reading frame 47
hsa-miR-1293	1	0	1	1	0	0	CD164L2	CD164 sialomucin-like 2
hsa-miR-1293	0	0	1	0	1	1	C1orf229	chromosome 1 open reading frame 229
hsa-miR-1293	0	0	1	0	0	0	TTTY2	testis-specific transcript, Y-linked 2 (non-protein coding)
hsa-miR-1293	0	0	1	0	0	0	TTTY4B	testis-specific transcript, Y-linked 4B (non-protein coding)
hsa-miR-1293	0	0	1	0	0	0	OR7E91P	olfactory receptor, family 7, subfamily E, member 91 pseudogene
hsa-miR-1293	0	0	1	0	0	0	NXF4	nuclear RNA export factor 4 pseudogene
hsa-miR-1293	0	0	1	0	0	0	RPL23AP32	ribosomal protein L23a pseudogene 32
hsa-miR-1293	0	0	1	0	0	0	AOC4	amine oxidase, copper containing 3 (vascular adhesion protein 1) pseudogene
hsa-miR-1293	0	0	1	0	0	0	LOC374443	C-type lectin domain family 2, member D pseudogene
hsa-miR-1293	0	0	1	0	0	0	AQP7P1	aquaporin 7 pseudogene 1
hsa-miR-1293	0	0	1	0	0	0	PTPRVP	protein tyrosine phosphatase, receptor type, V, pseudogene
hsa-miR-1293	0	0	1	0	0	0	SNX29P2	sorting nexin 29 pseudogene 2
hsa-miR-1293	0	0	1	0	0	0	SNORD116-4	small nucleolar RNA, C/D box 116-4
hsa-miR-1293	0	0	1	0	0	0	SNORD116-28	small nucleolar RNA, C/D box 116-28
hsa-miR-1293	1	0	1	1	1	1	CASP2	caspase 2, apoptosis-related cysteine peptidase
hsa-miR-1293	1	0	1	1	1	1	PDE4A	phosphodiesterase 4A, cAMP-specific
hsa-miR-1293	1	0	1	1	1	1	AKAP1	A kinase (PRKA) anchor protein 1
hsa-miR-1293	0	0	1	1	1	1	PEG3	paternally expressed 3
hsa-miR-1293	1	0	1	1	1	1	POU6F1	POU class 6 homeobox 1
