# Supplementary material for: Profiling of Selected MicroRNAs in Proliferative Eutopic Endometrium of Women with Ovarian Endometriosis
Source: Biomed Res Int. 2015 Aug 20;2015:760698. doi: 10.1155/2015/760698 (PMC4558423; doi:10.1155/2015/760698)
Supplement: Supplementary file 1 — Table I: The names of miRNAs significantly differentially expressed between eutopic endometrium of patients with endometriosis vs eutopic endometrium of patients without endometriosis. Table II: The associations between miRNA and mRNA, which presents detailed results of the search of six major databases i.e targetscan, tarbase, miranda, mirbase, mirtarget2 and pictar. [file 760698.f1.zip › 760698.f1/Table II/hsa-miR-1294.tsv]

miR	targetscan	tarbase	miranda	mirbase	mirtarget2	pictar	GeneSymbol	GeneName
hsa-miR-1294	1	0	1	1	0	0	SRCAP	Snf2-related CREBBP activator protein
hsa-miR-1294	1	0	1	0	1	1	KIAA0355	KIAA0355
hsa-miR-1294	1	0	1	1	1	1	PRUNE2	prune homolog 2 (Drosophila)
hsa-miR-1294	1	0	1	0	1	1	PTPRT	protein tyrosine phosphatase, receptor type, T
hsa-miR-1294	1	0	1	0	1	1	KIAA0408	KIAA0408
hsa-miR-1294	1	0	1	1	1	1	NUPL1	nucleoporin like 1
hsa-miR-1294	1	0	1	1	0	0	SEC14L5	SEC14-like 5 (S. cerevisiae)
hsa-miR-1294	0	0	1	1	0	0	PLCH2	phospholipase C, eta 2
hsa-miR-1294	1	0	1	0	1	1	CEP350	centrosomal protein 350kDa
hsa-miR-1294	0	0	1	0	0	0	FAM91A2	family with sequence similarity 91, member A2
hsa-miR-1294	0	0	1	1	1	1	NEU3	sialidase 3 (membrane sialidase)
hsa-miR-1294	1	0	1	1	1	1	BAI3	brain-specific angiogenesis inhibitor 3
hsa-miR-1294	1	0	1	1	1	1	GPATCH8	G patch domain containing 8
hsa-miR-1294	1	0	1	1	1	1	SLC4A7	solute carrier family 4, sodium bicarbonate cotransporter, member 7
hsa-miR-1294	1	0	1	1	1	1	HIPK1	homeodomain interacting protein kinase 1
hsa-miR-1294	0	0	1	1	0	0	ARHGEF2	Rho/Rac guanine nucleotide exchange factor (GEF) 2
hsa-miR-1294	0	0	1	1	1	1	KDM4C	lysine (K)-specific demethylase 4C
hsa-miR-1294	1	0	1	1	1	1	SOGA2	SOGA family member 2
hsa-miR-1294	1	0	1	1	1	1	SEMA4F	sema domain, immunoglobulin domain (Ig), transmembrane domain (TM) and short cytoplasmic domain, (semaphorin) 4F
hsa-miR-1294	1	0	1	1	1	1	BAHD1	bromo adjacent homology domain containing 1
hsa-miR-1294	0	0	1	1	1	1	FASTKD2	FAST kinase domains 2
hsa-miR-1294	0	0	1	1	0	0	FAM149B1	family with sequence similarity 149, member B1
hsa-miR-1294	1	0	1	1	1	1	PRRC2C	proline-rich coiled-coil 2C
hsa-miR-1294	1	0	1	1	1	1	PHF8	PHD finger protein 8
hsa-miR-1294	1	0	1	0	1	1	ODZ2	odz, odd Oz/ten-m homolog 2 (Drosophila)
hsa-miR-1294	1	0	1	1	1	1	RALGAPB	Ral GTPase activating protein, beta subunit (non-catalytic)
hsa-miR-1294	1	0	1	0	1	1	INTS2	integrator complex subunit 2
hsa-miR-1294	0	0	1	1	0	0	TNFRSF12A	tumor necrosis factor receptor superfamily, member 12A
hsa-miR-1294	0	0	1	1	1	1	CA10	carbonic anhydrase X
hsa-miR-1294	1	0	1	1	1	1	PCDH19	protocadherin 19
hsa-miR-1294	1	1	1	1	1	1	NFIA	nuclear factor I/A
hsa-miR-1294	1	0	1	0	0	0	PITPNM2	phosphatidylinositol transfer protein, membrane-associated 2
hsa-miR-1294	1	0	1	0	1	1	SEMA6D	sema domain, transmembrane domain (TM), and cytoplasmic domain, (semaphorin) 6D
hsa-miR-1294	1	0	1	1	1	1	FRAS1	Fraser syndrome 1
hsa-miR-1294	1	0	1	1	0	0	ZSWIM5	zinc finger, SWIM-type containing 5
hsa-miR-1294	1	0	1	1	1	1	FAM214B	family with sequence similarity 214, member B
hsa-miR-1294	1	0	1	0	1	1	LMO3	LIM domain only 3 (rhombotin-like 2)
hsa-miR-1294	1	0	1	1	1	1	INADL	InaD-like (Drosophila)
hsa-miR-1294	1	0	1	0	1	1	IGDCC4	immunoglobulin superfamily, DCC subclass, member 4
hsa-miR-1294	0	0	1	0	0	0	LOC440792	proline dehydrogenase (oxidase) 1 pseudogene
hsa-miR-1294	0	0	1	1	1	1	BHLHB9	basic helix-loop-helix domain containing, class B, 9
hsa-miR-1294	0	0	1	1	1	1	AMBRA1	autophagy/beclin-1 regulator 1
hsa-miR-1294	1	0	1	1	1	1	IKZF4	IKAROS family zinc finger 4 (Eos)
hsa-miR-1294	1	0	1	1	1	1	LCOR	ligand dependent nuclear receptor corepressor
hsa-miR-1294	1	0	1	0	1	1	JPH4	junctophilin 4
hsa-miR-1294	0	0	1	1	0	0	COL27A1	collagen, type XXVII, alpha 1
hsa-miR-1294	1	0	1	1	1	1	AHCTF1	AT hook containing transcription factor 1
hsa-miR-1294	1	0	1	1	1	1	HNRPDL	heterogeneous nuclear ribonucleoprotein D-like
hsa-miR-1294	1	0	1	1	1	1	OXR1	oxidation resistance 1
hsa-miR-1294	1	0	1	0	1	1	SGSM1	small G protein signaling modulator 1
hsa-miR-1294	1	0	1	0	1	1	RNF43	ring finger protein 43
hsa-miR-1294	1	0	1	0	0	0	ZBTB34	zinc finger and BTB domain containing 34
hsa-miR-1294	0	0	1	1	1	1	NELL1	NEL-like 1 (chicken)
hsa-miR-1294	0	0	1	1	1	1	PAK3	p21 protein (Cdc42/Rac)-activated kinase 3
hsa-miR-1294	0	0	1	1	0	0	HELLS	helicase, lymphoid-specific
hsa-miR-1294	0	0	1	1	0	0	IL2RG	interleukin 2 receptor, gamma
hsa-miR-1294	0	0	1	1	0	0	SSPO	SCO-spondin homolog (Bos taurus)
hsa-miR-1294	1	0	1	1	1	1	FAT2	FAT tumor suppressor homolog 2 (Drosophila)
hsa-miR-1294	1	0	1	1	1	1	ADARB1	adenosine deaminase, RNA-specific, B1
hsa-miR-1294	1	0	1	1	1	1	CCNF	cyclin F
hsa-miR-1294	1	0	1	0	1	1	PCDHA13	protocadherin alpha 13
hsa-miR-1294	1	0	1	1	1	1	PCDHA4	protocadherin alpha 4
hsa-miR-1294	1	0	1	1	1	1	RPS6KA3	ribosomal protein S6 kinase, 90kDa, polypeptide 3
hsa-miR-1294	1	0	1	1	1	1	NFYC	nuclear transcription factor Y, gamma
hsa-miR-1294	1	0	1	1	1	1	MKNK2	MAP kinase interacting serine/threonine kinase 2
hsa-miR-1294	1	0	1	1	1	1	DTNA	dystrobrevin, alpha
hsa-miR-1294	1	0	1	0	1	1	PLAG1	pleiomorphic adenoma gene 1
hsa-miR-1294	1	0	1	1	1	1	RASSF5	Ras association (RalGDS/AF-6) domain family member 5
hsa-miR-1294	1	0	1	0	1	1	SLC6A6	solute carrier family 6 (neurotransmitter transporter, taurine), member 6
hsa-miR-1294	0	0	1	0	1	1	NPY1R	neuropeptide Y receptor Y1
hsa-miR-1294	1	0	1	1	1	1	SATB2	SATB homeobox 2
hsa-miR-1294	0	0	1	1	1	1	GTF2IRD1	GTF2I repeat domain containing 1
hsa-miR-1294	1	0	1	0	1	1	CDON	Cdon homolog (mouse)
hsa-miR-1294	1	0	1	1	1	1	GIT1	G protein-coupled receptor kinase interacting ArfGAP 1
hsa-miR-1294	0	0	1	1	0	0	BMP1	bone morphogenetic protein 1
hsa-miR-1294	0	0	1	1	0	0	CFLAR	CASP8 and FADD-like apoptosis regulator
hsa-miR-1294	0	0	1	1	1	1	HLA-DQA1	major histocompatibility complex, class II, DQ alpha 1
hsa-miR-1294	1	0	1	1	0	0	ARRB2	arrestin, beta 2
hsa-miR-1294	1	0	1	1	1	1	CRTAM	cytotoxic and regulatory T cell molecule
hsa-miR-1294	1	0	1	1	1	1	TEAD1	TEA domain family member 1 (SV40 transcriptional enhancer factor)
hsa-miR-1294	0	0	1	1	1	1	SGSH	N-sulfoglucosamine sulfohydrolase
hsa-miR-1294	0	0	1	1	1	1	PLD1	phospholipase D1, phosphatidylcholine-specific
hsa-miR-1294	1	0	1	0	1	1	PDE7B	phosphodiesterase 7B
hsa-miR-1294	1	0	1	1	1	1	MEF2D	myocyte enhancer factor 2D
hsa-miR-1294	0	0	1	0	0	0	MIAT	myocardial infarction associated transcript (non-protein coding)
hsa-miR-1294	0	0	1	1	1	1	PON2	paraoxonase 2
hsa-miR-1294	1	0	1	0	1	1	MLL2	myeloid/lymphoid or mixed-lineage leukemia 2
hsa-miR-1294	1	0	1	0	1	1	PDE4D	phosphodiesterase 4D, cAMP-specific
hsa-miR-1294	1	0	1	1	1	1	CBFA2T2	core-binding factor, runt domain, alpha subunit 2; translocated to, 2
hsa-miR-1294	1	0	1	0	1	1	CELF2	CUGBP, Elav-like family member 2
hsa-miR-1294	0	0	1	1	1	1	CD84	CD84 molecule
hsa-miR-1294	0	0	1	0	1	1	GPR98	G protein-coupled receptor 98
hsa-miR-1294	0	0	1	1	1	1	SC5DL	sterol-C5-desaturase (ERG3 delta-5-desaturase homolog, S. cerevisiae)-like
hsa-miR-1294	0	0	1	1	0	0	SLC38A6	solute carrier family 38, member 6
hsa-miR-1294	1	0	1	1	1	1	AKAP9	A kinase (PRKA) anchor protein (yotiao) 9
hsa-miR-1294	0	0	1	0	0	0	ZNF880	zinc finger protein 880
hsa-miR-1294	0	0	1	1	1	1	BBS9	Bardet-Biedl syndrome 9
hsa-miR-1294	1	0	1	0	1	1	MAP4K4	mitogen-activated protein kinase kinase kinase kinase 4
hsa-miR-1294	0	0	1	1	1	1	SH2D1A	SH2 domain containing 1A
hsa-miR-1294	1	0	1	0	1	1	CD164	CD164 molecule, sialomucin
hsa-miR-1294	0	0	1	1	1	1	MSTO1	misato homolog 1 (Drosophila)
hsa-miR-1294	1	0	1	1	1	1	EDNRB	endothelin receptor type B
hsa-miR-1294	1	0	1	1	1	1	PRUNE	prune homolog (Drosophila)
hsa-miR-1294	0	0	1	1	1	1	DMRT2	doublesex and mab-3 related transcription factor 2
hsa-miR-1294	1	0	1	1	1	1	SORBS1	sorbin and SH3 domain containing 1
hsa-miR-1294	1	0	1	1	1	1	ZNF202	zinc finger protein 202
hsa-miR-1294	1	0	1	1	1	1	ANKRD13A	ankyrin repeat domain 13A
hsa-miR-1294	1	0	1	1	1	1	TACC2	transforming, acidic coiled-coil containing protein 2
hsa-miR-1294	0	0	1	0	0	0	ARL17A	ADP-ribosylation factor-like 17A
hsa-miR-1294	0	0	1	1	1	1	CD28	CD28 molecule
hsa-miR-1294	1	0	1	1	1	1	C21orf91	chromosome 21 open reading frame 91
hsa-miR-1294	0	0	1	0	0	0	TIGD7	tigger transposable element derived 7
hsa-miR-1294	1	0	1	1	1	1	ABI2	abl-interactor 2
hsa-miR-1294	0	0	1	1	1	1	C21orf7	chromosome 21 open reading frame 7
hsa-miR-1294	1	0	1	1	1	1	PUM2	pumilio homolog 2 (Drosophila)
hsa-miR-1294	0	0	1	1	1	1	LRTOMT	leucine rich transmembrane and 0-methyltransferase domain containing
hsa-miR-1294	0	0	1	1	1	1	SCYL1	SCY1-like 1 (S. cerevisiae)
hsa-miR-1294	1	0	1	1	1	1	METTL10	methyltransferase like 10
hsa-miR-1294	1	0	1	1	0	0	ZBTB37	zinc finger and BTB domain containing 37
hsa-miR-1294	1	0	1	1	1	1	VEGFA	vascular endothelial growth factor A
hsa-miR-1294	1	0	1	1	1	1	SPTBN4	spectrin, beta, non-erythrocytic 4
hsa-miR-1294	0	0	1	0	1	1	ZNF302	zinc finger protein 302
hsa-miR-1294	0	0	1	1	0	0	TTTY7	testis-specific transcript, Y-linked 7 (non-protein coding)
hsa-miR-1294	0	0	1	1	1	1	SEMA6C	sema domain, transmembrane domain (TM), and cytoplasmic domain, (semaphorin) 6C
hsa-miR-1294	1	0	1	1	1	1	CALU	calumenin
hsa-miR-1294	1	0	1	1	1	1	BBC3	BCL2 binding component 3
hsa-miR-1294	1	0	1	1	1	1	PBX3	pre-B-cell leukemia homeobox 3
hsa-miR-1294	1	0	1	1	1	1	KCNIP2	Kv channel interacting protein 2
hsa-miR-1294	0	0	1	0	0	0	NBPF10	neuroblastoma breakpoint family, member 10
hsa-miR-1294	0	0	1	1	1	1	WBP2NL	WBP2 N-terminal like
hsa-miR-1294	1	0	1	1	1	1	PSIP1	PC4 and SFRS1 interacting protein 1
hsa-miR-1294	1	0	1	1	1	1	HNRNPU	heterogeneous nuclear ribonucleoprotein U (scaffold attachment factor A)
hsa-miR-1294	1	0	1	1	1	1	CACNB2	calcium channel, voltage-dependent, beta 2 subunit
hsa-miR-1294	0	0	1	1	1	1	SLC2A14	solute carrier family 2 (facilitated glucose transporter), member 14
hsa-miR-1294	0	0	1	1	1	1	PTK7	PTK7 protein tyrosine kinase 7
hsa-miR-1294	1	0	1	0	1	1	IL1RAP	interleukin 1 receptor accessory protein
hsa-miR-1294	1	0	1	0	1	1	DICER1	dicer 1, ribonuclease type III
hsa-miR-1294	0	0	1	1	1	1	GNAS	GNAS complex locus
hsa-miR-1294	0	0	1	1	1	1	MTHFR	methylenetetrahydrofolate reductase (NAD(P)H)
hsa-miR-1294	1	0	1	1	1	1	CACNA2D2	calcium channel, voltage-dependent, alpha 2/delta subunit 2
hsa-miR-1294	1	0	1	1	1	1	PALM2	paralemmin 2
hsa-miR-1294	1	0	1	1	1	1	NRXN3	neurexin 3
hsa-miR-1294	0	0	1	0	1	1	SRPK1	SRSF protein kinase 1
hsa-miR-1294	1	0	1	1	1	1	EMID2	EMI domain containing 2
hsa-miR-1294	1	0	1	1	1	1	PPP3CB	protein phosphatase 3, catalytic subunit, beta isozyme
hsa-miR-1294	0	0	1	1	1	1	PPARG	peroxisome proliferator-activated receptor gamma
hsa-miR-1294	1	0	1	1	1	1	PPP1R9A	protein phosphatase 1, regulatory subunit 9A
hsa-miR-1294	1	0	1	1	1	1	AKAP2	A kinase (PRKA) anchor protein 2
hsa-miR-1294	1	0	1	0	1	1	NFAT5	nuclear factor of activated T-cells 5, tonicity-responsive
hsa-miR-1294	0	0	1	0	0	0	TUG1	taurine upregulated 1 (non-protein coding)
hsa-miR-1294	0	0	1	1	1	1	BANK1	B-cell scaffold protein with ankyrin repeats 1
hsa-miR-1294	1	0	1	1	1	1	BCAP29	B-cell receptor-associated protein 29
hsa-miR-1294	1	0	1	1	1	1	PDPR	pyruvate dehydrogenase phosphatase regulatory subunit
hsa-miR-1294	0	0	1	0	0	0	RNF31	ring finger protein 31
hsa-miR-1294	1	0	1	1	1	1	EIF2C1	eukaryotic translation initiation factor 2C, 1
hsa-miR-1294	1	0	1	1	1	1	PTBP3	polypyrimidine tract binding protein 3
hsa-miR-1294	1	0	1	1	0	0	SMUG1	single-strand-selective monofunctional uracil-DNA glycosylase 1
hsa-miR-1294	1	0	1	1	1	1	KLHDC8B	kelch domain containing 8B
hsa-miR-1294	1	0	1	1	1	1	C12orf23	chromosome 12 open reading frame 23
hsa-miR-1294	1	0	1	1	1	1	PGAP1	post-GPI attachment to proteins 1
hsa-miR-1294	1	0	1	0	1	1	LIN28A	lin-28 homolog A (C. elegans)
hsa-miR-1294	0	0	1	0	0	0	DUXAP10	double homeobox A pseudogene 10
hsa-miR-1294	0	0	1	1	0	0	RPS15A	ribosomal protein S15a
hsa-miR-1294	1	0	1	1	1	1	POMT2	protein-O-mannosyltransferase 2
hsa-miR-1294	0	0	1	0	0	0	LOC284561	uncharacterized LOC284561
hsa-miR-1294	0	0	1	1	0	0	RAD54L2	RAD54-like 2 (S. cerevisiae)
hsa-miR-1294	1	0	1	1	1	1	DERL1	derlin 1
hsa-miR-1294	1	0	1	1	1	1	PPFIA3	protein tyrosine phosphatase, receptor type, f polypeptide (PTPRF), interacting protein (liprin), alpha 3
hsa-miR-1294	0	0	1	0	1	1	FLJ14186	uncharacterized LOC401149
hsa-miR-1294	0	0	1	1	1	1	CXorf57	chromosome X open reading frame 57
hsa-miR-1294	1	0	1	1	1	1	ZNF385A	zinc finger protein 385A
hsa-miR-1294	0	0	1	1	1	1	CYTH4	cytohesin 4
hsa-miR-1294	1	0	1	1	1	1	DYRK2	dual-specificity tyrosine-(Y)-phosphorylation regulated kinase 2
hsa-miR-1294	0	0	1	1	1	1	PPFIBP2	PTPRF interacting protein, binding protein 2 (liprin beta 2)
hsa-miR-1294	0	0	1	0	0	0	KIAA1671	KIAA1671
hsa-miR-1294	1	0	1	1	1	1	DLC1	deleted in liver cancer 1
hsa-miR-1294	1	0	1	0	1	1	CADPS2	Ca++-dependent secretion activator 2
hsa-miR-1294	1	0	1	1	1	1	DENND4C	DENN/MADD domain containing 4C
hsa-miR-1294	0	0	1	0	1	1	HEMK1	HemK methyltransferase family member 1
hsa-miR-1294	0	0	1	1	0	0	ZNF276	zinc finger protein 276
hsa-miR-1294	1	0	1	1	0	0	PRMT8	protein arginine methyltransferase 8
hsa-miR-1294	0	0	1	1	1	1	GTF2H1	general transcription factor IIH, polypeptide 1, 62kDa
hsa-miR-1294	1	0	1	1	1	1	FBXL12	F-box and leucine-rich repeat protein 12
hsa-miR-1294	0	0	1	1	1	1	SUV39H2	suppressor of variegation 3-9 homolog 2 (Drosophila)
hsa-miR-1294	1	0	1	1	1	1	LRP4	low density lipoprotein receptor-related protein 4
hsa-miR-1294	1	0	1	1	1	1	GORASP2	golgi reassembly stacking protein 2, 55kDa
hsa-miR-1294	1	0	1	1	1	1	FOXP1	forkhead box P1
hsa-miR-1294	1	0	1	1	1	1	MARK1	MAP/microtubule affinity-regulating kinase 1
hsa-miR-1294	1	0	1	1	1	1	TMEM2	transmembrane protein 2
hsa-miR-1294	1	0	1	1	1	1	ARHGAP36	Rho GTPase activating protein 36
hsa-miR-1294	0	0	1	0	0	0	KIAA0664L3	KIAA0664-like 3
hsa-miR-1294	0	0	1	1	1	1	C8orf46	chromosome 8 open reading frame 46
hsa-miR-1294	1	0	1	1	1	1	DLGAP4	discs, large (Drosophila) homolog-associated protein 4
hsa-miR-1294	1	0	1	1	1	1	TPM1	tropomyosin 1 (alpha)
hsa-miR-1294	0	0	1	0	0	0	SNHG11	small nucleolar RNA host gene 11 (non-protein coding)
hsa-miR-1294	1	0	1	1	0	0	SH2D3C	SH2 domain containing 3C
hsa-miR-1294	0	0	1	0	0	0	JPX	JPX transcript, XIST activator (non-protein coding)
hsa-miR-1294	0	0	1	1	1	1	SEPT5	septin 5
hsa-miR-1294	1	0	1	1	1	1	SCAMP5	secretory carrier membrane protein 5
hsa-miR-1294	0	0	1	1	0	0	ZNF185	zinc finger protein 185 (LIM domain)
hsa-miR-1294	1	0	1	1	1	1	CLCN5	chloride channel, voltage-sensitive 5
hsa-miR-1294	0	0	1	1	0	0	ACOT8	acyl-CoA thioesterase 8
hsa-miR-1294	0	0	1	0	0	0	LOC255187	hCG1980447
hsa-miR-1294	1	0	1	1	0	0	QARS	glutaminyl-tRNA synthetase
hsa-miR-1294	1	0	1	1	1	1	TLE4	transducin-like enhancer of split 4 (E(sp1) homolog, Drosophila)
hsa-miR-1294	0	0	1	0	0	0	FLJ32742	uncharacterized locus FLJ32742
hsa-miR-1294	0	0	1	1	1	1	MS4A14	membrane-spanning 4-domains, subfamily A, member 14
hsa-miR-1294	0	0	1	1	0	0	AXDND1	axonemal dynein light chain domain containing 1
hsa-miR-1294	1	0	1	1	1	1	ANKRD49	ankyrin repeat domain 49
hsa-miR-1294	0	0	1	1	0	0	PTOV1	prostate tumor overexpressed 1
hsa-miR-1294	0	0	1	1	1	1	FXC1	fracture callus 1 homolog (rat)
hsa-miR-1294	0	0	1	1	0	0	CD37	CD37 molecule
hsa-miR-1294	0	0	1	0	1	1	CCDC68	coiled-coil domain containing 68
hsa-miR-1294	0	0	1	0	0	0	LINC00301	long intergenic non-protein coding RNA 301
hsa-miR-1294	0	0	1	1	0	0	RHBDF2	rhomboid 5 homolog 2 (Drosophila)
hsa-miR-1294	1	0	1	1	1	1	PHF15	PHD finger protein 15
hsa-miR-1294	1	0	1	1	1	1	EIF2AK4	eukaryotic translation initiation factor 2 alpha kinase 4
hsa-miR-1294	0	0	1	1	1	1	PKIB	protein kinase (cAMP-dependent, catalytic) inhibitor beta
hsa-miR-1294	0	0	1	0	1	1	CDHR3	cadherin-related family member 3
hsa-miR-1294	0	0	1	1	1	1	TSEN2	tRNA splicing endonuclease 2 homolog (S. cerevisiae)
hsa-miR-1294	0	0	1	1	0	0	NISCH	nischarin
hsa-miR-1294	1	0	1	1	1	1	PIP4K2C	phosphatidylinositol-5-phosphate 4-kinase, type II, gamma
hsa-miR-1294	0	0	1	0	1	1	TMSB15B	thymosin beta 15B
hsa-miR-1294	0	0	1	1	1	1	CCDC102B	coiled-coil domain containing 102B
hsa-miR-1294	0	0	1	1	0	0	ACOT11	acyl-CoA thioesterase 11
hsa-miR-1294	0	0	1	1	0	0	CTNNBL1	catenin, beta like 1
hsa-miR-1294	0	0	1	0	0	0	SEC14L2	SEC14-like 2 (S. cerevisiae)
hsa-miR-1294	1	0	1	1	1	1	AMMECR1	Alport syndrome, mental retardation, midface hypoplasia and elliptocytosis chromosomal region gene 1
hsa-miR-1294	0	0	1	1	0	0	CDK15	cyclin-dependent kinase 15
hsa-miR-1294	0	0	1	0	0	0	LOC440910	uncharacterized LOC440910
hsa-miR-1294	1	0	1	1	1	1	FBXW2	F-box and WD repeat domain containing 2
hsa-miR-1294	1	0	1	0	1	1	TEF	thyrotrophic embryonic factor
hsa-miR-1294	0	0	1	1	1	1	NRCAM	neuronal cell adhesion molecule
hsa-miR-1294	0	0	1	1	1	1	LZTFL1	leucine zipper transcription factor-like 1
hsa-miR-1294	0	0	1	1	1	1	TGFBI	transforming growth factor, beta-induced, 68kDa
hsa-miR-1294	1	0	1	1	1	1	LRRC57	leucine rich repeat containing 57
hsa-miR-1294	0	0	1	1	1	1	SPOCK1	sparc/osteonectin, cwcv and kazal-like domains proteoglycan (testican) 1
hsa-miR-1294	0	0	1	0	0	0	PART1	prostate androgen-regulated transcript 1 (non-protein coding)
hsa-miR-1294	1	0	1	1	1	1	SYT1	synaptotagmin I
hsa-miR-1294	1	0	1	0	1	1	ARL6IP6	ADP-ribosylation-like factor 6 interacting protein 6
hsa-miR-1294	1	0	1	1	1	1	PTPRU	protein tyrosine phosphatase, receptor type, U
hsa-miR-1294	0	0	1	0	0	0	FLJ37798	uncharacterized LOC401264
hsa-miR-1294	0	0	1	1	0	0	DPAGT1	dolichyl-phosphate (UDP-N-acetylglucosamine) N-acetylglucosaminephosphotransferase 1 (GlcNAc-1-P transferase)
hsa-miR-1294	0	0	1	1	1	1	LRRC34	leucine rich repeat containing 34
hsa-miR-1294	1	0	1	1	1	1	RASGEF1A	RasGEF domain family, member 1A
hsa-miR-1294	0	0	1	1	0	0	HPN	hepsin
hsa-miR-1294	0	0	1	1	1	1	FKRP	fukutin related protein
hsa-miR-1294	0	0	1	1	1	1	SIRPB2	signal-regulatory protein beta 2
hsa-miR-1294	1	0	1	0	1	1	FAM129A	family with sequence similarity 129, member A
hsa-miR-1294	0	0	1	0	0	0	LOC100129858	uncharacterized LOC100129858
hsa-miR-1294	1	0	1	1	1	1	FAM222B	family with sequence similarity 222, member B
hsa-miR-1294	1	0	1	1	1	1	SPATS2	spermatogenesis associated, serine-rich 2
hsa-miR-1294	1	0	1	1	1	1	CECR6	cat eye syndrome chromosome region, candidate 6
hsa-miR-1294	0	0	1	0	0	0	LOC284577	uncharacterized LOC284577
hsa-miR-1294	1	0	1	1	1	1	ZC3H11A	zinc finger CCCH-type containing 11A
hsa-miR-1294	1	0	1	1	1	1	SYNPO2L	synaptopodin 2-like
hsa-miR-1294	1	0	1	1	1	1	GREM1	gremlin 1
hsa-miR-1294	1	0	1	1	1	1	AMT	aminomethyltransferase
hsa-miR-1294	1	0	1	1	1	1	SLITRK2	SLIT and NTRK-like family, member 2
hsa-miR-1294	0	0	1	1	1	1	GNAI2	guanine nucleotide binding protein (G protein), alpha inhibiting activity polypeptide 2
hsa-miR-1294	1	0	1	1	0	0	FBRS	fibrosin
hsa-miR-1294	1	0	1	1	1	1	SYT6	synaptotagmin VI
hsa-miR-1294	1	0	1	1	1	1	EBF3	early B-cell factor 3
hsa-miR-1294	0	0	1	0	0	0	LINC00293	long intergenic non-protein coding RNA 293
hsa-miR-1294	1	0	1	1	1	1	NSUN4	NOP2/Sun domain family, member 4
hsa-miR-1294	1	0	1	1	1	1	PRKAG1	protein kinase, AMP-activated, gamma 1 non-catalytic subunit
hsa-miR-1294	0	0	1	1	1	1	CBWD5	COBW domain containing 5
hsa-miR-1294	0	0	1	1	0	0	PSAPL1	prosaposin-like 1 (gene/pseudogene)
hsa-miR-1294	1	0	1	1	1	1	ST7L	suppression of tumorigenicity 7 like
hsa-miR-1294	0	0	1	0	1	1	TNFAIP8	tumor necrosis factor, alpha-induced protein 8
hsa-miR-1294	0	0	1	0	0	0	CECR7	cat eye syndrome chromosome region, candidate 7 (non-protein coding)
hsa-miR-1294	0	0	1	1	1	1	TRPM7	transient receptor potential cation channel, subfamily M, member 7
hsa-miR-1294	0	0	1	1	1	1	CHCHD1	coiled-coil-helix-coiled-coil-helix domain containing 1
hsa-miR-1294	1	0	1	1	0	0	FBXL19	F-box and leucine-rich repeat protein 19
hsa-miR-1294	1	0	1	1	0	0	DGCR6	DiGeorge syndrome critical region gene 6
hsa-miR-1294	0	0	1	0	0	0	GTF2IP1	general transcription factor IIi, pseudogene 1
hsa-miR-1294	1	0	1	0	1	1	UNC5D	unc-5 homolog D (C. elegans)
hsa-miR-1294	1	0	1	1	1	1	ACSL6	acyl-CoA synthetase long-chain family member 6
hsa-miR-1294	1	0	1	1	1	1	CRMP1	collapsin response mediator protein 1
hsa-miR-1294	1	0	1	1	1	1	LMX1A	LIM homeobox transcription factor 1, alpha
hsa-miR-1294	1	0	1	1	0	0	CACNB3	calcium channel, voltage-dependent, beta 3 subunit
hsa-miR-1294	0	0	1	1	0	0	MX2	myxovirus (influenza virus) resistance 2 (mouse)
hsa-miR-1294	0	0	1	1	0	0	CFP	complement factor properdin
hsa-miR-1294	0	0	1	1	0	0	MARS	methionyl-tRNA synthetase
hsa-miR-1294	0	0	1	1	0	0	DGKA	diacylglycerol kinase, alpha 80kDa
hsa-miR-1294	0	0	1	1	1	1	DNAJC24	DnaJ (Hsp40) homolog, subfamily C, member 24
hsa-miR-1294	1	0	1	1	0	0	KCNC1	potassium voltage-gated channel, Shaw-related subfamily, member 1
hsa-miR-1294	1	0	1	1	1	1	MDGA2	MAM domain containing glycosylphosphatidylinositol anchor 2
hsa-miR-1294	1	0	1	1	1	1	ADAMTS8	ADAM metallopeptidase with thrombospondin type 1 motif, 8
hsa-miR-1294	1	0	1	1	1	1	FAM219A	family with sequence similarity 219, member A
hsa-miR-1294	0	0	1	0	0	0	LOC285043	uncharacterized LOC285043
hsa-miR-1294	0	0	1	1	0	0	NPIP	nuclear pore complex interacting protein
hsa-miR-1294	1	0	1	1	1	1	ABR	active BCR-related
hsa-miR-1294	1	0	1	1	1	1	DAB2IP	DAB2 interacting protein
hsa-miR-1294	0	0	1	0	0	0	LINC00282	long intergenic non-protein coding RNA 282
hsa-miR-1294	0	0	1	1	0	0	PPP1R18	protein phosphatase 1, regulatory subunit 18
hsa-miR-1294	1	0	1	1	1	1	SGIP1	SH3-domain GRB2-like (endophilin) interacting protein 1
hsa-miR-1294	1	0	1	1	0	0	GXYLT1	glucoside xylosyltransferase 1
hsa-miR-1294	0	0	1	0	1	1	PRELID2	PRELI domain containing 2
hsa-miR-1294	1	0	1	1	1	1	CTGF	connective tissue growth factor
hsa-miR-1294	0	0	1	1	1	1	CCDC66	coiled-coil domain containing 66
hsa-miR-1294	1	0	1	1	1	1	C15orf52	chromosome 15 open reading frame 52
hsa-miR-1294	0	0	1	1	1	1	CYB5D1	cytochrome b5 domain containing 1
hsa-miR-1294	1	0	1	0	0	0	MSL1	male-specific lethal 1 homolog (Drosophila)
hsa-miR-1294	0	0	1	1	1	1	PLOD2	procollagen-lysine, 2-oxoglutarate 5-dioxygenase 2
hsa-miR-1294	0	0	1	0	1	1	CTBP1-AS1	CTBP1 antisense RNA 1
hsa-miR-1294	0	0	1	1	0	0	RPRD2	regulation of nuclear pre-mRNA domain containing 2
hsa-miR-1294	1	0	1	1	1	1	TP53INP1	tumor protein p53 inducible nuclear protein 1
hsa-miR-1294	1	0	1	1	1	1	CHD5	chromodomain helicase DNA binding protein 5
hsa-miR-1294	0	0	1	1	0	0	C20orf141	chromosome 20 open reading frame 141
hsa-miR-1294	0	0	1	1	0	0	FSIP2	fibrous sheath interacting protein 2
hsa-miR-1294	1	0	1	1	0	0	ATXN7L3	ataxin 7-like 3
hsa-miR-1294	1	0	1	1	1	1	CSRNP3	cysteine-serine-rich nuclear protein 3
hsa-miR-1294	1	0	1	1	1	1	PIK3R1	phosphoinositide-3-kinase, regulatory subunit 1 (alpha)
hsa-miR-1294	1	0	1	1	0	0	SPEG	SPEG complex locus
hsa-miR-1294	0	0	1	1	0	0	SPATS1	spermatogenesis associated, serine-rich 1
hsa-miR-1294	1	0	1	1	1	1	DLG2	discs, large homolog 2 (Drosophila)
hsa-miR-1294	0	0	1	1	1	1	SZT2	seizure threshold 2 homolog (mouse)
hsa-miR-1294	1	0	1	1	1	1	C14orf28	chromosome 14 open reading frame 28
hsa-miR-1294	1	0	1	1	0	0	SNX30	sorting nexin family member 30
hsa-miR-1294	0	0	1	1	1	1	USP4	ubiquitin specific peptidase 4 (proto-oncogene)
hsa-miR-1294	0	0	1	1	0	0	FAM54B	family with sequence similarity 54, member B
hsa-miR-1294	1	0	1	1	1	1	MFSD6	major facilitator superfamily domain containing 6
hsa-miR-1294	1	0	1	1	0	0	MRVI1	murine retrovirus integration site 1 homolog
hsa-miR-1294	0	0	1	1	1	1	PIN4	protein (peptidylprolyl cis/trans isomerase) NIMA-interacting, 4 (parvulin)
hsa-miR-1294	0	0	1	0	0	0	LOC100128262	uncharacterized LOC100128262
hsa-miR-1294	1	0	1	0	1	1	FNDC3B	fibronectin type III domain containing 3B
hsa-miR-1294	0	0	1	1	0	0	NCF1	neutrophil cytosolic factor 1
hsa-miR-1294	0	0	1	0	0	0	TRAV20	T cell receptor alpha variable 20
hsa-miR-1294	1	0	1	1	1	1	AFAP1	actin filament associated protein 1
hsa-miR-1294	0	0	1	0	1	1	LOC401321	uncharacterized LOC401321
hsa-miR-1294	1	0	1	0	1	1	YOD1	YOD1 OTU deubiquinating enzyme 1 homolog (S. cerevisiae)
hsa-miR-1294	1	0	1	0	1	1	KDM2A	lysine (K)-specific demethylase 2A
hsa-miR-1294	1	0	1	0	1	1	USP37	ubiquitin specific peptidase 37
hsa-miR-1294	0	0	1	1	1	1	SHROOM3	shroom family member 3
hsa-miR-1294	0	0	1	0	0	0	LOC100129940	uncharacterized LOC100129940
hsa-miR-1294	0	0	1	0	0	0	EMBP1	embigin pseudogene 1
hsa-miR-1294	1	0	1	0	1	1	CYB561D1	cytochrome b-561 domain containing 1
hsa-miR-1294	1	0	1	1	1	1	PHC2	polyhomeotic homolog 2 (Drosophila)
hsa-miR-1294	0	0	1	0	0	0	PINLYP	phospholipase A2 inhibitor and LY6/PLAUR domain containing
hsa-miR-1294	0	0	1	1	1	1	TBX19	T-box 19
hsa-miR-1294	0	0	1	1	0	0	HEATR8	HEAT repeat containing 8
hsa-miR-1294	0	0	1	0	0	0	FAM27A	family with sequence similarity 27, member A
hsa-miR-1294	0	0	1	0	0	0	LOC494141	mitochondrial carrier triple repeat 1 pseudogene
hsa-miR-1294	0	0	1	0	0	0	LOC399491	GPS, PLAT and transmembrane domain-containing protein
hsa-miR-1294	1	0	1	0	1	1	ESRRG	estrogen-related receptor gamma
hsa-miR-1294	1	0	1	1	1	1	RNF111	ring finger protein 111
hsa-miR-1294	0	0	1	1	0	0	CYP4X1	cytochrome P450, family 4, subfamily X, polypeptide 1
hsa-miR-1294	1	0	1	1	1	1	NEK3	NIMA (never in mitosis gene a)-related kinase 3
hsa-miR-1294	1	0	1	1	1	1	PPP2R5C	protein phosphatase 2, regulatory subunit B', gamma
hsa-miR-1294	0	0	1	1	1	1	ZNF346	zinc finger protein 346
hsa-miR-1294	0	0	1	1	0	0	ZNF730	zinc finger protein 730
hsa-miR-1294	0	0	1	1	1	1	PDE2A	phosphodiesterase 2A, cGMP-stimulated
hsa-miR-1294	1	0	1	0	1	1	ZNF607	zinc finger protein 607
hsa-miR-1294	0	0	1	1	1	1	PHF12	PHD finger protein 12
hsa-miR-1294	0	0	1	1	0	0	ZSCAN18	zinc finger and SCAN domain containing 18
hsa-miR-1294	0	0	1	1	1	1	KAZALD1	Kazal-type serine peptidase inhibitor domain 1
hsa-miR-1294	0	0	1	1	0	0	ANAPC15	anaphase promoting complex subunit 15
hsa-miR-1294	0	0	1	1	1	1	RGS3	regulator of G-protein signaling 3
hsa-miR-1294	1	0	1	1	1	1	ATL2	atlastin GTPase 2
hsa-miR-1294	1	0	1	1	1	1	TBC1D15	TBC1 domain family, member 15
hsa-miR-1294	1	0	1	1	1	1	MEAF6	MYST/Esa1-associated factor 6
hsa-miR-1294	1	0	1	0	1	1	MAP3K3	mitogen-activated protein kinase kinase kinase 3
hsa-miR-1294	1	0	1	1	1	1	COBLL1	COBL-like 1
hsa-miR-1294	1	0	1	1	1	1	WDR20	WD repeat domain 20
hsa-miR-1294	0	0	1	1	1	1	PSMG2	proteasome (prosome, macropain) assembly chaperone 2
hsa-miR-1294	0	0	1	1	1	1	PUS7L	pseudouridylate synthase 7 homolog (S. cerevisiae)-like
hsa-miR-1294	1	0	1	1	1	1	LUC7L3	LUC7-like 3 (S. cerevisiae)
hsa-miR-1294	0	0	1	1	1	1	CCKBR	cholecystokinin B receptor
hsa-miR-1294	1	0	1	1	1	1	DUSP3	dual specificity phosphatase 3
hsa-miR-1294	1	0	1	1	1	1	APBB2	amyloid beta (A4) precursor protein-binding, family B, member 2
hsa-miR-1294	1	0	1	1	1	1	NECAP1	NECAP endocytosis associated 1
hsa-miR-1294	0	0	1	1	0	0	FAM149A	family with sequence similarity 149, member A
hsa-miR-1294	1	0	1	1	1	1	RIF1	RAP1 interacting factor homolog (yeast)
hsa-miR-1294	0	0	1	1	1	1	TFDP2	transcription factor Dp-2 (E2F dimerization partner 2)
hsa-miR-1294	1	0	1	0	1	1	SLC2A3	solute carrier family 2 (facilitated glucose transporter), member 3
hsa-miR-1294	0	0	1	0	0	0	POM121L9P	POM121 transmembrane nucleoporin-like 9, pseudogene
hsa-miR-1294	0	0	1	0	0	0	POM121L8P	POM121 transmembrane nucleoporin-like 8 pseudogene
hsa-miR-1294	1	0	1	0	1	1	DCDC2	doublecortin domain containing 2
hsa-miR-1294	0	0	1	1	1	1	KIDINS220	kinase D-interacting substrate, 220kDa
hsa-miR-1294	0	0	1	1	0	0	H2AFJ	H2A histone family, member J
hsa-miR-1294	1	0	1	1	1	1	MLLT6	myeloid/lymphoid or mixed-lineage leukemia (trithorax homolog, Drosophila); translocated to, 6
hsa-miR-1294	0	0	1	0	0	0	TPTE2P6	transmembrane phosphoinositide 3-phosphatase and tensin homolog 2 pseudogene 6
hsa-miR-1294	0	0	1	1	0	0	DNAI2	dynein, axonemal, intermediate chain 2
hsa-miR-1294	1	0	1	1	1	1	ERI1	exoribonuclease 1
hsa-miR-1294	1	0	1	1	1	1	KIAA1033	KIAA1033
hsa-miR-1294	1	0	1	0	1	1	GPR85	G protein-coupled receptor 85
hsa-miR-1294	1	0	1	1	1	1	CTTNBP2NL	CTTNBP2 N-terminal like
hsa-miR-1294	1	0	1	1	0	0	FAM108C1	family with sequence similarity 108, member C1
hsa-miR-1294	1	0	1	1	1	1	MSANTD2	Myb/SANT-like DNA-binding domain containing 2
hsa-miR-1294	1	0	1	0	1	1	BRPF1	bromodomain and PHD finger containing, 1
hsa-miR-1294	1	0	1	1	1	1	TMEFF1	transmembrane protein with EGF-like and two follistatin-like domains 1
hsa-miR-1294	0	0	1	1	0	0	KRBA1	KRAB-A domain containing 1
hsa-miR-1294	0	0	1	0	1	1	GAB3	GRB2-associated binding protein 3
hsa-miR-1294	1	0	1	1	1	1	MTMR10	myotubularin related protein 10
hsa-miR-1294	1	0	1	0	1	1	MPP5	membrane protein, palmitoylated 5 (MAGUK p55 subfamily member 5)
hsa-miR-1294	0	0	1	1	1	1	NEK9	NIMA (never in mitosis gene a)- related kinase 9
hsa-miR-1294	0	0	1	1	0	0	LGI4	leucine-rich repeat LGI family, member 4
hsa-miR-1294	0	0	1	1	1	1	C12orf50	chromosome 12 open reading frame 50
hsa-miR-1294	0	0	1	0	0	0	EPHA1-AS1	EPHA1 antisense RNA 1
hsa-miR-1294	1	0	1	0	1	1	EXOC5	exocyst complex component 5
hsa-miR-1294	1	0	1	1	1	1	CAPRIN2	caprin family member 2
hsa-miR-1294	1	0	1	1	1	1	SLC24A4	solute carrier family 24 (sodium/potassium/calcium exchanger), member 4
hsa-miR-1294	1	0	1	1	1	1	CADM2	cell adhesion molecule 2
hsa-miR-1294	1	0	1	1	1	1	RICTOR	RPTOR independent companion of MTOR, complex 2
hsa-miR-1294	1	0	1	1	1	1	ZNF207	zinc finger protein 207
hsa-miR-1294	1	0	1	0	1	1	KIF21B	kinesin family member 21B
hsa-miR-1294	1	0	1	0	1	1	NR3C1	nuclear receptor subfamily 3, group C, member 1 (glucocorticoid receptor)
hsa-miR-1294	1	0	1	1	1	1	BOLL	bol, boule-like (Drosophila)
hsa-miR-1294	0	0	1	1	1	1	LMAN2L	lectin, mannose-binding 2-like
hsa-miR-1294	0	0	1	0	1	1	PSG1	pregnancy specific beta-1-glycoprotein 1
hsa-miR-1294	1	0	1	1	1	1	PPP3CA	protein phosphatase 3, catalytic subunit, alpha isozyme
hsa-miR-1294	0	0	1	1	0	0	TMEM134	transmembrane protein 134
hsa-miR-1294	1	0	1	1	1	1	IKZF2	IKAROS family zinc finger 2 (Helios)
hsa-miR-1294	0	0	1	0	0	0	PMCHL1	pro-melanin-concentrating hormone-like 1, pseudogene
hsa-miR-1294	0	0	1	0	0	0	PMCHL2	pro-melanin-concentrating hormone-like 2, pseudogene
hsa-miR-1294	0	0	1	1	0	0	ERAP2	endoplasmic reticulum aminopeptidase 2
hsa-miR-1294	1	0	1	1	1	1	GGT7	gamma-glutamyltransferase 7
hsa-miR-1294	0	0	1	1	0	0	DNAH1	dynein, axonemal, heavy chain 1
hsa-miR-1294	0	0	1	1	1	1	IYD	iodotyrosine deiodinase
hsa-miR-1294	1	0	1	1	1	1	TPP1	tripeptidyl peptidase I
hsa-miR-1294	1	0	1	1	1	1	CAMTA1	calmodulin binding transcription activator 1
hsa-miR-1294	0	0	1	1	1	1	GPR114	G protein-coupled receptor 114
hsa-miR-1294	0	0	1	1	1	1	KDELC2	KDEL (Lys-Asp-Glu-Leu) containing 2
hsa-miR-1294	1	0	1	0	1	1	ANKRD28	ankyrin repeat domain 28
hsa-miR-1294	0	0	1	1	1	1	POTEG	POTE ankyrin domain family, member G
hsa-miR-1294	1	0	1	1	1	1	MYNN	myoneurin
hsa-miR-1294	0	0	1	1	1	1	HMBOX1	homeobox containing 1
hsa-miR-1294	0	0	1	1	1	1	UGT2B4	UDP glucuronosyltransferase 2 family, polypeptide B4
hsa-miR-1294	1	0	1	1	1	1	MECP2	methyl CpG binding protein 2 (Rett syndrome)
hsa-miR-1294	0	0	1	1	0	0	ASB16	ankyrin repeat and SOCS box containing 16
hsa-miR-1294	0	0	1	0	1	1	RAB18	RAB18, member RAS oncogene family
hsa-miR-1294	0	0	1	1	0	0	DHRS4	dehydrogenase/reductase (SDR family) member 4
hsa-miR-1294	0	0	1	1	1	1	SMPD1	sphingomyelin phosphodiesterase 1, acid lysosomal
hsa-miR-1294	1	0	1	1	1	1	QKI	QKI, KH domain containing, RNA binding
hsa-miR-1294	1	0	1	1	0	0	TAF4B	TAF4b RNA polymerase II, TATA box binding protein (TBP)-associated factor, 105kDa
hsa-miR-1294	0	0	1	1	0	0	NBPF8	neuroblastoma breakpoint family, member 8
hsa-miR-1294	0	0	1	1	0	0	KLK4	kallikrein-related peptidase 4
hsa-miR-1294	1	0	1	1	1	1	TBC1D22B	TBC1 domain family, member 22B
hsa-miR-1294	0	0	1	1	1	1	IL23R	interleukin 23 receptor
hsa-miR-1294	0	0	1	1	0	0	DGUOK	deoxyguanosine kinase
hsa-miR-1294	1	0	1	1	1	1	AZI2	5-azacytidine induced 2
hsa-miR-1294	0	0	1	1	1	1	TMOD1	tropomodulin 1
hsa-miR-1294	0	0	1	1	1	1	TUFT1	tuftelin 1
hsa-miR-1294	0	0	1	1	0	0	HEXIM2	hexamethylene bis-acetamide inducible 2
hsa-miR-1294	1	0	1	1	1	1	NUMA1	nuclear mitotic apparatus protein 1
hsa-miR-1294	0	0	1	1	1	1	RABL5	RAB, member RAS oncogene family-like 5
hsa-miR-1294	1	0	1	0	1	1	CGGBP1	CGG triplet repeat binding protein 1
hsa-miR-1294	0	0	1	1	1	1	ZNF589	zinc finger protein 589
hsa-miR-1294	1	0	1	1	1	1	POU2F2	POU class 2 homeobox 2
hsa-miR-1294	0	0	1	0	0	0	MGC13053	uncharacterized MGC13053
hsa-miR-1294	1	0	1	1	0	0	EIF4A1	eukaryotic translation initiation factor 4A1
hsa-miR-1294	0	0	1	1	1	1	KIRREL2	kin of IRRE like 2 (Drosophila)
hsa-miR-1294	0	0	1	1	1	1	LHPP	phospholysine phosphohistidine inorganic pyrophosphate phosphatase
hsa-miR-1294	0	0	1	1	1	1	ACPP	acid phosphatase, prostate
hsa-miR-1294	0	0	1	1	1	1	C1orf94	chromosome 1 open reading frame 94
hsa-miR-1294	1	0	1	1	1	1	UBE2O	ubiquitin-conjugating enzyme E2O
hsa-miR-1294	1	0	1	1	1	1	LMBR1L	limb region 1 homolog (mouse)-like
hsa-miR-1294	1	0	1	1	0	0	MARCH9	membrane-associated ring finger (C3HC4) 9
hsa-miR-1294	1	0	1	1	1	1	GSPT1	G1 to S phase transition 1
hsa-miR-1294	1	0	1	1	0	0	IQSEC1	IQ motif and Sec7 domain 1
hsa-miR-1294	1	0	1	1	1	1	ZFAND5	zinc finger, AN1-type domain 5
hsa-miR-1294	1	0	1	1	1	1	TRIM2	tripartite motif containing 2
hsa-miR-1294	0	0	1	1	1	1	GNL3L	guanine nucleotide binding protein-like 3 (nucleolar)-like
hsa-miR-1294	0	0	1	0	0	0	GRAMD1B	GRAM domain containing 1B
hsa-miR-1294	0	0	1	0	1	1	GDE1	glycerophosphodiester phosphodiesterase 1
hsa-miR-1294	0	0	1	1	0	0	HAVCR1	hepatitis A virus cellular receptor 1
hsa-miR-1294	0	0	1	1	1	1	KLHL29	kelch-like 29 (Drosophila)
hsa-miR-1294	0	0	1	1	0	0	PTPMT1	protein tyrosine phosphatase, mitochondrial 1
hsa-miR-1294	1	0	1	1	1	1	ETF1	eukaryotic translation termination factor 1
hsa-miR-1294	0	0	1	1	1	1	TOMM40L	translocase of outer mitochondrial membrane 40 homolog (yeast)-like
hsa-miR-1294	0	0	1	0	0	0	MGC21881	uncharacterized locus MGC21881
hsa-miR-1294	0	0	1	0	0	0	KLHL15	kelch-like 15 (Drosophila)
hsa-miR-1294	0	0	1	1	0	0	MAST2	microtubule associated serine/threonine kinase 2
hsa-miR-1294	0	0	1	0	1	1	ZNF37A	zinc finger protein 37A
hsa-miR-1294	1	0	1	0	1	1	NR1D2	nuclear receptor subfamily 1, group D, member 2
hsa-miR-1294	1	0	1	1	1	1	FAM176A	family with sequence similarity 176, member A
hsa-miR-1294	0	0	1	1	1	1	RAB37	RAB37, member RAS oncogene family
hsa-miR-1294	0	0	1	1	1	1	POLR3F	polymerase (RNA) III (DNA directed) polypeptide F, 39 kDa
hsa-miR-1294	1	0	1	1	1	1	NRF1	nuclear respiratory factor 1
hsa-miR-1294	1	0	1	0	1	1	ICMT	isoprenylcysteine carboxyl methyltransferase
hsa-miR-1294	0	0	1	1	0	0	ZDHHC6	zinc finger, DHHC-type containing 6
hsa-miR-1294	0	0	1	1	0	0	ZBTB32	zinc finger and BTB domain containing 32
hsa-miR-1294	0	0	1	0	0	0	LOC100144602	uncharacterized LOC100144602
hsa-miR-1294	0	0	1	1	1	1	RDH11	retinol dehydrogenase 11 (all-trans/9-cis/11-cis)
hsa-miR-1294	0	0	1	1	1	1	TARP	TCR gamma alternate reading frame protein
hsa-miR-1294	1	0	1	1	1	1	KIAA1217	KIAA1217
hsa-miR-1294	0	0	1	0	1	1	TP53RK	TP53 regulating kinase
hsa-miR-1294	0	0	1	0	0	0	LOC283693	actin, alpha 2, smooth muscle, aorta pseudogene
hsa-miR-1294	1	0	1	1	1	1	TM9SF4	transmembrane 9 superfamily protein member 4
hsa-miR-1294	1	0	1	1	1	1	SCML4	sex comb on midleg-like 4 (Drosophila)
hsa-miR-1294	0	0	1	1	0	0	CA5BP1	carbonic anhydrase VB pseudogene 1
hsa-miR-1294	0	0	1	0	0	0	FAM92A1P2	family with sequence similarity 92, member A3
hsa-miR-1294	1	0	1	1	1	1	SPOCK2	sparc/osteonectin, cwcv and kazal-like domains proteoglycan (testican) 2
hsa-miR-1294	0	0	1	0	0	0	SNX29P2	sorting nexin 29 pseudogene 2
hsa-miR-1294	1	0	1	1	1	1	FAM213A	family with sequence similarity 213, member A
hsa-miR-1294	1	0	1	1	1	1	ZNF200	zinc finger protein 200
hsa-miR-1294	0	0	1	1	0	0	GALNTL5	UDP-N-acetyl-alpha-D-galactosamine:polypeptide N-acetylgalactosaminyltransferase-like 5
hsa-miR-1294	1	0	1	1	1	1	NIPA1	non imprinted in Prader-Willi/Angelman syndrome 1
hsa-miR-1294	1	0	1	1	1	1	DDX6	DEAD (Asp-Glu-Ala-Asp) box helicase 6
hsa-miR-1294	1	0	1	1	1	1	ZDHHC5	zinc finger, DHHC-type containing 5
hsa-miR-1294	0	0	1	0	0	0	EVPLL	envoplakin-like
hsa-miR-1294	0	0	1	0	0	0	LOC400891	chromosome 14 open reading frame 166B pseudogene
hsa-miR-1294	0	0	1	0	1	1	KIAA0895	KIAA0895
hsa-miR-1294	0	0	1	1	1	1	PIP5K1B	phosphatidylinositol-4-phosphate 5-kinase, type I, beta
hsa-miR-1294	1	0	1	1	1	1	EYA4	eyes absent homolog 4 (Drosophila)
hsa-miR-1294	0	0	1	1	1	1	ZNF100	zinc finger protein 100
hsa-miR-1294	0	0	1	0	1	1	FLJ25328	uncharacterized LOC148231
hsa-miR-1294	1	0	1	1	1	1	RCOR3	REST corepressor 3
hsa-miR-1294	0	0	1	1	0	0	KIAA1324	KIAA1324
hsa-miR-1294	1	0	1	1	1	1	ZNF282	zinc finger protein 282
hsa-miR-1294	0	0	1	1	1	1	UBXN1	UBX domain protein 1
hsa-miR-1294	0	0	1	0	0	0	FAM86JP	family with sequence similarity 86, member A pseudogene
hsa-miR-1294	1	0	1	1	1	1	RHOBTB1	Rho-related BTB domain containing 1
hsa-miR-1294	0	0	1	1	0	0	IGFN1	immunoglobulin-like and fibronectin type III domain containing 1
hsa-miR-1294	1	0	1	1	1	1	PCDHA5	protocadherin alpha 5
hsa-miR-1294	1	0	1	1	1	1	RIC8B	resistance to inhibitors of cholinesterase 8 homolog B (C. elegans)
hsa-miR-1294	1	0	1	1	1	1	PML	promyelocytic leukemia
hsa-miR-1294	1	0	1	0	1	1	DDX3Y	DEAD (Asp-Glu-Ala-Asp) box polypeptide 3, Y-linked
hsa-miR-1294	0	0	1	1	1	1	KIF16B	kinesin family member 16B
hsa-miR-1294	1	0	1	1	1	1	NKAIN2	Na+/K+ transporting ATPase interacting 2
hsa-miR-1294	1	0	1	1	1	1	GRIA4	glutamate receptor, ionotropic, AMPA 4
hsa-miR-1294	0	0	1	1	0	0	PGS1	phosphatidylglycerophosphate synthase 1
hsa-miR-1294	0	0	1	1	1	1	TMEM139	transmembrane protein 139
hsa-miR-1294	0	0	1	1	1	1	SNAPC3	small nuclear RNA activating complex, polypeptide 3, 50kDa
hsa-miR-1294	1	0	1	1	1	1	ZNF618	zinc finger protein 618
hsa-miR-1294	1	0	1	1	1	1	PEX5L	peroxisomal biogenesis factor 5-like
hsa-miR-1294	0	0	1	1	1	1	TTLL9	tubulin tyrosine ligase-like family, member 9
hsa-miR-1294	1	0	1	1	1	1	SLC38A9	solute carrier family 38, member 9
hsa-miR-1294	1	0	1	1	1	1	LHX8	LIM homeobox 8
hsa-miR-1294	1	0	1	1	1	1	MEIS1	Meis homeobox 1
hsa-miR-1294	1	0	1	1	1	1	ACVR1	activin A receptor, type I
hsa-miR-1294	1	0	1	0	1	1	CLDN12	claudin 12
hsa-miR-1294	0	0	1	0	0	0	MEG3	maternally expressed 3 (non-protein coding)
hsa-miR-1294	1	0	1	1	1	1	BNC2	basonuclin 2
hsa-miR-1294	0	0	1	1	1	1	FAM71F1	family with sequence similarity 71, member F1
hsa-miR-1294	1	0	1	1	1	1	FAM135B	family with sequence similarity 135, member B
hsa-miR-1294	0	0	1	0	0	0	CRYBB2P1	crystallin, beta B2 pseudogene 1
hsa-miR-1294	1	0	1	0	1	1	KIAA0930	KIAA0930
hsa-miR-1294	0	0	1	1	0	0	HSPA14	heat shock 70kDa protein 14
hsa-miR-1294	0	0	1	1	0	0	H2AFZ	H2A histone family, member Z
hsa-miR-1294	1	0	1	1	1	1	FGFR2	fibroblast growth factor receptor 2
hsa-miR-1294	0	0	1	1	1	1	RMI2	RMI2, RecQ mediated genome instability 2, homolog (S. cerevisiae)
hsa-miR-1294	0	0	1	0	0	0	LOC221122	uncharacterized LOC221122
hsa-miR-1294	0	0	1	1	1	1	ZFP90	zinc finger protein 90 homolog (mouse)
hsa-miR-1294	0	0	1	0	0	0	SLC7A11-AS1	SLC7A11 antisense RNA 1
hsa-miR-1294	0	0	1	0	1	1	FAM13B	family with sequence similarity 13, member B
hsa-miR-1294	1	0	1	1	1	1	ARPP21	cAMP-regulated phosphoprotein, 21kDa
hsa-miR-1294	1	0	1	0	1	1	HSPA12A	heat shock 70kDa protein 12A
hsa-miR-1294	0	0	1	0	0	0	LOC154822	uncharacterized LOC154822
hsa-miR-1294	0	0	1	1	0	0	AQP12B	aquaporin 12B
hsa-miR-1294	1	0	1	1	1	1	TNFSF4	tumor necrosis factor (ligand) superfamily, member 4
hsa-miR-1294	1	0	1	0	1	1	DCUN1D4	DCN1, defective in cullin neddylation 1, domain containing 4 (S. cerevisiae)
hsa-miR-1294	0	0	1	1	1	1	ZNF568	zinc finger protein 568
hsa-miR-1294	0	0	1	1	0	0	TEX13A	testis expressed 13A
hsa-miR-1294	0	0	1	0	0	0	MORC2-AS1	MORC2 antisense RNA 1
hsa-miR-1294	0	0	1	0	0	0	LOC338579	ankyrin repeat domain-containing protein 30B pseudogene
hsa-miR-1294	0	0	1	0	0	0	LINC00347	long intergenic non-protein coding RNA 347
hsa-miR-1294	0	0	1	0	0	0	MORF4L2-AS1	MORF4L2 antisense RNA 1
hsa-miR-1294	0	0	1	0	0	0	LOC339260	uncharacterized LOC339260
hsa-miR-1294	1	0	1	1	1	1	RNF145	ring finger protein 145
hsa-miR-1294	1	0	1	0	1	1	PSD3	pleckstrin and Sec7 domain containing 3
hsa-miR-1294	0	0	1	1	1	1	MGC57346	uncharacterized LOC401884
hsa-miR-1294	1	0	1	1	1	1	SENP1	SUMO1/sentrin specific peptidase 1
hsa-miR-1294	1	0	1	1	1	1	CARM1	coactivator-associated arginine methyltransferase 1
hsa-miR-1294	0	0	1	1	0	0	LILRA1	leukocyte immunoglobulin-like receptor, subfamily A (with TM domain), member 1
hsa-miR-1294	0	0	1	1	1	1	P2RX6	purinergic receptor P2X, ligand-gated ion channel, 6
hsa-miR-1294	0	0	1	0	0	0	LOC348120	uncharacterized LOC348120
hsa-miR-1294	0	0	1	1	1	1	ANKDD1A	ankyrin repeat and death domain containing 1A
hsa-miR-1294	1	0	1	1	1	1	RTKN2	rhotekin 2
hsa-miR-1294	1	0	1	1	1	1	PALD1	phosphatase domain containing, paladin 1
hsa-miR-1294	1	0	1	1	1	1	PTPRG	protein tyrosine phosphatase, receptor type, G
hsa-miR-1294	0	0	1	0	1	1	ITGA1	integrin, alpha 1
hsa-miR-1294	1	0	1	1	1	1	RECK	reversion-inducing-cysteine-rich protein with kazal motifs
hsa-miR-1294	1	0	1	1	1	1	TMPO	thymopoietin
hsa-miR-1294	1	0	1	1	1	1	PCGF5	polycomb group ring finger 5
hsa-miR-1294	1	0	1	1	1	1	SCUBE3	signal peptide, CUB domain, EGF-like 3
hsa-miR-1294	0	0	1	0	0	0	LINC00265	long intergenic non-protein coding RNA 265
hsa-miR-1294	1	0	1	1	0	0	DALRD3	DALR anticodon binding domain containing 3
hsa-miR-1294	1	0	1	1	1	1	ATP8B4	ATPase, class I, type 8B, member 4
hsa-miR-1294	1	0	1	1	1	1	KLHL28	kelch-like 28 (Drosophila)
hsa-miR-1294	1	0	1	0	1	1	LYSMD3	LysM, putative peptidoglycan-binding, domain containing 3
hsa-miR-1294	0	0	1	1	0	0	GMFG	glia maturation factor, gamma
hsa-miR-1294	1	0	1	1	1	1	RPUSD3	RNA pseudouridylate synthase domain containing 3
hsa-miR-1294	1	0	1	1	0	0	ANKRD13B	ankyrin repeat domain 13B
hsa-miR-1294	0	0	1	1	0	0	AGAP11	ankyrin repeat and GTPase domain Arf GTPase activating protein 11
hsa-miR-1294	1	0	1	1	0	0	MANEAL	mannosidase, endo-alpha-like
hsa-miR-1294	0	0	1	1	0	0	PDSS1	prenyl (decaprenyl) diphosphate synthase, subunit 1
hsa-miR-1294	0	0	1	1	0	0	ADORA3	adenosine A3 receptor
hsa-miR-1294	0	0	1	0	0	0	LOC158435	uncharacterized LOC158435
hsa-miR-1294	1	0	1	1	1	1	IARS	isoleucyl-tRNA synthetase
hsa-miR-1294	1	0	1	1	1	1	VTCN1	V-set domain containing T cell activation inhibitor 1
hsa-miR-1294	0	0	1	1	1	1	ZNF189	zinc finger protein 189
hsa-miR-1294	0	0	1	1	0	0	TTYH1	tweety homolog 1 (Drosophila)
hsa-miR-1294	0	0	1	0	0	0	KANSL1-AS1	KANSL1 antisense RNA 1
hsa-miR-1294	1	0	1	1	1	1	CKAP2	cytoskeleton associated protein 2
hsa-miR-1294	1	0	1	1	1	1	NRSN1	neurensin 1
hsa-miR-1294	1	0	1	1	1	1	FAM129B	family with sequence similarity 129, member B
hsa-miR-1294	0	0	1	0	0	0	ZNF66P	zinc finger protein 66, pseudogene
hsa-miR-1294	0	0	1	1	1	1	SLAMF1	signaling lymphocytic activation molecule family member 1
hsa-miR-1294	1	0	1	1	1	1	PDCD6IP	programmed cell death 6 interacting protein
hsa-miR-1294	1	0	1	1	1	1	LINGO1	leucine rich repeat and Ig domain containing 1
hsa-miR-1294	0	0	1	1	0	0	KLK15	kallikrein-related peptidase 15
hsa-miR-1294	0	0	1	1	1	1	C21orf62	chromosome 21 open reading frame 62
hsa-miR-1294	0	0	1	1	0	0	CYP4F30P	cytochrome P450, family 4, subfamily F, polypeptide 30, pseudogene
hsa-miR-1294	1	0	1	1	1	1	AHR	aryl hydrocarbon receptor
hsa-miR-1294	1	0	1	0	1	1	TGFBR1	transforming growth factor, beta receptor 1
hsa-miR-1294	1	0	1	1	1	1	FARP1	FERM, RhoGEF (ARHGEF) and pleckstrin domain protein 1 (chondrocyte-derived)
hsa-miR-1294	0	0	1	1	1	1	TNFSF12	tumor necrosis factor (ligand) superfamily, member 12
hsa-miR-1294	0	0	1	1	1	1	SOX15	SRY (sex determining region Y)-box 15
hsa-miR-1294	0	0	1	1	0	0	S100A1	S100 calcium binding protein A1
hsa-miR-1294	1	0	1	1	1	1	OPCML	opioid binding protein/cell adhesion molecule-like
hsa-miR-1294	0	0	1	1	1	1	C3orf67	chromosome 3 open reading frame 67
hsa-miR-1294	1	0	1	0	1	1	AMMECR1L	AMME chromosomal region gene 1-like
hsa-miR-1294	0	0	1	0	0	0	LOC554249	uncharacterized LOC554249
hsa-miR-1294	1	0	1	1	1	1	HNRNPC	heterogeneous nuclear ribonucleoprotein C (C1/C2)
hsa-miR-1294	0	0	1	0	0	0	FRG1B	FSHD region gene 1 family, member B
hsa-miR-1294	1	0	1	1	1	1	ACVR2B	activin A receptor, type IIB
hsa-miR-1294	1	0	1	1	1	1	OTUD5	OTU domain containing 5
hsa-miR-1294	0	0	1	1	1	1	SPHKAP	SPHK1 interactor, AKAP domain containing
hsa-miR-1294	1	0	1	1	1	1	GABRB2	gamma-aminobutyric acid (GABA) A receptor, beta 2
hsa-miR-1294	0	0	1	0	0	0	FBXL19-AS1	FBXL19 antisense RNA 1 (head to head)
hsa-miR-1294	1	0	1	1	1	1	PNISR	PNN-interacting serine/arginine-rich protein
hsa-miR-1294	0	0	1	0	0	0	FAM86C2P	family with sequence similarity 86, member A pseudogene
hsa-miR-1294	1	0	1	1	1	1	TET2	tet methylcytosine dioxygenase 2
hsa-miR-1294	0	0	1	0	0	0	INTS4L1	integrator complex subunit 4-like 1
hsa-miR-1294	1	0	1	0	1	1	ROBO1	roundabout, axon guidance receptor, homolog 1 (Drosophila)
hsa-miR-1294	1	0	1	1	1	1	PAX3	paired box 3
hsa-miR-1294	1	0	1	1	1	1	TNS1	tensin 1
hsa-miR-1294	1	0	1	1	1	1	KIAA1324L	KIAA1324-like
hsa-miR-1294	1	0	1	1	1	1	ZNF827	zinc finger protein 827
hsa-miR-1294	1	0	1	0	1	1	PRDM10	PR domain containing 10
hsa-miR-1294	1	0	1	1	1	1	GRIA3	glutamate receptor, ionotropic, AMPA 3
hsa-miR-1294	0	0	1	1	0	0	SOCS7	suppressor of cytokine signaling 7
hsa-miR-1294	0	0	1	1	0	0	RGSL1	regulator of G-protein signaling like 1
hsa-miR-1294	0	0	1	1	0	0	HOXD12	homeobox D12
hsa-miR-1294	0	0	1	0	0	0	EEF1DP3	eukaryotic translation elongation factor 1 delta pseudogene 3
hsa-miR-1294	1	0	1	0	1	1	FBXO10	F-box protein 10
hsa-miR-1294	1	0	1	0	1	1	LRCH2	leucine-rich repeats and calponin homology (CH) domain containing 2
hsa-miR-1294	1	0	1	0	1	1	CAMSAP2	calmodulin regulated spectrin-associated protein family, member 2
hsa-miR-1294	1	0	1	1	1	1	RNF207	ring finger protein 207
hsa-miR-1294	0	0	1	1	1	1	HSF2	heat shock transcription factor 2
hsa-miR-1294	1	0	1	0	1	1	SEMA4G	sema domain, immunoglobulin domain (Ig), transmembrane domain (TM) and short cytoplasmic domain, (semaphorin) 4G
hsa-miR-1294	1	0	1	1	1	1	MLLT10	myeloid/lymphoid or mixed-lineage leukemia (trithorax homolog, Drosophila); translocated to, 10
hsa-miR-1294	0	0	1	0	1	1	PIK3C2G	phosphatidylinositol-4-phosphate 3-kinase, catalytic subunit type 2 gamma
hsa-miR-1294	0	0	1	0	0	0	FAM225B	family with sequence similarity 225, member B (non-protein coding)
hsa-miR-1294	1	0	1	0	1	1	FAM196A	family with sequence similarity 196, member A
hsa-miR-1294	1	0	1	1	1	1	NIPAL2	NIPA-like domain containing 2
hsa-miR-1294	1	0	1	0	1	1	TTC7B	tetratricopeptide repeat domain 7B
hsa-miR-1294	1	0	1	0	1	1	GNS	glucosamine (N-acetyl)-6-sulfatase
hsa-miR-1294	1	0	1	1	1	1	MKLN1	muskelin 1, intracellular mediator containing kelch motifs
hsa-miR-1294	1	0	1	1	0	0	RGS6	regulator of G-protein signaling 6
hsa-miR-1294	1	0	1	1	0	0	KRT80	keratin 80
hsa-miR-1294	0	0	1	0	0	0	DKFZp686D0853	uncharacterized LOC401613
hsa-miR-1294	1	0	1	1	1	1	ATP2B4	ATPase, Ca++ transporting, plasma membrane 4
hsa-miR-1294	0	0	1	1	1	1	NUP54	nucleoporin 54kDa
hsa-miR-1294	0	0	1	1	1	1	DSG3	desmoglein 3
hsa-miR-1294	0	0	1	1	1	1	CRB1	crumbs homolog 1 (Drosophila)
hsa-miR-1294	1	0	1	1	1	1	RAB30	RAB30, member RAS oncogene family
hsa-miR-1294	1	0	1	0	1	1	FAM73A	family with sequence similarity 73, member A
hsa-miR-1294	0	0	1	0	1	1	PRH2	proline-rich protein HaeIII subfamily 2
hsa-miR-1294	0	0	1	0	1	1	THAP6	THAP domain containing 6
hsa-miR-1294	0	0	1	1	1	1	NIPSNAP3B	nipsnap homolog 3B (C. elegans)
hsa-miR-1294	0	0	1	1	0	0	PRKCQ	protein kinase C, theta
hsa-miR-1294	0	0	1	1	0	0	LRR1	leucine rich repeat protein 1
hsa-miR-1294	1	0	1	1	1	1	PPFIA1	protein tyrosine phosphatase, receptor type, f polypeptide (PTPRF), interacting protein (liprin), alpha 1
hsa-miR-1294	0	0	1	1	1	1	CCNT2	cyclin T2
hsa-miR-1294	1	0	1	1	1	1	NFIB	nuclear factor I/B
hsa-miR-1294	1	0	1	1	1	1	NAV1	neuron navigator 1
hsa-miR-1294	1	0	1	0	1	1	KLHL24	kelch-like 24 (Drosophila)
hsa-miR-1294	1	0	1	1	1	1	RDX	radixin
hsa-miR-1294	1	0	1	1	1	1	PTER	phosphotriesterase related
hsa-miR-1294	1	0	1	1	1	1	FAM179B	family with sequence similarity 179, member B
hsa-miR-1294	0	0	1	1	1	1	PRPSAP2	phosphoribosyl pyrophosphate synthetase-associated protein 2
hsa-miR-1294	1	0	1	1	1	1	HIC2	hypermethylated in cancer 2
hsa-miR-1294	0	0	1	0	1	1	GINS3	GINS complex subunit 3 (Psf3 homolog)
hsa-miR-1294	0	0	1	1	0	0	NCAPH2	non-SMC condensin II complex, subunit H2
hsa-miR-1294	1	0	1	1	1	1	ARHGDIA	Rho GDP dissociation inhibitor (GDI) alpha
hsa-miR-1294	1	0	1	1	1	1	ADD2	adducin 2 (beta)
hsa-miR-1294	1	0	1	0	0	0	PLSCR5	phospholipid scramblase family, member 5
hsa-miR-1294	1	0	1	1	1	1	NAGA	N-acetylgalactosaminidase, alpha-
hsa-miR-1294	0	0	1	0	1	1	IDO1	indoleamine 2,3-dioxygenase 1
hsa-miR-1294	1	0	1	0	1	1	STX6	syntaxin 6
hsa-miR-1294	0	0	1	1	1	1	GTPBP3	GTP binding protein 3 (mitochondrial)
hsa-miR-1294	0	0	1	1	1	1	TTC27	tetratricopeptide repeat domain 27
hsa-miR-1294	0	0	1	0	0	0	FLJ30838	uncharacterized LOC400955
hsa-miR-1294	0	0	1	1	0	0	TBC1D22A	TBC1 domain family, member 22A
hsa-miR-1294	1	0	1	1	1	1	DDX19B	DEAD (Asp-Glu-Ala-Asp) box polypeptide 19B
hsa-miR-1294	1	0	1	1	1	1	CLDN11	claudin 11
hsa-miR-1294	0	0	1	1	1	1	DMWD	dystrophia myotonica, WD repeat containing
hsa-miR-1294	0	0	1	1	0	0	PSG8	pregnancy specific beta-1-glycoprotein 8
hsa-miR-1294	1	0	1	1	1	1	C8orf58	chromosome 8 open reading frame 58
hsa-miR-1294	1	0	1	1	1	1	ARL1	ADP-ribosylation factor-like 1
hsa-miR-1294	0	0	1	1	0	0	STAMBP	STAM binding protein
hsa-miR-1294	0	0	1	1	0	0	ITGB3BP	integrin beta 3 binding protein (beta3-endonexin)
hsa-miR-1294	1	0	1	0	1	1	SLCO2A1	solute carrier organic anion transporter family, member 2A1
hsa-miR-1294	0	0	1	1	0	0	FCGRT	Fc fragment of IgG, receptor, transporter, alpha
hsa-miR-1294	1	0	1	1	1	1	ANXA2	annexin A2
hsa-miR-1294	1	0	1	1	1	1	NEU1	sialidase 1 (lysosomal sialidase)
hsa-miR-1294	0	0	1	1	1	1	CCDC132	coiled-coil domain containing 132
hsa-miR-1294	1	0	1	1	1	1	ACTG1	actin, gamma 1
hsa-miR-1294	1	0	1	1	0	0	STX5	syntaxin 5
hsa-miR-1294	1	0	1	1	1	1	ADM	adrenomedullin
hsa-miR-1294	0	0	1	1	1	1	CD99	CD99 molecule
hsa-miR-1294	1	0	1	1	1	1	STARD3NL	STARD3 N-terminal like
hsa-miR-1294	1	0	1	1	1	1	SMARCE1	SWI/SNF related, matrix associated, actin dependent regulator of chromatin, subfamily e, member 1
hsa-miR-1294	0	0	1	1	1	1	MRPS36	mitochondrial ribosomal protein S36
hsa-miR-1294	1	0	1	1	1	1	COPZ1	coatomer protein complex, subunit zeta 1
hsa-miR-1294	1	0	1	1	0	0	PNPLA6	patatin-like phospholipase domain containing 6
hsa-miR-1294	1	0	1	0	1	1	RPS6KB1	ribosomal protein S6 kinase, 70kDa, polypeptide 1
hsa-miR-1294	0	0	1	1	1	1	TRIM68	tripartite motif containing 68
hsa-miR-1294	0	0	1	1	1	1	PGAP2	post-GPI attachment to proteins 2
hsa-miR-1294	1	0	1	1	1	1	LYPLA2	lysophospholipase II
hsa-miR-1294	1	0	1	1	1	1	BAMBI	BMP and activin membrane-bound inhibitor homolog (Xenopus laevis)
hsa-miR-1294	0	0	1	1	1	1	STXBP3	syntaxin binding protein 3
hsa-miR-1294	0	0	1	1	1	1	PSMA1	proteasome (prosome, macropain) subunit, alpha type, 1
hsa-miR-1294	0	0	1	0	1	1	TMEM155	transmembrane protein 155
hsa-miR-1294	0	0	1	1	1	1	CAPZB	capping protein (actin filament) muscle Z-line, beta
hsa-miR-1294	0	0	1	1	0	0	CCDC22	coiled-coil domain containing 22
hsa-miR-1294	0	0	1	1	1	1	SAP130	Sin3A-associated protein, 130kDa
hsa-miR-1294	0	0	1	1	0	0	PLB1	phospholipase B1
hsa-miR-1294	0	0	1	1	1	1	GTPBP4	GTP binding protein 4
hsa-miR-1294	1	0	1	1	1	1	TIMP3	TIMP metallopeptidase inhibitor 3
hsa-miR-1294	0	0	1	1	0	0	GLT8D1	glycosyltransferase 8 domain containing 1
hsa-miR-1294	0	0	1	1	1	1	TCTN3	tectonic family member 3
hsa-miR-1294	1	0	1	1	1	1	KCNS3	potassium voltage-gated channel, delayed-rectifier, subfamily S, member 3
hsa-miR-1294	1	0	1	1	1	1	EIF1	eukaryotic translation initiation factor 1
hsa-miR-1294	0	0	1	1	1	1	RCN2	reticulocalbin 2, EF-hand calcium binding domain
hsa-miR-1294	0	0	1	1	1	1	DNAJC25	DnaJ (Hsp40) homolog, subfamily C , member 25
hsa-miR-1294	0	0	1	0	0	0	LOC100130954	uncharacterized LOC100130954
hsa-miR-1294	0	0	1	1	0	0	CLEC1A	C-type lectin domain family 1, member A
hsa-miR-1294	1	0	1	1	1	1	RBFOX2	RNA binding protein, fox-1 homolog (C. elegans) 2
hsa-miR-1294	1	0	1	1	1	1	GALE	UDP-galactose-4-epimerase
hsa-miR-1294	1	0	1	1	0	0	STAG3L4	stromal antigen 3-like 4
hsa-miR-1294	0	0	1	1	1	1	LGI1	leucine-rich, glioma inactivated 1
hsa-miR-1294	1	0	1	1	0	0	PPP4C	protein phosphatase 4, catalytic subunit
hsa-miR-1294	1	0	1	1	0	0	FSD1	fibronectin type III and SPRY domain containing 1
hsa-miR-1294	0	0	1	0	1	1	TSPAN7	tetraspanin 7
hsa-miR-1294	0	0	1	1	1	1	RNF126	ring finger protein 126
hsa-miR-1294	0	0	1	1	0	0	FES	feline sarcoma oncogene
hsa-miR-1294	0	0	1	1	1	1	C10orf2	chromosome 10 open reading frame 2
hsa-miR-1294	1	0	1	1	1	1	SLC35A1	solute carrier family 35 (CMP-sialic acid transporter), member A1
hsa-miR-1294	1	0	1	1	1	1	SERF2	small EDRK-rich factor 2
hsa-miR-1294	1	0	1	1	1	1	RND3	Rho family GTPase 3
hsa-miR-1294	0	0	1	0	1	1	SERF1A	small EDRK-rich factor 1A (telomeric)
hsa-miR-1294	1	0	1	0	1	1	BTRC	beta-transducin repeat containing E3 ubiquitin protein ligase
hsa-miR-1294	1	0	1	1	1	1	PHACTR2	phosphatase and actin regulator 2
hsa-miR-1294	0	0	1	0	0	0	MUC19	mucin 19, oligomeric
hsa-miR-1294	1	0	1	0	1	1	XRN1	5'-3' exoribonuclease 1
hsa-miR-1294	0	0	1	1	1	1	SDAD1	SDA1 domain containing 1
hsa-miR-1294	0	0	1	1	1	1	SLC25A26	solute carrier family 25 (S-adenosylmethionine carrier), member 26
hsa-miR-1294	1	0	1	1	1	1	METAP1	methionyl aminopeptidase 1
hsa-miR-1294	1	0	1	0	1	1	ZNF776	zinc finger protein 776
hsa-miR-1294	0	0	1	0	0	0	ZNFX1-AS1	ZNFX1 antisense RNA 1
hsa-miR-1294	1	0	1	1	1	1	RBPJ	recombination signal binding protein for immunoglobulin kappa J region
hsa-miR-1294	1	0	1	1	1	1	SP2	Sp2 transcription factor
hsa-miR-1294	0	0	1	1	1	1	SLC39A14	solute carrier family 39 (zinc transporter), member 14
hsa-miR-1294	1	0	1	1	1	1	RBPMS	RNA binding protein with multiple splicing
hsa-miR-1294	0	0	1	1	1	1	LTA	lymphotoxin alpha (TNF superfamily, member 1)
hsa-miR-1294	0	0	1	1	1	1	PTGS1	prostaglandin-endoperoxide synthase 1 (prostaglandin G/H synthase and cyclooxygenase)
hsa-miR-1294	0	0	1	1	0	0	SPATA20	spermatogenesis associated 20
hsa-miR-1294	1	0	1	1	0	0	DPY19L1	dpy-19-like 1 (C. elegans)
hsa-miR-1294	0	0	1	0	0	0	LOC728377	Rho guanine nucleotide exchange factor (GEF) 5 pseudogene
hsa-miR-1294	0	0	1	1	0	0	CCNA1	cyclin A1
hsa-miR-1294	0	0	1	1	0	0	SPATA6	spermatogenesis associated 6
hsa-miR-1294	0	0	1	1	0	0	CEACAM3	carcinoembryonic antigen-related cell adhesion molecule 3
hsa-miR-1294	0	0	1	1	1	1	ALDH3B1	aldehyde dehydrogenase 3 family, member B1
hsa-miR-1294	1	0	1	1	1	1	MLL	myeloid/lymphoid or mixed-lineage leukemia (trithorax homolog, Drosophila)
hsa-miR-1294	0	0	1	1	1	1	ADPRH	ADP-ribosylarginine hydrolase
hsa-miR-1294	1	0	1	1	1	1	AFF1	AF4/FMR2 family, member 1
hsa-miR-1294	0	0	1	1	0	0	COL6A2	collagen, type VI, alpha 2
hsa-miR-1294	1	0	1	0	1	1	ACVR2A	activin A receptor, type IIA
hsa-miR-1294	1	0	1	1	0	0	ADRB3	adrenoceptor beta 3
hsa-miR-1294	1	0	1	1	1	1	COL1A1	collagen, type I, alpha 1
hsa-miR-1294	1	0	1	1	1	1	CYP19A1	cytochrome P450, family 19, subfamily A, polypeptide 1
hsa-miR-1294	1	0	1	1	1	1	DMD	dystrophin
hsa-miR-1294	1	0	1	0	1	1	EXT1	exostosin 1
hsa-miR-1294	0	0	1	1	0	0	FANCA	Fanconi anemia, complementation group A
hsa-miR-1294	0	0	1	0	1	1	MS4A2	membrane-spanning 4-domains, subfamily A, member 2
hsa-miR-1294	1	0	1	0	1	1	GLI3	GLI family zinc finger 3
hsa-miR-1294	1	0	1	1	1	1	INSR	insulin receptor
hsa-miR-1294	1	0	1	1	1	1	JAG1	jagged 1
hsa-miR-1294	1	0	1	1	1	1	KCNA1	potassium voltage-gated channel, shaker-related subfamily, member 1 (episodic ataxia with myokymia)
hsa-miR-1294	0	0	1	1	1	1	MTR	5-methyltetrahydrofolate-homocysteine methyltransferase
hsa-miR-1294	1	0	1	1	1	1	OCRL	oculocerebrorenal syndrome of Lowe
hsa-miR-1294	1	0	1	0	1	1	PTEN	phosphatase and tensin homolog
hsa-miR-1294	1	0	1	1	1	1	RB1	retinoblastoma 1
hsa-miR-1294	1	0	1	1	1	1	ATXN1	ataxin 1
hsa-miR-1294	0	0	1	1	1	1	STS	steroid sulfatase (microsomal), isozyme S
hsa-miR-1294	1	0	1	1	1	1	TAT	tyrosine aminotransferase
hsa-miR-1294	1	0	1	0	1	1	PAFAH1B1	platelet-activating factor acetylhydrolase 1b, regulatory subunit 1 (45kDa)
hsa-miR-1294	1	0	1	1	1	1	AQP2	aquaporin 2 (collecting duct)
hsa-miR-1294	0	0	1	1	1	1	CYP11B2	cytochrome P450, family 11, subfamily B, polypeptide 2
hsa-miR-1294	1	0	1	1	1	1	KCNJ11	potassium inwardly-rectifying channel, subfamily J, member 11
hsa-miR-1294	1	0	1	1	1	1	PLP1	proteolipid protein 1
hsa-miR-1294	1	0	1	1	1	1	TNF	tumor necrosis factor
hsa-miR-1294	1	0	1	0	1	1	IGFBP5	insulin-like growth factor binding protein 5
hsa-miR-1294	0	0	1	1	1	1	HGF	hepatocyte growth factor (hepapoietin A; scatter factor)
hsa-miR-1294	1	0	1	0	1	1	ADRB1	adrenoceptor beta 1
hsa-miR-1294	0	0	1	1	0	0	ALOX5	arachidonate 5-lipoxygenase
hsa-miR-1294	1	0	1	0	1	1	GABRA4	gamma-aminobutyric acid (GABA) A receptor, alpha 4
hsa-miR-1294	1	0	1	1	1	1	GABRB3	gamma-aminobutyric acid (GABA) A receptor, beta 3
hsa-miR-1294	1	0	1	1	1	1	GAD1	glutamate decarboxylase 1 (brain, 67kDa)
hsa-miR-1294	0	0	1	1	1	1	GAD2	glutamate decarboxylase 2 (pancreatic islets and brain, 65kDa)
hsa-miR-1294	1	0	1	1	1	1	IGF1R	insulin-like growth factor 1 receptor
hsa-miR-1294	1	0	1	0	1	1	KCNJ2	potassium inwardly-rectifying channel, subfamily J, member 2
hsa-miR-1294	1	0	1	1	0	0	SLC35E4	solute carrier family 35, member E4
hsa-miR-1294	1	0	1	0	1	1	GDF6	growth differentiation factor 6
hsa-miR-1294	1	0	1	0	1	1	ARHGEF37	Rho guanine nucleotide exchange factor (GEF) 37
hsa-miR-1294	0	0	1	1	0	0	RNASE9	ribonuclease, RNase A family, 9 (non-active)
hsa-miR-1294	1	0	1	1	1	1	RREB1	ras responsive element binding protein 1
hsa-miR-1294	0	0	1	1	1	1	ALG11	asparagine-linked glycosylation 11, alpha-1,2-mannosyltransferase homolog (yeast)
hsa-miR-1294	0	0	1	1	1	1	C1orf168	chromosome 1 open reading frame 168
hsa-miR-1294	1	0	1	0	1	1	LIN28B	lin-28 homolog B (C. elegans)
hsa-miR-1294	0	0	1	1	0	0	C7orf61	chromosome 7 open reading frame 61
hsa-miR-1294	1	0	1	1	1	1	TCEAL8	transcription elongation factor A (SII)-like 8
hsa-miR-1294	1	0	1	1	1	1	BRWD1	bromodomain and WD repeat domain containing 1
hsa-miR-1294	1	0	1	1	0	0	GEMIN7	gem (nuclear organelle) associated protein 7
hsa-miR-1294	1	0	1	1	1	1	EI24	etoposide induced 2.4 mRNA
hsa-miR-1294	1	0	1	1	1	1	STEAP3	STEAP family member 3, metalloreductase
hsa-miR-1294	0	0	1	1	1	1	MXI1	MAX interactor 1
hsa-miR-1294	0	0	1	1	0	0	ARMCX6	armadillo repeat containing, X-linked 6
hsa-miR-1294	0	0	1	1	1	1	HRNR	hornerin
hsa-miR-1294	1	0	1	1	1	1	ARHGAP28	Rho GTPase activating protein 28
hsa-miR-1294	0	0	1	1	1	1	SPIN3	spindlin family, member 3
hsa-miR-1294	0	0	1	1	1	1	DSTN	destrin (actin depolymerizing factor)
hsa-miR-1294	1	0	1	1	0	0	MCCD1	mitochondrial coiled-coil domain 1
hsa-miR-1294	1	0	1	1	1	1	CTNNBIP1	catenin, beta interacting protein 1
hsa-miR-1294	1	0	1	0	1	1	ZKSCAN2	zinc finger with KRAB and SCAN domains 2
hsa-miR-1294	0	0	1	1	1	1	C2orf68	chromosome 2 open reading frame 68
hsa-miR-1294	1	0	1	0	1	1	FIGNL2	fidgetin-like 2
hsa-miR-1294	1	0	1	1	1	1	CA7	carbonic anhydrase VII
hsa-miR-1294	0	0	1	1	1	1	RAB28	RAB28, member RAS oncogene family
hsa-miR-1294	1	0	1	1	1	1	VMA21	VMA21 vacuolar H+-ATPase homolog (S. cerevisiae)
hsa-miR-1294	0	0	1	1	1	1	GNG10	guanine nucleotide binding protein (G protein), gamma 10
hsa-miR-1294	1	0	1	1	1	1	NTRK2	neurotrophic tyrosine kinase, receptor, type 2
hsa-miR-1294	0	0	1	1	1	1	POLR2M	polymerase (RNA) II (DNA directed) polypeptide M
hsa-miR-1294	1	0	1	1	1	1	ABCC5	ATP-binding cassette, sub-family C (CFTR/MRP), member 5
hsa-miR-1294	1	0	1	1	1	1	SBK1	SH3-binding domain kinase 1
hsa-miR-1294	1	0	1	1	1	1	SLC6A9	solute carrier family 6 (neurotransmitter transporter, glycine), member 9
hsa-miR-1294	1	0	1	1	1	1	AFF3	AF4/FMR2 family, member 3
hsa-miR-1294	1	0	1	1	1	1	KCTD21	potassium channel tetramerisation domain containing 21
hsa-miR-1294	1	0	1	1	1	1	RGS7BP	regulator of G-protein signaling 7 binding protein
hsa-miR-1294	1	0	1	1	1	1	PLEKHG1	pleckstrin homology domain containing, family G (with RhoGef domain) member 1
hsa-miR-1294	1	0	1	1	1	1	MYCL1	v-myc myelocytomatosis viral oncogene homolog 1, lung carcinoma derived (avian)
hsa-miR-1294	1	0	1	0	1	1	SRGAP3	SLIT-ROBO Rho GTPase activating protein 3
hsa-miR-1294	1	0	1	0	1	1	RYR3	ryanodine receptor 3
hsa-miR-1294	0	0	1	0	0	0	FER1L6	fer-1-like 6 (C. elegans)
hsa-miR-1294	1	0	1	1	1	1	KIAA0317	KIAA0317
hsa-miR-1294	1	0	1	0	1	1	GK5	glycerol kinase 5 (putative)
hsa-miR-1294	1	0	1	1	1	1	SEC14L1	SEC14-like 1 (S. cerevisiae)
hsa-miR-1294	1	0	1	0	1	1	CREBZF	CREB/ATF bZIP transcription factor
hsa-miR-1294	0	0	1	1	0	0	ANGPTL4	angiopoietin-like 4
hsa-miR-1294	1	0	1	1	1	1	MOSPD3	motile sperm domain containing 3
hsa-miR-1294	0	0	1	1	1	1	SPOCK3	sparc/osteonectin, cwcv and kazal-like domains proteoglycan (testican) 3
hsa-miR-1294	1	0	1	1	1	1	HTR4	5-hydroxytryptamine (serotonin) receptor 4, G protein-coupled
hsa-miR-1294	0	0	1	1	1	1	MCHR2	melanin-concentrating hormone receptor 2
hsa-miR-1294	1	0	1	0	1	1	CD83	CD83 molecule
hsa-miR-1294	0	0	1	1	1	1	MTHFD2	methylenetetrahydrofolate dehydrogenase (NADP+ dependent) 2, methenyltetrahydrofolate cyclohydrolase
hsa-miR-1294	0	0	1	1	1	1	BTNL8	butyrophilin-like 8
hsa-miR-1294	1	0	1	1	1	1	CRCP	CGRP receptor component
hsa-miR-1294	0	0	1	0	1	1	STEAP2	STEAP family member 2, metalloreductase
hsa-miR-1294	1	0	1	1	0	0	BCL2L12	BCL2-like 12 (proline rich)
hsa-miR-1294	1	0	1	1	1	1	SLC9A6	solute carrier family 9, subfamily A (NHE6, cation proton antiporter 6), member 6
hsa-miR-1294	1	0	1	1	1	1	NSL1	NSL1, MIND kinetochore complex component, homolog (S. cerevisiae)
hsa-miR-1294	1	0	1	1	1	1	FRS2	fibroblast growth factor receptor substrate 2
hsa-miR-1294	1	0	1	1	1	1	ERBB4	v-erb-a erythroblastic leukemia viral oncogene homolog 4 (avian)
hsa-miR-1294	0	0	1	1	1	1	TTC14	tetratricopeptide repeat domain 14
hsa-miR-1294	0	0	1	1	1	1	FAM22G	family with sequence similarity 22, member G
hsa-miR-1294	1	0	1	1	1	1	C5orf43	chromosome 5 open reading frame 43
hsa-miR-1294	0	0	1	1	1	1	TUBG1	tubulin, gamma 1
hsa-miR-1294	1	0	1	0	1	1	SLC7A6	solute carrier family 7 (amino acid transporter light chain, y+L system), member 6
hsa-miR-1294	1	0	1	1	1	1	METTL9	methyltransferase like 9
hsa-miR-1294	1	0	1	1	1	1	ATG9A	autophagy related 9A
hsa-miR-1294	1	0	1	1	1	1	NCOR2	nuclear receptor corepressor 2
hsa-miR-1294	1	0	1	1	1	1	IRF2BP2	interferon regulatory factor 2 binding protein 2
hsa-miR-1294	0	0	1	1	1	1	ZNF586	zinc finger protein 586
hsa-miR-1294	0	0	1	1	1	1	KLK10	kallikrein-related peptidase 10
hsa-miR-1294	1	0	1	0	1	1	FAM127C	family with sequence similarity 127, member C
hsa-miR-1294	1	0	1	1	1	1	VAV3	vav 3 guanine nucleotide exchange factor
hsa-miR-1294	0	0	1	1	0	0	ARHGAP9	Rho GTPase activating protein 9
hsa-miR-1294	1	0	1	1	1	1	FAM155A	family with sequence similarity 155, member A
hsa-miR-1294	1	0	1	1	1	1	KDM6B	lysine (K)-specific demethylase 6B
hsa-miR-1294	1	0	1	0	1	1	THSD7B	thrombospondin, type I, domain containing 7B
hsa-miR-1294	1	0	1	0	1	1	CCDC85A	coiled-coil domain containing 85A
hsa-miR-1294	0	0	1	0	1	1	RBM44	RNA binding motif protein 44
hsa-miR-1294	0	0	1	1	1	1	TBX18	T-box 18
hsa-miR-1294	1	0	1	1	1	1	MGA	MAX gene associated
hsa-miR-1294	1	0	1	1	1	1	REPS2	RALBP1 associated Eps domain containing 2
hsa-miR-1294	1	0	1	1	1	1	ADAM10	ADAM metallopeptidase domain 10
hsa-miR-1294	1	0	1	1	1	1	PRDM1	PR domain containing 1, with ZNF domain
hsa-miR-1294	0	0	1	1	1	1	ENTPD3	ectonucleoside triphosphate diphosphohydrolase 3
hsa-miR-1294	1	0	1	1	1	1	CDH13	cadherin 13, H-cadherin (heart)
hsa-miR-1294	1	0	1	0	1	1	CDK6	cyclin-dependent kinase 6
hsa-miR-1294	0	0	1	1	1	1	CHUK	conserved helix-loop-helix ubiquitous kinase
hsa-miR-1294	0	0	1	1	1	1	CLIC2	chloride intracellular channel 2
hsa-miR-1294	0	0	1	1	1	1	CORT	cortistatin
hsa-miR-1294	1	0	1	0	1	1	CPD	carboxypeptidase D
hsa-miR-1294	0	0	1	0	1	1	EMP1	epithelial membrane protein 1
hsa-miR-1294	1	0	1	0	1	1	GCNT2	glucosaminyl (N-acetyl) transferase 2, I-branching enzyme (I blood group)
hsa-miR-1294	1	0	1	1	1	1	IRAK2	interleukin-1 receptor-associated kinase 2
hsa-miR-1294	1	0	1	1	1	1	ATP6V1A	ATPase, H+ transporting, lysosomal 70kDa, V1 subunit A
hsa-miR-1294	1	0	1	0	1	1	CCND2	cyclin D2
hsa-miR-1294	0	0	1	1	1	1	CD1D	CD1d molecule
hsa-miR-1294	1	0	1	1	1	1	CDK2	cyclin-dependent kinase 2
hsa-miR-1294	1	0	1	0	1	1	CEBPG	CCAAT/enhancer binding protein (C/EBP), gamma
hsa-miR-1294	1	0	1	1	1	1	CENPB	centromere protein B, 80kDa
hsa-miR-1294	1	0	1	1	1	1	COL4A1	collagen, type IV, alpha 1
hsa-miR-1294	1	0	1	1	1	1	COL4A6	collagen, type IV, alpha 6
hsa-miR-1294	0	0	1	1	1	1	SLC31A2	solute carrier family 31 (copper transporters), member 2
hsa-miR-1294	1	0	1	1	1	1	MASP1	mannan-binding lectin serine peptidase 1 (C4/C2 activating component of Ra-reactive factor)
hsa-miR-1294	0	0	1	1	0	0	CSNK2A2	casein kinase 2, alpha prime polypeptide
hsa-miR-1294	1	0	1	1	1	1	DPP4	dipeptidyl-peptidase 4
hsa-miR-1294	1	0	1	1	1	1	HBEGF	heparin-binding EGF-like growth factor
hsa-miR-1294	1	0	1	0	1	1	ETV6	ets variant 6
hsa-miR-1294	1	0	1	1	1	1	FBN2	fibrillin 2
hsa-miR-1294	1	0	1	0	1	1	FUT4	fucosyltransferase 4 (alpha (1,3) fucosyltransferase, myeloid-specific)
hsa-miR-1294	0	0	1	1	0	0	IFI6	interferon, alpha-inducible protein 6
hsa-miR-1294	0	0	1	1	1	1	HOXA4	homeobox A4
hsa-miR-1294	0	0	1	1	1	1	FOXN2	forkhead box N2
hsa-miR-1294	1	0	1	1	1	1	TNC	tenascin C
hsa-miR-1294	1	0	1	1	1	1	IL13	interleukin 13
hsa-miR-1294	1	0	1	1	1	1	ITGB8	integrin, beta 8
hsa-miR-1294	0	0	1	1	1	1	KCNK1	potassium channel, subfamily K, member 1
hsa-miR-1294	1	0	1	0	1	1	KIF3C	kinesin family member 3C
hsa-miR-1294	0	0	1	1	0	0	LALBA	lactalbumin, alpha-
hsa-miR-1294	0	0	1	1	0	0	LGALS3	lectin, galactoside-binding, soluble, 3
hsa-miR-1294	1	0	1	1	1	1	LIFR	leukemia inhibitory factor receptor alpha
hsa-miR-1294	1	0	1	1	1	1	SCGB2A1	secretoglobin, family 2A, member 1
hsa-miR-1294	0	0	1	0	1	1	CXCL9	chemokine (C-X-C motif) ligand 9
hsa-miR-1294	1	0	1	1	1	1	MSR1	macrophage scavenger receptor 1
hsa-miR-1294	0	0	1	1	1	1	CEACAM6	carcinoembryonic antigen-related cell adhesion molecule 6 (non-specific cross reacting antigen)
hsa-miR-1294	1	0	1	1	1	1	NDUFA4	NADH dehydrogenase (ubiquinone) 1 alpha subcomplex, 4, 9kDa
hsa-miR-1294	1	0	1	1	1	1	NPAT	nuclear protein, ataxia-telangiectasia locus
hsa-miR-1294	0	0	1	0	1	1	OPHN1	oligophrenin 1
hsa-miR-1294	1	0	1	0	1	1	PAPPA	pregnancy-associated plasma protein A, pappalysin 1
hsa-miR-1294	1	0	1	1	1	1	PHF1	PHD finger protein 1
hsa-miR-1294	0	0	1	1	1	1	PIM1	pim-1 oncogene
hsa-miR-1294	0	0	1	1	1	1	PPP1R3A	protein phosphatase 1, regulatory subunit 3A
hsa-miR-1294	1	0	1	0	1	1	PRKCA	protein kinase C, alpha
hsa-miR-1294	0	0	1	0	0	0	PSMB10	proteasome (prosome, macropain) subunit, beta type, 10
hsa-miR-1294	1	0	1	0	1	1	SORT1	sortilin 1
hsa-miR-1294	1	0	1	0	1	1	ST6GAL1	ST6 beta-galactosamide alpha-2,6-sialyltranferase 1
hsa-miR-1294	1	0	1	0	1	1	STC1	stanniocalcin 1
hsa-miR-1294	0	0	1	1	1	1	STIM1	stromal interaction molecule 1
hsa-miR-1294	1	0	1	0	1	1	TAL1	T-cell acute lymphocytic leukemia 1
hsa-miR-1294	1	0	1	1	1	1	TDG	thymine-DNA glycosylase
hsa-miR-1294	1	0	1	1	1	1	TFAP2B	transcription factor AP-2 beta (activating enhancer binding protein 2 beta)
hsa-miR-1294	0	0	1	1	0	0	TG	thyroglobulin
hsa-miR-1294	0	0	1	1	1	1	TRAF3	TNF receptor-associated factor 3
hsa-miR-1294	1	0	1	1	1	1	VSNL1	visinin-like 1
hsa-miR-1294	0	0	1	1	1	1	ZNF137P	zinc finger protein 137, pseudogene
hsa-miR-1294	1	0	1	1	1	1	PDHX	pyruvate dehydrogenase complex, component X
hsa-miR-1294	1	0	1	0	1	1	IRS2	insulin receptor substrate 2
hsa-miR-1294	0	0	1	1	1	1	SNX4	sorting nexin 4
hsa-miR-1294	0	0	1	1	1	1	CRADD	CASP2 and RIPK1 domain containing adaptor with death domain
hsa-miR-1294	1	0	1	1	1	1	ADAM9	ADAM metallopeptidase domain 9
hsa-miR-1294	0	0	1	1	1	1	TNFRSF10D	tumor necrosis factor receptor superfamily, member 10d, decoy with truncated death domain
hsa-miR-1294	1	0	1	1	1	1	SUCLG2	succinate-CoA ligase, GDP-forming, beta subunit
hsa-miR-1294	1	0	1	1	1	1	NRP2	neuropilin 2
hsa-miR-1294	1	0	1	1	1	1	KALRN	kalirin, RhoGEF kinase
hsa-miR-1294	1	0	1	1	1	1	BTAF1	BTAF1 RNA polymerase II, B-TFIID transcription factor-associated, 170kDa (Mot1 homolog, S. cerevisiae)
hsa-miR-1294	1	0	1	1	1	1	ACOX1	acyl-CoA oxidase 1, palmitoyl
hsa-miR-1294	1	0	1	1	1	1	BCL2L2	BCL2-like 2
hsa-miR-1294	0	0	1	1	1	1	FKBP1B	FK506 binding protein 1B, 12.6 kDa
hsa-miR-1294	0	0	1	1	1	1	DNAJC25-GNG10	DNAJC25-GNG10 readthrough
hsa-miR-1294	0	0	1	1	1	1	RAB27B	RAB27B, member RAS oncogene family
hsa-miR-1294	1	0	1	0	1	1	SLC1A2	solute carrier family 1 (glial high affinity glutamate transporter), member 2
hsa-miR-1294	0	0	1	1	1	1	TRIP13	thyroid hormone receptor interactor 13
hsa-miR-1294	0	0	1	1	1	1	HOMER1	homer homolog 1 (Drosophila)
hsa-miR-1294	1	0	1	1	1	1	SLC25A27	solute carrier family 25, member 27
hsa-miR-1294	1	0	1	1	1	1	ARL3	ADP-ribosylation factor-like 3
hsa-miR-1294	1	0	1	1	1	1	DAG1	dystroglycan 1 (dystrophin-associated glycoprotein 1)
hsa-miR-1294	1	0	1	1	1	1	DUSP5	dual specificity phosphatase 5
hsa-miR-1294	1	0	1	1	1	1	EGR3	early growth response 3
hsa-miR-1294	1	0	1	1	1	1	EPHB3	EPH receptor B3
hsa-miR-1294	1	0	1	0	1	1	ACSL4	acyl-CoA synthetase long-chain family member 4
hsa-miR-1294	1	0	1	1	1	1	ONECUT1	one cut homeobox 1
hsa-miR-1294	1	0	1	1	0	0	NRTN	neurturin
hsa-miR-1294	1	0	1	1	1	1	SF1	splicing factor 1
hsa-miR-1294	1	0	1	1	1	1	COIL	coilin
hsa-miR-1294	0	0	1	1	0	0	PRY	PTPN13-like, Y-linked
hsa-miR-1294	0	0	1	0	1	1	BPY2	basic charge, Y-linked, 2
hsa-miR-1294	0	0	1	1	1	1	KCNAB3	potassium voltage-gated channel, shaker-related subfamily, beta member 3
hsa-miR-1294	1	0	1	1	1	1	XPR1	xenotropic and polytropic retrovirus receptor 1
hsa-miR-1294	1	0	1	1	1	1	LARGE	like-glycosyltransferase
hsa-miR-1294	0	0	1	1	1	1	TAOK2	TAO kinase 2
hsa-miR-1294	0	0	1	0	1	1	ADIPOQ	adiponectin, C1Q and collagen domain containing
hsa-miR-1294	1	0	1	1	1	1	KIF3B	kinesin family member 3B
hsa-miR-1294	1	0	1	0	1	1	ARHGEF6	Rac/Cdc42 guanine nucleotide exchange factor (GEF) 6
hsa-miR-1294	1	0	1	1	1	1	ONECUT2	one cut homeobox 2
hsa-miR-1294	1	0	1	0	1	1	SPTLC2	serine palmitoyltransferase, long chain base subunit 2
hsa-miR-1294	1	0	1	1	1	1	SEC24C	SEC24 family, member C (S. cerevisiae)
hsa-miR-1294	1	0	1	0	1	1	SCD	stearoyl-CoA desaturase (delta-9-desaturase)
hsa-miR-1294	1	0	1	1	1	1	TLE1	transducin-like enhancer of split 1 (E(sp1) homolog, Drosophila)
hsa-miR-1294	0	0	1	1	1	1	CCS	copper chaperone for superoxide dismutase
hsa-miR-1294	1	0	1	1	0	0	BCL3	B-cell CLL/lymphoma 3
hsa-miR-1294	1	0	1	1	1	1	FOXN3	forkhead box N3
hsa-miR-1294	0	0	1	1	1	1	CSTA	cystatin A (stefin A)
hsa-miR-1294	1	0	1	1	1	1	DLX3	distal-less homeobox 3
hsa-miR-1294	1	0	1	1	1	1	HAS2	hyaluronan synthase 2
hsa-miR-1294	1	0	1	1	1	1	NEFM	neurofilament, medium polypeptide
hsa-miR-1294	1	0	1	0	1	1	PRKAB2	protein kinase, AMP-activated, beta 2 non-catalytic subunit
hsa-miR-1294	1	0	1	1	1	1	VEGFC	vascular endothelial growth factor C
hsa-miR-1294	1	0	1	1	1	1	RND2	Rho family GTPase 2
hsa-miR-1294	1	0	1	1	1	1	GABBR2	gamma-aminobutyric acid (GABA) B receptor, 2
hsa-miR-1294	1	0	1	1	1	1	AKT3	v-akt murine thymoma viral oncogene homolog 3 (protein kinase B, gamma)
hsa-miR-1294	1	0	1	0	0	0	FRAT1	frequently rearranged in advanced T-cell lymphomas
hsa-miR-1294	1	0	1	1	1	1	GTF2E1	general transcription factor IIE, polypeptide 1, alpha 56kDa
hsa-miR-1294	0	0	1	1	0	0	IVL	involucrin
hsa-miR-1294	1	0	1	1	1	1	LPP	LIM domain containing preferred translocation partner in lipoma
hsa-miR-1294	1	0	1	1	1	1	MAB21L1	mab-21-like 1 (C. elegans)
hsa-miR-1294	1	0	1	1	1	1	NHLH2	nescient helix loop helix 2
hsa-miR-1294	1	0	1	1	1	1	RHEB	Ras homolog enriched in brain
hsa-miR-1294	1	0	1	1	1	1	UST	uronyl-2-sulfotransferase
hsa-miR-1294	1	0	1	1	1	1	ACTR1A	ARP1 actin-related protein 1 homolog A, centractin alpha (yeast)
hsa-miR-1294	1	0	1	1	1	1	NAMPT	nicotinamide phosphoribosyltransferase
hsa-miR-1294	1	0	1	1	1	1	LHFPL2	lipoma HMGIC fusion partner-like 2
hsa-miR-1294	0	0	1	1	1	1	TXNDC9	thioredoxin domain containing 9
hsa-miR-1294	1	0	1	1	1	1	PURA	purine-rich element binding protein A
hsa-miR-1294	1	0	1	1	1	1	MAN1A1	mannosidase, alpha, class 1A, member 1
hsa-miR-1294	1	0	1	1	1	1	MAT2A	methionine adenosyltransferase II, alpha
hsa-miR-1294	1	0	1	1	1	1	MTF1	metal-regulatory transcription factor 1
hsa-miR-1294	1	0	1	1	1	1	ENDOU	endonuclease, polyU-specific
hsa-miR-1294	1	0	1	0	1	1	HDAC4	histone deacetylase 4
hsa-miR-1294	1	0	1	1	1	1	IRF9	interferon regulatory factor 9
hsa-miR-1294	0	0	1	1	0	0	NPPA	natriuretic peptide A
hsa-miR-1294	0	0	1	1	1	1	PPP2R5A	protein phosphatase 2, regulatory subunit B', alpha
hsa-miR-1294	1	0	1	1	1	1	PKN2	protein kinase N2
hsa-miR-1294	1	0	1	1	1	1	STK4	serine/threonine kinase 4
hsa-miR-1294	1	0	1	1	1	1	SMC1A	structural maintenance of chromosomes 1A
hsa-miR-1294	0	0	1	1	1	1	PGRMC2	progesterone receptor membrane component 2
hsa-miR-1294	1	0	1	1	1	1	ZNF238	zinc finger protein 238
hsa-miR-1294	0	0	1	1	1	1	LRRC41	leucine rich repeat containing 41
hsa-miR-1294	0	0	1	1	0	0	CIB1	calcium and integrin binding 1 (calmyrin)
hsa-miR-1294	1	0	1	1	1	1	NEBL	nebulette
hsa-miR-1294	1	0	1	1	1	1	SLC2A1	solute carrier family 2 (facilitated glucose transporter), member 1
hsa-miR-1294	0	0	1	0	1	1	SLC16A2	solute carrier family 16, member 2 (thyroid hormone transporter)
hsa-miR-1294	0	0	1	1	1	1	CLCA2	chloride channel accessory 2
hsa-miR-1294	1	0	1	0	1	1	IGF2BP1	insulin-like growth factor 2 mRNA binding protein 1
hsa-miR-1294	0	0	1	1	1	1	POLD3	polymerase (DNA-directed), delta 3, accessory subunit
hsa-miR-1294	0	0	1	1	0	0	WNK2	WNK lysine deficient protein kinase 2
hsa-miR-1294	1	0	1	1	1	1	CDH10	cadherin 10, type 2 (T2-cadherin)
hsa-miR-1294	0	0	1	1	1	1	TRIM10	tripartite motif containing 10
hsa-miR-1294	0	0	1	1	1	1	ASCC3	activating signal cointegrator 1 complex subunit 3
hsa-miR-1294	1	0	1	1	1	1	GLIPR1	GLI pathogenesis-related 1
hsa-miR-1294	0	0	1	1	1	1	ATF7	activating transcription factor 7
hsa-miR-1294	1	0	1	1	1	1	B3GNT1	UDP-GlcNAc:betaGal beta-1,3-N-acetylglucosaminyltransferase 1
hsa-miR-1294	1	0	1	1	1	1	SKP1	S-phase kinase-associated protein 1
hsa-miR-1294	1	0	1	0	1	1	WASF2	WAS protein family, member 2
hsa-miR-1294	1	0	1	1	1	1	ABHD2	abhydrolase domain containing 2
hsa-miR-1294	1	0	1	1	1	1	SOX30	SRY (sex determining region Y)-box 30
hsa-miR-1294	1	0	1	1	1	1	ESM1	endothelial cell-specific molecule 1
hsa-miR-1294	0	0	1	1	1	1	POLR3A	polymerase (RNA) III (DNA directed) polypeptide A, 155kDa
hsa-miR-1294	1	0	1	1	1	1	KAT7	K(lysine) acetyltransferase 7
hsa-miR-1294	1	0	1	1	1	1	SSR3	signal sequence receptor, gamma (translocon-associated protein gamma)
hsa-miR-1294	1	0	1	1	1	1	ZNF81	zinc finger protein 81
hsa-miR-1294	1	0	1	1	1	1	TESK2	testis-specific kinase 2
hsa-miR-1294	1	0	1	1	1	1	ABCF2	ATP-binding cassette, sub-family F (GCN20), member 2
hsa-miR-1294	0	0	1	1	1	1	WIF1	WNT inhibitory factor 1
hsa-miR-1294	1	0	1	1	1	1	PALM2-AKAP2	PALM2-AKAP2 readthrough
hsa-miR-1294	1	0	1	1	1	1	PDCD10	programmed cell death 10
hsa-miR-1294	1	0	1	1	1	1	KLF12	Kruppel-like factor 12
hsa-miR-1294	1	0	1	1	1	1	PADI2	peptidyl arginine deiminase, type II
hsa-miR-1294	0	0	1	1	1	1	ABCB10	ATP-binding cassette, sub-family B (MDR/TAP), member 10
hsa-miR-1294	1	0	1	0	1	1	CD2AP	CD2-associated protein
hsa-miR-1294	1	0	1	1	1	1	RHOQ	ras homolog family member Q
hsa-miR-1294	1	0	1	1	1	1	HEY2	hairy/enhancer-of-split related with YRPW motif 2
hsa-miR-1294	1	0	1	1	1	1	LAMP5	lysosomal-associated membrane protein family, member 5
hsa-miR-1294	1	0	1	1	1	1	HS2ST1	heparan sulfate 2-O-sulfotransferase 1
hsa-miR-1294	1	0	1	0	1	1	PXDN	peroxidasin homolog (Drosophila)
hsa-miR-1294	1	0	1	0	1	1	GAB2	GRB2-associated binding protein 2
hsa-miR-1294	1	0	1	0	1	1	MYCBP	c-myc binding protein
hsa-miR-1294	0	0	1	1	0	0	NTSR2	neurotensin receptor 2
hsa-miR-1294	1	0	1	1	1	1	YWHAG	tyrosine 3-monooxygenase/tryptophan 5-monooxygenase activation protein, gamma polypeptide
hsa-miR-1294	1	0	1	0	1	1	FLRT2	fibronectin leucine rich transmembrane protein 2
hsa-miR-1294	1	0	1	1	1	1	PPARGC1A	peroxisome proliferator-activated receptor gamma, coactivator 1 alpha
hsa-miR-1294	0	0	1	0	1	1	EMR2	egf-like module containing, mucin-like, hormone receptor-like 2
hsa-miR-1294	1	0	1	1	1	1	WDR37	WD repeat domain 37
hsa-miR-1294	1	0	1	1	1	1	SCN11A	sodium channel, voltage-gated, type XI, alpha subunit
hsa-miR-1294	0	0	1	1	0	0	EIF2B2	eukaryotic translation initiation factor 2B, subunit 2 beta, 39kDa
hsa-miR-1294	1	0	1	1	1	1	YME1L1	YME1-like 1 (S. cerevisiae)
hsa-miR-1294	1	0	1	1	1	1	MAPRE2	microtubule-associated protein, RP/EB family, member 2
hsa-miR-1294	0	0	1	1	0	0	QPRT	quinolinate phosphoribosyltransferase
hsa-miR-1294	1	0	1	1	1	1	MTCH2	mitochondrial carrier 2
hsa-miR-1294	0	0	1	1	1	1	LAMP3	lysosomal-associated membrane protein 3
hsa-miR-1294	1	0	1	1	1	1	SERP1	stress-associated endoplasmic reticulum protein 1
hsa-miR-1294	1	0	1	1	1	1	KLHL20	kelch-like 20 (Drosophila)
hsa-miR-1294	0	0	1	1	1	1	SOX8	SRY (sex determining region Y)-box 8
hsa-miR-1294	0	0	1	1	1	1	EHD2	EH-domain containing 2
hsa-miR-1294	1	0	1	1	0	0	TTLL4	tubulin tyrosine ligase-like family, member 4
hsa-miR-1294	1	0	1	0	1	1	EDEM1	ER degradation enhancer, mannosidase alpha-like 1
hsa-miR-1294	1	0	1	0	1	1	MLEC	malectin
hsa-miR-1294	1	0	1	0	1	1	SCRN1	secernin 1
hsa-miR-1294	1	0	1	1	1	1	TOMM70A	translocase of outer mitochondrial membrane 70 homolog A (S. cerevisiae)
hsa-miR-1294	1	0	1	1	1	1	ZBTB39	zinc finger and BTB domain containing 39
hsa-miR-1294	1	0	1	0	1	1	LPPR4	lipid phosphate phosphatase-related protein type 4
hsa-miR-1294	1	0	1	1	1	1	JOSD1	Josephin domain containing 1
hsa-miR-1294	1	0	1	0	1	1	ICK	intestinal cell (MAK-like) kinase
hsa-miR-1294	1	0	1	1	1	1	PLEKHA6	pleckstrin homology domain containing, family A member 6
hsa-miR-1294	1	0	1	1	1	1	SMG1	smg-1 homolog, phosphatidylinositol 3-kinase-related kinase (C. elegans)
hsa-miR-1294	1	0	1	1	1	1	TAB2	TGF-beta activated kinase 1/MAP3K7 binding protein 2
hsa-miR-1294	1	0	1	1	1	1	TBC1D9	TBC1 domain family, member 9 (with GRAM domain)
hsa-miR-1294	0	0	1	1	1	1	FBXO28	F-box protein 28
hsa-miR-1294	1	0	1	1	1	1	SIK2	salt-inducible kinase 2
hsa-miR-1294	1	0	1	0	1	1	KIAA1024	KIAA1024
hsa-miR-1294	1	0	1	1	1	1	NUP160	nucleoporin 160kDa
hsa-miR-1294	1	0	1	1	1	1	ANKS1A	ankyrin repeat and sterile alpha motif domain containing 1A
hsa-miR-1294	1	0	1	0	1	1	KHNYN	KH and NYN domain containing
hsa-miR-1294	1	0	1	1	1	1	NUDCD3	NudC domain containing 3
hsa-miR-1294	0	0	1	1	1	1	NBPF14	neuroblastoma breakpoint family, member 14
hsa-miR-1294	1	0	1	1	1	1	PARM1	prostate androgen-regulated mucin-like protein 1
hsa-miR-1294	1	0	1	1	1	1	RNF19A	ring finger protein 19A, E3 ubiquitin protein ligase
hsa-miR-1294	1	0	1	1	1	1	MAGI1	membrane associated guanylate kinase, WW and PDZ domain containing 1
hsa-miR-1294	1	0	1	1	1	1	PHF19	PHD finger protein 19
hsa-miR-1294	1	0	1	1	1	1	FAM155B	family with sequence similarity 155, member B
hsa-miR-1294	1	0	1	1	1	1	PLA2G3	phospholipase A2, group III
hsa-miR-1294	1	0	1	1	1	1	TAF9B	TAF9B RNA polymerase II, TATA box binding protein (TBP)-associated factor, 31kDa
hsa-miR-1294	1	0	1	1	1	1	PHF20L1	PHD finger protein 20-like 1
hsa-miR-1294	1	0	1	1	1	1	UBE2J1	ubiquitin-conjugating enzyme E2, J1
hsa-miR-1294	0	0	1	1	1	1	RAB10	RAB10, member RAS oncogene family
hsa-miR-1294	0	0	1	1	1	1	SLC45A2	solute carrier family 45, member 2
hsa-miR-1294	1	0	1	1	1	1	GPRC5B	G protein-coupled receptor, family C, group 5, member B
hsa-miR-1294	0	0	1	1	1	1	HSD17B11	hydroxysteroid (17-beta) dehydrogenase 11
hsa-miR-1294	1	0	1	0	1	1	HPCAL4	hippocalcin like 4
hsa-miR-1294	1	0	1	0	1	1	CRIM1	cysteine rich transmembrane BMP regulator 1 (chordin-like)
hsa-miR-1294	0	0	1	1	1	1	DTL	denticleless E3 ubiquitin protein ligase homolog (Drosophila)
hsa-miR-1294	0	0	1	1	0	0	FAM203A	family with sequence similarity 203, member A
hsa-miR-1294	0	0	1	1	0	0	ATP8A2	ATPase, aminophospholipid transporter, class I, type 8A, member 2
hsa-miR-1294	0	0	1	1	1	1	SLC22A17	solute carrier family 22, member 17
hsa-miR-1294	1	0	1	1	1	1	ZNF644	zinc finger protein 644
hsa-miR-1294	1	0	1	0	1	1	KLHL3	kelch-like 3 (Drosophila)
hsa-miR-1294	1	0	1	1	1	1	CPSF2	cleavage and polyadenylation specific factor 2, 100kDa
hsa-miR-1294	0	0	1	1	1	1	POLE3	polymerase (DNA directed), epsilon 3, accessory subunit
hsa-miR-1294	1	0	1	1	1	1	PLXNA3	plexin A3
hsa-miR-1294	1	0	1	1	1	1	INO80	INO80 homolog (S. cerevisiae)
hsa-miR-1294	1	0	1	1	1	1	GDAP2	ganglioside induced differentiation associated protein 2
hsa-miR-1294	0	0	1	1	1	1	WHSC1L1	Wolf-Hirschhorn syndrome candidate 1-like 1
hsa-miR-1294	1	0	1	1	1	1	VPS13B	vacuolar protein sorting 13 homolog B (yeast)
hsa-miR-1294	1	0	1	1	0	0	LAMTOR1	late endosomal/lysosomal adaptor, MAPK and MTOR activator 1
hsa-miR-1294	1	0	1	1	1	1	ZNHIT6	zinc finger, HIT-type containing 6
hsa-miR-1294	1	0	1	0	1	1	KIF26B	kinesin family member 26B
hsa-miR-1294	1	0	1	1	1	1	WDR6	WD repeat domain 6
hsa-miR-1294	0	0	1	1	1	1	GPATCH2	G patch domain containing 2
hsa-miR-1294	0	0	1	1	0	0	WDR11	WD repeat domain 11
hsa-miR-1294	1	0	1	1	1	1	FAM178A	family with sequence similarity 178, member A
hsa-miR-1294	1	0	1	0	1	1	MSL2	male-specific lethal 2 homolog (Drosophila)
hsa-miR-1294	0	0	1	0	1	1	FAM86C1	family with sequence similarity 86, member C1
hsa-miR-1294	0	0	1	0	1	1	TMEM57	transmembrane protein 57
hsa-miR-1294	0	0	1	1	1	1	AP5M1	adaptor-related protein complex 5, mu 1 subunit
hsa-miR-1294	1	0	1	1	1	1	DDX19A	DEAD (Asp-Glu-Ala-Asp) box polypeptide 19A
hsa-miR-1294	1	0	1	0	1	1	LIN7C	lin-7 homolog C (C. elegans)
hsa-miR-1294	1	0	1	0	1	1	TMEM106B	transmembrane protein 106B
hsa-miR-1294	0	0	1	1	1	1	BDP1	B double prime 1, subunit of RNA polymerase III transcription initiation factor IIIB
hsa-miR-1294	1	0	1	1	1	1	PAG1	phosphoprotein associated with glycosphingolipid microdomains 1
hsa-miR-1294	1	0	1	1	1	1	ASH1L	ash1 (absent, small, or homeotic)-like (Drosophila)
hsa-miR-1294	1	0	1	1	1	1	STRADB	STE20-related kinase adaptor beta
hsa-miR-1294	1	0	1	0	1	1	RNF114	ring finger protein 114
hsa-miR-1294	0	0	1	1	1	1	ELAC1	elaC homolog 1 (E. coli)
hsa-miR-1294	1	0	1	0	1	1	PCDHAC1	protocadherin alpha subfamily C, 1
hsa-miR-1294	1	0	1	0	1	1	PCDHAC2	protocadherin alpha subfamily C, 2
hsa-miR-1294	1	0	1	1	1	1	PCDHA1	protocadherin alpha 1
hsa-miR-1294	1	0	1	0	1	1	PCDHA10	protocadherin alpha 10
hsa-miR-1294	1	0	1	0	1	1	PCDHA11	protocadherin alpha 11
hsa-miR-1294	1	0	1	0	1	1	PCDHA12	protocadherin alpha 12
hsa-miR-1294	1	0	1	1	1	1	PCDHA2	protocadherin alpha 2
hsa-miR-1294	1	0	1	1	1	1	PCDHA3	protocadherin alpha 3
hsa-miR-1294	1	0	1	1	1	1	PCDHA6	protocadherin alpha 6
hsa-miR-1294	1	0	1	0	1	1	PCDHA7	protocadherin alpha 7
hsa-miR-1294	1	0	1	1	1	1	PCDHA8	protocadherin alpha 8
hsa-miR-1294	1	0	1	0	1	1	CYCS	cytochrome c, somatic
hsa-miR-1294	1	0	1	1	1	1	SASH3	SAM and SH3 domain containing 3
hsa-miR-1294	1	0	1	0	1	1	FAM190B	family with sequence similarity 190, member B
hsa-miR-1294	1	0	1	1	1	1	SEPT3	septin 3
hsa-miR-1294	1	0	1	1	1	1	EPB41L4B	erythrocyte membrane protein band 4.1 like 4B
hsa-miR-1294	0	0	1	1	1	1	KLHL4	kelch-like 4 (Drosophila)
hsa-miR-1294	0	0	1	1	0	0	BARHL2	BarH-like homeobox 2
hsa-miR-1294	0	0	1	1	1	1	CMC2	COX assembly mitochondrial protein 2 homolog (S. cerevisiae)
hsa-miR-1294	1	0	1	1	0	0	SLC17A7	solute carrier family 17 (sodium-dependent inorganic phosphate cotransporter), member 7
hsa-miR-1294	0	0	1	1	1	1	RALGAPA2	Ral GTPase activating protein, alpha subunit 2 (catalytic)
hsa-miR-1294	0	0	1	1	1	1	PDSS2	prenyl (decaprenyl) diphosphate synthase, subunit 2
hsa-miR-1294	0	0	1	1	0	0	CD248	CD248 molecule, endosialin
hsa-miR-1294	1	0	1	1	0	0	JPH2	junctophilin 2
hsa-miR-1294	1	0	1	1	1	1	OSM	oncostatin M
hsa-miR-1294	1	0	1	1	1	1	NRIP3	nuclear receptor interacting protein 3
hsa-miR-1294	0	0	1	1	0	0	AMIGO1	adhesion molecule with Ig-like domain 1
hsa-miR-1294	0	0	1	1	1	1	SHROOM4	shroom family member 4
hsa-miR-1294	1	0	1	1	1	1	USP31	ubiquitin specific peptidase 31
hsa-miR-1294	0	0	1	0	1	1	XPO5	exportin 5
hsa-miR-1294	1	0	1	1	1	1	RGAG1	retrotransposon gag domain containing 1
hsa-miR-1294	1	0	1	0	1	1	NUFIP2	nuclear fragile X mental retardation protein interacting protein 2
hsa-miR-1294	1	0	1	1	1	1	MIB1	mindbomb E3 ubiquitin protein ligase 1
hsa-miR-1294	1	0	1	0	1	1	SYT4	synaptotagmin IV
hsa-miR-1294	1	0	1	1	1	1	SIPA1L2	signal-induced proliferation-associated 1 like 2
hsa-miR-1294	0	0	1	1	1	1	PRX	periaxin
hsa-miR-1294	0	0	1	1	1	1	AQP9	aquaporin 9
hsa-miR-1294	1	0	1	0	1	1	RAP2A	RAP2A, member of RAS oncogene family
hsa-miR-1294	0	0	1	1	0	0	IFNA7	interferon, alpha 7
hsa-miR-1294	1	0	1	1	1	1	HCN1	hyperpolarization activated cyclic nucleotide-gated potassium channel 1
hsa-miR-1294	1	0	1	0	1	1	XK	X-linked Kx blood group (McLeod syndrome)
hsa-miR-1294	1	0	1	1	1	1	CLDN1	claudin 1
hsa-miR-1294	1	0	1	1	1	1	SNX6	sorting nexin 6
hsa-miR-1294	0	0	1	1	1	1	IL22RA1	interleukin 22 receptor, alpha 1
hsa-miR-1294	1	0	1	1	1	1	SENP2	SUMO1/sentrin/SMT3 specific peptidase 2
hsa-miR-1294	1	0	1	1	1	1	TRIB2	tribbles homolog 2 (Drosophila)
hsa-miR-1294	1	0	1	1	1	1	CLCN6	chloride channel, voltage-sensitive 6
hsa-miR-1294	0	0	1	1	0	0	LMAN1L	lectin, mannose-binding, 1 like
hsa-miR-1294	0	0	1	0	1	1	CFL2	cofilin 2 (muscle)
hsa-miR-1294	0	0	1	1	1	1	MS4A1	membrane-spanning 4-domains, subfamily A, member 1
hsa-miR-1294	1	0	1	1	1	1	EGLN1	egl nine homolog 1 (C. elegans)
hsa-miR-1294	1	0	1	1	1	1	CLSTN2	calsyntenin 2
hsa-miR-1294	0	0	1	1	0	0	POPDC2	popeye domain containing 2
hsa-miR-1294	1	0	1	1	1	1	XYLT1	xylosyltransferase I
hsa-miR-1294	1	0	1	1	1	1	ABCG4	ATP-binding cassette, sub-family G (WHITE), member 4
hsa-miR-1294	0	0	1	1	1	1	TCTA	T-cell leukemia translocation altered
hsa-miR-1294	1	0	1	1	1	1	HIF3A	hypoxia inducible factor 3, alpha subunit
hsa-miR-1294	1	0	1	0	1	1	MRPS25	mitochondrial ribosomal protein S25
hsa-miR-1294	1	0	1	1	1	1	GIGYF1	GRB10 interacting GYF protein 1
hsa-miR-1294	1	0	1	1	1	1	PRRX1	paired related homeobox 1
hsa-miR-1294	0	0	1	1	1	1	ACBD3	acyl-CoA binding domain containing 3
hsa-miR-1294	1	0	1	1	1	1	FAM160B2	family with sequence similarity 160, member B2
hsa-miR-1294	0	0	1	1	1	1	SFXN1	sideroflexin 1
hsa-miR-1294	1	0	1	1	0	0	AEN	apoptosis enhancing nuclease
hsa-miR-1294	1	0	1	0	1	1	BCL11B	B-cell CLL/lymphoma 11B (zinc finger protein)
hsa-miR-1294	1	0	1	1	1	1	REEP1	receptor accessory protein 1
hsa-miR-1294	0	0	1	1	1	1	SERF1B	small EDRK-rich factor 1B (centromeric)
hsa-miR-1294	1	0	1	0	1	1	NOTCH2	notch 2
hsa-miR-1294	1	0	1	1	1	1	LRRC2	leucine rich repeat containing 2
hsa-miR-1294	0	0	1	1	1	1	AKIRIN1	akirin 1
hsa-miR-1294	1	0	1	1	1	1	PPP1R3B	protein phosphatase 1, regulatory subunit 3B
hsa-miR-1294	0	0	1	1	1	1	GLT25D1	glycosyltransferase 25 domain containing 1
hsa-miR-1294	1	0	1	0	1	1	MOB3B	MOB kinase activator 3B
hsa-miR-1294	1	0	1	1	1	1	CLMP	CXADR-like membrane protein
hsa-miR-1294	0	0	1	1	1	1	ZNF767	zinc finger family member 767
hsa-miR-1294	1	0	1	0	1	1	NAA25	N(alpha)-acetyltransferase 25, NatB auxiliary subunit
hsa-miR-1294	1	0	1	1	1	1	MCF2L	MCF.2 cell line derived transforming sequence-like
hsa-miR-1294	1	0	1	0	1	1	VCPIP1	valosin containing protein (p97)/p47 complex interacting protein 1
hsa-miR-1294	1	0	1	0	1	1	EDEM3	ER degradation enhancer, mannosidase alpha-like 3
hsa-miR-1294	1	0	1	1	1	1	TRIB1	tribbles homolog 1 (Drosophila)
hsa-miR-1294	0	0	1	1	0	0	LY6G6C	lymphocyte antigen 6 complex, locus G6C
hsa-miR-1294	1	0	1	1	1	1	JHDM1D	jumonji C domain containing histone demethylase 1 homolog D (S. cerevisiae)
hsa-miR-1294	1	0	1	1	1	1	NRBF2	nuclear receptor binding factor 2
hsa-miR-1294	0	0	1	1	1	1	BCL2L14	BCL2-like 14 (apoptosis facilitator)
hsa-miR-1294	1	0	1	0	1	1	CSRNP2	cysteine-serine-rich nuclear protein 2
hsa-miR-1294	1	0	1	1	0	0	TCF7L1	transcription factor 7-like 1 (T-cell specific, HMG-box)
hsa-miR-1294	1	0	1	1	0	0	SCRT1	scratch homolog 1, zinc finger protein (Drosophila)
hsa-miR-1294	0	0	1	1	0	0	MRPL9	mitochondrial ribosomal protein L9
hsa-miR-1294	1	0	1	1	1	1	DNAL1	dynein, axonemal, light chain 1
hsa-miR-1294	1	0	1	0	1	1	ITCH	itchy E3 ubiquitin protein ligase
hsa-miR-1294	1	0	1	1	1	1	PCDHA9	protocadherin alpha 9
hsa-miR-1294	1	0	1	1	1	1	TMEM133	transmembrane protein 133
hsa-miR-1294	1	0	1	1	1	1	FBXO30	F-box protein 30
hsa-miR-1294	0	0	1	1	0	0	ARL6	ADP-ribosylation factor-like 6
hsa-miR-1294	1	0	1	1	1	1	ARID5B	AT rich interactive domain 5B (MRF1-like)
hsa-miR-1294	1	0	1	1	1	1	CAMKK1	calcium/calmodulin-dependent protein kinase kinase 1, alpha
hsa-miR-1294	1	0	1	1	1	1	DDI2	DNA-damage inducible 1 homolog 2 (S. cerevisiae)
hsa-miR-1294	1	0	1	1	1	1	BRMS1L	breast cancer metastasis-suppressor 1-like
hsa-miR-1294	0	0	1	1	1	1	USMG5	up-regulated during skeletal muscle growth 5 homolog (mouse)
hsa-miR-1294	0	0	1	1	0	0	TNS4	tensin 4
hsa-miR-1294	0	0	1	1	1	1	POLR2J2	polymerase (RNA) II (DNA directed) polypeptide J2
hsa-miR-1294	1	0	1	0	1	1	PURB	purine-rich element binding protein B
hsa-miR-1294	1	0	1	1	0	0	KCNH7	potassium voltage-gated channel, subfamily H (eag-related), member 7
hsa-miR-1294	1	0	1	1	1	1	RASL10B	RAS-like, family 10, member B
hsa-miR-1294	1	0	1	1	1	1	SSH2	slingshot homolog 2 (Drosophila)
hsa-miR-1294	1	0	1	1	0	0	FCHSD1	FCH and double SH3 domains 1
hsa-miR-1294	1	0	1	1	0	0	CCDC120	coiled-coil domain containing 120
hsa-miR-1294	1	0	1	1	1	1	SLC2A13	solute carrier family 2 (facilitated glucose transporter), member 13
hsa-miR-1294	0	0	1	1	0	0	PGLYRP2	peptidoglycan recognition protein 2
hsa-miR-1294	0	0	1	1	1	1	PLEKHG4B	pleckstrin homology domain containing, family G (with RhoGef domain) member 4B
hsa-miR-1294	1	0	1	1	1	1	TRIM9	tripartite motif containing 9
hsa-miR-1294	1	0	1	1	1	1	MED12L	mediator complex subunit 12-like
hsa-miR-1294	0	0	1	0	1	1	ZNF518B	zinc finger protein 518B
hsa-miR-1294	0	0	1	1	0	0	THEM4	thioesterase superfamily member 4
hsa-miR-1294	1	0	1	1	1	1	NAA15	N(alpha)-acetyltransferase 15, NatA auxiliary subunit
hsa-miR-1294	0	0	1	1	1	1	ABCA10	ATP-binding cassette, sub-family A (ABC1), member 10
hsa-miR-1294	1	0	1	1	1	1	COL11A2	collagen, type XI, alpha 2
hsa-miR-1294	1	0	1	1	1	1	ZNF280B	zinc finger protein 280B
hsa-miR-1294	1	0	1	1	1	1	ADAMTS19	ADAM metallopeptidase with thrombospondin type 1 motif, 19
hsa-miR-1294	1	0	1	1	1	1	FAM122A	family with sequence similarity 122A
hsa-miR-1294	0	0	1	0	0	0	AP5B1	adaptor-related protein complex 5, beta 1 subunit
hsa-miR-1294	1	0	1	1	0	0	PKDCC	protein kinase domain containing, cytoplasmic homolog (mouse)
hsa-miR-1294	1	0	1	0	1	1	FCHO2	FCH domain only 2
hsa-miR-1294	1	0	1	1	1	1	MBOAT2	membrane bound O-acyltransferase domain containing 2
hsa-miR-1294	1	0	1	1	1	1	CD200R1	CD200 receptor 1
hsa-miR-1294	0	0	1	1	1	1	SDR16C5	short chain dehydrogenase/reductase family 16C, member 5
hsa-miR-1294	0	0	1	0	1	1	MYO3B	myosin IIIB
hsa-miR-1294	1	0	1	1	1	1	ARX	aristaless related homeobox
hsa-miR-1294	1	0	1	1	0	0	LIPH	lipase, member H
hsa-miR-1294	1	0	1	0	1	1	CNOT6L	CCR4-NOT transcription complex, subunit 6-like
hsa-miR-1294	1	0	1	1	1	1	MAX	MYC associated factor X
hsa-miR-1294	0	0	1	0	1	1	SPATA18	spermatogenesis associated 18
hsa-miR-1294	1	0	1	1	1	1	CADM4	cell adhesion molecule 4
hsa-miR-1294	0	0	1	1	0	0	TCEB3C	transcription elongation factor B polypeptide 3C (elongin A3)
hsa-miR-1294	1	0	1	1	1	1	SEPT6	septin 6
hsa-miR-1294	0	0	1	1	1	1	GLIS1	GLIS family zinc finger 1
hsa-miR-1294	0	0	1	0	1	1	CHKB	choline kinase beta
hsa-miR-1294	0	0	1	1	1	1	TTC30A	tetratricopeptide repeat domain 30A
hsa-miR-1294	0	0	1	1	1	1	ZNF561	zinc finger protein 561
hsa-miR-1294	0	0	1	1	1	1	ZNF572	zinc finger protein 572
hsa-miR-1294	1	0	1	1	0	0	C9orf41	chromosome 9 open reading frame 41
hsa-miR-1294	1	0	1	1	1	1	ZNF583	zinc finger protein 583
hsa-miR-1294	0	0	1	1	1	1	CNIH3	cornichon homolog 3 (Drosophila)
hsa-miR-1294	0	0	1	1	1	1	DUSP18	dual specificity phosphatase 18
hsa-miR-1294	0	0	1	1	1	1	CCER1	coiled-coil glutamate-rich protein 1
hsa-miR-1294	0	0	1	1	1	1	DAND5	DAN domain family, member 5
hsa-miR-1294	0	0	1	1	1	1	KHDRBS2	KH domain containing, RNA binding, signal transduction associated 2
hsa-miR-1294	0	0	1	1	0	0	DOK6	docking protein 6
hsa-miR-1294	1	0	1	1	1	1	ATXN7L1	ataxin 7-like 1
hsa-miR-1294	1	0	1	0	1	1	TMEM196	transmembrane protein 196
hsa-miR-1294	1	0	1	1	1	1	PDIK1L	PDLIM1 interacting kinase 1 like
hsa-miR-1294	1	0	1	1	1	1	FAS	Fas (TNF receptor superfamily, member 6)
hsa-miR-1294	0	0	1	0	1	1	KBTBD6	kelch repeat and BTB (POZ) domain containing 6
hsa-miR-1294	0	0	1	0	0	0	FLJ32955	uncharacterized protein FLJ32955
hsa-miR-1294	0	0	1	1	0	0	ALDH16A1	aldehyde dehydrogenase 16 family, member A1
hsa-miR-1294	1	0	1	1	1	1	CREBRF	CREB3 regulatory factor
hsa-miR-1294	0	0	1	1	0	0	CMYA5	cardiomyopathy associated 5
hsa-miR-1294	1	0	1	1	1	1	MSI2	musashi homolog 2 (Drosophila)
hsa-miR-1294	0	0	1	1	1	1	ZFP91-CNTF	ZFP91-CNTF readthrough (non-protein coding)
hsa-miR-1294	0	0	1	1	1	1	CD8B	CD8b molecule
hsa-miR-1294	1	0	1	1	1	1	IL16	interleukin 16
hsa-miR-1294	0	0	1	1	1	1	REXO1L1	REX1, RNA exonuclease 1 homolog (S. cerevisiae)-like 1
hsa-miR-1294	1	0	1	1	1	1	NR4A3	nuclear receptor subfamily 4, group A, member 3
hsa-miR-1294	1	0	1	1	1	1	DCUN1D3	DCN1, defective in cullin neddylation 1, domain containing 3 (S. cerevisiae)
hsa-miR-1294	0	0	1	1	1	1	KLF17	Kruppel-like factor 17
hsa-miR-1294	1	0	1	1	1	1	TTBK2	tau tubulin kinase 2
hsa-miR-1294	1	0	1	1	1	1	FAM117B	family with sequence similarity 117, member B
hsa-miR-1294	1	0	1	1	1	1	CLVS1	clavesin 1
hsa-miR-1294	0	0	1	1	1	1	C10orf107	chromosome 10 open reading frame 107
hsa-miR-1294	1	0	1	0	1	1	KCTD20	potassium channel tetramerisation domain containing 20
hsa-miR-1294	1	0	1	0	1	1	PGM2L1	phosphoglucomutase 2-like 1
hsa-miR-1294	0	0	1	1	1	1	C17orf78	chromosome 17 open reading frame 78
hsa-miR-1294	0	0	1	0	1	1	C5orf64	chromosome 5 open reading frame 64
hsa-miR-1294	1	0	1	1	1	1	PRTG	protogenin
hsa-miR-1294	1	0	1	0	1	1	SREK1IP1	SREK1-interacting protein 1
hsa-miR-1294	1	0	1	1	1	1	SLC41A1	solute carrier family 41, member 1
hsa-miR-1294	1	0	1	0	1	1	TMEM167A	transmembrane protein 167A
hsa-miR-1294	1	0	1	1	1	1	SCN4B	sodium channel, voltage-gated, type IV, beta subunit
hsa-miR-1294	0	0	1	1	1	1	GIMAP8	GTPase, IMAP family member 8
hsa-miR-1294	1	0	1	0	1	1	CCDC71L	coiled-coil domain containing 71-like
hsa-miR-1294	1	0	1	0	1	1	C5orf51	chromosome 5 open reading frame 51
hsa-miR-1294	0	0	1	1	1	1	LYNX1	Ly6/neurotoxin 1
hsa-miR-1294	1	0	1	1	1	1	PPM1B	protein phosphatase, Mg2+/Mn2+ dependent, 1B
hsa-miR-1294	0	0	1	1	1	1	GPIHBP1	glycosylphosphatidylinositol anchored high density lipoprotein binding protein 1
hsa-miR-1294	0	0	1	1	1	1	ZNF831	zinc finger protein 831
hsa-miR-1294	1	0	1	1	1	1	TMEM26	transmembrane protein 26
hsa-miR-1294	0	0	1	1	1	1	STXBP4	syntaxin binding protein 4
hsa-miR-1294	0	0	1	1	1	1	CMTM4	CKLF-like MARVEL transmembrane domain containing 4
hsa-miR-1294	0	0	1	1	1	1	WDR69	WD repeat domain 69
hsa-miR-1294	0	0	1	0	1	1	ZNF445	zinc finger protein 445
hsa-miR-1294	0	0	1	1	1	1	WFDC8	WAP four-disulfide core domain 8
hsa-miR-1294	1	0	1	1	1	1	ISM2	isthmin 2 homolog (zebrafish)
hsa-miR-1294	0	0	1	1	0	0	GPX6	glutathione peroxidase 6 (olfactory)
hsa-miR-1294	0	0	1	0	1	1	C16orf82	chromosome 16 open reading frame 82
hsa-miR-1294	0	0	1	0	1	1	NBPF11	neuroblastoma breakpoint family, member 11
hsa-miR-1294	1	0	1	1	1	1	ZBTB41	zinc finger and BTB domain containing 41
hsa-miR-1294	0	0	1	0	1	1	BTNL3	butyrophilin-like 3
hsa-miR-1294	1	0	1	1	1	1	ASB7	ankyrin repeat and SOCS box containing 7
hsa-miR-1294	0	0	1	0	1	1	TCF21	transcription factor 21
hsa-miR-1294	0	0	1	1	1	1	FOXR2	forkhead box R2
hsa-miR-1294	1	0	1	0	1	1	NRK	Nik related kinase
hsa-miR-1294	0	0	1	1	1	1	APITD1	apoptosis-inducing, TAF9-like domain 1
hsa-miR-1294	0	0	1	1	1	1	LHFPL4	lipoma HMGIC fusion partner-like 4
hsa-miR-1294	1	0	1	1	0	0	ENHO	energy homeostasis associated
hsa-miR-1294	1	0	1	1	1	1	PTGER3	prostaglandin E receptor 3 (subtype EP3)
hsa-miR-1294	0	0	1	1	0	0	SIGLEC6	sialic acid binding Ig-like lectin 6
hsa-miR-1294	0	0	1	0	1	1	SIAH3	siah E3 ubiquitin protein ligase family member 3
hsa-miR-1294	0	0	1	1	1	1	KCTD1	potassium channel tetramerisation domain containing 1
hsa-miR-1294	0	0	1	1	0	0	FOXD4L4	forkhead box D4-like 4
hsa-miR-1294	0	0	1	1	0	0	CCDC23	coiled-coil domain containing 23
hsa-miR-1294	0	0	1	1	1	1	ILDR2	immunoglobulin-like domain containing receptor 2
hsa-miR-1294	0	0	1	1	1	1	SHC4	SHC (Src homology 2 domain containing) family, member 4
hsa-miR-1294	1	0	1	1	1	1	IGSF1	immunoglobulin superfamily, member 1
hsa-miR-1294	1	0	1	1	1	1	TNFAIP8L3	tumor necrosis factor, alpha-induced protein 8-like 3
hsa-miR-1294	0	0	1	1	0	0	TMPRSS11F	transmembrane protease, serine 11F
hsa-miR-1294	1	0	1	1	1	1	CAPN3	calpain 3, (p94)
hsa-miR-1294	0	0	1	1	1	1	DFFA	DNA fragmentation factor, 45kDa, alpha polypeptide
hsa-miR-1294	0	0	1	1	0	0	SNRPN	small nuclear ribonucleoprotein polypeptide N
hsa-miR-1294	0	0	1	0	0	0	SNORD108	small nucleolar RNA, C/D box 108
hsa-miR-1294	0	0	1	0	0	0	PAR5	Prader-Willi/Angelman syndrome-5
hsa-miR-1294	0	0	1	0	0	0	LYPLA2P1	lysophospholipase II pseudogene 1
hsa-miR-1294	0	0	1	0	0	0	ANXA2P3	annexin A2 pseudogene 3
hsa-miR-1294	0	0	1	0	0	0	TTTY2	testis-specific transcript, Y-linked 2 (non-protein coding)
hsa-miR-1294	0	0	1	0	0	0	TTTY22	testis-specific transcript, Y-linked 22 (non-protein coding)
hsa-miR-1294	0	0	1	0	0	0	TTTY23	testis-specific transcript, Y-linked 23 (non-protein coding)
hsa-miR-1294	0	0	1	0	0	0	TTTY15	testis-specific transcript, Y-linked 15 (non-protein coding)
hsa-miR-1294	0	0	1	0	0	0	ANXA2P1	annexin A2 pseudogene 1
hsa-miR-1294	0	0	1	0	0	0	FTH1P8	ferritin, heavy polypeptide 1 pseudogene 8
hsa-miR-1294	0	0	1	0	0	0	COX6B1P1	cytochrome c oxidase subunit VIb polypeptide 1 (ubiquitous) pseudogene 1
hsa-miR-1294	0	0	1	0	0	0	MSX2P1	msh homeobox 2 pseudogene 1
hsa-miR-1294	0	0	1	0	0	0	SNORD56	small nucleolar RNA, C/D box 56
hsa-miR-1294	0	0	1	0	0	0	HTR7P1	5-hydroxytryptamine (serotonin) receptor 7 pseudogene 1
hsa-miR-1294	0	0	1	0	0	0	SEPHS1P1	selenophosphate synthetase 1 pseudogene 1
hsa-miR-1294	0	0	1	0	0	0	LOC256880	uncharacterized LOC256880
hsa-miR-1294	0	0	1	0	0	0	MALAT1	metastasis associated lung adenocarcinoma transcript 1 (non-protein coding)
hsa-miR-1294	0	0	1	0	0	0	DUSP5P	dual specificity phosphatase 5 pseudogene
hsa-miR-1294	0	0	1	0	0	0	PTPRVP	protein tyrosine phosphatase, receptor type, V, pseudogene
hsa-miR-1294	0	0	1	0	0	0	SNORA39	small nucleolar RNA, H/ACA box 39
hsa-miR-1294	0	0	1	0	0	0	LILRP2	leukocyte immunoglobulin-like receptor pseudogene 2
hsa-miR-1294	0	0	1	0	0	0	PYY2	peptide YY, 2 (pseudogene)
hsa-miR-1294	1	0	1	1	0	0	HOXC5	homeobox C5
hsa-miR-1294	0	0	1	0	0	0	NBR2	neighbor of BRCA1 gene 2 (non-protein coding)
hsa-miR-1294	0	0	1	0	0	0	HSP90B3P	heat shock protein 90kDa beta (Grp94), member 3, pseudogene
hsa-miR-1294	0	0	1	0	0	0	ANP32AP1	acidic (leucine-rich) nuclear phosphoprotein 32 family, member A pseudogene 1
hsa-miR-1294	0	0	1	0	0	0	AFG3L1P	AFG3 ATPase family gene 3-like 1 (S. cerevisiae), pseudogene
hsa-miR-1294	0	0	1	0	0	0	SNORD116-22	small nucleolar RNA, C/D box 116-22
hsa-miR-1294	0	0	1	1	1	1	CAST	calpastatin
hsa-miR-1294	0	0	1	1	1	1	PSEN1	presenilin 1
hsa-miR-1294	1	0	1	1	1	1	TRIO	trio Rho guanine nucleotide exchange factor
hsa-miR-1294	0	0	1	1	1	1	PEG3	paternally expressed 3
hsa-miR-1294	0	0	1	1	0	0	STK19	serine/threonine kinase 19
hsa-miR-1294	0	0	1	1	0	0	GPR17	G protein-coupled receptor 17
