# Supplementary material for: Profiling of Selected MicroRNAs in Proliferative Eutopic Endometrium of Women with Ovarian Endometriosis
Source: Biomed Res Int. 2015 Aug 20;2015:760698. doi: 10.1155/2015/760698 (PMC4558423; doi:10.1155/2015/760698)
Supplement: Supplementary file 1 — Table I: The names of miRNAs significantly differentially expressed between eutopic endometrium of patients with endometriosis vs eutopic endometrium of patients without endometriosis. Table II: The associations between miRNA and mRNA, which presents detailed results of the search of six major databases i.e targetscan, tarbase, miranda, mirbase, mirtarget2 and pictar. [file 760698.f1.zip › 760698.f1/Table II/hsa-miR-1296.tsv]

miR	targetscan	tarbase	miranda	mirbase	mirtarget2	pictar	GeneSymbol	GeneName
hsa-miR-1296	0	0	1	1	1	1	BAI2	brain-specific angiogenesis inhibitor 2
hsa-miR-1296	1	0	1	0	1	1	PTPRT	protein tyrosine phosphatase, receptor type, T
hsa-miR-1296	0	0	1	1	1	1	C2CD2L	C2CD2-like
hsa-miR-1296	0	0	1	1	0	0	PLCH2	phospholipase C, eta 2
hsa-miR-1296	1	0	1	0	0	0	HECTD4	HECT domain containing E3 ubiquitin protein ligase 4
hsa-miR-1296	1	0	1	1	1	1	LPHN2	latrophilin 2
hsa-miR-1296	1	0	1	0	0	0	MICAL3	microtubule associated monoxygenase, calponin and LIM domain containing 3
hsa-miR-1296	1	0	1	1	1	1	RNMT	RNA (guanine-7-) methyltransferase
hsa-miR-1296	0	0	1	1	1	1	MAN2B2	mannosidase, alpha, class 2B, member 2
hsa-miR-1296	1	0	1	1	1	1	C11orf9	chromosome 11 open reading frame 9
hsa-miR-1296	1	0	1	1	1	1	NTNG1	netrin G1
hsa-miR-1296	1	0	1	1	0	0	KIAA1045	KIAA1045
hsa-miR-1296	0	0	1	1	0	0	RTEL1	regulator of telomere elongation helicase 1
hsa-miR-1296	1	0	1	1	1	1	PHF8	PHD finger protein 8
hsa-miR-1296	1	0	1	1	1	1	MKL2	MKL/myocardin-like 2
hsa-miR-1296	1	0	1	0	1	1	INTS2	integrator complex subunit 2
hsa-miR-1296	0	0	1	1	0	0	TNFRSF12A	tumor necrosis factor receptor superfamily, member 12A
hsa-miR-1296	1	0	1	0	0	0	ODZ4	odz, odd Oz/ten-m homolog 4 (Drosophila)
hsa-miR-1296	1	0	1	1	0	0	KIAA1462	KIAA1462
hsa-miR-1296	1	0	1	1	1	1	FRAS1	Fraser syndrome 1
hsa-miR-1296	1	0	1	1	0	0	ZSWIM5	zinc finger, SWIM-type containing 5
hsa-miR-1296	0	0	1	0	0	0	CHD8	chromodomain helicase DNA binding protein 8
hsa-miR-1296	1	0	1	1	0	0	MAGI3	membrane associated guanylate kinase, WW and PDZ domain containing 3
hsa-miR-1296	0	0	1	0	0	0	TTC28-AS1	TTC28 antisense RNA 1
hsa-miR-1296	1	0	1	1	1	1	IKZF4	IKAROS family zinc finger 4 (Eos)
hsa-miR-1296	1	0	1	1	1	1	LCOR	ligand dependent nuclear receptor corepressor
hsa-miR-1296	0	0	1	1	0	0	SEC16B	SEC16 homolog B (S. cerevisiae)
hsa-miR-1296	1	0	1	1	1	1	SSH3	slingshot homolog 3 (Drosophila)
hsa-miR-1296	1	0	1	1	1	1	SH3TC2	SH3 domain and tetratricopeptide repeats 2
hsa-miR-1296	1	0	1	0	1	1	RNF43	ring finger protein 43
hsa-miR-1296	0	0	1	1	0	0	FAM22D	family with sequence similarity 22, member D
hsa-miR-1296	0	0	1	1	0	0	MED12	mediator complex subunit 12
hsa-miR-1296	0	0	1	1	0	0	SSPO	SCO-spondin homolog (Bos taurus)
hsa-miR-1296	0	0	1	1	1	1	DOCK8	dedicator of cytokinesis 8
hsa-miR-1296	1	0	1	1	1	1	ADARB1	adenosine deaminase, RNA-specific, B1
hsa-miR-1296	0	0	1	1	1	1	ING4	inhibitor of growth family, member 4
hsa-miR-1296	0	0	1	1	0	0	DBP	D site of albumin promoter (albumin D-box) binding protein
hsa-miR-1296	1	0	1	1	1	1	OSBPL7	oxysterol binding protein-like 7
hsa-miR-1296	0	0	1	0	0	0	PIDD	p53-induced death domain protein
hsa-miR-1296	0	0	1	1	1	1	MAZ	MYC-associated zinc finger protein (purine-binding transcription factor)
hsa-miR-1296	1	0	1	0	1	1	MAML1	mastermind-like 1 (Drosophila)
hsa-miR-1296	1	0	1	0	1	1	SLC6A6	solute carrier family 6 (neurotransmitter transporter, taurine), member 6
hsa-miR-1296	1	0	1	1	0	0	CACNB1	calcium channel, voltage-dependent, beta 1 subunit
hsa-miR-1296	1	0	1	0	1	1	DPYSL2	dihydropyrimidinase-like 2
hsa-miR-1296	1	0	1	0	1	1	ETV1	ets variant 1
hsa-miR-1296	0	0	1	1	1	1	RXRB	retinoid X receptor, beta
hsa-miR-1296	1	0	1	1	0	0	TNK2	tyrosine kinase, non-receptor, 2
hsa-miR-1296	1	0	1	1	1	1	MTA1	metastasis associated 1
hsa-miR-1296	0	0	1	1	1	1	DGKE	diacylglycerol kinase, epsilon 64kDa
hsa-miR-1296	1	0	1	1	1	1	TBX2	T-box 2
hsa-miR-1296	1	0	1	1	1	1	MINK1	misshapen-like kinase 1
hsa-miR-1296	0	0	1	1	0	0	IGFBP2	insulin-like growth factor binding protein 2, 36kDa
hsa-miR-1296	1	0	1	1	1	1	LIMA1	LIM domain and actin binding 1
hsa-miR-1296	0	0	1	1	0	0	CFLAR	CASP8 and FADD-like apoptosis regulator
hsa-miR-1296	0	0	1	1	0	0	TRIM27	tripartite motif containing 27
hsa-miR-1296	0	0	1	1	0	0	MSH5	mutS homolog 5 (E. coli)
hsa-miR-1296	1	0	1	1	1	1	PICALM	phosphatidylinositol binding clathrin assembly protein
hsa-miR-1296	0	0	1	0	0	0	MIAT	myocardial infarction associated transcript (non-protein coding)
hsa-miR-1296	1	0	1	1	1	1	MDM4	Mdm4 p53 binding protein homolog (mouse)
hsa-miR-1296	1	0	1	0	1	1	MLL2	myeloid/lymphoid or mixed-lineage leukemia 2
hsa-miR-1296	0	0	1	1	0	0	SPTBN2	spectrin, beta, non-erythrocytic 2
hsa-miR-1296	1	0	1	0	0	0	MAP3K1	mitogen-activated protein kinase kinase kinase 1, E3 ubiquitin protein ligase
hsa-miR-1296	1	0	1	1	0	0	SH2D2A	SH2 domain containing 2A
hsa-miR-1296	1	0	1	1	1	1	CTNND1	catenin (cadherin-associated protein), delta 1
hsa-miR-1296	1	0	1	1	0	0	ASPHD1	aspartate beta-hydroxylase domain containing 1
hsa-miR-1296	1	0	1	1	0	0	PRRC2A	proline-rich coiled-coil 2A
hsa-miR-1296	0	0	1	1	0	0	SGK223	homolog of rat pragma of Rnd2
hsa-miR-1296	0	0	1	1	1	1	PCBP4	poly(rC) binding protein 4
hsa-miR-1296	0	0	1	1	1	1	IL18BP	interleukin 18 binding protein
hsa-miR-1296	1	0	1	0	0	0	PPME1	protein phosphatase methylesterase 1
hsa-miR-1296	1	0	1	1	1	1	CEP63	centrosomal protein 63kDa
hsa-miR-1296	1	0	1	1	1	1	EDNRB	endothelin receptor type B
hsa-miR-1296	0	0	1	1	0	0	CALHM2	calcium homeostasis modulator 2
hsa-miR-1296	1	0	1	1	1	1	C3orf18	chromosome 3 open reading frame 18
hsa-miR-1296	1	0	1	1	0	0	ECE2	endothelin converting enzyme 2
hsa-miR-1296	0	0	1	1	1	1	SLCO2B1	solute carrier organic anion transporter family, member 2B1
hsa-miR-1296	0	0	1	1	0	0	P2RY6	pyrimidinergic receptor P2Y, G-protein coupled, 6
hsa-miR-1296	0	0	1	1	1	1	DOCK10	dedicator of cytokinesis 10
hsa-miR-1296	0	0	1	1	0	0	NYX	nyctalopin
hsa-miR-1296	0	0	1	1	1	1	CTDSP1	CTD (carboxy-terminal domain, RNA polymerase II, polypeptide A) small phosphatase 1
hsa-miR-1296	1	0	1	1	1	1	LDB3	LIM domain binding 3
hsa-miR-1296	1	0	1	1	1	1	VPS39	vacuolar protein sorting 39 homolog (S. cerevisiae)
hsa-miR-1296	1	0	1	1	1	1	TMUB2	transmembrane and ubiquitin-like domain containing 2
hsa-miR-1296	0	0	1	0	1	1	KANSL3	KAT8 regulatory NSL complex subunit 3
hsa-miR-1296	0	0	1	1	0	0	SLC38A5	solute carrier family 38, member 5
hsa-miR-1296	1	0	1	1	1	1	SPTBN4	spectrin, beta, non-erythrocytic 4
hsa-miR-1296	0	0	1	1	0	0	ZAN	zonadhesin
hsa-miR-1296	1	0	1	1	1	1	CALU	calumenin
hsa-miR-1296	0	0	1	1	1	1	SLC6A15	solute carrier family 6 (neutral amino acid transporter), member 15
hsa-miR-1296	1	0	1	0	1	1	WIPF2	WAS/WASL interacting protein family, member 2
hsa-miR-1296	0	0	1	1	0	0	SNRPN	small nuclear ribonucleoprotein polypeptide N
hsa-miR-1296	1	0	1	1	1	1	NTRK2	neurotrophic tyrosine kinase, receptor, type 2
hsa-miR-1296	0	0	1	1	0	0	CNKSR2	connector enhancer of kinase suppressor of Ras 2
hsa-miR-1296	1	0	1	1	1	1	STX16	syntaxin 16
hsa-miR-1296	1	0	1	1	0	0	XRRA1	X-ray radiation resistance associated 1
hsa-miR-1296	1	0	1	1	1	1	SLC35A4	solute carrier family 35, member A4
hsa-miR-1296	0	0	1	1	0	0	RASGEF1C	RasGEF domain family, member 1C
hsa-miR-1296	1	0	1	1	1	1	BRSK1	BR serine/threonine kinase 1
hsa-miR-1296	0	0	1	1	1	1	PTK7	PTK7 protein tyrosine kinase 7
hsa-miR-1296	1	0	1	1	0	0	BRSK2	BR serine/threonine kinase 2
hsa-miR-1296	1	0	1	0	1	1	IL1RAP	interleukin 1 receptor accessory protein
hsa-miR-1296	0	0	1	0	0	0	CD177	CD177 molecule
hsa-miR-1296	1	0	1	1	1	1	NRXN3	neurexin 3
hsa-miR-1296	0	0	1	0	1	1	SRPK1	SRSF protein kinase 1
hsa-miR-1296	1	0	1	1	1	1	PPP3CB	protein phosphatase 3, catalytic subunit, beta isozyme
hsa-miR-1296	0	0	1	1	0	0	ASAP3	ArfGAP with SH3 domain, ankyrin repeat and PH domain 3
hsa-miR-1296	1	0	1	1	1	1	ENOX2	ecto-NOX disulfide-thiol exchanger 2
hsa-miR-1296	0	0	1	0	0	0	TUG1	taurine upregulated 1 (non-protein coding)
hsa-miR-1296	1	0	1	1	1	1	ARHGAP12	Rho GTPase activating protein 12
hsa-miR-1296	1	0	1	1	0	0	CCDC120	coiled-coil domain containing 120
hsa-miR-1296	0	0	1	0	0	0	C17orf72	chromosome 17 open reading frame 72
hsa-miR-1296	0	0	1	1	0	0	UBR4	ubiquitin protein ligase E3 component n-recognin 4
hsa-miR-1296	1	0	1	0	1	1	LIN28A	lin-28 homolog A (C. elegans)
hsa-miR-1296	1	0	1	1	1	1	SLCO5A1	solute carrier organic anion transporter family, member 5A1
hsa-miR-1296	0	0	1	1	0	0	JMJD4	jumonji domain containing 4
hsa-miR-1296	1	0	1	1	1	1	WDTC1	WD and tetratricopeptide repeats 1
hsa-miR-1296	1	0	1	1	0	0	FASTK	Fas-activated serine/threonine kinase
hsa-miR-1296	0	0	1	1	1	1	LRRN1	leucine rich repeat neuronal 1
hsa-miR-1296	0	0	1	0	0	0	LOC399491	GPS, PLAT and transmembrane domain-containing protein
hsa-miR-1296	1	0	1	1	1	1	BAZ2A	bromodomain adjacent to zinc finger domain, 2A
hsa-miR-1296	0	0	1	0	1	1	FLJ14186	uncharacterized LOC401149
hsa-miR-1296	0	0	1	1	1	1	MUC12	mucin 12, cell surface associated
hsa-miR-1296	0	0	1	0	0	0	FLJ21408	uncharacterized LOC400512
hsa-miR-1296	0	0	1	0	1	1	ATXN1L	ataxin 1-like
hsa-miR-1296	1	0	1	0	1	1	ZCCHC3	zinc finger, CCHC domain containing 3
hsa-miR-1296	0	0	1	0	1	1	HEMK1	HemK methyltransferase family member 1
hsa-miR-1296	1	0	1	1	0	0	PCED1A	PC-esterase domain containing 1A
hsa-miR-1296	0	0	1	1	1	1	FAM124B	family with sequence similarity 124B
hsa-miR-1296	1	0	1	1	1	1	DCAF8	DDB1 and CUL4 associated factor 8
hsa-miR-1296	1	0	1	1	1	1	FOXP1	forkhead box P1
hsa-miR-1296	1	0	1	1	1	1	FAM53C	family with sequence similarity 53, member C
hsa-miR-1296	0	0	1	0	0	0	JAKMIP2-AS1	JAKMIP2 antisense RNA 1
hsa-miR-1296	0	0	1	1	0	0	TMEM107	transmembrane protein 107
hsa-miR-1296	0	0	1	1	1	1	FAM107A	family with sequence similarity 107, member A
hsa-miR-1296	0	0	1	1	1	1	C8orf46	chromosome 8 open reading frame 46
hsa-miR-1296	1	0	1	1	1	1	PDLIM2	PDZ and LIM domain 2 (mystique)
hsa-miR-1296	0	0	1	1	1	1	TTC19	tetratricopeptide repeat domain 19
hsa-miR-1296	0	0	1	0	0	0	LOC157273	uncharacterized LOC157273
hsa-miR-1296	1	0	1	0	1	1	RNF165	ring finger protein 165
hsa-miR-1296	0	0	1	1	0	0	BEAN1	brain expressed, associated with NEDD4, 1
hsa-miR-1296	1	0	1	1	1	1	RAI2	retinoic acid induced 2
hsa-miR-1296	1	0	1	1	1	1	SHISA5	shisa homolog 5 (Xenopus laevis)
hsa-miR-1296	0	0	1	1	0	0	CHPF2	chondroitin polymerizing factor 2
hsa-miR-1296	0	0	1	0	0	0	LOC654433	uncharacterized LOC654433
hsa-miR-1296	0	0	1	0	1	1	FAM70A	family with sequence similarity 70, member A
hsa-miR-1296	1	0	1	1	1	1	SCAMP5	secretory carrier membrane protein 5
hsa-miR-1296	0	0	1	0	0	0	AFG3L1P	AFG3 ATPase family gene 3-like 1 (S. cerevisiae), pseudogene
hsa-miR-1296	0	0	1	1	1	1	ZNF606	zinc finger protein 606
hsa-miR-1296	0	0	1	1	1	1	GNB2	guanine nucleotide binding protein (G protein), beta polypeptide 2
hsa-miR-1296	0	0	1	0	0	0	LOC255187	hCG1980447
hsa-miR-1296	0	0	1	1	0	0	SLC25A28	solute carrier family 25 (mitochondrial iron transporter), member 28
hsa-miR-1296	0	0	1	0	1	1	AGBL1	ATP/GTP binding protein-like 1
hsa-miR-1296	0	0	1	1	0	0	SLC39A4	solute carrier family 39 (zinc transporter), member 4
hsa-miR-1296	0	0	1	0	1	1	ZNF498	zinc finger protein 498
hsa-miR-1296	0	0	1	1	0	0	RELT	RELT tumor necrosis factor receptor
hsa-miR-1296	0	0	1	0	0	0	PLCD4	phospholipase C, delta 4
hsa-miR-1296	1	0	1	1	1	1	MAP3K11	mitogen-activated protein kinase kinase kinase 11
hsa-miR-1296	0	0	1	1	0	0	NXF2	nuclear RNA export factor 2
hsa-miR-1296	1	0	1	1	0	0	ZFYVE27	zinc finger, FYVE domain containing 27
hsa-miR-1296	1	0	1	1	1	1	IST1	increased sodium tolerance 1 homolog (yeast)
hsa-miR-1296	0	0	1	1	0	0	CD37	CD37 molecule
hsa-miR-1296	1	0	1	1	1	1	PEAR1	platelet endothelial aggregation receptor 1
hsa-miR-1296	1	0	1	1	1	1	FAM73B	family with sequence similarity 73, member B
hsa-miR-1296	0	0	1	1	1	1	ROBO4	roundabout, axon guidance receptor, homolog 4 (Drosophila)
hsa-miR-1296	0	0	1	1	1	1	ZFAND2B	zinc finger, AN1-type domain 2B
hsa-miR-1296	0	0	1	0	0	0	SDHAP2	succinate dehydrogenase complex, subunit A, flavoprotein pseudogene 2
hsa-miR-1296	1	0	1	1	1	1	UBAP1	ubiquitin associated protein 1
hsa-miR-1296	1	0	1	1	0	0	B3GAT3	beta-1,3-glucuronyltransferase 3 (glucuronosyltransferase I)
hsa-miR-1296	0	0	1	1	0	0	GHDC	GH3 domain containing
hsa-miR-1296	0	0	1	1	1	1	CAMKV	CaM kinase-like vesicle-associated
hsa-miR-1296	1	0	1	0	1	1	SLC25A37	solute carrier family 25 (mitochondrial iron transporter), member 37
hsa-miR-1296	0	0	1	0	1	1	CADM1	cell adhesion molecule 1
hsa-miR-1296	1	0	1	1	1	1	PIP4K2C	phosphatidylinositol-5-phosphate 4-kinase, type II, gamma
hsa-miR-1296	0	0	1	1	0	0	FAM115C	family with sequence similarity 115, member C
hsa-miR-1296	0	0	1	1	0	0	PIGO	phosphatidylinositol glycan anchor biosynthesis, class O
hsa-miR-1296	0	0	1	1	1	1	MAPK10	mitogen-activated protein kinase 10
hsa-miR-1296	1	0	1	1	1	1	EGR2	early growth response 2
hsa-miR-1296	0	0	1	0	0	0	LOC440910	uncharacterized LOC440910
hsa-miR-1296	1	0	1	1	1	1	FBXW2	F-box and WD repeat domain containing 2
hsa-miR-1296	0	0	1	1	1	1	CD34	CD34 molecule
hsa-miR-1296	1	0	1	0	1	1	TEF	thyrotrophic embryonic factor
hsa-miR-1296	0	0	1	1	1	1	NRCAM	neuronal cell adhesion molecule
hsa-miR-1296	1	0	1	1	1	1	GNG2	guanine nucleotide binding protein (G protein), gamma 2
hsa-miR-1296	0	0	1	1	1	1	NRBP1	nuclear receptor binding protein 1
hsa-miR-1296	1	0	1	1	1	1	SARM1	sterile alpha and TIR motif containing 1
hsa-miR-1296	0	0	1	0	0	0	CXXC1P1	CXXC finger protein 1 pseudogene 1
hsa-miR-1296	1	0	1	1	0	0	TSEN54	tRNA splicing endonuclease 54 homolog (S. cerevisiae)
hsa-miR-1296	0	0	1	0	1	1	KANSL2	KAT8 regulatory NSL complex subunit 2
hsa-miR-1296	0	0	1	1	1	1	CORO7	coronin 7
hsa-miR-1296	1	0	1	0	1	1	GATAD2B	GATA zinc finger domain containing 2B
hsa-miR-1296	0	0	1	1	0	0	CES4A	carboxylesterase 4A
hsa-miR-1296	1	0	1	1	1	1	PTPRU	protein tyrosine phosphatase, receptor type, U
hsa-miR-1296	1	0	1	1	1	1	CPNE8	copine VIII
hsa-miR-1296	0	0	1	1	0	0	DPAGT1	dolichyl-phosphate (UDP-N-acetylglucosamine) N-acetylglucosaminephosphotransferase 1 (GlcNAc-1-P transferase)
hsa-miR-1296	1	0	1	1	1	1	RASGEF1A	RasGEF domain family, member 1A
hsa-miR-1296	1	0	1	1	1	1	NDEL1	nudE nuclear distribution E homolog (A. nidulans)-like 1
hsa-miR-1296	0	0	1	1	1	1	CHRM5	cholinergic receptor, muscarinic 5
hsa-miR-1296	0	0	1	1	1	1	GPR115	G protein-coupled receptor 115
hsa-miR-1296	1	0	1	1	1	1	EPB41L4A	erythrocyte membrane protein band 4.1 like 4A
hsa-miR-1296	1	0	1	0	1	1	KBTBD8	kelch repeat and BTB (POZ) domain containing 8
hsa-miR-1296	1	0	1	1	1	1	EPB41L1	erythrocyte membrane protein band 4.1-like 1
hsa-miR-1296	1	0	1	1	1	1	CDV3	CDV3 homolog (mouse)
hsa-miR-1296	0	0	1	1	1	1	TMEM177	transmembrane protein 177
hsa-miR-1296	1	0	1	0	1	1	YPEL2	yippee-like 2 (Drosophila)
hsa-miR-1296	1	0	1	1	1	1	RAB11FIP4	RAB11 family interacting protein 4 (class II)
hsa-miR-1296	0	0	1	0	0	0	LINC00293	long intergenic non-protein coding RNA 293
hsa-miR-1296	0	0	1	0	0	0	LOC284385	uncharacterized LOC284385
hsa-miR-1296	0	0	1	0	0	0	CECR7	cat eye syndrome chromosome region, candidate 7 (non-protein coding)
hsa-miR-1296	0	0	1	1	1	1	TIMM50	translocase of inner mitochondrial membrane 50 homolog (S. cerevisiae)
hsa-miR-1296	0	0	1	0	0	0	LOC100130954	uncharacterized LOC100130954
hsa-miR-1296	0	0	1	1	1	1	GRPEL1	GrpE-like 1, mitochondrial (E. coli)
hsa-miR-1296	0	0	1	1	0	0	GDPD5	glycerophosphodiester phosphodiesterase domain containing 5
hsa-miR-1296	0	0	1	1	1	1	SLFN13	schlafen family member 13
hsa-miR-1296	0	0	1	1	0	0	ZFYVE19	zinc finger, FYVE domain containing 19
hsa-miR-1296	1	0	1	1	0	0	WIZ	widely interspaced zinc finger motifs
hsa-miR-1296	1	0	1	1	1	1	ZBTB4	zinc finger and BTB domain containing 4
hsa-miR-1296	0	0	1	1	0	0	SLC26A10	solute carrier family 26, member 10
hsa-miR-1296	0	0	1	0	1	1	PATE4	prostate and testis expressed 4
hsa-miR-1296	1	0	1	1	1	1	MDGA2	MAM domain containing glycosylphosphatidylinositol anchor 2
hsa-miR-1296	0	0	1	1	1	1	FAM19A2	family with sequence similarity 19 (chemokine (C-C motif)-like), member A2
hsa-miR-1296	0	0	1	0	1	1	CWC22	CWC22 spliceosome-associated protein homolog (S. cerevisiae)
hsa-miR-1296	0	0	1	1	0	0	LIX1L	Lix1 homolog (mouse)-like
hsa-miR-1296	0	0	1	1	0	0	TTLL12	tubulin tyrosine ligase-like family, member 12
hsa-miR-1296	0	0	1	1	1	1	SLC9A1	solute carrier family 9, subfamily A (NHE1, cation proton antiporter 1), member 1
hsa-miR-1296	0	0	1	1	1	1	TBCCD1	TBCC domain containing 1
hsa-miR-1296	0	0	1	1	0	0	LOC100129995	uncharacterized LOC100129995
hsa-miR-1296	0	0	1	1	0	0	NPIP	nuclear pore complex interacting protein
hsa-miR-1296	1	0	1	1	1	1	FAM122B	family with sequence similarity 122B
hsa-miR-1296	1	0	1	1	0	0	BCORL1	BCL6 corepressor-like 1
hsa-miR-1296	1	0	1	1	1	1	CORO2B	coronin, actin binding protein, 2B
hsa-miR-1296	1	0	1	1	1	1	CELF6	CUGBP, Elav-like family member 6
hsa-miR-1296	1	0	1	1	1	1	C17orf85	chromosome 17 open reading frame 85
hsa-miR-1296	1	0	1	1	1	1	PIAS3	protein inhibitor of activated STAT, 3
hsa-miR-1296	1	0	1	1	1	1	METAP2	methionyl aminopeptidase 2
hsa-miR-1296	1	0	1	0	1	1	KIAA1456	KIAA1456
hsa-miR-1296	0	0	1	0	1	1	C17orf105	chromosome 17 open reading frame 105
hsa-miR-1296	0	0	1	0	0	0	FAM95B1	family with sequence similarity 95, member B1
hsa-miR-1296	0	0	1	1	0	0	C20orf141	chromosome 20 open reading frame 141
hsa-miR-1296	1	0	1	1	1	1	WWC2	WW and C2 domain containing 2
hsa-miR-1296	1	0	1	1	0	0	ATXN7L3	ataxin 7-like 3
hsa-miR-1296	0	0	1	1	0	0	CCDC88B	coiled-coil domain containing 88B
hsa-miR-1296	0	0	1	0	0	0	RPL23AP53	ribosomal protein L23a pseudogene 53
hsa-miR-1296	1	0	1	0	1	1	ADIPOR2	adiponectin receptor 2
hsa-miR-1296	1	0	1	1	1	1	HYOU1	hypoxia up-regulated 1
hsa-miR-1296	0	0	1	0	0	0	GRAMD1B	GRAM domain containing 1B
hsa-miR-1296	0	0	1	1	1	1	PIN4	protein (peptidylprolyl cis/trans isomerase) NIMA-interacting, 4 (parvulin)
hsa-miR-1296	0	0	1	0	0	0	ERVFRD-2	endogenous retrovirus group FRD, member 2
hsa-miR-1296	1	0	1	1	1	1	PLA2G15	phospholipase A2, group XV
hsa-miR-1296	0	0	1	1	0	0	NCF1	neutrophil cytosolic factor 1
hsa-miR-1296	0	0	1	1	0	0	TRIM46	tripartite motif containing 46
hsa-miR-1296	0	0	1	0	0	0	LINC00514	long intergenic non-protein coding RNA 514
hsa-miR-1296	1	0	1	0	1	1	ZZEF1	zinc finger, ZZ-type with EF-hand domain 1
hsa-miR-1296	1	0	1	1	1	1	BCR	breakpoint cluster region
hsa-miR-1296	0	0	1	1	0	0	WFIKKN1	WAP, follistatin/kazal, immunoglobulin, kunitz and netrin domain containing 1
hsa-miR-1296	1	0	1	1	1	1	MRFAP1	Morf4 family associated protein 1
hsa-miR-1296	0	0	1	1	0	0	ACSM2B	acyl-CoA synthetase medium-chain family member 2B
hsa-miR-1296	0	0	1	1	0	0	HEATR8	HEAT repeat containing 8
hsa-miR-1296	1	0	1	1	1	1	GPD1	glycerol-3-phosphate dehydrogenase 1 (soluble)
hsa-miR-1296	0	0	1	0	0	0	LOC390660	FLJ00317 protein
hsa-miR-1296	1	0	1	0	1	1	KIF21B	kinesin family member 21B
hsa-miR-1296	0	0	1	1	0	0	C3orf20	chromosome 3 open reading frame 20
hsa-miR-1296	0	0	1	1	1	1	PDE2A	phosphodiesterase 2A, cGMP-stimulated
hsa-miR-1296	0	0	1	1	0	0	ZSCAN18	zinc finger and SCAN domain containing 18
hsa-miR-1296	1	0	1	1	1	1	SYS1	SYS1 Golgi-localized integral membrane protein homolog (S. cerevisiae)
hsa-miR-1296	0	0	1	1	1	1	KAZALD1	Kazal-type serine peptidase inhibitor domain 1
hsa-miR-1296	1	0	1	1	1	1	TAP2	transporter 2, ATP-binding cassette, sub-family B (MDR/TAP)
hsa-miR-1296	0	0	1	1	1	1	FANCC	Fanconi anemia, complementation group C
hsa-miR-1296	0	0	1	0	1	1	PEX5	peroxisomal biogenesis factor 5
hsa-miR-1296	1	0	1	0	1	1	MGAT4B	mannosyl (alpha-1,3-)-glycoprotein beta-1,4-N-acetylglucosaminyltransferase, isozyme B
hsa-miR-1296	1	0	1	1	1	1	CAMK2G	calcium/calmodulin-dependent protein kinase II gamma
hsa-miR-1296	1	0	1	0	1	1	MAP3K3	mitogen-activated protein kinase kinase kinase 3
hsa-miR-1296	1	0	1	1	1	1	WDR20	WD repeat domain 20
hsa-miR-1296	0	0	1	1	1	1	CCKBR	cholecystokinin B receptor
hsa-miR-1296	1	0	1	0	1	1	TEAD3	TEA domain family member 3
hsa-miR-1296	0	0	1	0	0	0	PART1	prostate androgen-regulated transcript 1 (non-protein coding)
hsa-miR-1296	0	0	1	1	0	0	FAAH	fatty acid amide hydrolase
hsa-miR-1296	0	0	1	1	0	0	SAPCD1	suppressor APC domain containing 1
hsa-miR-1296	0	0	1	1	0	0	ODF3	outer dense fiber of sperm tails 3
hsa-miR-1296	0	0	1	0	0	0	KIAA0913	KIAA0913
hsa-miR-1296	0	0	1	1	0	0	PCIF1	PDX1 C-terminal inhibiting factor 1
hsa-miR-1296	0	0	1	1	1	1	AQP6	aquaporin 6, kidney specific
hsa-miR-1296	1	0	1	1	1	1	KIAA1033	KIAA1033
hsa-miR-1296	1	0	1	1	1	1	TFE3	transcription factor binding to IGHM enhancer 3
hsa-miR-1296	1	0	1	1	1	1	NEO1	neogenin 1
hsa-miR-1296	1	0	1	0	1	1	GRIN3A	glutamate receptor, ionotropic, N-methyl-D-aspartate 3A
hsa-miR-1296	0	0	1	0	0	0	FAM66D	family with sequence similarity 66, member D
hsa-miR-1296	0	0	1	0	0	0	ZBTB8B	zinc finger and BTB domain containing 8B
hsa-miR-1296	1	0	1	1	1	1	PKNOX2	PBX/knotted 1 homeobox 2
hsa-miR-1296	1	0	1	1	1	1	SLC30A8	solute carrier family 30 (zinc transporter), member 8
hsa-miR-1296	0	0	1	1	0	0	KRBA1	KRAB-A domain containing 1
hsa-miR-1296	1	0	1	1	1	1	MLL3	myeloid/lymphoid or mixed-lineage leukemia 3
hsa-miR-1296	0	0	1	1	0	0	LGI4	leucine-rich repeat LGI family, member 4
hsa-miR-1296	0	0	1	1	0	0	TMEM44	transmembrane protein 44
hsa-miR-1296	1	0	1	0	1	1	MEF2C	myocyte enhancer factor 2C
hsa-miR-1296	1	0	1	1	1	1	SOX6	SRY (sex determining region Y)-box 6
hsa-miR-1296	0	0	1	1	0	0	LRRN2	leucine rich repeat neuronal 2
hsa-miR-1296	0	0	1	1	1	1	KIAA1841	KIAA1841
hsa-miR-1296	1	0	1	1	0	0	KIAA0895L	KIAA0895-like
hsa-miR-1296	0	0	1	1	1	1	PNMAL1	paraneoplastic Ma antigen family-like 1
hsa-miR-1296	1	0	1	1	1	1	RICTOR	RPTOR independent companion of MTOR, complex 2
hsa-miR-1296	1	0	1	1	1	1	USF2	upstream transcription factor 2, c-fos interacting
hsa-miR-1296	0	0	1	1	0	0	CMTM1	CKLF-like MARVEL transmembrane domain containing 1
hsa-miR-1296	1	0	1	0	1	1	SS18L1	synovial sarcoma translocation gene on chromosome 18-like 1
hsa-miR-1296	0	0	1	1	0	0	DNAH1	dynein, axonemal, heavy chain 1
hsa-miR-1296	1	0	1	1	1	1	OPRM1	opioid receptor, mu 1
hsa-miR-1296	0	0	1	1	0	0	GFRA3	GDNF family receptor alpha 3
hsa-miR-1296	1	0	1	1	1	1	SP3	Sp3 transcription factor
hsa-miR-1296	1	0	1	1	1	1	ARHGAP20	Rho GTPase activating protein 20
hsa-miR-1296	1	0	1	1	1	1	MECP2	methyl CpG binding protein 2 (Rett syndrome)
hsa-miR-1296	0	0	1	1	1	1	SMPD1	sphingomyelin phosphodiesterase 1, acid lysosomal
hsa-miR-1296	0	0	1	1	1	1	FCRLB	Fc receptor-like B
hsa-miR-1296	1	0	1	1	0	0	TAF4B	TAF4b RNA polymerase II, TATA box binding protein (TBP)-associated factor, 105kDa
hsa-miR-1296	0	0	1	1	0	0	NBPF8	neuroblastoma breakpoint family, member 8
hsa-miR-1296	1	0	1	1	0	0	PLXNB3	plexin B3
hsa-miR-1296	0	0	1	1	1	1	WDR55	WD repeat domain 55
hsa-miR-1296	0	0	1	1	1	1	EMC4	ER membrane protein complex subunit 4
hsa-miR-1296	0	0	1	1	0	0	ZNF576	zinc finger protein 576
hsa-miR-1296	1	0	1	1	1	1	RIMS3	regulating synaptic membrane exocytosis 3
hsa-miR-1296	0	0	1	1	0	0	SNRPB	small nuclear ribonucleoprotein polypeptides B and B1
hsa-miR-1296	1	0	1	1	0	0	DHDDS	dehydrodolichyl diphosphate synthase
hsa-miR-1296	1	0	1	1	1	1	NUMA1	nuclear mitotic apparatus protein 1
hsa-miR-1296	1	0	1	1	0	0	POLR3D	polymerase (RNA) III (DNA directed) polypeptide D, 44kDa
hsa-miR-1296	1	0	1	0	1	1	CGGBP1	CGG triplet repeat binding protein 1
hsa-miR-1296	1	0	1	1	1	1	MBNL1	muscleblind-like splicing regulator 1
hsa-miR-1296	0	0	1	1	1	1	KIRREL2	kin of IRRE like 2 (Drosophila)
hsa-miR-1296	0	0	1	1	0	0	AGBL5	ATP/GTP binding protein-like 5
hsa-miR-1296	1	0	1	1	1	1	HMGA1	high mobility group AT-hook 1
hsa-miR-1296	0	0	1	1	1	1	HMBOX1	homeobox containing 1
hsa-miR-1296	1	0	1	1	1	1	RELL2	RELT-like 2
hsa-miR-1296	0	0	1	1	0	0	ARHGAP8	Rho GTPase activating protein 8
hsa-miR-1296	1	0	1	1	1	1	LRRFIP1	leucine rich repeat (in FLII) interacting protein 1
hsa-miR-1296	1	0	1	1	1	1	SLC46A1	solute carrier family 46 (folate transporter), member 1
hsa-miR-1296	0	0	1	1	0	0	TCN2	transcobalamin II
hsa-miR-1296	1	0	1	0	0	0	XPNPEP3	X-prolyl aminopeptidase (aminopeptidase P) 3, putative
hsa-miR-1296	0	0	1	1	1	1	GNL3L	guanine nucleotide binding protein-like 3 (nucleolar)-like
hsa-miR-1296	0	0	1	1	1	1	HDHD2	haloacid dehalogenase-like hydrolase domain containing 2
hsa-miR-1296	0	0	1	1	1	1	DEDD2	death effector domain containing 2
hsa-miR-1296	0	0	1	1	0	0	LCMT1	leucine carboxyl methyltransferase 1
hsa-miR-1296	1	0	1	1	0	0	FHL3	four and a half LIM domains 3
hsa-miR-1296	0	0	1	1	1	1	TOMM40L	translocase of outer mitochondrial membrane 40 homolog (yeast)-like
hsa-miR-1296	0	0	1	1	0	0	CCDC36	coiled-coil domain containing 36
hsa-miR-1296	0	0	1	0	0	0	MGC21881	uncharacterized locus MGC21881
hsa-miR-1296	0	0	1	1	1	1	C8orf33	chromosome 8 open reading frame 33
hsa-miR-1296	0	0	1	0	0	0	NUDT16P1	nudix (nucleoside diphosphate linked moiety X)-type motif 16 pseudogene 1
hsa-miR-1296	1	0	1	1	0	0	AKT1S1	AKT1 substrate 1 (proline-rich)
hsa-miR-1296	1	0	1	1	1	1	NUMBL	numb homolog (Drosophila)-like
hsa-miR-1296	0	0	1	1	0	0	PREB	prolactin regulatory element binding
hsa-miR-1296	0	0	1	1	1	1	CSDE1	cold shock domain containing E1, RNA-binding
hsa-miR-1296	0	0	1	1	0	0	ZBTB32	zinc finger and BTB domain containing 32
hsa-miR-1296	0	0	1	0	0	0	LOC100144602	uncharacterized LOC100144602
hsa-miR-1296	0	0	1	0	0	0	ZNF720	zinc finger protein 720
hsa-miR-1296	0	0	1	1	0	0	TEAD2	TEA domain family member 2
hsa-miR-1296	1	0	1	0	1	1	BTF3L4	basic transcription factor 3-like 4
hsa-miR-1296	1	0	1	1	0	0	TMEM63B	transmembrane protein 63B
hsa-miR-1296	0	0	1	0	0	0	SNX29P2	sorting nexin 29 pseudogene 2
hsa-miR-1296	1	0	1	1	1	1	ZDHHC5	zinc finger, DHHC-type containing 5
hsa-miR-1296	0	0	1	1	1	1	HS1BP3	HCLS1 binding protein 3
hsa-miR-1296	0	0	1	1	0	0	PLSCR3	phospholipid scramblase 3
hsa-miR-1296	1	0	1	1	1	1	SMYD2	SET and MYND domain containing 2
hsa-miR-1296	1	0	1	0	1	1	SV2B	synaptic vesicle glycoprotein 2B
hsa-miR-1296	1	0	1	1	0	0	FAM83F	family with sequence similarity 83, member F
hsa-miR-1296	1	0	1	1	1	1	ZPLD1	zona pellucida-like domain containing 1
hsa-miR-1296	0	0	1	0	0	0	ATP8B5P	ATPase, class I, type 8B, member 5, pseudogene
hsa-miR-1296	0	0	1	0	1	1	FLJ25328	uncharacterized LOC148231
hsa-miR-1296	1	0	1	1	1	1	RCOR3	REST corepressor 3
hsa-miR-1296	1	0	1	1	1	1	ZNF282	zinc finger protein 282
hsa-miR-1296	1	0	1	0	1	1	RNF4	ring finger protein 4
hsa-miR-1296	0	0	1	0	0	0	LOC643648	uncharacterized LOC643648
hsa-miR-1296	0	0	1	1	1	1	UBXN1	UBX domain protein 1
hsa-miR-1296	1	0	1	1	1	1	FGF1	fibroblast growth factor 1 (acidic)
hsa-miR-1296	1	0	1	1	0	0	MRC2	mannose receptor, C type 2
hsa-miR-1296	1	0	1	1	1	1	ZNF521	zinc finger protein 521
hsa-miR-1296	0	0	1	0	0	0	BCAS3	breast carcinoma amplified sequence 3
hsa-miR-1296	1	0	1	1	1	1	HMGCR	3-hydroxy-3-methylglutaryl-CoA reductase
hsa-miR-1296	1	0	1	1	0	0	GPR137	G protein-coupled receptor 137
hsa-miR-1296	0	0	1	1	1	1	POLM	polymerase (DNA directed), mu
hsa-miR-1296	0	0	1	0	0	0	C12orf77	chromosome 12 open reading frame 77
hsa-miR-1296	0	0	1	1	1	1	SNAPC3	small nuclear RNA activating complex, polypeptide 3, 50kDa
hsa-miR-1296	0	0	1	1	1	1	DUSP28	dual specificity phosphatase 28
hsa-miR-1296	1	0	1	1	1	1	BNC2	basonuclin 2
hsa-miR-1296	0	0	1	0	0	0	CYP4F35P	cytochrome P450, family 4, subfamily F, polypeptide 35, pseudogene
hsa-miR-1296	1	0	1	0	0	0	RAVER1	ribonucleoprotein, PTB-binding 1
hsa-miR-1296	1	0	1	1	0	0	CHD4	chromodomain helicase DNA binding protein 4
hsa-miR-1296	0	0	1	0	0	0	FLJ36000	uncharacterized FLJ36000
hsa-miR-1296	1	0	1	1	1	1	PAIP2	poly(A) binding protein interacting protein 2
hsa-miR-1296	0	0	1	0	0	0	LOC388906	opioid growth factor receptor pseudogene
hsa-miR-1296	1	0	1	1	0	0	LMO1	LIM domain only 1 (rhombotin 1)
hsa-miR-1296	0	0	1	0	1	1	LINC00634	long intergenic non-protein coding RNA 634
hsa-miR-1296	0	0	1	0	0	0	LRRC48	leucine rich repeat containing 48
hsa-miR-1296	0	0	1	0	1	1	METTL12	methyltransferase like 12
hsa-miR-1296	0	0	1	0	0	0	LOC154822	uncharacterized LOC154822
hsa-miR-1296	0	0	1	1	0	0	AQP12B	aquaporin 12B
hsa-miR-1296	1	0	1	1	0	0	INPP5J	inositol polyphosphate-5-phosphatase J
hsa-miR-1296	1	0	1	1	1	1	CTIF	CBP80/20-dependent translation initiation factor
hsa-miR-1296	1	0	1	0	1	1	USP6NL	USP6 N-terminal like
hsa-miR-1296	0	0	1	0	0	0	LOC338579	ankyrin repeat domain-containing protein 30B pseudogene
hsa-miR-1296	0	0	1	0	0	0	DKFZp686O1327	uncharacterized LOC401014
hsa-miR-1296	1	0	1	1	1	1	AGAP3	ArfGAP with GTPase domain, ankyrin repeat and PH domain 3
hsa-miR-1296	0	0	1	1	1	1	MST1	macrophage stimulating 1 (hepatocyte growth factor-like)
hsa-miR-1296	0	0	1	1	0	0	TCTN1	tectonic family member 1
hsa-miR-1296	1	0	1	0	1	1	PSD3	pleckstrin and Sec7 domain containing 3
hsa-miR-1296	0	0	1	0	0	0	LOC283914	uncharacterized LOC283914
hsa-miR-1296	1	0	1	1	1	1	SENP1	SUMO1/sentrin specific peptidase 1
hsa-miR-1296	0	0	1	0	0	0	DPY19L2P4	dpy-19-like 2 pseudogene 4 (C. elegans)
hsa-miR-1296	1	0	1	0	1	1	KDM2A	lysine (K)-specific demethylase 2A
hsa-miR-1296	0	0	1	1	0	0	OXLD1	oxidoreductase-like domain containing 1
hsa-miR-1296	0	0	1	1	1	1	ZNF589	zinc finger protein 589
hsa-miR-1296	1	0	1	1	1	1	PTPRG	protein tyrosine phosphatase, receptor type, G
hsa-miR-1296	0	0	1	0	0	0	AURKAPS1	aurora kinase A pseudogene 1
hsa-miR-1296	1	0	1	1	1	1	GATA2	GATA binding protein 2
hsa-miR-1296	0	0	1	1	1	1	RAB3IL1	RAB3A interacting protein (rabin3)-like 1
hsa-miR-1296	1	0	1	0	1	1	C14orf43	chromosome 14 open reading frame 43
hsa-miR-1296	0	0	1	1	1	1	ATP6V0B	ATPase, H+ transporting, lysosomal 21kDa, V0 subunit b
hsa-miR-1296	1	0	1	1	1	1	ATP8B4	ATPase, class I, type 8B, member 4
hsa-miR-1296	1	0	1	1	1	1	KLHL28	kelch-like 28 (Drosophila)
hsa-miR-1296	0	0	1	1	0	0	BCL7C	B-cell CLL/lymphoma 7C
hsa-miR-1296	0	0	1	1	0	0	GRIN2C	glutamate receptor, ionotropic, N-methyl D-aspartate 2C
hsa-miR-1296	1	0	1	1	1	1	SOX5	SRY (sex determining region Y)-box 5
hsa-miR-1296	0	0	1	1	0	0	AGAP11	ankyrin repeat and GTPase domain Arf GTPase activating protein 11
hsa-miR-1296	1	0	1	1	1	1	PDGFRA	platelet-derived growth factor receptor, alpha polypeptide
hsa-miR-1296	0	0	1	0	0	0	SCAND2	SCAN domain containing 2 pseudogene
hsa-miR-1296	1	0	1	0	0	0	PRRT4	proline-rich transmembrane protein 4
hsa-miR-1296	0	0	1	1	1	1	ZNF333	zinc finger protein 333
hsa-miR-1296	0	0	1	1	0	0	TSNARE1	t-SNARE domain containing 1
hsa-miR-1296	1	0	1	1	1	1	CUX1	cut-like homeobox 1
hsa-miR-1296	1	0	1	1	1	1	C5orf25	chromosome 5 open reading frame 25
hsa-miR-1296	1	0	1	1	1	1	FTL	ferritin, light polypeptide
hsa-miR-1296	1	0	1	0	1	1	MAGIX	MAGI family member, X-linked
hsa-miR-1296	1	0	1	1	1	1	LINGO1	leucine rich repeat and Ig domain containing 1
hsa-miR-1296	0	0	1	1	1	1	AQPEP	laeverin
hsa-miR-1296	0	0	1	1	0	0	CYP4F30P	cytochrome P450, family 4, subfamily F, polypeptide 30, pseudogene
hsa-miR-1296	0	0	1	1	1	1	MSTO1	misato homolog 1 (Drosophila)
hsa-miR-1296	1	0	1	1	1	1	DDR1	discoidin domain receptor tyrosine kinase 1
hsa-miR-1296	0	0	1	0	0	0	ZRANB2-AS1	ZRANB2 antisense RNA 1
hsa-miR-1296	0	0	1	0	0	0	AQP7P2	aquaporin 7 pseudogene 2
hsa-miR-1296	0	0	1	0	0	0	ULK4P1	unc-51-like kinase 4 (C. elegans) pseudogene 1
hsa-miR-1296	0	0	1	0	0	0	LOC727849	golgin A2 pseudogene
hsa-miR-1296	0	0	1	0	0	0	LOC727751	uncharacterized LOC727751
hsa-miR-1296	0	0	1	0	0	0	AGSK1	golgin subfamily A member 2-like
hsa-miR-1296	1	0	1	1	1	1	RARG	retinoic acid receptor, gamma
hsa-miR-1296	0	0	1	1	1	1	PCED1B	PC-esterase domain containing 1B
hsa-miR-1296	0	0	1	0	0	0	OAZ3	ornithine decarboxylase antizyme 3
hsa-miR-1296	0	0	1	0	0	0	AGAP9	ArfGAP with GTPase domain, ankyrin repeat and PH domain 9
hsa-miR-1296	0	0	1	1	1	1	FCF1	FCF1 small subunit (SSU) processome component homolog (S. cerevisiae)
hsa-miR-1296	0	0	1	0	0	0	TBC1D25	TBC1 domain family, member 25
hsa-miR-1296	0	0	1	1	0	0	DNHD1	dynein heavy chain domain 1
hsa-miR-1296	0	0	1	0	0	0	LOC554249	uncharacterized LOC554249
hsa-miR-1296	1	0	1	1	1	1	PLXNA2	plexin A2
hsa-miR-1296	0	0	1	1	1	1	TTLL9	tubulin tyrosine ligase-like family, member 9
hsa-miR-1296	0	0	1	0	0	0	FAM71F2	family with sequence similarity 71, member F2
hsa-miR-1296	1	0	1	1	1	1	PTPRD	protein tyrosine phosphatase, receptor type, D
hsa-miR-1296	0	0	1	1	0	0	SH2D6	SH2 domain containing 6
hsa-miR-1296	0	0	1	1	1	1	ZNF514	zinc finger protein 514
hsa-miR-1296	0	0	1	1	0	0	NLRX1	NLR family member X1
hsa-miR-1296	0	0	1	1	0	0	PRAMEF10	PRAME family member 10
hsa-miR-1296	0	0	1	1	0	0	RNF123	ring finger protein 123
hsa-miR-1296	1	0	1	1	1	1	TRIP12	thyroid hormone receptor interactor 12
hsa-miR-1296	1	0	1	1	1	1	SHANK2	SH3 and multiple ankyrin repeat domains 2
hsa-miR-1296	1	0	1	1	1	1	SIDT2	SID1 transmembrane family, member 2
hsa-miR-1296	1	0	1	1	1	1	OSBP2	oxysterol binding protein 2
hsa-miR-1296	0	0	1	1	0	0	SOCS7	suppressor of cytokine signaling 7
hsa-miR-1296	0	0	1	0	0	0	LINC00266-1	long intergenic non-protein coding RNA 266-1
hsa-miR-1296	0	0	1	1	0	0	TTC21A	tetratricopeptide repeat domain 21A
hsa-miR-1296	1	0	1	1	1	1	TMEM218	transmembrane protein 218
hsa-miR-1296	1	0	1	1	0	0	RGS6	regulator of G-protein signaling 6
hsa-miR-1296	1	0	1	1	0	0	KRT80	keratin 80
hsa-miR-1296	0	0	1	0	0	0	ADCY10P1	adenylate cyclase 10 (soluble) pseudogene 1
hsa-miR-1296	0	0	1	1	1	1	FUCA2	fucosidase, alpha-L- 2, plasma
hsa-miR-1296	1	0	1	1	1	1	C7orf31	chromosome 7 open reading frame 31
hsa-miR-1296	0	0	1	0	0	0	PCNXL3	pecanex-like 3 (Drosophila)
hsa-miR-1296	1	0	1	1	1	1	PRDM2	PR domain containing 2, with ZNF domain
hsa-miR-1296	1	0	1	1	1	1	CGN	cingulin
hsa-miR-1296	1	0	1	1	0	0	CECR2	cat eye syndrome chromosome region, candidate 2
hsa-miR-1296	1	0	1	1	1	1	SLC39A13	solute carrier family 39 (zinc transporter), member 13
hsa-miR-1296	0	0	1	0	1	1	TYW5	tRNA-yW synthesizing protein 5
hsa-miR-1296	0	0	1	1	0	0	ANKRD33	ankyrin repeat domain 33
hsa-miR-1296	1	0	1	1	1	1	USP6	ubiquitin specific peptidase 6 (Tre-2 oncogene)
hsa-miR-1296	0	0	1	0	0	0	LOC286299	uncharacterized LOC286299
hsa-miR-1296	0	0	1	1	1	1	PLA2G4C	phospholipase A2, group IVC (cytosolic, calcium-independent)
hsa-miR-1296	1	0	1	1	1	1	AAMP	angio-associated, migratory cell protein
hsa-miR-1296	0	0	1	1	1	1	SLC25A11	solute carrier family 25 (mitochondrial carrier; oxoglutarate carrier), member 11
hsa-miR-1296	1	0	1	1	1	1	SEL1L3	sel-1 suppressor of lin-12-like 3 (C. elegans)
hsa-miR-1296	0	0	1	1	1	1	CAT	catalase
hsa-miR-1296	1	0	1	0	0	0	IGLON5	IgLON family member 5
hsa-miR-1296	0	0	1	1	0	0	EMX1	empty spiracles homeobox 1
hsa-miR-1296	1	0	1	1	1	1	TARBP2	TAR (HIV-1) RNA binding protein 2
hsa-miR-1296	0	0	1	1	1	1	FBXO36	F-box protein 36
hsa-miR-1296	1	0	1	1	1	1	CNIH2	cornichon homolog 2 (Drosophila)
hsa-miR-1296	1	0	1	1	1	1	CLDN11	claudin 11
hsa-miR-1296	0	0	1	1	0	0	FCGRT	Fc fragment of IgG, receptor, transporter, alpha
hsa-miR-1296	1	0	1	1	1	1	FGF11	fibroblast growth factor 11
hsa-miR-1296	1	0	1	1	1	1	HNRNPA1	heterogeneous nuclear ribonucleoprotein A1
hsa-miR-1296	0	0	1	0	0	0	LOC440900	uncharacterized LOC440900
hsa-miR-1296	0	0	1	1	0	0	CGRRF1	cell growth regulator with ring finger domain 1
hsa-miR-1296	0	0	1	1	1	1	PCK2	phosphoenolpyruvate carboxykinase 2 (mitochondrial)
hsa-miR-1296	0	0	1	1	1	1	NAPA	N-ethylmaleimide-sensitive factor attachment protein, alpha
hsa-miR-1296	0	0	1	1	0	0	WISP2	WNT1 inducible signaling pathway protein 2
hsa-miR-1296	0	0	1	1	0	0	IKBKG	inhibitor of kappa light polypeptide gene enhancer in B-cells, kinase gamma
hsa-miR-1296	0	0	1	1	1	1	STON1	stonin 1
hsa-miR-1296	1	0	1	1	0	0	MAP3K10	mitogen-activated protein kinase kinase kinase 10
hsa-miR-1296	0	0	1	1	0	0	CXorf40A	chromosome X open reading frame 40A
hsa-miR-1296	1	0	1	1	1	1	LYPLA2	lysophospholipase II
hsa-miR-1296	0	0	1	1	1	1	CDS2	CDP-diacylglycerol synthase (phosphatidate cytidylyltransferase) 2
hsa-miR-1296	0	0	1	1	0	0	PDK3	pyruvate dehydrogenase kinase, isozyme 3
hsa-miR-1296	0	0	1	0	0	0	C12orf75	chromosome 12 open reading frame 75
hsa-miR-1296	0	0	1	0	0	0	TMEM208	transmembrane protein 208
hsa-miR-1296	0	0	1	1	0	0	NDUFS7	NADH dehydrogenase (ubiquinone) Fe-S protein 7, 20kDa (NADH-coenzyme Q reductase)
hsa-miR-1296	1	0	1	0	1	1	IP6K1	inositol hexakisphosphate kinase 1
hsa-miR-1296	0	0	1	1	0	0	PTGDS	prostaglandin D2 synthase 21kDa (brain)
hsa-miR-1296	0	0	1	0	0	0	PGF	placental growth factor
hsa-miR-1296	0	0	1	1	0	0	C15orf23	chromosome 15 open reading frame 23
hsa-miR-1296	0	0	1	1	1	1	CPZ	carboxypeptidase Z
hsa-miR-1296	1	0	1	1	1	1	DPF2	D4, zinc and double PHD fingers family 2
hsa-miR-1296	0	0	1	1	0	0	FAM57B	family with sequence similarity 57, member B
hsa-miR-1296	1	0	1	1	1	1	CNBP	CCHC-type zinc finger, nucleic acid binding protein
hsa-miR-1296	1	0	1	1	0	0	INO80E	INO80 complex subunit E
hsa-miR-1296	1	0	1	1	1	1	TMEM55B	transmembrane protein 55B
hsa-miR-1296	0	0	1	1	0	0	GPRC5C	G protein-coupled receptor, family C, group 5, member C
hsa-miR-1296	0	0	1	1	1	1	ZNF346	zinc finger protein 346
hsa-miR-1296	0	0	1	1	0	0	TESK1	testis-specific kinase 1
hsa-miR-1296	0	0	1	0	0	0	LOC100132984	uncharacterized LOC100132984
hsa-miR-1296	0	0	1	1	1	1	PSMD9	proteasome (prosome, macropain) 26S subunit, non-ATPase, 9
hsa-miR-1296	0	0	1	1	1	1	FAM118B	family with sequence similarity 118, member B
hsa-miR-1296	1	0	1	0	1	1	DNMT3A	DNA (cytosine-5-)-methyltransferase 3 alpha
hsa-miR-1296	0	0	1	1	0	0	CORO1B	coronin, actin binding protein, 1B
hsa-miR-1296	0	0	1	1	0	0	IL11RA	interleukin 11 receptor, alpha
hsa-miR-1296	1	0	1	0	1	1	KIAA0664	KIAA0664
hsa-miR-1296	0	0	1	0	0	0	LINC00661	long intergenic non-protein coding RNA 661
hsa-miR-1296	1	0	1	1	1	1	BCL2L1	BCL2-like 1
hsa-miR-1296	1	0	1	1	1	1	NKX2-1	NK2 homeobox 1
hsa-miR-1296	1	0	1	1	1	1	MAN2A2	mannosidase, alpha, class 2A, member 2
hsa-miR-1296	0	0	1	1	0	0	SPATA20	spermatogenesis associated 20
hsa-miR-1296	1	0	1	0	1	1	MAP2K7	mitogen-activated protein kinase kinase 7
hsa-miR-1296	0	0	1	0	0	0	POM121L8P	POM121 transmembrane nucleoporin-like 8 pseudogene
hsa-miR-1296	1	0	1	1	1	1	TNFAIP1	tumor necrosis factor, alpha-induced protein 1 (endothelial)
hsa-miR-1296	0	0	1	0	0	0	GPR144	G protein-coupled receptor 144
hsa-miR-1296	1	0	1	1	1	1	MLL	myeloid/lymphoid or mixed-lineage leukemia (trithorax homolog, Drosophila)
hsa-miR-1296	1	0	1	0	1	1	BCL2	B-cell CLL/lymphoma 2
hsa-miR-1296	0	0	1	1	1	1	HLA-G	major histocompatibility complex, class I, G
hsa-miR-1296	0	0	1	1	0	0	CD40LG	CD40 ligand
hsa-miR-1296	0	0	1	0	1	1	GBE1	glucan (1,4-alpha-), branching enzyme 1
hsa-miR-1296	1	0	1	0	1	1	ITGB3	integrin, beta 3 (platelet glycoprotein IIIa, antigen CD61)
hsa-miR-1296	1	0	1	1	1	1	KCNA1	potassium voltage-gated channel, shaker-related subfamily, member 1 (episodic ataxia with myokymia)
hsa-miR-1296	1	0	1	1	1	1	PTCH1	patched 1
hsa-miR-1296	1	0	1	1	1	1	OCRL	oculocerebrorenal syndrome of Lowe
hsa-miR-1296	0	0	1	1	1	1	PKP1	plakophilin 1 (ectodermal dysplasia/skin fragility syndrome)
hsa-miR-1296	0	0	1	1	1	1	LTBP2	latent transforming growth factor beta binding protein 2
hsa-miR-1296	0	0	1	1	1	1	ALPL	alkaline phosphatase, liver/bone/kidney
hsa-miR-1296	1	0	1	1	1	1	CD44	CD44 molecule (Indian blood group)
hsa-miR-1296	0	0	1	1	0	0	CACNG1	calcium channel, voltage-dependent, gamma subunit 1
hsa-miR-1296	1	0	1	1	1	1	CHRM1	cholinergic receptor, muscarinic 1
hsa-miR-1296	1	0	1	1	1	1	HTR4	5-hydroxytryptamine (serotonin) receptor 4, G protein-coupled
hsa-miR-1296	0	0	1	1	1	1	IL5	interleukin 5 (colony-stimulating factor, eosinophil)
hsa-miR-1296	1	0	1	1	1	1	MME	membrane metallo-endopeptidase
hsa-miR-1296	1	0	1	1	1	1	PDE3B	phosphodiesterase 3B, cGMP-inhibited
hsa-miR-1296	0	0	1	1	0	0	RPL29	ribosomal protein L29
hsa-miR-1296	0	0	1	1	1	1	BLOC1S2	biogenesis of lysosomal organelles complex-1, subunit 2
hsa-miR-1296	1	0	1	0	1	1	CACNA1I	calcium channel, voltage-dependent, T type, alpha 1I subunit
hsa-miR-1296	1	0	1	1	1	1	ABLIM1	actin binding LIM protein 1
hsa-miR-1296	0	0	1	1	0	0	C1orf95	chromosome 1 open reading frame 95
hsa-miR-1296	0	0	1	1	1	1	C11orf49	chromosome 11 open reading frame 49
hsa-miR-1296	0	0	1	1	1	1	DBX2	developing brain homeobox 2
hsa-miR-1296	1	0	1	1	1	1	NCK2	NCK adaptor protein 2
hsa-miR-1296	1	0	1	1	1	1	EDA	ectodysplasin A
hsa-miR-1296	0	0	1	1	1	1	LINC00478	long intergenic non-protein coding RNA 478
hsa-miR-1296	1	0	1	1	1	1	NTRK3	neurotrophic tyrosine kinase, receptor, type 3
hsa-miR-1296	1	0	1	1	1	1	CTDSPL	CTD (carboxy-terminal domain, RNA polymerase II, polypeptide A) small phosphatase-like
hsa-miR-1296	1	0	1	0	1	1	KIAA2022	KIAA2022
hsa-miR-1296	1	0	1	1	1	1	LPHN1	latrophilin 1
hsa-miR-1296	1	0	1	1	1	1	FNIP1	folliculin interacting protein 1
hsa-miR-1296	0	0	1	1	1	1	GCSAM	germinal center-associated, signaling and motility
hsa-miR-1296	1	0	1	0	1	1	ERMN	ermin, ERM-like protein
hsa-miR-1296	1	0	1	1	1	1	ARHGAP28	Rho GTPase activating protein 28
hsa-miR-1296	0	0	1	1	1	1	SPIN3	spindlin family, member 3
hsa-miR-1296	1	0	1	1	1	1	BCL2L15	BCL2-like 15
hsa-miR-1296	1	0	1	0	1	1	FYTTD1	forty-two-three domain containing 1
hsa-miR-1296	1	0	1	1	0	0	RPL21P44	ribosomal protein L21 pseudogene 44
hsa-miR-1296	1	0	1	0	1	1	CREB5	cAMP responsive element binding protein 5
hsa-miR-1296	0	0	1	1	0	0	SOHLH1	spermatogenesis and oogenesis specific basic helix-loop-helix 1
hsa-miR-1296	1	0	1	1	1	1	FOXP4	forkhead box P4
hsa-miR-1296	0	0	1	1	0	0	RGR	retinal G protein coupled receptor
hsa-miR-1296	0	0	1	0	0	0	LOC400707	uncharacterized LOC400707
hsa-miR-1296	0	0	1	1	1	1	LDLRAD2	low density lipoprotein receptor class A domain containing 2
hsa-miR-1296	0	0	1	0	1	1	TMEM30B	transmembrane protein 30B
hsa-miR-1296	0	0	1	1	0	0	POLR3H	polymerase (RNA) III (DNA directed) polypeptide H (22.9kD)
hsa-miR-1296	1	0	1	1	1	1	PODXL	podocalyxin-like
hsa-miR-1296	1	0	1	0	1	1	CELF2	CUGBP, Elav-like family member 2
hsa-miR-1296	1	0	1	1	1	1	VEGFA	vascular endothelial growth factor A
hsa-miR-1296	1	0	1	1	1	1	SLC35F1	solute carrier family 35, member F1
hsa-miR-1296	0	0	1	1	1	1	PLGLB1	plasminogen-like B1
hsa-miR-1296	1	0	1	1	1	1	ZNF704	zinc finger protein 704
hsa-miR-1296	1	0	1	1	1	1	ELMO1	engulfment and cell motility 1
hsa-miR-1296	1	0	1	0	1	1	USP9X	ubiquitin specific peptidase 9, X-linked
hsa-miR-1296	1	0	1	1	1	1	CHTF8	CTF8, chromosome transmission fidelity factor 8 homolog (S. cerevisiae)
hsa-miR-1296	1	0	1	1	1	1	CBLN3	cerebellin 3 precursor
hsa-miR-1296	1	0	1	1	0	0	ANKRD34A	ankyrin repeat domain 34A
hsa-miR-1296	1	0	1	1	1	1	C2orf88	chromosome 2 open reading frame 88
hsa-miR-1296	1	0	1	1	1	1	FRS2	fibroblast growth factor receptor substrate 2
hsa-miR-1296	1	0	1	1	1	1	ERBB4	v-erb-a erythroblastic leukemia viral oncogene homolog 4 (avian)
hsa-miR-1296	1	0	1	1	1	1	SNX21	sorting nexin family member 21
hsa-miR-1296	1	0	1	1	1	1	TPM3	tropomyosin 3
hsa-miR-1296	1	0	1	0	1	1	TMEM237	transmembrane protein 237
hsa-miR-1296	0	0	1	1	1	1	FAM22G	family with sequence similarity 22, member G
hsa-miR-1296	1	0	1	1	1	1	PDE11A	phosphodiesterase 11A
hsa-miR-1296	1	0	1	1	1	1	ATG9A	autophagy related 9A
hsa-miR-1296	1	0	1	1	1	1	NCOR2	nuclear receptor corepressor 2
hsa-miR-1296	0	0	1	1	0	0	VPS37D	vacuolar protein sorting 37 homolog D (S. cerevisiae)
hsa-miR-1296	1	0	1	1	1	1	ALG9	asparagine-linked glycosylation 9, alpha-1,2-mannosyltransferase homolog (S. cerevisiae)
hsa-miR-1296	0	0	1	1	0	0	TMEM134	transmembrane protein 134
hsa-miR-1296	0	0	1	1	0	0	PGA3	pepsinogen 3, group I (pepsinogen A)
hsa-miR-1296	0	0	1	1	0	0	PGA4	pepsinogen 4, group I (pepsinogen A)
hsa-miR-1296	1	0	1	0	1	1	FBXO41	F-box protein 41
hsa-miR-1296	1	0	1	1	1	1	SHANK3	SH3 and multiple ankyrin repeat domains 3
hsa-miR-1296	1	0	1	1	0	0	SNX29	sorting nexin 29
hsa-miR-1296	0	0	1	1	1	1	DARS	aspartyl-tRNA synthetase
hsa-miR-1296	1	0	1	1	1	1	CELSR3	cadherin, EGF LAG seven-pass G-type receptor 3 (flamingo homolog, Drosophila)
hsa-miR-1296	1	0	1	1	1	1	CELSR2	cadherin, EGF LAG seven-pass G-type receptor 2 (flamingo homolog, Drosophila)
hsa-miR-1296	0	0	1	1	0	0	ACP2	acid phosphatase 2, lysosomal
hsa-miR-1296	0	0	1	1	0	0	ACRV1	acrosomal vesicle protein 1
hsa-miR-1296	1	0	1	0	1	1	ARNT	aryl hydrocarbon receptor nuclear translocator
hsa-miR-1296	1	0	1	1	1	1	ATP6V1A	ATPase, H+ transporting, lysosomal 70kDa, V1 subunit A
hsa-miR-1296	0	0	1	0	0	0	BAI1	brain-specific angiogenesis inhibitor 1
hsa-miR-1296	1	0	1	1	1	1	CDC25A	cell division cycle 25 homolog A (S. pombe)
hsa-miR-1296	1	0	1	1	1	1	CSNK2A1	casein kinase 2, alpha 1 polypeptide
hsa-miR-1296	0	0	1	1	1	1	EDNRA	endothelin receptor type A
hsa-miR-1296	1	0	1	0	1	1	FUT4	fucosyltransferase 4 (alpha (1,3) fucosyltransferase, myeloid-specific)
hsa-miR-1296	0	0	1	1	1	1	GNB1	guanine nucleotide binding protein (G protein), beta polypeptide 1
hsa-miR-1296	1	0	1	1	0	0	GRK6	G protein-coupled receptor kinase 6
hsa-miR-1296	1	0	1	1	1	1	INSM1	insulinoma-associated 1
hsa-miR-1296	1	0	1	1	1	1	ITPKB	inositol-trisphosphate 3-kinase B
hsa-miR-1296	0	0	1	1	0	0	LALBA	lactalbumin, alpha-
hsa-miR-1296	1	0	1	1	1	1	ADAM11	ADAM metallopeptidase domain 11
hsa-miR-1296	1	0	1	1	1	1	MSN	moesin
hsa-miR-1296	1	0	1	1	1	1	MYH9	myosin, heavy chain 9, non-muscle
hsa-miR-1296	0	0	1	1	1	1	PDE6D	phosphodiesterase 6D, cGMP-specific, rod, delta
hsa-miR-1296	1	0	1	1	1	1	PHB	prohibitin
hsa-miR-1296	0	0	1	1	1	1	PLGLB2	plasminogen-like B2
hsa-miR-1296	0	0	1	1	0	0	PLP2	proteolipid protein 2 (colonic epithelium-enriched)
hsa-miR-1296	1	0	1	1	1	1	PTPN9	protein tyrosine phosphatase, non-receptor type 9
hsa-miR-1296	1	0	1	1	1	1	PVRL1	poliovirus receptor-related 1 (herpesvirus entry mediator C)
hsa-miR-1296	1	0	1	1	1	1	PVRL2	poliovirus receptor-related 2 (herpesvirus entry mediator B)
hsa-miR-1296	0	0	1	1	1	1	RAF1	v-raf-1 murine leukemia viral oncogene homolog 1
hsa-miR-1296	1	0	1	1	0	0	RFX1	regulatory factor X, 1 (influences HLA class II expression)
hsa-miR-1296	1	0	1	0	1	1	CCL22	chemokine (C-C motif) ligand 22
hsa-miR-1296	1	0	1	0	1	1	SFRP1	secreted frizzled-related protein 1
hsa-miR-1296	1	0	1	1	1	1	SRSF2	serine/arginine-rich splicing factor 2
hsa-miR-1296	1	0	1	1	1	1	SHB	Src homology 2 domain containing adaptor protein B
hsa-miR-1296	1	0	1	0	1	1	ST6GAL1	ST6 beta-galactosamide alpha-2,6-sialyltranferase 1
hsa-miR-1296	0	0	1	1	0	0	SNRPC	small nuclear ribonucleoprotein polypeptide C
hsa-miR-1296	1	0	1	0	1	1	SOX11	SRY (sex determining region Y)-box 11
hsa-miR-1296	1	0	1	1	1	1	SRF	serum response factor (c-fos serum response element-binding transcription factor)
hsa-miR-1296	1	0	1	1	1	1	SSR2	signal sequence receptor, beta (translocon-associated protein beta)
hsa-miR-1296	0	0	1	1	0	0	TTC1	tetratricopeptide repeat domain 1
hsa-miR-1296	1	0	1	1	1	1	UBE2H	ubiquitin-conjugating enzyme E2H
hsa-miR-1296	1	0	1	1	0	0	SLC30A3	solute carrier family 30 (zinc transporter), member 3
hsa-miR-1296	1	0	1	0	1	1	SNN	stannin
hsa-miR-1296	0	0	1	1	0	0	KRT36	keratin 36
hsa-miR-1296	0	0	1	1	1	1	RNF8	ring finger protein 8, E3 ubiquitin protein ligase
hsa-miR-1296	1	0	1	1	1	1	BCL2L2	BCL2-like 2
hsa-miR-1296	1	0	1	1	0	0	EIF4EBP1	eukaryotic translation initiation factor 4E binding protein 1
hsa-miR-1296	0	0	1	1	1	1	SLC1A1	solute carrier family 1 (neuronal/epithelial high affinity glutamate transporter, system Xag), member 1
hsa-miR-1296	0	0	1	1	1	1	EFTUD2	elongation factor Tu GTP binding domain containing 2
hsa-miR-1296	1	0	1	1	1	1	DBN1	drebrin 1
hsa-miR-1296	1	0	1	1	1	1	EFNB1	ephrin-B1
hsa-miR-1296	1	0	1	1	1	1	EPHB3	EPH receptor B3
hsa-miR-1296	1	0	1	0	1	1	ETV5	ets variant 5
hsa-miR-1296	1	0	1	1	1	1	FOXD2	forkhead box D2
hsa-miR-1296	1	0	1	1	1	1	FOXK2	forkhead box K2
hsa-miR-1296	0	0	1	1	0	0	MCM2	minichromosome maintenance complex component 2
hsa-miR-1296	1	0	1	1	1	1	BAP1	BRCA1 associated protein-1 (ubiquitin carboxy-terminal hydrolase)
hsa-miR-1296	1	0	1	1	1	1	MTMR4	myotubularin related protein 4
hsa-miR-1296	1	0	1	1	1	1	LARGE	like-glycosyltransferase
hsa-miR-1296	1	0	1	0	1	1	MAPKAPK2	mitogen-activated protein kinase-activated protein kinase 2
hsa-miR-1296	0	0	1	1	0	0	SLC22A6	solute carrier family 22 (organic anion transporter), member 6
hsa-miR-1296	1	0	1	1	1	1	KIF3B	kinesin family member 3B
hsa-miR-1296	1	0	1	1	1	1	ONECUT2	one cut homeobox 2
hsa-miR-1296	1	0	1	0	1	1	DOCK3	dedicator of cytokinesis 3
hsa-miR-1296	0	0	1	1	0	0	MMP9	matrix metallopeptidase 9 (gelatinase B, 92kDa gelatinase, 92kDa type IV collagenase)
hsa-miR-1296	0	0	1	1	0	0	PITX3	paired-like homeodomain 3
hsa-miR-1296	1	0	1	1	1	1	SFPQ	splicing factor proline/glutamine-rich
hsa-miR-1296	0	0	1	1	1	1	CEBPB	CCAAT/enhancer binding protein (C/EBP), beta
hsa-miR-1296	1	0	1	0	1	1	E2F1	E2F transcription factor 1
hsa-miR-1296	1	0	1	1	1	1	RALA	v-ral simian leukemia viral oncogene homolog A (ras related)
hsa-miR-1296	1	0	1	0	1	1	SRC	v-src sarcoma (Schmidt-Ruppin A-2) viral oncogene homolog (avian)
hsa-miR-1296	0	0	1	1	1	1	ST5	suppression of tumorigenicity 5
hsa-miR-1296	1	0	1	1	1	1	MLF2	myeloid leukemia factor 2
hsa-miR-1296	1	0	1	1	1	1	HCN4	hyperpolarization activated cyclic nucleotide-gated potassium channel 4
hsa-miR-1296	1	0	1	1	1	1	HOXA11	homeobox A11
hsa-miR-1296	1	0	1	1	1	1	UST	uronyl-2-sulfotransferase
hsa-miR-1296	0	0	1	1	0	0	PDZK1IP1	PDZK1 interacting protein 1
hsa-miR-1296	0	0	1	1	1	1	RNF41	ring finger protein 41
hsa-miR-1296	1	0	1	0	1	1	SPRY3	sprouty homolog 3 (Drosophila)
hsa-miR-1296	1	0	1	1	1	1	MTF1	metal-regulatory transcription factor 1
hsa-miR-1296	0	0	1	1	1	1	MANF	mesencephalic astrocyte-derived neurotrophic factor
hsa-miR-1296	1	0	1	1	1	1	HS3ST4	heparan sulfate (glucosamine) 3-O-sulfotransferase 4
hsa-miR-1296	1	0	1	1	1	1	DAGLA	diacylglycerol lipase, alpha
hsa-miR-1296	1	0	1	1	1	1	TMEM50B	transmembrane protein 50B
hsa-miR-1296	1	0	1	1	1	1	CDK16	cyclin-dependent kinase 16
hsa-miR-1296	0	0	1	1	1	1	TYRO3	TYRO3 protein tyrosine kinase
hsa-miR-1296	1	0	1	1	1	1	SMC1A	structural maintenance of chromosomes 1A
hsa-miR-1296	1	0	1	1	1	1	ZER1	zer-1 homolog (C. elegans)
hsa-miR-1296	1	0	1	1	1	1	VAT1	vesicle amine transport protein 1 homolog (T. californica)
hsa-miR-1296	0	0	1	0	1	1	SLC16A2	solute carrier family 16, member 2 (thyroid hormone transporter)
hsa-miR-1296	1	0	1	0	1	1	IGF2BP1	insulin-like growth factor 2 mRNA binding protein 1
hsa-miR-1296	1	0	1	1	1	1	MAP3K2	mitogen-activated protein kinase kinase kinase 2
hsa-miR-1296	1	0	1	1	1	1	MMP24	matrix metallopeptidase 24 (membrane-inserted)
hsa-miR-1296	1	0	1	1	0	0	PSKH1	protein serine kinase H1
hsa-miR-1296	0	0	1	1	0	0	BRAP	BRCA1 associated protein
hsa-miR-1296	1	0	1	0	1	1	SYNGAP1	synaptic Ras GTPase activating protein 1
hsa-miR-1296	1	0	1	1	1	1	SYN1	synapsin I
hsa-miR-1296	0	0	1	1	1	1	TEP1	telomerase-associated protein 1
hsa-miR-1296	0	0	1	1	0	0	USF1	upstream transcription factor 1
hsa-miR-1296	1	0	1	1	1	1	VEZF1	vascular endothelial zinc finger 1
hsa-miR-1296	1	0	1	1	1	1	TESK2	testis-specific kinase 2
hsa-miR-1296	1	0	1	1	1	1	ABCF2	ATP-binding cassette, sub-family F (GCN20), member 2
hsa-miR-1296	0	0	1	1	1	1	HRH3	histamine receptor H3
hsa-miR-1296	1	0	1	1	1	1	KLF12	Kruppel-like factor 12
hsa-miR-1296	0	0	1	0	1	1	PNMA2	paraneoplastic Ma antigen 2
hsa-miR-1296	1	0	1	1	1	1	PADI2	peptidyl arginine deiminase, type II
hsa-miR-1296	0	0	1	1	0	0	PRDX5	peroxiredoxin 5
hsa-miR-1296	1	0	1	0	1	1	FBXL7	F-box and leucine-rich repeat protein 7
hsa-miR-1296	1	0	1	1	1	1	LDOC1	leucine zipper, down-regulated in cancer 1
hsa-miR-1296	0	0	1	1	1	1	N6AMT1	N-6 adenine-specific DNA methyltransferase 1 (putative)
hsa-miR-1296	1	0	1	1	0	0	SNX15	sorting nexin 15
hsa-miR-1296	0	0	1	0	1	1	EMR2	egf-like module containing, mucin-like, hormone receptor-like 2
hsa-miR-1296	1	0	1	1	0	0	HOXC11	homeobox C11
hsa-miR-1296	1	0	1	1	1	1	LHX6	LIM homeobox 6
hsa-miR-1296	1	0	1	0	1	1	RNF11	ring finger protein 11
hsa-miR-1296	1	0	1	0	1	1	DIEXF	digestive organ expansion factor homolog (zebrafish)
hsa-miR-1296	0	0	1	1	0	0	GPR162	G protein-coupled receptor 162
hsa-miR-1296	0	0	1	1	0	0	RHOD	ras homolog family member D
hsa-miR-1296	1	0	1	1	1	1	CDR2L	cerebellar degeneration-related protein 2-like
hsa-miR-1296	1	0	1	1	1	1	ZNF592	zinc finger protein 592
hsa-miR-1296	1	0	1	0	1	1	SH3PXD2A	SH3 and PX domains 2A
hsa-miR-1296	0	0	1	1	0	0	GPRIN2	G protein regulated inducer of neurite outgrowth 2
hsa-miR-1296	1	0	1	1	1	1	MLL4	myeloid/lymphoid or mixed-lineage leukemia 4
hsa-miR-1296	1	0	1	0	1	1	MLEC	malectin
hsa-miR-1296	1	0	1	1	1	1	KIAA0247	KIAA0247
hsa-miR-1296	1	0	1	0	1	1	SCRN1	secernin 1
hsa-miR-1296	0	0	1	0	1	1	EPM2AIP1	EPM2A (laforin) interacting protein 1
hsa-miR-1296	1	0	1	1	1	1	NUAK1	NUAK family, SNF1-like kinase, 1
hsa-miR-1296	1	0	1	1	1	1	SV2A	synaptic vesicle glycoprotein 2A
hsa-miR-1296	1	0	1	1	1	1	PHLPP2	PH domain and leucine rich repeat protein phosphatase 2
hsa-miR-1296	1	0	1	0	1	1	ZNF609	zinc finger protein 609
hsa-miR-1296	1	0	1	1	1	1	ERP44	endoplasmic reticulum protein 44
hsa-miR-1296	1	0	1	0	1	1	PEG10	paternally expressed 10
hsa-miR-1296	1	0	1	0	1	1	LARP4B	La ribonucleoprotein domain family, member 4B
hsa-miR-1296	1	0	1	1	1	1	CUX2	cut-like homeobox 2
hsa-miR-1296	1	0	1	0	1	1	KHNYN	KH and NYN domain containing
hsa-miR-1296	1	0	1	0	1	1	ARHGEF12	Rho guanine nucleotide exchange factor (GEF) 12
hsa-miR-1296	0	0	1	0	1	1	TMEM158	transmembrane protein 158 (gene/pseudogene)
hsa-miR-1296	1	0	1	1	1	1	CNRIP1	cannabinoid receptor interacting protein 1
hsa-miR-1296	1	0	1	1	1	1	CLIP3	CAP-GLY domain containing linker protein 3
hsa-miR-1296	1	0	1	1	1	1	CHD5	chromodomain helicase DNA binding protein 5
hsa-miR-1296	1	0	1	0	1	1	PPP1R16B	protein phosphatase 1, regulatory subunit 16B
hsa-miR-1296	0	0	1	1	1	1	TRPC4AP	transient receptor potential cation channel, subfamily C, member 4 associated protein
hsa-miR-1296	1	0	1	1	1	1	FAM155B	family with sequence similarity 155, member B
hsa-miR-1296	1	0	1	1	1	1	FGFR1	fibroblast growth factor receptor 1
hsa-miR-1296	1	0	1	0	1	1	KLF13	Kruppel-like factor 13
hsa-miR-1296	1	0	1	1	1	1	PHF20L1	PHD finger protein 20-like 1
hsa-miR-1296	1	0	1	1	1	1	RRP15	ribosomal RNA processing 15 homolog (S. cerevisiae)
hsa-miR-1296	1	0	1	0	1	1	CNR1	cannabinoid receptor 1 (brain)
hsa-miR-1296	0	0	1	1	1	1	RBM19	RNA binding motif protein 19
hsa-miR-1296	1	0	1	0	1	1	HPCAL4	hippocalcin like 4
hsa-miR-1296	0	0	1	1	0	0	FAM203A	family with sequence similarity 203, member A
hsa-miR-1296	1	0	1	1	1	1	DNAJC27	DnaJ (Hsp40) homolog, subfamily C, member 27
hsa-miR-1296	1	0	1	1	1	1	RAB6B	RAB6B, member RAS oncogene family
hsa-miR-1296	0	0	1	1	1	1	KDM3B	lysine (K)-specific demethylase 3B
hsa-miR-1296	0	0	1	1	1	1	LRRC16A	leucine rich repeat containing 16A
hsa-miR-1296	1	0	1	0	1	1	FAM46C	family with sequence similarity 46, member C
hsa-miR-1296	1	0	1	1	1	1	RNF125	ring finger protein 125, E3 ubiquitin protein ligase
hsa-miR-1296	1	0	1	1	1	1	HIF1AN	hypoxia inducible factor 1, alpha subunit inhibitor
hsa-miR-1296	1	0	1	1	1	1	WDR6	WD repeat domain 6
hsa-miR-1296	0	0	1	1	0	0	GPN2	GPN-loop GTPase 2
hsa-miR-1296	1	0	1	0	1	1	ARL8B	ADP-ribosylation factor-like 8B
hsa-miR-1296	0	0	1	1	1	1	RCBTB1	regulator of chromosome condensation (RCC1) and BTB (POZ) domain containing protein 1
hsa-miR-1296	1	0	1	1	1	1	ZNF654	zinc finger protein 654
hsa-miR-1296	1	0	1	0	1	1	LIN7C	lin-7 homolog C (C. elegans)
hsa-miR-1296	1	0	1	0	1	1	FOXJ2	forkhead box J2
hsa-miR-1296	0	0	1	0	0	0	APOBR	apolipoprotein B receptor
hsa-miR-1296	1	0	1	1	0	0	HOXC5	homeobox C5
hsa-miR-1296	0	0	1	1	1	1	RPRM	reprimo, TP53 dependent G2 arrest mediator candidate
hsa-miR-1296	1	0	1	1	1	1	CYP26B1	cytochrome P450, family 26, subfamily B, polypeptide 1
hsa-miR-1296	1	0	1	1	1	1	C8orf4	chromosome 8 open reading frame 4
hsa-miR-1296	0	0	1	1	0	0	CHRNA10	cholinergic receptor, nicotinic, alpha 10 (neuronal)
hsa-miR-1296	1	0	1	1	1	1	ATP8B2	ATPase, aminophospholipid transporter, class I, type 8B, member 2
hsa-miR-1296	1	0	1	1	0	0	THAP11	THAP domain containing 11
hsa-miR-1296	0	0	1	1	1	1	KIAA1161	KIAA1161
hsa-miR-1296	0	0	1	1	1	1	SHROOM4	shroom family member 4
hsa-miR-1296	1	0	1	1	1	1	DLG3	discs, large homolog 3 (Drosophila)
hsa-miR-1296	1	0	1	1	0	0	CASKIN2	CASK interacting protein 2
hsa-miR-1296	1	0	1	1	1	1	NLGN2	neuroligin 2
hsa-miR-1296	1	0	1	1	1	1	RANBP10	RAN binding protein 10
hsa-miR-1296	0	0	1	1	1	1	PRX	periaxin
hsa-miR-1296	0	0	1	1	1	1	TLX3	T-cell leukemia homeobox 3
hsa-miR-1296	1	0	1	1	1	1	ZNFX1	zinc finger, NFX1-type containing 1
hsa-miR-1296	0	0	1	1	1	1	SLC15A2	solute carrier family 15 (H+/peptide transporter), member 2
hsa-miR-1296	1	0	1	0	1	1	TP53INP2	tumor protein p53 inducible nuclear protein 2
hsa-miR-1296	1	0	1	1	1	1	PPP1R11	protein phosphatase 1, regulatory (inhibitor) subunit 11
hsa-miR-1296	1	0	1	0	1	1	CSNK1G1	casein kinase 1, gamma 1
hsa-miR-1296	0	0	1	1	0	0	ABHD4	abhydrolase domain containing 4
hsa-miR-1296	1	0	1	1	1	1	XYLT2	xylosyltransferase II
hsa-miR-1296	1	0	1	0	1	1	GREM2	gremlin 2
hsa-miR-1296	1	0	1	1	1	1	SUDS3	suppressor of defective silencing 3 homolog (S. cerevisiae)
hsa-miR-1296	1	0	1	0	1	1	ELOVL4	ELOVL fatty acid elongase 4
hsa-miR-1296	1	0	1	1	0	0	CCDC71	coiled-coil domain containing 71
hsa-miR-1296	0	0	1	1	1	1	MARCKSL1	MARCKS-like 1
hsa-miR-1296	1	0	1	1	1	1	GDAP1L1	ganglioside induced differentiation associated protein 1-like 1
hsa-miR-1296	0	0	1	1	0	0	CUEDC2	CUE domain containing 2
hsa-miR-1296	0	0	1	1	0	0	CHAC1	ChaC, cation transport regulator homolog 1 (E. coli)
hsa-miR-1296	0	0	1	1	0	0	DCTN3	dynactin 3 (p22)
hsa-miR-1296	1	0	1	0	1	1	NOTCH2	notch 2
hsa-miR-1296	1	0	1	1	1	1	GCC1	GRIP and coiled-coil domain containing 1
hsa-miR-1296	0	0	1	1	1	1	LRRK1	leucine-rich repeat kinase 1
hsa-miR-1296	0	0	1	1	1	1	ARMC5	armadillo repeat containing 5
hsa-miR-1296	0	0	1	1	0	0	RNF122	ring finger protein 122
hsa-miR-1296	1	0	1	1	1	1	RNF34	ring finger protein 34, E3 ubiquitin protein ligase
hsa-miR-1296	1	0	1	1	1	1	NAA50	N(alpha)-acetyltransferase 50, NatE catalytic subunit
hsa-miR-1296	1	0	1	1	1	1	TRIB1	tribbles homolog 1 (Drosophila)
hsa-miR-1296	1	0	1	1	1	1	HOXA3	homeobox A3
hsa-miR-1296	0	0	1	1	0	0	HM13	histocompatibility (minor) 13
hsa-miR-1296	1	0	1	1	1	1	RAB1B	RAB1B, member RAS oncogene family
hsa-miR-1296	1	0	1	1	0	0	SCRT1	scratch homolog 1, zinc finger protein (Drosophila)
hsa-miR-1296	1	0	1	0	1	1	ITCH	itchy E3 ubiquitin protein ligase
hsa-miR-1296	0	0	1	1	1	1	FRMD8	FERM domain containing 8
hsa-miR-1296	1	0	1	1	1	1	PATZ1	POZ (BTB) and AT hook containing zinc finger 1
hsa-miR-1296	1	0	1	1	1	1	ZNRF1	zinc and ring finger 1, E3 ubiquitin protein ligase
hsa-miR-1296	1	0	1	1	0	0	TRAF7	TNF receptor-associated factor 7, E3 ubiquitin protein ligase
hsa-miR-1296	1	0	1	1	0	0	MAF1	MAF1 homolog (S. cerevisiae)
hsa-miR-1296	1	0	1	1	1	1	ZDHHC18	zinc finger, DHHC-type containing 18
hsa-miR-1296	0	0	1	0	1	1	LDOC1L	leucine zipper, down-regulated in cancer 1-like
hsa-miR-1296	1	0	1	0	1	1	PSD2	pleckstrin and Sec7 domain containing 2
hsa-miR-1296	0	0	1	1	1	1	C5orf4	chromosome 5 open reading frame 4
hsa-miR-1296	1	0	1	1	1	1	TTBK1	tau tubulin kinase 1
hsa-miR-1296	1	0	1	1	0	0	ZC3H10	zinc finger CCCH-type containing 10
hsa-miR-1296	1	0	1	1	1	1	ARHGEF39	Rho guanine nucleotide exchange factor (GEF) 39
hsa-miR-1296	0	0	1	1	0	0	TNS4	tensin 4
hsa-miR-1296	1	0	1	1	0	0	ATG4D	autophagy related 4D, cysteine peptidase
hsa-miR-1296	1	0	1	1	1	1	ARHGAP19	Rho GTPase activating protein 19
hsa-miR-1296	1	0	1	1	0	0	DMRTB1	DMRT-like family B with proline-rich C-terminal, 1
hsa-miR-1296	1	0	1	1	1	1	SSH2	slingshot homolog 2 (Drosophila)
hsa-miR-1296	1	0	1	1	1	1	LUZP1	leucine zipper protein 1
hsa-miR-1296	0	0	1	1	1	1	PLEKHG4B	pleckstrin homology domain containing, family G (with RhoGef domain) member 4B
hsa-miR-1296	1	0	1	1	1	1	TRIM9	tripartite motif containing 9
hsa-miR-1296	0	0	1	1	0	0	S100A16	S100 calcium binding protein A16
hsa-miR-1296	0	0	1	1	0	0	WFDC3	WAP four-disulfide core domain 3
hsa-miR-1296	1	0	1	1	1	1	COL11A2	collagen, type XI, alpha 2
hsa-miR-1296	1	0	1	1	0	0	ADAMTS14	ADAM metallopeptidase with thrombospondin type 1 motif, 14
hsa-miR-1296	1	0	1	1	1	1	GPR62	G protein-coupled receptor 62
hsa-miR-1296	0	0	1	1	1	1	RGS18	regulator of G-protein signaling 18
hsa-miR-1296	0	0	1	1	0	0	CITED4	Cbp/p300-interacting transactivator, with Glu/Asp-rich carboxy-terminal domain, 4
hsa-miR-1296	1	0	1	1	1	1	BMPER	BMP binding endothelial regulator
hsa-miR-1296	1	0	1	1	0	0	PKDCC	protein kinase domain containing, cytoplasmic homolog (mouse)
hsa-miR-1296	1	0	1	1	1	1	TSTD2	thiosulfate sulfurtransferase (rhodanese)-like domain containing 2
hsa-miR-1296	0	0	1	1	1	1	TMEM106A	transmembrane protein 106A
hsa-miR-1296	1	0	1	1	1	1	UBQLNL	ubiquilin-like
hsa-miR-1296	1	0	1	1	1	1	SLC2A12	solute carrier family 2 (facilitated glucose transporter), member 12
hsa-miR-1296	0	0	1	1	1	1	FAM100A	family with sequence similarity 100, member A
hsa-miR-1296	0	0	1	1	1	1	SCARF1	scavenger receptor class F, member 1
hsa-miR-1296	0	0	1	1	0	0	WFDC5	WAP four-disulfide core domain 5
hsa-miR-1296	0	0	1	1	0	0	TCEB3C	transcription elongation factor B polypeptide 3C (elongin A3)
hsa-miR-1296	1	0	1	1	1	1	SEPT6	septin 6
hsa-miR-1296	0	0	1	1	1	1	GLIS1	GLIS family zinc finger 1
hsa-miR-1296	0	0	1	0	1	1	CHKB	choline kinase beta
hsa-miR-1296	1	0	1	1	1	1	POGLUT1	protein O-glucosyltransferase 1
hsa-miR-1296	0	0	1	1	1	1	ELOVL3	ELOVL fatty acid elongase 3
hsa-miR-1296	1	0	1	1	1	1	FAM81A	family with sequence similarity 81, member A
hsa-miR-1296	0	0	1	1	1	1	SLC35G3	solute carrier family 35, member G3
hsa-miR-1296	1	0	1	1	1	1	ZNF362	zinc finger protein 362
hsa-miR-1296	0	0	1	1	0	0	DOK6	docking protein 6
hsa-miR-1296	0	0	1	1	0	0	GPC2	glypican 2
hsa-miR-1296	0	0	1	1	1	1	ASPRV1	aspartic peptidase, retroviral-like 1
hsa-miR-1296	0	0	1	0	1	1	KCTD7	potassium channel tetramerisation domain containing 7
hsa-miR-1296	1	0	1	1	1	1	C15orf32	chromosome 15 open reading frame 32
hsa-miR-1296	0	0	1	0	1	1	LIX1	Lix1 homolog (chicken)
hsa-miR-1296	0	0	1	1	1	1	SLC22A7	solute carrier family 22 (organic anion transporter), member 7
hsa-miR-1296	1	0	1	1	0	0	TMEM86A	transmembrane protein 86A
hsa-miR-1296	1	0	1	1	1	1	PRSS35	protease, serine, 35
hsa-miR-1296	1	0	1	0	1	1	MDGA1	MAM domain containing glycosylphosphatidylinositol anchor 1
hsa-miR-1296	1	0	1	1	1	1	CACUL1	CDK2-associated, cullin domain 1
hsa-miR-1296	0	0	1	1	0	0	GPR97	G protein-coupled receptor 97
hsa-miR-1296	1	0	1	1	1	1	POM121	POM121 transmembrane nucleoporin
hsa-miR-1296	1	0	1	1	1	1	RC3H1	ring finger and CCCH-type domains 1
hsa-miR-1296	0	0	1	1	1	1	CATSPER2	cation channel, sperm associated 2
hsa-miR-1296	1	0	1	1	1	1	IL28RA	interleukin 28 receptor, alpha (interferon, lambda receptor)
hsa-miR-1296	1	0	1	1	1	1	DIP2B	DIP2 disco-interacting protein 2 homolog B (Drosophila)
hsa-miR-1296	1	0	1	0	1	1	FAM84B	family with sequence similarity 84, member B
hsa-miR-1296	1	0	1	1	1	1	SYT9	synaptotagmin IX
hsa-miR-1296	0	0	1	1	0	0	IL9R	interleukin 9 receptor
hsa-miR-1296	1	0	1	1	1	1	PPM1B	protein phosphatase, Mg2+/Mn2+ dependent, 1B
hsa-miR-1296	1	0	1	1	1	1	GMCL1	germ cell-less, spermatogenesis associated 1
hsa-miR-1296	1	0	1	1	1	1	TMEM26	transmembrane protein 26
hsa-miR-1296	0	0	1	1	0	0	C7orf34	chromosome 7 open reading frame 34
hsa-miR-1296	1	0	1	1	1	1	TMED7	transmembrane emp24 protein transport domain containing 7
hsa-miR-1296	0	0	1	1	1	1	ZBTB12	zinc finger and BTB domain containing 12
hsa-miR-1296	0	0	1	1	1	1	LRP5L	low density lipoprotein receptor-related protein 5-like
hsa-miR-1296	1	0	1	1	1	1	ISM2	isthmin 2 homolog (zebrafish)
hsa-miR-1296	1	0	1	1	1	1	TMEM229B	transmembrane protein 229B
hsa-miR-1296	0	0	1	0	1	1	CLDN23	claudin 23
hsa-miR-1296	1	0	1	1	1	1	NAIF1	nuclear apoptosis inducing factor 1
hsa-miR-1296	1	0	1	1	1	1	AQP1	aquaporin 1 (Colton blood group)
hsa-miR-1296	1	0	1	0	1	1	PTPLB	protein tyrosine phosphatase-like (proline instead of catalytic arginine), member b
hsa-miR-1296	1	0	1	1	1	1	RAB43	RAB43, member RAS oncogene family
hsa-miR-1296	0	0	1	1	1	1	LHFPL4	lipoma HMGIC fusion partner-like 4
hsa-miR-1296	1	0	1	1	0	0	ENHO	energy homeostasis associated
hsa-miR-1296	1	0	1	0	0	0	RAB15	RAB15, member RAS oncogene family
hsa-miR-1296	0	0	1	1	1	1	MKNK1	MAP kinase interacting serine/threonine kinase 1
hsa-miR-1296	1	0	1	1	1	1	CXCL12	chemokine (C-X-C motif) ligand 12
hsa-miR-1296	0	0	1	0	1	1	SOGA1	suppressor of glucose, autophagy associated 1
hsa-miR-1296	1	0	1	1	1	1	FBXO33	F-box protein 33
hsa-miR-1296	0	0	1	1	1	1	ELP5	elongator acetyltransferase complex subunit 5
hsa-miR-1296	0	0	1	1	0	0	LYPD2	LY6/PLAUR domain containing 2
hsa-miR-1296	1	0	1	1	1	1	METTL21B	methyltransferase like 21B
hsa-miR-1296	1	0	1	1	1	1	ENSA	endosulfine alpha
hsa-miR-1296	0	0	1	1	1	1	SCIMP	SLP adaptor and CSK interacting membrane protein
hsa-miR-1296	0	0	1	0	1	1	C1orf229	chromosome 1 open reading frame 229
hsa-miR-1296	0	0	1	0	1	1	C11orf92	chromosome 11 open reading frame 92
hsa-miR-1296	1	0	1	1	1	1	TEX19	testis expressed 19
hsa-miR-1296	0	0	1	0	0	0	TFAMP1	transcription factor A, mitochondrial pseudogene 1
hsa-miR-1296	0	0	1	0	0	0	LYPLA2P1	lysophospholipase II pseudogene 1
hsa-miR-1296	0	0	1	0	0	0	TTTY2	testis-specific transcript, Y-linked 2 (non-protein coding)
hsa-miR-1296	0	0	1	0	0	0	GOLGA2P3Y	golgin A2 pseudogene 3, Y-linked
hsa-miR-1296	0	0	1	0	0	0	CSNK2A1P	casein kinase 2, alpha 1 polypeptide pseudogene
hsa-miR-1296	0	0	1	0	0	0	MEIS3P1	Meis homeobox 3 pseudogene 1
hsa-miR-1296	0	0	1	0	0	0	TRPC2	transient receptor potential cation channel, subfamily C, member 2, pseudogene
hsa-miR-1296	0	0	1	0	0	0	MBL1P	mannose-binding lectin (protein A) 1, pseudogene
hsa-miR-1296	0	0	1	0	0	0	RPL29P2	ribosomal protein L29 pseudogene 2
hsa-miR-1296	0	0	1	0	0	0	AQP7P1	aquaporin 7 pseudogene 1
hsa-miR-1296	0	0	1	0	0	0	PTPRVP	protein tyrosine phosphatase, receptor type, V, pseudogene
hsa-miR-1296	0	0	1	0	0	0	CDRT15P1	CMT1A duplicated region transcript 15 pseudogene 1
hsa-miR-1296	0	0	1	0	0	0	GMCL1P1	germ cell-less, spermatogenesis associated 1 pseudogene 1
hsa-miR-1296	0	0	1	0	0	0	SNORD115-7	small nucleolar RNA, C/D box 115-7
hsa-miR-1296	0	0	1	0	0	0	SNORD116-28	small nucleolar RNA, C/D box 116-28
hsa-miR-1296	1	0	1	1	1	1	TRIO	trio Rho guanine nucleotide exchange factor
hsa-miR-1296	1	0	1	1	1	1	ESR1	estrogen receptor 1
hsa-miR-1296	0	0	1	1	1	1	CD84	CD84 molecule
hsa-miR-1296	0	0	1	1	0	0	SHBG	sex hormone-binding globulin
hsa-miR-1296	1	0	1	1	1	1	CUL5	cullin 5
