# Supplementary material for: Profiling of Selected MicroRNAs in Proliferative Eutopic Endometrium of Women with Ovarian Endometriosis
Source: Biomed Res Int. 2015 Aug 20;2015:760698. doi: 10.1155/2015/760698 (PMC4558423; doi:10.1155/2015/760698)
Supplement: Supplementary file 1 — Table I: The names of miRNAs significantly differentially expressed between eutopic endometrium of patients with endometriosis vs eutopic endometrium of patients without endometriosis. Table II: The associations between miRNA and mRNA, which presents detailed results of the search of six major databases i.e targetscan, tarbase, miranda, mirbase, mirtarget2 and pictar. [file 760698.f1.zip › 760698.f1/Table II/hsa-miR-1298.tsv]

miR	targetscan	tarbase	miranda	mirbase	mirtarget2	pictar	GeneSymbol	GeneName
hsa-miR-1298	1	0	1	1	1	1	CHD9	chromodomain helicase DNA binding protein 9
hsa-miR-1298	1	0	1	0	1	1	KIAA0408	KIAA0408
hsa-miR-1298	1	0	1	1	1	1	HIPK1	homeodomain interacting protein kinase 1
hsa-miR-1298	1	0	1	0	1	1	SNX13	sorting nexin 13
hsa-miR-1298	0	0	1	1	0	0	FAM169A	family with sequence similarity 169, member A
hsa-miR-1298	0	0	1	0	0	0	THSD7A	thrombospondin, type I, domain containing 7A
hsa-miR-1298	1	0	1	0	1	1	ODZ2	odz, odd Oz/ten-m homolog 2 (Drosophila)
hsa-miR-1298	1	0	1	1	1	1	PCDH19	protocadherin 19
hsa-miR-1298	0	0	1	0	1	1	SETD5	SET domain containing 5
hsa-miR-1298	1	0	1	1	1	1	SH3TC2	SH3 domain and tetratricopeptide repeats 2
hsa-miR-1298	0	0	1	1	0	0	CIRH1A	cirrhosis, autosomal recessive 1A (cirhin)
hsa-miR-1298	1	0	1	0	0	0	ZC3H12C	zinc finger CCCH-type containing 12C
hsa-miR-1298	0	0	1	1	0	0	SSPO	SCO-spondin homolog (Bos taurus)
hsa-miR-1298	1	0	1	1	1	1	UBE3A	ubiquitin protein ligase E3A
hsa-miR-1298	1	0	1	1	1	1	VLDLR	very low density lipoprotein receptor
hsa-miR-1298	0	0	1	0	1	1	ATR	ataxia telangiectasia and Rad3 related
hsa-miR-1298	1	0	1	1	1	1	BACH2	BTB and CNC homology 1, basic leucine zipper transcription factor 2
hsa-miR-1298	1	0	1	1	1	1	SLC8A1	solute carrier family 8 (sodium/calcium exchanger), member 1
hsa-miR-1298	1	0	1	0	1	1	PLAG1	pleiomorphic adenoma gene 1
hsa-miR-1298	1	0	1	0	1	1	DPYSL2	dihydropyrimidinase-like 2
hsa-miR-1298	1	0	1	1	1	1	ANK1	ankyrin 1, erythrocytic
hsa-miR-1298	0	0	1	1	1	1	PPP1R12C	protein phosphatase 1, regulatory subunit 12C
hsa-miR-1298	1	0	1	0	1	1	CAV1	caveolin 1, caveolae protein, 22kDa
hsa-miR-1298	1	0	1	1	1	1	MEF2D	myocyte enhancer factor 2D
hsa-miR-1298	0	0	1	1	1	1	CD84	CD84 molecule
hsa-miR-1298	1	0	1	1	1	1	CBFA2T2	core-binding factor, runt domain, alpha subunit 2; translocated to, 2
hsa-miR-1298	1	0	1	1	0	0	PAK1	p21 protein (Cdc42/Rac)-activated kinase 1
hsa-miR-1298	1	0	1	1	1	1	GLS	glutaminase
hsa-miR-1298	1	0	1	1	1	1	LPHN2	latrophilin 2
hsa-miR-1298	0	0	1	0	1	1	ZDHHC17	zinc finger, DHHC-type containing 17
hsa-miR-1298	1	0	1	1	1	1	EDC3	enhancer of mRNA decapping 3 homolog (S. cerevisiae)
hsa-miR-1298	0	0	1	0	0	0	TIGD7	tigger transposable element derived 7
hsa-miR-1298	1	0	1	1	1	1	SH3GLB1	SH3-domain GRB2-like endophilin B1
hsa-miR-1298	1	0	1	0	1	1	TRPS1	trichorhinophalangeal syndrome I
hsa-miR-1298	0	0	1	1	1	1	ITPA	inosine triphosphatase (nucleoside triphosphate pyrophosphatase)
hsa-miR-1298	1	0	1	1	1	1	LARP4	La ribonucleoprotein domain family, member 4
hsa-miR-1298	0	0	1	0	0	0	NBPF10	neuroblastoma breakpoint family, member 10
hsa-miR-1298	1	0	1	1	1	1	NTRK2	neurotrophic tyrosine kinase, receptor, type 2
hsa-miR-1298	1	0	1	1	1	1	RBFOX1	RNA binding protein, fox-1 homolog (C. elegans) 1
hsa-miR-1298	0	0	1	1	1	1	SLC2A14	solute carrier family 2 (facilitated glucose transporter), member 14
hsa-miR-1298	1	0	1	0	1	1	IL1RAP	interleukin 1 receptor accessory protein
hsa-miR-1298	1	0	1	1	1	1	SUCO	SUN domain containing ossification factor
hsa-miR-1298	1	0	1	1	1	1	NRXN3	neurexin 3
hsa-miR-1298	1	0	1	1	1	1	NFYA	nuclear transcription factor Y, alpha
hsa-miR-1298	1	0	1	1	1	1	ARHGAP17	Rho GTPase activating protein 17
hsa-miR-1298	1	0	1	1	1	1	FAM131A	family with sequence similarity 131, member A
hsa-miR-1298	0	0	1	1	0	0	ZNF276	zinc finger protein 276
hsa-miR-1298	0	0	1	0	0	0	NBLA00301	Nbla00301
hsa-miR-1298	1	0	1	1	1	1	MAP4	microtubule-associated protein 4
hsa-miR-1298	1	0	1	1	1	1	TPM1	tropomyosin 1 (alpha)
hsa-miR-1298	1	0	1	1	0	0	SPEG	SPEG complex locus
hsa-miR-1298	0	0	1	0	0	0	LOC401242	uncharacterized LOC401242
hsa-miR-1298	1	0	1	1	1	1	MAP3K7	mitogen-activated protein kinase kinase kinase 7
hsa-miR-1298	0	0	1	0	0	0	RMST	rhabdomyosarcoma 2 associated transcript (non-protein coding)
hsa-miR-1298	1	0	1	0	1	1	FSTL4	follistatin-like 4
hsa-miR-1298	0	0	1	1	0	0	FAM54B	family with sequence similarity 54, member B
hsa-miR-1298	0	0	1	0	0	0	FLJ32742	uncharacterized locus FLJ32742
hsa-miR-1298	0	0	1	1	1	1	RANBP17	RAN binding protein 17
hsa-miR-1298	1	0	1	0	1	1	NCAM1	neural cell adhesion molecule 1
hsa-miR-1298	0	0	1	0	0	0	TUG1	taurine upregulated 1 (non-protein coding)
hsa-miR-1298	0	0	1	0	1	1	CADM1	cell adhesion molecule 1
hsa-miR-1298	1	0	1	1	1	1	AMMECR1	Alport syndrome, mental retardation, midface hypoplasia and elliptocytosis chromosomal region gene 1
hsa-miR-1298	1	0	1	1	1	1	EPN2	epsin 2
hsa-miR-1298	0	0	1	0	0	0	LOC283887	uncharacterized LOC283887
hsa-miR-1298	1	0	1	1	1	1	RRBP1	ribosome binding protein 1 homolog 180kDa (dog)
hsa-miR-1298	1	0	1	1	1	1	MAP3K12	mitogen-activated protein kinase kinase kinase 12
hsa-miR-1298	1	0	1	1	1	1	GLT25D2	glycosyltransferase 25 domain containing 2
hsa-miR-1298	0	0	1	0	0	0	LINC00486	long intergenic non-protein coding RNA 486
hsa-miR-1298	0	0	1	1	1	1	MYO6	myosin VI
hsa-miR-1298	0	0	1	0	0	0	LOC284577	uncharacterized LOC284577
hsa-miR-1298	0	0	1	0	1	1	C19orf66	chromosome 19 open reading frame 66
hsa-miR-1298	0	0	1	0	0	0	FAM66C	family with sequence similarity 66, member C
hsa-miR-1298	0	0	1	0	1	1	FLJ39080	uncharacterized LOC441355
hsa-miR-1298	1	0	1	0	1	1	KIAA1737	KIAA1737
hsa-miR-1298	1	0	1	0	1	1	THRB	thyroid hormone receptor, beta
hsa-miR-1298	1	0	1	1	1	1	CDV3	CDV3 homolog (mouse)
hsa-miR-1298	0	0	1	1	0	0	CHCHD5	coiled-coil-helix-coiled-coil-helix domain containing 5
hsa-miR-1298	1	0	1	1	1	1	KL	klotho
hsa-miR-1298	0	0	1	1	1	1	NEIL2	nei endonuclease VIII-like 2 (E. coli)
hsa-miR-1298	1	0	1	1	1	1	GDA	guanine deaminase
hsa-miR-1298	0	0	1	0	0	0	LOC284385	uncharacterized LOC284385
hsa-miR-1298	1	0	1	0	1	1	UNC5D	unc-5 homolog D (C. elegans)
hsa-miR-1298	0	0	1	1	0	0	MX2	myxovirus (influenza virus) resistance 2 (mouse)
hsa-miR-1298	0	0	1	1	1	1	ARHGEF26	Rho guanine nucleotide exchange factor (GEF) 26
hsa-miR-1298	1	0	1	1	1	1	IPPK	inositol 1,3,4,5,6-pentakisphosphate 2-kinase
hsa-miR-1298	1	0	1	0	1	1	DCUN1D4	DCN1, defective in cullin neddylation 1, domain containing 4 (S. cerevisiae)
hsa-miR-1298	1	0	1	1	1	1	CTGF	connective tissue growth factor
hsa-miR-1298	0	0	1	1	0	0	LOC100128239	uncharacterized LOC100128239
hsa-miR-1298	0	0	1	1	1	1	MKX	mohawk homeobox
hsa-miR-1298	1	0	1	1	1	1	FAM122B	family with sequence similarity 122B
hsa-miR-1298	1	0	1	1	1	1	PTPRB	protein tyrosine phosphatase, receptor type, B
hsa-miR-1298	1	0	1	1	1	1	UBE3C	ubiquitin protein ligase E3C
hsa-miR-1298	0	0	1	0	0	0	LRRC9	leucine rich repeat containing 9
hsa-miR-1298	0	0	1	1	0	0	TMEM136	transmembrane protein 136
hsa-miR-1298	1	0	1	1	1	1	ZNF655	zinc finger protein 655
hsa-miR-1298	0	0	1	1	1	1	SHROOM3	shroom family member 3
hsa-miR-1298	0	0	1	0	0	0	FLJ26245	uncharacterized LOC400533
hsa-miR-1298	1	0	1	0	1	1	RXRA	retinoid X receptor, alpha
hsa-miR-1298	1	0	1	0	1	1	KIF21B	kinesin family member 21B
hsa-miR-1298	1	0	1	0	1	1	STK3	serine/threonine kinase 3
hsa-miR-1298	1	0	1	1	1	1	NCOA1	nuclear receptor coactivator 1
hsa-miR-1298	1	0	1	0	1	1	SLC2A3	solute carrier family 2 (facilitated glucose transporter), member 3
hsa-miR-1298	0	0	1	0	0	0	POM121L9P	POM121 transmembrane nucleoporin-like 9, pseudogene
hsa-miR-1298	0	0	1	1	1	1	GRAMD1C	GRAM domain containing 1C
hsa-miR-1298	0	0	1	1	1	1	STAG3L1	stromal antigen 3-like 1
hsa-miR-1298	0	0	1	1	1	1	EGFLAM	EGF-like, fibronectin type III and laminin G domains
hsa-miR-1298	0	0	1	1	1	1	MYPN	myopalladin
hsa-miR-1298	1	0	1	1	1	1	TMEM68	transmembrane protein 68
hsa-miR-1298	0	0	1	0	0	0	ADCY10P1	adenylate cyclase 10 (soluble) pseudogene 1
hsa-miR-1298	0	0	1	1	0	0	ERAP2	endoplasmic reticulum aminopeptidase 2
hsa-miR-1298	1	0	1	1	1	1	SULF1	sulfatase 1
hsa-miR-1298	1	0	1	1	1	1	BCL11A	B-cell CLL/lymphoma 11A (zinc finger protein)
hsa-miR-1298	1	0	1	1	1	1	TPP1	tripeptidyl peptidase I
hsa-miR-1298	1	0	1	1	1	1	ALCAM	activated leukocyte cell adhesion molecule
hsa-miR-1298	0	0	1	1	1	1	KCNJ13	potassium inwardly-rectifying channel, subfamily J, member 13
hsa-miR-1298	1	0	1	1	1	1	NTNG1	netrin G1
hsa-miR-1298	1	0	1	1	1	1	SAT1	spermidine/spermine N1-acetyltransferase 1
hsa-miR-1298	1	0	1	1	0	0	TAF4B	TAF4b RNA polymerase II, TATA box binding protein (TBP)-associated factor, 105kDa
hsa-miR-1298	0	0	1	1	0	0	NBPF8	neuroblastoma breakpoint family, member 8
hsa-miR-1298	0	0	1	1	1	1	IL23R	interleukin 23 receptor
hsa-miR-1298	1	0	1	0	1	1	BAG4	BCL2-associated athanogene 4
hsa-miR-1298	0	0	1	1	1	1	MRRF	mitochondrial ribosome recycling factor
hsa-miR-1298	1	0	1	1	1	1	POU2F2	POU class 2 homeobox 2
hsa-miR-1298	1	0	1	1	1	1	PCGF5	polycomb group ring finger 5
hsa-miR-1298	1	0	1	1	1	1	TRIM39	tripartite motif containing 39
hsa-miR-1298	1	0	1	1	1	1	SHOX2	short stature homeobox 2
hsa-miR-1298	1	0	1	0	1	1	SEC62	SEC62 homolog (S. cerevisiae)
hsa-miR-1298	0	0	1	1	1	1	C8orf33	chromosome 8 open reading frame 33
hsa-miR-1298	1	0	1	1	1	1	ZNF131	zinc finger protein 131
hsa-miR-1298	0	0	1	1	1	1	NELL2	NEL-like 2 (chicken)
hsa-miR-1298	1	0	1	1	1	1	EPHA4	EPH receptor A4
hsa-miR-1298	1	0	1	1	1	1	GIGYF2	GRB10 interacting GYF protein 2
hsa-miR-1298	1	0	1	1	1	1	EYA4	eyes absent homolog 4 (Drosophila)
hsa-miR-1298	1	0	1	1	1	1	SULT4A1	sulfotransferase family 4A, member 1
hsa-miR-1298	1	0	1	1	1	1	SPATS2	spermatogenesis associated, serine-rich 2
hsa-miR-1298	0	0	1	0	1	1	TTC23L	tetratricopeptide repeat domain 23-like
hsa-miR-1298	1	0	1	1	1	1	CLK4	CDC-like kinase 4
hsa-miR-1298	0	0	1	0	0	0	C12orf77	chromosome 12 open reading frame 77
hsa-miR-1298	1	0	1	1	1	1	RNMT	RNA (guanine-7-) methyltransferase
hsa-miR-1298	1	0	1	0	1	1	CPEB4	cytoplasmic polyadenylation element binding protein 4
hsa-miR-1298	0	0	1	0	1	1	LINC00634	long intergenic non-protein coding RNA 634
hsa-miR-1298	1	0	1	0	1	1	G2E3	G2/M-phase specific E3 ubiquitin protein ligase
hsa-miR-1298	1	0	1	1	1	1	FBXO8	F-box protein 8
hsa-miR-1298	1	0	1	1	1	1	BVES	blood vessel epicardial substance
hsa-miR-1298	0	0	1	0	0	0	LINC00339	long intergenic non-protein coding RNA 339
hsa-miR-1298	0	0	1	0	0	0	LOC157381	uncharacterized LOC157381
hsa-miR-1298	1	0	1	0	1	1	LYPD6	LY6/PLAUR domain containing 6
hsa-miR-1298	1	0	1	1	1	1	RTKN2	rhotekin 2
hsa-miR-1298	1	0	1	1	1	1	PELI1	pellino E3 ubiquitin protein ligase 1
hsa-miR-1298	1	0	1	1	1	1	FNDC3A	fibronectin type III domain containing 3A
hsa-miR-1298	0	0	1	1	0	0	BCL7C	B-cell CLL/lymphoma 7C
hsa-miR-1298	0	0	1	1	0	0	DHX30	DEAH (Asp-Glu-Ala-His) box polypeptide 30
hsa-miR-1298	1	0	1	1	1	1	NIPBL	Nipped-B homolog (Drosophila)
hsa-miR-1298	1	0	1	1	1	1	LMO4	LIM domain only 4
hsa-miR-1298	0	0	1	1	0	0	TMEM183A	transmembrane protein 183A
hsa-miR-1298	1	0	1	1	1	1	PDCD6IP	programmed cell death 6 interacting protein
hsa-miR-1298	1	0	1	1	1	1	SLC26A7	solute carrier family 26, member 7
hsa-miR-1298	1	0	1	1	0	0	DCAF15	DDB1 and CUL4 associated factor 15
hsa-miR-1298	1	0	1	0	1	1	TGFBR1	transforming growth factor, beta receptor 1
hsa-miR-1298	1	0	1	1	1	1	GRAMD4	GRAM domain containing 4
hsa-miR-1298	0	0	1	1	1	1	TMEM52B	transmembrane protein 52B
hsa-miR-1298	0	0	1	1	0	0	HOXB1	homeobox B1
hsa-miR-1298	0	0	1	1	1	1	XG	Xg blood group
hsa-miR-1298	0	0	1	0	1	1	TCAIM	T cell activation inhibitor, mitochondrial
hsa-miR-1298	1	0	1	0	0	0	PWWP2A	PWWP domain containing 2A
hsa-miR-1298	0	0	1	0	0	0	LRRC37A11P	leucine rich repeat containing 37, member A11, pseudogene
hsa-miR-1298	1	0	1	1	1	1	PAX3	paired box 3
hsa-miR-1298	0	0	1	0	0	0	LINC00266-1	long intergenic non-protein coding RNA 266-1
hsa-miR-1298	0	0	1	1	1	1	CNIH	cornichon homolog (Drosophila)
hsa-miR-1298	0	0	1	1	1	1	NCBP2	nuclear cap binding protein subunit 2, 20kDa
hsa-miR-1298	0	0	1	1	1	1	PDZRN4	PDZ domain containing ring finger 4
hsa-miR-1298	0	0	1	1	1	1	CRB1	crumbs homolog 1 (Drosophila)
hsa-miR-1298	0	0	1	0	0	0	MGC23284	uncharacterized LOC197187
hsa-miR-1298	1	0	1	1	1	1	PRDM2	PR domain containing 2, with ZNF domain
hsa-miR-1298	1	0	1	1	1	1	C5orf24	chromosome 5 open reading frame 24
hsa-miR-1298	1	0	1	1	1	1	LYST	lysosomal trafficking regulator
hsa-miR-1298	0	0	1	0	1	1	GINS3	GINS complex subunit 3 (Psf3 homolog)
hsa-miR-1298	1	0	1	1	1	1	VIM	vimentin
hsa-miR-1298	0	0	1	1	0	0	URM1	ubiquitin related modifier 1
hsa-miR-1298	1	0	1	1	1	1	LETMD1	LETM1 domain containing 1
hsa-miR-1298	0	0	1	1	0	0	CCNDBP1	cyclin D-type binding-protein 1
hsa-miR-1298	0	0	1	1	1	1	FAT1	FAT tumor suppressor homolog 1 (Drosophila)
hsa-miR-1298	1	0	1	1	1	1	MBNL1	muscleblind-like splicing regulator 1
hsa-miR-1298	0	0	1	1	0	0	CXorf40A	chromosome X open reading frame 40A
hsa-miR-1298	1	0	1	1	1	1	STK38L	serine/threonine kinase 38 like
hsa-miR-1298	1	0	1	1	1	1	PIAS1	protein inhibitor of activated STAT, 1
hsa-miR-1298	1	0	1	1	1	1	BTBD10	BTB (POZ) domain containing 10
hsa-miR-1298	1	0	1	1	1	1	ARNTL	aryl hydrocarbon receptor nuclear translocator-like
hsa-miR-1298	0	0	1	1	0	0	DDB2	damage-specific DNA binding protein 2, 48kDa
hsa-miR-1298	1	0	1	1	1	1	ANAPC16	anaphase promoting complex subunit 16
hsa-miR-1298	0	0	1	1	0	0	ATP6V0C	ATPase, H+ transporting, lysosomal 16kDa, V0 subunit c
hsa-miR-1298	0	0	1	1	0	0	TUSC3	tumor suppressor candidate 3
hsa-miR-1298	1	0	1	1	1	1	RBFOX2	RNA binding protein, fox-1 homolog (C. elegans) 2
hsa-miR-1298	0	0	1	1	0	0	TMEM41A	transmembrane protein 41A
hsa-miR-1298	0	0	1	1	0	0	PCCA	propionyl CoA carboxylase, alpha polypeptide
hsa-miR-1298	0	0	1	1	0	0	CLK2	CDC-like kinase 2
hsa-miR-1298	1	0	1	1	1	1	MPP1	membrane protein, palmitoylated 1, 55kDa
hsa-miR-1298	1	0	1	0	1	1	KIAA0664	KIAA0664
hsa-miR-1298	1	0	1	1	0	0	SMCHD1	structural maintenance of chromosomes flexible hinge domain containing 1
hsa-miR-1298	1	0	1	1	1	1	ZFHX3	zinc finger homeobox 3
hsa-miR-1298	1	0	1	0	1	1	KLHDC10	kelch domain containing 10
hsa-miR-1298	0	0	1	1	1	1	PTGS1	prostaglandin-endoperoxide synthase 1 (prostaglandin G/H synthase and cyclooxygenase)
hsa-miR-1298	0	0	1	1	1	1	KLRG1	killer cell lectin-like receptor subfamily G, member 1
hsa-miR-1298	0	0	1	0	0	0	GPR144	G protein-coupled receptor 144
hsa-miR-1298	1	0	1	1	1	1	ATP2B2	ATPase, Ca++ transporting, plasma membrane 2
hsa-miR-1298	1	0	1	0	1	1	SLC26A2	solute carrier family 26 (sulfate transporter), member 2
hsa-miR-1298	1	0	1	1	1	1	ESR1	estrogen receptor 1
hsa-miR-1298	0	0	1	0	1	1	MS4A2	membrane-spanning 4-domains, subfamily A, member 2
hsa-miR-1298	0	0	1	1	0	0	FSHR	follicle stimulating hormone receptor
hsa-miR-1298	1	0	1	1	1	1	GJA1	gap junction protein, alpha 1, 43kDa
hsa-miR-1298	0	0	1	1	1	1	PRNP	prion protein
hsa-miR-1298	1	0	1	0	1	1	PTEN	phosphatase and tensin homolog
hsa-miR-1298	1	0	1	0	1	1	TSC1	tuberous sclerosis 1
hsa-miR-1298	0	0	1	1	1	1	CASR	calcium-sensing receptor
hsa-miR-1298	1	1	1	1	1	1	CDKN1A	cyclin-dependent kinase inhibitor 1A (p21, Cip1)
hsa-miR-1298	0	0	1	1	1	1	IL1RN	interleukin 1 receptor antagonist
hsa-miR-1298	1	0	1	1	1	1	CXCL12	chemokine (C-X-C motif) ligand 12
hsa-miR-1298	1	0	1	0	1	1	ALDH1A3	aldehyde dehydrogenase 1 family, member A3
hsa-miR-1298	1	0	1	0	1	1	KCNJ2	potassium inwardly-rectifying channel, subfamily J, member 2
hsa-miR-1298	1	0	1	1	1	1	FARP1	FERM, RhoGEF (ARHGEF) and pleckstrin domain protein 1 (chondrocyte-derived)
hsa-miR-1298	1	0	1	0	1	1	BMF	Bcl2 modifying factor
hsa-miR-1298	0	0	1	1	1	1	ALG11	asparagine-linked glycosylation 11, alpha-1,2-mannosyltransferase homolog (yeast)
hsa-miR-1298	1	0	1	0	1	1	PKP2	plakophilin 2
hsa-miR-1298	1	0	1	1	1	1	L3MBTL3	l(3)mbt-like 3 (Drosophila)
hsa-miR-1298	0	0	1	1	1	1	FAM154B	family with sequence similarity 154, member B
hsa-miR-1298	0	0	1	1	1	1	MXI1	MAX interactor 1
hsa-miR-1298	0	0	1	1	1	1	FBXO47	F-box protein 47
hsa-miR-1298	1	0	1	1	1	1	LUZP2	leucine zipper protein 2
hsa-miR-1298	0	0	1	0	1	1	C12orf69	chromosome 12 open reading frame 69
hsa-miR-1298	0	0	1	1	1	1	GCOM1	GRINL1A complex locus 1
hsa-miR-1298	1	0	1	1	1	1	FNBP1L	formin binding protein 1-like
hsa-miR-1298	0	0	1	1	1	1	SC5DL	sterol-C5-desaturase (ERG3 delta-5-desaturase homolog, S. cerevisiae)-like
hsa-miR-1298	0	0	1	1	1	1	ARRDC2	arrestin domain containing 2
hsa-miR-1298	1	0	1	0	1	1	SRGAP3	SLIT-ROBO Rho GTPase activating protein 3
hsa-miR-1298	0	0	1	1	0	0	CALCA	calcitonin-related polypeptide alpha
hsa-miR-1298	1	0	1	1	1	1	DLX1	distal-less homeobox 1
hsa-miR-1298	0	0	1	1	1	1	HEPACAM2	HEPACAM family member 2
hsa-miR-1298	1	0	1	1	1	1	LFNG	LFNG O-fucosylpeptide 3-beta-N-acetylglucosaminyltransferase
hsa-miR-1298	1	0	1	1	1	1	SLC9A6	solute carrier family 9, subfamily A (NHE6, cation proton antiporter 6), member 6
hsa-miR-1298	0	0	1	1	1	1	TTC14	tetratricopeptide repeat domain 14
hsa-miR-1298	1	0	1	0	1	1	SRGAP2	SLIT-ROBO Rho GTPase activating protein 2
hsa-miR-1298	1	0	1	1	1	1	NET1	neuroepithelial cell transforming 1
hsa-miR-1298	0	0	1	1	0	0	DBNDD2	dysbindin (dystrobrevin binding protein 1) domain containing 2
hsa-miR-1298	1	0	1	1	1	1	CDC14B	CDC14 cell division cycle 14 homolog B (S. cerevisiae)
hsa-miR-1298	1	0	1	0	1	1	ODZ3	odz, odd Oz/ten-m homolog 3 (Drosophila)
hsa-miR-1298	0	0	1	1	1	1	C15orf57	chromosome 15 open reading frame 57
hsa-miR-1298	0	0	1	1	0	0	CSAG2	CSAG family, member 2
hsa-miR-1298	1	0	1	0	0	0	ACAN	aggrecan
hsa-miR-1298	0	0	1	1	1	1	ENTPD3	ectonucleoside triphosphate diphosphohydrolase 3
hsa-miR-1298	1	0	1	1	0	0	GDI1	GDP dissociation inhibitor 1
hsa-miR-1298	0	0	1	1	1	1	ATP5F1	ATP synthase, H+ transporting, mitochondrial Fo complex, subunit B1
hsa-miR-1298	1	0	1	0	1	1	BMP7	bone morphogenetic protein 7
hsa-miR-1298	0	0	1	1	1	1	DST	dystonin
hsa-miR-1298	1	0	1	1	1	1	CD69	CD69 molecule
hsa-miR-1298	0	0	1	1	1	1	GADD45A	growth arrest and DNA-damage-inducible, alpha
hsa-miR-1298	0	0	1	1	1	1	HMGCS1	3-hydroxy-3-methylglutaryl-CoA synthase 1 (soluble)
hsa-miR-1298	0	0	1	1	1	1	IRF8	interferon regulatory factor 8
hsa-miR-1298	1	0	1	1	0	0	INHBB	inhibin, beta B
hsa-miR-1298	1	0	1	1	1	1	ITGB8	integrin, beta 8
hsa-miR-1298	1	0	1	1	1	1	KPNA4	karyopherin alpha 4 (importin alpha 3)
hsa-miR-1298	1	0	1	1	1	1	NCBP1	nuclear cap binding protein subunit 1, 80kDa
hsa-miR-1298	1	0	1	0	1	1	PAK2	p21 protein (Cdc42/Rac)-activated kinase 2
hsa-miR-1298	1	0	1	0	1	1	PAPPA	pregnancy-associated plasma protein A, pappalysin 1
hsa-miR-1298	0	0	1	1	1	1	PPP1R3A	protein phosphatase 1, regulatory subunit 3A
hsa-miR-1298	1	0	1	1	1	1	ARID4A	AT rich interactive domain 4A (RBP1-like)
hsa-miR-1298	1	0	1	0	1	1	SORT1	sortilin 1
hsa-miR-1298	1	0	1	1	1	1	TFAP4	transcription factor AP-4 (activating enhancer binding protein 4)
hsa-miR-1298	0	0	1	1	1	1	PRPF18	PRP18 pre-mRNA processing factor 18 homolog (S. cerevisiae)
hsa-miR-1298	1	0	1	1	0	0	KHSRP	KH-type splicing regulatory protein
hsa-miR-1298	1	0	1	0	1	1	TNKS	tankyrase, TRF1-interacting ankyrin-related ADP-ribose polymerase
hsa-miR-1298	1	0	1	0	1	1	SKAP2	src kinase associated phosphoprotein 2
hsa-miR-1298	1	0	1	0	1	1	WASL	Wiskott-Aldrich syndrome-like
hsa-miR-1298	1	0	1	0	1	1	SEMA5A	sema domain, seven thrombospondin repeats (type 1 and type 1-like), transmembrane domain (TM) and short cytoplasmic domain, (semaphorin) 5A
hsa-miR-1298	1	0	1	0	1	1	DGKB	diacylglycerol kinase, beta 90kDa
hsa-miR-1298	1	0	1	1	0	0	EIF4EBP1	eukaryotic translation initiation factor 4E binding protein 1
hsa-miR-1298	1	0	1	1	1	1	SOCS6	suppressor of cytokine signaling 6
hsa-miR-1298	1	0	1	1	1	1	BNIP2	BCL2/adenovirus E1B 19kDa interacting protein 2
hsa-miR-1298	1	0	1	1	1	1	DACH1	dachshund homolog 1 (Drosophila)
hsa-miR-1298	1	0	1	1	1	1	LRP2	low density lipoprotein receptor-related protein 2
hsa-miR-1298	1	0	1	1	1	1	RAB11A	RAB11A, member RAS oncogene family
hsa-miR-1298	0	0	1	1	1	1	ITGBL1	integrin, beta-like 1 (with EGF-like repeat domains)
hsa-miR-1298	1	0	1	1	1	1	ONECUT2	one cut homeobox 2
hsa-miR-1298	0	0	1	1	1	1	CLCA3P	chloride channel accessory 3, pseudogene
hsa-miR-1298	1	0	1	0	1	1	SEL1L	sel-1 suppressor of lin-12-like (C. elegans)
hsa-miR-1298	0	0	1	1	1	1	SIM1	single-minded homolog 1 (Drosophila)
hsa-miR-1298	0	0	1	1	1	1	FGFBP1	fibroblast growth factor binding protein 1
hsa-miR-1298	1	0	1	0	1	1	PRKAB2	protein kinase, AMP-activated, beta 2 non-catalytic subunit
hsa-miR-1298	0	0	1	1	1	1	SLC20A1	solute carrier family 20 (phosphate transporter), member 1
hsa-miR-1298	0	0	1	1	1	1	PAPSS1	3'-phosphoadenosine 5'-phosphosulfate synthase 1
hsa-miR-1298	1	0	1	1	1	1	RGS4	regulator of G-protein signaling 4
hsa-miR-1298	1	0	1	1	1	1	UST	uronyl-2-sulfotransferase
hsa-miR-1298	1	0	1	1	1	1	ARPC5	actin related protein 2/3 complex, subunit 5, 16kDa
hsa-miR-1298	1	0	1	1	1	1	PRKD3	protein kinase D3
hsa-miR-1298	1	0	1	1	1	1	HS3ST4	heparan sulfate (glucosamine) 3-O-sulfotransferase 4
hsa-miR-1298	1	0	1	1	1	1	DYNC1LI2	dynein, cytoplasmic 1, light intermediate chain 2
hsa-miR-1298	1	0	1	1	1	1	NEFL	neurofilament, light polypeptide
hsa-miR-1298	1	0	1	1	1	1	SMC1A	structural maintenance of chromosomes 1A
hsa-miR-1298	1	0	1	1	1	1	TUBGCP3	tubulin, gamma complex associated protein 3
hsa-miR-1298	1	0	1	1	1	1	KHDRBS1	KH domain containing, RNA binding, signal transduction associated 1
hsa-miR-1298	1	0	1	1	1	1	DIAPH2	diaphanous homolog 2 (Drosophila)
hsa-miR-1298	1	0	1	1	1	1	KAT6A	K(lysine) acetyltransferase 6A
hsa-miR-1298	1	0	1	1	1	1	ABHD2	abhydrolase domain containing 2
hsa-miR-1298	1	0	1	1	1	1	ZNF81	zinc finger protein 81
hsa-miR-1298	1	0	1	1	1	1	DUSP10	dual specificity phosphatase 10
hsa-miR-1298	1	0	1	1	1	1	PADI2	peptidyl arginine deiminase, type II
hsa-miR-1298	0	0	1	0	1	1	PLA2G2D	phospholipase A2, group IID
hsa-miR-1298	0	0	1	1	1	1	N6AMT1	N-6 adenine-specific DNA methyltransferase 1 (putative)
hsa-miR-1298	1	0	1	1	1	1	FLRT3	fibronectin leucine rich transmembrane protein 3
hsa-miR-1298	0	0	1	1	0	0	TBX21	T-box 21
hsa-miR-1298	0	0	1	1	1	1	LAMP3	lysosomal-associated membrane protein 3
hsa-miR-1298	1	0	1	0	1	1	HUNK	hormonally up-regulated Neu-associated kinase
hsa-miR-1298	1	0	1	1	1	1	RALGPS1	Ral GEF with PH domain and SH3 binding motif 1
hsa-miR-1298	0	0	1	0	1	1	PPM1E	protein phosphatase, Mg2+/Mn2+ dependent, 1E
hsa-miR-1298	1	0	1	0	1	1	PDS5B	PDS5, regulator of cohesion maintenance, homolog B (S. cerevisiae)
hsa-miR-1298	1	0	1	0	1	1	LARP4B	La ribonucleoprotein domain family, member 4B
hsa-miR-1298	1	0	1	1	1	1	RCOR1	REST corepressor 1
hsa-miR-1298	1	0	1	1	0	0	KIAA0556	KIAA0556
hsa-miR-1298	1	0	1	0	1	1	KIAA1024	KIAA1024
hsa-miR-1298	1	0	1	1	1	1	ANKS1A	ankyrin repeat and sterile alpha motif domain containing 1A
hsa-miR-1298	1	0	1	1	1	1	WDR7	WD repeat domain 7
hsa-miR-1298	1	0	1	1	1	1	DSTYK	dual serine/threonine and tyrosine protein kinase
hsa-miR-1298	0	0	1	1	1	1	NBPF14	neuroblastoma breakpoint family, member 14
hsa-miR-1298	0	0	1	1	1	1	SCCPDH	saccharopine dehydrogenase (putative)
hsa-miR-1298	0	0	1	1	1	1	APH1A	anterior pharynx defective 1 homolog A (C. elegans)
hsa-miR-1298	0	0	1	1	1	1	COMMD2	COMM domain containing 2
hsa-miR-1298	1	0	1	1	1	1	BIRC6	baculoviral IAP repeat containing 6
hsa-miR-1298	0	0	1	1	1	1	CDH9	cadherin 9, type 2 (T1-cadherin)
hsa-miR-1298	1	0	1	1	1	1	PHF20	PHD finger protein 20
hsa-miR-1298	1	0	1	1	1	1	HOXC13	homeobox C13
hsa-miR-1298	1	0	1	1	1	1	ZNF3	zinc finger protein 3
hsa-miR-1298	0	0	1	1	0	0	THG1L	tRNA-histidine guanylyltransferase 1-like (S. cerevisiae)
hsa-miR-1298	0	0	1	1	1	1	AIM1L	absent in melanoma 1-like
hsa-miR-1298	0	0	1	1	1	1	RBM22	RNA binding motif protein 22
hsa-miR-1298	0	0	1	0	1	1	SHQ1	SHQ1 homolog (S. cerevisiae)
hsa-miR-1298	1	0	1	1	1	1	PI4K2B	phosphatidylinositol 4-kinase type 2 beta
hsa-miR-1298	1	0	1	1	1	1	SPTLC3	serine palmitoyltransferase, long chain base subunit 3
hsa-miR-1298	1	0	1	0	1	1	FOXJ2	forkhead box J2
hsa-miR-1298	1	0	1	1	1	1	SLC16A10	solute carrier family 16, member 10 (aromatic amino acid transporter)
hsa-miR-1298	1	0	1	1	1	1	ETNK1	ethanolamine kinase 1
hsa-miR-1298	1	0	1	1	1	1	SEPT3	septin 3
hsa-miR-1298	1	0	1	1	1	1	PAK7	p21 protein (Cdc42/Rac)-activated kinase 7
hsa-miR-1298	1	0	1	1	1	1	NEFH	neurofilament, heavy polypeptide
hsa-miR-1298	0	0	1	1	1	1	SELK	selenoprotein K
hsa-miR-1298	1	0	1	1	0	0	HAND2	heart and neural crest derivatives expressed 2
hsa-miR-1298	1	0	1	0	1	1	CERS2	ceramide synthase 2
hsa-miR-1298	0	0	1	1	1	1	RBM15	RNA binding motif protein 15
hsa-miR-1298	1	0	1	1	1	1	NEUROG2	neurogenin 2
hsa-miR-1298	1	0	1	0	1	1	LIN28A	lin-28 homolog A (C. elegans)
hsa-miR-1298	0	0	1	1	1	1	ZNF767	zinc finger family member 767
hsa-miR-1298	1	0	1	1	1	1	HKDC1	hexokinase domain containing 1
hsa-miR-1298	1	0	1	1	1	1	CYB5B	cytochrome b5 type B (outer mitochondrial membrane)
hsa-miR-1298	1	0	1	0	1	1	SETD7	SET domain containing (lysine methyltransferase) 7
hsa-miR-1298	0	0	1	0	1	1	ENAM	enamelin
hsa-miR-1298	0	0	1	1	1	1	KRTAP3-2	keratin associated protein 3-2
hsa-miR-1298	1	0	1	1	1	1	SLITRK6	SLIT and NTRK-like family, member 6
hsa-miR-1298	0	0	1	1	1	1	JAGN1	jagunal homolog 1 (Drosophila)
hsa-miR-1298	1	0	1	1	1	1	TTBK1	tau tubulin kinase 1
hsa-miR-1298	1	0	1	1	1	1	HIATL1	hippocampus abundant transcript-like 1
hsa-miR-1298	0	0	1	1	1	1	FAM136A	family with sequence similarity 136, member A
hsa-miR-1298	1	0	1	1	1	1	C5orf30	chromosome 5 open reading frame 30
hsa-miR-1298	1	0	1	1	1	1	SSH2	slingshot homolog 2 (Drosophila)
hsa-miR-1298	1	0	1	1	1	1	EPT1	ethanolaminephosphotransferase 1 (CDP-ethanolamine-specific)
hsa-miR-1298	0	0	1	1	1	1	NACC1	nucleus accumbens associated 1, BEN and BTB (POZ) domain containing
hsa-miR-1298	1	0	1	1	1	1	MAL2	mal, T-cell differentiation protein 2 (gene/pseudogene)
hsa-miR-1298	1	0	1	0	1	1	ANTXR2	anthrax toxin receptor 2
hsa-miR-1298	0	0	1	1	0	0	BPIFA2	BPI fold containing family A, member 2
hsa-miR-1298	1	0	1	1	1	1	KCNE4	potassium voltage-gated channel, Isk-related family, member 4
hsa-miR-1298	1	0	1	1	1	1	SPSB4	splA/ryanodine receptor domain and SOCS box containing 4
hsa-miR-1298	1	0	1	1	1	1	BMPER	BMP binding endothelial regulator
hsa-miR-1298	1	0	1	1	1	1	DNER	delta/notch-like EGF repeat containing
hsa-miR-1298	1	0	1	1	0	0	SMCR8	Smith-Magenis syndrome chromosome region, candidate 8
hsa-miR-1298	1	0	1	1	1	1	YPEL4	yippee-like 4 (Drosophila)
hsa-miR-1298	0	0	1	1	1	1	C7orf45	chromosome 7 open reading frame 45
hsa-miR-1298	1	0	1	1	1	1	LPIN1	lipin 1
hsa-miR-1298	1	0	1	0	1	1	MTPN	myotrophin
hsa-miR-1298	0	0	1	1	1	1	CRYZL1	crystallin, zeta (quinone reductase)-like 1
hsa-miR-1298	0	0	1	1	0	0	KLK12	kallikrein-related peptidase 12
hsa-miR-1298	1	0	1	1	1	1	SPRED1	sprouty-related, EVH1 domain containing 1
hsa-miR-1298	1	0	1	1	1	1	TCEANC2	transcription elongation factor A (SII) N-terminal and central domain containing 2
hsa-miR-1298	1	0	1	0	1	1	SEMA6D	sema domain, transmembrane domain (TM), and cytoplasmic domain, (semaphorin) 6D
hsa-miR-1298	0	0	1	1	1	1	CREG2	cellular repressor of E1A-stimulated genes 2
hsa-miR-1298	0	0	1	1	1	1	REXO1L1	REX1, RNA exonuclease 1 homolog (S. cerevisiae)-like 1
hsa-miR-1298	0	0	1	1	1	1	C17orf78	chromosome 17 open reading frame 78
hsa-miR-1298	1	0	1	1	1	1	ARL10	ADP-ribosylation factor-like 10
hsa-miR-1298	1	0	1	0	1	1	TMEM167A	transmembrane protein 167A
hsa-miR-1298	0	0	1	1	1	1	CHSY3	chondroitin sulfate synthase 3
hsa-miR-1298	1	0	1	1	1	1	LRRTM3	leucine rich repeat transmembrane neuronal 3
hsa-miR-1298	0	0	1	0	0	0	FER1L6-AS2	FER1L6 antisense RNA 2
hsa-miR-1298	1	0	1	0	1	1	HNRNPA3	heterogeneous nuclear ribonucleoprotein A3
hsa-miR-1298	1	0	1	1	1	1	PTGER3	prostaglandin E receptor 3 (subtype EP3)
hsa-miR-1298	0	0	1	1	1	1	ZNF365	zinc finger protein 365
hsa-miR-1298	0	0	1	1	1	1	KCNRG	potassium channel regulator
hsa-miR-1298	1	0	1	1	1	1	BLOC1S5	biogenesis of lysosomal organelles complex-1, subunit 5, muted
hsa-miR-1298	0	0	1	0	0	0	CSAG3	CSAG family, member 3
hsa-miR-1298	0	0	1	1	1	1	ELP5	elongator acetyltransferase complex subunit 5
hsa-miR-1298	0	0	1	0	0	0	SNORD21	small nucleolar RNA, C/D box 21
hsa-miR-1298	0	0	1	0	0	0	SUMO1P1	SUMO1 pseudogene 1
hsa-miR-1298	0	0	1	0	0	0	TRPC2	transient receptor potential cation channel, subfamily C, member 2, pseudogene
hsa-miR-1298	0	0	1	0	0	0	ANP32AP1	acidic (leucine-rich) nuclear phosphoprotein 32 family, member A pseudogene 1
hsa-miR-1298	0	0	1	0	0	0	SNORD116-28	small nucleolar RNA, C/D box 116-28
hsa-miR-1298	0	0	1	1	0	0	SNRPN	small nuclear ribonucleoprotein polypeptide N
hsa-miR-1298	1	0	1	1	1	1	HOXA1	homeobox A1
hsa-miR-1298	1	0	1	1	1	1	FBN2	fibrillin 2
