# Supplementary material for: Profiling of Selected MicroRNAs in Proliferative Eutopic Endometrium of Women with Ovarian Endometriosis
Source: Biomed Res Int. 2015 Aug 20;2015:760698. doi: 10.1155/2015/760698 (PMC4558423; doi:10.1155/2015/760698)
Supplement: Supplementary file 1 — Table I: The names of miRNAs significantly differentially expressed between eutopic endometrium of patients with endometriosis vs eutopic endometrium of patients without endometriosis. Table II: The associations between miRNA and mRNA, which presents detailed results of the search of six major databases i.e targetscan, tarbase, miranda, mirbase, mirtarget2 and pictar. [file 760698.f1.zip › 760698.f1/Table II/hsa-miR-1299.tsv]

miR	targetscan	tarbase	miranda	mirbase	mirtarget2	pictar	GeneSymbol	GeneName
hsa-miR-1299	0	0	1	1	1	1	VRK2	vaccinia related kinase 2
hsa-miR-1299	1	0	1	1	1	1	CHD9	chromodomain helicase DNA binding protein 9
hsa-miR-1299	1	0	1	1	0	0	SRCAP	Snf2-related CREBBP activator protein
hsa-miR-1299	1	0	1	0	1	1	KIAA0355	KIAA0355
hsa-miR-1299	1	0	1	1	1	1	DAAM2	dishevelled associated activator of morphogenesis 2
hsa-miR-1299	1	0	1	1	1	1	FAM65B	family with sequence similarity 65, member B
hsa-miR-1299	1	0	1	1	1	1	ABCC5	ATP-binding cassette, sub-family C (CFTR/MRP), member 5
hsa-miR-1299	1	0	1	0	1	1	PTPRT	protein tyrosine phosphatase, receptor type, T
hsa-miR-1299	0	0	1	1	0	0	PLXNB1	plexin B1
hsa-miR-1299	1	0	1	0	1	1	KIAA0408	KIAA0408
hsa-miR-1299	1	0	1	1	1	1	PPIP5K2	diphosphoinositol pentakisphosphate kinase 2
hsa-miR-1299	1	0	1	0	1	1	NEDD4L	neural precursor cell expressed, developmentally down-regulated 4-like, E3 ubiquitin protein ligase
hsa-miR-1299	1	0	1	0	1	1	VPS13D	vacuolar protein sorting 13 homolog D (S. cerevisiae)
hsa-miR-1299	1	0	1	1	0	0	DENND4B	DENN/MADD domain containing 4B
hsa-miR-1299	1	0	1	0	1	1	CEP350	centrosomal protein 350kDa
hsa-miR-1299	0	0	1	0	0	0	FAM91A2	family with sequence similarity 91, member A2
hsa-miR-1299	0	0	1	1	0	0	ZNF862	zinc finger protein 862
hsa-miR-1299	1	0	1	1	1	1	GPATCH8	G patch domain containing 8
hsa-miR-1299	1	0	1	1	1	1	SLC4A7	solute carrier family 4, sodium bicarbonate cotransporter, member 7
hsa-miR-1299	1	0	1	1	0	0	SMCHD1	structural maintenance of chromosomes flexible hinge domain containing 1
hsa-miR-1299	1	0	1	0	1	1	LPHN3	latrophilin 3
hsa-miR-1299	1	0	1	1	1	1	DNM3	dynamin 3
hsa-miR-1299	0	0	1	1	0	0	FAM169A	family with sequence similarity 169, member A
hsa-miR-1299	1	0	1	1	1	1	ARHGEF15	Rho guanine nucleotide exchange factor (GEF) 15
hsa-miR-1299	0	0	1	1	1	1	MAN2B2	mannosidase, alpha, class 2B, member 2
hsa-miR-1299	1	0	1	0	0	0	DTX4	deltex homolog 4 (Drosophila)
hsa-miR-1299	1	0	1	1	1	1	CPEB3	cytoplasmic polyadenylation element binding protein 3
hsa-miR-1299	1	0	1	1	1	1	BAHD1	bromo adjacent homology domain containing 1
hsa-miR-1299	1	0	1	1	1	1	CIT	citron (rho-interacting, serine/threonine kinase 21)
hsa-miR-1299	1	0	1	1	1	1	C11orf9	chromosome 11 open reading frame 9
hsa-miR-1299	1	0	1	1	1	1	RGL1	ral guanine nucleotide dissociation stimulator-like 1
hsa-miR-1299	0	0	1	1	1	1	FASTKD2	FAST kinase domains 2
hsa-miR-1299	1	0	1	1	1	1	NTNG1	netrin G1
hsa-miR-1299	1	0	1	1	0	0	FRMD4B	FERM domain containing 4B
hsa-miR-1299	1	0	1	1	1	1	FNBP4	formin binding protein 4
hsa-miR-1299	1	0	1	1	0	0	KIAA1045	KIAA1045
hsa-miR-1299	1	0	1	1	0	0	ZC3H4	zinc finger CCCH-type containing 4
hsa-miR-1299	1	0	1	1	1	1	PRRC2C	proline-rich coiled-coil 2C
hsa-miR-1299	1	0	1	1	1	1	PHF8	PHD finger protein 8
hsa-miR-1299	1	0	1	1	1	1	SMARCAD1	SWI/SNF-related, matrix-associated actin-dependent regulator of chromatin, subfamily a, containing DEAD/H box 1
hsa-miR-1299	1	0	1	0	1	1	GPR158	G protein-coupled receptor 158
hsa-miR-1299	0	0	1	1	1	1	TMCC3	transmembrane and coiled-coil domain family 3
hsa-miR-1299	1	0	1	0	1	1	SRGAP3	SLIT-ROBO Rho GTPase activating protein 3
hsa-miR-1299	1	0	1	1	1	1	NDRG4	NDRG family member 4
hsa-miR-1299	1	0	1	1	1	1	KIAA1217	KIAA1217
hsa-miR-1299	1	0	1	1	1	1	ATXN7L1	ataxin 7-like 1
hsa-miR-1299	1	0	1	0	1	1	PPFIBP1	PTPRF interacting protein, binding protein 1 (liprin beta 1)
hsa-miR-1299	1	0	1	0	0	0	HEG1	HEG homolog 1 (zebrafish)
hsa-miR-1299	0	0	1	1	1	1	FSTL5	follistatin-like 5
hsa-miR-1299	1	0	1	1	1	1	STK36	serine/threonine kinase 36
hsa-miR-1299	0	0	1	1	1	1	GKAP1	G kinase anchoring protein 1
hsa-miR-1299	0	0	1	1	1	1	CA10	carbonic anhydrase X
hsa-miR-1299	1	0	1	0	0	0	NYNRIN	NYN domain and retroviral integrase containing
hsa-miR-1299	1	0	1	1	1	1	PCDH19	protocadherin 19
hsa-miR-1299	1	0	1	0	1	1	KCTD16	potassium channel tetramerisation domain containing 16
hsa-miR-1299	1	0	1	1	1	1	UPF2	UPF2 regulator of nonsense transcripts homolog (yeast)
hsa-miR-1299	1	0	1	1	0	0	EBF4	early B-cell factor 4
hsa-miR-1299	0	0	1	0	0	0	NYAP2	neuronal tyrosine-phosphorylated phosphoinositide-3-kinase adaptor 2
hsa-miR-1299	1	0	1	1	1	1	FRAS1	Fraser syndrome 1
hsa-miR-1299	1	0	1	1	1	1	FAM214B	family with sequence similarity 214, member B
hsa-miR-1299	0	0	1	0	1	1	CDC42EP4	CDC42 effector protein (Rho GTPase binding) 4
hsa-miR-1299	1	0	1	0	1	1	LMO3	LIM domain only 3 (rhombotin-like 2)
hsa-miR-1299	0	0	1	0	1	1	FBRSL1	fibrosin-like 1
hsa-miR-1299	1	0	1	1	0	0	MAGI3	membrane associated guanylate kinase, WW and PDZ domain containing 3
hsa-miR-1299	1	0	1	0	0	0	TANC2	tetratricopeptide repeat, ankyrin repeat and coiled-coil containing 2
hsa-miR-1299	0	0	1	1	1	1	PBLD	phenazine biosynthesis-like protein domain containing
hsa-miR-1299	1	0	1	1	1	1	PHF21A	PHD finger protein 21A
hsa-miR-1299	1	0	1	1	1	1	IKZF4	IKAROS family zinc finger 4 (Eos)
hsa-miR-1299	0	0	1	1	1	1	UNC80	unc-80 homolog (C. elegans)
hsa-miR-1299	0	0	1	1	0	0	NTNG2	netrin G2
hsa-miR-1299	0	0	1	1	0	0	SEC16B	SEC16 homolog B (S. cerevisiae)
hsa-miR-1299	1	0	1	1	1	1	POGZ	pogo transposable element with ZNF domain
hsa-miR-1299	1	0	1	1	1	1	OXR1	oxidation resistance 1
hsa-miR-1299	0	0	1	1	1	1	KIAA1967	KIAA1967
hsa-miR-1299	0	0	1	0	0	0	RSPRY1	ring finger and SPRY domain containing 1
hsa-miR-1299	1	0	1	1	1	1	SH3TC2	SH3 domain and tetratricopeptide repeats 2
hsa-miR-1299	0	0	1	1	0	0	GOLT1A	golgi transport 1A
hsa-miR-1299	1	0	1	0	0	0	FAT3	FAT tumor suppressor homolog 3 (Drosophila)
hsa-miR-1299	1	0	1	0	1	1	RNF43	ring finger protein 43
hsa-miR-1299	1	0	1	0	0	0	RNF169	ring finger protein 169
hsa-miR-1299	1	0	1	0	0	0	ZBTB34	zinc finger and BTB domain containing 34
hsa-miR-1299	0	0	1	0	1	1	RASSF8	Ras association (RalGDS/AF-6) domain family (N-terminal) member 8
hsa-miR-1299	1	0	1	1	1	1	SMEK1	SMEK homolog 1, suppressor of mek1 (Dictyostelium)
hsa-miR-1299	0	0	1	1	0	0	KRTAP24-1	keratin associated protein 24-1
hsa-miR-1299	0	0	1	1	0	0	HELLS	helicase, lymphoid-specific
hsa-miR-1299	0	0	1	1	1	1	IL7	interleukin 7
hsa-miR-1299	1	0	1	1	1	1	PAN3	PAN3 poly(A) specific ribonuclease subunit homolog (S. cerevisiae)
hsa-miR-1299	0	0	1	1	0	0	SSPO	SCO-spondin homolog (Bos taurus)
hsa-miR-1299	0	0	1	1	0	0	ERAP2	endoplasmic reticulum aminopeptidase 2
hsa-miR-1299	1	0	1	1	1	1	ARHGEF7	Rho guanine nucleotide exchange factor (GEF) 7
hsa-miR-1299	1	0	1	1	1	1	NRXN2	neurexin 2
hsa-miR-1299	0	0	1	1	1	1	PCBP2	poly(rC) binding protein 2
hsa-miR-1299	1	0	1	1	1	1	UBE3A	ubiquitin protein ligase E3A
hsa-miR-1299	1	0	1	1	1	1	TRIM36	tripartite motif containing 36
hsa-miR-1299	1	0	1	1	1	1	AP3D1	adaptor-related protein complex 3, delta 1 subunit
hsa-miR-1299	0	0	1	1	0	0	DBP	D site of albumin promoter (albumin D-box) binding protein
hsa-miR-1299	1	0	1	1	1	1	VLDLR	very low density lipoprotein receptor
hsa-miR-1299	0	0	1	1	0	0	MPST	mercaptopyruvate sulfurtransferase
hsa-miR-1299	0	0	1	0	1	1	ATR	ataxia telangiectasia and Rad3 related
hsa-miR-1299	1	0	1	1	1	1	SHC1	SHC (Src homology 2 domain containing) transforming protein 1
hsa-miR-1299	1	0	1	1	1	1	OSBPL6	oxysterol binding protein-like 6
hsa-miR-1299	1	0	1	1	0	0	GRIN1	glutamate receptor, ionotropic, N-methyl D-aspartate 1
hsa-miR-1299	1	0	1	1	1	1	CLIP4	CAP-GLY domain containing linker protein family, member 4
hsa-miR-1299	1	0	1	1	1	1	PML	promyelocytic leukemia
hsa-miR-1299	0	0	1	1	1	1	PTK2	PTK2 protein tyrosine kinase 2
hsa-miR-1299	1	0	1	1	1	1	SYNCRIP	synaptotagmin binding, cytoplasmic RNA interacting protein
hsa-miR-1299	1	0	1	1	1	1	RPS6KA2	ribosomal protein S6 kinase, 90kDa, polypeptide 2
hsa-miR-1299	1	0	1	1	1	1	RASSF5	Ras association (RalGDS/AF-6) domain family member 5
hsa-miR-1299	1	0	1	0	1	1	SLC6A6	solute carrier family 6 (neurotransmitter transporter, taurine), member 6
hsa-miR-1299	1	0	1	1	0	0	TSPYL2	TSPY-like 2
hsa-miR-1299	0	0	1	1	1	1	DVL1	dishevelled, dsh homolog 1 (Drosophila)
hsa-miR-1299	1	0	1	1	1	1	DMTF1	cyclin D binding myb-like transcription factor 1
hsa-miR-1299	0	0	1	0	1	1	NPY1R	neuropeptide Y receptor Y1
hsa-miR-1299	1	0	1	1	1	1	EPHA7	EPH receptor A7
hsa-miR-1299	1	0	1	1	1	1	TWF1	twinfilin, actin-binding protein, homolog 1 (Drosophila)
hsa-miR-1299	1	0	1	1	1	1	ARFGEF1	ADP-ribosylation factor guanine nucleotide-exchange factor 1 (brefeldin A-inhibited)
hsa-miR-1299	1	0	1	0	1	1	CHL1	cell adhesion molecule with homology to L1CAM (close homolog of L1)
hsa-miR-1299	1	0	1	1	1	1	AEBP2	AE binding protein 2
hsa-miR-1299	1	0	1	0	1	1	CDON	Cdon homolog (mouse)
hsa-miR-1299	0	0	1	1	0	0	IFT27	intraflagellar transport 27 homolog (Chlamydomonas)
hsa-miR-1299	0	0	1	1	0	0	PSMB2	proteasome (prosome, macropain) subunit, beta type, 2
hsa-miR-1299	0	0	1	1	1	1	GPM6B	glycoprotein M6B
hsa-miR-1299	1	0	1	1	1	1	PDLIM5	PDZ and LIM domain 5
hsa-miR-1299	0	0	1	1	1	1	STAU1	staufen, RNA binding protein, homolog 1 (Drosophila)
hsa-miR-1299	1	0	1	1	1	1	IPO8	importin 8
hsa-miR-1299	0	0	1	1	1	1	HLA-DQA1	major histocompatibility complex, class II, DQ alpha 1
hsa-miR-1299	1	0	1	1	0	0	SYN3	synapsin III
hsa-miR-1299	1	0	1	1	1	1	COL24A1	collagen, type XXIV, alpha 1
hsa-miR-1299	1	0	1	1	1	1	HMGA2	high mobility group AT-hook 2
hsa-miR-1299	1	0	1	1	1	1	TEAD1	TEA domain family member 1 (SV40 transcriptional enhancer factor)
hsa-miR-1299	1	0	1	1	0	0	PPP2R5D	protein phosphatase 2, regulatory subunit B', delta
hsa-miR-1299	0	0	1	1	1	1	DDX10	DEAD (Asp-Glu-Ala-Asp) box polypeptide 10
hsa-miR-1299	0	0	1	1	0	0	TRIM27	tripartite motif containing 27
hsa-miR-1299	0	0	1	1	1	1	SGSH	N-sulfoglucosamine sulfohydrolase
hsa-miR-1299	0	0	1	1	1	1	PLD1	phospholipase D1, phosphatidylcholine-specific
hsa-miR-1299	1	0	1	0	1	1	CAV1	caveolin 1, caveolae protein, 22kDa
hsa-miR-1299	1	0	1	1	1	1	SDHC	succinate dehydrogenase complex, subunit C, integral membrane protein, 15kDa
hsa-miR-1299	0	0	1	0	0	0	MIAT	myocardial infarction associated transcript (non-protein coding)
hsa-miR-1299	0	0	1	0	1	1	PARG	poly (ADP-ribose) glycohydrolase
hsa-miR-1299	0	0	1	1	1	1	HDAC3	histone deacetylase 3
hsa-miR-1299	1	0	1	1	1	1	DLGAP2	discs, large (Drosophila) homolog-associated protein 2
hsa-miR-1299	1	0	1	1	1	1	SLC4A4	solute carrier family 4, sodium bicarbonate cotransporter, member 4
hsa-miR-1299	1	0	1	1	1	1	YME1L1	YME1-like 1 (S. cerevisiae)
hsa-miR-1299	0	0	1	1	0	0	SPTBN2	spectrin, beta, non-erythrocytic 2
hsa-miR-1299	0	0	1	1	0	0	PLA1A	phospholipase A1 member A
hsa-miR-1299	1	0	1	0	1	1	CELF2	CUGBP, Elav-like family member 2
hsa-miR-1299	1	0	1	1	1	1	SOCS2	suppressor of cytokine signaling 2
hsa-miR-1299	1	0	1	0	0	0	MAP3K1	mitogen-activated protein kinase kinase kinase 1, E3 ubiquitin protein ligase
hsa-miR-1299	0	0	1	1	1	1	CD84	CD84 molecule
hsa-miR-1299	0	0	1	1	1	1	CYP4F3	cytochrome P450, family 4, subfamily F, polypeptide 3
hsa-miR-1299	1	0	1	1	1	1	MBNL2	muscleblind-like splicing regulator 2
hsa-miR-1299	1	0	1	1	1	1	CTNND1	catenin (cadherin-associated protein), delta 1
hsa-miR-1299	1	0	1	1	1	1	CBFA2T2	core-binding factor, runt domain, alpha subunit 2; translocated to, 2
hsa-miR-1299	1	0	1	1	1	1	TP63	tumor protein p63
hsa-miR-1299	0	0	1	1	1	1	LYPLA1	lysophospholipase I
hsa-miR-1299	0	0	1	1	1	1	ERAL1	Era G-protein-like 1 (E. coli)
hsa-miR-1299	1	0	1	1	1	1	GLS	glutaminase
hsa-miR-1299	0	0	1	1	1	1	FHL1	four and a half LIM domains 1
hsa-miR-1299	1	0	1	1	1	1	RABEP1	rabaptin, RAB GTPase binding effector protein 1
hsa-miR-1299	1	0	1	1	1	1	LPHN2	latrophilin 2
hsa-miR-1299	1	0	1	0	1	1	CD164	CD164 molecule, sialomucin
hsa-miR-1299	0	0	1	1	1	1	MSTO1	misato homolog 1 (Drosophila)
hsa-miR-1299	0	0	1	1	0	0	STOML1	stomatin (EPB72)-like 1
hsa-miR-1299	1	0	1	1	1	1	NF2	neurofibromin 2 (merlin)
hsa-miR-1299	0	0	1	1	1	1	DMRT2	doublesex and mab-3 related transcription factor 2
hsa-miR-1299	1	0	1	1	1	1	CAB39	calcium binding protein 39
hsa-miR-1299	1	0	1	0	1	1	BECN1	beclin 1, autophagy related
hsa-miR-1299	1	0	1	1	1	1	MYNN	myoneurin
hsa-miR-1299	1	0	1	1	1	1	C14orf129	chromosome 14 open reading frame 129
hsa-miR-1299	1	0	1	1	1	1	USP15	ubiquitin specific peptidase 15
hsa-miR-1299	0	0	1	0	1	1	PDP1	pyruvate dehyrogenase phosphatase catalytic subunit 1
hsa-miR-1299	1	0	1	1	1	1	TLK2	tousled-like kinase 2
hsa-miR-1299	0	0	1	0	1	1	CLDN2	claudin 2
hsa-miR-1299	0	0	1	0	1	1	SLC38A4	solute carrier family 38, member 4
hsa-miR-1299	1	0	1	1	1	1	TSC22D2	TSC22 domain family, member 2
hsa-miR-1299	0	0	1	1	1	1	LMBRD1	LMBR1 domain containing 1
hsa-miR-1299	1	0	1	1	1	1	SYDE1	synapse defective 1, Rho GTPase, homolog 1 (C. elegans)
hsa-miR-1299	0	0	1	1	1	1	BRD7	bromodomain containing 7
hsa-miR-1299	0	0	1	1	1	1	CD28	CD28 molecule
hsa-miR-1299	0	0	1	1	1	1	MFF	mitochondrial fission factor
hsa-miR-1299	1	0	1	1	1	1	DESI2	desumoylating isopeptidase 2
hsa-miR-1299	1	0	1	1	1	1	C21orf91	chromosome 21 open reading frame 91
hsa-miR-1299	0	0	1	1	1	1	DOCK10	dedicator of cytokinesis 10
hsa-miR-1299	1	0	1	1	1	1	ABI2	abl-interactor 2
hsa-miR-1299	1	0	1	1	1	1	SH3GLB1	SH3-domain GRB2-like endophilin B1
hsa-miR-1299	1	0	1	0	1	1	PARP11	poly (ADP-ribose) polymerase family, member 11
hsa-miR-1299	0	0	1	1	1	1	GOLGA6A	golgin A6 family, member A
hsa-miR-1299	1	0	1	0	1	1	TRPS1	trichorhinophalangeal syndrome I
hsa-miR-1299	0	0	1	1	0	0	ARL6IP4	ADP-ribosylation-like factor 6 interacting protein 4
hsa-miR-1299	0	0	1	1	0	0	BCAT2	branched chain amino-acid transaminase 2, mitochondrial
hsa-miR-1299	0	0	1	1	0	0	CSAG2	CSAG family, member 2
hsa-miR-1299	0	0	1	0	0	0	CSAG3	CSAG family, member 3
hsa-miR-1299	1	0	1	1	1	1	PUM2	pumilio homolog 2 (Drosophila)
hsa-miR-1299	0	0	1	0	1	1	ERBB2IP	erbb2 interacting protein
hsa-miR-1299	1	0	1	1	1	1	NRP1	neuropilin 1
hsa-miR-1299	1	0	1	1	1	1	VPS39	vacuolar protein sorting 39 homolog (S. cerevisiae)
hsa-miR-1299	1	0	1	1	1	1	CALN1	calneuron 1
hsa-miR-1299	1	0	1	1	1	1	KLHL12	kelch-like 12 (Drosophila)
hsa-miR-1299	0	0	1	1	1	1	PARP9	poly (ADP-ribose) polymerase family, member 9
hsa-miR-1299	0	0	1	1	1	1	CEP192	centrosomal protein 192kDa
hsa-miR-1299	1	0	1	1	1	1	VEGFA	vascular endothelial growth factor A
hsa-miR-1299	0	0	1	1	0	0	FEZF2	FEZ family zinc finger 2
hsa-miR-1299	0	0	1	1	1	1	SEMA6C	sema domain, transmembrane domain (TM), and cytoplasmic domain, (semaphorin) 6C
hsa-miR-1299	1	0	1	1	1	1	BIVM	basic, immunoglobulin-like variable motif containing
hsa-miR-1299	1	0	1	0	1	1	WIPF2	WAS/WASL interacting protein family, member 2
hsa-miR-1299	1	0	1	1	1	1	LARP4	La ribonucleoprotein domain family, member 4
hsa-miR-1299	0	0	1	1	0	0	SPNS1	spinster homolog 1 (Drosophila)
hsa-miR-1299	0	0	1	0	0	0	NBPF10	neuroblastoma breakpoint family, member 10
hsa-miR-1299	0	0	1	1	1	1	PARK2	parkinson protein 2, E3 ubiquitin protein ligase (parkin)
hsa-miR-1299	0	0	1	0	1	1	MYO3B	myosin IIIB
hsa-miR-1299	0	0	1	1	1	1	ORMDL1	ORM1-like 1 (S. cerevisiae)
hsa-miR-1299	0	0	1	1	1	1	PSEN1	presenilin 1
hsa-miR-1299	0	0	1	0	0	0	MYO15B	myosin XVB pseudogene
hsa-miR-1299	1	0	1	1	1	1	PSIP1	PC4 and SFRS1 interacting protein 1
hsa-miR-1299	1	0	1	1	1	1	SLC35A4	solute carrier family 35, member A4
hsa-miR-1299	1	0	1	1	1	1	CPNE4	copine IV
hsa-miR-1299	0	0	1	1	1	1	SAMD9L	sterile alpha motif domain containing 9-like
hsa-miR-1299	1	0	1	1	1	1	WAPAL	wings apart-like homolog (Drosophila)
hsa-miR-1299	0	0	1	1	1	1	CHODL	chondrolectin
hsa-miR-1299	0	0	1	1	1	1	R3HCC1L	R3H domain and coiled-coil containing 1-like
hsa-miR-1299	0	0	1	1	1	1	PTK7	PTK7 protein tyrosine kinase 7
hsa-miR-1299	1	0	1	0	1	1	IL1RAP	interleukin 1 receptor accessory protein
hsa-miR-1299	1	0	1	1	1	1	AFF2	AF4/FMR2 family, member 2
hsa-miR-1299	1	0	1	1	1	1	SH2B3	SH2B adaptor protein 3
hsa-miR-1299	1	0	1	1	1	1	SUCO	SUN domain containing ossification factor
hsa-miR-1299	0	0	1	1	1	1	CLDND1	claudin domain containing 1
hsa-miR-1299	0	0	1	1	1	1	TCFL5	transcription factor-like 5 (basic helix-loop-helix)
hsa-miR-1299	1	0	1	1	1	1	ILF3	interleukin enhancer binding factor 3, 90kDa
hsa-miR-1299	0	0	1	0	0	0	CACNA2D3	calcium channel, voltage-dependent, alpha 2/delta subunit 3
hsa-miR-1299	0	0	1	1	1	1	RANBP17	RAN binding protein 17
hsa-miR-1299	0	0	1	1	1	1	CD1E	CD1e molecule
hsa-miR-1299	0	0	1	1	0	0	KIF13A	kinesin family member 13A
hsa-miR-1299	1	0	1	1	1	1	VAMP7	vesicle-associated membrane protein 7
hsa-miR-1299	1	0	1	1	1	1	PALM2	paralemmin 2
hsa-miR-1299	1	0	1	1	1	1	NAV3	neuron navigator 3
hsa-miR-1299	0	0	1	1	0	0	RPP21	ribonuclease P/MRP 21kDa subunit
hsa-miR-1299	0	0	1	1	1	1	TAF1	TAF1 RNA polymerase II, TATA box binding protein (TBP)-associated factor, 250kDa
hsa-miR-1299	1	0	1	1	1	1	ARL4C	ADP-ribosylation factor-like 4C
hsa-miR-1299	1	0	1	0	1	1	TBC1D2B	TBC1 domain family, member 2B
hsa-miR-1299	0	0	1	1	1	1	ESRP1	epithelial splicing regulatory protein 1
hsa-miR-1299	1	0	1	1	1	1	AKAP2	A kinase (PRKA) anchor protein 2
hsa-miR-1299	1	0	1	0	1	1	NFAT5	nuclear factor of activated T-cells 5, tonicity-responsive
hsa-miR-1299	0	0	1	0	0	0	BABAM1	BRISC and BRCA1 A complex member 1
hsa-miR-1299	0	0	1	0	0	0	TUG1	taurine upregulated 1 (non-protein coding)
hsa-miR-1299	0	0	1	1	1	1	BANK1	B-cell scaffold protein with ankyrin repeats 1
hsa-miR-1299	0	0	1	0	1	1	EBF2	early B-cell factor 2
hsa-miR-1299	1	0	1	1	1	1	NIP7	nuclear import 7 homolog (S. cerevisiae)
hsa-miR-1299	0	0	1	1	0	0	MANSC1	MANSC domain containing 1
hsa-miR-1299	1	0	1	1	1	1	MEIS2	Meis homeobox 2
hsa-miR-1299	0	0	1	0	0	0	TPTEP1	transmembrane phosphatase with tensin homology pseudogene 1
hsa-miR-1299	1	0	1	1	1	1	PTBP3	polypyrimidine tract binding protein 3
hsa-miR-1299	1	0	1	1	1	1	SLC38A2	solute carrier family 38, member 2
hsa-miR-1299	1	0	1	1	1	1	ARMC8	armadillo repeat containing 8
hsa-miR-1299	0	0	1	1	1	1	LRIF1	ligand dependent nuclear receptor interacting factor 1
hsa-miR-1299	0	0	1	0	0	0	LINC00284	long intergenic non-protein coding RNA 284
hsa-miR-1299	1	0	1	1	1	1	ZNF395	zinc finger protein 395
hsa-miR-1299	1	0	1	1	1	1	INSIG2	insulin induced gene 2
hsa-miR-1299	1	0	1	1	1	1	C12orf23	chromosome 12 open reading frame 23
hsa-miR-1299	0	0	1	1	1	1	DEPDC1	DEP domain containing 1
hsa-miR-1299	0	0	1	0	0	0	LOC149134	uncharacterized LOC149134
hsa-miR-1299	0	0	1	0	0	0	DUXAP10	double homeobox A pseudogene 10
hsa-miR-1299	0	0	1	1	0	0	JMJD4	jumonji domain containing 4
hsa-miR-1299	1	0	1	1	1	1	SMEK2	SMEK homolog 2, suppressor of mek1 (Dictyostelium)
hsa-miR-1299	1	0	1	1	1	1	MACF1	microtubule-actin crosslinking factor 1
hsa-miR-1299	0	0	1	0	1	1	ARHGAP42	Rho GTPase activating protein 42
hsa-miR-1299	0	0	1	1	1	1	CLEC4M	C-type lectin domain family 4, member M
hsa-miR-1299	1	0	1	1	1	1	BAZ2A	bromodomain adjacent to zinc finger domain, 2A
hsa-miR-1299	0	0	1	1	1	1	NSUN7	NOP2/Sun domain family, member 7
hsa-miR-1299	0	0	1	0	1	1	FLJ14186	uncharacterized LOC401149
hsa-miR-1299	0	0	1	1	1	1	CXorf57	chromosome X open reading frame 57
hsa-miR-1299	1	0	1	1	1	1	COPS7B	COP9 constitutive photomorphogenic homolog subunit 7B (Arabidopsis)
hsa-miR-1299	1	0	1	1	1	1	ZNF385A	zinc finger protein 385A
hsa-miR-1299	0	0	1	1	0	0	SPON2	spondin 2, extracellular matrix protein
hsa-miR-1299	0	0	1	1	1	1	MUC12	mucin 12, cell surface associated
hsa-miR-1299	1	0	1	1	1	1	DYRK2	dual-specificity tyrosine-(Y)-phosphorylation regulated kinase 2
hsa-miR-1299	1	0	1	0	1	1	ATP2B1	ATPase, Ca++ transporting, plasma membrane 1
hsa-miR-1299	0	0	1	1	1	1	PPFIBP2	PTPRF interacting protein, binding protein 2 (liprin beta 2)
hsa-miR-1299	0	0	1	0	1	1	ATXN1L	ataxin 1-like
hsa-miR-1299	0	0	1	0	0	0	ARHGEF28	Rho guanine nucleotide exchange factor (GEF) 28
hsa-miR-1299	1	0	1	1	1	1	DLC1	deleted in liver cancer 1
hsa-miR-1299	1	0	1	1	1	1	YPEL5	yippee-like 5 (Drosophila)
hsa-miR-1299	1	0	1	1	1	1	NAA30	N(alpha)-acetyltransferase 30, NatC catalytic subunit
hsa-miR-1299	0	0	1	0	1	1	HEMK1	HemK methyltransferase family member 1
hsa-miR-1299	1	0	1	1	0	0	NIPAL4	NIPA-like domain containing 4
hsa-miR-1299	1	0	1	1	1	1	HPS3	Hermansky-Pudlak syndrome 3
hsa-miR-1299	0	0	1	1	1	1	FAM124B	family with sequence similarity 124B
hsa-miR-1299	1	0	1	1	0	0	POMGNT1	protein O-linked mannose beta1,2-N-acetylglucosaminyltransferase
hsa-miR-1299	0	0	1	0	1	1	FLJ23152	uncharacterized LOC401236
hsa-miR-1299	1	0	1	1	1	1	ITGA9	integrin, alpha 9
hsa-miR-1299	1	0	1	1	1	1	RNF185	ring finger protein 185
hsa-miR-1299	0	0	1	1	1	1	SPRTN	SprT-like N-terminal domain
hsa-miR-1299	0	0	1	1	0	0	RIC8A	resistance to inhibitors of cholinesterase 8 homolog A (C. elegans)
hsa-miR-1299	1	0	1	1	1	1	MARK1	MAP/microtubule affinity-regulating kinase 1
hsa-miR-1299	1	0	1	0	1	1	ATP10D	ATPase, class V, type 10D
hsa-miR-1299	1	0	1	1	1	1	SLC38A1	solute carrier family 38, member 1
hsa-miR-1299	1	0	1	1	1	1	GPD2	glycerol-3-phosphate dehydrogenase 2 (mitochondrial)
hsa-miR-1299	1	0	1	1	1	1	KCTD15	potassium channel tetramerisation domain containing 15
hsa-miR-1299	0	0	1	1	1	1	IGBP1	immunoglobulin (CD79A) binding protein 1
hsa-miR-1299	1	0	1	0	1	1	ZKSCAN1	zinc finger with KRAB and SCAN domains 1
hsa-miR-1299	0	0	1	1	1	1	RAB37	RAB37, member RAS oncogene family
hsa-miR-1299	1	0	1	0	1	1	AP1G1	adaptor-related protein complex 1, gamma 1 subunit
hsa-miR-1299	1	0	1	1	0	0	SMARCA4	SWI/SNF related, matrix associated, actin dependent regulator of chromatin, subfamily a, member 4
hsa-miR-1299	0	0	1	1	1	1	FANCI	Fanconi anemia, complementation group I
hsa-miR-1299	0	0	1	1	0	0	C21orf59	chromosome 21 open reading frame 59
hsa-miR-1299	1	0	1	1	1	1	ADPGK	ADP-dependent glucokinase
hsa-miR-1299	1	0	1	1	1	1	FRMD6	FERM domain containing 6
hsa-miR-1299	0	0	1	1	0	0	BEAN1	brain expressed, associated with NEDD4, 1
hsa-miR-1299	0	0	1	0	0	0	LOC441204	uncharacterized LOC441204
hsa-miR-1299	0	0	1	1	0	0	ZNF185	zinc finger protein 185 (LIM domain)
hsa-miR-1299	1	0	1	1	1	1	SORBS2	sorbin and SH3 domain containing 2
hsa-miR-1299	1	0	1	1	1	1	PUM1	pumilio homolog 1 (Drosophila)
hsa-miR-1299	0	0	1	0	0	0	LOC158376	uncharacterized LOC158376
hsa-miR-1299	0	0	1	0	0	0	LOC255187	hCG1980447
hsa-miR-1299	0	0	1	1	0	0	COMMD4	COMM domain containing 4
hsa-miR-1299	0	0	1	1	1	1	PSME3	proteasome (prosome, macropain) activator subunit 3 (PA28 gamma; Ki)
hsa-miR-1299	1	0	1	1	1	1	TLE4	transducin-like enhancer of split 4 (E(sp1) homolog, Drosophila)
hsa-miR-1299	0	0	1	0	0	0	TUBA3FP	tubulin, alpha 3f, pseudogene
hsa-miR-1299	0	0	1	1	0	0	NXF2	nuclear RNA export factor 2
hsa-miR-1299	1	0	1	0	1	1	NCAM1	neural cell adhesion molecule 1
hsa-miR-1299	0	0	1	1	0	0	UBAP2	ubiquitin associated protein 2
hsa-miR-1299	1	0	1	1	0	0	GBA2	glucosidase, beta (bile acid) 2
hsa-miR-1299	1	0	1	1	1	1	IST1	increased sodium tolerance 1 homolog (yeast)
hsa-miR-1299	0	0	1	1	1	1	A2ML1	alpha-2-macroglobulin-like 1
hsa-miR-1299	0	0	1	1	1	1	FXC1	fracture callus 1 homolog (rat)
hsa-miR-1299	1	0	1	1	1	1	C6orf89	chromosome 6 open reading frame 89
hsa-miR-1299	0	0	1	1	0	0	ANKAR	ankyrin and armadillo repeat containing
hsa-miR-1299	0	0	1	1	0	0	RHBDF2	rhomboid 5 homolog 2 (Drosophila)
hsa-miR-1299	0	0	1	1	0	0	TRIM41	tripartite motif containing 41
hsa-miR-1299	1	0	1	1	1	1	FAM73B	family with sequence similarity 73, member B
hsa-miR-1299	0	0	1	1	1	1	KIDINS220	kinase D-interacting substrate, 220kDa
hsa-miR-1299	1	0	1	1	1	1	HLF	hepatic leukemia factor
hsa-miR-1299	0	0	1	1	0	0	NDOR1	NADPH dependent diflavin oxidoreductase 1
hsa-miR-1299	0	0	1	0	1	1	CDHR3	cadherin-related family member 3
hsa-miR-1299	1	0	1	1	1	1	NOTCH2NL	notch 2 N-terminal like
hsa-miR-1299	0	0	1	1	1	1	TOR2A	torsin family 2, member A
hsa-miR-1299	1	0	1	1	1	1	PIP4K2C	phosphatidylinositol-5-phosphate 4-kinase, type II, gamma
hsa-miR-1299	1	0	1	1	1	1	BOC	Boc homolog (mouse)
hsa-miR-1299	0	0	1	1	0	0	ATP6AP1	ATPase, H+ transporting, lysosomal accessory protein 1
hsa-miR-1299	1	0	1	1	1	1	CYP46A1	cytochrome P450, family 46, subfamily A, polypeptide 1
hsa-miR-1299	0	0	1	1	1	1	STBD1	starch binding domain 1
hsa-miR-1299	0	0	1	0	1	1	TMSB15B	thymosin beta 15B
hsa-miR-1299	0	0	1	0	0	0	LOC643837	uncharacterized LOC643837
hsa-miR-1299	1	0	1	1	1	1	EGR2	early growth response 2
hsa-miR-1299	1	0	1	1	1	1	SUPT16H	suppressor of Ty 16 homolog (S. cerevisiae)
hsa-miR-1299	1	0	1	1	1	1	FBXW2	F-box and WD repeat domain containing 2
hsa-miR-1299	0	0	1	1	1	1	CD34	CD34 molecule
hsa-miR-1299	0	0	1	1	1	1	SP100	SP100 nuclear antigen
hsa-miR-1299	1	0	1	1	1	1	TSN	translin
hsa-miR-1299	1	0	1	1	1	1	LUC7L2	LUC7-like 2 (S. cerevisiae)
hsa-miR-1299	1	0	1	1	1	1	HDAC2	histone deacetylase 2
hsa-miR-1299	0	0	1	1	1	1	NRCAM	neuronal cell adhesion molecule
hsa-miR-1299	1	0	1	1	1	1	GNG2	guanine nucleotide binding protein (G protein), gamma 2
hsa-miR-1299	1	0	1	1	1	1	SLC25A3	solute carrier family 25 (mitochondrial carrier; phosphate carrier), member 3
hsa-miR-1299	0	0	1	1	1	1	RASGRP2	RAS guanyl releasing protein 2 (calcium and DAG-regulated)
hsa-miR-1299	0	0	1	1	1	1	STAMBPL1	STAM binding protein-like 1
hsa-miR-1299	0	0	1	1	0	0	EIF3H	eukaryotic translation initiation factor 3, subunit H
hsa-miR-1299	1	0	1	1	1	1	RRBP1	ribosome binding protein 1 homolog 180kDa (dog)
hsa-miR-1299	0	0	1	1	1	1	N4BP2L2	NEDD4 binding protein 2-like 2
hsa-miR-1299	0	0	1	0	0	0	LOC550112	uncharacterized LOC550112
hsa-miR-1299	0	0	1	1	1	1	LZTFL1	leucine zipper transcription factor-like 1
hsa-miR-1299	1	0	1	1	1	1	DZIP1	DAZ interacting protein 1
hsa-miR-1299	0	0	1	1	1	1	TGFBI	transforming growth factor, beta-induced, 68kDa
hsa-miR-1299	0	0	1	1	1	1	CYP11B1	cytochrome P450, family 11, subfamily B, polypeptide 1
hsa-miR-1299	0	0	1	1	1	1	MARC1	mitochondrial amidoxime reducing component 1
hsa-miR-1299	0	0	1	0	0	0	CXXC1P1	CXXC finger protein 1 pseudogene 1
hsa-miR-1299	0	0	1	0	1	1	RALYL	RALY RNA binding protein-like
hsa-miR-1299	1	0	1	1	1	1	SLC7A8	solute carrier family 7 (amino acid transporter light chain, L system), member 8
hsa-miR-1299	1	0	1	1	1	1	KLC2	kinesin light chain 2
hsa-miR-1299	0	0	1	1	1	1	CORO7	coronin 7
hsa-miR-1299	0	0	1	0	0	0	ZNF806	zinc finger protein 806
hsa-miR-1299	1	0	1	1	1	1	SIAH1	siah E3 ubiquitin protein ligase 1
hsa-miR-1299	0	0	1	0	0	0	LINC00340	long intergenic non-protein coding RNA 340
hsa-miR-1299	0	0	1	1	1	1	C9orf47	chromosome 9 open reading frame 47
hsa-miR-1299	1	0	1	1	1	1	LPPR2	lipid phosphate phosphatase-related protein type 2
hsa-miR-1299	1	0	1	1	1	1	GCLC	glutamate-cysteine ligase, catalytic subunit
hsa-miR-1299	0	0	1	0	0	0	LOC285500	uncharacterized LOC285500
hsa-miR-1299	1	0	1	1	1	1	GLT25D2	glycosyltransferase 25 domain containing 2
hsa-miR-1299	1	0	1	1	1	1	TBC1D20	TBC1 domain family, member 20
hsa-miR-1299	0	0	1	1	1	1	AES	amino-terminal enhancer of split
hsa-miR-1299	0	0	1	1	1	1	MYO6	myosin VI
hsa-miR-1299	1	0	1	0	1	1	UVRAG	UV radiation resistance associated gene
hsa-miR-1299	1	0	1	0	1	1	UBXN4	UBX domain protein 4
hsa-miR-1299	0	0	1	0	0	0	LOC100129620	uncharacterized LOC100129620
hsa-miR-1299	0	0	1	0	0	0	LOC284577	uncharacterized LOC284577
hsa-miR-1299	1	0	1	1	1	1	CS	citrate synthase
hsa-miR-1299	1	0	1	1	1	1	ZC3H11A	zinc finger CCCH-type containing 11A
hsa-miR-1299	0	0	1	1	1	1	VDAC1	voltage-dependent anion channel 1
hsa-miR-1299	0	0	1	1	1	1	BAG1	BCL2-associated athanogene
hsa-miR-1299	1	0	1	1	1	1	AMT	aminomethyltransferase
hsa-miR-1299	0	0	1	0	0	0	CCDC150	coiled-coil domain containing 150
hsa-miR-1299	0	0	1	1	0	0	RPN2	ribophorin II
hsa-miR-1299	0	0	1	0	0	0	ZNF815P	zinc finger protein 815, pseudogene
hsa-miR-1299	0	0	1	1	1	1	GNAI2	guanine nucleotide binding protein (G protein), alpha inhibiting activity polypeptide 2
hsa-miR-1299	0	0	1	0	0	0	FAM66C	family with sequence similarity 66, member C
hsa-miR-1299	0	0	1	0	0	0	METTL21CP1	methyltransferase like 21C pseudogene 1
hsa-miR-1299	1	0	1	1	1	1	LRP8	low density lipoprotein receptor-related protein 8, apolipoprotein e receptor
hsa-miR-1299	0	0	1	1	1	1	ZNF667	zinc finger protein 667
hsa-miR-1299	0	0	1	0	0	0	LOC643327	uncharacterized LOC643327
hsa-miR-1299	1	0	1	0	1	1	KIAA1737	KIAA1737
hsa-miR-1299	1	0	1	0	1	1	KBTBD8	kelch repeat and BTB (POZ) domain containing 8
hsa-miR-1299	1	0	1	1	1	1	STIM2	stromal interaction molecule 2
hsa-miR-1299	0	0	1	1	1	1	TMEM177	transmembrane protein 177
hsa-miR-1299	1	0	1	1	1	1	RPL22	ribosomal protein L22
hsa-miR-1299	1	0	1	0	1	1	YPEL2	yippee-like 2 (Drosophila)
hsa-miR-1299	0	0	1	0	1	1	TNFAIP8	tumor necrosis factor, alpha-induced protein 8
hsa-miR-1299	1	0	1	1	1	1	POU2F3	POU class 2 homeobox 3
hsa-miR-1299	1	0	1	1	1	1	RAB11FIP4	RAB11 family interacting protein 4 (class II)
hsa-miR-1299	0	0	1	1	1	1	CBWD5	COBW domain containing 5
hsa-miR-1299	0	0	1	1	1	1	POLR1D	polymerase (RNA) I polypeptide D, 16kDa
hsa-miR-1299	1	0	1	0	1	1	LRBA	LPS-responsive vesicle trafficking, beach and anchor containing
hsa-miR-1299	0	0	1	0	0	0	CECR7	cat eye syndrome chromosome region, candidate 7 (non-protein coding)
hsa-miR-1299	1	0	1	1	1	1	GATM	glycine amidinotransferase (L-arginine:glycine amidinotransferase)
hsa-miR-1299	1	0	1	1	1	1	ZCCHC2	zinc finger, CCHC domain containing 2
hsa-miR-1299	0	0	1	1	0	0	ZNF283	zinc finger protein 283
hsa-miR-1299	0	0	1	1	0	0	DCBLD1	discoidin, CUB and LCCL domain containing 1
hsa-miR-1299	0	0	1	1	1	1	TIMM50	translocase of inner mitochondrial membrane 50 homolog (S. cerevisiae)
hsa-miR-1299	0	0	1	1	0	0	FBXO16	F-box protein 16
hsa-miR-1299	0	0	1	1	1	1	VIPAS39	VPS33B interacting protein, apical-basolateral polarity regulator, spe-39 homolog
hsa-miR-1299	1	0	1	1	1	1	IL20RA	interleukin 20 receptor, alpha
hsa-miR-1299	0	0	1	1	1	1	FAM76A	family with sequence similarity 76, member A
hsa-miR-1299	0	0	1	1	1	1	CPXCR1	CPX chromosome region, candidate 1
hsa-miR-1299	0	0	1	1	0	0	CT45A4	cancer/testis antigen family 45, member A4
hsa-miR-1299	1	0	1	1	1	1	NDFIP2	Nedd4 family interacting protein 2
hsa-miR-1299	0	0	1	1	1	1	VWA3B	von Willebrand factor A domain containing 3B
hsa-miR-1299	1	0	1	1	1	1	TRAFD1	TRAF-type zinc finger domain containing 1
hsa-miR-1299	0	0	1	1	0	0	SLC14A2	solute carrier family 14 (urea transporter), member 2
hsa-miR-1299	0	0	1	1	1	1	SLFN13	schlafen family member 13
hsa-miR-1299	0	0	1	1	1	1	GPR128	G protein-coupled receptor 128
hsa-miR-1299	1	0	1	1	0	0	WIZ	widely interspaced zinc finger motifs
hsa-miR-1299	1	0	1	1	1	1	PPP1R21	protein phosphatase 1, regulatory subunit 21
hsa-miR-1299	0	0	1	1	0	0	ZNF335	zinc finger protein 335
hsa-miR-1299	1	0	1	1	1	1	ZBTB4	zinc finger and BTB domain containing 4
hsa-miR-1299	0	0	1	0	1	1	PATE4	prostate and testis expressed 4
hsa-miR-1299	1	0	1	1	1	1	KALRN	kalirin, RhoGEF kinase
hsa-miR-1299	0	0	1	0	0	0	C1orf132	chromosome 1 open reading frame 132
hsa-miR-1299	0	0	1	0	1	1	FLJ41200	uncharacterized LOC401492
hsa-miR-1299	1	0	1	1	1	1	MDGA2	MAM domain containing glycosylphosphatidylinositol anchor 2
hsa-miR-1299	1	0	1	1	1	1	EGLN3	egl nine homolog 3 (C. elegans)
hsa-miR-1299	0	0	1	1	1	1	BAI2	brain-specific angiogenesis inhibitor 2
hsa-miR-1299	0	0	1	1	1	1	CC2D2B	coiled-coil and C2 domain containing 2B
hsa-miR-1299	1	0	1	1	1	1	EPAS1	endothelial PAS domain protein 1
hsa-miR-1299	0	0	1	0	0	0	LOC285043	uncharacterized LOC285043
hsa-miR-1299	1	0	1	1	1	1	METTL8	methyltransferase like 8
hsa-miR-1299	1	0	1	1	1	1	PRDM2	PR domain containing 2, with ZNF domain
hsa-miR-1299	1	0	1	1	1	1	GJC1	gap junction protein, gamma 1, 45kDa
hsa-miR-1299	1	0	1	0	1	1	DCUN1D4	DCN1, defective in cullin neddylation 1, domain containing 4 (S. cerevisiae)
hsa-miR-1299	1	0	1	1	1	1	VPS54	vacuolar protein sorting 54 homolog (S. cerevisiae)
hsa-miR-1299	0	0	1	1	0	0	HOMER3	homer homolog 3 (Drosophila)
hsa-miR-1299	0	0	1	0	1	1	NAIP	NLR family, apoptosis inhibitory protein
hsa-miR-1299	0	0	1	1	0	0	NPIP	nuclear pore complex interacting protein
hsa-miR-1299	0	0	1	1	1	1	IDS	iduronate 2-sulfatase
hsa-miR-1299	1	0	1	1	1	1	NDRG1	N-myc downstream regulated 1
hsa-miR-1299	0	0	1	1	1	1	C2orf91	chromosome 2 open reading frame 91
hsa-miR-1299	1	0	1	1	1	1	PIAS3	protein inhibitor of activated STAT, 3
hsa-miR-1299	0	0	1	1	0	0	CUL9	cullin 9
hsa-miR-1299	0	0	1	1	1	1	FAM179A	family with sequence similarity 179, member A
hsa-miR-1299	0	0	1	1	1	1	CTPS2	CTP synthase 2
hsa-miR-1299	0	0	1	1	1	1	MKX	mohawk homeobox
hsa-miR-1299	0	0	1	0	1	1	CTBP1-AS1	CTBP1 antisense RNA 1
hsa-miR-1299	1	0	1	1	1	1	DPY19L3	dpy-19-like 3 (C. elegans)
hsa-miR-1299	0	0	1	1	0	0	RPRD2	regulation of nuclear pre-mRNA domain containing 2
hsa-miR-1299	0	0	1	1	1	1	RBM46	RNA binding motif protein 46
hsa-miR-1299	1	0	1	1	1	1	MACROD2	MACRO domain containing 2
hsa-miR-1299	0	0	1	0	0	0	FER1L5	fer-1-like 5 (C. elegans)
hsa-miR-1299	1	0	1	1	0	0	ATXN7L3	ataxin 7-like 3
hsa-miR-1299	1	0	1	1	1	1	CSRNP3	cysteine-serine-rich nuclear protein 3
hsa-miR-1299	1	0	1	1	1	1	SIKE1	suppressor of IKBKE 1
hsa-miR-1299	1	0	1	1	1	1	MRPL30	mitochondrial ribosomal protein L30
hsa-miR-1299	1	0	1	1	1	1	SACM1L	SAC1 suppressor of actin mutations 1-like (yeast)
hsa-miR-1299	1	0	1	1	0	0	TNK2	tyrosine kinase, non-receptor, 2
hsa-miR-1299	1	0	1	0	1	1	CLEC16A	C-type lectin domain family 16, member A
hsa-miR-1299	1	0	1	1	1	1	DLG2	discs, large homolog 2 (Drosophila)
hsa-miR-1299	1	0	1	1	1	1	C14orf28	chromosome 14 open reading frame 28
hsa-miR-1299	0	0	1	0	0	0	RPL23AP53	ribosomal protein L23a pseudogene 53
hsa-miR-1299	0	0	1	1	1	1	MOBP	myelin-associated oligodendrocyte basic protein
hsa-miR-1299	1	0	1	1	0	0	ADAMTSL2	ADAMTS-like 2
hsa-miR-1299	0	0	1	1	1	1	CSPP1	centrosome and spindle pole associated protein 1
hsa-miR-1299	1	0	1	0	1	1	ADIPOR2	adiponectin receptor 2
hsa-miR-1299	1	0	1	0	0	0	SLC16A3	solute carrier family 16, member 3 (monocarboxylic acid transporter 4)
hsa-miR-1299	1	0	1	1	1	1	PHF17	PHD finger protein 17
hsa-miR-1299	1	0	1	0	1	1	KIAA0182	KIAA0182
hsa-miR-1299	1	0	1	0	1	1	YAF2	YY1 associated factor 2
hsa-miR-1299	1	0	1	1	1	1	RNF44	ring finger protein 44
hsa-miR-1299	0	0	1	1	0	0	IQUB	IQ motif and ubiquitin domain containing
hsa-miR-1299	1	0	1	0	1	1	FNDC3B	fibronectin type III domain containing 3B
hsa-miR-1299	1	0	1	1	1	1	PLA2G15	phospholipase A2, group XV
hsa-miR-1299	0	0	1	0	0	0	TRAV20	T cell receptor alpha variable 20
hsa-miR-1299	1	0	1	1	1	1	AFAP1	actin filament associated protein 1
hsa-miR-1299	0	0	1	0	1	1	LOC401321	uncharacterized LOC401321
hsa-miR-1299	0	0	1	1	0	0	TTC16	tetratricopeptide repeat domain 16
hsa-miR-1299	1	0	1	0	1	1	YOD1	YOD1 OTU deubiquinating enzyme 1 homolog (S. cerevisiae)
hsa-miR-1299	0	0	1	1	1	1	MCU	mitochondrial calcium uniporter
hsa-miR-1299	0	0	1	0	0	0	FAM205B	transmembrane protein C9orf144B pseudogene
hsa-miR-1299	1	0	1	1	1	1	WDR37	WD repeat domain 37
hsa-miR-1299	0	0	1	0	0	0	EP400NL	EP400 N-terminal like
hsa-miR-1299	1	0	1	0	1	1	KDM2A	lysine (K)-specific demethylase 2A
hsa-miR-1299	1	0	1	1	1	1	FRYL	FRY-like
hsa-miR-1299	1	0	1	1	1	1	FBXO3	F-box protein 3
hsa-miR-1299	1	0	1	0	1	1	KPNA6	karyopherin alpha 6 (importin alpha 7)
hsa-miR-1299	0	0	1	0	0	0	IDO2	indoleamine 2,3-dioxygenase 2
hsa-miR-1299	1	0	1	1	1	1	CD200	CD200 molecule
hsa-miR-1299	1	0	1	1	1	1	RBM24	RNA binding motif protein 24
hsa-miR-1299	0	0	1	1	0	0	HEATR8	HEAT repeat containing 8
hsa-miR-1299	0	0	1	1	1	1	TMEM202	transmembrane protein 202
hsa-miR-1299	0	0	1	0	0	0	LOC494141	mitochondrial carrier triple repeat 1 pseudogene
hsa-miR-1299	1	0	1	0	1	1	ESRRG	estrogen-related receptor gamma
hsa-miR-1299	1	0	1	1	0	0	FOXP2	forkhead box P2
hsa-miR-1299	0	0	1	0	0	0	LOC100124692	maltase-glucoamylase (alpha-glucosidase) pseudogene
hsa-miR-1299	1	0	1	1	1	1	MAP3K14	mitogen-activated protein kinase kinase kinase 14
hsa-miR-1299	1	0	1	1	1	1	RABGAP1	RAB GTPase activating protein 1
hsa-miR-1299	0	0	1	1	1	1	ZNF346	zinc finger protein 346
hsa-miR-1299	0	0	1	1	0	0	ZNF730	zinc finger protein 730
hsa-miR-1299	1	0	1	1	1	1	MAP2K4	mitogen-activated protein kinase kinase 4
hsa-miR-1299	0	0	1	0	0	0	AGAP9	ArfGAP with GTPase domain, ankyrin repeat and PH domain 9
hsa-miR-1299	0	0	1	1	0	0	ZSCAN18	zinc finger and SCAN domain containing 18
hsa-miR-1299	0	0	1	1	0	0	CNOT3	CCR4-NOT transcription complex, subunit 3
hsa-miR-1299	0	0	1	1	1	1	XRN2	5'-3' exoribonuclease 2
hsa-miR-1299	1	0	1	1	1	1	TAP2	transporter 2, ATP-binding cassette, sub-family B (MDR/TAP)
hsa-miR-1299	0	0	1	1	1	1	RGS3	regulator of G-protein signaling 3
hsa-miR-1299	0	0	1	1	1	1	CRISP3	cysteine-rich secretory protein 3
hsa-miR-1299	1	0	1	1	0	0	ATP13A3	ATPase type 13A3
hsa-miR-1299	0	0	1	1	1	1	IFRD1	interferon-related developmental regulator 1
hsa-miR-1299	1	0	1	1	1	1	MEAF6	MYST/Esa1-associated factor 6
hsa-miR-1299	0	0	1	1	1	1	PDSS2	prenyl (decaprenyl) diphosphate synthase, subunit 2
hsa-miR-1299	1	0	1	0	1	1	MAP3K3	mitogen-activated protein kinase kinase kinase 3
hsa-miR-1299	0	0	1	1	1	1	SERPINE2	serpin peptidase inhibitor, clade E (nexin, plasminogen activator inhibitor type 1), member 2
hsa-miR-1299	1	0	1	1	1	1	COBLL1	COBL-like 1
hsa-miR-1299	1	0	1	1	1	1	PHTF2	putative homeodomain transcription factor 2
hsa-miR-1299	1	0	1	1	1	1	LUC7L3	LUC7-like 3 (S. cerevisiae)
hsa-miR-1299	1	0	1	1	1	1	NCOA1	nuclear receptor coactivator 1
hsa-miR-1299	1	0	1	1	1	1	NOVA1	neuro-oncological ventral antigen 1
hsa-miR-1299	0	0	1	1	0	0	TRIM69	tripartite motif containing 69
hsa-miR-1299	0	0	1	1	1	1	PTPN20B	protein tyrosine phosphatase, non-receptor type 20B
hsa-miR-1299	0	0	1	1	1	1	PTPN20A	protein tyrosine phosphatase, non-receptor type 20A
hsa-miR-1299	0	0	1	1	1	1	TFDP2	transcription factor Dp-2 (E2F dimerization partner 2)
hsa-miR-1299	0	0	1	1	1	1	TTLL3	tubulin tyrosine ligase-like family, member 3
hsa-miR-1299	0	0	1	0	0	0	ANKRD34C	ankyrin repeat domain 34C
hsa-miR-1299	0	0	1	0	0	0	POM121L9P	POM121 transmembrane nucleoporin-like 9, pseudogene
hsa-miR-1299	1	0	1	1	1	1	TAB2	TGF-beta activated kinase 1/MAP3K7 binding protein 2
hsa-miR-1299	0	0	1	0	0	0	POM121L8P	POM121 transmembrane nucleoporin-like 8 pseudogene
hsa-miR-1299	1	0	1	1	1	1	ARF6	ADP-ribosylation factor 6
hsa-miR-1299	0	0	1	0	0	0	TPTE2P6	transmembrane phosphoinositide 3-phosphatase and tensin homolog 2 pseudogene 6
hsa-miR-1299	0	0	1	1	1	1	TTLL5	tubulin tyrosine ligase-like family, member 5
hsa-miR-1299	0	0	1	0	0	0	DNAJC5B	DnaJ (Hsp40) homolog, subfamily C, member 5 beta
hsa-miR-1299	1	0	1	1	1	1	SMC6	structural maintenance of chromosomes 6
hsa-miR-1299	0	0	1	1	1	1	ZNF280D	zinc finger protein 280D
hsa-miR-1299	1	0	1	1	1	1	SLC25A36	solute carrier family 25 (pyrimidine nucleotide carrier ), member 36
hsa-miR-1299	0	0	1	1	1	1	TPCN2	two pore segment channel 2
hsa-miR-1299	0	0	1	1	1	1	STAG3L1	stromal antigen 3-like 1
hsa-miR-1299	0	0	1	1	0	0	LRCH3	leucine-rich repeats and calponin homology (CH) domain containing 3
hsa-miR-1299	0	0	1	1	0	0	BAG3	BCL2-associated athanogene 3
hsa-miR-1299	1	0	1	0	1	1	GPR85	G protein-coupled receptor 85
hsa-miR-1299	1	0	1	0	1	1	CEP170	centrosomal protein 170kDa
hsa-miR-1299	1	0	1	1	1	1	TFE3	transcription factor binding to IGHM enhancer 3
hsa-miR-1299	0	0	1	1	0	0	DOPEY1	dopey family member 1
hsa-miR-1299	1	0	1	1	1	1	NEO1	neogenin 1
hsa-miR-1299	0	0	1	1	1	1	SLC30A10	solute carrier family 30, member 10
hsa-miR-1299	0	0	1	0	0	0	FAM66D	family with sequence similarity 66, member D
hsa-miR-1299	1	0	1	1	1	1	PKNOX2	PBX/knotted 1 homeobox 2
hsa-miR-1299	1	0	1	1	1	1	MIER1	mesoderm induction early response 1 homolog (Xenopus laevis)
hsa-miR-1299	1	0	1	1	1	1	KDM6A	lysine (K)-specific demethylase 6A
hsa-miR-1299	0	0	1	0	1	1	GAB3	GRB2-associated binding protein 3
hsa-miR-1299	1	0	1	1	1	1	QTRTD1	queuine tRNA-ribosyltransferase domain containing 1
hsa-miR-1299	1	0	1	0	1	1	HNRNPA3	heterogeneous nuclear ribonucleoprotein A3
hsa-miR-1299	0	0	1	1	1	1	EGFLAM	EGF-like, fibronectin type III and laminin G domains
hsa-miR-1299	1	0	1	1	1	1	CHMP7	charged multivesicular body protein 7
hsa-miR-1299	1	0	1	0	0	0	YLPM1	YLP motif containing 1
hsa-miR-1299	1	0	1	1	0	0	USP24	ubiquitin specific peptidase 24
hsa-miR-1299	1	0	1	0	1	1	GPAM	glycerol-3-phosphate acyltransferase, mitochondrial
hsa-miR-1299	1	0	1	1	1	1	RNF180	ring finger protein 180
hsa-miR-1299	0	0	1	1	1	1	YAP1	Yes-associated protein 1
hsa-miR-1299	0	0	1	1	1	1	TMEM138	transmembrane protein 138
hsa-miR-1299	0	0	1	1	1	1	INPP5B	inositol polyphosphate-5-phosphatase, 75kDa
hsa-miR-1299	0	0	1	1	1	1	CCDC132	coiled-coil domain containing 132
hsa-miR-1299	1	0	1	1	1	1	HMCN1	hemicentin 1
hsa-miR-1299	0	0	1	0	1	1	PLEKHM1P	pleckstrin homology domain containing, family M (with RUN domain) member 1 pseudogene
hsa-miR-1299	0	0	1	1	1	1	NARG2	NMDA receptor regulated 2
hsa-miR-1299	0	0	1	1	1	1	CCDC66	coiled-coil domain containing 66
hsa-miR-1299	0	0	1	1	0	0	TMEM116	transmembrane protein 116
hsa-miR-1299	0	0	1	1	1	1	DDX55	DEAD (Asp-Glu-Ala-Asp) box polypeptide 55
hsa-miR-1299	1	0	1	1	1	1	IL17RD	interleukin 17 receptor D
hsa-miR-1299	0	0	1	1	1	1	TDRD9	tudor domain containing 9
hsa-miR-1299	1	0	1	1	1	1	DIS3L2	DIS3 mitotic control homolog (S. cerevisiae)-like 2
hsa-miR-1299	1	0	1	1	1	1	MBD6	methyl-CpG binding domain protein 6
hsa-miR-1299	1	0	1	0	1	1	SMURF1	SMAD specific E3 ubiquitin protein ligase 1
hsa-miR-1299	1	0	1	1	1	1	CADM2	cell adhesion molecule 2
hsa-miR-1299	1	0	1	1	1	1	C1orf131	chromosome 1 open reading frame 131
hsa-miR-1299	1	0	1	1	1	1	RICTOR	RPTOR independent companion of MTOR, complex 2
hsa-miR-1299	1	0	1	0	1	1	NR3C1	nuclear receptor subfamily 3, group C, member 1 (glucocorticoid receptor)
hsa-miR-1299	1	0	1	1	1	1	BOLL	bol, boule-like (Drosophila)
hsa-miR-1299	0	0	1	0	1	1	SYNPO2	synaptopodin 2
hsa-miR-1299	1	0	1	1	1	1	FAM76B	family with sequence similarity 76, member B
hsa-miR-1299	1	0	1	1	1	1	AP1AR	adaptor-related protein complex 1 associated regulatory protein
hsa-miR-1299	0	0	1	1	1	1	SLAMF7	SLAM family member 7
hsa-miR-1299	1	0	1	1	1	1	FBXL5	F-box and leucine-rich repeat protein 5
hsa-miR-1299	0	0	1	0	1	1	PSG1	pregnancy specific beta-1-glycoprotein 1
hsa-miR-1299	1	0	1	1	1	1	WDR44	WD repeat domain 44
hsa-miR-1299	0	0	1	1	1	1	KLHL7	kelch-like 7 (Drosophila)
hsa-miR-1299	1	0	1	1	1	1	CLIC5	chloride intracellular channel 5
hsa-miR-1299	0	0	1	1	1	1	RUNDC3B	RUN domain containing 3B
hsa-miR-1299	1	0	1	1	1	1	MIPOL1	mirror-image polydactyly 1
hsa-miR-1299	1	0	1	1	1	1	SULF1	sulfatase 1
hsa-miR-1299	0	0	1	0	0	0	TDH	L-threonine dehydrogenase
hsa-miR-1299	1	0	1	1	1	1	ANGPT1	angiopoietin 1
hsa-miR-1299	0	0	1	1	1	1	CYP4B1	cytochrome P450, family 4, subfamily B, polypeptide 1
hsa-miR-1299	0	0	1	1	1	1	CEP41	centrosomal protein 41kDa
hsa-miR-1299	0	0	1	1	0	0	DNAH1	dynein, axonemal, heavy chain 1
hsa-miR-1299	0	0	1	1	0	0	ZYG11A	zyg-11 homolog A (C. elegans)
hsa-miR-1299	0	0	1	1	1	1	GCOM1	GRINL1A complex locus 1
hsa-miR-1299	0	0	1	1	1	1	GON4L	gon-4-like (C. elegans)
hsa-miR-1299	0	0	1	1	1	1	IL20	interleukin 20
hsa-miR-1299	0	0	1	1	0	0	VSIG4	V-set and immunoglobulin domain containing 4
hsa-miR-1299	0	0	1	1	1	1	GPR114	G protein-coupled receptor 114
hsa-miR-1299	0	0	1	0	0	0	LINC00085	long intergenic non-protein coding RNA 85
hsa-miR-1299	0	0	1	1	1	1	TNFRSF19	tumor necrosis factor receptor superfamily, member 19
hsa-miR-1299	0	0	1	1	0	0	TEX264	testis expressed 264
hsa-miR-1299	1	0	1	0	1	1	ANKRD28	ankyrin repeat domain 28
hsa-miR-1299	1	0	1	1	1	1	BCL2L11	BCL2-like 11 (apoptosis facilitator)
hsa-miR-1299	0	0	1	0	0	0	CACNA1B	calcium channel, voltage-dependent, N type, alpha 1B subunit
hsa-miR-1299	0	0	1	1	1	1	POTEG	POTE ankyrin domain family, member G
hsa-miR-1299	0	0	1	1	1	1	UGT2B4	UDP glucuronosyltransferase 2 family, polypeptide B4
hsa-miR-1299	1	0	1	1	1	1	MECP2	methyl CpG binding protein 2 (Rett syndrome)
hsa-miR-1299	0	0	1	1	1	1	DIO1	deiodinase, iodothyronine, type I
hsa-miR-1299	0	0	1	0	1	1	RAB18	RAB18, member RAS oncogene family
hsa-miR-1299	1	0	1	1	1	1	CHRDL1	chordin-like 1
hsa-miR-1299	1	0	1	1	0	0	ZCCHC4	zinc finger, CCHC domain containing 4
hsa-miR-1299	0	0	1	1	1	1	SMPD1	sphingomyelin phosphodiesterase 1, acid lysosomal
hsa-miR-1299	0	0	1	1	1	1	ILDR1	immunoglobulin-like domain containing receptor 1
hsa-miR-1299	1	0	1	1	1	1	PLCH1	phospholipase C, eta 1
hsa-miR-1299	1	0	1	1	1	1	TRIT1	tRNA isopentenyltransferase 1
hsa-miR-1299	1	0	1	1	1	1	MCHR1	melanin-concentrating hormone receptor 1
hsa-miR-1299	1	0	1	1	1	1	MYB	v-myb myeloblastosis viral oncogene homolog (avian)
hsa-miR-1299	0	0	1	1	1	1	DLEC1	deleted in lung and esophageal cancer 1
hsa-miR-1299	0	0	1	0	0	0	MAST4	microtubule associated serine/threonine kinase family member 4
hsa-miR-1299	0	0	1	1	0	0	KLK4	kallikrein-related peptidase 4
hsa-miR-1299	0	0	1	1	1	1	IL23R	interleukin 23 receptor
hsa-miR-1299	0	0	1	1	1	1	IYD	iodotyrosine deiodinase
hsa-miR-1299	1	0	1	1	1	1	AMOT	angiomotin
hsa-miR-1299	0	0	1	1	1	1	RAD51C	RAD51 homolog C (S. cerevisiae)
hsa-miR-1299	1	0	1	0	1	1	FAM46A	family with sequence similarity 46, member A
hsa-miR-1299	0	0	1	1	0	0	DGUOK	deoxyguanosine kinase
hsa-miR-1299	1	0	1	1	1	1	ARHGAP17	Rho GTPase activating protein 17
hsa-miR-1299	0	0	1	1	0	0	GNA11	guanine nucleotide binding protein (G protein), alpha 11 (Gq class)
hsa-miR-1299	0	0	1	1	1	1	PTDSS1	phosphatidylserine synthase 1
hsa-miR-1299	0	0	1	1	1	1	RLIM	ring finger protein, LIM domain interacting
hsa-miR-1299	1	0	1	1	1	1	HOXC13	homeobox C13
hsa-miR-1299	0	0	1	1	1	1	TUFT1	tuftelin 1
hsa-miR-1299	0	0	1	1	0	0	ZNF576	zinc finger protein 576
hsa-miR-1299	1	0	1	1	1	1	RIMS3	regulating synaptic membrane exocytosis 3
hsa-miR-1299	1	0	1	1	1	1	PPP1R11	protein phosphatase 1, regulatory (inhibitor) subunit 11
hsa-miR-1299	1	0	1	1	0	0	DHDDS	dehydrodolichyl diphosphate synthase
hsa-miR-1299	1	0	1	0	1	1	CGGBP1	CGG triplet repeat binding protein 1
hsa-miR-1299	0	0	1	0	0	0	LOC93622	Morf4 family associated protein 1-like 1 pseudogene
hsa-miR-1299	1	0	1	0	1	1	C15orf41	chromosome 15 open reading frame 41
hsa-miR-1299	1	0	1	1	1	1	U2SURP	U2 snRNP-associated SURP domain containing
hsa-miR-1299	0	0	1	0	0	0	DNM1P33	DNM1 pseudogene 33
hsa-miR-1299	0	0	1	1	1	1	SEMG1	semenogelin I
hsa-miR-1299	1	0	1	1	1	1	TRIM39	tripartite motif containing 39
hsa-miR-1299	1	0	1	0	1	1	DDX3X	DEAD (Asp-Glu-Ala-Asp) box polypeptide 3, X-linked
hsa-miR-1299	1	0	1	1	1	1	CALM1	calmodulin 1 (phosphorylase kinase, delta)
hsa-miR-1299	0	0	1	1	1	1	TMEM30A	transmembrane protein 30A
hsa-miR-1299	0	0	1	1	1	1	MLIP	muscular LMNA-interacting protein
hsa-miR-1299	0	0	1	0	0	0	LOC400043	uncharacterized LOC400043
hsa-miR-1299	1	0	1	1	0	0	MARCH9	membrane-associated ring finger (C3HC4) 9
hsa-miR-1299	1	0	1	1	1	1	SLC27A4	solute carrier family 27 (fatty acid transporter), member 4
hsa-miR-1299	1	0	1	1	0	0	SIGMAR1	sigma non-opioid intracellular receptor 1
hsa-miR-1299	0	0	1	1	1	1	C9orf85	chromosome 9 open reading frame 85
hsa-miR-1299	1	0	1	1	1	1	SLC46A1	solute carrier family 46 (folate transporter), member 1
hsa-miR-1299	1	0	1	1	1	1	TRIM2	tripartite motif containing 2
hsa-miR-1299	0	0	1	1	1	1	TAF12	TAF12 RNA polymerase II, TATA box binding protein (TBP)-associated factor, 20kDa
hsa-miR-1299	0	0	1	1	1	1	H2AFY	H2A histone family, member Y
hsa-miR-1299	0	0	1	1	1	1	KLHL29	kelch-like 29 (Drosophila)
hsa-miR-1299	0	0	1	1	0	0	PTPMT1	protein tyrosine phosphatase, mitochondrial 1
hsa-miR-1299	1	0	1	1	1	1	ETF1	eukaryotic translation termination factor 1
hsa-miR-1299	0	0	1	1	1	1	TOMM40L	translocase of outer mitochondrial membrane 40 homolog (yeast)-like
hsa-miR-1299	0	0	1	0	1	1	AHI1	Abelson helper integration site 1
hsa-miR-1299	0	0	1	0	0	0	MGC21881	uncharacterized locus MGC21881
hsa-miR-1299	0	0	1	0	0	0	KLHL15	kelch-like 15 (Drosophila)
hsa-miR-1299	1	0	1	1	1	1	ZBTB38	zinc finger and BTB domain containing 38
hsa-miR-1299	0	0	1	0	1	1	ZNF37A	zinc finger protein 37A
hsa-miR-1299	1	0	1	1	1	1	NUMBL	numb homolog (Drosophila)-like
hsa-miR-1299	0	0	1	1	1	1	CMAS	cytidine monophosphate N-acetylneuraminic acid synthetase
hsa-miR-1299	1	0	1	0	1	1	CYBRD1	cytochrome b reductase 1
hsa-miR-1299	1	0	1	1	1	1	NRF1	nuclear respiratory factor 1
hsa-miR-1299	1	0	1	1	0	0	USP53	ubiquitin specific peptidase 53
hsa-miR-1299	0	0	1	1	0	0	ZDHHC6	zinc finger, DHHC-type containing 6
hsa-miR-1299	0	0	1	1	1	1	CSDE1	cold shock domain containing E1, RNA-binding
hsa-miR-1299	0	0	1	1	0	0	ZBTB32	zinc finger and BTB domain containing 32
hsa-miR-1299	1	0	1	1	1	1	WWC2	WW and C2 domain containing 2
hsa-miR-1299	0	0	1	0	0	0	FAM200B	family with sequence similarity 200, member B
hsa-miR-1299	0	0	1	1	1	1	FGF21	fibroblast growth factor 21
hsa-miR-1299	0	0	1	0	0	0	LOC100130776	uncharacterized LOC100130776
hsa-miR-1299	0	0	1	0	0	0	WDFY3-AS2	WDFY3 antisense RNA 2
hsa-miR-1299	0	0	1	0	0	0	RPL23AP82	ribosomal protein L23a pseudogene 82
hsa-miR-1299	0	0	1	0	1	1	TP53RK	TP53 regulating kinase
hsa-miR-1299	0	0	1	1	1	1	HIBADH	3-hydroxyisobutyrate dehydrogenase
hsa-miR-1299	0	0	1	1	0	0	DUOXA1	dual oxidase maturation factor 1
hsa-miR-1299	1	0	1	1	1	1	SCML4	sex comb on midleg-like 4 (Drosophila)
hsa-miR-1299	0	0	1	0	0	0	NBR2	neighbor of BRCA1 gene 2 (non-protein coding)
hsa-miR-1299	0	0	1	1	1	1	COMMD7	COMM domain containing 7
hsa-miR-1299	0	0	1	0	0	0	AZGP1P1	alpha-2-glycoprotein 1, zinc-binding pseudogene 1
hsa-miR-1299	1	0	1	1	1	1	SPRYD7	SPRY domain containing 7
hsa-miR-1299	0	0	1	1	1	1	ABCA8	ATP-binding cassette, sub-family A (ABC1), member 8
hsa-miR-1299	1	0	1	0	1	1	CDK19	cyclin-dependent kinase 19
hsa-miR-1299	0	0	1	0	0	0	SNX29P2	sorting nexin 29 pseudogene 2
hsa-miR-1299	0	0	1	1	1	1	TLR4	toll-like receptor 4
hsa-miR-1299	0	0	1	1	0	0	PRRG2	proline rich Gla (G-carboxyglutamic acid) 2
hsa-miR-1299	0	0	1	1	1	1	RHBDD1	rhomboid domain containing 1
hsa-miR-1299	1	0	1	1	1	1	RSPO2	R-spondin 2
hsa-miR-1299	1	0	1	1	1	1	APPL2	adaptor protein, phosphotyrosine interaction, PH domain and leucine zipper containing 2
hsa-miR-1299	0	0	1	1	1	1	SELP	selectin P (granule membrane protein 140kDa, antigen CD62)
hsa-miR-1299	0	0	1	1	0	0	PLSCR3	phospholipid scramblase 3
hsa-miR-1299	0	0	1	0	1	1	PAPOLG	poly(A) polymerase gamma
hsa-miR-1299	1	0	1	0	0	0	KCNU1	potassium channel, subfamily U, member 1
hsa-miR-1299	0	0	1	1	0	0	CCDC42	coiled-coil domain containing 42
hsa-miR-1299	0	0	1	1	1	1	LRMP	lymphoid-restricted membrane protein
hsa-miR-1299	0	0	1	0	0	0	LOC100130950	uncharacterized LOC100130950
hsa-miR-1299	0	0	1	1	1	1	SEMA3D	sema domain, immunoglobulin domain (Ig), short basic domain, secreted, (semaphorin) 3D
hsa-miR-1299	0	0	1	1	1	1	TFAM	transcription factor A, mitochondrial
hsa-miR-1299	1	0	1	1	1	1	MRO	maestro
hsa-miR-1299	0	0	1	1	0	0	TSPAN16	tetraspanin 16
hsa-miR-1299	0	0	1	1	0	0	SWI5	SWI5 recombination repair homolog (yeast)
hsa-miR-1299	0	0	1	1	1	1	PIK3AP1	phosphoinositide-3-kinase adaptor protein 1
hsa-miR-1299	0	0	1	1	1	1	TMEM117	transmembrane protein 117
hsa-miR-1299	1	0	1	1	1	1	MLLT3	myeloid/lymphoid or mixed-lineage leukemia (trithorax homolog, Drosophila); translocated to, 3
hsa-miR-1299	0	0	1	1	1	1	PIP5K1B	phosphatidylinositol-4-phosphate 5-kinase, type I, beta
hsa-miR-1299	0	0	1	1	1	1	IQCH	IQ motif containing H
hsa-miR-1299	0	0	1	0	0	0	ATP8B5P	ATPase, class I, type 8B, member 5, pseudogene
hsa-miR-1299	0	0	1	0	1	1	FLJ25328	uncharacterized LOC148231
hsa-miR-1299	0	0	1	0	1	1	B3GALTL	beta 1,3-galactosyltransferase-like
hsa-miR-1299	0	0	1	1	0	0	KIAA1324	KIAA1324
hsa-miR-1299	0	0	1	1	0	0	GLG1	golgi glycoprotein 1
hsa-miR-1299	0	0	1	1	1	1	ATF7	activating transcription factor 7
hsa-miR-1299	0	0	1	1	1	1	RMI1	RMI1, RecQ mediated genome instability 1, homolog (S. cerevisiae)
hsa-miR-1299	0	0	1	1	0	0	POLI	polymerase (DNA directed) iota
hsa-miR-1299	1	0	1	1	1	1	RAB5B	RAB5B, member RAS oncogene family
hsa-miR-1299	0	0	1	1	1	1	C5orf22	chromosome 5 open reading frame 22
hsa-miR-1299	1	0	1	1	1	1	RHOBTB1	Rho-related BTB domain containing 1
hsa-miR-1299	1	0	1	1	1	1	ANO1	anoctamin 1, calcium activated chloride channel
hsa-miR-1299	1	0	1	1	1	1	SLC25A27	solute carrier family 25, member 27
hsa-miR-1299	0	0	1	1	1	1	IL20RB	interleukin 20 receptor beta
hsa-miR-1299	1	0	1	1	0	0	FAM150B	family with sequence similarity 150, member B
hsa-miR-1299	0	0	1	1	1	1	HRASLS5	HRAS-like suppressor family, member 5
hsa-miR-1299	0	0	1	1	1	1	ZNF337	zinc finger protein 337
hsa-miR-1299	0	0	1	1	0	0	PLA2G6	phospholipase A2, group VI (cytosolic, calcium-independent)
hsa-miR-1299	1	0	1	1	1	1	LPGAT1	lysophosphatidylglycerol acyltransferase 1
hsa-miR-1299	1	0	1	1	1	1	CLK4	CDC-like kinase 4
hsa-miR-1299	0	0	1	0	1	1	DKFZP434I0714	uncharacterized protein DKFZP434I0714
hsa-miR-1299	1	0	1	0	1	1	PDE12	phosphodiesterase 12
hsa-miR-1299	0	0	1	0	0	0	LINC00494	long intergenic non-protein coding RNA 494
hsa-miR-1299	0	0	1	0	1	1	KSR1	kinase suppressor of ras 1
hsa-miR-1299	0	0	1	1	1	1	ARHGAP6	Rho GTPase activating protein 6
hsa-miR-1299	0	0	1	0	0	0	LOC339862	uncharacterized LOC339862
hsa-miR-1299	0	0	1	0	0	0	HOXA-AS2	HOXA cluster antisense RNA 2
hsa-miR-1299	0	0	1	1	1	1	SNAPC3	small nuclear RNA activating complex, polypeptide 3, 50kDa
hsa-miR-1299	1	0	1	1	1	1	PEX5L	peroxisomal biogenesis factor 5-like
hsa-miR-1299	0	0	1	0	0	0	SPATA3	spermatogenesis associated 3
hsa-miR-1299	1	0	1	1	1	1	ELMO2	engulfment and cell motility 2
hsa-miR-1299	1	0	1	1	1	1	MEIS1	Meis homeobox 1
hsa-miR-1299	1	0	1	1	1	1	RNMT	RNA (guanine-7-) methyltransferase
hsa-miR-1299	0	0	1	0	0	0	SRGAP2C	SLIT-ROBO Rho GTPase activating protein 2C
hsa-miR-1299	1	0	1	1	1	1	CEP128	centrosomal protein 128kDa
hsa-miR-1299	1	0	1	1	1	1	BNC2	basonuclin 2
hsa-miR-1299	1	0	1	1	1	1	FAM135B	family with sequence similarity 135, member B
hsa-miR-1299	1	0	1	0	1	1	RAG1	recombination activating gene 1
hsa-miR-1299	1	0	1	1	1	1	SOX6	SRY (sex determining region Y)-box 6
hsa-miR-1299	1	0	1	0	1	1	MMD2	monocyte to macrophage differentiation-associated 2
hsa-miR-1299	1	0	1	1	1	1	GALNT1	UDP-N-acetyl-alpha-D-galactosamine:polypeptide N-acetylgalactosaminyltransferase 1 (GalNAc-T1)
hsa-miR-1299	1	0	1	1	1	1	DPP10	dipeptidyl-peptidase 10 (non-functional)
hsa-miR-1299	0	0	1	1	1	1	TTC39B	tetratricopeptide repeat domain 39B
hsa-miR-1299	1	0	1	0	1	1	CEP44	centrosomal protein 44kDa
hsa-miR-1299	0	0	1	1	0	0	PRMT2	protein arginine methyltransferase 2
hsa-miR-1299	0	0	1	0	0	0	LOC100134868	uncharacterized LOC100134868
hsa-miR-1299	1	0	1	1	1	1	FGFR2	fibroblast growth factor receptor 2
hsa-miR-1299	1	0	1	1	1	1	ULK2	unc-51-like kinase 2 (C. elegans)
hsa-miR-1299	0	0	1	0	0	0	LOC401074	uncharacterized LOC401074
hsa-miR-1299	0	0	1	0	0	0	DLGAP1-AS3	DLGAP1 antisense RNA 3
hsa-miR-1299	1	0	1	1	1	1	DPP8	dipeptidyl-peptidase 8
hsa-miR-1299	1	0	1	1	1	1	DACH2	dachshund homolog 2 (Drosophila)
hsa-miR-1299	1	0	1	0	1	1	PACSIN1	protein kinase C and casein kinase substrate in neurons 1
hsa-miR-1299	0	0	1	1	1	1	TMEM45A	transmembrane protein 45A
hsa-miR-1299	0	0	1	1	1	1	ZFP90	zinc finger protein 90 homolog (mouse)
hsa-miR-1299	0	0	1	1	1	1	STAG1	stromal antigen 1
hsa-miR-1299	0	0	1	1	0	0	TMEM95	transmembrane protein 95
hsa-miR-1299	0	0	1	0	0	0	CST13P	cystatin 13, pseudogene
hsa-miR-1299	0	0	1	0	1	1	FAM13B	family with sequence similarity 13, member B
hsa-miR-1299	0	0	1	0	1	1	METTL12	methyltransferase like 12
hsa-miR-1299	1	0	1	1	1	1	FAM123A	family with sequence similarity 123A
hsa-miR-1299	1	0	1	0	1	1	HSPA12A	heat shock 70kDa protein 12A
hsa-miR-1299	0	0	1	1	1	1	CARD8	caspase recruitment domain family, member 8
hsa-miR-1299	0	0	1	1	1	1	C4orf32	chromosome 4 open reading frame 32
hsa-miR-1299	0	0	1	0	1	1	OAZ1	ornithine decarboxylase antizyme 1
hsa-miR-1299	0	0	1	0	0	0	LOC154822	uncharacterized LOC154822
hsa-miR-1299	0	0	1	0	0	0	LOC340094	uncharacterized LOC340094
hsa-miR-1299	0	0	1	0	0	0	LOC338579	ankyrin repeat domain-containing protein 30B pseudogene
hsa-miR-1299	1	0	1	1	1	1	ARHGAP30	Rho GTPase activating protein 30
hsa-miR-1299	0	0	1	0	0	0	LOC339260	uncharacterized LOC339260
hsa-miR-1299	1	0	1	1	1	1	HLTF	helicase-like transcription factor
hsa-miR-1299	0	0	1	1	1	1	MST1	macrophage stimulating 1 (hepatocyte growth factor-like)
hsa-miR-1299	0	0	1	0	0	0	LOC283914	uncharacterized LOC283914
hsa-miR-1299	1	0	1	1	1	1	PCYT1B	phosphate cytidylyltransferase 1, choline, beta
hsa-miR-1299	1	0	1	1	1	1	SUPT7L	suppressor of Ty 7 (S. cerevisiae)-like
hsa-miR-1299	1	0	1	1	1	1	SENP1	SUMO1/sentrin specific peptidase 1
hsa-miR-1299	0	0	1	1	0	0	SDK2	sidekick cell adhesion molecule 2
hsa-miR-1299	0	0	1	1	0	0	NIT1	nitrilase 1
hsa-miR-1299	1	0	1	0	1	1	LYPD6	LY6/PLAUR domain containing 6
hsa-miR-1299	0	0	1	0	1	1	IL33	interleukin 33
hsa-miR-1299	0	0	1	0	0	0	INHBA-AS1	INHBA antisense RNA 1
hsa-miR-1299	0	0	1	0	0	0	LOC348120	uncharacterized LOC348120
hsa-miR-1299	0	0	1	0	1	1	LOC338758	uncharacterized LOC338758
hsa-miR-1299	1	0	1	1	0	0	CELF5	CUGBP, Elav-like family member 5
hsa-miR-1299	1	0	1	1	1	1	RMND5A	required for meiotic nuclear division 5 homolog A (S. cerevisiae)
hsa-miR-1299	1	0	1	1	1	1	UPF3A	UPF3 regulator of nonsense transcripts homolog A (yeast)
hsa-miR-1299	1	0	1	1	1	1	RTKN2	rhotekin 2
hsa-miR-1299	1	0	1	1	1	1	WSB1	WD repeat and SOCS box containing 1
hsa-miR-1299	0	0	1	0	0	0	LOC255025	uncharacterized LOC255025
hsa-miR-1299	0	0	1	1	0	0	CDA	cytidine deaminase
hsa-miR-1299	0	0	1	1	1	1	ZNF589	zinc finger protein 589
hsa-miR-1299	1	0	1	1	1	1	PTPRG	protein tyrosine phosphatase, receptor type, G
hsa-miR-1299	0	0	1	0	0	0	LOC283038	uncharacterized LOC283038
hsa-miR-1299	1	0	1	1	1	1	CLVS1	clavesin 1
hsa-miR-1299	1	0	1	1	1	1	PELI1	pellino E3 ubiquitin protein ligase 1
hsa-miR-1299	1	0	1	0	1	1	RNF182	ring finger protein 182
hsa-miR-1299	0	0	1	1	1	1	FBXO38	F-box protein 38
hsa-miR-1299	1	0	1	1	1	1	LARP1B	La ribonucleoprotein domain family, member 1B
hsa-miR-1299	1	0	1	0	1	1	SMURF2	SMAD specific E3 ubiquitin protein ligase 2
hsa-miR-1299	1	0	1	1	1	1	ZFP91	zinc finger protein 91 homolog (mouse)
hsa-miR-1299	0	0	1	1	1	1	RHOT1	ras homolog family member T1
hsa-miR-1299	1	0	1	1	1	1	SCUBE3	signal peptide, CUB domain, EGF-like 3
hsa-miR-1299	0	0	1	0	0	0	LINC00265	long intergenic non-protein coding RNA 265
hsa-miR-1299	1	0	1	1	1	1	RCC2	regulator of chromosome condensation 2
hsa-miR-1299	1	0	1	1	1	1	KDM5C	lysine (K)-specific demethylase 5C
hsa-miR-1299	0	0	1	0	0	0	LOC255411	uncharacterized LOC255411
hsa-miR-1299	0	0	1	1	0	0	APOA1BP	apolipoprotein A-I binding protein
hsa-miR-1299	1	0	1	1	1	1	PRRG1	proline rich Gla (G-carboxyglutamic acid) 1
hsa-miR-1299	0	0	1	1	1	1	ELL3	elongation factor RNA polymerase II-like 3
hsa-miR-1299	1	0	1	1	0	0	ANKRD13B	ankyrin repeat domain 13B
hsa-miR-1299	1	0	1	1	1	1	PDGFRA	platelet-derived growth factor receptor, alpha polypeptide
hsa-miR-1299	0	0	1	1	1	1	GPATCH2	G patch domain containing 2
hsa-miR-1299	0	0	1	1	0	0	DHX30	DEAH (Asp-Glu-Ala-His) box polypeptide 30
hsa-miR-1299	0	0	1	1	0	0	PDSS1	prenyl (decaprenyl) diphosphate synthase, subunit 1
hsa-miR-1299	0	0	1	0	0	0	SCAND2	SCAN domain containing 2 pseudogene
hsa-miR-1299	0	0	1	1	1	1	C1orf109	chromosome 1 open reading frame 109
hsa-miR-1299	1	0	1	1	1	1	RANBP9	RAN binding protein 9
hsa-miR-1299	0	0	1	0	0	0	GNN	Grp94 neighboring nucleotidase pseudogene
hsa-miR-1299	0	0	1	1	0	0	PRSS55	protease, serine, 55
hsa-miR-1299	1	0	1	1	1	1	UEVLD	UEV and lactate/malate dehyrogenase domains
hsa-miR-1299	1	0	1	1	1	1	ADCY6	adenylate cyclase 6
hsa-miR-1299	1	0	1	1	0	0	ASRGL1	asparaginase like 1
hsa-miR-1299	0	0	1	1	0	0	PLB1	phospholipase B1
hsa-miR-1299	0	0	1	1	0	0	TTYH1	tweety homolog 1 (Drosophila)
hsa-miR-1299	0	0	1	0	0	0	LINC00052	long intergenic non-protein coding RNA 52
hsa-miR-1299	1	0	1	1	1	1	PDCD6IP	programmed cell death 6 interacting protein
hsa-miR-1299	1	0	1	1	1	1	PHACTR4	phosphatase and actin regulator 4
hsa-miR-1299	1	0	1	1	1	1	BAZ2B	bromodomain adjacent to zinc finger domain, 2B
hsa-miR-1299	1	0	1	1	1	1	SRPK2	SRSF protein kinase 2
hsa-miR-1299	1	0	1	1	0	0	CHTOP	chromatin target of PRMT1
hsa-miR-1299	0	0	1	0	0	0	AQP7P2	aquaporin 7 pseudogene 2
hsa-miR-1299	1	0	1	1	1	1	MED27	mediator complex subunit 27
hsa-miR-1299	0	0	1	1	1	1	SLC11A1	solute carrier family 11 (proton-coupled divalent metal ion transporters), member 1
hsa-miR-1299	0	0	1	1	1	1	PCDH18	protocadherin 18
hsa-miR-1299	1	0	1	0	1	1	TMEM194A	transmembrane protein 194A
hsa-miR-1299	0	0	1	0	0	0	JPX	JPX transcript, XIST activator (non-protein coding)
hsa-miR-1299	1	0	1	1	1	1	SNX27	sorting nexin family member 27
hsa-miR-1299	0	0	1	1	0	0	TRIM73	tripartite motif containing 73
hsa-miR-1299	1	0	1	1	1	1	WBP1L	WW domain binding protein 1-like
hsa-miR-1299	0	0	1	0	0	0	LINC00152	long intergenic non-protein coding RNA 152
hsa-miR-1299	1	0	1	1	1	1	OPCML	opioid binding protein/cell adhesion molecule-like
hsa-miR-1299	1	0	1	1	1	1	NTRK2	neurotrophic tyrosine kinase, receptor, type 2
hsa-miR-1299	0	0	1	0	0	0	TBC1D25	TBC1 domain family, member 25
hsa-miR-1299	0	0	1	1	0	0	DNHD1	dynein heavy chain domain 1
hsa-miR-1299	0	0	1	0	0	0	LOC554249	uncharacterized LOC554249
hsa-miR-1299	0	0	1	0	1	1	LOC389043	uncharacterized LOC389043
hsa-miR-1299	1	0	1	0	1	1	MEST	mesoderm specific transcript homolog (mouse)
hsa-miR-1299	1	0	1	1	1	1	FMNL3	formin-like 3
hsa-miR-1299	1	0	1	1	1	1	ZMYND11	zinc finger, MYND-type containing 11
hsa-miR-1299	1	0	1	1	1	1	GIGYF2	GRB10 interacting GYF protein 2
hsa-miR-1299	0	0	1	1	1	1	LIMS3	LIM and senescent cell antigen-like domains 3
hsa-miR-1299	1	0	1	0	1	1	PIK3R3	phosphoinositide-3-kinase, regulatory subunit 3 (gamma)
hsa-miR-1299	0	0	1	0	0	0	FRG1B	FSHD region gene 1 family, member B
hsa-miR-1299	1	0	1	1	1	1	ST8SIA2	ST8 alpha-N-acetyl-neuraminide alpha-2,8-sialyltransferase 2
hsa-miR-1299	0	0	1	1	1	1	OFD1	oral-facial-digital syndrome 1
hsa-miR-1299	1	0	1	0	1	1	LRRTM4	leucine rich repeat transmembrane neuronal 4
hsa-miR-1299	0	0	1	1	0	0	HOXB1	homeobox B1
hsa-miR-1299	0	0	1	1	0	0	ZNF541	zinc finger protein 541
hsa-miR-1299	0	0	1	1	1	1	ZNF365	zinc finger protein 365
hsa-miR-1299	1	0	1	0	1	1	MYBL1	v-myb myeloblastosis viral oncogene homolog (avian)-like 1
hsa-miR-1299	1	0	1	1	1	1	SLC35G1	solute carrier family 35, member G1
hsa-miR-1299	1	0	1	1	1	1	PTPRD	protein tyrosine phosphatase, receptor type, D
hsa-miR-1299	1	0	1	1	1	1	USP34	ubiquitin specific peptidase 34
hsa-miR-1299	0	0	1	0	0	0	LOC389765	kinesin family member 27 pseudogene
hsa-miR-1299	1	0	1	1	1	1	TLR10	toll-like receptor 10
hsa-miR-1299	0	0	1	1	0	0	SLC17A4	solute carrier family 17 (sodium phosphate), member 4
hsa-miR-1299	0	0	1	1	0	0	BTBD16	BTB (POZ) domain containing 16
hsa-miR-1299	1	0	1	1	1	1	CERS6	ceramide synthase 6
hsa-miR-1299	1	0	1	1	1	1	SP4	Sp4 transcription factor
hsa-miR-1299	0	0	1	0	0	0	FAM86C2P	family with sequence similarity 86, member A pseudogene
hsa-miR-1299	0	0	1	1	0	0	GKN2	gastrokine 2
hsa-miR-1299	0	0	1	1	1	1	SMTNL2	smoothelin-like 2
hsa-miR-1299	1	0	1	1	1	1	TMEM132B	transmembrane protein 132B
hsa-miR-1299	1	0	1	1	1	1	TMEM64	transmembrane protein 64
hsa-miR-1299	0	0	1	1	1	1	SLC8A3	solute carrier family 8 (sodium/calcium exchanger), member 3
hsa-miR-1299	0	0	1	1	0	0	SPOCD1	SPOC domain containing 1
hsa-miR-1299	1	0	1	0	1	1	PRDM10	PR domain containing 10
hsa-miR-1299	0	0	1	0	1	1	NWD1	NACHT and WD repeat domain containing 1
hsa-miR-1299	0	0	1	1	0	0	RGS12	regulator of G-protein signaling 12
hsa-miR-1299	1	0	1	1	1	1	OTUD4	OTU domain containing 4
hsa-miR-1299	1	0	1	1	1	1	OSBP2	oxysterol binding protein 2
hsa-miR-1299	0	0	1	1	0	0	RGSL1	regulator of G-protein signaling like 1
hsa-miR-1299	0	0	1	1	0	0	HOXD12	homeobox D12
hsa-miR-1299	0	0	1	0	0	0	TUBA4B	tubulin, alpha 4b (pseudogene)
hsa-miR-1299	0	0	1	0	1	1	GOLGA8G	golgin A8 family, member G
hsa-miR-1299	1	0	1	1	1	1	ANK2	ankyrin 2, neuronal
hsa-miR-1299	0	0	1	0	0	0	LINC00314	long intergenic non-protein coding RNA 314
hsa-miR-1299	1	0	1	1	1	1	CHIC1	cysteine-rich hydrophobic domain 1
hsa-miR-1299	0	0	1	0	0	0	C1orf226	chromosome 1 open reading frame 226
hsa-miR-1299	0	0	1	1	1	1	HSF2	heat shock transcription factor 2
hsa-miR-1299	0	0	1	1	0	0	HSF4	heat shock transcription factor 4
hsa-miR-1299	1	0	1	1	1	1	PHC2	polyhomeotic homolog 2 (Drosophila)
hsa-miR-1299	1	0	1	0	1	1	FAM196A	family with sequence similarity 196, member A
hsa-miR-1299	0	0	1	1	0	0	TCHH	trichohyalin
hsa-miR-1299	1	0	1	1	1	1	TMEM218	transmembrane protein 218
hsa-miR-1299	1	0	1	0	0	0	SDR39U1	short chain dehydrogenase/reductase family 39U, member 1
hsa-miR-1299	0	0	1	1	1	1	TINF2	TERF1 (TRF1)-interacting nuclear factor 2
hsa-miR-1299	1	0	1	1	1	1	CHGA	chromogranin A (parathyroid secretory protein 1)
hsa-miR-1299	0	0	1	0	0	0	LINC00643	long intergenic non-protein coding RNA 643
hsa-miR-1299	1	0	1	1	1	1	DLST	dihydrolipoamide S-succinyltransferase (E2 component of 2-oxo-glutarate complex)
hsa-miR-1299	1	0	1	1	1	1	EIF5	eukaryotic translation initiation factor 5
hsa-miR-1299	0	0	1	1	1	1	IP6K2	inositol hexakisphosphate kinase 2
hsa-miR-1299	1	0	1	1	0	0	KRT80	keratin 80
hsa-miR-1299	1	0	1	0	1	1	SEMA4B	sema domain, immunoglobulin domain (Ig), transmembrane domain (TM) and short cytoplasmic domain, (semaphorin) 4B
hsa-miR-1299	0	0	1	0	0	0	DKFZp686D0853	uncharacterized LOC401613
hsa-miR-1299	1	0	1	1	1	1	RBL2	retinoblastoma-like 2 (p130)
hsa-miR-1299	0	0	1	0	1	1	FEZ2	fasciculation and elongation protein zeta 2 (zygin II)
hsa-miR-1299	1	0	1	1	1	1	MIER3	mesoderm induction early response 1, family member 3
hsa-miR-1299	1	0	1	1	1	1	NIPAL3	NIPA-like domain containing 3
hsa-miR-1299	1	0	1	1	0	0	ABL2	v-abl Abelson murine leukemia viral oncogene homolog 2
hsa-miR-1299	1	0	1	1	1	1	ETS1	v-ets erythroblastosis virus E26 oncogene homolog 1 (avian)
hsa-miR-1299	0	0	1	1	1	1	AIG1	androgen-induced 1
hsa-miR-1299	1	0	1	0	1	1	CLASP2	cytoplasmic linker associated protein 2
hsa-miR-1299	0	0	1	1	1	1	CRB1	crumbs homolog 1 (Drosophila)
hsa-miR-1299	0	0	1	1	0	0	CDK5RAP2	CDK5 regulatory subunit associated protein 2
hsa-miR-1299	1	0	1	1	1	1	NFASC	neurofascin
hsa-miR-1299	0	0	1	1	1	1	PSMA2	proteasome (prosome, macropain) subunit, alpha type, 2
hsa-miR-1299	0	0	1	1	1	1	MAP2K6	mitogen-activated protein kinase kinase 6
hsa-miR-1299	1	0	1	1	1	1	PRKRIR	protein-kinase, interferon-inducible double stranded RNA dependent inhibitor, repressor of (P58 repressor)
hsa-miR-1299	0	0	1	0	0	0	EML6	echinoderm microtubule associated protein like 6
hsa-miR-1299	0	0	1	0	1	1	PRH2	proline-rich protein HaeIII subfamily 2
hsa-miR-1299	0	0	1	1	1	1	PRR14L	proline rich 14-like
hsa-miR-1299	0	0	1	0	0	0	SMG1P1	smg-1 homolog, phosphatidylinositol 3-kinase-related kinase pseudogene 1
hsa-miR-1299	1	0	1	1	0	0	RBM27	RNA binding motif protein 27
hsa-miR-1299	1	0	1	1	1	1	CBX3	chromobox homolog 3
hsa-miR-1299	0	0	1	0	1	1	THAP6	THAP domain containing 6
hsa-miR-1299	0	0	1	1	0	0	ANKRD33	ankyrin repeat domain 33
hsa-miR-1299	1	0	1	1	1	1	GTDC1	glycosyltransferase-like domain containing 1
hsa-miR-1299	0	0	1	1	1	1	HTR2A	5-hydroxytryptamine (serotonin) receptor 2A, G protein-coupled
hsa-miR-1299	1	0	1	1	1	1	TC2N	tandem C2 domains, nuclear
hsa-miR-1299	1	0	1	1	1	1	TSC22D3	TSC22 domain family, member 3
hsa-miR-1299	0	0	1	0	0	0	OVOS	ovostatin
hsa-miR-1299	1	0	1	1	1	1	DCAF5	DDB1 and CUL4 associated factor 5
hsa-miR-1299	1	0	1	1	1	1	HDAC1	histone deacetylase 1
hsa-miR-1299	1	0	1	1	1	1	PDXDC1	pyridoxal-dependent decarboxylase domain containing 1
hsa-miR-1299	0	0	1	1	1	1	ZNF250	zinc finger protein 250
hsa-miR-1299	1	0	1	1	1	1	SEMA4D	sema domain, immunoglobulin domain (Ig), transmembrane domain (TM) and short cytoplasmic domain, (semaphorin) 4D
hsa-miR-1299	1	0	1	1	1	1	CSMD3	CUB and Sushi multiple domains 3
hsa-miR-1299	0	0	1	1	1	1	ATP2A2	ATPase, Ca++ transporting, cardiac muscle, slow twitch 2
hsa-miR-1299	1	0	1	1	1	1	NFIB	nuclear factor I/B
hsa-miR-1299	1	0	1	1	1	1	BCLAF1	BCL2-associated transcription factor 1
hsa-miR-1299	1	0	1	1	1	1	NAV1	neuron navigator 1
hsa-miR-1299	1	0	1	0	1	1	KLHL24	kelch-like 24 (Drosophila)
hsa-miR-1299	1	0	1	0	1	1	IGF2BP3	insulin-like growth factor 2 mRNA binding protein 3
hsa-miR-1299	1	0	1	1	1	1	PTER	phosphotriesterase related
hsa-miR-1299	1	0	1	1	1	1	PGAP1	post-GPI attachment to proteins 1
hsa-miR-1299	1	0	1	1	1	1	RECK	reversion-inducing-cysteine-rich protein with kazal motifs
hsa-miR-1299	0	0	1	1	1	1	ABCD3	ATP-binding cassette, sub-family D (ALD), member 3
hsa-miR-1299	1	0	1	1	1	1	CALD1	caldesmon 1
hsa-miR-1299	1	0	1	1	1	1	EOGT	EGF domain-specific O-linked N-acetylglucosamine (GlcNAc) transferase
hsa-miR-1299	0	0	1	1	1	1	KIAA1328	KIAA1328
hsa-miR-1299	0	0	1	1	1	1	SSFA2	sperm specific antigen 2
hsa-miR-1299	1	0	1	1	1	1	LYST	lysosomal trafficking regulator
hsa-miR-1299	1	0	1	1	1	1	HIC2	hypermethylated in cancer 2
hsa-miR-1299	0	0	1	1	0	0	HNRNPAB	heterogeneous nuclear ribonucleoprotein A/B
hsa-miR-1299	0	0	1	0	1	1	CD59	CD59 molecule, complement regulatory protein
hsa-miR-1299	1	0	1	1	0	0	SMARCA2	SWI/SNF related, matrix associated, actin dependent regulator of chromatin, subfamily a, member 2
hsa-miR-1299	1	0	1	0	1	1	RNF144A	ring finger protein 144A
hsa-miR-1299	1	0	1	0	1	1	STX6	syntaxin 6
hsa-miR-1299	0	0	1	1	1	1	SMYD5	SMYD family member 5
hsa-miR-1299	0	0	1	1	0	0	H2AFY2	H2A histone family, member Y2
hsa-miR-1299	0	0	1	1	0	0	CDC37	cell division cycle 37 homolog (S. cerevisiae)
hsa-miR-1299	0	0	1	1	0	0	CHCHD3	coiled-coil-helix-coiled-coil-helix domain containing 3
hsa-miR-1299	0	0	1	0	0	0	LOC400768	uncharacterized LOC400768
hsa-miR-1299	0	0	1	1	1	1	FBXO36	F-box protein 36
hsa-miR-1299	0	0	1	1	1	1	PTPLAD2	protein tyrosine phosphatase-like A domain containing 2
hsa-miR-1299	0	0	1	1	0	0	TPST2	tyrosylprotein sulfotransferase 2
hsa-miR-1299	0	0	1	1	0	0	PSG8	pregnancy specific beta-1-glycoprotein 8
hsa-miR-1299	0	0	1	1	1	1	ATP1B3	ATPase, Na+/K+ transporting, beta 3 polypeptide
hsa-miR-1299	1	0	1	1	1	1	AP3S1	adaptor-related protein complex 3, sigma 1 subunit
hsa-miR-1299	1	0	1	1	1	1	DOLPP1	dolichyl pyrophosphate phosphatase 1
hsa-miR-1299	1	0	1	1	1	1	RAP1A	RAP1A, member of RAS oncogene family
hsa-miR-1299	1	1	1	1	0	0	EFNA3	ephrin-A3
hsa-miR-1299	0	0	1	1	1	1	PTGES3	prostaglandin E synthase 3 (cytosolic)
hsa-miR-1299	1	0	1	1	1	1	FGF11	fibroblast growth factor 11
hsa-miR-1299	0	0	1	1	1	1	C2orf43	chromosome 2 open reading frame 43
hsa-miR-1299	1	0	1	0	1	1	BNIP3L	BCL2/adenovirus E1B 19kDa interacting protein 3-like
hsa-miR-1299	0	0	1	1	1	1	BCL7B	B-cell CLL/lymphoma 7B
hsa-miR-1299	0	0	1	1	1	1	TASP1	taspase, threonine aspartase, 1
hsa-miR-1299	1	0	1	1	0	0	STX5	syntaxin 5
hsa-miR-1299	1	0	1	1	1	1	HMGN3	high mobility group nucleosomal binding domain 3
hsa-miR-1299	0	0	1	1	0	0	DNAJB2	DnaJ (Hsp40) homolog, subfamily B, member 2
hsa-miR-1299	0	0	1	0	0	0	LOC387647	patched domain containing 3 pseudogene
hsa-miR-1299	1	0	1	1	1	1	SMARCE1	SWI/SNF related, matrix associated, actin dependent regulator of chromatin, subfamily e, member 1
hsa-miR-1299	0	0	1	1	1	1	HPGD	hydroxyprostaglandin dehydrogenase 15-(NAD)
hsa-miR-1299	0	0	1	1	0	0	RPL7L1	ribosomal protein L7-like 1
hsa-miR-1299	1	0	1	1	1	1	ADAM9	ADAM metallopeptidase domain 9
hsa-miR-1299	0	0	1	0	1	1	IGF2-AS	IGF2 antisense RNA
hsa-miR-1299	0	0	1	1	1	1	IFNGR2	interferon gamma receptor 2 (interferon gamma transducer 1)
hsa-miR-1299	1	0	1	1	1	1	PLEKHB2	pleckstrin homology domain containing, family B (evectins) member 2
hsa-miR-1299	0	0	1	1	1	1	CCDC91	coiled-coil domain containing 91
hsa-miR-1299	1	0	1	1	1	1	MBNL1	muscleblind-like splicing regulator 1
hsa-miR-1299	0	0	1	0	0	0	LOC654433	uncharacterized LOC654433
hsa-miR-1299	1	0	1	0	1	1	RPS6KB1	ribosomal protein S6 kinase, 70kDa, polypeptide 1
hsa-miR-1299	0	0	1	1	1	1	STON1	stonin 1
hsa-miR-1299	1	0	1	1	1	1	POU2F2	POU class 2 homeobox 2
hsa-miR-1299	1	0	1	1	1	1	TMEM248	transmembrane protein 248
hsa-miR-1299	0	0	1	1	0	0	CXorf40A	chromosome X open reading frame 40A
hsa-miR-1299	1	0	1	1	1	1	ARFIP2	ADP-ribosylation factor interacting protein 2
hsa-miR-1299	1	0	1	1	1	1	PTBP1	polypyrimidine tract binding protein 1
hsa-miR-1299	0	0	1	0	0	0	FLJ45248	FLJ45248 protein
hsa-miR-1299	0	0	1	1	0	0	GPN1	GPN-loop GTPase 1
hsa-miR-1299	0	0	1	0	1	1	TMEM155	transmembrane protein 155
hsa-miR-1299	1	0	1	1	1	1	CRMP1	collapsin response mediator protein 1
hsa-miR-1299	0	0	1	1	1	1	MRPS7	mitochondrial ribosomal protein S7
hsa-miR-1299	0	0	1	1	1	1	VPS16	vacuolar protein sorting 16 homolog (S. cerevisiae)
hsa-miR-1299	1	0	1	1	0	0	MTX1	metaxin 1
hsa-miR-1299	1	0	1	1	1	1	PTPN18	protein tyrosine phosphatase, non-receptor type 18 (brain-derived)
hsa-miR-1299	1	0	1	1	1	1	KCNIP4	Kv channel interacting protein 4
hsa-miR-1299	0	0	1	1	0	0	NOX5	NADPH oxidase, EF-hand calcium binding domain 5
hsa-miR-1299	0	0	1	1	0	0	ELP4	elongator acetyltransferase complex subunit 4
hsa-miR-1299	1	0	1	1	1	1	ARNTL	aryl hydrocarbon receptor nuclear translocator-like
hsa-miR-1299	0	0	1	1	1	1	COMMD3	COMM domain containing 3
hsa-miR-1299	0	0	1	0	0	0	LOC100128988	uncharacterized LOC100128988
hsa-miR-1299	1	0	1	1	1	1	HN1	hematological and neurological expressed 1
hsa-miR-1299	0	0	1	1	0	0	XRCC6	X-ray repair complementing defective repair in Chinese hamster cells 6
hsa-miR-1299	0	0	1	1	0	0	GLT8D1	glycosyltransferase 8 domain containing 1
hsa-miR-1299	0	0	1	1	1	1	NOLC1	nucleolar and coiled-body phosphoprotein 1
hsa-miR-1299	1	0	1	1	1	1	GOLGA7	golgin A7
hsa-miR-1299	0	0	1	1	1	1	PSG5	pregnancy specific beta-1-glycoprotein 5
hsa-miR-1299	1	0	1	1	1	1	ZNF207	zinc finger protein 207
hsa-miR-1299	0	0	1	1	0	0	ATP6V0C	ATPase, H+ transporting, lysosomal 16kDa, V0 subunit c
hsa-miR-1299	1	0	1	1	1	1	F11R	F11 receptor
hsa-miR-1299	0	0	1	1	0	0	ZNF511	zinc finger protein 511
hsa-miR-1299	0	0	1	1	0	0	TUSC3	tumor suppressor candidate 3
hsa-miR-1299	0	0	1	1	1	1	STRAP	serine/threonine kinase receptor associated protein
hsa-miR-1299	1	0	1	1	1	1	RPUSD3	RNA pseudouridylate synthase domain containing 3
hsa-miR-1299	1	0	1	1	0	0	LMAN2	lectin, mannose-binding 2
hsa-miR-1299	0	0	1	1	0	0	OXA1L	oxidase (cytochrome c) assembly 1-like
hsa-miR-1299	1	0	1	0	1	1	MAP1B	microtubule-associated protein 1B
hsa-miR-1299	1	0	1	1	1	1	TMEM55B	transmembrane protein 55B
hsa-miR-1299	0	0	1	1	1	1	LGI1	leucine-rich, glioma inactivated 1
hsa-miR-1299	0	0	1	1	1	1	UBE2A	ubiquitin-conjugating enzyme E2A
hsa-miR-1299	1	0	1	1	0	0	CCM2	cerebral cavernous malformation 2
hsa-miR-1299	1	0	1	1	1	1	RUNX1	runt-related transcription factor 1
hsa-miR-1299	0	0	1	1	1	1	INPP5K	inositol polyphosphate-5-phosphatase K
hsa-miR-1299	0	0	1	1	1	1	CDKAL1	CDK5 regulatory subunit associated protein 1-like 1
hsa-miR-1299	0	0	1	1	0	0	TESK1	testis-specific kinase 1
hsa-miR-1299	1	0	1	1	1	1	ATPAF1	ATP synthase mitochondrial F1 complex assembly factor 1
hsa-miR-1299	1	0	1	1	1	1	TIPRL	TIP41, TOR signaling pathway regulator-like (S. cerevisiae)
hsa-miR-1299	0	0	1	1	1	1	SUGT1	SGT1, suppressor of G2 allele of SKP1 (S. cerevisiae)
hsa-miR-1299	0	0	1	1	0	0	FCGR2A	Fc fragment of IgG, low affinity IIa, receptor (CD32)
hsa-miR-1299	1	0	1	1	1	1	MAN1C1	mannosidase, alpha, class 1C, member 1
hsa-miR-1299	1	0	1	1	1	1	LGALSL	lectin, galactoside-binding-like
hsa-miR-1299	1	0	1	0	1	1	DNMT3A	DNA (cytosine-5-)-methyltransferase 3 alpha
hsa-miR-1299	1	0	1	1	1	1	SERF2	small EDRK-rich factor 2
hsa-miR-1299	1	0	1	0	1	1	KIAA0240	KIAA0240
hsa-miR-1299	0	0	1	0	0	0	FAM47E	family with sequence similarity 47, member E
hsa-miR-1299	1	0	1	0	1	1	KDM1B	lysine (K)-specific demethylase 1B
hsa-miR-1299	1	0	1	0	0	0	RNF40	ring finger protein 40, E3 ubiquitin protein ligase
hsa-miR-1299	0	0	1	0	0	0	LOC731789	uncharacterized LOC731789
hsa-miR-1299	0	0	1	1	1	1	CCP110	centriolar coiled coil protein 110kDa
hsa-miR-1299	0	0	1	1	1	1	BDP1	B double prime 1, subunit of RNA polymerase III transcription initiation factor IIIB
hsa-miR-1299	1	0	1	0	1	1	BTRC	beta-transducin repeat containing E3 ubiquitin protein ligase
hsa-miR-1299	1	0	1	1	1	1	FBXW7	F-box and WD repeat domain containing 7, E3 ubiquitin protein ligase
hsa-miR-1299	0	0	1	1	1	1	SYNE2	spectrin repeat containing, nuclear envelope 2
hsa-miR-1299	0	0	1	1	1	1	UPRT	uracil phosphoribosyltransferase (FUR1) homolog (S. cerevisiae)
hsa-miR-1299	0	0	1	0	0	0	LINC00661	long intergenic non-protein coding RNA 661
hsa-miR-1299	1	0	1	0	1	1	MEGF10	multiple EGF-like-domains 10
hsa-miR-1299	1	0	1	1	1	1	KIAA2018	KIAA2018
hsa-miR-1299	1	0	1	1	1	1	TIPARP	TCDD-inducible poly(ADP-ribose) polymerase
hsa-miR-1299	0	0	1	1	1	1	SLC25A26	solute carrier family 25 (S-adenosylmethionine carrier), member 26
hsa-miR-1299	0	0	1	0	0	0	MIR143HG	MIR143 host gene (non-protein coding)
hsa-miR-1299	1	0	1	0	1	1	CNTNAP2	contactin associated protein-like 2
hsa-miR-1299	1	0	1	0	1	1	ZNF652	zinc finger protein 652
hsa-miR-1299	1	0	1	1	1	1	BCL2L1	BCL2-like 1
hsa-miR-1299	1	0	1	1	1	1	SLC16A12	solute carrier family 16, member 12 (monocarboxylic acid transporter 12)
hsa-miR-1299	0	0	1	0	1	1	SYNPR	synaptoporin
hsa-miR-1299	1	0	1	1	1	1	ZFHX3	zinc finger homeobox 3
hsa-miR-1299	0	0	1	1	1	1	SLC39A14	solute carrier family 39 (zinc transporter), member 14
hsa-miR-1299	1	0	1	1	1	1	METAP1	methionyl aminopeptidase 1
hsa-miR-1299	1	0	1	1	1	1	PI15	peptidase inhibitor 15
hsa-miR-1299	1	0	1	1	1	1	SEC14L1	SEC14-like 1 (S. cerevisiae)
hsa-miR-1299	1	0	1	1	1	1	RB1CC1	RB1-inducible coiled-coil 1
hsa-miR-1299	1	0	1	0	1	1	KLHDC10	kelch domain containing 10
hsa-miR-1299	1	0	1	0	1	1	CBX7	chromobox homolog 7
hsa-miR-1299	1	0	1	1	1	1	RSPO1	R-spondin 1
hsa-miR-1299	0	0	1	1	1	1	PTGS1	prostaglandin-endoperoxide synthase 1 (prostaglandin G/H synthase and cyclooxygenase)
hsa-miR-1299	0	0	1	1	0	0	SPATA20	spermatogenesis associated 20
hsa-miR-1299	0	0	1	1	1	1	FAM83A	family with sequence similarity 83, member A
hsa-miR-1299	1	0	1	1	1	1	GLIS3	GLIS family zinc finger 3
hsa-miR-1299	0	0	1	0	0	0	LOC728377	Rho guanine nucleotide exchange factor (GEF) 5 pseudogene
hsa-miR-1299	0	0	1	1	0	0	CCNA1	cyclin A1
hsa-miR-1299	1	0	1	0	1	1	RBBP5	retinoblastoma binding protein 5
hsa-miR-1299	1	0	1	0	1	1	DCBLD2	discoidin, CUB and LCCL domain containing 2
hsa-miR-1299	1	0	1	1	1	1	SLC4A8	solute carrier family 4, sodium bicarbonate cotransporter, member 8
hsa-miR-1299	0	0	1	1	0	0	CEACAM3	carcinoembryonic antigen-related cell adhesion molecule 3
hsa-miR-1299	1	0	1	1	1	1	MLL	myeloid/lymphoid or mixed-lineage leukemia (trithorax homolog, Drosophila)
hsa-miR-1299	0	0	1	1	1	1	ADPRH	ADP-ribosylarginine hydrolase
hsa-miR-1299	1	0	1	0	1	1	STAT3	signal transducer and activator of transcription 3 (acute-phase response factor)
hsa-miR-1299	0	0	1	1	0	0	SGCA	sarcoglycan, alpha (50kDa dystrophin-associated glycoprotein)
hsa-miR-1299	0	0	1	0	1	1	OPRK1	opioid receptor, kappa 1
hsa-miR-1299	0	0	1	1	1	1	PLCB4	phospholipase C, beta 4
hsa-miR-1299	1	0	1	1	1	1	RALBP1	ralA binding protein 1
hsa-miR-1299	0	0	1	1	0	0	GNRH1	gonadotropin-releasing hormone 1 (luteinizing-releasing hormone)
hsa-miR-1299	0	0	1	1	0	0	APOC1	apolipoprotein C-I
hsa-miR-1299	1	0	1	1	1	1	IGF1	insulin-like growth factor 1 (somatomedin C)
hsa-miR-1299	1	0	1	0	1	1	ACVR2A	activin A receptor, type IIA
hsa-miR-1299	0	0	1	1	0	0	CD40LG	CD40 ligand
hsa-miR-1299	1	0	1	1	1	1	COL1A1	collagen, type I, alpha 1
hsa-miR-1299	1	0	1	1	1	1	COL1A2	collagen, type I, alpha 2
hsa-miR-1299	1	0	1	1	1	1	COL3A1	collagen, type III, alpha 1
hsa-miR-1299	1	0	1	1	1	1	COL4A3	collagen, type IV, alpha 3 (Goodpasture antigen)
hsa-miR-1299	1	0	1	1	1	1	COL4A4	collagen, type IV, alpha 4
hsa-miR-1299	1	0	1	0	1	1	SLC26A2	solute carrier family 26 (sulfate transporter), member 2
hsa-miR-1299	0	0	1	1	1	1	F11	coagulation factor XI
hsa-miR-1299	1	0	1	1	1	1	F13A1	coagulation factor XIII, A1 polypeptide
hsa-miR-1299	0	0	1	1	1	1	FABP2	fatty acid binding protein 2, intestinal
hsa-miR-1299	1	0	1	1	1	1	FBN1	fibrillin 1
hsa-miR-1299	1	0	1	1	1	1	FUCA1	fucosidase, alpha-L- 1, tissue
hsa-miR-1299	1	0	1	1	1	1	FUT1	fucosyltransferase 1 (galactoside 2-alpha-L-fucosyltransferase, H blood group)
hsa-miR-1299	1	0	1	0	1	1	G6PC	glucose-6-phosphatase, catalytic subunit
hsa-miR-1299	1	0	1	1	1	1	GALC	galactosylceramidase
hsa-miR-1299	1	0	1	0	1	1	ITGB3	integrin, beta 3 (platelet glycoprotein IIIa, antigen CD61)
hsa-miR-1299	1	0	1	1	1	1	KCNA1	potassium voltage-gated channel, shaker-related subfamily, member 1 (episodic ataxia with myokymia)
hsa-miR-1299	0	0	1	1	1	1	MAOA	monoamine oxidase A
hsa-miR-1299	1	0	1	1	1	1	MET	met proto-oncogene (hepatocyte growth factor receptor)
hsa-miR-1299	1	0	1	0	1	1	PTEN	phosphatase and tensin homolog
hsa-miR-1299	1	0	1	1	1	1	TAT	tyrosine aminotransferase
hsa-miR-1299	0	0	1	1	1	1	THBD	thrombomodulin
hsa-miR-1299	1	0	1	1	1	1	TIMP3	TIMP metallopeptidase inhibitor 3
hsa-miR-1299	0	0	1	1	1	1	SLC25A20	solute carrier family 25 (carnitine/acylcarnitine translocase), member 20
hsa-miR-1299	1	0	1	0	1	1	CYBB	cytochrome b-245, beta polypeptide
hsa-miR-1299	1	0	1	1	1	1	HLCS	holocarboxylase synthetase (biotin-(proprionyl-CoA-carboxylase (ATP-hydrolysing)) ligase)
hsa-miR-1299	0	0	1	1	0	0	HRG	histidine-rich glycoprotein
hsa-miR-1299	1	0	1	0	1	1	PAFAH1B1	platelet-activating factor acetylhydrolase 1b, regulatory subunit 1 (45kDa)
hsa-miR-1299	1	0	1	1	0	0	NOTCH3	notch 3
hsa-miR-1299	1	0	1	0	1	1	PCSK1	proprotein convertase subtilisin/kexin type 1
hsa-miR-1299	0	0	1	1	1	1	CYP11B2	cytochrome P450, family 11, subfamily B, polypeptide 2
hsa-miR-1299	1	0	1	1	1	1	HOXA13	homeobox A13
hsa-miR-1299	1	0	1	1	1	1	MPZ	myelin protein zero
hsa-miR-1299	1	0	1	1	1	1	DCX	doublecortin
hsa-miR-1299	1	0	1	1	1	1	TNF	tumor necrosis factor
hsa-miR-1299	0	0	1	1	1	1	HGF	hepatocyte growth factor (hepapoietin A; scatter factor)
hsa-miR-1299	1	0	1	0	1	1	ADRB1	adrenoceptor beta 1
hsa-miR-1299	0	0	1	1	1	1	AGTR1	angiotensin II receptor, type 1
hsa-miR-1299	0	0	1	1	1	1	AGTR2	angiotensin II receptor, type 2
hsa-miR-1299	1	0	1	0	1	1	CACNA1E	calcium channel, voltage-dependent, R type, alpha 1E subunit
hsa-miR-1299	1	0	1	1	1	1	CHRM1	cholinergic receptor, muscarinic 1
hsa-miR-1299	0	0	1	1	1	1	DCK	deoxycytidine kinase
hsa-miR-1299	1	0	1	1	1	1	DIO2	deiodinase, iodothyronine, type II
hsa-miR-1299	1	0	1	1	1	1	DRD1	dopamine receptor D1
hsa-miR-1299	1	0	1	1	1	1	GABRB3	gamma-aminobutyric acid (GABA) A receptor, beta 3
hsa-miR-1299	1	0	1	1	1	1	GRM1	glutamate receptor, metabotropic 1
hsa-miR-1299	1	0	1	1	1	1	HTR4	5-hydroxytryptamine (serotonin) receptor 4, G protein-coupled
hsa-miR-1299	0	0	1	1	1	1	HTR7	5-hydroxytryptamine (serotonin) receptor 7, adenylate cyclase-coupled
hsa-miR-1299	1	0	1	1	1	1	IGF1R	insulin-like growth factor 1 receptor
hsa-miR-1299	0	0	1	1	1	1	IL1R1	interleukin 1 receptor, type I
hsa-miR-1299	1	0	1	0	1	1	KCNJ2	potassium inwardly-rectifying channel, subfamily J, member 2
hsa-miR-1299	1	0	1	1	0	0	PDE3A	phosphodiesterase 3A, cGMP-inhibited
hsa-miR-1299	1	0	1	1	1	1	PTGFR	prostaglandin F receptor (FP)
hsa-miR-1299	0	0	1	0	1	1	DNAJB3	DnaJ (Hsp40) homolog, subfamily B, member 3
hsa-miR-1299	1	0	1	0	1	1	SMAD5	SMAD family member 5
hsa-miR-1299	1	0	1	0	1	1	ARHGEF37	Rho guanine nucleotide exchange factor (GEF) 37
hsa-miR-1299	1	0	1	0	1	1	FLJ33360	FLJ33360 protein
hsa-miR-1299	0	0	1	1	1	1	DDI1	DNA-damage inducible 1 homolog 1 (S. cerevisiae)
hsa-miR-1299	1	0	1	1	1	1	TPD52L3	tumor protein D52-like 3
hsa-miR-1299	0	0	1	1	1	1	FCGR2B	Fc fragment of IgG, low affinity IIb, receptor (CD32)
hsa-miR-1299	1	0	1	0	1	1	CACNA1I	calcium channel, voltage-dependent, T type, alpha 1I subunit
hsa-miR-1299	1	0	1	1	1	1	HMGXB4	HMG box domain containing 4
hsa-miR-1299	1	0	1	1	1	1	GLE1	GLE1 RNA export mediator homolog (yeast)
hsa-miR-1299	1	0	1	1	1	1	BICD2	bicaudal D homolog 2 (Drosophila)
hsa-miR-1299	1	0	1	1	0	0	NOMO3	NODAL modulator 3
hsa-miR-1299	0	0	1	1	1	1	AGMO	alkylglycerol monooxygenase
hsa-miR-1299	0	0	1	1	1	1	OR9Q1	olfactory receptor, family 9, subfamily Q, member 1
hsa-miR-1299	1	0	1	0	1	1	PKP2	plakophilin 2
hsa-miR-1299	1	0	1	1	1	1	PLCXD3	phosphatidylinositol-specific phospholipase C, X domain containing 3
hsa-miR-1299	1	0	1	1	1	1	EDA	ectodysplasin A
hsa-miR-1299	0	0	1	1	1	1	RYK	receptor-like tyrosine kinase
hsa-miR-1299	0	0	1	1	1	1	SCP2	sterol carrier protein 2
hsa-miR-1299	1	0	1	1	1	1	SPOP	speckle-type POZ protein
hsa-miR-1299	0	0	1	1	1	1	TRIM13	tripartite motif containing 13
hsa-miR-1299	0	0	1	1	1	1	SHISA2	shisa homolog 2 (Xenopus laevis)
hsa-miR-1299	0	0	1	1	0	0	CT45A5	cancer/testis antigen family 45, member A5
hsa-miR-1299	1	0	1	0	1	1	C18orf25	chromosome 18 open reading frame 25
hsa-miR-1299	1	0	1	1	1	1	CTDSPL	CTD (carboxy-terminal domain, RNA polymerase II, polypeptide A) small phosphatase-like
hsa-miR-1299	1	0	1	1	1	1	BCAP29	B-cell receptor-associated protein 29
hsa-miR-1299	1	0	1	1	1	1	RBM33	RNA binding motif protein 33
hsa-miR-1299	0	0	1	1	1	1	PIWIL3	piwi-like 3 (Drosophila)
hsa-miR-1299	0	0	1	1	1	1	MXRA7	matrix-remodelling associated 7
hsa-miR-1299	0	0	1	1	1	1	CXCR4	chemokine (C-X-C motif) receptor 4
hsa-miR-1299	1	0	1	1	1	1	LPHN1	latrophilin 1
hsa-miR-1299	1	0	1	1	1	1	LUZP2	leucine zipper protein 2
hsa-miR-1299	0	0	1	1	1	1	TMEM230	transmembrane protein 230
hsa-miR-1299	0	0	1	1	1	1	SPIN3	spindlin family, member 3
hsa-miR-1299	1	0	1	0	1	1	ZC3H12B	zinc finger CCCH-type containing 12B
hsa-miR-1299	1	0	1	0	1	1	MTX3	metaxin 3
hsa-miR-1299	0	0	1	0	1	1	THEMIS	thymocyte selection associated
hsa-miR-1299	1	0	1	0	1	1	CREB5	cAMP responsive element binding protein 5
hsa-miR-1299	1	0	1	1	1	1	BTBD1	BTB (POZ) domain containing 1
hsa-miR-1299	1	0	1	1	1	1	CENPP	centromere protein P
hsa-miR-1299	0	0	1	0	1	1	GOLGA8E	golgin A8 family, member E
hsa-miR-1299	1	0	1	1	1	1	FOXP4	forkhead box P4
hsa-miR-1299	0	0	1	0	1	1	C9orf106	chromosome 9 open reading frame 106
hsa-miR-1299	0	0	1	1	1	1	C18orf56	chromosome 18 open reading frame 56
hsa-miR-1299	1	0	1	0	1	1	RGMB	RGM domain family, member B
hsa-miR-1299	1	0	1	1	1	1	DISC1	disrupted in schizophrenia 1
hsa-miR-1299	1	0	1	1	1	1	PABPC1L2A	poly(A) binding protein, cytoplasmic 1-like 2A
hsa-miR-1299	1	0	1	0	1	1	ZKSCAN2	zinc finger with KRAB and SCAN domains 2
hsa-miR-1299	1	0	1	1	1	1	SORCS1	sortilin-related VPS10 domain containing receptor 1
hsa-miR-1299	1	0	1	1	1	1	FXR1	fragile X mental retardation, autosomal homolog 1
hsa-miR-1299	0	0	1	1	1	1	LDLRAD2	low density lipoprotein receptor class A domain containing 2
hsa-miR-1299	0	0	1	0	1	1	LINC00268	long intergenic non-protein coding RNA 268
hsa-miR-1299	1	0	1	1	1	1	RUNX2	runt-related transcription factor 2
hsa-miR-1299	1	0	1	1	1	1	PHF6	PHD finger protein 6
hsa-miR-1299	0	0	1	1	0	0	CT45A1	cancer/testis antigen family 45, member A1
hsa-miR-1299	0	0	1	1	0	0	ALDH18A1	aldehyde dehydrogenase 18 family, member A1
hsa-miR-1299	0	0	1	1	0	0	CT45A6	cancer/testis antigen family 45, member A6
hsa-miR-1299	0	0	1	1	1	1	BTBD11	BTB (POZ) domain containing 11
hsa-miR-1299	0	0	1	1	1	1	KIAA2026	KIAA2026
hsa-miR-1299	1	0	1	1	1	1	PFKFB2	6-phosphofructo-2-kinase/fructose-2,6-biphosphatase 2
hsa-miR-1299	1	0	1	0	1	1	BRCC3	BRCA1/BRCA2-containing complex, subunit 3
hsa-miR-1299	1	0	1	1	1	1	IQCB1	IQ motif containing B1
hsa-miR-1299	0	0	1	0	1	1	TM2D2	TM2 domain containing 2
hsa-miR-1299	1	0	1	0	1	1	RGAG4	retrotransposon gag domain containing 4
hsa-miR-1299	1	0	1	1	1	1	RAB3IP	RAB3A interacting protein (rabin3)
hsa-miR-1299	1	0	1	1	1	1	CANX	calnexin
hsa-miR-1299	1	0	1	1	1	1	SH3KBP1	SH3-domain kinase binding protein 1
hsa-miR-1299	1	0	1	0	1	1	BCL7A	B-cell CLL/lymphoma 7A
hsa-miR-1299	1	0	1	0	1	1	TNRC6B	trinucleotide repeat containing 6B
hsa-miR-1299	1	0	1	1	1	1	FNBP1L	formin binding protein 1-like
hsa-miR-1299	1	0	1	1	1	1	AFF3	AF4/FMR2 family, member 3
hsa-miR-1299	0	0	1	1	0	0	CLLU1OS	chronic lymphocytic leukemia up-regulated 1 opposite strand
hsa-miR-1299	0	0	1	1	1	1	ARRDC2	arrestin domain containing 2
hsa-miR-1299	1	0	1	1	1	1	SLC35F1	solute carrier family 35, member F1
hsa-miR-1299	0	0	1	0	1	1	C6orf120	chromosome 6 open reading frame 120
hsa-miR-1299	1	0	1	1	1	1	KIAA0101	KIAA0101
hsa-miR-1299	0	0	1	1	1	1	ATF3	activating transcription factor 3
hsa-miR-1299	0	0	1	1	1	1	MS4A3	membrane-spanning 4-domains, subfamily A, member 3 (hematopoietic cell-specific)
hsa-miR-1299	1	0	1	0	1	1	MSRB3	methionine sulfoxide reductase B3
hsa-miR-1299	1	0	1	1	1	1	MAF	v-maf musculoaponeurotic fibrosarcoma oncogene homolog (avian)
hsa-miR-1299	1	0	1	1	1	1	CSNK1G3	casein kinase 1, gamma 3
hsa-miR-1299	0	0	1	1	0	0	ACCSL	1-aminocyclopropane-1-carboxylate synthase homolog (Arabidopsis)(non-functional)-like
hsa-miR-1299	0	0	1	1	1	1	MMP28	matrix metallopeptidase 28
hsa-miR-1299	0	0	1	1	1	1	PLGLB1	plasminogen-like B1
hsa-miR-1299	1	0	1	1	1	1	MYCL1	v-myc myelocytomatosis viral oncogene homolog 1, lung carcinoma derived (avian)
hsa-miR-1299	1	0	1	1	1	1	SAR1B	SAR1 homolog B (S. cerevisiae)
hsa-miR-1299	1	0	1	1	1	1	PPM1B	protein phosphatase, Mg2+/Mn2+ dependent, 1B
hsa-miR-1299	1	0	1	1	0	0	MTUS2	microtubule associated tumor suppressor candidate 2
hsa-miR-1299	0	0	1	1	1	1	ERP29	endoplasmic reticulum protein 29
hsa-miR-1299	0	0	1	1	1	1	KCNIP1	Kv channel interacting protein 1
hsa-miR-1299	1	0	1	1	1	1	GALNTL6	UDP-N-acetyl-alpha-D-galactosamine:polypeptide N-acetylgalactosaminyltransferase-like 6
hsa-miR-1299	1	0	1	0	1	1	RYR3	ryanodine receptor 3
hsa-miR-1299	0	0	1	1	1	1	ATAD3C	ATPase family, AAA domain containing 3C
hsa-miR-1299	1	0	1	1	1	1	KIAA0317	KIAA0317
hsa-miR-1299	0	0	1	1	1	1	SIRPG	signal-regulatory protein gamma
hsa-miR-1299	1	0	1	0	1	1	GK5	glycerol kinase 5 (putative)
hsa-miR-1299	1	0	1	1	1	1	KREMEN1	kringle containing transmembrane protein 1
hsa-miR-1299	1	0	1	0	1	1	CREBZF	CREB/ATF bZIP transcription factor
hsa-miR-1299	1	0	1	1	1	1	CHTF8	CTF8, chromosome transmission fidelity factor 8 homolog (S. cerevisiae)
hsa-miR-1299	1	0	1	1	1	1	C3orf65	chromosome 3 open reading frame 65
hsa-miR-1299	1	0	1	1	1	1	STRN4	striatin, calmodulin binding protein 4
hsa-miR-1299	1	0	1	1	1	1	ZNF384	zinc finger protein 384
hsa-miR-1299	1	0	1	1	1	1	TCERG1	transcription elongation regulator 1
hsa-miR-1299	1	0	1	1	1	1	SPTSSB	serine palmitoyltransferase, small subunit B
hsa-miR-1299	0	0	1	1	1	1	MTHFD2	methylenetetrahydrofolate dehydrogenase (NADP+ dependent) 2, methenyltetrahydrofolate cyclohydrolase
hsa-miR-1299	0	0	1	1	1	1	BTNL8	butyrophilin-like 8
hsa-miR-1299	1	0	1	1	1	1	NCALD	neurocalcin delta
hsa-miR-1299	1	0	1	1	1	1	RUFY2	RUN and FYVE domain containing 2
hsa-miR-1299	1	0	1	1	1	1	SLC9A6	solute carrier family 9, subfamily A (NHE6, cation proton antiporter 6), member 6
hsa-miR-1299	1	0	1	1	1	1	NSL1	NSL1, MIND kinetochore complex component, homolog (S. cerevisiae)
hsa-miR-1299	0	0	1	1	1	1	TMEM8B	transmembrane protein 8B
hsa-miR-1299	1	0	1	1	1	1	ERBB4	v-erb-a erythroblastic leukemia viral oncogene homolog 4 (avian)
hsa-miR-1299	0	0	1	1	1	1	TTC14	tetratricopeptide repeat domain 14
hsa-miR-1299	1	0	1	1	1	1	KDM5A	lysine (K)-specific demethylase 5A
hsa-miR-1299	0	0	1	1	1	1	TRAK1	trafficking protein, kinesin binding 1
hsa-miR-1299	0	0	1	1	1	1	FAM22G	family with sequence similarity 22, member G
hsa-miR-1299	1	0	1	1	1	1	MZT1	mitotic spindle organizing protein 1
hsa-miR-1299	1	0	1	1	1	1	QSER1	glutamine and serine rich 1
hsa-miR-1299	1	0	1	1	1	1	PDE11A	phosphodiesterase 11A
hsa-miR-1299	1	0	1	1	1	1	IRF2BP2	interferon regulatory factor 2 binding protein 2
hsa-miR-1299	1	0	1	1	1	1	PHF16	PHD finger protein 16
hsa-miR-1299	1	0	1	0	1	1	UBXN2B	UBX domain protein 2B
hsa-miR-1299	1	0	1	0	1	1	FAM127C	family with sequence similarity 127, member C
hsa-miR-1299	1	0	1	1	1	1	UBN1	ubinuclein 1
hsa-miR-1299	1	0	1	1	1	1	N4BP2L1	NEDD4 binding protein 2-like 1
hsa-miR-1299	1	0	1	1	1	1	VAV3	vav 3 guanine nucleotide exchange factor
hsa-miR-1299	1	0	1	1	1	1	LDB3	LIM domain binding 3
hsa-miR-1299	1	0	1	0	1	1	THSD7B	thrombospondin, type I, domain containing 7B
hsa-miR-1299	0	0	1	1	1	1	HSF5	heat shock transcription factor family member 5
hsa-miR-1299	1	0	1	1	1	1	MGA	MAX gene associated
hsa-miR-1299	0	0	1	1	1	1	PPP1R1C	protein phosphatase 1, regulatory (inhibitor) subunit 1C
hsa-miR-1299	1	0	1	1	1	1	DGKG	diacylglycerol kinase, gamma 90kDa
hsa-miR-1299	1	0	1	1	1	1	MYO1C	myosin IC
hsa-miR-1299	1	0	1	0	1	1	SCN3A	sodium channel, voltage-gated, type III, alpha subunit
hsa-miR-1299	1	0	1	0	1	1	PDE5A	phosphodiesterase 5A, cGMP-specific
hsa-miR-1299	1	0	1	1	0	0	ASIC2	acid-sensing (proton-gated) ion channel 2
hsa-miR-1299	1	0	1	0	1	1	XIAP	X-linked inhibitor of apoptosis
hsa-miR-1299	0	0	1	1	0	0	ARG2	arginase, type II
hsa-miR-1299	1	0	1	0	1	1	BMPR2	bone morphogenetic protein receptor, type II (serine/threonine kinase)
hsa-miR-1299	1	0	1	1	1	1	CASP10	caspase 10, apoptosis-related cysteine peptidase
hsa-miR-1299	0	0	1	1	1	1	ENTPD3	ectonucleoside triphosphate diphosphohydrolase 3
hsa-miR-1299	1	0	1	0	1	1	CDK6	cyclin-dependent kinase 6
hsa-miR-1299	0	0	1	1	1	1	CDKN2C	cyclin-dependent kinase inhibitor 2C (p18, inhibits CDK4)
hsa-miR-1299	0	0	1	1	1	1	CHUK	conserved helix-loop-helix ubiquitous kinase
hsa-miR-1299	0	0	1	1	1	1	CLIC2	chloride intracellular channel 2
hsa-miR-1299	0	0	1	1	1	1	CCR1	chemokine (C-C motif) receptor 1
hsa-miR-1299	1	0	1	0	1	1	CPD	carboxypeptidase D
hsa-miR-1299	1	0	1	1	1	1	CREBL2	cAMP responsive element binding protein-like 2
hsa-miR-1299	0	0	1	1	1	1	CXADR	coxsackie virus and adenovirus receptor
hsa-miR-1299	0	0	1	1	0	0	DIO3	deiodinase, iodothyronine, type III
hsa-miR-1299	1	0	1	0	0	0	DLG4	discs, large homolog 4 (Drosophila)
hsa-miR-1299	1	0	1	1	1	1	CELSR2	cadherin, EGF LAG seven-pass G-type receptor 2 (flamingo homolog, Drosophila)
hsa-miR-1299	1	0	1	0	1	1	EIF2S3	eukaryotic translation initiation factor 2, subunit 3 gamma, 52kDa
hsa-miR-1299	1	0	1	1	1	1	ELAVL1	ELAV (embryonic lethal, abnormal vision, Drosophila)-like 1 (Hu antigen R)
hsa-miR-1299	0	0	1	0	1	1	EMP1	epithelial membrane protein 1
hsa-miR-1299	1	0	1	0	1	1	B4GALT1	UDP-Gal:betaGlcNAc beta 1,4- galactosyltransferase, polypeptide 1
hsa-miR-1299	1	0	1	1	1	1	NDST1	N-deacetylase/N-sulfotransferase (heparan glucosaminyl) 1
hsa-miR-1299	0	0	1	1	1	1	CXCL10	chemokine (C-X-C motif) ligand 10
hsa-miR-1299	0	0	1	0	1	1	ACADSB	acyl-CoA dehydrogenase, short/branched chain
hsa-miR-1299	0	0	1	1	1	1	ARF5	ADP-ribosylation factor 5
hsa-miR-1299	1	0	1	1	1	1	ATP6V1A	ATPase, H+ transporting, lysosomal 70kDa, V1 subunit A
hsa-miR-1299	0	0	1	1	0	0	ATP5O	ATP synthase, H+ transporting, mitochondrial F1 complex, O subunit
hsa-miR-1299	1	0	1	0	1	1	BMP7	bone morphogenetic protein 7
hsa-miR-1299	1	0	1	0	0	0	CDH3	cadherin 3, type 1, P-cadherin (placental)
hsa-miR-1299	1	0	1	0	1	1	CEBPG	CCAAT/enhancer binding protein (C/EBP), gamma
hsa-miR-1299	1	0	1	1	1	1	CENPB	centromere protein B, 80kDa
hsa-miR-1299	1	0	1	1	1	1	CLCN3	chloride channel, voltage-sensitive 3
hsa-miR-1299	1	0	1	1	1	1	COL4A6	collagen, type IV, alpha 6
hsa-miR-1299	0	0	1	1	1	1	SLC31A2	solute carrier family 31 (copper transporters), member 2
hsa-miR-1299	1	0	1	1	1	1	MASP1	mannan-binding lectin serine peptidase 1 (C4/C2 activating component of Ra-reactive factor)
hsa-miR-1299	0	0	1	1	1	1	CTH	cystathionase (cystathionine gamma-lyase)
hsa-miR-1299	0	0	1	1	0	0	DDB1	damage-specific DNA binding protein 1, 127kDa
hsa-miR-1299	0	0	1	1	1	1	DLAT	dihydrolipoamide S-acetyltransferase
hsa-miR-1299	0	0	1	1	1	1	EHHADH	enoyl-CoA, hydratase/3-hydroxyacyl CoA dehydrogenase
hsa-miR-1299	0	0	1	0	1	1	STX2	syntaxin 2
hsa-miR-1299	1	0	1	0	1	1	FOXO1	forkhead box O1
hsa-miR-1299	1	0	1	1	1	1	GBP1	guanylate binding protein 1, interferon-inducible
hsa-miR-1299	0	0	1	0	1	1	GYPA	glycophorin A (MNS blood group)
hsa-miR-1299	0	0	1	1	1	1	GYS1	glycogen synthase 1 (muscle)
hsa-miR-1299	0	0	1	1	1	1	HPCA	hippocalcin
hsa-miR-1299	1	0	1	1	1	1	HOXD10	homeobox D10
hsa-miR-1299	0	0	1	1	1	1	IL6ST	interleukin 6 signal transducer (gp130, oncostatin M receptor)
hsa-miR-1299	0	0	1	1	1	1	IL17A	interleukin 17A
hsa-miR-1299	1	0	1	1	1	1	ITGA3	integrin, alpha 3 (antigen CD49C, alpha 3 subunit of VLA-3 receptor)
hsa-miR-1299	1	0	1	1	1	1	JUN	jun proto-oncogene
hsa-miR-1299	1	0	1	1	1	1	KCNA3	potassium voltage-gated channel, shaker-related subfamily, member 3
hsa-miR-1299	1	0	1	1	1	1	KCNJ10	potassium inwardly-rectifying channel, subfamily J, member 10
hsa-miR-1299	1	0	1	1	1	1	KDR	kinase insert domain receptor (a type III receptor tyrosine kinase)
hsa-miR-1299	0	0	1	1	1	1	KPNA5	karyopherin alpha 5 (importin alpha 6)
hsa-miR-1299	0	0	1	1	0	0	KRT85	keratin 85
hsa-miR-1299	1	0	1	1	1	1	LIFR	leukemia inhibitory factor receptor alpha
hsa-miR-1299	1	0	1	1	1	1	M6PR	mannose-6-phosphate receptor (cation dependent)
hsa-miR-1299	1	0	1	0	1	1	MXD1	MAX dimerization protein 1
hsa-miR-1299	1	0	1	1	1	1	MAN2A1	mannosidase, alpha, class 2A, member 1
hsa-miR-1299	1	0	1	1	1	1	MSN	moesin
hsa-miR-1299	0	0	1	1	1	1	MSX2	msh homeobox 2
hsa-miR-1299	0	0	1	1	1	1	MTRR	5-methyltetrahydrofolate-homocysteine methyltransferase reductase
hsa-miR-1299	1	0	1	1	1	1	PPP1R12B	protein phosphatase 1, regulatory subunit 12B
hsa-miR-1299	1	0	1	1	1	1	NDUFA4	NADH dehydrogenase (ubiquinone) 1 alpha subcomplex, 4, 9kDa
hsa-miR-1299	1	0	1	1	1	1	NEUROD1	neuronal differentiation 1
hsa-miR-1299	1	0	1	1	1	1	NPAS2	neuronal PAS domain protein 2
hsa-miR-1299	1	0	1	1	1	1	NPTX1	neuronal pentraxin I
hsa-miR-1299	1	0	1	0	1	1	NRAS	neuroblastoma RAS viral (v-ras) oncogene homolog
hsa-miR-1299	0	0	1	1	0	0	NTSR1	neurotensin receptor 1 (high affinity)
hsa-miR-1299	0	0	1	1	1	1	OAS2	2'-5'-oligoadenylate synthetase 2, 69/71kDa
hsa-miR-1299	1	0	1	0	1	1	PCDHGC3	protocadherin gamma subfamily C, 3
hsa-miR-1299	0	0	1	1	1	1	PF4V1	platelet factor 4 variant 1
hsa-miR-1299	0	0	1	1	1	1	SERPINB8	serpin peptidase inhibitor, clade B (ovalbumin), member 8
hsa-miR-1299	0	0	1	1	1	1	PIK3C2B	phosphatidylinositol-4-phosphate 3-kinase, catalytic subunit type 2 beta
hsa-miR-1299	0	0	1	1	1	1	PIM1	pim-1 oncogene
hsa-miR-1299	1	0	1	1	1	1	PLAGL2	pleiomorphic adenoma gene-like 2
hsa-miR-1299	0	0	1	1	1	1	PLGLB2	plasminogen-like B2
hsa-miR-1299	0	0	1	1	0	0	PPP1R8	protein phosphatase 1, regulatory subunit 8
hsa-miR-1299	1	0	1	1	1	1	PPP2R1B	protein phosphatase 2, regulatory subunit A, beta
hsa-miR-1299	0	0	1	1	1	1	PRKCB	protein kinase C, beta
hsa-miR-1299	1	0	1	1	1	1	PTPN9	protein tyrosine phosphatase, non-receptor type 9
hsa-miR-1299	0	0	1	1	1	1	PTPRM	protein tyrosine phosphatase, receptor type, M
hsa-miR-1299	0	0	1	1	1	1	PTPRR	protein tyrosine phosphatase, receptor type, R
hsa-miR-1299	1	0	1	1	1	1	PVRL1	poliovirus receptor-related 1 (herpesvirus entry mediator C)
hsa-miR-1299	1	0	1	0	1	1	RAB6A	RAB6A, member RAS oncogene family
hsa-miR-1299	1	0	1	1	1	1	RAD23B	RAD23 homolog B (S. cerevisiae)
hsa-miR-1299	0	0	1	1	1	1	RAF1	v-raf-1 murine leukemia viral oncogene homolog 1
hsa-miR-1299	1	0	1	1	1	1	RASA1	RAS p21 protein activator (GTPase activating protein) 1
hsa-miR-1299	1	0	1	1	1	1	ARID4A	AT rich interactive domain 4A (RBP1-like)
hsa-miR-1299	1	0	1	0	1	1	ST6GAL1	ST6 beta-galactosamide alpha-2,6-sialyltranferase 1
hsa-miR-1299	1	0	1	1	1	1	SMARCC1	SWI/SNF related, matrix associated, actin dependent regulator of chromatin, subfamily c, member 1
hsa-miR-1299	0	0	1	1	1	1	SNAPC1	small nuclear RNA activating complex, polypeptide 1, 43kDa
hsa-miR-1299	0	0	1	0	1	1	SNRPF	small nuclear ribonucleoprotein polypeptide F
hsa-miR-1299	0	0	1	1	1	1	UAP1	UDP-N-acteylglucosamine pyrophosphorylase 1
hsa-miR-1299	1	0	1	1	1	1	SRI	sorcin
hsa-miR-1299	1	0	1	1	1	1	SRPR	signal recognition particle receptor (docking protein)
hsa-miR-1299	1	0	1	1	1	1	SSR2	signal sequence receptor, beta (translocon-associated protein beta)
hsa-miR-1299	1	0	1	0	1	1	STC1	stanniocalcin 1
hsa-miR-1299	1	0	1	1	1	1	SYN2	synapsin II
hsa-miR-1299	1	0	1	1	1	1	TCF12	transcription factor 12
hsa-miR-1299	0	0	1	0	1	1	TDGF1	teratocarcinoma-derived growth factor 1
hsa-miR-1299	1	0	1	1	1	1	TIAM1	T-cell lymphoma invasion and metastasis 1
hsa-miR-1299	1	0	1	1	1	1	NR2E1	nuclear receptor subfamily 2, group E, member 1
hsa-miR-1299	1	0	1	0	1	1	UBE2D2	ubiquitin-conjugating enzyme E2D 2
hsa-miR-1299	0	0	1	1	1	1	UBE2V2	ubiquitin-conjugating enzyme E2 variant 2
hsa-miR-1299	1	0	1	1	1	1	YY1	YY1 transcription factor
hsa-miR-1299	1	0	1	0	1	1	ZIC1	Zic family member 1
hsa-miR-1299	1	0	1	1	1	1	ZIC3	Zic family member 3
hsa-miR-1299	0	0	1	1	1	1	STAM	signal transducing adaptor molecule (SH3 domain and ITAM motif) 1
hsa-miR-1299	1	0	1	1	1	1	ADAM12	ADAM metallopeptidase domain 12
hsa-miR-1299	1	0	1	1	1	1	NRIP1	nuclear receptor interacting protein 1
hsa-miR-1299	1	0	1	0	1	1	CUL3	cullin 3
hsa-miR-1299	0	0	1	1	1	1	AGPS	alkylglycerone phosphate synthase
hsa-miR-1299	0	0	1	1	0	0	FCN3	ficolin (collagen/fibrinogen domain containing) 3 (Hakata antigen)
hsa-miR-1299	1	0	1	0	1	1	PCDHGA12	protocadherin gamma subfamily A, 12
hsa-miR-1299	1	0	1	0	1	1	PCDHGB4	protocadherin gamma subfamily B, 4
hsa-miR-1299	1	0	1	0	1	1	TNKS	tankyrase, TRF1-interacting ankyrin-related ADP-ribose polymerase
hsa-miR-1299	1	0	1	0	1	1	IRS2	insulin receptor substrate 2
hsa-miR-1299	1	0	1	1	1	1	SRSF9	serine/arginine-rich splicing factor 9
hsa-miR-1299	0	0	1	1	1	1	SNX4	sorting nexin 4
hsa-miR-1299	0	0	1	1	0	0	ADAM23	ADAM metallopeptidase domain 23
hsa-miR-1299	0	0	1	1	0	0	ADAM21	ADAM metallopeptidase domain 21
hsa-miR-1299	1	0	1	1	1	1	RIOK3	RIO kinase 3 (yeast)
hsa-miR-1299	0	0	1	1	1	1	SCEL	sciellin
hsa-miR-1299	1	0	1	1	1	1	PEX11B	peroxisomal biogenesis factor 11 beta
hsa-miR-1299	0	0	1	1	1	1	CREG1	cellular repressor of E1A-stimulated genes 1
hsa-miR-1299	1	0	1	1	1	1	NRP2	neuropilin 2
hsa-miR-1299	1	0	1	1	1	1	KAT2B	K(lysine) acetyltransferase 2B
hsa-miR-1299	1	0	1	1	1	1	FUBP1	far upstream element (FUSE) binding protein 1
hsa-miR-1299	1	0	1	1	1	1	BTAF1	BTAF1 RNA polymerase II, B-TFIID transcription factor-associated, 170kDa (Mot1 homolog, S. cerevisiae)
hsa-miR-1299	1	0	1	1	1	1	MAP7	microtubule-associated protein 7
hsa-miR-1299	1	0	1	1	1	1	ACOX1	acyl-CoA oxidase 1, palmitoyl
hsa-miR-1299	0	0	1	0	0	0	ARRB1	arrestin, beta 1
hsa-miR-1299	1	0	1	1	1	1	BCL2L2	BCL2-like 2
hsa-miR-1299	1	0	1	0	1	1	DGKB	diacylglycerol kinase, beta 90kDa
hsa-miR-1299	1	0	1	1	1	1	EFNB2	ephrin-B2
hsa-miR-1299	1	0	1	1	1	1	EYA4	eyes absent homolog 4 (Drosophila)
hsa-miR-1299	1	0	1	0	1	1	SLC1A2	solute carrier family 1 (glial high affinity glutamate transporter), member 2
hsa-miR-1299	1	0	1	0	1	1	MED14	mediator complex subunit 14
hsa-miR-1299	1	0	1	1	1	1	MED21	mediator complex subunit 21
hsa-miR-1299	1	0	1	0	1	1	AKAP6	A kinase (PRKA) anchor protein 6
hsa-miR-1299	1	0	1	0	1	1	GTPBP1	GTP binding protein 1
hsa-miR-1299	0	0	1	1	1	1	ACTL6A	actin-like 6A
hsa-miR-1299	1	0	1	1	1	1	ARL3	ADP-ribosylation factor-like 3
hsa-miR-1299	1	0	1	1	1	1	BCL9	B-cell CLL/lymphoma 9
hsa-miR-1299	0	0	1	1	1	1	BST1	bone marrow stromal cell antigen 1
hsa-miR-1299	0	0	1	1	1	1	CETN3	centrin, EF-hand protein, 3
hsa-miR-1299	1	0	1	1	1	1	DAG1	dystroglycan 1 (dystrophin-associated glycoprotein 1)
hsa-miR-1299	1	0	1	1	1	1	DUSP5	dual specificity phosphatase 5
hsa-miR-1299	0	0	1	0	1	1	FOXE1	forkhead box E1 (thyroid transcription factor 2)
hsa-miR-1299	1	0	1	0	1	1	ARHGAP35	Rho GTPase activating protein 35
hsa-miR-1299	0	0	1	1	0	0	GTF2A2	general transcription factor IIA, 2, 12kDa
hsa-miR-1299	1	0	1	1	1	1	LRP2	low density lipoprotein receptor-related protein 2
hsa-miR-1299	0	0	1	1	1	1	RAB27A	RAB27A, member RAS oncogene family
hsa-miR-1299	1	0	1	0	1	1	SCN2B	sodium channel, voltage-gated, type II, beta subunit
hsa-miR-1299	0	0	1	1	1	1	TRAF6	TNF receptor-associated factor 6, E3 ubiquitin protein ligase
hsa-miR-1299	1	0	1	1	1	1	BAP1	BRCA1 associated protein-1 (ubiquitin carboxy-terminal hydrolase)
hsa-miR-1299	0	0	1	1	1	1	SDPR	serum deprivation response
hsa-miR-1299	1	0	1	1	1	1	MTMR4	myotubularin related protein 4
hsa-miR-1299	0	0	1	0	1	1	CXorf1	chromosome X open reading frame 1
hsa-miR-1299	1	0	1	0	1	1	VAMP3	vesicle-associated membrane protein 3 (cellubrevin)
hsa-miR-1299	0	0	1	1	0	0	SLC22A14	solute carrier family 22, member 14
hsa-miR-1299	1	0	1	0	1	1	CDYL	chromodomain protein, Y-like
hsa-miR-1299	0	0	1	1	1	1	EIF2AK3	eukaryotic translation initiation factor 2-alpha kinase 3
hsa-miR-1299	1	0	1	1	1	1	HOMER2	homer homolog 2 (Drosophila)
hsa-miR-1299	1	0	1	0	1	1	ROCK2	Rho-associated, coiled-coil containing protein kinase 2
hsa-miR-1299	1	0	1	1	1	1	ONECUT2	one cut homeobox 2
hsa-miR-1299	1	0	1	1	1	1	KIF23	kinesin family member 23
hsa-miR-1299	1	0	1	1	1	1	CXCL14	chemokine (C-X-C motif) ligand 14
hsa-miR-1299	1	0	1	1	1	1	SEC24C	SEC24 family, member C (S. cerevisiae)
hsa-miR-1299	1	0	1	1	1	1	ZFP36L1	zinc finger protein 36, C3H type-like 1
hsa-miR-1299	0	0	1	1	1	1	CDH6	cadherin 6, type 2, K-cadherin (fetal kidney)
hsa-miR-1299	0	0	1	0	1	1	DSC2	desmocollin 2
hsa-miR-1299	1	0	1	1	1	1	GABRE	gamma-aminobutyric acid (GABA) A receptor, epsilon
hsa-miR-1299	0	0	1	1	0	0	IDE	insulin-degrading enzyme
hsa-miR-1299	1	0	1	0	1	1	KRAS	v-Ki-ras2 Kirsten rat sarcoma viral oncogene homolog
hsa-miR-1299	0	0	1	1	1	1	SERPINI1	serpin peptidase inhibitor, clade I (neuroserpin), member 1
hsa-miR-1299	1	0	1	0	1	1	SEL1L	sel-1 suppressor of lin-12-like (C. elegans)
hsa-miR-1299	0	0	1	1	1	1	XYLB	xylulokinase homolog (H. influenzae)
hsa-miR-1299	1	0	1	1	1	1	WDR1	WD repeat domain 1
hsa-miR-1299	1	0	1	1	1	1	SLC23A2	solute carrier family 23 (nucleobase transporters), member 2
hsa-miR-1299	0	0	1	1	1	1	SART1	squamous cell carcinoma antigen recognized by T cells
hsa-miR-1299	1	0	1	1	1	1	BMI1	BMI1 polycomb ring finger oncogene
hsa-miR-1299	1	0	1	1	1	1	CRK	v-crk sarcoma virus CT10 oncogene homolog (avian)
hsa-miR-1299	1	0	1	1	1	1	DLX3	distal-less homeobox 3
hsa-miR-1299	1	0	1	0	1	1	E2F1	E2F transcription factor 1
hsa-miR-1299	1	0	1	1	1	1	FOXG1	forkhead box G1
hsa-miR-1299	0	0	1	1	1	1	MSTN	myostatin
hsa-miR-1299	1	0	1	1	1	1	GPR3	G protein-coupled receptor 3
hsa-miR-1299	0	0	1	1	1	1	GRK5	G protein-coupled receptor kinase 5
hsa-miR-1299	1	0	1	1	1	1	HAS3	hyaluronan synthase 3
hsa-miR-1299	1	0	1	1	1	1	RALA	v-ral simian leukemia viral oncogene homolog A (ras related)
hsa-miR-1299	0	0	1	1	1	1	SEPP1	selenoprotein P, plasma, 1
hsa-miR-1299	1	0	1	0	1	1	CCDC6	coiled-coil domain containing 6
hsa-miR-1299	0	0	1	1	1	1	FOSL1	FOS-like antigen 1
hsa-miR-1299	1	0	1	1	0	0	ZBTB22	zinc finger and BTB domain containing 22
hsa-miR-1299	1	0	1	1	1	1	GABBR2	gamma-aminobutyric acid (GABA) B receptor, 2
hsa-miR-1299	0	0	1	1	0	0	HMX2	H6 family homeobox 2
hsa-miR-1299	1	0	1	1	1	1	HOXA1	homeobox A1
hsa-miR-1299	1	0	1	1	0	0	LOXL1	lysyl oxidase-like 1
hsa-miR-1299	1	0	1	1	1	1	LPP	LIM domain containing preferred translocation partner in lipoma
hsa-miR-1299	0	0	1	1	0	0	CD180	CD180 molecule
hsa-miR-1299	1	0	1	1	1	1	MAB21L1	mab-21-like 1 (C. elegans)
hsa-miR-1299	0	0	1	0	1	1	POU3F2	POU class 3 homeobox 2
hsa-miR-1299	0	0	1	1	1	1	SOX3	SRY (sex determining region Y)-box 3
hsa-miR-1299	1	0	1	1	1	1	SYT1	synaptotagmin I
hsa-miR-1299	0	0	1	1	1	1	TAF1B	TATA box binding protein (TBP)-associated factor, RNA polymerase I, B, 63kDa
hsa-miR-1299	1	0	1	1	1	1	UST	uronyl-2-sulfotransferase
hsa-miR-1299	1	0	1	1	1	1	ACTR1A	ARP1 actin-related protein 1 homolog A, centractin alpha (yeast)
hsa-miR-1299	1	0	1	1	1	1	NAMPT	nicotinamide phosphoribosyltransferase
hsa-miR-1299	0	0	1	1	1	1	CEBPZ	CCAAT/enhancer binding protein (C/EBP), zeta
hsa-miR-1299	0	0	1	1	1	1	RNF41	ring finger protein 41
hsa-miR-1299	1	0	1	1	1	1	PRKD3	protein kinase D3
hsa-miR-1299	1	0	1	0	1	1	DCAF7	DDB1 and CUL4 associated factor 7
hsa-miR-1299	1	0	1	1	1	1	GLYAT	glycine-N-acyltransferase
hsa-miR-1299	1	0	1	1	1	1	SRRM1	serine/arginine repetitive matrix 1
hsa-miR-1299	1	0	1	0	1	1	SPRY3	sprouty homolog 3 (Drosophila)
hsa-miR-1299	1	0	1	1	1	1	MEOX2	mesenchyme homeobox 2
hsa-miR-1299	1	0	1	1	1	1	MMP16	matrix metallopeptidase 16 (membrane-inserted)
hsa-miR-1299	1	0	1	1	1	1	MTF1	metal-regulatory transcription factor 1
hsa-miR-1299	1	0	1	0	1	1	NAB1	NGFI-A binding protein 1 (EGR1 binding protein 1)
hsa-miR-1299	0	0	1	1	0	0	PPYR1	pancreatic polypeptide receptor 1
hsa-miR-1299	0	0	1	1	1	1	AKR1D1	aldo-keto reductase family 1, member D1 (delta 4-3-ketosteroid-5-beta-reductase)
hsa-miR-1299	0	0	1	1	1	1	STK10	serine/threonine kinase 10
hsa-miR-1299	1	0	1	1	1	1	TSNAX	translin-associated factor X
hsa-miR-1299	0	0	1	0	1	1	HCAR3	hydroxycarboxylic acid receptor 3
hsa-miR-1299	0	0	1	1	1	1	PNMA1	paraneoplastic Ma antigen 1
hsa-miR-1299	1	0	1	0	1	1	SPATA2	spermatogenesis associated 2
hsa-miR-1299	0	0	1	1	1	1	HS3ST2	heparan sulfate (glucosamine) 3-O-sulfotransferase 2
hsa-miR-1299	1	0	1	1	1	1	SEMA3A	sema domain, immunoglobulin domain (Ig), short basic domain, secreted, (semaphorin) 3A
hsa-miR-1299	1	0	1	1	1	1	SPON1	spondin 1, extracellular matrix protein
hsa-miR-1299	1	0	1	1	1	1	DNAJB1	DnaJ (Hsp40) homolog, subfamily B, member 1
hsa-miR-1299	1	0	1	1	1	1	NEFL	neurofilament, light polypeptide
hsa-miR-1299	1	0	1	1	1	1	NFATC1	nuclear factor of activated T-cells, cytoplasmic, calcineurin-dependent 1
hsa-miR-1299	1	0	1	1	1	1	NR4A2	nuclear receptor subfamily 4, group A, member 2
hsa-miR-1299	1	0	1	1	1	1	ORC2	origin recognition complex, subunit 2
hsa-miR-1299	1	0	1	1	1	1	CDK16	cyclin-dependent kinase 16
hsa-miR-1299	0	0	1	1	1	1	PIK3CA	phosphatidylinositol-4,5-bisphosphate 3-kinase, catalytic subunit alpha
hsa-miR-1299	1	0	1	0	1	1	PITPNA	phosphatidylinositol transfer protein, alpha
hsa-miR-1299	1	0	1	1	1	1	PPP2R5E	protein phosphatase 2, regulatory subunit B', epsilon isoform
hsa-miR-1299	1	0	1	0	1	1	PRKAA2	protein kinase, AMP-activated, alpha 2 catalytic subunit
hsa-miR-1299	1	0	1	1	1	1	SMC1A	structural maintenance of chromosomes 1A
hsa-miR-1299	1	0	1	1	1	1	NPEPPS	aminopeptidase puromycin sensitive
hsa-miR-1299	1	0	1	1	1	1	TIMM17A	translocase of inner mitochondrial membrane 17 homolog A (yeast)
hsa-miR-1299	0	0	1	1	1	1	SLC30A9	solute carrier family 30 (zinc transporter), member 9
hsa-miR-1299	1	0	1	1	1	1	SEMA3C	sema domain, immunoglobulin domain (Ig), short basic domain, secreted, (semaphorin) 3C
hsa-miR-1299	1	0	1	0	1	1	APPBP2	amyloid beta precursor protein (cytoplasmic tail) binding protein 2
hsa-miR-1299	0	0	1	1	0	0	IPO7	importin 7
hsa-miR-1299	1	0	1	1	1	1	SPTLC1	serine palmitoyltransferase, long chain base subunit 1
hsa-miR-1299	1	0	1	0	1	1	MXD4	MAX dimerization protein 4
hsa-miR-1299	0	0	1	0	1	1	SLC16A2	solute carrier family 16, member 2 (thyroid hormone transporter)
hsa-miR-1299	1	0	1	0	1	1	NCOA2	nuclear receptor coactivator 2
hsa-miR-1299	0	0	1	1	1	1	CD226	CD226 molecule
hsa-miR-1299	1	0	1	1	1	1	B3GNT2	UDP-GlcNAc:betaGal beta-1,3-N-acetylglucosaminyltransferase 2
hsa-miR-1299	1	0	1	1	1	1	RBBP9	retinoblastoma binding protein 9
hsa-miR-1299	0	0	1	1	1	1	FGL2	fibrinogen-like 2
hsa-miR-1299	0	0	1	1	0	0	BRD8	bromodomain containing 8
hsa-miR-1299	1	0	1	1	1	1	MAN1A2	mannosidase, alpha, class 1A, member 2
hsa-miR-1299	0	0	1	1	1	1	GLO1	glyoxalase I
hsa-miR-1299	1	0	1	1	1	1	DIAPH2	diaphanous homolog 2 (Drosophila)
hsa-miR-1299	1	0	1	1	1	1	ZBTB33	zinc finger and BTB domain containing 33
hsa-miR-1299	1	0	1	0	1	1	PAPD7	PAP associated domain containing 7
hsa-miR-1299	1	0	1	1	1	1	ADAMTS5	ADAM metallopeptidase with thrombospondin type 1 motif, 5
hsa-miR-1299	0	0	1	1	1	1	RPP14	ribonuclease P/MRP 14kDa subunit
hsa-miR-1299	1	0	1	1	1	1	FGFR1OP	FGFR1 oncogene partner
hsa-miR-1299	1	0	1	1	1	1	TMF1	TATA element modulatory factor 1
hsa-miR-1299	1	0	1	1	1	1	UTY	ubiquitously transcribed tetratricopeptide repeat gene, Y-linked
hsa-miR-1299	0	0	1	1	1	1	ZNF80	zinc finger protein 80
hsa-miR-1299	1	0	1	1	1	1	ZNF81	zinc finger protein 81
hsa-miR-1299	1	0	1	0	1	1	PRSS23	protease, serine, 23
hsa-miR-1299	0	0	1	1	1	1	WIF1	WNT inhibitory factor 1
hsa-miR-1299	1	0	1	1	1	1	PALM2-AKAP2	PALM2-AKAP2 readthrough
hsa-miR-1299	0	0	1	1	1	1	XPOT	exportin, tRNA (nuclear export receptor for tRNAs)
hsa-miR-1299	0	0	1	0	1	1	PNMA2	paraneoplastic Ma antigen 2
hsa-miR-1299	0	0	1	0	1	1	AP4E1	adaptor-related protein complex 4, epsilon 1 subunit
hsa-miR-1299	0	0	1	1	1	1	MMRN1	multimerin 1
hsa-miR-1299	1	0	1	0	1	1	ZFPM2	zinc finger protein, multitype 2
hsa-miR-1299	0	0	1	1	1	1	FRAT2	frequently rearranged in advanced T-cell lymphomas 2
hsa-miR-1299	0	0	1	1	0	0	STAP1	signal transducing adaptor family member 1
hsa-miR-1299	1	0	1	0	1	1	EIF2C2	eukaryotic translation initiation factor 2C, 2
hsa-miR-1299	1	0	1	0	1	1	FZD4	frizzled family receptor 4
hsa-miR-1299	1	0	1	1	1	1	RYBP	RING1 and YY1 binding protein
hsa-miR-1299	0	0	1	1	0	0	SIRT4	sirtuin 4
hsa-miR-1299	1	0	1	1	1	1	DKK1	dickkopf 1 homolog (Xenopus laevis)
hsa-miR-1299	0	0	1	1	1	1	RRAS2	related RAS viral (r-ras) oncogene homolog 2
hsa-miR-1299	1	0	1	1	1	1	KCND2	potassium voltage-gated channel, Shal-related subfamily, member 2
hsa-miR-1299	1	0	1	0	1	1	ACAP2	ArfGAP with coiled-coil, ankyrin repeat and PH domains 2
hsa-miR-1299	1	0	1	0	1	1	G3BP2	GTPase activating protein (SH3 domain) binding protein 2
hsa-miR-1299	1	0	1	0	1	1	FBXL7	F-box and leucine-rich repeat protein 7
hsa-miR-1299	1	0	1	0	1	1	MYO10	myosin X
hsa-miR-1299	1	0	1	0	1	1	BLOC1S6	biogenesis of lysosomal organelles complex-1, subunit 6, pallidin
hsa-miR-1299	1	0	1	1	1	1	RANBP6	RAN binding protein 6
hsa-miR-1299	0	0	1	1	1	1	CD24	CD24 molecule
hsa-miR-1299	1	0	1	0	1	1	FLRT2	fibronectin leucine rich transmembrane protein 2
hsa-miR-1299	0	0	1	1	1	1	C16orf80	chromosome 16 open reading frame 80
hsa-miR-1299	1	0	1	1	1	1	CLCF1	cardiotrophin-like cytokine factor 1
hsa-miR-1299	0	0	1	1	1	1	TBK1	TANK-binding kinase 1
hsa-miR-1299	1	0	1	1	1	1	FLRT3	fibronectin leucine rich transmembrane protein 3
hsa-miR-1299	1	0	1	1	1	1	SLC30A4	solute carrier family 30 (zinc transporter), member 4
hsa-miR-1299	0	0	1	1	0	0	KCNJ14	potassium inwardly-rectifying channel, subfamily J, member 14
hsa-miR-1299	1	0	1	1	1	1	PADI1	peptidyl arginine deiminase, type I
hsa-miR-1299	0	0	1	1	1	1	ABT1	activator of basal transcription 1
hsa-miR-1299	1	0	1	0	1	1	TRHDE	thyrotropin-releasing hormone degrading enzyme
hsa-miR-1299	0	0	1	0	1	1	EMR2	egf-like module containing, mucin-like, hormone receptor-like 2
hsa-miR-1299	1	0	1	1	1	1	ZBTB44	zinc finger and BTB domain containing 44
hsa-miR-1299	0	0	1	1	0	0	ADAM18	ADAM metallopeptidase domain 18
hsa-miR-1299	0	0	1	1	1	1	PTPLA	protein tyrosine phosphatase-like (proline instead of catalytic arginine), member A
hsa-miR-1299	1	0	1	0	1	1	ODZ1	odz, odd Oz/ten-m homolog 1 (Drosophila)
hsa-miR-1299	1	0	1	1	1	1	MAPRE2	microtubule-associated protein, RP/EB family, member 2
hsa-miR-1299	0	0	1	1	0	0	NOMO1	NODAL modulator 1
hsa-miR-1299	1	0	1	1	1	1	CBX6	chromobox homolog 6
hsa-miR-1299	1	0	1	1	0	0	BRD4	bromodomain containing 4
hsa-miR-1299	1	0	1	1	1	1	LEMD3	LEM domain containing 3
hsa-miR-1299	1	0	1	1	1	1	SLC7A11	solute carrier family 7 (anionic amino acid transporter light chain, xc- system), member 11
hsa-miR-1299	0	0	1	1	1	1	OPTC	opticin
hsa-miR-1299	1	0	1	1	1	1	LHX6	LIM homeobox 6
hsa-miR-1299	0	0	1	1	1	1	TSPAN13	tetraspanin 13
hsa-miR-1299	1	0	1	1	1	1	AFF4	AF4/FMR2 family, member 4
hsa-miR-1299	0	0	1	1	1	1	SRPX2	sushi-repeat containing protein, X-linked 2
hsa-miR-1299	0	0	1	1	0	0	APOBEC3C	apolipoprotein B mRNA editing enzyme, catalytic polypeptide-like 3C
hsa-miR-1299	1	0	1	1	1	1	CNOT2	CCR4-NOT transcription complex, subunit 2
hsa-miR-1299	0	0	1	1	1	1	TMOD2	tropomodulin 2 (neuronal)
hsa-miR-1299	0	0	1	1	0	0	A1CF	APOBEC1 complementation factor
hsa-miR-1299	0	0	1	1	0	0	LMCD1	LIM and cysteine-rich domains 1
hsa-miR-1299	1	0	1	0	1	1	HUNK	hormonally up-regulated Neu-associated kinase
hsa-miR-1299	1	0	1	0	1	1	SH3PXD2A	SH3 and PX domains 2A
hsa-miR-1299	1	0	1	1	1	1	RALGPS1	Ral GEF with PH domain and SH3 binding motif 1
hsa-miR-1299	0	0	1	0	1	1	LPIN2	lipin 2
hsa-miR-1299	1	0	1	0	1	1	EDEM1	ER degradation enhancer, mannosidase alpha-like 1
hsa-miR-1299	1	0	1	0	1	1	TOX	thymocyte selection-associated high mobility group box
hsa-miR-1299	1	0	1	0	1	1	MLEC	malectin
hsa-miR-1299	1	0	1	0	1	1	KIAA0232	KIAA0232
hsa-miR-1299	0	0	1	1	1	1	SNX19	sorting nexin 19
hsa-miR-1299	0	0	1	0	1	1	DHCR24	24-dehydrocholesterol reductase
hsa-miR-1299	0	0	1	1	1	1	KIAA0141	KIAA0141
hsa-miR-1299	0	0	1	0	1	1	EPM2AIP1	EPM2A (laforin) interacting protein 1
hsa-miR-1299	1	0	1	1	1	1	ZBTB39	zinc finger and BTB domain containing 39
hsa-miR-1299	1	0	1	1	1	1	SV2A	synaptic vesicle glycoprotein 2A
hsa-miR-1299	1	0	1	1	0	0	IQSEC1	IQ motif and Sec7 domain 1
hsa-miR-1299	1	0	1	0	1	1	RAB11FIP2	RAB11 family interacting protein 2 (class I)
hsa-miR-1299	1	0	1	1	1	1	CHSY1	chondroitin sulfate synthase 1
hsa-miR-1299	1	0	1	0	1	1	ICK	intestinal cell (MAK-like) kinase
hsa-miR-1299	1	0	1	1	1	1	SPAST	spastin
hsa-miR-1299	0	0	1	1	1	1	TMEM41B	transmembrane protein 41B
hsa-miR-1299	1	0	1	1	1	1	ZNF423	zinc finger protein 423
hsa-miR-1299	1	0	1	1	1	1	IQSEC2	IQ motif and Sec7 domain 2
hsa-miR-1299	1	0	1	1	1	1	SMG1	smg-1 homolog, phosphatidylinositol 3-kinase-related kinase (C. elegans)
hsa-miR-1299	1	0	1	0	1	1	LARP4B	La ribonucleoprotein domain family, member 4B
hsa-miR-1299	0	0	1	1	1	1	FBXO28	F-box protein 28
hsa-miR-1299	1	0	1	1	1	1	PLCB1	phospholipase C, beta 1 (phosphoinositide-specific)
hsa-miR-1299	1	0	1	1	1	1	PDS5A	PDS5, regulator of cohesion maintenance, homolog A (S. cerevisiae)
hsa-miR-1299	1	0	1	1	1	1	ANKS1A	ankyrin repeat and sterile alpha motif domain containing 1A
hsa-miR-1299	1	0	1	1	1	1	CUX2	cut-like homeobox 2
hsa-miR-1299	1	0	1	1	1	1	PHF15	PHD finger protein 15
hsa-miR-1299	0	0	1	1	1	1	ANGEL1	angel homolog 1 (Drosophila)
hsa-miR-1299	1	0	1	1	1	1	MED13L	mediator complex subunit 13-like
hsa-miR-1299	0	0	1	0	1	1	ZDHHC17	zinc finger, DHHC-type containing 17
hsa-miR-1299	1	0	1	1	1	1	ASXL1	additional sex combs like 1 (Drosophila)
hsa-miR-1299	0	0	1	1	1	1	LEPROTL1	leptin receptor overlapping transcript-like 1
hsa-miR-1299	1	0	1	1	1	1	RIMBP2	RIMS binding protein 2
hsa-miR-1299	0	0	1	1	0	0	SPEF1	sperm flagellar 1
hsa-miR-1299	1	0	1	1	1	1	MYRIP	myosin VIIA and Rab interacting protein
hsa-miR-1299	1	0	1	1	1	1	CLIP3	CAP-GLY domain containing linker protein 3
hsa-miR-1299	1	0	1	0	1	1	OSBPL3	oxysterol binding protein-like 3
hsa-miR-1299	1	0	1	1	1	1	LRRTM2	leucine rich repeat transmembrane neuronal 2
hsa-miR-1299	1	0	1	0	1	1	PPP1R16B	protein phosphatase 1, regulatory subunit 16B
hsa-miR-1299	1	0	1	1	1	1	PHF19	PHD finger protein 19
hsa-miR-1299	1	0	1	1	1	1	ABCA12	ATP-binding cassette, sub-family A (ABC1), member 12
hsa-miR-1299	1	0	1	1	1	1	FAM155B	family with sequence similarity 155, member B
hsa-miR-1299	1	0	1	1	1	1	MBD2	methyl-CpG binding domain protein 2
hsa-miR-1299	1	0	1	1	1	1	WT1-AS	WT1 antisense RNA
hsa-miR-1299	1	0	1	1	1	1	ST8SIA3	ST8 alpha-N-acetyl-neuraminide alpha-2,8-sialyltransferase 3
hsa-miR-1299	1	0	1	0	1	1	TRIM33	tripartite motif containing 33
hsa-miR-1299	0	0	1	0	1	1	DERA	deoxyribose-phosphate aldolase (putative)
hsa-miR-1299	0	0	1	1	1	1	SNX7	sorting nexin 7
hsa-miR-1299	1	0	1	0	1	1	KLF13	Kruppel-like factor 13
hsa-miR-1299	1	0	1	1	1	1	UBE2J1	ubiquitin-conjugating enzyme E2, J1
hsa-miR-1299	1	0	1	1	1	1	DERL2	derlin 2
hsa-miR-1299	0	0	1	1	1	1	PPIL1	peptidylprolyl isomerase (cyclophilin)-like 1
hsa-miR-1299	1	0	1	0	1	1	CNR1	cannabinoid receptor 1 (brain)
hsa-miR-1299	1	0	1	1	1	1	VGLL3	vestigial like 3 (Drosophila)
hsa-miR-1299	1	0	1	0	1	1	HECA	headcase homolog (Drosophila)
hsa-miR-1299	1	0	1	1	1	1	SNX9	sorting nexin 9
hsa-miR-1299	1	0	1	1	1	1	GPRC5B	G protein-coupled receptor, family C, group 5, member B
hsa-miR-1299	0	0	1	1	1	1	CYB5R1	cytochrome b5 reductase 1
hsa-miR-1299	1	0	1	1	1	1	AKAP11	A kinase (PRKA) anchor protein 11
hsa-miR-1299	0	0	1	1	0	0	VGLL1	vestigial like 1 (Drosophila)
hsa-miR-1299	1	0	1	1	1	1	RNF138	ring finger protein 138, E3 ubiquitin protein ligase
hsa-miR-1299	1	0	1	1	1	1	TOB2	transducer of ERBB2, 2
hsa-miR-1299	1	0	1	0	1	1	SELT	selenoprotein T
hsa-miR-1299	1	0	1	0	1	1	TMEM216	transmembrane protein 216
hsa-miR-1299	1	0	1	1	1	1	DNAJC27	DnaJ (Hsp40) homolog, subfamily C, member 27
hsa-miR-1299	0	0	1	1	1	1	TIMMDC1	translocase of inner mitochondrial membrane domain containing 1
hsa-miR-1299	0	0	1	1	1	1	GNAS	GNAS complex locus
hsa-miR-1299	1	0	1	1	1	1	HOXC10	homeobox C10
hsa-miR-1299	1	0	1	0	1	1	FZD3	frizzled family receptor 3
hsa-miR-1299	1	0	1	0	1	1	KLHL3	kelch-like 3 (Drosophila)
hsa-miR-1299	0	0	1	1	0	0	IL1RAPL2	interleukin 1 receptor accessory protein-like 2
hsa-miR-1299	0	0	1	1	1	1	DEC1	deleted in esophageal cancer 1
hsa-miR-1299	0	0	1	1	1	1	POLE3	polymerase (DNA directed), epsilon 3, accessory subunit
hsa-miR-1299	0	0	1	1	0	0	UBQLN3	ubiquilin 3
hsa-miR-1299	0	0	1	1	1	1	NKRF	NFKB repressing factor
hsa-miR-1299	1	0	1	1	0	0	C17orf59	chromosome 17 open reading frame 59
hsa-miR-1299	1	0	1	1	1	1	ZNF280C	zinc finger protein 280C
hsa-miR-1299	0	0	1	1	0	0	NDE1	nudE nuclear distribution E homolog 1 (A. nidulans)
hsa-miR-1299	1	0	1	1	1	1	GDAP2	ganglioside induced differentiation associated protein 2
hsa-miR-1299	1	0	1	1	0	0	INO80D	INO80 complex subunit D
hsa-miR-1299	1	0	1	1	1	1	UBE2R2	ubiquitin-conjugating enzyme E2R 2
hsa-miR-1299	1	0	1	0	1	1	MARCH5	membrane-associated ring finger (C3HC4) 5
hsa-miR-1299	0	0	1	1	1	1	C1orf27	chromosome 1 open reading frame 27
hsa-miR-1299	0	0	1	1	1	1	TMEM70	transmembrane protein 70
hsa-miR-1299	0	0	1	1	1	1	C2orf42	chromosome 2 open reading frame 42
hsa-miR-1299	0	0	1	1	1	1	ACSM5	acyl-CoA synthetase medium-chain family member 5
hsa-miR-1299	1	0	1	1	1	1	FBXO34	F-box protein 34
hsa-miR-1299	1	0	1	1	1	1	ZNHIT6	zinc finger, HIT-type containing 6
hsa-miR-1299	0	0	1	0	1	1	WDR60	WD repeat domain 60
hsa-miR-1299	0	0	1	1	1	1	TSR1	TSR1, 20S rRNA accumulation, homolog (S. cerevisiae)
hsa-miR-1299	0	0	1	0	1	1	FAM86C1	family with sequence similarity 86, member C1
hsa-miR-1299	0	0	1	1	1	1	TRIM62	tripartite motif containing 62
hsa-miR-1299	1	0	1	1	1	1	UBA6	ubiquitin-like modifier activating enzyme 6
hsa-miR-1299	1	0	1	1	1	1	ZNF654	zinc finger protein 654
hsa-miR-1299	1	0	1	1	1	1	SPTLC3	serine palmitoyltransferase, long chain base subunit 3
hsa-miR-1299	1	0	1	0	1	1	LIN7C	lin-7 homolog C (C. elegans)
hsa-miR-1299	0	0	1	0	1	1	BLOC1S4	biogenesis of lysosomal organelles complex-1, subunit 4, cappuccino
hsa-miR-1299	1	0	1	0	1	1	TMEM106B	transmembrane protein 106B
hsa-miR-1299	0	0	1	1	1	1	STYK1	serine/threonine/tyrosine kinase 1
hsa-miR-1299	1	0	1	0	1	1	BRK1	BRICK1, SCAR/WAVE actin-nucleating complex subunit
hsa-miR-1299	0	0	1	1	1	1	HDAC8	histone deacetylase 8
hsa-miR-1299	1	0	1	1	1	1	CSGALNACT2	chondroitin sulfate N-acetylgalactosaminyltransferase 2
hsa-miR-1299	1	0	1	1	1	1	ETNK1	ethanolamine kinase 1
hsa-miR-1299	0	0	1	1	1	1	GOLGA6B	golgin A6 family, member B
hsa-miR-1299	1	0	1	0	1	1	RNF114	ring finger protein 114
hsa-miR-1299	1	0	1	1	1	1	CTTNBP2NL	CTTNBP2 N-terminal like
hsa-miR-1299	0	0	1	1	1	1	DHTKD1	dehydrogenase E1 and transketolase domain containing 1
hsa-miR-1299	1	0	1	0	1	1	TMEM55A	transmembrane protein 55A
hsa-miR-1299	1	0	1	0	1	1	ELMOD1	ELMO/CED-12 domain containing 1
hsa-miR-1299	1	0	1	1	1	1	GNG12	guanine nucleotide binding protein (G protein), gamma 12
hsa-miR-1299	1	0	1	1	1	1	PCDHGA1	protocadherin gamma subfamily A, 1
hsa-miR-1299	1	0	1	0	1	1	PCDHGA10	protocadherin gamma subfamily A, 10
hsa-miR-1299	1	0	1	0	1	1	PCDHGA11	protocadherin gamma subfamily A, 11
hsa-miR-1299	1	0	1	1	1	1	PCDHGA2	protocadherin gamma subfamily A, 2
hsa-miR-1299	1	0	1	0	1	1	PCDHGA3	protocadherin gamma subfamily A, 3
hsa-miR-1299	1	0	1	0	1	1	PCDHGA4	protocadherin gamma subfamily A, 4
hsa-miR-1299	1	0	1	0	1	1	PCDHGA5	protocadherin gamma subfamily A, 5
hsa-miR-1299	1	0	1	0	1	1	PCDHGA6	protocadherin gamma subfamily A, 6
hsa-miR-1299	1	0	1	0	1	1	PCDHGA7	protocadherin gamma subfamily A, 7
hsa-miR-1299	1	0	1	0	1	1	PCDHGA9	protocadherin gamma subfamily A, 9
hsa-miR-1299	1	0	1	0	1	1	PCDHGB1	protocadherin gamma subfamily B, 1
hsa-miR-1299	1	0	1	0	1	1	PCDHGB2	protocadherin gamma subfamily B, 2
hsa-miR-1299	1	0	1	0	1	1	PCDHGB3	protocadherin gamma subfamily B, 3
hsa-miR-1299	1	0	1	0	1	1	PCDHGB5	protocadherin gamma subfamily B, 5
hsa-miR-1299	1	0	1	0	1	1	PCDHGB6	protocadherin gamma subfamily B, 6
hsa-miR-1299	1	0	1	0	1	1	PCDHGB7	protocadherin gamma subfamily B, 7
hsa-miR-1299	1	0	1	0	1	1	PCDHGC4	protocadherin gamma subfamily C, 4
hsa-miR-1299	1	0	1	0	1	1	PCDHGC5	protocadherin gamma subfamily C, 5
hsa-miR-1299	0	0	1	1	1	1	ERRFI1	ERBB receptor feedback inhibitor 1
hsa-miR-1299	0	0	1	1	1	1	NPAP1	nuclear pore associated protein 1
hsa-miR-1299	1	0	1	0	1	1	FAM190B	family with sequence similarity 190, member B
hsa-miR-1299	0	0	1	1	1	1	KRT24	keratin 24
hsa-miR-1299	1	0	1	1	1	1	DLL4	delta-like 4 (Drosophila)
hsa-miR-1299	1	0	1	1	1	1	EPB41L4B	erythrocyte membrane protein band 4.1 like 4B
hsa-miR-1299	1	0	1	0	1	1	UBFD1	ubiquitin family domain containing 1
hsa-miR-1299	0	0	1	1	1	1	RNF20	ring finger protein 20, E3 ubiquitin protein ligase
hsa-miR-1299	1	0	1	1	1	1	ABCB9	ATP-binding cassette, sub-family B (MDR/TAP), member 9
hsa-miR-1299	1	0	1	1	1	1	CYP26B1	cytochrome P450, family 26, subfamily B, polypeptide 1
hsa-miR-1299	1	0	1	0	1	1	TM9SF3	transmembrane 9 superfamily member 3
hsa-miR-1299	1	0	1	1	1	1	MDM1	Mdm1 nuclear protein homolog (mouse)
hsa-miR-1299	1	0	1	1	1	1	C1GALT1	core 1 synthase, glycoprotein-N-acetylgalactosamine 3-beta-galactosyltransferase, 1
hsa-miR-1299	1	0	1	1	1	1	ASPH	aspartate beta-hydroxylase
hsa-miR-1299	0	0	1	1	1	1	RAD18	RAD18 homolog (S. cerevisiae)
hsa-miR-1299	1	0	1	1	1	1	CCDC47	coiled-coil domain containing 47
hsa-miR-1299	1	0	1	1	0	0	SLC17A7	solute carrier family 17 (sodium-dependent inorganic phosphate cotransporter), member 7
hsa-miR-1299	1	0	1	1	1	1	PAK7	p21 protein (Cdc42/Rac)-activated kinase 7
hsa-miR-1299	0	0	1	1	0	0	ENTPD7	ectonucleoside triphosphate diphosphohydrolase 7
hsa-miR-1299	0	0	1	1	1	1	HRASLS	HRAS-like suppressor
hsa-miR-1299	1	0	1	0	1	1	EIF5A2	eukaryotic translation initiation factor 5A2
hsa-miR-1299	0	0	1	1	0	0	CHRNA10	cholinergic receptor, nicotinic, alpha 10 (neuronal)
hsa-miR-1299	0	0	1	1	1	1	TCL6	T-cell leukemia/lymphoma 6 (non-protein coding)
hsa-miR-1299	0	0	1	0	1	1	TWSG1	twisted gastrulation homolog 1 (Drosophila)
hsa-miR-1299	1	0	1	1	1	1	RAB22A	RAB22A, member RAS oncogene family
hsa-miR-1299	0	0	1	1	1	1	SHROOM4	shroom family member 4
hsa-miR-1299	1	0	1	1	1	1	USP31	ubiquitin specific peptidase 31
hsa-miR-1299	1	0	1	0	1	1	NUFIP2	nuclear fragile X mental retardation protein interacting protein 2
hsa-miR-1299	1	0	1	0	1	1	ALPK3	alpha-kinase 3
hsa-miR-1299	1	0	1	0	1	1	ZNF398	zinc finger protein 398
hsa-miR-1299	1	0	1	0	1	1	KLHDC5	kelch domain containing 5
hsa-miR-1299	0	0	1	1	1	1	TXNDC16	thioredoxin domain containing 16
hsa-miR-1299	1	0	1	1	1	1	NCEH1	neutral cholesterol ester hydrolase 1
hsa-miR-1299	1	0	1	1	1	1	NLGN2	neuroligin 2
hsa-miR-1299	1	0	1	1	1	1	SEMA6A	sema domain, transmembrane domain (TM), and cytoplasmic domain, (semaphorin) 6A
hsa-miR-1299	0	0	1	1	1	1	ARRDC3	arrestin domain containing 3
hsa-miR-1299	1	0	1	1	1	1	KLHL14	kelch-like 14 (Drosophila)
hsa-miR-1299	1	0	1	1	1	1	HOMEZ	homeobox and leucine zipper encoding
hsa-miR-1299	1	0	1	1	1	1	RANBP10	RAN binding protein 10
hsa-miR-1299	1	0	1	1	1	1	KIAA1467	KIAA1467
hsa-miR-1299	1	0	1	1	1	1	TSHZ3	teashirt zinc finger homeobox 3
hsa-miR-1299	0	0	1	1	1	1	KLHL1	kelch-like 1 (Drosophila)
hsa-miR-1299	1	0	1	1	1	1	ZFP14	zinc finger protein 14 homolog (mouse)
hsa-miR-1299	0	0	1	1	1	1	PRX	periaxin
hsa-miR-1299	0	0	1	1	1	1	B3GALT1	UDP-Gal:betaGlcNAc beta 1,3-galactosyltransferase, polypeptide 1
hsa-miR-1299	0	0	1	1	1	1	SLC15A2	solute carrier family 15 (H+/peptide transporter), member 2
hsa-miR-1299	1	0	1	1	1	1	MTMR3	myotubularin related protein 3
hsa-miR-1299	0	0	1	1	1	1	RNASEL	ribonuclease L (2',5'-oligoisoadenylate synthetase-dependent)
hsa-miR-1299	1	0	1	0	1	1	TMX4	thioredoxin-related transmembrane protein 4
hsa-miR-1299	0	0	1	1	0	0	TRIB3	tribbles homolog 3 (Drosophila)
hsa-miR-1299	1	0	1	0	1	1	TP53INP2	tumor protein p53 inducible nuclear protein 2
hsa-miR-1299	1	0	1	1	1	1	RHOU	ras homolog family member U
hsa-miR-1299	1	0	1	1	1	1	DMRT3	doublesex and mab-3 related transcription factor 3
hsa-miR-1299	0	0	1	1	1	1	IL22RA1	interleukin 22 receptor, alpha 1
hsa-miR-1299	1	0	1	1	1	1	PRDM12	PR domain containing 12
hsa-miR-1299	0	0	1	1	1	1	PRDM13	PR domain containing 13
hsa-miR-1299	1	0	1	1	1	1	TMEM35	transmembrane protein 35
hsa-miR-1299	1	0	1	0	1	1	TSPYL4	TSPY-like 4
hsa-miR-1299	0	0	1	1	1	1	VPS11	vacuolar protein sorting 11 homolog (S. cerevisiae)
hsa-miR-1299	1	0	1	1	1	1	BACH2	BTB and CNC homology 1, basic leucine zipper transcription factor 2
hsa-miR-1299	0	0	1	0	1	1	CFL2	cofilin 2 (muscle)
hsa-miR-1299	0	0	1	1	0	0	MIIP	migration and invasion inhibitory protein
hsa-miR-1299	1	0	1	1	1	1	ZFAND3	zinc finger, AN1-type domain 3
hsa-miR-1299	0	0	1	1	1	1	MS4A1	membrane-spanning 4-domains, subfamily A, member 1
hsa-miR-1299	1	0	1	1	0	0	HAND2	heart and neural crest derivatives expressed 2
hsa-miR-1299	0	0	1	1	0	0	TMSB15A	thymosin beta 15a
hsa-miR-1299	1	0	1	0	1	1	CSNK1G1	casein kinase 1, gamma 1
hsa-miR-1299	1	0	1	1	1	1	GPR88	G protein-coupled receptor 88
hsa-miR-1299	0	0	1	1	1	1	CLSPN	claspin
hsa-miR-1299	1	0	1	1	1	1	LRRC4	leucine rich repeat containing 4
hsa-miR-1299	1	0	1	1	1	1	XYLT1	xylosyltransferase I
hsa-miR-1299	1	0	1	1	1	1	XYLT2	xylosyltransferase II
hsa-miR-1299	0	0	1	1	1	1	RAB38	RAB38, member RAS oncogene family
hsa-miR-1299	0	0	1	1	1	1	POPDC3	popeye domain containing 3
hsa-miR-1299	1	0	1	1	1	1	HIF3A	hypoxia inducible factor 3, alpha subunit
hsa-miR-1299	0	0	1	1	1	1	HHIP	hedgehog interacting protein
hsa-miR-1299	0	0	1	1	0	0	POLR1E	polymerase (RNA) I polypeptide E, 53kDa
hsa-miR-1299	1	0	1	1	1	1	SUDS3	suppressor of defective silencing 3 homolog (S. cerevisiae)
hsa-miR-1299	1	0	1	0	1	1	HOXC8	homeobox C8
hsa-miR-1299	1	0	1	0	1	1	ELOVL4	ELOVL fatty acid elongase 4
hsa-miR-1299	0	0	1	1	1	1	ACBD3	acyl-CoA binding domain containing 3
hsa-miR-1299	0	0	1	1	1	1	METTL4	methyltransferase like 4
hsa-miR-1299	1	0	1	1	1	1	RFX7	regulatory factor X, 7
hsa-miR-1299	0	0	1	0	1	1	CDCP1	CUB domain containing protein 1
hsa-miR-1299	0	0	1	0	1	1	LRRC19	leucine rich repeat containing 19
hsa-miR-1299	1	0	1	1	1	1	REEP1	receptor accessory protein 1
hsa-miR-1299	1	0	1	1	0	0	UBE2Z	ubiquitin-conjugating enzyme E2Z
hsa-miR-1299	1	0	1	1	1	1	GID4	GID complex subunit 4, VID24 homolog (S. cerevisiae)
hsa-miR-1299	0	0	1	1	0	0	IRX1	iroquois homeobox 1
hsa-miR-1299	1	0	1	1	1	1	PSTPIP2	proline-serine-threonine phosphatase interacting protein 2
hsa-miR-1299	1	0	1	1	1	1	HOXD1	homeobox D1
hsa-miR-1299	0	0	1	1	0	0	ZBED2	zinc finger, BED-type containing 2
hsa-miR-1299	1	0	1	1	1	1	RNF128	ring finger protein 128, E3 ubiquitin protein ligase
hsa-miR-1299	1	0	1	1	1	1	C10orf76	chromosome 10 open reading frame 76
hsa-miR-1299	1	0	1	1	1	1	PGBD5	piggyBac transposable element derived 5
hsa-miR-1299	0	0	1	1	0	0	TNFAIP8L2	tumor necrosis factor, alpha-induced protein 8-like 2
hsa-miR-1299	1	0	1	1	1	1	PPP1R3B	protein phosphatase 1, regulatory subunit 3B
hsa-miR-1299	1	0	1	1	1	1	DHX40	DEAH (Asp-Glu-Ala-His) box polypeptide 40
hsa-miR-1299	0	0	1	0	1	1	ZYG11B	zyg-11 homolog B (C. elegans)
hsa-miR-1299	0	0	1	1	1	1	CXorf36	chromosome X open reading frame 36
hsa-miR-1299	1	0	1	1	1	1	C15orf29	chromosome 15 open reading frame 29
hsa-miR-1299	1	0	1	0	1	1	MOB3B	MOB kinase activator 3B
hsa-miR-1299	0	0	1	1	1	1	WDR78	WD repeat domain 78
hsa-miR-1299	1	0	1	1	0	0	CCDC48	coiled-coil domain containing 48
hsa-miR-1299	1	0	1	1	1	1	CLMP	CXADR-like membrane protein
hsa-miR-1299	0	0	1	1	1	1	CCDC134	coiled-coil domain containing 134
hsa-miR-1299	0	0	1	1	1	1	ZNF767	zinc finger family member 767
hsa-miR-1299	1	0	1	1	1	1	MCF2L	MCF.2 cell line derived transforming sequence-like
hsa-miR-1299	0	0	1	1	1	1	GFM1	G elongation factor, mitochondrial 1
hsa-miR-1299	0	0	1	1	1	1	ARL14	ADP-ribosylation factor-like 14
hsa-miR-1299	1	0	1	0	1	1	VCPIP1	valosin containing protein (p97)/p47 complex interacting protein 1
hsa-miR-1299	0	0	1	1	1	1	COQ10B	coenzyme Q10 homolog B (S. cerevisiae)
hsa-miR-1299	1	0	1	0	1	1	EDEM3	ER degradation enhancer, mannosidase alpha-like 3
hsa-miR-1299	1	0	1	1	1	1	TRIB1	tribbles homolog 1 (Drosophila)
hsa-miR-1299	0	0	1	1	1	1	MED28	mediator complex subunit 28
hsa-miR-1299	0	0	1	0	1	1	PDGFD	platelet derived growth factor D
hsa-miR-1299	1	0	1	1	1	1	TNKS2	tankyrase, TRF1-interacting ankyrin-related ADP-ribose polymerase 2
hsa-miR-1299	1	0	1	1	1	1	SOST	sclerostin
hsa-miR-1299	1	0	1	1	1	1	PTPRO	protein tyrosine phosphatase, receptor type, O
hsa-miR-1299	1	0	1	1	1	1	NRBF2	nuclear receptor binding factor 2
hsa-miR-1299	0	0	1	1	1	1	HMGN5	high mobility group nucleosome binding domain 5
hsa-miR-1299	1	0	1	1	1	1	SYNC	syncoilin, intermediate filament protein
hsa-miR-1299	1	0	1	0	1	1	C1orf21	chromosome 1 open reading frame 21
hsa-miR-1299	1	0	1	1	1	1	C6orf62	chromosome 6 open reading frame 62
hsa-miR-1299	1	0	1	1	1	1	TIGD6	tigger transposable element derived 6
hsa-miR-1299	1	0	1	0	1	1	SPRY4	sprouty homolog 4 (Drosophila)
hsa-miR-1299	0	0	1	1	1	1	TEX15	testis expressed 15
hsa-miR-1299	0	0	1	1	0	0	MRPL9	mitochondrial ribosomal protein L9
hsa-miR-1299	1	0	1	0	1	1	NUDT12	nudix (nucleoside diphosphate linked moiety X)-type motif 12
hsa-miR-1299	1	0	1	1	1	1	SESN2	sestrin 2
hsa-miR-1299	1	0	1	0	1	1	SH3BGRL2	SH3 domain binding glutamic acid-rich protein like 2
hsa-miR-1299	0	0	1	1	1	1	INHBE	inhibin, beta E
hsa-miR-1299	1	0	1	0	1	1	ITCH	itchy E3 ubiquitin protein ligase
hsa-miR-1299	0	0	1	1	1	1	KCNA7	potassium voltage-gated channel, shaker-related subfamily, member 7
hsa-miR-1299	1	0	1	0	1	1	FAM172A	family with sequence similarity 172, member A
hsa-miR-1299	1	0	1	0	1	1	PCDHGA8	protocadherin gamma subfamily A, 8
hsa-miR-1299	0	0	1	1	1	1	MAGT1	magnesium transporter 1
hsa-miR-1299	0	0	1	1	1	1	TEX35	testis expressed 35
hsa-miR-1299	1	0	1	1	1	1	FAM175B	family with sequence similarity 175, member B
hsa-miR-1299	1	0	1	1	1	1	ARID5B	AT rich interactive domain 5B (MRF1-like)
hsa-miR-1299	1	0	1	1	1	1	ANTXR1	anthrax toxin receptor 1
hsa-miR-1299	1	0	1	0	1	1	FAR1	fatty acyl CoA reductase 1
hsa-miR-1299	1	0	1	1	1	1	MEX3B	mex-3 homolog B (C. elegans)
hsa-miR-1299	1	0	1	1	1	1	ZNRF1	zinc and ring finger 1, E3 ubiquitin protein ligase
hsa-miR-1299	0	0	1	1	0	0	NICN1	nicolin 1
hsa-miR-1299	0	0	1	0	1	1	DNAJC30	DnaJ (Hsp40) homolog, subfamily C, member 30
hsa-miR-1299	1	0	1	1	1	1	BRMS1L	breast cancer metastasis-suppressor 1-like
hsa-miR-1299	0	0	1	1	1	1	VPS25	vacuolar protein sorting 25 homolog (S. cerevisiae)
hsa-miR-1299	0	0	1	1	0	0	C3orf26	chromosome 3 open reading frame 26
hsa-miR-1299	0	0	1	1	1	1	CYSTM1	cysteine-rich transmembrane module containing 1
hsa-miR-1299	0	0	1	1	0	0	PCDH1	protocadherin 1
hsa-miR-1299	0	0	1	1	1	1	ZNF333	zinc finger protein 333
hsa-miR-1299	0	0	1	1	1	1	CHAMP1	chromosome alignment maintaining phosphoprotein 1
hsa-miR-1299	1	0	1	1	1	1	DCTN5	dynactin 5 (p25)
hsa-miR-1299	0	0	1	0	1	1	IMMP2L	IMP2 inner mitochondrial membrane peptidase-like (S. cerevisiae)
hsa-miR-1299	1	0	1	1	1	1	USP38	ubiquitin specific peptidase 38
hsa-miR-1299	0	0	1	0	1	1	TRIM52	tripartite motif containing 52
hsa-miR-1299	1	0	1	1	0	0	ZC3H10	zinc finger CCCH-type containing 10
hsa-miR-1299	1	0	1	1	1	1	AIFM2	apoptosis-inducing factor, mitochondrion-associated, 2
hsa-miR-1299	1	0	1	1	1	1	ARHGEF39	Rho guanine nucleotide exchange factor (GEF) 39
hsa-miR-1299	0	0	1	1	1	1	MICALCL	MICAL C-terminal like
hsa-miR-1299	1	0	1	0	1	1	C5orf62	chromosome 5 open reading frame 62
hsa-miR-1299	0	0	1	1	1	1	POLR2J2	polymerase (RNA) II (DNA directed) polypeptide J2
hsa-miR-1299	1	0	1	1	1	1	CASP2	caspase 2, apoptosis-related cysteine peptidase
hsa-miR-1299	1	0	1	1	1	1	C5orf30	chromosome 5 open reading frame 30
hsa-miR-1299	1	0	1	0	1	1	PURB	purine-rich element binding protein B
hsa-miR-1299	1	0	1	1	1	1	TP53INP1	tumor protein p53 inducible nuclear protein 1
hsa-miR-1299	1	0	1	1	1	1	SSH2	slingshot homolog 2 (Drosophila)
hsa-miR-1299	1	0	1	1	1	1	EPT1	ethanolaminephosphotransferase 1 (CDP-ethanolamine-specific)
hsa-miR-1299	1	0	1	1	0	0	DISP2	dispatched homolog 2 (Drosophila)
hsa-miR-1299	0	0	1	1	1	1	MYL12B	myosin, light chain 12B, regulatory
hsa-miR-1299	0	0	1	1	1	1	TRIM10	tripartite motif containing 10
hsa-miR-1299	0	0	1	1	0	0	PGLYRP2	peptidoglycan recognition protein 2
hsa-miR-1299	1	0	1	1	1	1	XKR4	XK, Kell blood group complex subunit-related family, member 4
hsa-miR-1299	0	0	1	1	1	1	LENG8	leukocyte receptor cluster (LRC) member 8
hsa-miR-1299	0	0	1	1	1	1	OSR2	odd-skipped related 2 (Drosophila)
hsa-miR-1299	1	0	1	1	1	1	MED12L	mediator complex subunit 12-like
hsa-miR-1299	0	0	1	1	1	1	CLEC4D	C-type lectin domain family 4, member D
hsa-miR-1299	0	0	1	1	0	0	ZNF280A	zinc finger protein 280A
hsa-miR-1299	1	0	1	1	1	1	FAM210B	family with sequence similarity 210, member B
hsa-miR-1299	0	0	1	1	0	0	WFDC6	WAP four-disulfide core domain 6
hsa-miR-1299	0	0	1	1	0	0	SLC22A9	solute carrier family 22 (organic anion transporter), member 9
hsa-miR-1299	1	0	1	0	1	1	SOCS4	suppressor of cytokine signaling 4
hsa-miR-1299	0	0	1	1	0	0	RXFP2	relaxin/insulin-like family peptide receptor 2
hsa-miR-1299	1	0	1	1	1	1	SPTSSA	serine palmitoyltransferase, small subunit A
hsa-miR-1299	0	0	1	1	1	1	PATE1	prostate and testis expressed 1
hsa-miR-1299	1	0	1	1	1	1	PANK1	pantothenate kinase 1
hsa-miR-1299	1	0	1	1	1	1	FAM122A	family with sequence similarity 122A
hsa-miR-1299	0	0	1	1	1	1	NAF1	nuclear assembly factor 1 homolog (S. cerevisiae)
hsa-miR-1299	0	0	1	1	0	0	C12orf57	chromosome 12 open reading frame 57
hsa-miR-1299	1	0	1	1	1	1	GLCCI1	glucocorticoid induced transcript 1
hsa-miR-1299	1	0	1	1	1	1	CD200R1	CD200 receptor 1
hsa-miR-1299	0	0	1	1	0	0	ESAM	endothelial cell adhesion molecule
hsa-miR-1299	0	0	1	1	1	1	ADAMTS17	ADAM metallopeptidase with thrombospondin type 1 motif, 17
hsa-miR-1299	1	0	1	1	1	1	PPTC7	PTC7 protein phosphatase homolog (S. cerevisiae)
hsa-miR-1299	1	0	1	0	1	1	CNOT6L	CCR4-NOT transcription complex, subunit 6-like
hsa-miR-1299	1	0	1	1	1	1	RFTN2	raftlin family member 2
hsa-miR-1299	1	0	1	1	1	1	TMEM182	transmembrane protein 182
hsa-miR-1299	0	0	1	1	1	1	RANBP3L	RAN binding protein 3-like
hsa-miR-1299	1	0	1	1	1	1	YPEL4	yippee-like 4 (Drosophila)
hsa-miR-1299	1	0	1	0	1	1	CENPBD1	CENPB DNA-binding domains containing 1
hsa-miR-1299	1	0	1	1	1	1	FAM84A	family with sequence similarity 84, member A
hsa-miR-1299	0	0	1	1	0	0	CSNK1A1L	casein kinase 1, alpha 1-like
hsa-miR-1299	1	0	1	1	1	1	VTI1A	vesicle transport through interaction with t-SNAREs homolog 1A (yeast)
hsa-miR-1299	1	0	1	1	1	1	CCSAP	centriole, cilia and spindle-associated protein
hsa-miR-1299	0	0	1	1	1	1	APOBEC3F	apolipoprotein B mRNA editing enzyme, catalytic polypeptide-like 3F
hsa-miR-1299	0	0	1	1	0	0	C10orf35	chromosome 10 open reading frame 35
hsa-miR-1299	0	0	1	1	0	0	TMEM217	transmembrane protein 217
hsa-miR-1299	0	0	1	1	1	1	SCARF1	scavenger receptor class F, member 1
hsa-miR-1299	1	0	1	1	1	1	SEPT6	septin 6
hsa-miR-1299	1	0	1	1	1	1	SGMS1	sphingomyelin synthase 1
hsa-miR-1299	1	0	1	1	1	1	FAM110B	family with sequence similarity 110, member B
hsa-miR-1299	1	0	1	1	1	1	CTSC	cathepsin C
hsa-miR-1299	0	0	1	1	1	1	DEFB106A	defensin, beta 106A
hsa-miR-1299	0	0	1	0	1	1	CHKB	choline kinase beta
hsa-miR-1299	1	0	1	1	1	1	UBTD2	ubiquitin domain containing 2
hsa-miR-1299	1	0	1	0	1	1	SYT11	synaptotagmin XI
hsa-miR-1299	0	0	1	0	0	0	ZNF285	zinc finger protein 285
hsa-miR-1299	1	0	1	1	1	1	TBX15	T-box 15
hsa-miR-1299	0	0	1	0	1	1	AFAP1L1	actin filament associated protein 1-like 1
hsa-miR-1299	0	0	1	1	1	1	TMEM199	transmembrane protein 199
hsa-miR-1299	1	0	1	1	1	1	ZNF362	zinc finger protein 362
hsa-miR-1299	0	0	1	1	1	1	ENTHD1	ENTH domain containing 1
hsa-miR-1299	0	0	1	1	1	1	RASEF	RAS and EF-hand domain containing
hsa-miR-1299	1	0	1	1	1	1	CNST	consortin, connexin sorting protein
hsa-miR-1299	1	0	1	0	1	1	DCP2	DCP2 decapping enzyme homolog (S. cerevisiae)
hsa-miR-1299	0	0	1	1	1	1	CCER1	coiled-coil glutamate-rich protein 1
hsa-miR-1299	0	0	1	1	1	1	DAND5	DAN domain family, member 5
hsa-miR-1299	1	0	1	0	1	1	TMEM154	transmembrane protein 154
hsa-miR-1299	1	0	1	1	1	1	SENP5	SUMO1/sentrin specific peptidase 5
hsa-miR-1299	1	0	1	0	1	1	ZBTB9	zinc finger and BTB domain containing 9
[truncated: 149 more rows]
