# Supplementary material for: Profiling of Selected MicroRNAs in Proliferative Eutopic Endometrium of Women with Ovarian Endometriosis
Source: Biomed Res Int. 2015 Aug 20;2015:760698. doi: 10.1155/2015/760698 (PMC4558423; doi:10.1155/2015/760698)
Supplement: Supplementary file 1 — Table I: The names of miRNAs significantly differentially expressed between eutopic endometrium of patients with endometriosis vs eutopic endometrium of patients without endometriosis. Table II: The associations between miRNA and mRNA, which presents detailed results of the search of six major databases i.e targetscan, tarbase, miranda, mirbase, mirtarget2 and pictar. [file 760698.f1.zip › 760698.f1/Table II/hsa-miR-1301.tsv]

miR	targetscan	tarbase	miranda	mirbase	mirtarget2	pictar	GeneSymbol	GeneName
hsa-miR-1301	1	0	1	1	0	0	SRCAP	Snf2-related CREBBP activator protein
hsa-miR-1301	1	0	1	1	1	1	MCF2L	MCF.2 cell line derived transforming sequence-like
hsa-miR-1301	1	0	1	1	1	1	DAAM2	dishevelled associated activator of morphogenesis 2
hsa-miR-1301	1	0	1	0	1	1	PTPRT	protein tyrosine phosphatase, receptor type, T
hsa-miR-1301	1	0	1	1	1	1	SGSM2	small G protein signaling modulator 2
hsa-miR-1301	1	0	1	1	0	0	OTUD3	OTU domain containing 3
hsa-miR-1301	0	0	1	0	1	1	KLHL21	kelch-like 21 (Drosophila)
hsa-miR-1301	0	0	1	1	0	0	ZNF862	zinc finger protein 862
hsa-miR-1301	1	0	1	1	0	0	PCLO	piccolo (presynaptic cytomatrix protein)
hsa-miR-1301	0	0	1	1	0	0	ARHGEF2	Rho/Rac guanine nucleotide exchange factor (GEF) 2
hsa-miR-1301	1	0	1	0	1	1	MAGI2	membrane associated guanylate kinase, WW and PDZ domain containing 2
hsa-miR-1301	1	0	1	0	1	1	SNX13	sorting nexin 13
hsa-miR-1301	0	0	1	1	0	0	ATP10B	ATPase, class V, type 10B
hsa-miR-1301	1	0	1	1	0	0	RIMS2	regulating synaptic membrane exocytosis 2
hsa-miR-1301	1	0	1	0	1	1	RBM12	RNA binding motif protein 12
hsa-miR-1301	1	0	1	1	1	1	DNM3	dynamin 3
hsa-miR-1301	1	0	1	1	1	1	LMO7	LIM domain 7
hsa-miR-1301	1	0	1	1	1	1	UBR5	ubiquitin protein ligase E3 component n-recognin 5
hsa-miR-1301	1	0	1	1	1	1	ARHGEF15	Rho guanine nucleotide exchange factor (GEF) 15
hsa-miR-1301	1	0	1	1	1	1	SEMA4F	sema domain, immunoglobulin domain (Ig), transmembrane domain (TM) and short cytoplasmic domain, (semaphorin) 4F
hsa-miR-1301	1	0	1	1	1	1	CPEB3	cytoplasmic polyadenylation element binding protein 3
hsa-miR-1301	1	0	1	1	1	1	BAHD1	bromo adjacent homology domain containing 1
hsa-miR-1301	1	0	1	1	1	1	CIT	citron (rho-interacting, serine/threonine kinase 21)
hsa-miR-1301	1	0	1	1	1	1	NLGN4Y	neuroligin 4, Y-linked
hsa-miR-1301	1	0	1	1	1	1	C11orf9	chromosome 11 open reading frame 9
hsa-miR-1301	1	0	1	1	0	0	FRMD4B	FERM domain containing 4B
hsa-miR-1301	1	0	1	1	1	1	FOXJ3	forkhead box J3
hsa-miR-1301	1	0	1	1	0	0	KIAA1045	KIAA1045
hsa-miR-1301	0	0	1	1	0	0	USP22	ubiquitin specific peptidase 22
hsa-miR-1301	1	0	1	1	1	1	PRRC2C	proline-rich coiled-coil 2C
hsa-miR-1301	0	0	1	1	0	0	SLC4A9	solute carrier family 4, sodium bicarbonate cotransporter, member 9
hsa-miR-1301	1	0	1	0	1	1	ODZ2	odz, odd Oz/ten-m homolog 2 (Drosophila)
hsa-miR-1301	1	0	1	1	1	1	SPIRE1	spire homolog 1 (Drosophila)
hsa-miR-1301	0	0	1	1	0	0	ZC4H2	zinc finger, C4H2 domain containing
hsa-miR-1301	1	0	1	1	0	0	ATAD2B	ATPase family, AAA domain containing 2B
hsa-miR-1301	1	0	1	1	1	1	MKL2	MKL/myocardin-like 2
hsa-miR-1301	1	0	1	0	1	1	ANKFY1	ankyrin repeat and FYVE domain containing 1
hsa-miR-1301	0	0	1	0	0	0	MTA3	metastasis associated 1 family, member 3
hsa-miR-1301	1	0	1	1	0	0	EBF4	early B-cell factor 4
hsa-miR-1301	1	0	1	0	0	0	PITPNM2	phosphatidylinositol transfer protein, membrane-associated 2
hsa-miR-1301	0	0	1	0	0	0	KRT19P2	keratin 19 pseudogene 2
hsa-miR-1301	0	0	1	0	1	1	ZSWIM6	zinc finger, SWIM-type containing 6
hsa-miR-1301	1	0	1	0	1	1	IGDCC4	immunoglobulin superfamily, DCC subclass, member 4
hsa-miR-1301	1	0	1	1	0	0	MAGI3	membrane associated guanylate kinase, WW and PDZ domain containing 3
hsa-miR-1301	1	0	1	0	0	0	TANC2	tetratricopeptide repeat, ankyrin repeat and coiled-coil containing 2
hsa-miR-1301	0	0	1	0	1	1	SETD5	SET domain containing 5
hsa-miR-1301	1	0	1	0	1	1	RIMS1	regulating synaptic membrane exocytosis 1
hsa-miR-1301	1	0	1	1	1	1	IKZF4	IKAROS family zinc finger 4 (Eos)
hsa-miR-1301	1	0	1	1	1	1	CDK13	cyclin-dependent kinase 13
hsa-miR-1301	1	0	1	1	1	1	LCOR	ligand dependent nuclear receptor corepressor
hsa-miR-1301	1	0	1	1	0	0	ZNF527	zinc finger protein 527
hsa-miR-1301	1	0	1	0	1	1	JPH4	junctophilin 4
hsa-miR-1301	0	0	1	1	0	0	COL27A1	collagen, type XXVII, alpha 1
hsa-miR-1301	1	0	1	1	1	1	SSH3	slingshot homolog 3 (Drosophila)
hsa-miR-1301	1	0	1	1	1	1	SH3TC2	SH3 domain and tetratricopeptide repeats 2
hsa-miR-1301	0	0	1	1	0	0	CIRH1A	cirrhosis, autosomal recessive 1A (cirhin)
hsa-miR-1301	1	0	1	0	0	0	RNF169	ring finger protein 169
hsa-miR-1301	0	0	1	0	1	1	RASSF8	Ras association (RalGDS/AF-6) domain family (N-terminal) member 8
hsa-miR-1301	1	0	1	0	0	0	ZC3H12C	zinc finger CCCH-type containing 12C
hsa-miR-1301	0	0	1	1	1	1	IL7	interleukin 7
hsa-miR-1301	0	0	1	1	0	0	SSPO	SCO-spondin homolog (Bos taurus)
hsa-miR-1301	1	0	1	1	1	1	KCNMA1	potassium large conductance calcium-activated channel, subfamily M, alpha member 1
hsa-miR-1301	1	0	1	1	1	1	SLC43A2	solute carrier family 43, member 2
hsa-miR-1301	0	0	1	1	0	0	ERAP2	endoplasmic reticulum aminopeptidase 2
hsa-miR-1301	1	1	1	1	1	1	BACE1	beta-site APP-cleaving enzyme 1
hsa-miR-1301	0	0	1	0	1	1	ACE2	angiotensin I converting enzyme (peptidyl-dipeptidase A) 2
hsa-miR-1301	1	0	1	1	1	1	ADARB1	adenosine deaminase, RNA-specific, B1
hsa-miR-1301	0	0	1	1	1	1	ING4	inhibitor of growth family, member 4
hsa-miR-1301	1	0	1	1	1	1	LTBP1	latent transforming growth factor beta binding protein 1
hsa-miR-1301	1	0	1	1	1	1	VLDLR	very low density lipoprotein receptor
hsa-miR-1301	1	0	1	1	1	1	BACH2	BTB and CNC homology 1, basic leucine zipper transcription factor 2
hsa-miR-1301	1	0	1	0	1	1	PCDHA13	protocadherin alpha 13
hsa-miR-1301	1	0	1	1	1	1	PCDHA4	protocadherin alpha 4
hsa-miR-1301	1	0	1	1	1	1	PLEKHH3	pleckstrin homology domain containing, family H (with MyTH4 domain) member 3
hsa-miR-1301	1	0	1	1	0	0	ELN	elastin
hsa-miR-1301	1	0	1	1	1	1	PML	promyelocytic leukemia
hsa-miR-1301	1	0	1	1	1	1	NFYC	nuclear transcription factor Y, gamma
hsa-miR-1301	1	0	1	1	1	1	PCCB	propionyl CoA carboxylase, beta polypeptide
hsa-miR-1301	0	0	1	1	1	1	PTK2	PTK2 protein tyrosine kinase 2
hsa-miR-1301	1	0	1	0	1	1	PLAG1	pleiomorphic adenoma gene 1
hsa-miR-1301	1	0	1	1	1	1	RASSF5	Ras association (RalGDS/AF-6) domain family member 5
hsa-miR-1301	1	0	1	1	0	0	CACNB1	calcium channel, voltage-dependent, beta 1 subunit
hsa-miR-1301	1	0	1	1	1	1	DMTF1	cyclin D binding myb-like transcription factor 1
hsa-miR-1301	1	0	1	1	1	1	SATB2	SATB homeobox 2
hsa-miR-1301	1	0	1	0	1	1	CDON	Cdon homolog (mouse)
hsa-miR-1301	1	0	1	1	1	1	SPTB	spectrin, beta, erythrocytic
hsa-miR-1301	1	0	1	1	1	1	ANK1	ankyrin 1, erythrocytic
hsa-miR-1301	0	0	1	1	0	0	IFT27	intraflagellar transport 27 homolog (Chlamydomonas)
hsa-miR-1301	0	0	1	1	1	1	RYR1	ryanodine receptor 1 (skeletal)
hsa-miR-1301	0	0	1	1	1	1	ACO1	aconitase 1, soluble
hsa-miR-1301	0	0	1	1	0	0	IGFBP2	insulin-like growth factor binding protein 2, 36kDa
hsa-miR-1301	0	0	1	1	0	0	EIF4E2	eukaryotic translation initiation factor 4E family member 2
hsa-miR-1301	0	0	1	1	1	1	GPM6B	glycoprotein M6B
hsa-miR-1301	0	0	1	1	0	0	HLA-DMB	major histocompatibility complex, class II, DM beta
hsa-miR-1301	0	0	1	1	0	0	CFLAR	CASP8 and FADD-like apoptosis regulator
hsa-miR-1301	0	0	1	1	1	1	HLA-DQA1	major histocompatibility complex, class II, DQ alpha 1
hsa-miR-1301	1	0	1	1	1	1	EPB41	erythrocyte membrane protein band 4.1 (elliptocytosis 1, RH-linked)
hsa-miR-1301	0	0	1	1	1	1	ALDH3B1	aldehyde dehydrogenase 3 family, member B1
hsa-miR-1301	0	0	1	1	1	1	CHN1	chimerin (chimaerin) 1
hsa-miR-1301	0	0	1	1	1	1	SGSH	N-sulfoglucosamine sulfohydrolase
hsa-miR-1301	1	0	1	1	1	1	MYO9B	myosin IXB
hsa-miR-1301	0	0	1	1	1	1	ACLY	ATP citrate lyase
hsa-miR-1301	1	0	1	1	1	1	SDHC	succinate dehydrogenase complex, subunit C, integral membrane protein, 15kDa
hsa-miR-1301	0	0	1	0	0	0	MIAT	myocardial infarction associated transcript (non-protein coding)
hsa-miR-1301	1	0	1	0	1	1	FYB	FYN binding protein
hsa-miR-1301	1	0	1	0	1	1	MLL2	myeloid/lymphoid or mixed-lineage leukemia 2
hsa-miR-1301	1	0	1	1	1	1	SLC4A4	solute carrier family 4, sodium bicarbonate cotransporter, member 4
hsa-miR-1301	1	0	1	0	1	1	PDE4D	phosphodiesterase 4D, cAMP-specific
hsa-miR-1301	0	0	1	0	0	0	ALOX12P2	arachidonate 12-lipoxygenase pseudogene 2
hsa-miR-1301	0	0	1	1	0	0	SPTBN2	spectrin, beta, non-erythrocytic 2
hsa-miR-1301	0	0	1	1	1	1	SESN1	sestrin 1
hsa-miR-1301	0	0	1	1	1	1	CD84	CD84 molecule
hsa-miR-1301	0	0	1	1	1	1	CYP4F3	cytochrome P450, family 4, subfamily F, polypeptide 3
hsa-miR-1301	1	0	1	1	1	1	SHOC2	soc-2 suppressor of clear homolog (C. elegans)
hsa-miR-1301	1	0	1	1	1	1	MBNL2	muscleblind-like splicing regulator 2
hsa-miR-1301	1	0	1	1	1	1	CTNND1	catenin (cadherin-associated protein), delta 1
hsa-miR-1301	0	0	1	1	1	1	HLA-G	major histocompatibility complex, class I, G
hsa-miR-1301	1	0	1	1	1	1	TP63	tumor protein p63
hsa-miR-1301	1	0	1	1	1	1	ZNF236	zinc finger protein 236
hsa-miR-1301	0	0	1	1	1	1	PCF11	PCF11, cleavage and polyadenylation factor subunit, homolog (S. cerevisiae)
hsa-miR-1301	0	0	1	1	0	0	CARD10	caspase recruitment domain family, member 10
hsa-miR-1301	0	0	1	1	1	1	GNAS	GNAS complex locus
hsa-miR-1301	0	0	1	1	1	1	PCBP4	poly(rC) binding protein 4
hsa-miR-1301	1	0	1	0	1	1	MAP4K4	mitogen-activated protein kinase kinase kinase kinase 4
hsa-miR-1301	1	0	1	1	1	1	GLS	glutaminase
hsa-miR-1301	0	0	1	1	1	1	FHL1	four and a half LIM domains 1
hsa-miR-1301	0	0	1	1	1	1	SH2D1A	SH2 domain containing 1A
hsa-miR-1301	0	0	1	1	0	0	AVPR2	arginine vasopressin receptor 2
hsa-miR-1301	0	0	1	1	1	1	THOC7	THO complex 7 homolog (Drosophila)
hsa-miR-1301	0	0	1	1	0	0	RBM5	RNA binding motif protein 5
hsa-miR-1301	1	0	1	0	1	1	SLC25A37	solute carrier family 25 (mitochondrial iron transporter), member 37
hsa-miR-1301	0	0	1	1	1	1	MAP3K4	mitogen-activated protein kinase kinase kinase 4
hsa-miR-1301	0	0	1	1	1	1	ACIN1	apoptotic chromatin condensation inducer 1
hsa-miR-1301	1	0	1	0	1	1	FAM19A5	family with sequence similarity 19 (chemokine (C-C motif)-like), member A5
hsa-miR-1301	1	0	1	0	1	1	WDR82	WD repeat domain 82
hsa-miR-1301	1	0	1	1	1	1	CAB39	calcium binding protein 39
hsa-miR-1301	0	0	1	1	0	0	ADAMTS7	ADAM metallopeptidase with thrombospondin type 1 motif, 7
hsa-miR-1301	1	0	1	1	1	1	C14orf129	chromosome 14 open reading frame 129
hsa-miR-1301	1	0	1	1	1	1	USP15	ubiquitin specific peptidase 15
hsa-miR-1301	1	0	1	1	1	1	ANKRD13A	ankyrin repeat domain 13A
hsa-miR-1301	0	0	1	1	1	1	NBPF14	neuroblastoma breakpoint family, member 14
hsa-miR-1301	0	0	1	0	1	1	CLDN2	claudin 2
hsa-miR-1301	1	0	1	1	1	1	SNPH	syntaphilin
hsa-miR-1301	0	0	1	0	1	1	SLC38A4	solute carrier family 38, member 4
hsa-miR-1301	0	0	1	1	1	1	CHPT1	choline phosphotransferase 1
hsa-miR-1301	0	0	1	0	0	0	BPESC1	blepharophimosis, epicanthus inversus and ptosis, candidate 1 (non-protein coding)
hsa-miR-1301	1	0	1	1	1	1	NXT2	nuclear transport factor 2-like export factor 2
hsa-miR-1301	0	0	1	1	0	0	MVK	mevalonate kinase
hsa-miR-1301	1	0	1	1	1	1	OGT	O-linked N-acetylglucosamine (GlcNAc) transferase
hsa-miR-1301	0	0	1	1	1	1	MFF	mitochondrial fission factor
hsa-miR-1301	1	0	1	1	0	0	TDRKH	tudor and KH domain containing
hsa-miR-1301	0	0	1	1	0	0	SH2B1	SH2B adaptor protein 1
hsa-miR-1301	1	0	1	1	1	1	DESI2	desumoylating isopeptidase 2
hsa-miR-1301	0	0	1	1	1	1	NKX3-1	NK3 homeobox 1
hsa-miR-1301	0	0	1	1	1	1	FOLH1	folate hydrolase (prostate-specific membrane antigen) 1
hsa-miR-1301	0	0	1	1	0	0	HES6	hairy and enhancer of split 6 (Drosophila)
hsa-miR-1301	1	0	1	1	1	1	RBM47	RNA binding motif protein 47
hsa-miR-1301	1	0	1	1	1	1	ERGIC1	endoplasmic reticulum-golgi intermediate compartment (ERGIC) 1
hsa-miR-1301	0	0	1	1	0	0	BCAT2	branched chain amino-acid transaminase 2, mitochondrial
hsa-miR-1301	1	0	1	1	1	1	TMUB2	transmembrane and ubiquitin-like domain containing 2
hsa-miR-1301	0	0	1	0	0	0	LOC645355	uncharacterized LOC645355
hsa-miR-1301	0	0	1	1	1	1	MED28	mediator complex subunit 28
hsa-miR-1301	0	0	1	1	1	1	TBC1D2	TBC1 domain family, member 2
hsa-miR-1301	1	0	1	1	1	1	CPEB1	cytoplasmic polyadenylation element binding protein 1
hsa-miR-1301	1	0	1	1	1	1	CHST9	carbohydrate (N-acetylgalactosamine 4-0) sulfotransferase 9
hsa-miR-1301	0	0	1	1	0	0	ZAN	zonadhesin
hsa-miR-1301	0	0	1	1	1	1	SEMA6C	sema domain, transmembrane domain (TM), and cytoplasmic domain, (semaphorin) 6C
hsa-miR-1301	1	0	1	1	1	1	DDR1	discoidin domain receptor tyrosine kinase 1
hsa-miR-1301	1	0	1	1	1	1	BBC3	BCL2 binding component 3
hsa-miR-1301	0	0	1	1	0	0	FGFR4	fibroblast growth factor receptor 4
hsa-miR-1301	0	0	1	0	0	0	C17orf109	chromosome 17 open reading frame 109
hsa-miR-1301	0	0	1	0	0	0	NBPF10	neuroblastoma breakpoint family, member 10
hsa-miR-1301	0	0	1	1	1	1	WBP2NL	WBP2 N-terminal like
hsa-miR-1301	1	0	1	1	1	1	NTRK2	neurotrophic tyrosine kinase, receptor, type 2
hsa-miR-1301	0	0	1	0	0	0	MYO15B	myosin XVB pseudogene
hsa-miR-1301	0	0	1	0	1	1	NBPF15	neuroblastoma breakpoint family, member 15
hsa-miR-1301	1	0	1	1	1	1	ST3GAL3	ST3 beta-galactoside alpha-2,3-sialyltransferase 3
hsa-miR-1301	1	0	1	1	1	1	STX16	syntaxin 16
hsa-miR-1301	1	0	1	1	0	0	SEPT8	septin 8
hsa-miR-1301	1	0	1	1	0	0	FOXP2	forkhead box P2
hsa-miR-1301	1	0	1	1	1	1	WAPAL	wings apart-like homolog (Drosophila)
hsa-miR-1301	0	0	1	1	0	0	HOPX	HOP homeobox
hsa-miR-1301	1	0	1	0	1	1	NUDCD1	NudC domain containing 1
hsa-miR-1301	0	0	1	1	1	1	R3HCC1L	R3H domain and coiled-coil containing 1-like
hsa-miR-1301	0	0	1	1	1	1	PTK7	PTK7 protein tyrosine kinase 7
hsa-miR-1301	1	0	1	1	0	0	BRSK2	BR serine/threonine kinase 2
hsa-miR-1301	0	0	1	1	1	1	ZNF638	zinc finger protein 638
hsa-miR-1301	1	0	1	0	1	1	IL1RAP	interleukin 1 receptor accessory protein
hsa-miR-1301	0	0	1	1	1	1	GLRX3	glutaredoxin 3
hsa-miR-1301	0	0	1	1	1	1	HIRIP3	HIRA interacting protein 3
hsa-miR-1301	0	0	1	1	0	0	SERGEF	secretion regulating guanine nucleotide exchange factor
hsa-miR-1301	1	0	1	1	1	1	SUCO	SUN domain containing ossification factor
hsa-miR-1301	1	0	1	1	1	1	CACNA2D2	calcium channel, voltage-dependent, alpha 2/delta subunit 2
hsa-miR-1301	1	0	1	1	1	1	ILF3	interleukin enhancer binding factor 3, 90kDa
hsa-miR-1301	0	0	1	0	0	0	CACNA2D3	calcium channel, voltage-dependent, alpha 2/delta subunit 3
hsa-miR-1301	0	0	1	1	1	1	CD1E	CD1e molecule
hsa-miR-1301	0	0	1	1	1	1	STK33	serine/threonine kinase 33
hsa-miR-1301	0	0	1	0	0	0	CD177	CD177 molecule
hsa-miR-1301	0	0	1	1	1	1	RNASE7	ribonuclease, RNase A family, 7
hsa-miR-1301	1	0	1	1	1	1	PALM2	paralemmin 2
hsa-miR-1301	1	0	1	1	1	1	NRXN3	neurexin 3
hsa-miR-1301	0	0	1	0	1	1	SRPK1	SRSF protein kinase 1
hsa-miR-1301	1	0	1	1	1	1	PDE1B	phosphodiesterase 1B, calmodulin-dependent
hsa-miR-1301	0	0	1	0	0	0	TOMM6	translocase of outer mitochondrial membrane 6 homolog (yeast)
hsa-miR-1301	1	0	1	1	1	1	PNISR	PNN-interacting serine/arginine-rich protein
hsa-miR-1301	0	0	1	1	1	1	ZNF248	zinc finger protein 248
hsa-miR-1301	0	0	1	1	0	0	SIRT2	sirtuin 2
hsa-miR-1301	0	0	1	1	0	0	MBD1	methyl-CpG binding domain protein 1
hsa-miR-1301	1	0	1	1	1	1	ARL4C	ADP-ribosylation factor-like 4C
hsa-miR-1301	0	0	1	1	1	1	PHACTR3	phosphatase and actin regulator 3
hsa-miR-1301	1	0	1	1	1	1	SYNM	synemin, intermediate filament protein
hsa-miR-1301	1	0	1	1	1	1	PPP1R9A	protein phosphatase 1, regulatory subunit 9A
hsa-miR-1301	1	0	1	1	0	0	TRPM4	transient receptor potential cation channel, subfamily M, member 4
hsa-miR-1301	0	0	1	1	0	0	GPRC5C	G protein-coupled receptor, family C, group 5, member C
hsa-miR-1301	1	0	1	1	1	1	AKAP2	A kinase (PRKA) anchor protein 2
hsa-miR-1301	0	0	1	1	1	1	PARP16	poly (ADP-ribose) polymerase family, member 16
hsa-miR-1301	0	0	1	1	1	1	UBE2Q2	ubiquitin-conjugating enzyme E2Q family member 2
hsa-miR-1301	1	0	1	1	1	1	ZC3H7A	zinc finger CCCH-type containing 7A
hsa-miR-1301	0	0	1	1	0	0	ZCWPW1	zinc finger, CW type with PWWP domain 1
hsa-miR-1301	1	0	1	1	0	0	SENP3	SUMO1/sentrin/SMT3 specific peptidase 3
hsa-miR-1301	0	0	1	0	1	1	EBF2	early B-cell factor 2
hsa-miR-1301	1	0	1	1	1	1	CADM3	cell adhesion molecule 3
hsa-miR-1301	1	0	1	1	1	1	EIF2C1	eukaryotic translation initiation factor 2C, 1
hsa-miR-1301	1	0	1	1	1	1	ARMC8	armadillo repeat containing 8
hsa-miR-1301	1	0	1	1	1	1	WDTC1	WD and tetratricopeptide repeats 1
hsa-miR-1301	0	0	1	1	1	1	CXXC5	CXXC finger protein 5
hsa-miR-1301	1	0	1	1	0	0	SMUG1	single-strand-selective monofunctional uracil-DNA glycosylase 1
hsa-miR-1301	0	0	1	1	1	1	RSRC2	arginine/serine-rich coiled-coil 2
hsa-miR-1301	1	0	1	1	1	1	MKLN1	muskelin 1, intracellular mediator containing kelch motifs
hsa-miR-1301	0	0	1	0	0	0	FLJ11235	uncharacterized FLJ11235
hsa-miR-1301	1	0	1	1	0	0	SLC35C1	solute carrier family 35, member C1
hsa-miR-1301	0	0	1	1	0	0	C17orf53	chromosome 17 open reading frame 53
hsa-miR-1301	0	0	1	1	0	0	TMC6	transmembrane channel-like 6
hsa-miR-1301	0	0	1	1	0	0	ADCK4	aarF domain containing kinase 4
hsa-miR-1301	0	0	1	1	1	1	RBM15	RNA binding motif protein 15
hsa-miR-1301	0	0	1	0	0	0	DUXAP10	double homeobox A pseudogene 10
hsa-miR-1301	1	0	1	1	1	1	SMEK2	SMEK homolog 2, suppressor of mek1 (Dictyostelium)
hsa-miR-1301	0	0	1	1	1	1	C14orf118	chromosome 14 open reading frame 118
hsa-miR-1301	0	0	1	1	1	1	CLEC4M	C-type lectin domain family 4, member M
hsa-miR-1301	1	0	1	1	1	1	BAZ2A	bromodomain adjacent to zinc finger domain, 2A
hsa-miR-1301	1	0	1	0	1	1	C14orf101	chromosome 14 open reading frame 101
hsa-miR-1301	0	0	1	1	1	1	NSUN7	NOP2/Sun domain family, member 7
hsa-miR-1301	1	0	1	1	0	0	MEX3A	mex-3 homolog A (C. elegans)
hsa-miR-1301	0	0	1	1	1	1	CXorf57	chromosome X open reading frame 57
hsa-miR-1301	0	0	1	1	1	1	METTL7A	methyltransferase like 7A
hsa-miR-1301	0	0	1	1	1	1	SIGLEC1	sialic acid binding Ig-like lectin 1, sialoadhesin
hsa-miR-1301	0	0	1	1	1	1	MUC12	mucin 12, cell surface associated
hsa-miR-1301	1	0	1	1	1	1	DYRK2	dual-specificity tyrosine-(Y)-phosphorylation regulated kinase 2
hsa-miR-1301	1	0	1	0	1	1	ATP2B1	ATPase, Ca++ transporting, plasma membrane 1
hsa-miR-1301	0	0	1	1	0	0	UBR4	ubiquitin protein ligase E3 component n-recognin 4
hsa-miR-1301	0	0	1	1	1	1	PPFIBP2	PTPRF interacting protein, binding protein 2 (liprin beta 2)
hsa-miR-1301	0	0	1	0	1	1	ATXN1L	ataxin 1-like
hsa-miR-1301	0	0	1	1	1	1	CC2D2A	coiled-coil and C2 domain containing 2A
hsa-miR-1301	1	0	1	1	1	1	DLC1	deleted in liver cancer 1
hsa-miR-1301	1	0	1	1	1	1	ARFGEF1	ADP-ribosylation factor guanine nucleotide-exchange factor 1 (brefeldin A-inhibited)
hsa-miR-1301	1	0	1	0	1	1	ZCCHC3	zinc finger, CCHC domain containing 3
hsa-miR-1301	0	0	1	0	1	1	HEMK1	HemK methyltransferase family member 1
hsa-miR-1301	1	0	1	0	0	0	DTX2	deltex homolog 2 (Drosophila)
hsa-miR-1301	0	0	1	1	0	0	EWSR1	Ewing sarcoma breakpoint region 1
hsa-miR-1301	0	0	1	1	0	0	NUDT7	nudix (nucleoside diphosphate linked moiety X)-type motif 7
hsa-miR-1301	0	0	1	1	0	0	EXOC6B	exocyst complex component 6B
hsa-miR-1301	0	0	1	1	1	1	USP48	ubiquitin specific peptidase 48
hsa-miR-1301	0	0	1	1	1	1	PLEKHS1	pleckstrin homology domain containing, family S member 1
hsa-miR-1301	0	0	1	1	1	1	GPBP1L1	GC-rich promoter binding protein 1-like 1
hsa-miR-1301	0	0	1	0	0	0	A1BG-AS1	A1BG antisense RNA 1
hsa-miR-1301	1	0	1	1	1	1	FOXP1	forkhead box P1
hsa-miR-1301	0	0	1	1	0	0	CCDC142	coiled-coil domain containing 142
hsa-miR-1301	1	0	1	0	1	1	ATP10D	ATPase, class V, type 10D
hsa-miR-1301	1	0	1	1	1	1	SLC38A1	solute carrier family 38, member 1
hsa-miR-1301	1	0	1	1	1	1	GPD2	glycerol-3-phosphate dehydrogenase 2 (mitochondrial)
hsa-miR-1301	0	0	1	1	1	1	SNAP47	synaptosomal-associated protein, 47kDa
hsa-miR-1301	0	0	1	1	0	0	IMPDH1	IMP (inosine 5'-monophosphate) dehydrogenase 1
hsa-miR-1301	0	0	1	0	0	0	KIAA0664L3	KIAA0664-like 3
hsa-miR-1301	0	0	1	1	1	1	PRR5L	proline rich 5 like
hsa-miR-1301	0	0	1	0	0	0	FLJ30838	uncharacterized LOC400955
hsa-miR-1301	0	0	1	0	0	0	SNHG11	small nucleolar RNA host gene 11 (non-protein coding)
hsa-miR-1301	0	0	1	1	1	1	CCND3	cyclin D3
hsa-miR-1301	1	0	1	1	1	1	FRMD6	FERM domain containing 6
hsa-miR-1301	0	0	1	0	0	0	LOC219688	uncharacterized LOC219688
hsa-miR-1301	1	0	1	1	1	1	DIXDC1	DIX domain containing 1
hsa-miR-1301	1	0	1	0	1	1	RAB1A	RAB1A, member RAS oncogene family
hsa-miR-1301	1	0	1	1	0	0	MEPCE	methylphosphate capping enzyme
hsa-miR-1301	1	0	1	0	1	1	RNF165	ring finger protein 165
hsa-miR-1301	1	0	1	0	1	1	PTPRE	protein tyrosine phosphatase, receptor type, E
hsa-miR-1301	0	0	1	1	1	1	MSTO1	misato homolog 1 (Drosophila)
hsa-miR-1301	0	0	1	1	0	0	BEAN1	brain expressed, associated with NEDD4, 1
hsa-miR-1301	0	0	1	0	0	0	BTBD19	BTB (POZ) domain containing 19
hsa-miR-1301	0	0	1	0	0	0	SEC14L2	SEC14-like 2 (S. cerevisiae)
hsa-miR-1301	0	0	1	0	0	0	JPX	JPX transcript, XIST activator (non-protein coding)
hsa-miR-1301	1	0	1	1	1	1	LMNA	lamin A/C
hsa-miR-1301	1	0	1	0	1	1	FSTL4	follistatin-like 4
hsa-miR-1301	1	0	1	1	1	1	SCAMP5	secretory carrier membrane protein 5
hsa-miR-1301	0	0	1	0	0	0	LOC284600	uncharacterized LOC284600
hsa-miR-1301	0	0	1	1	1	1	BRD2	bromodomain containing 2
hsa-miR-1301	0	0	1	1	0	0	ZNF185	zinc finger protein 185 (LIM domain)
hsa-miR-1301	1	0	1	1	1	1	APLP2	amyloid beta (A4) precursor-like protein 2
hsa-miR-1301	0	0	1	1	0	0	RELT	RELT tumor necrosis factor receptor
hsa-miR-1301	0	0	1	1	0	0	RGL3	ral guanine nucleotide dissociation stimulator-like 3
hsa-miR-1301	1	0	1	1	1	1	TLE4	transducin-like enhancer of split 4 (E(sp1) homolog, Drosophila)
hsa-miR-1301	0	0	1	1	1	1	VWA3B	von Willebrand factor A domain containing 3B
hsa-miR-1301	0	0	1	1	1	1	C14orf79	chromosome 14 open reading frame 79
hsa-miR-1301	1	0	1	1	1	1	MAP3K11	mitogen-activated protein kinase kinase kinase 11
hsa-miR-1301	1	0	1	1	0	0	ZBTB37	zinc finger and BTB domain containing 37
hsa-miR-1301	0	0	1	0	0	0	LOC100125918	uncharacterized LOC100125918
hsa-miR-1301	0	0	1	1	1	1	RANBP17	RAN binding protein 17
hsa-miR-1301	1	0	1	1	1	1	SEC22A	SEC22 vesicle trafficking protein homolog A (S. cerevisiae)
hsa-miR-1301	1	0	1	1	0	0	GBA2	glucosidase, beta (bile acid) 2
hsa-miR-1301	0	0	1	1	0	0	PTOV1	prostate tumor overexpressed 1
hsa-miR-1301	1	0	1	1	1	1	IST1	increased sodium tolerance 1 homolog (yeast)
hsa-miR-1301	0	0	1	0	0	0	LINC00637	long intergenic non-protein coding RNA 637
hsa-miR-1301	0	0	1	1	1	1	GSG1	germ cell associated 1
hsa-miR-1301	0	0	1	1	0	0	PRSS54	protease, serine, 54
hsa-miR-1301	1	0	1	1	1	1	C6orf89	chromosome 6 open reading frame 89
hsa-miR-1301	0	0	1	1	0	0	CD37	CD37 molecule
hsa-miR-1301	0	0	1	1	0	0	TRIM41	tripartite motif containing 41
hsa-miR-1301	0	0	1	1	0	0	SYTL1	synaptotagmin-like 1
hsa-miR-1301	0	0	1	0	1	1	CDHR3	cadherin-related family member 3
hsa-miR-1301	1	0	1	1	1	1	BLCAP	bladder cancer associated protein
hsa-miR-1301	0	0	1	0	0	0	SDHAP2	succinate dehydrogenase complex, subunit A, flavoprotein pseudogene 2
hsa-miR-1301	1	0	1	1	1	1	SIRT1	sirtuin 1
hsa-miR-1301	0	0	1	1	0	0	NISCH	nischarin
hsa-miR-1301	1	0	1	1	0	0	B3GAT3	beta-1,3-glucuronyltransferase 3 (glucuronosyltransferase I)
hsa-miR-1301	0	0	1	1	1	1	TOR2A	torsin family 2, member A
hsa-miR-1301	0	0	1	1	0	0	PIGO	phosphatidylinositol glycan anchor biosynthesis, class O
hsa-miR-1301	1	0	1	1	1	1	BOC	Boc homolog (mouse)
hsa-miR-1301	0	0	1	0	1	1	TMSB15B	thymosin beta 15B
hsa-miR-1301	0	0	1	1	0	0	CTNNBL1	catenin, beta like 1
hsa-miR-1301	1	0	1	1	1	1	ARIH2	ariadne homolog 2 (Drosophila)
hsa-miR-1301	1	0	1	1	1	1	SYN2	synapsin II
hsa-miR-1301	0	0	1	1	1	1	DYNC1I1	dynein, cytoplasmic 1, intermediate chain 1
hsa-miR-1301	1	0	1	1	1	1	EGR2	early growth response 2
hsa-miR-1301	0	0	1	0	0	0	LOC440910	uncharacterized LOC440910
hsa-miR-1301	1	0	1	1	1	1	FBXW2	F-box and WD repeat domain containing 2
hsa-miR-1301	1	0	1	1	1	1	TSN	translin
hsa-miR-1301	1	0	1	0	1	1	TEF	thyrotrophic embryonic factor
hsa-miR-1301	0	0	1	1	1	1	PTGR1	prostaglandin reductase 1
hsa-miR-1301	1	0	1	1	1	1	LUC7L2	LUC7-like 2 (S. cerevisiae)
hsa-miR-1301	1	0	1	1	1	1	GNG2	guanine nucleotide binding protein (G protein), gamma 2
hsa-miR-1301	1	0	1	1	0	0	PRMT8	protein arginine methyltransferase 8
hsa-miR-1301	0	0	1	1	0	0	EIF3B	eukaryotic translation initiation factor 3, subunit B
hsa-miR-1301	0	0	1	0	0	0	CXXC1P1	CXXC finger protein 1 pseudogene 1
hsa-miR-1301	1	0	1	1	1	1	BANP	BTG3 associated nuclear protein
hsa-miR-1301	0	0	1	1	0	0	WBP1	WW domain binding protein 1
hsa-miR-1301	1	0	1	0	1	1	KIAA1456	KIAA1456
hsa-miR-1301	0	0	1	1	1	1	SLC9A3R1	solute carrier family 9, subfamily A (NHE3, cation proton antiporter 3), member 3 regulator 1
hsa-miR-1301	1	0	1	1	1	1	RNF121	ring finger protein 121
hsa-miR-1301	1	0	1	1	1	1	SIAH1	siah E3 ubiquitin protein ligase 1
hsa-miR-1301	1	0	1	0	1	1	GATAD2B	GATA zinc finger domain containing 2B
hsa-miR-1301	0	0	1	0	0	0	LINC00340	long intergenic non-protein coding RNA 340
hsa-miR-1301	0	0	1	1	1	1	METTL13	methyltransferase like 13
hsa-miR-1301	0	0	1	0	1	1	AGBL4	ATP/GTP binding protein-like 4
hsa-miR-1301	0	0	1	1	1	1	SPAG16	sperm associated antigen 16
hsa-miR-1301	0	0	1	1	0	0	HPN	hepsin
hsa-miR-1301	1	0	1	1	1	1	NDEL1	nudE nuclear distribution E homolog (A. nidulans)-like 1
hsa-miR-1301	0	0	1	1	1	1	MOBP	myelin-associated oligodendrocyte basic protein
hsa-miR-1301	0	0	1	1	1	1	CHRM5	cholinergic receptor, muscarinic 5
hsa-miR-1301	1	0	1	1	1	1	CTNNB1	catenin (cadherin-associated protein), beta 1, 88kDa
hsa-miR-1301	1	0	1	1	1	1	EPHB1	EPH receptor B1
hsa-miR-1301	0	0	1	0	0	0	LOC730101	uncharacterized LOC730101
hsa-miR-1301	0	0	1	1	1	1	AQP3	aquaporin 3 (Gill blood group)
hsa-miR-1301	1	0	1	0	1	1	UBXN4	UBX domain protein 4
hsa-miR-1301	0	0	1	1	1	1	SIRPB2	signal-regulatory protein beta 2
hsa-miR-1301	1	0	1	1	1	1	KCNIP3	Kv channel interacting protein 3, calsenilin
hsa-miR-1301	0	0	1	0	1	1	NBPF3	neuroblastoma breakpoint family, member 3
hsa-miR-1301	0	0	1	0	0	0	LOC284577	uncharacterized LOC284577
hsa-miR-1301	0	0	1	1	1	1	CDK5RAP1	CDK5 regulatory subunit associated protein 1
hsa-miR-1301	0	0	1	1	1	1	LOC284023	uncharacterized LOC284023
hsa-miR-1301	0	0	1	1	1	1	P4HB	prolyl 4-hydroxylase, beta polypeptide
hsa-miR-1301	0	0	1	1	0	0	MXRA8	matrix-remodelling associated 8
hsa-miR-1301	0	0	1	1	1	1	VDAC1	voltage-dependent anion channel 1
hsa-miR-1301	0	0	1	1	1	1	BAG1	BCL2-associated athanogene
hsa-miR-1301	0	0	1	0	0	0	FAM92A1	family with sequence similarity 92, member A1
hsa-miR-1301	0	0	1	1	1	1	C8orf46	chromosome 8 open reading frame 46
hsa-miR-1301	1	0	1	1	1	1	TCEANC2	transcription elongation factor A (SII) N-terminal and central domain containing 2
hsa-miR-1301	1	0	1	0	1	1	KIAA1737	KIAA1737
hsa-miR-1301	0	0	1	0	0	0	LOC285505	uncharacterized LOC285505
hsa-miR-1301	0	0	1	1	1	1	RNASEH1	ribonuclease H1
hsa-miR-1301	0	0	1	1	1	1	GBAS	glioblastoma amplified sequence
hsa-miR-1301	0	0	1	0	0	0	LOC401463	uncharacterized LOC401463
hsa-miR-1301	0	0	1	1	1	1	CORO7	coronin 7
hsa-miR-1301	1	0	1	1	1	1	RAB11FIP4	RAB11 family interacting protein 4 (class II)
hsa-miR-1301	0	0	1	0	0	0	DNAJB8-AS1	DNAJB8 antisense RNA 1
hsa-miR-1301	0	0	1	1	0	0	KLHDC3	kelch domain containing 3
hsa-miR-1301	1	0	1	1	1	1	HOOK1	hook homolog 1 (Drosophila)
hsa-miR-1301	0	0	1	1	1	1	LRRC49	leucine rich repeat containing 49
hsa-miR-1301	0	0	1	1	0	0	CORO1A	coronin, actin binding protein, 1A
hsa-miR-1301	0	0	1	0	0	0	CECR7	cat eye syndrome chromosome region, candidate 7 (non-protein coding)
hsa-miR-1301	1	0	1	1	1	1	ZCCHC2	zinc finger, CCHC domain containing 2
hsa-miR-1301	0	0	1	1	1	1	RGS14	regulator of G-protein signaling 14
hsa-miR-1301	0	0	1	1	0	0	TMEM150A	transmembrane protein 150A
hsa-miR-1301	0	0	1	1	1	1	ANKZF1	ankyrin repeat and zinc finger domain containing 1
hsa-miR-1301	0	0	1	1	1	1	ARFGAP2	ADP-ribosylation factor GTPase activating protein 2
hsa-miR-1301	0	0	1	0	1	1	LOC155060	AI894139 pseudogene
hsa-miR-1301	0	0	1	1	1	1	GRPEL1	GrpE-like 1, mitochondrial (E. coli)
hsa-miR-1301	1	0	1	1	1	1	SLC39A13	solute carrier family 39 (zinc transporter), member 13
hsa-miR-1301	0	0	1	0	0	0	LOC338579	ankyrin repeat domain-containing protein 30B pseudogene
hsa-miR-1301	1	0	1	1	1	1	NDFIP2	Nedd4 family interacting protein 2
hsa-miR-1301	0	0	1	1	1	1	C1orf114	chromosome 1 open reading frame 114
hsa-miR-1301	0	0	1	1	0	0	ZFYVE19	zinc finger, FYVE domain containing 19
hsa-miR-1301	0	0	1	1	0	0	KIAA0146	KIAA0146
hsa-miR-1301	1	0	1	1	0	0	CACNB3	calcium channel, voltage-dependent, beta 3 subunit
hsa-miR-1301	0	0	1	1	0	0	CFP	complement factor properdin
hsa-miR-1301	0	0	1	1	0	0	MARS	methionyl-tRNA synthetase
hsa-miR-1301	0	0	1	1	1	1	ZNF546	zinc finger protein 546
hsa-miR-1301	0	0	1	1	1	1	GFI1	growth factor independent 1 transcription repressor
hsa-miR-1301	0	0	1	1	1	1	FRMPD2	FERM and PDZ domain containing 2
hsa-miR-1301	0	0	1	0	1	1	PATE4	prostate and testis expressed 4
hsa-miR-1301	1	0	1	1	1	1	FGD5	FYVE, RhoGEF and PH domain containing 5
hsa-miR-1301	1	0	1	1	1	1	KALRN	kalirin, RhoGEF kinase
hsa-miR-1301	0	0	1	0	0	0	LGALS17A	Charcot-Leyden crystal protein pseudogene
hsa-miR-1301	0	0	1	0	0	0	LOC650368	asparagine-linked glycosylation 1-like pseudogene
hsa-miR-1301	1	0	1	1	1	1	IPPK	inositol 1,3,4,5,6-pentakisphosphate 2-kinase
hsa-miR-1301	1	0	1	1	1	1	EPAS1	endothelial PAS domain protein 1
hsa-miR-1301	0	0	1	0	0	0	LOC100133029	sirtuin 5 pseudogene
hsa-miR-1301	1	0	1	1	1	1	PRDM2	PR domain containing 2, with ZNF domain
hsa-miR-1301	0	0	1	1	1	1	SLC9A1	solute carrier family 9, subfamily A (NHE1, cation proton antiporter 1), member 1
hsa-miR-1301	0	0	1	1	0	0	NMI	N-myc (and STAT) interactor
hsa-miR-1301	0	0	1	1	0	0	NPIP	nuclear pore complex interacting protein
hsa-miR-1301	0	0	1	1	1	1	C2orf91	chromosome 2 open reading frame 91
hsa-miR-1301	1	0	1	1	1	1	C17orf85	chromosome 17 open reading frame 85
hsa-miR-1301	1	0	1	1	1	1	C11orf30	chromosome 11 open reading frame 30
hsa-miR-1301	1	0	1	1	1	1	ATXN7	ataxin 7
hsa-miR-1301	1	0	1	1	0	0	GXYLT1	glucoside xylosyltransferase 1
hsa-miR-1301	0	0	1	1	0	0	LOC442075	uncharacterized LOC442075
hsa-miR-1301	0	0	1	0	0	0	LOC613266	uncharacterized LOC613266
hsa-miR-1301	0	0	1	1	0	0	LOC100131132	uncharacterized LOC100131132
hsa-miR-1301	0	0	1	0	1	1	C17orf105	chromosome 17 open reading frame 105
hsa-miR-1301	1	0	1	1	1	1	MACROD2	MACRO domain containing 2
hsa-miR-1301	1	0	1	1	0	0	UBN2	ubinuclein 2
hsa-miR-1301	0	0	1	1	1	1	MYOM3	myomesin family, member 3
hsa-miR-1301	0	0	1	1	1	1	EPPIN	epididymal peptidase inhibitor
hsa-miR-1301	0	0	1	1	0	0	FSIP2	fibrous sheath interacting protein 2
hsa-miR-1301	1	0	1	1	0	0	ATXN7L3	ataxin 7-like 3
hsa-miR-1301	1	0	1	1	1	1	IL16	interleukin 16
hsa-miR-1301	1	0	1	1	1	1	PIK3R1	phosphoinositide-3-kinase, regulatory subunit 1 (alpha)
hsa-miR-1301	0	0	1	1	0	0	HSPG2	heparan sulfate proteoglycan 2
hsa-miR-1301	1	0	1	1	1	1	NCAN	neurocan
hsa-miR-1301	0	0	1	1	0	0	SPATS1	spermatogenesis associated, serine-rich 1
hsa-miR-1301	0	0	1	1	1	1	BDH1	3-hydroxybutyrate dehydrogenase, type 1
hsa-miR-1301	0	0	1	0	0	0	PLEKHD1	pleckstrin homology domain containing, family D (with coiled-coil domains) member 1
hsa-miR-1301	1	0	1	1	1	1	DLG2	discs, large homolog 2 (Drosophila)
hsa-miR-1301	0	0	1	1	1	1	SZT2	seizure threshold 2 homolog (mouse)
hsa-miR-1301	1	0	1	1	1	1	CLIP1	CAP-GLY domain containing linker protein 1
hsa-miR-1301	0	0	1	0	0	0	RPL23AP53	ribosomal protein L23a pseudogene 53
hsa-miR-1301	1	0	1	1	1	1	TSHZ1	teashirt zinc finger homeobox 1
hsa-miR-1301	1	0	1	1	0	0	ADAMTSL2	ADAMTS-like 2
hsa-miR-1301	0	0	1	0	1	1	NPHP4	nephronophthisis 4
hsa-miR-1301	0	0	1	0	0	0	GRAMD1B	GRAM domain containing 1B
hsa-miR-1301	1	0	1	0	1	1	YAF2	YY1 associated factor 2
hsa-miR-1301	1	0	1	1	1	1	PLA2G15	phospholipase A2, group XV
hsa-miR-1301	1	0	1	0	1	1	CAPRIN1	cell cycle associated protein 1
hsa-miR-1301	0	0	1	1	0	0	C1orf86	chromosome 1 open reading frame 86
hsa-miR-1301	0	0	1	0	0	0	SHISA6	shisa homolog 6 (Xenopus laevis)
hsa-miR-1301	0	0	1	1	0	0	TRIM46	tripartite motif containing 46
hsa-miR-1301	0	0	1	1	0	0	MIB2	mindbomb E3 ubiquitin protein ligase 2
hsa-miR-1301	1	0	1	1	1	1	WDR37	WD repeat domain 37
hsa-miR-1301	0	0	1	0	0	0	FLJ46361	deleted in malignant brain tumors 1 pseudogene
hsa-miR-1301	0	0	1	1	0	0	FAM159A	family with sequence similarity 159, member A
hsa-miR-1301	1	0	1	1	1	1	KCTD12	potassium channel tetramerisation domain containing 12
hsa-miR-1301	1	0	1	1	1	1	FRYL	FRY-like
hsa-miR-1301	1	0	1	1	1	1	SH3D19	SH3 domain containing 19
hsa-miR-1301	0	0	1	0	0	0	EMBP1	embigin pseudogene 1
hsa-miR-1301	1	0	1	1	1	1	ADAMTSL1	ADAMTS-like 1
hsa-miR-1301	1	0	1	1	1	1	ADAMTS19	ADAM metallopeptidase with thrombospondin type 1 motif, 19
hsa-miR-1301	1	0	1	1	1	1	RBM24	RNA binding motif protein 24
hsa-miR-1301	0	0	1	0	0	0	LOC494141	mitochondrial carrier triple repeat 1 pseudogene
hsa-miR-1301	1	0	1	0	1	1	ESRRG	estrogen-related receptor gamma
hsa-miR-1301	0	0	1	0	1	1	RUFY4	RUN and FYVE domain containing 4
hsa-miR-1301	0	0	1	1	0	0	ISOC2	isochorismatase domain containing 2
hsa-miR-1301	1	0	1	0	1	1	STK3	serine/threonine kinase 3
hsa-miR-1301	1	0	1	1	1	1	RABGAP1	RAB GTPase activating protein 1
hsa-miR-1301	0	0	1	1	1	1	ZNF346	zinc finger protein 346
hsa-miR-1301	1	0	1	0	1	1	ZNF607	zinc finger protein 607
hsa-miR-1301	0	0	1	1	1	1	NR4A1	nuclear receptor subfamily 4, group A, member 1
hsa-miR-1301	0	0	1	0	1	1	ATP6V0E2	ATPase, H+ transporting V0 subunit e2
hsa-miR-1301	1	0	1	1	1	1	CTSA	cathepsin A
hsa-miR-1301	0	0	1	1	1	1	KAZALD1	Kazal-type serine peptidase inhibitor domain 1
hsa-miR-1301	1	0	1	1	1	1	TAP2	transporter 2, ATP-binding cassette, sub-family B (MDR/TAP)
hsa-miR-1301	0	0	1	1	1	1	ARID1A	AT rich interactive domain 1A (SWI-like)
hsa-miR-1301	0	0	1	0	1	1	PEX5	peroxisomal biogenesis factor 5
hsa-miR-1301	1	0	1	1	1	1	MEAF6	MYST/Esa1-associated factor 6
hsa-miR-1301	0	0	1	1	1	1	PDSS2	prenyl (decaprenyl) diphosphate synthase, subunit 2
hsa-miR-1301	1	0	1	0	1	1	MAP3K3	mitogen-activated protein kinase kinase kinase 3
hsa-miR-1301	1	0	1	1	1	1	ZNF655	zinc finger protein 655
hsa-miR-1301	0	0	1	1	0	0	TRIM69	tripartite motif containing 69
hsa-miR-1301	1	0	1	1	0	0	PRRC2B	proline-rich coiled-coil 2B
hsa-miR-1301	1	0	1	1	1	1	NPAS3	neuronal PAS domain protein 3
hsa-miR-1301	0	0	1	0	0	0	ANKRD34C	ankyrin repeat domain 34C
hsa-miR-1301	0	0	1	0	0	0	POM121L9P	POM121 transmembrane nucleoporin-like 9, pseudogene
hsa-miR-1301	0	0	1	1	0	0	TBC1D10B	TBC1 domain family, member 10B
hsa-miR-1301	0	0	1	1	1	1	ARIH1	ariadne homolog, ubiquitin-conjugating enzyme E2 binding protein, 1 (Drosophila)
hsa-miR-1301	0	0	1	1	0	0	MSH5	mutS homolog 5 (E. coli)
hsa-miR-1301	0	0	1	1	0	0	SAPCD1	suppressor APC domain containing 1
hsa-miR-1301	0	0	1	0	0	0	TPTE2P6	transmembrane phosphoinositide 3-phosphatase and tensin homolog 2 pseudogene 6
hsa-miR-1301	0	0	1	1	1	1	GFAP	glial fibrillary acidic protein
hsa-miR-1301	0	0	1	1	0	0	H2AFJ	H2A histone family, member J
hsa-miR-1301	0	0	1	0	0	0	KIAA0913	KIAA0913
hsa-miR-1301	1	0	1	1	1	1	FAM107B	family with sequence similarity 107, member B
hsa-miR-1301	1	0	1	0	1	1	DNAJC5	DnaJ (Hsp40) homolog, subfamily C, member 5
hsa-miR-1301	1	0	1	1	1	1	NBEA	neurobeachin
hsa-miR-1301	1	0	1	1	1	1	KIAA1033	KIAA1033
hsa-miR-1301	1	0	1	1	1	1	CTTNBP2NL	CTTNBP2 N-terminal like
hsa-miR-1301	0	0	1	0	0	0	FAM66D	family with sequence similarity 66, member D
hsa-miR-1301	0	0	1	1	1	1	IDH3A	isocitrate dehydrogenase 3 (NAD+) alpha
hsa-miR-1301	1	0	1	0	1	1	ZNF507	zinc finger protein 507
hsa-miR-1301	1	0	1	1	1	1	LIMCH1	LIM and calponin homology domains 1
hsa-miR-1301	0	0	1	0	1	1	GAB3	GRB2-associated binding protein 3
hsa-miR-1301	0	0	1	1	0	0	LETM2	leucine zipper-EF-hand containing transmembrane protein 2
hsa-miR-1301	0	0	1	1	1	1	RABEPK	Rab9 effector protein with kelch motifs
hsa-miR-1301	0	0	1	1	1	1	EGFLAM	EGF-like, fibronectin type III and laminin G domains
hsa-miR-1301	0	0	1	1	1	1	SRSF11	serine/arginine-rich splicing factor 11
hsa-miR-1301	0	0	1	1	1	1	YAP1	Yes-associated protein 1
hsa-miR-1301	0	0	1	1	1	1	CCDC132	coiled-coil domain containing 132
hsa-miR-1301	1	0	1	1	1	1	HMCN1	hemicentin 1
hsa-miR-1301	0	0	1	1	1	1	ZMYM6	zinc finger, MYM-type 6
hsa-miR-1301	1	0	1	0	1	1	MEF2C	myocyte enhancer factor 2C
hsa-miR-1301	0	0	1	1	1	1	C12orf50	chromosome 12 open reading frame 50
hsa-miR-1301	0	0	1	1	0	0	FCRL3	Fc receptor-like 3
hsa-miR-1301	0	0	1	1	1	1	KIAA1841	KIAA1841
hsa-miR-1301	1	0	1	1	1	1	FAM63B	family with sequence similarity 63, member B
hsa-miR-1301	1	0	1	1	1	1	IL17RD	interleukin 17 receptor D
hsa-miR-1301	1	0	1	1	1	1	PRPF38B	PRP38 pre-mRNA processing factor 38 (yeast) domain containing B
hsa-miR-1301	0	0	1	1	1	1	SLC35F2	solute carrier family 35, member F2
hsa-miR-1301	1	0	1	0	0	0	NPEPL1	aminopeptidase-like 1
hsa-miR-1301	1	0	1	1	0	0	KIAA0895L	KIAA0895-like
hsa-miR-1301	1	0	1	1	1	1	MBD6	methyl-CpG binding domain protein 6
hsa-miR-1301	0	0	1	1	1	1	TEX2	testis expressed 2
hsa-miR-1301	1	0	1	1	1	1	CADM2	cell adhesion molecule 2
hsa-miR-1301	0	0	1	0	1	1	SRR	serine racemase
hsa-miR-1301	0	0	1	1	1	1	C8orf34	chromosome 8 open reading frame 34
hsa-miR-1301	1	0	1	1	1	1	RICTOR	RPTOR independent companion of MTOR, complex 2
hsa-miR-1301	1	0	1	0	1	1	COX18	COX18 cytochrome c oxidase assembly homolog (S. cerevisiae)
hsa-miR-1301	1	0	1	0	1	1	KIF21B	kinesin family member 21B
hsa-miR-1301	1	0	1	0	1	1	NR3C1	nuclear receptor subfamily 3, group C, member 1 (glucocorticoid receptor)
hsa-miR-1301	1	0	1	1	1	1	SET	SET nuclear oncogene
hsa-miR-1301	1	0	1	0	1	1	PHYHIPL	phytanoyl-CoA 2-hydroxylase interacting protein-like
hsa-miR-1301	0	0	1	0	1	1	USO1	USO1 vesicle docking protein homolog (yeast)
hsa-miR-1301	1	0	1	1	1	1	TSHZ3	teashirt zinc finger homeobox 3
hsa-miR-1301	1	0	1	1	1	1	RNF38	ring finger protein 38
hsa-miR-1301	1	0	1	1	1	1	IKZF2	IKAROS family zinc finger 2 (Helios)
hsa-miR-1301	0	0	1	1	1	1	TSPAN17	tetraspanin 17
hsa-miR-1301	1	0	1	1	1	1	SULF1	sulfatase 1
hsa-miR-1301	1	0	1	1	1	1	CNRIP1	cannabinoid receptor interacting protein 1
hsa-miR-1301	1	0	1	1	1	1	USF2	upstream transcription factor 2, c-fos interacting
hsa-miR-1301	1	0	1	1	1	1	ZBTB8A	zinc finger and BTB domain containing 8A
hsa-miR-1301	0	0	1	1	1	1	SHPRH	SNF2 histone linker PHD RING helicase, E3 ubiquitin protein ligase
hsa-miR-1301	0	0	1	1	0	0	DNAH1	dynein, axonemal, heavy chain 1
hsa-miR-1301	0	0	1	1	1	1	PINX1	PIN2/TERF1 interacting, telomerase inhibitor 1
hsa-miR-1301	0	0	1	1	1	1	CCDC83	coiled-coil domain containing 83
hsa-miR-1301	0	0	1	1	0	0	GLYCTK	glycerate kinase
hsa-miR-1301	1	0	1	1	1	1	OPRM1	opioid receptor, mu 1
hsa-miR-1301	0	0	1	1	1	1	GCOM1	GRINL1A complex locus 1
hsa-miR-1301	1	0	1	1	1	1	CAMTA1	calmodulin binding transcription activator 1
hsa-miR-1301	0	0	1	1	1	1	LINGO2	leucine rich repeat and Ig domain containing 2
hsa-miR-1301	1	0	1	1	1	1	TMCC2	transmembrane and coiled-coil domain family 2
hsa-miR-1301	0	0	1	1	1	1	SLC22A15	solute carrier family 22, member 15
hsa-miR-1301	0	0	1	1	0	0	C16orf48	chromosome 16 open reading frame 48
hsa-miR-1301	0	0	1	1	1	1	TNFRSF19	tumor necrosis factor receptor superfamily, member 19
hsa-miR-1301	0	0	1	1	0	0	RAET1E	retinoic acid early transcript 1E
hsa-miR-1301	1	0	1	0	1	1	ANKRD28	ankyrin repeat domain 28
hsa-miR-1301	0	0	1	1	1	1	PAQR5	progestin and adipoQ receptor family member V
hsa-miR-1301	0	0	1	1	1	1	HMBOX1	homeobox containing 1
hsa-miR-1301	0	0	1	0	1	1	XKR5	XK, Kell blood group complex subunit-related family, member 5
hsa-miR-1301	1	0	1	1	1	1	MECP2	methyl CpG binding protein 2 (Rett syndrome)
hsa-miR-1301	1	0	1	1	0	0	ADAM15	ADAM metallopeptidase domain 15
hsa-miR-1301	1	0	1	1	1	1	MOG	myelin oligodendrocyte glycoprotein
hsa-miR-1301	1	0	1	1	1	1	HMGA2	high mobility group AT-hook 2
hsa-miR-1301	1	0	1	1	1	1	CHRDL1	chordin-like 1
hsa-miR-1301	0	0	1	1	1	1	SMPD1	sphingomyelin phosphodiesterase 1, acid lysosomal
hsa-miR-1301	0	0	1	1	1	1	FCRLB	Fc receptor-like B
hsa-miR-1301	1	0	1	0	1	1	MYO18A	myosin XVIIIA
hsa-miR-1301	1	0	1	1	1	1	NTNG1	netrin G1
hsa-miR-1301	0	0	1	1	0	0	NBPF8	neuroblastoma breakpoint family, member 8
hsa-miR-1301	0	0	1	1	0	0	CXorf26	chromosome X open reading frame 26
hsa-miR-1301	1	0	1	1	1	1	AMOT	angiomotin
hsa-miR-1301	0	0	1	1	0	0	DHCR7	7-dehydrocholesterol reductase
hsa-miR-1301	1	0	1	1	0	0	FAM108A1	family with sequence similarity 108, member A1
hsa-miR-1301	1	0	1	0	1	1	FAM46A	family with sequence similarity 46, member A
hsa-miR-1301	0	0	1	1	0	0	ANXA5	annexin A5
hsa-miR-1301	0	0	1	1	1	1	PAFAH1B2	platelet-activating factor acetylhydrolase 1b, catalytic subunit 2 (30kDa)
hsa-miR-1301	1	0	1	1	0	0	CCDC28B	coiled-coil domain containing 28B
hsa-miR-1301	0	0	1	1	1	1	TMOD1	tropomodulin 1
hsa-miR-1301	0	0	1	1	1	1	MRRF	mitochondrial ribosome recycling factor
hsa-miR-1301	1	0	1	1	1	1	TSPAN14	tetraspanin 14
hsa-miR-1301	0	0	1	1	0	0	ZNF576	zinc finger protein 576
hsa-miR-1301	1	0	1	1	1	1	RIMS3	regulating synaptic membrane exocytosis 3
hsa-miR-1301	1	0	1	1	1	1	DUS1L	dihydrouridine synthase 1-like (S. cerevisiae)
hsa-miR-1301	1	0	1	1	1	1	SMO	smoothened, frizzled family receptor
hsa-miR-1301	1	0	1	1	1	1	ZNF410	zinc finger protein 410
hsa-miR-1301	0	0	1	1	1	1	ANAPC1	anaphase promoting complex subunit 1
hsa-miR-1301	0	0	1	0	0	0	LOC93622	Morf4 family associated protein 1-like 1 pseudogene
hsa-miR-1301	0	0	1	0	0	0	MGC13053	uncharacterized MGC13053
hsa-miR-1301	0	0	1	1	0	0	AGBL5	ATP/GTP binding protein-like 5
hsa-miR-1301	0	0	1	1	0	0	NDUFB10	NADH dehydrogenase (ubiquinone) 1 beta subcomplex, 10, 22kDa
hsa-miR-1301	0	0	1	1	0	0	MYLK2	myosin light chain kinase 2
hsa-miR-1301	1	0	1	1	1	1	HMGA1	high mobility group AT-hook 1
hsa-miR-1301	0	0	1	1	1	1	MLIP	muscular LMNA-interacting protein
hsa-miR-1301	0	0	1	0	0	0	LOC400043	uncharacterized LOC400043
hsa-miR-1301	1	0	1	1	1	1	RELL2	RELT-like 2
hsa-miR-1301	1	0	1	1	1	1	KCTD17	potassium channel tetramerisation domain containing 17
hsa-miR-1301	0	0	1	1	0	0	ARHGAP8	Rho GTPase activating protein 8
hsa-miR-1301	0	0	1	0	0	0	LRRC14	leucine rich repeat containing 14
hsa-miR-1301	0	0	1	1	1	1	GNL3L	guanine nucleotide binding protein-like 3 (nucleolar)-like
hsa-miR-1301	1	0	1	1	1	1	OTUD5	OTU domain containing 5
hsa-miR-1301	1	0	1	1	1	1	DPH1	DPH1 homolog (S. cerevisiae)
hsa-miR-1301	0	0	1	1	1	1	H2AFY	H2A histone family, member Y
hsa-miR-1301	0	0	1	1	1	1	TOMM40L	translocase of outer mitochondrial membrane 40 homolog (yeast)-like
hsa-miR-1301	1	0	1	1	1	1	PAPOLA	poly(A) polymerase alpha
hsa-miR-1301	0	0	1	0	0	0	KLHL15	kelch-like 15 (Drosophila)
hsa-miR-1301	0	0	1	1	0	0	MAST2	microtubule associated serine/threonine kinase 2
hsa-miR-1301	0	0	1	0	1	1	ZNF37A	zinc finger protein 37A
hsa-miR-1301	0	0	1	0	0	0	GNN	Grp94 neighboring nucleotidase pseudogene
hsa-miR-1301	0	0	1	1	1	1	CMAS	cytidine monophosphate N-acetylneuraminic acid synthetase
hsa-miR-1301	1	0	1	1	1	1	CC2D1B	coiled-coil and C2 domain containing 1B
hsa-miR-1301	1	0	1	1	1	1	WIPI2	WD repeat domain, phosphoinositide interacting 2
hsa-miR-1301	1	0	1	1	1	1	NRF1	nuclear respiratory factor 1
hsa-miR-1301	0	0	1	1	0	0	ZBTB32	zinc finger and BTB domain containing 32
hsa-miR-1301	0	0	1	0	0	0	LOC100144602	uncharacterized LOC100144602
hsa-miR-1301	0	0	1	1	1	1	GLIPR2	GLI pathogenesis-related 2
hsa-miR-1301	0	0	1	0	1	1	ZNF641	zinc finger protein 641
hsa-miR-1301	1	0	1	1	1	1	SLC25A22	solute carrier family 25 (mitochondrial carrier: glutamate), member 22
hsa-miR-1301	0	0	1	1	1	1	TMEM40	transmembrane protein 40
hsa-miR-1301	1	0	1	0	1	1	BTF3L4	basic transcription factor 3-like 4
hsa-miR-1301	0	0	1	1	1	1	SNX17	sorting nexin 17
hsa-miR-1301	0	0	1	0	0	0	EEF1DP3	eukaryotic translation elongation factor 1 delta pseudogene 3
hsa-miR-1301	0	0	1	0	0	0	FAM92A1P2	family with sequence similarity 92, member A3
hsa-miR-1301	0	0	1	1	1	1	COMMD7	COMM domain containing 7
hsa-miR-1301	0	0	1	1	0	0	LYSMD2	LysM, putative peptidoglycan-binding, domain containing 2
hsa-miR-1301	0	0	1	0	0	0	AZGP1P1	alpha-2-glycoprotein 1, zinc-binding pseudogene 1
hsa-miR-1301	1	0	1	1	1	1	BEND6	BEN domain containing 6
hsa-miR-1301	0	0	1	1	1	1	CDC42SE2	CDC42 small effector 2
hsa-miR-1301	1	0	1	1	1	1	C16orf45	chromosome 16 open reading frame 45
hsa-miR-1301	0	0	1	1	0	0	FAM89B	family with sequence similarity 89, member B
hsa-miR-1301	0	0	1	1	0	0	KRBA2	KRAB-A domain containing 2
hsa-miR-1301	0	0	1	1	0	0	PRRG2	proline rich Gla (G-carboxyglutamic acid) 2
hsa-miR-1301	1	0	1	1	1	1	CNTN4	contactin 4
hsa-miR-1301	0	0	1	0	0	0	RNF216P1	ring finger protein 216 pseudogene 1
hsa-miR-1301	0	0	1	0	0	0	ZBED3-AS1	ZBED3 antisense RNA 1
hsa-miR-1301	0	0	1	1	1	1	C14orf105	chromosome 14 open reading frame 105
hsa-miR-1301	0	0	1	1	0	0	PLSCR3	phospholipid scramblase 3
hsa-miR-1301	1	0	1	1	1	1	SMYD2	SET and MYND domain containing 2
hsa-miR-1301	1	0	1	1	1	1	U2SURP	U2 snRNP-associated SURP domain containing
hsa-miR-1301	1	0	1	1	1	1	UHRF2	ubiquitin-like with PHD and ring finger domains 2, E3 ubiquitin protein ligase
hsa-miR-1301	1	0	1	1	1	1	TMEM127	transmembrane protein 127
hsa-miR-1301	1	0	1	0	0	0	KCNU1	potassium channel, subfamily U, member 1
hsa-miR-1301	0	0	1	1	1	1	CAMKMT	calmodulin-lysine N-methyltransferase
hsa-miR-1301	1	0	1	1	1	1	SYT9	synaptotagmin IX
hsa-miR-1301	1	0	1	0	1	1	PSMF1	proteasome (prosome, macropain) inhibitor subunit 1 (PI31)
hsa-miR-1301	0	0	1	0	0	0	ZNF503-AS2	ZNF503 antisense RNA 2
hsa-miR-1301	1	0	1	0	1	1	SV2B	synaptic vesicle glycoprotein 2B
hsa-miR-1301	1	0	1	1	1	1	TAF15	TAF15 RNA polymerase II, TATA box binding protein (TBP)-associated factor, 68kDa
hsa-miR-1301	0	0	1	1	1	1	LPAR1	lysophosphatidic acid receptor 1
hsa-miR-1301	1	0	1	1	1	1	GABRA1	gamma-aminobutyric acid (GABA) A receptor, alpha 1
hsa-miR-1301	1	0	1	1	0	0	FAM83F	family with sequence similarity 83, member F
hsa-miR-1301	0	0	1	0	1	1	B3GALTL	beta 1,3-galactosyltransferase-like
hsa-miR-1301	1	0	1	1	1	1	RCOR3	REST corepressor 3
hsa-miR-1301	1	0	1	1	1	1	ZNF282	zinc finger protein 282
hsa-miR-1301	0	0	1	0	0	0	LINC00593	long intergenic non-protein coding RNA 593
hsa-miR-1301	1	0	1	1	1	1	TBC1D1	TBC1 (tre-2/USP6, BUB2, cdc16) domain family, member 1
hsa-miR-1301	1	0	1	1	0	0	ANKRD13B	ankyrin repeat domain 13B
hsa-miR-1301	0	0	1	0	0	0	LOC643648	uncharacterized LOC643648
hsa-miR-1301	1	0	1	1	1	1	DCLK2	doublecortin-like kinase 2
hsa-miR-1301	0	0	1	0	0	0	FAM86JP	family with sequence similarity 86, member A pseudogene
hsa-miR-1301	1	0	1	1	1	1	SORL1	sortilin-related receptor, L(DLR class) A repeats containing
hsa-miR-1301	0	0	1	1	0	0	IGFN1	immunoglobulin-like and fibronectin type III domain containing 1
hsa-miR-1301	1	0	1	1	1	1	PLEKHA7	pleckstrin homology domain containing, family A member 7
hsa-miR-1301	1	0	1	0	1	1	KCTD2	potassium channel tetramerisation domain containing 2
hsa-miR-1301	0	0	1	1	1	1	C16orf89	chromosome 16 open reading frame 89
hsa-miR-1301	1	0	1	1	1	1	FAM189B	family with sequence similarity 189, member B
hsa-miR-1301	1	0	1	1	1	1	PCDHA5	protocadherin alpha 5
hsa-miR-1301	1	0	1	1	1	1	FBXL16	F-box and leucine-rich repeat protein 16
hsa-miR-1301	0	0	1	1	0	0	TNMD	tenomodulin
hsa-miR-1301	1	0	1	1	1	1	RIC8B	resistance to inhibitors of cholinesterase 8 homolog B (C. elegans)
hsa-miR-1301	0	0	1	0	0	0	LINC00452	long intergenic non-protein coding RNA 452
hsa-miR-1301	0	0	1	1	0	0	LYPD4	LY6/PLAUR domain containing 4
hsa-miR-1301	0	0	1	0	1	1	DKFZP434I0714	uncharacterized protein DKFZP434I0714
hsa-miR-1301	1	0	1	0	1	1	RHOBTB2	Rho-related BTB domain containing 2
hsa-miR-1301	0	0	1	1	1	1	EDA2R	ectodysplasin A2 receptor
hsa-miR-1301	1	0	1	0	1	1	DDX3Y	DEAD (Asp-Glu-Ala-Asp) box polypeptide 3, Y-linked
hsa-miR-1301	0	0	1	1	0	0	TSNAXIP1	translin-associated factor X interacting protein 1
hsa-miR-1301	0	0	1	0	0	0	LOC643529	hCG2024094
hsa-miR-1301	0	0	1	1	0	0	PGS1	phosphatidylglycerophosphate synthase 1
hsa-miR-1301	0	0	1	0	0	0	LOC339862	uncharacterized LOC339862
hsa-miR-1301	0	0	1	1	1	1	TMEM139	transmembrane protein 139
hsa-miR-1301	0	0	1	0	0	0	HOXA-AS2	HOXA cluster antisense RNA 2
hsa-miR-1301	0	0	1	1	0	0	B3GNTL1	UDP-GlcNAc:betaGal beta-1,3-N-acetylglucosaminyltransferase-like 1
hsa-miR-1301	0	0	1	1	1	1	SNAPC3	small nuclear RNA activating complex, polypeptide 3, 50kDa
hsa-miR-1301	0	0	1	1	1	1	UBE3D	ubiquitin protein ligase E3D
hsa-miR-1301	1	0	1	1	1	1	IMPACT	Impact homolog (mouse)
hsa-miR-1301	0	0	1	0	0	0	FAM201A	family with sequence similarity 201, member A
hsa-miR-1301	0	0	1	0	0	0	LINC00642	long intergenic non-protein coding RNA 642
hsa-miR-1301	1	0	1	1	1	1	SMG7	smg-7 homolog, nonsense mediated mRNA decay factor (C. elegans)
hsa-miR-1301	0	0	1	0	0	0	ANKRD30BP2	ankyrin repeat domain 30B pseudogene 2
hsa-miR-1301	1	0	1	1	1	1	MEIS1	Meis homeobox 1
hsa-miR-1301	1	0	1	1	1	1	SNAP91	synaptosomal-associated protein, 91kDa homolog (mouse)
hsa-miR-1301	0	0	1	0	0	0	SRGAP2C	SLIT-ROBO Rho GTPase activating protein 2C
hsa-miR-1301	1	0	1	1	1	1	WDR48	WD repeat domain 48
hsa-miR-1301	1	0	1	1	1	1	FAM135B	family with sequence similarity 135, member B
hsa-miR-1301	1	0	1	0	1	1	RAG1	recombination activating gene 1
hsa-miR-1301	1	0	1	1	1	1	SOX6	SRY (sex determining region Y)-box 6
hsa-miR-1301	0	0	1	0	0	0	CRYBB2P1	crystallin, beta B2 pseudogene 1
hsa-miR-1301	0	0	1	1	0	0	LAG3	lymphocyte-activation gene 3
hsa-miR-1301	1	0	1	0	1	1	CYB5RL	cytochrome b5 reductase-like
hsa-miR-1301	0	0	1	0	0	0	LOC284263	uncharacterized LOC284263
hsa-miR-1301	1	0	1	1	1	1	DPP10	dipeptidyl-peptidase 10 (non-functional)
hsa-miR-1301	0	0	1	1	0	0	PRMT2	protein arginine methyltransferase 2
hsa-miR-1301	1	0	1	1	1	1	PLS3	plastin 3
hsa-miR-1301	0	0	1	1	0	0	CCDC152	coiled-coil domain containing 152
hsa-miR-1301	0	0	1	0	0	0	FLJ36000	uncharacterized FLJ36000
hsa-miR-1301	0	0	1	0	0	0	TOB1-AS1	TOB1 antisense RNA 1
hsa-miR-1301	1	0	1	0	1	1	GPR107	G protein-coupled receptor 107
hsa-miR-1301	0	0	1	1	1	1	SLTM	SAFB-like, transcription modulator
hsa-miR-1301	1	0	1	1	1	1	DOLPP1	dolichyl pyrophosphate phosphatase 1
hsa-miR-1301	0	0	1	0	1	1	LINC00634	long intergenic non-protein coding RNA 634
hsa-miR-1301	0	0	1	0	1	1	SRSF5	serine/arginine-rich splicing factor 5
hsa-miR-1301	1	0	1	1	1	1	DACH2	dachshund homolog 2 (Drosophila)
hsa-miR-1301	0	0	1	1	1	1	SCLT1	sodium channel and clathrin linker 1
hsa-miR-1301	0	0	1	0	0	0	LOC339622	uncharacterized LOC339622
hsa-miR-1301	1	0	1	1	1	1	PDPK1	3-phosphoinositide dependent protein kinase-1
hsa-miR-1301	1	0	1	1	1	1	INTS6	integrator complex subunit 6
hsa-miR-1301	0	0	1	0	0	0	LOC339240	keratin 17 pseudogene
hsa-miR-1301	0	0	1	0	0	0	PVT1	Pvt1 oncogene (non-protein coding)
hsa-miR-1301	1	0	1	1	1	1	FAM123A	family with sequence similarity 123A
hsa-miR-1301	1	0	1	0	1	1	HSPA12A	heat shock 70kDa protein 12A
hsa-miR-1301	0	0	1	1	0	0	AQP12B	aquaporin 12B
hsa-miR-1301	1	0	1	1	1	1	PRRG1	proline rich Gla (G-carboxyglutamic acid) 1
hsa-miR-1301	0	0	1	1	1	1	MTHFD2L	methylenetetrahydrofolate dehydrogenase (NADP+ dependent) 2-like
hsa-miR-1301	0	0	1	1	1	1	SH3GL3	SH3-domain GRB2-like 3
hsa-miR-1301	0	0	1	0	0	0	LOC339260	uncharacterized LOC339260
hsa-miR-1301	1	0	1	0	1	1	PSD3	pleckstrin and Sec7 domain containing 3
hsa-miR-1301	0	0	1	1	1	1	MYO3A	myosin IIIA
hsa-miR-1301	1	0	1	1	1	1	MAMDC2	MAM domain containing 2
hsa-miR-1301	1	0	1	1	1	1	PPP2R5B	protein phosphatase 2, regulatory subunit B', beta
hsa-miR-1301	0	0	1	1	0	0	NIT1	nitrilase 1
hsa-miR-1301	0	0	1	1	1	1	P2RX6	purinergic receptor P2X, ligand-gated ion channel, 6
hsa-miR-1301	1	0	1	1	0	0	TBC1D10C	TBC1 domain family, member 10C
hsa-miR-1301	0	0	1	0	1	1	LOC338758	uncharacterized LOC338758
hsa-miR-1301	1	0	1	0	1	1	KDM2A	lysine (K)-specific demethylase 2A
hsa-miR-1301	1	0	1	1	1	1	KIF2A	kinesin heavy chain member 2A
hsa-miR-1301	1	0	1	0	1	1	ZNF800	zinc finger protein 800
hsa-miR-1301	0	0	1	1	0	0	OXLD1	oxidoreductase-like domain containing 1
hsa-miR-1301	0	0	1	1	1	1	ZNF589	zinc finger protein 589
hsa-miR-1301	1	0	1	1	1	1	PTPRG	protein tyrosine phosphatase, receptor type, G
hsa-miR-1301	1	0	1	0	1	1	ARHGAP5	Rho GTPase activating protein 5
hsa-miR-1301	0	0	1	1	1	1	NCMAP	noncompact myelin associated protein
hsa-miR-1301	0	0	1	1	0	0	NSUN5P2	NOP2/Sun domain family, member 5 pseudogene 2
hsa-miR-1301	1	0	1	0	1	1	NUDT10	nudix (nucleoside diphosphate linked moiety X)-type motif 10
hsa-miR-1301	1	0	1	0	1	1	SEMA4G	sema domain, immunoglobulin domain (Ig), transmembrane domain (TM) and short cytoplasmic domain, (semaphorin) 4G
hsa-miR-1301	0	0	1	1	0	0	SREBF2	sterol regulatory element binding transcription factor 2
hsa-miR-1301	1	0	1	1	1	1	YWHAZ	tyrosine 3-monooxygenase/tryptophan 5-monooxygenase activation protein, zeta polypeptide
hsa-miR-1301	0	0	1	1	1	1	SLC25A35	solute carrier family 25, member 35
hsa-miR-1301	0	0	1	1	0	0	LY6H	lymphocyte antigen 6 complex, locus H
hsa-miR-1301	0	0	1	0	0	0	LINC00265	long intergenic non-protein coding RNA 265
hsa-miR-1301	0	0	1	0	1	1	C17orf51	chromosome 17 open reading frame 51
hsa-miR-1301	0	0	1	1	0	0	TENC1	tensin like C1 domain containing phosphatase (tensin 2)
hsa-miR-1301	1	0	1	1	1	1	ATP8B4	ATPase, class I, type 8B, member 4
hsa-miR-1301	1	0	1	1	1	1	ZFP161	zinc finger protein 161 homolog (mouse)
hsa-miR-1301	1	0	1	1	1	1	KLHL28	kelch-like 28 (Drosophila)
hsa-miR-1301	0	0	1	1	0	0	GRIN2C	glutamate receptor, ionotropic, N-methyl D-aspartate 2C
hsa-miR-1301	1	0	1	1	1	1	ZSCAN29	zinc finger and SCAN domain containing 29
hsa-miR-1301	0	0	1	1	1	1	CLEC2D	C-type lectin domain family 2, member D
hsa-miR-1301	0	0	1	0	1	1	ASAP2	ArfGAP with SH3 domain, ankyrin repeat and PH domain 2
hsa-miR-1301	0	0	1	1	1	1	CAMLG	calcium modulating ligand
hsa-miR-1301	1	0	1	0	0	0	PRRT4	proline-rich transmembrane protein 4
hsa-miR-1301	0	0	1	1	0	0	SLC38A6	solute carrier family 38, member 6
hsa-miR-1301	1	0	1	1	1	1	AP3M1	adaptor-related protein complex 3, mu 1 subunit
hsa-miR-1301	1	0	1	1	1	1	NRSN1	neurensin 1
hsa-miR-1301	1	0	1	1	1	1	FAM129B	family with sequence similarity 129, member B
hsa-miR-1301	1	0	1	1	1	1	CCDC149	coiled-coil domain containing 149
hsa-miR-1301	0	0	1	1	1	1	SMAD9	SMAD family member 9
hsa-miR-1301	0	0	1	0	0	0	ZNF66P	zinc finger protein 66, pseudogene
hsa-miR-1301	0	0	1	0	0	0	PCP4L1	Purkinje cell protein 4 like 1
hsa-miR-1301	0	0	1	0	0	0	PABPC1P2	poly(A) binding protein, cytoplasmic 1 pseudogene 2
hsa-miR-1301	1	0	1	1	1	1	PDCD6IP	programmed cell death 6 interacting protein
hsa-miR-1301	1	0	1	1	1	1	MYEF2	myelin expression factor 2
hsa-miR-1301	0	0	1	1	1	1	AQPEP	laeverin
hsa-miR-1301	0	0	1	0	0	0	PTGER4P2	prostaglandin E receptor 4 (subtype EP4) pseudogene 2
hsa-miR-1301	0	0	1	0	0	0	C17orf69	chromosome 17 open reading frame 69
hsa-miR-1301	0	0	1	1	1	1	SLC11A1	solute carrier family 11 (proton-coupled divalent metal ion transporters), member 1
hsa-miR-1301	1	0	1	0	1	1	MAP4K3	mitogen-activated protein kinase kinase kinase kinase 3
hsa-miR-1301	0	0	1	1	1	1	PCDH18	protocadherin 18
hsa-miR-1301	0	0	1	0	0	0	ULK4P3	unc-51-like kinase 4 (C. elegans) pseudogene 3
hsa-miR-1301	0	0	1	1	1	1	FRMPDP2	FERM and PDZ domain containing 2 pseudogene 2
hsa-miR-1301	0	0	1	1	1	1	FRMPD2P1	FERM and PDZ domain containing 2 pseudogene 1
hsa-miR-1301	0	0	1	0	0	0	LOC440416	uncharacterized LOC440416
hsa-miR-1301	0	0	1	1	1	1	PCED1B	PC-esterase domain containing 1B
hsa-miR-1301	1	0	1	1	1	1	AGGF1	angiogenic factor with G patch and FHA domains 1
hsa-miR-1301	1	0	1	1	1	1	OPCML	opioid binding protein/cell adhesion molecule-like
hsa-miR-1301	1	0	1	1	1	1	WNT5A	wingless-type MMTV integration site family, member 5A
hsa-miR-1301	0	0	1	0	0	0	AGAP9	ArfGAP with GTPase domain, ankyrin repeat and PH domain 9
hsa-miR-1301	0	0	1	0	0	0	CAPN1	calpain 1, (mu/I) large subunit
hsa-miR-1301	0	0	1	1	1	1	C3orf67	chromosome 3 open reading frame 67
hsa-miR-1301	0	0	1	0	0	0	LINC00537	long intergenic non-protein coding RNA 537
hsa-miR-1301	0	0	1	1	0	0	DNHD1	dynein heavy chain domain 1
hsa-miR-1301	1	0	1	1	1	1	ZMYND11	zinc finger, MYND-type containing 11
hsa-miR-1301	0	0	1	0	1	1	CCL4L2	chemokine (C-C motif) ligand 4-like 2
hsa-miR-1301	0	0	1	1	1	1	CCL4L1	chemokine (C-C motif) ligand 4-like 1
hsa-miR-1301	0	0	1	1	1	1	LIMS3	LIM and senescent cell antigen-like domains 3
hsa-miR-1301	1	0	1	1	1	1	PLXNA2	plexin A2
hsa-miR-1301	0	0	1	1	1	1	TMBIM4	transmembrane BAX inhibitor motif containing 4
hsa-miR-1301	1	0	1	1	1	1	STK38	serine/threonine kinase 38
hsa-miR-1301	0	0	1	1	0	0	DNASE1	deoxyribonuclease I
hsa-miR-1301	0	0	1	0	0	0	FRG1B	FSHD region gene 1 family, member B
hsa-miR-1301	1	0	1	1	1	1	ST8SIA2	ST8 alpha-N-acetyl-neuraminide alpha-2,8-sialyltransferase 2
hsa-miR-1301	0	0	1	1	1	1	OFD1	oral-facial-digital syndrome 1
hsa-miR-1301	1	0	1	1	1	1	WNT10B	wingless-type MMTV integration site family, member 10B
hsa-miR-1301	0	0	1	1	1	1	RAB3GAP2	RAB3 GTPase activating protein subunit 2 (non-catalytic)
hsa-miR-1301	1	0	1	1	1	1	SYNJ1	synaptojanin 1
hsa-miR-1301	0	0	1	1	0	0	HOXB1	homeobox B1
hsa-miR-1301	0	0	1	1	1	1	ZNF365	zinc finger protein 365
hsa-miR-1301	0	0	1	1	0	0	RGL4	ral guanine nucleotide dissociation stimulator-like 4
hsa-miR-1301	1	0	1	0	1	1	MYBL1	v-myb myeloblastosis viral oncogene homolog (avian)-like 1
hsa-miR-1301	0	0	1	1	0	0	TMC1	transmembrane channel-like 1
hsa-miR-1301	0	0	1	1	1	1	TTLL9	tubulin tyrosine ligase-like family, member 9
hsa-miR-1301	0	0	1	0	0	0	GUSBP9	glucuronidase, beta pseudogene 9
hsa-miR-1301	0	0	1	1	0	0	ANAPC11	anaphase promoting complex subunit 11
hsa-miR-1301	0	0	1	0	0	0	LOC283174	uncharacterized LOC283174
hsa-miR-1301	1	0	1	0	0	0	PWWP2A	PWWP domain containing 2A
hsa-miR-1301	1	0	1	1	1	1	GABRB2	gamma-aminobutyric acid (GABA) A receptor, beta 2
hsa-miR-1301	0	0	1	1	0	0	YDJC	YdjC homolog (bacterial)
hsa-miR-1301	1	0	1	0	1	1	KIF5C	kinesin family member 5C
hsa-miR-1301	0	0	1	0	0	0	FAM86C2P	family with sequence similarity 86, member A pseudogene
hsa-miR-1301	1	0	1	1	1	1	TET2	tet methylcytosine dioxygenase 2
hsa-miR-1301	0	0	1	1	0	0	RELA	v-rel reticuloendotheliosis viral oncogene homolog A (avian)
hsa-miR-1301	0	0	1	0	0	0	LRRC37A11P	leucine rich repeat containing 37, member A11, pseudogene
hsa-miR-1301	1	0	1	1	1	1	NR3C2	nuclear receptor subfamily 3, group C, member 2
hsa-miR-1301	0	0	1	1	0	0	PRAMEF10	PRAME family member 10
hsa-miR-1301	0	0	1	1	0	0	RNF123	ring finger protein 123
hsa-miR-1301	1	0	1	1	1	1	CTSC	cathepsin C
hsa-miR-1301	1	0	1	1	0	0	MAPKBP1	mitogen-activated protein kinase binding protein 1
hsa-miR-1301	1	0	1	1	1	1	ST18	suppression of tumorigenicity 18 (breast carcinoma) (zinc finger protein)
hsa-miR-1301	1	0	1	1	1	1	ZNF827	zinc finger protein 827
hsa-miR-1301	0	0	1	1	0	0	SOCS7	suppressor of cytokine signaling 7
hsa-miR-1301	0	0	1	1	0	0	RGSL1	regulator of G-protein signaling like 1
hsa-miR-1301	0	0	1	0	0	0	KRT8P12	keratin 8 pseudogene 12
hsa-miR-1301	1	0	1	1	1	1	ANK2	ankyrin 2, neuronal
hsa-miR-1301	1	0	1	1	1	1	MEGF11	multiple EGF-like-domains 11
hsa-miR-1301	0	0	1	1	0	0	ATPAF1-AS1	ATPAF1 antisense RNA 1
hsa-miR-1301	1	0	1	1	1	1	ZEB2	zinc finger E-box binding homeobox 2
hsa-miR-1301	0	0	1	0	0	0	C1orf226	chromosome 1 open reading frame 226
hsa-miR-1301	0	0	1	1	0	0	USP19	ubiquitin specific peptidase 19
hsa-miR-1301	0	0	1	1	1	1	HSF2	heat shock transcription factor 2
hsa-miR-1301	1	0	1	1	1	1	MLLT10	myeloid/lymphoid or mixed-lineage leukemia (trithorax homolog, Drosophila); translocated to, 10
hsa-miR-1301	1	0	1	0	1	1	NFAT5	nuclear factor of activated T-cells 5, tonicity-responsive
hsa-miR-1301	0	0	1	0	0	0	SMA4	glucuronidase, beta pseudogene
hsa-miR-1301	1	0	1	0	1	1	FAM196A	family with sequence similarity 196, member A
hsa-miR-1301	1	0	1	1	1	1	NIPAL2	NIPA-like domain containing 2
hsa-miR-1301	0	0	1	1	1	1	ARG1	arginase, liver
hsa-miR-1301	0	0	1	1	1	1	PRKAR2A	protein kinase, cAMP-dependent, regulatory, type II, alpha
hsa-miR-1301	1	0	1	1	1	1	NUMB	numb homolog (Drosophila)
hsa-miR-1301	0	0	1	0	0	0	LINC00643	long intergenic non-protein coding RNA 643
hsa-miR-1301	0	0	1	0	0	0	FLJ39632	uncharacterized LOC642477
hsa-miR-1301	1	0	1	1	0	0	RGS6	regulator of G-protein signaling 6
hsa-miR-1301	1	0	1	1	0	0	KRT80	keratin 80
hsa-miR-1301	1	0	1	1	1	1	SASH1	SAM and SH3 domain containing 1
hsa-miR-1301	0	0	1	1	1	1	FUCA2	fucosidase, alpha-L- 2, plasma
hsa-miR-1301	0	0	1	1	1	1	AP1B1	adaptor-related protein complex 1, beta 1 subunit
hsa-miR-1301	0	0	1	0	0	0	DKFZp686D0853	uncharacterized LOC401613
hsa-miR-1301	1	0	1	1	1	1	JPH1	junctophilin 1
hsa-miR-1301	1	0	1	1	1	1	MIER3	mesoderm induction early response 1, family member 3
hsa-miR-1301	1	0	1	1	1	1	HECTD2	HECT domain containing E3 ubiquitin protein ligase 2
hsa-miR-1301	0	0	1	0	0	0	RGPD4	RANBP2-like and GRIP domain containing 4
hsa-miR-1301	1	0	1	1	1	1	CCNG1	cyclin G1
hsa-miR-1301	1	0	1	0	1	1	MTX3	metaxin 3
hsa-miR-1301	0	0	1	1	1	1	APTX	aprataxin
hsa-miR-1301	1	0	1	1	1	1	ETS1	v-ets erythroblastosis virus E26 oncogene homolog 1 (avian)
hsa-miR-1301	0	0	1	0	1	1	ZNF498	zinc finger protein 498
hsa-miR-1301	1	0	1	0	1	1	CLASP2	cytoplasmic linker associated protein 2
hsa-miR-1301	0	0	1	1	1	1	CRB1	crumbs homolog 1 (Drosophila)
hsa-miR-1301	0	0	1	1	1	1	PSMA2	proteasome (prosome, macropain) subunit, alpha type, 2
hsa-miR-1301	1	0	1	1	1	1	MYCBP2	MYC binding protein 2, E3 ubiquitin protein ligase
hsa-miR-1301	0	0	1	1	0	0	RPS24	ribosomal protein S24
hsa-miR-1301	0	0	1	1	1	1	PRR14L	proline rich 14-like
hsa-miR-1301	0	0	1	0	0	0	SMG1P1	smg-1 homolog, phosphatidylinositol 3-kinase-related kinase pseudogene 1
hsa-miR-1301	1	0	1	1	0	0	CECR2	cat eye syndrome chromosome region, candidate 2
hsa-miR-1301	0	0	1	1	1	1	FAM9C	family with sequence similarity 9, member C
hsa-miR-1301	0	0	1	0	1	1	ASB18	ankyrin repeat and SOCS box containing 18
hsa-miR-1301	1	0	1	1	1	1	CASP3	caspase 3, apoptosis-related cysteine peptidase
hsa-miR-1301	0	0	1	1	0	0	ANKRD33	ankyrin repeat domain 33
hsa-miR-1301	1	0	1	1	1	1	KLHL2	kelch-like 2, Mayven (Drosophila)
hsa-miR-1301	1	0	1	1	1	1	TC2N	tandem C2 domains, nuclear
hsa-miR-1301	1	0	1	1	1	1	TSC22D3	TSC22 domain family, member 3
hsa-miR-1301	0	0	1	1	0	0	TMEM41A	transmembrane protein 41A
hsa-miR-1301	0	0	1	0	0	0	OVOS	ovostatin
hsa-miR-1301	0	0	1	1	0	0	LRR1	leucine rich repeat protein 1
hsa-miR-1301	1	0	1	1	1	1	PPFIA1	protein tyrosine phosphatase, receptor type, f polypeptide (PTPRF), interacting protein (liprin), alpha 1
hsa-miR-1301	1	0	1	1	1	1	GDI2	GDP dissociation inhibitor 2
hsa-miR-1301	1	0	1	1	1	1	PHF21A	PHD finger protein 21A
hsa-miR-1301	1	0	1	1	1	1	PAQR3	progestin and adipoQ receptor family member III
hsa-miR-1301	1	0	1	1	1	1	KLHL6	kelch-like 6 (Drosophila)
hsa-miR-1301	1	0	1	1	1	1	NFIB	nuclear factor I/B
hsa-miR-1301	1	0	1	1	1	1	NAV1	neuron navigator 1
hsa-miR-1301	0	0	1	1	0	0	SAMD7	sterile alpha motif domain containing 7
hsa-miR-1301	1	0	1	1	1	1	PTER	phosphotriesterase related
hsa-miR-1301	1	0	1	0	1	1	TBL1XR1	transducin (beta)-like 1 X-linked receptor 1
hsa-miR-1301	0	0	1	0	0	0	DKFZp686K1684	uncharacterized LOC440034
hsa-miR-1301	1	0	1	1	1	1	SGK3	serum/glucocorticoid regulated kinase family, member 3
hsa-miR-1301	1	0	1	0	1	1	TTL	tubulin tyrosine ligase
hsa-miR-1301	1	0	1	1	1	1	HIC2	hypermethylated in cancer 2
hsa-miR-1301	1	0	1	1	1	1	BSDC1	BSD domain containing 1
hsa-miR-1301	1	0	1	1	0	0	GSK3B	glycogen synthase kinase 3 beta
hsa-miR-1301	0	0	1	1	1	1	POLR2H	polymerase (RNA) II (DNA directed) polypeptide H
hsa-miR-1301	0	0	1	1	0	0	MRPL48	mitochondrial ribosomal protein L48
hsa-miR-1301	0	0	1	1	0	0	LUC7L	LUC7-like (S. cerevisiae)
hsa-miR-1301	1	0	1	1	1	1	CLU	clusterin
hsa-miR-1301	1	0	1	0	0	0	IGLON5	IgLON family member 5
hsa-miR-1301	1	0	1	1	1	1	GPBP1	GC-rich promoter binding protein 1
hsa-miR-1301	0	0	1	1	1	1	TMEM53	transmembrane protein 53
hsa-miR-1301	0	0	1	1	1	1	KIAA0141	KIAA0141
hsa-miR-1301	1	0	1	0	0	0	TNPO1	transportin 1
hsa-miR-1301	0	0	1	1	1	1	GTPBP3	GTP binding protein 3 (mitochondrial)
hsa-miR-1301	1	0	1	1	1	1	VIM	vimentin
hsa-miR-1301	0	0	1	1	1	1	DGCR14	DiGeorge syndrome critical region gene 14
hsa-miR-1301	1	0	1	1	1	1	TARBP2	TAR (HIV-1) RNA binding protein 2
hsa-miR-1301	0	0	1	0	0	0	LOC400768	uncharacterized LOC400768
hsa-miR-1301	0	0	1	1	0	0	URM1	ubiquitin related modifier 1
hsa-miR-1301	1	0	1	0	1	1	OLA1	Obg-like ATPase 1
hsa-miR-1301	0	0	1	1	1	1	APH1A	anterior pharynx defective 1 homolog A (C. elegans)
hsa-miR-1301	1	0	1	1	1	1	PNP	purine nucleoside phosphorylase
hsa-miR-1301	0	0	1	1	0	0	PPOX	protoporphyrinogen oxidase
hsa-miR-1301	1	0	1	1	1	1	LETMD1	LETM1 domain containing 1
hsa-miR-1301	0	0	1	1	1	1	ATP1B3	ATPase, Na+/K+ transporting, beta 3 polypeptide
hsa-miR-1301	1	0	1	1	1	1	C8orf58	chromosome 8 open reading frame 58
hsa-miR-1301	0	0	1	1	0	0	ITGB3BP	integrin beta 3 binding protein (beta3-endonexin)
hsa-miR-1301	0	0	1	1	0	0	CYGB	cytoglobin
hsa-miR-1301	0	0	1	0	0	0	ARRDC1	arrestin domain containing 1
hsa-miR-1301	0	0	1	1	1	1	CIRBP	cold inducible RNA binding protein
hsa-miR-1301	1	0	1	1	1	1	NEU1	sialidase 1 (lysosomal sialidase)
hsa-miR-1301	0	0	1	1	0	0	CD81	CD81 molecule
hsa-miR-1301	1	0	1	0	1	1	BNIP3L	BCL2/adenovirus E1B 19kDa interacting protein 3-like
hsa-miR-1301	1	0	1	1	0	0	ELOVL1	ELOVL fatty acid elongase 1
hsa-miR-1301	0	0	1	1	1	1	TRIM14	tripartite motif containing 14
hsa-miR-1301	0	0	1	1	1	1	CHCHD4	coiled-coil-helix-coiled-coil-helix domain containing 4
hsa-miR-1301	0	0	1	1	0	0	WDR18	WD repeat domain 18
hsa-miR-1301	0	0	1	1	1	1	FAT1	FAT tumor suppressor homolog 1 (Drosophila)
hsa-miR-1301	1	0	1	1	1	1	HSPA9	heat shock 70kDa protein 9 (mortalin)
hsa-miR-1301	0	0	1	1	1	1	INCENP	inner centromere protein antigens 135/155kDa
hsa-miR-1301	1	0	1	1	1	1	SSR1	signal sequence receptor, alpha
hsa-miR-1301	0	0	1	1	0	0	HPCAL1	hippocalcin-like 1
hsa-miR-1301	0	0	1	0	0	0	NBLA00301	Nbla00301
hsa-miR-1301	0	0	1	1	0	0	MYL6	myosin, light chain 6, alkali, smooth muscle and non-muscle
hsa-miR-1301	0	0	1	1	1	1	LZTR1	leucine-zipper-like transcription regulator 1
hsa-miR-1301	0	0	1	1	1	1	CCDC115	coiled-coil domain containing 115
hsa-miR-1301	0	0	1	0	0	0	LOC643837	uncharacterized LOC643837
hsa-miR-1301	0	0	1	0	1	1	C17orf108	chromosome 17 open reading frame 108
hsa-miR-1301	0	0	1	1	1	1	ASCC2	activating signal cointegrator 1 complex subunit 2
hsa-miR-1301	0	0	1	0	1	1	IGF2-AS	IGF2 antisense RNA
hsa-miR-1301	1	0	1	1	1	1	NTM	neurotrimin
hsa-miR-1301	0	0	1	1	1	1	NAPA	N-ethylmaleimide-sensitive factor attachment protein, alpha
hsa-miR-1301	0	0	1	1	0	0	F10	coagulation factor X
hsa-miR-1301	1	0	1	1	1	1	MBNL1	muscleblind-like splicing regulator 1
hsa-miR-1301	0	0	1	1	0	0	WISP2	WNT1 inducible signaling pathway protein 2
hsa-miR-1301	1	0	1	1	0	0	PNPLA6	patatin-like phospholipase domain containing 6
hsa-miR-1301	0	0	1	0	0	0	LOC654433	uncharacterized LOC654433
hsa-miR-1301	0	0	1	1	0	0	IKBKG	inhibitor of kappa light polypeptide gene enhancer in B-cells, kinase gamma
hsa-miR-1301	0	0	1	1	1	1	GRAP2	GRB2-related adaptor protein 2
hsa-miR-1301	0	0	1	1	0	0	TMEM183A	transmembrane protein 183A
hsa-miR-1301	1	0	1	0	1	1	RPS6KB1	ribosomal protein S6 kinase, 70kDa, polypeptide 1
hsa-miR-1301	0	0	1	1	0	0	TRMT44	tRNA methyltransferase 44 homolog (S. cerevisiae)
hsa-miR-1301	0	0	1	1	1	1	ANKRD53	ankyrin repeat domain 53
hsa-miR-1301	1	0	1	1	1	1	STK38L	serine/threonine kinase 38 like
hsa-miR-1301	1	0	1	0	1	1	PLK3	polo-like kinase 3
hsa-miR-1301	1	0	1	1	1	1	WIPF1	WAS/WASL interacting protein family, member 1
hsa-miR-1301	0	0	1	0	0	0	LOC150568	uncharacterized LOC150568
hsa-miR-1301	1	0	1	1	0	0	MYO1F	myosin IF
hsa-miR-1301	1	0	1	1	1	1	DKK3	dickkopf 3 homolog (Xenopus laevis)
hsa-miR-1301	0	0	1	1	1	1	MPDU1	mannose-P-dolichol utilization defect 1
hsa-miR-1301	0	0	1	0	1	1	RASA4	RAS p21 protein activator 4
hsa-miR-1301	0	0	1	1	0	0	RPS3	ribosomal protein S3
hsa-miR-1301	0	0	1	0	0	0	LOC677759	uncharacterized LOC677759
hsa-miR-1301	1	0	1	1	1	1	DOK4	docking protein 4
hsa-miR-1301	0	0	1	1	0	0	CCDC22	coiled-coil domain containing 22
hsa-miR-1301	0	0	1	1	1	1	RPUSD1	RNA pseudouridylate synthase domain containing 1
hsa-miR-1301	0	0	1	1	0	0	C1orf122	chromosome 1 open reading frame 122
hsa-miR-1301	0	0	1	0	0	0	ZNF720	zinc finger protein 720
hsa-miR-1301	0	0	1	1	0	0	MRPS18A	mitochondrial ribosomal protein S18A
hsa-miR-1301	1	0	1	1	1	1	TAGLN2	transgelin 2
hsa-miR-1301	0	0	1	1	1	1	TFAM	transcription factor A, mitochondrial
hsa-miR-1301	1	0	1	1	1	1	PPP3CB	protein phosphatase 3, catalytic subunit, beta isozyme
hsa-miR-1301	0	0	1	0	1	1	VSTM2A	V-set and transmembrane domain containing 2A
hsa-miR-1301	0	0	1	0	1	1	RPL10	ribosomal protein L10
hsa-miR-1301	1	0	1	1	1	1	TIMP3	TIMP metallopeptidase inhibitor 3
hsa-miR-1301	1	0	1	1	1	1	DPF2	D4, zinc and double PHD fingers family 2
hsa-miR-1301	1	0	1	1	1	1	VEGFA	vascular endothelial growth factor A
hsa-miR-1301	0	0	1	1	0	0	PHPT1	phosphohistidine phosphatase 1
hsa-miR-1301	0	0	1	1	0	0	FAM57B	family with sequence similarity 57, member B
hsa-miR-1301	1	0	1	1	1	1	ATAT1	alpha tubulin acetyltransferase 1
hsa-miR-1301	0	0	1	1	1	1	CD1C	CD1c molecule
hsa-miR-1301	0	0	1	1	1	1	LDHA	lactate dehydrogenase A
hsa-miR-1301	1	0	1	1	1	1	PFN2	profilin 2
hsa-miR-1301	1	0	1	1	1	1	EIF1	eukaryotic translation initiation factor 1
hsa-miR-1301	1	0	1	0	1	1	GRAMD1A	GRAM domain containing 1A
hsa-miR-1301	1	0	1	1	0	0	CRELD1	cysteine-rich with EGF-like domains 1
hsa-miR-1301	0	0	1	1	0	0	CD79B	CD79b molecule, immunoglobulin-associated beta
hsa-miR-1301	1	0	1	1	1	1	RPUSD3	RNA pseudouridylate synthase domain containing 3
hsa-miR-1301	1	0	1	1	0	0	INO80E	INO80 complex subunit E
hsa-miR-1301	0	0	1	1	0	0	CCNDBP1	cyclin D-type binding-protein 1
hsa-miR-1301	1	0	1	0	1	1	MAP1B	microtubule-associated protein 1B
hsa-miR-1301	0	0	1	1	0	0	BCKDK	branched chain ketoacid dehydrogenase kinase
hsa-miR-1301	1	0	1	1	1	1	TMEM55B	transmembrane protein 55B
hsa-miR-1301	1	0	1	1	1	1	RALY	RNA binding protein, autoantigenic (hnRNP-associated with lethal yellow homolog (mouse))
hsa-miR-1301	0	0	1	1	0	0	PC	pyruvate carboxylase
hsa-miR-1301	0	0	1	1	1	1	LGI1	leucine-rich, glioma inactivated 1
hsa-miR-1301	0	0	1	1	0	0	OLFM1	olfactomedin 1
hsa-miR-1301	1	0	1	0	1	1	CD47	CD47 molecule
hsa-miR-1301	1	0	1	1	1	1	RUNX1	runt-related transcription factor 1
hsa-miR-1301	0	0	1	1	0	0	SLC15A3	solute carrier family 15, member 3
hsa-miR-1301	0	0	1	1	0	0	TESK1	testis-specific kinase 1
hsa-miR-1301	0	0	1	0	1	1	SEPT7	septin 7
hsa-miR-1301	1	0	1	1	1	1	ATPAF1	ATP synthase mitochondrial F1 complex assembly factor 1
hsa-miR-1301	1	0	1	1	1	1	TIPRL	TIP41, TOR signaling pathway regulator-like (S. cerevisiae)
hsa-miR-1301	1	0	1	1	0	0	RAD9A	RAD9 homolog A (S. pombe)
hsa-miR-1301	0	0	1	1	0	0	FES	feline sarcoma oncogene
hsa-miR-1301	0	0	1	1	1	1	FAM118B	family with sequence similarity 118, member B
hsa-miR-1301	0	0	1	1	0	0	ISG20	interferon stimulated exonuclease gene 20kDa
hsa-miR-1301	1	0	1	1	1	1	LGALSL	lectin, galactoside-binding-like
hsa-miR-1301	0	0	1	1	1	1	TOP3B	topoisomerase (DNA) III beta
hsa-miR-1301	0	0	1	1	1	1	C10orf2	chromosome 10 open reading frame 2
hsa-miR-1301	1	0	1	1	0	0	MMP11	matrix metallopeptidase 11 (stromelysin 3)
hsa-miR-1301	1	0	1	0	1	1	NMT1	N-myristoyltransferase 1
hsa-miR-1301	1	0	1	1	1	1	SLMAP	sarcolemma associated protein
hsa-miR-1301	0	0	1	1	1	1	UPRT	uracil phosphoribosyltransferase (FUR1) homolog (S. cerevisiae)
hsa-miR-1301	0	0	1	0	1	1	C3orf17	chromosome 3 open reading frame 17
hsa-miR-1301	0	0	1	1	1	1	MRPL42	mitochondrial ribosomal protein L42
hsa-miR-1301	0	0	1	0	0	0	LINC00661	long intergenic non-protein coding RNA 661
hsa-miR-1301	1	0	1	0	1	1	SLC7A6	solute carrier family 7 (amino acid transporter light chain, y+L system), member 6
hsa-miR-1301	0	0	1	1	0	0	FMN1	formin 1
hsa-miR-1301	0	0	1	0	0	0	MUC19	mucin 19, oligomeric
hsa-miR-1301	0	0	1	0	1	1	NWD1	NACHT and WD repeat domain containing 1
hsa-miR-1301	1	0	1	0	1	1	CNTNAP2	contactin associated protein-like 2
hsa-miR-1301	1	0	1	1	1	1	SLC30A7	solute carrier family 30 (zinc transporter), member 7
hsa-miR-1301	1	0	1	1	1	1	ZFHX3	zinc finger homeobox 3
hsa-miR-1301	0	0	1	1	0	0	GOLGB1	golgin B1
hsa-miR-1301	1	0	1	1	1	1	MAN2A2	mannosidase, alpha, class 2A, member 2
hsa-miR-1301	1	0	1	1	1	1	SEC14L1	SEC14-like 1 (S. cerevisiae)
hsa-miR-1301	0	0	1	1	1	1	ATF2	activating transcription factor 2
hsa-miR-1301	0	0	1	1	1	1	LTA	lymphotoxin alpha (TNF superfamily, member 1)
hsa-miR-1301	1	0	1	1	1	1	ATP2B3	ATPase, Ca++ transporting, plasma membrane 3
hsa-miR-1301	0	0	1	1	0	0	SPATA20	spermatogenesis associated 20
hsa-miR-1301	1	0	1	1	0	0	DPY19L1	dpy-19-like 1 (C. elegans)
hsa-miR-1301	0	0	1	1	1	1	P2RX7	purinergic receptor P2X, ligand-gated ion channel, 7
hsa-miR-1301	1	0	1	0	1	1	MAP2K7	mitogen-activated protein kinase kinase 7
hsa-miR-1301	1	0	1	1	0	0	LGSN	lengsin, lens protein with glutamine synthetase domain
hsa-miR-1301	0	0	1	0	0	0	POM121L8P	POM121 transmembrane nucleoporin-like 8 pseudogene
hsa-miR-1301	0	0	1	1	0	0	NBPF9	neuroblastoma breakpoint family, member 9
hsa-miR-1301	0	0	1	1	1	1	PROS1	protein S (alpha)
hsa-miR-1301	0	0	1	1	1	1	ITGAX	integrin, alpha X (complement component 3 receptor 4 subunit)
hsa-miR-1301	1	0	1	0	1	1	EPDR1	ependymin related protein 1 (zebrafish)
hsa-miR-1301	0	0	1	1	0	0	CEACAM3	carcinoembryonic antigen-related cell adhesion molecule 3
hsa-miR-1301	1	0	1	1	1	1	DAPK1	death-associated protein kinase 1
hsa-miR-1301	0	0	1	0	0	0	GPR144	G protein-coupled receptor 144
hsa-miR-1301	1	0	1	0	1	1	KCNB1	potassium voltage-gated channel, Shab-related subfamily, member 1
hsa-miR-1301	1	0	1	1	1	1	MLL	myeloid/lymphoid or mixed-lineage leukemia (trithorax homolog, Drosophila)
hsa-miR-1301	0	0	1	1	1	1	ADPRH	ADP-ribosylarginine hydrolase
hsa-miR-1301	1	0	1	1	1	1	AFF1	AF4/FMR2 family, member 1
hsa-miR-1301	1	0	1	0	1	1	STAT3	signal transducer and activator of transcription 3 (acute-phase response factor)
hsa-miR-1301	1	0	1	1	1	1	RALBP1	ralA binding protein 1
hsa-miR-1301	1	0	1	0	1	1	BCL2	B-cell CLL/lymphoma 2
hsa-miR-1301	1	0	1	1	1	1	PLAU	plasminogen activator, urokinase
hsa-miR-1301	0	0	1	1	1	1	ALDOB	aldolase B, fructose-bisphosphate
hsa-miR-1301	0	0	1	1	1	1	ATP7A	ATPase, Cu++ transporting, alpha polypeptide
hsa-miR-1301	0	0	1	1	1	1	FABP2	fatty acid binding protein 2, intestinal
hsa-miR-1301	0	0	1	0	1	1	MS4A2	membrane-spanning 4-domains, subfamily A, member 2
hsa-miR-1301	1	0	1	1	1	1	FUT1	fucosyltransferase 1 (galactoside 2-alpha-L-fucosyltransferase, H blood group)
hsa-miR-1301	1	0	1	0	1	1	GLI3	GLI family zinc finger 3
hsa-miR-1301	1	0	1	1	1	1	INSR	insulin receptor
hsa-miR-1301	1	0	1	1	1	1	KCNA1	potassium voltage-gated channel, shaker-related subfamily, member 1 (episodic ataxia with myokymia)
hsa-miR-1301	0	0	1	0	1	1	PGK1	phosphoglycerate kinase 1
hsa-miR-1301	1	0	1	1	1	1	RB1	retinoblastoma 1
hsa-miR-1301	1	0	1	1	1	1	ATXN1	ataxin 1
hsa-miR-1301	0	0	1	1	1	1	SLC5A1	solute carrier family 5 (sodium/glucose cotransporter), member 1
hsa-miR-1301	0	0	1	1	1	1	XDH	xanthine dehydrogenase
hsa-miR-1301	1	0	1	1	1	1	BLMH	bleomycin hydrolase
hsa-miR-1301	1	0	1	0	1	1	CYBB	cytochrome b-245, beta polypeptide
hsa-miR-1301	1	0	1	1	1	1	HLCS	holocarboxylase synthetase (biotin-(proprionyl-CoA-carboxylase (ATP-hydrolysing)) ligase)
hsa-miR-1301	0	0	1	1	1	1	L1CAM	L1 cell adhesion molecule
hsa-miR-1301	1	0	1	0	1	1	PAFAH1B1	platelet-activating factor acetylhydrolase 1b, regulatory subunit 1 (45kDa)
hsa-miR-1301	0	0	1	1	1	1	PECAM1	platelet/endothelial cell adhesion molecule 1
hsa-miR-1301	0	0	1	1	0	0	PHEX	phosphate regulating endopeptidase homolog, X-linked
hsa-miR-1301	0	0	1	1	1	1	PLEC	plectin
hsa-miR-1301	0	0	1	0	1	1	SLC10A2	solute carrier family 10 (sodium/bile acid cotransporter family), member 2
hsa-miR-1301	1	0	1	1	1	1	HOXD13	homeobox D13
hsa-miR-1301	0	0	1	1	0	0	VWF	von Willebrand factor
hsa-miR-1301	1	0	1	1	1	1	DCX	doublecortin
hsa-miR-1301	0	0	1	1	1	1	GPX1	glutathione peroxidase 1
hsa-miR-1301	1	0	1	0	1	1	ALDH1A3	aldehyde dehydrogenase 1 family, member A3
hsa-miR-1301	0	0	1	1	1	1	CRH	corticotropin releasing hormone
hsa-miR-1301	1	0	1	1	1	1	GABRB3	gamma-aminobutyric acid (GABA) A receptor, beta 3
hsa-miR-1301	1	0	1	1	0	0	GRIK3	glutamate receptor, ionotropic, kainate 3
hsa-miR-1301	1	0	1	1	0	0	GRIN2A	glutamate receptor, ionotropic, N-methyl D-aspartate 2A
hsa-miR-1301	0	0	1	1	1	1	GRIN2B	glutamate receptor, ionotropic, N-methyl D-aspartate 2B
hsa-miR-1301	0	0	1	1	1	1	GRM3	glutamate receptor, metabotropic 3
hsa-miR-1301	1	0	1	1	1	1	GRM7	glutamate receptor, metabotropic 7
hsa-miR-1301	0	0	1	1	1	1	HTR7	5-hydroxytryptamine (serotonin) receptor 7, adenylate cyclase-coupled
hsa-miR-1301	1	0	1	1	1	1	PTGDR	prostaglandin D2 receptor (DP)
hsa-miR-1301	1	0	1	0	1	1	SMAD5	SMAD family member 5
hsa-miR-1301	1	0	1	0	1	1	ARHGEF37	Rho guanine nucleotide exchange factor (GEF) 37
hsa-miR-1301	0	0	1	0	1	1	C9orf170	chromosome 9 open reading frame 170
hsa-miR-1301	1	0	1	1	1	1	FAM13C	family with sequence similarity 13, member C
hsa-miR-1301	1	0	1	1	1	1	LCLAT1	lysocardiolipin acyltransferase 1
hsa-miR-1301	1	0	1	1	1	1	GATA3	GATA binding protein 3
hsa-miR-1301	1	0	1	1	1	1	DNAJB12	DnaJ (Hsp40) homolog, subfamily B, member 12
hsa-miR-1301	1	0	1	1	1	1	WNK3	WNK lysine deficient protein kinase 3
hsa-miR-1301	0	0	1	1	1	1	PTRH1	peptidyl-tRNA hydrolase 1 homolog (S. cerevisiae)
hsa-miR-1301	1	0	1	0	1	1	CACNA1I	calcium channel, voltage-dependent, T type, alpha 1I subunit
hsa-miR-1301	1	0	1	0	1	1	SMAD2	SMAD family member 2
hsa-miR-1301	1	0	1	1	1	1	TMEM200B	transmembrane protein 200B
hsa-miR-1301	1	0	1	1	1	1	KLHL31	kelch-like 31 (Drosophila)
hsa-miR-1301	1	0	1	0	1	1	BMF	Bcl2 modifying factor
hsa-miR-1301	0	0	1	1	1	1	ALG11	asparagine-linked glycosylation 11, alpha-1,2-mannosyltransferase homolog (yeast)
hsa-miR-1301	1	0	1	0	1	1	LIN28B	lin-28 homolog B (C. elegans)
hsa-miR-1301	0	0	1	1	1	1	AGMO	alkylglycerol monooxygenase
hsa-miR-1301	0	0	1	1	1	1	DBX2	developing brain homeobox 2
hsa-miR-1301	0	0	1	0	1	1	FLJ46347	uncharacterized LOC389064
hsa-miR-1301	1	0	1	1	1	1	EDA	ectodysplasin A
hsa-miR-1301	0	0	1	1	1	1	LINC00478	long intergenic non-protein coding RNA 478
hsa-miR-1301	1	0	1	0	1	1	IP6K1	inositol hexakisphosphate kinase 1
hsa-miR-1301	0	0	1	0	0	0	FSD2	fibronectin type III and SPRY domain containing 2
hsa-miR-1301	1	0	1	0	1	1	CACYBP	calcyclin binding protein
hsa-miR-1301	1	0	1	1	1	1	IGSF3	immunoglobulin superfamily, member 3
hsa-miR-1301	1	0	1	1	1	1	BRWD1	bromodomain and WD repeat domain containing 1
hsa-miR-1301	0	0	1	1	1	1	RASL10A	RAS-like, family 10, member A
hsa-miR-1301	1	0	1	1	1	1	ZDHHC9	zinc finger, DHHC-type containing 9
hsa-miR-1301	1	0	1	1	1	1	BCAP29	B-cell receptor-associated protein 29
hsa-miR-1301	1	0	1	1	1	1	RBM33	RNA binding motif protein 33
hsa-miR-1301	1	0	1	1	1	1	EML1	echinoderm microtubule associated protein like 1
hsa-miR-1301	0	0	1	1	1	1	GCSAM	germinal center-associated, signaling and motility
hsa-miR-1301	0	0	1	1	1	1	ZCCHC11	zinc finger, CCHC domain containing 11
hsa-miR-1301	1	0	1	0	1	1	FAM102B	family with sequence similarity 102, member B
hsa-miR-1301	1	0	1	0	1	1	ZC3H12B	zinc finger CCCH-type containing 12B
hsa-miR-1301	0	0	1	1	1	1	CHCHD7	coiled-coil-helix-coiled-coil-helix domain containing 7
hsa-miR-1301	0	0	1	1	0	0	SOHLH1	spermatogenesis and oogenesis specific basic helix-loop-helix 1
hsa-miR-1301	1	0	1	1	1	1	SLC25A53	solute carrier family 25, member 53
hsa-miR-1301	1	0	1	1	1	1	UBE2NL	ubiquitin-conjugating enzyme E2N-like
hsa-miR-1301	0	0	1	1	1	1	CCNC	cyclin C
hsa-miR-1301	1	0	1	1	1	1	C12orf68	chromosome 12 open reading frame 68
hsa-miR-1301	1	0	1	1	1	1	RUNX2	runt-related transcription factor 2
hsa-miR-1301	0	0	1	1	0	0	SPRR2B	small proline-rich protein 2B
hsa-miR-1301	0	0	1	1	0	0	ALDH18A1	aldehyde dehydrogenase 18 family, member A1
hsa-miR-1301	1	0	1	1	1	1	ZHX1	zinc fingers and homeoboxes 1
hsa-miR-1301	0	0	1	1	1	1	ACTBL2	actin, beta-like 2
hsa-miR-1301	1	0	1	1	1	1	SORBS3	sorbin and SH3 domain containing 3
hsa-miR-1301	0	0	1	1	0	0	POLR3H	polymerase (RNA) III (DNA directed) polypeptide H (22.9kD)
hsa-miR-1301	1	0	1	1	1	1	ABCC5	ATP-binding cassette, sub-family C (CFTR/MRP), member 5
hsa-miR-1301	1	0	1	0	1	1	RGAG4	retrotransposon gag domain containing 4
hsa-miR-1301	1	0	1	0	1	1	BCL7A	B-cell CLL/lymphoma 7A
hsa-miR-1301	1	0	1	0	1	1	TNRC6B	trinucleotide repeat containing 6B
hsa-miR-1301	1	0	1	1	1	1	TGFBR2	transforming growth factor, beta receptor II (70/80kDa)
hsa-miR-1301	1	0	1	1	1	1	FNBP1L	formin binding protein 1-like
hsa-miR-1301	0	0	1	1	0	0	ARPC4	actin related protein 2/3 complex, subunit 4, 20kDa
hsa-miR-1301	1	0	1	0	1	1	CELF2	CUGBP, Elav-like family member 2
hsa-miR-1301	1	0	1	0	1	1	C3orf70	chromosome 3 open reading frame 70
hsa-miR-1301	1	0	1	1	1	1	KCTD21	potassium channel tetramerisation domain containing 21
hsa-miR-1301	1	0	1	0	1	1	MSRB3	methionine sulfoxide reductase B3
hsa-miR-1301	1	0	1	1	1	1	YTHDC1	YTH domain containing 1
hsa-miR-1301	0	0	1	1	1	1	C12orf40	chromosome 12 open reading frame 40
hsa-miR-1301	1	0	1	1	1	1	MAF	v-maf musculoaponeurotic fibrosarcoma oncogene homolog (avian)
hsa-miR-1301	1	0	1	1	1	1	MASP1	mannan-binding lectin serine peptidase 1 (C4/C2 activating component of Ra-reactive factor)
hsa-miR-1301	0	0	1	1	1	1	PLGLB1	plasminogen-like B1
hsa-miR-1301	1	0	1	0	1	1	GPR126	G protein-coupled receptor 126
hsa-miR-1301	1	0	1	1	1	1	AMD1	adenosylmethionine decarboxylase 1
hsa-miR-1301	1	0	1	1	1	1	TMEM98	transmembrane protein 98
hsa-miR-1301	1	0	1	1	0	0	MTUS2	microtubule associated tumor suppressor candidate 2
hsa-miR-1301	1	0	1	1	1	1	ACPL2	acid phosphatase-like 2
hsa-miR-1301	1	0	1	0	1	1	ARL5A	ADP-ribosylation factor-like 5A
hsa-miR-1301	0	0	1	1	1	1	C18orf62	chromosome 18 open reading frame 62
hsa-miR-1301	0	0	1	1	1	1	SPATA6L	spermatogenesis associated 6-like
hsa-miR-1301	1	0	1	1	1	1	ELMO1	engulfment and cell motility 1
hsa-miR-1301	1	0	1	1	1	1	KIAA0317	KIAA0317
hsa-miR-1301	0	0	1	1	1	1	MAP9	microtubule-associated protein 9
hsa-miR-1301	1	0	1	0	1	1	CREBZF	CREB/ATF bZIP transcription factor
hsa-miR-1301	0	0	1	1	0	0	ANGPTL4	angiopoietin-like 4
hsa-miR-1301	1	0	1	1	1	1	CHTF8	CTF8, chromosome transmission fidelity factor 8 homolog (S. cerevisiae)
hsa-miR-1301	0	0	1	1	1	1	ANKRD55	ankyrin repeat domain 55
hsa-miR-1301	1	0	1	1	1	1	FAM3C	family with sequence similarity 3, member C
hsa-miR-1301	0	0	1	0	1	1	SCN3B	sodium channel, voltage-gated, type III, beta subunit
hsa-miR-1301	1	0	1	1	1	1	PAPD5	PAP associated domain containing 5
hsa-miR-1301	0	0	1	1	1	1	MTHFD2	methylenetetrahydrofolate dehydrogenase (NADP+ dependent) 2, methenyltetrahydrofolate cyclohydrolase
hsa-miR-1301	1	0	1	1	0	0	BCL2L12	BCL2-like 12 (proline rich)
hsa-miR-1301	0	0	1	1	0	0	DEFB107B	defensin, beta 107B
hsa-miR-1301	0	0	1	1	0	0	FAM110A	family with sequence similarity 110, member A
hsa-miR-1301	1	0	1	1	1	1	RUFY2	RUN and FYVE domain containing 2
hsa-miR-1301	0	0	1	1	1	1	GEMIN8	gem (nuclear organelle) associated protein 8
hsa-miR-1301	0	0	1	1	1	1	C6orf162	chromosome 6 open reading frame 162
hsa-miR-1301	1	0	1	1	1	1	ZNF706	zinc finger protein 706
hsa-miR-1301	1	0	1	1	1	1	ERBB4	v-erb-a erythroblastic leukemia viral oncogene homolog 4 (avian)
hsa-miR-1301	1	0	1	1	1	1	SNX21	sorting nexin family member 21
hsa-miR-1301	1	0	1	1	1	1	RERE	arginine-glutamic acid dipeptide (RE) repeats
hsa-miR-1301	1	0	1	1	1	1	TPM3	tropomyosin 3
hsa-miR-1301	0	0	1	1	1	1	FAM22G	family with sequence similarity 22, member G
hsa-miR-1301	0	0	1	1	1	1	RCC1	regulator of chromosome condensation 1
hsa-miR-1301	1	0	1	1	1	1	HIPK3	homeodomain interacting protein kinase 3
hsa-miR-1301	0	0	1	1	0	0	TCN1	transcobalamin I (vitamin B12 binding protein, R binder family)
hsa-miR-1301	1	0	1	1	1	1	HS6ST2	heparan sulfate 6-O-sulfotransferase 2
hsa-miR-1301	1	0	1	1	1	1	SREK1	splicing regulatory glutamine/lysine-rich protein 1
hsa-miR-1301	0	0	1	1	1	1	KLK10	kallikrein-related peptidase 10
hsa-miR-1301	0	0	1	1	0	0	FAM127A	family with sequence similarity 127, member A
hsa-miR-1301	1	0	1	0	0	0	FAM127B	family with sequence similarity 127, member B
hsa-miR-1301	1	0	1	1	1	1	HNRNPUL2	heterogeneous nuclear ribonucleoprotein U-like 2
hsa-miR-1301	0	0	1	0	0	0	TMEM183B	transmembrane protein 183B
hsa-miR-1301	1	0	1	1	1	1	HAP1	huntingtin-associated protein 1
hsa-miR-1301	1	0	1	1	1	1	VAV3	vav 3 guanine nucleotide exchange factor
hsa-miR-1301	1	0	1	1	1	1	LDB3	LIM domain binding 3
hsa-miR-1301	1	0	1	1	1	1	PACRG	PARK2 co-regulated
hsa-miR-1301	1	0	1	1	1	1	SHANK3	SH3 and multiple ankyrin repeat domains 3
hsa-miR-1301	0	0	1	1	1	1	IGSF5	immunoglobulin superfamily, member 5
hsa-miR-1301	1	0	1	1	1	1	ZNF697	zinc finger protein 697
hsa-miR-1301	0	0	1	1	1	1	CPN2	carboxypeptidase N, polypeptide 2
hsa-miR-1301	0	0	1	1	1	1	C15orf57	chromosome 15 open reading frame 57
hsa-miR-1301	1	0	1	1	1	1	NXF1	nuclear RNA export factor 1
hsa-miR-1301	1	0	1	1	1	1	ASIC1	acid-sensing (proton-gated) ion channel 1
hsa-miR-1301	0	0	1	1	1	1	ACTA1	actin, alpha 1, skeletal muscle
hsa-miR-1301	0	0	1	1	0	0	AZGP1	alpha-2-glycoprotein 1, zinc-binding
hsa-miR-1301	1	0	1	0	1	1	KLF9	Kruppel-like factor 9
hsa-miR-1301	1	0	1	1	1	1	CASP10	caspase 10, apoptosis-related cysteine peptidase
hsa-miR-1301	0	0	1	1	1	1	ENTPD3	ectonucleoside triphosphate diphosphohydrolase 3
hsa-miR-1301	1	0	1	0	1	1	CDK6	cyclin-dependent kinase 6
hsa-miR-1301	1	0	1	1	1	1	MAPK14	mitogen-activated protein kinase 14
hsa-miR-1301	0	0	1	1	0	0	DIO3	deiodinase, iodothyronine, type III
hsa-miR-1301	1	0	1	1	1	1	CELSR2	cadherin, EGF LAG seven-pass G-type receptor 2 (flamingo homolog, Drosophila)
hsa-miR-1301	1	0	1	1	0	0	GDI1	GDP dissociation inhibitor 1
hsa-miR-1301	0	0	1	1	0	0	HSPB2	heat shock 27kDa protein 2
hsa-miR-1301	1	0	1	1	1	1	NDST1	N-deacetylase/N-sulfotransferase (heparan glucosaminyl) 1
hsa-miR-1301	0	0	1	1	1	1	APOD	apolipoprotein D
hsa-miR-1301	1	0	1	1	1	1	ARF3	ADP-ribosylation factor 3
hsa-miR-1301	0	0	1	1	1	1	RHOA	ras homolog family member A
hsa-miR-1301	1	0	1	0	1	1	ATP1B2	ATPase, Na+/K+ transporting, beta 2 polypeptide
hsa-miR-1301	1	0	1	1	1	1	BAAT	bile acid CoA: amino acid N-acyltransferase (glycine N-choloyltransferase)
hsa-miR-1301	0	0	1	1	0	0	BGN	biglycan
hsa-miR-1301	0	0	1	1	0	0	CXCR5	chemokine (C-X-C motif) receptor 5
hsa-miR-1301	0	0	1	1	1	1	BTC	betacellulin
hsa-miR-1301	0	0	1	1	0	0	C5	complement component 5
hsa-miR-1301	1	0	1	1	1	1	CBFB	core-binding factor, beta subunit
hsa-miR-1301	1	0	1	0	1	1	CCND2	cyclin D2
hsa-miR-1301	0	0	1	1	1	1	CD1D	CD1d molecule
hsa-miR-1301	0	0	1	1	1	1	CD34	CD34 molecule
hsa-miR-1301	1	0	1	1	1	1	CDK2	cyclin-dependent kinase 2
hsa-miR-1301	1	0	1	1	1	1	CENPB	centromere protein B, 80kDa
hsa-miR-1301	1	0	1	1	1	1	CLCN4	chloride channel, voltage-sensitive 4
hsa-miR-1301	1	0	1	1	1	1	COL4A6	collagen, type IV, alpha 6
hsa-miR-1301	1	0	1	0	1	1	COL19A1	collagen, type XIX, alpha 1
hsa-miR-1301	0	0	1	1	1	1	SLC31A2	solute carrier family 31 (copper transporters), member 2
hsa-miR-1301	0	0	1	0	0	0	CPE	carboxypeptidase E
hsa-miR-1301	1	0	1	1	1	1	CSNK2A1	casein kinase 2, alpha 1 polypeptide
hsa-miR-1301	1	0	1	1	1	1	DPP4	dipeptidyl-peptidase 4
hsa-miR-1301	0	0	1	1	1	1	DPT	dermatopontin
hsa-miR-1301	1	0	1	1	1	1	E2F3	E2F transcription factor 3
hsa-miR-1301	1	0	1	0	1	1	ETV6	ets variant 6
hsa-miR-1301	1	0	1	0	1	1	FUT4	fucosyltransferase 4 (alpha (1,3) fucosyltransferase, myeloid-specific)
hsa-miR-1301	0	0	1	1	1	1	FYN	FYN oncogene related to SRC, FGR, YES
hsa-miR-1301	0	0	1	0	1	1	GYPE	glycophorin E (MNS blood group)
hsa-miR-1301	1	0	1	1	1	1	TNC	tenascin C
hsa-miR-1301	1	0	1	1	1	1	ISL1	ISL LIM homeobox 1
hsa-miR-1301	1	0	1	1	1	1	ITGA5	integrin, alpha 5 (fibronectin receptor, alpha polypeptide)
hsa-miR-1301	1	0	1	1	1	1	ITGB8	integrin, beta 8
hsa-miR-1301	1	0	1	1	0	0	JUP	junction plakoglobin
hsa-miR-1301	1	0	1	1	1	1	KCNJ10	potassium inwardly-rectifying channel, subfamily J, member 10
hsa-miR-1301	1	0	1	0	1	1	KIF3C	kinesin family member 3C
hsa-miR-1301	1	0	1	1	1	1	KPNA3	karyopherin alpha 3 (importin alpha 4)
hsa-miR-1301	0	0	1	1	0	0	LGALS1	lectin, galactoside-binding, soluble, 1
hsa-miR-1301	1	0	1	1	1	1	LIMK1	LIM domain kinase 1
hsa-miR-1301	1	0	1	1	1	1	MARCKS	myristoylated alanine-rich protein kinase C substrate
hsa-miR-1301	1	0	1	1	1	1	MAFG	v-maf musculoaponeurotic fibrosarcoma oncogene homolog G (avian)
hsa-miR-1301	0	0	1	0	1	1	CXCL9	chemokine (C-X-C motif) ligand 9
hsa-miR-1301	1	0	1	1	1	1	MSN	moesin
hsa-miR-1301	1	0	1	1	1	1	MYH9	myosin, heavy chain 9, non-muscle
hsa-miR-1301	0	0	1	1	0	0	MYOG	myogenin (myogenic factor 4)
hsa-miR-1301	1	0	1	1	1	1	NEUROD1	neuronal differentiation 1
hsa-miR-1301	1	0	1	1	1	1	NGFR	nerve growth factor receptor
hsa-miR-1301	0	0	1	1	1	1	NOV	nephroblastoma overexpressed
hsa-miR-1301	1	0	1	1	1	1	NPTX1	neuronal pentraxin I
hsa-miR-1301	1	0	1	1	1	1	OLR1	oxidized low density lipoprotein (lectin-like) receptor 1
hsa-miR-1301	1	0	1	0	1	1	PAK2	p21 protein (Cdc42/Rac)-activated kinase 2
hsa-miR-1301	1	0	1	0	1	1	PAPPA	pregnancy-associated plasma protein A, pappalysin 1
hsa-miR-1301	1	0	1	0	1	1	CDK17	cyclin-dependent kinase 17
hsa-miR-1301	1	0	1	1	1	1	PGAM1	phosphoglycerate mutase 1 (brain)
hsa-miR-1301	0	0	1	1	1	1	PLGLB2	plasminogen-like B2
hsa-miR-1301	0	0	1	0	1	1	PMP2	peripheral myelin protein 2
hsa-miR-1301	1	0	1	0	0	0	PPP1R10	protein phosphatase 1, regulatory subunit 10
hsa-miR-1301	0	0	1	1	1	1	PRKCB	protein kinase C, beta
hsa-miR-1301	1	0	1	1	1	1	MAPK6	mitogen-activated protein kinase 6
hsa-miR-1301	1	0	1	1	1	1	PTPRJ	protein tyrosine phosphatase, receptor type, J
hsa-miR-1301	1	0	1	1	1	1	PTPRK	protein tyrosine phosphatase, receptor type, K
hsa-miR-1301	1	0	1	1	1	1	PVRL1	poliovirus receptor-related 1 (herpesvirus entry mediator C)
hsa-miR-1301	1	0	1	1	0	0	RFX1	regulatory factor X, 1 (influences HLA class II expression)
hsa-miR-1301	0	0	1	1	0	0	RNASE1	ribonuclease, RNase A family, 1 (pancreatic)
hsa-miR-1301	1	0	1	1	1	1	ROBO2	roundabout, axon guidance receptor, homolog 2 (Drosophila)
hsa-miR-1301	1	0	1	0	1	1	SORT1	sortilin 1
hsa-miR-1301	1	0	1	1	1	1	SALL1	sal-like 1 (Drosophila)
hsa-miR-1301	1	0	1	0	1	1	CCL22	chemokine (C-C motif) ligand 22
hsa-miR-1301	1	0	1	0	0	0	CX3CL1	chemokine (C-X3-C motif) ligand 1
hsa-miR-1301	1	0	1	1	1	1	SLC9A2	solute carrier family 9, subfamily A (NHE2, cation proton antiporter 2), member 2
hsa-miR-1301	1	0	1	1	1	1	SNAI2	snail homolog 2 (Drosophila)
hsa-miR-1301	1	0	1	1	1	1	SMARCD1	SWI/SNF related, matrix associated, actin dependent regulator of chromatin, subfamily d, member 1
hsa-miR-1301	1	0	1	1	1	1	SNX2	sorting nexin 2
hsa-miR-1301	1	0	1	1	1	1	SOX2	SRY (sex determining region Y)-box 2
hsa-miR-1301	1	0	1	0	1	1	SOX11	SRY (sex determining region Y)-box 11
hsa-miR-1301	1	0	1	1	1	1	SRI	sorcin
hsa-miR-1301	1	0	1	1	1	1	SRF	serum response factor (c-fos serum response element-binding transcription factor)
hsa-miR-1301	1	0	1	1	1	1	SRPR	signal recognition particle receptor (docking protein)
hsa-miR-1301	1	0	1	1	1	1	STAC	SH3 and cysteine rich domain
hsa-miR-1301	0	0	1	1	1	1	STIM1	stromal interaction molecule 1
hsa-miR-1301	1	0	1	1	1	1	TFAP2B	transcription factor AP-2 beta (activating enhancer binding protein 2 beta)
hsa-miR-1301	1	0	1	1	1	1	TGFB3	transforming growth factor, beta 3
hsa-miR-1301	0	0	1	1	1	1	TPP2	tripeptidyl peptidase II
hsa-miR-1301	1	0	1	1	1	1	NR2C2	nuclear receptor subfamily 2, group C, member 2
hsa-miR-1301	1	0	1	0	1	1	UBE2D2	ubiquitin-conjugating enzyme E2D 2
hsa-miR-1301	1	0	1	1	1	1	UBE2N	ubiquitin-conjugating enzyme E2N
hsa-miR-1301	0	0	1	1	1	1	UBE2V2	ubiquitin-conjugating enzyme E2 variant 2
hsa-miR-1301	1	0	1	0	1	1	YWHAB	tyrosine 3-monooxygenase/tryptophan 5-monooxygenase activation protein, beta polypeptide
hsa-miR-1301	1	0	1	1	1	1	FZD5	frizzled family receptor 5
hsa-miR-1301	1	0	1	1	1	1	KCNAB1	potassium voltage-gated channel, shaker-related subfamily, beta member 1
hsa-miR-1301	1	0	1	0	1	1	VAPA	VAMP (vesicle-associated membrane protein)-associated protein A, 33kDa
hsa-miR-1301	1	0	1	0	1	1	CNTNAP1	contactin associated protein 1
hsa-miR-1301	1	0	1	0	1	1	ENC1	ectodermal-neural cortex 1 (with BTB-like domain)
hsa-miR-1301	0	0	1	1	1	1	DDO	D-aspartate oxidase
hsa-miR-1301	1	0	1	1	1	1	BARX2	BARX homeobox 2
hsa-miR-1301	0	0	1	1	1	1	AGPS	alkylglycerone phosphate synthase
hsa-miR-1301	0	0	1	1	1	1	KMO	kynurenine 3-monooxygenase (kynurenine 3-hydroxylase)
hsa-miR-1301	0	0	1	1	1	1	SLC25A12	solute carrier family 25 (aspartate/glutamate carrier), member 12
hsa-miR-1301	0	0	1	1	0	0	ADAM21	ADAM metallopeptidase domain 21
hsa-miR-1301	1	0	1	1	1	1	NR5A2	nuclear receptor subfamily 5, group A, member 2
hsa-miR-1301	1	0	1	1	1	1	FGF18	fibroblast growth factor 18
hsa-miR-1301	1	0	1	0	1	1	CDK5R1	cyclin-dependent kinase 5, regulatory subunit 1 (p35)
hsa-miR-1301	1	0	1	1	1	1	PHOX2B	paired-like homeobox 2b
hsa-miR-1301	0	0	1	1	1	1	RNF8	ring finger protein 8, E3 ubiquitin protein ligase
hsa-miR-1301	1	0	1	1	1	1	BTAF1	BTAF1 RNA polymerase II, B-TFIID transcription factor-associated, 170kDa (Mot1 homolog, S. cerevisiae)
hsa-miR-1301	1	0	1	1	1	1	MAP7	microtubule-associated protein 7
hsa-miR-1301	1	0	1	1	1	1	BCL2L2	BCL2-like 2
hsa-miR-1301	0	0	1	1	1	1	CDKN1B	cyclin-dependent kinase inhibitor 1B (p27, Kip1)
hsa-miR-1301	0	0	1	1	0	0	AP2S1	adaptor-related protein complex 2, sigma 1 subunit
hsa-miR-1301	0	0	1	1	0	0	CRYBB3	crystallin, beta B3
hsa-miR-1301	1	0	1	0	1	1	E2F2	E2F transcription factor 2
hsa-miR-1301	1	0	1	1	1	1	EFNB2	ephrin-B2
hsa-miR-1301	0	0	1	1	1	1	RAB27B	RAB27B, member RAS oncogene family
hsa-miR-1301	1	0	1	1	1	1	SHMT1	serine hydroxymethyltransferase 1 (soluble)
hsa-miR-1301	1	0	1	0	1	1	SLC1A2	solute carrier family 1 (glial high affinity glutamate transporter), member 2
hsa-miR-1301	0	0	1	1	1	1	SNRPD3	small nuclear ribonucleoprotein D3 polypeptide 18kDa
hsa-miR-1301	0	0	1	1	1	1	LY86	lymphocyte antigen 86
hsa-miR-1301	1	0	1	1	1	1	GDA	guanine deaminase
hsa-miR-1301	1	0	1	1	1	1	ARL3	ADP-ribosylation factor-like 3
hsa-miR-1301	0	0	1	1	1	1	CBLN1	cerebellin 1 precursor
hsa-miR-1301	0	0	1	1	1	1	COL12A1	collagen, type XII, alpha 1
hsa-miR-1301	1	0	1	1	1	1	COX11	COX11 cytochrome c oxidase assembly homolog (yeast)
hsa-miR-1301	1	0	1	1	1	1	DACH1	dachshund homolog 1 (Drosophila)
hsa-miR-1301	1	0	1	1	1	1	DAG1	dystroglycan 1 (dystrophin-associated glycoprotein 1)
hsa-miR-1301	1	0	1	1	1	1	EFNB1	ephrin-B1
hsa-miR-1301	1	0	1	1	1	1	EZH2	enhancer of zeste homolog 2 (Drosophila)
hsa-miR-1301	1	0	1	1	1	1	ACSL3	acyl-CoA synthetase long-chain family member 3
hsa-miR-1301	0	0	1	1	1	1	GP5	glycoprotein V (platelet)
hsa-miR-1301	0	0	1	1	1	1	NDUFA10	NADH dehydrogenase (ubiquinone) 1 alpha subcomplex, 10, 42kDa
hsa-miR-1301	0	0	1	1	1	1	PIGH	phosphatidylinositol glycan anchor biosynthesis, class H
hsa-miR-1301	1	0	1	1	1	1	WNT11	wingless-type MMTV integration site family, member 11
hsa-miR-1301	1	0	1	1	1	1	COIL	coilin
hsa-miR-1301	1	0	1	1	1	1	MTMR4	myotubularin related protein 4
hsa-miR-1301	1	0	1	1	1	1	MAP3K13	mitogen-activated protein kinase kinase kinase 13
hsa-miR-1301	0	0	1	1	1	1	SLC33A1	solute carrier family 33 (acetyl-CoA transporter), member 1
hsa-miR-1301	1	0	1	1	1	1	LARGE	like-glycosyltransferase
hsa-miR-1301	1	0	1	1	1	1	KIF3B	kinesin family member 3B
hsa-miR-1301	0	0	1	1	0	0	AIM2	absent in melanoma 2
hsa-miR-1301	1	0	1	0	1	1	ROCK2	Rho-associated, coiled-coil containing protein kinase 2
hsa-miR-1301	1	0	1	1	1	1	KIF23	kinesin family member 23
hsa-miR-1301	0	0	1	1	1	1	GDF10	growth differentiation factor 10
hsa-miR-1301	1	0	1	0	1	1	KIF5A	kinesin family member 5A
hsa-miR-1301	0	0	1	1	1	1	RGPD5	RANBP2-like and GRIP domain containing 5
hsa-miR-1301	1	0	1	1	1	1	MED13	mediator complex subunit 13
hsa-miR-1301	1	0	1	0	1	1	CALM3	calmodulin 3 (phosphorylase kinase, delta)
hsa-miR-1301	0	0	1	1	0	0	CALML3	calmodulin-like 3
hsa-miR-1301	0	0	1	1	1	1	LPAR4	lysophosphatidic acid receptor 4
hsa-miR-1301	0	0	1	1	1	1	PDIA3	protein disulfide isomerase family A, member 3
hsa-miR-1301	1	0	1	1	1	1	RALA	v-ral simian leukemia viral oncogene homolog A (ras related)
hsa-miR-1301	0	0	1	1	1	1	SKIL	SKI-like oncogene
hsa-miR-1301	0	0	1	1	1	1	FOSL1	FOS-like antigen 1
hsa-miR-1301	0	0	1	1	1	1	FAIM3	Fas apoptotic inhibitory molecule 3
hsa-miR-1301	1	0	1	0	0	0	FRAT1	frequently rearranged in advanced T-cell lymphomas
hsa-miR-1301	0	0	1	1	0	0	LMNB1	lamin B1
hsa-miR-1301	1	0	1	1	1	1	LPP	LIM domain containing preferred translocation partner in lipoma
hsa-miR-1301	0	0	1	1	1	1	BCAM	basal cell adhesion molecule (Lutheran blood group)
hsa-miR-1301	1	0	1	1	1	1	RHEB	Ras homolog enriched in brain
hsa-miR-1301	1	0	1	1	1	1	TMPRSS2	transmembrane protease, serine 2
hsa-miR-1301	0	0	1	1	0	0	SNURF	SNRPN upstream reading frame
hsa-miR-1301	1	0	1	1	0	0	TSPAN5	tetraspanin 5
hsa-miR-1301	1	0	1	1	1	1	ACTR1A	ARP1 actin-related protein 1 homolog A, centractin alpha (yeast)
hsa-miR-1301	1	0	1	1	1	1	LHFPL2	lipoma HMGIC fusion partner-like 2
hsa-miR-1301	0	0	1	1	1	1	RNF41	ring finger protein 41
hsa-miR-1301	1	0	1	0	1	1	SPRY3	sprouty homolog 3 (Drosophila)
hsa-miR-1301	1	0	1	1	1	1	MAT2A	methionine adenosyltransferase II, alpha
hsa-miR-1301	1	0	1	1	1	1	FOXO4	forkhead box O4
hsa-miR-1301	1	0	1	1	1	1	MMP16	matrix metallopeptidase 16 (membrane-inserted)
hsa-miR-1301	1	0	1	0	1	1	HDAC4	histone deacetylase 4
hsa-miR-1301	1	0	1	1	1	1	HS3ST4	heparan sulfate (glucosamine) 3-O-sulfotransferase 4
hsa-miR-1301	0	0	1	1	1	1	LANCL1	LanC lantibiotic synthetase component C-like 1 (bacterial)
hsa-miR-1301	1	0	1	1	1	1	DAGLA	diacylglycerol lipase, alpha
hsa-miR-1301	1	0	1	1	1	1	DYNC1LI2	dynein, cytoplasmic 1, light intermediate chain 2
hsa-miR-1301	0	0	1	1	1	1	IRF6	interferon regulatory factor 6
hsa-miR-1301	1	0	1	1	1	1	NCK1	NCK adaptor protein 1
hsa-miR-1301	1	0	1	1	1	1	NFATC1	nuclear factor of activated T-cells, cytoplasmic, calcineurin-dependent 1
hsa-miR-1301	0	0	1	1	0	0	NPPA	natriuretic peptide A
hsa-miR-1301	0	0	1	1	0	0	PNOC	prepronociceptin
hsa-miR-1301	0	0	1	1	1	1	RRAS	related RAS viral (r-ras) oncogene homolog
hsa-miR-1301	1	0	1	1	1	1	TLN1	talin 1
hsa-miR-1301	0	0	1	1	1	1	TYRO3	TYRO3 protein tyrosine kinase
hsa-miR-1301	1	0	1	1	1	1	SMC1A	structural maintenance of chromosomes 1A
hsa-miR-1301	0	0	1	1	1	1	PGRMC2	progesterone receptor membrane component 2
hsa-miR-1301	1	0	1	1	1	1	TUBGCP3	tubulin, gamma complex associated protein 3
hsa-miR-1301	0	0	1	1	1	1	SLC30A9	solute carrier family 30 (zinc transporter), member 9
hsa-miR-1301	1	0	1	1	1	1	ZNF238	zinc finger protein 238
hsa-miR-1301	1	0	1	1	1	1	VAT1	vesicle amine transport protein 1 homolog (T. californica)
hsa-miR-1301	1	0	1	1	1	1	NEBL	nebulette
hsa-miR-1301	0	0	1	1	1	1	TM9SF1	transmembrane 9 superfamily member 1
hsa-miR-1301	1	0	1	0	1	1	GNAI3	guanine nucleotide binding protein (G protein), alpha inhibiting activity polypeptide 3
hsa-miR-1301	0	0	1	0	1	1	SLC16A2	solute carrier family 16, member 2 (thyroid hormone transporter)
hsa-miR-1301	1	0	1	1	1	1	DYNLT3	dynein, light chain, Tctex-type 3
hsa-miR-1301	1	0	1	0	1	1	IGF2BP1	insulin-like growth factor 2 mRNA binding protein 1
hsa-miR-1301	1	0	1	1	1	1	CTCF	CCCTC-binding factor (zinc finger protein)
hsa-miR-1301	1	0	1	1	1	1	CORIN	corin, serine peptidase
hsa-miR-1301	1	0	1	0	1	1	API5	apoptosis inhibitor 5
hsa-miR-1301	0	0	1	1	0	0	WNK2	WNK lysine deficient protein kinase 2
hsa-miR-1301	0	0	1	1	1	1	GLO1	glyoxalase I
hsa-miR-1301	0	0	1	1	0	0	DNAJB2	DnaJ (Hsp40) homolog, subfamily B, member 2
hsa-miR-1301	1	0	1	1	1	1	SNTB2	syntrophin, beta 2 (dystrophin-associated protein A1, 59kDa, basic component 2)
hsa-miR-1301	1	0	1	1	1	1	BTG2	BTG family, member 2
hsa-miR-1301	1	0	1	1	1	1	SCN1A	sodium channel, voltage-gated, type I, alpha subunit
hsa-miR-1301	1	0	1	0	1	1	SOX12	SRY (sex determining region Y)-box 12
hsa-miR-1301	0	0	1	1	1	1	SPP2	secreted phosphoprotein 2, 24kDa
hsa-miR-1301	1	0	1	1	1	1	HSPA13	heat shock protein 70kDa family, member 13
hsa-miR-1301	1	0	1	1	1	1	CLDN10	claudin 10
hsa-miR-1301	1	0	1	0	1	1	WASF2	WAS protein family, member 2
hsa-miR-1301	1	0	1	0	1	1	PAPD7	PAP associated domain containing 7
hsa-miR-1301	0	0	1	1	1	1	RTN4	reticulon 4
hsa-miR-1301	1	0	1	1	1	1	ABHD2	abhydrolase domain containing 2
hsa-miR-1301	0	0	1	1	1	1	TMEM115	transmembrane protein 115
hsa-miR-1301	1	0	1	1	1	1	TESK2	testis-specific kinase 2
hsa-miR-1301	1	0	1	1	1	1	ERLIN2	ER lipid raft associated 2
hsa-miR-1301	1	0	1	1	1	1	C14orf1	chromosome 14 open reading frame 1
hsa-miR-1301	1	0	1	1	1	1	ABCF2	ATP-binding cassette, sub-family F (GCN20), member 2
hsa-miR-1301	1	0	1	1	1	1	PALM2-AKAP2	PALM2-AKAP2 readthrough
hsa-miR-1301	0	0	1	1	0	0	GPR45	G protein-coupled receptor 45
hsa-miR-1301	1	0	1	1	1	1	KLF12	Kruppel-like factor 12
hsa-miR-1301	0	0	1	1	1	1	KLF8	Kruppel-like factor 8
hsa-miR-1301	1	0	1	1	1	1	PHLDA1	pleckstrin homology-like domain, family A, member 1
hsa-miR-1301	1	0	1	1	1	1	PADI2	peptidyl arginine deiminase, type II
hsa-miR-1301	0	0	1	1	0	0	LTB	lymphotoxin beta (TNF superfamily, member 3)
hsa-miR-1301	0	0	1	0	1	1	CD93	CD93 molecule
hsa-miR-1301	1	0	1	0	1	1	ZFPM2	zinc finger protein, multitype 2
hsa-miR-1301	1	0	1	1	1	1	ICOS	inducible T-cell co-stimulator
hsa-miR-1301	0	0	1	1	1	1	LMOD1	leiomodin 1 (smooth muscle)
hsa-miR-1301	0	0	1	1	1	1	HARS2	histidyl-tRNA synthetase 2, mitochondrial
hsa-miR-1301	0	0	1	1	0	0	SNW1	SNW domain containing 1
hsa-miR-1301	0	0	1	1	1	1	TKTL1	transketolase-like 1
hsa-miR-1301	1	0	1	1	1	1	KCNE1L	KCNE1-like
hsa-miR-1301	1	0	1	0	1	1	PXDN	peroxidasin homolog (Drosophila)
hsa-miR-1301	1	0	1	0	1	1	G3BP2	GTPase activating protein (SH3 domain) binding protein 2
hsa-miR-1301	1	0	1	0	1	1	BLOC1S6	biogenesis of lysosomal organelles complex-1, subunit 6, pallidin
hsa-miR-1301	1	0	1	1	1	1	STK39	serine threonine kinase 39
hsa-miR-1301	0	0	1	1	1	1	DNAJC15	DnaJ (Hsp40) homolog, subfamily C, member 15
hsa-miR-1301	0	0	1	1	1	1	N6AMT1	N-6 adenine-specific DNA methyltransferase 1 (putative)
hsa-miR-1301	1	0	1	1	1	1	PPARGC1A	peroxisome proliferator-activated receptor gamma, coactivator 1 alpha
hsa-miR-1301	0	0	1	1	0	0	SLCO3A1	solute carrier organic anion transporter family, member 3A1
hsa-miR-1301	0	0	1	1	0	0	C2orf27A	chromosome 2 open reading frame 27A
hsa-miR-1301	0	0	1	0	1	1	EMR2	egf-like module containing, mucin-like, hormone receptor-like 2
hsa-miR-1301	1	0	1	1	1	1	BAZ1A	bromodomain adjacent to zinc finger domain, 1A
hsa-miR-1301	1	0	1	0	1	1	CLIC4	chloride intracellular channel 4
hsa-miR-1301	1	0	1	1	1	1	LAMP2	lysosomal-associated membrane protein 2
hsa-miR-1301	1	0	1	0	1	1	C16orf72	chromosome 16 open reading frame 72
hsa-miR-1301	0	0	1	1	1	1	ORMDL2	ORM1-like 2 (S. cerevisiae)
hsa-miR-1301	0	0	1	1	1	1	COMMD9	COMM domain containing 9
hsa-miR-1301	0	0	1	0	1	1	SCN8A	sodium channel, voltage gated, type VIII, alpha subunit
hsa-miR-1301	1	0	1	0	1	1	ODZ1	odz, odd Oz/ten-m homolog 1 (Drosophila)
hsa-miR-1301	0	0	1	1	1	1	CAPN6	calpain 6
hsa-miR-1301	0	0	1	1	0	0	FRRS1L	ferric-chelate reductase 1-like
hsa-miR-1301	1	0	1	0	1	1	FJX1	four jointed box 1 (Drosophila)
hsa-miR-1301	1	0	1	0	1	1	RNF11	ring finger protein 11
hsa-miR-1301	1	0	1	0	1	1	DIEXF	digestive organ expansion factor homolog (zebrafish)
hsa-miR-1301	0	0	1	1	1	1	TAF5L	TAF5-like RNA polymerase II, p300/CBP-associated factor (PCAF)-associated factor, 65kDa
hsa-miR-1301	0	0	1	1	1	1	MCAT	malonyl CoA:ACP acyltransferase (mitochondrial)
hsa-miR-1301	1	0	1	1	1	1	GRHL1	grainyhead-like 1 (Drosophila)
hsa-miR-1301	1	0	1	0	1	1	HEYL	hairy/enhancer-of-split related with YRPW motif-like
hsa-miR-1301	1	0	1	1	1	1	SLC40A1	solute carrier family 40 (iron-regulated transporter), member 1
hsa-miR-1301	1	0	1	0	1	1	HUNK	hormonally up-regulated Neu-associated kinase
hsa-miR-1301	1	0	1	1	1	1	HERC3	HECT and RLD domain containing E3 ubiquitin protein ligase 3
hsa-miR-1301	0	0	1	1	1	1	HOXC4	homeobox C4
hsa-miR-1301	1	0	1	1	1	1	GCC2	GRIP and coiled-coil domain containing 2
hsa-miR-1301	1	0	1	1	1	1	RALGPS1	Ral GEF with PH domain and SH3 binding motif 1
hsa-miR-1301	0	0	1	1	1	1	FAM53B	family with sequence similarity 53, member B
hsa-miR-1301	1	0	1	1	1	1	KDM4A	lysine (K)-specific demethylase 4A
hsa-miR-1301	1	0	1	0	1	1	EDEM1	ER degradation enhancer, mannosidase alpha-like 1
hsa-miR-1301	1	0	1	1	1	1	ARHGAP32	Rho GTPase activating protein 32
hsa-miR-1301	1	0	1	0	1	1	MLEC	malectin
hsa-miR-1301	1	0	1	1	1	1	RASSF2	Ras association (RalGDS/AF-6) domain family member 2
hsa-miR-1301	1	0	1	1	1	1	SPCS2	signal peptidase complex subunit 2 homolog (S. cerevisiae)
hsa-miR-1301	1	0	1	0	1	1	MAML1	mastermind-like 1 (Drosophila)
hsa-miR-1301	1	0	1	0	1	1	KIAA0494	KIAA0494
hsa-miR-1301	1	0	1	1	1	1	TOMM70A	translocase of outer mitochondrial membrane 70 homolog A (S. cerevisiae)
hsa-miR-1301	1	0	1	0	1	1	PDAP1	PDGFA associated protein 1
hsa-miR-1301	0	0	1	1	0	0	MORC2	MORC family CW-type zinc finger 2
hsa-miR-1301	0	0	1	1	0	0	KIFAP3	kinesin-associated protein 3
hsa-miR-1301	1	0	1	1	1	1	RALGAPA1	Ral GTPase activating protein, alpha subunit 1 (catalytic)
hsa-miR-1301	1	0	1	1	1	1	FBXO21	F-box protein 21
hsa-miR-1301	1	0	1	1	1	1	PHLPP2	PH domain and leucine rich repeat protein phosphatase 2
hsa-miR-1301	1	0	1	1	1	1	HECW1	HECT, C2 and WW domain containing E3 ubiquitin protein ligase 1
hsa-miR-1301	1	0	1	0	1	1	PEG10	paternally expressed 10
hsa-miR-1301	1	0	1	1	1	1	SMG1	smg-1 homolog, phosphatidylinositol 3-kinase-related kinase (C. elegans)
hsa-miR-1301	1	0	1	1	0	0	CIC	capicua homolog (Drosophila)
hsa-miR-1301	1	0	1	1	1	1	RTF1	Rtf1, Paf1/RNA polymerase II complex component, homolog (S. cerevisiae)
hsa-miR-1301	1	0	1	0	1	1	LARP4B	La ribonucleoprotein domain family, member 4B
hsa-miR-1301	1	0	1	1	1	1	RCOR1	REST corepressor 1
hsa-miR-1301	1	0	1	1	1	1	TRIM9	tripartite motif containing 9
hsa-miR-1301	1	0	1	1	0	0	KIAA0556	KIAA0556
hsa-miR-1301	1	0	1	1	1	1	NUP160	nucleoporin 160kDa
hsa-miR-1301	1	0	1	0	1	1	LPHN3	latrophilin 3
hsa-miR-1301	1	0	1	1	1	1	CUX2	cut-like homeobox 2
hsa-miR-1301	1	0	1	1	1	1	PHF15	PHD finger protein 15
hsa-miR-1301	1	0	1	0	1	1	KHNYN	KH and NYN domain containing
hsa-miR-1301	1	0	1	0	1	1	ARHGEF12	Rho guanine nucleotide exchange factor (GEF) 12
hsa-miR-1301	1	0	1	0	1	1	SRGAP2	SLIT-ROBO Rho GTPase activating protein 2
hsa-miR-1301	0	0	1	1	1	1	LARS2	leucyl-tRNA synthetase 2, mitochondrial
hsa-miR-1301	0	0	1	1	1	1	LEPROTL1	leptin receptor overlapping transcript-like 1
hsa-miR-1301	1	0	1	1	1	1	MOB4	MOB family member 4, phocein
hsa-miR-1301	1	0	1	1	1	1	CNOT6	CCR4-NOT transcription complex, subunit 6
hsa-miR-1301	1	0	1	0	1	1	GLCE	glucuronic acid epimerase
hsa-miR-1301	1	0	1	0	1	1	PPP1R16B	protein phosphatase 1, regulatory subunit 16B
hsa-miR-1301	1	0	1	1	1	1	PHF19	PHD finger protein 19
hsa-miR-1301	1	0	1	1	1	1	ABCA12	ATP-binding cassette, sub-family A (ABC1), member 12
hsa-miR-1301	1	0	1	1	1	1	FAM155B	family with sequence similarity 155, member B
hsa-miR-1301	0	0	1	1	1	1	BRPF3	bromodomain and PHD finger containing, 3
hsa-miR-1301	1	0	1	0	1	1	RRM2B	ribonucleotide reductase M2 B (TP53 inducible)
hsa-miR-1301	0	0	1	1	1	1	KRT76	keratin 76
hsa-miR-1301	1	0	1	1	1	1	PHF20L1	PHD finger protein 20-like 1
hsa-miR-1301	0	0	1	1	1	1	RBMX2	RNA binding motif protein, X-linked 2
hsa-miR-1301	0	0	1	1	1	1	ISOC1	isochorismatase domain containing 1
hsa-miR-1301	1	0	1	1	1	1	RRP15	ribosomal RNA processing 15 homolog (S. cerevisiae)
hsa-miR-1301	1	0	1	1	1	1	SUFU	suppressor of fused homolog (Drosophila)
hsa-miR-1301	1	0	1	1	1	1	VGLL3	vestigial like 3 (Drosophila)
hsa-miR-1301	1	0	1	0	1	1	HPCAL4	hippocalcin like 4
hsa-miR-1301	1	0	1	1	1	1	RNF138	ring finger protein 138, E3 ubiquitin protein ligase
hsa-miR-1301	0	0	1	1	1	1	DNAJB11	DnaJ (Hsp40) homolog, subfamily B, member 11
hsa-miR-1301	0	0	1	1	1	1	CENPF	centromere protein F, 350/400kDa (mitosin)
hsa-miR-1301	1	0	1	1	1	1	PHF20	PHD finger protein 20
hsa-miR-1301	0	0	1	1	0	0	FAM203A	family with sequence similarity 203, member A
hsa-miR-1301	0	0	1	1	0	0	PHF7	PHD finger protein 7
hsa-miR-1301	1	0	1	0	1	1	RAB8B	RAB8B, member RAS oncogene family
hsa-miR-1301	1	0	1	1	1	1	DNAJC27	DnaJ (Hsp40) homolog, subfamily C, member 27
hsa-miR-1301	1	0	1	1	1	1	WAC	WW domain containing adaptor with coiled-coil
hsa-miR-1301	1	0	1	0	1	1	KLHL3	kelch-like 3 (Drosophila)
hsa-miR-1301	1	0	1	1	1	1	SIX4	SIX homeobox 4
hsa-miR-1301	0	0	1	1	0	0	UBQLN3	ubiquilin 3
hsa-miR-1301	1	0	1	1	1	1	PLXNA3	plexin A3
hsa-miR-1301	0	0	1	1	0	0	FNDC8	fibronectin type III domain containing 8
hsa-miR-1301	0	0	1	1	1	1	LRRC16A	leucine rich repeat containing 16A
hsa-miR-1301	1	0	1	0	1	1	FAM46C	family with sequence similarity 46, member C
hsa-miR-1301	0	0	1	0	1	1	CWC25	CWC25 spliceosome-associated protein homolog (S. cerevisiae)
hsa-miR-1301	1	0	1	1	1	1	LPPR1	lipid phosphate phosphatase-related protein type 1
hsa-miR-1301	1	0	1	1	0	0	INO80D	INO80 complex subunit D
hsa-miR-1301	0	0	1	1	1	1	C1orf27	chromosome 1 open reading frame 27
hsa-miR-1301	0	0	1	1	1	1	TMEM70	transmembrane protein 70
hsa-miR-1301	1	0	1	1	1	1	HIF1AN	hypoxia inducible factor 1, alpha subunit inhibitor
hsa-miR-1301	1	0	1	0	1	1	NPLOC4	nuclear protein localization 4 homolog (S. cerevisiae)
hsa-miR-1301	1	0	1	1	1	1	ZNHIT6	zinc finger, HIT-type containing 6
hsa-miR-1301	0	0	1	0	1	1	MREG	melanoregulin
hsa-miR-1301	0	0	1	1	1	1	OSBPL1A	oxysterol binding protein-like 1A
hsa-miR-1301	1	0	1	1	1	1	WDR6	WD repeat domain 6
hsa-miR-1301	0	0	1	1	1	1	RBM22	RNA binding motif protein 22
hsa-miR-1301	0	0	1	1	1	1	AKIRIN2	akirin 2
hsa-miR-1301	0	0	1	1	1	1	HEATR1	HEAT repeat containing 1
hsa-miR-1301	1	0	1	1	1	1	FAM178A	family with sequence similarity 178, member A
hsa-miR-1301	0	0	1	1	1	1	TSR1	TSR1, 20S rRNA accumulation, homolog (S. cerevisiae)
hsa-miR-1301	1	0	1	0	1	1	MSL2	male-specific lethal 2 homolog (Drosophila)
hsa-miR-1301	0	0	1	1	1	1	NUDT11	nudix (nucleoside diphosphate linked moiety X)-type motif 11
hsa-miR-1301	1	0	1	0	1	1	ARL8B	ADP-ribosylation factor-like 8B
hsa-miR-1301	1	0	1	1	1	1	TBC1D13	TBC1 domain family, member 13
hsa-miR-1301	0	0	1	0	1	1	TMEM57	transmembrane protein 57
hsa-miR-1301	0	0	1	1	1	1	TRIM62	tripartite motif containing 62
hsa-miR-1301	1	0	1	0	1	1	PARVA	parvin, alpha
hsa-miR-1301	1	0	1	1	1	1	UBA6	ubiquitin-like modifier activating enzyme 6
hsa-miR-1301	1	0	1	0	1	1	SEPT11	septin 11
hsa-miR-1301	0	0	1	1	0	0	THNSL2	threonine synthase-like 2 (S. cerevisiae)
hsa-miR-1301	1	0	1	1	1	1	TMEM143	transmembrane protein 143
hsa-miR-1301	1	0	1	1	1	1	AGPAT5	1-acylglycerol-3-phosphate O-acyltransferase 5 (lysophosphatidic acid acyltransferase, epsilon)
hsa-miR-1301	1	0	1	0	1	1	LIN7C	lin-7 homolog C (C. elegans)
hsa-miR-1301	1	0	1	1	1	1	RSBN1	round spermatid basic protein 1
hsa-miR-1301	0	0	1	0	0	0	FAM45B	family with sequence similarity 45, member A pseudogene
hsa-miR-1301	0	0	1	1	1	1	ELAC1	elaC homolog 1 (E. coli)
hsa-miR-1301	1	0	1	0	1	1	ELMOD1	ELMO/CED-12 domain containing 1
hsa-miR-1301	1	0	1	0	1	1	PCDHAC1	protocadherin alpha subfamily C, 1
hsa-miR-1301	1	0	1	0	1	1	PCDHAC2	protocadherin alpha subfamily C, 2
hsa-miR-1301	1	0	1	1	1	1	PCDHA1	protocadherin alpha 1
hsa-miR-1301	1	0	1	0	1	1	PCDHA10	protocadherin alpha 10
hsa-miR-1301	1	0	1	0	1	1	PCDHA11	protocadherin alpha 11
hsa-miR-1301	1	0	1	0	1	1	PCDHA12	protocadherin alpha 12
hsa-miR-1301	1	0	1	1	1	1	PCDHA2	protocadherin alpha 2
hsa-miR-1301	1	0	1	1	1	1	PCDHA3	protocadherin alpha 3
hsa-miR-1301	1	0	1	1	1	1	PCDHA6	protocadherin alpha 6
hsa-miR-1301	1	0	1	0	1	1	PCDHA7	protocadherin alpha 7
hsa-miR-1301	1	0	1	1	1	1	PCDHA8	protocadherin alpha 8
hsa-miR-1301	1	0	1	1	1	1	SASH3	SAM and SH3 domain containing 3
hsa-miR-1301	1	0	1	1	1	1	KCTD5	potassium channel tetramerisation domain containing 5
hsa-miR-1301	0	0	1	1	1	1	RIN2	Ras and Rab interactor 2
hsa-miR-1301	1	0	1	0	1	1	FAM190B	family with sequence similarity 190, member B
hsa-miR-1301	1	0	1	1	1	1	DLL4	delta-like 4 (Drosophila)
hsa-miR-1301	0	0	1	0	1	1	ARL15	ADP-ribosylation factor-like 15
hsa-miR-1301	1	0	1	1	1	1	SEPT3	septin 3
hsa-miR-1301	1	0	1	0	1	1	UBFD1	ubiquitin family domain containing 1
hsa-miR-1301	1	0	1	1	1	1	CCBL2	cysteine conjugate-beta lyase 2
hsa-miR-1301	1	0	1	1	1	1	CYP26B1	cytochrome P450, family 26, subfamily B, polypeptide 1
hsa-miR-1301	1	0	1	1	1	1	POLE4	polymerase (DNA-directed), epsilon 4, accessory subunit
hsa-miR-1301	0	0	1	0	1	1	ZC3HAV1	zinc finger CCCH-type, antiviral 1
hsa-miR-1301	1	0	1	0	1	1	PAPOLB	poly(A) polymerase beta (testis specific)
hsa-miR-1301	1	0	1	0	1	1	PMEPA1	prostate transmembrane protein, androgen induced 1
hsa-miR-1301	1	0	1	1	0	0	SLC17A7	solute carrier family 17 (sodium-dependent inorganic phosphate cotransporter), member 7
hsa-miR-1301	1	0	1	0	1	1	MNT	MAX binding protein
hsa-miR-1301	0	0	1	1	1	1	DST	dystonin
hsa-miR-1301	1	0	1	0	1	1	EIF5A2	eukaryotic translation initiation factor 5A2
hsa-miR-1301	0	0	1	1	1	1	ZNF695	zinc finger protein 695
hsa-miR-1301	1	0	1	1	1	1	OSM	oncostatin M
hsa-miR-1301	1	0	1	0	1	1	APMAP	adipocyte plasma membrane associated protein
hsa-miR-1301	1	0	1	0	1	1	DCUN1D1	DCN1, defective in cullin neddylation 1, domain containing 1 (S. cerevisiae)
hsa-miR-1301	1	0	1	1	1	1	SLC24A3	solute carrier family 24 (sodium/potassium/calcium exchanger), member 3
hsa-miR-1301	0	0	1	1	0	0	AMIGO1	adhesion molecule with Ig-like domain 1
hsa-miR-1301	0	0	1	1	1	1	SHROOM4	shroom family member 4
hsa-miR-1301	1	0	1	1	1	1	USP31	ubiquitin specific peptidase 31
hsa-miR-1301	1	0	1	1	1	1	DLG3	discs, large homolog 3 (Drosophila)
hsa-miR-1301	1	0	1	0	1	1	NUFIP2	nuclear fragile X mental retardation protein interacting protein 2
hsa-miR-1301	1	0	1	0	1	1	ALPK3	alpha-kinase 3
hsa-miR-1301	1	0	1	0	1	1	SYT4	synaptotagmin IV
hsa-miR-1301	1	0	1	1	1	1	SIPA1L2	signal-induced proliferation-associated 1 like 2
hsa-miR-1301	1	0	1	1	1	1	RANBP10	RAN binding protein 10
hsa-miR-1301	0	0	1	1	1	1	KLHL1	kelch-like 1 (Drosophila)
hsa-miR-1301	1	0	1	1	1	1	EPB41L5	erythrocyte membrane protein band 4.1 like 5
hsa-miR-1301	1	0	1	1	1	1	ZFP14	zinc finger protein 14 homolog (mouse)
hsa-miR-1301	1	0	1	1	1	1	FAM160B1	family with sequence similarity 160, member B1
hsa-miR-1301	0	0	1	1	1	1	PRX	periaxin
hsa-miR-1301	0	0	1	1	1	1	AQP9	aquaporin 9
hsa-miR-1301	0	0	1	1	1	1	B3GALT1	UDP-Gal:betaGlcNAc beta 1,3-galactosyltransferase, polypeptide 1
hsa-miR-1301	1	0	1	0	1	1	RAP2A	RAP2A, member of RAS oncogene family
hsa-miR-1301	0	0	1	1	0	0	MAGEA5	melanoma antigen family A, 5
hsa-miR-1301	1	0	1	1	1	1	HCN1	hyperpolarization activated cyclic nucleotide-gated potassium channel 1
hsa-miR-1301	1	0	1	1	1	1	MTMR3	myotubularin related protein 3
hsa-miR-1301	1	0	1	1	1	1	CLDN1	claudin 1
hsa-miR-1301	1	0	1	1	0	0	TMSB10	thymosin beta 10
hsa-miR-1301	0	0	1	0	1	1	MS4A7	membrane-spanning 4-domains, subfamily A, member 7
hsa-miR-1301	1	0	1	0	1	1	TP53INP2	tumor protein p53 inducible nuclear protein 2
hsa-miR-1301	1	0	1	1	1	1	TMEM35	transmembrane protein 35
hsa-miR-1301	1	0	1	1	1	1	OTX2	orthodenticle homeobox 2
hsa-miR-1301	1	0	1	1	1	1	DHX35	DEAH (Asp-Glu-Ala-His) box polypeptide 35
hsa-miR-1301	1	0	1	1	1	1	DMRT1	doublesex and mab-3 related transcription factor 1
hsa-miR-1301	1	0	1	1	1	1	FOXM1	forkhead box M1
hsa-miR-1301	1	0	1	1	1	1	GRIK2	glutamate receptor, ionotropic, kainate 2
hsa-miR-1301	1	0	1	0	1	1	MCL1	myeloid cell leukemia sequence 1 (BCL2-related)
hsa-miR-1301	0	0	1	1	1	1	PGM5	phosphoglucomutase 5
hsa-miR-1301	0	0	1	1	0	0	TMSB15A	thymosin beta 15a
hsa-miR-1301	0	0	1	1	0	0	POPDC2	popeye domain containing 2
hsa-miR-1301	0	0	1	1	0	0	KIF9	kinesin family member 9
hsa-miR-1301	1	0	1	1	1	1	NDRG3	NDRG family member 3
hsa-miR-1301	1	0	1	0	1	1	MRPS25	mitochondrial ribosomal protein S25
hsa-miR-1301	1	0	1	1	1	1	GIGYF1	GRB10 interacting GYF protein 1
hsa-miR-1301	1	0	1	0	1	1	HOXC8	homeobox C8
hsa-miR-1301	1	0	1	0	1	1	ELOVL4	ELOVL fatty acid elongase 4
hsa-miR-1301	1	0	1	1	1	1	FAM160B2	family with sequence similarity 160, member B2
hsa-miR-1301	1	0	1	1	1	1	FAM59A	family with sequence similarity 59, member A
hsa-miR-1301	1	0	1	1	1	1	S100PBP	S100P binding protein
hsa-miR-1301	1	0	1	1	1	1	RFX7	regulatory factor X, 7
hsa-miR-1301	0	0	1	1	1	1	MARCKSL1	MARCKS-like 1
hsa-miR-1301	1	0	1	1	0	0	UBE2Z	ubiquitin-conjugating enzyme E2Z
hsa-miR-1301	1	0	1	1	1	1	FAM134A	family with sequence similarity 134, member A
hsa-miR-1301	1	0	1	0	1	1	NOTCH2	notch 2
hsa-miR-1301	1	0	1	1	1	1	NKAIN1	Na+/K+ transporting ATPase interacting 1
hsa-miR-1301	1	0	1	1	1	1	C10orf76	chromosome 10 open reading frame 76
hsa-miR-1301	0	0	1	1	1	1	GLT25D1	glycosyltransferase 25 domain containing 1
hsa-miR-1301	1	0	1	0	1	1	NAA60	N(alpha)-acetyltransferase 60, NatF catalytic subunit
hsa-miR-1301	1	0	1	1	0	0	CNTD2	cyclin N-terminal domain containing 2
hsa-miR-1301	0	0	1	1	1	1	ZNF767	zinc finger family member 767
hsa-miR-1301	0	0	1	1	1	1	DOCK5	dedicator of cytokinesis 5
hsa-miR-1301	1	0	1	1	0	0	UBTD1	ubiquitin domain containing 1
hsa-miR-1301	1	0	1	1	1	1	FBXO11	F-box protein 11
hsa-miR-1301	1	0	1	1	1	1	NAA50	N(alpha)-acetyltransferase 50, NatE catalytic subunit
hsa-miR-1301	0	0	1	1	0	0	BPIFB2	BPI fold containing family B, member 2
hsa-miR-1301	1	0	1	0	1	1	SRCIN1	SRC kinase signaling inhibitor 1
hsa-miR-1301	0	0	1	1	1	1	THUMPD2	THUMP domain containing 2
hsa-miR-1301	1	0	1	1	1	1	CYB5B	cytochrome b5 type B (outer mitochondrial membrane)
hsa-miR-1301	1	0	1	1	1	1	JHDM1D	jumonji C domain containing histone demethylase 1 homolog D (S. cerevisiae)
hsa-miR-1301	1	0	1	1	1	1	SYNC	syncoilin, intermediate filament protein
hsa-miR-1301	1	0	1	0	1	1	C1orf21	chromosome 1 open reading frame 21
hsa-miR-1301	1	0	1	1	1	1	SNX27	sorting nexin family member 27
hsa-miR-1301	1	0	1	1	1	1	C6orf62	chromosome 6 open reading frame 62
hsa-miR-1301	1	0	1	1	1	1	TEX14	testis expressed 14
hsa-miR-1301	1	0	1	1	1	1	GABARAPL1	GABA(A) receptor-associated protein like 1
hsa-miR-1301	0	0	1	1	1	1	COG3	component of oligomeric golgi complex 3
hsa-miR-1301	0	0	1	1	0	0	KCNK17	potassium channel, subfamily K, member 17
hsa-miR-1301	1	0	1	0	1	1	SH3BGRL2	SH3 domain binding glutamic acid-rich protein like 2
hsa-miR-1301	1	0	1	1	1	1	PCDHA9	protocadherin alpha 9
hsa-miR-1301	0	0	1	1	1	1	KCNA7	potassium voltage-gated channel, shaker-related subfamily, member 7
hsa-miR-1301	0	0	1	1	1	1	MRPS24	mitochondrial ribosomal protein S24
hsa-miR-1301	1	0	1	1	1	1	PATZ1	POZ (BTB) and AT hook containing zinc finger 1
hsa-miR-1301	1	0	1	1	1	1	ARID5B	AT rich interactive domain 5B (MRF1-like)
hsa-miR-1301	1	0	1	1	1	1	ANTXR1	anthrax toxin receptor 1
hsa-miR-1301	1	0	1	1	1	1	ZNRF1	zinc and ring finger 1, E3 ubiquitin protein ligase
hsa-miR-1301	1	0	1	1	1	1	ZDHHC18	zinc finger, DHHC-type containing 18
hsa-miR-1301	1	0	1	1	1	1	CAMKK1	calcium/calmodulin-dependent protein kinase kinase 1, alpha
hsa-miR-1301	0	0	1	1	0	0	NICN1	nicolin 1
hsa-miR-1301	0	0	1	1	0	0	C3orf26	chromosome 3 open reading frame 26
hsa-miR-1301	1	0	1	1	1	1	HOOK3	hook homolog 3 (Drosophila)
hsa-miR-1301	0	0	1	1	0	0	STK19	serine/threonine kinase 19
hsa-miR-1301	0	0	1	1	1	1	JAGN1	jagunal homolog 1 (Drosophila)
hsa-miR-1301	1	0	1	1	1	1	USP38	ubiquitin specific peptidase 38
hsa-miR-1301	1	0	1	1	1	1	PHF5A	PHD finger protein 5A
hsa-miR-1301	0	0	1	0	1	1	TRIM52	tripartite motif containing 52
hsa-miR-1301	0	0	1	1	1	1	RPUSD4	RNA pseudouridylate synthase domain containing 4
hsa-miR-1301	1	0	1	0	1	1	PPP1R15B	protein phosphatase 1, regulatory subunit 15B
hsa-miR-1301	1	0	1	0	1	1	UBASH3B	ubiquitin associated and SH3 domain containing B
hsa-miR-1301	0	0	1	0	1	1	PIGY	phosphatidylinositol glycan anchor biosynthesis, class Y
hsa-miR-1301	0	0	1	1	1	1	POLR2J2	polymerase (RNA) II (DNA directed) polypeptide J2
hsa-miR-1301	0	0	1	0	1	1	TSLP	thymic stromal lymphopoietin
hsa-miR-1301	0	0	1	1	0	0	KRT84	keratin 84
hsa-miR-1301	1	0	1	1	1	1	TRIM55	tripartite motif containing 55
hsa-miR-1301	1	0	1	1	1	1	FGF1	fibroblast growth factor 1 (acidic)
hsa-miR-1301	1	0	1	0	1	1	PURB	purine-rich element binding protein B
hsa-miR-1301	1	0	1	1	1	1	TP53INP1	tumor protein p53 inducible nuclear protein 1
hsa-miR-1301	1	0	1	1	1	1	SSH2	slingshot homolog 2 (Drosophila)
hsa-miR-1301	1	0	1	1	0	0	FCHSD1	FCH and double SH3 domains 1
hsa-miR-1301	1	0	1	1	1	1	EPT1	ethanolaminephosphotransferase 1 (CDP-ethanolamine-specific)
hsa-miR-1301	1	0	1	1	1	1	TSPYL5	TSPY-like 5
hsa-miR-1301	0	0	1	1	1	1	ARHGAP18	Rho GTPase activating protein 18
hsa-miR-1301	1	0	1	1	1	1	SYS1	SYS1 Golgi-localized integral membrane protein homolog (S. cerevisiae)
hsa-miR-1301	1	0	1	1	1	1	VPS26B	vacuolar protein sorting 26 homolog B (S. pombe)
hsa-miR-1301	0	0	1	1	1	1	PLEKHG4B	pleckstrin homology domain containing, family G (with RhoGef domain) member 4B
hsa-miR-1301	1	0	1	1	1	1	SLITRK1	SLIT and NTRK-like family, member 1
hsa-miR-1301	0	0	1	1	0	0	RPL39L	ribosomal protein L39-like
hsa-miR-1301	0	0	1	1	1	1	ANKRD30A	ankyrin repeat domain 30A
hsa-miR-1301	0	0	1	0	1	1	SLC36A1	solute carrier family 36 (proton/amino acid symporter), member 1
hsa-miR-1301	0	0	1	1	0	0	MSANTD3	Myb/SANT-like DNA-binding domain containing 3
hsa-miR-1301	0	0	1	1	1	1	C14orf126	chromosome 14 open reading frame 126
hsa-miR-1301	1	0	1	1	0	0	ADAMTS14	ADAM metallopeptidase with thrombospondin type 1 motif, 14
hsa-miR-1301	1	0	1	1	1	1	WHSC1	Wolf-Hirschhorn syndrome candidate 1
hsa-miR-1301	0	0	1	0	1	1	SP140L	SP140 nuclear body protein-like
hsa-miR-1301	0	0	1	1	1	1	MRAP2	melanocortin 2 receptor accessory protein 2
hsa-miR-1301	1	0	1	0	1	1	NUS1	nuclear undecaprenyl pyrophosphate synthase 1 homolog (S. cerevisiae)
hsa-miR-1301	1	0	1	1	1	1	ICA1L	islet cell autoantigen 1,69kDa-like
hsa-miR-1301	1	0	1	0	1	1	SP1	Sp1 transcription factor
hsa-miR-1301	1	0	1	1	1	1	CD200R1	CD200 receptor 1
hsa-miR-1301	1	0	1	1	1	1	TSTD2	thiosulfate sulfurtransferase (rhodanese)-like domain containing 2
hsa-miR-1301	0	0	1	1	1	1	PUS10	pseudouridylate synthase 10
hsa-miR-1301	0	0	1	1	1	1	SPICE1	spindle and centriole associated protein 1
hsa-miR-1301	1	0	1	1	0	0	SMCR8	Smith-Magenis syndrome chromosome region, candidate 8
hsa-miR-1301	1	0	1	0	1	1	CENPBD1	CENPB DNA-binding domains containing 1
hsa-miR-1301	0	0	1	1	1	1	TMEM106A	transmembrane protein 106A
hsa-miR-1301	0	0	1	1	0	0	RNF183	ring finger protein 183
hsa-miR-1301	1	0	1	1	1	1	UBQLNL	ubiquilin-like
hsa-miR-1301	1	0	1	1	1	1	FAM84A	family with sequence similarity 84, member A
hsa-miR-1301	1	0	1	1	0	0	NAPRT1	nicotinate phosphoribosyltransferase domain containing 1
hsa-miR-1301	0	0	1	1	0	0	CSNK1A1L	casein kinase 1, alpha 1-like
hsa-miR-1301	1	0	1	1	1	1	VTI1A	vesicle transport through interaction with t-SNAREs homolog 1A (yeast)
hsa-miR-1301	1	0	1	1	1	1	CADM4	cell adhesion molecule 4
hsa-miR-1301	0	0	1	1	1	1	LRTOMT	leucine rich transmembrane and 0-methyltransferase domain containing
hsa-miR-1301	0	0	1	1	1	1	SCARF1	scavenger receptor class F, member 1
hsa-miR-1301	0	0	1	1	0	0	TCEB3C	transcription elongation factor B polypeptide 3C (elongin A3)
hsa-miR-1301	1	0	1	1	1	1	SEPT6	septin 6
hsa-miR-1301	1	0	1	0	1	1	MTPN	myotrophin
hsa-miR-1301	0	0	1	0	1	1	CHKB	choline kinase beta
hsa-miR-1301	0	0	1	1	1	1	LONRF1	LON peptidase N-terminal domain and ring finger 1
hsa-miR-1301	1	0	1	1	1	1	UBTD2	ubiquitin domain containing 2
hsa-miR-1301	1	0	1	0	1	1	SYT11	synaptotagmin XI
hsa-miR-1301	0	0	1	0	1	1	BBS5	Bardet-Biedl syndrome 5
hsa-miR-1301	1	0	1	1	1	1	FAM123B	family with sequence similarity 123B
hsa-miR-1301	0	0	1	1	1	1	RDH12	retinol dehydrogenase 12 (all-trans/9-cis/11-cis)
hsa-miR-1301	0	0	1	0	1	1	HORMAD2	HORMA domain containing 2
hsa-miR-1301	0	0	1	1	1	1	ZNF746	zinc finger protein 746
hsa-miR-1301	1	0	1	0	1	1	TMTC2	transmembrane and tetratricopeptide repeat containing 2
hsa-miR-1301	0	0	1	1	1	1	C1orf177	chromosome 1 open reading frame 177
hsa-miR-1301	0	0	1	1	0	0	C1orf65	chromosome 1 open reading frame 65
hsa-miR-1301	0	0	1	1	1	1	BBS12	Bardet-Biedl syndrome 12
hsa-miR-1301	0	0	1	1	1	1	CCER1	coiled-coil glutamate-rich protein 1
hsa-miR-1301	0	0	1	1	1	1	DAND5	DAN domain family, member 5
hsa-miR-1301	1	0	1	1	1	1	TCTEX1D1	Tctex1 domain containing 1
hsa-miR-1301	0	0	1	1	0	0	MUC20	mucin 20, cell surface associated
hsa-miR-1301	0	0	1	1	0	0	DOK6	docking protein 6
hsa-miR-1301	0	0	1	1	0	0	GPC2	glypican 2
hsa-miR-1301	1	0	1	1	1	1	NXPH1	neurexophilin 1
hsa-miR-1301	0	0	1	1	0	0	C19orf26	chromosome 19 open reading frame 26
hsa-miR-1301	0	0	1	1	1	1	ASPRV1	aspartic peptidase, retroviral-like 1
hsa-miR-1301	1	0	1	1	1	1	PDIK1L	PDLIM1 interacting kinase 1 like
hsa-miR-1301	1	0	1	1	0	0	TMEM86A	transmembrane protein 86A
hsa-miR-1301	1	0	1	1	1	1	TMEM161B	transmembrane protein 161B
hsa-miR-1301	1	0	1	0	1	1	ZCCHC24	zinc finger, CCHC domain containing 24
hsa-miR-1301	0	0	1	1	1	1	MED19	mediator complex subunit 19
hsa-miR-1301	1	0	1	1	1	1	HS6ST3	heparan sulfate 6-O-sulfotransferase 3
hsa-miR-1301	1	0	1	0	1	1	MDGA1	MAM domain containing glycosylphosphatidylinositol anchor 1
hsa-miR-1301	0	0	1	1	0	0	FAM71A	family with sequence similarity 71, member A
hsa-miR-1301	1	0	1	1	1	1	C2orf69	chromosome 2 open reading frame 69
hsa-miR-1301	0	0	1	0	1	1	RTP1	receptor (chemosensory) transporter protein 1
hsa-miR-1301	1	0	1	1	1	1	FNDC5	fibronectin type III domain containing 5
hsa-miR-1301	1	0	1	1	1	1	CACUL1	CDK2-associated, cullin domain 1
hsa-miR-1301	1	0	1	1	1	1	PHF13	PHD finger protein 13
hsa-miR-1301	0	0	1	1	1	1	ZFP91-CNTF	ZFP91-CNTF readthrough (non-protein coding)
hsa-miR-1301	1	0	1	0	1	1	PLEKHH2	pleckstrin homology domain containing, family H (with MyTH4 domain) member 2
hsa-miR-1301	0	0	1	1	1	1	CATSPER2	cation channel, sperm associated 2
hsa-miR-1301	0	0	1	1	1	1	IL29	interleukin 29 (interferon, lambda 1)
hsa-miR-1301	0	0	1	1	1	1	KCNH5	potassium voltage-gated channel, subfamily H (eag-related), member 5
hsa-miR-1301	1	0	1	1	1	1	AQP11	aquaporin 11
hsa-miR-1301	0	0	1	1	0	0	SLITRK4	SLIT and NTRK-like family, member 4
hsa-miR-1301	0	0	1	1	1	1	KLF17	Kruppel-like factor 17
hsa-miR-1301	0	0	1	1	0	0	EFCAB4A	EF-hand calcium binding domain 4A
hsa-miR-1301	1	0	1	1	1	1	IGSF22	immunoglobulin superfamily, member 22
hsa-miR-1301	1	0	1	1	1	1	DIP2B	DIP2 disco-interacting protein 2 homolog B (Drosophila)
hsa-miR-1301	1	0	1	1	1	1	SLC9A9	solute carrier family 9, subfamily A (NHE9, cation proton antiporter 9), member 9
hsa-miR-1301	0	0	1	0	1	1	C5orf64	chromosome 5 open reading frame 64
hsa-miR-1301	0	0	1	1	0	0	TMEM86B	transmembrane protein 86B
hsa-miR-1301	1	0	1	0	1	1	SREK1IP1	SREK1-interacting protein 1
hsa-miR-1301	1	0	1	1	1	1	SLC41A1	solute carrier family 41, member 1
hsa-miR-1301	1	0	1	1	1	1	LDLRAD3	low density lipoprotein receptor class A domain containing 3
hsa-miR-1301	1	0	1	1	1	1	SCN4B	sodium channel, voltage-gated, type IV, beta subunit
hsa-miR-1301	0	0	1	1	1	1	C16orf54	chromosome 16 open reading frame 54
hsa-miR-1301	1	0	1	1	1	1	ZADH2	zinc binding alcohol dehydrogenase domain containing 2
hsa-miR-1301	0	0	1	1	0	0	HRAS	v-Ha-ras Harvey rat sarcoma viral oncogene homolog
hsa-miR-1301	1	0	1	1	1	1	PDLIM2	PDZ and LIM domain 2 (mystique)
hsa-miR-1301	1	0	1	1	1	1	ASB6	ankyrin repeat and SOCS box containing 6
hsa-miR-1301	1	0	1	1	1	1	LRRTM3	leucine rich repeat transmembrane neuronal 3
hsa-miR-1301	0	0	1	1	0	0	PAQR7	progestin and adipoQ receptor family member VII
hsa-miR-1301	0	0	1	1	1	1	SLC9C2	solute carrier family 9, member C2 (putative)
hsa-miR-1301	0	0	1	1	0	0	C1orf64	chromosome 1 open reading frame 64
hsa-miR-1301	0	0	1	1	0	0	BCDIN3D	BCDIN3 domain containing
hsa-miR-1301	0	0	1	0	1	1	HCG27	HLA complex group 27 (non-protein coding)
hsa-miR-1301	0	0	1	0	1	1	SPATA12	spermatogenesis associated 12
hsa-miR-1301	1	0	1	1	1	1	FAM216B	family with sequence similarity 216, member B
hsa-miR-1301	1	0	1	1	1	1	ISM2	isthmin 2 homolog (zebrafish)
hsa-miR-1301	1	0	1	1	1	1	TMEM229B	transmembrane protein 229B
hsa-miR-1301	1	0	1	1	1	1	BCL9L	B-cell CLL/lymphoma 9-like
hsa-miR-1301	1	0	1	1	1	1	SP8	Sp8 transcription factor
hsa-miR-1301	1	0	1	1	1	1	CREM	cAMP responsive element modulator
hsa-miR-1301	1	0	1	1	1	1	PLCB1	phospholipase C, beta 1 (phosphoinositide-specific)
hsa-miR-1301	0	0	1	0	1	1	NBPF11	neuroblastoma breakpoint family, member 11
hsa-miR-1301	1	0	1	1	1	1	RBM38	RNA binding motif protein 38
hsa-miR-1301	1	0	1	0	1	1	SLC16A9	solute carrier family 16, member 9 (monocarboxylic acid transporter 9)
hsa-miR-1301	1	0	1	1	1	1	PHLPP1	PH domain and leucine rich repeat protein phosphatase 1
hsa-miR-1301	1	0	1	1	1	1	AQP1	aquaporin 1 (Colton blood group)
hsa-miR-1301	1	0	1	1	1	1	ASB7	ankyrin repeat and SOCS box containing 7
hsa-miR-1301	0	0	1	0	1	1	TCF21	transcription factor 21
hsa-miR-1301	0	0	1	1	0	0	KLRG2	killer cell lectin-like receptor subfamily G, member 2
hsa-miR-1301	0	0	1	0	0	0	IGFL1	IGF-like family member 1
hsa-miR-1301	0	0	1	1	0	0	SPATA21	spermatogenesis associated 21
hsa-miR-1301	1	0	1	0	1	1	FAM73A	family with sequence similarity 73, member A
hsa-miR-1301	0	0	1	1	1	1	LHFPL4	lipoma HMGIC fusion partner-like 4
hsa-miR-1301	1	0	1	0	1	1	ZC3H6	zinc finger CCCH-type containing 6
hsa-miR-1301	0	0	1	1	1	1	COL25A1	collagen, type XXV, alpha 1
hsa-miR-1301	1	0	1	0	1	1	LHFPL3	lipoma HMGIC fusion partner-like 3
hsa-miR-1301	0	0	1	1	1	1	FAM173B	family with sequence similarity 173, member B
hsa-miR-1301	0	0	1	0	1	1	WASH3P	WAS protein family homolog 3 pseudogene
hsa-miR-1301	0	0	1	1	0	0	FOXD4L4	forkhead box D4-like 4
hsa-miR-1301	1	0	1	1	1	1	ADAMTS18	ADAM metallopeptidase with thrombospondin type 1 motif, 18
hsa-miR-1301	0	0	1	1	1	1	CCDC80	coiled-coil domain containing 80
hsa-miR-1301	1	0	1	1	0	0	KAZN	kazrin, periplakin interacting protein
hsa-miR-1301	0	0	1	1	0	0	IER5L	immediate early response 5-like
hsa-miR-1301	0	0	1	0	1	1	NPSR1-AS1	NPSR1 antisense RNA 1
hsa-miR-1301	0	0	1	0	1	1	TP73-AS1	TP73 antisense RNA 1
hsa-miR-1301	1	0	1	1	1	1	SKIDA1	SKI/DACH domain containing 1
hsa-miR-1301	1	0	1	1	1	1	TNFAIP8L3	tumor necrosis factor, alpha-induced protein 8-like 3
hsa-miR-1301	0	0	1	0	1	1	FAM174B	family with sequence similarity 174, member B
hsa-miR-1301	1	0	1	1	1	1	TEX19	testis expressed 19
hsa-miR-1301	1	0	1	1	1	1	XKRX	XK, Kell blood group complex subunit-related, X-linked
hsa-miR-1301	1	0	1	1	1	1	RAPH1	Ras association (RalGDS/AF-6) and pleckstrin homology domains 1
hsa-miR-1301	0	0	1	1	0	0	C2orf27B	chromosome 2 open reading frame 27B
hsa-miR-1301	0	0	1	0	0	0	ESRRAP2	estrogen-related receptor alpha pseudogene 2
hsa-miR-1301	0	0	1	0	0	0	TTTY2	testis-specific transcript, Y-linked 2 (non-protein coding)
hsa-miR-1301	0	0	1	0	0	0	TTTY15	testis-specific transcript, Y-linked 15 (non-protein coding)
hsa-miR-1301	0	0	1	0	0	0	TTTY19	testis-specific transcript, Y-linked 19 (non-protein coding)
hsa-miR-1301	0	0	1	0	0	0	RBMY2EP	RNA binding motif protein, Y-linked, family 2, member E pseudogene
hsa-miR-1301	0	0	1	0	0	0	FAM224B	family with sequence similarity 224, member B (non-protein coding)
hsa-miR-1301	0	0	1	0	0	0	FTH1P2	ferritin, heavy polypeptide 1 pseudogene 2
hsa-miR-1301	0	0	1	0	0	0	FTH1P8	ferritin, heavy polypeptide 1 pseudogene 8
hsa-miR-1301	0	0	1	0	0	0	NXF4	nuclear RNA export factor 4 pseudogene
hsa-miR-1301	0	0	1	0	0	0	PDIA3P	protein disulfide isomerase family A, member 3 pseudogene
hsa-miR-1301	0	0	1	0	0	0	TRPC2	transient receptor potential cation channel, subfamily C, member 2, pseudogene
hsa-miR-1301	0	0	1	0	0	0	SNORD56	small nucleolar RNA, C/D box 56
hsa-miR-1301	0	0	1	0	0	0	HTR7P1	5-hydroxytryptamine (serotonin) receptor 7 pseudogene 1
hsa-miR-1301	0	0	1	0	0	0	RPL29P2	ribosomal protein L29 pseudogene 2
hsa-miR-1301	0	0	1	0	0	0	RPL13P5	ribosomal protein L13 pseudogene 5
hsa-miR-1301	0	0	1	0	0	0	AQP7P1	aquaporin 7 pseudogene 1
hsa-miR-1301	0	0	1	0	0	0	HERC2P8	hect domain and RLD 2 pseudogene 8
hsa-miR-1301	0	0	1	0	0	0	HAS2-AS1	HAS2 antisense RNA 1
hsa-miR-1301	0	0	1	0	0	0	SNORA13	small nucleolar RNA, H/ACA box 13
hsa-miR-1301	0	0	1	0	0	0	PTPRVP	protein tyrosine phosphatase, receptor type, V, pseudogene
hsa-miR-1301	0	0	1	0	0	0	SNX29P2	sorting nexin 29 pseudogene 2
hsa-miR-1301	0	0	1	0	0	0	TCAM1P	testicular cell adhesion molecule 1 homolog (mouse), pseudogene
hsa-miR-1301	0	0	1	0	0	0	SNORA39	small nucleolar RNA, H/ACA box 39
hsa-miR-1301	0	0	1	0	0	0	SCARNA6	small Cajal body-specific RNA 6
hsa-miR-1301	0	0	1	0	0	0	GBP1P1	guanylate binding protein 1, interferon-inducible pseudogene 1
hsa-miR-1301	0	0	1	1	0	0	GLP1R	glucagon-like peptide 1 receptor
hsa-miR-1301	0	0	1	1	0	0	TBL3	transducin (beta)-like 3
hsa-miR-1301	1	0	1	0	1	1	NFIX	nuclear factor I/X (CCAAT-binding transcription factor)
hsa-miR-1301	0	0	1	0	0	0	GAGE3	G antigen 3
hsa-miR-1301	1	0	1	1	1	1	TRIO	trio Rho guanine nucleotide exchange factor
hsa-miR-1301	0	0	1	1	0	0	VEGFB	vascular endothelial growth factor B
hsa-miR-1301	0	0	1	1	1	1	CD6	CD6 molecule
hsa-miR-1301	0	0	1	1	0	0	BMP1	bone morphogenetic protein 1
hsa-miR-1301	0	0	1	0	0	0	MUC5AC	mucin 5AC, oligomeric mucus/gel-forming
