# Supplementary material for: Profiling of Selected MicroRNAs in Proliferative Eutopic Endometrium of Women with Ovarian Endometriosis
Source: Biomed Res Int. 2015 Aug 20;2015:760698. doi: 10.1155/2015/760698 (PMC4558423; doi:10.1155/2015/760698)
Supplement: Supplementary file 1 — Table I: The names of miRNAs significantly differentially expressed between eutopic endometrium of patients with endometriosis vs eutopic endometrium of patients without endometriosis. Table II: The associations between miRNA and mRNA, which presents detailed results of the search of six major databases i.e targetscan, tarbase, miranda, mirbase, mirtarget2 and pictar. [file 760698.f1.zip › 760698.f1/Table II/hsa-miR-1303.tsv]

miR	targetscan	tarbase	miranda	mirbase	mirtarget2	pictar	GeneSymbol	GeneName
hsa-miR-1303	0	0	1	0	0	0	NOP14-AS1	NOP14 antisense RNA 1
hsa-miR-1303	1	0	1	1	1	1	CHD9	chromodomain helicase DNA binding protein 9
hsa-miR-1303	1	0	1	1	0	0	RAPGEF2	Rap guanine nucleotide exchange factor (GEF) 2
hsa-miR-1303	1	0	1	0	0	0	TRANK1	tetratricopeptide repeat and ankyrin repeat containing 1
hsa-miR-1303	1	0	1	0	1	1	KIAA0355	KIAA0355
hsa-miR-1303	1	0	1	1	1	1	IGSF1	immunoglobulin superfamily, member 1
hsa-miR-1303	1	0	1	1	1	1	PRUNE2	prune homolog 2 (Drosophila)
hsa-miR-1303	0	0	1	1	1	1	PPIP5K1	diphosphoinositol pentakisphosphate kinase 1
hsa-miR-1303	1	0	1	0	1	1	PTPRT	protein tyrosine phosphatase, receptor type, T
hsa-miR-1303	1	0	1	0	1	1	MTSS1	metastasis suppressor 1
hsa-miR-1303	1	0	1	1	1	1	AUTS2	autism susceptibility candidate 2
hsa-miR-1303	1	0	1	0	1	1	CEP350	centrosomal protein 350kDa
hsa-miR-1303	1	0	1	1	0	0	PCLO	piccolo (presynaptic cytomatrix protein)
hsa-miR-1303	1	0	1	1	1	1	GREB1	growth regulation by estrogen in breast cancer 1
hsa-miR-1303	1	0	1	1	1	1	HIPK1	homeodomain interacting protein kinase 1
hsa-miR-1303	1	0	1	0	1	1	MAGI2	membrane associated guanylate kinase, WW and PDZ domain containing 2
hsa-miR-1303	0	0	1	1	0	0	RAD51D	RAD51 homolog D (S. cerevisiae)
hsa-miR-1303	1	0	1	1	1	1	DNM3	dynamin 3
hsa-miR-1303	1	0	1	1	1	1	RNMT	RNA (guanine-7-) methyltransferase
hsa-miR-1303	1	0	1	0	0	0	DTX4	deltex homolog 4 (Drosophila)
hsa-miR-1303	0	0	1	0	0	0	THSD7A	thrombospondin, type I, domain containing 7A
hsa-miR-1303	0	0	1	1	1	1	FASTKD2	FAST kinase domains 2
hsa-miR-1303	1	0	1	1	1	1	RPGRIP1L	RPGRIP1-like
hsa-miR-1303	0	0	1	0	1	1	TP53TG3	TP53 target 3
hsa-miR-1303	0	0	1	0	0	0	TP53TG3B	TP53 target 3B
hsa-miR-1303	1	0	1	1	1	1	FOXJ3	forkhead box J3
hsa-miR-1303	1	0	1	1	0	0	KIAA1045	KIAA1045
hsa-miR-1303	1	0	1	1	0	0	ZC3H4	zinc finger CCCH-type containing 4
hsa-miR-1303	1	0	1	1	1	1	NLGN1	neuroligin 1
hsa-miR-1303	1	0	1	1	1	1	PRRC2C	proline-rich coiled-coil 2C
hsa-miR-1303	0	0	1	0	0	0	KIAA1107	KIAA1107
hsa-miR-1303	0	0	1	0	0	0	ELTD1	EGF, latrophilin and seven transmembrane domain containing 1
hsa-miR-1303	1	0	1	1	1	1	SMARCAD1	SWI/SNF-related, matrix-associated actin-dependent regulator of chromatin, subfamily a, containing DEAD/H box 1
hsa-miR-1303	1	0	1	0	1	1	ODZ2	odz, odd Oz/ten-m homolog 2 (Drosophila)
hsa-miR-1303	1	0	1	0	0	0	HEG1	HEG homolog 1 (zebrafish)
hsa-miR-1303	1	0	1	1	1	1	ASAP1	ArfGAP with SH3 domain, ankyrin repeat and PH domain 1
hsa-miR-1303	0	0	1	1	1	1	KIF20B	kinesin family member 20B
hsa-miR-1303	1	0	1	1	1	1	PCDH19	protocadherin 19
hsa-miR-1303	1	0	1	1	1	1	UPF2	UPF2 regulator of nonsense transcripts homolog (yeast)
hsa-miR-1303	1	0	1	0	1	1	SEMA6D	sema domain, transmembrane domain (TM), and cytoplasmic domain, (semaphorin) 6D
hsa-miR-1303	1	0	1	0	1	1	IGDCC4	immunoglobulin superfamily, DCC subclass, member 4
hsa-miR-1303	1	0	1	1	1	1	ZNF532	zinc finger protein 532
hsa-miR-1303	1	0	1	0	0	0	TANC2	tetratricopeptide repeat, ankyrin repeat and coiled-coil containing 2
hsa-miR-1303	1	0	1	1	1	1	PHF21A	PHD finger protein 21A
hsa-miR-1303	0	0	1	1	1	1	BHLHB9	basic helix-loop-helix domain containing, class B, 9
hsa-miR-1303	1	0	1	0	1	1	RIMS1	regulating synaptic membrane exocytosis 1
hsa-miR-1303	0	0	1	1	0	0	PFDN5	prefoldin subunit 5
hsa-miR-1303	1	0	1	1	1	1	IKZF4	IKAROS family zinc finger 4 (Eos)
hsa-miR-1303	1	0	1	1	1	1	POGZ	pogo transposable element with ZNF domain
hsa-miR-1303	0	0	1	0	0	0	NBLA00301	Nbla00301
hsa-miR-1303	1	0	1	1	1	1	SH3TC2	SH3 domain and tetratricopeptide repeats 2
hsa-miR-1303	1	0	1	0	0	0	ZBTB34	zinc finger and BTB domain containing 34
hsa-miR-1303	1	0	1	1	1	1	RFX4	regulatory factor X, 4 (influences HLA class II expression)
hsa-miR-1303	1	0	1	0	0	0	ZC3H12C	zinc finger CCCH-type containing 12C
hsa-miR-1303	1	0	1	1	1	1	C11orf57	chromosome 11 open reading frame 57
hsa-miR-1303	1	0	1	1	1	1	KCNMA1	potassium large conductance calcium-activated channel, subfamily M, alpha member 1
hsa-miR-1303	0	0	1	1	1	1	BIRC5	baculoviral IAP repeat containing 5
hsa-miR-1303	1	1	1	1	1	1	BACE1	beta-site APP-cleaving enzyme 1
hsa-miR-1303	0	0	1	0	1	1	ACE2	angiotensin I converting enzyme (peptidyl-dipeptidase A) 2
hsa-miR-1303	0	0	1	1	1	1	SYBU	syntabulin (syntaxin-interacting)
hsa-miR-1303	1	0	1	1	1	1	LTBP1	latent transforming growth factor beta binding protein 1
hsa-miR-1303	1	0	1	0	1	1	PCDHA13	protocadherin alpha 13
hsa-miR-1303	1	0	1	1	1	1	PCDHA4	protocadherin alpha 4
hsa-miR-1303	0	0	1	1	0	0	KCNC3	potassium voltage-gated channel, Shaw-related subfamily, member 3
hsa-miR-1303	1	0	1	1	1	1	RPS6KA3	ribosomal protein S6 kinase, 90kDa, polypeptide 3
hsa-miR-1303	1	0	1	1	1	1	NFYC	nuclear transcription factor Y, gamma
hsa-miR-1303	1	0	1	1	0	0	GRIA1	glutamate receptor, ionotropic, AMPA 1
hsa-miR-1303	1	0	1	1	1	1	DTNA	dystrobrevin, alpha
hsa-miR-1303	1	0	1	1	1	1	RASSF5	Ras association (RalGDS/AF-6) domain family member 5
hsa-miR-1303	0	0	1	1	0	0	CASP9	caspase 9, apoptosis-related cysteine peptidase
hsa-miR-1303	1	0	1	0	1	1	DPYSL2	dihydropyrimidinase-like 2
hsa-miR-1303	1	0	1	1	1	1	EPHA7	EPH receptor A7
hsa-miR-1303	1	0	1	1	1	1	TWF1	twinfilin, actin-binding protein, homolog 1 (Drosophila)
hsa-miR-1303	1	0	1	1	1	1	ARFGEF1	ADP-ribosylation factor guanine nucleotide-exchange factor 1 (brefeldin A-inhibited)
hsa-miR-1303	1	0	1	1	1	1	SATB2	SATB homeobox 2
hsa-miR-1303	1	0	1	1	1	1	AEBP2	AE binding protein 2
hsa-miR-1303	0	0	1	1	0	0	IGFBP2	insulin-like growth factor binding protein 2, 36kDa
hsa-miR-1303	0	0	1	1	0	0	EIF4E2	eukaryotic translation initiation factor 4E family member 2
hsa-miR-1303	0	0	1	1	0	0	EIF2B4	eukaryotic translation initiation factor 2B, subunit 4 delta, 67kDa
hsa-miR-1303	1	0	1	0	1	1	TBL1X	transducin (beta)-like 1X-linked
hsa-miR-1303	0	0	1	1	1	1	HLA-DQA1	major histocompatibility complex, class II, DQ alpha 1
hsa-miR-1303	0	0	1	1	0	0	SLC22A8	solute carrier family 22 (organic anion transporter), member 8
hsa-miR-1303	1	0	1	1	1	1	GOLGA4	golgin A4
hsa-miR-1303	1	0	1	1	0	0	GRIN2A	glutamate receptor, ionotropic, N-methyl D-aspartate 2A
hsa-miR-1303	0	0	1	1	1	1	KIF3A	kinesin family member 3A
hsa-miR-1303	0	0	1	1	1	1	CHN1	chimerin (chimaerin) 1
hsa-miR-1303	1	0	1	1	1	1	TEAD1	TEA domain family member 1 (SV40 transcriptional enhancer factor)
hsa-miR-1303	0	0	1	1	0	0	TRIM27	tripartite motif containing 27
hsa-miR-1303	0	0	1	1	1	1	PLD1	phospholipase D1, phosphatidylcholine-specific
hsa-miR-1303	1	0	1	1	1	1	MEF2D	myocyte enhancer factor 2D
hsa-miR-1303	1	0	1	1	1	1	SDHC	succinate dehydrogenase complex, subunit C, integral membrane protein, 15kDa
hsa-miR-1303	0	0	1	1	1	1	CD55	CD55 molecule, decay accelerating factor for complement (Cromer blood group)
hsa-miR-1303	0	0	1	1	1	1	BRCA1	breast cancer 1, early onset
hsa-miR-1303	1	0	1	1	1	1	OVOL1	ovo-like 1(Drosophila)
hsa-miR-1303	1	0	1	0	0	0	MAP3K1	mitogen-activated protein kinase kinase kinase 1, E3 ubiquitin protein ligase
hsa-miR-1303	1	0	1	1	1	1	RUNX2	runt-related transcription factor 2
hsa-miR-1303	0	0	1	0	1	1	GPR98	G protein-coupled receptor 98
hsa-miR-1303	0	0	1	1	1	1	ZNF33A	zinc finger protein 33A
hsa-miR-1303	1	0	1	1	0	0	PAK1	p21 protein (Cdc42/Rac)-activated kinase 1
hsa-miR-1303	1	0	1	0	1	1	MAP4K4	mitogen-activated protein kinase kinase kinase kinase 4
hsa-miR-1303	1	0	1	1	1	1	LPHN2	latrophilin 2
hsa-miR-1303	0	0	1	1	0	0	RBM5	RNA binding motif protein 5
hsa-miR-1303	0	0	1	1	1	1	IL18BP	interleukin 18 binding protein
hsa-miR-1303	1	0	1	1	1	1	SORBS1	sorbin and SH3 domain containing 1
hsa-miR-1303	0	0	1	0	1	1	CLEC5A	C-type lectin domain family 5, member A
hsa-miR-1303	0	0	1	0	1	1	PDP1	pyruvate dehyrogenase phosphatase catalytic subunit 1
hsa-miR-1303	0	0	1	1	1	1	FGFR1OP2	FGFR1 oncogene partner 2
hsa-miR-1303	1	0	1	1	1	1	TACC2	transforming, acidic coiled-coil containing protein 2
hsa-miR-1303	0	0	1	0	1	1	CLDN2	claudin 2
hsa-miR-1303	0	0	1	0	0	0	BPESC1	blepharophimosis, epicanthus inversus and ptosis, candidate 1 (non-protein coding)
hsa-miR-1303	1	0	1	1	1	1	SENP7	SUMO1/sentrin specific peptidase 7
hsa-miR-1303	1	0	1	1	1	1	KCNMB2	potassium large conductance calcium-activated channel, subfamily M, beta member 2
hsa-miR-1303	0	0	1	1	1	1	SAMSN1	SAM domain, SH3 domain and nuclear localization signals 1
hsa-miR-1303	1	0	1	1	1	1	SNTB2	syntrophin, beta 2 (dystrophin-associated protein A1, 59kDa, basic component 2)
hsa-miR-1303	0	0	1	1	1	1	PJA1	praja ring finger 1, E3 ubiquitin protein ligase
hsa-miR-1303	0	0	1	1	1	1	CCR3	chemokine (C-C motif) receptor 3
hsa-miR-1303	1	0	1	1	1	1	SH3GLB1	SH3-domain GRB2-like endophilin B1
hsa-miR-1303	1	0	1	0	1	1	TRPS1	trichorhinophalangeal syndrome I
hsa-miR-1303	1	0	1	1	1	1	PCDH11Y	protocadherin 11 Y-linked
hsa-miR-1303	0	0	1	1	0	0	KCNK6	potassium channel, subfamily K, member 6
hsa-miR-1303	1	0	1	1	1	1	MGEA5	meningioma expressed antigen 5 (hyaluronidase)
hsa-miR-1303	1	0	1	1	0	0	ZBTB37	zinc finger and BTB domain containing 37
hsa-miR-1303	0	0	1	1	0	0	TTTY7	testis-specific transcript, Y-linked 7 (non-protein coding)
hsa-miR-1303	1	0	1	1	1	1	CALU	calumenin
hsa-miR-1303	0	0	1	1	1	1	SLC6A15	solute carrier family 6 (neutral amino acid transporter), member 15
hsa-miR-1303	1	0	1	1	1	1	LARP4	La ribonucleoprotein domain family, member 4
hsa-miR-1303	0	0	1	0	0	0	NBPF10	neuroblastoma breakpoint family, member 10
hsa-miR-1303	1	0	1	1	1	1	SON	SON DNA binding protein
hsa-miR-1303	1	0	1	1	1	1	RCAN1	regulator of calcineurin 1
hsa-miR-1303	0	0	1	1	0	0	SNRPN	small nuclear ribonucleoprotein polypeptide N
hsa-miR-1303	1	0	1	1	1	1	MAGI1	membrane associated guanylate kinase, WW and PDZ domain containing 1
hsa-miR-1303	1	0	1	1	1	1	NTRK2	neurotrophic tyrosine kinase, receptor, type 2
hsa-miR-1303	0	0	1	0	0	0	MYO15B	myosin XVB pseudogene
hsa-miR-1303	0	0	1	1	0	0	BRE	brain and reproductive organ-expressed (TNFRSF1A modulator)
hsa-miR-1303	1	0	1	1	0	0	SAMD4A	sterile alpha motif domain containing 4A
hsa-miR-1303	1	0	1	1	0	0	YTHDF2	YTH domain family, member 2
hsa-miR-1303	1	0	1	1	0	0	SEPT8	septin 8
hsa-miR-1303	0	0	1	1	0	0	HOPX	HOP homeobox
hsa-miR-1303	1	0	1	1	1	1	LRRC7	leucine rich repeat containing 7
hsa-miR-1303	0	0	1	1	1	1	BMP2K	BMP2 inducible kinase
hsa-miR-1303	0	0	1	0	0	0	HOXB-AS5	HOXB cluster antisense RNA 5
hsa-miR-1303	1	0	1	1	0	0	BRSK2	BR serine/threonine kinase 2
hsa-miR-1303	0	0	1	1	1	1	ANKRD36B	ankyrin repeat domain 36B
hsa-miR-1303	0	0	1	0	0	0	CACNA2D3	calcium channel, voltage-dependent, alpha 2/delta subunit 3
hsa-miR-1303	1	0	1	1	1	1	PALM2	paralemmin 2
hsa-miR-1303	1	0	1	1	1	1	NRXN3	neurexin 3
hsa-miR-1303	0	0	1	1	0	0	MBD1	methyl-CpG binding domain protein 1
hsa-miR-1303	1	0	1	1	1	1	ARL4C	ADP-ribosylation factor-like 4C
hsa-miR-1303	0	0	1	1	0	0	NHLRC2	NHL repeat containing 2
hsa-miR-1303	0	0	1	1	1	1	ESRP1	epithelial splicing regulatory protein 1
hsa-miR-1303	0	0	1	1	0	0	ASAP3	ArfGAP with SH3 domain, ankyrin repeat and PH domain 3
hsa-miR-1303	1	0	1	1	1	1	ENOX2	ecto-NOX disulfide-thiol exchanger 2
hsa-miR-1303	1	0	1	1	1	1	SIK2	salt-inducible kinase 2
hsa-miR-1303	0	0	1	1	1	1	PARP16	poly (ADP-ribose) polymerase family, member 16
hsa-miR-1303	0	0	1	1	0	0	AP4B1	adaptor-related protein complex 4, beta 1 subunit
hsa-miR-1303	0	0	1	1	0	0	MANSC1	MANSC domain containing 1
hsa-miR-1303	0	0	1	1	1	1	STOX2	storkhead box 2
hsa-miR-1303	1	0	1	1	1	1	SCAMP1	secretory carrier membrane protein 1
hsa-miR-1303	1	0	1	1	1	1	PTBP3	polypyrimidine tract binding protein 3
hsa-miR-1303	0	0	1	1	0	0	C17orf53	chromosome 17 open reading frame 53
hsa-miR-1303	1	0	1	1	1	1	C12orf23	chromosome 12 open reading frame 23
hsa-miR-1303	0	0	1	0	0	0	DUXAP10	double homeobox A pseudogene 10
hsa-miR-1303	1	0	1	1	1	1	S100PBP	S100P binding protein
hsa-miR-1303	1	0	1	1	1	1	WDTC1	WD and tetratricopeptide repeats 1
hsa-miR-1303	1	0	1	1	1	1	SMEK2	SMEK homolog 2, suppressor of mek1 (Dictyostelium)
hsa-miR-1303	0	0	1	1	1	1	VPRBP	Vpr (HIV-1) binding protein
hsa-miR-1303	1	0	1	0	1	1	UBP1	upstream binding protein 1 (LBP-1a)
hsa-miR-1303	1	0	1	1	1	1	PHF20L1	PHD finger protein 20-like 1
hsa-miR-1303	0	0	1	1	0	0	OBSL1	obscurin-like 1
hsa-miR-1303	0	0	1	1	1	1	CDKAL1	CDK5 regulatory subunit associated protein 1-like 1
hsa-miR-1303	0	0	1	0	1	1	FLJ14186	uncharacterized LOC401149
hsa-miR-1303	1	0	1	0	1	1	ATP2B1	ATPase, Ca++ transporting, plasma membrane 1
hsa-miR-1303	1	0	1	0	1	1	MYO5B	myosin VB
hsa-miR-1303	0	0	1	1	1	1	PPFIBP2	PTPRF interacting protein, binding protein 2 (liprin beta 2)
hsa-miR-1303	0	0	1	0	0	0	KIAA1671	KIAA1671
hsa-miR-1303	0	0	1	0	0	0	LINC00340	long intergenic non-protein coding RNA 340
hsa-miR-1303	0	0	1	1	1	1	FAM124B	family with sequence similarity 124B
hsa-miR-1303	1	0	1	1	0	0	UBXN7	UBX domain protein 7
hsa-miR-1303	0	0	1	1	0	0	EXOC6B	exocyst complex component 6B
hsa-miR-1303	1	0	1	1	1	1	DCAF8	DDB1 and CUL4 associated factor 8
hsa-miR-1303	1	0	1	1	1	1	LRP4	low density lipoprotein receptor-related protein 4
hsa-miR-1303	0	0	1	1	1	1	DUSP14	dual specificity phosphatase 14
hsa-miR-1303	1	0	1	1	1	1	FOXP1	forkhead box P1
hsa-miR-1303	0	0	1	1	0	0	CCDC142	coiled-coil domain containing 142
hsa-miR-1303	0	0	1	1	1	1	CHD1L	chromodomain helicase DNA binding protein 1-like
hsa-miR-1303	1	0	1	1	1	1	STRBP	spermatid perinuclear RNA binding protein
hsa-miR-1303	0	0	1	0	0	0	LOC283508	uncharacterized LOC283508
hsa-miR-1303	0	0	1	1	0	0	FAM153B	family with sequence similarity 153, member B
hsa-miR-1303	1	0	1	1	1	1	RAP1GDS1	RAP1, GTP-GDP dissociation stimulator 1
hsa-miR-1303	0	0	1	1	1	1	GABRP	gamma-aminobutyric acid (GABA) A receptor, pi
hsa-miR-1303	0	0	1	1	0	0	SLC26A8	solute carrier family 26, member 8
hsa-miR-1303	0	0	1	0	0	0	FLJ30838	uncharacterized LOC400955
hsa-miR-1303	0	0	1	0	0	0	FLJ31104	uncharacterized LOC441072
hsa-miR-1303	1	0	1	1	1	1	DIXDC1	DIX domain containing 1
hsa-miR-1303	1	0	1	1	1	1	MAP3K7	mitogen-activated protein kinase kinase kinase 7
hsa-miR-1303	1	0	1	0	1	1	RNF165	ring finger protein 165
hsa-miR-1303	0	0	1	1	1	1	PDE1C	phosphodiesterase 1C, calmodulin-dependent 70kDa
hsa-miR-1303	1	0	1	1	1	1	AGPAT1	1-acylglycerol-3-phosphate O-acyltransferase 1 (lysophosphatidic acid acyltransferase, alpha)
hsa-miR-1303	1	0	1	1	1	1	ZIC4	Zic family member 4
hsa-miR-1303	1	0	1	1	1	1	CLCN5	chloride channel, voltage-sensitive 5
hsa-miR-1303	1	0	1	1	1	1	PUM1	pumilio homolog 1 (Drosophila)
hsa-miR-1303	0	0	1	0	0	0	LOC255187	hCG1980447
hsa-miR-1303	1	0	1	0	1	1	RABGEF1	RAB guanine nucleotide exchange factor (GEF) 1
hsa-miR-1303	1	0	1	1	1	1	TPM3	tropomyosin 3
hsa-miR-1303	0	0	1	1	1	1	XAF1	XIAP associated factor 1
hsa-miR-1303	1	0	1	1	1	1	HMGB1	high mobility group box 1
hsa-miR-1303	0	0	1	1	1	1	PSME3	proteasome (prosome, macropain) activator subunit 3 (PA28 gamma; Ki)
hsa-miR-1303	0	0	1	1	1	1	VWA3B	von Willebrand factor A domain containing 3B
hsa-miR-1303	0	0	1	0	0	0	LOC100125918	uncharacterized LOC100125918
hsa-miR-1303	0	0	1	1	0	0	NXF2	nuclear RNA export factor 2
hsa-miR-1303	1	0	1	0	1	1	PLEKHA1	pleckstrin homology domain containing, family A (phosphoinositide binding specific) member 1
hsa-miR-1303	0	0	1	0	1	1	CHURC1	churchill domain containing 1
hsa-miR-1303	0	0	1	0	0	0	UBE2QL1	ubiquitin-conjugating enzyme E2Q family-like 1
hsa-miR-1303	1	0	1	1	1	1	IST1	increased sodium tolerance 1 homolog (yeast)
hsa-miR-1303	0	0	1	1	1	1	A2ML1	alpha-2-macroglobulin-like 1
hsa-miR-1303	0	0	1	1	1	1	ZNF385B	zinc finger protein 385B
hsa-miR-1303	0	0	1	1	0	0	EFCAB6	EF-hand calcium binding domain 6
hsa-miR-1303	0	0	1	1	1	1	ZBTB26	zinc finger and BTB domain containing 26
hsa-miR-1303	0	0	1	0	0	0	FLJ25363	uncharacterized LOC401082
hsa-miR-1303	0	0	1	1	0	0	ANKAR	ankyrin and armadillo repeat containing
hsa-miR-1303	0	0	1	1	0	0	TRIM41	tripartite motif containing 41
hsa-miR-1303	0	0	1	1	1	1	HDAC8	histone deacetylase 8
hsa-miR-1303	1	0	1	1	1	1	GANC	glucosidase, alpha; neutral C
hsa-miR-1303	0	0	1	0	1	1	CDHR3	cadherin-related family member 3
hsa-miR-1303	0	0	1	1	1	1	GALNT6	UDP-N-acetyl-alpha-D-galactosamine:polypeptide N-acetylgalactosaminyltransferase 6 (GalNAc-T6)
hsa-miR-1303	0	0	1	1	1	1	MAPK10	mitogen-activated protein kinase 10
hsa-miR-1303	1	0	1	1	1	1	EGR2	early growth response 2
hsa-miR-1303	1	0	1	1	1	1	AMMECR1	Alport syndrome, mental retardation, midface hypoplasia and elliptocytosis chromosomal region gene 1
hsa-miR-1303	1	0	1	1	1	1	SUPT16H	suppressor of Ty 16 homolog (S. cerevisiae)
hsa-miR-1303	0	0	1	0	1	1	TBX5-AS1	TBX5 antisense RNA 1
hsa-miR-1303	0	0	1	0	0	0	LOC440910	uncharacterized LOC440910
hsa-miR-1303	1	0	1	1	1	1	FBXW2	F-box and WD repeat domain containing 2
hsa-miR-1303	0	0	1	1	1	1	CD34	CD34 molecule
hsa-miR-1303	1	0	1	0	1	1	TEF	thyrotrophic embryonic factor
hsa-miR-1303	0	0	1	1	0	0	APOBEC3G	apolipoprotein B mRNA editing enzyme, catalytic polypeptide-like 3G
hsa-miR-1303	0	0	1	1	1	1	PRKRA	protein kinase, interferon-inducible double stranded RNA dependent activator
hsa-miR-1303	0	0	1	0	0	0	LOC283887	uncharacterized LOC283887
hsa-miR-1303	0	0	1	1	1	1	CYP11B1	cytochrome P450, family 11, subfamily B, polypeptide 1
hsa-miR-1303	1	0	1	1	1	1	DEM1	defects in morphology 1 homolog (S. cerevisiae)
hsa-miR-1303	0	0	1	0	0	0	CXXC1P1	CXXC finger protein 1 pseudogene 1
hsa-miR-1303	1	0	1	1	1	1	LRRC57	leucine rich repeat containing 57
hsa-miR-1303	0	0	1	1	1	1	C19orf47	chromosome 19 open reading frame 47
hsa-miR-1303	0	0	1	1	1	1	SPOCK1	sparc/osteonectin, cwcv and kazal-like domains proteoglycan (testican) 1
hsa-miR-1303	0	0	1	0	0	0	PART1	prostate androgen-regulated transcript 1 (non-protein coding)
hsa-miR-1303	0	0	1	1	1	1	SPEF2	sperm flagellar 2
hsa-miR-1303	0	0	1	0	0	0	ZNF806	zinc finger protein 806
hsa-miR-1303	1	0	1	1	1	1	GALNTL2	UDP-N-acetyl-alpha-D-galactosamine:polypeptide N-acetylgalactosaminyltransferase-like 2
hsa-miR-1303	1	0	1	1	1	1	CPNE8	copine VIII
hsa-miR-1303	0	0	1	1	0	0	TMEM108	transmembrane protein 108
hsa-miR-1303	1	0	1	0	1	1	IL1RAP	interleukin 1 receptor accessory protein
hsa-miR-1303	1	0	1	1	1	1	ANKRD46	ankyrin repeat domain 46
hsa-miR-1303	1	0	1	1	1	1	SPATS2	spermatogenesis associated, serine-rich 2
hsa-miR-1303	1	0	1	1	1	1	CECR6	cat eye syndrome chromosome region, candidate 6
hsa-miR-1303	0	0	1	1	1	1	FBLN1	fibulin 1
hsa-miR-1303	1	0	1	1	1	1	EPB41L4A	erythrocyte membrane protein band 4.1 like 4A
hsa-miR-1303	1	0	1	1	1	1	ACSL1	acyl-CoA synthetase long-chain family member 1
hsa-miR-1303	0	0	1	1	1	1	ZNF626	zinc finger protein 626
hsa-miR-1303	0	0	1	1	0	0	RPN2	ribophorin II
hsa-miR-1303	0	0	1	0	0	0	ZNF815P	zinc finger protein 815, pseudogene
hsa-miR-1303	0	0	1	1	0	0	CXorf56	chromosome X open reading frame 56
hsa-miR-1303	0	0	1	0	1	1	FLJ39080	uncharacterized LOC441355
hsa-miR-1303	0	0	1	1	1	1	MPHOSPH9	M-phase phosphoprotein 9
hsa-miR-1303	1	0	1	0	1	1	THRB	thyroid hormone receptor, beta
hsa-miR-1303	1	0	1	0	1	1	KBTBD8	kelch repeat and BTB (POZ) domain containing 8
hsa-miR-1303	1	0	1	1	1	1	STIM2	stromal interaction molecule 2
hsa-miR-1303	1	0	1	1	1	1	EPB41L1	erythrocyte membrane protein band 4.1-like 1
hsa-miR-1303	0	0	1	1	1	1	RNASEH1	ribonuclease H1
hsa-miR-1303	1	0	1	1	1	1	SPARC	secreted protein, acidic, cysteine-rich (osteonectin)
hsa-miR-1303	0	0	1	0	0	0	LOC400680	uncharacterized LOC400680
hsa-miR-1303	0	0	1	1	1	1	FAM9B	family with sequence similarity 9, member B
hsa-miR-1303	1	0	1	1	1	1	NSUN4	NOP2/Sun domain family, member 4
hsa-miR-1303	1	0	1	1	1	1	PRKAG1	protein kinase, AMP-activated, gamma 1 non-catalytic subunit
hsa-miR-1303	0	0	1	1	1	1	ATP9B	ATPase, class II, type 9B
hsa-miR-1303	1	0	1	1	1	1	ST7L	suppression of tumorigenicity 7 like
hsa-miR-1303	1	0	1	0	1	1	LRBA	LPS-responsive vesicle trafficking, beach and anchor containing
hsa-miR-1303	1	0	1	1	0	0	ENTPD1	ectonucleoside triphosphate diphosphohydrolase 1
hsa-miR-1303	0	0	1	0	0	0	LOC100130954	uncharacterized LOC100130954
hsa-miR-1303	1	0	1	0	1	1	UNC5D	unc-5 homolog D (C. elegans)
hsa-miR-1303	0	0	1	1	1	1	SLFN13	schlafen family member 13
hsa-miR-1303	1	0	1	1	1	1	LMX1A	LIM homeobox transcription factor 1, alpha
hsa-miR-1303	1	0	1	1	0	0	WIZ	widely interspaced zinc finger motifs
hsa-miR-1303	0	0	1	1	0	0	MARS	methionyl-tRNA synthetase
hsa-miR-1303	0	0	1	1	1	1	ZNF546	zinc finger protein 546
hsa-miR-1303	1	0	1	1	1	1	ZBTB4	zinc finger and BTB domain containing 4
hsa-miR-1303	0	0	1	1	1	1	FRMPD2	FERM and PDZ domain containing 2
hsa-miR-1303	0	0	1	1	1	1	DNAJC24	DnaJ (Hsp40) homolog, subfamily C, member 24
hsa-miR-1303	0	0	1	0	0	0	C1orf132	chromosome 1 open reading frame 132
hsa-miR-1303	0	0	1	1	0	0	GCAT	glycine C-acetyltransferase
hsa-miR-1303	1	0	1	1	1	1	PLEKHH1	pleckstrin homology domain containing, family H (with MyTH4 domain) member 1
hsa-miR-1303	1	0	1	1	1	1	IPPK	inositol 1,3,4,5,6-pentakisphosphate 2-kinase
hsa-miR-1303	0	0	1	0	0	0	LOC285043	uncharacterized LOC285043
hsa-miR-1303	1	0	1	1	1	1	GJC1	gap junction protein, gamma 1, 45kDa
hsa-miR-1303	1	0	1	1	1	1	VPS54	vacuolar protein sorting 54 homolog (S. cerevisiae)
hsa-miR-1303	0	0	1	1	0	0	NPIP	nuclear pore complex interacting protein
hsa-miR-1303	0	0	1	1	0	0	SSPO	SCO-spondin homolog (Bos taurus)
hsa-miR-1303	1	0	1	0	1	1	RHBDL3	rhomboid, veinlet-like 3 (Drosophila)
hsa-miR-1303	1	0	1	1	0	0	BCORL1	BCL6 corepressor-like 1
hsa-miR-1303	1	0	1	0	1	1	CNTN2	contactin 2 (axonal)
hsa-miR-1303	0	0	1	1	1	1	MKX	mohawk homeobox
hsa-miR-1303	1	0	1	0	0	0	ANKRD52	ankyrin repeat domain 52
hsa-miR-1303	1	0	1	0	0	0	MSL1	male-specific lethal 1 homolog (Drosophila)
hsa-miR-1303	0	0	1	1	1	1	PLOD2	procollagen-lysine, 2-oxoglutarate 5-dioxygenase 2
hsa-miR-1303	0	0	1	1	0	0	KIAA0226L	KIAA0226-like
hsa-miR-1303	1	0	1	1	0	0	KIAA1211	KIAA1211
hsa-miR-1303	0	0	1	1	0	0	C20orf141	chromosome 20 open reading frame 141
hsa-miR-1303	1	0	1	1	1	1	CSRNP3	cysteine-serine-rich nuclear protein 3
hsa-miR-1303	0	0	1	0	1	1	LOC388942	uncharacterized LOC388942
hsa-miR-1303	1	0	1	1	1	1	SACM1L	SAC1 suppressor of actin mutations 1-like (yeast)
hsa-miR-1303	0	0	1	1	1	1	BDH1	3-hydroxybutyrate dehydrogenase, type 1
hsa-miR-1303	0	0	1	1	0	0	TMEM151B	transmembrane protein 151B
hsa-miR-1303	0	0	1	1	1	1	LARS	leucyl-tRNA synthetase
hsa-miR-1303	0	0	1	1	0	0	FAM54B	family with sequence similarity 54, member B
hsa-miR-1303	1	0	1	0	1	1	ADIPOR2	adiponectin receptor 2
hsa-miR-1303	0	0	1	1	1	1	ARHGAP33	Rho GTPase activating protein 33
hsa-miR-1303	0	0	1	1	1	1	ERI2	ERI1 exoribonuclease family member 2
hsa-miR-1303	1	0	1	1	1	1	SLC26A9	solute carrier family 26, member 9
hsa-miR-1303	0	0	1	1	1	1	ZNF503	zinc finger protein 503
hsa-miR-1303	1	0	1	1	1	1	R3HDM1	R3H domain containing 1
hsa-miR-1303	1	0	1	1	1	1	EYA1	eyes absent homolog 1 (Drosophila)
hsa-miR-1303	1	0	1	0	1	1	FNDC3B	fibronectin type III domain containing 3B
hsa-miR-1303	0	0	1	0	0	0	ERVFRD-2	endogenous retrovirus group FRD, member 2
hsa-miR-1303	1	0	1	0	1	1	CAPRIN1	cell cycle associated protein 1
hsa-miR-1303	1	0	1	1	1	1	AHRR	aryl-hydrocarbon receptor repressor
hsa-miR-1303	1	0	1	1	0	0	C15orf39	chromosome 15 open reading frame 39
hsa-miR-1303	1	0	1	0	1	1	KDM2A	lysine (K)-specific demethylase 2A
hsa-miR-1303	1	0	1	0	1	1	NBR1	neighbor of BRCA1 gene 1
hsa-miR-1303	1	0	1	0	1	1	USP37	ubiquitin specific peptidase 37
hsa-miR-1303	1	0	1	0	1	1	BLOC1S6	biogenesis of lysosomal organelles complex-1, subunit 6, pallidin
hsa-miR-1303	1	0	1	0	1	1	CYB561D1	cytochrome b-561 domain containing 1
hsa-miR-1303	0	0	1	0	0	0	FLJ26245	uncharacterized LOC400533
hsa-miR-1303	0	0	1	1	1	1	TBX19	T-box 19
hsa-miR-1303	1	0	1	1	1	1	CEP97	centrosomal protein 97kDa
hsa-miR-1303	0	0	1	1	1	1	ENPP2	ectonucleotide pyrophosphatase/phosphodiesterase 2
hsa-miR-1303	0	0	1	0	0	0	FAM27A	family with sequence similarity 27, member A
hsa-miR-1303	0	0	1	1	1	1	TMEM202	transmembrane protein 202
hsa-miR-1303	0	0	1	0	0	0	LOC494141	mitochondrial carrier triple repeat 1 pseudogene
hsa-miR-1303	1	0	1	0	1	1	ESRRG	estrogen-related receptor gamma
hsa-miR-1303	0	0	1	0	1	1	GALNT13	UDP-N-acetyl-alpha-D-galactosamine:polypeptide N-acetylgalactosaminyltransferase 13 (GalNAc-T13)
hsa-miR-1303	0	0	1	1	1	1	TMC5	transmembrane channel-like 5
hsa-miR-1303	0	0	1	0	1	1	RUFY4	RUN and FYVE domain containing 4
hsa-miR-1303	1	0	1	1	1	1	RNF111	ring finger protein 111
hsa-miR-1303	0	0	1	1	0	0	DNASE1L3	deoxyribonuclease I-like 3
hsa-miR-1303	0	0	1	0	0	0	LOC100124692	maltase-glucoamylase (alpha-glucosidase) pseudogene
hsa-miR-1303	1	0	1	0	1	1	STK3	serine/threonine kinase 3
hsa-miR-1303	0	0	1	1	1	1	SYTL2	synaptotagmin-like 2
hsa-miR-1303	1	0	1	1	1	1	MAP3K14	mitogen-activated protein kinase kinase kinase 14
hsa-miR-1303	0	0	1	1	1	1	ZNF346	zinc finger protein 346
hsa-miR-1303	0	0	1	0	1	1	ATP6V0E2	ATPase, H+ transporting V0 subunit e2
hsa-miR-1303	1	0	1	1	1	1	CTSA	cathepsin A
hsa-miR-1303	0	0	1	1	1	1	AKTIP	AKT interacting protein
hsa-miR-1303	0	0	1	1	1	1	CEACAM5	carcinoembryonic antigen-related cell adhesion molecule 5
hsa-miR-1303	0	0	1	1	1	1	MSH2	mutS homolog 2, colon cancer, nonpolyposis type 1 (E. coli)
hsa-miR-1303	1	0	1	0	1	1	SEZ6	seizure related 6 homolog (mouse)
hsa-miR-1303	1	0	1	1	1	1	FAM135A	family with sequence similarity 135, member A
hsa-miR-1303	1	0	1	1	1	1	PHTF2	putative homeodomain transcription factor 2
hsa-miR-1303	1	0	1	1	1	1	HSDL2	hydroxysteroid dehydrogenase like 2
hsa-miR-1303	1	0	1	1	1	1	EDN1	endothelin 1
hsa-miR-1303	1	0	1	1	1	1	NOVA1	neuro-oncological ventral antigen 1
hsa-miR-1303	0	0	1	1	1	1	PTPN20B	protein tyrosine phosphatase, non-receptor type 20B
hsa-miR-1303	0	0	1	1	1	1	PTPN20A	protein tyrosine phosphatase, non-receptor type 20A
hsa-miR-1303	1	0	1	1	1	1	RIF1	RAP1 interacting factor homolog (yeast)
hsa-miR-1303	0	0	1	0	0	0	POM121L8P	POM121 transmembrane nucleoporin-like 8 pseudogene
hsa-miR-1303	0	0	1	1	1	1	ARIH1	ariadne homolog, ubiquitin-conjugating enzyme E2 binding protein, 1 (Drosophila)
hsa-miR-1303	0	0	1	1	1	1	MTPAP	mitochondrial poly(A) polymerase
hsa-miR-1303	1	0	1	1	1	1	SMAP2	small ArfGAP2
hsa-miR-1303	0	0	1	1	0	0	H2AFJ	H2A histone family, member J
hsa-miR-1303	0	0	1	0	0	0	DNAJC5B	DnaJ (Hsp40) homolog, subfamily C, member 5 beta
hsa-miR-1303	0	0	1	1	1	1	RHOT1	ras homolog family member T1
hsa-miR-1303	0	0	1	1	1	1	STAG3L1	stromal antigen 3-like 1
hsa-miR-1303	1	0	1	0	1	1	GPR85	G protein-coupled receptor 85
hsa-miR-1303	1	0	1	0	1	1	CEP170	centrosomal protein 170kDa
hsa-miR-1303	1	0	1	1	1	1	CTTNBP2NL	CTTNBP2 N-terminal like
hsa-miR-1303	0	0	1	1	1	1	SLC30A10	solute carrier family 30, member 10
hsa-miR-1303	1	0	1	0	1	1	GRIN3A	glutamate receptor, ionotropic, N-methyl-D-aspartate 3A
hsa-miR-1303	0	0	1	0	0	0	RPL23AP82	ribosomal protein L23a pseudogene 82
hsa-miR-1303	0	0	1	0	0	0	FAM66D	family with sequence similarity 66, member D
hsa-miR-1303	1	0	1	1	1	1	PKNOX2	PBX/knotted 1 homeobox 2
hsa-miR-1303	0	0	1	1	1	1	COBL	cordon-bleu homolog (mouse)
hsa-miR-1303	1	0	1	1	1	1	SLC30A8	solute carrier family 30 (zinc transporter), member 8
hsa-miR-1303	1	0	1	1	1	1	DENND1B	DENN/MADD domain containing 1B
hsa-miR-1303	1	0	1	1	1	1	LIMCH1	LIM and calponin homology domains 1
hsa-miR-1303	0	0	1	1	1	1	FILIP1	filamin A interacting protein 1
hsa-miR-1303	0	0	1	0	1	1	GAB3	GRB2-associated binding protein 3
hsa-miR-1303	0	0	1	1	1	1	BEND7	BEN domain containing 7
hsa-miR-1303	0	0	1	0	0	0	ZNF720	zinc finger protein 720
hsa-miR-1303	1	0	1	1	1	1	NFX1	nuclear transcription factor, X-box binding 1
hsa-miR-1303	0	0	1	1	1	1	VIT	vitrin
hsa-miR-1303	0	0	1	1	1	1	INPP5B	inositol polyphosphate-5-phosphatase, 75kDa
hsa-miR-1303	0	0	1	1	1	1	CCDC132	coiled-coil domain containing 132
hsa-miR-1303	1	0	1	0	1	1	MEF2C	myocyte enhancer factor 2C
hsa-miR-1303	1	0	1	1	1	1	SOX6	SRY (sex determining region Y)-box 6
hsa-miR-1303	0	0	1	1	1	1	CCDC14	coiled-coil domain containing 14
hsa-miR-1303	0	0	1	1	1	1	C12orf50	chromosome 12 open reading frame 50
hsa-miR-1303	1	0	1	0	1	1	CLINT1	clathrin interactor 1
hsa-miR-1303	0	0	1	0	0	0	EPHA1-AS1	EPHA1 antisense RNA 1
hsa-miR-1303	1	0	1	1	1	1	NRP1	neuropilin 1
hsa-miR-1303	1	0	1	1	1	1	FAM63B	family with sequence similarity 63, member B
hsa-miR-1303	0	0	1	1	1	1	SOAT1	sterol O-acyltransferase 1
hsa-miR-1303	1	0	1	1	1	1	ATAT1	alpha tubulin acetyltransferase 1
hsa-miR-1303	1	0	1	1	1	1	ANKRD12	ankyrin repeat domain 12
hsa-miR-1303	1	0	1	1	1	1	CADM2	cell adhesion molecule 2
hsa-miR-1303	1	0	1	1	1	1	RICTOR	RPTOR independent companion of MTOR, complex 2
hsa-miR-1303	1	0	1	0	1	1	KIF21B	kinesin family member 21B
hsa-miR-1303	1	0	1	0	1	1	NR3C1	nuclear receptor subfamily 3, group C, member 1 (glucocorticoid receptor)
hsa-miR-1303	1	0	1	1	1	1	BOLL	bol, boule-like (Drosophila)
hsa-miR-1303	0	0	1	1	0	0	FAM161A	family with sequence similarity 161, member A
hsa-miR-1303	0	0	1	0	1	1	SYNPO2	synaptopodin 2
hsa-miR-1303	1	0	1	0	1	1	PATL1	protein associated with topoisomerase II homolog 1 (yeast)
hsa-miR-1303	1	0	1	1	1	1	PPP3CA	protein phosphatase 3, catalytic subunit, alpha isozyme
hsa-miR-1303	1	0	1	1	1	1	RNF38	ring finger protein 38
hsa-miR-1303	0	0	1	1	1	1	CCDC62	coiled-coil domain containing 62
hsa-miR-1303	0	0	1	1	1	1	KLHL7	kelch-like 7 (Drosophila)
hsa-miR-1303	0	0	1	1	1	1	OSR2	odd-skipped related 2 (Drosophila)
hsa-miR-1303	0	0	1	1	1	1	CRB1	crumbs homolog 1 (Drosophila)
hsa-miR-1303	1	0	1	1	1	1	TXNRD1	thioredoxin reductase 1
hsa-miR-1303	1	0	1	1	1	1	SORCS1	sortilin-related VPS10 domain containing receptor 1
hsa-miR-1303	1	0	1	1	1	1	ANGPT1	angiopoietin 1
hsa-miR-1303	0	0	1	1	1	1	NFXL1	nuclear transcription factor, X-box binding-like 1
hsa-miR-1303	1	0	1	1	1	1	WDR26	WD repeat domain 26
hsa-miR-1303	1	0	1	1	1	1	BCL11A	B-cell CLL/lymphoma 11A (zinc finger protein)
hsa-miR-1303	1	0	1	1	1	1	PNRC1	proline-rich nuclear receptor coactivator 1
hsa-miR-1303	1	0	1	1	1	1	OPRM1	opioid receptor, mu 1
hsa-miR-1303	0	0	1	0	1	1	ANKS1B	ankyrin repeat and sterile alpha motif domain containing 1B
hsa-miR-1303	0	0	1	1	0	0	LRRC39	leucine rich repeat containing 39
hsa-miR-1303	0	0	1	1	0	0	VSIG4	V-set and immunoglobulin domain containing 4
hsa-miR-1303	1	0	1	0	1	1	MEGF9	multiple EGF-like-domains 9
hsa-miR-1303	0	0	1	1	1	1	KDELC2	KDEL (Lys-Asp-Glu-Leu) containing 2
hsa-miR-1303	0	0	1	1	0	0	RAET1E	retinoic acid early transcript 1E
hsa-miR-1303	0	0	1	1	1	1	VWA5A	von Willebrand factor A domain containing 5A
hsa-miR-1303	1	0	1	1	1	1	SSX2IP	synovial sarcoma, X breakpoint 2 interacting protein
hsa-miR-1303	1	0	1	0	1	1	ANKRD28	ankyrin repeat domain 28
hsa-miR-1303	0	0	1	1	1	1	POTEG	POTE ankyrin domain family, member G
hsa-miR-1303	1	0	1	1	1	1	MECP2	methyl CpG binding protein 2 (Rett syndrome)
hsa-miR-1303	0	0	1	1	1	1	PRPF4	PRP4 pre-mRNA processing factor 4 homolog (yeast)
hsa-miR-1303	1	0	1	1	1	1	PLCH1	phospholipase C, eta 1
hsa-miR-1303	0	0	1	1	1	1	KCNJ13	potassium inwardly-rectifying channel, subfamily J, member 13
hsa-miR-1303	0	0	1	0	1	1	KCNE1	potassium voltage-gated channel, Isk-related family, member 1
hsa-miR-1303	0	0	1	1	0	0	NBPF8	neuroblastoma breakpoint family, member 8
hsa-miR-1303	0	0	1	1	1	1	IYD	iodotyrosine deiodinase
hsa-miR-1303	0	0	1	1	0	0	DHCR7	7-dehydrocholesterol reductase
hsa-miR-1303	1	0	1	0	1	1	FAM46A	family with sequence similarity 46, member A
hsa-miR-1303	0	0	1	1	0	0	DGUOK	deoxyguanosine kinase
hsa-miR-1303	0	0	1	1	1	1	ATG3	autophagy related 3
hsa-miR-1303	1	0	1	1	1	1	TSPAN14	tetraspanin 14
hsa-miR-1303	1	0	1	1	1	1	RIMS3	regulating synaptic membrane exocytosis 3
hsa-miR-1303	1	0	1	1	1	1	NONO	non-POU domain containing, octamer-binding
hsa-miR-1303	1	0	1	0	1	1	DCAF10	DDB1 and CUL4 associated factor 10
hsa-miR-1303	1	0	1	1	1	1	ZNF410	zinc finger protein 410
hsa-miR-1303	1	0	1	0	1	1	EIF1AD	eukaryotic translation initiation factor 1A domain containing
hsa-miR-1303	1	0	1	0	1	1	CGGBP1	CGG triplet repeat binding protein 1
hsa-miR-1303	1	0	1	1	1	1	MBNL1	muscleblind-like splicing regulator 1
hsa-miR-1303	0	0	1	0	0	0	MGC13053	uncharacterized MGC13053
hsa-miR-1303	0	0	1	1	1	1	ARPC1A	actin related protein 2/3 complex, subunit 1A, 41kDa
hsa-miR-1303	1	0	1	1	1	1	PCGF5	polycomb group ring finger 5
hsa-miR-1303	0	0	1	1	0	0	PRR11	proline rich 11
hsa-miR-1303	0	0	1	1	1	1	TMEM30A	transmembrane protein 30A
hsa-miR-1303	1	0	1	1	1	1	B4GALT3	UDP-Gal:betaGlcNAc beta 1,4- galactosyltransferase, polypeptide 3
hsa-miR-1303	1	0	1	0	1	1	TMEM39A	transmembrane protein 39A
hsa-miR-1303	1	0	1	1	0	0	FA2H	fatty acid 2-hydroxylase
hsa-miR-1303	0	0	1	1	1	1	CPNE5	copine V
hsa-miR-1303	1	0	1	1	1	1	YY1	YY1 transcription factor
hsa-miR-1303	1	0	1	1	0	0	FHL3	four and a half LIM domains 3
hsa-miR-1303	0	0	1	1	0	0	USP19	ubiquitin specific peptidase 19
hsa-miR-1303	0	0	1	1	1	1	ZNF114	zinc finger protein 114
hsa-miR-1303	0	0	1	1	1	1	TOMM40L	translocase of outer mitochondrial membrane 40 homolog (yeast)-like
hsa-miR-1303	1	0	1	1	1	1	PAPOLA	poly(A) polymerase alpha
hsa-miR-1303	0	0	1	0	0	0	KLHL15	kelch-like 15 (Drosophila)
hsa-miR-1303	0	0	1	0	1	1	ZNF37A	zinc finger protein 37A
hsa-miR-1303	0	0	1	1	1	1	CMAS	cytidine monophosphate N-acetylneuraminic acid synthetase
hsa-miR-1303	1	0	1	0	1	1	CYBRD1	cytochrome b reductase 1
hsa-miR-1303	0	0	1	1	1	1	ANKRD44	ankyrin repeat domain 44
hsa-miR-1303	1	0	1	1	1	1	ELF4	E74-like factor 4 (ets domain transcription factor)
hsa-miR-1303	0	0	1	0	0	0	FAM200B	family with sequence similarity 200, member B
hsa-miR-1303	1	0	1	1	1	1	KIAA1217	KIAA1217
hsa-miR-1303	0	0	1	0	0	0	WDFY3-AS2	WDFY3 antisense RNA 2
hsa-miR-1303	0	0	1	0	0	0	LOC283693	actin, alpha 2, smooth muscle, aorta pseudogene
hsa-miR-1303	0	0	1	1	0	0	CYP27B1	cytochrome P450, family 27, subfamily B, polypeptide 1
hsa-miR-1303	0	0	1	0	1	1	ZNF718	zinc finger protein 718
hsa-miR-1303	0	0	1	1	1	1	HLA-G	major histocompatibility complex, class I, G
hsa-miR-1303	0	0	1	1	0	0	DPF1	D4, zinc and double PHD fingers family 1
hsa-miR-1303	0	0	1	0	0	0	NBR2	neighbor of BRCA1 gene 2 (non-protein coding)
hsa-miR-1303	0	0	1	1	0	0	SLC22A9	solute carrier family 22 (organic anion transporter), member 9
hsa-miR-1303	0	0	1	0	0	0	AZGP1P1	alpha-2-glycoprotein 1, zinc-binding pseudogene 1
hsa-miR-1303	1	0	1	0	1	1	CDK19	cyclin-dependent kinase 19
hsa-miR-1303	0	0	1	0	0	0	SNX29P2	sorting nexin 29 pseudogene 2
hsa-miR-1303	1	0	1	1	1	1	NIPA1	non imprinted in Prader-Willi/Angelman syndrome 1
hsa-miR-1303	1	0	1	1	1	1	RTKN2	rhotekin 2
hsa-miR-1303	0	0	1	1	1	1	MAP2	microtubule-associated protein 2
hsa-miR-1303	0	0	1	1	1	1	SELP	selectin P (granule membrane protein 140kDa, antigen CD62)
hsa-miR-1303	1	0	1	1	1	1	U2SURP	U2 snRNP-associated SURP domain containing
hsa-miR-1303	1	0	1	1	1	1	TMEM127	transmembrane protein 127
hsa-miR-1303	1	0	1	1	1	1	HTR2C	5-hydroxytryptamine (serotonin) receptor 2C, G protein-coupled
hsa-miR-1303	1	0	1	1	1	1	PPARGC1A	peroxisome proliferator-activated receptor gamma, coactivator 1 alpha
hsa-miR-1303	1	0	1	1	1	1	MRO	maestro
hsa-miR-1303	1	0	1	0	1	1	SV2B	synaptic vesicle glycoprotein 2B
hsa-miR-1303	0	0	1	1	1	1	CCP110	centriolar coiled coil protein 110kDa
hsa-miR-1303	0	0	1	1	1	1	PIP5K1B	phosphatidylinositol-4-phosphate 5-kinase, type I, beta
hsa-miR-1303	0	0	1	0	1	1	ERAP1	endoplasmic reticulum aminopeptidase 1
hsa-miR-1303	1	0	1	1	0	0	FAM83F	family with sequence similarity 83, member F
hsa-miR-1303	1	0	1	1	1	1	TBC1D1	TBC1 (tre-2/USP6, BUB2, cdc16) domain family, member 1
hsa-miR-1303	0	0	1	1	0	0	TTC12	tetratricopeptide repeat domain 12
hsa-miR-1303	1	0	1	1	1	1	FGF1	fibroblast growth factor 1 (acidic)
hsa-miR-1303	0	0	1	1	0	0	WASIR2	WASH and IL9R antisense RNA 2
hsa-miR-1303	1	0	1	1	1	1	SIRPA	signal-regulatory protein alpha
hsa-miR-1303	1	0	1	1	1	1	PLEKHA7	pleckstrin homology domain containing, family A member 7
hsa-miR-1303	1	0	1	1	1	1	CRKL	v-crk sarcoma virus CT10 oncogene homolog (avian)-like
hsa-miR-1303	1	0	1	1	1	1	SEPT2	septin 2
hsa-miR-1303	1	0	1	1	1	1	HMGCR	3-hydroxy-3-methylglutaryl-CoA reductase
hsa-miR-1303	1	0	1	1	1	1	PCDHA5	protocadherin alpha 5
hsa-miR-1303	1	0	1	0	1	1	KIF5A	kinesin family member 5A
hsa-miR-1303	1	0	1	1	1	1	RIC8B	resistance to inhibitors of cholinesterase 8 homolog B (C. elegans)
hsa-miR-1303	0	0	1	1	1	1	ZNF337	zinc finger protein 337
hsa-miR-1303	0	0	1	0	0	0	NDUFB4	NADH dehydrogenase (ubiquinone) 1 beta subcomplex, 4, 15kDa
hsa-miR-1303	0	0	1	0	0	0	FAM66C	family with sequence similarity 66, member C
hsa-miR-1303	0	0	1	1	1	1	EDA2R	ectodysplasin A2 receptor
hsa-miR-1303	1	0	1	0	1	1	DDX3Y	DEAD (Asp-Glu-Ala-Asp) box polypeptide 3, Y-linked
hsa-miR-1303	0	0	1	1	0	0	CCDC158	coiled-coil domain containing 158
hsa-miR-1303	0	0	1	0	1	1	FAM72A	family with sequence similarity 72, member A
hsa-miR-1303	1	0	1	1	1	1	CTDSPL2	CTD (carboxy-terminal domain, RNA polymerase II, polypeptide A) small phosphatase like 2
hsa-miR-1303	0	0	1	0	0	0	LOC339862	uncharacterized LOC339862
hsa-miR-1303	0	0	1	1	1	1	TMEM139	transmembrane protein 139
hsa-miR-1303	0	0	1	1	1	1	CLEC12B	C-type lectin domain family 12, member B
hsa-miR-1303	0	0	1	1	1	1	FAM171B	family with sequence similarity 171, member B
hsa-miR-1303	0	0	1	1	1	1	TADA1	transcriptional adaptor 1
hsa-miR-1303	0	0	1	0	0	0	ANKRD30BP2	ankyrin repeat domain 30B pseudogene 2
hsa-miR-1303	1	0	1	0	1	1	CLDN12	claudin 12
hsa-miR-1303	0	0	1	0	0	0	SRGAP2C	SLIT-ROBO Rho GTPase activating protein 2C
hsa-miR-1303	1	0	1	1	1	1	BNC2	basonuclin 2
hsa-miR-1303	0	0	1	0	0	0	LOC286184	uncharacterized LOC286184
hsa-miR-1303	0	0	1	1	1	1	ZNF138	zinc finger protein 138
hsa-miR-1303	0	0	1	1	1	1	BPHL	biphenyl hydrolase-like (serine hydrolase)
hsa-miR-1303	0	0	1	0	0	0	MGC42157	uncharacterized locus MGC42157
hsa-miR-1303	0	0	1	0	0	0	LOC100134868	uncharacterized LOC100134868
hsa-miR-1303	1	0	1	1	1	1	PLS3	plastin 3
hsa-miR-1303	1	0	1	0	1	1	LPHN3	latrophilin 3
hsa-miR-1303	0	0	1	1	1	1	SLC14A1	solute carrier family 14 (urea transporter), member 1 (Kidd blood group)
hsa-miR-1303	1	0	1	1	1	1	DACH2	dachshund homolog 2 (Drosophila)
hsa-miR-1303	1	0	1	0	1	1	PCSK2	proprotein convertase subtilisin/kexin type 2
hsa-miR-1303	0	0	1	1	0	0	MTCH1	mitochondrial carrier 1
hsa-miR-1303	0	0	1	1	0	0	SLC13A4	solute carrier family 13 (sodium/sulfate symporters), member 4
hsa-miR-1303	0	0	1	1	1	1	FAM71F1	family with sequence similarity 71, member F1
hsa-miR-1303	0	0	1	1	1	1	SIAE	sialic acid acetylesterase
hsa-miR-1303	0	0	1	0	0	0	SLC7A11-AS1	SLC7A11 antisense RNA 1
hsa-miR-1303	1	0	1	0	1	1	KIAA0430	KIAA0430
hsa-miR-1303	0	0	1	1	1	1	C17orf104	chromosome 17 open reading frame 104
hsa-miR-1303	0	0	1	0	0	0	LOC154092	uncharacterized LOC154092
hsa-miR-1303	1	0	1	1	1	1	ROCK1	Rho-associated, coiled-coil containing protein kinase 1
hsa-miR-1303	0	0	1	1	1	1	RABGAP1L	RAB GTPase activating protein 1-like
hsa-miR-1303	1	0	1	1	1	1	NPL	N-acetylneuraminate pyruvate lyase (dihydrodipicolinate synthase)
hsa-miR-1303	1	0	1	1	1	1	MEIS3	Meis homeobox 3
hsa-miR-1303	0	0	1	1	0	0	C1orf87	chromosome 1 open reading frame 87
hsa-miR-1303	0	0	1	0	1	1	C12orf74	chromosome 12 open reading frame 74
hsa-miR-1303	0	0	1	0	0	0	FAM27E3	family with sequence similarity 27, member E3
hsa-miR-1303	0	0	1	0	0	0	LOC283914	uncharacterized LOC283914
hsa-miR-1303	1	0	1	1	1	1	KLHL17	kelch-like 17 (Drosophila)
hsa-miR-1303	0	0	1	0	0	0	LOC286135	uncharacterized LOC286135
hsa-miR-1303	1	0	1	1	1	1	SF3B1	splicing factor 3b, subunit 1, 155kDa
hsa-miR-1303	0	0	1	1	0	0	FAM72B	family with sequence similarity 72, member B
hsa-miR-1303	0	0	1	1	1	1	EBP	emopamil binding protein (sterol isomerase)
hsa-miR-1303	0	0	1	0	0	0	LOC339529	uncharacterized LOC339529
hsa-miR-1303	0	0	1	0	0	0	INHBA-AS1	INHBA antisense RNA 1
hsa-miR-1303	0	0	1	0	0	0	CLEC4GP1	C-type lectin domain family 4, member G pseudogene 1
hsa-miR-1303	1	0	1	1	1	1	PELI1	pellino E3 ubiquitin protein ligase 1
hsa-miR-1303	1	0	1	0	1	1	RNF182	ring finger protein 182
hsa-miR-1303	1	0	1	0	1	1	NUDT10	nudix (nucleoside diphosphate linked moiety X)-type motif 10
hsa-miR-1303	1	0	1	0	1	1	SEMA4G	sema domain, immunoglobulin domain (Ig), transmembrane domain (TM) and short cytoplasmic domain, (semaphorin) 4G
hsa-miR-1303	0	0	1	0	0	0	BMS1P6	BMS1 pseudogene 6
hsa-miR-1303	0	0	1	1	1	1	LINC00086	long intergenic non-protein coding RNA 86
hsa-miR-1303	1	0	1	1	1	1	YWHAZ	tyrosine 3-monooxygenase/tryptophan 5-monooxygenase activation protein, zeta polypeptide
hsa-miR-1303	0	0	1	1	1	1	COG2	component of oligomeric golgi complex 2
hsa-miR-1303	1	0	1	0	1	1	C14orf43	chromosome 14 open reading frame 43
hsa-miR-1303	0	0	1	1	1	1	PLEKHA8	pleckstrin homology domain containing, family A (phosphoinositide binding specific) member 8
hsa-miR-1303	0	0	1	1	1	1	ZNF254	zinc finger protein 254
hsa-miR-1303	0	0	1	1	1	1	MCOLN3	mucolipin 3
hsa-miR-1303	1	0	1	1	1	1	SOX5	SRY (sex determining region Y)-box 5
hsa-miR-1303	1	0	1	1	1	1	PRRG1	proline rich Gla (G-carboxyglutamic acid) 1
hsa-miR-1303	0	0	1	1	1	1	ELL3	elongation factor RNA polymerase II-like 3
hsa-miR-1303	1	0	1	1	1	1	SCOC	short coiled-coil protein
hsa-miR-1303	1	0	1	1	1	1	PDGFRA	platelet-derived growth factor receptor, alpha polypeptide
hsa-miR-1303	0	0	1	1	1	1	GPATCH2	G patch domain containing 2
hsa-miR-1303	0	0	1	1	1	1	ST6GALNAC1	ST6 (alpha-N-acetyl-neuraminyl-2,3-beta-galactosyl-1,3)-N-acetylgalactosaminide alpha-2,6-sialyltransferase 1
hsa-miR-1303	0	0	1	1	0	0	PRSS55	protease, serine, 55
hsa-miR-1303	0	0	1	1	1	1	ZNF333	zinc finger protein 333
hsa-miR-1303	1	0	1	1	1	1	MYLK	myosin light chain kinase
hsa-miR-1303	1	0	1	0	1	1	MAGIX	MAGI family member, X-linked
hsa-miR-1303	0	0	1	0	0	0	ZNF66P	zinc finger protein 66, pseudogene
hsa-miR-1303	0	0	1	0	0	0	ADAM5	ADAM metallopeptidase domain 5, pseudogene
hsa-miR-1303	1	0	1	1	1	1	SLC26A7	solute carrier family 26, member 7
hsa-miR-1303	1	0	1	1	1	1	SRPK2	SRSF protein kinase 2
hsa-miR-1303	0	0	1	0	0	0	PTGER4P2	prostaglandin E receptor 4 (subtype EP4) pseudogene 2
hsa-miR-1303	0	0	1	0	0	0	C17orf69	chromosome 17 open reading frame 69
hsa-miR-1303	1	0	1	1	1	1	DDR1	discoidin domain receptor tyrosine kinase 1
hsa-miR-1303	1	0	1	1	1	1	AHR	aryl hydrocarbon receptor
hsa-miR-1303	0	0	1	1	0	0	RPLP0	ribosomal protein, large, P0
hsa-miR-1303	1	0	1	0	1	1	TMEM194A	transmembrane protein 194A
hsa-miR-1303	0	0	1	0	0	0	ULK4P1	unc-51-like kinase 4 (C. elegans) pseudogene 1
hsa-miR-1303	0	0	1	0	0	0	JPX	JPX transcript, XIST activator (non-protein coding)
hsa-miR-1303	0	0	1	0	0	0	ULK4P3	unc-51-like kinase 4 (C. elegans) pseudogene 3
hsa-miR-1303	1	0	1	1	1	1	LOXL3	lysyl oxidase-like 3
hsa-miR-1303	0	0	1	1	1	1	FRMPDP2	FERM and PDZ domain containing 2 pseudogene 2
hsa-miR-1303	0	0	1	1	1	1	FRMPD2P1	FERM and PDZ domain containing 2 pseudogene 1
hsa-miR-1303	0	0	1	0	1	1	TNFRSF8	tumor necrosis factor receptor superfamily, member 8
hsa-miR-1303	1	0	1	1	1	1	OPCML	opioid binding protein/cell adhesion molecule-like
hsa-miR-1303	0	0	1	0	0	0	LOC441259	PMS2 postmeiotic segregation increased 2 (S. cerevisiae)-like
hsa-miR-1303	0	0	1	0	0	0	LINC00537	long intergenic non-protein coding RNA 537
hsa-miR-1303	1	0	1	1	1	1	HNRNPC	heterogeneous nuclear ribonucleoprotein C (C1/C2)
hsa-miR-1303	1	0	1	1	0	0	SLC45A4	solute carrier family 45, member 4
hsa-miR-1303	1	0	1	0	1	1	PIK3R3	phosphoinositide-3-kinase, regulatory subunit 3 (gamma)
hsa-miR-1303	1	0	1	1	1	1	PLXNA2	plexin A2
hsa-miR-1303	1	0	1	1	1	1	ST8SIA2	ST8 alpha-N-acetyl-neuraminide alpha-2,8-sialyltransferase 2
hsa-miR-1303	0	0	1	0	0	0	ABCA11P	ATP-binding cassette, sub-family A (ABC1), member 11, pseudogene
hsa-miR-1303	1	0	1	0	1	1	LRRTM4	leucine rich repeat transmembrane neuronal 4
hsa-miR-1303	0	0	1	1	1	1	FUT11	fucosyltransferase 11 (alpha (1,3) fucosyltransferase)
hsa-miR-1303	0	0	1	1	1	1	ZNF365	zinc finger protein 365
hsa-miR-1303	1	0	1	0	1	1	VANGL2	vang-like 2 (van gogh, Drosophila)
hsa-miR-1303	1	0	1	0	1	1	CPEB2	cytoplasmic polyadenylation element binding protein 2
hsa-miR-1303	0	0	1	0	0	0	GUSBP9	glucuronidase, beta pseudogene 9
hsa-miR-1303	1	0	1	1	1	1	SLC35G1	solute carrier family 35, member G1
hsa-miR-1303	0	0	1	1	1	1	SPHKAP	SPHK1 interactor, AKAP domain containing
hsa-miR-1303	0	0	1	1	1	1	MUC21	mucin 21, cell surface associated
hsa-miR-1303	0	0	1	0	0	0	FBXL19-AS1	FBXL19 antisense RNA 1 (head to head)
hsa-miR-1303	1	0	1	0	1	1	RBM23	RNA binding motif protein 23
hsa-miR-1303	1	0	1	1	1	1	PTPRD	protein tyrosine phosphatase, receptor type, D
hsa-miR-1303	0	0	1	1	1	1	TTN	titin
hsa-miR-1303	0	0	1	1	0	0	C9orf153	chromosome 9 open reading frame 153
hsa-miR-1303	0	0	1	1	0	0	NLRP7	NLR family, pyrin domain containing 7
hsa-miR-1303	1	0	1	1	1	1	CERS6	ceramide synthase 6
hsa-miR-1303	1	0	1	0	1	1	ATP8A1	ATPase, aminophospholipid transporter (APLT), class I, type 8A, member 1
hsa-miR-1303	0	0	1	1	0	0	GKN2	gastrokine 2
hsa-miR-1303	1	0	1	0	1	1	ROBO1	roundabout, axon guidance receptor, homolog 1 (Drosophila)
hsa-miR-1303	1	0	1	1	1	1	TMEM132B	transmembrane protein 132B
hsa-miR-1303	1	0	1	1	1	1	TMEM64	transmembrane protein 64
hsa-miR-1303	1	0	1	1	1	1	TRIP12	thyroid hormone receptor interactor 12
hsa-miR-1303	0	0	1	1	0	0	C14orf178	chromosome 14 open reading frame 178
hsa-miR-1303	0	0	1	1	0	0	TMC1	transmembrane channel-like 1
hsa-miR-1303	1	0	1	1	1	1	SHANK2	SH3 and multiple ankyrin repeat domains 2
hsa-miR-1303	0	0	1	1	1	1	LRCH1	leucine-rich repeats and calponin homology (CH) domain containing 1
hsa-miR-1303	1	0	1	1	1	1	OTUD4	OTU domain containing 4
hsa-miR-1303	0	0	1	0	1	1	GOLGA8G	golgin A8 family, member G
hsa-miR-1303	1	0	1	0	1	1	CAMSAP2	calmodulin regulated spectrin-associated protein family, member 2
hsa-miR-1303	0	0	1	1	1	1	RNF14	ring finger protein 14
hsa-miR-1303	1	0	1	1	1	1	TRAPPC8	trafficking protein particle complex 8
hsa-miR-1303	1	0	1	1	1	1	MLLT10	myeloid/lymphoid or mixed-lineage leukemia (trithorax homolog, Drosophila); translocated to, 10
hsa-miR-1303	0	0	1	0	0	0	FAM225B	family with sequence similarity 225, member B (non-protein coding)
hsa-miR-1303	0	0	1	0	0	0	SMA4	glucuronidase, beta pseudogene
hsa-miR-1303	1	0	1	0	1	1	FAM196A	family with sequence similarity 196, member A
hsa-miR-1303	0	0	1	1	1	1	UCHL5	ubiquitin carboxyl-terminal hydrolase L5
hsa-miR-1303	0	0	1	1	1	1	PRKAR2A	protein kinase, cAMP-dependent, regulatory, type II, alpha
hsa-miR-1303	0	0	1	0	0	0	FUT8-AS1	FUT8 antisense RNA 1
hsa-miR-1303	0	0	1	1	0	0	EFCAB11	EF-hand calcium binding domain 11
hsa-miR-1303	0	0	1	0	0	0	LOC100133207	uncharacterized LOC100133207
hsa-miR-1303	1	0	1	1	1	1	CHGA	chromogranin A (parathyroid secretory protein 1)
hsa-miR-1303	0	0	1	0	0	0	LINC00643	long intergenic non-protein coding RNA 643
hsa-miR-1303	1	0	1	1	1	1	MIER3	mesoderm induction early response 1, family member 3
hsa-miR-1303	0	0	1	1	1	1	KBTBD12	kelch repeat and BTB (POZ) domain containing 12
hsa-miR-1303	1	0	1	1	1	1	SGCD	sarcoglycan, delta (35kDa dystrophin-associated glycoprotein)
hsa-miR-1303	1	0	1	1	1	1	SUN2	Sad1 and UNC84 domain containing 2
hsa-miR-1303	1	0	1	0	1	1	CLASP2	cytoplasmic linker associated protein 2
hsa-miR-1303	1	0	1	1	1	1	C7orf31	chromosome 7 open reading frame 31
hsa-miR-1303	1	0	1	1	1	1	TJP1	tight junction protein 1
hsa-miR-1303	0	0	1	1	0	0	CDK5RAP2	CDK5 regulatory subunit associated protein 2
hsa-miR-1303	0	0	1	1	1	1	VPS35	vacuolar protein sorting 35 homolog (S. cerevisiae)
hsa-miR-1303	1	0	1	1	1	1	PRDM2	PR domain containing 2, with ZNF domain
hsa-miR-1303	1	0	1	1	0	0	RBM27	RNA binding motif protein 27
hsa-miR-1303	0	0	1	1	1	1	ADH1B	alcohol dehydrogenase 1B (class I), beta polypeptide
hsa-miR-1303	0	0	1	1	1	1	MLIP	muscular LMNA-interacting protein
hsa-miR-1303	0	0	1	1	1	1	PPP1R1C	protein phosphatase 1, regulatory (inhibitor) subunit 1C
hsa-miR-1303	0	0	1	1	1	1	NIPSNAP3B	nipsnap homolog 3B (C. elegans)
hsa-miR-1303	1	0	1	0	1	1	EML4	echinoderm microtubule associated protein like 4
hsa-miR-1303	0	0	1	1	1	1	HTR2A	5-hydroxytryptamine (serotonin) receptor 2A, G protein-coupled
hsa-miR-1303	0	0	1	0	0	0	OVOS	ovostatin
hsa-miR-1303	1	0	1	1	1	1	DCAF5	DDB1 and CUL4 associated factor 5
hsa-miR-1303	1	0	1	1	1	1	DDAH1	dimethylarginine dimethylaminohydrolase 1
hsa-miR-1303	1	0	1	1	1	1	NFIB	nuclear factor I/B
hsa-miR-1303	1	0	1	1	1	1	C5orf24	chromosome 5 open reading frame 24
hsa-miR-1303	1	0	1	1	1	1	RDX	radixin
hsa-miR-1303	1	0	1	1	1	1	PTER	phosphotriesterase related
hsa-miR-1303	1	0	1	1	1	1	PGAP1	post-GPI attachment to proteins 1
hsa-miR-1303	1	0	1	1	1	1	CALD1	caldesmon 1
hsa-miR-1303	1	0	1	0	1	1	TBL1XR1	transducin (beta)-like 1 X-linked receptor 1
hsa-miR-1303	1	0	1	1	1	1	DLG5	discs, large homolog 5 (Drosophila)
hsa-miR-1303	0	0	1	1	1	1	PICK1	protein interacting with PRKCA 1
hsa-miR-1303	1	0	1	1	1	1	BSDC1	BSD domain containing 1
hsa-miR-1303	0	0	1	0	1	1	CD59	CD59 molecule, complement regulatory protein
hsa-miR-1303	0	0	1	1	0	0	ALDOA	aldolase A, fructose-bisphosphate
hsa-miR-1303	0	0	1	1	0	0	PPT2	palmitoyl-protein thioesterase 2
hsa-miR-1303	0	0	1	0	0	0	LOC401127	WD repeat domain 5 pseudogene
hsa-miR-1303	1	0	1	1	1	1	GPBP1	GC-rich promoter binding protein 1
hsa-miR-1303	0	0	1	0	0	0	LOC400768	uncharacterized LOC400768
hsa-miR-1303	0	0	1	1	1	1	FBXO36	F-box protein 36
hsa-miR-1303	0	0	1	1	0	0	RBM28	RNA binding motif protein 28
hsa-miR-1303	0	0	1	1	0	0	RAD23A	RAD23 homolog A (S. cerevisiae)
hsa-miR-1303	0	0	1	0	0	0	ABCB5	ATP-binding cassette, sub-family B (MDR/TAP), member 5
hsa-miR-1303	1	0	1	1	1	1	LETMD1	LETM1 domain containing 1
hsa-miR-1303	0	0	1	1	1	1	BTF3	basic transcription factor 3
hsa-miR-1303	1	0	1	1	1	1	AP3S1	adaptor-related protein complex 3, sigma 1 subunit
hsa-miR-1303	1	0	1	1	1	1	DOLPP1	dolichyl pyrophosphate phosphatase 1
hsa-miR-1303	1	0	1	1	1	1	RBM3	RNA binding motif (RNP1, RRM) protein 3
hsa-miR-1303	1	0	1	1	1	1	FGF11	fibroblast growth factor 11
hsa-miR-1303	0	0	1	1	1	1	ATP5F1	ATP synthase, H+ transporting, mitochondrial Fo complex, subunit B1
hsa-miR-1303	1	0	1	0	1	1	BNIP3L	BCL2/adenovirus E1B 19kDa interacting protein 3-like
hsa-miR-1303	0	0	1	1	1	1	CHCHD4	coiled-coil-helix-coiled-coil-helix domain containing 4
hsa-miR-1303	0	0	1	0	0	0	MYCT1	myc target 1
hsa-miR-1303	0	0	1	1	1	1	SDE2	SDE2 telomere maintenance homolog (S. pombe)
hsa-miR-1303	0	0	1	1	0	0	METTL23	methyltransferase like 23
hsa-miR-1303	0	0	1	0	1	1	CD99P1	CD99 molecule pseudogene 1
hsa-miR-1303	1	0	1	1	1	1	CDK18	cyclin-dependent kinase 18
hsa-miR-1303	0	0	1	0	0	0	LOC643837	uncharacterized LOC643837
hsa-miR-1303	1	0	1	1	1	1	COPS2	COP9 constitutive photomorphogenic homolog subunit 2 (Arabidopsis)
hsa-miR-1303	1	0	1	1	1	1	DAZAP1	DAZ associated protein 1
hsa-miR-1303	0	0	1	0	0	0	TRIQK	triple QxxK/R motif containing
hsa-miR-1303	0	0	1	1	0	0	RAD54B	RAD54 homolog B (S. cerevisiae)
hsa-miR-1303	0	0	1	0	1	1	EMX2	empty spiracles homeobox 2
hsa-miR-1303	1	0	1	1	1	1	COPZ1	coatomer protein complex, subunit zeta 1
hsa-miR-1303	1	0	1	1	1	1	PLEKHB2	pleckstrin homology domain containing, family B (evectins) member 2
hsa-miR-1303	0	0	1	1	0	0	TCP1	t-complex 1
hsa-miR-1303	0	0	1	0	0	0	LOC729678	uncharacterized LOC729678
hsa-miR-1303	0	0	1	1	1	1	TRIM68	tripartite motif containing 68
hsa-miR-1303	0	0	1	1	1	1	COPS7A	COP9 constitutive photomorphogenic homolog subunit 7A (Arabidopsis)
hsa-miR-1303	1	0	1	1	1	1	STK38L	serine/threonine kinase 38 like
hsa-miR-1303	0	0	1	1	1	1	EIF3J	eukaryotic translation initiation factor 3, subunit J
hsa-miR-1303	1	0	1	1	1	1	MGST3	microsomal glutathione S-transferase 3
hsa-miR-1303	0	0	1	1	1	1	TRIM38	tripartite motif containing 38
hsa-miR-1303	0	0	1	0	1	1	TMEM155	transmembrane protein 155
hsa-miR-1303	1	0	1	1	0	0	THY1	Thy-1 cell surface antigen
hsa-miR-1303	0	0	1	1	1	1	CHEK1	checkpoint kinase 1
hsa-miR-1303	0	0	1	1	1	1	C1orf88	chromosome 1 open reading frame 88
hsa-miR-1303	0	0	1	0	0	0	LOC645513	uncharacterized LOC645513
hsa-miR-1303	0	0	1	1	1	1	PEX19	peroxisomal biogenesis factor 19
hsa-miR-1303	1	0	1	0	1	1	ANKH	ankylosis, progressive homolog (mouse)
hsa-miR-1303	0	0	1	1	0	0	KCNK17	potassium channel, subfamily K, member 17
hsa-miR-1303	0	0	1	0	1	1	SUMO2	SMT3 suppressor of mif two 3 homolog 2 (S. cerevisiae)
hsa-miR-1303	1	0	1	1	0	0	ATP6V1B2	ATPase, H+ transporting, lysosomal 56/58kDa, V1 subunit B2
hsa-miR-1303	1	0	1	1	0	0	INO80E	INO80 complex subunit E
hsa-miR-1303	1	0	1	1	1	1	RNF2	ring finger protein 2
hsa-miR-1303	0	0	1	1	0	0	CCDC107	coiled-coil domain containing 107
hsa-miR-1303	0	0	1	1	1	1	HUS1	HUS1 checkpoint homolog (S. pombe)
hsa-miR-1303	1	0	1	1	1	1	RALY	RNA binding protein, autoantigenic (hnRNP-associated with lethal yellow homolog (mouse))
hsa-miR-1303	0	0	1	1	1	1	HS3ST2	heparan sulfate (glucosamine) 3-O-sulfotransferase 2
hsa-miR-1303	0	0	1	1	0	0	TMEM41A	transmembrane protein 41A
hsa-miR-1303	0	0	1	1	1	1	LGI1	leucine-rich, glioma inactivated 1
hsa-miR-1303	0	0	1	1	1	1	UBE2A	ubiquitin-conjugating enzyme E2A
hsa-miR-1303	1	0	1	1	1	1	YWHAE	tyrosine 3-monooxygenase/tryptophan 5-monooxygenase activation protein, epsilon polypeptide
hsa-miR-1303	0	0	1	1	1	1	GATSL3	GATS protein-like 3
hsa-miR-1303	0	0	1	1	0	0	TMEM222	transmembrane protein 222
hsa-miR-1303	1	0	1	1	1	1	ATPAF1	ATP synthase mitochondrial F1 complex assembly factor 1
hsa-miR-1303	0	0	1	1	0	0	TTYH1	tweety homolog 1 (Drosophila)
hsa-miR-1303	0	0	1	1	0	0	CORO1B	coronin, actin binding protein, 1B
hsa-miR-1303	1	0	1	1	1	1	GABPB2	GA binding protein transcription factor, beta subunit 2
hsa-miR-1303	0	0	1	1	1	1	C9orf3	chromosome 9 open reading frame 3
hsa-miR-1303	0	0	1	1	1	1	VPS16	vacuolar protein sorting 16 homolog (S. cerevisiae)
hsa-miR-1303	1	0	1	1	1	1	SLMAP	sarcolemma associated protein
hsa-miR-1303	1	0	1	1	1	1	STAG2	stromal antigen 2
hsa-miR-1303	0	0	1	0	0	0	LOC731789	uncharacterized LOC731789
hsa-miR-1303	0	0	1	1	1	1	ATG5	autophagy related 5
hsa-miR-1303	0	0	1	0	0	0	LINC00661	long intergenic non-protein coding RNA 661
hsa-miR-1303	1	0	1	0	1	1	PTP4A1	protein tyrosine phosphatase type IVA, member 1
hsa-miR-1303	0	0	1	0	1	1	USP10	ubiquitin specific peptidase 10
hsa-miR-1303	1	0	1	0	1	1	MCFD2	multiple coagulation factor deficiency 2
hsa-miR-1303	0	0	1	1	1	1	SLC25A26	solute carrier family 25 (S-adenosylmethionine carrier), member 26
hsa-miR-1303	0	0	1	1	0	0	PGS1	phosphatidylglycerophosphate synthase 1
hsa-miR-1303	0	0	1	0	0	0	MIR143HG	MIR143 host gene (non-protein coding)
hsa-miR-1303	0	0	1	0	0	0	DNAJC27-AS1	DNAJC27 antisense RNA 1
hsa-miR-1303	1	0	1	0	1	1	CNTNAP2	contactin associated protein-like 2
hsa-miR-1303	0	0	1	1	1	1	APOBEC3B	apolipoprotein B mRNA editing enzyme, catalytic polypeptide-like 3B
hsa-miR-1303	1	0	1	1	1	1	SP2	Sp2 transcription factor
hsa-miR-1303	0	0	1	0	0	0	61E3.4	nuclear pore complex interacting protein-like
hsa-miR-1303	0	0	1	1	1	1	MPV17L	MPV17 mitochondrial membrane protein-like
hsa-miR-1303	0	0	1	1	1	1	PARP14	poly (ADP-ribose) polymerase family, member 14
hsa-miR-1303	0	0	1	1	1	1	LTA	lymphotoxin alpha (TNF superfamily, member 1)
hsa-miR-1303	0	0	1	1	1	1	PTGS1	prostaglandin-endoperoxide synthase 1 (prostaglandin G/H synthase and cyclooxygenase)
hsa-miR-1303	1	0	1	1	1	1	ATP2B3	ATPase, Ca++ transporting, plasma membrane 3
hsa-miR-1303	1	0	1	1	0	0	DPY19L1	dpy-19-like 1 (C. elegans)
hsa-miR-1303	1	0	1	1	1	1	MOSPD1	motile sperm domain containing 1
hsa-miR-1303	1	0	1	1	1	1	GLIS3	GLIS family zinc finger 3
hsa-miR-1303	0	0	1	1	0	0	SLCO3A1	solute carrier organic anion transporter family, member 3A1
hsa-miR-1303	1	0	1	1	1	1	TNFAIP1	tumor necrosis factor, alpha-induced protein 1 (endothelial)
hsa-miR-1303	1	0	1	1	1	1	SLC4A8	solute carrier family 4, sodium bicarbonate cotransporter, member 8
hsa-miR-1303	1	0	1	1	1	1	TMEM220	transmembrane protein 220
hsa-miR-1303	0	0	1	1	1	1	ALDH3B1	aldehyde dehydrogenase 3 family, member B1
hsa-miR-1303	0	0	1	1	1	1	PLCB4	phospholipase C, beta 4
hsa-miR-1303	1	0	1	0	1	1	BCL2	B-cell CLL/lymphoma 2
hsa-miR-1303	1	0	1	1	1	1	PML	promyelocytic leukemia
hsa-miR-1303	0	0	1	1	1	1	GAD2	glutamate decarboxylase 2 (pancreatic islets and brain, 65kDa)
hsa-miR-1303	0	0	1	1	1	1	CNGA1	cyclic nucleotide gated channel alpha 1
hsa-miR-1303	0	0	1	1	1	1	CA2	carbonic anhydrase II
hsa-miR-1303	1	0	1	1	1	1	COL4A4	collagen, type IV, alpha 4
hsa-miR-1303	1	0	1	1	1	1	COL5A1	collagen, type V, alpha 1
hsa-miR-1303	1	0	1	0	1	1	SLC26A2	solute carrier family 26 (sulfate transporter), member 2
hsa-miR-1303	0	0	1	1	1	1	FABP2	fatty acid binding protein 2, intestinal
hsa-miR-1303	1	0	1	1	1	1	FBN1	fibrillin 1
hsa-miR-1303	1	0	1	0	1	1	ITGB3	integrin, beta 3 (platelet glycoprotein IIIa, antigen CD61)
hsa-miR-1303	1	0	1	1	1	1	KCNA1	potassium voltage-gated channel, shaker-related subfamily, member 1 (episodic ataxia with myokymia)
hsa-miR-1303	1	0	1	0	1	1	SGCB	sarcoglycan, beta (43kDa dystrophin-associated glycoprotein)
hsa-miR-1303	0	0	1	1	1	1	LPL	lipoprotein lipase
hsa-miR-1303	0	0	1	1	1	1	MTM1	myotubularin 1
hsa-miR-1303	0	0	1	1	1	1	MTR	5-methyltetrahydrofolate-homocysteine methyltransferase
hsa-miR-1303	0	0	1	1	1	1	NDP	Norrie disease (pseudoglioma)
hsa-miR-1303	1	0	1	1	1	1	ATXN1	ataxin 1
hsa-miR-1303	0	0	1	1	1	1	SRD5A2	steroid-5-alpha-reductase, alpha polypeptide 2 (3-oxo-5 alpha-steroid delta 4-dehydrogenase alpha 2)
hsa-miR-1303	0	0	1	1	1	1	SLC25A20	solute carrier family 25 (carnitine/acylcarnitine translocase), member 20
hsa-miR-1303	0	0	1	1	1	1	CASR	calcium-sensing receptor
hsa-miR-1303	1	0	1	0	1	1	COL5A2	collagen, type V, alpha 2
hsa-miR-1303	0	0	1	1	0	0	IL2RA	interleukin 2 receptor, alpha
hsa-miR-1303	1	0	1	1	1	1	RFX5	regulatory factor X, 5 (influences HLA class II expression)
hsa-miR-1303	1	0	1	1	1	1	ATRX	alpha thalassemia/mental retardation syndrome X-linked
hsa-miR-1303	1	0	1	1	1	1	CFTR	cystic fibrosis transmembrane conductance regulator (ATP-binding cassette sub-family C, member 7)
hsa-miR-1303	0	0	1	1	1	1	CYP11B2	cytochrome P450, family 11, subfamily B, polypeptide 2
hsa-miR-1303	1	0	1	1	1	1	PLP1	proteolipid protein 1
hsa-miR-1303	0	0	1	1	0	0	REN	renin
hsa-miR-1303	1	0	1	0	1	1	IGFBP5	insulin-like growth factor binding protein 5
hsa-miR-1303	1	0	1	1	1	1	CXCL12	chemokine (C-X-C motif) ligand 12
hsa-miR-1303	0	0	1	1	1	1	IGF2	insulin-like growth factor 2 (somatomedin A)
hsa-miR-1303	1	0	1	0	1	1	ALDH1A3	aldehyde dehydrogenase 1 family, member A3
hsa-miR-1303	1	0	1	1	1	1	DIO2	deiodinase, iodothyronine, type II
hsa-miR-1303	1	0	1	1	1	1	GABRB3	gamma-aminobutyric acid (GABA) A receptor, beta 3
hsa-miR-1303	0	0	1	1	1	1	HRH1	histamine receptor H1
hsa-miR-1303	1	0	1	1	1	1	IGF1R	insulin-like growth factor 1 receptor
hsa-miR-1303	1	0	1	1	1	1	MME	membrane metallo-endopeptidase
hsa-miR-1303	0	0	1	1	0	0	RPL7	ribosomal protein L7
hsa-miR-1303	1	0	1	0	1	1	CLDN18	claudin 18
hsa-miR-1303	0	0	1	1	1	1	SUMO4	SMT3 suppressor of mif two 3 homolog 4 (S. cerevisiae)
hsa-miR-1303	1	0	1	1	1	1	LCLAT1	lysocardiolipin acyltransferase 1
hsa-miR-1303	1	0	1	1	1	1	KLHL31	kelch-like 31 (Drosophila)
hsa-miR-1303	1	0	1	1	1	1	BICD2	bicaudal D homolog 2 (Drosophila)
hsa-miR-1303	0	0	1	1	1	1	TRIM6-TRIM34	TRIM6-TRIM34 readthrough
hsa-miR-1303	0	0	1	1	1	1	TRIM34	tripartite motif containing 34
hsa-miR-1303	0	0	1	1	1	1	TSPYL6	TSPY-like 6
hsa-miR-1303	1	0	1	0	1	1	BMF	Bcl2 modifying factor
hsa-miR-1303	0	0	1	1	1	1	ZCCHC16	zinc finger, CCHC domain containing 16
hsa-miR-1303	1	0	1	0	1	1	LIN28B	lin-28 homolog B (C. elegans)
hsa-miR-1303	0	0	1	1	1	1	AGMO	alkylglycerol monooxygenase
hsa-miR-1303	0	0	1	0	1	1	ZNF705A	zinc finger protein 705A
hsa-miR-1303	0	0	1	1	1	1	DBX2	developing brain homeobox 2
hsa-miR-1303	0	0	1	0	1	1	FLJ16124	FLJ16124 protein
hsa-miR-1303	0	0	1	1	1	1	ANKRD34B	ankyrin repeat domain 34B
hsa-miR-1303	1	0	1	1	0	0	NEURL4	neuralized homolog 4 (Drosophila)
hsa-miR-1303	1	0	1	1	1	1	NFKBIZ	nuclear factor of kappa light polypeptide gene enhancer in B-cells inhibitor, zeta
hsa-miR-1303	1	0	1	1	1	1	EDA	ectodysplasin A
hsa-miR-1303	0	0	1	1	1	1	MAPKAP1	mitogen-activated protein kinase associated protein 1
hsa-miR-1303	0	0	1	1	1	1	SCP2	sterol carrier protein 2
hsa-miR-1303	1	0	1	1	1	1	L3MBTL3	l(3)mbt-like 3 (Drosophila)
hsa-miR-1303	1	0	1	1	1	1	IGF2BP2	insulin-like growth factor 2 mRNA binding protein 2
hsa-miR-1303	1	0	1	1	1	1	CNOT4	CCR4-NOT transcription complex, subunit 4
hsa-miR-1303	1	0	1	1	1	1	UMOD	uromodulin
hsa-miR-1303	1	0	1	1	1	1	NUPL1	nucleoporin like 1
hsa-miR-1303	0	0	1	1	1	1	GCSAM	germinal center-associated, signaling and motility
hsa-miR-1303	1	0	1	1	1	1	CUL4A	cullin 4A
hsa-miR-1303	1	0	1	1	1	1	LUZP2	leucine zipper protein 2
hsa-miR-1303	1	0	1	0	1	1	ERMN	ermin, ERM-like protein
hsa-miR-1303	1	0	1	1	1	1	ARHGAP28	Rho GTPase activating protein 28
hsa-miR-1303	0	0	1	1	0	0	TMEM244	transmembrane protein 244
hsa-miR-1303	1	0	1	0	1	1	ZC3H12B	zinc finger CCCH-type containing 12B
hsa-miR-1303	0	0	1	1	1	1	ZMAT1	zinc finger, matrin-type 1
hsa-miR-1303	0	0	1	0	1	1	GOLGA8E	golgin A8 family, member E
hsa-miR-1303	1	0	1	1	1	1	FOXP4	forkhead box P4
hsa-miR-1303	1	0	1	1	1	1	SLC25A53	solute carrier family 25, member 53
hsa-miR-1303	0	0	1	1	1	1	BEX5	brain expressed, X-linked 5
hsa-miR-1303	1	0	1	0	1	1	ZKSCAN2	zinc finger with KRAB and SCAN domains 2
hsa-miR-1303	0	0	1	1	0	0	LINC00207	long intergenic non-protein coding RNA 207
hsa-miR-1303	1	0	1	1	1	1	C12orf68	chromosome 12 open reading frame 68
hsa-miR-1303	0	0	1	0	1	1	LINC00268	long intergenic non-protein coding RNA 268
hsa-miR-1303	0	0	1	1	1	1	STAG3L3	stromal antigen 3-like 3
hsa-miR-1303	1	0	1	0	1	1	SYT14L	synaptotagmin XIV-like
hsa-miR-1303	1	0	1	1	1	1	KATNAL1	katanin p60 subunit A-like 1
hsa-miR-1303	0	0	1	1	1	1	ME3	malic enzyme 3, NADP(+)-dependent, mitochondrial
hsa-miR-1303	1	0	1	1	1	1	PHF6	PHD finger protein 6
hsa-miR-1303	1	0	1	0	1	1	GOPC	golgi-associated PDZ and coiled-coil motif containing
hsa-miR-1303	0	0	1	1	0	0	SPRR2B	small proline-rich protein 2B
hsa-miR-1303	0	0	1	1	1	1	DNTT	deoxynucleotidyltransferase, terminal
hsa-miR-1303	0	0	1	1	1	1	BTBD11	BTB (POZ) domain containing 11
hsa-miR-1303	1	0	1	1	1	1	ZHX1	zinc fingers and homeoboxes 1
hsa-miR-1303	1	0	1	0	1	1	BRCC3	BRCA1/BRCA2-containing complex, subunit 3
hsa-miR-1303	0	0	1	1	0	0	PIR	pirin (iron-binding nuclear protein)
hsa-miR-1303	1	0	1	1	1	1	SBK1	SH3-binding domain kinase 1
hsa-miR-1303	1	0	1	0	1	1	BCL7A	B-cell CLL/lymphoma 7A
hsa-miR-1303	1	0	1	0	1	1	TNRC6B	trinucleotide repeat containing 6B
hsa-miR-1303	1	0	1	0	1	1	CELF2	CUGBP, Elav-like family member 2
hsa-miR-1303	1	0	1	1	1	1	AFF3	AF4/FMR2 family, member 3
hsa-miR-1303	0	0	1	1	0	0	KPRP	keratinocyte proline-rich protein
hsa-miR-1303	1	0	1	0	1	1	CLLU1	chronic lymphocytic leukemia up-regulated 1
hsa-miR-1303	1	0	1	1	1	1	VEGFA	vascular endothelial growth factor A
hsa-miR-1303	1	0	1	1	1	1	PDE8B	phosphodiesterase 8B
hsa-miR-1303	1	0	1	1	1	1	SLC35F1	solute carrier family 35, member F1
hsa-miR-1303	0	0	1	1	1	1	ATF3	activating transcription factor 3
hsa-miR-1303	1	0	1	1	1	1	CTNS	cystinosin, lysosomal cystine transporter
hsa-miR-1303	1	0	1	1	1	1	MAF	v-maf musculoaponeurotic fibrosarcoma oncogene homolog (avian)
hsa-miR-1303	1	0	1	1	1	1	CSNK1G3	casein kinase 1, gamma 3
hsa-miR-1303	1	0	1	1	1	1	STK24	serine/threonine kinase 24
hsa-miR-1303	0	0	1	1	1	1	PLGLB1	plasminogen-like B1
hsa-miR-1303	0	0	1	1	1	1	KCNIP1	Kv channel interacting protein 1
hsa-miR-1303	1	0	1	1	1	1	AGAP1	ArfGAP with GTPase domain, ankyrin repeat and PH domain 1
hsa-miR-1303	1	0	1	0	1	1	CDC42SE1	CDC42 small effector 1
hsa-miR-1303	1	0	1	1	1	1	ELMO1	engulfment and cell motility 1
hsa-miR-1303	0	0	1	1	1	1	SIRPG	signal-regulatory protein gamma
hsa-miR-1303	1	0	1	0	1	1	GK5	glycerol kinase 5 (putative)
hsa-miR-1303	1	0	1	1	1	1	AP1S3	adaptor-related protein complex 1, sigma 3 subunit
hsa-miR-1303	0	0	1	0	1	1	ZNF705D	zinc finger protein 705D
hsa-miR-1303	1	0	1	0	1	1	CREBZF	CREB/ATF bZIP transcription factor
hsa-miR-1303	1	0	1	1	1	1	C3orf65	chromosome 3 open reading frame 65
hsa-miR-1303	0	0	1	1	0	0	MEOX1	mesenchyme homeobox 1
hsa-miR-1303	1	0	1	1	1	1	TCERG1	transcription elongation regulator 1
hsa-miR-1303	0	0	1	0	1	1	SCN3B	sodium channel, voltage-gated, type III, beta subunit
hsa-miR-1303	1	0	1	1	1	1	PAPD5	PAP associated domain containing 5
hsa-miR-1303	1	0	1	0	1	1	DCUN1D4	DCN1, defective in cullin neddylation 1, domain containing 4 (S. cerevisiae)
hsa-miR-1303	1	0	1	1	1	1	NCALD	neurocalcin delta
hsa-miR-1303	0	0	1	0	1	1	STEAP2	STEAP family member 2, metalloreductase
hsa-miR-1303	1	0	1	1	1	1	HMGCLL1	3-hydroxymethyl-3-methylglutaryl-CoA lyase-like 1
hsa-miR-1303	0	0	1	1	1	1	GEMIN8	gem (nuclear organelle) associated protein 8
hsa-miR-1303	1	0	1	1	1	1	DIAPH3	diaphanous homolog 3 (Drosophila)
hsa-miR-1303	1	0	1	1	1	1	C2orf88	chromosome 2 open reading frame 88
hsa-miR-1303	1	0	1	1	1	1	FRS2	fibroblast growth factor receptor substrate 2
hsa-miR-1303	1	0	1	1	1	1	ERBB4	v-erb-a erythroblastic leukemia viral oncogene homolog 4 (avian)
hsa-miR-1303	1	0	1	1	1	1	ATG9A	autophagy related 9A
hsa-miR-1303	1	0	1	1	1	1	SREK1	splicing regulatory glutamine/lysine-rich protein 1
hsa-miR-1303	1	0	1	1	1	1	IRF2BP2	interferon regulatory factor 2 binding protein 2
hsa-miR-1303	1	0	1	1	1	1	ALG9	asparagine-linked glycosylation 9, alpha-1,2-mannosyltransferase homolog (S. cerevisiae)
hsa-miR-1303	1	0	1	1	1	1	N4BP2L1	NEDD4 binding protein 2-like 1
hsa-miR-1303	1	0	1	1	1	1	FAM155A	family with sequence similarity 155, member A
hsa-miR-1303	1	0	1	0	1	1	CCDC85A	coiled-coil domain containing 85A
hsa-miR-1303	1	0	1	0	1	1	ODZ3	odz, odd Oz/ten-m homolog 3 (Drosophila)
hsa-miR-1303	1	0	1	1	1	1	UNC119B	unc-119 homolog B (C. elegans)
hsa-miR-1303	1	0	1	1	1	1	MGA	MAX gene associated
hsa-miR-1303	1	0	1	1	1	1	DGKG	diacylglycerol kinase, gamma 90kDa
hsa-miR-1303	0	0	1	1	1	1	C15orf57	chromosome 15 open reading frame 57
hsa-miR-1303	1	0	1	1	1	1	REPS2	RALBP1 associated Eps domain containing 2
hsa-miR-1303	1	0	1	0	1	1	SCN3A	sodium channel, voltage-gated, type III, alpha subunit
hsa-miR-1303	1	0	1	0	1	1	BACH1	BTB and CNC homology 1, basic leucine zipper transcription factor 1
hsa-miR-1303	1	0	1	1	1	1	PRDM1	PR domain containing 1, with ZNF domain
hsa-miR-1303	1	0	1	1	1	1	BMP2	bone morphogenetic protein 2
hsa-miR-1303	1	0	1	1	1	1	CASP10	caspase 10, apoptosis-related cysteine peptidase
hsa-miR-1303	0	0	1	1	1	1	CASQ1	calsequestrin 1 (fast-twitch, skeletal muscle)
hsa-miR-1303	0	0	1	1	1	1	CDKN2C	cyclin-dependent kinase inhibitor 2C (p18, inhibits CDK4)
hsa-miR-1303	0	0	1	1	1	1	CHUK	conserved helix-loop-helix ubiquitous kinase
hsa-miR-1303	1	0	1	1	1	1	CREBL2	cAMP responsive element binding protein-like 2
hsa-miR-1303	1	0	1	1	1	1	MAPK14	mitogen-activated protein kinase 14
hsa-miR-1303	0	0	1	1	0	0	DIO3	deiodinase, iodothyronine, type III
hsa-miR-1303	1	0	1	0	1	1	EFNB3	ephrin-B3
hsa-miR-1303	0	0	1	0	1	1	EMP1	epithelial membrane protein 1
hsa-miR-1303	1	0	1	0	1	1	B4GALT1	UDP-Gal:betaGlcNAc beta 1,4- galactosyltransferase, polypeptide 1
hsa-miR-1303	0	0	1	1	0	0	HSPB2	heat shock 27kDa protein 2
hsa-miR-1303	0	0	1	1	1	1	IL13RA1	interleukin 13 receptor, alpha 1
hsa-miR-1303	1	0	1	1	1	1	ARF3	ADP-ribosylation factor 3
hsa-miR-1303	0	0	1	1	0	0	RHOG	ras homolog family member G
hsa-miR-1303	1	0	1	0	1	1	ARNT	aryl hydrocarbon receptor nuclear translocator
hsa-miR-1303	1	0	1	1	1	1	CBFB	core-binding factor, beta subunit
hsa-miR-1303	0	0	1	1	1	1	CDO1	cysteine dioxygenase, type I
hsa-miR-1303	0	0	1	1	0	0	CLC	Charcot-Leyden crystal protein
hsa-miR-1303	1	0	1	1	1	1	COL4A6	collagen, type IV, alpha 6
hsa-miR-1303	1	0	1	1	1	1	SLC31A1	solute carrier family 31 (copper transporters), member 1
hsa-miR-1303	1	0	1	1	1	1	DSC3	desmocollin 3
hsa-miR-1303	0	0	1	1	1	1	DSG1	desmoglein 1
hsa-miR-1303	1	0	1	1	1	1	HBEGF	heparin-binding EGF-like growth factor
hsa-miR-1303	1	0	1	1	1	1	E2F3	E2F transcription factor 3
hsa-miR-1303	0	0	1	1	0	0	FAU	Finkel-Biskis-Reilly murine sarcoma virus (FBR-MuSV) ubiquitously expressed
hsa-miR-1303	1	0	1	1	1	1	FGF7	fibroblast growth factor 7
hsa-miR-1303	1	0	1	1	1	1	FKBP4	FK506 binding protein 4, 59kDa
hsa-miR-1303	1	0	1	0	1	1	FOXO1	forkhead box O1
hsa-miR-1303	0	0	1	1	1	1	FLI1	Friend leukemia virus integration 1
hsa-miR-1303	1	0	1	0	1	1	GNAI1	guanine nucleotide binding protein (G protein), alpha inhibiting activity polypeptide 1
hsa-miR-1303	1	0	1	1	1	1	GOLGA1	golgin A1
hsa-miR-1303	0	0	1	1	1	1	HMGCS1	3-hydroxy-3-methylglutaryl-CoA synthase 1 (soluble)
hsa-miR-1303	0	0	1	1	1	1	IL12B	interleukin 12B (natural killer cell stimulatory factor 2, cytotoxic lymphocyte maturation factor 2, p40)
hsa-miR-1303	1	0	1	1	1	1	INSM1	insulinoma-associated 1
hsa-miR-1303	1	0	1	1	1	1	KCNJ10	potassium inwardly-rectifying channel, subfamily J, member 10
hsa-miR-1303	1	0	1	1	1	1	KPNA3	karyopherin alpha 3 (importin alpha 4)
hsa-miR-1303	1	0	1	1	1	1	IPO5	importin 5
hsa-miR-1303	0	0	1	1	1	1	TACSTD2	tumor-associated calcium signal transducer 2
hsa-miR-1303	1	0	1	0	1	1	MXD1	MAX dimerization protein 1
hsa-miR-1303	0	0	1	1	1	1	MAG	myelin associated glycoprotein
hsa-miR-1303	0	0	1	1	1	1	MCM3	minichromosome maintenance complex component 3
hsa-miR-1303	0	0	1	0	1	1	CXCL9	chemokine (C-X-C motif) ligand 9
hsa-miR-1303	0	0	1	1	1	1	CEACAM6	carcinoembryonic antigen-related cell adhesion molecule 6 (non-specific cross reacting antigen)
hsa-miR-1303	1	0	1	1	1	1	NEUROD1	neuronal differentiation 1
hsa-miR-1303	0	0	1	1	1	1	NID1	nidogen 1
hsa-miR-1303	1	0	1	0	1	1	NRAS	neuroblastoma RAS viral (v-ras) oncogene homolog
hsa-miR-1303	1	0	1	0	1	1	PAK2	p21 protein (Cdc42/Rac)-activated kinase 2
hsa-miR-1303	1	0	1	1	1	1	PCDH7	protocadherin 7
hsa-miR-1303	0	0	1	1	1	1	PGC	progastricsin (pepsinogen C)
hsa-miR-1303	1	0	1	1	1	1	PHB	prohibitin
hsa-miR-1303	1	0	1	1	1	1	PHF1	PHD finger protein 1
hsa-miR-1303	0	0	1	1	1	1	PIK3C2B	phosphatidylinositol-4-phosphate 3-kinase, catalytic subunit type 2 beta
hsa-miR-1303	0	0	1	1	1	1	PLGLB2	plasminogen-like B2
hsa-miR-1303	0	0	1	1	1	1	PLIN1	perilipin 1
hsa-miR-1303	0	0	1	1	1	1	PPP1R3A	protein phosphatase 1, regulatory subunit 3A
hsa-miR-1303	0	0	1	1	0	0	PPP1R8	protein phosphatase 1, regulatory subunit 8
hsa-miR-1303	1	0	1	0	1	1	PRKCA	protein kinase C, alpha
hsa-miR-1303	0	0	1	0	0	0	PSMB10	proteasome (prosome, macropain) subunit, beta type, 10
hsa-miR-1303	1	0	1	1	0	0	PSMD7	proteasome (prosome, macropain) 26S subunit, non-ATPase, 7
hsa-miR-1303	0	0	1	1	1	1	PTPN12	protein tyrosine phosphatase, non-receptor type 12
hsa-miR-1303	0	0	1	1	1	1	PTPRM	protein tyrosine phosphatase, receptor type, M
hsa-miR-1303	0	0	1	0	1	1	RAB3B	RAB3B, member RAS oncogene family
hsa-miR-1303	1	0	1	0	1	1	RAB6A	RAB6A, member RAS oncogene family
hsa-miR-1303	1	0	1	1	1	1	RABIF	RAB interacting factor
hsa-miR-1303	1	0	1	0	1	1	RAP2B	RAP2B, member of RAS oncogene family
hsa-miR-1303	1	0	1	0	1	1	SORT1	sortilin 1
hsa-miR-1303	1	0	1	1	1	1	SALL1	sal-like 1 (Drosophila)
hsa-miR-1303	0	0	1	1	1	1	SDHD	succinate dehydrogenase complex, subunit D, integral membrane protein
hsa-miR-1303	1	0	1	1	1	1	SFRP2	secreted frizzled-related protein 2
hsa-miR-1303	1	0	1	1	1	1	SRSF2	serine/arginine-rich splicing factor 2
hsa-miR-1303	1	0	1	0	1	1	ST6GAL1	ST6 beta-galactosamide alpha-2,6-sialyltranferase 1
hsa-miR-1303	1	0	1	0	1	1	SLC6A1	solute carrier family 6 (neurotransmitter transporter, GABA), member 1
hsa-miR-1303	1	0	1	0	1	1	SOX11	SRY (sex determining region Y)-box 11
hsa-miR-1303	1	0	1	0	1	1	STC1	stanniocalcin 1
hsa-miR-1303	0	0	1	1	1	1	STIM1	stromal interaction molecule 1
hsa-miR-1303	0	0	1	1	1	1	SULT2A1	sulfotransferase family, cytosolic, 2A, dehydroepiandrosterone (DHEA)-preferring, member 1
hsa-miR-1303	1	0	1	1	1	1	TAF4	TAF4 RNA polymerase II, TATA box binding protein (TBP)-associated factor, 135kDa
hsa-miR-1303	1	0	1	1	1	1	TFAP2B	transcription factor AP-2 beta (activating enhancer binding protein 2 beta)
hsa-miR-1303	0	0	1	1	0	0	TG	thyroglobulin
hsa-miR-1303	1	0	1	1	1	1	TIAM1	T-cell lymphoma invasion and metastasis 1
hsa-miR-1303	1	0	1	1	1	1	TRPC1	transient receptor potential cation channel, subfamily C, member 1
hsa-miR-1303	1	0	1	0	1	1	ZIC1	Zic family member 1
hsa-miR-1303	0	0	1	1	1	1	ZNF137P	zinc finger protein 137, pseudogene
hsa-miR-1303	1	0	1	1	1	1	CUL5	cullin 5
hsa-miR-1303	1	0	1	1	1	1	AKAP1	A kinase (PRKA) anchor protein 1
hsa-miR-1303	0	0	1	1	0	0	HIST1H4I	histone cluster 1, H4i
hsa-miR-1303	1	0	1	1	1	1	FZD7	frizzled family receptor 7
hsa-miR-1303	1	0	1	1	1	1	PPM1D	protein phosphatase, Mg2+/Mn2+ dependent, 1D
hsa-miR-1303	0	0	1	1	1	1	CHST1	carbohydrate (keratan sulfate Gal-6) sulfotransferase 1
hsa-miR-1303	1	0	1	1	1	1	CDC14A	CDC14 cell division cycle 14 homolog A (S. cerevisiae)
hsa-miR-1303	1	0	1	0	1	1	TNKS	tankyrase, TRF1-interacting ankyrin-related ADP-ribose polymerase
hsa-miR-1303	0	0	1	1	0	0	ADAM21	ADAM metallopeptidase domain 21
hsa-miR-1303	1	0	1	1	1	1	NR5A2	nuclear receptor subfamily 5, group A, member 2
hsa-miR-1303	1	0	1	1	1	1	SNAP23	synaptosomal-associated protein, 23kDa
hsa-miR-1303	0	0	1	1	0	0	DLK1	delta-like 1 homolog (Drosophila)
hsa-miR-1303	1	0	1	0	1	1	SGPL1	sphingosine-1-phosphate lyase 1
hsa-miR-1303	0	0	1	1	1	1	PRPF4B	PRP4 pre-mRNA processing factor 4 homolog B (yeast)
hsa-miR-1303	1	0	1	0	1	1	SEMA5A	sema domain, seven thrombospondin repeats (type 1 and type 1-like), transmembrane domain (TM) and short cytoplasmic domain, (semaphorin) 5A
hsa-miR-1303	0	0	1	0	1	1	RHOB	ras homolog family member B
hsa-miR-1303	1	0	1	1	1	1	CDH12	cadherin 12, type 2 (N-cadherin 2)
hsa-miR-1303	0	0	1	1	1	1	CRY1	cryptochrome 1 (photolyase-like)
hsa-miR-1303	0	0	1	1	1	1	FLT3	fms-related tyrosine kinase 3
hsa-miR-1303	0	0	1	1	1	1	LBP	lipopolysaccharide binding protein
hsa-miR-1303	0	0	1	1	1	1	SLC1A1	solute carrier family 1 (neuronal/epithelial high affinity glutamate transporter, system Xag), member 1
hsa-miR-1303	1	0	1	0	1	1	SLC1A2	solute carrier family 1 (glial high affinity glutamate transporter), member 2
hsa-miR-1303	0	0	1	1	0	0	WNT2B	wingless-type MMTV integration site family, member 2B
hsa-miR-1303	1	0	1	1	1	1	SYT7	synaptotagmin VII
hsa-miR-1303	1	0	1	0	1	1	MED14	mediator complex subunit 14
hsa-miR-1303	1	0	1	1	1	1	SOCS6	suppressor of cytokine signaling 6
hsa-miR-1303	0	0	1	1	1	1	HOMER1	homer homolog 1 (Drosophila)
hsa-miR-1303	1	0	1	1	1	1	GDA	guanine deaminase
hsa-miR-1303	0	0	1	1	1	1	ACTL6A	actin-like 6A
hsa-miR-1303	1	0	1	1	1	1	BNIP2	BCL2/adenovirus E1B 19kDa interacting protein 2
hsa-miR-1303	0	0	1	1	1	1	COL12A1	collagen, type XII, alpha 1
hsa-miR-1303	0	0	1	1	1	1	CSK	c-src tyrosine kinase
hsa-miR-1303	1	0	1	1	1	1	DACH1	dachshund homolog 1 (Drosophila)
hsa-miR-1303	1	0	1	1	1	1	EGR3	early growth response 3
hsa-miR-1303	1	0	1	1	1	1	EPS8	epidermal growth factor receptor pathway substrate 8
hsa-miR-1303	0	0	1	1	1	1	GPC5	glypican 5
hsa-miR-1303	1	0	1	1	0	0	FIGF	c-fos induced growth factor (vascular endothelial growth factor D)
hsa-miR-1303	0	0	1	1	1	1	GP5	glycoprotein V (platelet)
hsa-miR-1303	0	0	1	1	0	0	GTF2A2	general transcription factor IIA, 2, 12kDa
hsa-miR-1303	0	0	1	0	1	1	POU4F2	POU class 4 homeobox 2
hsa-miR-1303	1	0	1	0	1	1	SCN2B	sodium channel, voltage-gated, type II, beta subunit
hsa-miR-1303	0	0	1	1	1	1	MGAM	maltase-glucoamylase (alpha-glucosidase)
hsa-miR-1303	0	0	1	1	0	0	HGS	hepatocyte growth factor-regulated tyrosine kinase substrate
hsa-miR-1303	0	0	1	1	1	1	BUB3	budding uninhibited by benzimidazoles 3 homolog (yeast)
hsa-miR-1303	1	0	1	1	1	1	STK17A	serine/threonine kinase 17a
hsa-miR-1303	1	0	1	0	1	1	VAMP3	vesicle-associated membrane protein 3 (cellubrevin)
hsa-miR-1303	0	0	1	0	1	1	ADIPOQ	adiponectin, C1Q and collagen domain containing
hsa-miR-1303	1	0	1	1	1	1	NRXN1	neurexin 1
hsa-miR-1303	0	0	1	1	0	0	SLC22A14	solute carrier family 22, member 14
hsa-miR-1303	1	0	1	0	1	1	CDYL	chromodomain protein, Y-like
hsa-miR-1303	1	0	1	1	1	1	ONECUT2	one cut homeobox 2
hsa-miR-1303	1	0	1	1	1	1	TBPL1	TBP-like 1
hsa-miR-1303	0	0	1	1	1	1	CALB1	calbindin 1, 28kDa
hsa-miR-1303	0	0	1	1	1	1	CDH6	cadherin 6, type 2, K-cadherin (fetal kidney)
hsa-miR-1303	0	0	1	0	1	1	DSC2	desmocollin 2
hsa-miR-1303	0	0	1	1	0	0	MMP9	matrix metallopeptidase 9 (gelatinase B, 92kDa gelatinase, 92kDa type IV collagenase)
hsa-miR-1303	1	0	1	0	1	1	SCD	stearoyl-CoA desaturase (delta-9-desaturase)
hsa-miR-1303	1	0	1	1	0	0	ZMYM3	zinc finger, MYM-type 3
hsa-miR-1303	1	0	1	1	0	0	ADAMTS4	ADAM metallopeptidase with thrombospondin type 1 motif, 4
hsa-miR-1303	1	0	1	1	1	1	BMI1	BMI1 polycomb ring finger oncogene
hsa-miR-1303	0	0	1	1	1	1	CSTA	cystatin A (stefin A)
hsa-miR-1303	1	0	1	0	1	1	DLX6	distal-less homeobox 6
hsa-miR-1303	1	0	1	1	1	1	ELK1	ELK1, member of ETS oncogene family
hsa-miR-1303	1	0	1	1	1	1	ETS1	v-ets erythroblastosis virus E26 oncogene homolog 1 (avian)
hsa-miR-1303	1	0	1	1	1	1	FOXG1	forkhead box G1
hsa-miR-1303	1	0	1	1	1	1	GPM6A	glycoprotein M6A
hsa-miR-1303	0	0	1	1	1	1	PDIA3	protein disulfide isomerase family A, member 3
hsa-miR-1303	1	0	1	1	1	1	RAB8A	RAB8A, member RAS oncogene family
hsa-miR-1303	1	0	1	1	0	0	NNAT	neuronatin
hsa-miR-1303	1	0	1	1	1	1	PDCL	phosducin-like
hsa-miR-1303	1	0	1	0	1	1	PRKAB2	protein kinase, AMP-activated, beta 2 non-catalytic subunit
hsa-miR-1303	1	0	1	1	0	0	SALL2	sal-like 2 (Drosophila)
hsa-miR-1303	0	0	1	1	1	1	CCL13	chemokine (C-C motif) ligand 13
hsa-miR-1303	0	0	1	1	1	1	CXCL11	chemokine (C-X-C motif) ligand 11
hsa-miR-1303	0	0	1	1	1	1	SEPP1	selenoprotein P, plasma, 1
hsa-miR-1303	0	0	1	1	0	0	ARHGEF5	Rho guanine nucleotide exchange factor (GEF) 5
hsa-miR-1303	1	0	1	0	1	1	CCDC6	coiled-coil domain containing 6
hsa-miR-1303	1	0	1	1	1	1	RND2	Rho family GTPase 2
hsa-miR-1303	0	0	1	1	1	1	INSL5	insulin-like 5
hsa-miR-1303	1	0	1	1	1	1	TOM1L1	target of myb1 (chicken)-like 1
hsa-miR-1303	1	0	1	1	1	1	GTF2E1	general transcription factor IIE, polypeptide 1, alpha 56kDa
hsa-miR-1303	1	0	1	1	1	1	HOXA1	homeobox A1
hsa-miR-1303	1	0	1	1	1	1	NHLH2	nescient helix loop helix 2
hsa-miR-1303	0	0	1	0	1	1	POU3F2	POU class 3 homeobox 2
hsa-miR-1303	1	0	1	1	1	1	RGS4	regulator of G-protein signaling 4
hsa-miR-1303	1	0	1	1	1	1	RNASE6	ribonuclease, RNase A family, k6
hsa-miR-1303	1	0	1	1	1	1	ST8SIA4	ST8 alpha-N-acetyl-neuraminide alpha-2,8-sialyltransferase 4
hsa-miR-1303	0	0	1	1	0	0	KCNK7	potassium channel, subfamily K, member 7
hsa-miR-1303	0	0	1	1	1	1	RNF41	ring finger protein 41
hsa-miR-1303	1	0	1	0	1	1	SPRY3	sprouty homolog 3 (Drosophila)
hsa-miR-1303	1	0	1	1	1	1	BET1	blocked early in transport 1 homolog (S. cerevisiae)
hsa-miR-1303	0	0	1	1	1	1	EIF1B	eukaryotic translation initiation factor 1B
hsa-miR-1303	1	0	1	1	1	1	MMP16	matrix metallopeptidase 16 (membrane-inserted)
hsa-miR-1303	1	0	1	1	1	1	MTF1	metal-regulatory transcription factor 1
hsa-miR-1303	1	0	1	0	1	1	NAB1	NGFI-A binding protein 1 (EGR1 binding protein 1)
hsa-miR-1303	0	0	1	1	1	1	STK10	serine/threonine kinase 10
hsa-miR-1303	1	0	1	1	1	1	LIPG	lipase, endothelial
hsa-miR-1303	1	0	1	1	1	1	HS3ST4	heparan sulfate (glucosamine) 3-O-sulfotransferase 4
hsa-miR-1303	0	0	1	1	1	1	LANCL1	LanC lantibiotic synthetase component C-like 1 (bacterial)
hsa-miR-1303	1	0	1	1	1	1	LUC7L3	LUC7-like 3 (S. cerevisiae)
hsa-miR-1303	0	0	1	1	1	1	CSF2RA	colony stimulating factor 2 receptor, alpha, low-affinity (granulocyte-macrophage)
hsa-miR-1303	1	0	1	1	1	1	DYNC1LI2	dynein, cytoplasmic 1, light intermediate chain 2
hsa-miR-1303	0	0	1	1	1	1	IRF6	interferon regulatory factor 6
hsa-miR-1303	0	0	1	1	0	0	LGALS4	lectin, galactoside-binding, soluble, 4
hsa-miR-1303	0	0	1	1	1	1	NKX3-1	NK3 homeobox 1
hsa-miR-1303	1	0	1	1	1	1	PPP2R5E	protein phosphatase 2, regulatory subunit B', epsilon isoform
hsa-miR-1303	0	0	1	0	0	0	PTPN13	protein tyrosine phosphatase, non-receptor type 13 (APO-1/CD95 (Fas)-associated phosphatase)
hsa-miR-1303	1	0	1	1	1	1	RANBP2	RAN binding protein 2
hsa-miR-1303	1	0	1	1	1	1	TUBGCP3	tubulin, gamma complex associated protein 3
hsa-miR-1303	0	0	1	1	1	1	CAP2	CAP, adenylate cyclase-associated protein, 2 (yeast)
hsa-miR-1303	1	0	1	1	1	1	VAT1	vesicle amine transport protein 1 homolog (T. californica)
hsa-miR-1303	0	0	1	1	0	0	IPO7	importin 7
hsa-miR-1303	1	0	1	1	1	1	NEBL	nebulette
hsa-miR-1303	1	0	1	1	1	1	PAIP1	poly(A) binding protein interacting protein 1
hsa-miR-1303	0	0	1	1	0	0	STAMBP	STAM binding protein
hsa-miR-1303	1	0	1	1	1	1	KHDRBS1	KH domain containing, RNA binding, signal transduction associated 1
hsa-miR-1303	1	0	1	1	1	1	RRAGA	Ras-related GTP binding A
hsa-miR-1303	1	0	1	0	1	1	API5	apoptosis inhibitor 5
hsa-miR-1303	1	0	1	1	1	1	PGRMC1	progesterone receptor membrane component 1
hsa-miR-1303	1	0	1	1	1	1	MMP24	matrix metallopeptidase 24 (membrane-inserted)
hsa-miR-1303	0	0	1	1	1	1	LYVE1	lymphatic vessel endothelial hyaluronan receptor 1
hsa-miR-1303	1	0	1	1	1	1	DIAPH2	diaphanous homolog 2 (Drosophila)
hsa-miR-1303	0	0	1	1	1	1	SSFA2	sperm specific antigen 2
hsa-miR-1303	0	0	1	1	1	1	SYPL1	synaptophysin-like 1
hsa-miR-1303	1	0	1	1	1	1	BTG2	BTG family, member 2
hsa-miR-1303	0	0	1	1	1	1	IFI44L	interferon-induced protein 44-like
hsa-miR-1303	0	0	1	1	1	1	PKIA	protein kinase (cAMP-dependent, catalytic) inhibitor alpha
hsa-miR-1303	1	0	1	1	1	1	RP2	retinitis pigmentosa 2 (X-linked recessive)
hsa-miR-1303	1	0	1	0	1	1	SLC5A3	solute carrier family 5 (sodium/myo-inositol cotransporter), member 3
hsa-miR-1303	0	0	1	1	1	1	RTN4	reticulon 4
hsa-miR-1303	1	0	1	1	1	1	ERLIN2	ER lipid raft associated 2
hsa-miR-1303	0	0	1	1	1	1	SLC6A14	solute carrier family 6 (amino acid transporter), member 14
hsa-miR-1303	1	0	1	1	1	1	KLF12	Kruppel-like factor 12
hsa-miR-1303	0	0	1	1	1	1	STAT1	signal transducer and activator of transcription 1, 91kDa
hsa-miR-1303	1	0	1	1	1	1	ZNF236	zinc finger protein 236
hsa-miR-1303	0	0	1	0	1	1	PAXIP1	PAX interacting (with transcription-activation domain) protein 1
hsa-miR-1303	1	0	1	1	1	1	PHLDA1	pleckstrin homology-like domain, family A, member 1
hsa-miR-1303	1	0	1	1	1	1	PADI2	peptidyl arginine deiminase, type II
hsa-miR-1303	1	0	1	0	1	1	CASP8AP2	caspase 8 associated protein 2
hsa-miR-1303	0	0	1	1	1	1	EHF	ets homologous factor
hsa-miR-1303	1	0	1	1	1	1	RHOQ	ras homolog family member Q
hsa-miR-1303	1	0	1	1	1	1	HS2ST1	heparan sulfate 2-O-sulfotransferase 1
hsa-miR-1303	0	0	1	1	1	1	IL36RN	interleukin 36 receptor antagonist
hsa-miR-1303	1	0	1	1	1	1	KCND2	potassium voltage-gated channel, Shal-related subfamily, member 2
hsa-miR-1303	1	0	1	0	1	1	PXDN	peroxidasin homolog (Drosophila)
hsa-miR-1303	1	0	1	1	1	1	RANBP6	RAN binding protein 6
hsa-miR-1303	1	0	1	1	1	1	YWHAG	tyrosine 3-monooxygenase/tryptophan 5-monooxygenase activation protein, gamma polypeptide
hsa-miR-1303	1	0	1	0	1	1	FLRT2	fibronectin leucine rich transmembrane protein 2
hsa-miR-1303	1	0	1	0	1	1	TRHDE	thyrotropin-releasing hormone degrading enzyme
hsa-miR-1303	0	0	1	1	1	1	UBQLN2	ubiquilin 2
hsa-miR-1303	0	0	1	0	1	1	EMR2	egf-like module containing, mucin-like, hormone receptor-like 2
hsa-miR-1303	1	0	1	1	1	1	WDR37	WD repeat domain 37
hsa-miR-1303	1	0	1	1	1	1	ASF1A	ASF1 anti-silencing function 1 homolog A (S. cerevisiae)
hsa-miR-1303	1	0	1	1	1	1	ATAD2	ATPase family, AAA domain containing 2
hsa-miR-1303	0	0	1	0	1	1	SCN8A	sodium channel, voltage gated, type VIII, alpha subunit
hsa-miR-1303	1	0	1	0	1	1	LIMD1	LIM domains containing 1
hsa-miR-1303	0	0	1	1	1	1	TRAM1	translocation associated membrane protein 1
hsa-miR-1303	1	0	1	1	1	1	PATZ1	POZ (BTB) and AT hook containing zinc finger 1
hsa-miR-1303	1	0	1	1	1	1	LHX6	LIM homeobox 6
hsa-miR-1303	1	0	1	0	1	1	RNF11	ring finger protein 11
hsa-miR-1303	0	0	1	1	1	1	MORC1	MORC family CW-type zinc finger 1
hsa-miR-1303	0	0	1	1	1	1	LSM3	LSM3 homolog, U6 small nuclear RNA associated (S. cerevisiae)
hsa-miR-1303	0	0	1	1	1	1	P2RY10	purinergic receptor P2Y, G-protein coupled, 10
hsa-miR-1303	0	0	1	1	0	0	UBE2S	ubiquitin-conjugating enzyme E2S
hsa-miR-1303	0	0	1	1	0	0	APOBEC3C	apolipoprotein B mRNA editing enzyme, catalytic polypeptide-like 3C
hsa-miR-1303	1	0	1	0	1	1	HEYL	hairy/enhancer-of-split related with YRPW motif-like
hsa-miR-1303	0	0	1	1	0	0	HOXD4	homeobox D4
hsa-miR-1303	1	0	1	1	1	1	ZNF592	zinc finger protein 592
hsa-miR-1303	1	0	1	1	1	1	RALGPS1	Ral GEF with PH domain and SH3 binding motif 1
hsa-miR-1303	1	0	1	0	1	1	EDEM1	ER degradation enhancer, mannosidase alpha-like 1
hsa-miR-1303	1	0	1	0	1	1	SERTAD2	SERTA domain containing 2
hsa-miR-1303	1	0	1	1	1	1	MRPL19	mitochondrial ribosomal protein L19
hsa-miR-1303	1	0	1	0	1	1	SCRN1	secernin 1
hsa-miR-1303	1	0	1	1	1	1	RUFY3	RUN and FYVE domain containing 3
hsa-miR-1303	1	0	1	0	1	1	WDFY3	WD repeat and FYVE domain containing 3
hsa-miR-1303	0	0	1	1	1	1	KDM4C	lysine (K)-specific demethylase 4C
hsa-miR-1303	1	0	1	1	1	1	IQSEC2	IQ motif and Sec7 domain 2
hsa-miR-1303	1	0	1	1	1	1	TAB2	TGF-beta activated kinase 1/MAP3K7 binding protein 2
hsa-miR-1303	1	0	1	0	1	1	SNX13	sorting nexin 13
hsa-miR-1303	1	0	1	1	1	1	RCOR1	REST corepressor 1
hsa-miR-1303	1	0	1	0	1	1	KHNYN	KH and NYN domain containing
hsa-miR-1303	0	0	1	1	0	0	VPS8	vacuolar protein sorting 8 homolog (S. cerevisiae)
hsa-miR-1303	1	0	1	1	1	1	AHCYL2	adenosylhomocysteinase-like 2
hsa-miR-1303	1	0	1	1	1	1	MED13L	mediator complex subunit 13-like
hsa-miR-1303	0	0	1	1	1	1	LEPROTL1	leptin receptor overlapping transcript-like 1
hsa-miR-1303	1	0	1	1	1	1	ZFYVE26	zinc finger, FYVE domain containing 26
hsa-miR-1303	1	0	1	1	1	1	MORC3	MORC family CW-type zinc finger 3
hsa-miR-1303	0	0	1	1	1	1	NBPF14	neuroblastoma breakpoint family, member 14
hsa-miR-1303	0	0	1	1	1	1	ANAPC13	anaphase promoting complex subunit 13
hsa-miR-1303	1	0	1	1	1	1	PARM1	prostate androgen-regulated mucin-like protein 1
hsa-miR-1303	1	0	1	1	1	1	RNF19A	ring finger protein 19A, E3 ubiquitin protein ligase
hsa-miR-1303	1	0	1	1	1	1	PNKD	paroxysmal nonkinesigenic dyskinesia
hsa-miR-1303	1	0	1	1	1	1	CLIP3	CAP-GLY domain containing linker protein 3
hsa-miR-1303	1	0	1	1	1	1	SLITRK5	SLIT and NTRK-like family, member 5
hsa-miR-1303	1	0	1	0	1	1	ERC2	ELKS/RAB6-interacting/CAST family member 2
hsa-miR-1303	1	0	1	1	1	1	PHF19	PHD finger protein 19
hsa-miR-1303	0	0	1	1	1	1	C10orf12	chromosome 10 open reading frame 12
hsa-miR-1303	0	0	1	1	1	1	RSL1D1	ribosomal L1 domain containing 1
hsa-miR-1303	1	0	1	0	1	1	WWC3	WWC family member 3
hsa-miR-1303	1	0	1	1	1	1	PLA2G3	phospholipase A2, group III
hsa-miR-1303	1	0	1	1	1	1	AZIN1	antizyme inhibitor 1
hsa-miR-1303	1	0	1	0	1	1	TRIM33	tripartite motif containing 33
hsa-miR-1303	0	0	1	1	1	1	NOP58	NOP58 ribonucleoprotein homolog (yeast)
hsa-miR-1303	0	0	1	1	1	1	SCCPDH	saccharopine dehydrogenase (putative)
hsa-miR-1303	0	0	1	1	1	1	APH1A	anterior pharynx defective 1 homolog A (C. elegans)
hsa-miR-1303	0	0	1	1	1	1	LACTB2	lactamase, beta 2
hsa-miR-1303	1	0	1	1	1	1	RRP15	ribosomal RNA processing 15 homolog (S. cerevisiae)
hsa-miR-1303	0	0	1	1	1	1	HDDC2	HD domain containing 2
hsa-miR-1303	0	0	1	1	1	1	MRPS23	mitochondrial ribosomal protein S23
hsa-miR-1303	0	0	1	1	1	1	MRPS33	mitochondrial ribosomal protein S33
hsa-miR-1303	1	0	1	0	1	1	CNR1	cannabinoid receptor 1 (brain)
hsa-miR-1303	0	0	1	1	1	1	RAB10	RAB10, member RAS oncogene family
hsa-miR-1303	1	0	1	1	1	1	VGLL3	vestigial like 3 (Drosophila)
hsa-miR-1303	0	0	1	1	1	1	HSD17B11	hydroxysteroid (17-beta) dehydrogenase 11
hsa-miR-1303	1	0	1	1	1	1	BIRC6	baculoviral IAP repeat containing 6
hsa-miR-1303	1	0	1	0	1	1	HPCAL4	hippocalcin like 4
hsa-miR-1303	1	0	1	1	1	1	RNF138	ring finger protein 138, E3 ubiquitin protein ligase
hsa-miR-1303	0	0	1	1	1	1	CD244	CD244 molecule, natural killer cell receptor 2B4
hsa-miR-1303	1	0	1	0	1	1	CRIM1	cysteine rich transmembrane BMP regulator 1 (chordin-like)
hsa-miR-1303	1	0	1	1	1	1	VTA1	Vps20-associated 1 homolog (S. cerevisiae)
hsa-miR-1303	0	0	1	1	1	1	AMBN	ameloblastin (enamel matrix protein)
hsa-miR-1303	1	0	1	0	1	1	KLF3	Kruppel-like factor 3 (basic)
hsa-miR-1303	0	0	1	1	1	1	C1RL	complement component 1, r subcomponent-like
hsa-miR-1303	1	0	1	1	1	1	RAB6B	RAB6B, member RAS oncogene family
hsa-miR-1303	0	0	1	1	0	0	PCDH12	protocadherin 12
hsa-miR-1303	1	0	1	1	1	1	ZNF644	zinc finger protein 644
hsa-miR-1303	1	0	1	1	1	1	MEX3C	mex-3 homolog C (C. elegans)
hsa-miR-1303	0	0	1	1	0	0	AHSP	alpha hemoglobin stabilizing protein
hsa-miR-1303	1	0	1	0	1	1	KLHL3	kelch-like 3 (Drosophila)
hsa-miR-1303	0	0	1	1	1	1	KIF27	kinesin family member 27
hsa-miR-1303	1	0	1	0	1	1	EIF2C4	eukaryotic translation initiation factor 2C, 4
hsa-miR-1303	1	0	1	0	1	1	KCTD9	potassium channel tetramerisation domain containing 9
hsa-miR-1303	1	0	1	1	1	1	GDAP2	ganglioside induced differentiation associated protein 2
hsa-miR-1303	1	0	1	0	1	1	DCAF16	DDB1 and CUL4 associated factor 16
hsa-miR-1303	1	0	1	0	1	1	CHD7	chromodomain helicase DNA binding protein 7
hsa-miR-1303	0	0	1	1	1	1	CCDC99	coiled-coil domain containing 99
hsa-miR-1303	1	0	1	1	1	1	UBE2R2	ubiquitin-conjugating enzyme E2R 2
hsa-miR-1303	1	0	1	1	1	1	IMPAD1	inositol monophosphatase domain containing 1
hsa-miR-1303	1	0	1	1	1	1	RNF125	ring finger protein 125, E3 ubiquitin protein ligase
hsa-miR-1303	0	0	1	1	1	1	C1orf56	chromosome 1 open reading frame 56
hsa-miR-1303	0	0	1	1	1	1	IWS1	IWS1 homolog (S. cerevisiae)
hsa-miR-1303	1	0	1	1	1	1	C9orf40	chromosome 9 open reading frame 40
hsa-miR-1303	1	0	1	1	1	1	ARGLU1	arginine and glutamate rich 1
hsa-miR-1303	0	0	1	1	1	1	RBM22	RNA binding motif protein 22
hsa-miR-1303	1	0	1	1	1	1	MAGOHB	mago-nashi homolog B (Drosophila)
hsa-miR-1303	1	0	1	0	1	1	MSL2	male-specific lethal 2 homolog (Drosophila)
hsa-miR-1303	1	0	1	1	1	1	RPRD1A	regulation of nuclear pre-mRNA domain containing 1A
hsa-miR-1303	0	0	1	0	1	1	GOLPH3L	golgi phosphoprotein 3-like
hsa-miR-1303	1	0	1	1	1	1	ZNF654	zinc finger protein 654
hsa-miR-1303	0	0	1	1	1	1	RBM41	RNA binding motif protein 41
hsa-miR-1303	1	0	1	1	1	1	SPTLC3	serine palmitoyltransferase, long chain base subunit 3
hsa-miR-1303	1	0	1	1	1	1	KIAA1598	KIAA1598
hsa-miR-1303	1	0	1	1	1	1	AGPAT5	1-acylglycerol-3-phosphate O-acyltransferase 5 (lysophosphatidic acid acyltransferase, epsilon)
hsa-miR-1303	1	0	1	1	1	1	RSBN1	round spermatid basic protein 1
hsa-miR-1303	0	0	1	1	1	1	STYK1	serine/threonine/tyrosine kinase 1
hsa-miR-1303	0	0	1	1	1	1	CISD1	CDGSH iron sulfur domain 1
hsa-miR-1303	1	0	1	1	1	1	CAMK2N1	calcium/calmodulin-dependent protein kinase II inhibitor 1
hsa-miR-1303	1	0	1	0	1	1	PCDHAC1	protocadherin alpha subfamily C, 1
hsa-miR-1303	1	0	1	0	1	1	PCDHAC2	protocadherin alpha subfamily C, 2
hsa-miR-1303	1	0	1	1	1	1	PCDHA1	protocadherin alpha 1
hsa-miR-1303	1	0	1	0	1	1	PCDHA10	protocadherin alpha 10
hsa-miR-1303	1	0	1	0	1	1	PCDHA11	protocadherin alpha 11
hsa-miR-1303	1	0	1	0	1	1	PCDHA12	protocadherin alpha 12
hsa-miR-1303	1	0	1	1	1	1	PCDHA2	protocadherin alpha 2
hsa-miR-1303	1	0	1	1	1	1	PCDHA3	protocadherin alpha 3
hsa-miR-1303	1	0	1	1	1	1	PCDHA6	protocadherin alpha 6
hsa-miR-1303	1	0	1	0	1	1	PCDHA7	protocadherin alpha 7
hsa-miR-1303	1	0	1	1	1	1	PCDHA8	protocadherin alpha 8
hsa-miR-1303	0	0	1	1	1	1	NPAP1	nuclear pore associated protein 1
hsa-miR-1303	1	0	1	0	1	1	FAM190B	family with sequence similarity 190, member B
hsa-miR-1303	1	0	1	0	1	1	TMX3	thioredoxin-related transmembrane protein 3
hsa-miR-1303	1	0	1	1	1	1	SEPT3	septin 3
hsa-miR-1303	0	0	1	1	1	1	KLHL4	kelch-like 4 (Drosophila)
hsa-miR-1303	1	0	1	1	1	1	ABCB9	ATP-binding cassette, sub-family B (MDR/TAP), member 9
hsa-miR-1303	1	0	1	0	1	1	KCMF1	potassium channel modulatory factor 1
hsa-miR-1303	1	0	1	1	1	1	C8orf4	chromosome 8 open reading frame 4
hsa-miR-1303	0	0	1	1	1	1	BDH2	3-hydroxybutyrate dehydrogenase, type 2
hsa-miR-1303	0	0	1	1	1	1	TMEM167B	transmembrane protein 167B
hsa-miR-1303	1	0	1	0	1	1	PAPOLB	poly(A) polymerase beta (testis specific)
hsa-miR-1303	0	0	1	1	1	1	RAD18	RAD18 homolog (S. cerevisiae)
hsa-miR-1303	1	0	1	1	1	1	FEM1C	fem-1 homolog c (C. elegans)
hsa-miR-1303	0	0	1	1	1	1	PRTFDC1	phosphoribosyl transferase domain containing 1
hsa-miR-1303	1	0	1	0	1	1	OTUD7B	OTU domain containing 7B
hsa-miR-1303	1	0	1	1	1	1	PCDH9	protocadherin 9
hsa-miR-1303	1	0	1	1	1	1	SCYL3	SCY1-like 3 (S. cerevisiae)
hsa-miR-1303	1	0	1	0	1	1	DCUN1D1	DCN1, defective in cullin neddylation 1, domain containing 1 (S. cerevisiae)
hsa-miR-1303	0	0	1	0	1	1	TWSG1	twisted gastrulation homolog 1 (Drosophila)
hsa-miR-1303	1	0	1	1	1	1	RAB22A	RAB22A, member RAS oncogene family
hsa-miR-1303	1	0	1	0	1	1	KCNS2	potassium voltage-gated channel, delayed-rectifier, subfamily S, member 2
hsa-miR-1303	1	0	1	0	1	1	FAM40B	family with sequence similarity 40, member B
hsa-miR-1303	1	0	1	1	1	1	ARHGAP31	Rho GTPase activating protein 31
hsa-miR-1303	1	0	1	0	1	1	NUFIP2	nuclear fragile X mental retardation protein interacting protein 2
hsa-miR-1303	1	0	1	1	1	1	NCEH1	neutral cholesterol ester hydrolase 1
hsa-miR-1303	1	0	1	1	1	1	NLGN2	neuroligin 2
hsa-miR-1303	1	0	1	1	1	1	SEMA6A	sema domain, transmembrane domain (TM), and cytoplasmic domain, (semaphorin) 6A
hsa-miR-1303	1	0	1	1	1	1	HOMEZ	homeobox and leucine zipper encoding
hsa-miR-1303	1	0	1	0	1	1	GPAM	glycerol-3-phosphate acyltransferase, mitochondrial
hsa-miR-1303	0	0	1	1	1	1	PRX	periaxin
hsa-miR-1303	0	0	1	1	1	1	EPG5	ectopic P-granules autophagy protein 5 homolog (C. elegans)
hsa-miR-1303	0	0	1	1	1	1	HIST1H2AG	histone cluster 1, H2ag
hsa-miR-1303	1	0	1	1	1	1	MTMR3	myotubularin related protein 3
hsa-miR-1303	1	0	1	1	1	1	ADCY1	adenylate cyclase 1 (brain)
hsa-miR-1303	0	0	1	1	1	1	IL22RA1	interleukin 22 receptor, alpha 1
hsa-miR-1303	0	0	1	1	1	1	SCPEP1	serine carboxypeptidase 1
hsa-miR-1303	0	0	1	0	1	1	SPCS3	signal peptidase complex subunit 3 homolog (S. cerevisiae)
hsa-miR-1303	0	0	1	1	1	1	MS4A1	membrane-spanning 4-domains, subfamily A, member 1
hsa-miR-1303	1	0	1	0	1	1	MCL1	myeloid cell leukemia sequence 1 (BCL2-related)
hsa-miR-1303	1	0	1	0	1	1	GAN	gigaxonin
hsa-miR-1303	1	0	1	0	1	1	CERS2	ceramide synthase 2
hsa-miR-1303	1	0	1	1	1	1	SNX16	sorting nexin 16
hsa-miR-1303	1	0	1	1	1	1	XYLT1	xylosyltransferase I
hsa-miR-1303	1	0	1	1	1	1	GIGYF1	GRB10 interacting GYF protein 1
hsa-miR-1303	0	0	1	1	1	1	IQCH	IQ motif containing H
hsa-miR-1303	1	0	1	0	1	1	USP46	ubiquitin specific peptidase 46
hsa-miR-1303	0	0	1	1	1	1	MARCKSL1	MARCKS-like 1
hsa-miR-1303	0	0	1	0	1	1	FUNDC2	FUN14 domain containing 2
hsa-miR-1303	1	0	1	1	1	1	NEUROG2	neurogenin 2
hsa-miR-1303	0	0	1	0	1	1	TRPM8	transient receptor potential cation channel, subfamily M, member 8
hsa-miR-1303	0	0	1	1	0	0	DCTPP1	dCTP pyrophosphatase 1
hsa-miR-1303	0	0	1	1	1	1	CEP70	centrosomal protein 70kDa
hsa-miR-1303	1	0	1	1	1	1	NKAIN1	Na+/K+ transporting ATPase interacting 1
hsa-miR-1303	0	0	1	0	1	1	ZYG11B	zyg-11 homolog B (C. elegans)
hsa-miR-1303	0	0	1	1	1	1	LRRK1	leucine-rich repeat kinase 1
hsa-miR-1303	1	0	1	0	1	1	ZFHX4	zinc finger homeobox 4
hsa-miR-1303	1	0	1	0	1	1	MOB3B	MOB kinase activator 3B
hsa-miR-1303	0	0	1	1	1	1	AGBL2	ATP/GTP binding protein-like 2
hsa-miR-1303	0	0	1	1	0	0	RNF122	ring finger protein 122
hsa-miR-1303	0	0	1	1	0	0	TMEM156	transmembrane protein 156
hsa-miR-1303	0	0	1	1	0	0	NRSN2	neurensin 2
hsa-miR-1303	1	0	1	0	1	1	VCPIP1	valosin containing protein (p97)/p47 complex interacting protein 1
hsa-miR-1303	0	0	1	1	1	1	CWH43	cell wall biogenesis 43 C-terminal homolog (S. cerevisiae)
hsa-miR-1303	0	0	1	1	0	0	IFT74	intraflagellar transport 74 homolog (Chlamydomonas)
hsa-miR-1303	1	0	1	1	1	1	NAA50	N(alpha)-acetyltransferase 50, NatE catalytic subunit
hsa-miR-1303	1	0	1	1	1	1	ZBTB46	zinc finger and BTB domain containing 46
hsa-miR-1303	1	0	1	1	1	1	TNKS2	tankyrase, TRF1-interacting ankyrin-related ADP-ribose polymerase 2
hsa-miR-1303	0	0	1	1	1	1	THUMPD2	THUMP domain containing 2
hsa-miR-1303	1	0	1	0	1	1	TET1	tet methylcytosine dioxygenase 1
hsa-miR-1303	1	0	1	1	1	1	JHDM1D	jumonji C domain containing histone demethylase 1 homolog D (S. cerevisiae)
hsa-miR-1303	1	0	1	0	1	1	SETD7	SET domain containing (lysine methyltransferase) 7
hsa-miR-1303	1	0	1	1	1	1	TMX1	thioredoxin-related transmembrane protein 1
hsa-miR-1303	1	0	1	0	1	1	C1orf21	chromosome 1 open reading frame 21
hsa-miR-1303	1	0	1	0	1	1	CSRNP2	cysteine-serine-rich nuclear protein 2
hsa-miR-1303	0	0	1	1	1	1	RIOK1	RIO kinase 1 (yeast)
hsa-miR-1303	1	0	1	0	1	1	ITCH	itchy E3 ubiquitin protein ligase
hsa-miR-1303	1	0	1	1	1	1	PCDHA9	protocadherin alpha 9
hsa-miR-1303	0	0	1	1	0	0	CACNG6	calcium channel, voltage-dependent, gamma subunit 6
hsa-miR-1303	0	0	1	1	1	1	MAGT1	magnesium transporter 1
hsa-miR-1303	1	0	1	1	1	1	FBXO30	F-box protein 30
hsa-miR-1303	1	0	1	1	1	1	DSEL	dermatan sulfate epimerase-like
hsa-miR-1303	1	0	1	1	1	1	FAM175B	family with sequence similarity 175, member B
hsa-miR-1303	1	0	1	1	1	1	ARID5B	AT rich interactive domain 5B (MRF1-like)
hsa-miR-1303	0	0	1	1	1	1	METTL25	methyltransferase like 25
hsa-miR-1303	0	0	1	0	1	1	LDOC1L	leucine zipper, down-regulated in cancer 1-like
hsa-miR-1303	1	0	1	1	1	1	BRMS1L	breast cancer metastasis-suppressor 1-like
hsa-miR-1303	1	0	1	1	1	1	USP38	ubiquitin specific peptidase 38
hsa-miR-1303	1	0	1	1	1	1	HIATL1	hippocampus abundant transcript-like 1
hsa-miR-1303	0	0	1	1	1	1	SPZ1	spermatogenic leucine zipper 1
hsa-miR-1303	1	0	1	0	1	1	INA	internexin neuronal intermediate filament protein, alpha
hsa-miR-1303	1	0	1	1	1	1	RBM17	RNA binding motif protein 17
hsa-miR-1303	0	0	1	1	1	1	POLR2J2	polymerase (RNA) II (DNA directed) polypeptide J2
hsa-miR-1303	1	0	1	1	1	1	PCDH11X	protocadherin 11 X-linked
hsa-miR-1303	0	0	1	1	0	0	MUC13	mucin 13, cell surface associated
hsa-miR-1303	1	0	1	1	1	1	HIAT1	hippocampus abundant transcript 1
hsa-miR-1303	1	0	1	0	1	1	PURB	purine-rich element binding protein B
hsa-miR-1303	1	0	1	1	0	0	CAMK2N2	calcium/calmodulin-dependent protein kinase II inhibitor 2
hsa-miR-1303	1	0	1	1	1	1	FOXQ1	forkhead box Q1
hsa-miR-1303	0	0	1	1	1	1	MRPS36	mitochondrial ribosomal protein S36
hsa-miR-1303	1	0	1	1	1	1	TP53INP1	tumor protein p53 inducible nuclear protein 1
hsa-miR-1303	1	0	1	1	1	1	SSH2	slingshot homolog 2 (Drosophila)
hsa-miR-1303	0	0	1	1	1	1	ARHGAP18	Rho GTPase activating protein 18
hsa-miR-1303	1	0	1	1	1	1	BRWD1	bromodomain and WD repeat domain containing 1
hsa-miR-1303	0	0	1	1	1	1	ZNF830	zinc finger protein 830
hsa-miR-1303	0	0	1	1	0	0	SIGLEC11	sialic acid binding Ig-like lectin 11
hsa-miR-1303	1	0	1	1	1	1	SLC2A13	solute carrier family 2 (facilitated glucose transporter), member 13
hsa-miR-1303	1	0	1	1	1	1	MAL2	mal, T-cell differentiation protein 2 (gene/pseudogene)
hsa-miR-1303	0	0	1	1	0	0	PGLYRP2	peptidoglycan recognition protein 2
hsa-miR-1303	1	0	1	1	1	1	ELFN2	extracellular leucine-rich repeat and fibronectin type III domain containing 2
hsa-miR-1303	0	0	1	1	1	1	PLEKHG4B	pleckstrin homology domain containing, family G (with RhoGef domain) member 4B
hsa-miR-1303	1	0	1	1	1	1	SLITRK1	SLIT and NTRK-like family, member 1
hsa-miR-1303	1	0	1	1	1	1	TRIM9	tripartite motif containing 9
hsa-miR-1303	1	0	1	1	1	1	NAA15	N(alpha)-acetyltransferase 15, NatA auxiliary subunit
hsa-miR-1303	0	0	1	1	1	1	CDKN2B	cyclin-dependent kinase inhibitor 2B (p15, inhibits CDK4)
hsa-miR-1303	1	0	1	1	1	1	PTP4A2	protein tyrosine phosphatase type IVA, member 2
hsa-miR-1303	0	0	1	1	1	1	SLC32A1	solute carrier family 32 (GABA vesicular transporter), member 1
hsa-miR-1303	0	0	1	1	1	1	UBE2F	ubiquitin-conjugating enzyme E2F (putative)
hsa-miR-1303	1	0	1	1	1	1	COL11A2	collagen, type XI, alpha 2
hsa-miR-1303	1	0	1	0	0	0	SRSF12	serine/arginine-rich splicing factor 12
hsa-miR-1303	1	0	1	1	1	1	GPR62	G protein-coupled receptor 62
hsa-miR-1303	1	0	1	0	1	1	SOCS4	suppressor of cytokine signaling 4
hsa-miR-1303	0	0	1	1	1	1	COLEC12	collectin sub-family member 12
hsa-miR-1303	0	0	1	1	1	1	KCNG3	potassium voltage-gated channel, subfamily G, member 3
hsa-miR-1303	1	0	1	1	1	1	ADAMTS19	ADAM metallopeptidase with thrombospondin type 1 motif, 19
hsa-miR-1303	1	0	1	1	1	1	PANK1	pantothenate kinase 1
hsa-miR-1303	1	0	1	1	1	1	PCSK6	proprotein convertase subtilisin/kexin type 6
hsa-miR-1303	1	0	1	1	1	1	GLCCI1	glucocorticoid induced transcript 1
hsa-miR-1303	1	0	1	1	1	1	KCTD12	potassium channel tetramerisation domain containing 12
hsa-miR-1303	1	0	1	0	1	1	NUS1	nuclear undecaprenyl pyrophosphate synthase 1 homolog (S. cerevisiae)
hsa-miR-1303	0	0	1	1	1	1	C1orf213	chromosome 1 open reading frame 213
hsa-miR-1303	0	0	1	0	1	1	PRELID2	PRELI domain containing 2
hsa-miR-1303	0	0	1	0	1	1	MYO3B	myosin IIIB
hsa-miR-1303	1	0	1	1	1	1	DNER	delta/notch-like EGF repeat containing
hsa-miR-1303	0	0	1	1	1	1	KCNC2	potassium voltage-gated channel, Shaw-related subfamily, member 2
hsa-miR-1303	1	0	1	1	0	0	LIPH	lipase, member H
hsa-miR-1303	1	0	1	1	1	1	PPTC7	PTC7 protein phosphatase homolog (S. cerevisiae)
hsa-miR-1303	1	0	1	1	1	1	RFTN2	raftlin family member 2
hsa-miR-1303	0	0	1	1	1	1	TMEM106A	transmembrane protein 106A
hsa-miR-1303	0	0	1	1	1	1	DACT3	dapper, antagonist of beta-catenin, homolog 3 (Xenopus laevis)
hsa-miR-1303	1	0	1	1	1	1	FAM84A	family with sequence similarity 84, member A
hsa-miR-1303	0	0	1	0	1	1	SPATA18	spermatogenesis associated 18
hsa-miR-1303	0	0	1	1	0	0	NKX2-3	NK2 homeobox 3
hsa-miR-1303	0	0	1	1	1	1	APOBEC3F	apolipoprotein B mRNA editing enzyme, catalytic polypeptide-like 3F
hsa-miR-1303	0	0	1	1	1	1	C7orf33	chromosome 7 open reading frame 33
hsa-miR-1303	0	0	1	1	1	1	LRTOMT	leucine rich transmembrane and 0-methyltransferase domain containing
hsa-miR-1303	0	0	1	1	1	1	APOBEC3A	apolipoprotein B mRNA editing enzyme, catalytic polypeptide-like 3A
hsa-miR-1303	1	0	1	1	1	1	SEPT6	septin 6
hsa-miR-1303	1	0	1	0	1	1	MTPN	myotrophin
hsa-miR-1303	1	0	1	1	1	1	POGLUT1	protein O-glucosyltransferase 1
hsa-miR-1303	0	0	1	1	1	1	ERP27	endoplasmic reticulum protein 27
hsa-miR-1303	1	0	1	1	1	1	LSM12	LSM12 homolog (S. cerevisiae)
hsa-miR-1303	1	0	1	0	1	1	UBXN10	UBX domain protein 10
hsa-miR-1303	1	0	1	1	1	1	TBX15	T-box 15
hsa-miR-1303	1	0	1	1	1	1	FAM123B	family with sequence similarity 123B
hsa-miR-1303	1	0	1	1	1	1	FAM81A	family with sequence similarity 81, member A
hsa-miR-1303	0	0	1	0	1	1	HORMAD2	HORMA domain containing 2
hsa-miR-1303	0	0	1	1	0	0	C2orf57	chromosome 2 open reading frame 57
hsa-miR-1303	0	0	1	1	1	1	METTL15	methyltransferase like 15
hsa-miR-1303	0	0	1	1	1	1	KHDRBS2	KH domain containing, RNA binding, signal transduction associated 2
hsa-miR-1303	1	0	1	1	1	1	ABCA13	ATP-binding cassette, sub-family A (ABC1), member 13
hsa-miR-1303	0	0	1	1	0	0	GPC2	glypican 2
hsa-miR-1303	1	0	1	1	1	1	NXPH1	neurexophilin 1
hsa-miR-1303	0	0	1	1	1	1	CNPY4	canopy 4 homolog (zebrafish)
hsa-miR-1303	0	0	1	0	1	1	KBTBD6	kelch repeat and BTB (POZ) domain containing 6
hsa-miR-1303	1	0	1	0	1	1	KDM1B	lysine (K)-specific demethylase 1B
hsa-miR-1303	0	0	1	0	1	1	LIX1	Lix1 homolog (chicken)
hsa-miR-1303	1	0	1	1	1	1	SYT14	synaptotagmin XIV
hsa-miR-1303	0	0	1	1	1	1	COL6A5	collagen, type VI, alpha 5
hsa-miR-1303	1	0	1	1	0	0	TMEM86A	transmembrane protein 86A
hsa-miR-1303	0	0	1	1	0	0	APCDD1L	adenomatosis polyposis coli down-regulated 1-like
hsa-miR-1303	0	0	1	1	1	1	CAMK1D	calcium/calmodulin-dependent protein kinase ID
hsa-miR-1303	1	0	1	1	1	1	CREBRF	CREB3 regulatory factor
hsa-miR-1303	1	0	1	1	1	1	CACUL1	CDK2-associated, cullin domain 1
hsa-miR-1303	1	0	1	1	1	1	NR4A3	nuclear receptor subfamily 4, group A, member 3
hsa-miR-1303	1	0	1	1	1	1	MOB1B	MOB kinase activator 1B
hsa-miR-1303	1	0	1	1	1	1	MMGT1	membrane magnesium transporter 1
hsa-miR-1303	1	0	1	1	1	1	CNTD1	cyclin N-terminal domain containing 1
hsa-miR-1303	1	0	1	1	1	1	CCDC117	coiled-coil domain containing 117
hsa-miR-1303	0	0	1	1	0	0	C11orf42	chromosome 11 open reading frame 42
hsa-miR-1303	1	0	1	0	1	1	RNF152	ring finger protein 152
hsa-miR-1303	0	0	1	1	1	1	UNC5CL	unc-5 homolog C (C. elegans)-like
hsa-miR-1303	0	0	1	1	0	0	EPHX4	epoxide hydrolase 4
hsa-miR-1303	1	0	1	1	1	1	DIP2B	DIP2 disco-interacting protein 2 homolog B (Drosophila)
hsa-miR-1303	0	0	1	0	1	1	C5orf64	chromosome 5 open reading frame 64
hsa-miR-1303	1	0	1	0	1	1	SREK1IP1	SREK1-interacting protein 1
hsa-miR-1303	1	0	1	0	1	1	TMEM167A	transmembrane protein 167A
hsa-miR-1303	0	0	1	1	0	0	FAAH2	fatty acid amide hydrolase 2
hsa-miR-1303	1	0	1	1	1	1	C4orf34	chromosome 4 open reading frame 34
hsa-miR-1303	0	0	1	1	1	1	FRMD3	FERM domain containing 3
hsa-miR-1303	0	0	1	1	1	1	FAM9A	family with sequence similarity 9, member A
hsa-miR-1303	1	0	1	1	1	1	RAB3IP	RAB3A interacting protein (rabin3)
hsa-miR-1303	1	0	1	1	1	1	SYT9	synaptotagmin IX
hsa-miR-1303	1	0	1	1	0	0	KRTAP11-1	keratin associated protein 11-1
hsa-miR-1303	1	0	1	1	1	1	EXOC8	exocyst complex component 8
hsa-miR-1303	0	0	1	1	1	1	PRNT	prion protein (testis specific)
hsa-miR-1303	1	0	1	1	1	1	LRRTM3	leucine rich repeat transmembrane neuronal 3
hsa-miR-1303	0	0	1	1	1	1	SESTD1	SEC14 and spectrin domains 1
hsa-miR-1303	0	0	1	1	0	0	PILRA	paired immunoglobin-like type 2 receptor alpha
hsa-miR-1303	0	0	1	1	1	1	ZNF831	zinc finger protein 831
hsa-miR-1303	1	0	1	1	1	1	DCAF12L1	DDB1 and CUL4 associated factor 12-like 1
hsa-miR-1303	0	0	1	1	1	1	STXBP4	syntaxin binding protein 4
hsa-miR-1303	0	0	1	0	1	1	HCG27	HLA complex group 27 (non-protein coding)
hsa-miR-1303	1	0	1	1	1	1	SPRED2	sprouty-related, EVH1 domain containing 2
hsa-miR-1303	1	0	1	1	1	1	ZSCAN22	zinc finger and SCAN domain containing 22
hsa-miR-1303	0	0	1	0	1	1	NBPF11	neuroblastoma breakpoint family, member 11
hsa-miR-1303	1	0	1	1	1	1	ARRDC4	arrestin domain containing 4
hsa-miR-1303	1	0	1	1	1	1	SPTY2D1	SPT2, Suppressor of Ty, domain containing 1 (S. cerevisiae)
hsa-miR-1303	1	0	1	1	1	1	ZBTB41	zinc finger and BTB domain containing 41
hsa-miR-1303	1	0	1	1	1	1	AQP1	aquaporin 1 (Colton blood group)
hsa-miR-1303	1	0	1	1	1	1	E2F6	E2F transcription factor 6
hsa-miR-1303	1	0	1	1	1	1	GPRIN3	GPRIN family member 3
hsa-miR-1303	0	0	1	1	0	0	TMEM173	transmembrane protein 173
hsa-miR-1303	0	0	1	0	1	1	TCF21	transcription factor 21
hsa-miR-1303	0	0	1	1	1	1	APOOL	apolipoprotein O-like
hsa-miR-1303	0	0	1	1	1	1	FOXR2	forkhead box R2
hsa-miR-1303	0	0	1	1	0	0	VWC2	von Willebrand factor C domain containing 2
hsa-miR-1303	1	0	1	0	1	1	ZC3H6	zinc finger CCCH-type containing 6
hsa-miR-1303	1	0	1	0	1	1	PRICKLE2	prickle homolog 2 (Drosophila)
hsa-miR-1303	0	0	1	1	1	1	UBE3D	ubiquitin protein ligase E3D
hsa-miR-1303	1	0	1	0	1	1	LHFPL3	lipoma HMGIC fusion partner-like 3
hsa-miR-1303	0	0	1	1	1	1	COL18A1-AS1	COL18A1 antisense RNA 1
hsa-miR-1303	0	0	1	1	1	1	AMACR	alpha-methylacyl-CoA racemase
hsa-miR-1303	0	0	1	1	1	1	SERTM1	serine-rich and transmembrane domain containing 1
hsa-miR-1303	0	0	1	1	1	1	ACYP1	acylphosphatase 1, erythrocyte (common) type
hsa-miR-1303	1	0	1	1	1	1	MOG	myelin oligodendrocyte glycoprotein
hsa-miR-1303	0	0	1	1	1	1	C10orf129	chromosome 10 open reading frame 129
hsa-miR-1303	0	0	1	1	1	1	ERICH1	glutamate-rich 1
hsa-miR-1303	1	0	1	1	1	1	FREM2	FRAS1 related extracellular matrix protein 2
hsa-miR-1303	1	0	1	1	1	1	SKIDA1	SKI/DACH domain containing 1
hsa-miR-1303	1	0	1	1	1	1	TNFAIP8L3	tumor necrosis factor, alpha-induced protein 8-like 3
hsa-miR-1303	0	0	1	1	0	0	TMPRSS11F	transmembrane protease, serine 11F
hsa-miR-1303	0	0	1	0	1	1	FSD1L	fibronectin type III and SPRY domain containing 1-like
hsa-miR-1303	0	0	1	0	1	1	TMEM215	transmembrane protein 215
hsa-miR-1303	1	0	1	1	1	1	XKRX	XK, Kell blood group complex subunit-related, X-linked
hsa-miR-1303	0	0	1	0	0	0	CELP	carboxyl ester lipase pseudogene
hsa-miR-1303	0	0	1	0	0	0	SNORD108	small nucleolar RNA, C/D box 108
hsa-miR-1303	0	0	1	0	0	0	PAR5	Prader-Willi/Angelman syndrome-5
hsa-miR-1303	0	0	1	0	0	0	MIR155HG	MIR155 host gene (non-protein coding)
hsa-miR-1303	0	0	1	0	0	0	TTTY15	testis-specific transcript, Y-linked 15 (non-protein coding)
hsa-miR-1303	0	0	1	0	0	0	SUMO1P1	SUMO1 pseudogene 1
hsa-miR-1303	0	0	1	0	0	0	MEIS3P1	Meis homeobox 3 pseudogene 1
hsa-miR-1303	0	0	1	0	0	0	NXF4	nuclear RNA export factor 4 pseudogene
hsa-miR-1303	0	0	1	0	0	0	PDIA3P	protein disulfide isomerase family A, member 3 pseudogene
hsa-miR-1303	0	0	1	0	0	0	SNORA4	small nucleolar RNA, H/ACA box 4
hsa-miR-1303	0	0	1	0	0	0	TDGF1P3	teratocarcinoma-derived growth factor 1 pseudogene 3
hsa-miR-1303	0	0	1	0	0	0	HTR7P1	5-hydroxytryptamine (serotonin) receptor 7 pseudogene 1
hsa-miR-1303	0	0	1	0	0	0	RPLP0P2	ribosomal protein, large, P0 pseudogene 2
hsa-miR-1303	0	0	1	0	0	0	TRIM78P	tripartite motif containing 78, pseudogene
hsa-miR-1303	0	0	1	0	0	0	TPTE2P6	transmembrane phosphoinositide 3-phosphatase and tensin homolog 2 pseudogene 6
hsa-miR-1303	0	0	1	0	0	0	HIATL2	hippocampus abundant transcript-like 2
hsa-miR-1303	0	0	1	0	0	0	TCAM1P	testicular cell adhesion molecule 1 homolog (mouse), pseudogene
hsa-miR-1303	0	0	1	0	0	0	HSP90AB2P	heat shock protein 90kDa alpha (cytosolic), class B member 2, pseudogene
hsa-miR-1303	1	0	1	1	1	1	CASP2	caspase 2, apoptosis-related cysteine peptidase
hsa-miR-1303	1	0	1	1	1	1	TRIO	trio Rho guanine nucleotide exchange factor
