# Supplementary material for: Profiling of Selected MicroRNAs in Proliferative Eutopic Endometrium of Women with Ovarian Endometriosis
Source: Biomed Res Int. 2015 Aug 20;2015:760698. doi: 10.1155/2015/760698 (PMC4558423; doi:10.1155/2015/760698)
Supplement: Supplementary file 1 — Table I: The names of miRNAs significantly differentially expressed between eutopic endometrium of patients with endometriosis vs eutopic endometrium of patients without endometriosis. Table II: The associations between miRNA and mRNA, which presents detailed results of the search of six major databases i.e targetscan, tarbase, miranda, mirbase, mirtarget2 and pictar. [file 760698.f1.zip › 760698.f1/Table II/hsa-miR-1305.tsv]

miR	targetscan	tarbase	miranda	mirbase	mirtarget2	pictar	GeneSymbol	GeneName
hsa-miR-1305	1	0	1	1	1	1	ARNTL	aryl hydrocarbon receptor nuclear translocator-like
hsa-miR-1305	1	0	1	1	1	1	CHD9	chromodomain helicase DNA binding protein 9
hsa-miR-1305	1	0	1	1	0	0	SRCAP	Snf2-related CREBBP activator protein
hsa-miR-1305	1	0	1	1	1	1	PRUNE2	prune homolog 2 (Drosophila)
hsa-miR-1305	1	0	1	1	1	1	FAM65B	family with sequence similarity 65, member B
hsa-miR-1305	1	0	1	0	1	1	GAS7	growth arrest-specific 7
hsa-miR-1305	1	0	1	0	1	1	KIAA0408	KIAA0408
hsa-miR-1305	0	0	1	1	1	1	PDE4DIP	phosphodiesterase 4D interacting protein
hsa-miR-1305	0	0	1	1	1	1	RABGAP1L	RAB GTPase activating protein 1-like
hsa-miR-1305	1	0	1	0	1	1	CEP350	centrosomal protein 350kDa
hsa-miR-1305	1	0	1	1	1	1	HIPK1	homeodomain interacting protein kinase 1
hsa-miR-1305	1	0	1	1	1	1	GIGYF2	GRB10 interacting GYF protein 2
hsa-miR-1305	1	0	1	1	1	1	PPP6R2	protein phosphatase 6, regulatory subunit 2
hsa-miR-1305	1	0	1	1	1	1	CAMKK2	calcium/calmodulin-dependent protein kinase kinase 2, beta
hsa-miR-1305	1	0	1	0	0	0	MICAL3	microtubule associated monoxygenase, calponin and LIM domain containing 3
hsa-miR-1305	1	0	1	1	1	1	DNM3	dynamin 3
hsa-miR-1305	1	0	1	1	1	1	DMXL2	Dmx-like 2
hsa-miR-1305	0	0	1	1	1	1	MAU2	MAU2 chromatid cohesion factor homolog (C. elegans)
hsa-miR-1305	1	0	1	1	1	1	ARHGEF15	Rho guanine nucleotide exchange factor (GEF) 15
hsa-miR-1305	1	0	1	1	1	1	UBE2K	ubiquitin-conjugating enzyme E2K
hsa-miR-1305	1	0	1	1	1	1	RNMT	RNA (guanine-7-) methyltransferase
hsa-miR-1305	0	0	1	1	1	1	MAN2B2	mannosidase, alpha, class 2B, member 2
hsa-miR-1305	1	0	1	0	0	0	DTX4	deltex homolog 4 (Drosophila)
hsa-miR-1305	1	0	1	1	1	1	CPEB3	cytoplasmic polyadenylation element binding protein 3
hsa-miR-1305	0	0	1	1	0	0	FAM149B1	family with sequence similarity 149, member B1
hsa-miR-1305	0	0	1	1	1	1	TBC1D30	TBC1 domain family, member 30
hsa-miR-1305	1	0	1	1	1	1	PALLD	palladin, cytoskeletal associated protein
hsa-miR-1305	1	0	1	1	1	1	CNOT1	CCR4-NOT transcription complex, subunit 1
hsa-miR-1305	0	0	1	1	1	1	AGTPBP1	ATP/GTP binding protein 1
hsa-miR-1305	0	0	1	1	1	1	TTC28	tetratricopeptide repeat domain 28
hsa-miR-1305	1	0	1	1	0	0	ZC3H4	zinc finger CCCH-type containing 4
hsa-miR-1305	1	0	1	0	1	1	ZNF507	zinc finger protein 507
hsa-miR-1305	1	0	1	1	1	1	FAM208A	family with sequence similarity 208, member A
hsa-miR-1305	1	0	1	0	1	1	GPR158	G protein-coupled receptor 158
hsa-miR-1305	1	0	1	1	1	1	RALGAPB	Ral GTPase activating protein, beta subunit (non-catalytic)
hsa-miR-1305	0	0	1	1	0	0	ODF2L	outer dense fiber of sperm tails 2-like
hsa-miR-1305	1	0	1	1	0	0	ATAD2B	ATPase family, AAA domain containing 2B
hsa-miR-1305	1	0	1	1	1	1	ASAP1	ArfGAP with SH3 domain, ankyrin repeat and PH domain 1
hsa-miR-1305	0	0	1	1	1	1	FSTL5	follistatin-like 5
hsa-miR-1305	1	0	1	1	1	1	STK36	serine/threonine kinase 36
hsa-miR-1305	1	0	1	0	1	1	KCTD16	potassium channel tetramerisation domain containing 16
hsa-miR-1305	1	0	1	1	1	1	TAOK1	TAO kinase 1
hsa-miR-1305	1	0	1	1	1	1	FAM135A	family with sequence similarity 135, member A
hsa-miR-1305	1	1	1	1	1	1	NFIA	nuclear factor I/A
hsa-miR-1305	0	0	1	1	0	0	MAGED4B	melanoma antigen family D, 4B
hsa-miR-1305	0	0	1	1	0	0	MAGED4	melanoma antigen family D, 4
hsa-miR-1305	1	0	1	1	0	0	KIAA1462	KIAA1462
hsa-miR-1305	1	0	1	0	1	1	SEMA6D	sema domain, transmembrane domain (TM), and cytoplasmic domain, (semaphorin) 6D
hsa-miR-1305	1	0	1	1	1	1	FAM214B	family with sequence similarity 214, member B
hsa-miR-1305	1	0	1	0	1	1	ZNF295	zinc finger protein 295
hsa-miR-1305	1	0	1	0	1	1	LMO3	LIM domain only 3 (rhombotin-like 2)
hsa-miR-1305	1	0	1	1	1	1	SLC2A4RG	SLC2A4 regulator
hsa-miR-1305	1	0	1	1	0	0	KIAA1549	KIAA1549
hsa-miR-1305	0	0	1	0	1	1	ZSWIM6	zinc finger, SWIM-type containing 6
hsa-miR-1305	0	0	1	1	1	1	SPEF2	sperm flagellar 2
hsa-miR-1305	1	0	1	0	1	1	RIMS1	regulating synaptic membrane exocytosis 1
hsa-miR-1305	0	0	1	1	1	1	SPOCK3	sparc/osteonectin, cwcv and kazal-like domains proteoglycan (testican) 3
hsa-miR-1305	1	0	1	1	1	1	LCOR	ligand dependent nuclear receptor corepressor
hsa-miR-1305	1	0	1	1	1	1	AHCTF1	AT hook containing transcription factor 1
hsa-miR-1305	1	0	1	1	1	1	NAV2	neuron navigator 2
hsa-miR-1305	1	0	1	1	1	1	TET2	tet methylcytosine dioxygenase 2
hsa-miR-1305	0	0	1	0	0	0	RSPRY1	ring finger and SPRY domain containing 1
hsa-miR-1305	1	0	1	1	1	1	SH3TC2	SH3 domain and tetratricopeptide repeats 2
hsa-miR-1305	1	0	1	0	0	0	FAT3	FAT tumor suppressor homolog 3 (Drosophila)
hsa-miR-1305	1	0	1	1	1	1	CDC20B	cell division cycle 20 homolog B (S. cerevisiae)
hsa-miR-1305	1	0	1	0	1	1	RNF43	ring finger protein 43
hsa-miR-1305	1	0	1	0	0	0	ZBTB34	zinc finger and BTB domain containing 34
hsa-miR-1305	0	0	1	1	1	1	MCF2	MCF.2 cell line derived transforming sequence
hsa-miR-1305	0	0	1	0	1	1	CADM1	cell adhesion molecule 1
hsa-miR-1305	1	0	1	1	1	1	SMEK1	SMEK homolog 1, suppressor of mek1 (Dictyostelium)
hsa-miR-1305	1	0	1	1	1	1	UBR3	ubiquitin protein ligase E3 component n-recognin 3 (putative)
hsa-miR-1305	1	0	1	0	0	0	ZC3H12C	zinc finger CCCH-type containing 12C
hsa-miR-1305	0	0	1	1	0	0	KRTAP24-1	keratin associated protein 24-1
hsa-miR-1305	0	0	1	1	1	1	DOCK8	dedicator of cytokinesis 8
hsa-miR-1305	0	0	1	0	1	1	ACE2	angiotensin I converting enzyme (peptidyl-dipeptidase A) 2
hsa-miR-1305	1	0	1	0	1	1	CCDC88A	coiled-coil domain containing 88A
hsa-miR-1305	0	0	1	0	1	1	ATR	ataxia telangiectasia and Rad3 related
hsa-miR-1305	1	0	1	1	0	0	ELN	elastin
hsa-miR-1305	0	0	1	1	1	1	PTK2	PTK2 protein tyrosine kinase 2
hsa-miR-1305	1	0	1	0	1	1	SLC6A6	solute carrier family 6 (neurotransmitter transporter, taurine), member 6
hsa-miR-1305	1	0	1	1	1	1	FMR1	fragile X mental retardation 1
hsa-miR-1305	1	0	1	0	1	1	ETV1	ets variant 1
hsa-miR-1305	0	0	1	0	1	1	NPY1R	neuropeptide Y receptor Y1
hsa-miR-1305	0	0	1	1	1	1	TFRC	transferrin receptor (p90, CD71)
hsa-miR-1305	1	0	1	1	1	1	PPFIA1	protein tyrosine phosphatase, receptor type, f polypeptide (PTPRF), interacting protein (liprin), alpha 1
hsa-miR-1305	1	0	1	0	1	1	CHL1	cell adhesion molecule with homology to L1CAM (close homolog of L1)
hsa-miR-1305	1	0	1	1	1	1	AEBP2	AE binding protein 2
hsa-miR-1305	0	0	1	1	1	1	ACO1	aconitase 1, soluble
hsa-miR-1305	1	0	1	1	1	1	MYO5A	myosin VA (heavy chain 12, myoxin)
hsa-miR-1305	0	0	1	1	1	1	STAU1	staufen, RNA binding protein, homolog 1 (Drosophila)
hsa-miR-1305	1	0	1	0	1	1	CAV1	caveolin 1, caveolae protein, 22kDa
hsa-miR-1305	1	0	1	0	1	1	PDE7B	phosphodiesterase 7B
hsa-miR-1305	0	0	1	1	1	1	CENPE	centromere protein E, 312kDa
hsa-miR-1305	1	0	1	1	1	1	INSC	inscuteable homolog (Drosophila)
hsa-miR-1305	0	0	1	0	1	1	PARG	poly (ADP-ribose) glycohydrolase
hsa-miR-1305	1	0	1	1	1	1	STX16	syntaxin 16
hsa-miR-1305	0	0	1	1	1	1	MFSD11	major facilitator superfamily domain containing 11
hsa-miR-1305	1	0	1	1	1	1	PCDH17	protocadherin 17
hsa-miR-1305	0	0	1	1	1	1	CD84	CD84 molecule
hsa-miR-1305	0	0	1	1	1	1	CYP4F3	cytochrome P450, family 4, subfamily F, polypeptide 3
hsa-miR-1305	1	0	1	1	1	1	SHOC2	soc-2 suppressor of clear homolog (C. elegans)
hsa-miR-1305	1	0	1	1	1	1	PFKFB3	6-phosphofructo-2-kinase/fructose-2,6-biphosphatase 3
hsa-miR-1305	1	0	1	1	1	1	MBNL2	muscleblind-like splicing regulator 2
hsa-miR-1305	0	0	1	1	1	1	ZNF33A	zinc finger protein 33A
hsa-miR-1305	1	0	1	1	1	1	ERLIN1	ER lipid raft associated 1
hsa-miR-1305	1	0	1	0	1	1	CELF2	CUGBP, Elav-like family member 2
hsa-miR-1305	1	0	1	1	1	1	GLS	glutaminase
hsa-miR-1305	0	0	1	1	1	1	SH2D1A	SH2 domain containing 1A
hsa-miR-1305	1	0	1	0	1	1	CD164	CD164 molecule, sialomucin
hsa-miR-1305	0	0	1	1	1	1	SMC2	structural maintenance of chromosomes 2
hsa-miR-1305	1	0	1	0	1	1	CDK14	cyclin-dependent kinase 14
hsa-miR-1305	0	0	1	1	1	1	DMRT2	doublesex and mab-3 related transcription factor 2
hsa-miR-1305	1	0	1	0	1	1	BECN1	beclin 1, autophagy related
hsa-miR-1305	1	0	1	1	1	1	HMG20A	high mobility group 20A
hsa-miR-1305	1	0	1	1	1	1	USP15	ubiquitin specific peptidase 15
hsa-miR-1305	1	0	1	1	1	1	ANKRD13A	ankyrin repeat domain 13A
hsa-miR-1305	0	0	1	0	1	1	PDP1	pyruvate dehyrogenase phosphatase catalytic subunit 1
hsa-miR-1305	0	0	1	1	1	1	FAM114A2	family with sequence similarity 114, member A2
hsa-miR-1305	1	0	1	1	1	1	CHFR	checkpoint with forkhead and ring finger domains, E3 ubiquitin protein ligase
hsa-miR-1305	1	0	1	1	1	1	SEPT9	septin 9
hsa-miR-1305	0	0	1	1	0	0	NCOA6	nuclear receptor coactivator 6
hsa-miR-1305	0	0	1	0	0	0	ARL17A	ADP-ribosylation factor-like 17A
hsa-miR-1305	1	0	1	1	1	1	NXT2	nuclear transport factor 2-like export factor 2
hsa-miR-1305	0	0	1	1	1	1	FASTKD2	FAST kinase domains 2
hsa-miR-1305	1	0	1	1	1	1	DESI2	desumoylating isopeptidase 2
hsa-miR-1305	1	0	1	1	1	1	SNTB2	syntrophin, beta 2 (dystrophin-associated protein A1, 59kDa, basic component 2)
hsa-miR-1305	1	0	1	1	1	1	STRN3	striatin, calmodulin binding protein 3
hsa-miR-1305	0	0	1	0	0	0	TIGD7	tigger transposable element derived 7
hsa-miR-1305	1	0	1	1	1	1	ELF2	E74-like factor 2 (ets domain transcription factor)
hsa-miR-1305	1	0	1	1	0	0	LMO2	LIM domain only 2 (rhombotin-like 1)
hsa-miR-1305	1	0	1	0	1	1	TRPS1	trichorhinophalangeal syndrome I
hsa-miR-1305	0	0	1	1	1	1	RANGRF	RAN guanine nucleotide release factor
hsa-miR-1305	1	0	1	1	1	1	ERGIC1	endoplasmic reticulum-golgi intermediate compartment (ERGIC) 1
hsa-miR-1305	1	0	1	1	1	1	PUM2	pumilio homolog 2 (Drosophila)
hsa-miR-1305	1	0	1	1	1	1	NRP1	neuropilin 1
hsa-miR-1305	0	0	1	1	0	0	KCNK6	potassium channel, subfamily K, member 6
hsa-miR-1305	0	0	1	0	1	1	C1QTNF7	C1q and tumor necrosis factor related protein 7
hsa-miR-1305	0	0	1	1	1	1	RERG	RAS-like, estrogen-regulated, growth inhibitor
hsa-miR-1305	1	0	1	1	1	1	CALU	calumenin
hsa-miR-1305	1	0	1	1	1	1	PBX3	pre-B-cell leukemia homeobox 3
hsa-miR-1305	1	0	1	1	1	1	LARP4	La ribonucleoprotein domain family, member 4
hsa-miR-1305	0	0	1	1	1	1	ORMDL1	ORM1-like 1 (S. cerevisiae)
hsa-miR-1305	1	0	1	1	1	1	MAGI1	membrane associated guanylate kinase, WW and PDZ domain containing 1
hsa-miR-1305	0	0	1	0	0	0	MYO15B	myosin XVB pseudogene
hsa-miR-1305	1	0	1	1	1	1	ST3GAL3	ST3 beta-galactoside alpha-2,3-sialyltransferase 3
hsa-miR-1305	1	0	1	1	1	1	PSIP1	PC4 and SFRS1 interacting protein 1
hsa-miR-1305	0	0	1	1	1	1	PSRC1	proline/serine-rich coiled-coil 1
hsa-miR-1305	1	0	1	1	1	1	RBFOX1	RNA binding protein, fox-1 homolog (C. elegans) 1
hsa-miR-1305	1	0	1	1	1	1	CPNE4	copine IV
hsa-miR-1305	0	0	1	1	0	0	HOPX	HOP homeobox
hsa-miR-1305	1	0	1	0	1	1	IL1RAP	interleukin 1 receptor accessory protein
hsa-miR-1305	1	0	1	1	1	1	DPP9	dipeptidyl-peptidase 9
hsa-miR-1305	0	0	1	1	1	1	ANKRD36B	ankyrin repeat domain 36B
hsa-miR-1305	1	0	1	0	1	1	MED14	mediator complex subunit 14
hsa-miR-1305	0	0	1	1	1	1	GNAS	GNAS complex locus
hsa-miR-1305	1	0	1	0	1	1	GRB10	growth factor receptor-bound protein 10
hsa-miR-1305	1	0	1	1	1	1	ILF3	interleukin enhancer binding factor 3, 90kDa
hsa-miR-1305	1	0	1	1	1	1	VAMP7	vesicle-associated membrane protein 7
hsa-miR-1305	1	0	1	1	1	1	PALM2	paralemmin 2
hsa-miR-1305	1	0	1	1	1	1	NAV3	neuron navigator 3
hsa-miR-1305	1	0	1	1	1	1	PPP3CB	protein phosphatase 3, catalytic subunit, beta isozyme
hsa-miR-1305	1	0	1	1	1	1	ARL4C	ADP-ribosylation factor-like 4C
hsa-miR-1305	1	0	1	0	1	1	NAALADL2	N-acetylated alpha-linked acidic dipeptidase-like 2
hsa-miR-1305	0	0	1	1	0	0	NHLRC2	NHL repeat containing 2
hsa-miR-1305	1	0	1	0	1	1	NFAT5	nuclear factor of activated T-cells 5, tonicity-responsive
hsa-miR-1305	0	0	1	0	1	1	OAS3	2'-5'-oligoadenylate synthetase 3, 100kDa
hsa-miR-1305	0	0	1	0	0	0	TUG1	taurine upregulated 1 (non-protein coding)
hsa-miR-1305	1	0	1	0	1	1	PPFIBP1	PTPRF interacting protein, binding protein 1 (liprin beta 1)
hsa-miR-1305	0	0	1	0	0	0	MCM3AP-AS1	MCM3AP antisense RNA 1
hsa-miR-1305	0	0	1	1	1	1	STOX2	storkhead box 2
hsa-miR-1305	1	0	1	0	1	1	CLIC4	chloride intracellular channel 4
hsa-miR-1305	1	0	1	1	1	1	SLC38A2	solute carrier family 38, member 2
hsa-miR-1305	1	0	1	1	0	0	SMUG1	single-strand-selective monofunctional uracil-DNA glycosylase 1
hsa-miR-1305	1	0	1	1	1	1	ACER3	alkaline ceramidase 3
hsa-miR-1305	1	0	1	1	1	1	KLHDC8B	kelch domain containing 8B
hsa-miR-1305	0	0	1	1	1	1	TCP11L1	t-complex 11 (mouse)-like 1
hsa-miR-1305	1	0	1	1	1	1	C12orf23	chromosome 12 open reading frame 23
hsa-miR-1305	0	0	1	1	0	0	ANAPC7	anaphase promoting complex subunit 7
hsa-miR-1305	1	0	1	1	1	1	MAEA	macrophage erythroblast attacher
hsa-miR-1305	1	0	1	0	1	1	LIN28A	lin-28 homolog A (C. elegans)
hsa-miR-1305	0	0	1	0	0	0	DUXAP10	double homeobox A pseudogene 10
hsa-miR-1305	1	0	1	1	1	1	S100PBP	S100P binding protein
hsa-miR-1305	1	0	1	1	1	1	SMEK2	SMEK homolog 2, suppressor of mek1 (Dictyostelium)
hsa-miR-1305	0	0	1	1	0	0	BUB1	budding uninhibited by benzimidazoles 1 homolog (yeast)
hsa-miR-1305	0	0	1	0	0	0	LOC284561	uncharacterized LOC284561
hsa-miR-1305	1	0	1	1	1	1	BAZ2A	bromodomain adjacent to zinc finger domain, 2A
hsa-miR-1305	1	0	1	1	1	1	PAX8	paired box 8
hsa-miR-1305	0	0	1	1	1	1	AMFR	autocrine motility factor receptor, E3 ubiquitin protein ligase
hsa-miR-1305	0	0	1	0	1	1	ZNF766	zinc finger protein 766
hsa-miR-1305	1	0	1	1	1	1	COPS7B	COP9 constitutive photomorphogenic homolog subunit 7B (Arabidopsis)
hsa-miR-1305	1	0	1	0	0	0	ZDBF2	zinc finger, DBF-type containing 2
hsa-miR-1305	1	0	1	1	1	1	YPEL5	yippee-like 5 (Drosophila)
hsa-miR-1305	1	0	1	1	1	1	NAA30	N(alpha)-acetyltransferase 30, NatC catalytic subunit
hsa-miR-1305	0	0	1	0	1	1	FLJ22763	uncharacterized LOC401081
hsa-miR-1305	0	0	1	1	0	0	EXOC6B	exocyst complex component 6B
hsa-miR-1305	1	0	1	1	1	1	LRP4	low density lipoprotein receptor-related protein 4
hsa-miR-1305	0	0	1	1	1	1	PLEKHS1	pleckstrin homology domain containing, family S member 1
hsa-miR-1305	1	0	1	1	1	1	FOXP1	forkhead box P1
hsa-miR-1305	0	0	1	1	1	1	RNF146	ring finger protein 146
hsa-miR-1305	1	0	1	0	1	1	ATP10D	ATPase, class V, type 10D
hsa-miR-1305	1	0	1	0	1	1	CCNL2	cyclin L2
hsa-miR-1305	1	0	1	1	1	1	GPD2	glycerol-3-phosphate dehydrogenase 2 (mitochondrial)
hsa-miR-1305	1	0	1	0	1	1	AP1G1	adaptor-related protein complex 1, gamma 1 subunit
hsa-miR-1305	0	0	1	1	1	1	FBXO5	F-box protein 5
hsa-miR-1305	0	0	1	0	1	1	HDX	highly divergent homeobox
hsa-miR-1305	0	0	1	0	0	0	FLJ30838	uncharacterized LOC400955
hsa-miR-1305	1	0	1	1	1	1	FRMD6	FERM domain containing 6
hsa-miR-1305	1	0	1	1	1	1	GULP1	GULP, engulfment adaptor PTB domain containing 1
hsa-miR-1305	1	0	1	1	1	1	DHX15	DEAH (Asp-Glu-Ala-His) box polypeptide 15
hsa-miR-1305	1	0	1	1	1	1	MAP3K7	mitogen-activated protein kinase kinase kinase 7
hsa-miR-1305	1	0	1	0	1	1	RAB1A	RAB1A, member RAS oncogene family
hsa-miR-1305	1	0	1	1	1	1	ZNF664	zinc finger protein 664
hsa-miR-1305	0	0	1	0	0	0	JPX	JPX transcript, XIST activator (non-protein coding)
hsa-miR-1305	1	0	1	1	1	1	ZIC4	Zic family member 4
hsa-miR-1305	0	0	1	0	1	1	FAM70A	family with sequence similarity 70, member A
hsa-miR-1305	1	0	1	1	1	1	PUM1	pumilio homolog 1 (Drosophila)
hsa-miR-1305	0	0	1	0	0	0	LOC158376	uncharacterized LOC158376
hsa-miR-1305	0	0	1	0	0	0	LOC255187	hCG1980447
hsa-miR-1305	0	0	1	0	0	0	LOC157381	uncharacterized LOC157381
hsa-miR-1305	0	0	1	1	0	0	SLC39A4	solute carrier family 39 (zinc transporter), member 4
hsa-miR-1305	1	0	1	1	1	1	TLE4	transducin-like enhancer of split 4 (E(sp1) homolog, Drosophila)
hsa-miR-1305	0	0	1	1	1	1	VWA3B	von Willebrand factor A domain containing 3B
hsa-miR-1305	0	0	1	1	1	1	MYBPC1	myosin binding protein C, slow type
hsa-miR-1305	0	0	1	0	0	0	FLJ32742	uncharacterized locus FLJ32742
hsa-miR-1305	0	0	1	0	0	0	LOC100125918	uncharacterized LOC100125918
hsa-miR-1305	0	0	1	0	1	1	ARHGAP42	Rho GTPase activating protein 42
hsa-miR-1305	0	0	1	1	1	1	RANBP17	RAN binding protein 17
hsa-miR-1305	0	0	1	1	0	0	AXDND1	axonemal dynein light chain domain containing 1
hsa-miR-1305	0	0	1	0	1	1	CHURC1	churchill domain containing 1
hsa-miR-1305	0	0	1	1	0	0	FAM156A	family with sequence similarity 156, member A
hsa-miR-1305	1	0	1	1	1	1	IST1	increased sodium tolerance 1 homolog (yeast)
hsa-miR-1305	0	0	1	1	1	1	ZNF385B	zinc finger protein 385B
hsa-miR-1305	1	0	1	1	1	1	C6orf89	chromosome 6 open reading frame 89
hsa-miR-1305	0	0	1	0	0	0	FLJ25363	uncharacterized LOC401082
hsa-miR-1305	0	0	1	0	1	1	CCDC68	coiled-coil domain containing 68
hsa-miR-1305	0	0	1	0	0	0	LINC00301	long intergenic non-protein coding RNA 301
hsa-miR-1305	0	0	1	1	0	0	ANKAR	ankyrin and armadillo repeat containing
hsa-miR-1305	1	0	1	1	1	1	FAM73B	family with sequence similarity 73, member B
hsa-miR-1305	0	0	1	0	0	0	C10orf105	chromosome 10 open reading frame 105
hsa-miR-1305	1	0	1	1	1	1	ZNF449	zinc finger protein 449
hsa-miR-1305	1	0	1	1	1	1	GANC	glucosidase, alpha; neutral C
hsa-miR-1305	0	0	1	1	1	1	PKIB	protein kinase (cAMP-dependent, catalytic) inhibitor beta
hsa-miR-1305	1	0	1	1	1	1	SIRT1	sirtuin 1
hsa-miR-1305	1	0	1	1	1	1	PIP4K2C	phosphatidylinositol-5-phosphate 4-kinase, type II, gamma
hsa-miR-1305	1	0	1	1	1	1	TTC13	tetratricopeptide repeat domain 13
hsa-miR-1305	1	0	1	1	1	1	STXBP5	syntaxin binding protein 5 (tomosyn)
hsa-miR-1305	1	0	1	1	1	1	TLK1	tousled-like kinase 1
hsa-miR-1305	0	0	1	0	1	1	TMSB15B	thymosin beta 15B
hsa-miR-1305	0	0	1	0	0	0	LOC643837	uncharacterized LOC643837
hsa-miR-1305	1	0	1	1	1	1	AMMECR1	Alport syndrome, mental retardation, midface hypoplasia and elliptocytosis chromosomal region gene 1
hsa-miR-1305	0	0	1	0	0	0	LOC440910	uncharacterized LOC440910
hsa-miR-1305	1	0	1	1	1	1	FBXW2	F-box and WD repeat domain containing 2
hsa-miR-1305	0	0	1	1	1	1	CD34	CD34 molecule
hsa-miR-1305	0	0	1	1	0	0	RPS7	ribosomal protein S7
hsa-miR-1305	1	0	1	1	1	1	LUC7L2	LUC7-like 2 (S. cerevisiae)
hsa-miR-1305	0	0	1	1	1	1	HNRNPH1	heterogeneous nuclear ribonucleoprotein H1 (H)
hsa-miR-1305	1	0	1	1	1	1	MAFK	v-maf musculoaponeurotic fibrosarcoma oncogene homolog K (avian)
hsa-miR-1305	1	0	1	1	1	1	SLC25A3	solute carrier family 25 (mitochondrial carrier; phosphate carrier), member 3
hsa-miR-1305	0	0	1	0	1	1	SSPN	sarcospan
hsa-miR-1305	0	0	1	1	1	1	LZTFL1	leucine zipper transcription factor-like 1
hsa-miR-1305	0	0	1	1	0	0	HSD17B4	hydroxysteroid (17-beta) dehydrogenase 4
hsa-miR-1305	0	0	1	1	1	1	TMPRSS11D	transmembrane protease, serine 11D
hsa-miR-1305	0	0	1	1	1	1	TGFBI	transforming growth factor, beta-induced, 68kDa
hsa-miR-1305	0	0	1	1	1	1	SLC16A1	solute carrier family 16, member 1 (monocarboxylic acid transporter 1)
hsa-miR-1305	1	0	1	1	1	1	MCMBP	minichromosome maintenance complex binding protein
hsa-miR-1305	1	0	1	0	1	1	SYT2	synaptotagmin II
hsa-miR-1305	1	0	1	1	1	1	SIAH1	siah E3 ubiquitin protein ligase 1
hsa-miR-1305	1	0	1	0	1	1	ARL6IP6	ADP-ribosylation-like factor 6 interacting protein 6
hsa-miR-1305	0	0	1	1	1	1	RBM25	RNA binding motif protein 25
hsa-miR-1305	1	0	1	0	1	1	NCOA7	nuclear receptor coactivator 7
hsa-miR-1305	1	0	1	1	1	1	KANSL1	KAT8 regulatory NSL complex subunit 1
hsa-miR-1305	1	0	1	1	1	1	ARHGEF7	Rho guanine nucleotide exchange factor (GEF) 7
hsa-miR-1305	0	0	1	1	1	1	MOBP	myelin-associated oligodendrocyte basic protein
hsa-miR-1305	1	0	1	1	0	0	SAP30BP	SAP30 binding protein
hsa-miR-1305	1	0	1	0	1	1	UVRAG	UV radiation resistance associated gene
hsa-miR-1305	0	0	1	0	1	1	NBPF3	neuroblastoma breakpoint family, member 3
hsa-miR-1305	0	0	1	0	1	1	HDAC9	histone deacetylase 9
hsa-miR-1305	1	0	1	1	1	1	ZC3H11A	zinc finger CCCH-type containing 11A
hsa-miR-1305	0	0	1	1	1	1	P4HB	prolyl 4-hydroxylase, beta polypeptide
hsa-miR-1305	0	0	1	1	1	1	FBLN1	fibulin 1
hsa-miR-1305	0	0	1	1	1	1	VDAC1	voltage-dependent anion channel 1
hsa-miR-1305	0	0	1	0	0	0	CCDC150	coiled-coil domain containing 150
hsa-miR-1305	1	0	1	1	1	1	GAPVD1	GTPase activating protein and VPS9 domains 1
hsa-miR-1305	0	0	1	1	0	0	RPN2	ribophorin II
hsa-miR-1305	1	0	1	1	1	1	FADS1	fatty acid desaturase 1
hsa-miR-1305	0	0	1	0	0	0	OTUD1	OTU domain containing 1
hsa-miR-1305	0	0	1	0	1	1	FLJ39080	uncharacterized LOC441355
hsa-miR-1305	1	0	1	0	1	1	COL21A1	collagen, type XXI, alpha 1
hsa-miR-1305	1	0	1	0	1	1	THRB	thyroid hormone receptor, beta
hsa-miR-1305	1	0	1	1	1	1	SYT6	synaptotagmin VI
hsa-miR-1305	1	0	1	1	1	1	CCDC141	coiled-coil domain containing 141
hsa-miR-1305	1	0	1	1	1	1	CA12	carbonic anhydrase XII
hsa-miR-1305	1	0	1	1	1	1	STIM2	stromal interaction molecule 2
hsa-miR-1305	0	0	1	1	1	1	GBAS	glioblastoma amplified sequence
hsa-miR-1305	0	0	1	0	0	0	LOC401463	uncharacterized LOC401463
hsa-miR-1305	0	0	1	0	0	0	LOC400680	uncharacterized LOC400680
hsa-miR-1305	0	0	1	0	0	0	LINC00293	long intergenic non-protein coding RNA 293
hsa-miR-1305	1	0	1	1	1	1	GOLGA8B	golgin A8 family, member B
hsa-miR-1305	0	0	1	0	0	0	LOC284385	uncharacterized LOC284385
hsa-miR-1305	1	0	1	1	1	1	VAV3	vav 3 guanine nucleotide exchange factor
hsa-miR-1305	0	0	1	0	0	0	CECR7	cat eye syndrome chromosome region, candidate 7 (non-protein coding)
hsa-miR-1305	1	0	1	1	1	1	PIGA	phosphatidylinositol glycan anchor biosynthesis, class A
hsa-miR-1305	1	0	1	1	0	0	ENTPD1	ectonucleoside triphosphate diphosphohydrolase 1
hsa-miR-1305	1	0	1	1	1	1	IL20RA	interleukin 20 receptor, alpha
hsa-miR-1305	0	0	1	0	1	1	MYLK4	myosin light chain kinase family, member 4
hsa-miR-1305	1	0	1	1	1	1	LMX1A	LIM homeobox transcription factor 1, alpha
hsa-miR-1305	1	0	1	1	1	1	WEE1	WEE1 homolog (S. pombe)
hsa-miR-1305	1	0	1	1	1	1	SIK3	SIK family kinase 3
hsa-miR-1305	0	0	1	1	1	1	ZDHHC15	zinc finger, DHHC-type containing 15
hsa-miR-1305	0	0	1	1	1	1	FRMD5	FERM domain containing 5
hsa-miR-1305	0	0	1	1	1	1	FRMPD2	FERM and PDZ domain containing 2
hsa-miR-1305	0	0	1	1	1	1	ARHGEF26	Rho guanine nucleotide exchange factor (GEF) 26
hsa-miR-1305	1	0	1	1	1	1	KALRN	kalirin, RhoGEF kinase
hsa-miR-1305	1	0	1	1	1	1	CBLB	Cbl proto-oncogene, E3 ubiquitin protein ligase B
hsa-miR-1305	1	0	1	1	0	0	KCNC1	potassium voltage-gated channel, Shaw-related subfamily, member 1
hsa-miR-1305	1	0	1	1	1	1	TPRG1	tumor protein p63 regulated 1
hsa-miR-1305	0	0	1	1	1	1	EXOC6	exocyst complex component 6
hsa-miR-1305	1	0	1	1	1	1	EGLN3	egl nine homolog 3 (C. elegans)
hsa-miR-1305	0	0	1	0	0	0	TMPRSS11BNL	TMPRSS11B N terminal-like
hsa-miR-1305	0	0	1	0	1	1	CWC22	CWC22 spliceosome-associated protein homolog (S. cerevisiae)
hsa-miR-1305	1	0	1	1	1	1	OSBPL9	oxysterol binding protein-like 9
hsa-miR-1305	0	0	1	0	0	0	DKFZP434H168	uncharacterized LOC26077
hsa-miR-1305	1	0	1	1	1	1	GJC1	gap junction protein, gamma 1, 45kDa
hsa-miR-1305	0	0	1	0	0	0	LINC00282	long intergenic non-protein coding RNA 282
hsa-miR-1305	1	0	1	1	1	1	XPO1	exportin 1 (CRM1 homolog, yeast)
hsa-miR-1305	1	0	1	1	1	1	FAM118A	family with sequence similarity 118, member A
hsa-miR-1305	1	0	1	1	1	1	C11orf30	chromosome 11 open reading frame 30
hsa-miR-1305	0	0	1	1	0	0	GABRA2	gamma-aminobutyric acid (GABA) A receptor, alpha 2
hsa-miR-1305	1	0	1	1	1	1	CTGF	connective tissue growth factor
hsa-miR-1305	1	0	1	1	1	1	IGFBP3	insulin-like growth factor binding protein 3
hsa-miR-1305	0	0	1	1	1	1	RMND5B	required for meiotic nuclear division 5 homolog B (S. cerevisiae)
hsa-miR-1305	0	0	1	0	1	1	ASB15	ankyrin repeat and SOCS box containing 15
hsa-miR-1305	0	0	1	1	1	1	ZNF337	zinc finger protein 337
hsa-miR-1305	1	0	1	1	1	1	SACS	spastic ataxia of Charlevoix-Saguenay (sacsin)
hsa-miR-1305	1	0	1	1	1	1	ATP11C	ATPase, class VI, type 11C
hsa-miR-1305	0	0	1	0	0	0	LOC613266	uncharacterized LOC613266
hsa-miR-1305	1	0	1	1	1	1	KPNA1	karyopherin alpha 1 (importin alpha 5)
hsa-miR-1305	0	0	1	1	1	1	PLOD2	procollagen-lysine, 2-oxoglutarate 5-dioxygenase 2
hsa-miR-1305	0	0	1	1	1	1	RBM46	RNA binding motif protein 46
hsa-miR-1305	1	0	1	1	1	1	MACROD2	MACRO domain containing 2
hsa-miR-1305	1	0	1	1	0	0	UBN2	ubinuclein 2
hsa-miR-1305	1	0	1	1	1	1	DCTN4	dynactin 4 (p62)
hsa-miR-1305	0	0	1	1	1	1	EPPIN	epididymal peptidase inhibitor
hsa-miR-1305	0	0	1	1	0	0	FSIP2	fibrous sheath interacting protein 2
hsa-miR-1305	1	0	1	1	0	0	ATXN7L3	ataxin 7-like 3
hsa-miR-1305	1	0	1	1	1	1	LIN9	lin-9 homolog (C. elegans)
hsa-miR-1305	1	0	1	1	1	1	SIKE1	suppressor of IKBKE 1
hsa-miR-1305	1	0	1	1	1	1	PIK3R1	phosphoinositide-3-kinase, regulatory subunit 1 (alpha)
hsa-miR-1305	0	0	1	1	1	1	CCDC132	coiled-coil domain containing 132
hsa-miR-1305	1	0	1	1	0	0	SPEG	SPEG complex locus
hsa-miR-1305	1	0	1	1	1	1	IBTK	inhibitor of Bruton agammaglobulinemia tyrosine kinase
hsa-miR-1305	1	0	1	0	1	1	GPR180	G protein-coupled receptor 180
hsa-miR-1305	0	0	1	0	0	0	HNRNPKP3	heterogeneous nuclear ribonucleoprotein K pseudogene 3
hsa-miR-1305	0	0	1	1	1	1	SZT2	seizure threshold 2 homolog (mouse)
hsa-miR-1305	1	0	1	1	1	1	CLIP1	CAP-GLY domain containing linker protein 1
hsa-miR-1305	0	0	1	0	0	0	RPL23AP53	ribosomal protein L23a pseudogene 53
hsa-miR-1305	1	0	1	1	1	1	MKRN1	makorin ring finger protein 1
hsa-miR-1305	0	0	1	1	0	0	FAM54B	family with sequence similarity 54, member B
hsa-miR-1305	1	0	1	1	1	1	MFSD6	major facilitator superfamily domain containing 6
hsa-miR-1305	1	0	1	1	1	1	PHF17	PHD finger protein 17
hsa-miR-1305	1	0	1	1	1	1	ENAH	enabled homolog (Drosophila)
hsa-miR-1305	1	0	1	1	1	1	RNF44	ring finger protein 44
hsa-miR-1305	1	0	1	1	1	1	CXorf23	chromosome X open reading frame 23
hsa-miR-1305	1	0	1	0	1	1	FNDC3B	fibronectin type III domain containing 3B
hsa-miR-1305	0	0	1	1	0	0	AADACL3	arylacetamide deacetylase-like 3
hsa-miR-1305	1	0	1	1	1	1	AHRR	aryl-hydrocarbon receptor repressor
hsa-miR-1305	1	0	1	0	1	1	YOD1	YOD1 OTU deubiquinating enzyme 1 homolog (S. cerevisiae)
hsa-miR-1305	1	0	1	0	1	1	KDM2A	lysine (K)-specific demethylase 2A
hsa-miR-1305	0	0	1	1	1	1	ZNF662	zinc finger protein 662
hsa-miR-1305	0	0	1	0	0	0	IDO2	indoleamine 2,3-dioxygenase 2
hsa-miR-1305	0	0	1	0	0	0	EMBP1	embigin pseudogene 1
hsa-miR-1305	1	0	1	1	1	1	PHC2	polyhomeotic homolog 2 (Drosophila)
hsa-miR-1305	1	0	1	1	1	1	DPY19L3	dpy-19-like 3 (C. elegans)
hsa-miR-1305	0	0	1	1	1	1	PRAME	preferentially expressed antigen in melanoma
hsa-miR-1305	1	0	1	1	1	1	CD200	CD200 molecule
hsa-miR-1305	1	0	1	0	1	1	IRF4	interferon regulatory factor 4
hsa-miR-1305	0	0	1	1	1	1	C1orf185	chromosome 1 open reading frame 185
hsa-miR-1305	0	0	1	0	0	0	LOC494141	mitochondrial carrier triple repeat 1 pseudogene
hsa-miR-1305	1	0	1	0	1	1	ESRRG	estrogen-related receptor gamma
hsa-miR-1305	0	0	1	0	1	1	GALNT13	UDP-N-acetyl-alpha-D-galactosamine:polypeptide N-acetylgalactosaminyltransferase 13 (GalNAc-T13)
hsa-miR-1305	0	0	1	0	0	0	LOC100133315	transient receptor potential cation channel, subfamily C, member 2-like
hsa-miR-1305	1	0	1	1	1	1	RNF111	ring finger protein 111
hsa-miR-1305	1	0	1	1	1	1	PPP2R5C	protein phosphatase 2, regulatory subunit B', gamma
hsa-miR-1305	0	0	1	0	0	0	AGAP9	ArfGAP with GTPase domain, ankyrin repeat and PH domain 9
hsa-miR-1305	0	0	1	1	0	0	ZSCAN18	zinc finger and SCAN domain containing 18
hsa-miR-1305	1	0	1	1	1	1	RBBP4	retinoblastoma binding protein 4
hsa-miR-1305	0	0	1	1	1	1	FANCC	Fanconi anemia, complementation group C
hsa-miR-1305	1	0	1	0	1	1	TMEM106B	transmembrane protein 106B
hsa-miR-1305	0	0	1	1	1	1	CRISP3	cysteine-rich secretory protein 3
hsa-miR-1305	1	0	1	1	1	1	TBC1D15	TBC1 domain family, member 15
hsa-miR-1305	1	0	1	1	1	1	COBLL1	COBL-like 1
hsa-miR-1305	1	0	1	1	1	1	PHTF2	putative homeodomain transcription factor 2
hsa-miR-1305	0	0	1	1	1	1	TBC1D3G	TBC1 domain family, member 3G
hsa-miR-1305	1	0	1	1	1	1	SETX	senataxin
hsa-miR-1305	0	0	1	1	0	0	TRIM69	tripartite motif containing 69
hsa-miR-1305	1	0	1	1	1	1	DUSP3	dual specificity phosphatase 3
hsa-miR-1305	0	0	1	1	1	1	PTPN20B	protein tyrosine phosphatase, non-receptor type 20B
hsa-miR-1305	0	0	1	1	1	1	PTPN20A	protein tyrosine phosphatase, non-receptor type 20A
hsa-miR-1305	1	0	1	1	1	1	NECAP1	NECAP endocytosis associated 1
hsa-miR-1305	0	0	1	0	1	1	NEK1	NIMA (never in mitosis gene a)-related kinase 1
hsa-miR-1305	0	0	1	1	0	0	NEK7	NIMA (never in mitosis gene a)-related kinase 7
hsa-miR-1305	1	0	1	1	1	1	ARF6	ADP-ribosylation factor 6
hsa-miR-1305	0	0	1	1	1	1	RTTN	rotatin
hsa-miR-1305	0	0	1	1	1	1	KIDINS220	kinase D-interacting substrate, 220kDa
hsa-miR-1305	0	0	1	1	0	0	H2AFJ	H2A histone family, member J
hsa-miR-1305	0	0	1	1	1	1	ZNF280D	zinc finger protein 280D
hsa-miR-1305	0	0	1	0	1	1	TBC1D3F	TBC1 domain family, member 3F
hsa-miR-1305	0	0	1	1	1	1	MIOS	missing oocyte, meiosis regulator, homolog (Drosophila)
hsa-miR-1305	0	0	1	1	0	0	WDR96	WD repeat domain 96
hsa-miR-1305	0	0	1	1	1	1	RHOT1	ras homolog family member T1
hsa-miR-1305	0	0	1	1	0	0	LRCH3	leucine-rich repeats and calponin homology (CH) domain containing 3
hsa-miR-1305	1	0	1	1	1	1	GOLGA8A	golgin A8 family, member A
hsa-miR-1305	1	0	1	1	1	1	KIAA1033	KIAA1033
hsa-miR-1305	1	0	1	0	1	1	CEP170	centrosomal protein 170kDa
hsa-miR-1305	1	0	1	0	1	1	GRIN3A	glutamate receptor, ionotropic, N-methyl-D-aspartate 3A
hsa-miR-1305	1	0	1	1	1	1	SLC30A8	solute carrier family 30 (zinc transporter), member 8
hsa-miR-1305	1	0	1	1	1	1	DENND1B	DENN/MADD domain containing 1B
hsa-miR-1305	1	0	1	1	0	0	ATOH8	atonal homolog 8 (Drosophila)
hsa-miR-1305	0	0	1	0	1	1	GAB3	GRB2-associated binding protein 3
hsa-miR-1305	0	0	1	1	0	0	THADA	thyroid adenoma associated
hsa-miR-1305	0	0	1	0	0	0	ZNF720	zinc finger protein 720
hsa-miR-1305	1	0	1	0	1	1	FAM214A	family with sequence similarity 214, member A
hsa-miR-1305	1	0	1	1	1	1	RNF180	ring finger protein 180
hsa-miR-1305	0	0	1	1	1	1	YAP1	Yes-associated protein 1
hsa-miR-1305	1	0	1	1	0	0	PTAR1	protein prenyltransferase alpha subunit repeat containing 1
hsa-miR-1305	1	0	1	1	1	1	FAM126A	family with sequence similarity 126, member A
hsa-miR-1305	1	0	1	0	1	1	CLINT1	clathrin interactor 1
hsa-miR-1305	1	0	1	1	1	1	MARCH7	membrane-associated ring finger (C3HC4) 7, E3 ubiquitin protein ligase
hsa-miR-1305	1	0	1	1	1	1	CADM2	cell adhesion molecule 2
hsa-miR-1305	0	0	1	1	1	1	PNMAL1	paraneoplastic Ma antigen family-like 1
hsa-miR-1305	0	0	1	1	1	1	C8orf34	chromosome 8 open reading frame 34
hsa-miR-1305	1	0	1	1	1	1	RICTOR	RPTOR independent companion of MTOR, complex 2
hsa-miR-1305	1	0	1	0	1	1	NR3C1	nuclear receptor subfamily 3, group C, member 1 (glucocorticoid receptor)
hsa-miR-1305	1	0	1	0	1	1	APOLD1	apolipoprotein L domain containing 1
hsa-miR-1305	0	0	1	0	1	1	USO1	USO1 vesicle docking protein homolog (yeast)
hsa-miR-1305	1	0	1	1	1	1	RNF38	ring finger protein 38
hsa-miR-1305	1	0	1	1	1	1	IKZF2	IKAROS family zinc finger 2 (Helios)
hsa-miR-1305	1	0	1	1	1	1	RCAN2	regulator of calcineurin 2
hsa-miR-1305	1	0	1	0	1	1	BDNF	brain-derived neurotrophic factor
hsa-miR-1305	1	0	1	1	1	1	MIPOL1	mirror-image polydactyly 1
hsa-miR-1305	0	0	1	0	0	0	LOC374443	C-type lectin domain family 2, member D pseudogene
hsa-miR-1305	0	0	1	1	1	1	MED19	mediator complex subunit 19
hsa-miR-1305	0	0	1	1	1	1	SHPRH	SNF2 histone linker PHD RING helicase, E3 ubiquitin protein ligase
hsa-miR-1305	0	0	1	1	0	0	CMTM1	CKLF-like MARVEL transmembrane domain containing 1
hsa-miR-1305	0	0	1	1	1	1	CEP41	centrosomal protein 41kDa
hsa-miR-1305	1	0	1	1	1	1	GCNT1	glucosaminyl (N-acetyl) transferase 1, core 2
hsa-miR-1305	0	0	1	1	1	1	IYD	iodotyrosine deiodinase
hsa-miR-1305	0	0	1	1	0	0	GLYCTK	glycerate kinase
hsa-miR-1305	1	0	1	1	1	1	TAB3	TGF-beta activated kinase 1/MAP3K7 binding protein 3
hsa-miR-1305	0	0	1	1	1	1	MFAP5	microfibrillar associated protein 5
hsa-miR-1305	0	0	1	0	0	0	FAM138C	family with sequence similarity 138, member C
hsa-miR-1305	0	0	1	1	1	1	KDELC2	KDEL (Lys-Asp-Glu-Leu) containing 2
hsa-miR-1305	0	0	1	1	1	1	VWA5A	von Willebrand factor A domain containing 5A
hsa-miR-1305	1	0	1	1	1	1	SSX2IP	synovial sarcoma, X breakpoint 2 interacting protein
hsa-miR-1305	1	0	1	0	1	1	ANKRD28	ankyrin repeat domain 28
hsa-miR-1305	1	0	1	1	1	1	SP3	Sp3 transcription factor
hsa-miR-1305	0	0	1	1	1	1	DIDO1	death inducer-obliterator 1
hsa-miR-1305	1	0	1	1	1	1	RBM24	RNA binding motif protein 24
hsa-miR-1305	0	0	1	0	0	0	THOC1	THO complex 1
hsa-miR-1305	1	0	1	1	1	1	PLCH1	phospholipase C, eta 1
hsa-miR-1305	1	0	1	1	1	1	NIPA2	non imprinted in Prader-Willi/Angelman syndrome 2
hsa-miR-1305	1	0	1	1	1	1	NTNG1	netrin G1
hsa-miR-1305	1	0	1	1	1	1	CD109	CD109 molecule
hsa-miR-1305	1	0	1	1	1	1	PCDH11X	protocadherin 11 X-linked
hsa-miR-1305	1	0	1	1	0	0	TRPC3	transient receptor potential cation channel, subfamily C, member 3
hsa-miR-1305	1	0	1	1	0	0	TAF4B	TAF4b RNA polymerase II, TATA box binding protein (TBP)-associated factor, 105kDa
hsa-miR-1305	0	0	1	1	0	0	NBPF8	neuroblastoma breakpoint family, member 8
hsa-miR-1305	1	0	1	1	1	1	TBC1D22B	TBC1 domain family, member 22B
hsa-miR-1305	1	0	1	1	1	1	NEK6	NIMA (never in mitosis gene a)-related kinase 6
hsa-miR-1305	0	0	1	0	1	1	MIS12	MIS12, MIND kinetochore complex component, homolog (S. pombe)
hsa-miR-1305	1	0	1	0	1	1	FAM46A	family with sequence similarity 46, member A
hsa-miR-1305	0	0	1	1	1	1	ASB9	ankyrin repeat and SOCS box containing 9
hsa-miR-1305	0	0	1	1	0	0	AAR2	AAR2 splicing factor homolog (S. cerevisiae)
hsa-miR-1305	0	0	1	1	1	1	TMOD1	tropomodulin 1
hsa-miR-1305	0	0	1	1	0	0	ZNF576	zinc finger protein 576
hsa-miR-1305	1	0	1	1	1	1	RIMS3	regulating synaptic membrane exocytosis 3
hsa-miR-1305	1	0	1	0	1	1	DCAF10	DDB1 and CUL4 associated factor 10
hsa-miR-1305	1	0	1	1	1	1	GABPB1	GA binding protein transcription factor, beta subunit 1
hsa-miR-1305	0	0	1	1	1	1	RABL5	RAB, member RAS oncogene family-like 5
hsa-miR-1305	1	0	1	0	1	1	CGGBP1	CGG triplet repeat binding protein 1
hsa-miR-1305	1	0	1	1	1	1	MBNL1	muscleblind-like splicing regulator 1
hsa-miR-1305	1	0	1	1	1	1	U2SURP	U2 snRNP-associated SURP domain containing
hsa-miR-1305	1	0	1	0	1	1	VAMP4	vesicle-associated membrane protein 4
hsa-miR-1305	0	0	1	1	0	0	RBM14	RNA binding motif protein 14
hsa-miR-1305	0	0	1	1	1	1	ICA1	islet cell autoantigen 1, 69kDa
hsa-miR-1305	1	0	1	1	1	1	SHOX2	short stature homeobox 2
hsa-miR-1305	0	0	1	1	1	1	TMEM30A	transmembrane protein 30A
hsa-miR-1305	0	0	1	1	0	0	PANK2	pantothenate kinase 2
hsa-miR-1305	1	0	1	1	0	0	MARCH9	membrane-associated ring finger (C3HC4) 9
hsa-miR-1305	0	0	1	1	0	0	MPRIP	myosin phosphatase Rho interacting protein
hsa-miR-1305	1	0	1	0	1	1	TMEM39A	transmembrane protein 39A
hsa-miR-1305	1	0	1	1	1	1	GRIA2	glutamate receptor, ionotropic, AMPA 2
hsa-miR-1305	1	0	1	1	1	1	SZRD1	SUZ RNA binding domain containing 1
hsa-miR-1305	1	0	1	1	1	1	LRRFIP1	leucine rich repeat (in FLII) interacting protein 1
hsa-miR-1305	1	0	1	1	1	1	SLC46A1	solute carrier family 46 (folate transporter), member 1
hsa-miR-1305	0	0	1	1	1	1	HDHD2	haloacid dehalogenase-like hydrolase domain containing 2
hsa-miR-1305	1	0	1	1	1	1	RBM7	RNA binding motif protein 7
hsa-miR-1305	0	0	1	1	1	1	KLHL29	kelch-like 29 (Drosophila)
hsa-miR-1305	1	0	1	1	1	1	YY1	YY1 transcription factor
hsa-miR-1305	1	0	1	1	1	1	ETF1	eukaryotic translation termination factor 1
hsa-miR-1305	0	0	1	1	1	1	EAF2	ELL associated factor 2
hsa-miR-1305	0	0	1	0	0	0	CEP170P1	centrosomal protein 170kDa pseudogene 1
hsa-miR-1305	0	0	1	1	0	0	CCDC36	coiled-coil domain containing 36
hsa-miR-1305	0	0	1	0	0	0	KLHL15	kelch-like 15 (Drosophila)
hsa-miR-1305	1	0	1	1	0	0	ARMCX2	armadillo repeat containing, X-linked 2
hsa-miR-1305	1	0	1	1	1	1	SCAMP1	secretory carrier membrane protein 1
hsa-miR-1305	1	0	1	1	1	1	FAM199X	family with sequence similarity 199, X-linked
hsa-miR-1305	0	0	1	1	1	1	FAM122C	family with sequence similarity 122C
hsa-miR-1305	1	0	1	0	1	1	CYBRD1	cytochrome b reductase 1
hsa-miR-1305	0	0	1	0	0	0	LOC100144602	uncharacterized LOC100144602
hsa-miR-1305	0	0	1	1	1	1	RDH11	retinol dehydrogenase 11 (all-trans/9-cis/11-cis)
hsa-miR-1305	1	0	1	1	1	1	ZNF131	zinc finger protein 131
hsa-miR-1305	0	0	1	0	0	0	FAM200B	family with sequence similarity 200, member B
hsa-miR-1305	0	0	1	1	0	0	GAGE2D	G antigen 2D
hsa-miR-1305	0	0	1	1	0	0	GAGE2E	G antigen 2E
hsa-miR-1305	1	0	1	1	1	1	ARHGEF9	Cdc42 guanine nucleotide exchange factor (GEF) 9
hsa-miR-1305	0	0	1	1	1	1	SRP19	signal recognition particle 19kDa
hsa-miR-1305	0	0	1	0	0	0	WDFY3-AS2	WDFY3 antisense RNA 2
hsa-miR-1305	0	0	1	0	1	1	CD99P1	CD99 molecule pseudogene 1
hsa-miR-1305	1	0	1	1	1	1	FAM188A	family with sequence similarity 188, member A
hsa-miR-1305	0	0	1	0	1	1	ZNF718	zinc finger protein 718
hsa-miR-1305	1	0	1	0	1	1	BTF3L4	basic transcription factor 3-like 4
hsa-miR-1305	1	0	1	1	1	1	SCML4	sex comb on midleg-like 4 (Drosophila)
hsa-miR-1305	0	0	1	0	0	0	FAM92A1P2	family with sequence similarity 92, member A3
hsa-miR-1305	1	0	1	1	1	1	TMEM71	transmembrane protein 71
hsa-miR-1305	0	0	1	1	0	0	IMMP1L	IMP1 inner mitochondrial membrane peptidase-like (S. cerevisiae)
hsa-miR-1305	1	0	1	0	1	1	CDK19	cyclin-dependent kinase 19
hsa-miR-1305	0	0	1	0	0	0	SNX29P2	sorting nexin 29 pseudogene 2
hsa-miR-1305	1	0	1	1	1	1	NIPA1	non imprinted in Prader-Willi/Angelman syndrome 1
hsa-miR-1305	1	0	1	1	1	1	RTKN2	rhotekin 2
hsa-miR-1305	1	0	1	1	1	1	CNTN4	contactin 4
hsa-miR-1305	0	0	1	0	0	0	ZBED3-AS1	ZBED3 antisense RNA 1
hsa-miR-1305	0	0	1	1	1	1	MAP2	microtubule-associated protein 2
hsa-miR-1305	1	0	1	1	1	1	B3GNT5	UDP-GlcNAc:betaGal beta-1,3-N-acetylglucosaminyltransferase 5
hsa-miR-1305	0	0	1	1	1	1	ZNF589	zinc finger protein 589
hsa-miR-1305	1	0	1	1	1	1	HTR2C	5-hydroxytryptamine (serotonin) receptor 2C, G protein-coupled
hsa-miR-1305	0	0	1	0	0	0	ANKRD19P	ankyrin repeat domain 19, pseudogene
hsa-miR-1305	0	0	1	0	0	0	BCAS3	breast carcinoma amplified sequence 3
hsa-miR-1305	0	0	1	1	1	1	CCP110	centriolar coiled coil protein 110kDa
hsa-miR-1305	0	0	1	1	1	1	TMEM117	transmembrane protein 117
hsa-miR-1305	0	0	1	1	1	1	TARP	TCR gamma alternate reading frame protein
hsa-miR-1305	1	0	1	1	1	1	EYA4	eyes absent homolog 4 (Drosophila)
hsa-miR-1305	0	0	1	1	1	1	RBBP8	retinoblastoma binding protein 8
hsa-miR-1305	1	0	1	1	1	1	TAF15	TAF15 RNA polymerase II, TATA box binding protein (TBP)-associated factor, 68kDa
hsa-miR-1305	1	0	1	1	1	1	MUM1L1	melanoma associated antigen (mutated) 1-like 1
hsa-miR-1305	0	0	1	0	0	0	LOC729307	uncharacterized LOC729307
hsa-miR-1305	1	0	1	1	1	1	ZPLD1	zona pellucida-like domain containing 1
hsa-miR-1305	0	0	1	0	0	0	ATP8B5P	ATPase, class I, type 8B, member 5, pseudogene
hsa-miR-1305	1	0	1	1	1	1	RCOR3	REST corepressor 3
hsa-miR-1305	0	0	1	0	0	0	CFL1P1	cofilin 1 (non-muscle) pseudogene 1
hsa-miR-1305	1	0	1	0	1	1	RNF4	ring finger protein 4
hsa-miR-1305	0	0	1	0	1	1	PLEKHM1P	pleckstrin homology domain containing, family M (with RUN domain) member 1 pseudogene
hsa-miR-1305	0	0	1	0	0	0	LOC643648	uncharacterized LOC643648
hsa-miR-1305	1	0	1	1	1	1	EPB41L5	erythrocyte membrane protein band 4.1 like 5
hsa-miR-1305	0	0	1	1	1	1	C5orf22	chromosome 5 open reading frame 22
hsa-miR-1305	1	0	1	1	1	1	RHOBTB1	Rho-related BTB domain containing 1
hsa-miR-1305	1	0	1	1	1	1	MAK	male germ cell-associated kinase
hsa-miR-1305	1	0	1	1	1	1	SLC25A27	solute carrier family 25, member 27
hsa-miR-1305	1	0	1	1	1	1	SIRPA	signal-regulatory protein alpha
hsa-miR-1305	0	0	1	1	1	1	MYOF	myoferlin
hsa-miR-1305	1	0	1	1	1	1	HMGCR	3-hydroxy-3-methylglutaryl-CoA reductase
hsa-miR-1305	1	0	1	1	1	1	ATF7IP2	activating transcription factor 7 interacting protein 2
hsa-miR-1305	1	0	1	1	1	1	FAM120A	family with sequence similarity 120A
hsa-miR-1305	0	0	1	1	1	1	KIF16B	kinesin family member 16B
hsa-miR-1305	1	0	1	1	1	1	ZEB2	zinc finger E-box binding homeobox 2
hsa-miR-1305	1	0	1	1	1	1	CTDSPL2	CTD (carboxy-terminal domain, RNA polymerase II, polypeptide A) small phosphatase like 2
hsa-miR-1305	0	0	1	0	0	0	LOC339862	uncharacterized LOC339862
hsa-miR-1305	0	0	1	1	1	1	UBE3D	ubiquitin protein ligase E3D
hsa-miR-1305	0	0	1	1	0	0	MCCC1	methylcrotonoyl-CoA carboxylase 1 (alpha)
hsa-miR-1305	1	0	1	1	1	1	HECTD2	HECT domain containing E3 ubiquitin protein ligase 2
hsa-miR-1305	1	0	1	1	1	1	BNC2	basonuclin 2
hsa-miR-1305	0	0	1	0	0	0	LOC286184	uncharacterized LOC286184
hsa-miR-1305	1	0	1	1	1	1	CTBP2	C-terminal binding protein 2
hsa-miR-1305	1	0	1	1	1	1	DPP10	dipeptidyl-peptidase 10 (non-functional)
hsa-miR-1305	0	0	1	1	1	1	C14orf118	chromosome 14 open reading frame 118
hsa-miR-1305	0	0	1	1	1	1	NAALAD2	N-acetylated alpha-linked acidic dipeptidase 2
hsa-miR-1305	0	0	1	1	0	0	H2AFZ	H2A histone family, member Z
hsa-miR-1305	1	0	1	1	1	1	PLS3	plastin 3
hsa-miR-1305	0	0	1	0	0	0	FLJ36000	uncharacterized FLJ36000
hsa-miR-1305	1	0	1	1	1	1	FGFR2	fibroblast growth factor receptor 2
hsa-miR-1305	0	0	1	1	1	1	CACHD1	cache domain containing 1
hsa-miR-1305	1	0	1	1	1	1	PAIP2	poly(A) binding protein interacting protein 2
hsa-miR-1305	1	0	1	0	1	1	LPHN3	latrophilin 3
hsa-miR-1305	0	0	1	1	1	1	ARHGAP25	Rho GTPase activating protein 25
hsa-miR-1305	1	0	1	1	1	1	TIMP2	TIMP metallopeptidase inhibitor 2
hsa-miR-1305	0	0	1	1	1	1	SLC14A1	solute carrier family 14 (urea transporter), member 1 (Kidd blood group)
hsa-miR-1305	0	0	1	0	1	1	SRSF5	serine/arginine-rich splicing factor 5
hsa-miR-1305	1	0	1	1	1	1	DACH2	dachshund homolog 2 (Drosophila)
hsa-miR-1305	0	0	1	0	0	0	LRRC48	leucine rich repeat containing 48
hsa-miR-1305	0	0	1	1	1	1	TMEM45A	transmembrane protein 45A
hsa-miR-1305	0	0	1	1	1	1	ZFP90	zinc finger protein 90 homolog (mouse)
hsa-miR-1305	1	0	1	1	1	1	INTS6	integrator complex subunit 6
hsa-miR-1305	0	0	1	0	0	0	LOC339240	keratin 17 pseudogene
hsa-miR-1305	0	0	1	1	1	1	FAM71F1	family with sequence similarity 71, member F1
hsa-miR-1305	0	0	1	1	0	0	KIAA1432	KIAA1432
hsa-miR-1305	1	0	1	1	1	1	TNFSF4	tumor necrosis factor (ligand) superfamily, member 4
hsa-miR-1305	0	0	1	0	1	1	PDGFC	platelet derived growth factor C
hsa-miR-1305	0	0	1	1	1	1	GOLGA6L9	golgin A6 family-like 9
hsa-miR-1305	1	0	1	1	1	1	CLOCK	clock homolog (mouse)
hsa-miR-1305	0	0	1	1	1	1	C4orf32	chromosome 4 open reading frame 32
hsa-miR-1305	0	0	1	1	1	1	DGKH	diacylglycerol kinase, eta
hsa-miR-1305	0	0	1	1	1	1	CBWD5	COBW domain containing 5
hsa-miR-1305	1	0	1	0	1	1	PSD3	pleckstrin and Sec7 domain containing 3
hsa-miR-1305	1	0	1	0	1	1	LYPD6	LY6/PLAUR domain containing 6
hsa-miR-1305	0	0	1	0	0	0	LOC348120	uncharacterized LOC348120
hsa-miR-1305	1	0	1	0	1	1	ZNF800	zinc finger protein 800
hsa-miR-1305	0	0	1	0	0	0	RPL37A	ribosomal protein L37a
hsa-miR-1305	1	0	1	1	1	1	CLVS1	clavesin 1
hsa-miR-1305	0	0	1	1	1	1	SLC29A3	solute carrier family 29 (nucleoside transporters), member 3
hsa-miR-1305	0	0	1	0	0	0	IDI2-AS1	IDI2 antisense RNA 1
hsa-miR-1305	1	0	1	1	1	1	ZFP91	zinc finger protein 91 homolog (mouse)
hsa-miR-1305	0	0	1	0	0	0	LINC00265	long intergenic non-protein coding RNA 265
hsa-miR-1305	1	0	1	1	1	1	RCC2	regulator of chromosome condensation 2
hsa-miR-1305	1	0	1	1	1	1	SCOC	short coiled-coil protein
hsa-miR-1305	1	0	1	0	1	1	CSNK1G1	casein kinase 1, gamma 1
hsa-miR-1305	0	0	1	1	1	1	CLEC2D	C-type lectin domain family 2, member D
hsa-miR-1305	0	0	1	0	0	0	LOC387647	patched domain containing 3 pseudogene
hsa-miR-1305	0	0	1	1	1	1	ATF7IP	activating transcription factor 7 interacting protein
hsa-miR-1305	1	0	1	1	1	1	NIPBL	Nipped-B homolog (Drosophila)
hsa-miR-1305	1	0	1	1	0	0	ANKIB1	ankyrin repeat and IBR domain containing 1
hsa-miR-1305	0	0	1	1	1	1	SCLT1	sodium channel and clathrin linker 1
hsa-miR-1305	1	0	1	1	1	1	CKAP2	cytoskeleton associated protein 2
hsa-miR-1305	1	0	1	1	1	1	C18orf1	chromosome 18 open reading frame 1
hsa-miR-1305	0	0	1	0	0	0	LEF1-AS1	LEF1 antisense RNA 1
hsa-miR-1305	1	0	1	1	1	1	PDCD6IP	programmed cell death 6 interacting protein
hsa-miR-1305	1	0	1	1	1	1	SLC26A7	solute carrier family 26, member 7
hsa-miR-1305	1	0	1	1	1	1	LINGO1	leucine rich repeat and Ig domain containing 1
hsa-miR-1305	0	0	1	0	0	0	PTGER4P2	prostaglandin E receptor 4 (subtype EP4) pseudogene 2
hsa-miR-1305	0	0	1	0	0	0	GAGE7	G antigen 7
hsa-miR-1305	0	0	1	1	0	0	GAGE12I	G antigen 12I
hsa-miR-1305	0	0	1	1	0	0	GAGE12G	G antigen 12G
hsa-miR-1305	0	0	1	1	0	0	GAGE12F	G antigen 12F
hsa-miR-1305	0	0	1	1	0	0	GAGE2A	G antigen 2A
hsa-miR-1305	0	0	1	1	1	1	SLC11A1	solute carrier family 11 (proton-coupled divalent metal ion transporters), member 1
hsa-miR-1305	1	0	1	0	1	1	TGFBR1	transforming growth factor, beta receptor 1
hsa-miR-1305	1	0	1	0	1	1	TMEM194A	transmembrane protein 194A
hsa-miR-1305	0	0	1	1	1	1	FRMPDP2	FERM and PDZ domain containing 2 pseudogene 2
hsa-miR-1305	0	0	1	1	1	1	FRMPD2P1	FERM and PDZ domain containing 2 pseudogene 1
hsa-miR-1305	0	0	1	0	0	0	TRGV9	T cell receptor gamma variable 9
hsa-miR-1305	0	0	1	1	1	1	VPS16	vacuolar protein sorting 16 homolog (S. cerevisiae)
hsa-miR-1305	1	0	1	1	1	1	OPCML	opioid binding protein/cell adhesion molecule-like
hsa-miR-1305	0	0	1	0	0	0	LOC441259	PMS2 postmeiotic segregation increased 2 (S. cerevisiae)-like
hsa-miR-1305	0	0	1	1	1	1	C3orf67	chromosome 3 open reading frame 67
hsa-miR-1305	1	0	1	0	1	1	DPYSL3	dihydropyrimidinase-like 3
hsa-miR-1305	1	0	1	1	1	1	ZBTB7A	zinc finger and BTB domain containing 7A
hsa-miR-1305	0	0	1	0	0	0	TCEB1	transcription elongation factor B (SIII), polypeptide 1 (15kDa, elongin C)
hsa-miR-1305	0	0	1	1	1	1	KCTD3	potassium channel tetramerisation domain containing 3
hsa-miR-1305	1	0	1	1	1	1	ACVR2B	activin A receptor, type IIB
hsa-miR-1305	1	0	1	1	1	1	FGD4	FYVE, RhoGEF and PH domain containing 4
hsa-miR-1305	1	0	1	0	1	1	LRRTM4	leucine rich repeat transmembrane neuronal 4
hsa-miR-1305	1	0	1	1	1	1	SYNJ1	synaptojanin 1
hsa-miR-1305	1	0	1	1	1	1	GTF2I	general transcription factor IIi
hsa-miR-1305	1	0	1	0	1	1	ARPP19	cAMP-regulated phosphoprotein, 19kDa
hsa-miR-1305	0	0	1	1	1	1	XG	Xg blood group
hsa-miR-1305	0	0	1	1	1	1	FUT11	fucosyltransferase 11 (alpha (1,3) fucosyltransferase)
hsa-miR-1305	1	0	1	1	1	1	ARFIP1	ADP-ribosylation factor interacting protein 1
hsa-miR-1305	1	0	1	0	1	1	CPEB2	cytoplasmic polyadenylation element binding protein 2
hsa-miR-1305	0	0	1	0	0	0	LOC441493	uncharacterized LOC441493
hsa-miR-1305	1	0	1	1	0	0	KIAA1644	KIAA1644
hsa-miR-1305	0	0	1	1	1	1	CCDC126	coiled-coil domain containing 126
hsa-miR-1305	1	0	1	1	1	1	SLC35G1	solute carrier family 35, member G1
hsa-miR-1305	0	0	1	1	0	0	TRPV3	transient receptor potential cation channel, subfamily V, member 3
hsa-miR-1305	1	0	1	1	1	1	GABRB2	gamma-aminobutyric acid (GABA) A receptor, beta 2
hsa-miR-1305	0	0	1	0	0	0	FBXL19-AS1	FBXL19 antisense RNA 1 (head to head)
hsa-miR-1305	0	0	1	1	1	1	SLC25A35	solute carrier family 25, member 35
hsa-miR-1305	1	0	1	1	1	1	SUV420H1	suppressor of variegation 4-20 homolog 1 (Drosophila)
hsa-miR-1305	1	0	1	0	1	1	BTBD3	BTB (POZ) domain containing 3
hsa-miR-1305	0	0	1	1	1	1	RASAL2	RAS protein activator like 2
hsa-miR-1305	0	0	1	0	0	0	INTS4L1	integrator complex subunit 4-like 1
hsa-miR-1305	1	0	1	1	1	1	SLK	STE20-like kinase
hsa-miR-1305	0	0	1	1	1	1	LOC100499484-C9ORF174	LOC100499484-C9orf174 readthrough
hsa-miR-1305	0	0	1	1	0	0	SPOCD1	SPOC domain containing 1
hsa-miR-1305	1	0	1	0	1	1	PRDM10	PR domain containing 10
hsa-miR-1305	1	0	1	1	1	1	OTUD4	OTU domain containing 4
hsa-miR-1305	0	0	1	0	1	1	GOLGA8G	golgin A8 family, member G
hsa-miR-1305	1	0	1	0	1	1	LRCH2	leucine-rich repeats and calponin homology (CH) domain containing 2
hsa-miR-1305	1	0	1	0	1	1	CAMSAP2	calmodulin regulated spectrin-associated protein family, member 2
hsa-miR-1305	1	0	1	1	1	1	ANK2	ankyrin 2, neuronal
hsa-miR-1305	1	0	1	1	1	1	JMJD1C	jumonji domain containing 1C
hsa-miR-1305	1	0	1	1	1	1	MLLT10	myeloid/lymphoid or mixed-lineage leukemia (trithorax homolog, Drosophila); translocated to, 10
hsa-miR-1305	0	0	1	1	0	0	DZANK1	double zinc ribbon and ankyrin repeat domains 1
hsa-miR-1305	0	0	1	0	0	0	GAGE12B	G antigen 12B
hsa-miR-1305	0	0	1	1	0	0	TCHH	trichohyalin
hsa-miR-1305	1	0	1	1	1	1	EIF5	eukaryotic translation initiation factor 5
hsa-miR-1305	0	0	1	0	0	0	ADCY10P1	adenylate cyclase 10 (soluble) pseudogene 1
hsa-miR-1305	1	0	1	1	1	1	JPH1	junctophilin 1
hsa-miR-1305	1	0	1	1	1	1	RAB7A	RAB7A, member RAS oncogene family
hsa-miR-1305	0	0	1	0	1	1	AP1S2	adaptor-related protein complex 1, sigma 2 subunit
hsa-miR-1305	1	0	1	1	1	1	MTFR1	mitochondrial fission regulator 1
hsa-miR-1305	0	0	1	0	1	1	GPX8	glutathione peroxidase 8 (putative)
hsa-miR-1305	0	0	1	1	0	0	CCDC171	coiled-coil domain containing 171
hsa-miR-1305	1	0	1	1	0	0	CCDC30	coiled-coil domain containing 30
hsa-miR-1305	1	0	1	1	1	1	CSGALNACT2	chondroitin sulfate N-acetylgalactosaminyltransferase 2
hsa-miR-1305	1	0	1	1	1	1	PRKRIR	protein-kinase, interferon-inducible double stranded RNA dependent inhibitor, repressor of (P58 repressor)
hsa-miR-1305	1	0	1	0	1	1	FAM73A	family with sequence similarity 73, member A
hsa-miR-1305	1	0	1	1	1	1	SMAD4	SMAD family member 4
hsa-miR-1305	0	0	1	1	1	1	IPCEF1	interaction protein for cytohesin exchange factors 1
hsa-miR-1305	1	0	1	1	1	1	PRDM2	PR domain containing 2, with ZNF domain
hsa-miR-1305	0	0	1	0	0	0	LINC00240	long intergenic non-protein coding RNA 240
hsa-miR-1305	0	0	1	1	0	0	PRKCQ	protein kinase C, theta
hsa-miR-1305	1	0	1	0	1	1	EML4	echinoderm microtubule associated protein like 4
hsa-miR-1305	0	0	1	1	0	0	PPP2R2B	protein phosphatase 2, regulatory subunit B, beta
hsa-miR-1305	0	0	1	1	1	1	ZNF365	zinc finger protein 365
hsa-miR-1305	0	0	1	0	0	0	OVOS	ovostatin
hsa-miR-1305	0	0	1	1	0	0	C3orf77	chromosome 3 open reading frame 77
hsa-miR-1305	1	0	1	1	1	1	NFIB	nuclear factor I/B
hsa-miR-1305	1	0	1	1	1	1	BCLAF1	BCL2-associated transcription factor 1
hsa-miR-1305	1	0	1	0	1	1	IGF2BP3	insulin-like growth factor 2 mRNA binding protein 3
hsa-miR-1305	1	0	1	1	1	1	EDIL3	EGF-like repeats and discoidin I-like domains 3
hsa-miR-1305	0	0	1	1	1	1	DAZL	deleted in azoospermia-like
hsa-miR-1305	1	0	1	1	1	1	PGAP1	post-GPI attachment to proteins 1
hsa-miR-1305	1	0	1	1	1	1	RECK	reversion-inducing-cysteine-rich protein with kazal motifs
hsa-miR-1305	1	0	1	1	1	1	TMEM135	transmembrane protein 135
hsa-miR-1305	0	0	1	1	1	1	ABCD3	ATP-binding cassette, sub-family D (ALD), member 3
hsa-miR-1305	0	0	1	1	1	1	THSD4	thrombospondin, type I, domain containing 4
hsa-miR-1305	1	0	1	1	1	1	HIF1A	hypoxia inducible factor 1, alpha subunit (basic helix-loop-helix transcription factor)
hsa-miR-1305	1	0	1	1	1	1	CALD1	caldesmon 1
hsa-miR-1305	0	0	1	0	1	1	STT3A	STT3, subunit of the oligosaccharyltransferase complex, homolog A (S. cerevisiae)
hsa-miR-1305	1	0	1	1	1	1	LYST	lysosomal trafficking regulator
hsa-miR-1305	0	0	1	1	1	1	FGG	fibrinogen gamma chain
hsa-miR-1305	1	0	1	1	0	0	SMARCA2	SWI/SNF related, matrix associated, actin dependent regulator of chromatin, subfamily a, member 2
hsa-miR-1305	0	0	1	0	1	1	IDO1	indoleamine 2,3-dioxygenase 1
hsa-miR-1305	0	0	1	1	1	1	GSTM3	glutathione S-transferase mu 3 (brain)
hsa-miR-1305	0	0	1	1	1	1	CAT	catalase
hsa-miR-1305	1	0	1	1	1	1	ARF1	ADP-ribosylation factor 1
hsa-miR-1305	0	0	1	1	0	0	ABCA6	ATP-binding cassette, sub-family A (ABC1), member 6
hsa-miR-1305	1	0	1	1	1	1	VIM	vimentin
hsa-miR-1305	0	0	1	1	1	1	COPS8	COP9 constitutive photomorphogenic homolog subunit 8 (Arabidopsis)
hsa-miR-1305	1	0	1	1	1	1	ANXA2	annexin A2
hsa-miR-1305	1	0	1	1	1	1	RAP1A	RAP1A, member of RAS oncogene family
hsa-miR-1305	1	0	1	0	1	1	BNIP3L	BCL2/adenovirus E1B 19kDa interacting protein 3-like
hsa-miR-1305	1	0	1	1	1	1	ACTG1	actin, gamma 1
hsa-miR-1305	0	0	1	1	1	1	TCEA2	transcription elongation factor A (SII), 2
hsa-miR-1305	0	0	1	1	1	1	XRCC4	X-ray repair complementing defective repair in Chinese hamster cells 4
hsa-miR-1305	1	0	1	1	1	1	HMGN3	high mobility group nucleosomal binding domain 3
hsa-miR-1305	0	0	1	1	0	0	METTL23	methyltransferase like 23
hsa-miR-1305	1	0	1	1	1	1	STARD3NL	STARD3 N-terminal like
hsa-miR-1305	0	0	1	1	1	1	MTCP1	mature T-cell proliferation 1
hsa-miR-1305	1	0	1	1	1	1	CCNE1	cyclin E1
hsa-miR-1305	0	0	1	1	1	1	SORD	sorbitol dehydrogenase
hsa-miR-1305	0	0	1	1	0	0	RAD54B	RAD54 homolog B (S. cerevisiae)
hsa-miR-1305	1	0	1	1	1	1	FBXO9	F-box protein 9
hsa-miR-1305	1	0	1	1	1	1	TRA2B	transformer 2 beta homolog (Drosophila)
hsa-miR-1305	0	0	1	1	1	1	GGPS1	geranylgeranyl diphosphate synthase 1
hsa-miR-1305	0	0	1	1	0	0	TMEM183A	transmembrane protein 183A
hsa-miR-1305	1	0	1	0	1	1	RPS6KB1	ribosomal protein S6 kinase, 70kDa, polypeptide 1
hsa-miR-1305	0	0	1	1	1	1	STON1	stonin 1
hsa-miR-1305	0	0	1	1	1	1	CDS2	CDP-diacylglycerol synthase (phosphatidate cytidylyltransferase) 2
hsa-miR-1305	1	0	1	1	1	1	DKK3	dickkopf 3 homolog (Xenopus laevis)
hsa-miR-1305	1	0	1	1	1	1	KCNIP4	Kv channel interacting protein 4
hsa-miR-1305	0	0	1	1	1	1	PEX19	peroxisomal biogenesis factor 19
hsa-miR-1305	1	0	1	0	1	1	C15orf41	chromosome 15 open reading frame 41
hsa-miR-1305	1	0	1	1	1	1	CAMK2A	calcium/calmodulin-dependent protein kinase II alpha
hsa-miR-1305	1	0	1	0	1	1	ANKH	ankylosis, progressive homolog (mouse)
hsa-miR-1305	1	0	1	1	1	1	DPF2	D4, zinc and double PHD fingers family 2
hsa-miR-1305	1	0	1	1	1	1	NFYB	nuclear transcription factor Y, beta
hsa-miR-1305	0	0	1	1	1	1	RCN2	reticulocalbin 2, EF-hand calcium binding domain
hsa-miR-1305	0	0	1	1	1	1	IL15	interleukin 15
hsa-miR-1305	1	0	1	1	1	1	PDCL	phosducin-like
hsa-miR-1305	1	0	1	0	1	1	MAP1B	microtubule-associated protein 1B
hsa-miR-1305	1	0	1	1	1	1	RUNX1	runt-related transcription factor 1
hsa-miR-1305	1	0	1	1	1	1	YWHAE	tyrosine 3-monooxygenase/tryptophan 5-monooxygenase activation protein, epsilon polypeptide
hsa-miR-1305	0	0	1	0	0	0	LOC100132984	uncharacterized LOC100132984
hsa-miR-1305	0	0	1	0	1	1	TSPAN7	tetraspanin 7
hsa-miR-1305	0	0	1	0	0	0	LOC100132352	FSHD region gene 1 pseudogene
hsa-miR-1305	1	0	1	1	1	1	RND3	Rho family GTPase 3
hsa-miR-1305	1	0	1	1	1	1	SLMAP	sarcolemma associated protein
hsa-miR-1305	1	0	1	1	1	1	CHD2	chromodomain helicase DNA binding protein 2
hsa-miR-1305	1	0	1	1	0	0	SMCHD1	structural maintenance of chromosomes flexible hinge domain containing 1
hsa-miR-1305	0	0	1	0	0	0	LOC731789	uncharacterized LOC731789
hsa-miR-1305	0	0	1	1	1	1	SYNE2	spectrin repeat containing, nuclear envelope 2
hsa-miR-1305	0	0	1	0	0	0	LINC00661	long intergenic non-protein coding RNA 661
hsa-miR-1305	1	0	1	0	1	1	MEGF10	multiple EGF-like-domains 10
hsa-miR-1305	1	0	1	1	1	1	KIAA2018	KIAA2018
hsa-miR-1305	1	0	1	0	1	1	PTP4A1	protein tyrosine phosphatase type IVA, member 1
hsa-miR-1305	1	0	1	0	1	1	XRN1	5'-3' exoribonuclease 1
hsa-miR-1305	0	0	1	1	1	1	CCDC102B	coiled-coil domain containing 102B
hsa-miR-1305	1	0	1	0	1	1	OSBPL8	oxysterol binding protein-like 8
hsa-miR-1305	1	0	1	0	1	1	CNTNAP2	contactin associated protein-like 2
hsa-miR-1305	1	0	1	1	1	1	SLC16A12	solute carrier family 16, member 12 (monocarboxylic acid transporter 12)
hsa-miR-1305	1	0	1	1	1	1	ZFHX3	zinc finger homeobox 3
hsa-miR-1305	0	0	1	1	1	1	TMEM41B	transmembrane protein 41B
hsa-miR-1305	0	0	1	1	1	1	SLC39A14	solute carrier family 39 (zinc transporter), member 14
hsa-miR-1305	1	0	1	0	1	1	KLHDC10	kelch domain containing 10
hsa-miR-1305	0	0	1	1	0	0	SPINK5	serine peptidase inhibitor, Kazal type 5
hsa-miR-1305	0	0	1	1	1	1	PTGS1	prostaglandin-endoperoxide synthase 1 (prostaglandin G/H synthase and cyclooxygenase)
hsa-miR-1305	1	0	1	1	1	1	ATP2B3	ATPase, Ca++ transporting, plasma membrane 3
hsa-miR-1305	1	0	1	1	1	1	CDC27	cell division cycle 27 homolog (S. cerevisiae)
hsa-miR-1305	1	0	1	1	0	0	MYL2	myosin, light chain 2, regulatory, cardiac, slow
hsa-miR-1305	1	0	1	1	1	1	MLL	myeloid/lymphoid or mixed-lineage leukemia (trithorax homolog, Drosophila)
hsa-miR-1305	1	0	1	1	1	1	ATP2B2	ATPase, Ca++ transporting, plasma membrane 2
hsa-miR-1305	1	0	1	1	1	1	CCNG2	cyclin G2
hsa-miR-1305	1	0	1	0	1	1	BCL2	B-cell CLL/lymphoma 2
hsa-miR-1305	1	0	1	1	1	1	IGF1	insulin-like growth factor 1 (somatomedin C)
hsa-miR-1305	0	0	1	1	1	1	NPR3	natriuretic peptide receptor C/guanylate cyclase C (atrionatriuretic peptide receptor C)
hsa-miR-1305	0	0	1	1	1	1	ATP7A	ATPase, Cu++ transporting, alpha polypeptide
hsa-miR-1305	0	0	1	1	1	1	ERCC8	excision repair cross-complementing rodent repair deficiency, complementation group 8
hsa-miR-1305	1	0	1	1	1	1	COL3A1	collagen, type III, alpha 1
hsa-miR-1305	1	0	1	1	1	1	CPOX	coproporphyrinogen oxidase
hsa-miR-1305	1	0	1	0	1	1	SLC26A2	solute carrier family 26 (sulfate transporter), member 2
hsa-miR-1305	0	0	1	1	1	1	EDN3	endothelin 3
hsa-miR-1305	1	0	1	1	1	1	FBN1	fibrillin 1
hsa-miR-1305	1	0	1	0	1	1	GHR	growth hormone receptor
hsa-miR-1305	1	0	1	1	1	1	GJA1	gap junction protein, alpha 1, 43kDa
hsa-miR-1305	1	0	1	1	1	1	GK	glycerol kinase
hsa-miR-1305	1	0	1	1	1	1	JAG1	jagged 1
hsa-miR-1305	1	0	1	1	1	1	KCNA1	potassium voltage-gated channel, shaker-related subfamily, member 1 (episodic ataxia with myokymia)
hsa-miR-1305	1	0	1	1	1	1	MITF	microphthalmia-associated transcription factor
hsa-miR-1305	1	0	1	1	1	1	NF1	neurofibromin 1
hsa-miR-1305	1	0	1	1	1	1	OCRL	oculocerebrorenal syndrome of Lowe
hsa-miR-1305	1	0	1	0	1	1	PTEN	phosphatase and tensin homolog
hsa-miR-1305	1	0	1	1	1	1	ATXN1	ataxin 1
hsa-miR-1305	1	0	1	1	1	1	SOX9	SRY (sex determining region Y)-box 9
hsa-miR-1305	1	0	1	0	1	1	COL5A2	collagen, type V, alpha 2
hsa-miR-1305	0	0	1	1	1	1	KRT10	keratin 10
hsa-miR-1305	0	0	1	1	1	1	PECAM1	platelet/endothelial cell adhesion molecule 1
hsa-miR-1305	1	0	1	0	1	1	RAG1	recombination activating gene 1
hsa-miR-1305	1	0	1	1	1	1	ATRX	alpha thalassemia/mental retardation syndrome X-linked
hsa-miR-1305	1	0	1	1	1	1	IL1A	interleukin 1, alpha
hsa-miR-1305	0	0	1	1	1	1	HGF	hepatocyte growth factor (hepapoietin A; scatter factor)
hsa-miR-1305	1	0	1	1	1	1	CD44	CD44 molecule (Indian blood group)
hsa-miR-1305	0	0	1	1	1	1	SELL	selectin L
hsa-miR-1305	0	0	1	1	1	1	ADH4	alcohol dehydrogenase 4 (class II), pi polypeptide
hsa-miR-1305	1	0	1	0	1	1	ALDH1A3	aldehyde dehydrogenase 1 family, member A3
hsa-miR-1305	1	0	1	1	1	1	CACNB4	calcium channel, voltage-dependent, beta 4 subunit
hsa-miR-1305	1	0	1	1	1	1	DIO2	deiodinase, iodothyronine, type II
hsa-miR-1305	1	0	1	1	1	1	GRIA4	glutamate receptor, ionotropic, AMPA 4
hsa-miR-1305	1	0	1	1	1	1	GRM8	glutamate receptor, metabotropic 8
hsa-miR-1305	1	0	1	1	1	1	GUCY1A2	guanylate cyclase 1, soluble, alpha 2
hsa-miR-1305	0	0	1	1	1	1	HTR1D	5-hydroxytryptamine (serotonin) receptor 1D, G protein-coupled
hsa-miR-1305	0	0	1	1	1	1	IL2RB	interleukin 2 receptor, beta
hsa-miR-1305	1	0	1	1	1	1	PTGER2	prostaglandin E receptor 2 (subtype EP2), 53kDa
hsa-miR-1305	1	0	1	1	1	1	PTGER4	prostaglandin E receptor 4 (subtype EP4)
hsa-miR-1305	0	0	1	1	1	1	BLOC1S2	biogenesis of lysosomal organelles complex-1, subunit 2
hsa-miR-1305	0	0	1	1	1	1	TBC1D3C	TBC1 domain family, member 3C
hsa-miR-1305	0	0	1	1	1	1	GALK2	galactokinase 2
hsa-miR-1305	1	0	1	0	1	1	SPOPL	speckle-type POZ protein-like
hsa-miR-1305	0	0	1	1	1	1	CYP27C1	cytochrome P450, family 27, subfamily C, polypeptide 1
hsa-miR-1305	1	0	1	0	1	1	ARHGEF37	Rho guanine nucleotide exchange factor (GEF) 37
hsa-miR-1305	0	0	1	1	1	1	CC2D2B	coiled-coil and C2 domain containing 2B
hsa-miR-1305	0	0	1	0	0	0	KLK2	kallikrein-related peptidase 2
hsa-miR-1305	1	0	1	1	1	1	ATP5G3	ATP synthase, H+ transporting, mitochondrial Fo complex, subunit C3 (subunit 9)
hsa-miR-1305	1	0	1	0	1	1	SMAD2	SMAD family member 2
hsa-miR-1305	1	0	1	1	1	1	RBMS3	RNA binding motif, single stranded interacting protein 3
hsa-miR-1305	1	0	1	0	1	1	LIN28B	lin-28 homolog B (C. elegans)
hsa-miR-1305	1	0	1	1	1	1	AK4	adenylate kinase 4
hsa-miR-1305	0	0	1	1	0	0	ZNF32	zinc finger protein 32
hsa-miR-1305	1	0	1	1	1	1	PLCXD3	phosphatidylinositol-specific phospholipase C, X domain containing 3
hsa-miR-1305	1	0	1	1	1	1	EDA	ectodysplasin A
hsa-miR-1305	0	0	1	1	1	1	RYK	receptor-like tyrosine kinase
hsa-miR-1305	1	0	1	1	0	0	RPS6KA1	ribosomal protein S6 kinase, 90kDa, polypeptide 1
hsa-miR-1305	1	0	1	0	1	1	GOSR1	golgi SNAP receptor complex member 1
hsa-miR-1305	1	0	1	1	1	1	NTRK3	neurotrophic tyrosine kinase, receptor, type 3
hsa-miR-1305	0	0	1	0	1	1	GIMAP6	GTPase, IMAP family member 6
hsa-miR-1305	1	0	1	1	1	1	IGF2BP2	insulin-like growth factor 2 mRNA binding protein 2
hsa-miR-1305	1	0	1	1	1	1	SPOP	speckle-type POZ protein
hsa-miR-1305	1	0	1	1	1	1	IGSF3	immunoglobulin superfamily, member 3
hsa-miR-1305	1	0	1	1	1	1	BRWD1	bromodomain and WD repeat domain containing 1
hsa-miR-1305	0	0	1	1	1	1	WDHD1	WD repeat and HMG-box DNA binding protein 1
hsa-miR-1305	0	0	1	1	1	1	MXI1	MAX interactor 1
hsa-miR-1305	0	0	1	1	0	0	CST9	cystatin 9 (testatin)
hsa-miR-1305	0	0	1	1	1	1	GCSAM	germinal center-associated, signaling and motility
hsa-miR-1305	1	0	1	1	1	1	LUZP2	leucine zipper protein 2
hsa-miR-1305	0	0	1	1	1	1	TMEM230	transmembrane protein 230
hsa-miR-1305	1	0	1	0	1	1	ERMN	ermin, ERM-like protein
hsa-miR-1305	1	0	1	0	1	1	FAM102B	family with sequence similarity 102, member B
hsa-miR-1305	1	0	1	0	1	1	ZC3H12B	zinc finger CCCH-type containing 12B
hsa-miR-1305	1	0	1	1	1	1	BCL2L15	BCL2-like 15
hsa-miR-1305	0	0	1	1	1	1	ZMAT1	zinc finger, matrin-type 1
hsa-miR-1305	1	0	1	0	1	1	CREB5	cAMP responsive element binding protein 5
hsa-miR-1305	0	0	1	0	1	1	GOLGA8E	golgin A8 family, member E
hsa-miR-1305	1	0	1	1	1	1	SLC25A53	solute carrier family 25, member 53
hsa-miR-1305	0	0	1	0	0	0	LOC441956	uncharacterized LOC441956
hsa-miR-1305	1	0	1	0	1	1	SYT14L	synaptotagmin XIV-like
hsa-miR-1305	1	0	1	1	1	1	KCNMA1	potassium large conductance calcium-activated channel, subfamily M, alpha member 1
hsa-miR-1305	1	0	1	1	1	1	RUNX2	runt-related transcription factor 2
hsa-miR-1305	1	0	1	1	1	1	TMCC1	transmembrane and coiled-coil domain family 1
hsa-miR-1305	0	0	1	1	1	1	BTBD11	BTB (POZ) domain containing 11
hsa-miR-1305	1	0	1	1	1	1	ZHX1	zinc fingers and homeoboxes 1
hsa-miR-1305	0	0	1	1	1	1	KIAA2026	KIAA2026
hsa-miR-1305	1	0	1	1	1	1	VMA21	VMA21 vacuolar H+-ATPase homolog (S. cerevisiae)
hsa-miR-1305	1	0	1	1	1	1	NTRK2	neurotrophic tyrosine kinase, receptor, type 2
hsa-miR-1305	0	0	1	1	1	1	HNMT	histamine N-methyltransferase
hsa-miR-1305	1	0	1	0	1	1	TNRC6B	trinucleotide repeat containing 6B
hsa-miR-1305	0	0	1	1	1	1	WASF1	WAS protein family, member 1
hsa-miR-1305	1	0	1	1	1	1	FNBP1L	formin binding protein 1-like
hsa-miR-1305	0	0	1	1	0	0	ABCF1	ATP-binding cassette, sub-family F (GCN20), member 1
hsa-miR-1305	1	0	1	0	1	1	ADAR	adenosine deaminase, RNA-specific
hsa-miR-1305	1	0	1	1	1	1	AFF3	AF4/FMR2 family, member 3
hsa-miR-1305	0	0	1	0	1	1	STAG3L2	stromal antigen 3-like 2
hsa-miR-1305	1	0	1	0	1	1	CLLU1	chronic lymphocytic leukemia up-regulated 1
hsa-miR-1305	1	0	1	0	1	1	C3orf70	chromosome 3 open reading frame 70
hsa-miR-1305	1	0	1	0	1	1	ANO6	anoctamin 6
hsa-miR-1305	1	0	1	1	1	1	RGS7BP	regulator of G-protein signaling 7 binding protein
hsa-miR-1305	0	0	1	1	1	1	PGAM4	phosphoglycerate mutase family member 4
hsa-miR-1305	1	0	1	0	1	1	MSRB3	methionine sulfoxide reductase B3
hsa-miR-1305	0	0	1	1	1	1	C12orf40	chromosome 12 open reading frame 40
hsa-miR-1305	1	0	1	1	1	1	KLF10	Kruppel-like factor 10
hsa-miR-1305	1	0	1	1	1	1	TMPO	thymopoietin
hsa-miR-1305	1	0	1	1	1	1	AMD1	adenosylmethionine decarboxylase 1
hsa-miR-1305	0	0	1	1	0	0	NGRN	neugrin, neurite outgrowth associated
hsa-miR-1305	1	0	1	0	1	1	CDC42SE1	CDC42 small effector 1
hsa-miR-1305	0	0	1	0	1	1	ZNF705D	zinc finger protein 705D
hsa-miR-1305	1	0	1	0	1	1	CREBZF	CREB/ATF bZIP transcription factor
hsa-miR-1305	1	0	1	1	1	1	CDC42	cell division cycle 42 (GTP binding protein, 25kDa)
hsa-miR-1305	0	0	1	0	1	1	OPALIN	oligodendrocytic myelin paranodal and inner loop protein
hsa-miR-1305	1	0	1	1	1	1	PAPD5	PAP associated domain containing 5
hsa-miR-1305	1	0	1	1	1	1	MTMR12	myotubularin related protein 12
hsa-miR-1305	1	0	1	1	1	1	FAM63B	family with sequence similarity 63, member B
hsa-miR-1305	1	0	1	1	1	1	PRKAG2	protein kinase, AMP-activated, gamma 2 non-catalytic subunit
hsa-miR-1305	0	0	1	0	1	1	STEAP2	STEAP family member 2, metalloreductase
hsa-miR-1305	0	0	1	0	1	1	ABCE1	ATP-binding cassette, sub-family E (OABP), member 1
hsa-miR-1305	1	0	1	1	1	1	CYLD	cylindromatosis (turban tumor syndrome)
hsa-miR-1305	1	0	1	1	1	1	CEP63	centrosomal protein 63kDa
hsa-miR-1305	0	0	1	1	1	1	PSPC1	paraspeckle component 1
hsa-miR-1305	0	0	1	1	1	1	MST4	serine/threonine protein kinase MST4
hsa-miR-1305	1	0	1	1	1	1	NSL1	NSL1, MIND kinetochore complex component, homolog (S. cerevisiae)
hsa-miR-1305	1	0	1	1	1	1	FRS2	fibroblast growth factor receptor substrate 2
hsa-miR-1305	1	0	1	1	1	1	ERBB4	v-erb-a erythroblastic leukemia viral oncogene homolog 4 (avian)
hsa-miR-1305	1	0	1	1	1	1	TPM3	tropomyosin 3
hsa-miR-1305	1	0	1	1	1	1	NET1	neuroepithelial cell transforming 1
hsa-miR-1305	0	0	1	1	0	0	TCN1	transcobalamin I (vitamin B12 binding protein, R binder family)
hsa-miR-1305	1	0	1	1	1	1	MZT1	mitotic spindle organizing protein 1
hsa-miR-1305	1	0	1	1	1	1	PDE11A	phosphodiesterase 11A
hsa-miR-1305	1	0	1	1	1	1	IRF2BP2	interferon regulatory factor 2 binding protein 2
hsa-miR-1305	0	0	1	0	1	1	WTH3DI	RAB6C-like
hsa-miR-1305	1	0	1	1	1	1	SRSF1	serine/arginine-rich splicing factor 1
hsa-miR-1305	1	0	1	1	1	1	HNRNPUL2	heterogeneous nuclear ribonucleoprotein U-like 2
hsa-miR-1305	1	0	1	1	1	1	N4BP2L1	NEDD4 binding protein 2-like 1
hsa-miR-1305	0	0	1	1	1	1	FKTN	fukutin
hsa-miR-1305	0	0	1	0	0	0	TMEM183B	transmembrane protein 183B
hsa-miR-1305	1	0	1	1	1	1	KIAA0368	KIAA0368
hsa-miR-1305	1	0	1	0	1	1	THSD7B	thrombospondin, type I, domain containing 7B
hsa-miR-1305	1	0	1	0	1	1	ODZ3	odz, odd Oz/ten-m homolog 3 (Drosophila)
hsa-miR-1305	1	0	1	0	1	1	MEGF9	multiple EGF-like-domains 9
hsa-miR-1305	1	0	1	1	1	1	REPS2	RALBP1 associated Eps domain containing 2
hsa-miR-1305	0	0	1	1	1	1	G6PC2	glucose-6-phosphatase, catalytic, 2
hsa-miR-1305	1	0	1	0	1	1	PDE5A	phosphodiesterase 5A, cGMP-specific
hsa-miR-1305	1	0	1	1	1	1	ASIC1	acid-sensing (proton-gated) ion channel 1
hsa-miR-1305	0	0	1	1	1	1	ACPP	acid phosphatase, prostate
hsa-miR-1305	1	0	1	1	1	1	SLC25A5	solute carrier family 25 (mitochondrial carrier; adenine nucleotide translocator), member 5
hsa-miR-1305	1	0	1	1	1	1	BMP2	bone morphogenetic protein 2
hsa-miR-1305	1	0	1	0	1	1	BMPR2	bone morphogenetic protein receptor, type II (serine/threonine kinase)
hsa-miR-1305	1	0	1	0	1	1	CDK6	cyclin-dependent kinase 6
hsa-miR-1305	1	0	1	1	1	1	DYRK1A	dual-specificity tyrosine-(Y)-phosphorylation regulated kinase 1A
hsa-miR-1305	1	0	1	1	1	1	ELAVL1	ELAV (embryonic lethal, abnormal vision, Drosophila)-like 1 (Hu antigen R)
hsa-miR-1305	0	0	1	0	1	1	ELF5	E74-like factor 5 (ets domain transcription factor)
hsa-miR-1305	0	0	1	0	1	1	FMO2	flavin containing monooxygenase 2 (non-functional)
hsa-miR-1305	0	0	1	1	0	0	GAGE2C	G antigen 2C
hsa-miR-1305	1	0	1	1	1	1	NR6A1	nuclear receptor subfamily 6, group A, member 1
hsa-miR-1305	1	0	1	1	0	0	GDI1	GDP dissociation inhibitor 1
hsa-miR-1305	0	0	1	0	1	1	CXCL1	chemokine (C-X-C motif) ligand 1 (melanoma growth stimulating activity, alpha)
hsa-miR-1305	0	0	1	1	1	1	CXCL10	chemokine (C-X-C motif) ligand 10
hsa-miR-1305	1	0	1	1	1	1	ADD2	adducin 2 (beta)
hsa-miR-1305	1	0	1	1	1	1	AHR	aryl hydrocarbon receptor
hsa-miR-1305	1	0	1	1	1	1	BAAT	bile acid CoA: amino acid N-acyltransferase (glycine N-choloyltransferase)
hsa-miR-1305	1	0	1	1	1	1	BCL6	B-cell CLL/lymphoma 6
hsa-miR-1305	0	0	1	1	1	1	DST	dystonin
hsa-miR-1305	1	0	1	1	1	1	KLF5	Kruppel-like factor 5 (intestinal)
hsa-miR-1305	0	0	1	1	1	1	BTN1A1	butyrophilin, subfamily 1, member A1
hsa-miR-1305	1	0	1	1	1	1	CBFB	core-binding factor, beta subunit
hsa-miR-1305	0	0	1	1	1	1	CD1D	CD1d molecule
hsa-miR-1305	1	0	1	1	1	1	CDC25A	cell division cycle 25 homolog A (S. pombe)
hsa-miR-1305	1	0	1	1	1	1	CDK2	cyclin-dependent kinase 2
hsa-miR-1305	1	0	1	1	1	1	CLCN4	chloride channel, voltage-sensitive 4
hsa-miR-1305	1	0	1	1	1	1	COL15A1	collagen, type XV, alpha 1
hsa-miR-1305	1	0	1	1	1	1	CSNK2A1	casein kinase 2, alpha 1 polypeptide
hsa-miR-1305	0	0	1	1	1	1	CTSE	cathepsin E
hsa-miR-1305	1	0	1	1	1	1	DPP4	dipeptidyl-peptidase 4
hsa-miR-1305	0	0	1	1	0	0	EFNA5	ephrin-A5
hsa-miR-1305	1	0	1	0	1	1	FUT4	fucosyltransferase 4 (alpha (1,3) fucosyltransferase, myeloid-specific)
hsa-miR-1305	0	0	1	1	0	0	GARS	glycyl-tRNA synthetase
hsa-miR-1305	1	0	1	1	1	1	GRB2	growth factor receptor-bound protein 2
hsa-miR-1305	0	0	1	0	1	1	GYPA	glycophorin A (MNS blood group)
hsa-miR-1305	0	0	1	1	1	1	HOXA4	homeobox A4
hsa-miR-1305	0	0	1	0	1	1	ITGAV	integrin, alpha V
hsa-miR-1305	1	0	1	1	1	1	ITPR2	inositol 1,4,5-trisphosphate receptor, type 2
hsa-miR-1305	1	0	1	1	1	1	KCNJ10	potassium inwardly-rectifying channel, subfamily J, member 10
hsa-miR-1305	1	0	1	0	1	1	KIF3C	kinesin family member 3C
hsa-miR-1305	0	0	1	1	1	1	KLRC1	killer cell lectin-like receptor subfamily C, member 1
hsa-miR-1305	0	0	1	1	1	1	KLRC2	killer cell lectin-like receptor subfamily C, member 2
hsa-miR-1305	1	0	1	1	1	1	KPNA3	karyopherin alpha 3 (importin alpha 4)
hsa-miR-1305	1	0	1	1	1	1	IPO5	importin 5
hsa-miR-1305	1	0	1	0	1	1	MXD1	MAX dimerization protein 1
hsa-miR-1305	1	0	1	1	1	1	MAN2A1	mannosidase, alpha, class 2A, member 1
hsa-miR-1305	1	0	1	1	1	1	ME1	malic enzyme 1, NADP(+)-dependent, cytosolic
hsa-miR-1305	1	0	1	1	1	1	SCGB2A1	secretoglobin, family 2A, member 1
hsa-miR-1305	1	0	1	1	0	0	SCGB2A2	secretoglobin, family 2A, member 2
hsa-miR-1305	1	0	1	1	1	1	NPAT	nuclear protein, ataxia-telangiectasia locus
hsa-miR-1305	1	0	1	1	1	1	NPTX1	neuronal pentraxin I
hsa-miR-1305	0	0	1	0	1	1	OAZ2	ornithine decarboxylase antizyme 2
hsa-miR-1305	0	0	1	0	1	1	OPHN1	oligophrenin 1
hsa-miR-1305	0	0	1	1	1	1	P2RY1	purinergic receptor P2Y, G-protein coupled, 1
hsa-miR-1305	1	0	1	0	1	1	PAK2	p21 protein (Cdc42/Rac)-activated kinase 2
hsa-miR-1305	1	0	1	0	1	1	PAPPA	pregnancy-associated plasma protein A, pappalysin 1
hsa-miR-1305	0	0	1	1	1	1	PIGF	phosphatidylinositol glycan anchor biosynthesis, class F
hsa-miR-1305	1	0	1	1	1	1	PPP1CB	protein phosphatase 1, catalytic subunit, beta isozyme
hsa-miR-1305	0	0	1	1	1	1	PPP1R3A	protein phosphatase 1, regulatory subunit 3A
hsa-miR-1305	0	0	1	1	0	0	PPP1R8	protein phosphatase 1, regulatory subunit 8
hsa-miR-1305	1	0	1	0	1	1	MAPK4	mitogen-activated protein kinase 4
hsa-miR-1305	0	0	1	1	1	1	MAPK9	mitogen-activated protein kinase 9
hsa-miR-1305	0	0	1	1	1	1	MAP2K6	mitogen-activated protein kinase kinase 6
hsa-miR-1305	0	0	1	1	0	0	PRM1	protamine 1
hsa-miR-1305	0	0	1	1	1	1	PSMD10	proteasome (prosome, macropain) 26S subunit, non-ATPase, 10
hsa-miR-1305	1	0	1	1	1	1	PTPN2	protein tyrosine phosphatase, non-receptor type 2
hsa-miR-1305	1	0	1	1	1	1	PTPRO	protein tyrosine phosphatase, receptor type, O
hsa-miR-1305	1	0	1	1	1	1	PVRL1	poliovirus receptor-related 1 (herpesvirus entry mediator C)
hsa-miR-1305	1	0	1	1	1	1	RASA1	RAS p21 protein activator (GTPase activating protein) 1
hsa-miR-1305	1	0	1	1	1	1	ARID4A	AT rich interactive domain 4A (RBP1-like)
hsa-miR-1305	0	0	1	1	1	1	RGS2	regulator of G-protein signaling 2, 24kDa
hsa-miR-1305	1	0	1	1	1	1	SALL1	sal-like 1 (Drosophila)
hsa-miR-1305	1	0	1	0	1	1	CCL22	chemokine (C-C motif) ligand 22
hsa-miR-1305	0	0	1	1	1	1	SH3BGRL	SH3 domain binding glutamic acid-rich protein like
hsa-miR-1305	1	0	1	0	1	1	ST6GAL1	ST6 beta-galactosamide alpha-2,6-sialyltranferase 1
hsa-miR-1305	0	0	1	0	0	0	SLC18A2	solute carrier family 18 (vesicular monoamine), member 2
hsa-miR-1305	1	0	1	1	1	1	SMARCC1	SWI/SNF related, matrix associated, actin dependent regulator of chromatin, subfamily c, member 1
hsa-miR-1305	0	0	1	1	0	0	SNRPA1	small nuclear ribonucleoprotein polypeptide A'
hsa-miR-1305	1	0	1	0	1	1	SOX11	SRY (sex determining region Y)-box 11
hsa-miR-1305	0	0	1	1	1	1	UAP1	UDP-N-acteylglucosamine pyrophosphorylase 1
hsa-miR-1305	0	0	1	1	1	1	TAC1	tachykinin, precursor 1
hsa-miR-1305	1	0	1	1	1	1	TAF4	TAF4 RNA polymerase II, TATA box binding protein (TBP)-associated factor, 135kDa
hsa-miR-1305	0	0	1	0	1	1	TDGF1	teratocarcinoma-derived growth factor 1
hsa-miR-1305	0	0	1	1	1	1	THBS2	thrombospondin 2
hsa-miR-1305	1	0	1	1	1	1	NR2C2	nuclear receptor subfamily 2, group C, member 2
hsa-miR-1305	1	0	1	0	1	1	UBE2G2	ubiquitin-conjugating enzyme E2G 2
hsa-miR-1305	0	0	1	1	1	1	UBE2V2	ubiquitin-conjugating enzyme E2 variant 2
hsa-miR-1305	1	0	1	0	1	1	YWHAB	tyrosine 3-monooxygenase/tryptophan 5-monooxygenase activation protein, beta polypeptide
hsa-miR-1305	1	0	1	1	1	1	HMGA2	high mobility group AT-hook 2
hsa-miR-1305	1	0	1	1	1	1	AKAP1	A kinase (PRKA) anchor protein 1
hsa-miR-1305	1	0	1	1	1	1	NRIP1	nuclear receptor interacting protein 1
hsa-miR-1305	1	0	1	1	1	1	FZD7	frizzled family receptor 7
hsa-miR-1305	0	0	1	1	1	1	PIP5K1B	phosphatidylinositol-4-phosphate 5-kinase, type I, beta
hsa-miR-1305	1	0	1	1	1	1	DYRK2	dual-specificity tyrosine-(Y)-phosphorylation regulated kinase 2
hsa-miR-1305	0	0	1	1	1	1	KMO	kynurenine 3-monooxygenase (kynurenine 3-hydroxylase)
hsa-miR-1305	0	0	1	1	1	1	SLC25A12	solute carrier family 25 (aspartate/glutamate carrier), member 12
hsa-miR-1305	0	0	1	1	1	1	UNC5C	unc-5 homolog C (C. elegans)
hsa-miR-1305	1	0	1	1	1	1	B3GALT2	UDP-Gal:betaGlcNAc beta 1,3-galactosyltransferase, polypeptide 2
hsa-miR-1305	0	0	1	1	1	1	TNFRSF11A	tumor necrosis factor receptor superfamily, member 11a, NFKB activator
hsa-miR-1305	0	0	1	1	1	1	TRIM24	tripartite motif containing 24
hsa-miR-1305	0	0	1	1	0	0	SAP30	Sin3A-associated protein, 30kDa
hsa-miR-1305	1	0	1	1	1	1	IQGAP1	IQ motif containing GTPase activating protein 1
hsa-miR-1305	1	0	1	1	1	1	KAT2B	K(lysine) acetyltransferase 2B
hsa-miR-1305	0	0	1	1	1	1	TIMELESS	timeless homolog (Drosophila)
hsa-miR-1305	1	0	1	0	1	1	WASL	Wiskott-Aldrich syndrome-like
hsa-miR-1305	1	0	1	1	1	1	ACOX1	acyl-CoA oxidase 1, palmitoyl
hsa-miR-1305	0	0	1	1	1	1	CDKN1B	cyclin-dependent kinase inhibitor 1B (p27, Kip1)
hsa-miR-1305	1	0	1	1	1	1	EFNB2	ephrin-B2
hsa-miR-1305	0	0	1	0	1	1	EIF4EBP2	eukaryotic translation initiation factor 4E binding protein 2
hsa-miR-1305	1	0	1	1	1	1	GMFB	glia maturation factor, beta
hsa-miR-1305	1	0	1	0	1	1	SLC1A2	solute carrier family 1 (glial high affinity glutamate transporter), member 2
hsa-miR-1305	1	0	1	1	1	1	SOCS6	suppressor of cytokine signaling 6
hsa-miR-1305	0	0	1	1	1	1	HOMER1	homer homolog 1 (Drosophila)
hsa-miR-1305	1	0	1	1	1	1	GDA	guanine deaminase
hsa-miR-1305	1	0	1	0	1	1	RUNX1T1	runt-related transcription factor 1; translocated to, 1 (cyclin D-related)
hsa-miR-1305	0	0	1	1	1	1	COL12A1	collagen, type XII, alpha 1
hsa-miR-1305	1	0	1	1	1	1	CREB1	cAMP responsive element binding protein 1
hsa-miR-1305	1	0	1	1	1	1	DBN1	drebrin 1
hsa-miR-1305	0	0	1	1	1	1	DDX10	DEAD (Asp-Glu-Ala-Asp) box polypeptide 10
hsa-miR-1305	1	0	1	1	1	1	DLX2	distal-less homeobox 2
hsa-miR-1305	1	0	1	1	1	1	ENSA	endosulfine alpha
hsa-miR-1305	1	0	1	0	1	1	ETV5	ets variant 5
hsa-miR-1305	1	0	1	0	1	1	FGF5	fibroblast growth factor 5
hsa-miR-1305	0	0	1	0	1	1	GALNT3	UDP-N-acetyl-alpha-D-galactosamine:polypeptide N-acetylgalactosaminyltransferase 3 (GalNAc-T3)
hsa-miR-1305	0	0	1	1	1	1	FOXA1	forkhead box A1
hsa-miR-1305	0	0	1	1	1	1	NDUFC2	NADH dehydrogenase (ubiquinone) 1, subcomplex unknown, 2, 14.5kDa
hsa-miR-1305	0	0	1	1	1	1	SDPR	serum deprivation response
hsa-miR-1305	1	0	1	1	1	1	RAB11A	RAB11A, member RAS oncogene family
hsa-miR-1305	1	0	1	1	1	1	MTMR6	myotubularin related protein 6
hsa-miR-1305	0	0	1	1	1	1	LATS1	LATS, large tumor suppressor, homolog 1 (Drosophila)
hsa-miR-1305	0	0	1	0	1	1	CXorf1	chromosome X open reading frame 1
hsa-miR-1305	1	0	1	1	1	1	SCAF11	SR-related CTD-associated factor 11
hsa-miR-1305	0	0	1	1	1	1	SLC33A1	solute carrier family 33 (acetyl-CoA transporter), member 1
hsa-miR-1305	1	0	1	1	1	1	XPR1	xenotropic and polytropic retrovirus receptor 1
hsa-miR-1305	1	0	1	0	1	1	VAMP3	vesicle-associated membrane protein 3 (cellubrevin)
hsa-miR-1305	1	0	1	1	1	1	KIF3B	kinesin family member 3B
hsa-miR-1305	0	0	1	1	0	0	SLC22A14	solute carrier family 22, member 14
hsa-miR-1305	0	0	1	1	1	1	EIF2AK3	eukaryotic translation initiation factor 2-alpha kinase 3
hsa-miR-1305	1	0	1	1	1	1	ONECUT2	one cut homeobox 2
hsa-miR-1305	1	0	1	1	1	1	KIF23	kinesin family member 23
hsa-miR-1305	0	0	1	1	1	1	CALB1	calbindin 1, 28kDa
hsa-miR-1305	0	0	1	1	1	1	CDKN2B	cyclin-dependent kinase inhibitor 2B (p15, inhibits CDK4)
hsa-miR-1305	1	0	1	0	1	1	KRAS	v-Ki-ras2 Kirsten rat sarcoma viral oncogene homolog
hsa-miR-1305	0	0	1	1	0	0	PFN1	profilin 1
hsa-miR-1305	1	0	1	1	1	1	PIK3CD	phosphatidylinositol-4,5-bisphosphate 3-kinase, catalytic subunit delta
hsa-miR-1305	1	0	1	1	1	1	KDM5A	lysine (K)-specific demethylase 5A
hsa-miR-1305	1	0	1	0	1	1	SEL1L	sel-1 suppressor of lin-12-like (C. elegans)
hsa-miR-1305	1	0	1	1	1	1	SIAH2	siah E3 ubiquitin protein ligase 2
hsa-miR-1305	1	0	1	1	1	1	TLE1	transducin-like enhancer of split 1 (E(sp1) homolog, Drosophila)
hsa-miR-1305	1	0	1	1	1	1	GFPT2	glutamine-fructose-6-phosphate transaminase 2
hsa-miR-1305	1	0	1	1	1	1	MED13	mediator complex subunit 13
hsa-miR-1305	1	0	1	0	1	1	NUP153	nucleoporin 153kDa
hsa-miR-1305	0	0	1	1	1	1	ABCD2	ATP-binding cassette, sub-family D (ALD), member 2
hsa-miR-1305	1	0	1	1	1	1	FOXN3	forkhead box N3
hsa-miR-1305	1	0	1	1	1	1	DLX3	distal-less homeobox 3
hsa-miR-1305	1	0	1	1	0	0	EFNA4	ephrin-A4
hsa-miR-1305	1	0	1	1	1	1	HSPA5	heat shock 70kDa protein 5 (glucose-regulated protein, 78kDa)
hsa-miR-1305	0	0	1	1	1	1	NUP98	nucleoporin 98kDa
hsa-miR-1305	0	0	1	1	1	1	CXCL11	chemokine (C-X-C motif) ligand 11
hsa-miR-1305	1	0	1	1	1	1	GABBR2	gamma-aminobutyric acid (GABA) B receptor, 2
hsa-miR-1305	1	0	1	1	1	1	MAFB	v-maf musculoaponeurotic fibrosarcoma oncogene homolog B (avian)
hsa-miR-1305	1	0	1	1	1	1	AKT3	v-akt murine thymoma viral oncogene homolog 3 (protein kinase B, gamma)
hsa-miR-1305	0	0	1	1	1	1	INSL5	insulin-like 5
hsa-miR-1305	1	0	1	1	1	1	PIGK	phosphatidylinositol glycan anchor biosynthesis, class K
hsa-miR-1305	1	0	1	1	1	1	ABCA1	ATP-binding cassette, sub-family A (ABC1), member 1
hsa-miR-1305	1	0	1	1	1	1	SCARB2	scavenger receptor class B, member 2
hsa-miR-1305	1	0	1	1	1	1	GTF2E1	general transcription factor IIE, polypeptide 1, alpha 56kDa
hsa-miR-1305	1	0	1	1	1	1	MAB21L1	mab-21-like 1 (C. elegans)
hsa-miR-1305	0	0	1	0	1	1	POU3F2	POU class 3 homeobox 2
hsa-miR-1305	0	0	1	1	1	1	CCL8	chemokine (C-C motif) ligand 8
hsa-miR-1305	0	0	1	1	1	1	SOX3	SRY (sex determining region Y)-box 3
hsa-miR-1305	1	0	1	1	1	1	EVI5	ecotropic viral integration site 5
hsa-miR-1305	1	0	1	1	1	1	ST8SIA4	ST8 alpha-N-acetyl-neuraminide alpha-2,8-sialyltransferase 4
hsa-miR-1305	1	0	1	0	1	1	TSPAN2	tetraspanin 2
hsa-miR-1305	0	0	1	0	1	1	CD96	CD96 molecule
hsa-miR-1305	1	0	1	1	1	1	SPRY1	sprouty homolog 1, antagonist of FGF signaling (Drosophila)
hsa-miR-1305	1	0	1	1	1	1	GOLGA3	golgin A3
hsa-miR-1305	1	0	1	0	1	1	SMAD3	SMAD family member 3
hsa-miR-1305	1	0	1	1	1	1	FOXO4	forkhead box O4
hsa-miR-1305	1	0	1	1	1	1	PRCC	papillary renal cell carcinoma (translocation-associated)
hsa-miR-1305	1	0	1	1	1	1	LIPG	lipase, endothelial
hsa-miR-1305	1	0	1	0	1	1	SPATA2	spermatogenesis associated 2
hsa-miR-1305	1	0	1	1	1	1	CITED2	Cbp/p300-interacting transactivator, with Glu/Asp-rich carboxy-terminal domain, 2
hsa-miR-1305	1	0	1	1	1	1	SPON1	spondin 1, extracellular matrix protein
hsa-miR-1305	1	0	1	1	1	1	CAPZA2	capping protein (actin filament) muscle Z-line, alpha 2
hsa-miR-1305	1	0	1	1	1	1	DYNC1LI2	dynein, cytoplasmic 1, light intermediate chain 2
hsa-miR-1305	1	0	1	1	1	1	NFATC1	nuclear factor of activated T-cells, cytoplasmic, calcineurin-dependent 1
hsa-miR-1305	1	0	1	1	1	1	NR4A2	nuclear receptor subfamily 4, group A, member 2
hsa-miR-1305	1	0	1	1	1	1	ORC2	origin recognition complex, subunit 2
hsa-miR-1305	1	0	1	1	1	1	PDGFRA	platelet-derived growth factor receptor, alpha polypeptide
hsa-miR-1305	1	0	1	1	1	1	PFKFB2	6-phosphofructo-2-kinase/fructose-2,6-biphosphatase 2
hsa-miR-1305	1	0	1	0	1	1	PITPNA	phosphatidylinositol transfer protein, alpha
hsa-miR-1305	1	0	1	0	1	1	PPP1R2	protein phosphatase 1, regulatory (inhibitor) subunit 2
hsa-miR-1305	1	0	1	0	1	1	PRKAA2	protein kinase, AMP-activated, alpha 2 catalytic subunit
hsa-miR-1305	1	0	1	1	1	1	RAD21	RAD21 homolog (S. pombe)
hsa-miR-1305	1	0	1	1	1	1	STK4	serine/threonine kinase 4
hsa-miR-1305	1	0	1	1	1	1	BASP1	brain abundant, membrane attached signal protein 1
hsa-miR-1305	1	0	1	1	1	1	ZNF238	zinc finger protein 238
hsa-miR-1305	1	0	1	1	1	1	NEBL	nebulette
hsa-miR-1305	1	0	1	1	1	1	MAB21L2	mab-21-like 2 (C. elegans)
hsa-miR-1305	1	0	1	1	1	1	PAIP1	poly(A) binding protein interacting protein 1
hsa-miR-1305	1	0	1	0	1	1	GNAI3	guanine nucleotide binding protein (G protein), alpha inhibiting activity polypeptide 3
hsa-miR-1305	0	0	1	0	1	1	SLC16A2	solute carrier family 16, member 2 (thyroid hormone transporter)
hsa-miR-1305	0	0	1	1	1	1	KHDRBS3	KH domain containing, RNA binding, signal transduction associated 3
hsa-miR-1305	1	0	1	1	1	1	CTCF	CCCTC-binding factor (zinc finger protein)
hsa-miR-1305	1	0	1	0	1	1	MAP4K5	mitogen-activated protein kinase kinase kinase kinase 5
hsa-miR-1305	1	0	1	1	1	1	CORIN	corin, serine peptidase
hsa-miR-1305	1	0	1	1	1	1	ZBTB6	zinc finger and BTB domain containing 6
hsa-miR-1305	0	0	1	1	0	0	NMU	neuromedin U
hsa-miR-1305	0	0	1	1	1	1	FGL2	fibrinogen-like 2
hsa-miR-1305	0	0	1	1	1	1	LYVE1	lymphatic vessel endothelial hyaluronan receptor 1
hsa-miR-1305	1	0	1	1	1	1	SPIN1	spindlin 1
hsa-miR-1305	1	0	1	1	1	1	HIVEP2	human immunodeficiency virus type I enhancer binding protein 2
hsa-miR-1305	0	0	1	1	1	1	SYPL1	synaptophysin-like 1
hsa-miR-1305	1	0	1	1	1	1	BTG2	BTG family, member 2
hsa-miR-1305	0	0	1	1	1	1	PKIA	protein kinase (cAMP-dependent, catalytic) inhibitor alpha
hsa-miR-1305	1	0	1	1	1	1	B3GNT1	UDP-GlcNAc:betaGal beta-1,3-N-acetylglucosaminyltransferase 1
hsa-miR-1305	1	0	1	1	1	1	RIT1	Ras-like without CAAX 1
hsa-miR-1305	1	0	1	1	1	1	SKP1	S-phase kinase-associated protein 1
hsa-miR-1305	1	0	1	0	1	1	SLC5A3	solute carrier family 5 (sodium/myo-inositol cotransporter), member 3
hsa-miR-1305	0	0	1	1	1	1	TAF5	TAF5 RNA polymerase II, TATA box binding protein (TBP)-associated factor, 100kDa
hsa-miR-1305	0	0	1	1	1	1	NPM3	nucleophosmin/nucleoplasmin 3
hsa-miR-1305	1	0	1	1	1	1	WWP1	WW domain containing E3 ubiquitin protein ligase 1
hsa-miR-1305	1	0	1	1	1	1	SOX30	SRY (sex determining region Y)-box 30
hsa-miR-1305	1	0	1	1	1	1	ESM1	endothelial cell-specific molecule 1
hsa-miR-1305	1	0	1	1	1	1	ADAMTS5	ADAM metallopeptidase with thrombospondin type 1 motif, 5
hsa-miR-1305	1	0	1	1	1	1	SSR3	signal sequence receptor, gamma (translocon-associated protein gamma)
hsa-miR-1305	1	0	1	1	1	1	UTRN	utrophin
hsa-miR-1305	1	0	1	1	1	1	VCP	valosin containing protein
hsa-miR-1305	1	0	1	1	1	1	ZIC2	Zic family member 2
hsa-miR-1305	1	0	1	1	1	1	ZNF81	zinc finger protein 81
hsa-miR-1305	0	0	1	0	1	1	ZXDB	zinc finger, X-linked, duplicated B
hsa-miR-1305	1	0	1	1	1	1	C14orf1	chromosome 14 open reading frame 1
hsa-miR-1305	1	0	1	0	1	1	CHP1	calcineurin-like EF hand protein 1
hsa-miR-1305	1	0	1	1	1	1	KLF12	Kruppel-like factor 12
hsa-miR-1305	1	0	1	1	1	1	CBX3	chromobox homolog 3
hsa-miR-1305	0	0	1	0	1	1	AP4E1	adaptor-related protein complex 4, epsilon 1 subunit
hsa-miR-1305	1	0	1	1	1	1	PHLDA1	pleckstrin homology-like domain, family A, member 1
hsa-miR-1305	1	0	1	1	1	1	PADI2	peptidyl arginine deiminase, type II
hsa-miR-1305	1	0	1	1	1	1	TARDBP	TAR DNA binding protein
hsa-miR-1305	1	0	1	1	1	1	ELL2	elongation factor, RNA polymerase II, 2
hsa-miR-1305	0	0	1	1	0	0	STAP1	signal transducing adaptor family member 1
hsa-miR-1305	0	0	1	1	0	0	GAGE8	G antigen 8
hsa-miR-1305	1	0	1	1	1	1	MGEA5	meningioma expressed antigen 5 (hyaluronidase)
hsa-miR-1305	0	0	1	1	1	1	SEPHS2	selenophosphate synthetase 2
hsa-miR-1305	1	0	1	1	1	1	HEY2	hairy/enhancer-of-split related with YRPW motif 2
hsa-miR-1305	1	0	1	1	1	1	HS2ST1	heparan sulfate 2-O-sulfotransferase 1
hsa-miR-1305	1	0	1	0	1	1	G3BP2	GTPase activating protein (SH3 domain) binding protein 2
hsa-miR-1305	1	0	1	0	1	1	FBXL7	F-box and leucine-rich repeat protein 7
hsa-miR-1305	1	0	1	1	1	1	KIF4A	kinesin family member 4A
hsa-miR-1305	1	0	1	1	1	1	MAPRE1	microtubule-associated protein, RP/EB family, member 1
hsa-miR-1305	0	0	1	0	1	1	PIGN	phosphatidylinositol glycan anchor biosynthesis, class N
hsa-miR-1305	1	0	1	1	1	1	DNAJB9	DnaJ (Hsp40) homolog, subfamily B, member 9
hsa-miR-1305	1	0	1	0	1	1	BLOC1S6	biogenesis of lysosomal organelles complex-1, subunit 6, pallidin
hsa-miR-1305	0	0	1	0	1	1	TLL1	tolloid-like 1
hsa-miR-1305	1	0	1	0	1	1	FLRT2	fibronectin leucine rich transmembrane protein 2
hsa-miR-1305	0	0	1	1	1	1	DNAJC15	DnaJ (Hsp40) homolog, subfamily C, member 15
hsa-miR-1305	1	0	1	1	1	1	FLRT3	fibronectin leucine rich transmembrane protein 3
hsa-miR-1305	0	0	1	1	0	0	KCNJ14	potassium inwardly-rectifying channel, subfamily J, member 14
hsa-miR-1305	1	0	1	0	1	1	TRHDE	thyrotropin-releasing hormone degrading enzyme
hsa-miR-1305	1	0	1	1	1	1	SLC25A24	solute carrier family 25 (mitochondrial carrier; phosphate carrier), member 24
hsa-miR-1305	0	0	1	1	1	1	UBQLN1	ubiquilin 1
hsa-miR-1305	0	0	1	1	1	1	METTL7A	methyltransferase like 7A
hsa-miR-1305	1	0	1	1	1	1	ZBTB44	zinc finger and BTB domain containing 44
hsa-miR-1305	1	0	1	0	1	1	ODZ1	odz, odd Oz/ten-m homolog 1 (Drosophila)
hsa-miR-1305	1	0	1	1	1	1	YME1L1	YME1-like 1 (S. cerevisiae)
hsa-miR-1305	1	0	1	1	0	0	BRD4	bromodomain containing 4
hsa-miR-1305	1	0	1	1	1	1	SLC7A11	solute carrier family 7 (anionic amino acid transporter light chain, xc- system), member 11
hsa-miR-1305	0	0	1	0	1	1	EID1	EP300 interacting inhibitor of differentiation 1
hsa-miR-1305	1	0	1	0	1	1	RNF11	ring finger protein 11
hsa-miR-1305	0	0	1	1	1	1	TSPAN13	tetraspanin 13
hsa-miR-1305	1	0	1	1	1	1	ZBTB11	zinc finger and BTB domain containing 11
hsa-miR-1305	1	0	1	1	1	1	SERP1	stress-associated endoplasmic reticulum protein 1
hsa-miR-1305	0	0	1	1	0	0	UBE2S	ubiquitin-conjugating enzyme E2S
hsa-miR-1305	1	0	1	1	1	1	ERO1L	ERO1-like (S. cerevisiae)
hsa-miR-1305	1	0	1	1	1	1	ZNF592	zinc finger protein 592
hsa-miR-1305	1	0	1	1	1	1	RALGPS1	Ral GEF with PH domain and SH3 binding motif 1
hsa-miR-1305	0	0	1	1	1	1	PHF14	PHD finger protein 14
hsa-miR-1305	1	0	1	0	1	1	BZW1	basic leucine zipper and W2 domains 1
hsa-miR-1305	1	0	1	0	1	1	EDEM1	ER degradation enhancer, mannosidase alpha-like 1
hsa-miR-1305	1	0	1	1	1	1	ARHGAP32	Rho GTPase activating protein 32
hsa-miR-1305	1	0	1	1	1	1	TBKBP1	TBK1 binding protein 1
hsa-miR-1305	0	0	1	1	1	1	FRMPD4	FERM and PDZ domain containing 4
hsa-miR-1305	1	0	1	0	1	1	TOX	thymocyte selection-associated high mobility group box
hsa-miR-1305	1	0	1	0	1	1	KIAA0513	KIAA0513
hsa-miR-1305	1	0	1	1	1	1	RASSF2	Ras association (RalGDS/AF-6) domain family member 2
hsa-miR-1305	1	0	1	0	1	1	SERTAD2	SERTA domain containing 2
hsa-miR-1305	1	0	1	1	1	1	MRPL19	mitochondrial ribosomal protein L19
hsa-miR-1305	1	0	1	1	1	1	JAKMIP2	janus kinase and microtubule interacting protein 2
hsa-miR-1305	1	0	1	0	1	1	PJA2	praja ring finger 2, E3 ubiquitin protein ligase
hsa-miR-1305	0	0	1	1	1	1	ZBED4	zinc finger, BED-type containing 4
hsa-miR-1305	1	0	1	1	1	1	ARHGAP44	Rho GTPase activating protein 44
hsa-miR-1305	1	0	1	0	1	1	KBTBD11	kelch repeat and BTB (POZ) domain containing 11
hsa-miR-1305	1	0	1	0	1	1	RAB11FIP2	RAB11 family interacting protein 2 (class I)
hsa-miR-1305	0	0	1	0	1	1	PPM1E	protein phosphatase, Mg2+/Mn2+ dependent, 1E
hsa-miR-1305	1	0	1	0	1	1	ICK	intestinal cell (MAK-like) kinase
hsa-miR-1305	1	0	1	1	1	1	SPAST	spastin
hsa-miR-1305	1	0	1	1	1	1	SORCS3	sortilin-related VPS10 domain containing receptor 3
hsa-miR-1305	1	0	1	1	1	1	RAB21	RAB21, member RAS oncogene family
hsa-miR-1305	1	0	1	1	1	1	SPEN	spen homolog, transcriptional regulator (Drosophila)
hsa-miR-1305	1	0	1	1	1	1	USP33	ubiquitin specific peptidase 33
hsa-miR-1305	0	0	1	1	1	1	FTSJD2	FtsJ methyltransferase domain containing 2
hsa-miR-1305	1	0	1	1	1	1	TAB2	TGF-beta activated kinase 1/MAP3K7 binding protein 2
hsa-miR-1305	1	0	1	0	1	1	ZZEF1	zinc finger, ZZ-type with EF-hand domain 1
hsa-miR-1305	1	0	1	0	1	1	LARP4B	La ribonucleoprotein domain family, member 4B
hsa-miR-1305	0	0	1	1	1	1	ARL6IP1	ADP-ribosylation factor-like 6 interacting protein 1
hsa-miR-1305	0	0	1	1	1	1	FBXO28	F-box protein 28
hsa-miR-1305	1	0	1	1	0	0	KIAA0556	KIAA0556
hsa-miR-1305	1	0	1	0	1	1	KIAA1024	KIAA1024
hsa-miR-1305	1	0	1	1	1	1	CUX2	cut-like homeobox 2
hsa-miR-1305	1	0	1	0	1	1	KHNYN	KH and NYN domain containing
hsa-miR-1305	1	0	1	0	1	1	ARHGEF12	Rho guanine nucleotide exchange factor (GEF) 12
hsa-miR-1305	1	0	1	0	1	1	SRGAP2	SLIT-ROBO Rho GTPase activating protein 2
hsa-miR-1305	0	0	1	1	1	1	ADNP	activity-dependent neuroprotector homeobox
hsa-miR-1305	0	0	1	1	1	1	NBPF14	neuroblastoma breakpoint family, member 14
hsa-miR-1305	0	0	1	1	1	1	ZNF10	zinc finger protein 10
hsa-miR-1305	1	0	1	1	1	1	CNOT6	CCR4-NOT transcription complex, subunit 6
hsa-miR-1305	1	0	1	1	1	1	CNRIP1	cannabinoid receptor interacting protein 1
hsa-miR-1305	0	0	1	1	1	1	SOSTDC1	sclerostin domain containing 1
hsa-miR-1305	1	0	1	0	1	1	GLCE	glucuronic acid epimerase
hsa-miR-1305	1	0	1	1	1	1	LTN1	listerin E3 ubiquitin protein ligase 1
hsa-miR-1305	1	0	1	0	1	1	ERC2	ELKS/RAB6-interacting/CAST family member 2
hsa-miR-1305	1	0	1	1	0	0	POLDIP2	polymerase (DNA-directed), delta interacting protein 2
hsa-miR-1305	1	0	1	1	1	1	ABCA12	ATP-binding cassette, sub-family A (ABC1), member 12
hsa-miR-1305	0	0	1	1	1	1	HMP19	HMP19 protein
hsa-miR-1305	1	0	1	1	0	0	YBX2	Y box binding protein 2
hsa-miR-1305	1	0	1	0	1	1	KLF13	Kruppel-like factor 13
hsa-miR-1305	0	0	1	1	1	1	SCCPDH	saccharopine dehydrogenase (putative)
hsa-miR-1305	1	0	1	1	1	1	UBE2J1	ubiquitin-conjugating enzyme E2, J1
hsa-miR-1305	0	0	1	1	1	1	PPIL1	peptidylprolyl isomerase (cyclophilin)-like 1
hsa-miR-1305	1	0	1	1	1	1	GOLT1B	golgi transport 1B
hsa-miR-1305	0	0	1	1	1	1	HDGFRP3	hepatoma-derived growth factor, related protein 3
hsa-miR-1305	1	0	1	0	1	1	WNT16	wingless-type MMTV integration site family, member 16
hsa-miR-1305	0	0	1	1	1	1	RAB10	RAB10, member RAS oncogene family
hsa-miR-1305	1	0	1	1	1	1	VGLL3	vestigial like 3 (Drosophila)
hsa-miR-1305	0	0	1	1	1	1	VPS29	vacuolar protein sorting 29 homolog (S. cerevisiae)
hsa-miR-1305	1	0	1	1	1	1	AKAP11	A kinase (PRKA) anchor protein 11
hsa-miR-1305	1	0	1	1	1	1	RNF138	ring finger protein 138, E3 ubiquitin protein ligase
hsa-miR-1305	1	0	1	1	1	1	ARID4B	AT rich interactive domain 4B (RBP1-like)
hsa-miR-1305	0	0	1	1	0	0	TRMT112	tRNA methyltransferase 11-2 homolog (S. cerevisiae)
hsa-miR-1305	1	0	1	0	1	1	CRIM1	cysteine rich transmembrane BMP regulator 1 (chordin-like)
hsa-miR-1305	0	0	1	1	1	1	AMBN	ameloblastin (enamel matrix protein)
hsa-miR-1305	1	0	1	1	1	1	DNAJC27	DnaJ (Hsp40) homolog, subfamily C, member 27
hsa-miR-1305	0	0	1	1	1	1	CHCHD8	coiled-coil-helix-coiled-coil-helix domain containing 8
hsa-miR-1305	1	0	1	1	1	1	RAB6B	RAB6B, member RAS oncogene family
hsa-miR-1305	0	0	1	1	0	0	IL23A	interleukin 23, alpha subunit p19
hsa-miR-1305	1	0	1	0	1	1	KLHL3	kelch-like 3 (Drosophila)
hsa-miR-1305	1	0	1	1	1	1	SIX4	SIX homeobox 4
hsa-miR-1305	1	0	1	1	1	1	GALNT7	UDP-N-acetyl-alpha-D-galactosamine:polypeptide N-acetylgalactosaminyltransferase 7 (GalNAc-T7)
hsa-miR-1305	1	0	1	1	1	1	CPSF2	cleavage and polyadenylation specific factor 2, 100kDa
hsa-miR-1305	0	0	1	1	1	1	NKRF	NFKB repressing factor
hsa-miR-1305	1	0	1	0	1	1	UBE2Q1	ubiquitin-conjugating enzyme E2Q family member 1
hsa-miR-1305	0	0	1	0	1	1	TRIM44	tripartite motif containing 44
hsa-miR-1305	0	0	1	0	1	1	VEZT	vezatin, adherens junctions transmembrane protein
hsa-miR-1305	1	0	1	0	1	1	KCTD9	potassium channel tetramerisation domain containing 9
hsa-miR-1305	1	0	1	1	1	1	CNNM2	cyclin M2
hsa-miR-1305	0	0	1	1	0	0	NUP62CL	nucleoporin 62kDa C-terminal like
hsa-miR-1305	1	0	1	1	1	1	VPS13C	vacuolar protein sorting 13 homolog C (S. cerevisiae)
hsa-miR-1305	1	0	1	0	1	1	FAM46C	family with sequence similarity 46, member C
hsa-miR-1305	1	0	1	0	1	1	DCAF16	DDB1 and CUL4 associated factor 16
hsa-miR-1305	0	0	1	0	1	1	CWC25	CWC25 spliceosome-associated protein homolog (S. cerevisiae)
hsa-miR-1305	0	0	1	1	1	1	WHSC1L1	Wolf-Hirschhorn syndrome candidate 1-like 1
hsa-miR-1305	1	0	1	1	1	1	YTHDF1	YTH domain family, member 1
hsa-miR-1305	1	0	1	1	1	1	UBE2R2	ubiquitin-conjugating enzyme E2R 2
hsa-miR-1305	0	0	1	1	1	1	SOHLH2	spermatogenesis and oogenesis specific basic helix-loop-helix 2
hsa-miR-1305	1	0	1	1	1	1	RNF125	ring finger protein 125, E3 ubiquitin protein ligase
hsa-miR-1305	0	0	1	1	1	1	C2orf42	chromosome 2 open reading frame 42
hsa-miR-1305	1	0	1	1	1	1	GID8	GID complex subunit 8 homolog (S. cerevisiae)
hsa-miR-1305	0	0	1	1	0	0	PIH1D1	PIH1 domain containing 1
hsa-miR-1305	1	0	1	1	1	1	FBXO34	F-box protein 34
hsa-miR-1305	1	0	1	1	1	1	ARGLU1	arginine and glutamate rich 1
hsa-miR-1305	1	0	1	1	1	1	FIGN	fidgetin
hsa-miR-1305	0	0	1	1	0	0	WDR11	WD repeat domain 11
hsa-miR-1305	1	0	1	0	1	1	MSL2	male-specific lethal 2 homolog (Drosophila)
hsa-miR-1305	0	0	1	1	1	1	SEC61A2	Sec61 alpha 2 subunit (S. cerevisiae)
hsa-miR-1305	1	0	1	1	1	1	RIC8B	resistance to inhibitors of cholinesterase 8 homolog B (C. elegans)
hsa-miR-1305	1	0	1	1	1	1	RPRD1A	regulation of nuclear pre-mRNA domain containing 1A
hsa-miR-1305	0	0	1	1	1	1	RBM41	RNA binding motif protein 41
hsa-miR-1305	1	0	1	1	1	1	AGPAT5	1-acylglycerol-3-phosphate O-acyltransferase 5 (lysophosphatidic acid acyltransferase, epsilon)
hsa-miR-1305	1	0	1	0	1	1	LIN7C	lin-7 homolog C (C. elegans)
hsa-miR-1305	1	0	1	1	1	1	RSBN1	round spermatid basic protein 1
hsa-miR-1305	1	0	1	0	1	1	FOXJ2	forkhead box J2
hsa-miR-1305	0	0	1	1	1	1	STYK1	serine/threonine/tyrosine kinase 1
hsa-miR-1305	0	0	1	1	1	1	BDP1	B double prime 1, subunit of RNA polymerase III transcription initiation factor IIIB
hsa-miR-1305	0	0	1	1	1	1	CISD1	CDGSH iron sulfur domain 1
hsa-miR-1305	0	0	1	1	1	1	ZC3H15	zinc finger CCCH-type containing 15
hsa-miR-1305	0	0	1	0	0	0	FAM45B	family with sequence similarity 45, member A pseudogene
hsa-miR-1305	0	0	1	1	1	1	ECHDC1	enoyl CoA hydratase domain containing 1
hsa-miR-1305	1	0	1	1	1	1	ASH1L	ash1 (absent, small, or homeotic)-like (Drosophila)
hsa-miR-1305	1	0	1	1	1	1	AJAP1	adherens junctions associated protein 1
hsa-miR-1305	0	0	1	1	0	0	NDUFA12	NADH dehydrogenase (ubiquinone) 1 alpha subcomplex, 12
hsa-miR-1305	1	0	1	0	1	1	KLHL9	kelch-like 9 (Drosophila)
hsa-miR-1305	0	0	1	1	1	1	TERF2IP	telomeric repeat binding factor 2, interacting protein
hsa-miR-1305	1	0	1	0	1	1	FAM190B	family with sequence similarity 190, member B
hsa-miR-1305	1	0	1	0	1	1	CCDC93	coiled-coil domain containing 93
hsa-miR-1305	1	0	1	1	1	1	EPB41L4B	erythrocyte membrane protein band 4.1 like 4B
hsa-miR-1305	1	0	1	0	1	1	UBFD1	ubiquitin family domain containing 1
hsa-miR-1305	1	0	1	1	0	0	KCNQ5	potassium voltage-gated channel, KQT-like subfamily, member 5
hsa-miR-1305	1	0	1	0	1	1	TM9SF3	transmembrane 9 superfamily member 3
hsa-miR-1305	1	0	1	1	1	1	MDM1	Mdm1 nuclear protein homolog (mouse)
hsa-miR-1305	0	0	1	1	1	1	TMEM167B	transmembrane protein 167B
hsa-miR-1305	1	0	1	0	1	1	PAPOLB	poly(A) polymerase beta (testis specific)
hsa-miR-1305	1	0	1	1	1	1	FEM1C	fem-1 homolog c (C. elegans)
hsa-miR-1305	1	0	1	0	1	1	PMEPA1	prostate transmembrane protein, androgen induced 1
hsa-miR-1305	1	0	1	1	1	1	CCDC47	coiled-coil domain containing 47
hsa-miR-1305	1	0	1	0	1	1	OTUD7B	OTU domain containing 7B
hsa-miR-1305	0	0	1	1	0	0	ENTPD7	ectonucleoside triphosphate diphosphohydrolase 7
hsa-miR-1305	1	0	1	1	1	1	PCDH9	protocadherin 9
hsa-miR-1305	1	0	1	1	1	1	LYRM2	LYR motif containing 2
hsa-miR-1305	0	0	1	1	1	1	RIPK4	receptor-interacting serine-threonine kinase 4
hsa-miR-1305	1	0	1	0	1	1	DCUN1D1	DCN1, defective in cullin neddylation 1, domain containing 1 (S. cerevisiae)
hsa-miR-1305	1	0	1	1	1	1	RAB22A	RAB22A, member RAS oncogene family
hsa-miR-1305	0	0	1	1	0	0	AMIGO1	adhesion molecule with Ig-like domain 1
hsa-miR-1305	1	0	1	1	1	1	SLC12A5	solute carrier family 12 (potassium/chloride transporter), member 5
hsa-miR-1305	0	0	1	1	1	1	SHROOM4	shroom family member 4
hsa-miR-1305	1	0	1	1	1	1	USP31	ubiquitin specific peptidase 31
hsa-miR-1305	1	0	1	1	1	1	RNF150	ring finger protein 150
hsa-miR-1305	1	0	1	0	1	1	ZNF398	zinc finger protein 398
hsa-miR-1305	1	0	1	0	1	1	WDFY1	WD repeat and FYVE domain containing 1
hsa-miR-1305	0	0	1	1	1	1	KLHL1	kelch-like 1 (Drosophila)
hsa-miR-1305	0	0	1	1	0	0	PHRF1	PHD and ring finger domains 1
hsa-miR-1305	1	0	1	0	1	1	GPAM	glycerol-3-phosphate acyltransferase, mitochondrial
hsa-miR-1305	0	0	1	1	1	1	PPM1A	protein phosphatase, Mg2+/Mn2+ dependent, 1A
hsa-miR-1305	0	0	1	1	0	0	HIST1H2AJ	histone cluster 1, H2aj
hsa-miR-1305	1	0	1	1	1	1	HCN1	hyperpolarization activated cyclic nucleotide-gated potassium channel 1
hsa-miR-1305	1	0	1	1	1	1	CLDN1	claudin 1
hsa-miR-1305	0	0	1	1	0	0	SPINK2	serine peptidase inhibitor, Kazal type 2 (acrosin-trypsin inhibitor)
hsa-miR-1305	1	0	1	1	1	1	NTN4	netrin 4
hsa-miR-1305	1	0	1	1	1	1	SNX6	sorting nexin 6
hsa-miR-1305	0	0	1	0	1	1	CFL2	cofilin 2 (muscle)
hsa-miR-1305	1	0	1	1	1	1	ZFAND3	zinc finger, AN1-type domain 3
hsa-miR-1305	0	0	1	1	1	1	GJA3	gap junction protein, alpha 3, 46kDa
hsa-miR-1305	1	0	1	1	1	1	SEC24A	SEC24 family, member A (S. cerevisiae)
hsa-miR-1305	1	0	1	0	1	1	GAN	gigaxonin
hsa-miR-1305	1	0	1	1	1	1	MRPL17	mitochondrial ribosomal protein L17
hsa-miR-1305	0	0	1	1	1	1	FAM204A	family with sequence similarity 204, member A
hsa-miR-1305	0	0	1	1	1	1	CLSPN	claspin
hsa-miR-1305	1	0	1	1	1	1	GOLPH3	golgi phosphoprotein 3 (coat-protein)
hsa-miR-1305	1	0	1	1	1	1	ABCG4	ATP-binding cassette, sub-family G (WHITE), member 4
hsa-miR-1305	0	0	1	1	0	0	TFB2M	transcription factor B2, mitochondrial
hsa-miR-1305	1	0	1	1	1	1	SUDS3	suppressor of defective silencing 3 homolog (S. cerevisiae)
hsa-miR-1305	0	0	1	0	1	1	EBF2	early B-cell factor 2
hsa-miR-1305	0	0	1	1	0	0	NUCKS1	nuclear casein kinase and cyclin-dependent kinase substrate 1
hsa-miR-1305	0	0	1	1	1	1	OSBPL11	oxysterol binding protein-like 11
hsa-miR-1305	1	0	1	1	1	1	DEPTOR	DEP domain containing MTOR-interacting protein
hsa-miR-1305	1	0	1	1	1	1	RFX7	regulatory factor X, 7
hsa-miR-1305	1	0	1	0	1	1	BCL11B	B-cell CLL/lymphoma 11B (zinc finger protein)
hsa-miR-1305	1	0	1	1	1	1	REEP1	receptor accessory protein 1
hsa-miR-1305	0	0	1	1	1	1	MARCKSL1	MARCKS-like 1
hsa-miR-1305	1	0	1	1	1	1	SOWAHC	sosondowah ankyrin repeat domain family member C
hsa-miR-1305	1	0	1	1	1	1	GRAMD3	GRAM domain containing 3
hsa-miR-1305	1	0	1	1	1	1	GCC1	GRIP and coiled-coil domain containing 1
hsa-miR-1305	1	0	1	1	1	1	RNF128	ring finger protein 128, E3 ubiquitin protein ligase
hsa-miR-1305	1	0	1	1	1	1	C10orf76	chromosome 10 open reading frame 76
hsa-miR-1305	1	0	1	1	1	1	CCNJL	cyclin J-like
hsa-miR-1305	1	0	1	0	1	1	PLEKHF2	pleckstrin homology domain containing, family F (with FYVE domain) member 2
hsa-miR-1305	0	0	1	0	1	1	ZYG11B	zyg-11 homolog B (C. elegans)
hsa-miR-1305	0	0	1	1	1	1	GLT25D1	glycosyltransferase 25 domain containing 1
hsa-miR-1305	1	0	1	1	1	1	C15orf29	chromosome 15 open reading frame 29
hsa-miR-1305	1	0	1	0	1	1	ZFHX4	zinc finger homeobox 4
hsa-miR-1305	1	0	1	0	1	1	MOB3B	MOB kinase activator 3B
hsa-miR-1305	1	0	1	1	1	1	CLMP	CXADR-like membrane protein
hsa-miR-1305	1	0	1	1	1	1	L2HGDH	L-2-hydroxyglutarate dehydrogenase
hsa-miR-1305	1	0	1	0	1	1	NAA25	N(alpha)-acetyltransferase 25, NatB auxiliary subunit
hsa-miR-1305	0	0	1	1	0	0	CENPT	centromere protein T
hsa-miR-1305	1	0	1	1	1	1	NAA50	N(alpha)-acetyltransferase 50, NatE catalytic subunit
hsa-miR-1305	0	0	1	1	1	1	COQ10B	coenzyme Q10 homolog B (S. cerevisiae)
hsa-miR-1305	1	0	1	0	1	1	EDEM3	ER degradation enhancer, mannosidase alpha-like 3
hsa-miR-1305	0	0	1	1	1	1	SLC19A3	solute carrier family 19, member 3
hsa-miR-1305	1	0	1	1	1	1	CYB5B	cytochrome b5 type B (outer mitochondrial membrane)
hsa-miR-1305	1	0	1	1	1	1	JHDM1D	jumonji C domain containing histone demethylase 1 homolog D (S. cerevisiae)
hsa-miR-1305	1	0	1	0	1	1	SETD7	SET domain containing (lysine methyltransferase) 7
hsa-miR-1305	1	0	1	1	1	1	ITFG1	integrin alpha FG-GAP repeat containing 1
hsa-miR-1305	1	0	1	1	1	1	SGPP1	sphingosine-1-phosphate phosphatase 1
hsa-miR-1305	1	0	1	0	1	1	C1orf21	chromosome 1 open reading frame 21
hsa-miR-1305	1	0	1	1	1	1	ANKRD13C	ankyrin repeat domain 13C
hsa-miR-1305	1	0	1	1	1	1	MAP4	microtubule-associated protein 4
hsa-miR-1305	0	0	1	1	1	1	FCRL5	Fc receptor-like 5
hsa-miR-1305	1	0	1	0	1	1	TMEM47	transmembrane protein 47
hsa-miR-1305	0	0	1	1	1	1	KCNA7	potassium voltage-gated channel, shaker-related subfamily, member 7
hsa-miR-1305	0	0	1	0	1	1	ENAM	enamelin
hsa-miR-1305	0	0	1	1	1	1	MRPL14	mitochondrial ribosomal protein L14
hsa-miR-1305	1	0	1	1	1	1	FBXO30	F-box protein 30
hsa-miR-1305	1	0	1	1	1	1	DSEL	dermatan sulfate epimerase-like
hsa-miR-1305	1	0	1	1	1	1	SON	SON DNA binding protein
hsa-miR-1305	1	0	1	1	1	1	ARID5B	AT rich interactive domain 5B (MRF1-like)
hsa-miR-1305	1	0	1	1	1	1	ANTXR1	anthrax toxin receptor 1
hsa-miR-1305	0	0	1	1	0	0	ELMOD3	ELMO/CED-12 domain containing 3
hsa-miR-1305	1	0	1	0	1	1	FAR1	fatty acyl CoA reductase 1
hsa-miR-1305	1	0	1	1	0	0	TRAF7	TNF receptor-associated factor 7, E3 ubiquitin protein ligase
hsa-miR-1305	1	0	1	1	1	1	BRMS1L	breast cancer metastasis-suppressor 1-like
hsa-miR-1305	1	0	1	1	1	1	HOOK3	hook homolog 3 (Drosophila)
hsa-miR-1305	1	0	1	1	1	1	SYVN1	synovial apoptosis inhibitor 1, synoviolin
hsa-miR-1305	0	0	1	1	1	1	ZNF333	zinc finger protein 333
hsa-miR-1305	0	0	1	1	1	1	CHAMP1	chromosome alignment maintaining phosphoprotein 1
hsa-miR-1305	1	0	1	0	1	1	PPP1R15B	protein phosphatase 1, regulatory subunit 15B
hsa-miR-1305	0	0	1	1	1	1	C13orf33	chromosome 13 open reading frame 33
hsa-miR-1305	1	0	1	1	1	1	PCDH10	protocadherin 10
hsa-miR-1305	1	0	1	1	1	1	PCDH11Y	protocadherin 11 Y-linked
hsa-miR-1305	0	0	1	1	1	1	TRIM4	tripartite motif containing 4
hsa-miR-1305	1	0	1	0	1	1	EAF1	ELL associated factor 1
hsa-miR-1305	0	0	1	1	1	1	ZIC5	Zic family member 5
hsa-miR-1305	1	0	1	1	1	1	C5orf30	chromosome 5 open reading frame 30
hsa-miR-1305	1	0	1	0	1	1	PURB	purine-rich element binding protein B
hsa-miR-1305	0	0	1	1	1	1	SEC11C	SEC11 homolog C (S. cerevisiae)
hsa-miR-1305	1	0	1	1	1	1	TP53INP1	tumor protein p53 inducible nuclear protein 1
hsa-miR-1305	0	0	1	1	1	1	ARHGAP18	Rho GTPase activating protein 18
hsa-miR-1305	1	0	1	0	1	1	C20orf72	chromosome 20 open reading frame 72
hsa-miR-1305	0	0	1	1	1	1	MED8	mediator complex subunit 8
hsa-miR-1305	1	0	1	1	1	1	MAL2	mal, T-cell differentiation protein 2 (gene/pseudogene)
hsa-miR-1305	1	0	1	1	1	1	ESCO1	establishment of cohesion 1 homolog 1 (S. cerevisiae)
hsa-miR-1305	1	0	1	0	1	1	FAM129A	family with sequence similarity 129, member A
hsa-miR-1305	0	0	1	1	1	1	ANKRD30A	ankyrin repeat domain 30A
hsa-miR-1305	1	0	1	1	1	1	NAA15	N(alpha)-acetyltransferase 15, NatA auxiliary subunit
hsa-miR-1305	1	0	1	1	1	1	SEPT4	septin 4
hsa-miR-1305	0	0	1	1	1	1	RSAD2	radical S-adenosyl methionine domain containing 2
hsa-miR-1305	1	0	1	1	1	1	COL11A2	collagen, type XI, alpha 2
hsa-miR-1305	1	0	1	0	1	1	EDARADD	EDAR-associated death domain
hsa-miR-1305	1	0	1	0	1	1	SOCS4	suppressor of cytokine signaling 4
hsa-miR-1305	1	0	1	1	1	1	KLHL6	kelch-like 6 (Drosophila)
hsa-miR-1305	0	0	1	1	1	1	RGS18	regulator of G-protein signaling 18
hsa-miR-1305	1	0	1	1	1	1	WHSC1	Wolf-Hirschhorn syndrome candidate 1
hsa-miR-1305	1	0	1	1	1	1	BMPER	BMP binding endothelial regulator
hsa-miR-1305	1	0	1	1	1	1	ZAK	sterile alpha motif and leucine zipper containing kinase AZK
hsa-miR-1305	0	0	1	1	1	1	RFX3	regulatory factor X, 3 (influences HLA class II expression)
hsa-miR-1305	1	0	1	1	1	1	PANK1	pantothenate kinase 1
hsa-miR-1305	1	0	1	1	1	1	PCSK6	proprotein convertase subtilisin/kexin type 6
hsa-miR-1305	1	0	1	1	1	1	FAM105B	family with sequence similarity 105, member B
hsa-miR-1305	0	0	1	1	1	1	MRAP2	melanocortin 2 receptor accessory protein 2
hsa-miR-1305	0	0	1	1	1	1	CASC4	cancer susceptibility candidate 4
hsa-miR-1305	1	0	1	0	1	1	NUS1	nuclear undecaprenyl pyrophosphate synthase 1 homolog (S. cerevisiae)
hsa-miR-1305	1	0	1	0	1	1	SP1	Sp1 transcription factor
hsa-miR-1305	0	0	1	1	1	1	C1orf213	chromosome 1 open reading frame 213
hsa-miR-1305	1	0	1	0	1	1	FCHO2	FCH domain only 2
hsa-miR-1305	0	0	1	1	1	1	PPIL4	peptidylprolyl isomerase (cyclophilin)-like 4
hsa-miR-1305	0	0	1	0	1	1	SLC17A8	solute carrier family 17 (sodium-dependent inorganic phosphate cotransporter), member 8
hsa-miR-1305	1	0	1	1	1	1	ATRN	attractin
hsa-miR-1305	0	0	1	1	1	1	CASC5	cancer susceptibility candidate 5
hsa-miR-1305	1	0	1	0	1	1	CNOT6L	CCR4-NOT transcription complex, subunit 6-like
hsa-miR-1305	0	0	1	1	1	1	C15orf40	chromosome 15 open reading frame 40
hsa-miR-1305	0	0	1	1	0	0	DHRS13	dehydrogenase/reductase (SDR family) member 13
hsa-miR-1305	0	0	1	1	0	0	C2orf15	chromosome 2 open reading frame 15
hsa-miR-1305	1	0	1	0	1	1	CENPBD1	CENPB DNA-binding domains containing 1
hsa-miR-1305	0	0	1	1	1	1	DACT3	dapper, antagonist of beta-catenin, homolog 3 (Xenopus laevis)
hsa-miR-1305	1	0	1	1	1	1	MRPL30	mitochondrial ribosomal protein L30
hsa-miR-1305	0	0	1	1	1	1	HFE2	hemochromatosis type 2 (juvenile)
hsa-miR-1305	0	0	1	1	1	1	APOBEC3F	apolipoprotein B mRNA editing enzyme, catalytic polypeptide-like 3F
hsa-miR-1305	0	0	1	1	0	0	SPESP1	sperm equatorial segment protein 1
hsa-miR-1305	1	0	1	1	1	1	UBTD2	ubiquitin domain containing 2
hsa-miR-1305	1	0	1	0	1	1	SYT11	synaptotagmin XI
hsa-miR-1305	0	0	1	1	1	1	ERP27	endoplasmic reticulum protein 27
hsa-miR-1305	1	0	1	1	1	1	BHLHE22	basic helix-loop-helix family, member e22
hsa-miR-1305	0	0	1	1	1	1	DCAF4L2	DDB1 and CUL4 associated factor 4-like 2
hsa-miR-1305	0	0	1	1	1	1	PIWIL4	piwi-like 4 (Drosophila)
hsa-miR-1305	0	0	1	1	0	0	COMMD1	copper metabolism (Murr1) domain containing 1
hsa-miR-1305	1	0	1	1	1	1	C7orf60	chromosome 7 open reading frame 60
hsa-miR-1305	1	0	1	0	1	1	TMTC2	transmembrane and tetratricopeptide repeat containing 2
hsa-miR-1305	1	0	1	1	1	1	TCTEX1D1	Tctex1 domain containing 1
hsa-miR-1305	1	0	1	0	1	1	FAM116A	family with sequence similarity 116, member A
hsa-miR-1305	1	0	1	0	1	1	RWDD4	RWD domain containing 4
hsa-miR-1305	0	0	1	1	1	1	KHDRBS2	KH domain containing, RNA binding, signal transduction associated 2
hsa-miR-1305	1	0	1	1	1	1	ZCCHC5	zinc finger, CCHC domain containing 5
hsa-miR-1305	0	0	1	1	0	0	DOK6	docking protein 6
hsa-miR-1305	1	0	1	1	1	1	NXPH1	neurexophilin 1
hsa-miR-1305	1	0	1	1	1	1	ATXN7L1	ataxin 7-like 1
hsa-miR-1305	0	0	1	0	0	0	TCP11L2	t-complex 11 (mouse)-like 2
hsa-miR-1305	1	0	1	1	1	1	PDIK1L	PDLIM1 interacting kinase 1 like
hsa-miR-1305	1	0	1	1	1	1	WTAP	Wilms tumor 1 associated protein
hsa-miR-1305	0	0	1	0	1	1	KBTBD6	kelch repeat and BTB (POZ) domain containing 6
hsa-miR-1305	1	0	1	1	1	1	TCEANC2	transcription elongation factor A (SII) N-terminal and central domain containing 2
hsa-miR-1305	1	0	1	1	1	1	SYT14	synaptotagmin XIV
hsa-miR-1305	0	0	1	1	1	1	SLC22A7	solute carrier family 22 (organic anion transporter), member 7
hsa-miR-1305	1	0	1	0	1	1	ENPP6	ectonucleotide pyrophosphatase/phosphodiesterase 6
hsa-miR-1305	1	0	1	1	1	1	FBXL16	F-box and leucine-rich repeat protein 16
hsa-miR-1305	1	0	1	0	1	1	ZCCHC24	zinc finger, CCHC domain containing 24
hsa-miR-1305	0	0	1	0	1	1	VGLL2	vestigial like 2 (Drosophila)
hsa-miR-1305	1	0	1	1	1	1	HS6ST3	heparan sulfate 6-O-sulfotransferase 3
hsa-miR-1305	1	0	1	1	1	1	CREBRF	CREB3 regulatory factor
hsa-miR-1305	1	0	1	1	1	1	LCORL	ligand dependent nuclear receptor corepressor-like
hsa-miR-1305	0	0	1	0	1	1	RTP1	receptor (chemosensory) transporter protein 1
hsa-miR-1305	1	0	1	1	1	1	FNDC5	fibronectin type III domain containing 5
hsa-miR-1305	1	0	1	1	1	1	PKHD1	polycystic kidney and hepatic disease 1 (autosomal recessive)
hsa-miR-1305	1	0	1	1	1	1	SMG7	smg-7 homolog, nonsense mediated mRNA decay factor (C. elegans)
hsa-miR-1305	1	0	1	1	1	1	MOB1B	MOB kinase activator 1B
hsa-miR-1305	1	0	1	1	1	1	MMGT1	membrane magnesium transporter 1
hsa-miR-1305	1	0	1	1	1	1	TTBK2	tau tubulin kinase 2
hsa-miR-1305	0	0	1	1	1	1	C15orf26	chromosome 15 open reading frame 26
hsa-miR-1305	0	0	1	1	1	1	FNDC7	fibronectin type III domain containing 7
hsa-miR-1305	1	0	1	0	1	1	C3orf58	chromosome 3 open reading frame 58
hsa-miR-1305	0	0	1	1	1	1	UNC5CL	unc-5 homolog C (C. elegans)-like
hsa-miR-1305	0	0	1	0	1	1	C5orf64	chromosome 5 open reading frame 64
hsa-miR-1305	0	0	1	1	1	1	FAM133A	family with sequence similarity 133, member A
hsa-miR-1305	0	0	1	1	1	1	C3orf38	chromosome 3 open reading frame 38
hsa-miR-1305	0	0	1	1	1	1	CCDC75	coiled-coil domain containing 75
hsa-miR-1305	0	0	1	1	0	0	CHMP4B	charged multivesicular body protein 4B
hsa-miR-1305	1	0	1	1	1	1	INADL	InaD-like (Drosophila)
hsa-miR-1305	1	0	1	1	1	1	PPAP2B	phosphatidic acid phosphatase type 2B
hsa-miR-1305	1	0	1	1	1	1	LRRTM3	leucine rich repeat transmembrane neuronal 3
hsa-miR-1305	1	0	1	1	1	1	DCAF12L1	DDB1 and CUL4 associated factor 12-like 1
hsa-miR-1305	1	0	1	1	1	1	TMEM26	transmembrane protein 26
hsa-miR-1305	0	0	1	1	1	1	CMTM4	CKLF-like MARVEL transmembrane domain containing 4
hsa-miR-1305	1	0	1	1	1	1	SFXN2	sideroflexin 2
hsa-miR-1305	0	0	1	1	1	1	IL22RA2	interleukin 22 receptor, alpha 2
hsa-miR-1305	1	0	1	1	1	1	ERAS	ES cell expressed Ras
hsa-miR-1305	1	0	1	1	1	1	ZSCAN22	zinc finger and SCAN domain containing 22
hsa-miR-1305	0	0	1	1	0	0	CCDC144B	coiled-coil domain containing 144B (pseudogene)
hsa-miR-1305	0	0	1	0	1	1	VSIG1	V-set and immunoglobulin domain containing 1
hsa-miR-1305	0	0	1	1	1	1	SKA2	spindle and kinetochore associated complex subunit 2
hsa-miR-1305	1	0	1	1	1	1	SP8	Sp8 transcription factor
hsa-miR-1305	0	0	1	0	1	1	NBPF11	neuroblastoma breakpoint family, member 11
hsa-miR-1305	1	0	1	0	1	1	HNRNPA3	heterogeneous nuclear ribonucleoprotein A3
hsa-miR-1305	0	0	1	1	1	1	ISCA2	iron-sulfur cluster assembly 2 homolog (S. cerevisiae)
hsa-miR-1305	1	0	1	1	1	1	SPTY2D1	SPT2, Suppressor of Ty, domain containing 1 (S. cerevisiae)
hsa-miR-1305	1	0	1	1	1	1	TMEM65	transmembrane protein 65
hsa-miR-1305	1	0	1	0	1	1	SLC16A9	solute carrier family 16, member 9 (monocarboxylic acid transporter 9)
hsa-miR-1305	1	0	1	1	1	1	C1orf52	chromosome 1 open reading frame 52
hsa-miR-1305	1	0	1	1	1	1	AQP1	aquaporin 1 (Colton blood group)
hsa-miR-1305	1	0	1	1	1	1	GPRIN3	GPRIN family member 3
hsa-miR-1305	0	0	1	1	1	1	EMB	embigin
hsa-miR-1305	1	0	1	0	1	1	ZC3H6	zinc finger CCCH-type containing 6
hsa-miR-1305	0	0	1	1	1	1	COL25A1	collagen, type XXV, alpha 1
hsa-miR-1305	1	0	1	0	1	1	ACACA	acetyl-CoA carboxylase alpha
hsa-miR-1305	1	0	1	0	1	1	PRICKLE2	prickle homolog 2 (Drosophila)
hsa-miR-1305	1	0	1	1	1	1	STAC2	SH3 and cysteine rich domain 2
hsa-miR-1305	1	0	1	0	1	1	LHFPL3	lipoma HMGIC fusion partner-like 3
hsa-miR-1305	0	0	1	1	1	1	THAP1	THAP domain containing, apoptosis associated protein 1
hsa-miR-1305	1	0	1	1	1	1	NSUN4	NOP2/Sun domain family, member 4
hsa-miR-1305	0	0	1	1	1	1	MDFIC	MyoD family inhibitor domain containing
hsa-miR-1305	0	0	1	1	1	1	PFN4	profilin family, member 4
hsa-miR-1305	1	0	1	1	1	1	BLOC1S5	biogenesis of lysosomal organelles complex-1, subunit 5, muted
hsa-miR-1305	0	0	1	1	0	0	USP51	ubiquitin specific peptidase 51
hsa-miR-1305	1	0	1	1	0	0	KAZN	kazrin, periplakin interacting protein
hsa-miR-1305	1	0	1	1	1	1	GLYAT	glycine-N-acyltransferase
hsa-miR-1305	0	0	1	1	1	1	ZNF321P	zinc finger protein 321, pseudogene
hsa-miR-1305	1	0	1	0	1	1	CAPRIN1	cell cycle associated protein 1
hsa-miR-1305	0	0	1	1	1	1	SERTM1	serine-rich and transmembrane domain containing 1
hsa-miR-1305	0	0	1	1	1	1	CCDC18	coiled-coil domain containing 18
hsa-miR-1305	1	0	1	1	1	1	GADL1	glutamate decarboxylase-like 1
hsa-miR-1305	1	0	1	0	1	1	NCKAP5	NCK-associated protein 5
hsa-miR-1305	1	0	1	1	1	1	SKIDA1	SKI/DACH domain containing 1
hsa-miR-1305	0	0	1	0	0	0	C16orf47	chromosome 16 open reading frame 47
hsa-miR-1305	0	0	1	1	1	1	C15orf53	chromosome 15 open reading frame 53
hsa-miR-1305	0	0	1	0	1	1	FAM174B	family with sequence similarity 174, member B
hsa-miR-1305	1	0	1	1	1	1	ADAMTSL3	ADAMTS-like 3
hsa-miR-1305	1	0	1	1	1	1	CAPN3	calpain 3, (p94)
hsa-miR-1305	0	0	1	1	1	1	LYSMD1	LysM, putative peptidoglycan-binding, domain containing 1
hsa-miR-1305	0	0	1	0	1	1	TMEM215	transmembrane protein 215
hsa-miR-1305	1	0	1	0	1	1	STAT3	signal transducer and activator of transcription 3 (acute-phase response factor)
hsa-miR-1305	0	0	1	0	0	0	ESRRAP2	estrogen-related receptor alpha pseudogene 2
hsa-miR-1305	0	0	1	0	0	0	RAB9BP1	RAB9B, member RAS oncogene family pseudogene 1
hsa-miR-1305	0	0	1	0	0	0	ANXA2P3	annexin A2 pseudogene 3
hsa-miR-1305	0	0	1	0	0	0	TTTY12	testis-specific transcript, Y-linked 12 (non-protein coding)
hsa-miR-1305	0	0	1	0	0	0	SUMO1P1	SUMO1 pseudogene 1
hsa-miR-1305	0	0	1	0	0	0	GTF2IP1	general transcription factor IIi, pseudogene 1
hsa-miR-1305	0	0	1	0	0	0	NXF4	nuclear RNA export factor 4 pseudogene
hsa-miR-1305	0	0	1	0	0	0	RPL23AP32	ribosomal protein L23a pseudogene 32
hsa-miR-1305	0	0	1	0	0	0	HNRNPA3P1	heterogeneous nuclear ribonucleoprotein A3 pseudogene 1
hsa-miR-1305	0	0	1	0	0	0	SNORD56	small nucleolar RNA, C/D box 56
hsa-miR-1305	0	0	1	0	0	0	TPTE2P3	transmembrane phosphoinositide 3-phosphatase and tensin homolog 2 pseudogene 3
hsa-miR-1305	0	0	1	0	0	0	NEAT1	nuclear paraspeckle assembly transcript 1 (non-protein coding)
hsa-miR-1305	0	0	1	0	0	0	DUSP5P	dual specificity phosphatase 5 pseudogene
hsa-miR-1305	0	0	1	0	0	0	SNORA78	small nucleolar RNA, H/ACA box 78
hsa-miR-1305	0	0	1	0	0	0	HSP90B3P	heat shock protein 90kDa beta (Grp94), member 3, pseudogene
hsa-miR-1305	0	0	1	0	0	0	SNORD115-23	small nucleolar RNA, C/D box 115-23
hsa-miR-1305	0	0	1	0	0	0	PAR4	Prader-Willi/Angelman region gene 4
hsa-miR-1305	0	0	1	1	0	0	SNRPN	small nuclear ribonucleoprotein polypeptide N
hsa-miR-1305	1	0	1	0	1	1	NFIX	nuclear factor I/X (CCAAT-binding transcription factor)
hsa-miR-1305	0	0	1	0	0	0	GAGE3	G antigen 3
hsa-miR-1305	0	0	1	0	0	0	GAGE5	G antigen 5
hsa-miR-1305	0	0	1	0	0	0	GAGE6	G antigen 6
hsa-miR-1305	1	0	1	1	0	0	DTNB	dystrobrevin, beta
