# Supplementary material for: Profiling of Selected MicroRNAs in Proliferative Eutopic Endometrium of Women with Ovarian Endometriosis
Source: Biomed Res Int. 2015 Aug 20;2015:760698. doi: 10.1155/2015/760698 (PMC4558423; doi:10.1155/2015/760698)
Supplement: Supplementary file 1 — Table I: The names of miRNAs significantly differentially expressed between eutopic endometrium of patients with endometriosis vs eutopic endometrium of patients without endometriosis. Table II: The associations between miRNA and mRNA, which presents detailed results of the search of six major databases i.e targetscan, tarbase, miranda, mirbase, mirtarget2 and pictar. [file 760698.f1.zip › 760698.f1/Table II/hsa-miR-1321.tsv]

miR	targetscan	tarbase	miranda	mirbase	mirtarget2	pictar	GeneSymbol	GeneName
hsa-miR-1321	1	0	1	1	1	1	CHD9	chromodomain helicase DNA binding protein 9
hsa-miR-1321	1	0	1	1	0	0	SRCAP	Snf2-related CREBBP activator protein
hsa-miR-1321	1	0	1	1	0	0	RAPGEF2	Rap guanine nucleotide exchange factor (GEF) 2
hsa-miR-1321	1	0	1	0	1	1	KIAA0355	KIAA0355
hsa-miR-1321	1	0	1	1	1	1	ABCC5	ATP-binding cassette, sub-family C (CFTR/MRP), member 5
hsa-miR-1321	0	0	1	1	0	0	SIPA1	signal-induced proliferation-associated 1
hsa-miR-1321	1	0	1	0	1	1	PTPRT	protein tyrosine phosphatase, receptor type, T
hsa-miR-1321	0	0	1	1	1	1	C2CD2L	C2CD2-like
hsa-miR-1321	1	0	1	0	1	1	KIAA0408	KIAA0408
hsa-miR-1321	1	0	1	1	1	1	IQSEC2	IQ motif and Sec7 domain 2
hsa-miR-1321	1	0	1	1	1	1	GPATCH8	G patch domain containing 8
hsa-miR-1321	1	0	1	0	0	0	HECTD4	HECT domain containing E3 ubiquitin protein ligase 4
hsa-miR-1321	1	0	1	1	1	1	GIGYF2	GRB10 interacting GYF protein 2
hsa-miR-1321	1	0	1	1	0	0	ESYT1	extended synaptotagmin-like protein 1
hsa-miR-1321	0	0	1	1	1	1	MICAL2	microtubule associated monoxygenase, calponin and LIM domain containing 2
hsa-miR-1321	0	0	1	1	1	1	SEC31A	SEC31 homolog A (S. cerevisiae)
hsa-miR-1321	0	0	1	1	1	1	WDR47	WD repeat domain 47
hsa-miR-1321	1	0	1	0	0	0	DTX4	deltex homolog 4 (Drosophila)
hsa-miR-1321	1	0	1	1	1	1	BAHD1	bromo adjacent homology domain containing 1
hsa-miR-1321	1	0	1	1	1	1	CIT	citron (rho-interacting, serine/threonine kinase 21)
hsa-miR-1321	1	0	1	1	1	1	C11orf9	chromosome 11 open reading frame 9
hsa-miR-1321	1	0	1	1	1	1	PALLD	palladin, cytoskeletal associated protein
hsa-miR-1321	1	0	1	1	1	1	RPGRIP1L	RPGRIP1-like
hsa-miR-1321	1	0	1	1	1	1	FNBP4	formin binding protein 4
hsa-miR-1321	1	0	1	1	0	0	IGSF9B	immunoglobulin superfamily, member 9B
hsa-miR-1321	0	0	1	1	1	1	AGTPBP1	ATP/GTP binding protein 1
hsa-miR-1321	1	0	1	1	1	1	FOXJ3	forkhead box J3
hsa-miR-1321	1	0	1	1	1	1	PHF8	PHD finger protein 8
hsa-miR-1321	0	0	1	1	1	1	SEMA4A	sema domain, immunoglobulin domain (Ig), transmembrane domain (TM) and short cytoplasmic domain, (semaphorin) 4A
hsa-miR-1321	0	0	1	1	0	0	CIZ1	CDKN1A interacting zinc finger protein 1
hsa-miR-1321	1	0	1	0	1	1	SRGAP3	SLIT-ROBO Rho GTPase activating protein 3
hsa-miR-1321	1	0	1	1	0	0	KIAA1210	KIAA1210
hsa-miR-1321	1	0	1	1	1	1	MKL2	MKL/myocardin-like 2
hsa-miR-1321	0	0	1	0	0	0	MTA3	metastasis associated 1 family, member 3
hsa-miR-1321	0	0	1	1	1	1	COPS7A	COP9 constitutive photomorphogenic homolog subunit 7A (Arabidopsis)
hsa-miR-1321	0	0	1	1	1	1	TCF7L2	transcription factor 7-like 2 (T-cell specific, HMG-box)
hsa-miR-1321	1	0	1	0	0	0	NYNRIN	NYN domain and retroviral integrase containing
hsa-miR-1321	0	0	1	1	1	1	KLHL13	kelch-like 13 (Drosophila)
hsa-miR-1321	1	0	1	1	1	1	PCDH19	protocadherin 19
hsa-miR-1321	1	0	1	0	1	1	KCTD16	potassium channel tetramerisation domain containing 16
hsa-miR-1321	0	0	1	0	1	1	MUC3B	mucin 3B, cell surface associated
hsa-miR-1321	1	0	1	0	0	0	PITPNM2	phosphatidylinositol transfer protein, membrane-associated 2
hsa-miR-1321	1	0	1	1	0	0	KIAA1462	KIAA1462
hsa-miR-1321	1	0	1	1	1	1	BAZ2B	bromodomain adjacent to zinc finger domain, 2B
hsa-miR-1321	0	0	1	0	0	0	COL20A1	collagen, type XX, alpha 1
hsa-miR-1321	1	0	1	1	1	1	FAM214B	family with sequence similarity 214, member B
hsa-miR-1321	0	0	1	1	0	0	PQBP1	polyglutamine binding protein 1
hsa-miR-1321	1	0	1	1	0	0	KIAA1549	KIAA1549
hsa-miR-1321	0	0	1	0	0	0	CHD8	chromodomain helicase DNA binding protein 8
hsa-miR-1321	1	0	1	1	0	0	NCKAP5L	NCK-associated protein 5-like
hsa-miR-1321	1	0	1	1	0	0	MAGI3	membrane associated guanylate kinase, WW and PDZ domain containing 3
hsa-miR-1321	0	0	1	1	1	1	ZNF407	zinc finger protein 407
hsa-miR-1321	1	0	1	1	1	1	IKZF4	IKAROS family zinc finger 4 (Eos)
hsa-miR-1321	1	0	1	0	1	1	JPH4	junctophilin 4
hsa-miR-1321	1	0	1	1	1	1	NAV2	neuron navigator 2
hsa-miR-1321	1	0	1	1	1	1	HNRPDL	heterogeneous nuclear ribonucleoprotein D-like
hsa-miR-1321	0	0	1	1	0	0	SEC16B	SEC16 homolog B (S. cerevisiae)
hsa-miR-1321	1	0	1	1	1	1	BCL2L11	BCL2-like 11 (apoptosis facilitator)
hsa-miR-1321	0	0	1	1	0	0	TPGS2	tubulin polyglutamylase complex subunit 2
hsa-miR-1321	1	0	1	1	1	1	POGZ	pogo transposable element with ZNF domain
hsa-miR-1321	1	0	1	1	0	0	ADC	arginine decarboxylase
hsa-miR-1321	1	0	1	1	1	1	SH3TC2	SH3 domain and tetratricopeptide repeats 2
hsa-miR-1321	1	0	1	0	1	1	RNF43	ring finger protein 43
hsa-miR-1321	1	0	1	0	0	0	ZBTB34	zinc finger and BTB domain containing 34
hsa-miR-1321	1	0	1	1	1	1	C11orf57	chromosome 11 open reading frame 57
hsa-miR-1321	0	0	1	1	1	1	PAK3	p21 protein (Cdc42/Rac)-activated kinase 3
hsa-miR-1321	0	0	1	1	0	0	DDB2	damage-specific DNA binding protein 2, 48kDa
hsa-miR-1321	1	0	1	1	1	1	FAT2	FAT tumor suppressor homolog 2 (Drosophila)
hsa-miR-1321	0	0	1	0	0	0	TIFAB	TRAF-interacting protein with forkhead-associated domain, family member B
hsa-miR-1321	0	0	1	1	1	1	ZFAT	zinc finger and AT hook domain containing
hsa-miR-1321	1	1	1	1	1	1	BACE1	beta-site APP-cleaving enzyme 1
hsa-miR-1321	0	0	1	1	0	0	PTPRF	protein tyrosine phosphatase, receptor type, F
hsa-miR-1321	1	0	1	1	1	1	NRXN2	neurexin 2
hsa-miR-1321	1	0	1	1	1	1	UBE3A	ubiquitin protein ligase E3A
hsa-miR-1321	0	0	1	1	1	1	ING4	inhibitor of growth family, member 4
hsa-miR-1321	1	0	1	1	1	1	VLDLR	very low density lipoprotein receptor
hsa-miR-1321	0	0	1	1	0	0	MPST	mercaptopyruvate sulfurtransferase
hsa-miR-1321	1	0	1	1	1	1	SHC1	SHC (Src homology 2 domain containing) transforming protein 1
hsa-miR-1321	1	0	1	1	0	0	NDST2	N-deacetylase/N-sulfotransferase (heparan glucosaminyl) 2
hsa-miR-1321	1	0	1	1	1	1	OSBPL7	oxysterol binding protein-like 7
hsa-miR-1321	0	0	1	1	0	0	KCNC3	potassium voltage-gated channel, Shaw-related subfamily, member 3
hsa-miR-1321	1	0	1	1	0	0	ELN	elastin
hsa-miR-1321	0	0	1	1	0	0	SMARCC2	SWI/SNF related, matrix associated, actin dependent regulator of chromatin, subfamily c, member 2
hsa-miR-1321	0	0	1	1	1	1	MAZ	MYC-associated zinc finger protein (purine-binding transcription factor)
hsa-miR-1321	0	0	1	1	1	1	PTK2	PTK2 protein tyrosine kinase 2
hsa-miR-1321	0	0	1	0	1	1	DCAF11	DDB1 and CUL4 associated factor 11
hsa-miR-1321	1	0	1	1	1	1	SLC8A1	solute carrier family 8 (sodium/calcium exchanger), member 1
hsa-miR-1321	1	0	1	1	1	1	RASSF5	Ras association (RalGDS/AF-6) domain family member 5
hsa-miR-1321	0	0	1	1	1	1	DGKI	diacylglycerol kinase, iota
hsa-miR-1321	1	0	1	0	1	1	SLC6A6	solute carrier family 6 (neurotransmitter transporter, taurine), member 6
hsa-miR-1321	1	0	1	1	0	0	CACNB1	calcium channel, voltage-dependent, beta 1 subunit
hsa-miR-1321	1	0	1	1	0	0	TSPYL2	TSPY-like 2
hsa-miR-1321	1	0	1	0	1	1	DPYSL2	dihydropyrimidinase-like 2
hsa-miR-1321	1	0	1	1	1	1	ERF	Ets2 repressor factor
hsa-miR-1321	1	0	1	1	0	0	TNK2	tyrosine kinase, non-receptor, 2
hsa-miR-1321	1	0	1	1	1	1	TBX2	T-box 2
hsa-miR-1321	1	0	1	1	1	1	SPTB	spectrin, beta, erythrocytic
hsa-miR-1321	0	0	1	1	0	0	ASIC3	acid-sensing (proton-gated) ion channel 3
hsa-miR-1321	1	0	1	1	0	0	EHMT2	euchromatic histone-lysine N-methyltransferase 2
hsa-miR-1321	1	0	1	1	1	1	MINK1	misshapen-like kinase 1
hsa-miR-1321	1	0	1	1	1	1	PDLIM5	PDZ and LIM domain 5
hsa-miR-1321	1	0	1	1	1	1	GIT1	G protein-coupled receptor kinase interacting ArfGAP 1
hsa-miR-1321	0	0	1	1	1	1	ZNF747	zinc finger protein 747
hsa-miR-1321	0	0	1	1	0	0	ITGA2B	integrin, alpha 2b (platelet glycoprotein IIb of IIb/IIIa complex, antigen CD41)
hsa-miR-1321	0	0	1	1	0	0	BMP1	bone morphogenetic protein 1
hsa-miR-1321	1	0	1	1	1	1	DDX17	DEAD (Asp-Glu-Ala-Asp) box helicase 17
hsa-miR-1321	1	0	1	1	1	1	IPO8	importin 8
hsa-miR-1321	1	0	1	0	1	1	RPL28	ribosomal protein L28
hsa-miR-1321	0	0	1	1	0	0	SLC22A8	solute carrier family 22 (organic anion transporter), member 8
hsa-miR-1321	1	0	1	1	1	1	TEAD1	TEA domain family member 1 (SV40 transcriptional enhancer factor)
hsa-miR-1321	1	0	1	1	0	0	PPP2R5D	protein phosphatase 2, regulatory subunit B', delta
hsa-miR-1321	1	0	1	1	1	1	ZFX	zinc finger protein, X-linked
hsa-miR-1321	1	0	1	0	1	1	CAV1	caveolin 1, caveolae protein, 22kDa
hsa-miR-1321	1	0	1	0	1	1	PDE7B	phosphodiesterase 7B
hsa-miR-1321	1	0	1	1	1	1	MEF2D	myocyte enhancer factor 2D
hsa-miR-1321	1	0	1	1	1	1	MYH10	myosin, heavy chain 10, non-muscle
hsa-miR-1321	1	0	1	1	1	1	SDHC	succinate dehydrogenase complex, subunit C, integral membrane protein, 15kDa
hsa-miR-1321	1	0	1	0	1	1	DDX3X	DEAD (Asp-Glu-Ala-Asp) box polypeptide 3, X-linked
hsa-miR-1321	1	0	1	1	1	1	DLGAP2	discs, large (Drosophila) homolog-associated protein 2
hsa-miR-1321	1	0	1	0	1	1	MLL2	myeloid/lymphoid or mixed-lineage leukemia 2
hsa-miR-1321	1	0	1	1	1	1	CBFA2T2	core-binding factor, runt domain, alpha subunit 2; translocated to, 2
hsa-miR-1321	0	0	1	1	0	0	SPTBN2	spectrin, beta, non-erythrocytic 2
hsa-miR-1321	1	0	1	1	1	1	SOCS2	suppressor of cytokine signaling 2
hsa-miR-1321	0	0	1	1	1	1	CREB3L1	cAMP responsive element binding protein 3-like 1
hsa-miR-1321	1	0	1	1	1	1	ERLIN1	ER lipid raft associated 1
hsa-miR-1321	1	0	1	1	0	0	ASPHD1	aspartate beta-hydroxylase domain containing 1
hsa-miR-1321	0	0	1	1	1	1	EPN1	epsin 1
hsa-miR-1321	1	0	1	1	0	0	PRRC2A	proline-rich coiled-coil 2A
hsa-miR-1321	0	0	1	1	0	0	SGK223	homolog of rat pragma of Rnd2
hsa-miR-1321	1	0	1	1	1	1	TP63	tumor protein p63
hsa-miR-1321	0	0	1	1	1	1	SSBP2	single-stranded DNA binding protein 2
hsa-miR-1321	0	0	1	1	0	0	CARD10	caspase recruitment domain family, member 10
hsa-miR-1321	1	0	1	1	1	1	VAPB	VAMP (vesicle-associated membrane protein)-associated protein B and C
hsa-miR-1321	1	0	1	1	1	1	SLMAP	sarcolemma associated protein
hsa-miR-1321	0	0	1	1	0	0	AVPR2	arginine vasopressin receptor 2
hsa-miR-1321	0	0	1	1	1	1	TMEM176B	transmembrane protein 176B
hsa-miR-1321	0	0	1	1	1	1	CSAD	cysteine sulfinic acid decarboxylase
hsa-miR-1321	1	0	1	0	1	1	CDK14	cyclin-dependent kinase 14
hsa-miR-1321	1	0	1	1	1	1	NF2	neurofibromin 2 (merlin)
hsa-miR-1321	0	0	1	1	1	1	ACIN1	apoptotic chromatin condensation inducer 1
hsa-miR-1321	1	0	1	1	1	1	SORBS1	sorbin and SH3 domain containing 1
hsa-miR-1321	0	0	1	1	1	1	CNPPD1	cyclin Pas1/PHO80 domain containing 1
hsa-miR-1321	1	0	1	1	1	1	TLK2	tousled-like kinase 2
hsa-miR-1321	1	0	1	1	1	1	C16orf70	chromosome 16 open reading frame 70
hsa-miR-1321	0	0	1	0	1	1	CLDN2	claudin 2
hsa-miR-1321	1	0	1	1	1	1	SENP7	SUMO1/sentrin specific peptidase 7
hsa-miR-1321	0	0	1	1	1	1	SLCO2B1	solute carrier organic anion transporter family, member 2B1
hsa-miR-1321	1	0	1	1	1	1	SYDE1	synapse defective 1, Rho GTPase, homolog 1 (C. elegans)
hsa-miR-1321	0	0	1	1	0	0	MVK	mevalonate kinase
hsa-miR-1321	1	0	1	1	1	1	OGT	O-linked N-acetylglucosamine (GlcNAc) transferase
hsa-miR-1321	1	0	1	1	0	0	TDRKH	tudor and KH domain containing
hsa-miR-1321	0	0	1	1	1	1	PGLYRP4	peptidoglycan recognition protein 4
hsa-miR-1321	0	0	1	0	0	0	TIGD7	tigger transposable element derived 7
hsa-miR-1321	1	0	1	1	1	1	ERGIC1	endoplasmic reticulum-golgi intermediate compartment (ERGIC) 1
hsa-miR-1321	0	0	1	1	0	0	BCAT2	branched chain amino-acid transaminase 2, mitochondrial
hsa-miR-1321	0	0	1	1	1	1	ZNF331	zinc finger protein 331
hsa-miR-1321	1	0	1	1	1	1	PUM2	pumilio homolog 2 (Drosophila)
hsa-miR-1321	0	0	1	1	0	0	KCNK6	potassium channel, subfamily K, member 6
hsa-miR-1321	1	0	1	1	1	1	TMUB2	transmembrane and ubiquitin-like domain containing 2
hsa-miR-1321	1	0	1	1	0	0	ZBTB37	zinc finger and BTB domain containing 37
hsa-miR-1321	1	0	1	1	1	1	VEGFA	vascular endothelial growth factor A
hsa-miR-1321	1	0	1	1	1	1	SPTBN4	spectrin, beta, non-erythrocytic 4
hsa-miR-1321	1	0	1	1	1	1	CPEB1	cytoplasmic polyadenylation element binding protein 1
hsa-miR-1321	0	0	1	1	0	0	FEZF2	FEZ family zinc finger 2
hsa-miR-1321	0	0	1	1	1	1	KLRC3	killer cell lectin-like receptor subfamily C, member 3
hsa-miR-1321	1	0	1	1	1	1	KCNIP2	Kv channel interacting protein 2
hsa-miR-1321	0	0	1	0	0	0	NBPF10	neuroblastoma breakpoint family, member 10
hsa-miR-1321	0	0	1	1	1	1	CASP8	caspase 8, apoptosis-related cysteine peptidase
hsa-miR-1321	0	0	1	1	0	0	SNRPN	small nuclear ribonucleoprotein polypeptide N
hsa-miR-1321	1	0	1	1	1	1	MAGI1	membrane associated guanylate kinase, WW and PDZ domain containing 1
hsa-miR-1321	0	0	1	1	1	1	SPSB1	splA/ryanodine receptor domain and SOCS box containing 1
hsa-miR-1321	1	0	1	1	1	1	NTRK2	neurotrophic tyrosine kinase, receptor, type 2
hsa-miR-1321	0	0	1	0	0	0	MYO15B	myosin XVB pseudogene
hsa-miR-1321	0	0	1	0	1	1	NBPF15	neuroblastoma breakpoint family, member 15
hsa-miR-1321	0	0	1	0	0	0	RESP18	regulated endocrine-specific protein 18 homolog (rat)
hsa-miR-1321	0	0	1	1	1	1	PSRC1	proline/serine-rich coiled-coil 1
hsa-miR-1321	0	0	1	1	1	1	SLC2A14	solute carrier family 2 (facilitated glucose transporter), member 14
hsa-miR-1321	1	0	1	0	1	1	IL1RAP	interleukin 1 receptor accessory protein
hsa-miR-1321	1	0	1	1	0	0	SEZ6L2	seizure related 6 homolog (mouse)-like 2
hsa-miR-1321	1	0	1	0	1	1	GRB10	growth factor receptor-bound protein 10
hsa-miR-1321	0	0	1	0	0	0	CACNA2D3	calcium channel, voltage-dependent, alpha 2/delta subunit 3
hsa-miR-1321	0	0	1	1	1	1	SLC37A1	solute carrier family 37 (glycerol-3-phosphate transporter), member 1
hsa-miR-1321	1	0	1	1	1	1	SLAMF6	SLAM family member 6
hsa-miR-1321	0	0	1	1	1	1	RNASE7	ribonuclease, RNase A family, 7
hsa-miR-1321	1	0	1	1	1	1	PALM2	paralemmin 2
hsa-miR-1321	0	0	1	0	0	0	LY6G6E	lymphocyte antigen 6 complex, locus G6E (pseudogene)
hsa-miR-1321	1	0	1	1	1	1	NRXN3	neurexin 3
hsa-miR-1321	1	0	1	1	1	1	PDE1B	phosphodiesterase 1B, calmodulin-dependent
hsa-miR-1321	1	0	1	1	1	1	ARL4C	ADP-ribosylation factor-like 4C
hsa-miR-1321	0	0	1	1	1	1	TFEB	transcription factor EB
hsa-miR-1321	0	0	1	1	0	0	ACSS2	acyl-CoA synthetase short-chain family member 2
hsa-miR-1321	0	0	1	1	0	0	GPRC5C	G protein-coupled receptor, family C, group 5, member C
hsa-miR-1321	1	0	1	1	1	1	ENOX2	ecto-NOX disulfide-thiol exchanger 2
hsa-miR-1321	0	0	1	1	1	1	STOX2	storkhead box 2
hsa-miR-1321	0	0	1	1	1	1	RNF220	ring finger protein 220
hsa-miR-1321	1	0	1	1	1	1	CADM3	cell adhesion molecule 3
hsa-miR-1321	1	0	1	1	1	1	EIF2C1	eukaryotic translation initiation factor 2C, 1
hsa-miR-1321	1	0	1	1	1	1	KLHDC8B	kelch domain containing 8B
hsa-miR-1321	1	0	1	1	0	0	SLC35C1	solute carrier family 35, member C1
hsa-miR-1321	1	0	1	1	1	1	HNRNPUL1	heterogeneous nuclear ribonucleoprotein U-like 1
hsa-miR-1321	0	0	1	1	0	0	C17orf53	chromosome 17 open reading frame 53
hsa-miR-1321	0	0	1	1	0	0	ANAPC7	anaphase promoting complex subunit 7
hsa-miR-1321	0	0	1	1	1	1	SNCAIP	synuclein, alpha interacting protein
hsa-miR-1321	0	0	1	1	0	0	TFR2	transferrin receptor 2
hsa-miR-1321	0	0	1	1	0	0	MLST8	MTOR associated protein, LST8 homolog (S. cerevisiae)
hsa-miR-1321	0	0	1	1	0	0	ADCK4	aarF domain containing kinase 4
hsa-miR-1321	1	0	1	1	0	0	YPEL3	yippee-like 3 (Drosophila)
hsa-miR-1321	0	0	1	1	0	0	CPSF3L	cleavage and polyadenylation specific factor 3-like
hsa-miR-1321	0	0	1	0	0	0	LOC149134	uncharacterized LOC149134
hsa-miR-1321	0	0	1	1	0	0	JMJD4	jumonji domain containing 4
hsa-miR-1321	1	0	1	1	1	1	WDTC1	WD and tetratricopeptide repeats 1
hsa-miR-1321	0	0	1	1	1	1	ARMC5	armadillo repeat containing 5
hsa-miR-1321	1	0	1	0	1	1	DCAF17	DDB1 and CUL4 associated factor 17
hsa-miR-1321	1	0	1	1	1	1	POMT2	protein-O-mannosyltransferase 2
hsa-miR-1321	0	0	1	0	0	0	LOC284561	uncharacterized LOC284561
hsa-miR-1321	1	0	1	1	1	1	BAZ2A	bromodomain adjacent to zinc finger domain, 2A
hsa-miR-1321	1	0	1	1	1	1	ARHGEF15	Rho guanine nucleotide exchange factor (GEF) 15
hsa-miR-1321	1	0	1	1	1	1	PAX8	paired box 8
hsa-miR-1321	0	0	1	0	1	1	FLJ14186	uncharacterized LOC401149
hsa-miR-1321	0	0	1	0	0	0	LOC286059	tumor necrosis factor receptor superfamily, member 10d, decoy with truncated death domain pseudogene
hsa-miR-1321	1	0	1	1	1	1	FAM131A	family with sequence similarity 131, member A
hsa-miR-1321	1	0	1	1	1	1	ZNF385A	zinc finger protein 385A
hsa-miR-1321	1	0	1	1	1	1	SCAF1	SR-related CTD-associated factor 1
hsa-miR-1321	0	0	1	0	0	0	IFFO2	intermediate filament family orphan 2
hsa-miR-1321	1	0	1	1	1	1	ZMIZ1	zinc finger, MIZ-type containing 1
hsa-miR-1321	0	0	1	1	0	0	KLHDC4	kelch domain containing 4
hsa-miR-1321	1	0	1	1	1	1	CLIP4	CAP-GLY domain containing linker protein family, member 4
hsa-miR-1321	0	0	1	0	0	0	FLJ21408	uncharacterized LOC400512
hsa-miR-1321	0	0	1	0	1	1	ATXN1L	ataxin 1-like
hsa-miR-1321	1	0	1	1	1	1	PHACTR4	phosphatase and actin regulator 4
hsa-miR-1321	1	0	1	0	1	1	ZCCHC3	zinc finger, CCHC domain containing 3
hsa-miR-1321	0	0	1	0	1	1	HEMK1	HemK methyltransferase family member 1
hsa-miR-1321	0	0	1	0	1	1	FLJ22447	uncharacterized LOC400221
hsa-miR-1321	0	0	1	1	1	1	MYEOV	myeloma overexpressed (in a subset of t(11;14) positive multiple myelomas)
hsa-miR-1321	0	0	1	1	0	0	DDAH2	dimethylarginine dimethylaminohydrolase 2
hsa-miR-1321	0	0	1	1	0	0	MOGAT2	monoacylglycerol O-acyltransferase 2
hsa-miR-1321	0	0	1	1	1	1	FAM124B	family with sequence similarity 124B
hsa-miR-1321	1	0	1	1	0	0	UBXN7	UBX domain protein 7
hsa-miR-1321	1	0	1	1	1	1	LRP4	low density lipoprotein receptor-related protein 4
hsa-miR-1321	1	0	1	1	1	1	FAM53C	family with sequence similarity 53, member C
hsa-miR-1321	0	0	1	1	1	1	CCDC14	coiled-coil domain containing 14
hsa-miR-1321	1	0	1	1	1	1	GPD2	glycerol-3-phosphate dehydrogenase 2 (mitochondrial)
hsa-miR-1321	0	0	1	1	1	1	IGBP1	immunoglobulin (CD79A) binding protein 1
hsa-miR-1321	0	0	1	1	0	0	IMPDH1	IMP (inosine 5'-monophosphate) dehydrogenase 1
hsa-miR-1321	0	0	1	0	0	0	KIAA0664L3	KIAA0664-like 3
hsa-miR-1321	0	0	1	1	1	1	FAM107A	family with sequence similarity 107, member A
hsa-miR-1321	0	0	1	0	0	0	FAM185A	family with sequence similarity 185, member A
hsa-miR-1321	1	0	1	1	1	1	C7orf43	chromosome 7 open reading frame 43
hsa-miR-1321	1	0	1	1	1	1	RAP1GDS1	RAP1, GTP-GDP dissociation stimulator 1
hsa-miR-1321	0	0	1	1	1	1	C8orf46	chromosome 8 open reading frame 46
hsa-miR-1321	1	0	1	1	1	1	PPM1L	protein phosphatase, Mg2+/Mn2+ dependent, 1L
hsa-miR-1321	1	0	1	0	1	1	AP1G1	adaptor-related protein complex 1, gamma 1 subunit
hsa-miR-1321	0	0	1	1	1	1	TOX2	TOX high mobility group box family member 2
hsa-miR-1321	1	0	1	1	1	1	DLGAP4	discs, large (Drosophila) homolog-associated protein 4
hsa-miR-1321	0	0	1	1	1	1	KLC4	kinesin light chain 4
hsa-miR-1321	1	0	1	1	0	0	SPEG	SPEG complex locus
hsa-miR-1321	0	0	1	0	0	0	FLJ30838	uncharacterized LOC400955
hsa-miR-1321	0	0	1	1	1	1	CCND3	cyclin D3
hsa-miR-1321	1	0	1	1	1	1	FRMD6	FERM domain containing 6
hsa-miR-1321	1	0	1	1	1	1	PDLIM2	PDZ and LIM domain 2 (mystique)
hsa-miR-1321	0	0	1	1	0	0	USP11	ubiquitin specific peptidase 11
hsa-miR-1321	0	0	1	0	0	0	FLJ31104	uncharacterized LOC441072
hsa-miR-1321	0	0	1	1	1	1	DECR2	2,4-dienoyl CoA reductase 2, peroxisomal
hsa-miR-1321	1	0	1	1	1	1	DHX15	DEAH (Asp-Glu-Ala-His) box polypeptide 15
hsa-miR-1321	1	0	1	1	0	0	MEPCE	methylphosphate capping enzyme
hsa-miR-1321	1	0	1	1	0	0	SH2D3C	SH2 domain containing 3C
hsa-miR-1321	1	0	1	0	1	1	PTPRE	protein tyrosine phosphatase, receptor type, E
hsa-miR-1321	0	0	1	1	0	0	STRA6	stimulated by retinoic acid gene 6 homolog (mouse)
hsa-miR-1321	0	0	1	1	0	0	BEAN1	brain expressed, associated with NEDD4, 1
hsa-miR-1321	1	0	1	1	1	1	LMNA	lamin A/C
hsa-miR-1321	0	0	1	0	0	0	BTBD19	BTB (POZ) domain containing 19
hsa-miR-1321	0	0	1	0	0	0	JPX	JPX transcript, XIST activator (non-protein coding)
hsa-miR-1321	1	0	1	1	1	1	SHISA5	shisa homolog 5 (Xenopus laevis)
hsa-miR-1321	0	0	1	0	0	0	FLJ12825	uncharacterized LOC440101
hsa-miR-1321	1	0	1	1	1	1	SCAMP5	secretory carrier membrane protein 5
hsa-miR-1321	0	0	1	0	0	0	LOC441204	uncharacterized LOC441204
hsa-miR-1321	0	0	1	0	0	0	LOC255187	hCG1980447
hsa-miR-1321	0	0	1	1	0	0	HECTD3	HECT domain containing E3 ubiquitin protein ligase 3
hsa-miR-1321	1	0	1	1	1	1	TPM3	tropomyosin 3
hsa-miR-1321	1	0	1	1	0	0	SLC29A2	solute carrier family 29 (nucleoside transporters), member 2
hsa-miR-1321	0	0	1	1	1	1	PSME3	proteasome (prosome, macropain) activator subunit 3 (PA28 gamma; Ki)
hsa-miR-1321	1	0	1	1	1	1	TLE4	transducin-like enhancer of split 4 (E(sp1) homolog, Drosophila)
hsa-miR-1321	0	0	1	1	1	1	VWA3B	von Willebrand factor A domain containing 3B
hsa-miR-1321	0	0	1	0	0	0	TUBA3FP	tubulin, alpha 3f, pseudogene
hsa-miR-1321	0	0	1	1	1	1	TAF8	TAF8 RNA polymerase II, TATA box binding protein (TBP)-associated factor, 43kDa
hsa-miR-1321	0	0	1	1	0	0	NXF2	nuclear RNA export factor 2
hsa-miR-1321	1	0	1	0	1	1	PLEKHA1	pleckstrin homology domain containing, family A (phosphoinositide binding specific) member 1
hsa-miR-1321	0	0	1	1	1	1	RANBP17	RAN binding protein 17
hsa-miR-1321	0	0	1	0	0	0	LOC285074	anaphase promoting complex subunit 1 pseudogene
hsa-miR-1321	1	0	1	1	1	1	C6orf89	chromosome 6 open reading frame 89
hsa-miR-1321	0	0	1	1	0	0	RHBDF2	rhomboid 5 homolog 2 (Drosophila)
hsa-miR-1321	0	0	1	1	0	0	TRIM41	tripartite motif containing 41
hsa-miR-1321	0	0	1	1	0	0	MRPL46	mitochondrial ribosomal protein L46
hsa-miR-1321	1	0	1	1	1	1	HLF	hepatic leukemia factor
hsa-miR-1321	0	0	1	1	1	1	ZFAND2B	zinc finger, AN1-type domain 2B
hsa-miR-1321	1	0	1	1	1	1	PRRT2	proline-rich transmembrane protein 2
hsa-miR-1321	0	0	1	1	0	0	NISCH	nischarin
hsa-miR-1321	0	0	1	1	0	0	SHKBP1	SH3KBP1 binding protein 1
hsa-miR-1321	0	0	1	1	0	0	CPAMD8	C3 and PZP-like, alpha-2-macroglobulin domain containing 8
hsa-miR-1321	0	0	1	1	0	0	GHDC	GH3 domain containing
hsa-miR-1321	1	0	1	0	1	1	SLC25A37	solute carrier family 25 (mitochondrial iron transporter), member 37
hsa-miR-1321	0	0	1	1	0	0	PIGO	phosphatidylinositol glycan anchor biosynthesis, class O
hsa-miR-1321	0	0	1	0	0	0	LOC643837	uncharacterized LOC643837
hsa-miR-1321	0	0	1	0	1	1	PIANP	PILR alpha associated neural protein
hsa-miR-1321	1	0	1	1	1	1	FBXW2	F-box and WD repeat domain containing 2
hsa-miR-1321	0	0	1	1	1	1	CD34	CD34 molecule
hsa-miR-1321	1	0	1	0	1	1	TEF	thyrotrophic embryonic factor
hsa-miR-1321	0	0	1	1	0	0	CDC25B	cell division cycle 25 homolog B (S. pombe)
hsa-miR-1321	1	0	1	1	0	0	TOE1	target of EGR1, member 1 (nuclear)
hsa-miR-1321	1	0	1	1	1	1	TIAM1	T-cell lymphoma invasion and metastasis 1
hsa-miR-1321	0	0	1	1	0	0	ARPC2	actin related protein 2/3 complex, subunit 2, 34kDa
hsa-miR-1321	0	0	1	1	1	1	LZTFL1	leucine zipper transcription factor-like 1
hsa-miR-1321	0	0	1	1	0	0	RBM6	RNA binding motif protein 6
hsa-miR-1321	0	0	1	0	1	1	PVR	poliovirus receptor
hsa-miR-1321	0	0	1	1	0	0	NDUFA4L2	NADH dehydrogenase (ubiquinone) 1 alpha subcomplex, 4-like 2
hsa-miR-1321	0	0	1	1	0	0	WBP1	WW domain binding protein 1
hsa-miR-1321	1	0	1	1	1	1	KCND1	potassium voltage-gated channel, Shal-related subfamily, member 1
hsa-miR-1321	1	0	1	1	1	1	RNF121	ring finger protein 121
hsa-miR-1321	1	0	1	1	1	1	SLC7A8	solute carrier family 7 (amino acid transporter light chain, L system), member 8
hsa-miR-1321	1	0	1	1	1	1	KLC2	kinesin light chain 2
hsa-miR-1321	1	0	1	0	1	1	GATAD2B	GATA zinc finger domain containing 2B
hsa-miR-1321	0	0	1	1	0	0	C9orf24	chromosome 9 open reading frame 24
hsa-miR-1321	1	0	1	1	1	1	LPPR2	lipid phosphate phosphatase-related protein type 2
hsa-miR-1321	0	0	1	1	1	1	TMEM170A	transmembrane protein 170A
hsa-miR-1321	0	0	1	1	0	0	HPN	hepsin
hsa-miR-1321	0	0	1	1	0	0	ZNF185	zinc finger protein 185 (LIM domain)
hsa-miR-1321	1	0	1	1	1	1	EPHB1	EPH receptor B1
hsa-miR-1321	1	0	1	1	1	1	ATXN10	ataxin 10
hsa-miR-1321	0	0	1	1	1	1	AQP3	aquaporin 3 (Gill blood group)
hsa-miR-1321	0	0	1	1	1	1	SIRPB2	signal-regulatory protein beta 2
hsa-miR-1321	1	0	1	1	1	1	KCNIP3	Kv channel interacting protein 3, calsenilin
hsa-miR-1321	0	0	1	0	0	0	LOC100129858	uncharacterized LOC100129858
hsa-miR-1321	0	0	1	0	0	0	LOC284577	uncharacterized LOC284577
hsa-miR-1321	1	0	1	1	1	1	CS	citrate synthase
hsa-miR-1321	1	0	1	0	1	1	CLIC4	chloride intracellular channel 4
hsa-miR-1321	1	0	1	1	1	1	CRTC2	CREB regulated transcription coactivator 2
hsa-miR-1321	0	0	1	0	0	0	LOC643327	uncharacterized LOC643327
hsa-miR-1321	1	0	1	0	1	1	KIAA1737	KIAA1737
hsa-miR-1321	0	0	1	0	0	0	LINC00340	long intergenic non-protein coding RNA 340
hsa-miR-1321	1	0	1	0	1	1	KBTBD8	kelch repeat and BTB (POZ) domain containing 8
hsa-miR-1321	1	0	1	1	1	1	SNRNP70	small nuclear ribonucleoprotein 70kDa (U1)
hsa-miR-1321	0	0	1	1	1	1	IL17RE	interleukin 17 receptor E
hsa-miR-1321	1	0	1	1	1	1	C3orf62	chromosome 3 open reading frame 62
hsa-miR-1321	1	0	1	1	1	1	ETS2	v-ets erythroblastosis virus E26 oncogene homolog 2 (avian)
hsa-miR-1321	1	0	1	1	1	1	EPB41L1	erythrocyte membrane protein band 4.1-like 1
hsa-miR-1321	0	0	1	0	0	0	FLJ39534	uncharacterized FLJ39534
hsa-miR-1321	1	0	1	1	1	1	GATA4	GATA binding protein 4
hsa-miR-1321	1	0	1	0	1	1	YPEL2	yippee-like 2 (Drosophila)
hsa-miR-1321	0	0	1	1	0	0	VPS37C	vacuolar protein sorting 37 homolog C (S. cerevisiae)
hsa-miR-1321	1	0	1	1	1	1	POU2F3	POU class 2 homeobox 3
hsa-miR-1321	0	0	1	0	0	0	LOC100128560	uncharacterized LOC100128560
hsa-miR-1321	0	0	1	0	0	0	KIRREL3-AS3	KIRREL3 antisense RNA 3
hsa-miR-1321	1	0	1	0	1	1	PRKAR1A	protein kinase, cAMP-dependent, regulatory, type I, alpha
hsa-miR-1321	0	0	1	1	1	1	RBM4	RNA binding motif protein 4
hsa-miR-1321	0	0	1	1	0	0	AHCY	adenosylhomocysteinase
hsa-miR-1321	0	0	1	0	0	0	LOC284385	uncharacterized LOC284385
hsa-miR-1321	1	0	1	1	0	0	CFL1	cofilin 1 (non-muscle)
hsa-miR-1321	0	0	1	1	0	0	KLHDC3	kelch domain containing 3
hsa-miR-1321	0	0	1	1	1	1	LRRC49	leucine rich repeat containing 49
hsa-miR-1321	1	0	1	1	1	1	ST7L	suppression of tumorigenicity 7 like
hsa-miR-1321	0	0	1	1	1	1	POLR1D	polymerase (RNA) I polypeptide D, 16kDa
hsa-miR-1321	1	0	1	1	1	1	LZTS2	leucine zipper, putative tumor suppressor 2
hsa-miR-1321	0	0	1	0	0	0	CECR7	cat eye syndrome chromosome region, candidate 7 (non-protein coding)
hsa-miR-1321	0	0	1	1	1	1	RP1	retinitis pigmentosa 1 (autosomal dominant)
hsa-miR-1321	0	0	1	1	1	1	VIPAS39	VPS33B interacting protein, apical-basolateral polarity regulator, spe-39 homolog
hsa-miR-1321	1	0	1	1	1	1	THTPA	thiamine triphosphatase
hsa-miR-1321	0	0	1	1	0	0	PPAPDC1A	phosphatidic acid phosphatase type 2 domain containing 1A
hsa-miR-1321	0	0	1	1	1	1	DHFRL1	dihydrofolate reductase-like 1
hsa-miR-1321	0	0	1	1	1	1	SLFN13	schlafen family member 13
hsa-miR-1321	1	0	1	1	1	1	AGAP2	ArfGAP with GTPase domain, ankyrin repeat and PH domain 2
hsa-miR-1321	1	0	1	1	1	1	WEE1	WEE1 homolog (S. pombe)
hsa-miR-1321	0	0	1	1	0	0	PMFBP1	polyamine modulated factor 1 binding protein 1
hsa-miR-1321	0	0	1	1	0	0	MARS	methionyl-tRNA synthetase
hsa-miR-1321	0	0	1	1	0	0	ZNF335	zinc finger protein 335
hsa-miR-1321	1	0	1	1	1	1	ZBTB4	zinc finger and BTB domain containing 4
hsa-miR-1321	0	0	1	1	0	0	DGKA	diacylglycerol kinase, alpha 80kDa
hsa-miR-1321	0	0	1	1	1	1	RNF103	ring finger protein 103
hsa-miR-1321	1	0	1	1	1	1	CBLB	Cbl proto-oncogene, E3 ubiquitin protein ligase B
hsa-miR-1321	1	0	1	1	0	0	KCNC1	potassium voltage-gated channel, Shaw-related subfamily, member 1
hsa-miR-1321	0	0	1	0	1	1	FLJ41200	uncharacterized LOC401492
hsa-miR-1321	0	0	1	1	1	1	RGS3	regulator of G-protein signaling 3
hsa-miR-1321	0	0	1	1	0	0	TJAP1	tight junction associated protein 1 (peripheral)
hsa-miR-1321	0	0	1	1	1	1	PRRT1	proline-rich transmembrane protein 1
hsa-miR-1321	0	0	1	1	1	1	PCBP2	poly(rC) binding protein 2
hsa-miR-1321	1	0	1	1	1	1	EPAS1	endothelial PAS domain protein 1
hsa-miR-1321	1	0	1	1	1	1	PRDM2	PR domain containing 2, with ZNF domain
hsa-miR-1321	0	0	1	1	1	1	SLC9A1	solute carrier family 9, subfamily A (NHE1, cation proton antiporter 1), member 1
hsa-miR-1321	0	0	1	1	0	0	C20orf27	chromosome 20 open reading frame 27
hsa-miR-1321	1	0	1	1	1	1	ADIPOR1	adiponectin receptor 1
hsa-miR-1321	0	0	1	1	0	0	SSPO	SCO-spondin homolog (Bos taurus)
hsa-miR-1321	1	0	1	0	1	1	TTYH3	tweety homolog 3 (Drosophila)
hsa-miR-1321	0	0	1	1	1	1	IDS	iduronate 2-sulfatase
hsa-miR-1321	1	0	1	1	1	1	PLEKHH1	pleckstrin homology domain containing, family H (with MyTH4 domain) member 1
hsa-miR-1321	0	0	1	1	0	0	PPP1R18	protein phosphatase 1, regulatory subunit 18
hsa-miR-1321	0	0	1	1	1	1	C2orf91	chromosome 2 open reading frame 91
hsa-miR-1321	0	0	1	1	1	1	ATPBD4	ATP binding domain 4
hsa-miR-1321	0	0	1	1	0	0	VARS2	valyl-tRNA synthetase 2, mitochondrial (putative)
hsa-miR-1321	1	0	1	1	0	0	RANBP3	RAN binding protein 3
hsa-miR-1321	1	0	1	1	1	1	C15orf52	chromosome 15 open reading frame 52
hsa-miR-1321	1	0	1	0	0	0	ANKRD52	ankyrin repeat domain 52
hsa-miR-1321	0	0	1	1	1	1	DENND5A	DENN/MADD domain containing 5A
hsa-miR-1321	0	0	1	1	1	1	ZNF337	zinc finger protein 337
hsa-miR-1321	0	0	1	0	0	0	FAM75D4	family with sequence similarity 75, member D4
hsa-miR-1321	0	0	1	1	0	0	RPRD2	regulation of nuclear pre-mRNA domain containing 2
hsa-miR-1321	1	0	1	1	1	1	TP53INP1	tumor protein p53 inducible nuclear protein 1
hsa-miR-1321	0	0	1	1	1	1	MYOM3	myomesin family, member 3
hsa-miR-1321	0	0	1	1	0	0	C20orf141	chromosome 20 open reading frame 141
hsa-miR-1321	0	0	1	1	0	0	FSIP2	fibrous sheath interacting protein 2
hsa-miR-1321	1	0	1	1	0	0	ATXN7L3	ataxin 7-like 3
hsa-miR-1321	1	0	1	1	1	1	CSRNP3	cysteine-serine-rich nuclear protein 3
hsa-miR-1321	1	0	1	0	1	1	ANO6	anoctamin 6
hsa-miR-1321	0	0	1	0	0	0	PLEKHD1	pleckstrin homology domain containing, family D (with coiled-coil domains) member 1
hsa-miR-1321	1	0	1	1	1	1	DLG2	discs, large homolog 2 (Drosophila)
hsa-miR-1321	1	0	1	1	1	1	NIPBL	Nipped-B homolog (Drosophila)
hsa-miR-1321	0	0	1	1	0	0	TMEM151B	transmembrane protein 151B
hsa-miR-1321	0	0	1	0	0	0	RPL23AP53	ribosomal protein L23a pseudogene 53
hsa-miR-1321	0	0	1	1	1	1	RAB37	RAB37, member RAS oncogene family
hsa-miR-1321	1	0	1	0	1	1	N4BP3	NEDD4 binding protein 3
hsa-miR-1321	1	0	1	1	1	1	HYOU1	hypoxia up-regulated 1
hsa-miR-1321	1	0	1	1	1	1	KANK4	KN motif and ankyrin repeat domains 4
hsa-miR-1321	0	0	1	0	0	0	LOC285812	uncharacterized LOC285812
hsa-miR-1321	0	0	1	0	0	0	LOC100128262	uncharacterized LOC100128262
hsa-miR-1321	1	0	1	1	1	1	RNF44	ring finger protein 44
hsa-miR-1321	1	0	1	0	1	1	FNDC3B	fibronectin type III domain containing 3B
hsa-miR-1321	1	0	1	1	1	1	PLA2G15	phospholipase A2, group XV
hsa-miR-1321	0	0	1	0	1	1	LOC401321	uncharacterized LOC401321
hsa-miR-1321	0	0	1	1	1	1	MCU	mitochondrial calcium uniporter
hsa-miR-1321	1	0	1	0	1	1	KDM2A	lysine (K)-specific demethylase 2A
hsa-miR-1321	0	0	1	1	1	1	MON1B	MON1 homolog B (yeast)
hsa-miR-1321	1	0	1	1	1	1	AIF1L	allograft inflammatory factor 1-like
hsa-miR-1321	0	0	1	1	1	1	ATXN2	ataxin 2
hsa-miR-1321	0	0	1	1	1	1	ZNF662	zinc finger protein 662
hsa-miR-1321	0	0	1	1	1	1	SHROOM3	shroom family member 3
hsa-miR-1321	1	0	1	0	1	1	CYB561D1	cytochrome b-561 domain containing 1
hsa-miR-1321	1	0	1	1	1	1	CD200	CD200 molecule
hsa-miR-1321	0	0	1	1	1	1	SQRDL	sulfide quinone reductase-like (yeast)
hsa-miR-1321	0	0	1	0	0	0	FAM27A	family with sequence similarity 27, member A
hsa-miR-1321	1	0	1	1	1	1	RNF111	ring finger protein 111
hsa-miR-1321	0	0	1	1	0	0	DNASE1L3	deoxyribonuclease I-like 3
hsa-miR-1321	0	0	1	1	1	1	RNF19B	ring finger protein 19B
hsa-miR-1321	0	0	1	1	1	1	ZNF346	zinc finger protein 346
hsa-miR-1321	1	0	1	1	1	1	MAP2K4	mitogen-activated protein kinase kinase 4
hsa-miR-1321	0	0	1	1	0	0	C9orf96	chromosome 9 open reading frame 96
hsa-miR-1321	0	0	1	1	0	0	CNOT3	CCR4-NOT transcription complex, subunit 3
hsa-miR-1321	1	0	1	1	1	1	TAP2	transporter 2, ATP-binding cassette, sub-family B (MDR/TAP)
hsa-miR-1321	0	0	1	1	1	1	FANCC	Fanconi anemia, complementation group C
hsa-miR-1321	0	0	1	1	1	1	CRISP3	cysteine-rich secretory protein 3
hsa-miR-1321	1	0	1	1	1	1	CYYR1	cysteine/tyrosine-rich 1
hsa-miR-1321	1	0	1	1	0	0	ABLIM3	actin binding LIM protein family, member 3
hsa-miR-1321	1	0	1	1	1	1	CAMK2G	calcium/calmodulin-dependent protein kinase II gamma
hsa-miR-1321	1	0	1	1	1	1	ACTN1	actinin, alpha 1
hsa-miR-1321	1	0	1	0	1	1	MAP3K3	mitogen-activated protein kinase kinase kinase 3
hsa-miR-1321	1	0	1	1	1	1	AHCYL1	adenosylhomocysteinase-like 1
hsa-miR-1321	1	0	1	1	1	1	RIF1	RAP1 interacting factor homolog (yeast)
hsa-miR-1321	1	0	1	0	1	1	SLC2A3	solute carrier family 2 (facilitated glucose transporter), member 3
hsa-miR-1321	0	0	1	0	0	0	POM121L9P	POM121 transmembrane nucleoporin-like 9, pseudogene
hsa-miR-1321	0	0	1	1	1	1	ARIH1	ariadne homolog, ubiquitin-conjugating enzyme E2 binding protein, 1 (Drosophila)
hsa-miR-1321	0	0	1	1	0	0	MSH5	mutS homolog 5 (E. coli)
hsa-miR-1321	0	0	1	1	0	0	SAPCD1	suppressor APC domain containing 1
hsa-miR-1321	0	0	1	1	1	1	GFAP	glial fibrillary acidic protein
hsa-miR-1321	0	0	1	0	0	0	KIAA0913	KIAA0913
hsa-miR-1321	0	0	1	1	0	0	PCIF1	PDX1 C-terminal inhibiting factor 1
hsa-miR-1321	1	0	1	1	1	1	ECT2	epithelial cell transforming sequence 2 oncogene
hsa-miR-1321	0	0	1	1	1	1	ARFGAP1	ADP-ribosylation factor GTPase activating protein 1
hsa-miR-1321	0	0	1	1	1	1	SYNJ2	synaptojanin 2
hsa-miR-1321	1	0	1	0	1	1	CEP170	centrosomal protein 170kDa
hsa-miR-1321	0	0	1	1	0	0	DOPEY1	dopey family member 1
hsa-miR-1321	0	0	1	1	1	1	MESP2	mesoderm posterior 2 homolog (mouse)
hsa-miR-1321	0	0	1	0	0	0	FAM66D	family with sequence similarity 66, member D
hsa-miR-1321	1	0	1	1	1	1	SLC30A8	solute carrier family 30 (zinc transporter), member 8
hsa-miR-1321	1	0	1	1	1	1	YTHDF3	YTH domain family, member 3
hsa-miR-1321	1	0	1	1	1	1	TMEFF1	transmembrane protein with EGF-like and two follistatin-like domains 1
hsa-miR-1321	1	0	1	1	1	1	FAM126B	family with sequence similarity 126, member B
hsa-miR-1321	1	0	1	0	0	0	YLPM1	YLP motif containing 1
hsa-miR-1321	0	0	1	1	0	0	HEATR8	HEAT repeat containing 8
hsa-miR-1321	0	0	1	1	1	1	SYTL4	synaptotagmin-like 4
hsa-miR-1321	0	0	1	0	0	0	FAM225A	family with sequence similarity 225, member A (non-protein coding)
hsa-miR-1321	0	0	1	1	1	1	C12orf50	chromosome 12 open reading frame 50
hsa-miR-1321	1	0	1	1	1	1	FAM63B	family with sequence similarity 63, member B
hsa-miR-1321	0	0	1	0	0	0	ADCY10P1	adenylate cyclase 10 (soluble) pseudogene 1
hsa-miR-1321	1	0	1	1	1	1	ATAT1	alpha tubulin acetyltransferase 1
hsa-miR-1321	1	0	1	1	1	1	IL17RD	interleukin 17 receptor D
hsa-miR-1321	1	0	1	0	0	0	NPEPL1	aminopeptidase-like 1
hsa-miR-1321	1	0	1	1	1	1	MBD6	methyl-CpG binding domain protein 6
hsa-miR-1321	1	0	1	0	1	1	SMURF1	SMAD specific E3 ubiquitin protein ligase 1
hsa-miR-1321	1	0	1	0	0	0	XPNPEP3	X-prolyl aminopeptidase (aminopeptidase P) 3, putative
hsa-miR-1321	1	0	1	0	1	1	PHYHIPL	phytanoyl-CoA 2-hydroxylase interacting protein-like
hsa-miR-1321	1	0	1	1	0	0	LRRC58	leucine rich repeat containing 58
hsa-miR-1321	0	0	1	1	1	1	TMEM130	transmembrane protein 130
hsa-miR-1321	1	0	1	1	1	1	RNF38	ring finger protein 38
hsa-miR-1321	1	0	1	1	1	1	IKZF2	IKAROS family zinc finger 2 (Helios)
hsa-miR-1321	0	0	1	1	0	0	ERAP2	endoplasmic reticulum aminopeptidase 2
hsa-miR-1321	1	0	1	1	1	1	CLIC5	chloride intracellular channel 5
hsa-miR-1321	0	0	1	1	1	1	ALS2CR8	amyotrophic lateral sclerosis 2 (juvenile) chromosome region, candidate 8
hsa-miR-1321	1	0	1	1	1	1	DUSP16	dual specificity phosphatase 16
hsa-miR-1321	0	0	1	0	0	0	LOC374443	C-type lectin domain family 2, member D pseudogene
hsa-miR-1321	1	0	1	1	1	1	RFFL	ring finger and FYVE-like domain containing E3 ubiquitin protein ligase
hsa-miR-1321	1	0	1	1	1	1	SORCS1	sortilin-related VPS10 domain containing receptor 1
hsa-miR-1321	0	0	1	1	0	0	CRB3	crumbs homolog 3 (Drosophila)
hsa-miR-1321	1	0	1	1	1	1	USF2	upstream transcription factor 2, c-fos interacting
hsa-miR-1321	0	0	1	1	1	1	CYP4B1	cytochrome P450, family 4, subfamily B, polypeptide 1
hsa-miR-1321	0	0	1	1	1	1	SHPRH	SNF2 histone linker PHD RING helicase, E3 ubiquitin protein ligase
hsa-miR-1321	0	0	1	1	1	1	CEP41	centrosomal protein 41kDa
hsa-miR-1321	1	0	1	0	1	1	SS18L1	synovial sarcoma translocation gene on chromosome 18-like 1
hsa-miR-1321	0	0	1	1	0	0	ESPN	espin
hsa-miR-1321	1	0	1	1	1	1	RIC8B	resistance to inhibitors of cholinesterase 8 homolog B (C. elegans)
hsa-miR-1321	0	0	1	1	0	0	DNAH1	dynein, axonemal, heavy chain 1
hsa-miR-1321	1	0	1	1	1	1	BCL11A	B-cell CLL/lymphoma 11A (zinc finger protein)
hsa-miR-1321	1	0	1	1	1	1	TPP1	tripeptidyl peptidase I
hsa-miR-1321	0	0	1	1	1	1	KLK6	kallikrein-related peptidase 6
hsa-miR-1321	0	0	1	1	0	0	GLYCTK	glycerate kinase
hsa-miR-1321	1	0	1	1	1	1	GFRA2	GDNF family receptor alpha 2
hsa-miR-1321	1	0	1	1	1	1	LAMA3	laminin, alpha 3
hsa-miR-1321	1	0	1	0	1	1	AP2B1	adaptor-related protein complex 2, beta 1 subunit
hsa-miR-1321	0	0	1	0	0	0	FAM138C	family with sequence similarity 138, member C
hsa-miR-1321	0	0	1	1	0	0	LRRC28	leucine rich repeat containing 28
hsa-miR-1321	1	0	1	1	1	1	SUFU	suppressor of fused homolog (Drosophila)
hsa-miR-1321	1	0	1	0	1	1	ANKRD28	ankyrin repeat domain 28
hsa-miR-1321	1	0	1	0	1	1	NHS	Nance-Horan syndrome (congenital cataracts and dental anomalies)
hsa-miR-1321	0	0	1	1	1	1	POTEG	POTE ankyrin domain family, member G
hsa-miR-1321	0	0	1	0	0	0	BDNF-AS	BDNF antisense RNA
hsa-miR-1321	0	0	1	1	1	1	EHBP1	EH domain binding protein 1
hsa-miR-1321	1	0	1	1	1	1	MECP2	methyl CpG binding protein 2 (Rett syndrome)
hsa-miR-1321	0	0	1	1	0	0	PAOX	polyamine oxidase (exo-N4-amino)
hsa-miR-1321	1	0	1	1	1	1	HMGA2	high mobility group AT-hook 2
hsa-miR-1321	0	0	1	1	1	1	KANK2	KN motif and ankyrin repeat domains 2
hsa-miR-1321	0	0	1	1	1	1	IL24	interleukin 24
hsa-miR-1321	0	0	1	1	0	0	USP27X	ubiquitin specific peptidase 27, X-linked
hsa-miR-1321	0	0	1	1	1	1	CEACAM1	carcinoembryonic antigen-related cell adhesion molecule 1 (biliary glycoprotein)
hsa-miR-1321	0	0	1	1	0	0	DMKN	dermokine
hsa-miR-1321	0	0	1	1	0	0	NBPF8	neuroblastoma breakpoint family, member 8
hsa-miR-1321	0	0	1	1	0	0	KLK4	kallikrein-related peptidase 4
hsa-miR-1321	1	0	1	1	1	1	TBC1D22B	TBC1 domain family, member 22B
hsa-miR-1321	0	0	1	1	0	0	RNF167	ring finger protein 167
hsa-miR-1321	1	0	1	1	1	1	AMOT	angiomotin
hsa-miR-1321	1	0	1	1	1	1	RPRD1A	regulation of nuclear pre-mRNA domain containing 1A
hsa-miR-1321	0	0	1	1	0	0	PSMB2	proteasome (prosome, macropain) subunit, beta type, 2
hsa-miR-1321	0	0	1	1	1	1	SLC6A2	solute carrier family 6 (neurotransmitter transporter, noradrenalin), member 2
hsa-miR-1321	0	0	1	1	1	1	TFG	TRK-fused gene
hsa-miR-1321	0	0	1	1	0	0	TMCO6	transmembrane and coiled-coil domains 6
hsa-miR-1321	0	0	1	1	1	1	B4GALT2	UDP-Gal:betaGlcNAc beta 1,4- galactosyltransferase, polypeptide 2
hsa-miR-1321	1	0	1	0	1	1	DPYSL5	dihydropyrimidinase-like 5
hsa-miR-1321	1	0	1	1	1	1	TSPAN14	tetraspanin 14
hsa-miR-1321	0	0	1	1	1	1	TUFT1	tuftelin 1
hsa-miR-1321	1	0	1	1	0	0	STX1A	syntaxin 1A (brain)
hsa-miR-1321	1	0	1	1	1	1	RIMS3	regulating synaptic membrane exocytosis 3
hsa-miR-1321	1	0	1	1	1	1	PPP1R11	protein phosphatase 1, regulatory (inhibitor) subunit 11
hsa-miR-1321	1	0	1	0	1	1	DCAF10	DDB1 and CUL4 associated factor 10
hsa-miR-1321	0	0	1	1	0	0	DNAJC7	DnaJ (Hsp40) homolog, subfamily C, member 7
hsa-miR-1321	1	0	1	1	0	0	DHDDS	dehydrodolichyl diphosphate synthase
hsa-miR-1321	1	0	1	1	0	0	POLR3D	polymerase (RNA) III (DNA directed) polypeptide D, 44kDa
hsa-miR-1321	0	0	1	1	0	0	TMEM51	transmembrane protein 51
hsa-miR-1321	1	0	1	1	1	1	POU2F2	POU class 2 homeobox 2
hsa-miR-1321	1	0	1	1	1	1	U2SURP	U2 snRNP-associated SURP domain containing
hsa-miR-1321	0	0	1	1	0	0	CBX5	chromobox homolog 5
hsa-miR-1321	0	0	1	1	0	0	OBSL1	obscurin-like 1
hsa-miR-1321	1	0	1	1	1	1	COL2A1	collagen, type II, alpha 1
hsa-miR-1321	0	0	1	1	0	0	AGBL5	ATP/GTP binding protein-like 5
hsa-miR-1321	0	0	1	1	1	1	C1orf94	chromosome 1 open reading frame 94
hsa-miR-1321	0	0	1	1	0	0	MYLK2	myosin light chain kinase 2
hsa-miR-1321	1	0	1	1	1	1	SHMT2	serine hydroxymethyltransferase 2 (mitochondrial)
hsa-miR-1321	1	0	1	1	1	1	HMGA1	high mobility group AT-hook 1
hsa-miR-1321	0	0	1	0	0	0	LOC400043	uncharacterized LOC400043
hsa-miR-1321	1	0	1	1	0	0	AGFG2	ArfGAP with FG repeats 2
hsa-miR-1321	1	0	1	1	0	0	MARCH9	membrane-associated ring finger (C3HC4) 9
hsa-miR-1321	1	0	1	1	1	1	B4GALT3	UDP-Gal:betaGlcNAc beta 1,4- galactosyltransferase, polypeptide 3
hsa-miR-1321	0	0	1	1	0	0	FUZ	fuzzy homolog (Drosophila)
hsa-miR-1321	0	0	1	1	0	0	ARHGAP8	Rho GTPase activating protein 8
hsa-miR-1321	1	0	1	1	1	1	SZRD1	SUZ RNA binding domain containing 1
hsa-miR-1321	1	0	1	0	1	1	CNP	2',3'-cyclic nucleotide 3' phosphodiesterase
hsa-miR-1321	0	0	1	1	0	0	TCN2	transcobalamin II
hsa-miR-1321	0	0	1	1	1	1	GNL3L	guanine nucleotide binding protein-like 3 (nucleolar)-like
hsa-miR-1321	0	0	1	0	0	0	GRAMD1B	GRAM domain containing 1B
hsa-miR-1321	1	0	1	0	1	1	SEC62	SEC62 homolog (S. cerevisiae)
hsa-miR-1321	1	0	1	1	1	1	DNAJB5	DnaJ (Hsp40) homolog, subfamily B, member 5
hsa-miR-1321	0	0	1	1	1	1	NUP98	nucleoporin 98kDa
hsa-miR-1321	1	0	1	1	1	1	CAP1	CAP, adenylate cyclase-associated protein 1 (yeast)
hsa-miR-1321	0	0	1	1	1	1	DLX4	distal-less homeobox 4
hsa-miR-1321	1	0	1	1	0	0	LRFN1	leucine rich repeat and fibronectin type III domain containing 1
hsa-miR-1321	1	0	1	1	1	1	PAPOLA	poly(A) polymerase alpha
hsa-miR-1321	0	0	1	1	1	1	C8orf33	chromosome 8 open reading frame 33
hsa-miR-1321	0	0	1	0	0	0	NUDT16P1	nudix (nucleoside diphosphate linked moiety X)-type motif 16 pseudogene 1
hsa-miR-1321	1	0	1	1	1	1	ZNF512	zinc finger protein 512
hsa-miR-1321	0	0	1	0	0	0	DTX2P1-UPK3BP1-PMS2P11	DTX2P1-UPK3BP1-PMS2P11 readthrough (non-protein coding)
hsa-miR-1321	1	0	1	1	1	1	TMEM9B	TMEM9 domain family, member B
hsa-miR-1321	1	0	1	1	1	1	NRF1	nuclear respiratory factor 1
hsa-miR-1321	0	0	1	1	0	0	ZBTB32	zinc finger and BTB domain containing 32
hsa-miR-1321	1	0	1	1	1	1	ARHGEF9	Cdc42 guanine nucleotide exchange factor (GEF) 9
hsa-miR-1321	1	0	1	1	1	1	KIAA1217	KIAA1217
hsa-miR-1321	0	0	1	1	0	0	PTPMT1	protein tyrosine phosphatase, mitochondrial 1
hsa-miR-1321	1	0	1	0	1	1	BTF3L4	basic transcription factor 3-like 4
hsa-miR-1321	0	0	1	1	0	0	DPF1	D4, zinc and double PHD fingers family 1
hsa-miR-1321	1	0	1	1	0	0	TET3	tet methylcytosine dioxygenase 3
hsa-miR-1321	1	0	1	1	1	1	C16orf45	chromosome 16 open reading frame 45
hsa-miR-1321	1	0	1	0	1	1	CDK19	cyclin-dependent kinase 19
hsa-miR-1321	0	0	1	0	0	0	SNX29P2	sorting nexin 29 pseudogene 2
hsa-miR-1321	0	0	1	0	0	0	LOC728485	uncharacterized LOC728485
hsa-miR-1321	0	0	1	1	1	1	PPHLN1	periphilin 1
hsa-miR-1321	1	0	1	1	1	1	ZDHHC5	zinc finger, DHHC-type containing 5
hsa-miR-1321	0	0	1	0	1	1	FHAD1	forkhead-associated (FHA) phosphopeptide binding domain 1
hsa-miR-1321	0	0	1	0	0	0	TRGV7	T cell receptor gamma variable 7 (pseudogene)
hsa-miR-1321	1	0	1	1	1	1	APPL2	adaptor protein, phosphotyrosine interaction, PH domain and leucine zipper containing 2
hsa-miR-1321	1	0	1	1	1	1	TMEM127	transmembrane protein 127
hsa-miR-1321	1	0	1	1	1	1	HTR2C	5-hydroxytryptamine (serotonin) receptor 2C, G protein-coupled
hsa-miR-1321	1	0	1	0	1	1	NCAM1	neural cell adhesion molecule 1
hsa-miR-1321	0	0	1	1	1	1	KIAA1755	KIAA1755
hsa-miR-1321	0	0	1	1	1	1	PDSS2	prenyl (decaprenyl) diphosphate synthase, subunit 2
hsa-miR-1321	1	0	1	0	1	1	SV2B	synaptic vesicle glycoprotein 2B
hsa-miR-1321	0	0	1	1	1	1	SH3TC1	SH3 domain and tetratricopeptide repeats 1
hsa-miR-1321	0	0	1	1	0	0	AHSA2	AHA1, activator of heat shock 90kDa protein ATPase homolog 2 (yeast)
hsa-miR-1321	0	0	1	0	0	0	ATP8B5P	ATPase, class I, type 8B, member 5, pseudogene
hsa-miR-1321	0	0	1	0	1	1	FLJ25328	uncharacterized LOC148231
hsa-miR-1321	0	0	1	1	1	1	RBM42	RNA binding motif protein 42
hsa-miR-1321	1	0	1	1	1	1	SF1	splicing factor 1
hsa-miR-1321	1	0	1	1	1	1	RAB5B	RAB5B, member RAS oncogene family
hsa-miR-1321	1	0	1	0	1	1	LYPD6	LY6/PLAUR domain containing 6
hsa-miR-1321	1	0	1	1	1	1	PPP2R2C	protein phosphatase 2, regulatory subunit B, gamma
hsa-miR-1321	1	0	1	1	1	1	SECISBP2L	SECIS binding protein 2-like
hsa-miR-1321	1	0	1	1	1	1	ANO1	anoctamin 1, calcium activated chloride channel
hsa-miR-1321	1	0	1	1	1	1	SIRPA	signal-regulatory protein alpha
hsa-miR-1321	0	0	1	0	0	0	AKR1A1	aldo-keto reductase family 1, member A1 (aldehyde reductase)
hsa-miR-1321	1	0	1	1	0	0	GPR137	G protein-coupled receptor 137
hsa-miR-1321	0	0	1	1	0	0	TNMD	tenomodulin
hsa-miR-1321	1	0	1	1	1	1	TTC26	tetratricopeptide repeat domain 26
hsa-miR-1321	0	0	1	0	1	1	DKFZP434I0714	uncharacterized protein DKFZP434I0714
hsa-miR-1321	1	0	1	1	1	1	ABCA1	ATP-binding cassette, sub-family A (ABC1), member 1
hsa-miR-1321	1	0	1	1	1	1	THRA	thyroid hormone receptor, alpha
hsa-miR-1321	1	0	1	1	0	0	CHST4	carbohydrate (N-acetylglucosamine 6-O) sulfotransferase 4
hsa-miR-1321	0	0	1	1	0	0	GGT1	gamma-glutamyltransferase 1
hsa-miR-1321	0	0	1	0	1	1	TMSB15B	thymosin beta 15B
hsa-miR-1321	0	0	1	0	1	1	FAM72A	family with sequence similarity 72, member A
hsa-miR-1321	0	0	1	0	0	0	FLJ10661	family with sequence similarity 86, member A pseudogene
hsa-miR-1321	0	0	1	0	0	0	LOC339862	uncharacterized LOC339862
hsa-miR-1321	1	0	1	1	1	1	ZNF618	zinc finger protein 618
hsa-miR-1321	0	0	1	1	1	1	DUSP28	dual specificity phosphatase 28
hsa-miR-1321	0	0	1	0	1	1	C9orf57	chromosome 9 open reading frame 57
hsa-miR-1321	0	0	1	0	0	0	LINC00642	long intergenic non-protein coding RNA 642
hsa-miR-1321	0	0	1	1	0	0	FAM3B	family with sequence similarity 3, member B
hsa-miR-1321	1	0	1	1	1	1	ELMO2	engulfment and cell motility 2
hsa-miR-1321	1	0	1	1	1	1	HECTD2	HECT domain containing E3 ubiquitin protein ligase 2
hsa-miR-1321	1	0	1	1	1	1	MEIS1	Meis homeobox 1
hsa-miR-1321	0	0	1	0	0	0	LOC652276	potassium channel tetramerisation domain containing 5 pseudogene
hsa-miR-1321	1	0	1	1	0	0	RASGEF1B	RasGEF domain family, member 1B
hsa-miR-1321	1	0	1	1	1	1	RNMT	RNA (guanine-7-) methyltransferase
hsa-miR-1321	1	0	1	1	1	1	CEP128	centrosomal protein 128kDa
hsa-miR-1321	1	0	1	1	1	1	BNC2	basonuclin 2
hsa-miR-1321	0	0	1	0	0	0	CYP4F35P	cytochrome P450, family 4, subfamily F, polypeptide 35, pseudogene
hsa-miR-1321	0	0	1	0	0	0	LOC286184	uncharacterized LOC286184
hsa-miR-1321	1	0	1	0	0	0	RAVER1	ribonucleoprotein, PTB-binding 1
hsa-miR-1321	1	0	1	1	0	0	EBF4	early B-cell factor 4
hsa-miR-1321	0	0	1	1	1	1	TPPP3	tubulin polymerization-promoting protein family member 3
hsa-miR-1321	1	0	1	1	1	1	SOX6	SRY (sex determining region Y)-box 6
hsa-miR-1321	1	0	1	1	1	1	WSCD2	WSC domain containing 2
hsa-miR-1321	1	0	1	1	1	1	CMIP	c-Maf inducing protein
hsa-miR-1321	0	0	1	0	0	0	LOC284263	uncharacterized LOC284263
hsa-miR-1321	1	0	1	1	0	0	CHD4	chromodomain helicase DNA binding protein 4
hsa-miR-1321	0	0	1	0	0	0	LOC100134868	uncharacterized LOC100134868
hsa-miR-1321	0	0	1	0	0	0	FLJ36000	uncharacterized FLJ36000
hsa-miR-1321	0	0	1	0	0	0	LOC401074	uncharacterized LOC401074
hsa-miR-1321	1	0	1	0	1	1	GPR107	G protein-coupled receptor 107
hsa-miR-1321	1	0	1	1	0	0	HES7	hairy and enhancer of split 7 (Drosophila)
hsa-miR-1321	0	0	1	0	1	1	LINC00634	long intergenic non-protein coding RNA 634
hsa-miR-1321	0	0	1	0	0	0	C4orf52	chromosome 4 open reading frame 52
hsa-miR-1321	0	0	1	1	1	1	ZFP90	zinc finger protein 90 homolog (mouse)
hsa-miR-1321	0	0	1	1	0	0	MTCH1	mitochondrial carrier 1
hsa-miR-1321	0	0	1	1	0	0	TMEM95	transmembrane protein 95
hsa-miR-1321	0	0	1	1	0	0	TTLL6	tubulin tyrosine ligase-like family, member 6
hsa-miR-1321	1	0	1	1	1	1	GNG2	guanine nucleotide binding protein (G protein), gamma 2
hsa-miR-1321	1	0	1	1	1	1	TNFSF4	tumor necrosis factor (ligand) superfamily, member 4
hsa-miR-1321	1	0	1	1	1	1	MEIS3	Meis homeobox 3
hsa-miR-1321	0	0	1	0	1	1	OAZ1	ornithine decarboxylase antizyme 1
hsa-miR-1321	1	0	1	1	1	1	ARHGAP30	Rho GTPase activating protein 30
hsa-miR-1321	0	0	1	0	0	0	LOC339166	uncharacterized LOC339166
hsa-miR-1321	1	0	1	0	1	1	PSD3	pleckstrin and Sec7 domain containing 3
hsa-miR-1321	1	0	1	1	1	1	MAMDC2	MAM domain containing 2
hsa-miR-1321	0	0	1	1	1	1	MGC57346	uncharacterized LOC401884
hsa-miR-1321	0	0	1	0	0	0	LOC283914	uncharacterized LOC283914
hsa-miR-1321	1	0	1	1	1	1	PPP2R5B	protein phosphatase 2, regulatory subunit B', beta
hsa-miR-1321	1	0	1	1	1	1	SENP1	SUMO1/sentrin specific peptidase 1
hsa-miR-1321	0	0	1	1	0	0	TOM1	target of myb1 (chicken)
hsa-miR-1321	0	0	1	1	0	0	FAM72B	family with sequence similarity 72, member B
hsa-miR-1321	0	0	1	1	0	0	FOXJ1	forkhead box J1
hsa-miR-1321	0	0	1	1	0	0	LILRA1	leukocyte immunoglobulin-like receptor, subfamily A (with TM domain), member 1
hsa-miR-1321	0	0	1	0	0	0	CRYBB2P1	crystallin, beta B2 pseudogene 1
hsa-miR-1321	0	0	1	0	0	0	LOC348120	uncharacterized LOC348120
hsa-miR-1321	0	0	1	0	0	0	DPY19L2P4	dpy-19-like 2 pseudogene 4 (C. elegans)
hsa-miR-1321	1	0	1	1	0	0	NCSTN	nicastrin
hsa-miR-1321	0	0	1	0	0	0	SUZ12P1	suppressor of zeste 12 homolog pseudogene 1
hsa-miR-1321	1	0	1	1	1	1	PALD1	phosphatase domain containing, paladin 1
hsa-miR-1321	0	0	1	1	0	0	FKBP11	FK506 binding protein 11, 19 kDa
hsa-miR-1321	1	0	1	1	1	1	PTPRG	protein tyrosine phosphatase, receptor type, G
hsa-miR-1321	0	0	1	0	0	0	LOC283038	uncharacterized LOC283038
hsa-miR-1321	1	0	1	0	1	1	SEMA4G	sema domain, immunoglobulin domain (Ig), transmembrane domain (TM) and short cytoplasmic domain, (semaphorin) 4G
hsa-miR-1321	1	0	1	1	1	1	ZFP91	zinc finger protein 91 homolog (mouse)
hsa-miR-1321	1	0	1	1	1	1	YWHAZ	tyrosine 3-monooxygenase/tryptophan 5-monooxygenase activation protein, zeta polypeptide
hsa-miR-1321	0	0	1	1	1	1	RAB3IL1	RAB3A interacting protein (rabin3)-like 1
hsa-miR-1321	0	0	1	1	1	1	HLA-DQA1	major histocompatibility complex, class II, DQ alpha 1
hsa-miR-1321	0	0	1	1	0	0	LY6H	lymphocyte antigen 6 complex, locus H
hsa-miR-1321	0	0	1	1	1	1	ATP6V0B	ATPase, H+ transporting, lysosomal 21kDa, V0 subunit b
hsa-miR-1321	1	0	1	1	1	1	KDM5C	lysine (K)-specific demethylase 5C
hsa-miR-1321	0	0	1	1	0	0	CUEDC1	CUE domain containing 1
hsa-miR-1321	0	0	1	1	0	0	C20orf152	chromosome 20 open reading frame 152
hsa-miR-1321	0	0	1	1	0	0	BCL7C	B-cell CLL/lymphoma 7C
hsa-miR-1321	1	0	1	1	1	1	PRRG1	proline rich Gla (G-carboxyglutamic acid) 1
hsa-miR-1321	1	0	1	1	1	1	INPP5A	inositol polyphosphate-5-phosphatase, 40kDa
hsa-miR-1321	0	0	1	1	0	0	WDR90	WD repeat domain 90
hsa-miR-1321	1	0	1	1	1	1	RPUSD3	RNA pseudouridylate synthase domain containing 3
hsa-miR-1321	0	0	1	1	0	0	PRR19	proline rich 19
hsa-miR-1321	1	0	1	1	0	0	MANEAL	mannosidase, endo-alpha-like
hsa-miR-1321	1	0	1	0	0	0	PRRT4	proline-rich transmembrane protein 4
hsa-miR-1321	0	0	1	1	0	0	SLC38A6	solute carrier family 38, member 6
hsa-miR-1321	0	0	1	0	0	0	FLJ35390	uncharacterized LOC255031
hsa-miR-1321	1	0	1	1	1	1	ADCY6	adenylate cyclase 6
hsa-miR-1321	0	0	1	1	0	0	PLB1	phospholipase B1
hsa-miR-1321	0	0	1	1	0	0	TSNARE1	t-SNARE domain containing 1
hsa-miR-1321	0	0	1	1	1	1	TAGLN	transgelin
hsa-miR-1321	1	0	1	1	1	1	ZNF449	zinc finger protein 449
hsa-miR-1321	1	0	1	1	1	1	FAM129B	family with sequence similarity 129, member B
hsa-miR-1321	0	0	1	1	1	1	SLAMF1	signaling lymphocytic activation molecule family member 1
hsa-miR-1321	0	0	1	1	1	1	IL1RN	interleukin 1 receptor antagonist
hsa-miR-1321	1	0	1	1	1	1	MAPKAPK3	mitogen-activated protein kinase-activated protein kinase 3
hsa-miR-1321	0	0	1	0	0	0	PTGER4P2	prostaglandin E receptor 4 (subtype EP4) pseudogene 2
hsa-miR-1321	0	0	1	0	0	0	FOXN3-AS2	FOXN3 antisense RNA 2
hsa-miR-1321	0	0	1	1	0	0	CYP4F30P	cytochrome P450, family 4, subfamily F, polypeptide 30, pseudogene
hsa-miR-1321	1	0	1	1	0	0	CHTOP	chromatin target of PRMT1
hsa-miR-1321	1	0	1	1	1	1	SCAF8	SR-related CTD-associated factor 8
hsa-miR-1321	1	0	1	1	1	1	LRRC32	leucine rich repeat containing 32
hsa-miR-1321	1	0	1	0	1	1	TMEM194A	transmembrane protein 194A
hsa-miR-1321	0	0	1	1	0	0	D2HGDH	D-2-hydroxyglutarate dehydrogenase
hsa-miR-1321	1	0	1	1	1	1	SNX27	sorting nexin family member 27
hsa-miR-1321	0	0	1	1	1	1	TNFSF12	tumor necrosis factor (ligand) superfamily, member 12
hsa-miR-1321	0	0	1	0	1	1	DHFR	dihydrofolate reductase
hsa-miR-1321	0	0	1	0	0	0	LOC440416	uncharacterized LOC440416
hsa-miR-1321	1	0	1	1	1	1	WBP1L	WW domain binding protein 1-like
hsa-miR-1321	1	0	1	1	1	1	WNT5A	wingless-type MMTV integration site family, member 5A
hsa-miR-1321	1	0	1	0	1	1	DPYSL3	dihydropyrimidinase-like 3
hsa-miR-1321	0	0	1	0	0	0	LINC00537	long intergenic non-protein coding RNA 537
hsa-miR-1321	0	0	1	0	0	0	TBC1D25	TBC1 domain family, member 25
hsa-miR-1321	0	0	1	0	0	0	LINC00626	long intergenic non-protein coding RNA 626
hsa-miR-1321	1	0	1	1	1	1	ZBTB7A	zinc finger and BTB domain containing 7A
hsa-miR-1321	1	0	1	0	1	1	PIK3R3	phosphoinositide-3-kinase, regulatory subunit 3 (gamma)
hsa-miR-1321	0	0	1	0	0	0	FRG1B	FSHD region gene 1 family, member B
hsa-miR-1321	1	0	1	1	1	1	ST8SIA2	ST8 alpha-N-acetyl-neuraminide alpha-2,8-sialyltransferase 2
hsa-miR-1321	1	0	1	1	1	1	ACVR2B	activin A receptor, type IIB
hsa-miR-1321	0	0	1	1	1	1	KLRF1	killer cell lectin-like receptor subfamily F, member 1
hsa-miR-1321	1	0	1	0	1	1	LRRTM4	leucine rich repeat transmembrane neuronal 4
hsa-miR-1321	0	0	1	1	1	1	TCEA2	transcription elongation factor A (SII), 2
hsa-miR-1321	0	0	1	1	0	0	HOXB1	homeobox B1
hsa-miR-1321	0	0	1	1	0	0	ZNF541	zinc finger protein 541
hsa-miR-1321	1	0	1	0	1	1	MYBL1	v-myb myeloblastosis viral oncogene homolog (avian)-like 1
hsa-miR-1321	0	0	1	1	1	1	SPHKAP	SPHK1 interactor, AKAP domain containing
hsa-miR-1321	0	0	1	1	0	0	RIPPLY1	ripply1 homolog (zebrafish)
hsa-miR-1321	0	0	1	0	0	0	FAM71F2	family with sequence similarity 71, member F2
hsa-miR-1321	0	0	1	1	1	1	SLC25A35	solute carrier family 25, member 35
hsa-miR-1321	1	0	1	0	1	1	RBM23	RNA binding motif protein 23
hsa-miR-1321	1	0	1	1	1	1	GBA3	glucosidase, beta, acid 3 (cytosolic)
hsa-miR-1321	0	0	1	1	1	1	SMTNL2	smoothelin-like 2
hsa-miR-1321	0	0	1	1	0	0	RNF123	ring finger protein 123
hsa-miR-1321	0	0	1	1	1	1	FSHB	follicle stimulating hormone, beta polypeptide
hsa-miR-1321	1	0	1	1	1	1	ITSN1	intersectin 1 (SH3 domain protein)
hsa-miR-1321	1	0	1	1	1	1	TNS1	tensin 1
hsa-miR-1321	0	0	1	1	0	0	RGS9	regulator of G-protein signaling 9
hsa-miR-1321	1	0	1	0	1	1	PRDM10	PR domain containing 10
hsa-miR-1321	1	0	1	1	1	1	GRIA3	glutamate receptor, ionotropic, AMPA 3
hsa-miR-1321	0	0	1	0	0	0	FAM27E3	family with sequence similarity 27, member E3
hsa-miR-1321	1	0	1	1	1	1	FKBP1A	FK506 binding protein 1A, 12kDa
hsa-miR-1321	0	0	1	1	1	1	C9orf171	chromosome 9 open reading frame 171
hsa-miR-1321	0	0	1	0	0	0	FOXR1	forkhead box R1
hsa-miR-1321	0	0	1	0	0	0	EEF1DP3	eukaryotic translation elongation factor 1 delta pseudogene 3
hsa-miR-1321	0	0	1	0	0	0	KRT8P12	keratin 8 pseudogene 12
hsa-miR-1321	0	0	1	1	1	1	SLC7A13	solute carrier family 7 (anionic amino acid transporter), member 13
hsa-miR-1321	1	0	1	1	1	1	ZMYM4	zinc finger, MYM-type 4
hsa-miR-1321	0	0	1	1	1	1	SLC22A23	solute carrier family 22, member 23
hsa-miR-1321	0	0	1	1	0	0	TTC21A	tetratricopeptide repeat domain 21A
hsa-miR-1321	0	0	1	0	0	0	FAM225B	family with sequence similarity 225, member B (non-protein coding)
hsa-miR-1321	1	0	1	1	1	1	C18orf34	chromosome 18 open reading frame 34
hsa-miR-1321	1	0	1	0	1	1	NFAT5	nuclear factor of activated T-cells 5, tonicity-responsive
hsa-miR-1321	1	0	1	1	1	1	NIPAL2	NIPA-like domain containing 2
hsa-miR-1321	0	0	1	0	0	0	FUT8-AS1	FUT8 antisense RNA 1
hsa-miR-1321	0	0	1	0	0	0	MEG3	maternally expressed 3 (non-protein coding)
hsa-miR-1321	0	0	1	0	0	0	FLJ39632	uncharacterized LOC642477
hsa-miR-1321	1	0	1	1	1	1	LITAF	lipopolysaccharide-induced TNF factor
hsa-miR-1321	1	0	1	1	0	0	KRT80	keratin 80
hsa-miR-1321	1	0	1	1	1	1	ATP2B4	ATPase, Ca++ transporting, plasma membrane 4
hsa-miR-1321	1	0	1	1	1	1	RAB7A	RAB7A, member RAS oncogene family
hsa-miR-1321	0	0	1	0	1	1	AP1S2	adaptor-related protein complex 1, sigma 2 subunit
hsa-miR-1321	1	0	1	0	1	1	NFIX	nuclear factor I/X (CCAAT-binding transcription factor)
hsa-miR-1321	1	0	1	0	1	1	CCDC88A	coiled-coil domain containing 88A
hsa-miR-1321	1	0	1	1	1	1	NIPAL3	NIPA-like domain containing 3
hsa-miR-1321	1	0	1	1	1	1	FOSB	FBJ murine osteosarcoma viral oncogene homolog B
hsa-miR-1321	1	0	1	1	1	1	SLC35F1	solute carrier family 35, member F1
hsa-miR-1321	1	0	1	1	1	1	TGOLN2	trans-golgi network protein 2
hsa-miR-1321	0	0	1	0	0	0	MGC23284	uncharacterized LOC197187
hsa-miR-1321	0	0	1	1	1	1	PSMA2	proteasome (prosome, macropain) subunit, alpha type, 2
hsa-miR-1321	1	0	1	0	1	1	GALNT4	UDP-N-acetyl-alpha-D-galactosamine:polypeptide N-acetylgalactosaminyltransferase 4 (GalNAc-T4)
hsa-miR-1321	0	0	1	1	0	0	RPS24	ribosomal protein S24
hsa-miR-1321	0	0	1	1	1	1	PRR14L	proline rich 14-like
hsa-miR-1321	1	0	1	1	1	1	CGN	cingulin
hsa-miR-1321	1	0	1	1	0	0	CECR2	cat eye syndrome chromosome region, candidate 2
hsa-miR-1321	1	0	1	1	1	1	SLC39A13	solute carrier family 39 (zinc transporter), member 13
hsa-miR-1321	1	0	1	1	1	1	TLN2	talin 2
hsa-miR-1321	0	0	1	1	0	0	ANKRD33	ankyrin repeat domain 33
hsa-miR-1321	0	0	1	1	1	1	ZNF365	zinc finger protein 365
hsa-miR-1321	0	0	1	1	0	0	ELP3	elongator acetyltransferase complex subunit 3
hsa-miR-1321	1	0	1	1	1	1	NEDD9	neural precursor cell expressed, developmentally down-regulated 9
hsa-miR-1321	1	0	1	1	1	1	DDAH1	dimethylarginine dimethylaminohydrolase 1
hsa-miR-1321	1	0	1	1	1	1	KLHL6	kelch-like 6 (Drosophila)
hsa-miR-1321	0	0	1	0	0	0	LINC00338	long intergenic non-protein coding RNA 338
hsa-miR-1321	1	0	1	1	1	1	NFIB	nuclear factor I/B
hsa-miR-1321	1	0	1	1	1	1	C5orf24	chromosome 5 open reading frame 24
hsa-miR-1321	1	0	1	1	1	1	PGAP1	post-GPI attachment to proteins 1
hsa-miR-1321	0	0	1	1	1	1	PRPSAP2	phosphoribosyl pyrophosphate synthetase-associated protein 2
hsa-miR-1321	1	0	1	1	1	1	FAM208A	family with sequence similarity 208, member A
hsa-miR-1321	1	0	1	1	1	1	CREB3L2	cAMP responsive element binding protein 3-like 2
hsa-miR-1321	1	0	1	0	1	1	TTL	tubulin tyrosine ligase
hsa-miR-1321	0	0	1	1	1	1	PICK1	protein interacting with PRKCA 1
hsa-miR-1321	1	0	1	1	1	1	BSDC1	BSD domain containing 1
hsa-miR-1321	1	0	1	1	1	1	MAX	MYC associated factor X
hsa-miR-1321	0	0	1	1	1	1	C6orf223	chromosome 6 open reading frame 223
hsa-miR-1321	0	0	1	1	1	1	CHEK1	checkpoint kinase 1
hsa-miR-1321	0	0	1	1	1	1	RIPK2	receptor-interacting serine-threonine kinase 2
hsa-miR-1321	1	0	1	0	0	0	IGLON5	IgLON family member 5
hsa-miR-1321	1	0	1	1	1	1	ARF1	ADP-ribosylation factor 1
hsa-miR-1321	0	0	1	1	0	0	CDC37	cell division cycle 37 homolog (S. cerevisiae)
hsa-miR-1321	0	0	1	1	0	0	HSD3B1	hydroxy-delta-5-steroid dehydrogenase, 3 beta- and steroid delta-isomerase 1
hsa-miR-1321	1	0	1	1	1	1	VIM	vimentin
hsa-miR-1321	0	0	1	1	0	0	SARS	seryl-tRNA synthetase
hsa-miR-1321	0	0	1	0	0	0	RPS16P10	ribosomal protein S16 pseudogene 10
hsa-miR-1321	0	0	1	1	1	1	CETN2	centrin, EF-hand protein, 2
hsa-miR-1321	1	0	1	1	1	1	PCGF2	polycomb group ring finger 2
hsa-miR-1321	0	0	1	1	0	0	TMEM62	transmembrane protein 62
hsa-miR-1321	0	0	1	1	0	0	URM1	ubiquitin related modifier 1
hsa-miR-1321	1	0	1	1	1	1	ERI3	ERI1 exoribonuclease family member 3
hsa-miR-1321	0	0	1	0	0	0	COX4I2	cytochrome c oxidase subunit IV isoform 2 (lung)
hsa-miR-1321	1	0	1	1	0	0	TSC22D4	TSC22 domain family, member 4
hsa-miR-1321	1	0	1	1	1	1	LETMD1	LETM1 domain containing 1
hsa-miR-1321	0	0	1	1	1	1	DMWD	dystrophia myotonica, WD repeat containing
hsa-miR-1321	1	0	1	1	1	1	ARL1	ADP-ribosylation factor-like 1
hsa-miR-1321	0	0	1	1	0	0	CYGB	cytoglobin
hsa-miR-1321	0	0	1	1	0	0	FXYD7	FXYD domain containing ion transport regulator 7
hsa-miR-1321	0	0	1	1	1	1	BTF3	basic transcription factor 3
hsa-miR-1321	0	0	1	1	0	0	FCGRT	Fc fragment of IgG, receptor, transporter, alpha
hsa-miR-1321	1	0	1	1	1	1	DOLPP1	dolichyl pyrophosphate phosphatase 1
hsa-miR-1321	0	0	1	1	0	0	FCHO1	FCH domain only 1
hsa-miR-1321	0	0	1	1	1	1	CIRBP	cold inducible RNA binding protein
hsa-miR-1321	1	1	1	1	0	0	EFNA3	ephrin-A3
hsa-miR-1321	0	0	1	1	1	1	TOP3B	topoisomerase (DNA) III beta
hsa-miR-1321	0	0	1	1	1	1	C1orf43	chromosome 1 open reading frame 43
hsa-miR-1321	0	0	1	1	1	1	SLC25A4	solute carrier family 25 (mitochondrial carrier; adenine nucleotide translocator), member 4
hsa-miR-1321	1	0	1	1	0	0	ELOVL1	ELOVL fatty acid elongase 1
hsa-miR-1321	0	0	1	0	0	0	H19	H19, imprinted maternally expressed transcript (non-protein coding)
hsa-miR-1321	0	0	1	0	0	0	SBDSP1	Shwachman-Bodian-Diamond syndrome pseudogene 1
hsa-miR-1321	0	0	1	1	1	1	CD99	CD99 molecule
hsa-miR-1321	0	0	1	1	0	0	DNAJB2	DnaJ (Hsp40) homolog, subfamily B, member 2
hsa-miR-1321	0	0	1	1	1	1	ABCD1	ATP-binding cassette, sub-family D (ALD), member 1
hsa-miR-1321	1	0	1	1	1	1	TPM4	tropomyosin 4
hsa-miR-1321	0	0	1	0	0	0	NBLA00301	Nbla00301
hsa-miR-1321	1	0	1	1	1	1	STARD3NL	STARD3 N-terminal like
hsa-miR-1321	0	0	1	0	1	1	CD99P1	CD99 molecule pseudogene 1
hsa-miR-1321	1	0	1	1	1	1	RALB	v-ral simian leukemia viral oncogene homolog B (ras related; GTP binding protein)
hsa-miR-1321	1	0	1	1	1	1	COPZ1	coatomer protein complex, subunit zeta 1
hsa-miR-1321	0	0	1	1	1	1	DCTD	dCMP deaminase
hsa-miR-1321	0	0	1	1	1	1	GRAP2	GRB2-related adaptor protein 2
hsa-miR-1321	1	0	1	0	1	1	RPS6KB1	ribosomal protein S6 kinase, 70kDa, polypeptide 1
hsa-miR-1321	0	0	1	1	0	0	CXorf40A	chromosome X open reading frame 40A
hsa-miR-1321	0	0	1	1	0	0	PDK3	pyruvate dehydrogenase kinase, isozyme 3
hsa-miR-1321	0	0	1	1	0	0	NDUFS7	NADH dehydrogenase (ubiquinone) Fe-S protein 7, 20kDa (NADH-coenzyme Q reductase)
hsa-miR-1321	1	0	1	0	1	1	DCAF7	DDB1 and CUL4 associated factor 7
hsa-miR-1321	0	0	1	1	0	0	CDK2AP2	cyclin-dependent kinase 2 associated protein 2
hsa-miR-1321	1	0	1	1	1	1	WIPF1	WAS/WASL interacting protein family, member 1
hsa-miR-1321	0	0	1	1	0	0	C11orf68	chromosome 11 open reading frame 68
hsa-miR-1321	0	0	1	0	1	1	TMEM155	transmembrane protein 155
hsa-miR-1321	0	0	1	1	0	0	CD7	CD7 molecule
hsa-miR-1321	0	0	1	1	1	1	CAPZB	capping protein (actin filament) muscle Z-line, beta
hsa-miR-1321	0	0	1	1	1	1	PDLIM1	PDZ and LIM domain 1
hsa-miR-1321	1	0	1	1	1	1	MMP2	matrix metallopeptidase 2 (gelatinase A, 72kDa gelatinase, 72kDa type IV collagenase)
hsa-miR-1321	0	0	1	1	0	0	PTGDS	prostaglandin D2 synthase 21kDa (brain)
hsa-miR-1321	1	0	1	1	1	1	NRN1	neuritin 1
hsa-miR-1321	0	0	1	1	1	1	CD3E	CD3e molecule, epsilon (CD3-TCR complex)
hsa-miR-1321	0	0	1	1	1	1	PEX19	peroxisomal biogenesis factor 19
hsa-miR-1321	0	0	1	1	0	0	MRPL4	mitochondrial ribosomal protein L4
hsa-miR-1321	0	0	1	1	1	1	DEDD	death effector domain containing
hsa-miR-1321	0	0	1	1	1	1	JMJD8	jumonji domain containing 8
hsa-miR-1321	1	0	1	0	1	1	ANKH	ankylosis, progressive homolog (mouse)
hsa-miR-1321	1	0	1	1	0	0	WBP2	WW domain binding protein 2
hsa-miR-1321	1	0	1	1	1	1	YWHAQ	tyrosine 3-monooxygenase/tryptophan 5-monooxygenase activation protein, theta polypeptide
hsa-miR-1321	0	0	1	1	1	1	UBE2A	ubiquitin-conjugating enzyme E2A
hsa-miR-1321	0	0	1	1	1	1	SFXN3	sideroflexin 3
hsa-miR-1321	1	0	1	1	1	1	PFN2	profilin 2
hsa-miR-1321	0	0	1	1	1	1	TTC4	tetratricopeptide repeat domain 4
hsa-miR-1321	0	0	1	1	1	1	SLCO4A1	solute carrier organic anion transporter family, member 4A1
hsa-miR-1321	1	0	1	1	1	1	F11R	F11 receptor
hsa-miR-1321	0	0	1	1	1	1	ZNF333	zinc finger protein 333
hsa-miR-1321	0	0	1	1	1	1	DNAJC25	DnaJ (Hsp40) homolog, subfamily C , member 25
hsa-miR-1321	0	0	1	1	0	0	YIPF3	Yip1 domain family, member 3
hsa-miR-1321	1	0	1	1	1	1	ARHGEF40	Rho guanine nucleotide exchange factor (GEF) 40
hsa-miR-1321	1	0	1	1	1	1	AZI2	5-azacytidine induced 2
hsa-miR-1321	0	0	1	1	0	0	CLEC1A	C-type lectin domain family 1, member A
hsa-miR-1321	0	0	1	1	0	0	GPC3	glypican 3
hsa-miR-1321	1	0	1	1	1	1	TMEM55B	transmembrane protein 55B
hsa-miR-1321	1	0	1	1	1	1	RALY	RNA binding protein, autoantigenic (hnRNP-associated with lethal yellow homolog (mouse))
hsa-miR-1321	1	0	1	1	1	1	TRAPPC3	trafficking protein particle complex 3
hsa-miR-1321	0	0	1	1	0	0	CTSW	cathepsin W
hsa-miR-1321	1	0	1	0	1	1	CD47	CD47 molecule
hsa-miR-1321	0	0	1	0	0	0	NUDT18	nudix (nucleoside diphosphate linked moiety X)-type motif 18
hsa-miR-1321	0	0	1	0	0	0	PRMT1	protein arginine methyltransferase 1
hsa-miR-1321	0	0	1	1	1	1	LRRC38	leucine rich repeat containing 38
hsa-miR-1321	0	0	1	1	1	1	INPP5K	inositol polyphosphate-5-phosphatase K
hsa-miR-1321	0	0	1	1	0	0	POLB	polymerase (DNA directed), beta
hsa-miR-1321	0	0	1	1	0	0	TTYH1	tweety homolog 1 (Drosophila)
hsa-miR-1321	1	0	1	1	1	1	MED1	mediator complex subunit 1
hsa-miR-1321	1	0	1	0	1	1	DNMT3A	DNA (cytosine-5-)-methyltransferase 3 alpha
hsa-miR-1321	0	0	1	1	0	0	IL11RA	interleukin 11 receptor, alpha
hsa-miR-1321	0	0	1	1	1	1	NUB1	negative regulator of ubiquitin-like proteins 1
hsa-miR-1321	0	0	1	0	0	0	MYSM1	Myb-like, SWIRM and MPN domains 1
hsa-miR-1321	1	0	1	0	1	1	KIAA0240	KIAA0240
hsa-miR-1321	0	0	1	0	0	0	LOC731789	uncharacterized LOC731789
hsa-miR-1321	1	0	1	0	1	1	BTRC	beta-transducin repeat containing E3 ubiquitin protein ligase
hsa-miR-1321	0	0	1	0	1	1	USP10	ubiquitin specific peptidase 10
hsa-miR-1321	0	0	1	0	0	0	MUC19	mucin 19, oligomeric
hsa-miR-1321	0	0	1	0	0	0	DNAJC27-AS1	DNAJC27 antisense RNA 1
hsa-miR-1321	1	0	1	1	1	1	BCL2L1	BCL2-like 1
hsa-miR-1321	0	0	1	0	0	0	LOC440518	golgin A2 pseudogene
hsa-miR-1321	1	0	1	1	1	1	ZFHX3	zinc finger homeobox 3
hsa-miR-1321	0	0	1	1	1	1	MOBP	myelin-associated oligodendrocyte basic protein
hsa-miR-1321	1	0	1	1	1	1	SP2	Sp2 transcription factor
hsa-miR-1321	0	0	1	1	0	0	HMGXB3	HMG box domain containing 3
hsa-miR-1321	1	0	1	1	1	1	MOSPD1	motile sperm domain containing 1
hsa-miR-1321	1	0	1	1	1	1	QKI	QKI, KH domain containing, RNA binding
hsa-miR-1321	1	0	1	0	1	1	MAP2K7	mitogen-activated protein kinase kinase 7
hsa-miR-1321	1	0	1	0	1	1	RBBP5	retinoblastoma binding protein 5
hsa-miR-1321	0	0	1	1	0	0	SLCO3A1	solute carrier organic anion transporter family, member 3A1
hsa-miR-1321	1	0	1	1	1	1	IRF1	interferon regulatory factor 1
hsa-miR-1321	1	0	1	0	1	1	EPDR1	ependymin related protein 1 (zebrafish)
hsa-miR-1321	0	0	1	1	1	1	MORC4	MORC family CW-type zinc finger 4
hsa-miR-1321	0	0	1	1	1	1	ALDH3B1	aldehyde dehydrogenase 3 family, member B1
hsa-miR-1321	1	0	1	1	1	1	MLL	myeloid/lymphoid or mixed-lineage leukemia (trithorax homolog, Drosophila)
hsa-miR-1321	1	0	1	1	1	1	ATP2B2	ATPase, Ca++ transporting, plasma membrane 2
hsa-miR-1321	0	0	1	1	1	1	PCYT1A	phosphate cytidylyltransferase 1, choline, alpha
hsa-miR-1321	1	0	1	0	1	1	BCL2	B-cell CLL/lymphoma 2
hsa-miR-1321	1	0	1	1	1	1	ELK1	ELK1, member of ETS oncogene family
hsa-miR-1321	1	0	1	1	1	1	IGF1	insulin-like growth factor 1 (somatomedin C)
hsa-miR-1321	0	0	1	1	1	1	NPR3	natriuretic peptide receptor C/guanylate cyclase C (atrionatriuretic peptide receptor C)
hsa-miR-1321	1	0	1	0	1	1	ACVR2A	activin A receptor, type IIA
hsa-miR-1321	1	0	1	1	0	0	ADRB3	adrenoceptor beta 3
hsa-miR-1321	0	0	1	0	0	0	AR	androgen receptor
hsa-miR-1321	0	0	1	1	0	0	CHRNE	cholinergic receptor, nicotinic, epsilon (muscle)
hsa-miR-1321	1	0	1	1	1	1	COL3A1	collagen, type III, alpha 1
hsa-miR-1321	1	0	1	1	1	1	COL4A4	collagen, type IV, alpha 4
hsa-miR-1321	1	0	1	0	1	1	SLC26A2	solute carrier family 26 (sulfate transporter), member 2
hsa-miR-1321	0	0	1	1	1	1	F8	coagulation factor VIII, procoagulant component
hsa-miR-1321	0	0	1	1	1	1	FXN	frataxin
hsa-miR-1321	1	0	1	0	1	1	ITGB3	integrin, beta 3 (platelet glycoprotein IIIa, antigen CD61)
hsa-miR-1321	1	0	1	0	1	1	KIT	v-kit Hardy-Zuckerman 4 feline sarcoma viral oncogene homolog
hsa-miR-1321	1	0	1	1	1	1	MITF	microphthalmia-associated transcription factor
hsa-miR-1321	1	0	1	1	1	1	NF1	neurofibromin 1
hsa-miR-1321	1	0	1	1	1	1	OCRL	oculocerebrorenal syndrome of Lowe
hsa-miR-1321	1	0	1	1	1	1	PMP22	peripheral myelin protein 22
hsa-miR-1321	0	0	1	1	1	1	SRD5A2	steroid-5-alpha-reductase, alpha polypeptide 2 (3-oxo-5 alpha-steroid delta 4-dehydrogenase alpha 2)
hsa-miR-1321	1	0	1	1	1	1	TIMP3	TIMP metallopeptidase inhibitor 3
hsa-miR-1321	0	0	1	1	1	1	XDH	xanthine dehydrogenase
hsa-miR-1321	0	0	1	1	1	1	CASR	calcium-sensing receptor
hsa-miR-1321	0	0	1	1	1	1	GM2A	GM2 ganglioside activator
hsa-miR-1321	0	0	1	1	0	0	KEL	Kell blood group, metallo-endopeptidase
hsa-miR-1321	1	0	1	0	1	1	PAFAH1B1	platelet-activating factor acetylhydrolase 1b, regulatory subunit 1 (45kDa)
hsa-miR-1321	1	0	1	1	0	0	NOTCH3	notch 3
hsa-miR-1321	0	0	1	1	1	1	PECAM1	platelet/endothelial cell adhesion molecule 1
hsa-miR-1321	0	0	1	0	1	1	SLC10A2	solute carrier family 10 (sodium/bile acid cotransporter family), member 2
hsa-miR-1321	1	0	1	1	1	1	AQP2	aquaporin 2 (collecting duct)
hsa-miR-1321	1	0	1	1	1	1	HOXD13	homeobox D13
hsa-miR-1321	1	0	1	1	1	1	MPZ	myelin protein zero
hsa-miR-1321	0	0	1	1	1	1	CRX	cone-rod homeobox
hsa-miR-1321	0	0	1	1	1	1	FCGR1A	Fc fragment of IgG, high affinity Ia, receptor (CD64)
hsa-miR-1321	1	0	1	1	1	1	IL10	interleukin 10
hsa-miR-1321	0	0	1	1	1	1	TAP1	transporter 1, ATP-binding cassette, sub-family B (MDR/TAP)
hsa-miR-1321	0	0	1	1	1	1	LTA	lymphotoxin alpha (TNF superfamily, member 1)
hsa-miR-1321	1	0	1	0	1	1	IGFBP5	insulin-like growth factor binding protein 5
hsa-miR-1321	1	0	1	1	0	0	ADRA1B	adrenoceptor alpha 1B
hsa-miR-1321	0	0	1	1	1	1	ALDH2	aldehyde dehydrogenase 2 family (mitochondrial)
hsa-miR-1321	1	0	1	0	1	1	ALDH1A3	aldehyde dehydrogenase 1 family, member A3
hsa-miR-1321	1	0	1	0	1	1	CACNA1E	calcium channel, voltage-dependent, R type, alpha 1E subunit
hsa-miR-1321	1	0	1	1	1	1	CD247	CD247 molecule
hsa-miR-1321	1	0	1	1	1	1	CHRM1	cholinergic receptor, muscarinic 1
hsa-miR-1321	0	0	1	1	0	0	CHRNA2	cholinergic receptor, nicotinic, alpha 2 (neuronal)
hsa-miR-1321	1	0	1	1	1	1	CSF1	colony stimulating factor 1 (macrophage)
hsa-miR-1321	1	0	1	1	1	1	DIO2	deiodinase, iodothyronine, type II
hsa-miR-1321	0	0	1	1	1	1	EPO	erythropoietin
hsa-miR-1321	1	0	1	0	1	1	GABRA4	gamma-aminobutyric acid (GABA) A receptor, alpha 4
hsa-miR-1321	1	0	1	1	1	1	GABRB3	gamma-aminobutyric acid (GABA) A receptor, beta 3
hsa-miR-1321	1	0	1	1	1	1	GABRG2	gamma-aminobutyric acid (GABA) A receptor, gamma 2
hsa-miR-1321	1	0	1	1	1	1	GRIA4	glutamate receptor, ionotropic, AMPA 4
hsa-miR-1321	1	0	1	1	0	0	GRIN2A	glutamate receptor, ionotropic, N-methyl D-aspartate 2A
hsa-miR-1321	1	0	1	1	1	1	GRM5	glutamate receptor, metabotropic 5
hsa-miR-1321	1	0	1	1	1	1	HTR4	5-hydroxytryptamine (serotonin) receptor 4, G protein-coupled
hsa-miR-1321	0	0	1	1	1	1	NQO1	NAD(P)H dehydrogenase, quinone 1
hsa-miR-1321	1	0	1	1	1	1	REEP3	receptor accessory protein 3
hsa-miR-1321	1	0	1	0	1	1	FLJ33360	FLJ33360 protein
hsa-miR-1321	0	0	1	1	1	1	STAG3L1	stromal antigen 3-like 1
hsa-miR-1321	1	0	1	1	1	1	ABLIM1	actin binding LIM protein 1
hsa-miR-1321	1	0	1	1	1	1	HMGXB4	HMG box domain containing 4
hsa-miR-1321	1	0	1	1	1	1	HNRNPD	heterogeneous nuclear ribonucleoprotein D (AU-rich element RNA binding protein 1, 37kDa)
hsa-miR-1321	1	0	1	1	0	0	NOMO3	NODAL modulator 3
hsa-miR-1321	1	0	1	0	1	1	ZNF740	zinc finger protein 740
hsa-miR-1321	0	0	1	0	1	1	ZNF705A	zinc finger protein 705A
hsa-miR-1321	1	0	1	0	1	1	LRRC55	leucine rich repeat containing 55
hsa-miR-1321	1	0	1	0	1	1	IP6K1	inositol hexakisphosphate kinase 1
hsa-miR-1321	1	0	1	1	0	0	RPS6KA1	ribosomal protein S6 kinase, 90kDa, polypeptide 1
hsa-miR-1321	1	0	1	1	1	1	TAC3	tachykinin 3
hsa-miR-1321	0	0	1	1	1	1	LRRC18	leucine rich repeat containing 18
hsa-miR-1321	1	0	1	0	1	1	GOSR1	golgi SNAP receptor complex member 1
hsa-miR-1321	1	0	1	1	1	1	IGF2BP2	insulin-like growth factor 2 mRNA binding protein 2
hsa-miR-1321	1	0	1	1	1	1	BRWD1	bromodomain and WD repeat domain containing 1
hsa-miR-1321	0	0	1	1	1	1	KLHDC9	kelch domain containing 9
hsa-miR-1321	1	0	1	1	1	1	EI24	etoposide induced 2.4 mRNA
hsa-miR-1321	0	0	1	1	0	0	F8A3	coagulation factor VIII-associated 3
hsa-miR-1321	1	0	1	0	1	1	SS18	synovial sarcoma translocation, chromosome 18
hsa-miR-1321	1	0	1	0	1	1	CPLX2	complexin 2
hsa-miR-1321	1	0	1	0	1	1	KIAA2022	KIAA2022
hsa-miR-1321	1	0	1	1	1	1	LPHN1	latrophilin 1
hsa-miR-1321	1	0	1	1	1	1	RBPMS	RNA binding protein with multiple splicing
hsa-miR-1321	0	0	1	1	0	0	ARMCX6	armadillo repeat containing, X-linked 6
hsa-miR-1321	1	0	1	0	1	1	ZC3H12B	zinc finger CCCH-type containing 12B
hsa-miR-1321	0	0	1	1	1	1	SERP2	stress-associated endoplasmic reticulum protein family member 2
hsa-miR-1321	0	0	1	1	1	1	NCMAP	noncompact myelin associated protein
hsa-miR-1321	1	0	1	1	1	1	FOXP4	forkhead box P4
hsa-miR-1321	0	0	1	1	0	0	MYPOP	Myb-related transcription factor, partner of profilin
hsa-miR-1321	1	0	1	1	1	1	SLC25A53	solute carrier family 25, member 53
hsa-miR-1321	0	0	1	1	0	0	NUDT17	nudix (nucleoside diphosphate linked moiety X)-type motif 17
hsa-miR-1321	1	0	1	0	1	1	ZKSCAN2	zinc finger with KRAB and SCAN domains 2
hsa-miR-1321	1	0	1	1	1	1	UBE2NL	ubiquitin-conjugating enzyme E2N-like
hsa-miR-1321	1	0	1	1	1	1	C12orf68	chromosome 12 open reading frame 68
hsa-miR-1321	0	0	1	1	1	1	C2orf68	chromosome 2 open reading frame 68
hsa-miR-1321	0	0	1	1	1	1	LDLRAD2	low density lipoprotein receptor class A domain containing 2
hsa-miR-1321	0	0	1	0	1	1	LINC00268	long intergenic non-protein coding RNA 268
hsa-miR-1321	0	0	1	1	0	0	RTKN	rhotekin
hsa-miR-1321	0	0	1	1	1	1	PURG	purine-rich element binding protein G
hsa-miR-1321	1	0	1	1	1	1	VMA21	VMA21 vacuolar H+-ATPase homolog (S. cerevisiae)
hsa-miR-1321	1	0	1	1	1	1	SH3PXD2B	SH3 and PX domains 2B
hsa-miR-1321	0	0	1	0	0	0	ADIG	adipogenin
hsa-miR-1321	0	0	1	1	0	0	FNTA	farnesyltransferase, CAAX box, alpha
hsa-miR-1321	1	0	1	1	1	1	IQCB1	IQ motif containing B1
hsa-miR-1321	1	0	1	0	1	1	BCL7A	B-cell CLL/lymphoma 7A
hsa-miR-1321	1	0	1	0	1	1	TNRC6B	trinucleotide repeat containing 6B
hsa-miR-1321	0	0	1	1	0	0	ARPC4	actin related protein 2/3 complex, subunit 4, 20kDa
hsa-miR-1321	1	0	1	0	1	1	CELF2	CUGBP, Elav-like family member 2
hsa-miR-1321	1	0	1	0	1	1	ADAR	adenosine deaminase, RNA-specific
hsa-miR-1321	0	0	1	1	1	1	SPAG16	sperm associated antigen 16
hsa-miR-1321	0	0	1	0	1	1	STXBP1	syntaxin binding protein 1
hsa-miR-1321	1	0	1	1	1	1	RCE1	RCE1 homolog, prenyl protein protease (S. cerevisiae)
hsa-miR-1321	1	0	1	1	1	1	TFAP2A	transcription factor AP-2 alpha (activating enhancer binding protein 2 alpha)
hsa-miR-1321	1	0	1	1	1	1	UBE2V1	ubiquitin-conjugating enzyme E2 variant 1
hsa-miR-1321	0	0	1	1	1	1	SLC35A2	solute carrier family 35 (UDP-galactose transporter), member A2
hsa-miR-1321	1	0	1	0	1	1	NPNT	nephronectin
hsa-miR-1321	0	0	1	1	1	1	HAT1	histone acetyltransferase 1
hsa-miR-1321	1	0	1	1	1	1	SCN1B	sodium channel, voltage-gated, type I, beta subunit
hsa-miR-1321	1	0	1	0	1	1	ARL5A	ADP-ribosylation factor-like 5A
hsa-miR-1321	0	0	1	0	0	0	FER1L6	fer-1-like 6 (C. elegans)
hsa-miR-1321	1	0	1	0	1	1	TTPAL	tocopherol (alpha) transfer protein-like
hsa-miR-1321	0	0	1	1	1	1	ATAD3C	ATPase family, AAA domain containing 3C
hsa-miR-1321	1	0	1	1	1	1	ELMO1	engulfment and cell motility 1
hsa-miR-1321	0	0	1	1	1	1	SIRPG	signal-regulatory protein gamma
hsa-miR-1321	1	0	1	1	1	1	KREMEN1	kringle containing transmembrane protein 1
hsa-miR-1321	1	0	1	1	1	1	KCNC4	potassium voltage-gated channel, Shaw-related subfamily, member 4
hsa-miR-1321	0	0	1	0	1	1	ZNF705D	zinc finger protein 705D
hsa-miR-1321	0	0	1	1	1	1	ZMYM5	zinc finger, MYM-type 5
hsa-miR-1321	1	0	1	1	1	1	CHTF8	CTF8, chromosome transmission fidelity factor 8 homolog (S. cerevisiae)
hsa-miR-1321	1	0	1	1	1	1	CBLN3	cerebellin 3 precursor
hsa-miR-1321	1	0	1	1	1	1	MOSPD3	motile sperm domain containing 3
hsa-miR-1321	1	0	1	1	1	1	PALM	paralemmin
hsa-miR-1321	0	0	1	0	1	1	SCN3B	sodium channel, voltage-gated, type III, beta subunit
hsa-miR-1321	1	0	1	1	1	1	ASB1	ankyrin repeat and SOCS box containing 1
hsa-miR-1321	1	0	1	1	1	1	NCALD	neurocalcin delta
hsa-miR-1321	1	0	1	1	1	1	CRCP	CGRP receptor component
hsa-miR-1321	1	0	1	1	0	0	KIAA0895L	KIAA0895-like
hsa-miR-1321	0	0	1	1	0	0	FAM110A	family with sequence similarity 110, member A
hsa-miR-1321	1	0	1	1	1	1	ZC2HC1C	zinc finger, C2HC-type containing 1C
hsa-miR-1321	0	0	1	1	1	1	TMEM80	transmembrane protein 80
hsa-miR-1321	0	0	1	1	1	1	GEMIN8	gem (nuclear organelle) associated protein 8
hsa-miR-1321	1	0	1	1	1	1	GLRA3	glycine receptor, alpha 3
hsa-miR-1321	1	0	1	1	1	1	NSL1	NSL1, MIND kinetochore complex component, homolog (S. cerevisiae)
hsa-miR-1321	1	0	1	1	1	1	FRS2	fibroblast growth factor receptor substrate 2
hsa-miR-1321	1	0	1	1	1	1	ERBB4	v-erb-a erythroblastic leukemia viral oncogene homolog 4 (avian)
hsa-miR-1321	0	0	1	1	1	1	TRAK1	trafficking protein, kinesin binding 1
hsa-miR-1321	0	0	1	1	1	1	FAM22G	family with sequence similarity 22, member G
hsa-miR-1321	0	0	1	1	1	1	KIR3DX1	killer cell immunoglobulin-like receptor, three domains, X1
hsa-miR-1321	1	0	1	1	1	1	METTL9	methyltransferase like 9
hsa-miR-1321	1	0	1	1	1	1	PRR3	proline rich 3
hsa-miR-1321	0	0	1	1	0	0	FAM127A	family with sequence similarity 127, member A
hsa-miR-1321	1	0	1	0	0	0	FAM127B	family with sequence similarity 127, member B
hsa-miR-1321	1	0	1	0	1	1	FAM127C	family with sequence similarity 127, member C
hsa-miR-1321	1	0	1	1	1	1	DACT1	dapper, antagonist of beta-catenin, homolog 1 (Xenopus laevis)
hsa-miR-1321	0	0	1	1	1	1	FKTN	fukutin
hsa-miR-1321	0	0	1	1	1	1	DIAPH1	diaphanous homolog 1 (Drosophila)
hsa-miR-1321	1	0	1	1	1	1	VAV3	vav 3 guanine nucleotide exchange factor
hsa-miR-1321	1	0	1	1	1	1	LDB3	LIM domain binding 3
hsa-miR-1321	1	0	1	1	1	1	FAM155A	family with sequence similarity 155, member A
hsa-miR-1321	1	0	1	1	0	0	DLGAP3	discs, large (Drosophila) homolog-associated protein 3
hsa-miR-1321	1	0	1	1	1	1	SHANK3	SH3 and multiple ankyrin repeat domains 3
hsa-miR-1321	0	0	1	1	1	1	LRRC4B	leucine rich repeat containing 4B
hsa-miR-1321	1	0	1	1	1	1	ZNF697	zinc finger protein 697
hsa-miR-1321	0	0	1	0	0	0	ARHGEF28	Rho guanine nucleotide exchange factor (GEF) 28
hsa-miR-1321	1	0	1	0	1	1	MEGF9	multiple EGF-like-domains 9
hsa-miR-1321	0	0	1	1	0	0	ARRDC5	arrestin domain containing 5
hsa-miR-1321	0	0	1	0	0	0	C16orf90	chromosome 16 open reading frame 90
hsa-miR-1321	0	0	1	1	0	0	NEURL3	neuralized homolog 3 (Drosophila) pseudogene
hsa-miR-1321	1	0	1	1	1	1	MGA	MAX gene associated
hsa-miR-1321	1	0	1	1	1	1	MYO1C	myosin IC
hsa-miR-1321	0	0	1	1	1	1	C15orf57	chromosome 15 open reading frame 57
hsa-miR-1321	0	0	1	1	0	0	JMJD6	jumonji domain containing 6
hsa-miR-1321	1	0	1	1	0	0	ASIC2	acid-sensing (proton-gated) ion channel 2
hsa-miR-1321	1	0	1	1	1	1	ASIC1	acid-sensing (proton-gated) ion channel 1
hsa-miR-1321	0	0	1	1	0	0	AOX1	aldehyde oxidase 1
hsa-miR-1321	1	0	1	0	1	1	XIAP	X-linked inhibitor of apoptosis
hsa-miR-1321	1	0	1	1	1	1	CAMK2D	calcium/calmodulin-dependent protein kinase II delta
hsa-miR-1321	0	0	1	1	1	1	ENTPD3	ectonucleoside triphosphate diphosphohydrolase 3
hsa-miR-1321	1	0	1	1	1	1	CDH13	cadherin 13, H-cadherin (heart)
hsa-miR-1321	0	0	1	1	1	1	CHUK	conserved helix-loop-helix ubiquitous kinase
hsa-miR-1321	0	0	1	1	0	0	CLPTM1	cleft lip and palate associated transmembrane protein 1
hsa-miR-1321	1	0	1	1	1	1	CREBL2	cAMP responsive element binding protein-like 2
hsa-miR-1321	1	0	1	1	1	1	MAPK14	mitogen-activated protein kinase 14
hsa-miR-1321	0	0	1	1	0	0	DIO3	deiodinase, iodothyronine, type III
hsa-miR-1321	1	0	1	1	1	1	S1PR1	sphingosine-1-phosphate receptor 1
hsa-miR-1321	1	0	1	0	1	1	EFNB3	ephrin-B3
hsa-miR-1321	1	0	1	1	1	1	CELSR3	cadherin, EGF LAG seven-pass G-type receptor 3 (flamingo homolog, Drosophila)
hsa-miR-1321	0	0	1	0	1	1	EMP1	epithelial membrane protein 1
hsa-miR-1321	1	0	1	1	1	1	NDST1	N-deacetylase/N-sulfotransferase (heparan glucosaminyl) 1
hsa-miR-1321	0	0	1	1	1	1	CXCL10	chemokine (C-X-C motif) ligand 10
hsa-miR-1321	0	0	1	1	0	0	ACP2	acid phosphatase 2, lysosomal
hsa-miR-1321	1	0	1	1	1	1	ARF3	ADP-ribosylation factor 3
hsa-miR-1321	1	0	1	0	1	1	ARNT	aryl hydrocarbon receptor nuclear translocator
hsa-miR-1321	0	0	1	1	1	1	ATP12A	ATPase, H+/K+ transporting, nongastric, alpha polypeptide
hsa-miR-1321	1	0	1	0	1	1	ATP1B2	ATPase, Na+/K+ transporting, beta 2 polypeptide
hsa-miR-1321	1	0	1	1	1	1	ATP6V1A	ATPase, H+ transporting, lysosomal 70kDa, V1 subunit A
hsa-miR-1321	1	0	1	1	1	1	CALM2	calmodulin 2 (phosphorylase kinase, delta)
hsa-miR-1321	1	0	1	0	1	1	CCND2	cyclin D2
hsa-miR-1321	1	0	1	1	1	1	CENPB	centromere protein B, 80kDa
hsa-miR-1321	0	0	1	1	0	0	CNTFR	ciliary neurotrophic factor receptor
hsa-miR-1321	1	0	1	1	1	1	MASP1	mannan-binding lectin serine peptidase 1 (C4/C2 activating component of Ra-reactive factor)
hsa-miR-1321	0	0	1	1	0	0	CTRL	chymotrypsin-like
hsa-miR-1321	0	0	1	1	0	0	DDB1	damage-specific DNA binding protein 1, 127kDa
hsa-miR-1321	1	0	1	1	1	1	E2F3	E2F transcription factor 3
hsa-miR-1321	0	0	1	1	0	0	EFNA5	ephrin-A5
hsa-miR-1321	1	0	1	1	1	1	EPB49	erythrocyte membrane protein band 4.9 (dematin)
hsa-miR-1321	1	0	1	0	1	1	ETV6	ets variant 6
hsa-miR-1321	1	0	1	1	1	1	FBN2	fibrillin 2
hsa-miR-1321	0	0	1	0	1	1	FGF2	fibroblast growth factor 2 (basic)
hsa-miR-1321	1	0	1	1	1	1	FGF7	fibroblast growth factor 7
hsa-miR-1321	0	0	1	1	0	0	GLP1R	glucagon-like peptide 1 receptor
hsa-miR-1321	0	0	1	1	1	1	GNAQ	guanine nucleotide binding protein (G protein), q polypeptide
hsa-miR-1321	1	0	1	1	1	1	GRB2	growth factor receptor-bound protein 2
hsa-miR-1321	0	0	1	0	1	1	GYPA	glycophorin A (MNS blood group)
hsa-miR-1321	1	0	1	1	0	0	GYPC	glycophorin C (Gerbich blood group)
hsa-miR-1321	0	0	1	0	0	0	HLA-DRB1	major histocompatibility complex, class II, DR beta 1
hsa-miR-1321	0	0	1	1	1	1	FOXN2	forkhead box N2
hsa-miR-1321	0	0	1	1	1	1	IL12B	interleukin 12B (natural killer cell stimulatory factor 2, cytotoxic lymphocyte maturation factor 2, p40)
hsa-miR-1321	1	0	1	1	1	1	ITGA5	integrin, alpha 5 (fibronectin receptor, alpha polypeptide)
hsa-miR-1321	1	0	1	1	1	1	JUN	jun proto-oncogene
hsa-miR-1321	1	0	1	1	1	1	KCNA3	potassium voltage-gated channel, shaker-related subfamily, member 3
hsa-miR-1321	1	0	1	1	1	1	KCNJ10	potassium inwardly-rectifying channel, subfamily J, member 10
hsa-miR-1321	0	0	1	1	0	0	KCNK3	potassium channel, subfamily K, member 3
hsa-miR-1321	1	0	1	0	1	1	KIF3C	kinesin family member 3C
hsa-miR-1321	0	0	1	1	0	0	KRT31	keratin 31
hsa-miR-1321	1	0	1	1	1	1	LRP1	low density lipoprotein receptor-related protein 1
hsa-miR-1321	0	0	1	1	1	1	MAG	myelin associated glycoprotein
hsa-miR-1321	1	0	1	1	1	1	MAP1A	microtubule-associated protein 1A
hsa-miR-1321	1	0	1	1	1	1	ADAM11	ADAM metallopeptidase domain 11
hsa-miR-1321	0	0	1	0	1	1	MFNG	MFNG O-fucosylpeptide 3-beta-N-acetylglucosaminyltransferase
hsa-miR-1321	0	0	1	1	1	1	MMP19	matrix metallopeptidase 19
hsa-miR-1321	1	0	1	1	1	1	MSN	moesin
hsa-miR-1321	1	0	1	1	1	1	MSR1	macrophage scavenger receptor 1
hsa-miR-1321	0	0	1	1	1	1	MSX2	msh homeobox 2
hsa-miR-1321	1	0	1	1	1	1	MYH9	myosin, heavy chain 9, non-muscle
hsa-miR-1321	1	0	1	1	1	1	PPP1R12B	protein phosphatase 1, regulatory subunit 12B
hsa-miR-1321	1	0	1	1	1	1	NGFR	nerve growth factor receptor
hsa-miR-1321	0	0	1	1	1	1	NID1	nidogen 1
hsa-miR-1321	1	0	1	1	1	1	NPTX1	neuronal pentraxin I
hsa-miR-1321	0	0	1	1	1	1	OMG	oligodendrocyte myelin glycoprotein
hsa-miR-1321	0	0	1	0	1	1	OPHN1	oligophrenin 1
hsa-miR-1321	1	0	1	1	1	1	FURIN	furin (paired basic amino acid cleaving enzyme)
hsa-miR-1321	1	0	1	0	1	1	PAK2	p21 protein (Cdc42/Rac)-activated kinase 2
hsa-miR-1321	1	0	1	0	1	1	PAPPA	pregnancy-associated plasma protein A, pappalysin 1
hsa-miR-1321	1	0	1	1	1	1	PAWR	PRKC, apoptosis, WT1, regulator
hsa-miR-1321	0	0	1	1	1	1	PBX1	pre-B-cell leukemia homeobox 1
hsa-miR-1321	1	0	1	1	1	1	PBX2	pre-B-cell leukemia homeobox 2
hsa-miR-1321	1	0	1	0	1	1	PCDHGC3	protocadherin gamma subfamily C, 3
hsa-miR-1321	1	0	1	1	0	0	PDGFB	platelet-derived growth factor beta polypeptide
hsa-miR-1321	0	0	1	1	1	1	PIM1	pim-1 oncogene
hsa-miR-1321	1	0	1	1	1	1	PLAGL2	pleiomorphic adenoma gene-like 2
hsa-miR-1321	1	0	1	1	1	1	PPP1CB	protein phosphatase 1, catalytic subunit, beta isozyme
hsa-miR-1321	1	0	1	1	1	1	PPP2CA	protein phosphatase 2, catalytic subunit, alpha isozyme
hsa-miR-1321	1	0	1	1	1	1	PPP2R3A	protein phosphatase 2, regulatory subunit B'', alpha
hsa-miR-1321	1	0	1	0	1	1	PRKCA	protein kinase C, alpha
hsa-miR-1321	1	0	1	1	1	1	PTMS	parathymosin
hsa-miR-1321	1	0	1	1	1	1	PTPN1	protein tyrosine phosphatase, non-receptor type 1
hsa-miR-1321	1	0	1	1	1	1	PTPN9	protein tyrosine phosphatase, non-receptor type 9
hsa-miR-1321	1	0	1	1	1	1	PTPRJ	protein tyrosine phosphatase, receptor type, J
hsa-miR-1321	1	0	1	1	1	1	PTPRK	protein tyrosine phosphatase, receptor type, K
hsa-miR-1321	1	0	1	1	1	1	RAD23B	RAD23 homolog B (S. cerevisiae)
hsa-miR-1321	1	0	1	1	1	1	ARID4A	AT rich interactive domain 4A (RBP1-like)
hsa-miR-1321	1	0	1	1	0	0	RFX1	regulatory factor X, 1 (influences HLA class II expression)
hsa-miR-1321	1	0	1	0	1	1	SORT1	sortilin 1
hsa-miR-1321	0	0	1	1	1	1	S100A10	S100 calcium binding protein A10
hsa-miR-1321	0	0	1	1	0	0	CCL11	chemokine (C-C motif) ligand 11
hsa-miR-1321	1	0	1	0	1	1	CCL22	chemokine (C-C motif) ligand 22
hsa-miR-1321	0	0	1	0	1	1	CXCL5	chemokine (C-X-C motif) ligand 5
hsa-miR-1321	0	0	1	1	1	1	SDC4	syndecan 4
hsa-miR-1321	1	0	1	1	1	1	SMARCC1	SWI/SNF related, matrix associated, actin dependent regulator of chromatin, subfamily c, member 1
hsa-miR-1321	1	0	1	0	1	1	SOX11	SRY (sex determining region Y)-box 11
hsa-miR-1321	1	0	1	1	1	1	SRF	serum response factor (c-fos serum response element-binding transcription factor)
hsa-miR-1321	1	0	1	1	1	1	SRPR	signal recognition particle receptor (docking protein)
hsa-miR-1321	1	0	1	1	1	1	STAC	SH3 and cysteine rich domain
hsa-miR-1321	1	0	1	0	1	1	STC1	stanniocalcin 1
hsa-miR-1321	0	0	1	1	1	1	STIM1	stromal interaction molecule 1
hsa-miR-1321	0	0	1	1	1	1	SUPT6H	suppressor of Ty 6 homolog (S. cerevisiae)
hsa-miR-1321	1	0	1	1	1	1	SUV39H1	suppressor of variegation 3-9 homolog 1 (Drosophila)
hsa-miR-1321	1	0	1	1	1	1	SYN2	synapsin II
hsa-miR-1321	0	0	1	0	1	1	TCEB3	transcription elongation factor B (SIII), polypeptide 3 (110kDa, elongin A)
hsa-miR-1321	1	0	1	1	1	1	TFAP2B	transcription factor AP-2 beta (activating enhancer binding protein 2 beta)
hsa-miR-1321	1	0	1	0	1	1	TUB	tubby homolog (mouse)
hsa-miR-1321	1	0	1	1	1	1	UBE2D3	ubiquitin-conjugating enzyme E2D 3
hsa-miR-1321	1	0	1	1	1	1	UBE2N	ubiquitin-conjugating enzyme E2N
hsa-miR-1321	0	0	1	1	1	1	ZNF137P	zinc finger protein 137, pseudogene
hsa-miR-1321	1	0	1	1	1	1	KCNAB1	potassium voltage-gated channel, shaker-related subfamily, beta member 1
hsa-miR-1321	1	0	1	1	1	1	TRRAP	transformation/transcription domain-associated protein
hsa-miR-1321	1	0	1	0	1	1	CUL3	cullin 3
hsa-miR-1321	0	0	1	1	0	0	SEMA7A	semaphorin 7A, GPI membrane anchor (John Milton Hagen blood group)
hsa-miR-1321	1	0	1	0	1	1	CNTNAP1	contactin associated protein 1
hsa-miR-1321	0	0	1	1	1	1	ITGA10	integrin, alpha 10
hsa-miR-1321	0	0	1	1	1	1	CHST1	carbohydrate (keratan sulfate Gal-6) sulfotransferase 1
hsa-miR-1321	0	0	1	1	0	0	CAMK1	calcium/calmodulin-dependent protein kinase I
hsa-miR-1321	1	0	1	1	1	1	BARX2	BARX homeobox 2
hsa-miR-1321	1	0	1	0	1	1	PCDHGA12	protocadherin gamma subfamily A, 12
hsa-miR-1321	1	0	1	0	1	1	PCDHGB4	protocadherin gamma subfamily B, 4
hsa-miR-1321	1	0	1	1	1	1	NR5A2	nuclear receptor subfamily 5, group A, member 2
hsa-miR-1321	1	0	1	0	1	1	CDK5R1	cyclin-dependent kinase 5, regulatory subunit 1 (p35)
hsa-miR-1321	1	0	1	1	1	1	ALDH1A2	aldehyde dehydrogenase 1 family, member A2
hsa-miR-1321	0	0	1	1	1	1	LDB1	LIM domain binding 1
hsa-miR-1321	0	0	1	1	1	1	HERC1	HECT and RLD domain containing E3 ubiquitin protein ligase family member 1
hsa-miR-1321	1	0	1	0	1	1	ST13	suppression of tumorigenicity 13 (colon carcinoma) (Hsp70 interacting protein)
hsa-miR-1321	0	0	1	1	1	1	ATP6V0E1	ATPase, H+ transporting, lysosomal 9kDa, V0 subunit e1
hsa-miR-1321	0	0	1	1	1	1	RNF8	ring finger protein 8, E3 ubiquitin protein ligase
hsa-miR-1321	0	0	1	1	0	0	NPR2	natriuretic peptide receptor B/guanylate cyclase B (atrionatriuretic peptide receptor B)
hsa-miR-1321	0	0	1	0	1	1	RHOB	ras homolog family member B
hsa-miR-1321	1	0	1	1	0	0	COX8A	cytochrome c oxidase subunit VIIIA (ubiquitous)
hsa-miR-1321	0	0	1	1	1	1	TIMM8A	translocase of inner mitochondrial membrane 8 homolog A (yeast)
hsa-miR-1321	1	0	1	0	1	1	E2F2	E2F transcription factor 2
hsa-miR-1321	1	0	1	1	1	1	EFNB2	ephrin-B2
hsa-miR-1321	0	0	1	0	1	1	EIF4EBP2	eukaryotic translation initiation factor 4E binding protein 2
hsa-miR-1321	1	0	1	1	1	1	GMFB	glia maturation factor, beta
hsa-miR-1321	0	0	1	0	1	1	HABP2	hyaluronan binding protein 2
hsa-miR-1321	0	0	1	1	1	1	LBP	lipopolysaccharide binding protein
hsa-miR-1321	1	0	1	0	1	1	SLC1A2	solute carrier family 1 (glial high affinity glutamate transporter), member 2
hsa-miR-1321	0	0	1	1	0	0	WNT2B	wingless-type MMTV integration site family, member 2B
hsa-miR-1321	1	0	1	1	0	0	SYNGR3	synaptogyrin 3
hsa-miR-1321	1	0	1	0	1	1	MED14	mediator complex subunit 14
hsa-miR-1321	1	0	1	1	1	1	CD163	CD163 molecule
hsa-miR-1321	1	0	1	0	1	1	AKAP6	A kinase (PRKA) anchor protein 6
hsa-miR-1321	0	0	1	1	1	1	EEF1E1	eukaryotic translation elongation factor 1 epsilon 1
hsa-miR-1321	0	0	1	1	1	1	CARTPT	CART prepropeptide
hsa-miR-1321	1	0	1	0	1	1	ACVR1B	activin A receptor, type IB
hsa-miR-1321	1	0	1	1	1	1	ARL3	ADP-ribosylation factor-like 3
hsa-miR-1321	1	0	1	0	1	1	RUNX1T1	runt-related transcription factor 1; translocated to, 1 (cyclin D-related)
hsa-miR-1321	1	0	1	1	1	1	ATF6B	activating transcription factor 6 beta
hsa-miR-1321	1	0	1	1	1	1	DBN1	drebrin 1
hsa-miR-1321	0	0	1	1	1	1	DNM1	dynamin 1
hsa-miR-1321	1	0	1	1	1	1	DUSP5	dual specificity phosphatase 5
hsa-miR-1321	1	0	1	1	1	1	EFNB1	ephrin-B1
hsa-miR-1321	1	0	1	1	1	1	ENSA	endosulfine alpha
hsa-miR-1321	1	0	1	1	1	1	EPHB3	EPH receptor B3
hsa-miR-1321	1	0	1	1	1	1	FLOT2	flotillin 2
hsa-miR-1321	0	0	1	1	1	1	FOXA1	forkhead box A1
hsa-miR-1321	0	0	1	1	1	1	HOXB7	homeobox B7
hsa-miR-1321	1	0	1	1	0	0	HOXC6	homeobox C6
hsa-miR-1321	1	0	1	0	1	1	SCN2B	sodium channel, voltage-gated, type II, beta subunit
hsa-miR-1321	0	0	1	1	0	0	PRPF3	PRP3 pre-mRNA processing factor 3 homolog (S. cerevisiae)
hsa-miR-1321	0	0	1	1	0	0	DYRK1B	dual-specificity tyrosine-(Y)-phosphorylation regulated kinase 1B
hsa-miR-1321	0	0	1	1	1	1	MTA2	metastasis associated 1 family, member 2
hsa-miR-1321	1	0	1	0	1	1	MAPKAPK2	mitogen-activated protein kinase-activated protein kinase 2
hsa-miR-1321	1	0	1	1	1	1	B4GALT6	UDP-Gal:betaGlcNAc beta 1,4- galactosyltransferase, polypeptide 6
hsa-miR-1321	0	0	1	1	1	1	TAOK2	TAO kinase 2
hsa-miR-1321	0	0	1	1	1	1	LHX2	LIM homeobox 2
hsa-miR-1321	1	0	1	1	1	1	KIF3B	kinesin family member 3B
hsa-miR-1321	0	0	1	0	1	1	CIAO1	cytosolic iron-sulfur protein assembly 1
hsa-miR-1321	1	0	1	0	1	1	CDYL	chromodomain protein, Y-like
hsa-miR-1321	1	0	1	1	1	1	MED26	mediator complex subunit 26
hsa-miR-1321	0	0	1	1	0	0	AIM2	absent in melanoma 2
hsa-miR-1321	1	0	1	0	1	1	ARHGEF6	Rac/Cdc42 guanine nucleotide exchange factor (GEF) 6
hsa-miR-1321	1	0	1	1	1	1	FXR2	fragile X mental retardation, autosomal homolog 2
hsa-miR-1321	1	0	1	1	1	1	ZFP36L1	zinc finger protein 36, C3H type-like 1
hsa-miR-1321	1	0	1	0	1	1	DOCK3	dedicator of cytokinesis 3
hsa-miR-1321	1	0	1	1	1	1	GABRE	gamma-aminobutyric acid (GABA) A receptor, epsilon
hsa-miR-1321	1	0	1	1	1	1	JARID2	jumonji, AT rich interactive domain 2
hsa-miR-1321	1	0	1	0	1	1	KIF5A	kinesin family member 5A
hsa-miR-1321	0	0	1	1	0	0	PITX3	paired-like homeodomain 3
hsa-miR-1321	1	0	1	0	1	1	SCD	stearoyl-CoA desaturase (delta-9-desaturase)
hsa-miR-1321	1	0	1	0	1	1	SEL1L	sel-1 suppressor of lin-12-like (C. elegans)
hsa-miR-1321	1	0	1	1	0	0	ZMYM3	zinc finger, MYM-type 3
hsa-miR-1321	1	0	1	1	0	0	ADAMTS4	ADAM metallopeptidase with thrombospondin type 1 motif, 4
hsa-miR-1321	1	0	1	1	1	1	WDR1	WD repeat domain 1
hsa-miR-1321	1	0	1	1	1	1	MED13	mediator complex subunit 13
hsa-miR-1321	1	0	1	0	1	1	NR1D2	nuclear receptor subfamily 1, group D, member 2
hsa-miR-1321	0	0	1	1	0	0	CNGA2	cyclic nucleotide gated channel alpha 2
hsa-miR-1321	0	0	1	1	1	1	SART1	squamous cell carcinoma antigen recognized by T cells
hsa-miR-1321	1	0	1	1	1	1	APLNR	apelin receptor
hsa-miR-1321	1	0	1	1	1	1	CBL	Cbl proto-oncogene, E3 ubiquitin protein ligase
hsa-miR-1321	1	0	1	1	1	1	DLX3	distal-less homeobox 3
hsa-miR-1321	0	0	1	0	1	1	FOSL2	FOS-like antigen 2
hsa-miR-1321	0	0	1	1	1	1	LPAR4	lysophosphatidic acid receptor 4
hsa-miR-1321	0	0	1	1	0	0	HCLS1	hematopoietic cell-specific Lyn substrate 1
hsa-miR-1321	1	0	1	1	0	0	HDLBP	high density lipoprotein binding protein
hsa-miR-1321	1	0	1	1	0	0	JUND	jun D proto-oncogene
hsa-miR-1321	0	0	1	1	0	0	LIPE	lipase, hormone-sensitive
hsa-miR-1321	1	0	1	1	1	1	MYCL1	v-myc myelocytomatosis viral oncogene homolog 1, lung carcinoma derived (avian)
hsa-miR-1321	1	0	1	1	0	0	SALL2	sal-like 2 (Drosophila)
hsa-miR-1321	0	0	1	1	1	1	SIX3	SIX homeobox 3
hsa-miR-1321	1	0	1	1	1	1	WNT1	wingless-type MMTV integration site family, member 1
hsa-miR-1321	1	0	1	1	1	1	RND2	Rho family GTPase 2
hsa-miR-1321	1	0	1	1	1	1	GABBR2	gamma-aminobutyric acid (GABA) B receptor, 2
hsa-miR-1321	1	0	1	0	0	0	FRAT1	frequently rearranged in advanced T-cell lymphomas
hsa-miR-1321	1	0	1	1	1	1	ITGA3	integrin, alpha 3 (antigen CD49C, alpha 3 subunit of VLA-3 receptor)
hsa-miR-1321	1	0	1	1	1	1	GTF2E1	general transcription factor IIE, polypeptide 1, alpha 56kDa
hsa-miR-1321	1	0	1	1	0	0	LOXL1	lysyl oxidase-like 1
hsa-miR-1321	0	0	1	1	1	1	BCAM	basal cell adhesion molecule (Lutheran blood group)
hsa-miR-1321	1	0	1	1	1	1	NHLH1	nescient helix loop helix 1
hsa-miR-1321	1	0	1	1	1	1	RHEB	Ras homolog enriched in brain
hsa-miR-1321	1	0	1	0	1	1	GPC6	glypican 6
hsa-miR-1321	1	0	1	1	1	1	GIPC1	GIPC PDZ domain containing family, member 1
hsa-miR-1321	1	0	1	1	1	1	ACTR1A	ARP1 actin-related protein 1 homolog A, centractin alpha (yeast)
hsa-miR-1321	0	0	1	1	1	1	TOB1	transducer of ERBB2, 1
hsa-miR-1321	0	0	1	1	1	1	RNF41	ring finger protein 41
hsa-miR-1321	0	0	1	1	1	1	NUTF2	nuclear transport factor 2
hsa-miR-1321	1	0	1	0	1	1	SPRY3	sprouty homolog 3 (Drosophila)
hsa-miR-1321	0	0	1	0	1	1	STAM2	signal transducing adaptor molecule (SH3 domain and ITAM motif) 2
hsa-miR-1321	1	0	1	1	1	1	EFS	embryonal Fyn-associated substrate
hsa-miR-1321	0	0	1	1	1	1	CD5L	CD5 molecule-like
hsa-miR-1321	1	0	1	0	1	1	MAP1B	microtubule-associated protein 1B
hsa-miR-1321	1	0	1	1	1	1	MAT2A	methionine adenosyltransferase II, alpha
hsa-miR-1321	1	0	1	1	1	1	FOXO4	forkhead box O4
hsa-miR-1321	1	0	1	1	1	1	MMP16	matrix metallopeptidase 16 (membrane-inserted)
hsa-miR-1321	1	0	1	1	0	0	NAB2	NGFI-A binding protein 2 (EGR1 binding protein 2)
hsa-miR-1321	1	0	1	1	1	1	HS3ST4	heparan sulfate (glucosamine) 3-O-sulfotransferase 4
hsa-miR-1321	1	0	1	1	1	1	CITED2	Cbp/p300-interacting transactivator, with Glu/Asp-rich carboxy-terminal domain, 2
hsa-miR-1321	1	0	1	1	1	1	DAGLA	diacylglycerol lipase, alpha
hsa-miR-1321	1	0	1	1	1	1	CAPZA1	capping protein (actin filament) muscle Z-line, alpha 1
hsa-miR-1321	1	0	1	1	1	1	LASP1	LIM and SH3 protein 1
hsa-miR-1321	1	0	1	1	1	1	NEUROD2	neuronal differentiation 2
hsa-miR-1321	0	0	1	0	1	1	OAS3	2'-5'-oligoadenylate synthetase 3, 100kDa
hsa-miR-1321	1	0	1	1	1	1	ORC2	origin recognition complex, subunit 2
hsa-miR-1321	1	0	1	1	1	1	CDK16	cyclin-dependent kinase 16
hsa-miR-1321	1	0	1	1	1	1	PDGFRA	platelet-derived growth factor receptor, alpha polypeptide
hsa-miR-1321	1	0	1	0	1	1	PITPNA	phosphatidylinositol transfer protein, alpha
hsa-miR-1321	1	0	1	1	1	1	POU4F1	POU class 4 homeobox 1
hsa-miR-1321	0	0	1	1	1	1	PPP2R5A	protein phosphatase 2, regulatory subunit B', alpha
hsa-miR-1321	1	0	1	1	1	1	CCL7	chemokine (C-C motif) ligand 7
hsa-miR-1321	1	0	1	1	1	1	NPEPPS	aminopeptidase puromycin sensitive
hsa-miR-1321	1	0	1	1	1	1	ZNF238	zinc finger protein 238
hsa-miR-1321	0	0	1	1	1	1	SLC25A17	solute carrier family 25 (mitochondrial carrier; peroxisomal membrane protein, 34kDa), member 17
hsa-miR-1321	0	0	1	0	0	0	CREB3	cAMP responsive element binding protein 3
hsa-miR-1321	1	0	1	0	1	1	APPBP2	amyloid beta precursor protein (cytoplasmic tail) binding protein 2
hsa-miR-1321	1	0	1	1	1	1	ANP32B	acidic (leucine-rich) nuclear phosphoprotein 32 family, member B
hsa-miR-1321	1	0	1	1	1	1	MAB21L2	mab-21-like 2 (C. elegans)
hsa-miR-1321	1	0	1	1	1	1	TRIM3	tripartite motif containing 3
hsa-miR-1321	0	0	1	0	0	0	RELB	v-rel reticuloendotheliosis viral oncogene homolog B
hsa-miR-1321	1	0	1	0	1	1	IGF2BP1	insulin-like growth factor 2 mRNA binding protein 1
hsa-miR-1321	1	0	1	1	1	1	CTCF	CCCTC-binding factor (zinc finger protein)
hsa-miR-1321	0	0	1	1	0	0	TNFSF13B	tumor necrosis factor (ligand) superfamily, member 13b
hsa-miR-1321	0	0	1	1	0	0	SLC12A7	solute carrier family 12 (potassium/chloride transporters), member 7
hsa-miR-1321	0	0	1	1	0	0	KIF1C	kinesin family member 1C
hsa-miR-1321	0	0	1	1	1	1	CD300C	CD300c molecule
hsa-miR-1321	1	0	1	1	1	1	MMP24	matrix metallopeptidase 24 (membrane-inserted)
hsa-miR-1321	0	0	1	1	1	1	NUDT3	nudix (nucleoside diphosphate linked moiety X)-type motif 3
hsa-miR-1321	0	0	1	1	1	1	GLO1	glyoxalase I
hsa-miR-1321	1	0	1	1	1	1	DIAPH2	diaphanous homolog 2 (Drosophila)
hsa-miR-1321	1	0	1	1	0	0	PSKH1	protein serine kinase H1
hsa-miR-1321	1	0	1	1	1	1	SNTB2	syntrophin, beta 2 (dystrophin-associated protein A1, 59kDa, basic component 2)
hsa-miR-1321	0	0	1	1	0	0	UPK2	uroplakin 2
hsa-miR-1321	1	0	1	1	1	1	LAPTM5	lysosomal protein transmembrane 5
hsa-miR-1321	1	0	1	1	1	1	BTG2	BTG family, member 2
hsa-miR-1321	1	0	1	0	1	1	SYNGAP1	synaptic Ras GTPase activating protein 1
hsa-miR-1321	0	0	1	1	1	1	MLLT11	myeloid/lymphoid or mixed-lineage leukemia (trithorax homolog, Drosophila); translocated to, 11
hsa-miR-1321	0	0	1	1	1	1	TMED10	transmembrane emp24-like trafficking protein 10 (yeast)
hsa-miR-1321	1	0	1	1	1	1	GLIPR1	GLI pathogenesis-related 1
hsa-miR-1321	0	0	1	1	1	1	HOXD3	homeobox D3
hsa-miR-1321	1	0	1	0	1	1	SOX12	SRY (sex determining region Y)-box 12
hsa-miR-1321	1	0	1	0	1	1	WASF2	WAS protein family, member 2
hsa-miR-1321	0	0	1	1	1	1	NPM3	nucleophosmin/nucleoplasmin 3
hsa-miR-1321	1	0	1	1	1	1	KAT7	K(lysine) acetyltransferase 7
hsa-miR-1321	1	0	1	1	1	1	SOX21	SRY (sex determining region Y)-box 21
hsa-miR-1321	0	0	1	1	0	0	TCEB2	transcription elongation factor B (SIII), polypeptide 2 (18kDa, elongin B)
hsa-miR-1321	1	0	1	1	1	1	VCP	valosin containing protein
hsa-miR-1321	0	0	1	0	1	1	ZXDB	zinc finger, X-linked, duplicated B
hsa-miR-1321	1	0	1	1	1	1	TESK2	testis-specific kinase 2
hsa-miR-1321	1	0	1	1	1	1	ERLIN2	ER lipid raft associated 2
hsa-miR-1321	0	0	1	1	1	1	WBP4	WW domain binding protein 4 (formin binding protein 21)
hsa-miR-1321	1	0	1	1	1	1	DUSP10	dual specificity phosphatase 10
hsa-miR-1321	0	0	1	1	1	1	HRH3	histamine receptor H3
hsa-miR-1321	1	0	1	1	1	1	KLF12	Kruppel-like factor 12
hsa-miR-1321	0	0	1	0	0	0	PHB2	prohibitin 2
hsa-miR-1321	1	0	1	1	1	1	TUSC2	tumor suppressor candidate 2
hsa-miR-1321	0	0	1	1	0	0	GABARAP	GABA(A) receptor-associated protein
hsa-miR-1321	0	0	1	0	1	1	AP4E1	adaptor-related protein complex 4, epsilon 1 subunit
hsa-miR-1321	1	0	1	1	1	1	CASC3	cancer susceptibility candidate 3
hsa-miR-1321	1	0	1	1	1	1	PADI2	peptidyl arginine deiminase, type II
hsa-miR-1321	0	0	1	1	1	1	MIP	major intrinsic protein of lens fiber
hsa-miR-1321	0	0	1	1	0	0	PRDX5	peroxiredoxin 5
hsa-miR-1321	1	0	1	1	1	1	APPL1	adaptor protein, phosphotyrosine interaction, PH domain and leucine zipper containing 1
hsa-miR-1321	0	0	1	1	1	1	AHSA1	AHA1, activator of heat shock 90kDa protein ATPase homolog 1 (yeast)
hsa-miR-1321	1	0	1	0	1	1	CASP8AP2	caspase 8 associated protein 2
hsa-miR-1321	1	0	1	1	1	1	CHORDC1	cysteine and histidine-rich domain (CHORD) containing 1
hsa-miR-1321	0	0	1	1	1	1	TKTL1	transketolase-like 1
hsa-miR-1321	1	0	1	1	1	1	HS2ST1	heparan sulfate 2-O-sulfotransferase 1
hsa-miR-1321	1	0	1	1	1	1	KCNE1L	KCNE1-like
hsa-miR-1321	1	0	1	0	1	1	MYCBP	c-myc binding protein
hsa-miR-1321	0	0	1	1	1	1	TTC33	tetratricopeptide repeat domain 33
hsa-miR-1321	1	0	1	1	1	1	STAT5B	signal transducer and activator of transcription 5B
hsa-miR-1321	0	0	1	1	0	0	SYNGR4	synaptogyrin 4
hsa-miR-1321	1	0	1	1	1	1	STK39	serine threonine kinase 39
hsa-miR-1321	0	0	1	1	0	0	PRSS50	protease, serine, 50
hsa-miR-1321	1	0	1	1	0	0	ZDHHC1	zinc finger, DHHC-type containing 1
hsa-miR-1321	1	0	1	1	1	1	SERTAD3	SERTA domain containing 3
hsa-miR-1321	0	0	1	1	0	0	ZDHHC8	zinc finger, DHHC-type containing 8
hsa-miR-1321	0	0	1	1	1	1	UBQLN2	ubiquilin 2
hsa-miR-1321	0	0	1	0	1	1	EMR2	egf-like module containing, mucin-like, hormone receptor-like 2
hsa-miR-1321	1	0	1	1	1	1	BAZ1A	bromodomain adjacent to zinc finger domain, 1A
hsa-miR-1321	1	0	1	1	1	1	NRG1	neuregulin 1
hsa-miR-1321	1	0	1	0	1	1	OSTM1	osteopetrosis associated transmembrane protein 1
hsa-miR-1321	0	0	1	1	1	1	DUOX2	dual oxidase 2
hsa-miR-1321	0	0	1	1	1	1	CCDC113	coiled-coil domain containing 113
hsa-miR-1321	0	0	1	0	1	1	AP2A1	adaptor-related protein complex 2, alpha 1 subunit
hsa-miR-1321	1	0	1	0	1	1	VAMP2	vesicle-associated membrane protein 2 (synaptobrevin 2)
hsa-miR-1321	0	0	1	1	1	1	UBL4A	ubiquitin-like 4A
hsa-miR-1321	0	0	1	1	0	0	NOMO1	NODAL modulator 1
hsa-miR-1321	1	0	1	1	0	0	BRD4	bromodomain containing 4
hsa-miR-1321	1	0	1	1	1	1	LEMD3	LEM domain containing 3
hsa-miR-1321	1	0	1	1	1	1	PATZ1	POZ (BTB) and AT hook containing zinc finger 1
hsa-miR-1321	1	0	1	0	1	1	FJX1	four jointed box 1 (Drosophila)
hsa-miR-1321	1	0	1	1	1	1	LHX6	LIM homeobox 6
hsa-miR-1321	1	0	1	0	1	1	DIEXF	digestive organ expansion factor homolog (zebrafish)
hsa-miR-1321	1	0	1	1	1	1	AFF4	AF4/FMR2 family, member 4
hsa-miR-1321	0	0	1	1	1	1	LSM3	LSM3 homolog, U6 small nuclear RNA associated (S. cerevisiae)
hsa-miR-1321	1	0	1	1	1	1	RND1	Rho family GTPase 1
hsa-miR-1321	1	0	1	1	1	1	HERC3	HECT and RLD domain containing E3 ubiquitin protein ligase 3
hsa-miR-1321	0	0	1	1	0	0	HOXD4	homeobox D4
hsa-miR-1321	1	0	1	1	1	1	ZNF592	zinc finger protein 592
hsa-miR-1321	1	0	1	1	1	1	RALGPS1	Ral GEF with PH domain and SH3 binding motif 1
hsa-miR-1321	0	0	1	1	0	0	SDC3	syndecan 3
hsa-miR-1321	1	0	1	0	1	1	BZW1	basic leucine zipper and W2 domains 1
hsa-miR-1321	1	0	1	1	1	1	TBKBP1	TBK1 binding protein 1
hsa-miR-1321	1	0	1	0	1	1	MLEC	malectin
hsa-miR-1321	1	0	1	1	1	1	KIAA0247	KIAA0247
hsa-miR-1321	0	0	1	0	1	1	DHCR24	24-dehydrocholesterol reductase
hsa-miR-1321	1	0	1	1	1	1	DAZAP2	DAZ associated protein 2
hsa-miR-1321	1	0	1	1	1	1	ARHGEF11	Rho guanine nucleotide exchange factor (GEF) 11
hsa-miR-1321	0	0	1	0	1	1	EPM2AIP1	EPM2A (laforin) interacting protein 1
hsa-miR-1321	1	0	1	1	1	1	ZBTB39	zinc finger and BTB domain containing 39
hsa-miR-1321	1	0	1	1	1	1	SV2A	synaptic vesicle glycoprotein 2A
hsa-miR-1321	1	0	1	0	1	1	RAB11FIP2	RAB11 family interacting protein 2 (class I)
hsa-miR-1321	1	0	1	1	1	1	SPEN	spen homolog, transcriptional regulator (Drosophila)
hsa-miR-1321	1	0	1	0	1	1	ZNF609	zinc finger protein 609
hsa-miR-1321	1	0	1	0	1	1	SNX13	sorting nexin 13
hsa-miR-1321	1	0	1	1	1	1	RTF1	Rtf1, Paf1/RNA polymerase II complex component, homolog (S. cerevisiae)
hsa-miR-1321	0	0	1	1	1	1	ARC	activity-regulated cytoskeleton-associated protein
hsa-miR-1321	1	0	1	1	1	1	PHF15	PHD finger protein 15
hsa-miR-1321	0	0	1	1	1	1	ANGEL1	angel homolog 1 (Drosophila)
hsa-miR-1321	1	0	1	0	1	1	LARP1	La ribonucleoprotein domain family, member 1
hsa-miR-1321	1	0	1	1	0	0	SMG5	smg-5 homolog, nonsense mediated mRNA decay factor (C. elegans)
hsa-miR-1321	1	0	1	1	1	1	ASXL1	additional sex combs like 1 (Drosophila)
hsa-miR-1321	1	0	1	1	1	1	PARM1	prostate androgen-regulated mucin-like protein 1
hsa-miR-1321	1	0	1	0	1	1	PPP1R16B	protein phosphatase 1, regulatory subunit 16B
hsa-miR-1321	1	0	1	1	1	1	PHF19	PHD finger protein 19
hsa-miR-1321	1	0	1	1	0	0	SENP3	SUMO1/sentrin/SMT3 specific peptidase 3
hsa-miR-1321	1	0	1	1	1	1	FAM155B	family with sequence similarity 155, member B
hsa-miR-1321	1	0	1	1	1	1	PLA2G3	phospholipase A2, group III
hsa-miR-1321	0	0	1	1	1	1	KRT76	keratin 76
hsa-miR-1321	0	0	1	1	1	1	HMP19	HMP19 protein
hsa-miR-1321	0	0	1	1	1	1	SCCPDH	saccharopine dehydrogenase (putative)
hsa-miR-1321	0	0	1	1	1	1	APH1A	anterior pharynx defective 1 homolog A (C. elegans)
hsa-miR-1321	0	0	1	1	1	1	MRPS33	mitochondrial ribosomal protein S33
hsa-miR-1321	1	0	1	0	1	1	CNR1	cannabinoid receptor 1 (brain)
hsa-miR-1321	1	0	1	1	1	1	MPC1	mitochondrial pyruvate carrier 1
hsa-miR-1321	1	0	1	1	1	1	CERCAM	cerebral endothelial cell adhesion molecule
hsa-miR-1321	1	0	1	1	1	1	GPRC5B	G protein-coupled receptor, family C, group 5, member B
hsa-miR-1321	1	0	1	1	1	1	RAB14	RAB14, member RAS oncogene family
hsa-miR-1321	1	0	1	1	1	1	RAPGEFL1	Rap guanine nucleotide exchange factor (GEF)-like 1
hsa-miR-1321	0	0	1	1	0	0	FAM203A	family with sequence similarity 203, member A
hsa-miR-1321	1	0	1	0	1	1	TMEM216	transmembrane protein 216
hsa-miR-1321	0	0	1	1	1	1	PIPOX	pipecolic acid oxidase
hsa-miR-1321	1	0	1	0	1	1	KLF3	Kruppel-like factor 3 (basic)
hsa-miR-1321	0	0	1	0	1	1	GPR83	G protein-coupled receptor 83
hsa-miR-1321	1	0	1	1	1	1	RAB6B	RAB6B, member RAS oncogene family
hsa-miR-1321	0	0	1	1	1	1	GNAS	GNAS complex locus
hsa-miR-1321	0	0	1	1	1	1	SLC22A17	solute carrier family 22, member 17
hsa-miR-1321	1	0	1	1	1	1	HOXC10	homeobox C10
hsa-miR-1321	1	0	1	0	1	1	KLHL3	kelch-like 3 (Drosophila)
hsa-miR-1321	0	0	1	1	1	1	POLE3	polymerase (DNA directed), epsilon 3, accessory subunit
hsa-miR-1321	1	0	1	1	1	1	PLXNA3	plexin A3
hsa-miR-1321	1	0	1	0	1	1	UBE2Q1	ubiquitin-conjugating enzyme E2Q family member 1
hsa-miR-1321	1	0	1	1	0	0	C17orf59	chromosome 17 open reading frame 59
hsa-miR-1321	0	0	1	1	1	1	SOHLH2	spermatogenesis and oogenesis specific basic helix-loop-helix 2
hsa-miR-1321	1	0	1	1	1	1	RNF125	ring finger protein 125, E3 ubiquitin protein ligase
hsa-miR-1321	1	0	1	1	1	1	HIF1AN	hypoxia inducible factor 1, alpha subunit inhibitor
hsa-miR-1321	1	0	1	1	0	0	LAMTOR1	late endosomal/lysosomal adaptor, MAPK and MTOR activator 1
hsa-miR-1321	0	0	1	1	1	1	C14orf119	chromosome 14 open reading frame 119
hsa-miR-1321	0	0	1	1	0	0	CEP55	centrosomal protein 55kDa
hsa-miR-1321	0	0	1	1	1	1	TRIM62	tripartite motif containing 62
hsa-miR-1321	0	0	1	1	0	0	CCDC87	coiled-coil domain containing 87
hsa-miR-1321	1	0	1	1	1	1	TMEM143	transmembrane protein 143
hsa-miR-1321	1	0	1	1	1	1	ZNF654	zinc finger protein 654
hsa-miR-1321	1	0	1	1	1	1	SPTLC3	serine palmitoyltransferase, long chain base subunit 3
hsa-miR-1321	1	0	1	1	1	1	RSBN1	round spermatid basic protein 1
hsa-miR-1321	1	0	1	0	1	1	FOXJ2	forkhead box J2
hsa-miR-1321	0	0	1	0	0	0	KDM3A	lysine (K)-specific demethylase 3A
hsa-miR-1321	1	0	1	1	1	1	ASH1L	ash1 (absent, small, or homeotic)-like (Drosophila)
hsa-miR-1321	1	0	1	1	1	1	LRRC59	leucine rich repeat containing 59
hsa-miR-1321	1	0	1	1	1	1	ETNK1	ethanolamine kinase 1
hsa-miR-1321	1	0	1	1	1	1	PCDHGA1	protocadherin gamma subfamily A, 1
hsa-miR-1321	1	0	1	0	1	1	PCDHGA10	protocadherin gamma subfamily A, 10
hsa-miR-1321	1	0	1	0	1	1	PCDHGA11	protocadherin gamma subfamily A, 11
hsa-miR-1321	1	0	1	1	1	1	PCDHGA2	protocadherin gamma subfamily A, 2
hsa-miR-1321	1	0	1	0	1	1	PCDHGA3	protocadherin gamma subfamily A, 3
hsa-miR-1321	1	0	1	0	1	1	PCDHGA4	protocadherin gamma subfamily A, 4
hsa-miR-1321	1	0	1	0	1	1	PCDHGA5	protocadherin gamma subfamily A, 5
hsa-miR-1321	1	0	1	0	1	1	PCDHGA6	protocadherin gamma subfamily A, 6
hsa-miR-1321	1	0	1	0	1	1	PCDHGA7	protocadherin gamma subfamily A, 7
hsa-miR-1321	1	0	1	0	1	1	PCDHGA9	protocadherin gamma subfamily A, 9
hsa-miR-1321	1	0	1	0	1	1	PCDHGB1	protocadherin gamma subfamily B, 1
hsa-miR-1321	1	0	1	0	1	1	PCDHGB2	protocadherin gamma subfamily B, 2
hsa-miR-1321	1	0	1	0	1	1	PCDHGB3	protocadherin gamma subfamily B, 3
hsa-miR-1321	1	0	1	0	1	1	PCDHGB5	protocadherin gamma subfamily B, 5
hsa-miR-1321	1	0	1	0	1	1	PCDHGB6	protocadherin gamma subfamily B, 6
hsa-miR-1321	1	0	1	0	1	1	PCDHGB7	protocadherin gamma subfamily B, 7
hsa-miR-1321	1	0	1	0	1	1	PCDHGC4	protocadherin gamma subfamily C, 4
hsa-miR-1321	1	0	1	0	1	1	PCDHGC5	protocadherin gamma subfamily C, 5
hsa-miR-1321	1	0	1	1	1	1	HOXA10	homeobox A10
hsa-miR-1321	1	0	1	1	1	1	KCTD5	potassium channel tetramerisation domain containing 5
hsa-miR-1321	1	0	1	1	1	1	DLL4	delta-like 4 (Drosophila)
hsa-miR-1321	1	0	1	1	1	1	SEPT3	septin 3
hsa-miR-1321	1	0	1	1	1	1	LRRC8A	leucine rich repeat containing 8 family, member A
hsa-miR-1321	1	0	1	1	1	1	CYP26B1	cytochrome P450, family 26, subfamily B, polypeptide 1
hsa-miR-1321	1	0	1	0	1	1	SLAMF8	SLAM family member 8
hsa-miR-1321	0	0	1	1	1	1	UBQLN4	ubiquilin 4
hsa-miR-1321	1	0	1	0	1	1	PMEPA1	prostate transmembrane protein, androgen induced 1
hsa-miR-1321	1	0	1	0	1	1	MNT	MAX binding protein
hsa-miR-1321	0	0	1	1	1	1	PAPPA2	pappalysin 2
hsa-miR-1321	1	0	1	1	1	1	PAK7	p21 protein (Cdc42/Rac)-activated kinase 7
hsa-miR-1321	0	0	1	1	0	0	ENTPD7	ectonucleoside triphosphate diphosphohydrolase 7
hsa-miR-1321	1	0	1	0	1	1	EIF5A2	eukaryotic translation initiation factor 5A2
hsa-miR-1321	0	0	1	0	0	0	CD177	CD177 molecule
hsa-miR-1321	1	0	1	1	0	0	JPH2	junctophilin 2
hsa-miR-1321	1	0	1	1	1	1	LYRM2	LYR motif containing 2
hsa-miR-1321	1	0	1	1	1	1	EPHA8	EPH receptor A8
hsa-miR-1321	1	0	1	1	1	1	NRIP3	nuclear receptor interacting protein 3
hsa-miR-1321	1	0	1	1	1	1	SLC24A3	solute carrier family 24 (sodium/potassium/calcium exchanger), member 3
hsa-miR-1321	0	0	1	1	1	1	SHROOM4	shroom family member 4
hsa-miR-1321	1	0	1	1	1	1	DLG3	discs, large homolog 3 (Drosophila)
hsa-miR-1321	1	0	1	0	1	1	NUFIP2	nuclear fragile X mental retardation protein interacting protein 2
hsa-miR-1321	1	0	1	1	1	1	MIB1	mindbomb E3 ubiquitin protein ligase 1
hsa-miR-1321	1	0	1	1	1	1	NLGN2	neuroligin 2
hsa-miR-1321	1	0	1	1	1	1	RANBP10	RAN binding protein 10
hsa-miR-1321	0	0	1	1	1	1	PRX	periaxin
hsa-miR-1321	1	0	1	1	1	1	ZNFX1	zinc finger, NFX1-type containing 1
hsa-miR-1321	1	0	1	1	1	1	MTMR3	myotubularin related protein 3
hsa-miR-1321	0	0	1	1	1	1	RNASEL	ribonuclease L (2',5'-oligoisoadenylate synthetase-dependent)
hsa-miR-1321	1	0	1	1	1	1	RTN1	reticulon 1
hsa-miR-1321	1	0	1	0	1	1	TP53INP2	tumor protein p53 inducible nuclear protein 2
hsa-miR-1321	1	0	1	1	1	1	FAM60A	family with sequence similarity 60, member A
hsa-miR-1321	1	0	1	1	1	1	SNX6	sorting nexin 6
hsa-miR-1321	0	0	1	1	1	1	IL22RA1	interleukin 22 receptor, alpha 1
hsa-miR-1321	0	0	1	1	1	1	CHST6	carbohydrate (N-acetylglucosamine 6-O) sulfotransferase 6
hsa-miR-1321	1	0	1	1	1	1	PRDM12	PR domain containing 12
hsa-miR-1321	0	0	1	1	1	1	NR1D1	nuclear receptor subfamily 1, group D, member 1
hsa-miR-1321	0	0	1	1	1	1	GABBR1	gamma-aminobutyric acid (GABA) B receptor, 1
hsa-miR-1321	0	0	1	0	1	1	CFL2	cofilin 2 (muscle)
hsa-miR-1321	1	0	1	0	0	0	ALX4	ALX homeobox 4
hsa-miR-1321	1	0	1	1	1	1	GRIK2	glutamate receptor, ionotropic, kainate 2
hsa-miR-1321	1	0	1	0	1	1	CSNK1G1	casein kinase 1, gamma 1
hsa-miR-1321	0	0	1	1	0	0	ABHD4	abhydrolase domain containing 4
hsa-miR-1321	1	0	1	0	1	1	CERS2	ceramide synthase 2
hsa-miR-1321	0	0	1	0	0	0	FN3K	fructosamine 3 kinase
hsa-miR-1321	1	0	1	1	1	1	ABCG4	ATP-binding cassette, sub-family G (WHITE), member 4
hsa-miR-1321	0	0	1	1	1	1	ICAM4	intercellular adhesion molecule 4 (Landsteiner-Wiener blood group)
hsa-miR-1321	1	0	1	1	1	1	HIF3A	hypoxia inducible factor 3, alpha subunit
hsa-miR-1321	1	0	1	1	0	0	CDH24	cadherin 24, type 2
hsa-miR-1321	1	0	1	1	1	1	GIGYF1	GRB10 interacting GYF protein 1
hsa-miR-1321	1	0	1	0	1	1	HOXC8	homeobox C8
hsa-miR-1321	1	0	1	1	1	1	PRRX1	paired related homeobox 1
hsa-miR-1321	1	0	1	1	1	1	NEUROD6	neuronal differentiation 6
hsa-miR-1321	1	0	1	1	1	1	FAM160B2	family with sequence similarity 160, member B2
hsa-miR-1321	1	0	1	1	1	1	YTHDC2	YTH domain containing 2
hsa-miR-1321	1	0	1	0	1	1	BCL11B	B-cell CLL/lymphoma 11B (zinc finger protein)
hsa-miR-1321	1	0	1	1	1	1	FOXL2	forkhead box L2
hsa-miR-1321	1	0	1	1	0	0	UBE2Z	ubiquitin-conjugating enzyme E2Z
hsa-miR-1321	1	0	1	1	1	1	GDAP1L1	ganglioside induced differentiation associated protein 1-like 1
hsa-miR-1321	1	0	1	1	0	0	C19orf43	chromosome 19 open reading frame 43
hsa-miR-1321	1	0	1	1	1	1	FAM134A	family with sequence similarity 134, member A
hsa-miR-1321	1	0	1	1	0	0	PHF23	PHD finger protein 23
hsa-miR-1321	1	0	1	0	1	1	NOTCH2	notch 2
hsa-miR-1321	1	0	1	1	1	1	PSTPIP2	proline-serine-threonine phosphatase interacting protein 2
hsa-miR-1321	1	0	1	1	1	1	NKAIN1	Na+/K+ transporting ATPase interacting 1
hsa-miR-1321	1	0	1	1	1	1	C10orf76	chromosome 10 open reading frame 76
hsa-miR-1321	1	0	1	1	1	1	DHX40	DEAH (Asp-Glu-Ala-His) box polypeptide 40
hsa-miR-1321	0	0	1	1	1	1	STEAP4	STEAP family member 4
hsa-miR-1321	0	0	1	0	1	1	ZYG11B	zyg-11 homolog B (C. elegans)
hsa-miR-1321	0	0	1	1	1	1	NSUN7	NOP2/Sun domain family, member 7
hsa-miR-1321	0	0	1	1	1	1	E2F8	E2F transcription factor 8
hsa-miR-1321	0	0	1	1	1	1	SNIP1	Smad nuclear interacting protein 1
hsa-miR-1321	1	0	1	1	0	0	CCDC48	coiled-coil domain containing 48
hsa-miR-1321	0	0	1	1	0	0	RNF122	ring finger protein 122
hsa-miR-1321	1	0	1	1	0	0	CNTD2	cyclin N-terminal domain containing 2
hsa-miR-1321	0	0	1	1	1	1	ZNF767	zinc finger family member 767
hsa-miR-1321	1	0	1	1	1	1	CPED1	cadherin-like and PC-esterase domain containing 1
hsa-miR-1321	1	0	1	1	1	1	GRHL2	grainyhead-like 2 (Drosophila)
hsa-miR-1321	0	0	1	1	1	1	DOCK5	dedicator of cytokinesis 5
hsa-miR-1321	1	0	1	1	1	1	KLHL18	kelch-like 18 (Drosophila)
hsa-miR-1321	0	0	1	1	1	1	ZNF606	zinc finger protein 606
hsa-miR-1321	0	0	1	1	0	0	BAIAP2L2	BAI1-associated protein 2-like 2
hsa-miR-1321	1	0	1	0	1	1	VCPIP1	valosin containing protein (p97)/p47 complex interacting protein 1
hsa-miR-1321	0	0	1	1	0	0	BPIFB2	BPI fold containing family B, member 2
hsa-miR-1321	1	0	1	0	1	1	SRCIN1	SRC kinase signaling inhibitor 1
hsa-miR-1321	1	0	1	1	1	1	CYB5B	cytochrome b5 type B (outer mitochondrial membrane)
hsa-miR-1321	1	0	1	1	1	1	PTPRO	protein tyrosine phosphatase, receptor type, O
hsa-miR-1321	0	0	1	1	0	0	WBSCR16	Williams-Beuren syndrome chromosome region 16
hsa-miR-1321	1	0	1	1	1	1	FAM117A	family with sequence similarity 117, member A
hsa-miR-1321	1	0	1	1	0	0	PVRL4	poliovirus receptor-related 4
hsa-miR-1321	1	0	1	0	1	1	SPRY4	sprouty homolog 4 (Drosophila)
hsa-miR-1321	1	0	1	1	1	1	RAB1B	RAB1B, member RAS oncogene family
hsa-miR-1321	1	0	1	1	0	0	TCF7L1	transcription factor 7-like 1 (T-cell specific, HMG-box)
hsa-miR-1321	1	0	1	1	0	0	SCRT1	scratch homolog 1, zinc finger protein (Drosophila)
hsa-miR-1321	0	0	1	1	1	1	COG3	component of oligomeric golgi complex 3
hsa-miR-1321	0	0	1	1	1	1	MS4A8B	membrane-spanning 4-domains, subfamily A, member 8B
hsa-miR-1321	1	0	1	1	1	1	SESN2	sestrin 2
hsa-miR-1321	0	0	1	1	1	1	KCNA7	potassium voltage-gated channel, shaker-related subfamily, member 7
hsa-miR-1321	0	0	1	0	1	1	ENAM	enamelin
hsa-miR-1321	0	0	1	1	1	1	FRMD8	FERM domain containing 8
hsa-miR-1321	1	0	1	1	1	1	GPR61	G protein-coupled receptor 61
hsa-miR-1321	1	0	1	1	1	1	SNX25	sorting nexin 25
hsa-miR-1321	0	0	1	0	0	0	KRTAP3-1	keratin associated protein 3-1
hsa-miR-1321	0	0	1	1	1	1	TSSK1B	testis-specific serine kinase 1B
hsa-miR-1321	1	0	1	0	1	1	PCDHGA8	protocadherin gamma subfamily A, 8
hsa-miR-1321	0	0	1	1	1	1	ANKRD27	ankyrin repeat domain 27 (VPS9 domain)
hsa-miR-1321	1	0	1	1	1	1	DSEL	dermatan sulfate epimerase-like
hsa-miR-1321	1	0	1	1	1	1	ARID5B	AT rich interactive domain 5B (MRF1-like)
hsa-miR-1321	0	0	1	1	0	0	ELMOD3	ELMO/CED-12 domain containing 3
hsa-miR-1321	1	0	1	0	1	1	FAR1	fatty acyl CoA reductase 1
hsa-miR-1321	1	0	1	1	1	1	ZDHHC18	zinc finger, DHHC-type containing 18
hsa-miR-1321	0	0	1	1	1	1	MED10	mediator complex subunit 10
hsa-miR-1321	0	0	1	0	1	1	LDOC1L	leucine zipper, down-regulated in cancer 1-like
hsa-miR-1321	1	0	1	0	1	1	PSD2	pleckstrin and Sec7 domain containing 2
hsa-miR-1321	1	0	1	1	1	1	ING5	inhibitor of growth family, member 5
hsa-miR-1321	1	0	1	1	1	1	BRMS1L	breast cancer metastasis-suppressor 1-like
hsa-miR-1321	0	0	1	1	1	1	VPS25	vacuolar protein sorting 25 homolog (S. cerevisiae)
hsa-miR-1321	0	0	1	1	1	1	C5orf4	chromosome 5 open reading frame 4
hsa-miR-1321	0	0	1	1	0	0	PCDH1	protocadherin 1
hsa-miR-1321	1	0	1	1	1	1	PARD6B	par-6 partitioning defective 6 homolog beta (C. elegans)
hsa-miR-1321	1	0	1	1	1	1	TTBK1	tau tubulin kinase 1
hsa-miR-1321	1	0	1	0	1	1	GLYR1	glyoxylate reductase 1 homolog (Arabidopsis)
hsa-miR-1321	1	0	1	1	1	1	PPP1R9B	protein phosphatase 1, regulatory subunit 9B
hsa-miR-1321	1	0	1	0	1	1	INA	internexin neuronal intermediate filament protein, alpha
hsa-miR-1321	1	0	1	1	0	0	ZC3H10	zinc finger CCCH-type containing 10
hsa-miR-1321	1	0	1	1	0	0	ORAI1	ORAI calcium release-activated calcium modulator 1
hsa-miR-1321	1	0	1	0	1	1	ADO	2-aminoethanethiol (cysteamine) dioxygenase
hsa-miR-1321	1	0	1	1	1	1	ARHGEF39	Rho guanine nucleotide exchange factor (GEF) 39
hsa-miR-1321	1	0	1	0	1	1	PPP1R15B	protein phosphatase 1, regulatory subunit 15B
hsa-miR-1321	1	0	1	1	1	1	SPRYD3	SPRY domain containing 3
hsa-miR-1321	1	0	1	1	0	0	ATG4D	autophagy related 4D, cysteine peptidase
hsa-miR-1321	0	0	1	1	0	0	NXF5	nuclear RNA export factor 5
hsa-miR-1321	0	0	1	1	1	1	POLR2J2	polymerase (RNA) II (DNA directed) polypeptide J2
hsa-miR-1321	0	0	1	1	1	1	ZWINT	ZW10 interactor
hsa-miR-1321	0	0	1	1	1	1	PCDH15	protocadherin-related 15
hsa-miR-1321	1	0	1	1	1	1	ADAM19	ADAM metallopeptidase domain 19
hsa-miR-1321	1	0	1	1	1	1	RASL10B	RAS-like, family 10, member B
hsa-miR-1321	1	0	1	1	0	0	FCHSD1	FCH and double SH3 domains 1
hsa-miR-1321	1	0	1	1	0	0	CCDC120	coiled-coil domain containing 120
hsa-miR-1321	1	0	1	1	1	1	LUZP1	leucine zipper protein 1
hsa-miR-1321	0	0	1	0	1	1	CCDC97	coiled-coil domain containing 97
hsa-miR-1321	1	0	1	0	0	0	ANKRD40	ankyrin repeat domain 40
hsa-miR-1321	0	0	1	1	0	0	PGLYRP2	peptidoglycan recognition protein 2
hsa-miR-1321	0	0	1	1	0	0	PGLYRP3	peptidoglycan recognition protein 3
hsa-miR-1321	1	0	1	1	1	1	ELFN2	extracellular leucine-rich repeat and fibronectin type III domain containing 2
hsa-miR-1321	0	0	1	1	1	1	LENG8	leukocyte receptor cluster (LRC) member 8
hsa-miR-1321	0	0	1	1	0	0	TNFRSF13C	tumor necrosis factor receptor superfamily, member 13C
hsa-miR-1321	0	0	1	1	0	0	APOA5	apolipoprotein A-V
hsa-miR-1321	0	0	1	1	0	0	SCGB3A2	secretoglobin, family 3A, member 2
hsa-miR-1321	0	0	1	1	1	1	MIA2	melanoma inhibitory activity 2
hsa-miR-1321	0	0	1	1	0	0	KRT3	keratin 3
hsa-miR-1321	0	0	1	1	0	0	COL6A2	collagen, type VI, alpha 2
hsa-miR-1321	1	0	1	1	1	1	PTP4A2	protein tyrosine phosphatase type IVA, member 2
hsa-miR-1321	1	0	1	1	1	1	COL11A2	collagen, type XI, alpha 2
hsa-miR-1321	1	0	1	0	1	1	SOCS4	suppressor of cytokine signaling 4
hsa-miR-1321	0	0	1	1	0	0	GGTLC1	gamma-glutamyltransferase light chain 1
hsa-miR-1321	0	0	1	1	1	1	ATP6V1G2	ATPase, H+ transporting, lysosomal 13kDa, V1 subunit G2
hsa-miR-1321	0	0	1	1	1	1	CHST14	carbohydrate (N-acetylgalactosamine 4-0) sulfotransferase 14
hsa-miR-1321	0	0	1	0	1	1	PAQR8	progestin and adipoQ receptor family member VIII
hsa-miR-1321	1	0	1	1	0	0	UNC5A	unc-5 homolog A (C. elegans)
hsa-miR-1321	1	0	1	1	1	1	FAM122A	family with sequence similarity 122A
hsa-miR-1321	1	0	1	1	0	0	PKDCC	protein kinase domain containing, cytoplasmic homolog (mouse)
hsa-miR-1321	0	0	1	0	1	1	SP140L	SP140 nuclear body protein-like
hsa-miR-1321	0	0	1	1	1	1	MRAP2	melanocortin 2 receptor accessory protein 2
hsa-miR-1321	0	0	1	1	1	1	CASC4	cancer susceptibility candidate 4
hsa-miR-1321	0	0	1	1	1	1	C7orf29	chromosome 7 open reading frame 29
hsa-miR-1321	1	0	1	0	1	1	SP1	Sp1 transcription factor
hsa-miR-1321	0	0	1	0	1	1	PRELID2	PRELI domain containing 2
hsa-miR-1321	0	0	1	1	1	1	KLF14	Kruppel-like factor 14
hsa-miR-1321	0	0	1	1	1	1	ADAMTS17	ADAM metallopeptidase with thrombospondin type 1 motif, 17
hsa-miR-1321	1	0	1	1	0	0	LIPH	lipase, member H
hsa-miR-1321	1	0	1	1	1	1	ATRN	attractin
hsa-miR-1321	1	0	1	0	1	1	CNOT6L	CCR4-NOT transcription complex, subunit 6-like
hsa-miR-1321	1	0	1	1	1	1	YPEL4	yippee-like 4 (Drosophila)
hsa-miR-1321	0	0	1	1	0	0	GLYATL2	glycine-N-acyltransferase-like 2
hsa-miR-1321	0	0	1	1	0	0	PRKCDBP	protein kinase C, delta binding protein
hsa-miR-1321	0	0	1	1	1	1	TMEM106A	transmembrane protein 106A
hsa-miR-1321	0	0	1	0	1	1	PIGM	phosphatidylinositol glycan anchor biosynthesis, class M
hsa-miR-1321	1	0	1	1	0	0	NAPRT1	nicotinate phosphoribosyltransferase domain containing 1
hsa-miR-1321	1	0	1	1	1	1	SEPT6	septin 6
hsa-miR-1321	1	0	1	1	0	0	ISL2	ISL LIM homeobox 2
hsa-miR-1321	0	0	1	1	0	0	NTN5	netrin 5
hsa-miR-1321	1	0	1	1	1	1	SGMS1	sphingomyelin synthase 1
hsa-miR-1321	0	0	1	1	1	1	RPP25L	ribonuclease P/MRP 25kDa subunit-like
hsa-miR-1321	1	0	1	0	1	1	SYT11	synaptotagmin XI
hsa-miR-1321	0	0	1	1	1	1	ATP1A3	ATPase, Na+/K+ transporting, alpha 3 polypeptide
hsa-miR-1321	1	0	1	1	1	1	POGLUT1	protein O-glucosyltransferase 1
hsa-miR-1321	0	0	1	1	1	1	RMI2	RMI2, RecQ mediated genome instability 2, homolog (S. cerevisiae)
hsa-miR-1321	0	0	1	1	1	1	CDYL2	chromodomain protein, Y-like 2
hsa-miR-1321	1	0	1	1	1	1	LSM12	LSM12 homolog (S. cerevisiae)
hsa-miR-1321	0	0	1	1	1	1	EFCAB13	EF-hand calcium binding domain 13
hsa-miR-1321	0	0	1	1	1	1	C1orf172	chromosome 1 open reading frame 172
hsa-miR-1321	1	0	1	1	1	1	FAM123B	family with sequence similarity 123B
hsa-miR-1321	0	0	1	1	1	1	C12orf66	chromosome 12 open reading frame 66
hsa-miR-1321	1	0	1	1	1	1	LRFN5	leucine rich repeat and fibronectin type III domain containing 5
hsa-miR-1321	1	0	1	1	1	1	ZNF362	zinc finger protein 362
hsa-miR-1321	0	0	1	1	0	0	MARCH10	membrane-associated ring finger (C3HC4) 10, E3 ubiquitin protein ligase
hsa-miR-1321	1	0	1	1	0	0	ZNF579	zinc finger protein 579
hsa-miR-1321	1	0	1	0	1	1	TMEM154	transmembrane protein 154
hsa-miR-1321	0	0	1	1	0	0	MS4A15	membrane-spanning 4-domains, subfamily A, member 15
hsa-miR-1321	0	0	1	0	0	0	C17orf66	chromosome 17 open reading frame 66
hsa-miR-1321	0	0	1	1	1	1	ASPRV1	aspartic peptidase, retroviral-like 1
hsa-miR-1321	1	0	1	0	1	1	C7orf41	chromosome 7 open reading frame 41
hsa-miR-1321	1	0	1	1	1	1	C3orf45	chromosome 3 open reading frame 45
hsa-miR-1321	1	0	1	1	1	1	TMEM151A	transmembrane protein 151A
hsa-miR-1321	0	0	1	1	0	0	SCARF2	scavenger receptor class F, member 2
hsa-miR-1321	1	0	1	0	1	1	ENPP6	ectonucleotide pyrophosphatase/phosphodiesterase 6
hsa-miR-1321	1	0	1	1	1	1	HS6ST3	heparan sulfate 6-O-sulfotransferase 3
hsa-miR-1321	1	0	1	0	1	1	MDGA1	MAM domain containing glycosylphosphatidylinositol anchor 1
hsa-miR-1321	0	0	1	1	0	0	CMYA5	cardiomyopathy associated 5
hsa-miR-1321	1	0	1	0	1	1	SEMA6D	sema domain, transmembrane domain (TM), and cytoplasmic domain, (semaphorin) 6D
hsa-miR-1321	1	0	1	1	1	1	HOXA1	homeobox A1
hsa-miR-1321	0	0	1	1	1	1	SIAE	sialic acid acetylesterase
hsa-miR-1321	1	0	1	0	1	1	PLEKHH2	pleckstrin homology domain containing, family H (with MyTH4 domain) member 2
hsa-miR-1321	0	0	1	1	1	1	TAPBP	TAP binding protein (tapasin)
hsa-miR-1321	1	0	1	1	1	1	MMGT1	membrane magnesium transporter 1
hsa-miR-1321	1	0	1	1	1	1	CNTD1	cyclin N-terminal domain containing 1
hsa-miR-1321	0	0	1	1	0	0	CCDC105	coiled-coil domain containing 105
hsa-miR-1321	1	0	1	1	1	1	TTBK2	tau tubulin kinase 2
hsa-miR-1321	0	0	1	1	1	1	UNC5CL	unc-5 homolog C (C. elegans)-like
hsa-miR-1321	1	0	1	0	1	1	KSR2	kinase suppressor of ras 2
hsa-miR-1321	0	0	1	1	0	0	NOMO2	NODAL modulator 2
hsa-miR-1321	0	0	1	1	1	1	C17orf78	chromosome 17 open reading frame 78
hsa-miR-1321	0	0	1	1	0	0	TMEM145	transmembrane protein 145
hsa-miR-1321	1	0	1	1	1	1	ARL10	ADP-ribosylation factor-like 10
hsa-miR-1321	1	0	1	1	1	1	XKR6	XK, Kell blood group complex subunit-related family, member 6
hsa-miR-1321	1	0	1	0	1	1	SREK1IP1	SREK1-interacting protein 1
hsa-miR-1321	1	0	1	0	1	1	FAM84B	family with sequence similarity 84, member B
hsa-miR-1321	0	0	1	1	1	1	CLEC14A	C-type lectin domain family 14, member A
hsa-miR-1321	1	0	1	1	1	1	SYT9	synaptotagmin IX
hsa-miR-1321	0	0	1	1	0	0	TAS1R1	taste receptor, type 1, member 1
hsa-miR-1321	0	0	1	1	1	1	HSD17B13	hydroxysteroid (17-beta) dehydrogenase 13
hsa-miR-1321	0	0	1	1	1	1	GPIHBP1	glycosylphosphatidylinositol anchored high density lipoprotein binding protein 1
hsa-miR-1321	0	0	1	1	1	1	ATPIF1	ATPase inhibitory factor 1
hsa-miR-1321	0	0	1	1	1	1	MRPL52	mitochondrial ribosomal protein L52
hsa-miR-1321	0	0	1	1	1	1	ZNF831	zinc finger protein 831
hsa-miR-1321	0	0	1	1	1	1	FBXO27	F-box protein 27
hsa-miR-1321	0	0	1	1	0	0	C7orf34	chromosome 7 open reading frame 34
hsa-miR-1321	1	0	1	1	1	1	LRRTM1	leucine rich repeat transmembrane neuronal 1
hsa-miR-1321	1	0	1	1	0	0	KCTD13	potassium channel tetramerisation domain containing 13
hsa-miR-1321	0	0	1	0	1	1	ZNF445	zinc finger protein 445
hsa-miR-1321	0	0	1	0	1	1	ITGA1	integrin, alpha 1
hsa-miR-1321	0	0	1	1	1	1	C17orf58	chromosome 17 open reading frame 58
hsa-miR-1321	0	0	1	1	0	0	CENPV	centromere protein V
hsa-miR-1321	1	0	1	1	1	1	ZSCAN22	zinc finger and SCAN domain containing 22
hsa-miR-1321	0	0	1	1	1	1	USP12	ubiquitin specific peptidase 12
hsa-miR-1321	0	0	1	1	0	0	BPIFB4	BPI fold containing family B, member 4
hsa-miR-1321	1	0	1	1	1	1	TMEM229B	transmembrane protein 229B
hsa-miR-1321	0	0	1	1	1	1	C1QL2	complement component 1, q subcomponent-like 2
hsa-miR-1321	0	0	1	1	1	1	HTR3D	5-hydroxytryptamine (serotonin) receptor 3D, ionotropic
hsa-miR-1321	1	0	1	1	1	1	BCL9L	B-cell CLL/lymphoma 9-like
hsa-miR-1321	0	0	1	1	0	0	PKMYT1	protein kinase, membrane associated tyrosine/threonine 1
hsa-miR-1321	0	0	1	0	1	1	C16orf82	chromosome 16 open reading frame 82
hsa-miR-1321	1	0	1	0	1	1	RIMS4	regulating synaptic membrane exocytosis 4
hsa-miR-1321	0	0	1	0	1	1	NBPF11	neuroblastoma breakpoint family, member 11
hsa-miR-1321	1	0	1	1	1	1	RALGAPA1	Ral GTPase activating protein, alpha subunit 1 (catalytic)
hsa-miR-1321	1	0	1	1	1	1	ADAMTS6	ADAM metallopeptidase with thrombospondin type 1 motif, 6
hsa-miR-1321	0	0	1	1	0	0	TMEM173	transmembrane protein 173
hsa-miR-1321	0	0	1	1	1	1	DERL3	derlin 3
hsa-miR-1321	1	0	1	1	1	1	RAB43	RAB43, member RAS oncogene family
hsa-miR-1321	0	0	1	0	0	0	IGFL1	IGF-like family member 1
hsa-miR-1321	0	0	1	1	1	1	LHFPL4	lipoma HMGIC fusion partner-like 4
hsa-miR-1321	1	0	1	1	0	0	AGRN	agrin
hsa-miR-1321	1	0	1	0	1	1	ZC3H6	zinc finger CCCH-type containing 6
hsa-miR-1321	0	0	1	1	1	1	UBE3D	ubiquitin protein ligase E3D
hsa-miR-1321	0	0	1	1	1	1	MKNK1	MAP kinase interacting serine/threonine kinase 1
hsa-miR-1321	1	0	1	1	1	1	TMEM189-UBE2V1	TMEM189-UBE2V1 readthrough
hsa-miR-1321	0	0	1	1	1	1	ILDR2	immunoglobulin-like domain containing receptor 2
hsa-miR-1321	0	0	1	1	1	1	GPX1	glutathione peroxidase 1
hsa-miR-1321	1	0	1	1	0	0	KAZN	kazrin, periplakin interacting protein
hsa-miR-1321	0	0	1	1	0	0	FAM27L	family with sequence similarity 27-like
hsa-miR-1321	1	0	1	1	1	1	IGSF1	immunoglobulin superfamily, member 1
hsa-miR-1321	0	0	1	1	0	0	LST1	leukocyte specific transcript 1
hsa-miR-1321	1	0	1	1	1	1	SKIDA1	SKI/DACH domain containing 1
hsa-miR-1321	1	0	1	1	0	0	CD164L2	CD164 sialomucin-like 2
hsa-miR-1321	0	0	1	0	0	0	FLJ43860	FLJ43860 protein
hsa-miR-1321	0	0	1	1	1	1	LYSMD1	LysM, putative peptidoglycan-binding, domain containing 1
hsa-miR-1321	1	0	1	1	1	1	RAPH1	Ras association (RalGDS/AF-6) and pleckstrin homology domains 1
hsa-miR-1321	0	0	1	0	0	0	PCDHB19P	protocadherin beta 19 pseudogene
hsa-miR-1321	0	0	1	0	0	0	TTTY15	testis-specific transcript, Y-linked 15 (non-protein coding)
hsa-miR-1321	0	0	1	0	0	0	COX6B1P1	cytochrome c oxidase subunit VIb polypeptide 1 (ubiquitous) pseudogene 1
hsa-miR-1321	0	0	1	0	0	0	MEIS3P1	Meis homeobox 3 pseudogene 1
hsa-miR-1321	0	0	1	0	0	0	NXF4	nuclear RNA export factor 4 pseudogene
hsa-miR-1321	0	0	1	0	0	0	LOC606724	coronin, actin binding protein, 1A pseudogene
hsa-miR-1321	0	0	1	0	0	0	CLK2P	CDC-like kinase 2, pseudogene
hsa-miR-1321	0	0	1	0	0	0	TRIM78P	tripartite motif containing 78, pseudogene
hsa-miR-1321	0	0	1	0	0	0	PRR24	proline rich 24
hsa-miR-1321	0	0	1	0	0	0	TMED10P1	transmembrane emp24-like trafficking protein 10 (yeast) pseudogene 1
hsa-miR-1321	0	0	1	0	0	0	TPTE2P6	transmembrane phosphoinositide 3-phosphatase and tensin homolog 2 pseudogene 6
hsa-miR-1321	0	0	1	0	0	0	MALAT1	metastasis associated lung adenocarcinoma transcript 1 (non-protein coding)
hsa-miR-1321	0	0	1	0	0	0	DUSP5P	dual specificity phosphatase 5 pseudogene
hsa-miR-1321	0	0	1	0	0	0	HAS2-AS1	HAS2 antisense RNA 1
hsa-miR-1321	0	0	1	0	0	0	PTPRVP	protein tyrosine phosphatase, receptor type, V, pseudogene
hsa-miR-1321	0	0	1	0	0	0	TCAM1P	testicular cell adhesion molecule 1 homolog (mouse), pseudogene
hsa-miR-1321	0	0	1	0	0	0	LILRP2	leukocyte immunoglobulin-like receptor pseudogene 2
hsa-miR-1321	1	0	1	1	0	0	HOXC5	homeobox C5
hsa-miR-1321	0	0	1	1	1	1	CNGB1	cyclic nucleotide gated channel beta 1
hsa-miR-1321	1	0	1	1	1	1	TRIO	trio Rho guanine nucleotide exchange factor
hsa-miR-1321	1	0	1	1	1	1	TCF3	transcription factor 3 (E2A immunoglobulin enhancer binding factors E12/E47)
hsa-miR-1321	0	0	1	1	1	1	CD6	CD6 molecule
hsa-miR-1321	0	0	1	1	1	1	RXRB	retinoid X receptor, beta
hsa-miR-1321	0	0	1	1	0	0	GPR17	G protein-coupled receptor 17
