# Supplementary material for: Profiling of Selected MicroRNAs in Proliferative Eutopic Endometrium of Women with Ovarian Endometriosis
Source: Biomed Res Int. 2015 Aug 20;2015:760698. doi: 10.1155/2015/760698 (PMC4558423; doi:10.1155/2015/760698)
Supplement: Supplementary file 1 — Table I: The names of miRNAs significantly differentially expressed between eutopic endometrium of patients with endometriosis vs eutopic endometrium of patients without endometriosis. Table II: The associations between miRNA and mRNA, which presents detailed results of the search of six major databases i.e targetscan, tarbase, miranda, mirbase, mirtarget2 and pictar. [file 760698.f1.zip › 760698.f1/Table II/hsa-miR-1322.tsv]

miR	targetscan	tarbase	miranda	mirbase	mirtarget2	pictar	GeneSymbol	GeneName
hsa-miR-1322	1	0	1	1	1	1	ARNTL	aryl hydrocarbon receptor nuclear translocator-like
hsa-miR-1322	1	0	1	1	1	1	ZFYVE16	zinc finger, FYVE domain containing 16
hsa-miR-1322	1	0	1	1	0	0	RAPGEF2	Rap guanine nucleotide exchange factor (GEF) 2
hsa-miR-1322	1	0	1	0	1	1	KIAA0408	KIAA0408
hsa-miR-1322	1	0	1	1	0	0	SEC14L5	SEC14-like 5 (S. cerevisiae)
hsa-miR-1322	0	0	1	1	1	1	NEU3	sialidase 3 (membrane sialidase)
hsa-miR-1322	0	0	1	1	0	0	ZNF862	zinc finger protein 862
hsa-miR-1322	1	0	1	1	1	1	GPATCH8	G patch domain containing 8
hsa-miR-1322	1	0	1	1	1	1	AHCYL2	adenosylhomocysteinase-like 2
hsa-miR-1322	0	0	1	1	1	1	MAU2	MAU2 chromatid cohesion factor homolog (C. elegans)
hsa-miR-1322	1	0	1	1	1	1	RGL1	ral guanine nucleotide dissociation stimulator-like 1
hsa-miR-1322	0	0	1	0	0	0	THSD7A	thrombospondin, type I, domain containing 7A
hsa-miR-1322	0	0	1	1	1	1	FASTKD2	FAST kinase domains 2
hsa-miR-1322	1	0	1	1	1	1	PALLD	palladin, cytoskeletal associated protein
hsa-miR-1322	1	0	1	1	1	1	PRRC2C	proline-rich coiled-coil 2C
hsa-miR-1322	1	0	1	1	1	1	PHF8	PHD finger protein 8
hsa-miR-1322	1	0	1	1	1	1	RALGAPB	Ral GTPase activating protein, beta subunit (non-catalytic)
hsa-miR-1322	1	0	1	1	1	1	UPF2	UPF2 regulator of nonsense transcripts homolog (yeast)
hsa-miR-1322	1	1	1	1	1	1	NFIA	nuclear factor I/A
hsa-miR-1322	1	0	1	0	0	0	PITPNM2	phosphatidylinositol transfer protein, membrane-associated 2
hsa-miR-1322	1	0	1	1	0	0	PLXNA4	plexin A4
hsa-miR-1322	1	0	1	0	1	1	IGDCC4	immunoglobulin superfamily, DCC subclass, member 4
hsa-miR-1322	1	0	1	1	1	1	LCOR	ligand dependent nuclear receptor corepressor
hsa-miR-1322	1	0	1	1	1	1	CSRNP1	cysteine-serine-rich nuclear protein 1
hsa-miR-1322	0	0	1	1	0	0	SEC16B	SEC16 homolog B (S. cerevisiae)
hsa-miR-1322	1	0	1	1	1	1	LSM14A	LSM14A, SCD6 homolog A (S. cerevisiae)
hsa-miR-1322	1	0	1	1	1	1	TET2	tet methylcytosine dioxygenase 2
hsa-miR-1322	1	0	1	1	1	1	OXR1	oxidation resistance 1
hsa-miR-1322	1	0	1	1	0	0	ADC	arginine decarboxylase
hsa-miR-1322	1	0	1	1	1	1	SH3TC2	SH3 domain and tetratricopeptide repeats 2
hsa-miR-1322	0	0	1	1	0	0	CIRH1A	cirrhosis, autosomal recessive 1A (cirhin)
hsa-miR-1322	0	0	1	1	0	0	SLC22A10	solute carrier family 22, member 10
hsa-miR-1322	0	0	1	1	0	0	DDB2	damage-specific DNA binding protein 2, 48kDa
hsa-miR-1322	0	0	1	1	0	0	SSPO	SCO-spondin homolog (Bos taurus)
hsa-miR-1322	1	0	1	0	1	1	BEND4	BEN domain containing 4
hsa-miR-1322	1	1	1	1	1	1	BACE1	beta-site APP-cleaving enzyme 1
hsa-miR-1322	0	0	1	1	0	0	PTPRF	protein tyrosine phosphatase, receptor type, F
hsa-miR-1322	1	0	1	1	1	1	ADARB1	adenosine deaminase, RNA-specific, B1
hsa-miR-1322	1	0	1	1	1	1	VLDLR	very low density lipoprotein receptor
hsa-miR-1322	1	0	1	0	1	1	LRBA	LPS-responsive vesicle trafficking, beach and anchor containing
hsa-miR-1322	0	0	1	0	1	1	ATR	ataxia telangiectasia and Rad3 related
hsa-miR-1322	1	0	1	0	1	1	PCDHA13	protocadherin alpha 13
hsa-miR-1322	1	0	1	1	1	1	PCDHA4	protocadherin alpha 4
hsa-miR-1322	0	0	1	1	0	0	KCNC3	potassium voltage-gated channel, Shaw-related subfamily, member 3
hsa-miR-1322	1	0	1	1	1	1	CLIP4	CAP-GLY domain containing linker protein family, member 4
hsa-miR-1322	0	0	1	1	1	1	PTK2	PTK2 protein tyrosine kinase 2
hsa-miR-1322	1	0	1	1	1	1	SLC8A1	solute carrier family 8 (sodium/calcium exchanger), member 1
hsa-miR-1322	1	0	1	1	1	1	DTNA	dystrobrevin, alpha
hsa-miR-1322	1	0	1	0	1	1	PLAG1	pleiomorphic adenoma gene 1
hsa-miR-1322	1	0	1	0	1	1	MPPED2	metallophosphoesterase domain containing 2
hsa-miR-1322	1	0	1	1	0	0	CACNB1	calcium channel, voltage-dependent, beta 1 subunit
hsa-miR-1322	1	0	1	1	1	1	TWF1	twinfilin, actin-binding protein, homolog 1 (Drosophila)
hsa-miR-1322	1	0	1	1	1	1	MYO5A	myosin VA (heavy chain 12, myoxin)
hsa-miR-1322	0	0	1	1	0	0	BMP1	bone morphogenetic protein 1
hsa-miR-1322	0	0	1	1	0	0	CFLAR	CASP8 and FADD-like apoptosis regulator
hsa-miR-1322	0	0	1	1	0	0	MCM5	minichromosome maintenance complex component 5
hsa-miR-1322	1	0	1	0	1	1	RPL28	ribosomal protein L28
hsa-miR-1322	0	0	1	1	1	1	ALDH3B1	aldehyde dehydrogenase 3 family, member B1
hsa-miR-1322	1	0	1	1	1	1	SATB1	SATB homeobox 1
hsa-miR-1322	0	0	1	1	1	1	RNF130	ring finger protein 130
hsa-miR-1322	0	0	1	1	1	1	PLD1	phospholipase D1, phosphatidylcholine-specific
hsa-miR-1322	1	0	1	1	1	1	TTC39A	tetratricopeptide repeat domain 39A
hsa-miR-1322	0	0	1	1	0	0	MUC3A	mucin 3A, cell surface associated
hsa-miR-1322	1	0	1	1	1	1	YME1L1	YME1-like 1 (S. cerevisiae)
hsa-miR-1322	1	0	1	0	0	0	MAP3K1	mitogen-activated protein kinase kinase kinase 1, E3 ubiquitin protein ligase
hsa-miR-1322	1	0	1	1	1	1	SHOC2	soc-2 suppressor of clear homolog (C. elegans)
hsa-miR-1322	1	0	1	1	1	1	TP63	tumor protein p63
hsa-miR-1322	1	0	1	1	1	1	USP3	ubiquitin specific peptidase 3
hsa-miR-1322	0	0	1	1	1	1	LYPLA1	lysophospholipase I
hsa-miR-1322	1	0	1	1	1	1	SLMAP	sarcolemma associated protein
hsa-miR-1322	1	0	1	0	1	1	CD164	CD164 molecule, sialomucin
hsa-miR-1322	1	0	1	1	1	1	SORBS1	sorbin and SH3 domain containing 1
hsa-miR-1322	1	0	1	1	1	1	ANKRD13A	ankyrin repeat domain 13A
hsa-miR-1322	1	0	1	1	1	1	NXT2	nuclear transport factor 2-like export factor 2
hsa-miR-1322	0	0	1	1	1	1	DOCK10	dedicator of cytokinesis 10
hsa-miR-1322	0	0	1	0	0	0	TIGD7	tigger transposable element derived 7
hsa-miR-1322	1	0	1	1	0	0	CANT1	calcium activated nucleotidase 1
hsa-miR-1322	1	0	1	1	1	1	CALU	calumenin
hsa-miR-1322	0	0	1	1	0	0	CTNNBL1	catenin, beta like 1
hsa-miR-1322	1	0	1	1	1	1	ST3GAL3	ST3 beta-galactoside alpha-2,3-sialyltransferase 3
hsa-miR-1322	0	0	1	1	0	0	RASGEF1C	RasGEF domain family, member 1C
hsa-miR-1322	1	0	1	1	0	0	FOXP2	forkhead box P2
hsa-miR-1322	1	0	1	1	1	1	WAPAL	wings apart-like homolog (Drosophila)
hsa-miR-1322	1	0	1	1	1	1	LRRC7	leucine rich repeat containing 7
hsa-miR-1322	1	0	1	0	1	1	IL1RAP	interleukin 1 receptor accessory protein
hsa-miR-1322	0	0	1	1	1	1	ANKRD36B	ankyrin repeat domain 36B
hsa-miR-1322	0	0	1	1	1	1	HIRIP3	HIRA interacting protein 3
hsa-miR-1322	1	0	1	1	1	1	PALM2	paralemmin 2
hsa-miR-1322	0	0	1	0	1	1	SRPK1	SRSF protein kinase 1
hsa-miR-1322	0	0	1	1	1	1	PDE1A	phosphodiesterase 1A, calmodulin-dependent
hsa-miR-1322	1	0	1	1	1	1	NRXN3	neurexin 3
hsa-miR-1322	1	0	1	1	1	1	SYT14	synaptotagmin XIV
hsa-miR-1322	0	0	1	1	1	1	ESRP1	epithelial splicing regulatory protein 1
hsa-miR-1322	1	0	1	1	1	1	AKAP2	A kinase (PRKA) anchor protein 2
hsa-miR-1322	1	0	1	1	0	0	SENP3	SUMO1/sentrin/SMT3 specific peptidase 3
hsa-miR-1322	0	0	1	1	1	1	STOX2	storkhead box 2
hsa-miR-1322	0	0	1	1	1	1	TCP11L1	t-complex 11 (mouse)-like 1
hsa-miR-1322	1	0	1	1	1	1	PGAP1	post-GPI attachment to proteins 1
hsa-miR-1322	0	0	1	0	0	0	SOX2-OT	SOX2 overlapping transcript (non-protein coding)
hsa-miR-1322	0	0	1	1	0	0	RPS15A	ribosomal protein S15a
hsa-miR-1322	0	0	1	1	1	1	ARMC5	armadillo repeat containing 5
hsa-miR-1322	0	0	1	1	1	1	C5orf42	chromosome 5 open reading frame 42
hsa-miR-1322	0	0	1	1	0	0	BUB1	budding uninhibited by benzimidazoles 1 homolog (yeast)
hsa-miR-1322	0	0	1	0	0	0	LINC00475	long intergenic non-protein coding RNA 475
hsa-miR-1322	0	0	1	0	0	0	LINC00340	long intergenic non-protein coding RNA 340
hsa-miR-1322	0	0	1	1	0	0	EWSR1	Ewing sarcoma breakpoint region 1
hsa-miR-1322	0	0	1	0	1	1	FLJ22763	uncharacterized LOC401081
hsa-miR-1322	0	0	1	0	0	0	NEURL1B	neuralized homolog 1B (Drosophila)
hsa-miR-1322	1	0	1	1	1	1	FAM53C	family with sequence similarity 53, member C
hsa-miR-1322	1	0	1	0	1	1	ATP10D	ATPase, class V, type 10D
hsa-miR-1322	0	0	1	0	1	1	TWSG1	twisted gastrulation homolog 1 (Drosophila)
hsa-miR-1322	1	0	1	1	1	1	GPD2	glycerol-3-phosphate dehydrogenase 2 (mitochondrial)
hsa-miR-1322	0	0	1	1	1	1	IGBP1	immunoglobulin (CD79A) binding protein 1
hsa-miR-1322	1	0	1	1	1	1	SLAIN1	SLAIN motif family, member 1
hsa-miR-1322	1	0	1	1	1	1	RAP1GDS1	RAP1, GTP-GDP dissociation stimulator 1
hsa-miR-1322	0	0	1	1	1	1	MTRF1	mitochondrial translational release factor 1
hsa-miR-1322	1	0	1	1	0	0	SMARCA4	SWI/SNF related, matrix associated, actin dependent regulator of chromatin, subfamily a, member 4
hsa-miR-1322	1	0	1	1	1	1	DIXDC1	DIX domain containing 1
hsa-miR-1322	1	0	1	1	1	1	TMTC1	transmembrane and tetratricopeptide repeat containing 1
hsa-miR-1322	1	0	1	0	1	1	PTPRE	protein tyrosine phosphatase, receptor type, E
hsa-miR-1322	0	0	1	1	1	1	MSTO1	misato homolog 1 (Drosophila)
hsa-miR-1322	0	0	1	0	0	0	JPX	JPX transcript, XIST activator (non-protein coding)
hsa-miR-1322	1	0	1	1	1	1	TMEM25	transmembrane protein 25
hsa-miR-1322	1	0	1	1	1	1	CLCN5	chloride channel, voltage-sensitive 5
hsa-miR-1322	1	0	1	1	1	1	SORBS2	sorbin and SH3 domain containing 2
hsa-miR-1322	0	0	1	0	0	0	LOC255187	hCG1980447
hsa-miR-1322	0	0	1	1	1	1	DST	dystonin
hsa-miR-1322	1	0	1	1	1	1	GABARAPL1	GABA(A) receptor-associated protein like 1
hsa-miR-1322	0	0	1	1	1	1	PSME3	proteasome (prosome, macropain) activator subunit 3 (PA28 gamma; Ki)
hsa-miR-1322	1	0	1	1	0	0	ZBTB37	zinc finger and BTB domain containing 37
hsa-miR-1322	1	0	1	1	0	0	TCF7	transcription factor 7 (T-cell specific, HMG-box)
hsa-miR-1322	0	0	1	1	0	0	PTOV1	prostate tumor overexpressed 1
hsa-miR-1322	0	0	1	1	1	1	ZBTB26	zinc finger and BTB domain containing 26
hsa-miR-1322	0	0	1	0	1	1	ELF5	E74-like factor 5 (ets domain transcription factor)
hsa-miR-1322	0	0	1	1	0	0	CPAMD8	C3 and PZP-like, alpha-2-macroglobulin domain containing 8
hsa-miR-1322	1	0	1	1	1	1	STXBP5	syntaxin binding protein 5 (tomosyn)
hsa-miR-1322	0	0	1	0	0	0	LOC727993	uncharacterized LOC727993
hsa-miR-1322	0	0	1	1	1	1	STBD1	starch binding domain 1
hsa-miR-1322	0	0	1	0	0	0	LOC643837	uncharacterized LOC643837
hsa-miR-1322	1	0	1	1	1	1	FBXW2	F-box and WD repeat domain containing 2
hsa-miR-1322	0	0	1	0	1	1	SNRNP48	small nuclear ribonucleoprotein 48kDa (U11/U12)
hsa-miR-1322	1	0	1	1	1	1	GNG2	guanine nucleotide binding protein (G protein), gamma 2
hsa-miR-1322	0	0	1	1	1	1	NRBP1	nuclear receptor binding protein 1
hsa-miR-1322	1	0	1	1	1	1	SPTBN1	spectrin, beta, non-erythrocytic 1
hsa-miR-1322	0	0	1	1	1	1	TGFBI	transforming growth factor, beta-induced, 68kDa
hsa-miR-1322	0	0	1	1	1	1	SLC16A1	solute carrier family 16, member 1 (monocarboxylic acid transporter 1)
hsa-miR-1322	0	0	1	1	1	1	CYP11B1	cytochrome P450, family 11, subfamily B, polypeptide 1
hsa-miR-1322	1	0	1	1	1	1	RCN1	reticulocalbin 1, EF-hand calcium binding domain
hsa-miR-1322	1	0	1	1	1	1	KCND1	potassium voltage-gated channel, Shal-related subfamily, member 1
hsa-miR-1322	0	0	1	0	0	0	PART1	prostate androgen-regulated transcript 1 (non-protein coding)
hsa-miR-1322	1	0	1	1	1	1	ATXN10	ataxin 10
hsa-miR-1322	1	0	1	1	1	1	KCNIP3	Kv channel interacting protein 3, calsenilin
hsa-miR-1322	0	0	1	0	1	1	NBPF3	neuroblastoma breakpoint family, member 3
hsa-miR-1322	1	0	1	1	1	1	GAPVD1	GTPase activating protein and VPS9 domains 1
hsa-miR-1322	1	0	1	1	1	1	ERGIC1	endoplasmic reticulum-golgi intermediate compartment (ERGIC) 1
hsa-miR-1322	1	0	1	0	1	1	AGFG1	ArfGAP with FG repeats 1
hsa-miR-1322	0	0	1	1	1	1	TEX35	testis expressed 35
hsa-miR-1322	0	0	1	1	1	1	CKAP2L	cytoskeleton associated protein 2-like
hsa-miR-1322	0	0	1	1	1	1	ARFGAP2	ADP-ribosylation factor GTPase activating protein 2
hsa-miR-1322	1	0	1	0	1	1	UNC5D	unc-5 homolog D (C. elegans)
hsa-miR-1322	0	0	1	1	1	1	NFKB1	nuclear factor of kappa light polypeptide gene enhancer in B-cells 1
hsa-miR-1322	0	0	1	1	0	0	MX2	myxovirus (influenza virus) resistance 2 (mouse)
hsa-miR-1322	1	0	1	1	1	1	MDGA2	MAM domain containing glycosylphosphatidylinositol anchor 2
hsa-miR-1322	1	0	1	0	1	1	KCNK2	potassium channel, subfamily K, member 2
hsa-miR-1322	0	0	1	0	0	0	LGALS17A	Charcot-Leyden crystal protein pseudogene
hsa-miR-1322	1	0	1	1	1	1	SBF2	SET binding factor 2
hsa-miR-1322	1	0	1	1	1	1	FAM219A	family with sequence similarity 219, member A
hsa-miR-1322	1	0	1	1	1	1	MBTD1	mbt domain containing 1
hsa-miR-1322	0	0	1	1	0	0	NPIP	nuclear pore complex interacting protein
hsa-miR-1322	1	0	1	0	1	1	RHBDL3	rhomboid, veinlet-like 3 (Drosophila)
hsa-miR-1322	0	0	1	0	0	0	LINC00282	long intergenic non-protein coding RNA 282
hsa-miR-1322	1	0	1	1	1	1	ERBB3	v-erb-b2 erythroblastic leukemia viral oncogene homolog 3 (avian)
hsa-miR-1322	0	0	1	1	1	1	MKX	mohawk homeobox
hsa-miR-1322	0	0	1	1	1	1	ZNF337	zinc finger protein 337
hsa-miR-1322	0	0	1	1	0	0	RPRD2	regulation of nuclear pre-mRNA domain containing 2
hsa-miR-1322	0	0	1	1	1	1	RBM46	RNA binding motif protein 46
hsa-miR-1322	1	0	1	1	1	1	CSRNP3	cysteine-serine-rich nuclear protein 3
hsa-miR-1322	1	0	1	1	1	1	MRPL30	mitochondrial ribosomal protein L30
hsa-miR-1322	1	0	1	1	1	1	ATP1A2	ATPase, Na+/K+ transporting, alpha 2 polypeptide
hsa-miR-1322	1	0	1	1	1	1	CLTC	clathrin, heavy chain (Hc)
hsa-miR-1322	0	0	1	0	0	0	LRRC9	leucine rich repeat containing 9
hsa-miR-1322	1	0	1	1	1	1	ZNF655	zinc finger protein 655
hsa-miR-1322	0	0	1	1	1	1	ATXN2	ataxin 2
hsa-miR-1322	1	0	1	1	1	1	ADAMTS19	ADAM metallopeptidase with thrombospondin type 1 motif, 19
hsa-miR-1322	0	0	1	1	0	0	HEATR8	HEAT repeat containing 8
hsa-miR-1322	0	0	1	0	0	0	LOC399491	GPS, PLAT and transmembrane domain-containing protein
hsa-miR-1322	1	0	1	1	1	1	SMAD7	SMAD family member 7
hsa-miR-1322	0	0	1	0	0	0	AGAP9	ArfGAP with GTPase domain, ankyrin repeat and PH domain 9
hsa-miR-1322	0	0	1	1	0	0	ZSCAN18	zinc finger and SCAN domain containing 18
hsa-miR-1322	1	0	1	0	1	1	TMEM106B	transmembrane protein 106B
hsa-miR-1322	1	0	1	1	1	1	NOVA1	neuro-oncological ventral antigen 1
hsa-miR-1322	0	0	1	1	0	0	TRIM69	tripartite motif containing 69
hsa-miR-1322	0	0	1	0	0	0	ANKRD34C	ankyrin repeat domain 34C
hsa-miR-1322	0	0	1	1	1	1	ARIH1	ariadne homolog, ubiquitin-conjugating enzyme E2 binding protein, 1 (Drosophila)
hsa-miR-1322	1	0	1	1	1	1	SMAP2	small ArfGAP2
hsa-miR-1322	0	0	1	1	1	1	RHOT1	ras homolog family member T1
hsa-miR-1322	1	0	1	0	1	1	FAM19A1	family with sequence similarity 19 (chemokine (C-C motif)-like), member A1
hsa-miR-1322	1	0	1	1	1	1	SLC30A8	solute carrier family 30 (zinc transporter), member 8
hsa-miR-1322	1	0	1	1	1	1	MIER1	mesoderm induction early response 1 homolog (Xenopus laevis)
hsa-miR-1322	0	0	1	1	1	1	FAM221A	family with sequence similarity 221, member A
hsa-miR-1322	1	0	1	1	1	1	LYPD3	LY6/PLAUR domain containing 3
hsa-miR-1322	1	0	1	1	1	1	CHMP7	charged multivesicular body protein 7
hsa-miR-1322	1	0	1	0	0	0	YLPM1	YLP motif containing 1
hsa-miR-1322	1	0	1	0	1	1	STYX	serine/threonine/tyrosine interacting protein
hsa-miR-1322	0	0	1	1	1	1	SYTL4	synaptotagmin-like 4
hsa-miR-1322	0	0	1	1	1	1	NARG2	NMDA receptor regulated 2
hsa-miR-1322	0	0	1	1	0	0	PPIE	peptidylprolyl isomerase E (cyclophilin E)
hsa-miR-1322	1	0	1	1	1	1	NRP1	neuropilin 1
hsa-miR-1322	1	0	1	1	1	1	MARCH7	membrane-associated ring finger (C3HC4) 7, E3 ubiquitin protein ligase
hsa-miR-1322	0	0	1	1	1	1	PCDH20	protocadherin 20
hsa-miR-1322	1	0	1	1	1	1	IL17RD	interleukin 17 receptor D
hsa-miR-1322	1	0	1	1	1	1	HERC2	HECT and RLD domain containing E3 ubiquitin protein ligase 2
hsa-miR-1322	1	0	1	1	1	1	MBD6	methyl-CpG binding domain protein 6
hsa-miR-1322	1	0	1	1	1	1	CADM2	cell adhesion molecule 2
hsa-miR-1322	1	0	1	1	1	1	RNF38	ring finger protein 38
hsa-miR-1322	0	0	1	0	0	0	PMCHL1	pro-melanin-concentrating hormone-like 1, pseudogene
hsa-miR-1322	0	0	1	0	0	0	PMCHL2	pro-melanin-concentrating hormone-like 2, pseudogene
hsa-miR-1322	0	0	1	0	0	0	CR1L	complement component (3b/4b) receptor 1-like
hsa-miR-1322	0	0	1	1	0	0	DNAH1	dynein, axonemal, heavy chain 1
hsa-miR-1322	1	0	1	1	1	1	OPRM1	opioid receptor, mu 1
hsa-miR-1322	0	0	1	1	1	1	ATF7IP	activating transcription factor 7 interacting protein
hsa-miR-1322	1	0	1	1	1	1	CAMTA1	calmodulin binding transcription activator 1
hsa-miR-1322	0	0	1	1	1	1	KDELC2	KDEL (Lys-Asp-Glu-Leu) containing 2
hsa-miR-1322	1	0	1	1	1	1	FGD4	FYVE, RhoGEF and PH domain containing 4
hsa-miR-1322	1	0	1	1	1	1	GLRA2	glycine receptor, alpha 2
hsa-miR-1322	1	0	1	1	1	1	MECP2	methyl CpG binding protein 2 (Rett syndrome)
hsa-miR-1322	0	0	1	1	1	1	C9orf78	chromosome 9 open reading frame 78
hsa-miR-1322	0	0	1	1	0	0	USP27X	ubiquitin specific peptidase 27, X-linked
hsa-miR-1322	0	0	1	1	1	1	ILDR1	immunoglobulin-like domain containing receptor 1
hsa-miR-1322	1	0	1	1	1	1	MCHR1	melanin-concentrating hormone receptor 1
hsa-miR-1322	0	0	1	0	0	0	PTPRVP	protein tyrosine phosphatase, receptor type, V, pseudogene
hsa-miR-1322	1	0	1	1	1	1	AMOT	angiomotin
hsa-miR-1322	0	0	1	1	1	1	ASB9	ankyrin repeat and SOCS box containing 9
hsa-miR-1322	1	0	1	1	1	1	ELOVL6	ELOVL fatty acid elongase 6
hsa-miR-1322	0	0	1	1	1	1	RLIM	ring finger protein, LIM domain interacting
hsa-miR-1322	1	0	1	1	1	1	NONO	non-POU domain containing, octamer-binding
hsa-miR-1322	1	0	1	0	1	1	DCAF10	DDB1 and CUL4 associated factor 10
hsa-miR-1322	0	0	1	1	1	1	FTO	fat mass and obesity associated
hsa-miR-1322	1	0	1	1	1	1	SMO	smoothened, frizzled family receptor
hsa-miR-1322	1	0	1	0	1	1	CGGBP1	CGG triplet repeat binding protein 1
hsa-miR-1322	1	0	1	1	1	1	VTA1	Vps20-associated 1 homolog (S. cerevisiae)
hsa-miR-1322	1	0	1	0	1	1	VAMP4	vesicle-associated membrane protein 4
hsa-miR-1322	0	0	1	0	0	0	GLIS3-AS1	GLIS3 antisense RNA 1
hsa-miR-1322	1	0	1	1	1	1	UBE2O	ubiquitin-conjugating enzyme E2O
hsa-miR-1322	1	0	1	1	0	0	RUVBL2	RuvB-like 2 (E. coli)
hsa-miR-1322	0	0	1	0	0	0	ATXN7L3B	ataxin 7-like 3B
hsa-miR-1322	0	0	1	0	0	0	HIST1H2BN	histone cluster 1, H2bn
hsa-miR-1322	1	0	1	1	1	1	GRIA2	glutamate receptor, ionotropic, AMPA 2
hsa-miR-1322	1	0	1	1	1	1	ZFAND5	zinc finger, AN1-type domain 5
hsa-miR-1322	0	0	1	0	1	1	C5orf44	chromosome 5 open reading frame 44
hsa-miR-1322	1	0	1	0	1	1	MTMR2	myotubularin related protein 2
hsa-miR-1322	0	0	1	0	1	1	GDE1	glycerophosphodiester phosphodiesterase 1
hsa-miR-1322	0	0	1	1	0	0	C8orf76	chromosome 8 open reading frame 76
hsa-miR-1322	1	0	1	1	1	1	GDAP2	ganglioside induced differentiation associated protein 2
hsa-miR-1322	0	0	1	0	0	0	MGC20647	uncharacterized protein MGC20647
hsa-miR-1322	0	0	1	1	1	1	TOMM40L	translocase of outer mitochondrial membrane 40 homolog (yeast)-like
hsa-miR-1322	0	0	1	1	1	1	FAM122C	family with sequence similarity 122C
hsa-miR-1322	1	0	1	1	1	1	ELF4	E74-like factor 4 (ets domain transcription factor)
hsa-miR-1322	0	0	1	1	1	1	SRP19	signal recognition particle 19kDa
hsa-miR-1322	0	0	1	1	1	1	LRRK1	leucine-rich repeat kinase 1
hsa-miR-1322	0	0	1	1	1	1	CCNE2	cyclin E2
hsa-miR-1322	0	0	1	1	1	1	SRGN	serglycin
hsa-miR-1322	0	0	1	1	1	1	RNF103	ring finger protein 103
hsa-miR-1322	0	0	1	1	1	1	PDE1C	phosphodiesterase 1C, calmodulin-dependent 70kDa
hsa-miR-1322	0	0	1	0	0	0	LINC00488	long intergenic non-protein coding RNA 488
hsa-miR-1322	1	0	1	0	1	1	CDK19	cyclin-dependent kinase 19
hsa-miR-1322	0	0	1	1	1	1	BIRC2	baculoviral IAP repeat containing 2
hsa-miR-1322	1	0	1	0	1	1	NCAM1	neural cell adhesion molecule 1
hsa-miR-1322	0	0	1	1	1	1	LRMP	lymphoid-restricted membrane protein
hsa-miR-1322	1	0	1	1	1	1	GIGYF2	GRB10 interacting GYF protein 2
hsa-miR-1322	1	0	1	0	1	1	PSMF1	proteasome (prosome, macropain) inhibitor subunit 1 (PI31)
hsa-miR-1322	0	0	1	1	0	0	TSPAN16	tetraspanin 16
hsa-miR-1322	1	0	1	0	1	1	SV2B	synaptic vesicle glycoprotein 2B
hsa-miR-1322	1	0	1	0	1	1	GPR107	G protein-coupled receptor 107
hsa-miR-1322	0	0	1	1	1	1	PIP5K1B	phosphatidylinositol-4-phosphate 5-kinase, type I, beta
hsa-miR-1322	1	0	1	1	1	1	PITPNB	phosphatidylinositol transfer protein, beta
hsa-miR-1322	1	0	1	1	1	1	DFFB	DNA fragmentation factor, 40kDa, beta polypeptide (caspase-activated DNase)
hsa-miR-1322	1	0	1	1	1	1	MAK	male germ cell-associated kinase
hsa-miR-1322	1	0	1	1	1	1	HMGCR	3-hydroxy-3-methylglutaryl-CoA reductase
hsa-miR-1322	1	0	1	1	1	1	PCDHA5	protocadherin alpha 5
hsa-miR-1322	1	0	1	1	1	1	ZZZ3	zinc finger, ZZ-type containing 3
hsa-miR-1322	0	0	1	1	0	0	PGS1	phosphatidylglycerophosphate synthase 1
hsa-miR-1322	1	0	1	1	0	0	INO80E	INO80 complex subunit E
hsa-miR-1322	0	0	1	1	0	0	C2orf80	chromosome 2 open reading frame 80
hsa-miR-1322	0	0	1	1	0	0	VPS8	vacuolar protein sorting 8 homolog (S. cerevisiae)
hsa-miR-1322	0	0	1	1	1	1	SNAPC3	small nuclear RNA activating complex, polypeptide 3, 50kDa
hsa-miR-1322	1	0	1	1	1	1	IMPACT	Impact homolog (mouse)
hsa-miR-1322	1	0	1	1	1	1	HECTD2	HECT domain containing E3 ubiquitin protein ligase 2
hsa-miR-1322	1	0	1	1	1	1	MEIS1	Meis homeobox 1
hsa-miR-1322	1	0	1	0	1	1	CPEB4	cytoplasmic polyadenylation element binding protein 4
hsa-miR-1322	1	0	1	1	1	1	BNC2	basonuclin 2
hsa-miR-1322	1	0	1	0	1	1	RAG1	recombination activating gene 1
hsa-miR-1322	0	0	1	0	0	0	LOC286184	uncharacterized LOC286184
hsa-miR-1322	1	0	1	1	0	0	EBF4	early B-cell factor 4
hsa-miR-1322	1	0	1	1	1	1	CTBP2	C-terminal binding protein 2
hsa-miR-1322	1	0	1	1	0	0	CCDC138	coiled-coil domain containing 138
hsa-miR-1322	1	0	1	0	1	1	ARID2	AT rich interactive domain 2 (ARID, RFX-like)
hsa-miR-1322	0	0	1	1	0	0	CLSTN3	calsyntenin 3
hsa-miR-1322	0	0	1	1	0	0	CCDC152	coiled-coil domain containing 152
hsa-miR-1322	1	0	1	1	1	1	PAIP2	poly(A) binding protein interacting protein 2
hsa-miR-1322	1	0	1	0	0	0	CT62	cancer/testis antigen 62
hsa-miR-1322	0	0	1	1	0	0	MTCH1	mitochondrial carrier 1
hsa-miR-1322	1	0	1	1	1	1	ARPP21	cAMP-regulated phosphoprotein, 21kDa
hsa-miR-1322	1	0	1	0	1	1	HSPA12A	heat shock 70kDa protein 12A
hsa-miR-1322	0	0	1	0	0	0	CDKL3	cyclin-dependent kinase-like 3
hsa-miR-1322	0	0	1	0	0	0	LRRC37BP1	leucine rich repeat containing 37B pseudogene 1
hsa-miR-1322	1	0	1	0	1	1	USP6NL	USP6 N-terminal like
hsa-miR-1322	0	0	1	0	0	0	LOC338579	ankyrin repeat domain-containing protein 30B pseudogene
hsa-miR-1322	0	0	1	1	1	1	MST1	macrophage stimulating 1 (hepatocyte growth factor-like)
hsa-miR-1322	0	0	1	0	0	0	LOC283914	uncharacterized LOC283914
hsa-miR-1322	0	0	1	1	1	1	DOCK8	dedicator of cytokinesis 8
hsa-miR-1322	1	0	1	1	1	1	SF3B1	splicing factor 3b, subunit 1, 155kDa
hsa-miR-1322	0	0	1	0	0	0	LOC348120	uncharacterized LOC348120
hsa-miR-1322	0	0	1	1	1	1	ZNF589	zinc finger protein 589
hsa-miR-1322	0	0	1	1	0	0	RFNG	RFNG O-fucosylpeptide 3-beta-N-acetylglucosaminyltransferase
hsa-miR-1322	0	0	1	0	0	0	IDI2-AS1	IDI2 antisense RNA 1
hsa-miR-1322	0	0	1	0	0	0	BMS1P6	BMS1 pseudogene 6
hsa-miR-1322	1	0	1	1	1	1	LIMD2	LIM domain containing 2
hsa-miR-1322	1	0	1	1	1	1	PCGF5	polycomb group ring finger 5
hsa-miR-1322	1	0	1	0	1	1	C14orf43	chromosome 14 open reading frame 43
hsa-miR-1322	0	0	1	0	1	1	C17orf51	chromosome 17 open reading frame 51
hsa-miR-1322	1	0	1	1	1	1	ATP8B4	ATPase, class I, type 8B, member 4
hsa-miR-1322	0	0	1	1	1	1	ZNF365	zinc finger protein 365
hsa-miR-1322	0	0	1	1	0	0	AGAP11	ankyrin repeat and GTPase domain Arf GTPase activating protein 11
hsa-miR-1322	0	0	1	1	1	1	GPATCH2	G patch domain containing 2
hsa-miR-1322	0	0	1	1	1	1	VNN2	vanin 2
hsa-miR-1322	1	0	1	1	1	1	ADCY6	adenylate cyclase 6
hsa-miR-1322	1	0	1	1	1	1	ZNF449	zinc finger protein 449
hsa-miR-1322	0	0	1	1	0	0	LNP1	leukemia NUP98 fusion partner 1
hsa-miR-1322	0	0	1	0	0	0	PABPC1P2	poly(A) binding protein, cytoplasmic 1 pseudogene 2
hsa-miR-1322	1	0	1	1	1	1	PDCD6IP	programmed cell death 6 interacting protein
hsa-miR-1322	0	0	1	0	0	0	LOC441259	PMS2 postmeiotic segregation increased 2 (S. cerevisiae)-like
hsa-miR-1322	1	0	1	1	1	1	ZMYND11	zinc finger, MYND-type containing 11
hsa-miR-1322	1	0	1	1	1	1	STK38	serine/threonine kinase 38
hsa-miR-1322	0	0	1	1	1	1	XG	Xg blood group
hsa-miR-1322	0	0	1	1	0	0	FBXW12	F-box and WD repeat domain containing 12
hsa-miR-1322	0	0	1	1	0	0	TMC1	transmembrane channel-like 1
hsa-miR-1322	0	0	1	0	0	0	GUSBP9	glucuronidase, beta pseudogene 9
hsa-miR-1322	1	0	1	1	1	1	SLC35G1	solute carrier family 35, member G1
hsa-miR-1322	1	0	1	1	1	1	PTPRD	protein tyrosine phosphatase, receptor type, D
hsa-miR-1322	0	0	1	0	0	0	HIST2H2BA	histone cluster 2, H2ba (pseudogene)
hsa-miR-1322	0	0	1	0	0	0	LOC389765	kinesin family member 27 pseudogene
hsa-miR-1322	0	0	1	1	0	0	ITGB1BP2	integrin beta 1 binding protein (melusin) 2
hsa-miR-1322	1	0	1	1	1	1	SP4	Sp4 transcription factor
hsa-miR-1322	1	0	1	1	1	1	TMEM132B	transmembrane protein 132B
hsa-miR-1322	1	0	1	1	1	1	TMEM64	transmembrane protein 64
hsa-miR-1322	1	0	1	1	0	0	GRIN2A	glutamate receptor, ionotropic, N-methyl D-aspartate 2A
hsa-miR-1322	0	0	1	1	0	0	AQP7	aquaporin 7
hsa-miR-1322	0	0	1	1	1	1	UGT1A4	UDP glucuronosyltransferase 1 family, polypeptide A4
hsa-miR-1322	0	0	1	0	0	0	LSP1P3	lymphocyte-specific protein 1 pseudogene 3
hsa-miR-1322	0	0	1	0	0	0	CCT6P1	chaperonin containing TCP1, subunit 6 (zeta) pseudogene 1
hsa-miR-1322	0	0	1	0	0	0	KRT8P12	keratin 8 pseudogene 12
hsa-miR-1322	1	0	1	0	1	1	LRCH2	leucine-rich repeats and calponin homology (CH) domain containing 2
hsa-miR-1322	0	0	1	0	0	0	C3orf55	chromosome 3 open reading frame 55
hsa-miR-1322	1	0	1	1	1	1	MEGF11	multiple EGF-like-domains 11
hsa-miR-1322	0	0	1	0	0	0	SMA4	glucuronidase, beta pseudogene
hsa-miR-1322	0	0	1	1	1	1	UCHL5	ubiquitin carboxyl-terminal hydrolase L5
hsa-miR-1322	0	0	1	0	0	0	DKFZp686D0853	uncharacterized LOC401613
hsa-miR-1322	1	0	1	1	1	1	JPH1	junctophilin 1
hsa-miR-1322	0	0	1	1	1	1	AIG1	androgen-induced 1
hsa-miR-1322	1	0	1	1	1	1	MLLT10	myeloid/lymphoid or mixed-lineage leukemia (trithorax homolog, Drosophila); translocated to, 10
hsa-miR-1322	0	0	1	1	1	1	PSMA2	proteasome (prosome, macropain) subunit, alpha type, 2
hsa-miR-1322	0	0	1	0	1	1	NHSL1	NHS-like 1
hsa-miR-1322	0	0	1	1	0	0	PRKCQ	protein kinase C, theta
hsa-miR-1322	0	0	1	0	1	1	TYW5	tRNA-yW synthesizing protein 5
hsa-miR-1322	1	0	1	1	1	1	FOXP1	forkhead box P1
hsa-miR-1322	0	0	1	1	1	1	HTR2A	5-hydroxytryptamine (serotonin) receptor 2A, G protein-coupled
hsa-miR-1322	1	0	1	1	1	1	TSC22D3	TSC22 domain family, member 3
hsa-miR-1322	1	0	1	1	1	1	MGA	MAX gene associated
hsa-miR-1322	1	0	1	1	1	1	CACNB4	calcium channel, voltage-dependent, beta 4 subunit
hsa-miR-1322	1	0	1	1	1	1	BZRAP1	benzodiazapine receptor (peripheral) associated protein 1
hsa-miR-1322	1	0	1	1	1	1	HIF1A	hypoxia inducible factor 1, alpha subunit (basic helix-loop-helix transcription factor)
hsa-miR-1322	0	0	1	1	1	1	DNM1	dynamin 1
hsa-miR-1322	0	0	1	1	0	0	CDC37	cell division cycle 37 homolog (S. cerevisiae)
hsa-miR-1322	0	0	1	1	1	1	TMEM53	transmembrane protein 53
hsa-miR-1322	1	0	1	1	0	0	CGREF1	cell growth regulator with EF-hand domain 1
hsa-miR-1322	0	0	1	1	1	1	MDH2	malate dehydrogenase 2, NAD (mitochondrial)
hsa-miR-1322	0	0	1	0	0	0	PRMT1	protein arginine methyltransferase 1
hsa-miR-1322	1	0	1	1	1	1	HAPLN1	hyaluronan and proteoglycan link protein 1
hsa-miR-1322	0	0	1	1	1	1	BCL7B	B-cell CLL/lymphoma 7B
hsa-miR-1322	1	0	1	1	1	1	CAAP1	caspase activity and apoptosis inhibitor 1
hsa-miR-1322	0	0	1	1	1	1	FCGR3A	Fc fragment of IgG, low affinity IIIa, receptor (CD16a)
hsa-miR-1322	1	0	1	1	1	1	SMARCE1	SWI/SNF related, matrix associated, actin dependent regulator of chromatin, subfamily e, member 1
hsa-miR-1322	1	0	1	1	0	0	CCM2	cerebral cavernous malformation 2
hsa-miR-1322	0	0	1	1	1	1	MTCP1	mature T-cell proliferation 1
hsa-miR-1322	1	0	1	1	0	0	MAP3K10	mitogen-activated protein kinase kinase kinase 10
hsa-miR-1322	1	0	1	1	1	1	STK38L	serine/threonine kinase 38 like
hsa-miR-1322	1	0	1	1	1	1	WIPF1	WAS/WASL interacting protein family, member 1
hsa-miR-1322	0	0	1	1	1	1	QPCT	glutaminyl-peptide cyclotransferase
hsa-miR-1322	0	0	1	0	1	1	TMEM155	transmembrane protein 155
hsa-miR-1322	1	0	1	0	1	1	IP6K1	inositol hexakisphosphate kinase 1
hsa-miR-1322	0	0	1	1	1	1	KLHDC2	kelch domain containing 2
hsa-miR-1322	0	0	1	1	1	1	RPUSD1	RNA pseudouridylate synthase domain containing 1
hsa-miR-1322	0	0	1	1	1	1	PDE4DIP	phosphodiesterase 4D interacting protein
hsa-miR-1322	0	0	1	1	1	1	DEDD	death effector domain containing
hsa-miR-1322	1	0	1	0	1	1	ANKH	ankylosis, progressive homolog (mouse)
hsa-miR-1322	1	0	1	1	1	1	TIMP3	TIMP metallopeptidase inhibitor 3
hsa-miR-1322	1	0	1	1	1	1	FUBP3	far upstream element (FUSE) binding protein 3
hsa-miR-1322	1	0	1	1	1	1	ANAPC16	anaphase promoting complex subunit 16
hsa-miR-1322	1	0	1	1	1	1	KCNS3	potassium voltage-gated channel, delayed-rectifier, subfamily S, member 3
hsa-miR-1322	1	0	1	1	1	1	PFN2	profilin 2
hsa-miR-1322	1	0	1	1	1	1	NFYB	nuclear transcription factor Y, beta
hsa-miR-1322	1	0	1	1	1	1	RNF2	ring finger protein 2
hsa-miR-1322	1	0	1	1	0	0	STAG3L4	stromal antigen 3-like 4
hsa-miR-1322	1	0	1	1	1	1	UBE2K	ubiquitin-conjugating enzyme E2K
hsa-miR-1322	0	0	1	1	1	1	LGI1	leucine-rich, glioma inactivated 1
hsa-miR-1322	1	0	1	0	1	1	CD47	CD47 molecule
hsa-miR-1322	0	0	1	1	0	0	PIH1D2	PIH1 domain containing 2
hsa-miR-1322	0	0	1	1	0	0	TMEM222	transmembrane protein 222
hsa-miR-1322	0	0	1	1	1	1	TOR2A	torsin family 2, member A
hsa-miR-1322	1	0	1	1	0	0	SOD1	superoxide dismutase 1, soluble
hsa-miR-1322	0	0	1	1	1	1	ARHGEF25	Rho guanine nucleotide exchange factor (GEF) 25
hsa-miR-1322	0	0	1	1	1	1	NUDT21	nudix (nucleoside diphosphate linked moiety X)-type motif 21
hsa-miR-1322	0	0	1	1	1	1	COPS4	COP9 constitutive photomorphogenic homolog subunit 4 (Arabidopsis)
hsa-miR-1322	0	0	1	1	1	1	ZFAND1	zinc finger, AN1-type domain 1
hsa-miR-1322	0	0	1	1	0	0	C18orf8	chromosome 18 open reading frame 8
hsa-miR-1322	0	0	1	0	0	0	FAM47E	family with sequence similarity 47, member E
hsa-miR-1322	0	0	1	0	0	0	LOC731789	uncharacterized LOC731789
hsa-miR-1322	0	0	1	1	1	1	CCP110	centriolar coiled coil protein 110kDa
hsa-miR-1322	1	0	1	1	1	1	HECW2	HECT, C2 and WW domain containing E3 ubiquitin protein ligase 2
hsa-miR-1322	0	0	1	0	0	0	MUC19	mucin 19, oligomeric
hsa-miR-1322	0	0	1	0	1	1	HDAC9	histone deacetylase 9
hsa-miR-1322	0	0	1	1	1	1	GLIPR2	GLI pathogenesis-related 2
hsa-miR-1322	1	0	1	1	1	1	NAPEPLD	N-acyl phosphatidylethanolamine phospholipase D
hsa-miR-1322	0	0	1	1	0	0	TENC1	tensin like C1 domain containing phosphatase (tensin 2)
hsa-miR-1322	1	0	1	1	1	1	MAN2A2	mannosidase, alpha, class 2A, member 2
hsa-miR-1322	1	0	1	1	1	1	SEC14L1	SEC14-like 1 (S. cerevisiae)
hsa-miR-1322	1	0	1	1	0	0	DPY19L1	dpy-19-like 1 (C. elegans)
hsa-miR-1322	1	0	1	1	1	1	QKI	QKI, KH domain containing, RNA binding
hsa-miR-1322	0	0	1	0	0	0	CDKN2B-AS1	CDKN2B antisense RNA 1
hsa-miR-1322	1	0	1	1	1	1	IRF1	interferon regulatory factor 1
hsa-miR-1322	0	0	1	1	1	1	CCL20	chemokine (C-C motif) ligand 20
hsa-miR-1322	0	0	1	1	1	1	PRB4	proline-rich protein BstNI subfamily 4
hsa-miR-1322	0	0	1	1	0	0	APOC1	apolipoprotein C-I
hsa-miR-1322	1	0	1	1	1	1	IGF1	insulin-like growth factor 1 (somatomedin C)
hsa-miR-1322	1	0	1	1	1	1	COL4A3	collagen, type IV, alpha 3 (Goodpasture antigen)
hsa-miR-1322	1	0	1	1	1	1	GALC	galactosylceramidase
hsa-miR-1322	0	0	1	1	0	0	GBA	glucosidase, beta, acid
hsa-miR-1322	1	0	1	0	1	1	ITGB3	integrin, beta 3 (platelet glycoprotein IIIa, antigen CD61)
hsa-miR-1322	0	0	1	1	1	1	KCNJ1	potassium inwardly-rectifying channel, subfamily J, member 1
hsa-miR-1322	0	0	1	1	1	1	MTM1	myotubularin 1
hsa-miR-1322	0	0	1	1	1	1	NDP	Norrie disease (pseudoglioma)
hsa-miR-1322	1	0	1	0	1	1	PTEN	phosphatase and tensin homolog
hsa-miR-1322	0	0	1	1	1	1	LTBP2	latent transforming growth factor beta binding protein 2
hsa-miR-1322	1	0	1	0	1	1	CACNA1E	calcium channel, voltage-dependent, R type, alpha 1E subunit
hsa-miR-1322	1	0	1	1	1	1	CACNA2D1	calcium channel, voltage-dependent, alpha 2/delta subunit 1
hsa-miR-1322	1	0	1	1	1	1	GRM1	glutamate receptor, metabotropic 1
hsa-miR-1322	1	0	1	1	1	1	IGF1R	insulin-like growth factor 1 receptor
hsa-miR-1322	1	0	1	0	1	1	FLJ33360	FLJ33360 protein
hsa-miR-1322	0	0	1	0	0	0	OR8G1	olfactory receptor, family 8, subfamily G, member 1
hsa-miR-1322	1	0	1	1	1	1	C1orf173	chromosome 1 open reading frame 173
hsa-miR-1322	1	0	1	0	1	1	SMAD2	SMAD family member 2
hsa-miR-1322	1	0	1	0	1	1	LIN28B	lin-28 homolog B (C. elegans)
hsa-miR-1322	1	0	1	0	1	1	LRRC55	leucine rich repeat containing 55
hsa-miR-1322	1	0	1	1	1	1	EBF3	early B-cell factor 3
hsa-miR-1322	1	0	1	0	1	1	GOSR1	golgi SNAP receptor complex member 1
hsa-miR-1322	0	0	1	1	1	1	SCP2	sterol carrier protein 2
hsa-miR-1322	1	0	1	0	1	1	SS18	synovial sarcoma translocation, chromosome 18
hsa-miR-1322	1	0	1	0	1	1	C18orf25	chromosome 18 open reading frame 25
hsa-miR-1322	1	0	1	1	1	1	BCAP29	B-cell receptor-associated protein 29
hsa-miR-1322	1	0	1	1	1	1	LPHN1	latrophilin 1
hsa-miR-1322	0	0	1	1	0	0	ARMCX6	armadillo repeat containing, X-linked 6
hsa-miR-1322	0	0	1	1	1	1	BRD9	bromodomain containing 9
hsa-miR-1322	1	0	1	1	1	1	LUZP2	leucine zipper protein 2
hsa-miR-1322	1	0	1	0	1	1	RCHY1	ring finger and CHY zinc finger domain containing 1, E3 ubiquitin protein ligase
hsa-miR-1322	0	0	1	1	1	1	SAMD13	sterile alpha motif domain containing 13
hsa-miR-1322	1	0	1	1	1	1	FOXP4	forkhead box P4
hsa-miR-1322	0	0	1	1	1	1	C9orf152	chromosome 9 open reading frame 152
hsa-miR-1322	1	0	1	1	1	1	SORCS1	sortilin-related VPS10 domain containing receptor 1
hsa-miR-1322	0	0	1	1	1	1	PURG	purine-rich element binding protein G
hsa-miR-1322	1	0	1	1	1	1	PHF6	PHD finger protein 6
hsa-miR-1322	1	0	1	1	1	1	TMCC1	transmembrane and coiled-coil domain family 1
hsa-miR-1322	0	0	1	1	1	1	GCOM1	GRINL1A complex locus 1
hsa-miR-1322	0	0	1	1	1	1	POLR2M	polymerase (RNA) II (DNA directed) polypeptide M
hsa-miR-1322	1	0	1	0	1	1	CELF2	CUGBP, Elav-like family member 2
hsa-miR-1322	0	0	1	1	1	1	ATF3	activating transcription factor 3
hsa-miR-1322	1	0	1	1	0	0	CRELD1	cysteine-rich with EGF-like domains 1
hsa-miR-1322	1	0	1	1	1	1	YTHDC1	YTH domain containing 1
hsa-miR-1322	1	0	1	1	1	1	TFAP2A	transcription factor AP-2 alpha (activating enhancer binding protein 2 alpha)
hsa-miR-1322	1	0	1	0	1	1	NPNT	nephronectin
hsa-miR-1322	0	0	1	1	1	1	KCNIP1	Kv channel interacting protein 1
hsa-miR-1322	1	0	1	0	1	1	RYR2	ryanodine receptor 2 (cardiac)
hsa-miR-1322	1	0	1	1	1	1	SDHC	succinate dehydrogenase complex, subunit C, integral membrane protein, 15kDa
hsa-miR-1322	1	0	1	1	1	1	SCN1B	sodium channel, voltage-gated, type I, beta subunit
hsa-miR-1322	0	0	1	1	1	1	CEP112	centrosomal protein 112kDa
hsa-miR-1322	0	0	1	0	1	1	RGS21	regulator of G-protein signaling 21
hsa-miR-1322	0	0	1	1	1	1	SPATA6L	spermatogenesis associated 6-like
hsa-miR-1322	1	0	1	0	1	1	GK5	glycerol kinase 5 (putative)
hsa-miR-1322	1	0	1	1	1	1	CDC42	cell division cycle 42 (GTP binding protein, 25kDa)
hsa-miR-1322	1	0	1	1	1	1	CHN2	chimerin (chimaerin) 2
hsa-miR-1322	0	0	1	1	1	1	MCHR2	melanin-concentrating hormone receptor 2
hsa-miR-1322	0	0	1	1	1	1	MTHFD2	methylenetetrahydrofolate dehydrogenase (NADP+ dependent) 2, methenyltetrahydrofolate cyclohydrolase
hsa-miR-1322	1	0	1	1	1	1	ZBTB8A	zinc finger and BTB domain containing 8A
hsa-miR-1322	1	0	1	1	1	1	MTMR12	myotubularin related protein 12
hsa-miR-1322	1	0	1	1	1	1	FAM63B	family with sequence similarity 63, member B
hsa-miR-1322	0	0	1	0	1	1	STEAP2	STEAP family member 2, metalloreductase
hsa-miR-1322	0	0	1	1	1	1	CENPA	centromere protein A
hsa-miR-1322	1	0	1	1	1	1	DIAPH3	diaphanous homolog 3 (Drosophila)
hsa-miR-1322	1	0	1	1	1	1	FRS2	fibroblast growth factor receptor substrate 2
hsa-miR-1322	1	0	1	1	1	1	CRTC3	CREB regulated transcription coactivator 3
hsa-miR-1322	1	0	1	0	1	1	TMEM237	transmembrane protein 237
hsa-miR-1322	1	0	1	1	1	1	QSER1	glutamine and serine rich 1
hsa-miR-1322	1	0	1	1	1	1	METTL9	methyltransferase like 9
hsa-miR-1322	1	0	1	1	1	1	HS6ST2	heparan sulfate 6-O-sulfotransferase 2
hsa-miR-1322	1	0	1	1	1	1	VAV3	vav 3 guanine nucleotide exchange factor
hsa-miR-1322	1	0	1	1	1	1	LDB3	LIM domain binding 3
hsa-miR-1322	1	0	1	1	1	1	FAM155A	family with sequence similarity 155, member A
hsa-miR-1322	1	0	1	1	1	1	KIAA0368	KIAA0368
hsa-miR-1322	1	0	1	1	1	1	SHANK3	SH3 and multiple ankyrin repeat domains 3
hsa-miR-1322	1	0	1	0	1	1	THSD7B	thrombospondin, type I, domain containing 7B
hsa-miR-1322	0	0	1	1	1	1	HSF5	heat shock transcription factor family member 5
hsa-miR-1322	1	0	1	1	1	1	BEND3	BEN domain containing 3
hsa-miR-1322	1	0	1	1	1	1	MYO1C	myosin IC
hsa-miR-1322	1	0	1	0	1	1	SCN3A	sodium channel, voltage-gated, type III, alpha subunit
hsa-miR-1322	1	0	1	0	1	1	XIAP	X-linked inhibitor of apoptosis
hsa-miR-1322	1	0	1	1	1	1	CAMK2D	calcium/calmodulin-dependent protein kinase II delta
hsa-miR-1322	0	0	1	0	1	1	CASQ2	calsequestrin 2 (cardiac muscle)
hsa-miR-1322	0	0	1	1	1	1	CHUK	conserved helix-loop-helix ubiquitous kinase
hsa-miR-1322	0	0	1	1	1	1	CCR1	chemokine (C-C motif) receptor 1
hsa-miR-1322	0	0	1	1	1	1	AOAH	acyloxyacyl hydrolase (neutrophil)
hsa-miR-1322	0	0	1	1	0	0	BICD1	bicaudal D homolog 1 (Drosophila)
hsa-miR-1322	0	0	1	1	1	1	BTN1A1	butyrophilin, subfamily 1, member A1
hsa-miR-1322	1	0	1	1	1	1	CBFB	core-binding factor, beta subunit
hsa-miR-1322	1	0	1	1	1	1	CDK2	cyclin-dependent kinase 2
hsa-miR-1322	0	0	1	1	1	1	GADD45A	growth arrest and DNA-damage-inducible, alpha
hsa-miR-1322	0	0	1	1	1	1	DSG1	desmoglein 1
hsa-miR-1322	0	0	1	1	0	0	EFNA5	ephrin-A5
hsa-miR-1322	1	0	1	0	1	1	ETV6	ets variant 6
hsa-miR-1322	0	0	1	1	0	0	GH2	growth hormone 2
hsa-miR-1322	0	0	1	1	1	1	HLA-DOA	major histocompatibility complex, class II, DO alpha
hsa-miR-1322	1	0	1	1	1	1	ITGB8	integrin, beta 8
hsa-miR-1322	1	0	1	1	1	1	JUN	jun proto-oncogene
hsa-miR-1322	0	0	1	1	1	1	KLRC1	killer cell lectin-like receptor subfamily C, member 1
hsa-miR-1322	0	0	1	1	1	1	MTAP	methylthioadenosine phosphorylase
hsa-miR-1322	0	0	1	1	0	0	NDUFB3	NADH dehydrogenase (ubiquinone) 1 beta subcomplex, 3, 12kDa
hsa-miR-1322	0	0	1	1	1	1	NDUFC1	NADH dehydrogenase (ubiquinone) 1, subcomplex unknown, 1, 6kDa
hsa-miR-1322	1	0	1	0	1	1	PCDHGC3	protocadherin gamma subfamily C, 3
hsa-miR-1322	0	0	1	1	1	1	PDE7A	phosphodiesterase 7A
hsa-miR-1322	1	0	1	1	1	1	PLAGL2	pleiomorphic adenoma gene-like 2
hsa-miR-1322	0	0	1	0	1	1	PMP2	peripheral myelin protein 2
hsa-miR-1322	1	0	1	1	1	1	PPP1CB	protein phosphatase 1, catalytic subunit, beta isozyme
hsa-miR-1322	0	0	1	1	0	0	PPP1R8	protein phosphatase 1, regulatory subunit 8
hsa-miR-1322	1	0	1	0	1	1	PRKCA	protein kinase C, alpha
hsa-miR-1322	1	0	1	1	0	0	PSMD7	proteasome (prosome, macropain) 26S subunit, non-ATPase, 7
hsa-miR-1322	1	0	1	1	1	1	PTPRK	protein tyrosine phosphatase, receptor type, K
hsa-miR-1322	1	0	1	0	1	1	SORT1	sortilin 1
hsa-miR-1322	0	0	1	1	1	1	CXCL6	chemokine (C-X-C motif) ligand 6 (granulocyte chemotactic protein 2)
hsa-miR-1322	1	0	1	1	1	1	SMARCC1	SWI/SNF related, matrix associated, actin dependent regulator of chromatin, subfamily c, member 1
hsa-miR-1322	1	0	1	1	1	1	STAC	SH3 and cysteine rich domain
hsa-miR-1322	0	0	1	1	1	1	STRN	striatin, calmodulin binding protein
hsa-miR-1322	1	0	1	0	1	1	BSN	bassoon (presynaptic cytomatrix protein)
hsa-miR-1322	1	0	1	1	1	1	FZD5	frizzled family receptor 5
hsa-miR-1322	1	0	1	0	1	1	PCDHGA12	protocadherin gamma subfamily A, 12
hsa-miR-1322	1	0	1	0	1	1	PCDHGB4	protocadherin gamma subfamily B, 4
hsa-miR-1322	1	0	1	0	1	1	TNKS	tankyrase, TRF1-interacting ankyrin-related ADP-ribose polymerase
hsa-miR-1322	1	0	1	1	1	1	SNAP23	synaptosomal-associated protein, 23kDa
hsa-miR-1322	0	0	1	1	0	0	FCGBP	Fc fragment of IgG binding protein
hsa-miR-1322	1	0	1	0	1	1	SKAP2	src kinase associated phosphoprotein 2
hsa-miR-1322	1	0	1	0	1	1	ST13	suppression of tumorigenicity 13 (colon carcinoma) (Hsp70 interacting protein)
hsa-miR-1322	1	0	1	1	1	1	EFNB2	ephrin-B2
hsa-miR-1322	0	0	1	1	1	1	FKBP1B	FK506 binding protein 1B, 12.6 kDa
hsa-miR-1322	1	0	1	0	1	1	SLC1A2	solute carrier family 1 (glial high affinity glutamate transporter), member 2
hsa-miR-1322	1	0	1	1	1	1	MED21	mediator complex subunit 21
hsa-miR-1322	1	0	1	0	1	1	ACVR1B	activin A receptor, type IB
hsa-miR-1322	1	0	1	1	1	1	COX11	COX11 cytochrome c oxidase assembly homolog (yeast)
hsa-miR-1322	1	0	1	1	1	1	DACH1	dachshund homolog 1 (Drosophila)
hsa-miR-1322	0	0	1	1	1	1	GP5	glycoprotein V (platelet)
hsa-miR-1322	0	0	1	1	1	1	NDUFA10	NADH dehydrogenase (ubiquinone) 1 alpha subcomplex, 10, 42kDa
hsa-miR-1322	0	0	1	1	1	1	MGAM	maltase-glucoamylase (alpha-glucosidase)
hsa-miR-1322	0	0	1	1	0	0	MAP3K6	mitogen-activated protein kinase kinase kinase 6
hsa-miR-1322	1	0	1	1	1	1	DCLK1	doublecortin-like kinase 1
hsa-miR-1322	1	0	1	1	1	1	ONECUT2	one cut homeobox 2
hsa-miR-1322	1	0	1	0	1	1	KRAS	v-Ki-ras2 Kirsten rat sarcoma viral oncogene homolog
hsa-miR-1322	1	0	1	1	1	1	ATXN3	ataxin 3
hsa-miR-1322	1	0	1	1	1	1	SLC23A2	solute carrier family 23 (nucleobase transporters), member 2
hsa-miR-1322	1	0	1	1	1	1	MED13	mediator complex subunit 13
hsa-miR-1322	1	0	1	1	1	1	BMI1	BMI1 polycomb ring finger oncogene
hsa-miR-1322	1	0	1	1	1	1	GPM6A	glycoprotein M6A
hsa-miR-1322	1	0	1	1	1	1	H3F3B	H3 histone, family 3B (H3.3B)
hsa-miR-1322	1	0	1	1	1	1	RAB8A	RAB8A, member RAS oncogene family
hsa-miR-1322	1	0	1	0	1	1	PRKAB2	protein kinase, AMP-activated, beta 2 non-catalytic subunit
hsa-miR-1322	1	0	1	0	1	1	PRKCE	protein kinase C, epsilon
hsa-miR-1322	1	0	1	0	1	1	SRC	v-src sarcoma (Schmidt-Ruppin A-2) viral oncogene homolog (avian)
hsa-miR-1322	1	0	1	0	1	1	CCDC6	coiled-coil domain containing 6
hsa-miR-1322	0	0	1	1	1	1	SMC3	structural maintenance of chromosomes 3
hsa-miR-1322	0	0	1	1	0	0	VDAC3	voltage-dependent anion channel 3
hsa-miR-1322	1	0	1	1	1	1	ABCF2	ATP-binding cassette, sub-family F (GCN20), member 2
hsa-miR-1322	0	0	1	1	1	1	TOB1	transducer of ERBB2, 1
hsa-miR-1322	1	0	1	0	1	1	SPRY3	sprouty homolog 3 (Drosophila)
hsa-miR-1322	0	0	1	1	1	1	SAP18	Sin3A-associated protein, 18kDa
hsa-miR-1322	1	0	1	1	1	1	MMP16	matrix metallopeptidase 16 (membrane-inserted)
hsa-miR-1322	0	0	1	1	0	0	PPYR1	pancreatic polypeptide receptor 1
hsa-miR-1322	0	0	1	0	1	1	HCAR3	hydroxycarboxylic acid receptor 3
hsa-miR-1322	1	0	1	1	1	1	HS3ST4	heparan sulfate (glucosamine) 3-O-sulfotransferase 4
hsa-miR-1322	0	0	1	1	0	0	RRAGB	Ras-related GTP binding B
hsa-miR-1322	1	0	1	1	1	1	SPON1	spondin 1, extracellular matrix protein
hsa-miR-1322	1	0	1	1	1	1	CAPZA2	capping protein (actin filament) muscle Z-line, alpha 2
hsa-miR-1322	0	0	1	1	0	0	NEDD8	neural precursor cell expressed, developmentally down-regulated 8
hsa-miR-1322	1	0	1	1	1	1	CTCF	CCCTC-binding factor (zinc finger protein)
hsa-miR-1322	1	0	1	0	1	1	API5	apoptosis inhibitor 5
hsa-miR-1322	1	0	1	1	1	1	SLC20A2	solute carrier family 20 (phosphate transporter), member 2
hsa-miR-1322	0	0	1	1	1	1	SYPL1	synaptophysin-like 1
hsa-miR-1322	1	0	1	1	1	1	CBX1	chromobox homolog 1
hsa-miR-1322	1	0	1	1	1	1	RP2	retinitis pigmentosa 2 (X-linked recessive)
hsa-miR-1322	1	0	1	1	1	1	PALM2-AKAP2	PALM2-AKAP2 readthrough
hsa-miR-1322	0	0	1	1	1	1	SLC6A14	solute carrier family 6 (amino acid transporter), member 14
hsa-miR-1322	1	0	1	1	1	1	KLF12	Kruppel-like factor 12
hsa-miR-1322	0	0	1	1	1	1	STAT1	signal transducer and activator of transcription 1, 91kDa
hsa-miR-1322	1	0	1	1	1	1	TSPAN12	tetraspanin 12
hsa-miR-1322	0	0	1	0	1	1	PITPNC1	phosphatidylinositol transfer protein, cytoplasmic 1
hsa-miR-1322	0	0	1	0	1	1	TLL1	tolloid-like 1
hsa-miR-1322	1	0	1	1	1	1	TLL2	tolloid-like 2
hsa-miR-1322	0	0	1	1	1	1	N6AMT1	N-6 adenine-specific DNA methyltransferase 1 (putative)
hsa-miR-1322	0	0	1	1	0	0	REM1	RAS (RAD and GEM)-like GTP-binding 1
hsa-miR-1322	1	0	1	1	1	1	SLC25A15	solute carrier family 25 (mitochondrial carrier; ornithine transporter) member 15
hsa-miR-1322	1	0	1	1	1	1	C11orf58	chromosome 11 open reading frame 58
hsa-miR-1322	0	0	1	1	1	1	TRAM1	translocation associated membrane protein 1
hsa-miR-1322	1	0	1	1	1	1	LEMD3	LEM domain containing 3
hsa-miR-1322	0	0	1	1	1	1	ZNF330	zinc finger protein 330
hsa-miR-1322	0	0	1	1	1	1	RPS6KA6	ribosomal protein S6 kinase, 90kDa, polypeptide 6
hsa-miR-1322	1	0	1	1	1	1	ERO1L	ERO1-like (S. cerevisiae)
hsa-miR-1322	1	0	1	1	1	1	EHD3	EH-domain containing 3
hsa-miR-1322	1	0	1	1	1	1	ULK2	unc-51-like kinase 2 (C. elegans)
hsa-miR-1322	1	0	1	0	1	1	MLEC	malectin
hsa-miR-1322	0	0	1	0	1	1	EPM2AIP1	EPM2A (laforin) interacting protein 1
hsa-miR-1322	1	0	1	1	1	1	TBC1D4	TBC1 domain family, member 4
hsa-miR-1322	1	0	1	0	1	1	WDFY3	WD repeat and FYVE domain containing 3
hsa-miR-1322	1	0	1	1	1	1	ERP44	endoplasmic reticulum protein 44
hsa-miR-1322	1	0	1	0	1	1	PEG10	paternally expressed 10
hsa-miR-1322	1	0	1	1	1	1	SIK2	salt-inducible kinase 2
hsa-miR-1322	1	0	1	1	1	1	PLCB1	phospholipase C, beta 1 (phosphoinositide-specific)
hsa-miR-1322	1	0	1	1	1	1	PHF15	PHD finger protein 15
hsa-miR-1322	1	0	1	0	1	1	LARP1	La ribonucleoprotein domain family, member 1
hsa-miR-1322	1	0	1	0	1	1	SRGAP2	SLIT-ROBO Rho GTPase activating protein 2
hsa-miR-1322	0	0	1	0	1	1	ZDHHC17	zinc finger, DHHC-type containing 17
hsa-miR-1322	1	0	1	1	1	1	ASXL1	additional sex combs like 1 (Drosophila)
hsa-miR-1322	0	0	1	1	1	1	LEPROTL1	leptin receptor overlapping transcript-like 1
hsa-miR-1322	1	0	1	1	1	1	RNF19A	ring finger protein 19A, E3 ubiquitin protein ligase
hsa-miR-1322	1	0	1	1	1	1	CNOT6	CCR4-NOT transcription complex, subunit 6
hsa-miR-1322	1	0	1	1	1	1	FGFR1	fibroblast growth factor receptor 1
hsa-miR-1322	1	0	1	1	1	1	AZIN1	antizyme inhibitor 1
hsa-miR-1322	1	0	1	1	1	1	PHF20	PHD finger protein 20
hsa-miR-1322	1	0	1	0	1	1	CRIM1	cysteine rich transmembrane BMP regulator 1 (chordin-like)
hsa-miR-1322	1	0	1	0	1	1	KLHL3	kelch-like 3 (Drosophila)
hsa-miR-1322	0	0	1	1	0	0	UBQLN3	ubiquilin 3
hsa-miR-1322	0	0	1	1	1	1	BHMT2	betaine--homocysteine S-methyltransferase 2
hsa-miR-1322	1	0	1	0	1	1	KCTD9	potassium channel tetramerisation domain containing 9
hsa-miR-1322	0	0	1	1	0	0	NUP62CL	nucleoporin 62kDa C-terminal like
hsa-miR-1322	0	0	1	1	0	0	CNTLN	centlein, centrosomal protein
hsa-miR-1322	0	0	1	1	1	1	WHSC1L1	Wolf-Hirschhorn syndrome candidate 1-like 1
hsa-miR-1322	1	0	1	1	1	1	YTHDF1	YTH domain family, member 1
hsa-miR-1322	0	0	1	1	1	1	ACSM5	acyl-CoA synthetase medium-chain family member 5
hsa-miR-1322	1	0	1	0	1	1	MSL2	male-specific lethal 2 homolog (Drosophila)
hsa-miR-1322	1	0	1	0	1	1	ARL8B	ADP-ribosylation factor-like 8B
hsa-miR-1322	0	0	1	0	1	1	TMEM57	transmembrane protein 57
hsa-miR-1322	1	0	1	1	1	1	ZNF654	zinc finger protein 654
hsa-miR-1322	1	0	1	1	1	1	C9orf72	chromosome 9 open reading frame 72
hsa-miR-1322	1	0	1	1	1	1	ACER3	alkaline ceramidase 3
hsa-miR-1322	1	0	1	0	1	1	PCDHAC1	protocadherin alpha subfamily C, 1
hsa-miR-1322	1	0	1	0	1	1	PCDHAC2	protocadherin alpha subfamily C, 2
hsa-miR-1322	1	0	1	1	1	1	PCDHA1	protocadherin alpha 1
hsa-miR-1322	1	0	1	0	1	1	PCDHA10	protocadherin alpha 10
hsa-miR-1322	1	0	1	0	1	1	PCDHA11	protocadherin alpha 11
hsa-miR-1322	1	0	1	0	1	1	PCDHA12	protocadherin alpha 12
hsa-miR-1322	1	0	1	1	1	1	PCDHA2	protocadherin alpha 2
hsa-miR-1322	1	0	1	1	1	1	PCDHA3	protocadherin alpha 3
hsa-miR-1322	1	0	1	1	1	1	PCDHA6	protocadherin alpha 6
hsa-miR-1322	1	0	1	0	1	1	PCDHA7	protocadherin alpha 7
hsa-miR-1322	1	0	1	1	1	1	PCDHA8	protocadherin alpha 8
hsa-miR-1322	1	0	1	1	1	1	PCDHGA1	protocadherin gamma subfamily A, 1
hsa-miR-1322	1	0	1	0	1	1	PCDHGA10	protocadherin gamma subfamily A, 10
hsa-miR-1322	1	0	1	0	1	1	PCDHGA11	protocadherin gamma subfamily A, 11
hsa-miR-1322	1	0	1	1	1	1	PCDHGA2	protocadherin gamma subfamily A, 2
hsa-miR-1322	1	0	1	0	1	1	PCDHGA3	protocadherin gamma subfamily A, 3
hsa-miR-1322	1	0	1	0	1	1	PCDHGA4	protocadherin gamma subfamily A, 4
hsa-miR-1322	1	0	1	0	1	1	PCDHGA5	protocadherin gamma subfamily A, 5
hsa-miR-1322	1	0	1	0	1	1	PCDHGA6	protocadherin gamma subfamily A, 6
hsa-miR-1322	1	0	1	0	1	1	PCDHGA7	protocadherin gamma subfamily A, 7
hsa-miR-1322	1	0	1	0	1	1	PCDHGA9	protocadherin gamma subfamily A, 9
hsa-miR-1322	1	0	1	0	1	1	PCDHGB1	protocadherin gamma subfamily B, 1
hsa-miR-1322	1	0	1	0	1	1	PCDHGB2	protocadherin gamma subfamily B, 2
hsa-miR-1322	1	0	1	0	1	1	PCDHGB3	protocadherin gamma subfamily B, 3
hsa-miR-1322	1	0	1	0	1	1	PCDHGB5	protocadherin gamma subfamily B, 5
hsa-miR-1322	1	0	1	0	1	1	PCDHGB6	protocadherin gamma subfamily B, 6
hsa-miR-1322	1	0	1	0	1	1	PCDHGB7	protocadherin gamma subfamily B, 7
hsa-miR-1322	1	0	1	0	1	1	PCDHGC4	protocadherin gamma subfamily C, 4
hsa-miR-1322	1	0	1	0	1	1	PCDHGC5	protocadherin gamma subfamily C, 5
hsa-miR-1322	0	0	1	1	1	1	GAR1	GAR1 ribonucleoprotein homolog (yeast)
hsa-miR-1322	1	0	1	0	1	1	TMX3	thioredoxin-related transmembrane protein 3
hsa-miR-1322	0	0	1	1	1	1	TRMT13	tRNA methyltransferase 13 homolog (S. cerevisiae)
hsa-miR-1322	1	0	1	1	1	1	SEPT3	septin 3
hsa-miR-1322	0	0	1	1	1	1	KLHL4	kelch-like 4 (Drosophila)
hsa-miR-1322	0	0	1	1	0	0	NGEF	neuronal guanine nucleotide exchange factor
hsa-miR-1322	1	0	1	0	1	1	TM9SF3	transmembrane 9 superfamily member 3
hsa-miR-1322	1	0	1	1	1	1	ASPH	aspartate beta-hydroxylase
hsa-miR-1322	1	0	1	1	1	1	FEM1C	fem-1 homolog c (C. elegans)
hsa-miR-1322	1	0	1	1	1	1	CCDC47	coiled-coil domain containing 47
hsa-miR-1322	0	0	1	1	1	1	PRTFDC1	phosphoribosyl transferase domain containing 1
hsa-miR-1322	0	0	1	1	1	1	HRASLS	HRAS-like suppressor
hsa-miR-1322	1	0	1	0	1	1	EIF5A2	eukaryotic translation initiation factor 5A2
hsa-miR-1322	1	0	1	1	1	1	EPHA8	EPH receptor A8
hsa-miR-1322	1	0	1	1	1	1	TSHZ3	teashirt zinc finger homeobox 3
hsa-miR-1322	0	0	1	0	0	0	FGF6	fibroblast growth factor 6
hsa-miR-1322	0	0	1	1	0	0	IFNA7	interferon, alpha 7
hsa-miR-1322	1	0	1	0	1	1	XK	X-linked Kx blood group (McLeod syndrome)
hsa-miR-1322	0	0	1	0	1	1	SLCO1A2	solute carrier organic anion transporter family, member 1A2
hsa-miR-1322	1	0	1	1	1	1	KCNK10	potassium channel, subfamily K, member 10
hsa-miR-1322	0	0	1	1	0	0	MYOZ1	myozenin 1
hsa-miR-1322	1	0	1	1	1	1	PELI2	pellino E3 ubiquitin protein ligase family member 2
hsa-miR-1322	1	0	1	1	1	1	BACH2	BTB and CNC homology 1, basic leucine zipper transcription factor 2
hsa-miR-1322	0	0	1	1	1	1	MS4A1	membrane-spanning 4-domains, subfamily A, member 1
hsa-miR-1322	1	0	1	1	1	1	GRIK2	glutamate receptor, ionotropic, kainate 2
hsa-miR-1322	1	0	1	1	1	1	TIA1	TIA1 cytotoxic granule-associated RNA binding protein
hsa-miR-1322	1	0	1	1	1	1	ATL2	atlastin GTPase 2
hsa-miR-1322	0	0	1	1	1	1	OSBPL11	oxysterol binding protein-like 11
hsa-miR-1322	0	0	1	1	1	1	C8orf33	chromosome 8 open reading frame 33
hsa-miR-1322	1	0	1	1	1	1	IRF2BPL	interferon regulatory factor 2 binding protein-like
hsa-miR-1322	0	0	1	1	1	1	TEFM	transcription elongation factor, mitochondrial
hsa-miR-1322	1	0	1	0	1	1	MOB3B	MOB kinase activator 3B
hsa-miR-1322	1	0	1	1	1	1	EIF2C3	eukaryotic translation initiation factor 2C, 3
hsa-miR-1322	0	0	1	1	1	1	PYROXD1	pyridine nucleotide-disulphide oxidoreductase domain 1
hsa-miR-1322	1	0	1	1	1	1	JHDM1D	jumonji C domain containing histone demethylase 1 homolog D (S. cerevisiae)
hsa-miR-1322	1	0	1	1	1	1	PTPRO	protein tyrosine phosphatase, receptor type, O
hsa-miR-1322	1	0	1	1	1	1	NRBF2	nuclear receptor binding factor 2
hsa-miR-1322	0	0	1	1	1	1	FCRL2	Fc receptor-like 2
hsa-miR-1322	0	0	1	1	1	1	BCL2L14	BCL2-like 14 (apoptosis facilitator)
hsa-miR-1322	1	0	1	1	1	1	ITFG1	integrin alpha FG-GAP repeat containing 1
hsa-miR-1322	1	0	1	1	1	1	HSDL1	hydroxysteroid dehydrogenase like 1
hsa-miR-1322	1	0	1	1	1	1	PCDHA9	protocadherin alpha 9
hsa-miR-1322	1	0	1	0	1	1	PCDHGA8	protocadherin gamma subfamily A, 8
hsa-miR-1322	1	0	1	1	1	1	FAM175B	family with sequence similarity 175, member B
hsa-miR-1322	1	0	1	1	1	1	SETD3	SET domain containing 3
hsa-miR-1322	1	0	1	1	1	1	ZNRF1	zinc and ring finger 1, E3 ubiquitin protein ligase
hsa-miR-1322	1	0	1	1	1	1	BRMS1L	breast cancer metastasis-suppressor 1-like
hsa-miR-1322	0	0	1	1	1	1	PPIL3	peptidylprolyl isomerase (cyclophilin)-like 3
hsa-miR-1322	1	0	1	1	1	1	PARD6B	par-6 partitioning defective 6 homolog beta (C. elegans)
hsa-miR-1322	1	0	1	1	1	1	USP38	ubiquitin specific peptidase 38
hsa-miR-1322	1	0	1	1	1	1	PDGFA	platelet-derived growth factor alpha polypeptide
hsa-miR-1322	1	0	1	1	1	1	TRIM5	tripartite motif containing 5
hsa-miR-1322	0	0	1	1	1	1	RBM18	RNA binding motif protein 18
hsa-miR-1322	0	0	1	1	1	1	ZIC5	Zic family member 5
hsa-miR-1322	1	0	1	0	1	1	PURB	purine-rich element binding protein B
hsa-miR-1322	0	0	1	1	1	1	CTTNBP2	cortactin binding protein 2
hsa-miR-1322	0	0	1	1	1	1	ARHGAP18	Rho GTPase activating protein 18
hsa-miR-1322	1	0	1	1	1	1	SLC2A13	solute carrier family 2 (facilitated glucose transporter), member 13
hsa-miR-1322	1	0	1	1	1	1	XKR4	XK, Kell blood group complex subunit-related family, member 4
hsa-miR-1322	0	0	1	1	1	1	CLEC4D	C-type lectin domain family 4, member D
hsa-miR-1322	1	0	1	1	1	1	SLC44A1	solute carrier family 44, member 1
hsa-miR-1322	0	0	1	1	1	1	CBLN4	cerebellin 4 precursor
hsa-miR-1322	1	0	1	1	1	1	DYRK1A	dual-specificity tyrosine-(Y)-phosphorylation regulated kinase 1A
hsa-miR-1322	1	0	1	1	1	1	JDP2	Jun dimerization protein 2
hsa-miR-1322	1	0	1	1	1	1	BMPER	BMP binding endothelial regulator
hsa-miR-1322	1	0	1	1	1	1	SPTSSA	serine palmitoyltransferase, small subunit A
hsa-miR-1322	1	0	1	1	1	1	GLCCI1	glucocorticoid induced transcript 1
hsa-miR-1322	1	0	1	1	1	1	MSR1	macrophage scavenger receptor 1
hsa-miR-1322	1	0	1	1	1	1	PPTC7	PTC7 protein phosphatase homolog (S. cerevisiae)
hsa-miR-1322	1	0	1	1	1	1	TMEM182	transmembrane protein 182
hsa-miR-1322	1	0	1	1	1	1	MBNL2	muscleblind-like splicing regulator 2
hsa-miR-1322	1	0	1	0	1	1	CENPBD1	CENPB DNA-binding domains containing 1
hsa-miR-1322	0	0	1	1	0	0	SENP8	SUMO/sentrin specific peptidase family member 8
hsa-miR-1322	0	0	1	1	1	1	HFE2	hemochromatosis type 2 (juvenile)
hsa-miR-1322	0	0	1	1	0	0	IL27	interleukin 27
hsa-miR-1322	1	0	1	1	1	1	BHLHE22	basic helix-loop-helix family, member e22
hsa-miR-1322	1	0	1	1	1	1	FAM123B	family with sequence similarity 123B
hsa-miR-1322	0	0	1	1	1	1	CNIH3	cornichon homolog 3 (Drosophila)
hsa-miR-1322	0	0	1	1	1	1	DUSP18	dual specificity phosphatase 18
hsa-miR-1322	1	0	1	0	1	1	FAM116A	family with sequence similarity 116, member A
hsa-miR-1322	0	0	1	1	1	1	GAPT	GRB2-binding adaptor protein, transmembrane
hsa-miR-1322	0	0	1	0	0	0	TCP11L2	t-complex 11 (mouse)-like 2
hsa-miR-1322	1	0	1	1	1	1	PDIK1L	PDLIM1 interacting kinase 1 like
hsa-miR-1322	1	0	1	1	1	1	CREBRF	CREB3 regulatory factor
hsa-miR-1322	0	0	1	1	1	1	TAF1L	TAF1 RNA polymerase II, TATA box binding protein (TBP)-associated factor, 210kDa-like
hsa-miR-1322	0	0	1	1	1	1	TEDDM1	transmembrane epididymal protein 1
hsa-miR-1322	1	0	1	1	1	1	FAM117B	family with sequence similarity 117, member B
hsa-miR-1322	0	0	1	1	1	1	OTOGL	otogelin-like
hsa-miR-1322	1	0	1	0	1	1	SREK1IP1	SREK1-interacting protein 1
hsa-miR-1322	0	0	1	1	0	0	PDILT	protein disulfide isomerase-like, testis expressed
hsa-miR-1322	1	0	1	1	0	0	JPH2	junctophilin 2
hsa-miR-1322	0	0	1	1	1	1	S100A7A	S100 calcium binding protein A7A
hsa-miR-1322	1	0	1	1	1	1	PPAP2B	phosphatidic acid phosphatase type 2B
hsa-miR-1322	1	0	1	0	1	1	ZDHHC21	zinc finger, DHHC-type containing 21
hsa-miR-1322	1	0	1	0	1	1	ARL5B	ADP-ribosylation factor-like 5B
hsa-miR-1322	0	0	1	0	1	1	ZNF445	zinc finger protein 445
hsa-miR-1322	0	0	1	1	1	1	LRP5L	low density lipoprotein receptor-related protein 5-like
hsa-miR-1322	0	0	1	0	1	1	VSIG1	V-set and immunoglobulin domain containing 1
hsa-miR-1322	0	0	1	0	1	1	C16orf82	chromosome 16 open reading frame 82
hsa-miR-1322	1	0	1	0	1	1	SLC16A9	solute carrier family 16, member 9 (monocarboxylic acid transporter 9)
hsa-miR-1322	1	0	1	1	1	1	E2F6	E2F transcription factor 6
hsa-miR-1322	1	0	1	0	1	1	NRK	Nik related kinase
hsa-miR-1322	0	0	1	1	1	1	ZPBP2	zona pellucida binding protein 2
hsa-miR-1322	1	0	1	0	1	1	DLEU7	deleted in lymphocytic leukemia, 7
hsa-miR-1322	1	0	1	0	1	1	LHFPL3	lipoma HMGIC fusion partner-like 3
hsa-miR-1322	0	0	1	1	1	1	TMEM207	transmembrane protein 207
hsa-miR-1322	1	0	1	1	1	1	FREM2	FRAS1 related extracellular matrix protein 2
hsa-miR-1322	0	0	1	0	0	0	HLA-H	major histocompatibility complex, class I, H (pseudogene)
hsa-miR-1322	0	0	1	0	0	0	TTTY2	testis-specific transcript, Y-linked 2 (non-protein coding)
hsa-miR-1322	0	0	1	0	0	0	DKFZP586I1420	uncharacterized protein DKFZp586I1420
hsa-miR-1322	0	0	1	0	0	0	GOLGA2P3Y	golgin A2 pseudogene 3, Y-linked
hsa-miR-1322	0	0	1	0	0	0	HCG26	HLA complex group 26 (non-protein coding)
hsa-miR-1322	0	0	1	0	0	0	AQP7P1	aquaporin 7 pseudogene 1
hsa-miR-1322	0	0	1	0	0	0	GBP1P1	guanylate binding protein 1, interferon-inducible pseudogene 1
hsa-miR-1322	0	0	1	1	0	0	TCP10	t-complex 10 homolog (mouse)
hsa-miR-1322	1	0	1	0	1	1	NFIX	nuclear factor I/X (CCAAT-binding transcription factor)
